# Supplementary material
Source: bioRxiv or medRxiv preprint supplement (https://www.biorxiv.org/highwire/filestream/108602/field_highwire_adjunct_files/34/178806-6.pdf)
Supplement: Supplementary file [file 178806-6.pdf]

# IDP GWAS Manhattan Plots

## List of Figures

|    |                                                         |    |
|----|---------------------------------------------------------|----|
| 1  | T1 SIENAX peripheral grey normalised volume . . . . .   | 1  |
| 2  | T1 SIENAX peripheral grey unnormalised volume . . . . . | 2  |
| 3  | T1 SIENAX CSF normalised volume . . . . .               | 3  |
| 4  | T1 SIENAX CSF unnormalised volume . . . . .             | 4  |
| 5  | T1 SIENAX grey normalised volume . . . . .              | 5  |
| 6  | T1 SIENAX grey unnormalised volume . . . . .            | 6  |
| 7  | T1 SIENAX white normalised volume . . . . .             | 7  |
| 8  | T1 SIENAX white unnormalised volume . . . . .           | 8  |
| 9  | T1 SIENAX brain-normalised volume . . . . .             | 9  |
| 10 | T1 SIENAX brain-unnormalised volume . . . . .           | 10 |
| 11 | T1 FIRST left thalamus volume . . . . .                 | 11 |
| 12 | T1 FIRST right thalamus volume . . . . .                | 12 |
| 13 | T1 FIRST left caudate volume . . . . .                  | 13 |
| 14 | T1 FIRST right caudate volume . . . . .                 | 14 |
| 15 | T1 FIRST left putamen volume . . . . .                  | 15 |
| 16 | T1 FIRST right putamen volume . . . . .                 | 16 |
| 17 | T1 FIRST left pallidum volume . . . . .                 | 17 |
| 18 | T1 FIRST right pallidum volume . . . . .                | 18 |
| 19 | T1 FIRST left hippocampus volume . . . . .              | 19 |
| 20 | T1 FIRST right hippocampus volume . . . . .             | 20 |
| 21 | T1 FIRST left amygdala volume . . . . .                 | 21 |
| 22 | T1 FIRST right amygdala volume . . . . .                | 22 |
| 23 | T1 FIRST left accumbens volume . . . . .                | 23 |
| 24 | T1 FIRST right accumbens volume . . . . .               | 24 |
| 25 | T1 FIRST brain stem+4th ventricle volume . . . . .      | 25 |
| 26 | T1 FAST ROIs L frontal pole . . . . .                   | 26 |
| 27 | T1 FAST ROIs R frontal pole . . . . .                   | 27 |
| 28 | T1 FAST ROIs L insular cortex . . . . .                 | 28 |
| 29 | T1 FAST ROIs R insular cortex . . . . .                 | 29 |
| 30 | T1 FAST ROIs L sup front gyrus . . . . .                | 30 |
| 31 | T1 FAST ROIs R sup front gyrus . . . . .                | 31 |
| 32 | T1 FAST ROIs L mid front gyrus . . . . .                | 32 |
| 33 | T1 FAST ROIs R mid front gyrus . . . . .                | 33 |
| 34 | T1 FAST ROIs L inf front gyrus parstri . . . . .        | 34 |
| 35 | T1 FAST ROIs R inf front gyrus parstri . . . . .        | 35 |
| 36 | T1 FAST ROIs L inf front gyrus parsop . . . . .         | 36 |
| 37 | T1 FAST ROIs R inf front gyrus parsop . . . . .         | 37 |
| 38 | T1 FAST ROIs L precentral gyrus . . . . .               | 38 |
| 39 | T1 FAST ROIs R precentral gyrus . . . . .               | 39 |
| 40 | T1 FAST ROIs L temporal pole . . . . .                  | 40 |
| 41 | T1 FAST ROIs R temporal pole . . . . .                  | 41 |
| 42 | T1 FAST ROIs L sup temp gyrus ant . . . . .             | 42 |
| 43 | T1 FAST ROIs R sup temp gyrus ant . . . . .             | 43 |
| 44 | T1 FAST ROIs L sup temp gyrus post . . . . .            | 44 |
| 45 | T1 FAST ROIs R sup temp gyrus post . . . . .            | 45 |
| 46 | T1 FAST ROIs L mid temp gyrus ant . . . . .             | 46 |
| 47 | T1 FAST ROIs R mid temp gyrus ant . . . . .             | 47 |
| 48 | T1 FAST ROIs L mid temp gyrus post . . . . .            | 48 |

|     |                                       |     |
|-----|---------------------------------------|-----|
| 49  | T1 FAST ROIs R mid temp gyrus post    | 49  |
| 50  | T1 FAST ROIs L mid temp gyrus tempocc | 50  |
| 51  | T1 FAST ROIs R mid temp gyrus tempocc | 51  |
| 52  | T1 FAST ROIs L inf temp gyrus ant     | 52  |
| 53  | T1 FAST ROIs R inf temp gyrus ant     | 53  |
| 54  | T1 FAST ROIs L inf temp gyrus post    | 54  |
| 55  | T1 FAST ROIs R inf temp gyrus post    | 55  |
| 56  | T1 FAST ROIs L inf temp gyrus tempocc | 56  |
| 57  | T1 FAST ROIs R inf temp gyrus tempocc | 57  |
| 58  | T1 FAST ROIs L postcent gyrus         | 58  |
| 59  | T1 FAST ROIs R postcent gyrus         | 59  |
| 60  | T1 FAST ROIs L sup parietal lobule    | 60  |
| 61  | T1 FAST ROIs R sup parietal lobule    | 61  |
| 62  | T1 FAST ROIs L supramarg gyrus ant    | 62  |
| 63  | T1 FAST ROIs R supramarg gyrus ant    | 63  |
| 64  | T1 FAST ROIs L supramarg gyrus post   | 64  |
| 65  | T1 FAST ROIs R supramarg gyrus post   | 65  |
| 66  | T1 FAST ROIs L angular gyrus          | 66  |
| 67  | T1 FAST ROIs R angular gyrus          | 67  |
| 68  | T1 FAST ROIs L latocc cortex sup      | 68  |
| 69  | T1 FAST ROIs R latocc cortex sup      | 69  |
| 70  | T1 FAST ROIs L latocc cortex inf      | 70  |
| 71  | T1 FAST ROIs R latocc cortex inf      | 71  |
| 72  | T1 FAST ROIs L intracalc cortex       | 72  |
| 73  | T1 FAST ROIs R intracalc cortex       | 73  |
| 74  | T1 FAST ROIs L front med cortex       | 74  |
| 75  | T1 FAST ROIs R front med cortex       | 75  |
| 76  | T1 FAST ROIs L juxtapos lobule cortex | 76  |
| 77  | T1 FAST ROIs R juxtapos lobule cortex | 77  |
| 78  | T1 FAST ROIs L subcallosal cortex     | 78  |
| 79  | T1 FAST ROIs R subcallosal cortex     | 79  |
| 80  | T1 FAST ROIs L paracing gyrus         | 80  |
| 81  | T1 FAST ROIs R paracing gyrus         | 81  |
| 82  | T1 FAST ROIs L cing gyrus ant         | 82  |
| 83  | T1 FAST ROIs R cing gyrus ant         | 83  |
| 84  | T1 FAST ROIs L cing gyrus post        | 84  |
| 85  | T1 FAST ROIs R cing gyrus post        | 85  |
| 86  | T1 FAST ROIs L precun cortex          | 86  |
| 87  | T1 FAST ROIs R precun cortex          | 87  |
| 88  | T1 FAST ROIs L cuneal cortex          | 88  |
| 89  | T1 FAST ROIs R cuneal cortex          | 89  |
| 90  | T1 FAST ROIs L front orb cortex       | 90  |
| 91  | T1 FAST ROIs R front orb cortex       | 91  |
| 92  | T1 FAST ROIs L parahipp gyrus ant     | 92  |
| 93  | T1 FAST ROIs R parahipp gyrus ant     | 93  |
| 94  | T1 FAST ROIs L parahipp gyrus post    | 94  |
| 95  | T1 FAST ROIs R parahipp gyrus post    | 95  |
| 96  | T1 FAST ROIs L lingual gyrus          | 96  |
| 97  | T1 FAST ROIs R lingual gyrus          | 97  |
| 98  | T1 FAST ROIs L temp fusif cortex ant  | 98  |
| 99  | T1 FAST ROIs R temp fusif cortex ant  | 99  |
| 100 | T1 FAST ROIs L temp fusif cortex post | 100 |
| 101 | T1 FAST ROIs R temp fusif cortex post | 101 |
| 102 | T1 FAST ROIs L temp occ fusif cortex  | 102 |
| 103 | T1 FAST ROIs R temp occ fusif cortex  | 103 |
| 104 | T1 FAST ROIs L occ fusif gyrus        | 104 |
| 105 | T1 FAST ROIs R occ fusif gyrus        | 105 |
| 106 | T1 FAST ROIs L front operc cortex     | 106 |
| 107 | T1 FAST ROIs R front operc cortex     | 107 |
| 108 | T1 FAST ROIs L cent operc cortex      | 108 |



|     |                                      |     |
|-----|--------------------------------------|-----|
| 109 | T1 FAST ROIs R cent operc cortex     | 109 |
| 110 | T1 FAST ROIs L parietal operc cortex | 110 |
| 111 | T1 FAST ROIs R parietal operc cortex | 111 |
| 112 | T1 FAST ROIs L planum polare         | 112 |
| 113 | T1 FAST ROIs R planum polare         | 113 |
| 114 | T1 FAST ROIs L heschl gyrus          | 114 |
| 115 | T1 FAST ROIs R heschl gyrus          | 115 |
| 116 | T1 FAST ROIs L planum temporale      | 116 |
| 117 | T1 FAST ROIs R planum temporale      | 117 |
| 118 | T1 FAST ROIs L supracalc cortex      | 118 |
| 119 | T1 FAST ROIs R supracalc cortex      | 119 |
| 120 | T1 FAST ROIs L occ pole              | 120 |
| 121 | T1 FAST ROIs R occ pole              | 121 |
| 122 | T1 FAST ROIs L thalamus              | 122 |
| 123 | T1 FAST ROIs R thalamus              | 123 |
| 124 | T1 FAST ROIs L caudate               | 124 |
| 125 | T1 FAST ROIs R caudate               | 125 |
| 126 | T1 FAST ROIs L putamen               | 126 |
| 127 | T1 FAST ROIs R putamen               | 127 |
| 128 | T1 FAST ROIs L pallidum              | 128 |
| 129 | T1 FAST ROIs R pallidum              | 129 |
| 130 | T1 FAST ROIs L hippocampus           | 130 |
| 131 | T1 FAST ROIs R hippocampus           | 131 |
| 132 | T1 FAST ROIs L amygdala              | 132 |
| 133 | T1 FAST ROIs R amygdala              | 133 |
| 134 | T1 FAST ROIs L ventral striatum      | 134 |
| 135 | T1 FAST ROIs R ventral striatum      | 135 |
| 136 | T1 FAST ROIs brain stem              | 136 |
| 137 | T1 FAST ROIs L cerebellum I-IV       | 137 |
| 138 | T1 FAST ROIs R cerebellum I-IV       | 138 |
| 139 | T1 FAST ROIs L cerebellum V          | 139 |
| 140 | T1 FAST ROIs R cerebellum V          | 140 |
| 141 | T1 FAST ROIs L cerebellum VI         | 141 |
| 142 | T1 FAST ROIs V cerebellum VI         | 142 |
| 143 | T1 FAST ROIs R cerebellum VI         | 143 |
| 144 | T1 FAST ROIs L cerebellum crus I     | 144 |
| 145 | T1 FAST ROIs V cerebellum crus I     | 145 |
| 146 | T1 FAST ROIs R cerebellum crus I     | 146 |
| 147 | T1 FAST ROIs L cerebellum crus II    | 147 |
| 148 | T1 FAST ROIs V cerebellum crus II    | 148 |
| 149 | T1 FAST ROIs R cerebellum crus II    | 149 |
| 150 | T1 FAST ROIs L cerebellum VIIb       | 150 |
| 151 | T1 FAST ROIs V cerebellum VIIb       | 151 |
| 152 | T1 FAST ROIs R cerebellum VIIb       | 152 |
| 153 | T1 FAST ROIs L cerebellum VIIIa      | 153 |
| 154 | T1 FAST ROIs V cerebellum VIIIa      | 154 |
| 155 | T1 FAST ROIs R cerebellum VIIIa      | 155 |
| 156 | T1 FAST ROIs L cerebellum VIIIb      | 156 |
| 157 | T1 FAST ROIs V cerebellum VIIIb      | 157 |
| 158 | T1 FAST ROIs R cerebellum VIIIb      | 158 |
| 159 | T1 FAST ROIs L cerebellum IX         | 159 |
| 160 | T1 FAST ROIs V cerebellum IX         | 160 |
| 161 | T1 FAST ROIs R cerebellum IX         | 161 |
| 162 | T1 FAST ROIs L cerebellum X          | 162 |
| 163 | T1 FAST ROIs V cerebellum X          | 163 |
| 164 | T1 FAST ROIs R cerebellum X          | 164 |
| 165 | T2 FLAIR BIANCA WMH volume           | 165 |
| 166 | SWI T2star left thalamus             | 166 |
| 167 | SWI T2star right thalamus            | 167 |
| 168 | SWI T2star left caudate              | 168 |

|     |                                                         |     |
|-----|---------------------------------------------------------|-----|
| 169 | SWI T2star right caudate                                | 169 |
| 170 | SWI T2star left putamen                                 | 170 |
| 171 | SWI T2star right putamen                                | 171 |
| 172 | SWI T2star left pallidum                                | 172 |
| 173 | SWI T2star right pallidum                               | 173 |
| 174 | SWI T2star left hippocampus                             | 174 |
| 175 | SWI T2star right hippocampus                            | 175 |
| 176 | SWI T2star left amygdala                                | 176 |
| 177 | SWI T2star right amygdala                               | 177 |
| 178 | SWI T2star left accumbens                               | 178 |
| 179 | SWI T2star right accumbens                              | 179 |
| 180 | tfMRI median BOLD shapes                                | 180 |
| 181 | tfMRI 90th-percentile BOLD shapes                       | 181 |
| 182 | tfMRI median zstat shapes                               | 182 |
| 183 | tfMRI 90th-percentile zstat shapes                      | 183 |
| 184 | tfMRI median BOLD faces                                 | 184 |
| 185 | tfMRI 90th-percentile BOLD faces                        | 185 |
| 186 | tfMRI median zstat faces                                | 186 |
| 187 | tfMRI 90th-percentile zstat faces                       | 187 |
| 188 | tfMRI median BOLD faces-shapes                          | 188 |
| 189 | tfMRI 90th-percentile BOLD faces-shapes                 | 189 |
| 190 | tfMRI median zstat faces-shapes                         | 190 |
| 191 | tfMRI 90th-percentile zstat faces-shapes                | 191 |
| 192 | tfMRI median BOLD faces-shapes amygdala                 | 192 |
| 193 | tfMRI 90th-percentile BOLD faces-shapes amygdala        | 193 |
| 194 | tfMRI median zstat faces-shapes amygdala                | 194 |
| 195 | tfMRI 90th-percentile zstat faces-shapes amygdala       | 195 |
| 196 | dMRI TBSS FA Middle cerebellar peduncle                 | 196 |
| 197 | dMRI TBSS FA Pontine crossing tract                     | 197 |
| 198 | dMRI TBSS FA Genu of corpus callosum                    | 198 |
| 199 | dMRI TBSS FA Body of corpus callosum                    | 199 |
| 200 | dMRI TBSS FA Splenium of corpus callosum                | 200 |
| 201 | dMRI TBSS FA Fornix                                     | 201 |
| 202 | dMRI TBSS FA Corticospinal tract R                      | 202 |
| 203 | dMRI TBSS FA Corticospinal tract L                      | 203 |
| 204 | dMRI TBSS FA Medial lemniscus R                         | 204 |
| 205 | dMRI TBSS FA Medial lemniscus L                         | 205 |
| 206 | dMRI TBSS FA Inferior cerebellar peduncle R             | 206 |
| 207 | dMRI TBSS FA Inferior cerebellar peduncle L             | 207 |
| 208 | dMRI TBSS FA Superior cerebellar peduncle R             | 208 |
| 209 | dMRI TBSS FA Superior cerebellar peduncle L             | 209 |
| 210 | dMRI TBSS FA Cerebral peduncle R                        | 210 |
| 211 | dMRI TBSS FA Cerebral peduncle L                        | 211 |
| 212 | dMRI TBSS FA Anterior limb of internal capsule R        | 212 |
| 213 | dMRI TBSS FA Anterior limb of internal capsule L        | 213 |
| 214 | dMRI TBSS FA Posterior limb of internal capsule R       | 214 |
| 215 | dMRI TBSS FA Posterior limb of internal capsule L       | 215 |
| 216 | dMRI TBSS FA Retrolenticular part of internal capsule R | 216 |
| 217 | dMRI TBSS FA Retrolenticular part of internal capsule L | 217 |
| 218 | dMRI TBSS FA Anterior corona radiata R                  | 218 |
| 219 | dMRI TBSS FA Anterior corona radiata L                  | 219 |
| 220 | dMRI TBSS FA Superior corona radiata R                  | 220 |
| 221 | dMRI TBSS FA Superior corona radiata L                  | 221 |
| 222 | dMRI TBSS FA Posterior corona radiata R                 | 222 |
| 223 | dMRI TBSS FA Posterior corona radiata L                 | 223 |
| 224 | dMRI TBSS FA Posterior thalamic radiation R             | 224 |
| 225 | dMRI TBSS FA Posterior thalamic radiation L             | 225 |
| 226 | dMRI TBSS FA Sagittal stratum R                         | 226 |
| 227 | dMRI TBSS FA Sagittal stratum L                         | 227 |
| 228 | dMRI TBSS FA External capsule R                         | 228 |

|     |                                                         |     |
|-----|---------------------------------------------------------|-----|
| 229 | dMRI TBSS FA External capsule L                         | 229 |
| 230 | dMRI TBSS FA Cingulum cingulate gyrus R                 | 230 |
| 231 | dMRI TBSS FA Cingulum cingulate gyrus L                 | 231 |
| 232 | dMRI TBSS FA Cingulum hippocampus R                     | 232 |
| 233 | dMRI TBSS FA Cingulum hippocampus L                     | 233 |
| 234 | dMRI TBSS FA Fornix cres+Stria terminalis R             | 234 |
| 235 | dMRI TBSS FA Fornix cres+Stria terminalis L             | 235 |
| 236 | dMRI TBSS FA Superior longitudinal fasciculus R         | 236 |
| 237 | dMRI TBSS FA Superior longitudinal fasciculus L         | 237 |
| 238 | dMRI TBSS FA Superior fronto-occipital fasciculus R     | 238 |
| 239 | dMRI TBSS FA Superior fronto-occipital fasciculus L     | 239 |
| 240 | dMRI TBSS FA Uncinate fasciculus R                      | 240 |
| 241 | dMRI TBSS FA Uncinate fasciculus L                      | 241 |
| 242 | dMRI TBSS FA Tapetum R                                  | 242 |
| 243 | dMRI TBSS FA Tapetum L                                  | 243 |
| 244 | dMRI TBSS MD Middle cerebellar peduncle                 | 244 |
| 245 | dMRI TBSS MD Pontine crossing tract                     | 245 |
| 246 | dMRI TBSS MD Genu of corpus callosum                    | 246 |
| 247 | dMRI TBSS MD Body of corpus callosum                    | 247 |
| 248 | dMRI TBSS MD Splenium of corpus callosum                | 248 |
| 249 | dMRI TBSS MD Fornix                                     | 249 |
| 250 | dMRI TBSS MD Corticospinal tract R                      | 250 |
| 251 | dMRI TBSS MD Corticospinal tract L                      | 251 |
| 252 | dMRI TBSS MD Medial lemniscus R                         | 252 |
| 253 | dMRI TBSS MD Medial lemniscus L                         | 253 |
| 254 | dMRI TBSS MD Inferior cerebellar peduncle R             | 254 |
| 255 | dMRI TBSS MD Inferior cerebellar peduncle L             | 255 |
| 256 | dMRI TBSS MD Superior cerebellar peduncle R             | 256 |
| 257 | dMRI TBSS MD Superior cerebellar peduncle L             | 257 |
| 258 | dMRI TBSS MD Cerebral peduncle R                        | 258 |
| 259 | dMRI TBSS MD Cerebral peduncle L                        | 259 |
| 260 | dMRI TBSS MD Anterior limb of internal capsule R        | 260 |
| 261 | dMRI TBSS MD Anterior limb of internal capsule L        | 261 |
| 262 | dMRI TBSS MD Posterior limb of internal capsule R       | 262 |
| 263 | dMRI TBSS MD Posterior limb of internal capsule L       | 263 |
| 264 | dMRI TBSS MD Retrolenticular part of internal capsule R | 264 |
| 265 | dMRI TBSS MD Retrolenticular part of internal capsule L | 265 |
| 266 | dMRI TBSS MD Anterior corona radiata R                  | 266 |
| 267 | dMRI TBSS MD Anterior corona radiata L                  | 267 |
| 268 | dMRI TBSS MD Superior corona radiata R                  | 268 |
| 269 | dMRI TBSS MD Superior corona radiata L                  | 269 |
| 270 | dMRI TBSS MD Posterior corona radiata R                 | 270 |
| 271 | dMRI TBSS MD Posterior corona radiata L                 | 271 |
| 272 | dMRI TBSS MD Posterior thalamic radiation R             | 272 |
| 273 | dMRI TBSS MD Posterior thalamic radiation L             | 273 |
| 274 | dMRI TBSS MD Sagittal stratum R                         | 274 |
| 275 | dMRI TBSS MD Sagittal stratum L                         | 275 |
| 276 | dMRI TBSS MD External capsule R                         | 276 |
| 277 | dMRI TBSS MD External capsule L                         | 277 |
| 278 | dMRI TBSS MD Cingulum cingulate gyrus R                 | 278 |
| 279 | dMRI TBSS MD Cingulum cingulate gyrus L                 | 279 |
| 280 | dMRI TBSS MD Cingulum hippocampus R                     | 280 |
| 281 | dMRI TBSS MD Cingulum hippocampus L                     | 281 |
| 282 | dMRI TBSS MD Fornix cres+Stria terminalis R             | 282 |
| 283 | dMRI TBSS MD Fornix cres+Stria terminalis L             | 283 |
| 284 | dMRI TBSS MD Superior longitudinal fasciculus R         | 284 |
| 285 | dMRI TBSS MD Superior longitudinal fasciculus L         | 285 |
| 286 | dMRI TBSS MD Superior fronto-occipital fasciculus R     | 286 |
| 287 | dMRI TBSS MD Superior fronto-occipital fasciculus L     | 287 |
| 288 | dMRI TBSS MD Uncinate fasciculus R                      | 288 |

|     |                                                         |     |
|-----|---------------------------------------------------------|-----|
| 289 | dMRI TBSS MD Uncinate fasciculus L                      | 289 |
| 290 | dMRI TBSS MD Tapetum R                                  | 290 |
| 291 | dMRI TBSS MD Tapetum L                                  | 291 |
| 292 | dMRI TBSS MO Middle cerebellar peduncle                 | 292 |
| 293 | dMRI TBSS MO Pontine crossing tract                     | 293 |
| 294 | dMRI TBSS MO Genu of corpus callosum                    | 294 |
| 295 | dMRI TBSS MO Body of corpus callosum                    | 295 |
| 296 | dMRI TBSS MO Splenium of corpus callosum                | 296 |
| 297 | dMRI TBSS MO Fornix                                     | 297 |
| 298 | dMRI TBSS MO Corticospinal tract R                      | 298 |
| 299 | dMRI TBSS MO Corticospinal tract L                      | 299 |
| 300 | dMRI TBSS MO Medial lemniscus R                         | 300 |
| 301 | dMRI TBSS MO Medial lemniscus L                         | 301 |
| 302 | dMRI TBSS MO Inferior cerebellar peduncle R             | 302 |
| 303 | dMRI TBSS MO Inferior cerebellar peduncle L             | 303 |
| 304 | dMRI TBSS MO Superior cerebellar peduncle R             | 304 |
| 305 | dMRI TBSS MO Superior cerebellar peduncle L             | 305 |
| 306 | dMRI TBSS MO Cerebral peduncle R                        | 306 |
| 307 | dMRI TBSS MO Cerebral peduncle L                        | 307 |
| 308 | dMRI TBSS MO Anterior limb of internal capsule R        | 308 |
| 309 | dMRI TBSS MO Anterior limb of internal capsule L        | 309 |
| 310 | dMRI TBSS MO Posterior limb of internal capsule R       | 310 |
| 311 | dMRI TBSS MO Posterior limb of internal capsule L       | 311 |
| 312 | dMRI TBSS MO Retrolenticular part of internal capsule R | 312 |
| 313 | dMRI TBSS MO Retrolenticular part of internal capsule L | 313 |
| 314 | dMRI TBSS MO Anterior corona radiata R                  | 314 |
| 315 | dMRI TBSS MO Anterior corona radiata L                  | 315 |
| 316 | dMRI TBSS MO Superior corona radiata R                  | 316 |
| 317 | dMRI TBSS MO Superior corona radiata L                  | 317 |
| 318 | dMRI TBSS MO Posterior corona radiata R                 | 318 |
| 319 | dMRI TBSS MO Posterior corona radiata L                 | 319 |
| 320 | dMRI TBSS MO Posterior thalamic radiation R             | 320 |
| 321 | dMRI TBSS MO Posterior thalamic radiation L             | 321 |
| 322 | dMRI TBSS MO Sagittal stratum R                         | 322 |
| 323 | dMRI TBSS MO Sagittal stratum L                         | 323 |
| 324 | dMRI TBSS MO External capsule R                         | 324 |
| 325 | dMRI TBSS MO External capsule L                         | 325 |
| 326 | dMRI TBSS MO Cingulum cingulate gyrus R                 | 326 |
| 327 | dMRI TBSS MO Cingulum cingulate gyrus L                 | 327 |
| 328 | dMRI TBSS MO Cingulum hippocampus R                     | 328 |
| 329 | dMRI TBSS MO Cingulum hippocampus L                     | 329 |
| 330 | dMRI TBSS MO Fornix cres+Stria terminalis R             | 330 |
| 331 | dMRI TBSS MO Fornix cres+Stria terminalis L             | 331 |
| 332 | dMRI TBSS MO Superior longitudinal fasciculus R         | 332 |
| 333 | dMRI TBSS MO Superior longitudinal fasciculus L         | 333 |
| 334 | dMRI TBSS MO Superior fronto-occipital fasciculus R     | 334 |
| 335 | dMRI TBSS MO Superior fronto-occipital fasciculus L     | 335 |
| 336 | dMRI TBSS MO Uncinate fasciculus R                      | 336 |
| 337 | dMRI TBSS MO Uncinate fasciculus L                      | 337 |
| 338 | dMRI TBSS MO Tapetum R                                  | 338 |
| 339 | dMRI TBSS MO Tapetum L                                  | 339 |
| 340 | dMRI TBSS L1 Middle cerebellar peduncle                 | 340 |
| 341 | dMRI TBSS L1 Pontine crossing tract                     | 341 |
| 342 | dMRI TBSS L1 Genu of corpus callosum                    | 342 |
| 343 | dMRI TBSS L1 Body of corpus callosum                    | 343 |
| 344 | dMRI TBSS L1 Splenium of corpus callosum                | 344 |
| 345 | dMRI TBSS L1 Fornix                                     | 345 |
| 346 | dMRI TBSS L1 Corticospinal tract R                      | 346 |
| 347 | dMRI TBSS L1 Corticospinal tract L                      | 347 |
| 348 | dMRI TBSS L1 Medial lemniscus R                         | 348 |

|     |                                                         |     |
|-----|---------------------------------------------------------|-----|
| 349 | dMRI TBSS L1 Medial lemniscus L                         | 349 |
| 350 | dMRI TBSS L1 Inferior cerebellar peduncle R             | 350 |
| 351 | dMRI TBSS L1 Inferior cerebellar peduncle L             | 351 |
| 352 | dMRI TBSS L1 Superior cerebellar peduncle R             | 352 |
| 353 | dMRI TBSS L1 Superior cerebellar peduncle L             | 353 |
| 354 | dMRI TBSS L1 Cerebral peduncle R                        | 354 |
| 355 | dMRI TBSS L1 Cerebral peduncle L                        | 355 |
| 356 | dMRI TBSS L1 Anterior limb of internal capsule R        | 356 |
| 357 | dMRI TBSS L1 Anterior limb of internal capsule L        | 357 |
| 358 | dMRI TBSS L1 Posterior limb of internal capsule R       | 358 |
| 359 | dMRI TBSS L1 Posterior limb of internal capsule L       | 359 |
| 360 | dMRI TBSS L1 Retrolenticular part of internal capsule R | 360 |
| 361 | dMRI TBSS L1 Retrolenticular part of internal capsule L | 361 |
| 362 | dMRI TBSS L1 Anterior corona radiata R                  | 362 |
| 363 | dMRI TBSS L1 Anterior corona radiata L                  | 363 |
| 364 | dMRI TBSS L1 Superior corona radiata R                  | 364 |
| 365 | dMRI TBSS L1 Superior corona radiata L                  | 365 |
| 366 | dMRI TBSS L1 Posterior corona radiata R                 | 366 |
| 367 | dMRI TBSS L1 Posterior corona radiata L                 | 367 |
| 368 | dMRI TBSS L1 Posterior thalamic radiation R             | 368 |
| 369 | dMRI TBSS L1 Posterior thalamic radiation L             | 369 |
| 370 | dMRI TBSS L1 Sagittal stratum R                         | 370 |
| 371 | dMRI TBSS L1 Sagittal stratum L                         | 371 |
| 372 | dMRI TBSS L1 External capsule R                         | 372 |
| 373 | dMRI TBSS L1 External capsule L                         | 373 |
| 374 | dMRI TBSS L1 Cingulum cingulate gyrus R                 | 374 |
| 375 | dMRI TBSS L1 Cingulum cingulate gyrus L                 | 375 |
| 376 | dMRI TBSS L1 Cingulum hippocampus R                     | 376 |
| 377 | dMRI TBSS L1 Cingulum hippocampus L                     | 377 |
| 378 | dMRI TBSS L1 Fornix cres+Stria terminalis R             | 378 |
| 379 | dMRI TBSS L1 Fornix cres+Stria terminalis L             | 379 |
| 380 | dMRI TBSS L1 Superior longitudinal fasciculus R         | 380 |
| 381 | dMRI TBSS L1 Superior longitudinal fasciculus L         | 381 |
| 382 | dMRI TBSS L1 Superior fronto-occipital fasciculus R     | 382 |
| 383 | dMRI TBSS L1 Superior fronto-occipital fasciculus L     | 383 |
| 384 | dMRI TBSS L1 Uncinate fasciculus R                      | 384 |
| 385 | dMRI TBSS L1 Uncinate fasciculus L                      | 385 |
| 386 | dMRI TBSS L1 Tapetum R                                  | 386 |
| 387 | dMRI TBSS L1 Tapetum L                                  | 387 |
| 388 | dMRI TBSS L2 Middle cerebellar peduncle                 | 388 |
| 389 | dMRI TBSS L2 Pontine crossing tract                     | 389 |
| 390 | dMRI TBSS L2 Genu of corpus callosum                    | 390 |
| 391 | dMRI TBSS L2 Body of corpus callosum                    | 391 |
| 392 | dMRI TBSS L2 Splenium of corpus callosum                | 392 |
| 393 | dMRI TBSS L2 Fornix                                     | 393 |
| 394 | dMRI TBSS L2 Corticospinal tract R                      | 394 |
| 395 | dMRI TBSS L2 Corticospinal tract L                      | 395 |
| 396 | dMRI TBSS L2 Medial lemniscus R                         | 396 |
| 397 | dMRI TBSS L2 Medial lemniscus L                         | 397 |
| 398 | dMRI TBSS L2 Inferior cerebellar peduncle R             | 398 |
| 399 | dMRI TBSS L2 Inferior cerebellar peduncle L             | 399 |
| 400 | dMRI TBSS L2 Superior cerebellar peduncle R             | 400 |
| 401 | dMRI TBSS L2 Superior cerebellar peduncle L             | 401 |
| 402 | dMRI TBSS L2 Cerebral peduncle R                        | 402 |
| 403 | dMRI TBSS L2 Cerebral peduncle L                        | 403 |
| 404 | dMRI TBSS L2 Anterior limb of internal capsule R        | 404 |
| 405 | dMRI TBSS L2 Anterior limb of internal capsule L        | 405 |
| 406 | dMRI TBSS L2 Posterior limb of internal capsule R       | 406 |
| 407 | dMRI TBSS L2 Posterior limb of internal capsule L       | 407 |
| 408 | dMRI TBSS L2 Retrolenticular part of internal capsule R | 408 |

|     |                                                         |     |
|-----|---------------------------------------------------------|-----|
| 409 | dMRI TBSS L2 Retrolenticular part of internal capsule L | 409 |
| 410 | dMRI TBSS L2 Anterior corona radiata R                  | 410 |
| 411 | dMRI TBSS L2 Anterior corona radiata L                  | 411 |
| 412 | dMRI TBSS L2 Superior corona radiata R                  | 412 |
| 413 | dMRI TBSS L2 Superior corona radiata L                  | 413 |
| 414 | dMRI TBSS L2 Posterior corona radiata R                 | 414 |
| 415 | dMRI TBSS L2 Posterior corona radiata L                 | 415 |
| 416 | dMRI TBSS L2 Posterior thalamic radiation R             | 416 |
| 417 | dMRI TBSS L2 Posterior thalamic radiation L             | 417 |
| 418 | dMRI TBSS L2 Sagittal stratum R                         | 418 |
| 419 | dMRI TBSS L2 Sagittal stratum L                         | 419 |
| 420 | dMRI TBSS L2 External capsule R                         | 420 |
| 421 | dMRI TBSS L2 External capsule L                         | 421 |
| 422 | dMRI TBSS L2 Cingulum cingulate gyrus R                 | 422 |
| 423 | dMRI TBSS L2 Cingulum cingulate gyrus L                 | 423 |
| 424 | dMRI TBSS L2 Cingulum hippocampus R                     | 424 |
| 425 | dMRI TBSS L2 Cingulum hippocampus L                     | 425 |
| 426 | dMRI TBSS L2 Fornix cres+Stria terminalis R             | 426 |
| 427 | dMRI TBSS L2 Fornix cres+Stria terminalis L             | 427 |
| 428 | dMRI TBSS L2 Superior longitudinal fasciculus R         | 428 |
| 429 | dMRI TBSS L2 Superior longitudinal fasciculus L         | 429 |
| 430 | dMRI TBSS L2 Superior fronto-occipital fasciculus R     | 430 |
| 431 | dMRI TBSS L2 Superior fronto-occipital fasciculus L     | 431 |
| 432 | dMRI TBSS L2 Uncinate fasciculus R                      | 432 |
| 433 | dMRI TBSS L2 Uncinate fasciculus L                      | 433 |
| 434 | dMRI TBSS L2 Tapetum R                                  | 434 |
| 435 | dMRI TBSS L2 Tapetum L                                  | 435 |
| 436 | dMRI TBSS L3 Middle cerebellar peduncle                 | 436 |
| 437 | dMRI TBSS L3 Pontine crossing tract                     | 437 |
| 438 | dMRI TBSS L3 Genu of corpus callosum                    | 438 |
| 439 | dMRI TBSS L3 Body of corpus callosum                    | 439 |
| 440 | dMRI TBSS L3 Splenium of corpus callosum                | 440 |
| 441 | dMRI TBSS L3 Fornix                                     | 441 |
| 442 | dMRI TBSS L3 Corticospinal tract R                      | 442 |
| 443 | dMRI TBSS L3 Corticospinal tract L                      | 443 |
| 444 | dMRI TBSS L3 Medial lemniscus R                         | 444 |
| 445 | dMRI TBSS L3 Medial lemniscus L                         | 445 |
| 446 | dMRI TBSS L3 Inferior cerebellar peduncle R             | 446 |
| 447 | dMRI TBSS L3 Inferior cerebellar peduncle L             | 447 |
| 448 | dMRI TBSS L3 Superior cerebellar peduncle R             | 448 |
| 449 | dMRI TBSS L3 Superior cerebellar peduncle L             | 449 |
| 450 | dMRI TBSS L3 Cerebral peduncle R                        | 450 |
| 451 | dMRI TBSS L3 Cerebral peduncle L                        | 451 |
| 452 | dMRI TBSS L3 Anterior limb of internal capsule R        | 452 |
| 453 | dMRI TBSS L3 Anterior limb of internal capsule L        | 453 |
| 454 | dMRI TBSS L3 Posterior limb of internal capsule R       | 454 |
| 455 | dMRI TBSS L3 Posterior limb of internal capsule L       | 455 |
| 456 | dMRI TBSS L3 Retrolenticular part of internal capsule R | 456 |
| 457 | dMRI TBSS L3 Retrolenticular part of internal capsule L | 457 |
| 458 | dMRI TBSS L3 Anterior corona radiata R                  | 458 |
| 459 | dMRI TBSS L3 Anterior corona radiata L                  | 459 |
| 460 | dMRI TBSS L3 Superior corona radiata R                  | 460 |
| 461 | dMRI TBSS L3 Superior corona radiata L                  | 461 |
| 462 | dMRI TBSS L3 Posterior corona radiata R                 | 462 |
| 463 | dMRI TBSS L3 Posterior corona radiata L                 | 463 |
| 464 | dMRI TBSS L3 Posterior thalamic radiation R             | 464 |
| 465 | dMRI TBSS L3 Posterior thalamic radiation L             | 465 |
| 466 | dMRI TBSS L3 Sagittal stratum R                         | 466 |
| 467 | dMRI TBSS L3 Sagittal stratum L                         | 467 |
| 468 | dMRI TBSS L3 External capsule R                         | 468 |

|     |                                                           |     |
|-----|-----------------------------------------------------------|-----|
| 469 | dMRI TBSS L3 External capsule L                           | 469 |
| 470 | dMRI TBSS L3 Cingulum cingulate gyrus R                   | 470 |
| 471 | dMRI TBSS L3 Cingulum cingulate gyrus L                   | 471 |
| 472 | dMRI TBSS L3 Cingulum hippocampus R                       | 472 |
| 473 | dMRI TBSS L3 Cingulum hippocampus L                       | 473 |
| 474 | dMRI TBSS L3 Fornix cres+Stria terminalis R               | 474 |
| 475 | dMRI TBSS L3 Fornix cres+Stria terminalis L               | 475 |
| 476 | dMRI TBSS L3 Superior longitudinal fasciculus R           | 476 |
| 477 | dMRI TBSS L3 Superior longitudinal fasciculus L           | 477 |
| 478 | dMRI TBSS L3 Superior fronto-occipital fasciculus R       | 478 |
| 479 | dMRI TBSS L3 Superior fronto-occipital fasciculus L       | 479 |
| 480 | dMRI TBSS L3 Uncinate fasciculus R                        | 480 |
| 481 | dMRI TBSS L3 Uncinate fasciculus L                        | 481 |
| 482 | dMRI TBSS L3 Tapetum R                                    | 482 |
| 483 | dMRI TBSS L3 Tapetum L                                    | 483 |
| 484 | dMRI TBSS ICVF Middle cerebellar peduncle                 | 484 |
| 485 | dMRI TBSS ICVF Pontine crossing tract                     | 485 |
| 486 | dMRI TBSS ICVF Genu of corpus callosum                    | 486 |
| 487 | dMRI TBSS ICVF Body of corpus callosum                    | 487 |
| 488 | dMRI TBSS ICVF Splenium of corpus callosum                | 488 |
| 489 | dMRI TBSS ICVF Fornix                                     | 489 |
| 490 | dMRI TBSS ICVF Corticospinal tract R                      | 490 |
| 491 | dMRI TBSS ICVF Corticospinal tract L                      | 491 |
| 492 | dMRI TBSS ICVF Medial lemniscus R                         | 492 |
| 493 | dMRI TBSS ICVF Medial lemniscus L                         | 493 |
| 494 | dMRI TBSS ICVF Inferior cerebellar peduncle R             | 494 |
| 495 | dMRI TBSS ICVF Inferior cerebellar peduncle L             | 495 |
| 496 | dMRI TBSS ICVF Superior cerebellar peduncle R             | 496 |
| 497 | dMRI TBSS ICVF Superior cerebellar peduncle L             | 497 |
| 498 | dMRI TBSS ICVF Cerebral peduncle R                        | 498 |
| 499 | dMRI TBSS ICVF Cerebral peduncle L                        | 499 |
| 500 | dMRI TBSS ICVF Anterior limb of internal capsule R        | 500 |
| 501 | dMRI TBSS ICVF Anterior limb of internal capsule L        | 501 |
| 502 | dMRI TBSS ICVF Posterior limb of internal capsule R       | 502 |
| 503 | dMRI TBSS ICVF Posterior limb of internal capsule L       | 503 |
| 504 | dMRI TBSS ICVF Retrolenticular part of internal capsule R | 504 |
| 505 | dMRI TBSS ICVF Retrolenticular part of internal capsule L | 505 |
| 506 | dMRI TBSS ICVF Anterior corona radiata R                  | 506 |
| 507 | dMRI TBSS ICVF Anterior corona radiata L                  | 507 |
| 508 | dMRI TBSS ICVF Superior corona radiata R                  | 508 |
| 509 | dMRI TBSS ICVF Superior corona radiata L                  | 509 |
| 510 | dMRI TBSS ICVF Posterior corona radiata R                 | 510 |
| 511 | dMRI TBSS ICVF Posterior corona radiata L                 | 511 |
| 512 | dMRI TBSS ICVF Posterior thalamic radiation R             | 512 |
| 513 | dMRI TBSS ICVF Posterior thalamic radiation L             | 513 |
| 514 | dMRI TBSS ICVF Sagittal stratum R                         | 514 |
| 515 | dMRI TBSS ICVF Sagittal stratum L                         | 515 |
| 516 | dMRI TBSS ICVF External capsule R                         | 516 |
| 517 | dMRI TBSS ICVF External capsule L                         | 517 |
| 518 | dMRI TBSS ICVF Cingulum cingulate gyrus R                 | 518 |
| 519 | dMRI TBSS ICVF Cingulum cingulate gyrus L                 | 519 |
| 520 | dMRI TBSS ICVF Cingulum hippocampus R                     | 520 |
| 521 | dMRI TBSS ICVF Cingulum hippocampus L                     | 521 |
| 522 | dMRI TBSS ICVF Fornix cres+Stria terminalis R             | 522 |
| 523 | dMRI TBSS ICVF Fornix cres+Stria terminalis L             | 523 |
| 524 | dMRI TBSS ICVF Superior longitudinal fasciculus R         | 524 |
| 525 | dMRI TBSS ICVF Superior longitudinal fasciculus L         | 525 |
| 526 | dMRI TBSS ICVF Superior fronto-occipital fasciculus R     | 526 |
| 527 | dMRI TBSS ICVF Superior fronto-occipital fasciculus L     | 527 |
| 528 | dMRI TBSS ICVF Uncinate fasciculus R                      | 528 |

|     |                                                         |     |
|-----|---------------------------------------------------------|-----|
| 529 | dMRI TBSS ICVF Uncinate fasciculus L                    | 529 |
| 530 | dMRI TBSS ICVF Tapetum R                                | 530 |
| 531 | dMRI TBSS ICVF Tapetum L                                | 531 |
| 532 | dMRI TBSS OD Middle cerebellar peduncle                 | 532 |
| 533 | dMRI TBSS OD Pontine crossing tract                     | 533 |
| 534 | dMRI TBSS OD Genu of corpus callosum                    | 534 |
| 535 | dMRI TBSS OD Body of corpus callosum                    | 535 |
| 536 | dMRI TBSS OD Splenium of corpus callosum                | 536 |
| 537 | dMRI TBSS OD Fornix                                     | 537 |
| 538 | dMRI TBSS OD Corticospinal tract R                      | 538 |
| 539 | dMRI TBSS OD Corticospinal tract L                      | 539 |
| 540 | dMRI TBSS OD Medial lemniscus R                         | 540 |
| 541 | dMRI TBSS OD Medial lemniscus L                         | 541 |
| 542 | dMRI TBSS OD Inferior cerebellar peduncle R             | 542 |
| 543 | dMRI TBSS OD Inferior cerebellar peduncle L             | 543 |
| 544 | dMRI TBSS OD Superior cerebellar peduncle R             | 544 |
| 545 | dMRI TBSS OD Superior cerebellar peduncle L             | 545 |
| 546 | dMRI TBSS OD Cerebral peduncle R                        | 546 |
| 547 | dMRI TBSS OD Cerebral peduncle L                        | 547 |
| 548 | dMRI TBSS OD Anterior limb of internal capsule R        | 548 |
| 549 | dMRI TBSS OD Anterior limb of internal capsule L        | 549 |
| 550 | dMRI TBSS OD Posterior limb of internal capsule R       | 550 |
| 551 | dMRI TBSS OD Posterior limb of internal capsule L       | 551 |
| 552 | dMRI TBSS OD Retrolenticular part of internal capsule R | 552 |
| 553 | dMRI TBSS OD Retrolenticular part of internal capsule L | 553 |
| 554 | dMRI TBSS OD Anterior corona radiata R                  | 554 |
| 555 | dMRI TBSS OD Anterior corona radiata L                  | 555 |
| 556 | dMRI TBSS OD Superior corona radiata R                  | 556 |
| 557 | dMRI TBSS OD Superior corona radiata L                  | 557 |
| 558 | dMRI TBSS OD Posterior corona radiata R                 | 558 |
| 559 | dMRI TBSS OD Posterior corona radiata L                 | 559 |
| 560 | dMRI TBSS OD Posterior thalamic radiation R             | 560 |
| 561 | dMRI TBSS OD Posterior thalamic radiation L             | 561 |
| 562 | dMRI TBSS OD Sagittal stratum R                         | 562 |
| 563 | dMRI TBSS OD Sagittal stratum L                         | 563 |
| 564 | dMRI TBSS OD External capsule R                         | 564 |
| 565 | dMRI TBSS OD External capsule L                         | 565 |
| 566 | dMRI TBSS OD Cingulum cingulate gyrus R                 | 566 |
| 567 | dMRI TBSS OD Cingulum cingulate gyrus L                 | 567 |
| 568 | dMRI TBSS OD Cingulum hippocampus R                     | 568 |
| 569 | dMRI TBSS OD Cingulum hippocampus L                     | 569 |
| 570 | dMRI TBSS OD Fornix cres+Stria terminalis R             | 570 |
| 571 | dMRI TBSS OD Fornix cres+Stria terminalis L             | 571 |
| 572 | dMRI TBSS OD Superior longitudinal fasciculus R         | 572 |
| 573 | dMRI TBSS OD Superior longitudinal fasciculus L         | 573 |
| 574 | dMRI TBSS OD Superior fronto-occipital fasciculus R     | 574 |
| 575 | dMRI TBSS OD Superior fronto-occipital fasciculus L     | 575 |
| 576 | dMRI TBSS OD Uncinate fasciculus R                      | 576 |
| 577 | dMRI TBSS OD Uncinate fasciculus L                      | 577 |
| 578 | dMRI TBSS OD Tapetum R                                  | 578 |
| 579 | dMRI TBSS OD Tapetum L                                  | 579 |
| 580 | dMRI TBSS ISOVF Middle cerebellar peduncle              | 580 |
| 581 | dMRI TBSS ISOVF Pontine crossing tract                  | 581 |
| 582 | dMRI TBSS ISOVF Genu of corpus callosum                 | 582 |
| 583 | dMRI TBSS ISOVF Body of corpus callosum                 | 583 |
| 584 | dMRI TBSS ISOVF Splenium of corpus callosum             | 584 |
| 585 | dMRI TBSS ISOVF Fornix                                  | 585 |
| 586 | dMRI TBSS ISOVF Corticospinal tract R                   | 586 |
| 587 | dMRI TBSS ISOVF Corticospinal tract L                   | 587 |
| 588 | dMRI TBSS ISOVF Medial lemniscus R                      | 588 |



|     |                                                            |     |
|-----|------------------------------------------------------------|-----|
| 589 | dMRI TBSS ISOVF Medial lemniscus L                         | 589 |
| 590 | dMRI TBSS ISOVF Inferior cerebellar peduncle R             | 590 |
| 591 | dMRI TBSS ISOVF Inferior cerebellar peduncle L             | 591 |
| 592 | dMRI TBSS ISOVF Superior cerebellar peduncle R             | 592 |
| 593 | dMRI TBSS ISOVF Superior cerebellar peduncle L             | 593 |
| 594 | dMRI TBSS ISOVF Cerebral peduncle R                        | 594 |
| 595 | dMRI TBSS ISOVF Cerebral peduncle L                        | 595 |
| 596 | dMRI TBSS ISOVF Anterior limb of internal capsule R        | 596 |
| 597 | dMRI TBSS ISOVF Anterior limb of internal capsule L        | 597 |
| 598 | dMRI TBSS ISOVF Posterior limb of internal capsule R       | 598 |
| 599 | dMRI TBSS ISOVF Posterior limb of internal capsule L       | 599 |
| 600 | dMRI TBSS ISOVF Retrolenticular part of internal capsule R | 600 |
| 601 | dMRI TBSS ISOVF Retrolenticular part of internal capsule L | 601 |
| 602 | dMRI TBSS ISOVF Anterior corona radiata R                  | 602 |
| 603 | dMRI TBSS ISOVF Anterior corona radiata L                  | 603 |
| 604 | dMRI TBSS ISOVF Superior corona radiata R                  | 604 |
| 605 | dMRI TBSS ISOVF Superior corona radiata L                  | 605 |
| 606 | dMRI TBSS ISOVF Posterior corona radiata R                 | 606 |
| 607 | dMRI TBSS ISOVF Posterior corona radiata L                 | 607 |
| 608 | dMRI TBSS ISOVF Posterior thalamic radiation R             | 608 |
| 609 | dMRI TBSS ISOVF Posterior thalamic radiation L             | 609 |
| 610 | dMRI TBSS ISOVF Sagittal stratum R                         | 610 |
| 611 | dMRI TBSS ISOVF Sagittal stratum L                         | 611 |
| 612 | dMRI TBSS ISOVF External capsule R                         | 612 |
| 613 | dMRI TBSS ISOVF External capsule L                         | 613 |
| 614 | dMRI TBSS ISOVF Cingulum cingulate gyrus R                 | 614 |
| 615 | dMRI TBSS ISOVF Cingulum cingulate gyrus L                 | 615 |
| 616 | dMRI TBSS ISOVF Cingulum hippocampus R                     | 616 |
| 617 | dMRI TBSS ISOVF Cingulum hippocampus L                     | 617 |
| 618 | dMRI TBSS ISOVF Fornix cres+Stria terminalis R             | 618 |
| 619 | dMRI TBSS ISOVF Fornix cres+Stria terminalis L             | 619 |
| 620 | dMRI TBSS ISOVF Superior longitudinal fasciculus R         | 620 |
| 621 | dMRI TBSS ISOVF Superior longitudinal fasciculus L         | 621 |
| 622 | dMRI TBSS ISOVF Superior fronto-occipital fasciculus R     | 622 |
| 623 | dMRI TBSS ISOVF Superior fronto-occipital fasciculus L     | 623 |
| 624 | dMRI TBSS ISOVF Uncinate fasciculus R                      | 624 |
| 625 | dMRI TBSS ISOVF Uncinate fasciculus L                      | 625 |
| 626 | dMRI TBSS ISOVF Tapetum R                                  | 626 |
| 627 | dMRI TBSS ISOVF Tapetum L                                  | 627 |
| 628 | dMRI ProbtrackX FA ar l                                    | 628 |
| 629 | dMRI ProbtrackX FA ar r                                    | 629 |
| 630 | dMRI ProbtrackX FA atr l                                   | 630 |
| 631 | dMRI ProbtrackX FA atr r                                   | 631 |
| 632 | dMRI ProbtrackX FA cgc l                                   | 632 |
| 633 | dMRI ProbtrackX FA cgc r                                   | 633 |
| 634 | dMRI ProbtrackX FA cgh l                                   | 634 |
| 635 | dMRI ProbtrackX FA cgh r                                   | 635 |
| 636 | dMRI ProbtrackX FA cst l                                   | 636 |
| 637 | dMRI ProbtrackX FA cst r                                   | 637 |
| 638 | dMRI ProbtrackX FA fma                                     | 638 |
| 639 | dMRI ProbtrackX FA fmi                                     | 639 |
| 640 | dMRI ProbtrackX FA ifo l                                   | 640 |
| 641 | dMRI ProbtrackX FA ifo r                                   | 641 |
| 642 | dMRI ProbtrackX FA ilf l                                   | 642 |
| 643 | dMRI ProbtrackX FA ilf r                                   | 643 |
| 644 | dMRI ProbtrackX FA mcp                                     | 644 |
| 645 | dMRI ProbtrackX FA ml l                                    | 645 |
| 646 | dMRI ProbtrackX FA ml r                                    | 646 |
| 647 | dMRI ProbtrackX FA ptr l                                   | 647 |
| 648 | dMRI ProbtrackX FA ptr r                                   | 648 |

|     |                          |     |
|-----|--------------------------|-----|
| 649 | dMRI ProbtrackX FA slf l | 649 |
| 650 | dMRI ProbtrackX FA slf r | 650 |
| 651 | dMRI ProbtrackX FA str l | 651 |
| 652 | dMRI ProbtrackX FA str r | 652 |
| 653 | dMRI ProbtrackX FA unc l | 653 |
| 654 | dMRI ProbtrackX FA unc r | 654 |
| 655 | dMRI ProbtrackX MD ar l  | 655 |
| 656 | dMRI ProbtrackX MD ar r  | 656 |
| 657 | dMRI ProbtrackX MD atr l | 657 |
| 658 | dMRI ProbtrackX MD atr r | 658 |
| 659 | dMRI ProbtrackX MD cgc l | 659 |
| 660 | dMRI ProbtrackX MD cgc r | 660 |
| 661 | dMRI ProbtrackX MD cgh l | 661 |
| 662 | dMRI ProbtrackX MD cgh r | 662 |
| 663 | dMRI ProbtrackX MD cst l | 663 |
| 664 | dMRI ProbtrackX MD cst r | 664 |
| 665 | dMRI ProbtrackX MD fma   | 665 |
| 666 | dMRI ProbtrackX MD fmi   | 666 |
| 667 | dMRI ProbtrackX MD ifo l | 667 |
| 668 | dMRI ProbtrackX MD ifo r | 668 |
| 669 | dMRI ProbtrackX MD ilf l | 669 |
| 670 | dMRI ProbtrackX MD ilf r | 670 |
| 671 | dMRI ProbtrackX MD mcp   | 671 |
| 672 | dMRI ProbtrackX MD ml l  | 672 |
| 673 | dMRI ProbtrackX MD ml r  | 673 |
| 674 | dMRI ProbtrackX MD ptr l | 674 |
| 675 | dMRI ProbtrackX MD ptr r | 675 |
| 676 | dMRI ProbtrackX MD slf l | 676 |
| 677 | dMRI ProbtrackX MD slf r | 677 |
| 678 | dMRI ProbtrackX MD str l | 678 |
| 679 | dMRI ProbtrackX MD str r | 679 |
| 680 | dMRI ProbtrackX MD unc l | 680 |
| 681 | dMRI ProbtrackX MD unc r | 681 |
| 682 | dMRI ProbtrackX MO ar l  | 682 |
| 683 | dMRI ProbtrackX MO ar r  | 683 |
| 684 | dMRI ProbtrackX MO atr l | 684 |
| 685 | dMRI ProbtrackX MO atr r | 685 |
| 686 | dMRI ProbtrackX MO cgc l | 686 |
| 687 | dMRI ProbtrackX MO cgc r | 687 |
| 688 | dMRI ProbtrackX MO cgh l | 688 |
| 689 | dMRI ProbtrackX MO cgh r | 689 |
| 690 | dMRI ProbtrackX MO cst l | 690 |
| 691 | dMRI ProbtrackX MO cst r | 691 |
| 692 | dMRI ProbtrackX MO fma   | 692 |
| 693 | dMRI ProbtrackX MO fmi   | 693 |
| 694 | dMRI ProbtrackX MO ifo l | 694 |
| 695 | dMRI ProbtrackX MO ifo r | 695 |
| 696 | dMRI ProbtrackX MO ilf l | 696 |
| 697 | dMRI ProbtrackX MO ilf r | 697 |
| 698 | dMRI ProbtrackX MO mcp   | 698 |
| 699 | dMRI ProbtrackX MO ml l  | 699 |
| 700 | dMRI ProbtrackX MO ml r  | 700 |
| 701 | dMRI ProbtrackX MO ptr l | 701 |
| 702 | dMRI ProbtrackX MO ptr r | 702 |
| 703 | dMRI ProbtrackX MO slf l | 703 |
| 704 | dMRI ProbtrackX MO slf r | 704 |
| 705 | dMRI ProbtrackX MO str l | 705 |
| 706 | dMRI ProbtrackX MO str r | 706 |
| 707 | dMRI ProbtrackX MO unc l | 707 |
| 708 | dMRI ProbtrackX MO unc r | 708 |

|     |                          |     |
|-----|--------------------------|-----|
| 709 | dMRI ProbtrackX L1 ar l  | 709 |
| 710 | dMRI ProbtrackX L1 ar r  | 710 |
| 711 | dMRI ProbtrackX L1 atr l | 711 |
| 712 | dMRI ProbtrackX L1 atr r | 712 |
| 713 | dMRI ProbtrackX L1 cgc l | 713 |
| 714 | dMRI ProbtrackX L1 cgc r | 714 |
| 715 | dMRI ProbtrackX L1 cgh l | 715 |
| 716 | dMRI ProbtrackX L1 cgh r | 716 |
| 717 | dMRI ProbtrackX L1 cst l | 717 |
| 718 | dMRI ProbtrackX L1 cst r | 718 |
| 719 | dMRI ProbtrackX L1 fma   | 719 |
| 720 | dMRI ProbtrackX L1 fmi   | 720 |
| 721 | dMRI ProbtrackX L1 ifo l | 721 |
| 722 | dMRI ProbtrackX L1 ifo r | 722 |
| 723 | dMRI ProbtrackX L1 ilf l | 723 |
| 724 | dMRI ProbtrackX L1 ilf r | 724 |
| 725 | dMRI ProbtrackX L1 mcp   | 725 |
| 726 | dMRI ProbtrackX L1 ml l  | 726 |
| 727 | dMRI ProbtrackX L1 ml r  | 727 |
| 728 | dMRI ProbtrackX L1 ptr l | 728 |
| 729 | dMRI ProbtrackX L1 ptr r | 729 |
| 730 | dMRI ProbtrackX L1 slf l | 730 |
| 731 | dMRI ProbtrackX L1 slf r | 731 |
| 732 | dMRI ProbtrackX L1 str l | 732 |
| 733 | dMRI ProbtrackX L1 str r | 733 |
| 734 | dMRI ProbtrackX L1 unc l | 734 |
| 735 | dMRI ProbtrackX L1 unc r | 735 |
| 736 | dMRI ProbtrackX L2 ar l  | 736 |
| 737 | dMRI ProbtrackX L2 ar r  | 737 |
| 738 | dMRI ProbtrackX L2 atr l | 738 |
| 739 | dMRI ProbtrackX L2 atr r | 739 |
| 740 | dMRI ProbtrackX L2 cgc l | 740 |
| 741 | dMRI ProbtrackX L2 cgc r | 741 |
| 742 | dMRI ProbtrackX L2 cgh l | 742 |
| 743 | dMRI ProbtrackX L2 cgh r | 743 |
| 744 | dMRI ProbtrackX L2 cst l | 744 |
| 745 | dMRI ProbtrackX L2 cst r | 745 |
| 746 | dMRI ProbtrackX L2 fma   | 746 |
| 747 | dMRI ProbtrackX L2 fmi   | 747 |
| 748 | dMRI ProbtrackX L2 ifo l | 748 |
| 749 | dMRI ProbtrackX L2 ifo r | 749 |
| 750 | dMRI ProbtrackX L2 ilf l | 750 |
| 751 | dMRI ProbtrackX L2 ilf r | 751 |
| 752 | dMRI ProbtrackX L2 mcp   | 752 |
| 753 | dMRI ProbtrackX L2 ml l  | 753 |
| 754 | dMRI ProbtrackX L2 ml r  | 754 |
| 755 | dMRI ProbtrackX L2 ptr l | 755 |
| 756 | dMRI ProbtrackX L2 ptr r | 756 |
| 757 | dMRI ProbtrackX L2 slf l | 757 |
| 758 | dMRI ProbtrackX L2 slf r | 758 |
| 759 | dMRI ProbtrackX L2 str l | 759 |
| 760 | dMRI ProbtrackX L2 str r | 760 |
| 761 | dMRI ProbtrackX L2 unc l | 761 |
| 762 | dMRI ProbtrackX L2 unc r | 762 |
| 763 | dMRI ProbtrackX L3 ar l  | 763 |
| 764 | dMRI ProbtrackX L3 ar r  | 764 |
| 765 | dMRI ProbtrackX L3 atr l | 765 |
| 766 | dMRI ProbtrackX L3 atr r | 766 |
| 767 | dMRI ProbtrackX L3 cgc l | 767 |
| 768 | dMRI ProbtrackX L3 cgc r | 768 |

|     |                            |     |
|-----|----------------------------|-----|
| 769 | dMRI ProbtrackX L3 cgh l   | 769 |
| 770 | dMRI ProbtrackX L3 cgh r   | 770 |
| 771 | dMRI ProbtrackX L3 cst l   | 771 |
| 772 | dMRI ProbtrackX L3 cst r   | 772 |
| 773 | dMRI ProbtrackX L3 fma     | 773 |
| 774 | dMRI ProbtrackX L3 fmi     | 774 |
| 775 | dMRI ProbtrackX L3 ifo l   | 775 |
| 776 | dMRI ProbtrackX L3 ifo r   | 776 |
| 777 | dMRI ProbtrackX L3 ilf l   | 777 |
| 778 | dMRI ProbtrackX L3 ilf r   | 778 |
| 779 | dMRI ProbtrackX L3 mcp     | 779 |
| 780 | dMRI ProbtrackX L3 ml l    | 780 |
| 781 | dMRI ProbtrackX L3 ml r    | 781 |
| 782 | dMRI ProbtrackX L3 ptr l   | 782 |
| 783 | dMRI ProbtrackX L3 ptr r   | 783 |
| 784 | dMRI ProbtrackX L3 slf l   | 784 |
| 785 | dMRI ProbtrackX L3 slf r   | 785 |
| 786 | dMRI ProbtrackX L3 str l   | 786 |
| 787 | dMRI ProbtrackX L3 str r   | 787 |
| 788 | dMRI ProbtrackX L3 unc l   | 788 |
| 789 | dMRI ProbtrackX L3 unc r   | 789 |
| 790 | dMRI ProbtrackX ICVF ar l  | 790 |
| 791 | dMRI ProbtrackX ICVF ar r  | 791 |
| 792 | dMRI ProbtrackX ICVF atr l | 792 |
| 793 | dMRI ProbtrackX ICVF atr r | 793 |
| 794 | dMRI ProbtrackX ICVF cgc l | 794 |
| 795 | dMRI ProbtrackX ICVF cgc r | 795 |
| 796 | dMRI ProbtrackX ICVF cgh l | 796 |
| 797 | dMRI ProbtrackX ICVF cgh r | 797 |
| 798 | dMRI ProbtrackX ICVF cst l | 798 |
| 799 | dMRI ProbtrackX ICVF cst r | 799 |
| 800 | dMRI ProbtrackX ICVF fma   | 800 |
| 801 | dMRI ProbtrackX ICVF fmi   | 801 |
| 802 | dMRI ProbtrackX ICVF ifo l | 802 |
| 803 | dMRI ProbtrackX ICVF ifo r | 803 |
| 804 | dMRI ProbtrackX ICVF ilf l | 804 |
| 805 | dMRI ProbtrackX ICVF ilf r | 805 |
| 806 | dMRI ProbtrackX ICVF mcp   | 806 |
| 807 | dMRI ProbtrackX ICVF ml l  | 807 |
| 808 | dMRI ProbtrackX ICVF ml r  | 808 |
| 809 | dMRI ProbtrackX ICVF ptr l | 809 |
| 810 | dMRI ProbtrackX ICVF ptr r | 810 |
| 811 | dMRI ProbtrackX ICVF slf l | 811 |
| 812 | dMRI ProbtrackX ICVF slf r | 812 |
| 813 | dMRI ProbtrackX ICVF str l | 813 |
| 814 | dMRI ProbtrackX ICVF str r | 814 |
| 815 | dMRI ProbtrackX ICVF unc l | 815 |
| 816 | dMRI ProbtrackX ICVF unc r | 816 |
| 817 | dMRI ProbtrackX OD ar l    | 817 |
| 818 | dMRI ProbtrackX OD ar r    | 818 |
| 819 | dMRI ProbtrackX OD atr l   | 819 |
| 820 | dMRI ProbtrackX OD atr r   | 820 |
| 821 | dMRI ProbtrackX OD cgc l   | 821 |
| 822 | dMRI ProbtrackX OD cgc r   | 822 |
| 823 | dMRI ProbtrackX OD cgh l   | 823 |
| 824 | dMRI ProbtrackX OD cgh r   | 824 |
| 825 | dMRI ProbtrackX OD cst l   | 825 |
| 826 | dMRI ProbtrackX OD cst r   | 826 |
| 827 | dMRI ProbtrackX OD fma     | 827 |
| 828 | dMRI ProbtrackX OD fmi     | 828 |

|     |                             |     |
|-----|-----------------------------|-----|
| 829 | dMRI ProbtrackX OD ifo l    | 829 |
| 830 | dMRI ProbtrackX OD ifo r    | 830 |
| 831 | dMRI ProbtrackX OD ilf l    | 831 |
| 832 | dMRI ProbtrackX OD ilf r    | 832 |
| 833 | dMRI ProbtrackX OD mcp      | 833 |
| 834 | dMRI ProbtrackX OD ml l     | 834 |
| 835 | dMRI ProbtrackX OD ml r     | 835 |
| 836 | dMRI ProbtrackX OD ptr l    | 836 |
| 837 | dMRI ProbtrackX OD ptr r    | 837 |
| 838 | dMRI ProbtrackX OD slf l    | 838 |
| 839 | dMRI ProbtrackX OD slf r    | 839 |
| 840 | dMRI ProbtrackX OD str l    | 840 |
| 841 | dMRI ProbtrackX OD str r    | 841 |
| 842 | dMRI ProbtrackX OD unc l    | 842 |
| 843 | dMRI ProbtrackX OD unc r    | 843 |
| 844 | dMRI ProbtrackX ISOVF ar l  | 844 |
| 845 | dMRI ProbtrackX ISOVF ar r  | 845 |
| 846 | dMRI ProbtrackX ISOVF atr l | 846 |
| 847 | dMRI ProbtrackX ISOVF atr r | 847 |
| 848 | dMRI ProbtrackX ISOVF cgc l | 848 |
| 849 | dMRI ProbtrackX ISOVF cgc r | 849 |
| 850 | dMRI ProbtrackX ISOVF cgh l | 850 |
| 851 | dMRI ProbtrackX ISOVF cgh r | 851 |
| 852 | dMRI ProbtrackX ISOVF cst l | 852 |
| 853 | dMRI ProbtrackX ISOVF cst r | 853 |
| 854 | dMRI ProbtrackX ISOVF fma   | 854 |
| 855 | dMRI ProbtrackX ISOVF fmi   | 855 |
| 856 | dMRI ProbtrackX ISOVF ifo l | 856 |
| 857 | dMRI ProbtrackX ISOVF ifo r | 857 |
| 858 | dMRI ProbtrackX ISOVF ilf l | 858 |
| 859 | dMRI ProbtrackX ISOVF ilf r | 859 |
| 860 | dMRI ProbtrackX ISOVF mcp   | 860 |
| 861 | dMRI ProbtrackX ISOVF ml l  | 861 |
| 862 | dMRI ProbtrackX ISOVF ml r  | 862 |
| 863 | dMRI ProbtrackX ISOVF ptr l | 863 |
| 864 | dMRI ProbtrackX ISOVF ptr r | 864 |
| 865 | dMRI ProbtrackX ISOVF slf l | 865 |
| 866 | dMRI ProbtrackX ISOVF slf r | 866 |
| 867 | dMRI ProbtrackX ISOVF str l | 867 |
| 868 | dMRI ProbtrackX ISOVF str r | 868 |
| 869 | dMRI ProbtrackX ISOVF unc l | 869 |
| 870 | dMRI ProbtrackX ISOVF unc r | 870 |
| 871 | NETMAT amplitudes (25) 01   | 871 |
| 872 | NETMAT amplitudes (25) 02   | 872 |
| 873 | NETMAT amplitudes (25) 03   | 873 |
| 874 | NETMAT amplitudes (25) 04   | 874 |
| 875 | NETMAT amplitudes (25) 05   | 875 |
| 876 | NETMAT amplitudes (25) 06   | 876 |
| 877 | NETMAT amplitudes (25) 07   | 877 |
| 878 | NETMAT amplitudes (25) 08   | 878 |
| 879 | NETMAT amplitudes (25) 09   | 879 |
| 880 | NETMAT amplitudes (25) 10   | 880 |
| 881 | NETMAT amplitudes (25) 11   | 881 |
| 882 | NETMAT amplitudes (25) 12   | 882 |
| 883 | NETMAT amplitudes (25) 13   | 883 |
| 884 | NETMAT amplitudes (25) 14   | 884 |
| 885 | NETMAT amplitudes (25) 15   | 885 |
| 886 | NETMAT amplitudes (25) 16   | 886 |
| 887 | NETMAT amplitudes (25) 17   | 887 |
| 888 | NETMAT amplitudes (25) 18   | 888 |

|     |                            |     |
|-----|----------------------------|-----|
| 889 | NETMAT amplitudes (25) 19  | 889 |
| 890 | NETMAT amplitudes (25) 20  | 890 |
| 891 | NETMAT amplitudes (25) 21  | 891 |
| 892 | NETMAT amplitudes (100) 01 | 892 |
| 893 | NETMAT amplitudes (100) 02 | 893 |
| 894 | NETMAT amplitudes (100) 03 | 894 |
| 895 | NETMAT amplitudes (100) 04 | 895 |
| 896 | NETMAT amplitudes (100) 05 | 896 |
| 897 | NETMAT amplitudes (100) 06 | 897 |
| 898 | NETMAT amplitudes (100) 07 | 898 |
| 899 | NETMAT amplitudes (100) 08 | 899 |
| 900 | NETMAT amplitudes (100) 09 | 900 |
| 901 | NETMAT amplitudes (100) 10 | 901 |
| 902 | NETMAT amplitudes (100) 11 | 902 |
| 903 | NETMAT amplitudes (100) 12 | 903 |
| 904 | NETMAT amplitudes (100) 13 | 904 |
| 905 | NETMAT amplitudes (100) 14 | 905 |
| 906 | NETMAT amplitudes (100) 15 | 906 |
| 907 | NETMAT amplitudes (100) 16 | 907 |
| 908 | NETMAT amplitudes (100) 17 | 908 |
| 909 | NETMAT amplitudes (100) 18 | 909 |
| 910 | NETMAT amplitudes (100) 19 | 910 |
| 911 | NETMAT amplitudes (100) 20 | 911 |
| 912 | NETMAT amplitudes (100) 21 | 912 |
| 913 | NETMAT amplitudes (100) 22 | 913 |
| 914 | NETMAT amplitudes (100) 23 | 914 |
| 915 | NETMAT amplitudes (100) 24 | 915 |
| 916 | NETMAT amplitudes (100) 25 | 916 |
| 917 | NETMAT amplitudes (100) 26 | 917 |
| 918 | NETMAT amplitudes (100) 27 | 918 |
| 919 | NETMAT amplitudes (100) 28 | 919 |
| 920 | NETMAT amplitudes (100) 29 | 920 |
| 921 | NETMAT amplitudes (100) 30 | 921 |
| 922 | NETMAT amplitudes (100) 31 | 922 |
| 923 | NETMAT amplitudes (100) 32 | 923 |
| 924 | NETMAT amplitudes (100) 33 | 924 |
| 925 | NETMAT amplitudes (100) 34 | 925 |
| 926 | NETMAT amplitudes (100) 35 | 926 |
| 927 | NETMAT amplitudes (100) 36 | 927 |
| 928 | NETMAT amplitudes (100) 37 | 928 |
| 929 | NETMAT amplitudes (100) 38 | 929 |
| 930 | NETMAT amplitudes (100) 39 | 930 |
| 931 | NETMAT amplitudes (100) 40 | 931 |
| 932 | NETMAT amplitudes (100) 41 | 932 |
| 933 | NETMAT amplitudes (100) 42 | 933 |
| 934 | NETMAT amplitudes (100) 43 | 934 |
| 935 | NETMAT amplitudes (100) 44 | 935 |
| 936 | NETMAT amplitudes (100) 45 | 936 |
| 937 | NETMAT amplitudes (100) 46 | 937 |
| 938 | NETMAT amplitudes (100) 47 | 938 |
| 939 | NETMAT amplitudes (100) 48 | 939 |
| 940 | NETMAT amplitudes (100) 49 | 940 |
| 941 | NETMAT amplitudes (100) 50 | 941 |
| 942 | NETMAT amplitudes (100) 51 | 942 |
| 943 | NETMAT amplitudes (100) 52 | 943 |
| 944 | NETMAT amplitudes (100) 53 | 944 |
| 945 | NETMAT amplitudes (100) 54 | 945 |
| 946 | NETMAT amplitudes (100) 55 | 946 |
| 947 | NETMAT edge (25) 001       | 947 |
| 948 | NETMAT edge (25) 002       | 948 |

|      |        |           |     |      |
|------|--------|-----------|-----|------|
| 949  | NETMAT | edge (25) | 003 | 949  |
| 950  | NETMAT | edge (25) | 004 | 950  |
| 951  | NETMAT | edge (25) | 005 | 951  |
| 952  | NETMAT | edge (25) | 006 | 952  |
| 953  | NETMAT | edge (25) | 007 | 953  |
| 954  | NETMAT | edge (25) | 008 | 954  |
| 955  | NETMAT | edge (25) | 009 | 955  |
| 956  | NETMAT | edge (25) | 010 | 956  |
| 957  | NETMAT | edge (25) | 011 | 957  |
| 958  | NETMAT | edge (25) | 012 | 958  |
| 959  | NETMAT | edge (25) | 013 | 959  |
| 960  | NETMAT | edge (25) | 014 | 960  |
| 961  | NETMAT | edge (25) | 015 | 961  |
| 962  | NETMAT | edge (25) | 016 | 962  |
| 963  | NETMAT | edge (25) | 017 | 963  |
| 964  | NETMAT | edge (25) | 018 | 964  |
| 965  | NETMAT | edge (25) | 019 | 965  |
| 966  | NETMAT | edge (25) | 020 | 966  |
| 967  | NETMAT | edge (25) | 021 | 967  |
| 968  | NETMAT | edge (25) | 022 | 968  |
| 969  | NETMAT | edge (25) | 023 | 969  |
| 970  | NETMAT | edge (25) | 024 | 970  |
| 971  | NETMAT | edge (25) | 025 | 971  |
| 972  | NETMAT | edge (25) | 026 | 972  |
| 973  | NETMAT | edge (25) | 027 | 973  |
| 974  | NETMAT | edge (25) | 028 | 974  |
| 975  | NETMAT | edge (25) | 029 | 975  |
| 976  | NETMAT | edge (25) | 030 | 976  |
| 977  | NETMAT | edge (25) | 031 | 977  |
| 978  | NETMAT | edge (25) | 032 | 978  |
| 979  | NETMAT | edge (25) | 033 | 979  |
| 980  | NETMAT | edge (25) | 034 | 980  |
| 981  | NETMAT | edge (25) | 035 | 981  |
| 982  | NETMAT | edge (25) | 036 | 982  |
| 983  | NETMAT | edge (25) | 037 | 983  |
| 984  | NETMAT | edge (25) | 038 | 984  |
| 985  | NETMAT | edge (25) | 039 | 985  |
| 986  | NETMAT | edge (25) | 040 | 986  |
| 987  | NETMAT | edge (25) | 041 | 987  |
| 988  | NETMAT | edge (25) | 042 | 988  |
| 989  | NETMAT | edge (25) | 043 | 989  |
| 990  | NETMAT | edge (25) | 044 | 990  |
| 991  | NETMAT | edge (25) | 045 | 991  |
| 992  | NETMAT | edge (25) | 046 | 992  |
| 993  | NETMAT | edge (25) | 047 | 993  |
| 994  | NETMAT | edge (25) | 048 | 994  |
| 995  | NETMAT | edge (25) | 049 | 995  |
| 996  | NETMAT | edge (25) | 050 | 996  |
| 997  | NETMAT | edge (25) | 051 | 997  |
| 998  | NETMAT | edge (25) | 052 | 998  |
| 999  | NETMAT | edge (25) | 053 | 999  |
| 1000 | NETMAT | edge (25) | 054 | 1000 |
| 1001 | NETMAT | edge (25) | 055 | 1001 |
| 1002 | NETMAT | edge (25) | 056 | 1002 |
| 1003 | NETMAT | edge (25) | 057 | 1003 |
| 1004 | NETMAT | edge (25) | 058 | 1004 |
| 1005 | NETMAT | edge (25) | 059 | 1005 |
| 1006 | NETMAT | edge (25) | 060 | 1006 |
| 1007 | NETMAT | edge (25) | 061 | 1007 |
| 1008 | NETMAT | edge (25) | 062 | 1008 |

|      |        |           |     |      |
|------|--------|-----------|-----|------|
| 1009 | NETMAT | edge (25) | 063 | 1009 |
| 1010 | NETMAT | edge (25) | 064 | 1010 |
| 1011 | NETMAT | edge (25) | 065 | 1011 |
| 1012 | NETMAT | edge (25) | 066 | 1012 |
| 1013 | NETMAT | edge (25) | 067 | 1013 |
| 1014 | NETMAT | edge (25) | 068 | 1014 |
| 1015 | NETMAT | edge (25) | 069 | 1015 |
| 1016 | NETMAT | edge (25) | 070 | 1016 |
| 1017 | NETMAT | edge (25) | 071 | 1017 |
| 1018 | NETMAT | edge (25) | 072 | 1018 |
| 1019 | NETMAT | edge (25) | 073 | 1019 |
| 1020 | NETMAT | edge (25) | 074 | 1020 |
| 1021 | NETMAT | edge (25) | 075 | 1021 |
| 1022 | NETMAT | edge (25) | 076 | 1022 |
| 1023 | NETMAT | edge (25) | 077 | 1023 |
| 1024 | NETMAT | edge (25) | 078 | 1024 |
| 1025 | NETMAT | edge (25) | 079 | 1025 |
| 1026 | NETMAT | edge (25) | 080 | 1026 |
| 1027 | NETMAT | edge (25) | 081 | 1027 |
| 1028 | NETMAT | edge (25) | 082 | 1028 |
| 1029 | NETMAT | edge (25) | 083 | 1029 |
| 1030 | NETMAT | edge (25) | 084 | 1030 |
| 1031 | NETMAT | edge (25) | 085 | 1031 |
| 1032 | NETMAT | edge (25) | 086 | 1032 |
| 1033 | NETMAT | edge (25) | 087 | 1033 |
| 1034 | NETMAT | edge (25) | 088 | 1034 |
| 1035 | NETMAT | edge (25) | 089 | 1035 |
| 1036 | NETMAT | edge (25) | 090 | 1036 |
| 1037 | NETMAT | edge (25) | 091 | 1037 |
| 1038 | NETMAT | edge (25) | 092 | 1038 |
| 1039 | NETMAT | edge (25) | 093 | 1039 |
| 1040 | NETMAT | edge (25) | 094 | 1040 |
| 1041 | NETMAT | edge (25) | 095 | 1041 |
| 1042 | NETMAT | edge (25) | 096 | 1042 |
| 1043 | NETMAT | edge (25) | 097 | 1043 |
| 1044 | NETMAT | edge (25) | 098 | 1044 |
| 1045 | NETMAT | edge (25) | 099 | 1045 |
| 1046 | NETMAT | edge (25) | 100 | 1046 |
| 1047 | NETMAT | edge (25) | 101 | 1047 |
| 1048 | NETMAT | edge (25) | 102 | 1048 |
| 1049 | NETMAT | edge (25) | 103 | 1049 |
| 1050 | NETMAT | edge (25) | 104 | 1050 |
| 1051 | NETMAT | edge (25) | 105 | 1051 |
| 1052 | NETMAT | edge (25) | 106 | 1052 |
| 1053 | NETMAT | edge (25) | 107 | 1053 |
| 1054 | NETMAT | edge (25) | 108 | 1054 |
| 1055 | NETMAT | edge (25) | 109 | 1055 |
| 1056 | NETMAT | edge (25) | 110 | 1056 |
| 1057 | NETMAT | edge (25) | 111 | 1057 |
| 1058 | NETMAT | edge (25) | 112 | 1058 |
| 1059 | NETMAT | edge (25) | 113 | 1059 |
| 1060 | NETMAT | edge (25) | 114 | 1060 |
| 1061 | NETMAT | edge (25) | 115 | 1061 |
| 1062 | NETMAT | edge (25) | 116 | 1062 |
| 1063 | NETMAT | edge (25) | 117 | 1063 |
| 1064 | NETMAT | edge (25) | 118 | 1064 |
| 1065 | NETMAT | edge (25) | 119 | 1065 |
| 1066 | NETMAT | edge (25) | 120 | 1066 |
| 1067 | NETMAT | edge (25) | 121 | 1067 |
| 1068 | NETMAT | edge (25) | 122 | 1068 |



|      |        |           |     |      |
|------|--------|-----------|-----|------|
| 1069 | NETMAT | edge (25) | 123 | 1069 |
| 1070 | NETMAT | edge (25) | 124 | 1070 |
| 1071 | NETMAT | edge (25) | 125 | 1071 |
| 1072 | NETMAT | edge (25) | 126 | 1072 |
| 1073 | NETMAT | edge (25) | 127 | 1073 |
| 1074 | NETMAT | edge (25) | 128 | 1074 |
| 1075 | NETMAT | edge (25) | 129 | 1075 |
| 1076 | NETMAT | edge (25) | 130 | 1076 |
| 1077 | NETMAT | edge (25) | 131 | 1077 |
| 1078 | NETMAT | edge (25) | 132 | 1078 |
| 1079 | NETMAT | edge (25) | 133 | 1079 |
| 1080 | NETMAT | edge (25) | 134 | 1080 |
| 1081 | NETMAT | edge (25) | 135 | 1081 |
| 1082 | NETMAT | edge (25) | 136 | 1082 |
| 1083 | NETMAT | edge (25) | 137 | 1083 |
| 1084 | NETMAT | edge (25) | 138 | 1084 |
| 1085 | NETMAT | edge (25) | 139 | 1085 |
| 1086 | NETMAT | edge (25) | 140 | 1086 |
| 1087 | NETMAT | edge (25) | 141 | 1087 |
| 1088 | NETMAT | edge (25) | 142 | 1088 |
| 1089 | NETMAT | edge (25) | 143 | 1089 |
| 1090 | NETMAT | edge (25) | 144 | 1090 |
| 1091 | NETMAT | edge (25) | 145 | 1091 |
| 1092 | NETMAT | edge (25) | 146 | 1092 |
| 1093 | NETMAT | edge (25) | 147 | 1093 |
| 1094 | NETMAT | edge (25) | 148 | 1094 |
| 1095 | NETMAT | edge (25) | 149 | 1095 |
| 1096 | NETMAT | edge (25) | 150 | 1096 |
| 1097 | NETMAT | edge (25) | 151 | 1097 |
| 1098 | NETMAT | edge (25) | 152 | 1098 |
| 1099 | NETMAT | edge (25) | 153 | 1099 |
| 1100 | NETMAT | edge (25) | 154 | 1100 |
| 1101 | NETMAT | edge (25) | 155 | 1101 |
| 1102 | NETMAT | edge (25) | 156 | 1102 |
| 1103 | NETMAT | edge (25) | 157 | 1103 |
| 1104 | NETMAT | edge (25) | 158 | 1104 |
| 1105 | NETMAT | edge (25) | 159 | 1105 |
| 1106 | NETMAT | edge (25) | 160 | 1106 |
| 1107 | NETMAT | edge (25) | 161 | 1107 |
| 1108 | NETMAT | edge (25) | 162 | 1108 |
| 1109 | NETMAT | edge (25) | 163 | 1109 |
| 1110 | NETMAT | edge (25) | 164 | 1110 |
| 1111 | NETMAT | edge (25) | 165 | 1111 |
| 1112 | NETMAT | edge (25) | 166 | 1112 |
| 1113 | NETMAT | edge (25) | 167 | 1113 |
| 1114 | NETMAT | edge (25) | 168 | 1114 |
| 1115 | NETMAT | edge (25) | 169 | 1115 |
| 1116 | NETMAT | edge (25) | 170 | 1116 |
| 1117 | NETMAT | edge (25) | 171 | 1117 |
| 1118 | NETMAT | edge (25) | 172 | 1118 |
| 1119 | NETMAT | edge (25) | 173 | 1119 |
| 1120 | NETMAT | edge (25) | 174 | 1120 |
| 1121 | NETMAT | edge (25) | 175 | 1121 |
| 1122 | NETMAT | edge (25) | 176 | 1122 |
| 1123 | NETMAT | edge (25) | 177 | 1123 |
| 1124 | NETMAT | edge (25) | 178 | 1124 |
| 1125 | NETMAT | edge (25) | 179 | 1125 |
| 1126 | NETMAT | edge (25) | 180 | 1126 |
| 1127 | NETMAT | edge (25) | 181 | 1127 |
| 1128 | NETMAT | edge (25) | 182 | 1128 |

|      |        |            |      |      |
|------|--------|------------|------|------|
| 1129 | NETMAT | edge (25)  | 183  | 1129 |
| 1130 | NETMAT | edge (25)  | 184  | 1130 |
| 1131 | NETMAT | edge (25)  | 185  | 1131 |
| 1132 | NETMAT | edge (25)  | 186  | 1132 |
| 1133 | NETMAT | edge (25)  | 187  | 1133 |
| 1134 | NETMAT | edge (25)  | 188  | 1134 |
| 1135 | NETMAT | edge (25)  | 189  | 1135 |
| 1136 | NETMAT | edge (25)  | 190  | 1136 |
| 1137 | NETMAT | edge (25)  | 191  | 1137 |
| 1138 | NETMAT | edge (25)  | 192  | 1138 |
| 1139 | NETMAT | edge (25)  | 193  | 1139 |
| 1140 | NETMAT | edge (25)  | 194  | 1140 |
| 1141 | NETMAT | edge (25)  | 195  | 1141 |
| 1142 | NETMAT | edge (25)  | 196  | 1142 |
| 1143 | NETMAT | edge (25)  | 197  | 1143 |
| 1144 | NETMAT | edge (25)  | 198  | 1144 |
| 1145 | NETMAT | edge (25)  | 199  | 1145 |
| 1146 | NETMAT | edge (25)  | 200  | 1146 |
| 1147 | NETMAT | edge (25)  | 201  | 1147 |
| 1148 | NETMAT | edge (25)  | 202  | 1148 |
| 1149 | NETMAT | edge (25)  | 203  | 1149 |
| 1150 | NETMAT | edge (25)  | 204  | 1150 |
| 1151 | NETMAT | edge (25)  | 205  | 1151 |
| 1152 | NETMAT | edge (25)  | 206  | 1152 |
| 1153 | NETMAT | edge (25)  | 207  | 1153 |
| 1154 | NETMAT | edge (25)  | 208  | 1154 |
| 1155 | NETMAT | edge (25)  | 209  | 1155 |
| 1156 | NETMAT | edge (25)  | 210  | 1156 |
| 1157 | NETMAT | edge (100) | 0001 | 1157 |
| 1158 | NETMAT | edge (100) | 0002 | 1158 |
| 1159 | NETMAT | edge (100) | 0003 | 1159 |
| 1160 | NETMAT | edge (100) | 0004 | 1160 |
| 1161 | NETMAT | edge (100) | 0005 | 1161 |
| 1162 | NETMAT | edge (100) | 0006 | 1162 |
| 1163 | NETMAT | edge (100) | 0007 | 1163 |
| 1164 | NETMAT | edge (100) | 0008 | 1164 |
| 1165 | NETMAT | edge (100) | 0009 | 1165 |
| 1166 | NETMAT | edge (100) | 0010 | 1166 |
| 1167 | NETMAT | edge (100) | 0011 | 1167 |
| 1168 | NETMAT | edge (100) | 0012 | 1168 |
| 1169 | NETMAT | edge (100) | 0013 | 1169 |
| 1170 | NETMAT | edge (100) | 0014 | 1170 |
| 1171 | NETMAT | edge (100) | 0015 | 1171 |
| 1172 | NETMAT | edge (100) | 0016 | 1172 |
| 1173 | NETMAT | edge (100) | 0017 | 1173 |
| 1174 | NETMAT | edge (100) | 0018 | 1174 |
| 1175 | NETMAT | edge (100) | 0019 | 1175 |
| 1176 | NETMAT | edge (100) | 0020 | 1176 |
| 1177 | NETMAT | edge (100) | 0021 | 1177 |
| 1178 | NETMAT | edge (100) | 0022 | 1178 |
| 1179 | NETMAT | edge (100) | 0023 | 1179 |
| 1180 | NETMAT | edge (100) | 0024 | 1180 |
| 1181 | NETMAT | edge (100) | 0025 | 1181 |
| 1182 | NETMAT | edge (100) | 0026 | 1182 |
| 1183 | NETMAT | edge (100) | 0027 | 1183 |
| 1184 | NETMAT | edge (100) | 0028 | 1184 |
| 1185 | NETMAT | edge (100) | 0029 | 1185 |
| 1186 | NETMAT | edge (100) | 0030 | 1186 |
| 1187 | NETMAT | edge (100) | 0031 | 1187 |
| 1188 | NETMAT | edge (100) | 0032 | 1188 |

|      |        |            |      |      |
|------|--------|------------|------|------|
| 1189 | NETMAT | edge (100) | 0033 | 1189 |
| 1190 | NETMAT | edge (100) | 0034 | 1190 |
| 1191 | NETMAT | edge (100) | 0035 | 1191 |
| 1192 | NETMAT | edge (100) | 0036 | 1192 |
| 1193 | NETMAT | edge (100) | 0037 | 1193 |
| 1194 | NETMAT | edge (100) | 0038 | 1194 |
| 1195 | NETMAT | edge (100) | 0039 | 1195 |
| 1196 | NETMAT | edge (100) | 0040 | 1196 |
| 1197 | NETMAT | edge (100) | 0041 | 1197 |
| 1198 | NETMAT | edge (100) | 0042 | 1198 |
| 1199 | NETMAT | edge (100) | 0043 | 1199 |
| 1200 | NETMAT | edge (100) | 0044 | 1200 |
| 1201 | NETMAT | edge (100) | 0045 | 1201 |
| 1202 | NETMAT | edge (100) | 0046 | 1202 |
| 1203 | NETMAT | edge (100) | 0047 | 1203 |
| 1204 | NETMAT | edge (100) | 0048 | 1204 |
| 1205 | NETMAT | edge (100) | 0049 | 1205 |
| 1206 | NETMAT | edge (100) | 0050 | 1206 |
| 1207 | NETMAT | edge (100) | 0051 | 1207 |
| 1208 | NETMAT | edge (100) | 0052 | 1208 |
| 1209 | NETMAT | edge (100) | 0053 | 1209 |
| 1210 | NETMAT | edge (100) | 0054 | 1210 |
| 1211 | NETMAT | edge (100) | 0055 | 1211 |
| 1212 | NETMAT | edge (100) | 0056 | 1212 |
| 1213 | NETMAT | edge (100) | 0057 | 1213 |
| 1214 | NETMAT | edge (100) | 0058 | 1214 |
| 1215 | NETMAT | edge (100) | 0059 | 1215 |
| 1216 | NETMAT | edge (100) | 0060 | 1216 |
| 1217 | NETMAT | edge (100) | 0061 | 1217 |
| 1218 | NETMAT | edge (100) | 0062 | 1218 |
| 1219 | NETMAT | edge (100) | 0063 | 1219 |
| 1220 | NETMAT | edge (100) | 0064 | 1220 |
| 1221 | NETMAT | edge (100) | 0065 | 1221 |
| 1222 | NETMAT | edge (100) | 0066 | 1222 |
| 1223 | NETMAT | edge (100) | 0067 | 1223 |
| 1224 | NETMAT | edge (100) | 0068 | 1224 |
| 1225 | NETMAT | edge (100) | 0069 | 1225 |
| 1226 | NETMAT | edge (100) | 0070 | 1226 |
| 1227 | NETMAT | edge (100) | 0071 | 1227 |
| 1228 | NETMAT | edge (100) | 0072 | 1228 |
| 1229 | NETMAT | edge (100) | 0073 | 1229 |
| 1230 | NETMAT | edge (100) | 0074 | 1230 |
| 1231 | NETMAT | edge (100) | 0075 | 1231 |
| 1232 | NETMAT | edge (100) | 0076 | 1232 |
| 1233 | NETMAT | edge (100) | 0077 | 1233 |
| 1234 | NETMAT | edge (100) | 0078 | 1234 |
| 1235 | NETMAT | edge (100) | 0079 | 1235 |
| 1236 | NETMAT | edge (100) | 0080 | 1236 |
| 1237 | NETMAT | edge (100) | 0081 | 1237 |
| 1238 | NETMAT | edge (100) | 0082 | 1238 |
| 1239 | NETMAT | edge (100) | 0083 | 1239 |
| 1240 | NETMAT | edge (100) | 0084 | 1240 |
| 1241 | NETMAT | edge (100) | 0085 | 1241 |
| 1242 | NETMAT | edge (100) | 0086 | 1242 |
| 1243 | NETMAT | edge (100) | 0087 | 1243 |
| 1244 | NETMAT | edge (100) | 0088 | 1244 |
| 1245 | NETMAT | edge (100) | 0089 | 1245 |
| 1246 | NETMAT | edge (100) | 0090 | 1246 |
| 1247 | NETMAT | edge (100) | 0091 | 1247 |
| 1248 | NETMAT | edge (100) | 0092 | 1248 |

|      |        |            |      |      |
|------|--------|------------|------|------|
| 1249 | NETMAT | edge (100) | 0093 | 1249 |
| 1250 | NETMAT | edge (100) | 0094 | 1250 |
| 1251 | NETMAT | edge (100) | 0095 | 1251 |
| 1252 | NETMAT | edge (100) | 0096 | 1252 |
| 1253 | NETMAT | edge (100) | 0097 | 1253 |
| 1254 | NETMAT | edge (100) | 0098 | 1254 |
| 1255 | NETMAT | edge (100) | 0099 | 1255 |
| 1256 | NETMAT | edge (100) | 0100 | 1256 |
| 1257 | NETMAT | edge (100) | 0101 | 1257 |
| 1258 | NETMAT | edge (100) | 0102 | 1258 |
| 1259 | NETMAT | edge (100) | 0103 | 1259 |
| 1260 | NETMAT | edge (100) | 0104 | 1260 |
| 1261 | NETMAT | edge (100) | 0105 | 1261 |
| 1262 | NETMAT | edge (100) | 0106 | 1262 |
| 1263 | NETMAT | edge (100) | 0107 | 1263 |
| 1264 | NETMAT | edge (100) | 0108 | 1264 |
| 1265 | NETMAT | edge (100) | 0109 | 1265 |
| 1266 | NETMAT | edge (100) | 0110 | 1266 |
| 1267 | NETMAT | edge (100) | 0111 | 1267 |
| 1268 | NETMAT | edge (100) | 0112 | 1268 |
| 1269 | NETMAT | edge (100) | 0113 | 1269 |
| 1270 | NETMAT | edge (100) | 0114 | 1270 |
| 1271 | NETMAT | edge (100) | 0115 | 1271 |
| 1272 | NETMAT | edge (100) | 0116 | 1272 |
| 1273 | NETMAT | edge (100) | 0117 | 1273 |
| 1274 | NETMAT | edge (100) | 0118 | 1274 |
| 1275 | NETMAT | edge (100) | 0119 | 1275 |
| 1276 | NETMAT | edge (100) | 0120 | 1276 |
| 1277 | NETMAT | edge (100) | 0121 | 1277 |
| 1278 | NETMAT | edge (100) | 0122 | 1278 |
| 1279 | NETMAT | edge (100) | 0123 | 1279 |
| 1280 | NETMAT | edge (100) | 0124 | 1280 |
| 1281 | NETMAT | edge (100) | 0125 | 1281 |
| 1282 | NETMAT | edge (100) | 0126 | 1282 |
| 1283 | NETMAT | edge (100) | 0127 | 1283 |
| 1284 | NETMAT | edge (100) | 0128 | 1284 |
| 1285 | NETMAT | edge (100) | 0129 | 1285 |
| 1286 | NETMAT | edge (100) | 0130 | 1286 |
| 1287 | NETMAT | edge (100) | 0131 | 1287 |
| 1288 | NETMAT | edge (100) | 0132 | 1288 |
| 1289 | NETMAT | edge (100) | 0133 | 1289 |
| 1290 | NETMAT | edge (100) | 0134 | 1290 |
| 1291 | NETMAT | edge (100) | 0135 | 1291 |
| 1292 | NETMAT | edge (100) | 0136 | 1292 |
| 1293 | NETMAT | edge (100) | 0137 | 1293 |
| 1294 | NETMAT | edge (100) | 0138 | 1294 |
| 1295 | NETMAT | edge (100) | 0139 | 1295 |
| 1296 | NETMAT | edge (100) | 0140 | 1296 |
| 1297 | NETMAT | edge (100) | 0141 | 1297 |
| 1298 | NETMAT | edge (100) | 0142 | 1298 |
| 1299 | NETMAT | edge (100) | 0143 | 1299 |
| 1300 | NETMAT | edge (100) | 0144 | 1300 |
| 1301 | NETMAT | edge (100) | 0145 | 1301 |
| 1302 | NETMAT | edge (100) | 0146 | 1302 |
| 1303 | NETMAT | edge (100) | 0147 | 1303 |
| 1304 | NETMAT | edge (100) | 0148 | 1304 |
| 1305 | NETMAT | edge (100) | 0149 | 1305 |
| 1306 | NETMAT | edge (100) | 0150 | 1306 |
| 1307 | NETMAT | edge (100) | 0151 | 1307 |
| 1308 | NETMAT | edge (100) | 0152 | 1308 |

|      |        |            |      |      |
|------|--------|------------|------|------|
| 1309 | NETMAT | edge (100) | 0153 | 1309 |
| 1310 | NETMAT | edge (100) | 0154 | 1310 |
| 1311 | NETMAT | edge (100) | 0155 | 1311 |
| 1312 | NETMAT | edge (100) | 0156 | 1312 |
| 1313 | NETMAT | edge (100) | 0157 | 1313 |
| 1314 | NETMAT | edge (100) | 0158 | 1314 |
| 1315 | NETMAT | edge (100) | 0159 | 1315 |
| 1316 | NETMAT | edge (100) | 0160 | 1316 |
| 1317 | NETMAT | edge (100) | 0161 | 1317 |
| 1318 | NETMAT | edge (100) | 0162 | 1318 |
| 1319 | NETMAT | edge (100) | 0163 | 1319 |
| 1320 | NETMAT | edge (100) | 0164 | 1320 |
| 1321 | NETMAT | edge (100) | 0165 | 1321 |
| 1322 | NETMAT | edge (100) | 0166 | 1322 |
| 1323 | NETMAT | edge (100) | 0167 | 1323 |
| 1324 | NETMAT | edge (100) | 0168 | 1324 |
| 1325 | NETMAT | edge (100) | 0169 | 1325 |
| 1326 | NETMAT | edge (100) | 0170 | 1326 |
| 1327 | NETMAT | edge (100) | 0171 | 1327 |
| 1328 | NETMAT | edge (100) | 0172 | 1328 |
| 1329 | NETMAT | edge (100) | 0173 | 1329 |
| 1330 | NETMAT | edge (100) | 0174 | 1330 |
| 1331 | NETMAT | edge (100) | 0175 | 1331 |
| 1332 | NETMAT | edge (100) | 0176 | 1332 |
| 1333 | NETMAT | edge (100) | 0177 | 1333 |
| 1334 | NETMAT | edge (100) | 0178 | 1334 |
| 1335 | NETMAT | edge (100) | 0179 | 1335 |
| 1336 | NETMAT | edge (100) | 0180 | 1336 |
| 1337 | NETMAT | edge (100) | 0181 | 1337 |
| 1338 | NETMAT | edge (100) | 0182 | 1338 |
| 1339 | NETMAT | edge (100) | 0183 | 1339 |
| 1340 | NETMAT | edge (100) | 0184 | 1340 |
| 1341 | NETMAT | edge (100) | 0185 | 1341 |
| 1342 | NETMAT | edge (100) | 0186 | 1342 |
| 1343 | NETMAT | edge (100) | 0187 | 1343 |
| 1344 | NETMAT | edge (100) | 0188 | 1344 |
| 1345 | NETMAT | edge (100) | 0189 | 1345 |
| 1346 | NETMAT | edge (100) | 0190 | 1346 |
| 1347 | NETMAT | edge (100) | 0191 | 1347 |
| 1348 | NETMAT | edge (100) | 0192 | 1348 |
| 1349 | NETMAT | edge (100) | 0193 | 1349 |
| 1350 | NETMAT | edge (100) | 0194 | 1350 |
| 1351 | NETMAT | edge (100) | 0195 | 1351 |
| 1352 | NETMAT | edge (100) | 0196 | 1352 |
| 1353 | NETMAT | edge (100) | 0197 | 1353 |
| 1354 | NETMAT | edge (100) | 0198 | 1354 |
| 1355 | NETMAT | edge (100) | 0199 | 1355 |
| 1356 | NETMAT | edge (100) | 0200 | 1356 |
| 1357 | NETMAT | edge (100) | 0201 | 1357 |
| 1358 | NETMAT | edge (100) | 0202 | 1358 |
| 1359 | NETMAT | edge (100) | 0203 | 1359 |
| 1360 | NETMAT | edge (100) | 0204 | 1360 |
| 1361 | NETMAT | edge (100) | 0205 | 1361 |
| 1362 | NETMAT | edge (100) | 0206 | 1362 |
| 1363 | NETMAT | edge (100) | 0207 | 1363 |
| 1364 | NETMAT | edge (100) | 0208 | 1364 |
| 1365 | NETMAT | edge (100) | 0209 | 1365 |
| 1366 | NETMAT | edge (100) | 0210 | 1366 |
| 1367 | NETMAT | edge (100) | 0211 | 1367 |
| 1368 | NETMAT | edge (100) | 0212 | 1368 |

|      |        |            |      |      |
|------|--------|------------|------|------|
| 1369 | NETMAT | edge (100) | 0213 | 1369 |
| 1370 | NETMAT | edge (100) | 0214 | 1370 |
| 1371 | NETMAT | edge (100) | 0215 | 1371 |
| 1372 | NETMAT | edge (100) | 0216 | 1372 |
| 1373 | NETMAT | edge (100) | 0217 | 1373 |
| 1374 | NETMAT | edge (100) | 0218 | 1374 |
| 1375 | NETMAT | edge (100) | 0219 | 1375 |
| 1376 | NETMAT | edge (100) | 0220 | 1376 |
| 1377 | NETMAT | edge (100) | 0221 | 1377 |
| 1378 | NETMAT | edge (100) | 0222 | 1378 |
| 1379 | NETMAT | edge (100) | 0223 | 1379 |
| 1380 | NETMAT | edge (100) | 0224 | 1380 |
| 1381 | NETMAT | edge (100) | 0225 | 1381 |
| 1382 | NETMAT | edge (100) | 0226 | 1382 |
| 1383 | NETMAT | edge (100) | 0227 | 1383 |
| 1384 | NETMAT | edge (100) | 0228 | 1384 |
| 1385 | NETMAT | edge (100) | 0229 | 1385 |
| 1386 | NETMAT | edge (100) | 0230 | 1386 |
| 1387 | NETMAT | edge (100) | 0231 | 1387 |
| 1388 | NETMAT | edge (100) | 0232 | 1388 |
| 1389 | NETMAT | edge (100) | 0233 | 1389 |
| 1390 | NETMAT | edge (100) | 0234 | 1390 |
| 1391 | NETMAT | edge (100) | 0235 | 1391 |
| 1392 | NETMAT | edge (100) | 0236 | 1392 |
| 1393 | NETMAT | edge (100) | 0237 | 1393 |
| 1394 | NETMAT | edge (100) | 0238 | 1394 |
| 1395 | NETMAT | edge (100) | 0239 | 1395 |
| 1396 | NETMAT | edge (100) | 0240 | 1396 |
| 1397 | NETMAT | edge (100) | 0241 | 1397 |
| 1398 | NETMAT | edge (100) | 0242 | 1398 |
| 1399 | NETMAT | edge (100) | 0243 | 1399 |
| 1400 | NETMAT | edge (100) | 0244 | 1400 |
| 1401 | NETMAT | edge (100) | 0245 | 1401 |
| 1402 | NETMAT | edge (100) | 0246 | 1402 |
| 1403 | NETMAT | edge (100) | 0247 | 1403 |
| 1404 | NETMAT | edge (100) | 0248 | 1404 |
| 1405 | NETMAT | edge (100) | 0249 | 1405 |
| 1406 | NETMAT | edge (100) | 0250 | 1406 |
| 1407 | NETMAT | edge (100) | 0251 | 1407 |
| 1408 | NETMAT | edge (100) | 0252 | 1408 |
| 1409 | NETMAT | edge (100) | 0253 | 1409 |
| 1410 | NETMAT | edge (100) | 0254 | 1410 |
| 1411 | NETMAT | edge (100) | 0255 | 1411 |
| 1412 | NETMAT | edge (100) | 0256 | 1412 |
| 1413 | NETMAT | edge (100) | 0257 | 1413 |
| 1414 | NETMAT | edge (100) | 0258 | 1414 |
| 1415 | NETMAT | edge (100) | 0259 | 1415 |
| 1416 | NETMAT | edge (100) | 0260 | 1416 |
| 1417 | NETMAT | edge (100) | 0261 | 1417 |
| 1418 | NETMAT | edge (100) | 0262 | 1418 |
| 1419 | NETMAT | edge (100) | 0263 | 1419 |
| 1420 | NETMAT | edge (100) | 0264 | 1420 |
| 1421 | NETMAT | edge (100) | 0265 | 1421 |
| 1422 | NETMAT | edge (100) | 0266 | 1422 |
| 1423 | NETMAT | edge (100) | 0267 | 1423 |
| 1424 | NETMAT | edge (100) | 0268 | 1424 |
| 1425 | NETMAT | edge (100) | 0269 | 1425 |
| 1426 | NETMAT | edge (100) | 0270 | 1426 |
| 1427 | NETMAT | edge (100) | 0271 | 1427 |
| 1428 | NETMAT | edge (100) | 0272 | 1428 |

|      |        |            |      |      |
|------|--------|------------|------|------|
| 1429 | NETMAT | edge (100) | 0273 | 1429 |
| 1430 | NETMAT | edge (100) | 0274 | 1430 |
| 1431 | NETMAT | edge (100) | 0275 | 1431 |
| 1432 | NETMAT | edge (100) | 0276 | 1432 |
| 1433 | NETMAT | edge (100) | 0277 | 1433 |
| 1434 | NETMAT | edge (100) | 0278 | 1434 |
| 1435 | NETMAT | edge (100) | 0279 | 1435 |
| 1436 | NETMAT | edge (100) | 0280 | 1436 |
| 1437 | NETMAT | edge (100) | 0281 | 1437 |
| 1438 | NETMAT | edge (100) | 0282 | 1438 |
| 1439 | NETMAT | edge (100) | 0283 | 1439 |
| 1440 | NETMAT | edge (100) | 0284 | 1440 |
| 1441 | NETMAT | edge (100) | 0285 | 1441 |
| 1442 | NETMAT | edge (100) | 0286 | 1442 |
| 1443 | NETMAT | edge (100) | 0287 | 1443 |
| 1444 | NETMAT | edge (100) | 0288 | 1444 |
| 1445 | NETMAT | edge (100) | 0289 | 1445 |
| 1446 | NETMAT | edge (100) | 0290 | 1446 |
| 1447 | NETMAT | edge (100) | 0291 | 1447 |
| 1448 | NETMAT | edge (100) | 0292 | 1448 |
| 1449 | NETMAT | edge (100) | 0293 | 1449 |
| 1450 | NETMAT | edge (100) | 0294 | 1450 |
| 1451 | NETMAT | edge (100) | 0295 | 1451 |
| 1452 | NETMAT | edge (100) | 0296 | 1452 |
| 1453 | NETMAT | edge (100) | 0297 | 1453 |
| 1454 | NETMAT | edge (100) | 0298 | 1454 |
| 1455 | NETMAT | edge (100) | 0299 | 1455 |
| 1456 | NETMAT | edge (100) | 0300 | 1456 |
| 1457 | NETMAT | edge (100) | 0301 | 1457 |
| 1458 | NETMAT | edge (100) | 0302 | 1458 |
| 1459 | NETMAT | edge (100) | 0303 | 1459 |
| 1460 | NETMAT | edge (100) | 0304 | 1460 |
| 1461 | NETMAT | edge (100) | 0305 | 1461 |
| 1462 | NETMAT | edge (100) | 0306 | 1462 |
| 1463 | NETMAT | edge (100) | 0307 | 1463 |
| 1464 | NETMAT | edge (100) | 0308 | 1464 |
| 1465 | NETMAT | edge (100) | 0309 | 1465 |
| 1466 | NETMAT | edge (100) | 0310 | 1466 |
| 1467 | NETMAT | edge (100) | 0311 | 1467 |
| 1468 | NETMAT | edge (100) | 0312 | 1468 |
| 1469 | NETMAT | edge (100) | 0313 | 1469 |
| 1470 | NETMAT | edge (100) | 0314 | 1470 |
| 1471 | NETMAT | edge (100) | 0315 | 1471 |
| 1472 | NETMAT | edge (100) | 0316 | 1472 |
| 1473 | NETMAT | edge (100) | 0317 | 1473 |
| 1474 | NETMAT | edge (100) | 0318 | 1474 |
| 1475 | NETMAT | edge (100) | 0319 | 1475 |
| 1476 | NETMAT | edge (100) | 0320 | 1476 |
| 1477 | NETMAT | edge (100) | 0321 | 1477 |
| 1478 | NETMAT | edge (100) | 0322 | 1478 |
| 1479 | NETMAT | edge (100) | 0323 | 1479 |
| 1480 | NETMAT | edge (100) | 0324 | 1480 |
| 1481 | NETMAT | edge (100) | 0325 | 1481 |
| 1482 | NETMAT | edge (100) | 0326 | 1482 |
| 1483 | NETMAT | edge (100) | 0327 | 1483 |
| 1484 | NETMAT | edge (100) | 0328 | 1484 |
| 1485 | NETMAT | edge (100) | 0329 | 1485 |
| 1486 | NETMAT | edge (100) | 0330 | 1486 |
| 1487 | NETMAT | edge (100) | 0331 | 1487 |
| 1488 | NETMAT | edge (100) | 0332 | 1488 |

|      |        |            |      |      |
|------|--------|------------|------|------|
| 1489 | NETMAT | edge (100) | 0333 | 1489 |
| 1490 | NETMAT | edge (100) | 0334 | 1490 |
| 1491 | NETMAT | edge (100) | 0335 | 1491 |
| 1492 | NETMAT | edge (100) | 0336 | 1492 |
| 1493 | NETMAT | edge (100) | 0337 | 1493 |
| 1494 | NETMAT | edge (100) | 0338 | 1494 |
| 1495 | NETMAT | edge (100) | 0339 | 1495 |
| 1496 | NETMAT | edge (100) | 0340 | 1496 |
| 1497 | NETMAT | edge (100) | 0341 | 1497 |
| 1498 | NETMAT | edge (100) | 0342 | 1498 |
| 1499 | NETMAT | edge (100) | 0343 | 1499 |
| 1500 | NETMAT | edge (100) | 0344 | 1500 |
| 1501 | NETMAT | edge (100) | 0345 | 1501 |
| 1502 | NETMAT | edge (100) | 0346 | 1502 |
| 1503 | NETMAT | edge (100) | 0347 | 1503 |
| 1504 | NETMAT | edge (100) | 0348 | 1504 |
| 1505 | NETMAT | edge (100) | 0349 | 1505 |
| 1506 | NETMAT | edge (100) | 0350 | 1506 |
| 1507 | NETMAT | edge (100) | 0351 | 1507 |
| 1508 | NETMAT | edge (100) | 0352 | 1508 |
| 1509 | NETMAT | edge (100) | 0353 | 1509 |
| 1510 | NETMAT | edge (100) | 0354 | 1510 |
| 1511 | NETMAT | edge (100) | 0355 | 1511 |
| 1512 | NETMAT | edge (100) | 0356 | 1512 |
| 1513 | NETMAT | edge (100) | 0357 | 1513 |
| 1514 | NETMAT | edge (100) | 0358 | 1514 |
| 1515 | NETMAT | edge (100) | 0359 | 1515 |
| 1516 | NETMAT | edge (100) | 0360 | 1516 |
| 1517 | NETMAT | edge (100) | 0361 | 1517 |
| 1518 | NETMAT | edge (100) | 0362 | 1518 |
| 1519 | NETMAT | edge (100) | 0363 | 1519 |
| 1520 | NETMAT | edge (100) | 0364 | 1520 |
| 1521 | NETMAT | edge (100) | 0365 | 1521 |
| 1522 | NETMAT | edge (100) | 0366 | 1522 |
| 1523 | NETMAT | edge (100) | 0367 | 1523 |
| 1524 | NETMAT | edge (100) | 0368 | 1524 |
| 1525 | NETMAT | edge (100) | 0369 | 1525 |
| 1526 | NETMAT | edge (100) | 0370 | 1526 |
| 1527 | NETMAT | edge (100) | 0371 | 1527 |
| 1528 | NETMAT | edge (100) | 0372 | 1528 |
| 1529 | NETMAT | edge (100) | 0373 | 1529 |
| 1530 | NETMAT | edge (100) | 0374 | 1530 |
| 1531 | NETMAT | edge (100) | 0375 | 1531 |
| 1532 | NETMAT | edge (100) | 0376 | 1532 |
| 1533 | NETMAT | edge (100) | 0377 | 1533 |
| 1534 | NETMAT | edge (100) | 0378 | 1534 |
| 1535 | NETMAT | edge (100) | 0379 | 1535 |
| 1536 | NETMAT | edge (100) | 0380 | 1536 |
| 1537 | NETMAT | edge (100) | 0381 | 1537 |
| 1538 | NETMAT | edge (100) | 0382 | 1538 |
| 1539 | NETMAT | edge (100) | 0383 | 1539 |
| 1540 | NETMAT | edge (100) | 0384 | 1540 |
| 1541 | NETMAT | edge (100) | 0385 | 1541 |
| 1542 | NETMAT | edge (100) | 0386 | 1542 |
| 1543 | NETMAT | edge (100) | 0387 | 1543 |
| 1544 | NETMAT | edge (100) | 0388 | 1544 |
| 1545 | NETMAT | edge (100) | 0389 | 1545 |
| 1546 | NETMAT | edge (100) | 0390 | 1546 |
| 1547 | NETMAT | edge (100) | 0391 | 1547 |
| 1548 | NETMAT | edge (100) | 0392 | 1548 |



|      |        |            |      |      |
|------|--------|------------|------|------|
| 1549 | NETMAT | edge (100) | 0393 | 1549 |
| 1550 | NETMAT | edge (100) | 0394 | 1550 |
| 1551 | NETMAT | edge (100) | 0395 | 1551 |
| 1552 | NETMAT | edge (100) | 0396 | 1552 |
| 1553 | NETMAT | edge (100) | 0397 | 1553 |
| 1554 | NETMAT | edge (100) | 0398 | 1554 |
| 1555 | NETMAT | edge (100) | 0399 | 1555 |
| 1556 | NETMAT | edge (100) | 0400 | 1556 |
| 1557 | NETMAT | edge (100) | 0401 | 1557 |
| 1558 | NETMAT | edge (100) | 0402 | 1558 |
| 1559 | NETMAT | edge (100) | 0403 | 1559 |
| 1560 | NETMAT | edge (100) | 0404 | 1560 |
| 1561 | NETMAT | edge (100) | 0405 | 1561 |
| 1562 | NETMAT | edge (100) | 0406 | 1562 |
| 1563 | NETMAT | edge (100) | 0407 | 1563 |
| 1564 | NETMAT | edge (100) | 0408 | 1564 |
| 1565 | NETMAT | edge (100) | 0409 | 1565 |
| 1566 | NETMAT | edge (100) | 0410 | 1566 |
| 1567 | NETMAT | edge (100) | 0411 | 1567 |
| 1568 | NETMAT | edge (100) | 0412 | 1568 |
| 1569 | NETMAT | edge (100) | 0413 | 1569 |
| 1570 | NETMAT | edge (100) | 0414 | 1570 |
| 1571 | NETMAT | edge (100) | 0415 | 1571 |
| 1572 | NETMAT | edge (100) | 0416 | 1572 |
| 1573 | NETMAT | edge (100) | 0417 | 1573 |
| 1574 | NETMAT | edge (100) | 0418 | 1574 |
| 1575 | NETMAT | edge (100) | 0419 | 1575 |
| 1576 | NETMAT | edge (100) | 0420 | 1576 |
| 1577 | NETMAT | edge (100) | 0421 | 1577 |
| 1578 | NETMAT | edge (100) | 0422 | 1578 |
| 1579 | NETMAT | edge (100) | 0423 | 1579 |
| 1580 | NETMAT | edge (100) | 0424 | 1580 |
| 1581 | NETMAT | edge (100) | 0425 | 1581 |
| 1582 | NETMAT | edge (100) | 0426 | 1582 |
| 1583 | NETMAT | edge (100) | 0427 | 1583 |
| 1584 | NETMAT | edge (100) | 0428 | 1584 |
| 1585 | NETMAT | edge (100) | 0429 | 1585 |
| 1586 | NETMAT | edge (100) | 0430 | 1586 |
| 1587 | NETMAT | edge (100) | 0431 | 1587 |
| 1588 | NETMAT | edge (100) | 0432 | 1588 |
| 1589 | NETMAT | edge (100) | 0433 | 1589 |
| 1590 | NETMAT | edge (100) | 0434 | 1590 |
| 1591 | NETMAT | edge (100) | 0435 | 1591 |
| 1592 | NETMAT | edge (100) | 0436 | 1592 |
| 1593 | NETMAT | edge (100) | 0437 | 1593 |
| 1594 | NETMAT | edge (100) | 0438 | 1594 |
| 1595 | NETMAT | edge (100) | 0439 | 1595 |
| 1596 | NETMAT | edge (100) | 0440 | 1596 |
| 1597 | NETMAT | edge (100) | 0441 | 1597 |
| 1598 | NETMAT | edge (100) | 0442 | 1598 |
| 1599 | NETMAT | edge (100) | 0443 | 1599 |
| 1600 | NETMAT | edge (100) | 0444 | 1600 |
| 1601 | NETMAT | edge (100) | 0445 | 1601 |
| 1602 | NETMAT | edge (100) | 0446 | 1602 |
| 1603 | NETMAT | edge (100) | 0447 | 1603 |
| 1604 | NETMAT | edge (100) | 0448 | 1604 |
| 1605 | NETMAT | edge (100) | 0449 | 1605 |
| 1606 | NETMAT | edge (100) | 0450 | 1606 |
| 1607 | NETMAT | edge (100) | 0451 | 1607 |
| 1608 | NETMAT | edge (100) | 0452 | 1608 |

|      |        |            |      |      |
|------|--------|------------|------|------|
| 1609 | NETMAT | edge (100) | 0453 | 1609 |
| 1610 | NETMAT | edge (100) | 0454 | 1610 |
| 1611 | NETMAT | edge (100) | 0455 | 1611 |
| 1612 | NETMAT | edge (100) | 0456 | 1612 |
| 1613 | NETMAT | edge (100) | 0457 | 1613 |
| 1614 | NETMAT | edge (100) | 0458 | 1614 |
| 1615 | NETMAT | edge (100) | 0459 | 1615 |
| 1616 | NETMAT | edge (100) | 0460 | 1616 |
| 1617 | NETMAT | edge (100) | 0461 | 1617 |
| 1618 | NETMAT | edge (100) | 0462 | 1618 |
| 1619 | NETMAT | edge (100) | 0463 | 1619 |
| 1620 | NETMAT | edge (100) | 0464 | 1620 |
| 1621 | NETMAT | edge (100) | 0465 | 1621 |
| 1622 | NETMAT | edge (100) | 0466 | 1622 |
| 1623 | NETMAT | edge (100) | 0467 | 1623 |
| 1624 | NETMAT | edge (100) | 0468 | 1624 |
| 1625 | NETMAT | edge (100) | 0469 | 1625 |
| 1626 | NETMAT | edge (100) | 0470 | 1626 |
| 1627 | NETMAT | edge (100) | 0471 | 1627 |
| 1628 | NETMAT | edge (100) | 0472 | 1628 |
| 1629 | NETMAT | edge (100) | 0473 | 1629 |
| 1630 | NETMAT | edge (100) | 0474 | 1630 |
| 1631 | NETMAT | edge (100) | 0475 | 1631 |
| 1632 | NETMAT | edge (100) | 0476 | 1632 |
| 1633 | NETMAT | edge (100) | 0477 | 1633 |
| 1634 | NETMAT | edge (100) | 0478 | 1634 |
| 1635 | NETMAT | edge (100) | 0479 | 1635 |
| 1636 | NETMAT | edge (100) | 0480 | 1636 |
| 1637 | NETMAT | edge (100) | 0481 | 1637 |
| 1638 | NETMAT | edge (100) | 0482 | 1638 |
| 1639 | NETMAT | edge (100) | 0483 | 1639 |
| 1640 | NETMAT | edge (100) | 0484 | 1640 |
| 1641 | NETMAT | edge (100) | 0485 | 1641 |
| 1642 | NETMAT | edge (100) | 0486 | 1642 |
| 1643 | NETMAT | edge (100) | 0487 | 1643 |
| 1644 | NETMAT | edge (100) | 0488 | 1644 |
| 1645 | NETMAT | edge (100) | 0489 | 1645 |
| 1646 | NETMAT | edge (100) | 0490 | 1646 |
| 1647 | NETMAT | edge (100) | 0491 | 1647 |
| 1648 | NETMAT | edge (100) | 0492 | 1648 |
| 1649 | NETMAT | edge (100) | 0493 | 1649 |
| 1650 | NETMAT | edge (100) | 0494 | 1650 |
| 1651 | NETMAT | edge (100) | 0495 | 1651 |
| 1652 | NETMAT | edge (100) | 0496 | 1652 |
| 1653 | NETMAT | edge (100) | 0497 | 1653 |
| 1654 | NETMAT | edge (100) | 0498 | 1654 |
| 1655 | NETMAT | edge (100) | 0499 | 1655 |
| 1656 | NETMAT | edge (100) | 0500 | 1656 |
| 1657 | NETMAT | edge (100) | 0501 | 1657 |
| 1658 | NETMAT | edge (100) | 0502 | 1658 |
| 1659 | NETMAT | edge (100) | 0503 | 1659 |
| 1660 | NETMAT | edge (100) | 0504 | 1660 |
| 1661 | NETMAT | edge (100) | 0505 | 1661 |
| 1662 | NETMAT | edge (100) | 0506 | 1662 |
| 1663 | NETMAT | edge (100) | 0507 | 1663 |
| 1664 | NETMAT | edge (100) | 0508 | 1664 |
| 1665 | NETMAT | edge (100) | 0509 | 1665 |
| 1666 | NETMAT | edge (100) | 0510 | 1666 |
| 1667 | NETMAT | edge (100) | 0511 | 1667 |
| 1668 | NETMAT | edge (100) | 0512 | 1668 |

|      |        |      |       |      |      |
|------|--------|------|-------|------|------|
| 1669 | NETMAT | edge | (100) | 0513 | 1669 |
| 1670 | NETMAT | edge | (100) | 0514 | 1670 |
| 1671 | NETMAT | edge | (100) | 0515 | 1671 |
| 1672 | NETMAT | edge | (100) | 0516 | 1672 |
| 1673 | NETMAT | edge | (100) | 0517 | 1673 |
| 1674 | NETMAT | edge | (100) | 0518 | 1674 |
| 1675 | NETMAT | edge | (100) | 0519 | 1675 |
| 1676 | NETMAT | edge | (100) | 0520 | 1676 |
| 1677 | NETMAT | edge | (100) | 0521 | 1677 |
| 1678 | NETMAT | edge | (100) | 0522 | 1678 |
| 1679 | NETMAT | edge | (100) | 0523 | 1679 |
| 1680 | NETMAT | edge | (100) | 0524 | 1680 |
| 1681 | NETMAT | edge | (100) | 0525 | 1681 |
| 1682 | NETMAT | edge | (100) | 0526 | 1682 |
| 1683 | NETMAT | edge | (100) | 0527 | 1683 |
| 1684 | NETMAT | edge | (100) | 0528 | 1684 |
| 1685 | NETMAT | edge | (100) | 0529 | 1685 |
| 1686 | NETMAT | edge | (100) | 0530 | 1686 |
| 1687 | NETMAT | edge | (100) | 0531 | 1687 |
| 1688 | NETMAT | edge | (100) | 0532 | 1688 |
| 1689 | NETMAT | edge | (100) | 0533 | 1689 |
| 1690 | NETMAT | edge | (100) | 0534 | 1690 |
| 1691 | NETMAT | edge | (100) | 0535 | 1691 |
| 1692 | NETMAT | edge | (100) | 0536 | 1692 |
| 1693 | NETMAT | edge | (100) | 0537 | 1693 |
| 1694 | NETMAT | edge | (100) | 0538 | 1694 |
| 1695 | NETMAT | edge | (100) | 0539 | 1695 |
| 1696 | NETMAT | edge | (100) | 0540 | 1696 |
| 1697 | NETMAT | edge | (100) | 0541 | 1697 |
| 1698 | NETMAT | edge | (100) | 0542 | 1698 |
| 1699 | NETMAT | edge | (100) | 0543 | 1699 |
| 1700 | NETMAT | edge | (100) | 0544 | 1700 |
| 1701 | NETMAT | edge | (100) | 0545 | 1701 |
| 1702 | NETMAT | edge | (100) | 0546 | 1702 |
| 1703 | NETMAT | edge | (100) | 0547 | 1703 |
| 1704 | NETMAT | edge | (100) | 0548 | 1704 |
| 1705 | NETMAT | edge | (100) | 0549 | 1705 |
| 1706 | NETMAT | edge | (100) | 0550 | 1706 |
| 1707 | NETMAT | edge | (100) | 0551 | 1707 |
| 1708 | NETMAT | edge | (100) | 0552 | 1708 |
| 1709 | NETMAT | edge | (100) | 0553 | 1709 |
| 1710 | NETMAT | edge | (100) | 0554 | 1710 |
| 1711 | NETMAT | edge | (100) | 0555 | 1711 |
| 1712 | NETMAT | edge | (100) | 0556 | 1712 |
| 1713 | NETMAT | edge | (100) | 0557 | 1713 |
| 1714 | NETMAT | edge | (100) | 0558 | 1714 |
| 1715 | NETMAT | edge | (100) | 0559 | 1715 |
| 1716 | NETMAT | edge | (100) | 0560 | 1716 |
| 1717 | NETMAT | edge | (100) | 0561 | 1717 |
| 1718 | NETMAT | edge | (100) | 0562 | 1718 |
| 1719 | NETMAT | edge | (100) | 0563 | 1719 |
| 1720 | NETMAT | edge | (100) | 0564 | 1720 |
| 1721 | NETMAT | edge | (100) | 0565 | 1721 |
| 1722 | NETMAT | edge | (100) | 0566 | 1722 |
| 1723 | NETMAT | edge | (100) | 0567 | 1723 |
| 1724 | NETMAT | edge | (100) | 0568 | 1724 |
| 1725 | NETMAT | edge | (100) | 0569 | 1725 |
| 1726 | NETMAT | edge | (100) | 0570 | 1726 |
| 1727 | NETMAT | edge | (100) | 0571 | 1727 |
| 1728 | NETMAT | edge | (100) | 0572 | 1728 |

|      |        |            |      |      |
|------|--------|------------|------|------|
| 1729 | NETMAT | edge (100) | 0573 | 1729 |
| 1730 | NETMAT | edge (100) | 0574 | 1730 |
| 1731 | NETMAT | edge (100) | 0575 | 1731 |
| 1732 | NETMAT | edge (100) | 0576 | 1732 |
| 1733 | NETMAT | edge (100) | 0577 | 1733 |
| 1734 | NETMAT | edge (100) | 0578 | 1734 |
| 1735 | NETMAT | edge (100) | 0579 | 1735 |
| 1736 | NETMAT | edge (100) | 0580 | 1736 |
| 1737 | NETMAT | edge (100) | 0581 | 1737 |
| 1738 | NETMAT | edge (100) | 0582 | 1738 |
| 1739 | NETMAT | edge (100) | 0583 | 1739 |
| 1740 | NETMAT | edge (100) | 0584 | 1740 |
| 1741 | NETMAT | edge (100) | 0585 | 1741 |
| 1742 | NETMAT | edge (100) | 0586 | 1742 |
| 1743 | NETMAT | edge (100) | 0587 | 1743 |
| 1744 | NETMAT | edge (100) | 0588 | 1744 |
| 1745 | NETMAT | edge (100) | 0589 | 1745 |
| 1746 | NETMAT | edge (100) | 0590 | 1746 |
| 1747 | NETMAT | edge (100) | 0591 | 1747 |
| 1748 | NETMAT | edge (100) | 0592 | 1748 |
| 1749 | NETMAT | edge (100) | 0593 | 1749 |
| 1750 | NETMAT | edge (100) | 0594 | 1750 |
| 1751 | NETMAT | edge (100) | 0595 | 1751 |
| 1752 | NETMAT | edge (100) | 0596 | 1752 |
| 1753 | NETMAT | edge (100) | 0597 | 1753 |
| 1754 | NETMAT | edge (100) | 0598 | 1754 |
| 1755 | NETMAT | edge (100) | 0599 | 1755 |
| 1756 | NETMAT | edge (100) | 0600 | 1756 |
| 1757 | NETMAT | edge (100) | 0601 | 1757 |
| 1758 | NETMAT | edge (100) | 0602 | 1758 |
| 1759 | NETMAT | edge (100) | 0603 | 1759 |
| 1760 | NETMAT | edge (100) | 0604 | 1760 |
| 1761 | NETMAT | edge (100) | 0605 | 1761 |
| 1762 | NETMAT | edge (100) | 0606 | 1762 |
| 1763 | NETMAT | edge (100) | 0607 | 1763 |
| 1764 | NETMAT | edge (100) | 0608 | 1764 |
| 1765 | NETMAT | edge (100) | 0609 | 1765 |
| 1766 | NETMAT | edge (100) | 0610 | 1766 |
| 1767 | NETMAT | edge (100) | 0611 | 1767 |
| 1768 | NETMAT | edge (100) | 0612 | 1768 |
| 1769 | NETMAT | edge (100) | 0613 | 1769 |
| 1770 | NETMAT | edge (100) | 0614 | 1770 |
| 1771 | NETMAT | edge (100) | 0615 | 1771 |
| 1772 | NETMAT | edge (100) | 0616 | 1772 |
| 1773 | NETMAT | edge (100) | 0617 | 1773 |
| 1774 | NETMAT | edge (100) | 0618 | 1774 |
| 1775 | NETMAT | edge (100) | 0619 | 1775 |
| 1776 | NETMAT | edge (100) | 0620 | 1776 |
| 1777 | NETMAT | edge (100) | 0621 | 1777 |
| 1778 | NETMAT | edge (100) | 0622 | 1778 |
| 1779 | NETMAT | edge (100) | 0623 | 1779 |
| 1780 | NETMAT | edge (100) | 0624 | 1780 |
| 1781 | NETMAT | edge (100) | 0625 | 1781 |
| 1782 | NETMAT | edge (100) | 0626 | 1782 |
| 1783 | NETMAT | edge (100) | 0627 | 1783 |
| 1784 | NETMAT | edge (100) | 0628 | 1784 |
| 1785 | NETMAT | edge (100) | 0629 | 1785 |
| 1786 | NETMAT | edge (100) | 0630 | 1786 |
| 1787 | NETMAT | edge (100) | 0631 | 1787 |
| 1788 | NETMAT | edge (100) | 0632 | 1788 |

|      |        |            |      |      |
|------|--------|------------|------|------|
| 1789 | NETMAT | edge (100) | 0633 | 1789 |
| 1790 | NETMAT | edge (100) | 0634 | 1790 |
| 1791 | NETMAT | edge (100) | 0635 | 1791 |
| 1792 | NETMAT | edge (100) | 0636 | 1792 |
| 1793 | NETMAT | edge (100) | 0637 | 1793 |
| 1794 | NETMAT | edge (100) | 0638 | 1794 |
| 1795 | NETMAT | edge (100) | 0639 | 1795 |
| 1796 | NETMAT | edge (100) | 0640 | 1796 |
| 1797 | NETMAT | edge (100) | 0641 | 1797 |
| 1798 | NETMAT | edge (100) | 0642 | 1798 |
| 1799 | NETMAT | edge (100) | 0643 | 1799 |
| 1800 | NETMAT | edge (100) | 0644 | 1800 |
| 1801 | NETMAT | edge (100) | 0645 | 1801 |
| 1802 | NETMAT | edge (100) | 0646 | 1802 |
| 1803 | NETMAT | edge (100) | 0647 | 1803 |
| 1804 | NETMAT | edge (100) | 0648 | 1804 |
| 1805 | NETMAT | edge (100) | 0649 | 1805 |
| 1806 | NETMAT | edge (100) | 0650 | 1806 |
| 1807 | NETMAT | edge (100) | 0651 | 1807 |
| 1808 | NETMAT | edge (100) | 0652 | 1808 |
| 1809 | NETMAT | edge (100) | 0653 | 1809 |
| 1810 | NETMAT | edge (100) | 0654 | 1810 |
| 1811 | NETMAT | edge (100) | 0655 | 1811 |
| 1812 | NETMAT | edge (100) | 0656 | 1812 |
| 1813 | NETMAT | edge (100) | 0657 | 1813 |
| 1814 | NETMAT | edge (100) | 0658 | 1814 |
| 1815 | NETMAT | edge (100) | 0659 | 1815 |
| 1816 | NETMAT | edge (100) | 0660 | 1816 |
| 1817 | NETMAT | edge (100) | 0661 | 1817 |
| 1818 | NETMAT | edge (100) | 0662 | 1818 |
| 1819 | NETMAT | edge (100) | 0663 | 1819 |
| 1820 | NETMAT | edge (100) | 0664 | 1820 |
| 1821 | NETMAT | edge (100) | 0665 | 1821 |
| 1822 | NETMAT | edge (100) | 0666 | 1822 |
| 1823 | NETMAT | edge (100) | 0667 | 1823 |
| 1824 | NETMAT | edge (100) | 0668 | 1824 |
| 1825 | NETMAT | edge (100) | 0669 | 1825 |
| 1826 | NETMAT | edge (100) | 0670 | 1826 |
| 1827 | NETMAT | edge (100) | 0671 | 1827 |
| 1828 | NETMAT | edge (100) | 0672 | 1828 |
| 1829 | NETMAT | edge (100) | 0673 | 1829 |
| 1830 | NETMAT | edge (100) | 0674 | 1830 |
| 1831 | NETMAT | edge (100) | 0675 | 1831 |
| 1832 | NETMAT | edge (100) | 0676 | 1832 |
| 1833 | NETMAT | edge (100) | 0677 | 1833 |
| 1834 | NETMAT | edge (100) | 0678 | 1834 |
| 1835 | NETMAT | edge (100) | 0679 | 1835 |
| 1836 | NETMAT | edge (100) | 0680 | 1836 |
| 1837 | NETMAT | edge (100) | 0681 | 1837 |
| 1838 | NETMAT | edge (100) | 0682 | 1838 |
| 1839 | NETMAT | edge (100) | 0683 | 1839 |
| 1840 | NETMAT | edge (100) | 0684 | 1840 |
| 1841 | NETMAT | edge (100) | 0685 | 1841 |
| 1842 | NETMAT | edge (100) | 0686 | 1842 |
| 1843 | NETMAT | edge (100) | 0687 | 1843 |
| 1844 | NETMAT | edge (100) | 0688 | 1844 |
| 1845 | NETMAT | edge (100) | 0689 | 1845 |
| 1846 | NETMAT | edge (100) | 0690 | 1846 |
| 1847 | NETMAT | edge (100) | 0691 | 1847 |
| 1848 | NETMAT | edge (100) | 0692 | 1848 |

|      |        |            |      |      |
|------|--------|------------|------|------|
| 1849 | NETMAT | edge (100) | 0693 | 1849 |
| 1850 | NETMAT | edge (100) | 0694 | 1850 |
| 1851 | NETMAT | edge (100) | 0695 | 1851 |
| 1852 | NETMAT | edge (100) | 0696 | 1852 |
| 1853 | NETMAT | edge (100) | 0697 | 1853 |
| 1854 | NETMAT | edge (100) | 0698 | 1854 |
| 1855 | NETMAT | edge (100) | 0699 | 1855 |
| 1856 | NETMAT | edge (100) | 0700 | 1856 |
| 1857 | NETMAT | edge (100) | 0701 | 1857 |
| 1858 | NETMAT | edge (100) | 0702 | 1858 |
| 1859 | NETMAT | edge (100) | 0703 | 1859 |
| 1860 | NETMAT | edge (100) | 0704 | 1860 |
| 1861 | NETMAT | edge (100) | 0705 | 1861 |
| 1862 | NETMAT | edge (100) | 0706 | 1862 |
| 1863 | NETMAT | edge (100) | 0707 | 1863 |
| 1864 | NETMAT | edge (100) | 0708 | 1864 |
| 1865 | NETMAT | edge (100) | 0709 | 1865 |
| 1866 | NETMAT | edge (100) | 0710 | 1866 |
| 1867 | NETMAT | edge (100) | 0711 | 1867 |
| 1868 | NETMAT | edge (100) | 0712 | 1868 |
| 1869 | NETMAT | edge (100) | 0713 | 1869 |
| 1870 | NETMAT | edge (100) | 0714 | 1870 |
| 1871 | NETMAT | edge (100) | 0715 | 1871 |
| 1872 | NETMAT | edge (100) | 0716 | 1872 |
| 1873 | NETMAT | edge (100) | 0717 | 1873 |
| 1874 | NETMAT | edge (100) | 0718 | 1874 |
| 1875 | NETMAT | edge (100) | 0719 | 1875 |
| 1876 | NETMAT | edge (100) | 0720 | 1876 |
| 1877 | NETMAT | edge (100) | 0721 | 1877 |
| 1878 | NETMAT | edge (100) | 0722 | 1878 |
| 1879 | NETMAT | edge (100) | 0723 | 1879 |
| 1880 | NETMAT | edge (100) | 0724 | 1880 |
| 1881 | NETMAT | edge (100) | 0725 | 1881 |
| 1882 | NETMAT | edge (100) | 0726 | 1882 |
| 1883 | NETMAT | edge (100) | 0727 | 1883 |
| 1884 | NETMAT | edge (100) | 0728 | 1884 |
| 1885 | NETMAT | edge (100) | 0729 | 1885 |
| 1886 | NETMAT | edge (100) | 0730 | 1886 |
| 1887 | NETMAT | edge (100) | 0731 | 1887 |
| 1888 | NETMAT | edge (100) | 0732 | 1888 |
| 1889 | NETMAT | edge (100) | 0733 | 1889 |
| 1890 | NETMAT | edge (100) | 0734 | 1890 |
| 1891 | NETMAT | edge (100) | 0735 | 1891 |
| 1892 | NETMAT | edge (100) | 0736 | 1892 |
| 1893 | NETMAT | edge (100) | 0737 | 1893 |
| 1894 | NETMAT | edge (100) | 0738 | 1894 |
| 1895 | NETMAT | edge (100) | 0739 | 1895 |
| 1896 | NETMAT | edge (100) | 0740 | 1896 |
| 1897 | NETMAT | edge (100) | 0741 | 1897 |
| 1898 | NETMAT | edge (100) | 0742 | 1898 |
| 1899 | NETMAT | edge (100) | 0743 | 1899 |
| 1900 | NETMAT | edge (100) | 0744 | 1900 |
| 1901 | NETMAT | edge (100) | 0745 | 1901 |
| 1902 | NETMAT | edge (100) | 0746 | 1902 |
| 1903 | NETMAT | edge (100) | 0747 | 1903 |
| 1904 | NETMAT | edge (100) | 0748 | 1904 |
| 1905 | NETMAT | edge (100) | 0749 | 1905 |
| 1906 | NETMAT | edge (100) | 0750 | 1906 |
| 1907 | NETMAT | edge (100) | 0751 | 1907 |
| 1908 | NETMAT | edge (100) | 0752 | 1908 |

|      |        |      |       |      |      |
|------|--------|------|-------|------|------|
| 1909 | NETMAT | edge | (100) | 0753 | 1909 |
| 1910 | NETMAT | edge | (100) | 0754 | 1910 |
| 1911 | NETMAT | edge | (100) | 0755 | 1911 |
| 1912 | NETMAT | edge | (100) | 0756 | 1912 |
| 1913 | NETMAT | edge | (100) | 0757 | 1913 |
| 1914 | NETMAT | edge | (100) | 0758 | 1914 |
| 1915 | NETMAT | edge | (100) | 0759 | 1915 |
| 1916 | NETMAT | edge | (100) | 0760 | 1916 |
| 1917 | NETMAT | edge | (100) | 0761 | 1917 |
| 1918 | NETMAT | edge | (100) | 0762 | 1918 |
| 1919 | NETMAT | edge | (100) | 0763 | 1919 |
| 1920 | NETMAT | edge | (100) | 0764 | 1920 |
| 1921 | NETMAT | edge | (100) | 0765 | 1921 |
| 1922 | NETMAT | edge | (100) | 0766 | 1922 |
| 1923 | NETMAT | edge | (100) | 0767 | 1923 |
| 1924 | NETMAT | edge | (100) | 0768 | 1924 |
| 1925 | NETMAT | edge | (100) | 0769 | 1925 |
| 1926 | NETMAT | edge | (100) | 0770 | 1926 |
| 1927 | NETMAT | edge | (100) | 0771 | 1927 |
| 1928 | NETMAT | edge | (100) | 0772 | 1928 |
| 1929 | NETMAT | edge | (100) | 0773 | 1929 |
| 1930 | NETMAT | edge | (100) | 0774 | 1930 |
| 1931 | NETMAT | edge | (100) | 0775 | 1931 |
| 1932 | NETMAT | edge | (100) | 0776 | 1932 |
| 1933 | NETMAT | edge | (100) | 0777 | 1933 |
| 1934 | NETMAT | edge | (100) | 0778 | 1934 |
| 1935 | NETMAT | edge | (100) | 0779 | 1935 |
| 1936 | NETMAT | edge | (100) | 0780 | 1936 |
| 1937 | NETMAT | edge | (100) | 0781 | 1937 |
| 1938 | NETMAT | edge | (100) | 0782 | 1938 |
| 1939 | NETMAT | edge | (100) | 0783 | 1939 |
| 1940 | NETMAT | edge | (100) | 0784 | 1940 |
| 1941 | NETMAT | edge | (100) | 0785 | 1941 |
| 1942 | NETMAT | edge | (100) | 0786 | 1942 |
| 1943 | NETMAT | edge | (100) | 0787 | 1943 |
| 1944 | NETMAT | edge | (100) | 0788 | 1944 |
| 1945 | NETMAT | edge | (100) | 0789 | 1945 |
| 1946 | NETMAT | edge | (100) | 0790 | 1946 |
| 1947 | NETMAT | edge | (100) | 0791 | 1947 |
| 1948 | NETMAT | edge | (100) | 0792 | 1948 |
| 1949 | NETMAT | edge | (100) | 0793 | 1949 |
| 1950 | NETMAT | edge | (100) | 0794 | 1950 |
| 1951 | NETMAT | edge | (100) | 0795 | 1951 |
| 1952 | NETMAT | edge | (100) | 0796 | 1952 |
| 1953 | NETMAT | edge | (100) | 0797 | 1953 |
| 1954 | NETMAT | edge | (100) | 0798 | 1954 |
| 1955 | NETMAT | edge | (100) | 0799 | 1955 |
| 1956 | NETMAT | edge | (100) | 0800 | 1956 |
| 1957 | NETMAT | edge | (100) | 0801 | 1957 |
| 1958 | NETMAT | edge | (100) | 0802 | 1958 |
| 1959 | NETMAT | edge | (100) | 0803 | 1959 |
| 1960 | NETMAT | edge | (100) | 0804 | 1960 |
| 1961 | NETMAT | edge | (100) | 0805 | 1961 |
| 1962 | NETMAT | edge | (100) | 0806 | 1962 |
| 1963 | NETMAT | edge | (100) | 0807 | 1963 |
| 1964 | NETMAT | edge | (100) | 0808 | 1964 |
| 1965 | NETMAT | edge | (100) | 0809 | 1965 |
| 1966 | NETMAT | edge | (100) | 0810 | 1966 |
| 1967 | NETMAT | edge | (100) | 0811 | 1967 |
| 1968 | NETMAT | edge | (100) | 0812 | 1968 |

|      |        |      |       |      |      |
|------|--------|------|-------|------|------|
| 1969 | NETMAT | edge | (100) | 0813 | 1969 |
| 1970 | NETMAT | edge | (100) | 0814 | 1970 |
| 1971 | NETMAT | edge | (100) | 0815 | 1971 |
| 1972 | NETMAT | edge | (100) | 0816 | 1972 |
| 1973 | NETMAT | edge | (100) | 0817 | 1973 |
| 1974 | NETMAT | edge | (100) | 0818 | 1974 |
| 1975 | NETMAT | edge | (100) | 0819 | 1975 |
| 1976 | NETMAT | edge | (100) | 0820 | 1976 |
| 1977 | NETMAT | edge | (100) | 0821 | 1977 |
| 1978 | NETMAT | edge | (100) | 0822 | 1978 |
| 1979 | NETMAT | edge | (100) | 0823 | 1979 |
| 1980 | NETMAT | edge | (100) | 0824 | 1980 |
| 1981 | NETMAT | edge | (100) | 0825 | 1981 |
| 1982 | NETMAT | edge | (100) | 0826 | 1982 |
| 1983 | NETMAT | edge | (100) | 0827 | 1983 |
| 1984 | NETMAT | edge | (100) | 0828 | 1984 |
| 1985 | NETMAT | edge | (100) | 0829 | 1985 |
| 1986 | NETMAT | edge | (100) | 0830 | 1986 |
| 1987 | NETMAT | edge | (100) | 0831 | 1987 |
| 1988 | NETMAT | edge | (100) | 0832 | 1988 |
| 1989 | NETMAT | edge | (100) | 0833 | 1989 |
| 1990 | NETMAT | edge | (100) | 0834 | 1990 |
| 1991 | NETMAT | edge | (100) | 0835 | 1991 |
| 1992 | NETMAT | edge | (100) | 0836 | 1992 |
| 1993 | NETMAT | edge | (100) | 0837 | 1993 |
| 1994 | NETMAT | edge | (100) | 0838 | 1994 |
| 1995 | NETMAT | edge | (100) | 0839 | 1995 |
| 1996 | NETMAT | edge | (100) | 0840 | 1996 |
| 1997 | NETMAT | edge | (100) | 0841 | 1997 |
| 1998 | NETMAT | edge | (100) | 0842 | 1998 |
| 1999 | NETMAT | edge | (100) | 0843 | 1999 |
| 2000 | NETMAT | edge | (100) | 0844 | 2000 |
| 2001 | NETMAT | edge | (100) | 0845 | 2001 |
| 2002 | NETMAT | edge | (100) | 0846 | 2002 |
| 2003 | NETMAT | edge | (100) | 0847 | 2003 |
| 2004 | NETMAT | edge | (100) | 0848 | 2004 |
| 2005 | NETMAT | edge | (100) | 0849 | 2005 |
| 2006 | NETMAT | edge | (100) | 0850 | 2006 |
| 2007 | NETMAT | edge | (100) | 0851 | 2007 |
| 2008 | NETMAT | edge | (100) | 0852 | 2008 |
| 2009 | NETMAT | edge | (100) | 0853 | 2009 |
| 2010 | NETMAT | edge | (100) | 0854 | 2010 |
| 2011 | NETMAT | edge | (100) | 0855 | 2011 |
| 2012 | NETMAT | edge | (100) | 0856 | 2012 |
| 2013 | NETMAT | edge | (100) | 0857 | 2013 |
| 2014 | NETMAT | edge | (100) | 0858 | 2014 |
| 2015 | NETMAT | edge | (100) | 0859 | 2015 |
| 2016 | NETMAT | edge | (100) | 0860 | 2016 |
| 2017 | NETMAT | edge | (100) | 0861 | 2017 |
| 2018 | NETMAT | edge | (100) | 0862 | 2018 |
| 2019 | NETMAT | edge | (100) | 0863 | 2019 |
| 2020 | NETMAT | edge | (100) | 0864 | 2020 |
| 2021 | NETMAT | edge | (100) | 0865 | 2021 |
| 2022 | NETMAT | edge | (100) | 0866 | 2022 |
| 2023 | NETMAT | edge | (100) | 0867 | 2023 |
| 2024 | NETMAT | edge | (100) | 0868 | 2024 |
| 2025 | NETMAT | edge | (100) | 0869 | 2025 |
| 2026 | NETMAT | edge | (100) | 0870 | 2026 |
| 2027 | NETMAT | edge | (100) | 0871 | 2027 |
| 2028 | NETMAT | edge | (100) | 0872 | 2028 |



|      |        |      |       |      |      |
|------|--------|------|-------|------|------|
| 2029 | NETMAT | edge | (100) | 0873 | 2029 |
| 2030 | NETMAT | edge | (100) | 0874 | 2030 |
| 2031 | NETMAT | edge | (100) | 0875 | 2031 |
| 2032 | NETMAT | edge | (100) | 0876 | 2032 |
| 2033 | NETMAT | edge | (100) | 0877 | 2033 |
| 2034 | NETMAT | edge | (100) | 0878 | 2034 |
| 2035 | NETMAT | edge | (100) | 0879 | 2035 |
| 2036 | NETMAT | edge | (100) | 0880 | 2036 |
| 2037 | NETMAT | edge | (100) | 0881 | 2037 |
| 2038 | NETMAT | edge | (100) | 0882 | 2038 |
| 2039 | NETMAT | edge | (100) | 0883 | 2039 |
| 2040 | NETMAT | edge | (100) | 0884 | 2040 |
| 2041 | NETMAT | edge | (100) | 0885 | 2041 |
| 2042 | NETMAT | edge | (100) | 0886 | 2042 |
| 2043 | NETMAT | edge | (100) | 0887 | 2043 |
| 2044 | NETMAT | edge | (100) | 0888 | 2044 |
| 2045 | NETMAT | edge | (100) | 0889 | 2045 |
| 2046 | NETMAT | edge | (100) | 0890 | 2046 |
| 2047 | NETMAT | edge | (100) | 0891 | 2047 |
| 2048 | NETMAT | edge | (100) | 0892 | 2048 |
| 2049 | NETMAT | edge | (100) | 0893 | 2049 |
| 2050 | NETMAT | edge | (100) | 0894 | 2050 |
| 2051 | NETMAT | edge | (100) | 0895 | 2051 |
| 2052 | NETMAT | edge | (100) | 0896 | 2052 |
| 2053 | NETMAT | edge | (100) | 0897 | 2053 |
| 2054 | NETMAT | edge | (100) | 0898 | 2054 |
| 2055 | NETMAT | edge | (100) | 0899 | 2055 |
| 2056 | NETMAT | edge | (100) | 0900 | 2056 |
| 2057 | NETMAT | edge | (100) | 0901 | 2057 |
| 2058 | NETMAT | edge | (100) | 0902 | 2058 |
| 2059 | NETMAT | edge | (100) | 0903 | 2059 |
| 2060 | NETMAT | edge | (100) | 0904 | 2060 |
| 2061 | NETMAT | edge | (100) | 0905 | 2061 |
| 2062 | NETMAT | edge | (100) | 0906 | 2062 |
| 2063 | NETMAT | edge | (100) | 0907 | 2063 |
| 2064 | NETMAT | edge | (100) | 0908 | 2064 |
| 2065 | NETMAT | edge | (100) | 0909 | 2065 |
| 2066 | NETMAT | edge | (100) | 0910 | 2066 |
| 2067 | NETMAT | edge | (100) | 0911 | 2067 |
| 2068 | NETMAT | edge | (100) | 0912 | 2068 |
| 2069 | NETMAT | edge | (100) | 0913 | 2069 |
| 2070 | NETMAT | edge | (100) | 0914 | 2070 |
| 2071 | NETMAT | edge | (100) | 0915 | 2071 |
| 2072 | NETMAT | edge | (100) | 0916 | 2072 |
| 2073 | NETMAT | edge | (100) | 0917 | 2073 |
| 2074 | NETMAT | edge | (100) | 0918 | 2074 |
| 2075 | NETMAT | edge | (100) | 0919 | 2075 |
| 2076 | NETMAT | edge | (100) | 0920 | 2076 |
| 2077 | NETMAT | edge | (100) | 0921 | 2077 |
| 2078 | NETMAT | edge | (100) | 0922 | 2078 |
| 2079 | NETMAT | edge | (100) | 0923 | 2079 |
| 2080 | NETMAT | edge | (100) | 0924 | 2080 |
| 2081 | NETMAT | edge | (100) | 0925 | 2081 |
| 2082 | NETMAT | edge | (100) | 0926 | 2082 |
| 2083 | NETMAT | edge | (100) | 0927 | 2083 |
| 2084 | NETMAT | edge | (100) | 0928 | 2084 |
| 2085 | NETMAT | edge | (100) | 0929 | 2085 |
| 2086 | NETMAT | edge | (100) | 0930 | 2086 |
| 2087 | NETMAT | edge | (100) | 0931 | 2087 |
| 2088 | NETMAT | edge | (100) | 0932 | 2088 |

|      |        |            |      |      |
|------|--------|------------|------|------|
| 2089 | NETMAT | edge (100) | 0933 | 2089 |
| 2090 | NETMAT | edge (100) | 0934 | 2090 |
| 2091 | NETMAT | edge (100) | 0935 | 2091 |
| 2092 | NETMAT | edge (100) | 0936 | 2092 |
| 2093 | NETMAT | edge (100) | 0937 | 2093 |
| 2094 | NETMAT | edge (100) | 0938 | 2094 |
| 2095 | NETMAT | edge (100) | 0939 | 2095 |
| 2096 | NETMAT | edge (100) | 0940 | 2096 |
| 2097 | NETMAT | edge (100) | 0941 | 2097 |
| 2098 | NETMAT | edge (100) | 0942 | 2098 |
| 2099 | NETMAT | edge (100) | 0943 | 2099 |
| 2100 | NETMAT | edge (100) | 0944 | 2100 |
| 2101 | NETMAT | edge (100) | 0945 | 2101 |
| 2102 | NETMAT | edge (100) | 0946 | 2102 |
| 2103 | NETMAT | edge (100) | 0947 | 2103 |
| 2104 | NETMAT | edge (100) | 0948 | 2104 |
| 2105 | NETMAT | edge (100) | 0949 | 2105 |
| 2106 | NETMAT | edge (100) | 0950 | 2106 |
| 2107 | NETMAT | edge (100) | 0951 | 2107 |
| 2108 | NETMAT | edge (100) | 0952 | 2108 |
| 2109 | NETMAT | edge (100) | 0953 | 2109 |
| 2110 | NETMAT | edge (100) | 0954 | 2110 |
| 2111 | NETMAT | edge (100) | 0955 | 2111 |
| 2112 | NETMAT | edge (100) | 0956 | 2112 |
| 2113 | NETMAT | edge (100) | 0957 | 2113 |
| 2114 | NETMAT | edge (100) | 0958 | 2114 |
| 2115 | NETMAT | edge (100) | 0959 | 2115 |
| 2116 | NETMAT | edge (100) | 0960 | 2116 |
| 2117 | NETMAT | edge (100) | 0961 | 2117 |
| 2118 | NETMAT | edge (100) | 0962 | 2118 |
| 2119 | NETMAT | edge (100) | 0963 | 2119 |
| 2120 | NETMAT | edge (100) | 0964 | 2120 |
| 2121 | NETMAT | edge (100) | 0965 | 2121 |
| 2122 | NETMAT | edge (100) | 0966 | 2122 |
| 2123 | NETMAT | edge (100) | 0967 | 2123 |
| 2124 | NETMAT | edge (100) | 0968 | 2124 |
| 2125 | NETMAT | edge (100) | 0969 | 2125 |
| 2126 | NETMAT | edge (100) | 0970 | 2126 |
| 2127 | NETMAT | edge (100) | 0971 | 2127 |
| 2128 | NETMAT | edge (100) | 0972 | 2128 |
| 2129 | NETMAT | edge (100) | 0973 | 2129 |
| 2130 | NETMAT | edge (100) | 0974 | 2130 |
| 2131 | NETMAT | edge (100) | 0975 | 2131 |
| 2132 | NETMAT | edge (100) | 0976 | 2132 |
| 2133 | NETMAT | edge (100) | 0977 | 2133 |
| 2134 | NETMAT | edge (100) | 0978 | 2134 |
| 2135 | NETMAT | edge (100) | 0979 | 2135 |
| 2136 | NETMAT | edge (100) | 0980 | 2136 |
| 2137 | NETMAT | edge (100) | 0981 | 2137 |
| 2138 | NETMAT | edge (100) | 0982 | 2138 |
| 2139 | NETMAT | edge (100) | 0983 | 2139 |
| 2140 | NETMAT | edge (100) | 0984 | 2140 |
| 2141 | NETMAT | edge (100) | 0985 | 2141 |
| 2142 | NETMAT | edge (100) | 0986 | 2142 |
| 2143 | NETMAT | edge (100) | 0987 | 2143 |
| 2144 | NETMAT | edge (100) | 0988 | 2144 |
| 2145 | NETMAT | edge (100) | 0989 | 2145 |
| 2146 | NETMAT | edge (100) | 0990 | 2146 |
| 2147 | NETMAT | edge (100) | 0991 | 2147 |
| 2148 | NETMAT | edge (100) | 0992 | 2148 |

|      |        |            |      |      |
|------|--------|------------|------|------|
| 2149 | NETMAT | edge (100) | 0993 | 2149 |
| 2150 | NETMAT | edge (100) | 0994 | 2150 |
| 2151 | NETMAT | edge (100) | 0995 | 2151 |
| 2152 | NETMAT | edge (100) | 0996 | 2152 |
| 2153 | NETMAT | edge (100) | 0997 | 2153 |
| 2154 | NETMAT | edge (100) | 0998 | 2154 |
| 2155 | NETMAT | edge (100) | 0999 | 2155 |
| 2156 | NETMAT | edge (100) | 1000 | 2156 |
| 2157 | NETMAT | edge (100) | 1001 | 2157 |
| 2158 | NETMAT | edge (100) | 1002 | 2158 |
| 2159 | NETMAT | edge (100) | 1003 | 2159 |
| 2160 | NETMAT | edge (100) | 1004 | 2160 |
| 2161 | NETMAT | edge (100) | 1005 | 2161 |
| 2162 | NETMAT | edge (100) | 1006 | 2162 |
| 2163 | NETMAT | edge (100) | 1007 | 2163 |
| 2164 | NETMAT | edge (100) | 1008 | 2164 |
| 2165 | NETMAT | edge (100) | 1009 | 2165 |
| 2166 | NETMAT | edge (100) | 1010 | 2166 |
| 2167 | NETMAT | edge (100) | 1011 | 2167 |
| 2168 | NETMAT | edge (100) | 1012 | 2168 |
| 2169 | NETMAT | edge (100) | 1013 | 2169 |
| 2170 | NETMAT | edge (100) | 1014 | 2170 |
| 2171 | NETMAT | edge (100) | 1015 | 2171 |
| 2172 | NETMAT | edge (100) | 1016 | 2172 |
| 2173 | NETMAT | edge (100) | 1017 | 2173 |
| 2174 | NETMAT | edge (100) | 1018 | 2174 |
| 2175 | NETMAT | edge (100) | 1019 | 2175 |
| 2176 | NETMAT | edge (100) | 1020 | 2176 |
| 2177 | NETMAT | edge (100) | 1021 | 2177 |
| 2178 | NETMAT | edge (100) | 1022 | 2178 |
| 2179 | NETMAT | edge (100) | 1023 | 2179 |
| 2180 | NETMAT | edge (100) | 1024 | 2180 |
| 2181 | NETMAT | edge (100) | 1025 | 2181 |
| 2182 | NETMAT | edge (100) | 1026 | 2182 |
| 2183 | NETMAT | edge (100) | 1027 | 2183 |
| 2184 | NETMAT | edge (100) | 1028 | 2184 |
| 2185 | NETMAT | edge (100) | 1029 | 2185 |
| 2186 | NETMAT | edge (100) | 1030 | 2186 |
| 2187 | NETMAT | edge (100) | 1031 | 2187 |
| 2188 | NETMAT | edge (100) | 1032 | 2188 |
| 2189 | NETMAT | edge (100) | 1033 | 2189 |
| 2190 | NETMAT | edge (100) | 1034 | 2190 |
| 2191 | NETMAT | edge (100) | 1035 | 2191 |
| 2192 | NETMAT | edge (100) | 1036 | 2192 |
| 2193 | NETMAT | edge (100) | 1037 | 2193 |
| 2194 | NETMAT | edge (100) | 1038 | 2194 |
| 2195 | NETMAT | edge (100) | 1039 | 2195 |
| 2196 | NETMAT | edge (100) | 1040 | 2196 |
| 2197 | NETMAT | edge (100) | 1041 | 2197 |
| 2198 | NETMAT | edge (100) | 1042 | 2198 |
| 2199 | NETMAT | edge (100) | 1043 | 2199 |
| 2200 | NETMAT | edge (100) | 1044 | 2200 |
| 2201 | NETMAT | edge (100) | 1045 | 2201 |
| 2202 | NETMAT | edge (100) | 1046 | 2202 |
| 2203 | NETMAT | edge (100) | 1047 | 2203 |
| 2204 | NETMAT | edge (100) | 1048 | 2204 |
| 2205 | NETMAT | edge (100) | 1049 | 2205 |
| 2206 | NETMAT | edge (100) | 1050 | 2206 |
| 2207 | NETMAT | edge (100) | 1051 | 2207 |
| 2208 | NETMAT | edge (100) | 1052 | 2208 |

|      |        |            |      |      |
|------|--------|------------|------|------|
| 2209 | NETMAT | edge (100) | 1053 | 2209 |
| 2210 | NETMAT | edge (100) | 1054 | 2210 |
| 2211 | NETMAT | edge (100) | 1055 | 2211 |
| 2212 | NETMAT | edge (100) | 1056 | 2212 |
| 2213 | NETMAT | edge (100) | 1057 | 2213 |
| 2214 | NETMAT | edge (100) | 1058 | 2214 |
| 2215 | NETMAT | edge (100) | 1059 | 2215 |
| 2216 | NETMAT | edge (100) | 1060 | 2216 |
| 2217 | NETMAT | edge (100) | 1061 | 2217 |
| 2218 | NETMAT | edge (100) | 1062 | 2218 |
| 2219 | NETMAT | edge (100) | 1063 | 2219 |
| 2220 | NETMAT | edge (100) | 1064 | 2220 |
| 2221 | NETMAT | edge (100) | 1065 | 2221 |
| 2222 | NETMAT | edge (100) | 1066 | 2222 |
| 2223 | NETMAT | edge (100) | 1067 | 2223 |
| 2224 | NETMAT | edge (100) | 1068 | 2224 |
| 2225 | NETMAT | edge (100) | 1069 | 2225 |
| 2226 | NETMAT | edge (100) | 1070 | 2226 |
| 2227 | NETMAT | edge (100) | 1071 | 2227 |
| 2228 | NETMAT | edge (100) | 1072 | 2228 |
| 2229 | NETMAT | edge (100) | 1073 | 2229 |
| 2230 | NETMAT | edge (100) | 1074 | 2230 |
| 2231 | NETMAT | edge (100) | 1075 | 2231 |
| 2232 | NETMAT | edge (100) | 1076 | 2232 |
| 2233 | NETMAT | edge (100) | 1077 | 2233 |
| 2234 | NETMAT | edge (100) | 1078 | 2234 |
| 2235 | NETMAT | edge (100) | 1079 | 2235 |
| 2236 | NETMAT | edge (100) | 1080 | 2236 |
| 2237 | NETMAT | edge (100) | 1081 | 2237 |
| 2238 | NETMAT | edge (100) | 1082 | 2238 |
| 2239 | NETMAT | edge (100) | 1083 | 2239 |
| 2240 | NETMAT | edge (100) | 1084 | 2240 |
| 2241 | NETMAT | edge (100) | 1085 | 2241 |
| 2242 | NETMAT | edge (100) | 1086 | 2242 |
| 2243 | NETMAT | edge (100) | 1087 | 2243 |
| 2244 | NETMAT | edge (100) | 1088 | 2244 |
| 2245 | NETMAT | edge (100) | 1089 | 2245 |
| 2246 | NETMAT | edge (100) | 1090 | 2246 |
| 2247 | NETMAT | edge (100) | 1091 | 2247 |
| 2248 | NETMAT | edge (100) | 1092 | 2248 |
| 2249 | NETMAT | edge (100) | 1093 | 2249 |
| 2250 | NETMAT | edge (100) | 1094 | 2250 |
| 2251 | NETMAT | edge (100) | 1095 | 2251 |
| 2252 | NETMAT | edge (100) | 1096 | 2252 |
| 2253 | NETMAT | edge (100) | 1097 | 2253 |
| 2254 | NETMAT | edge (100) | 1098 | 2254 |
| 2255 | NETMAT | edge (100) | 1099 | 2255 |
| 2256 | NETMAT | edge (100) | 1100 | 2256 |
| 2257 | NETMAT | edge (100) | 1101 | 2257 |
| 2258 | NETMAT | edge (100) | 1102 | 2258 |
| 2259 | NETMAT | edge (100) | 1103 | 2259 |
| 2260 | NETMAT | edge (100) | 1104 | 2260 |
| 2261 | NETMAT | edge (100) | 1105 | 2261 |
| 2262 | NETMAT | edge (100) | 1106 | 2262 |
| 2263 | NETMAT | edge (100) | 1107 | 2263 |
| 2264 | NETMAT | edge (100) | 1108 | 2264 |
| 2265 | NETMAT | edge (100) | 1109 | 2265 |
| 2266 | NETMAT | edge (100) | 1110 | 2266 |
| 2267 | NETMAT | edge (100) | 1111 | 2267 |
| 2268 | NETMAT | edge (100) | 1112 | 2268 |

|      |        |            |      |      |
|------|--------|------------|------|------|
| 2269 | NETMAT | edge (100) | 1113 | 2269 |
| 2270 | NETMAT | edge (100) | 1114 | 2270 |
| 2271 | NETMAT | edge (100) | 1115 | 2271 |
| 2272 | NETMAT | edge (100) | 1116 | 2272 |
| 2273 | NETMAT | edge (100) | 1117 | 2273 |
| 2274 | NETMAT | edge (100) | 1118 | 2274 |
| 2275 | NETMAT | edge (100) | 1119 | 2275 |
| 2276 | NETMAT | edge (100) | 1120 | 2276 |
| 2277 | NETMAT | edge (100) | 1121 | 2277 |
| 2278 | NETMAT | edge (100) | 1122 | 2278 |
| 2279 | NETMAT | edge (100) | 1123 | 2279 |
| 2280 | NETMAT | edge (100) | 1124 | 2280 |
| 2281 | NETMAT | edge (100) | 1125 | 2281 |
| 2282 | NETMAT | edge (100) | 1126 | 2282 |
| 2283 | NETMAT | edge (100) | 1127 | 2283 |
| 2284 | NETMAT | edge (100) | 1128 | 2284 |
| 2285 | NETMAT | edge (100) | 1129 | 2285 |
| 2286 | NETMAT | edge (100) | 1130 | 2286 |
| 2287 | NETMAT | edge (100) | 1131 | 2287 |
| 2288 | NETMAT | edge (100) | 1132 | 2288 |
| 2289 | NETMAT | edge (100) | 1133 | 2289 |
| 2290 | NETMAT | edge (100) | 1134 | 2290 |
| 2291 | NETMAT | edge (100) | 1135 | 2291 |
| 2292 | NETMAT | edge (100) | 1136 | 2292 |
| 2293 | NETMAT | edge (100) | 1137 | 2293 |
| 2294 | NETMAT | edge (100) | 1138 | 2294 |
| 2295 | NETMAT | edge (100) | 1139 | 2295 |
| 2296 | NETMAT | edge (100) | 1140 | 2296 |
| 2297 | NETMAT | edge (100) | 1141 | 2297 |
| 2298 | NETMAT | edge (100) | 1142 | 2298 |
| 2299 | NETMAT | edge (100) | 1143 | 2299 |
| 2300 | NETMAT | edge (100) | 1144 | 2300 |
| 2301 | NETMAT | edge (100) | 1145 | 2301 |
| 2302 | NETMAT | edge (100) | 1146 | 2302 |
| 2303 | NETMAT | edge (100) | 1147 | 2303 |
| 2304 | NETMAT | edge (100) | 1148 | 2304 |
| 2305 | NETMAT | edge (100) | 1149 | 2305 |
| 2306 | NETMAT | edge (100) | 1150 | 2306 |
| 2307 | NETMAT | edge (100) | 1151 | 2307 |
| 2308 | NETMAT | edge (100) | 1152 | 2308 |
| 2309 | NETMAT | edge (100) | 1153 | 2309 |
| 2310 | NETMAT | edge (100) | 1154 | 2310 |
| 2311 | NETMAT | edge (100) | 1155 | 2311 |
| 2312 | NETMAT | edge (100) | 1156 | 2312 |
| 2313 | NETMAT | edge (100) | 1157 | 2313 |
| 2314 | NETMAT | edge (100) | 1158 | 2314 |
| 2315 | NETMAT | edge (100) | 1159 | 2315 |
| 2316 | NETMAT | edge (100) | 1160 | 2316 |
| 2317 | NETMAT | edge (100) | 1161 | 2317 |
| 2318 | NETMAT | edge (100) | 1162 | 2318 |
| 2319 | NETMAT | edge (100) | 1163 | 2319 |
| 2320 | NETMAT | edge (100) | 1164 | 2320 |
| 2321 | NETMAT | edge (100) | 1165 | 2321 |
| 2322 | NETMAT | edge (100) | 1166 | 2322 |
| 2323 | NETMAT | edge (100) | 1167 | 2323 |
| 2324 | NETMAT | edge (100) | 1168 | 2324 |
| 2325 | NETMAT | edge (100) | 1169 | 2325 |
| 2326 | NETMAT | edge (100) | 1170 | 2326 |
| 2327 | NETMAT | edge (100) | 1171 | 2327 |
| 2328 | NETMAT | edge (100) | 1172 | 2328 |

|      |        |            |      |      |
|------|--------|------------|------|------|
| 2329 | NETMAT | edge (100) | 1173 | 2329 |
| 2330 | NETMAT | edge (100) | 1174 | 2330 |
| 2331 | NETMAT | edge (100) | 1175 | 2331 |
| 2332 | NETMAT | edge (100) | 1176 | 2332 |
| 2333 | NETMAT | edge (100) | 1177 | 2333 |
| 2334 | NETMAT | edge (100) | 1178 | 2334 |
| 2335 | NETMAT | edge (100) | 1179 | 2335 |
| 2336 | NETMAT | edge (100) | 1180 | 2336 |
| 2337 | NETMAT | edge (100) | 1181 | 2337 |
| 2338 | NETMAT | edge (100) | 1182 | 2338 |
| 2339 | NETMAT | edge (100) | 1183 | 2339 |
| 2340 | NETMAT | edge (100) | 1184 | 2340 |
| 2341 | NETMAT | edge (100) | 1185 | 2341 |
| 2342 | NETMAT | edge (100) | 1186 | 2342 |
| 2343 | NETMAT | edge (100) | 1187 | 2343 |
| 2344 | NETMAT | edge (100) | 1188 | 2344 |
| 2345 | NETMAT | edge (100) | 1189 | 2345 |
| 2346 | NETMAT | edge (100) | 1190 | 2346 |
| 2347 | NETMAT | edge (100) | 1191 | 2347 |
| 2348 | NETMAT | edge (100) | 1192 | 2348 |
| 2349 | NETMAT | edge (100) | 1193 | 2349 |
| 2350 | NETMAT | edge (100) | 1194 | 2350 |
| 2351 | NETMAT | edge (100) | 1195 | 2351 |
| 2352 | NETMAT | edge (100) | 1196 | 2352 |
| 2353 | NETMAT | edge (100) | 1197 | 2353 |
| 2354 | NETMAT | edge (100) | 1198 | 2354 |
| 2355 | NETMAT | edge (100) | 1199 | 2355 |
| 2356 | NETMAT | edge (100) | 1200 | 2356 |
| 2357 | NETMAT | edge (100) | 1201 | 2357 |
| 2358 | NETMAT | edge (100) | 1202 | 2358 |
| 2359 | NETMAT | edge (100) | 1203 | 2359 |
| 2360 | NETMAT | edge (100) | 1204 | 2360 |
| 2361 | NETMAT | edge (100) | 1205 | 2361 |
| 2362 | NETMAT | edge (100) | 1206 | 2362 |
| 2363 | NETMAT | edge (100) | 1207 | 2363 |
| 2364 | NETMAT | edge (100) | 1208 | 2364 |
| 2365 | NETMAT | edge (100) | 1209 | 2365 |
| 2366 | NETMAT | edge (100) | 1210 | 2366 |
| 2367 | NETMAT | edge (100) | 1211 | 2367 |
| 2368 | NETMAT | edge (100) | 1212 | 2368 |
| 2369 | NETMAT | edge (100) | 1213 | 2369 |
| 2370 | NETMAT | edge (100) | 1214 | 2370 |
| 2371 | NETMAT | edge (100) | 1215 | 2371 |
| 2372 | NETMAT | edge (100) | 1216 | 2372 |
| 2373 | NETMAT | edge (100) | 1217 | 2373 |
| 2374 | NETMAT | edge (100) | 1218 | 2374 |
| 2375 | NETMAT | edge (100) | 1219 | 2375 |
| 2376 | NETMAT | edge (100) | 1220 | 2376 |
| 2377 | NETMAT | edge (100) | 1221 | 2377 |
| 2378 | NETMAT | edge (100) | 1222 | 2378 |
| 2379 | NETMAT | edge (100) | 1223 | 2379 |
| 2380 | NETMAT | edge (100) | 1224 | 2380 |
| 2381 | NETMAT | edge (100) | 1225 | 2381 |
| 2382 | NETMAT | edge (100) | 1226 | 2382 |
| 2383 | NETMAT | edge (100) | 1227 | 2383 |
| 2384 | NETMAT | edge (100) | 1228 | 2384 |
| 2385 | NETMAT | edge (100) | 1229 | 2385 |
| 2386 | NETMAT | edge (100) | 1230 | 2386 |
| 2387 | NETMAT | edge (100) | 1231 | 2387 |
| 2388 | NETMAT | edge (100) | 1232 | 2388 |

|      |        |            |      |      |
|------|--------|------------|------|------|
| 2389 | NETMAT | edge (100) | 1233 | 2389 |
| 2390 | NETMAT | edge (100) | 1234 | 2390 |
| 2391 | NETMAT | edge (100) | 1235 | 2391 |
| 2392 | NETMAT | edge (100) | 1236 | 2392 |
| 2393 | NETMAT | edge (100) | 1237 | 2393 |
| 2394 | NETMAT | edge (100) | 1238 | 2394 |
| 2395 | NETMAT | edge (100) | 1239 | 2395 |
| 2396 | NETMAT | edge (100) | 1240 | 2396 |
| 2397 | NETMAT | edge (100) | 1241 | 2397 |
| 2398 | NETMAT | edge (100) | 1242 | 2398 |
| 2399 | NETMAT | edge (100) | 1243 | 2399 |
| 2400 | NETMAT | edge (100) | 1244 | 2400 |
| 2401 | NETMAT | edge (100) | 1245 | 2401 |
| 2402 | NETMAT | edge (100) | 1246 | 2402 |
| 2403 | NETMAT | edge (100) | 1247 | 2403 |
| 2404 | NETMAT | edge (100) | 1248 | 2404 |
| 2405 | NETMAT | edge (100) | 1249 | 2405 |
| 2406 | NETMAT | edge (100) | 1250 | 2406 |
| 2407 | NETMAT | edge (100) | 1251 | 2407 |
| 2408 | NETMAT | edge (100) | 1252 | 2408 |
| 2409 | NETMAT | edge (100) | 1253 | 2409 |
| 2410 | NETMAT | edge (100) | 1254 | 2410 |
| 2411 | NETMAT | edge (100) | 1255 | 2411 |
| 2412 | NETMAT | edge (100) | 1256 | 2412 |
| 2413 | NETMAT | edge (100) | 1257 | 2413 |
| 2414 | NETMAT | edge (100) | 1258 | 2414 |
| 2415 | NETMAT | edge (100) | 1259 | 2415 |
| 2416 | NETMAT | edge (100) | 1260 | 2416 |
| 2417 | NETMAT | edge (100) | 1261 | 2417 |
| 2418 | NETMAT | edge (100) | 1262 | 2418 |
| 2419 | NETMAT | edge (100) | 1263 | 2419 |
| 2420 | NETMAT | edge (100) | 1264 | 2420 |
| 2421 | NETMAT | edge (100) | 1265 | 2421 |
| 2422 | NETMAT | edge (100) | 1266 | 2422 |
| 2423 | NETMAT | edge (100) | 1267 | 2423 |
| 2424 | NETMAT | edge (100) | 1268 | 2424 |
| 2425 | NETMAT | edge (100) | 1269 | 2425 |
| 2426 | NETMAT | edge (100) | 1270 | 2426 |
| 2427 | NETMAT | edge (100) | 1271 | 2427 |
| 2428 | NETMAT | edge (100) | 1272 | 2428 |
| 2429 | NETMAT | edge (100) | 1273 | 2429 |
| 2430 | NETMAT | edge (100) | 1274 | 2430 |
| 2431 | NETMAT | edge (100) | 1275 | 2431 |
| 2432 | NETMAT | edge (100) | 1276 | 2432 |
| 2433 | NETMAT | edge (100) | 1277 | 2433 |
| 2434 | NETMAT | edge (100) | 1278 | 2434 |
| 2435 | NETMAT | edge (100) | 1279 | 2435 |
| 2436 | NETMAT | edge (100) | 1280 | 2436 |
| 2437 | NETMAT | edge (100) | 1281 | 2437 |
| 2438 | NETMAT | edge (100) | 1282 | 2438 |
| 2439 | NETMAT | edge (100) | 1283 | 2439 |
| 2440 | NETMAT | edge (100) | 1284 | 2440 |
| 2441 | NETMAT | edge (100) | 1285 | 2441 |
| 2442 | NETMAT | edge (100) | 1286 | 2442 |
| 2443 | NETMAT | edge (100) | 1287 | 2443 |
| 2444 | NETMAT | edge (100) | 1288 | 2444 |
| 2445 | NETMAT | edge (100) | 1289 | 2445 |
| 2446 | NETMAT | edge (100) | 1290 | 2446 |
| 2447 | NETMAT | edge (100) | 1291 | 2447 |
| 2448 | NETMAT | edge (100) | 1292 | 2448 |

|      |        |            |      |      |
|------|--------|------------|------|------|
| 2449 | NETMAT | edge (100) | 1293 | 2449 |
| 2450 | NETMAT | edge (100) | 1294 | 2450 |
| 2451 | NETMAT | edge (100) | 1295 | 2451 |
| 2452 | NETMAT | edge (100) | 1296 | 2452 |
| 2453 | NETMAT | edge (100) | 1297 | 2453 |
| 2454 | NETMAT | edge (100) | 1298 | 2454 |
| 2455 | NETMAT | edge (100) | 1299 | 2455 |
| 2456 | NETMAT | edge (100) | 1300 | 2456 |
| 2457 | NETMAT | edge (100) | 1301 | 2457 |
| 2458 | NETMAT | edge (100) | 1302 | 2458 |
| 2459 | NETMAT | edge (100) | 1303 | 2459 |
| 2460 | NETMAT | edge (100) | 1304 | 2460 |
| 2461 | NETMAT | edge (100) | 1305 | 2461 |
| 2462 | NETMAT | edge (100) | 1306 | 2462 |
| 2463 | NETMAT | edge (100) | 1307 | 2463 |
| 2464 | NETMAT | edge (100) | 1308 | 2464 |
| 2465 | NETMAT | edge (100) | 1309 | 2465 |
| 2466 | NETMAT | edge (100) | 1310 | 2466 |
| 2467 | NETMAT | edge (100) | 1311 | 2467 |
| 2468 | NETMAT | edge (100) | 1312 | 2468 |
| 2469 | NETMAT | edge (100) | 1313 | 2469 |
| 2470 | NETMAT | edge (100) | 1314 | 2470 |
| 2471 | NETMAT | edge (100) | 1315 | 2471 |
| 2472 | NETMAT | edge (100) | 1316 | 2472 |
| 2473 | NETMAT | edge (100) | 1317 | 2473 |
| 2474 | NETMAT | edge (100) | 1318 | 2474 |
| 2475 | NETMAT | edge (100) | 1319 | 2475 |
| 2476 | NETMAT | edge (100) | 1320 | 2476 |
| 2477 | NETMAT | edge (100) | 1321 | 2477 |
| 2478 | NETMAT | edge (100) | 1322 | 2478 |
| 2479 | NETMAT | edge (100) | 1323 | 2479 |
| 2480 | NETMAT | edge (100) | 1324 | 2480 |
| 2481 | NETMAT | edge (100) | 1325 | 2481 |
| 2482 | NETMAT | edge (100) | 1326 | 2482 |
| 2483 | NETMAT | edge (100) | 1327 | 2483 |
| 2484 | NETMAT | edge (100) | 1328 | 2484 |
| 2485 | NETMAT | edge (100) | 1329 | 2485 |
| 2486 | NETMAT | edge (100) | 1330 | 2486 |
| 2487 | NETMAT | edge (100) | 1331 | 2487 |
| 2488 | NETMAT | edge (100) | 1332 | 2488 |
| 2489 | NETMAT | edge (100) | 1333 | 2489 |
| 2490 | NETMAT | edge (100) | 1334 | 2490 |
| 2491 | NETMAT | edge (100) | 1335 | 2491 |
| 2492 | NETMAT | edge (100) | 1336 | 2492 |
| 2493 | NETMAT | edge (100) | 1337 | 2493 |
| 2494 | NETMAT | edge (100) | 1338 | 2494 |
| 2495 | NETMAT | edge (100) | 1339 | 2495 |
| 2496 | NETMAT | edge (100) | 1340 | 2496 |
| 2497 | NETMAT | edge (100) | 1341 | 2497 |
| 2498 | NETMAT | edge (100) | 1342 | 2498 |
| 2499 | NETMAT | edge (100) | 1343 | 2499 |
| 2500 | NETMAT | edge (100) | 1344 | 2500 |
| 2501 | NETMAT | edge (100) | 1345 | 2501 |
| 2502 | NETMAT | edge (100) | 1346 | 2502 |
| 2503 | NETMAT | edge (100) | 1347 | 2503 |
| 2504 | NETMAT | edge (100) | 1348 | 2504 |
| 2505 | NETMAT | edge (100) | 1349 | 2505 |
| 2506 | NETMAT | edge (100) | 1350 | 2506 |
| 2507 | NETMAT | edge (100) | 1351 | 2507 |
| 2508 | NETMAT | edge (100) | 1352 | 2508 |



|      |        |            |      |      |
|------|--------|------------|------|------|
| 2509 | NETMAT | edge (100) | 1353 | 2509 |
| 2510 | NETMAT | edge (100) | 1354 | 2510 |
| 2511 | NETMAT | edge (100) | 1355 | 2511 |
| 2512 | NETMAT | edge (100) | 1356 | 2512 |
| 2513 | NETMAT | edge (100) | 1357 | 2513 |
| 2514 | NETMAT | edge (100) | 1358 | 2514 |
| 2515 | NETMAT | edge (100) | 1359 | 2515 |
| 2516 | NETMAT | edge (100) | 1360 | 2516 |
| 2517 | NETMAT | edge (100) | 1361 | 2517 |
| 2518 | NETMAT | edge (100) | 1362 | 2518 |
| 2519 | NETMAT | edge (100) | 1363 | 2519 |
| 2520 | NETMAT | edge (100) | 1364 | 2520 |
| 2521 | NETMAT | edge (100) | 1365 | 2521 |
| 2522 | NETMAT | edge (100) | 1366 | 2522 |
| 2523 | NETMAT | edge (100) | 1367 | 2523 |
| 2524 | NETMAT | edge (100) | 1368 | 2524 |
| 2525 | NETMAT | edge (100) | 1369 | 2525 |
| 2526 | NETMAT | edge (100) | 1370 | 2526 |
| 2527 | NETMAT | edge (100) | 1371 | 2527 |
| 2528 | NETMAT | edge (100) | 1372 | 2528 |
| 2529 | NETMAT | edge (100) | 1373 | 2529 |
| 2530 | NETMAT | edge (100) | 1374 | 2530 |
| 2531 | NETMAT | edge (100) | 1375 | 2531 |
| 2532 | NETMAT | edge (100) | 1376 | 2532 |
| 2533 | NETMAT | edge (100) | 1377 | 2533 |
| 2534 | NETMAT | edge (100) | 1378 | 2534 |
| 2535 | NETMAT | edge (100) | 1379 | 2535 |
| 2536 | NETMAT | edge (100) | 1380 | 2536 |
| 2537 | NETMAT | edge (100) | 1381 | 2537 |
| 2538 | NETMAT | edge (100) | 1382 | 2538 |
| 2539 | NETMAT | edge (100) | 1383 | 2539 |
| 2540 | NETMAT | edge (100) | 1384 | 2540 |
| 2541 | NETMAT | edge (100) | 1385 | 2541 |
| 2542 | NETMAT | edge (100) | 1386 | 2542 |
| 2543 | NETMAT | edge (100) | 1387 | 2543 |
| 2544 | NETMAT | edge (100) | 1388 | 2544 |
| 2545 | NETMAT | edge (100) | 1389 | 2545 |
| 2546 | NETMAT | edge (100) | 1390 | 2546 |
| 2547 | NETMAT | edge (100) | 1391 | 2547 |
| 2548 | NETMAT | edge (100) | 1392 | 2548 |
| 2549 | NETMAT | edge (100) | 1393 | 2549 |
| 2550 | NETMAT | edge (100) | 1394 | 2550 |
| 2551 | NETMAT | edge (100) | 1395 | 2551 |
| 2552 | NETMAT | edge (100) | 1396 | 2552 |
| 2553 | NETMAT | edge (100) | 1397 | 2553 |
| 2554 | NETMAT | edge (100) | 1398 | 2554 |
| 2555 | NETMAT | edge (100) | 1399 | 2555 |
| 2556 | NETMAT | edge (100) | 1400 | 2556 |
| 2557 | NETMAT | edge (100) | 1401 | 2557 |
| 2558 | NETMAT | edge (100) | 1402 | 2558 |
| 2559 | NETMAT | edge (100) | 1403 | 2559 |
| 2560 | NETMAT | edge (100) | 1404 | 2560 |
| 2561 | NETMAT | edge (100) | 1405 | 2561 |
| 2562 | NETMAT | edge (100) | 1406 | 2562 |
| 2563 | NETMAT | edge (100) | 1407 | 2563 |
| 2564 | NETMAT | edge (100) | 1408 | 2564 |
| 2565 | NETMAT | edge (100) | 1409 | 2565 |
| 2566 | NETMAT | edge (100) | 1410 | 2566 |
| 2567 | NETMAT | edge (100) | 1411 | 2567 |
| 2568 | NETMAT | edge (100) | 1412 | 2568 |

|      |        |            |      |      |
|------|--------|------------|------|------|
| 2569 | NETMAT | edge (100) | 1413 | 2569 |
| 2570 | NETMAT | edge (100) | 1414 | 2570 |
| 2571 | NETMAT | edge (100) | 1415 | 2571 |
| 2572 | NETMAT | edge (100) | 1416 | 2572 |
| 2573 | NETMAT | edge (100) | 1417 | 2573 |
| 2574 | NETMAT | edge (100) | 1418 | 2574 |
| 2575 | NETMAT | edge (100) | 1419 | 2575 |
| 2576 | NETMAT | edge (100) | 1420 | 2576 |
| 2577 | NETMAT | edge (100) | 1421 | 2577 |
| 2578 | NETMAT | edge (100) | 1422 | 2578 |
| 2579 | NETMAT | edge (100) | 1423 | 2579 |
| 2580 | NETMAT | edge (100) | 1424 | 2580 |
| 2581 | NETMAT | edge (100) | 1425 | 2581 |
| 2582 | NETMAT | edge (100) | 1426 | 2582 |
| 2583 | NETMAT | edge (100) | 1427 | 2583 |
| 2584 | NETMAT | edge (100) | 1428 | 2584 |
| 2585 | NETMAT | edge (100) | 1429 | 2585 |
| 2586 | NETMAT | edge (100) | 1430 | 2586 |
| 2587 | NETMAT | edge (100) | 1431 | 2587 |
| 2588 | NETMAT | edge (100) | 1432 | 2588 |
| 2589 | NETMAT | edge (100) | 1433 | 2589 |
| 2590 | NETMAT | edge (100) | 1434 | 2590 |
| 2591 | NETMAT | edge (100) | 1435 | 2591 |
| 2592 | NETMAT | edge (100) | 1436 | 2592 |
| 2593 | NETMAT | edge (100) | 1437 | 2593 |
| 2594 | NETMAT | edge (100) | 1438 | 2594 |
| 2595 | NETMAT | edge (100) | 1439 | 2595 |
| 2596 | NETMAT | edge (100) | 1440 | 2596 |
| 2597 | NETMAT | edge (100) | 1441 | 2597 |
| 2598 | NETMAT | edge (100) | 1442 | 2598 |
| 2599 | NETMAT | edge (100) | 1443 | 2599 |
| 2600 | NETMAT | edge (100) | 1444 | 2600 |
| 2601 | NETMAT | edge (100) | 1445 | 2601 |
| 2602 | NETMAT | edge (100) | 1446 | 2602 |
| 2603 | NETMAT | edge (100) | 1447 | 2603 |
| 2604 | NETMAT | edge (100) | 1448 | 2604 |
| 2605 | NETMAT | edge (100) | 1449 | 2605 |
| 2606 | NETMAT | edge (100) | 1450 | 2606 |
| 2607 | NETMAT | edge (100) | 1451 | 2607 |
| 2608 | NETMAT | edge (100) | 1452 | 2608 |
| 2609 | NETMAT | edge (100) | 1453 | 2609 |
| 2610 | NETMAT | edge (100) | 1454 | 2610 |
| 2611 | NETMAT | edge (100) | 1455 | 2611 |
| 2612 | NETMAT | edge (100) | 1456 | 2612 |
| 2613 | NETMAT | edge (100) | 1457 | 2613 |
| 2614 | NETMAT | edge (100) | 1458 | 2614 |
| 2615 | NETMAT | edge (100) | 1459 | 2615 |
| 2616 | NETMAT | edge (100) | 1460 | 2616 |
| 2617 | NETMAT | edge (100) | 1461 | 2617 |
| 2618 | NETMAT | edge (100) | 1462 | 2618 |
| 2619 | NETMAT | edge (100) | 1463 | 2619 |
| 2620 | NETMAT | edge (100) | 1464 | 2620 |
| 2621 | NETMAT | edge (100) | 1465 | 2621 |
| 2622 | NETMAT | edge (100) | 1466 | 2622 |
| 2623 | NETMAT | edge (100) | 1467 | 2623 |
| 2624 | NETMAT | edge (100) | 1468 | 2624 |
| 2625 | NETMAT | edge (100) | 1469 | 2625 |
| 2626 | NETMAT | edge (100) | 1470 | 2626 |
| 2627 | NETMAT | edge (100) | 1471 | 2627 |
| 2628 | NETMAT | edge (100) | 1472 | 2628 |

|      |                                                 |      |
|------|-------------------------------------------------|------|
| 2629 | NETMAT edge (100) 1473                          | 2629 |
| 2630 | NETMAT edge (100) 1474                          | 2630 |
| 2631 | NETMAT edge (100) 1475                          | 2631 |
| 2632 | NETMAT edge (100) 1476                          | 2632 |
| 2633 | NETMAT edge (100) 1477                          | 2633 |
| 2634 | NETMAT edge (100) 1478                          | 2634 |
| 2635 | NETMAT edge (100) 1479                          | 2635 |
| 2636 | NETMAT edge (100) 1480                          | 2636 |
| 2637 | NETMAT edge (100) 1481                          | 2637 |
| 2638 | NETMAT edge (100) 1482                          | 2638 |
| 2639 | NETMAT edge (100) 1483                          | 2639 |
| 2640 | NETMAT edge (100) 1484                          | 2640 |
| 2641 | NETMAT edge (100) 1485                          | 2641 |
| 2642 | T1 FIRST left plus right thalamus volume        | 2642 |
| 2643 | T1 FIRST left plus right caudate volume         | 2643 |
| 2644 | T1 FIRST left plus right putamen volume         | 2644 |
| 2645 | T1 FIRST left plus right pallidum volume        | 2645 |
| 2646 | T1 FIRST left plus right hippocampus volume     | 2646 |
| 2647 | T1 FIRST left plus right amygdala volume        | 2647 |
| 2648 | T1 FIRST left plus right accumbens volume       | 2648 |
| 2649 | SWI T2star left plus right thalamus             | 2649 |
| 2650 | SWI T2star left plus right caudate              | 2650 |
| 2651 | SWI T2star left plus right putamen              | 2651 |
| 2652 | SWI T2star left plus right pallidum             | 2652 |
| 2653 | SWI T2star left plus right hippocampus          | 2653 |
| 2654 | SWI T2star left plus right amygdala             | 2654 |
| 2655 | SWI T2star left plus right accumbens            | 2655 |
| 2656 | FreeSurfer volume Left-Lateral-Ventricle        | 2656 |
| 2657 | FreeSurfer volume Left-Inf-Lat-Vent             | 2657 |
| 2658 | FreeSurfer volume Left-Cerebellum-White-Matter  | 2658 |
| 2659 | FreeSurfer volume Left-Cerebellum-Cortex        | 2659 |
| 2660 | FreeSurfer volume Left-Thalamus-Proper          | 2660 |
| 2661 | FreeSurfer volume Left-Caudate                  | 2661 |
| 2662 | FreeSurfer volume Left-Putamen                  | 2662 |
| 2663 | FreeSurfer volume Left-Pallidum                 | 2663 |
| 2664 | FreeSurfer volume 3rd-Ventricle                 | 2664 |
| 2665 | FreeSurfer volume 4th-Ventricle                 | 2665 |
| 2666 | FreeSurfer volume Brain-Stem                    | 2666 |
| 2667 | FreeSurfer volume Left-Hippocampus              | 2667 |
| 2668 | FreeSurfer volume Left-Amygdala                 | 2668 |
| 2669 | FreeSurfer volume CSF                           | 2669 |
| 2670 | FreeSurfer volume Left-Accumbens-area           | 2670 |
| 2671 | FreeSurfer volume Left-VentralDC                | 2671 |
| 2672 | FreeSurfer volume Left-vessel                   | 2672 |
| 2673 | FreeSurfer volume Left-choroid-plexus           | 2673 |
| 2674 | FreeSurfer volume Right-Lateral-Ventricle       | 2674 |
| 2675 | FreeSurfer volume Right-Inf-Lat-Vent            | 2675 |
| 2676 | FreeSurfer volume Right-Cerebellum-White-Matter | 2676 |
| 2677 | FreeSurfer volume Right-Cerebellum-Cortex       | 2677 |
| 2678 | FreeSurfer volume Right-Thalamus-Proper         | 2678 |
| 2679 | FreeSurfer volume Right-Caudate                 | 2679 |
| 2680 | FreeSurfer volume Right-Putamen                 | 2680 |
| 2681 | FreeSurfer volume Right-Pallidum                | 2681 |
| 2682 | FreeSurfer volume Right-Hippocampus             | 2682 |
| 2683 | FreeSurfer volume Right-Amygdala                | 2683 |
| 2684 | FreeSurfer volume Right-Accumbens-area          | 2684 |
| 2685 | FreeSurfer volume Right-VentralDC               | 2685 |
| 2686 | FreeSurfer volume Right-vessel                  | 2686 |
| 2687 | FreeSurfer volume Right-choroid-plexus          | 2687 |
| 2688 | FreeSurfer volume Optic-Chiasm                  | 2688 |

|      |                                                      |      |
|------|------------------------------------------------------|------|
| 2689 | FreeSurfer volume CC Posterior                       | 2689 |
| 2690 | FreeSurfer volume CC Mid Posterior                   | 2690 |
| 2691 | FreeSurfer volume CC Central                         | 2691 |
| 2692 | FreeSurfer volume CC Mid Anterior                    | 2692 |
| 2693 | FreeSurfer volume CC Anterior                        | 2693 |
| 2694 | FreeSurfer volume BrainSegVol                        | 2694 |
| 2695 | FreeSurfer volume BrainSegVolNotVent                 | 2695 |
| 2696 | FreeSurfer volume BrainSegVolNotVentSurf             | 2696 |
| 2697 | FreeSurfer volume lhCortexVol                        | 2697 |
| 2698 | FreeSurfer volume rhCortexVol                        | 2698 |
| 2699 | FreeSurfer volume CortexVol                          | 2699 |
| 2700 | FreeSurfer volume lhCerebralWhiteMatterVol           | 2700 |
| 2701 | FreeSurfer volume rhCerebralWhiteMatterVol           | 2701 |
| 2702 | FreeSurfer volume CerebralWhiteMatterVol             | 2702 |
| 2703 | FreeSurfer volume SubCortGrayVol                     | 2703 |
| 2704 | FreeSurfer volume TotalGrayVol                       | 2704 |
| 2705 | FreeSurfer volume SupraTentorialVol                  | 2705 |
| 2706 | FreeSurfer volume SupraTentorialVolNotVent           | 2706 |
| 2707 | FreeSurfer volume SupraTentorialVolNotVentVox        | 2707 |
| 2708 | FreeSurfer volume MaskVol                            | 2708 |
| 2709 | FreeSurfer volume BrainSegVol-to-eTIV                | 2709 |
| 2710 | FreeSurfer volume MaskVol-to-eTIV                    | 2710 |
| 2711 | FreeSurfer volume lhSurfaceHoles                     | 2711 |
| 2712 | FreeSurfer volume rhSurfaceHoles                     | 2712 |
| 2713 | FreeSurfer volume SurfaceHoles                       | 2713 |
| 2714 | FreeSurfer volume EstimatedTotalIntraCranialVol      | 2714 |
| 2715 | FreeSurfer DKTatlas lh caudalanteriorcingulate area  | 2715 |
| 2716 | FreeSurfer DKTatlas lh caudalmiddlefrontal area      | 2716 |
| 2717 | FreeSurfer DKTatlas lh cuneus area                   | 2717 |
| 2718 | FreeSurfer DKTatlas lh entorhinal area               | 2718 |
| 2719 | FreeSurfer DKTatlas lh fusiform area                 | 2719 |
| 2720 | FreeSurfer DKTatlas lh inferiorparietal area         | 2720 |
| 2721 | FreeSurfer DKTatlas lh inferiortemporal area         | 2721 |
| 2722 | FreeSurfer DKTatlas lh isthmuscingulate area         | 2722 |
| 2723 | FreeSurfer DKTatlas lh lateraloccipital area         | 2723 |
| 2724 | FreeSurfer DKTatlas lh lateralorbitofrontal area     | 2724 |
| 2725 | FreeSurfer DKTatlas lh lingual area                  | 2725 |
| 2726 | FreeSurfer DKTatlas lh medialorbitofrontal area      | 2726 |
| 2727 | FreeSurfer DKTatlas lh middletemporal area           | 2727 |
| 2728 | FreeSurfer DKTatlas lh parahippocampal area          | 2728 |
| 2729 | FreeSurfer DKTatlas lh paracentral area              | 2729 |
| 2730 | FreeSurfer DKTatlas lh parsopercularis area          | 2730 |
| 2731 | FreeSurfer DKTatlas lh parsorbitalis area            | 2731 |
| 2732 | FreeSurfer DKTatlas lh parstriangularis area         | 2732 |
| 2733 | FreeSurfer DKTatlas lh pericalcarine area            | 2733 |
| 2734 | FreeSurfer DKTatlas lh postcentral area              | 2734 |
| 2735 | FreeSurfer DKTatlas lh posteriorcingulate area       | 2735 |
| 2736 | FreeSurfer DKTatlas lh precentral area               | 2736 |
| 2737 | FreeSurfer DKTatlas lh precuneus area                | 2737 |
| 2738 | FreeSurfer DKTatlas lh rostralanteriorcingulate area | 2738 |
| 2739 | FreeSurfer DKTatlas lh rostralmiddlefrontal area     | 2739 |
| 2740 | FreeSurfer DKTatlas lh superiorfrontal area          | 2740 |
| 2741 | FreeSurfer DKTatlas lh superiorparietal area         | 2741 |
| 2742 | FreeSurfer DKTatlas lh superiortemporal area         | 2742 |
| 2743 | FreeSurfer DKTatlas lh supramarginal area            | 2743 |
| 2744 | FreeSurfer DKTatlas lh transversetemporal area       | 2744 |
| 2745 | FreeSurfer DKTatlas lh insula area                   | 2745 |
| 2746 | FreeSurfer DKTatlas lh WhiteSurfArea area            | 2746 |
| 2747 | FreeSurfer a2009s lh G and S frontomargin area       | 2747 |
| 2748 | FreeSurfer a2009s lh G and S occipital inf area      | 2748 |

|      |                                                     |      |
|------|-----------------------------------------------------|------|
| 2749 | FreeSurfer a2009s lh G and S paracentral area       | 2749 |
| 2750 | FreeSurfer a2009s lh G and S subcentral area        | 2750 |
| 2751 | FreeSurfer a2009s lh G and S transv frontopol area  | 2751 |
| 2752 | FreeSurfer a2009s lh G and S cingul-Ant area        | 2752 |
| 2753 | FreeSurfer a2009s lh G and S cingul-Mid-Ant area    | 2753 |
| 2754 | FreeSurfer a2009s lh G and S cingul-Mid-Post area   | 2754 |
| 2755 | FreeSurfer a2009s lh G cingul-Post-dorsal area      | 2755 |
| 2756 | FreeSurfer a2009s lh G cingul-Post-ventral area     | 2756 |
| 2757 | FreeSurfer a2009s lh G cuneus area                  | 2757 |
| 2758 | FreeSurfer a2009s lh G front inf-Opercular area     | 2758 |
| 2759 | FreeSurfer a2009s lh G front inf-Orbital area       | 2759 |
| 2760 | FreeSurfer a2009s lh G front inf-Triangul area      | 2760 |
| 2761 | FreeSurfer a2009s lh G front middle area            | 2761 |
| 2762 | FreeSurfer a2009s lh G front sup area               | 2762 |
| 2763 | FreeSurfer a2009s lh G Ins lg and S cent ins area   | 2763 |
| 2764 | FreeSurfer a2009s lh G insular short area           | 2764 |
| 2765 | FreeSurfer a2009s lh G occipital middle area        | 2765 |
| 2766 | FreeSurfer a2009s lh G occipital sup area           | 2766 |
| 2767 | FreeSurfer a2009s lh G oc-temp lat-fusifor area     | 2767 |
| 2768 | FreeSurfer a2009s lh G oc-temp med-Lingual area     | 2768 |
| 2769 | FreeSurfer a2009s lh G oc-temp med-Parahip area     | 2769 |
| 2770 | FreeSurfer a2009s lh G orbital area                 | 2770 |
| 2771 | FreeSurfer a2009s lh G pariet inf-Angular area      | 2771 |
| 2772 | FreeSurfer a2009s lh G pariet inf-Supramar area     | 2772 |
| 2773 | FreeSurfer a2009s lh G parietal sup area            | 2773 |
| 2774 | FreeSurfer a2009s lh G postcentral area             | 2774 |
| 2775 | FreeSurfer a2009s lh G precentral area              | 2775 |
| 2776 | FreeSurfer a2009s lh G precuneus area               | 2776 |
| 2777 | FreeSurfer a2009s lh G rectus area                  | 2777 |
| 2778 | FreeSurfer a2009s lh G subcallosal area             | 2778 |
| 2779 | FreeSurfer a2009s lh G temp sup-G T transv area     | 2779 |
| 2780 | FreeSurfer a2009s lh G temp sup-Lateral area        | 2780 |
| 2781 | FreeSurfer a2009s lh G temp sup-Plan polar area     | 2781 |
| 2782 | FreeSurfer a2009s lh G temp sup-Plan tempo area     | 2782 |
| 2783 | FreeSurfer a2009s lh G temporal inf area            | 2783 |
| 2784 | FreeSurfer a2009s lh G temporal middle area         | 2784 |
| 2785 | FreeSurfer a2009s lh Lat Fis-ant-Horizont area      | 2785 |
| 2786 | FreeSurfer a2009s lh Lat Fis-ant-Vertical area      | 2786 |
| 2787 | FreeSurfer a2009s lh Lat Fis-post area              | 2787 |
| 2788 | FreeSurfer a2009s lh Pole occipital area            | 2788 |
| 2789 | FreeSurfer a2009s lh Pole temporal area             | 2789 |
| 2790 | FreeSurfer a2009s lh S calcarine area               | 2790 |
| 2791 | FreeSurfer a2009s lh S central area                 | 2791 |
| 2792 | FreeSurfer a2009s lh S cingul-Marginalis area       | 2792 |
| 2793 | FreeSurfer a2009s lh S circular insula ant area     | 2793 |
| 2794 | FreeSurfer a2009s lh S circular insula inf area     | 2794 |
| 2795 | FreeSurfer a2009s lh S circular insula sup area     | 2795 |
| 2796 | FreeSurfer a2009s lh S collat transv ant area       | 2796 |
| 2797 | FreeSurfer a2009s lh S collat transv post area      | 2797 |
| 2798 | FreeSurfer a2009s lh S front inf area               | 2798 |
| 2799 | FreeSurfer a2009s lh S front middle area            | 2799 |
| 2800 | FreeSurfer a2009s lh S front sup area               | 2800 |
| 2801 | FreeSurfer a2009s lh S interm prim-Jensen area      | 2801 |
| 2802 | FreeSurfer a2009s lh S intrapariet and P trans area | 2802 |
| 2803 | FreeSurfer a2009s lh S oc middle and Lunatus area   | 2803 |
| 2804 | FreeSurfer a2009s lh S oc sup and transversal area  | 2804 |
| 2805 | FreeSurfer a2009s lh S occipital ant area           | 2805 |
| 2806 | FreeSurfer a2009s lh S oc-temp lat area             | 2806 |
| 2807 | FreeSurfer a2009s lh S oc-temp med and Lingual area | 2807 |
| 2808 | FreeSurfer a2009s lh S orbital lateral area         | 2808 |

|      |                                                      |      |
|------|------------------------------------------------------|------|
| 2809 | FreeSurfer a2009s lh S orbital med-olfact area       | 2809 |
| 2810 | FreeSurfer a2009s lh S orbital-H Shaped area         | 2810 |
| 2811 | FreeSurfer a2009s lh S parieto occipital area        | 2811 |
| 2812 | FreeSurfer a2009s lh S pericallosal area             | 2812 |
| 2813 | FreeSurfer a2009s lh S postcentral area              | 2813 |
| 2814 | FreeSurfer a2009s lh S precentral-inf-part area      | 2814 |
| 2815 | FreeSurfer a2009s lh S precentral-sup-part area      | 2815 |
| 2816 | FreeSurfer a2009s lh S suborbital area               | 2816 |
| 2817 | FreeSurfer a2009s lh S subparietal area              | 2817 |
| 2818 | FreeSurfer a2009s lh S temporal inf area             | 2818 |
| 2819 | FreeSurfer a2009s lh S temporal sup area             | 2819 |
| 2820 | FreeSurfer a2009s lh S temporal transverse area      | 2820 |
| 2821 | FreeSurfer DKTatlas rh caudalanteriorcingulate area  | 2821 |
| 2822 | FreeSurfer DKTatlas rh caudalmiddlefrontal area      | 2822 |
| 2823 | FreeSurfer DKTatlas rh cuneus area                   | 2823 |
| 2824 | FreeSurfer DKTatlas rh entorhinal area               | 2824 |
| 2825 | FreeSurfer DKTatlas rh fusiform area                 | 2825 |
| 2826 | FreeSurfer DKTatlas rh inferiorparietal area         | 2826 |
| 2827 | FreeSurfer DKTatlas rh inferiortemporal area         | 2827 |
| 2828 | FreeSurfer DKTatlas rh isthmuscingulate area         | 2828 |
| 2829 | FreeSurfer DKTatlas rh lateraloccipital area         | 2829 |
| 2830 | FreeSurfer DKTatlas rh lateralorbitofrontal area     | 2830 |
| 2831 | FreeSurfer DKTatlas rh lingual area                  | 2831 |
| 2832 | FreeSurfer DKTatlas rh medialorbitofrontal area      | 2832 |
| 2833 | FreeSurfer DKTatlas rh middletemporal area           | 2833 |
| 2834 | FreeSurfer DKTatlas rh parahippocampal area          | 2834 |
| 2835 | FreeSurfer DKTatlas rh paracentral area              | 2835 |
| 2836 | FreeSurfer DKTatlas rh parsopercularis area          | 2836 |
| 2837 | FreeSurfer DKTatlas rh parsorbitalis area            | 2837 |
| 2838 | FreeSurfer DKTatlas rh parstriangularis area         | 2838 |
| 2839 | FreeSurfer DKTatlas rh pericalcarine area            | 2839 |
| 2840 | FreeSurfer DKTatlas rh postcentral area              | 2840 |
| 2841 | FreeSurfer DKTatlas rh posteriorcingulate area       | 2841 |
| 2842 | FreeSurfer DKTatlas rh precentral area               | 2842 |
| 2843 | FreeSurfer DKTatlas rh precuneus area                | 2843 |
| 2844 | FreeSurfer DKTatlas rh rostralanteriorcingulate area | 2844 |
| 2845 | FreeSurfer DKTatlas rh rostralmiddlefrontal area     | 2845 |
| 2846 | FreeSurfer DKTatlas rh superiorfrontal area          | 2846 |
| 2847 | FreeSurfer DKTatlas rh superiorparietal area         | 2847 |
| 2848 | FreeSurfer DKTatlas rh superiortemporal area         | 2848 |
| 2849 | FreeSurfer DKTatlas rh supramarginal area            | 2849 |
| 2850 | FreeSurfer DKTatlas rh transversetemporal area       | 2850 |
| 2851 | FreeSurfer DKTatlas rh insula area                   | 2851 |
| 2852 | FreeSurfer DKTatlas rh WhiteSurfArea area            | 2852 |
| 2853 | FreeSurfer a2009s rh G and S frontomargin area       | 2853 |
| 2854 | FreeSurfer a2009s rh G and S occipital inf area      | 2854 |
| 2855 | FreeSurfer a2009s rh G and S paracentral area        | 2855 |
| 2856 | FreeSurfer a2009s rh G and S subcentral area         | 2856 |
| 2857 | FreeSurfer a2009s rh G and S transv frontopol area   | 2857 |
| 2858 | FreeSurfer a2009s rh G and S cingul-Ant area         | 2858 |
| 2859 | FreeSurfer a2009s rh G and S cingul-Mid-Ant area     | 2859 |
| 2860 | FreeSurfer a2009s rh G and S cingul-Mid-Post area    | 2860 |
| 2861 | FreeSurfer a2009s rh G cingul-Post-dorsal area       | 2861 |
| 2862 | FreeSurfer a2009s rh G cingul-Post-ventral area      | 2862 |
| 2863 | FreeSurfer a2009s rh G cuneus area                   | 2863 |
| 2864 | FreeSurfer a2009s rh G front inf-Opercular area      | 2864 |
| 2865 | FreeSurfer a2009s rh G front inf-Orbital area        | 2865 |
| 2866 | FreeSurfer a2009s rh G front inf-Triangul area       | 2866 |
| 2867 | FreeSurfer a2009s rh G front middle area             | 2867 |
| 2868 | FreeSurfer a2009s rh G front sup area                | 2868 |

|      |                           |                                   |      |
|------|---------------------------|-----------------------------------|------|
| 2869 | FreeSurfer a2009s rh G    | Ins lg and S cent ins area        | 2869 |
| 2870 | FreeSurfer a2009s rh G    | insular short area                | 2870 |
| 2871 | FreeSurfer a2009s rh G    | occipital middle area             | 2871 |
| 2872 | FreeSurfer a2009s rh G    | occipital sup area                | 2872 |
| 2873 | FreeSurfer a2009s rh G    | oc-temp lat-fusifor area          | 2873 |
| 2874 | FreeSurfer a2009s rh G    | oc-temp med-Lingual area          | 2874 |
| 2875 | FreeSurfer a2009s rh G    | oc-temp med-Parahip area          | 2875 |
| 2876 | FreeSurfer a2009s rh G    | orbital area                      | 2876 |
| 2877 | FreeSurfer a2009s rh G    | pariet inf-Angular area           | 2877 |
| 2878 | FreeSurfer a2009s rh G    | pariet inf-Supramar area          | 2878 |
| 2879 | FreeSurfer a2009s rh G    | parietal sup area                 | 2879 |
| 2880 | FreeSurfer a2009s rh G    | postcentral area                  | 2880 |
| 2881 | FreeSurfer a2009s rh G    | precentral area                   | 2881 |
| 2882 | FreeSurfer a2009s rh G    | precuneus area                    | 2882 |
| 2883 | FreeSurfer a2009s rh G    | rectus area                       | 2883 |
| 2884 | FreeSurfer a2009s rh G    | subcallosal area                  | 2884 |
| 2885 | FreeSurfer a2009s rh G    | temp sup-G T transv area          | 2885 |
| 2886 | FreeSurfer a2009s rh G    | temp sup-Lateral area             | 2886 |
| 2887 | FreeSurfer a2009s rh G    | temp sup-Plan polar area          | 2887 |
| 2888 | FreeSurfer a2009s rh G    | temp sup-Plan tempo area          | 2888 |
| 2889 | FreeSurfer a2009s rh G    | temporal inf area                 | 2889 |
| 2890 | FreeSurfer a2009s rh G    | temporal middle area              | 2890 |
| 2891 | FreeSurfer a2009s rh Lat  | Fis-ant-Horizont area             | 2891 |
| 2892 | FreeSurfer a2009s rh Lat  | Fis-ant-Vertical area             | 2892 |
| 2893 | FreeSurfer a2009s rh Lat  | Fis-post area                     | 2893 |
| 2894 | FreeSurfer a2009s rh Pole | occipital area                    | 2894 |
| 2895 | FreeSurfer a2009s rh Pole | temporal area                     | 2895 |
| 2896 | FreeSurfer a2009s rh S    | calcarine area                    | 2896 |
| 2897 | FreeSurfer a2009s rh S    | central area                      | 2897 |
| 2898 | FreeSurfer a2009s rh S    | cingul-Marginalis area            | 2898 |
| 2899 | FreeSurfer a2009s rh S    | circular insula ant area          | 2899 |
| 2900 | FreeSurfer a2009s rh S    | circular insula inf area          | 2900 |
| 2901 | FreeSurfer a2009s rh S    | circular insula sup area          | 2901 |
| 2902 | FreeSurfer a2009s rh S    | collat transv ant area            | 2902 |
| 2903 | FreeSurfer a2009s rh S    | collat transv post area           | 2903 |
| 2904 | FreeSurfer a2009s rh S    | front inf area                    | 2904 |
| 2905 | FreeSurfer a2009s rh S    | front middle area                 | 2905 |
| 2906 | FreeSurfer a2009s rh S    | front sup area                    | 2906 |
| 2907 | FreeSurfer a2009s rh S    | interm prim-Jensen area           | 2907 |
| 2908 | FreeSurfer a2009s rh S    | intrapariet and P trans area      | 2908 |
| 2909 | FreeSurfer a2009s rh S    | oc middle and Lunatus area        | 2909 |
| 2910 | FreeSurfer a2009s rh S    | oc sup and transversal area       | 2910 |
| 2911 | FreeSurfer a2009s rh S    | occipital ant area                | 2911 |
| 2912 | FreeSurfer a2009s rh S    | oc-temp lat area                  | 2912 |
| 2913 | FreeSurfer a2009s rh S    | oc-temp med and Lingual area      | 2913 |
| 2914 | FreeSurfer a2009s rh S    | orbital lateral area              | 2914 |
| 2915 | FreeSurfer a2009s rh S    | orbital med-olfact area           | 2915 |
| 2916 | FreeSurfer a2009s rh S    | orbital-H Shaped area             | 2916 |
| 2917 | FreeSurfer a2009s rh S    | parieto occipital area            | 2917 |
| 2918 | FreeSurfer a2009s rh S    | pericallosal area                 | 2918 |
| 2919 | FreeSurfer a2009s rh S    | postcentral area                  | 2919 |
| 2920 | FreeSurfer a2009s rh S    | precentral-inf-part area          | 2920 |
| 2921 | FreeSurfer a2009s rh S    | precentral-sup-part area          | 2921 |
| 2922 | FreeSurfer a2009s rh S    | suborbital area                   | 2922 |
| 2923 | FreeSurfer a2009s rh S    | subparietal area                  | 2923 |
| 2924 | FreeSurfer a2009s rh S    | temporal inf area                 | 2924 |
| 2925 | FreeSurfer a2009s rh S    | temporal sup area                 | 2925 |
| 2926 | FreeSurfer a2009s rh S    | temporal transverse area          | 2926 |
| 2927 | FreeSurfer DKTatlas lh    | caudalanteriorcingulate thickness | 2927 |
| 2928 | FreeSurfer DKTatlas lh    | caudalmiddlefrontal thickness     | 2928 |

|      |                        |                                    |      |
|------|------------------------|------------------------------------|------|
| 2929 | FreeSurfer DKTAtlas lh | cuneus thickness                   | 2929 |
| 2930 | FreeSurfer DKTAtlas lh | entorhinal thickness               | 2930 |
| 2931 | FreeSurfer DKTAtlas lh | fusiform thickness                 | 2931 |
| 2932 | FreeSurfer DKTAtlas lh | inferiorparietal thickness         | 2932 |
| 2933 | FreeSurfer DKTAtlas lh | inferiortemporal thickness         | 2933 |
| 2934 | FreeSurfer DKTAtlas lh | isthmuscingulate thickness         | 2934 |
| 2935 | FreeSurfer DKTAtlas lh | lateraloccipital thickness         | 2935 |
| 2936 | FreeSurfer DKTAtlas lh | lateralorbitofrontal thickness     | 2936 |
| 2937 | FreeSurfer DKTAtlas lh | lingual thickness                  | 2937 |
| 2938 | FreeSurfer DKTAtlas lh | medialorbitofrontal thickness      | 2938 |
| 2939 | FreeSurfer DKTAtlas lh | middletemporal thickness           | 2939 |
| 2940 | FreeSurfer DKTAtlas lh | parahippocampal thickness          | 2940 |
| 2941 | FreeSurfer DKTAtlas lh | paracentral thickness              | 2941 |
| 2942 | FreeSurfer DKTAtlas lh | parsopercularis thickness          | 2942 |
| 2943 | FreeSurfer DKTAtlas lh | parsorbitalis thickness            | 2943 |
| 2944 | FreeSurfer DKTAtlas lh | parstriangularis thickness         | 2944 |
| 2945 | FreeSurfer DKTAtlas lh | pericalcarine thickness            | 2945 |
| 2946 | FreeSurfer DKTAtlas lh | postcentral thickness              | 2946 |
| 2947 | FreeSurfer DKTAtlas lh | posteriorcingulate thickness       | 2947 |
| 2948 | FreeSurfer DKTAtlas lh | precentral thickness               | 2948 |
| 2949 | FreeSurfer DKTAtlas lh | precuneus thickness                | 2949 |
| 2950 | FreeSurfer DKTAtlas lh | rostralanteriorcingulate thickness | 2950 |
| 2951 | FreeSurfer DKTAtlas lh | rostralmiddlefrontal thickness     | 2951 |
| 2952 | FreeSurfer DKTAtlas lh | superiorfrontal thickness          | 2952 |
| 2953 | FreeSurfer DKTAtlas lh | superiorparietal thickness         | 2953 |
| 2954 | FreeSurfer DKTAtlas lh | superiortemporal thickness         | 2954 |
| 2955 | FreeSurfer DKTAtlas lh | supramarginal thickness            | 2955 |
| 2956 | FreeSurfer DKTAtlas lh | transverse temporal thickness      | 2956 |
| 2957 | FreeSurfer DKTAtlas lh | insula thickness                   | 2957 |
| 2958 | FreeSurfer DKTAtlas lh | MeanThickness thickness            | 2958 |
| 2959 | FreeSurfer a2009s lh   | G and S frontomargin thickness     | 2959 |
| 2960 | FreeSurfer a2009s lh   | G and S occipital inf thickness    | 2960 |
| 2961 | FreeSurfer a2009s lh   | G and S paracentral thickness      | 2961 |
| 2962 | FreeSurfer a2009s lh   | G and S subcentral thickness       | 2962 |
| 2963 | FreeSurfer a2009s lh   | G and S transv frontopol thickness | 2963 |
| 2964 | FreeSurfer a2009s lh   | G and S cingul-Ant thickness       | 2964 |
| 2965 | FreeSurfer a2009s lh   | G and S cingul-Mid-Ant thickness   | 2965 |
| 2966 | FreeSurfer a2009s lh   | G and S cingul-Mid-Post thickness  | 2966 |
| 2967 | FreeSurfer a2009s lh   | G cingul-Post-dorsal thickness     | 2967 |
| 2968 | FreeSurfer a2009s lh   | G cingul-Post-ventral thickness    | 2968 |
| 2969 | FreeSurfer a2009s lh   | G cuneus thickness                 | 2969 |
| 2970 | FreeSurfer a2009s lh   | G front inf-Opercular thickness    | 2970 |
| 2971 | FreeSurfer a2009s lh   | G front inf-Orbital thickness      | 2971 |
| 2972 | FreeSurfer a2009s lh   | G front inf-Triangul thickness     | 2972 |
| 2973 | FreeSurfer a2009s lh   | G front middle thickness           | 2973 |
| 2974 | FreeSurfer a2009s lh   | G front sup thickness              | 2974 |
| 2975 | FreeSurfer a2009s lh   | G Ins lg and S cent ins thickness  | 2975 |
| 2976 | FreeSurfer a2009s lh   | G insular short thickness          | 2976 |
| 2977 | FreeSurfer a2009s lh   | G occipital middle thickness       | 2977 |
| 2978 | FreeSurfer a2009s lh   | G occipital sup thickness          | 2978 |
| 2979 | FreeSurfer a2009s lh   | G oc-temp lat-fusifor thickness    | 2979 |
| 2980 | FreeSurfer a2009s lh   | G oc-temp med-Lingual thickness    | 2980 |
| 2981 | FreeSurfer a2009s lh   | G oc-temp med-Parahip thickness    | 2981 |
| 2982 | FreeSurfer a2009s lh   | G orbital thickness                | 2982 |
| 2983 | FreeSurfer a2009s lh   | G pariet inf-Angular thickness     | 2983 |
| 2984 | FreeSurfer a2009s lh   | G pariet inf-Supamar thickness     | 2984 |
| 2985 | FreeSurfer a2009s lh   | G parietal sup thickness           | 2985 |
| 2986 | FreeSurfer a2009s lh   | G postcentral thickness            | 2986 |
| 2987 | FreeSurfer a2009s lh   | G precentral thickness             | 2987 |
| 2988 | FreeSurfer a2009s lh   | G precuneus thickness              | 2988 |



|      |                                                          |      |
|------|----------------------------------------------------------|------|
| 2989 | FreeSurfer a2009s lh G rectus thickness                  | 2989 |
| 2990 | FreeSurfer a2009s lh G subcallosal thickness             | 2990 |
| 2991 | FreeSurfer a2009s lh G temp sup-G T transv thickness     | 2991 |
| 2992 | FreeSurfer a2009s lh G temp sup-Lateral thickness        | 2992 |
| 2993 | FreeSurfer a2009s lh G temp sup-Plan polar thickness     | 2993 |
| 2994 | FreeSurfer a2009s lh G temp sup-Plan tempo thickness     | 2994 |
| 2995 | FreeSurfer a2009s lh G temporal inf thickness            | 2995 |
| 2996 | FreeSurfer a2009s lh G temporal middle thickness         | 2996 |
| 2997 | FreeSurfer a2009s lh Lat Fis-ant-Horizont thickness      | 2997 |
| 2998 | FreeSurfer a2009s lh Lat Fis-ant-Vertical thickness      | 2998 |
| 2999 | FreeSurfer a2009s lh Lat Fis-post thickness              | 2999 |
| 3000 | FreeSurfer a2009s lh Pole occipital thickness            | 3000 |
| 3001 | FreeSurfer a2009s lh Pole temporal thickness             | 3001 |
| 3002 | FreeSurfer a2009s lh S calcarine thickness               | 3002 |
| 3003 | FreeSurfer a2009s lh S central thickness                 | 3003 |
| 3004 | FreeSurfer a2009s lh S cingul-Marginalis thickness       | 3004 |
| 3005 | FreeSurfer a2009s lh S circular insula ant thickness     | 3005 |
| 3006 | FreeSurfer a2009s lh S circular insula inf thickness     | 3006 |
| 3007 | FreeSurfer a2009s lh S circular insula sup thickness     | 3007 |
| 3008 | FreeSurfer a2009s lh S collat transv ant thickness       | 3008 |
| 3009 | FreeSurfer a2009s lh S collat transv post thickness      | 3009 |
| 3010 | FreeSurfer a2009s lh S front inf thickness               | 3010 |
| 3011 | FreeSurfer a2009s lh S front middle thickness            | 3011 |
| 3012 | FreeSurfer a2009s lh S front sup thickness               | 3012 |
| 3013 | FreeSurfer a2009s lh S interm prim-Jensen thickness      | 3013 |
| 3014 | FreeSurfer a2009s lh S intrapariet and P trans thickness | 3014 |
| 3015 | FreeSurfer a2009s lh S oc middle and Lunatus thickness   | 3015 |
| 3016 | FreeSurfer a2009s lh S oc sup and transversal thickness  | 3016 |
| 3017 | FreeSurfer a2009s lh S occipital ant thickness           | 3017 |
| 3018 | FreeSurfer a2009s lh S oc-temp lat thickness             | 3018 |
| 3019 | FreeSurfer a2009s lh S oc-temp med and Lingual thickness | 3019 |
| 3020 | FreeSurfer a2009s lh S orbital lateral thickness         | 3020 |
| 3021 | FreeSurfer a2009s lh S orbital med-olfact thickness      | 3021 |
| 3022 | FreeSurfer a2009s lh S orbital-H Shaped thickness        | 3022 |
| 3023 | FreeSurfer a2009s lh S parieto occipital thickness       | 3023 |
| 3024 | FreeSurfer a2009s lh S pericallosal thickness            | 3024 |
| 3025 | FreeSurfer a2009s lh S postcentral thickness             | 3025 |
| 3026 | FreeSurfer a2009s lh S precentral-inf-part thickness     | 3026 |
| 3027 | FreeSurfer a2009s lh S precentral-sup-part thickness     | 3027 |
| 3028 | FreeSurfer a2009s lh S suborbital thickness              | 3028 |
| 3029 | FreeSurfer a2009s lh S subparietal thickness             | 3029 |
| 3030 | FreeSurfer a2009s lh S temporal inf thickness            | 3030 |
| 3031 | FreeSurfer a2009s lh S temporal sup thickness            | 3031 |
| 3032 | FreeSurfer a2009s lh S temporal transverse thickness     | 3032 |
| 3033 | FreeSurfer DKTatlas rh caudalanteriorcingulate thickness | 3033 |
| 3034 | FreeSurfer DKTatlas rh caudalmiddlefrontal thickness     | 3034 |
| 3035 | FreeSurfer DKTatlas rh cuneus thickness                  | 3035 |
| 3036 | FreeSurfer DKTatlas rh entorhinal thickness              | 3036 |
| 3037 | FreeSurfer DKTatlas rh fusiform thickness                | 3037 |
| 3038 | FreeSurfer DKTatlas rh inferiorparietal thickness        | 3038 |
| 3039 | FreeSurfer DKTatlas rh inferiortemporal thickness        | 3039 |
| 3040 | FreeSurfer DKTatlas rh isthmuscingulate thickness        | 3040 |
| 3041 | FreeSurfer DKTatlas rh lateraloccipital thickness        | 3041 |
| 3042 | FreeSurfer DKTatlas rh lateralorbitofrontal thickness    | 3042 |
| 3043 | FreeSurfer DKTatlas rh lingual thickness                 | 3043 |
| 3044 | FreeSurfer DKTatlas rh medialorbitofrontal thickness     | 3044 |
| 3045 | FreeSurfer DKTatlas rh middletemporal thickness          | 3045 |
| 3046 | FreeSurfer DKTatlas rh parahippocampal thickness         | 3046 |
| 3047 | FreeSurfer DKTatlas rh paracentral thickness             | 3047 |
| 3048 | FreeSurfer DKTatlas rh parsopercularis thickness         | 3048 |

|      |                        |                                    |      |
|------|------------------------|------------------------------------|------|
| 3049 | FreeSurfer DKTatlas rh | parsorbitalis thickness            | 3049 |
| 3050 | FreeSurfer DKTatlas rh | parstriangularis thickness         | 3050 |
| 3051 | FreeSurfer DKTatlas rh | pericalcarine thickness            | 3051 |
| 3052 | FreeSurfer DKTatlas rh | postcentral thickness              | 3052 |
| 3053 | FreeSurfer DKTatlas rh | posteriorcingulate thickness       | 3053 |
| 3054 | FreeSurfer DKTatlas rh | precentral thickness               | 3054 |
| 3055 | FreeSurfer DKTatlas rh | precuneus thickness                | 3055 |
| 3056 | FreeSurfer DKTatlas rh | rostralanteriorcingulate thickness | 3056 |
| 3057 | FreeSurfer DKTatlas rh | rostralmiddlefrontal thickness     | 3057 |
| 3058 | FreeSurfer DKTatlas rh | superiorfrontal thickness          | 3058 |
| 3059 | FreeSurfer DKTatlas rh | superiorparietal thickness         | 3059 |
| 3060 | FreeSurfer DKTatlas rh | superiortemporal thickness         | 3060 |
| 3061 | FreeSurfer DKTatlas rh | supramarginal thickness            | 3061 |
| 3062 | FreeSurfer DKTatlas rh | transversetemporal thickness       | 3062 |
| 3063 | FreeSurfer DKTatlas rh | insula thickness                   | 3063 |
| 3064 | FreeSurfer DKTatlas rh | MeanThickness thickness            | 3064 |
| 3065 | FreeSurfer a2009s rh   | G and S frontomargin thickness     | 3065 |
| 3066 | FreeSurfer a2009s rh   | G and S occipital inf thickness    | 3066 |
| 3067 | FreeSurfer a2009s rh   | G and S paracentral thickness      | 3067 |
| 3068 | FreeSurfer a2009s rh   | G and S subcentral thickness       | 3068 |
| 3069 | FreeSurfer a2009s rh   | G and S transv frontopol thickness | 3069 |
| 3070 | FreeSurfer a2009s rh   | G and S cingul-Ant thickness       | 3070 |
| 3071 | FreeSurfer a2009s rh   | G and S cingul-Mid-Ant thickness   | 3071 |
| 3072 | FreeSurfer a2009s rh   | G and S cingul-Mid-Post thickness  | 3072 |
| 3073 | FreeSurfer a2009s rh   | G cingul-Post-dorsal thickness     | 3073 |
| 3074 | FreeSurfer a2009s rh   | G cingul-Post-ventral thickness    | 3074 |
| 3075 | FreeSurfer a2009s rh   | G cuneus thickness                 | 3075 |
| 3076 | FreeSurfer a2009s rh   | G front inf-Opercular thickness    | 3076 |
| 3077 | FreeSurfer a2009s rh   | G front inf-Orbital thickness      | 3077 |
| 3078 | FreeSurfer a2009s rh   | G front inf-Triangul thickness     | 3078 |
| 3079 | FreeSurfer a2009s rh   | G front middle thickness           | 3079 |
| 3080 | FreeSurfer a2009s rh   | G front sup thickness              | 3080 |
| 3081 | FreeSurfer a2009s rh   | G Ins lg and S cent ins thickness  | 3081 |
| 3082 | FreeSurfer a2009s rh   | G insular short thickness          | 3082 |
| 3083 | FreeSurfer a2009s rh   | G occipital middle thickness       | 3083 |
| 3084 | FreeSurfer a2009s rh   | G occipital sup thickness          | 3084 |
| 3085 | FreeSurfer a2009s rh   | G oc-temp lat-fusifor thickness    | 3085 |
| 3086 | FreeSurfer a2009s rh   | G oc-temp med-Lingual thickness    | 3086 |
| 3087 | FreeSurfer a2009s rh   | G oc-temp med-Parahip thickness    | 3087 |
| 3088 | FreeSurfer a2009s rh   | G orbital thickness                | 3088 |
| 3089 | FreeSurfer a2009s rh   | G pariet inf-Angular thickness     | 3089 |
| 3090 | FreeSurfer a2009s rh   | G pariet inf-Supramar thickness    | 3090 |
| 3091 | FreeSurfer a2009s rh   | G parietal sup thickness           | 3091 |
| 3092 | FreeSurfer a2009s rh   | G postcentral thickness            | 3092 |
| 3093 | FreeSurfer a2009s rh   | G precentral thickness             | 3093 |
| 3094 | FreeSurfer a2009s rh   | G precuneus thickness              | 3094 |
| 3095 | FreeSurfer a2009s rh   | G rectus thickness                 | 3095 |
| 3096 | FreeSurfer a2009s rh   | G subcallosal thickness            | 3096 |
| 3097 | FreeSurfer a2009s rh   | G temp sup-G T transv thickness    | 3097 |
| 3098 | FreeSurfer a2009s rh   | G temp sup-Lateral thickness       | 3098 |
| 3099 | FreeSurfer a2009s rh   | G temp sup-Plan polar thickness    | 3099 |
| 3100 | FreeSurfer a2009s rh   | G temp sup-Plan tempo thickness    | 3100 |
| 3101 | FreeSurfer a2009s rh   | G temporal inf thickness           | 3101 |
| 3102 | FreeSurfer a2009s rh   | G temporal middle thickness        | 3102 |
| 3103 | FreeSurfer a2009s rh   | Lat Fis-ant-Horizont thickness     | 3103 |
| 3104 | FreeSurfer a2009s rh   | Lat Fis-ant-Vertical thickness     | 3104 |
| 3105 | FreeSurfer a2009s rh   | Lat Fis-post thickness             | 3105 |
| 3106 | FreeSurfer a2009s rh   | Pole occipital thickness           | 3106 |
| 3107 | FreeSurfer a2009s rh   | Pole temporal thickness            | 3107 |
| 3108 | FreeSurfer a2009s rh   | S calcarine thickness              | 3108 |

|      |                                                          |      |
|------|----------------------------------------------------------|------|
| 3109 | FreeSurfer a2009s rh S central thickness                 | 3109 |
| 3110 | FreeSurfer a2009s rh S cingul-Marginalis thickness       | 3110 |
| 3111 | FreeSurfer a2009s rh S circular insula ant thickness     | 3111 |
| 3112 | FreeSurfer a2009s rh S circular insula inf thickness     | 3112 |
| 3113 | FreeSurfer a2009s rh S circular insula sup thickness     | 3113 |
| 3114 | FreeSurfer a2009s rh S collat transv ant thickness       | 3114 |
| 3115 | FreeSurfer a2009s rh S collat transv post thickness      | 3115 |
| 3116 | FreeSurfer a2009s rh S front inf thickness               | 3116 |
| 3117 | FreeSurfer a2009s rh S front middle thickness            | 3117 |
| 3118 | FreeSurfer a2009s rh S front sup thickness               | 3118 |
| 3119 | FreeSurfer a2009s rh S interm prim-Jensen thickness      | 3119 |
| 3120 | FreeSurfer a2009s rh S intrapariet and P trans thickness | 3120 |
| 3121 | FreeSurfer a2009s rh S oc middle and Lunatus thickness   | 3121 |
| 3122 | FreeSurfer a2009s rh S oc sup and transversal thickness  | 3122 |
| 3123 | FreeSurfer a2009s rh S occipital ant thickness           | 3123 |
| 3124 | FreeSurfer a2009s rh S oc-temp lat thickness             | 3124 |
| 3125 | FreeSurfer a2009s rh S oc-temp med and Lingual thickness | 3125 |
| 3126 | FreeSurfer a2009s rh S orbital lateral thickness         | 3126 |
| 3127 | FreeSurfer a2009s rh S orbital med-olfact thickness      | 3127 |
| 3128 | FreeSurfer a2009s rh S orbital-H Shaped thickness        | 3128 |
| 3129 | FreeSurfer a2009s rh S parieto occipital thickness       | 3129 |
| 3130 | FreeSurfer a2009s rh S pericallosal thickness            | 3130 |
| 3131 | FreeSurfer a2009s rh S postcentral thickness             | 3131 |
| 3132 | FreeSurfer a2009s rh S precentral-inf-part thickness     | 3132 |
| 3133 | FreeSurfer a2009s rh S precentral-sup-part thickness     | 3133 |
| 3134 | FreeSurfer a2009s rh S suborbital thickness              | 3134 |
| 3135 | FreeSurfer a2009s rh S subparietal thickness             | 3135 |
| 3136 | FreeSurfer a2009s rh S temporal inf thickness            | 3136 |
| 3137 | FreeSurfer a2009s rh S temporal sup thickness            | 3137 |
| 3138 | FreeSurfer a2009s rh S temporal transverse thickness     | 3138 |
| 3139 | NETMAT edge ICA 1                                        | 3139 |
| 3140 | NETMAT edge ICA 2                                        | 3140 |
| 3141 | NETMAT edge ICA 3                                        | 3141 |
| 3142 | NETMAT edge ICA 4                                        | 3142 |
| 3143 | NETMAT edge ICA 5                                        | 3143 |
| 3144 | NETMAT edge ICA 6                                        | 3144 |

Figure 1: T1 SIENAX peripheral grey normalised volume

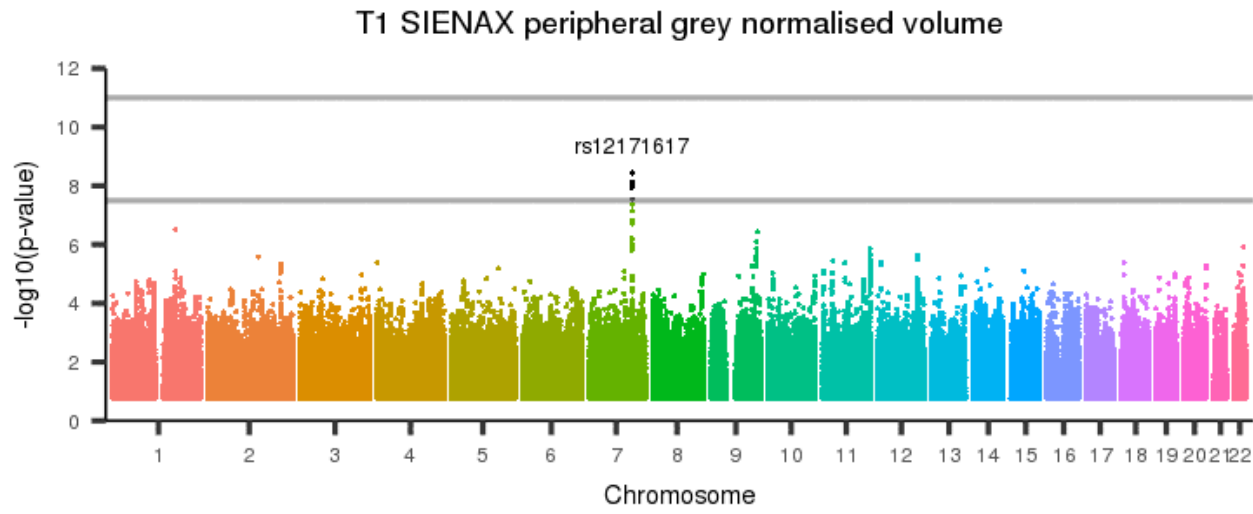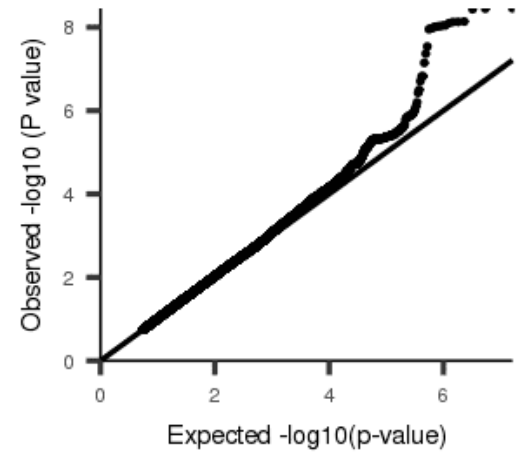

[back to list of plots](#)

Figure 2: T1 SIENAX peripheral grey unnormalised volume

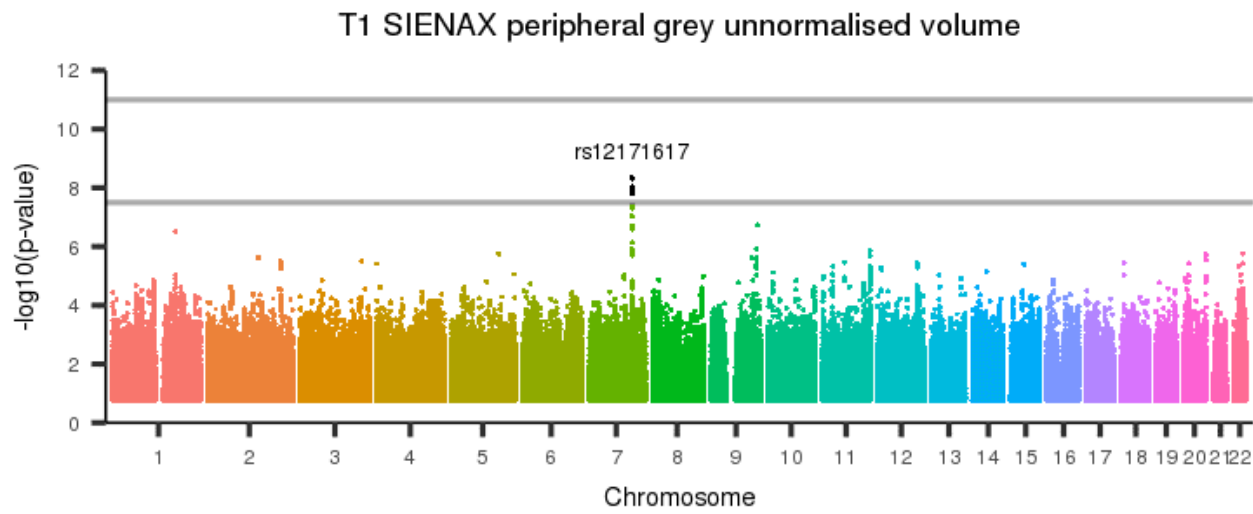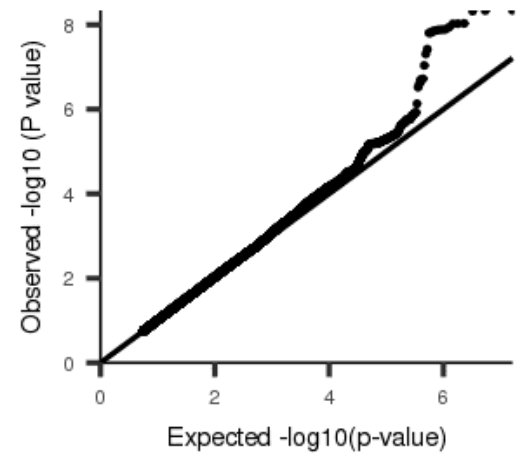

[back to list of plots](#)

Figure 3: T1 SIENAX CSF normalised volume

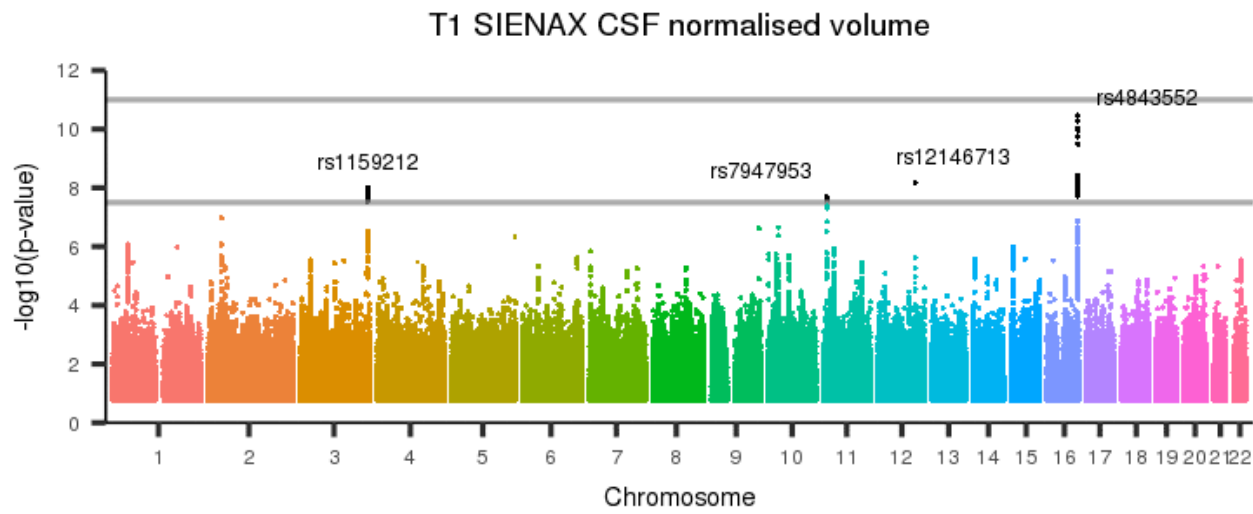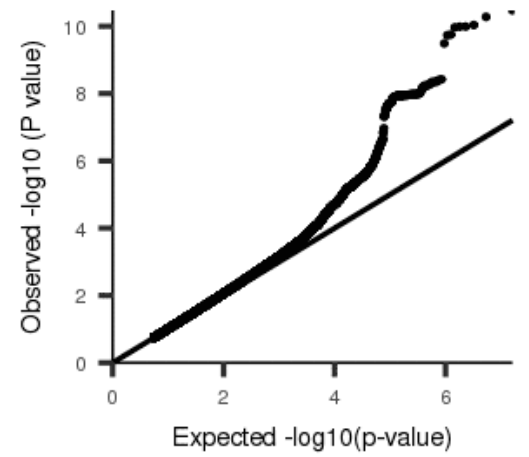

[back to list of plots](#)

Figure 4: T1 SIENAX CSF unnormalised volume

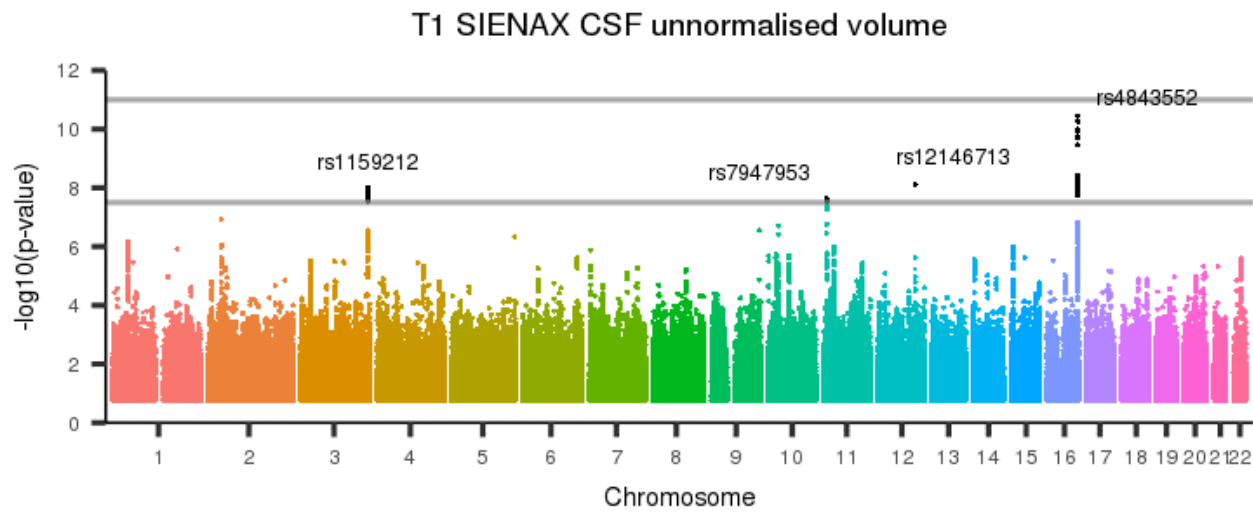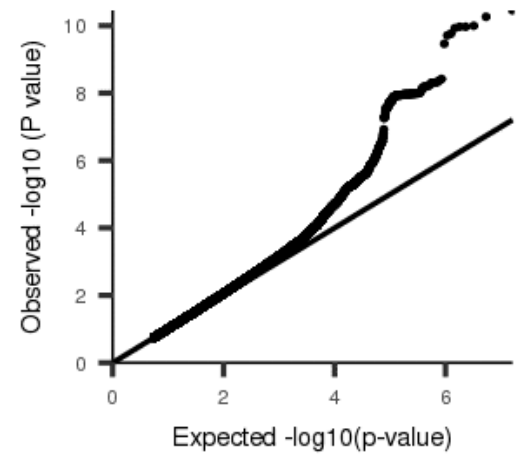

[back to list of plots](#)

Figure 5: T1 SIENAX grey normalised volume

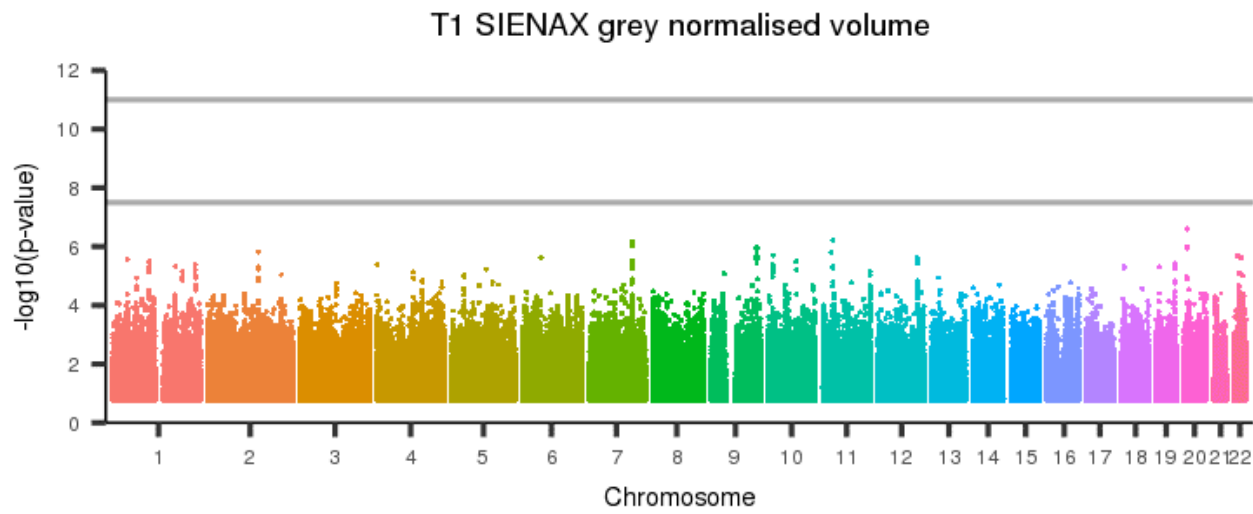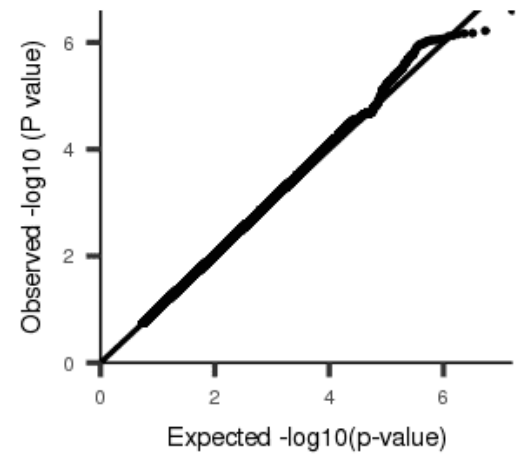

[back to list of plots](#)



Figure 6: T1 SIENAX grey unnormalised volume

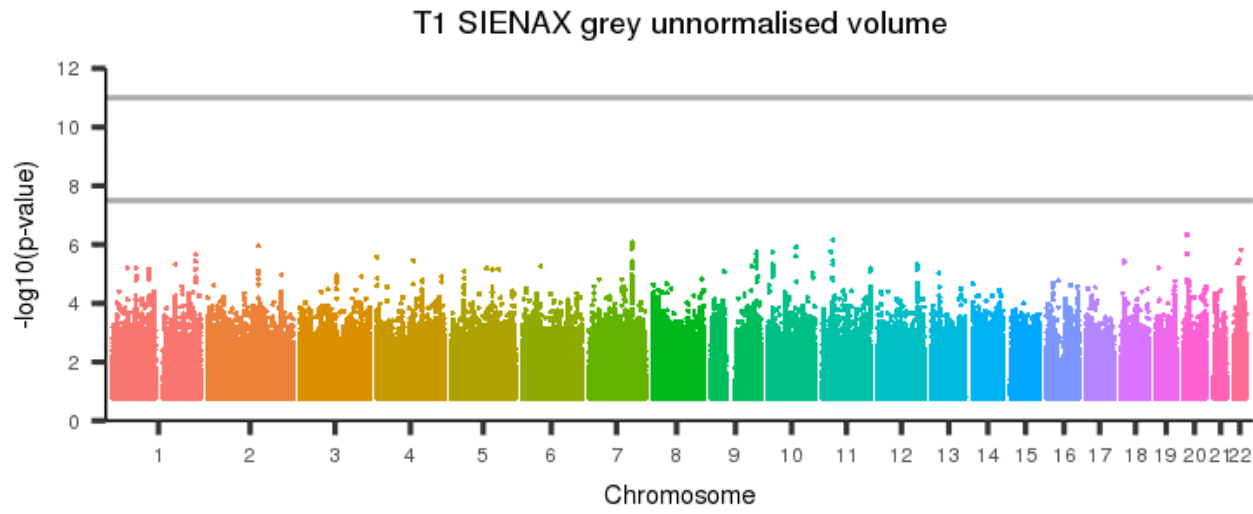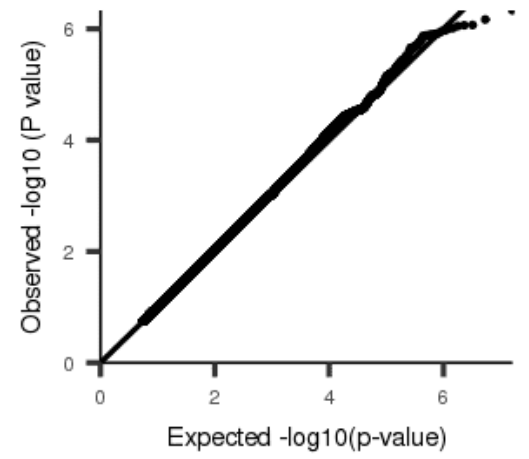

[back to list of plots](#)

Figure 7: T1 SIENAX white normalised volume

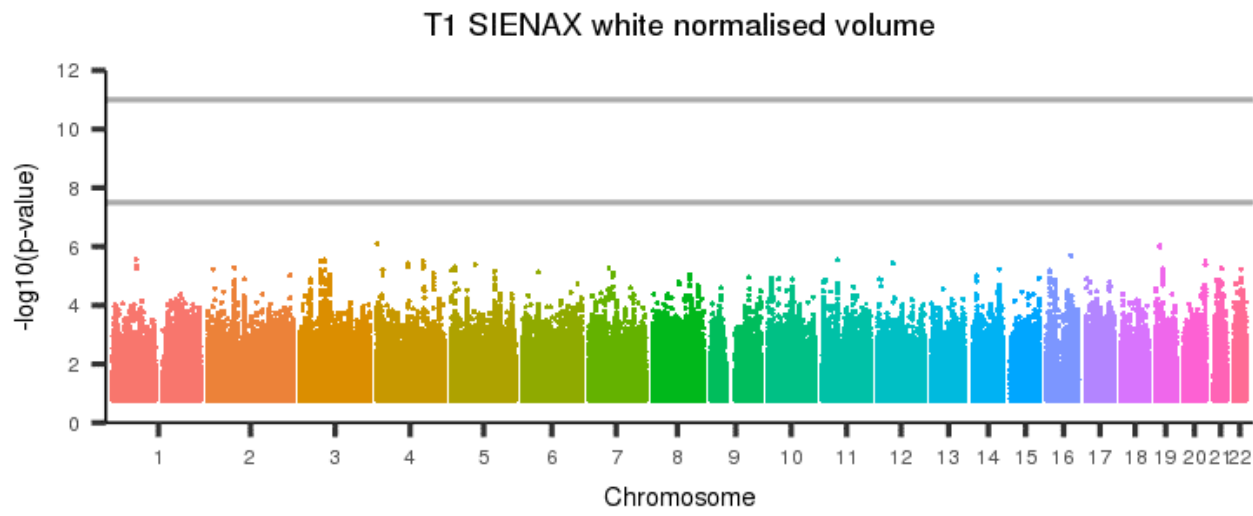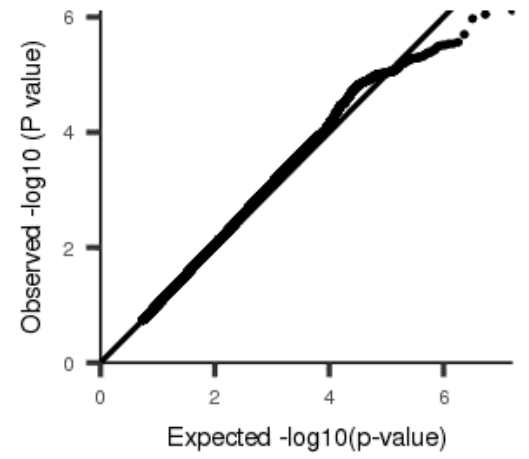

[back to list of plots](#)

Figure 8: T1 SIENAX white unnormalised volume

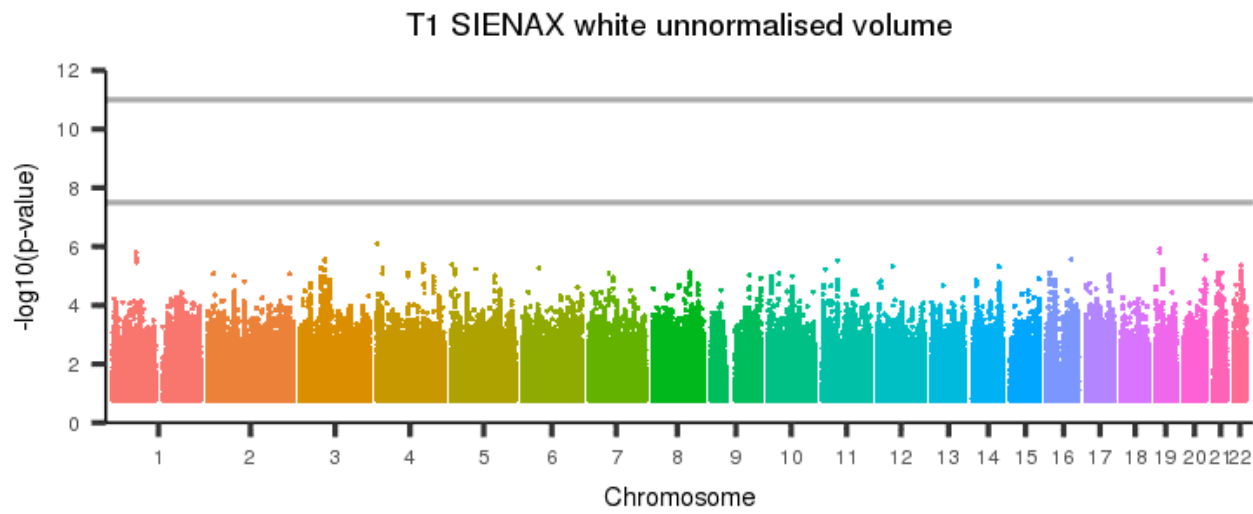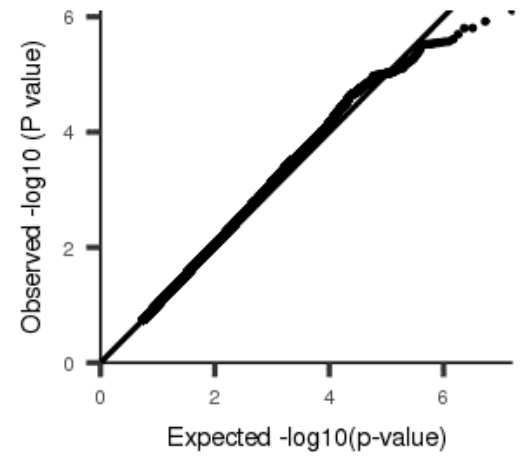

[back to list of plots](#)

Figure 9: T1 SIENAX brain-normalised volume

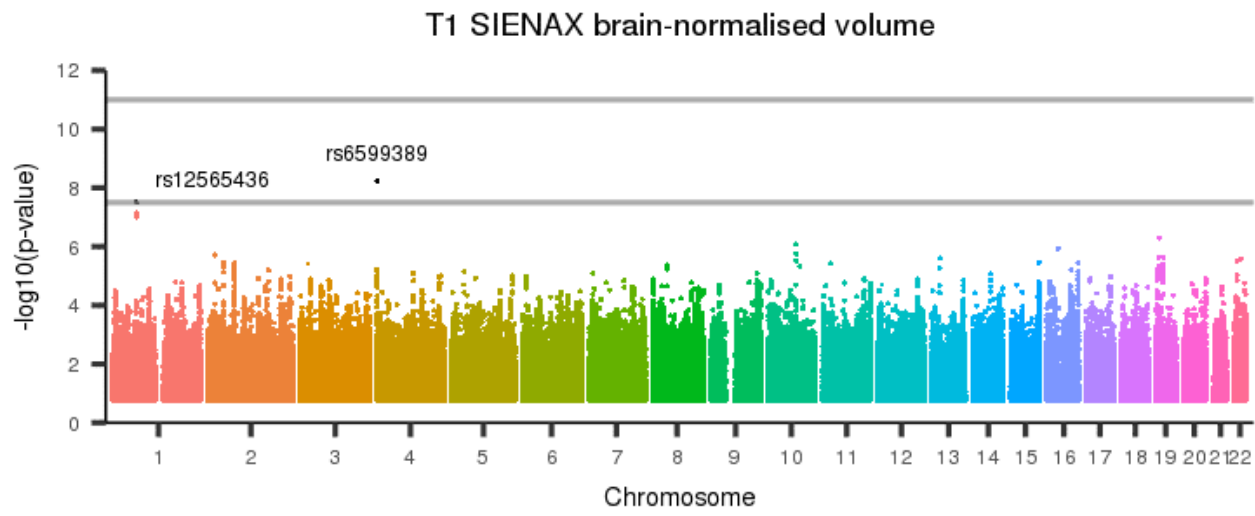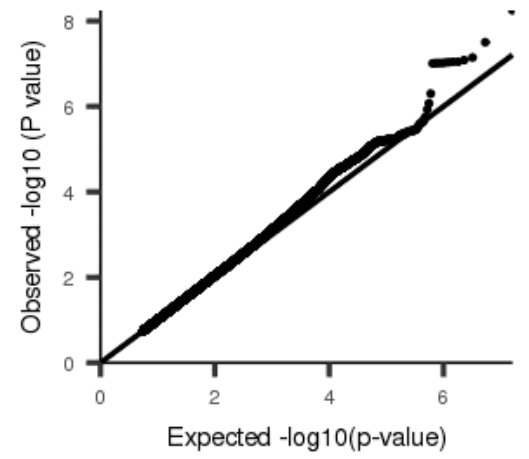

[back to list of plots](#)

Figure 10: T1 SIENAX brain-unnormalised volume

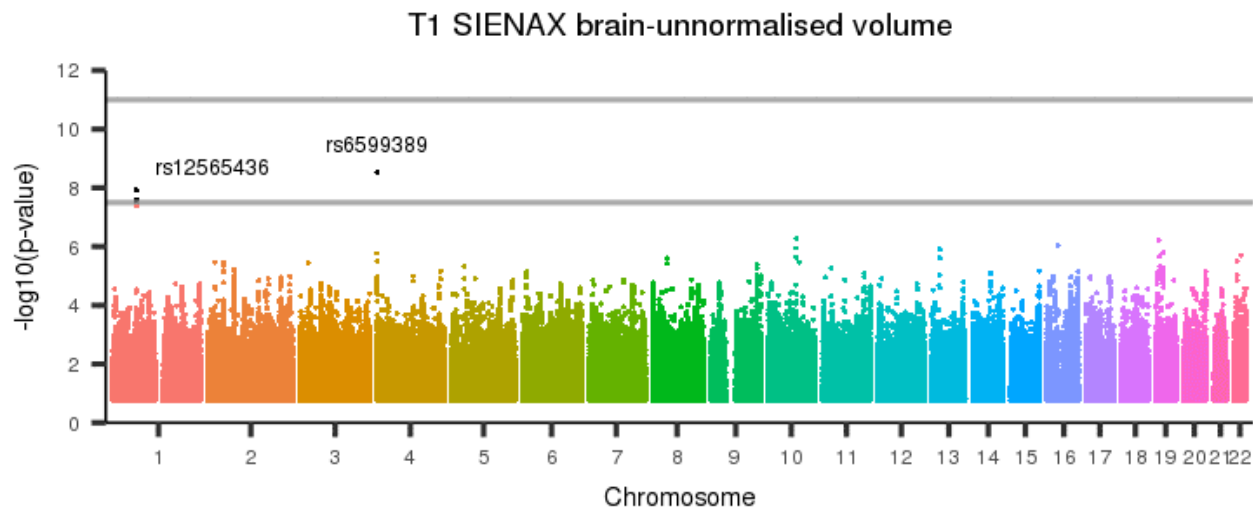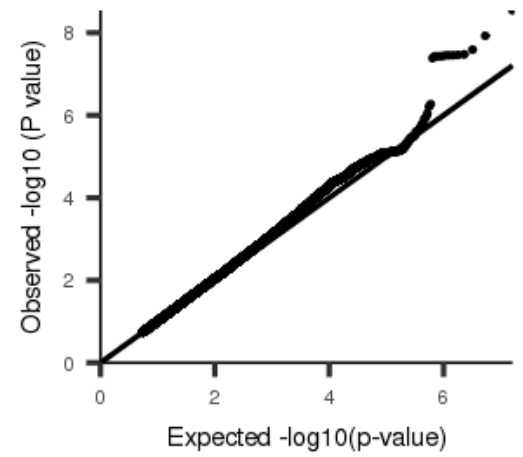

[back to list of plots](#)

Figure 11: T1 FIRST left thalamus volume

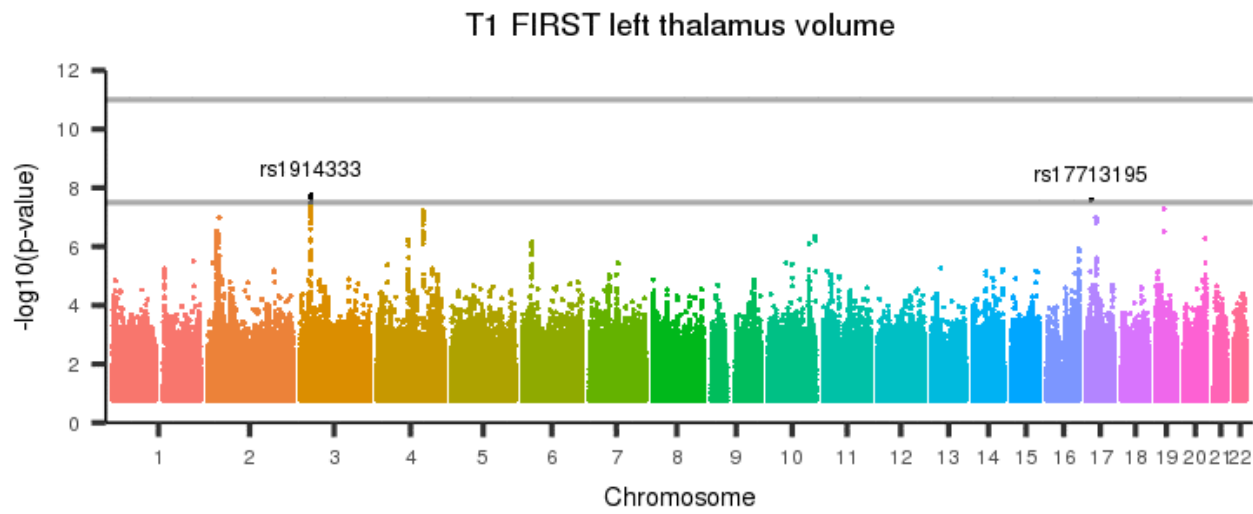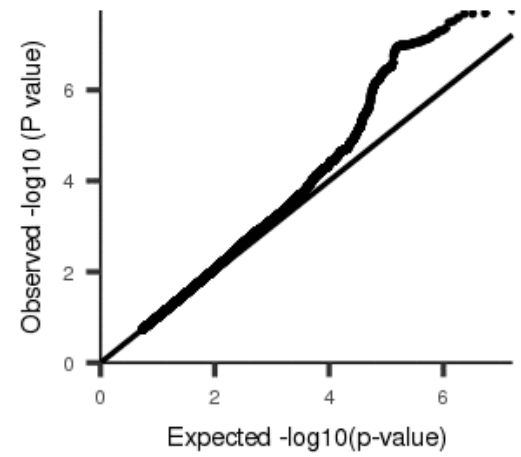

[back to list of plots](#)

Figure 12: T1 FIRST right thalamus volume

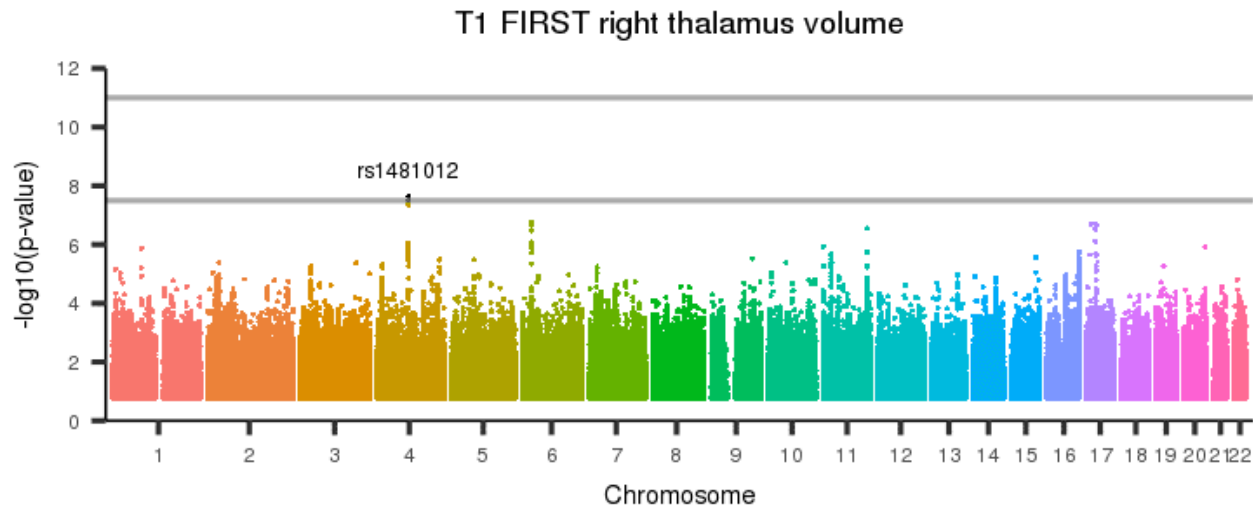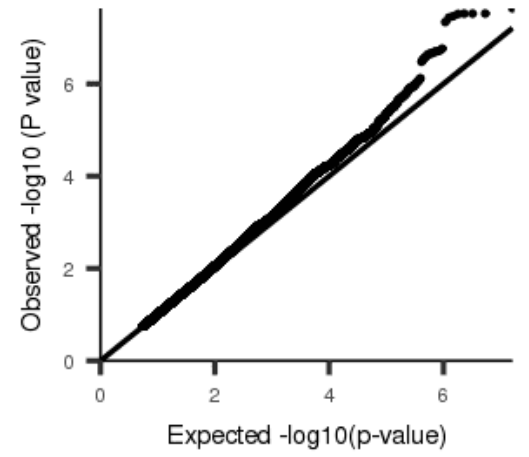

[back to list of plots](#)

Figure 13: T1 FIRST left caudate volume

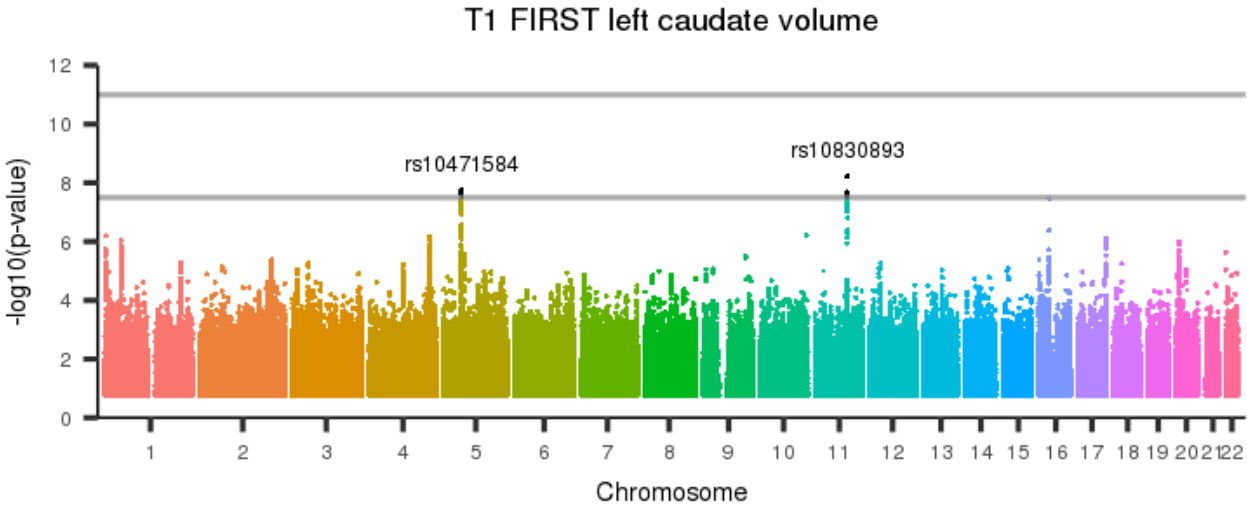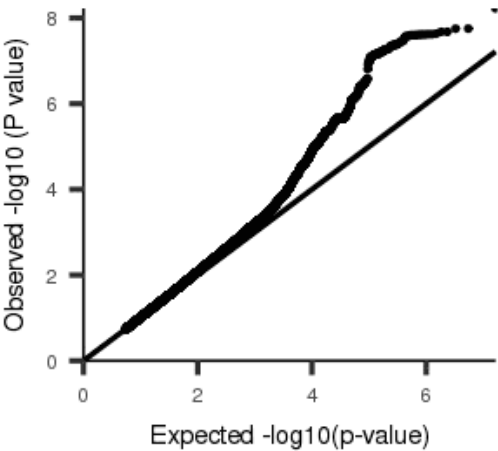

[back to list of plots](#)



Figure 14: T1 FIRST right caudate volume

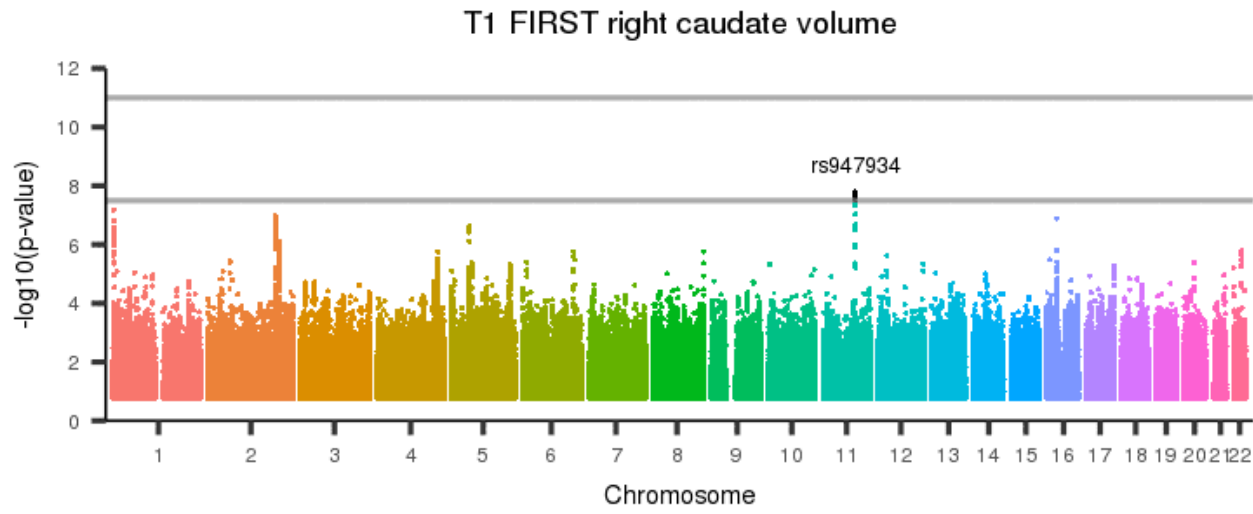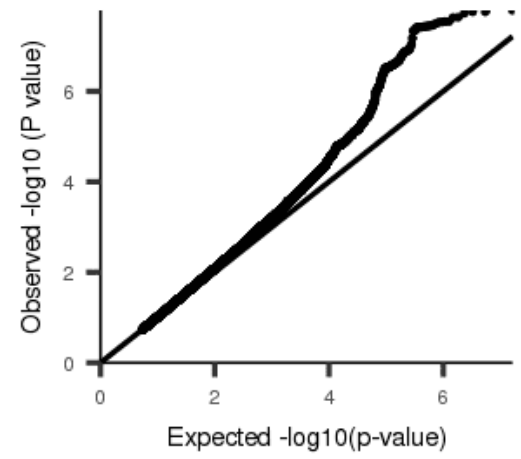

[back to list of plots](#)

Figure 15: T1 FIRST left putamen volume

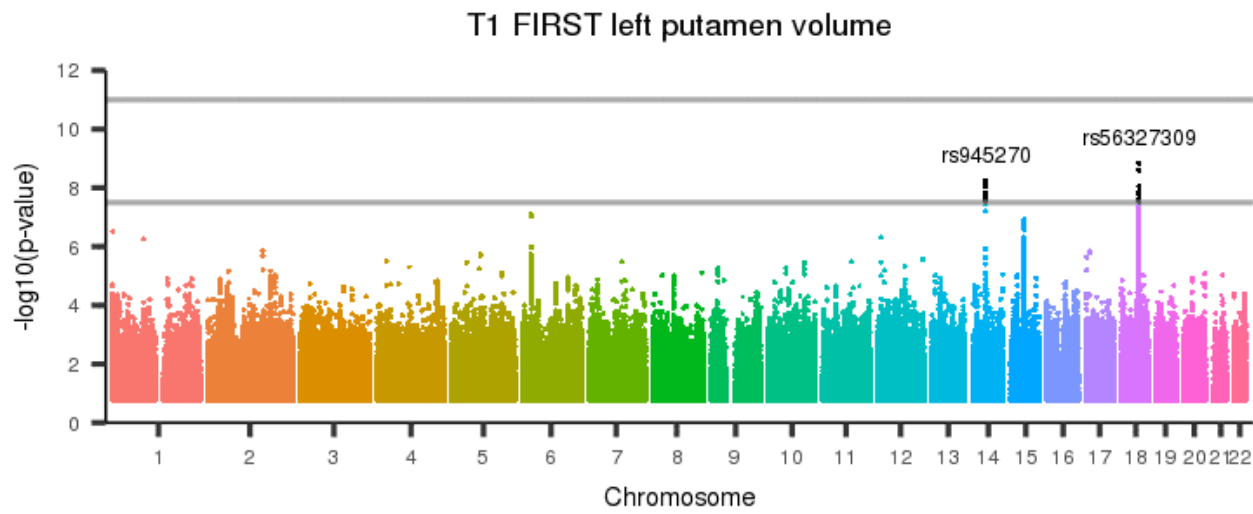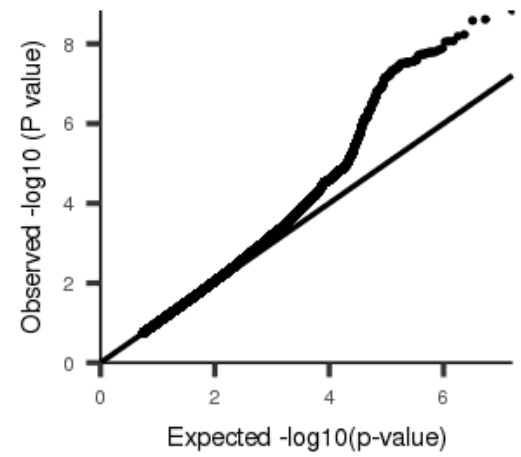

[back to list of plots](#)

Figure 16: T1 FIRST right putamen volume

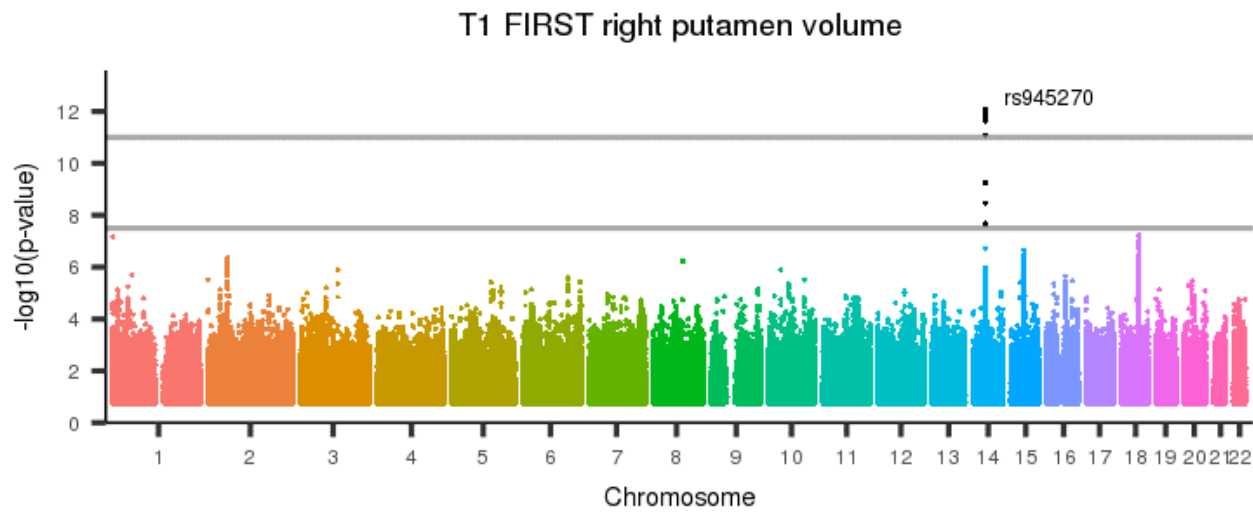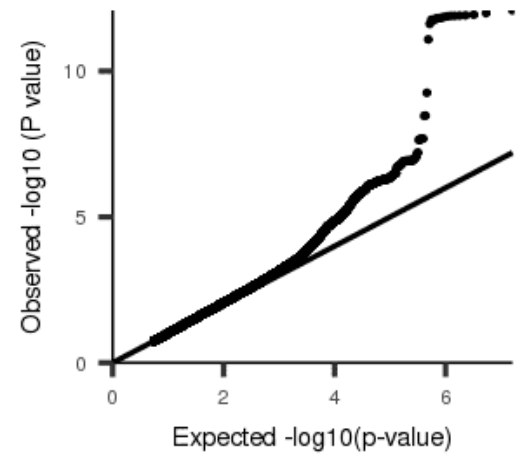

[back to list of plots](#)

Figure 17: T1 FIRST left pallidum volume

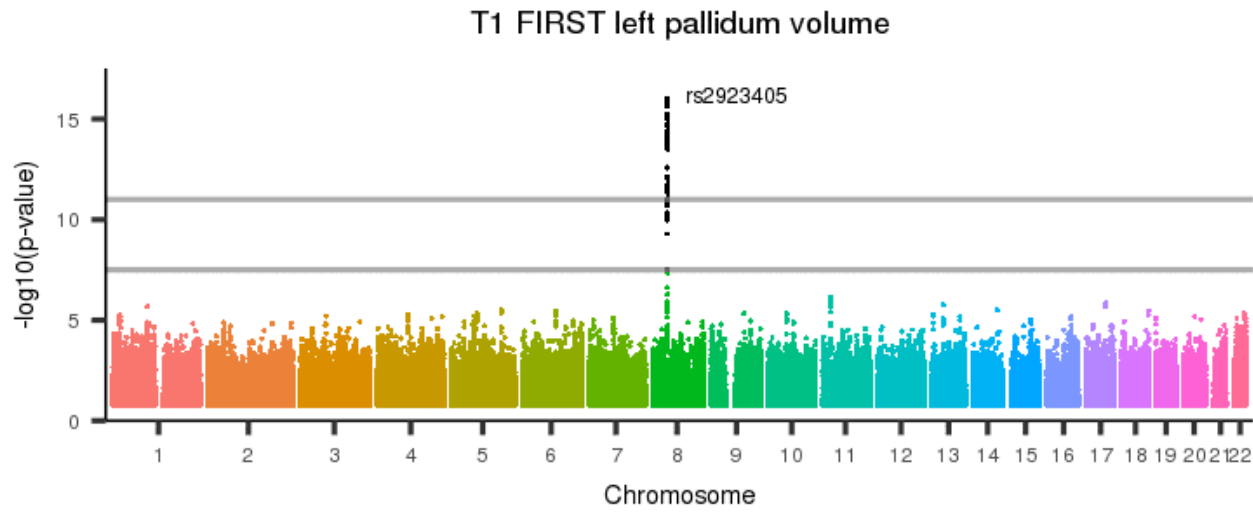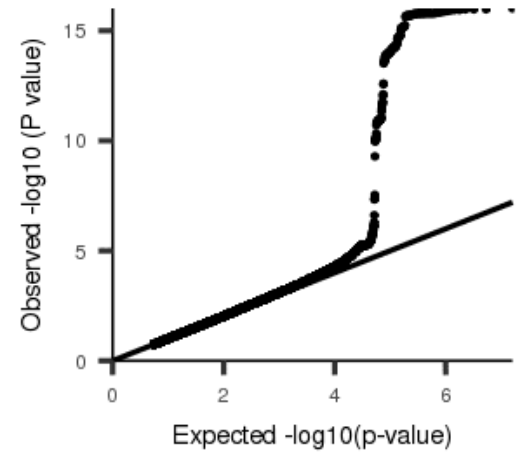

[back to list of plots](#)

Figure 18: T1 FIRST right pallidum volume

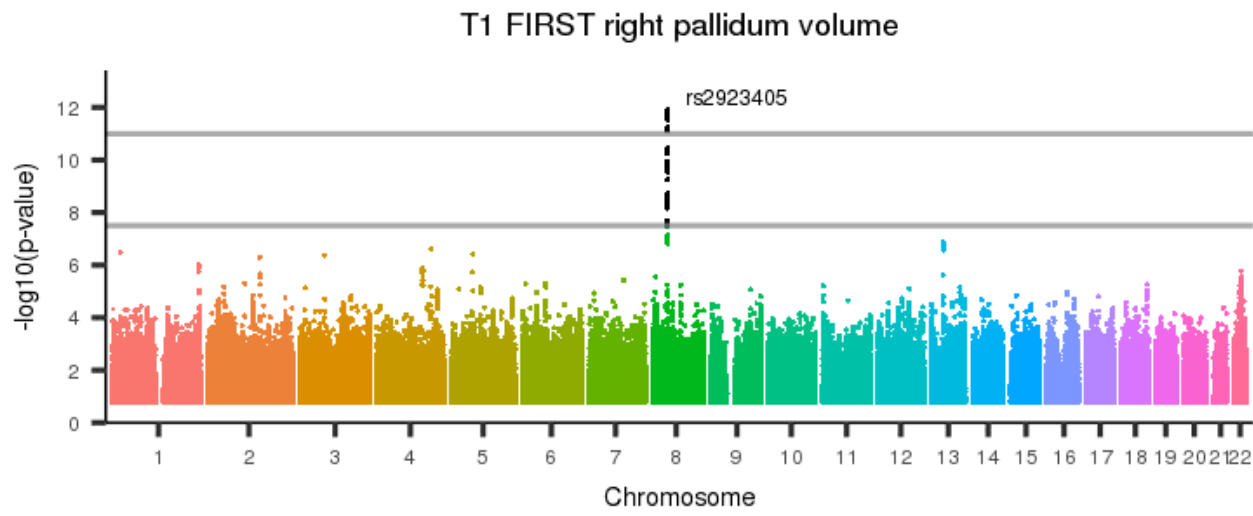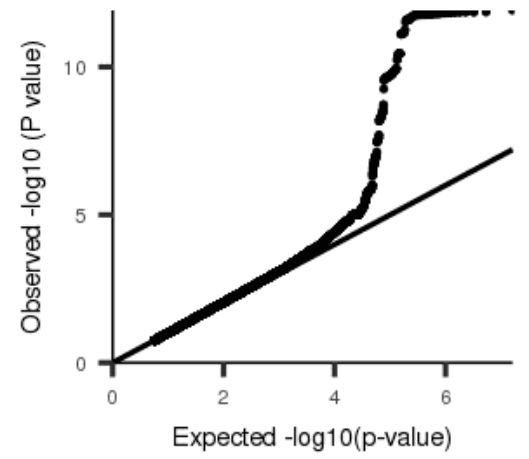

[back to list of plots](#)

Figure 19: T1 FIRST left hippocampus volume

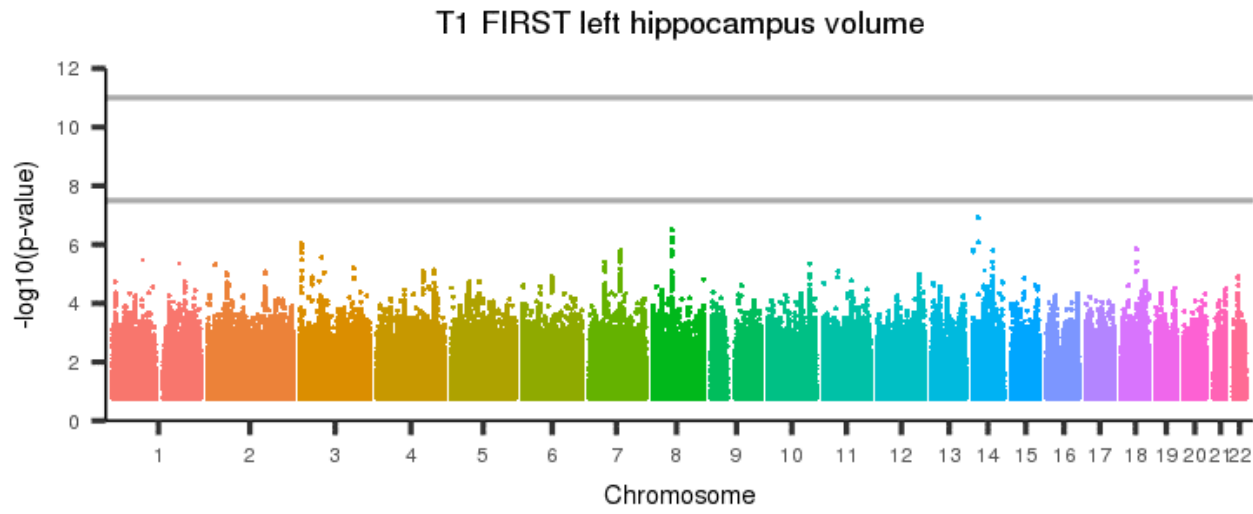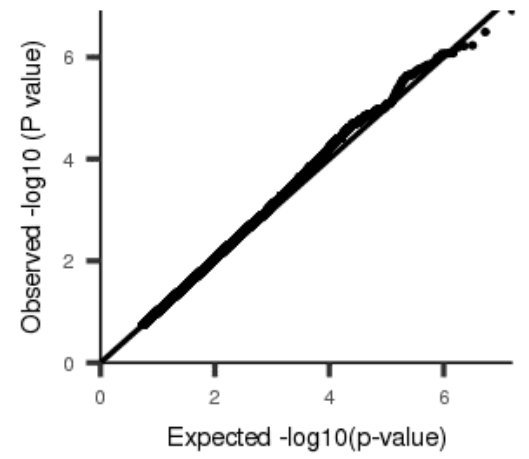

[back to list of plots](#)

Figure 20: T1 FIRST right hippocampus volume

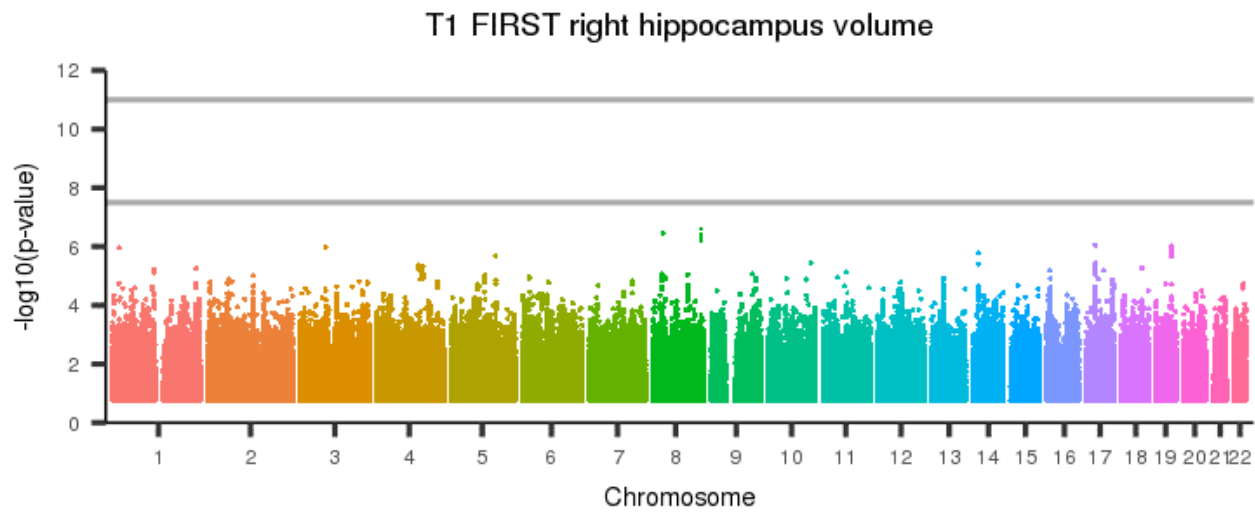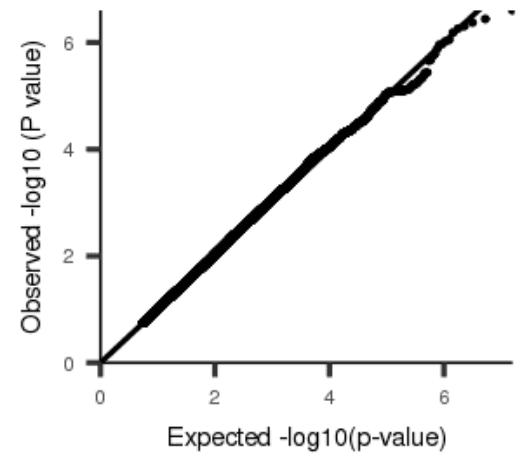

[back to list of plots](#)

Figure 21: T1 FIRST left amygdala volume

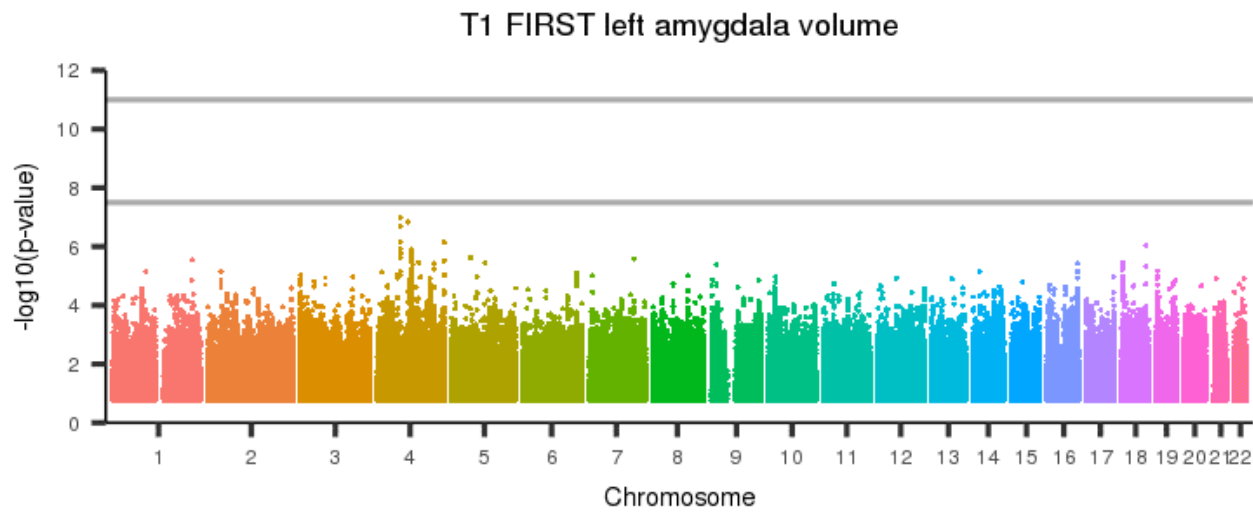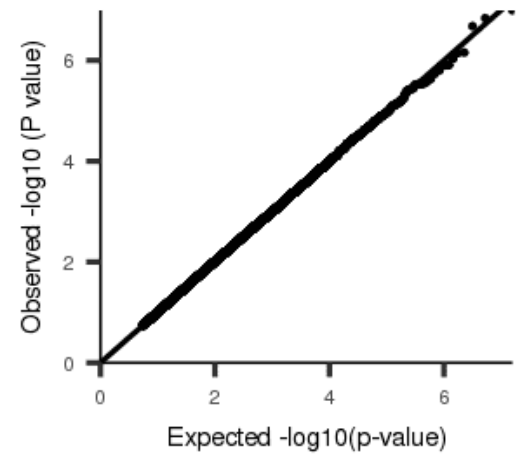

[back to list of plots](#)



Figure 22: T1 FIRST right amygdala volume

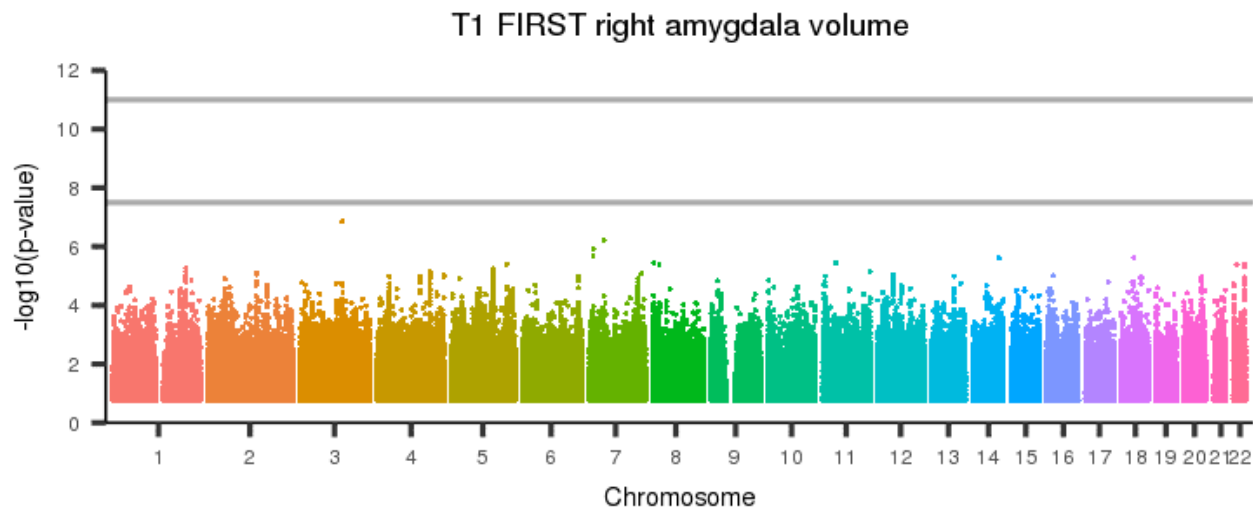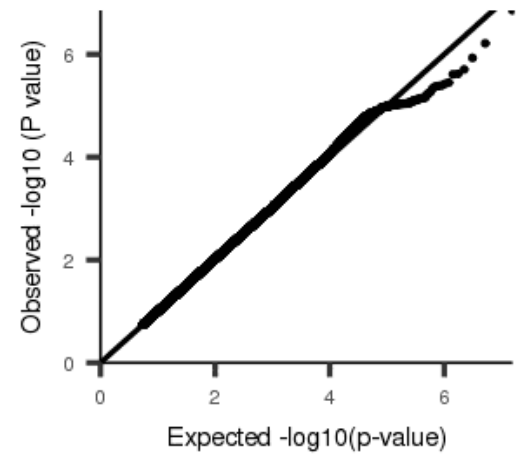

[back to list of plots](#)

Figure 23: T1 FIRST left accumbens volume

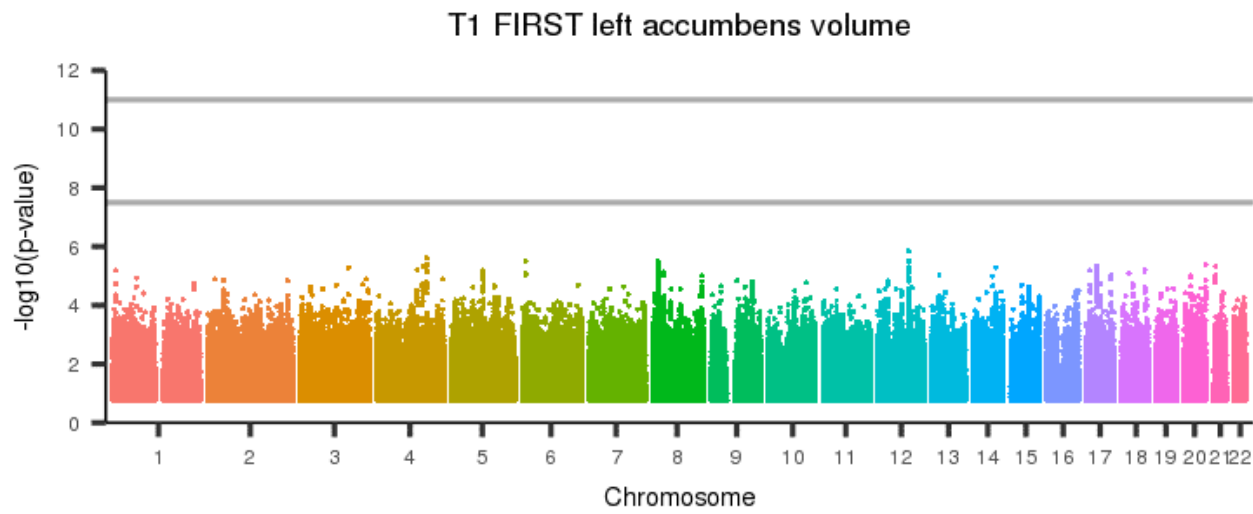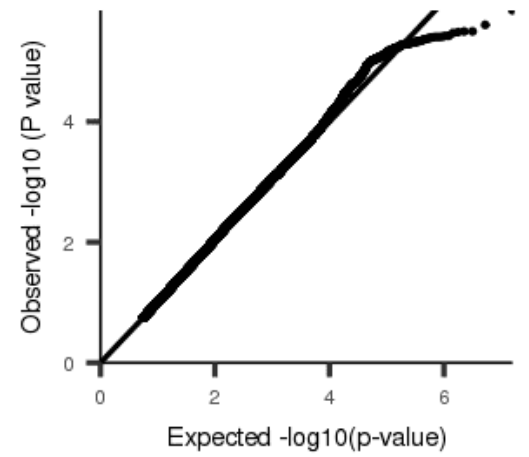

[back to list of plots](#)

Figure 24: T1 FIRST right accumbens volume

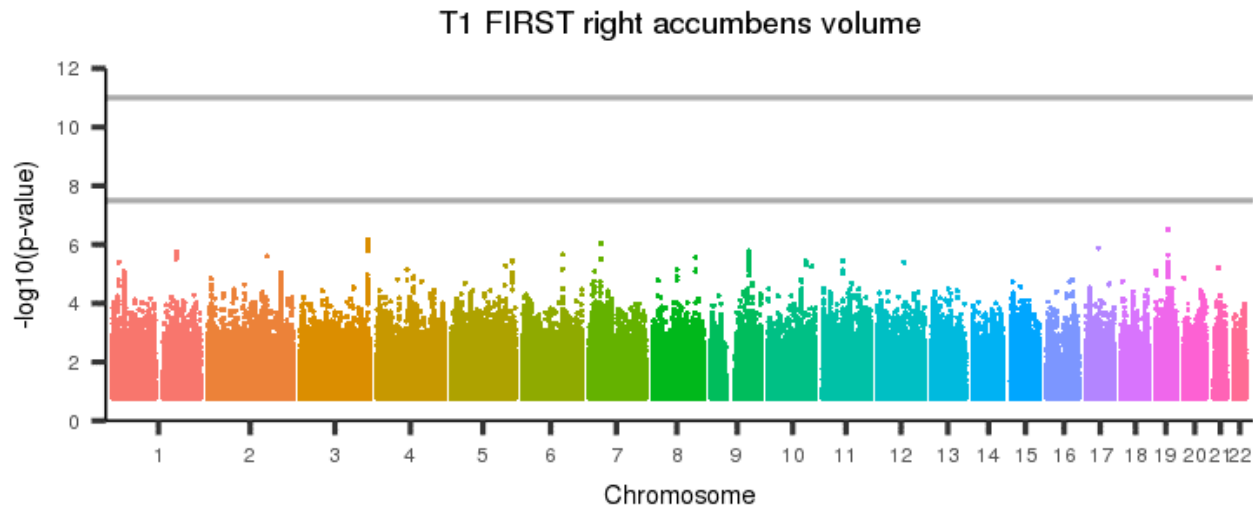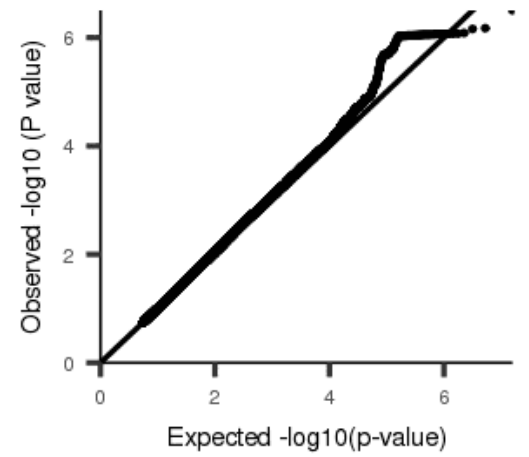

[back to list of plots](#)

Figure 25: T1 FIRST brain stem+4th ventricle volume

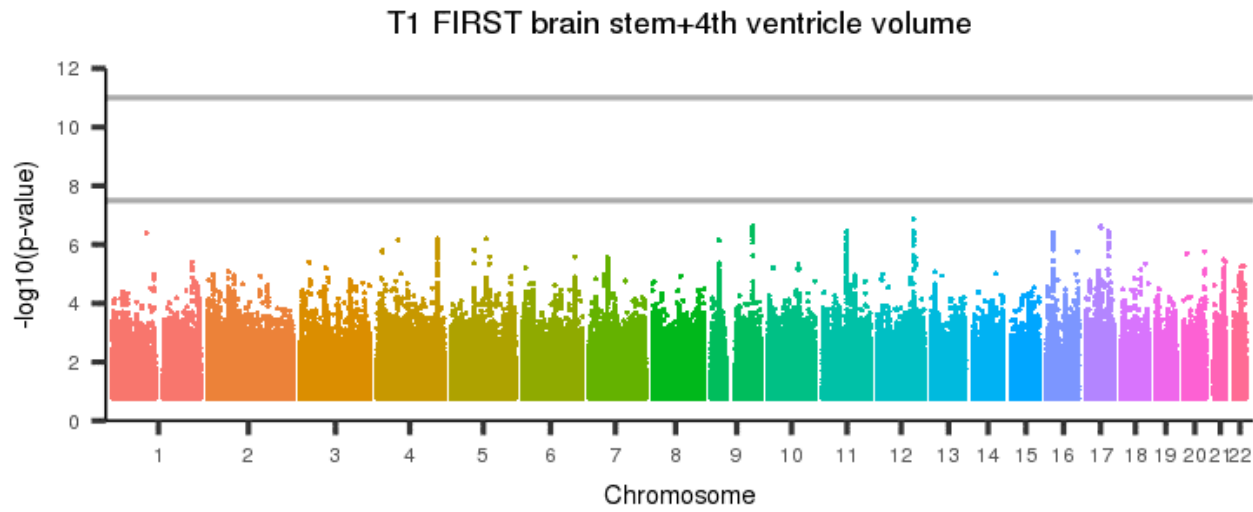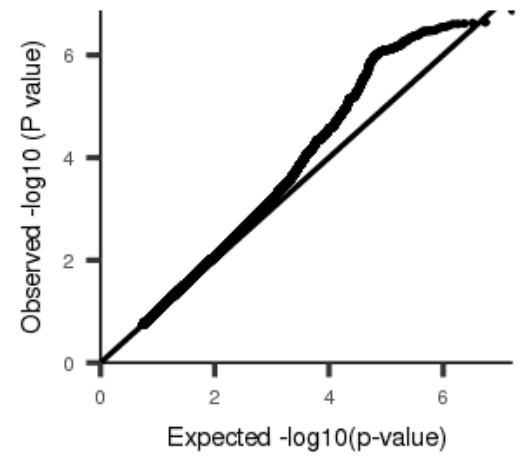

[back to list of plots](#)

Figure 26: T1 FAST ROIs L frontal pole

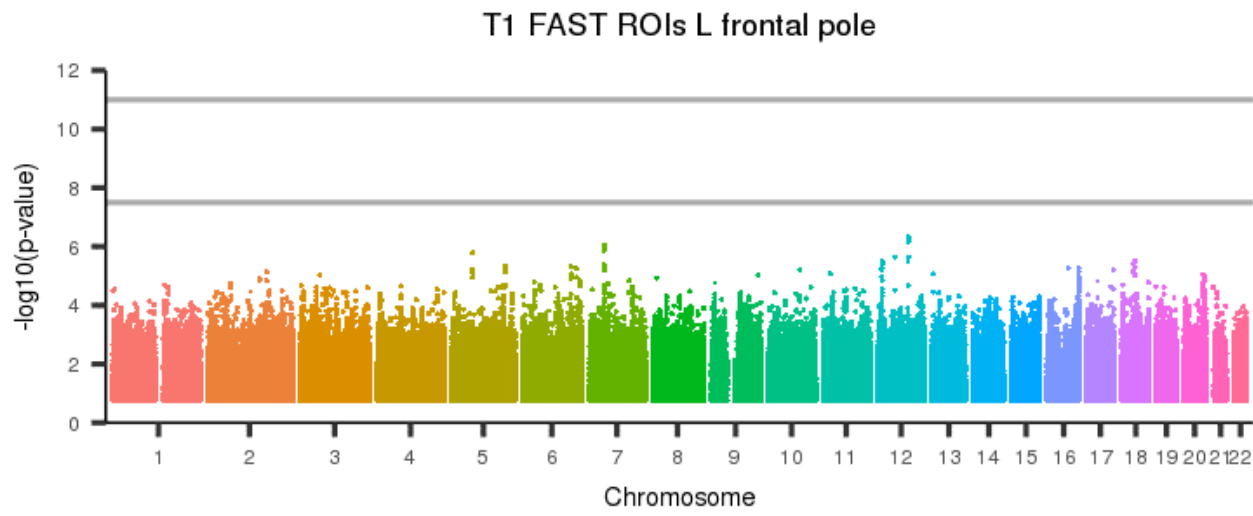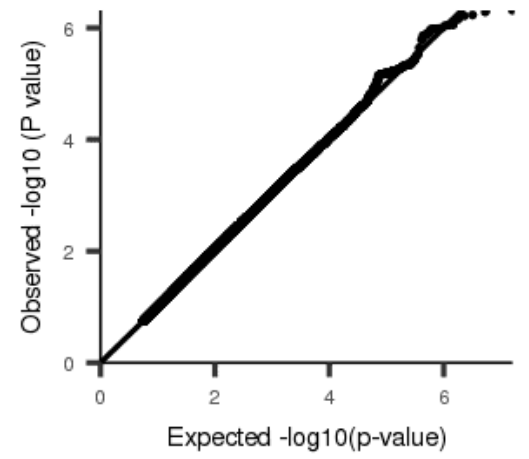

[back to list of plots](#)

Figure 27: T1 FAST ROIs R frontal pole

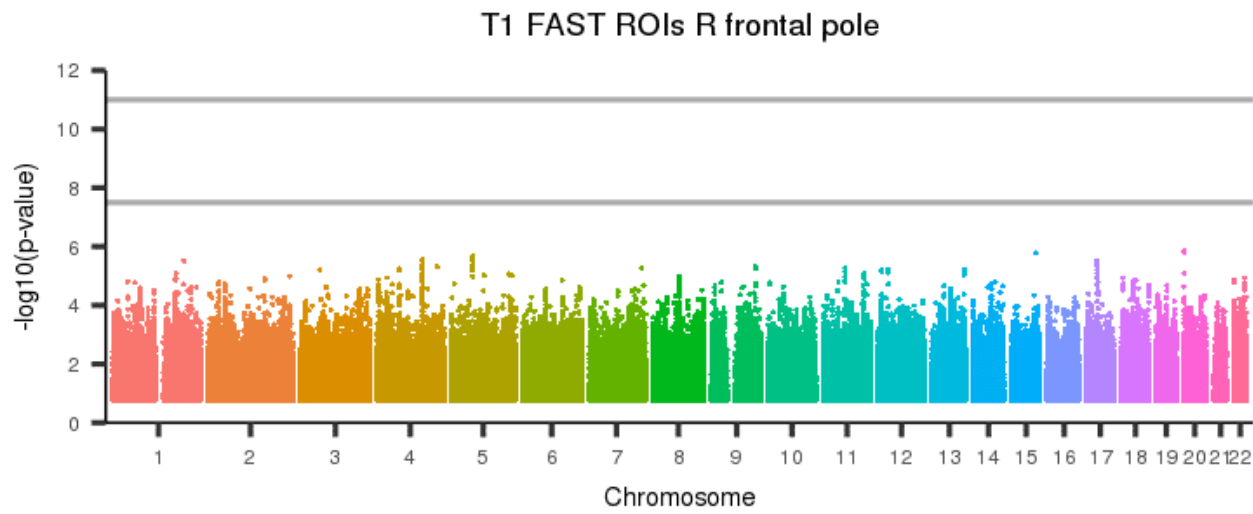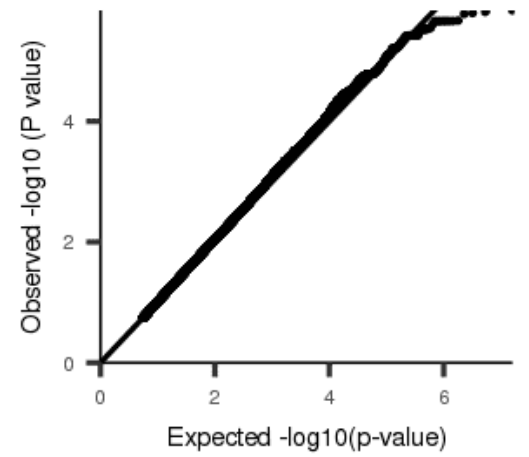

[back to list of plots](#)

Figure 28: T1 FAST ROIs L insular cortex

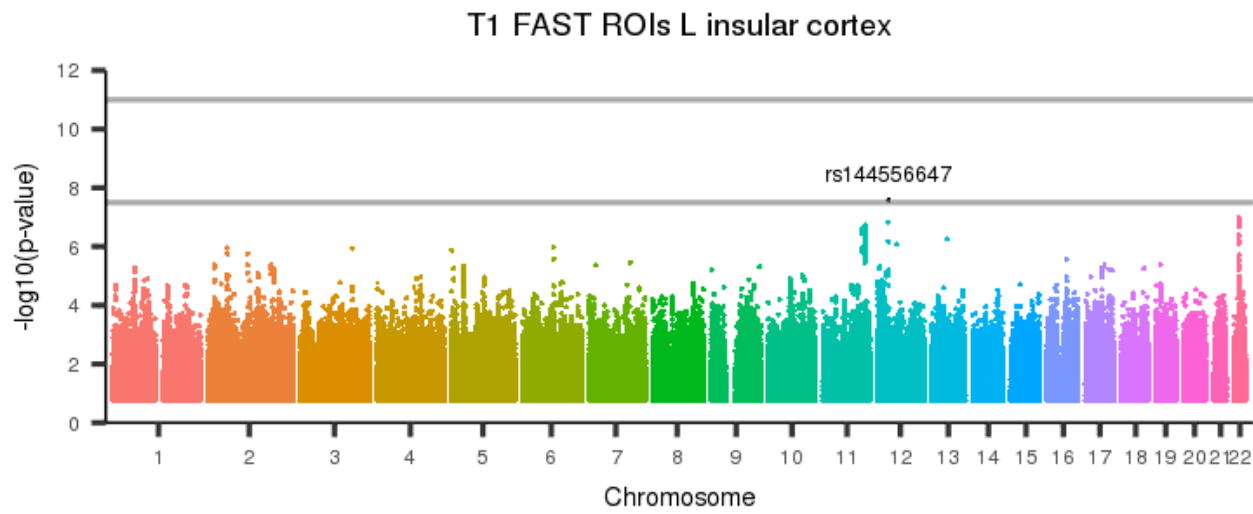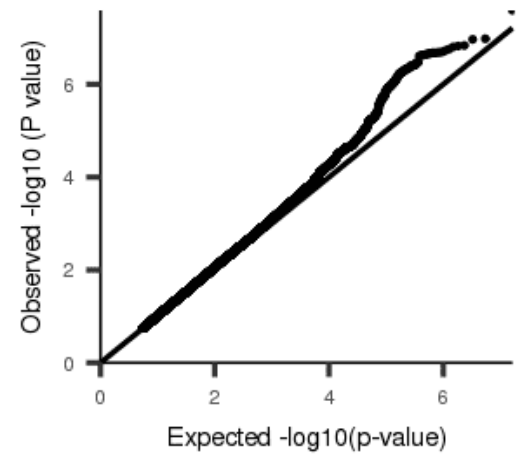

[back to list of plots](#)

Figure 29: T1 FAST ROIs R insular cortex

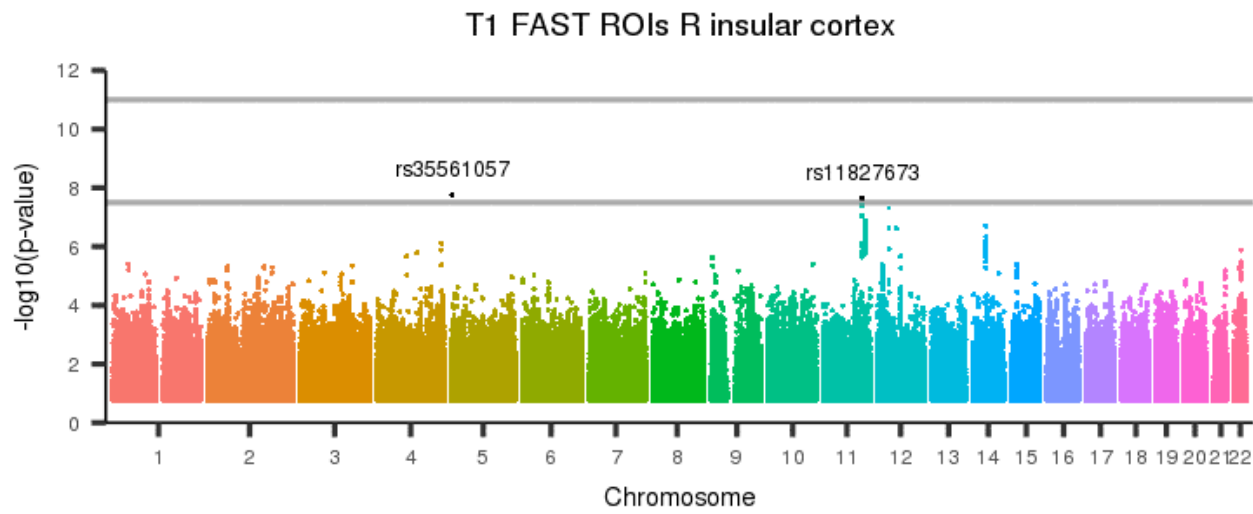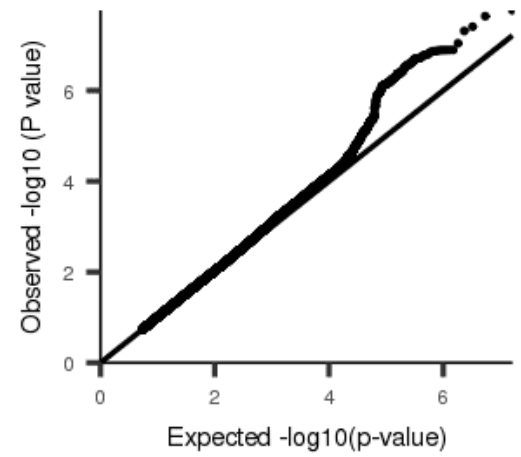

[back to list of plots](#)



Figure 30: T1 FAST ROIs L sup front gyrus

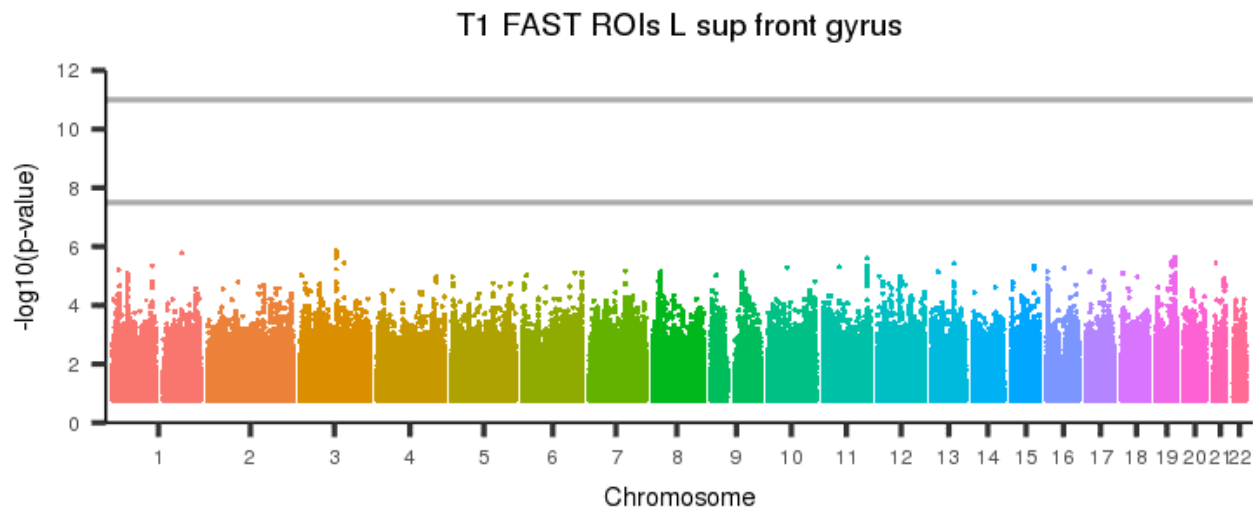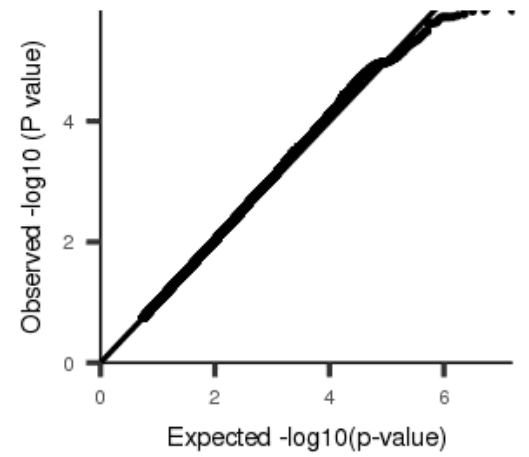

[back to list of plots](#)

Figure 31: T1 FAST ROIs R sup front gyrus

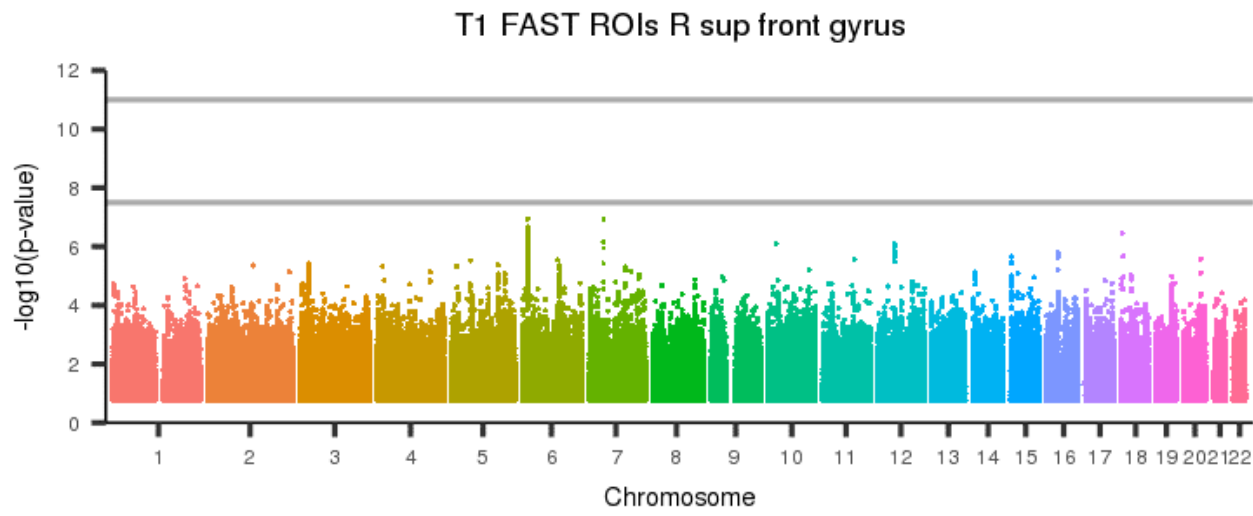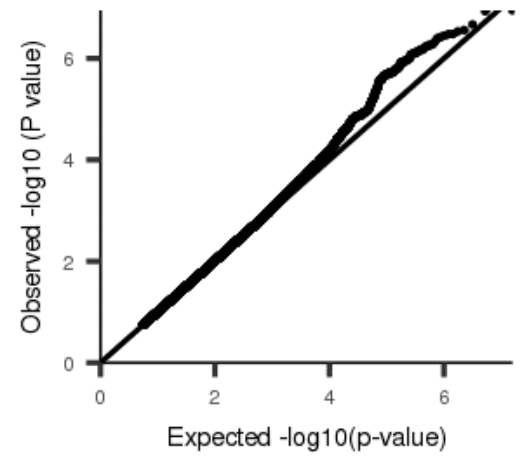

[back to list of plots](#)

Figure 32: T1 FAST ROIs L mid front gyrus

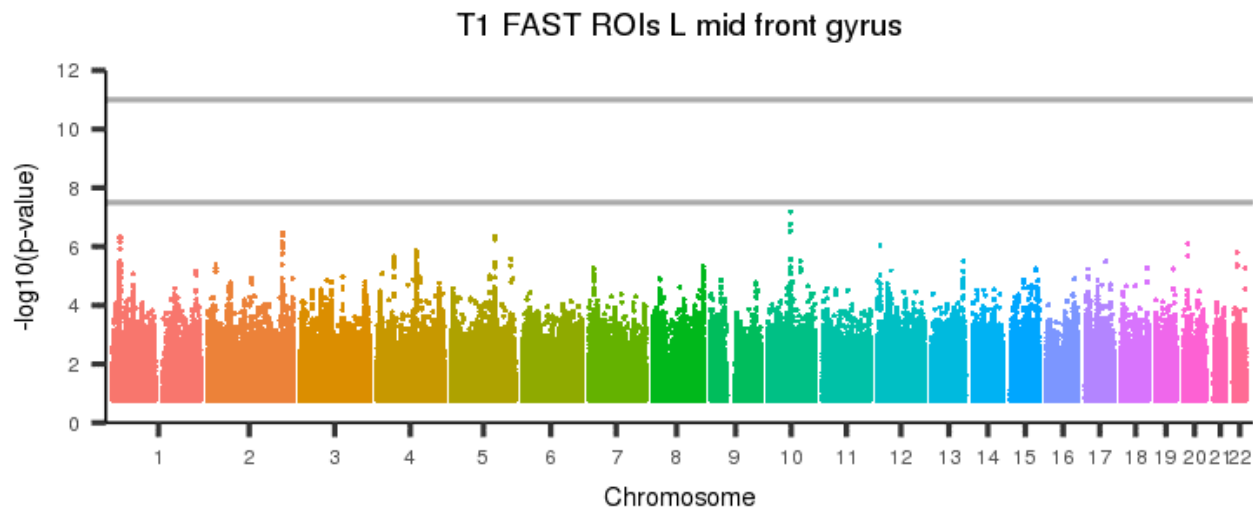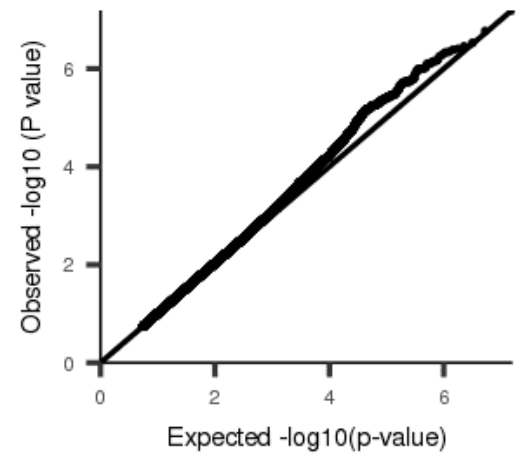

[back to list of plots](#)

Figure 33: T1 FAST ROIs R mid front gyrus

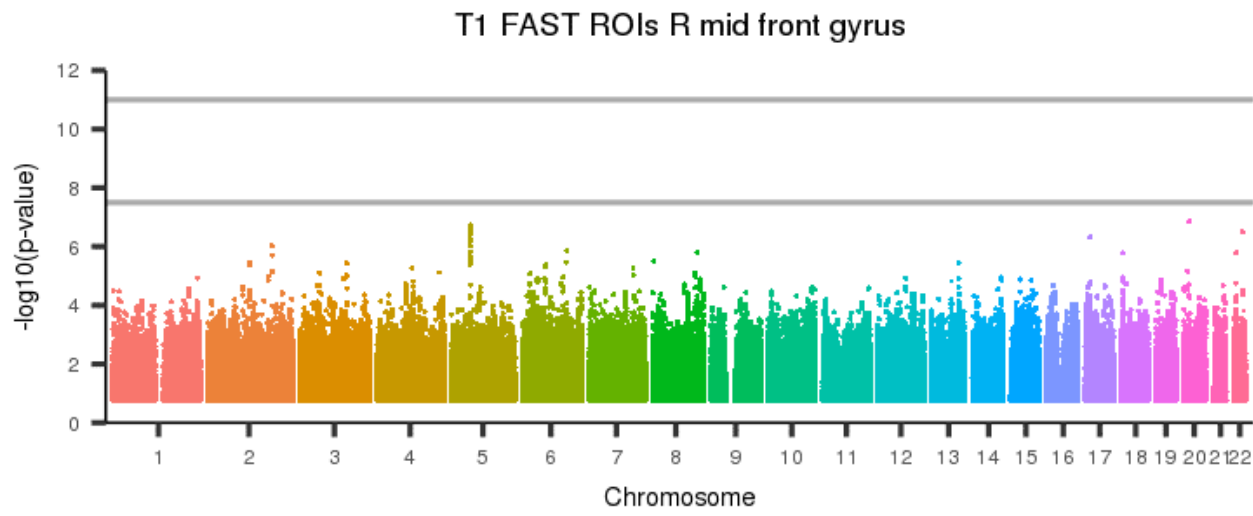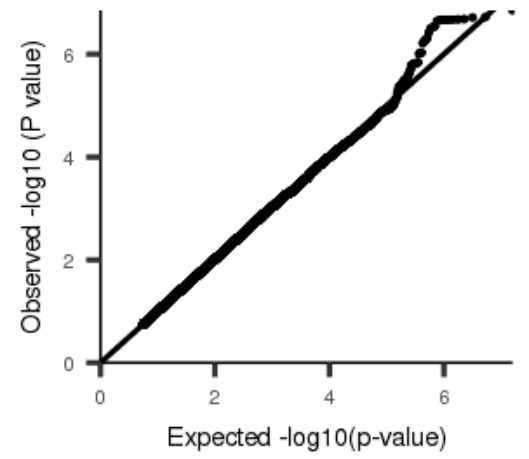

[back to list of plots](#)

Figure 34: T1 FAST ROIs L inf front gyrus parstri

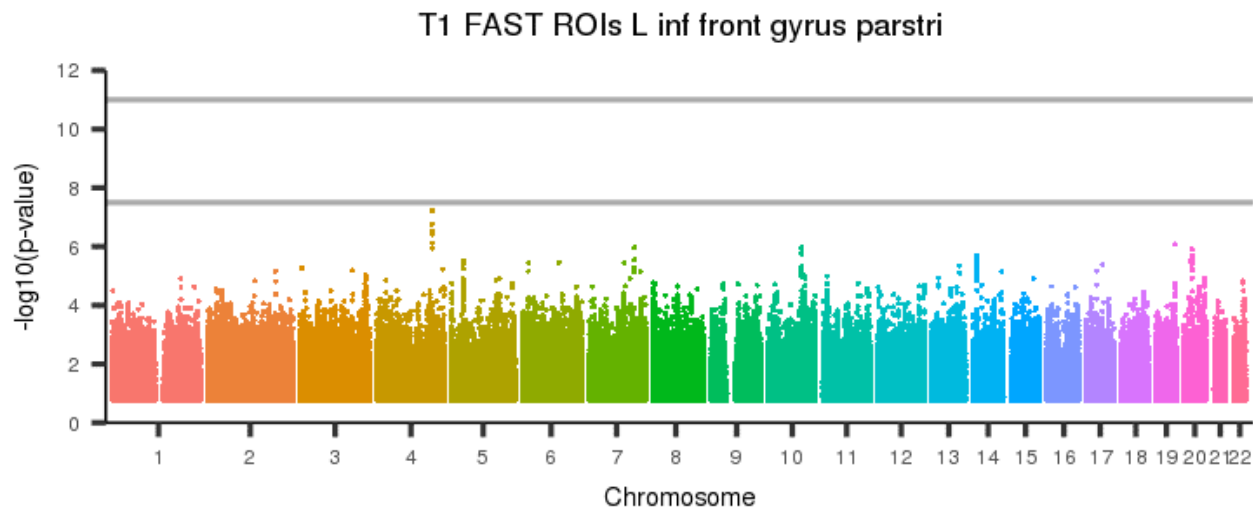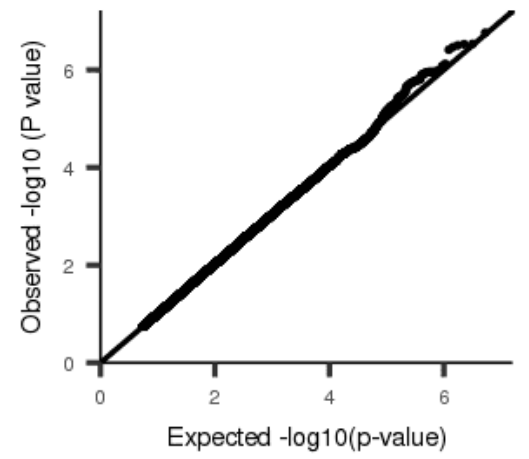

[back to list of plots](#)

Figure 35: T1 FAST ROIs R inf front gyrus parstri

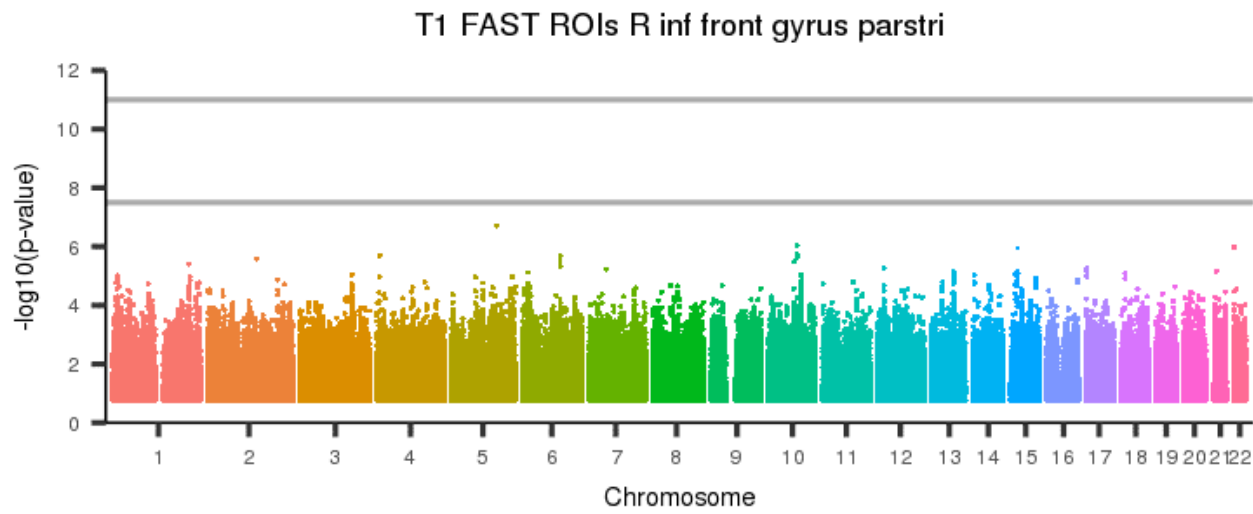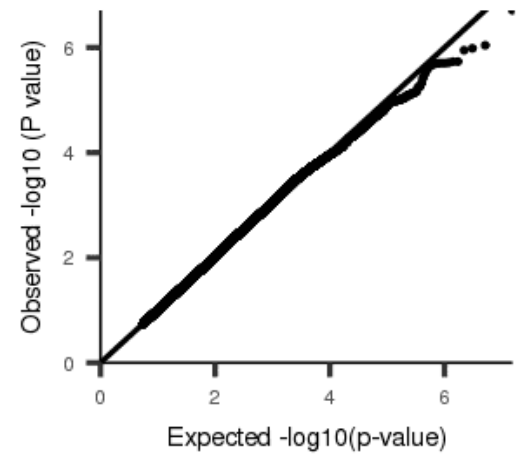

[back to list of plots](#)

Figure 36: T1 FAST ROIs L inf front gyrus parsop

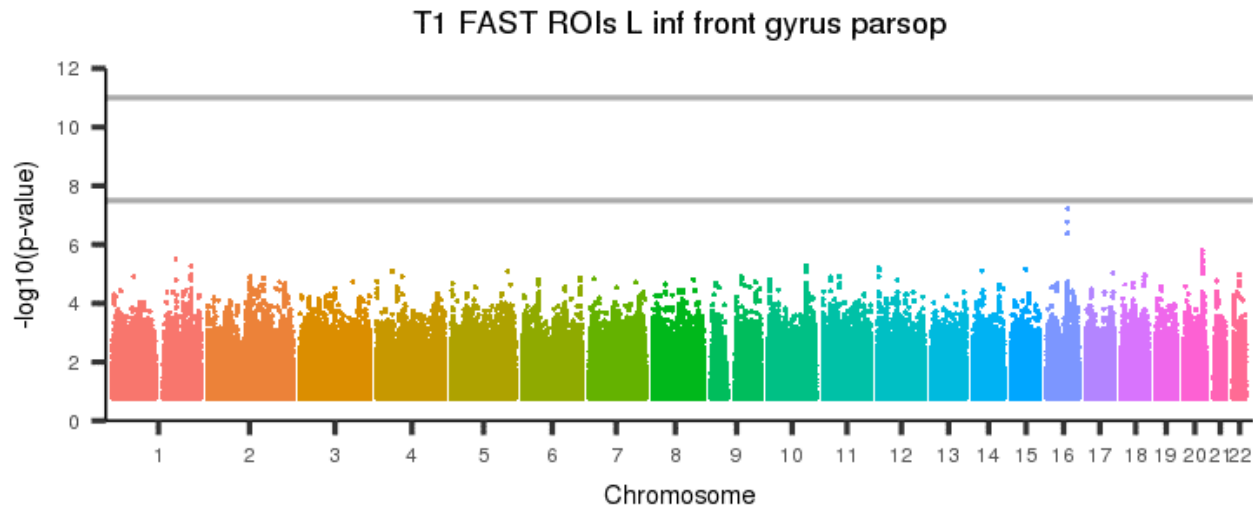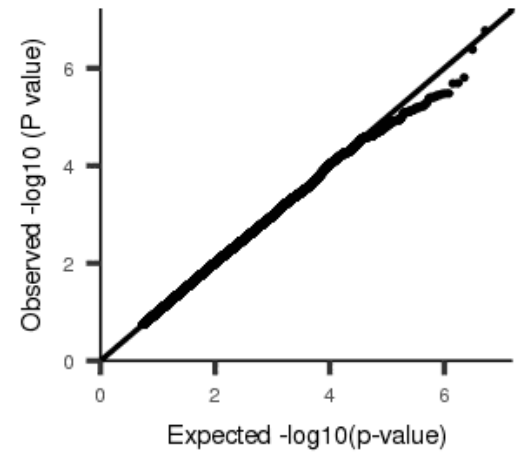

[back to list of plots](#)

Figure 37: T1 FAST ROIs R inf front gyrus parsop

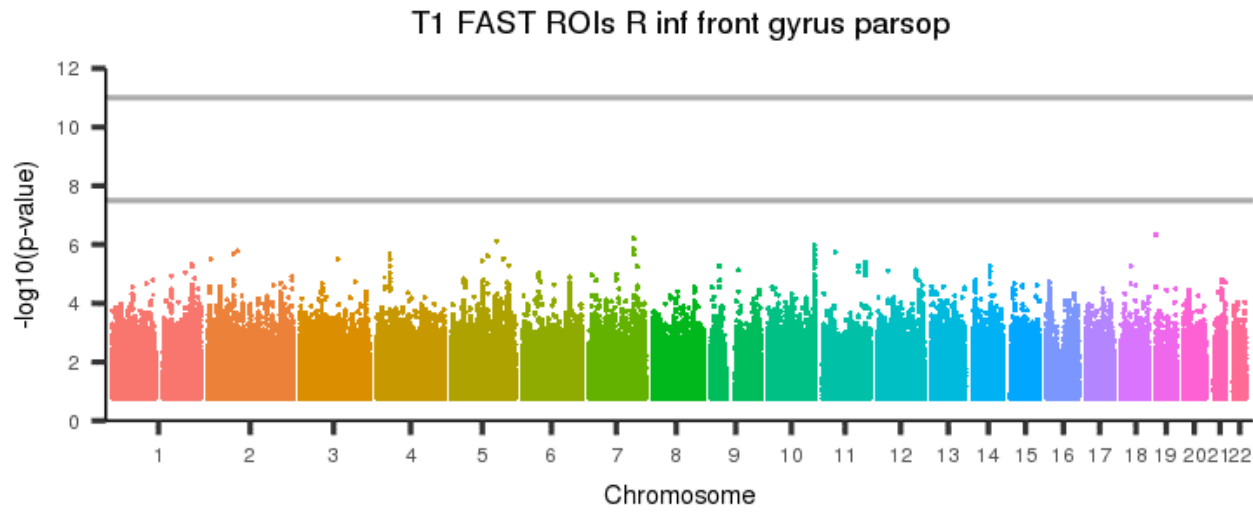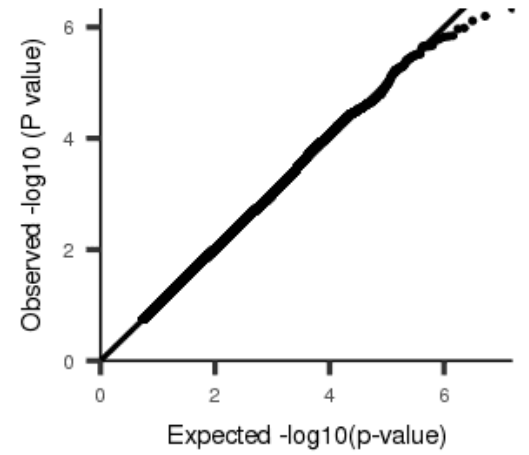

[back to list of plots](#)



Figure 38: T1 FAST ROIs L precentral gyrus

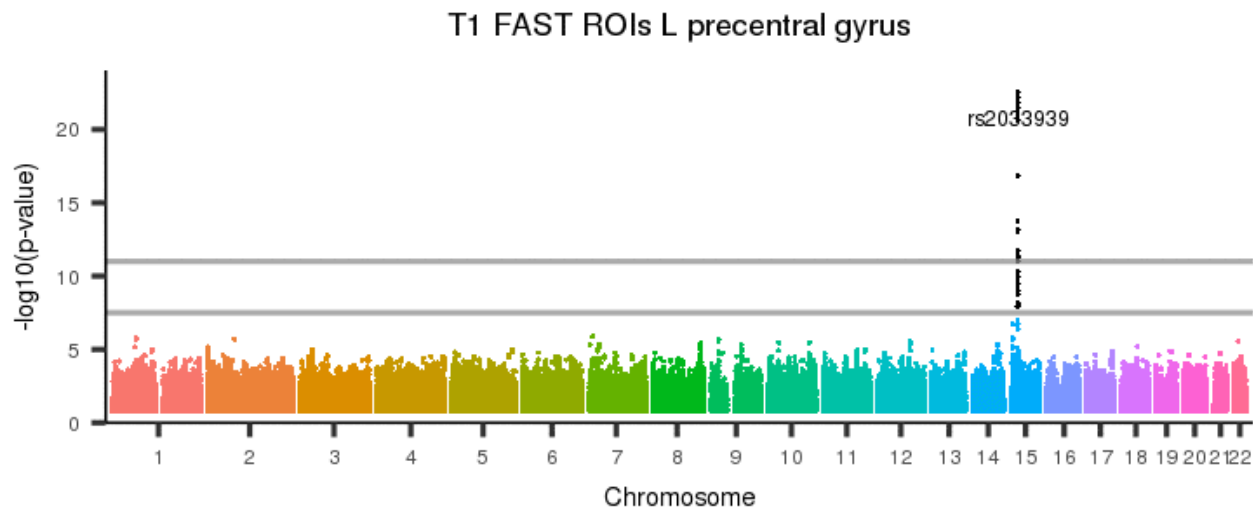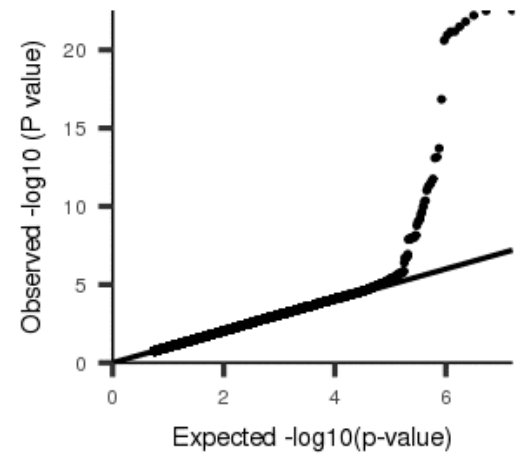

[back to list of plots](#)

Figure 39: T1 FAST ROIs R precentral gyrus

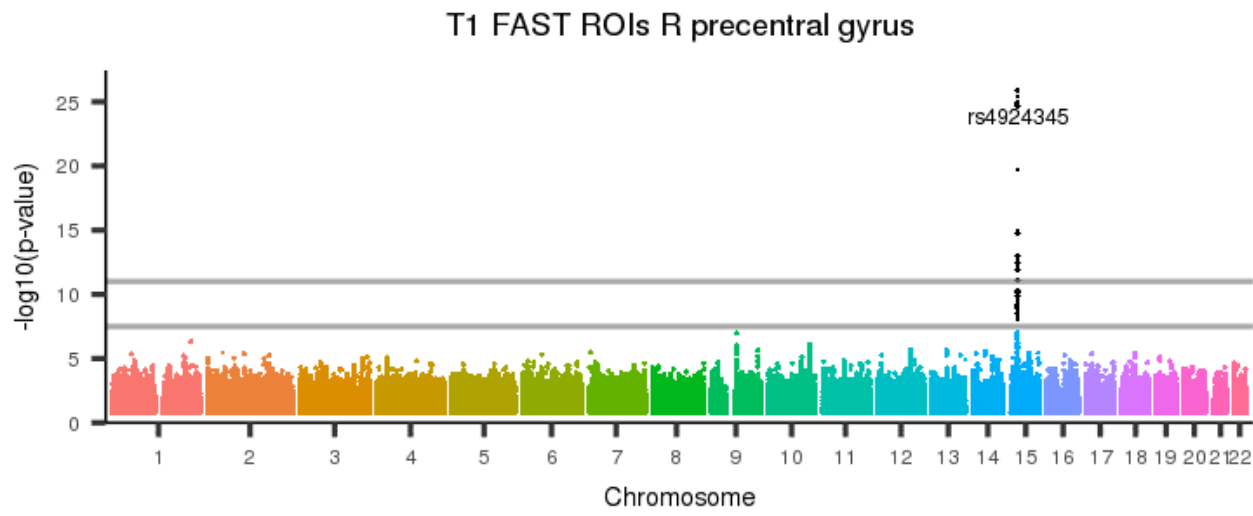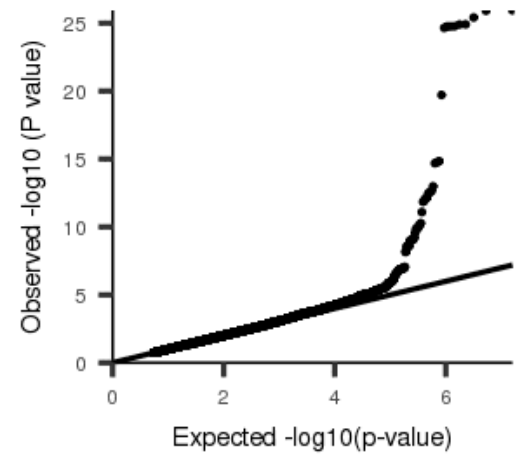

[back to list of plots](#)

Figure 40: T1 FAST ROIs L temporal pole

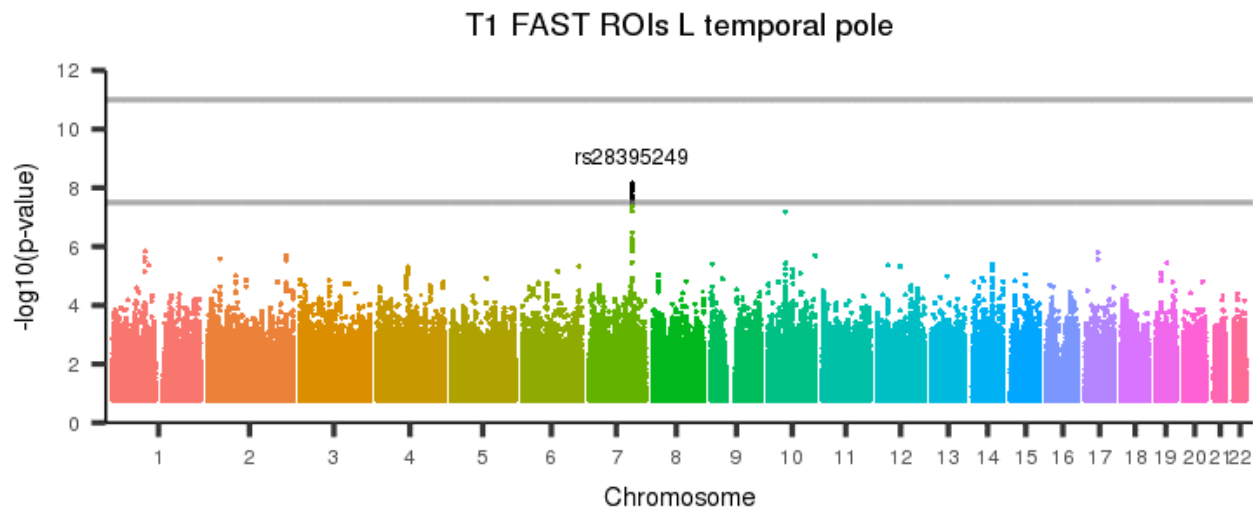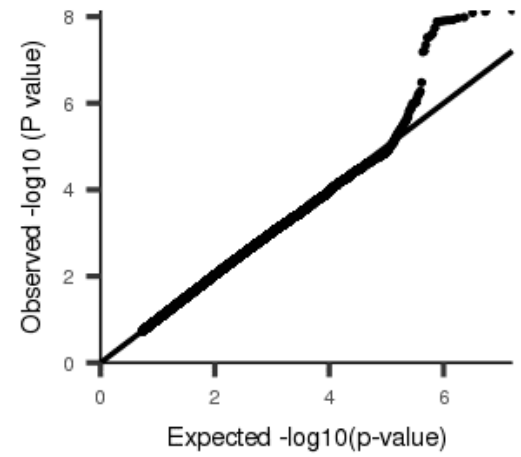

[back to list of plots](#)

Figure 41: T1 FAST ROIs R temporal pole

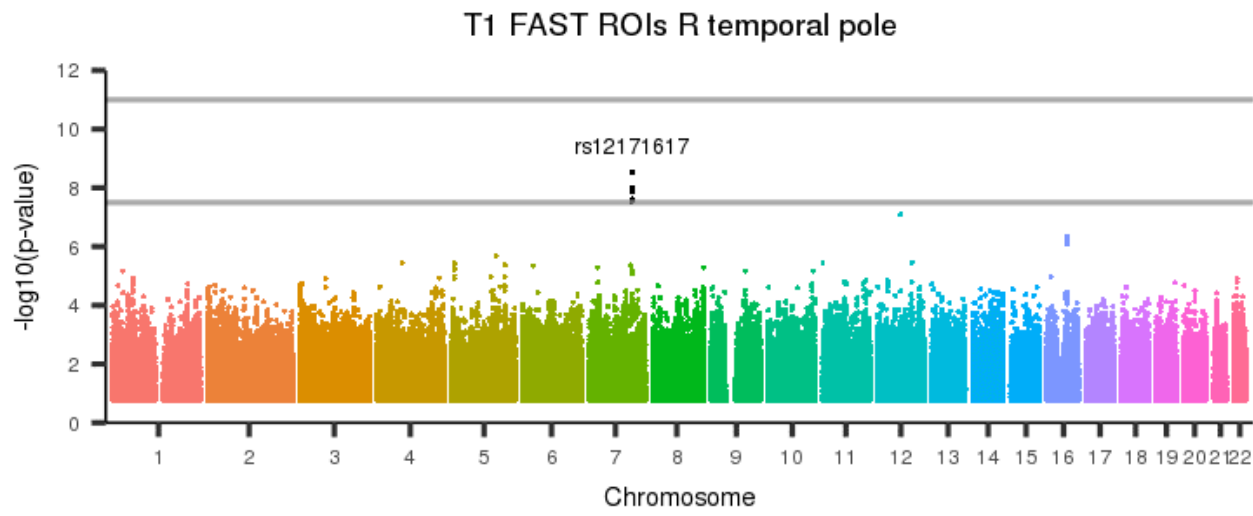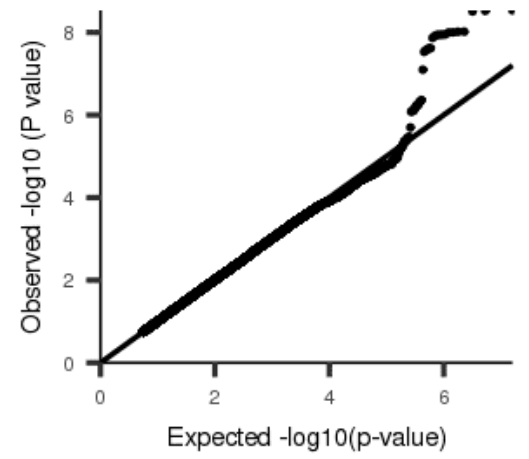

[back to list of plots](#)

Figure 42: T1 FAST ROIs L sup temp gyrus ant

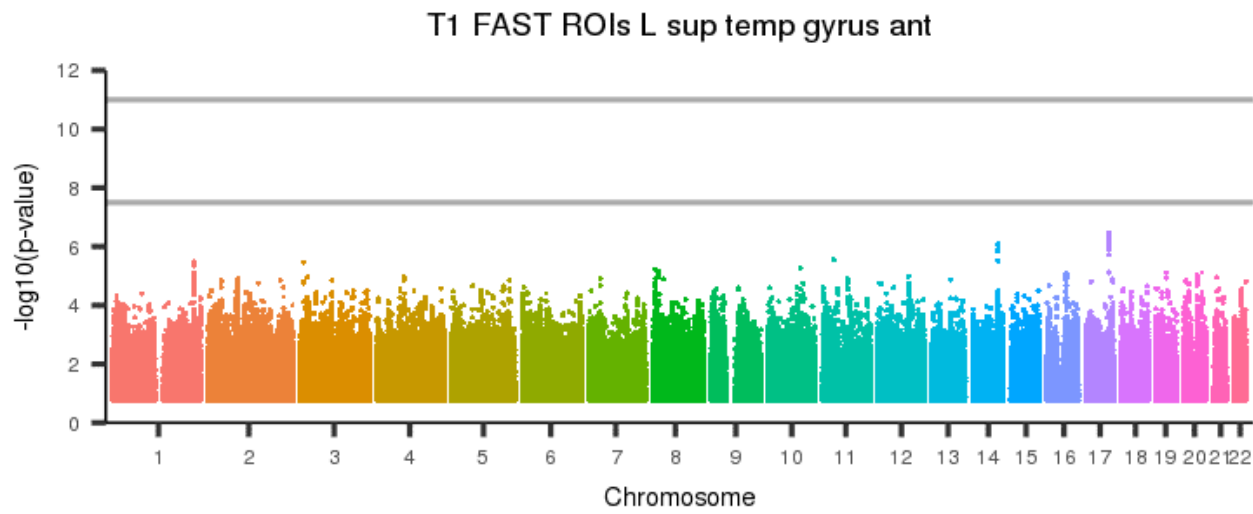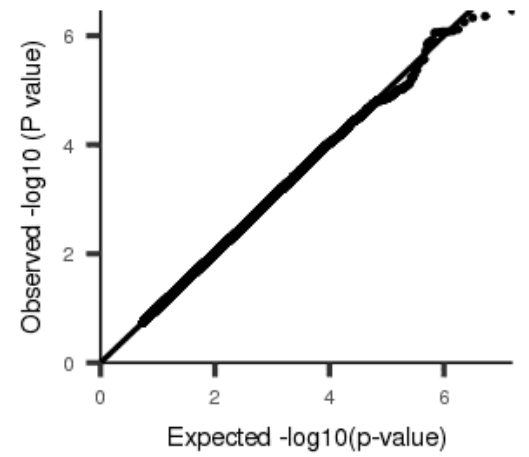

[back to list of plots](#)

Figure 43: T1 FAST ROIs R sup temp gyrus ant

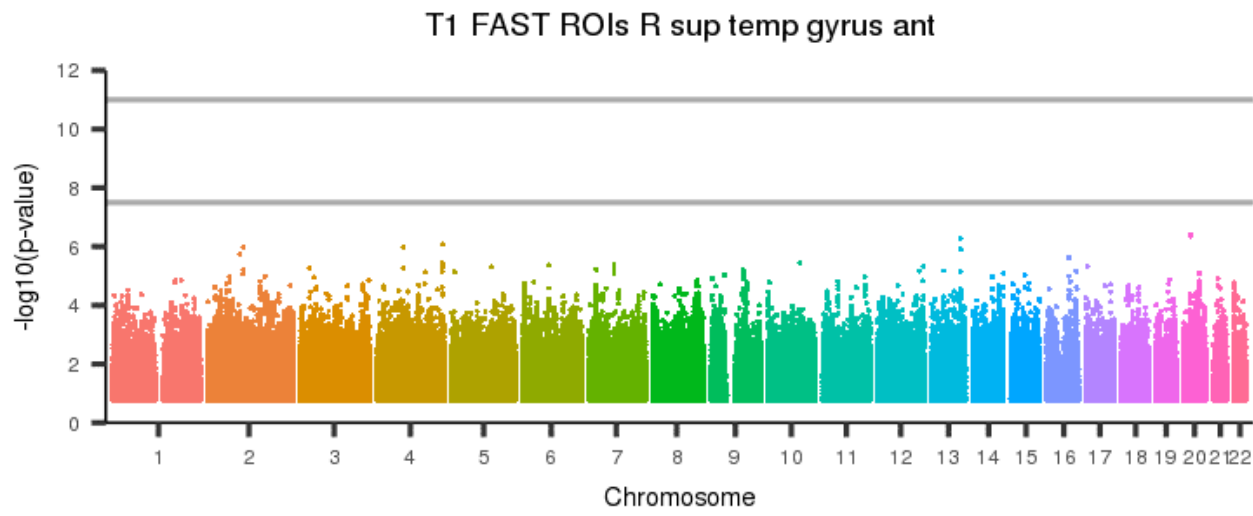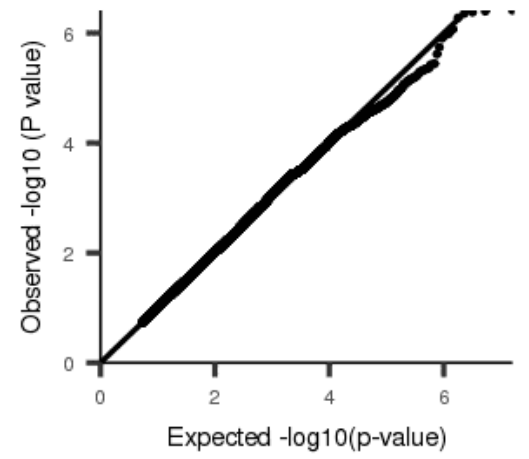

[back to list of plots](#)

Figure 44: T1 FAST ROIs L sup temp gyrus post

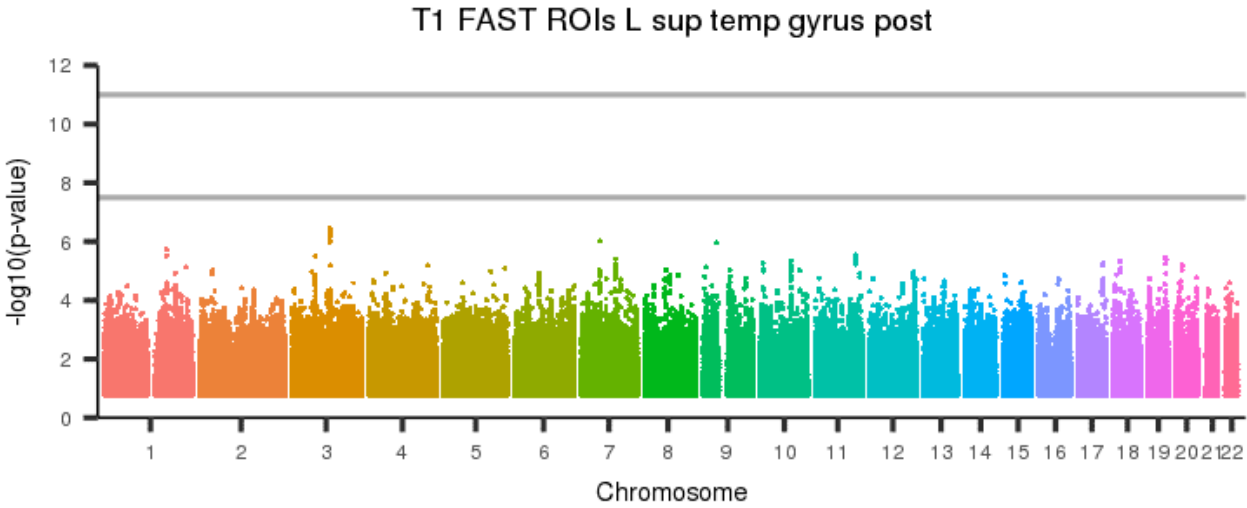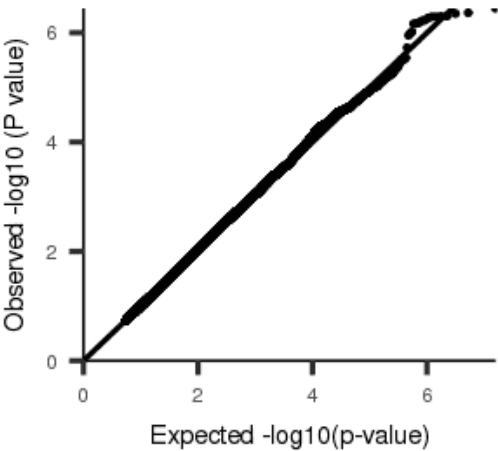

[back to list of plots](#)

Figure 45: T1 FAST ROIs R sup temp gyrus post

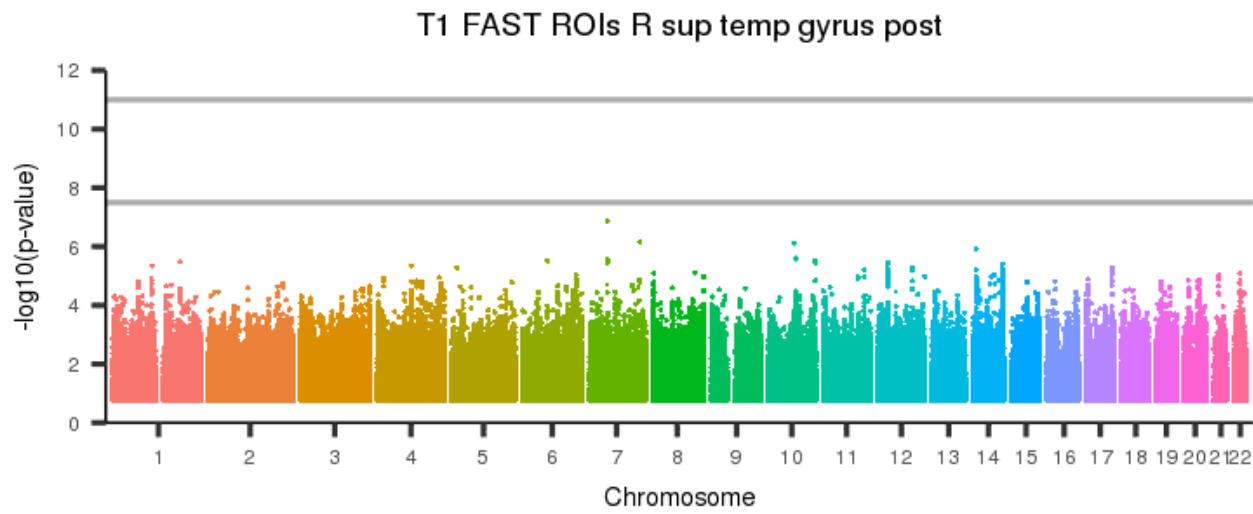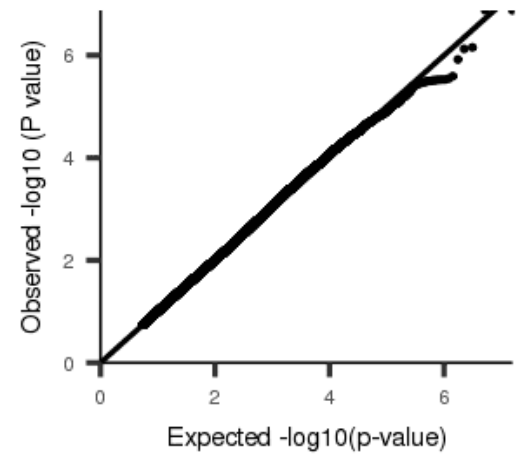

[back to list of plots](#)



Figure 46: T1 FAST ROIs L mid temp gyrus ant

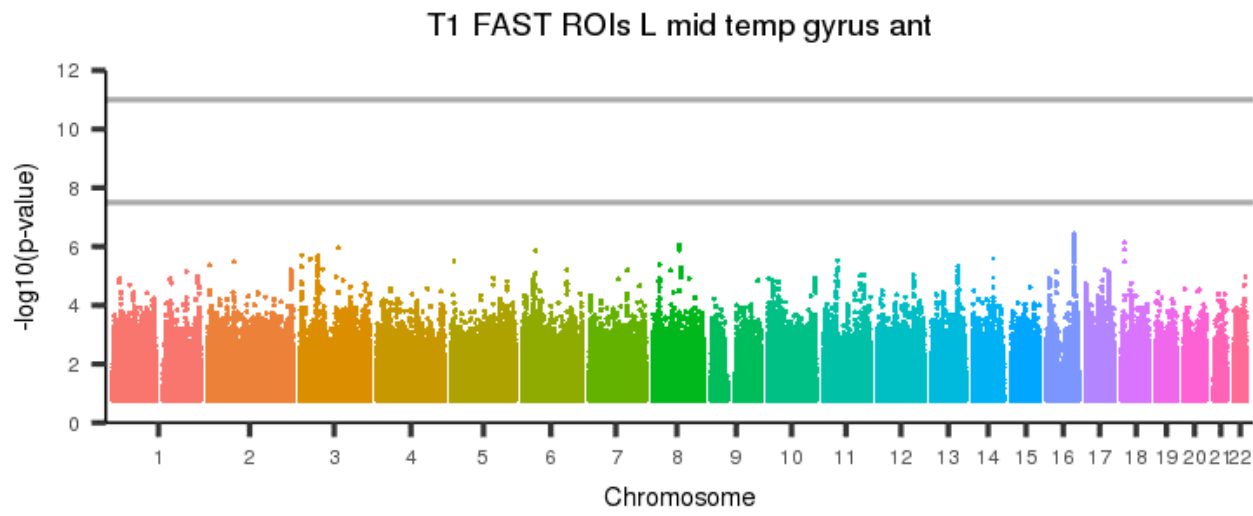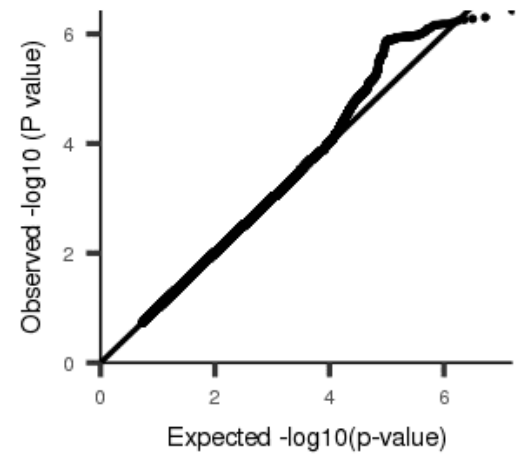

[back to list of plots](#)

Figure 47: T1 FAST ROIs R mid temp gyrus ant

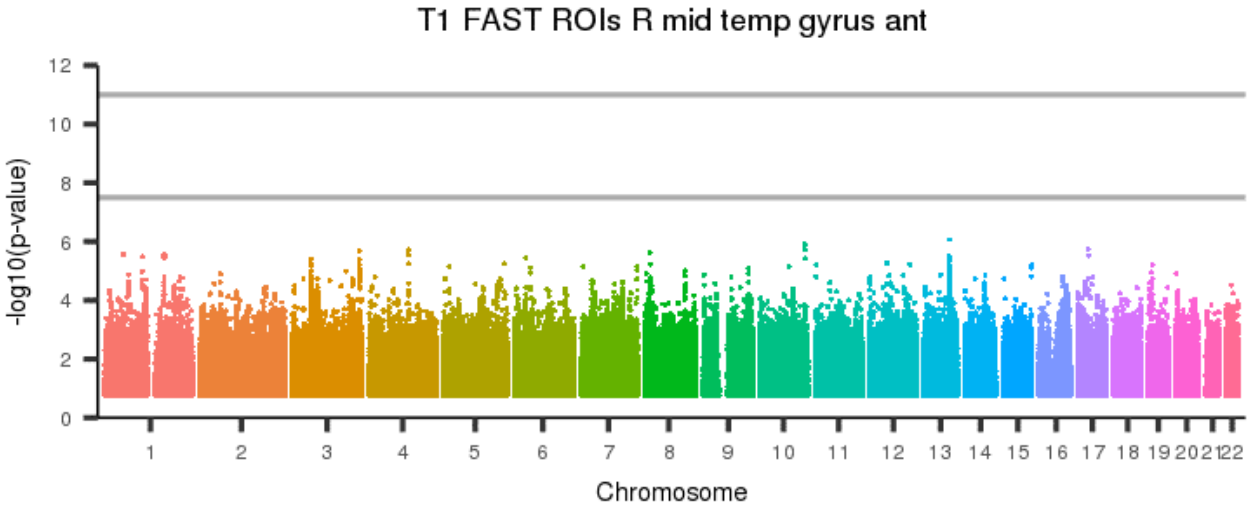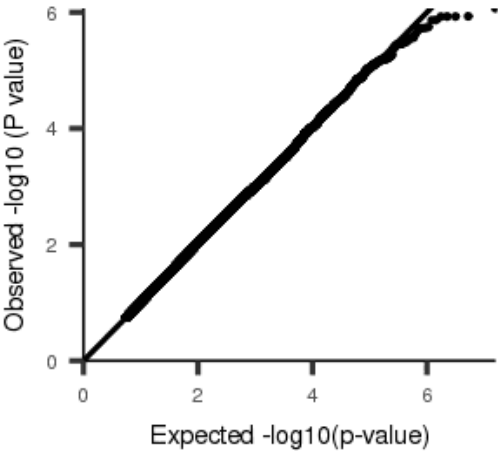

[back to list of plots](#)

Figure 48: T1 FAST ROIs L mid temp gyrus post

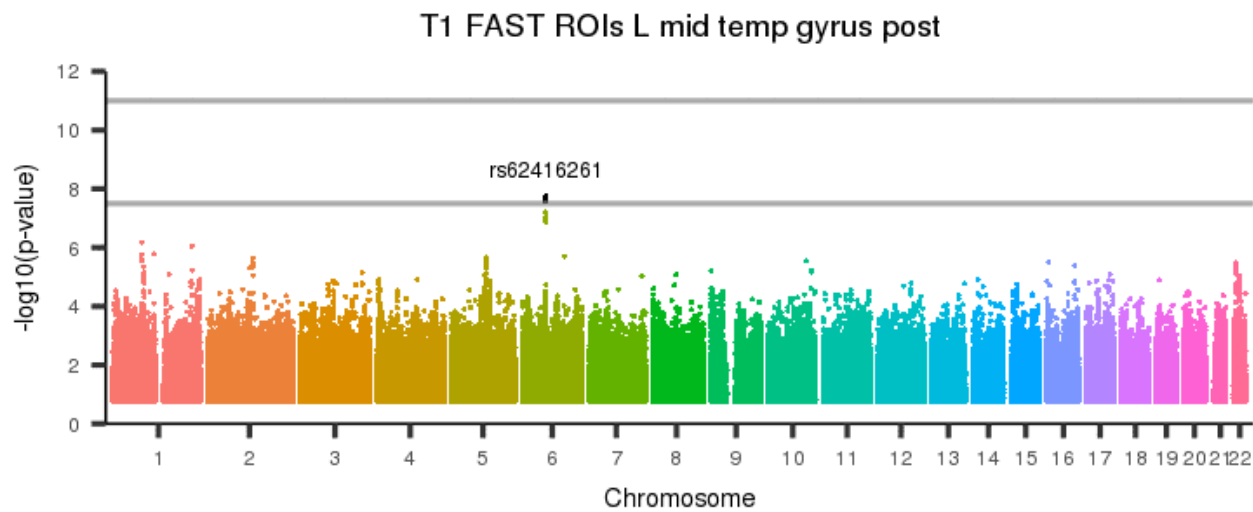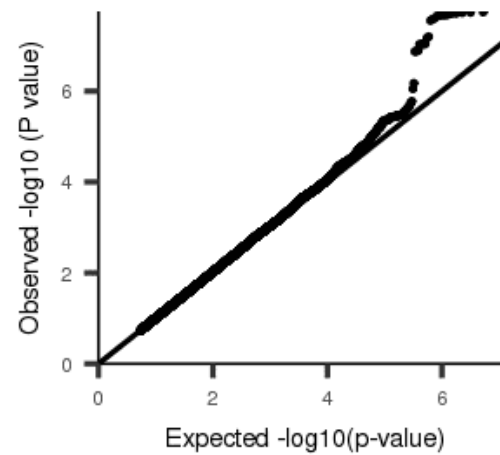

[back to list of plots](#)

Figure 49: T1 FAST ROIs R mid temp gyrus post

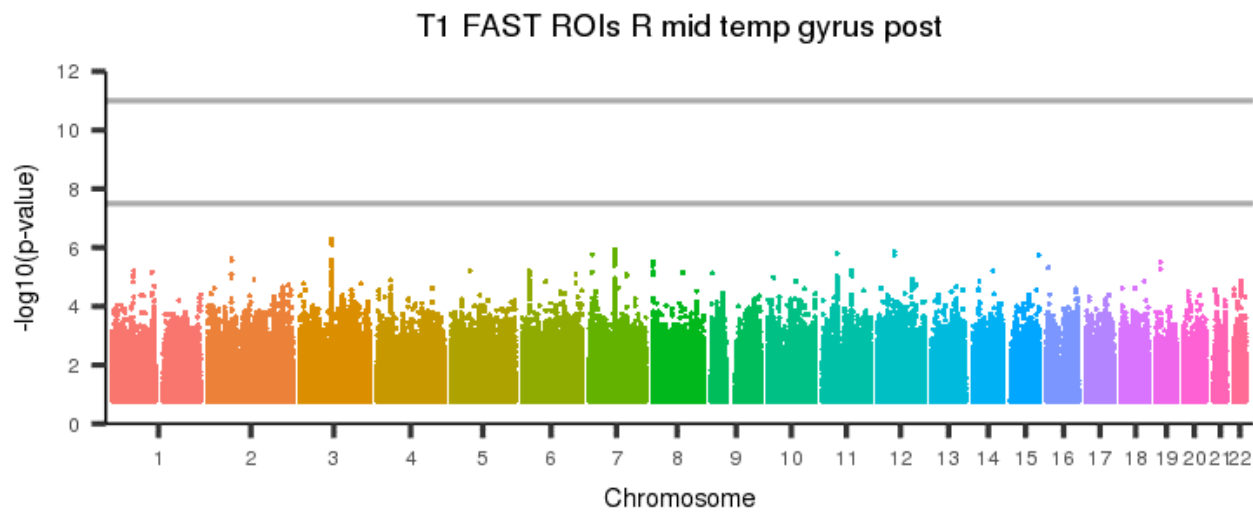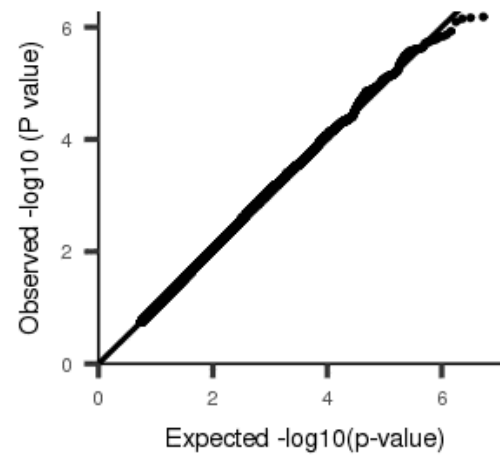

[back to list of plots](#)

Figure 50: T1 FAST ROIs L mid temp gyrus tempocc

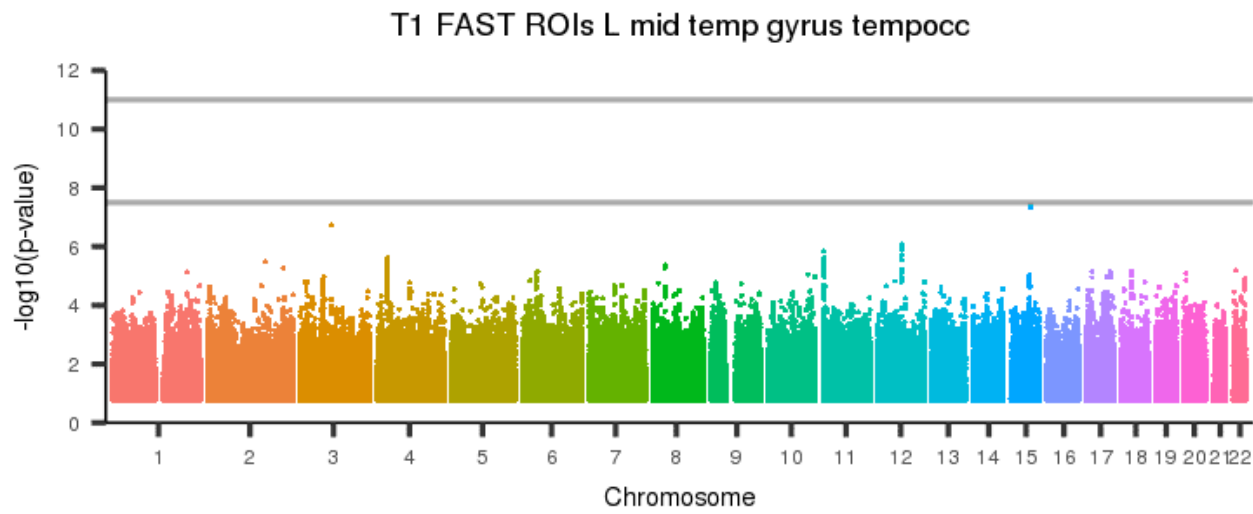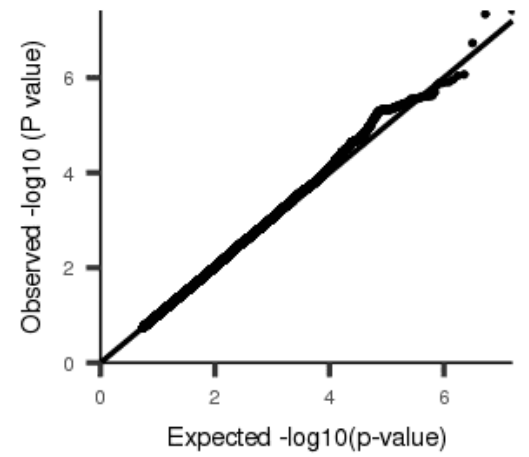

[back to list of plots](#)

Figure 51: T1 FAST ROIs R mid temp gyrus tempocc

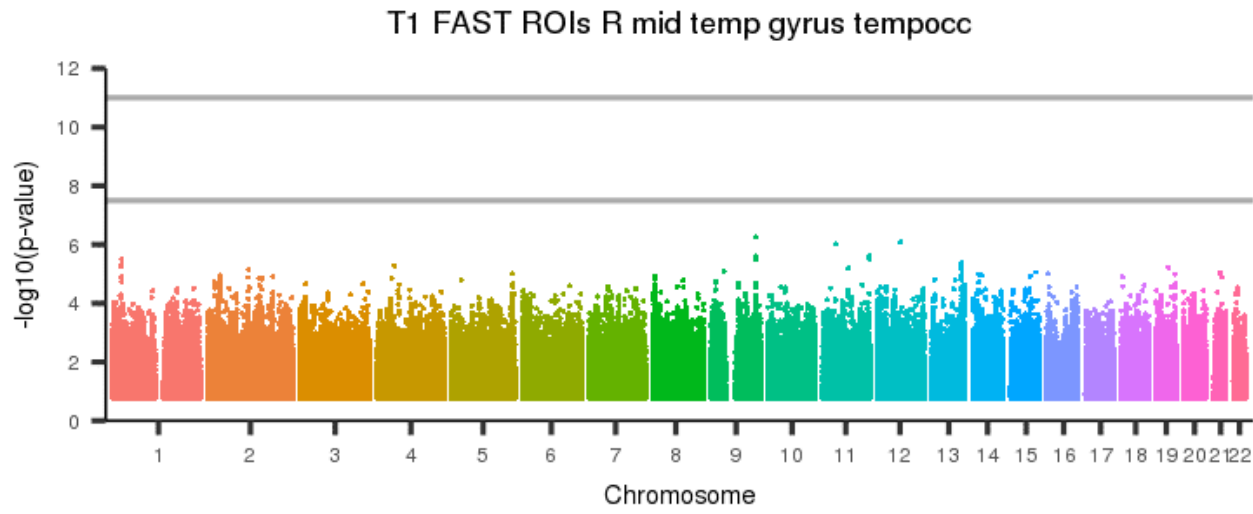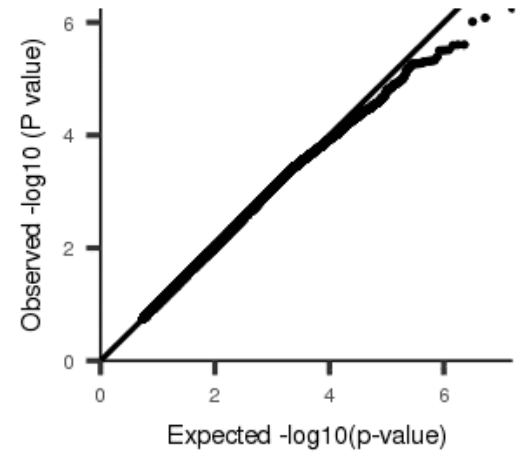

[back to list of plots](#)

Figure 52: T1 FAST ROIs L inf temp gyrus ant

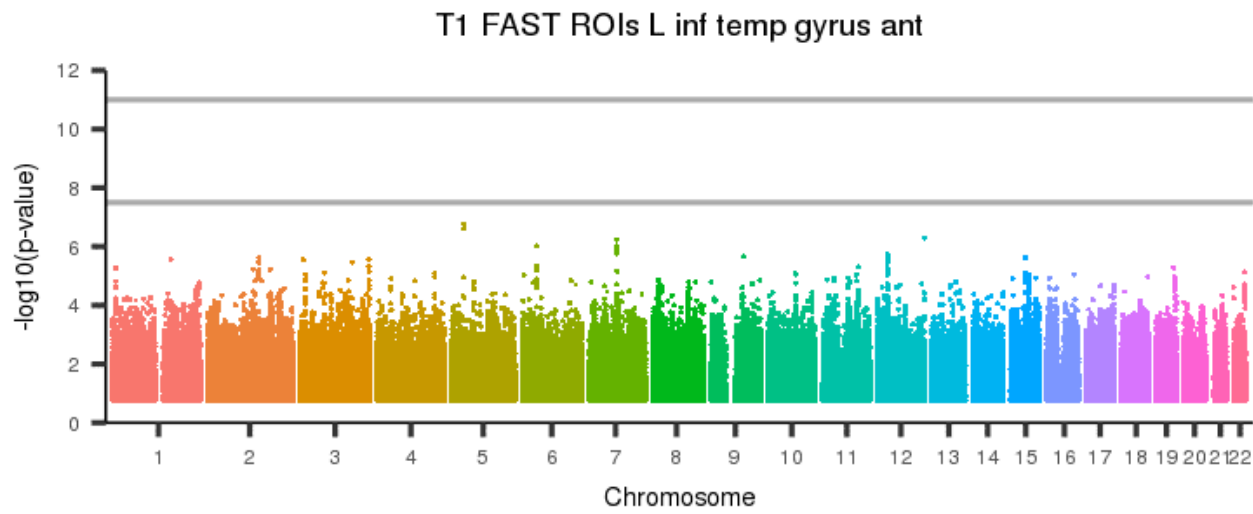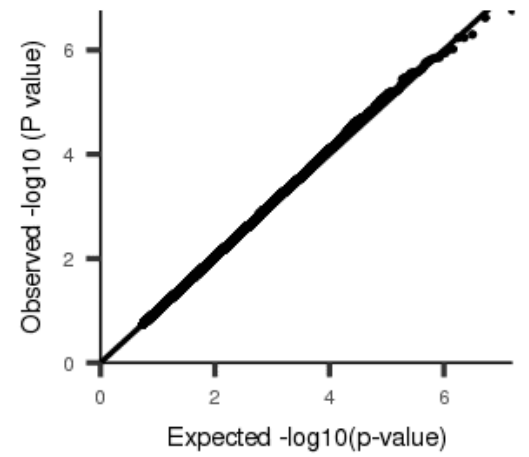

[back to list of plots](#)

Figure 53: T1 FAST ROIs R inf temp gyrus ant

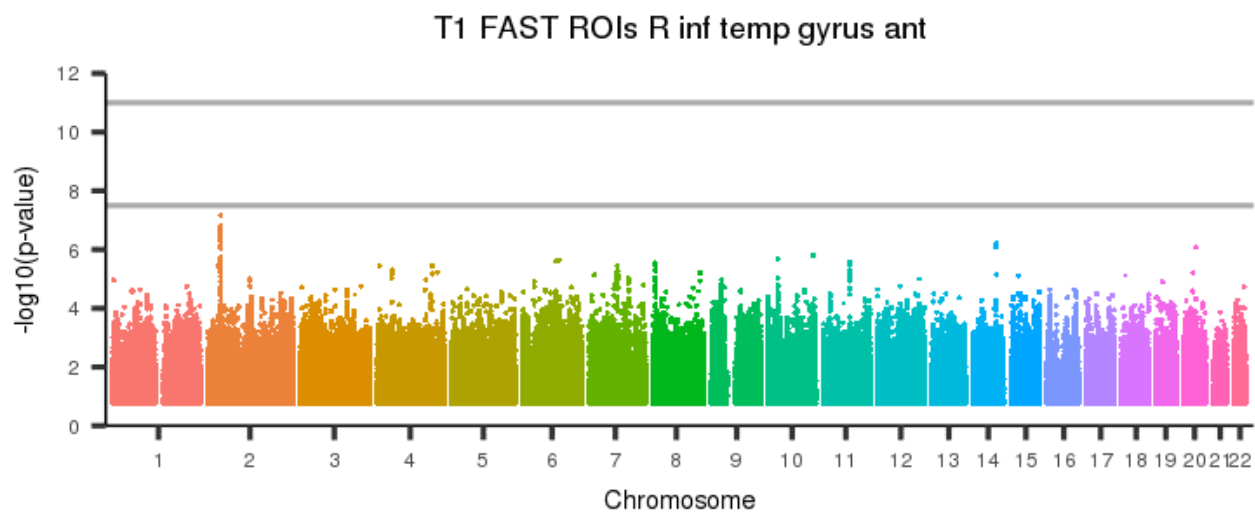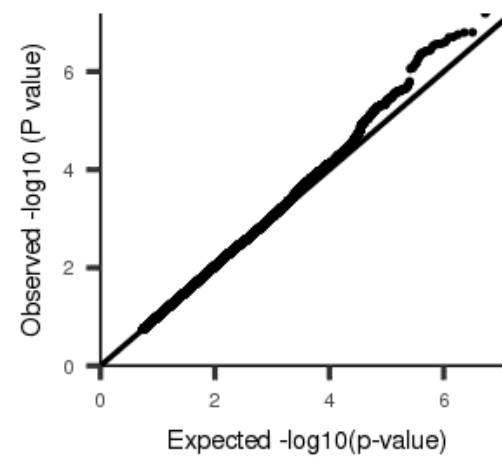

[back to list of plots](#)



Figure 54: T1 FAST ROIs L inf temp gyrus post

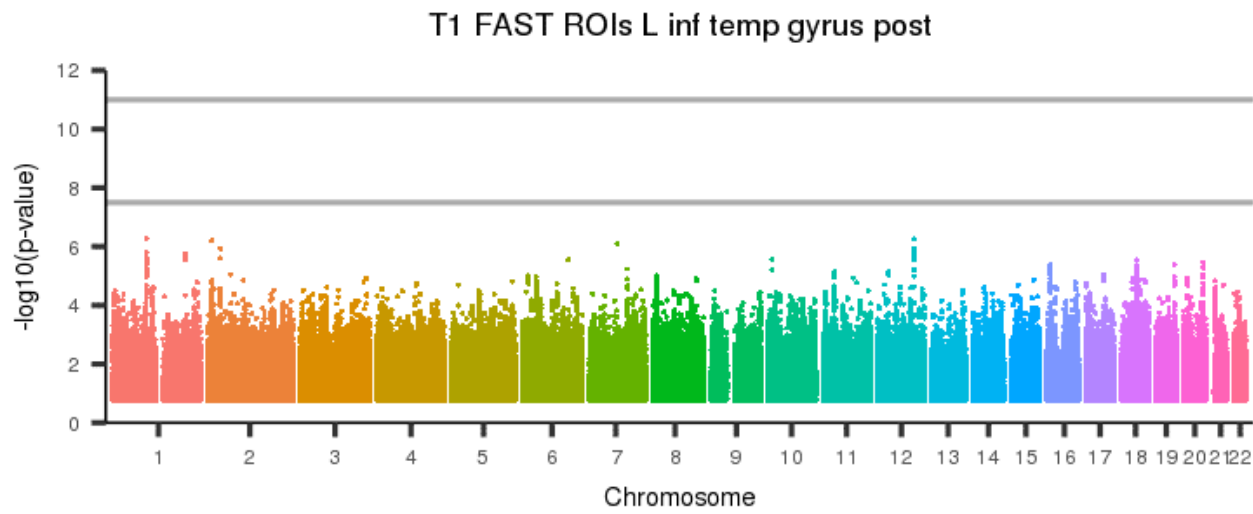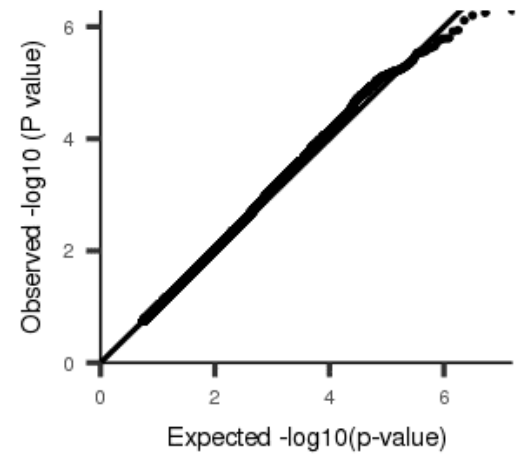

[back to list of plots](#)

Figure 55: T1 FAST ROIs R inf temp gyrus post

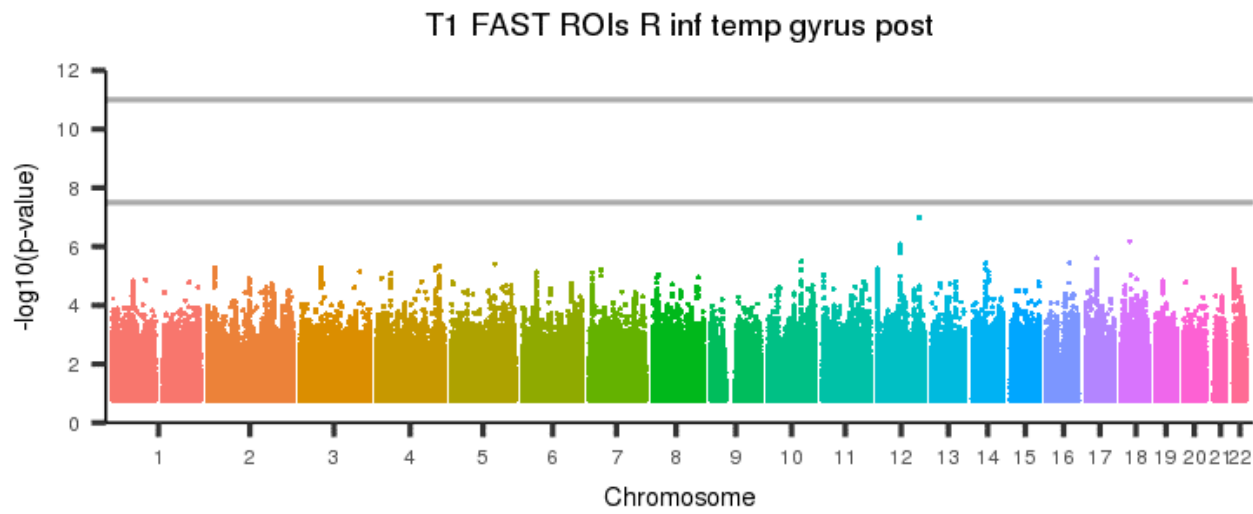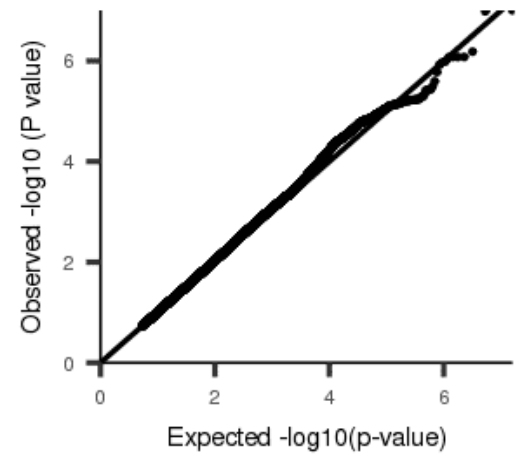

[back to list of plots](#)

Figure 56: T1 FAST ROIs L inf temp gyrus tempocc

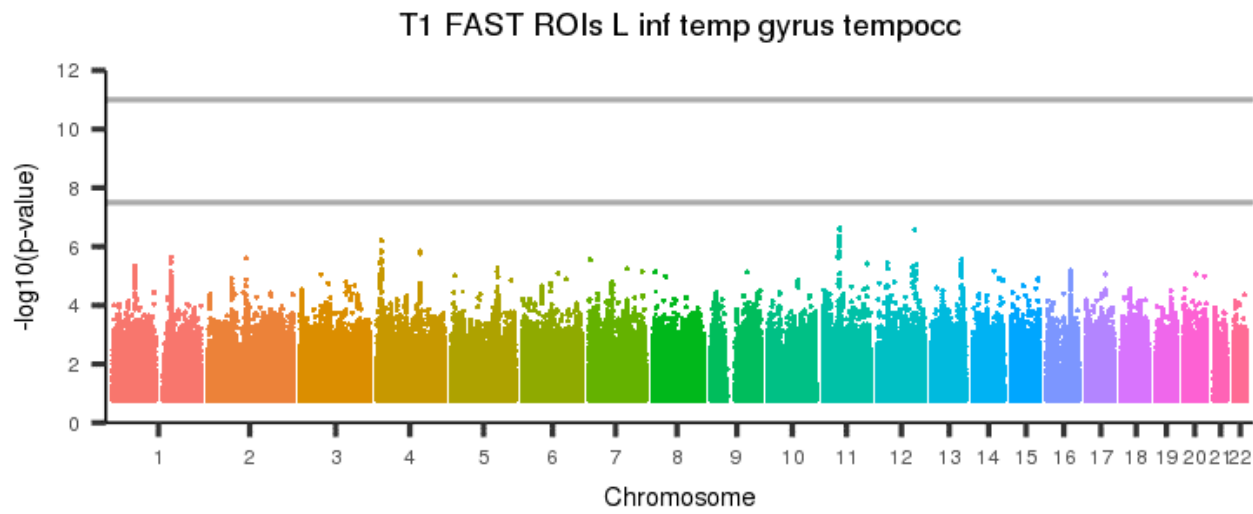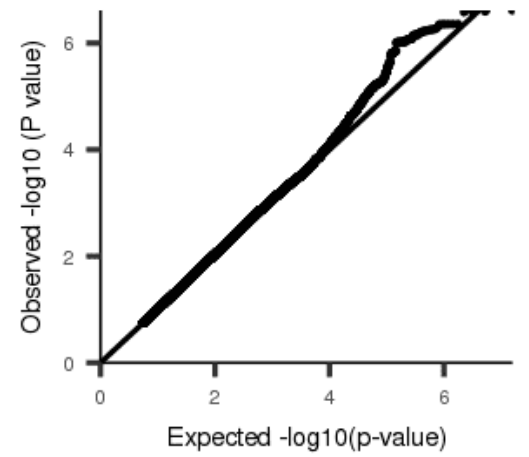

[back to list of plots](#)

Figure 57: T1 FAST ROIs R inf temp gyrus tempocc

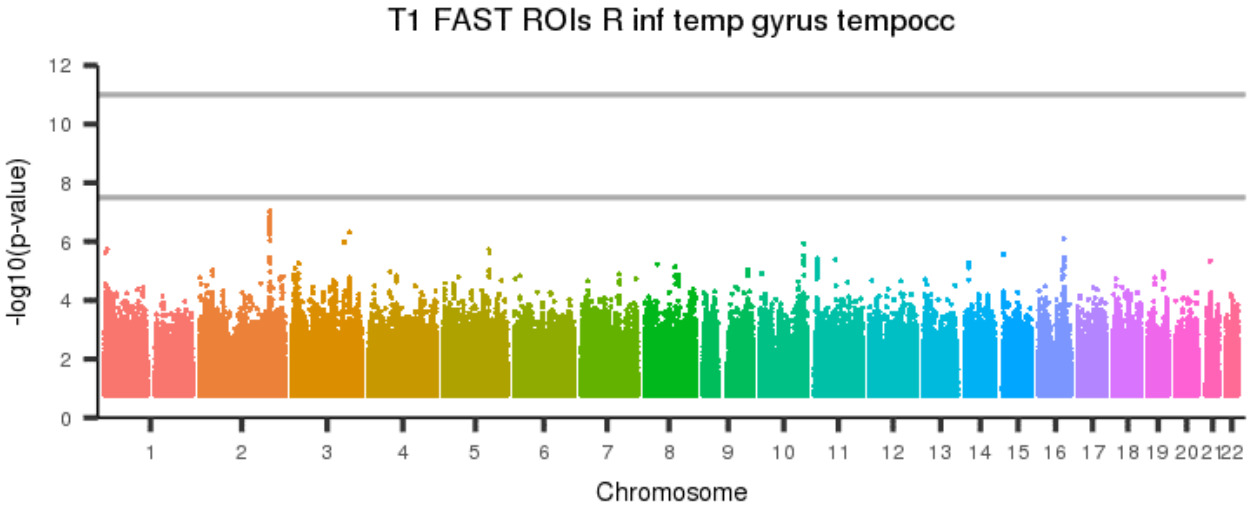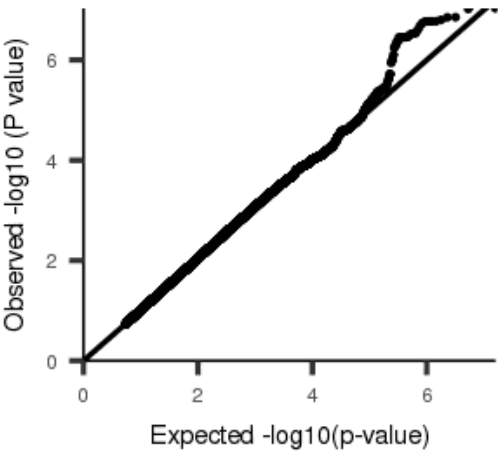

[back to list of plots](#)

Figure 58: T1 FAST ROIs L postcent gyrus

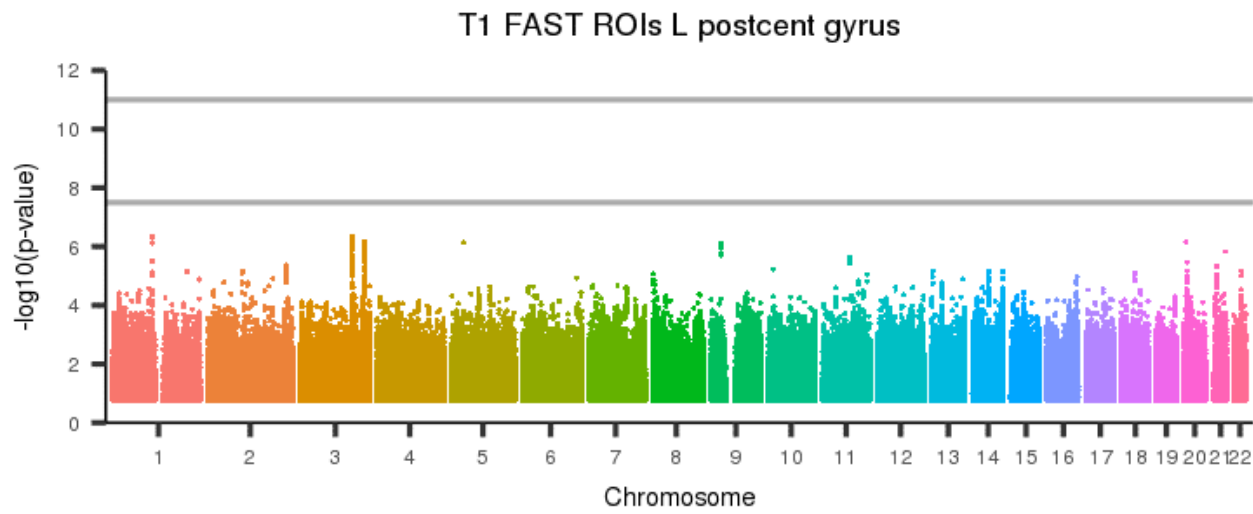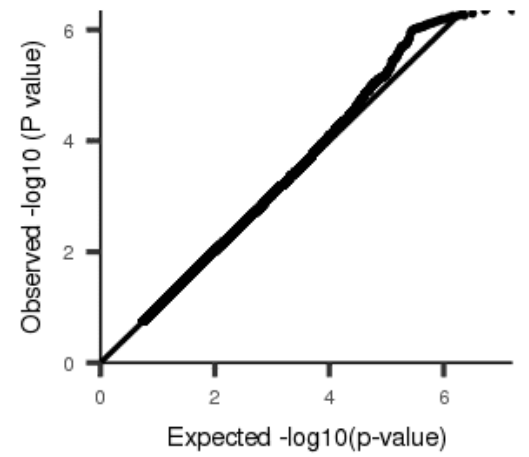

[back to list of plots](#)

Figure 59: T1 FAST ROIs R postcent gyrus

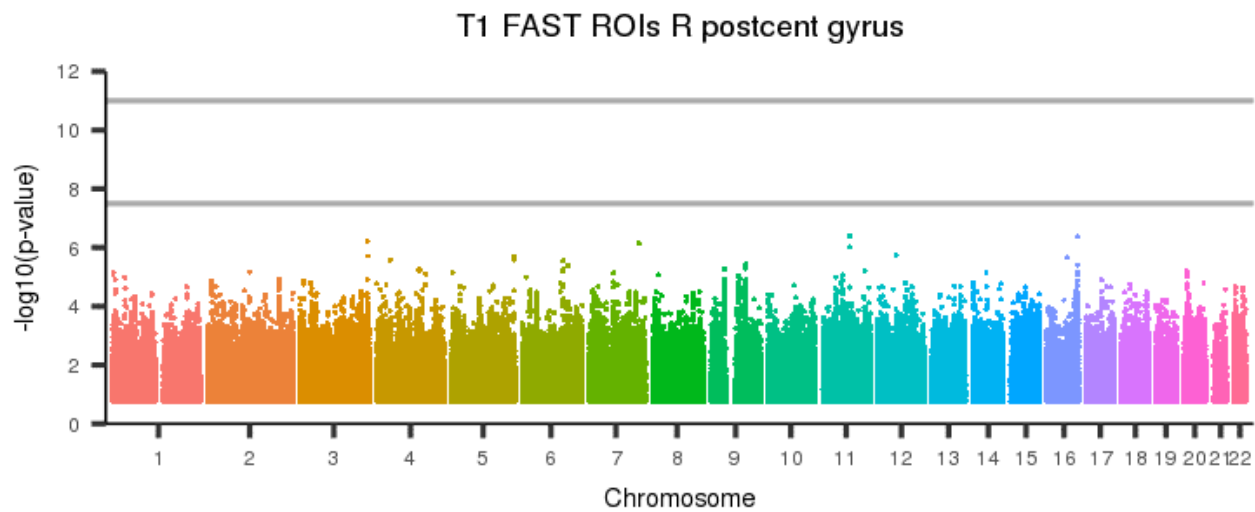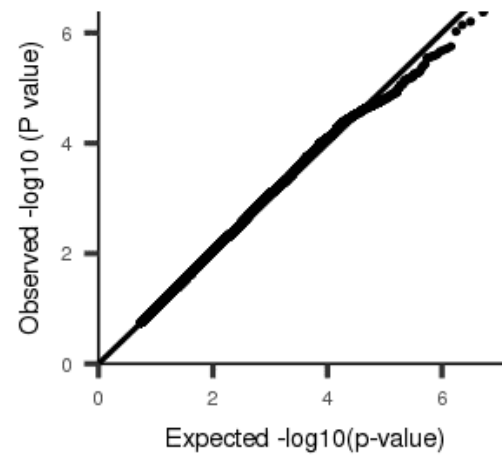

[back to list of plots](#)

Figure 60: T1 FAST ROIs L sup parietal lobule

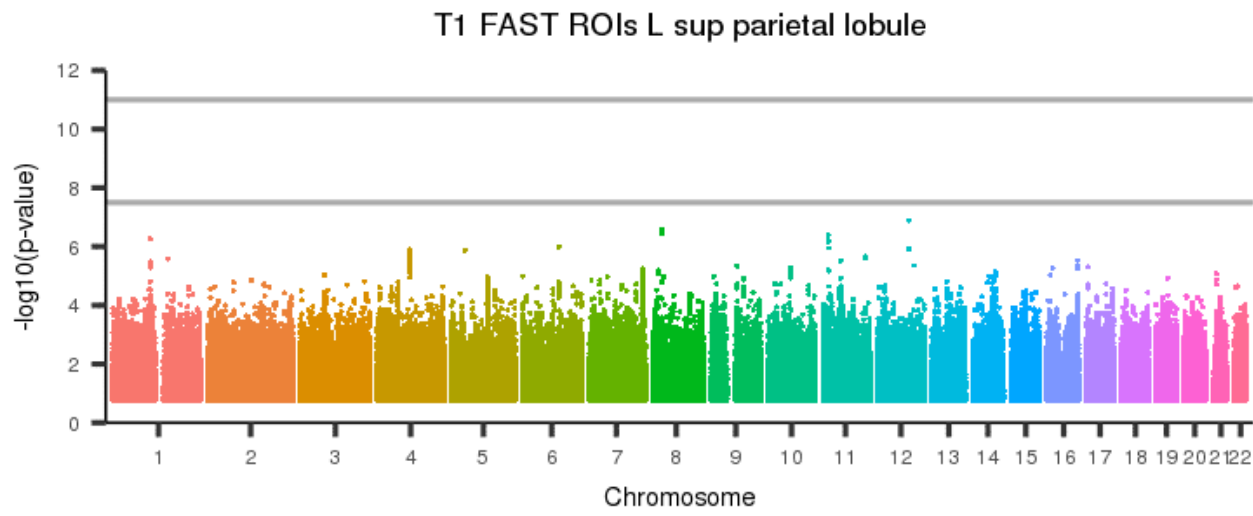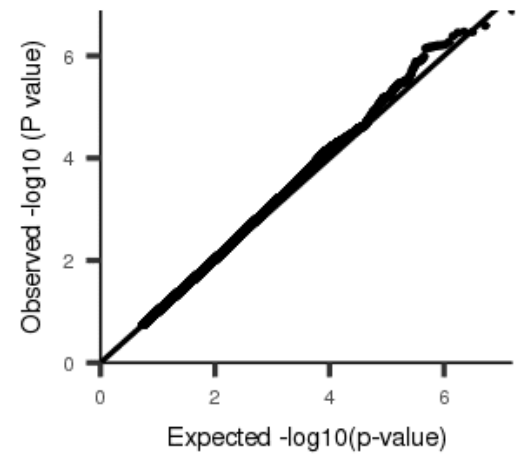

[back to list of plots](#)

Figure 61: T1 FAST ROIs R sup parietal lobule

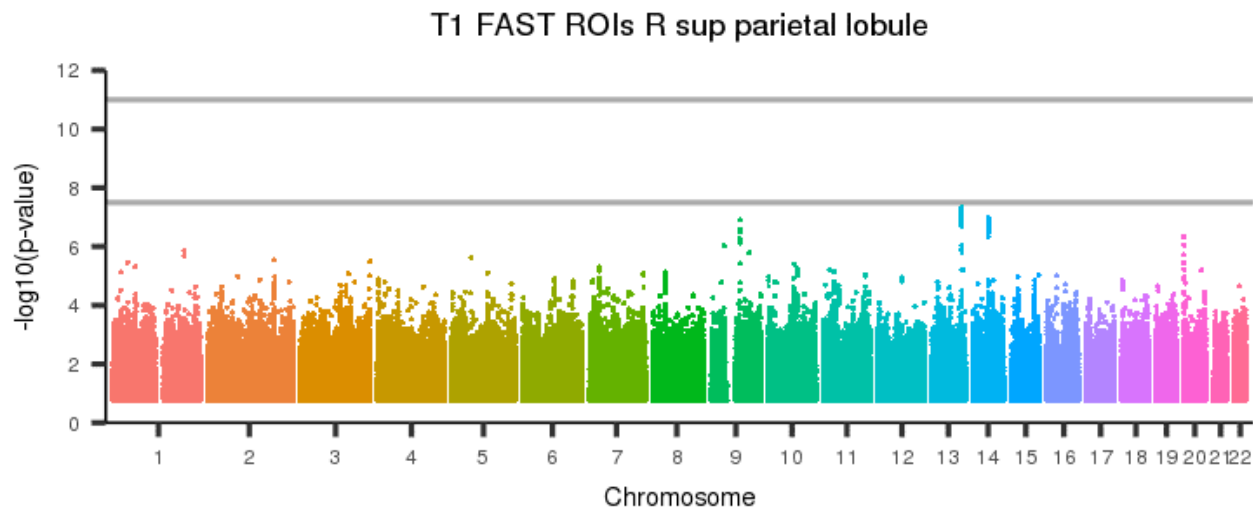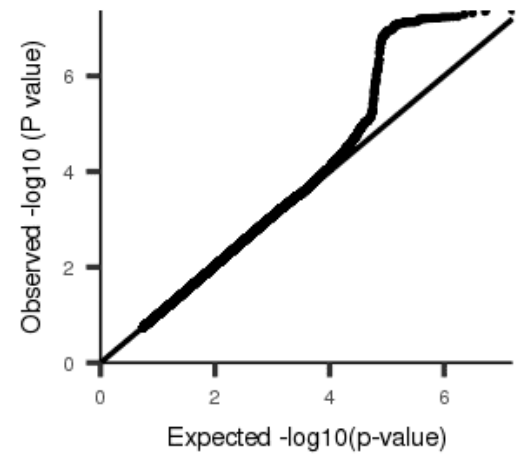

[back to list of plots](#)



Figure 62: T1 FAST ROIs L supramarg gyrus ant

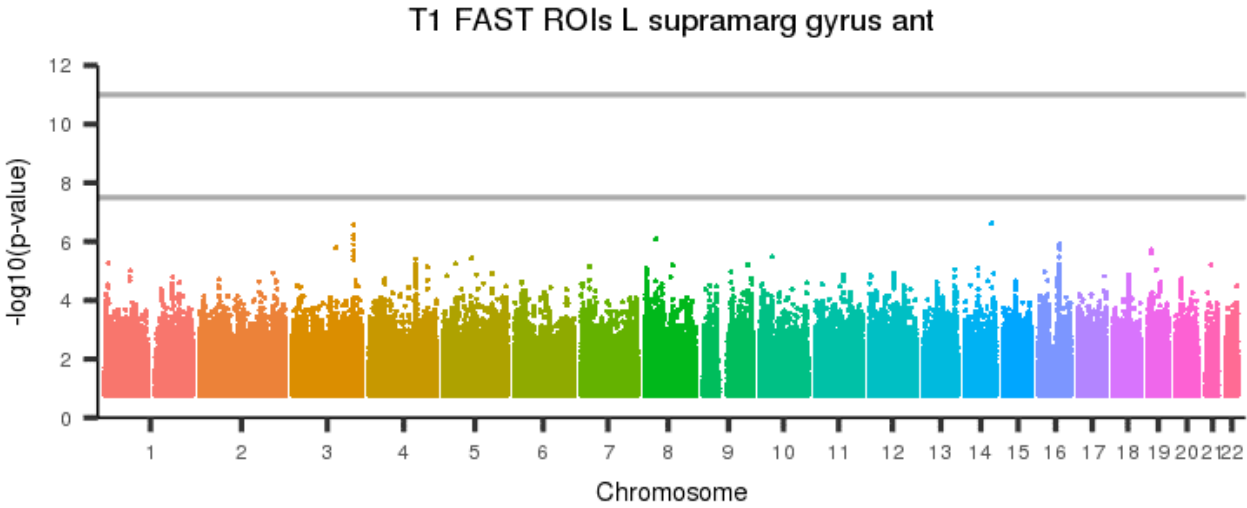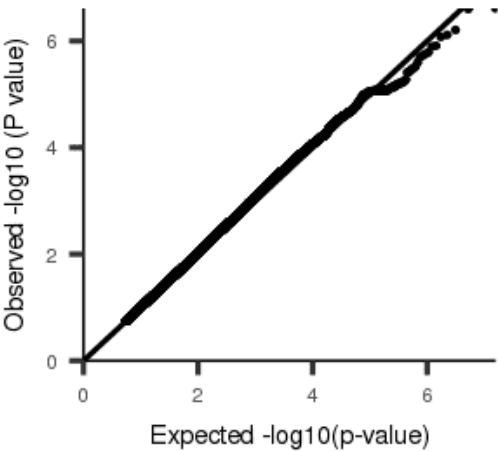

[back to list of plots](#)

Figure 63: T1 FAST ROIs R supramarg gyrus ant

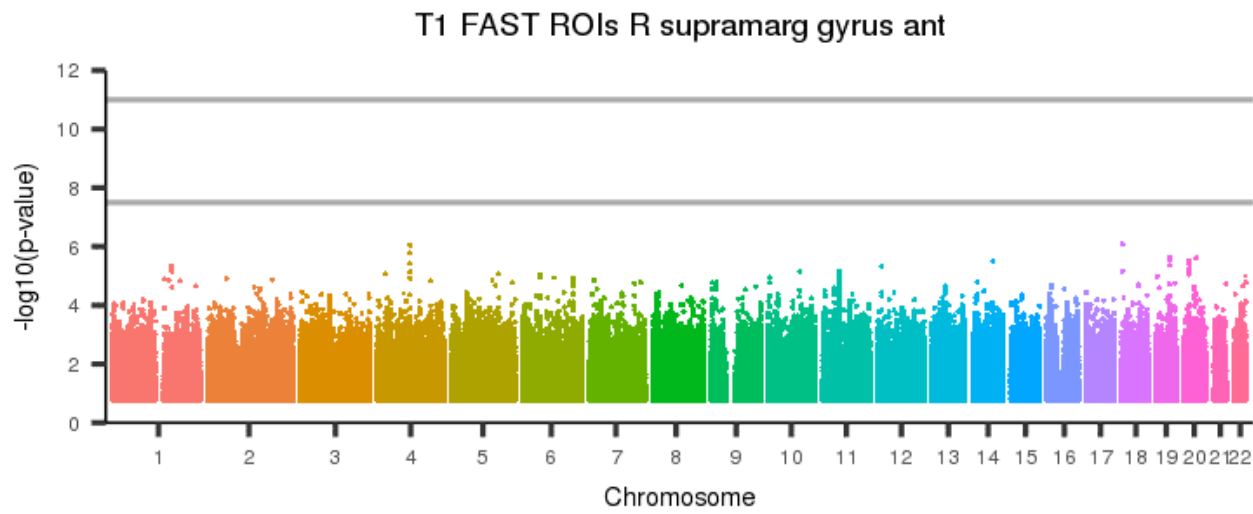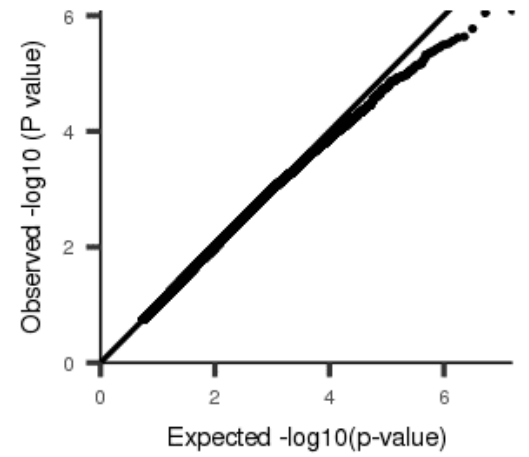

[back to list of plots](#)

Figure 64: T1 FAST ROIs L supramarg gyrus post

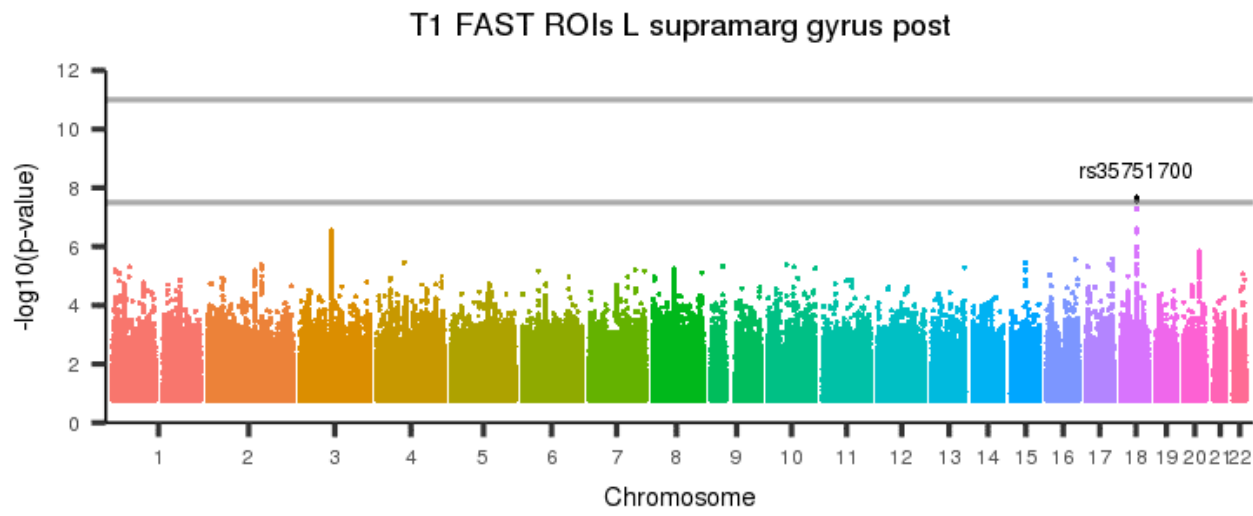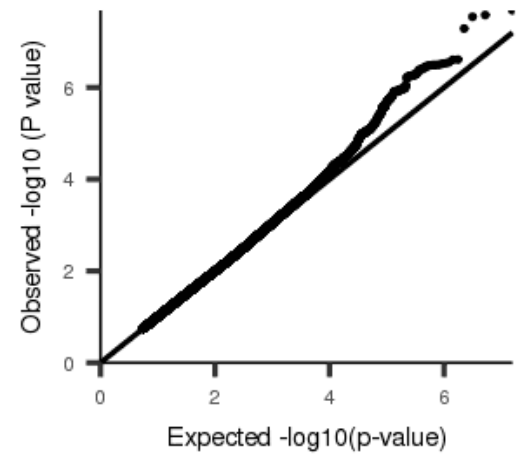

[back to list of plots](#)

Figure 65: T1 FAST ROIs R supramarg gyrus post

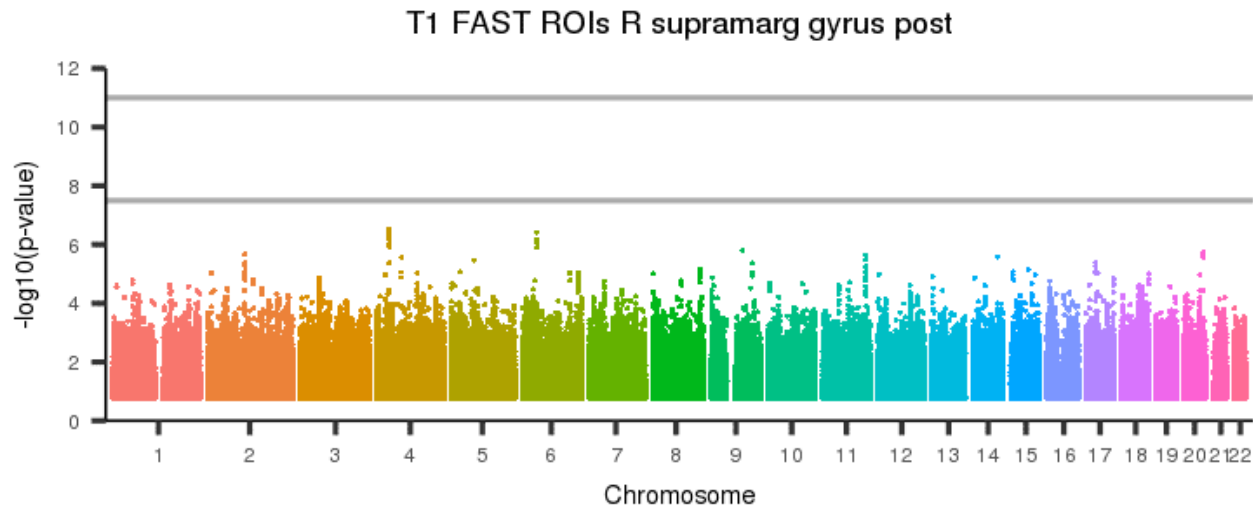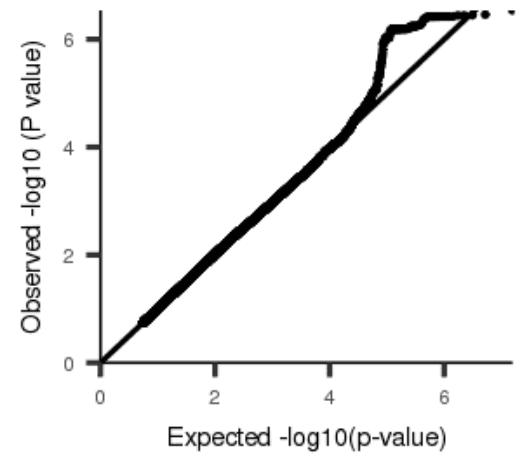

[back to list of plots](#)

Figure 66: T1 FAST ROIs L angular gyrus

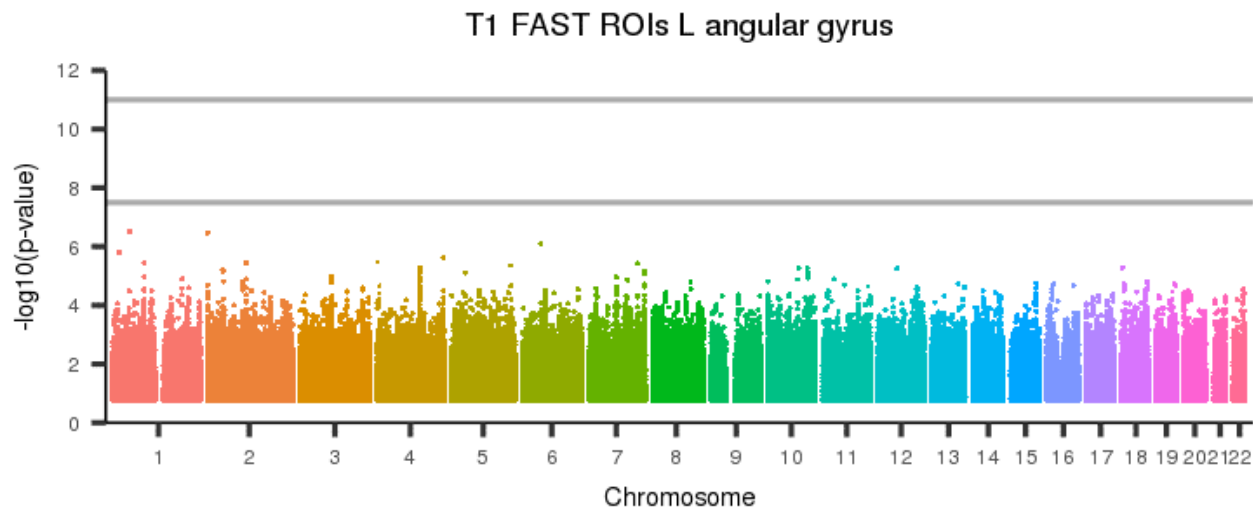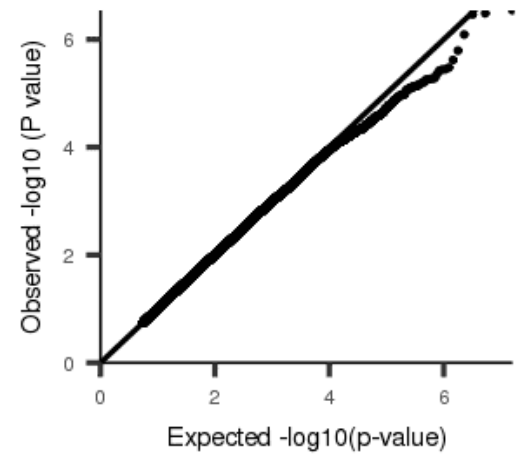

[back to list of plots](#)

Figure 67: T1 FAST ROIs R angular gyrus

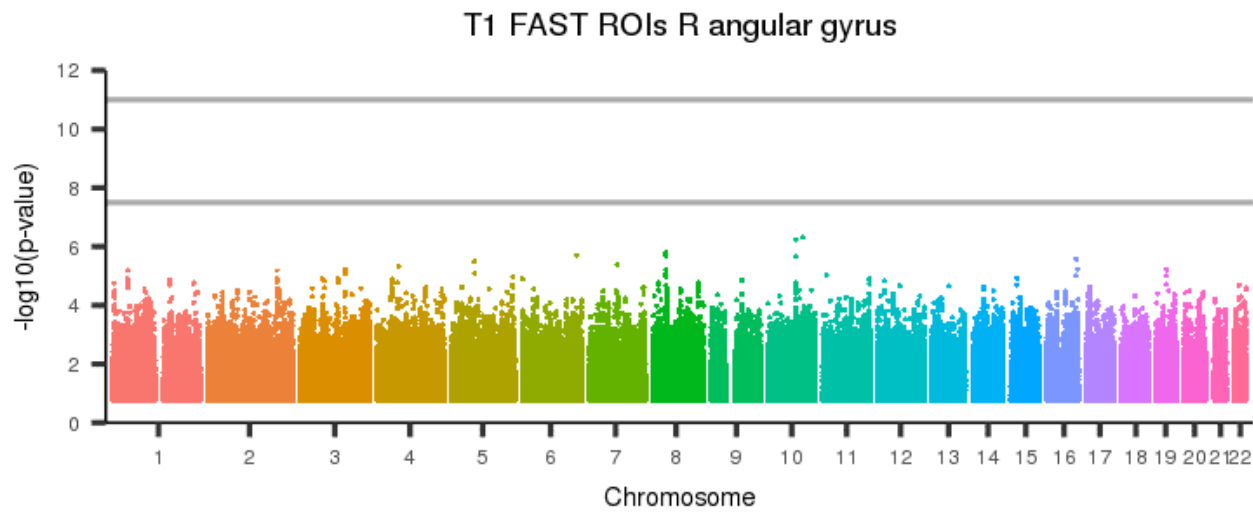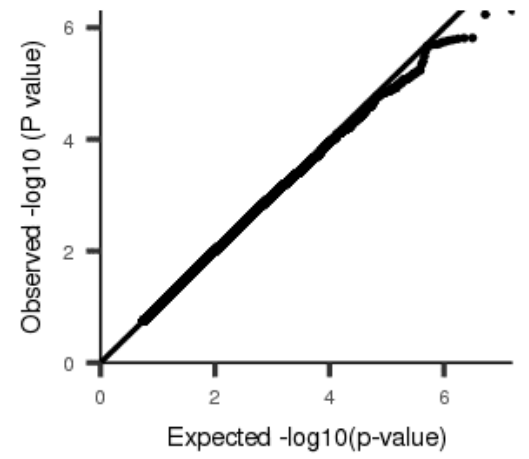

[back to list of plots](#)

Figure 68: T1 FAST ROIs L latocc cortex sup

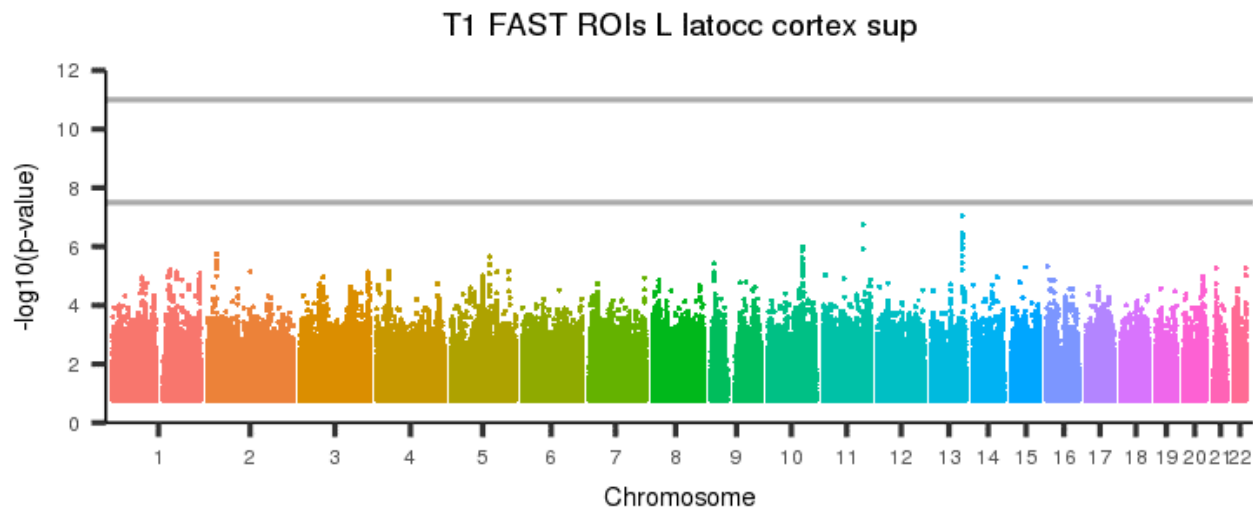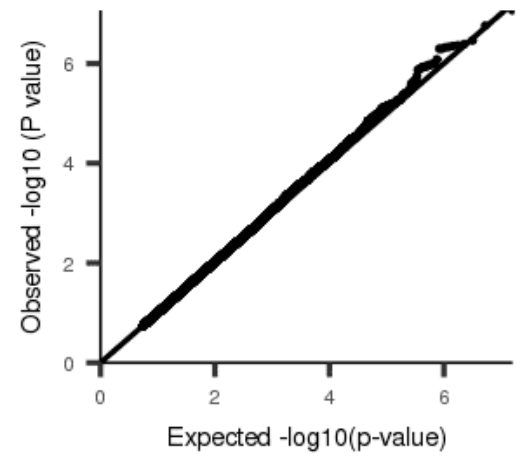

[back to list of plots](#)

Figure 69: T1 FAST ROIs R latocc cortex sup

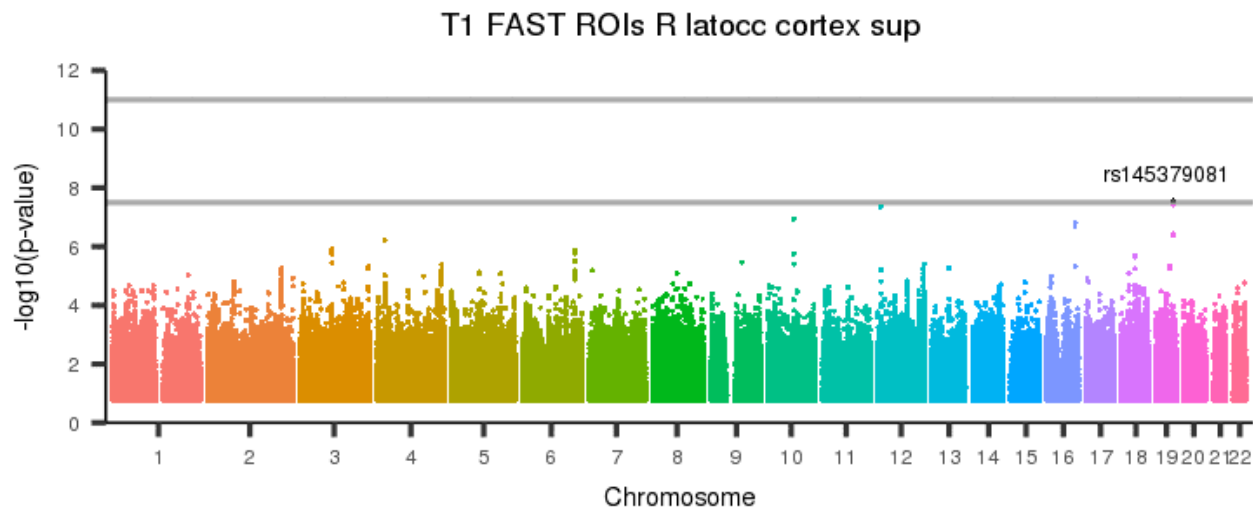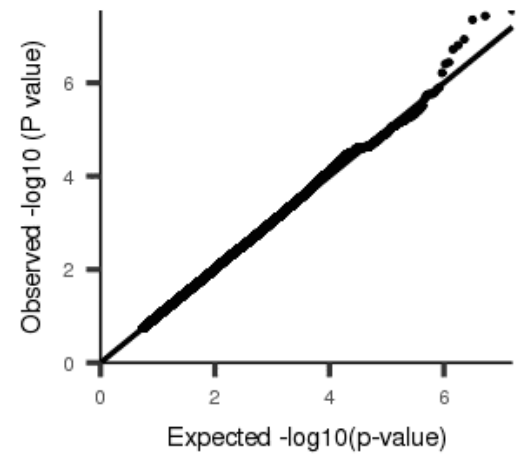

[back to list of plots](#)



Figure 70: T1 FAST ROIs L latocc cortex inf

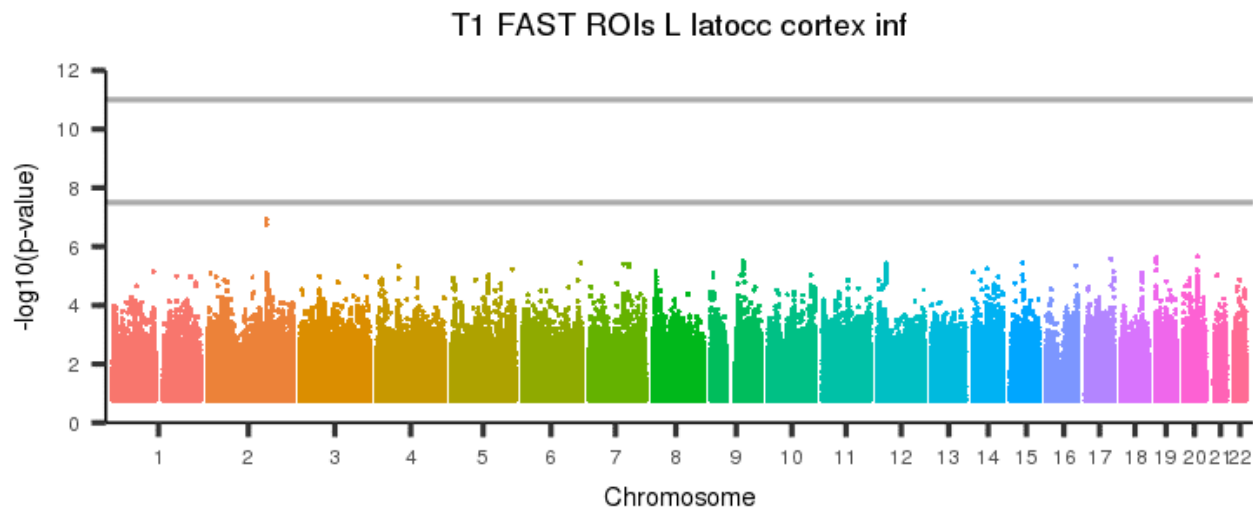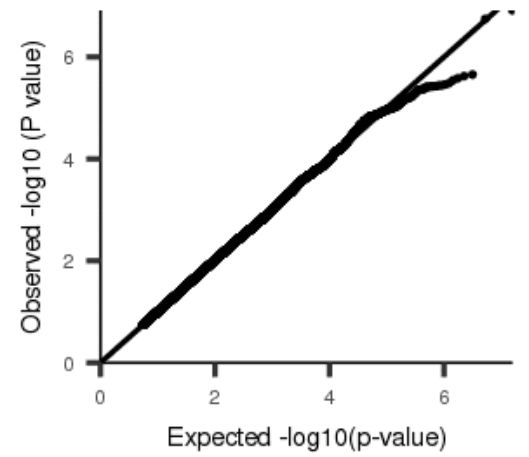

[back to list of plots](#)

Figure 71: T1 FAST ROIs R latocc cortex inf

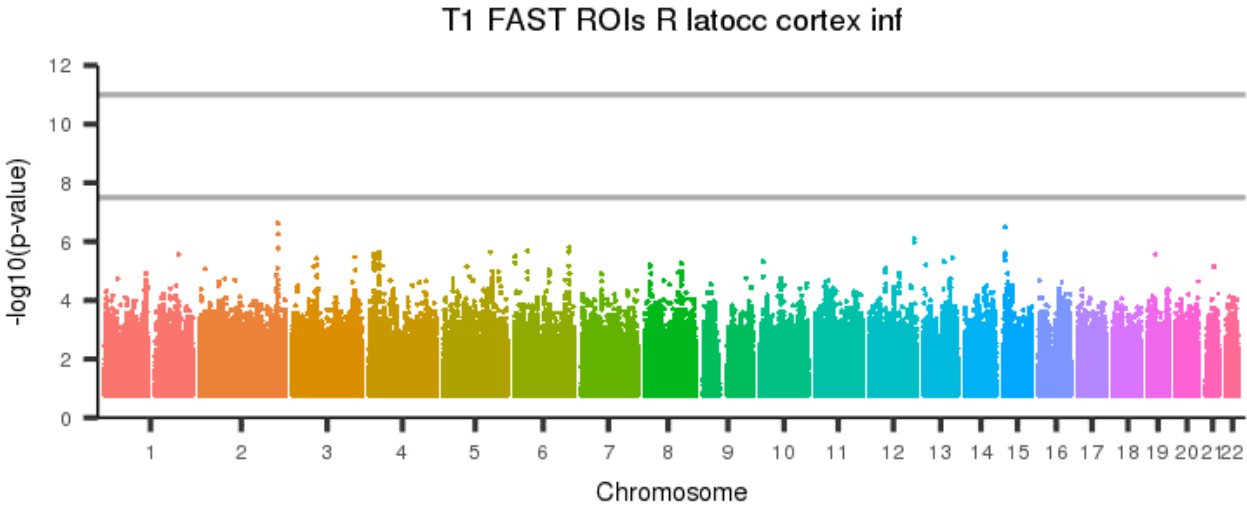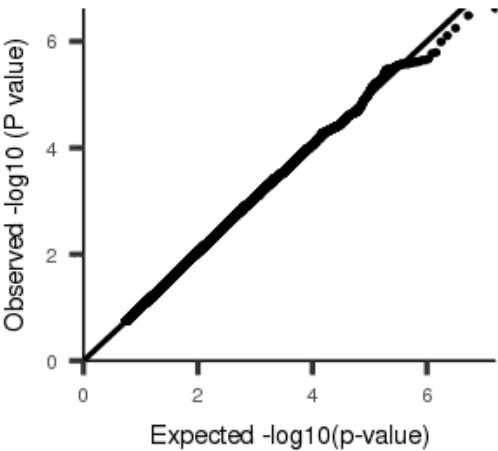

[back to list of plots](#)

Figure 72: T1 FAST ROIs L intracalc cortex

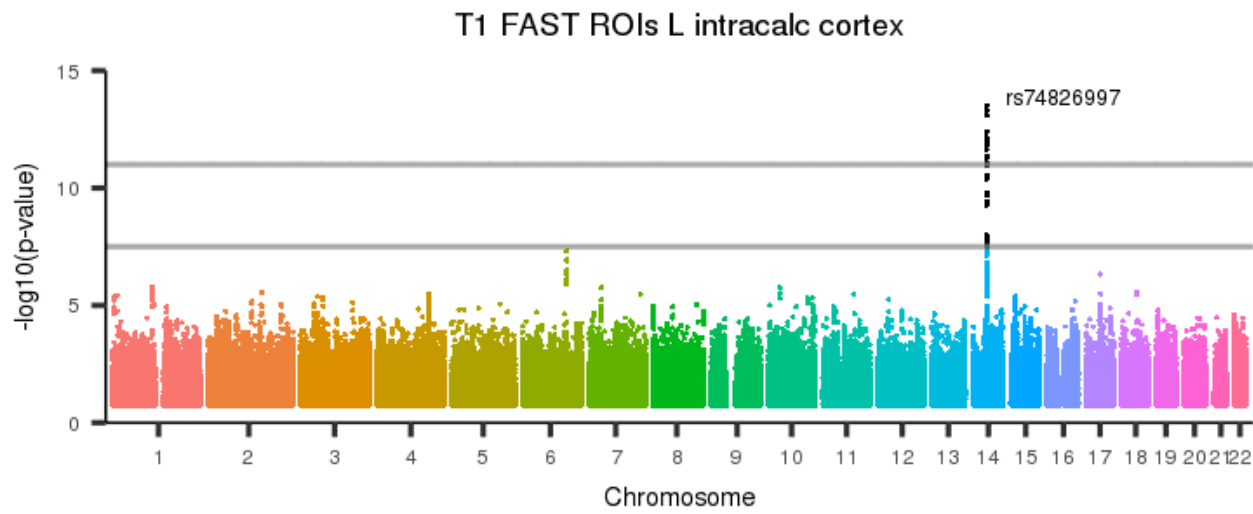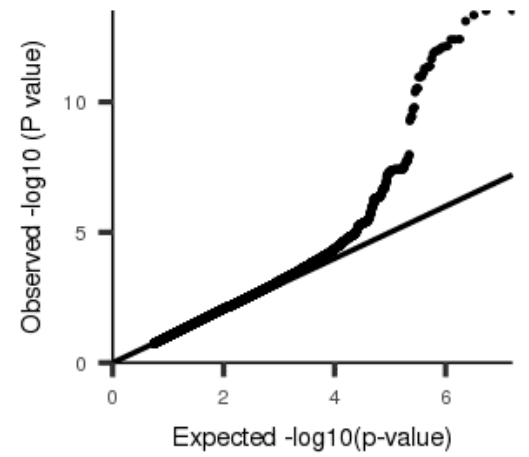

[back to list of plots](#)

Figure 73: T1 FAST ROIs R intracalc cortex

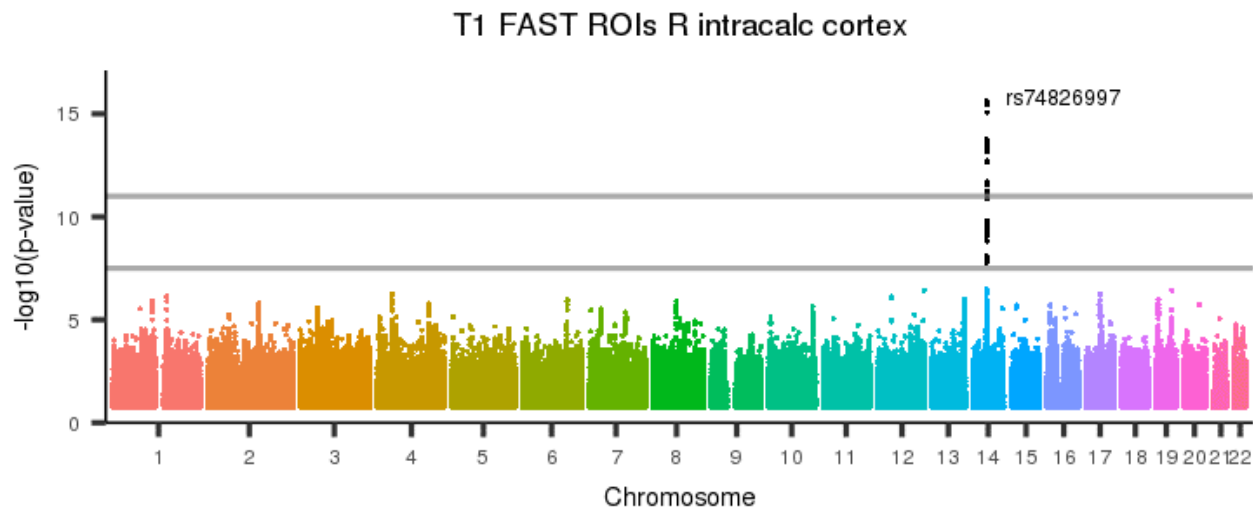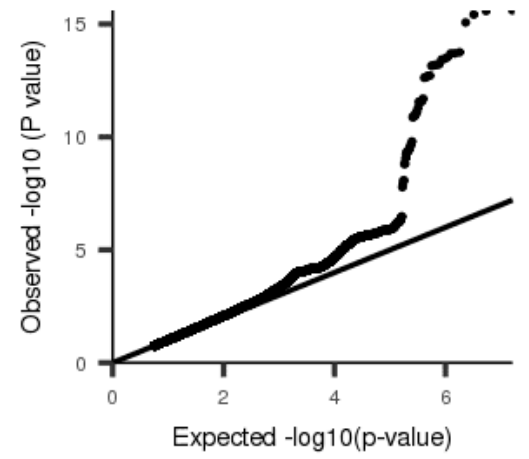

[back to list of plots](#)

Figure 74: T1 FAST ROIs L front med cortex

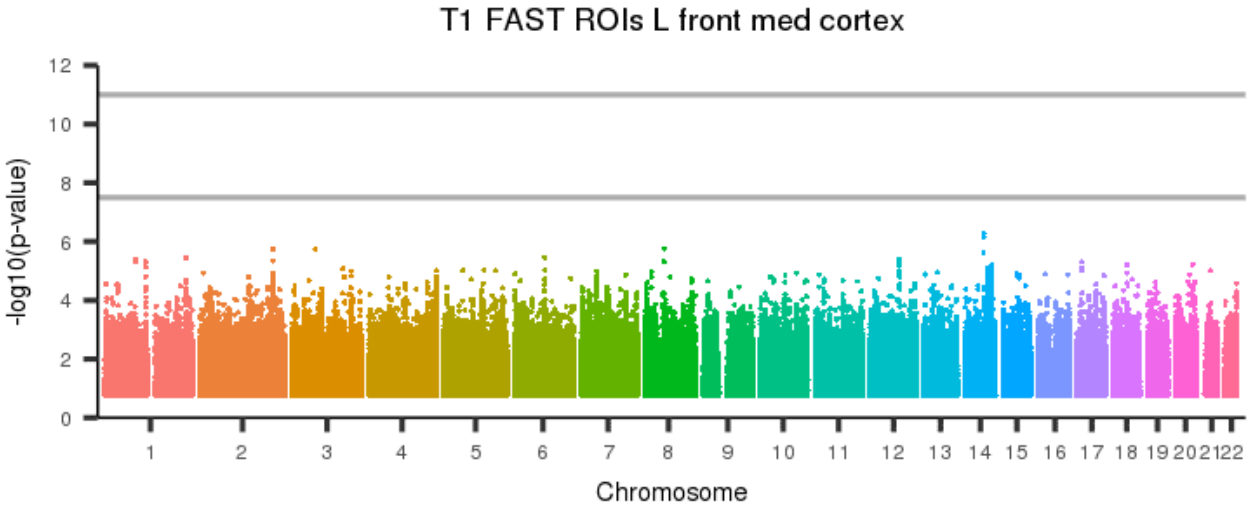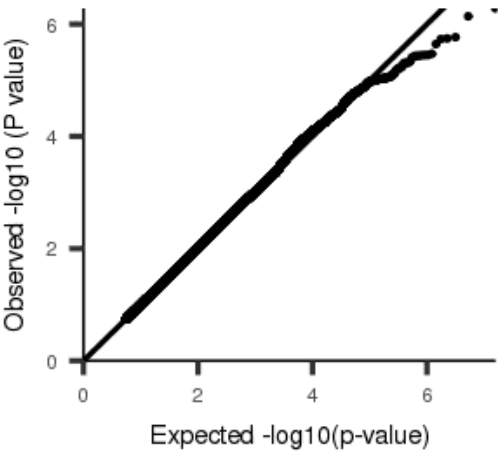

[back to list of plots](#)

Figure 75: T1 FAST ROIs R front med cortex

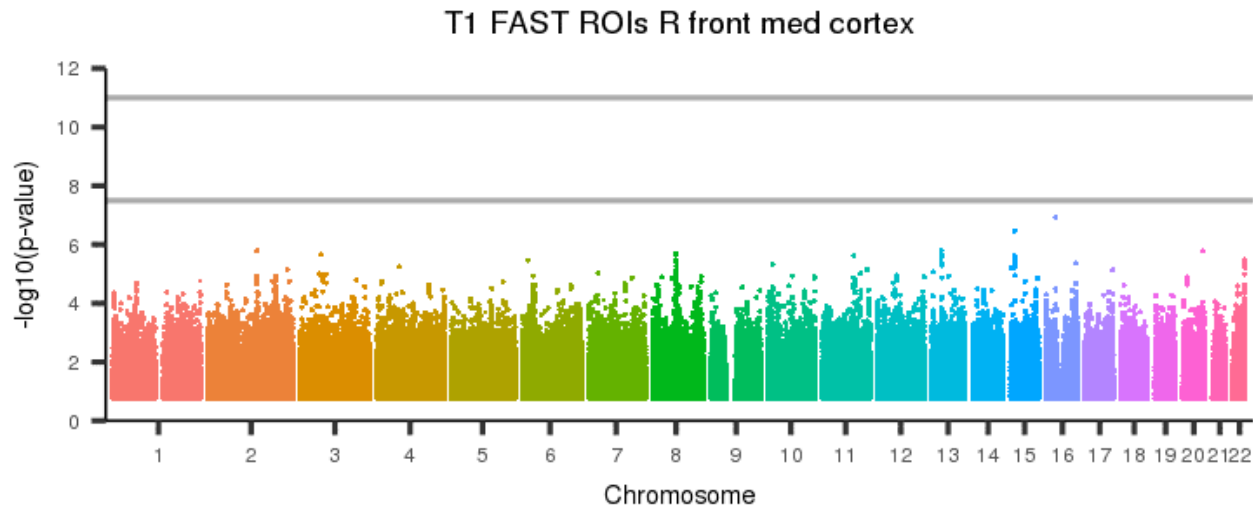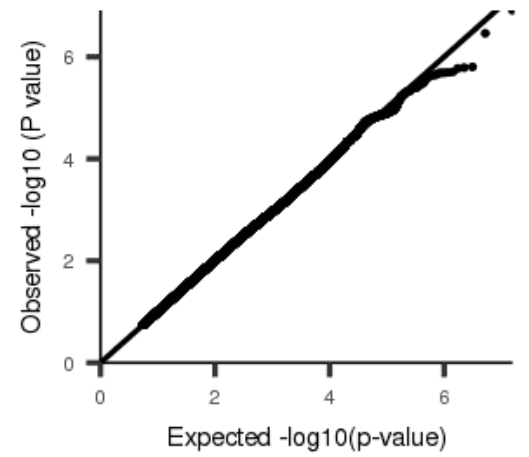

[back to list of plots](#)

Figure 76: T1 FAST ROIs L juxtapos lobule cortex

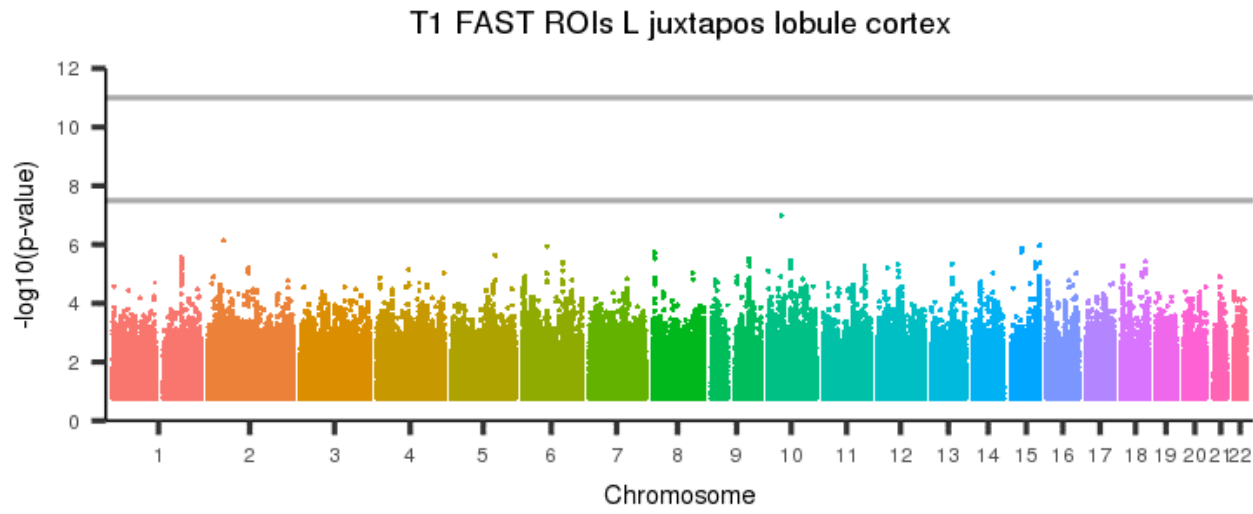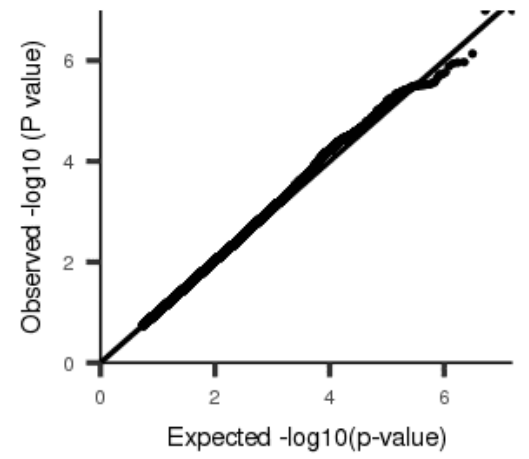

[back to list of plots](#)

Figure 77: T1 FAST ROIs R juxtapos lobule cortex

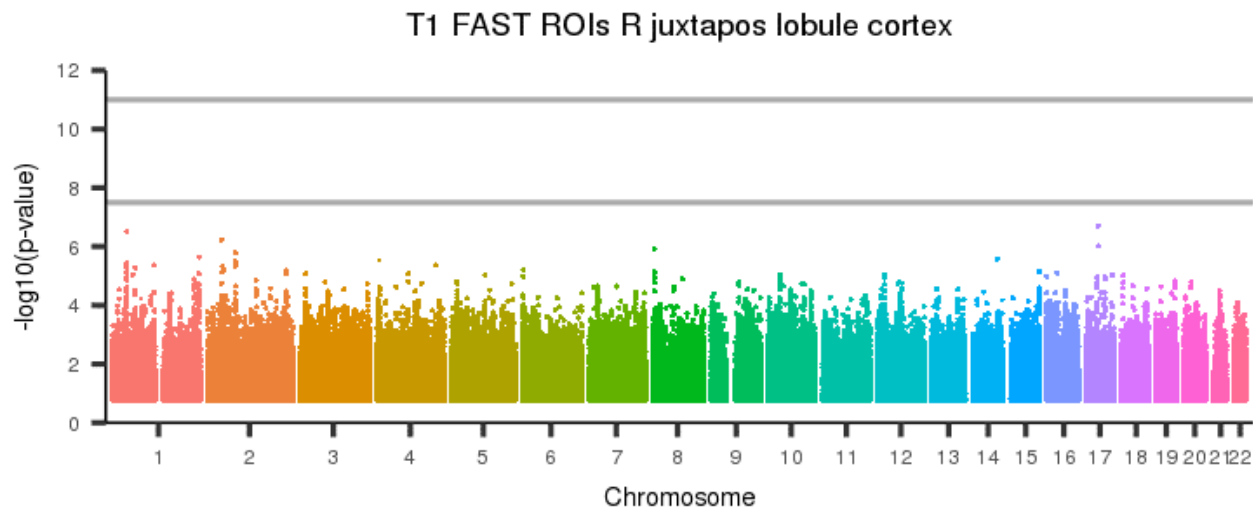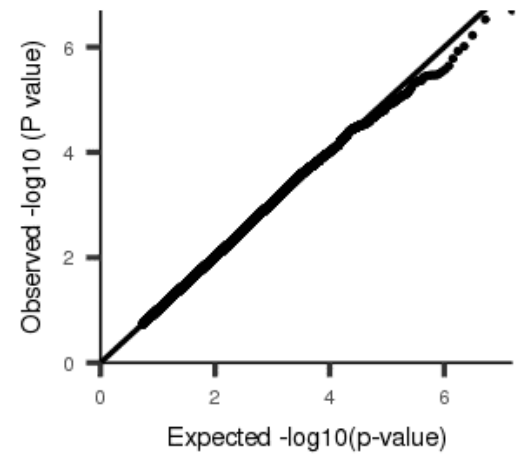

[back to list of plots](#)



Figure 78: T1 FAST ROIs L subcallosal cortex

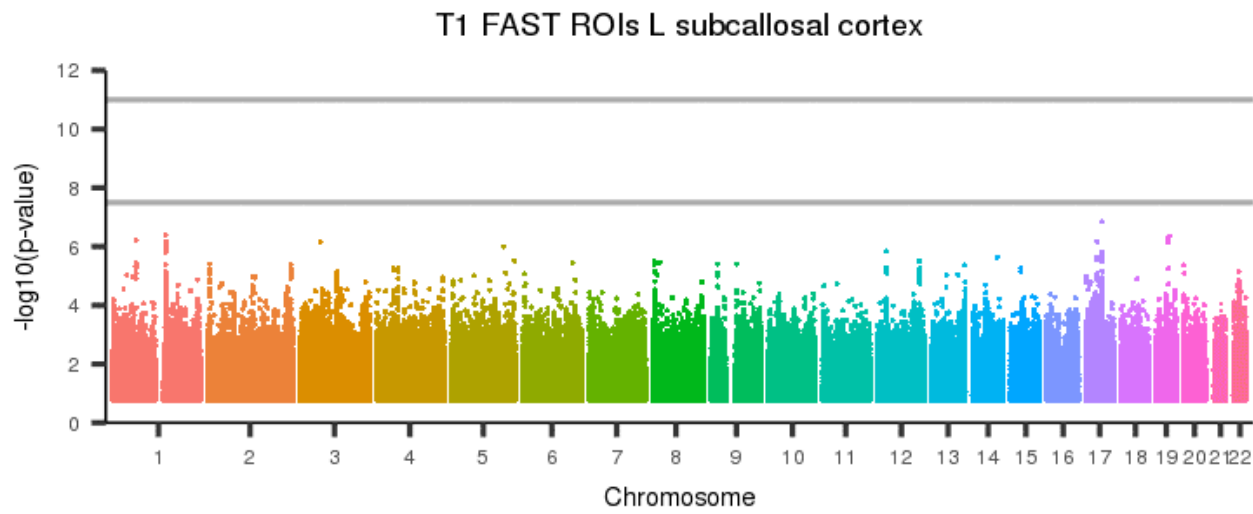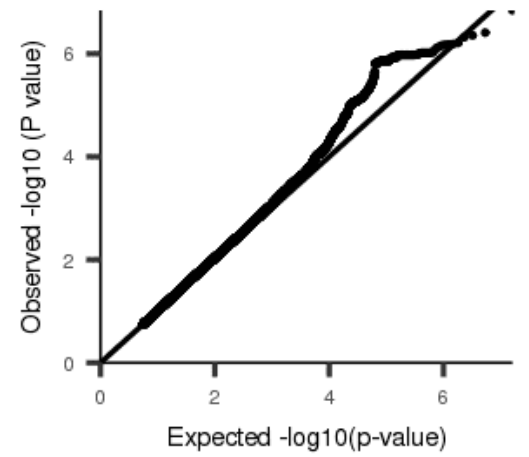

[back to list of plots](#)

Figure 79: T1 FAST ROIs R subcallosal cortex

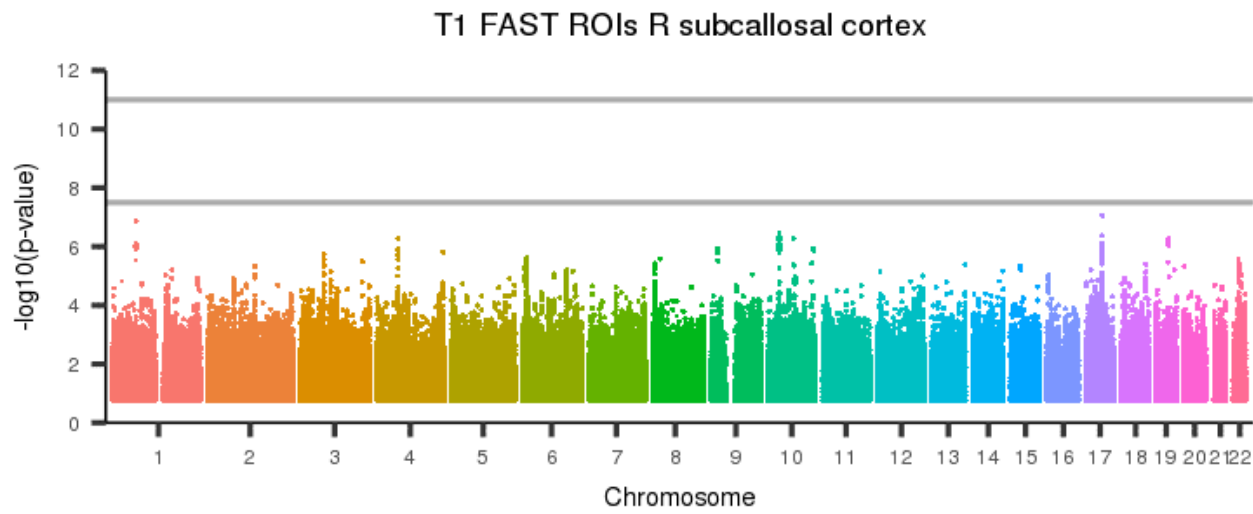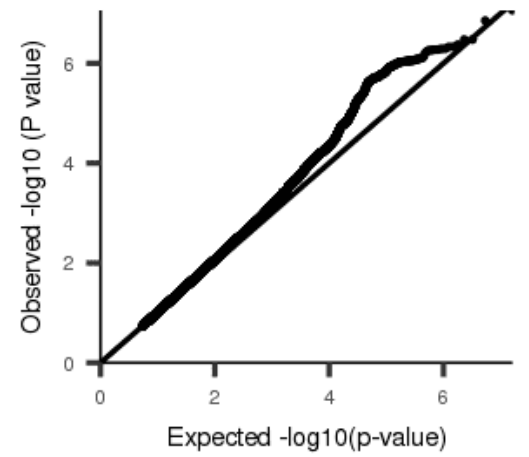

[back to list of plots](#)

Figure 80: T1 FAST ROIs L paracing gyrus

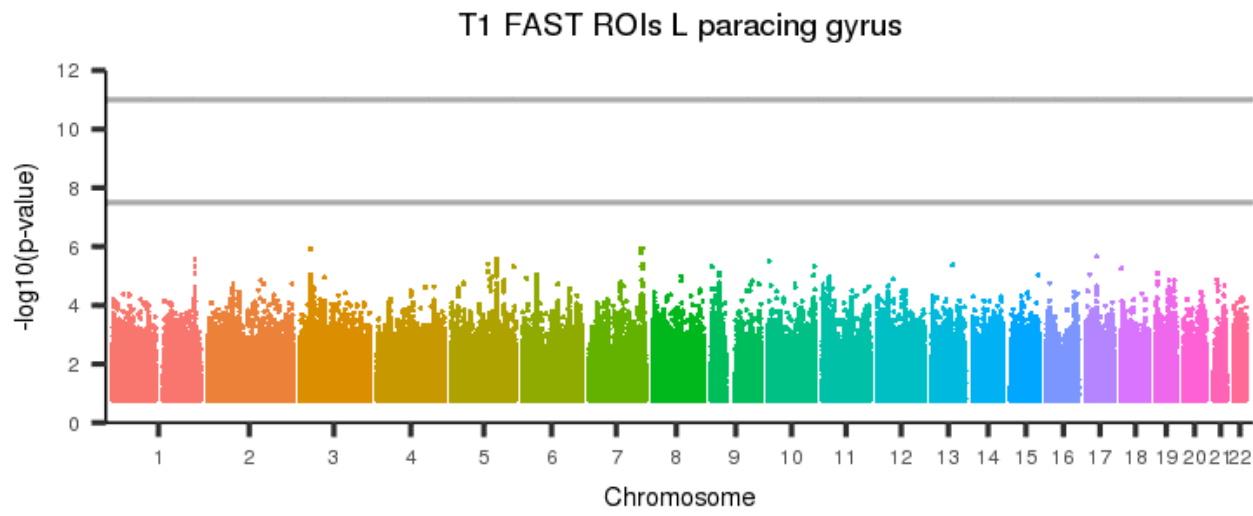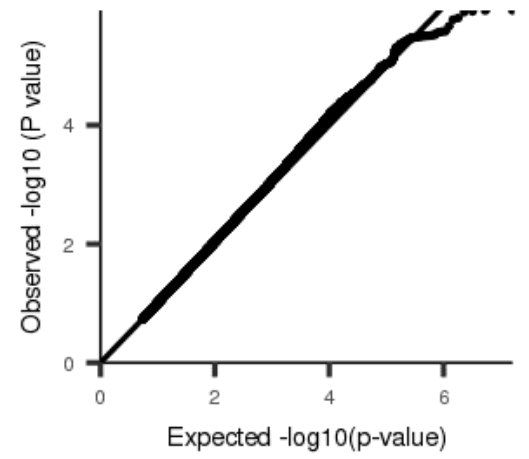

[back to list of plots](#)

Figure 81: T1 FAST ROIs R paracing gyrus

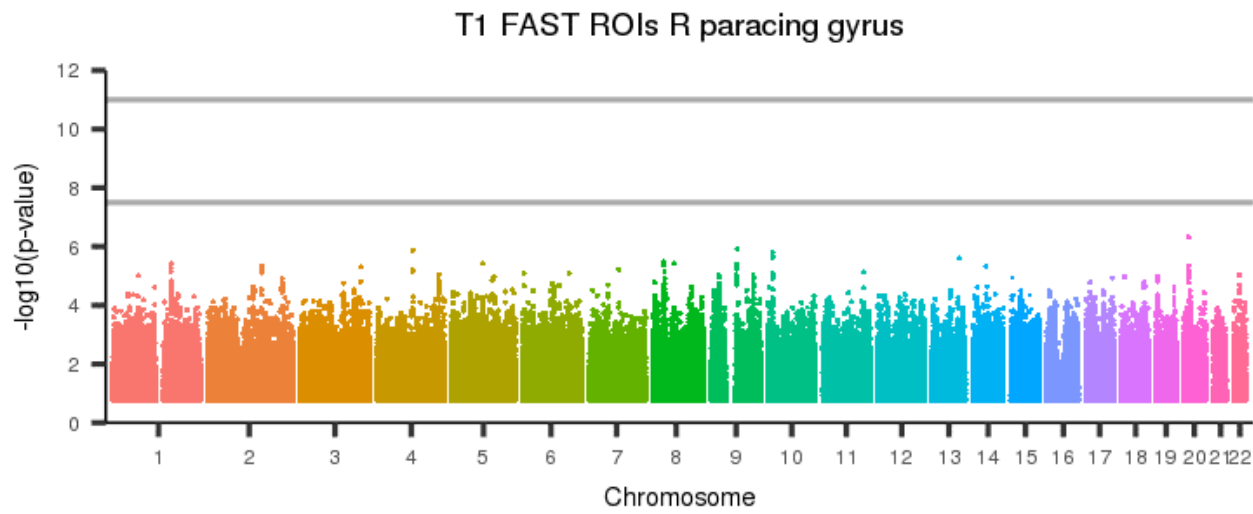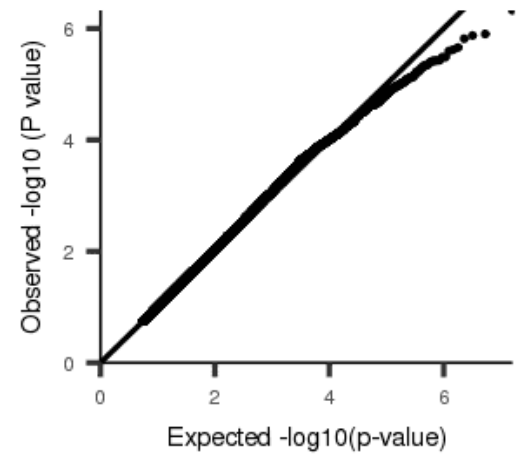

[back to list of plots](#)

Figure 82: T1 FAST ROIs L cing gyrus ant

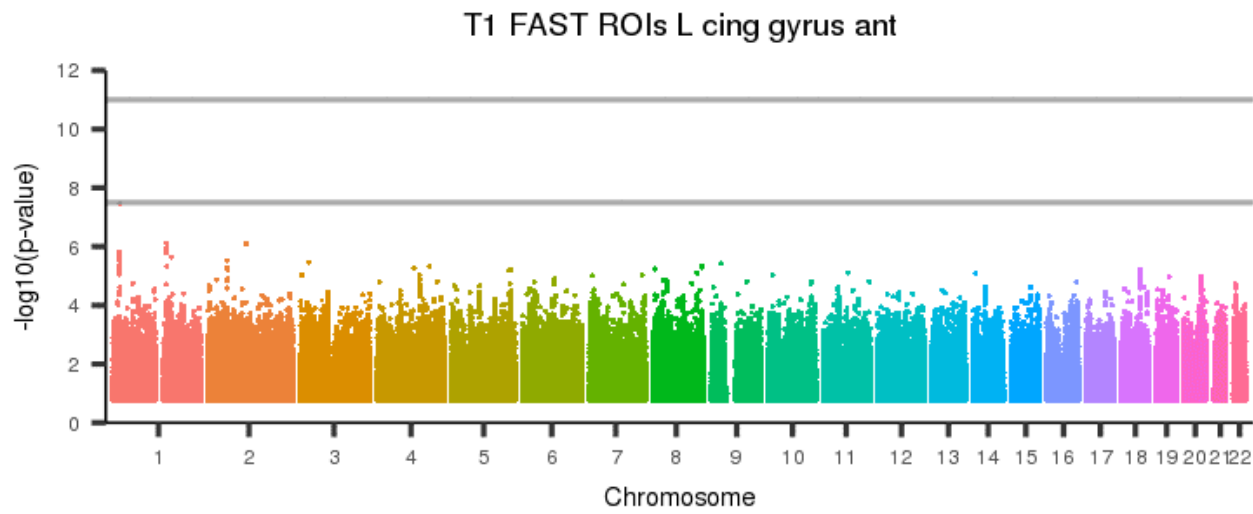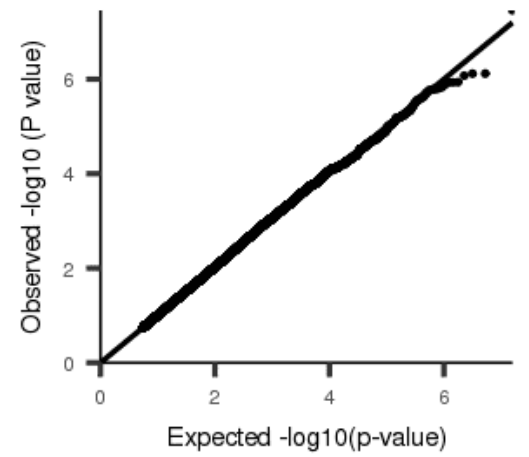

[back to list of plots](#)

Figure 83: T1 FAST ROIs R cing gyrus ant

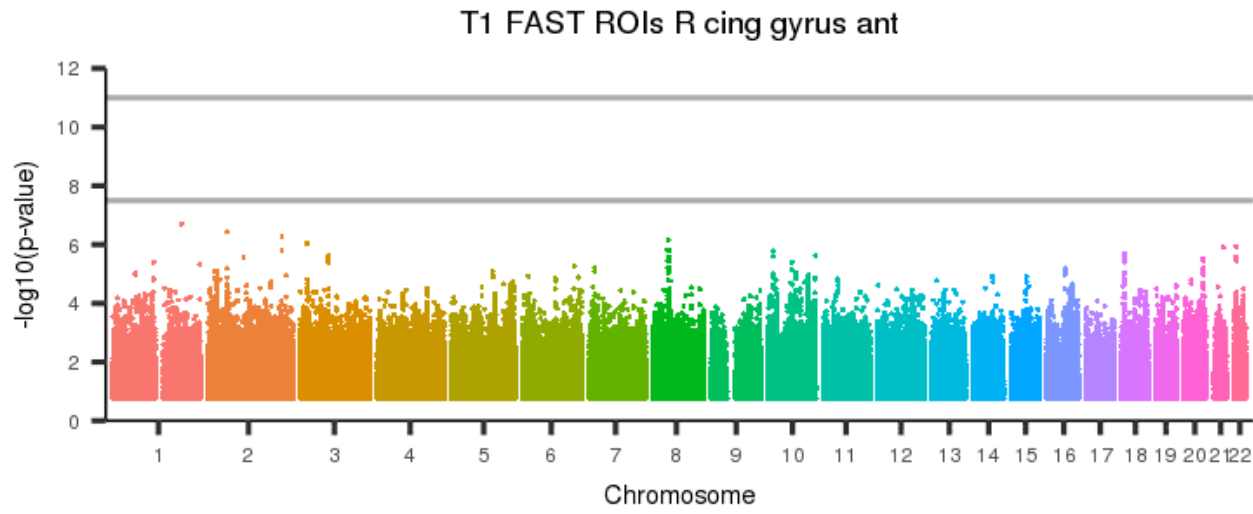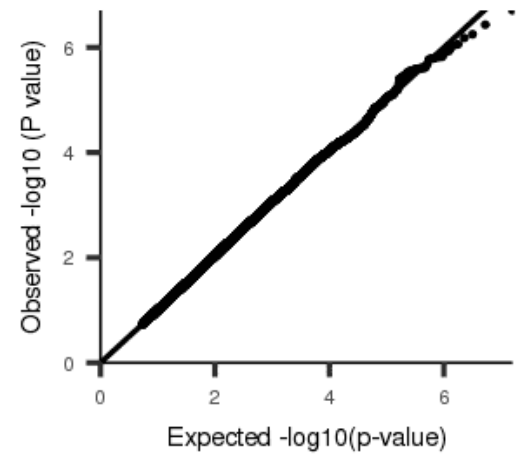

[back to list of plots](#)

Figure 84: T1 FAST ROIs L cing gyrus post

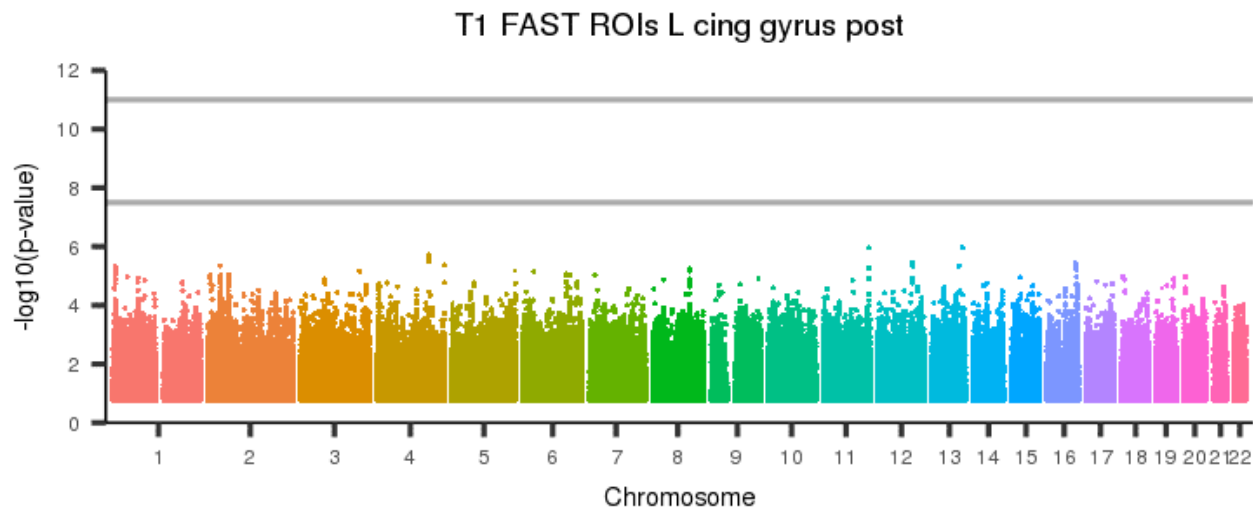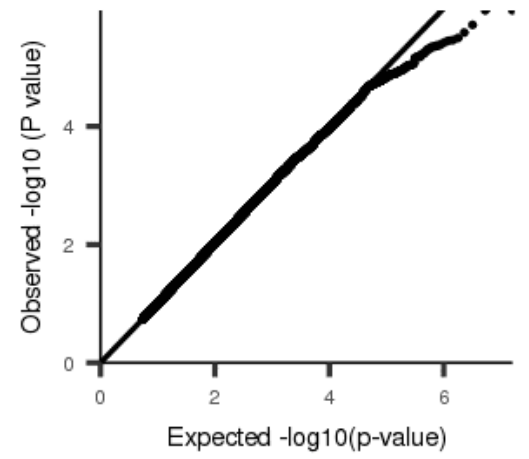

[back to list of plots](#)

Figure 85: T1 FAST ROIs R cing gyrus post

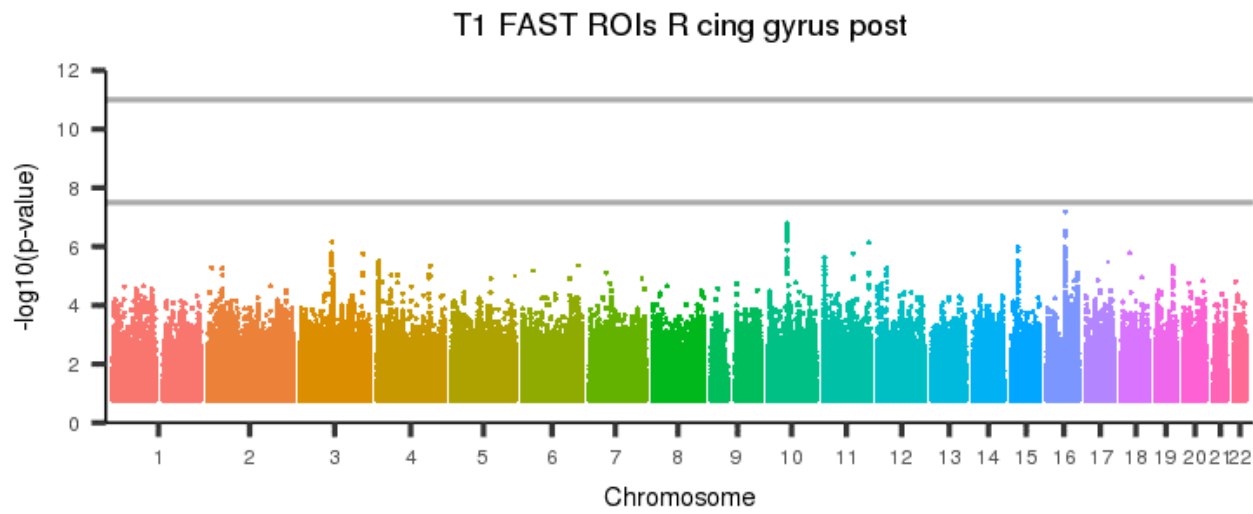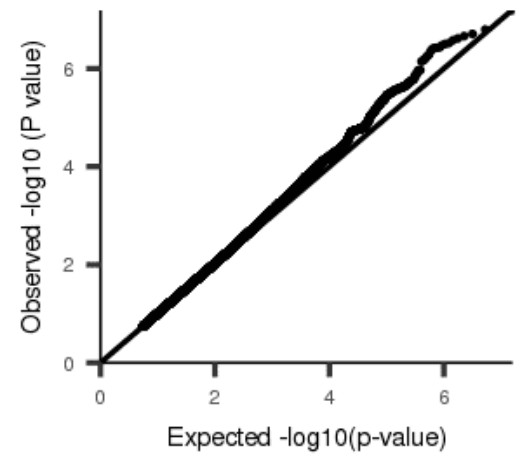

[back to list of plots](#)



Figure 86: T1 FAST ROIs L precun cortex

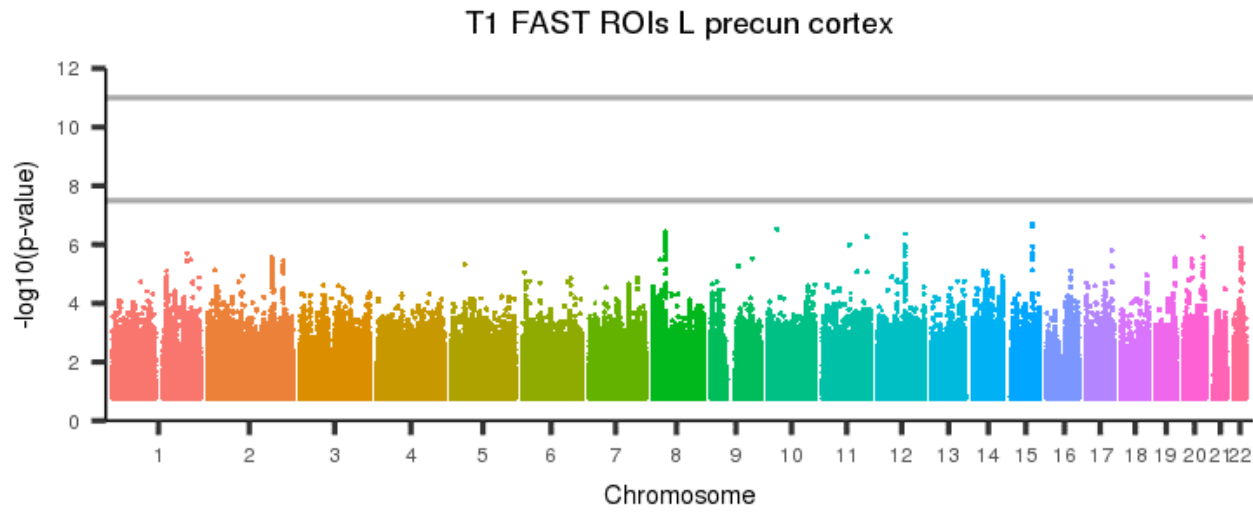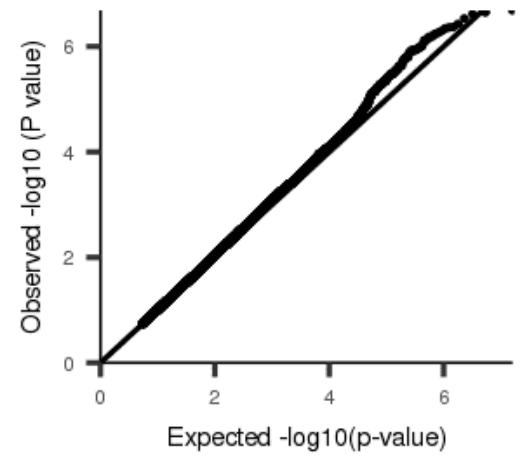

[back to list of plots](#)

Figure 87: T1 FAST ROIs R precun cortex

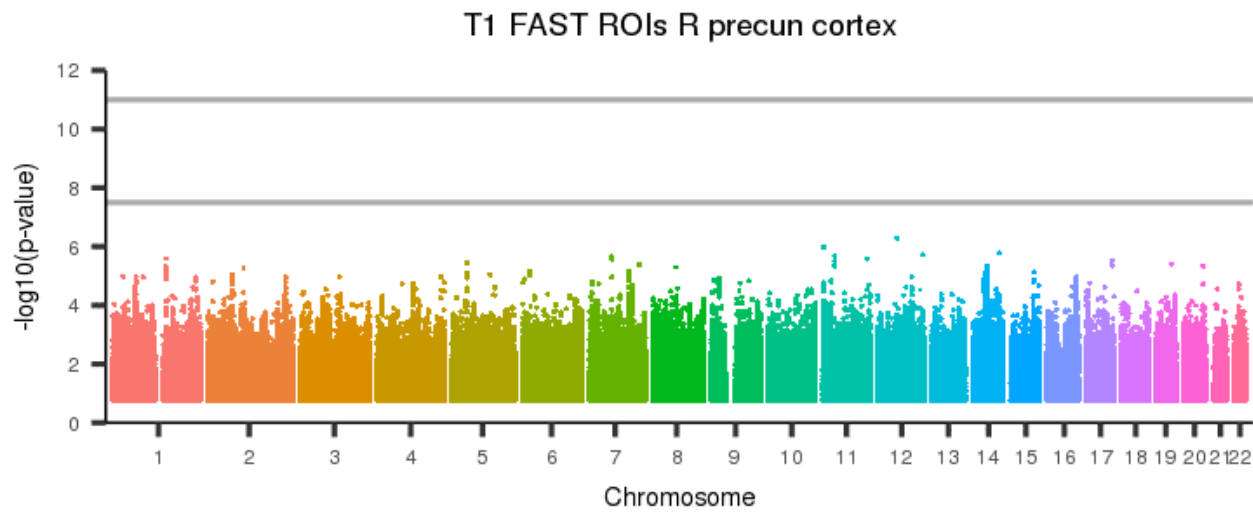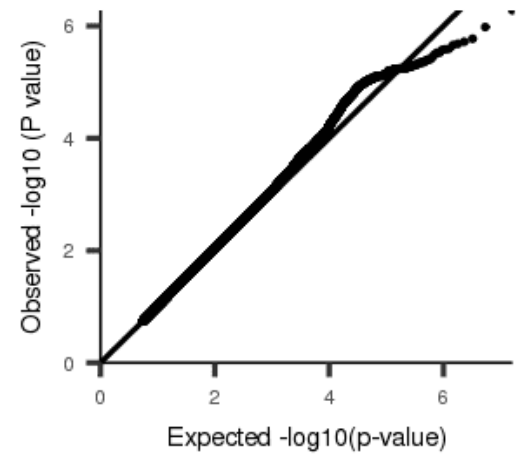

[back to list of plots](#)

Figure 88: T1 FAST ROIs L cuneal cortex

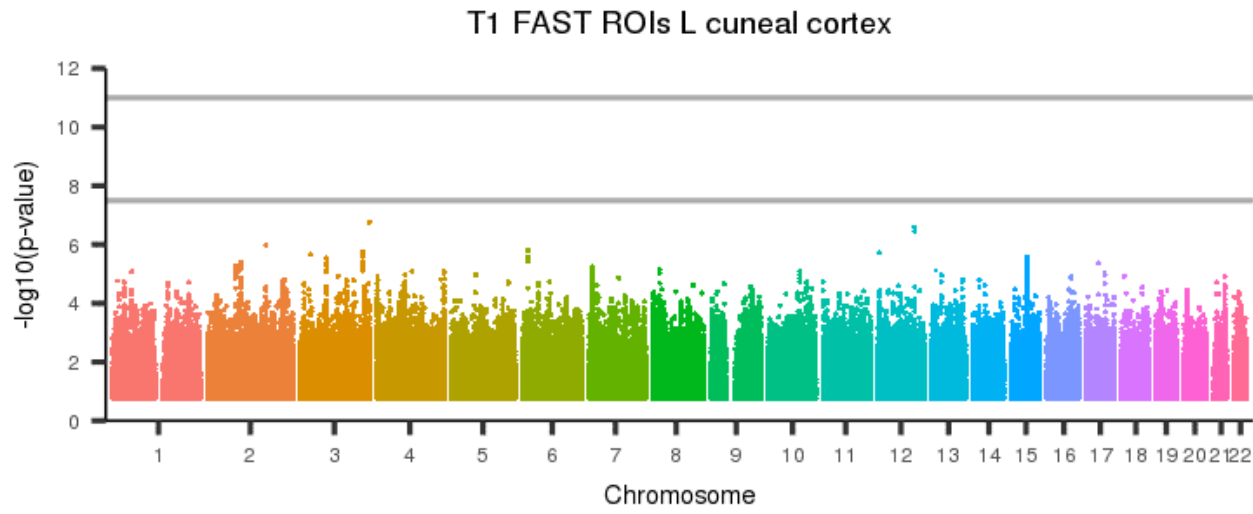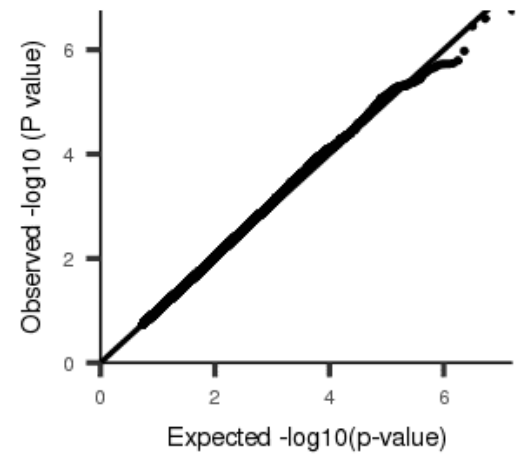

[back to list of plots](#)

Figure 89: T1 FAST ROIs R cuneal cortex

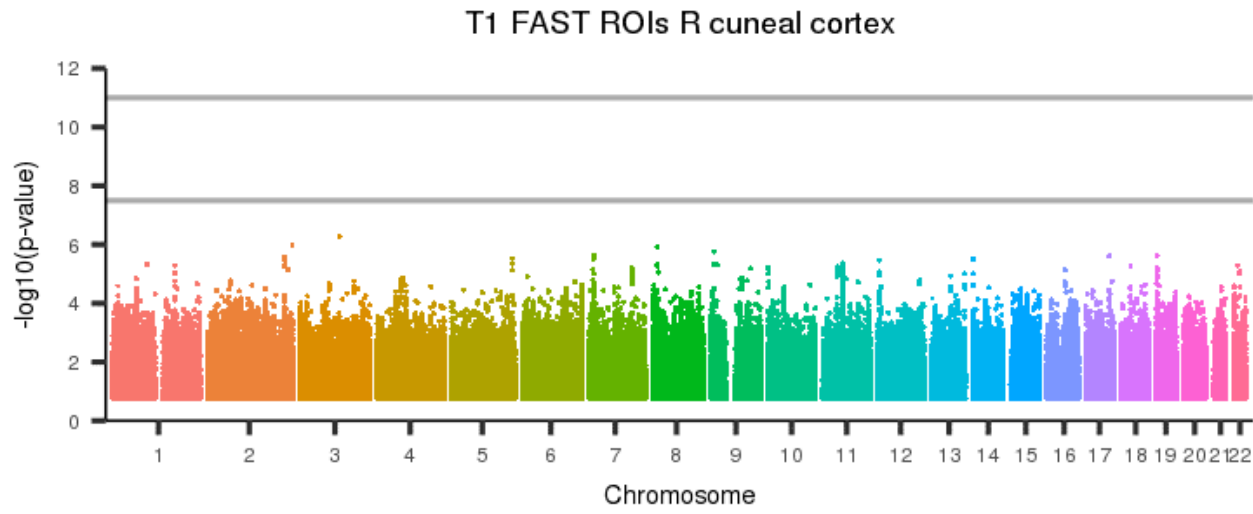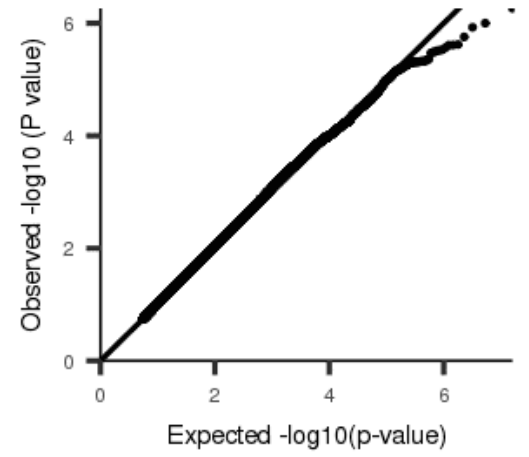

[back to list of plots](#)

Figure 90: T1 FAST ROIs L front orb cortex

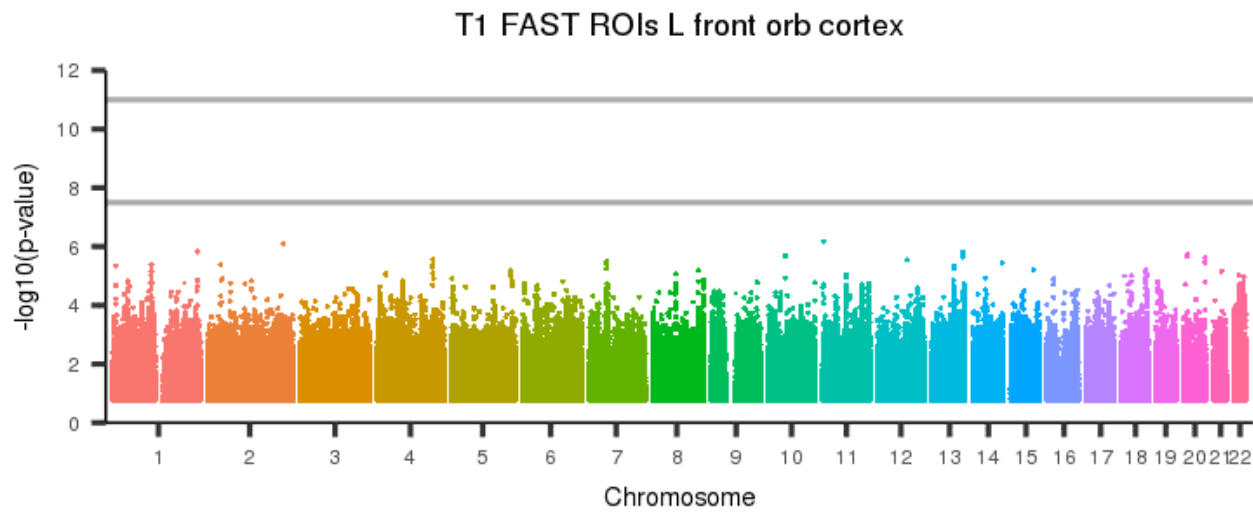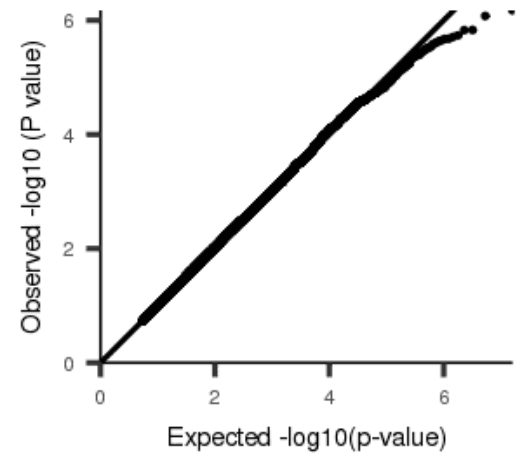

[back to list of plots](#)

Figure 91: T1 FAST ROIs R front orb cortex

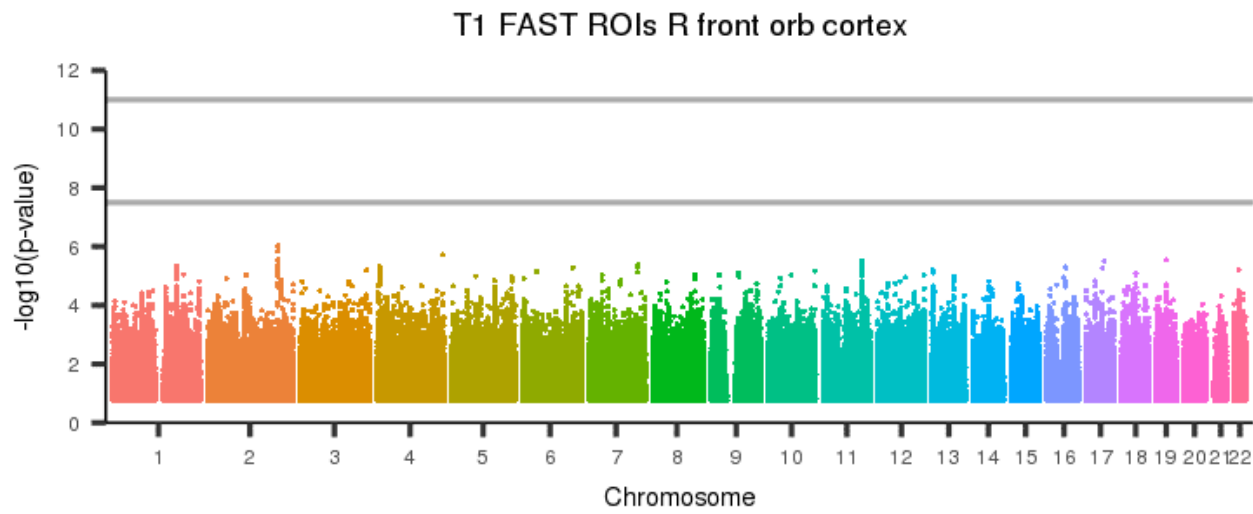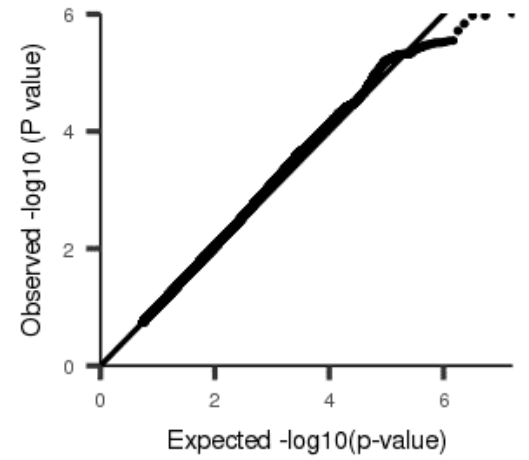

[back to list of plots](#)

Figure 92: T1 FAST ROIs L parahipp gyrus ant

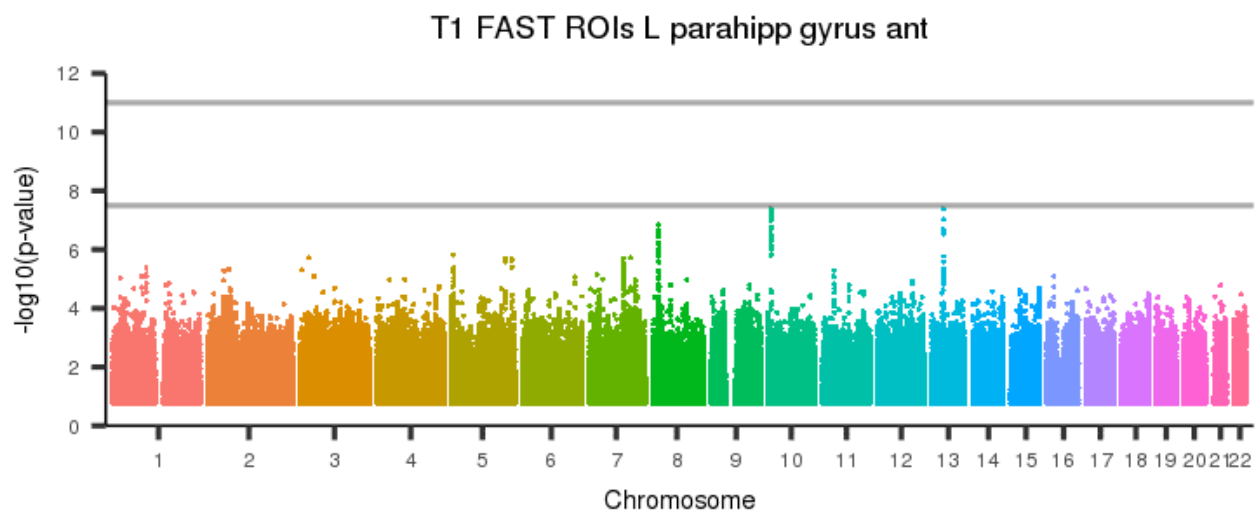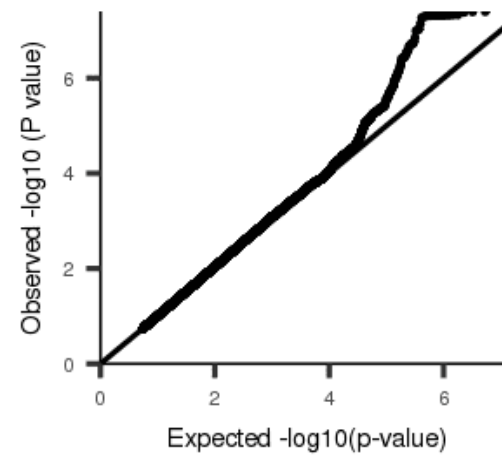

[back to list of plots](#)

Figure 93: T1 FAST ROIs R parahipp gyrus ant

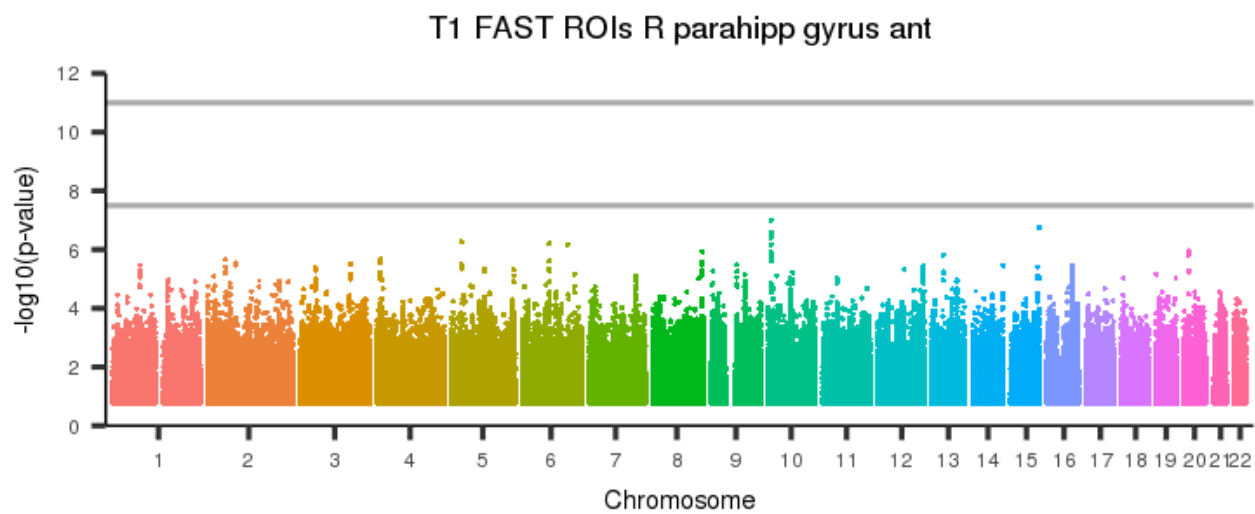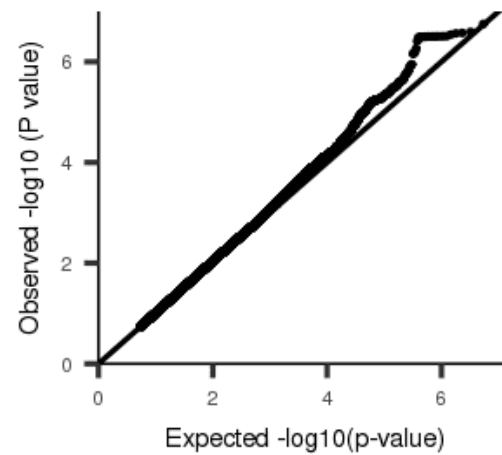

[back to list of plots](#)



Figure 94: T1 FAST ROIs L parahipp gyrus post

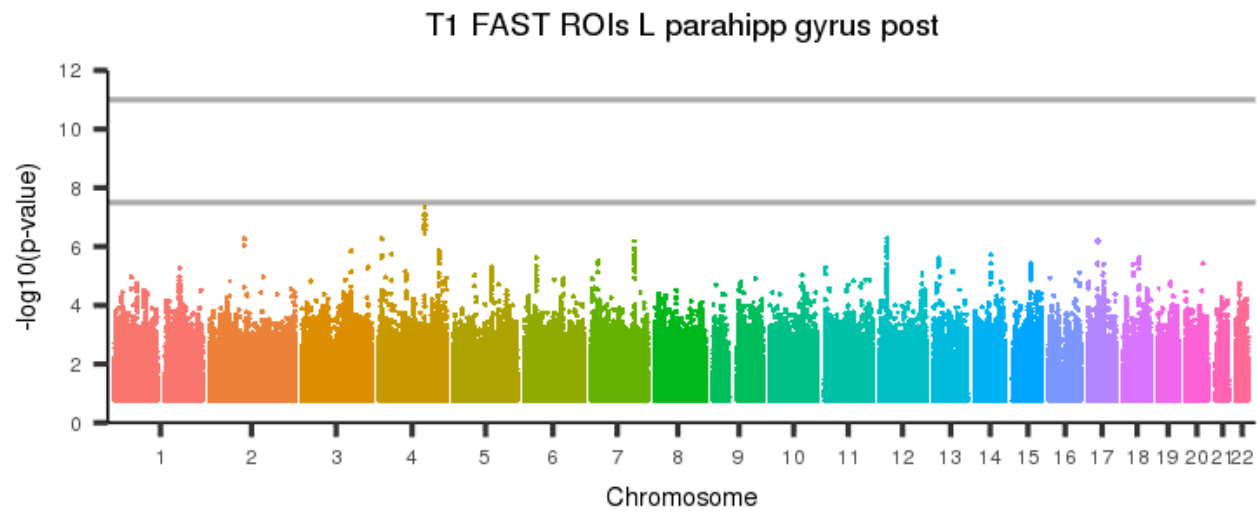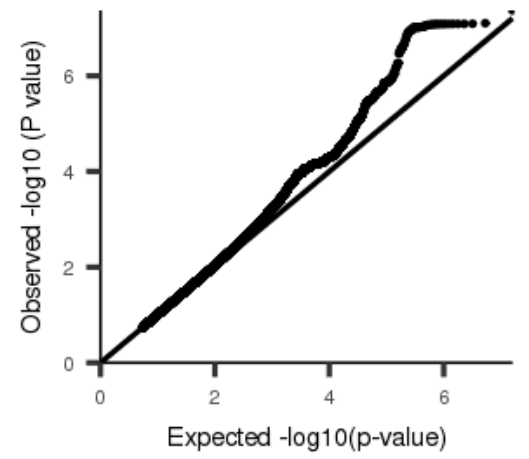

[back to list of plots](#)

Figure 95: T1 FAST ROIs R parahipp gyrus post

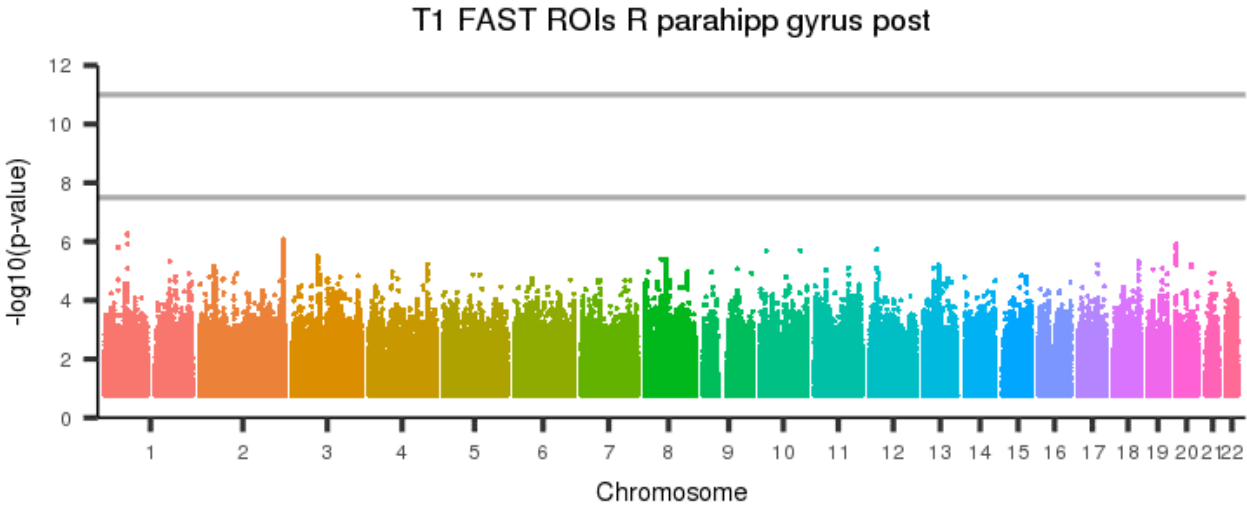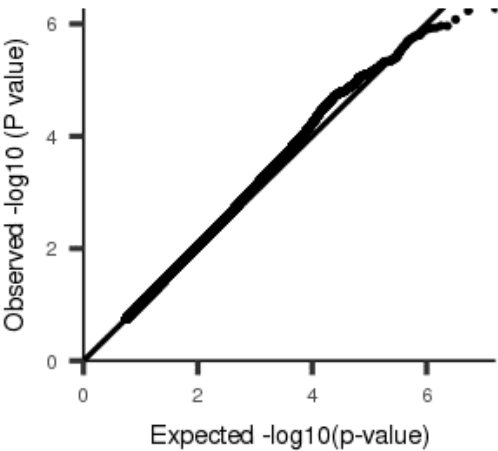

[back to list of plots](#)

Figure 96: T1 FAST ROIs L lingual gyrus

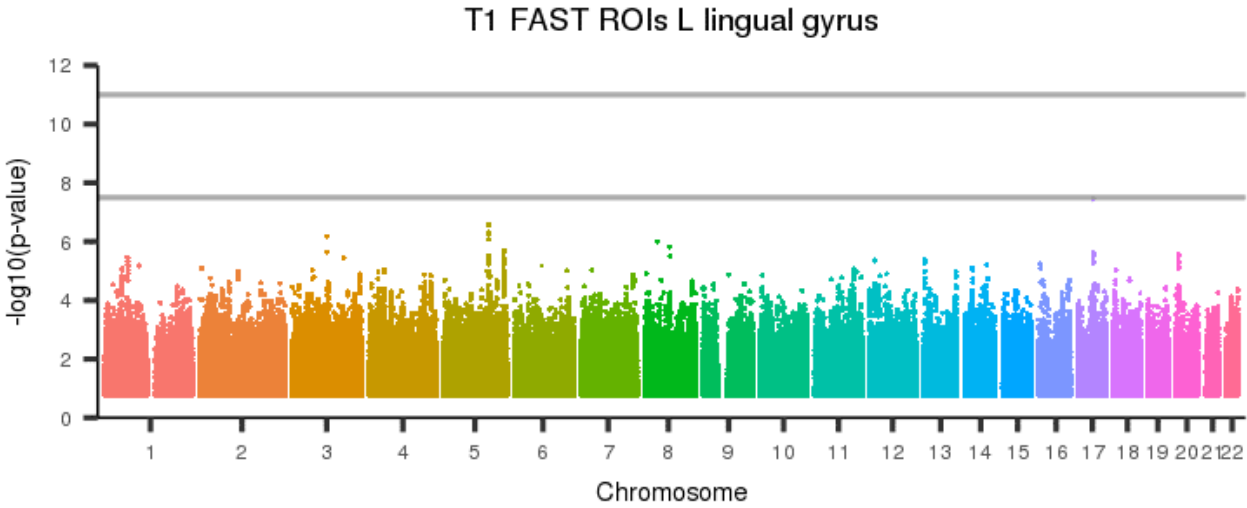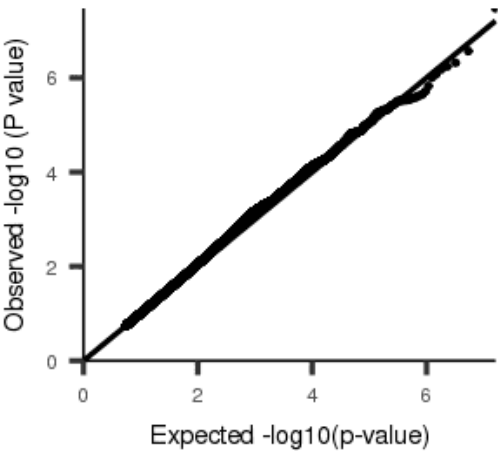

[back to list of plots](#)

Figure 97: T1 FAST ROIs R lingual gyrus

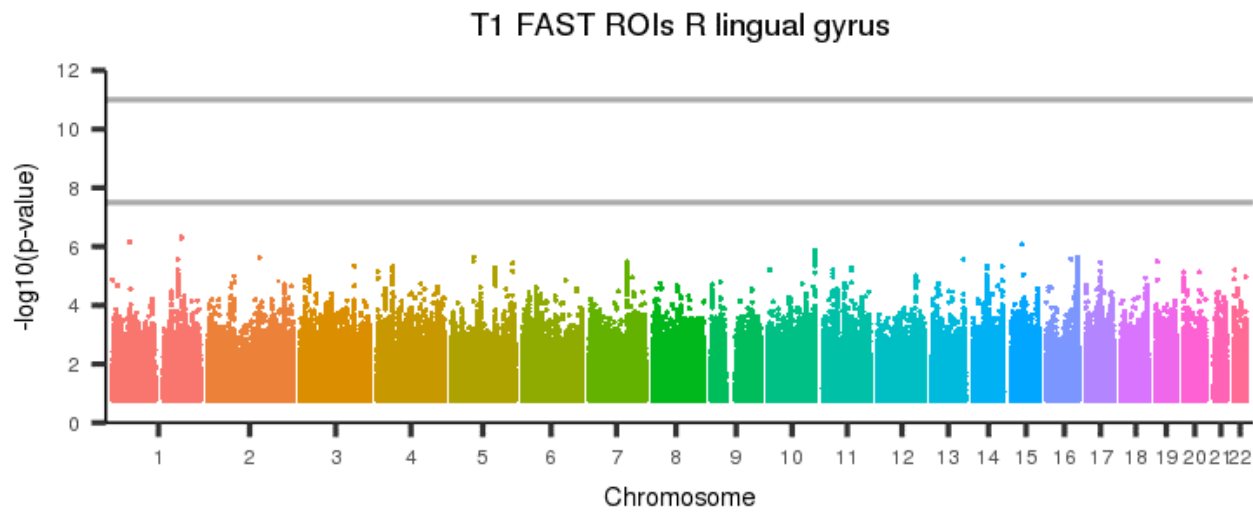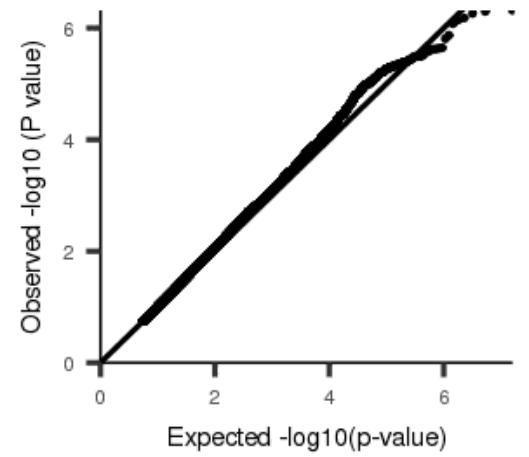

[back to list of plots](#)

Figure 98: T1 FAST ROIs L temp fusif cortex ant

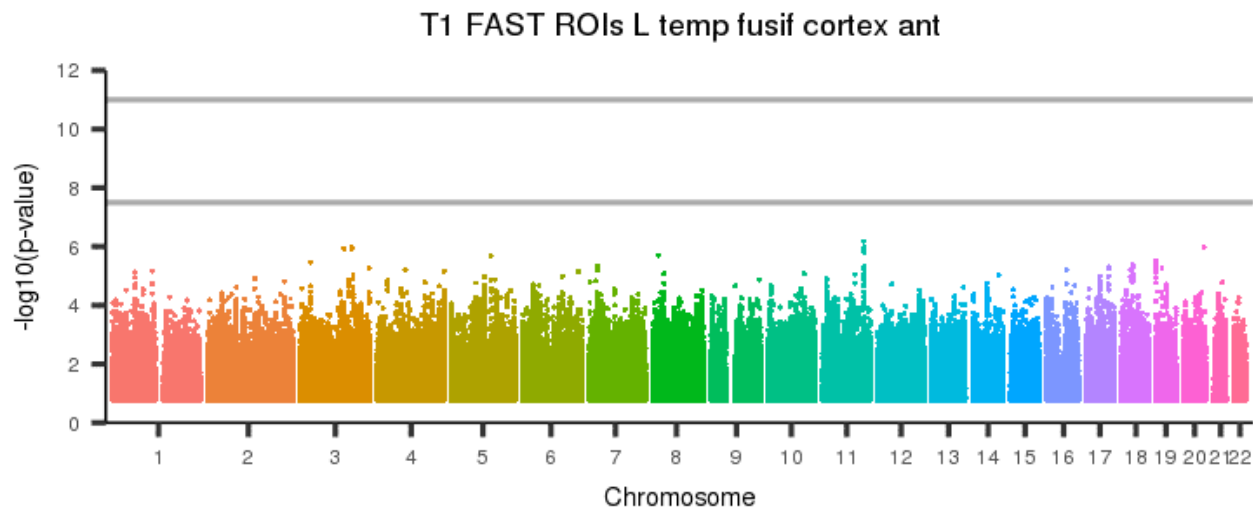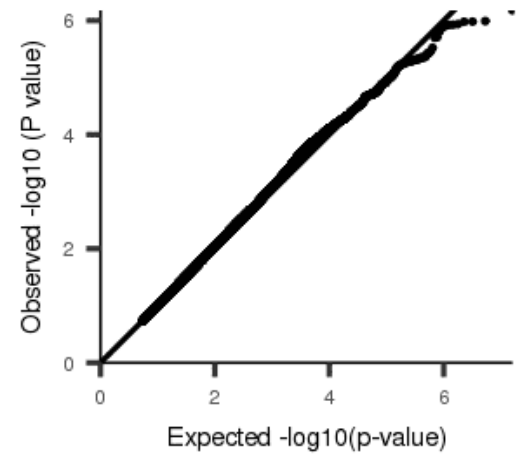

[back to list of plots](#)

Figure 99: T1 FAST ROIs R temp fusif cortex ant

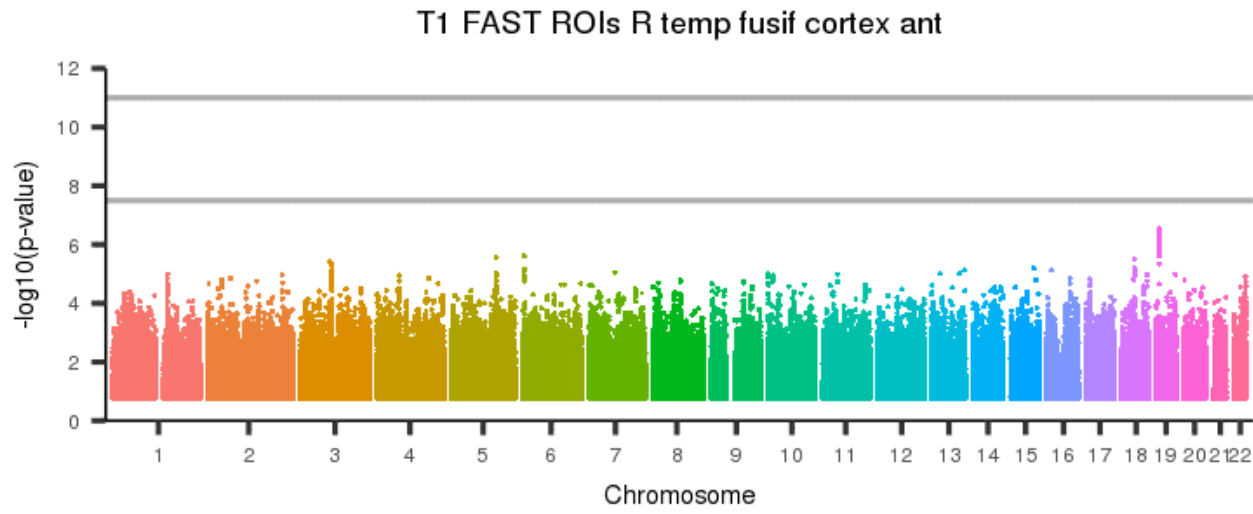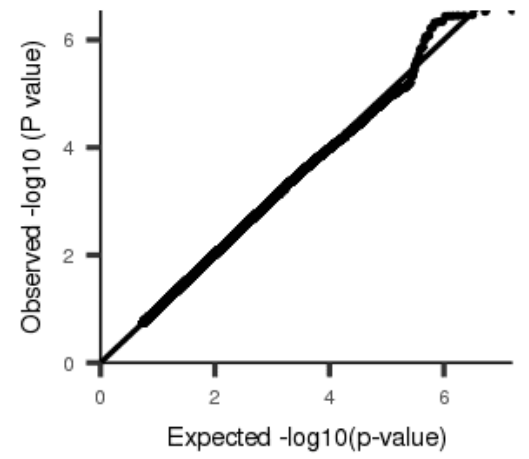

[back to list of plots](#)

Figure 100: T1 FAST ROIs L temp fusif cortex post

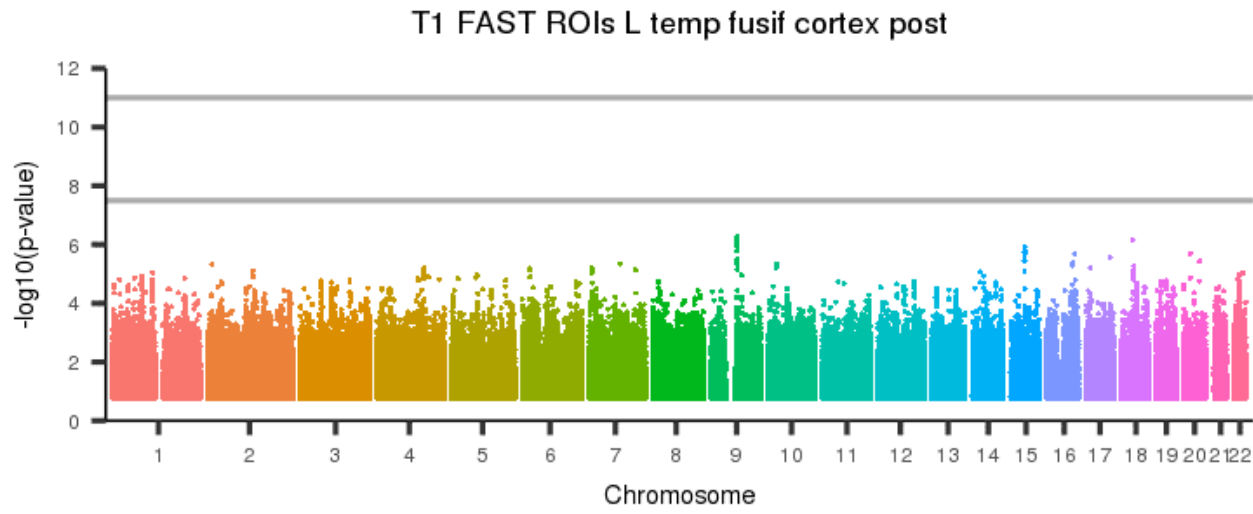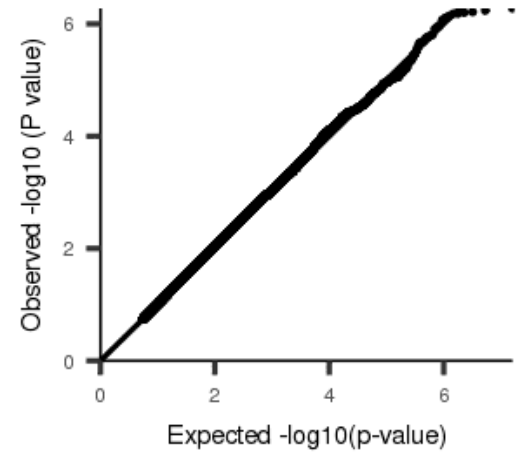

[back to list of plots](#)

Figure 101: T1 FAST ROIs R temp fusif cortex post

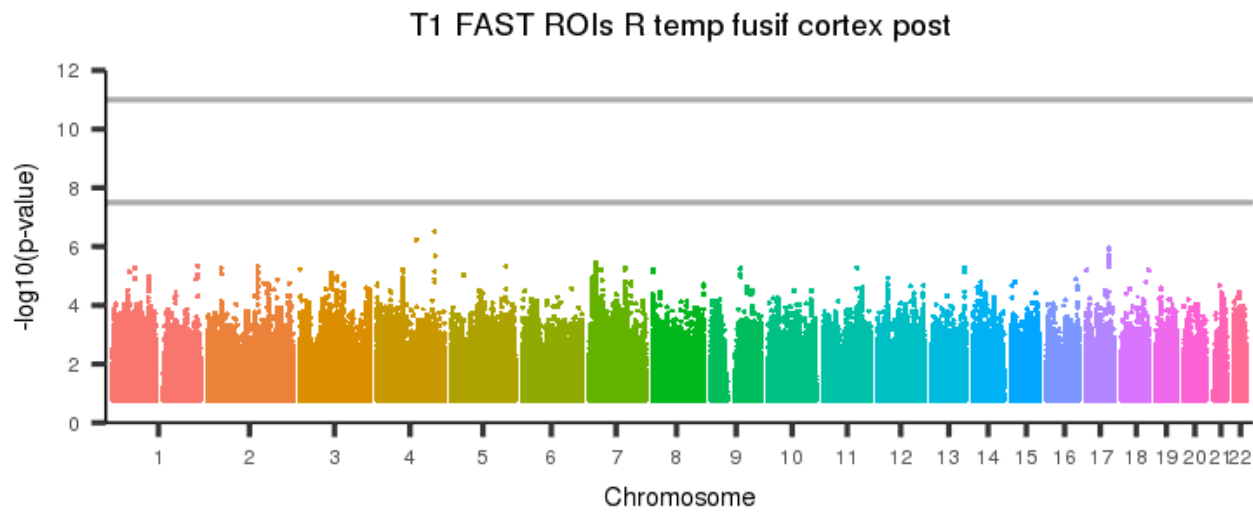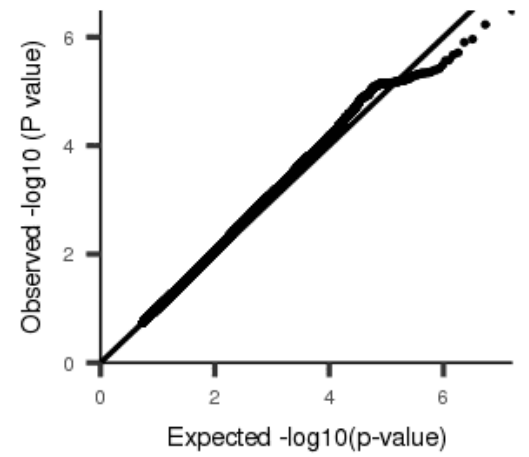

[back to list of plots](#)



Figure 102: T1 FAST ROIs L temp occ fusif cortex

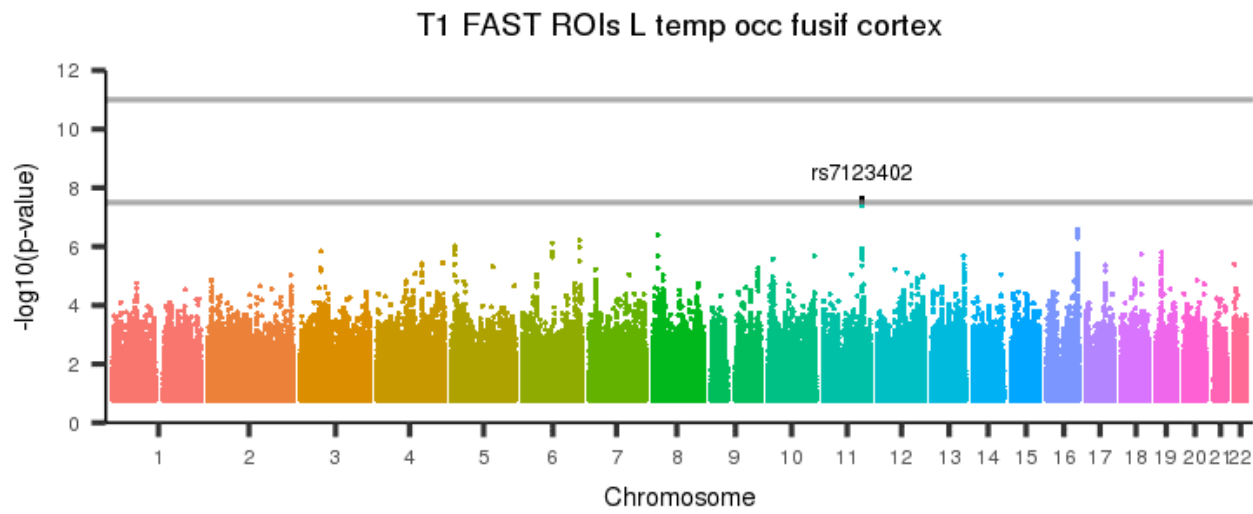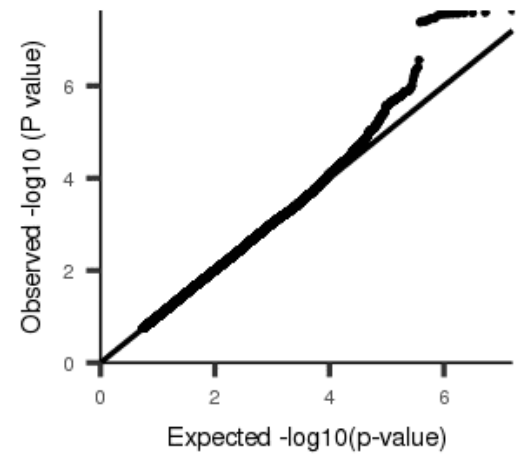

[back to list of plots](#)

Figure 103: T1 FAST ROIs R temp occ fusif cortex

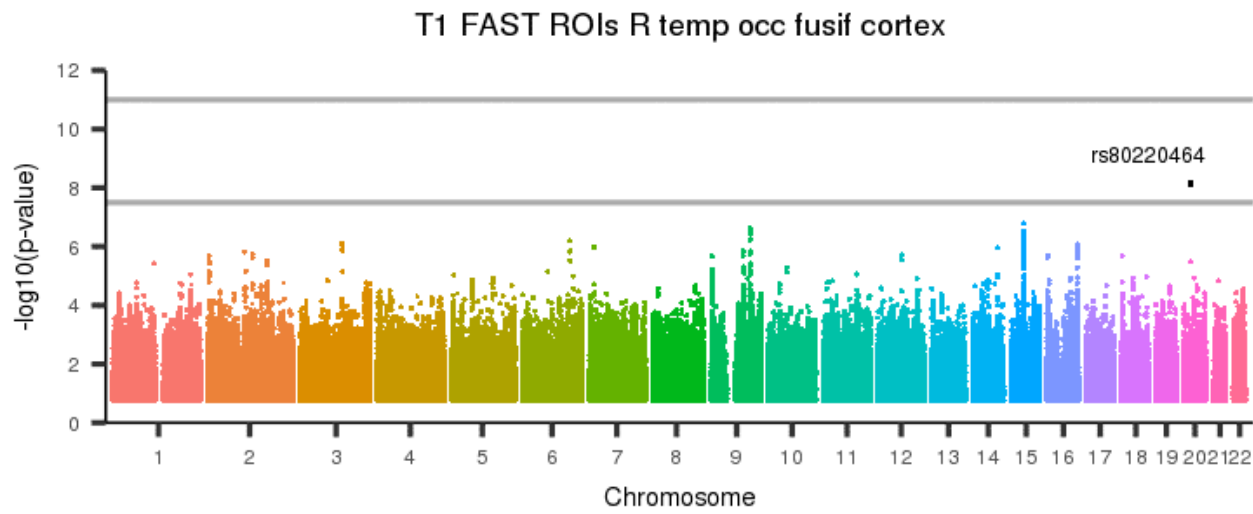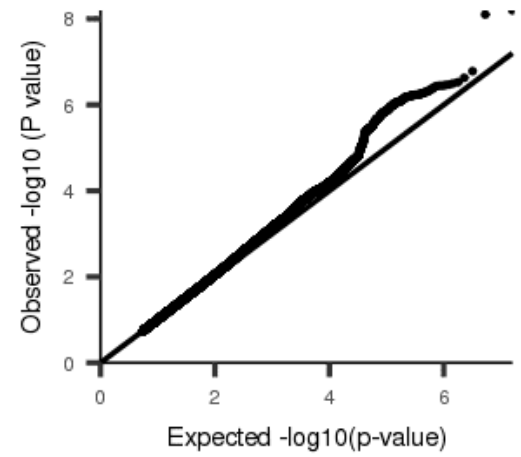

[back to list of plots](#)

Figure 104: T1 FAST ROIs L occ fusif gyrus

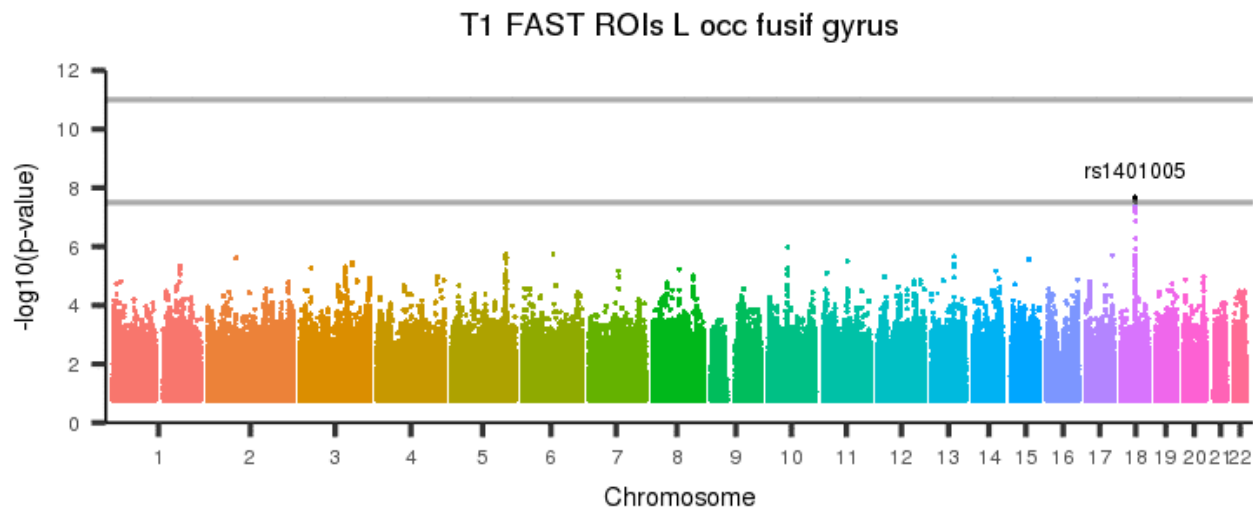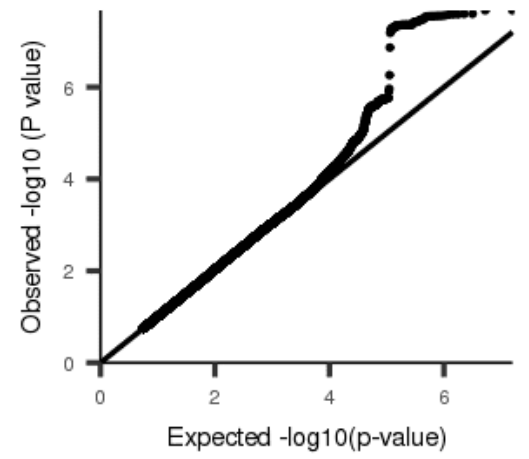

[back to list of plots](#)

Figure 105: T1 FAST ROIs R occ fusif gyrus

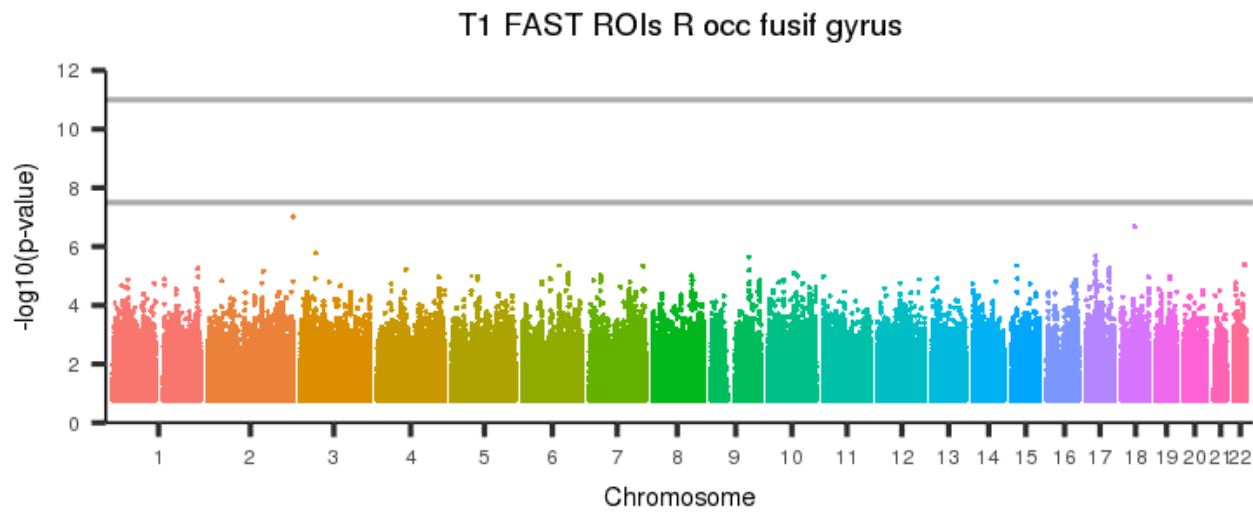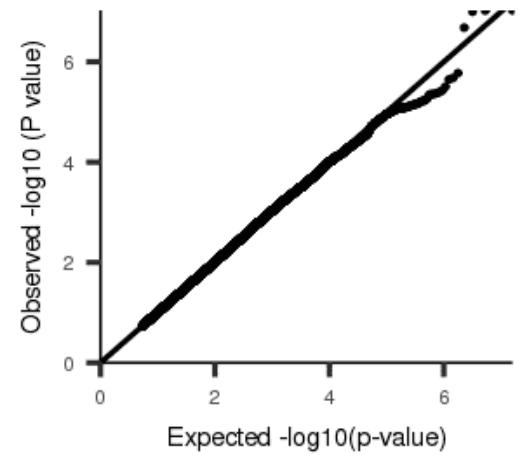

[back to list of plots](#)

Figure 106: T1 FAST ROIs L front operc cortex

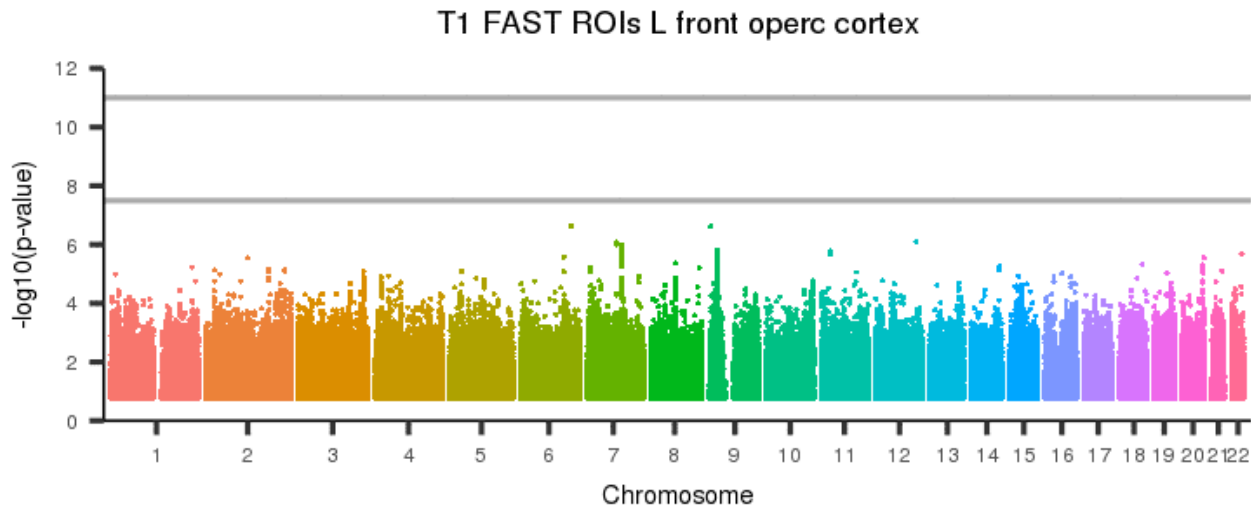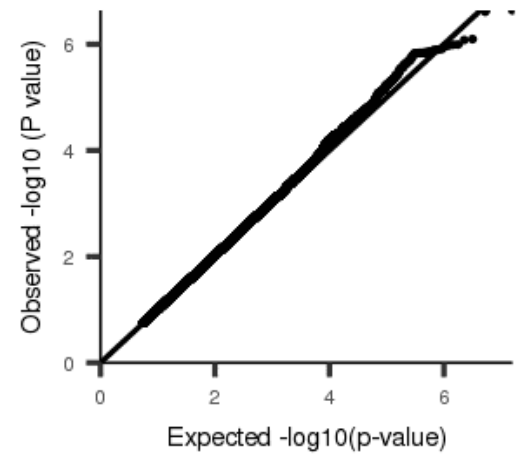

[back to list of plots](#)

Figure 107: T1 FAST ROIs R front operc cortex

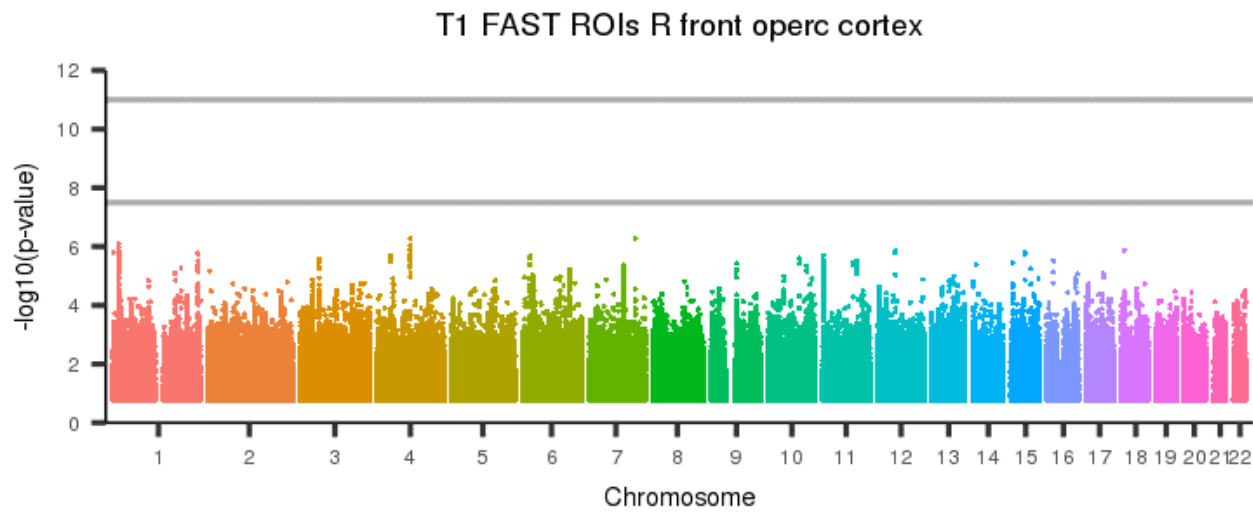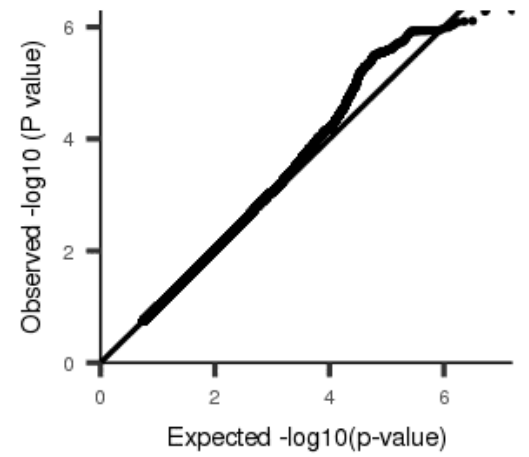

[back to list of plots](#)

Figure 108: T1 FAST ROIs L cent operc cortex

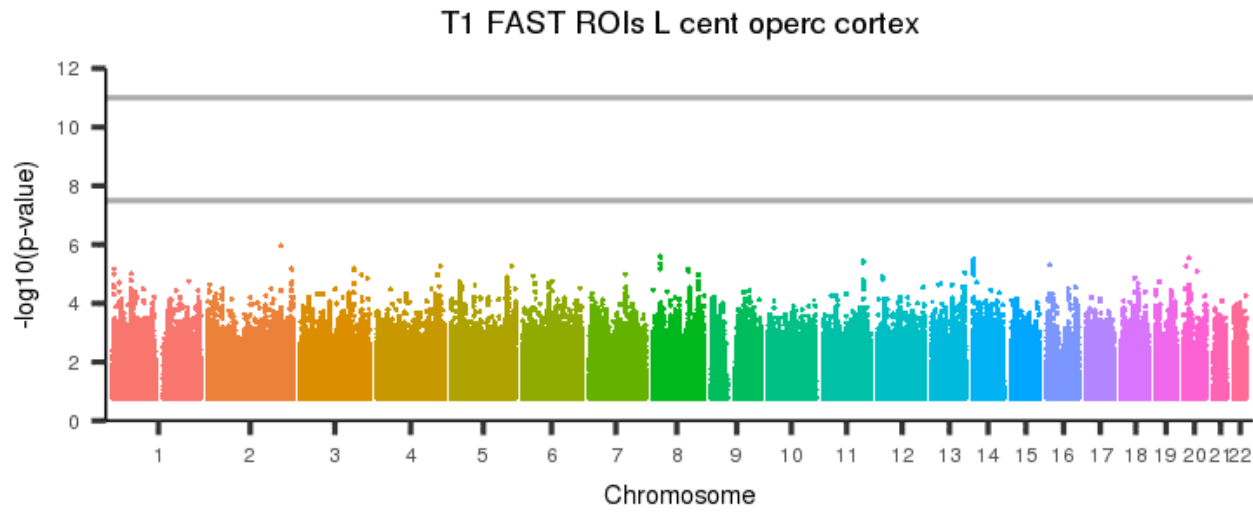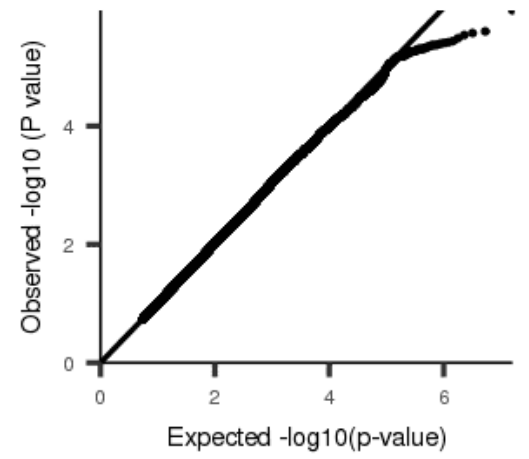

[back to list of plots](#)

Figure 109: T1 FAST ROIs R cent operc cortex

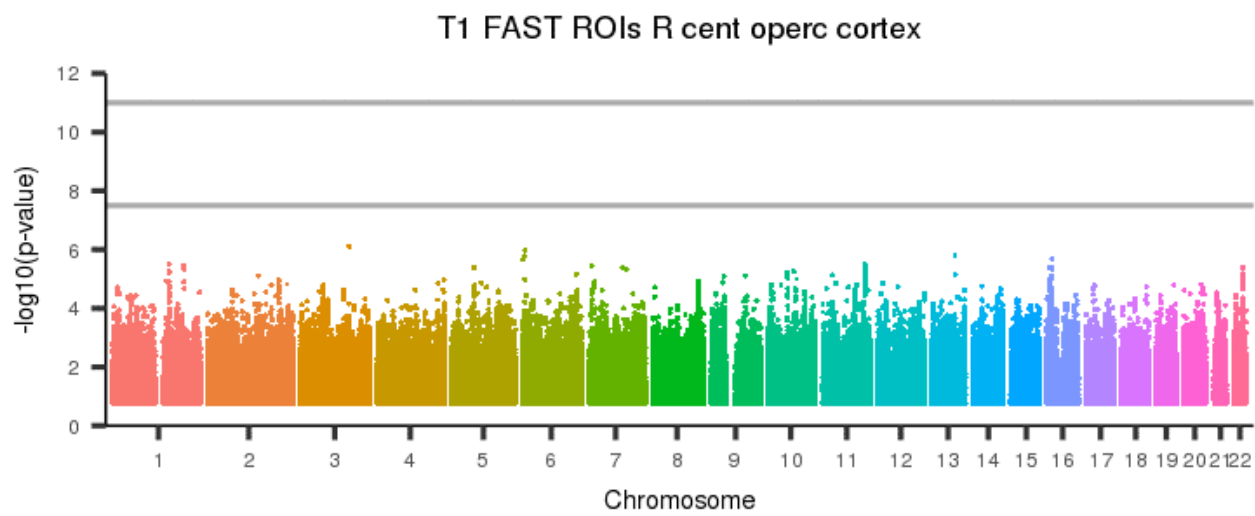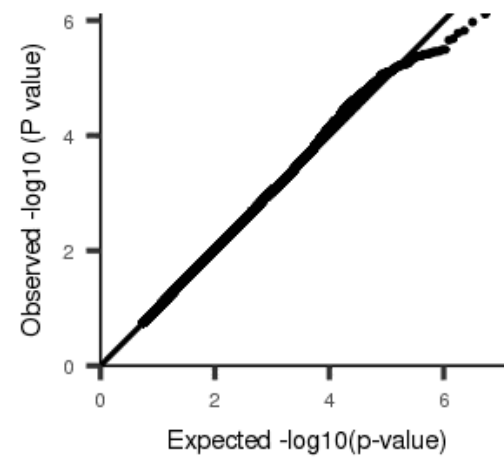

[back to list of plots](#)



Figure 110: T1 FAST ROIs L parietal operc cortex

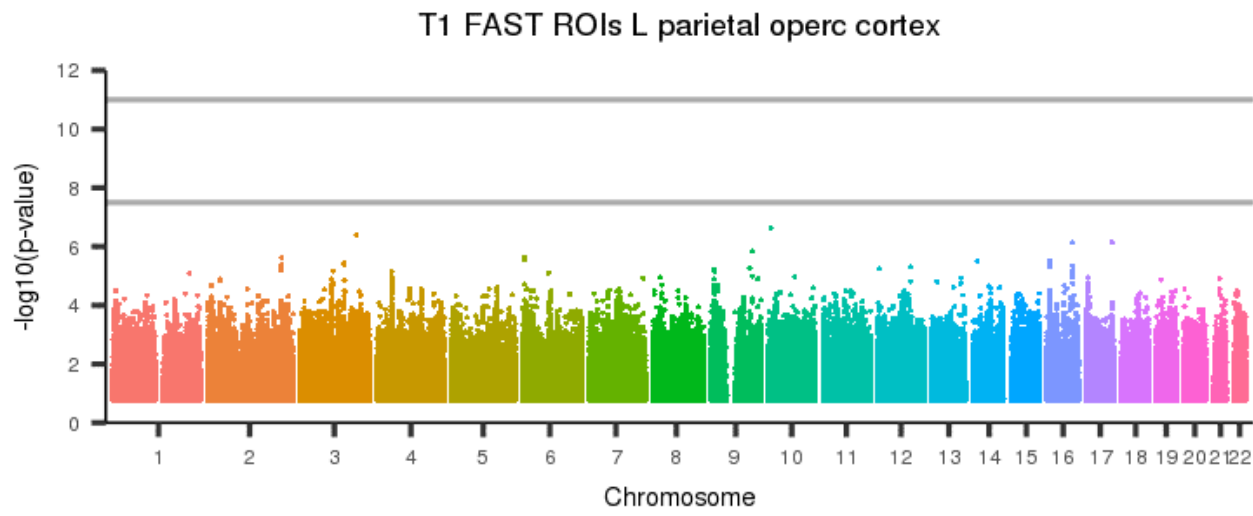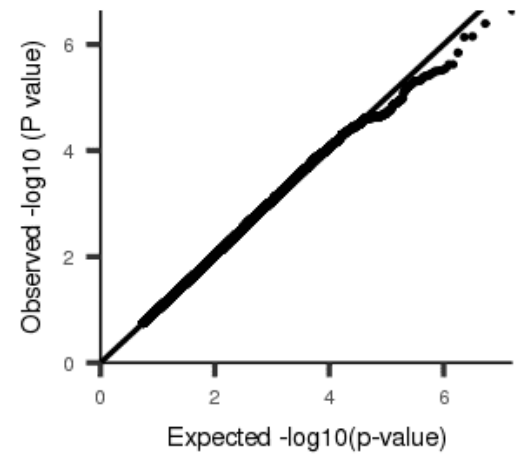

[back to list of plots](#)

Figure 111: T1 FAST ROIs R parietal operc cortex

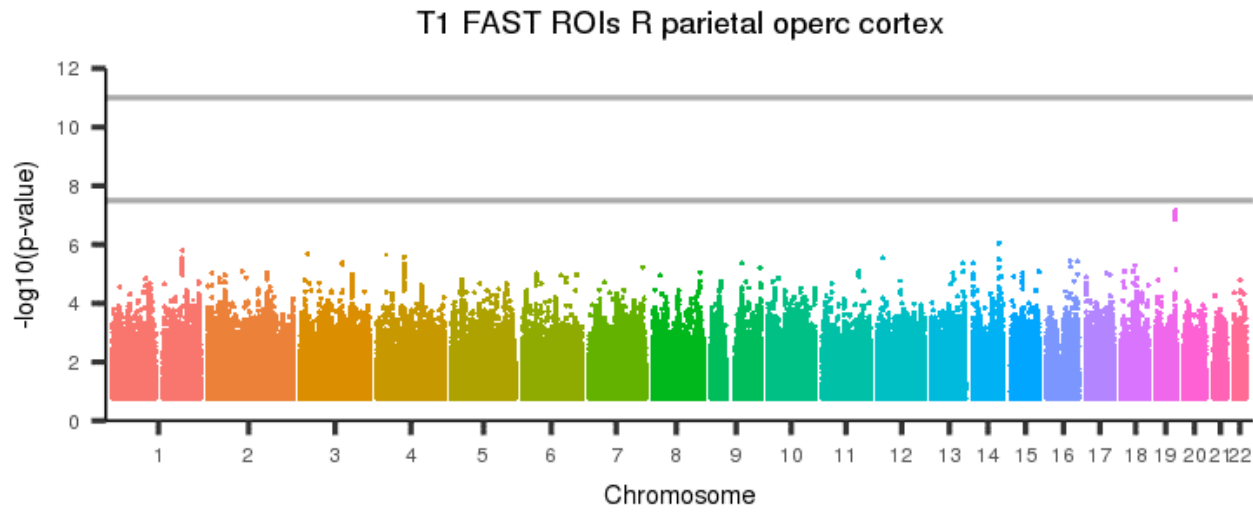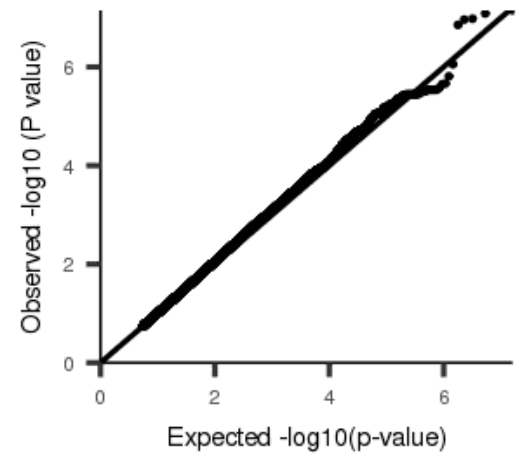

[back to list of plots](#)

Figure 112: T1 FAST ROIs L planum polare

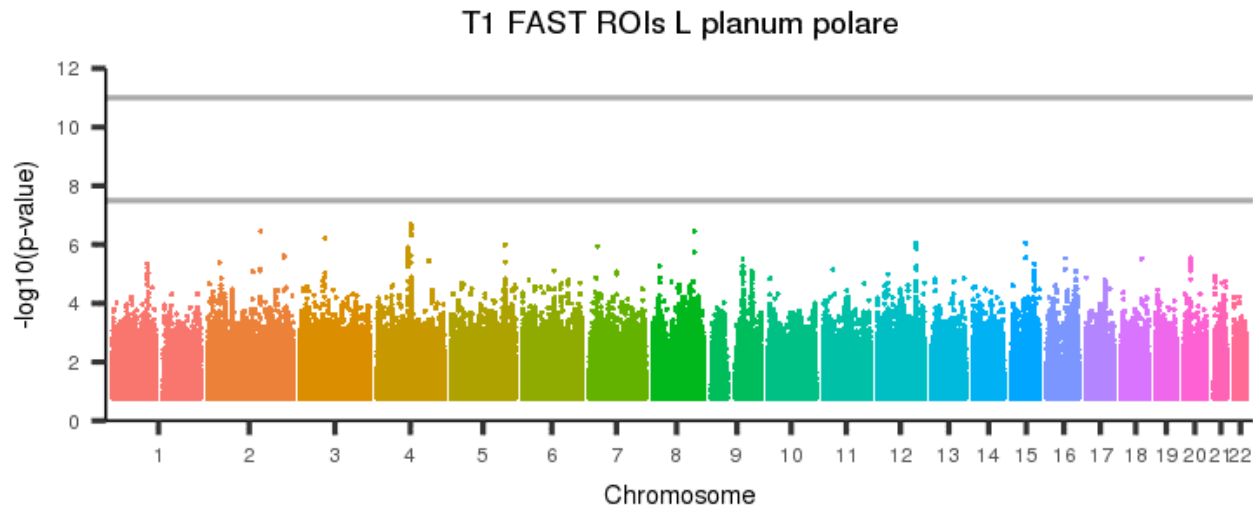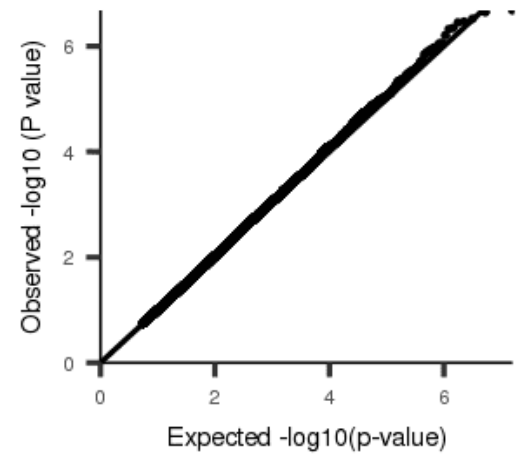

[back to list of plots](#)

Figure 113: T1 FAST ROIs R planum polare

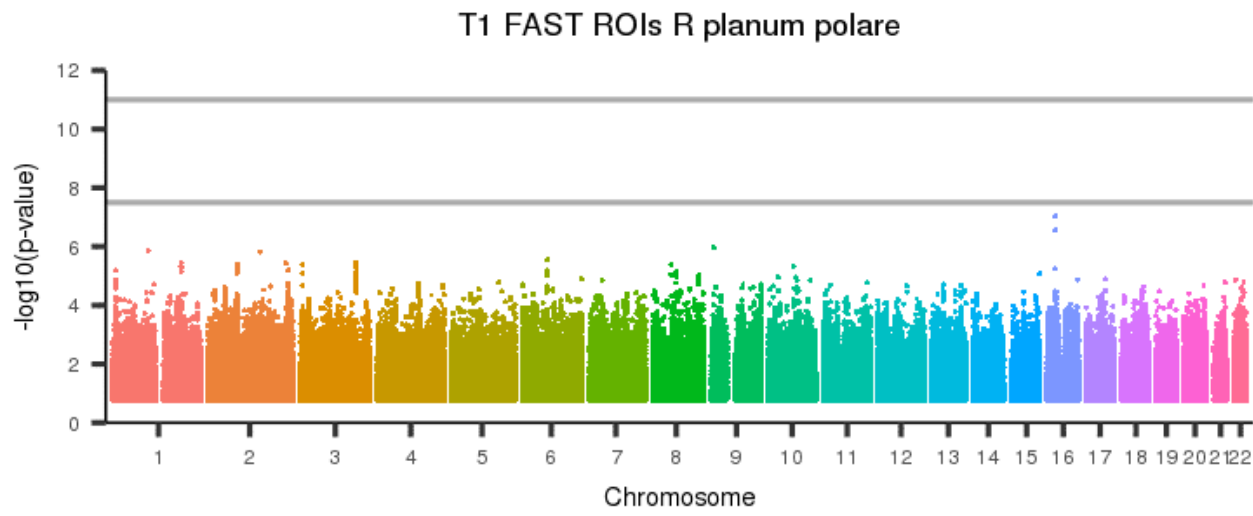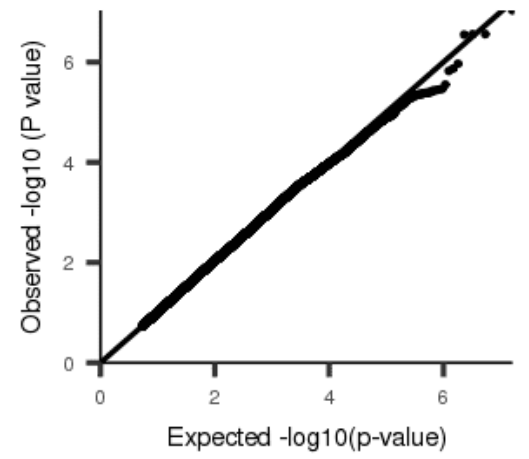

[back to list of plots](#)

Figure 114: T1 FAST ROIs L heschl gyrus

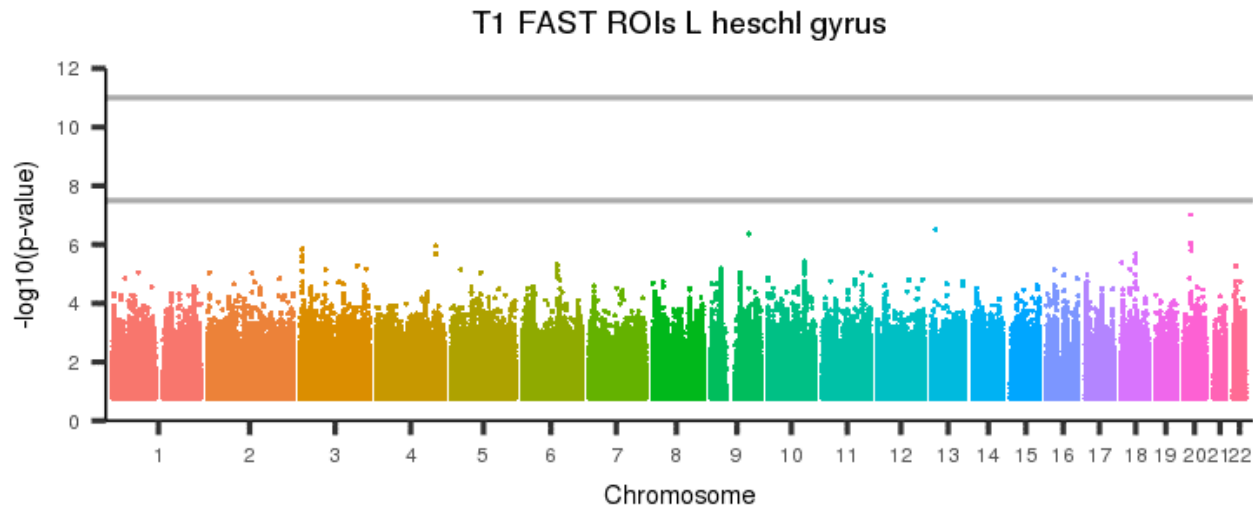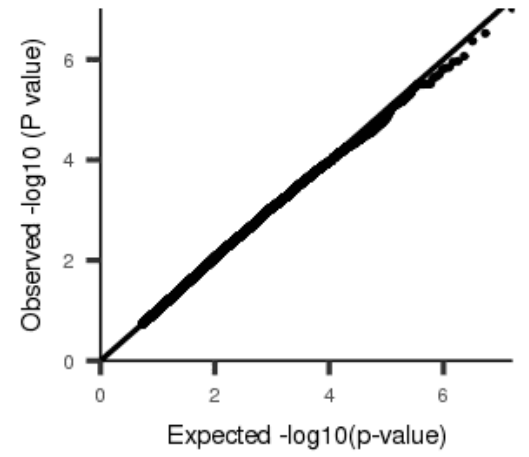

[back to list of plots](#)

Figure 115: T1 FAST ROIs R heschl gyrus

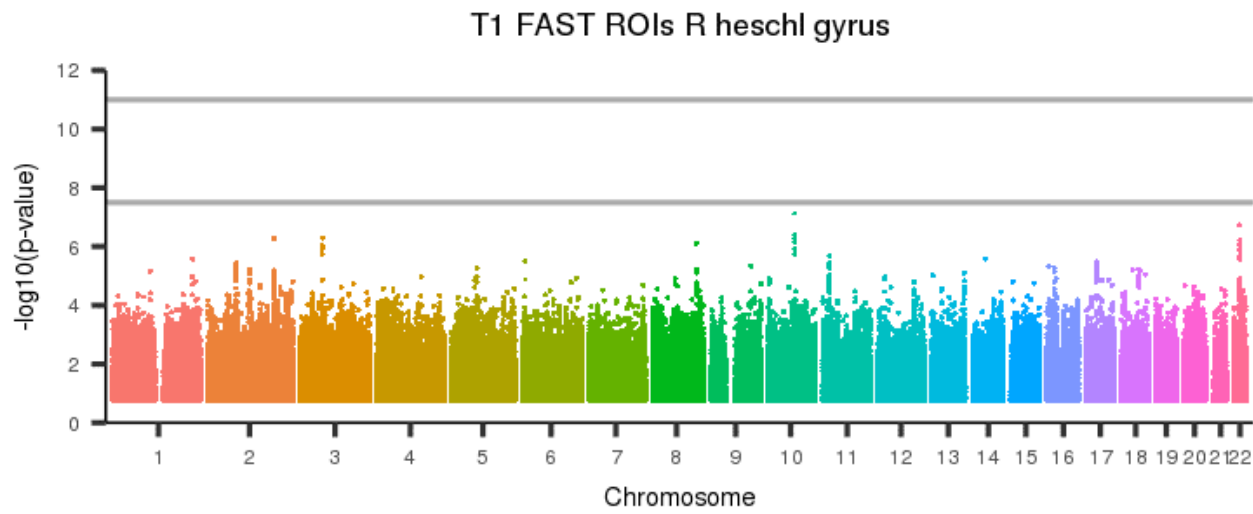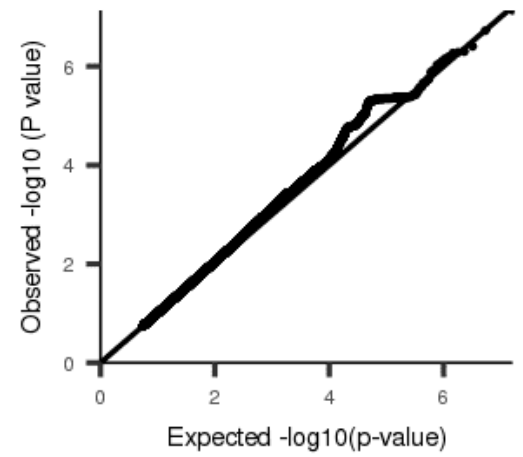

[back to list of plots](#)

Figure 116: T1 FAST ROIs L planum temporale

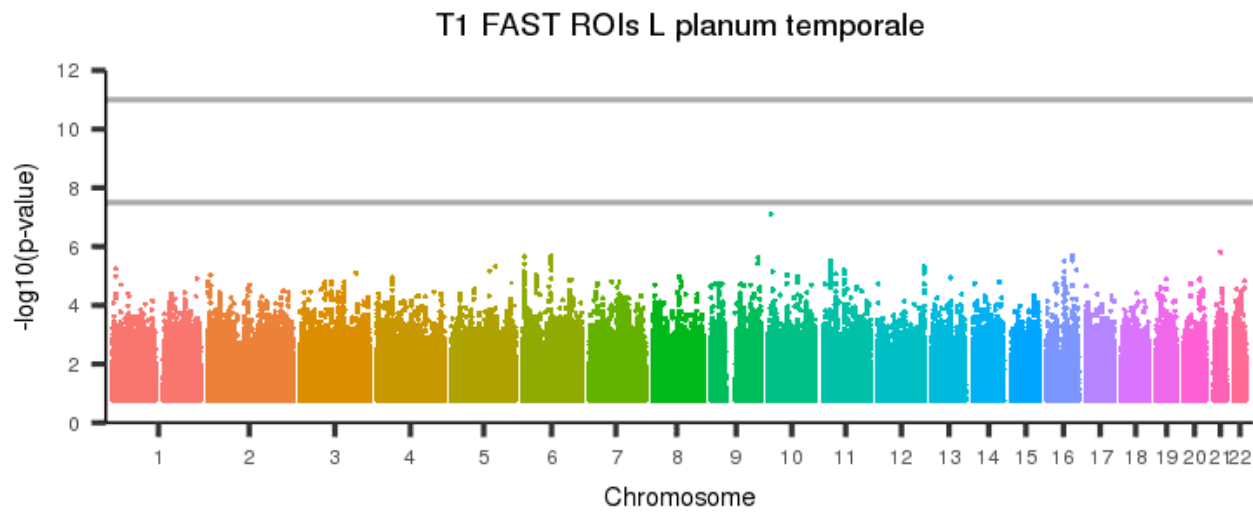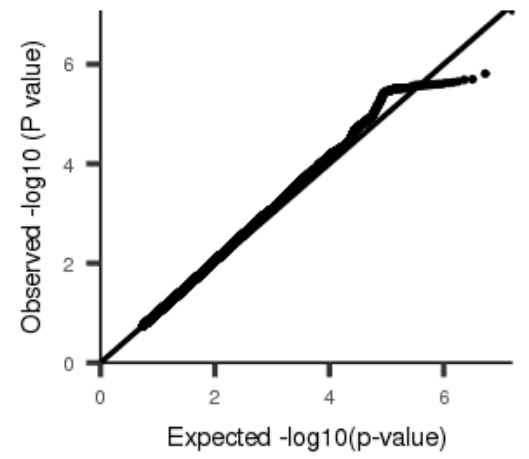

[back to list of plots](#)

Figure 117: T1 FAST ROIs R planum temporale

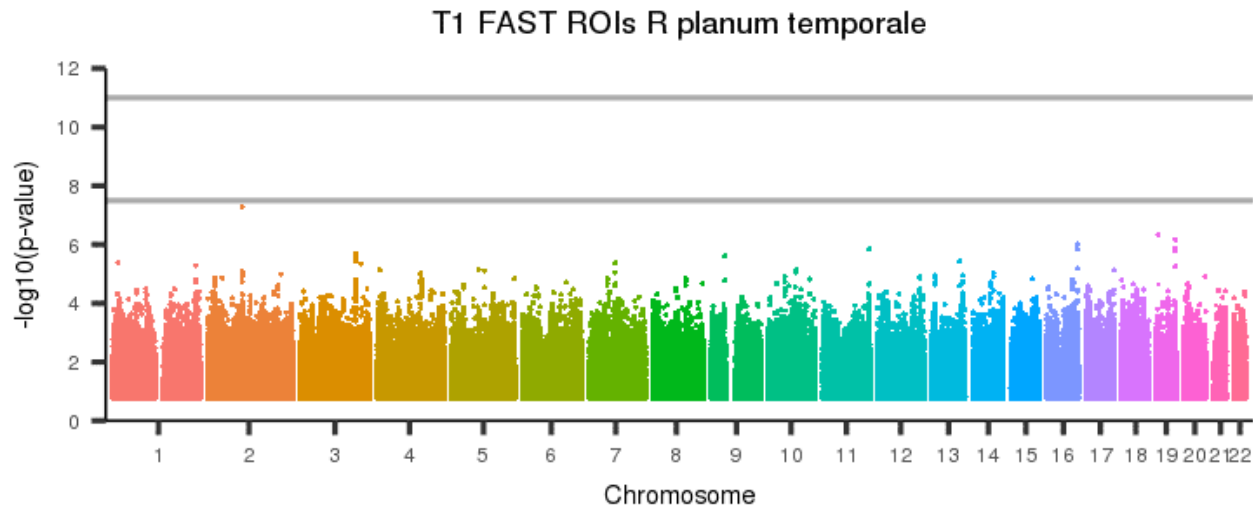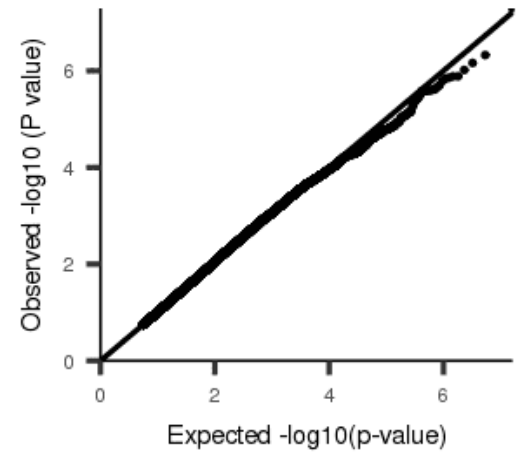

[back to list of plots](#)



Figure 118: T1 FAST ROIs L supracalc cortex

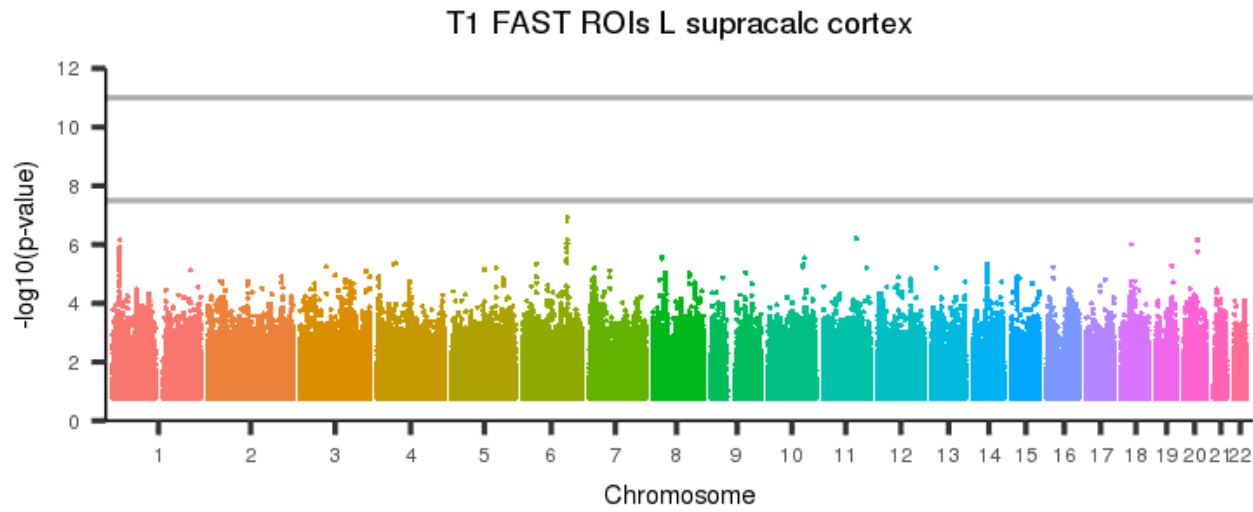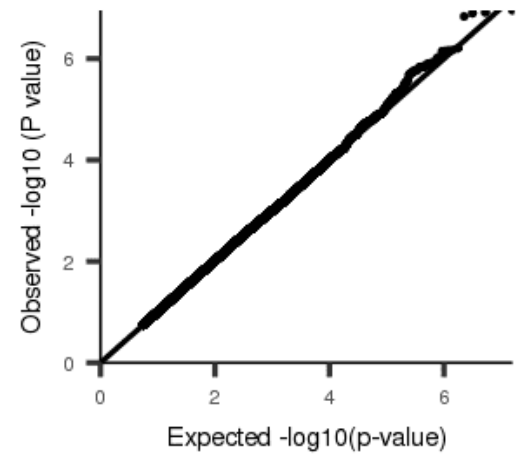

[back to list of plots](#)

Figure 119: T1 FAST ROIs R supracalc cortex

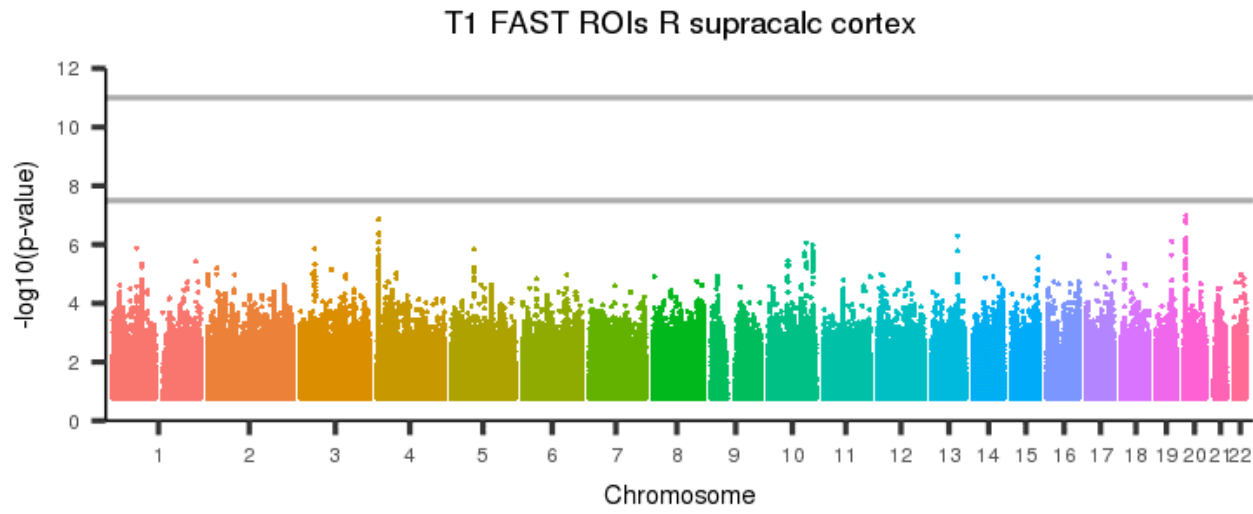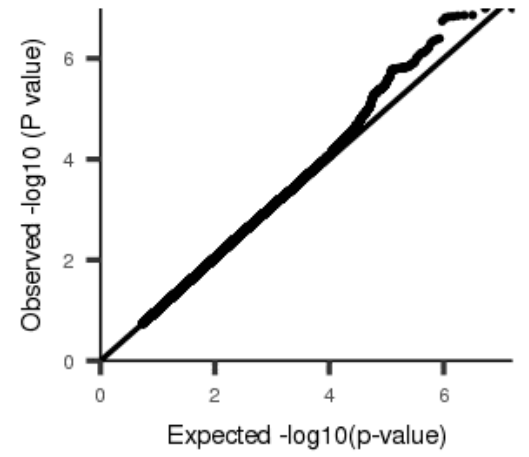

[back to list of plots](#)

Figure 120: T1 FAST ROIs L occ pole

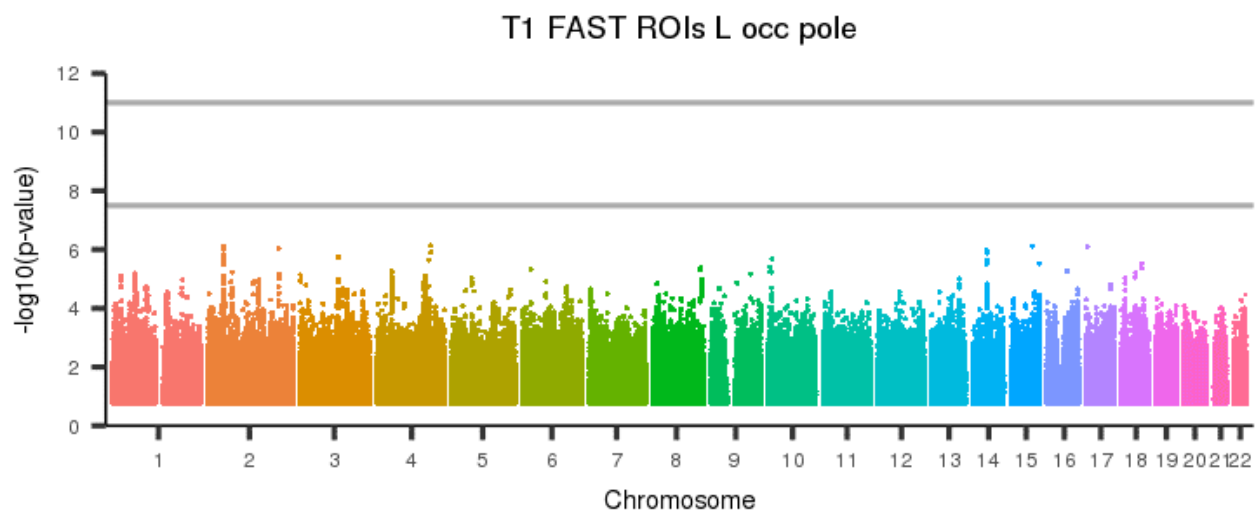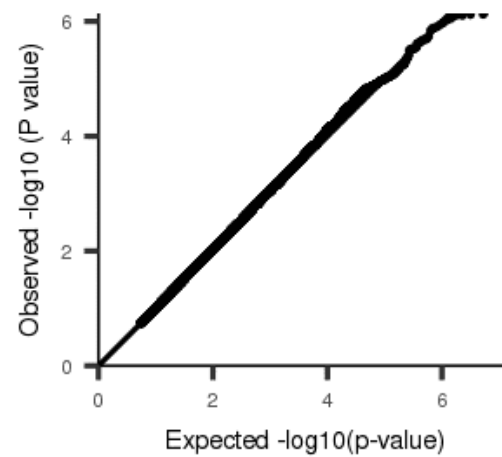

[back to list of plots](#)

Figure 121: T1 FAST ROIs R occ pole

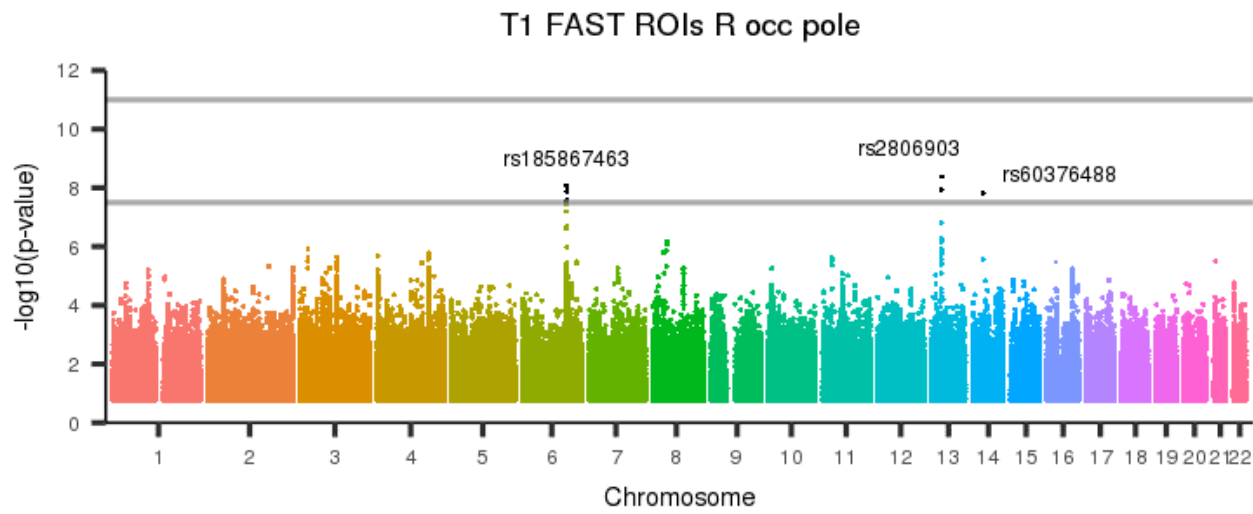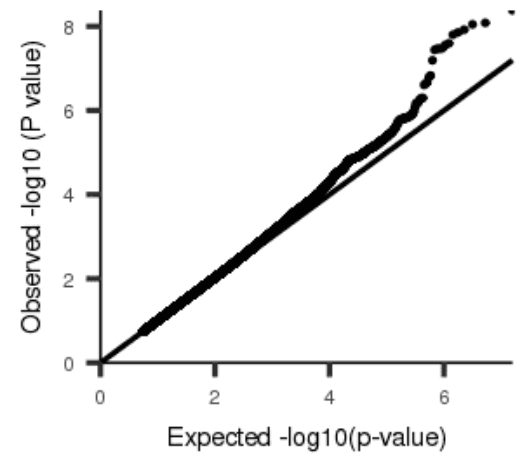

[back to list of plots](#)

Figure 122: T1 FAST ROIs L thalamus

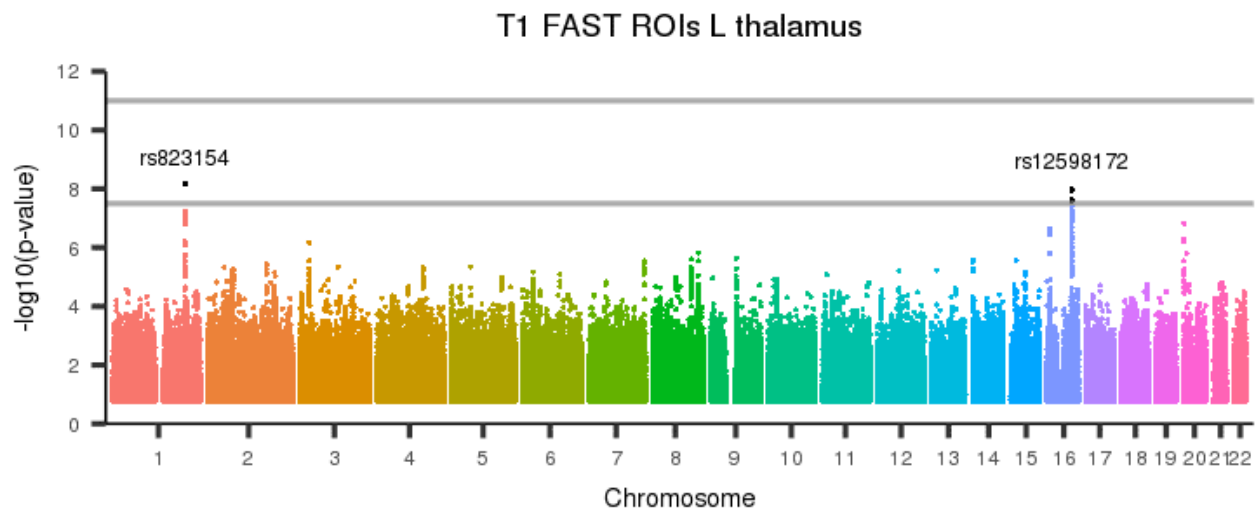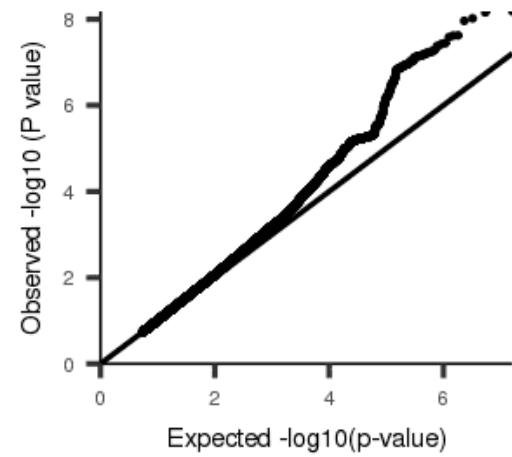

[back to list of plots](#)

Figure 123: T1 FAST ROIs R thalamus

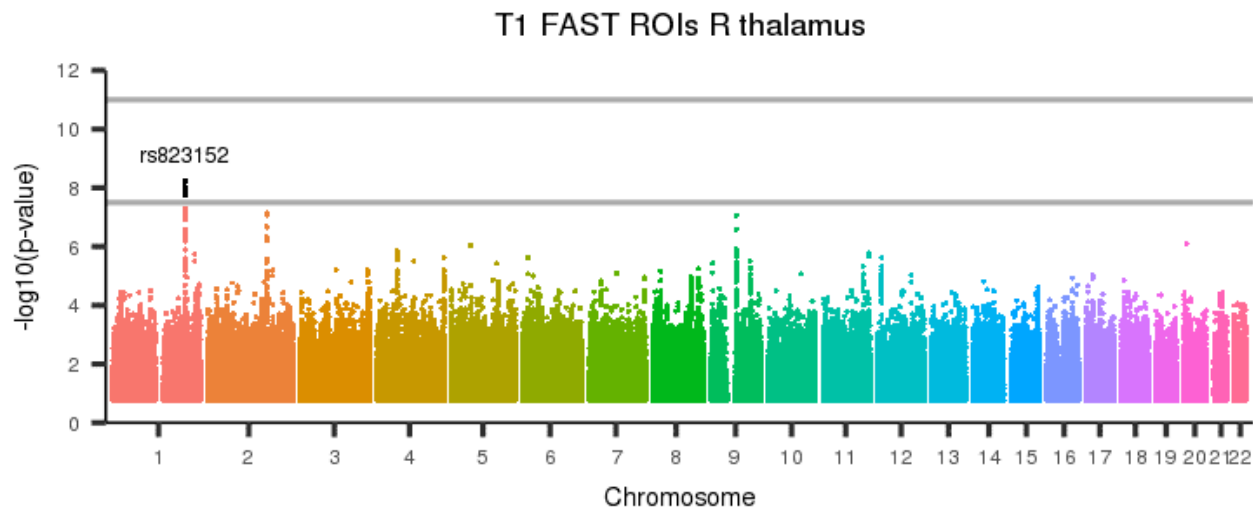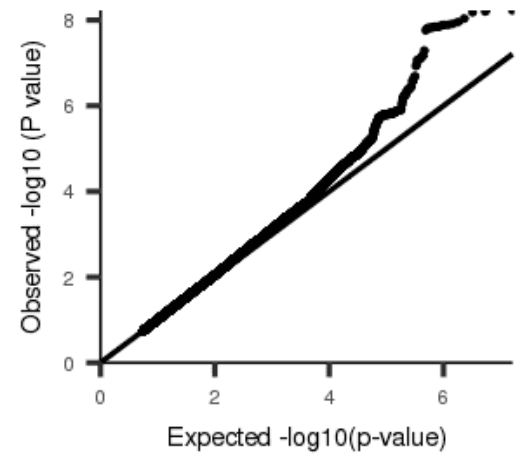

[back to list of plots](#)

Figure 124: T1 FAST ROIs L caudate

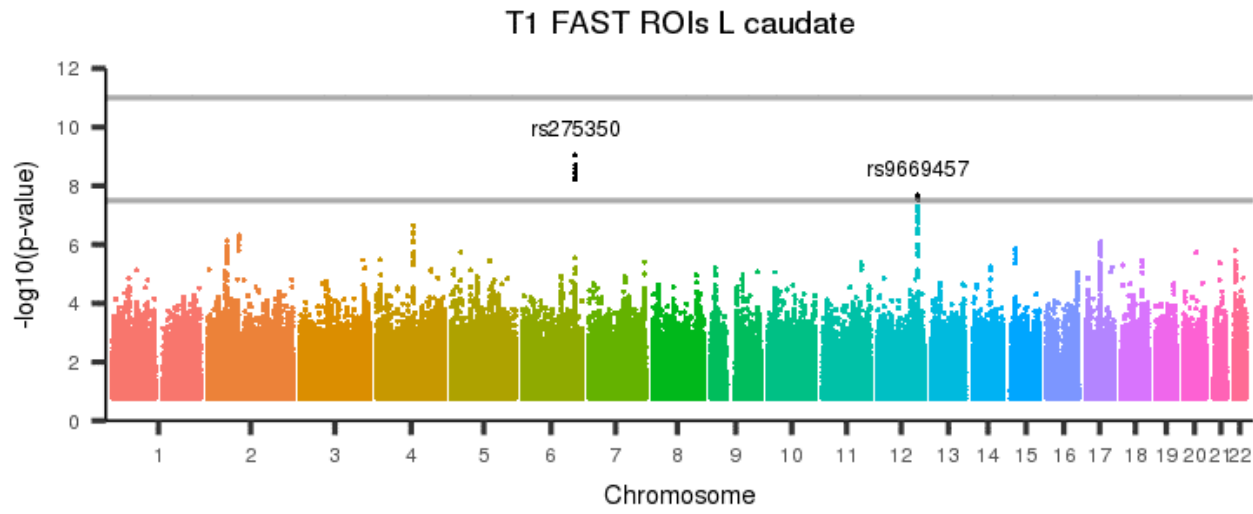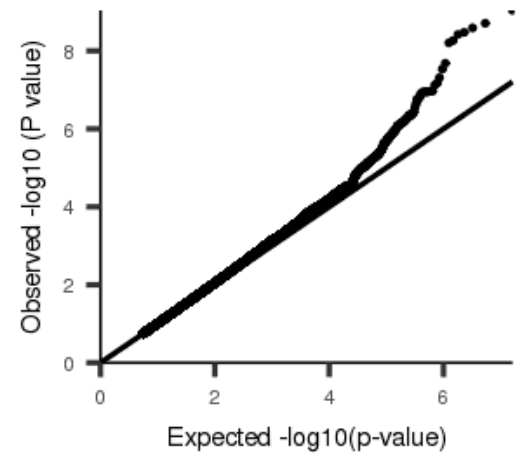

[back to list of plots](#)

Figure 125: T1 FAST ROIs R caudate

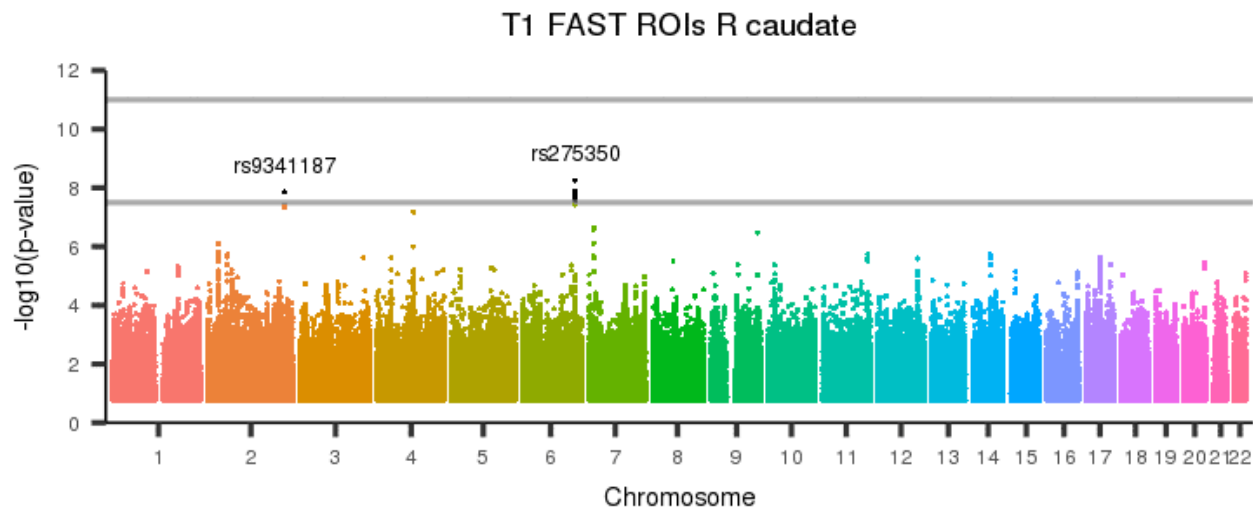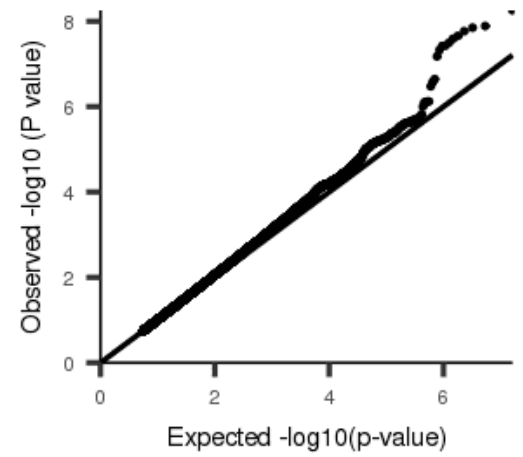

[back to list of plots](#)



Figure 126: T1 FAST ROIs L putamen

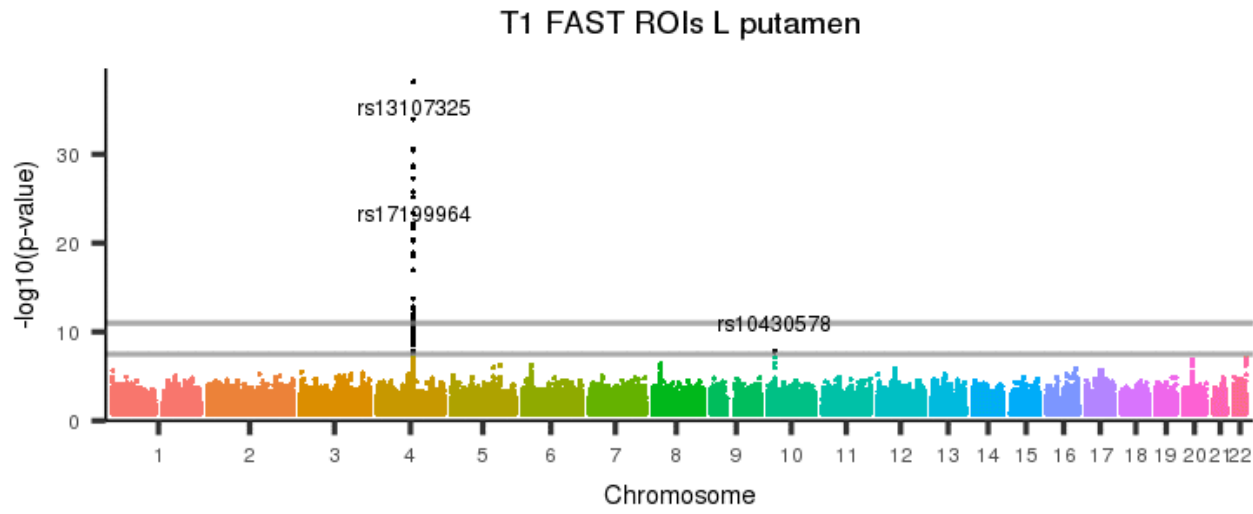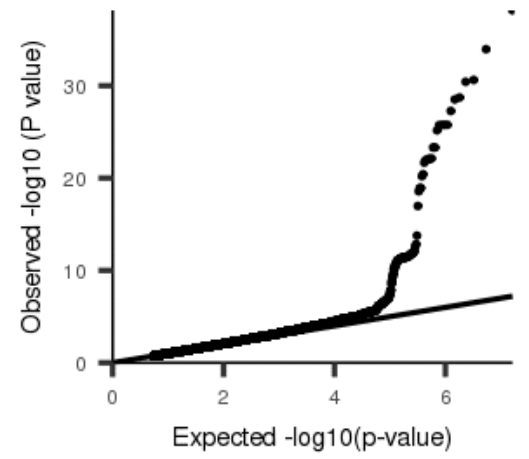

[back to list of plots](#)

Figure 127: T1 FAST ROIs R putamen

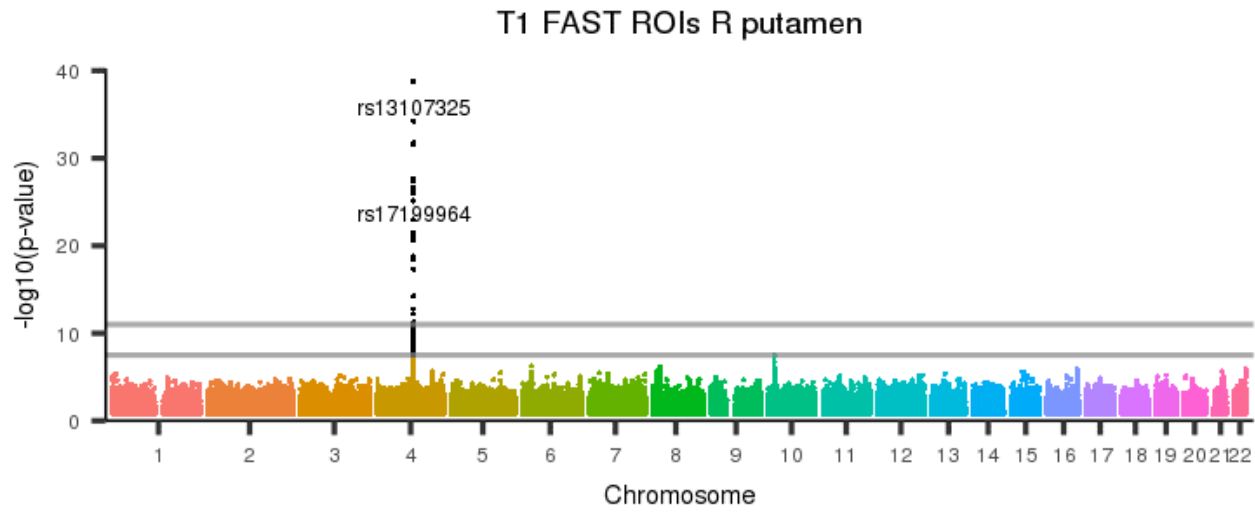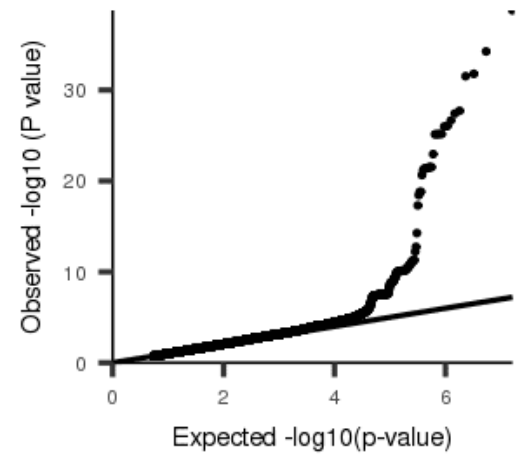

[back to list of plots](#)

Figure 128: T1 FAST ROIs L pallidum

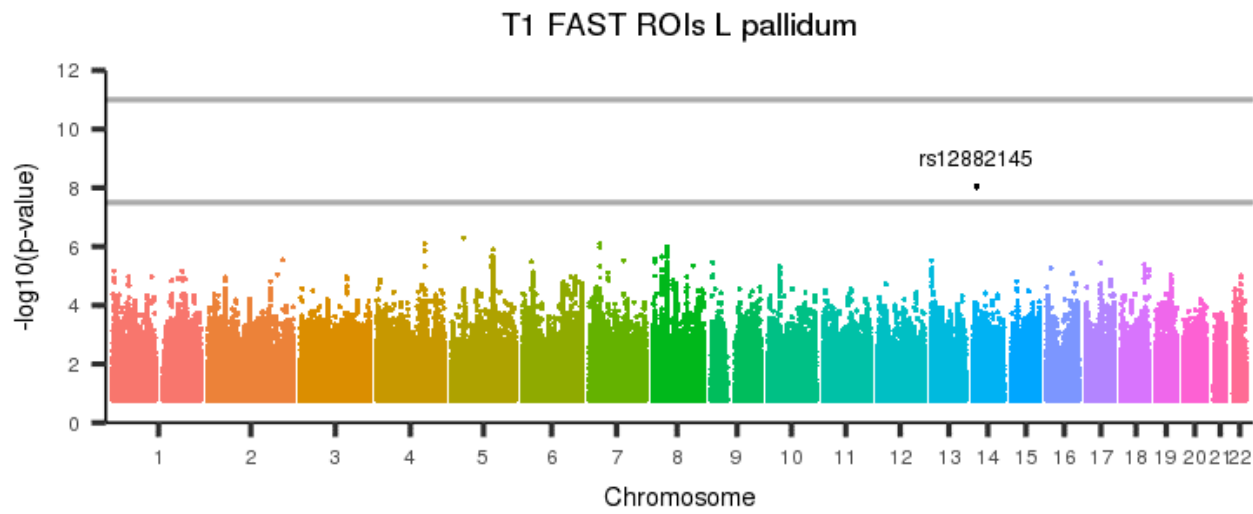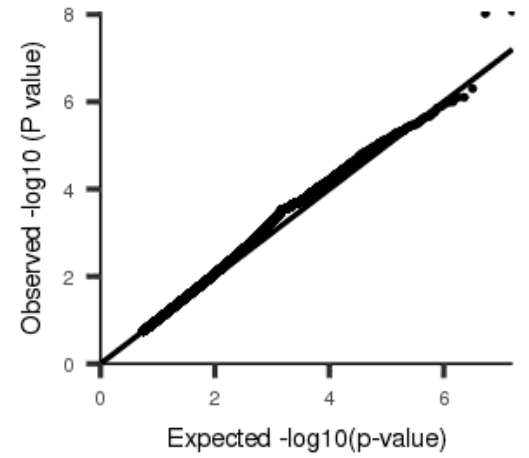

[back to list of plots](#)

Figure 129: T1 FAST ROIs R pallidum

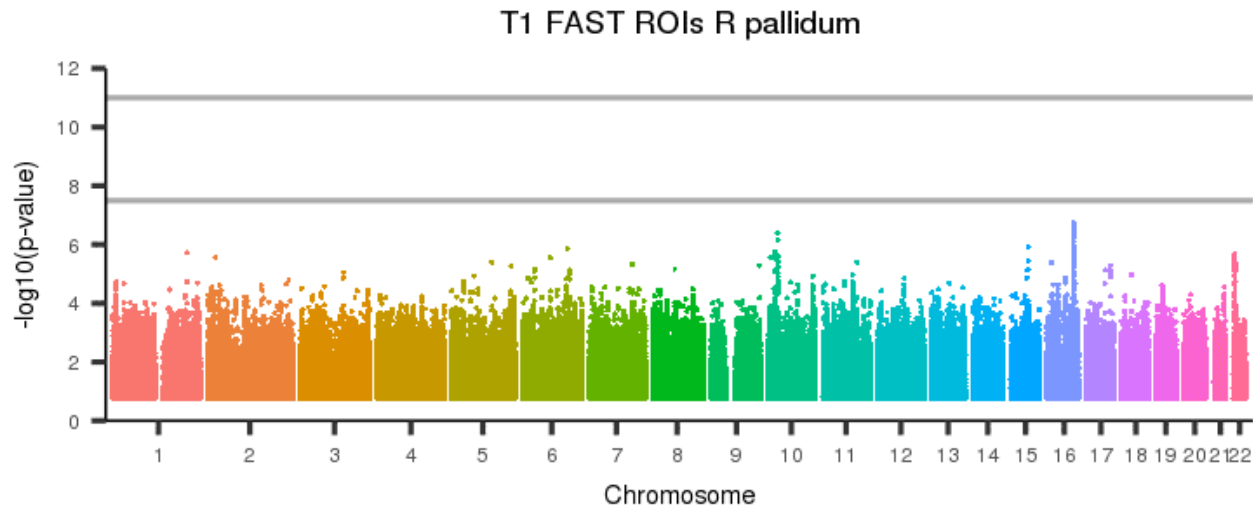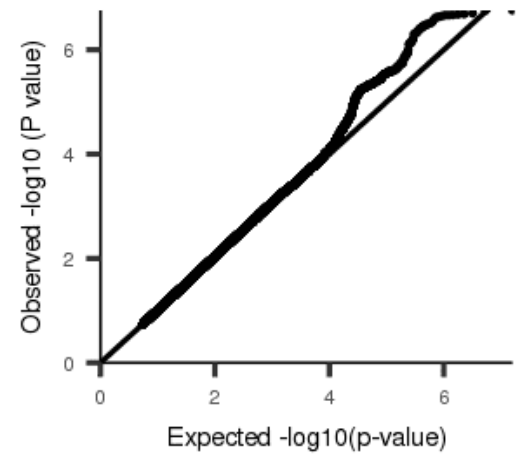

[back to list of plots](#)

Figure 130: T1 FAST ROIs L hippocampus

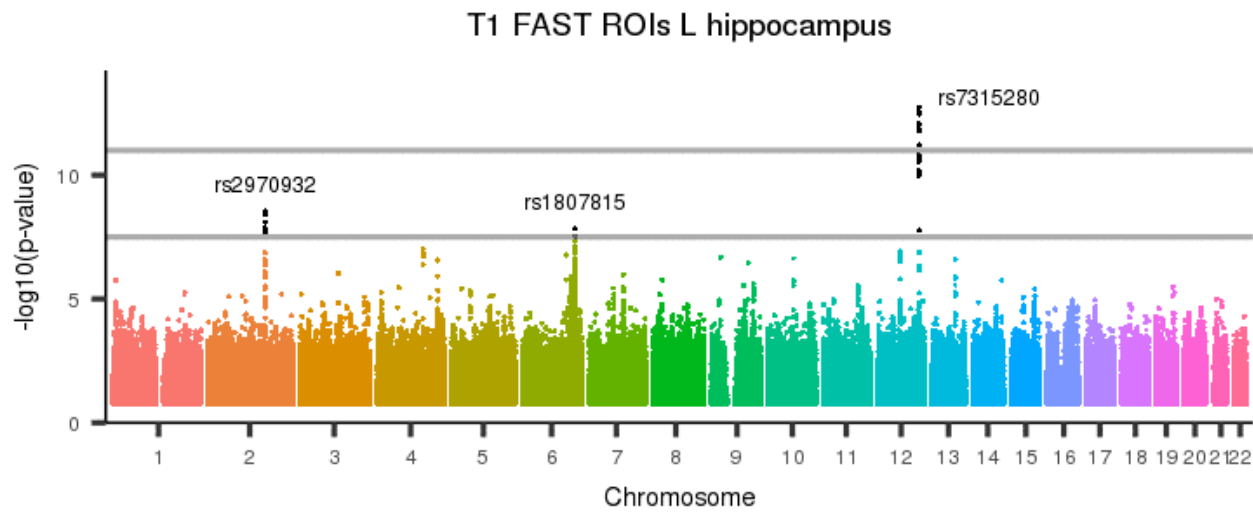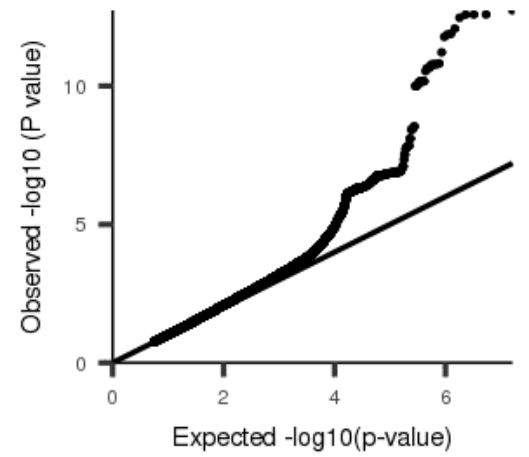

[back to list of plots](#)

Figure 131: T1 FAST ROIs R hippocampus

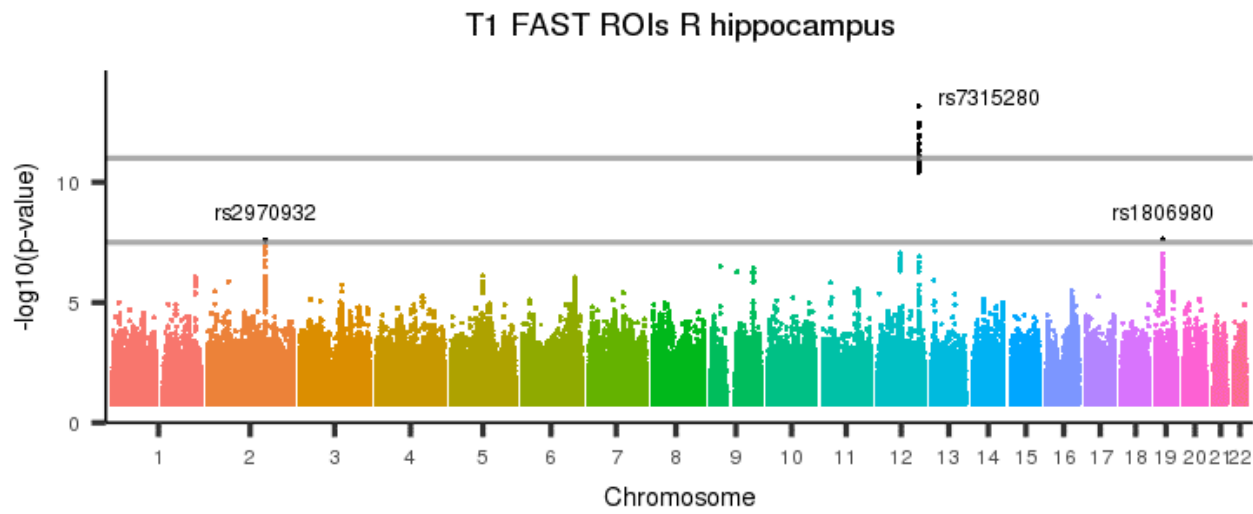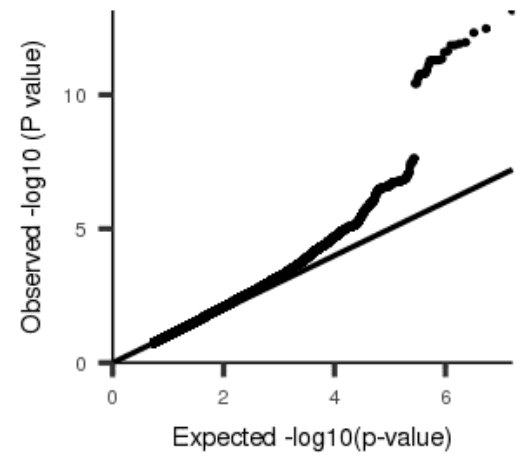

[back to list of plots](#)

Figure 132: T1 FAST ROIs L amygdala

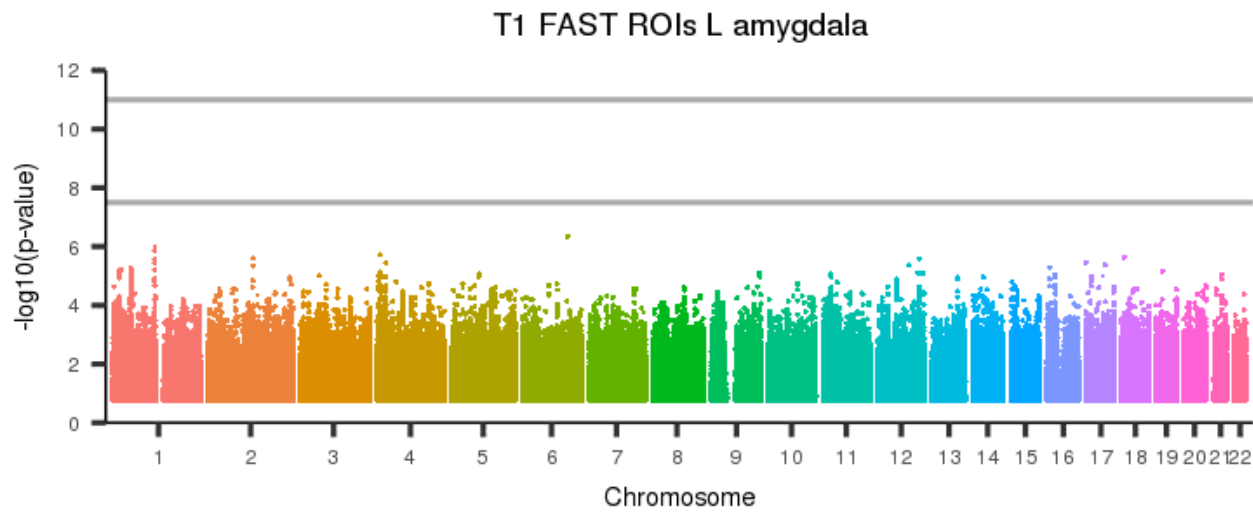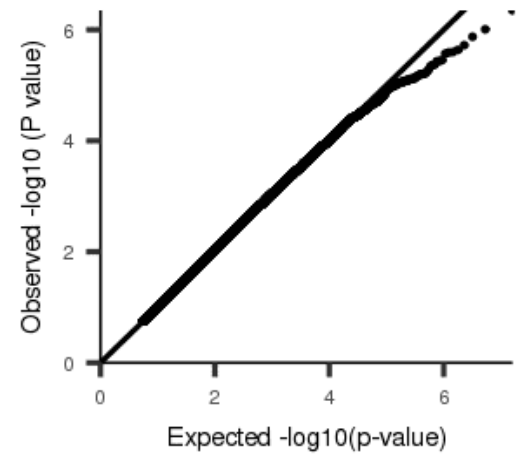

[back to list of plots](#)

Figure 133: T1 FAST ROIs R amygdala

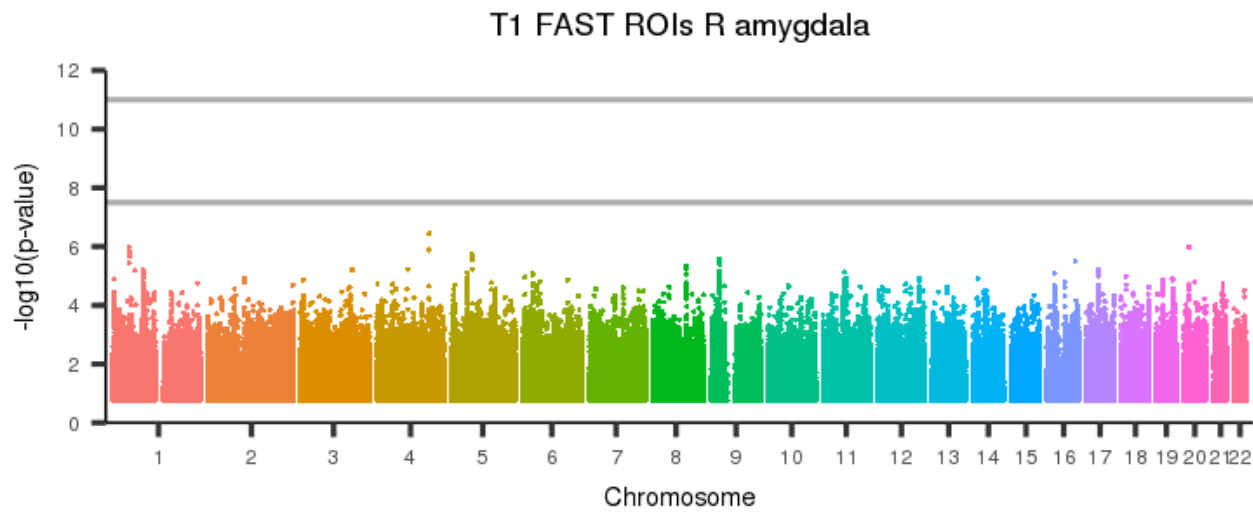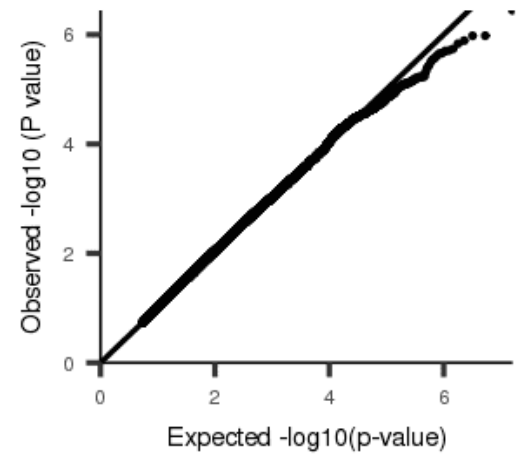

[back to list of plots](#)



Figure 134: T1 FAST ROIs L ventral striatum

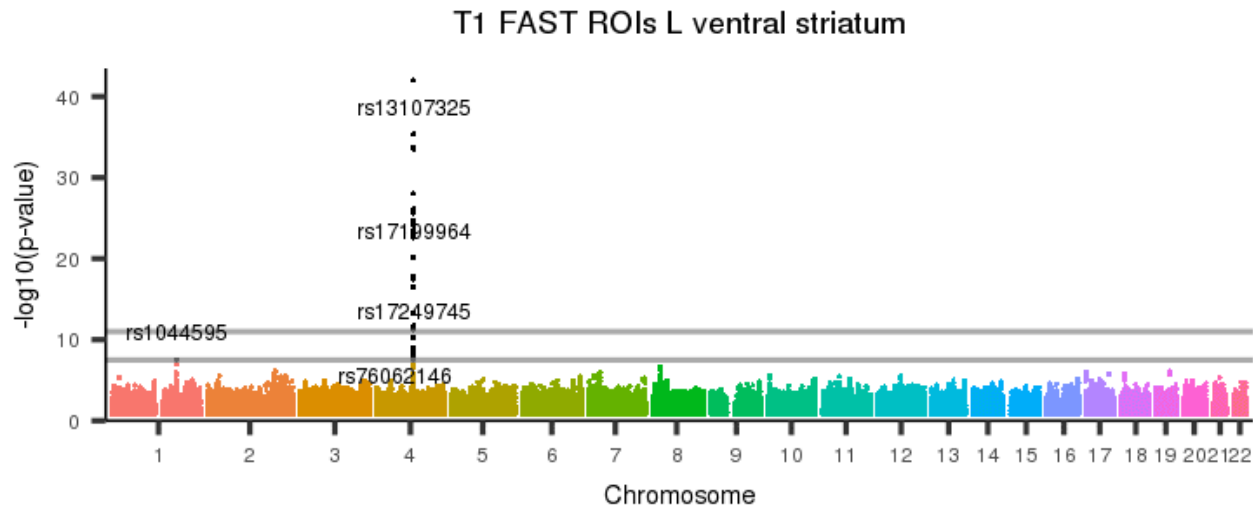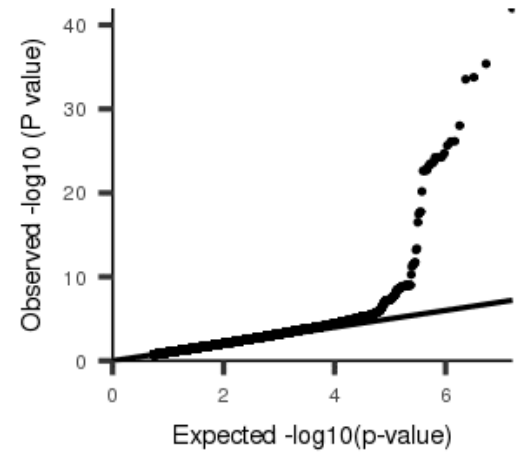

[back to list of plots](#)

Figure 135: T1 FAST ROIs R ventral striatum

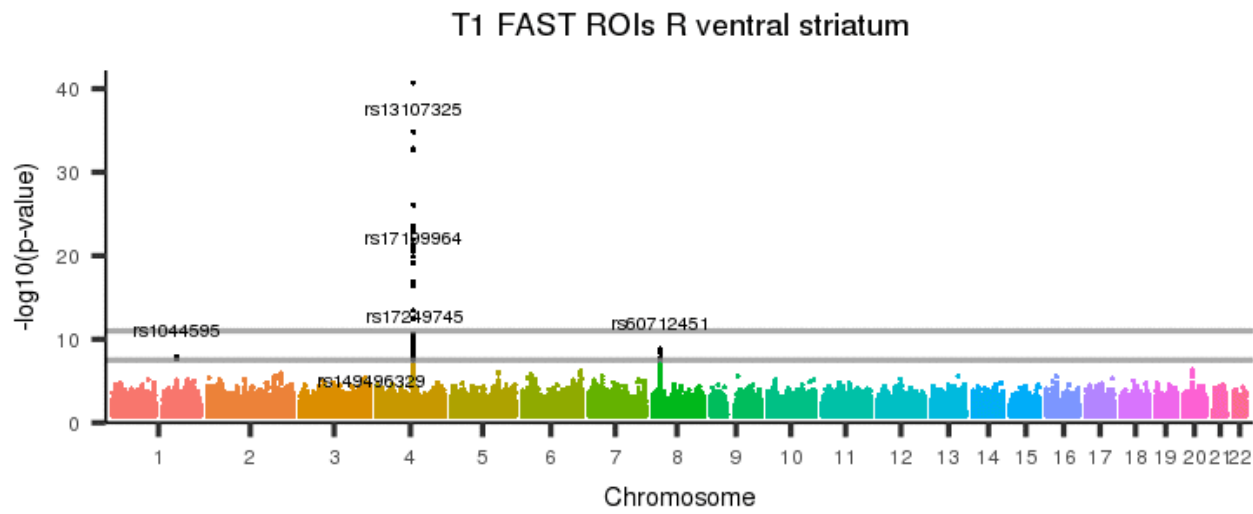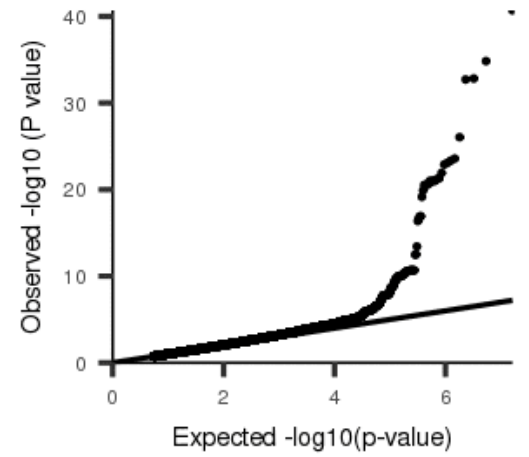

[back to list of plots](#)

Figure 136: T1 FAST ROIs brain stem

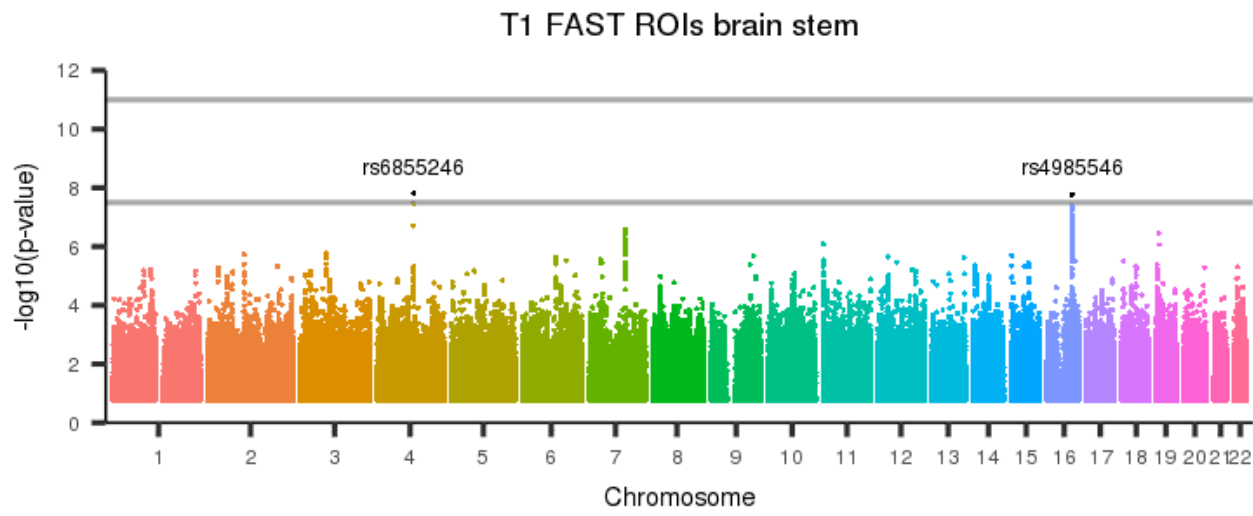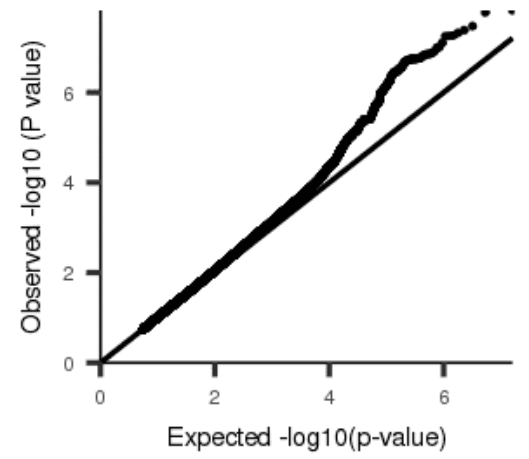

[back to list of plots](#)

Figure 137: T1 FAST ROIs L cerebellum I-IV

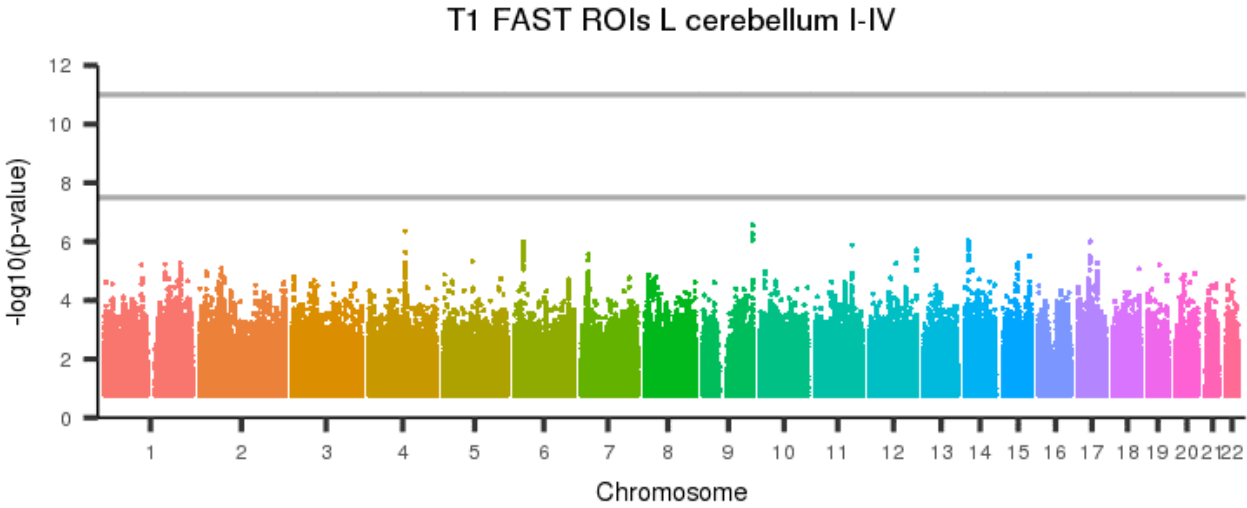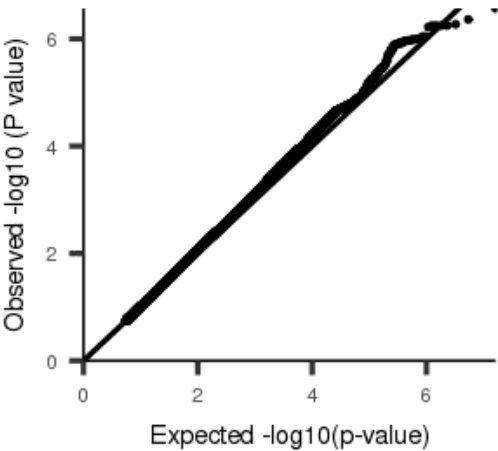

[back to list of plots](#)

Figure 138: T1 FAST ROIs R cerebellum I-IV

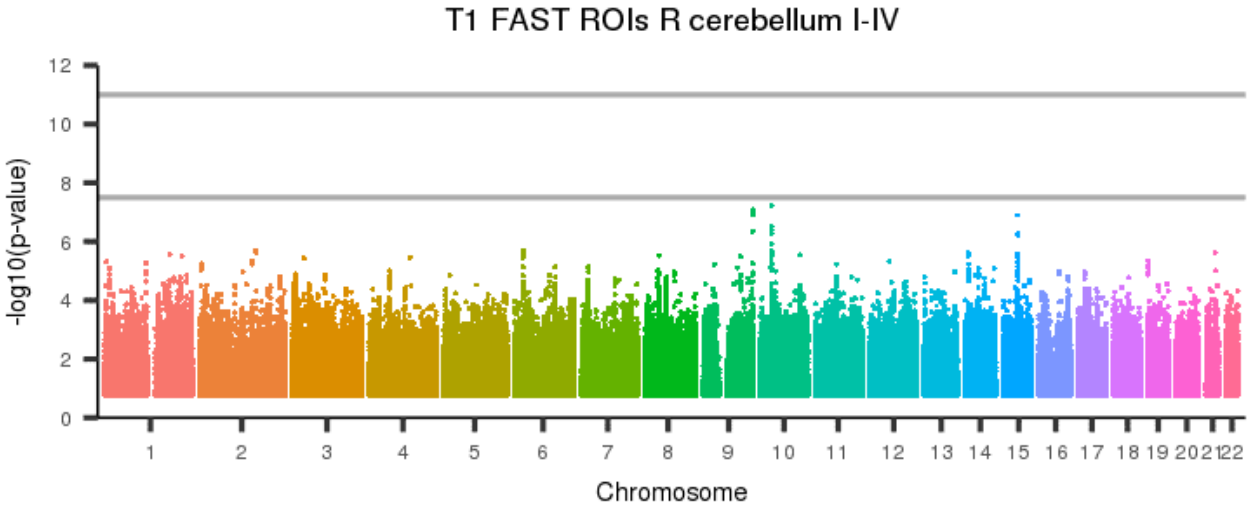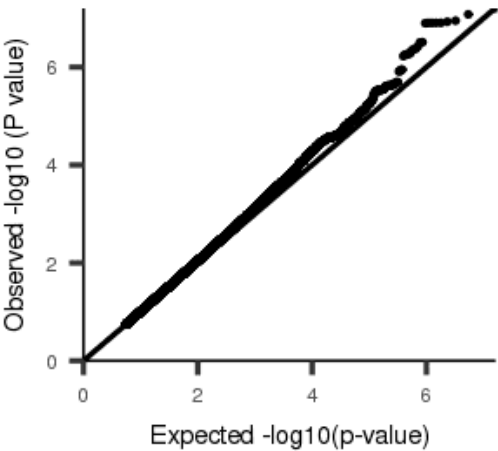

[back to list of plots](#)

Figure 139: T1 FAST ROIs L cerebellum V

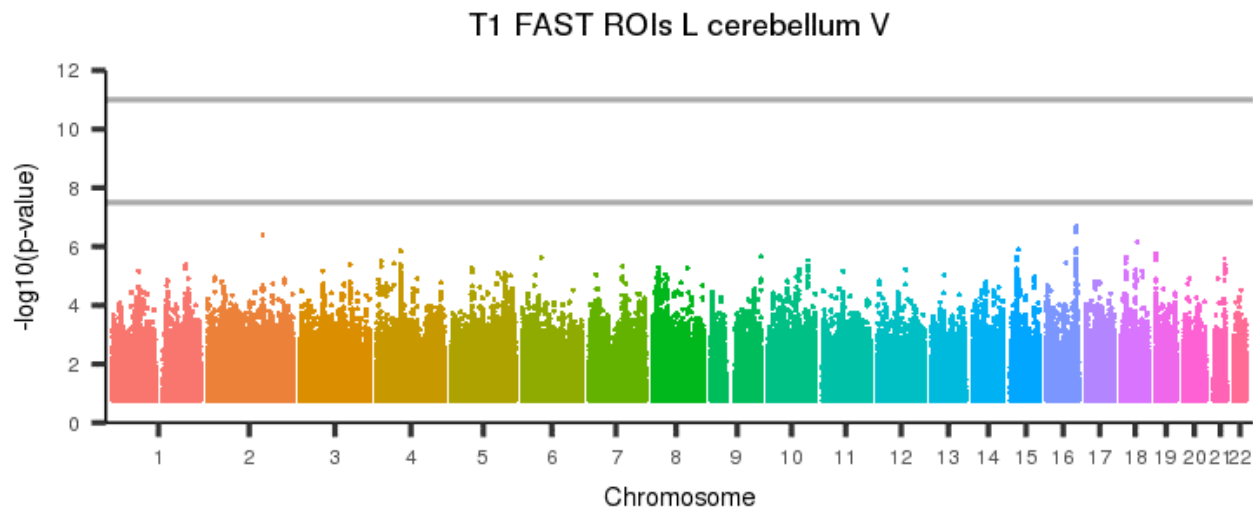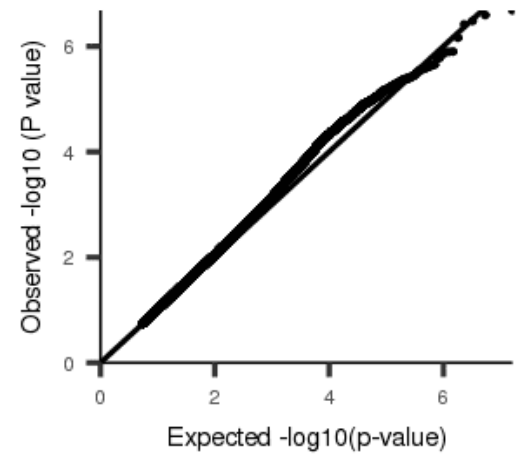

[back to list of plots](#)

Figure 140: T1 FAST ROIs R cerebellum V

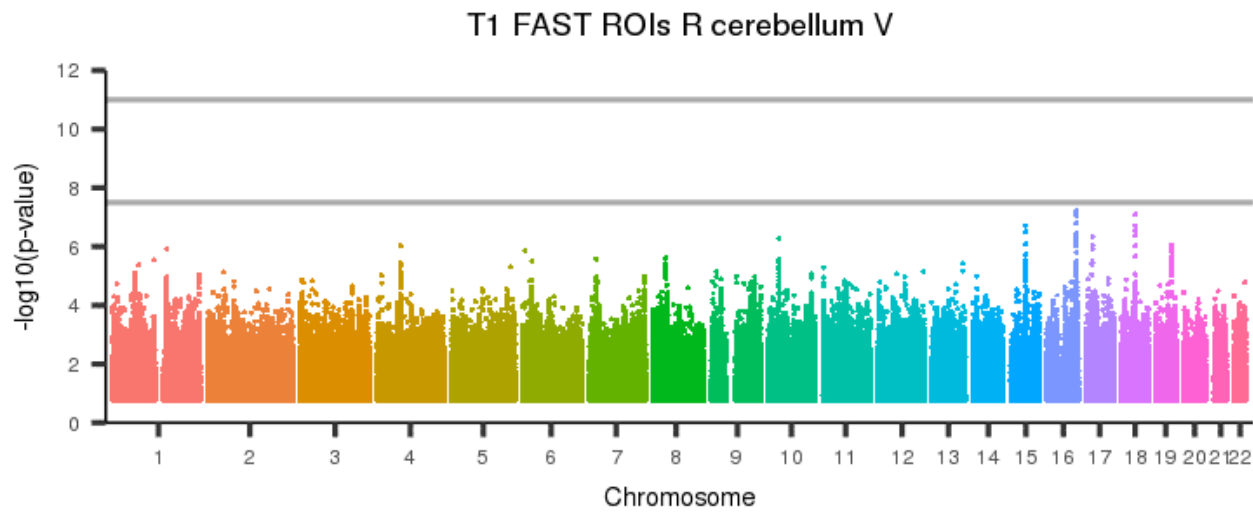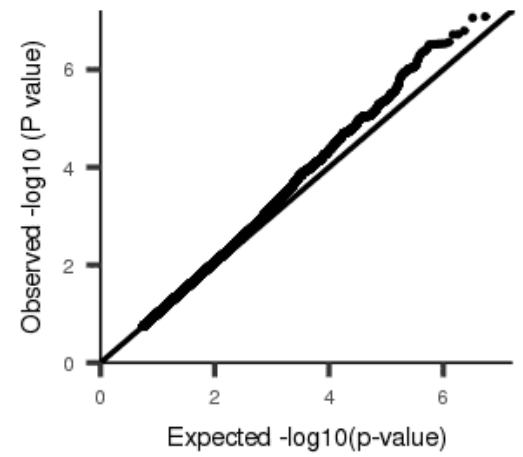

[back to list of plots](#)

Figure 141: T1 FAST ROIs L cerebellum VI

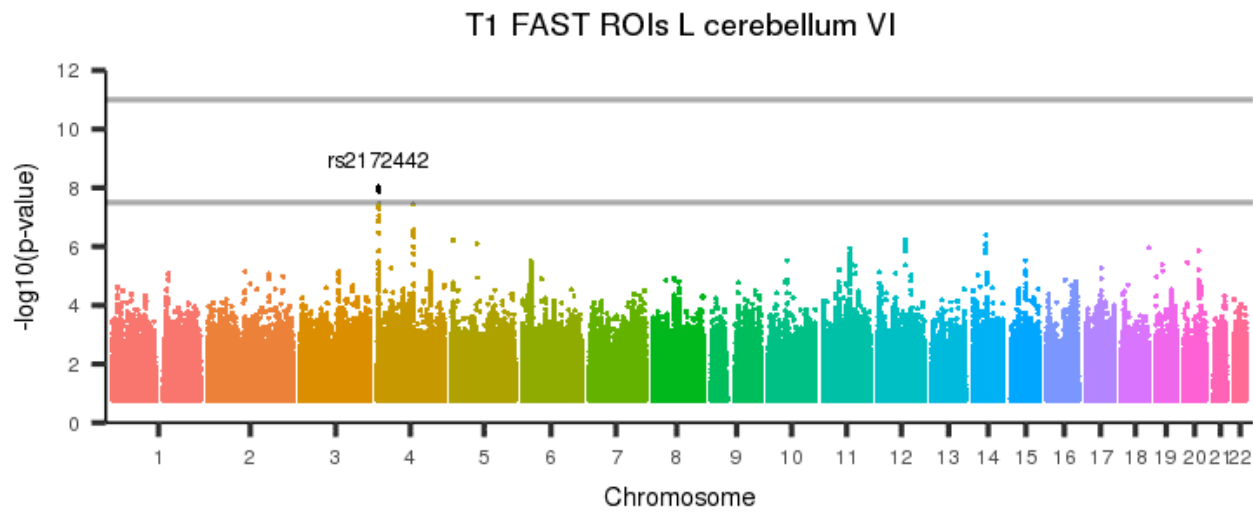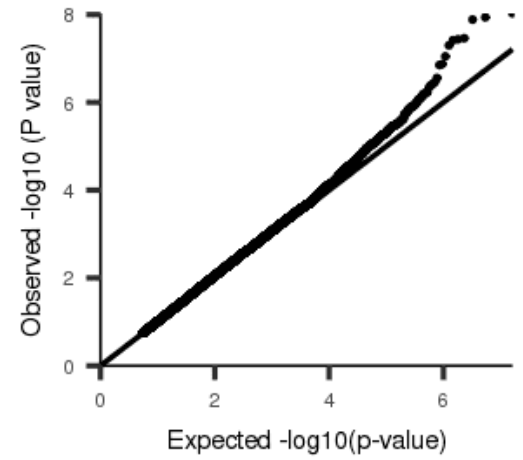

[back to list of plots](#)



Figure 142: T1 FAST ROIs V cerebellum VI

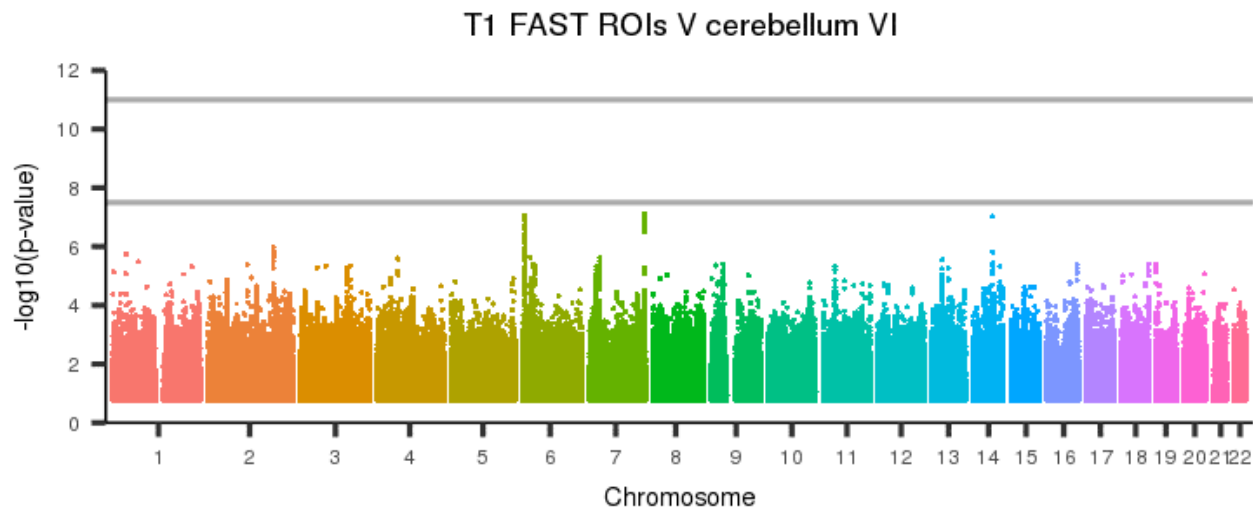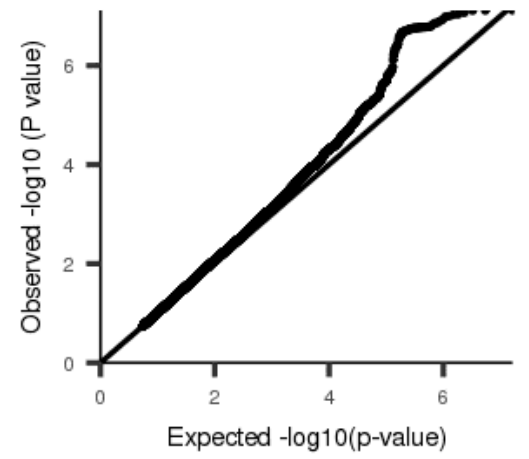

[back to list of plots](#)

Figure 143: T1 FAST ROIs R cerebellum VI

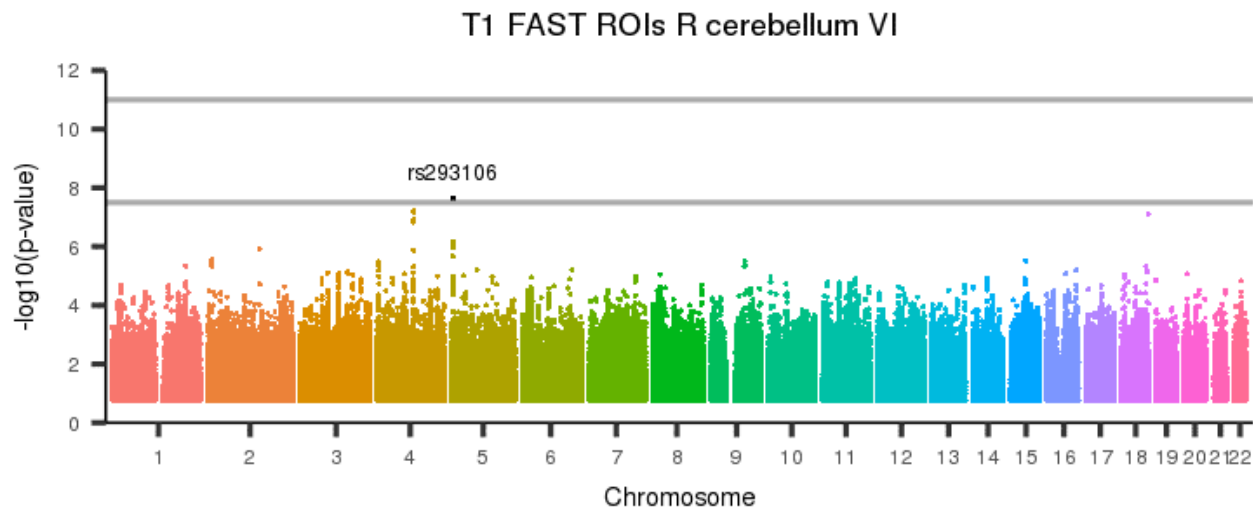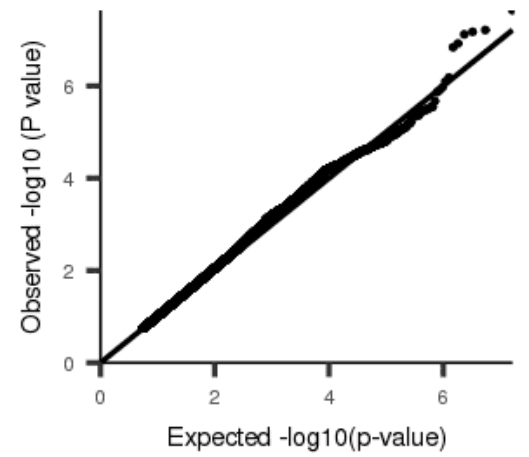

[back to list of plots](#)

Figure 144: T1 FAST ROIs L cerebellum crus I

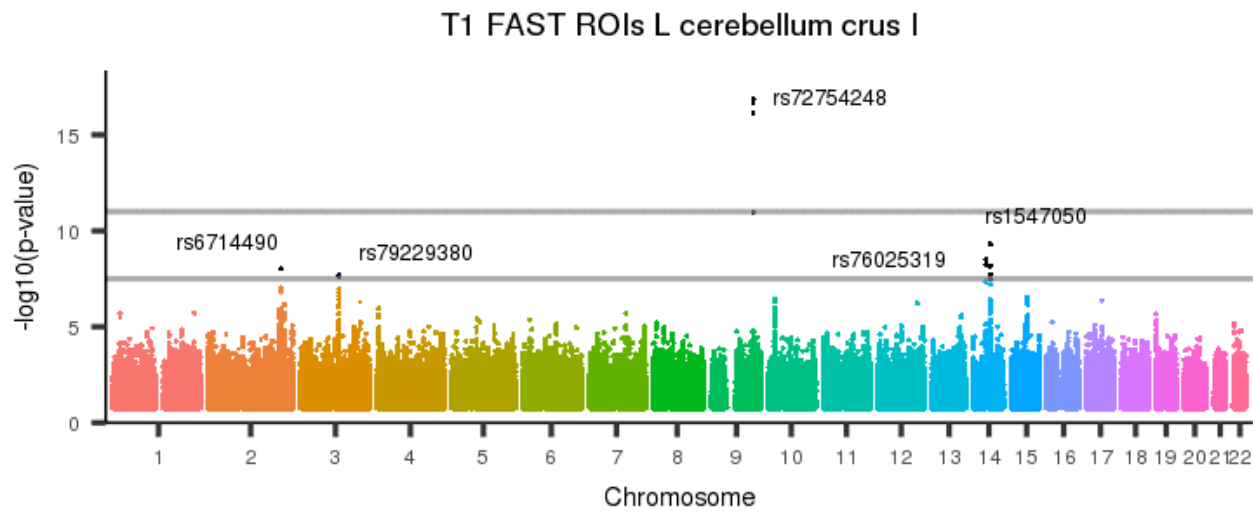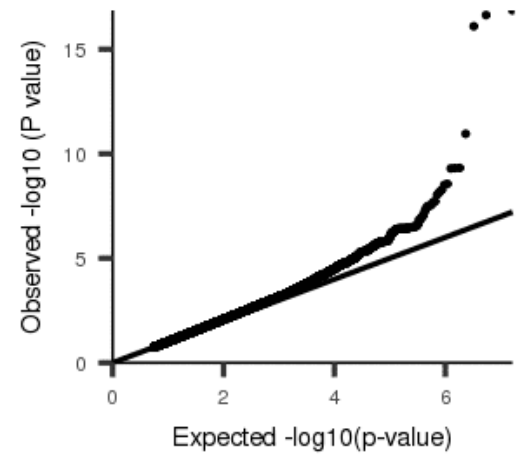

[back to list of plots](#)

Figure 145: T1 FAST ROIs V cerebellum crus I

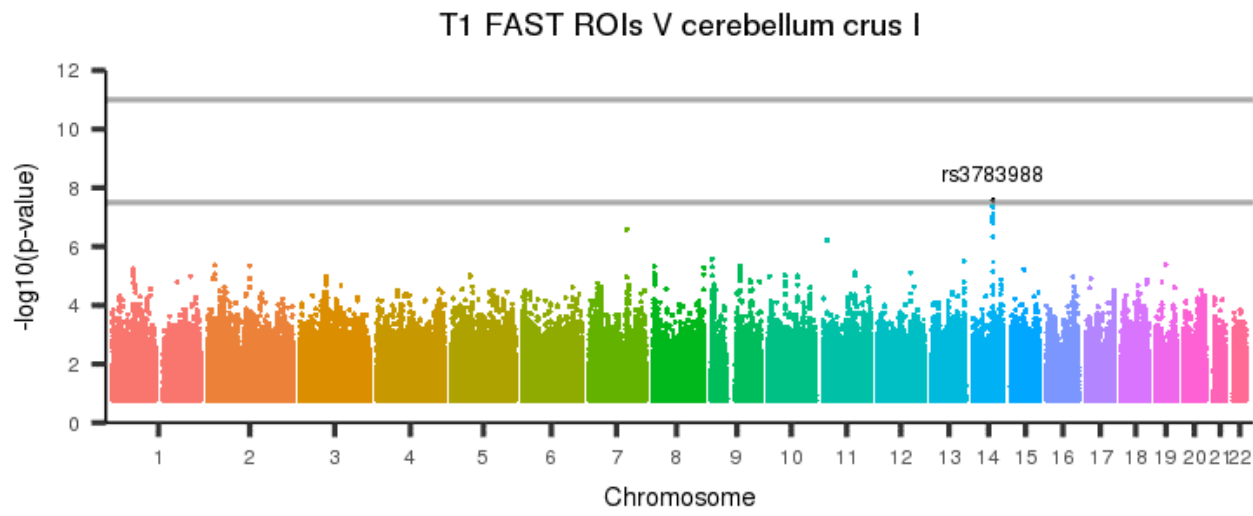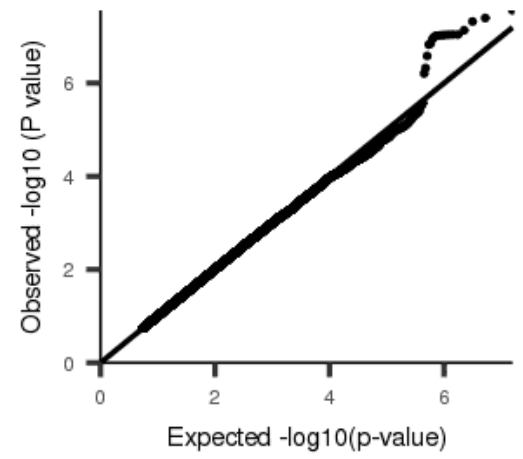

[back to list of plots](#)

Figure 146: T1 FAST ROIs R cerebellum crus I

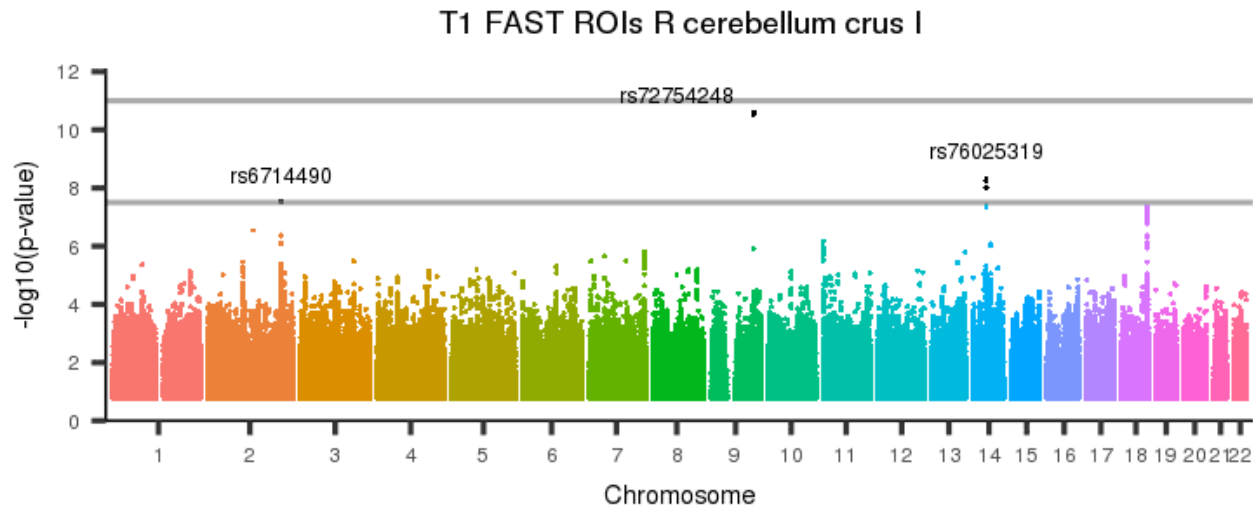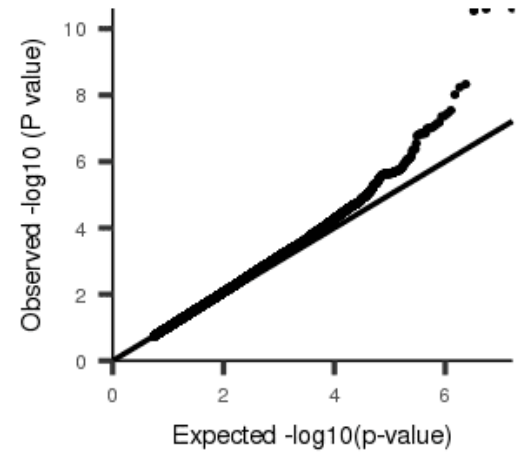

[back to list of plots](#)

Figure 147: T1 FAST ROIs L cerebellum crus II

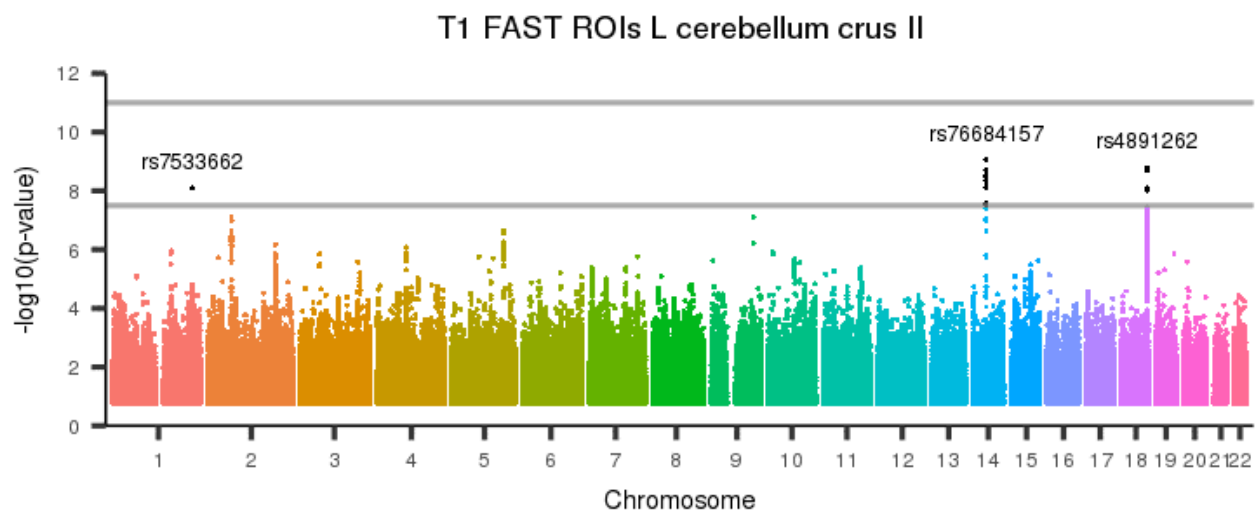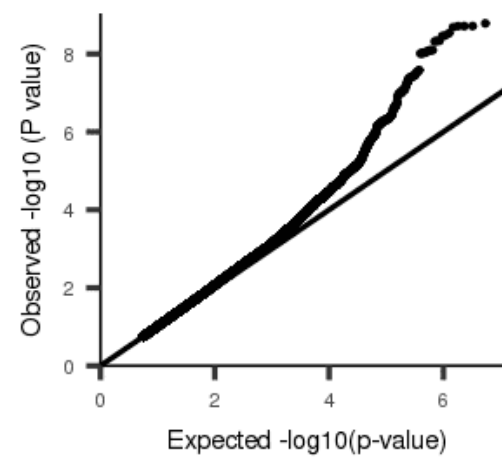

[back to list of plots](#)

Figure 148: T1 FAST ROIs V cerebellum crus II

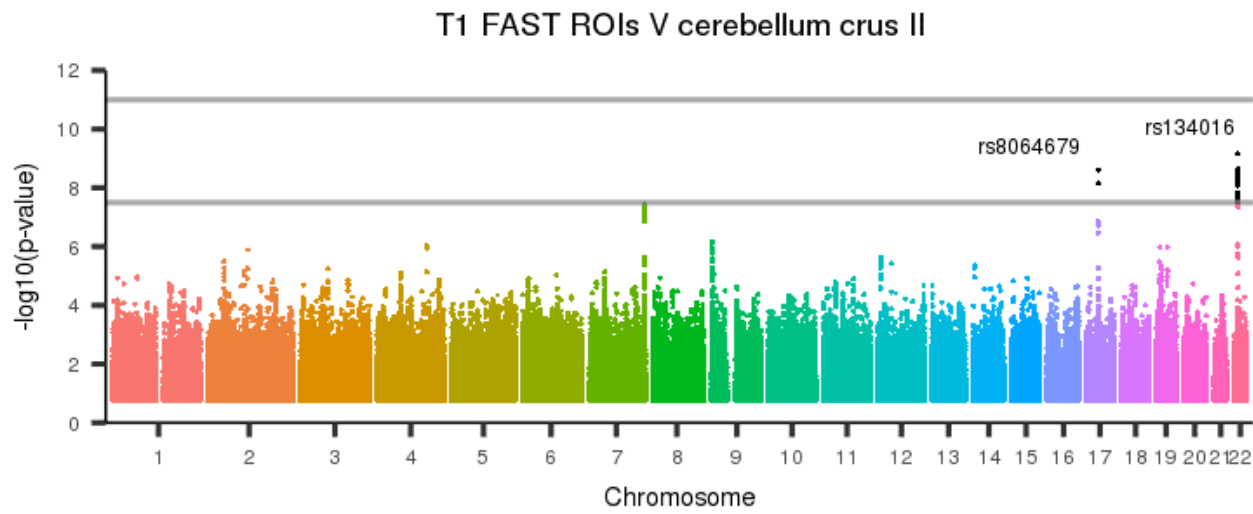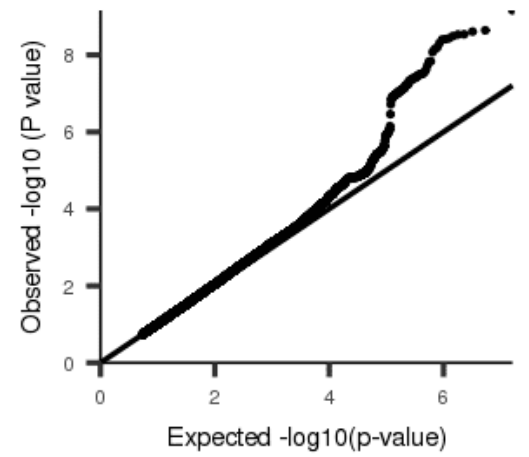

[back to list of plots](#)

Figure 149: T1 FAST ROIs R cerebellum crus II

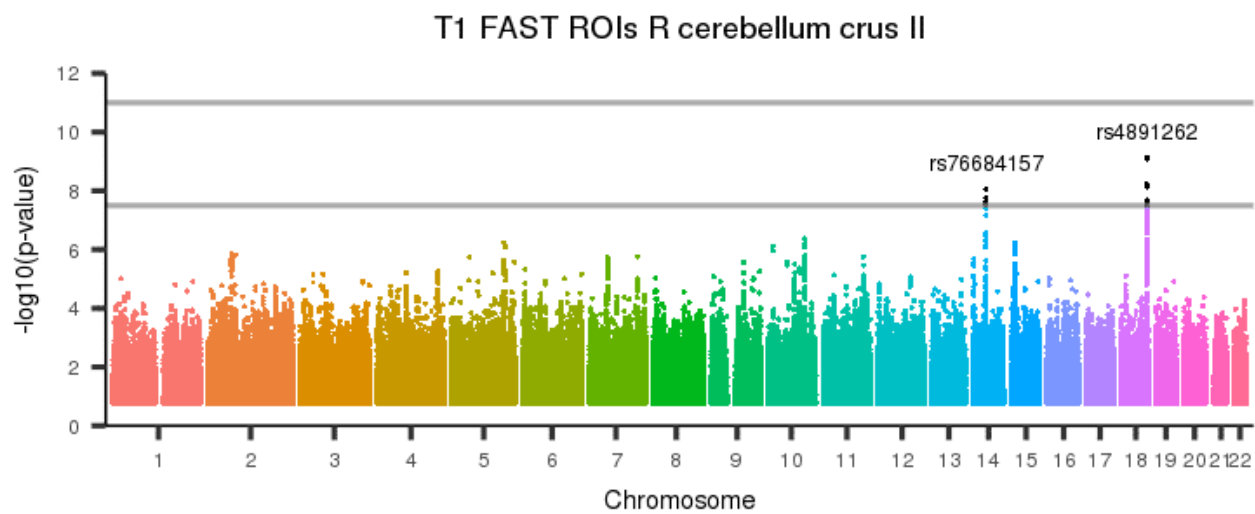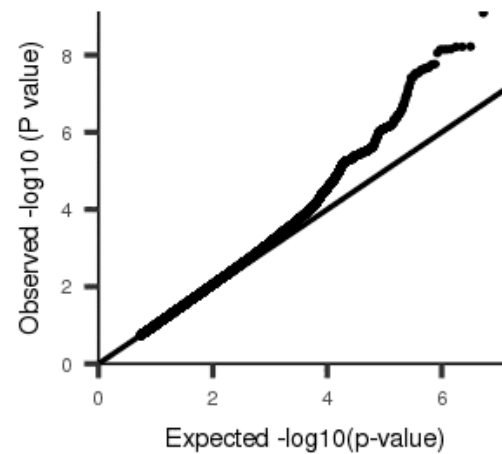

[back to list of plots](#)



Figure 150: T1 FAST ROIs L cerebellum VIIb

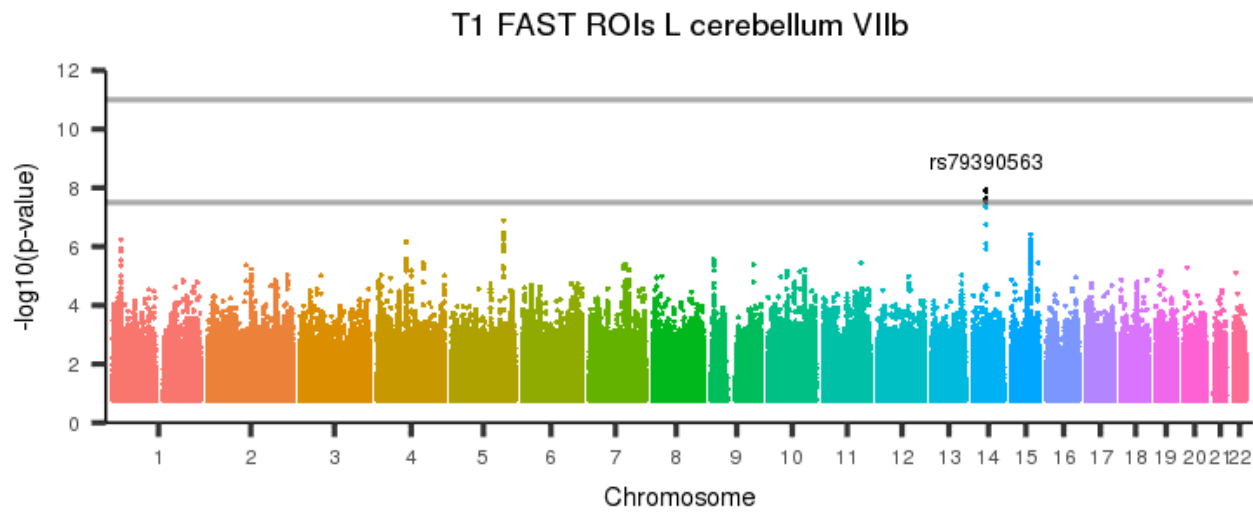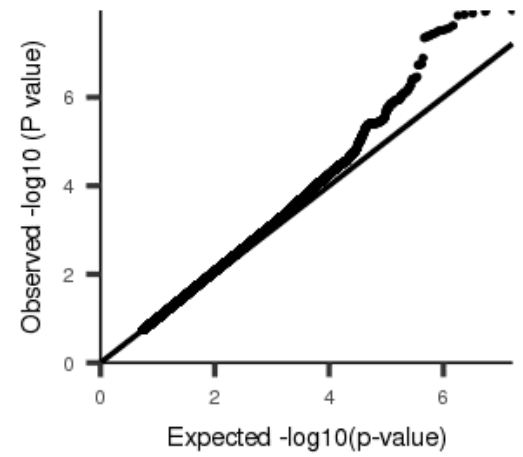

[back to list of plots](#)

Figure 151: T1 FAST ROIs V cerebellum VIIb

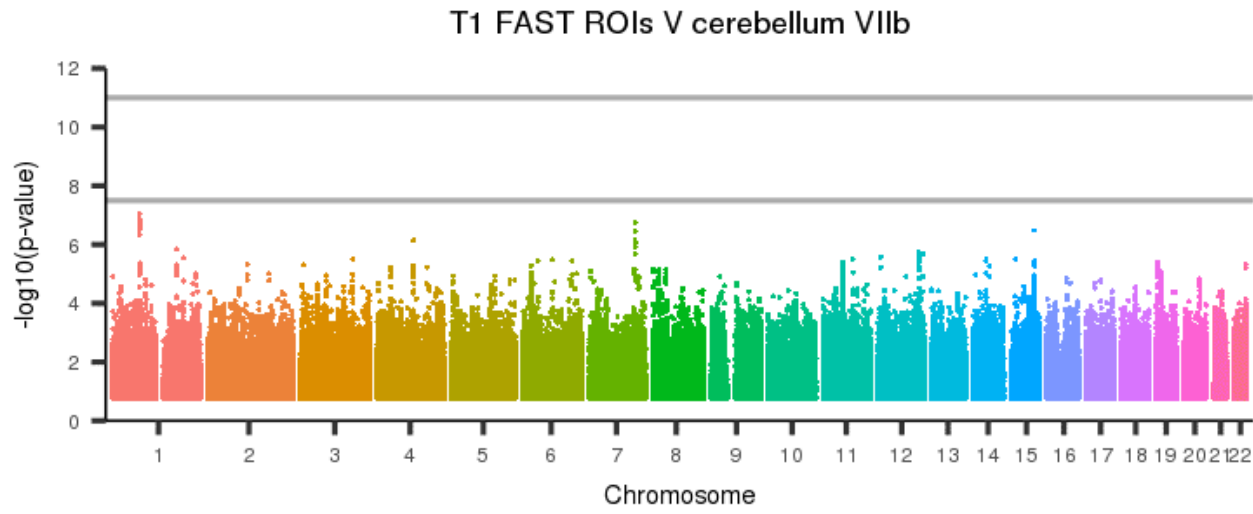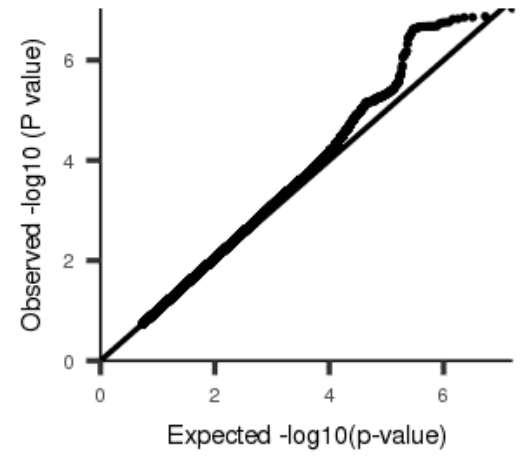

[back to list of plots](#)

Figure 152: T1 FAST ROIs R cerebellum VIIb

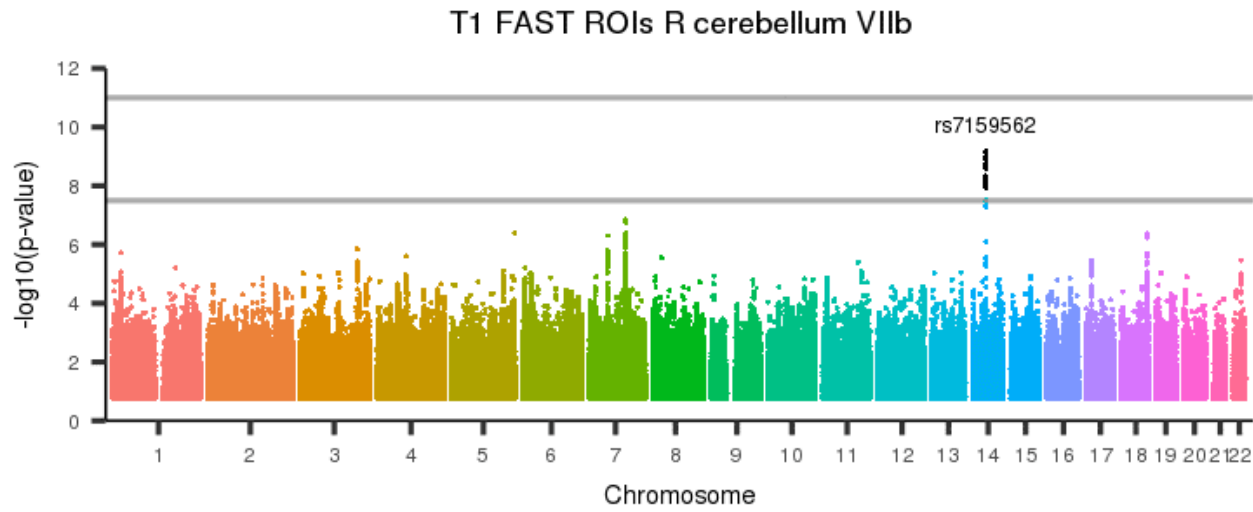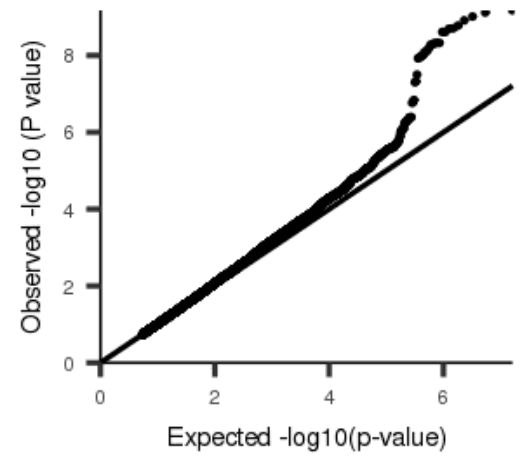

[back to list of plots](#)

Figure 153: T1 FAST ROIs L cerebellum VIIIa

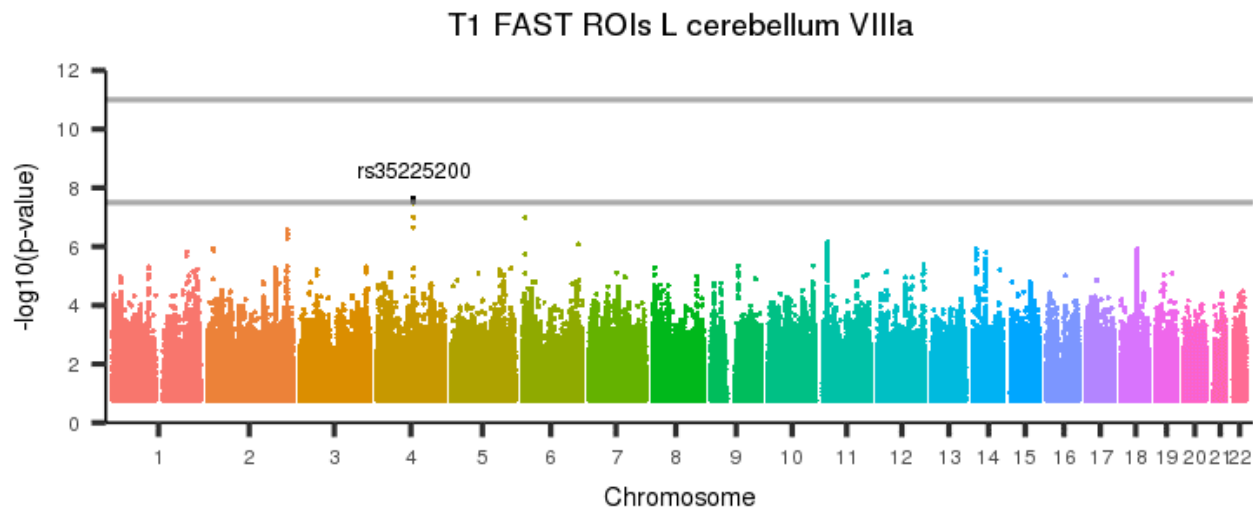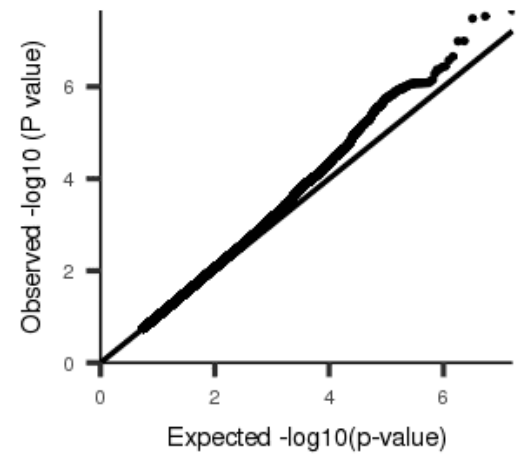

[back to list of plots](#)

Figure 154: T1 FAST ROIs V cerebellum VIIIa

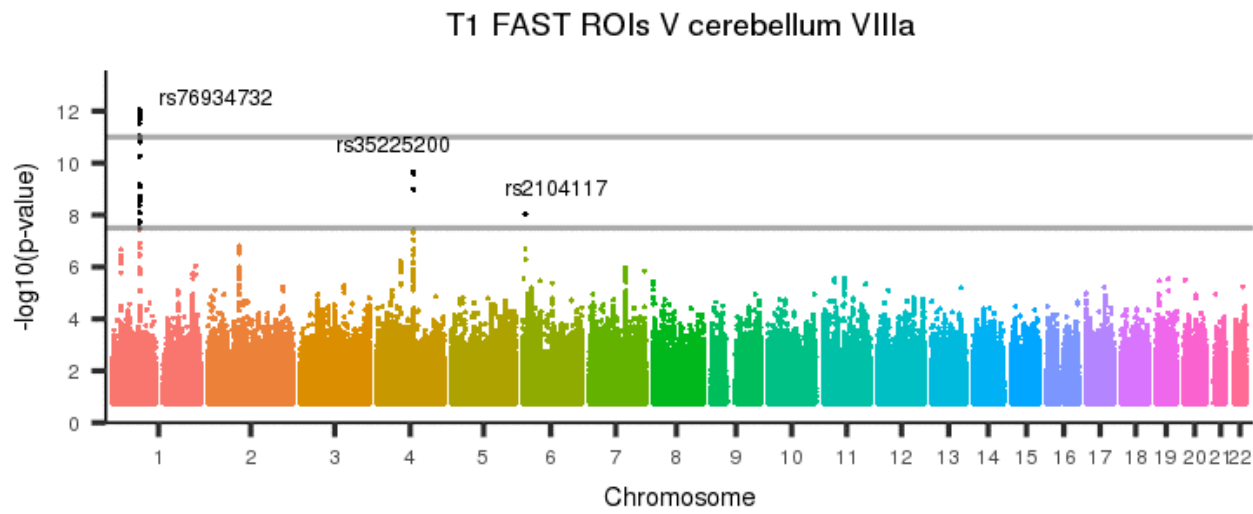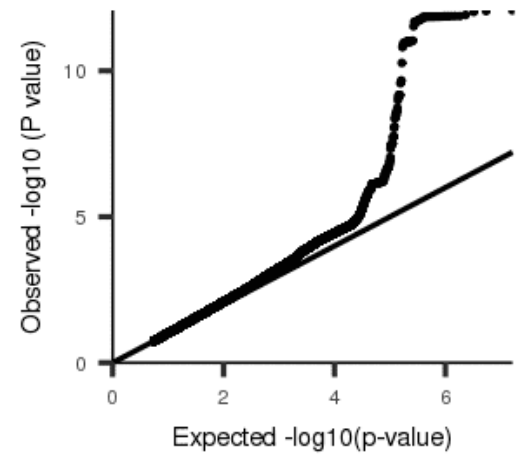

[back to list of plots](#)

Figure 155: T1 FAST ROIs R cerebellum VIIIa

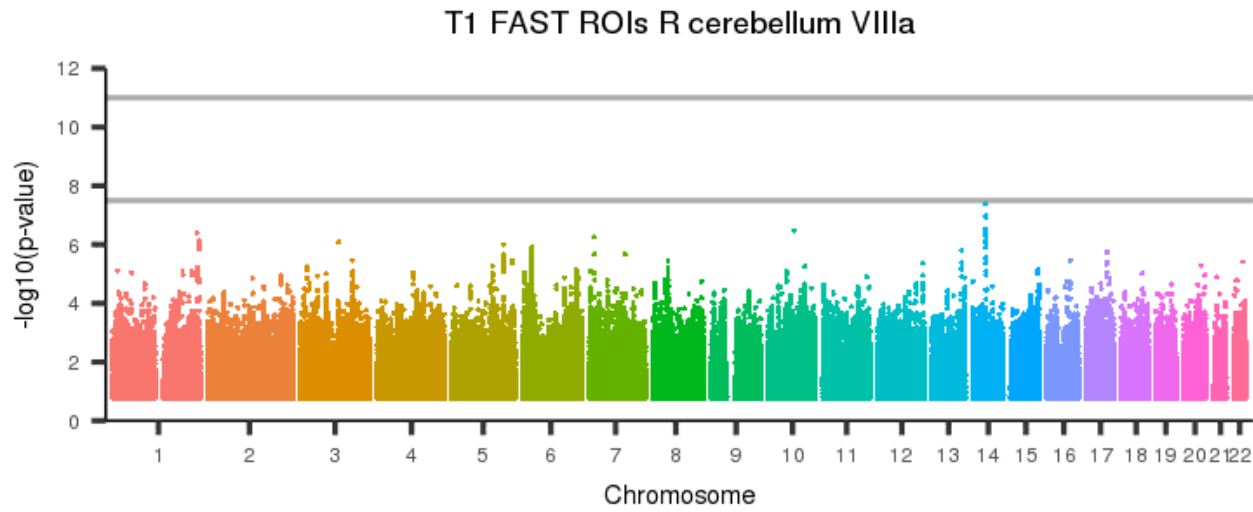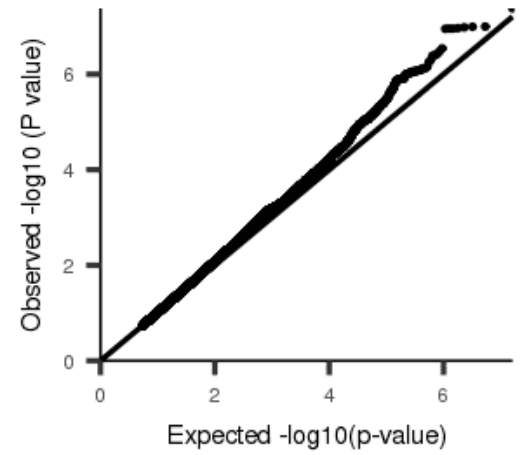

[back to list of plots](#)

Figure 156: T1 FAST ROIs L cerebellum VIIIb

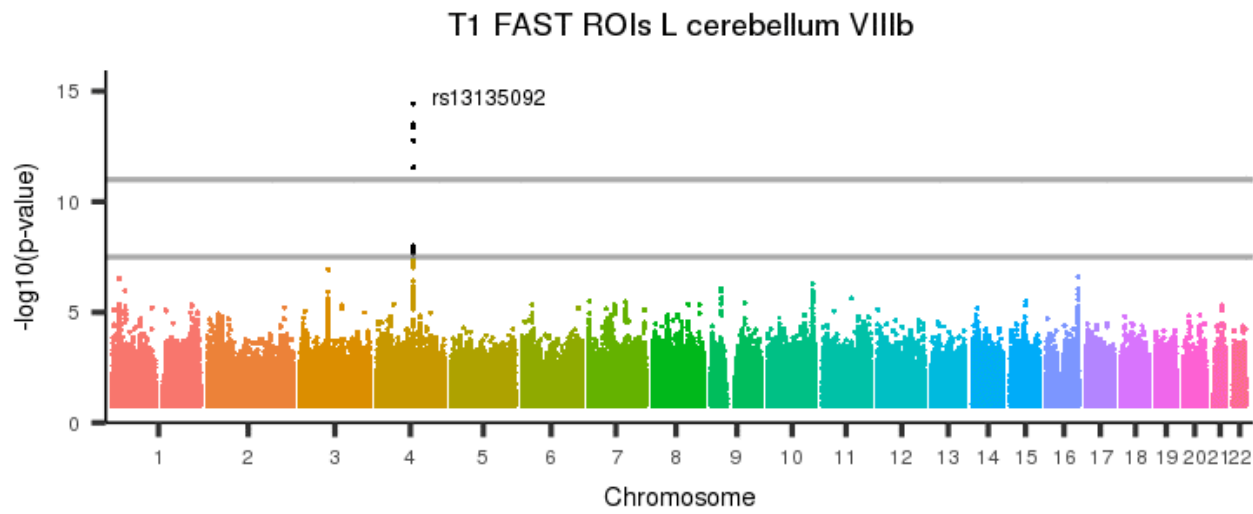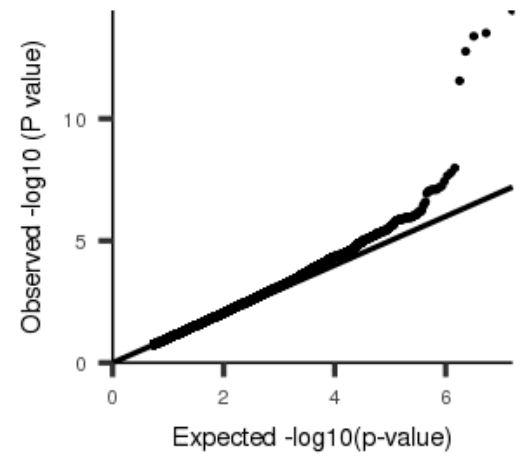

[back to list of plots](#)

Figure 157: T1 FAST ROIs V cerebellum VIIIb

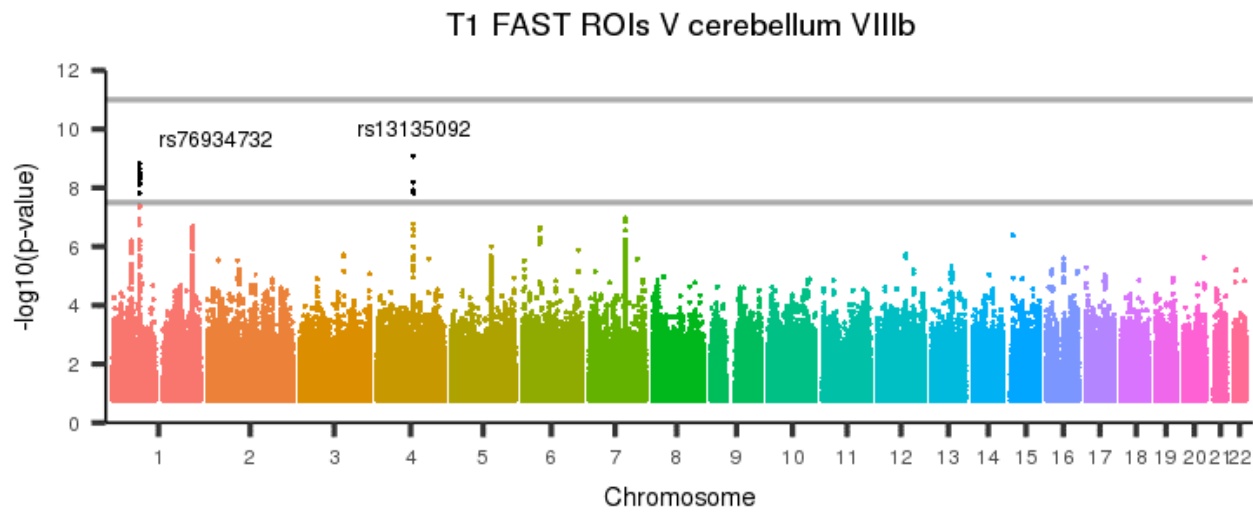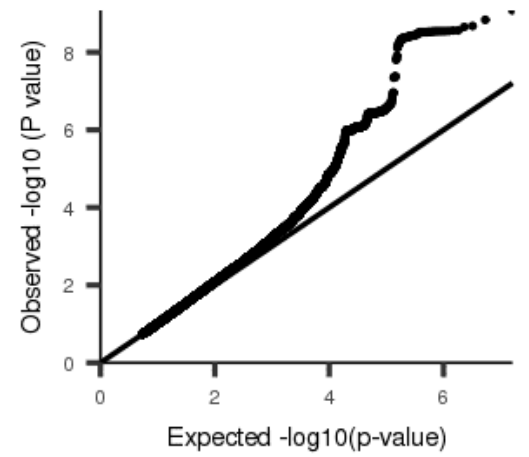

[back to list of plots](#)



Figure 158: T1 FAST ROIs R cerebellum VIIIb

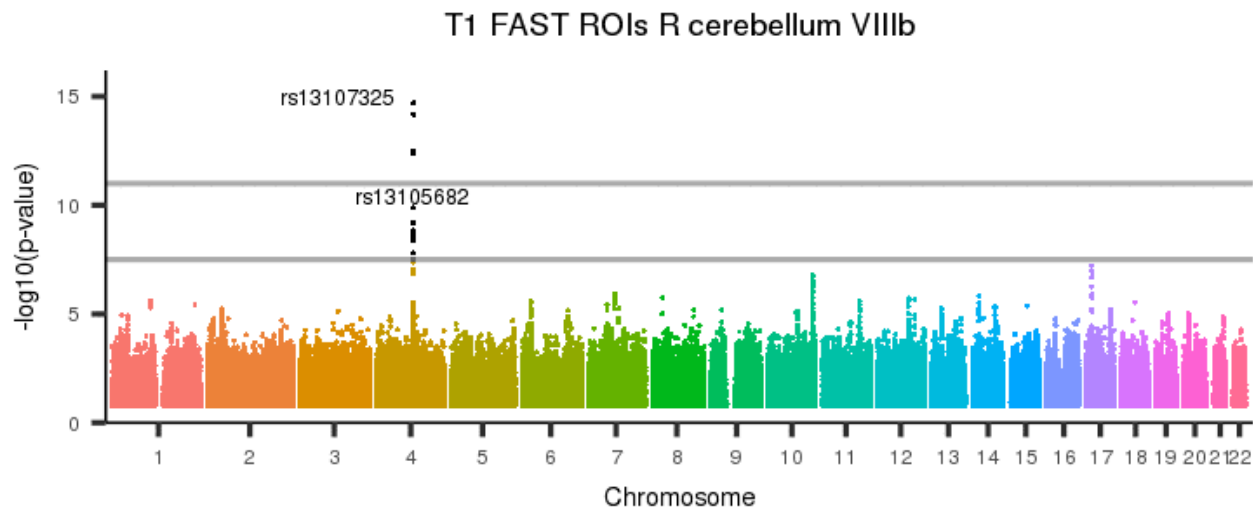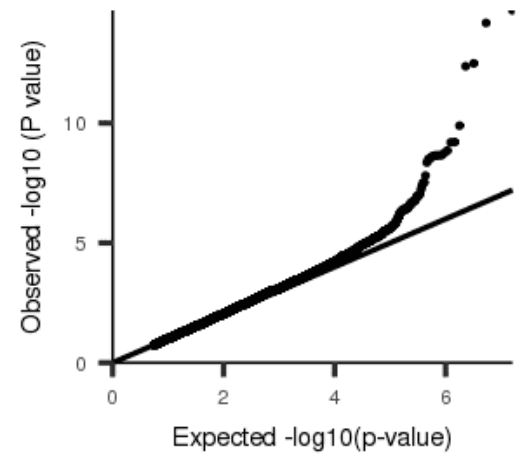

[back to list of plots](#)

Figure 159: T1 FAST ROIs L cerebellum IX

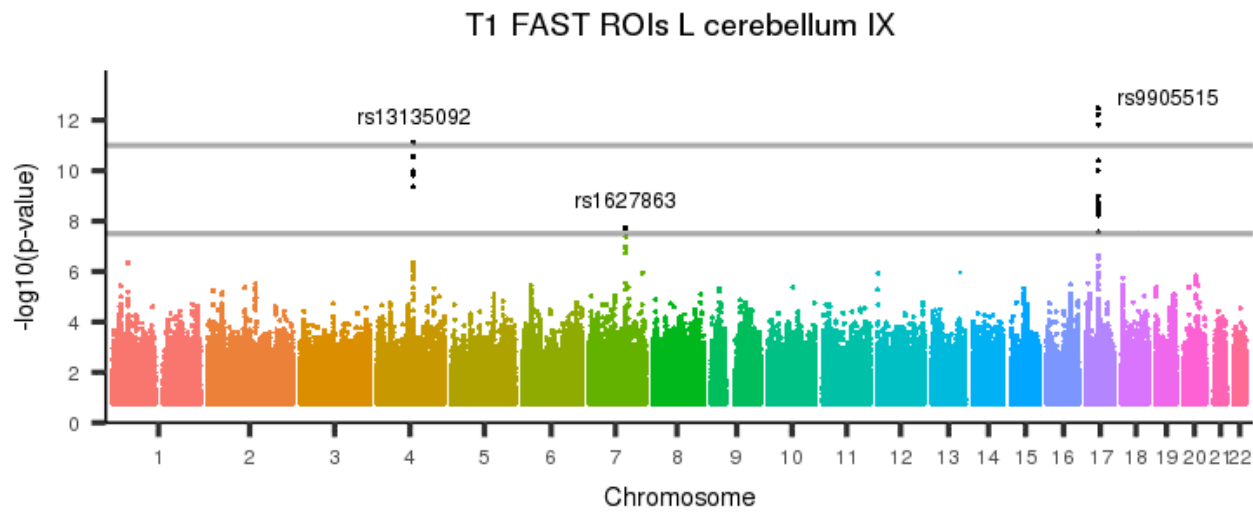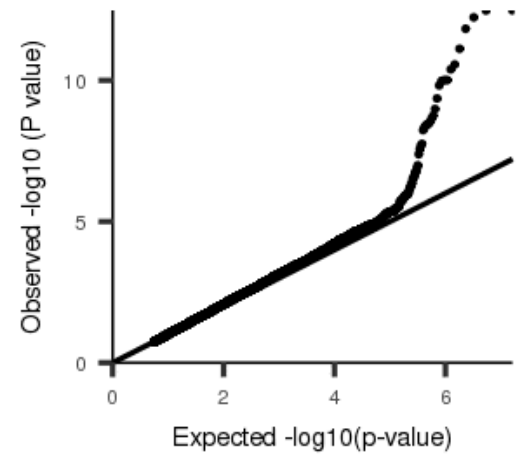

[back to list of plots](#)

Figure 160: T1 FAST ROIs V cerebellum IX

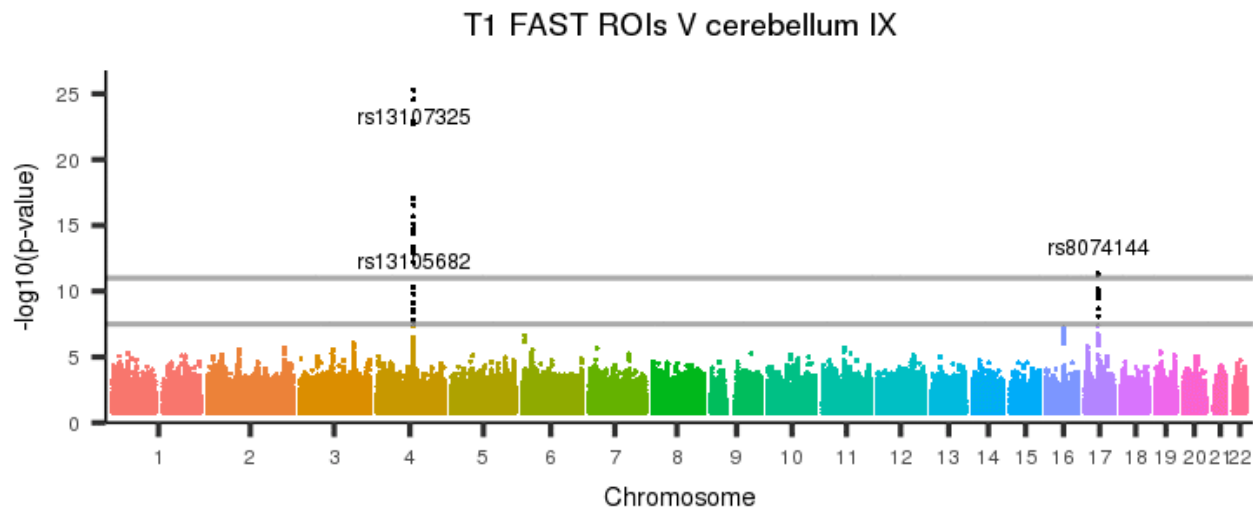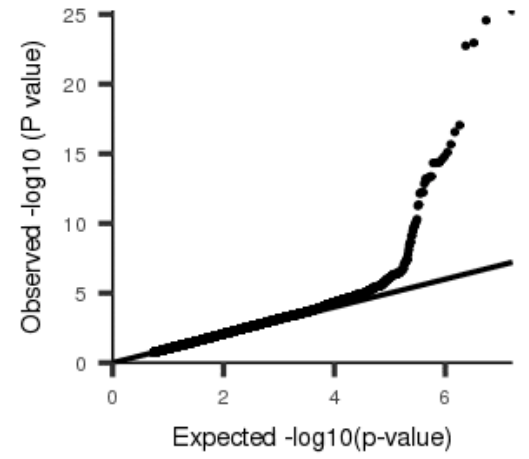

[back to list of plots](#)

Figure 161: T1 FAST ROIs R cerebellum IX

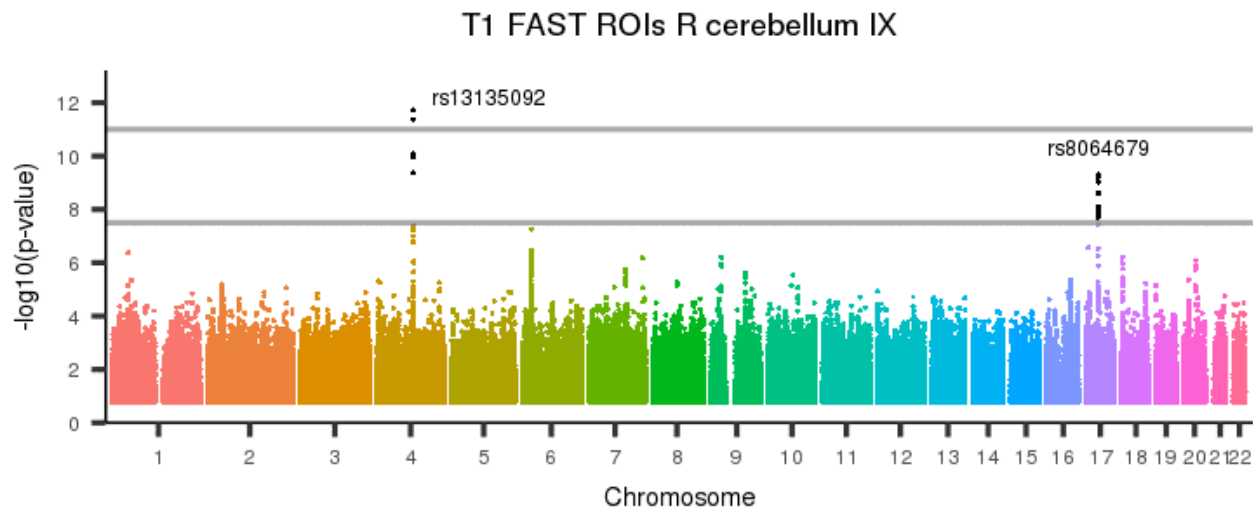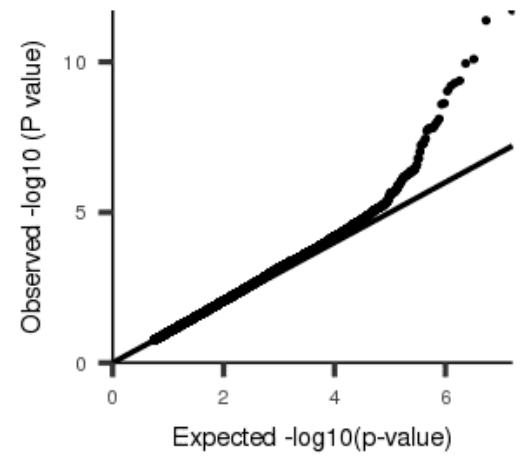

[back to list of plots](#)

Figure 162: T1 FAST ROIs L cerebellum X

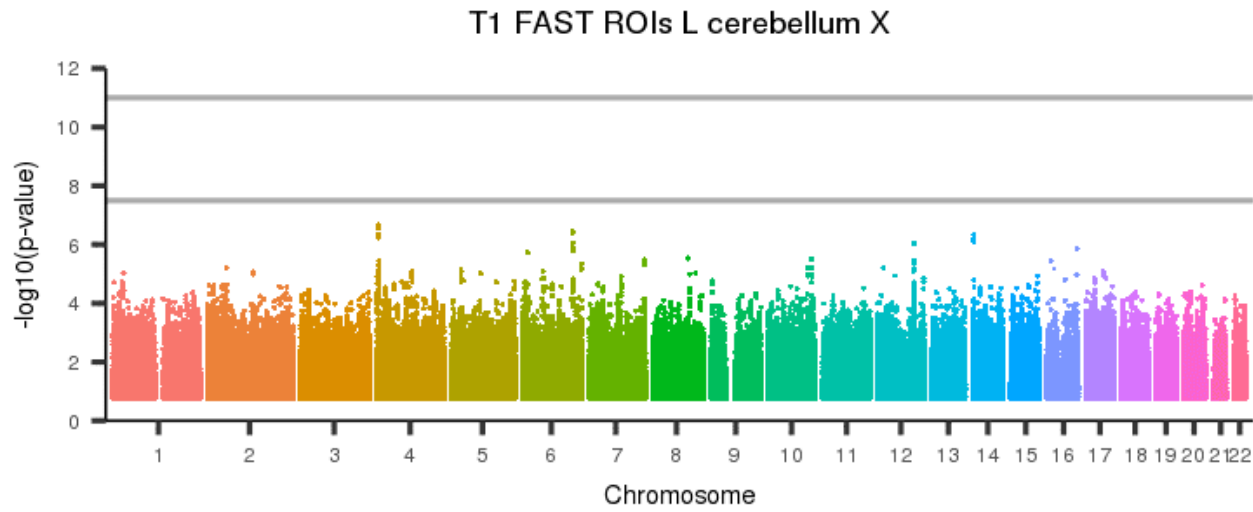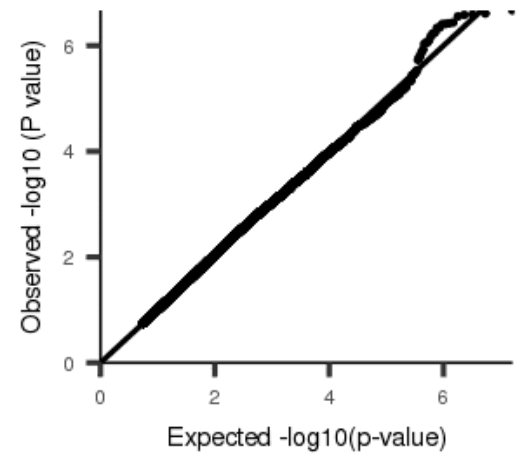

[back to list of plots](#)

Figure 163: T1 FAST ROIs V cerebellum X

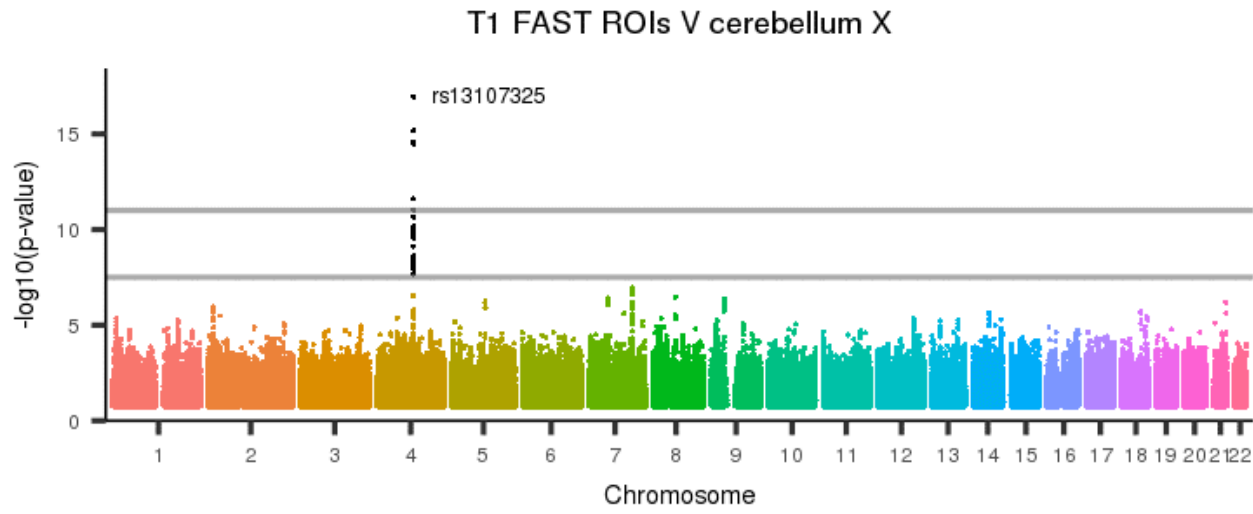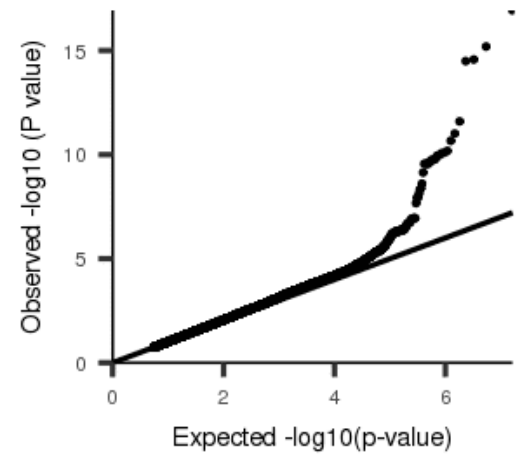

[back to list of plots](#)

Figure 164: T1 FAST ROIs R cerebellum X

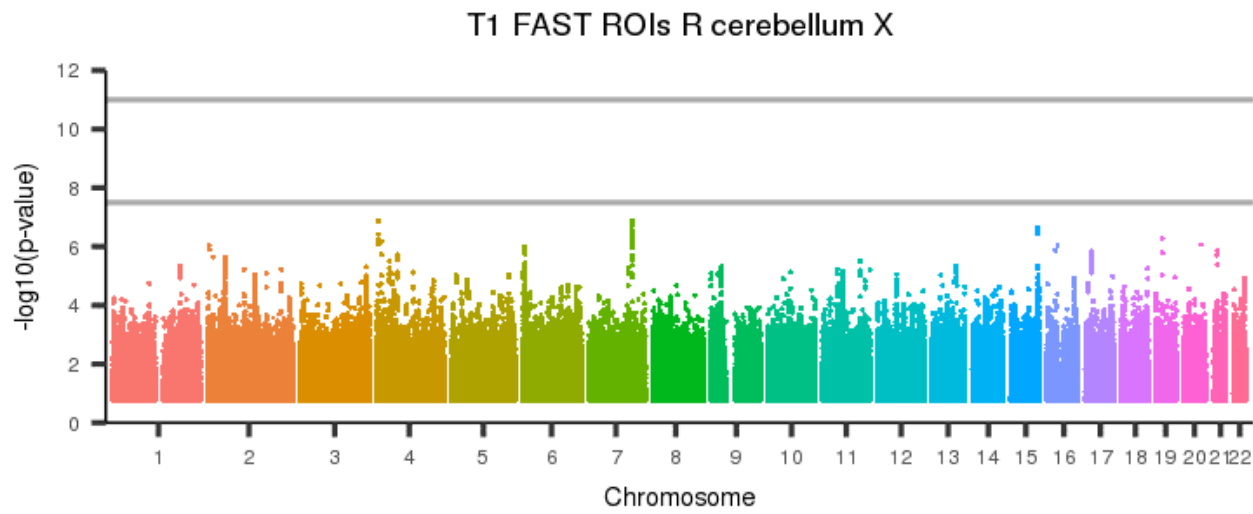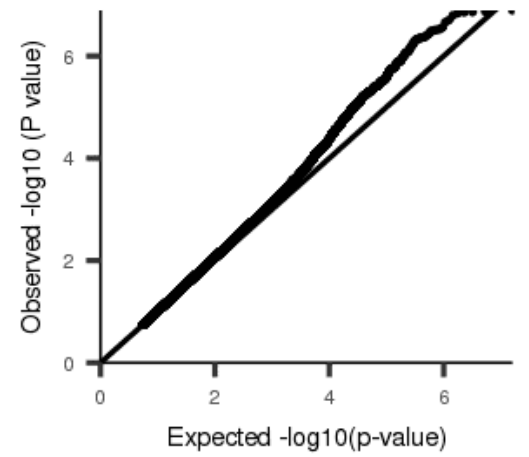

[back to list of plots](#)

Figure 165: T2 FLAIR BIANCA WMH volume

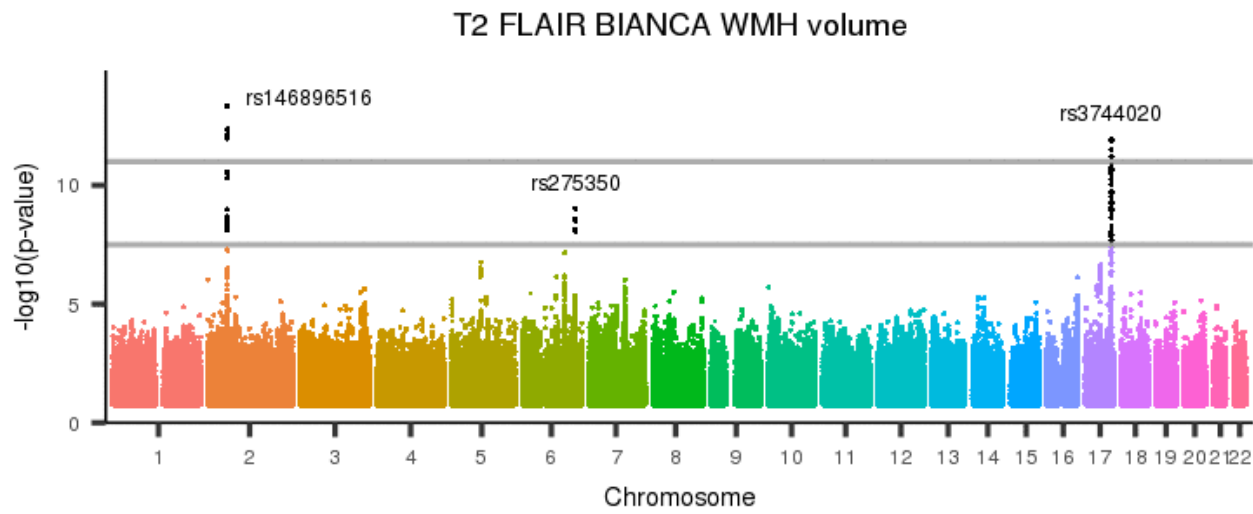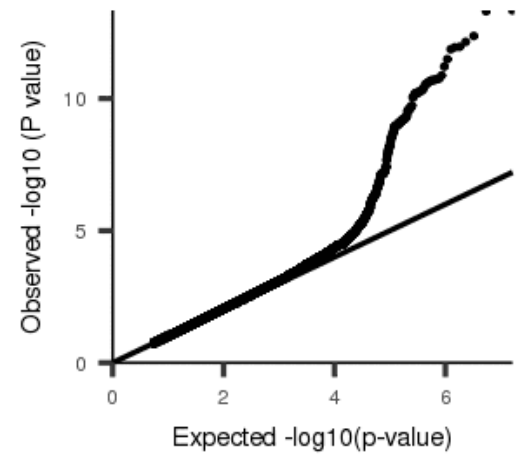

[back to list of plots](#)



Figure 166: SWI T2star left thalamus

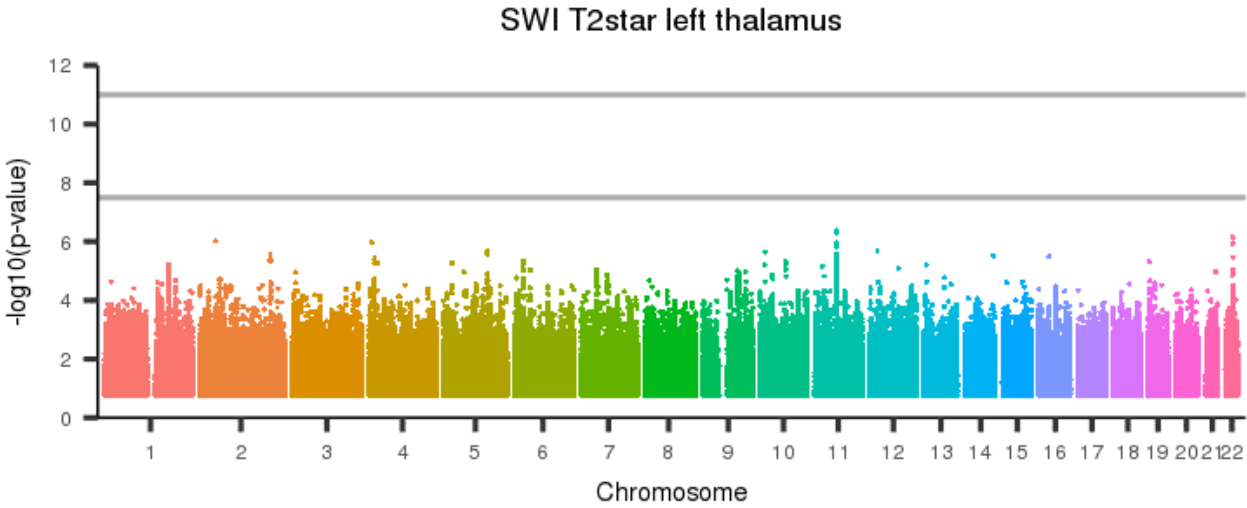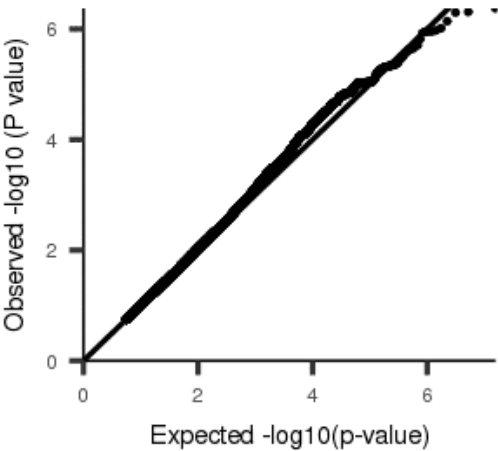

[back to list of plots](#)

Figure 167: SWI T2star right thalamus

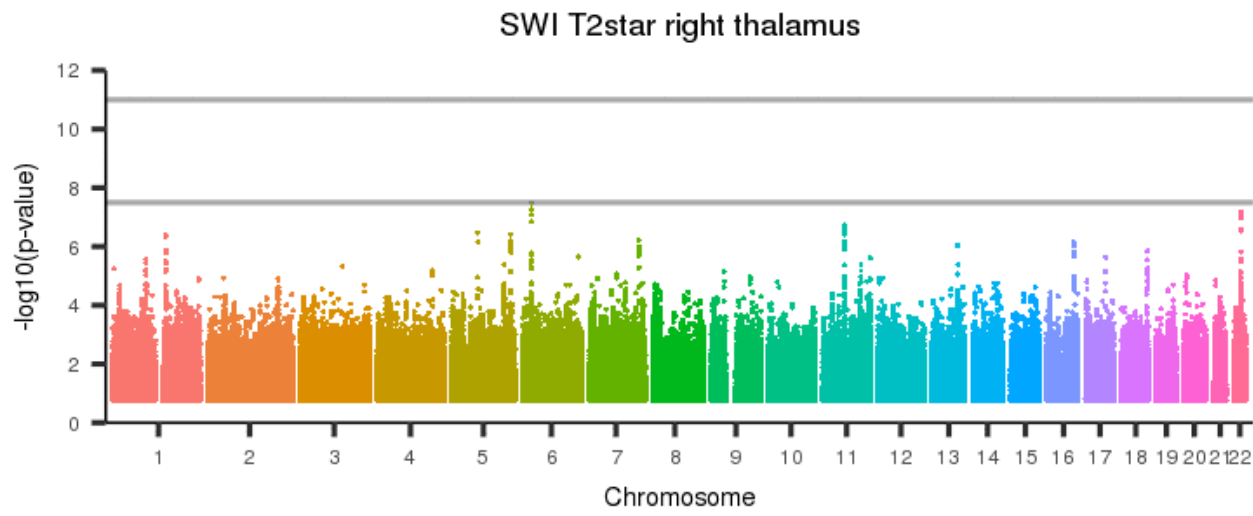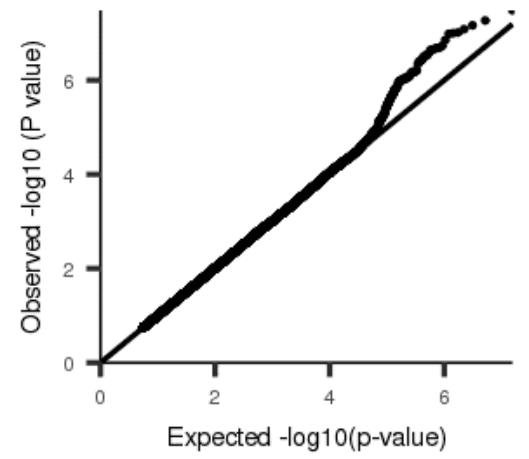

[back to list of plots](#)

Figure 168: SWI T2star left caudate

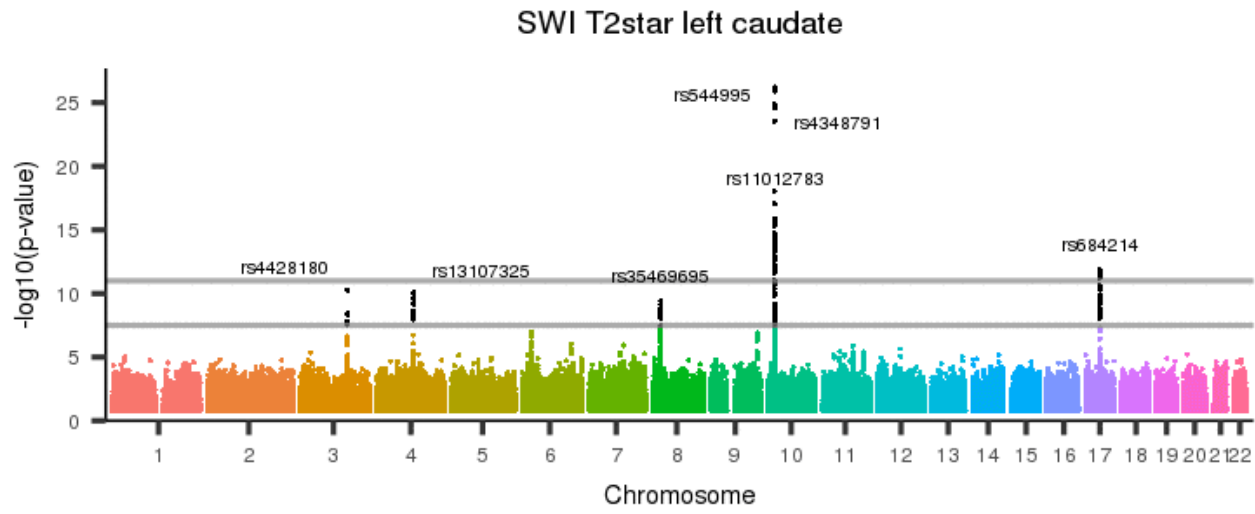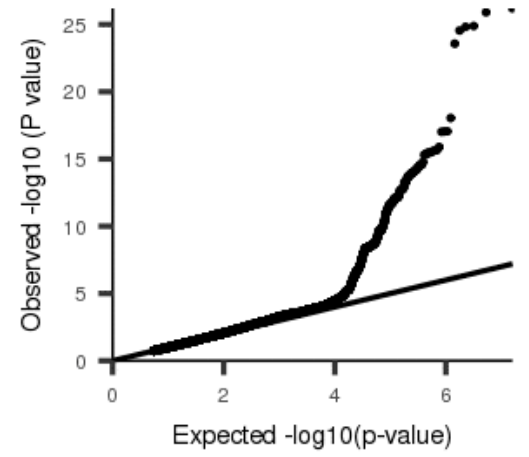

[back to list of plots](#)

Figure 169: SWI T2star right caudate

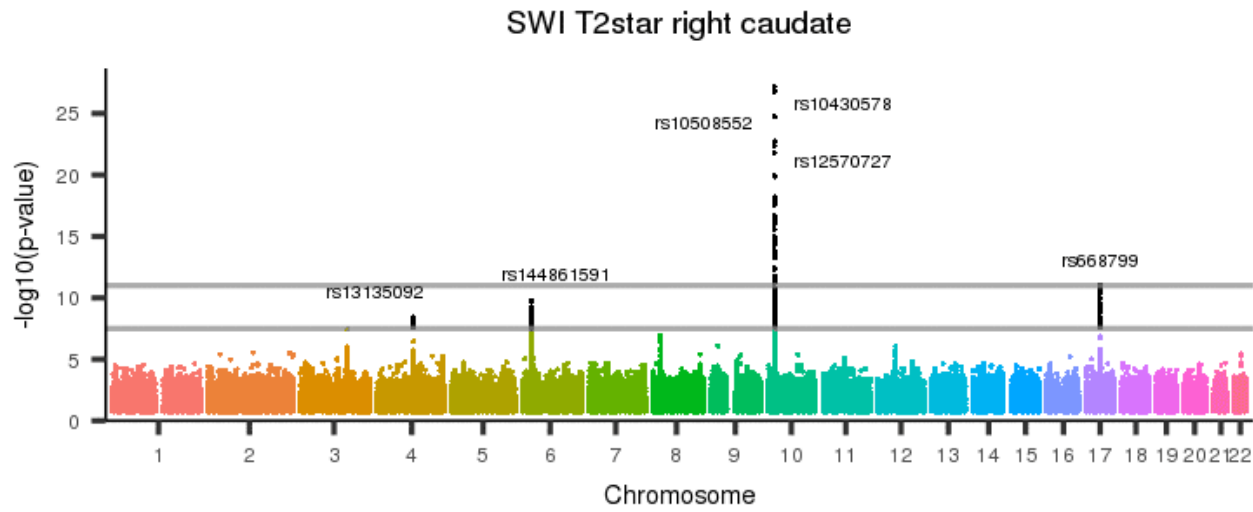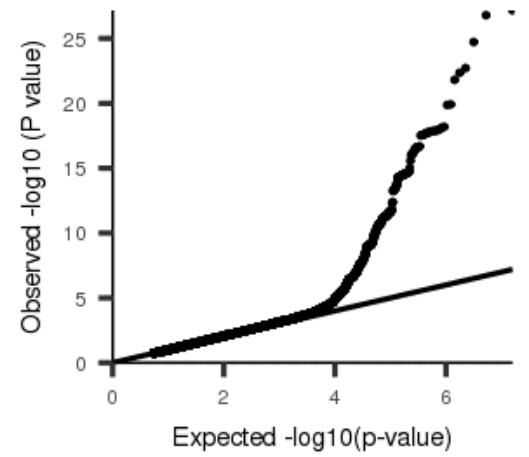

[back to list of plots](#)

Figure 170: SWI T2star left putamen

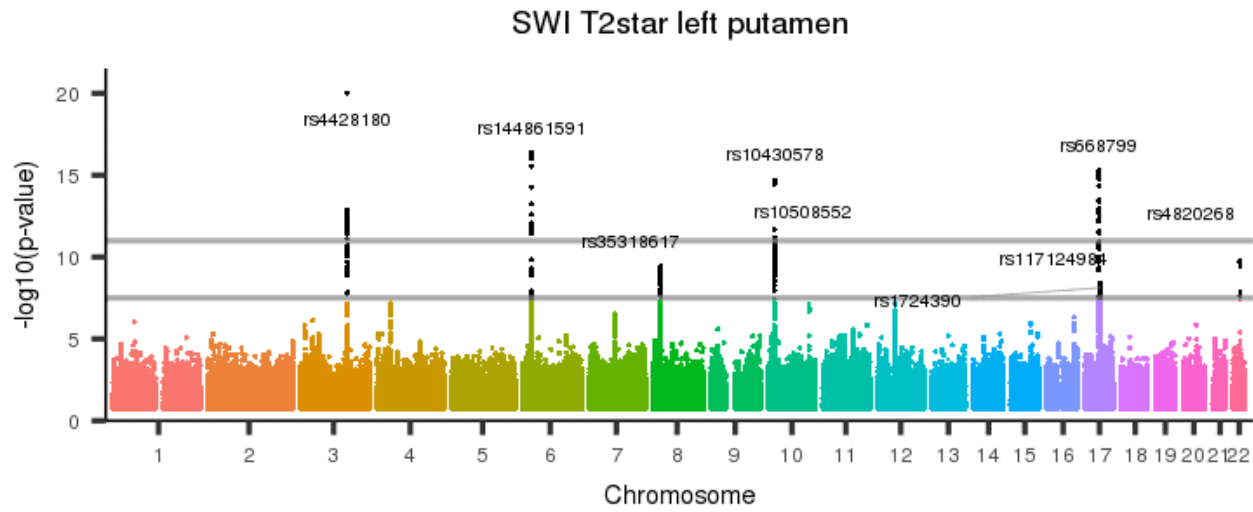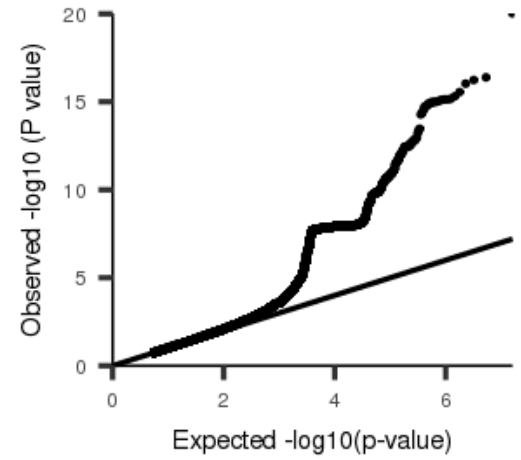

[back to list of plots](#)

Figure 171: SWI T2star right putamen

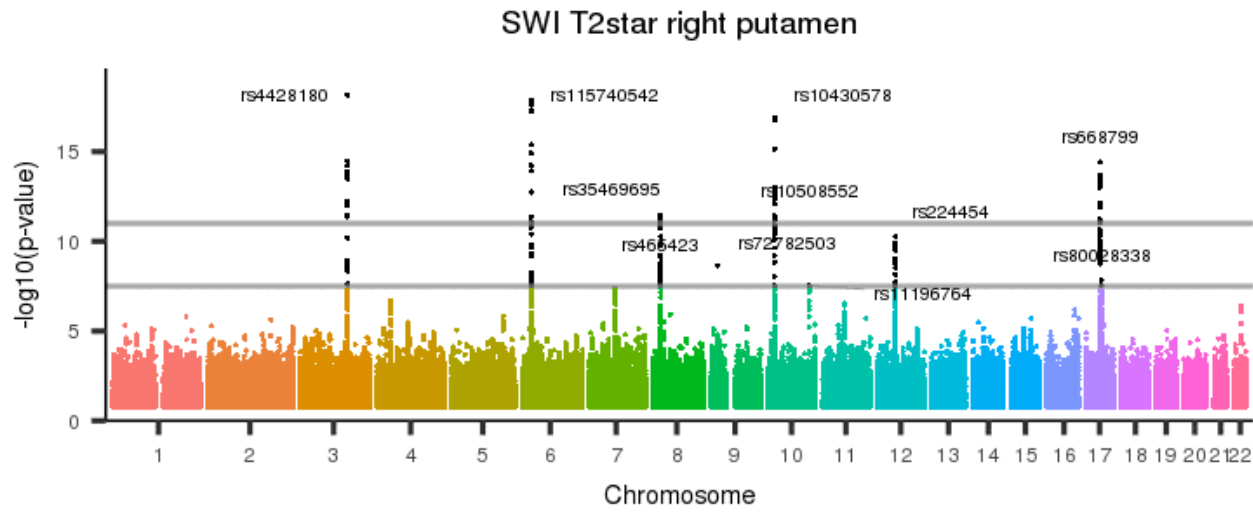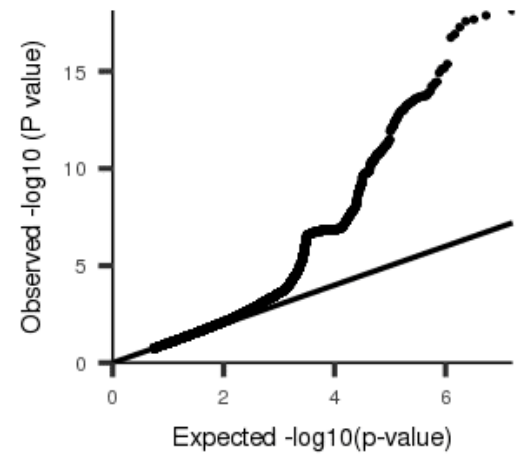

[back to list of plots](#)

Figure 172: SWI T2star left pallidum

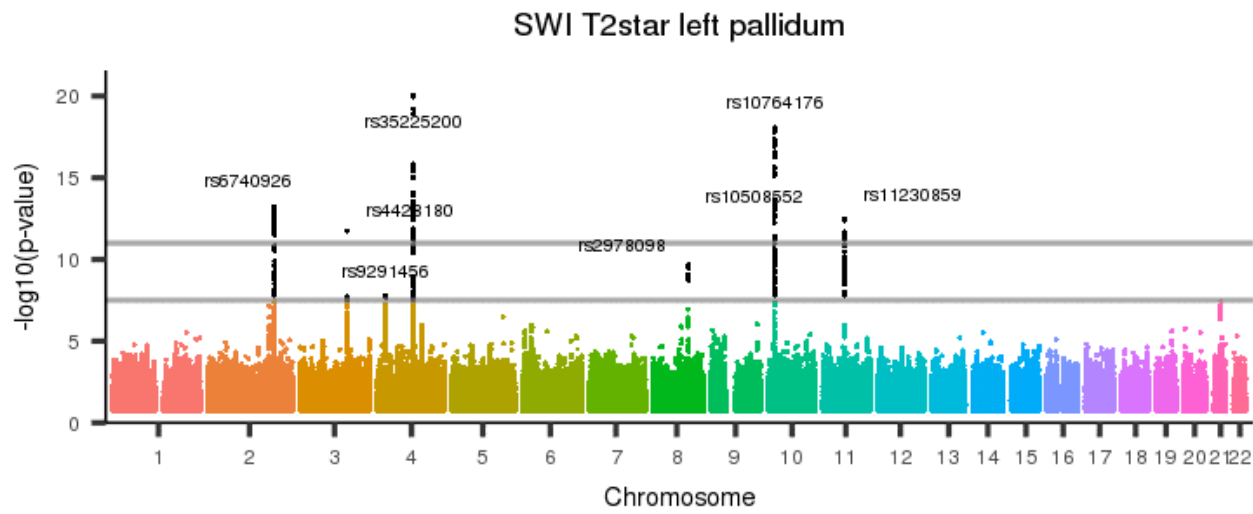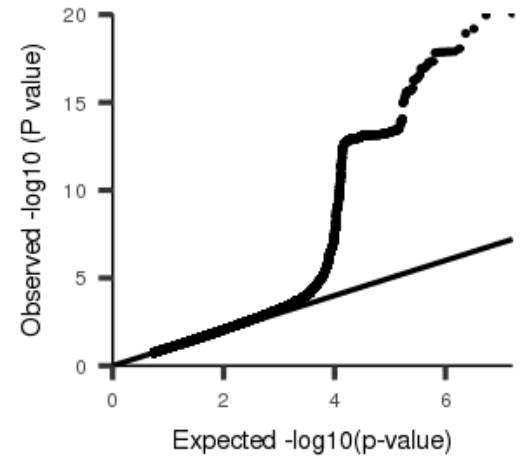

[back to list of plots](#)

Figure 173: SWI T2star right pallidum

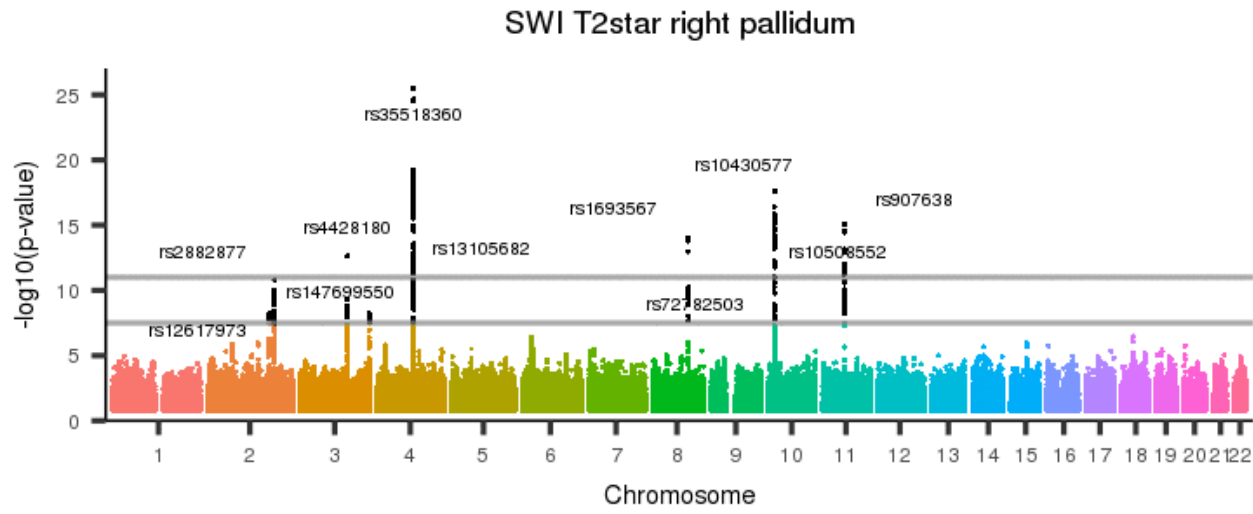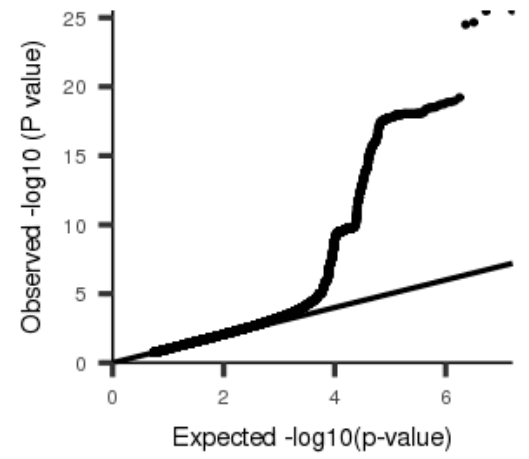

[back to list of plots](#)



Figure 174: SWI T2star left hippocampus

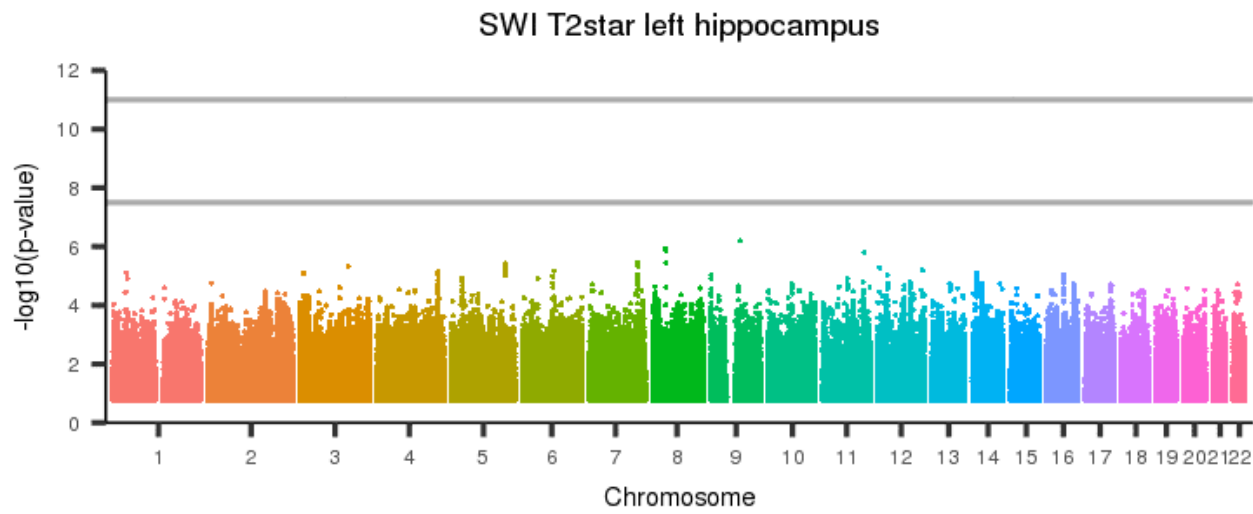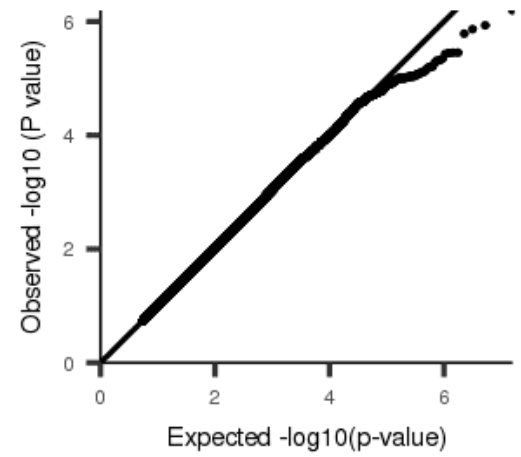

[back to list of plots](#)

Figure 175: SWI T2star right hippocampus

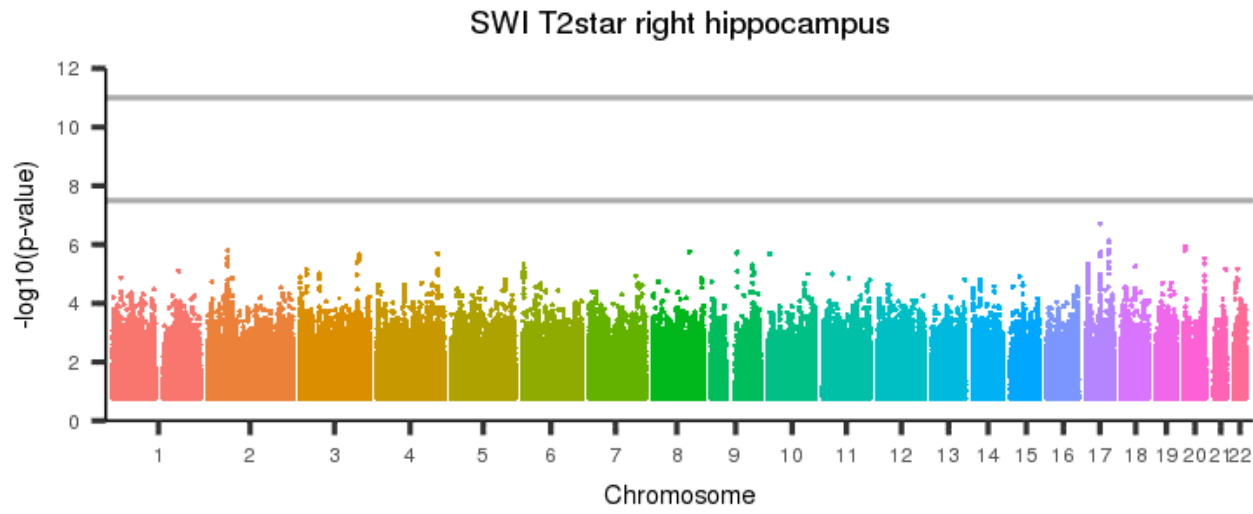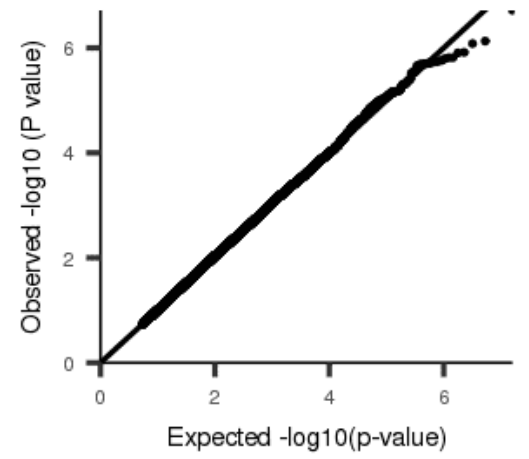

[back to list of plots](#)

Figure 176: SWI T2star left amygdala

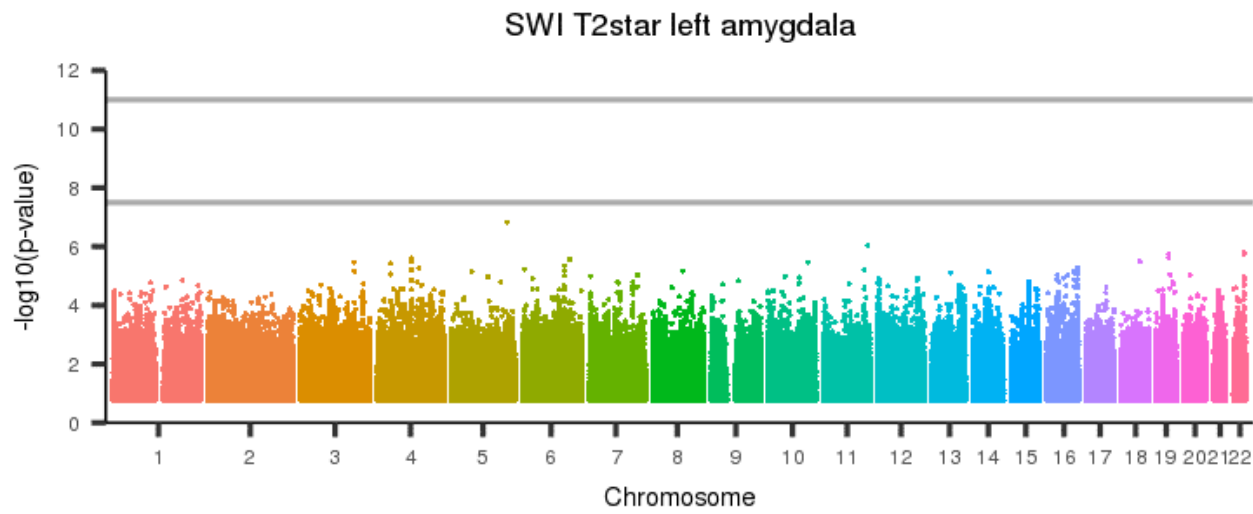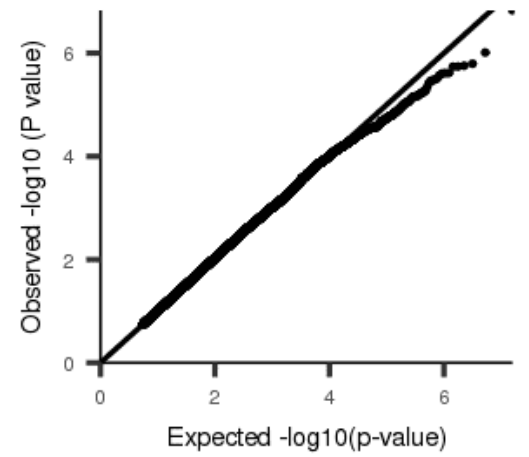

[back to list of plots](#)

Figure 177: SWI T2star right amygdala

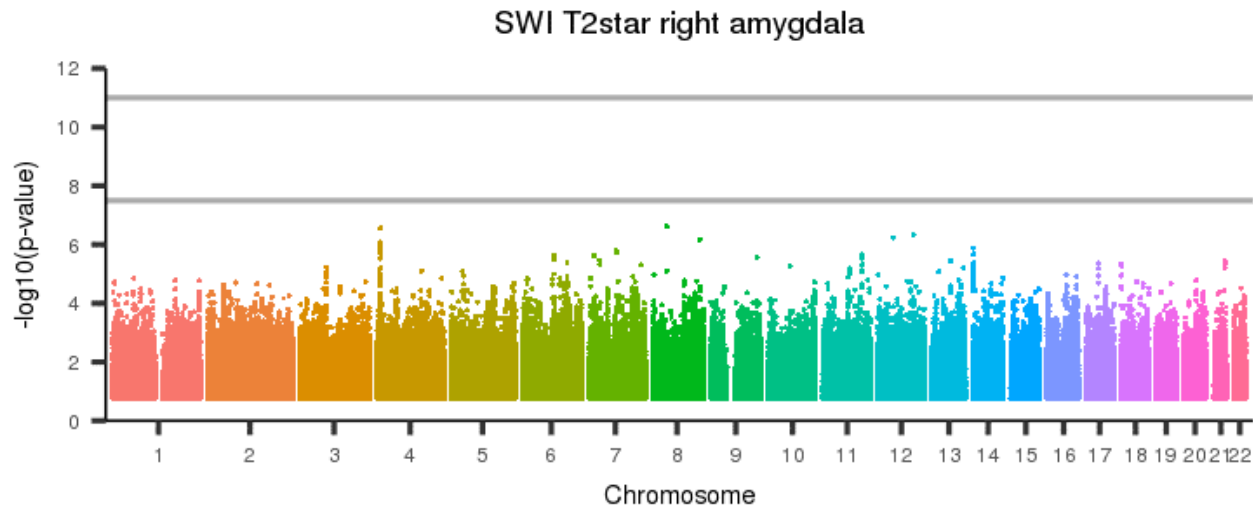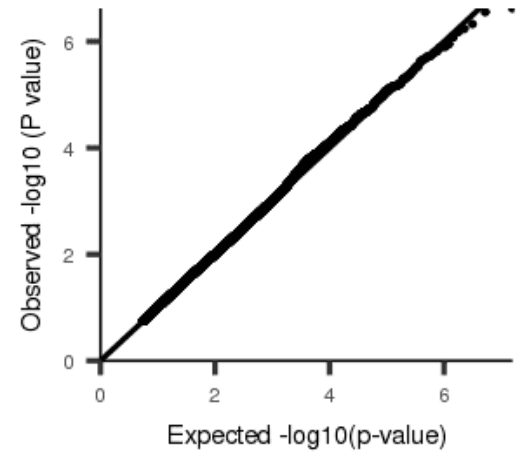

[back to list of plots](#)

Figure 178: SWI T2star left accumbens

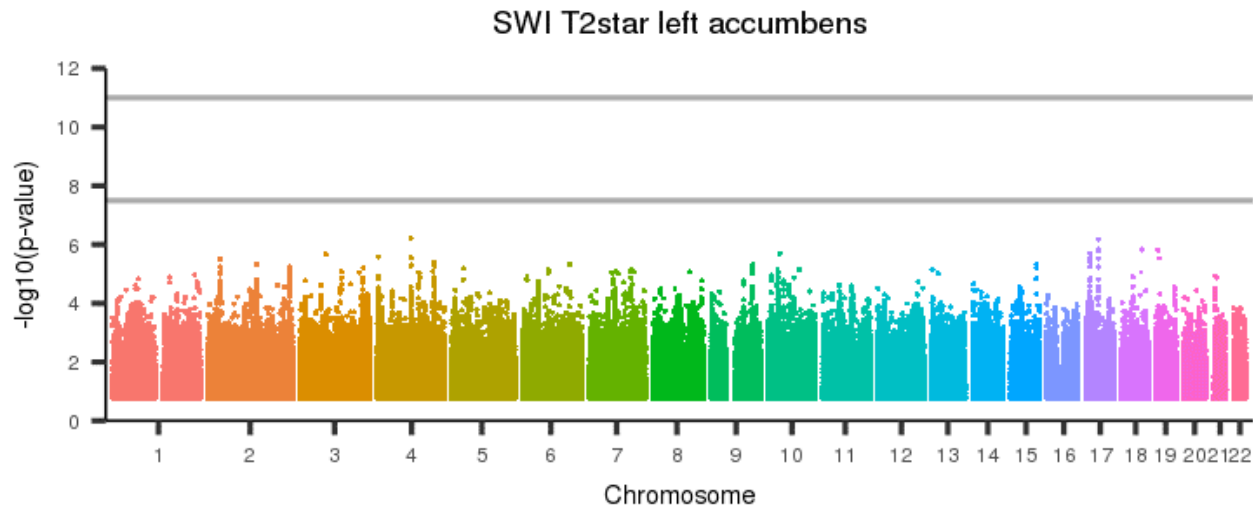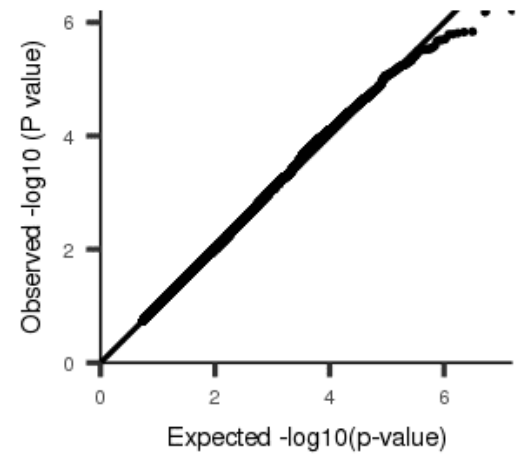

[back to list of plots](#)

Figure 179: SWI T2star right accumbens

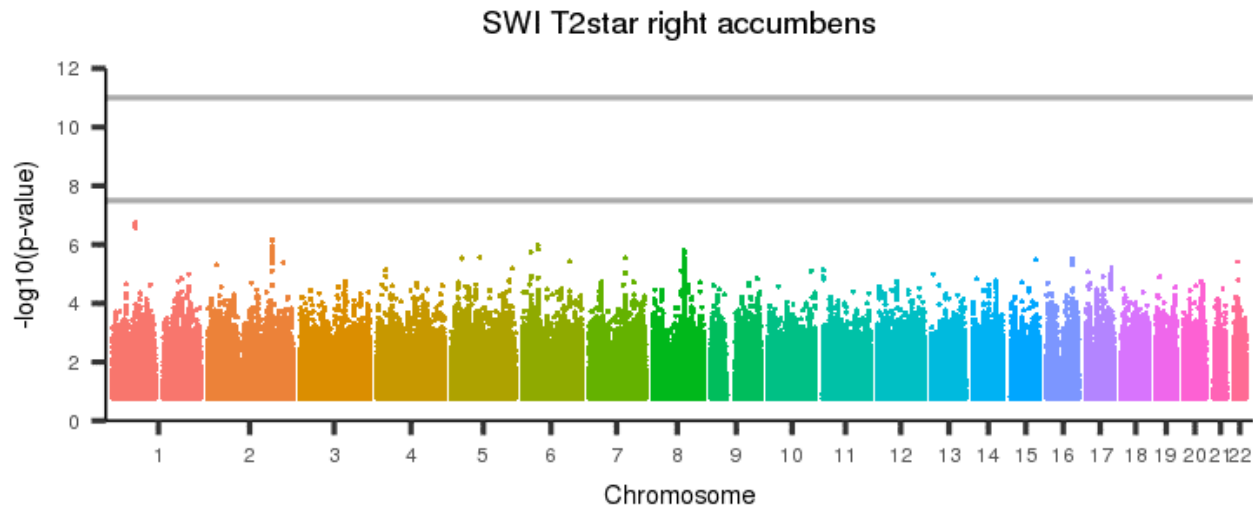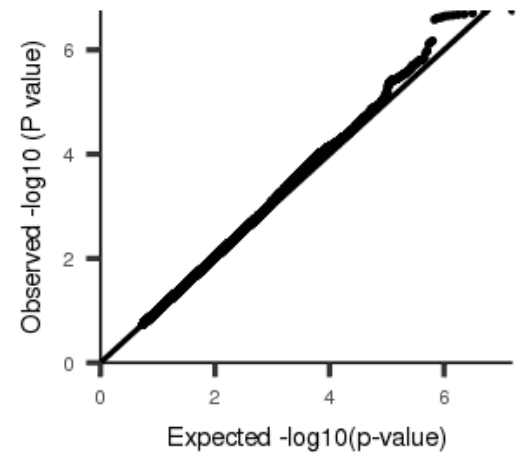

[back to list of plots](#)

Figure 180: tfMRI median BOLD shapes

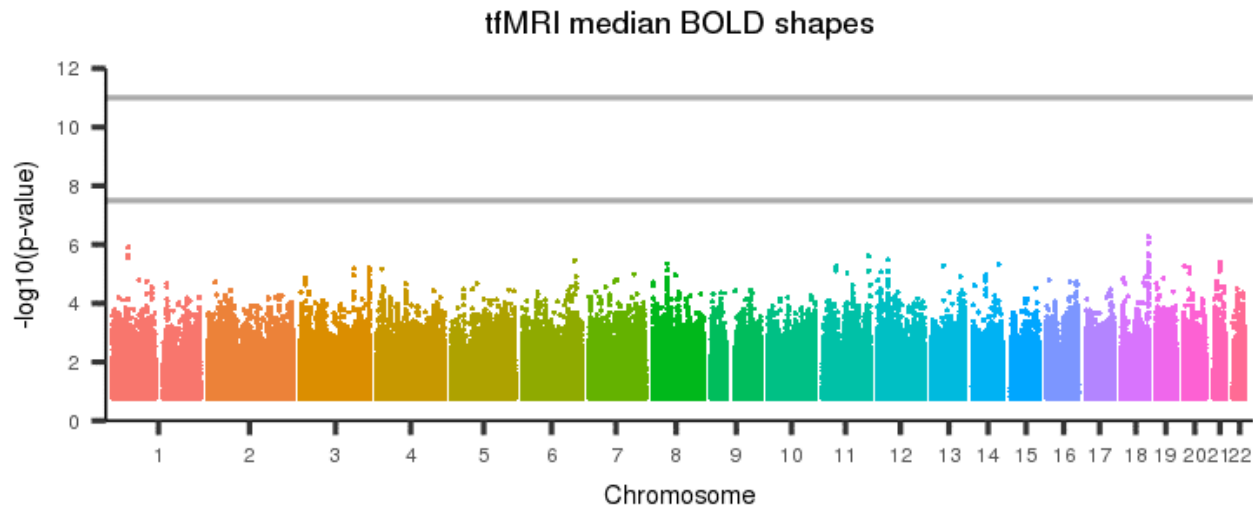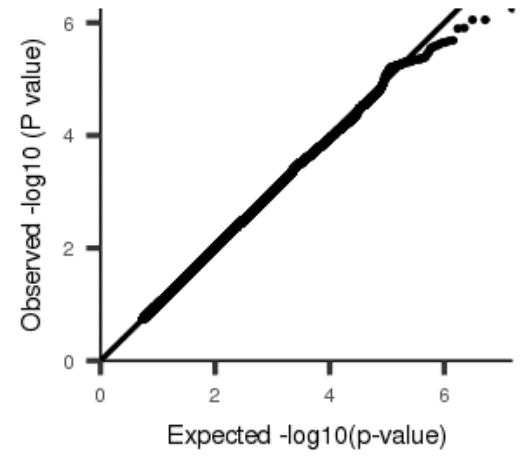

[back to list of plots](#)

Figure 181: tfMRI 90th-percentile BOLD shapes

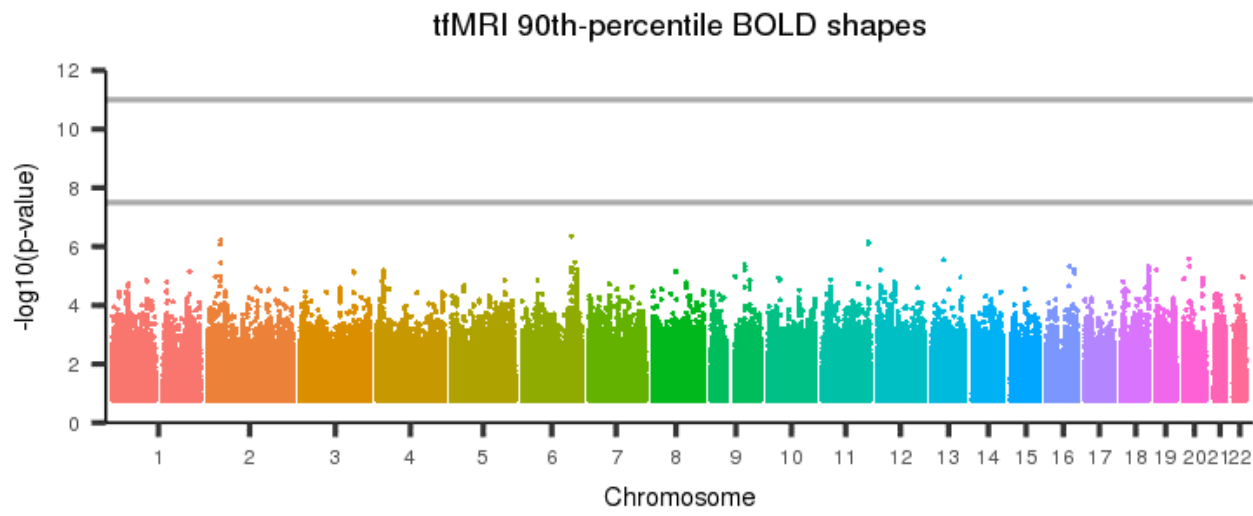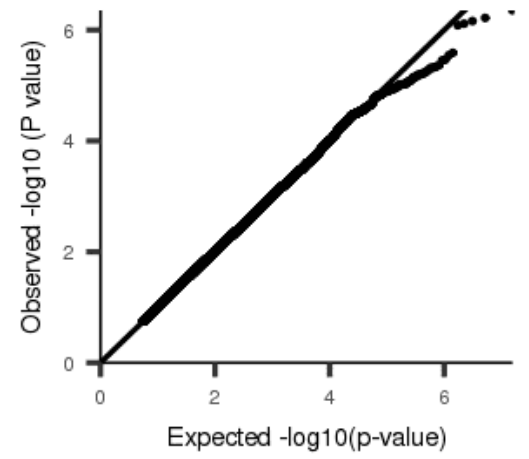

[back to list of plots](#)



Figure 182: tfMRI median zstat shapes

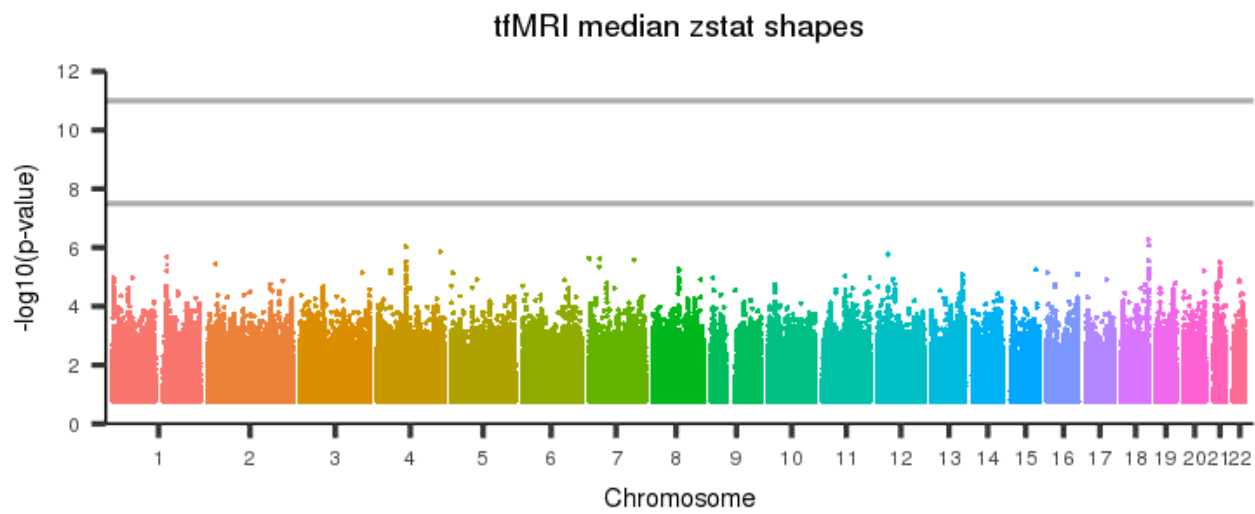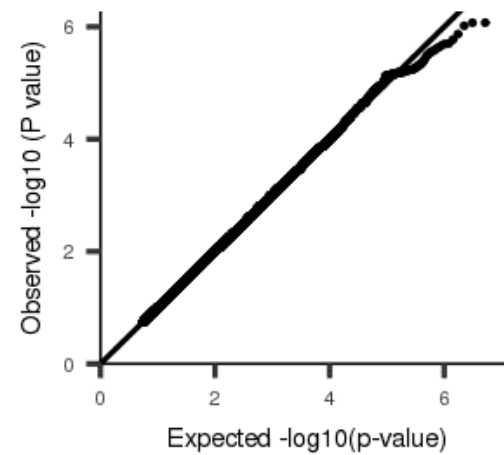

[back to list of plots](#)

Figure 183: tfMRI 90th-percentile zstat shapes

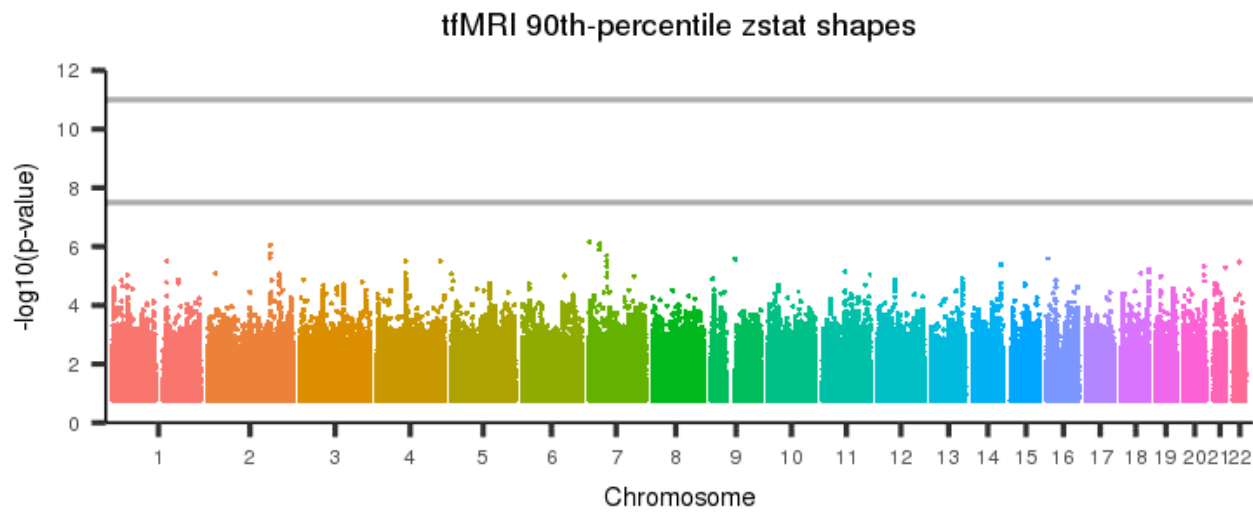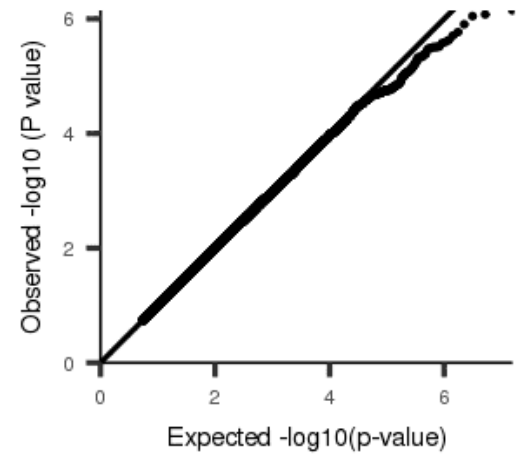

[back to list of plots](#)

Figure 184: tfMRI median BOLD faces

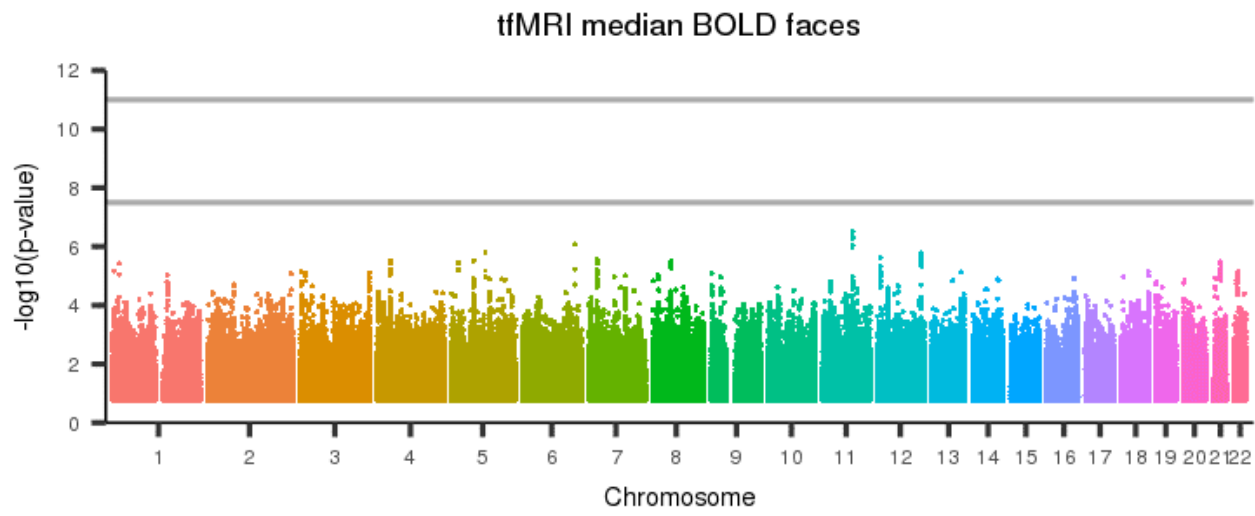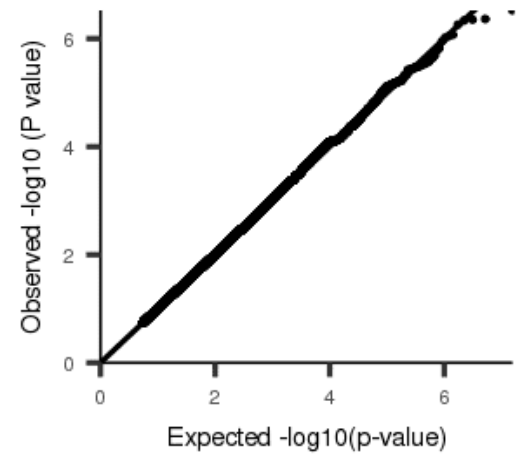

[back to list of plots](#)

Figure 185: tfMRI 90th-percentile BOLD faces

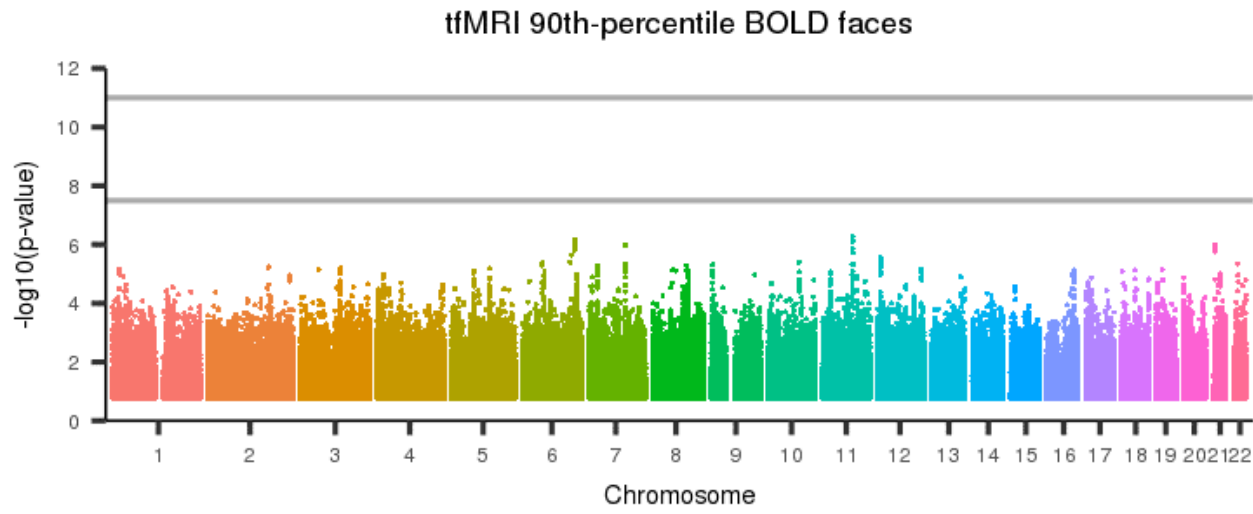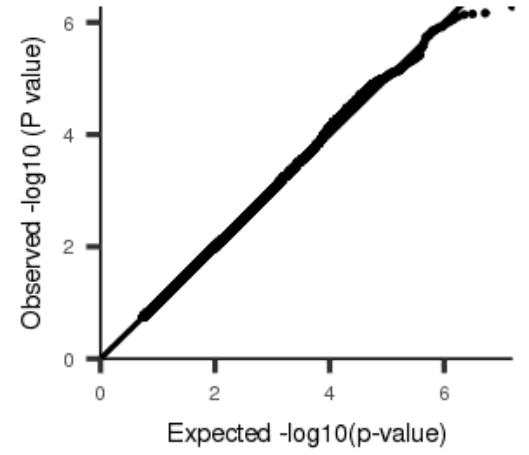

[back to list of plots](#)

Figure 186: tfMRI median zstat faces

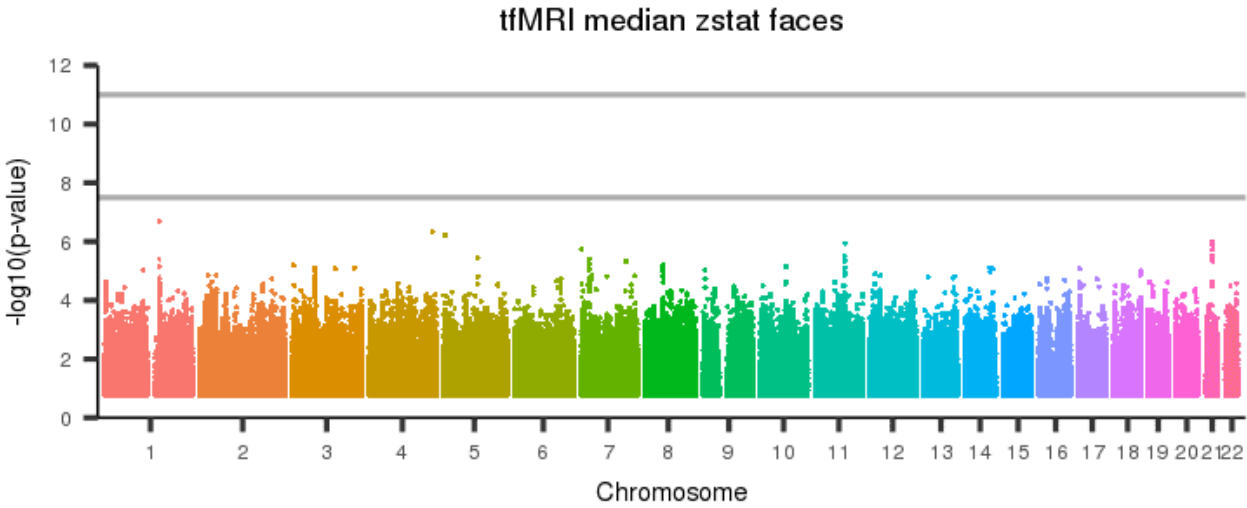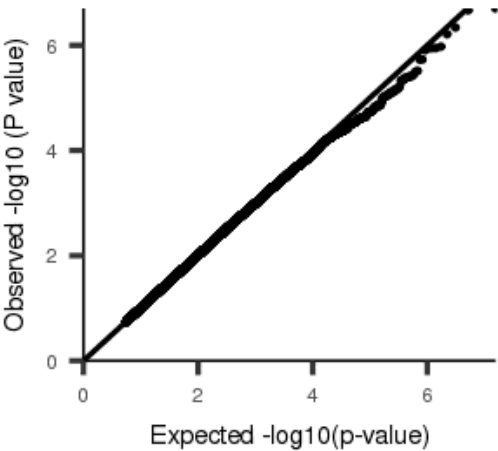

[back to list of plots](#)

Figure 187: tfMRI 90th-percentile zstat faces

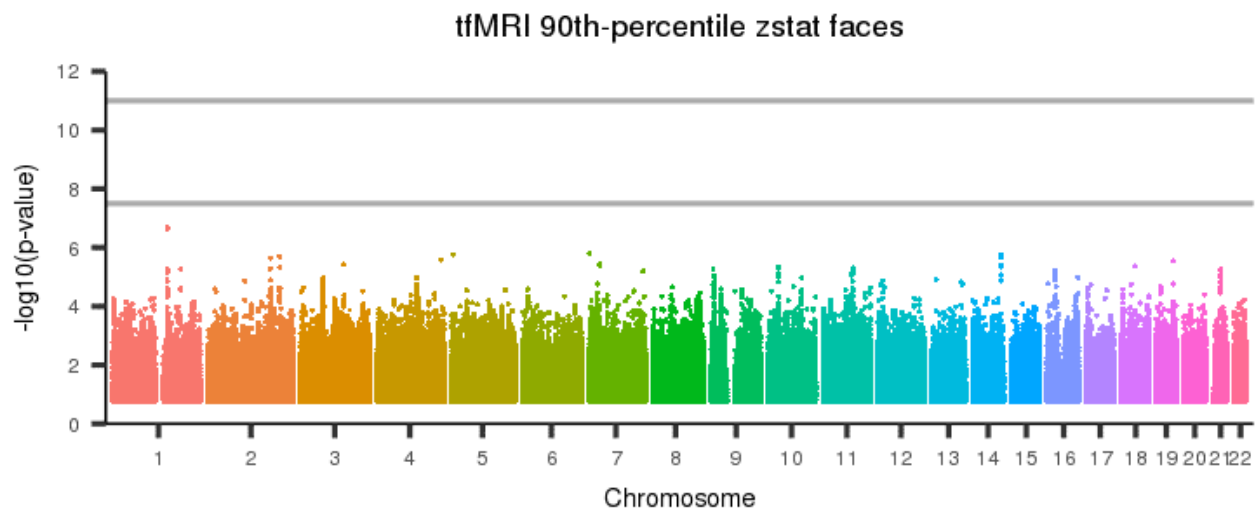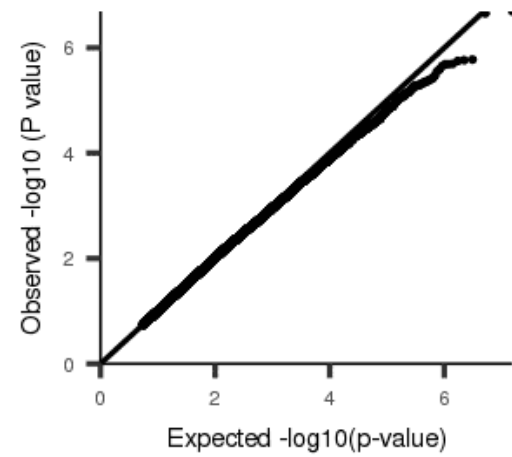

[back to list of plots](#)

Figure 188: tfMRI median BOLD faces-shapes

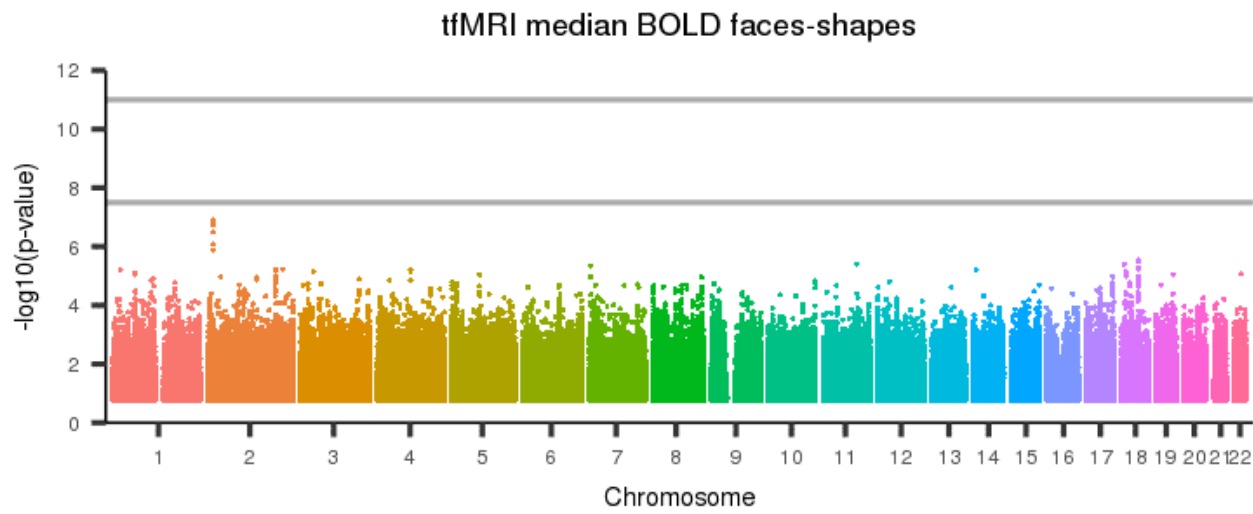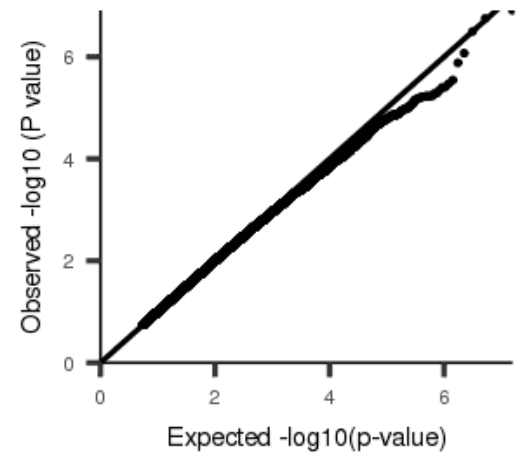

[back to list of plots](#)

Figure 189: tfMRI 90th-percentile BOLD faces-shapes

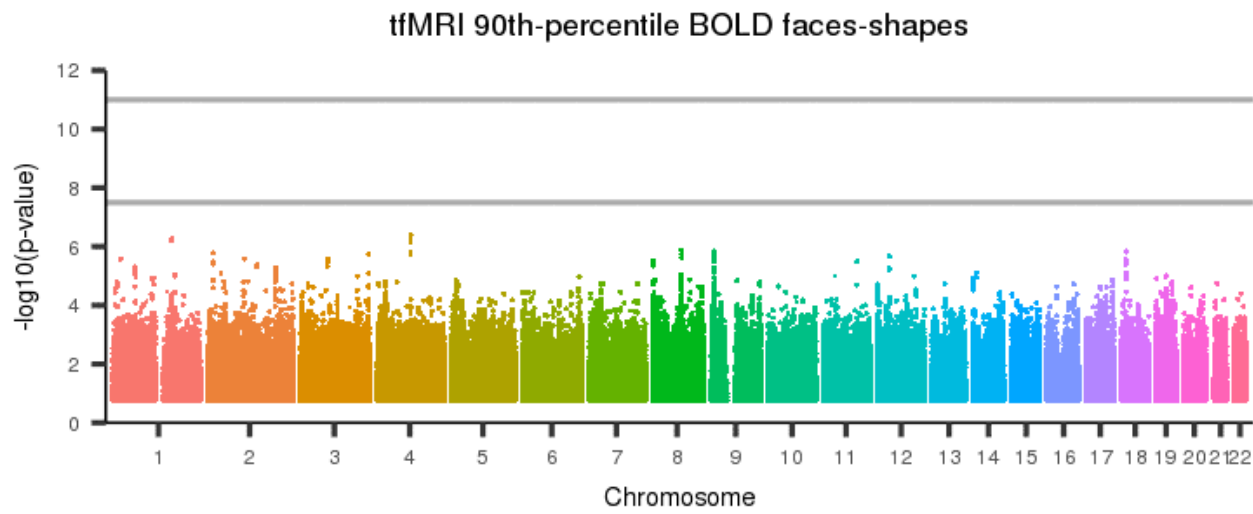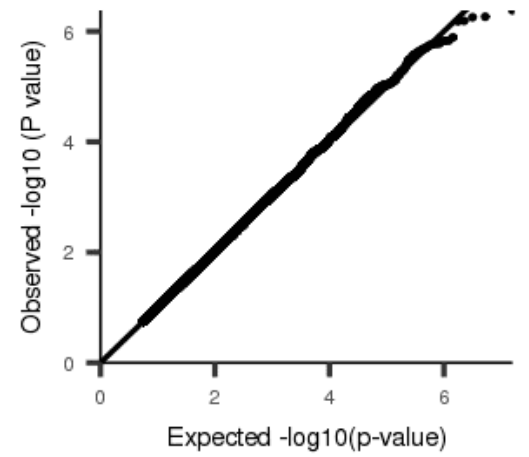

[back to list of plots](#)



Figure 190: tfMRI median zstat faces-shapes

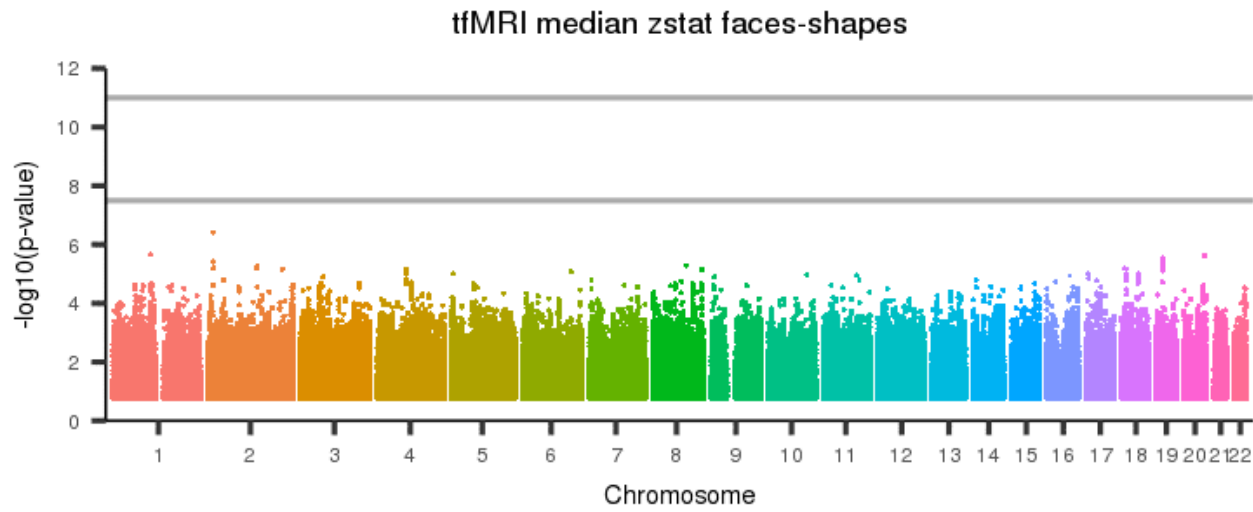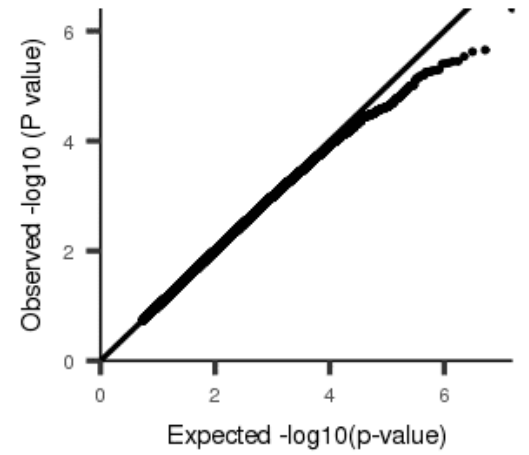

[back to list of plots](#)

Figure 191: tfMRI 90th-percentile zstat faces-shapes

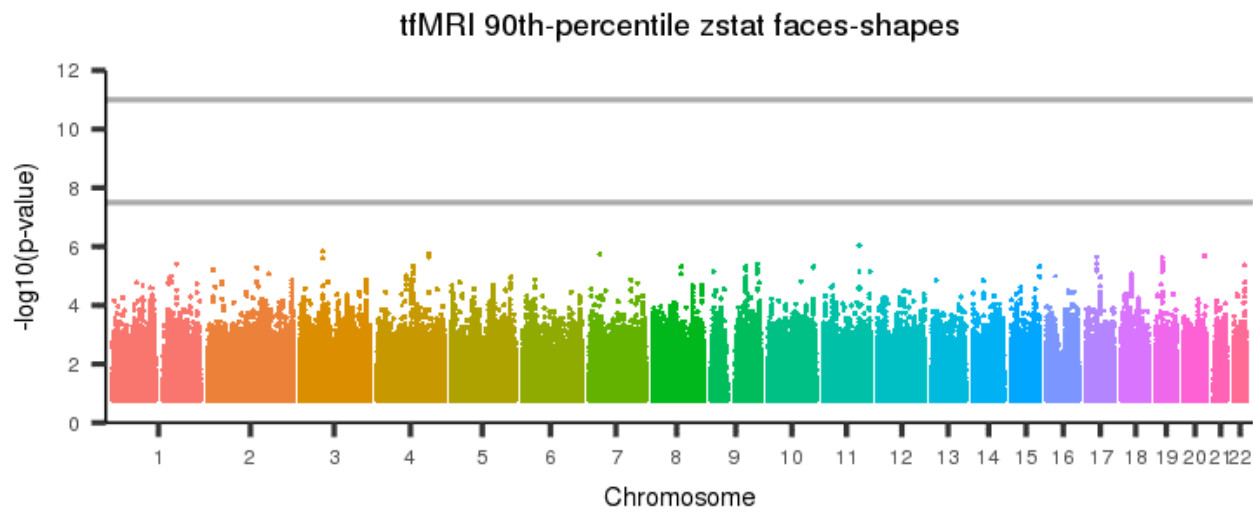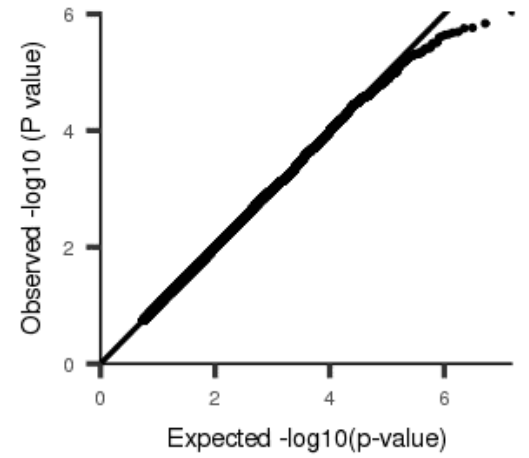

[back to list of plots](#)

Figure 192: tfMRI median BOLD faces-shapes amygdala

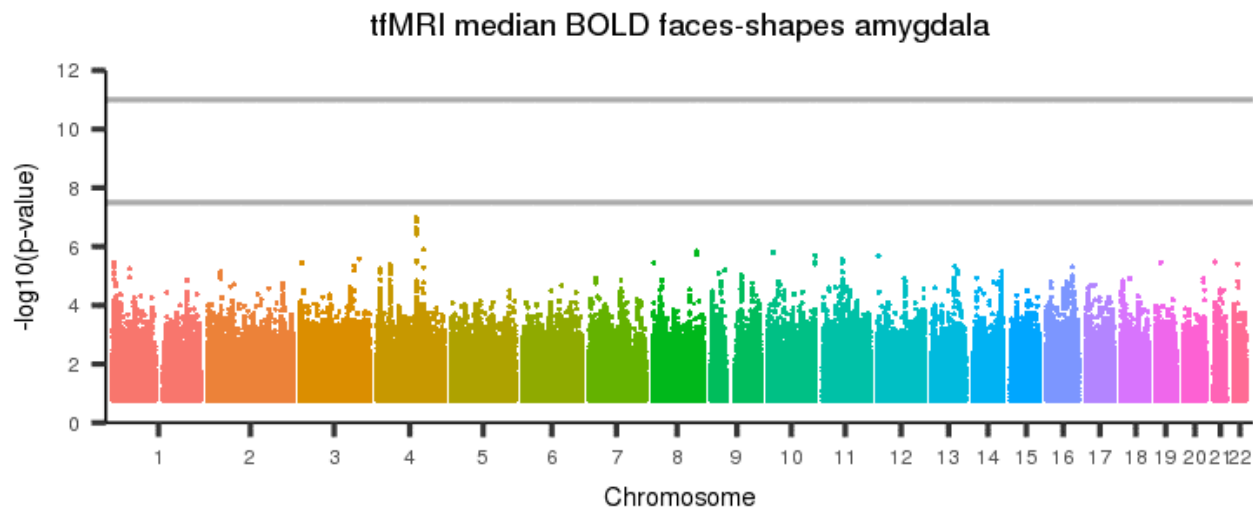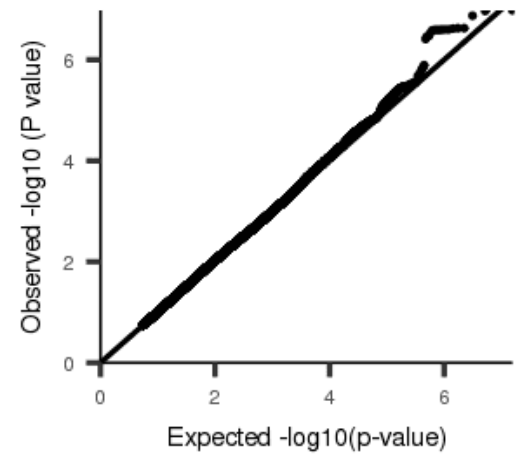

[back to list of plots](#)

Figure 193: tfMRI 90th-percentile BOLD faces-shapes amygdala

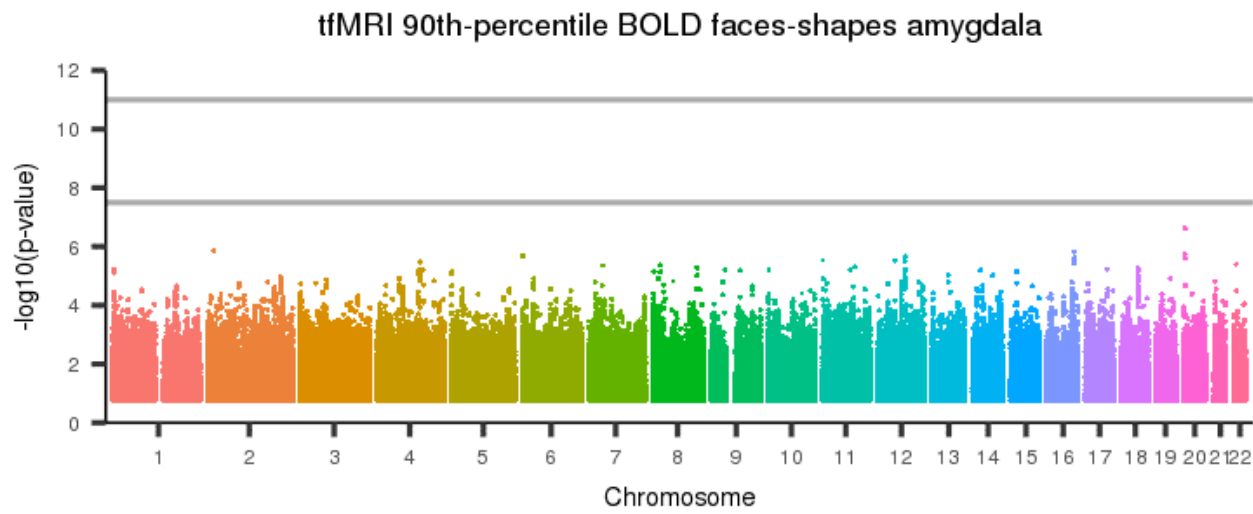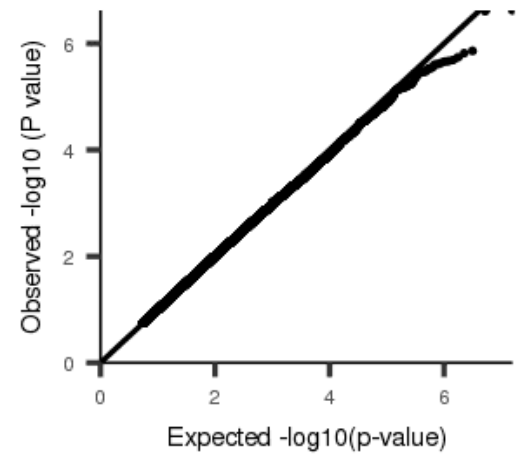

[back to list of plots](#)

Figure 194: tfMRI median zstat faces-shapes amygdala

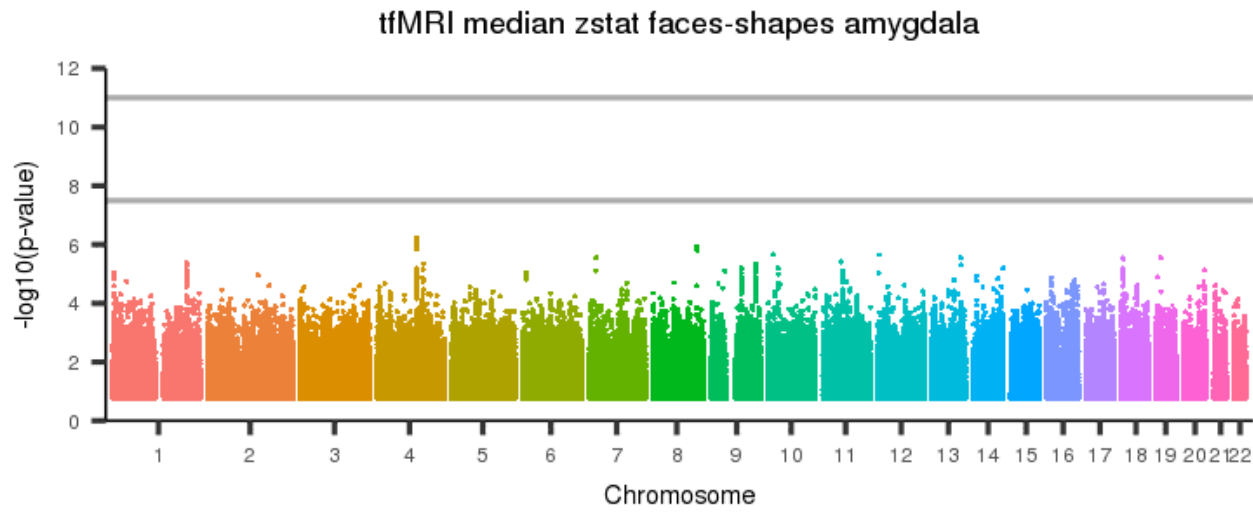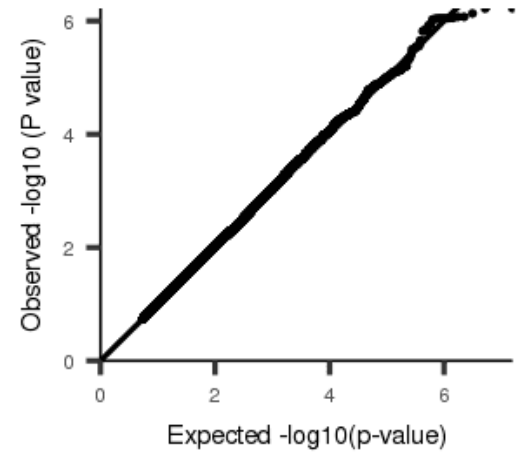

[back to list of plots](#)

Figure 195: tfMRI 90th-percentile zstat faces-shapes amygdala

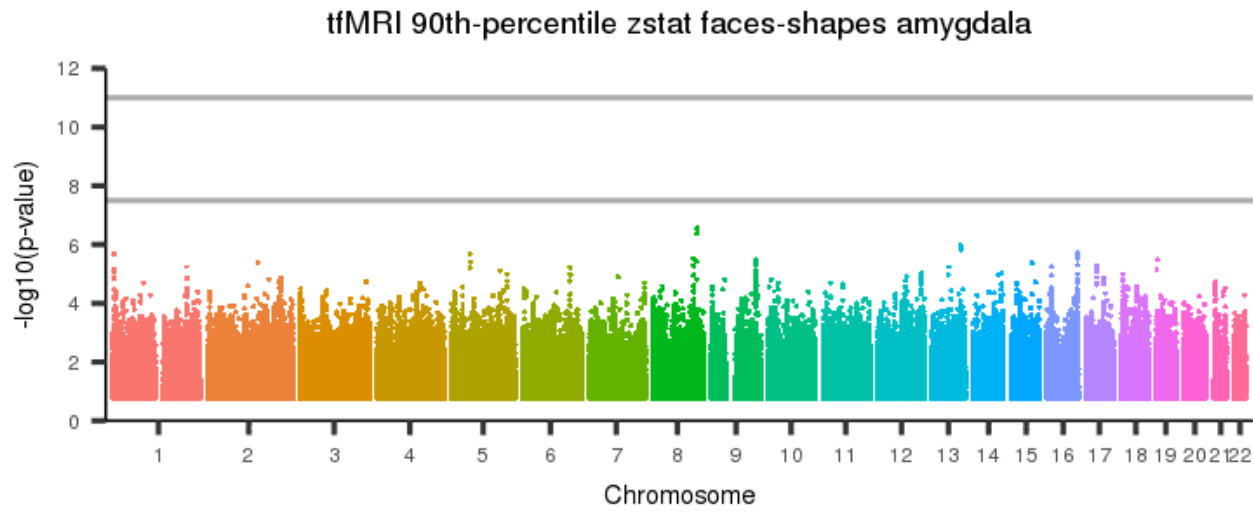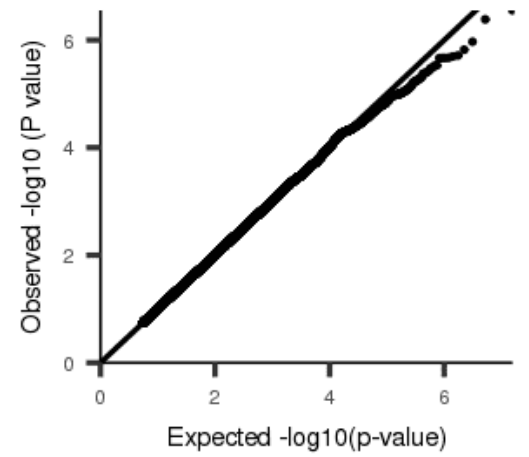

[back to list of plots](#)

Figure 196: dMRI TBSS FA Middle cerebellar peduncle

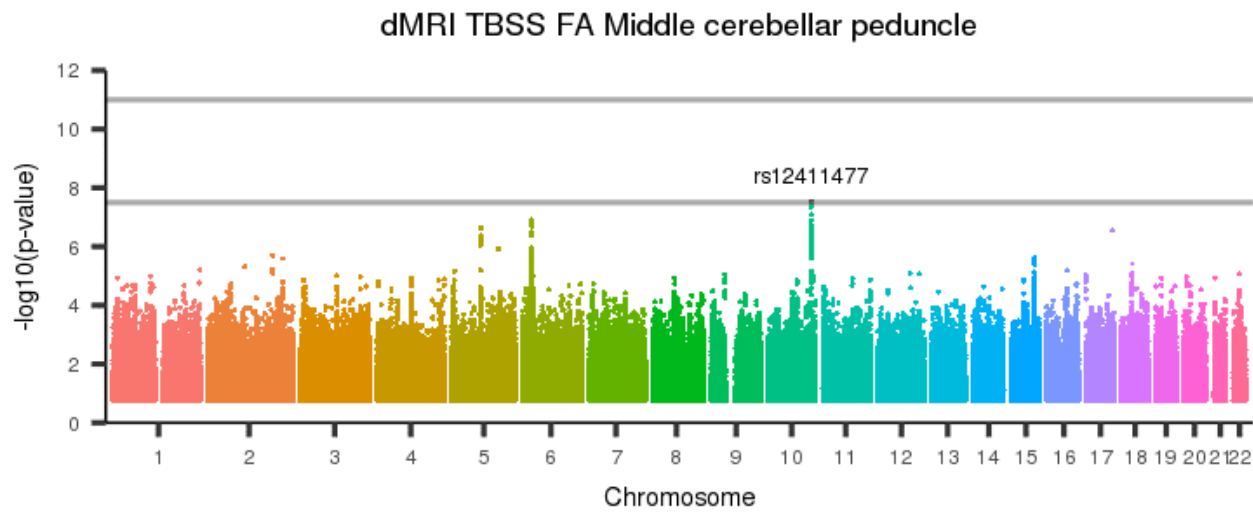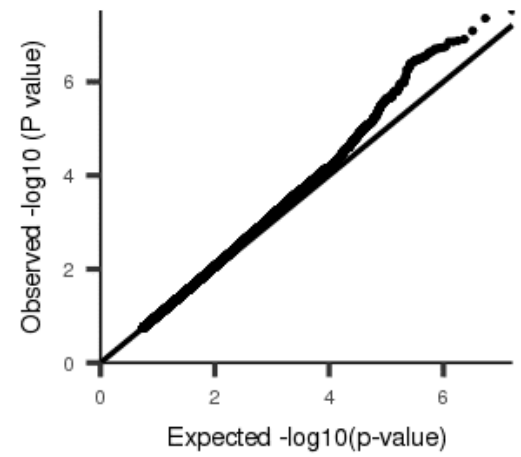

[back to list of plots](#)

Figure 197: dMRI TBSS FA Pontine crossing tract

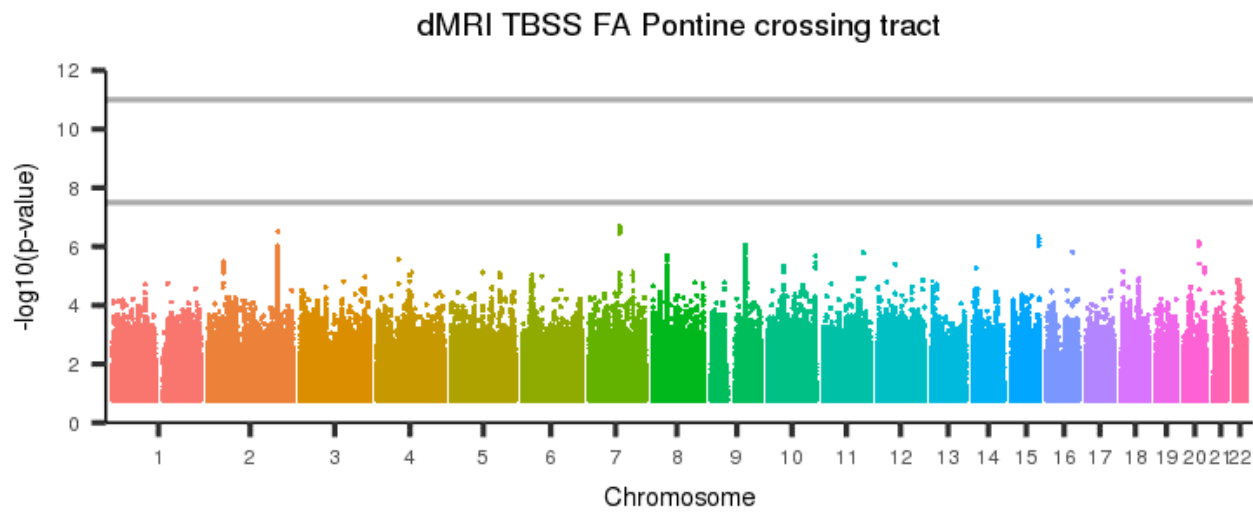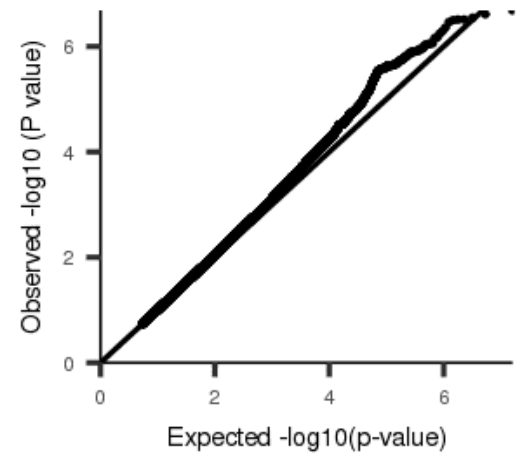

[back to list of plots](#)



Figure 198: dMRI TBSS FA Genu of corpus callosum

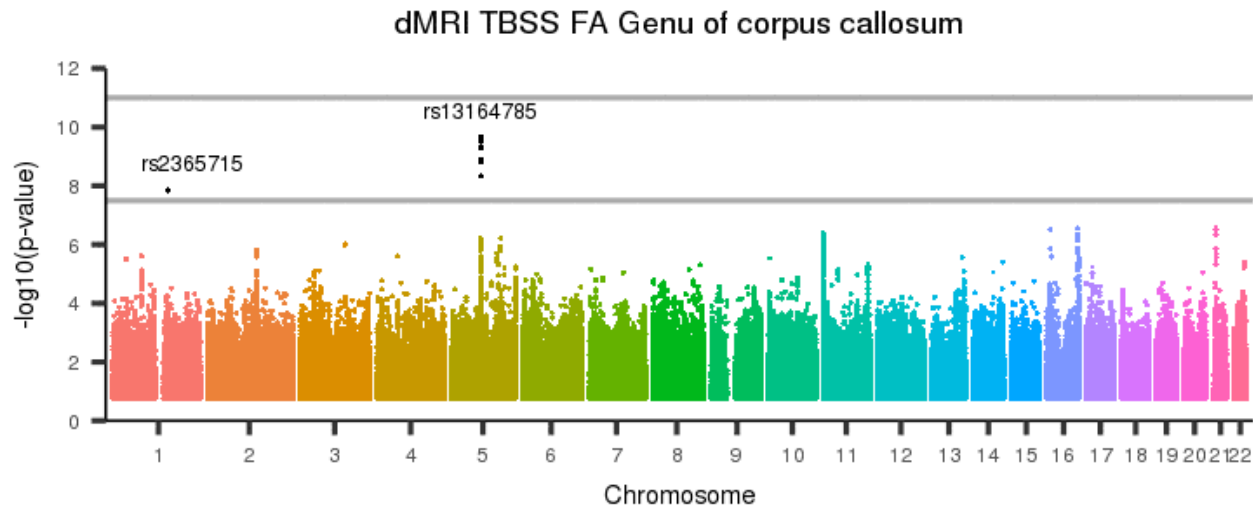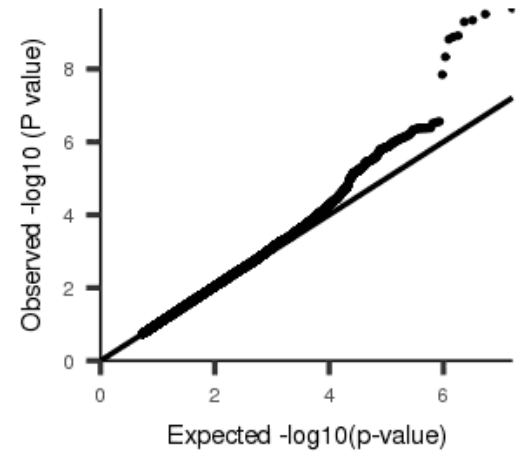

[back to list of plots](#)

Figure 199: dMRI TBSS FA Body of corpus callosum

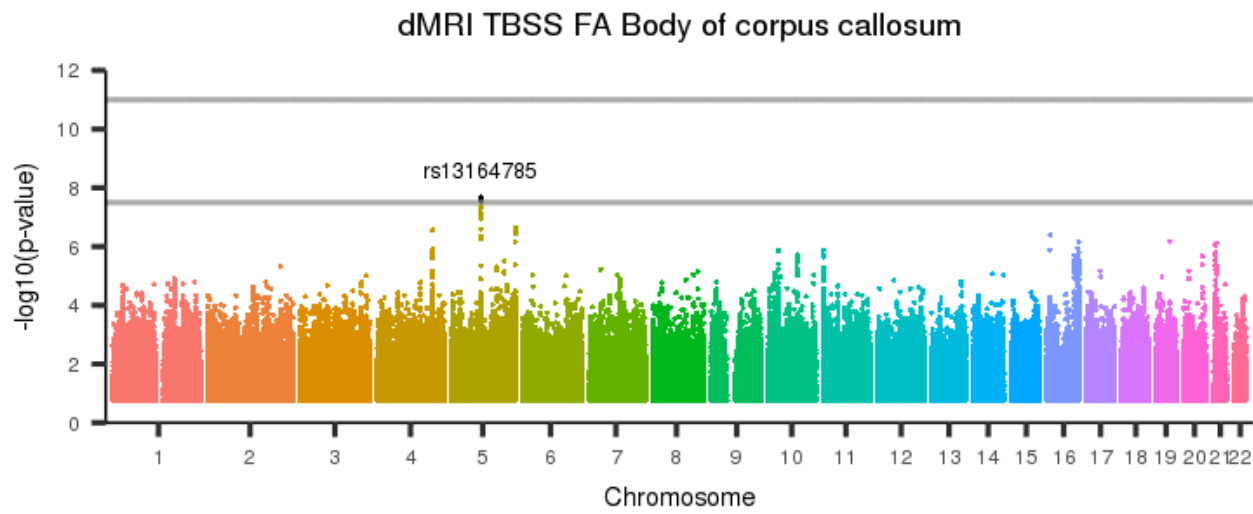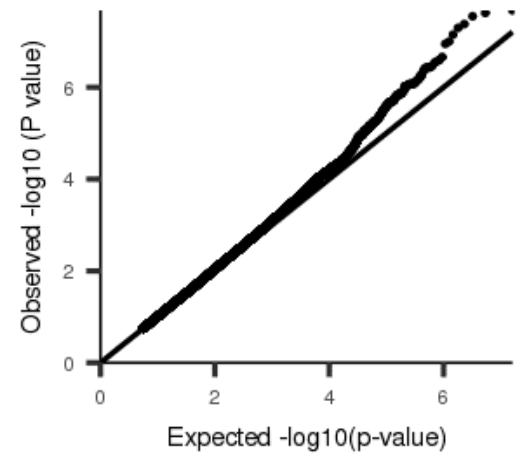

[back to list of plots](#)

Figure 200: dMRI TBSS FA Splenium of corpus callosum

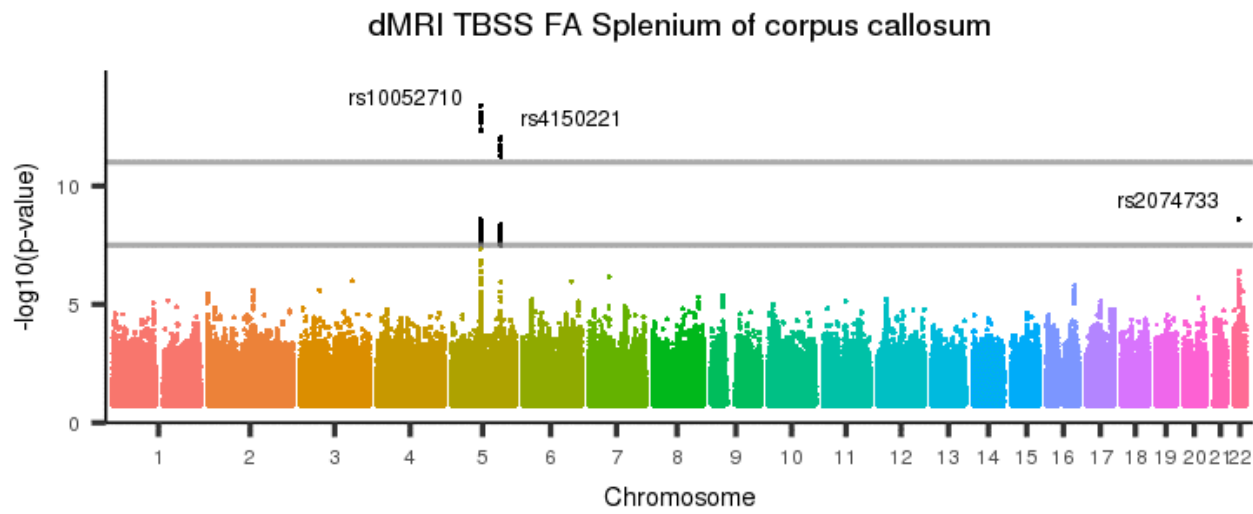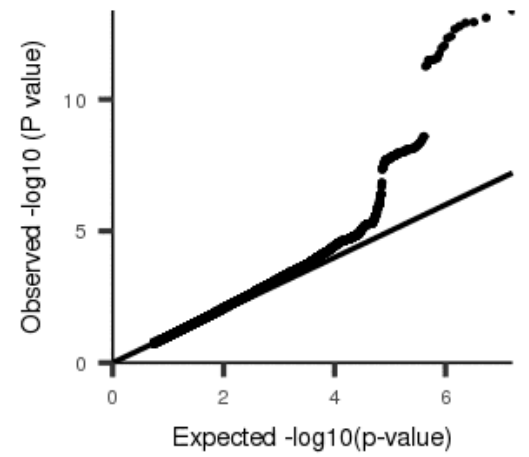

[back to list of plots](#)

Figure 201: dMRI TBSS FA Fornix

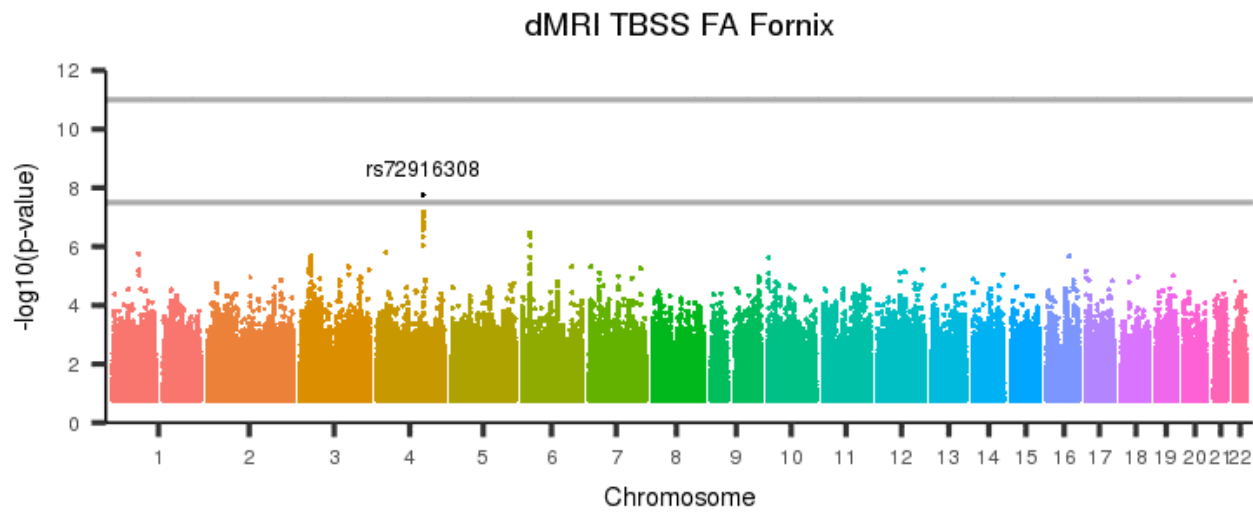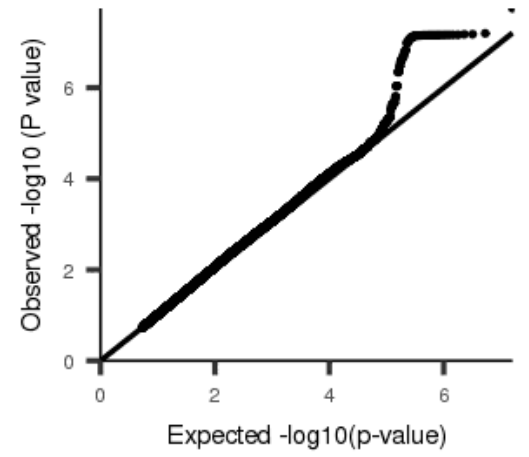

[back to list of plots](#)

Figure 202: dMRI TBSS FA Corticospinal tract R

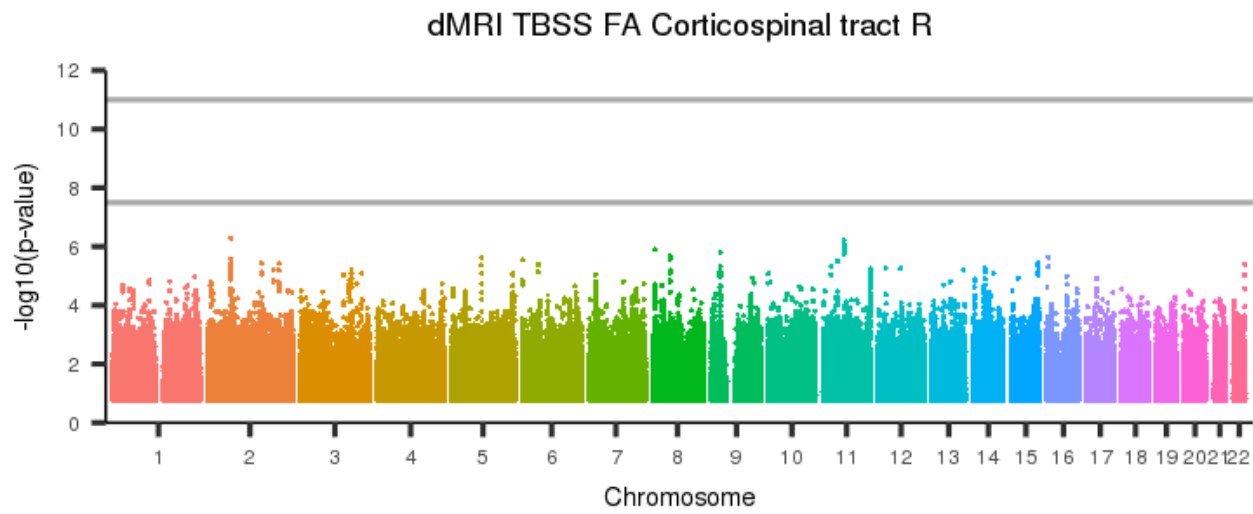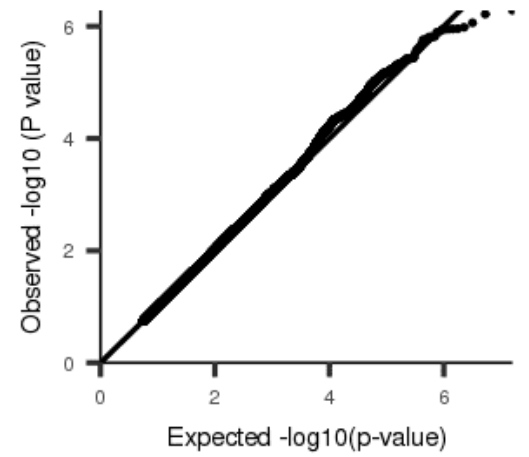

[back to list of plots](#)

Figure 203: dMRI TBSS FA Corticospinal tract L

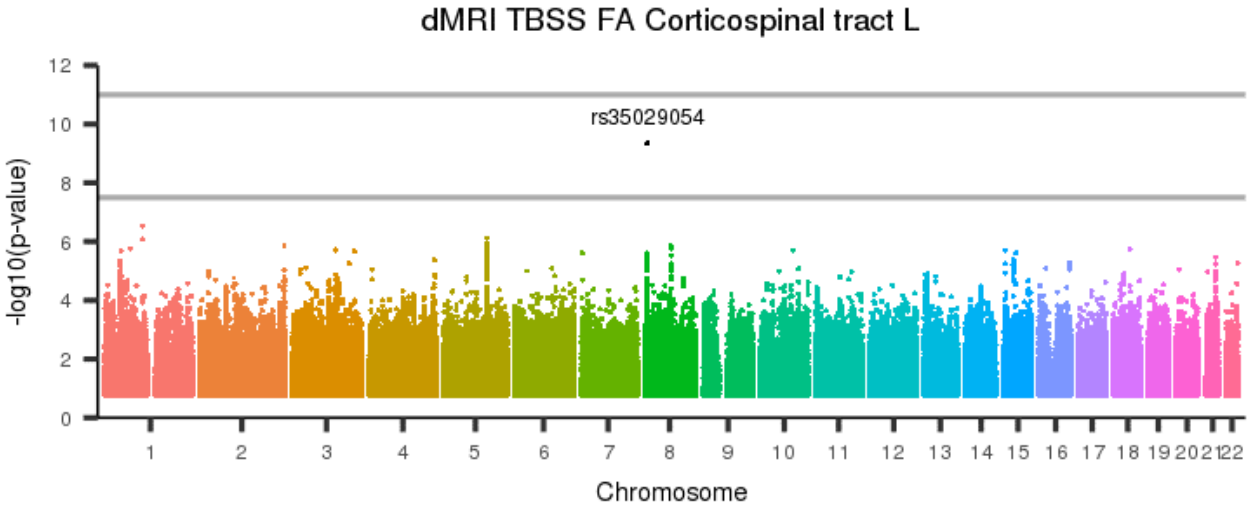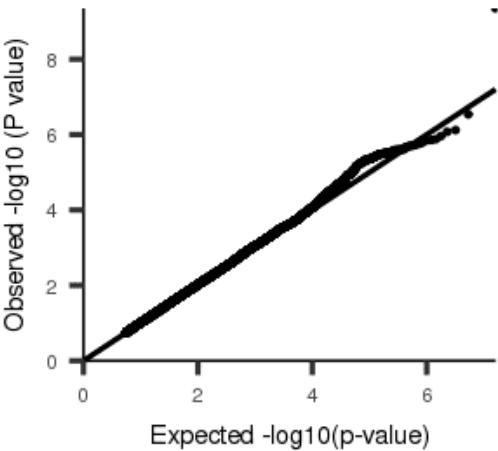

[back to list of plots](#)

Figure 204: dMRI TBSS FA Medial lemniscus R

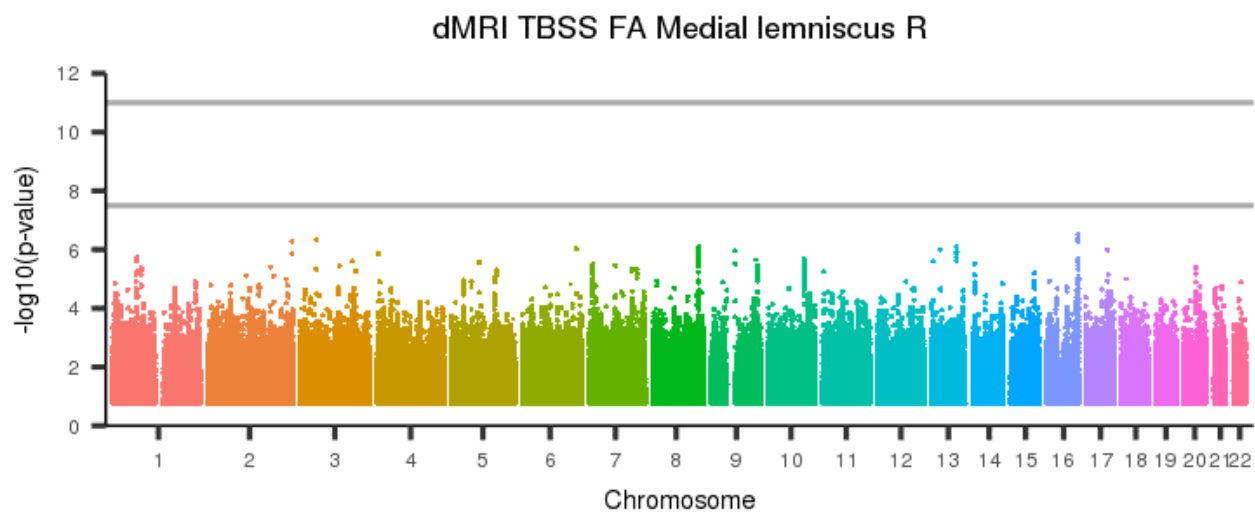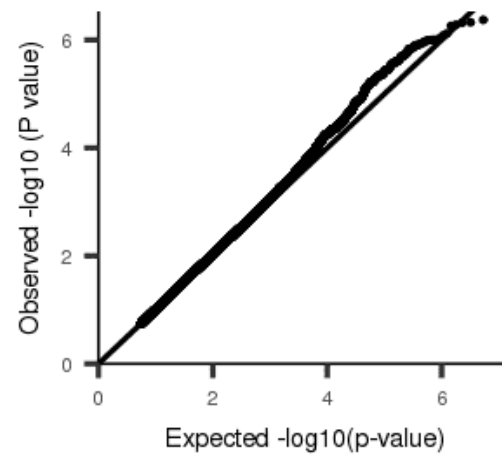

[back to list of plots](#)

Figure 205: dMRI TBSS FA Medial lemniscus L

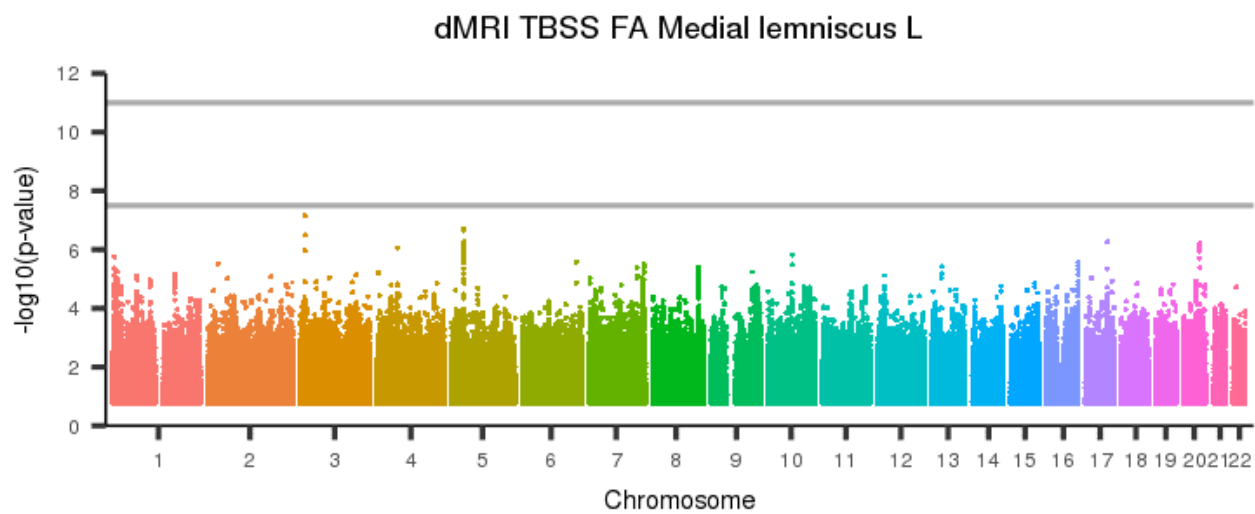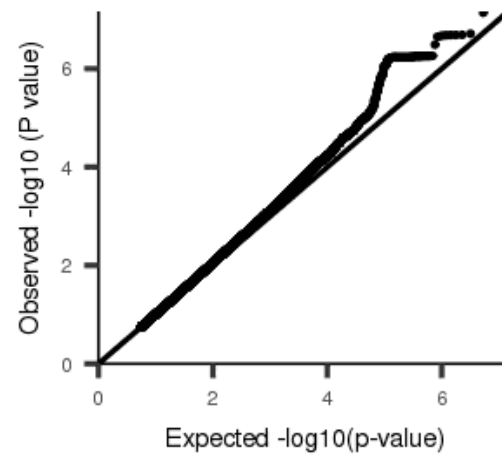

[back to list of plots](#)



Figure 206: dMRI TBSS FA Inferior cerebellar peduncle R

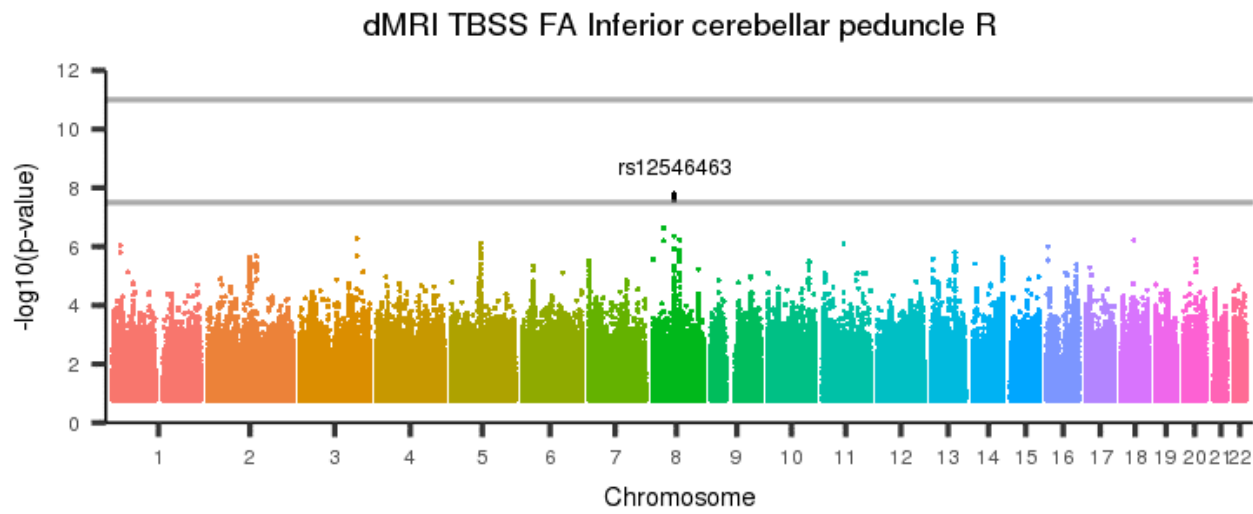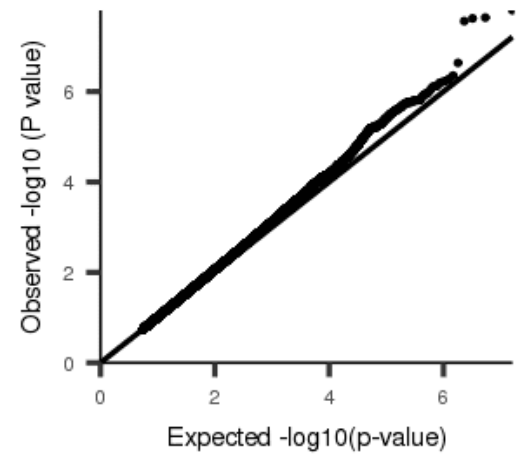

[back to list of plots](#)

Figure 207: dMRI TBSS FA Inferior cerebellar peduncle L

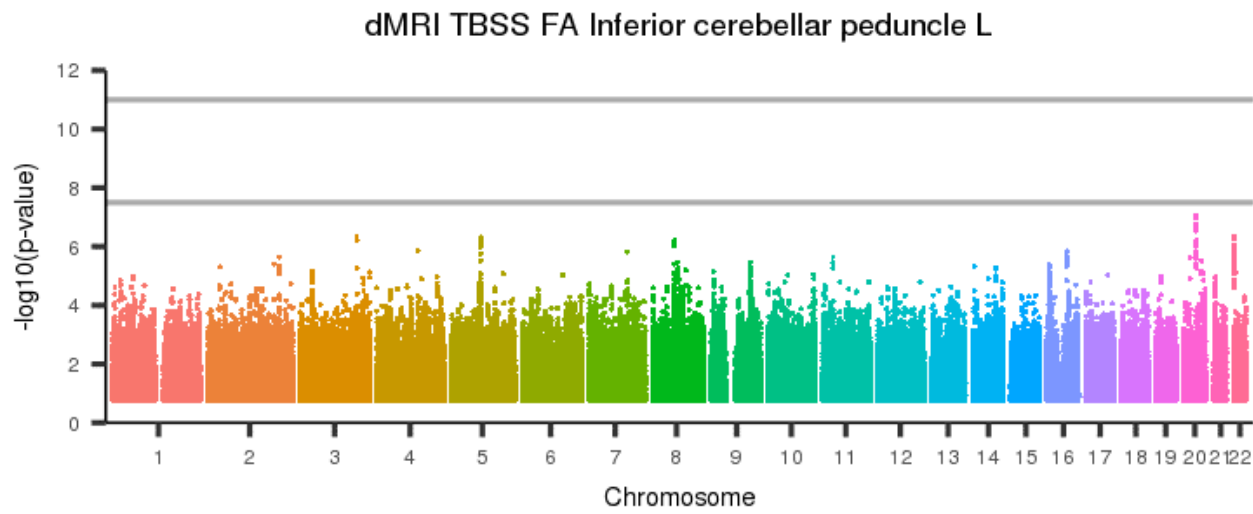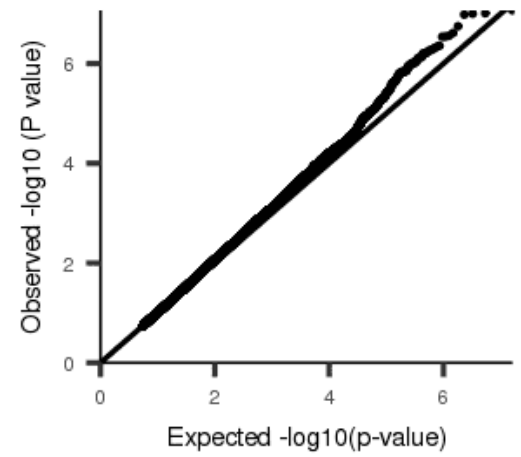

[back to list of plots](#)

Figure 208: dMRI TBSS FA Superior cerebellar peduncle R

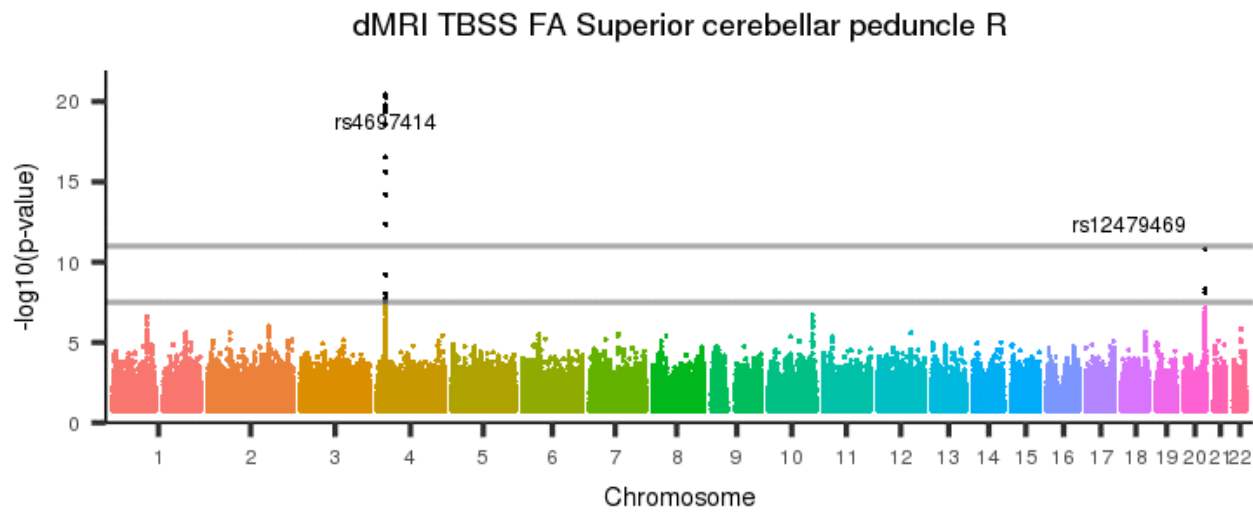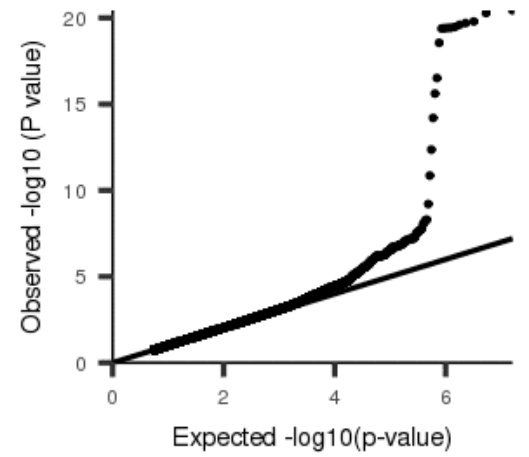

[back to list of plots](#)

Figure 209: dMRI TBSS FA Superior cerebellar peduncle L

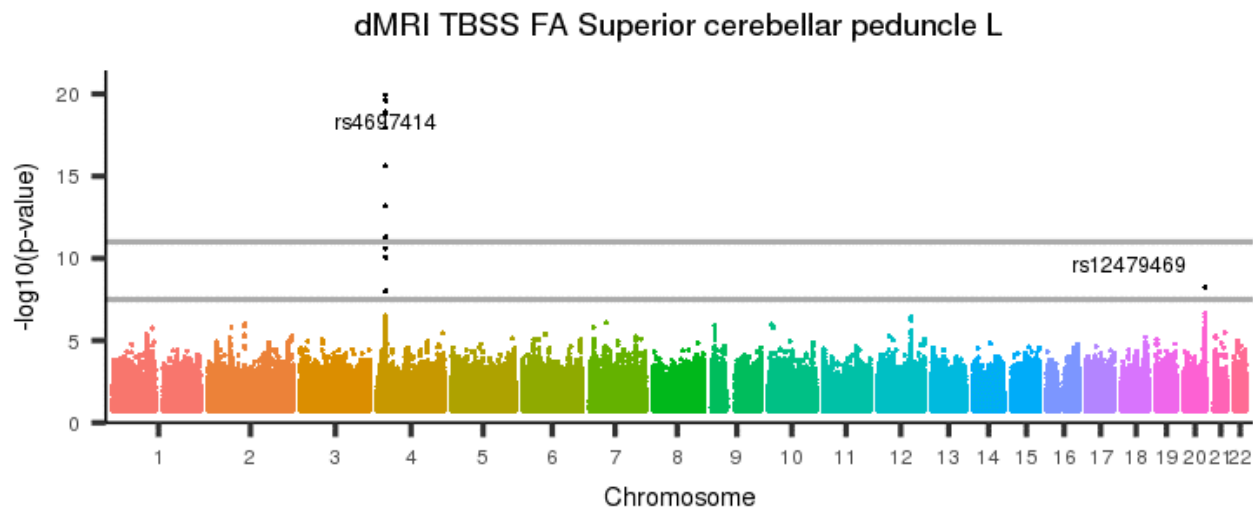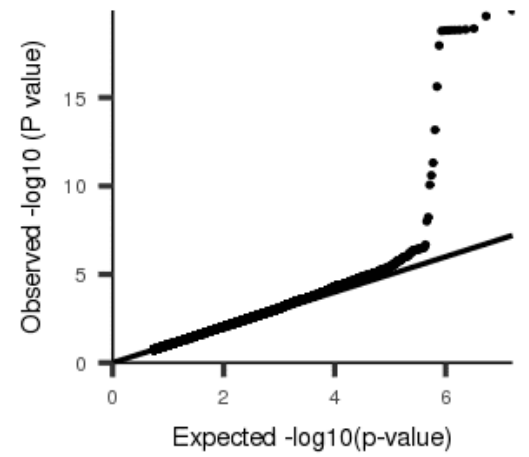

[back to list of plots](#)

Figure 210: dMRI TBSS FA Cerebral peduncle R

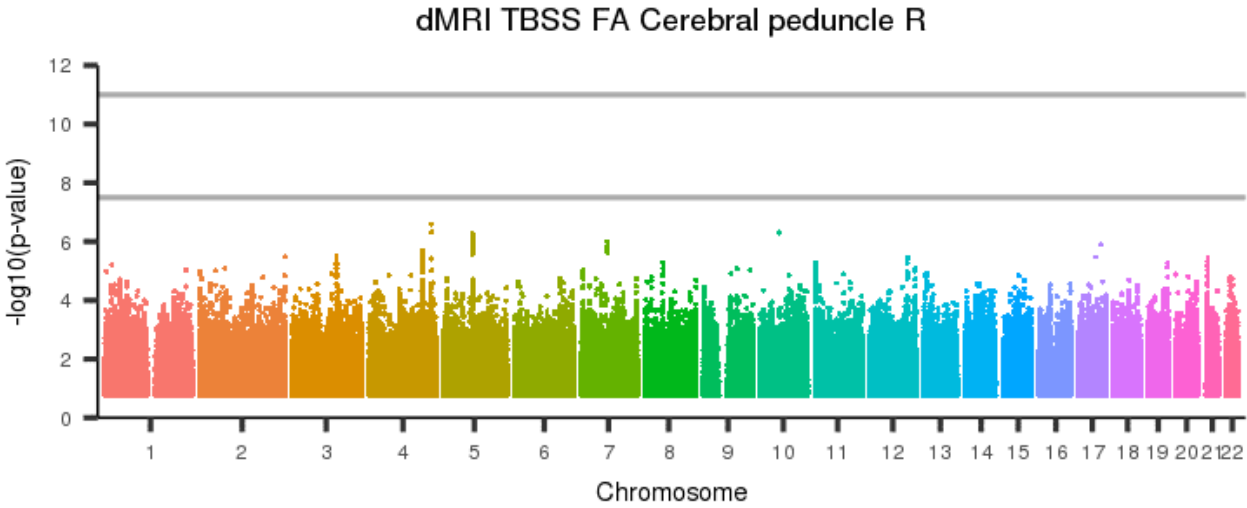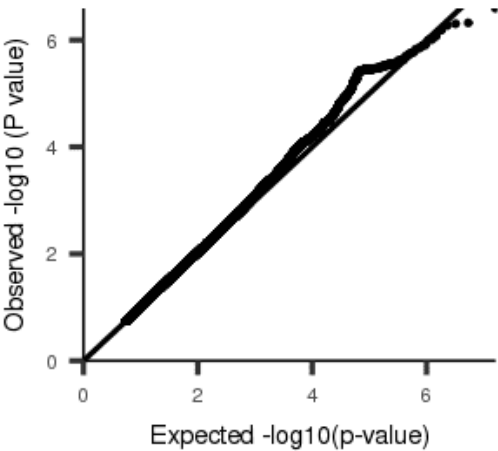

[back to list of plots](#)

Figure 211: dMRI TBSS FA Cerebral peduncle L

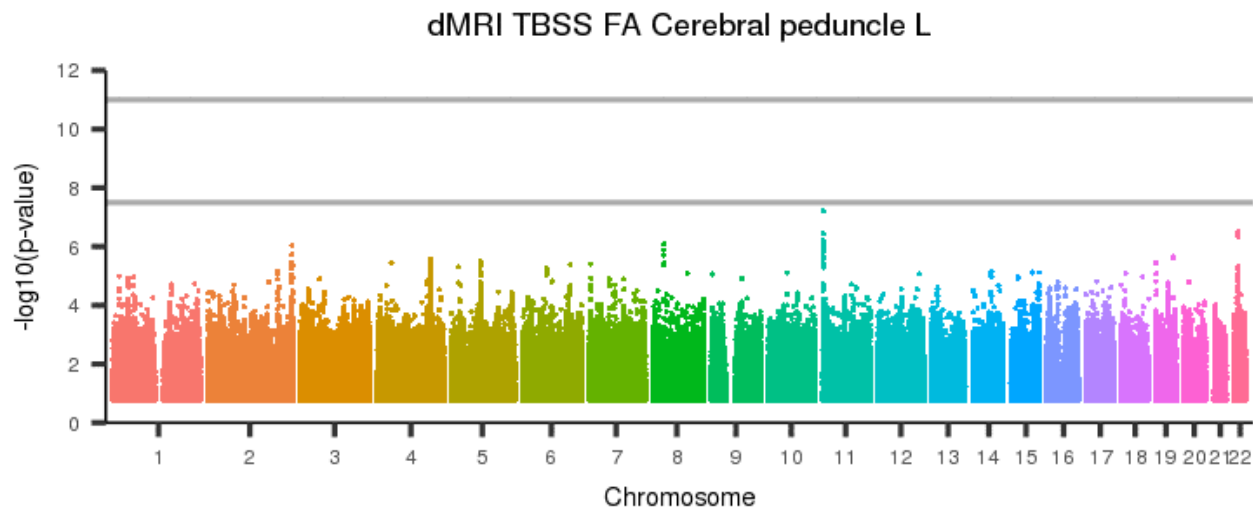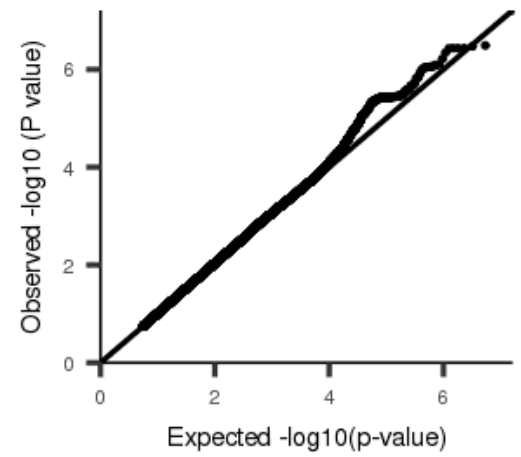

[back to list of plots](#)

Figure 212: dMRI TBSS FA Anterior limb of internal capsule R

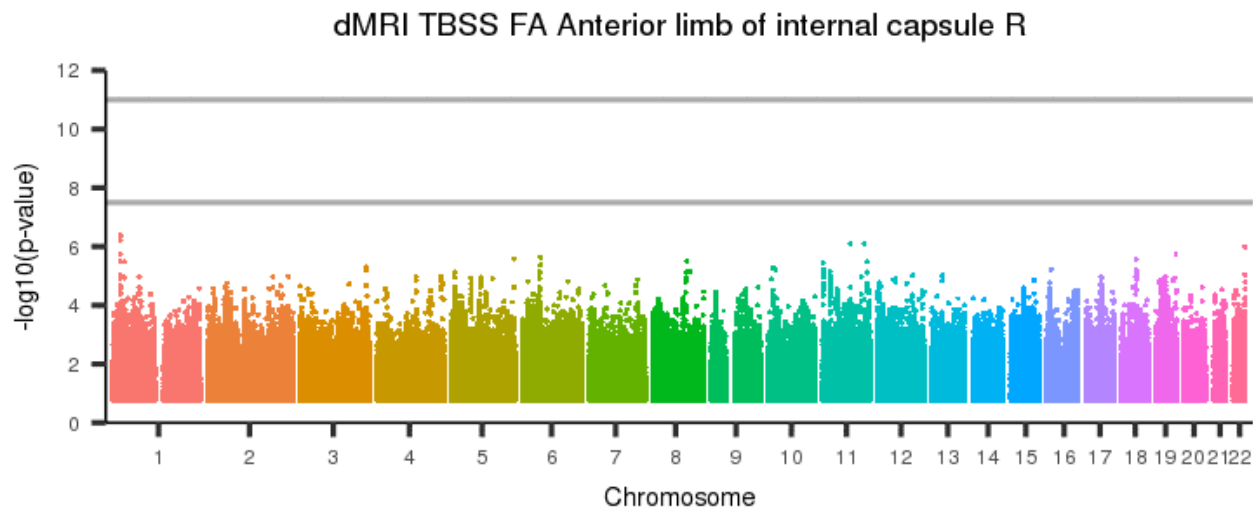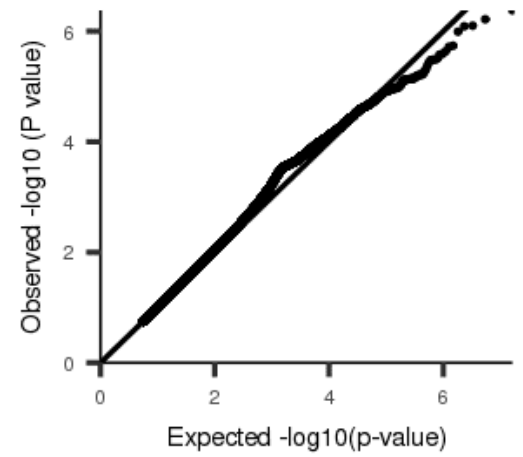

[back to list of plots](#)

Figure 213: dMRI TBSS FA Anterior limb of internal capsule L

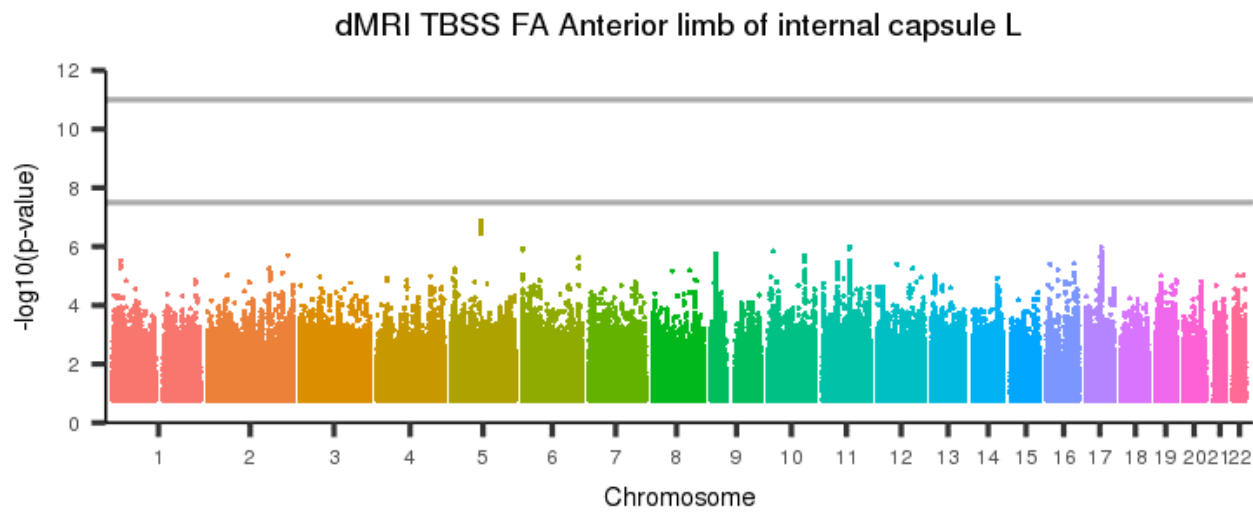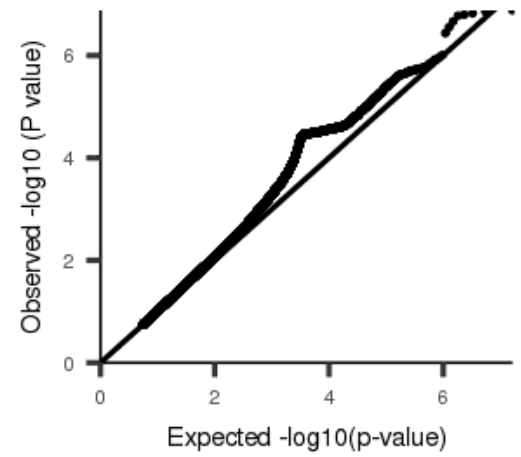

[back to list of plots](#)



Figure 214: dMRI TBSS FA Posterior limb of internal capsule R

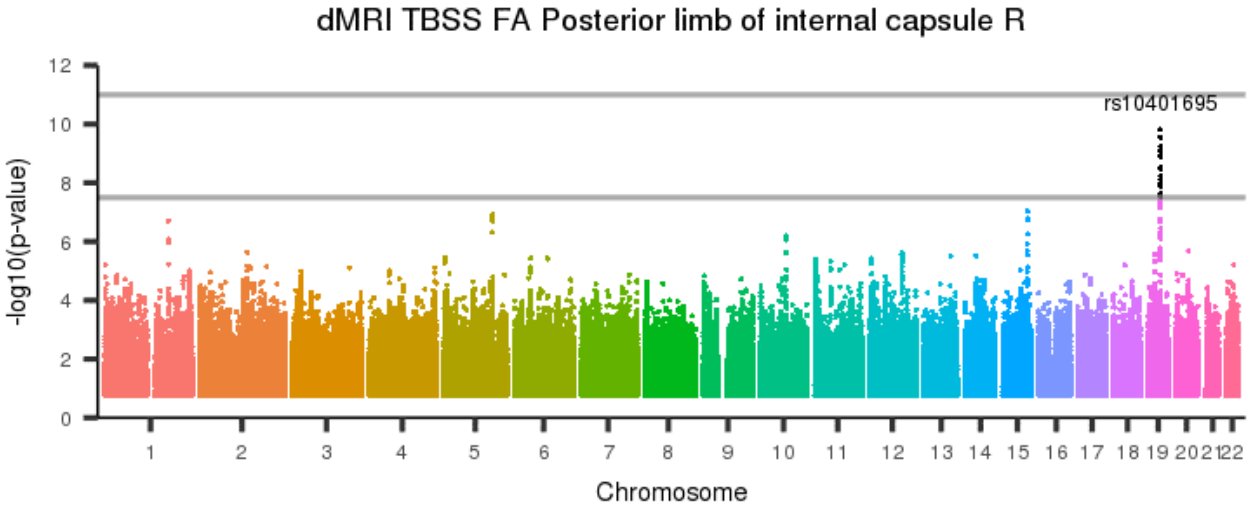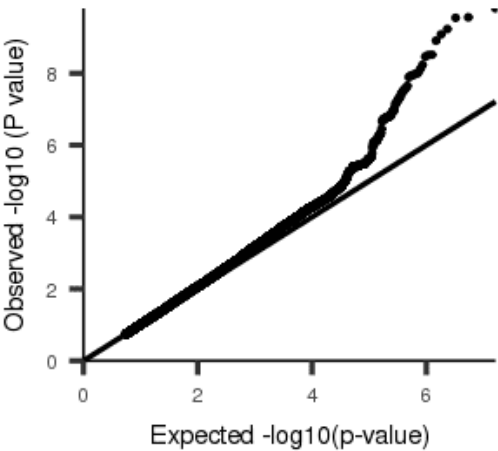

[back to list of plots](#)

Figure 215: dMRI TBSS FA Posterior limb of internal capsule L

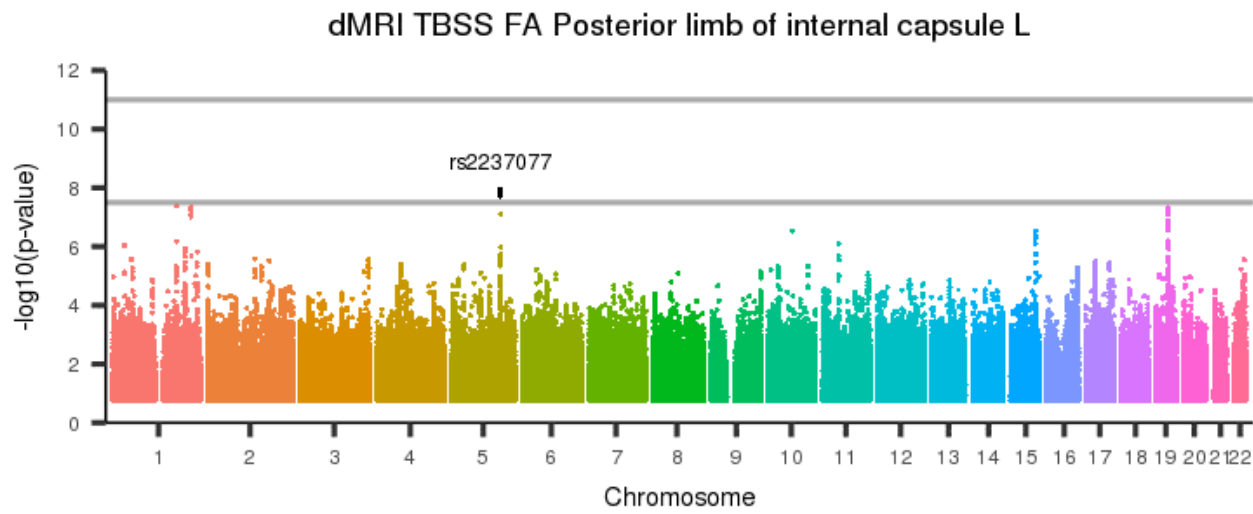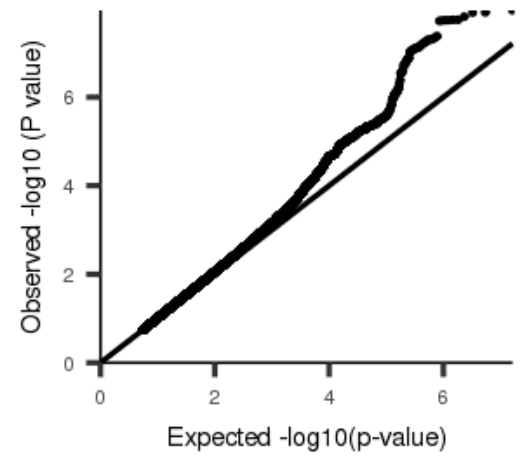

[back to list of plots](#)

Figure 216: dMRI TBSS FA Retrolesional part of internal capsule R

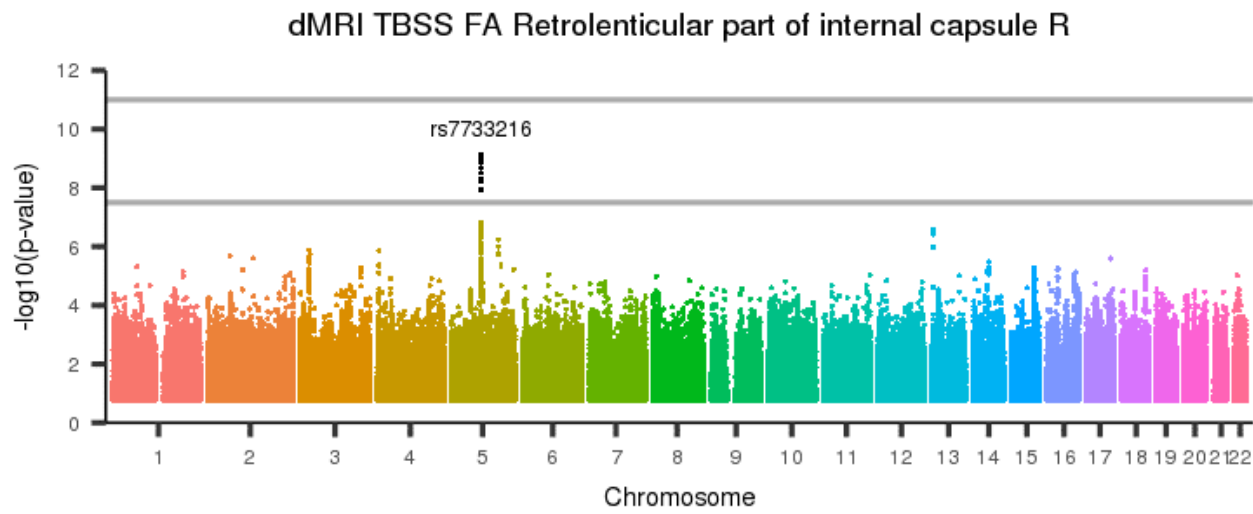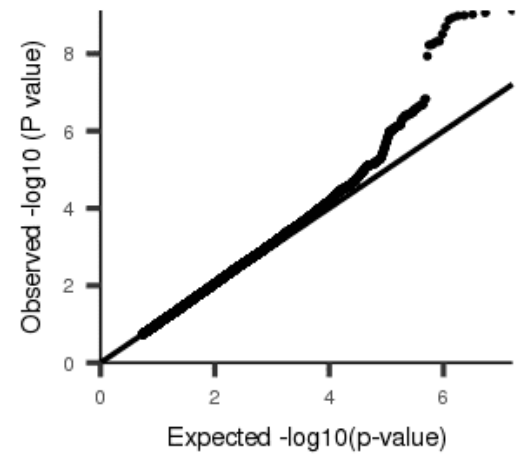

[back to list of plots](#)

Figure 217: dMRI TBSS FA Retrolesional part of internal capsule L

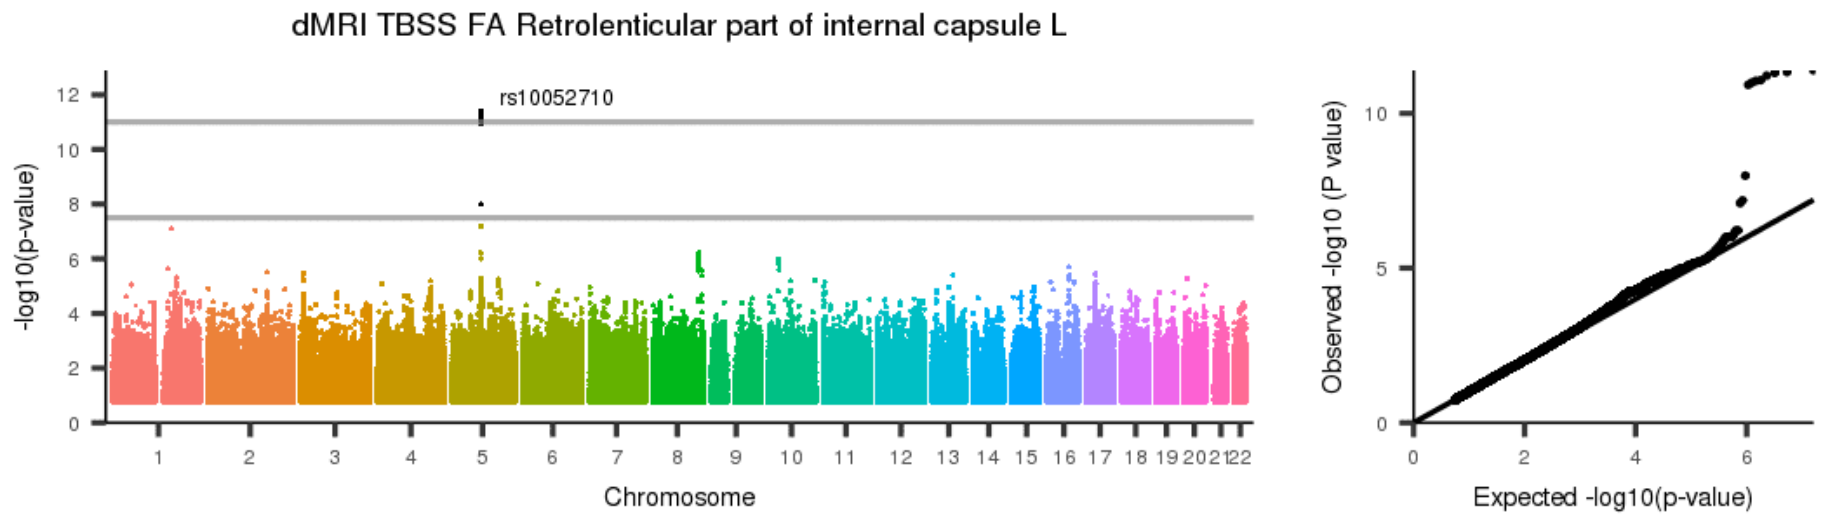

[back to list of plots](#)

Figure 218: dMRI TBSS FA Anterior corona radiata R

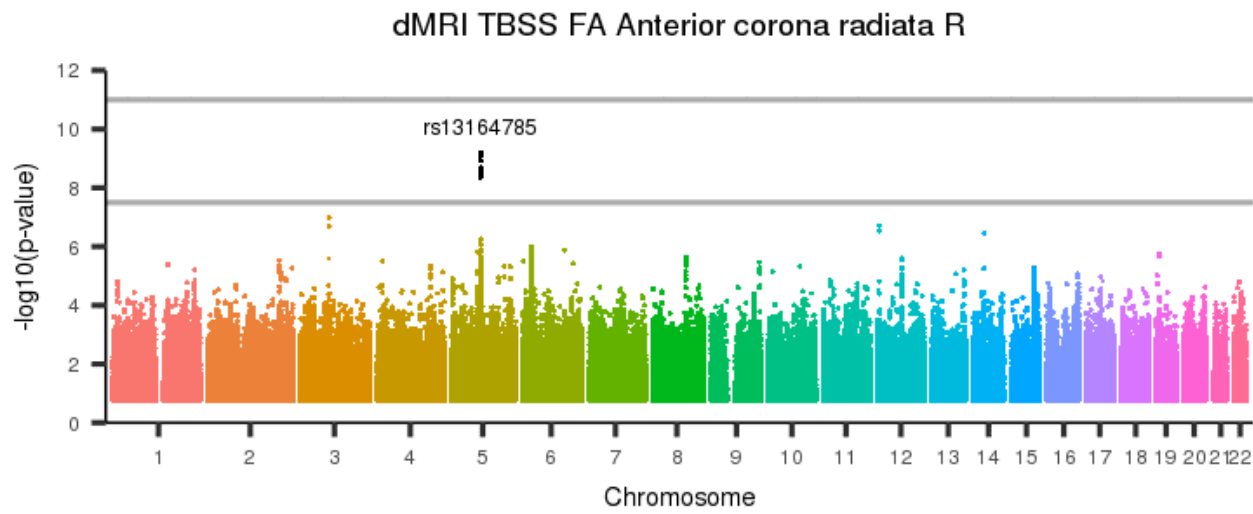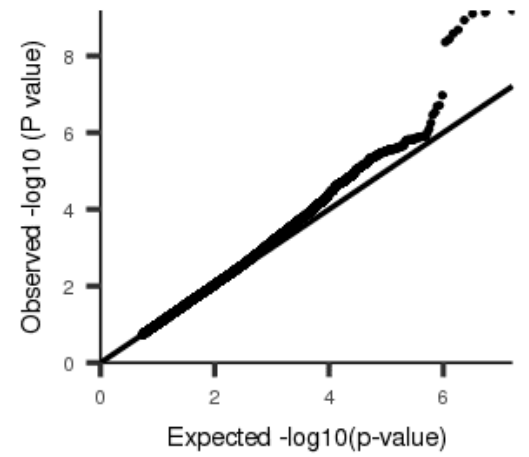

[back to list of plots](#)

Figure 219: dMRI TBSS FA Anterior corona radiata L

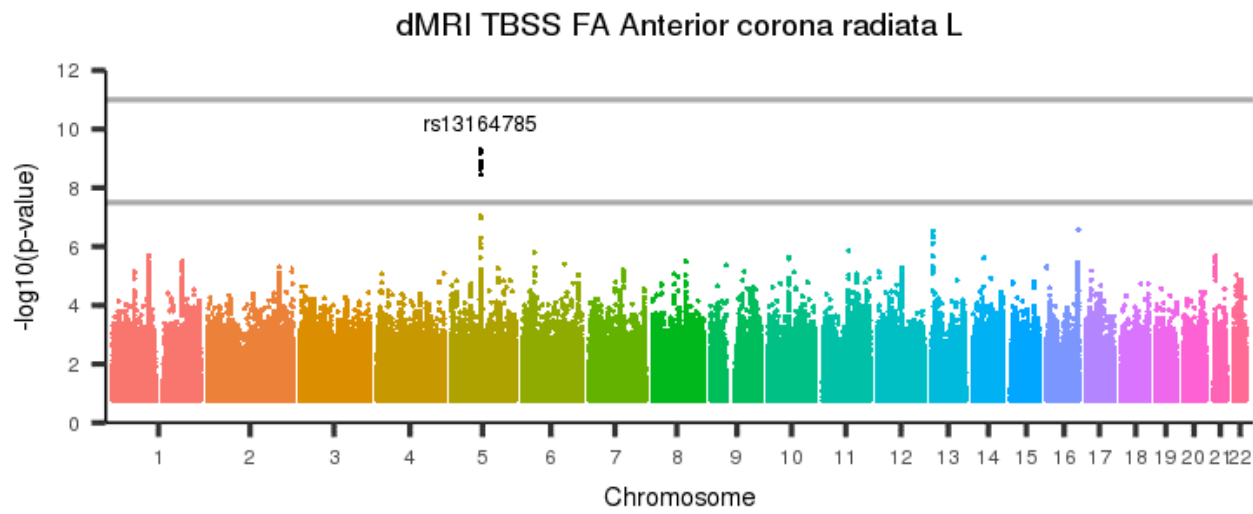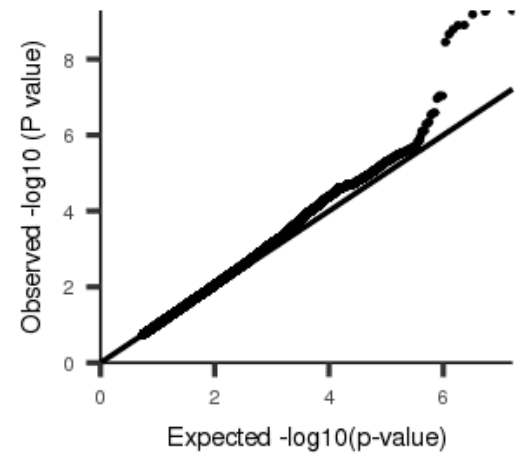

[back to list of plots](#)

Figure 220: dMRI TBSS FA Superior corona radiata R

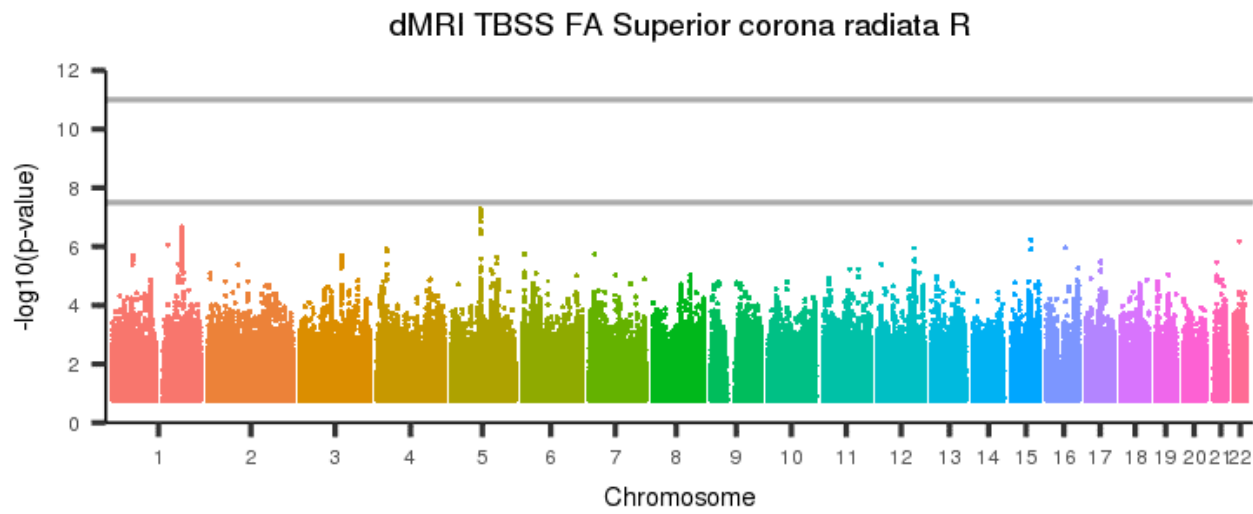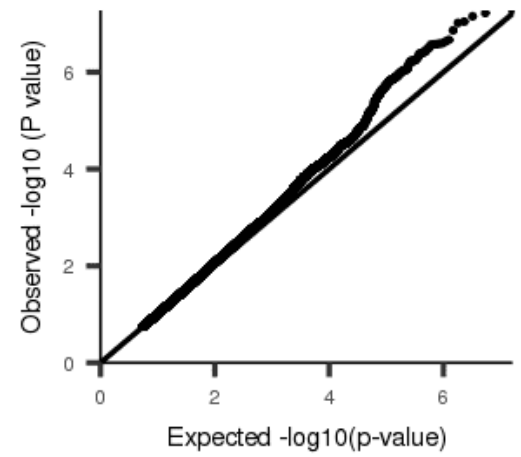

[back to list of plots](#)

Figure 221: dMRI TBSS FA Superior corona radiata L

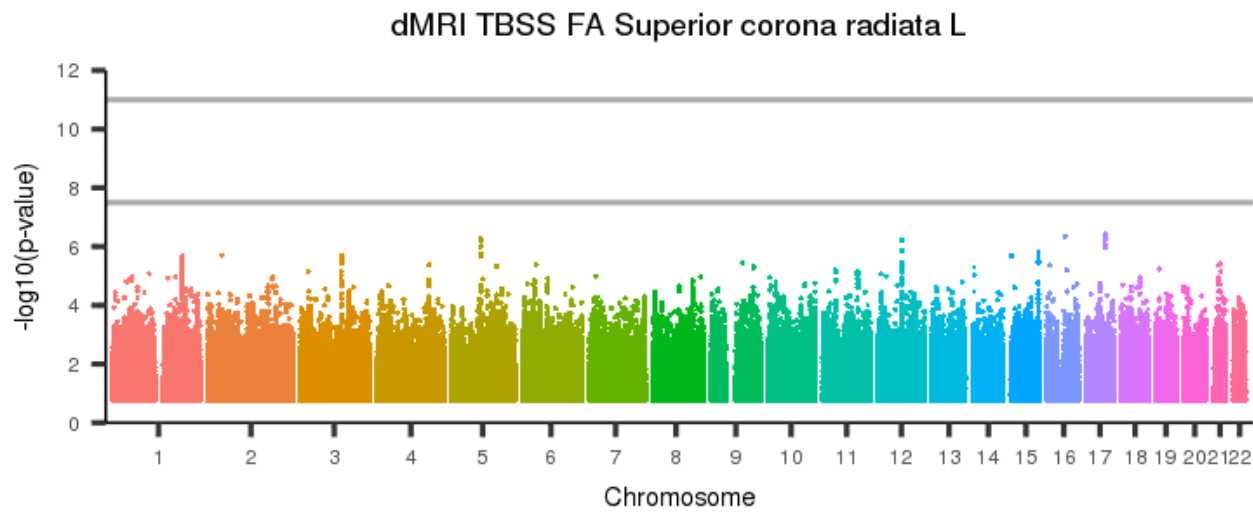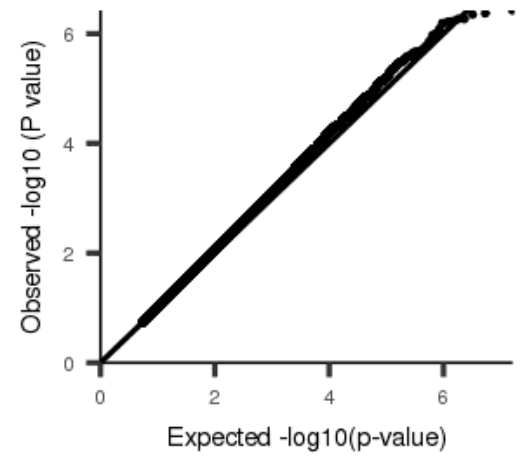

[back to list of plots](#)



Figure 222: dMRI TBSS FA Posterior corona radiata R

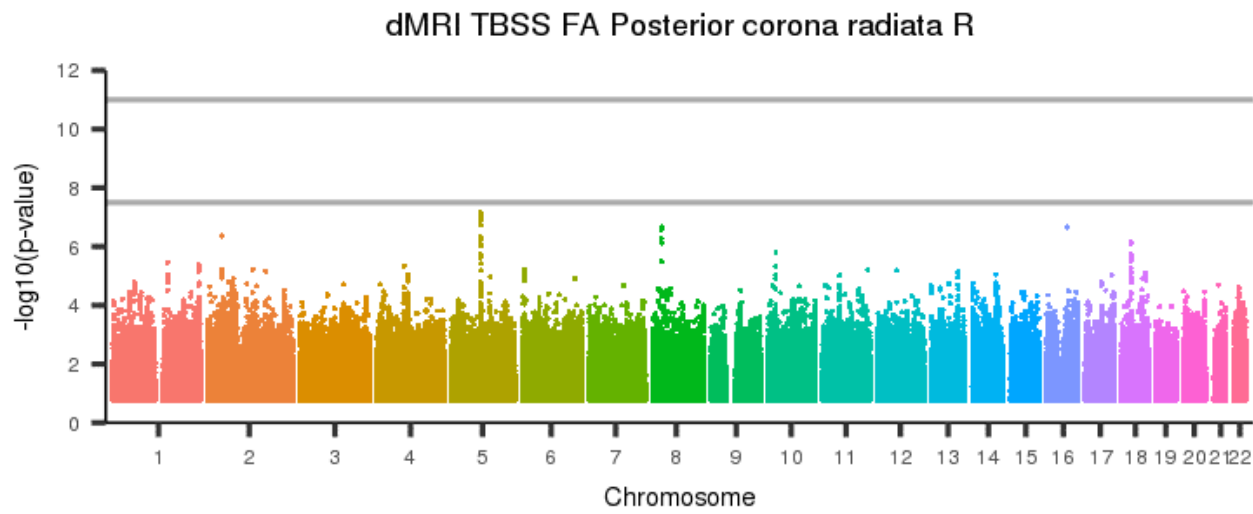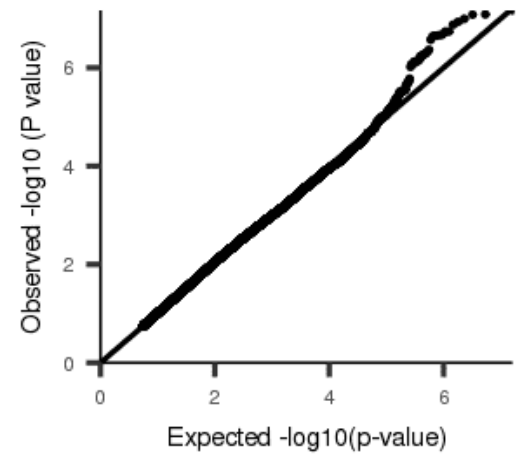

[back to list of plots](#)

Figure 223: dMRI TBSS FA Posterior corona radiata L

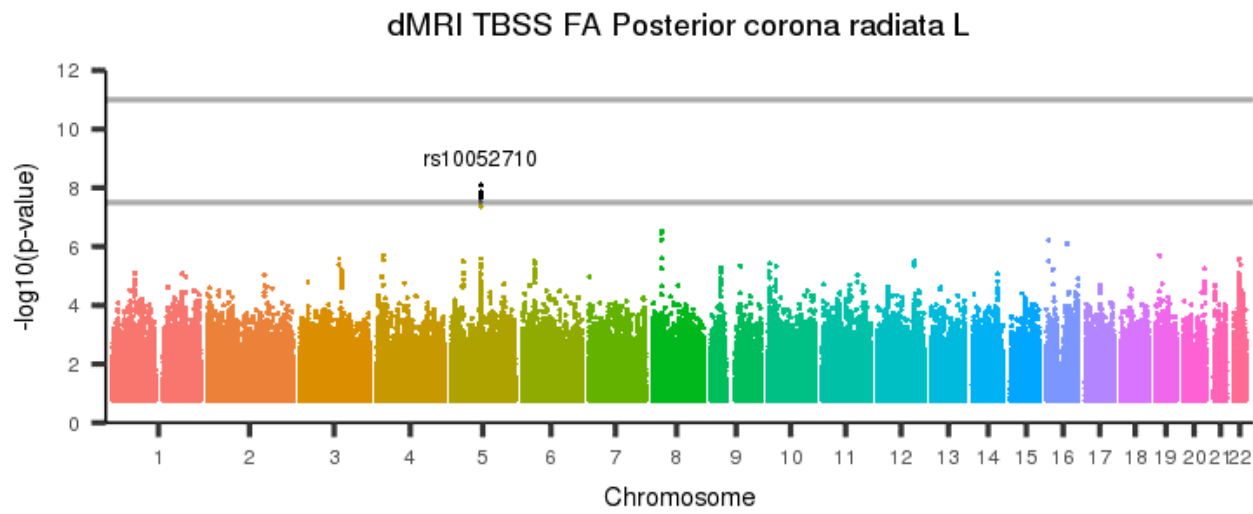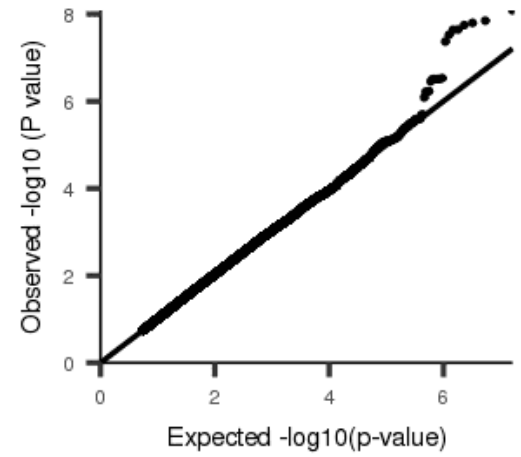

[back to list of plots](#)

Figure 224: dMRI TBSS FA Posterior thalamic radiation R

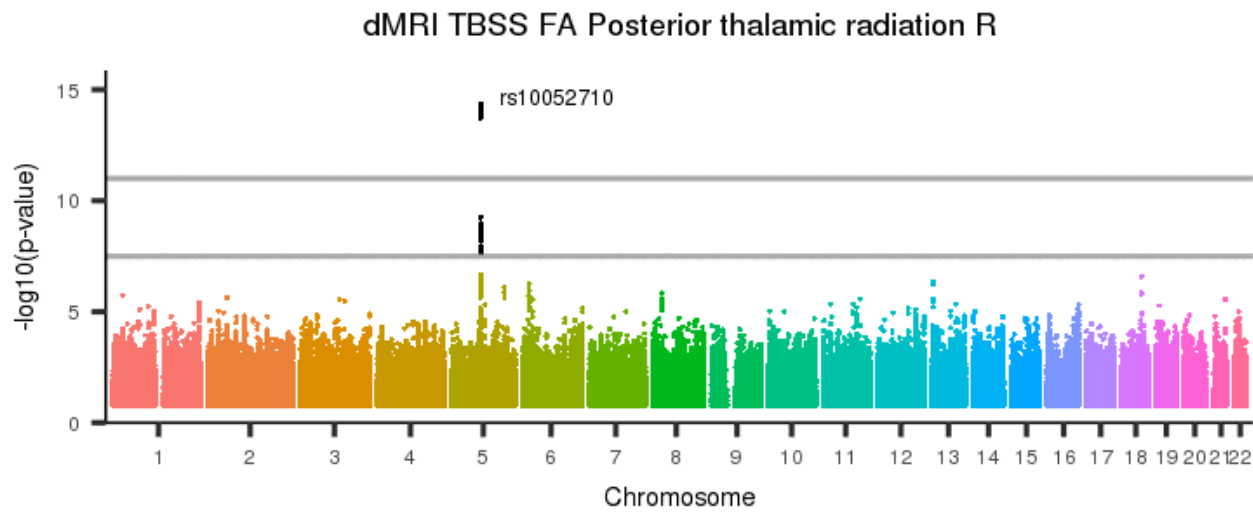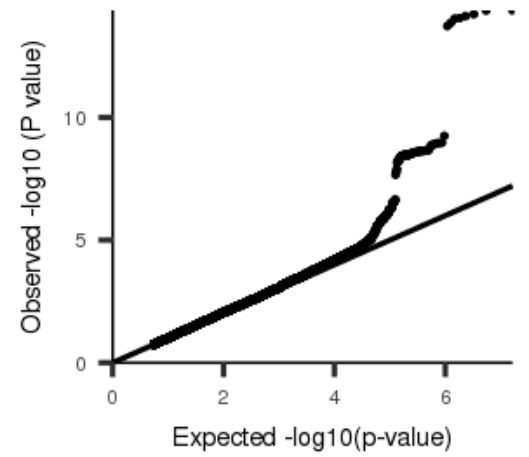

[back to list of plots](#)

Figure 225: dMRI TBSS FA Posterior thalamic radiation L

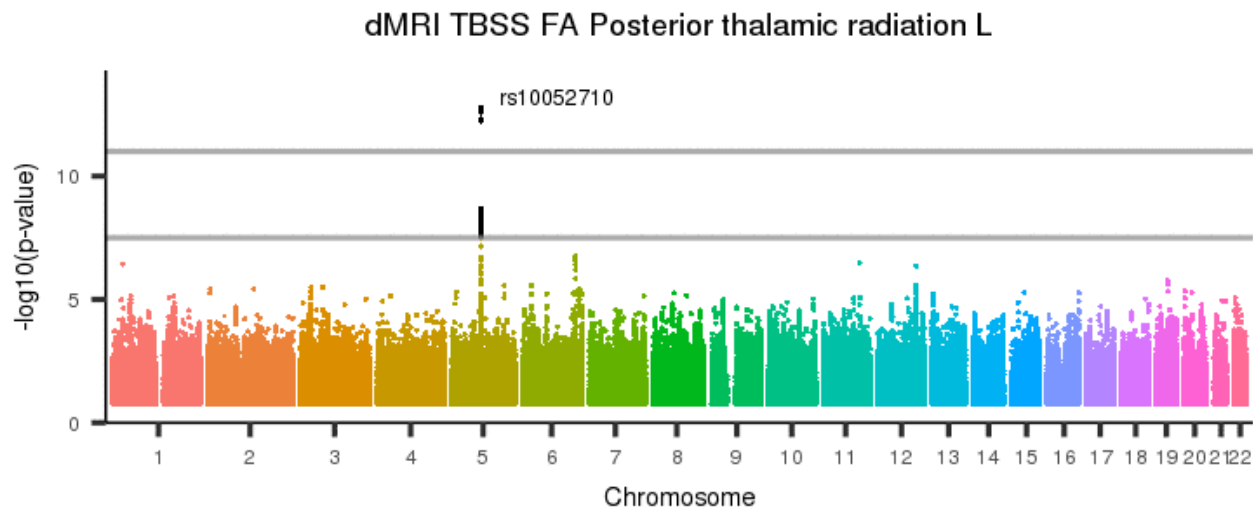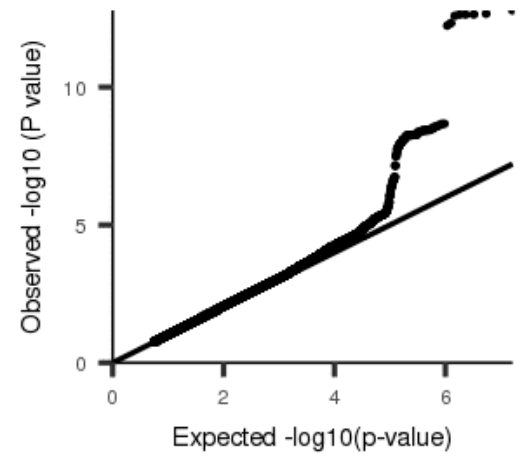

[back to list of plots](#)

Figure 226: dMRI TBSS FA Sagittal stratum R

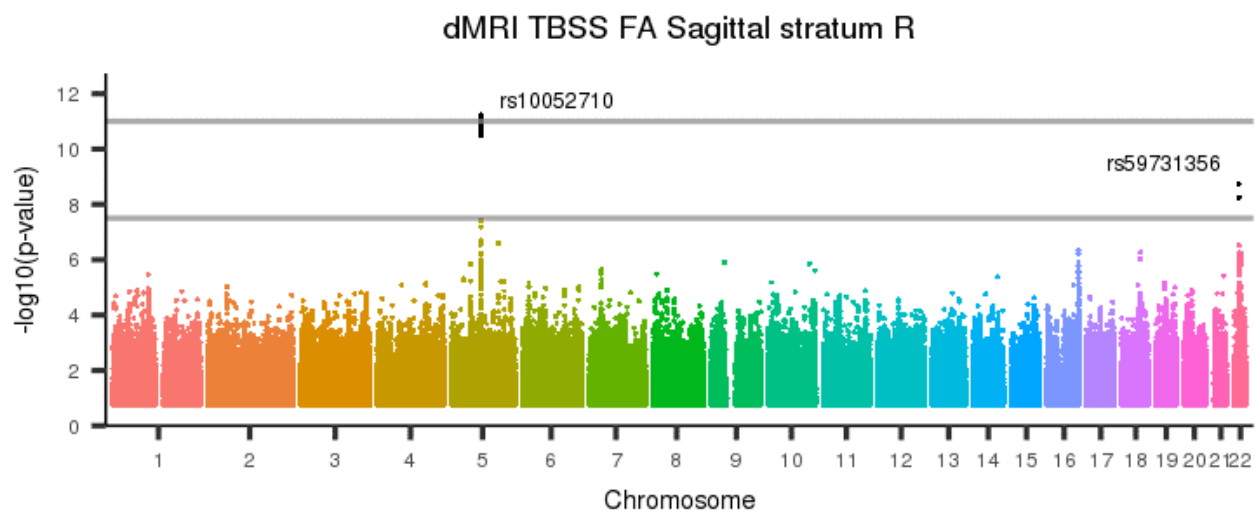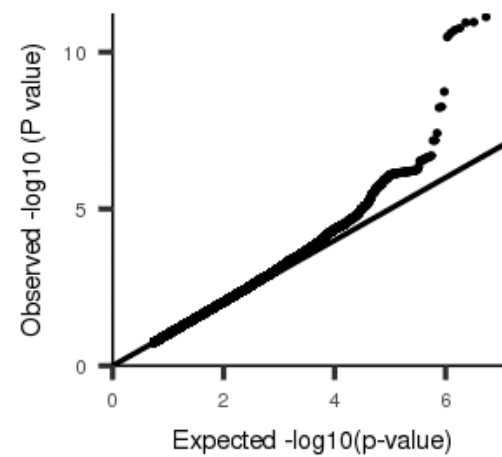

[back to list of plots](#)

Figure 227: dMRI TBSS FA Sagittal stratum L

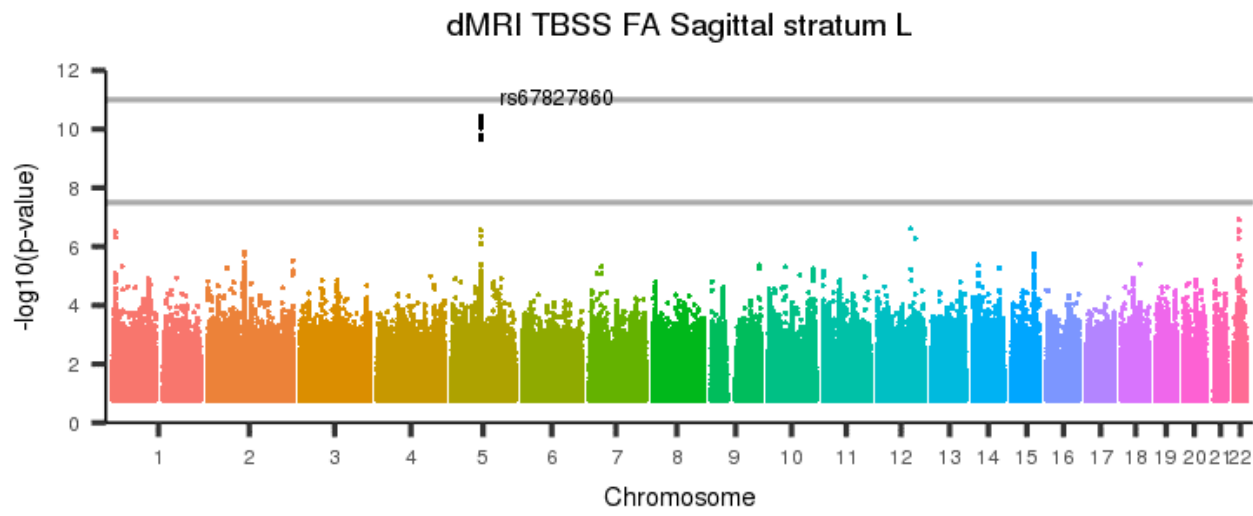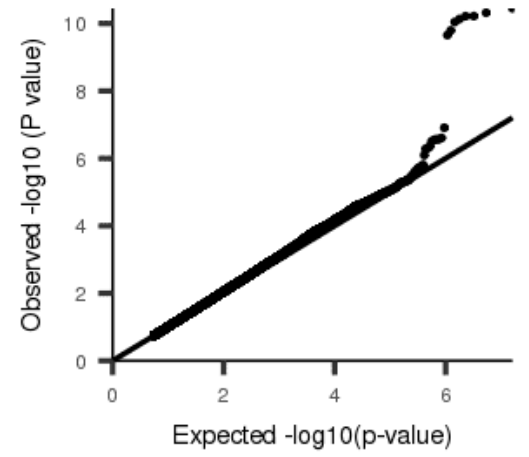

[back to list of plots](#)

Figure 228: dMRI TBSS FA External capsule R

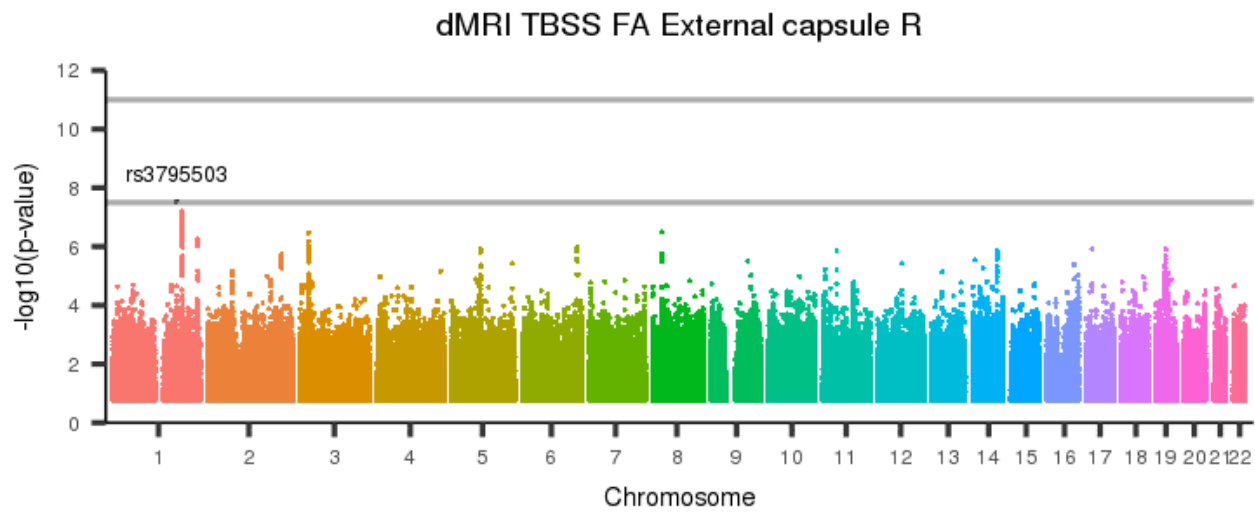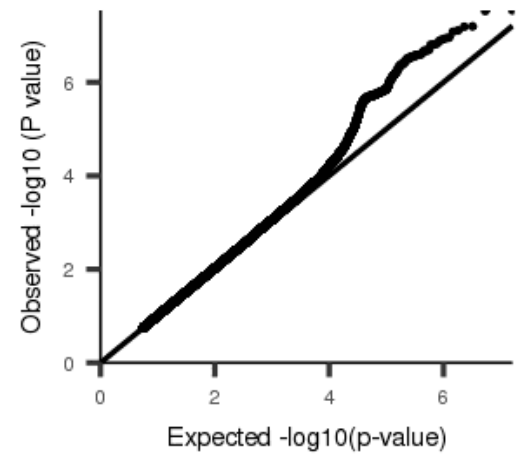

[back to list of plots](#)

Figure 229: dMRI TBSS FA External capsule L

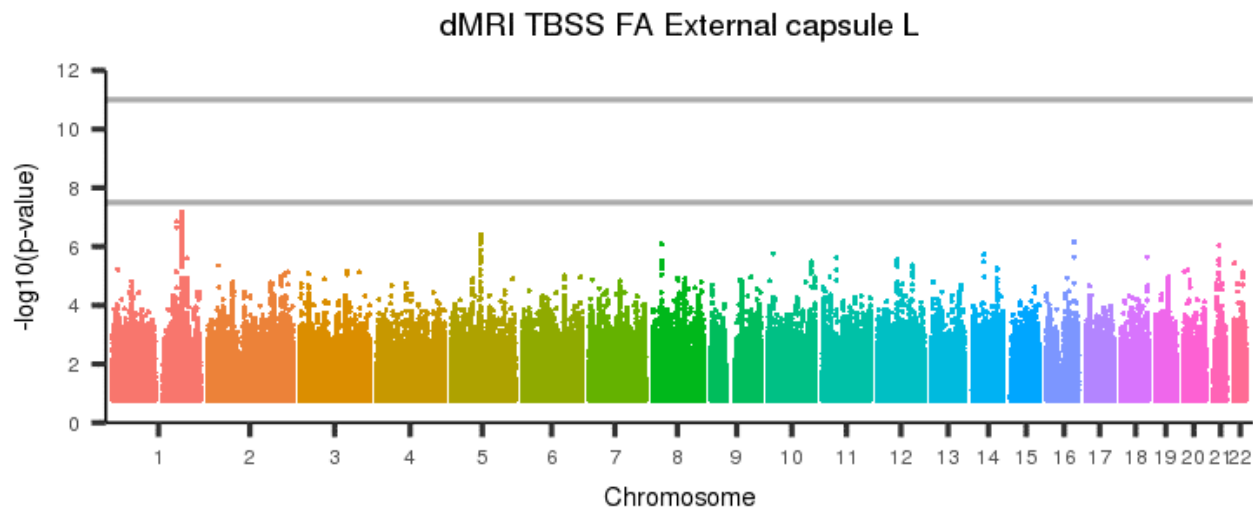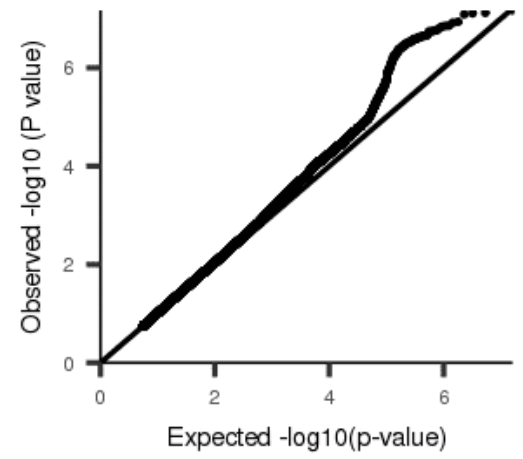

[back to list of plots](#)



Figure 230: dMRI TBSS FA Cingulum cingulate gyrus R

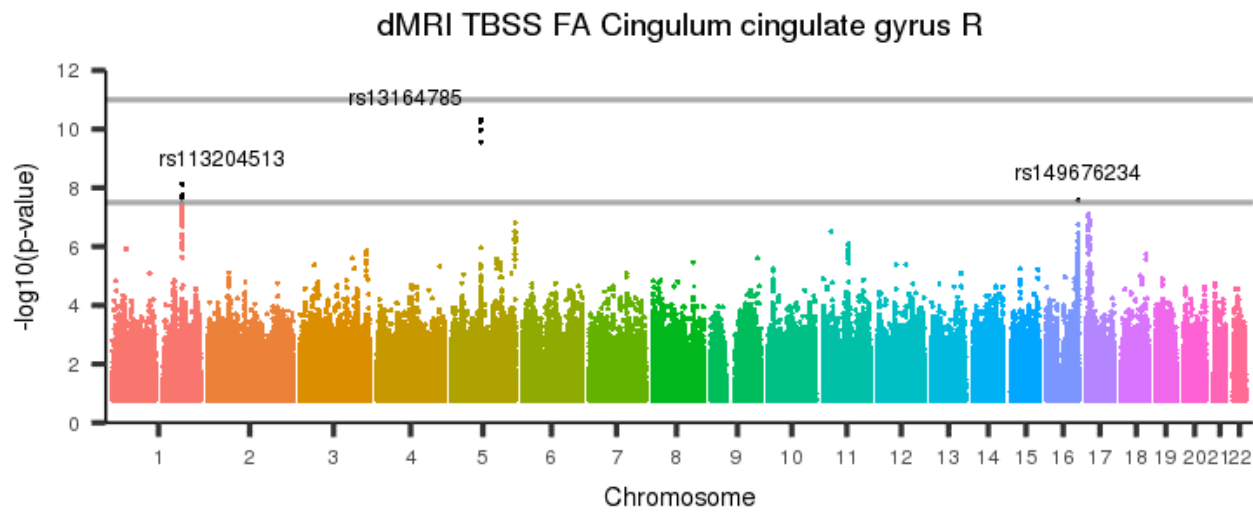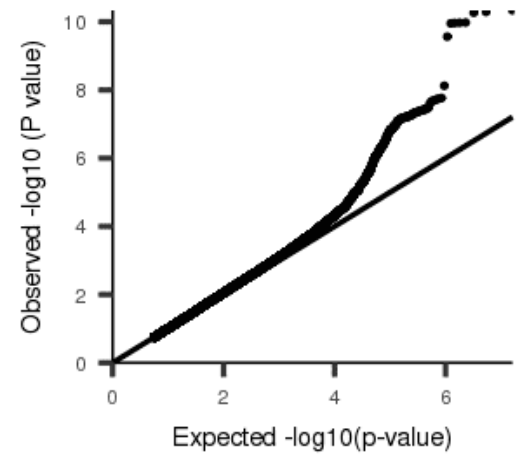

[back to list of plots](#)

Figure 231: dMRI TBSS FA Cingulum cingulate gyrus L

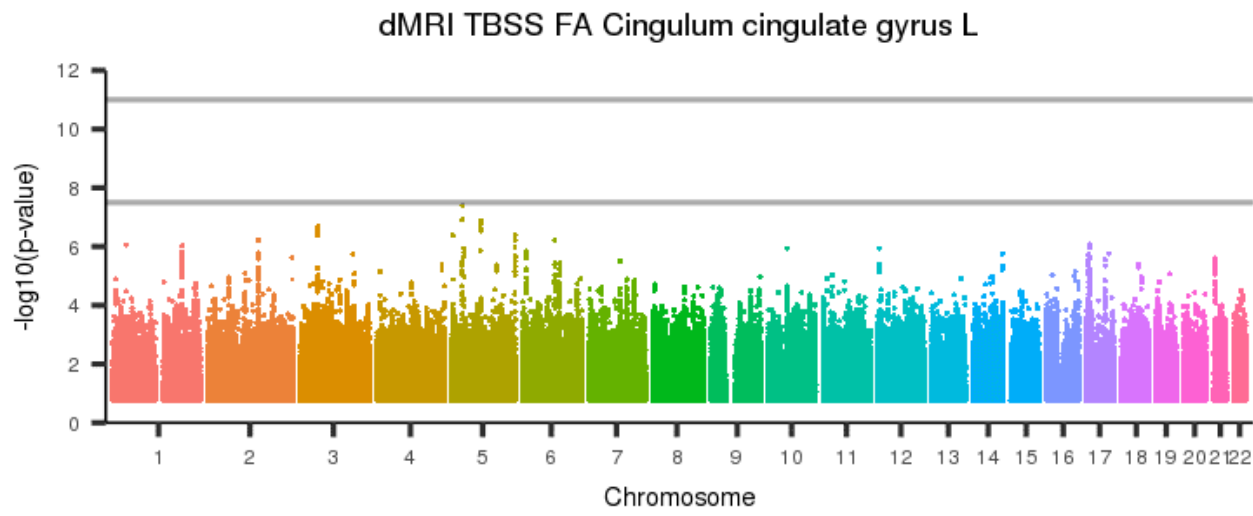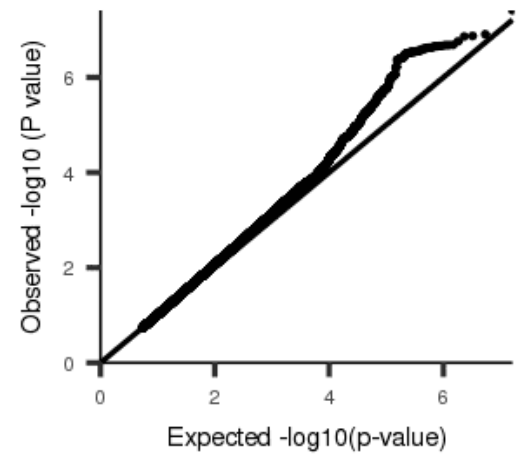

[back to list of plots](#)

Figure 232: dMRI TBSS FA Cingulum hippocampus R

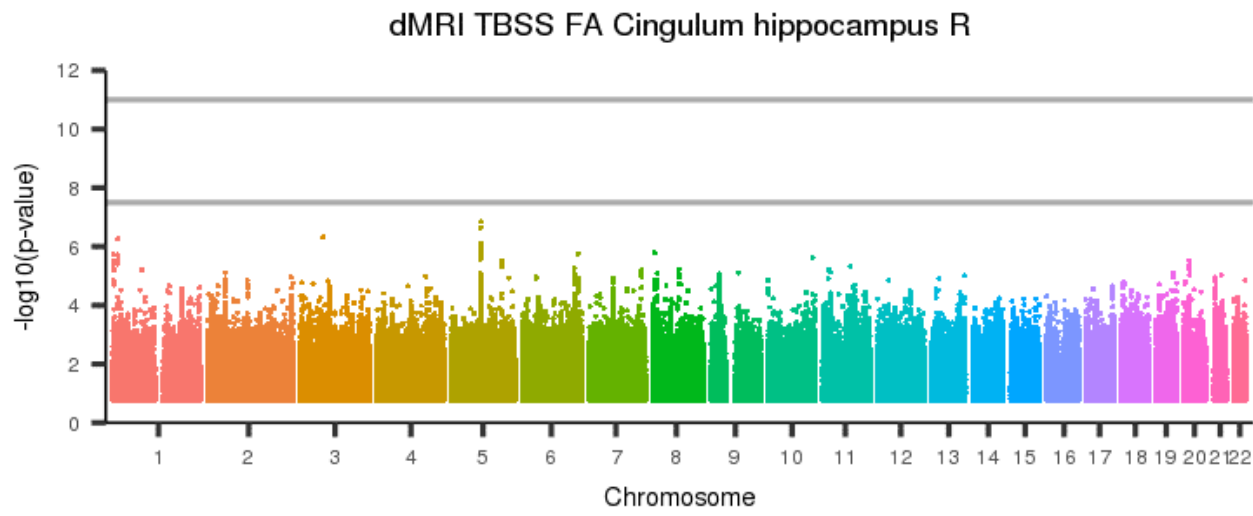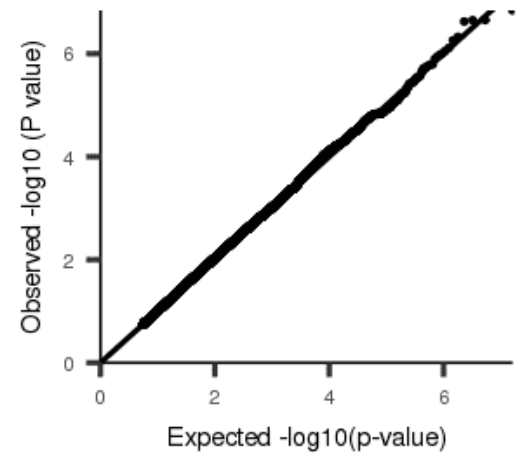

[back to list of plots](#)

Figure 233: dMRI TBSS FA Cingulum hippocampus L

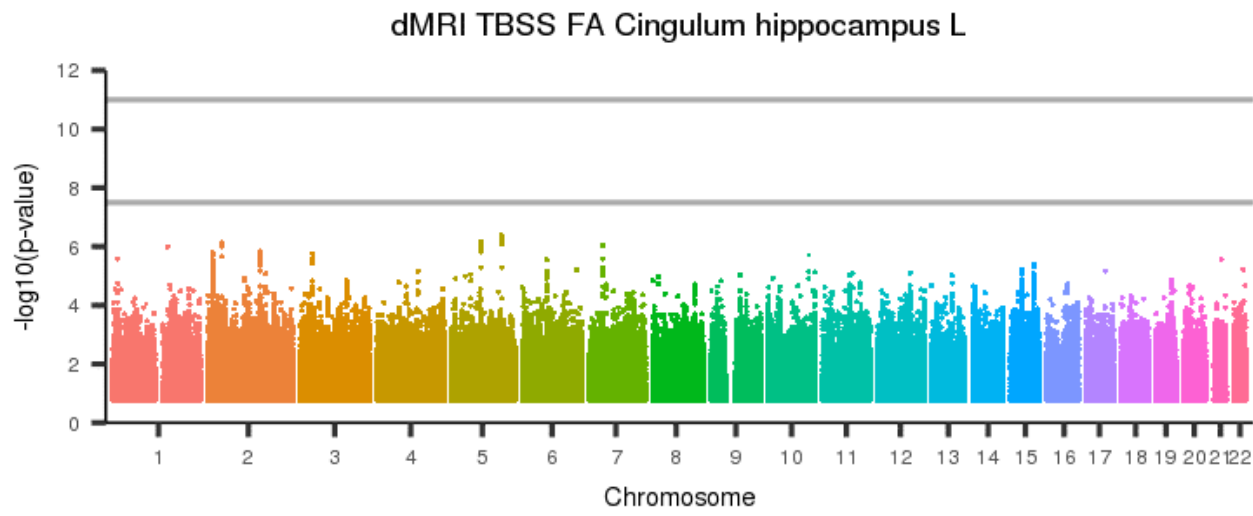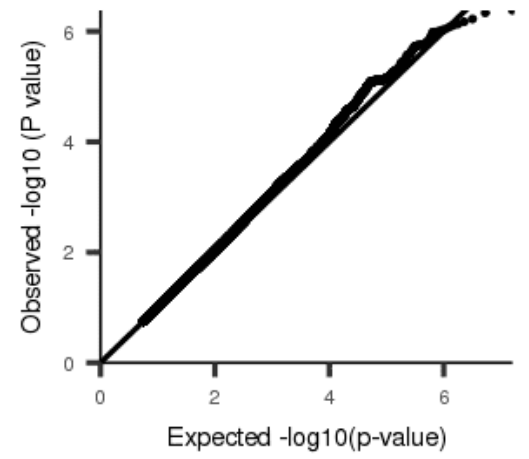

[back to list of plots](#)

Figure 234: dMRI TBSS FA Fornix cres+Stria terminalis R

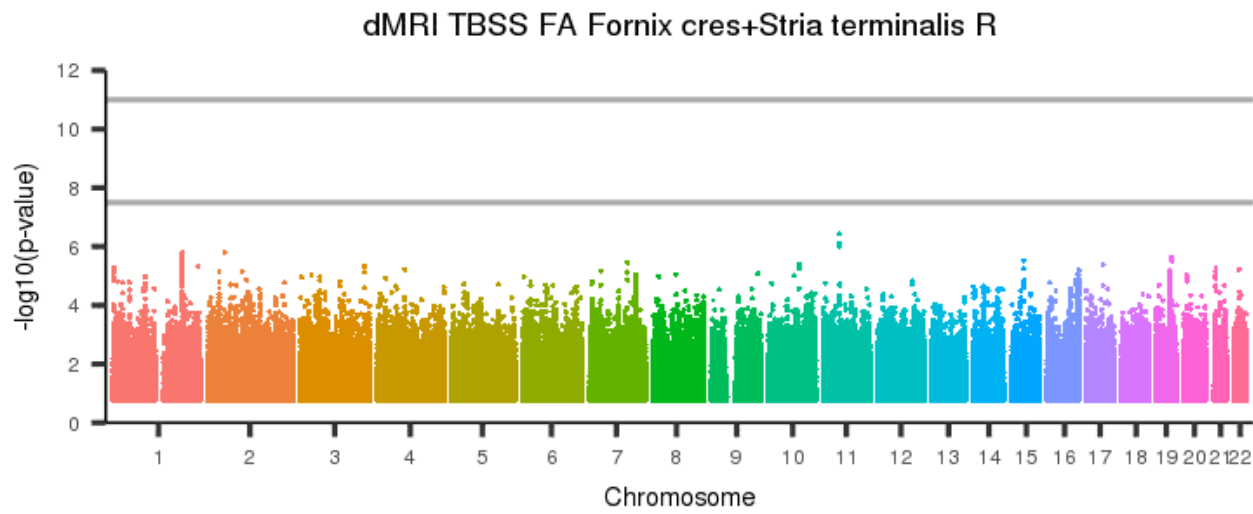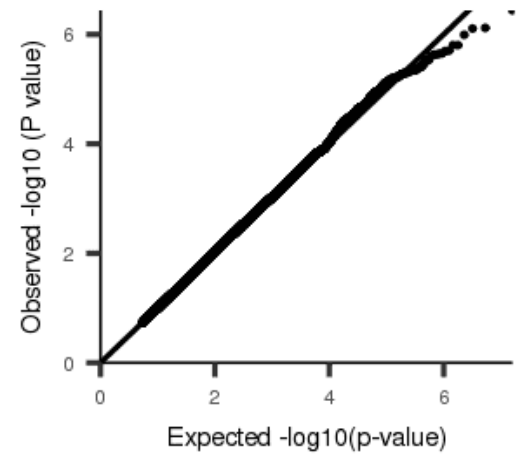

[back to list of plots](#)

Figure 235: dMRI TBSS FA Fornix cres+Stria terminalis L

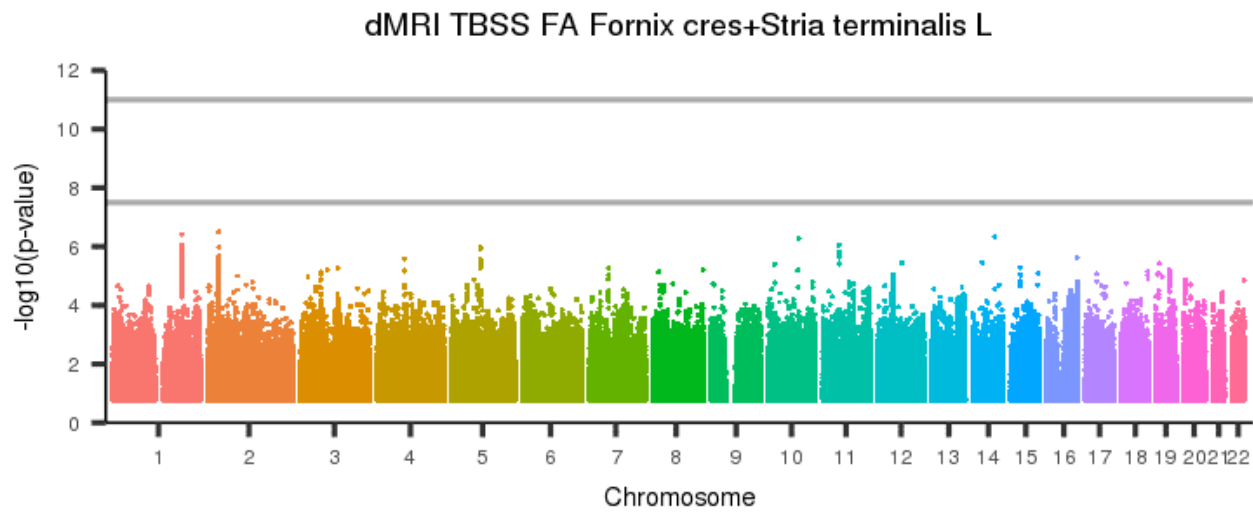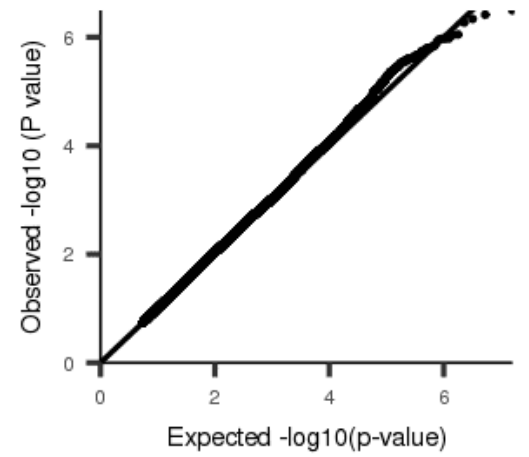

[back to list of plots](#)

Figure 236: dMRI TBSS FA Superior longitudinal fasciculus R

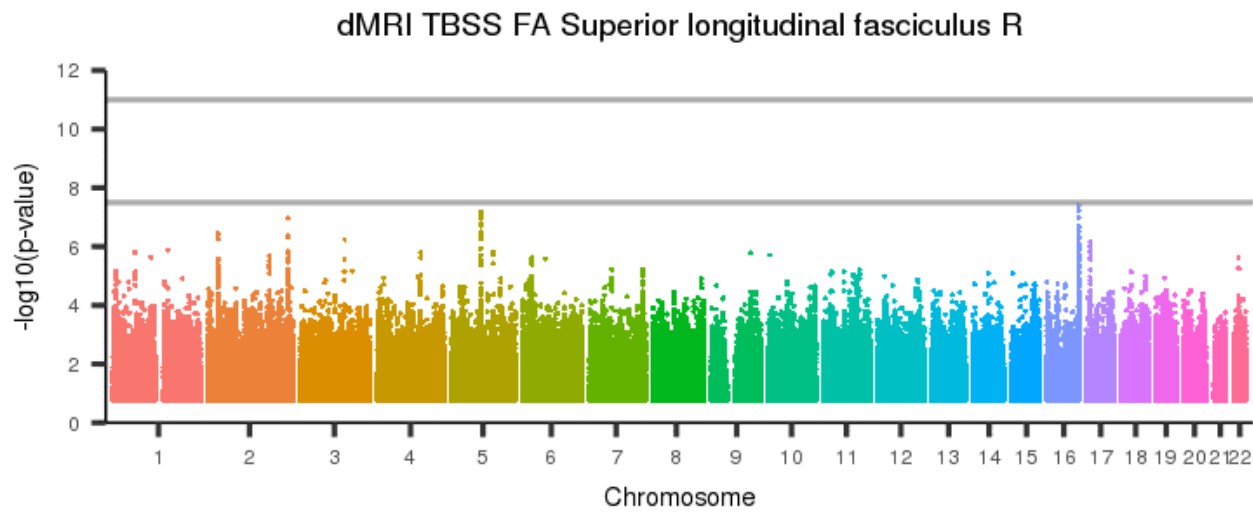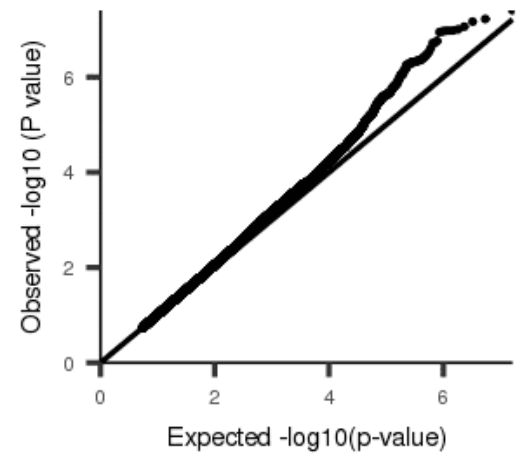

[back to list of plots](#)

Figure 237: dMRI TBSS FA Superior longitudinal fasciculus L

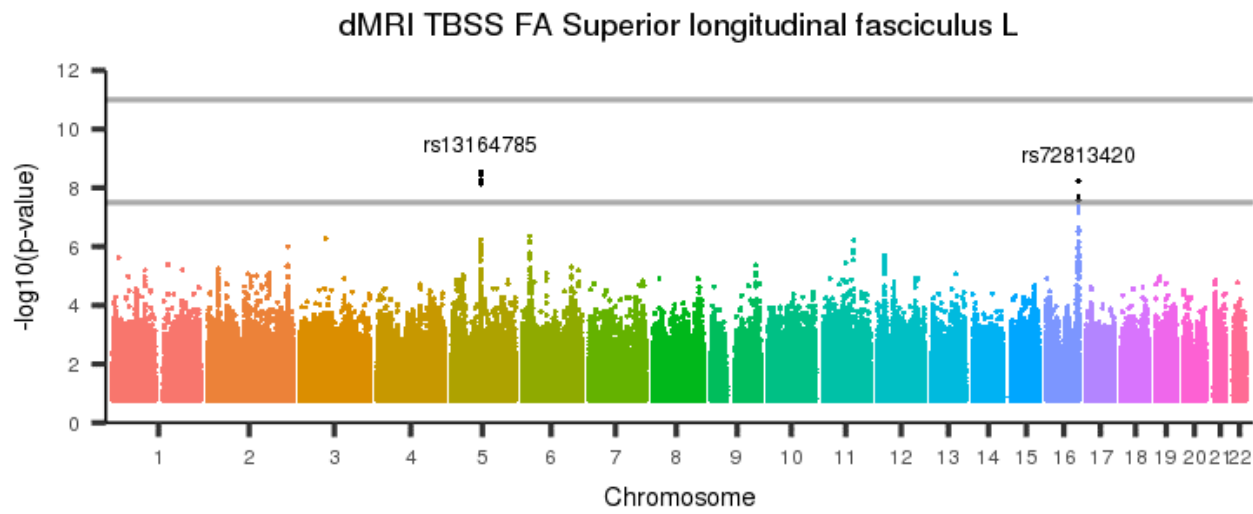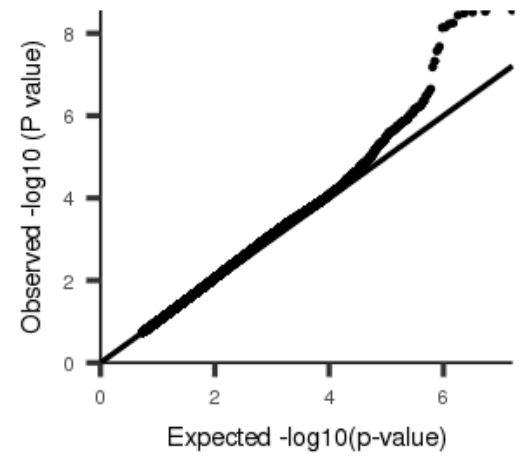

[back to list of plots](#)



Figure 238: dMRI TBSS FA Superior fronto-occipital fasciculus R

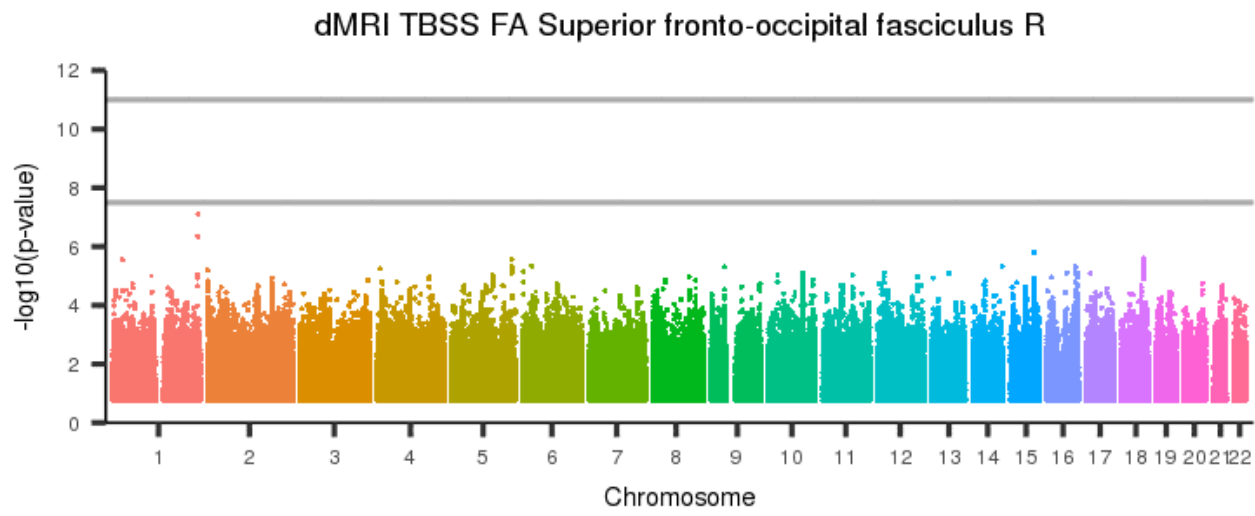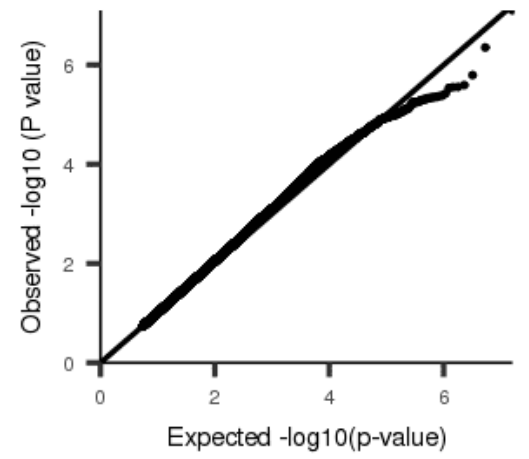

[back to list of plots](#)

Figure 239: dMRI TBSS FA Superior fronto-occipital fasciculus L

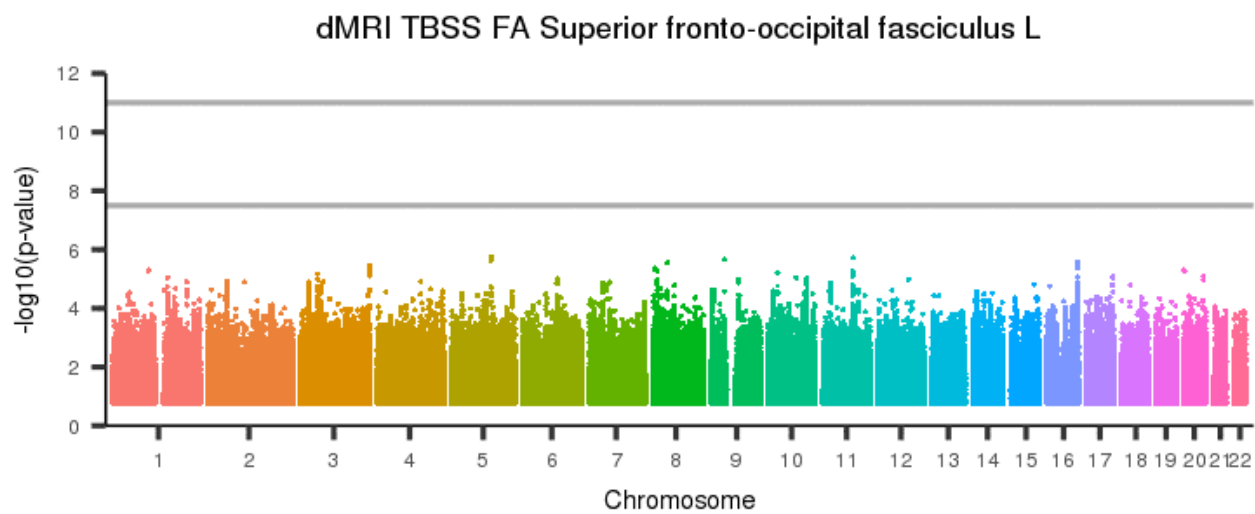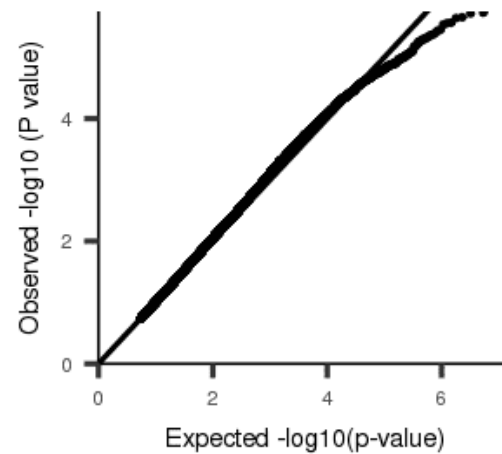

[back to list of plots](#)

Figure 240: dMRI TBSS FA Uncinate fasciculus R

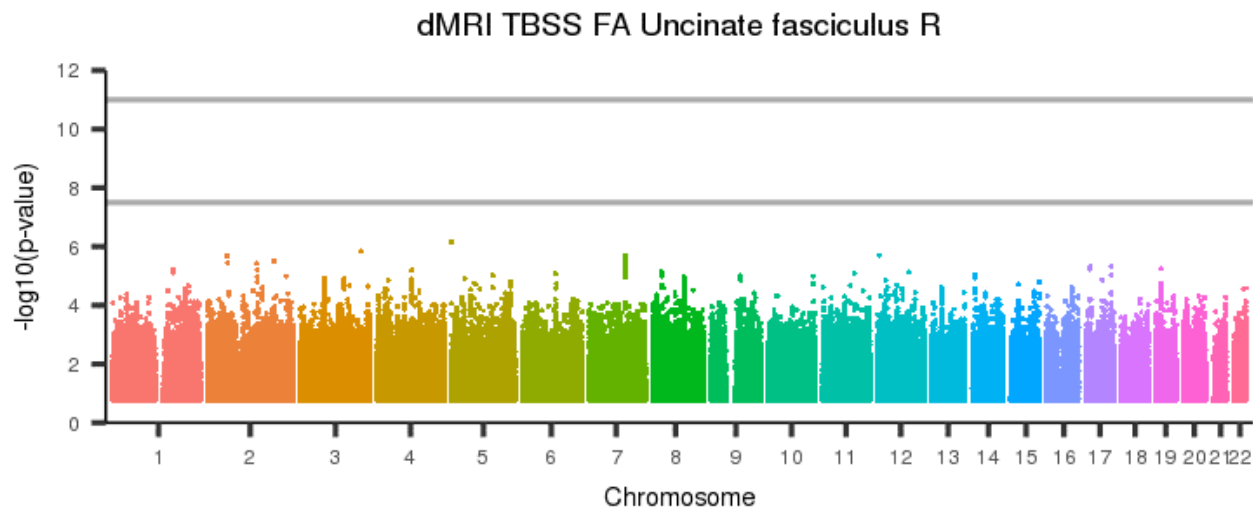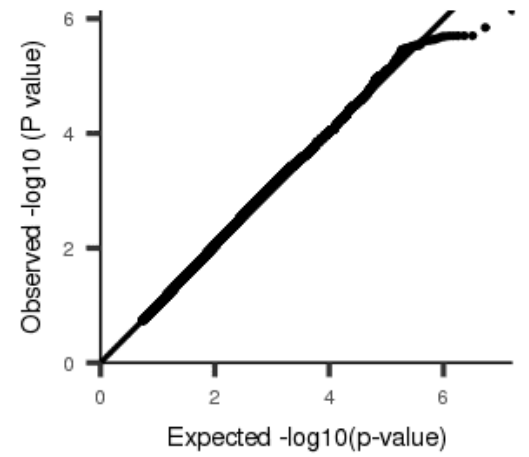

[back to list of plots](#)

Figure 241: dMRI TBSS FA Uncinate fasciculus L

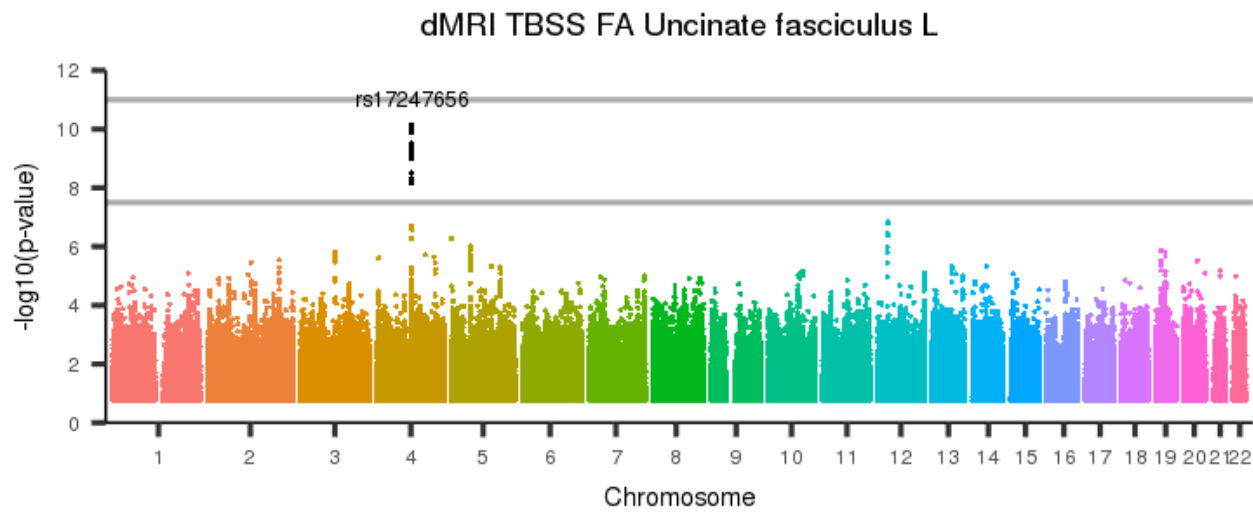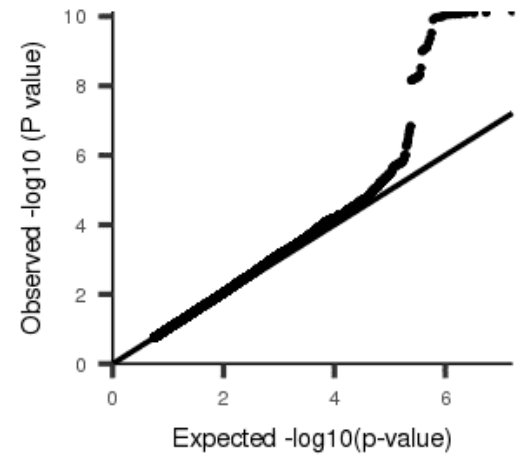

[back to list of plots](#)

Figure 242: dMRI TBSS FA Tapetum R

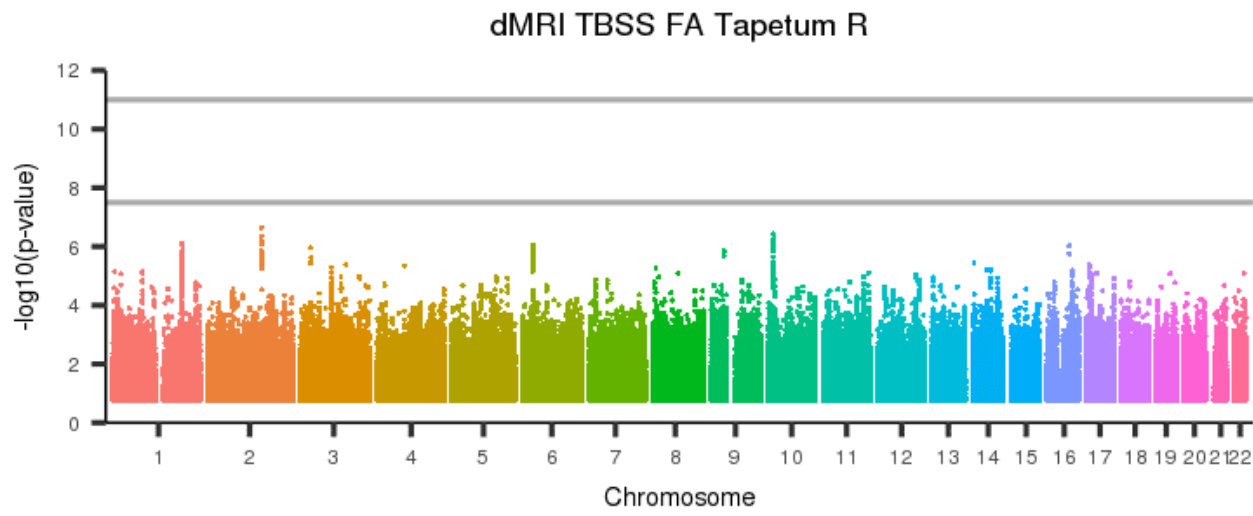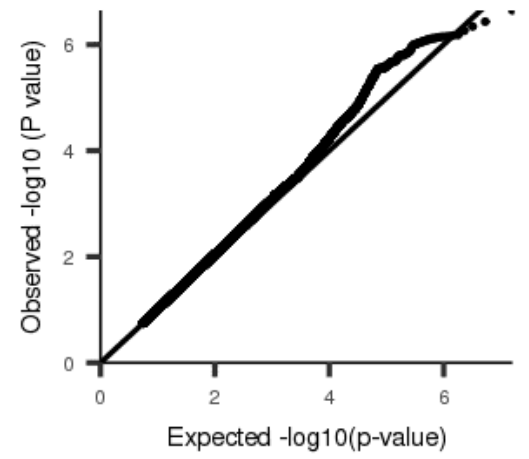

[back to list of plots](#)

Figure 243: dMRI TBSS FA Tapetum L

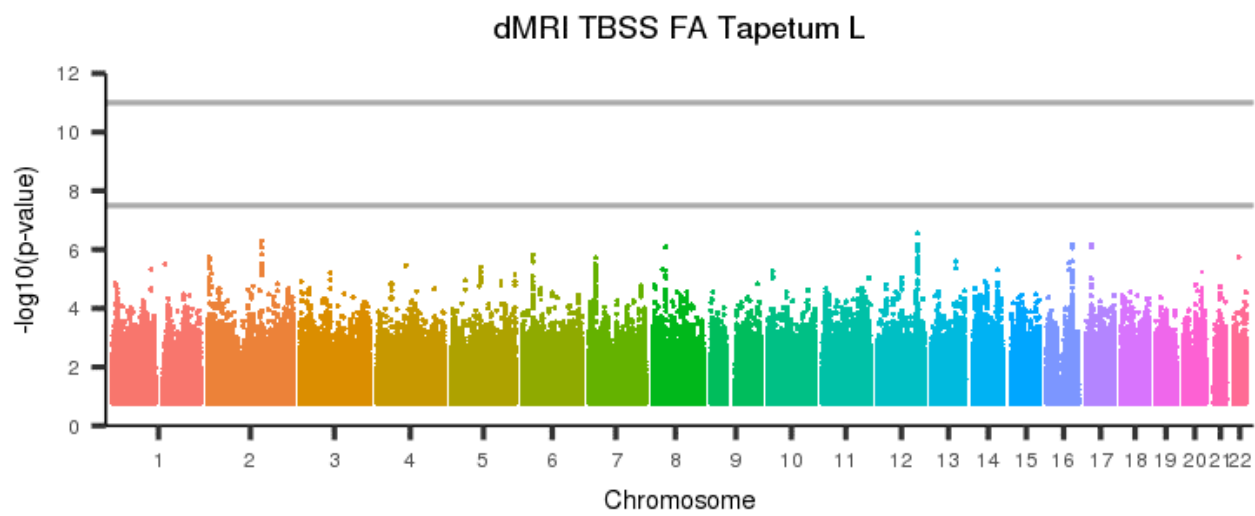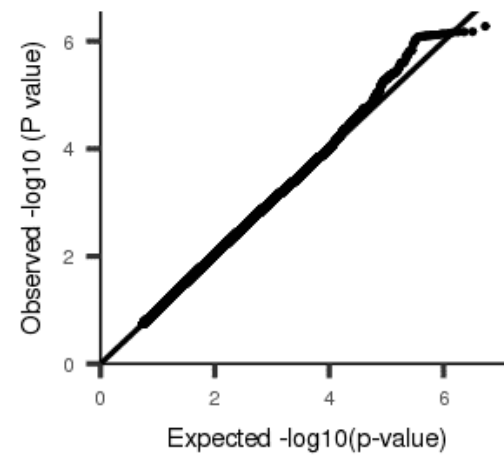

[back to list of plots](#)

Figure 244: dMRI TBSS MD Middle cerebellar peduncle

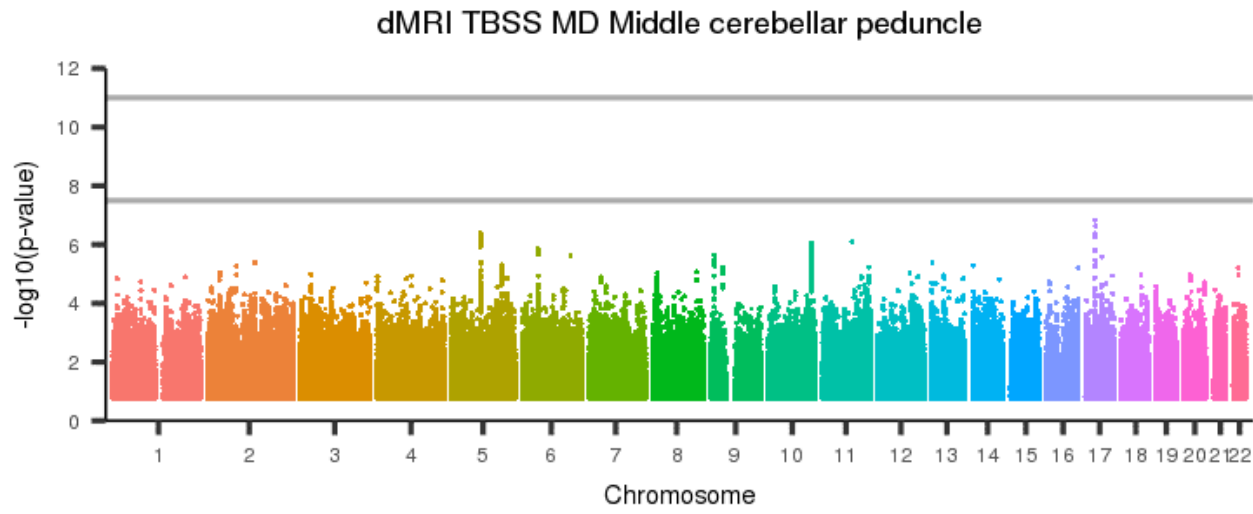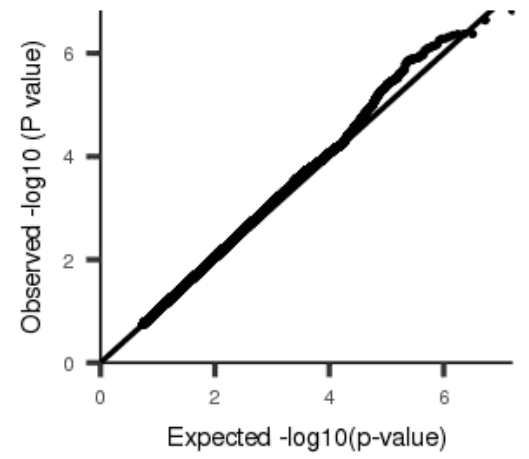

[back to list of plots](#)

Figure 245: dMRI TBSS MD Pontine crossing tract

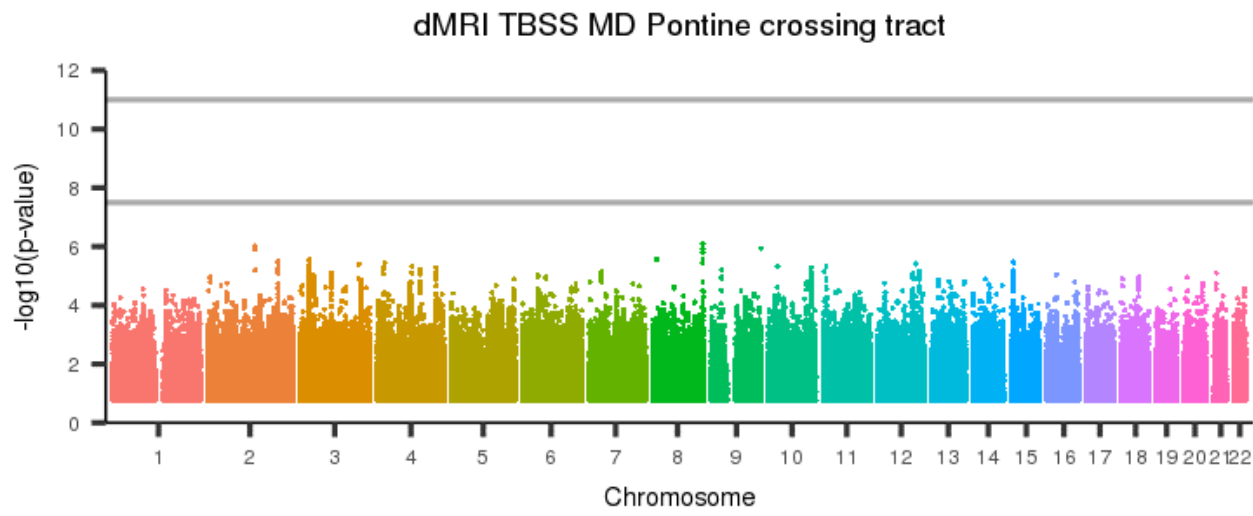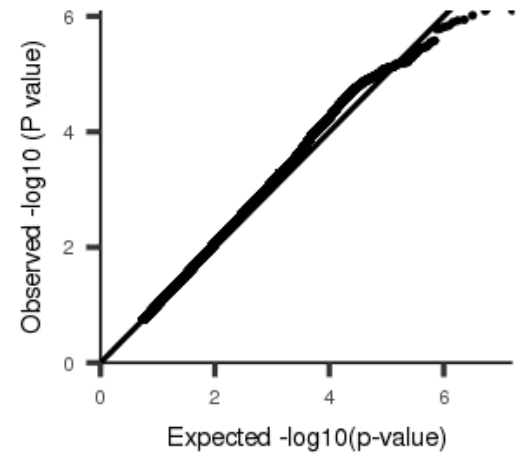

[back to list of plots](#)



Figure 246: dMRI TBSS MD Genu of corpus callosum

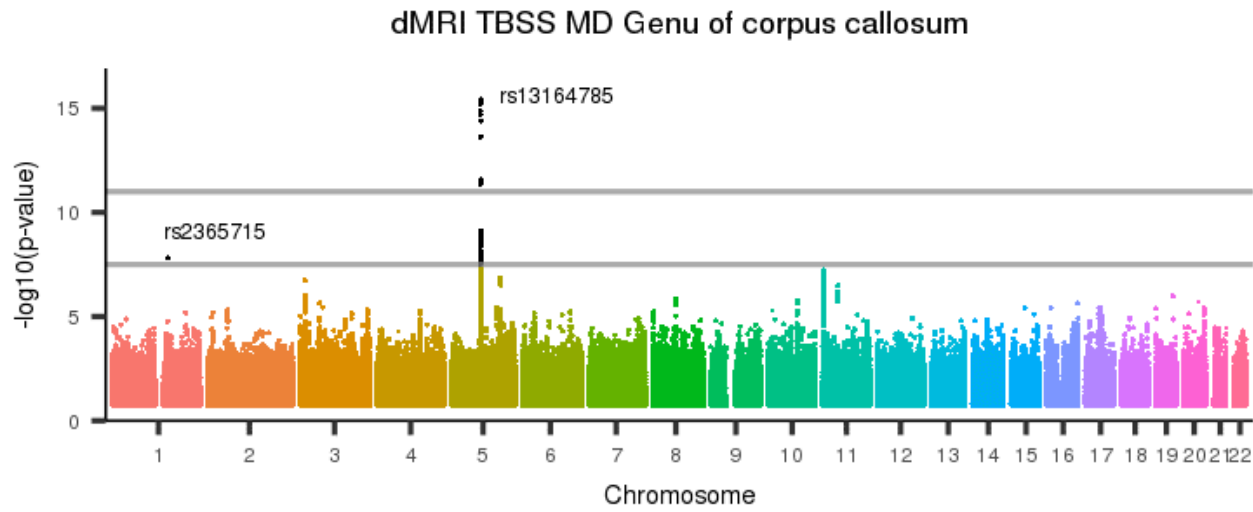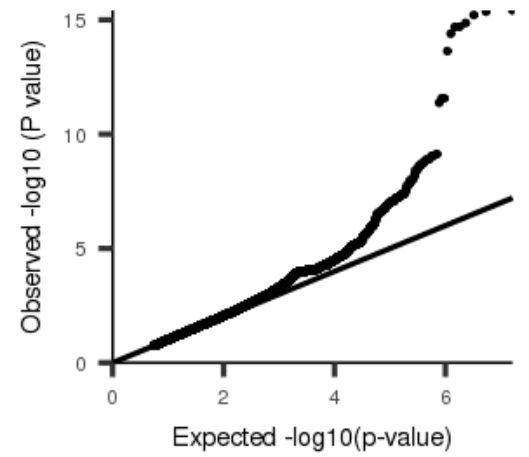

[back to list of plots](#)

Figure 247: dMRI TBSS MD Body of corpus callosum

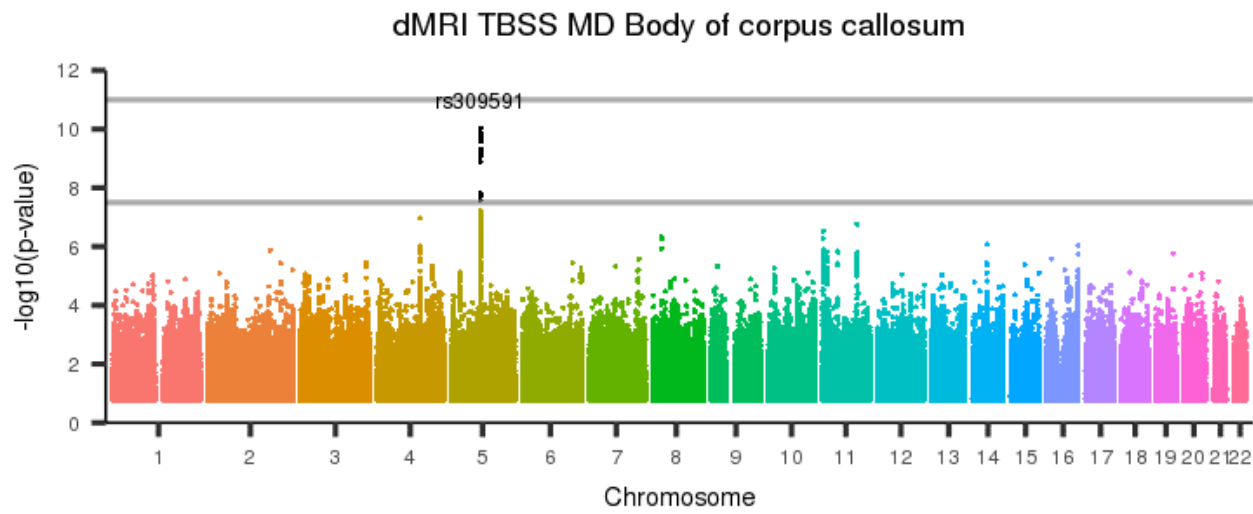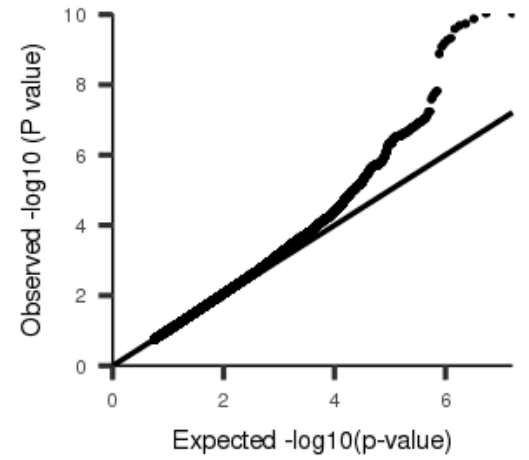

[back to list of plots](#)

Figure 248: dMRI TBSS MD Splenium of corpus callosum

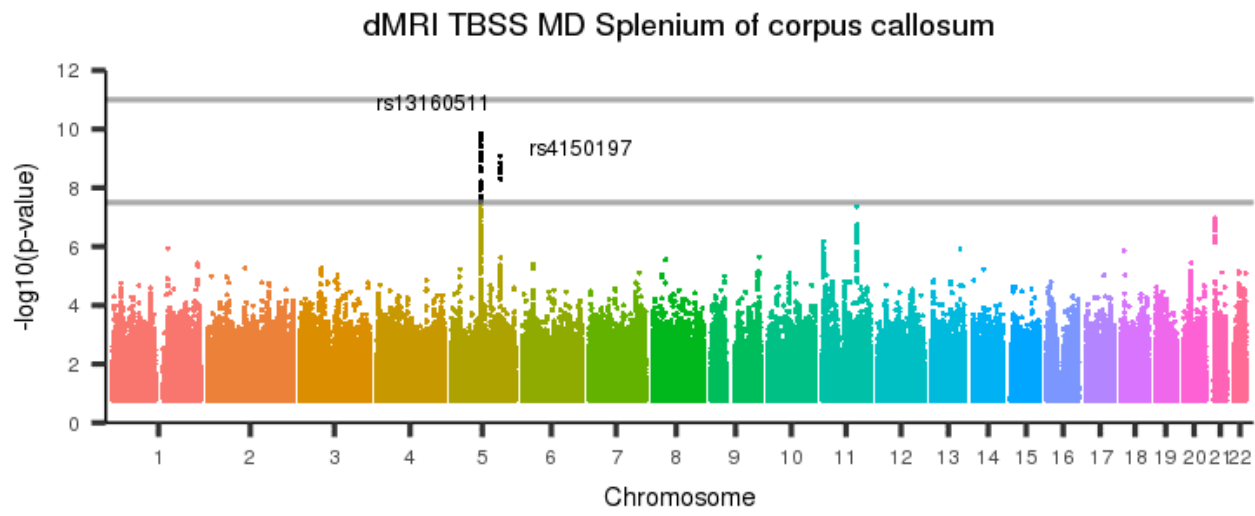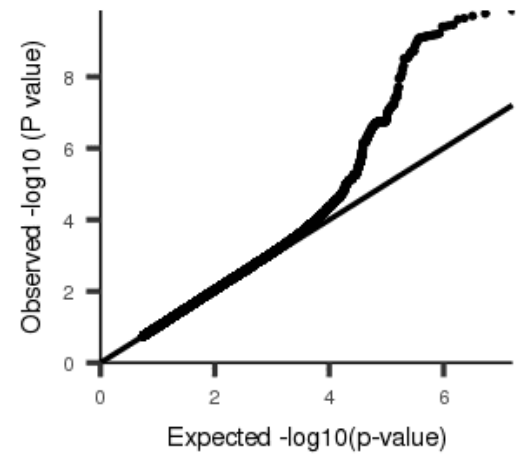

[back to list of plots](#)

Figure 249: dMRI TBSS MD Fornix

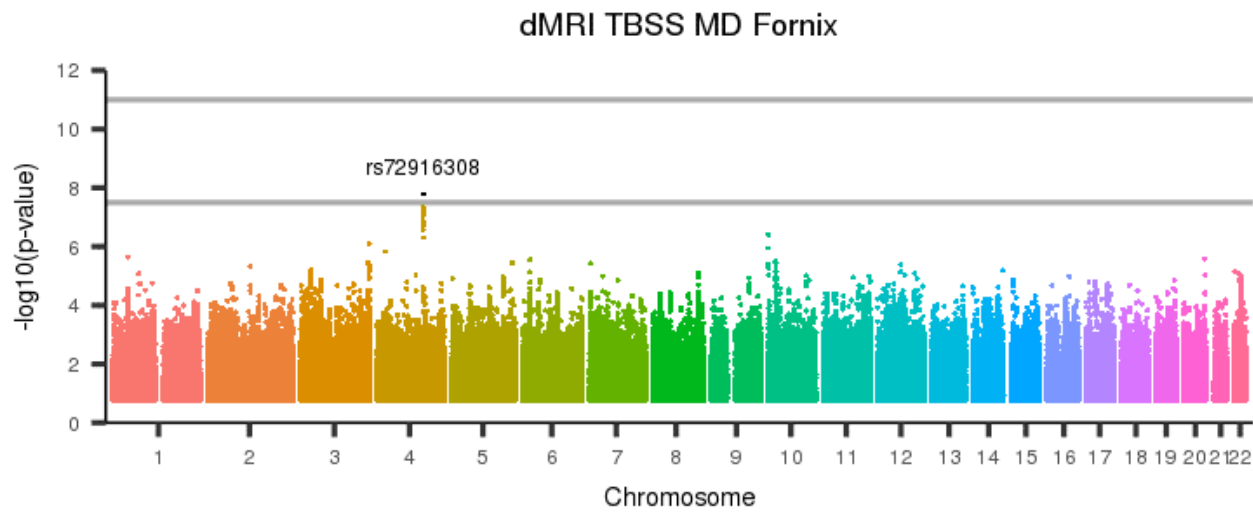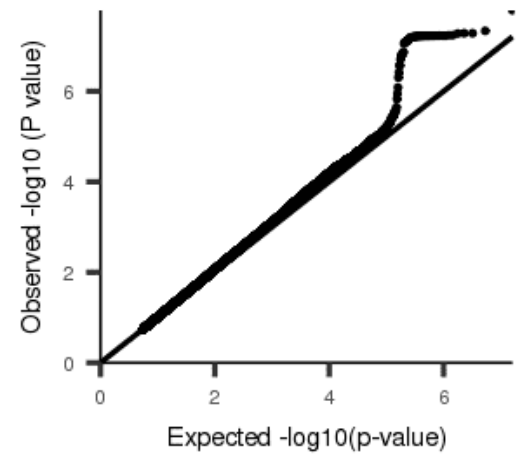

[back to list of plots](#)

Figure 250: dMRI TBSS MD Corticospinal tract R

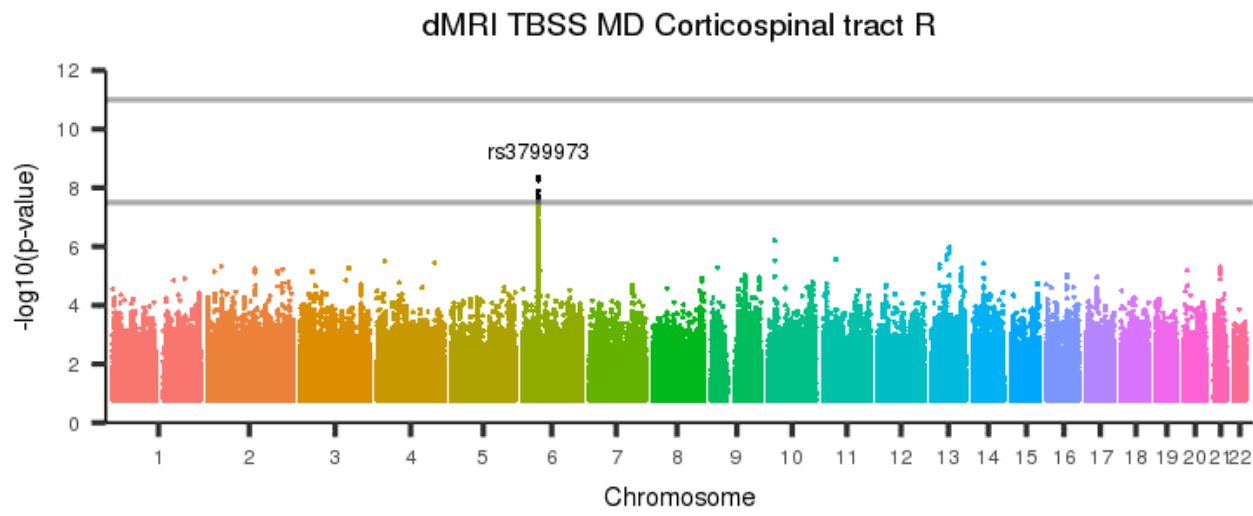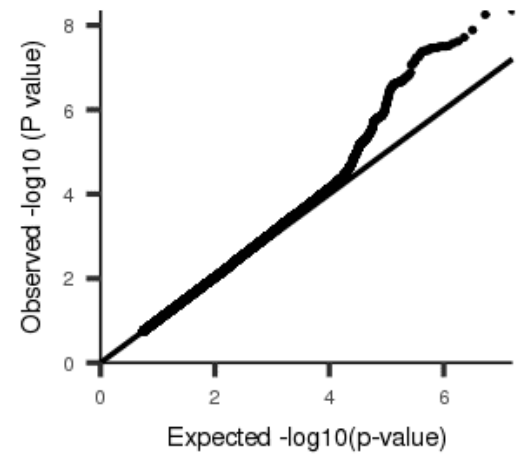

[back to list of plots](#)

Figure 251: dMRI TBSS MD Corticospinal tract L

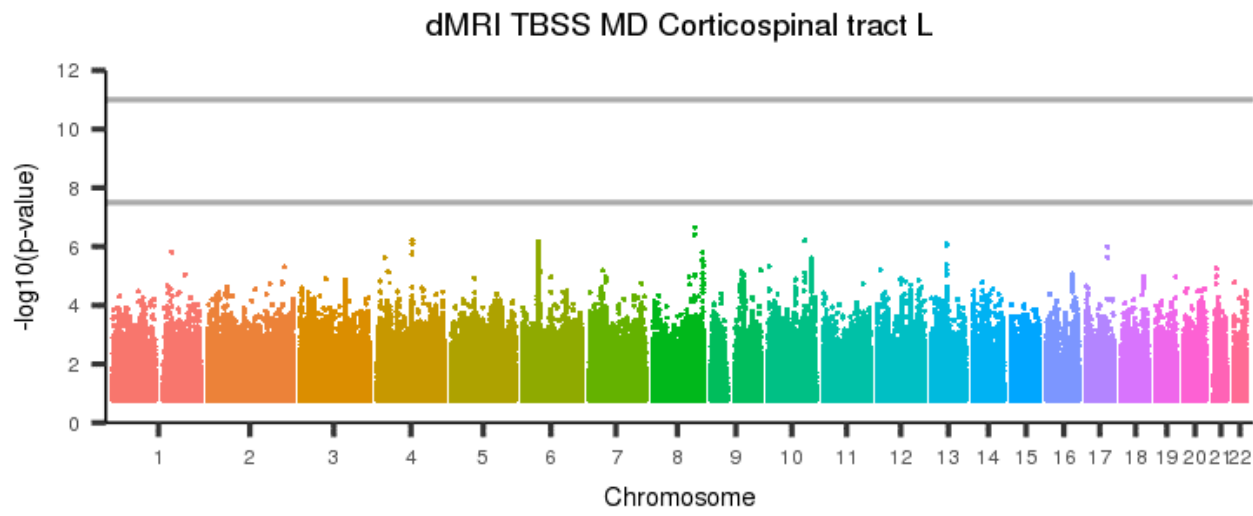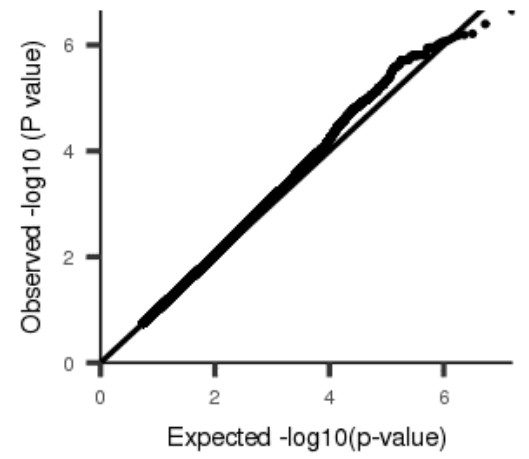

[back to list of plots](#)

Figure 252: dMRI TBSS MD Medial lemniscus R

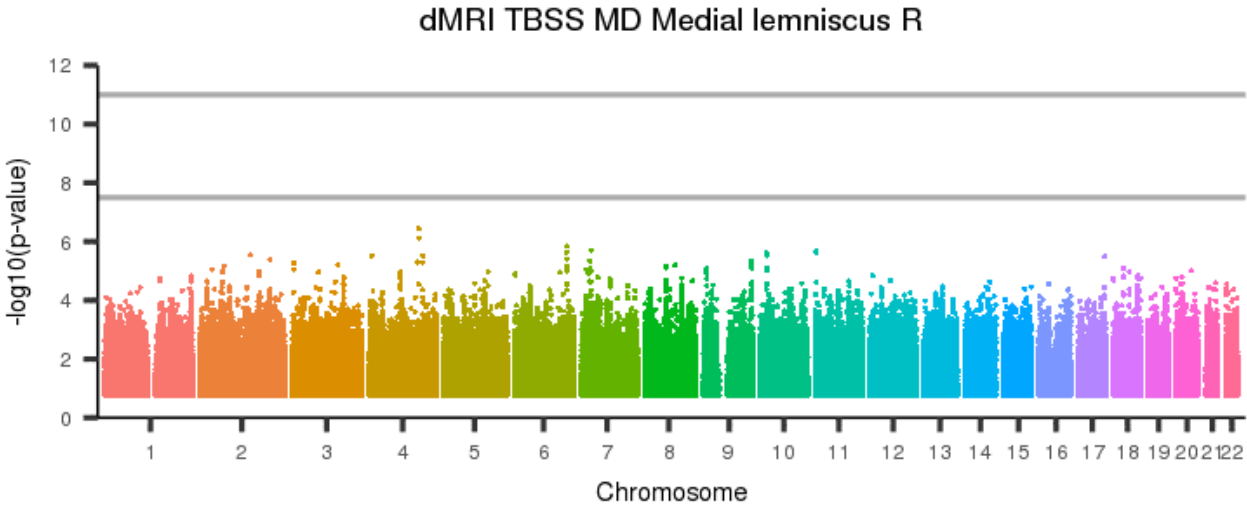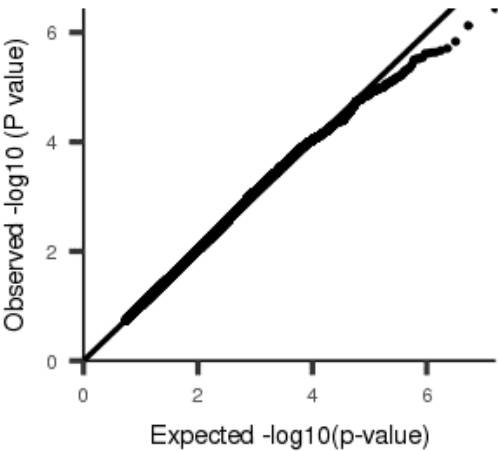

[back to list of plots](#)

Figure 253: dMRI TBSS MD Medial lemniscus L

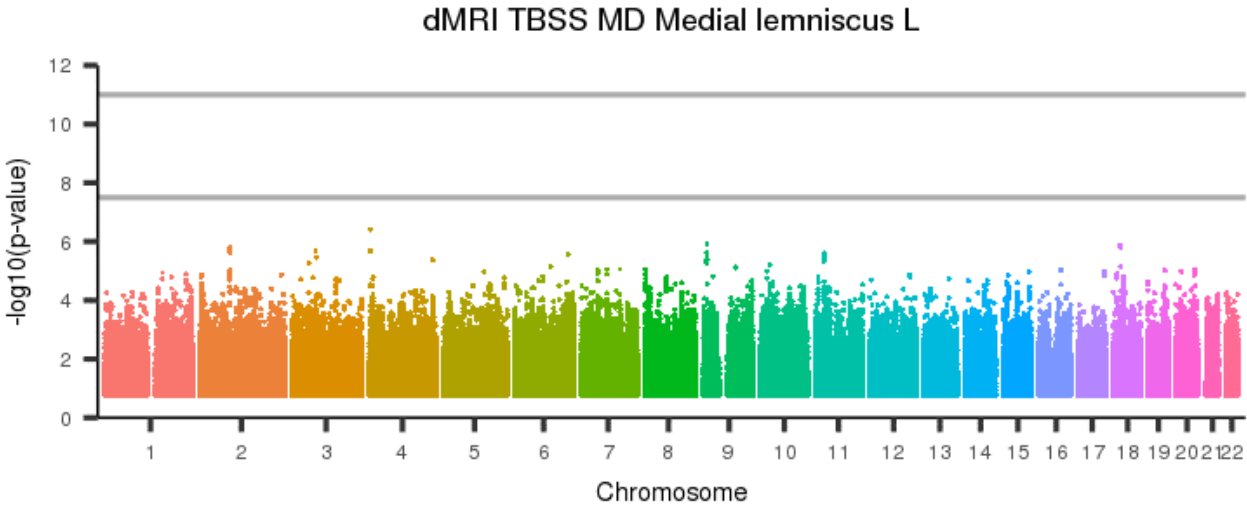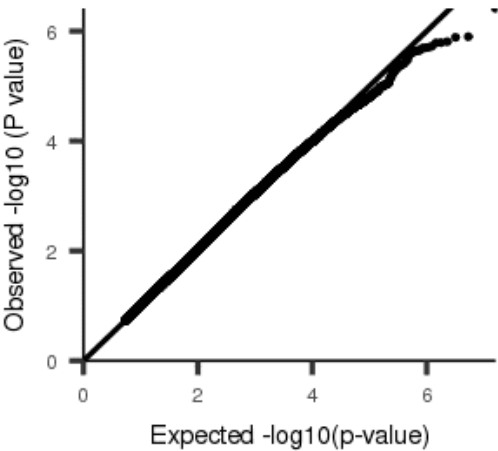

[back to list of plots](#)



Figure 254: dMRI TBSS MD Inferior cerebellar peduncle R

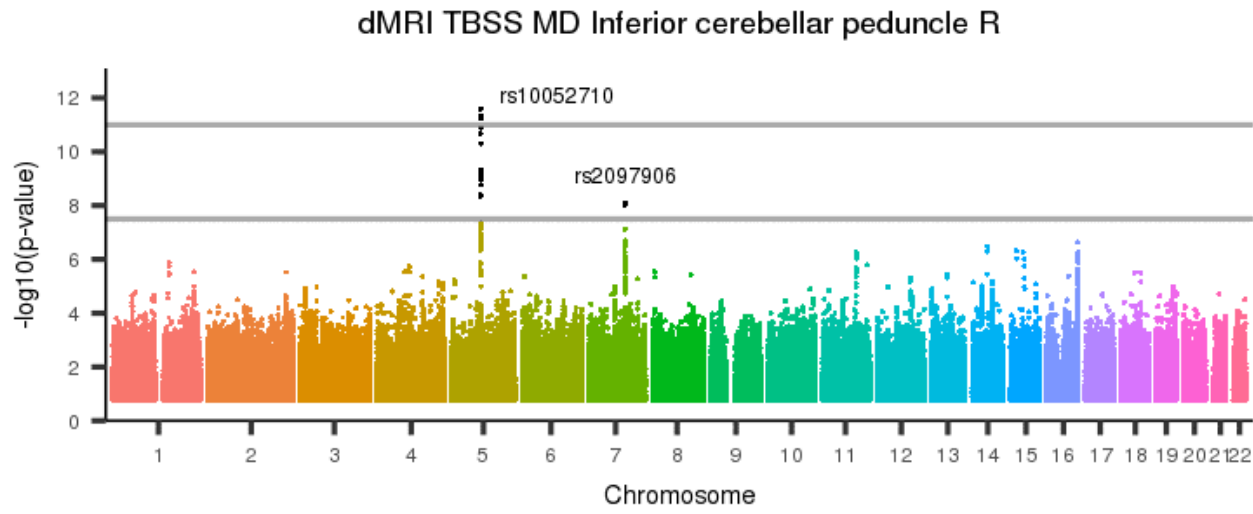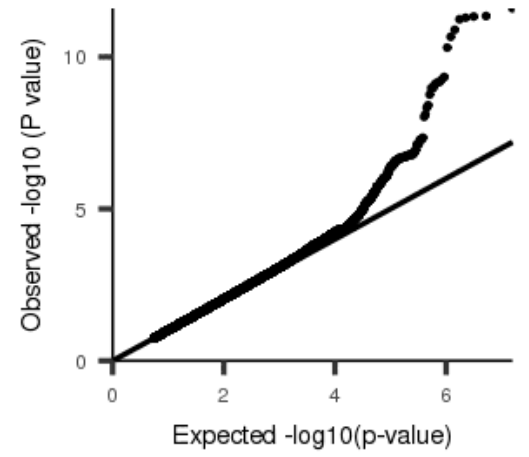

[back to list of plots](#)

Figure 255: dMRI TBSS MD Inferior cerebellar peduncle L

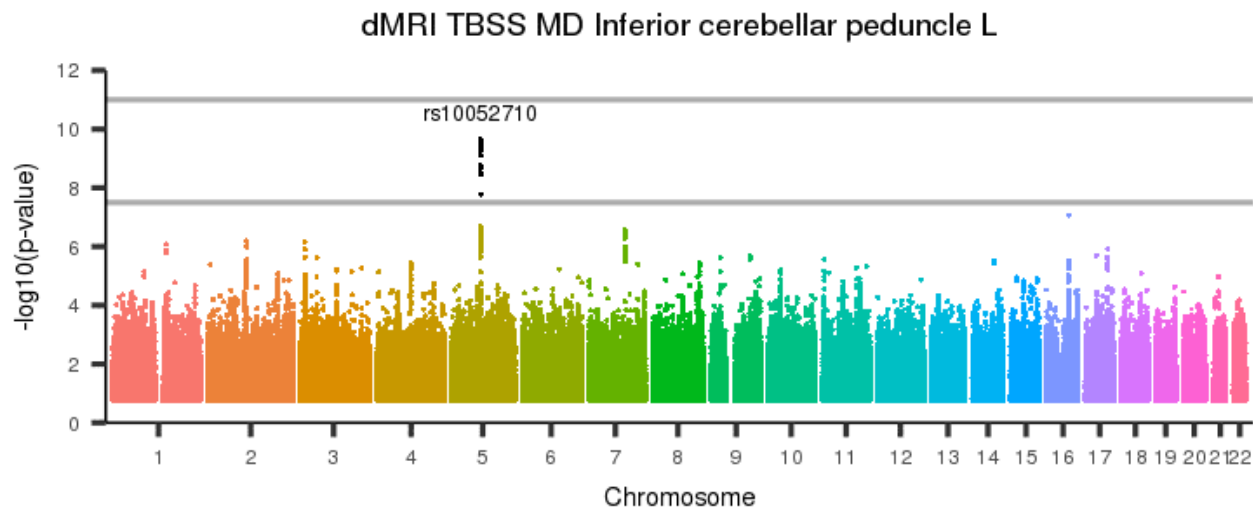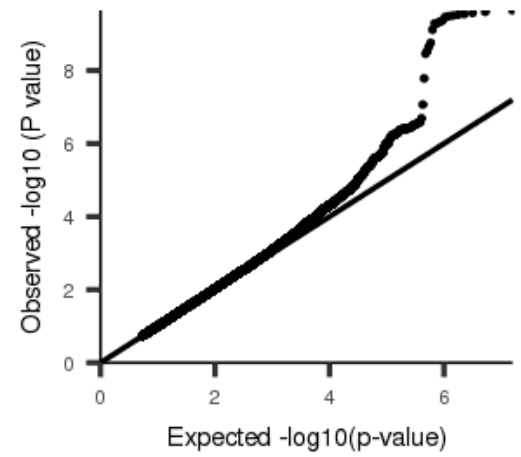

[back to list of plots](#)

Figure 256: dMRI TBSS MD Superior cerebellar peduncle R

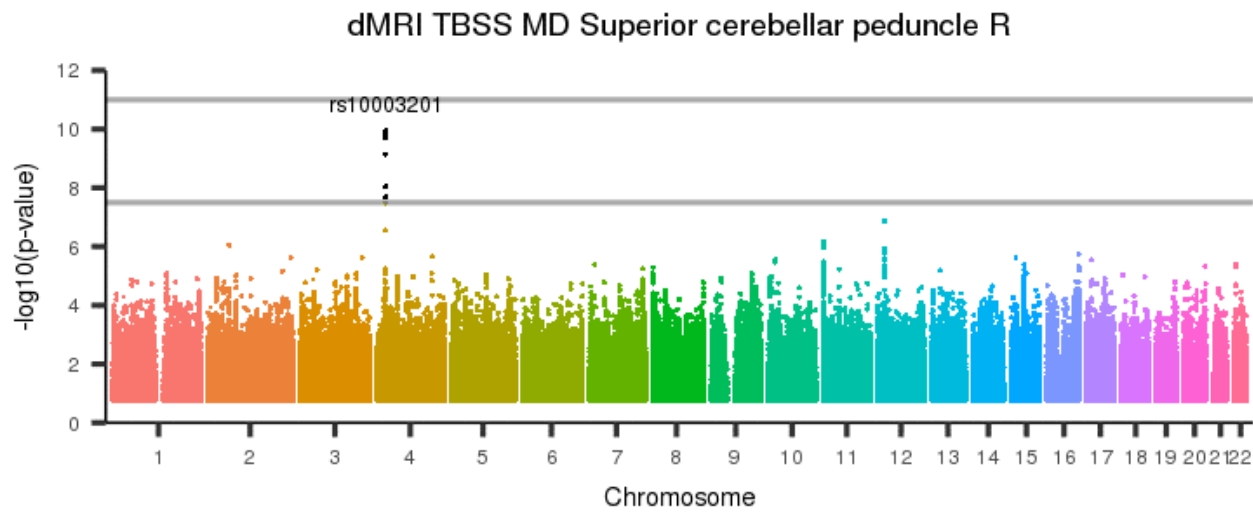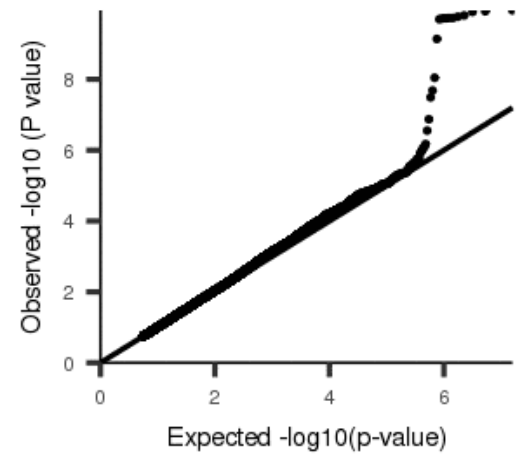

[back to list of plots](#)

Figure 257: dMRI TBSS MD Superior cerebellar peduncle L

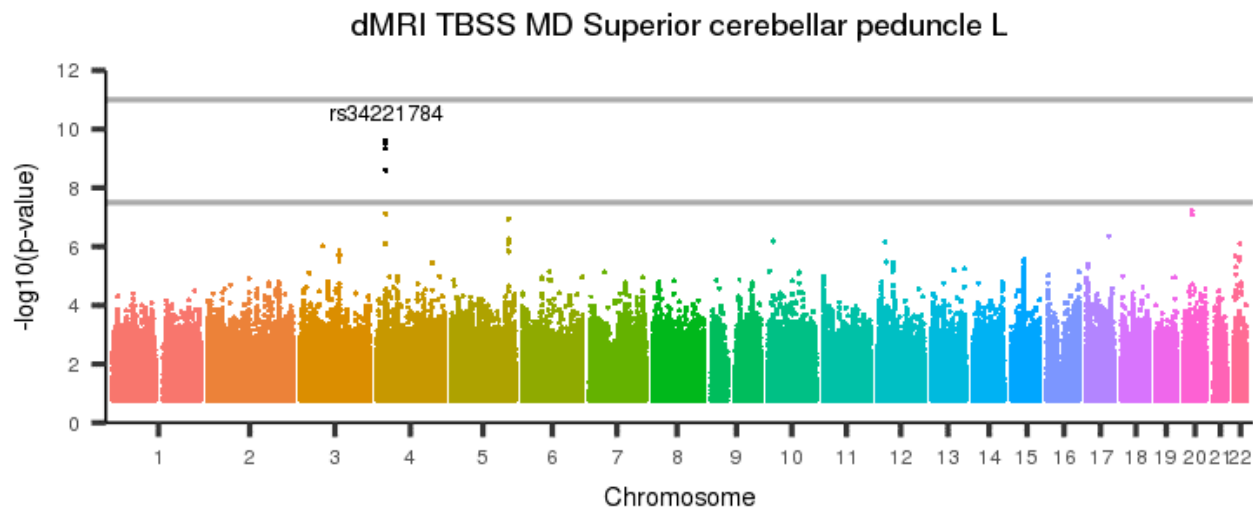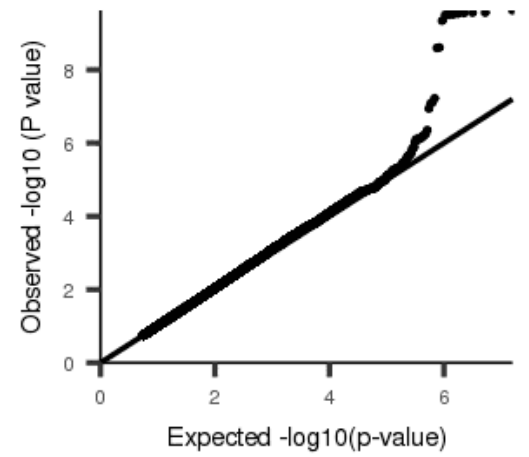

[back to list of plots](#)

Figure 258: dMRI TBSS MD Cerebral peduncle R

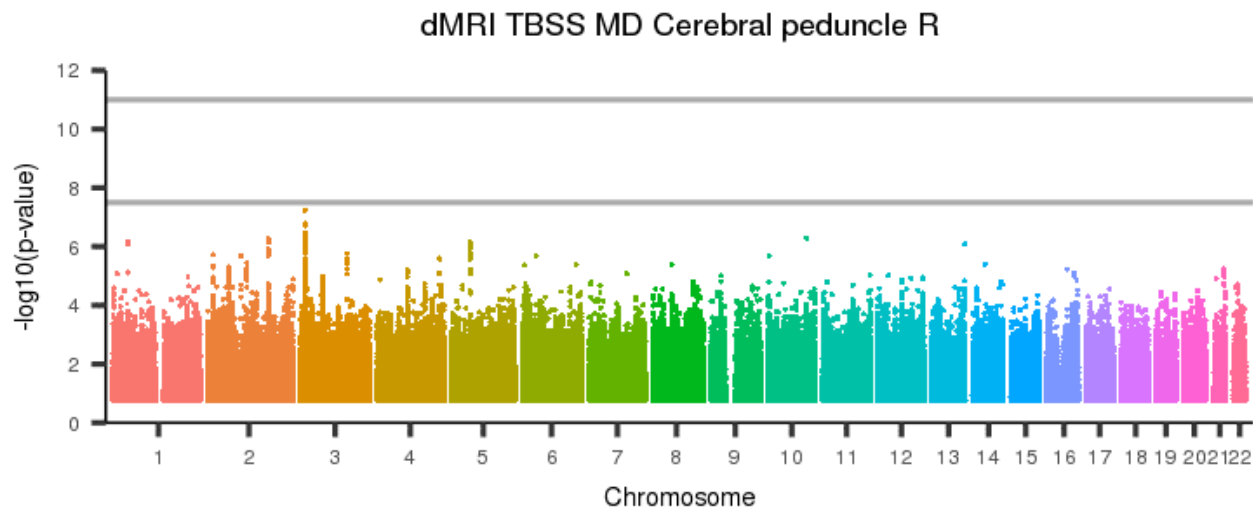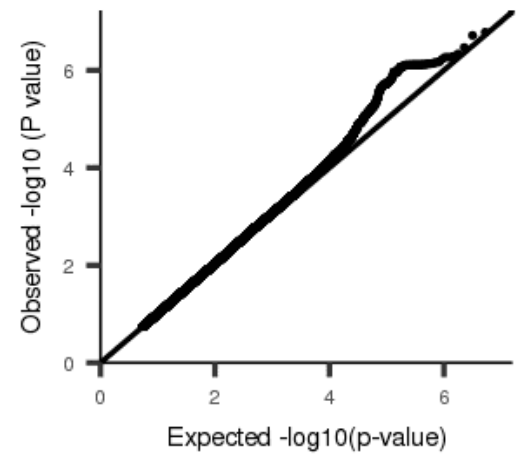

[back to list of plots](#)

Figure 259: dMRI TBSS MD Cerebral peduncle L

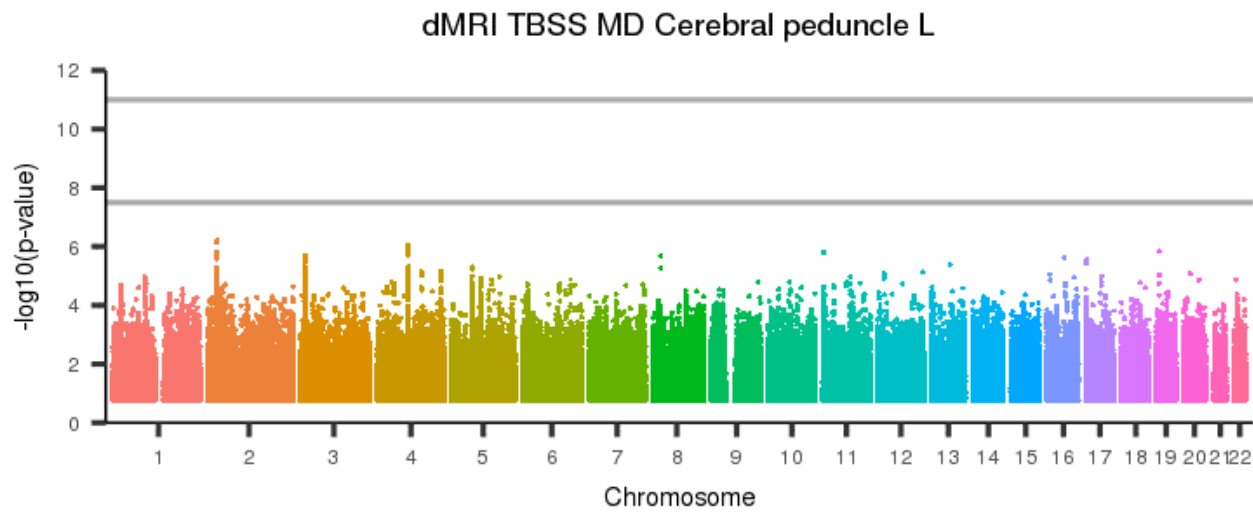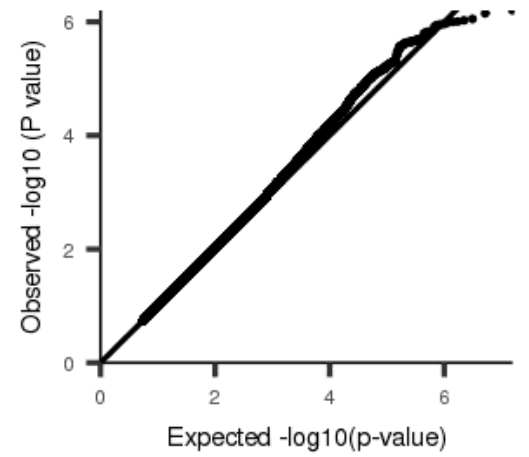

[back to list of plots](#)

Figure 260: dMRI TBSS MD Anterior limb of internal capsule R

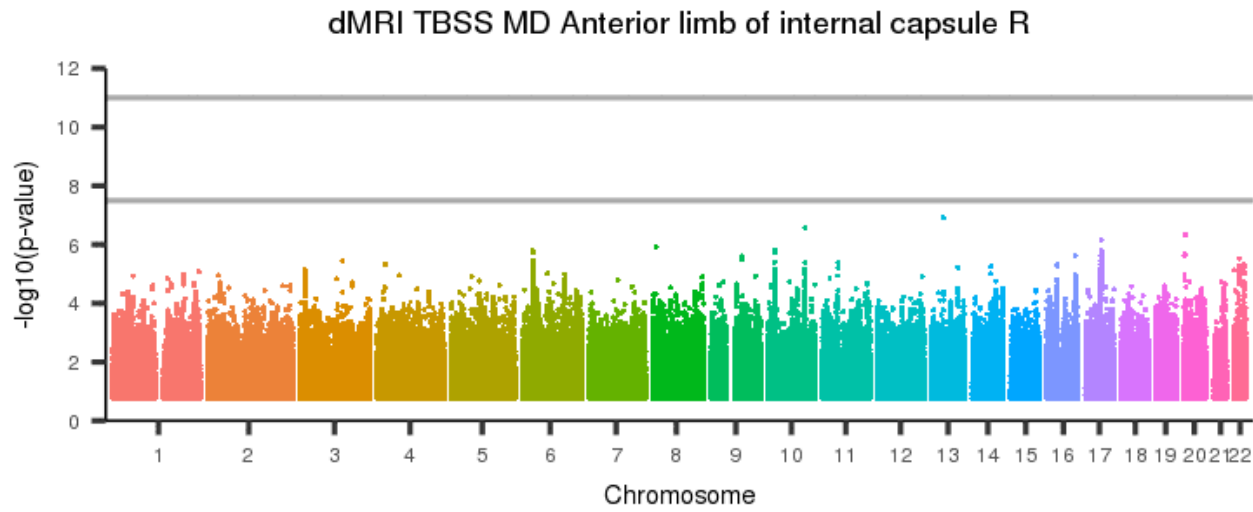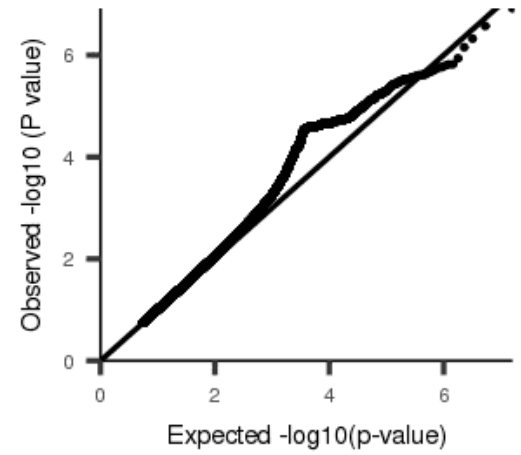

[back to list of plots](#)

Figure 261: dMRI TBSS MD Anterior limb of internal capsule L

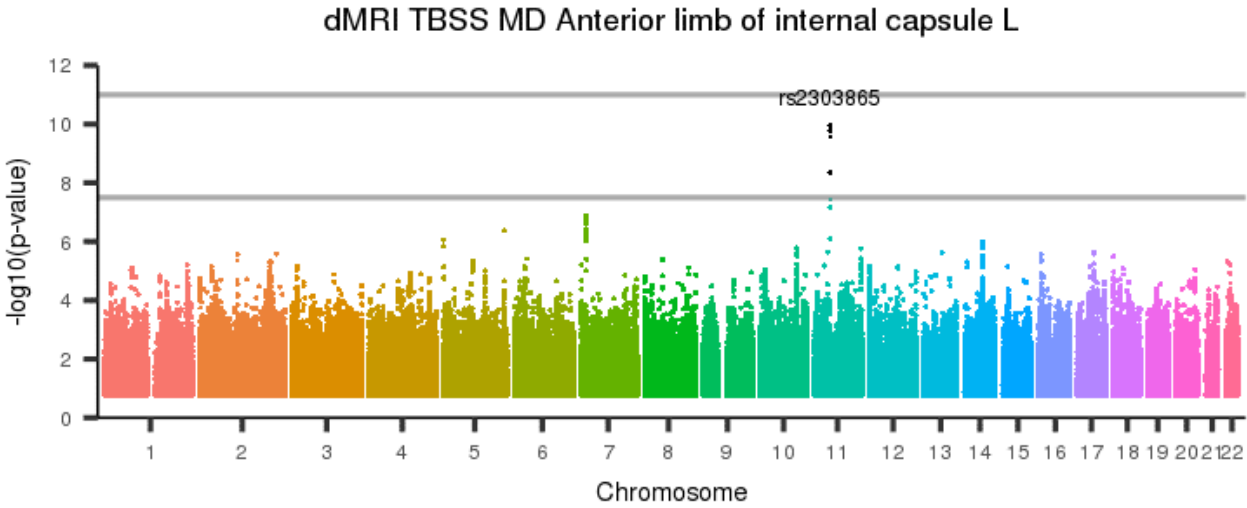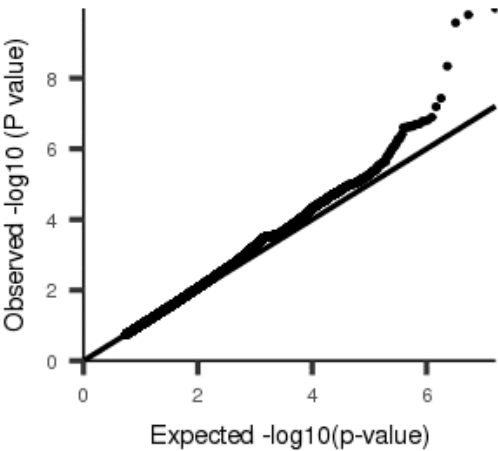

[back to list of plots](#)



Figure 262: dMRI TBSS MD Posterior limb of internal capsule R

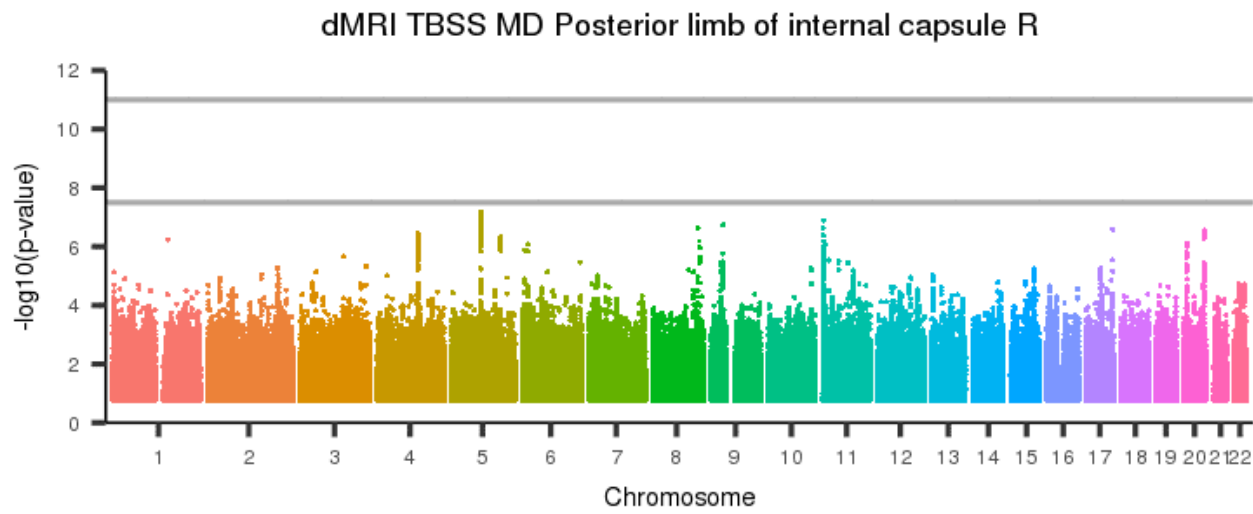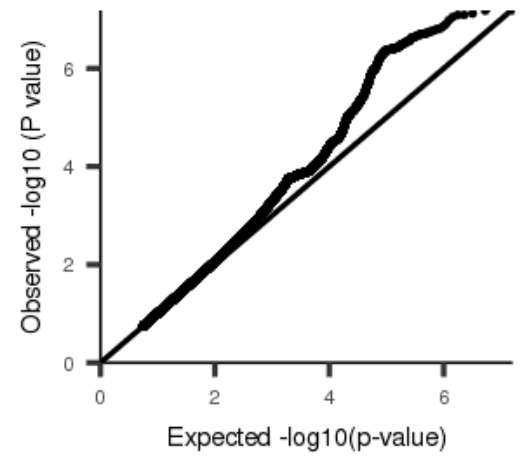

[back to list of plots](#)

Figure 263: dMRI TBSS MD Posterior limb of internal capsule L

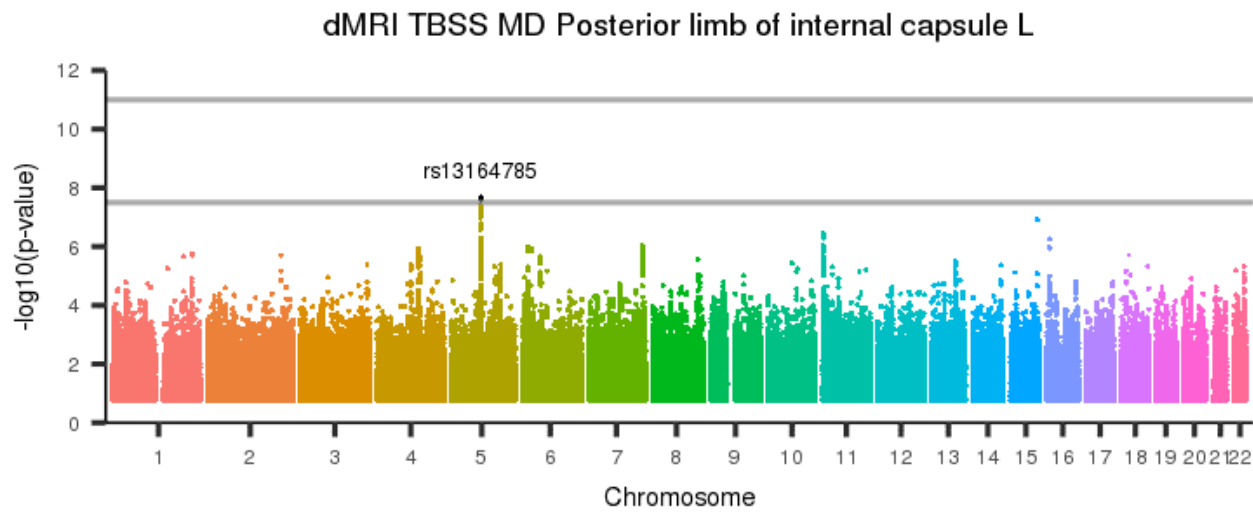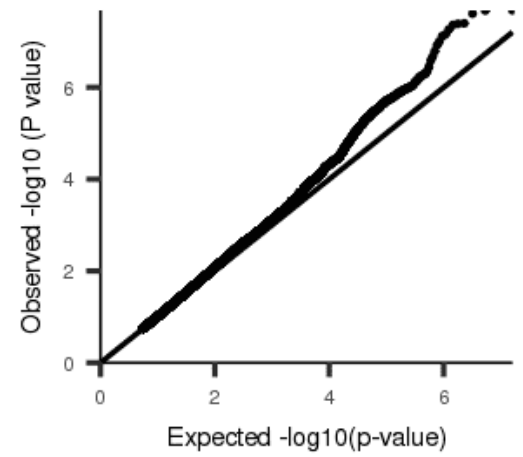

[back to list of plots](#)

Figure 264: dMRI TBSS MD Retrolenticular part of internal capsule R

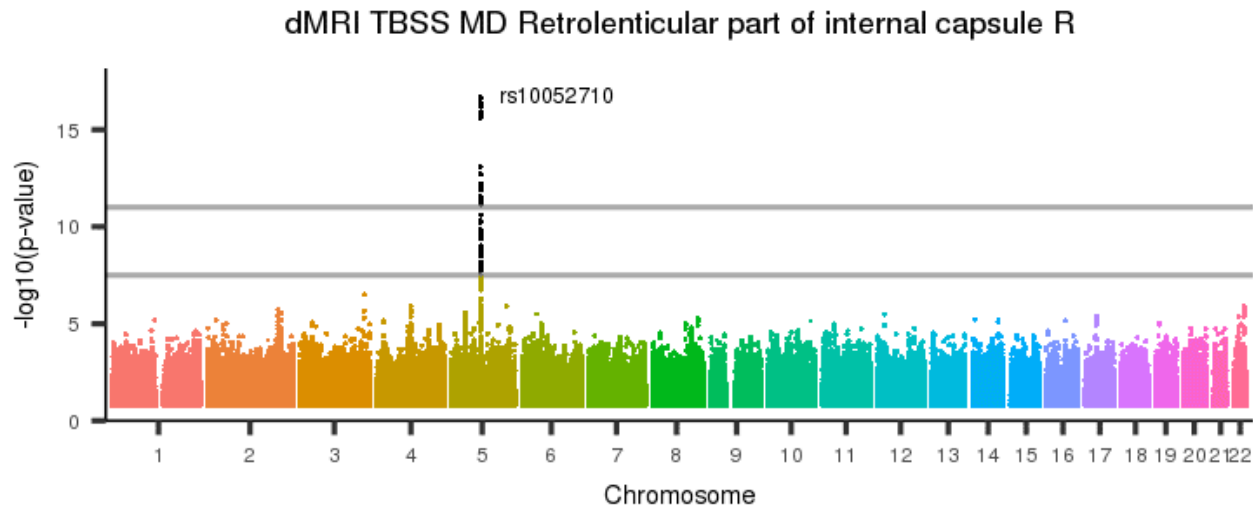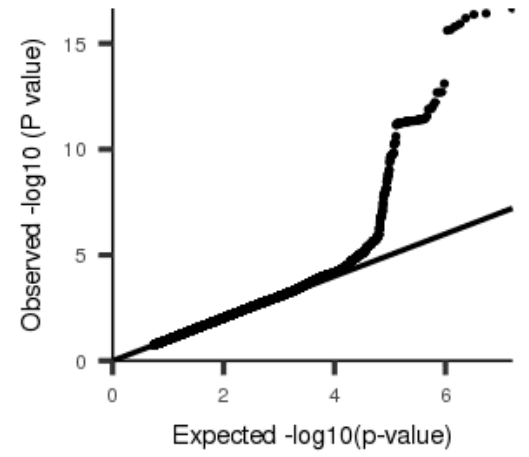

[back to list of plots](#)

Figure 265: dMRI TBSS MD Retrolesional part of internal capsule L

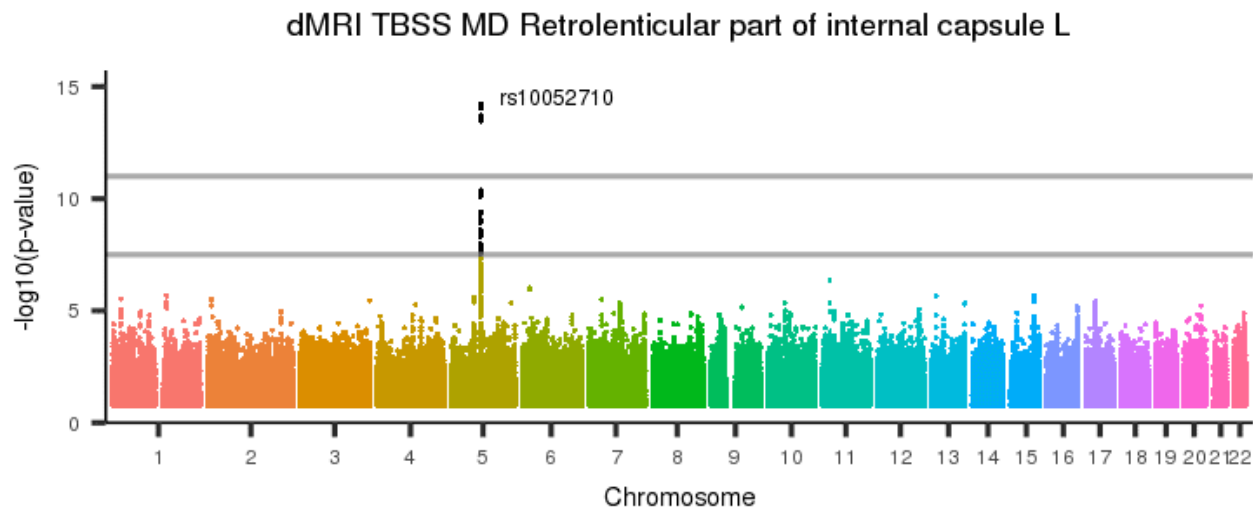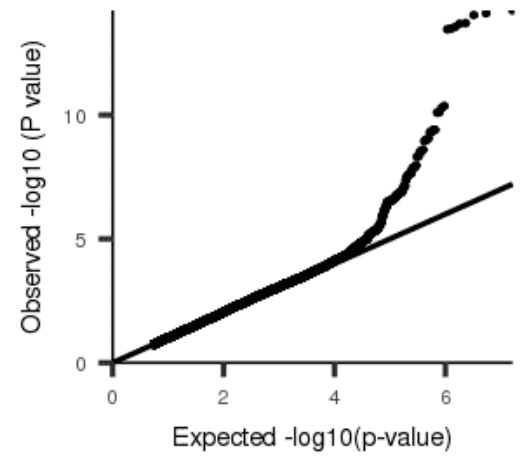

[back to list of plots](#)

Figure 266: dMRI TBSS MD Anterior corona radiata R

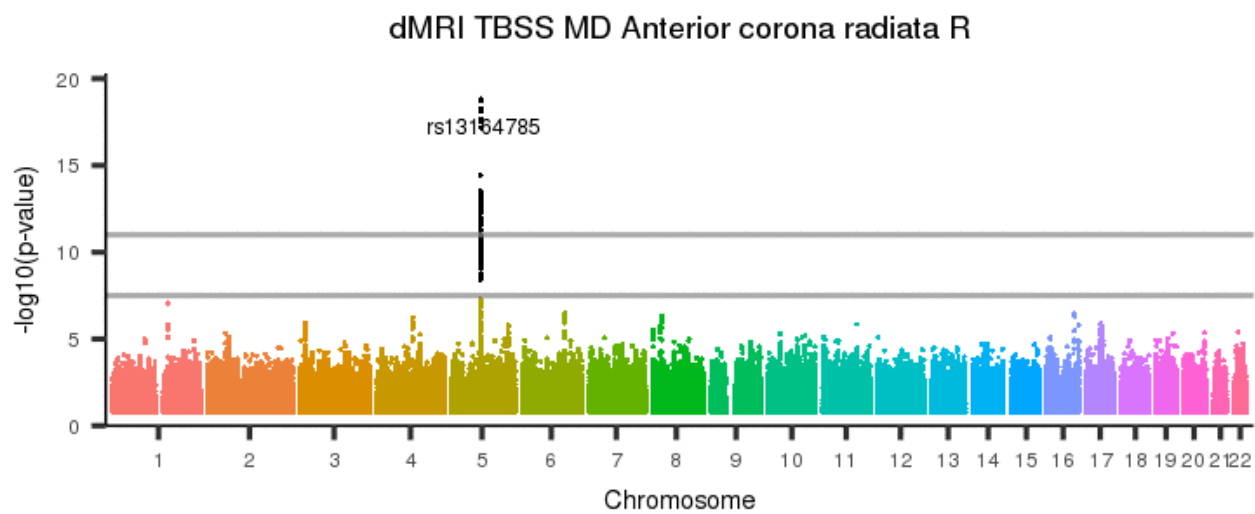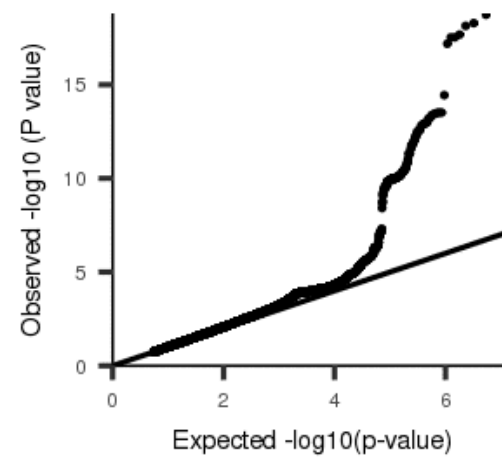

[back to list of plots](#)

Figure 267: dMRI TBSS MD Anterior corona radiata L

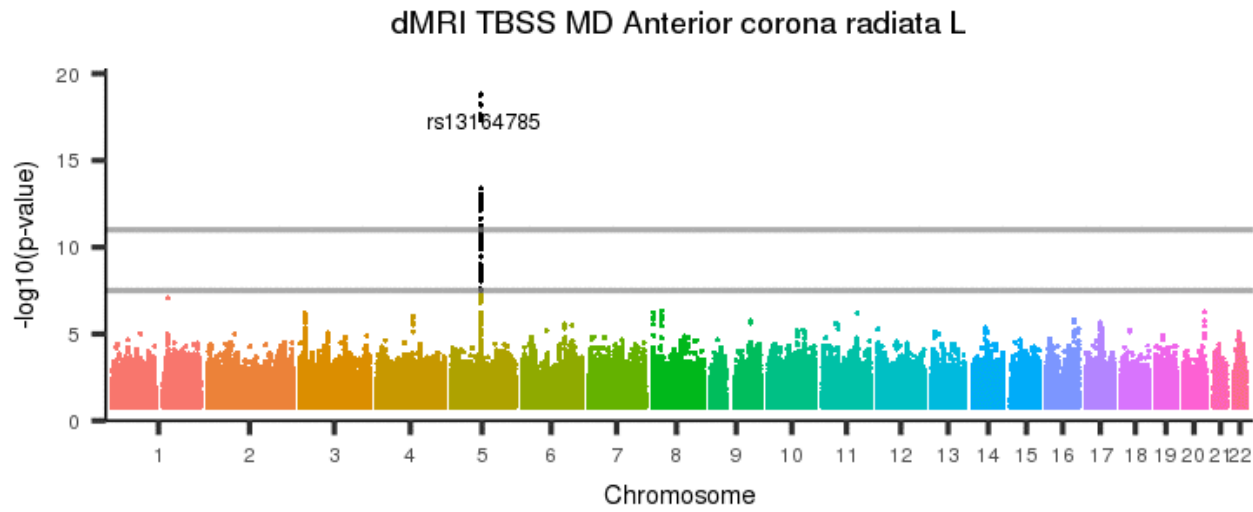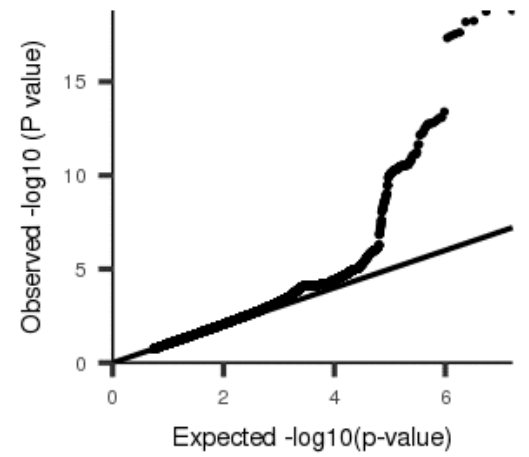

[back to list of plots](#)

Figure 268: dMRI TBSS MD Superior corona radiata R

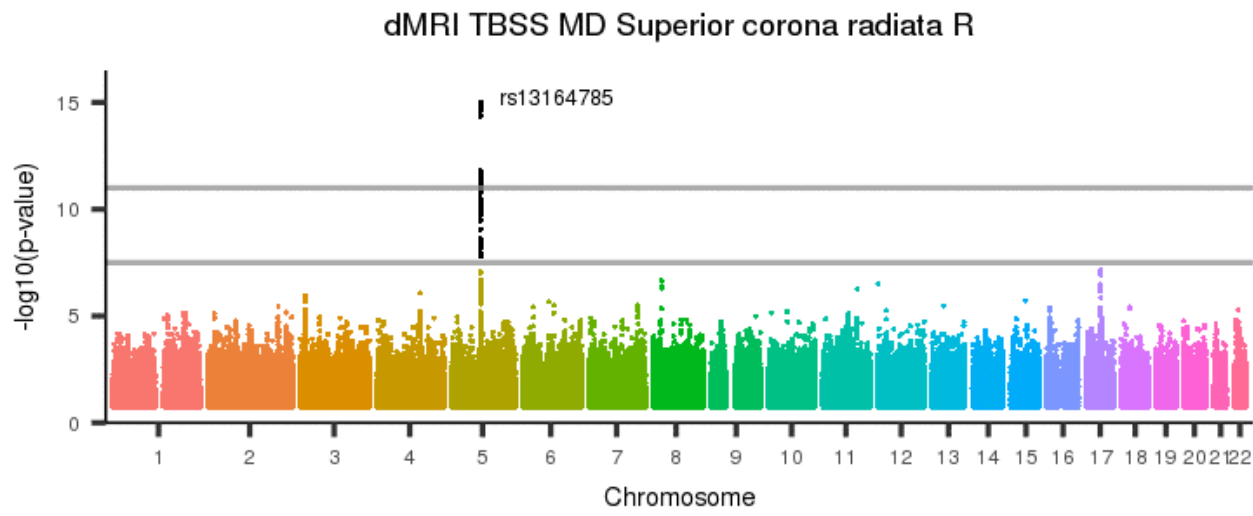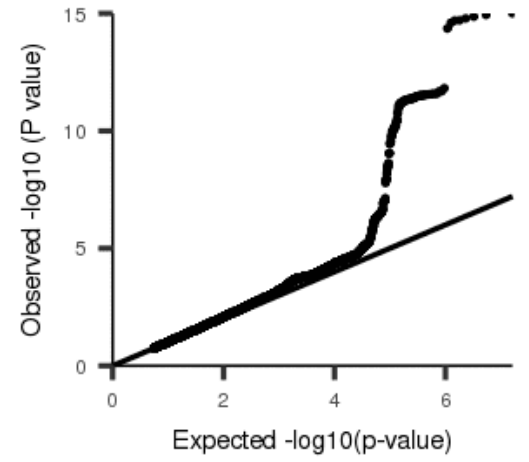

[back to list of plots](#)

Figure 269: dMRI TBSS MD Superior corona radiata L

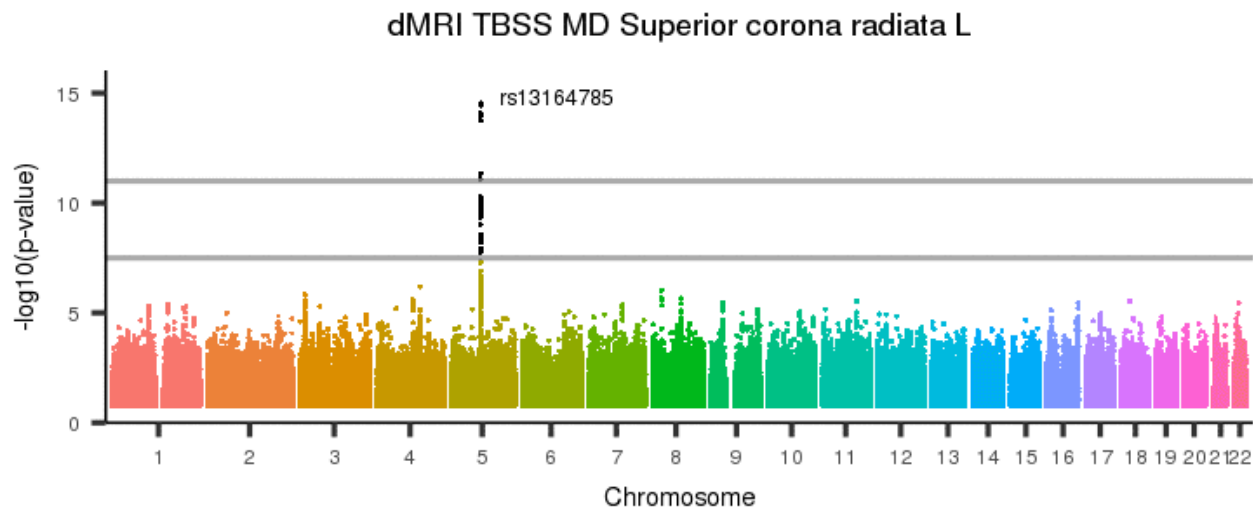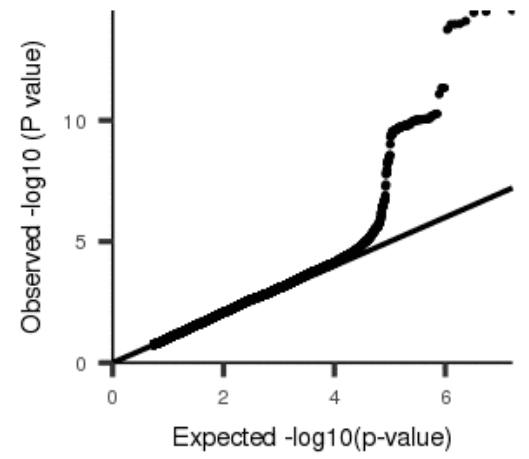

[back to list of plots](#)



Figure 270: dMRI TBSS MD Posterior corona radiata R

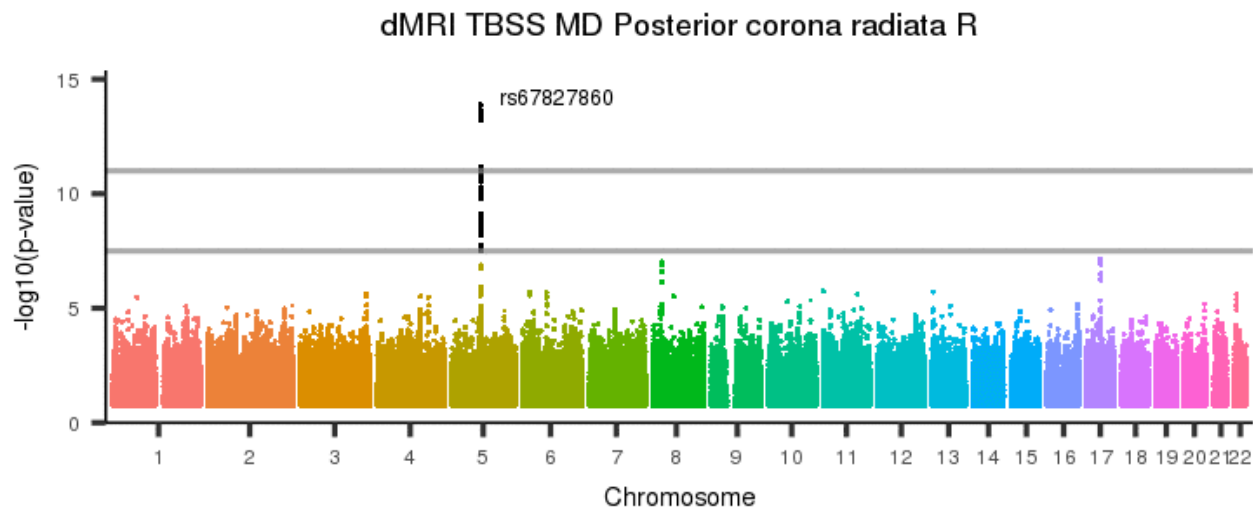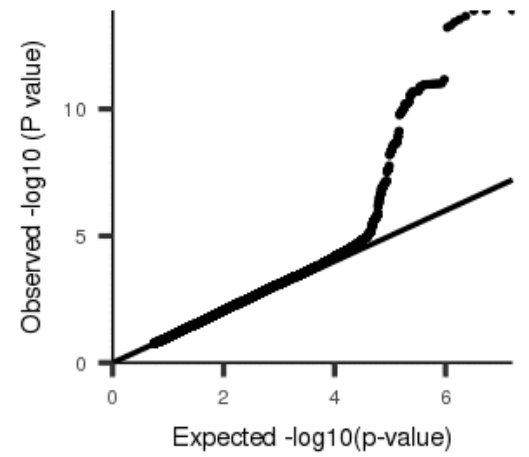

[back to list of plots](#)

Figure 271: dMRI TBSS MD Posterior corona radiata L

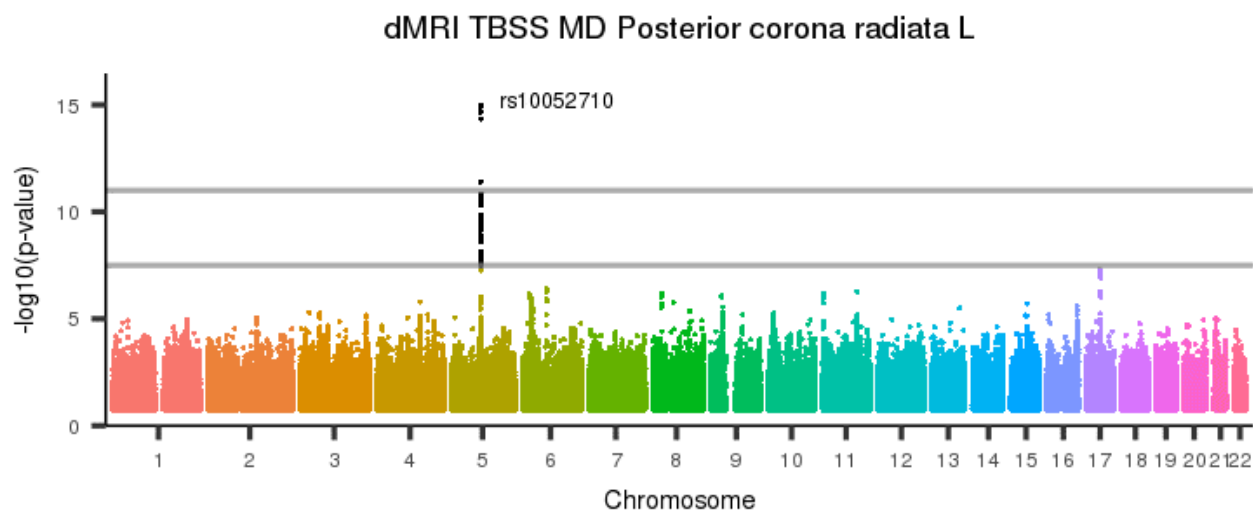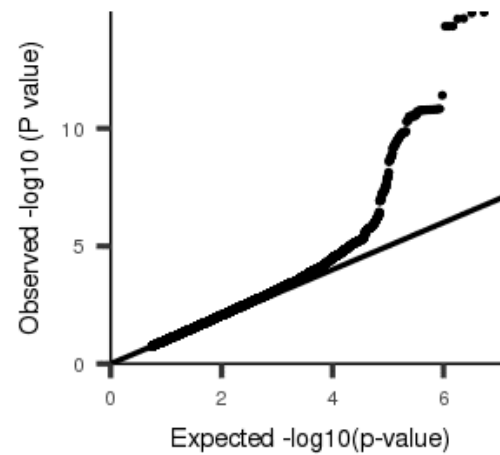

[back to list of plots](#)

Figure 272: dMRI TBSS MD Posterior thalamic radiation R

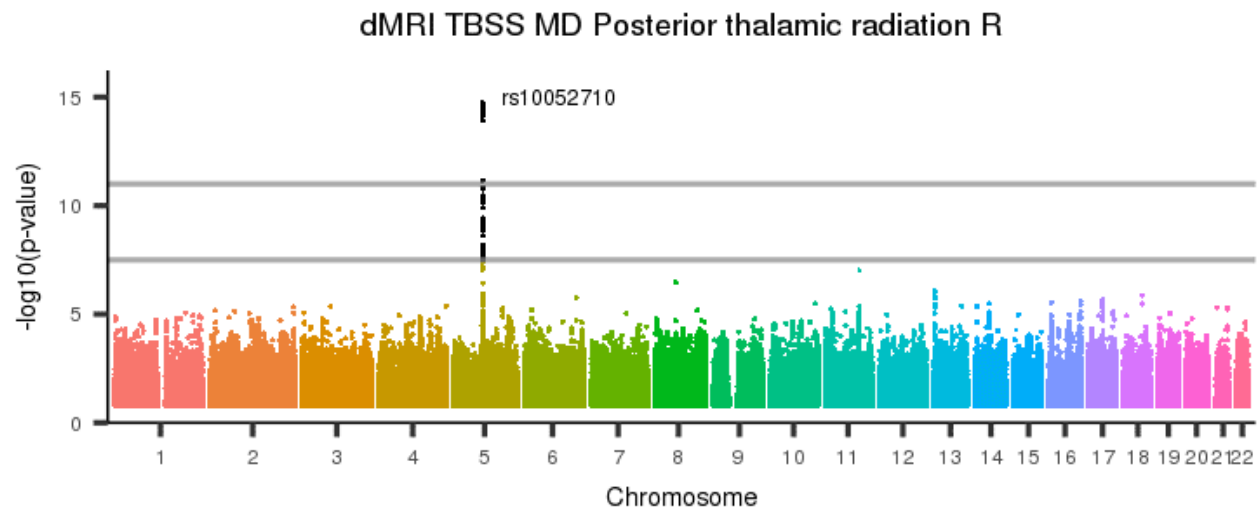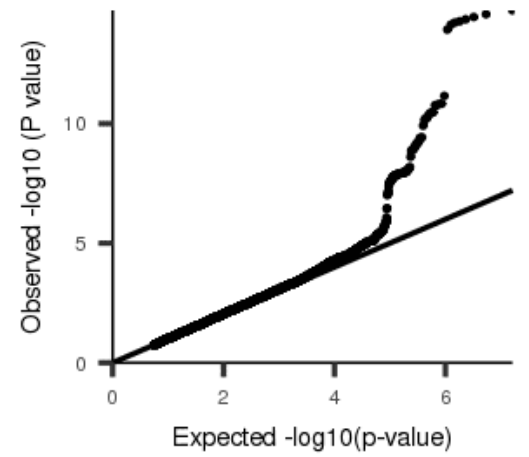

[back to list of plots](#)

Figure 273: dMRI TBSS MD Posterior thalamic radiation L

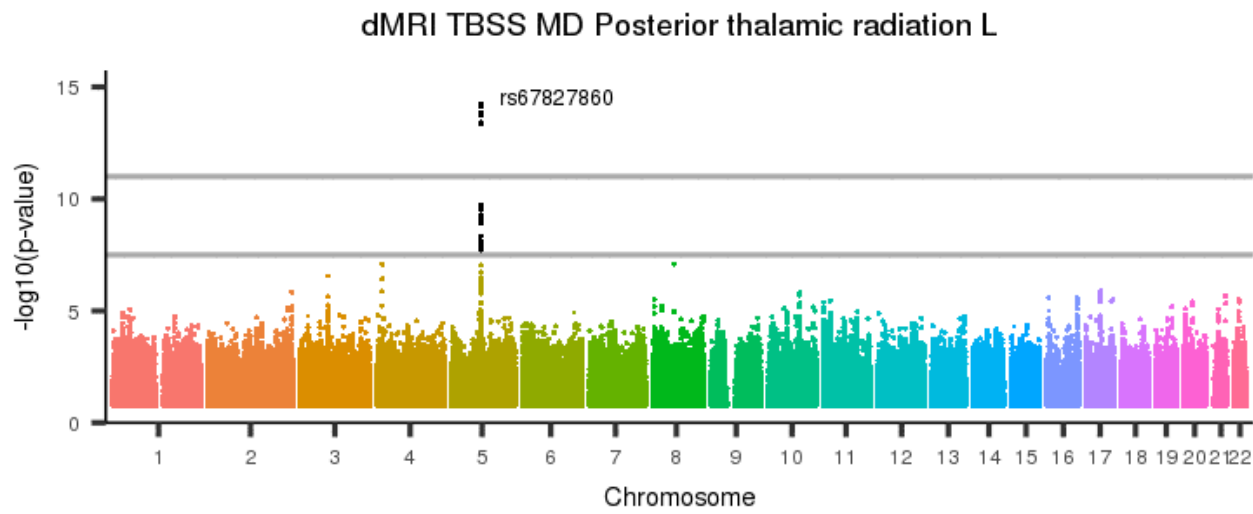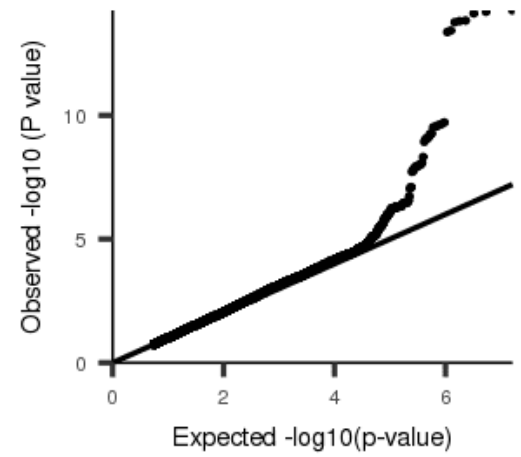

[back to list of plots](#)

Figure 274: dMRI TBSS MD Sagittal stratum R

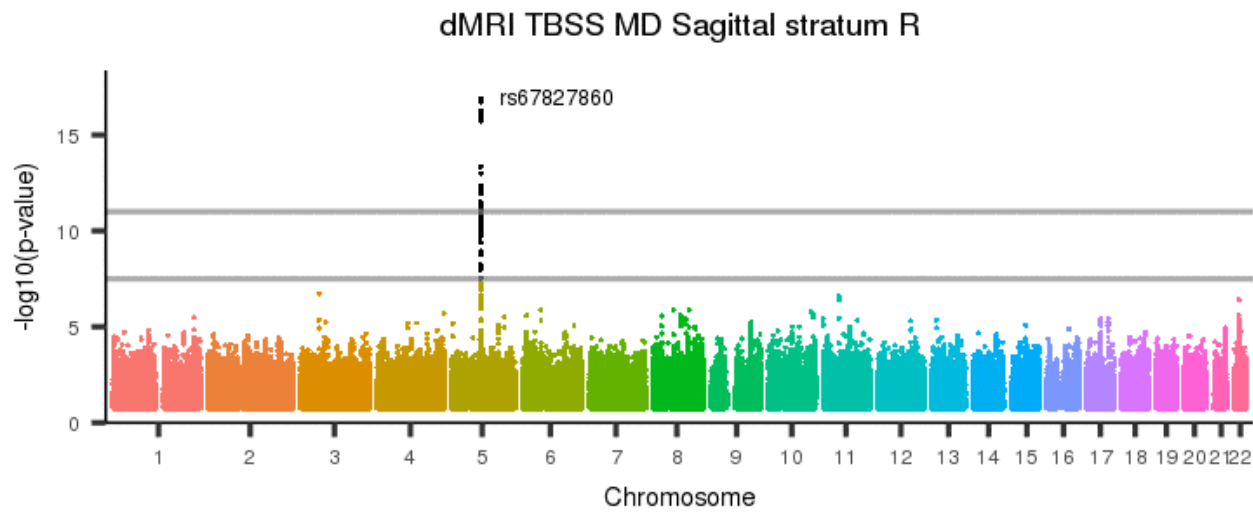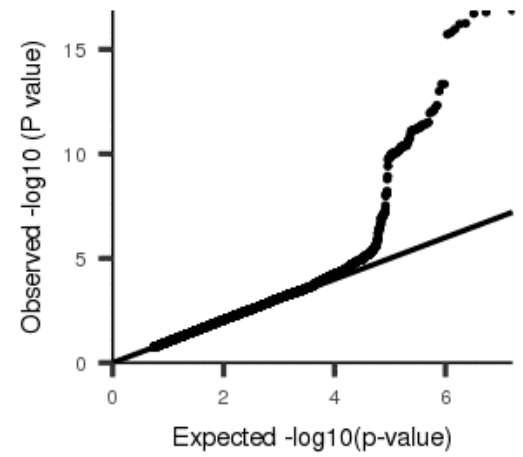

[back to list of plots](#)

Figure 275: dMRI TBSS MD Sagittal stratum L

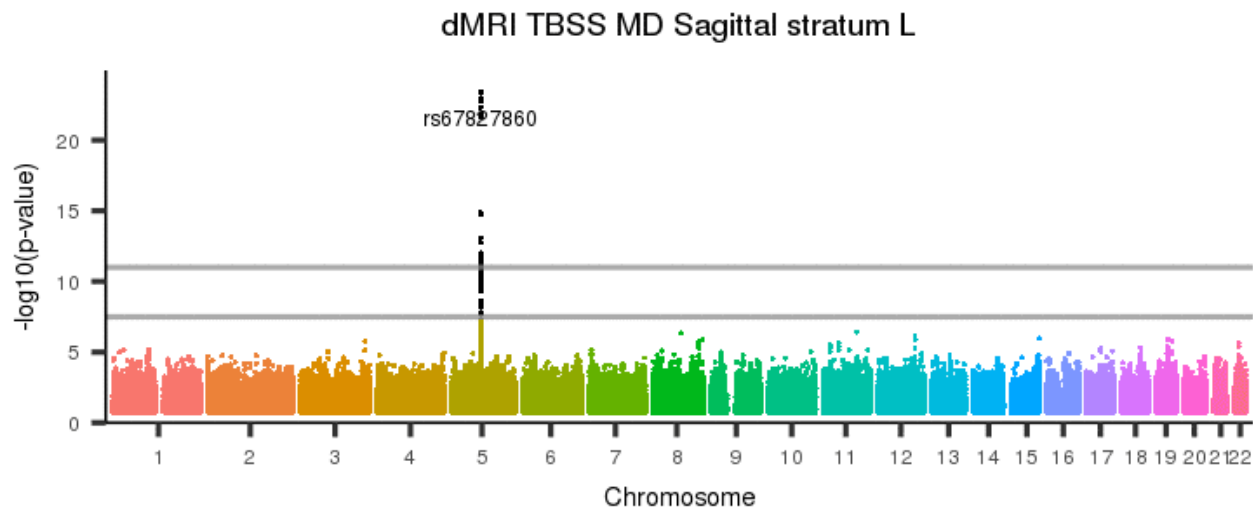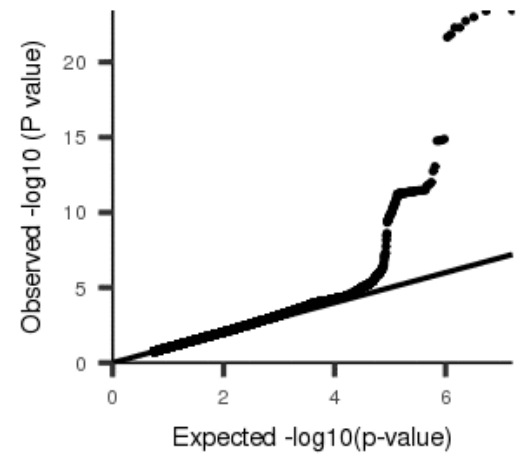

[back to list of plots](#)

Figure 276: dMRI TBSS MD External capsule R

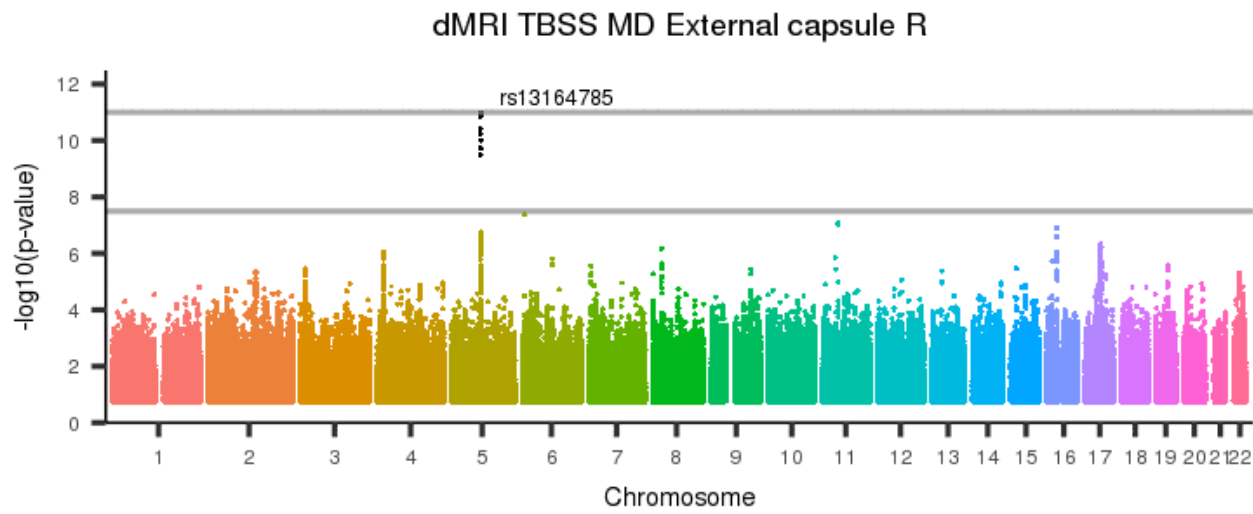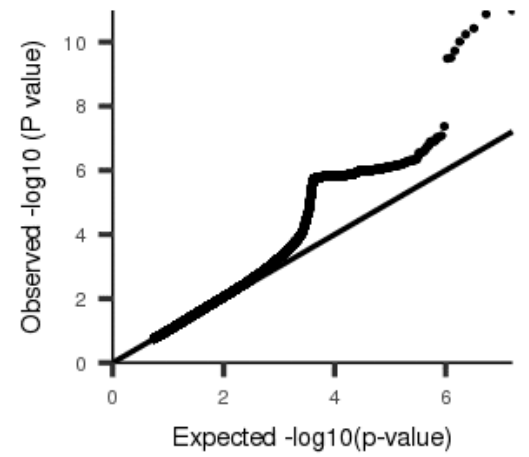

[back to list of plots](#)

Figure 277: dMRI TBSS MD External capsule L

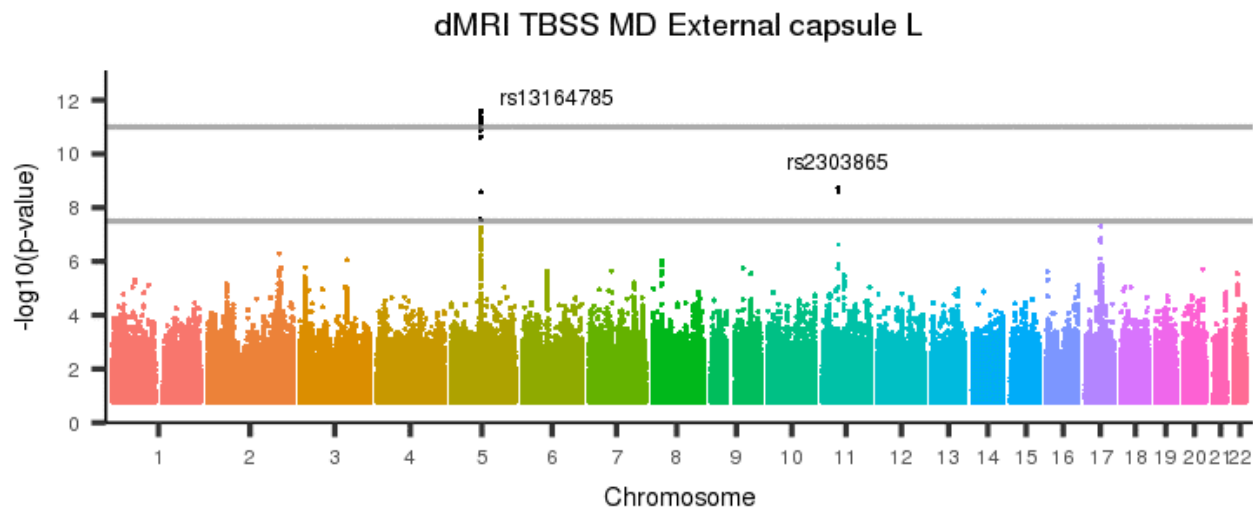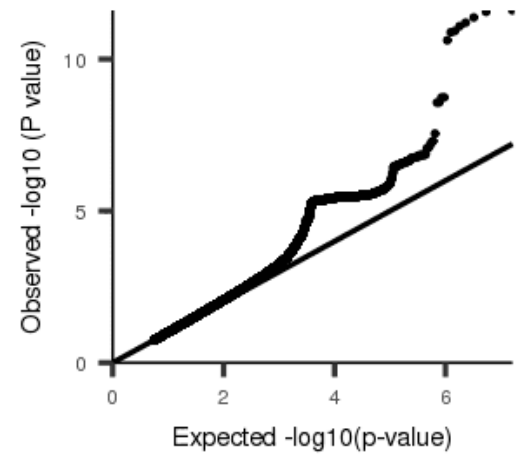

[back to list of plots](#)



Figure 278: dMRI TBSS MD Cingulum cingulate gyrus R

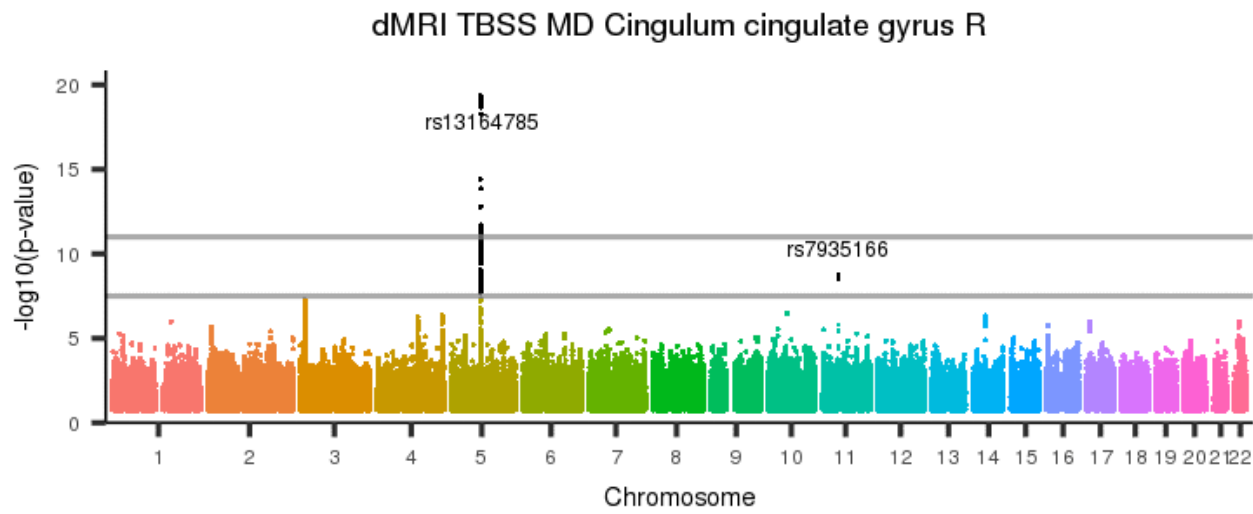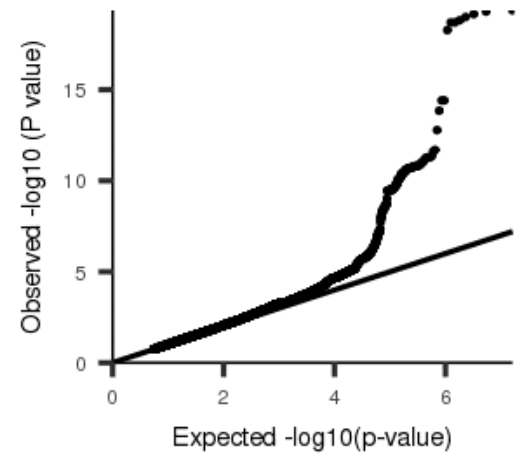

[back to list of plots](#)

Figure 279: dMRI TBSS MD Cingulum cingulate gyrus L

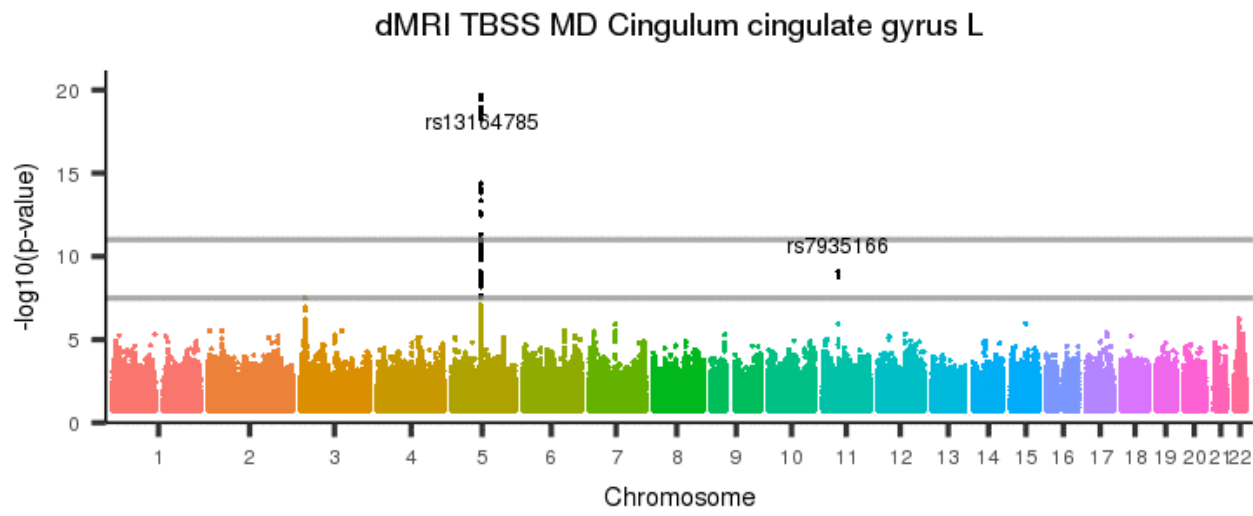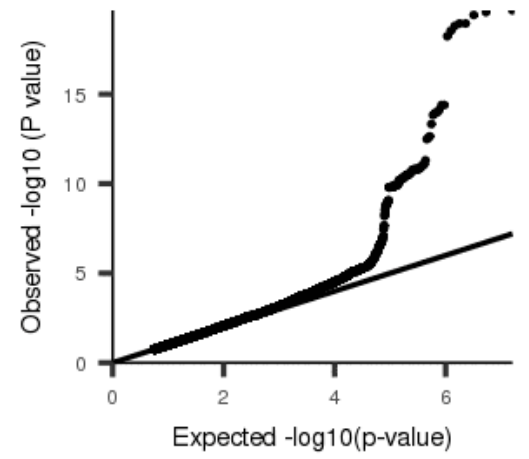

[back to list of plots](#)

Figure 280: dMRI TBSS MD Cingulum hippocampus R

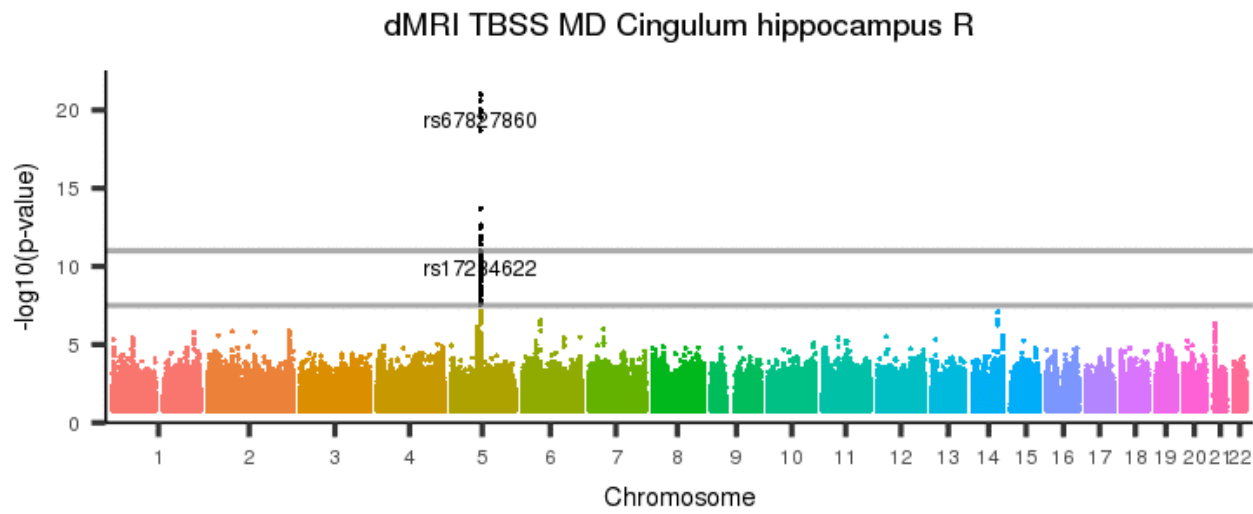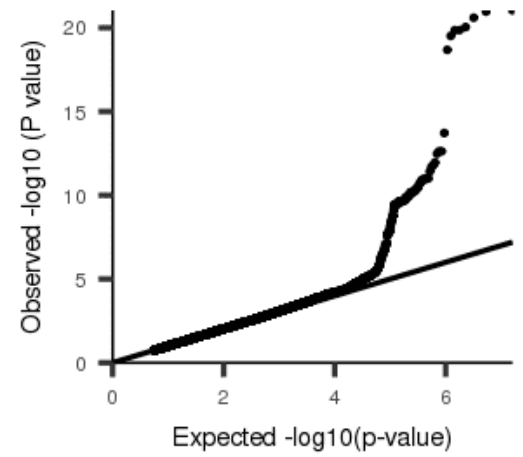

[back to list of plots](#)

Figure 281: dMRI TBSS MD Cingulum hippocampus L

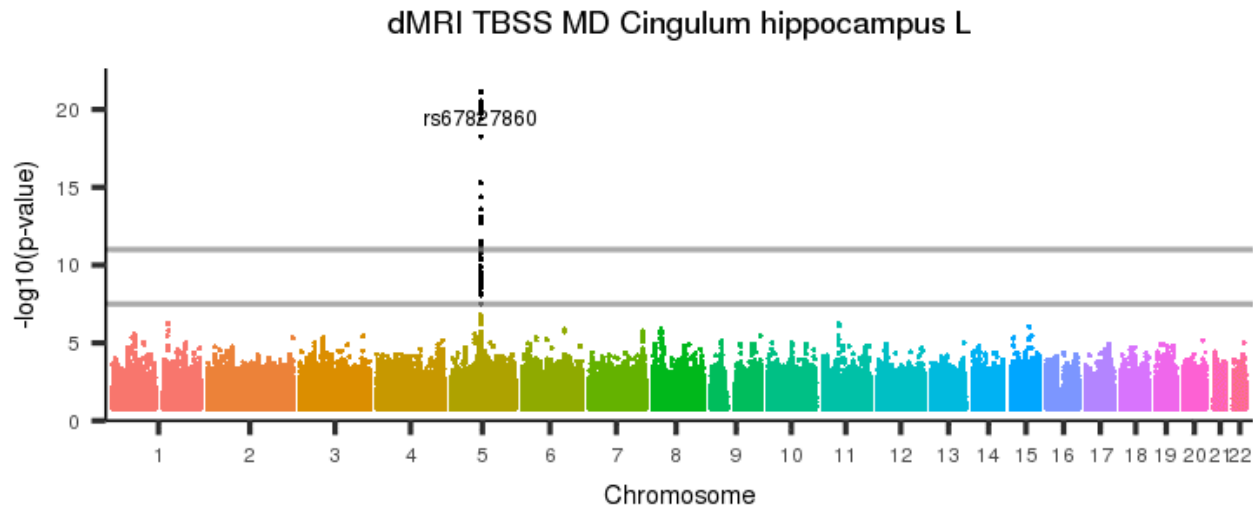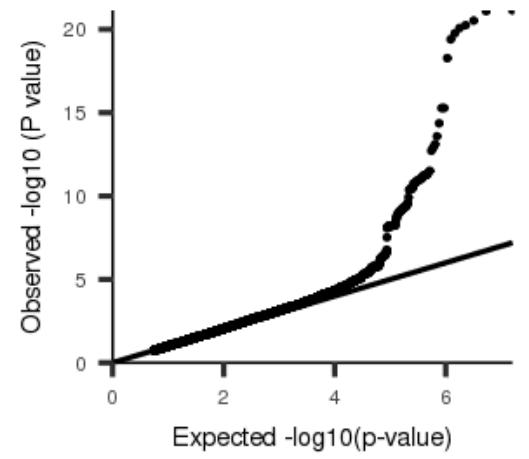

[back to list of plots](#)

Figure 282: dMRI TBSS MD Fornix cres+Stria terminalis R

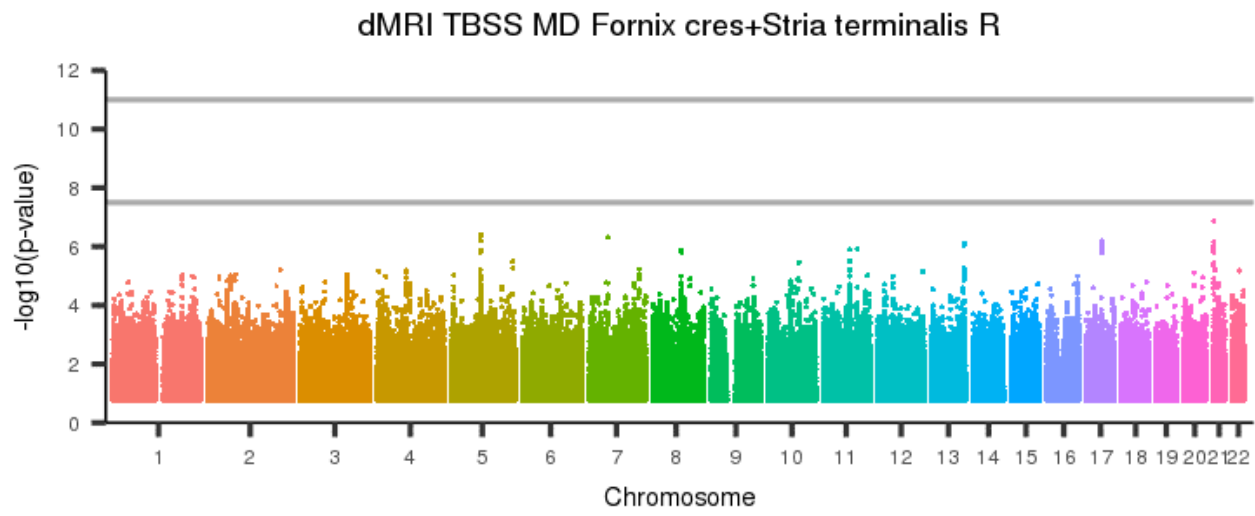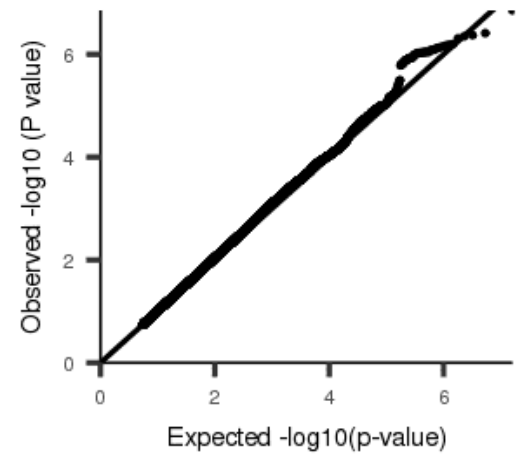

[back to list of plots](#)

Figure 283: dMRI TBSS MD Fornix cres+Stria terminalis L

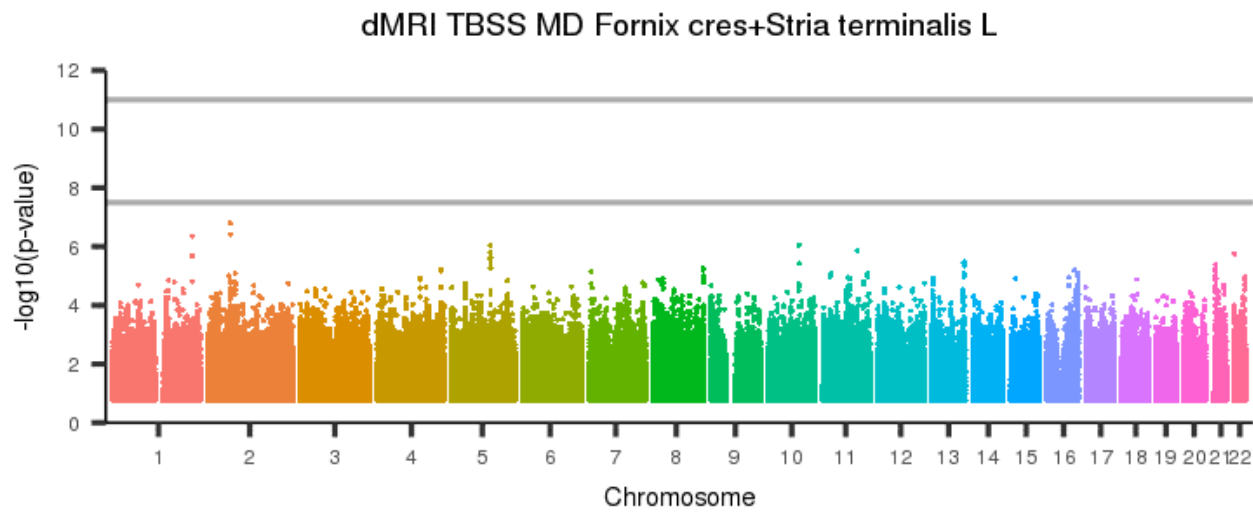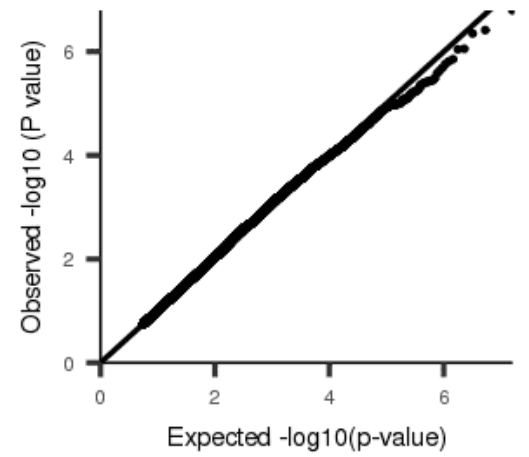

[back to list of plots](#)

Figure 284: dMRI TBSS MD Superior longitudinal fasciculus R

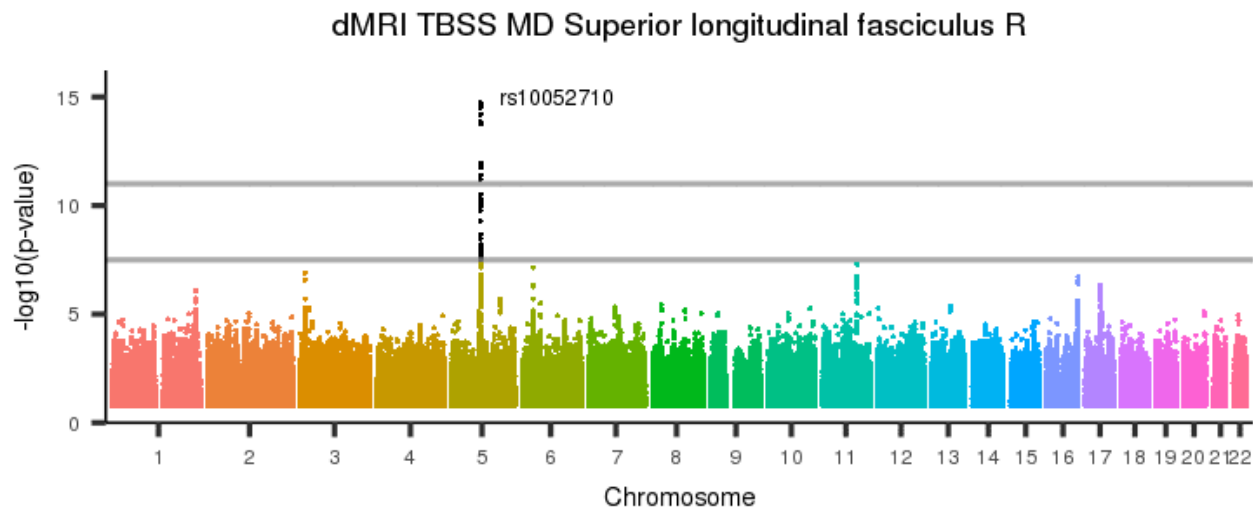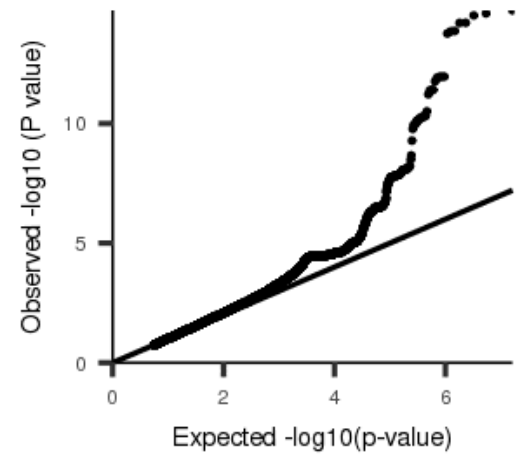

[back to list of plots](#)

Figure 285: dMRI TBSS MD Superior longitudinal fasciculus L

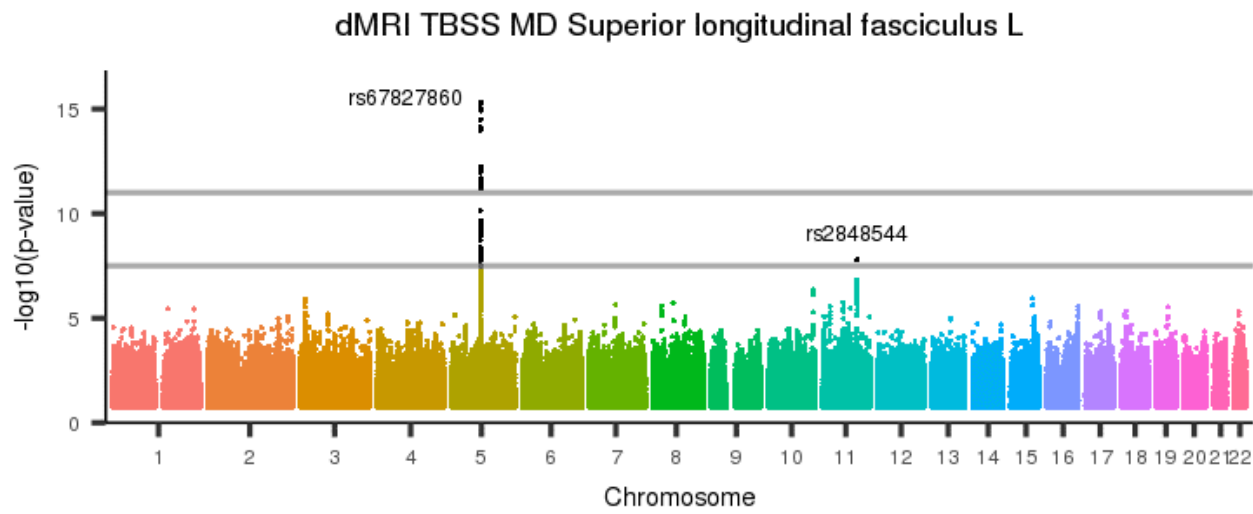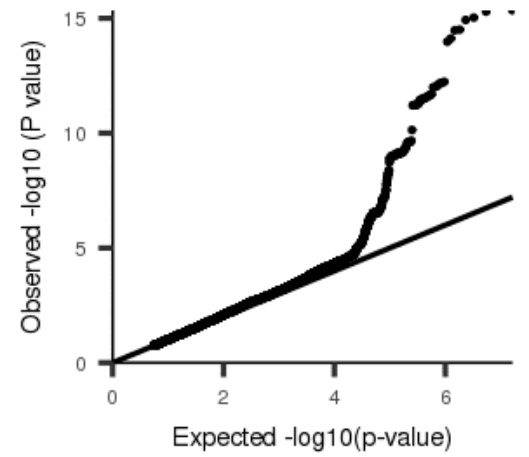

[back to list of plots](#)



Figure 286: dMRI TBSS MD Superior fronto-occipital fasciculus R

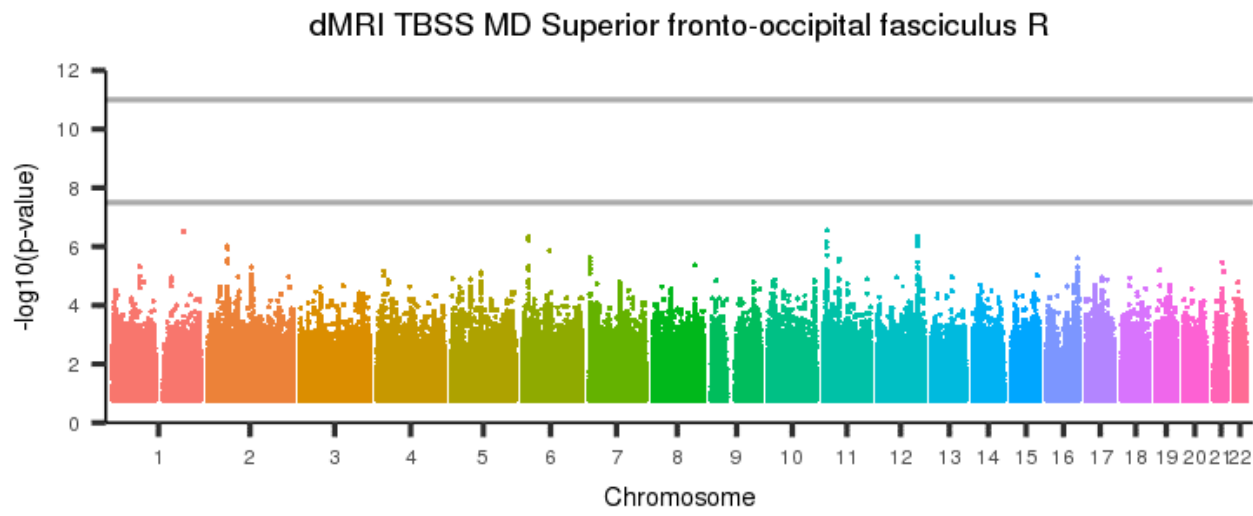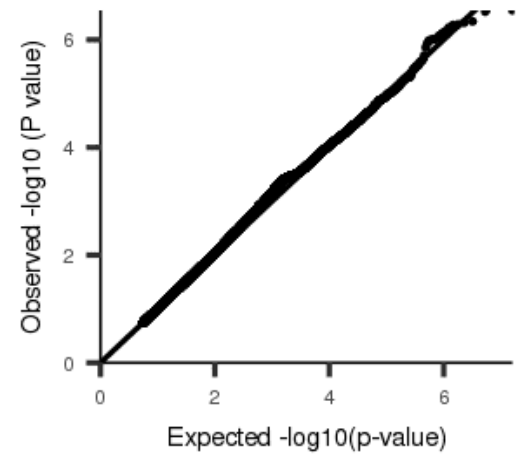

[back to list of plots](#)

Figure 287: dMRI TBSS MD Superior fronto-occipital fasciculus L

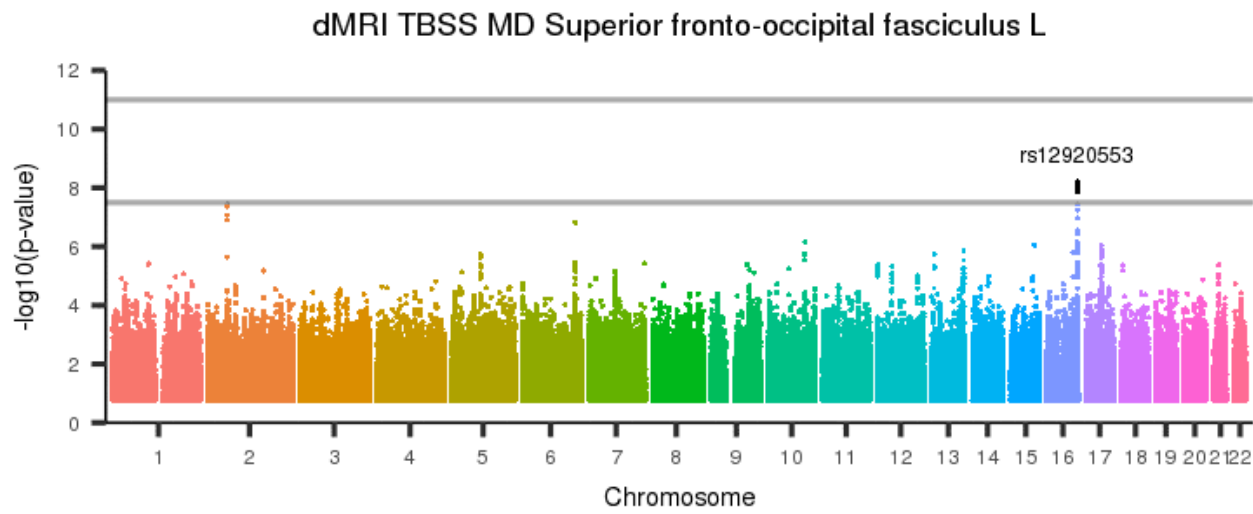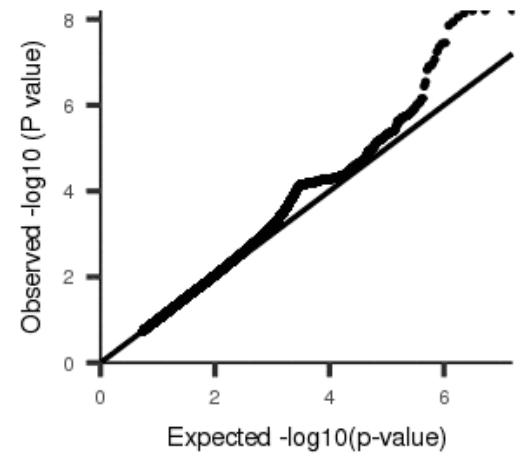

[back to list of plots](#)

Figure 288: dMRI TBSS MD Uncinate fasciculus R

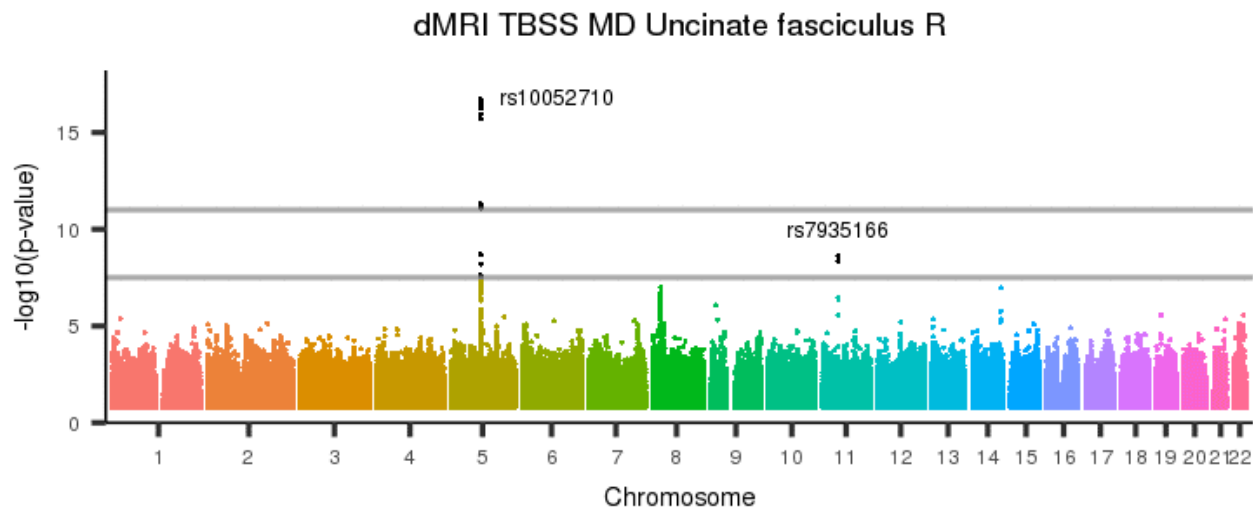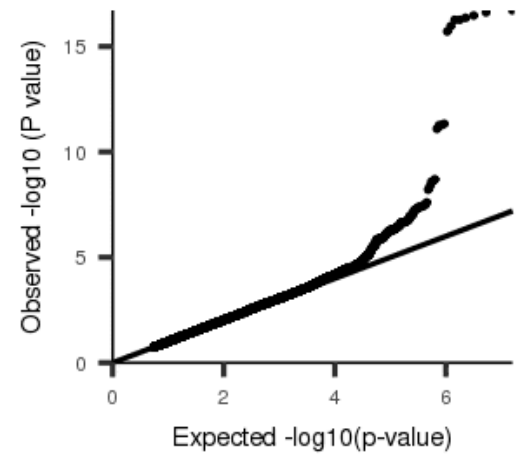

[back to list of plots](#)

Figure 289: dMRI TBSS MD Uncinate fasciculus L

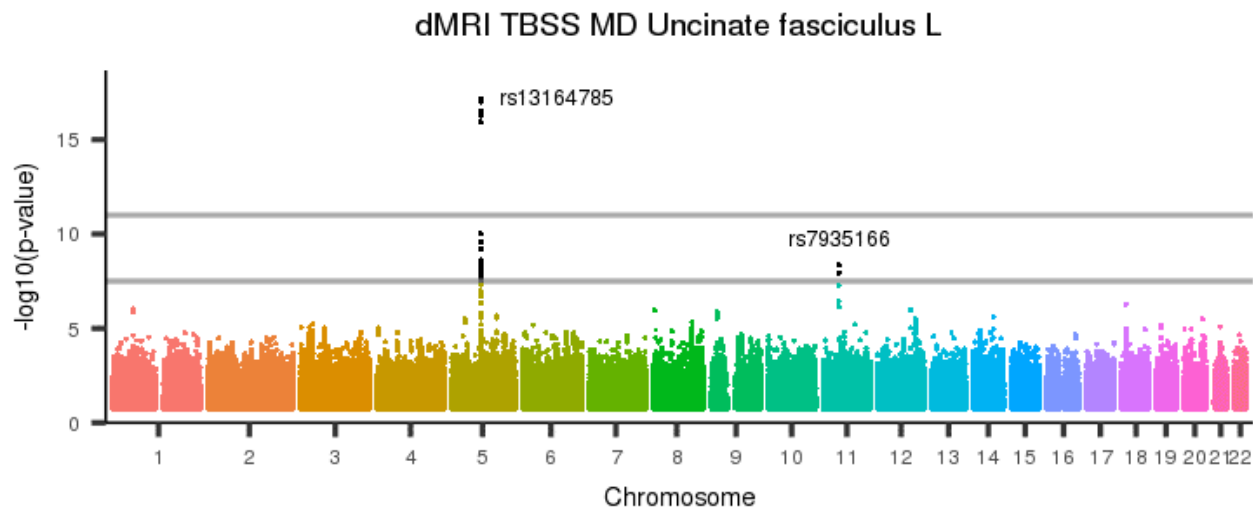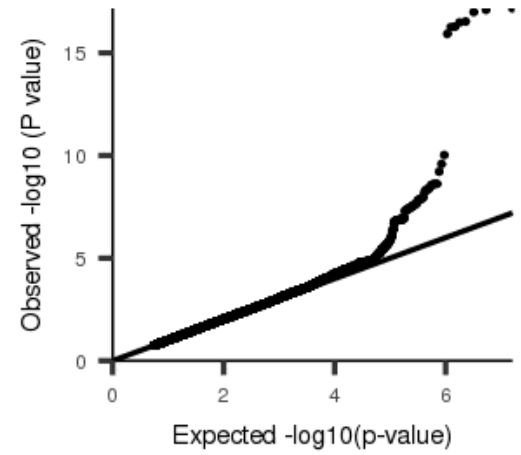

[back to list of plots](#)

Figure 290: dMRI TBSS MD Tapetum R

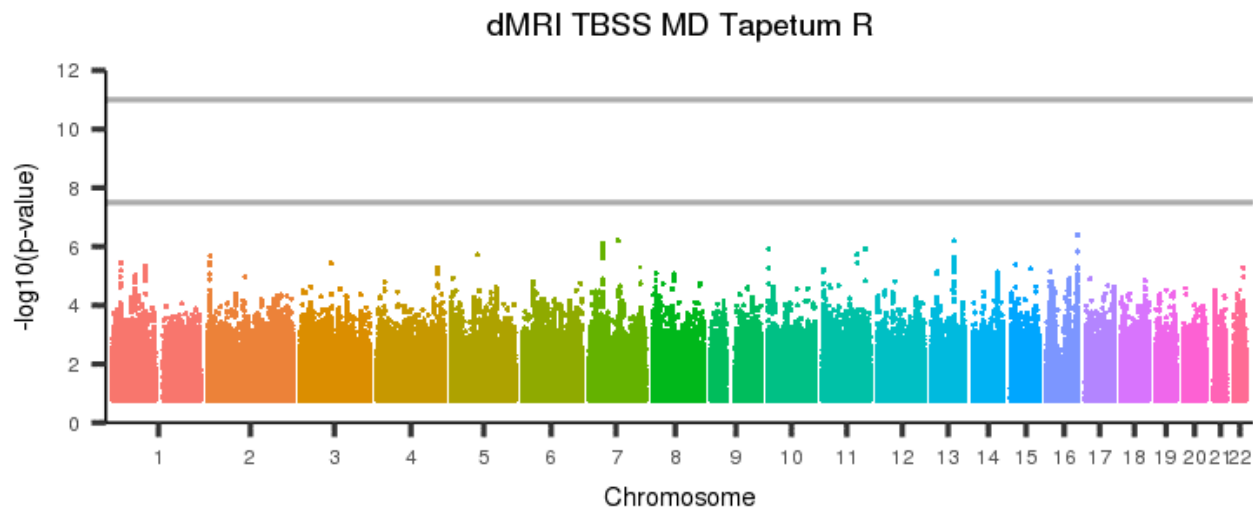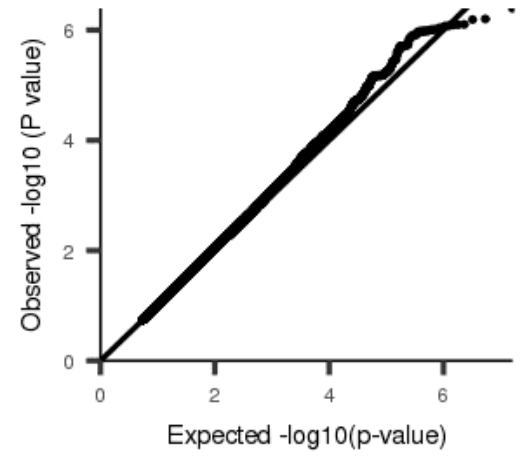

[back to list of plots](#)

Figure 291: dMRI TBSS MD Tapetum L

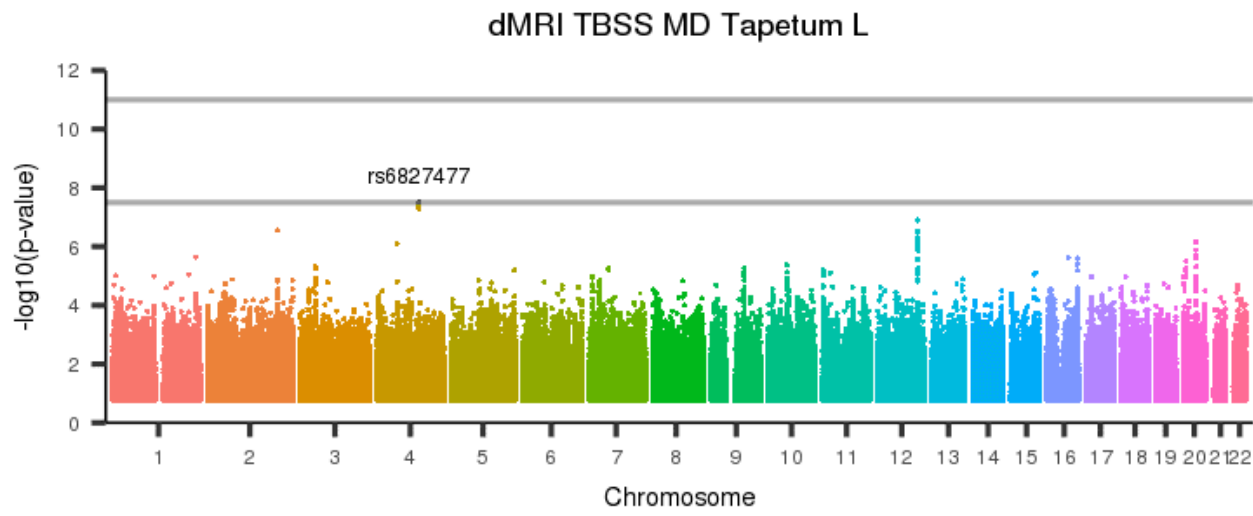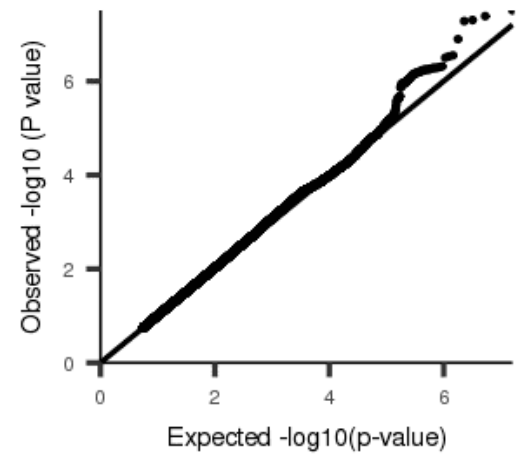

[back to list of plots](#)

Figure 292: dMRI TBSS MO Middle cerebellar peduncle

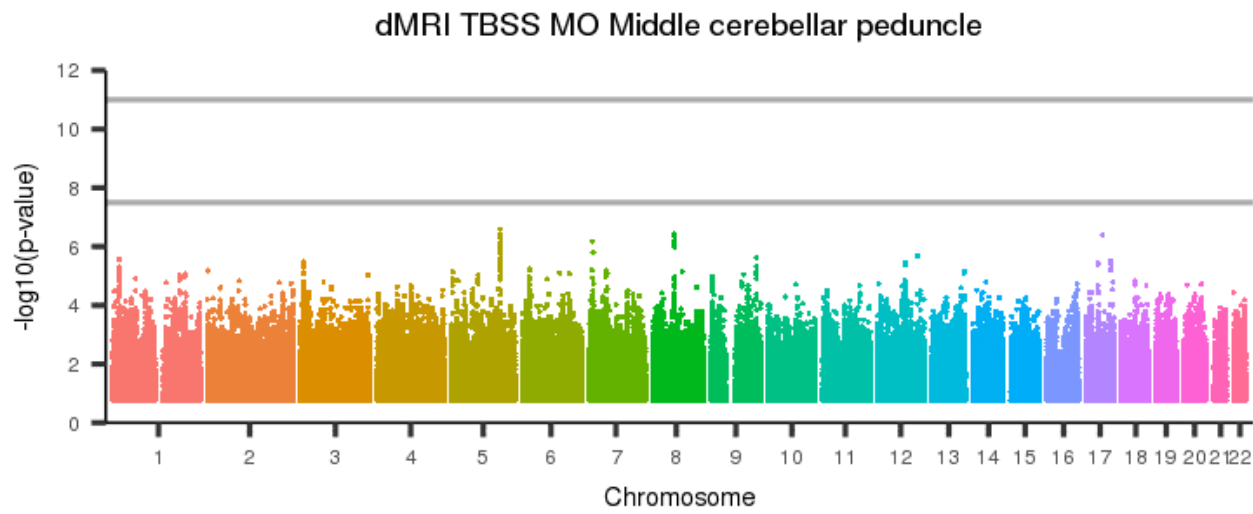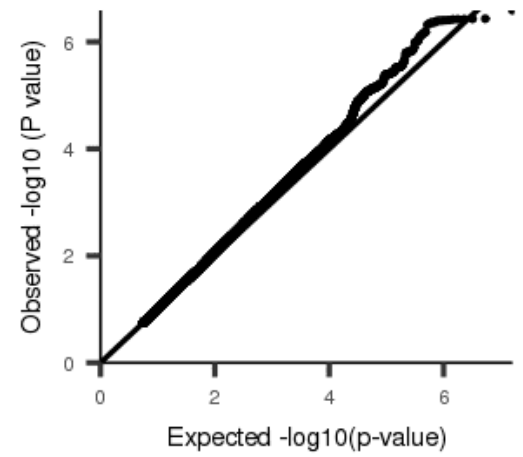

[back to list of plots](#)

Figure 293: dMRI TBSS MO Pontine crossing tract

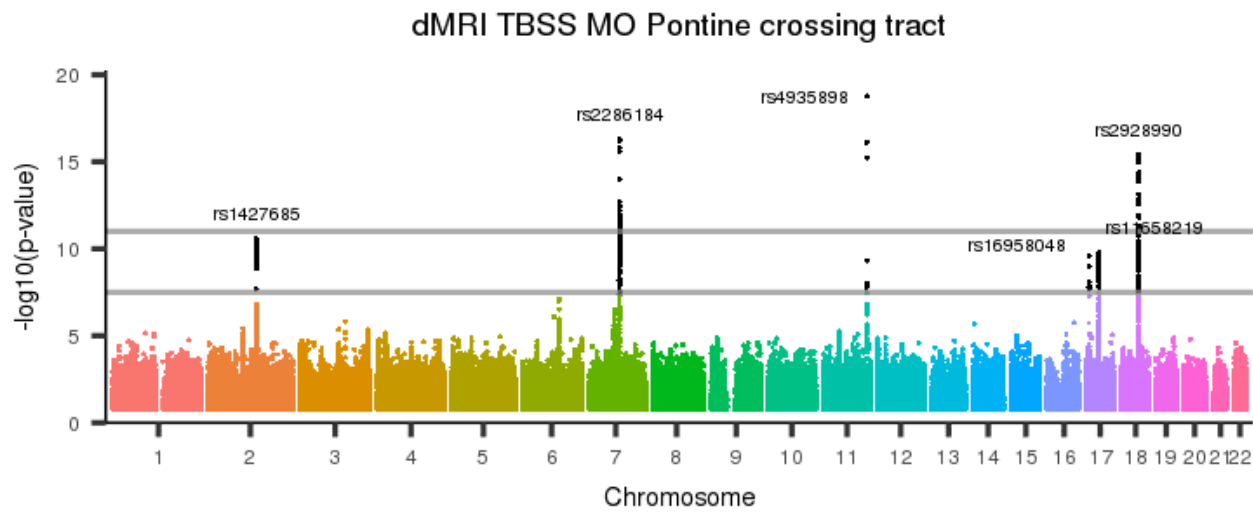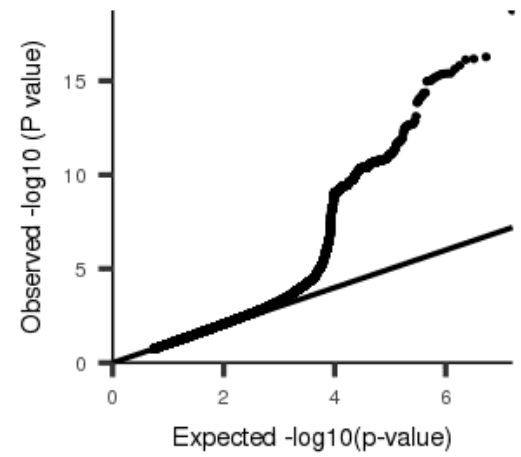

[back to list of plots](#)



Figure 294: dMRI TBSS MO Genu of corpus callosum

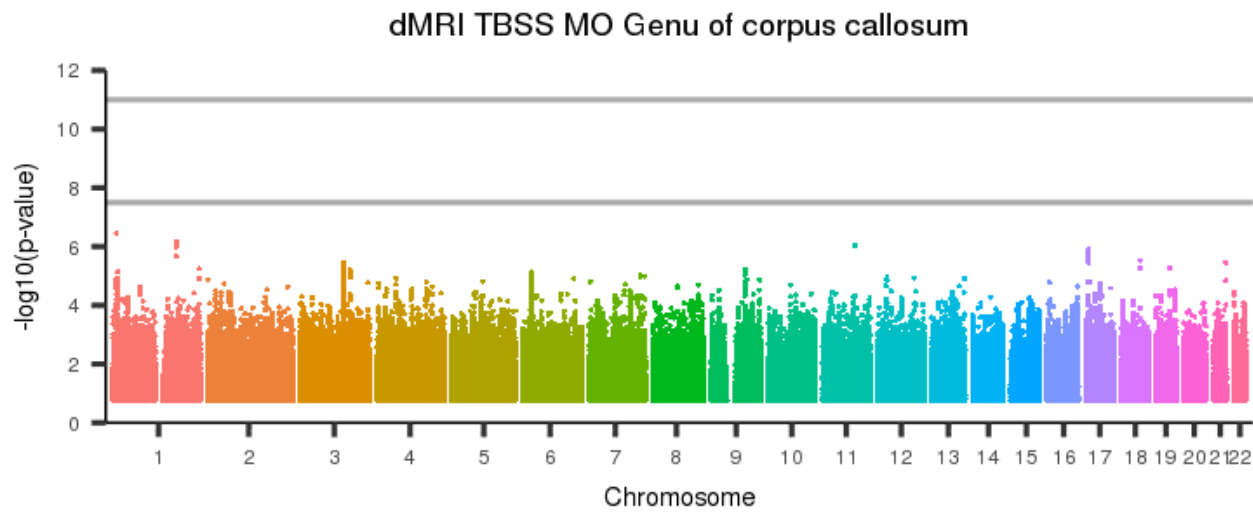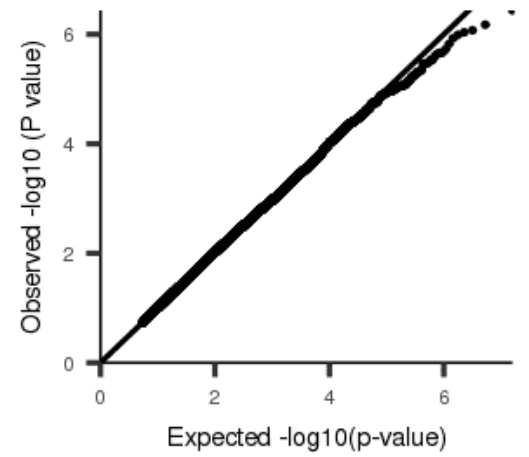

[back to list of plots](#)

Figure 295: dMRI TBSS MO Body of corpus callosum

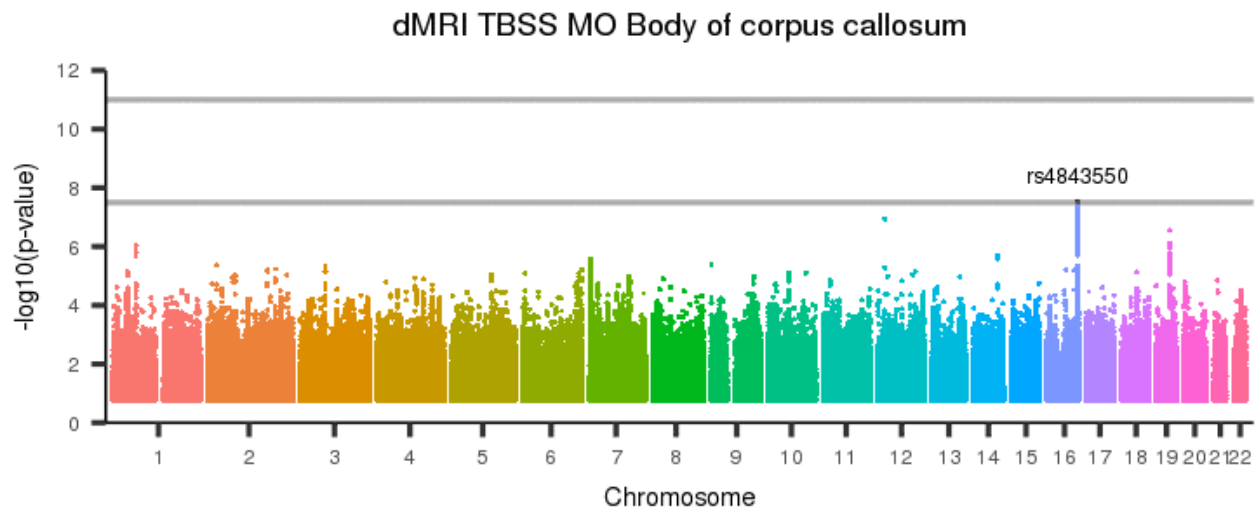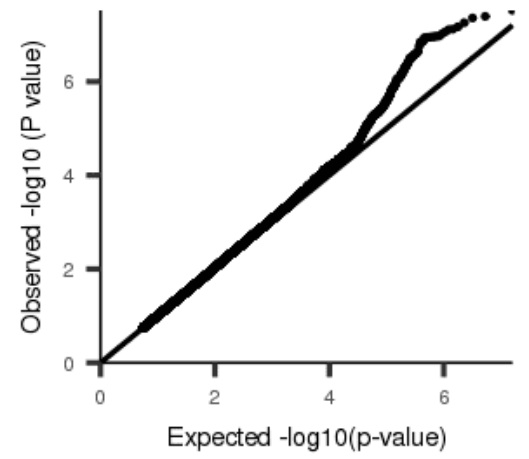

[back to list of plots](#)

Figure 296: dMRI TBSS MO Splenium of corpus callosum

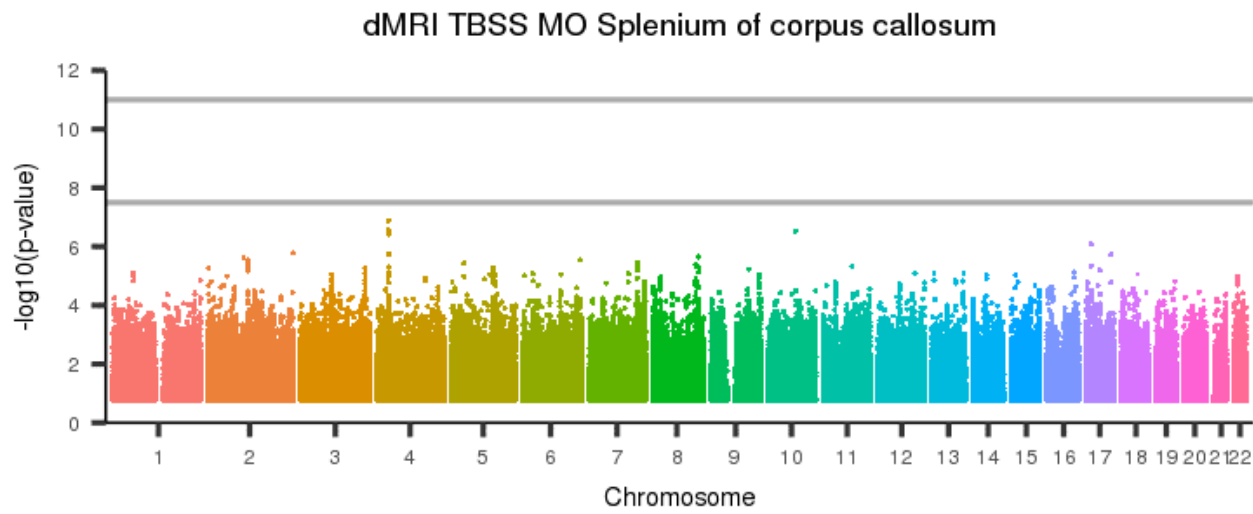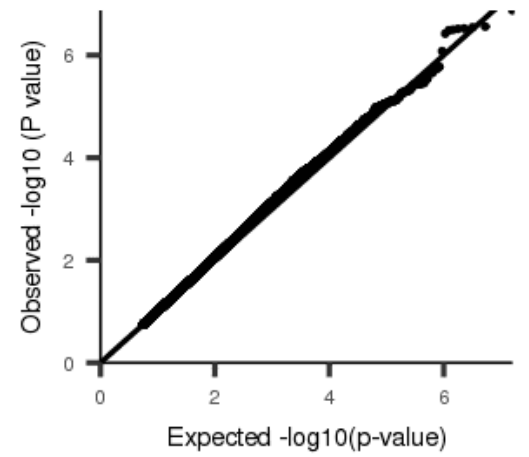

[back to list of plots](#)

Figure 297: dMRI TBSS MO Fornix

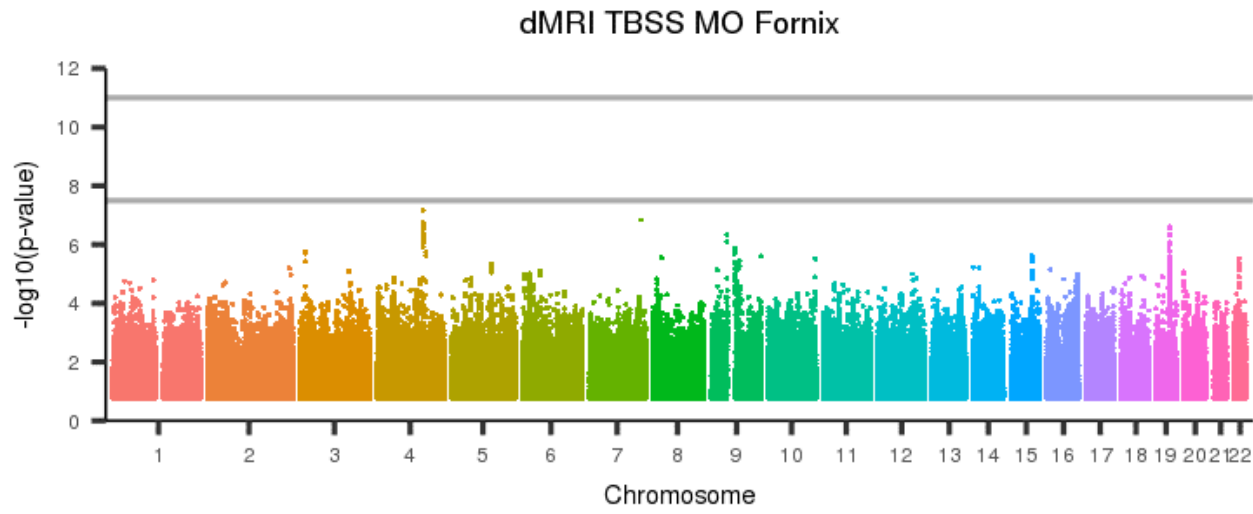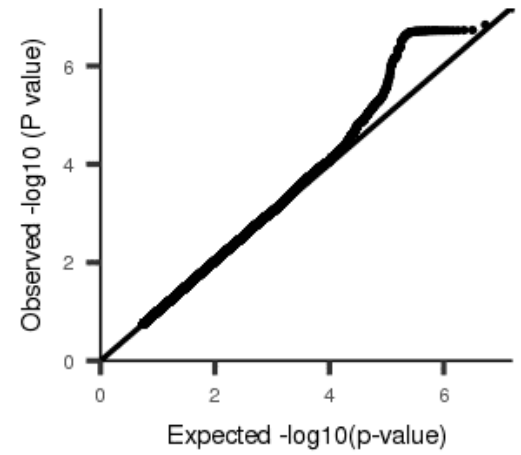

[back to list of plots](#)

Figure 298: dMRI TBSS MO Corticospinal tract R

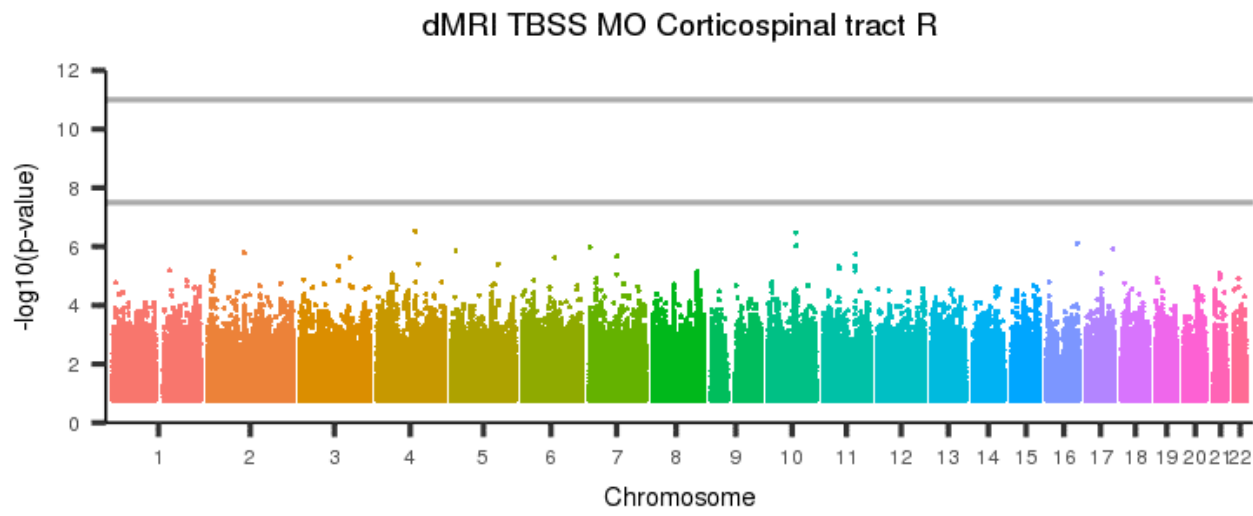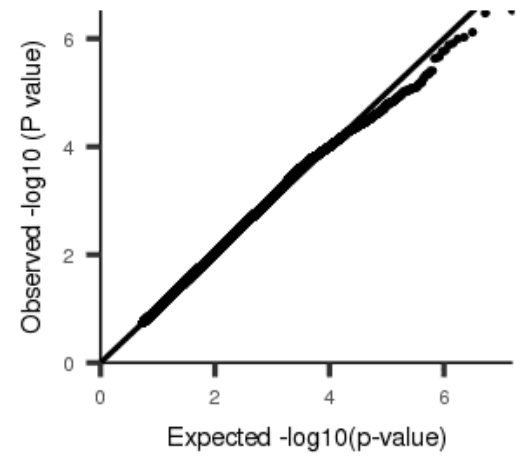

[back to list of plots](#)

Figure 299: dMRI TBSS MO Corticospinal tract L

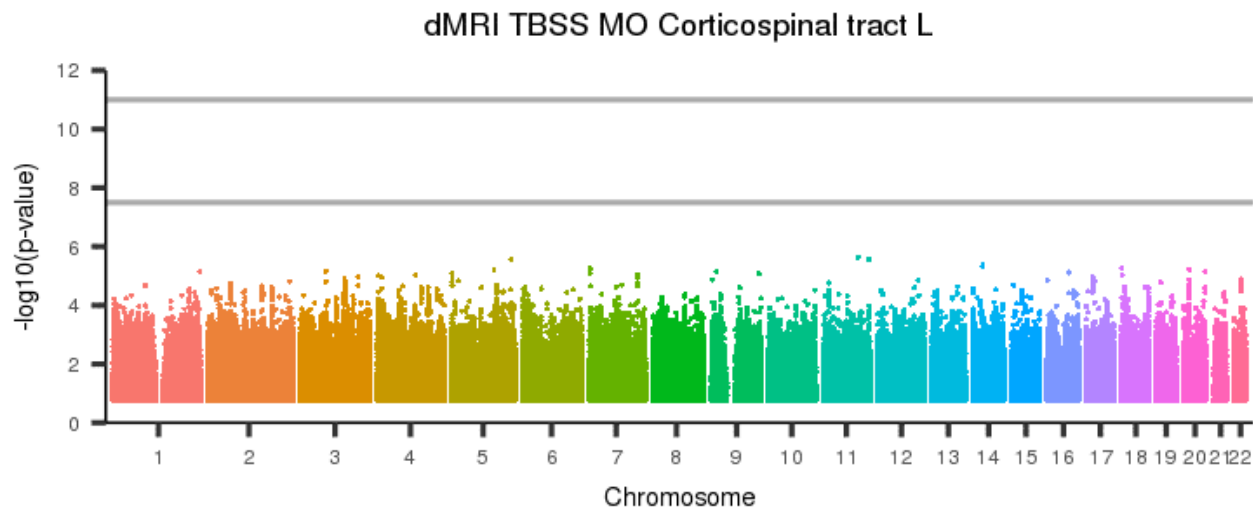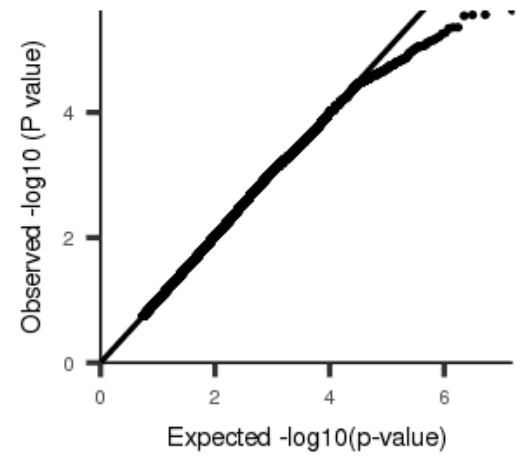

[back to list of plots](#)

Figure 300: dMRI TBSS MO Medial lemniscus R

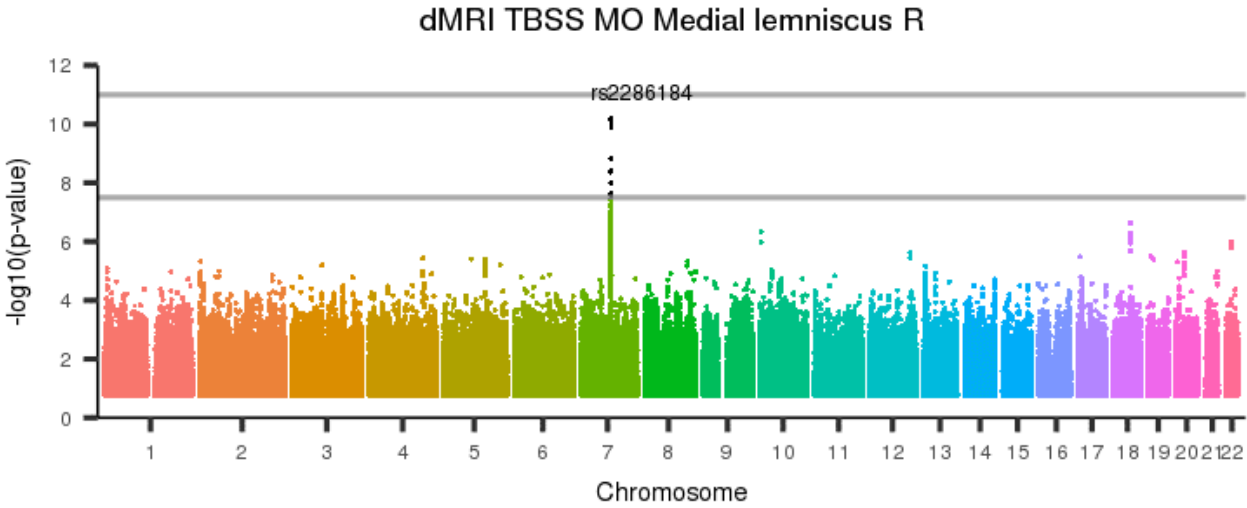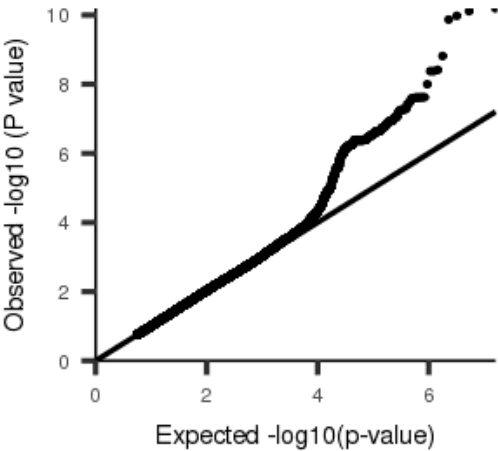

[back to list of plots](#)

Figure 301: dMRI TBSS MO Medial lemniscus L

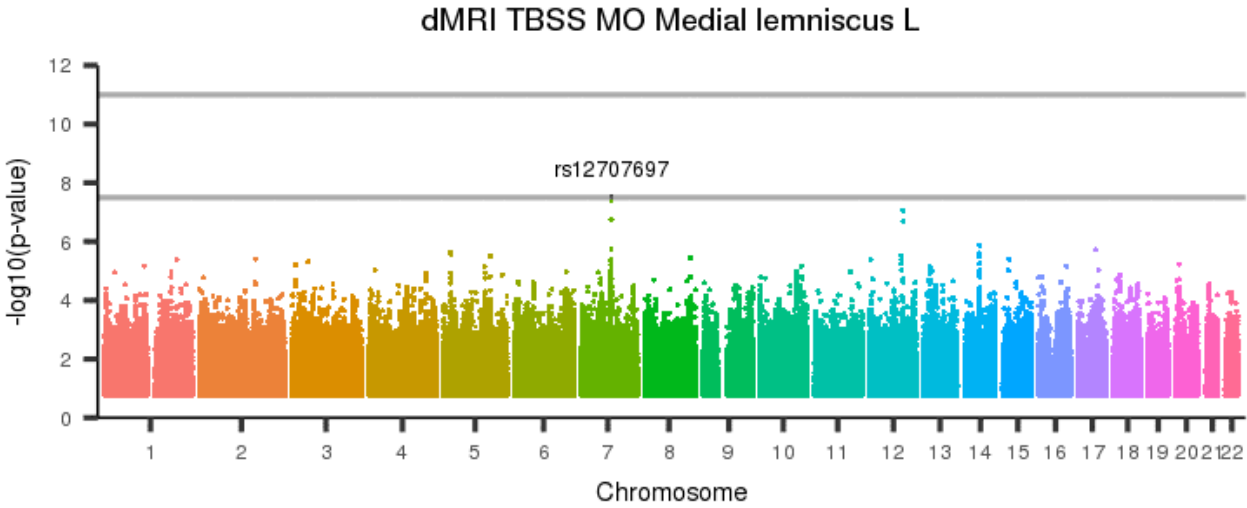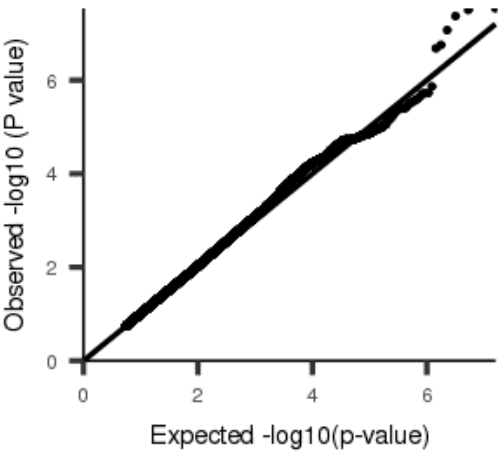

[back to list of plots](#)



Figure 302: dMRI TBSS MO Inferior cerebellar peduncle R

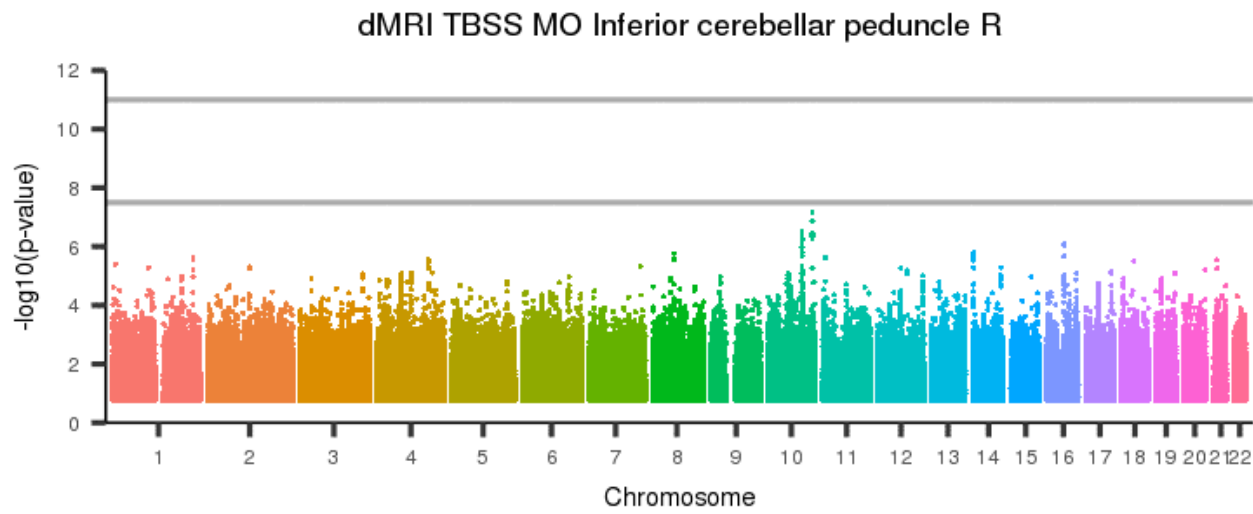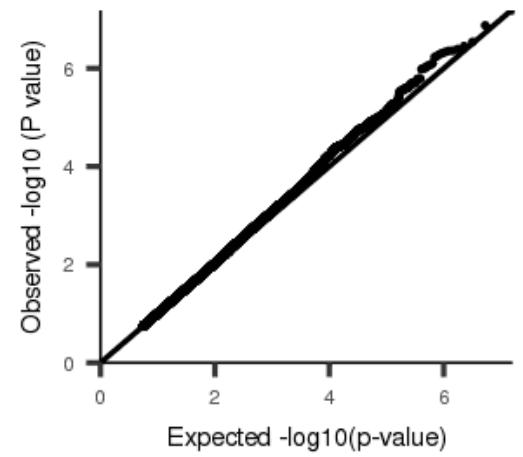

[back to list of plots](#)

Figure 303: dMRI TBSS MO Inferior cerebellar peduncle L

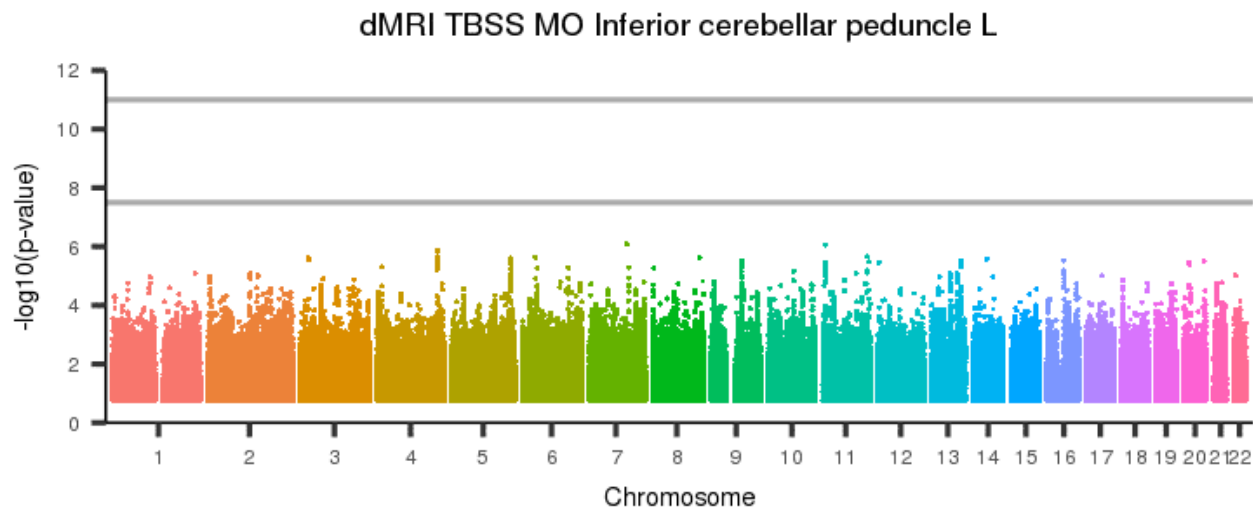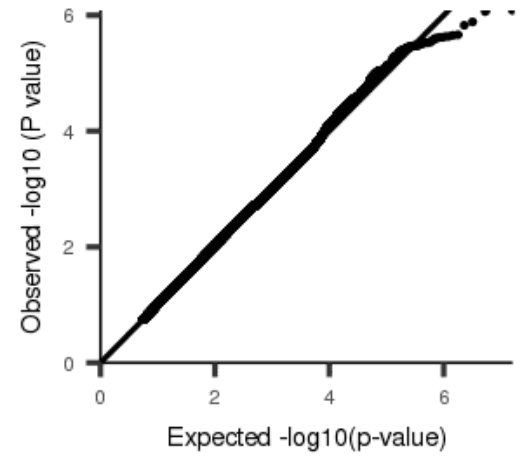

[back to list of plots](#)

Figure 304: dMRI TBSS MO Superior cerebellar peduncle R

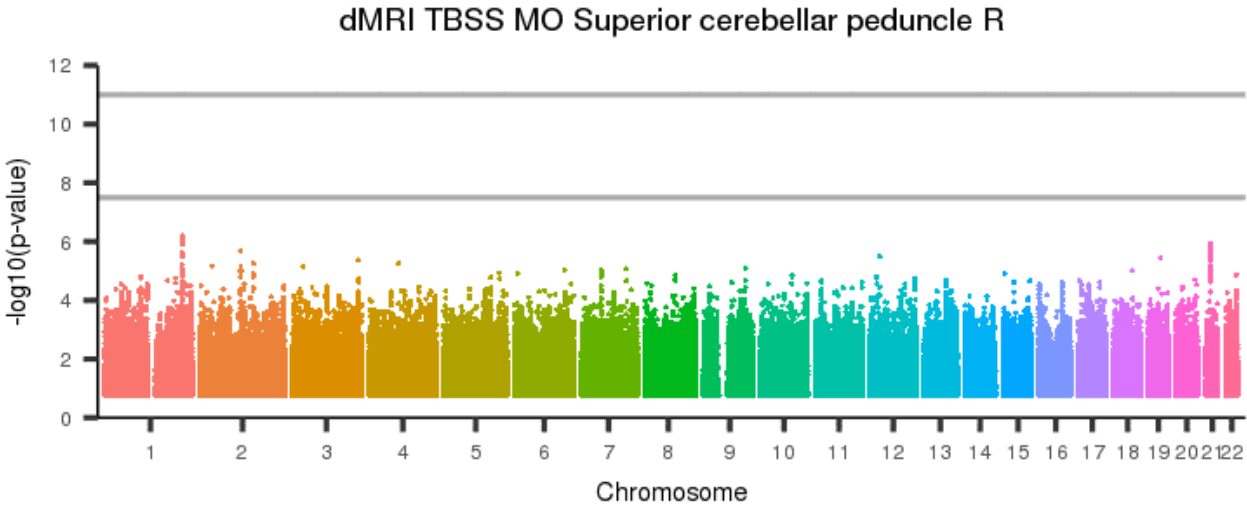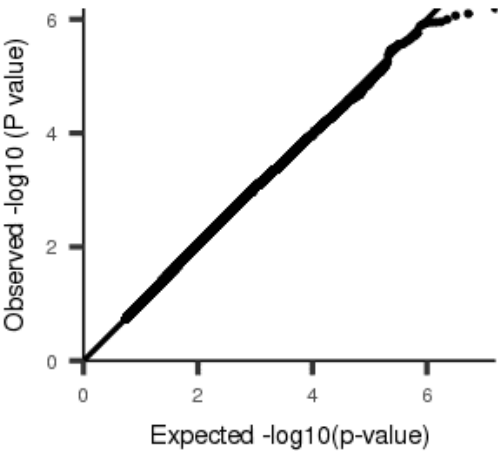

[back to list of plots](#)

Figure 305: dMRI TBSS MO Superior cerebellar peduncle L

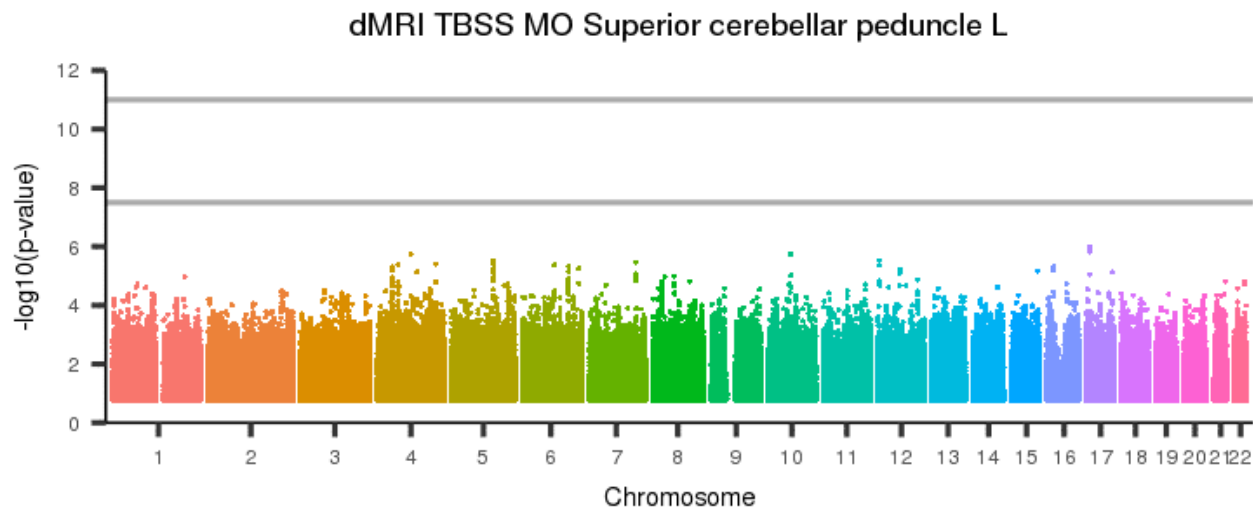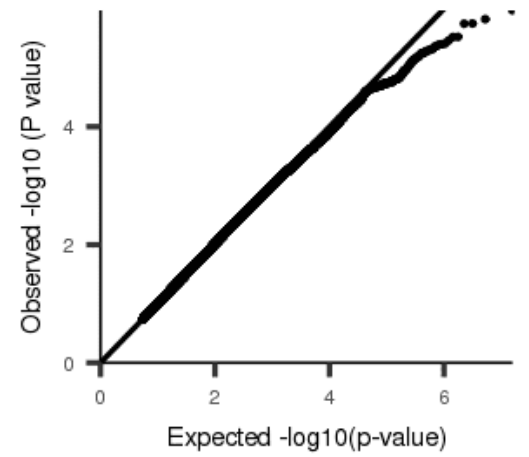

[back to list of plots](#)

Figure 306: dMRI TBSS MO Cerebral peduncle R

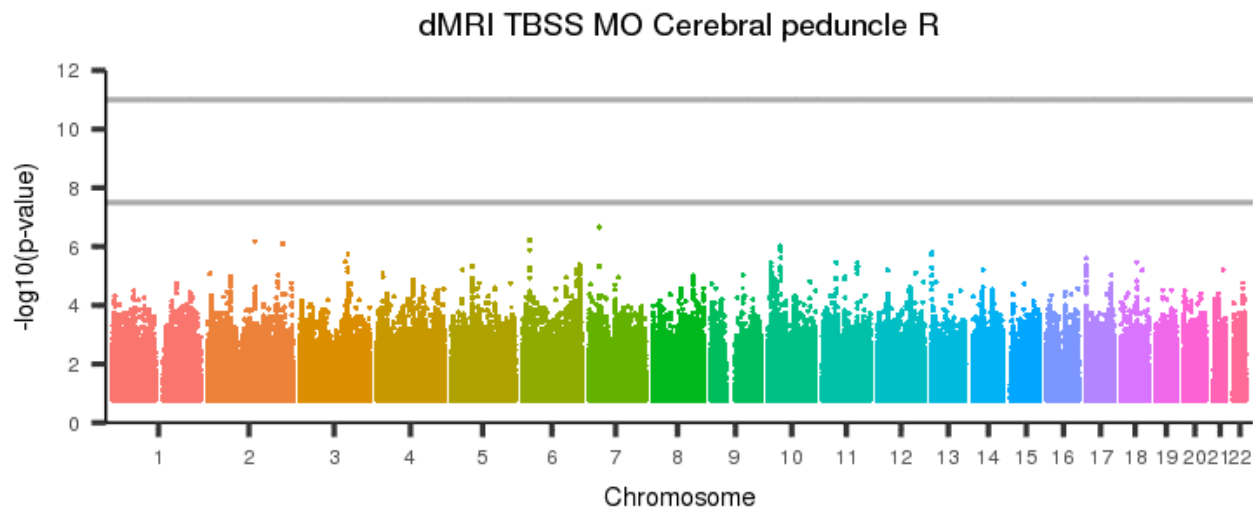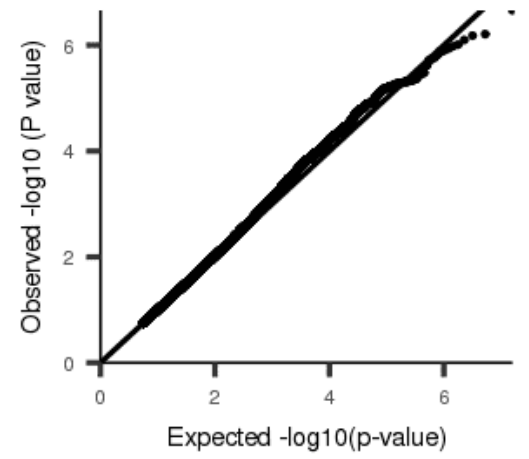

[back to list of plots](#)

Figure 307: dMRI TBSS MO Cerebral peduncle L

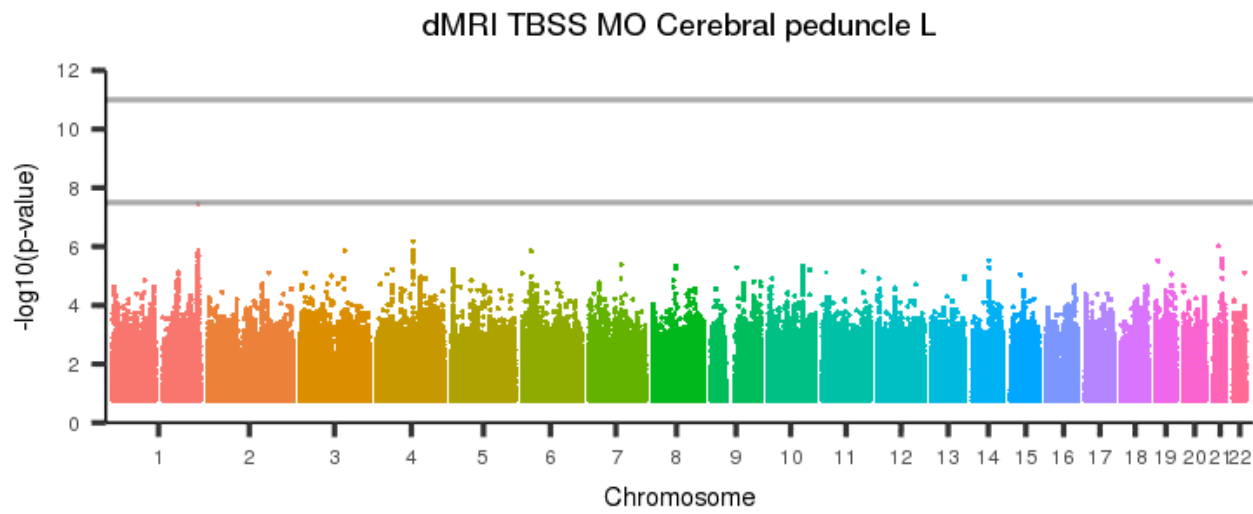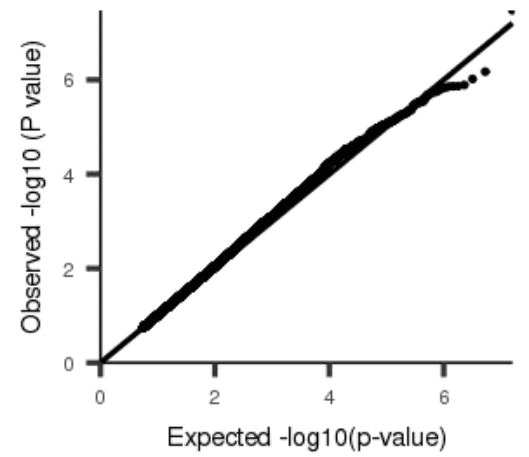

[back to list of plots](#)

Figure 308: dMRI TBSS MO Anterior limb of internal capsule R

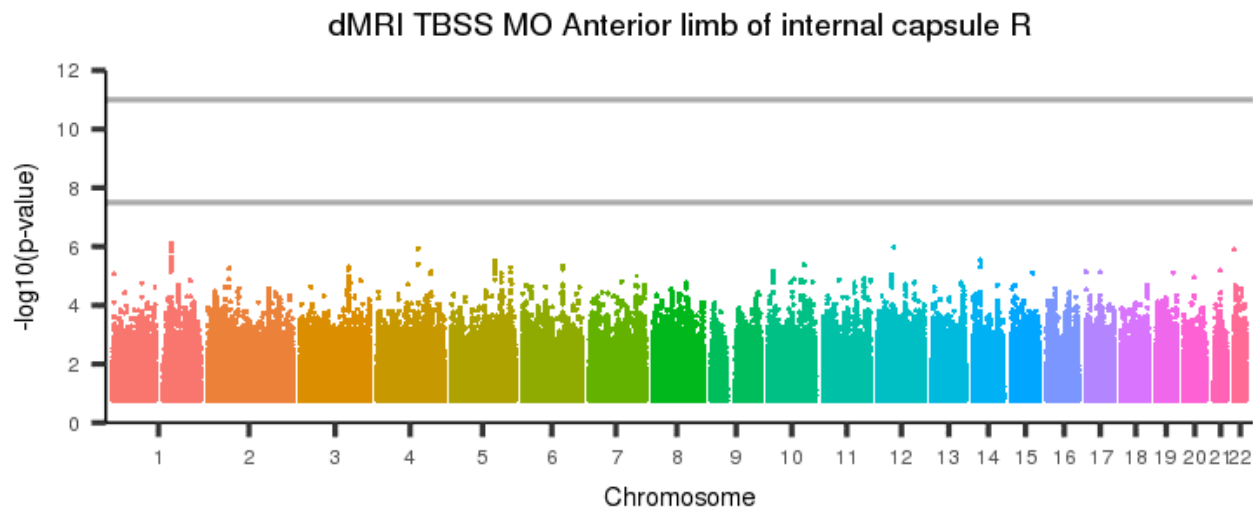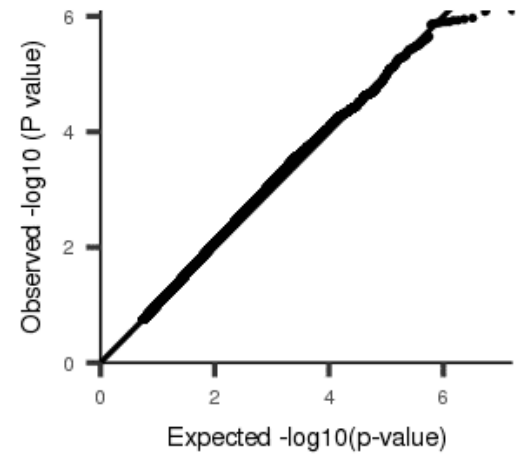

[back to list of plots](#)

Figure 309: dMRI TBSS MO Anterior limb of internal capsule L

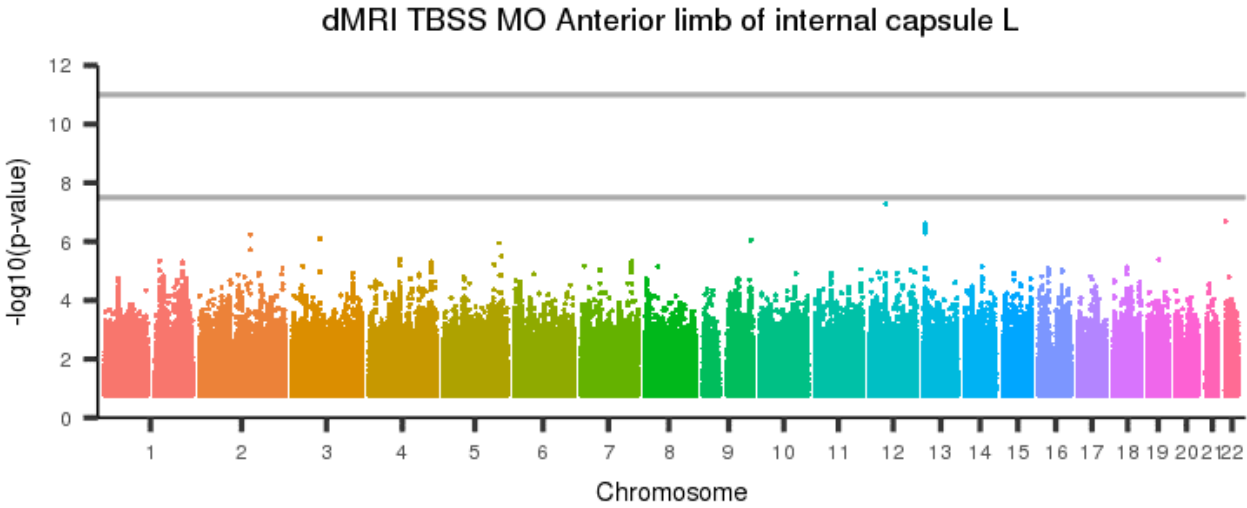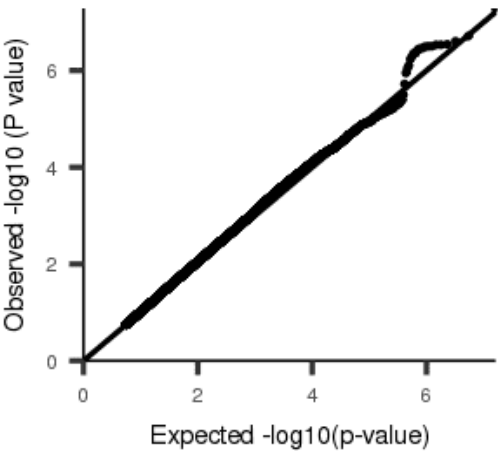

[back to list of plots](#)



Figure 310: dMRI TBSS MO Posterior limb of internal capsule R

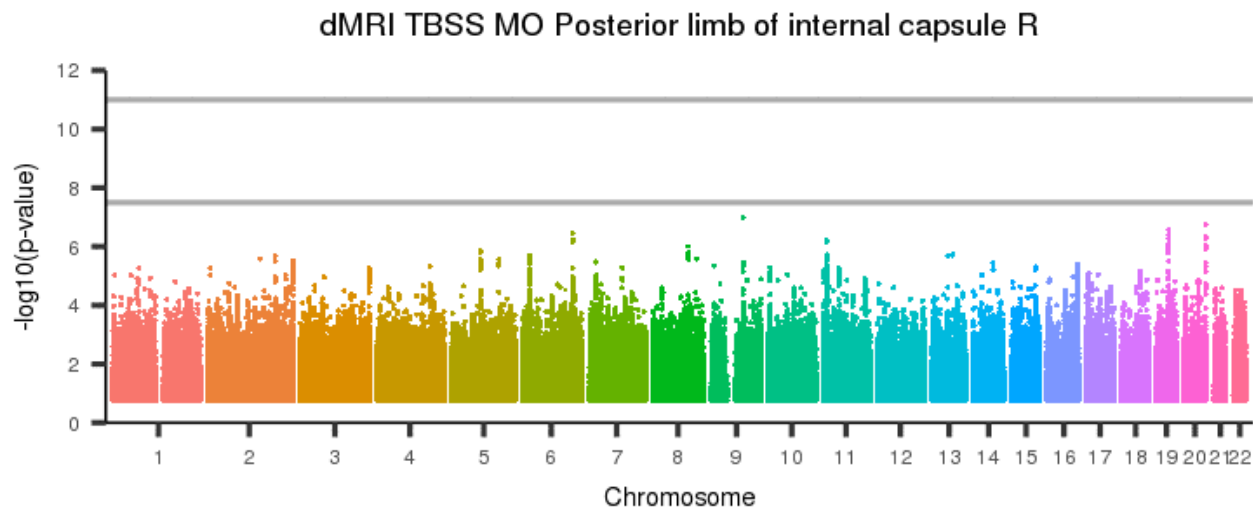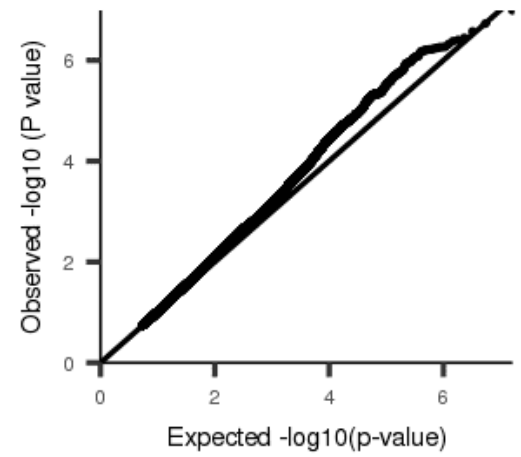

[back to list of plots](#)

Figure 311: dMRI TBSS MO Posterior limb of internal capsule L

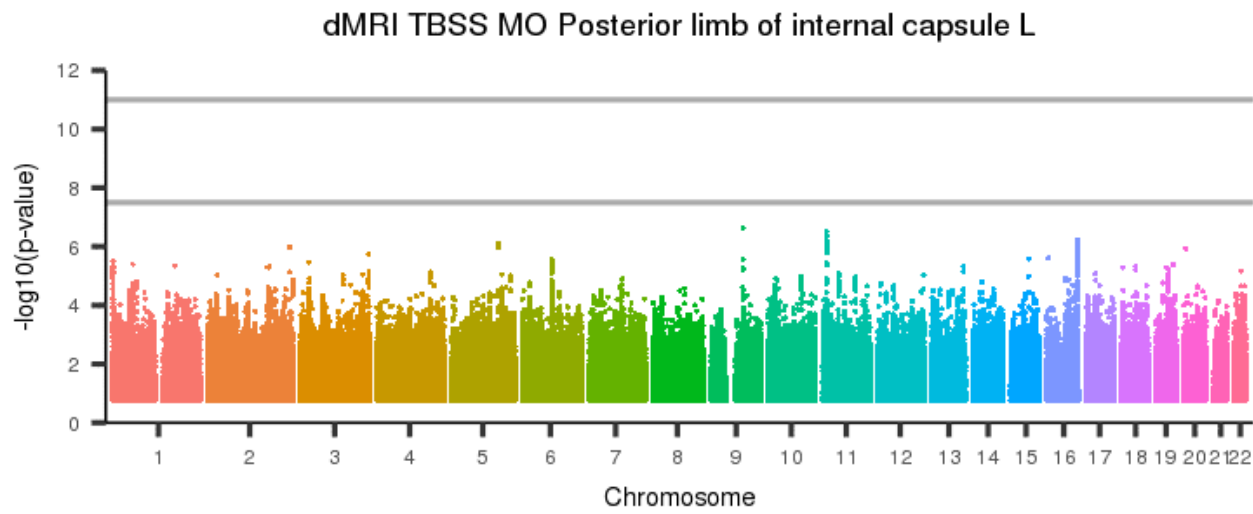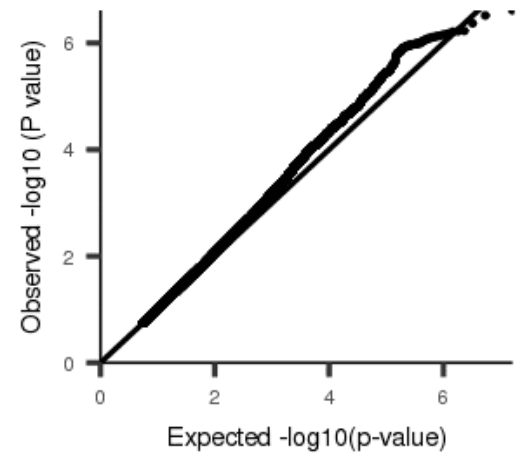

[back to list of plots](#)

Figure 312: dMRI TBSS MO Retrolesional part of internal capsule R

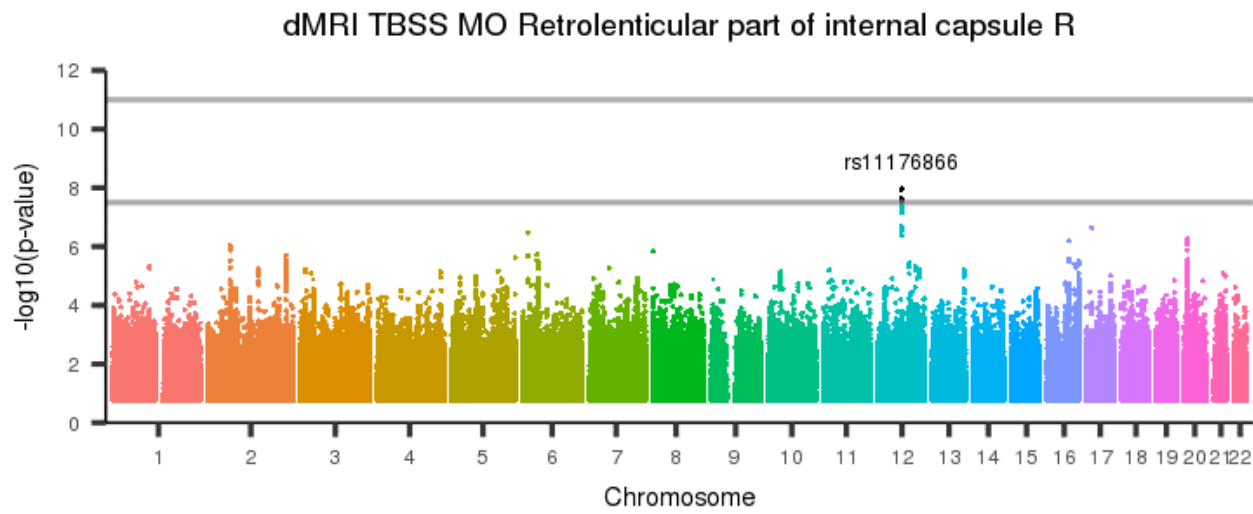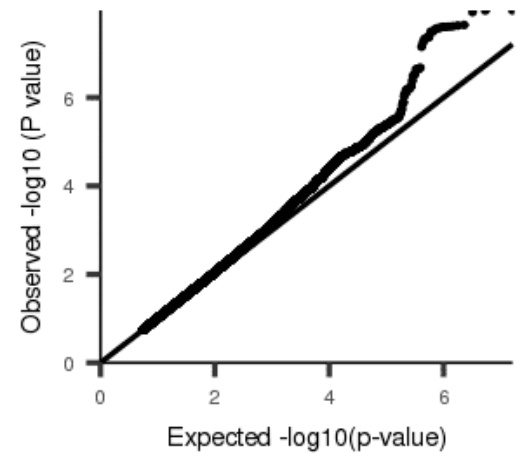

[back to list of plots](#)

Figure 313: dMRI TBSS MO Retrolenticular part of internal capsule L

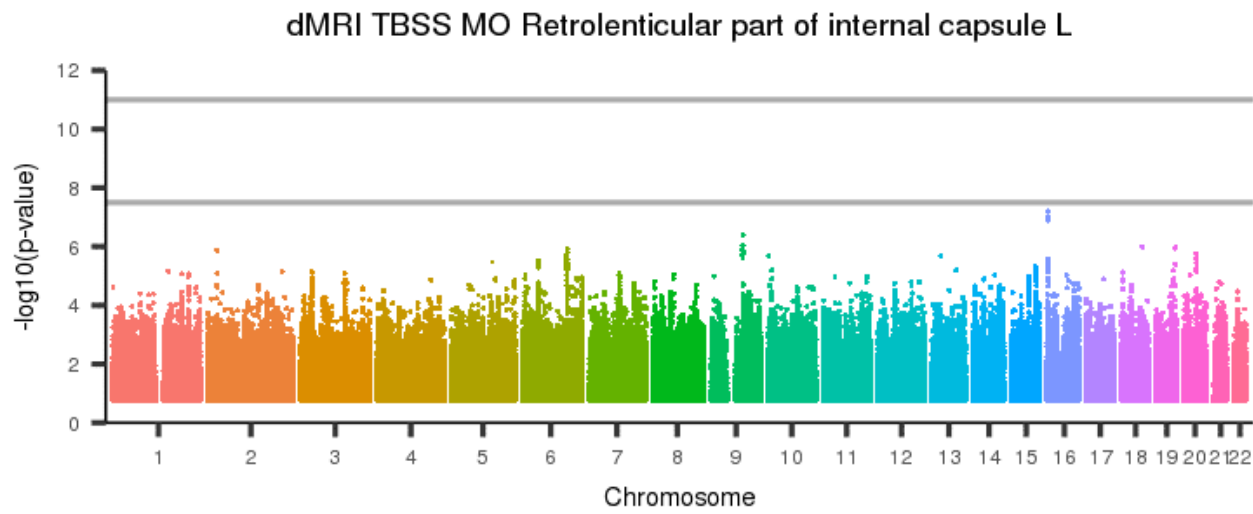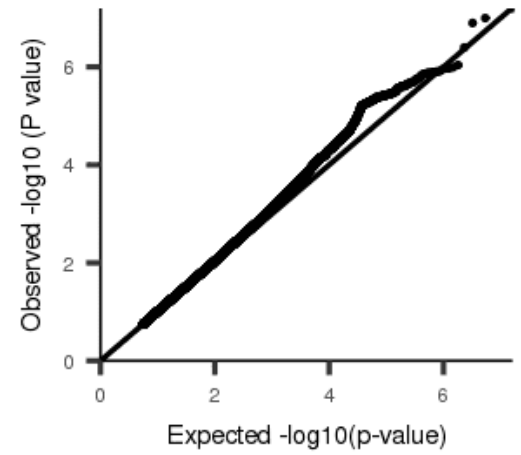

[back to list of plots](#)

Figure 314: dMRI TBSS MO Anterior corona radiata R

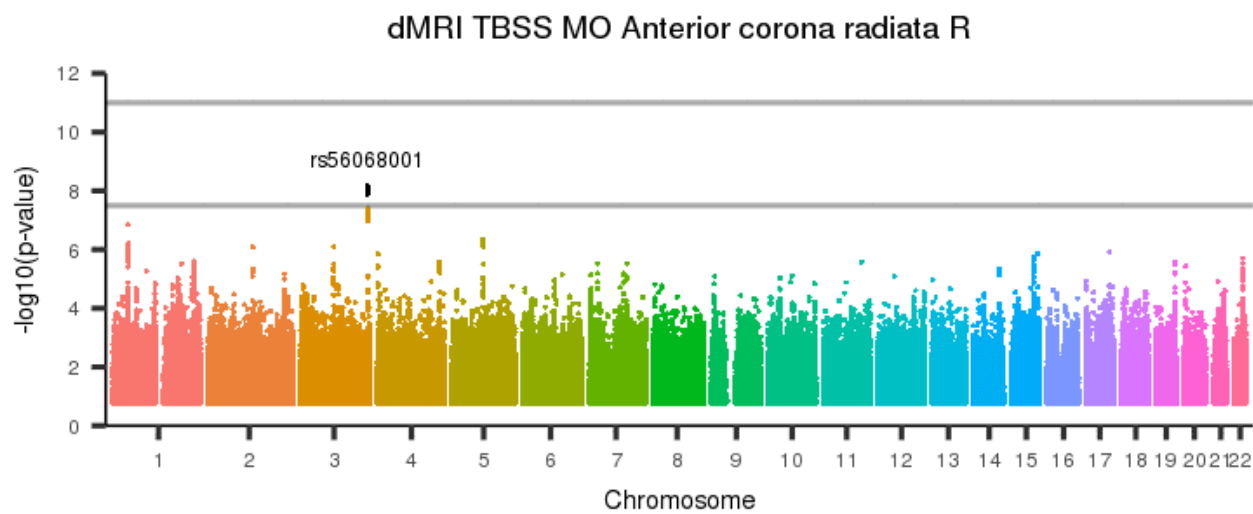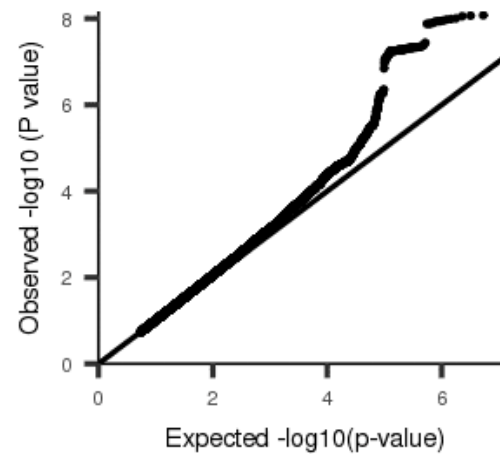

[back to list of plots](#)

Figure 315: dMRI TBSS MO Anterior corona radiata L

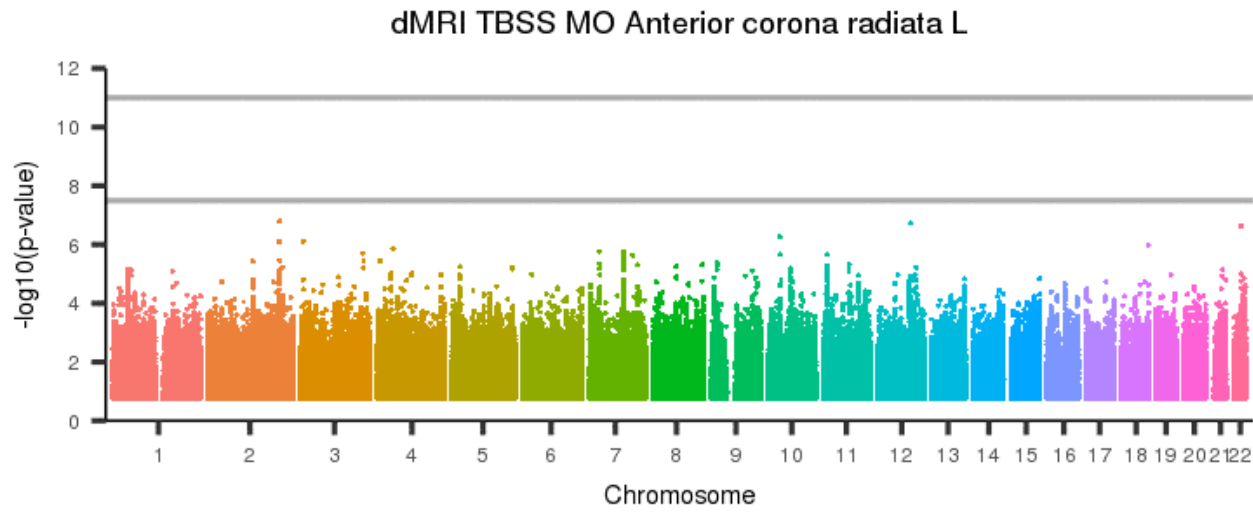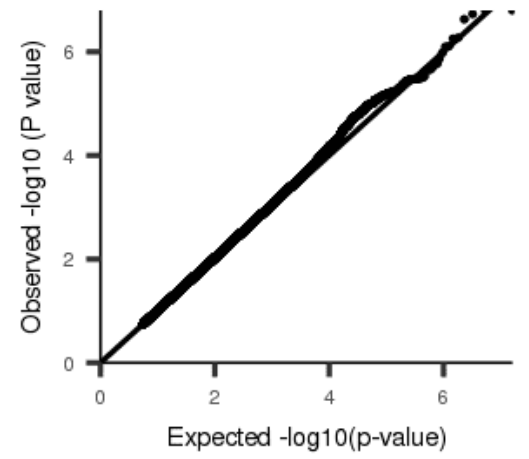

[back to list of plots](#)

Figure 316: dMRI TBSS MO Superior corona radiata R

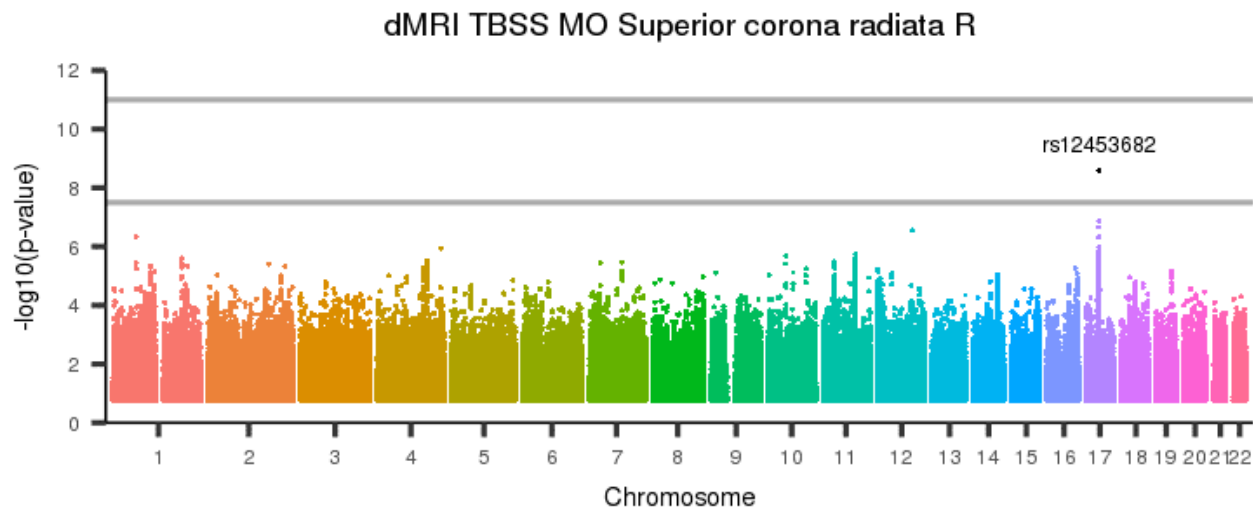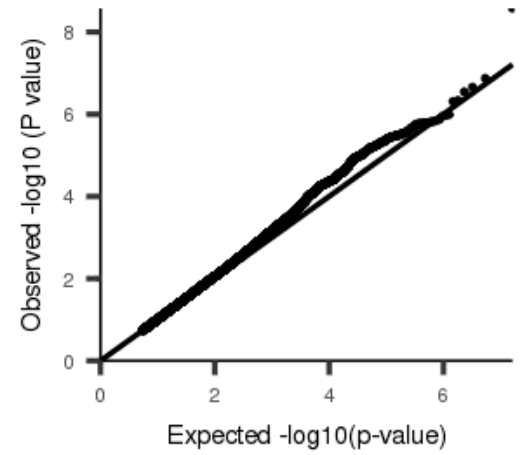

[back to list of plots](#)

Figure 317: dMRI TBSS MO Superior corona radiata L

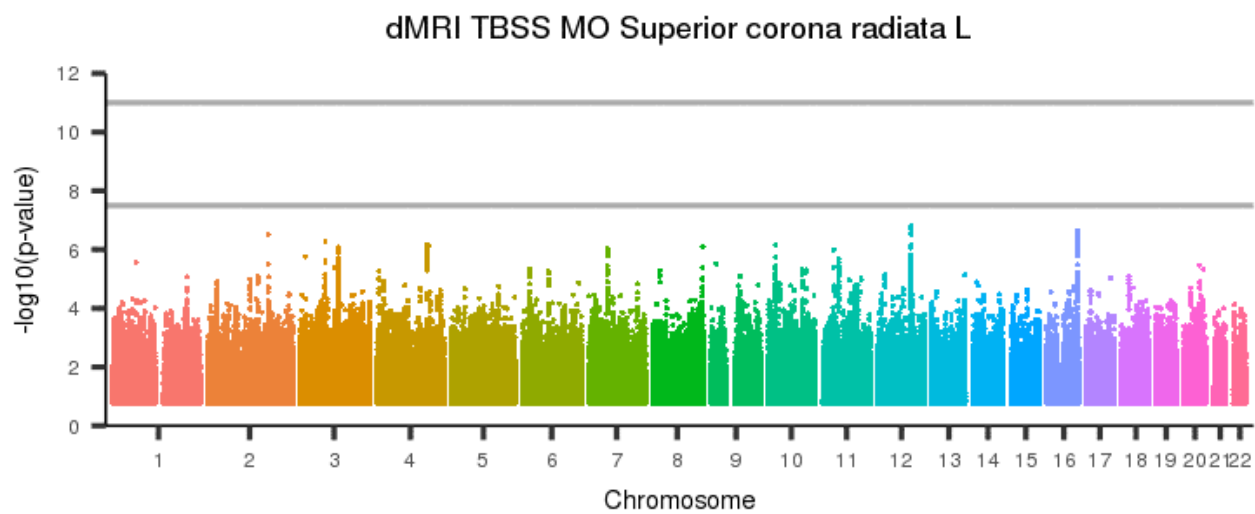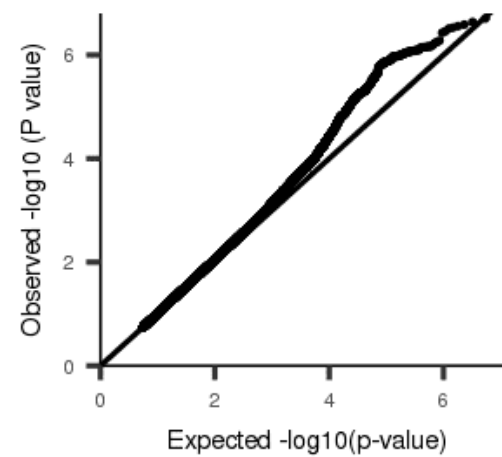

[back to list of plots](#)



Figure 318: dMRI TBSS MO Posterior corona radiata R

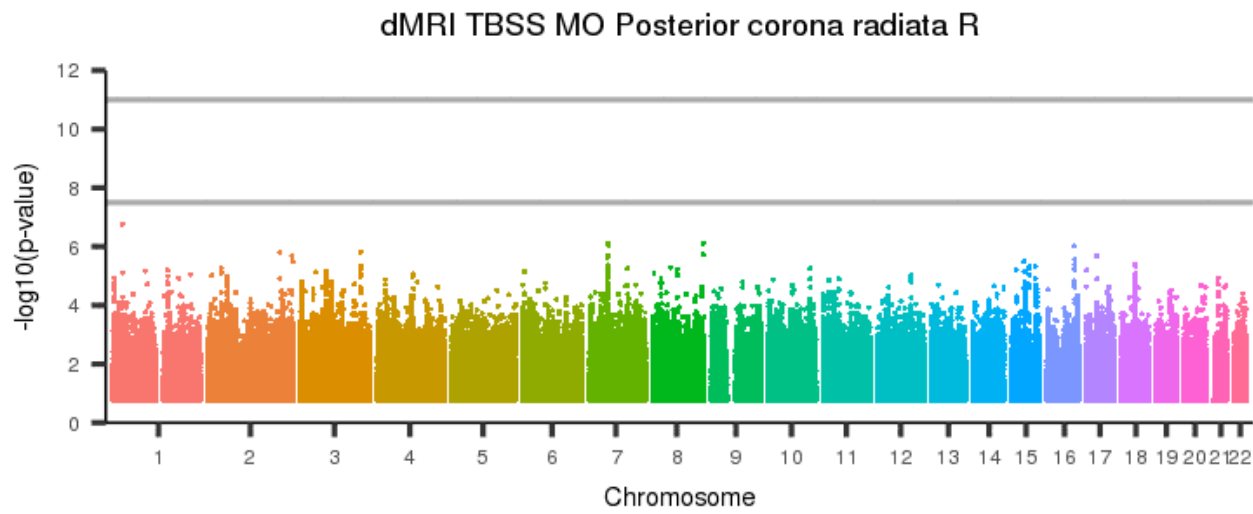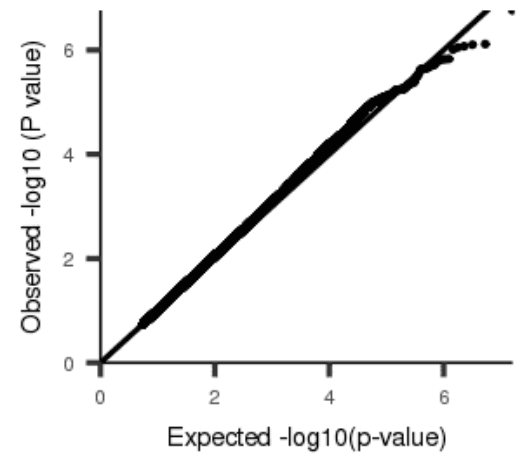

[back to list of plots](#)

Figure 319: dMRI TBSS MO Posterior corona radiata L

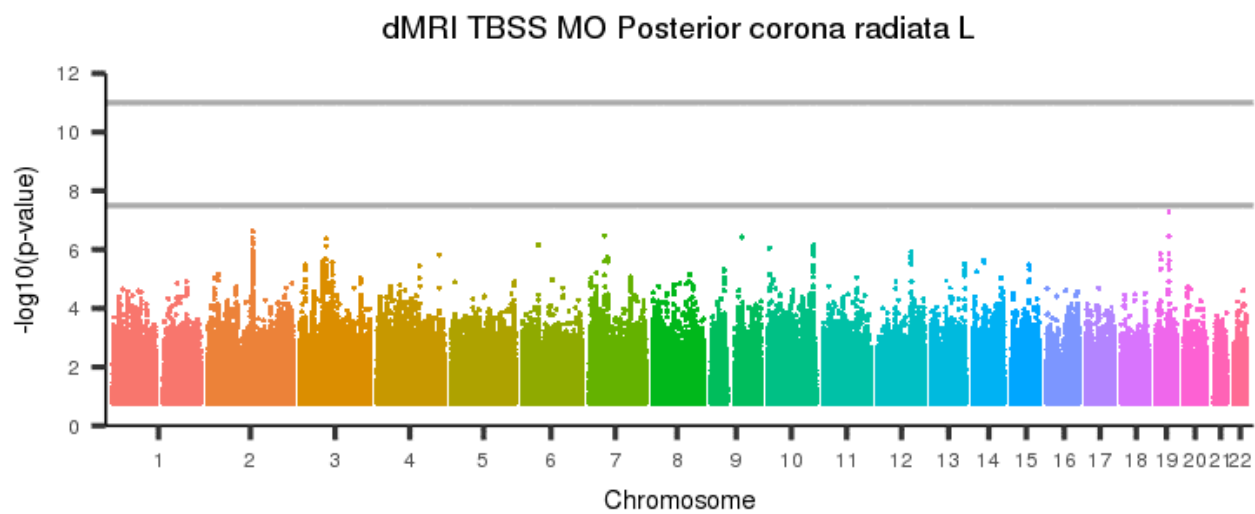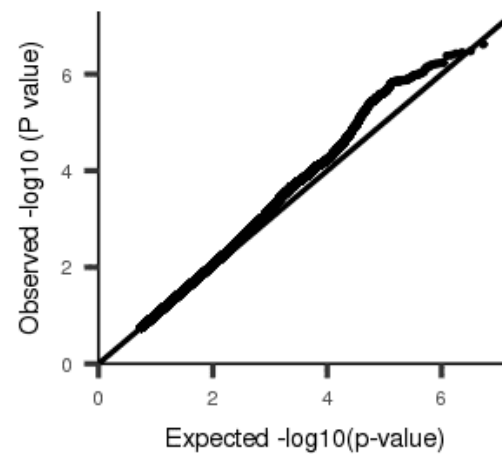

[back to list of plots](#)

Figure 320: dMRI TBSS MO Posterior thalamic radiation R

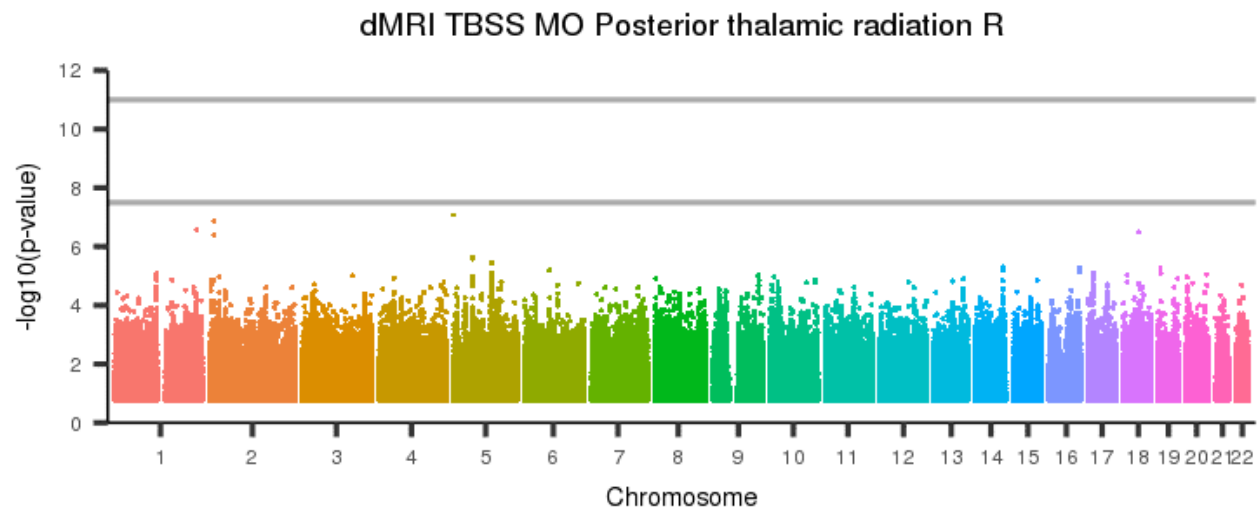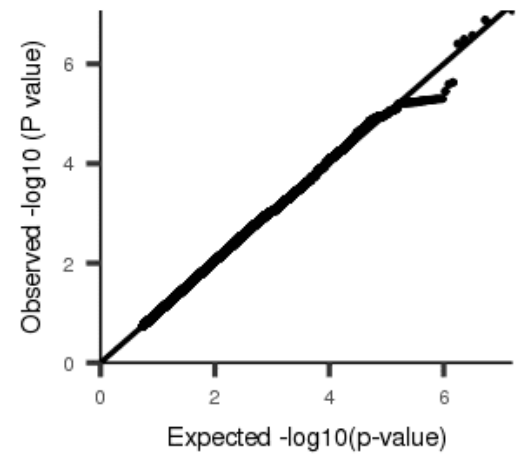

[back to list of plots](#)

Figure 321: dMRI TBSS MO Posterior thalamic radiation L

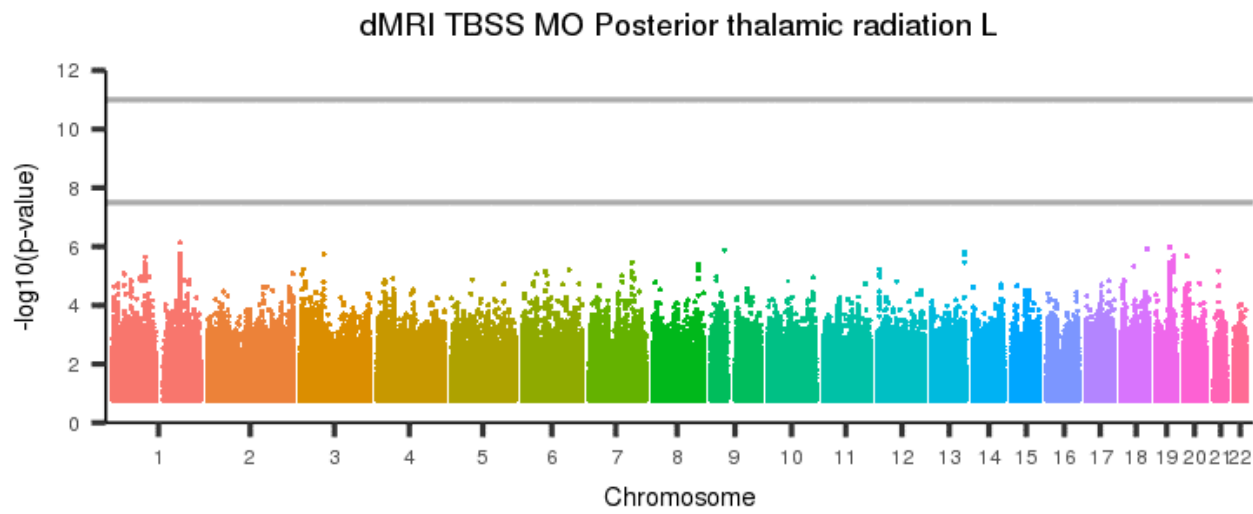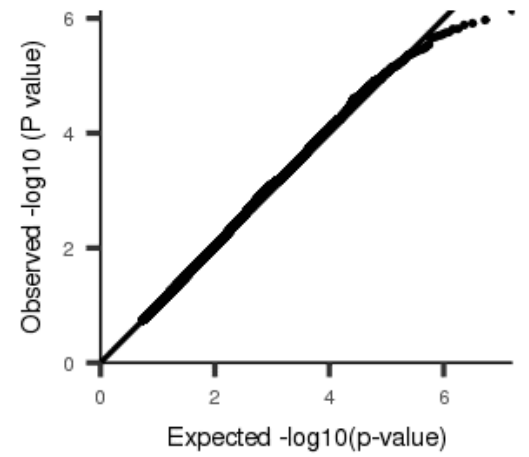

[back to list of plots](#)

Figure 322: dMRI TBSS MO Sagittal stratum R

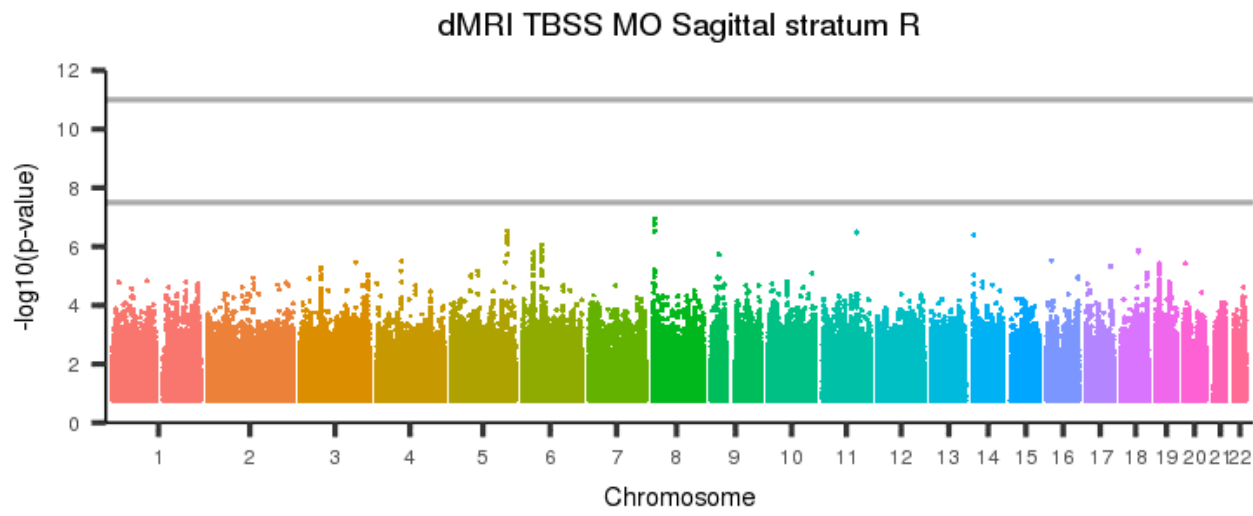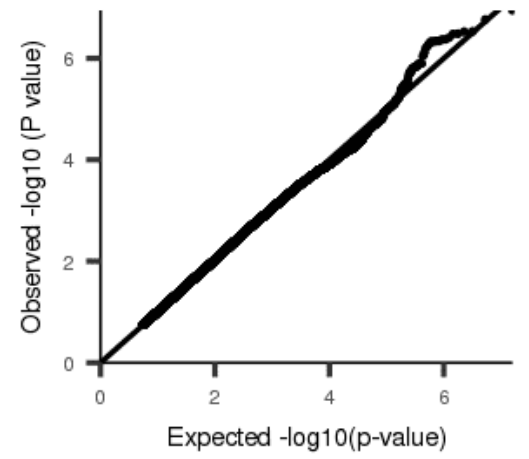

[back to list of plots](#)

Figure 323: dMRI TBSS MO Sagittal stratum L

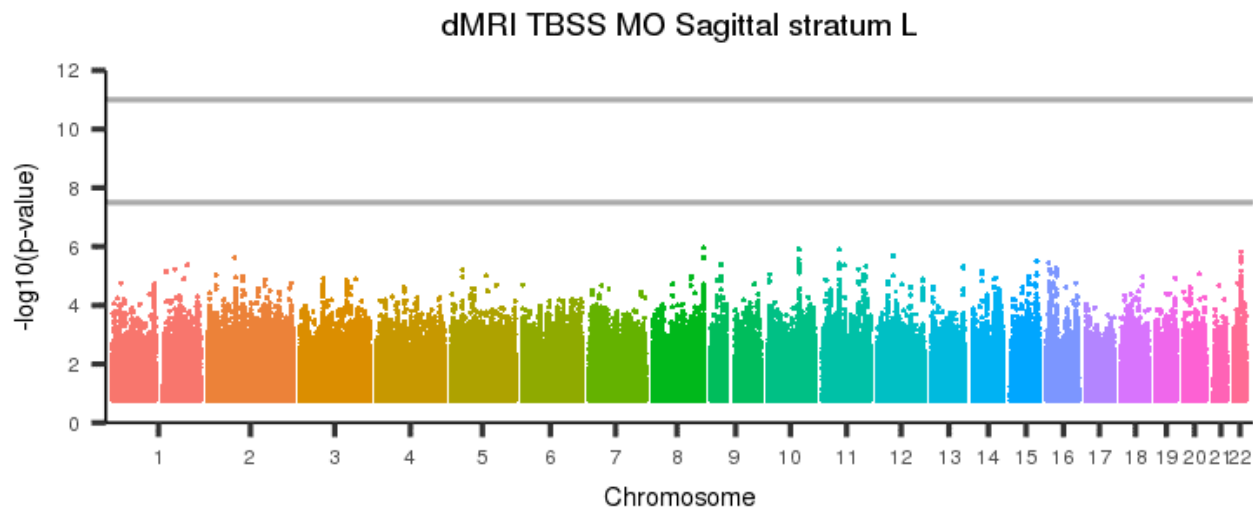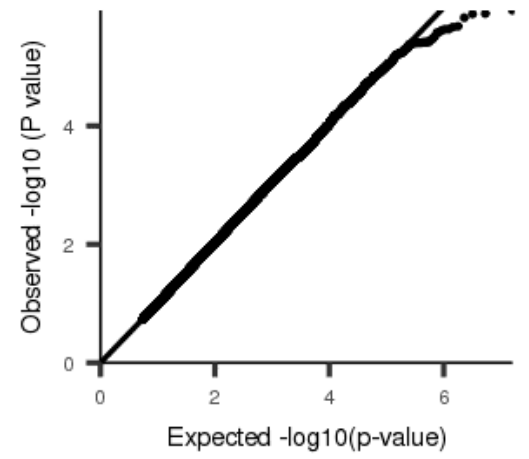

[back to list of plots](#)

Figure 324: dMRI TBSS MO External capsule R

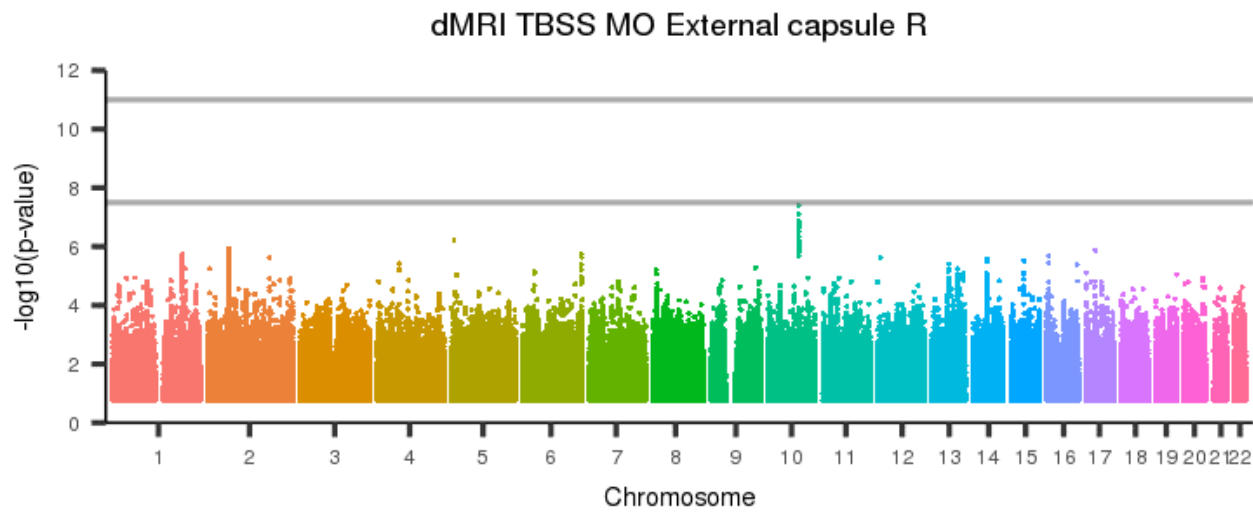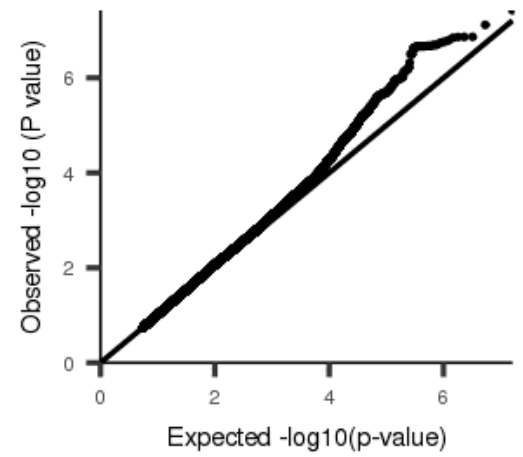

[back to list of plots](#)

Figure 325: dMRI TBSS MO External capsule L

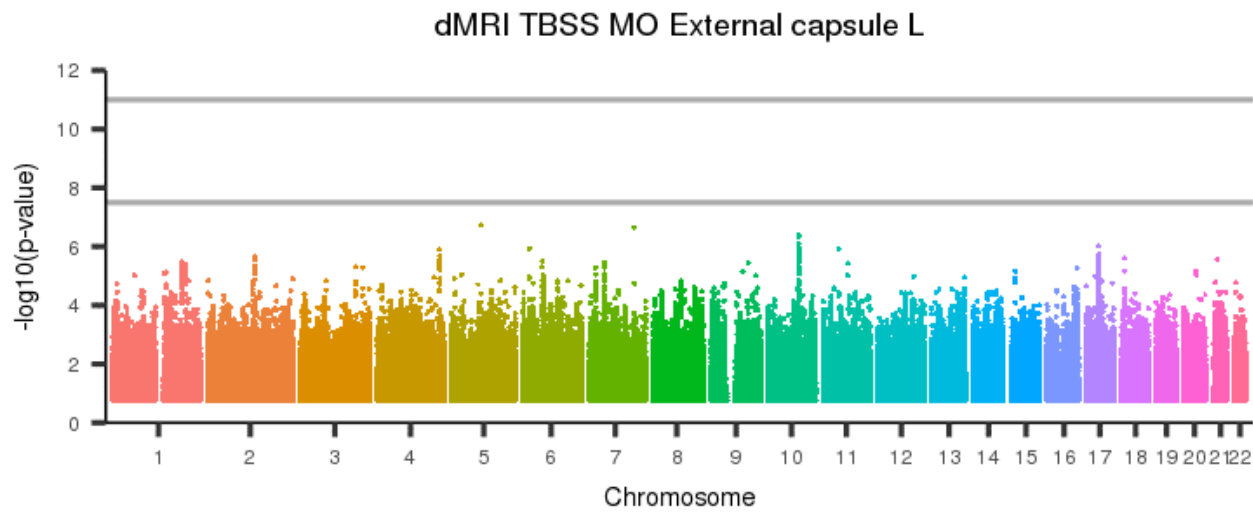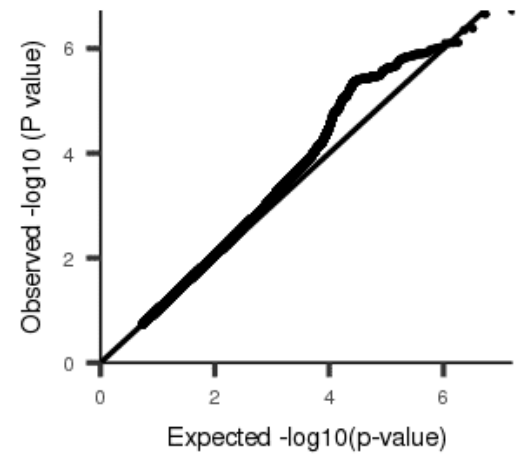

[back to list of plots](#)



Figure 326: dMRI TBSS MO Cingulum cingulate gyrus R

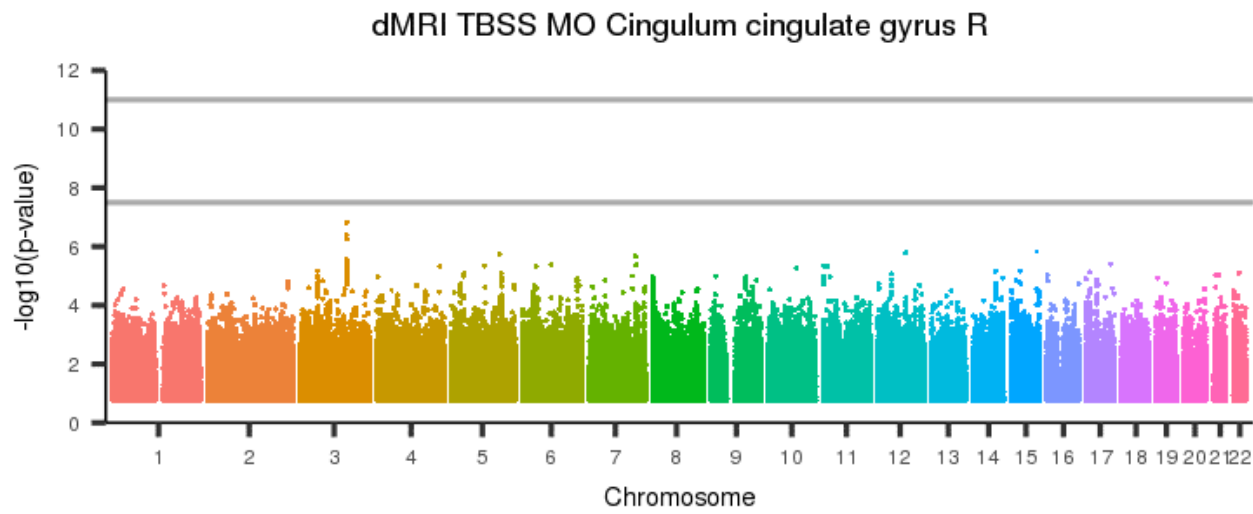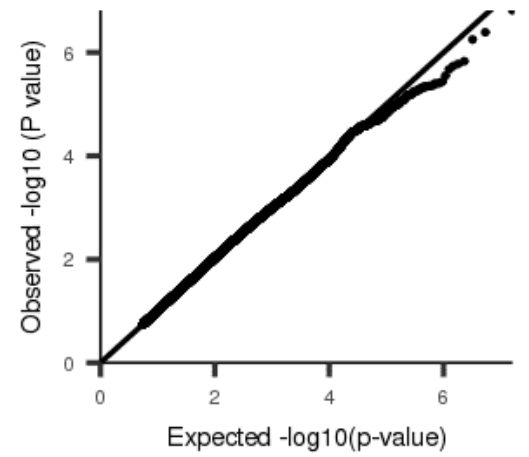

[back to list of plots](#)

Figure 327: dMRI TBSS MO Cingulum cingulate gyrus L

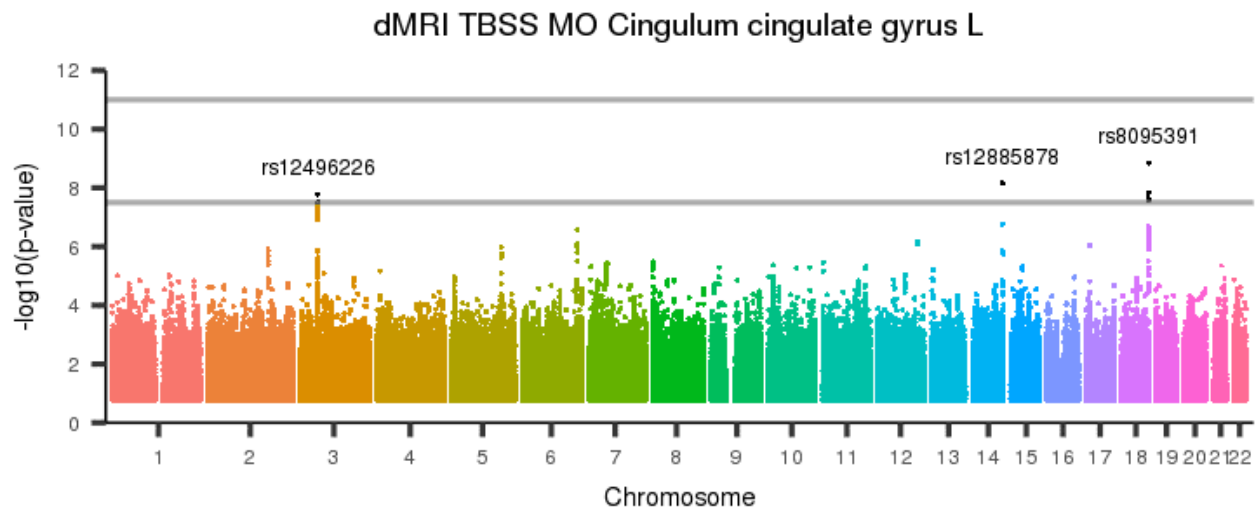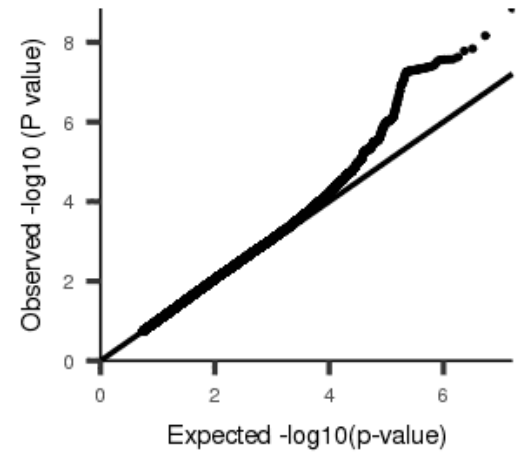

[back to list of plots](#)

Figure 328: dMRI TBSS MO Cingulum hippocampus R

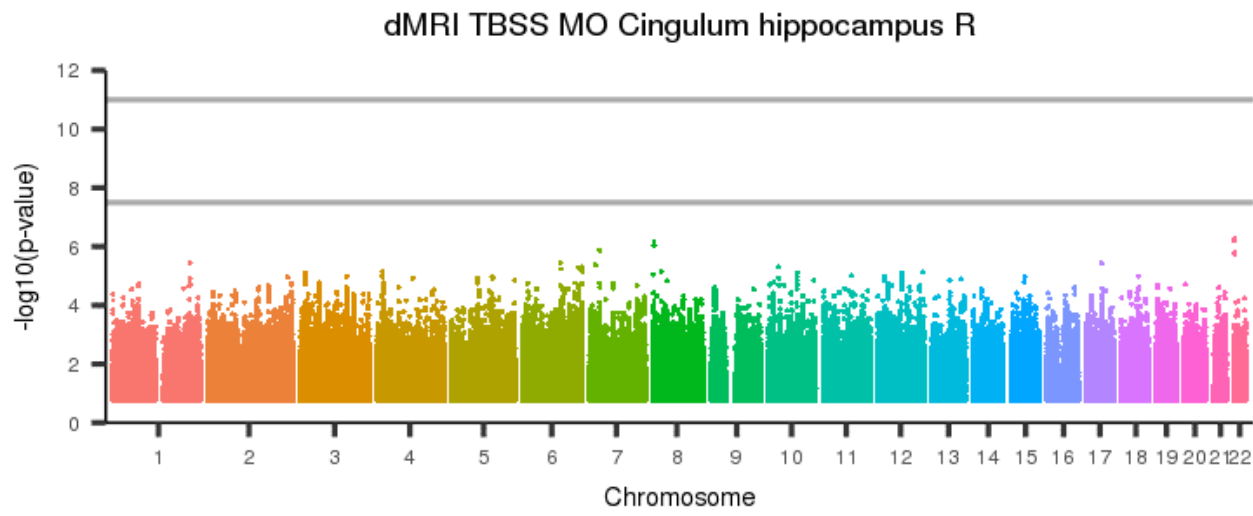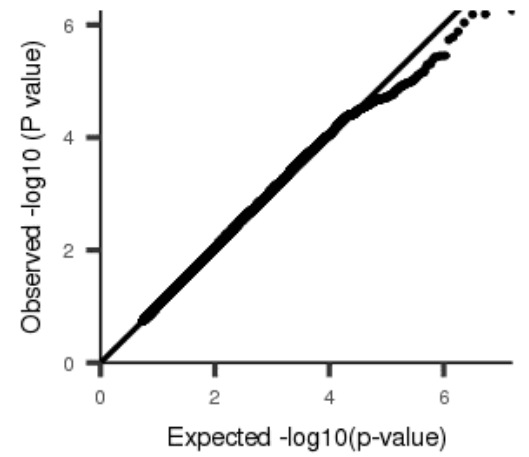

[back to list of plots](#)

Figure 329: dMRI TBSS MO Cingulum hippocampus L

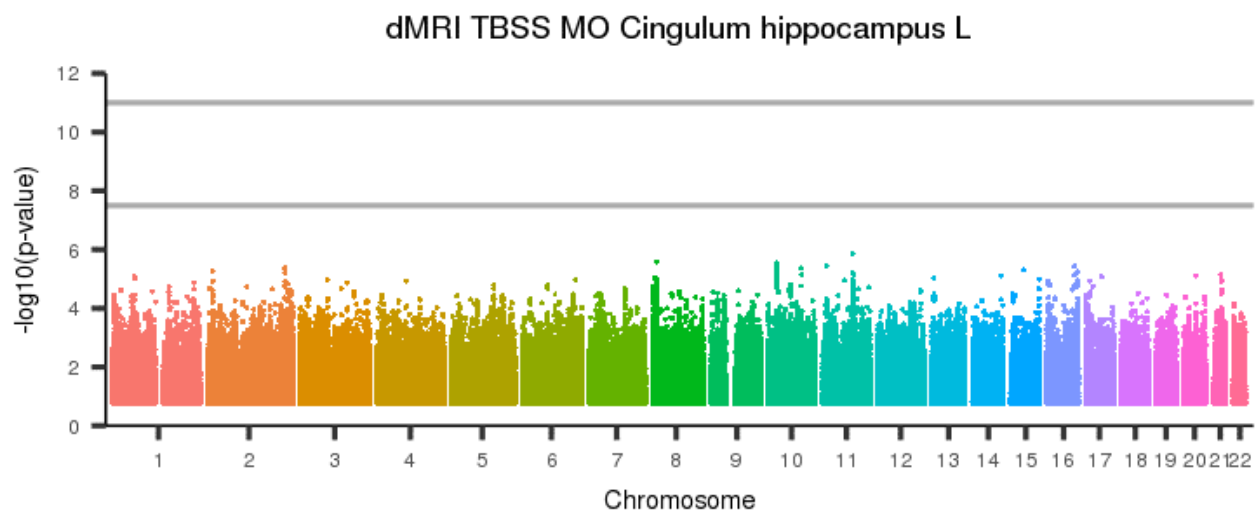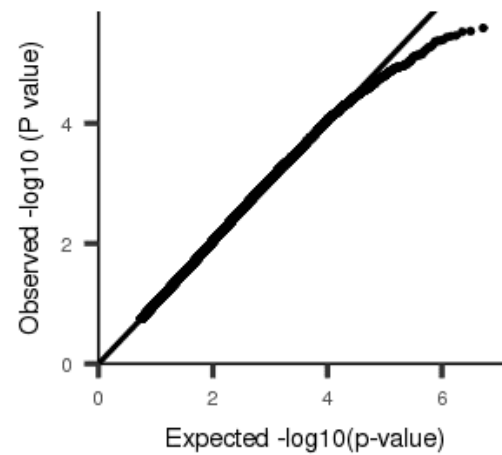

[back to list of plots](#)

Figure 330: dMRI TBSS MO Fornix cres+Stria terminalis R

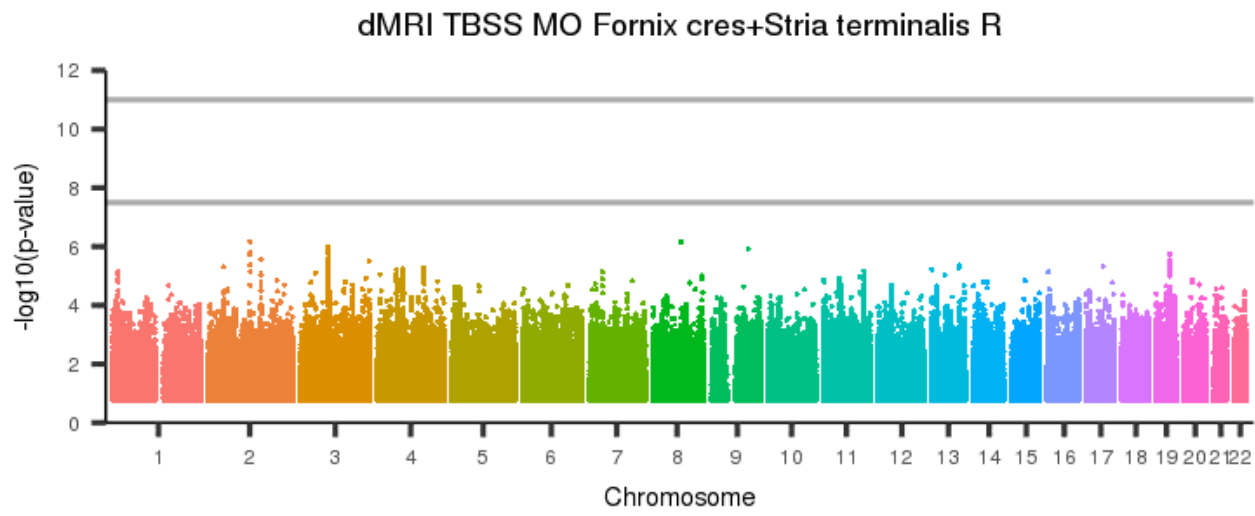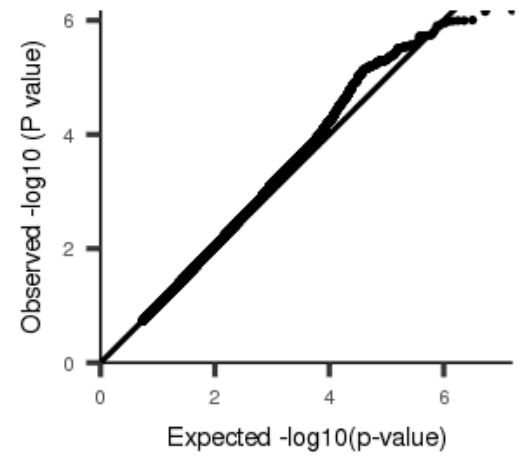

[back to list of plots](#)

Figure 331: dMRI TBSS MO Fornix cres+Stria terminalis L

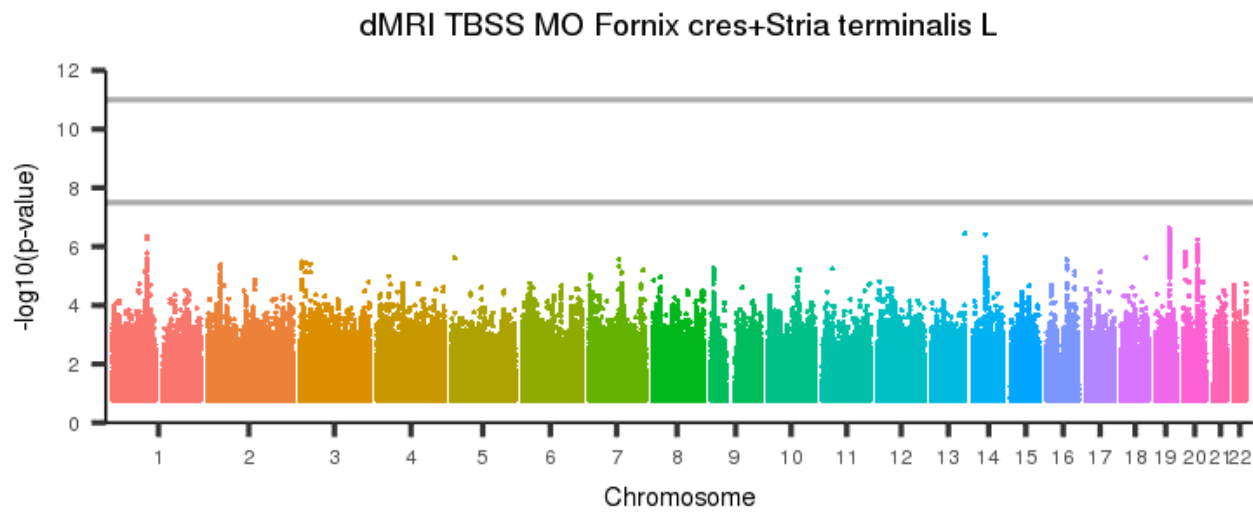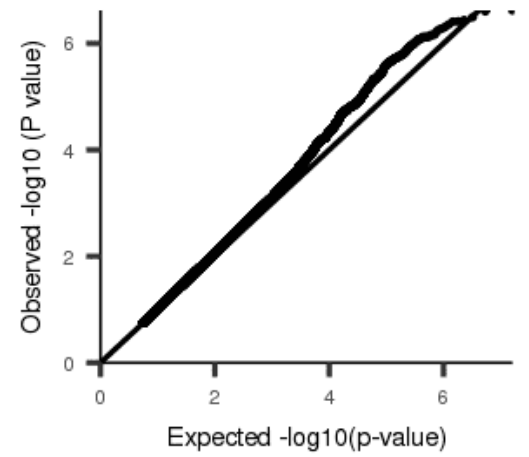

[back to list of plots](#)

Figure 332: dMRI TBSS MO Superior longitudinal fasciculus R

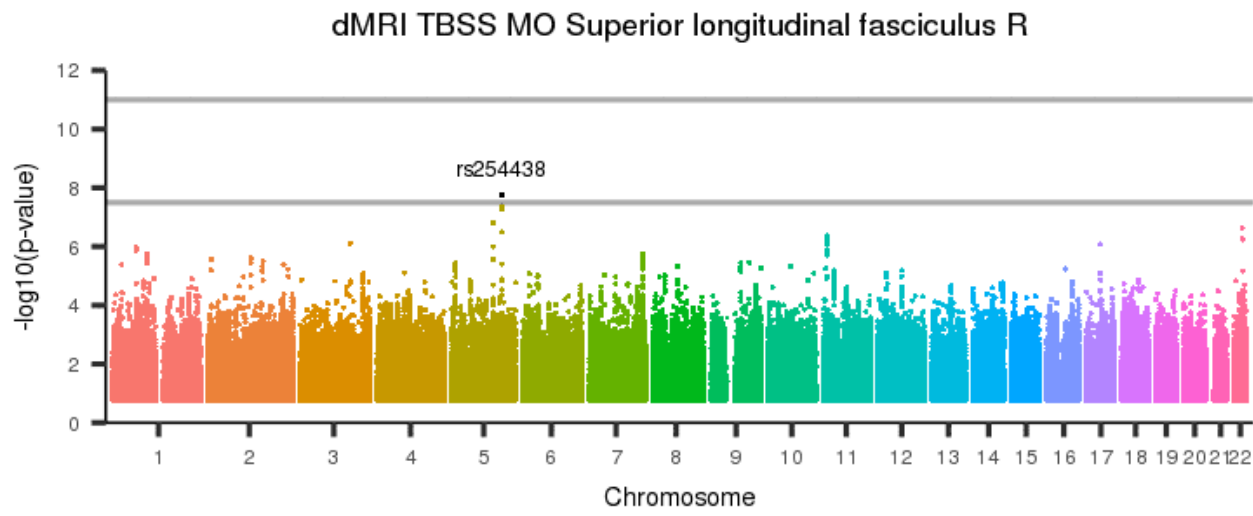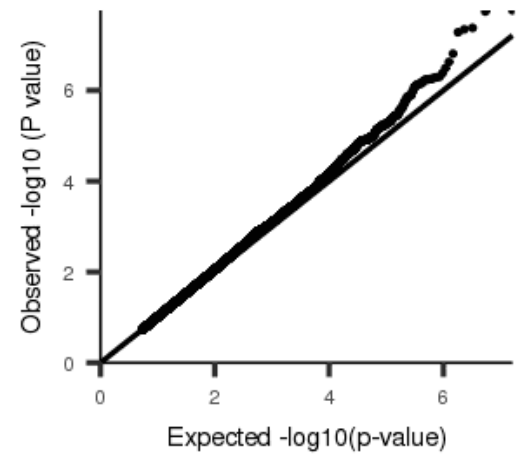

[back to list of plots](#)

Figure 333: dMRI TBSS MO Superior longitudinal fasciculus L

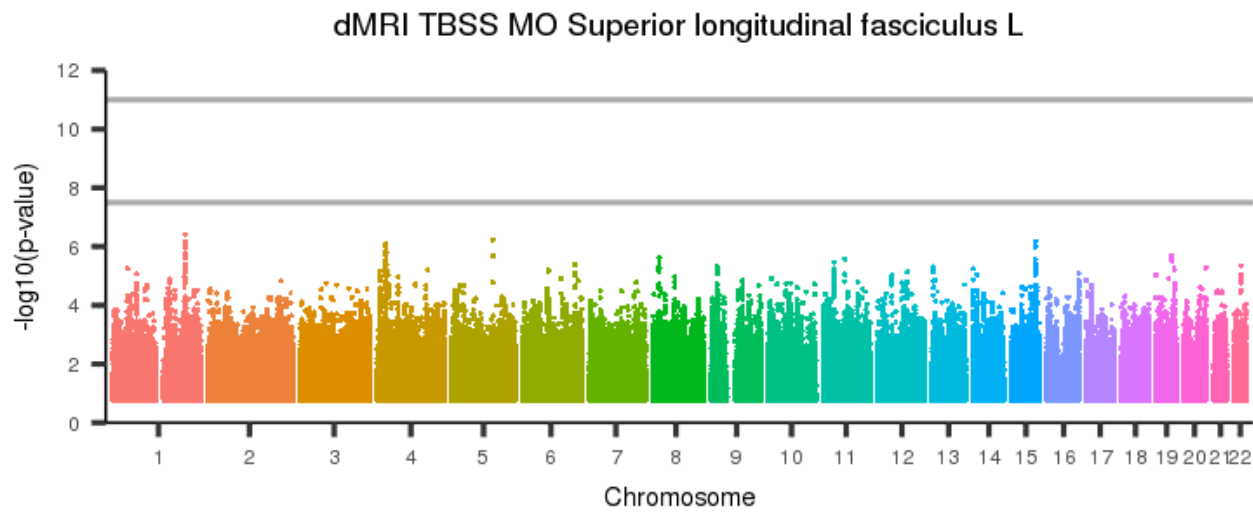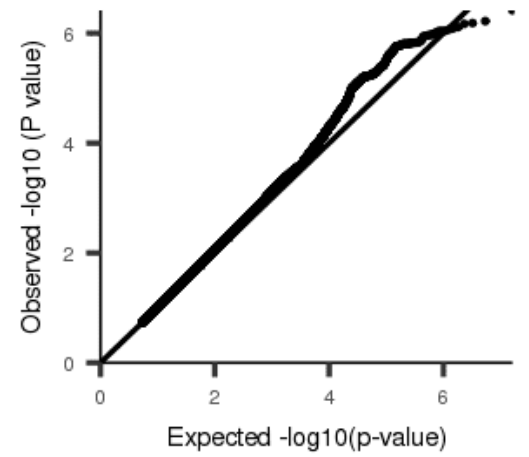

[back to list of plots](#)



Figure 334: dMRI TBSS MO Superior fronto-occipital fasciculus R

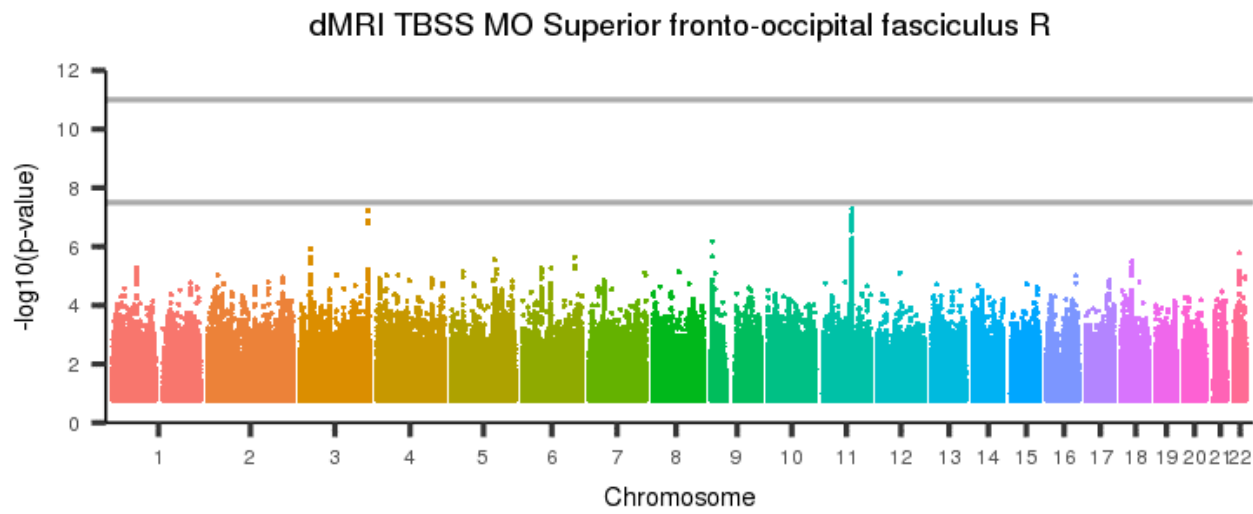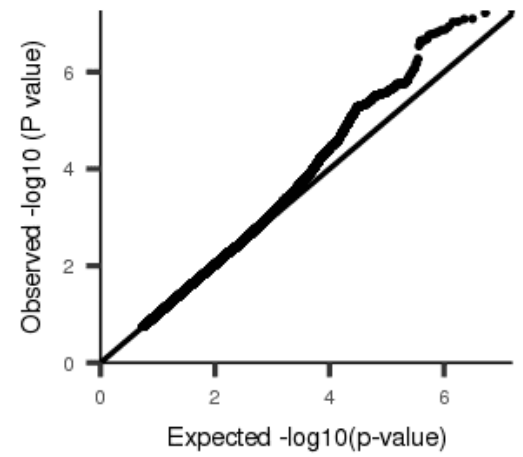

[back to list of plots](#)

Figure 335: dMRI TBSS MO Superior fronto-occipital fasciculus L

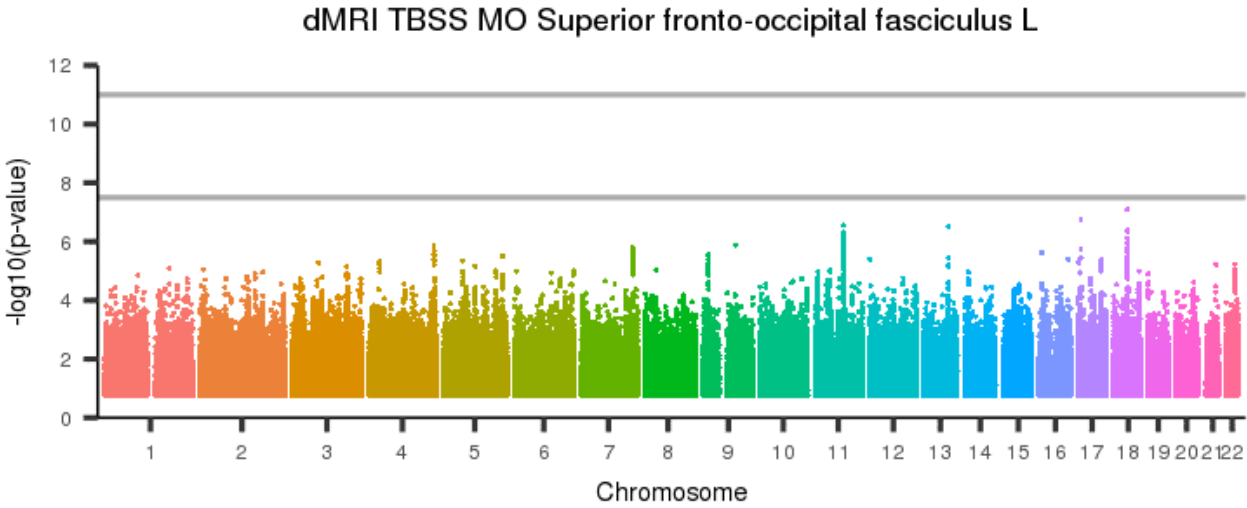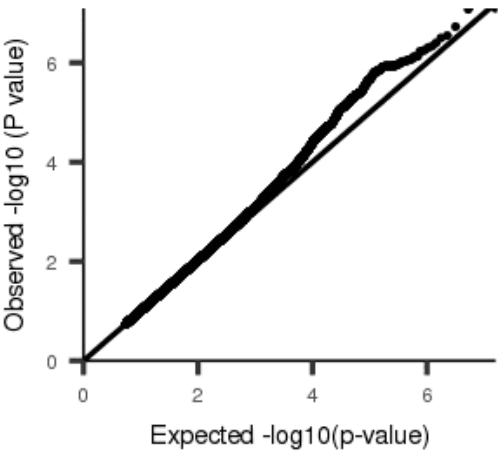

[back to list of plots](#)

Figure 336: dMRI TBSS MO Uncinate fasciculus R

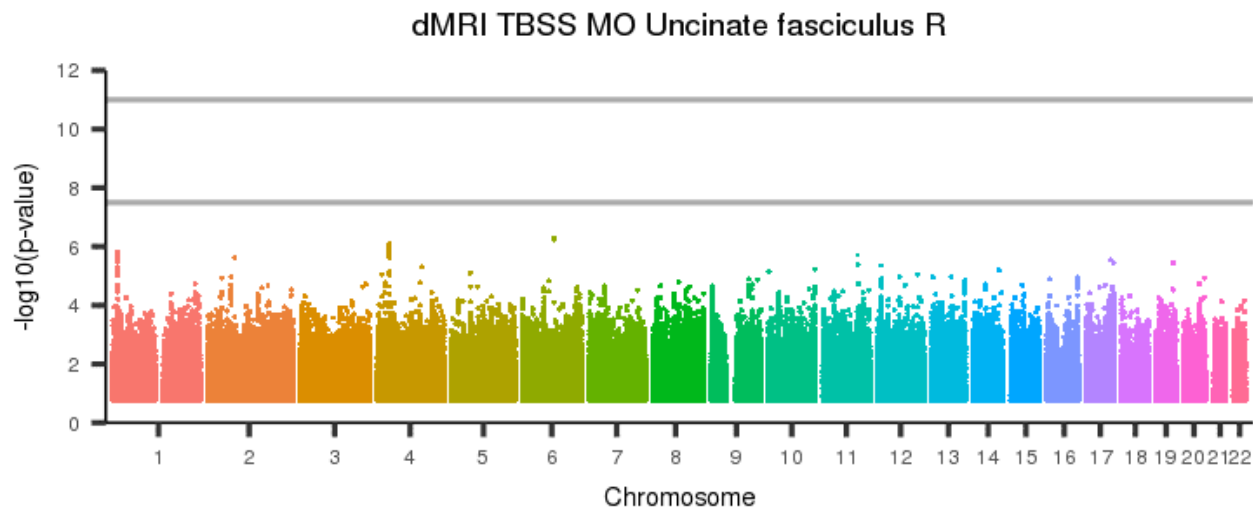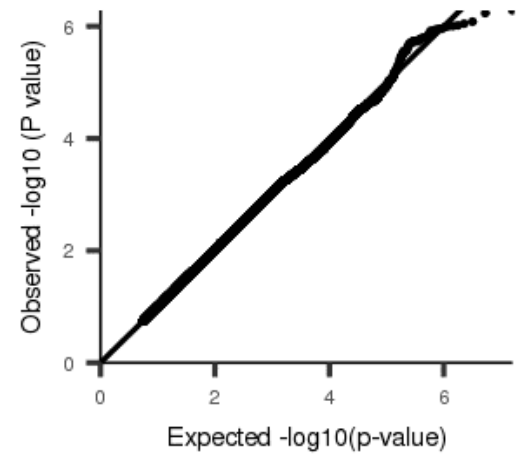

[back to list of plots](#)

Figure 337: dMRI TBSS MO Uncinate fasciculus L

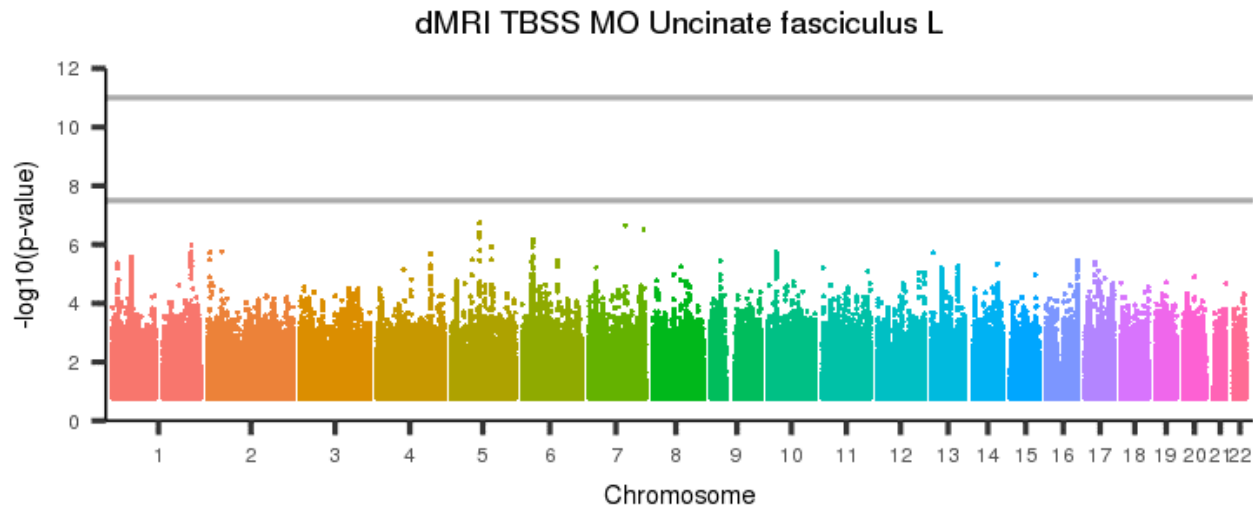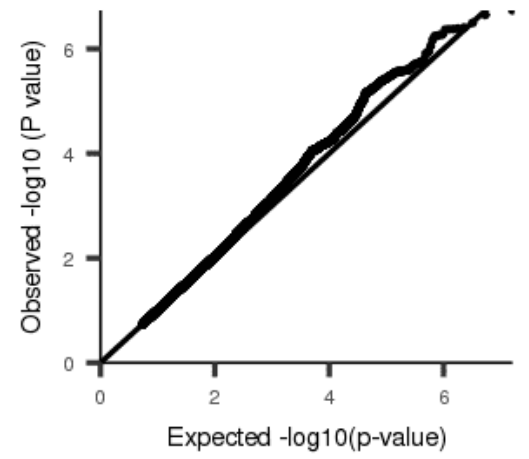

[back to list of plots](#)

Figure 338: dMRI TBSS MO Tapetum R

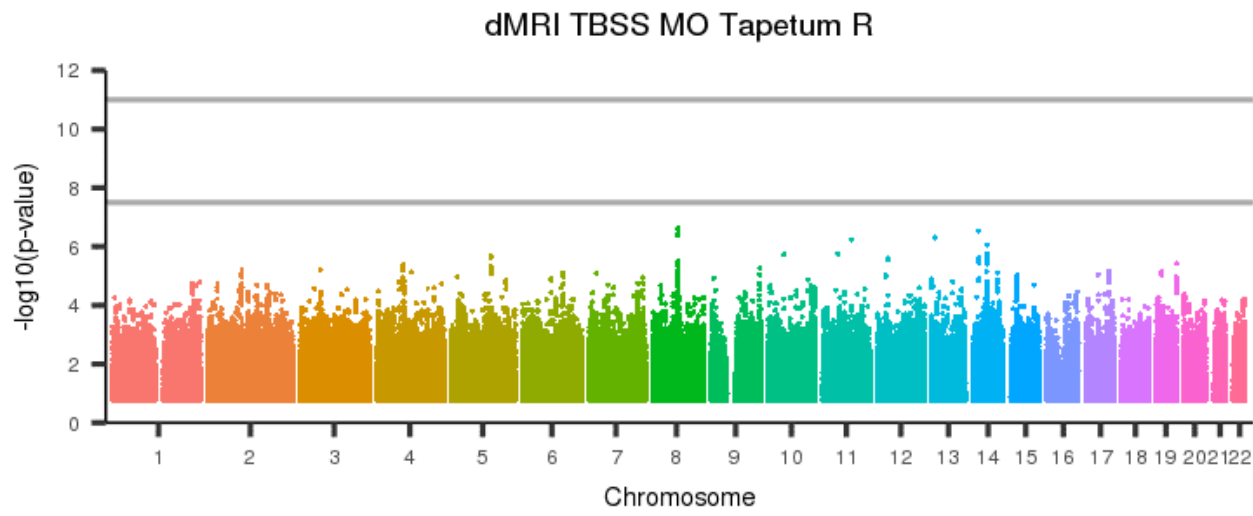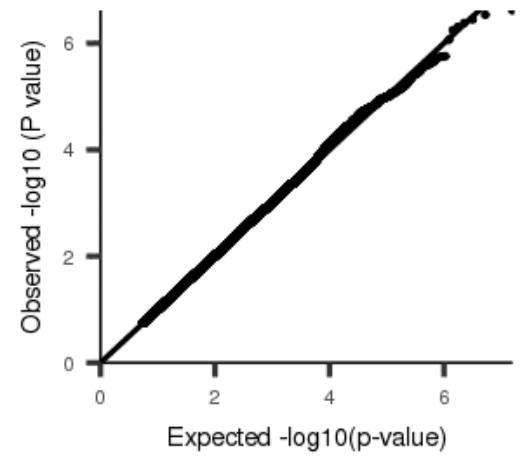

[back to list of plots](#)

Figure 339: dMRI TBSS MO Tapetum L

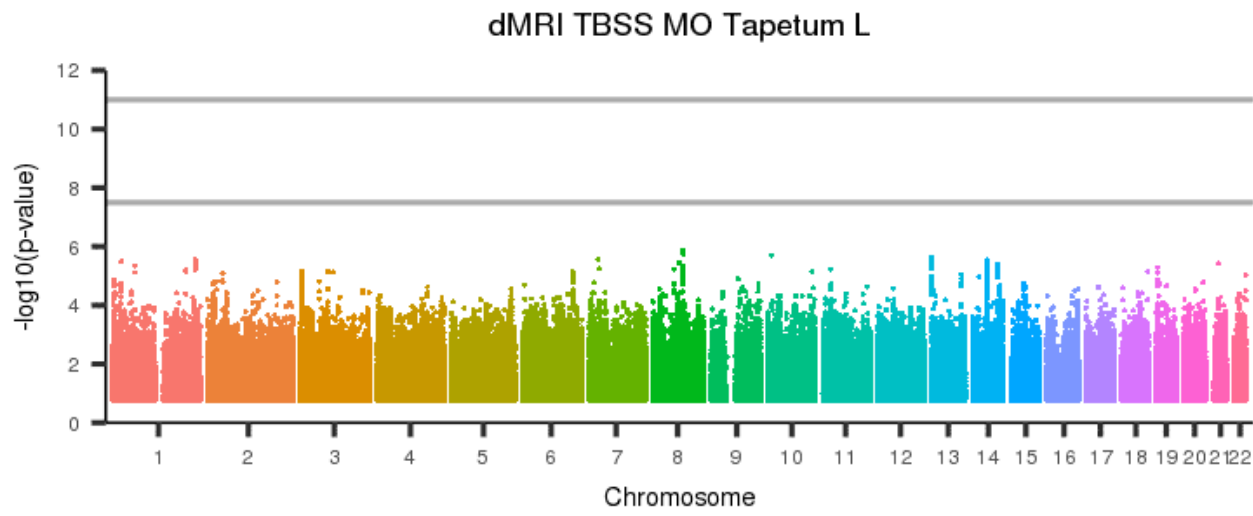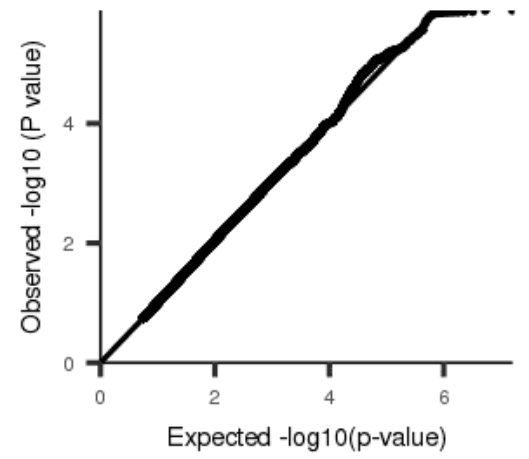

[back to list of plots](#)

Figure 340: dMRI TBSS L1 Middle cerebellar peduncle

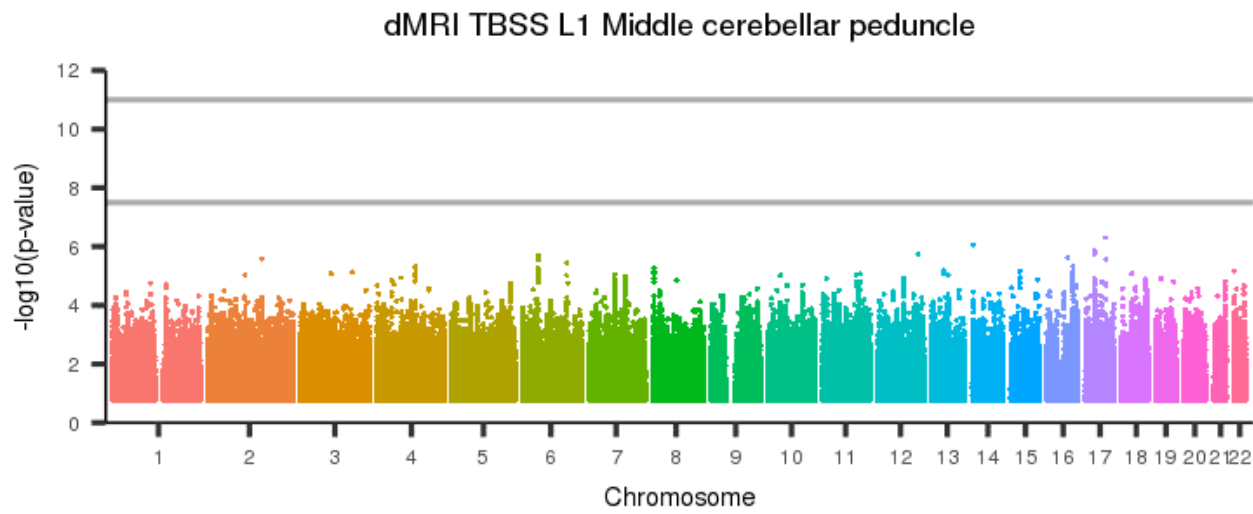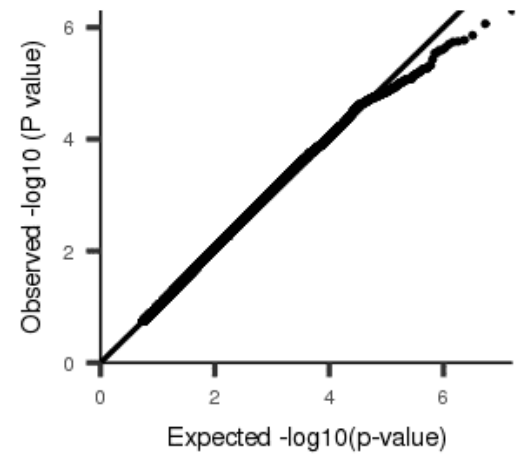

[back to list of plots](#)

Figure 341: dMRI TBSS L1 Pontine crossing tract

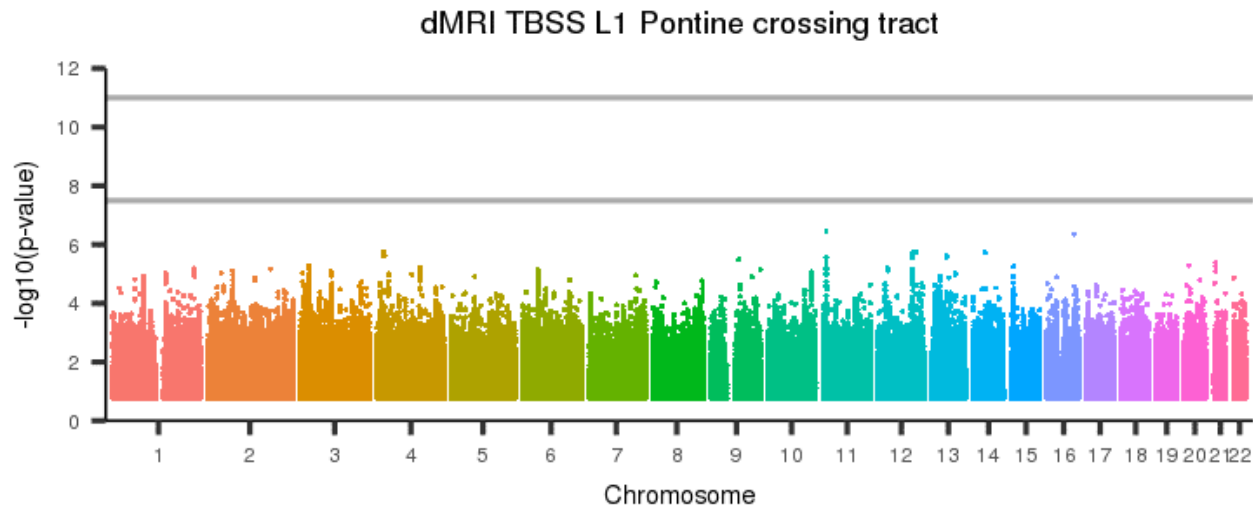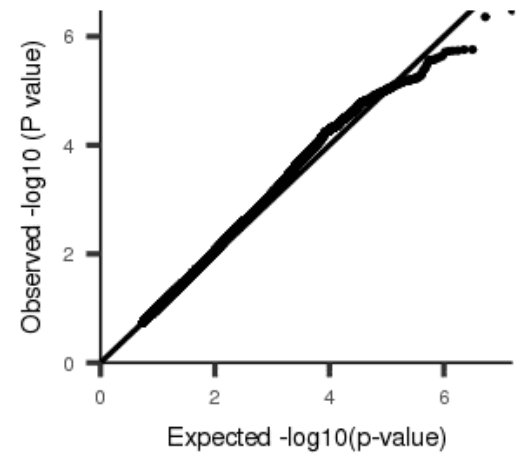

[back to list of plots](#)



Figure 342: dMRI TBSS L1 Genu of corpus callosum

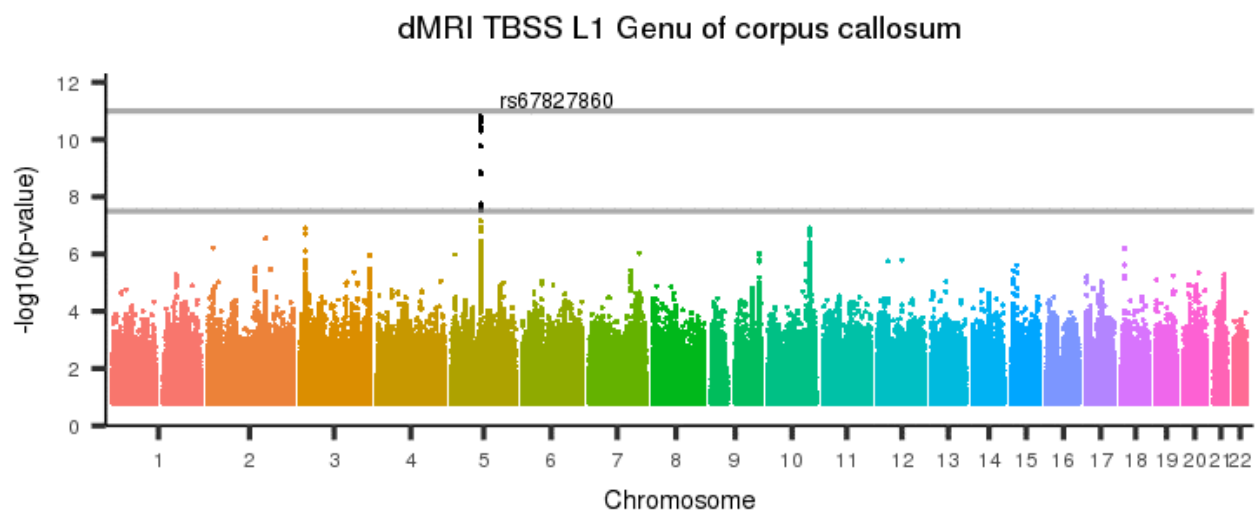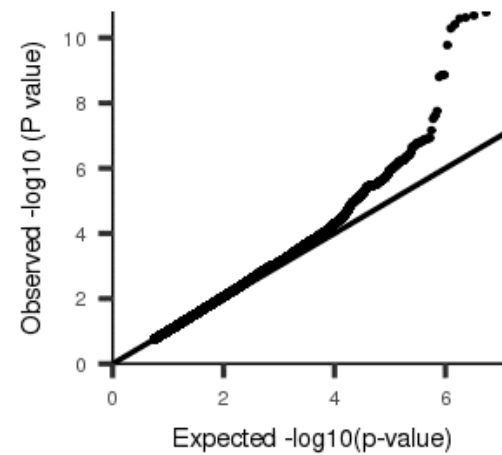

[back to list of plots](#)

Figure 343: dMRI TBSS L1 Body of corpus callosum

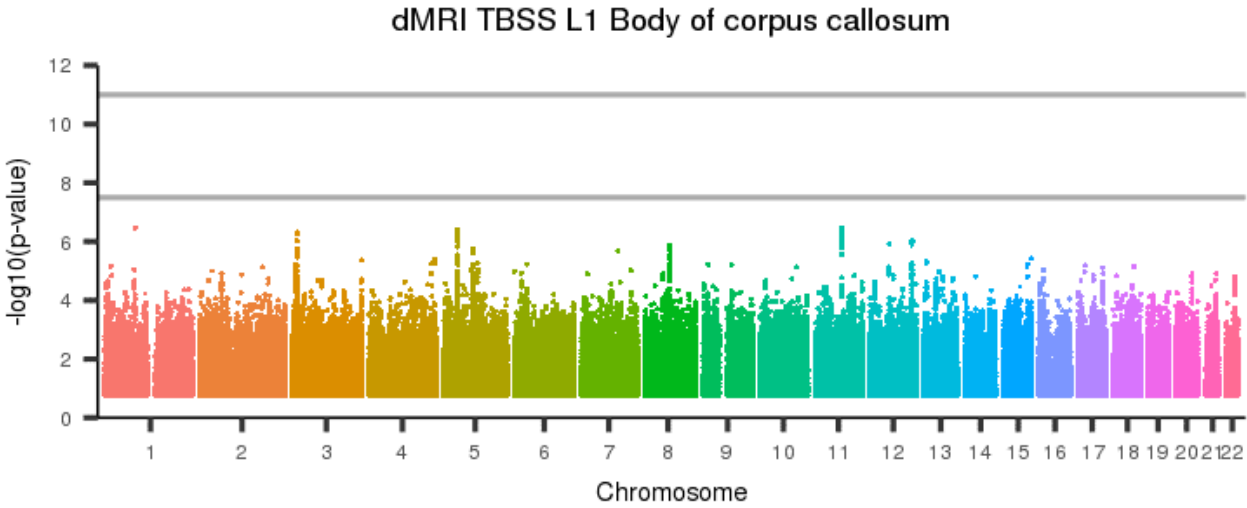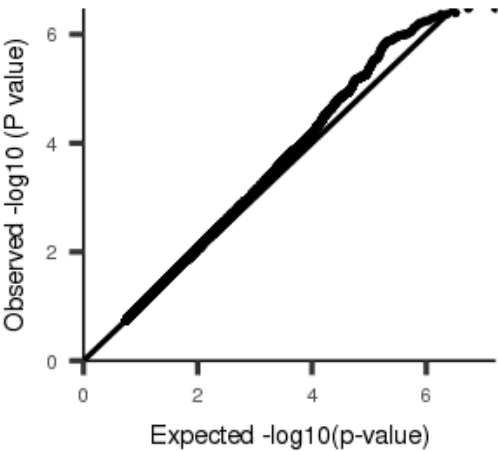

[back to list of plots](#)

Figure 344: dMRI TBSS L1 Splenium of corpus callosum

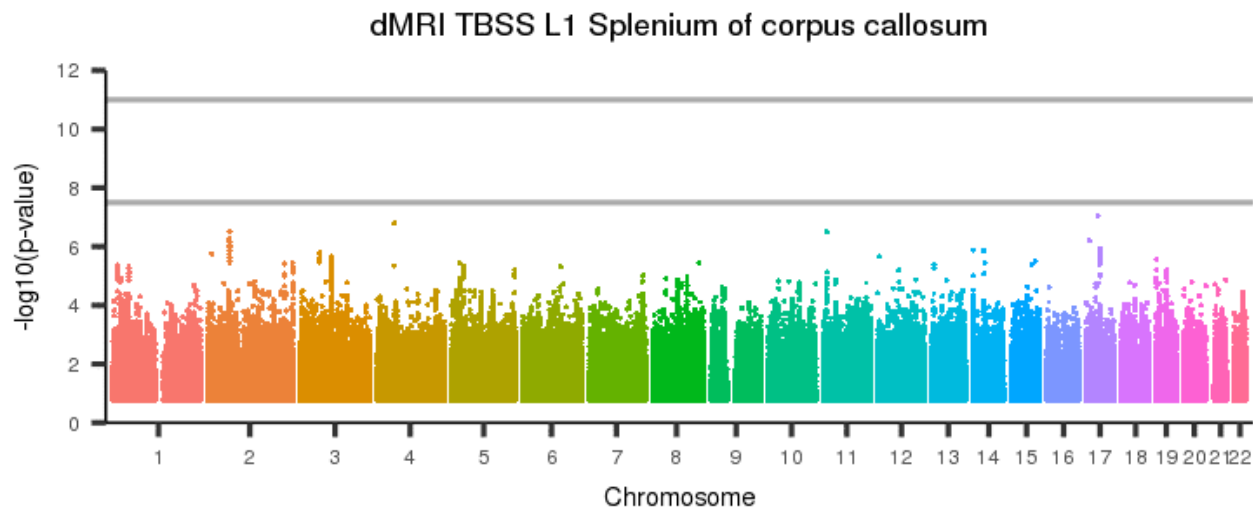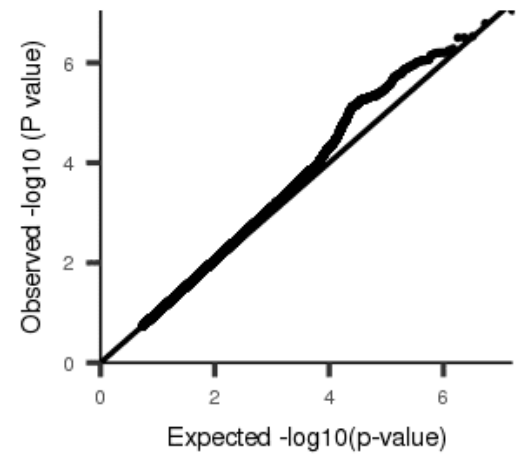

[back to list of plots](#)

Figure 345: dMRI TBSS L1 Fornix

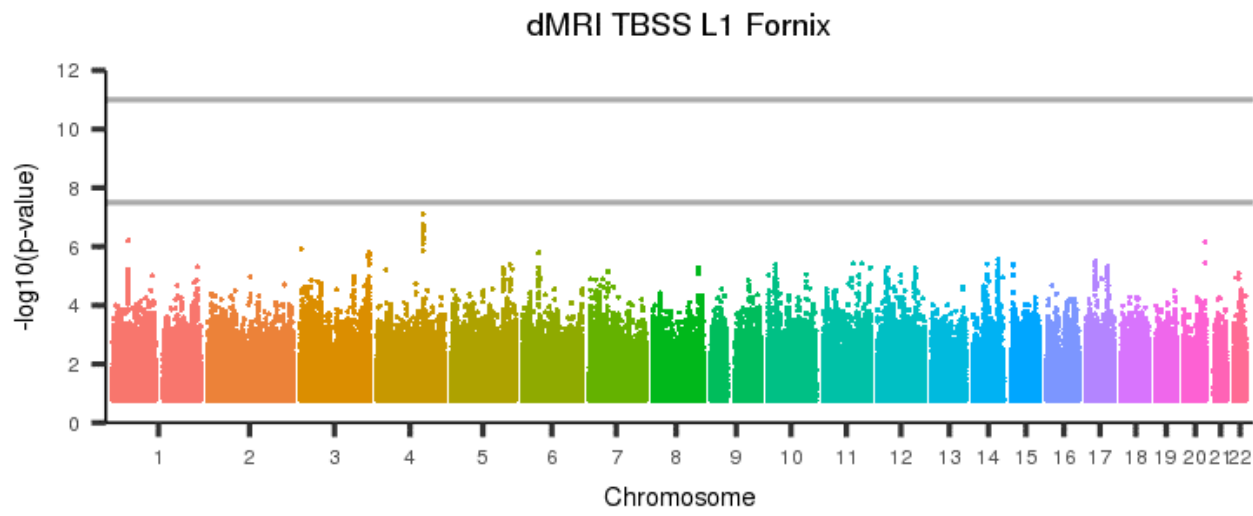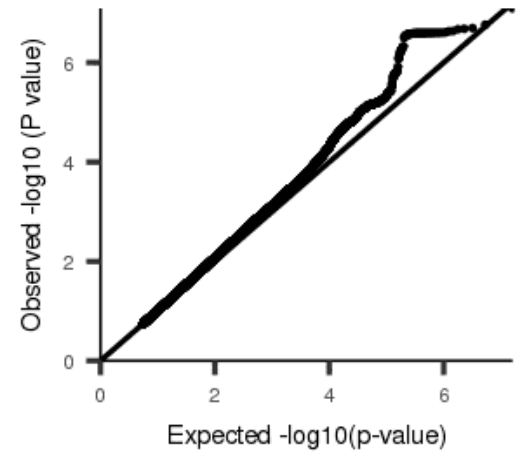

[back to list of plots](#)

Figure 346: dMRI TBSS L1 Corticospinal tract R

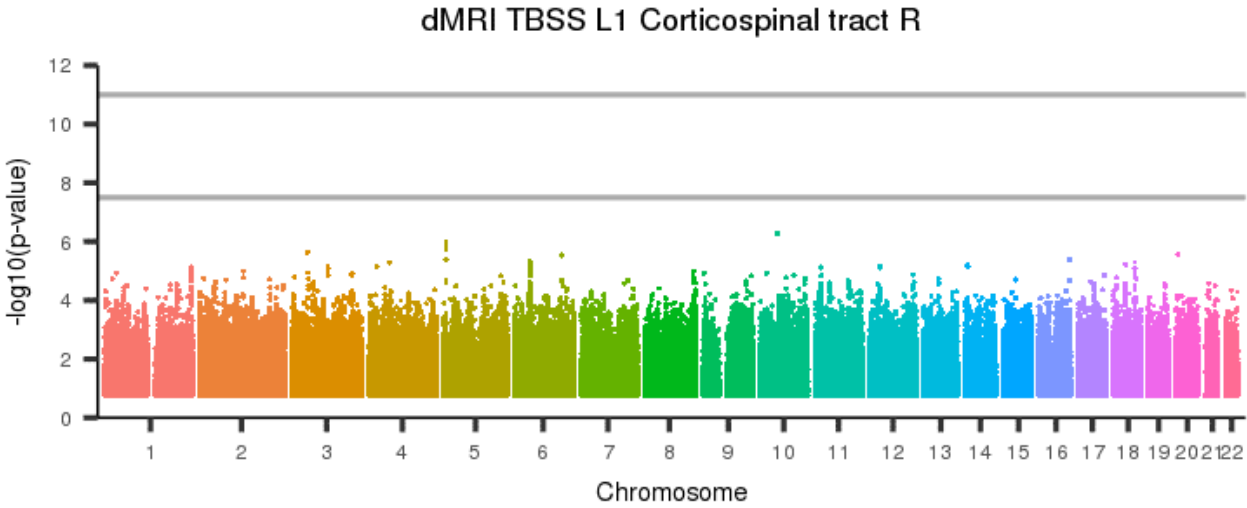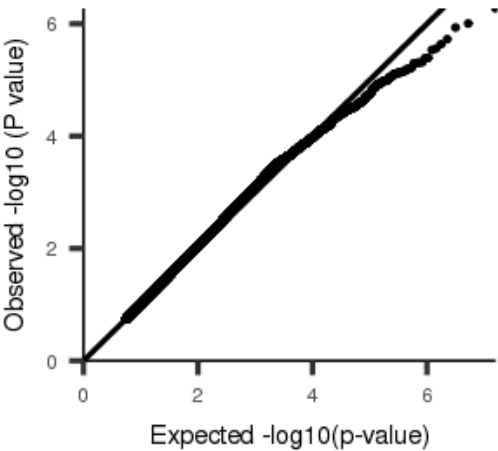

[back to list of plots](#)

Figure 347: dMRI TBSS L1 Corticospinal tract L

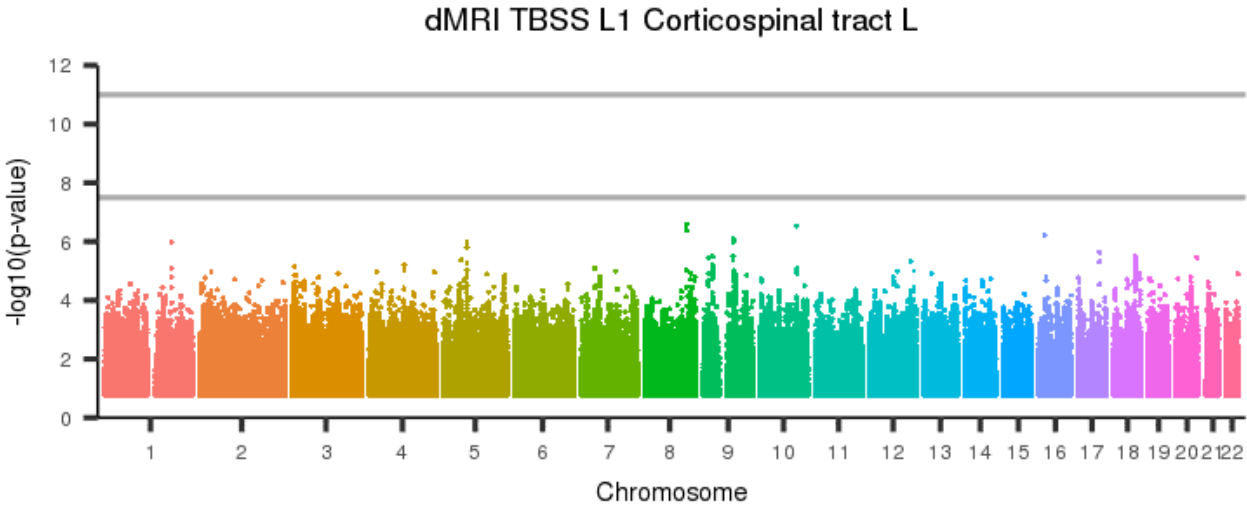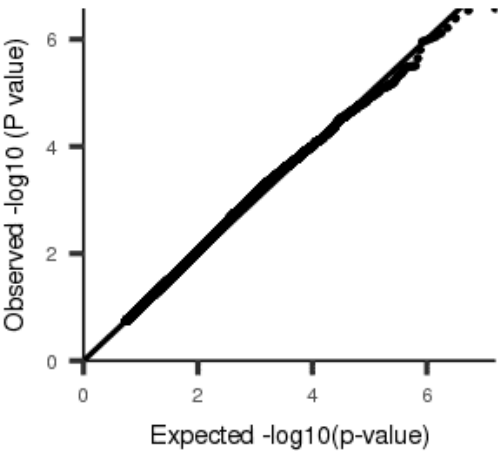

[back to list of plots](#)

Figure 348: dMRI TBSS L1 Medial lemniscus R

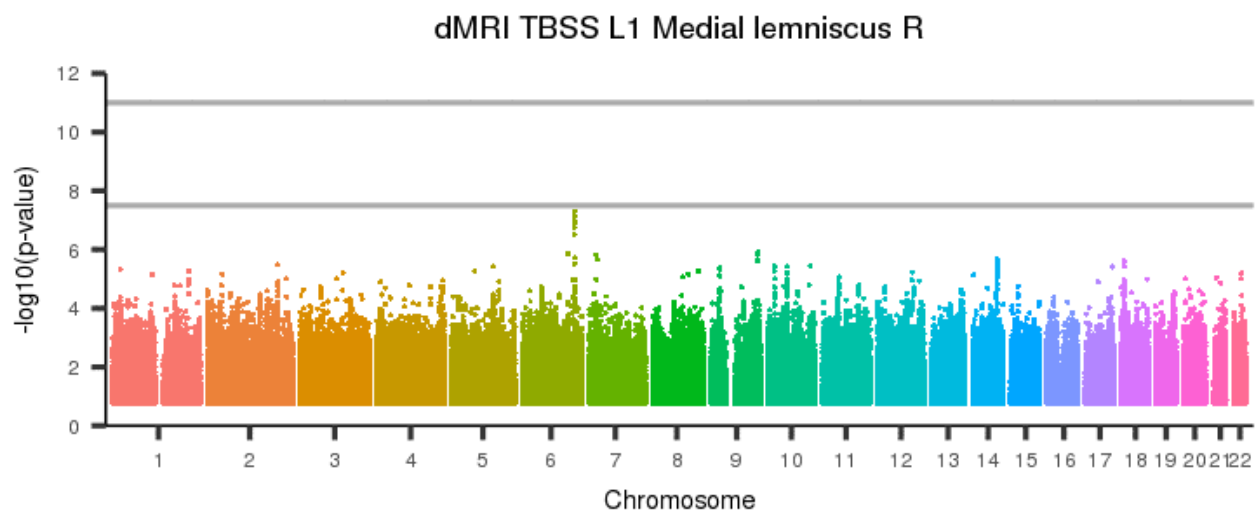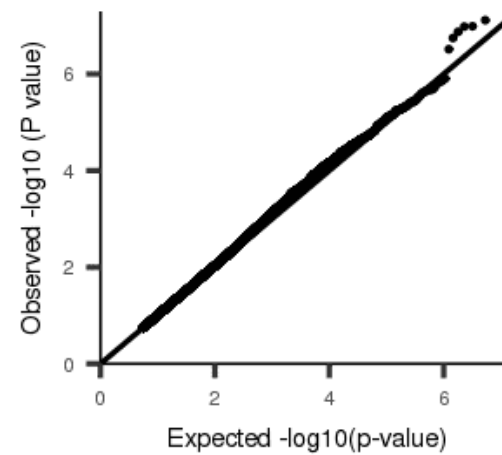

[back to list of plots](#)

Figure 349: dMRI TBSS L1 Medial lemniscus L

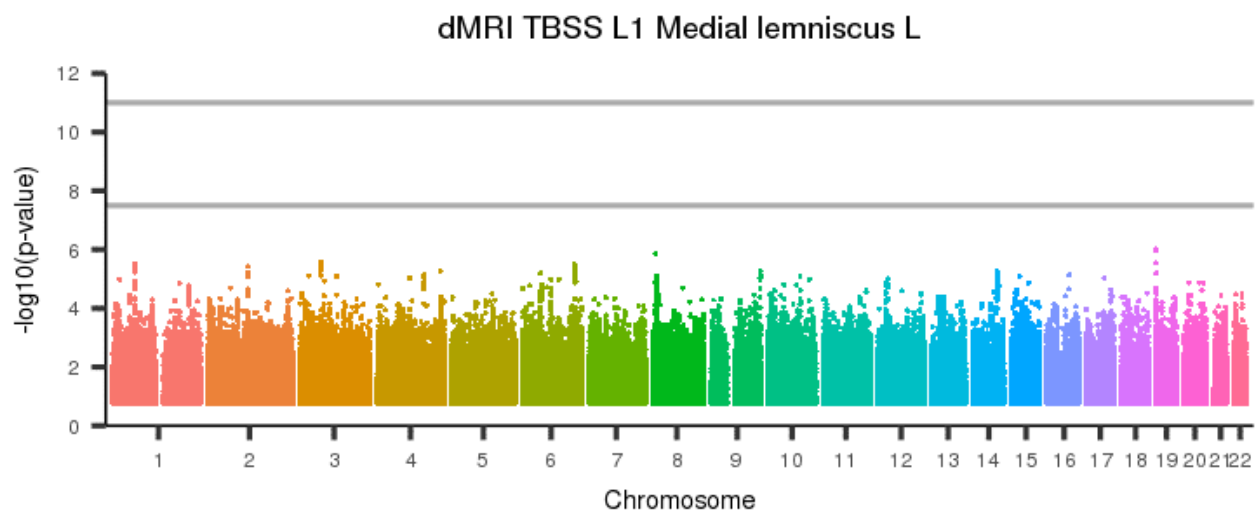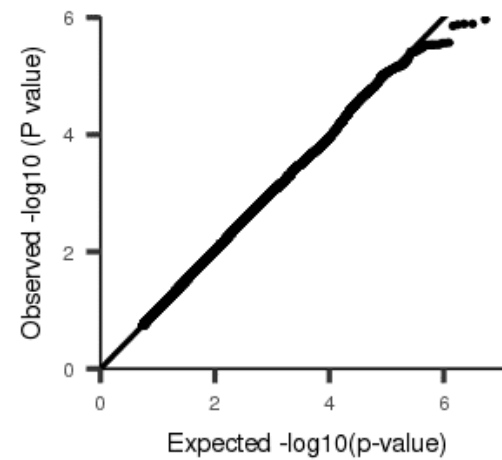

[back to list of plots](#)



Figure 350: dMRI TBSS L1 Inferior cerebellar peduncle R

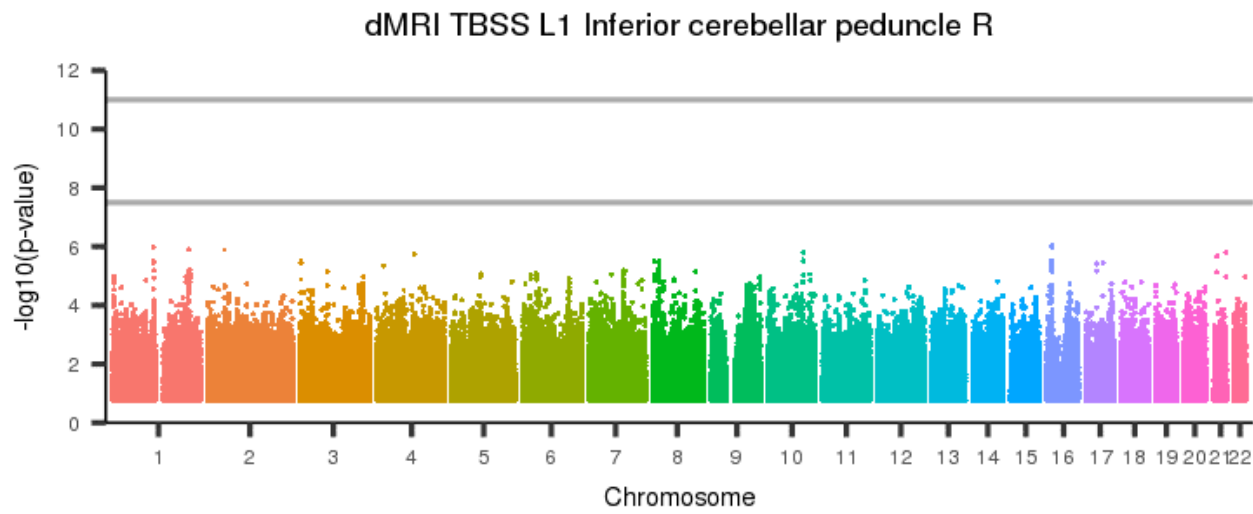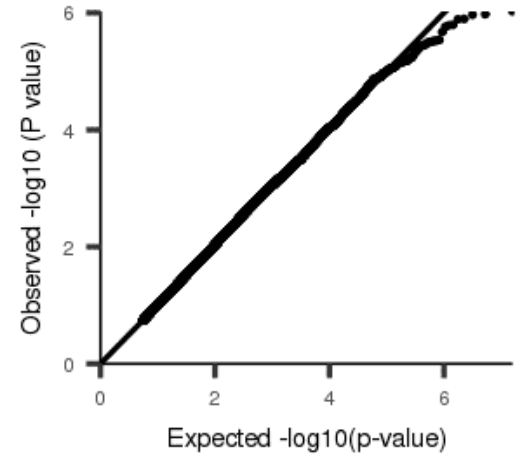

[back to list of plots](#)

Figure 351: dMRI TBSS L1 Inferior cerebellar peduncle L

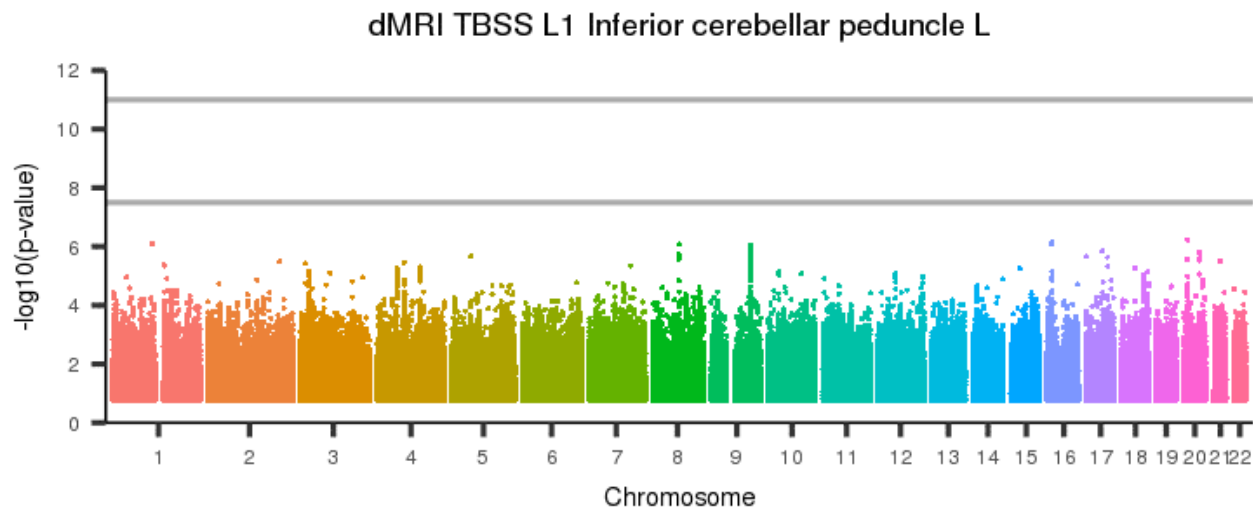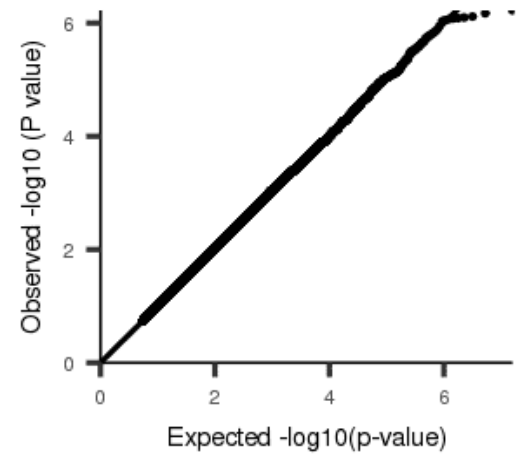

[back to list of plots](#)

Figure 352: dMRI TBSS L1 Superior cerebellar peduncle R

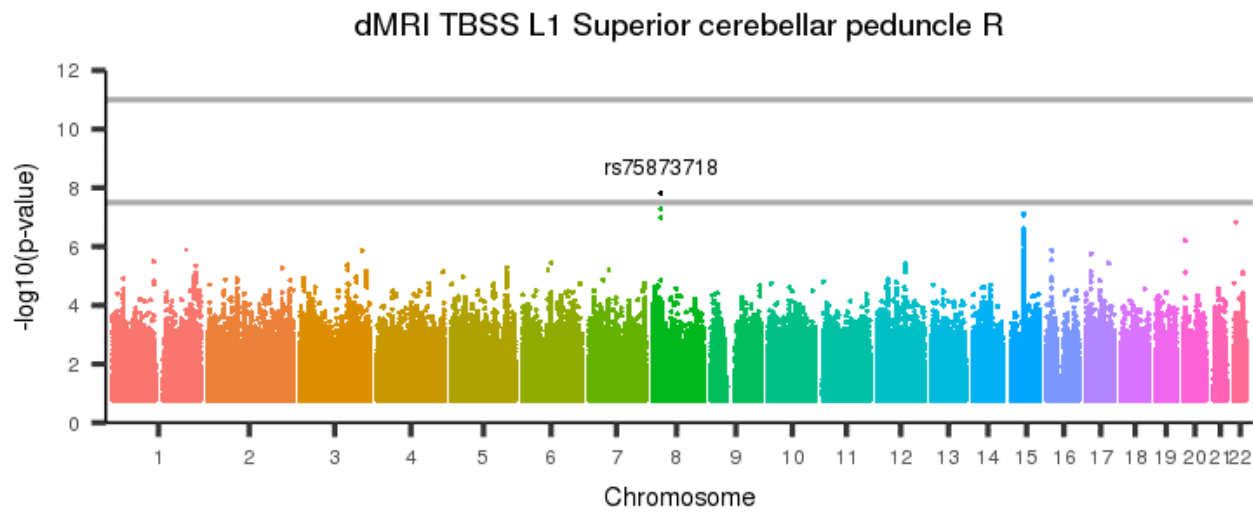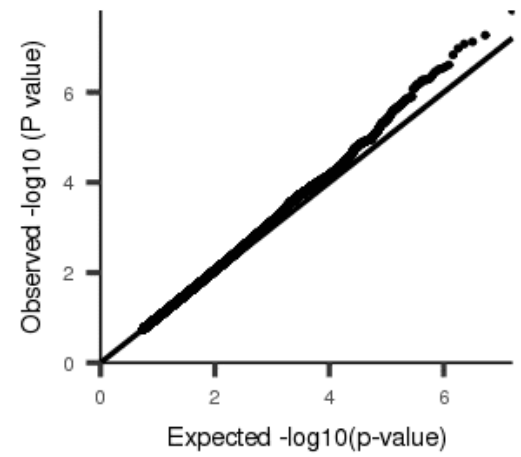

[back to list of plots](#)

Figure 353: dMRI TBSS L1 Superior cerebellar peduncle L

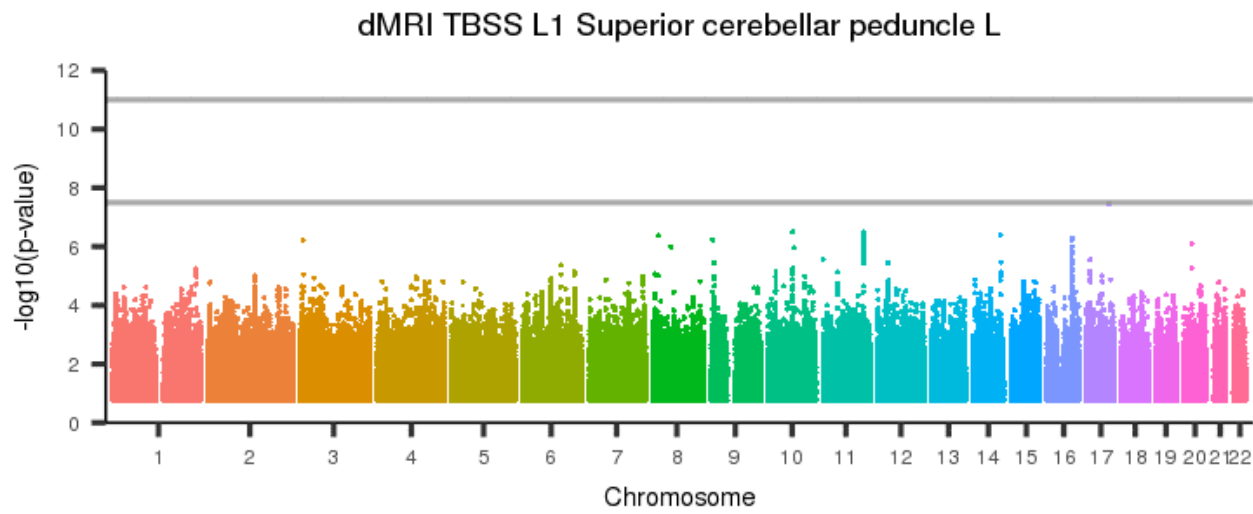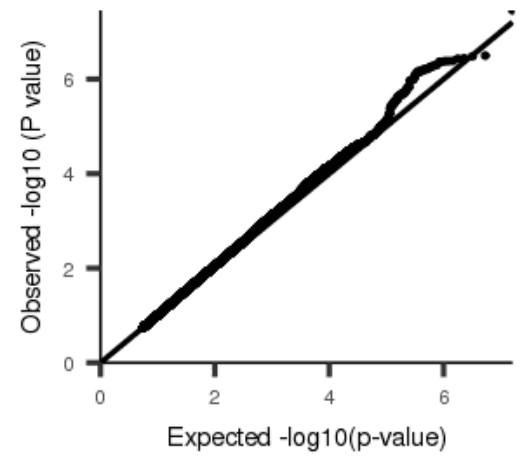

[back to list of plots](#)

Figure 354: dMRI TBSS L1 Cerebral peduncle R

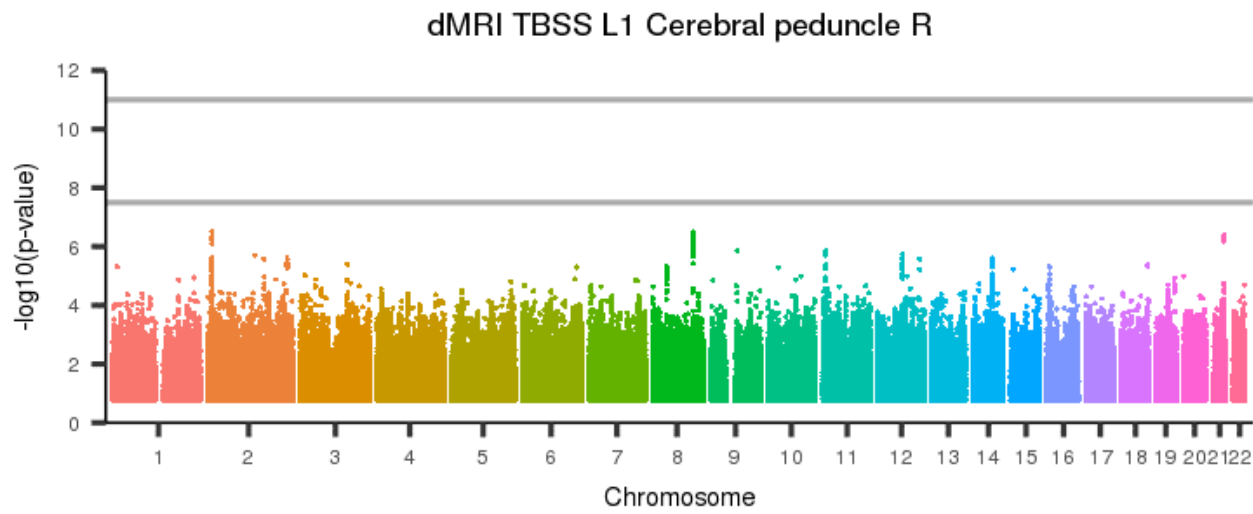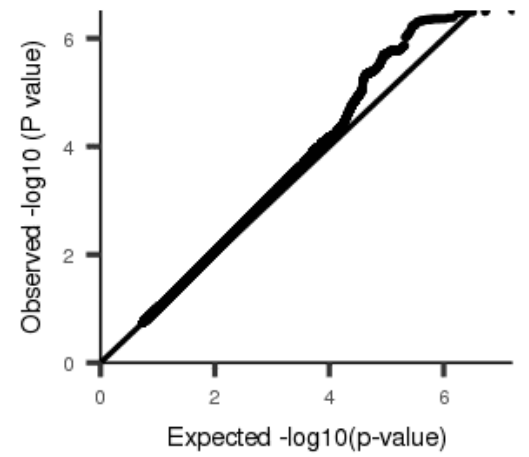

[back to list of plots](#)

Figure 355: dMRI TBSS L1 Cerebral peduncle L

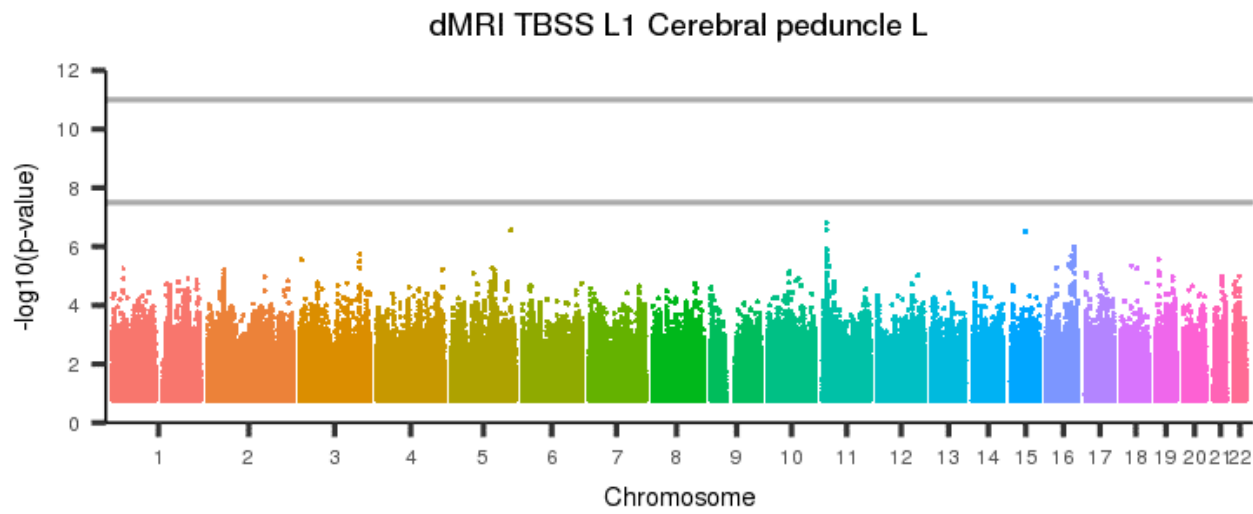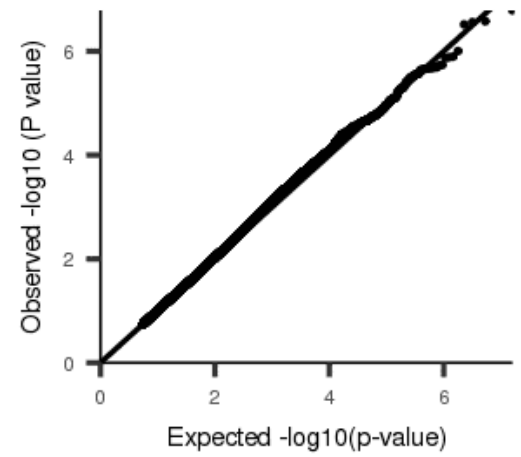

[back to list of plots](#)

Figure 356: dMRI TBSS L1 Anterior limb of internal capsule R

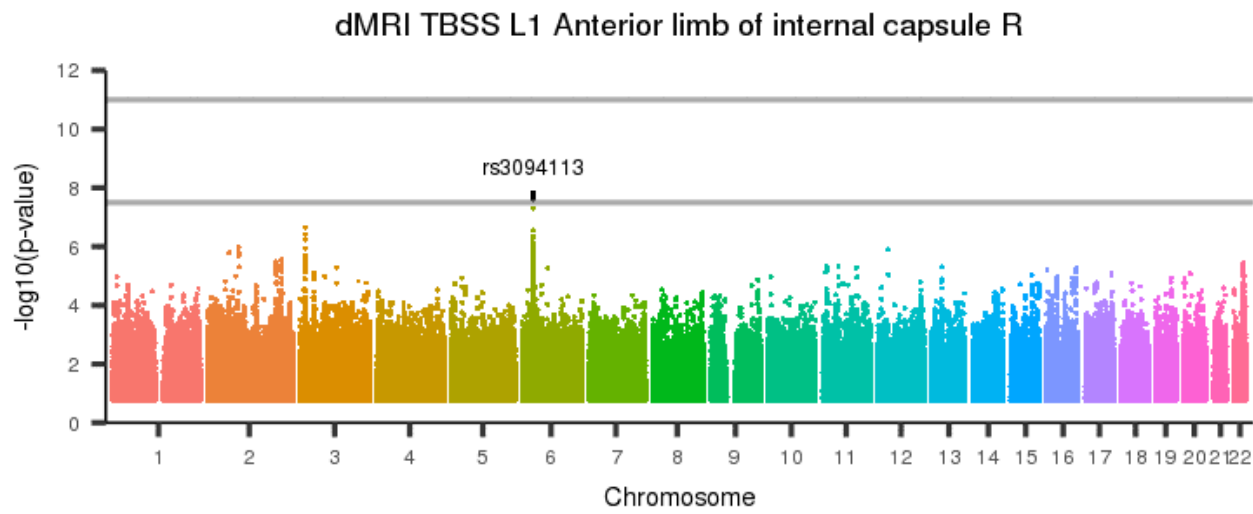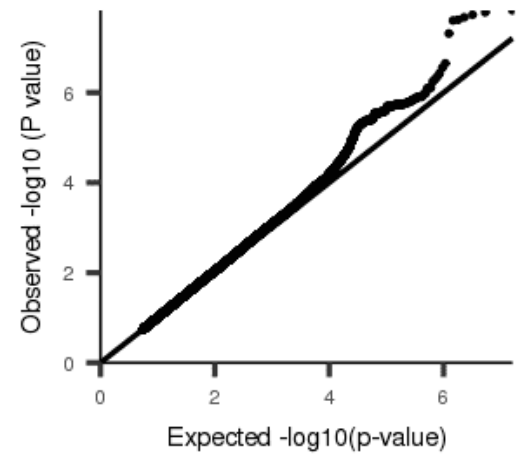

[back to list of plots](#)

Figure 357: dMRI TBSS L1 Anterior limb of internal capsule L

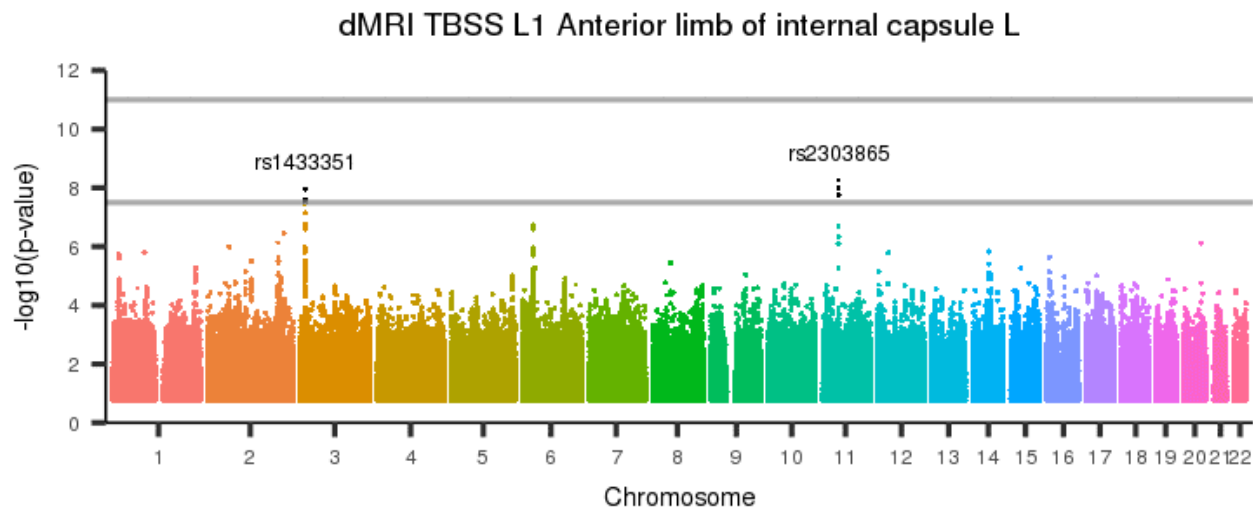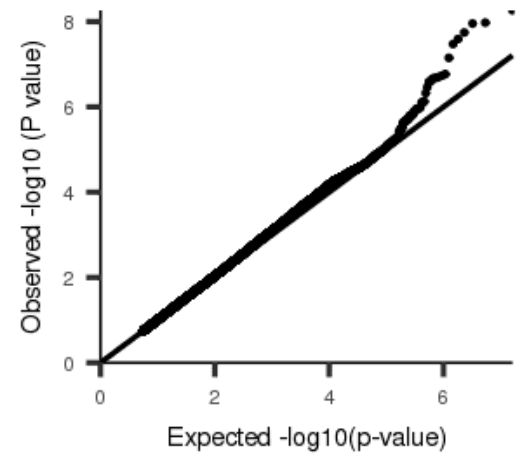

[back to list of plots](#)



Figure 358: dMRI TBSS L1 Posterior limb of internal capsule R

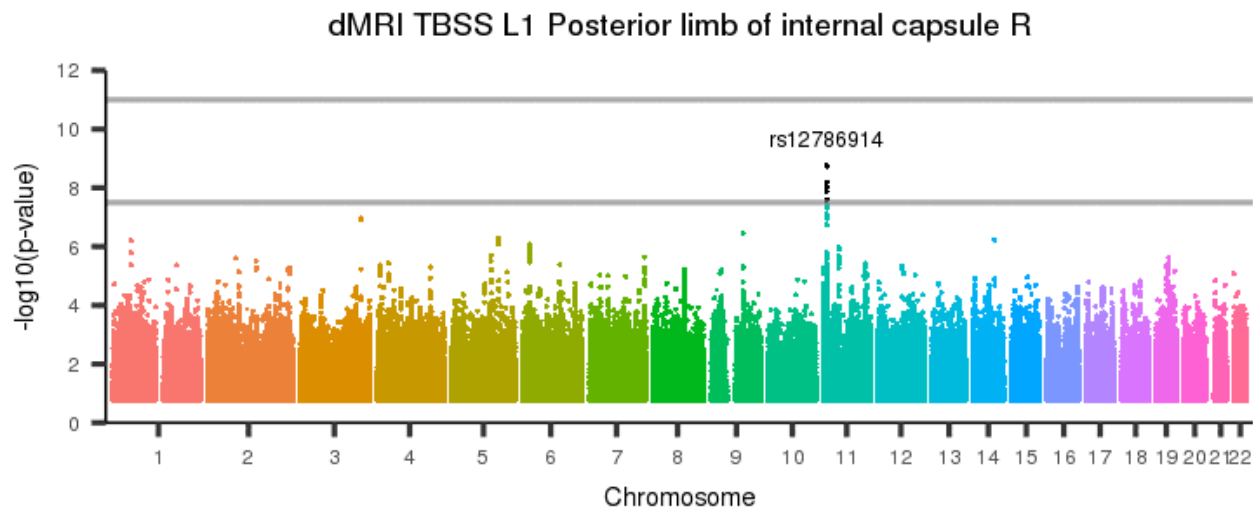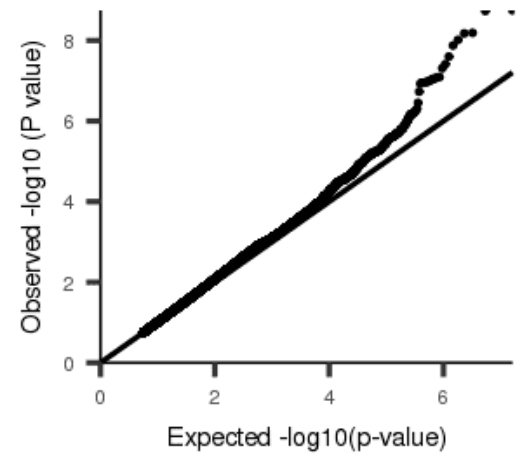

[back to list of plots](#)

Figure 359: dMRI TBSS L1 Posterior limb of internal capsule L

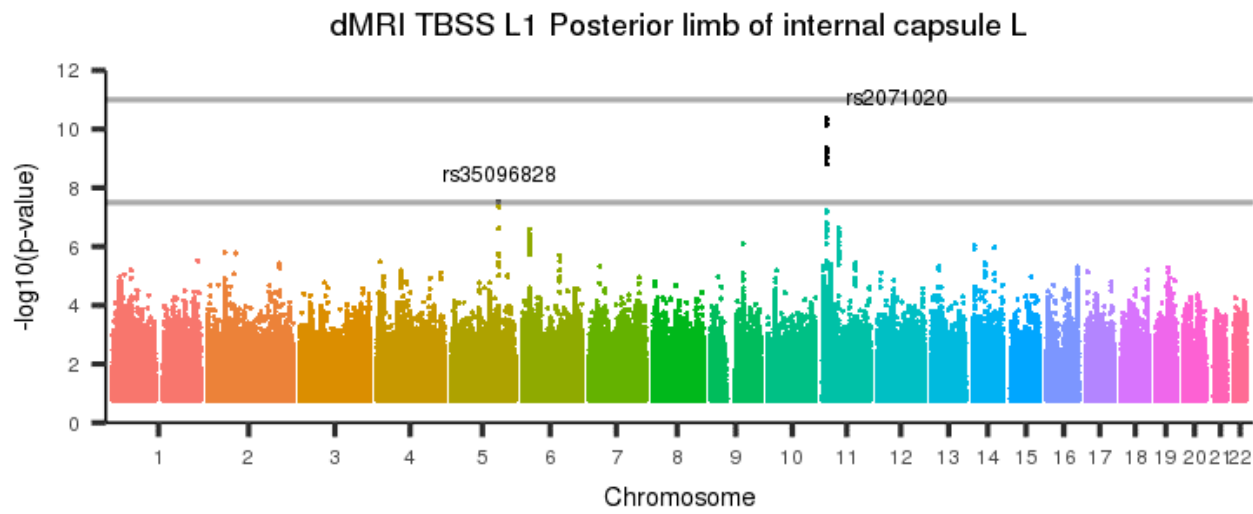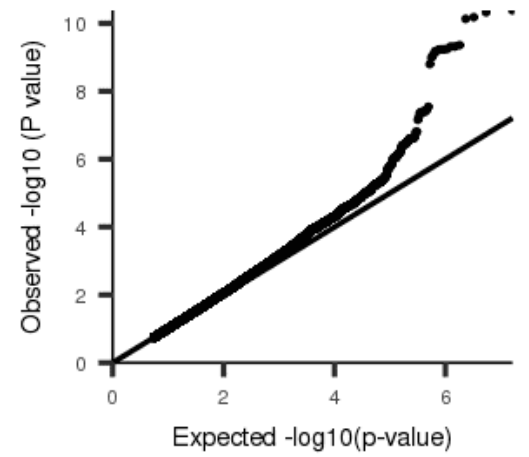

[back to list of plots](#)

Figure 360: dMRI TBSS L1 Retrolenticular part of internal capsule R

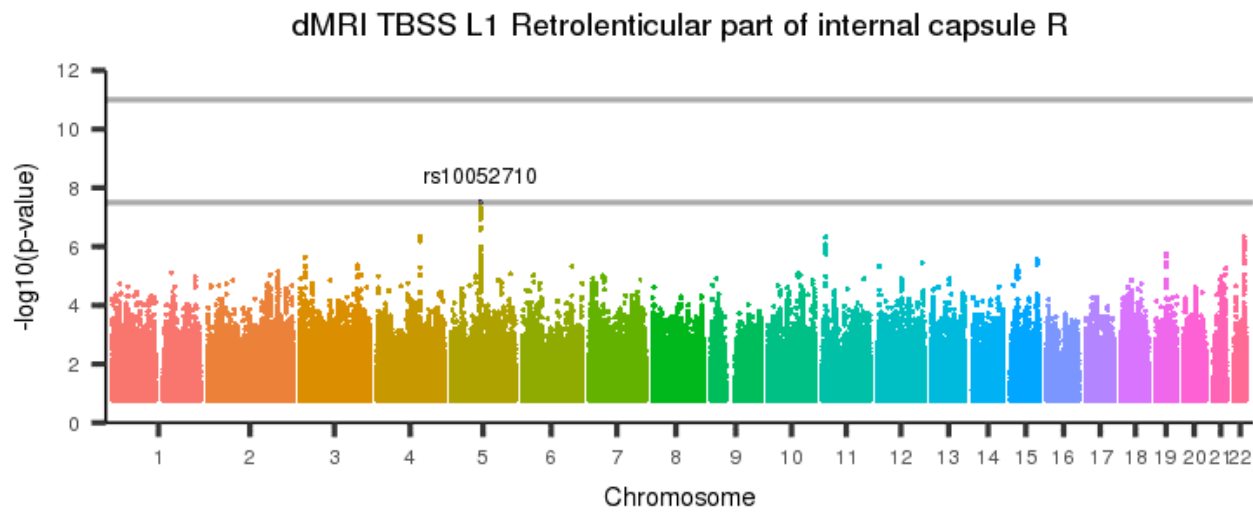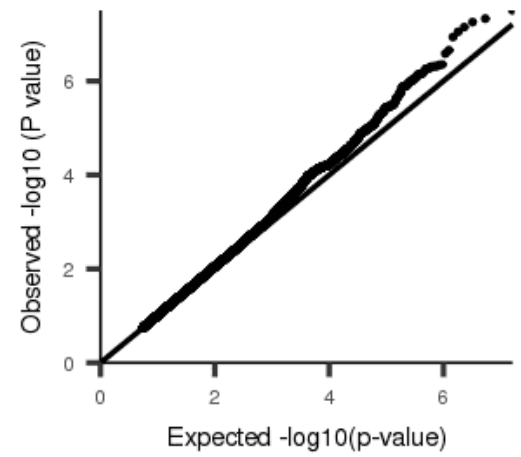

[back to list of plots](#)

Figure 361: dMRI TBSS L1 Retrolenticular part of internal capsule L

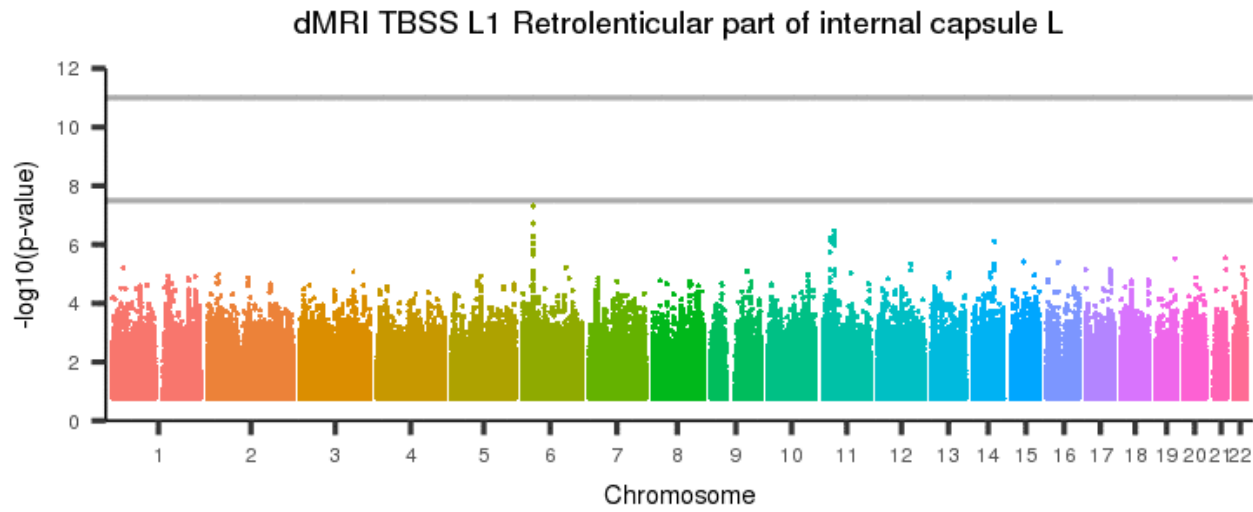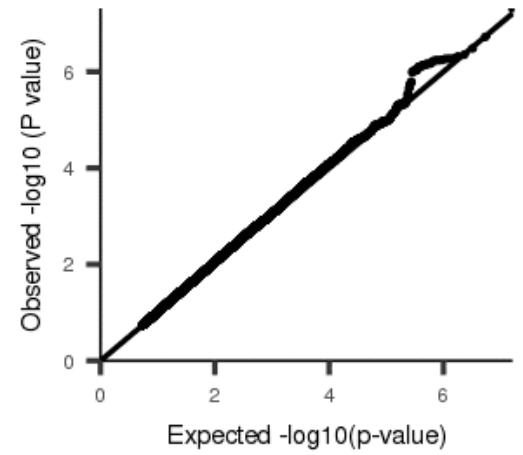

[back to list of plots](#)

Figure 362: dMRI TBSS L1 Anterior corona radiata R

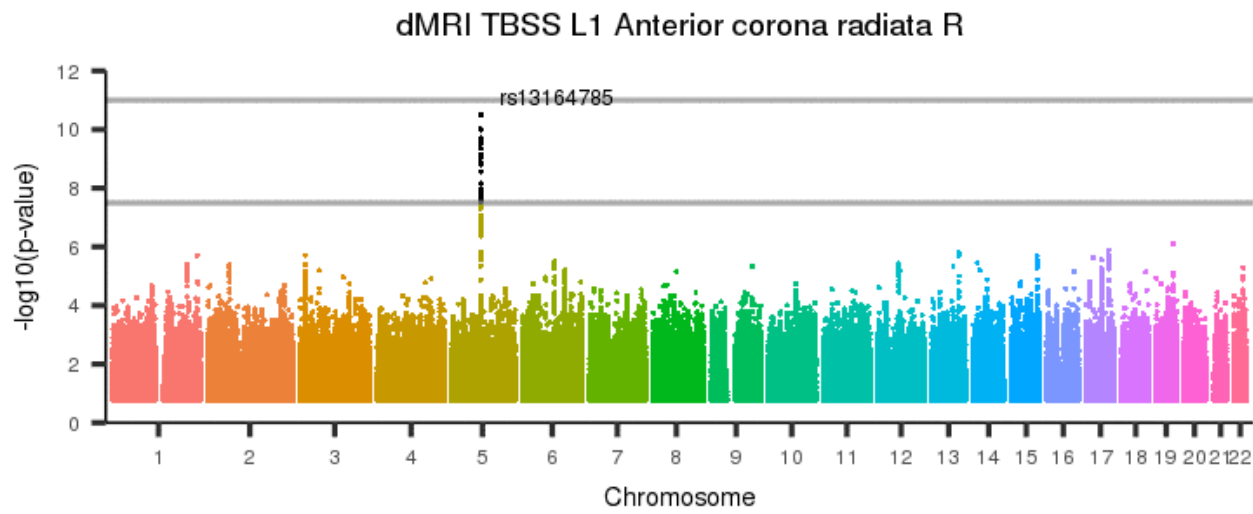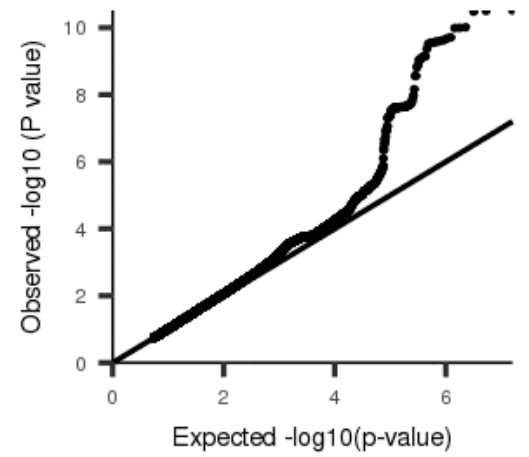

[back to list of plots](#)

Figure 363: dMRI TBSS L1 Anterior corona radiata L

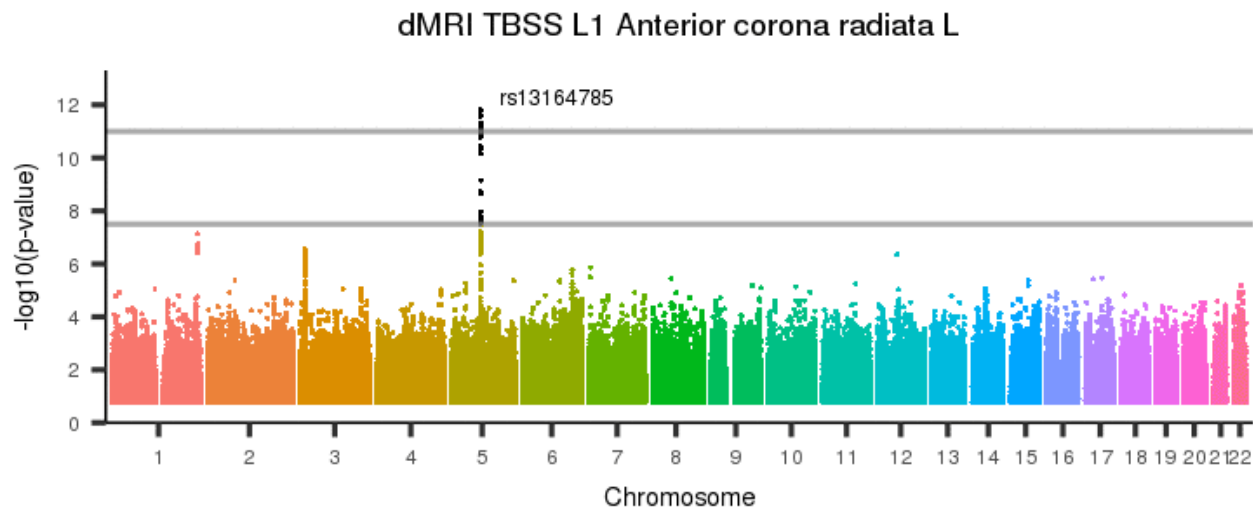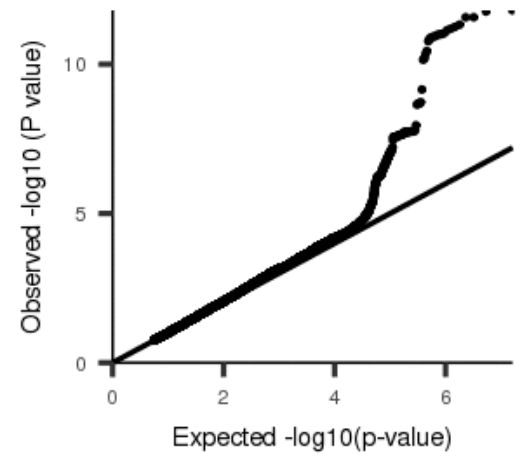

[back to list of plots](#)

Figure 364: dMRI TBSS L1 Superior corona radiata R

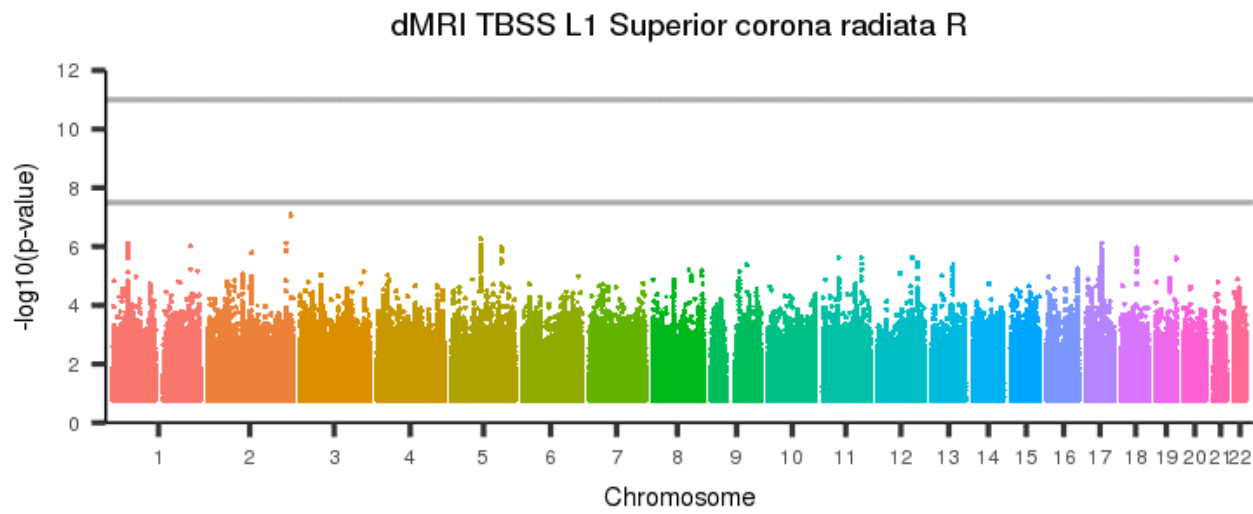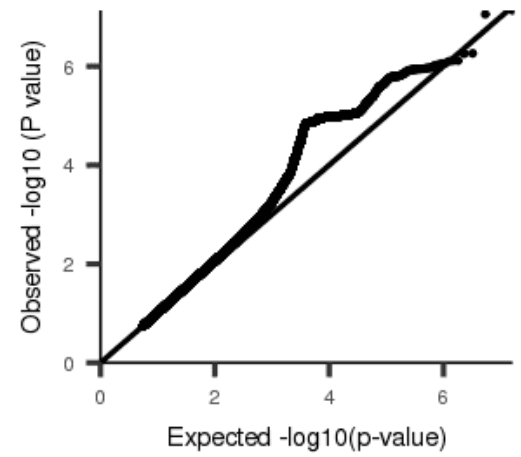

[back to list of plots](#)

Figure 365: dMRI TBSS L1 Superior corona radiata L

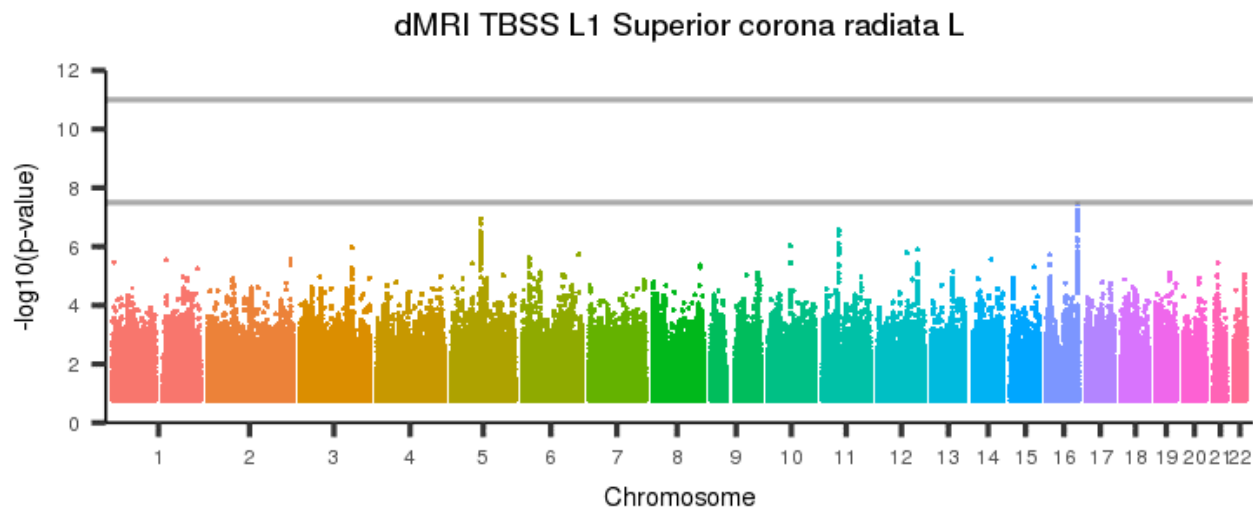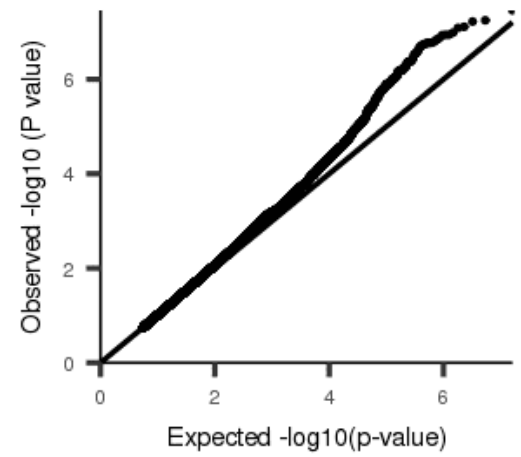

[back to list of plots](#)



Figure 366: dMRI TBSS L1 Posterior corona radiata R

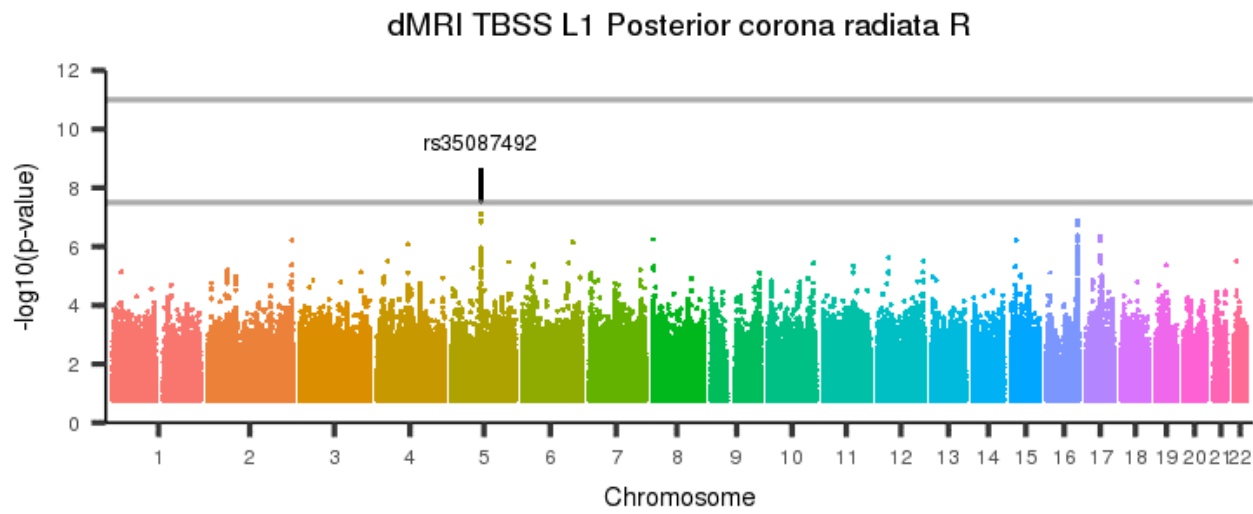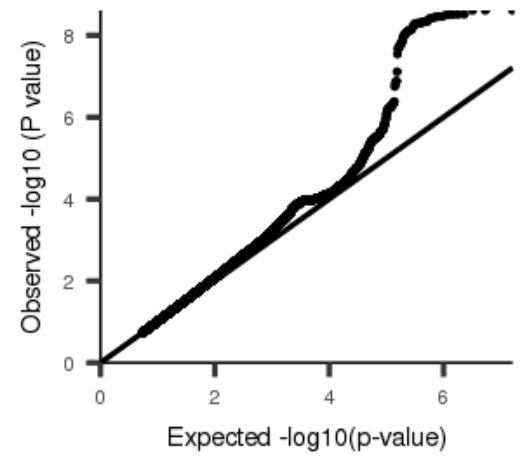

[back to list of plots](#)

Figure 367: dMRI TBSS L1 Posterior corona radiata L

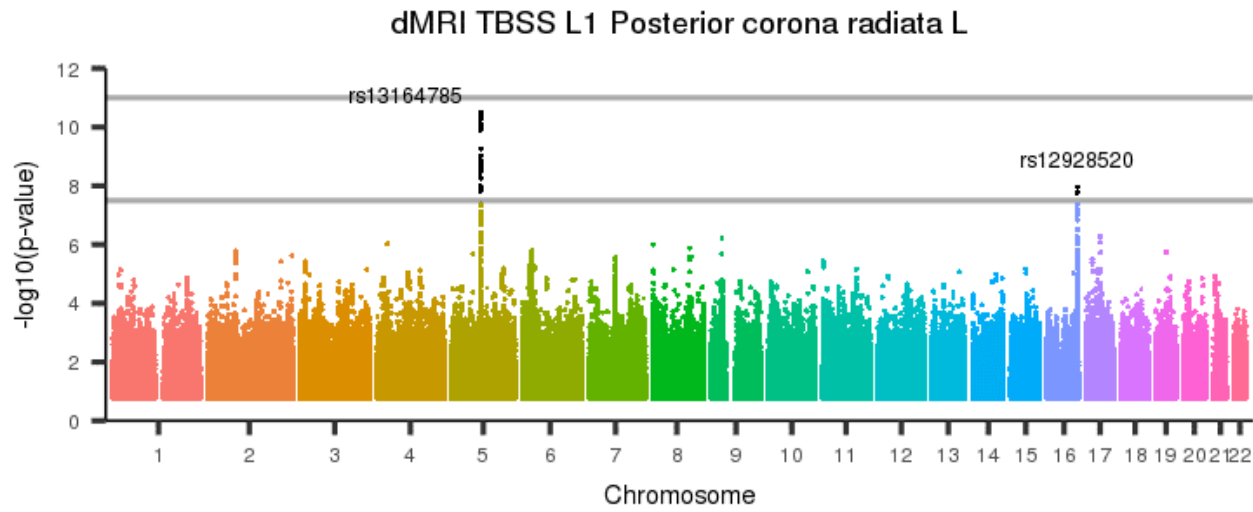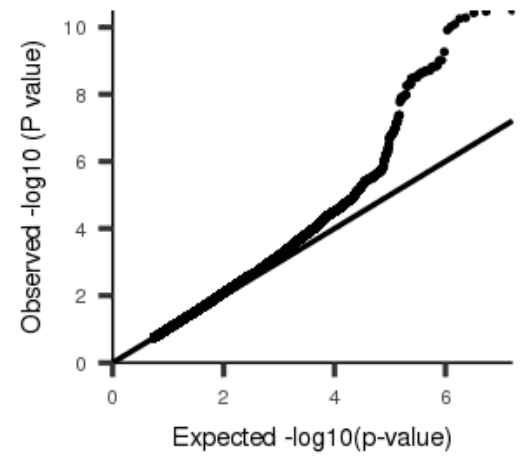

[back to list of plots](#)

Figure 368: dMRI TBSS L1 Posterior thalamic radiation R

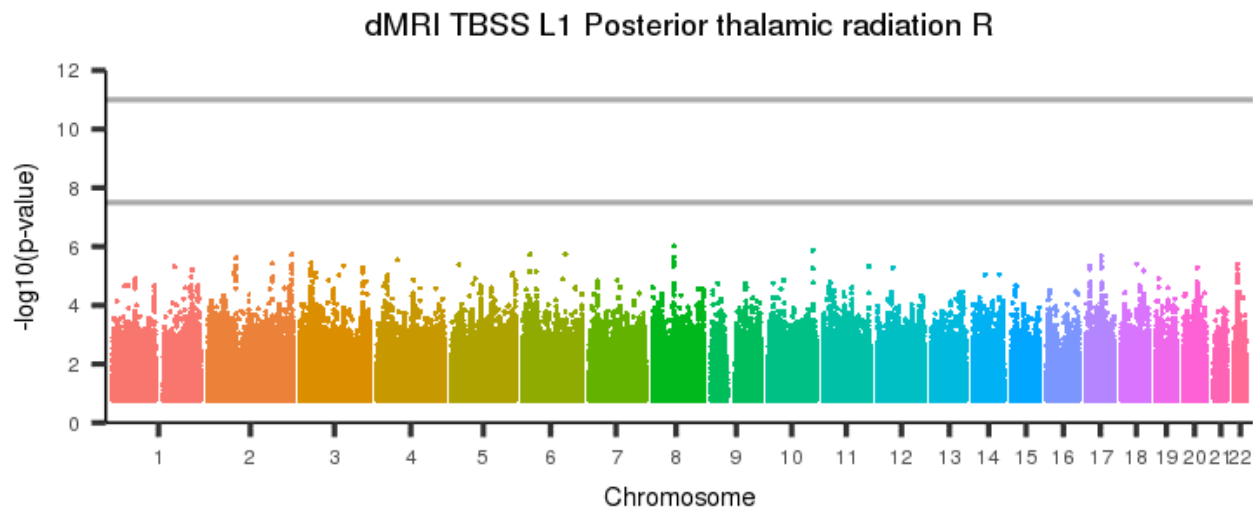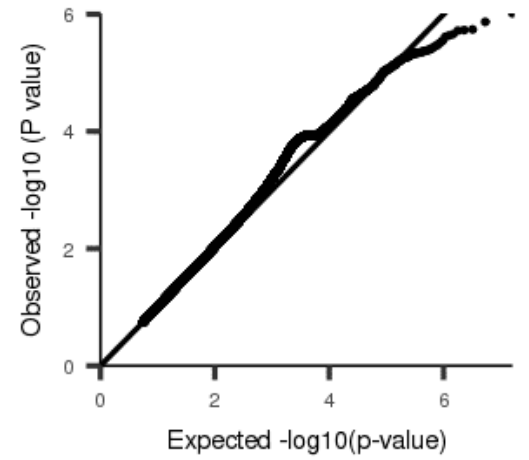

[back to list of plots](#)

Figure 369: dMRI TBSS L1 Posterior thalamic radiation L

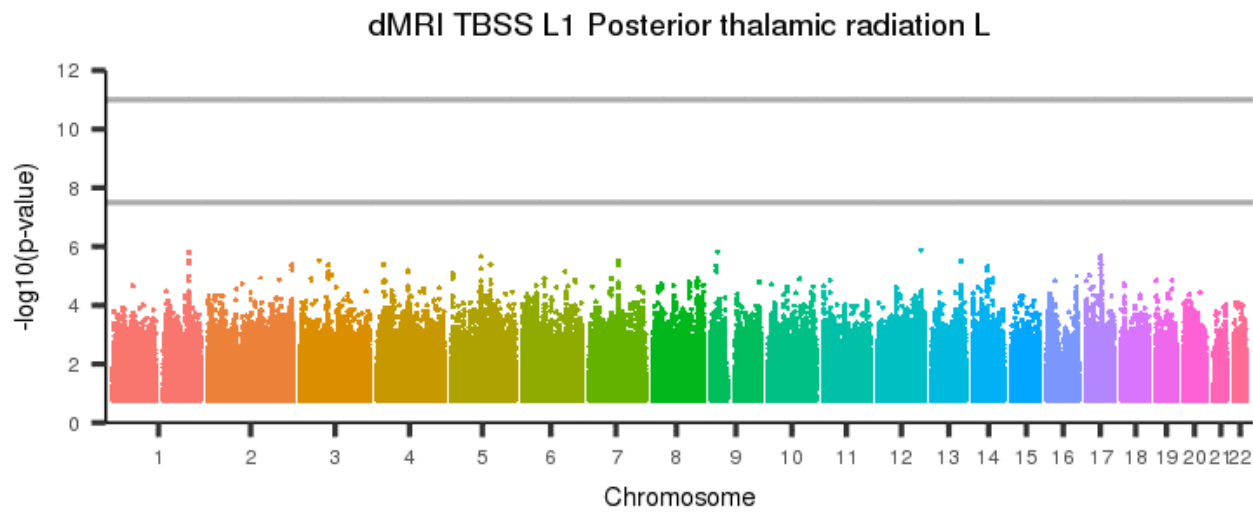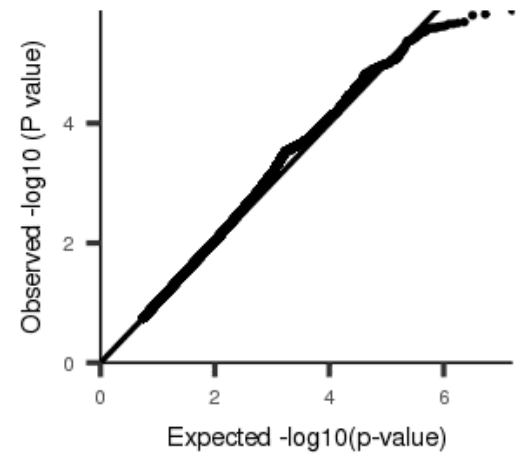

[back to list of plots](#)

Figure 370: dMRI TBSS L1 Sagittal stratum R

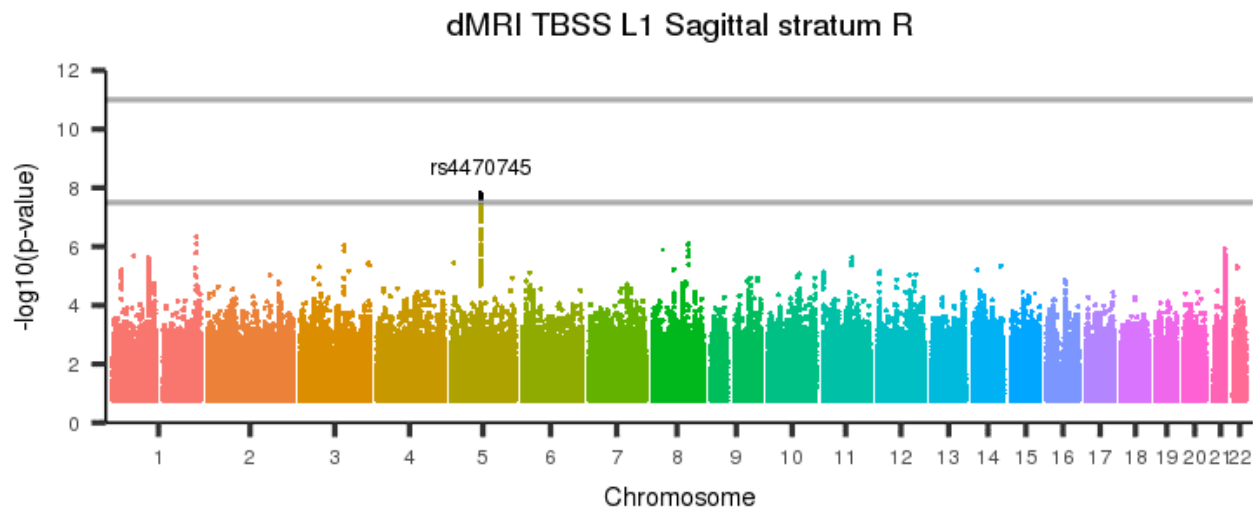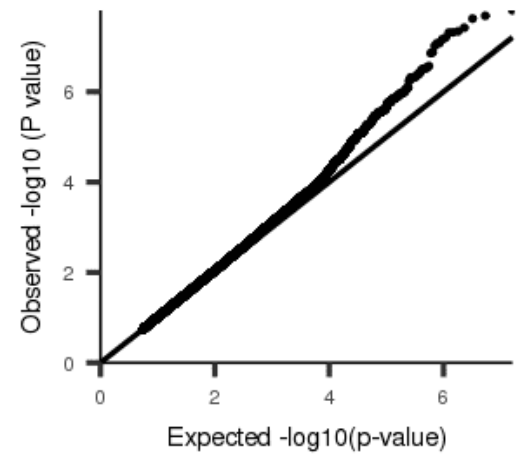

[back to list of plots](#)

Figure 371: dMRI TBSS L1 Sagittal stratum L

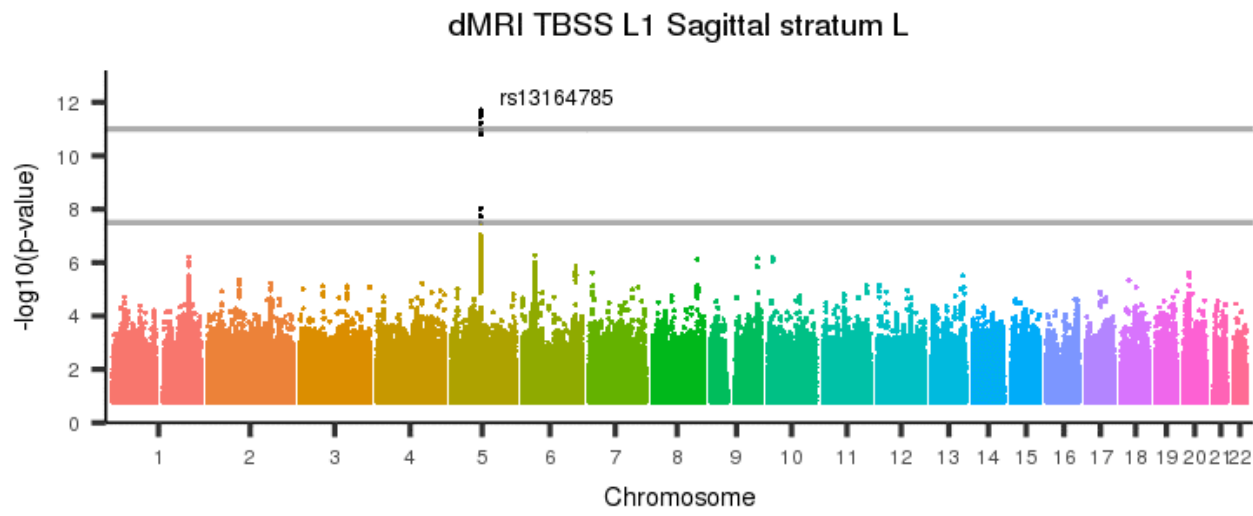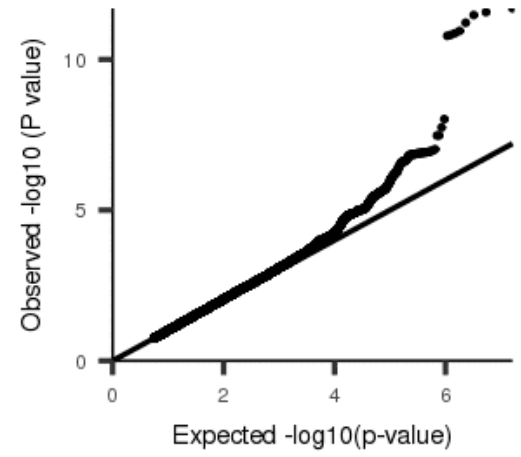

[back to list of plots](#)

Figure 372: dMRI TBSS L1 External capsule R

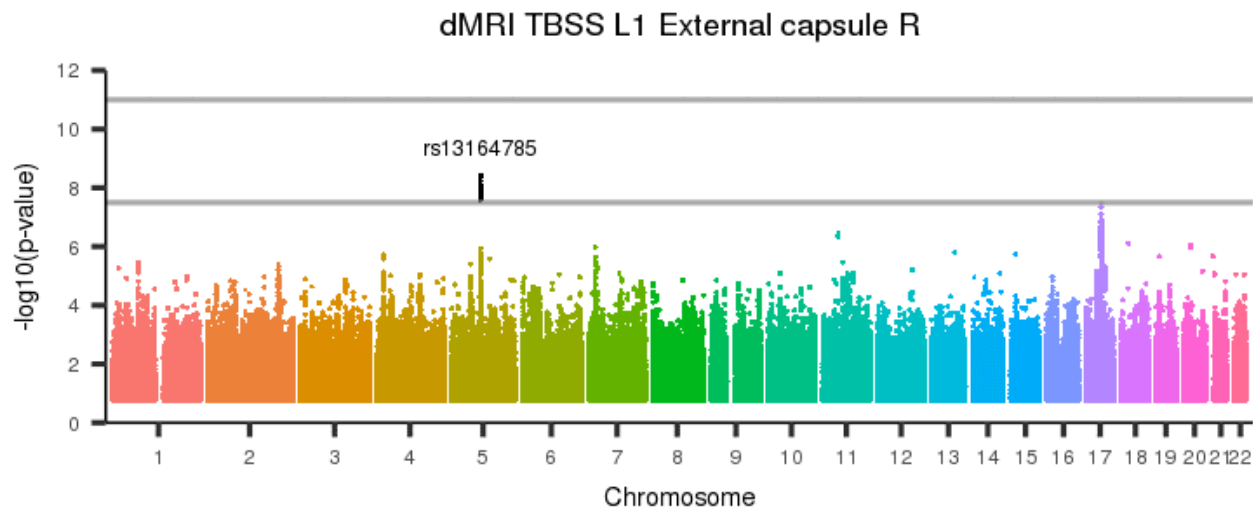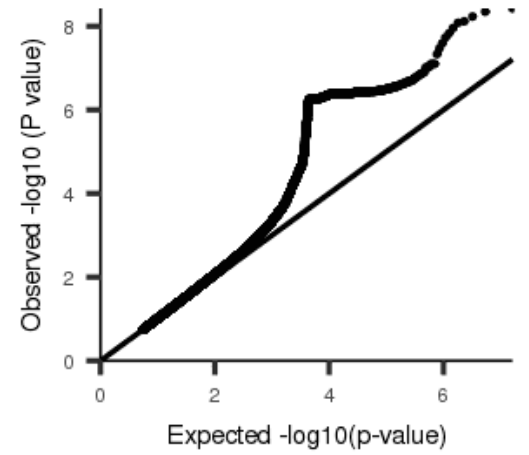

[back to list of plots](#)

Figure 373: dMRI TBSS L1 External capsule L

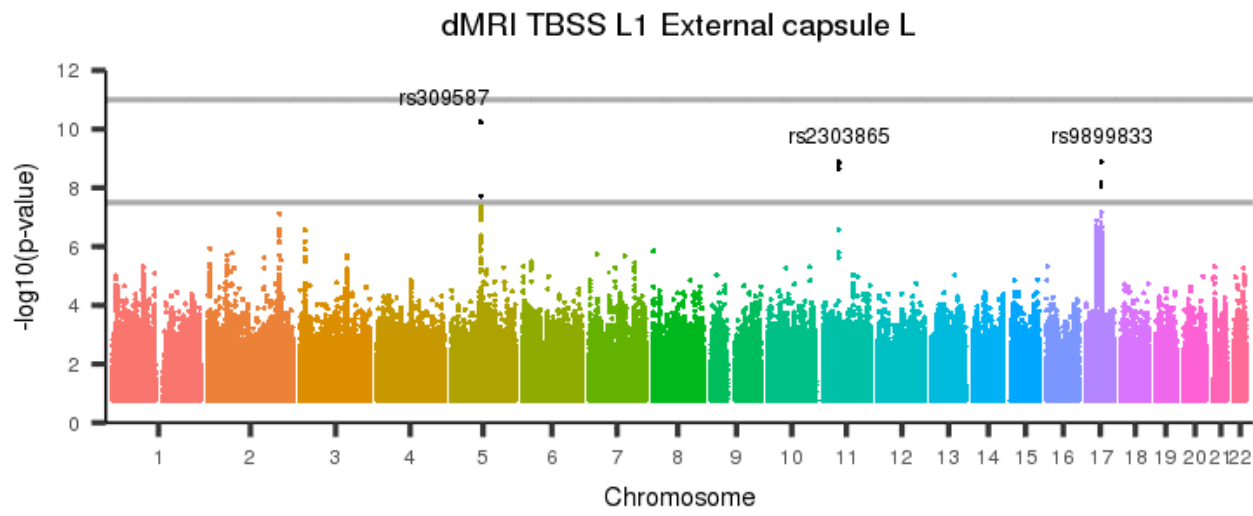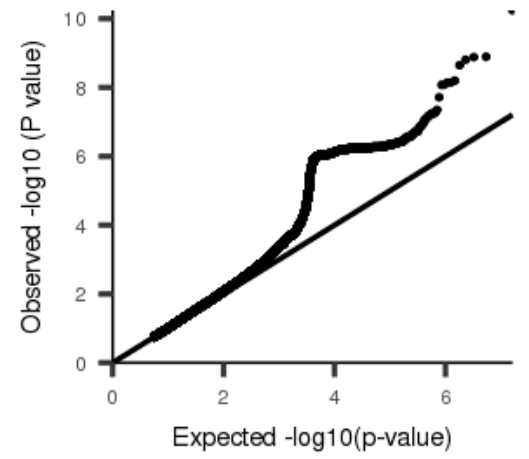

[back to list of plots](#)



Figure 374: dMRI TBSS L1 Cingulum cingulate gyrus R

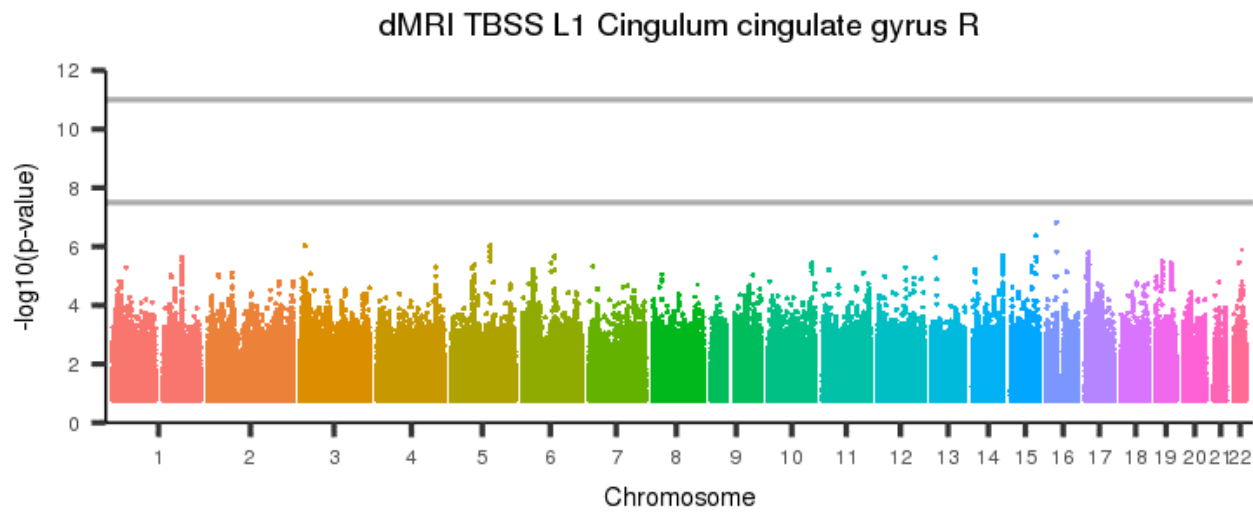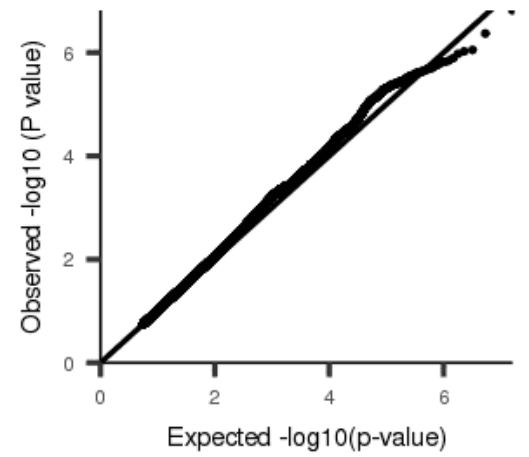

[back to list of plots](#)

Figure 375: dMRI TBSS L1 Cingulum cingulate gyrus L

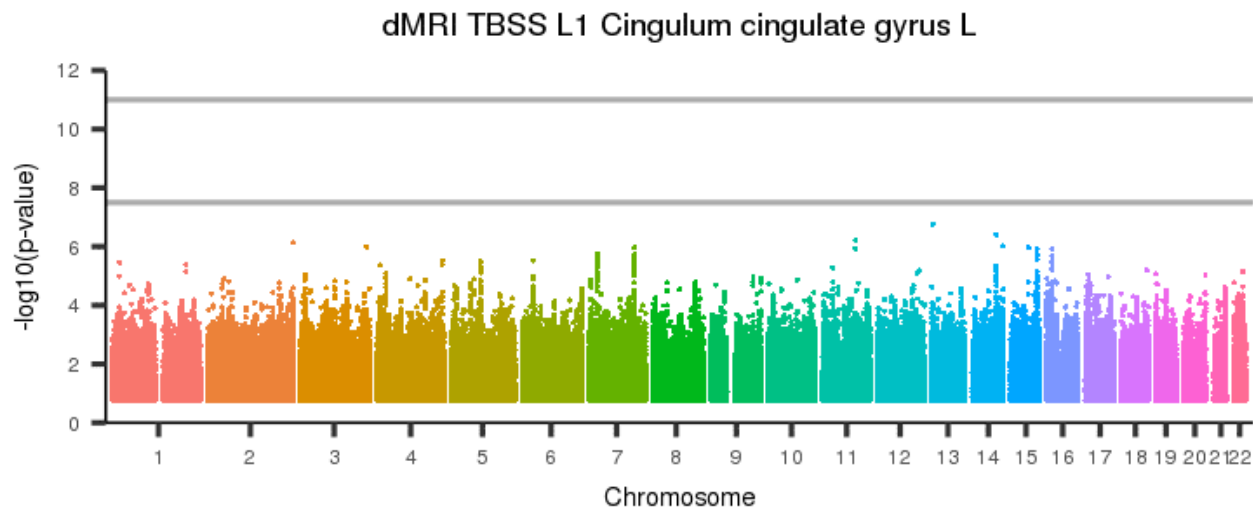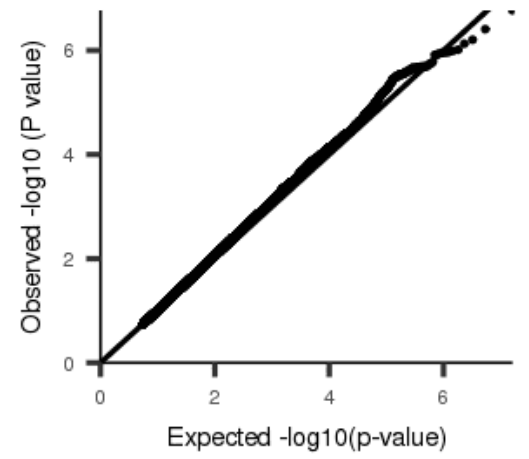

[back to list of plots](#)

Figure 376: dMRI TBSS L1 Cingulum hippocampus R

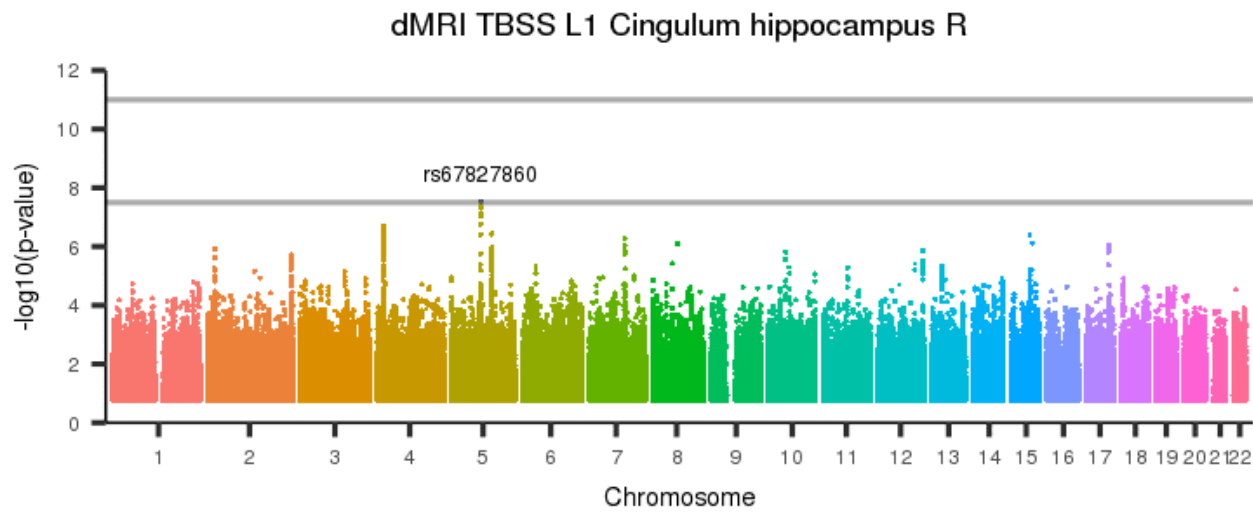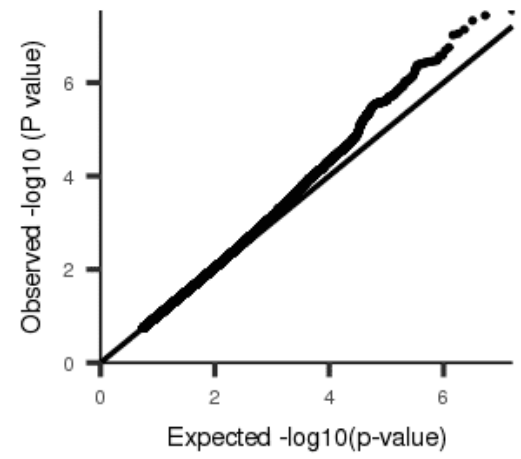

[back to list of plots](#)

Figure 377: dMRI TBSS L1 Cingulum hippocampus L

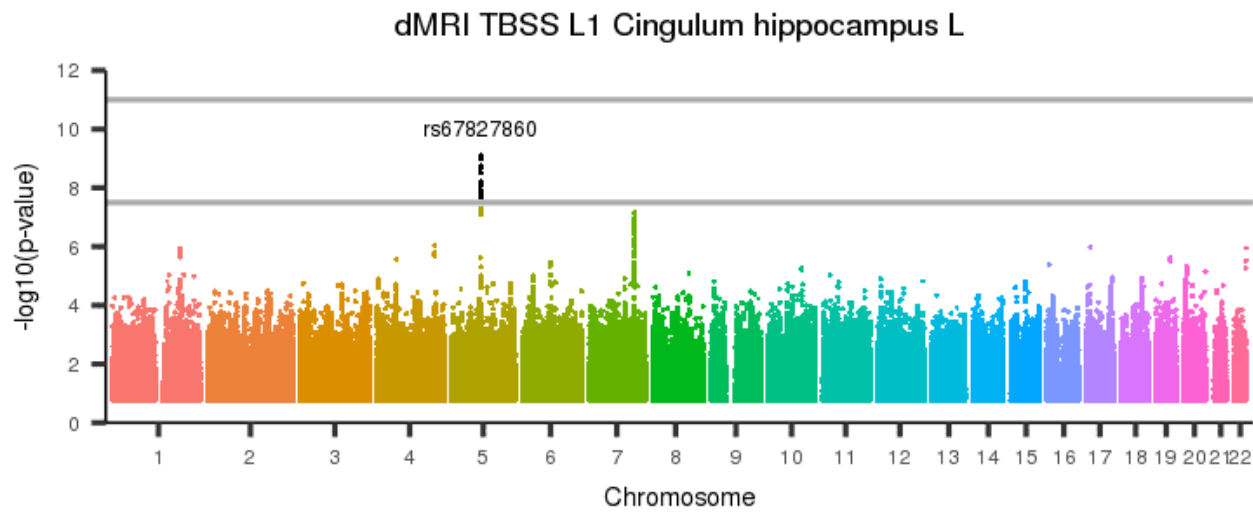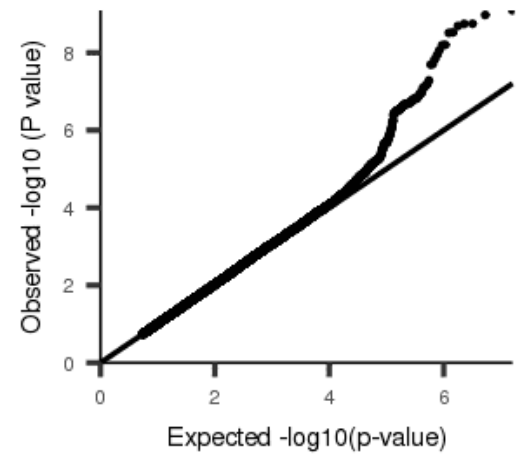

[back to list of plots](#)

Figure 378: dMRI TBSS L1 Fornix cres+Stria terminalis R

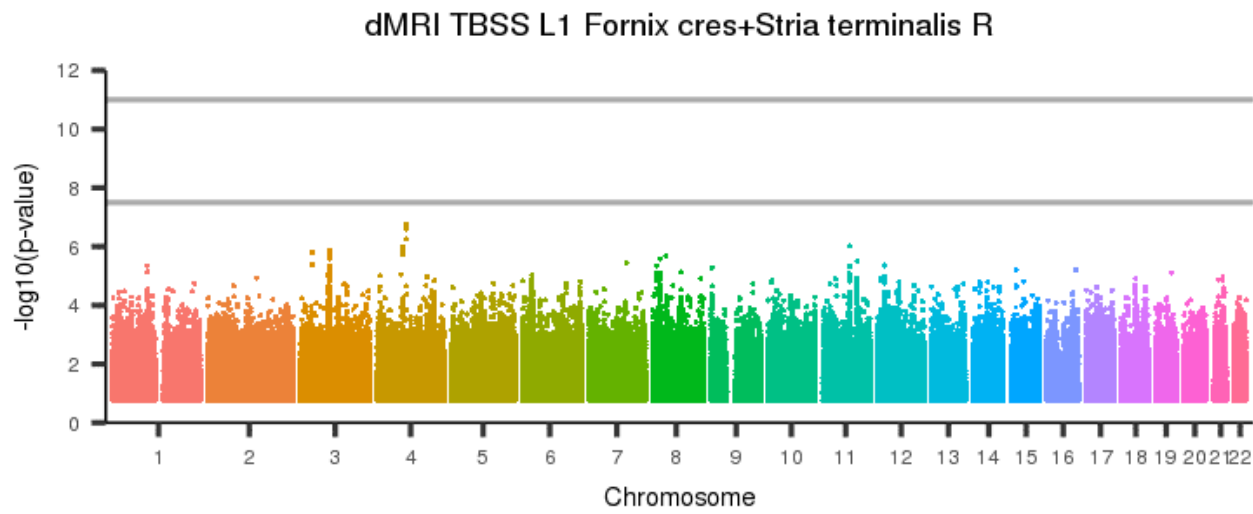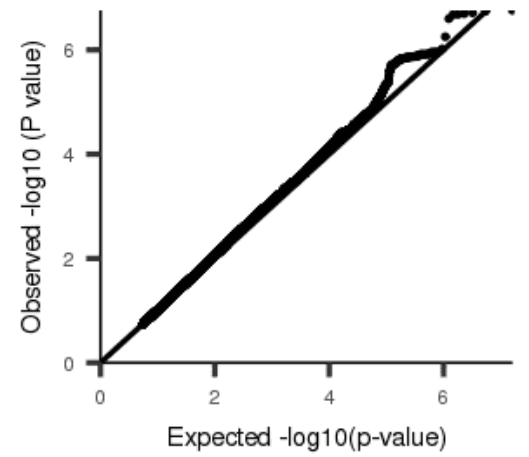

[back to list of plots](#)

Figure 379: dMRI TBSS L1 Fornix cres+Stria terminalis L

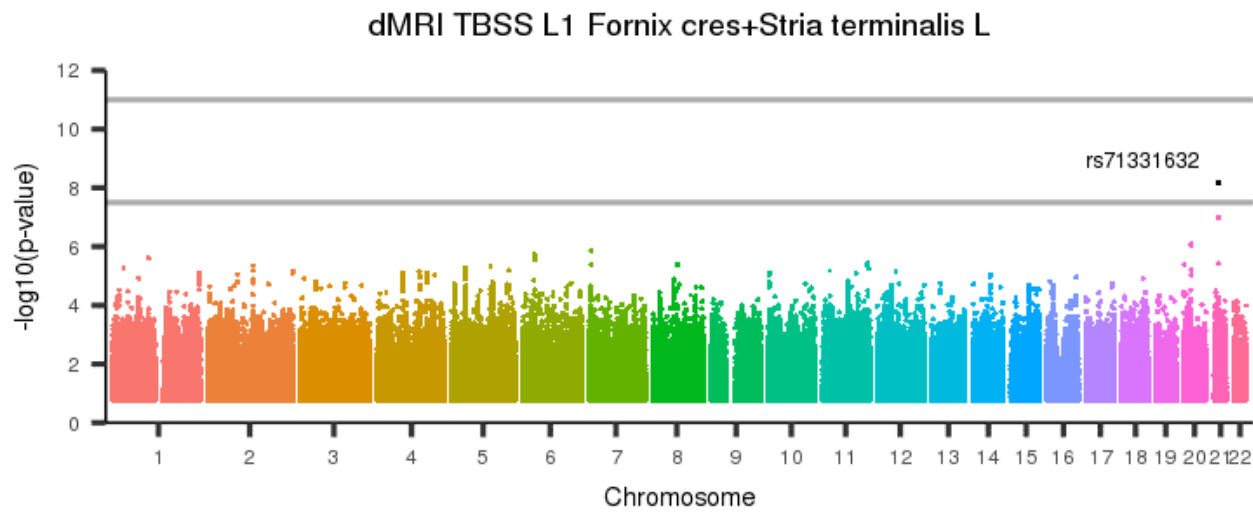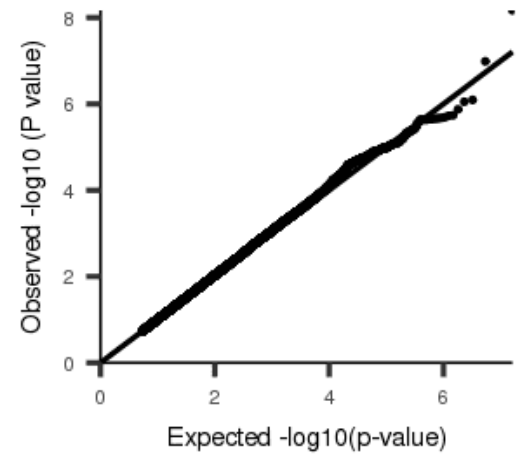

[back to list of plots](#)

Figure 380: dMRI TBSS L1 Superior longitudinal fasciculus R

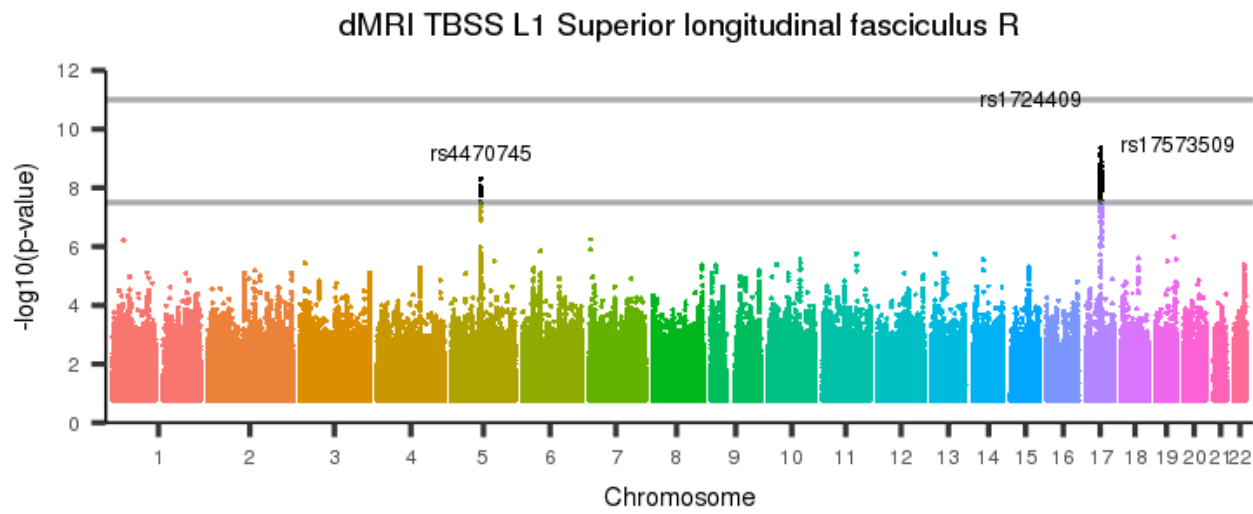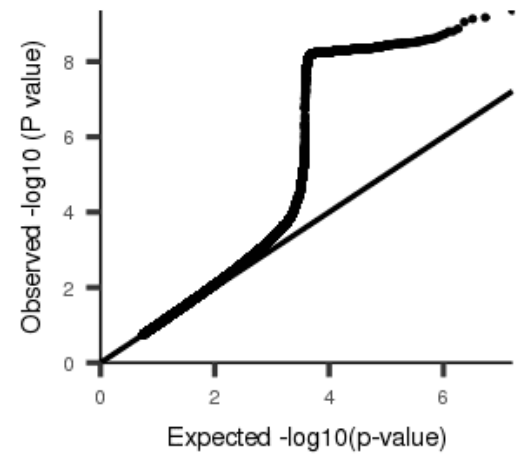

[back to list of plots](#)

Figure 381: dMRI TBSS L1 Superior longitudinal fasciculus L

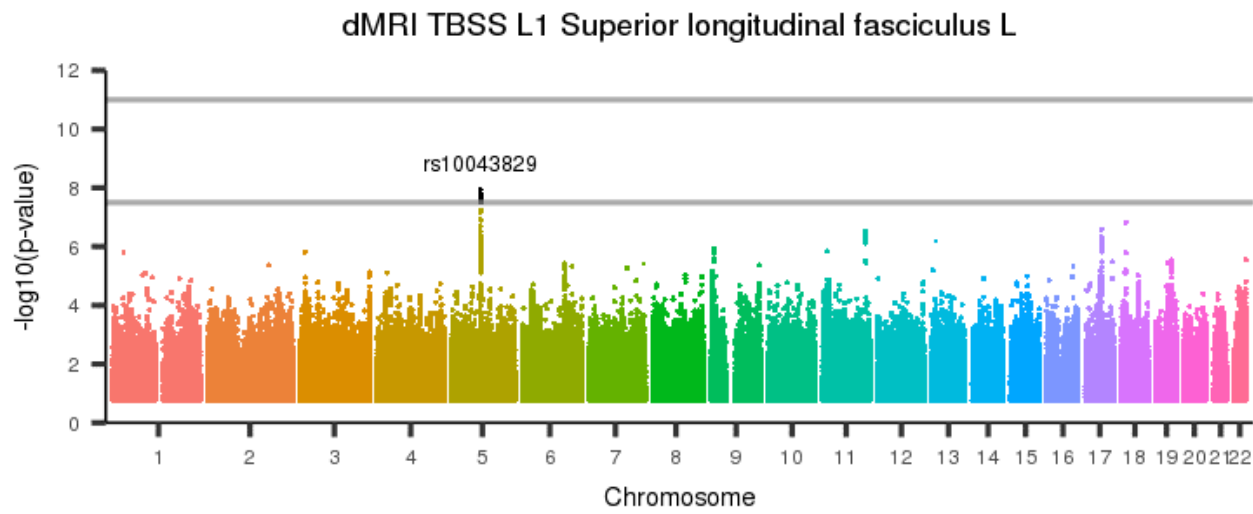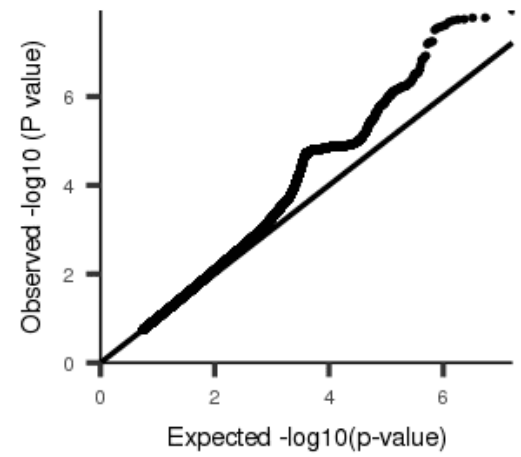

[back to list of plots](#)



Figure 382: dMRI TBSS L1 Superior fronto-occipital fasciculus R

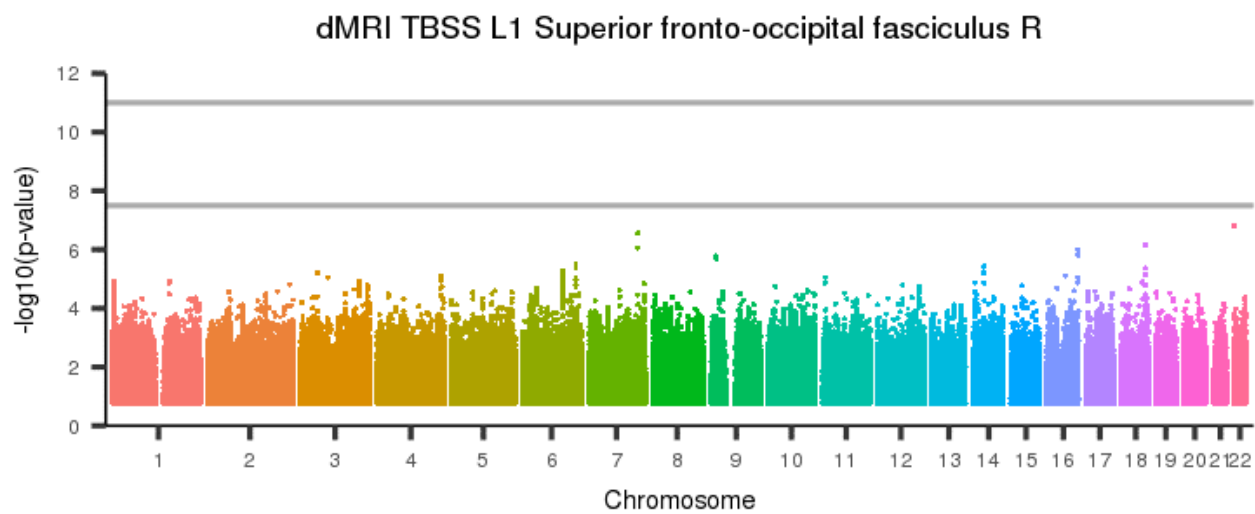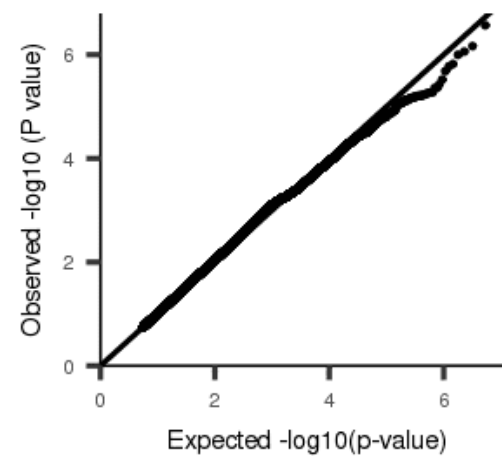

[back to list of plots](#)

Figure 383: dMRI TBSS L1 Superior fronto-occipital fasciculus L

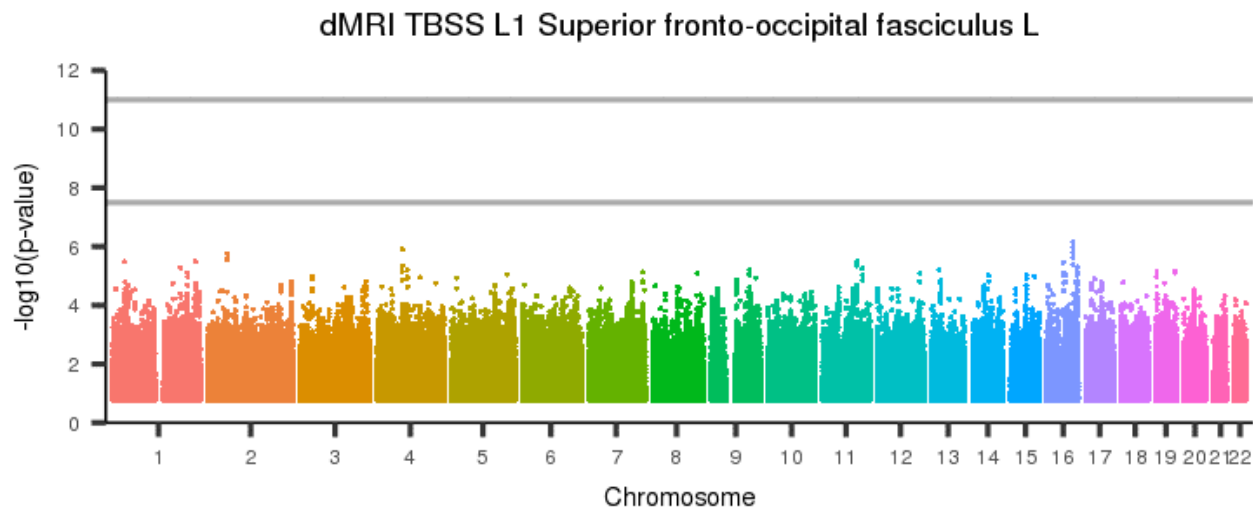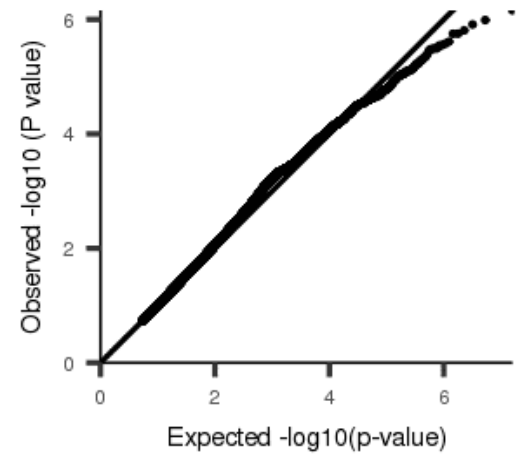

[back to list of plots](#)

Figure 384: dMRI TBSS L1 Uncinate fasciculus R

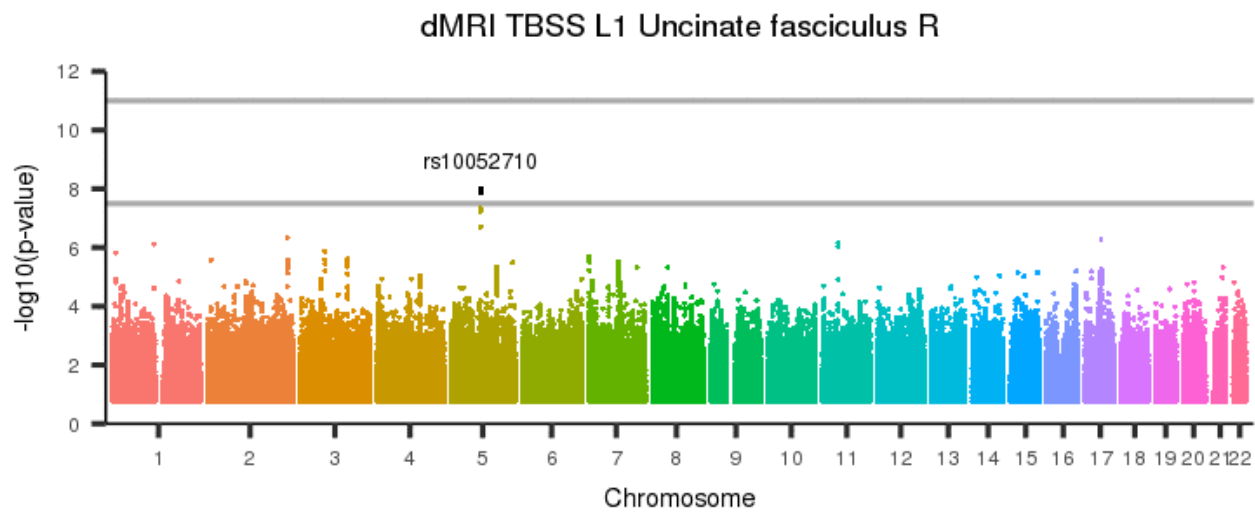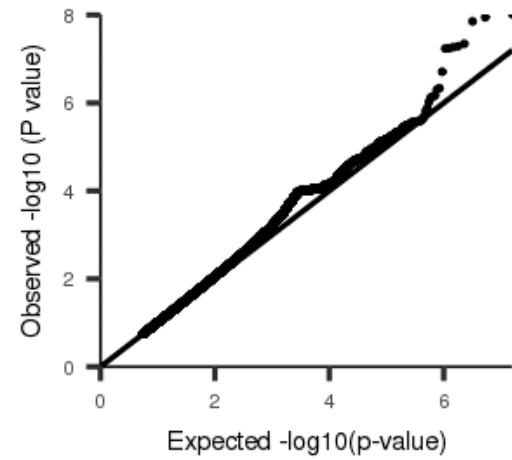

[back to list of plots](#)

Figure 385: dMRI TBSS L1 Uncinate fasciculus L

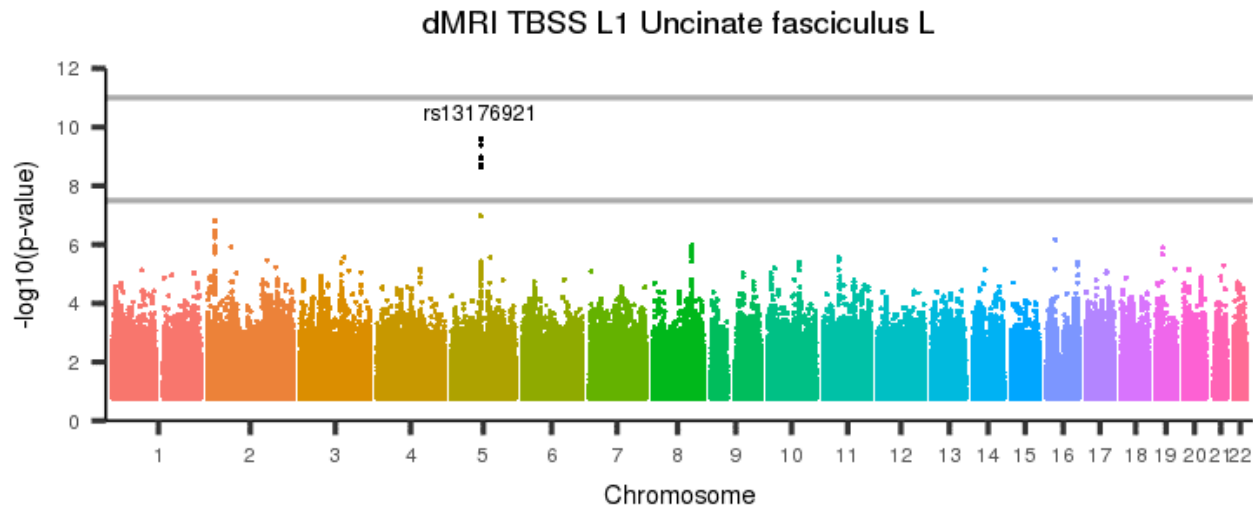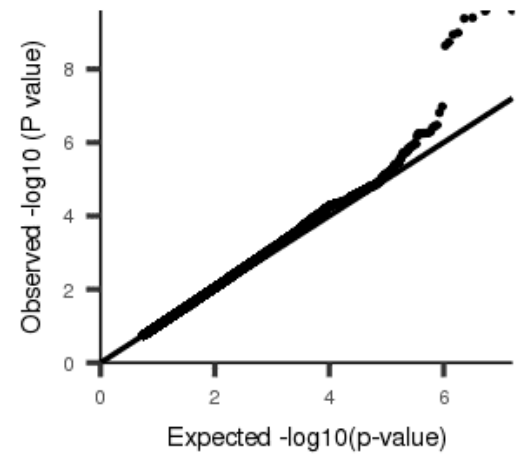

[back to list of plots](#)

Figure 386: dMRI TBSS L1 Tapetum R

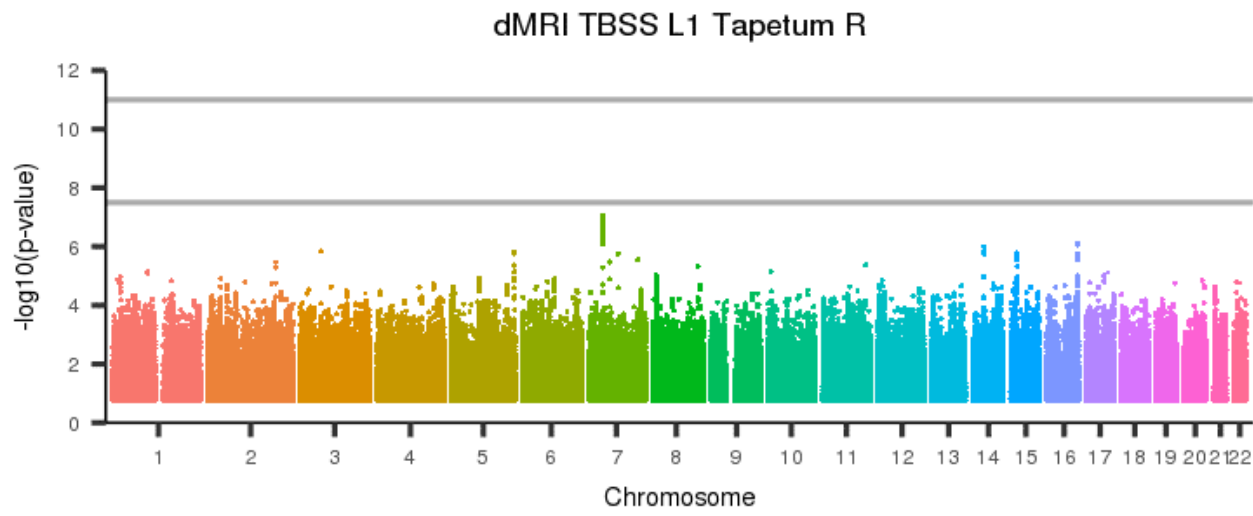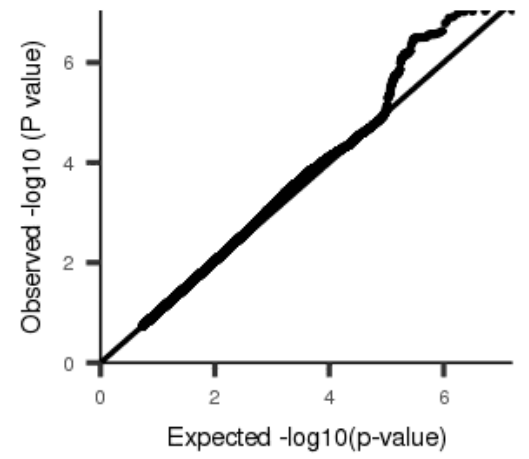

[back to list of plots](#)

Figure 387: dMRI TBSS L1 Tapetum L

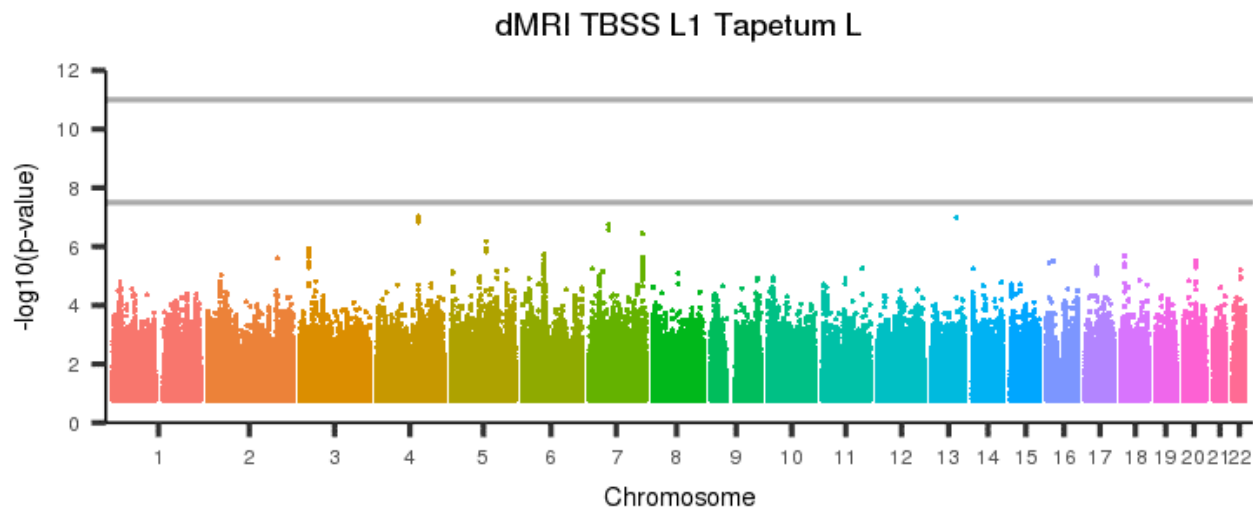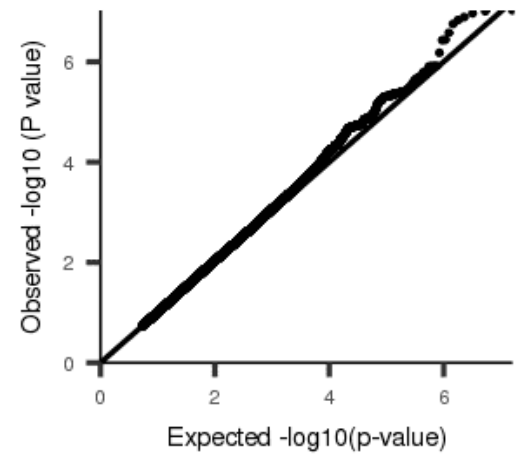

[back to list of plots](#)

Figure 388: dMRI TBSS L2 Middle cerebellar peduncle

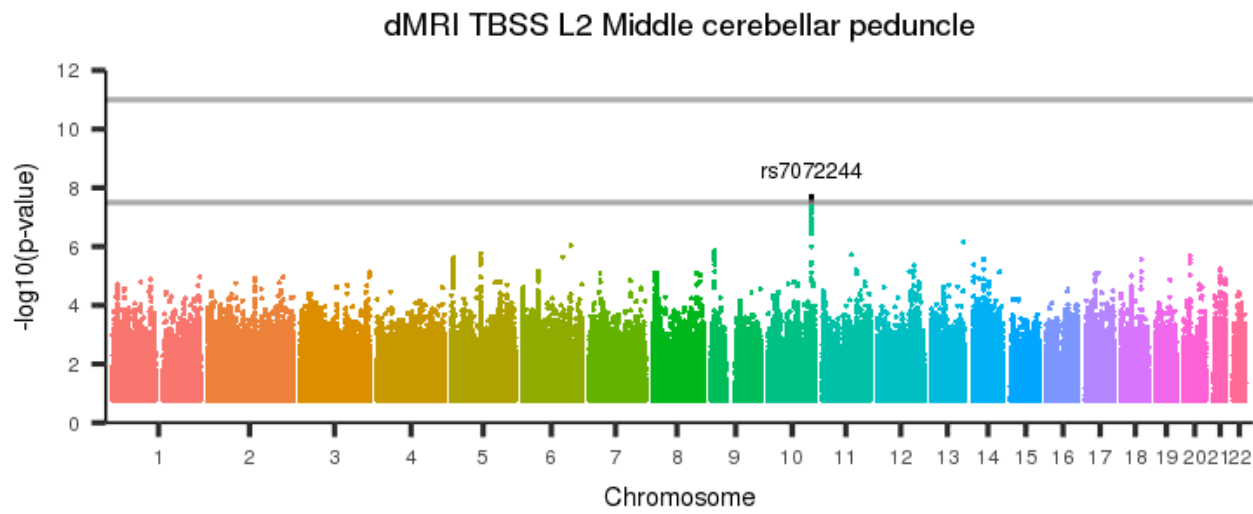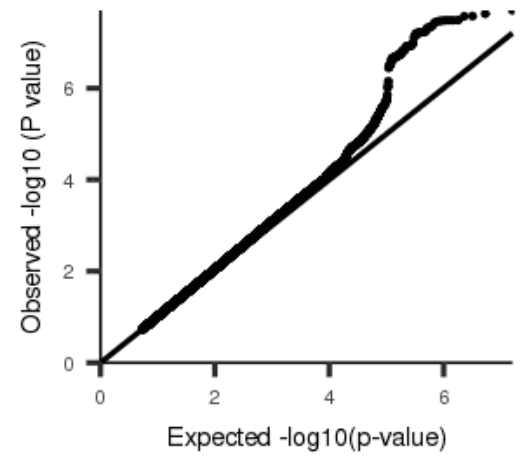

[back to list of plots](#)

Figure 389: dMRI TBSS L2 Pontine crossing tract

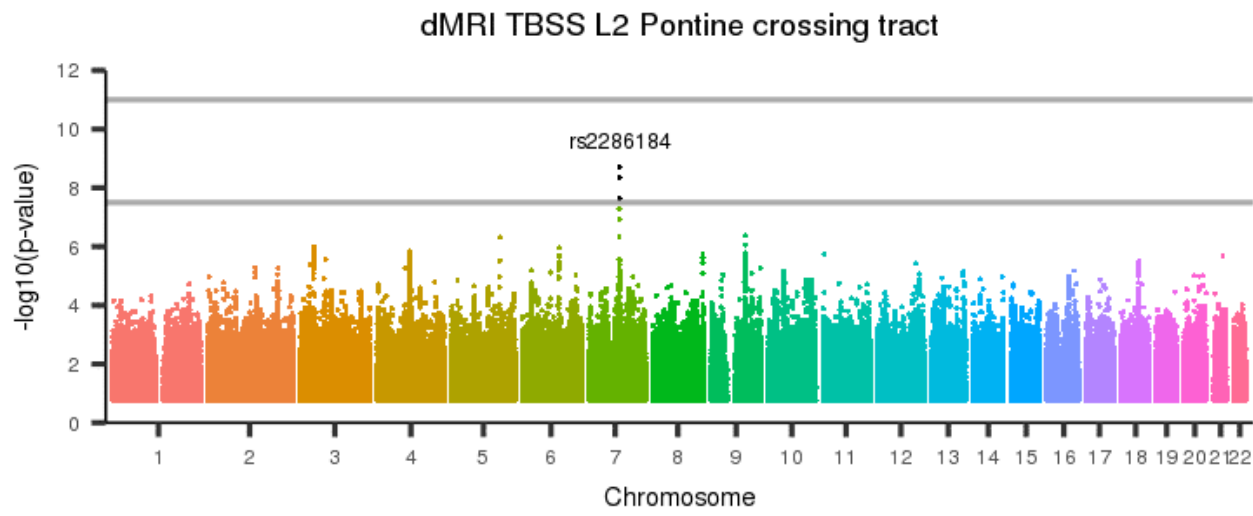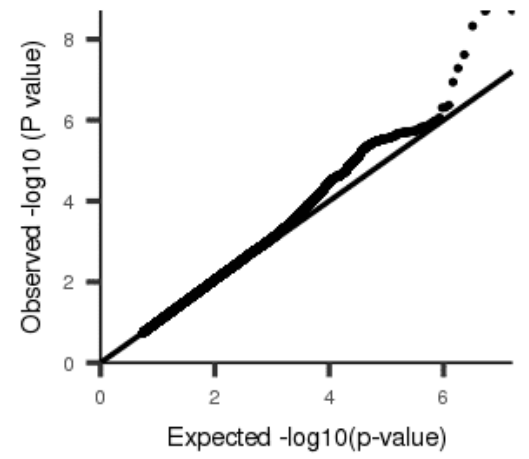

[back to list of plots](#)



Figure 390: dMRI TBSS L2 Genu of corpus callosum

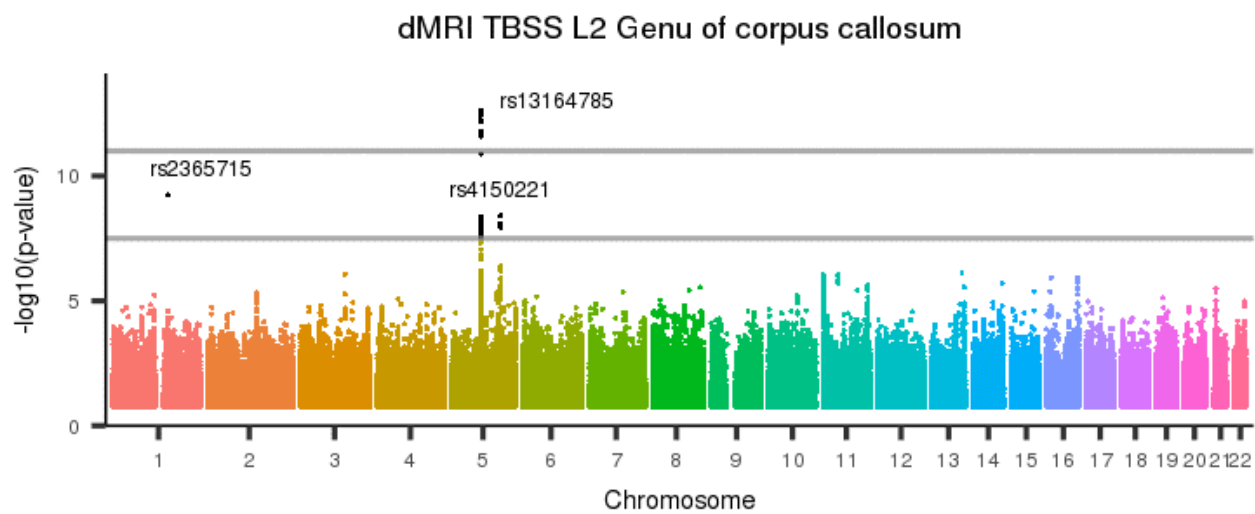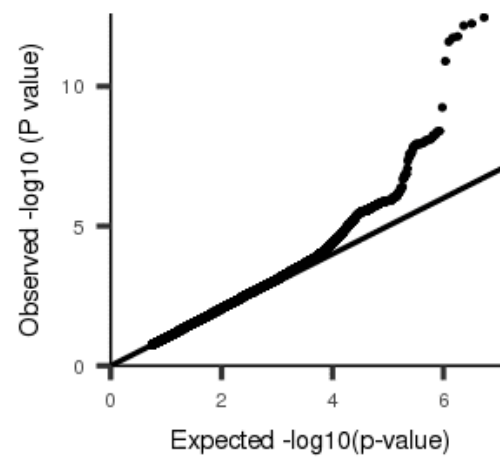

[back to list of plots](#)

Figure 391: dMRI TBSS L2 Body of corpus callosum

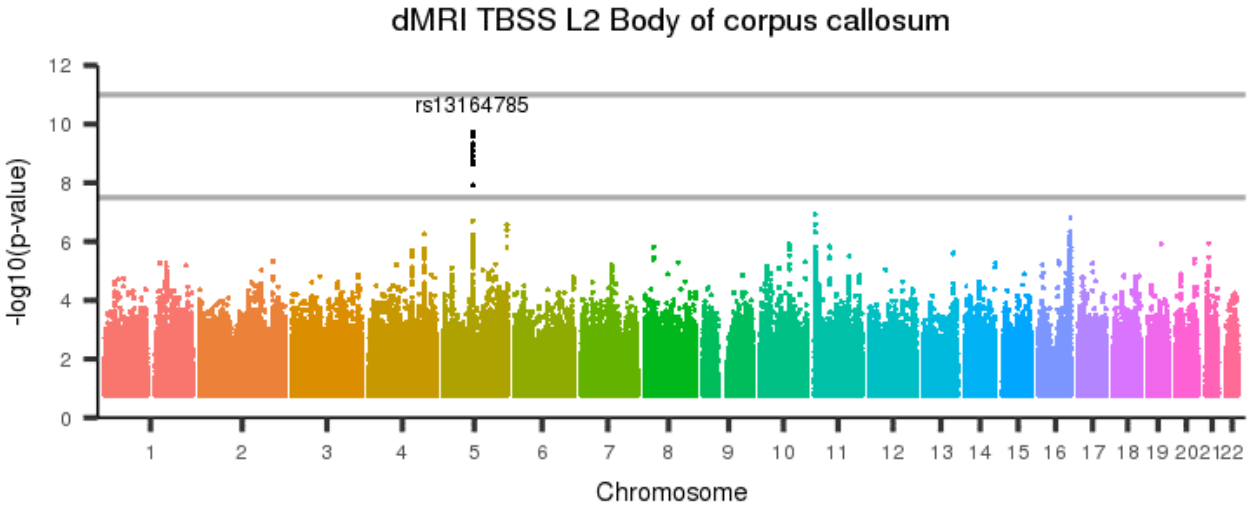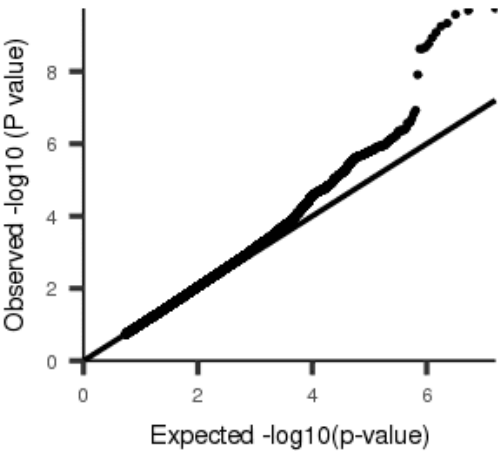

[back to list of plots](#)

Figure 392: dMRI TBSS L2 Splenium of corpus callosum

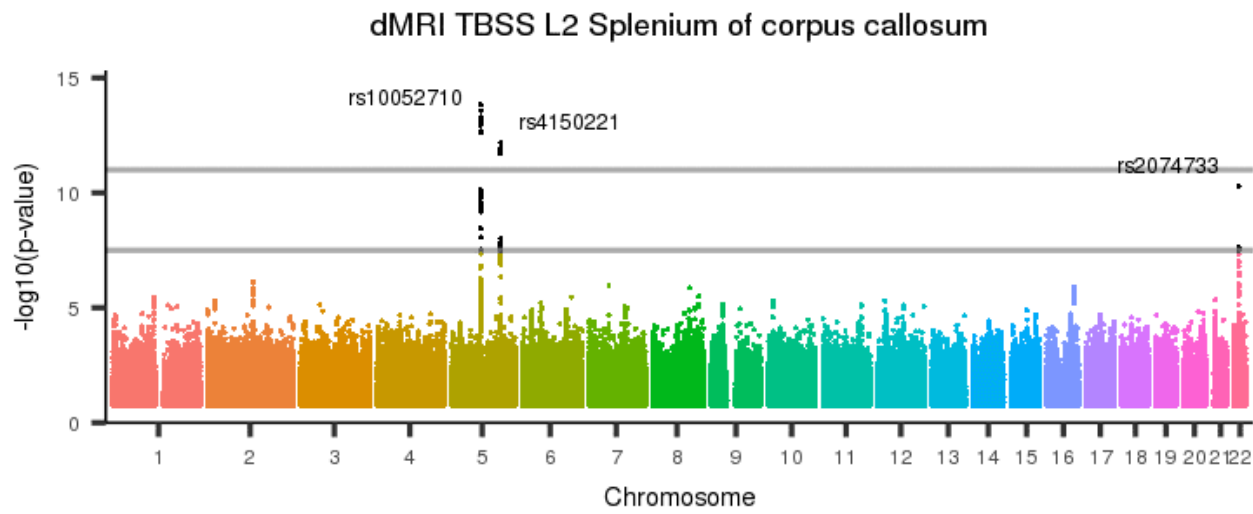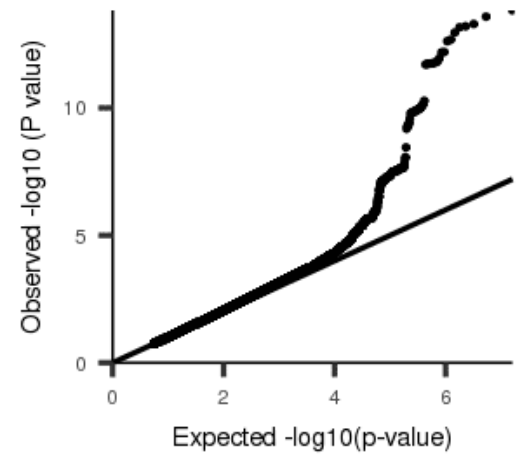

[back to list of plots](#)

Figure 393: dMRI TBSS L2 Fornix

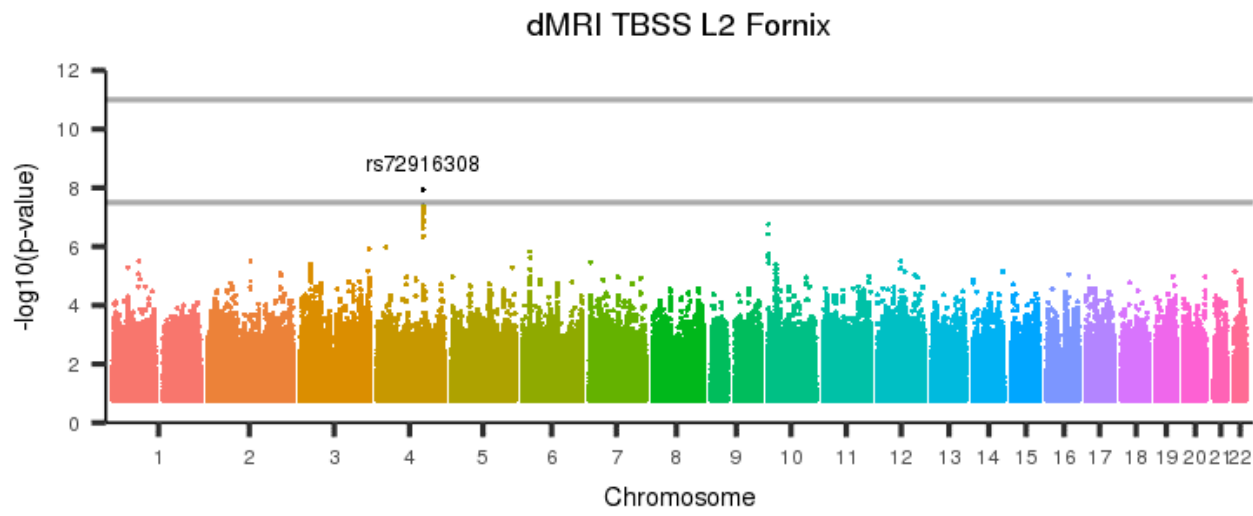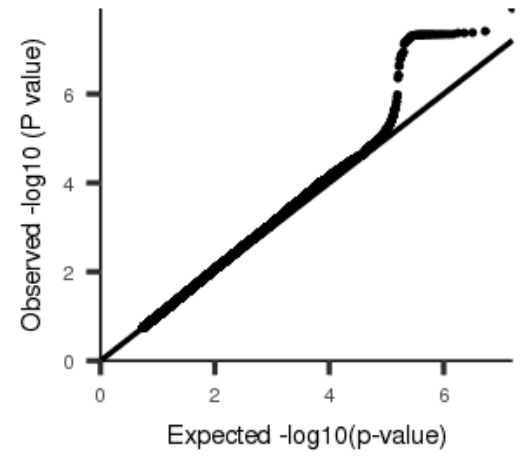

[back to list of plots](#)

Figure 394: dMRI TBSS L2 Corticospinal tract R

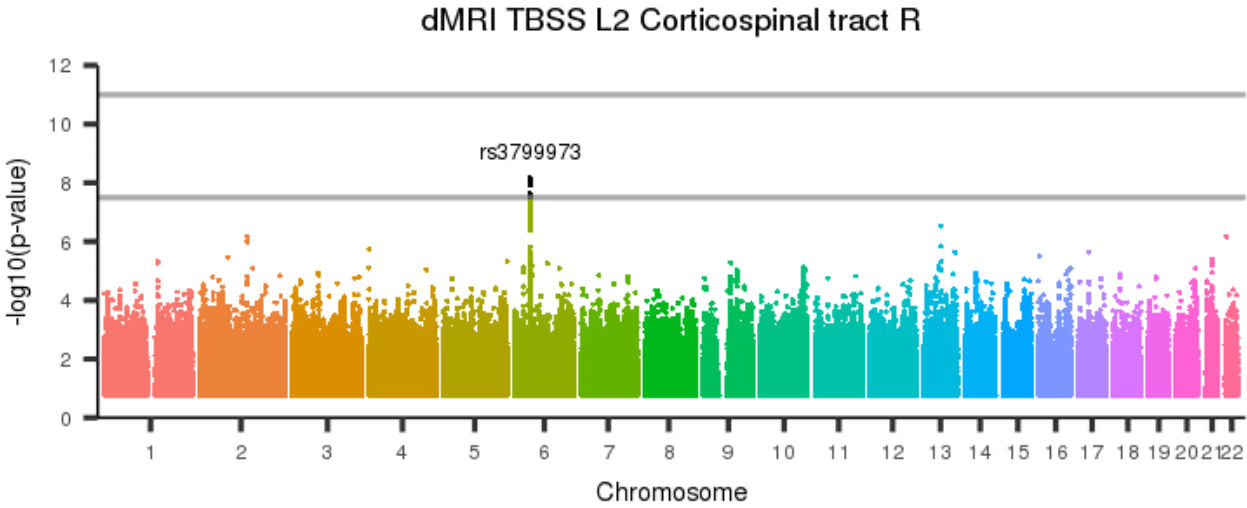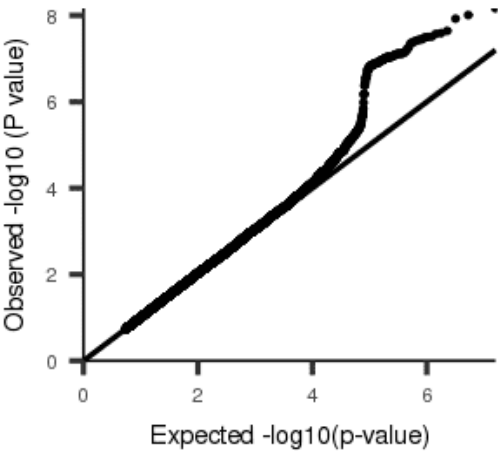

[back to list of plots](#)

Figure 395: dMRI TBSS L2 Corticospinal tract L

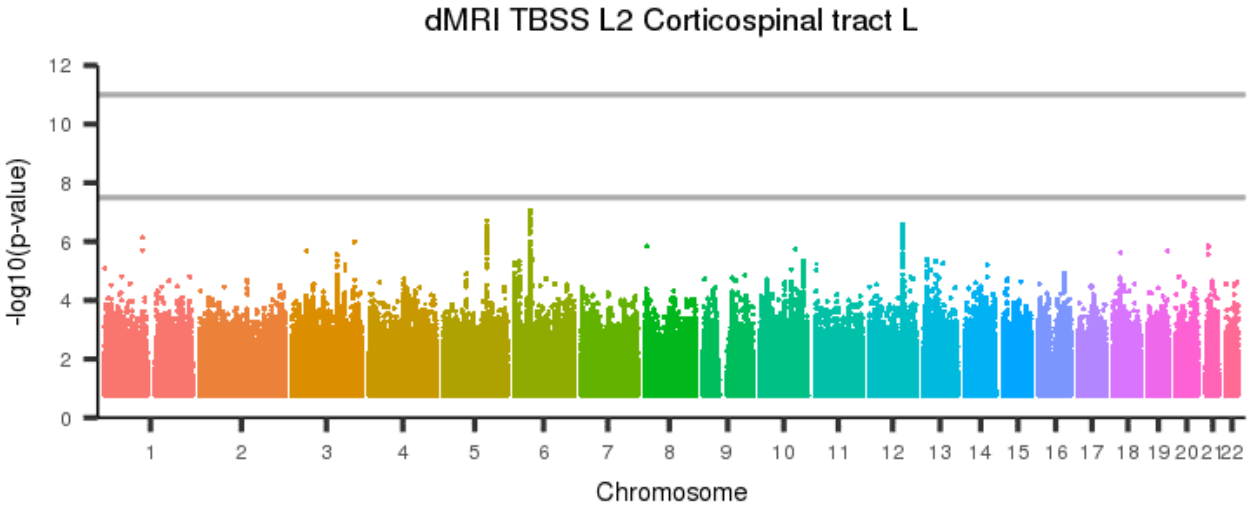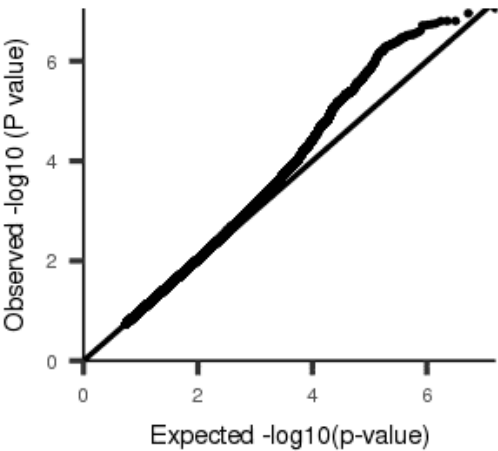

[back to list of plots](#)

Figure 396: dMRI TBSS L2 Medial lemniscus R

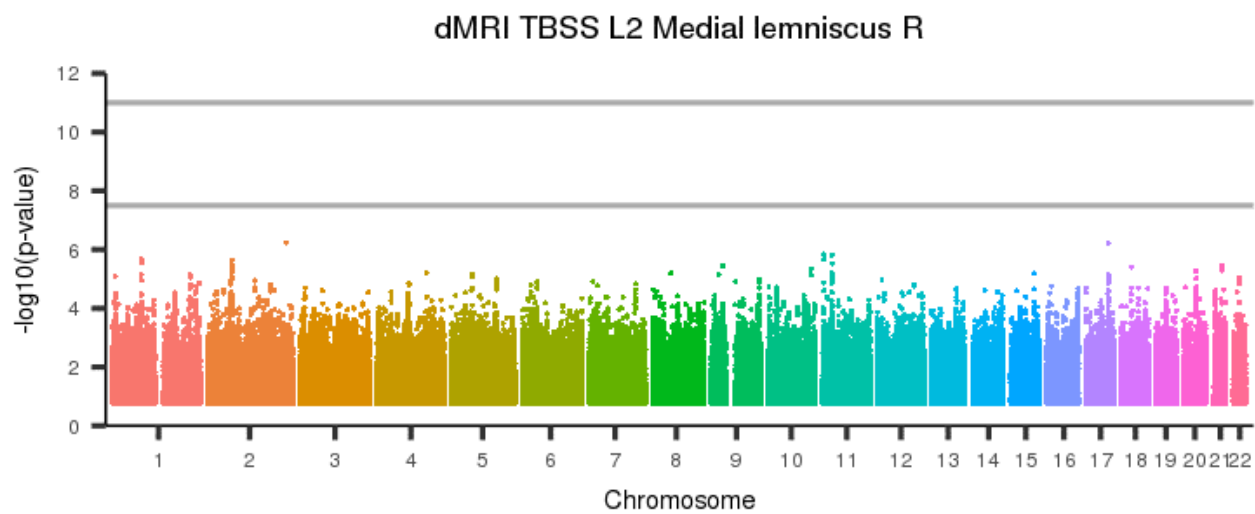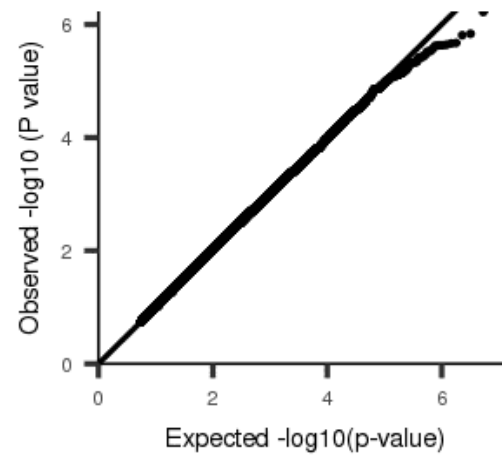

[back to list of plots](#)

Figure 397: dMRI TBSS L2 Medial lemniscus L

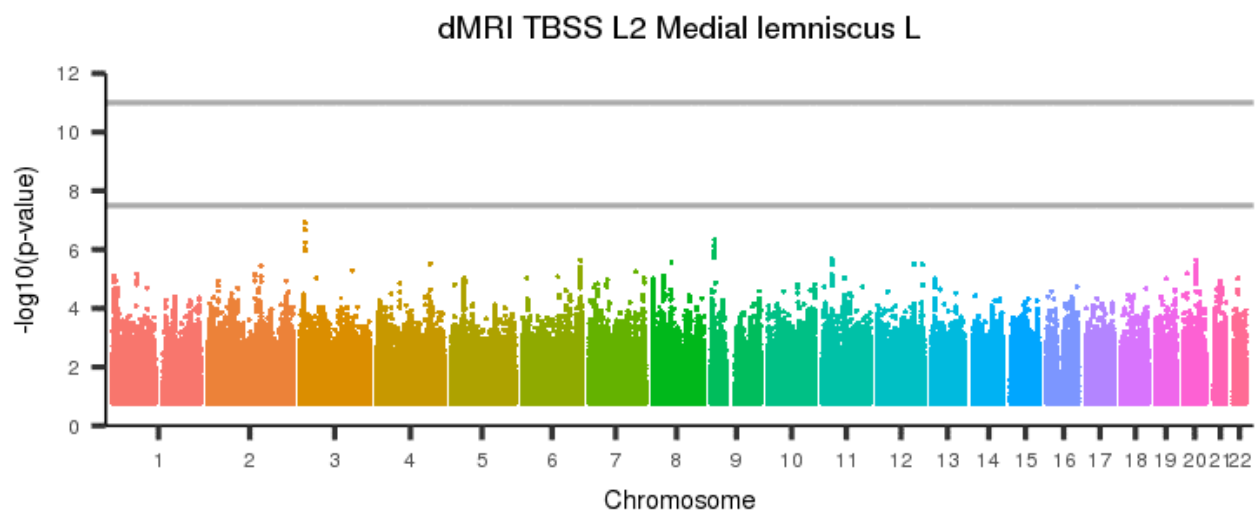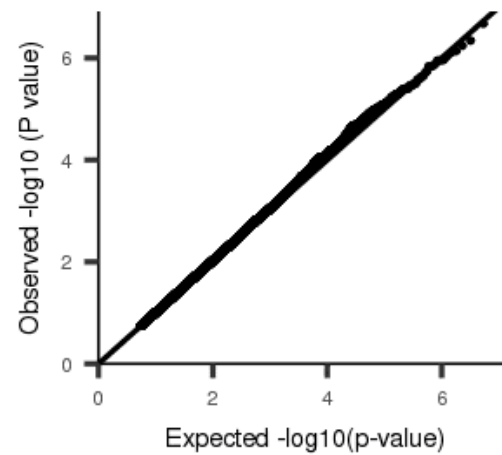

[back to list of plots](#)



Figure 398: dMRI TBSS L2 Inferior cerebellar peduncle R

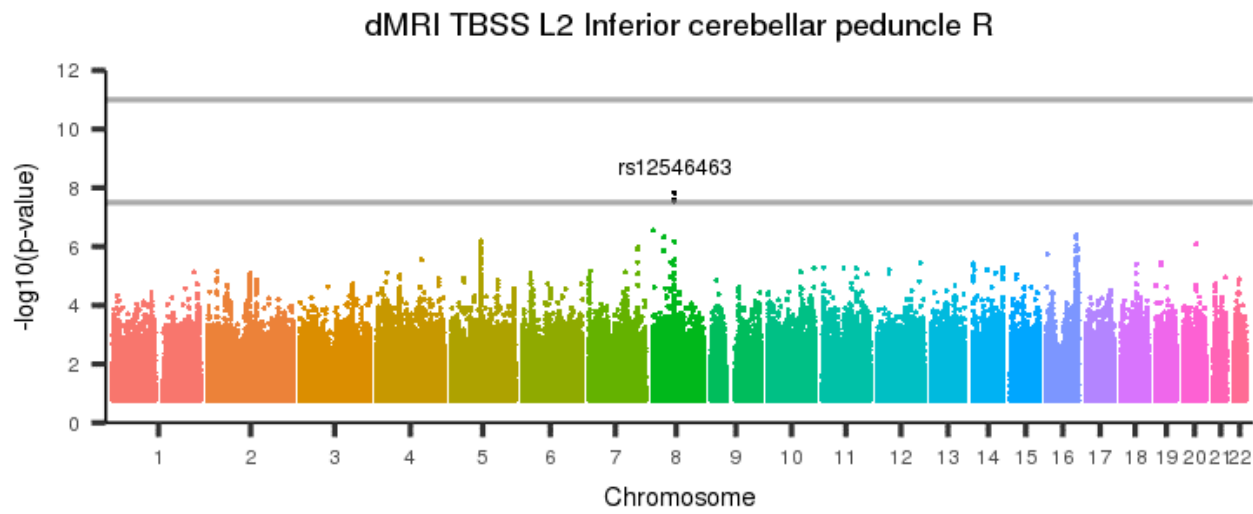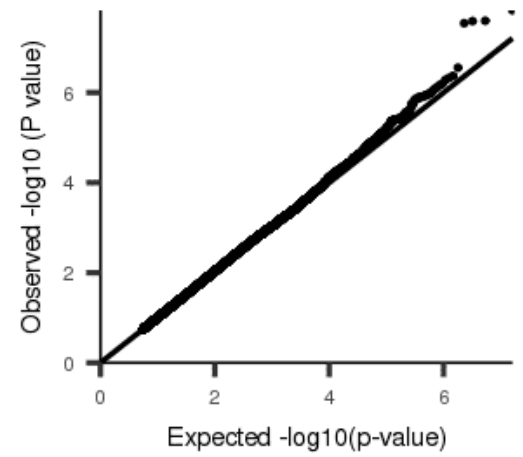

[back to list of plots](#)

Figure 399: dMRI TBSS L2 Inferior cerebellar peduncle L

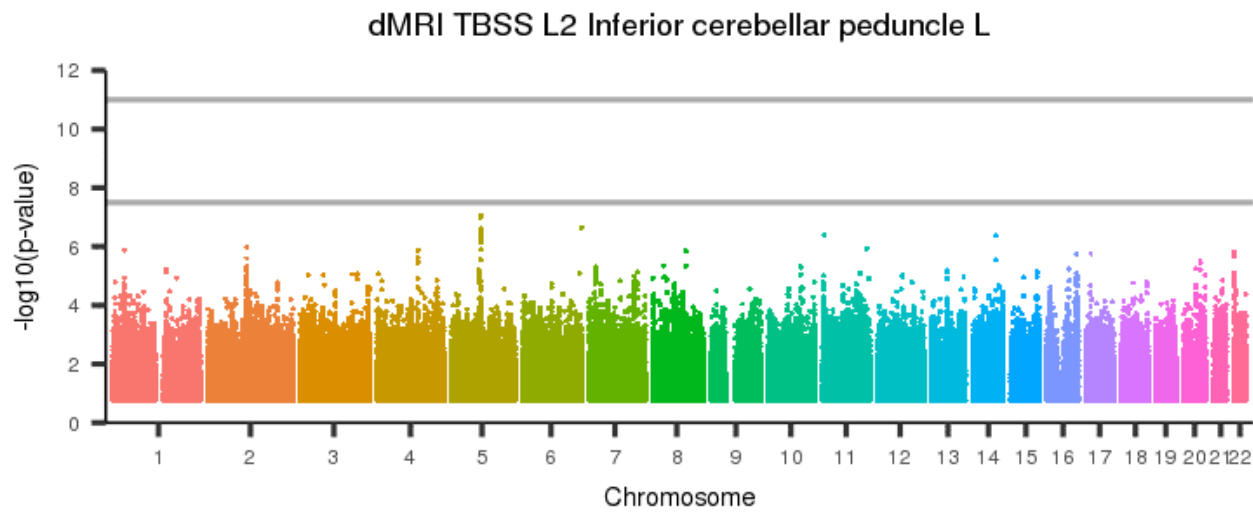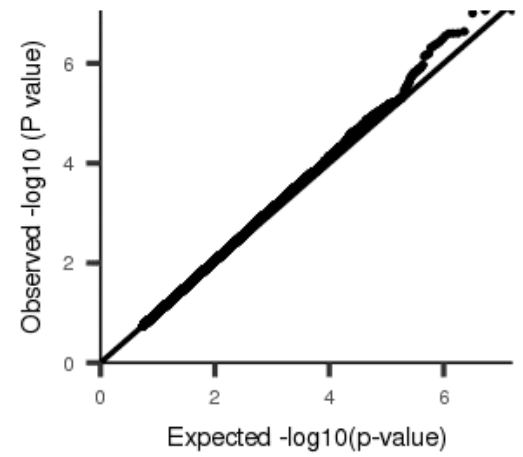

[back to list of plots](#)

Figure 400: dMRI TBSS L2 Superior cerebellar peduncle R

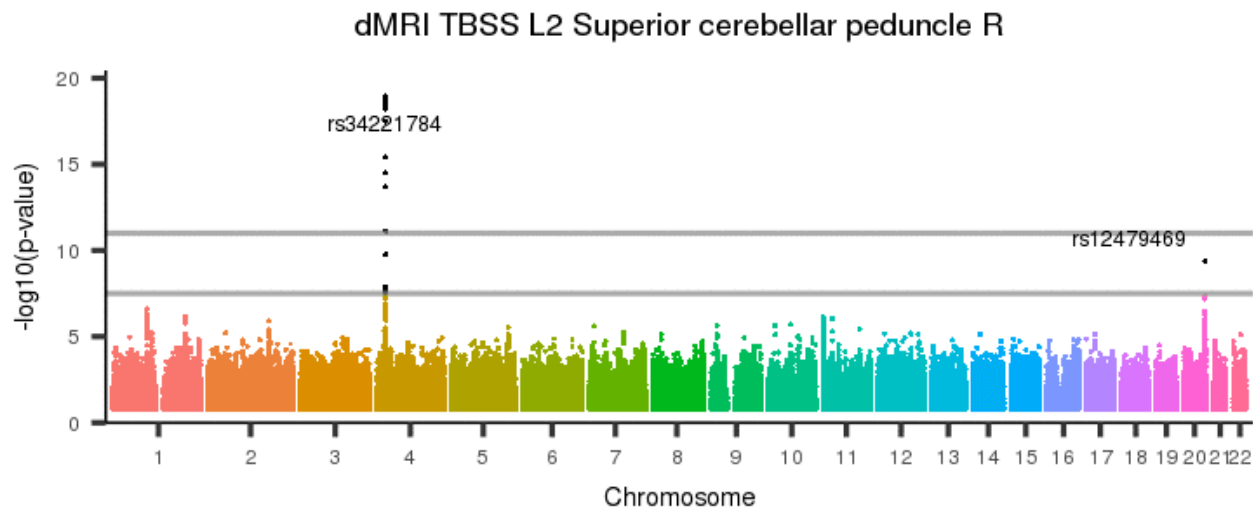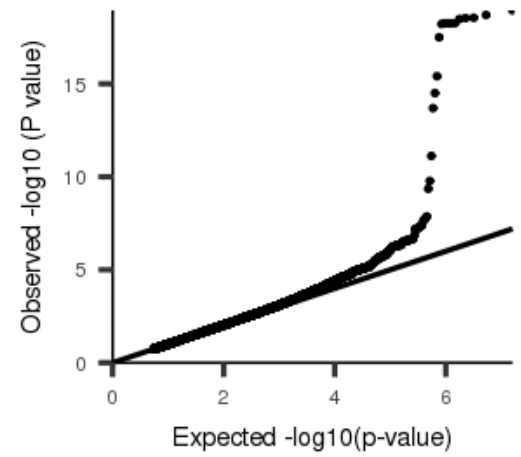

[back to list of plots](#)

Figure 401: dMRI TBSS L2 Superior cerebellar peduncle L

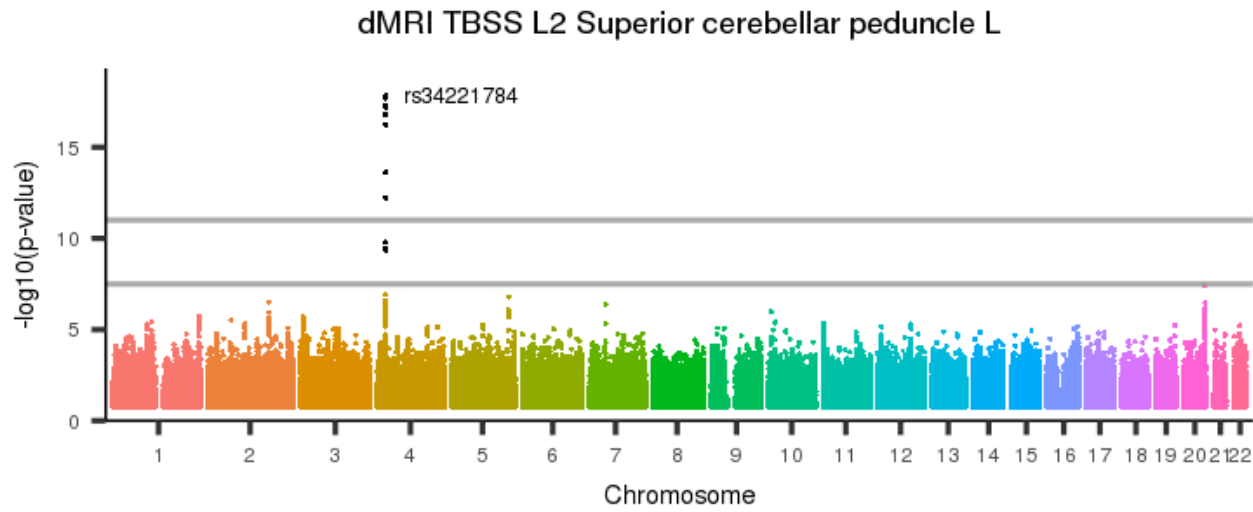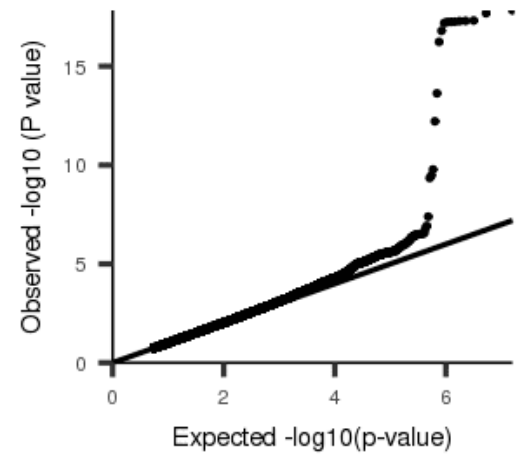

[back to list of plots](#)

Figure 402: dMRI TBSS L2 Cerebral peduncle R

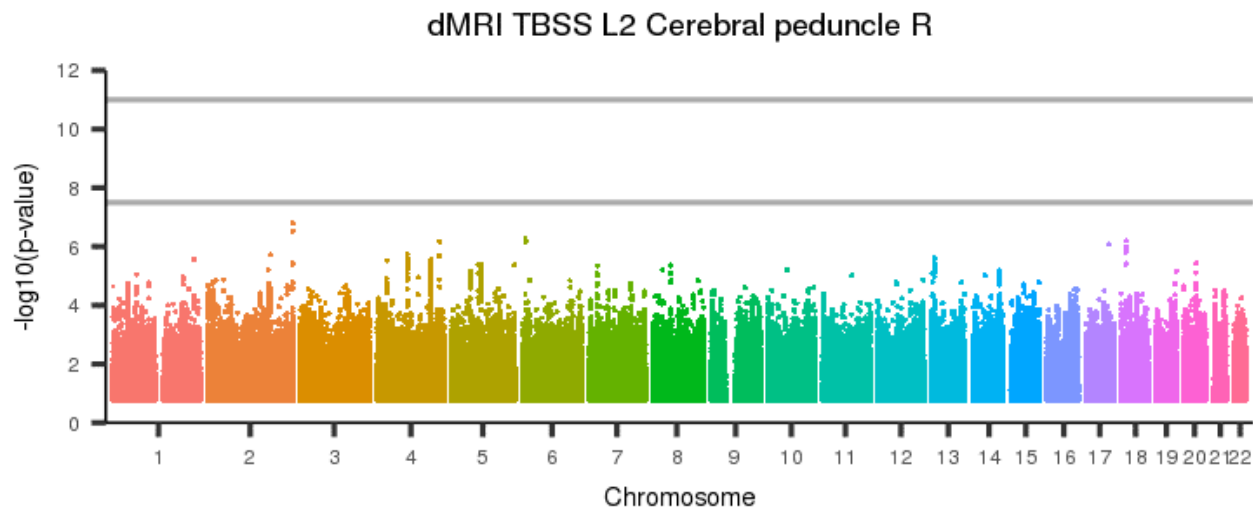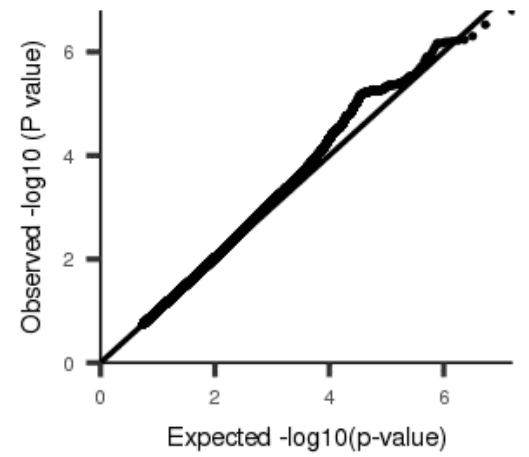

[back to list of plots](#)

Figure 403: dMRI TBSS L2 Cerebral peduncle L

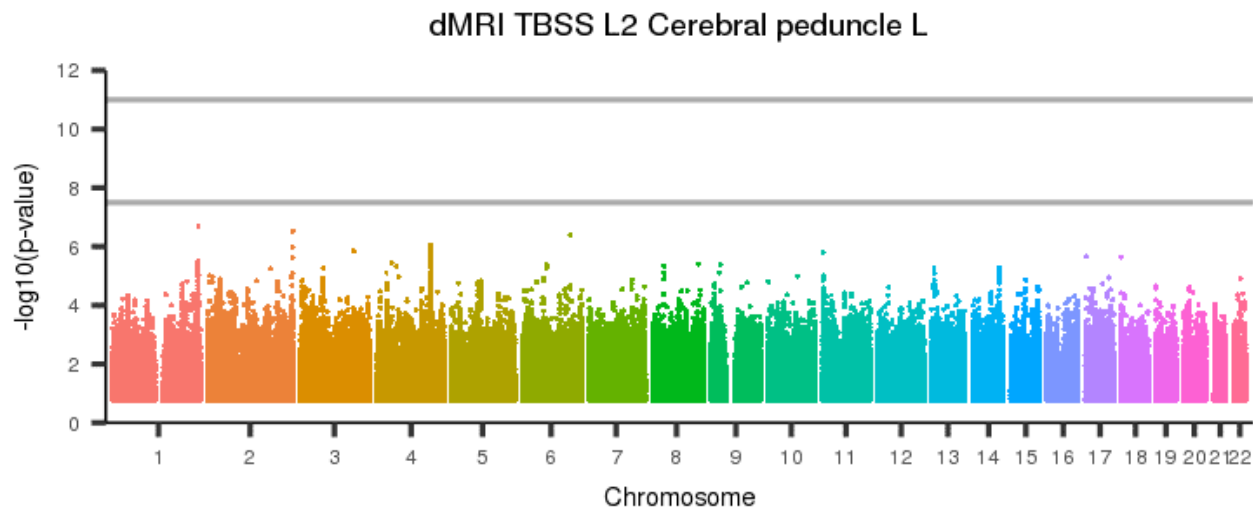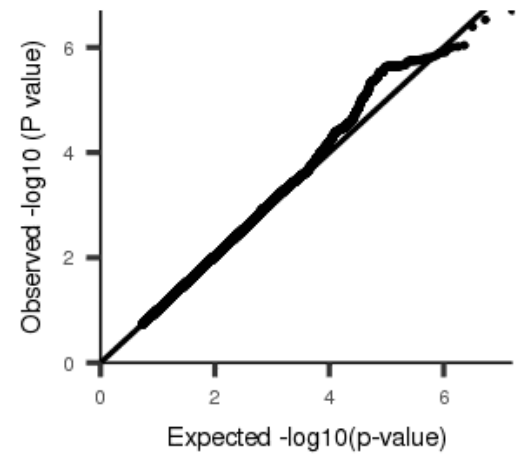

[back to list of plots](#)

Figure 404: dMRI TBSS L2 Anterior limb of internal capsule R

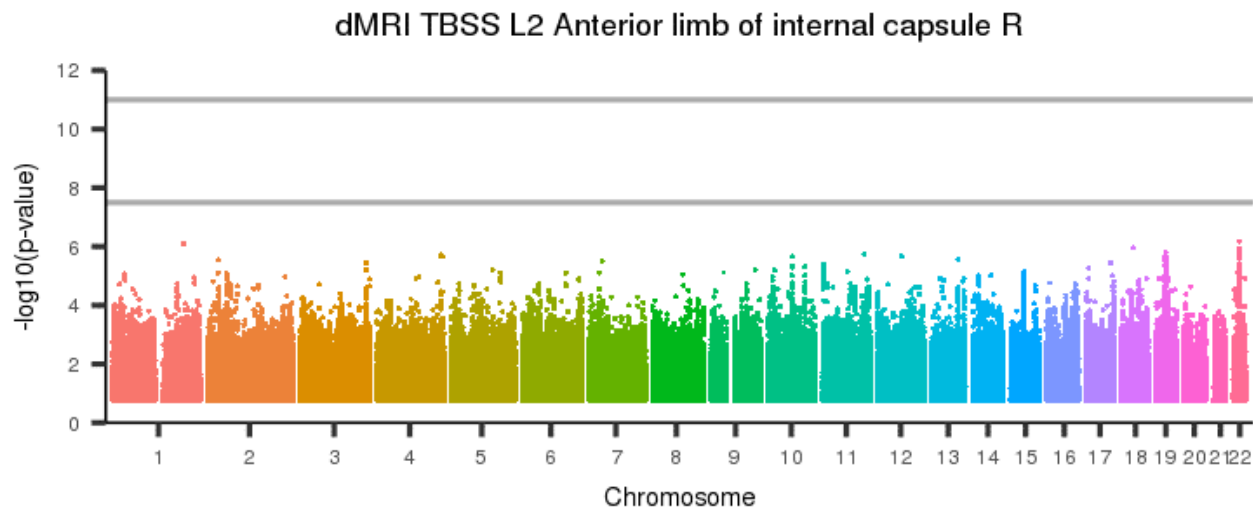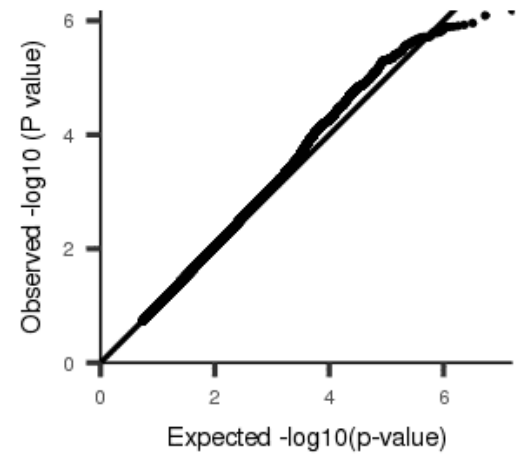

[back to list of plots](#)

Figure 405: dMRI TBSS L2 Anterior limb of internal capsule L

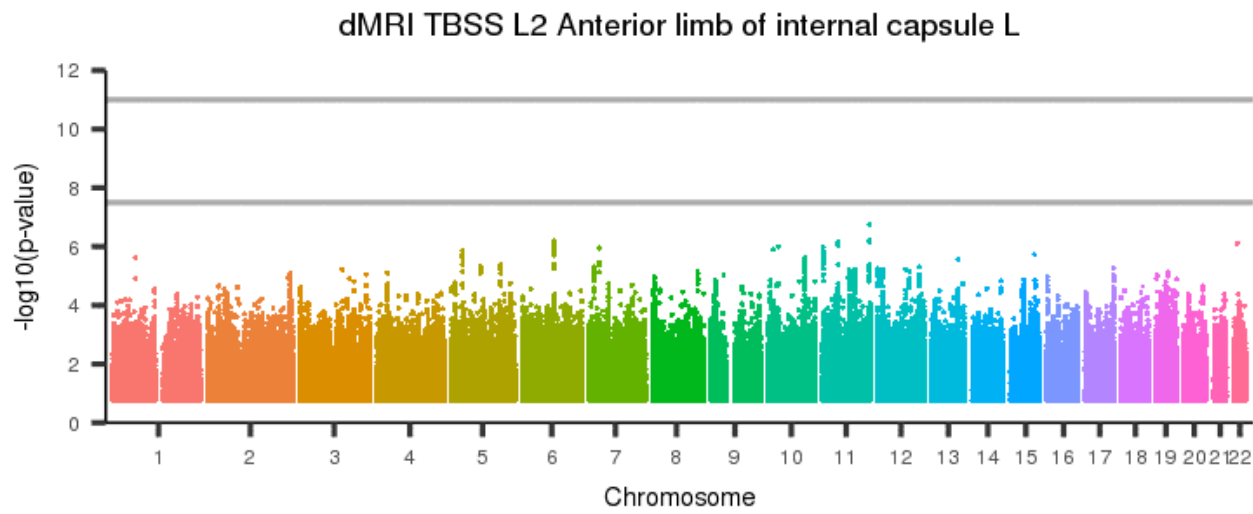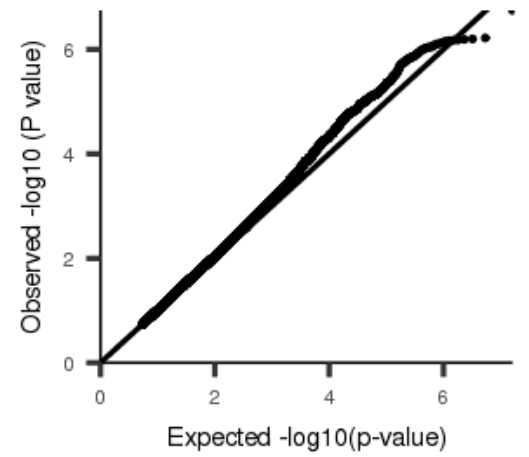

[back to list of plots](#)



Figure 406: dMRI TBSS L2 Posterior limb of internal capsule R

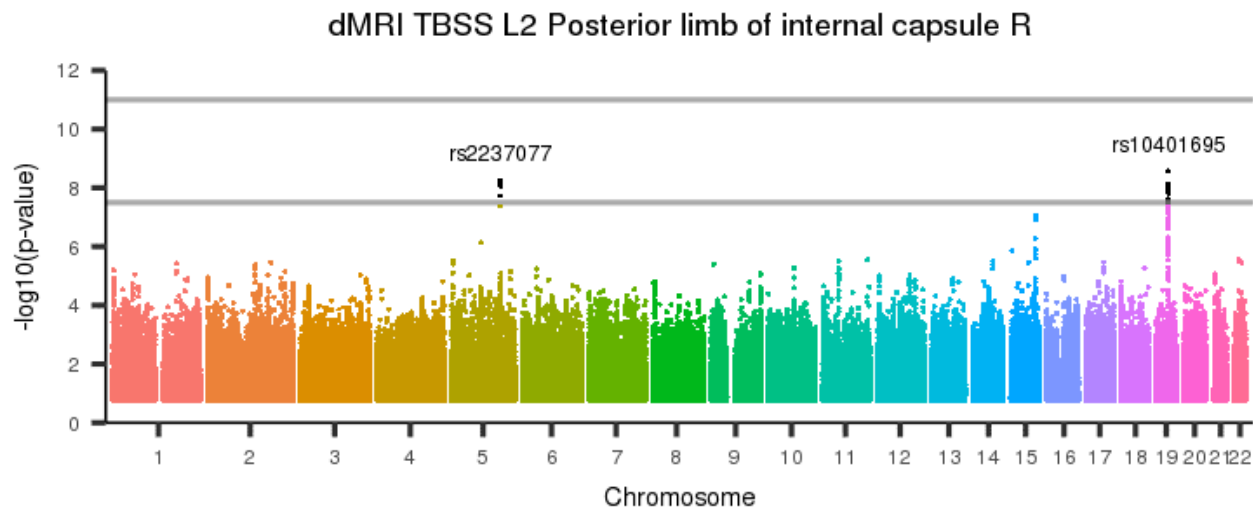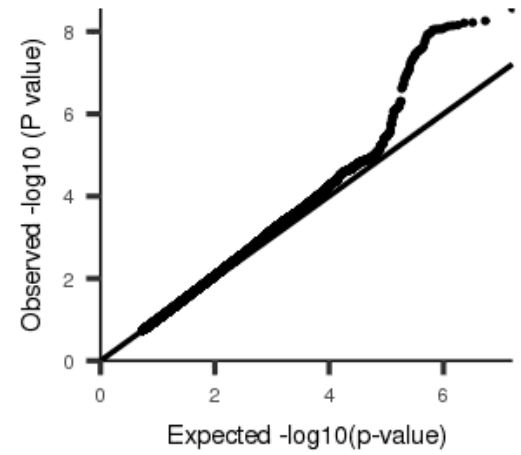

[back to list of plots](#)

Figure 407: dMRI TBSS L2 Posterior limb of internal capsule L

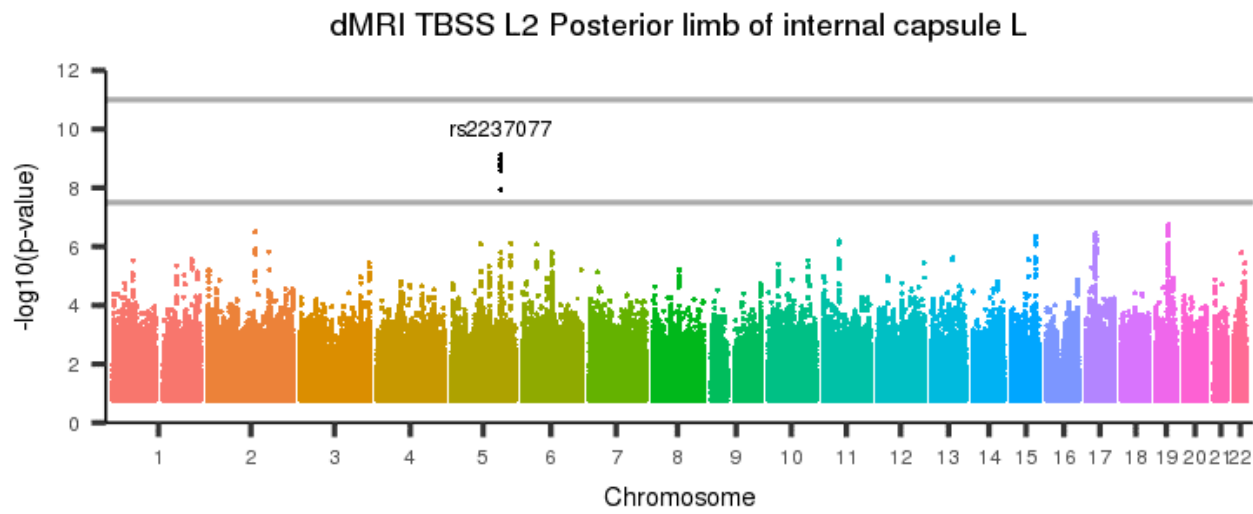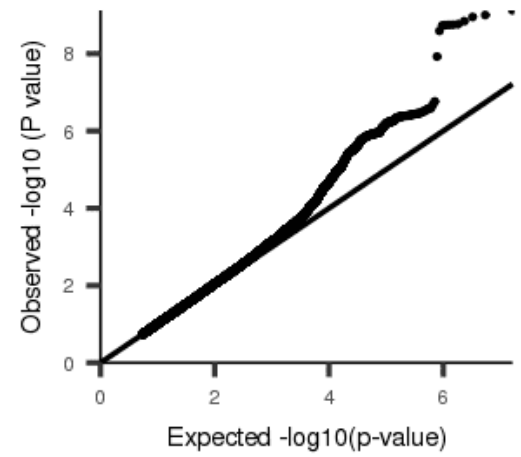

[back to list of plots](#)

Figure 408: dMRI TBSS L2 Retrolenticular part of internal capsule R

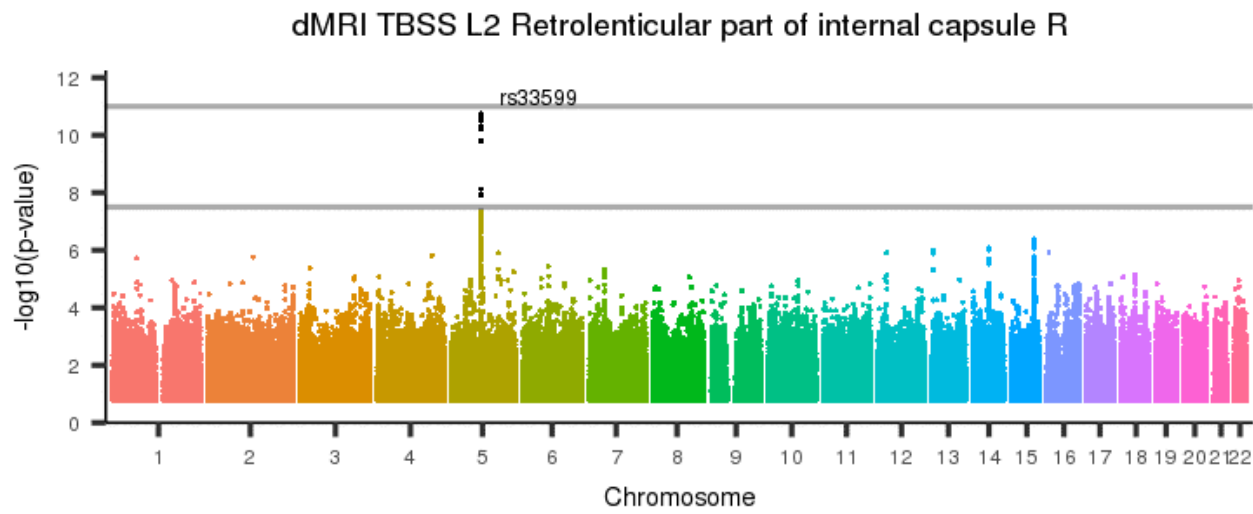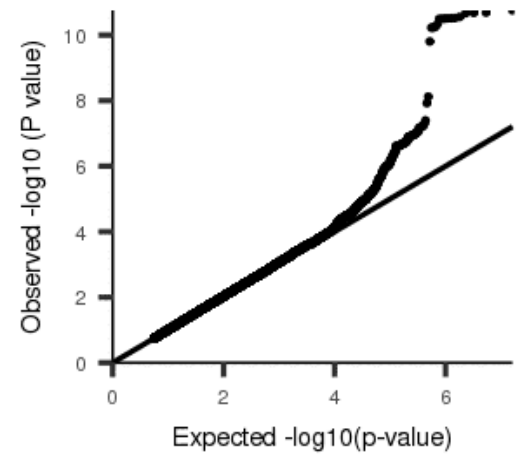

[back to list of plots](#)

Figure 409: dMRI TBSS L2 Retrolenticular part of internal capsule L

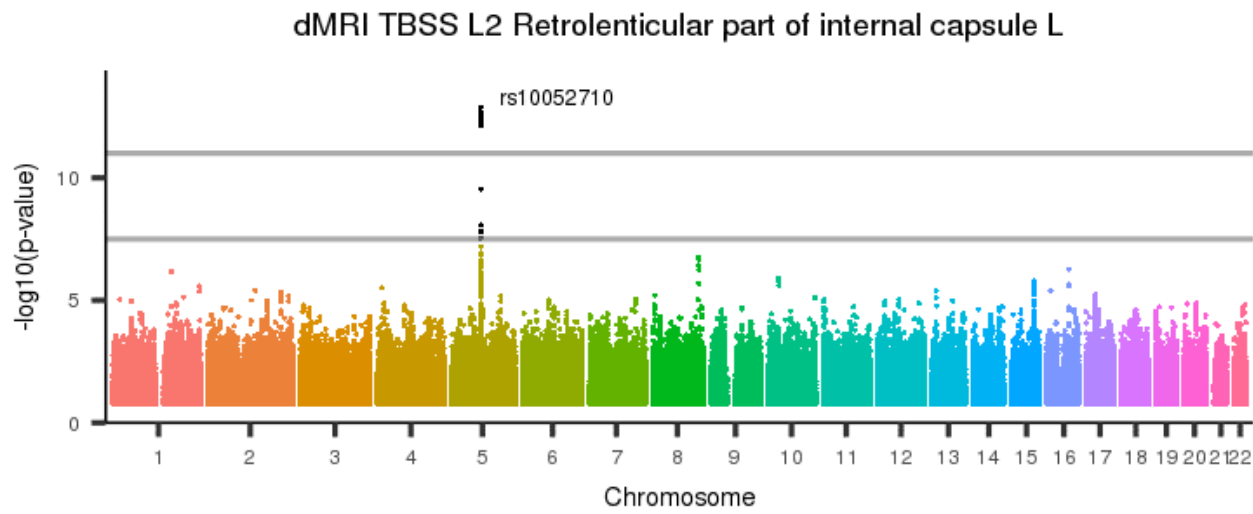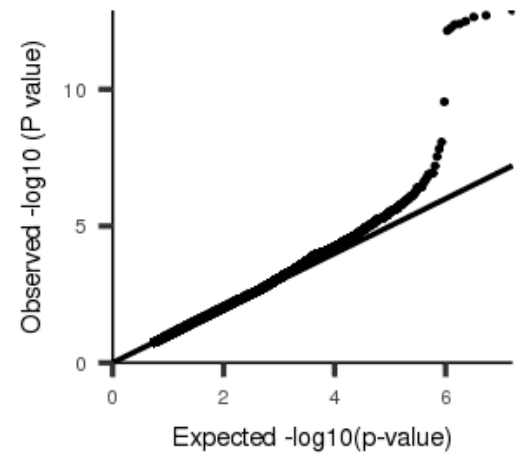

[back to list of plots](#)

Figure 410: dMRI TBSS L2 Anterior corona radiata R

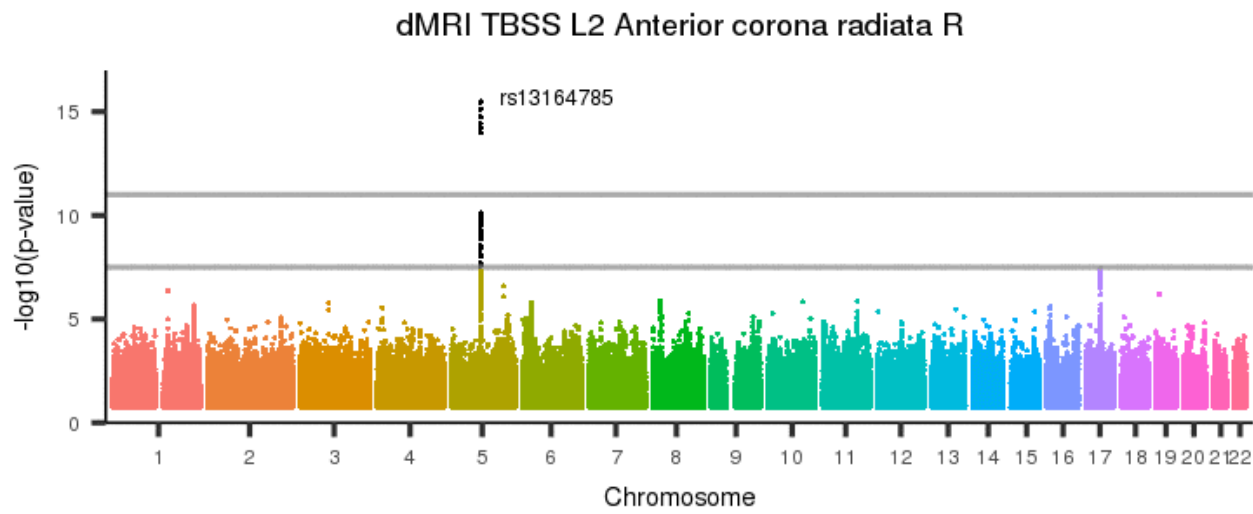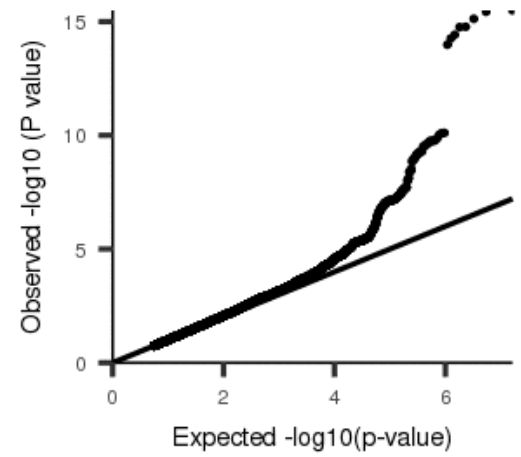

[back to list of plots](#)

Figure 411: dMRI TBSS L2 Anterior corona radiata L

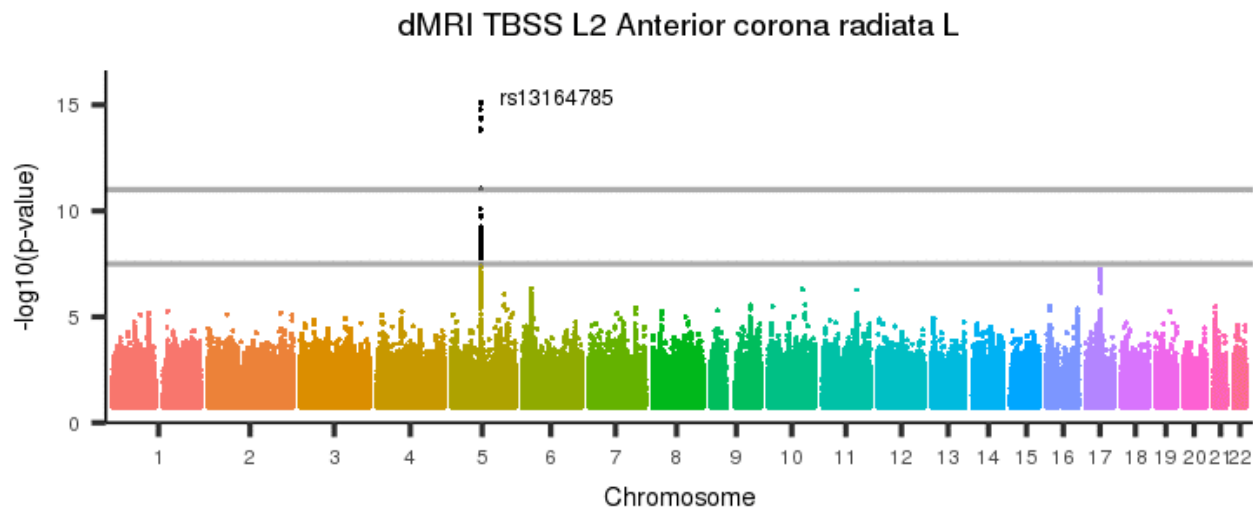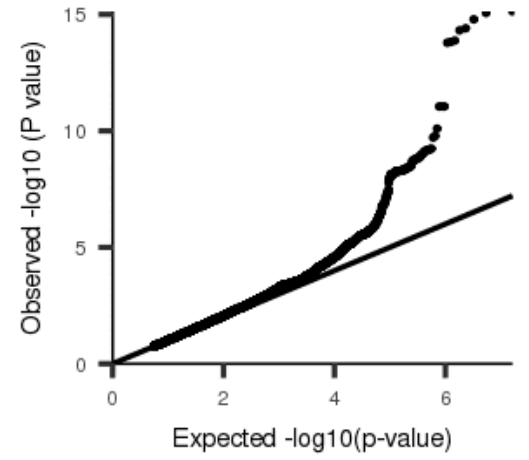

[back to list of plots](#)

Figure 412: dMRI TBSS L2 Superior corona radiata R

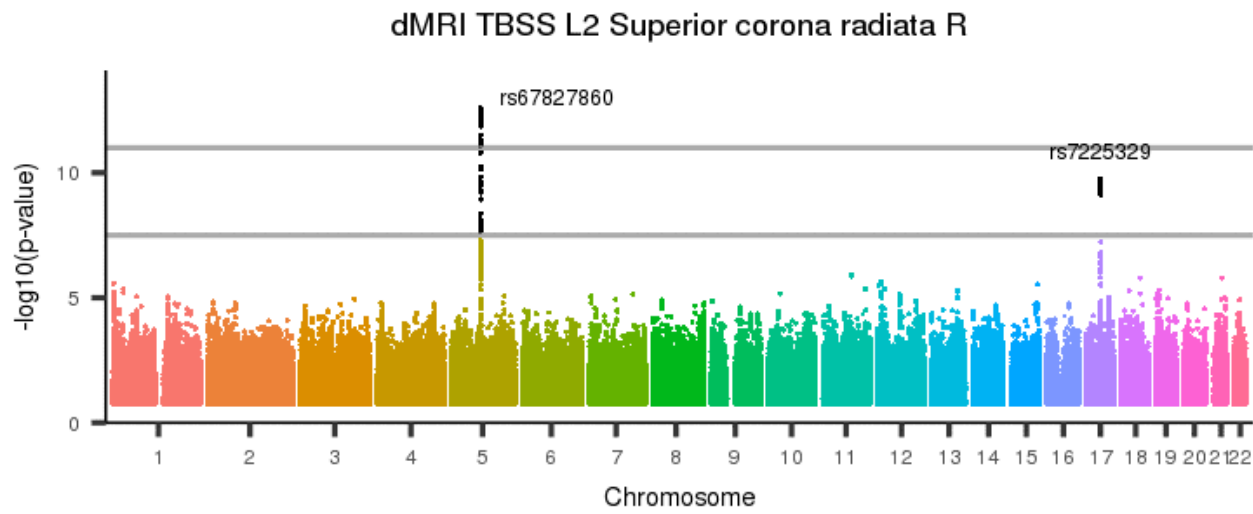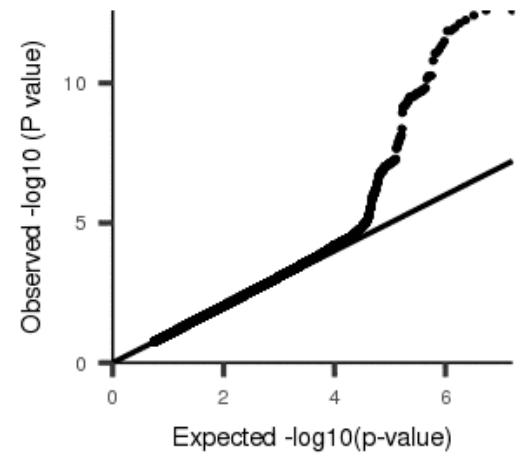

[back to list of plots](#)

Figure 413: dMRI TBSS L2 Superior corona radiata L

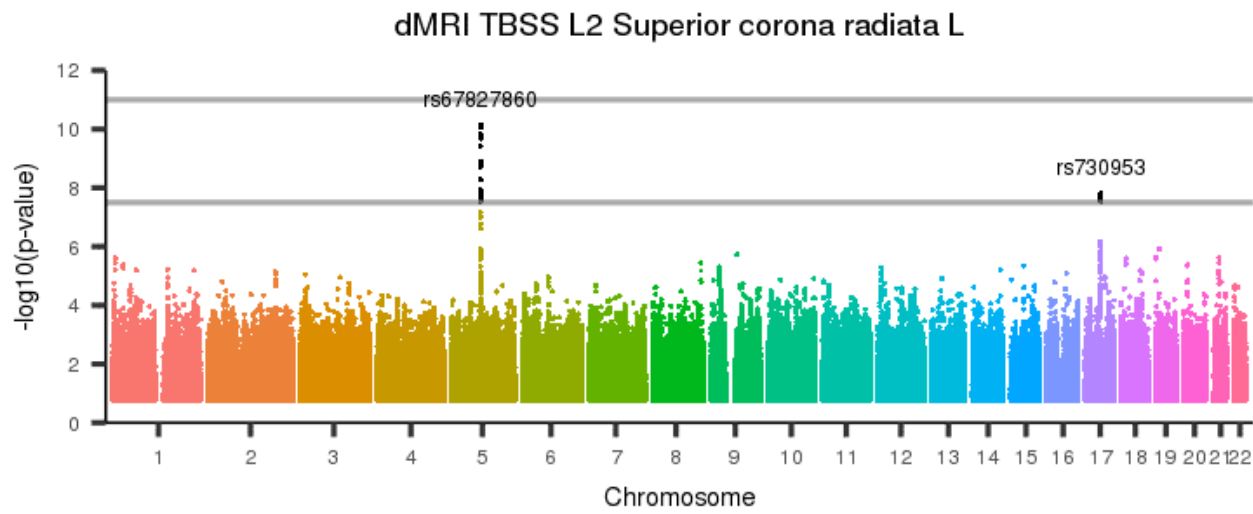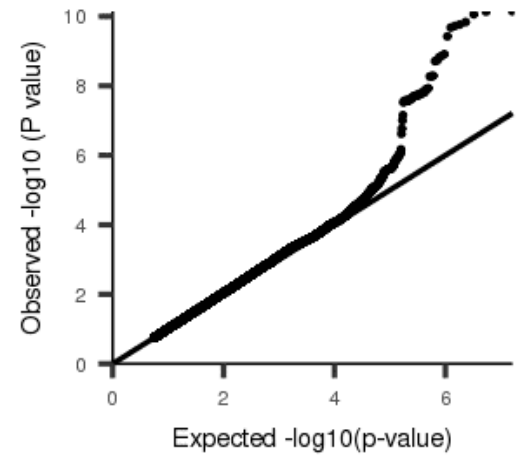

[back to list of plots](#)



Figure 414: dMRI TBSS L2 Posterior corona radiata R

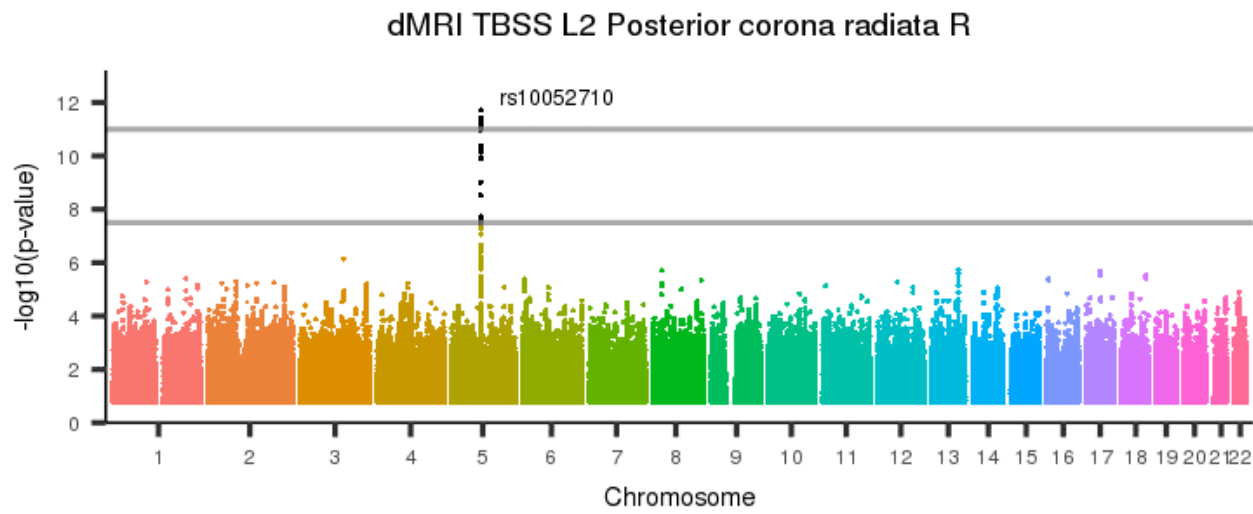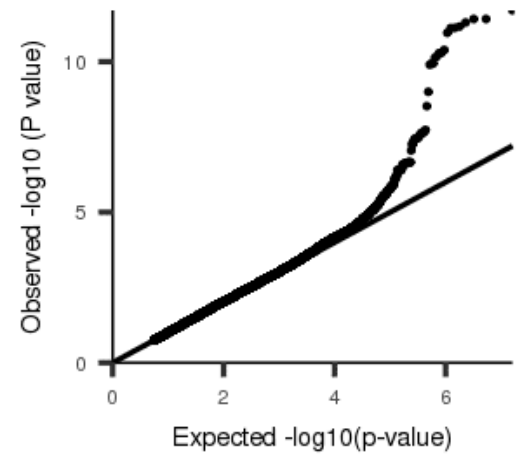

[back to list of plots](#)

Figure 415: dMRI TBSS L2 Posterior corona radiata L

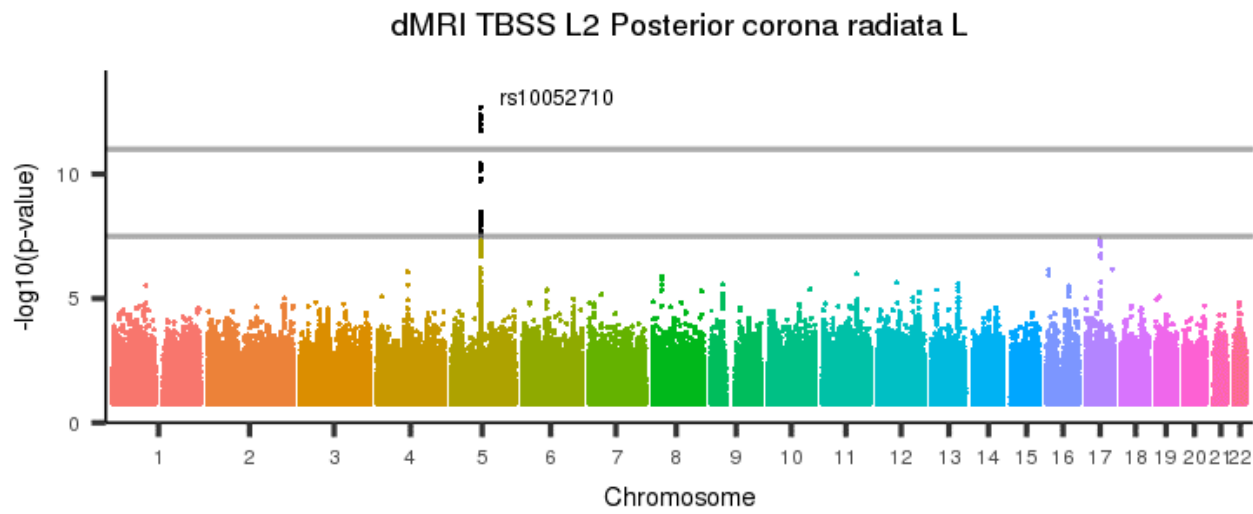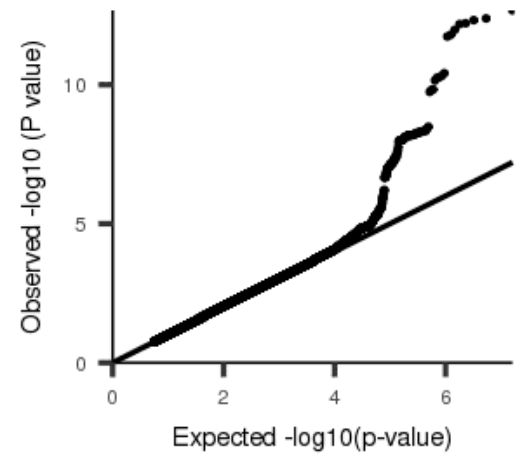

[back to list of plots](#)

Figure 416: dMRI TBSS L2 Posterior thalamic radiation R

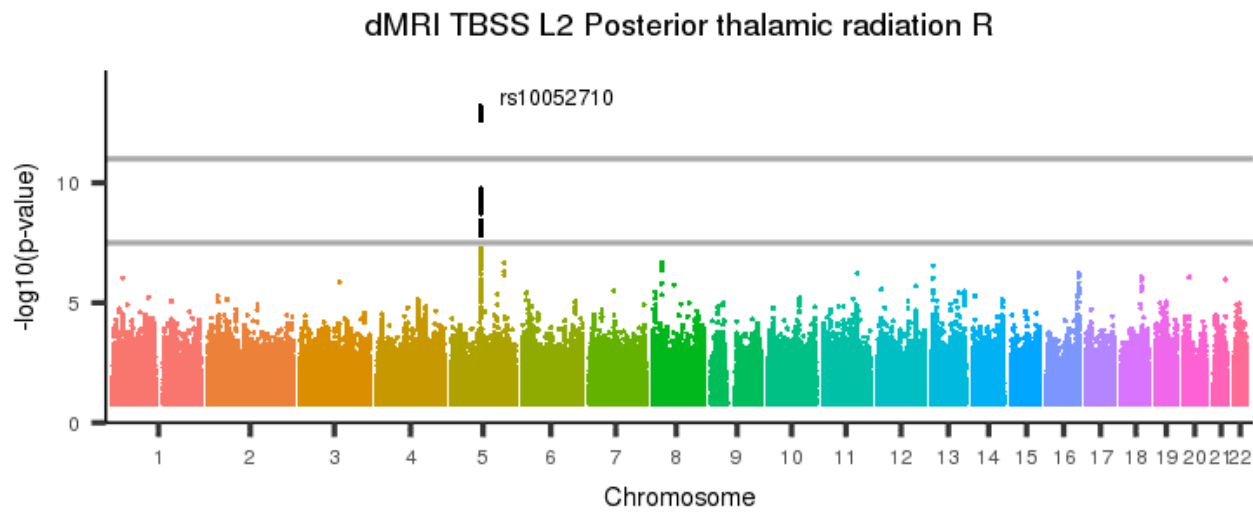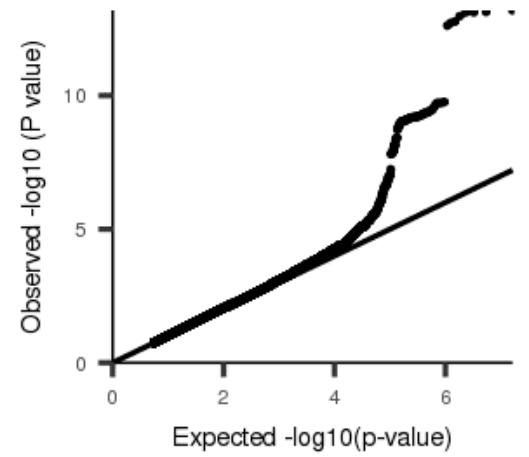

[back to list of plots](#)

Figure 417: dMRI TBSS L2 Posterior thalamic radiation L

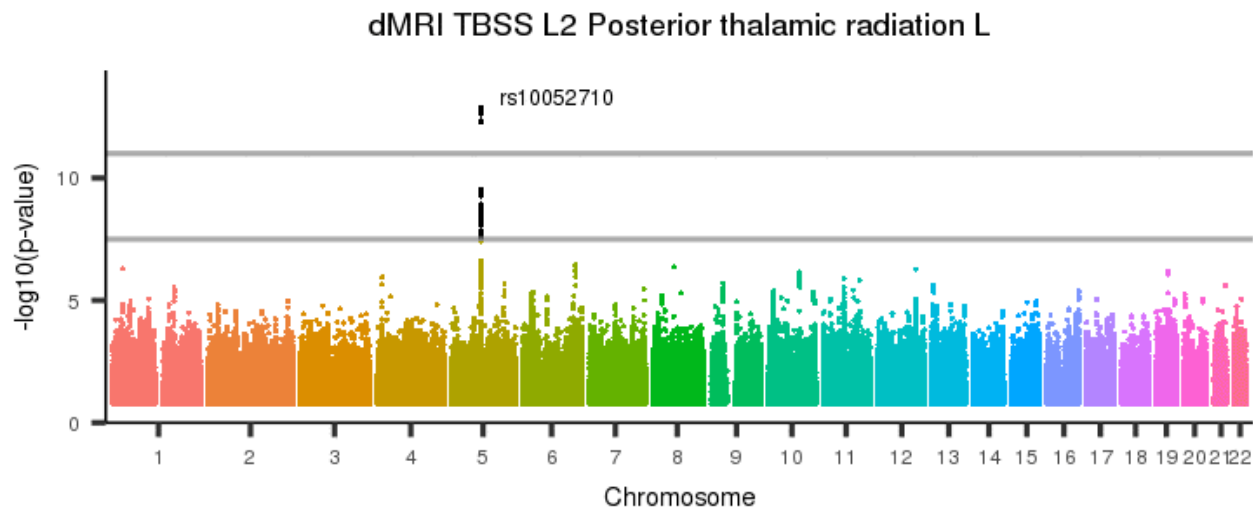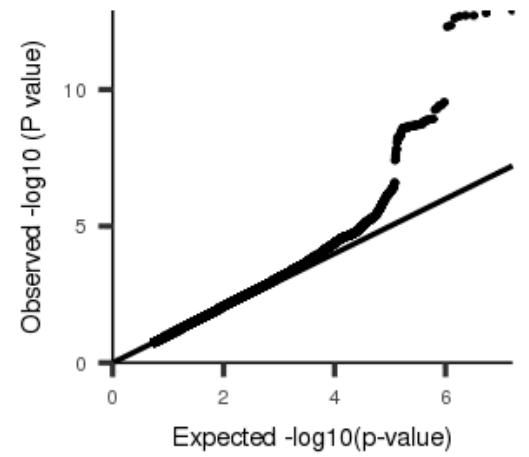

[back to list of plots](#)

Figure 418: dMRI TBSS L2 Sagittal stratum R

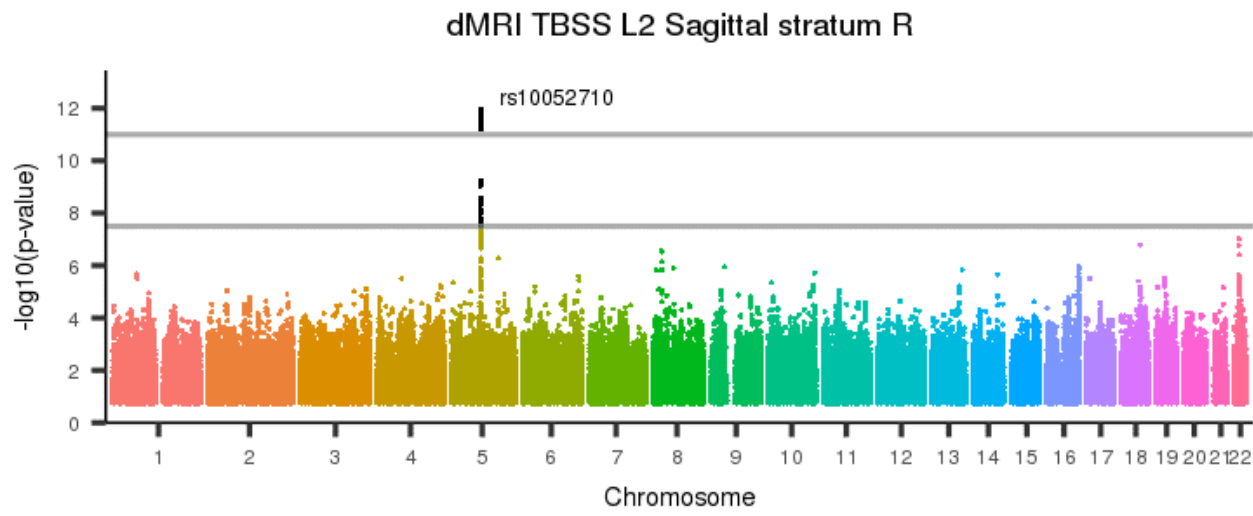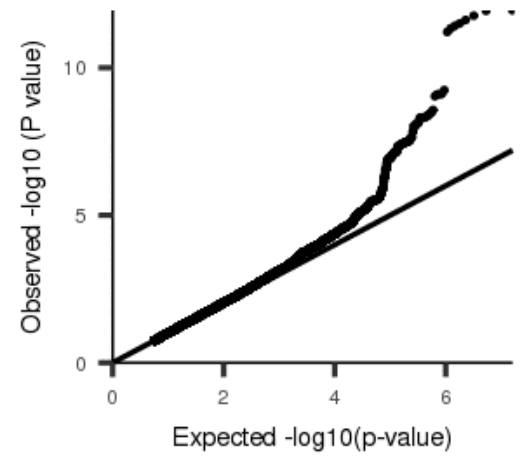

[back to list of plots](#)

Figure 419: dMRI TBSS L2 Sagittal stratum L

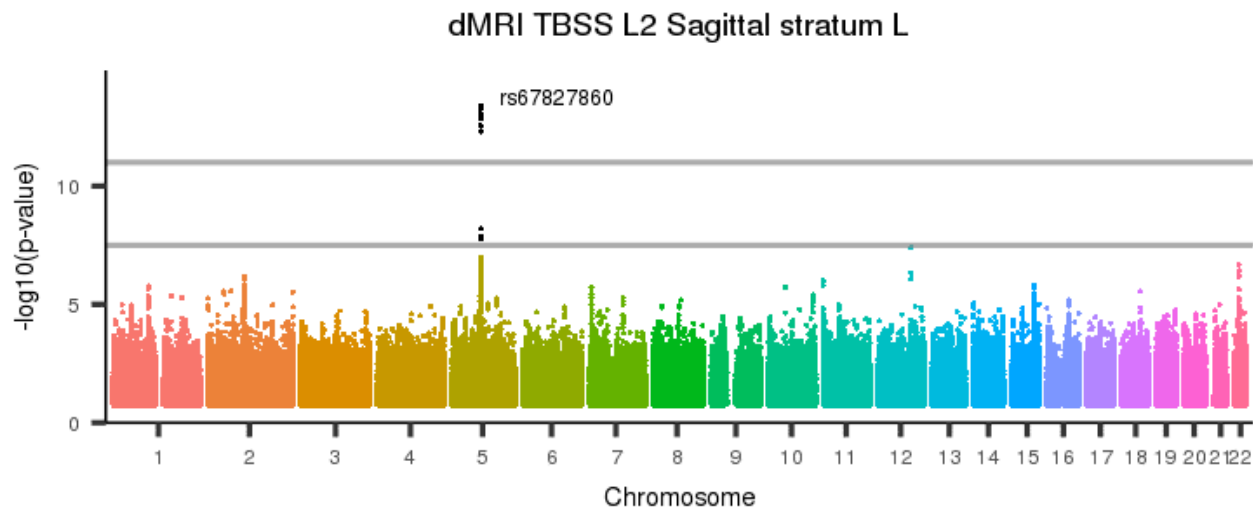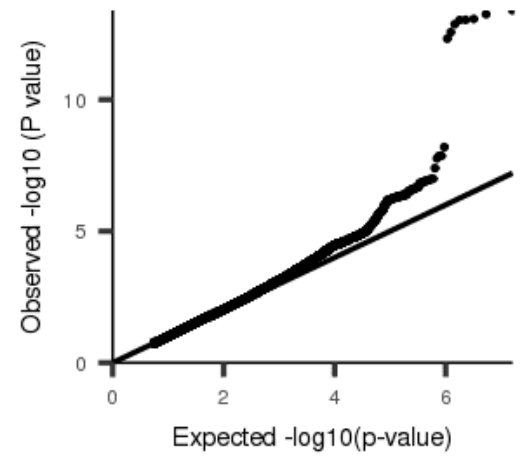

[back to list of plots](#)

Figure 420: dMRI TBSS L2 External capsule R

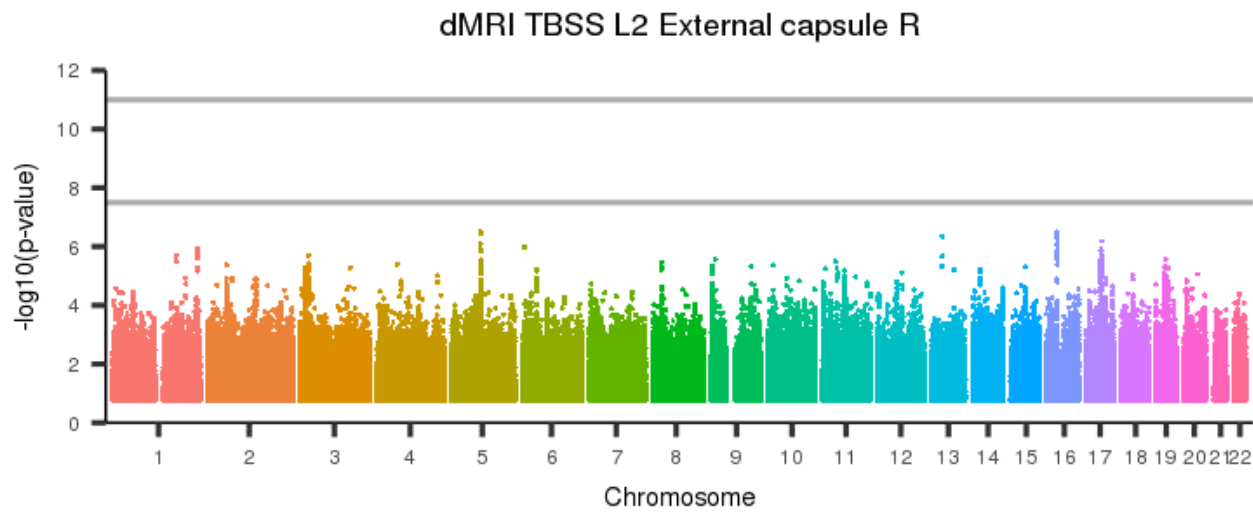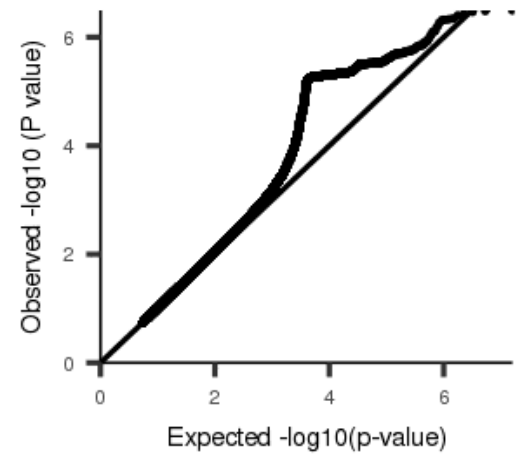

[back to list of plots](#)

Figure 421: dMRI TBSS L2 External capsule L

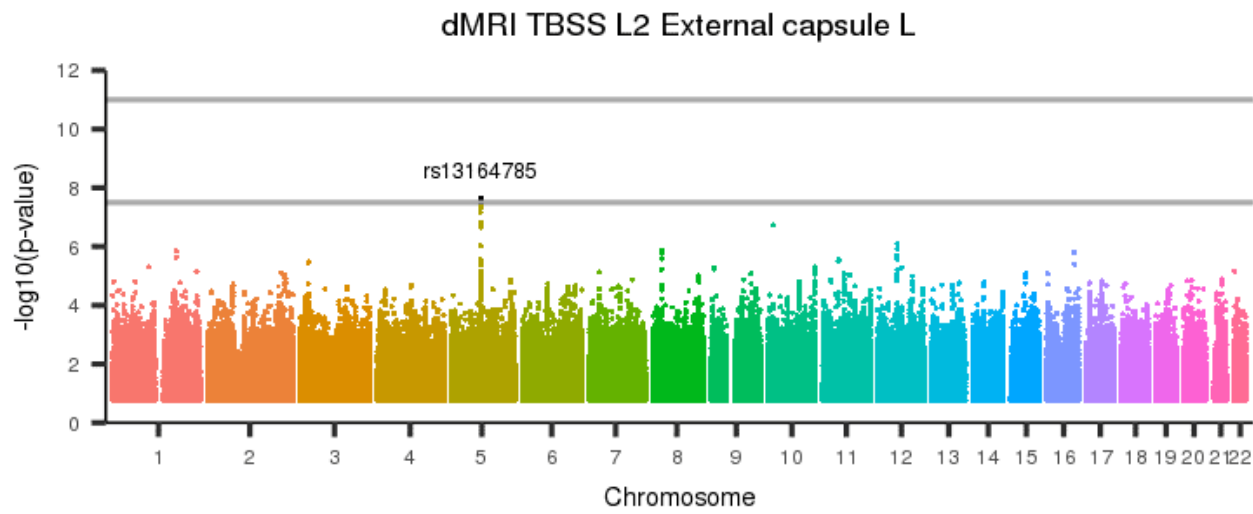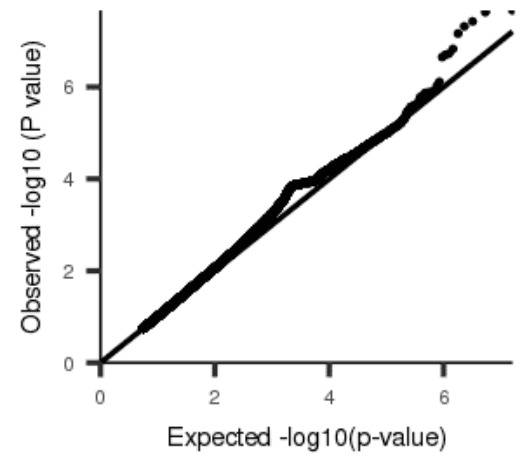

[back to list of plots](#)



Figure 422: dMRI TBSS L2 Cingulum cingulate gyrus R

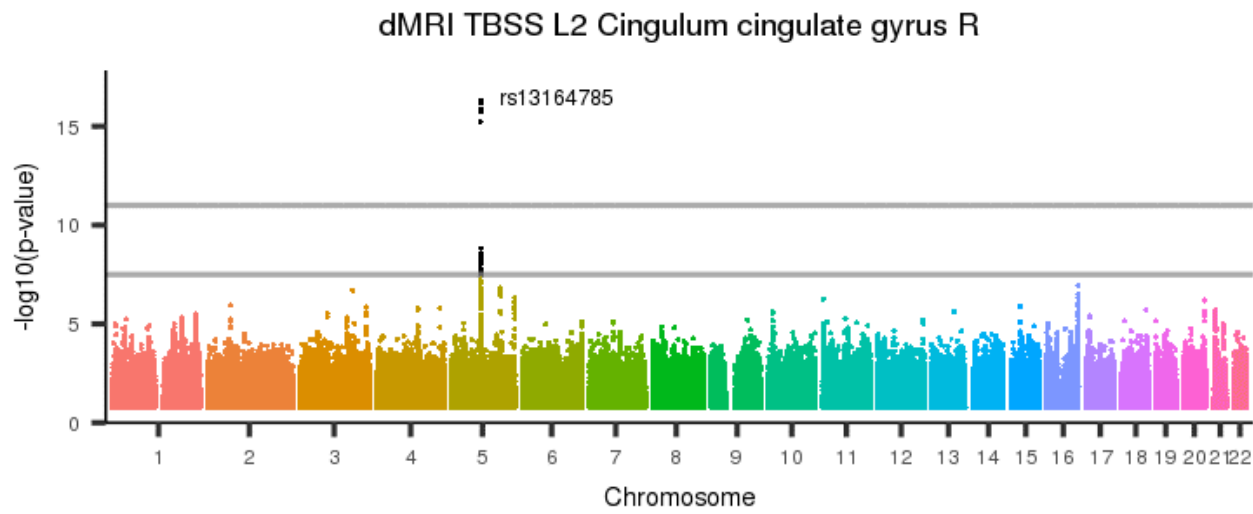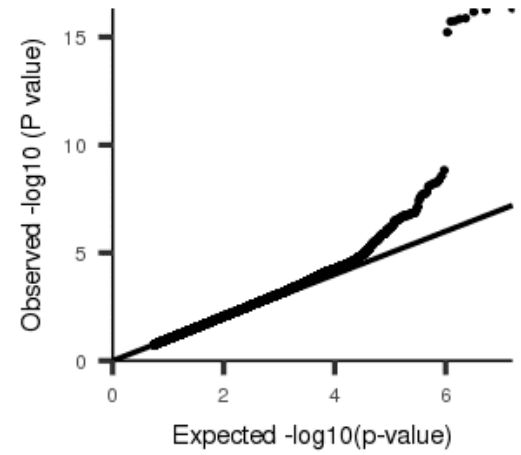

[back to list of plots](#)

Figure 423: dMRI TBSS L2 Cingulum cingulate gyrus L

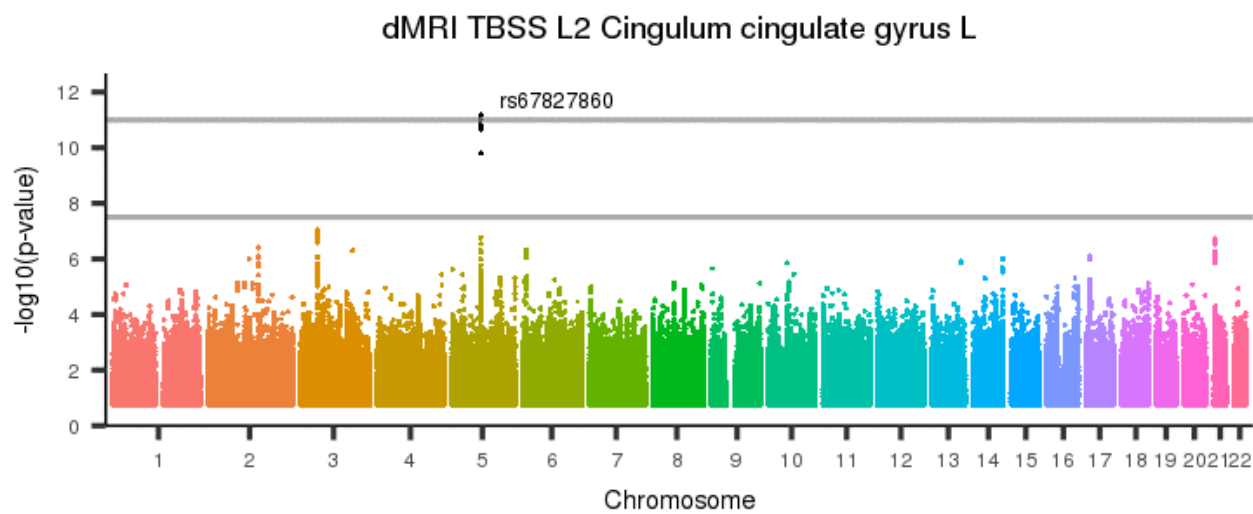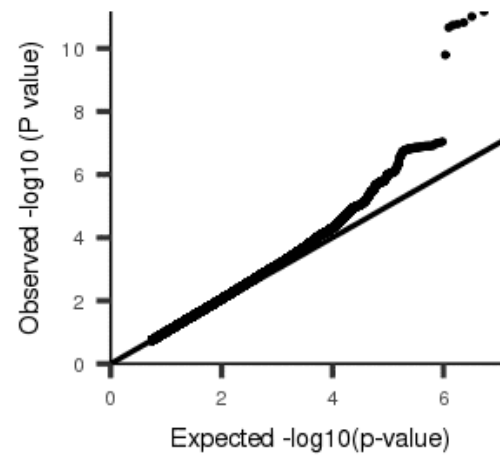

[back to list of plots](#)

Figure 424: dMRI TBSS L2 Cingulum hippocampus R

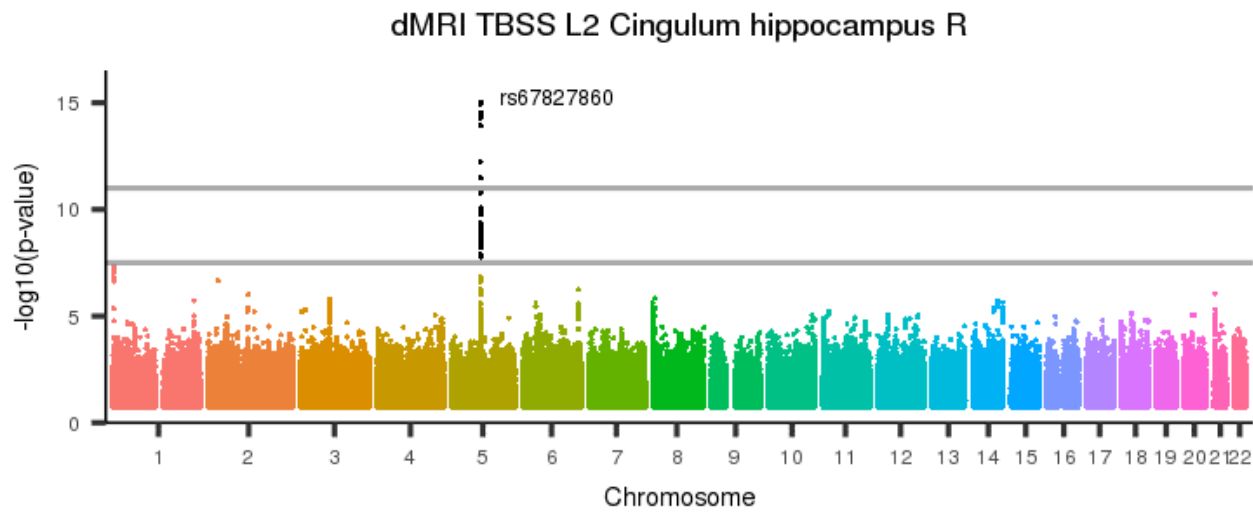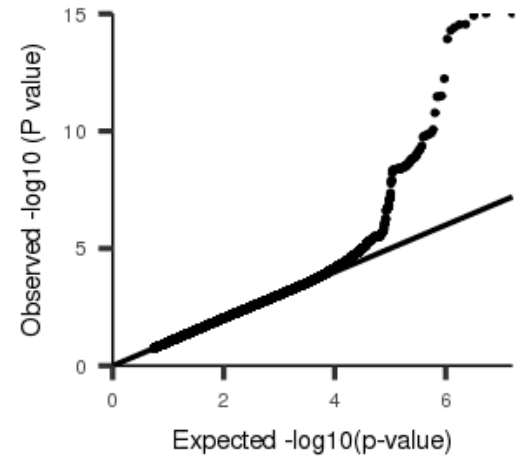

[back to list of plots](#)

Figure 425: dMRI TBSS L2 Cingulum hippocampus L

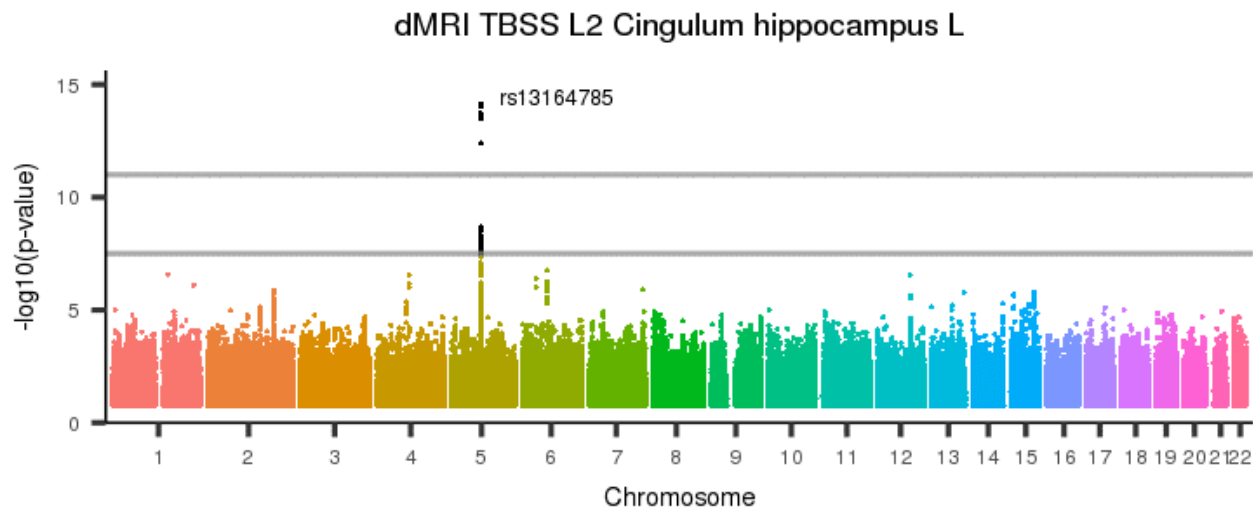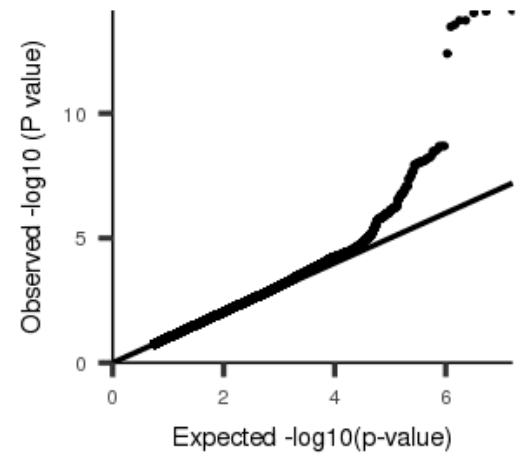

[back to list of plots](#)

Figure 426: dMRI TBSS L2 Fornix cres+Stria terminalis R

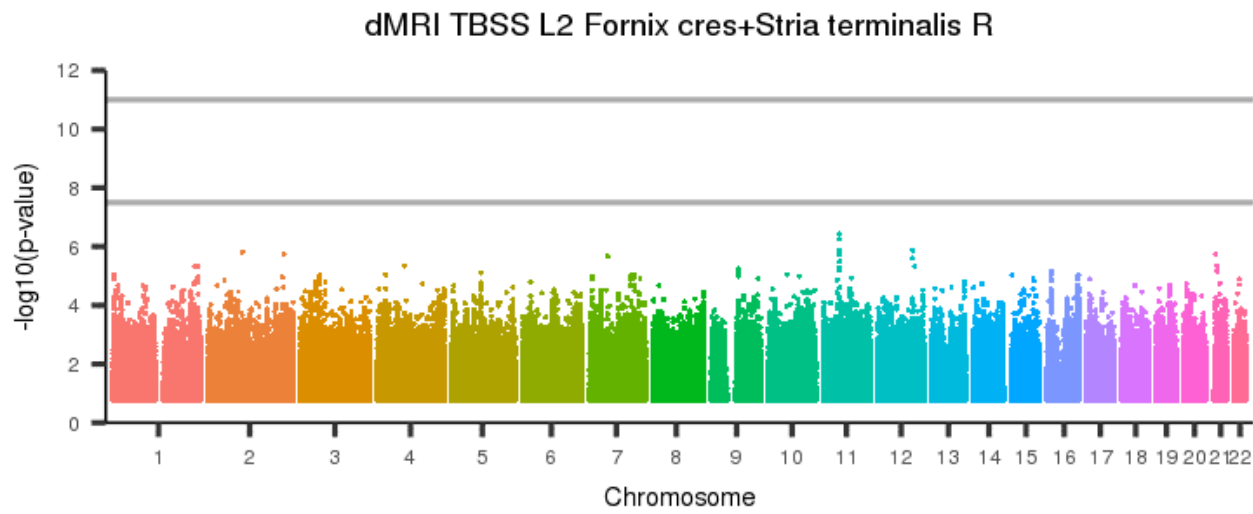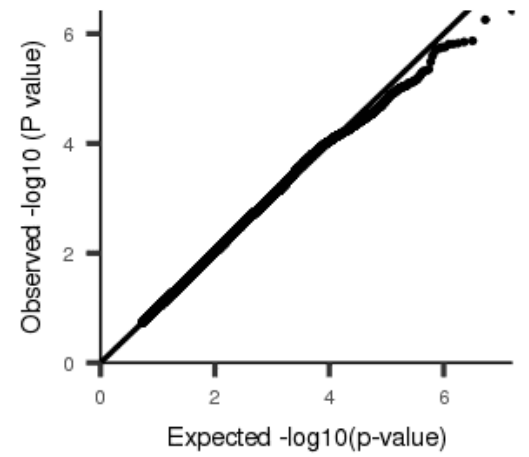

[back to list of plots](#)

Figure 427: dMRI TBSS L2 Fornix cres+Stria terminalis L

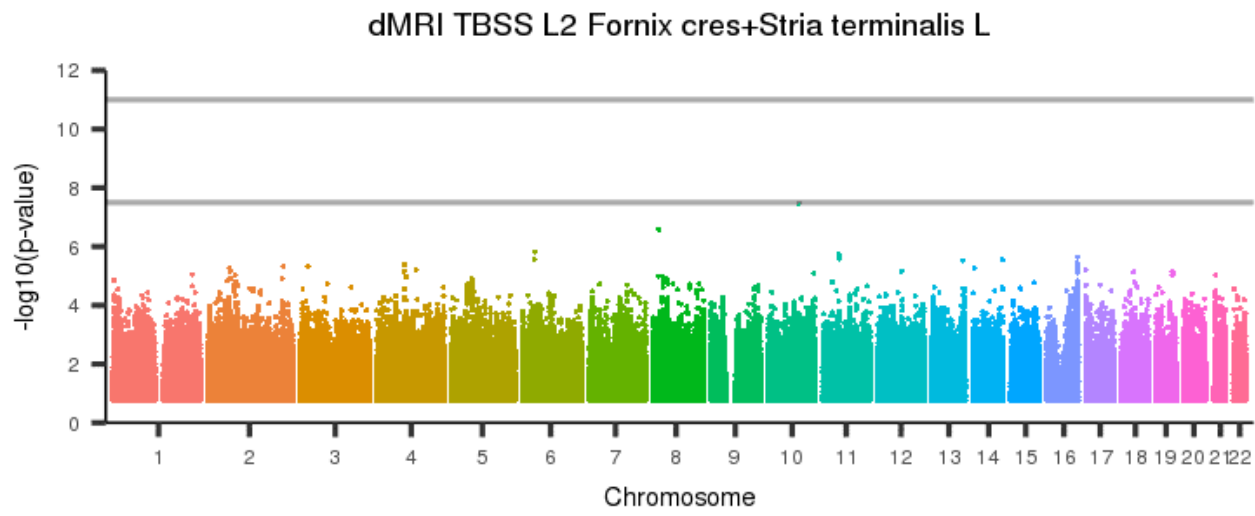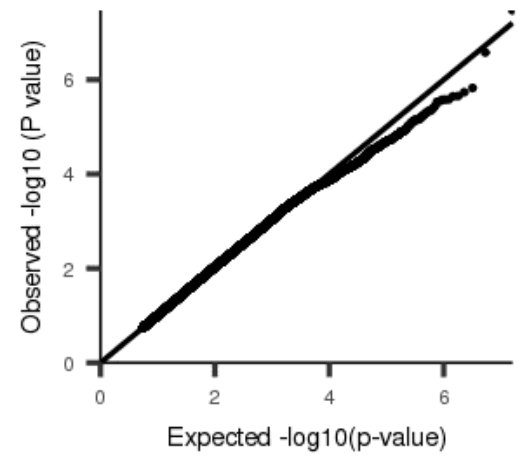

[back to list of plots](#)

Figure 428: dMRI TBSS L2 Superior longitudinal fasciculus R

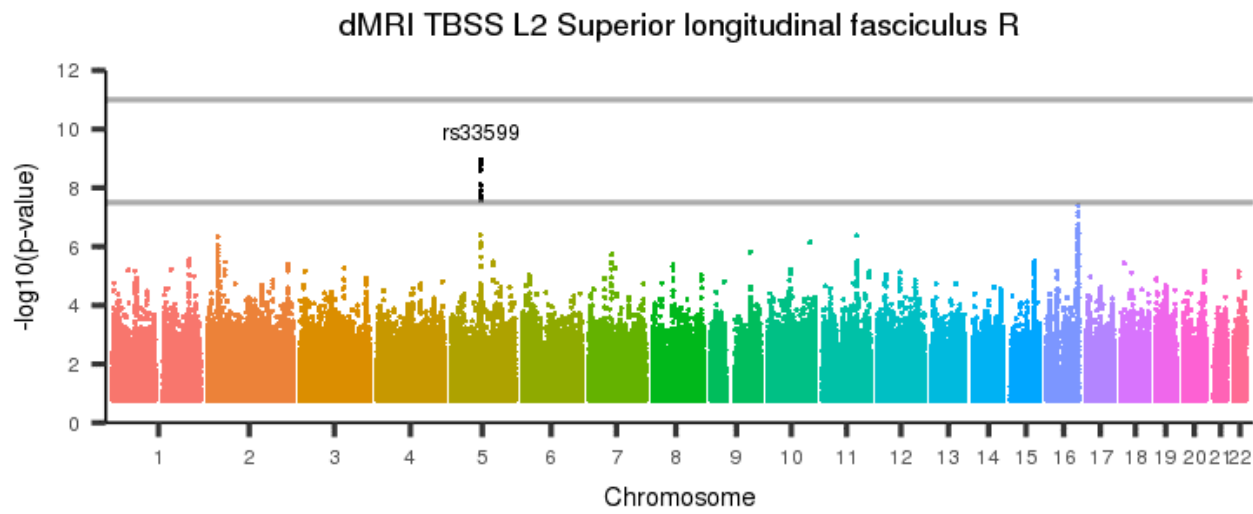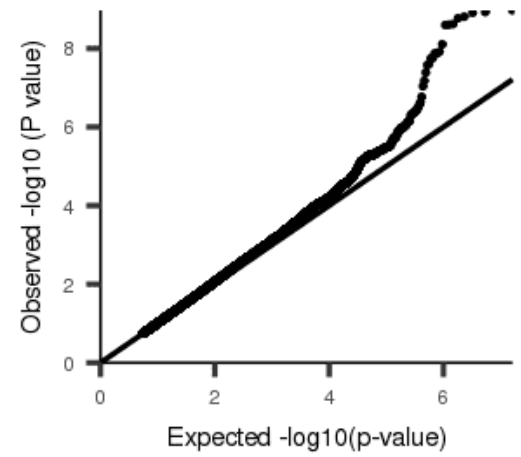

[back to list of plots](#)

Figure 429: dMRI TBSS L2 Superior longitudinal fasciculus L

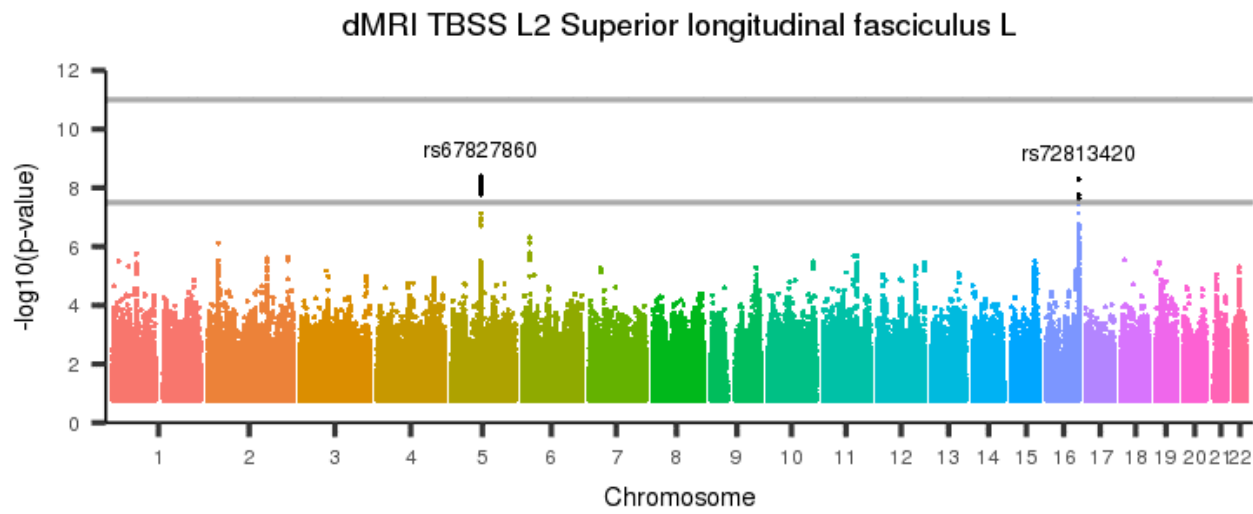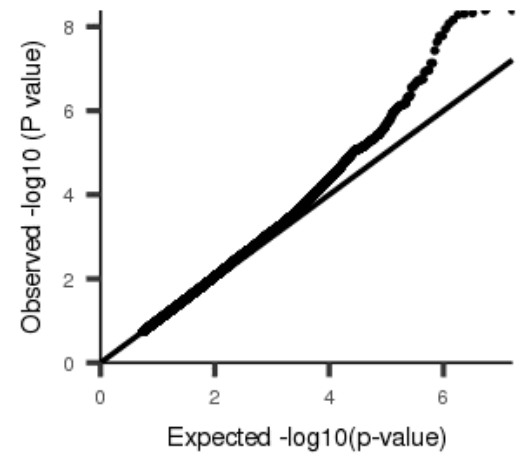

[back to list of plots](#)



Figure 430: dMRI TBSS L2 Superior fronto-occipital fasciculus R

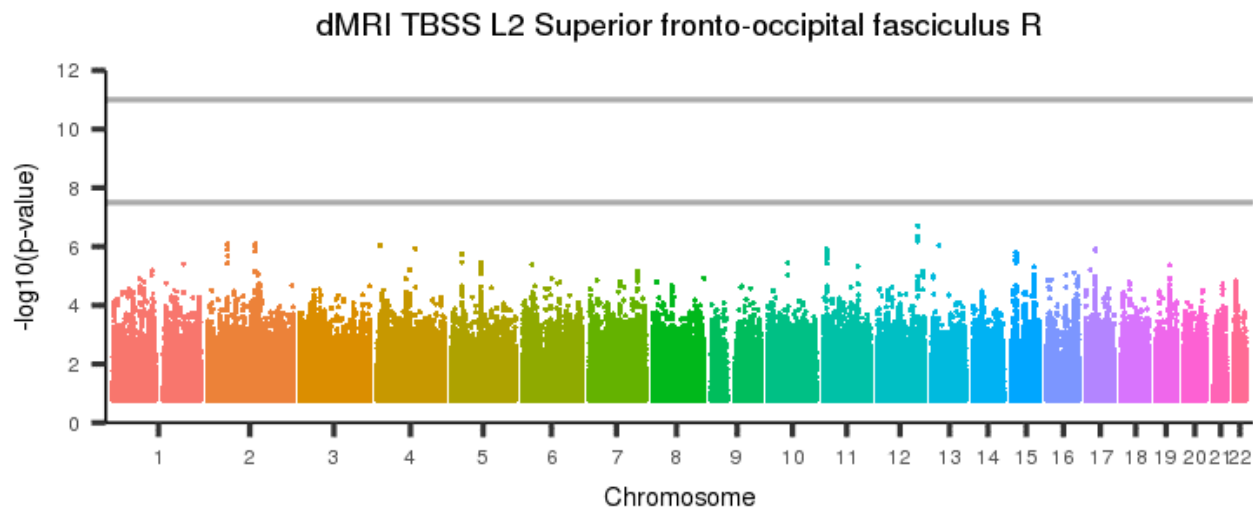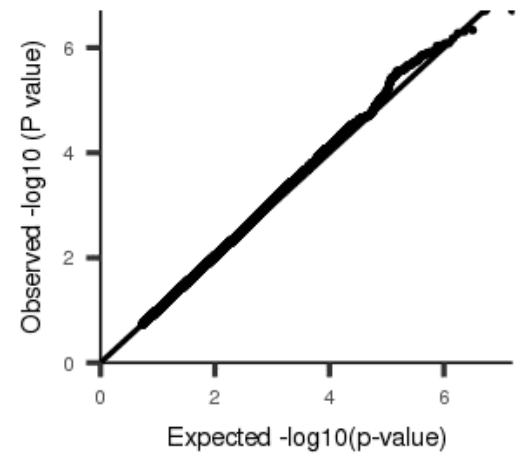

[back to list of plots](#)

Figure 431: dMRI TBSS L2 Superior fronto-occipital fasciculus L

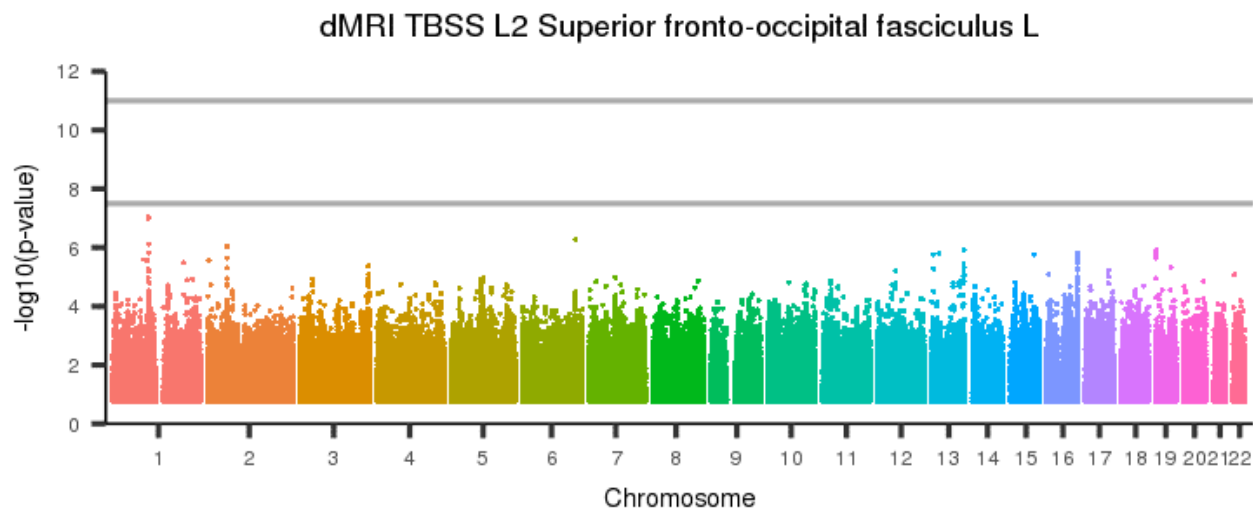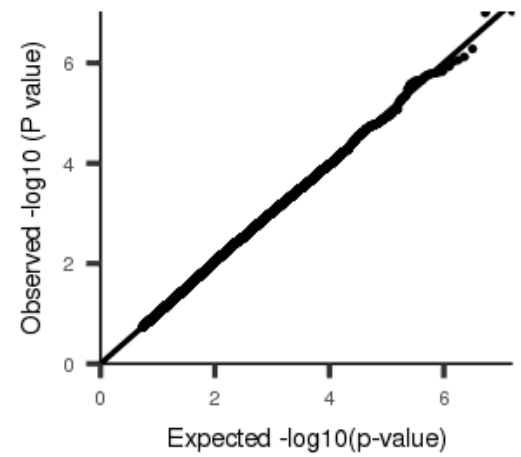

[back to list of plots](#)

Figure 432: dMRI TBSS L2 Uncinate fasciculus R

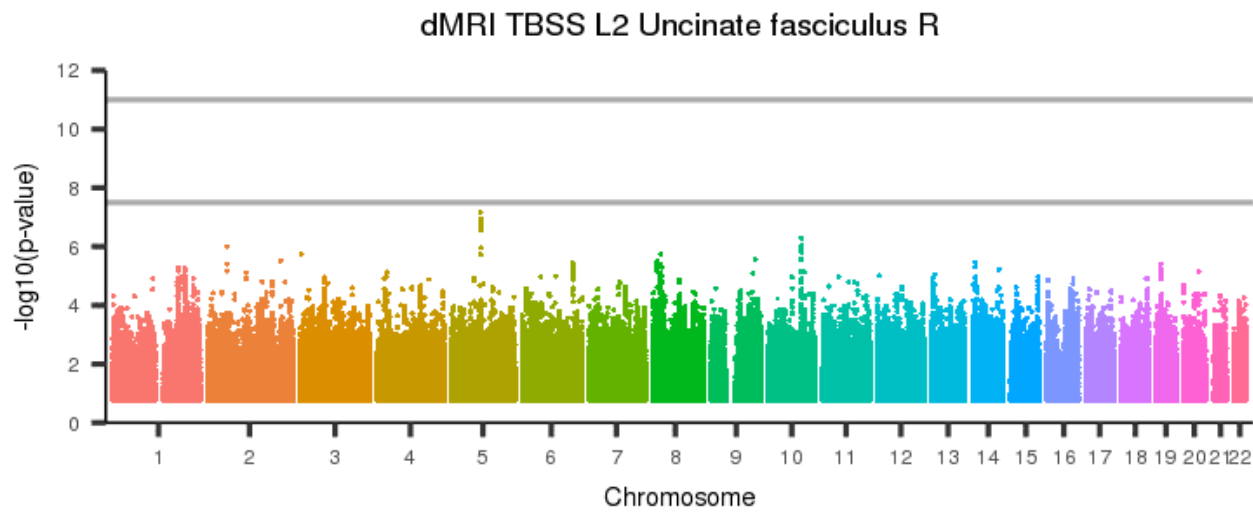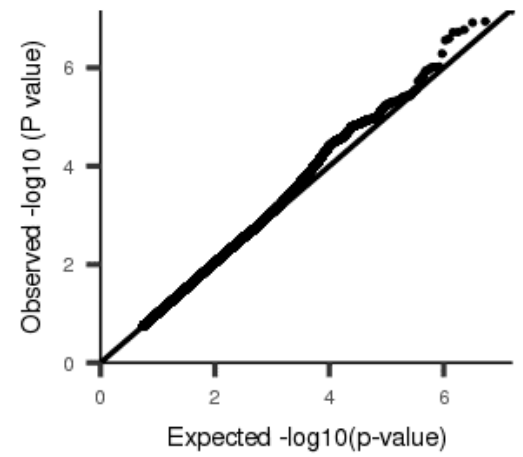

[back to list of plots](#)

Figure 433: dMRI TBSS L2 Uncinate fasciculus L

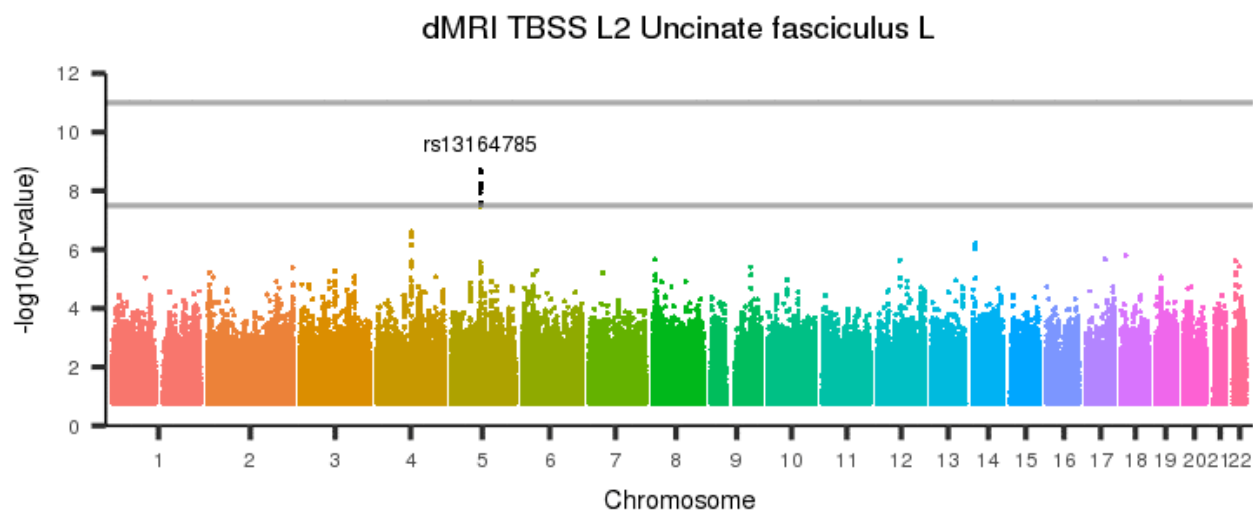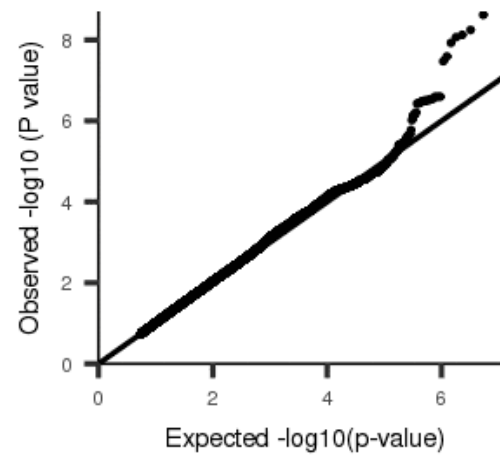

[back to list of plots](#)

Figure 434: dMRI TBSS L2 Tapetum R

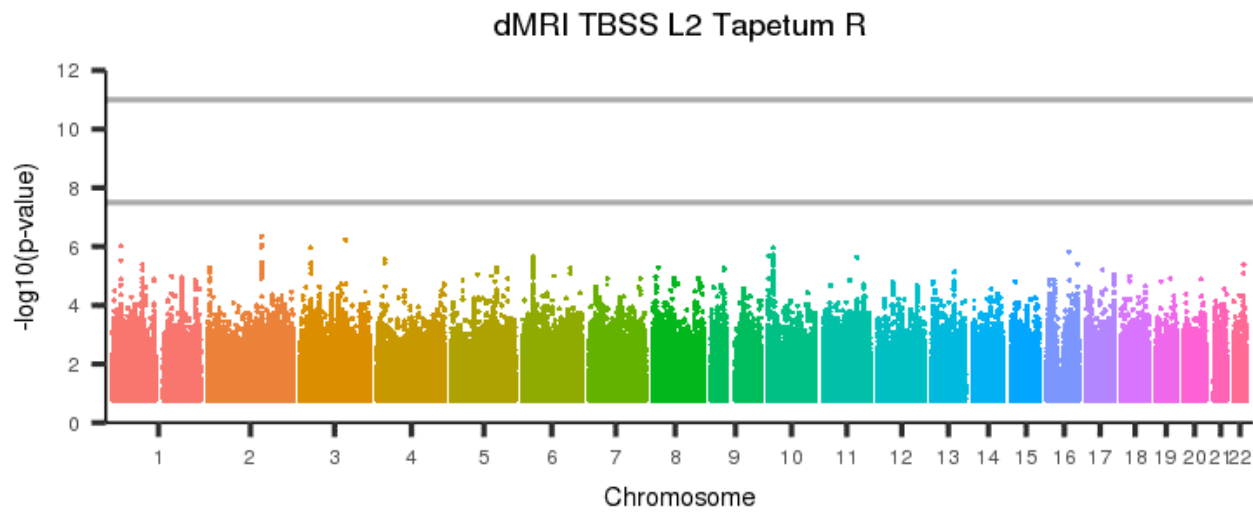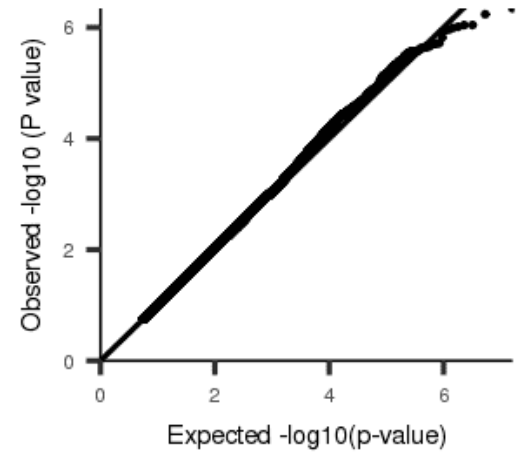

[back to list of plots](#)

Figure 435: dMRI TBSS L2 Tapetum L

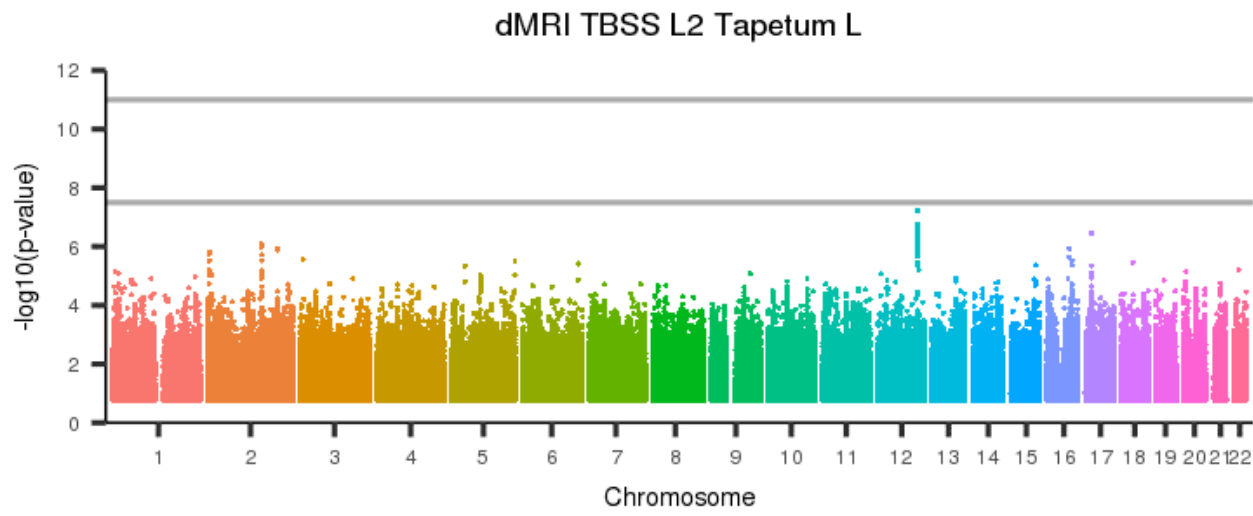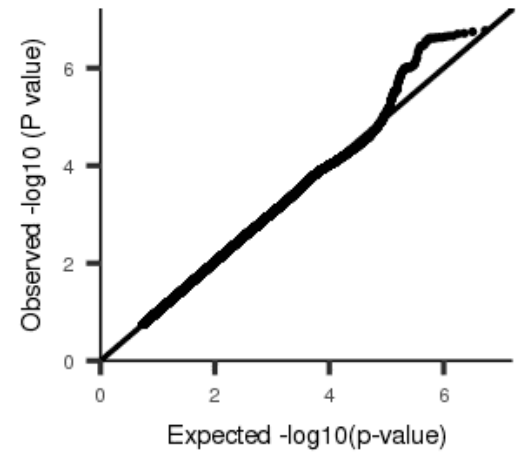

[back to list of plots](#)

Figure 436: dMRI TBSS L3 Middle cerebellar peduncle

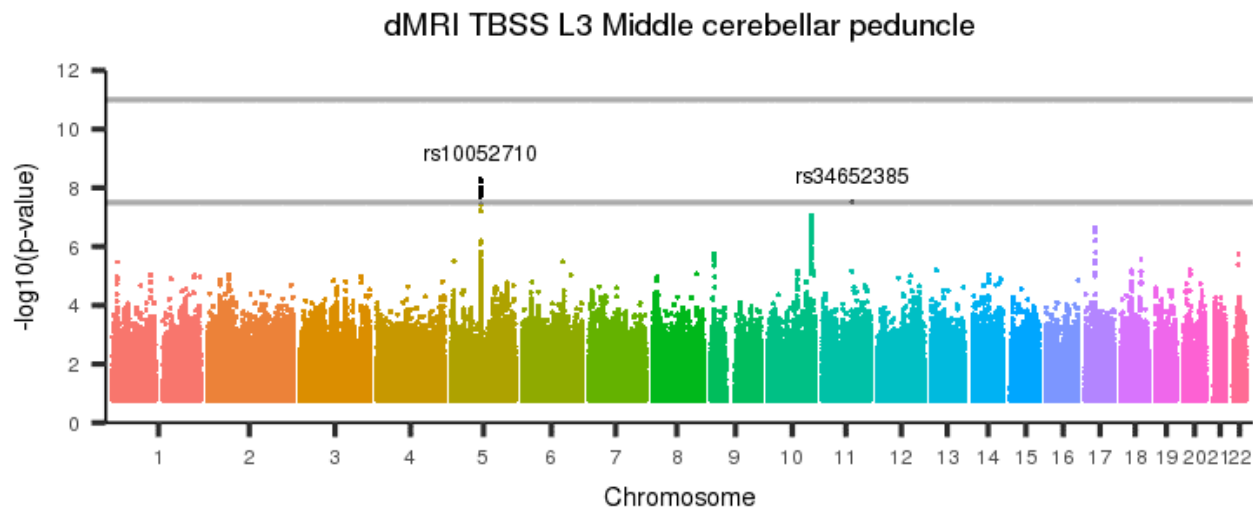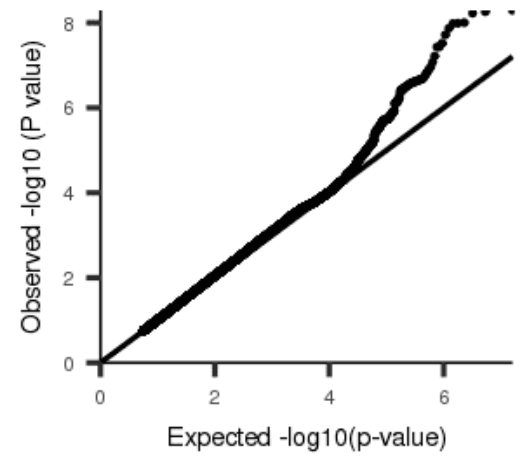

[back to list of plots](#)

Figure 437: dMRI TBSS L3 Pontine crossing tract

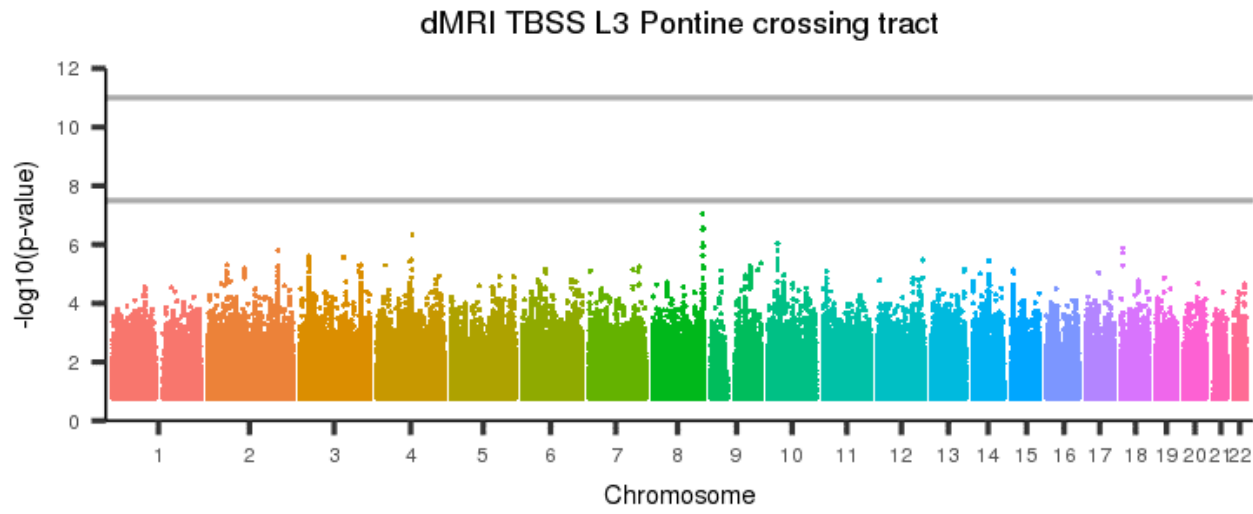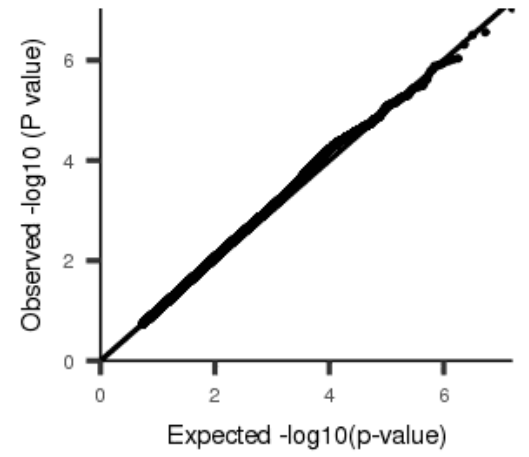

[back to list of plots](#)



Figure 438: dMRI TBSS L3 Genu of corpus callosum

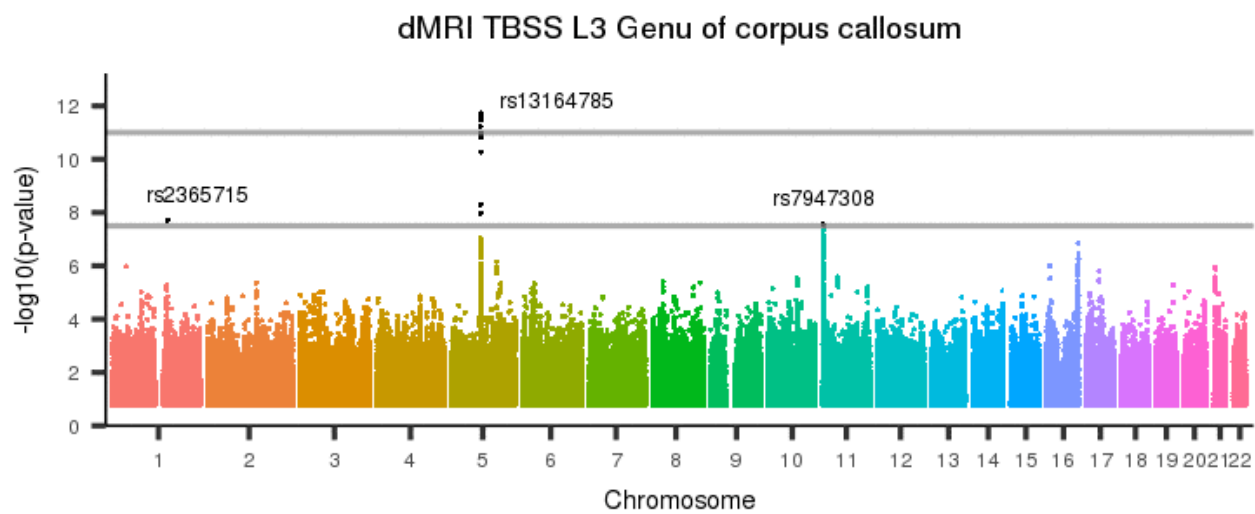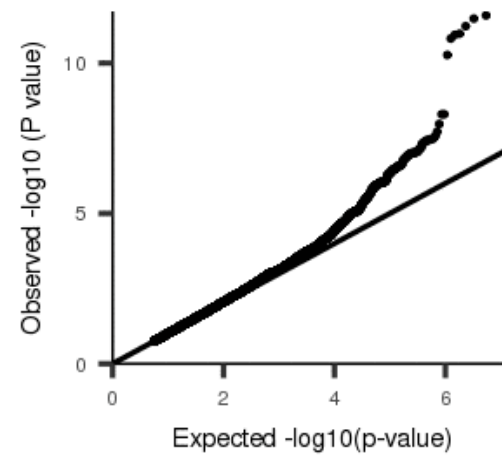

[back to list of plots](#)

Figure 439: dMRI TBSS L3 Body of corpus callosum

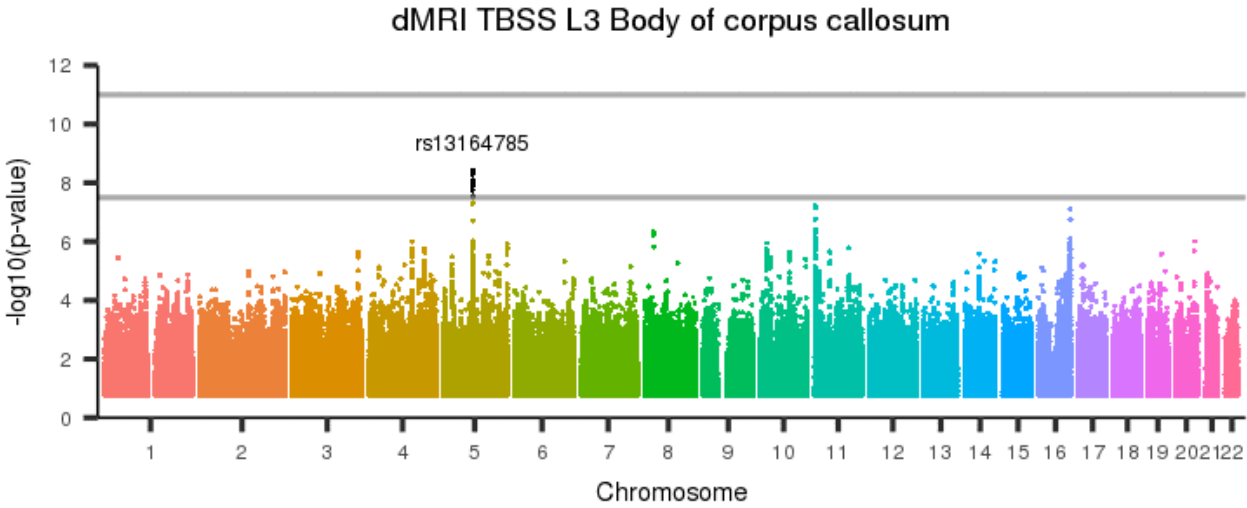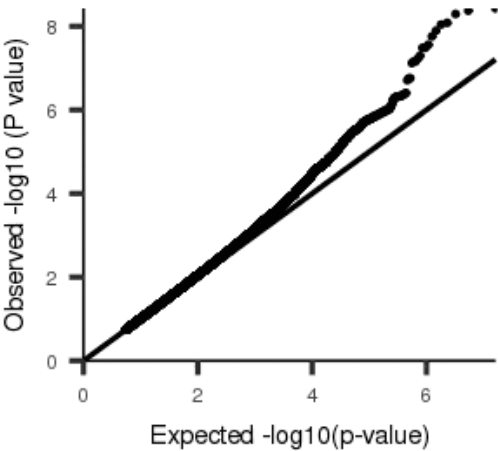

[back to list of plots](#)

Figure 440: dMRI TBSS L3 Splenium of corpus callosum

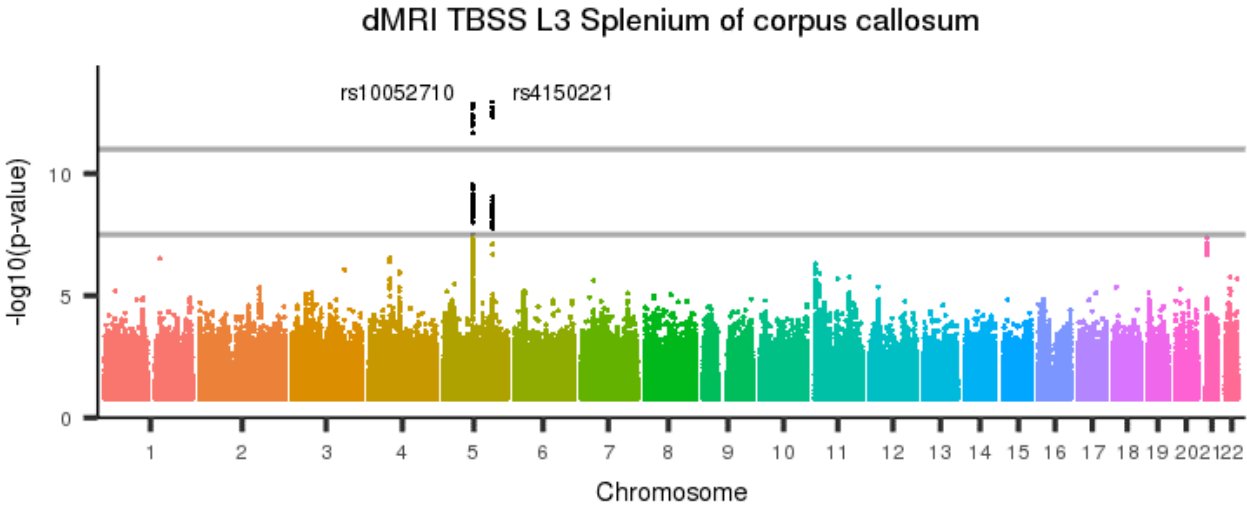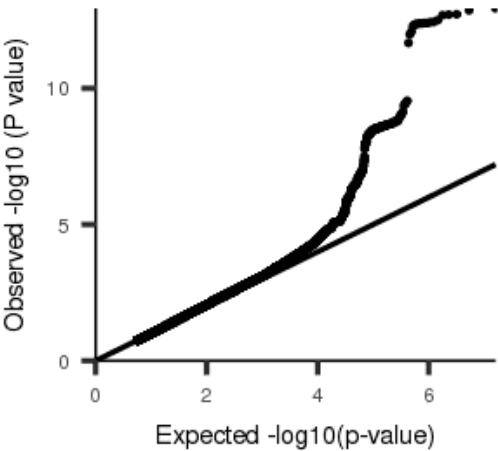

[back to list of plots](#)

Figure 441: dMRI TBSS L3 Fornix

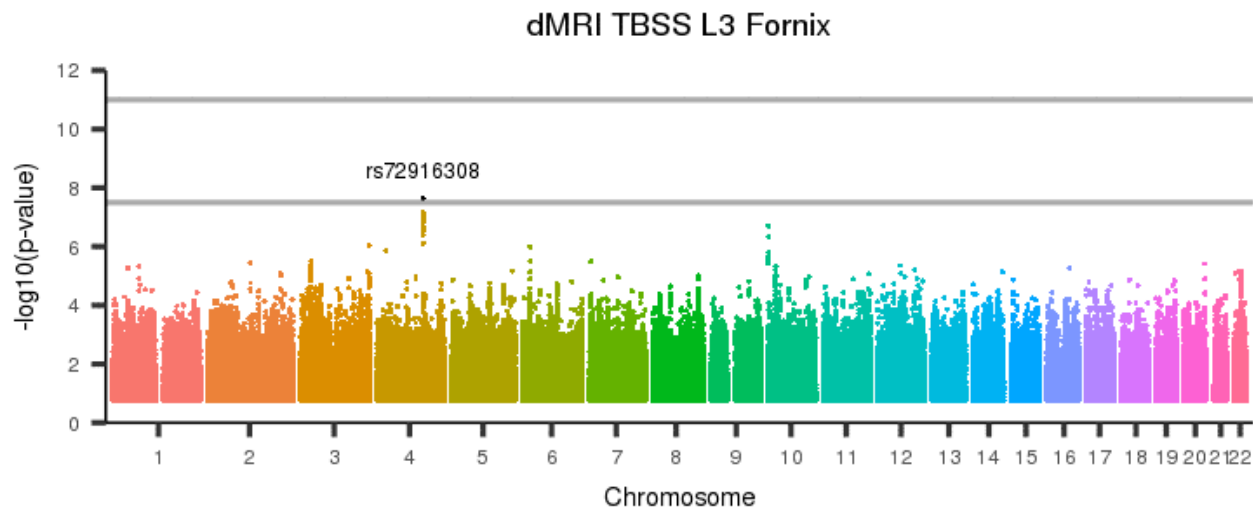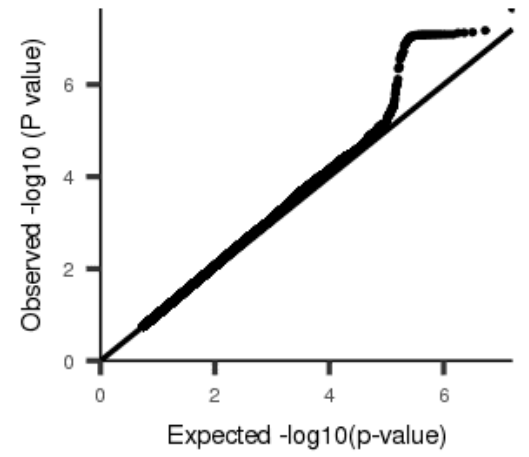

[back to list of plots](#)

Figure 442: dMRI TBSS L3 Corticospinal tract R

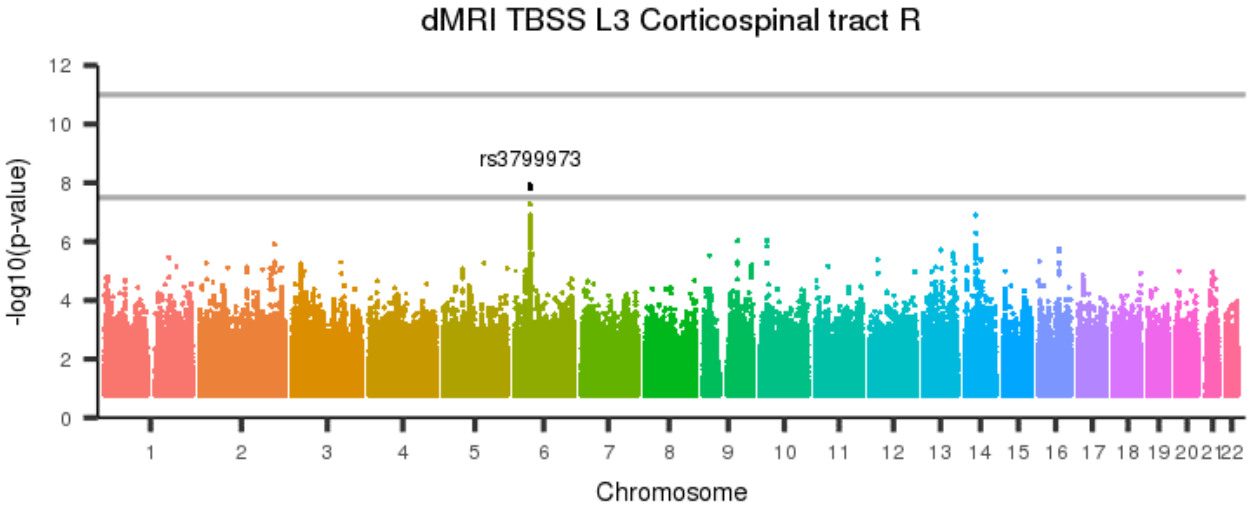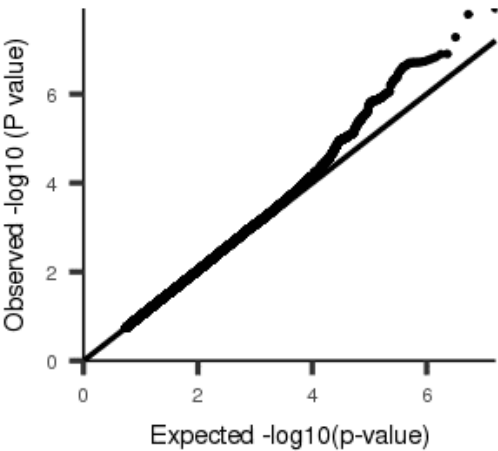

[back to list of plots](#)

Figure 443: dMRI TBSS L3 Corticospinal tract L

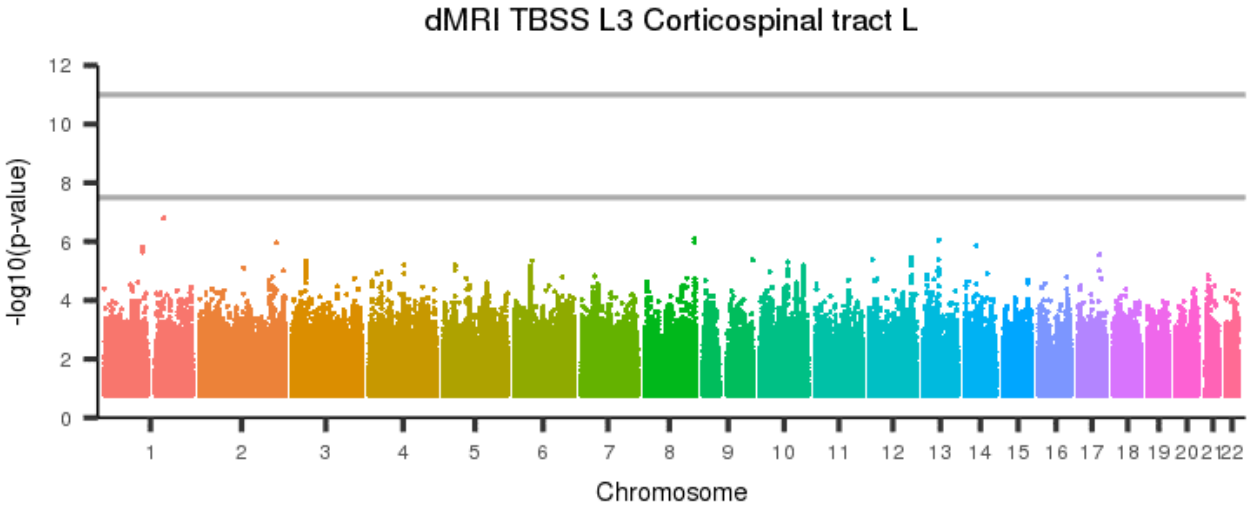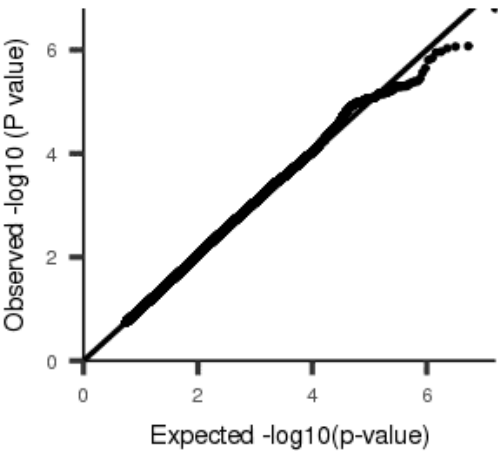

[back to list of plots](#)

Figure 444: dMRI TBSS L3 Medial lemniscus R

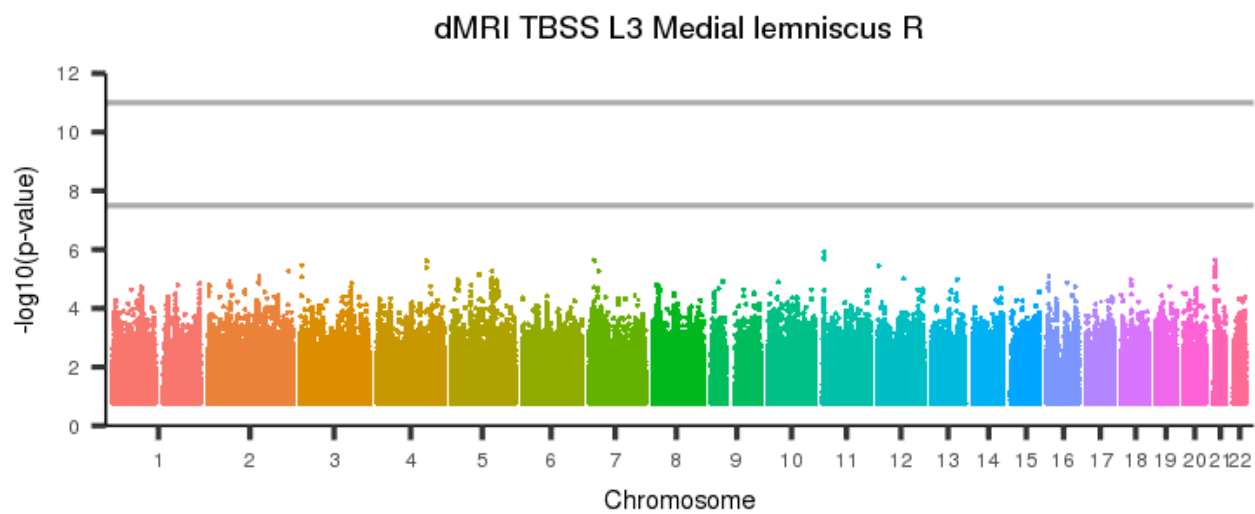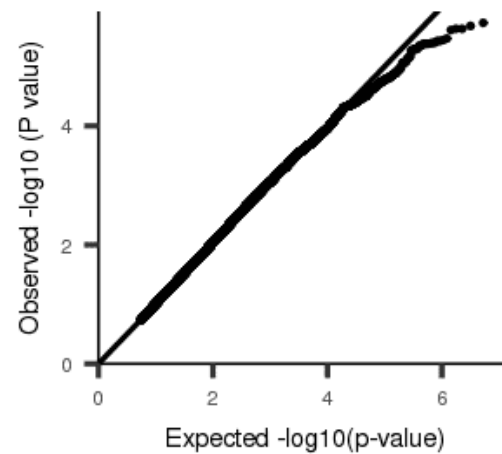

[back to list of plots](#)

Figure 445: dMRI TBSS L3 Medial lemniscus L

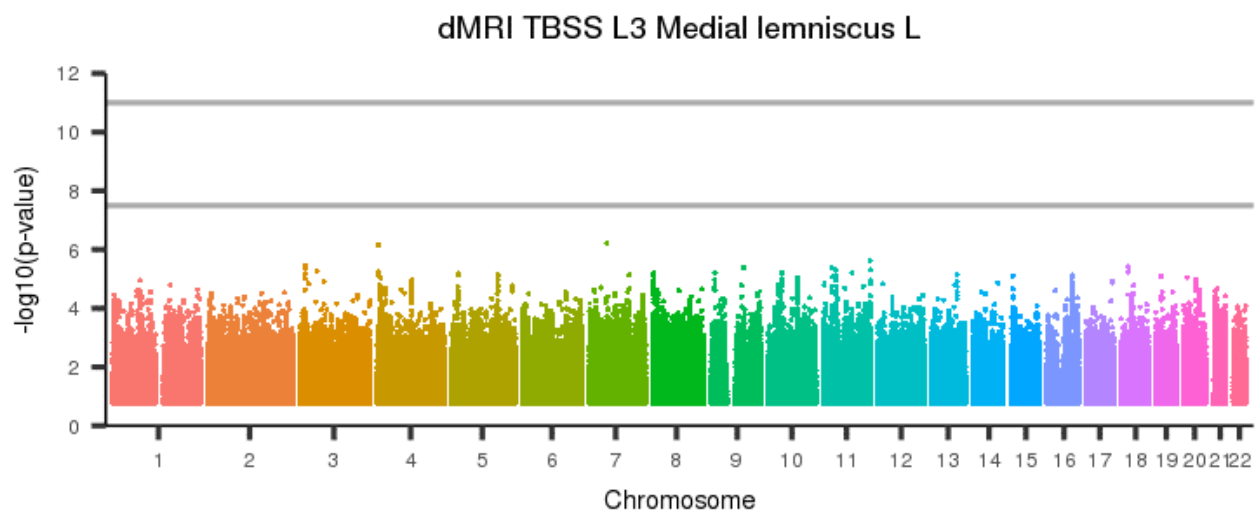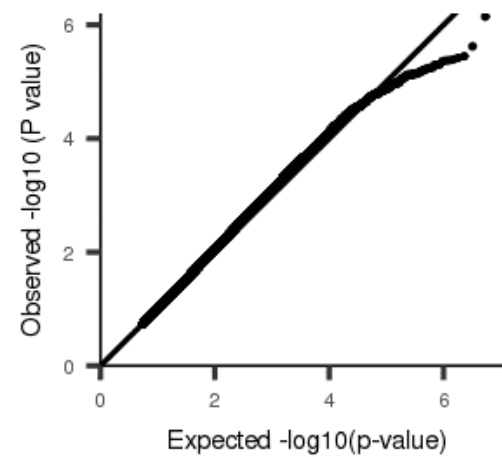

[back to list of plots](#)



Figure 446: dMRI TBSS L3 Inferior cerebellar peduncle R

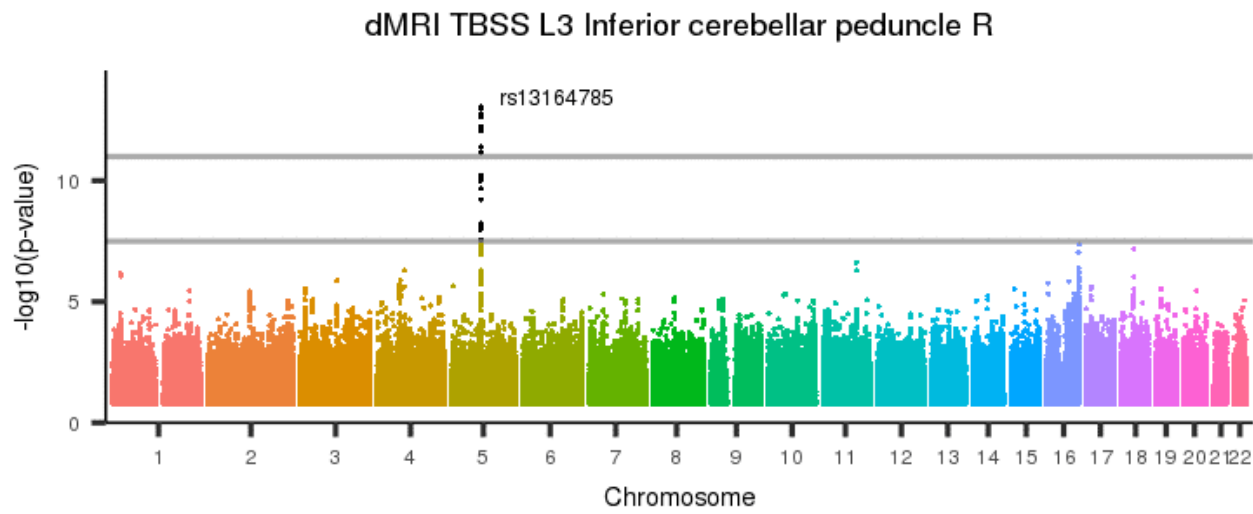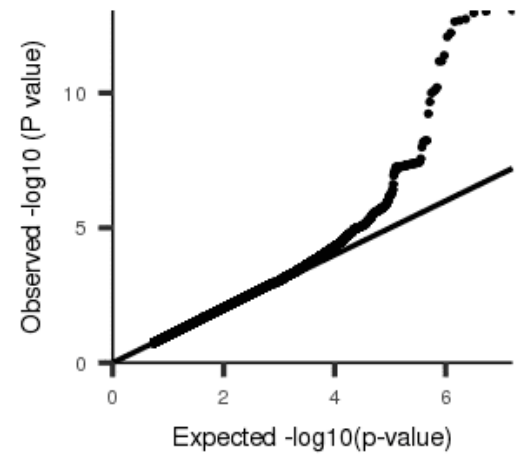

[back to list of plots](#)

Figure 447: dMRI TBSS L3 Inferior cerebellar peduncle L

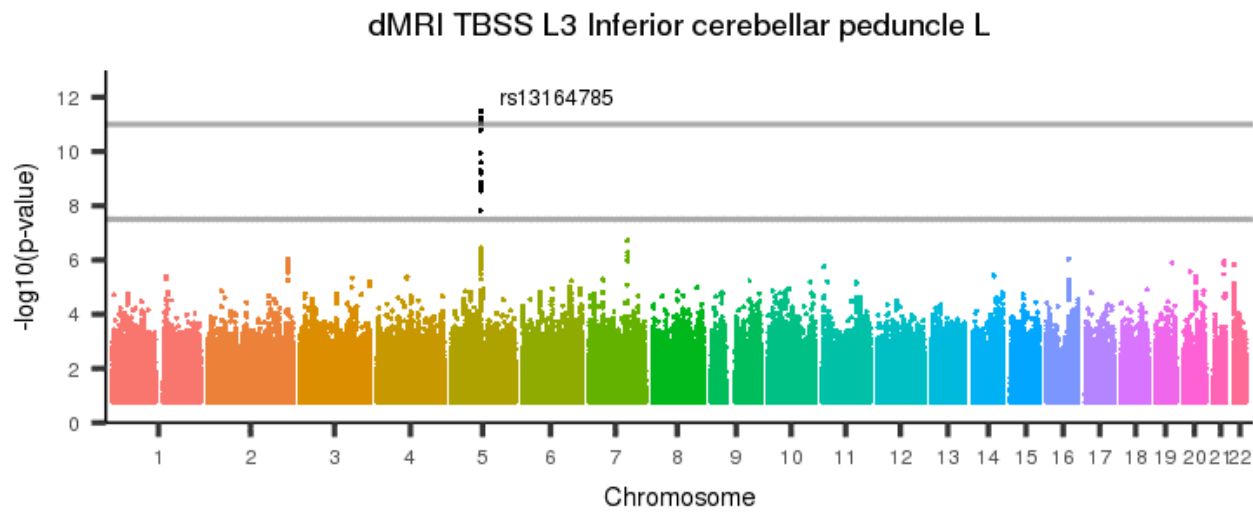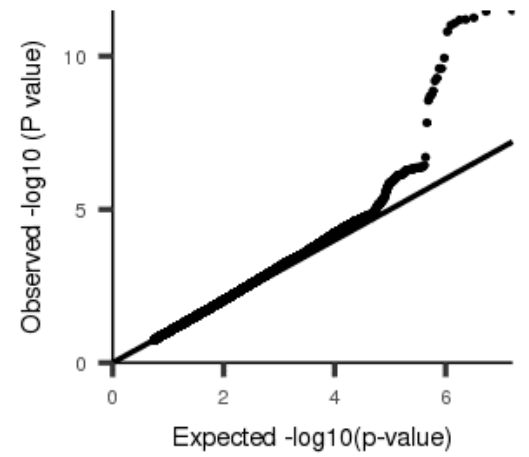

[back to list of plots](#)

Figure 448: dMRI TBSS L3 Superior cerebellar peduncle R

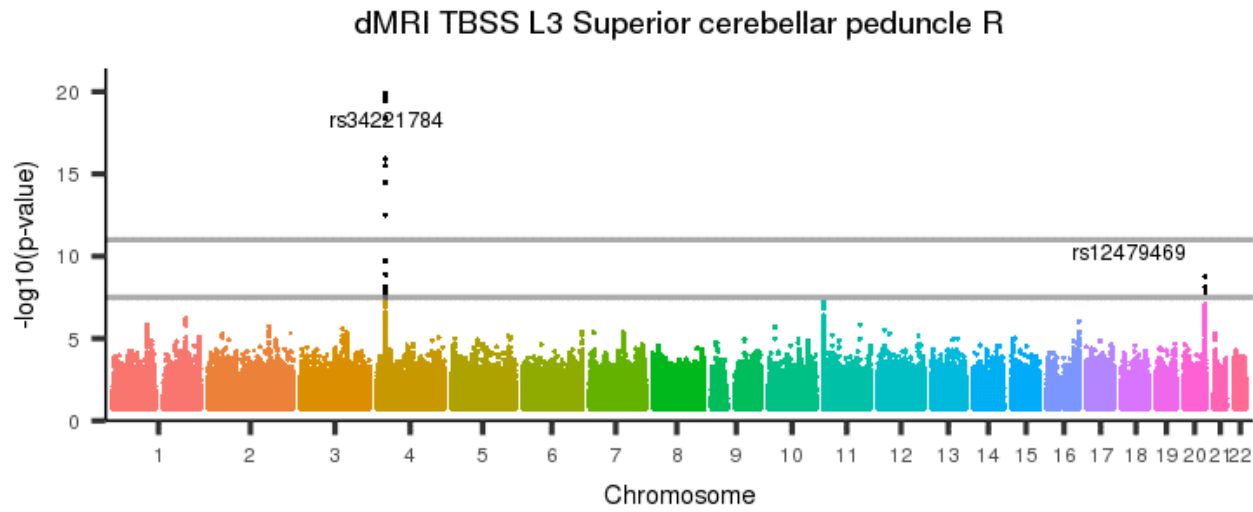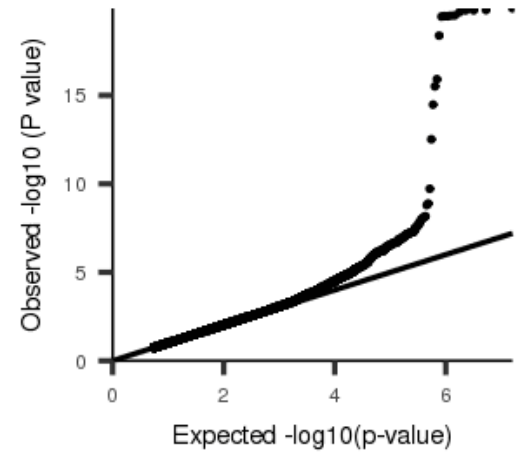

[back to list of plots](#)

Figure 449: dMRI TBSS L3 Superior cerebellar peduncle L

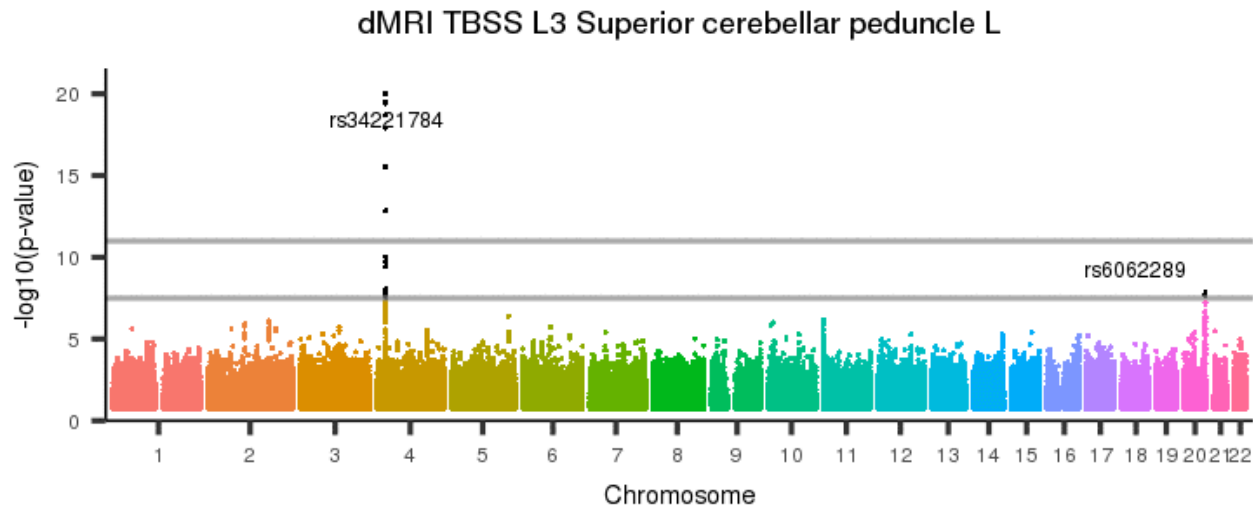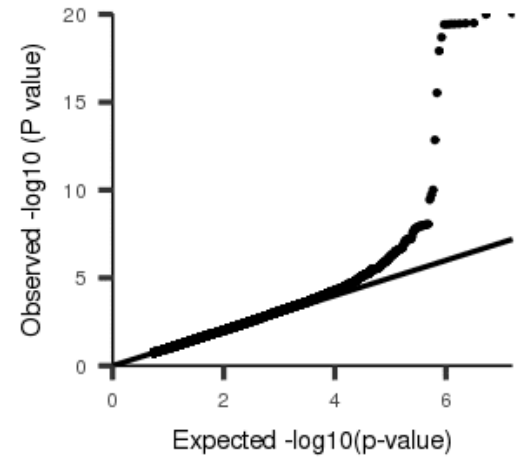

[back to list of plots](#)

Figure 450: dMRI TBSS L3 Cerebral peduncle R

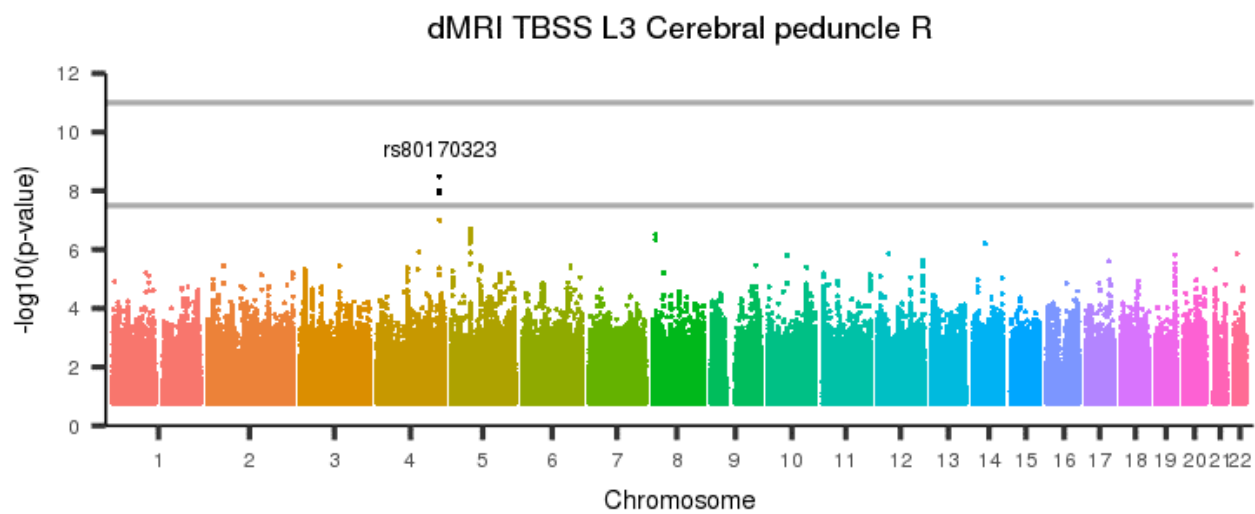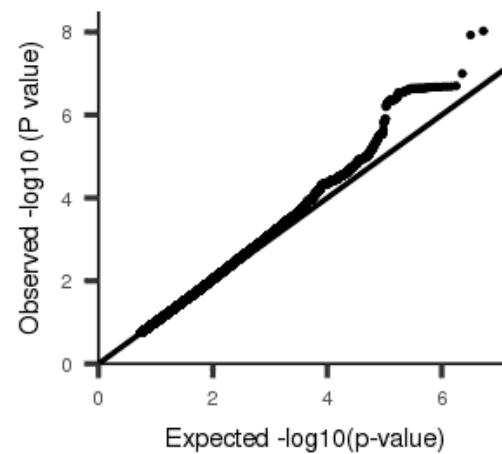

[back to list of plots](#)

Figure 451: dMRI TBSS L3 Cerebral peduncle L

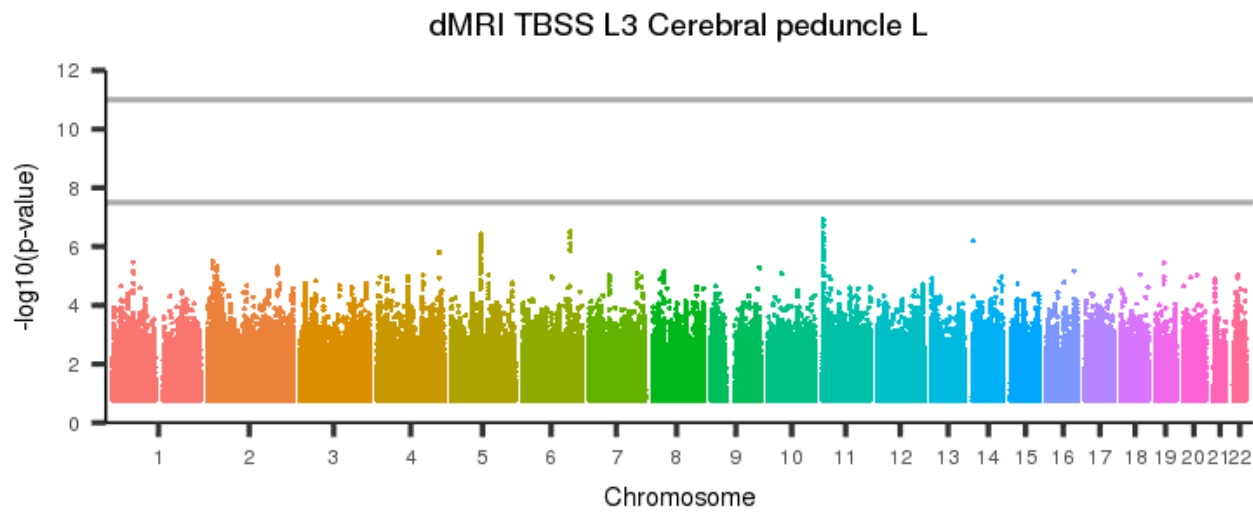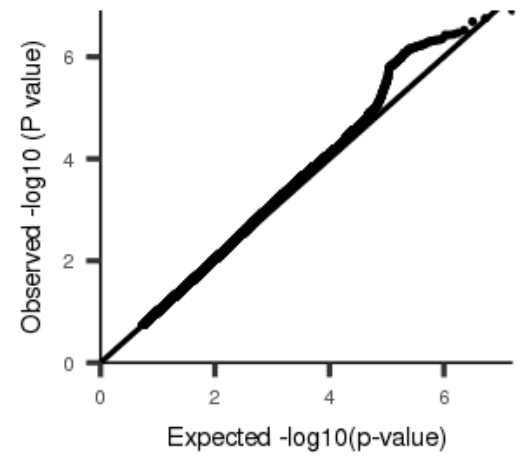

[back to list of plots](#)

Figure 452: dMRI TBSS L3 Anterior limb of internal capsule R

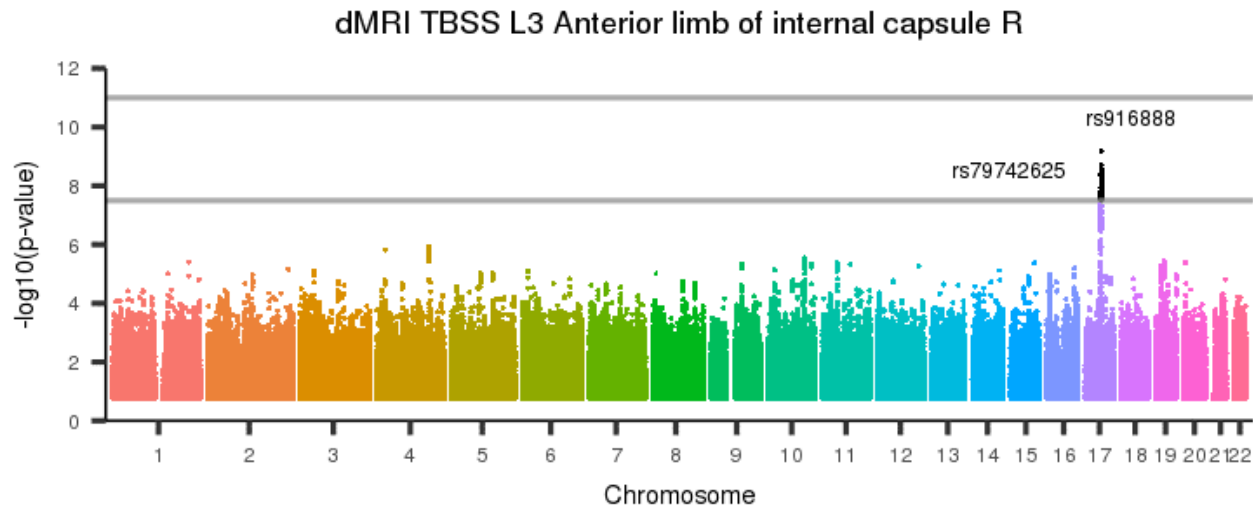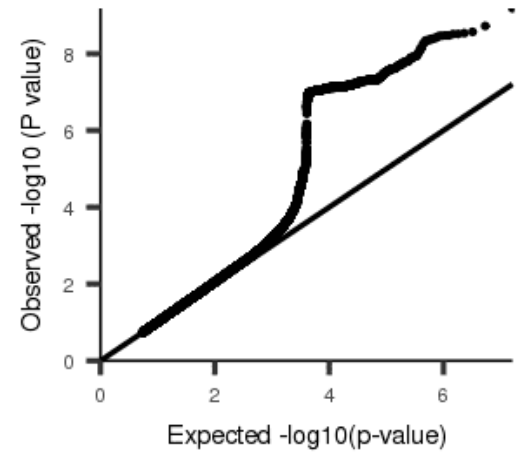

[back to list of plots](#)

Figure 453: dMRI TBSS L3 Anterior limb of internal capsule L

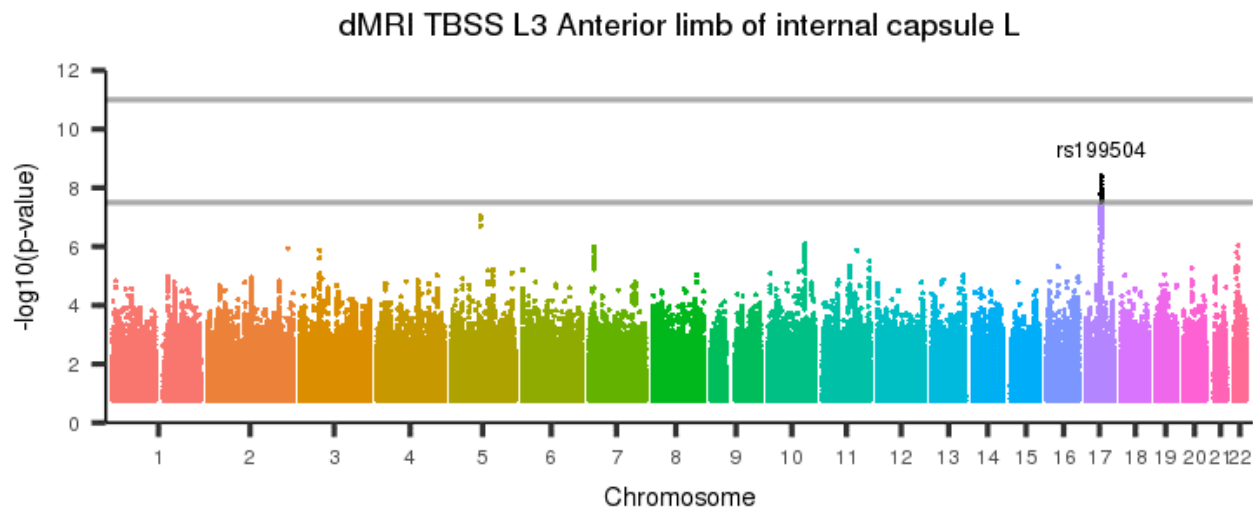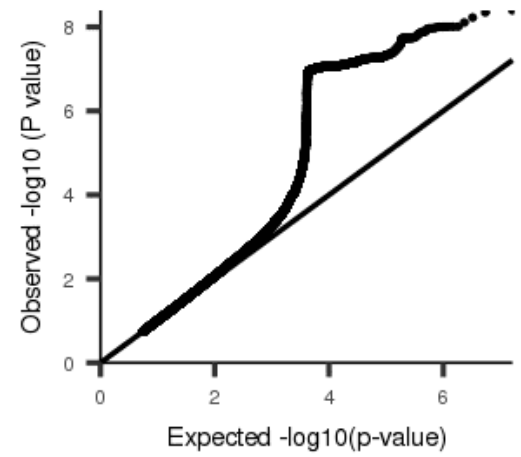

[back to list of plots](#)



Figure 454: dMRI TBSS L3 Posterior limb of internal capsule R

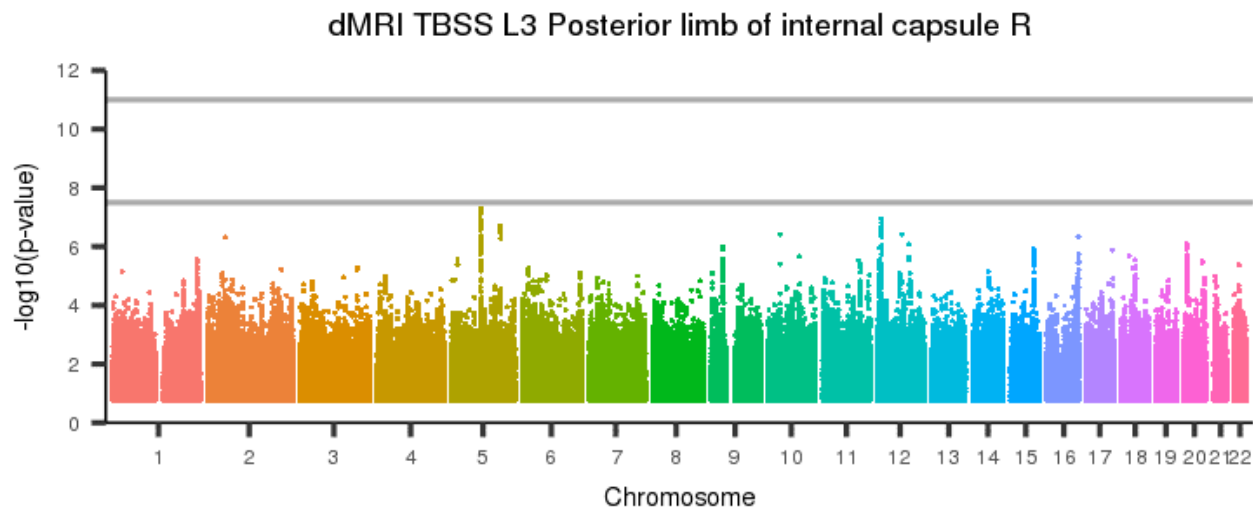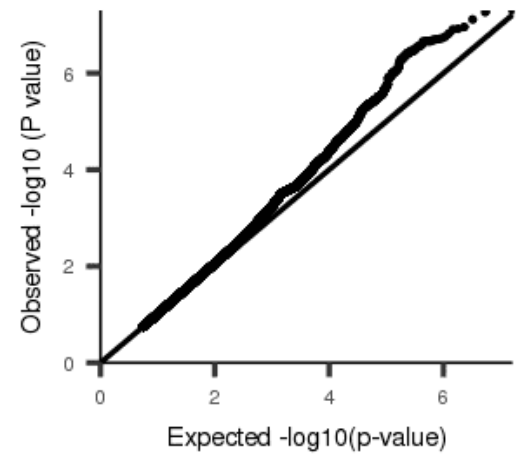

[back to list of plots](#)

Figure 455: dMRI TBSS L3 Posterior limb of internal capsule L

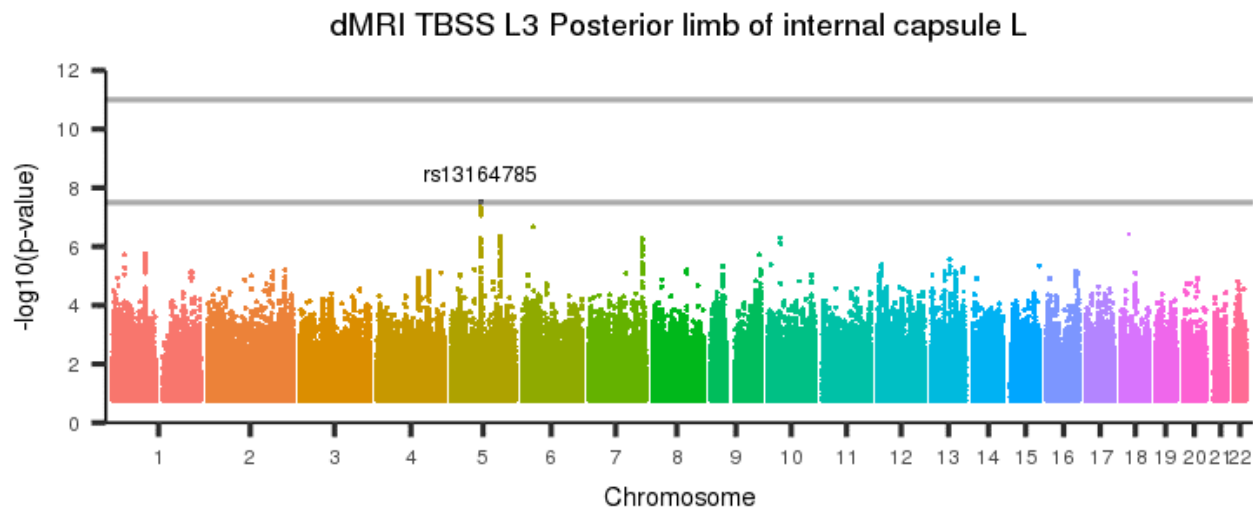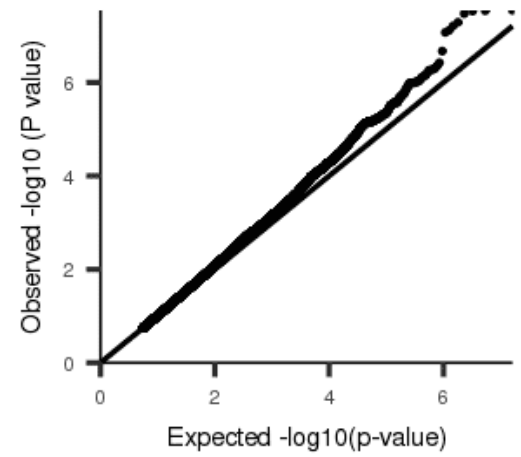

[back to list of plots](#)

Figure 456: dMRI TBSS L3 Retrolenticular part of internal capsule R

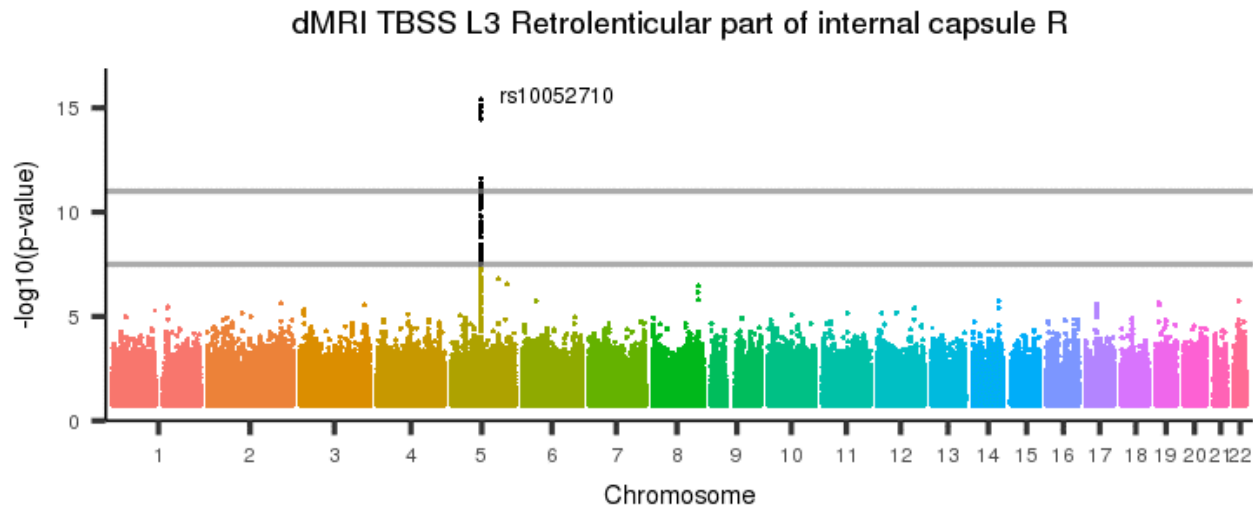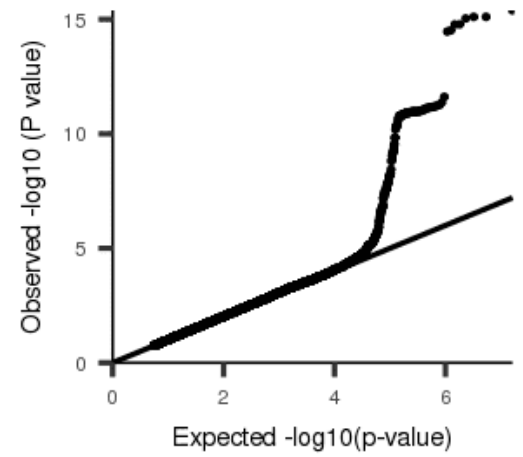

[back to list of plots](#)

Figure 457: dMRI TBSS L3 Retrolenticular part of internal capsule L

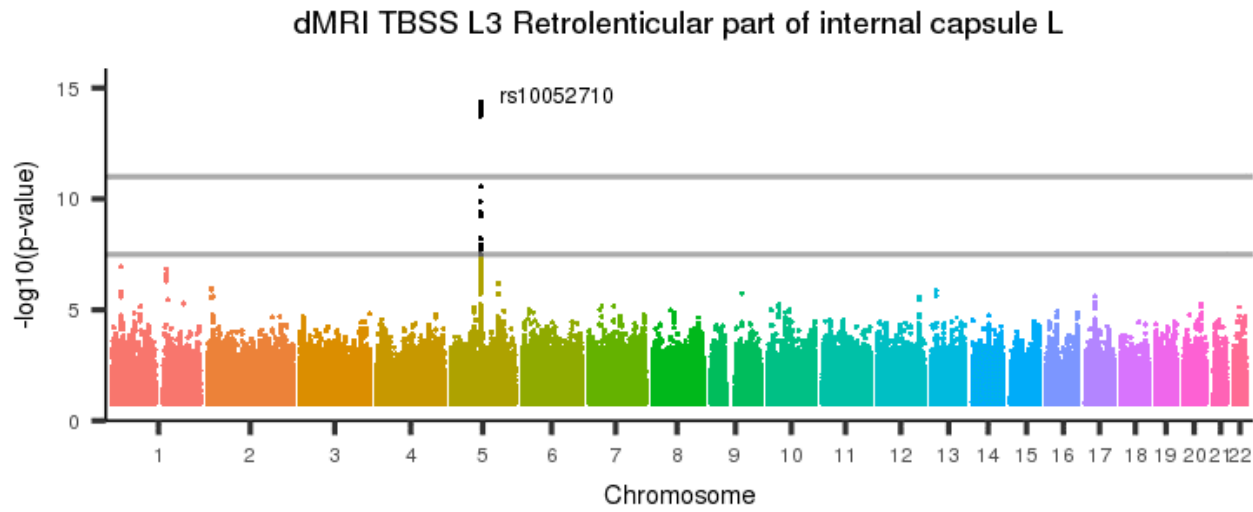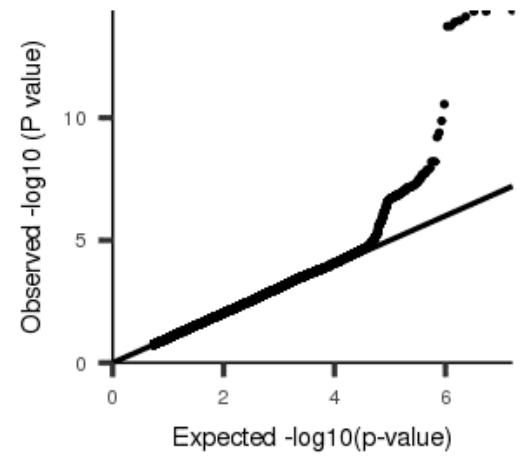

[back to list of plots](#)

Figure 458: dMRI TBSS L3 Anterior corona radiata R

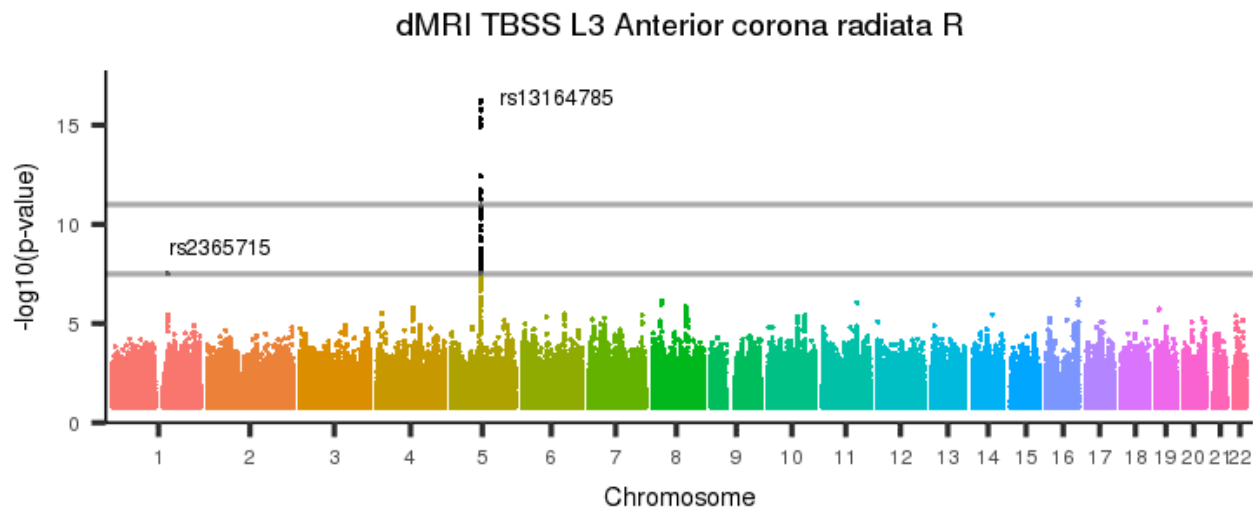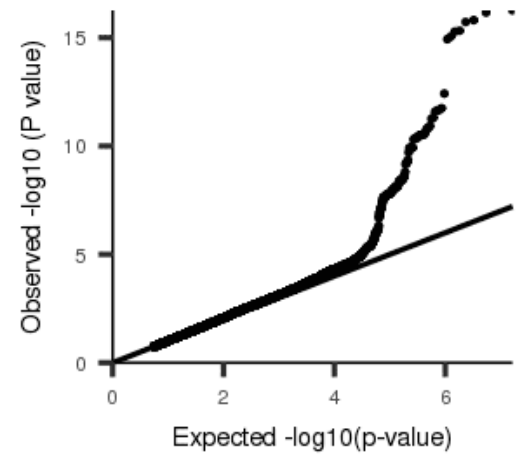

[back to list of plots](#)

Figure 459: dMRI TBSS L3 Anterior corona radiata L

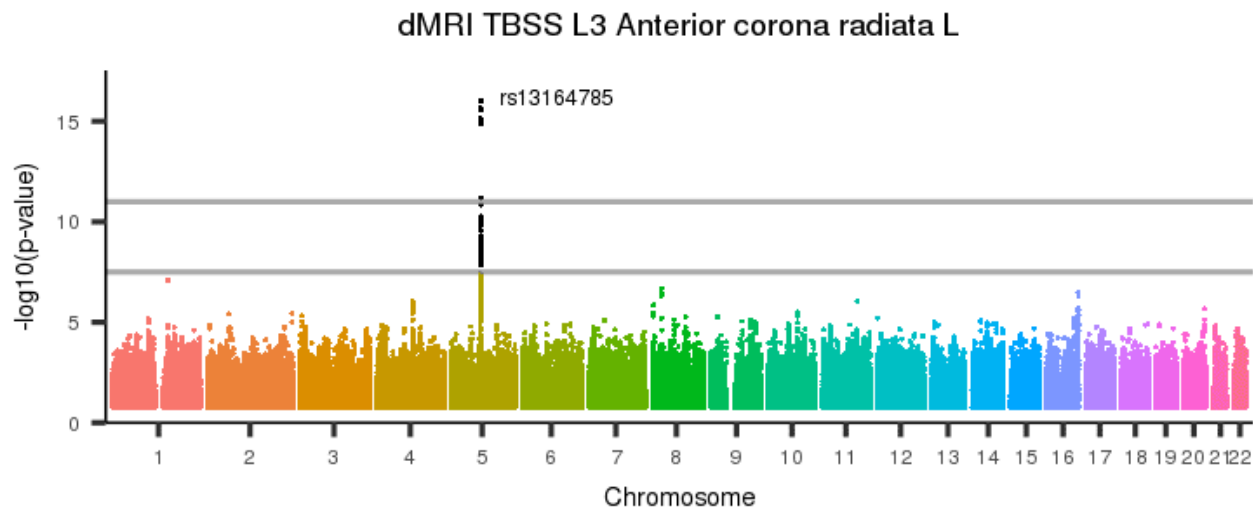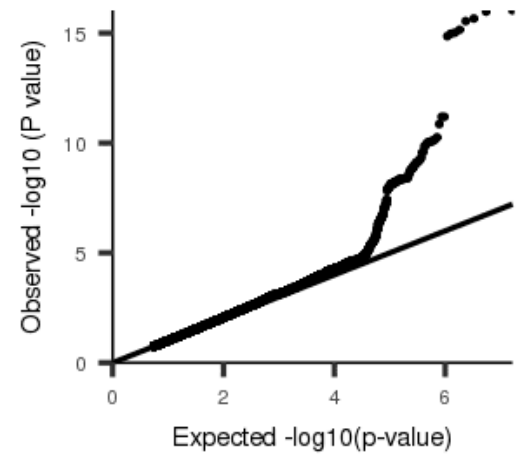

[back to list of plots](#)

Figure 460: dMRI TBSS L3 Superior corona radiata R

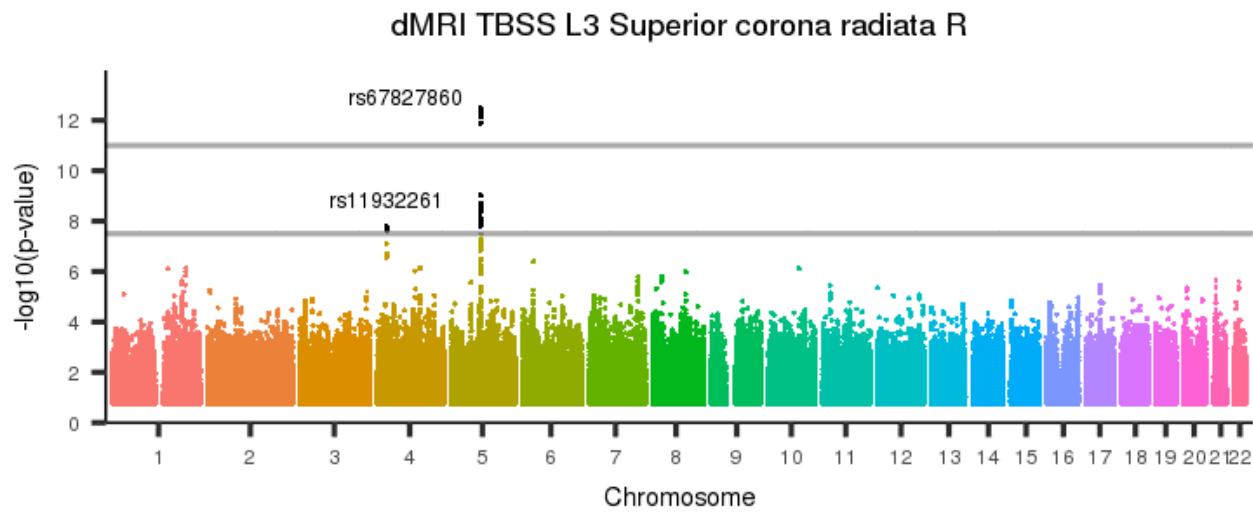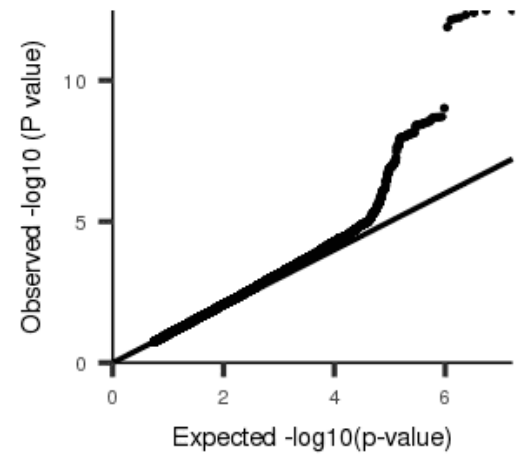

[back to list of plots](#)

Figure 461: dMRI TBSS L3 Superior corona radiata L

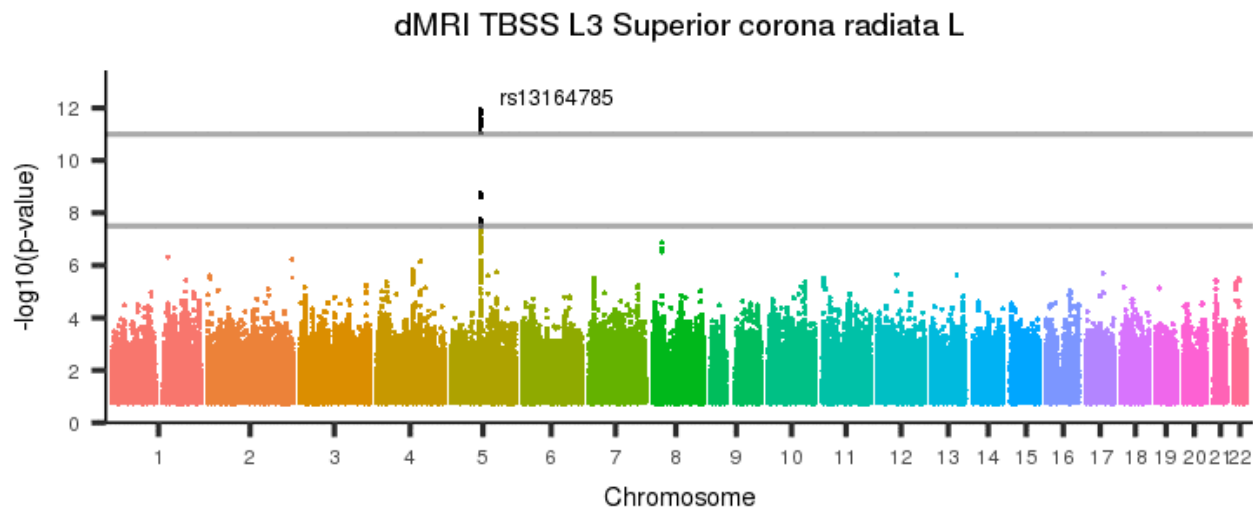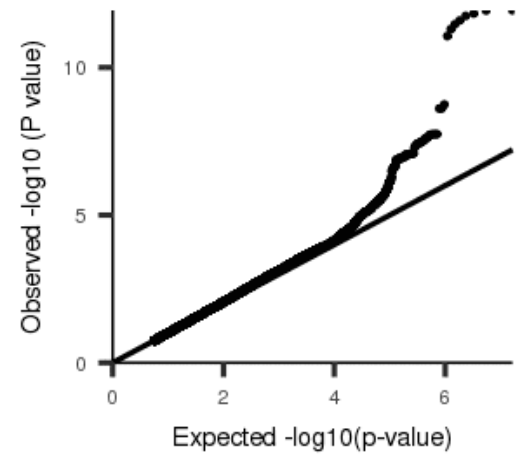

[back to list of plots](#)



Figure 462: dMRI TBSS L3 Posterior corona radiata R

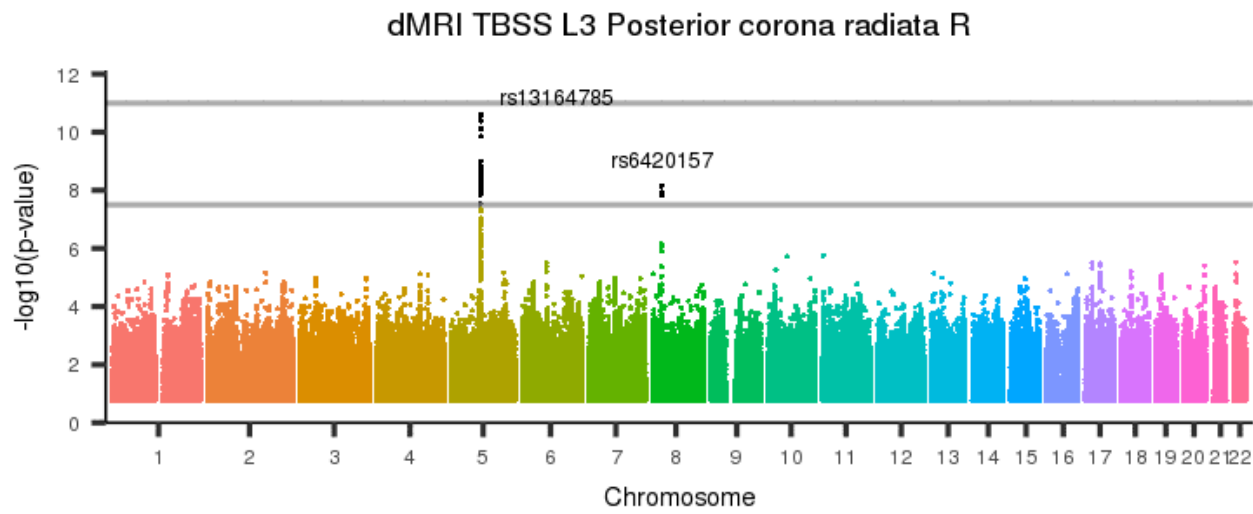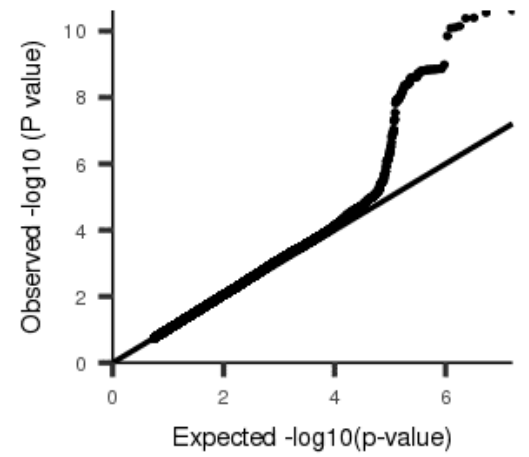

[back to list of plots](#)

Figure 463: dMRI TBSS L3 Posterior corona radiata L

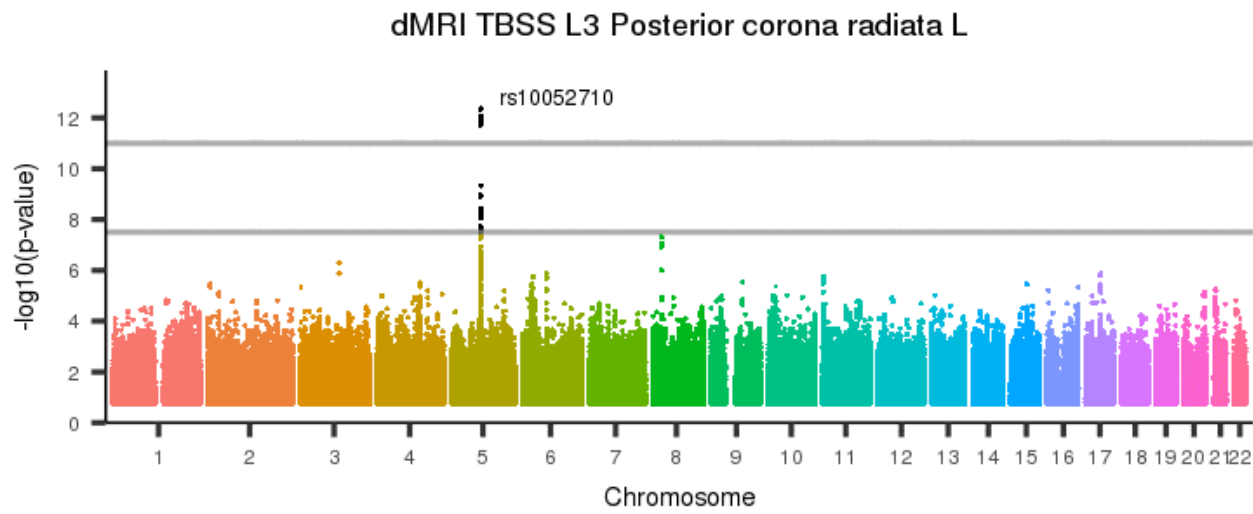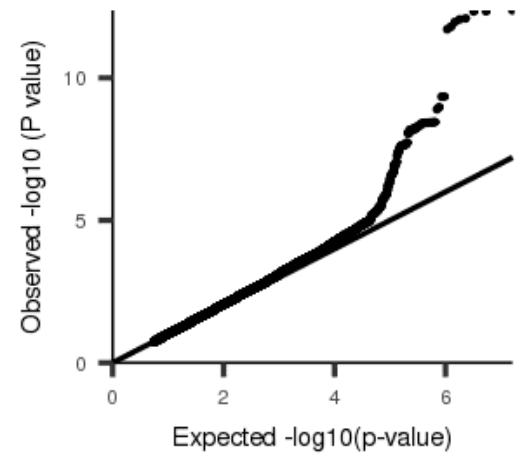

[back to list of plots](#)

Figure 464: dMRI TBSS L3 Posterior thalamic radiation R

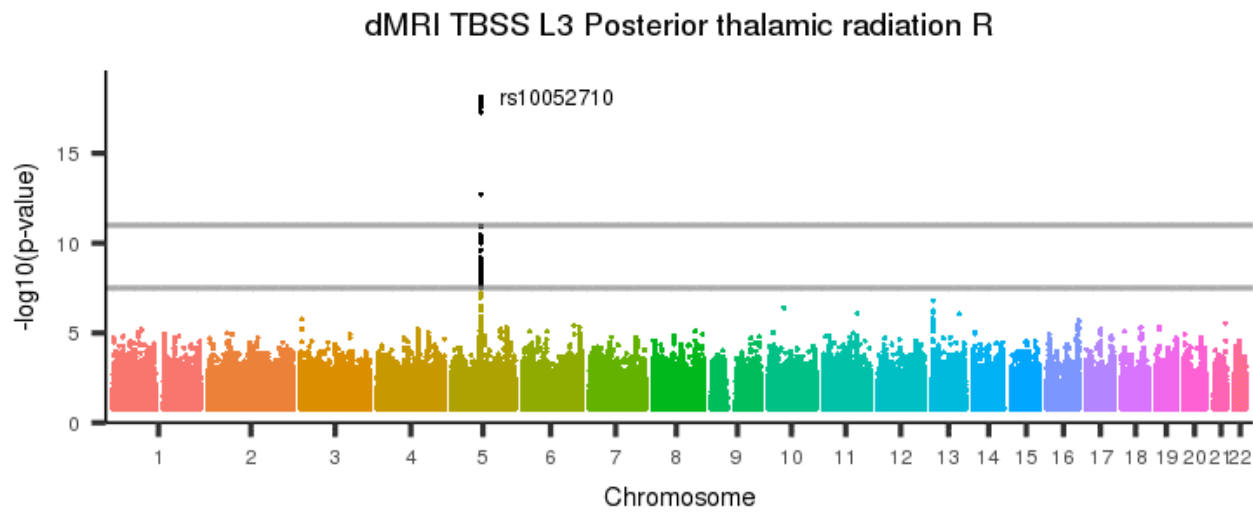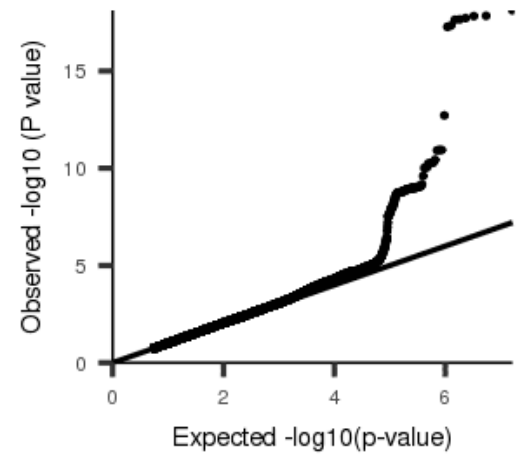

[back to list of plots](#)

Figure 465: dMRI TBSS L3 Posterior thalamic radiation L

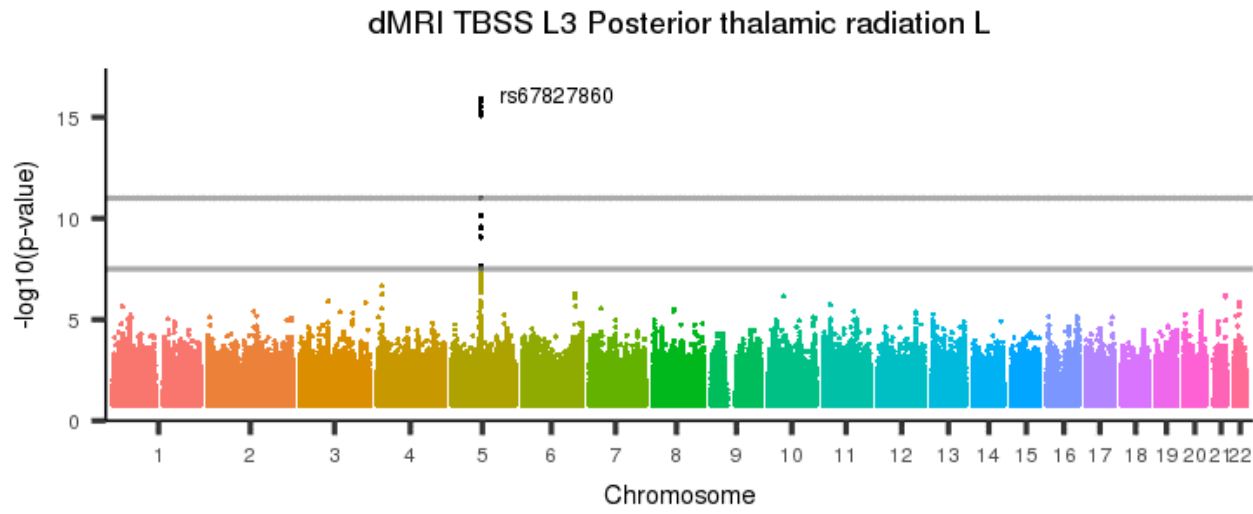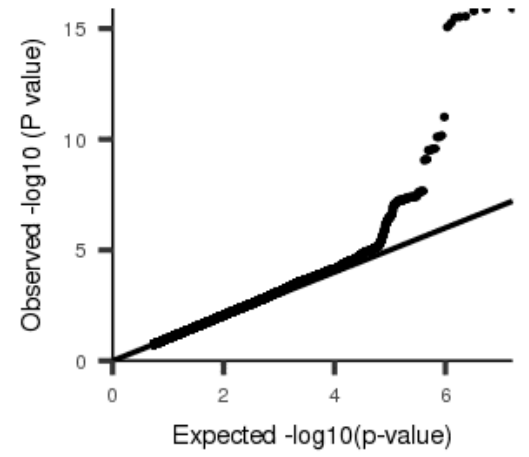

[back to list of plots](#)

Figure 466: dMRI TBSS L3 Sagittal stratum R

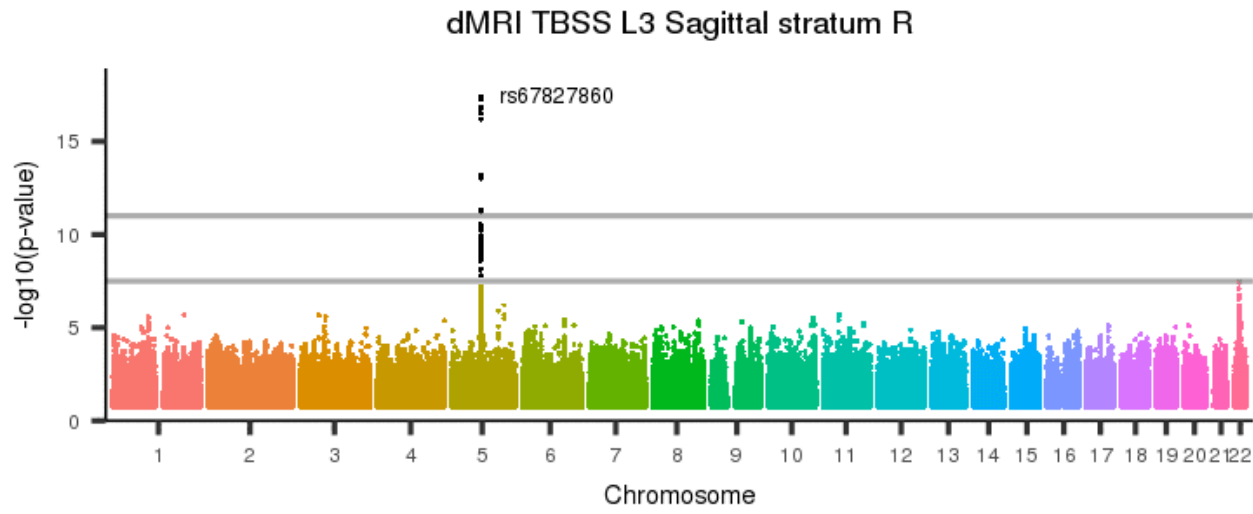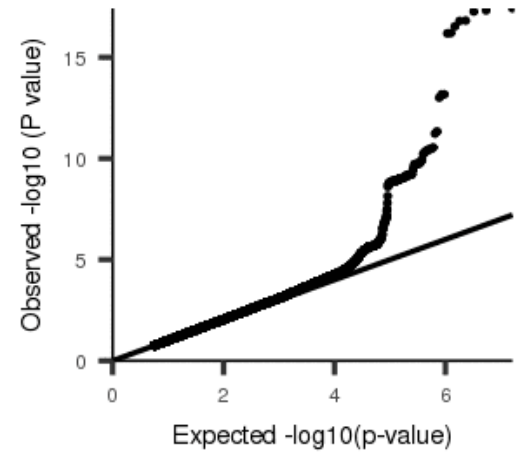

[back to list of plots](#)

Figure 467: dMRI TBSS L3 Sagittal stratum L

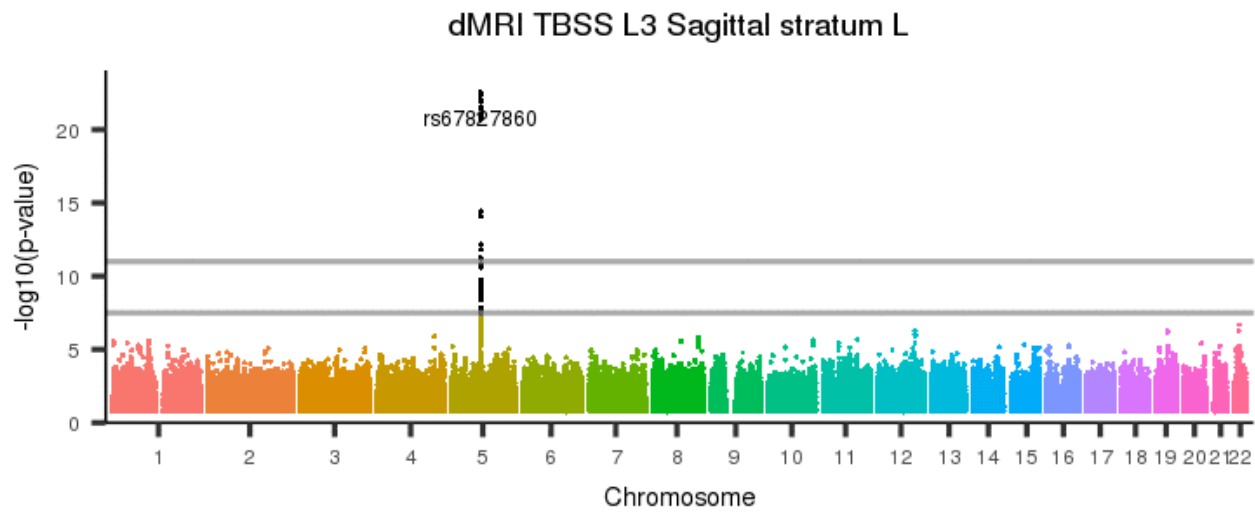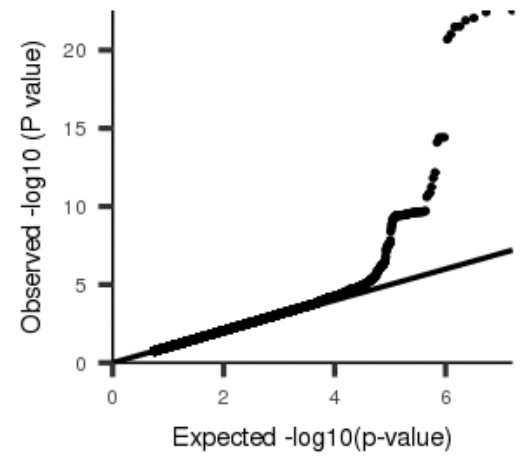

[back to list of plots](#)

Figure 468: dMRI TBSS L3 External capsule R

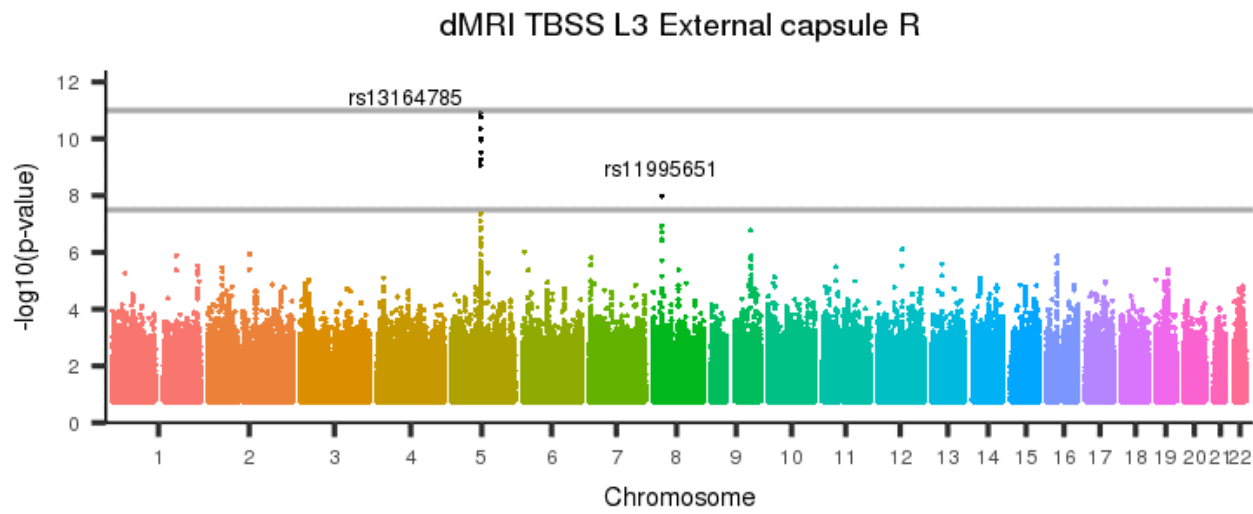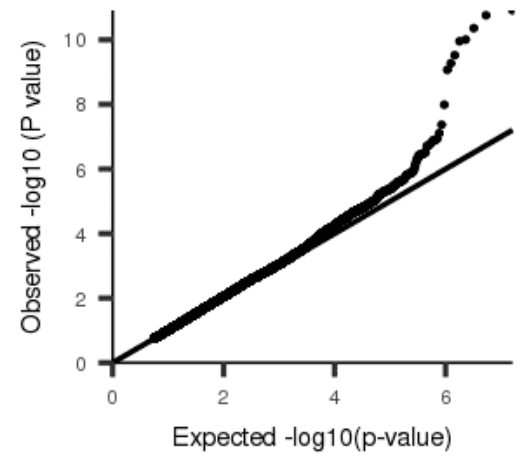

[back to list of plots](#)

Figure 469: dMRI TBSS L3 External capsule L

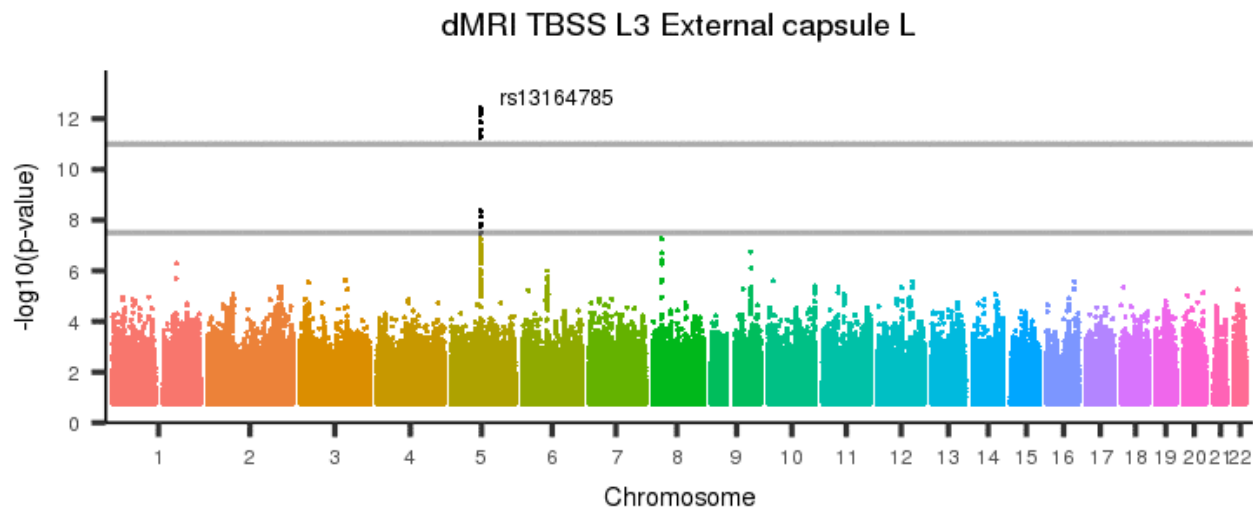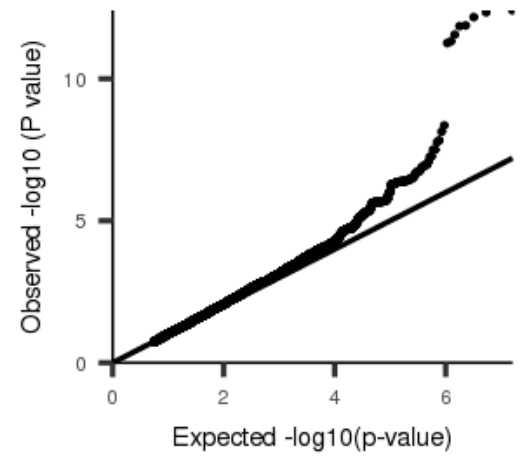

[back to list of plots](#)



Figure 470: dMRI TBSS L3 Cingulum cingulate gyrus R

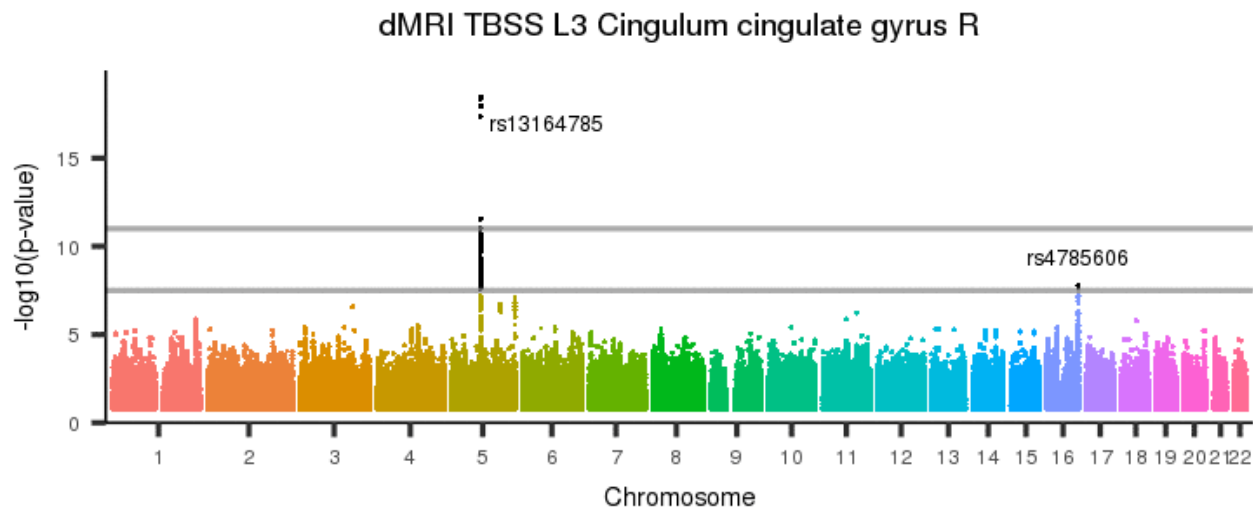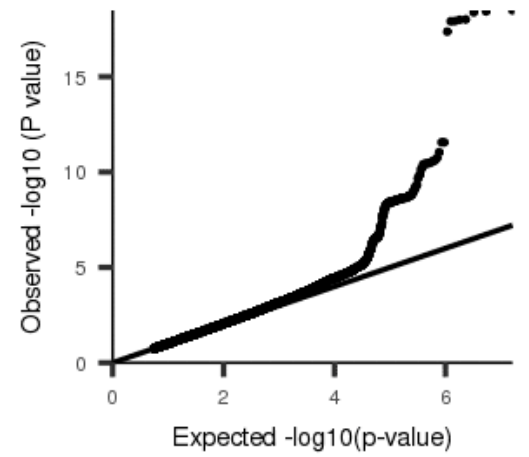

[back to list of plots](#)

Figure 471: dMRI TBSS L3 Cingulum cingulate gyrus L

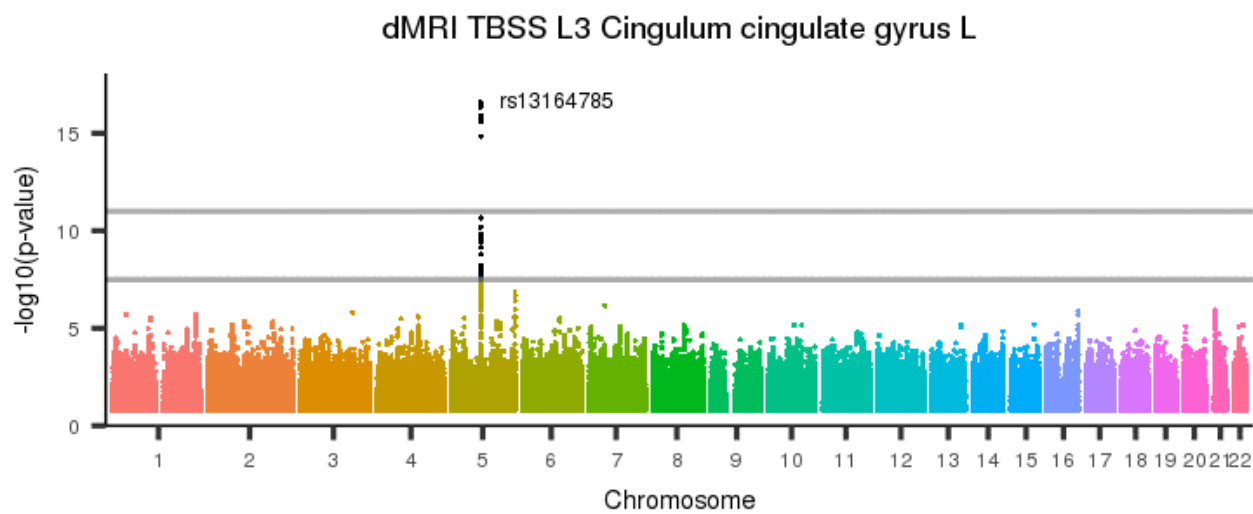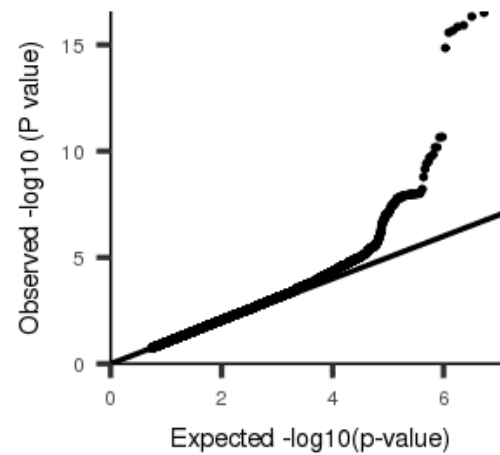

[back to list of plots](#)

Figure 472: dMRI TBSS L3 Cingulum hippocampus R

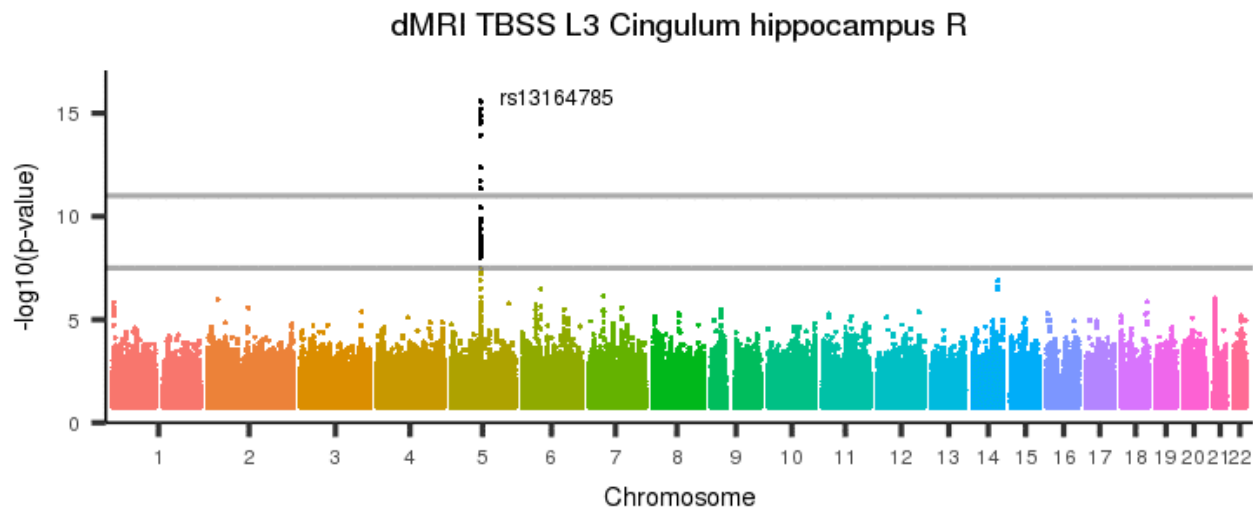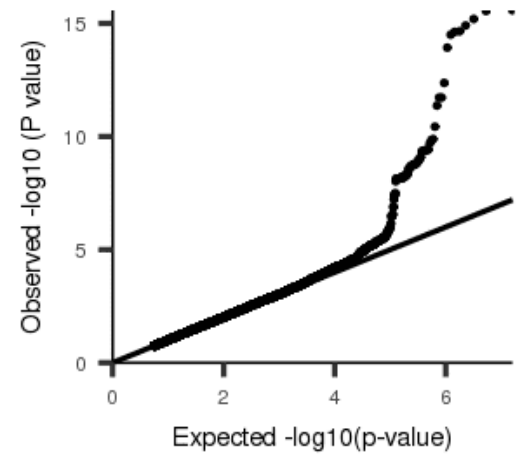

[back to list of plots](#)

Figure 473: dMRI TBSS L3 Cingulum hippocampus L

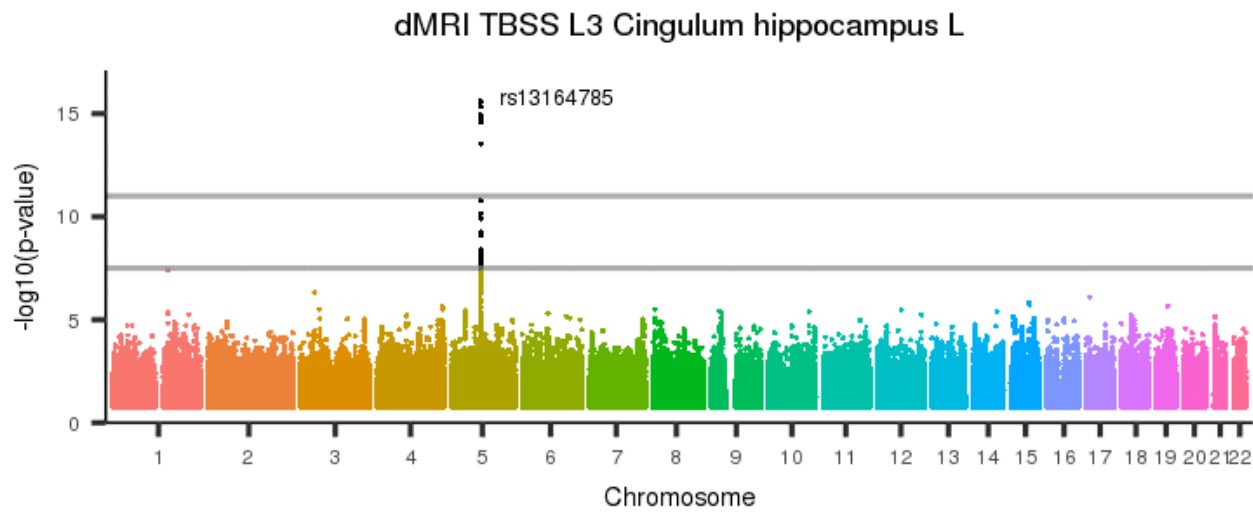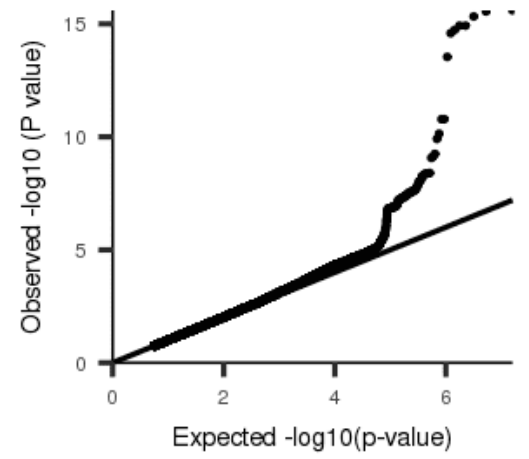

[back to list of plots](#)

Figure 474: dMRI TBSS L3 Fornix cres+Stria terminalis R

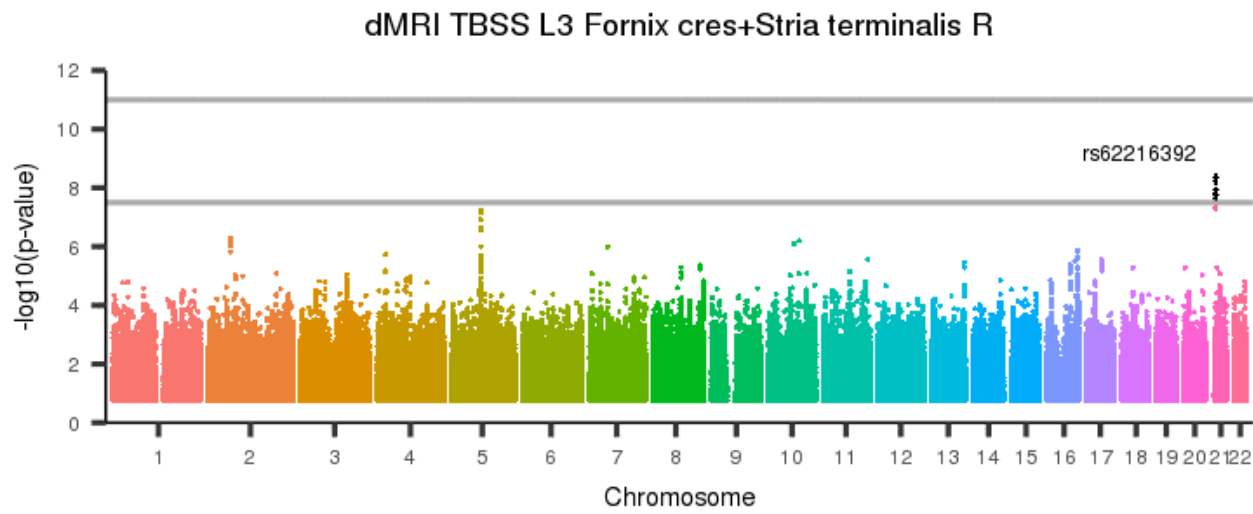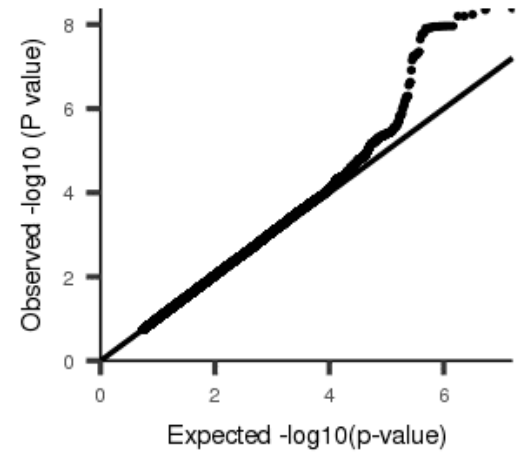

[back to list of plots](#)

Figure 475: dMRI TBSS L3 Fornix cres+Stria terminalis L

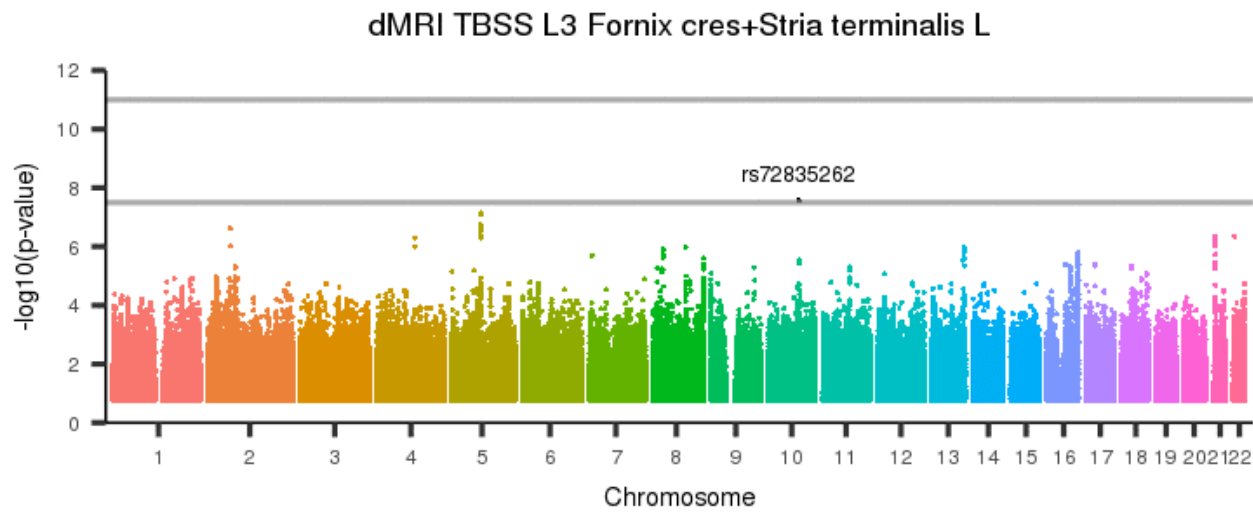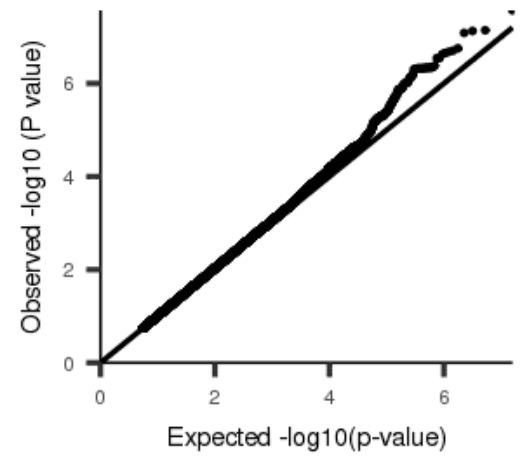

[back to list of plots](#)

Figure 476: dMRI TBSS L3 Superior longitudinal fasciculus R

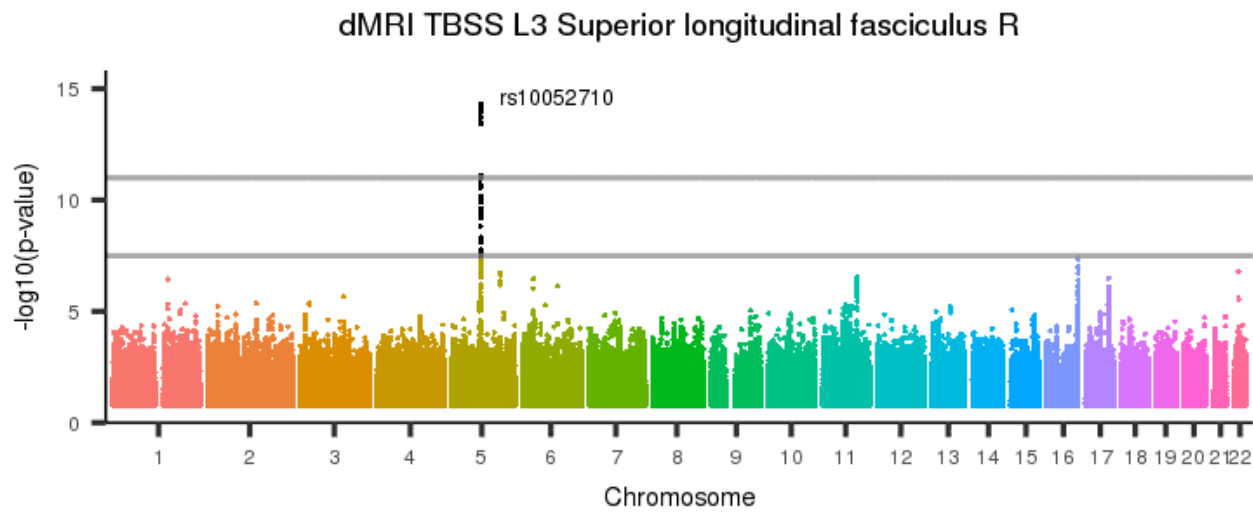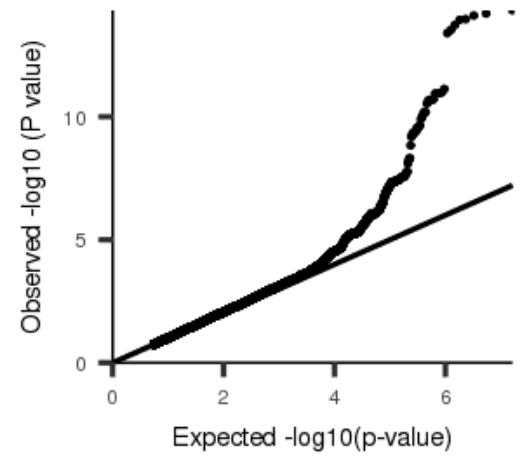

[back to list of plots](#)

Figure 477: dMRI TBSS L3 Superior longitudinal fasciculus L

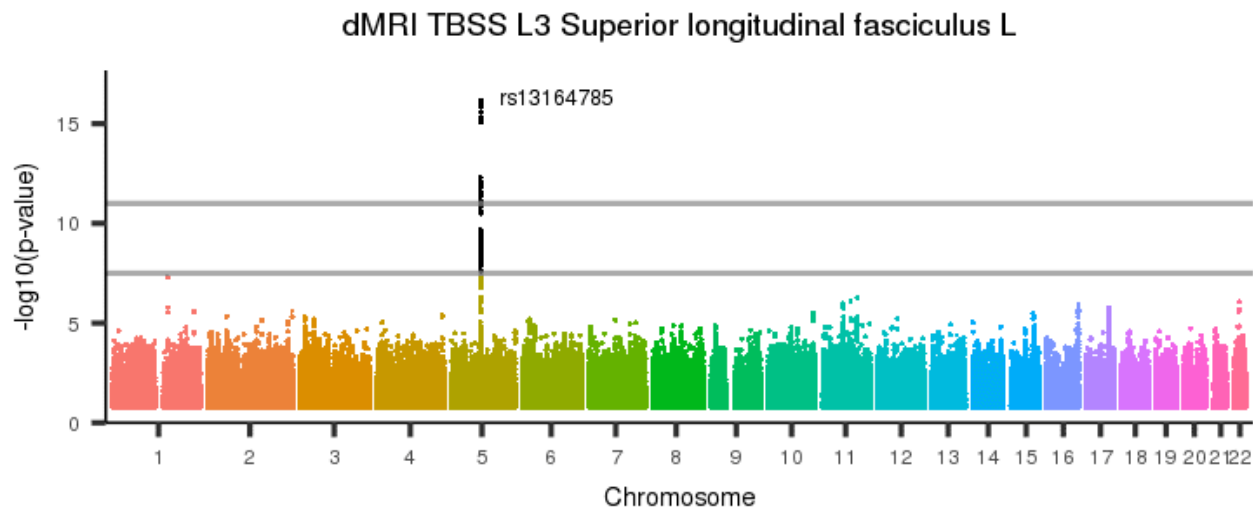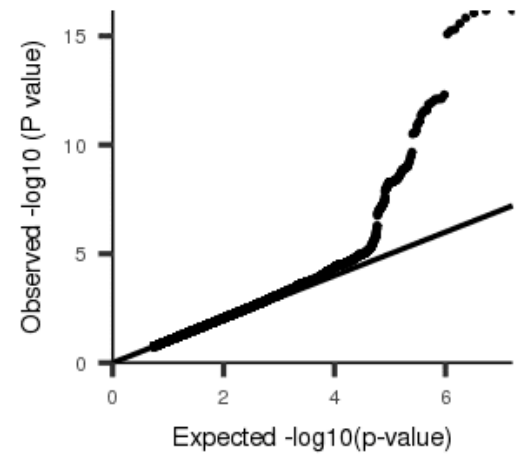

[back to list of plots](#)



Figure 478: dMRI TBSS L3 Superior fronto-occipital fasciculus R

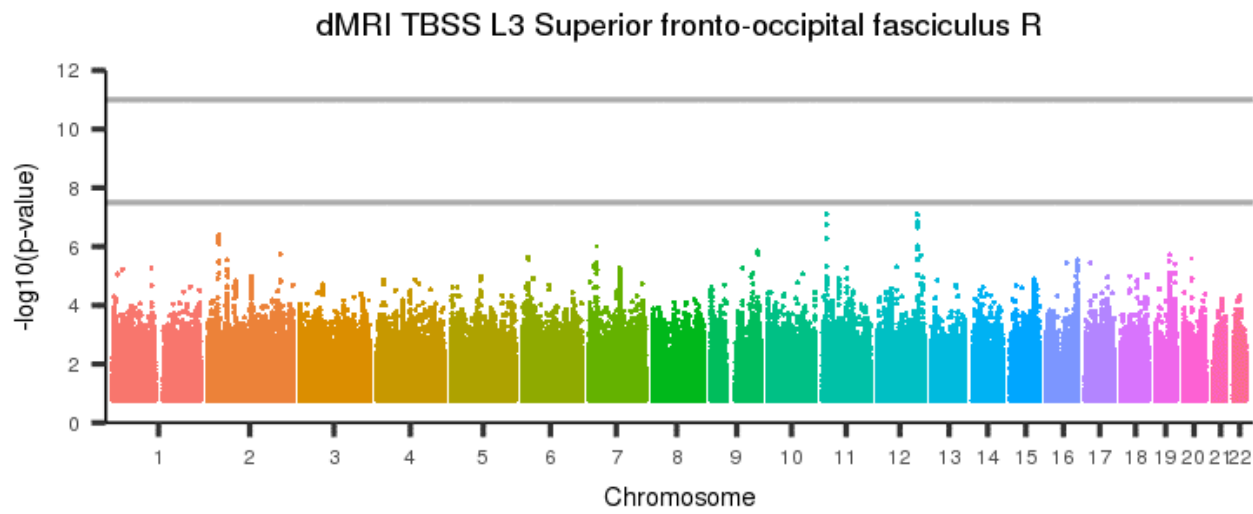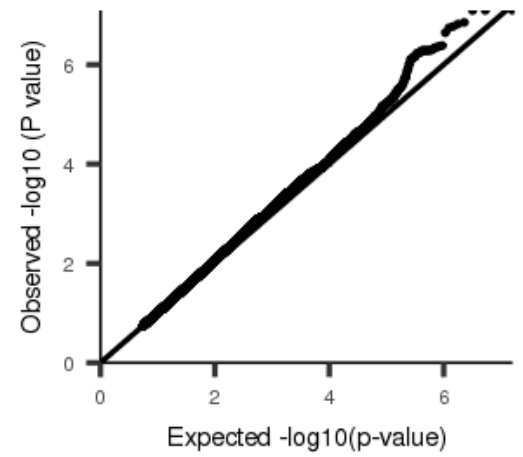

[back to list of plots](#)

Figure 479: dMRI TBSS L3 Superior fronto-occipital fasciculus L

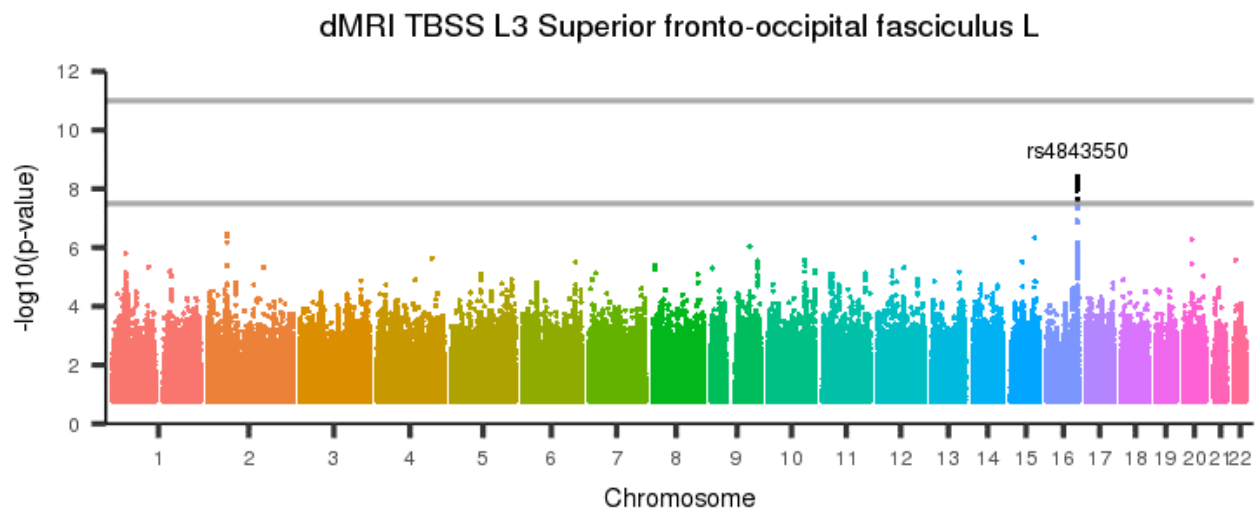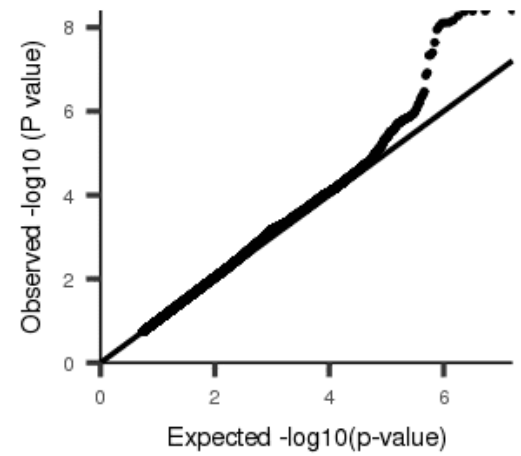

[back to list of plots](#)

Figure 480: dMRI TBSS L3 Uncinate fasciculus R

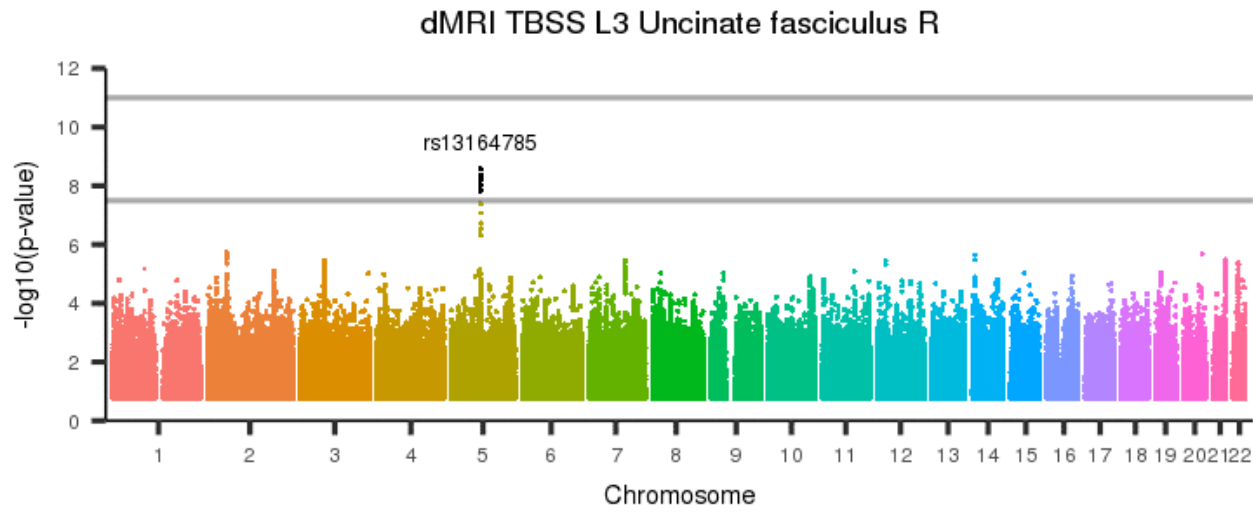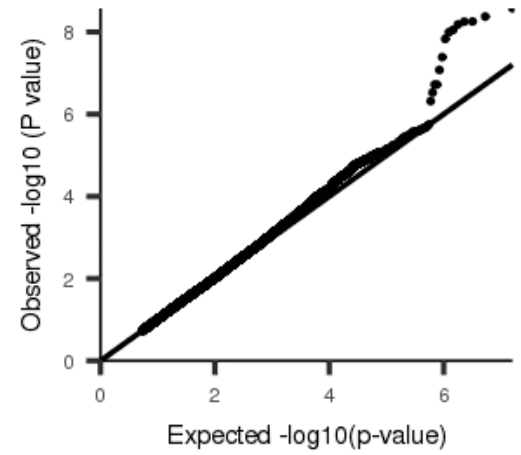

[back to list of plots](#)

Figure 481: dMRI TBSS L3 Uncinate fasciculus L

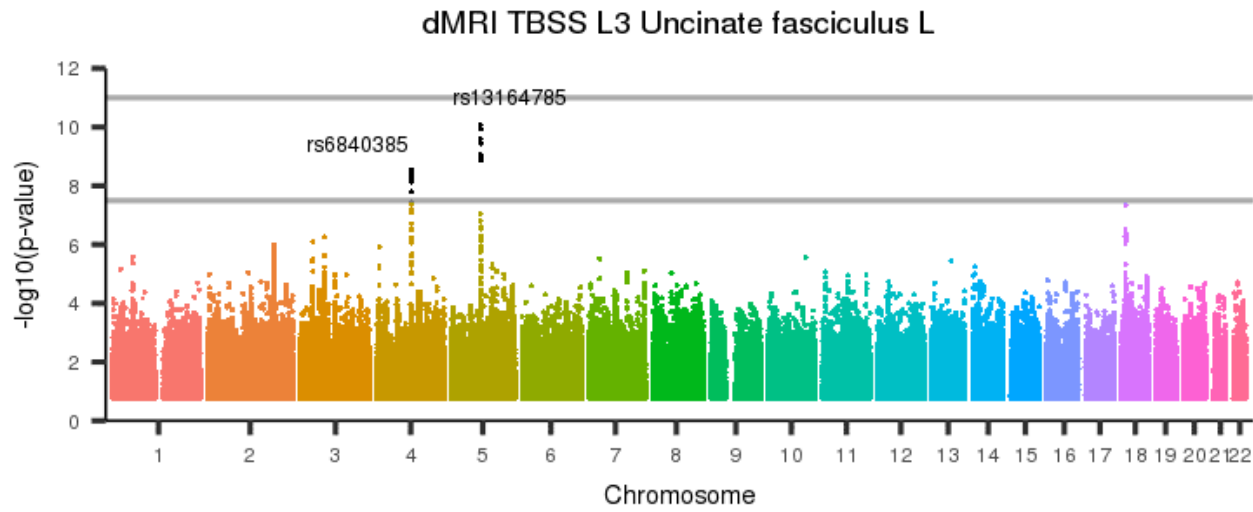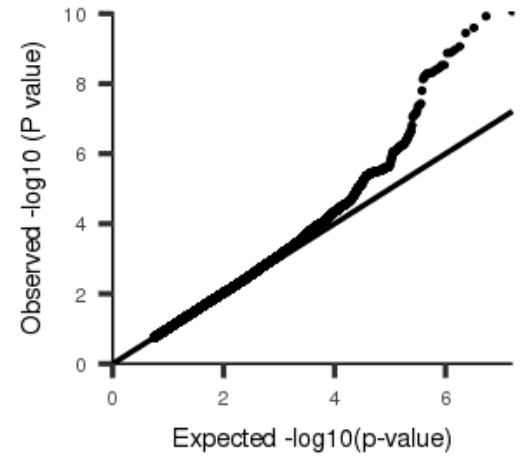

[back to list of plots](#)

Figure 482: dMRI TBSS L3 Tapetum R

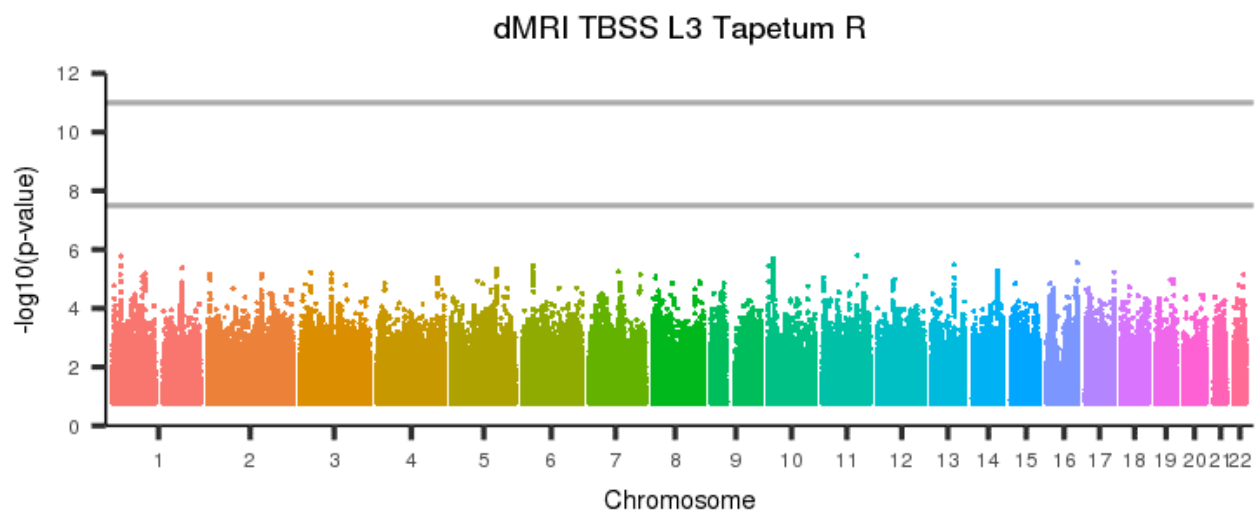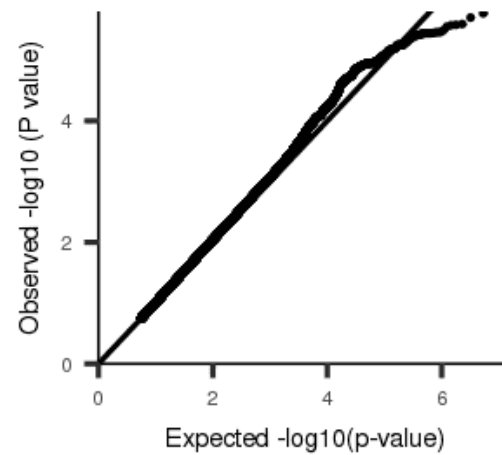

[back to list of plots](#)

Figure 483: dMRI TBSS L3 Tapetum L

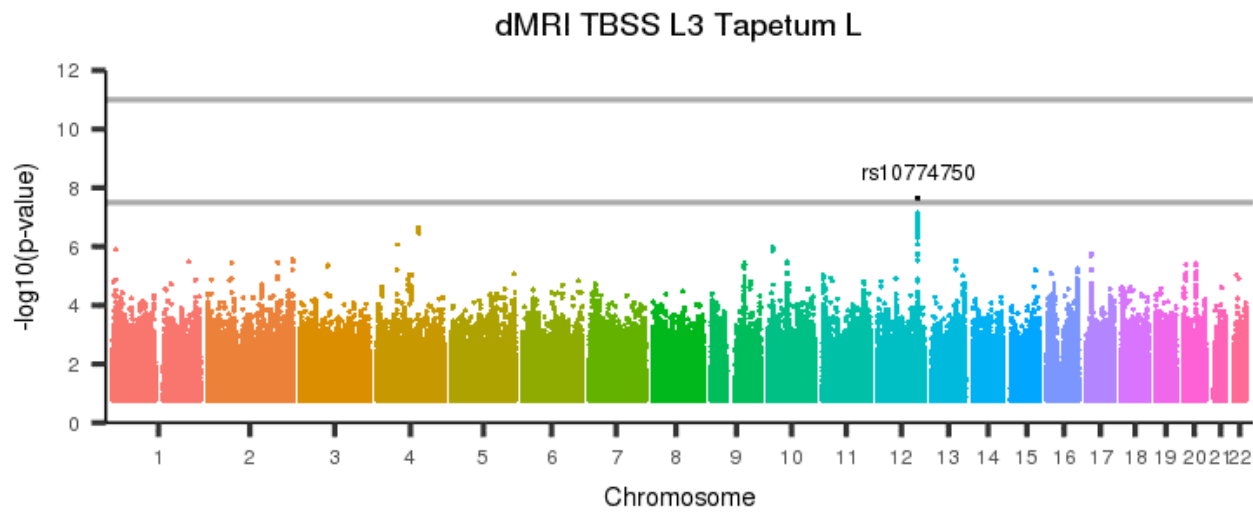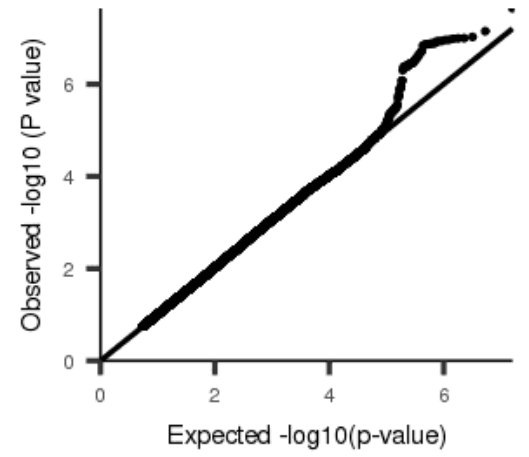

[back to list of plots](#)

Figure 484: dMRI TBSS ICVF Middle cerebellar peduncle

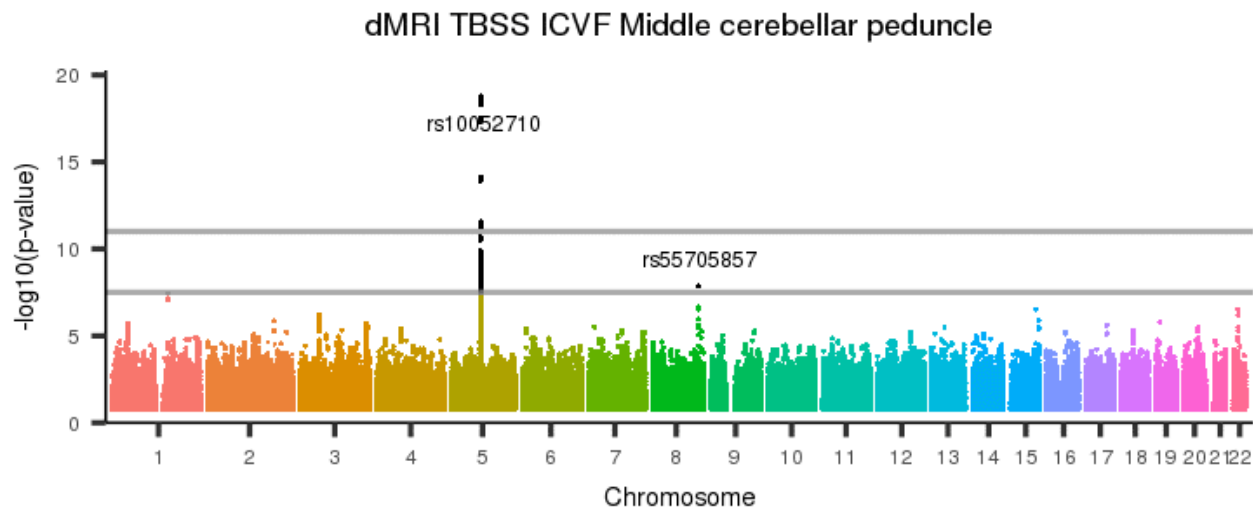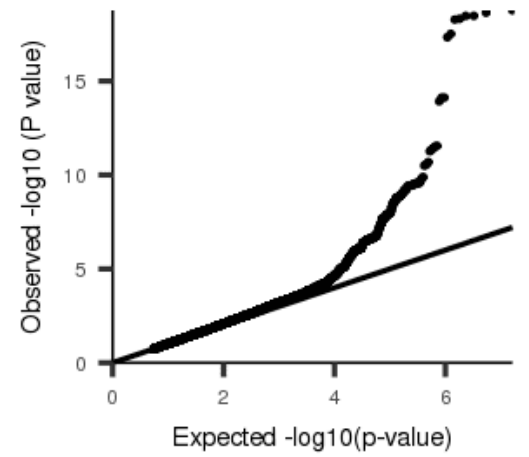

[back to list of plots](#)

Figure 485: dMRI TBSS ICVF Pontine crossing tract

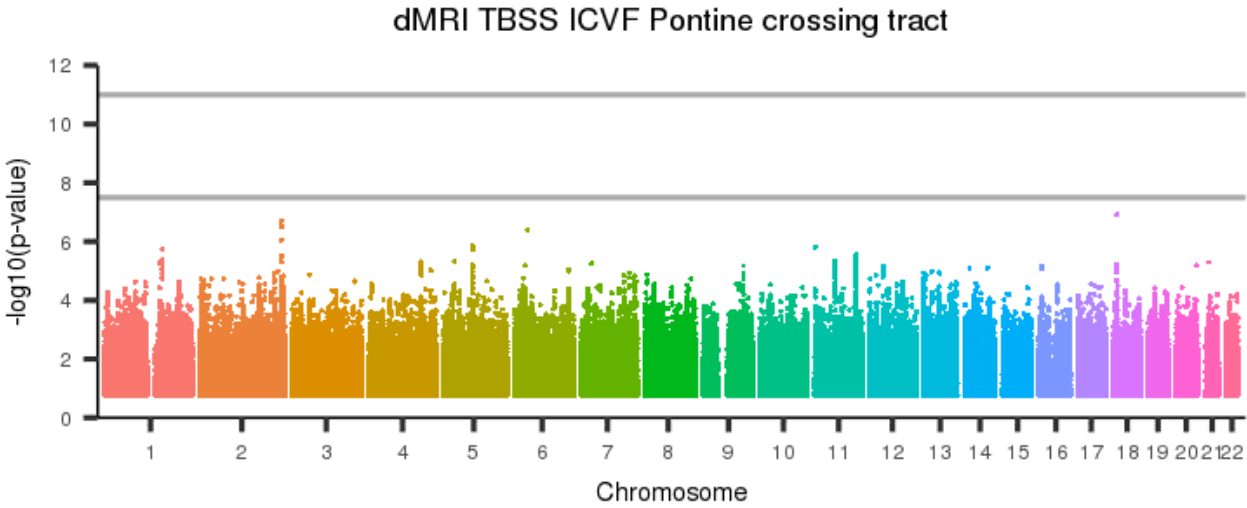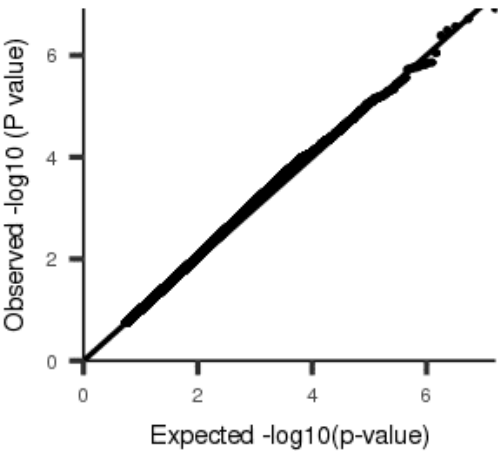

[back to list of plots](#)



Figure 486: dMRI TBSS ICVF Genu of corpus callosum

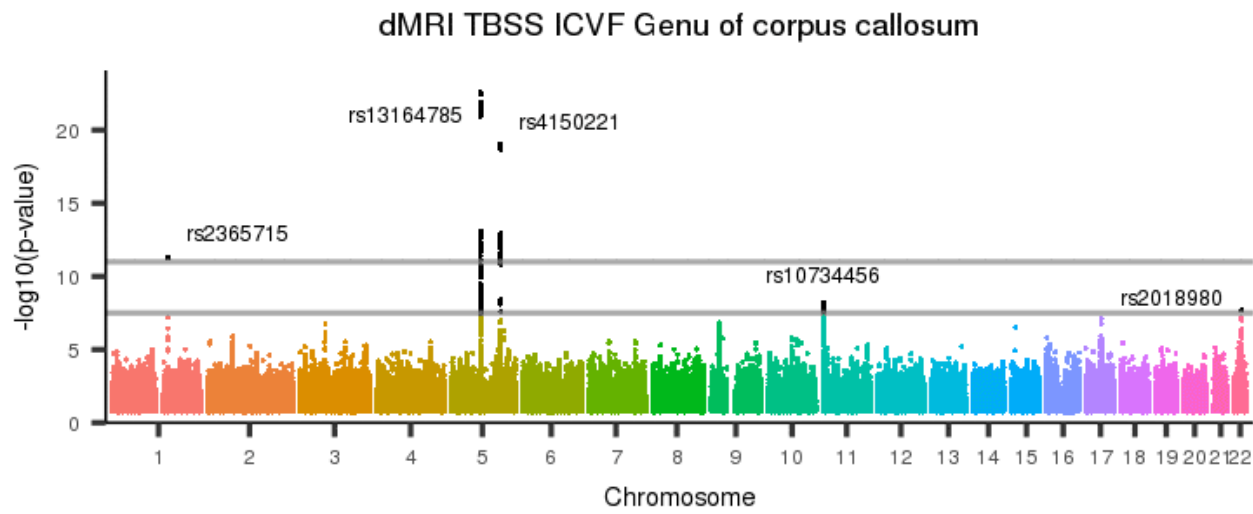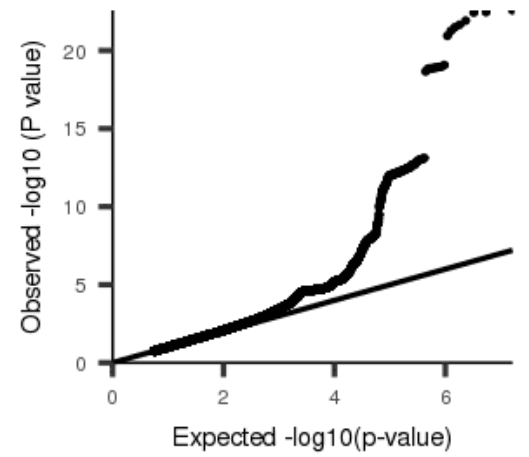

[back to list of plots](#)

Figure 487: dMRI TBSS ICVF Body of corpus callosum

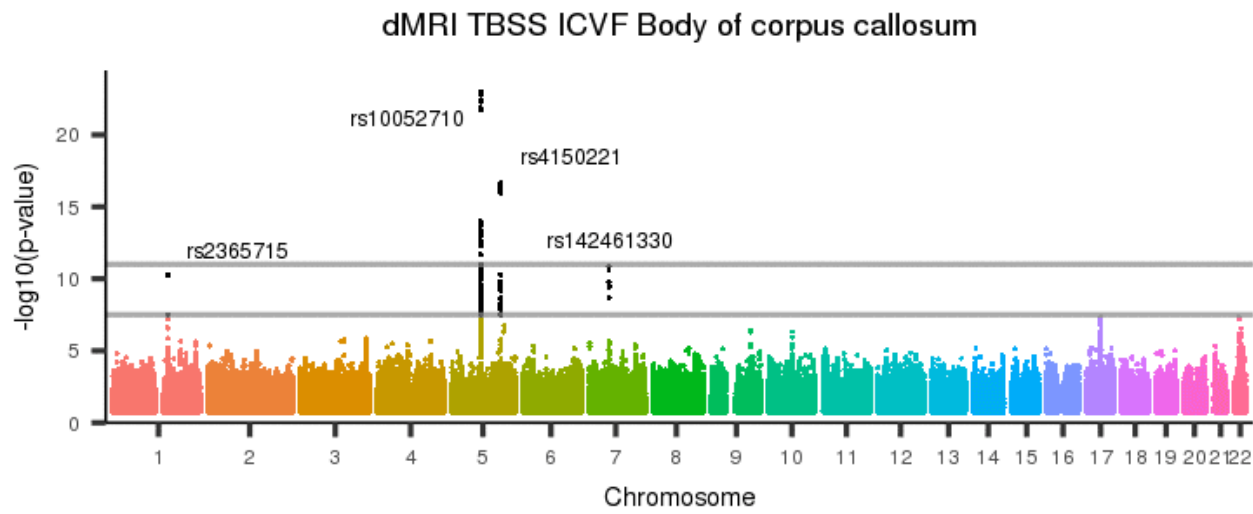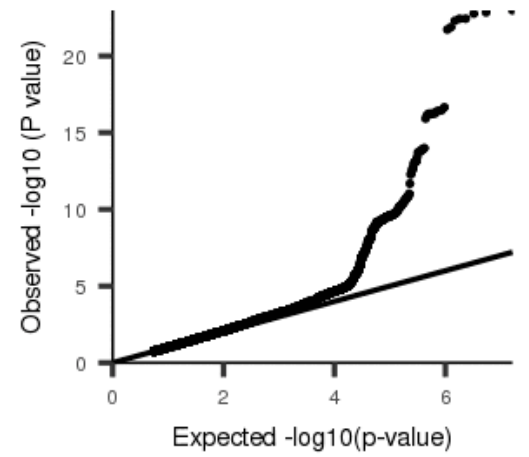

[back to list of plots](#)

Figure 488: dMRI TBSS ICVF Splenium of corpus callosum

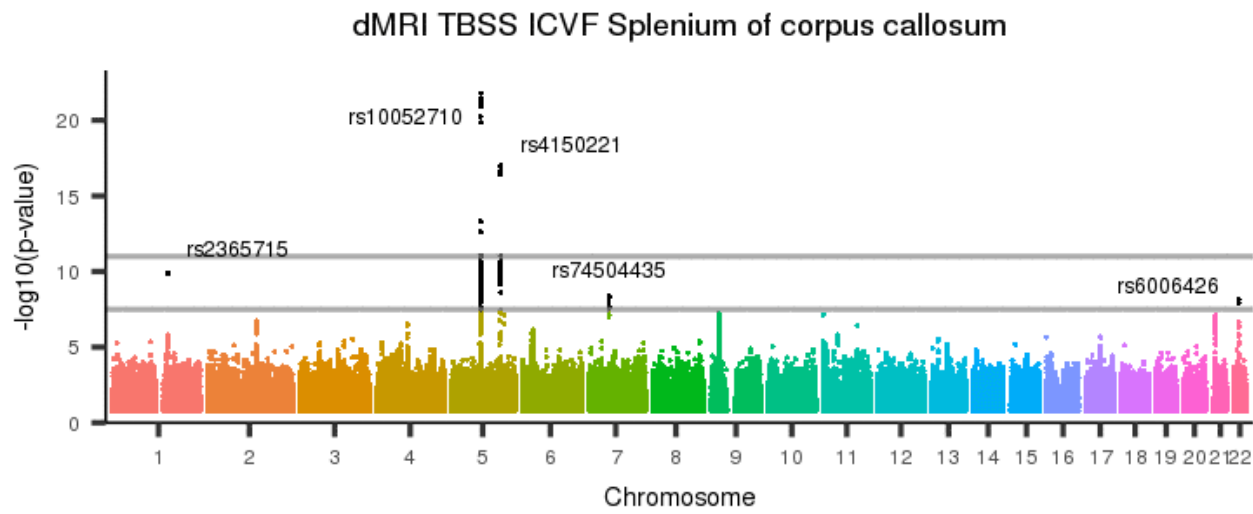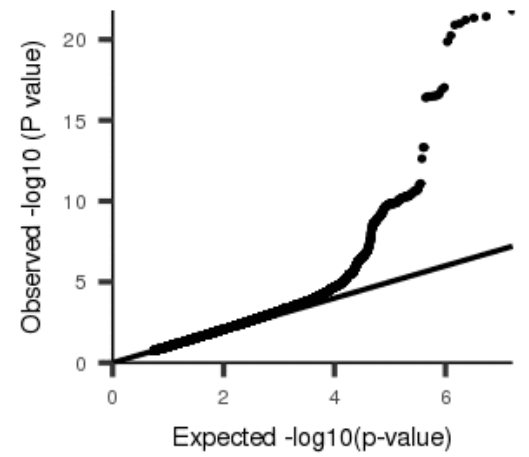

[back to list of plots](#)

Figure 489: dMRI TBSS ICVF Fornix

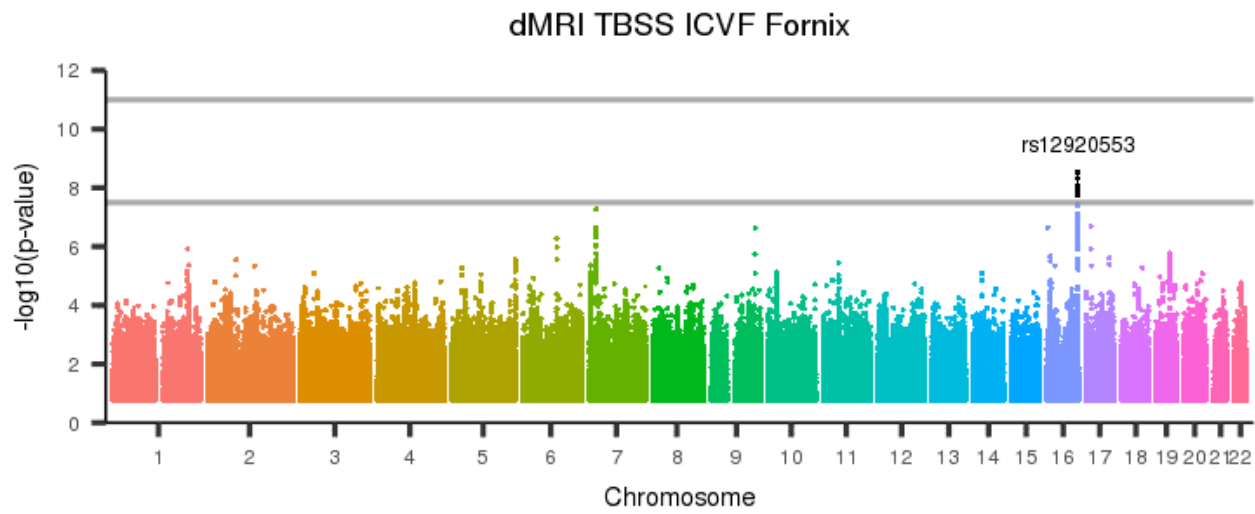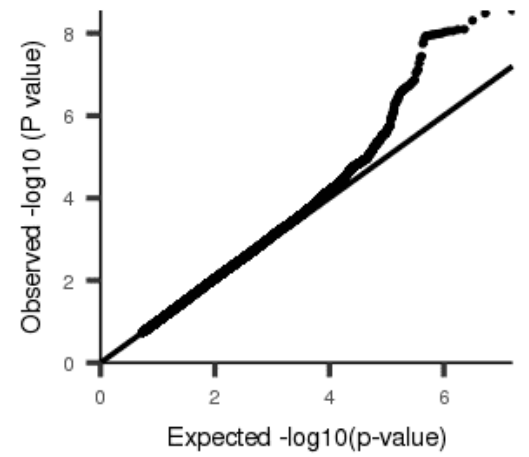

[back to list of plots](#)

Figure 490: dMRI TBSS ICVF Corticospinal tract R

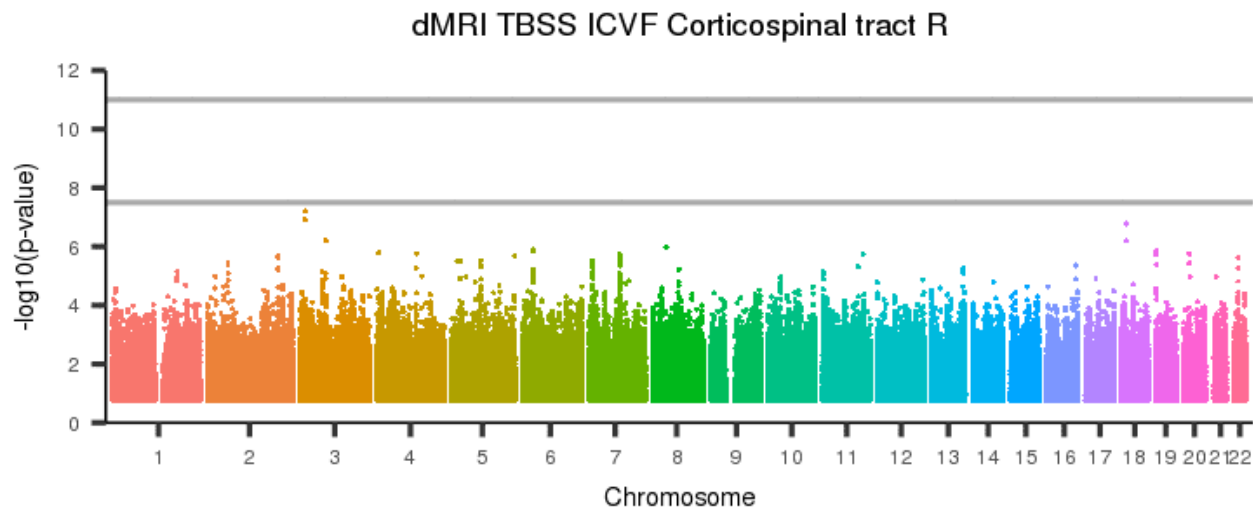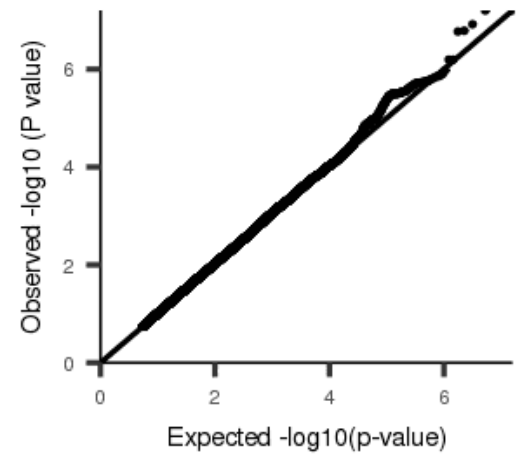

[back to list of plots](#)

Figure 491: dMRI TBSS ICVF Corticospinal tract L

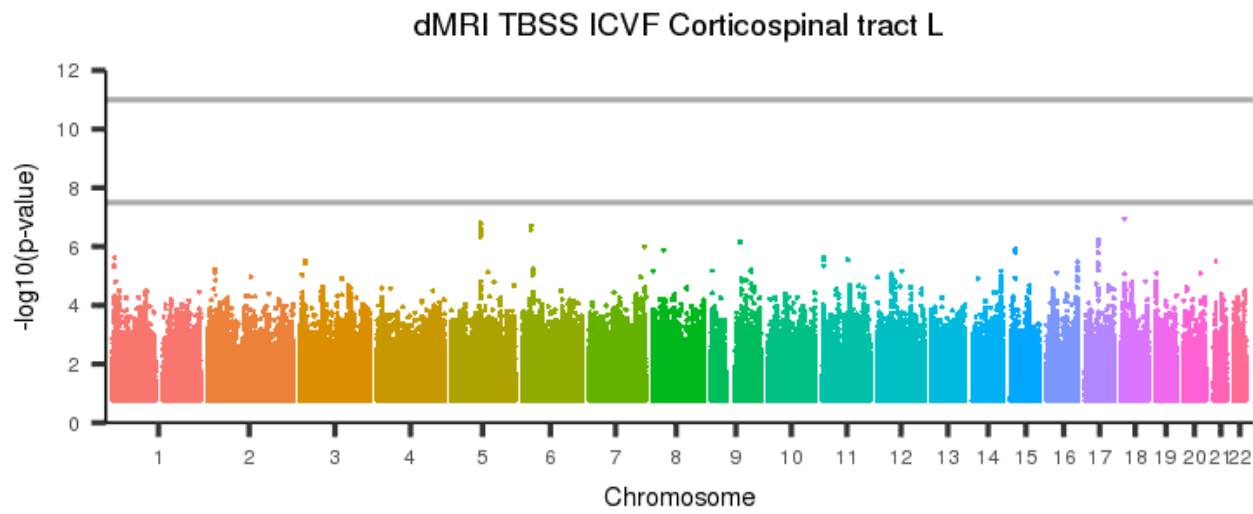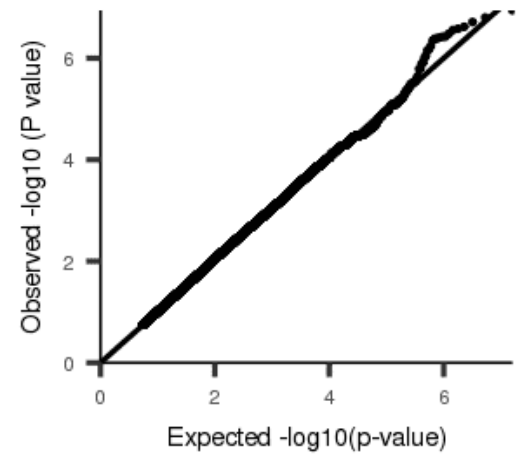

[back to list of plots](#)

Figure 492: dMRI TBSS ICVF Medial lemniscus R

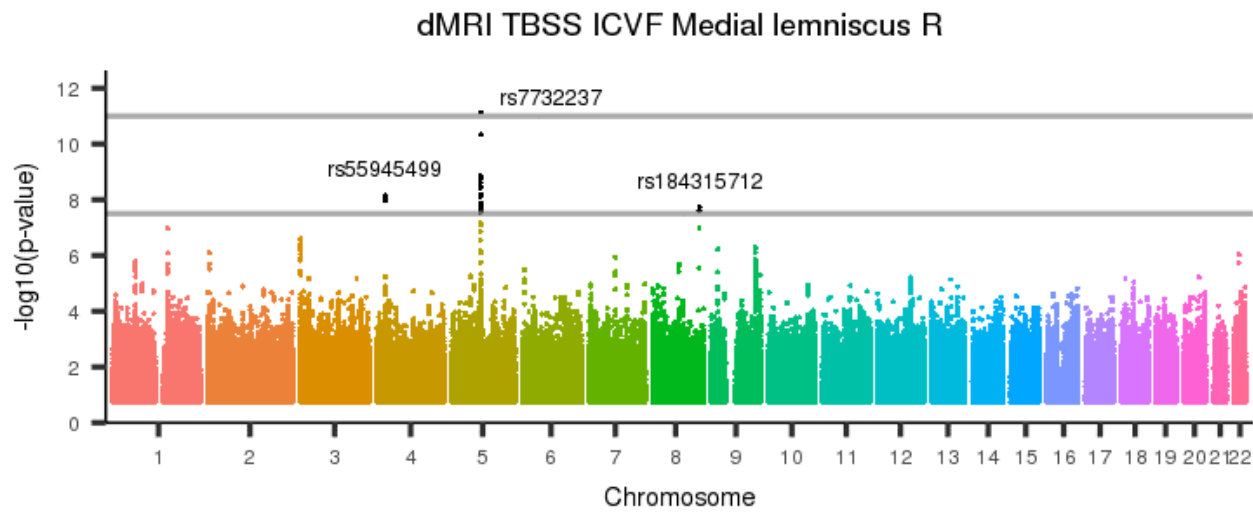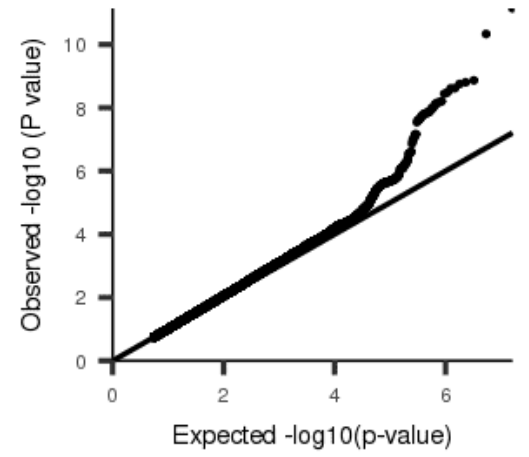

[back to list of plots](#)

Figure 493: dMRI TBSS ICVF Medial lemniscus L

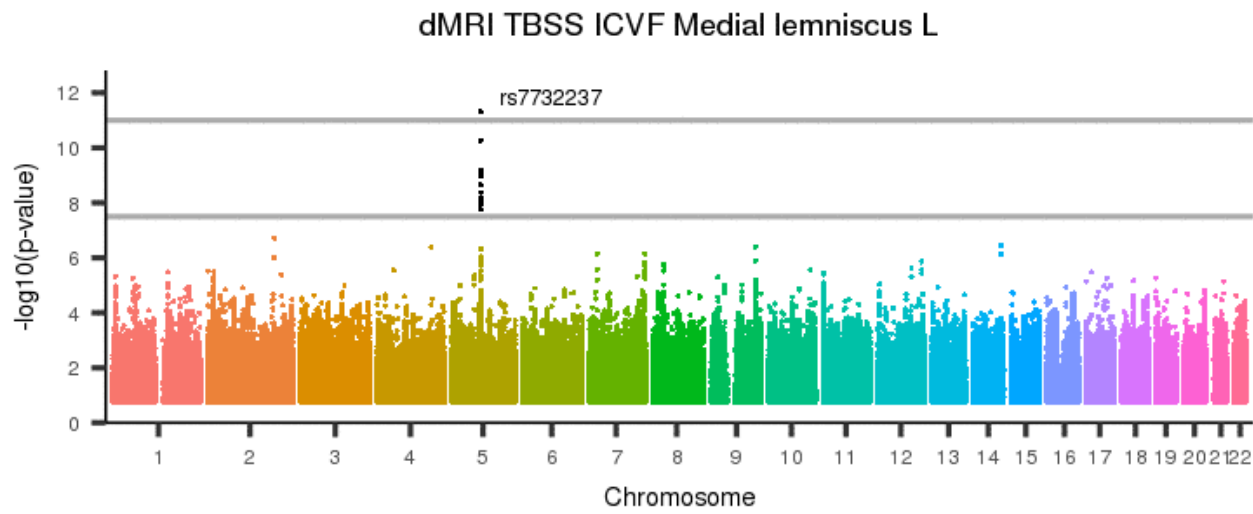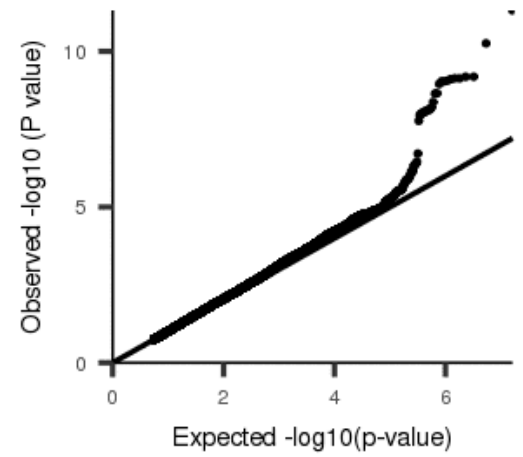

[back to list of plots](#)



Figure 494: dMRI TBSS ICVF Inferior cerebellar peduncle R

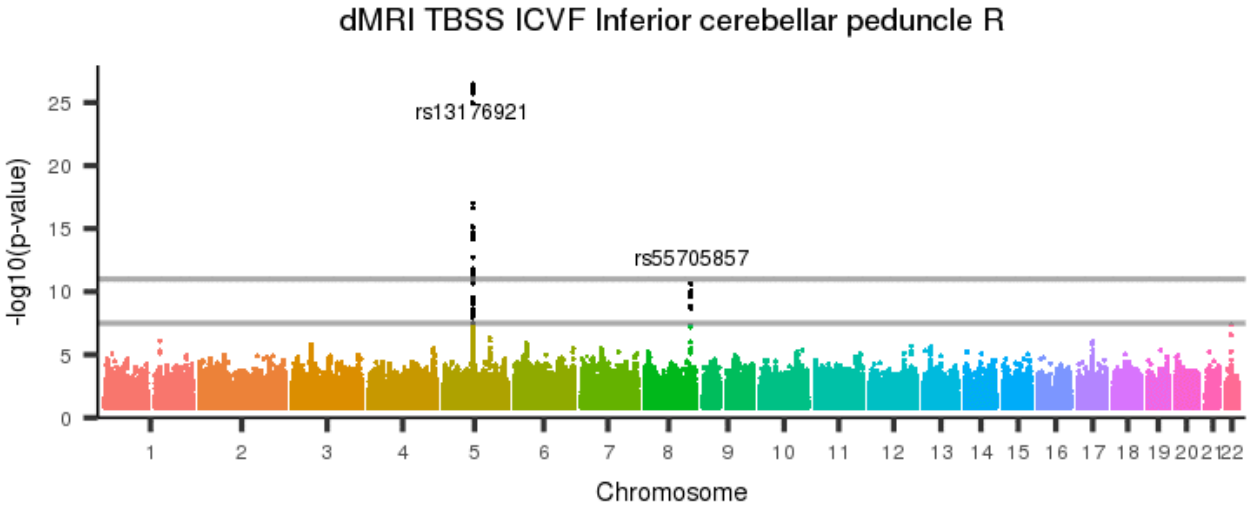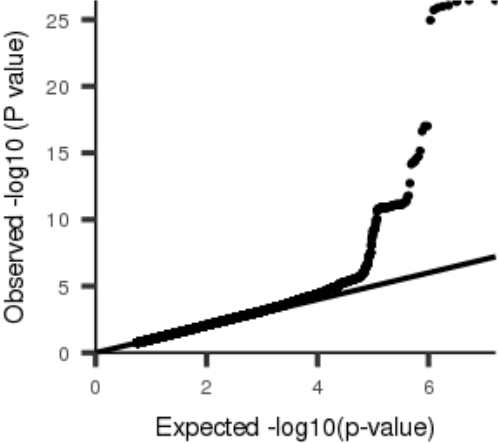

[back to list of plots](#)

Figure 495: dMRI TBSS ICVF Inferior cerebellar peduncle L

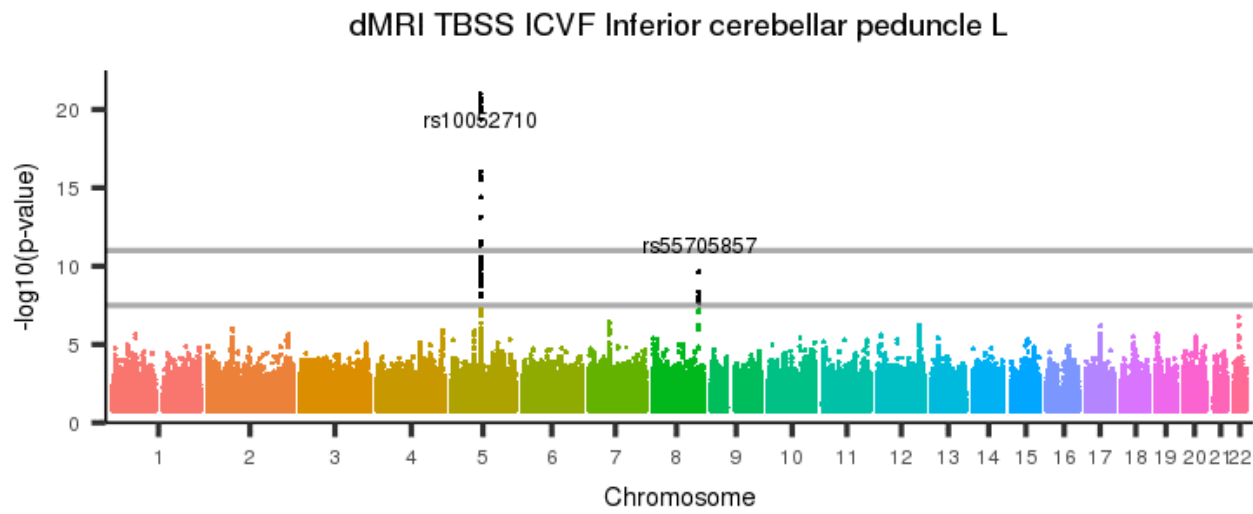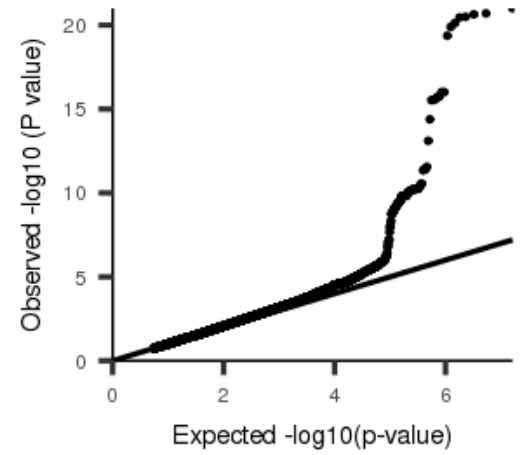

[back to list of plots](#)

Figure 496: dMRI TBSS ICVF Superior cerebellar peduncle R

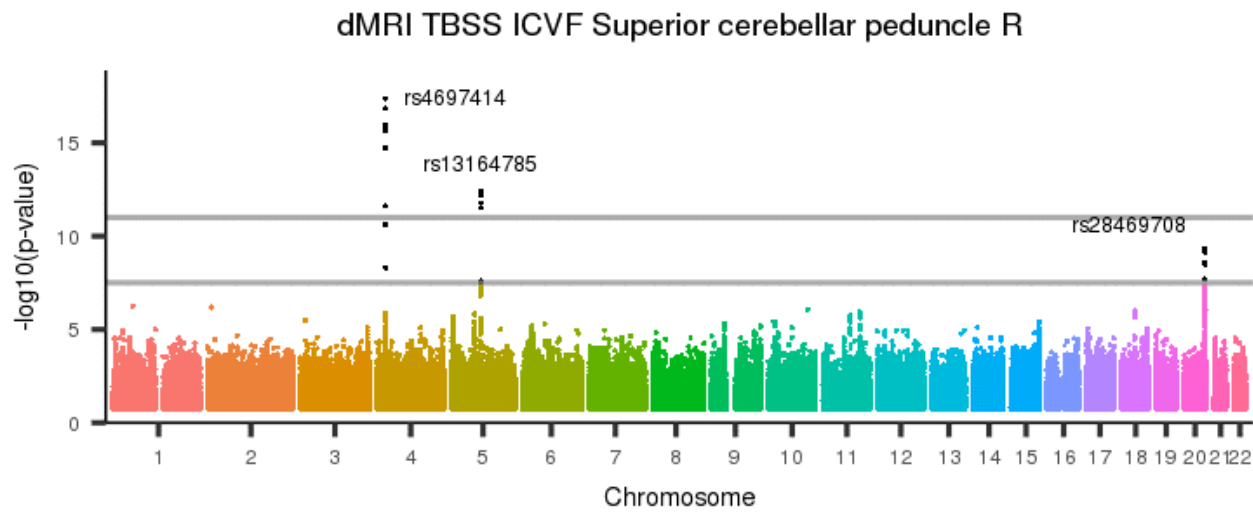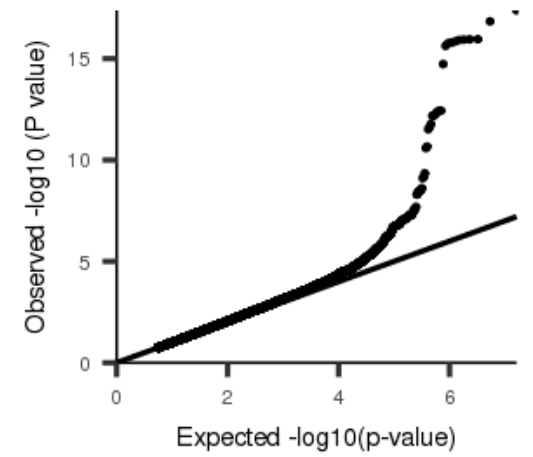

[back to list of plots](#)

Figure 497: dMRI TBSS ICVF Superior cerebellar peduncle L

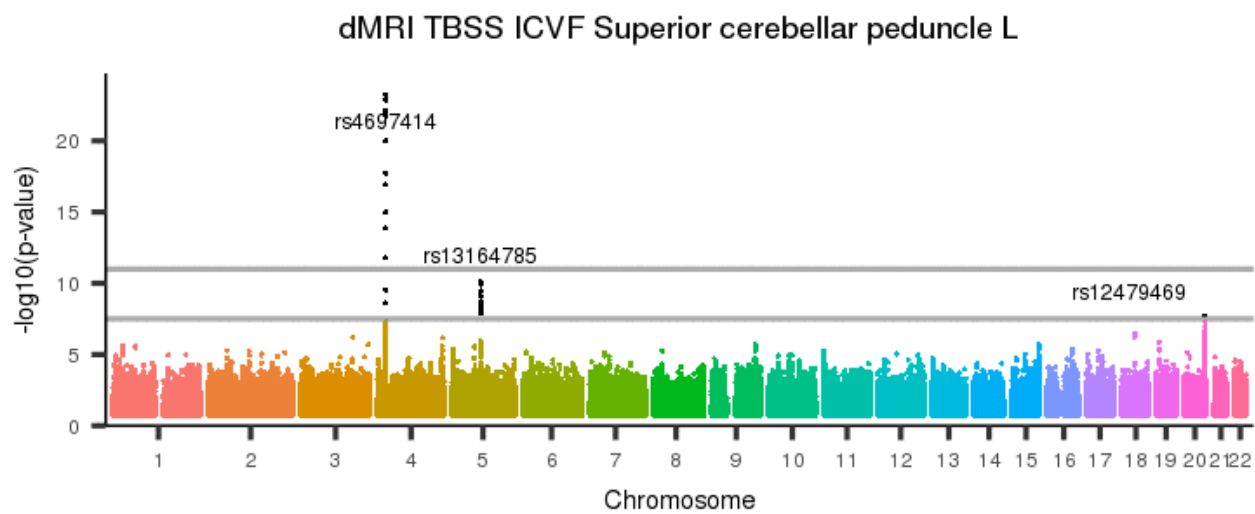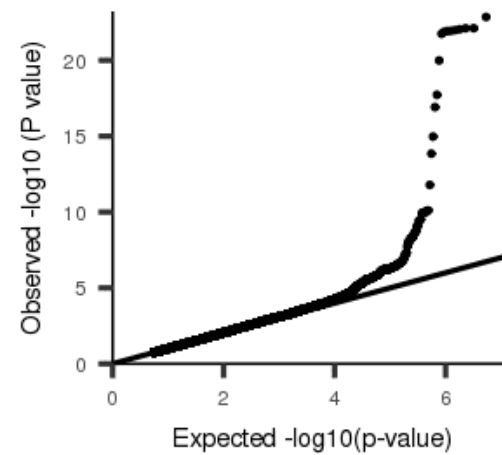

[back to list of plots](#)

Figure 498: dMRI TBSS ICVF Cerebral peduncle R

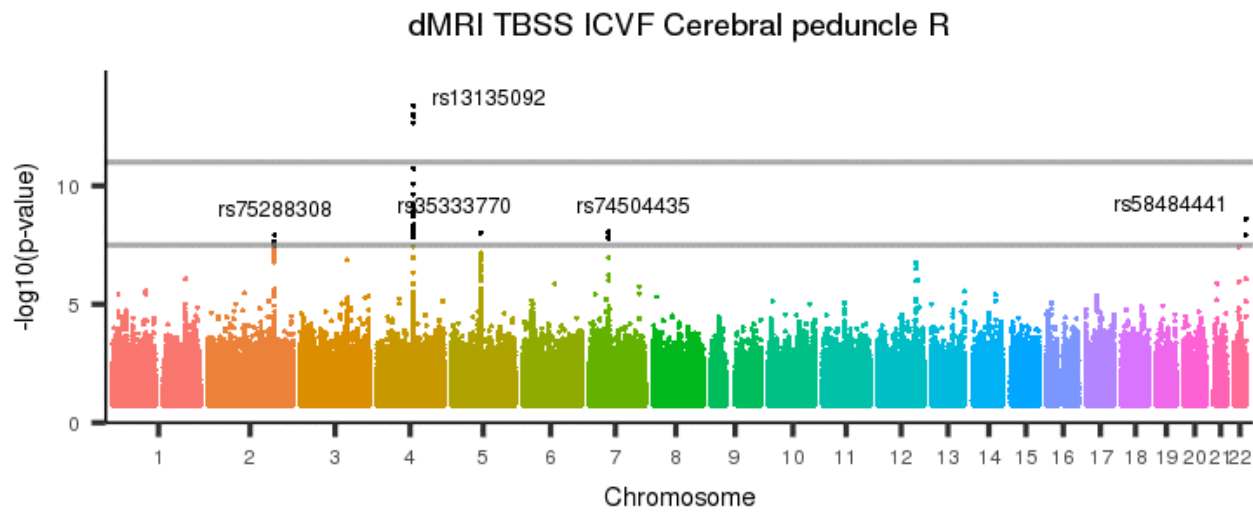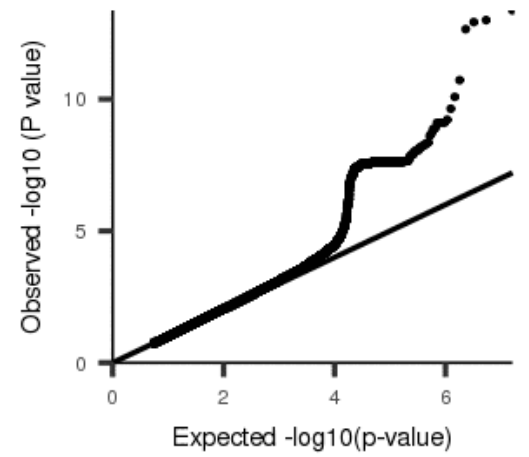

[back to list of plots](#)

Figure 499: dMRI TBSS ICVF Cerebral peduncle L

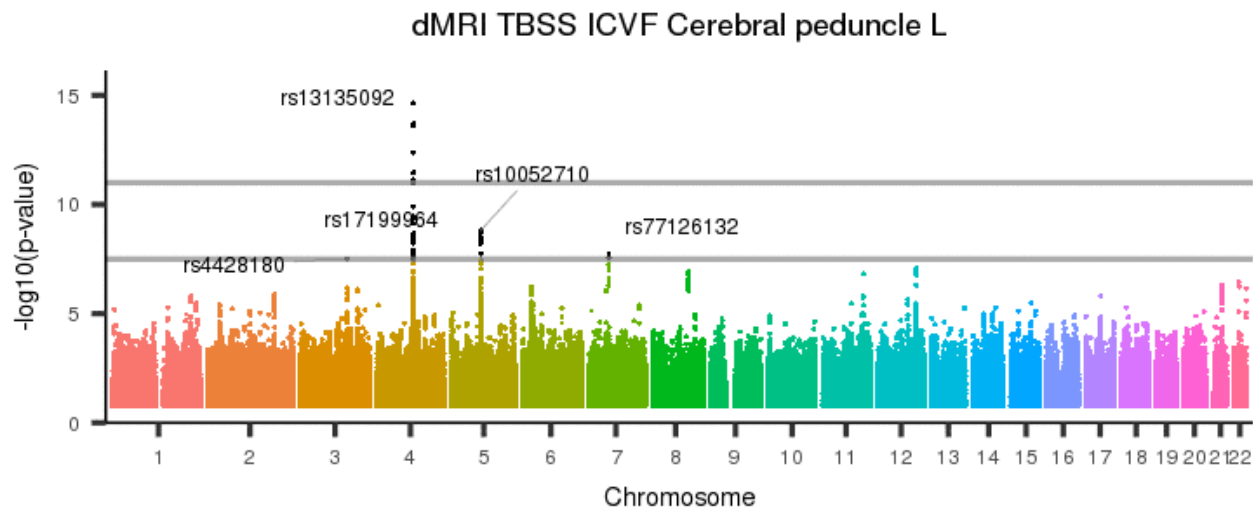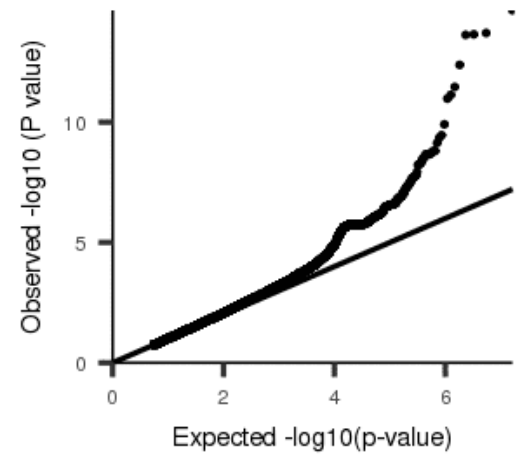

[back to list of plots](#)

Figure 500: dMRI TBSS ICVF Anterior limb of internal capsule R

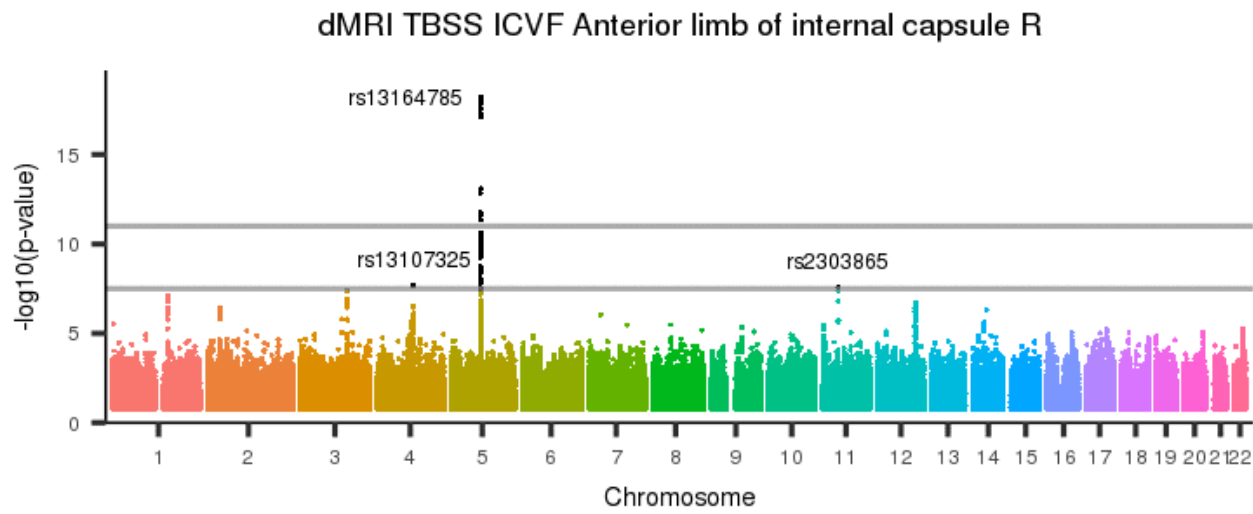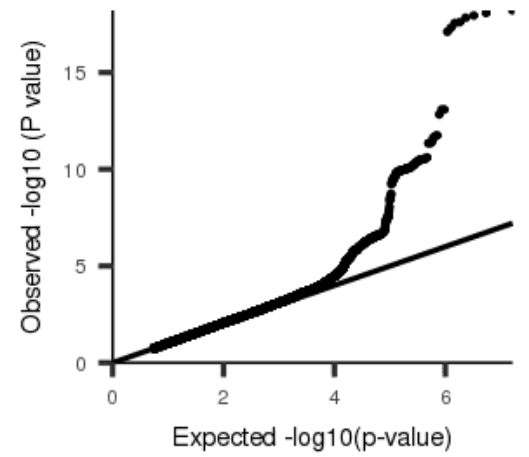

[back to list of plots](#)

Figure 501: dMRI TBSS ICVF Anterior limb of internal capsule L

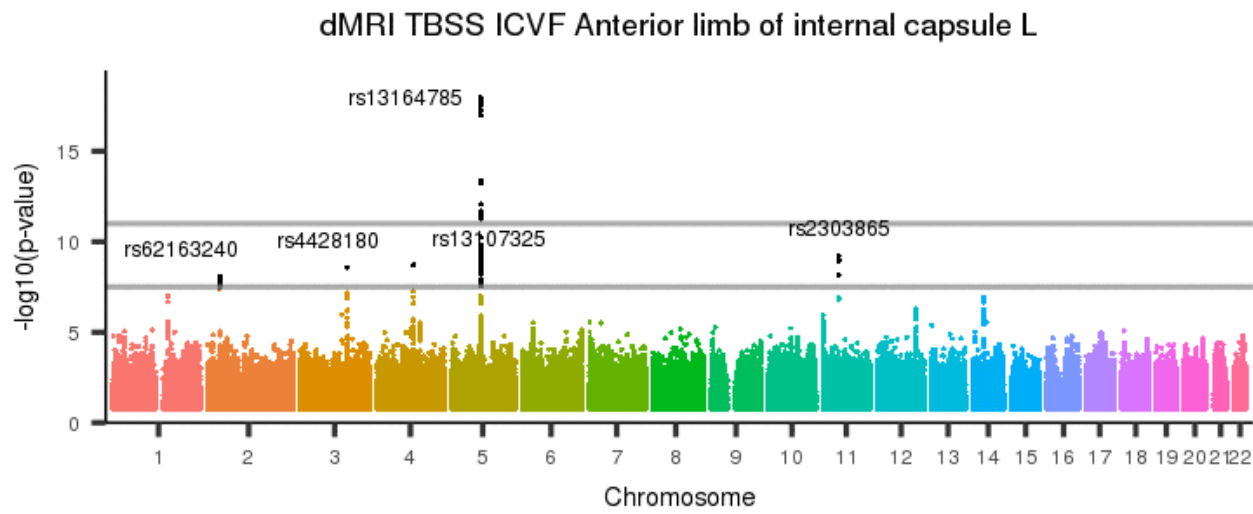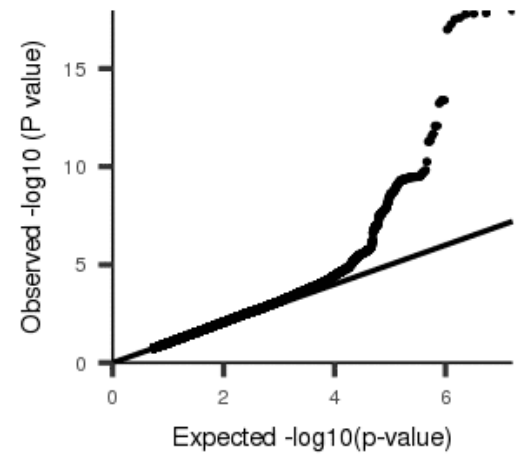

[back to list of plots](#)



Figure 502: dMRI TBSS ICVF Posterior limb of internal capsule R

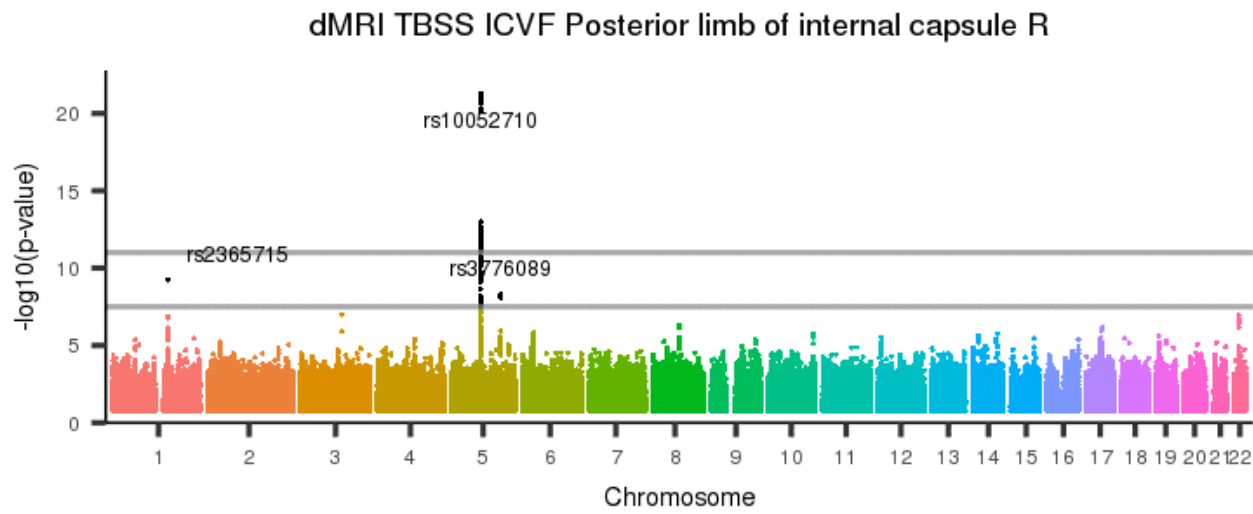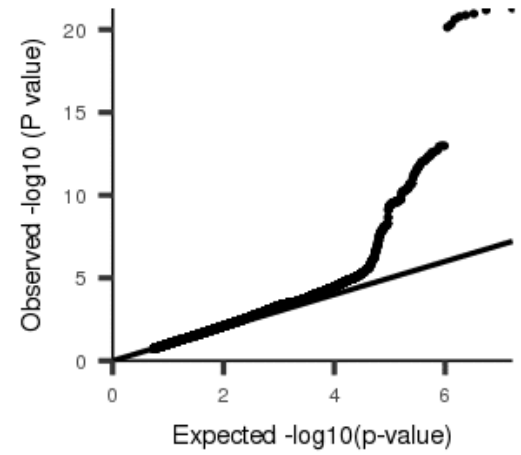

[back to list of plots](#)

Figure 503: dMRI TBSS ICVF Posterior limb of internal capsule L

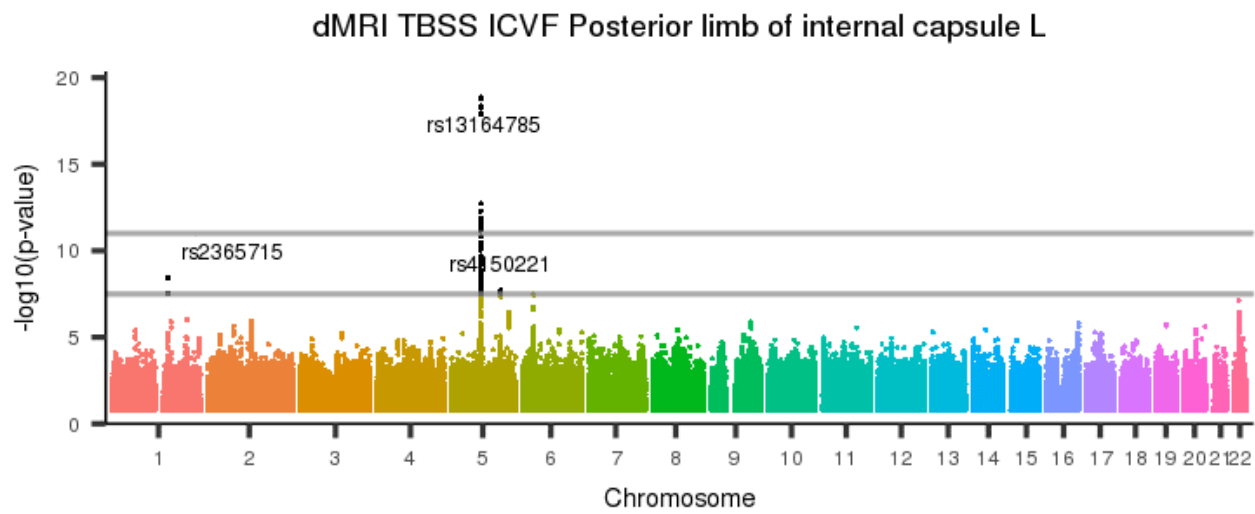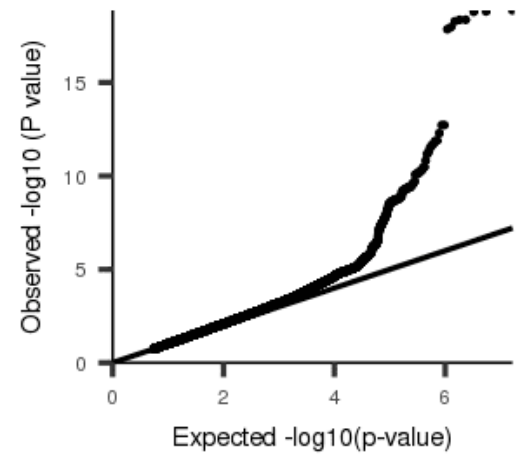

[back to list of plots](#)

Figure 504: dMRI TBSS ICVF Retrolesional part of internal capsule R

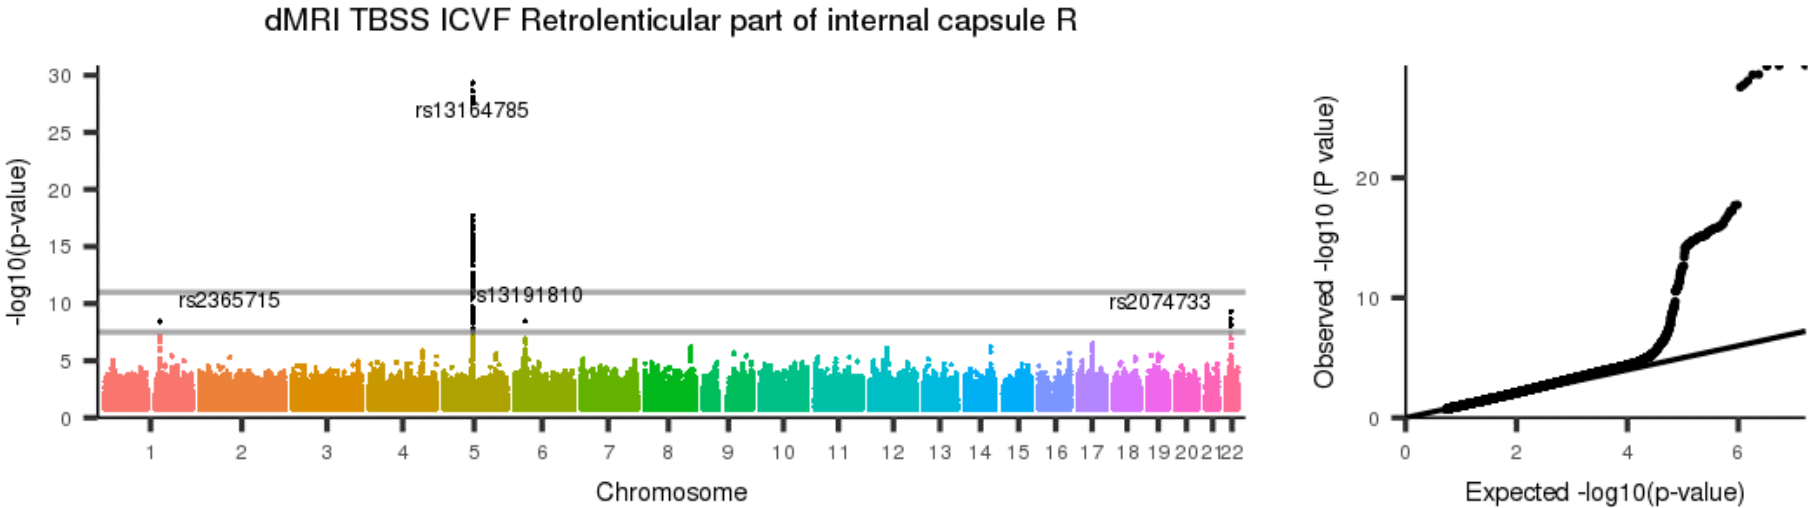

[back to list of plots](#)

Figure 505: dMRI TBSS ICVF Retrolesional part of internal capsule L

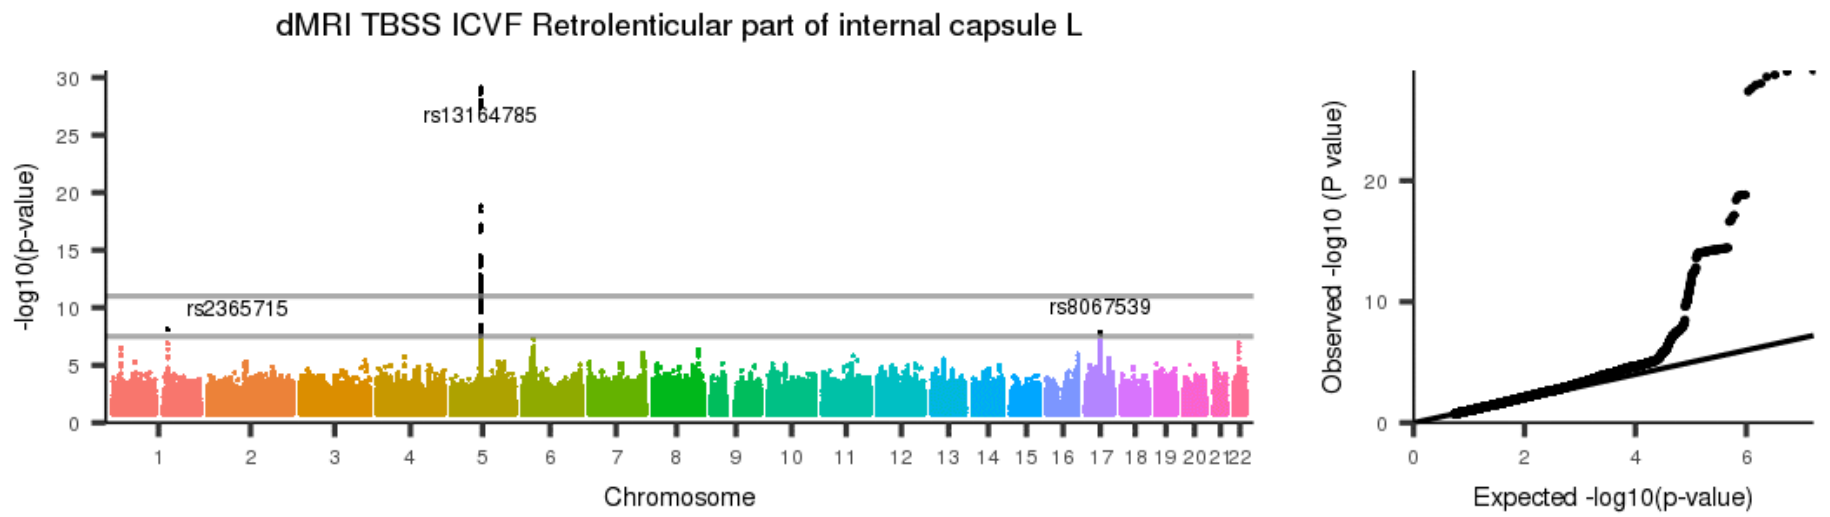

[back to list of plots](#)

Figure 506: dMRI TBSS ICVF Anterior corona radiata R

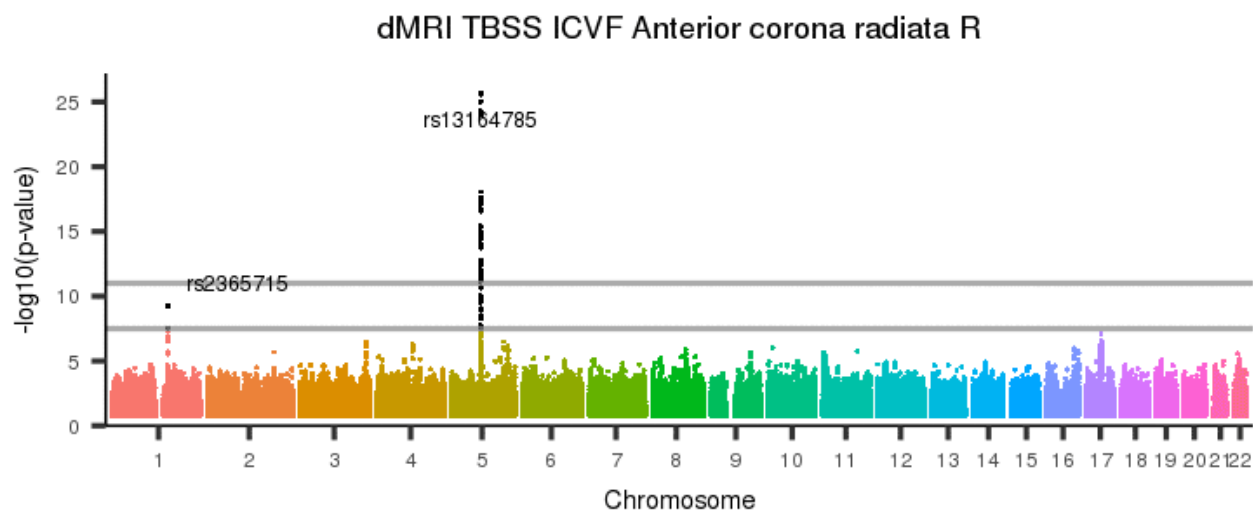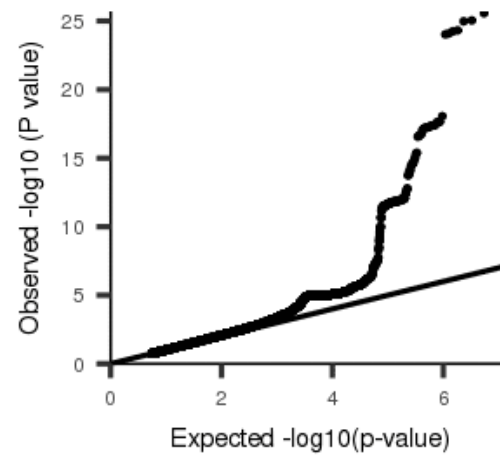

[back to list of plots](#)

Figure 507: dMRI TBSS ICVF Anterior corona radiata L

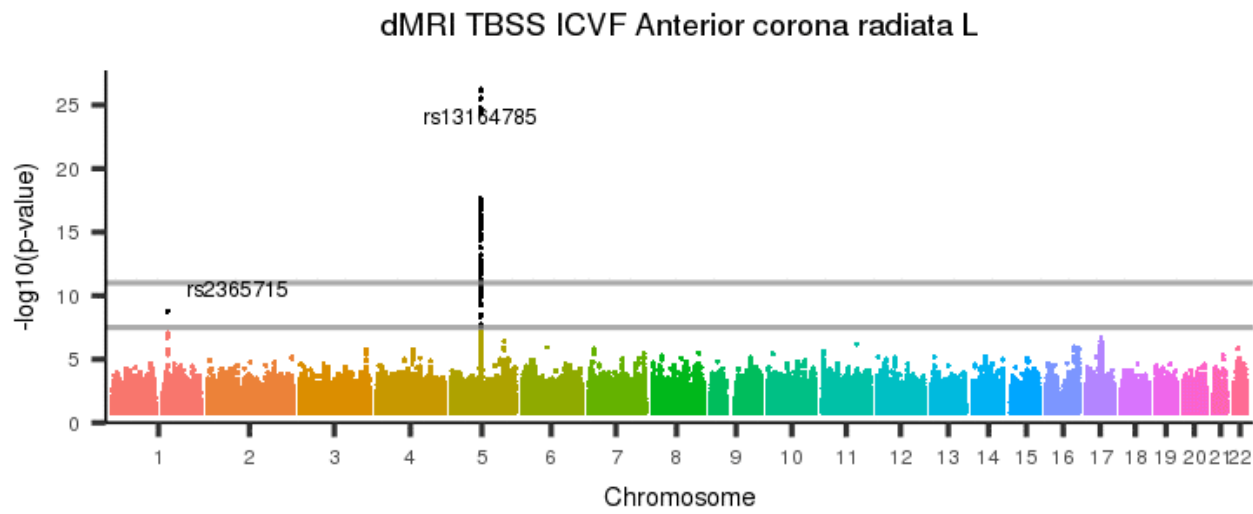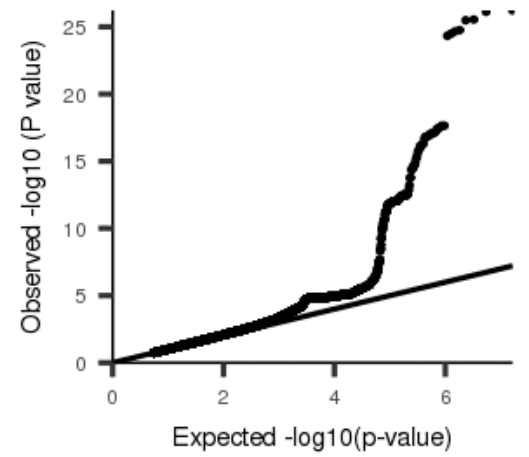

[back to list of plots](#)

Figure 508: dMRI TBSS ICVF Superior corona radiata R

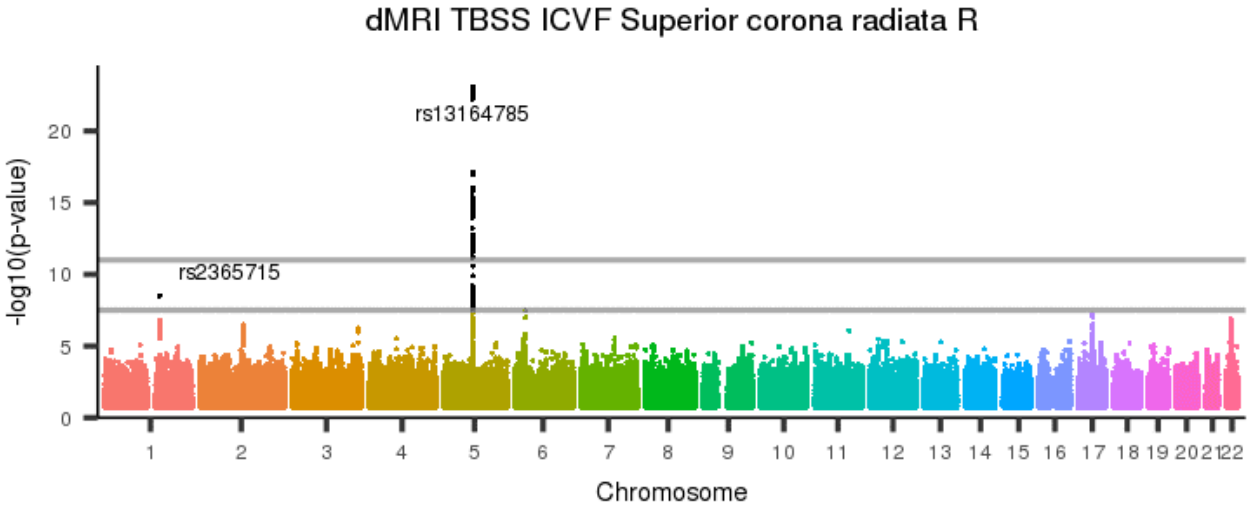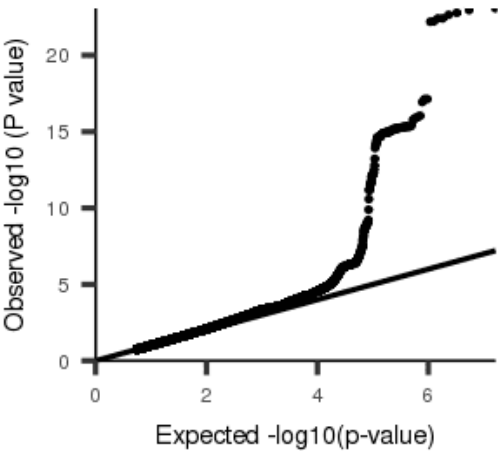

[back to list of plots](#)

Figure 509: dMRI TBSS ICVF Superior corona radiata L

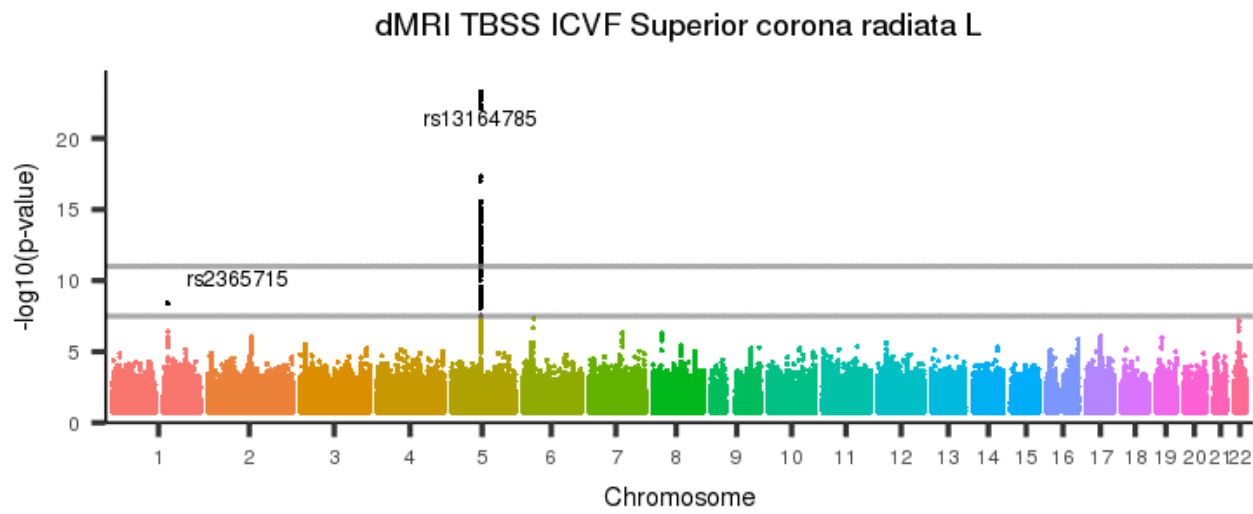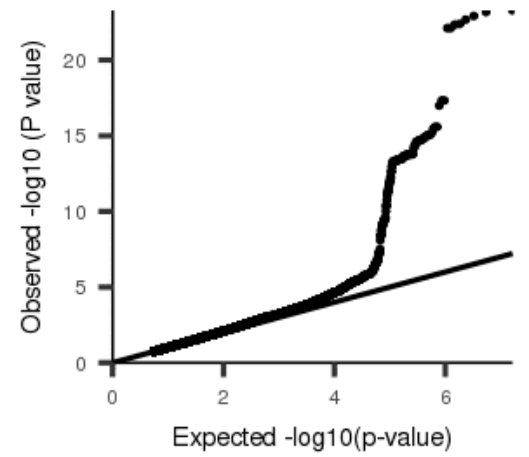

[back to list of plots](#)



Figure 510: dMRI TBSS ICVF Posterior corona radiata R

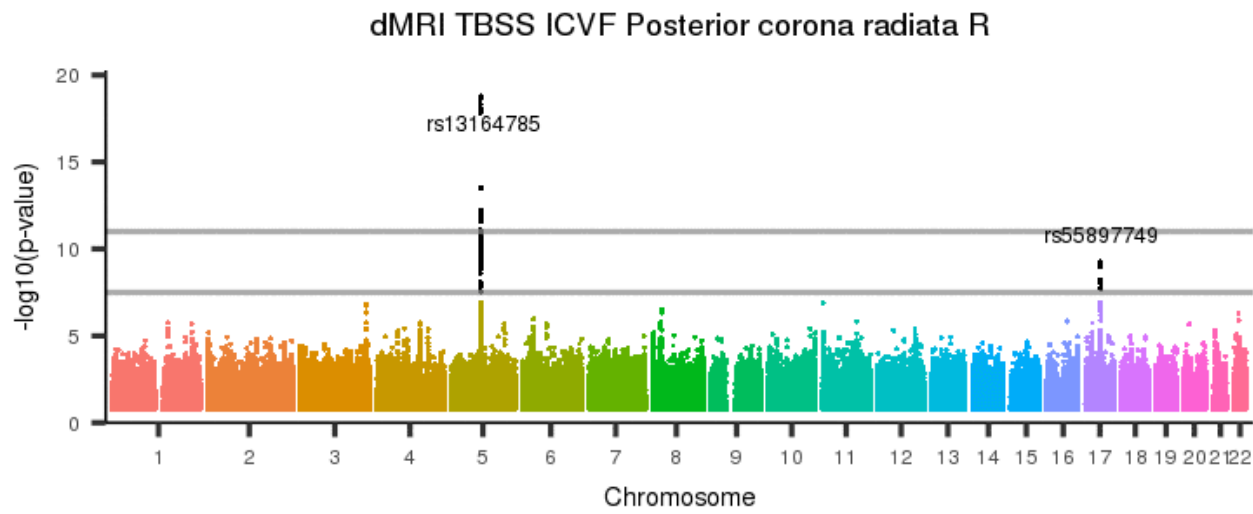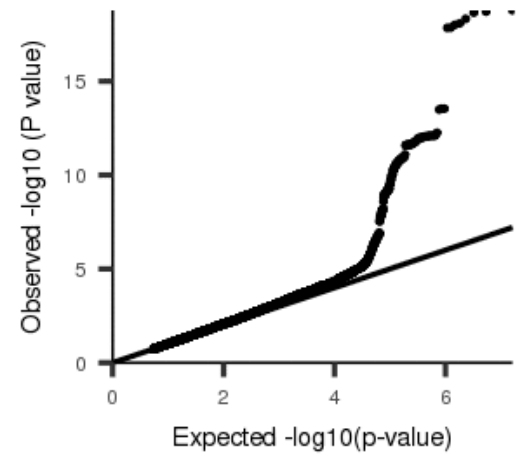

[back to list of plots](#)

Figure 511: dMRI TBSS ICVF Posterior corona radiata L

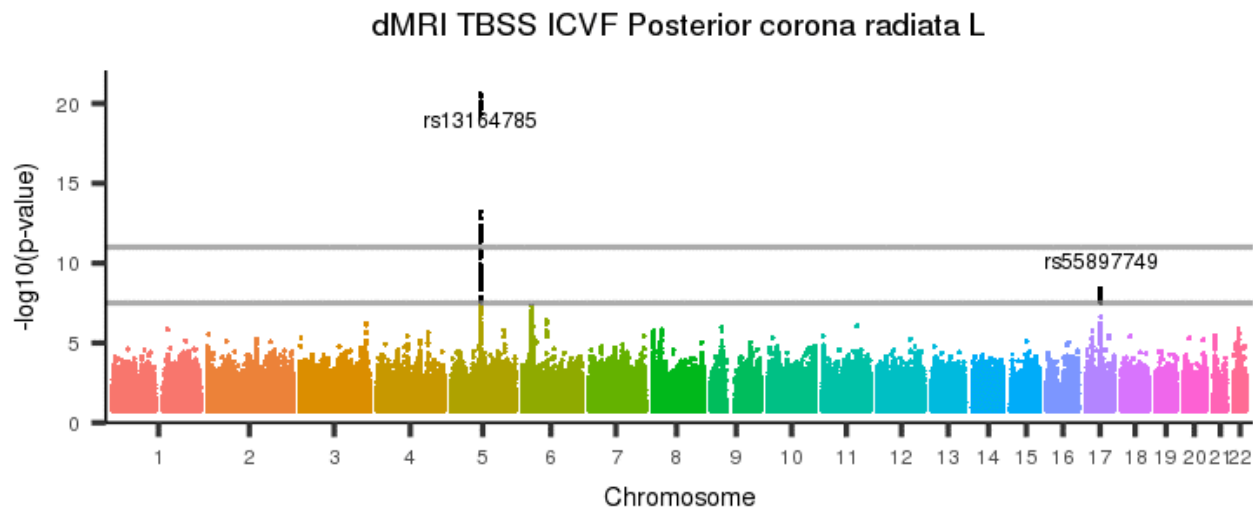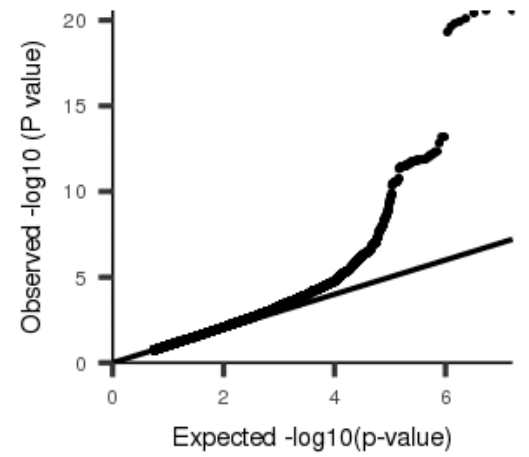

[back to list of plots](#)

Figure 512: dMRI TBSS ICVF Posterior thalamic radiation R

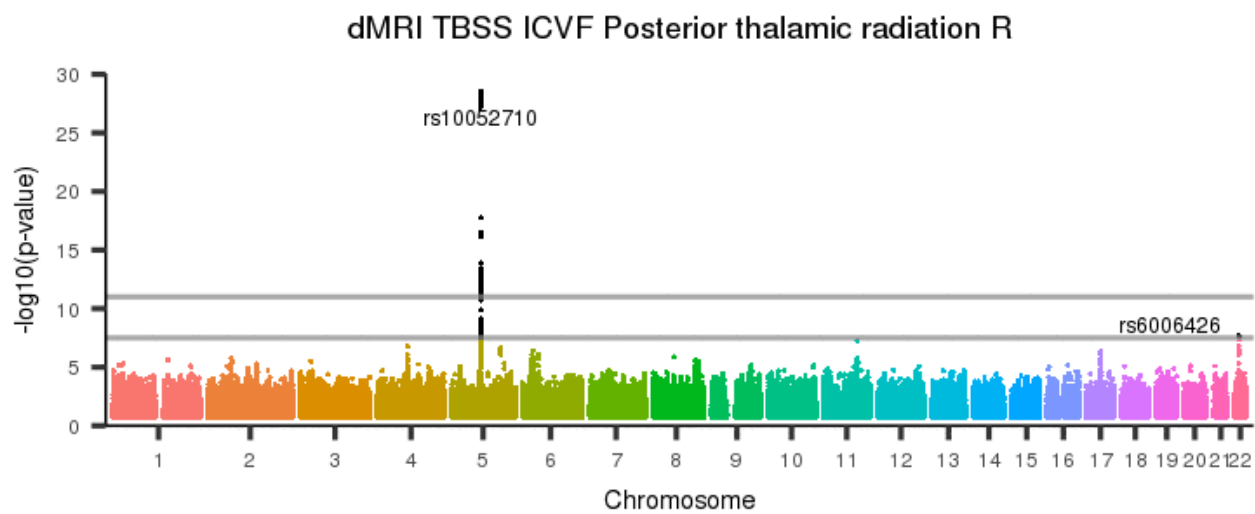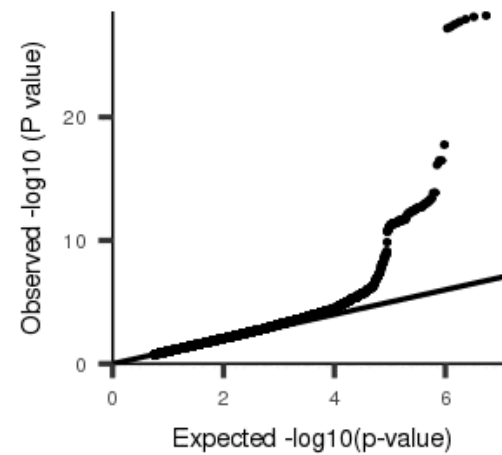

[back to list of plots](#)

Figure 513: dMRI TBSS ICVF Posterior thalamic radiation L

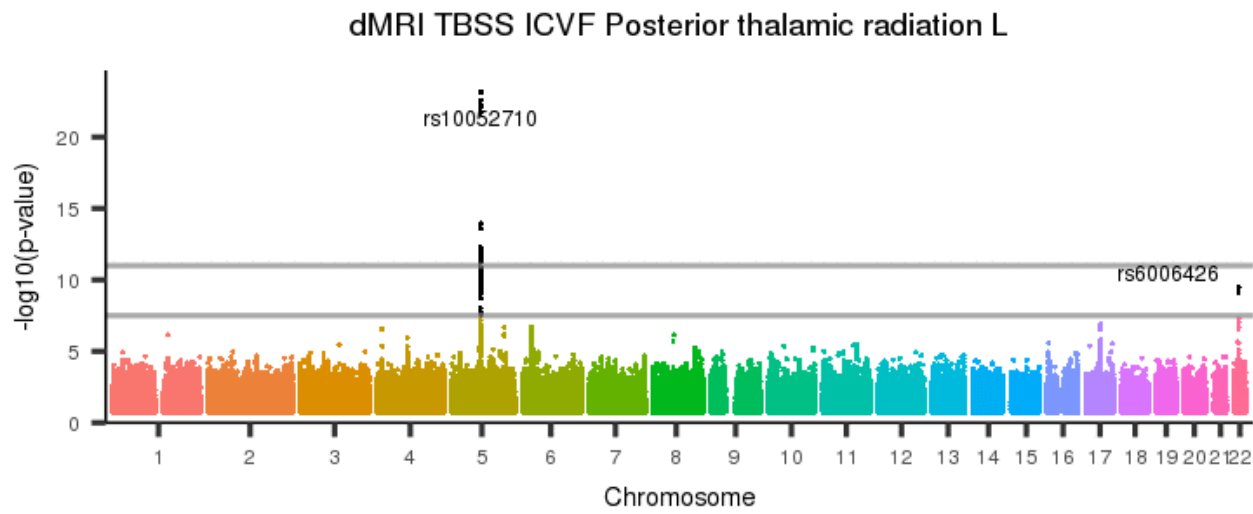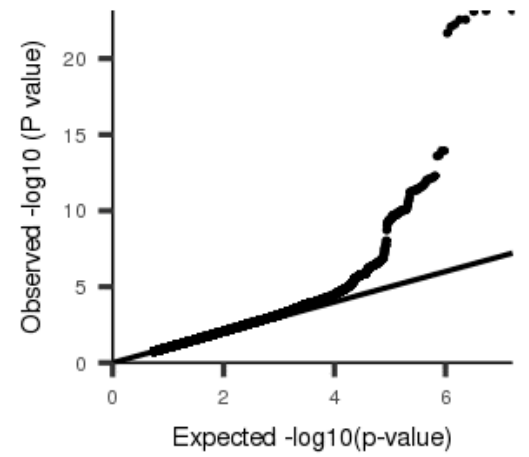

[back to list of plots](#)

Figure 514: dMRI TBSS ICVF Sagittal stratum R

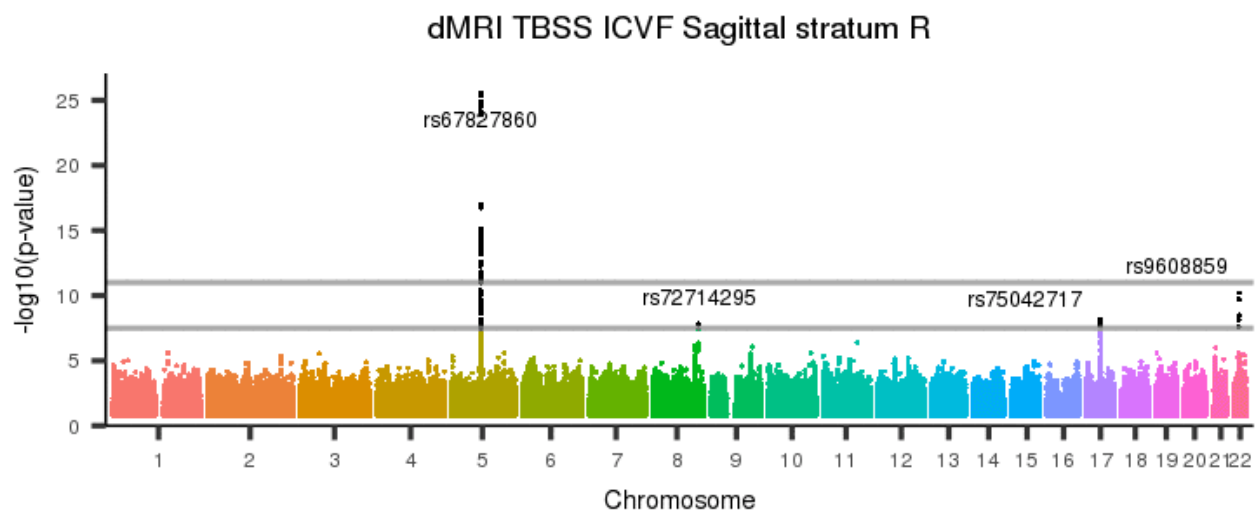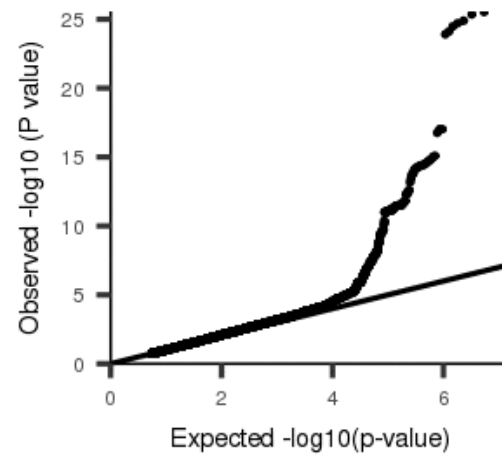

[back to list of plots](#)

Figure 515: dMRI TBSS ICVF Sagittal stratum L

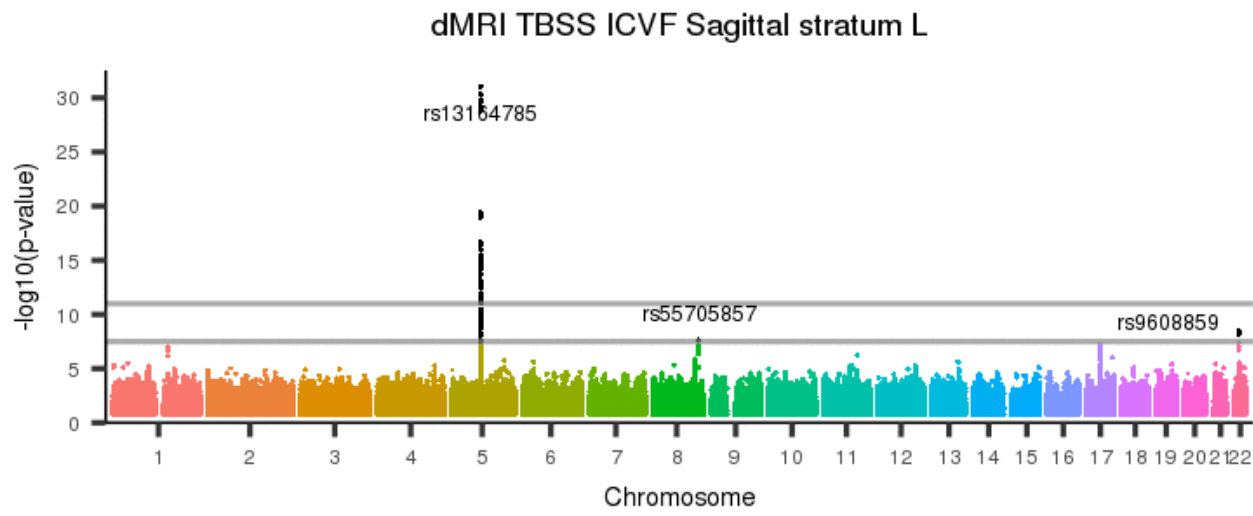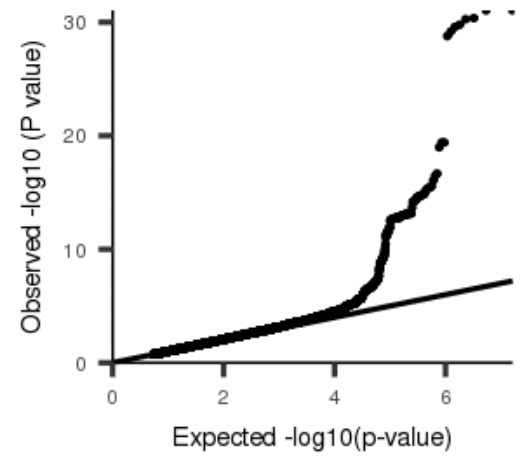

[back to list of plots](#)

Figure 516: dMRI TBSS ICVF External capsule R

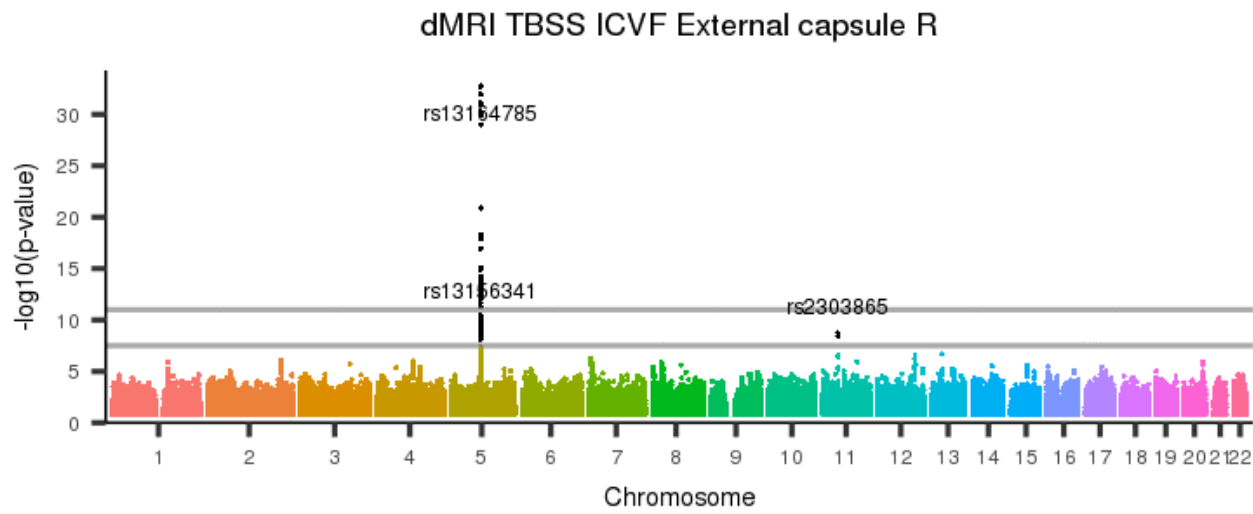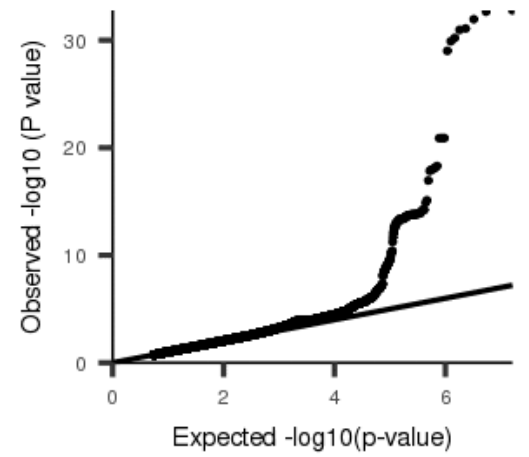

[back to list of plots](#)

Figure 517: dMRI TBSS ICVF External capsule L

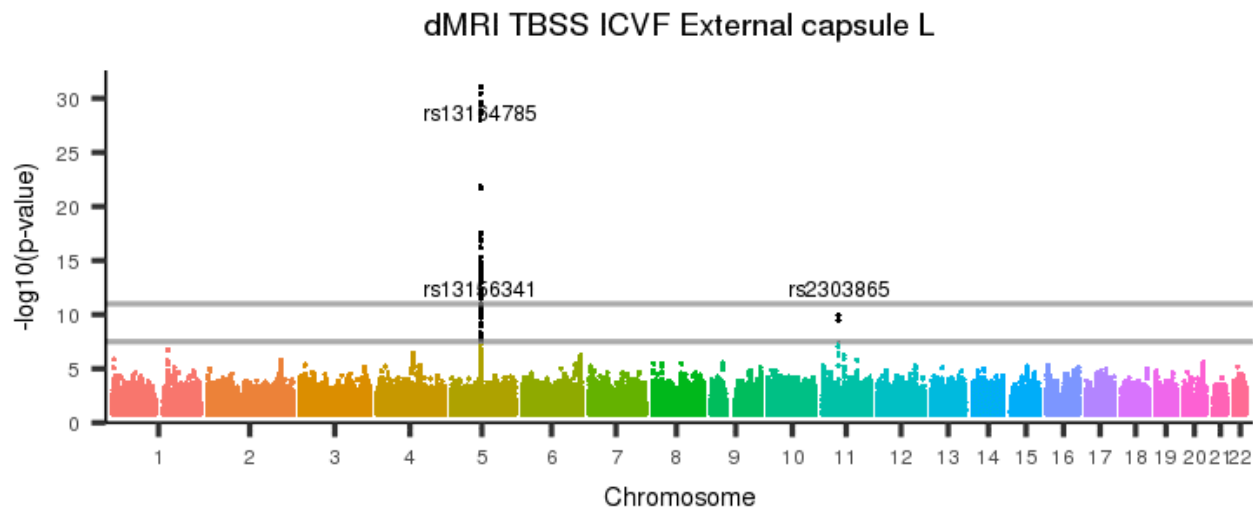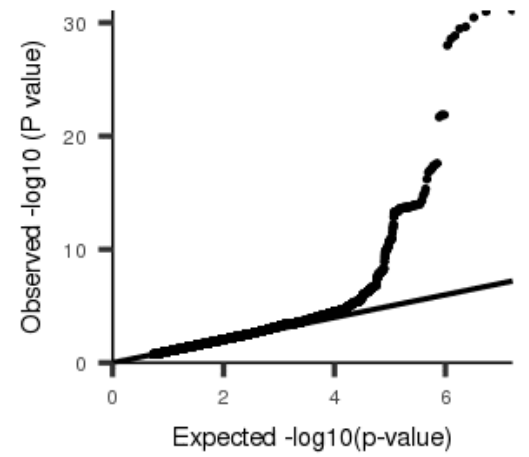

[back to list of plots](#)



Figure 518: dMRI TBSS ICVF Cingulum cingulate gyrus R

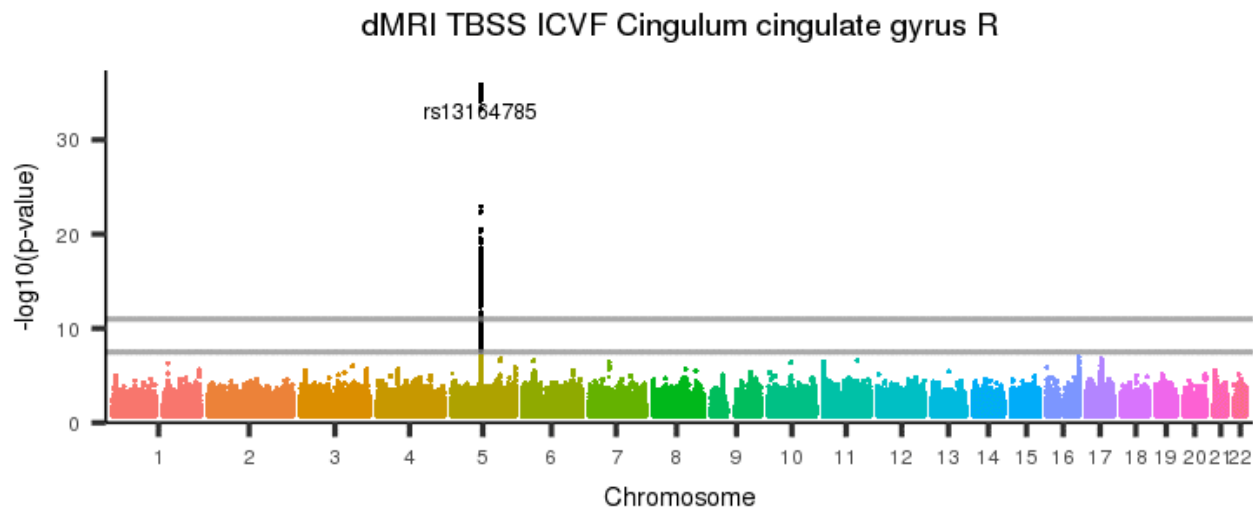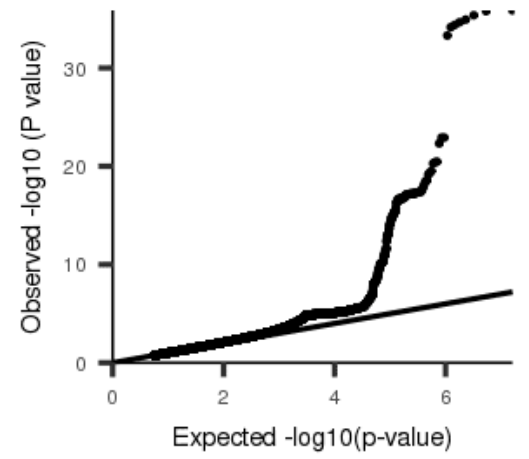

[back to list of plots](#)

Figure 519: dMRI TBSS ICVF Cingulum cingulate gyrus L

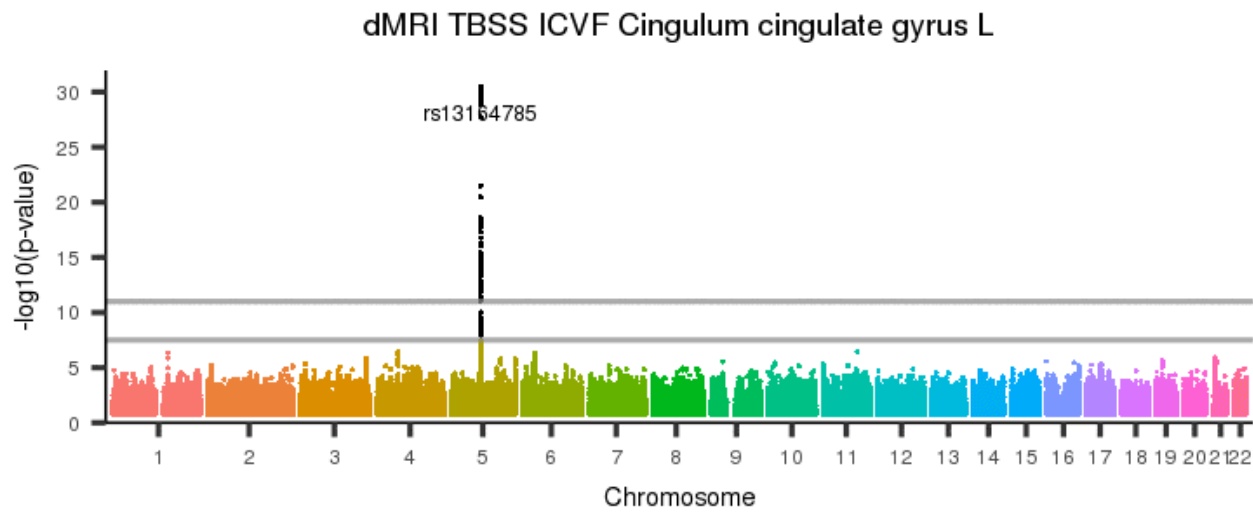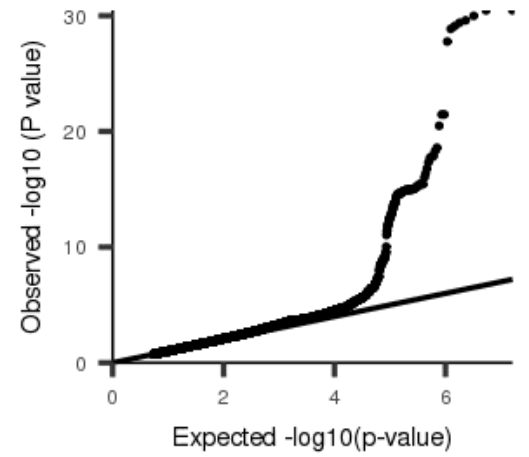

[back to list of plots](#)

Figure 520: dMRI TBSS ICVF Cingulum hippocampus R

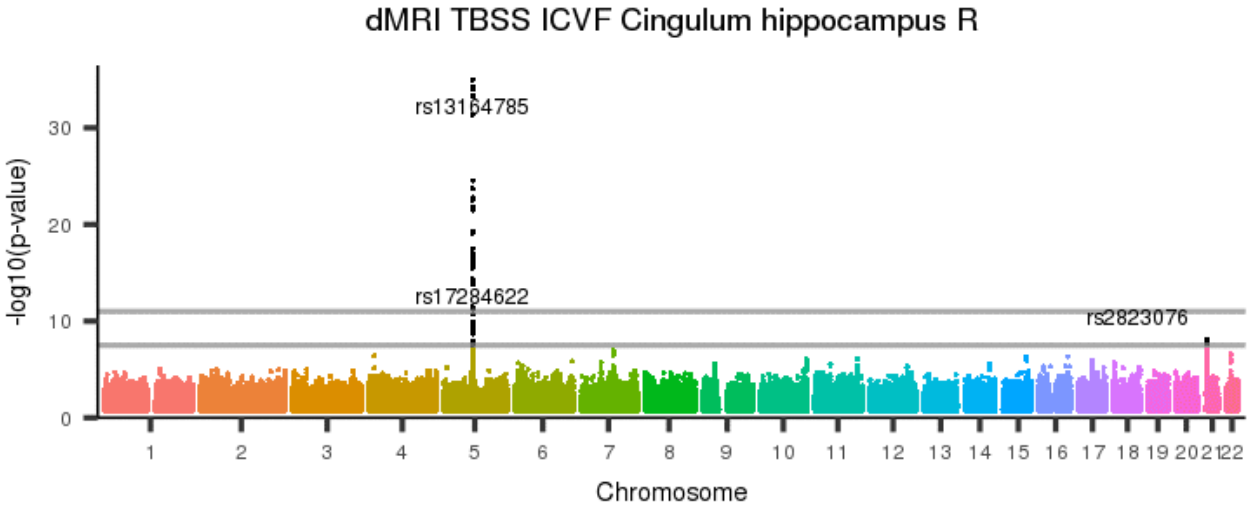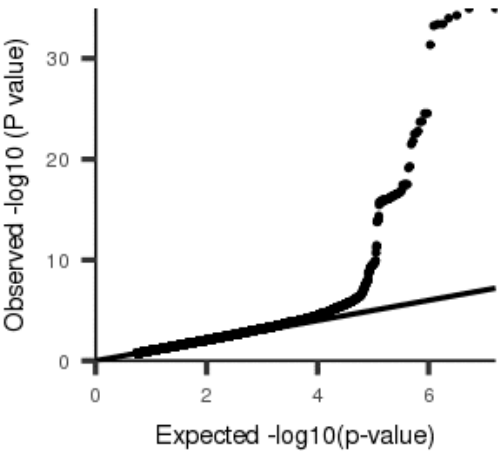

[back to list of plots](#)

Figure 521: dMRI TBSS ICVF Cingulum hippocampus L

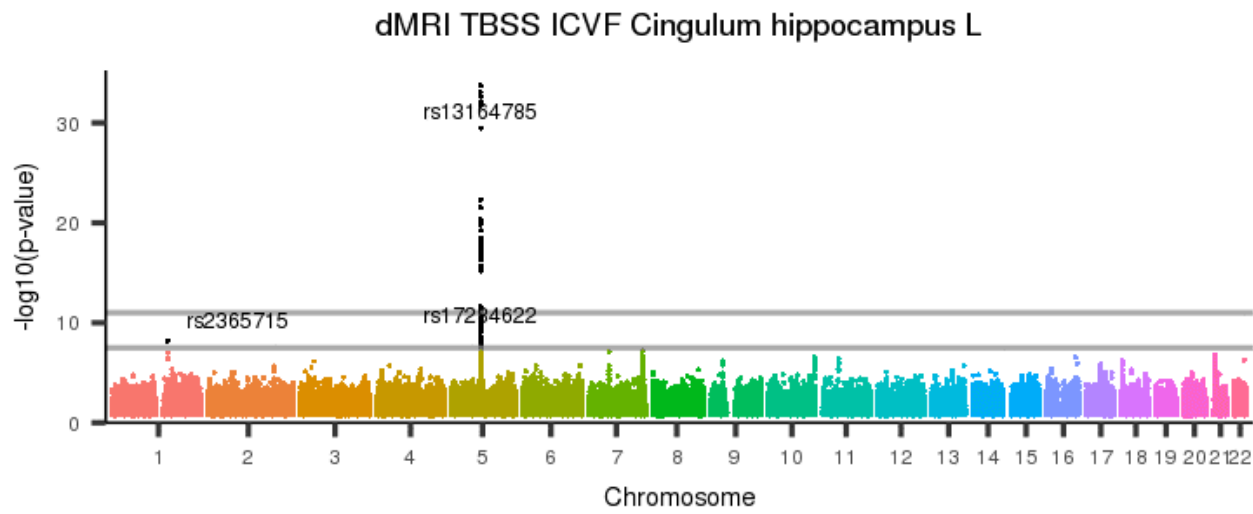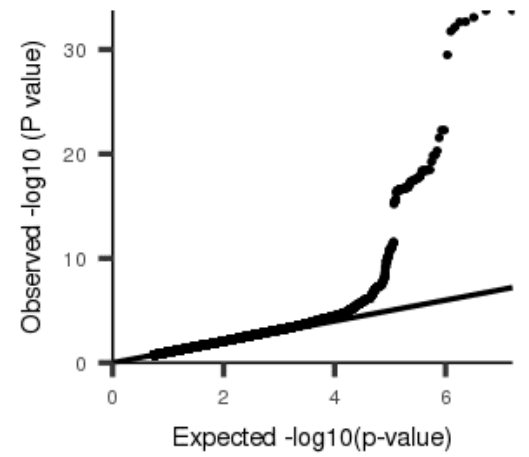

[back to list of plots](#)

Figure 522: dMRI TBSS ICVF Fornix cres+Stria terminalis R

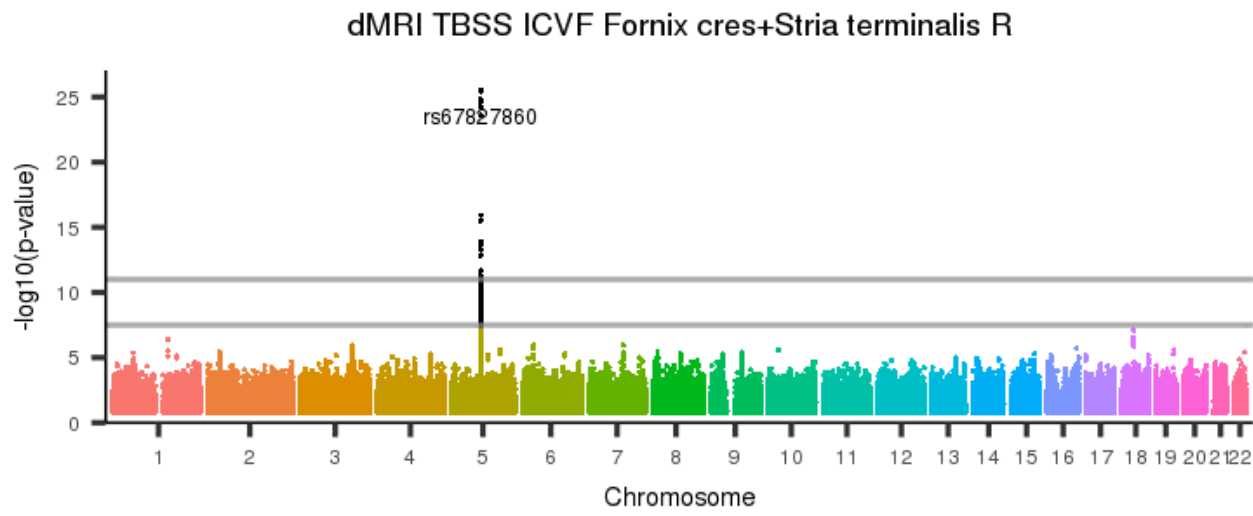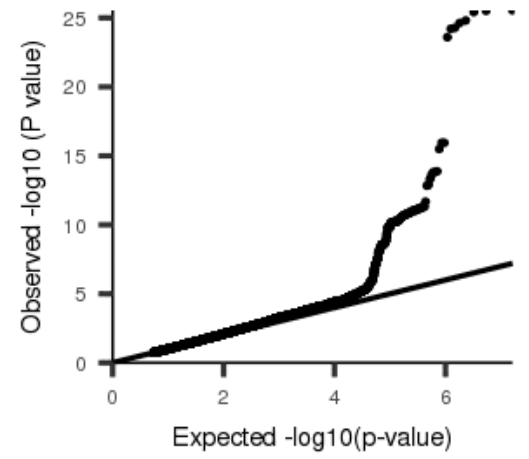

[back to list of plots](#)

Figure 523: dMRI TBSS ICVF Fornix cres+Stria terminalis L

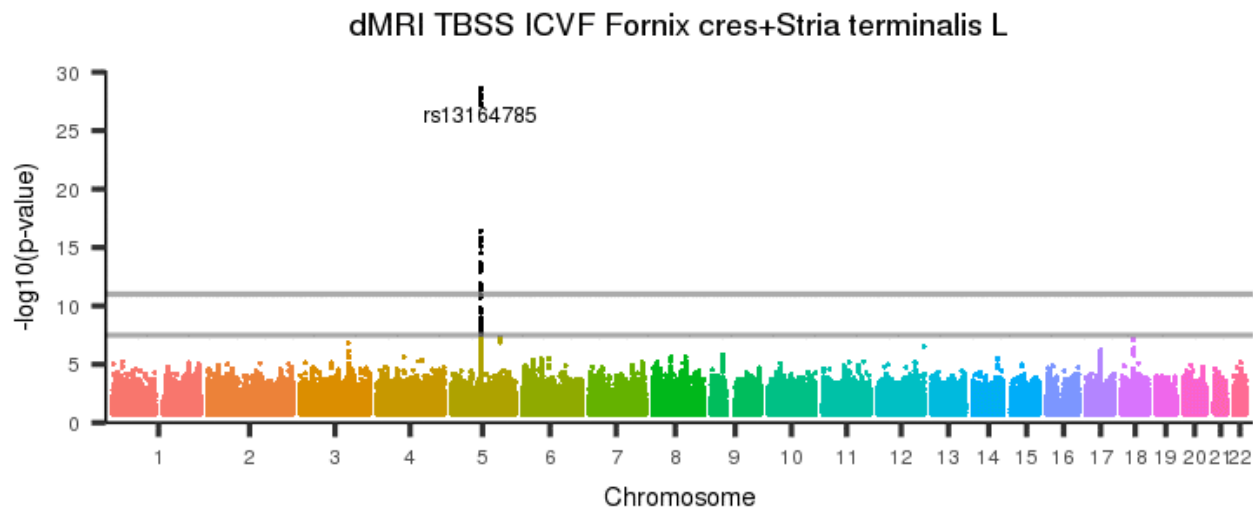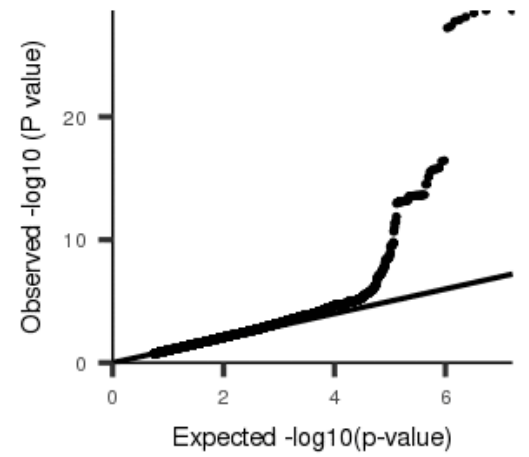

[back to list of plots](#)

Figure 524: dMRI TBSS ICVF Superior longitudinal fasciculus R

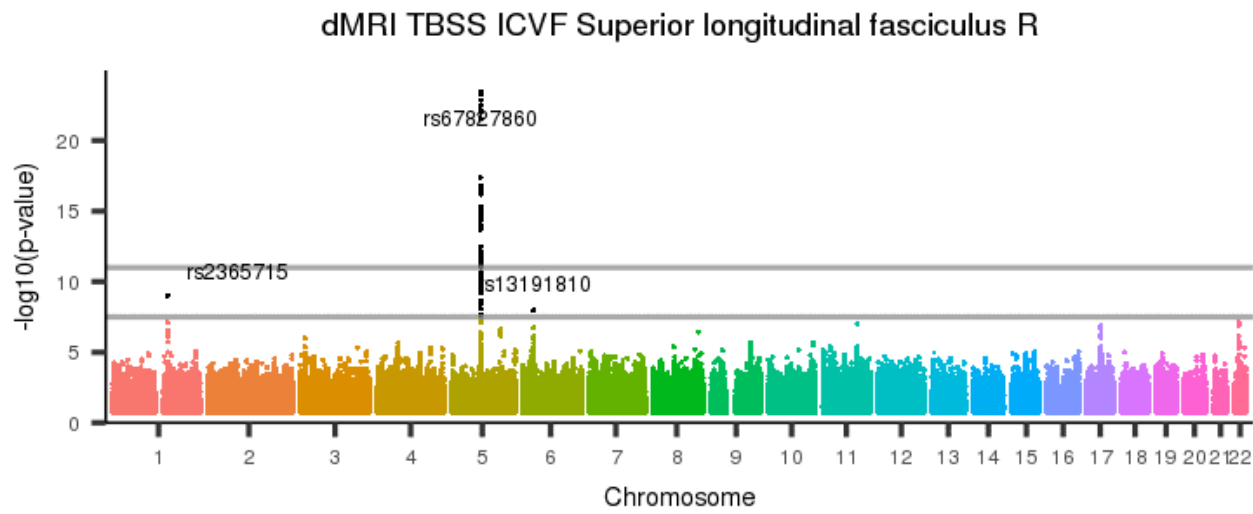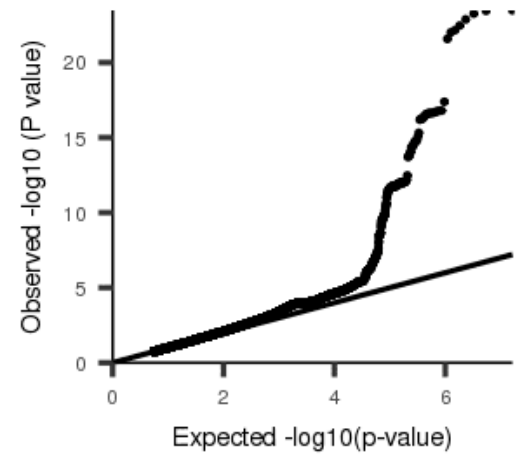

[back to list of plots](#)

Figure 525: dMRI TBSS ICVF Superior longitudinal fasciculus L

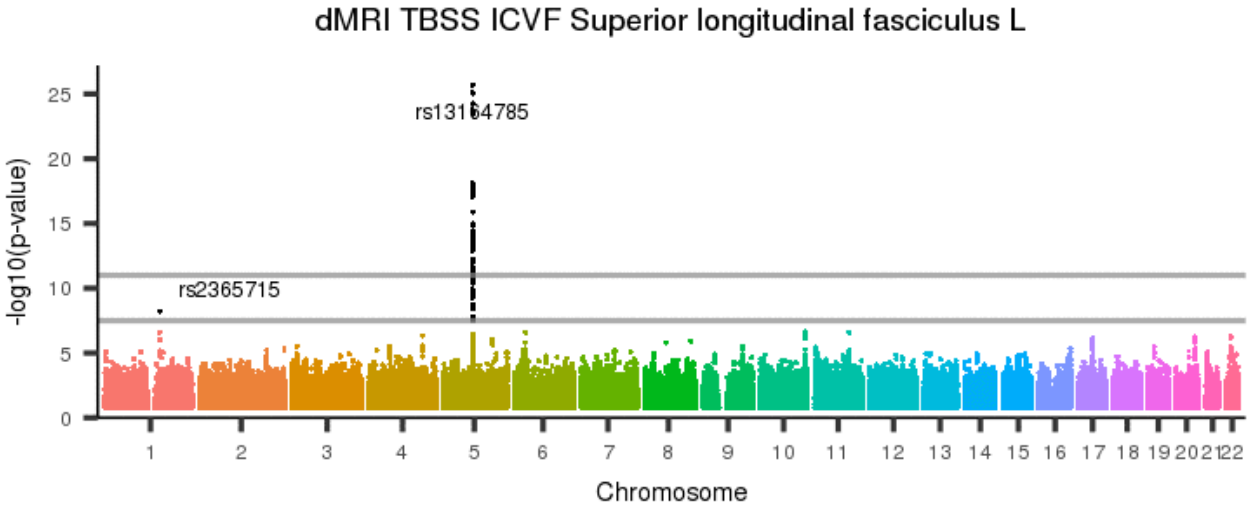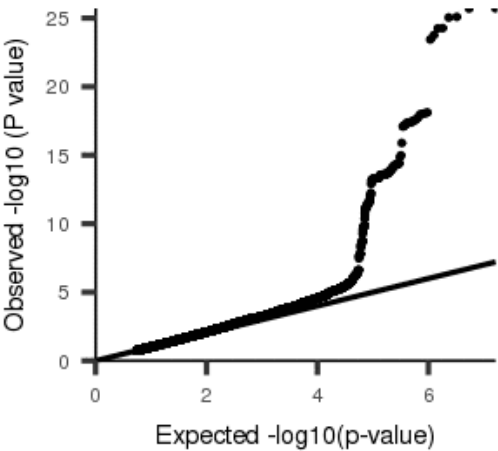

[back to list of plots](#)



Figure 526: dMRI TBSS ICVF Superior fronto-occipital fasciculus R

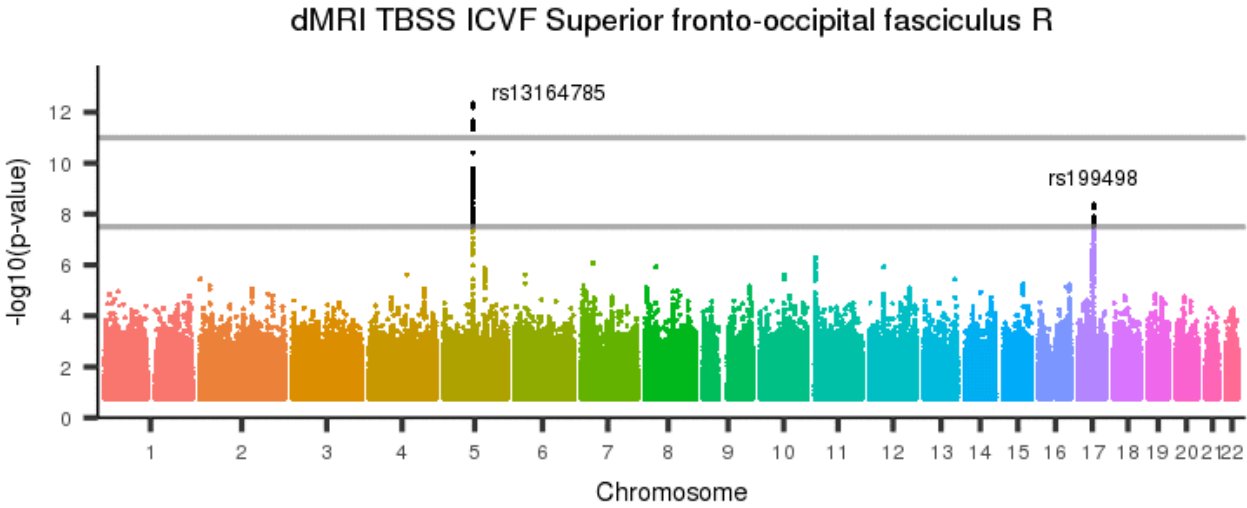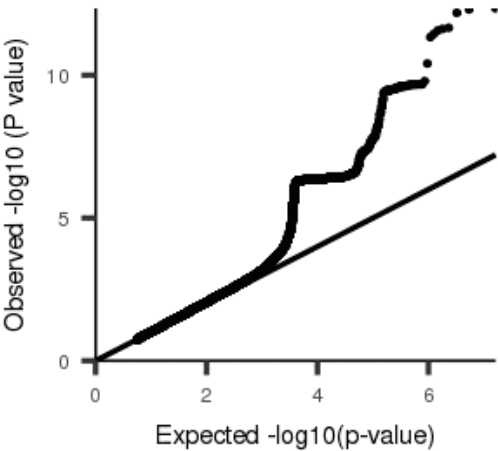

[back to list of plots](#)

Figure 527: dMRI TBSS ICVF Superior fronto-occipital fasciculus L

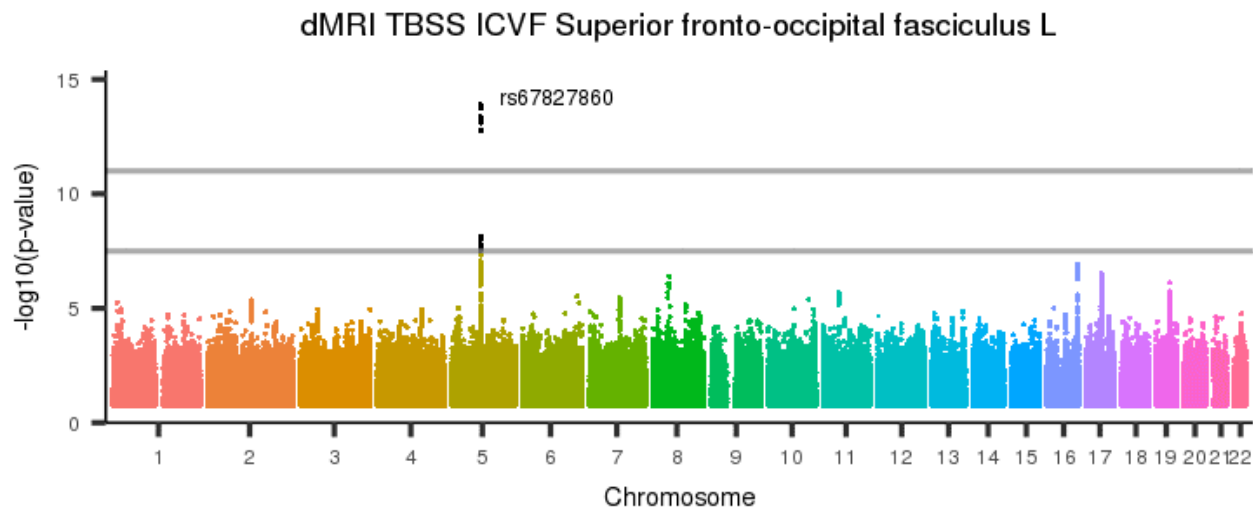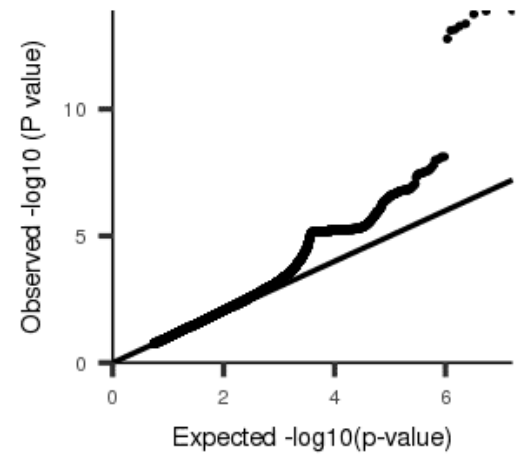

[back to list of plots](#)

Figure 528: dMRI TBSS ICVF Uncinate fasciculus R

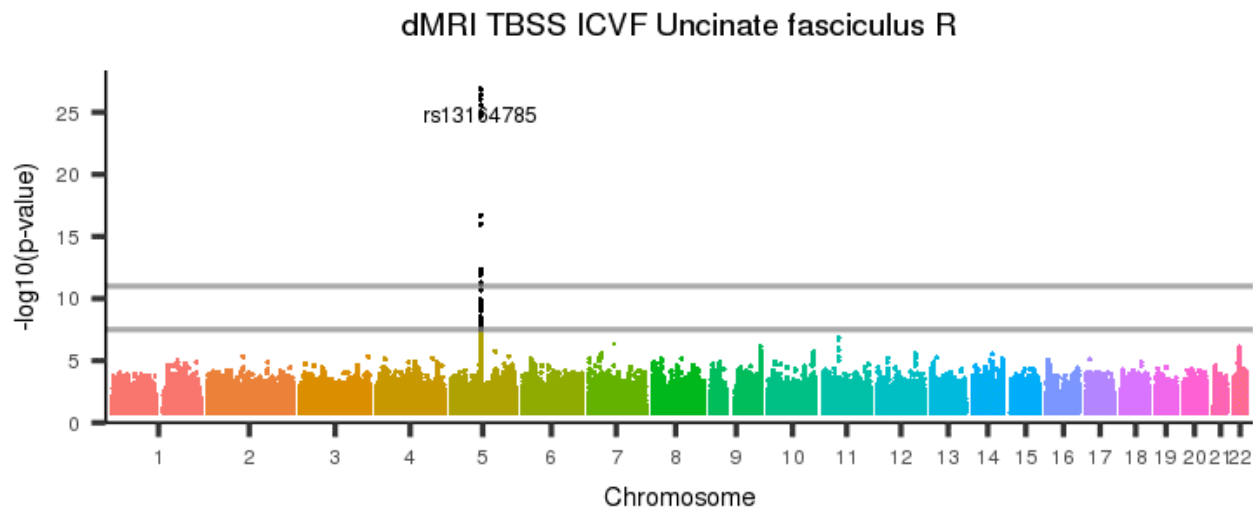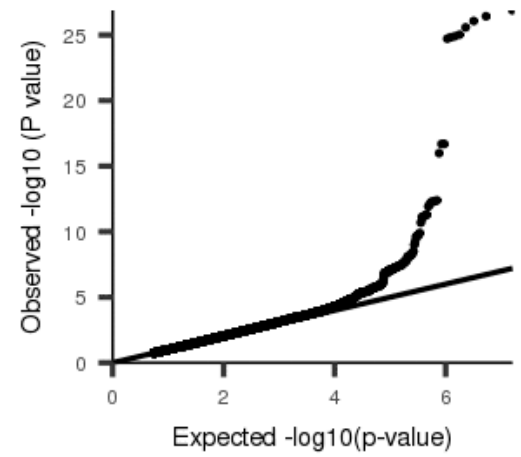

[back to list of plots](#)

Figure 529: dMRI TBSS ICVF Uncinate fasciculus L

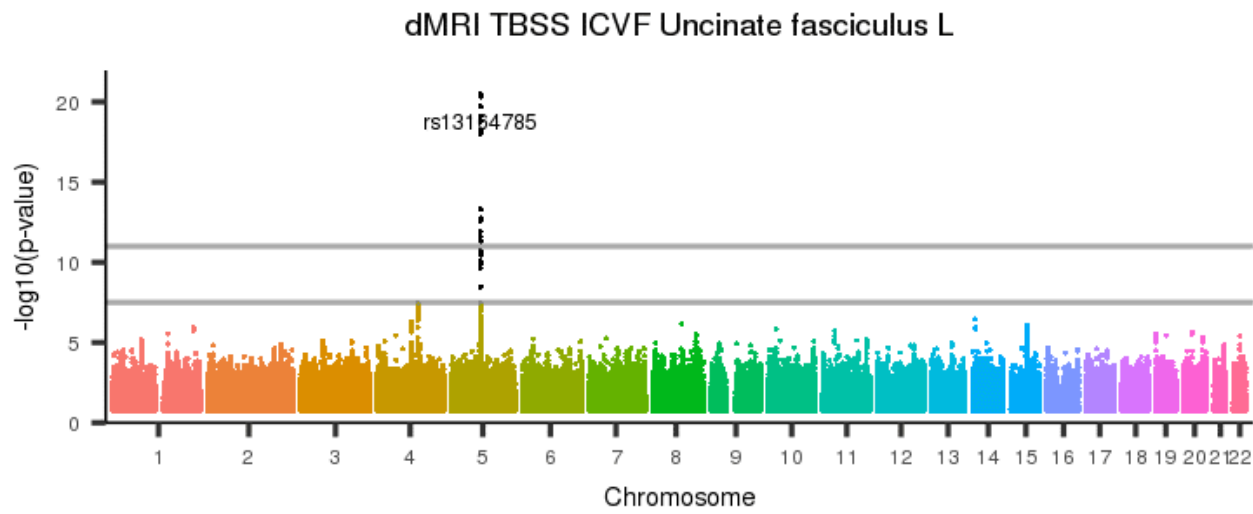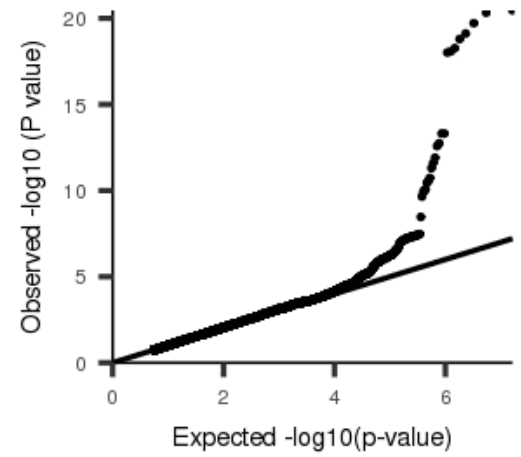

[back to list of plots](#)

Figure 530: dMRI TBSS ICVF Tapetum R

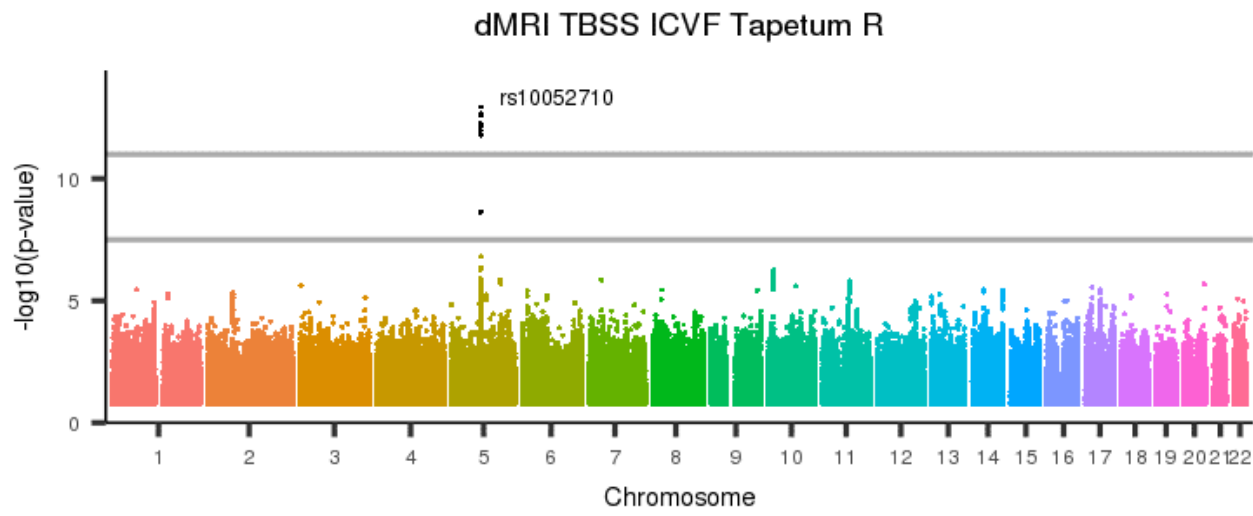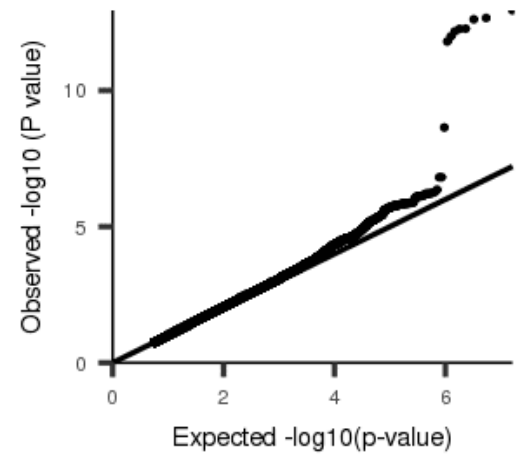

[back to list of plots](#)

Figure 531: dMRI TBSS ICVF Tapetum L

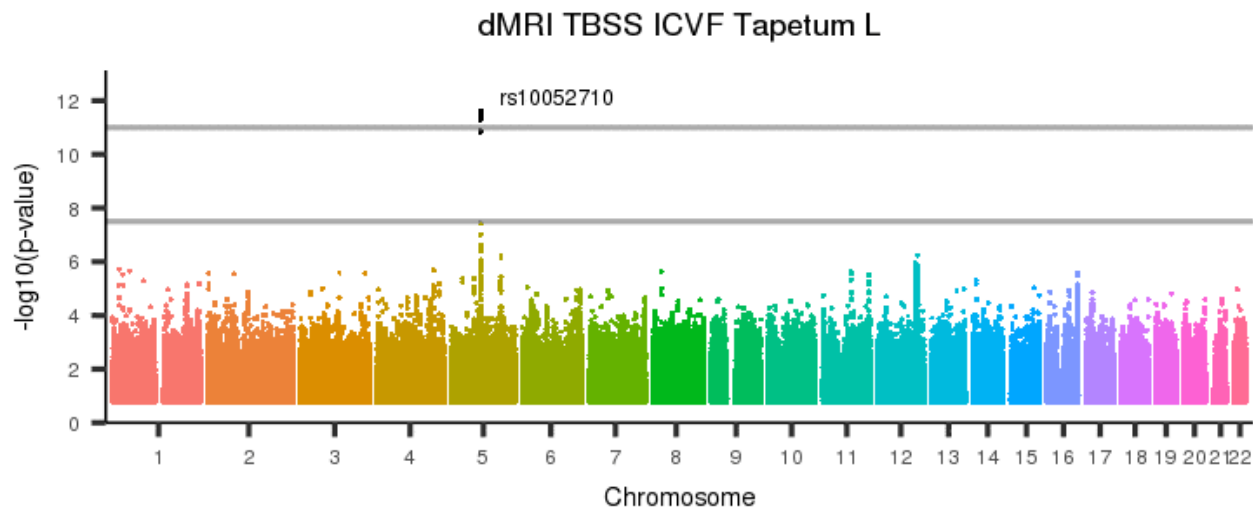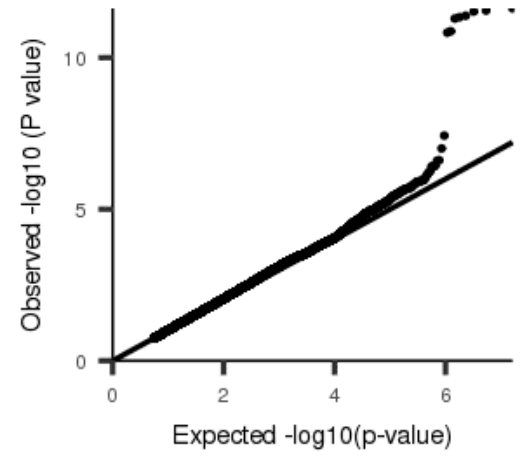

[back to list of plots](#)

Figure 532: dMRI TBSS OD Middle cerebellar peduncle

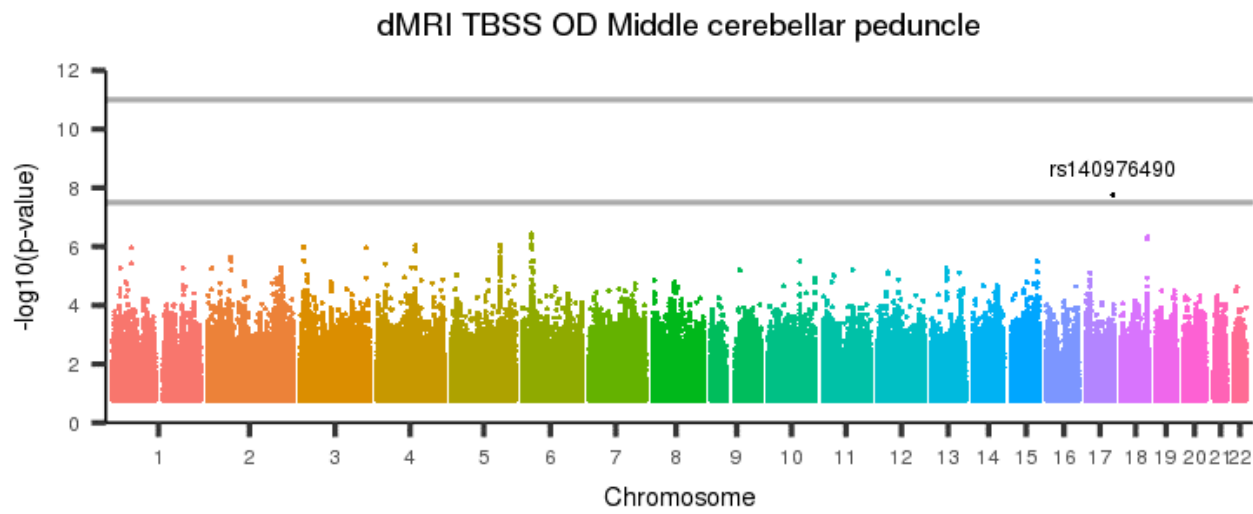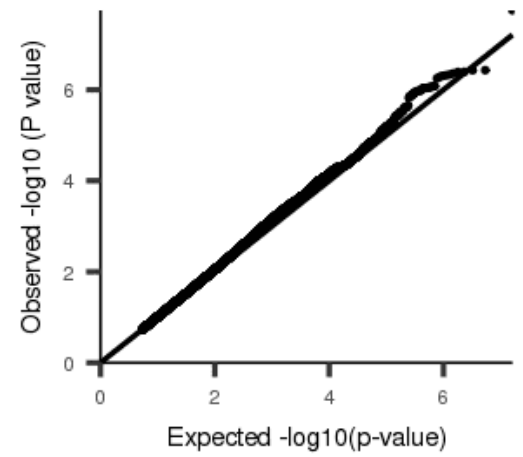

[back to list of plots](#)

Figure 533: dMRI TBSS OD Pontine crossing tract

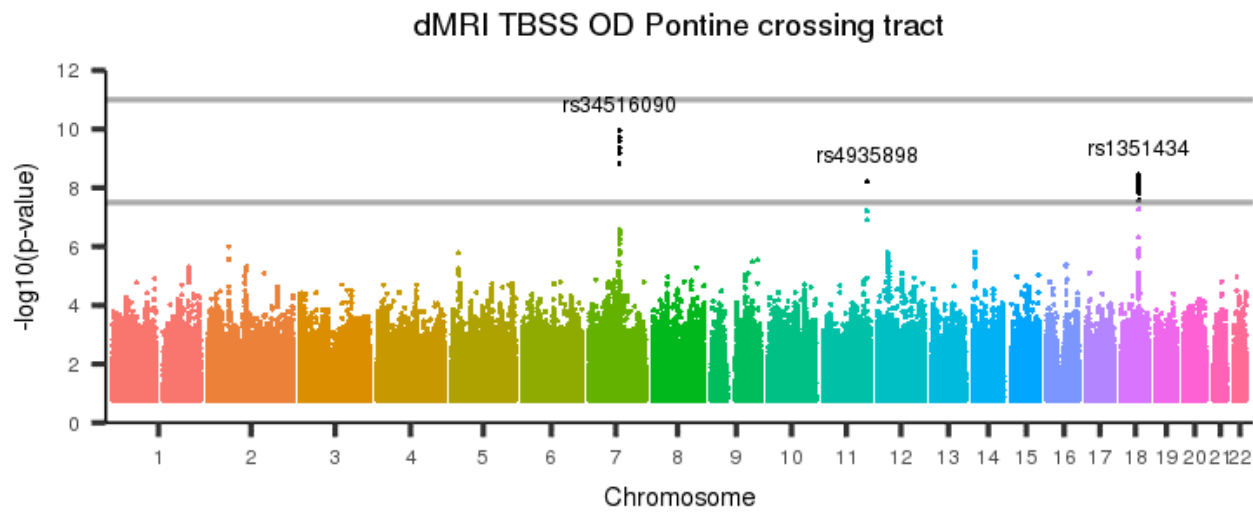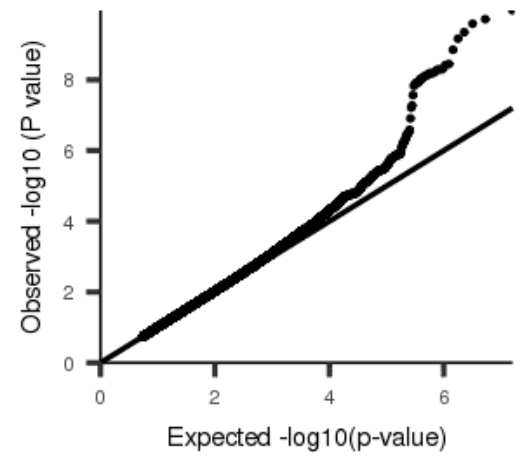

[back to list of plots](#)



Figure 534: dMRI TBSS OD Genu of corpus callosum

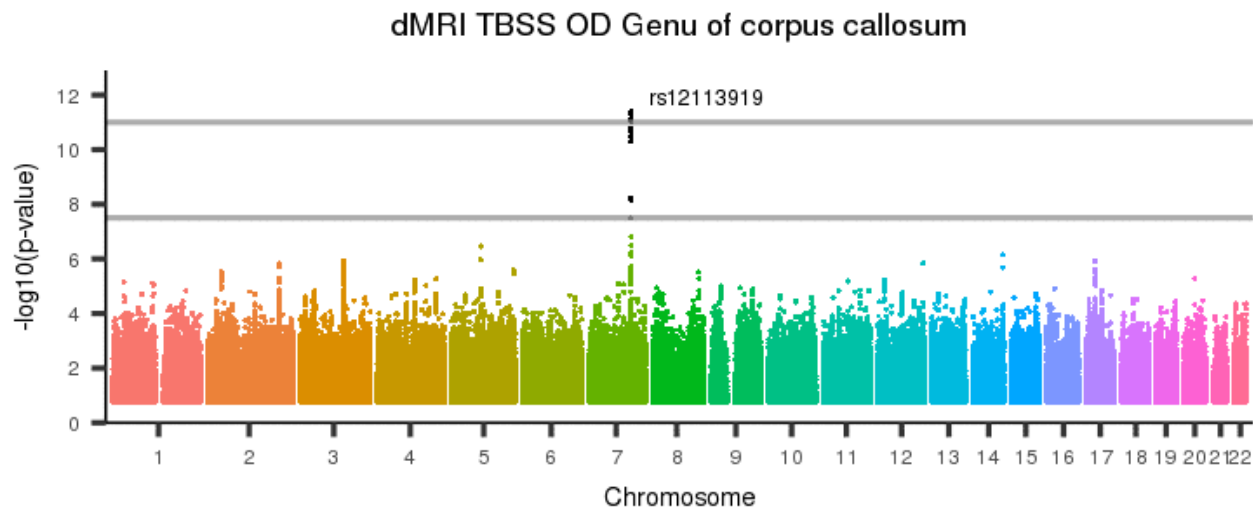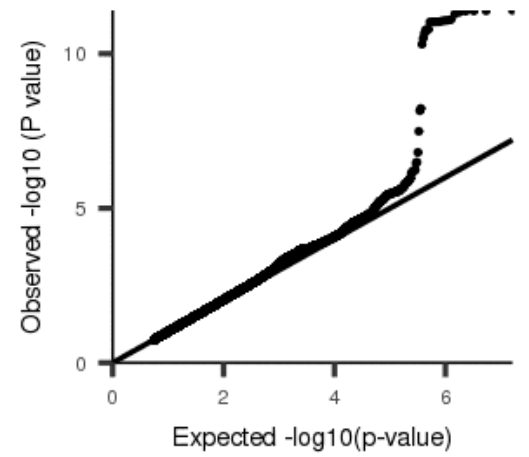

[back to list of plots](#)

Figure 535: dMRI TBSS OD Body of corpus callosum

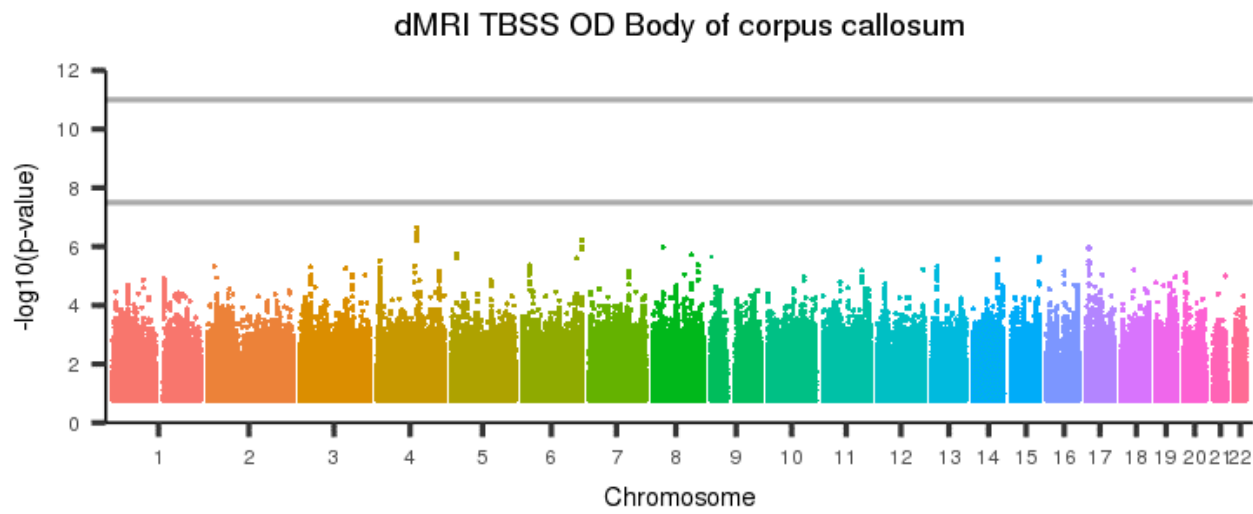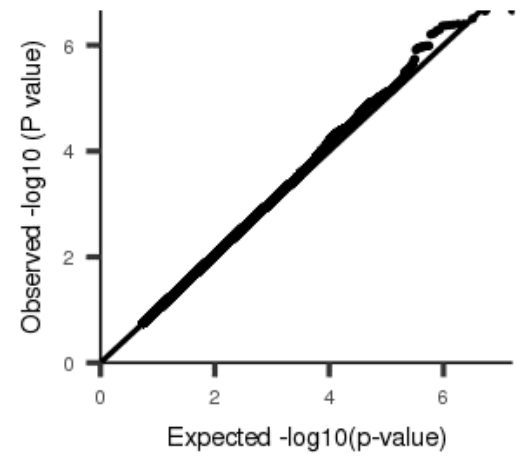

[back to list of plots](#)

Figure 536: dMRI TBSS OD Splenium of corpus callosum

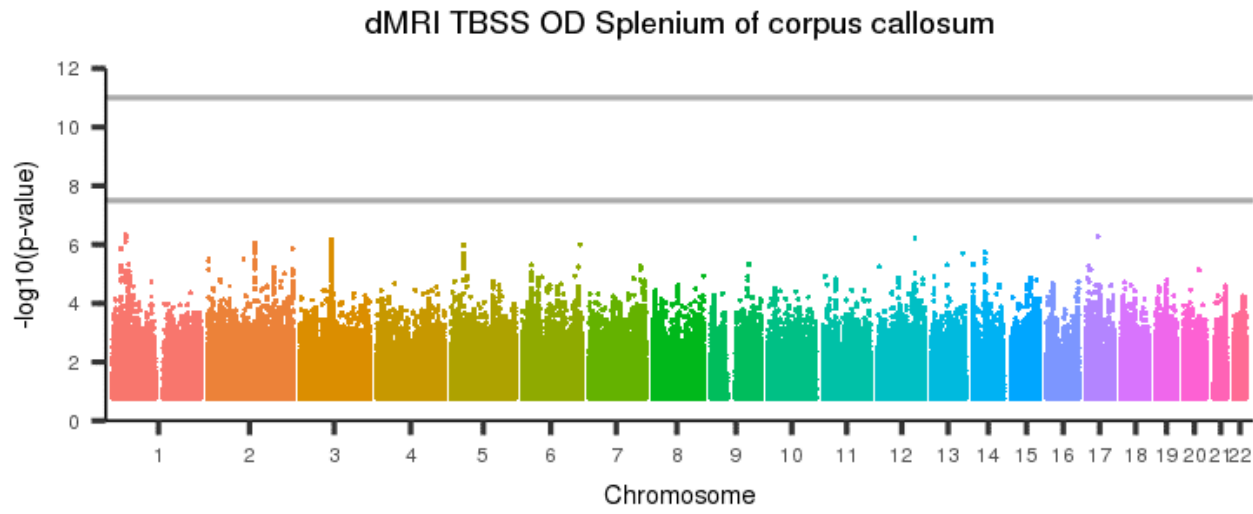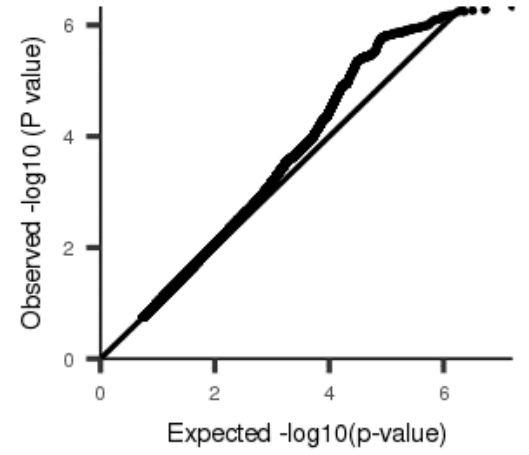

[back to list of plots](#)

Figure 537: dMRI TBSS OD Fornix

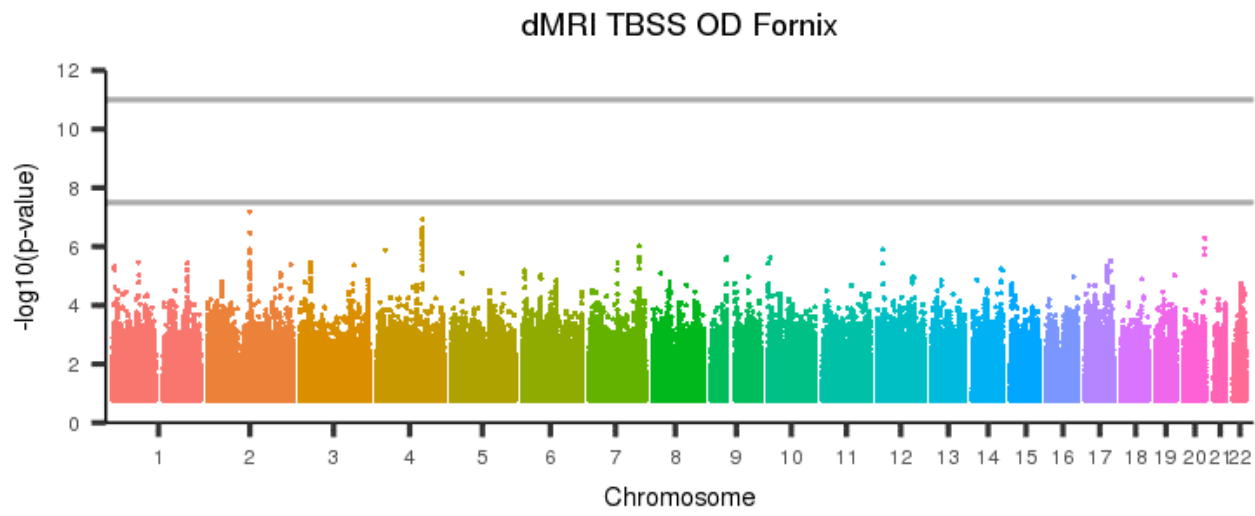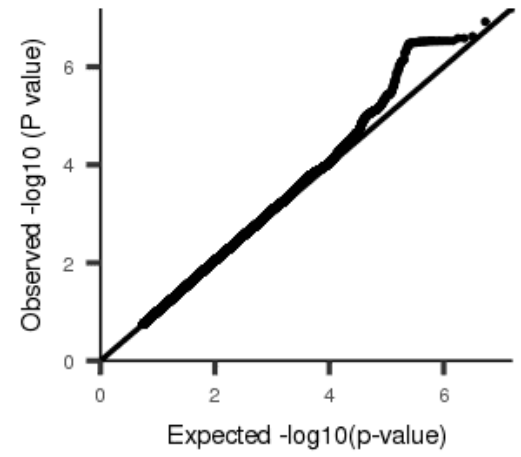

[back to list of plots](#)

Figure 538: dMRI TBSS OD Corticospinal tract R

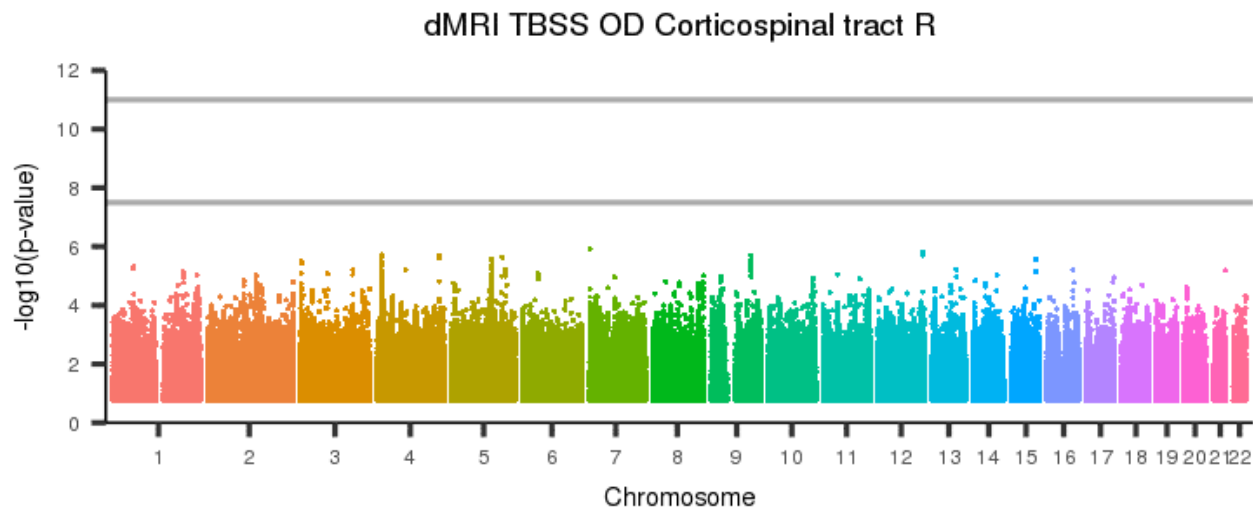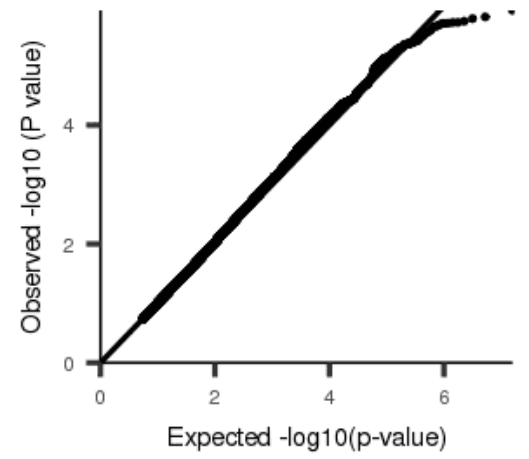

[back to list of plots](#)

Figure 539: dMRI TBSS OD Corticospinal tract L

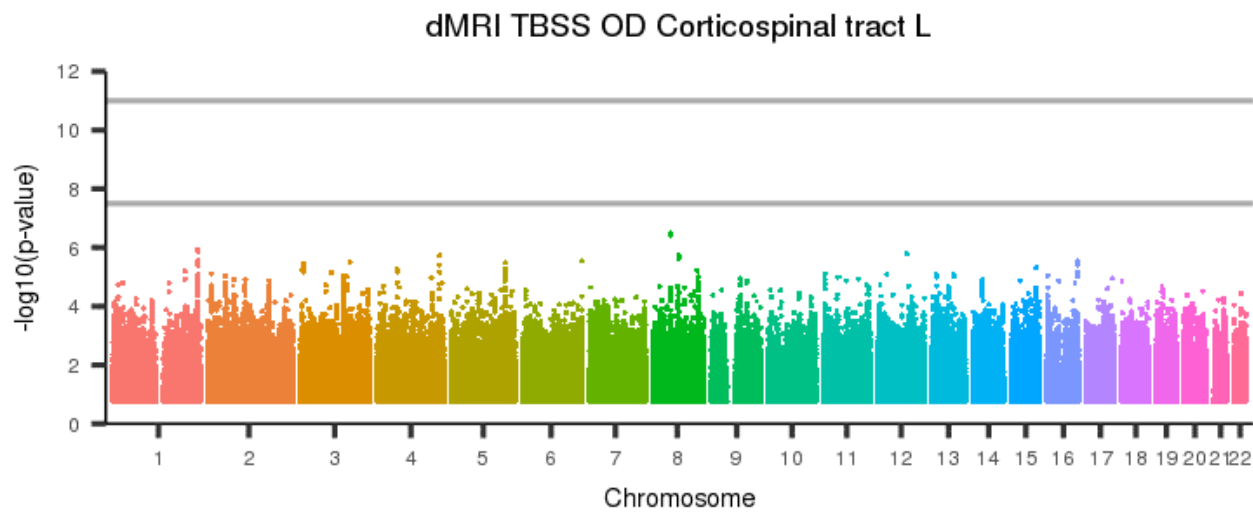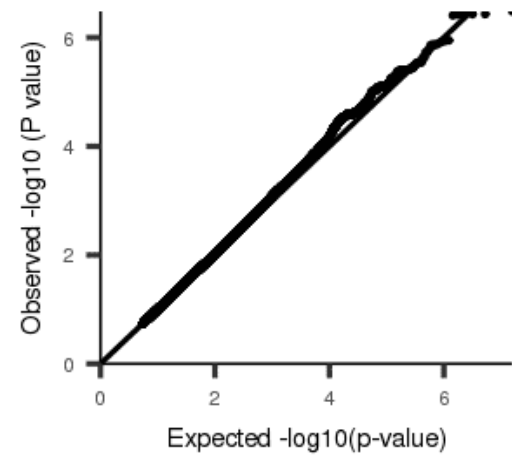

[back to list of plots](#)

Figure 540: dMRI TBSS OD Medial lemniscus R

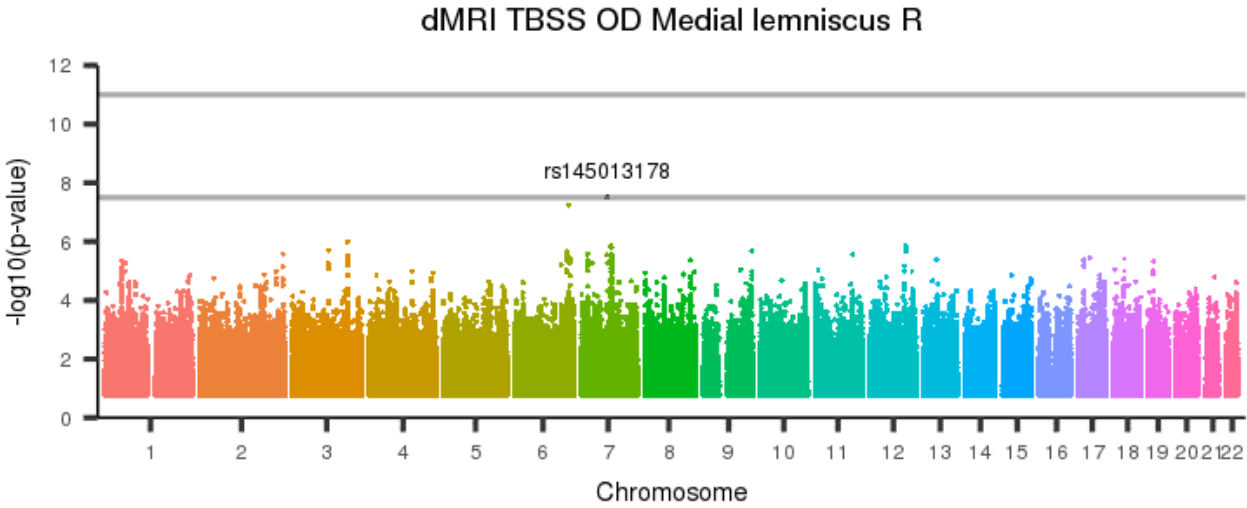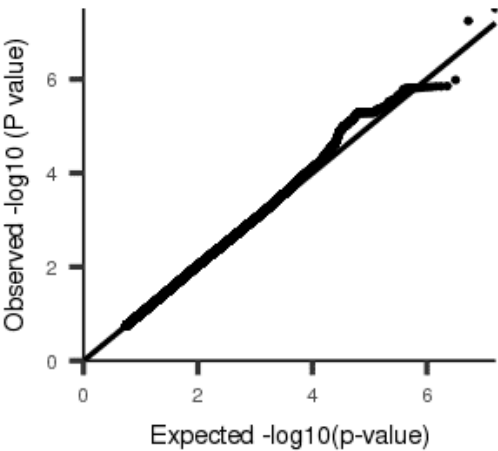

[back to list of plots](#)

Figure 541: dMRI TBSS OD Medial lemniscus L

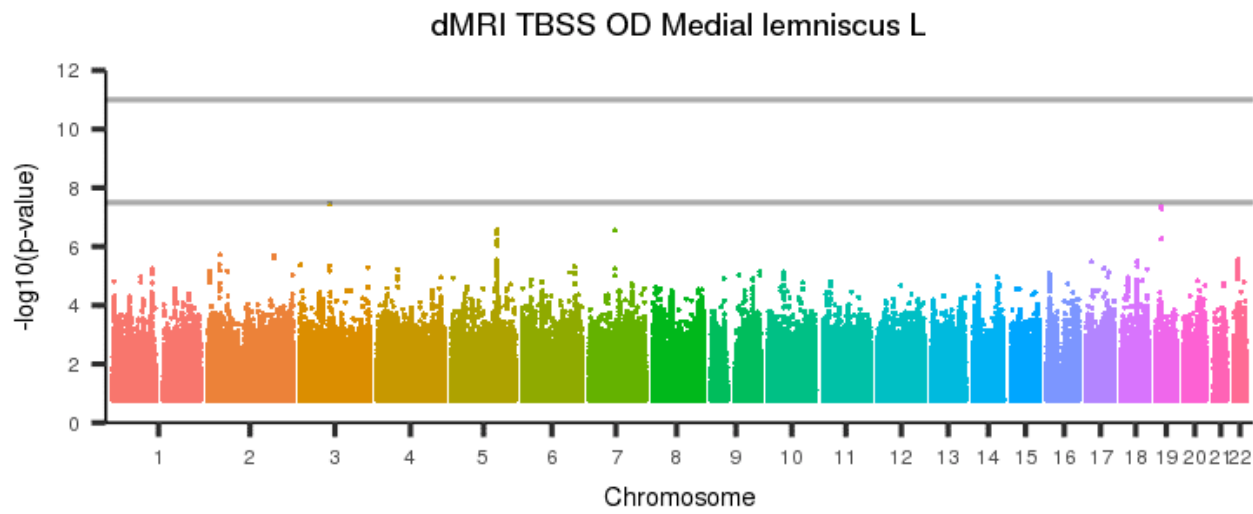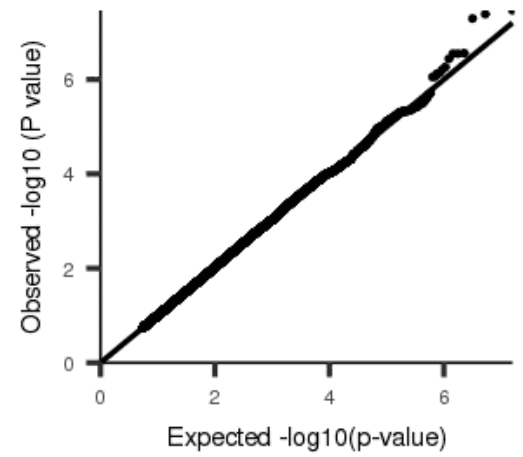

[back to list of plots](#)



Figure 542: dMRI TBSS OD Inferior cerebellar peduncle R

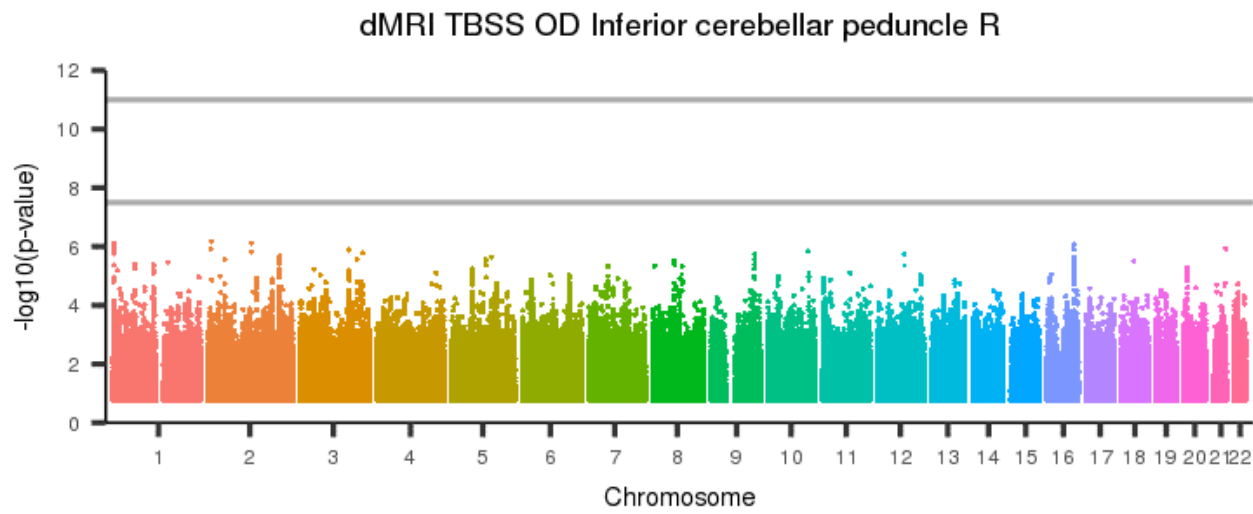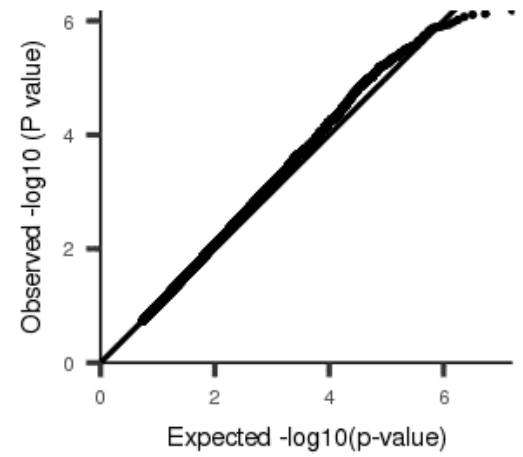

[back to list of plots](#)

Figure 543: dMRI TBSS OD Inferior cerebellar peduncle L

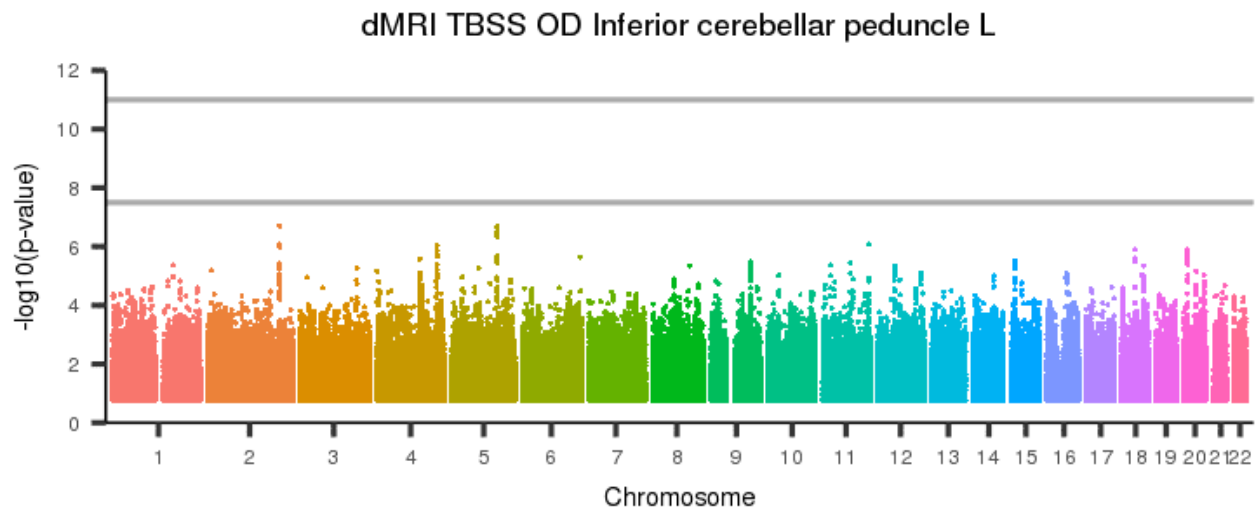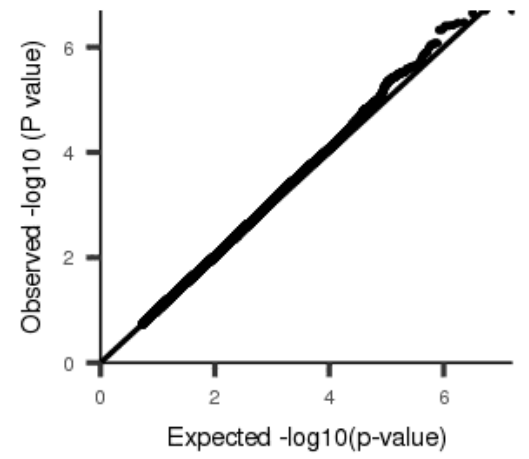

[back to list of plots](#)

Figure 544: dMRI TBSS OD Superior cerebellar peduncle R

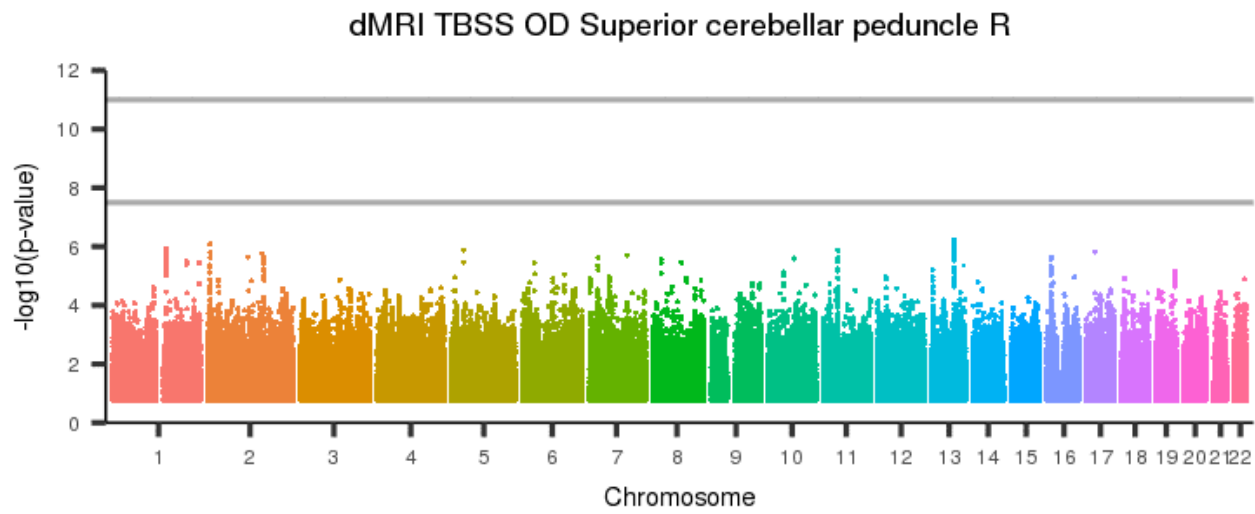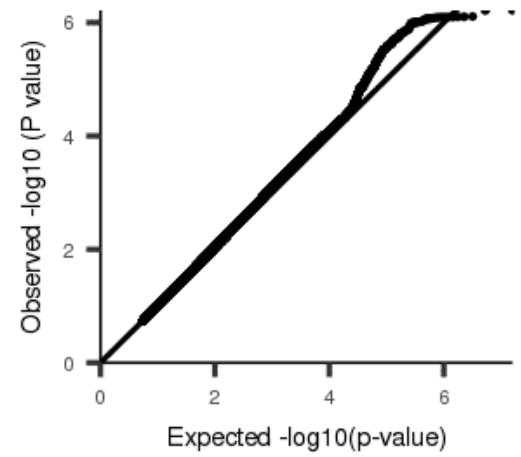

[back to list of plots](#)

Figure 545: dMRI TBSS OD Superior cerebellar peduncle L

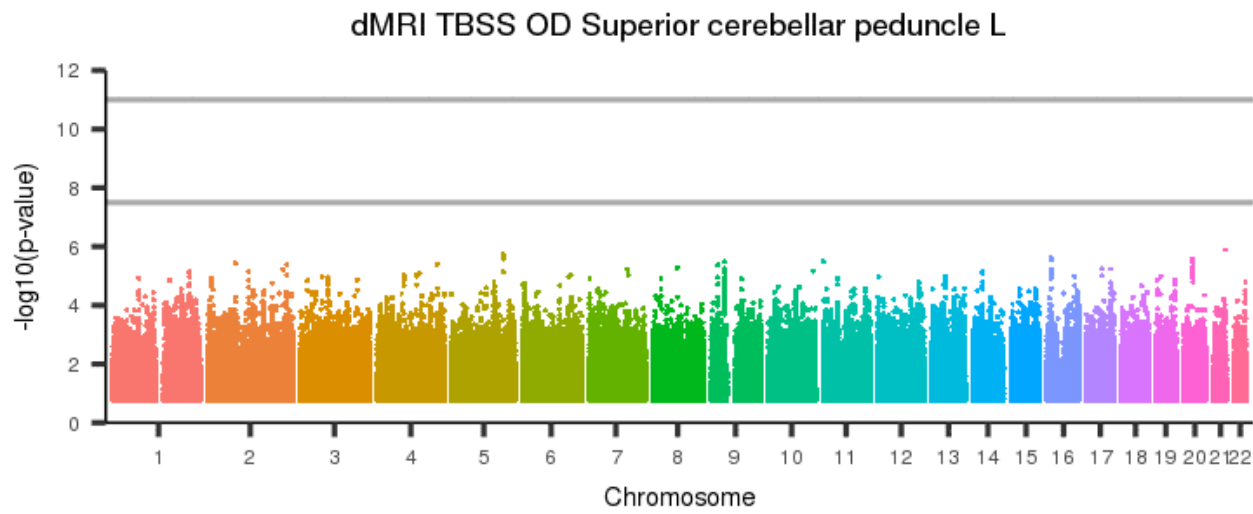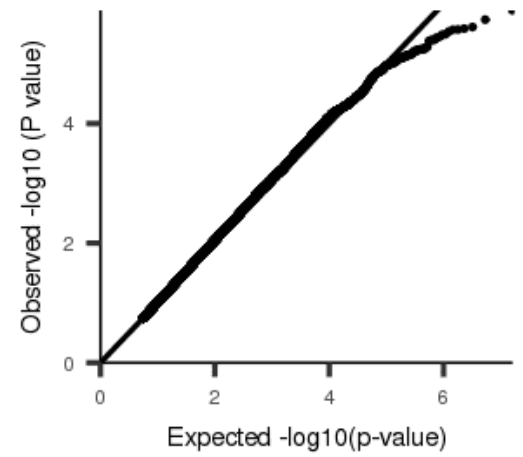

[back to list of plots](#)

Figure 546: dMRI TBSS OD Cerebral peduncle R

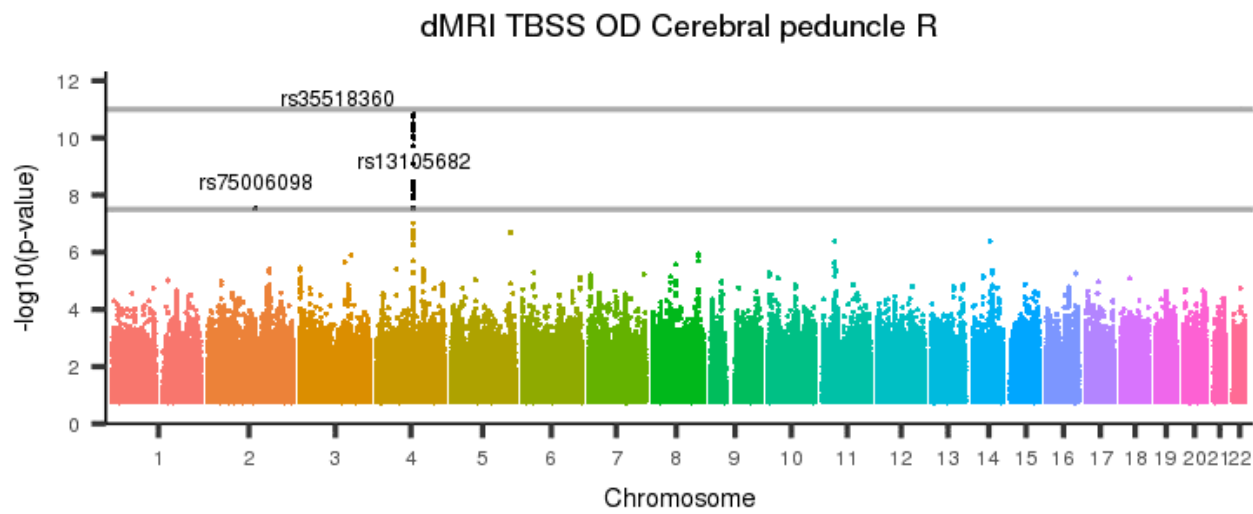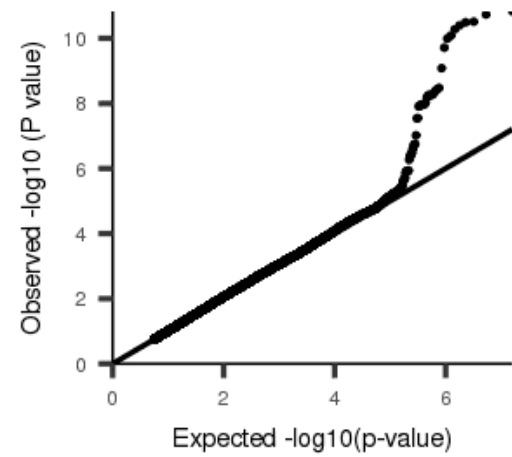

[back to list of plots](#)

Figure 547: dMRI TBSS OD Cerebral peduncle L

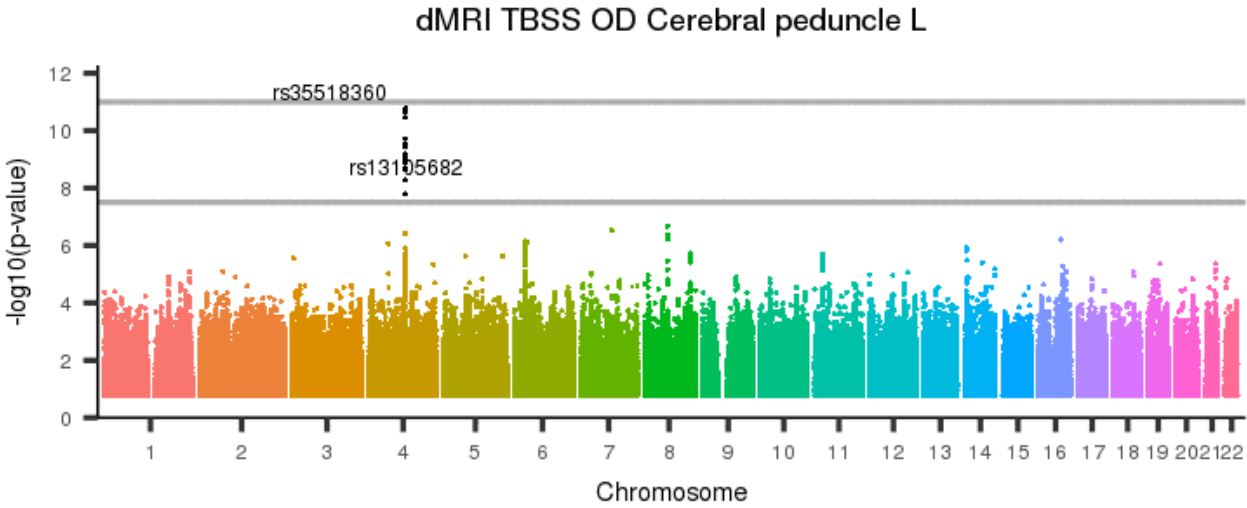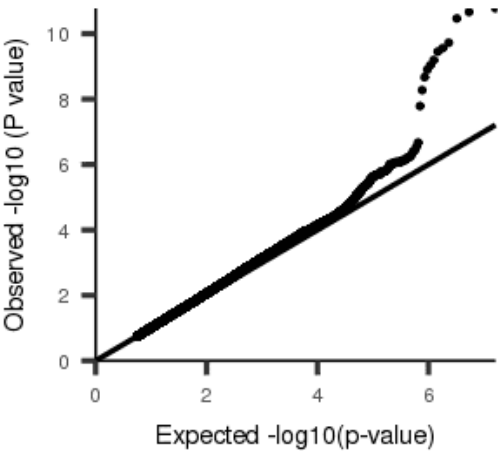

[back to list of plots](#)

Figure 548: dMRI TBSS OD Anterior limb of internal capsule R

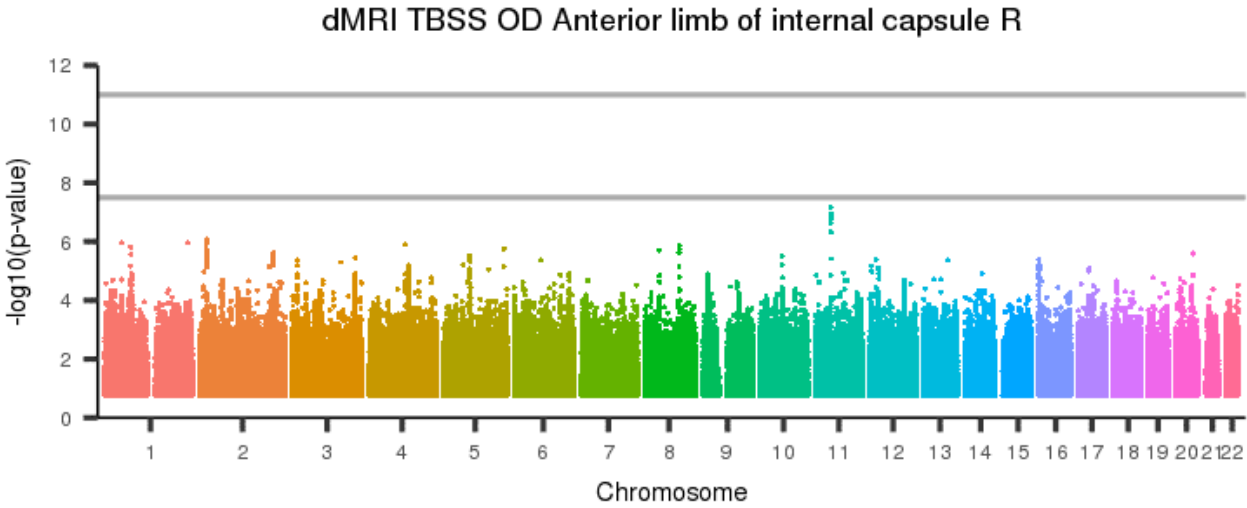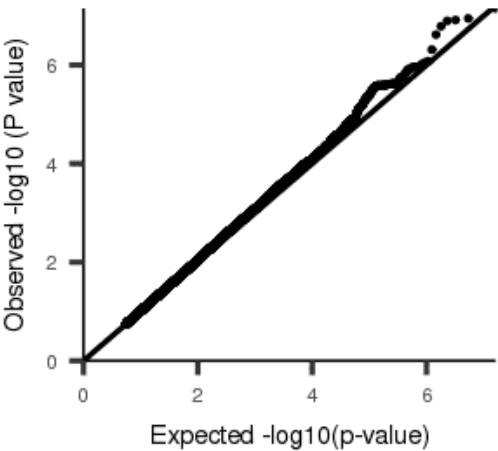

[back to list of plots](#)

Figure 549: dMRI TBSS OD Anterior limb of internal capsule L

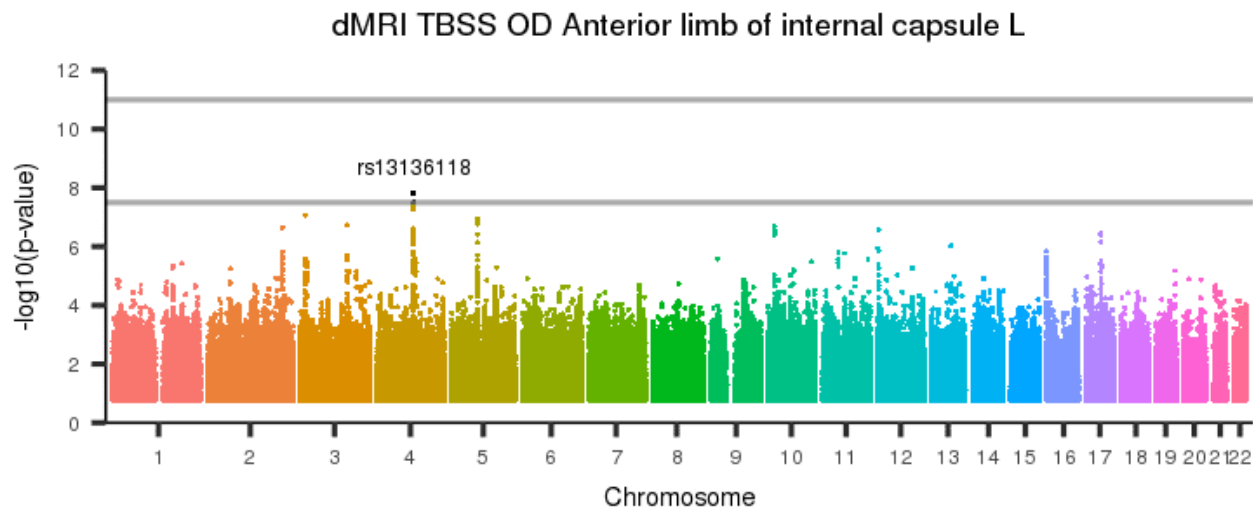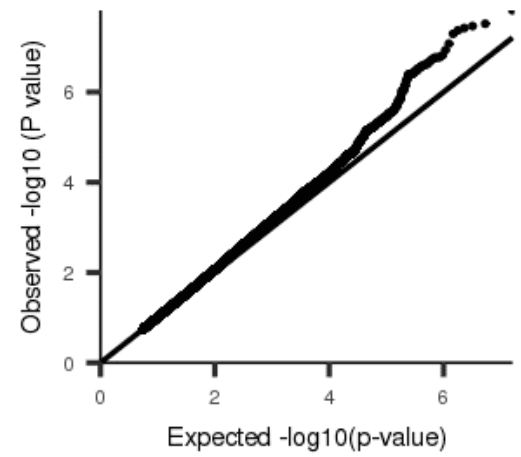

[back to list of plots](#)



Figure 550: dMRI TBSS OD Posterior limb of internal capsule R

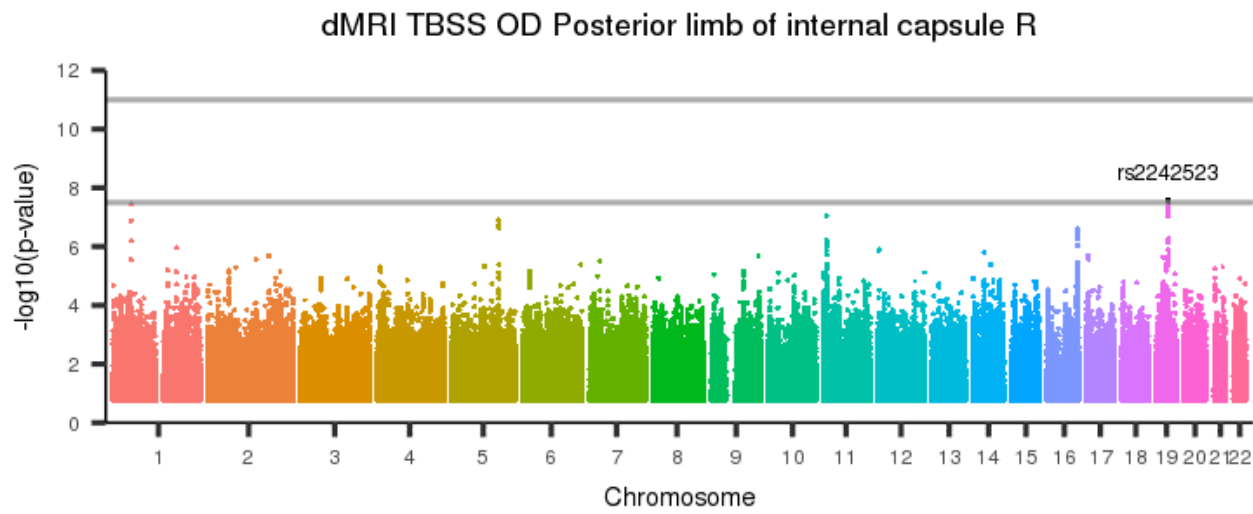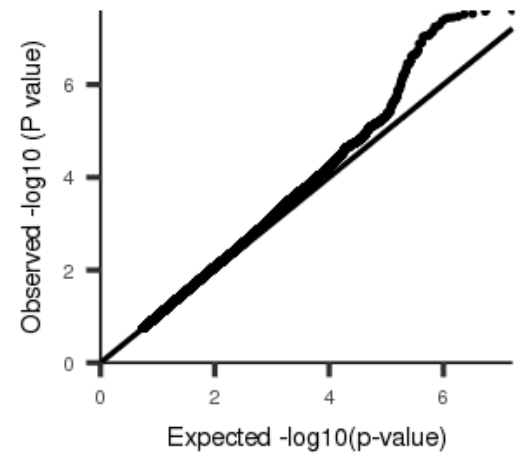

[back to list of plots](#)

Figure 551: dMRI TBSS OD Posterior limb of internal capsule L

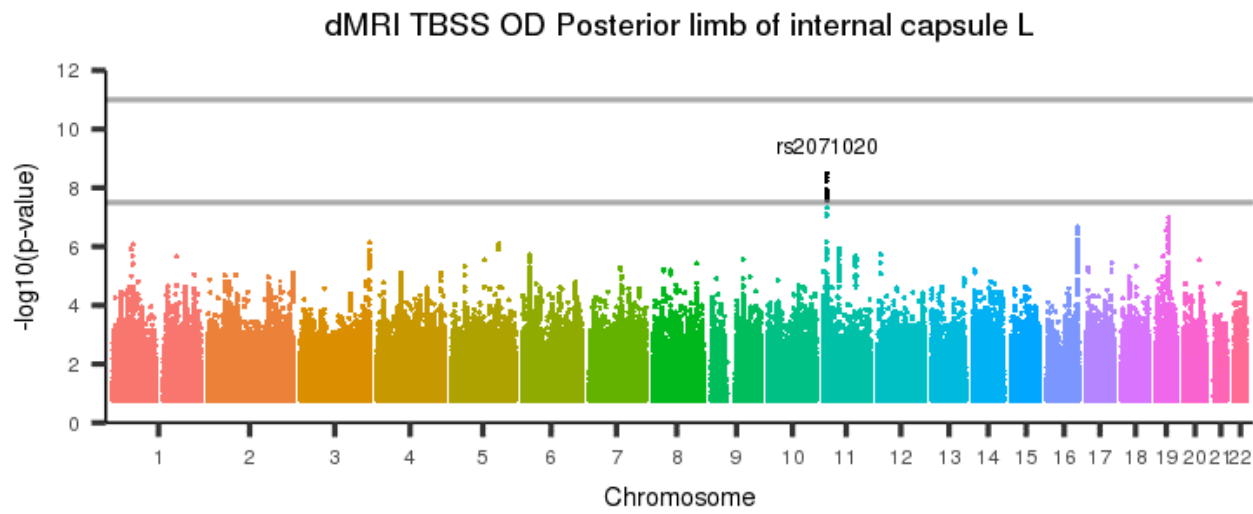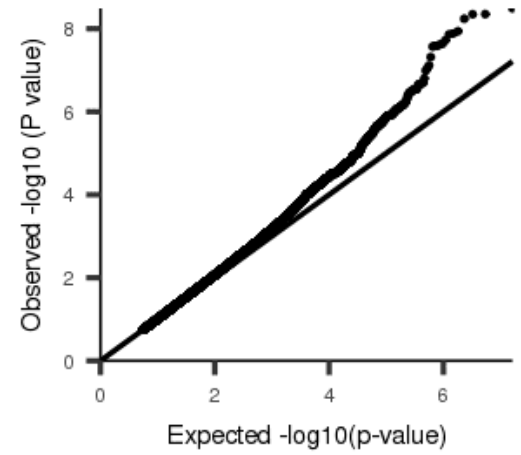

[back to list of plots](#)

Figure 552: dMRI TBSS OD Retrolesional part of internal capsule R

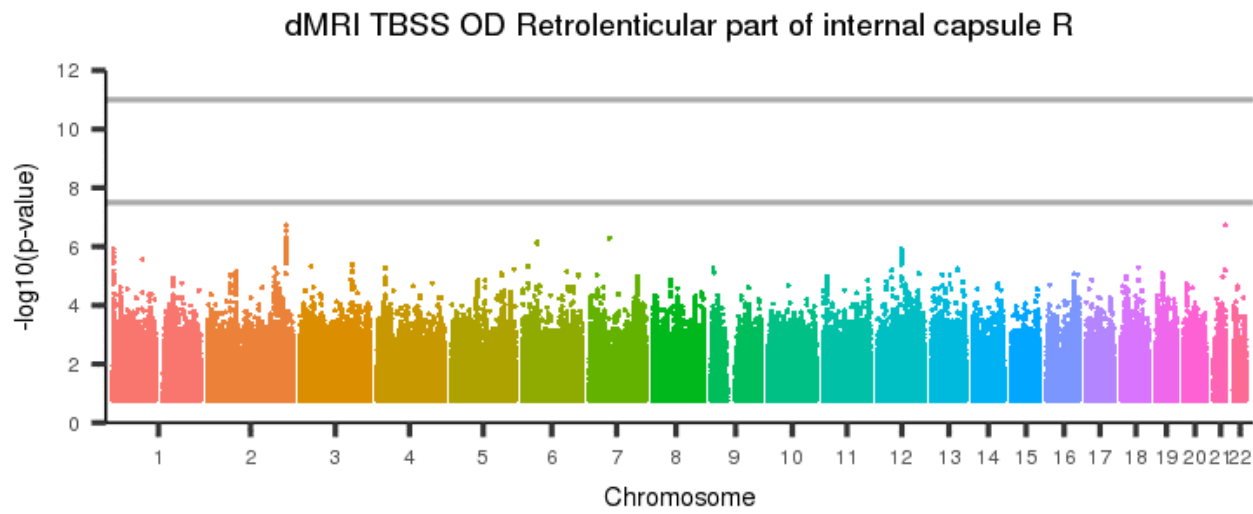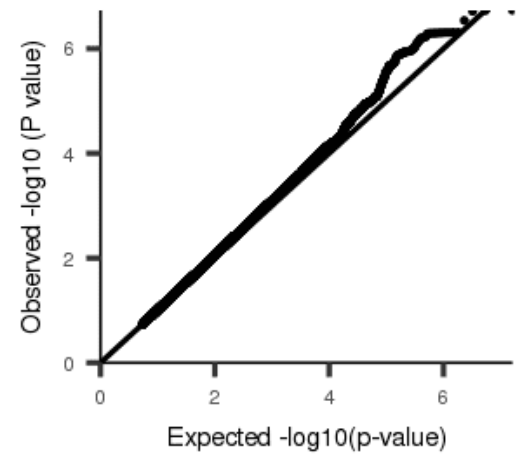

[back to list of plots](#)

Figure 553: dMRI TBSS OD Retrolenticular part of internal capsule L

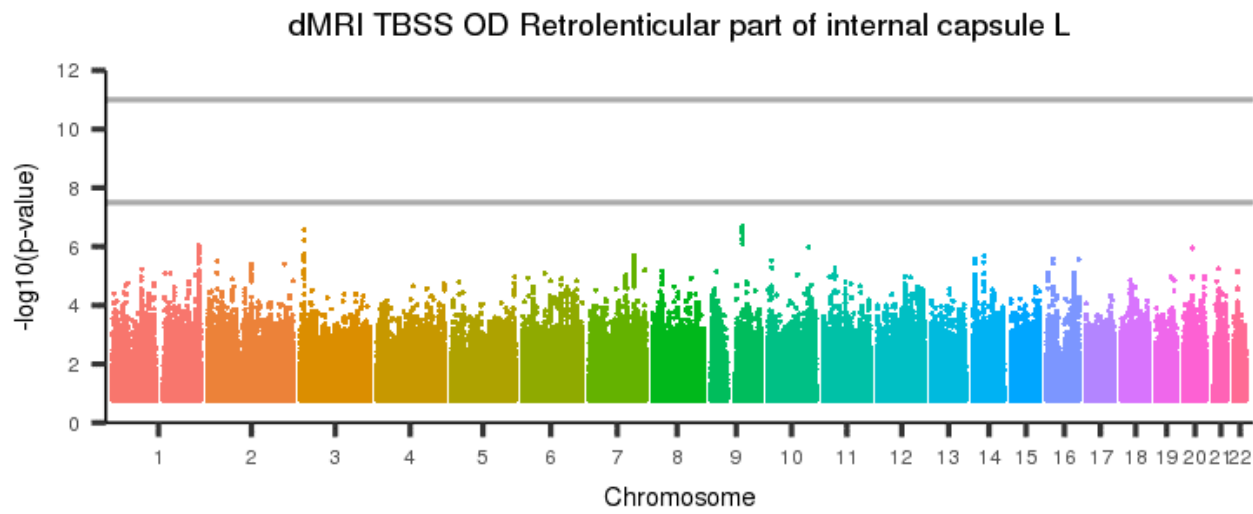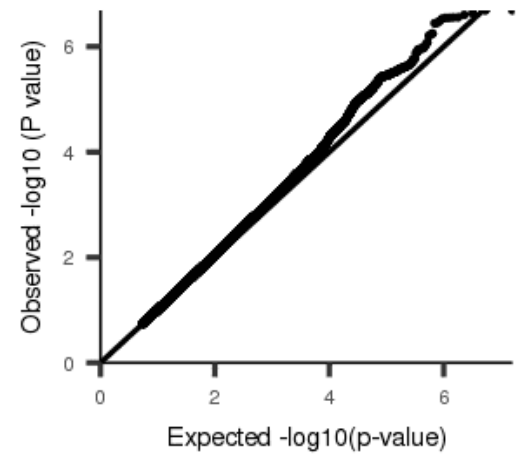

[back to list of plots](#)

Figure 554: dMRI TBSS OD Anterior corona radiata R

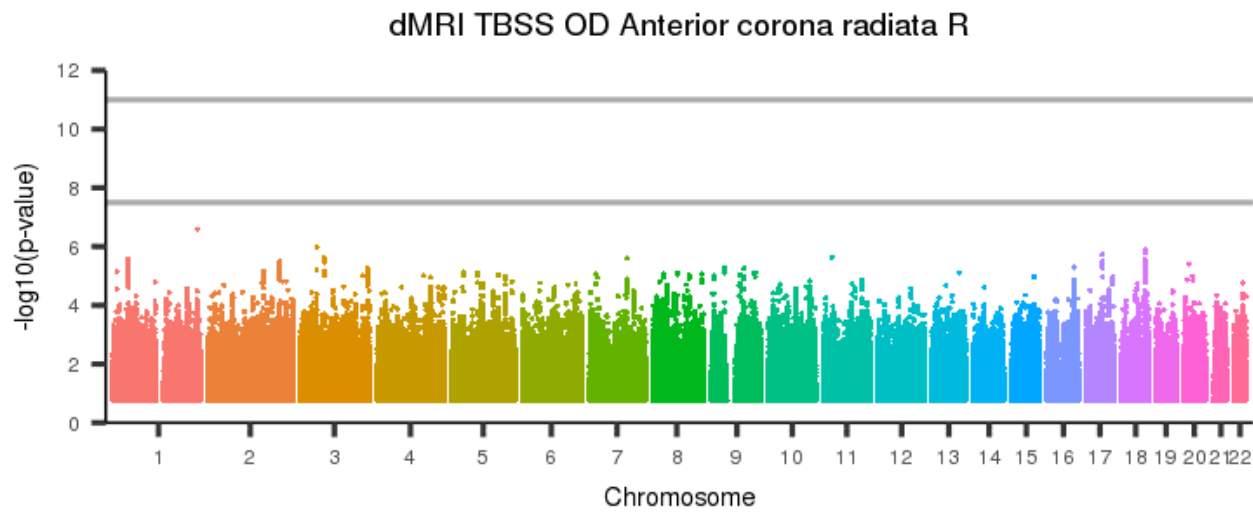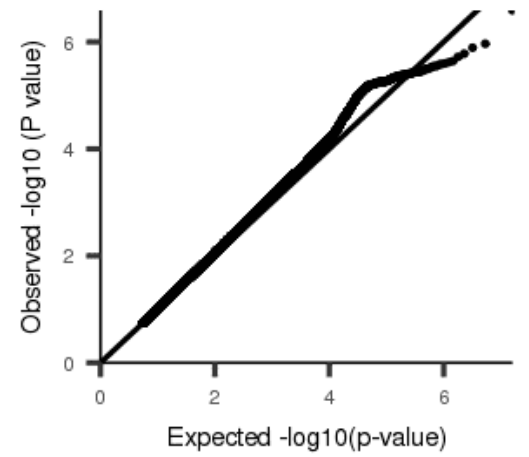

[back to list of plots](#)

Figure 555: dMRI TBSS OD Anterior corona radiata L

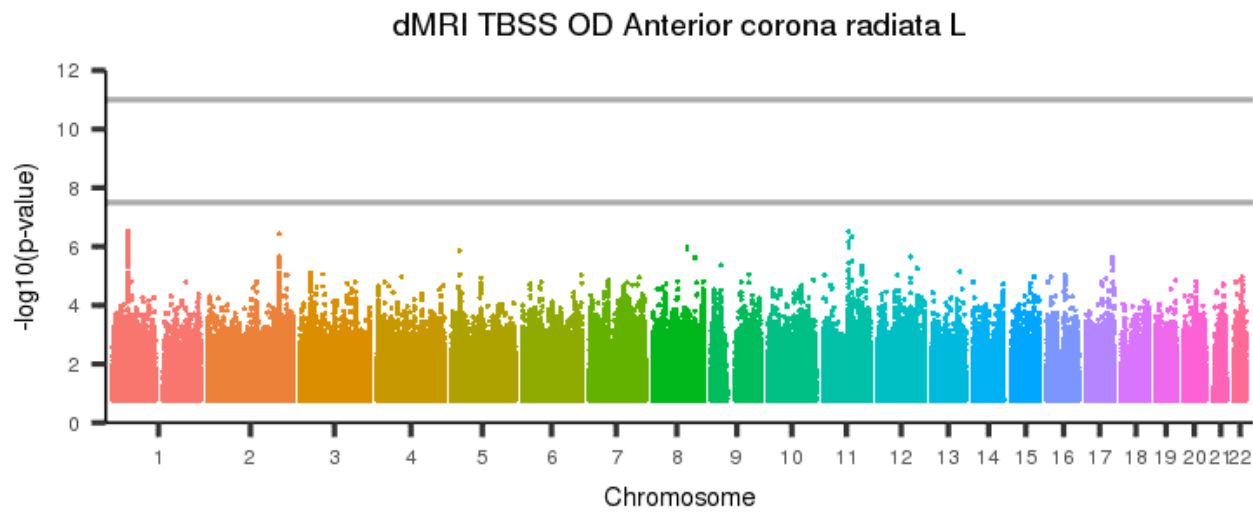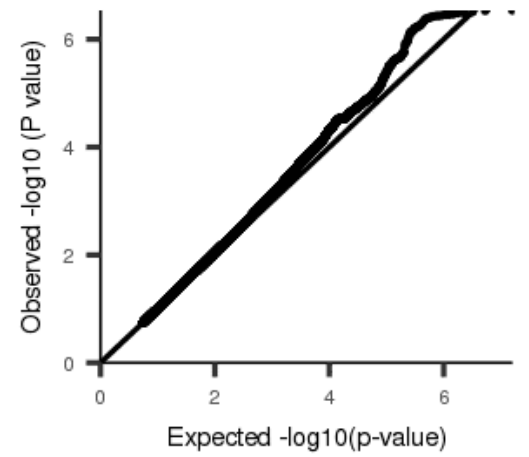

[back to list of plots](#)

Figure 556: dMRI TBSS OD Superior corona radiata R

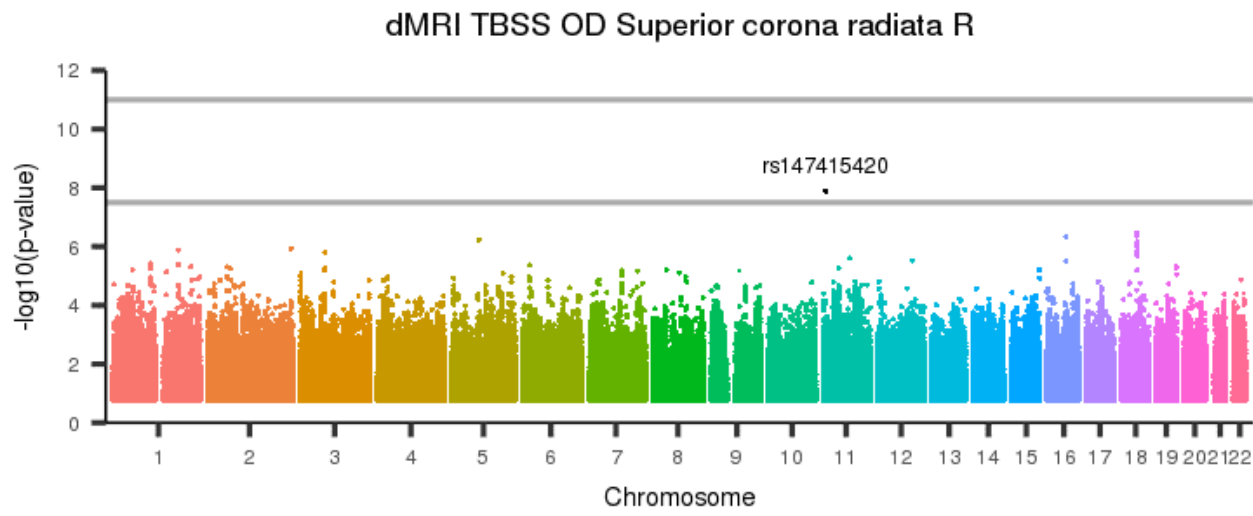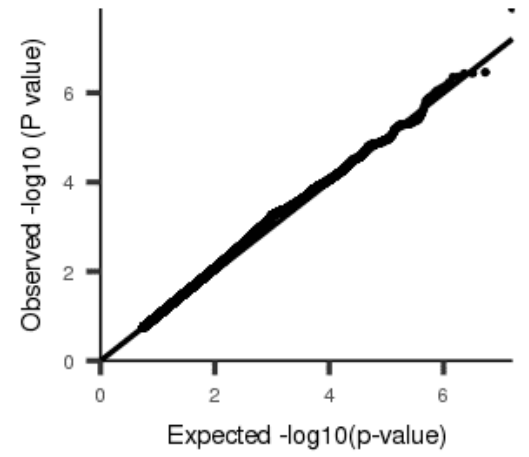

[back to list of plots](#)

Figure 557: dMRI TBSS OD Superior corona radiata L

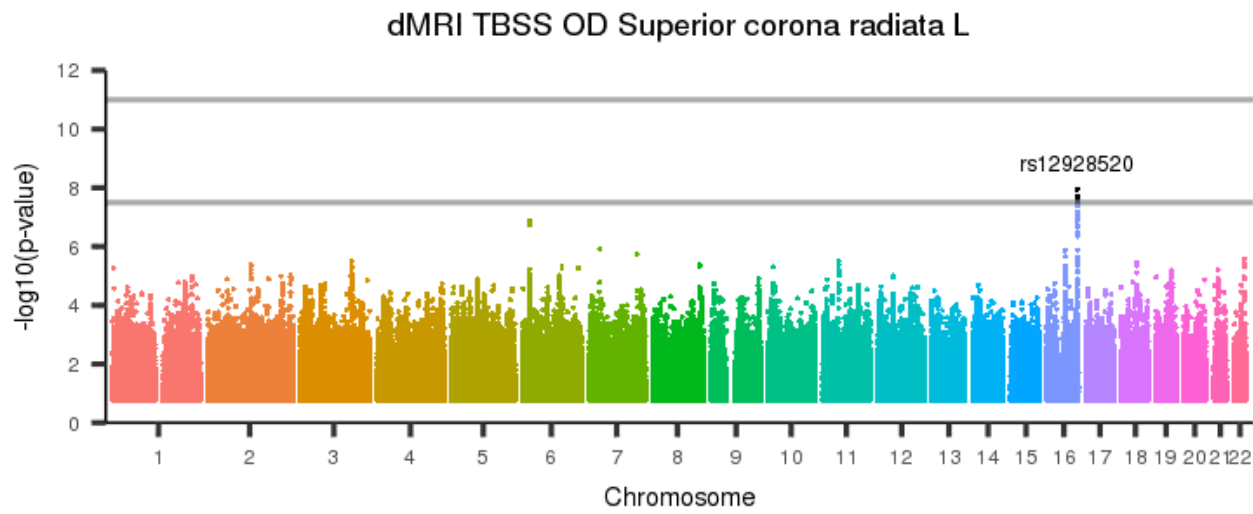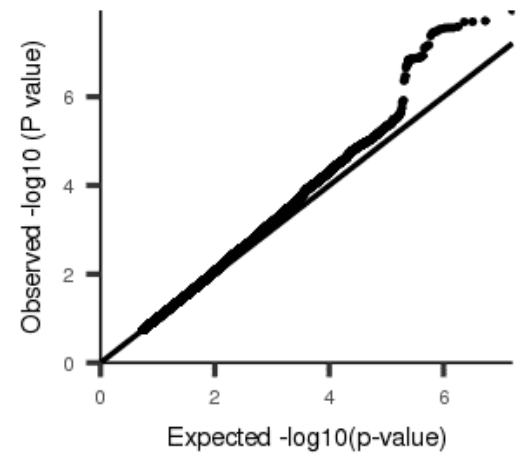

[back to list of plots](#)



Figure 558: dMRI TBSS OD Posterior corona radiata R

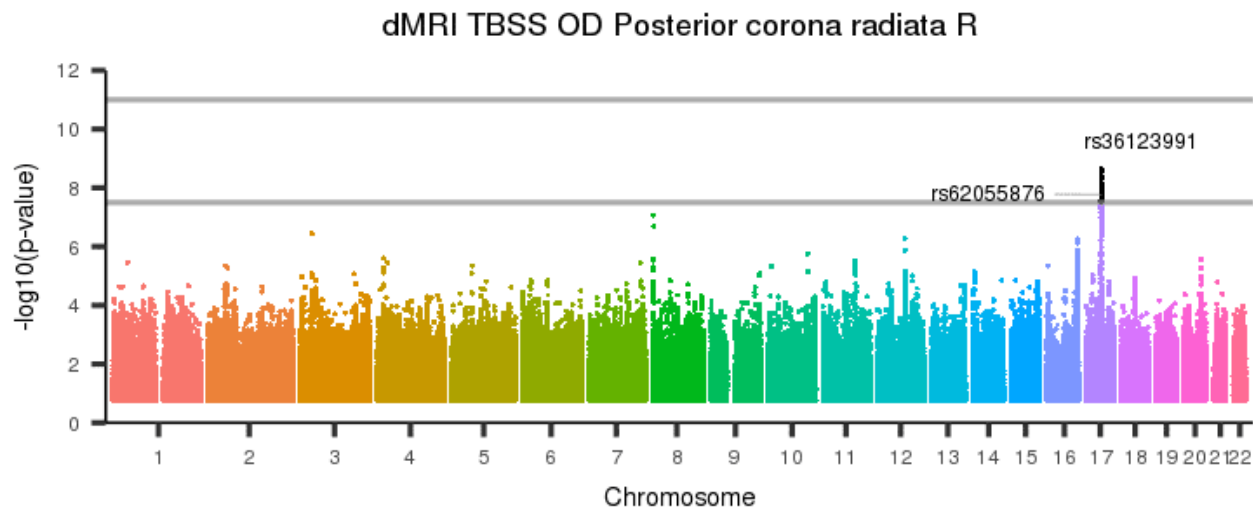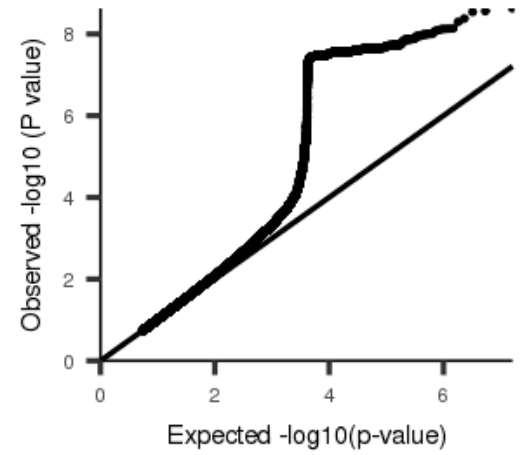

[back to list of plots](#)

Figure 559: dMRI TBSS OD Posterior corona radiata L

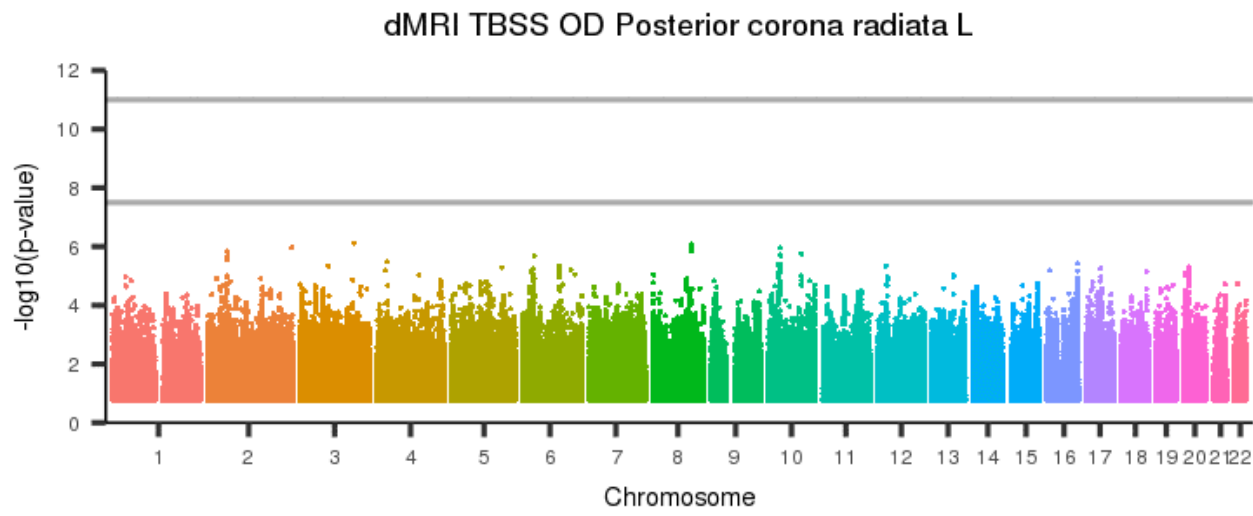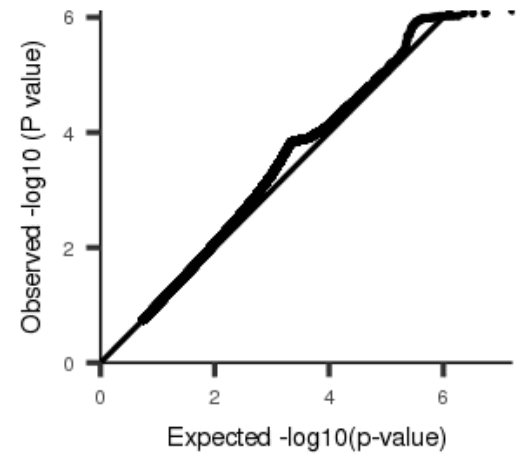

[back to list of plots](#)

Figure 560: dMRI TBSS OD Posterior thalamic radiation R

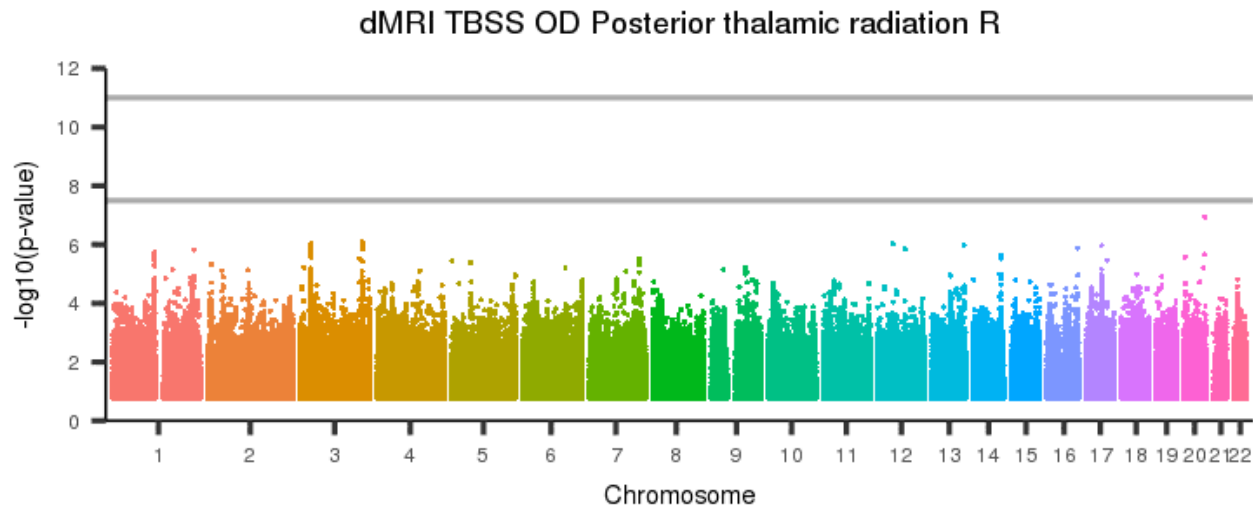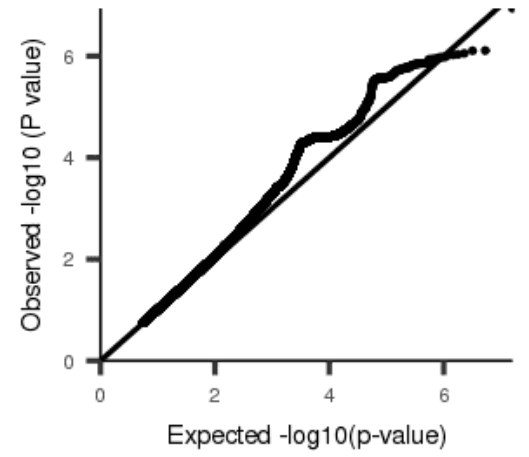

[back to list of plots](#)

Figure 561: dMRI TBSS OD Posterior thalamic radiation L

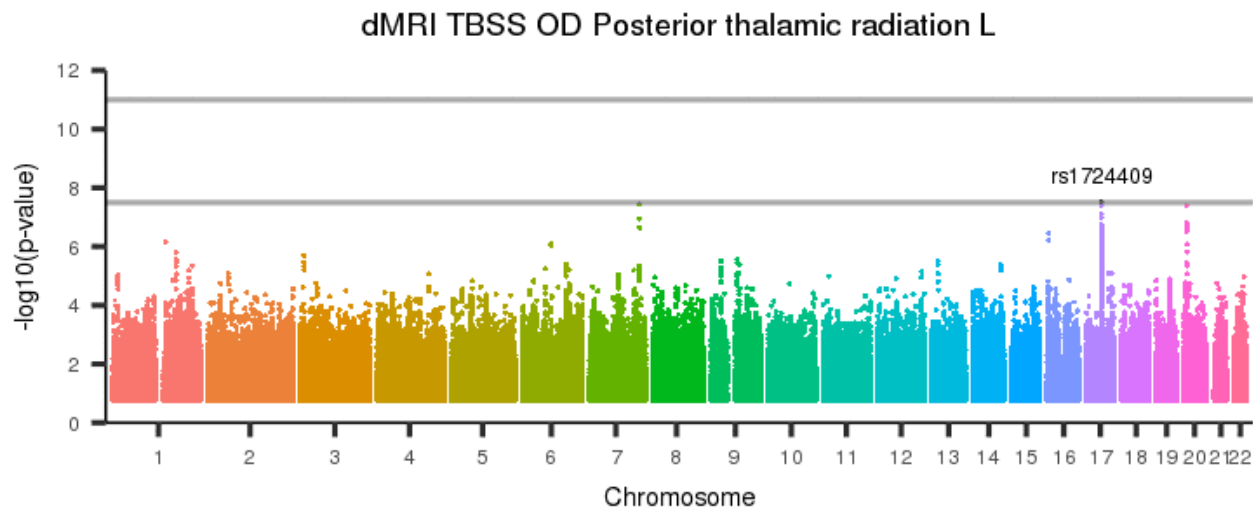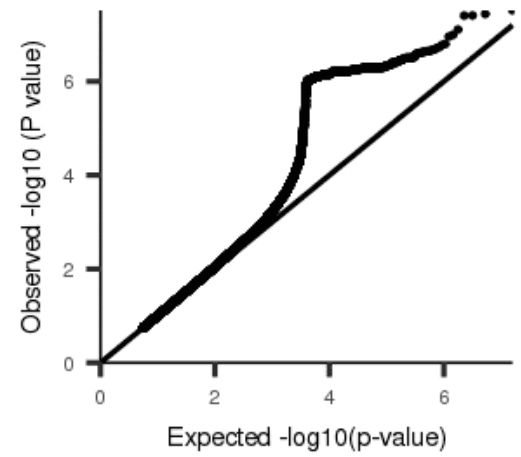

[back to list of plots](#)

Figure 562: dMRI TBSS OD Sagittal stratum R

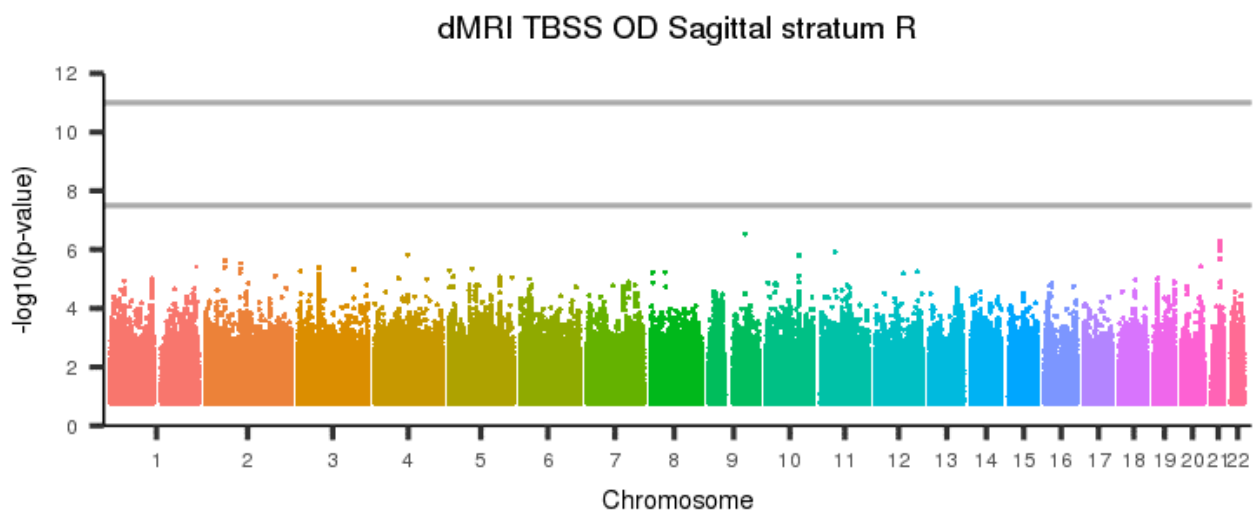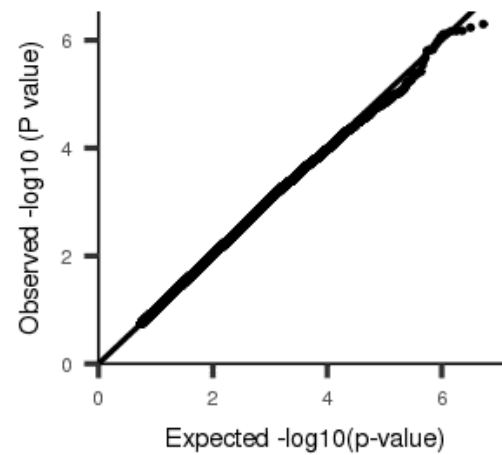

[back to list of plots](#)

Figure 563: dMRI TBSS OD Sagittal stratum L

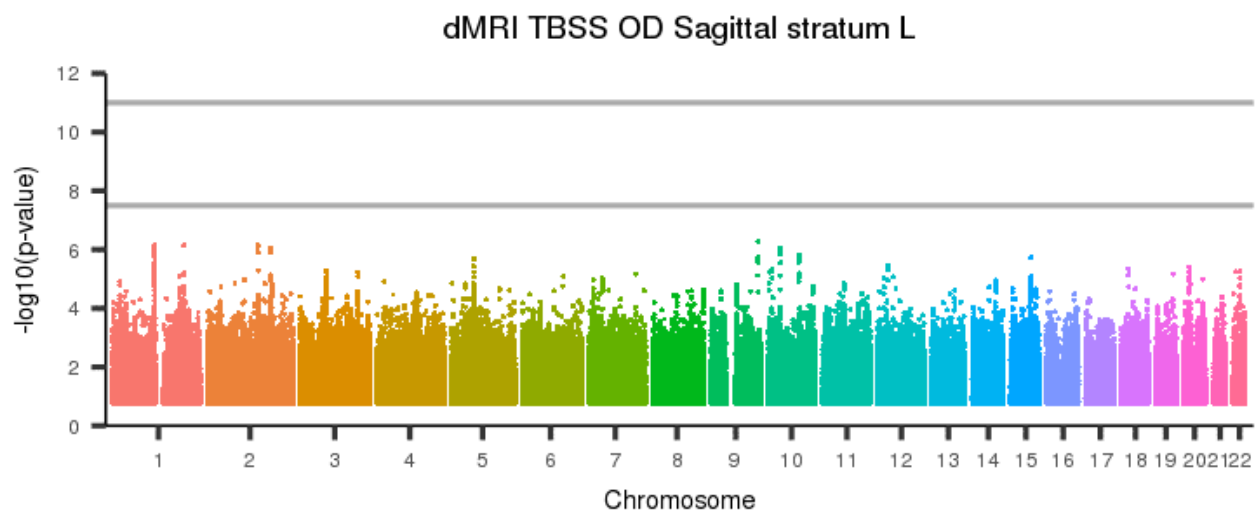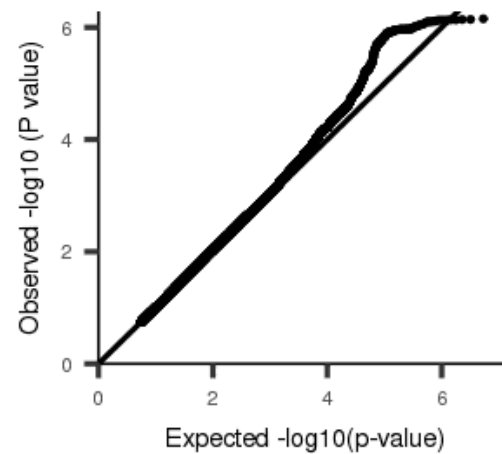

[back to list of plots](#)

Figure 564: dMRI TBSS OD External capsule R

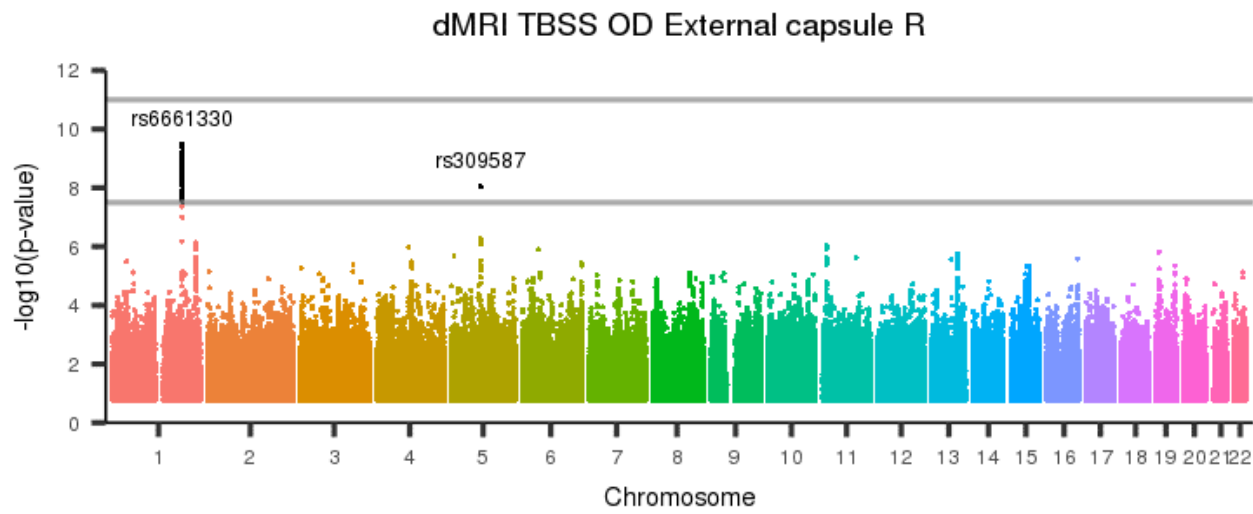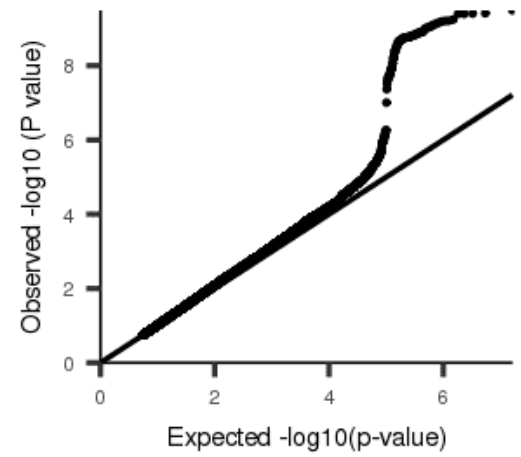

[back to list of plots](#)

Figure 565: dMRI TBSS OD External capsule L

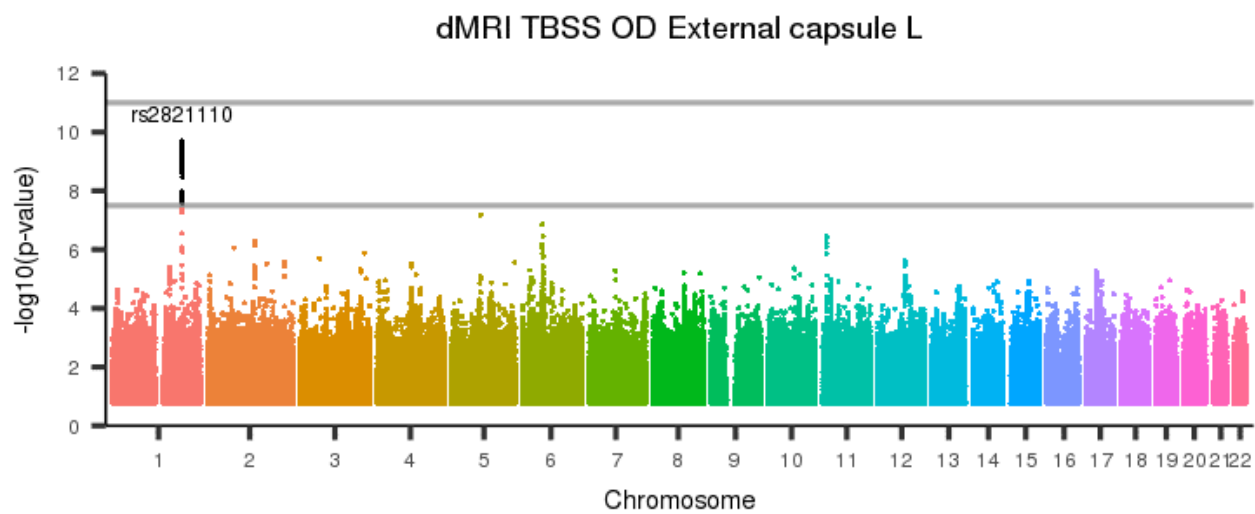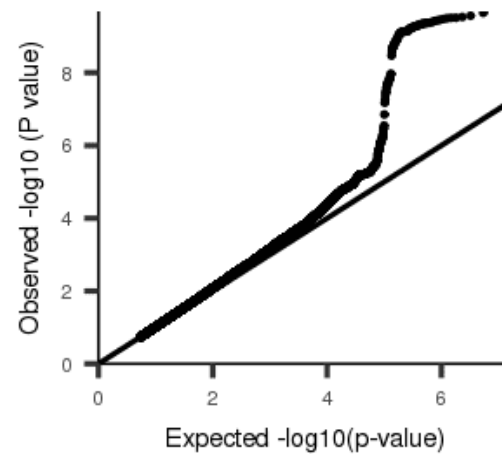

[back to list of plots](#)



Figure 566: dMRI TBSS OD Cingulum cingulate gyrus R

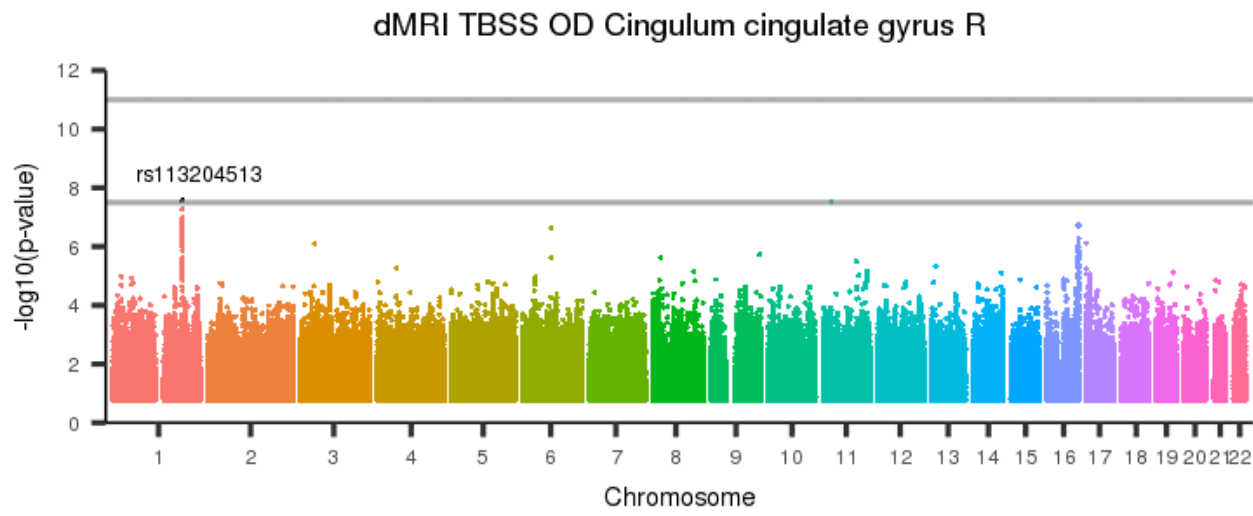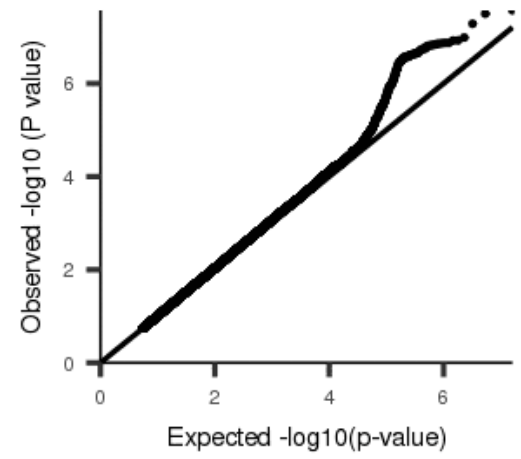

[back to list of plots](#)

Figure 567: dMRI TBSS OD Cingulum cingulate gyrus L

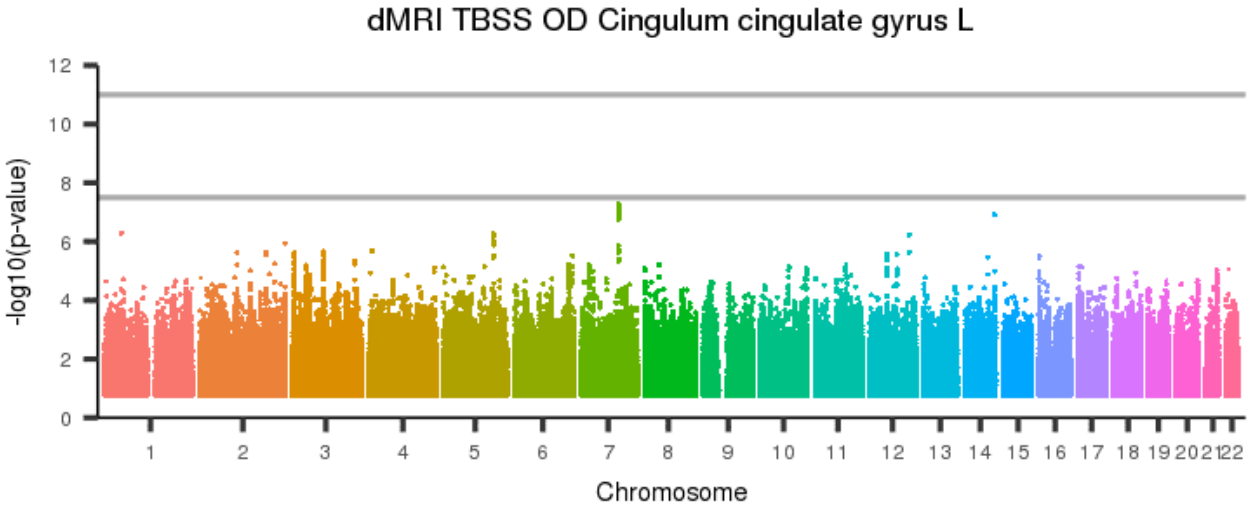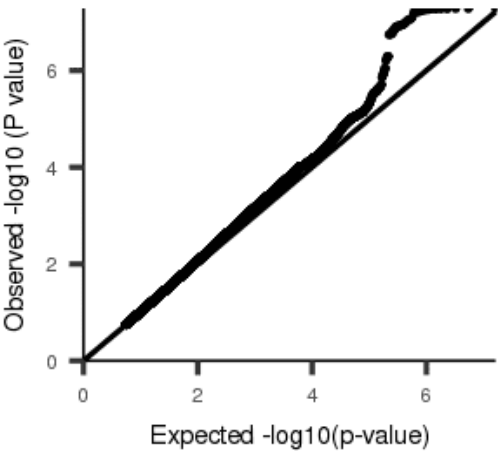

[back to list of plots](#)

Figure 568: dMRI TBSS OD Cingulum hippocampus R

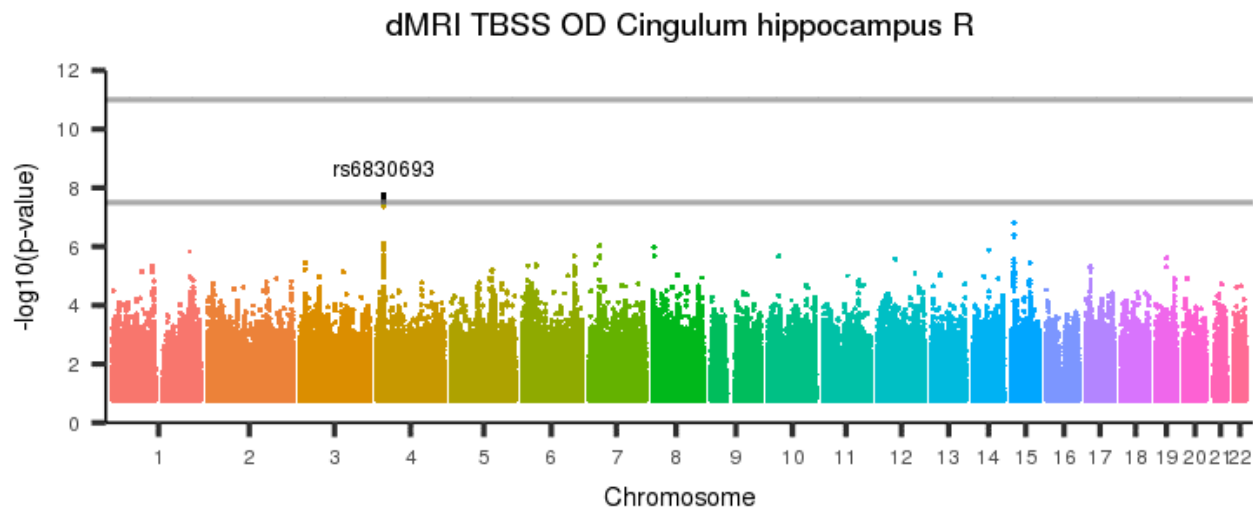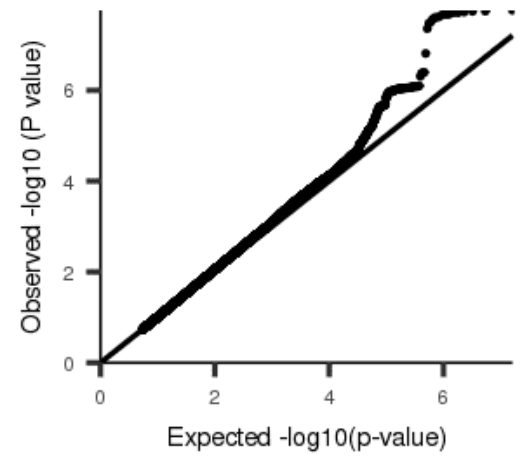

[back to list of plots](#)

Figure 569: dMRI TBSS OD Cingulum hippocampus L

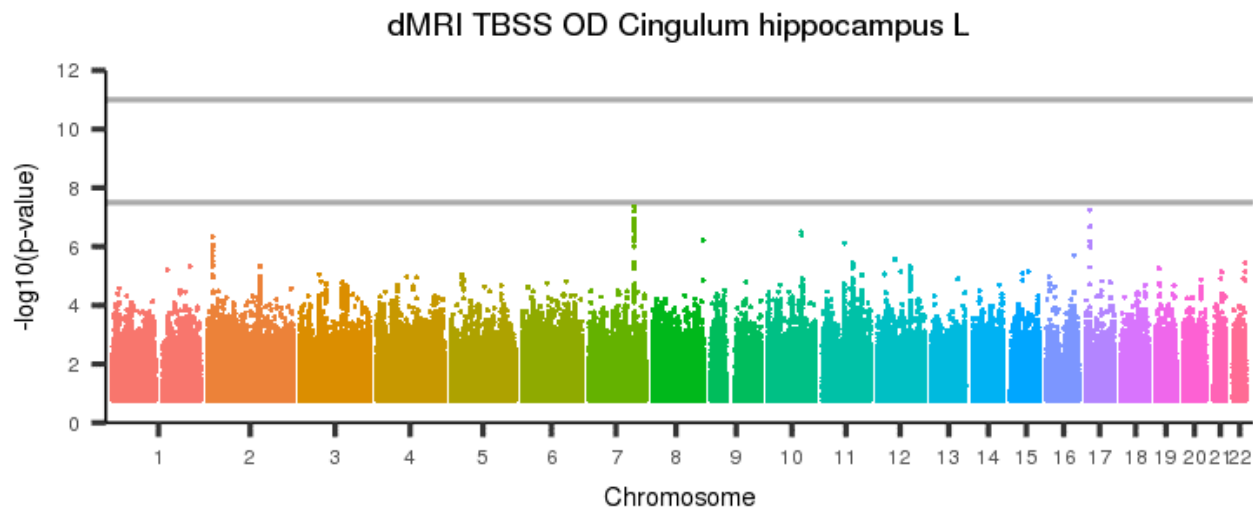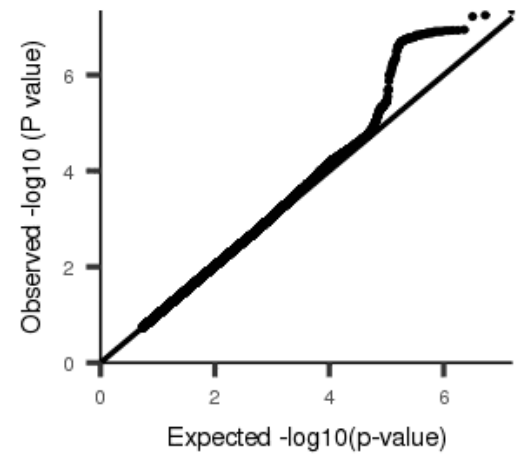

[back to list of plots](#)

Figure 570: dMRI TBSS OD Fornix cres+Stria terminalis R

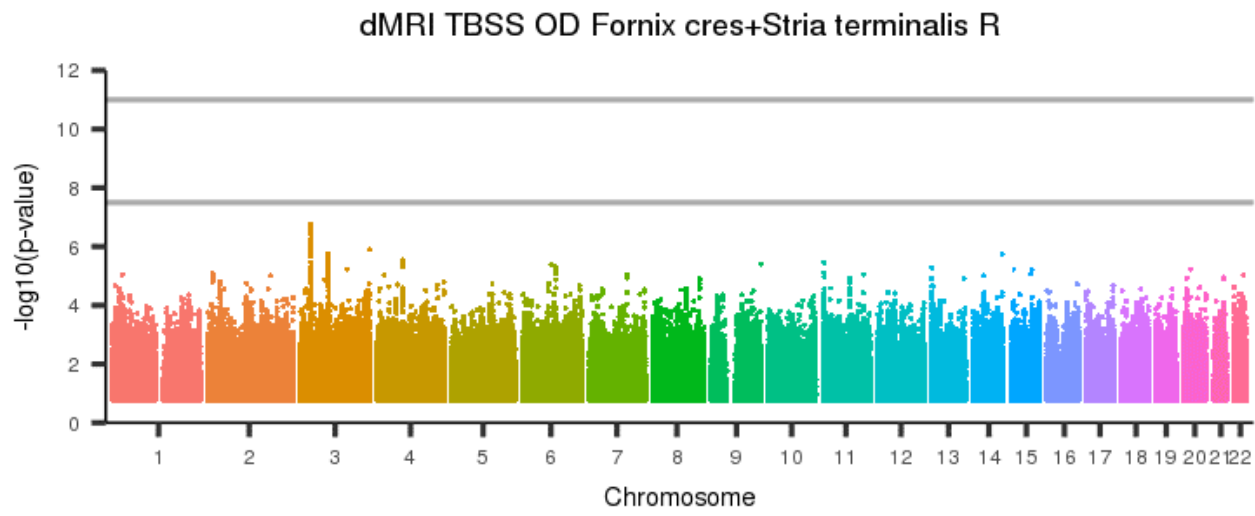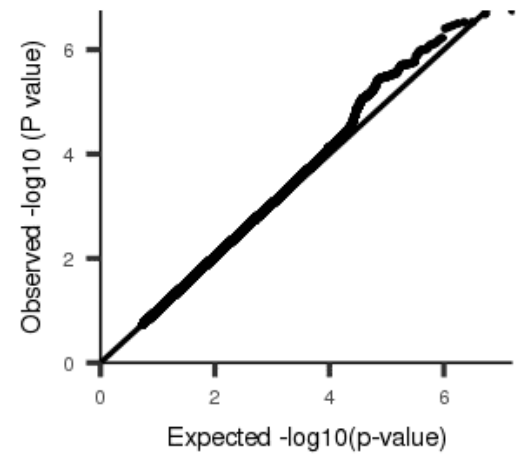

[back to list of plots](#)

Figure 571: dMRI TBSS OD Fornix cres+Stria terminalis L

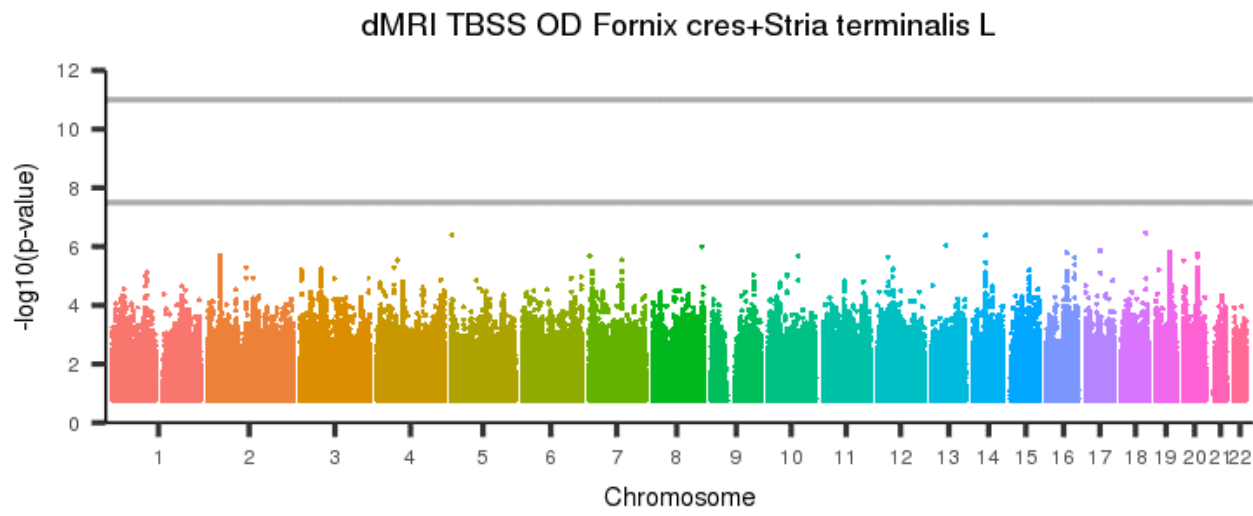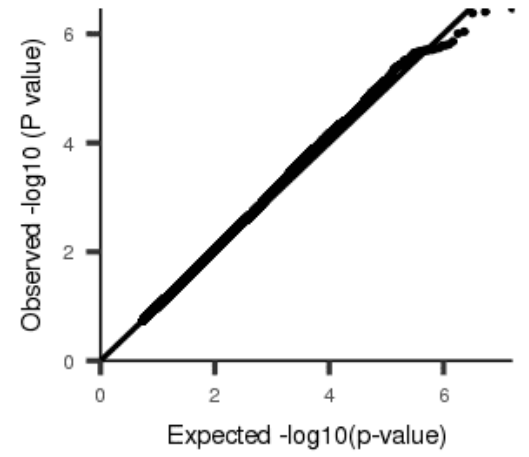

[back to list of plots](#)

Figure 572: dMRI TBSS OD Superior longitudinal fasciculus R

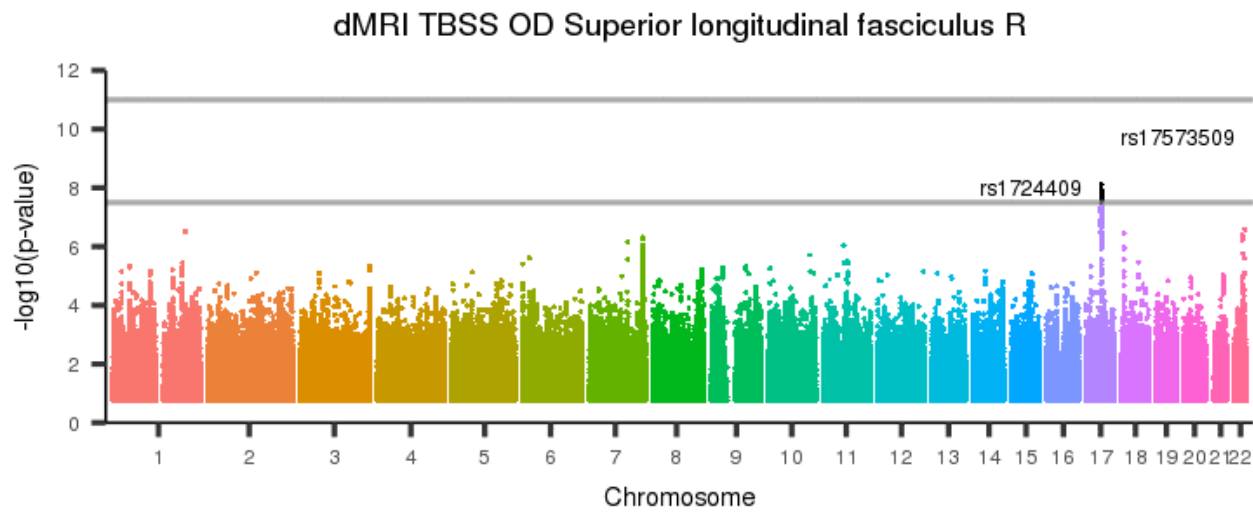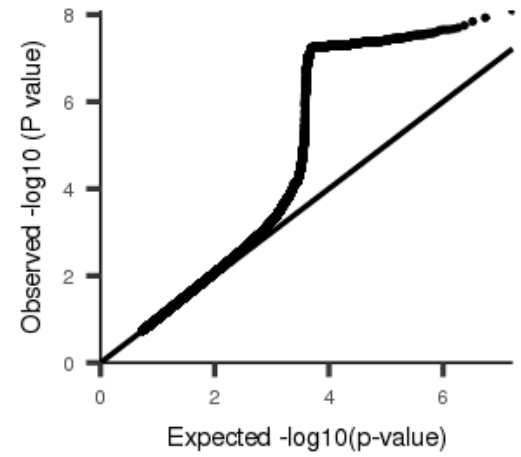

[back to list of plots](#)

Figure 573: dMRI TBSS OD Superior longitudinal fasciculus L

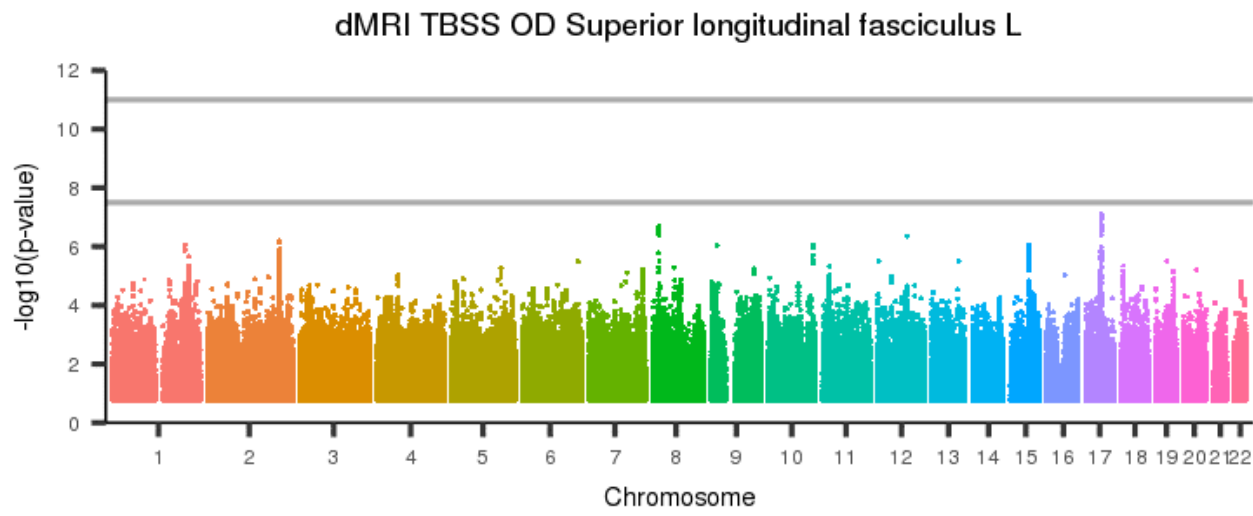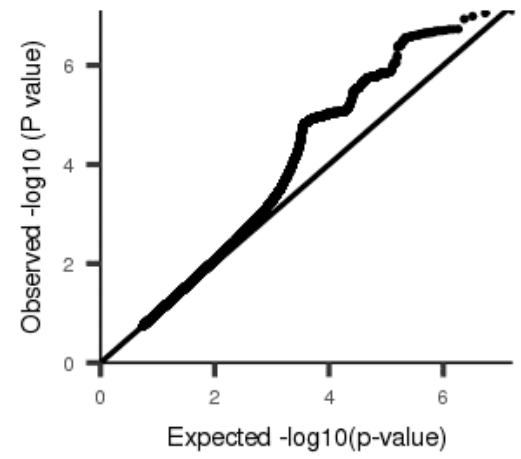

[back to list of plots](#)



Figure 574: dMRI TBSS OD Superior fronto-occipital fasciculus R

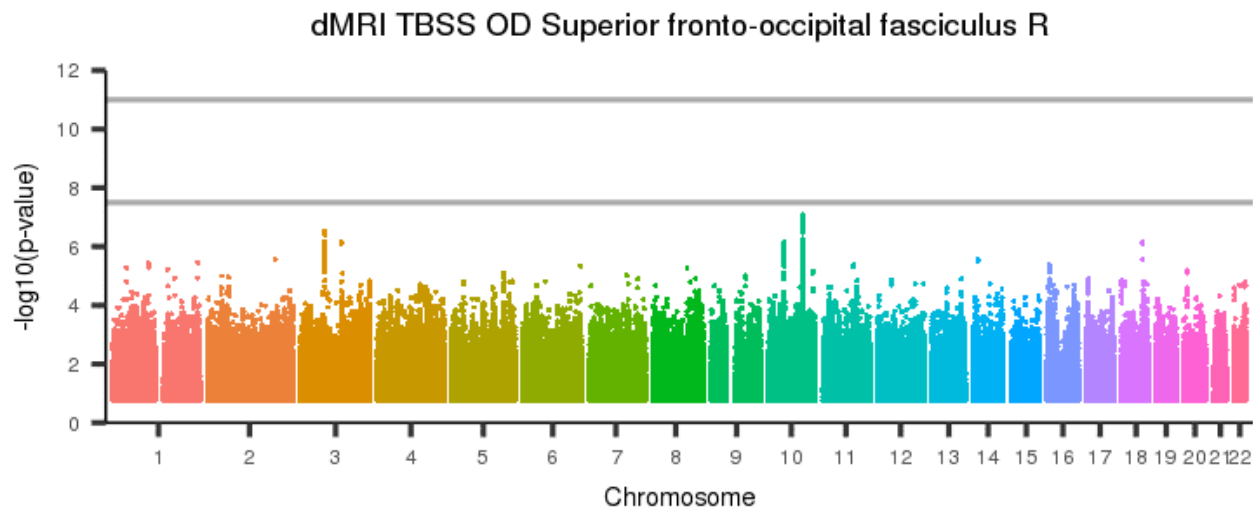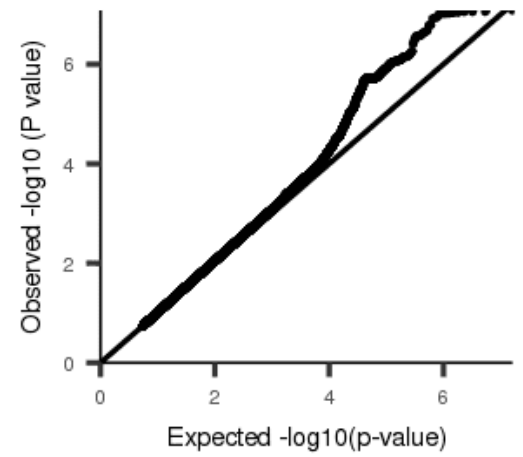

[back to list of plots](#)

Figure 575: dMRI TBSS OD Superior fronto-occipital fasciculus L

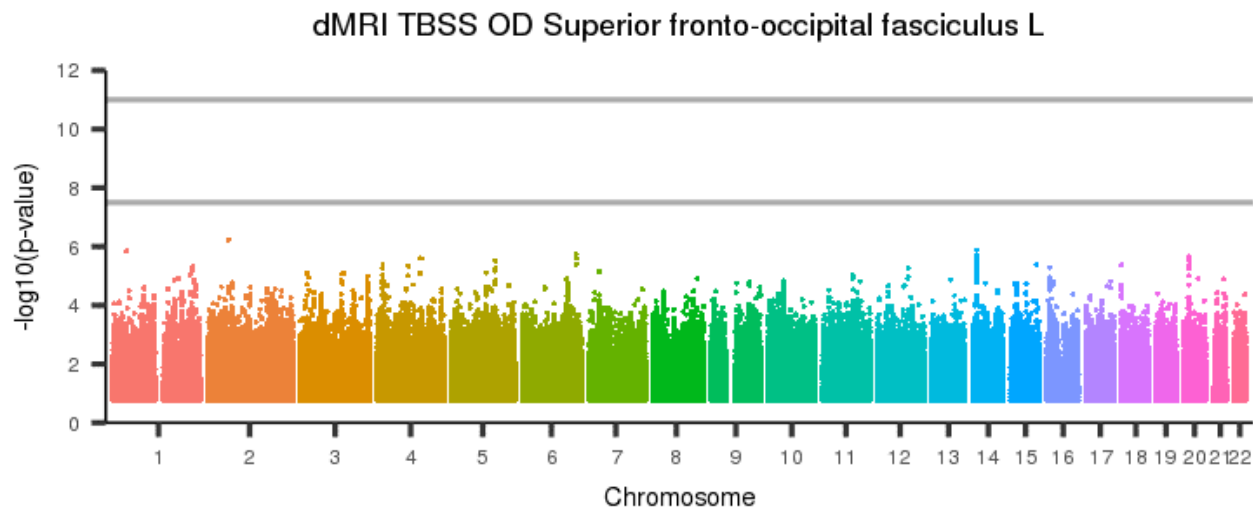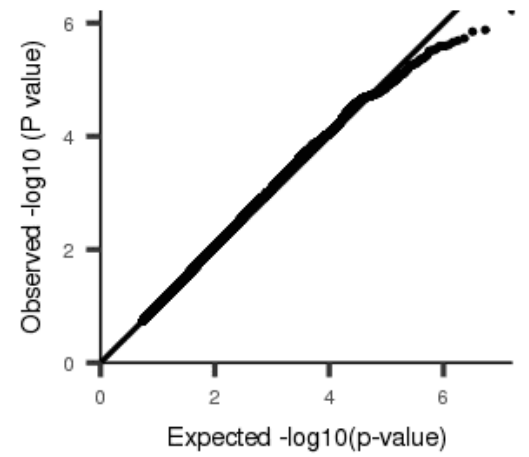

[back to list of plots](#)

Figure 576: dMRI TBSS OD Uncinate fasciculus R

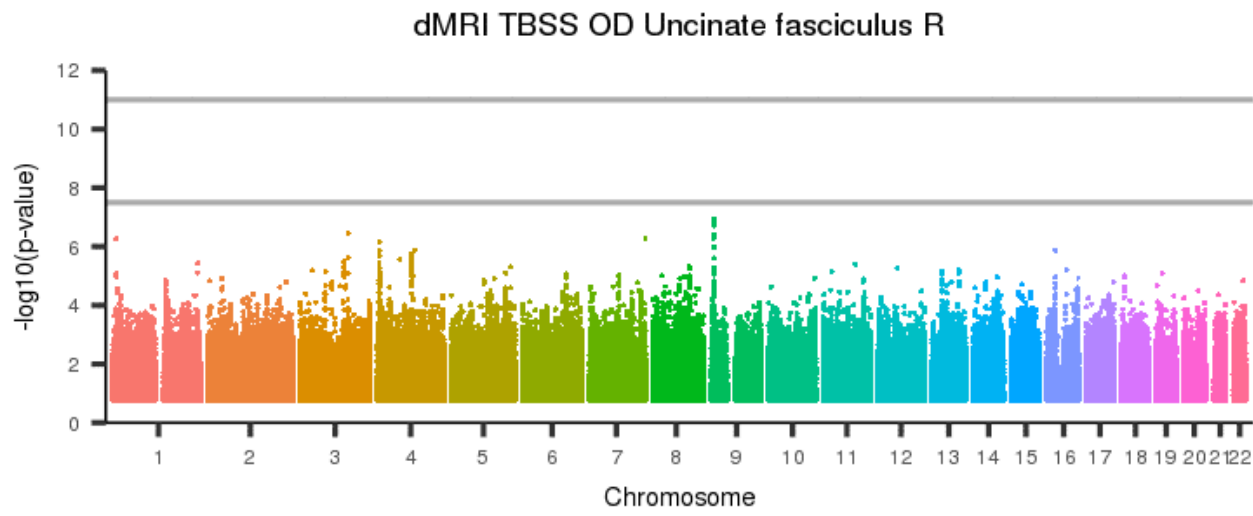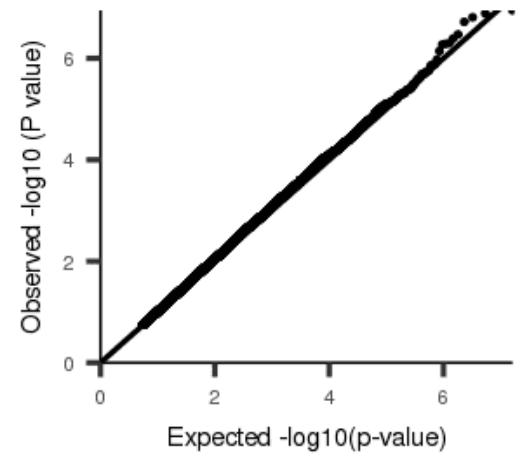

[back to list of plots](#)

Figure 577: dMRI TBSS OD Uncinate fasciculus L

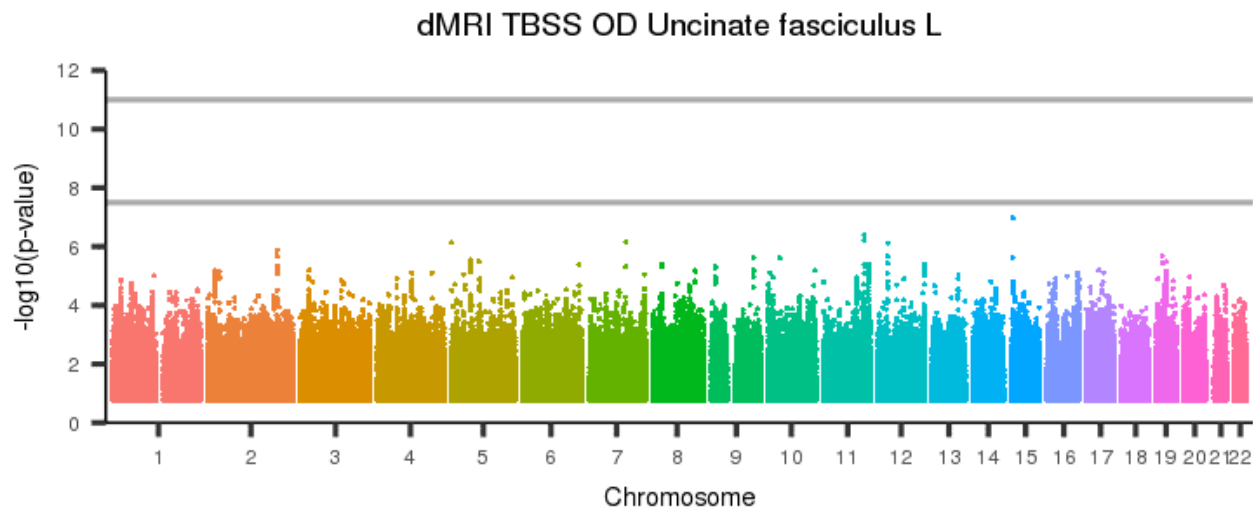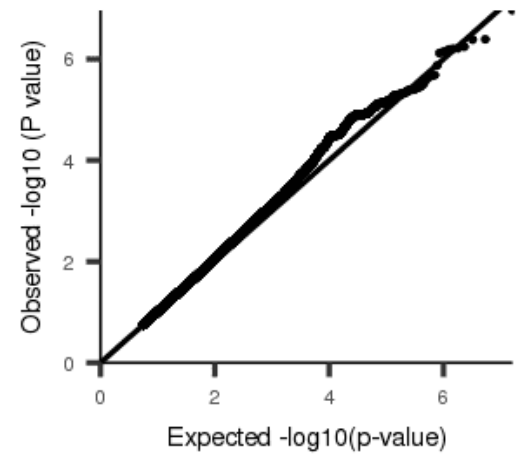

[back to list of plots](#)

Figure 578: dMRI TBSS OD Tapetum R

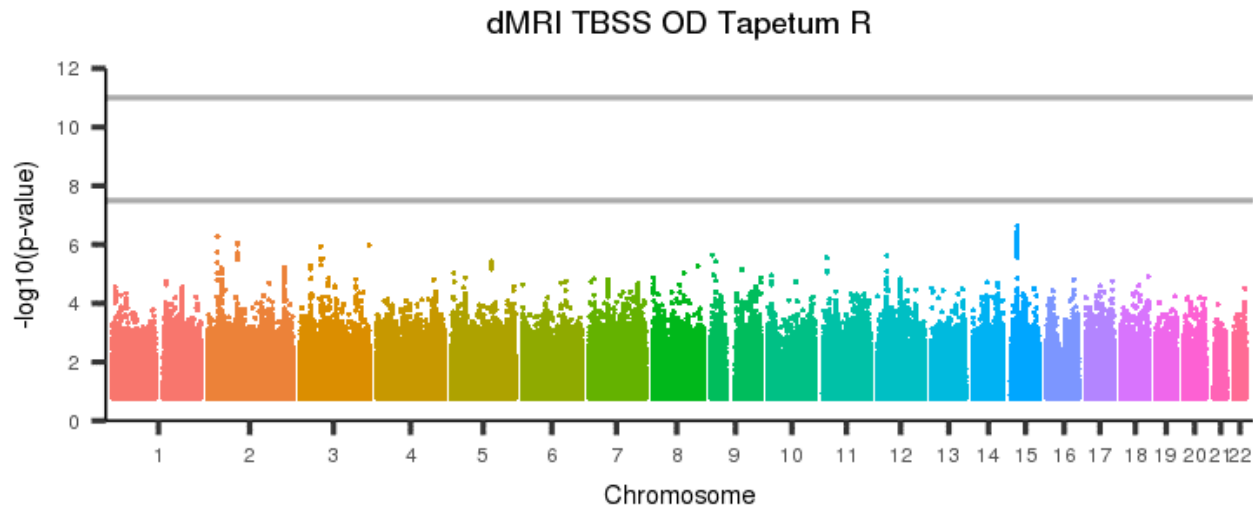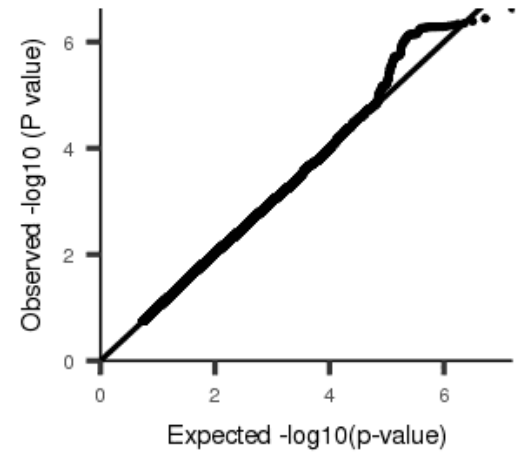

[back to list of plots](#)

Figure 579: dMRI TBSS OD Tapetum L

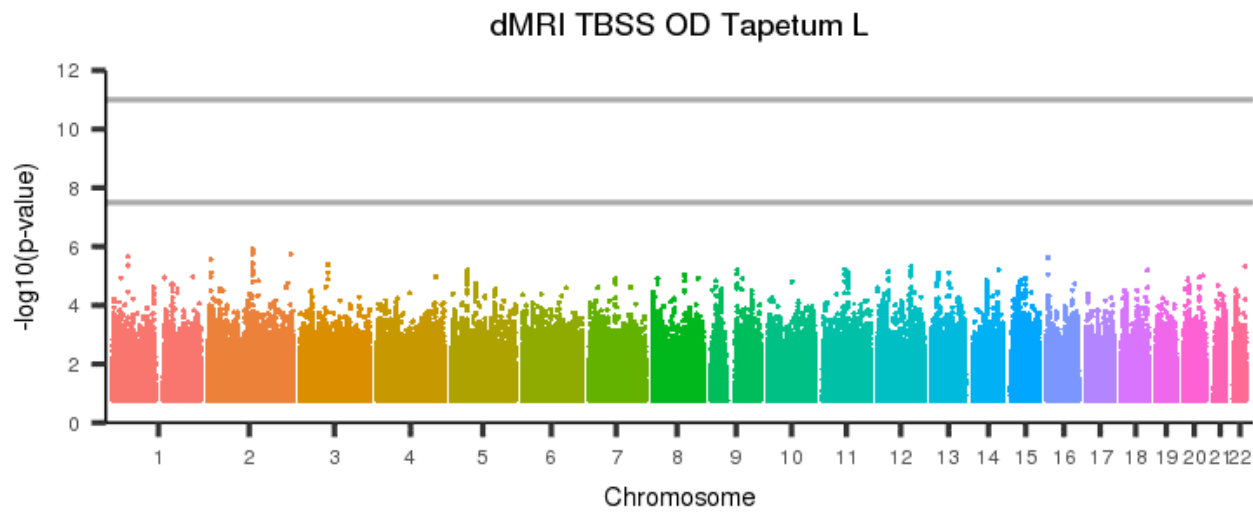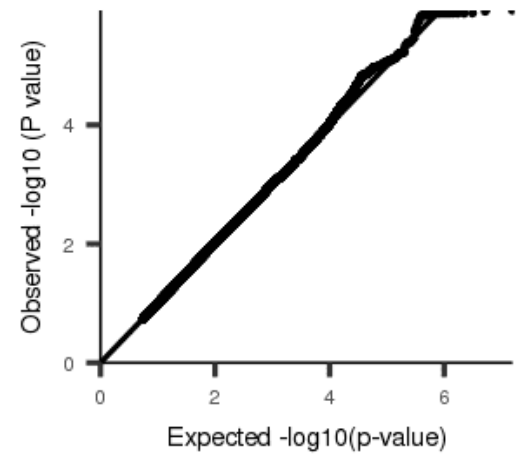

[back to list of plots](#)

Figure 580: dMRI TBSS ISOVF Middle cerebellar peduncle

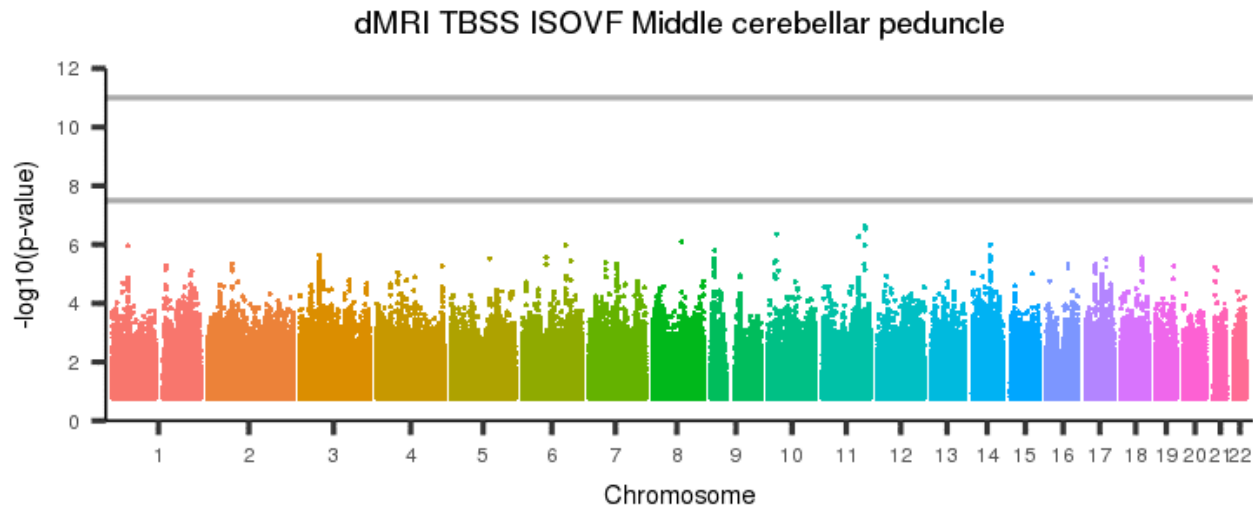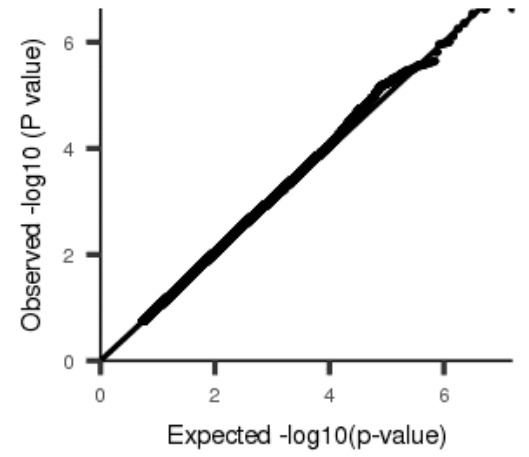

[back to list of plots](#)

Figure 581: dMRI TBSS ISOVF Pontine crossing tract

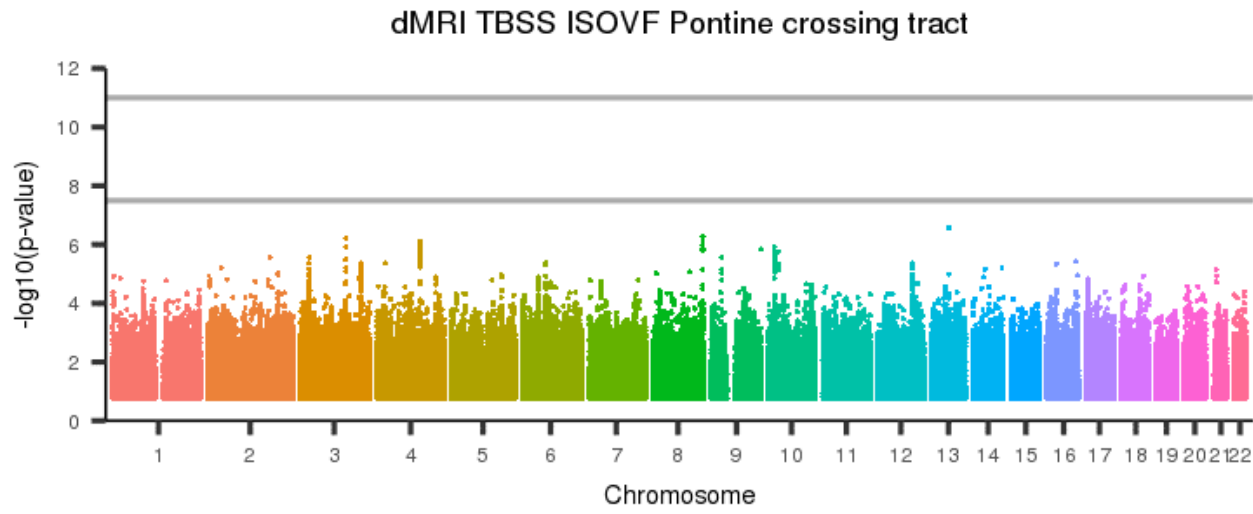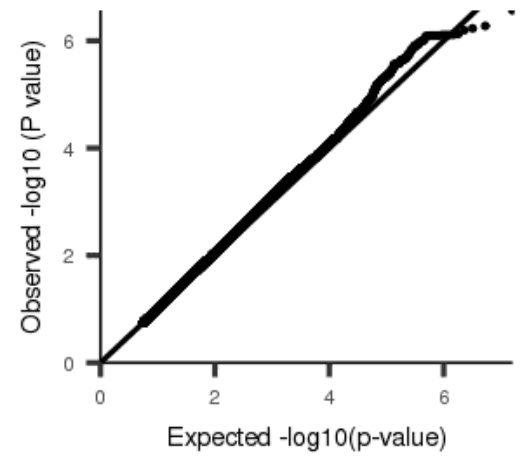

[back to list of plots](#)



Figure 582: dMRI TBSS ISOVF Genu of corpus callosum

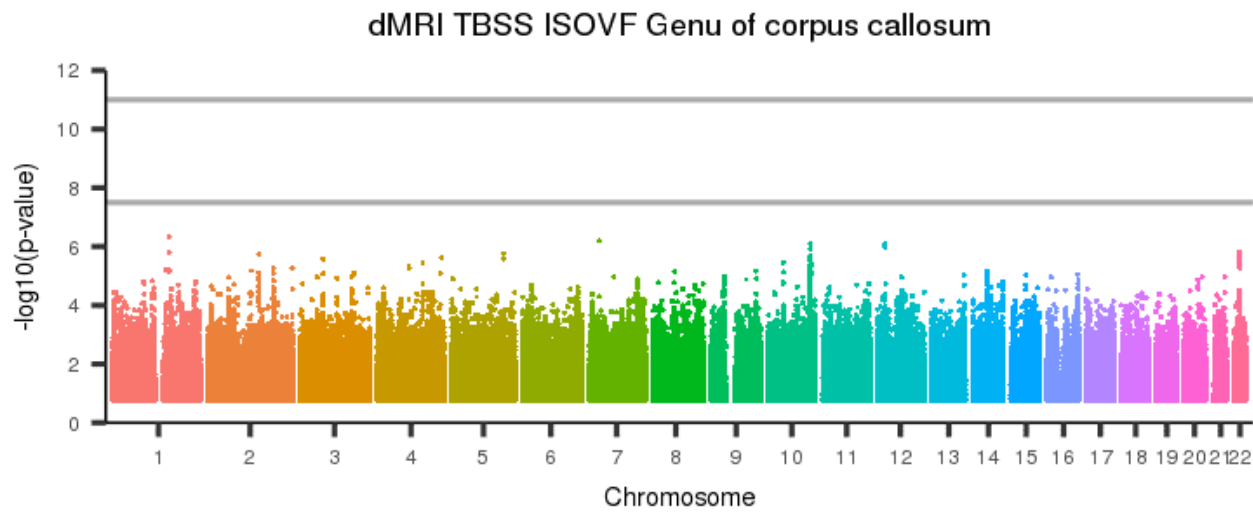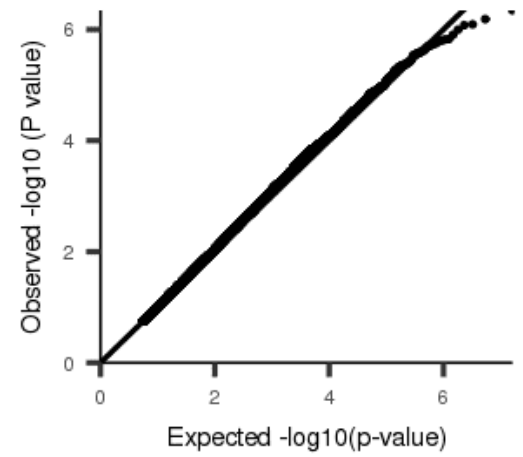

[back to list of plots](#)

Figure 583: dMRI TBSS ISOVF Body of corpus callosum

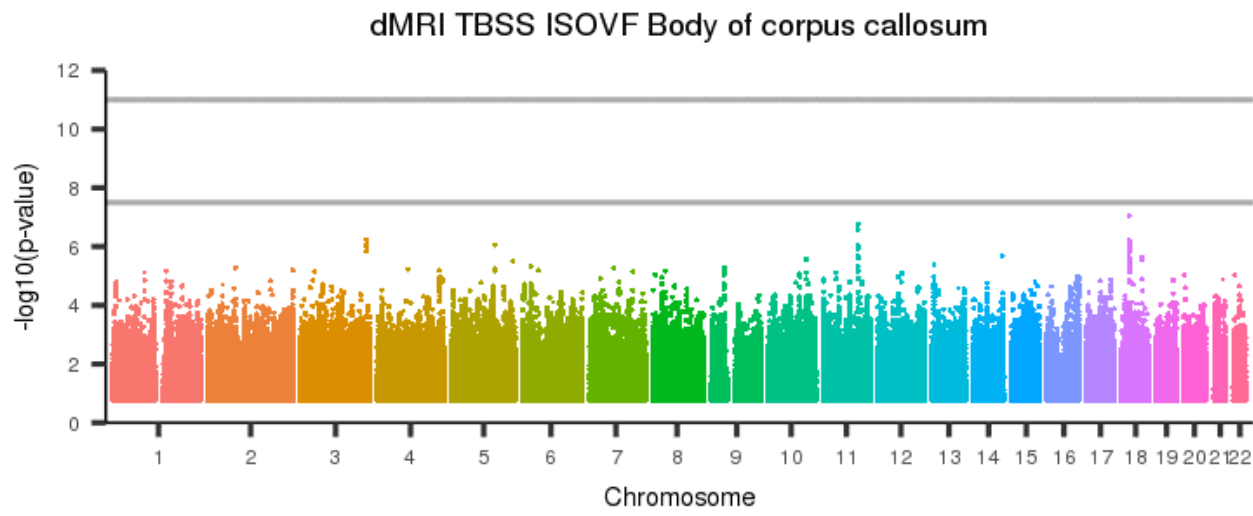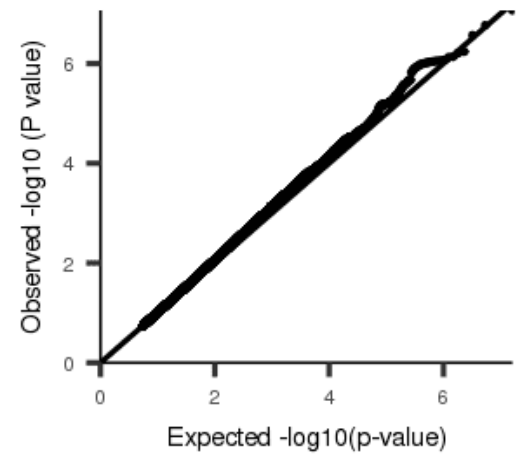

[back to list of plots](#)

Figure 584: dMRI TBSS ISOVF Splenium of corpus callosum

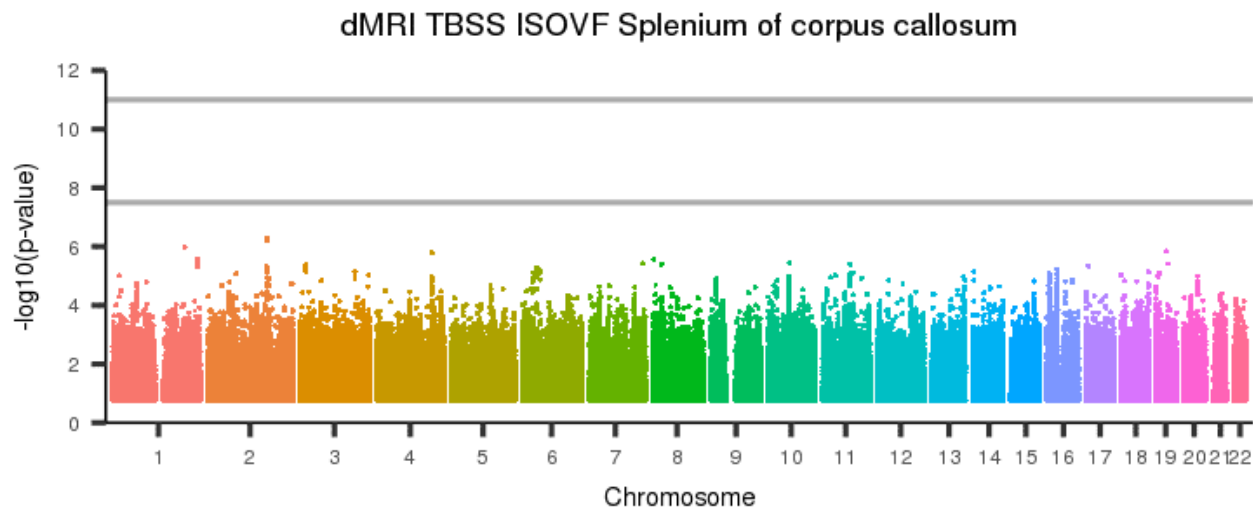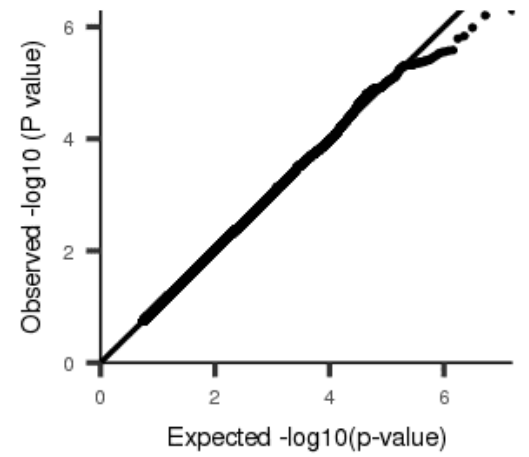

[back to list of plots](#)

Figure 585: dMRI TBSS ISOVF Fornix

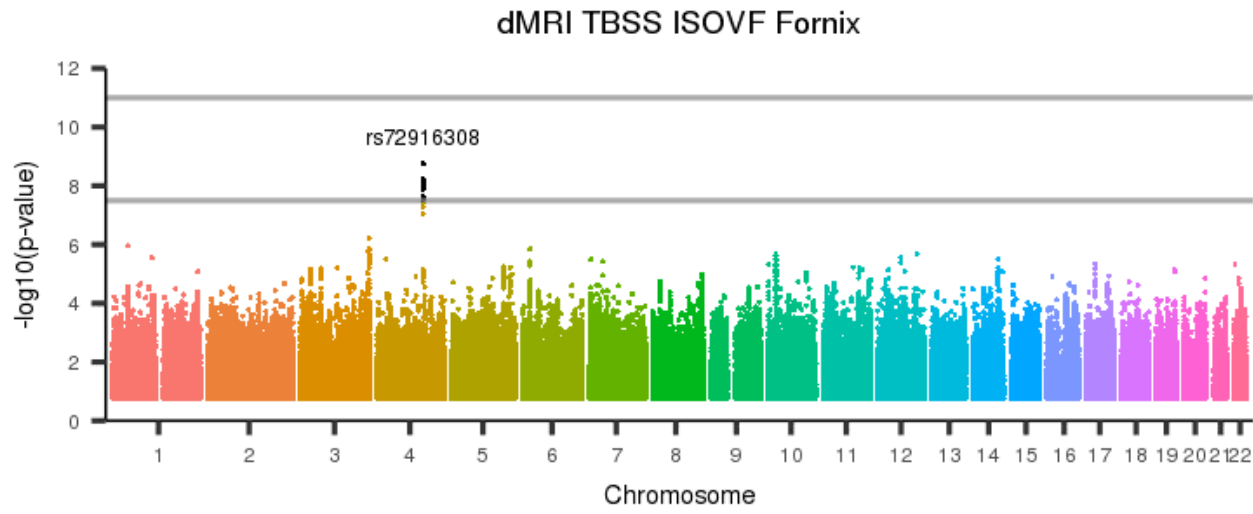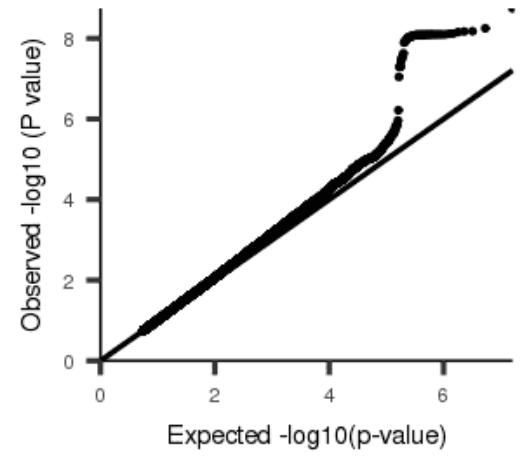

[back to list of plots](#)

Figure 586: dMRI TBSS ISOVF Corticospinal tract R

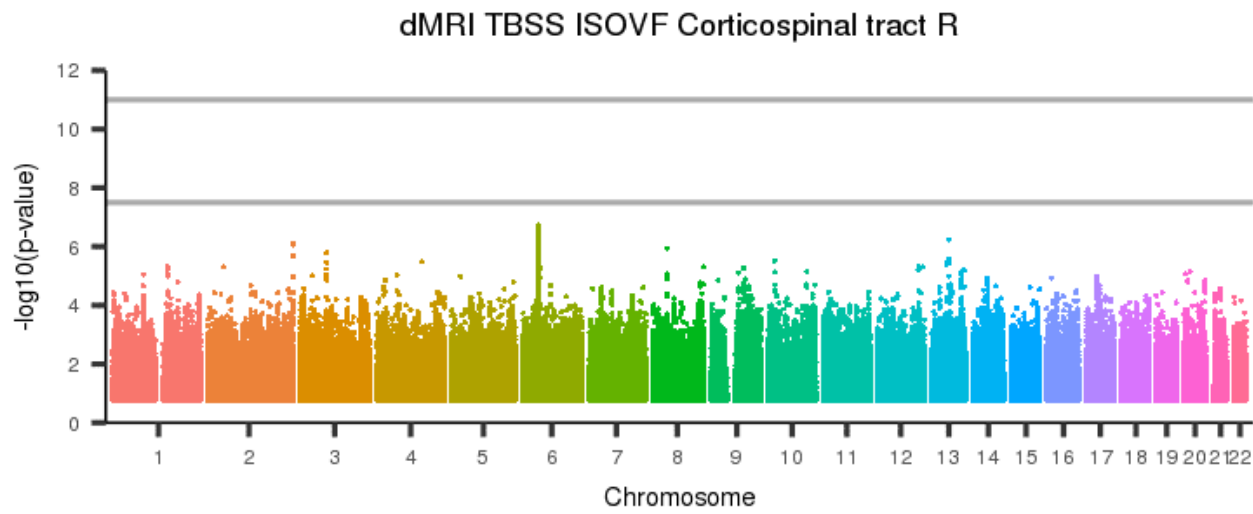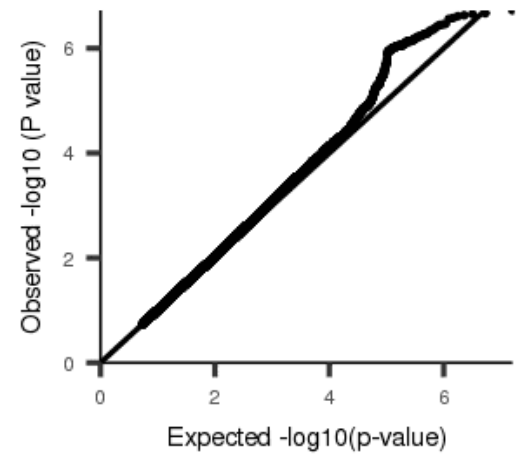

[back to list of plots](#)

Figure 587: dMRI TBSS ISOVF Corticospinal tract L

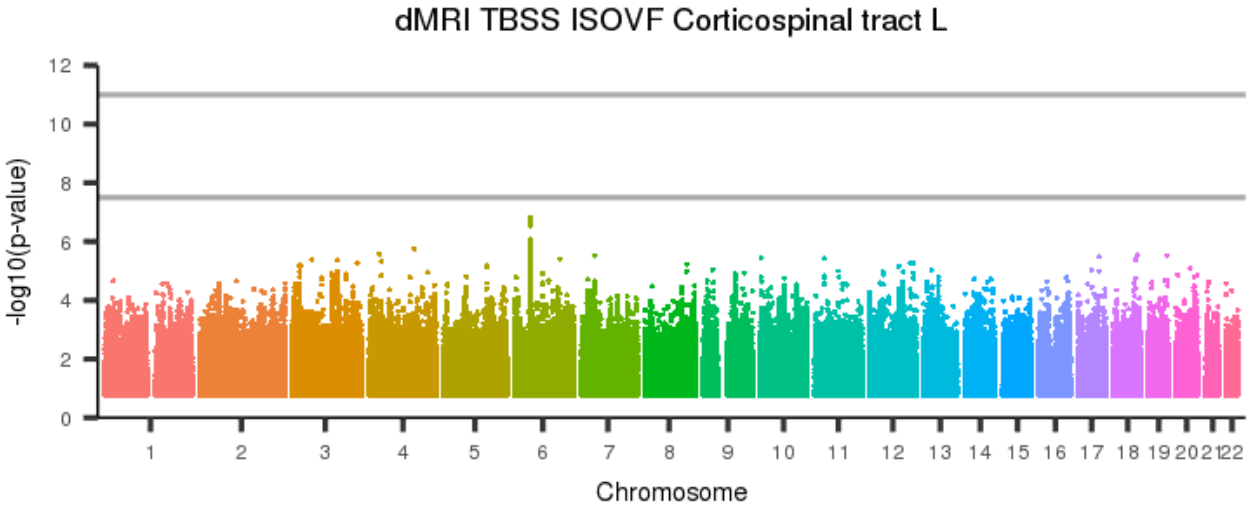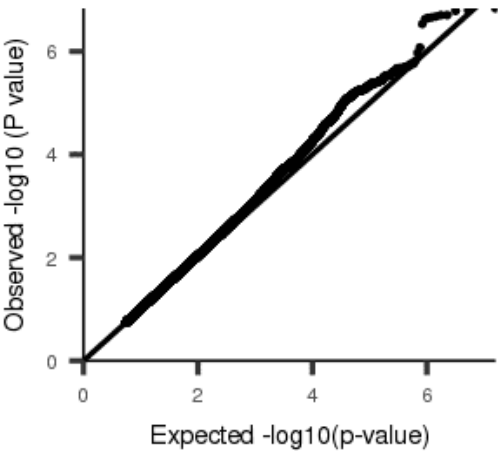

[back to list of plots](#)

Figure 588: dMRI TBSS ISOVF Medial lemniscus R

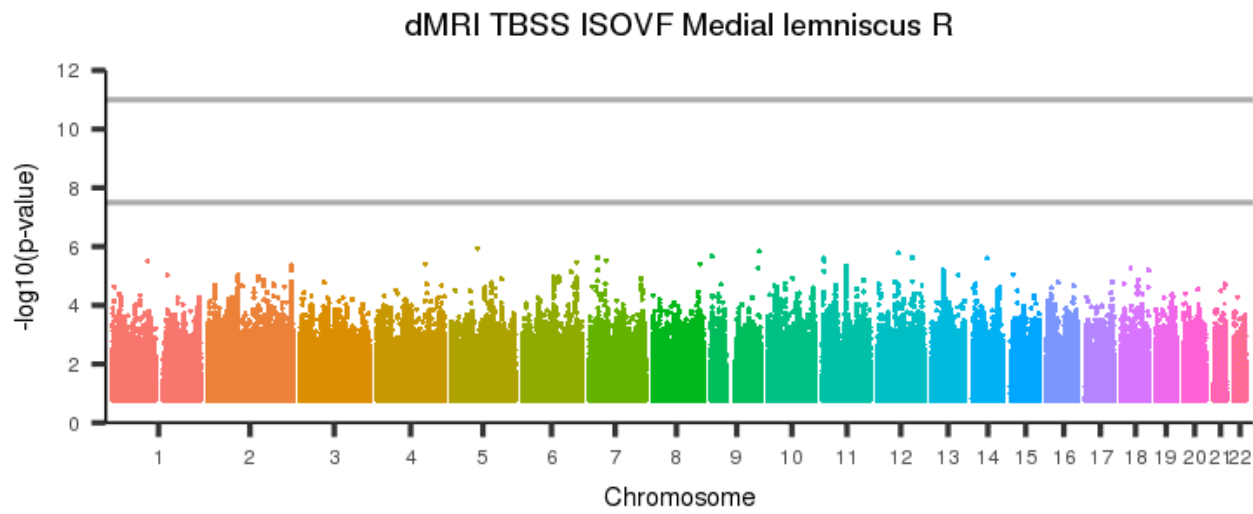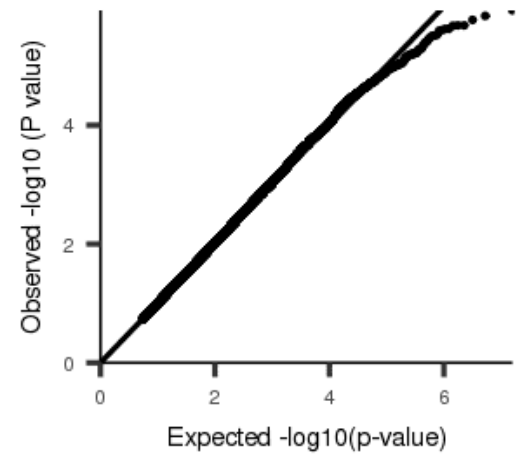

[back to list of plots](#)

Figure 589: dMRI TBSS ISOVF Medial lemniscus L

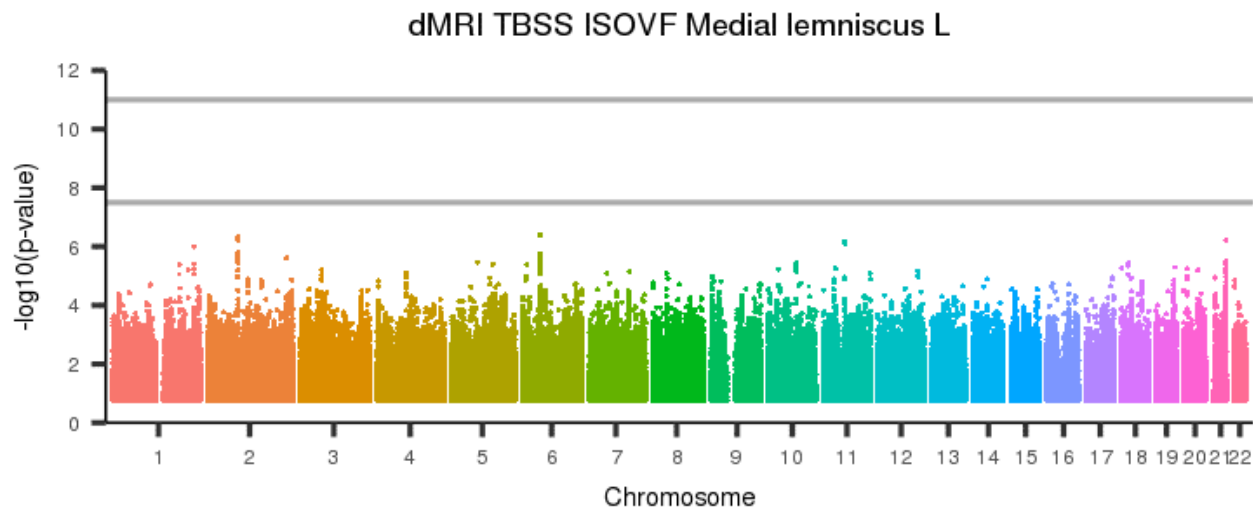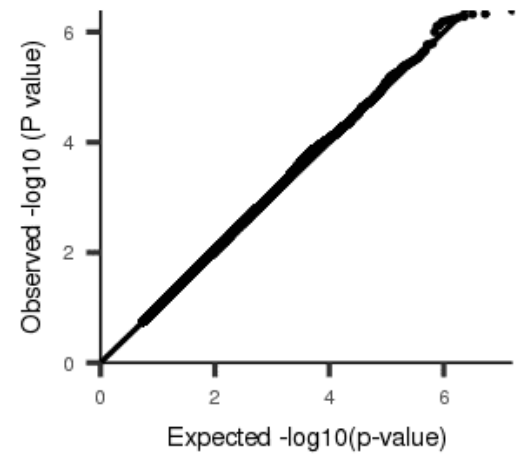

[back to list of plots](#)



Figure 590: dMRI TBSS ISOVF Inferior cerebellar peduncle R

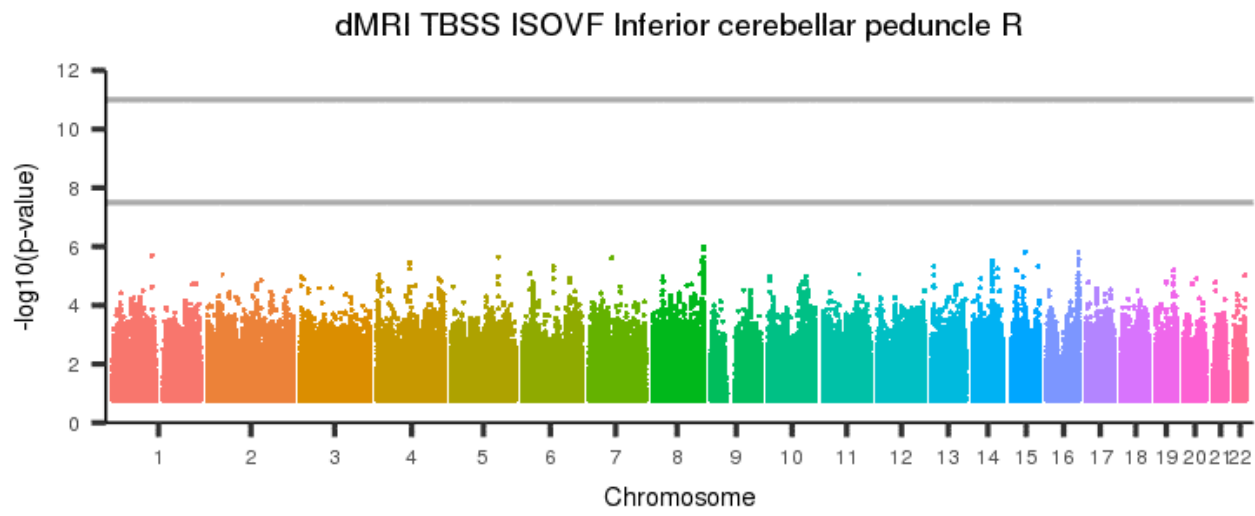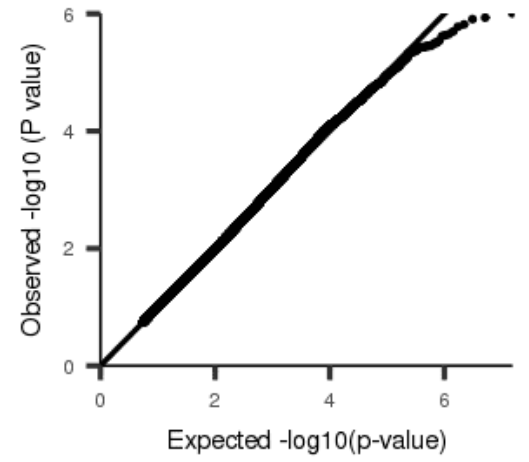

[back to list of plots](#)

Figure 591: dMRI TBSS ISOVF Inferior cerebellar peduncle L

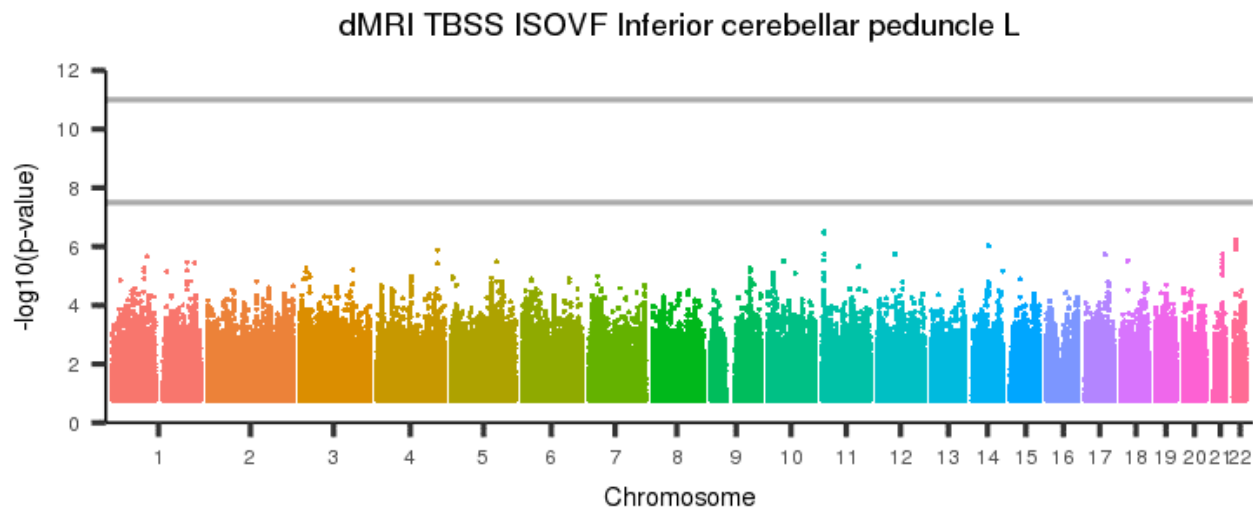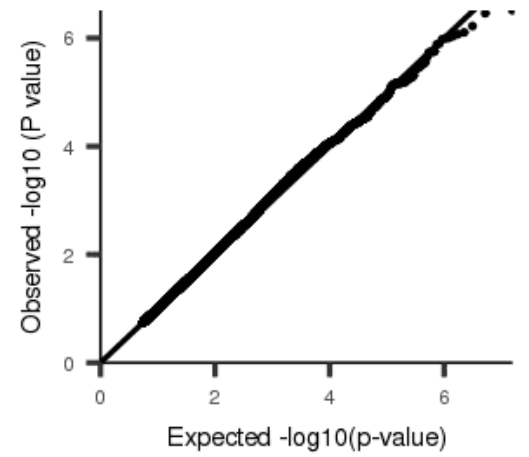

[back to list of plots](#)

Figure 592: dMRI TBSS ISOVF Superior cerebellar peduncle R

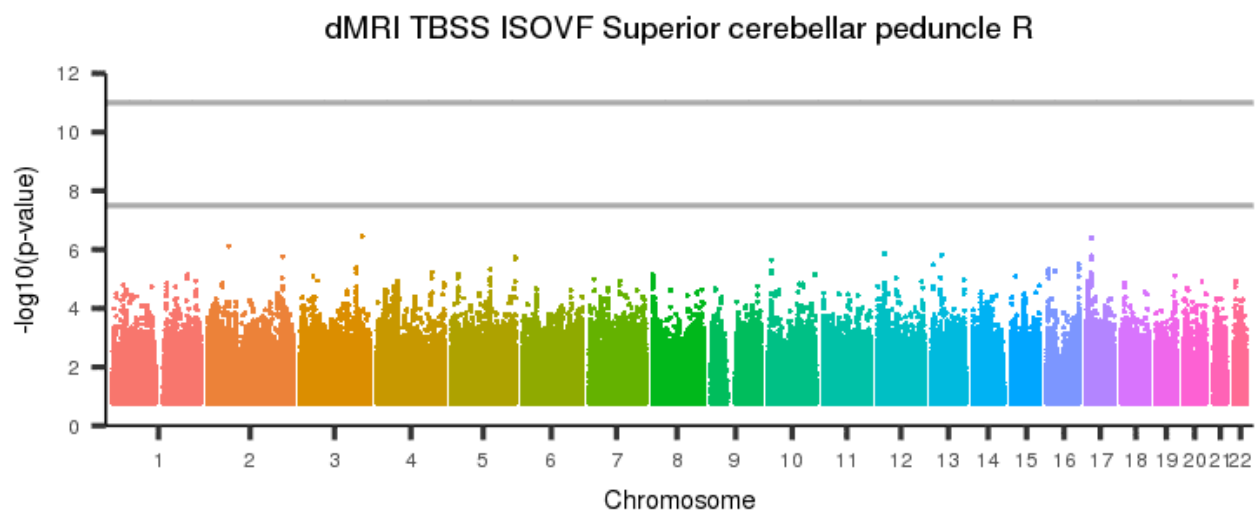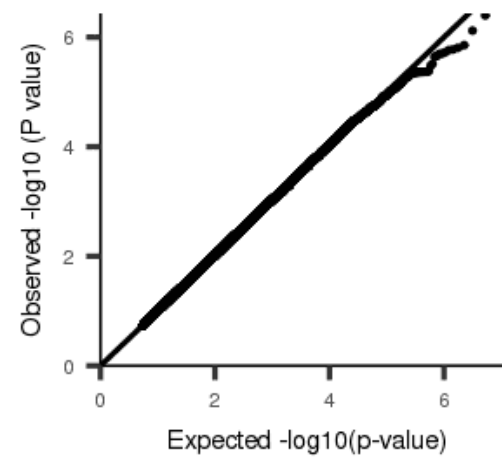

[back to list of plots](#)

Figure 593: dMRI TBSS ISOVF Superior cerebellar peduncle L

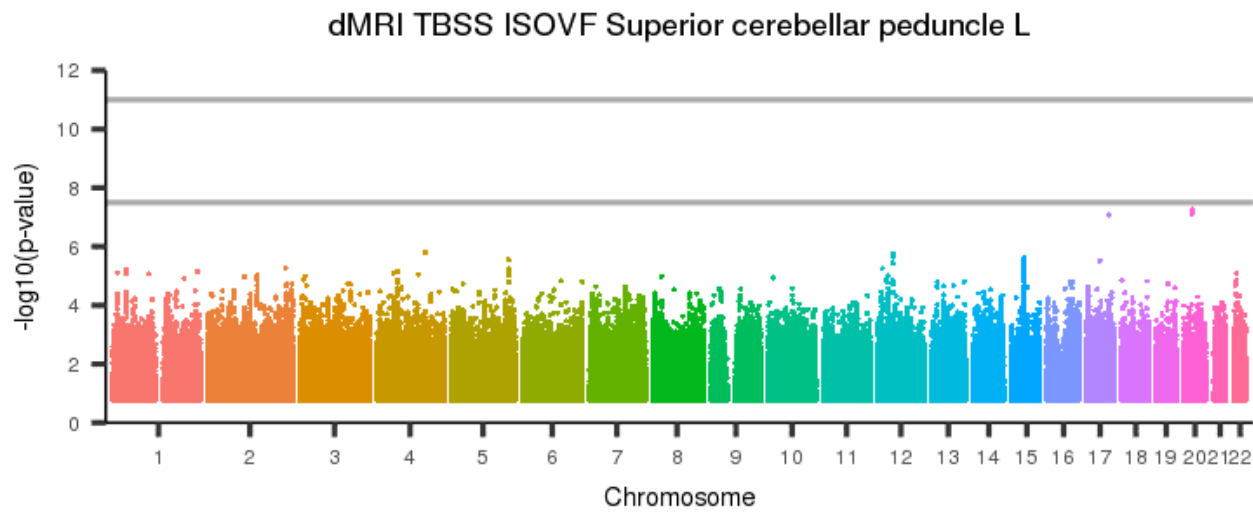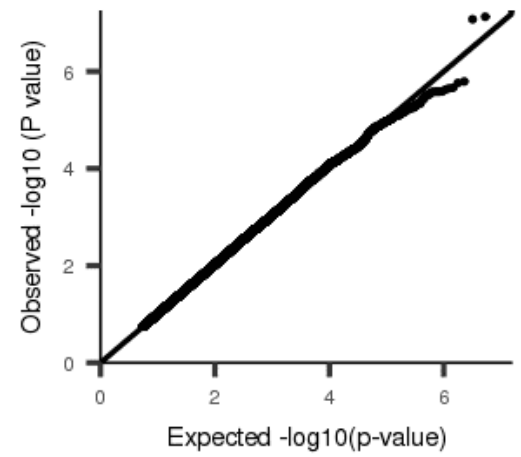

[back to list of plots](#)

Figure 594: dMRI TBSS ISOVF Cerebral peduncle R

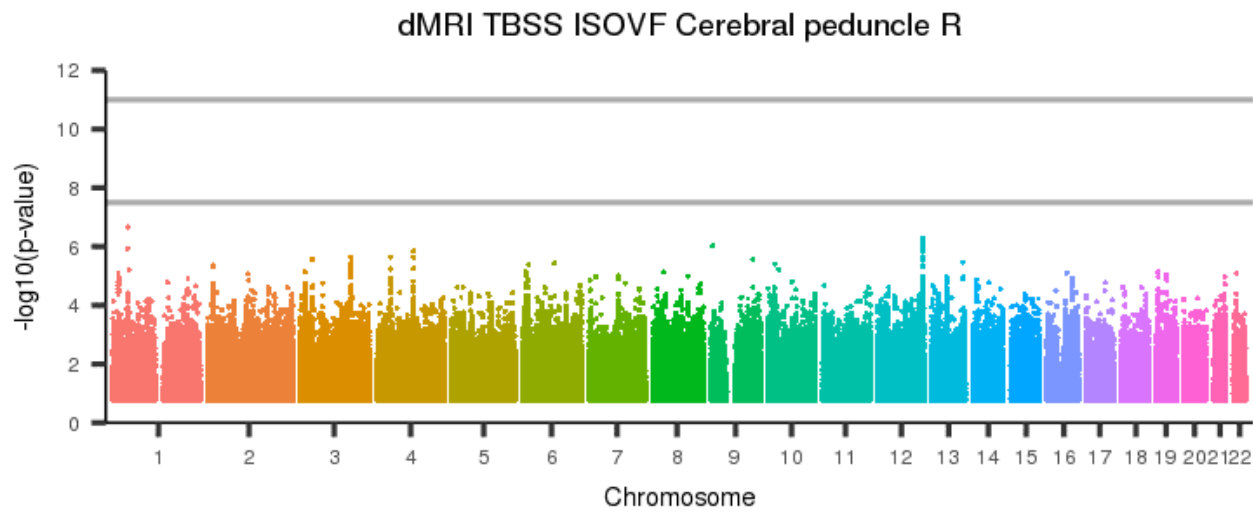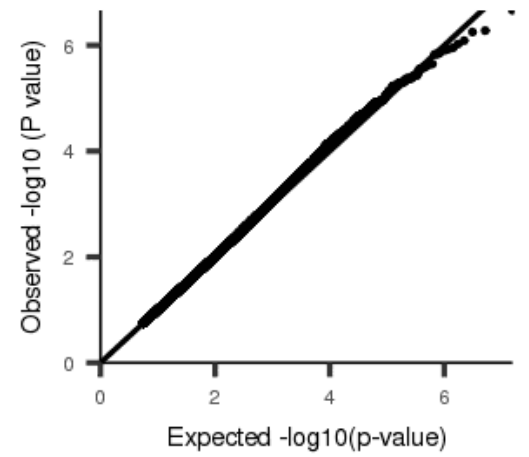

[back to list of plots](#)

Figure 595: dMRI TBSS ISOVF Cerebral peduncle L

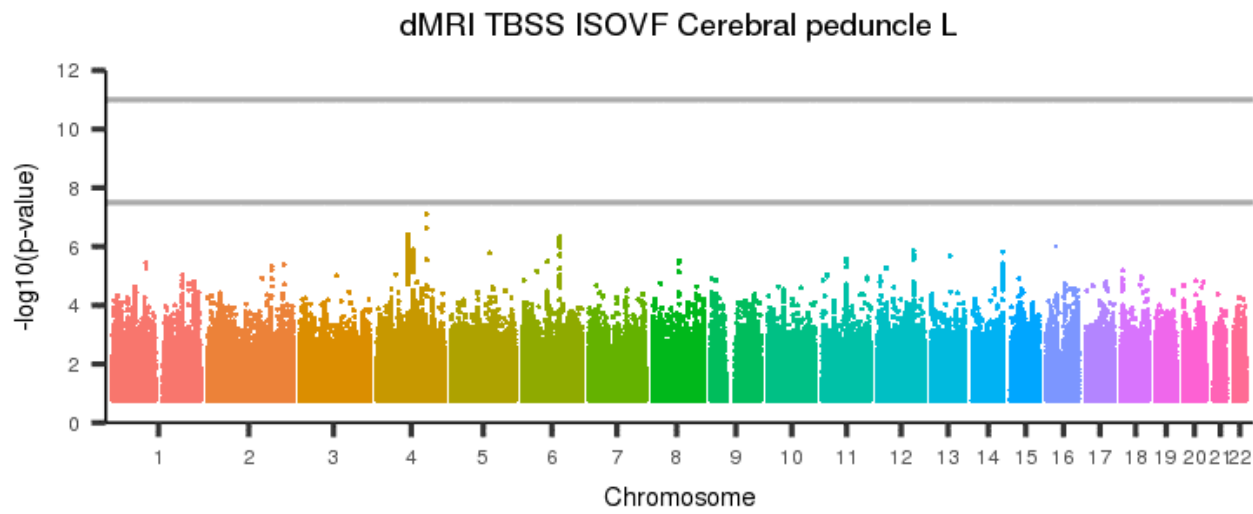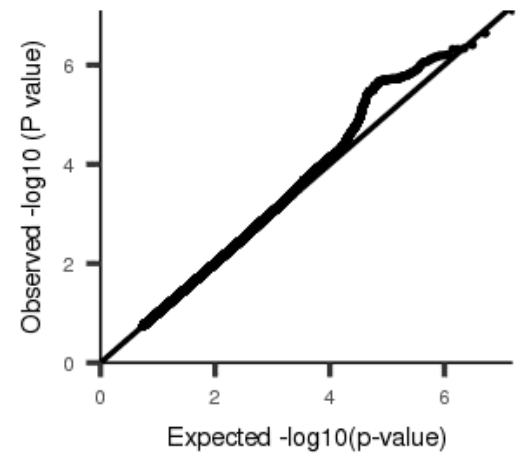

[back to list of plots](#)

Figure 596: dMRI TBSS ISOVF Anterior limb of internal capsule R

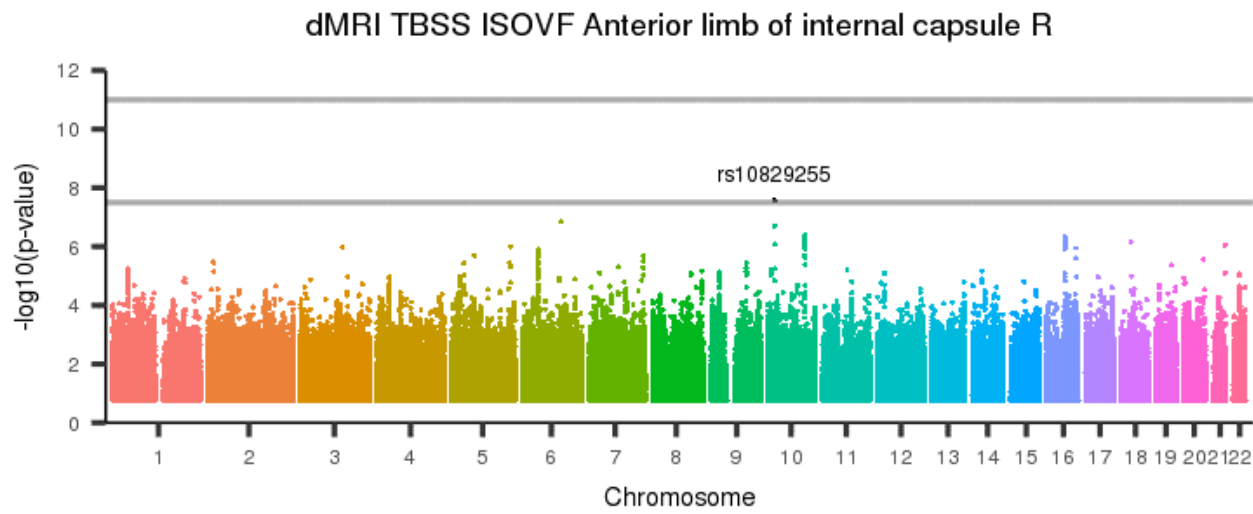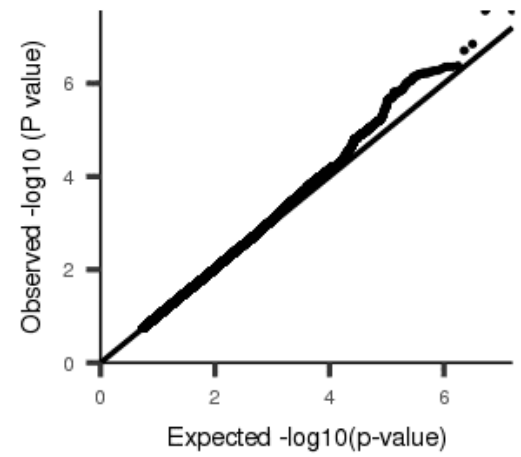

[back to list of plots](#)

Figure 597: dMRI TBSS ISOVF Anterior limb of internal capsule L

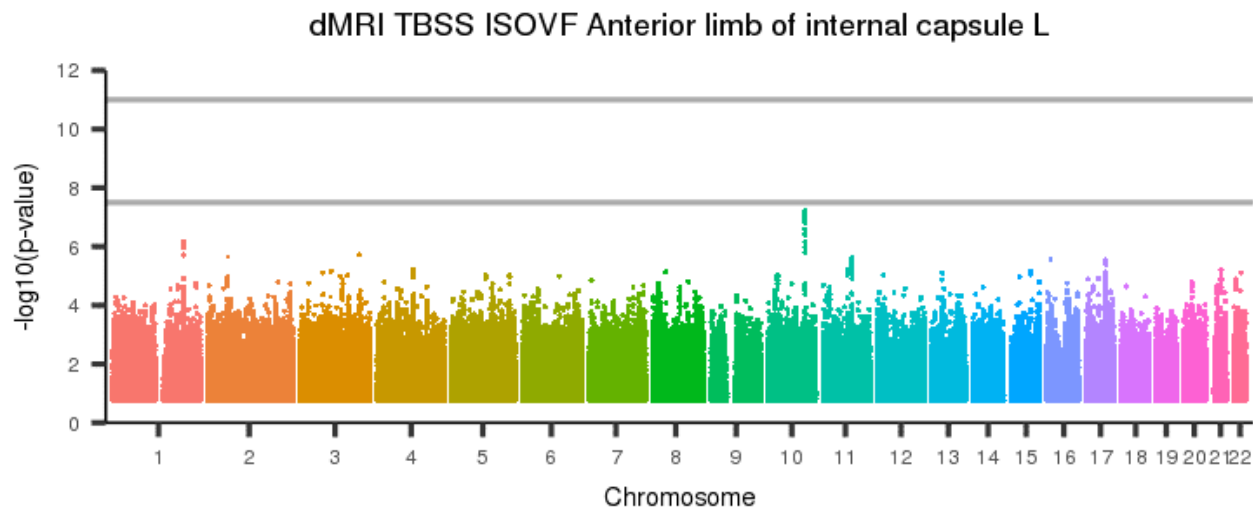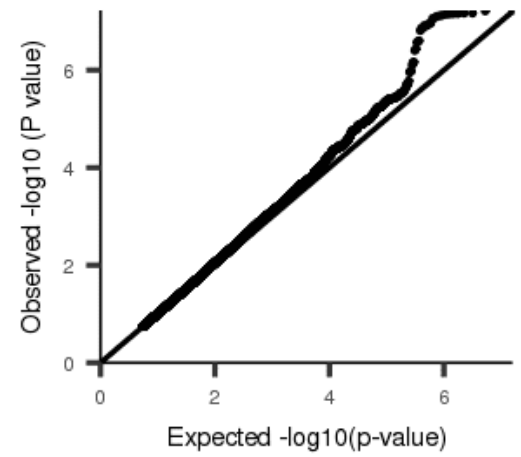

[back to list of plots](#)



Figure 598: dMRI TBSS ISOVF Posterior limb of internal capsule R

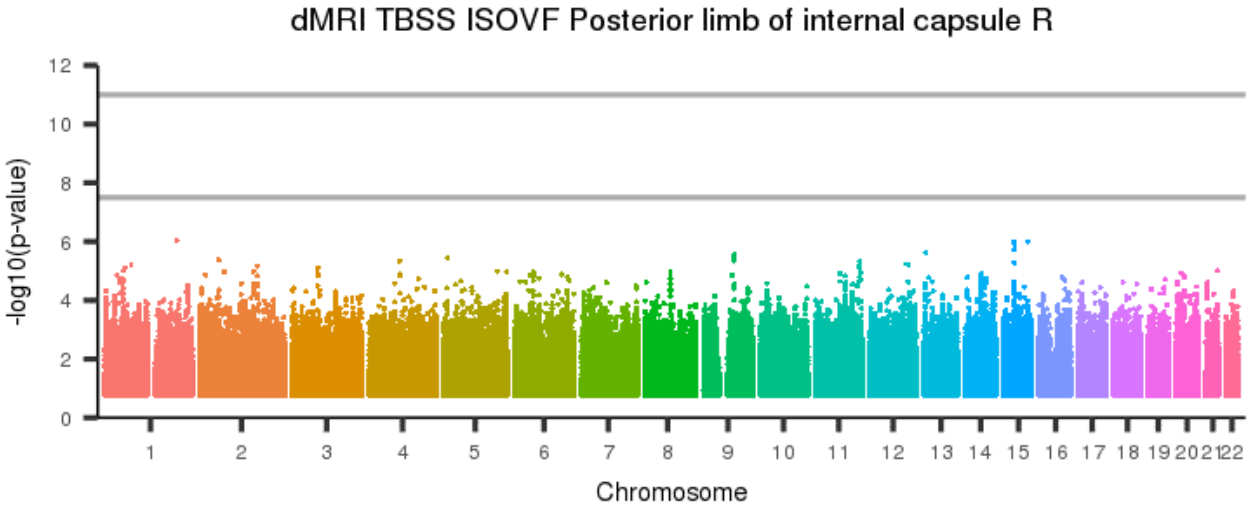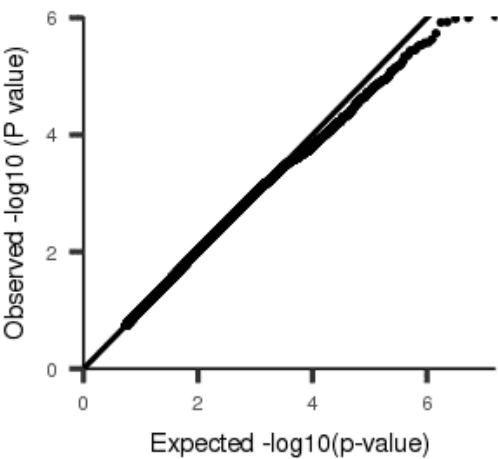

[back to list of plots](#)

Figure 599: dMRI TBSS ISOVF Posterior limb of internal capsule L

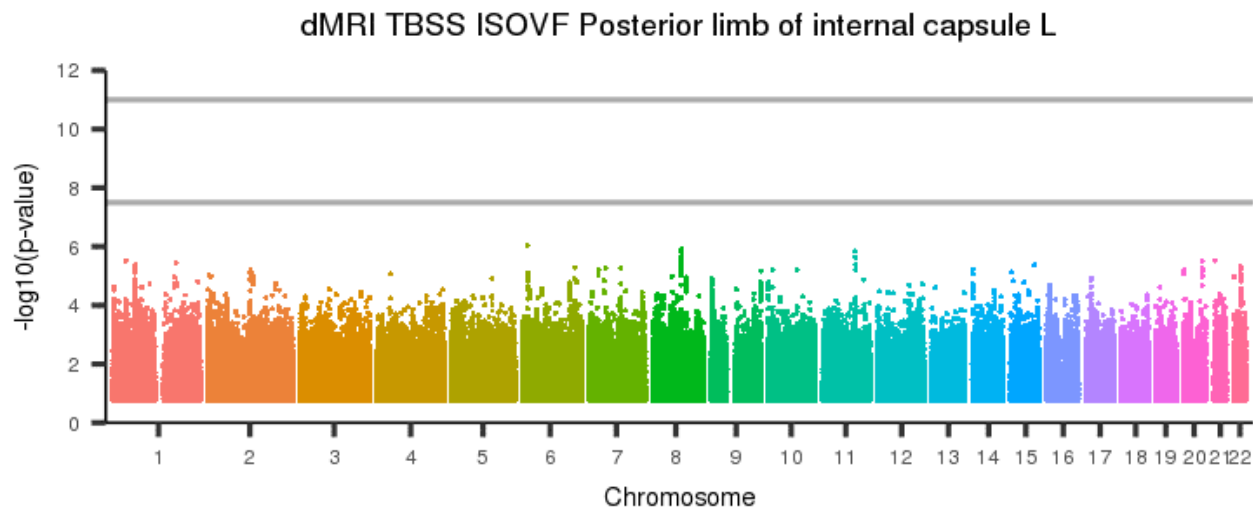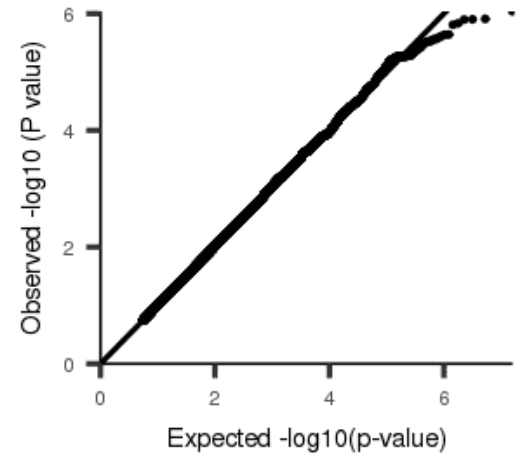

[back to list of plots](#)

Figure 600: dMRI TBSS ISOVF Retrolenticular part of internal capsule R

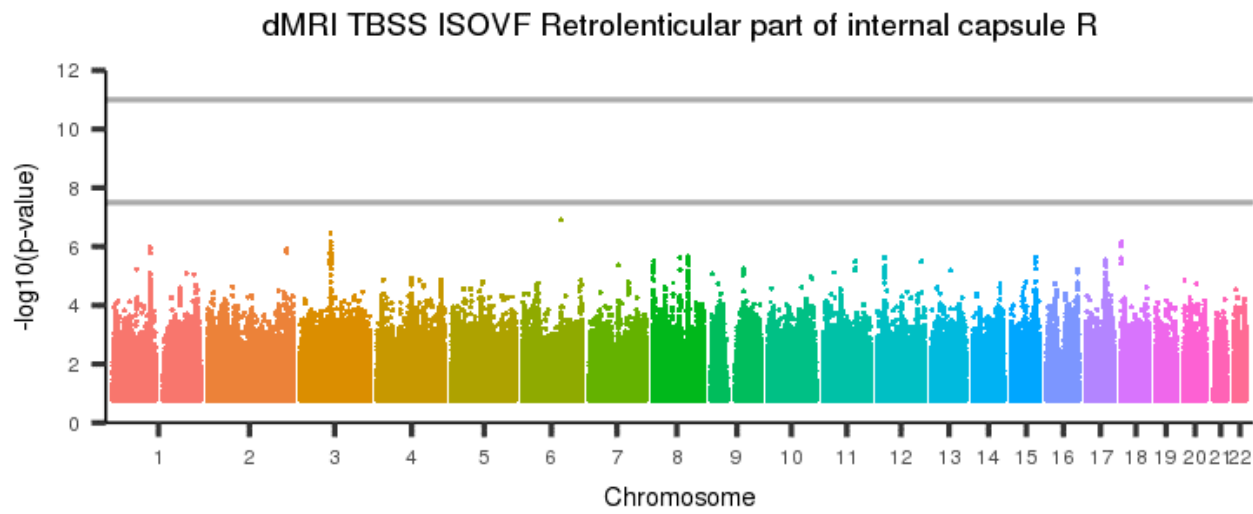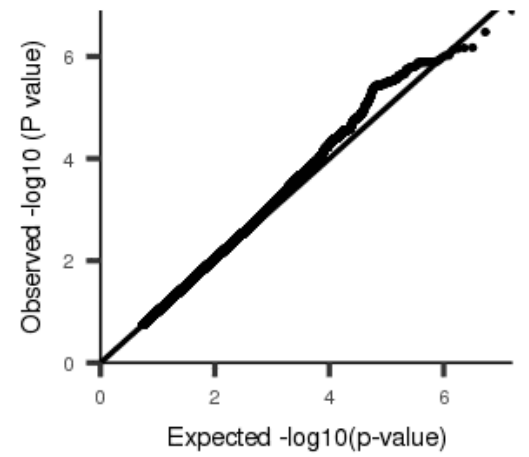

[back to list of plots](#)

Figure 601: dMRI TBSS ISOVF Retrolesional part of internal capsule L

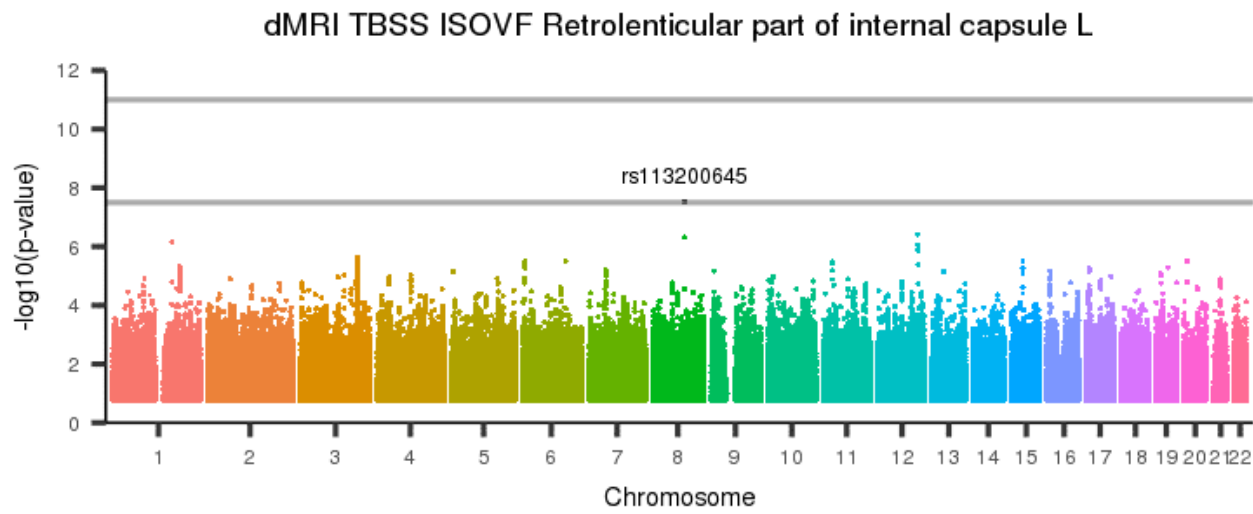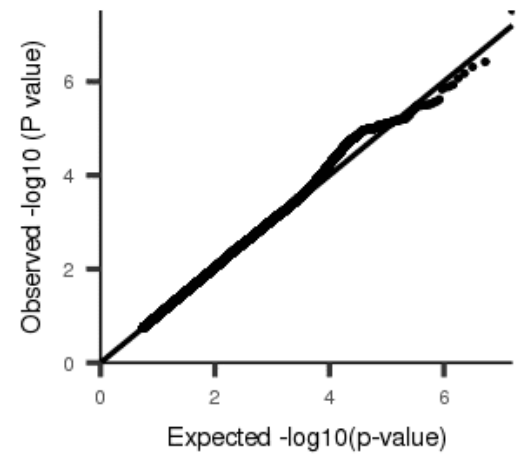

[back to list of plots](#)

Figure 602: dMRI TBSS ISOVF Anterior corona radiata R

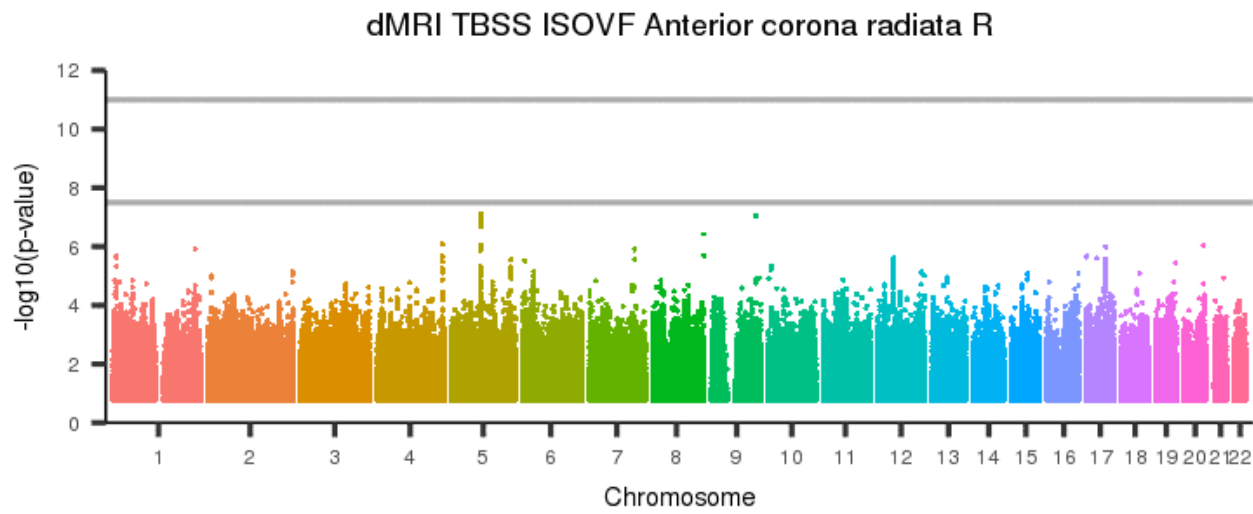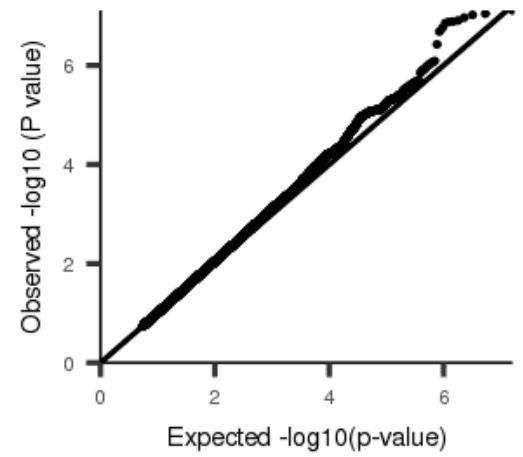

[back to list of plots](#)

Figure 603: dMRI TBSS ISOVF Anterior corona radiata L

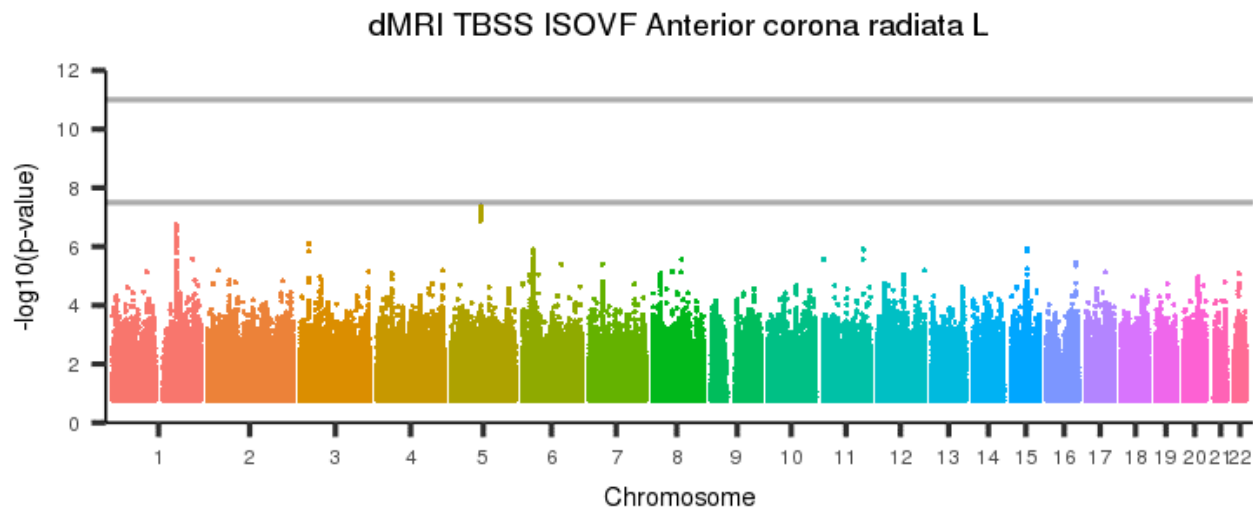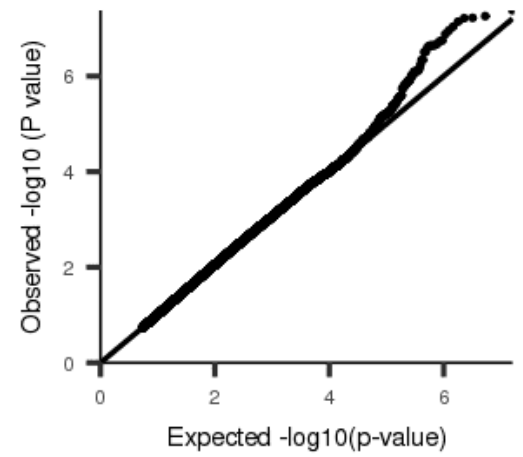

[back to list of plots](#)

Figure 604: dMRI TBSS ISOVF Superior corona radiata R

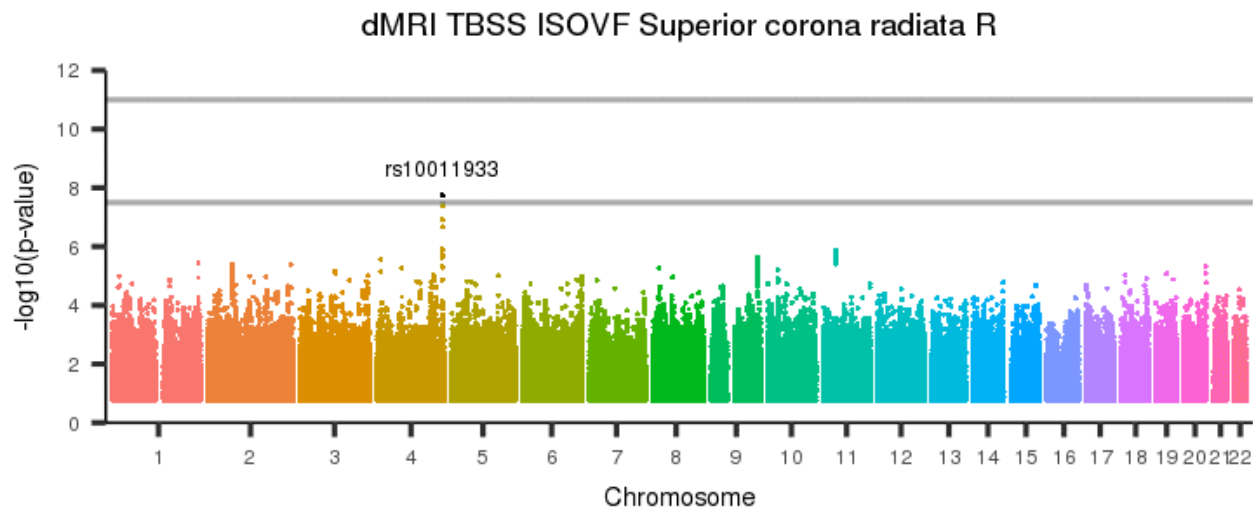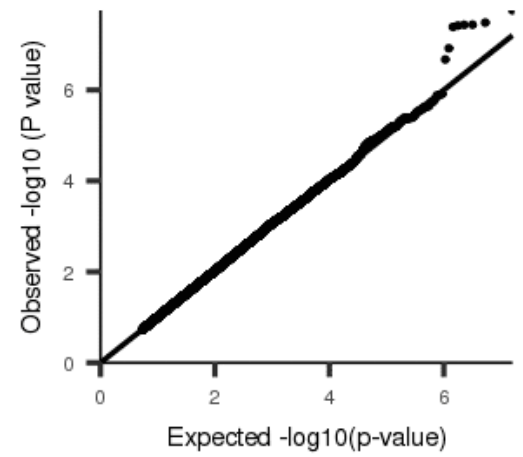

[back to list of plots](#)

Figure 605: dMRI TBSS ISOVF Superior corona radiata L

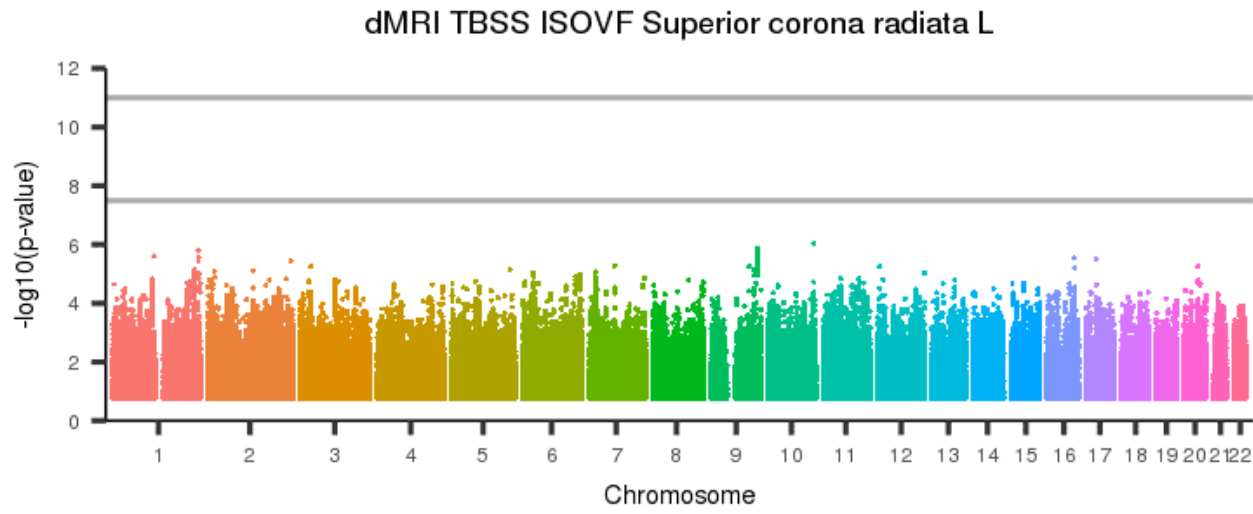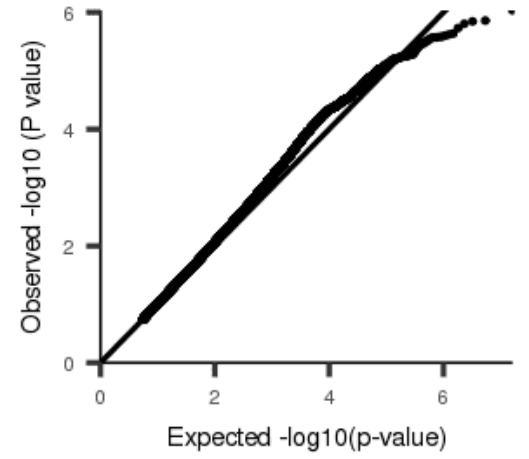

[back to list of plots](#)



Figure 606: dMRI TBSS ISOVF Posterior corona radiata R

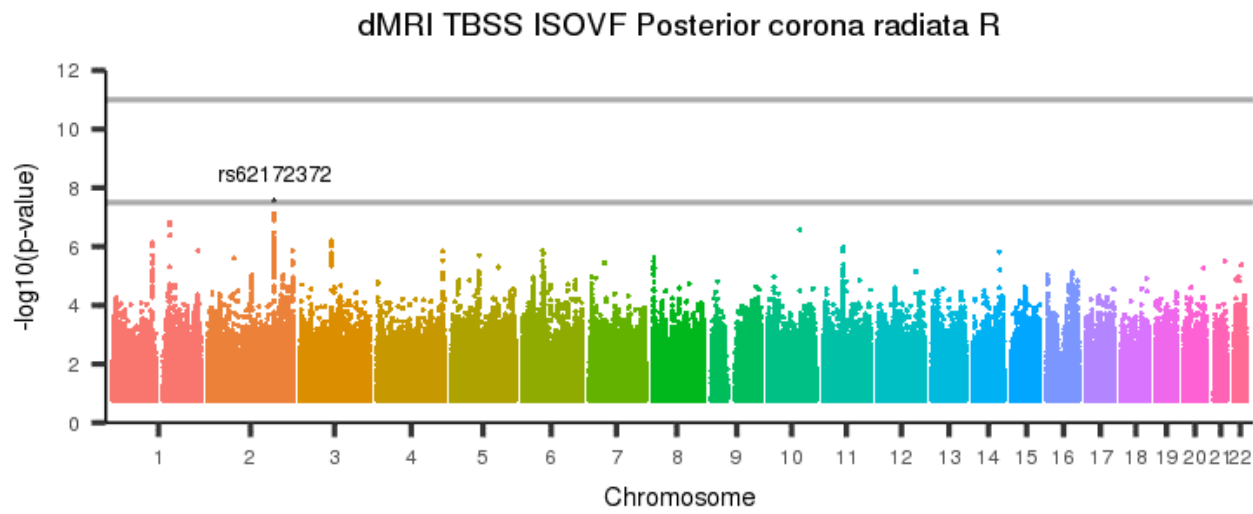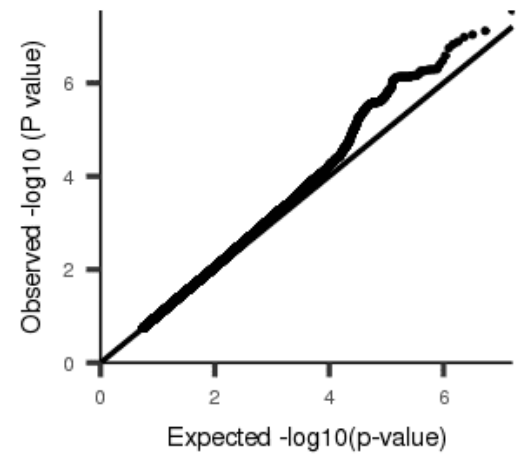

[back to list of plots](#)

Figure 607: dMRI TBSS ISOVF Posterior corona radiata L

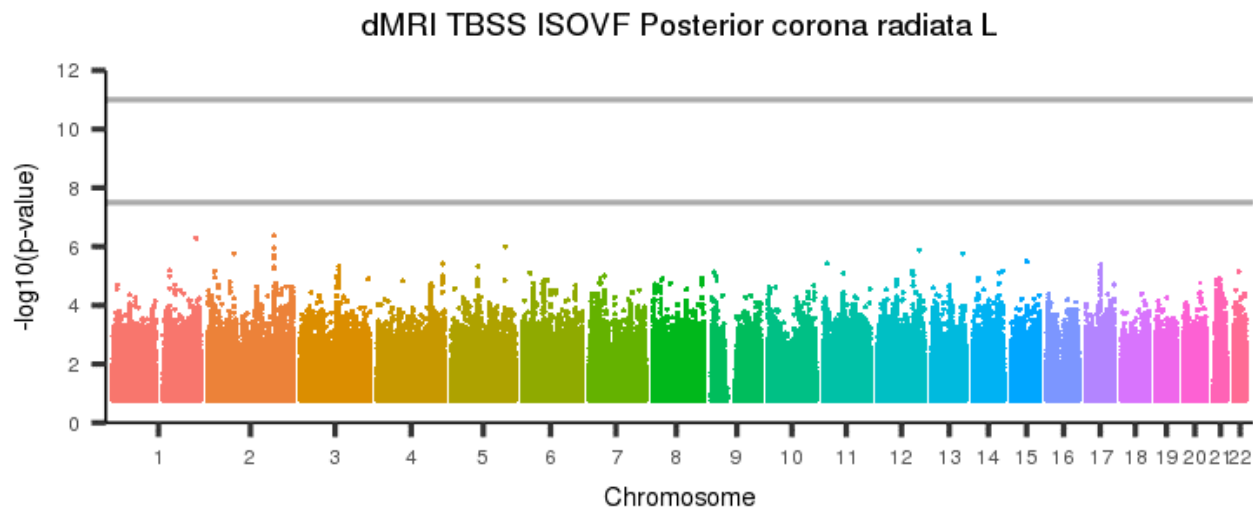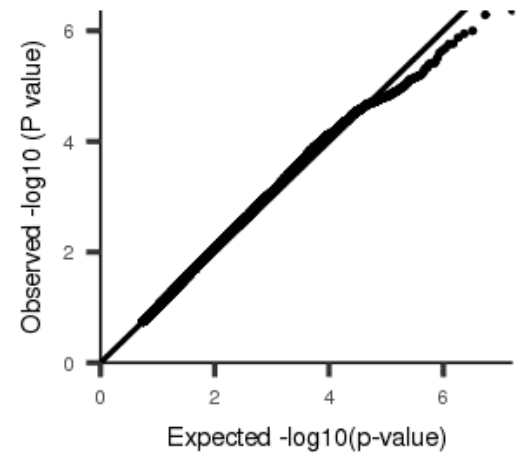

[back to list of plots](#)

Figure 608: dMRI TBSS ISOVF Posterior thalamic radiation R

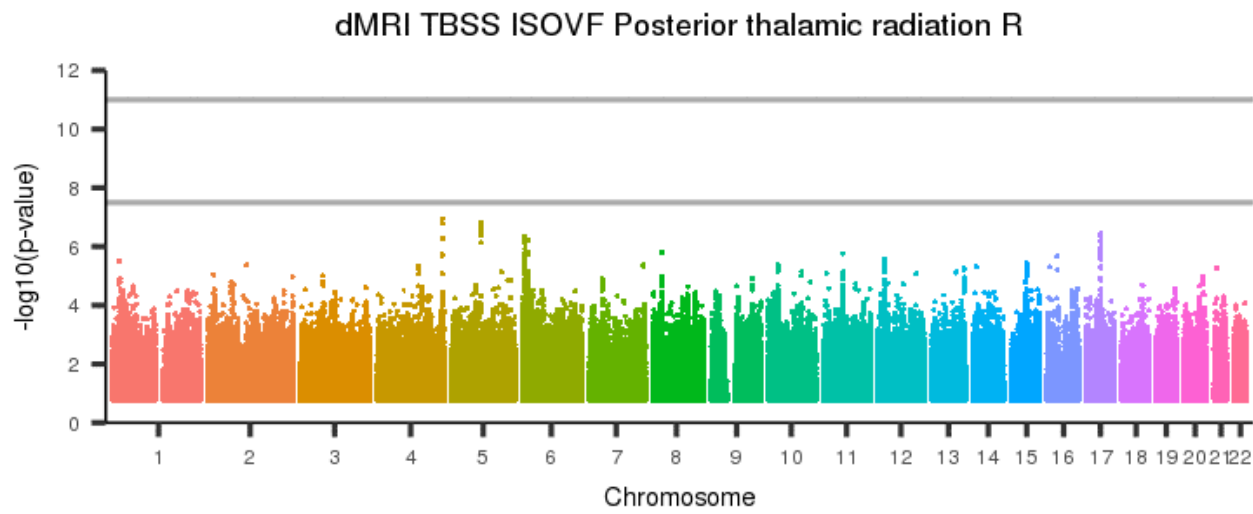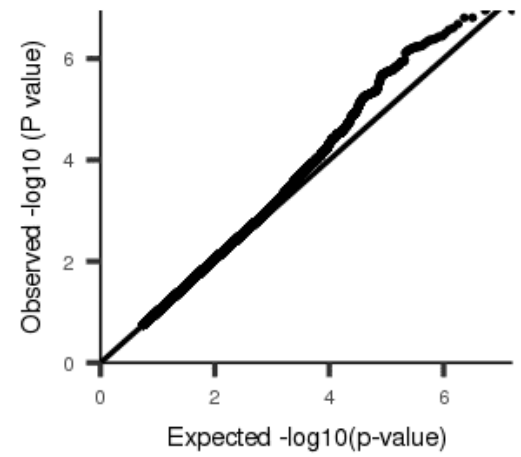

[back to list of plots](#)

Figure 609: dMRI TBSS ISOVF Posterior thalamic radiation L

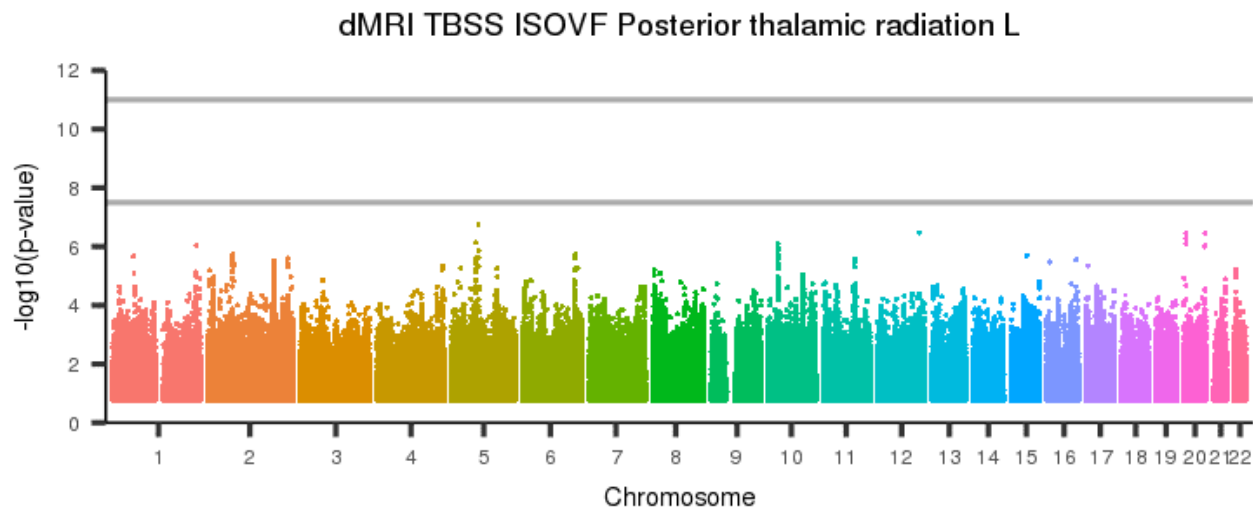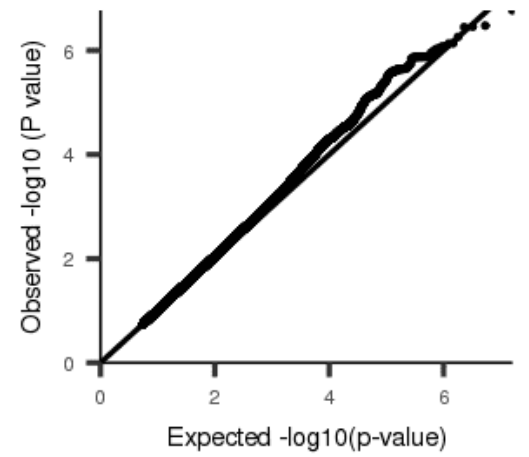

[back to list of plots](#)

Figure 610: dMRI TBSS ISOVF Sagittal stratum R

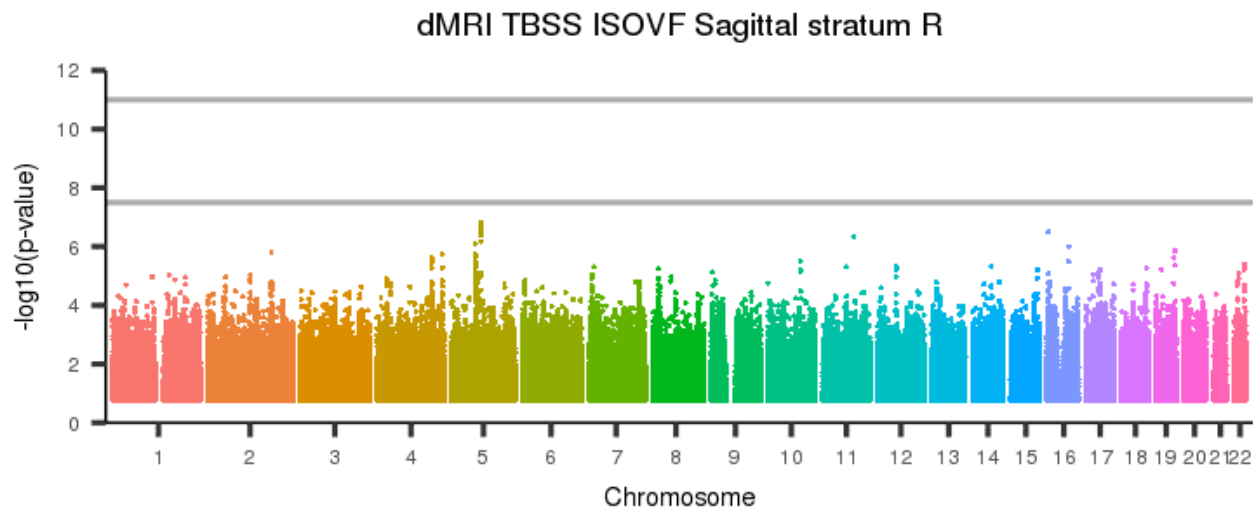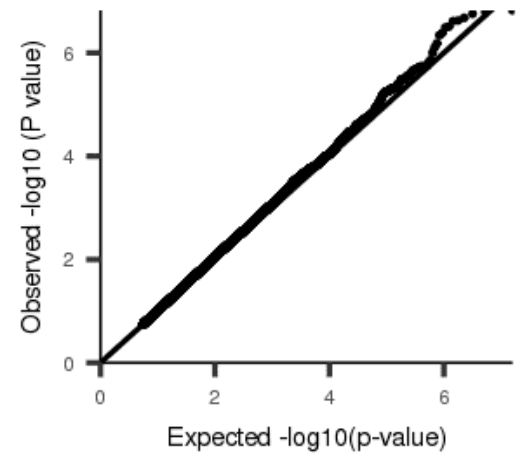

[back to list of plots](#)

Figure 611: dMRI TBSS ISOVF Sagittal stratum L

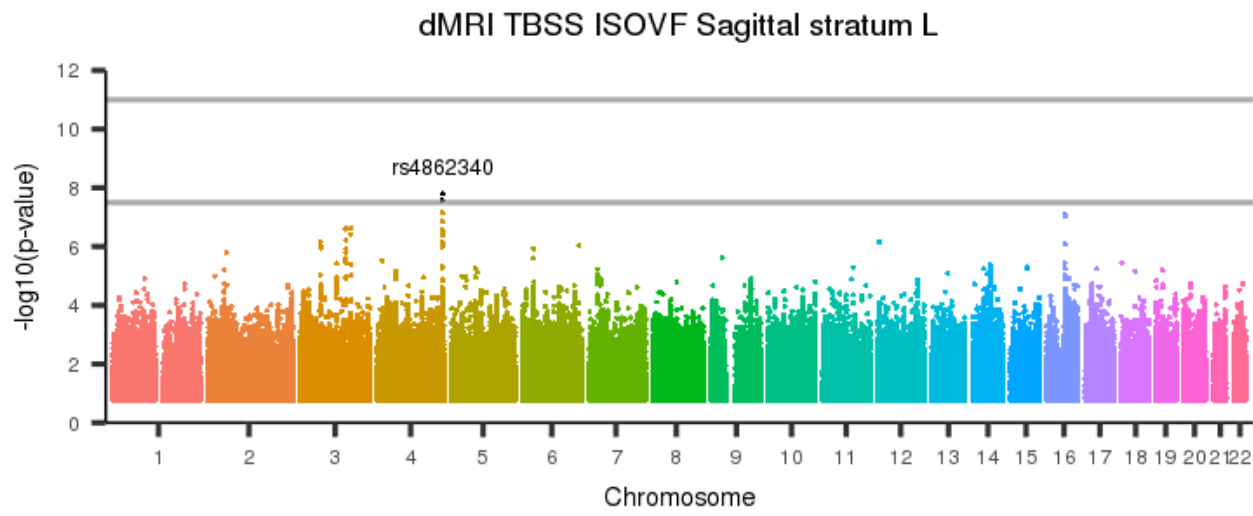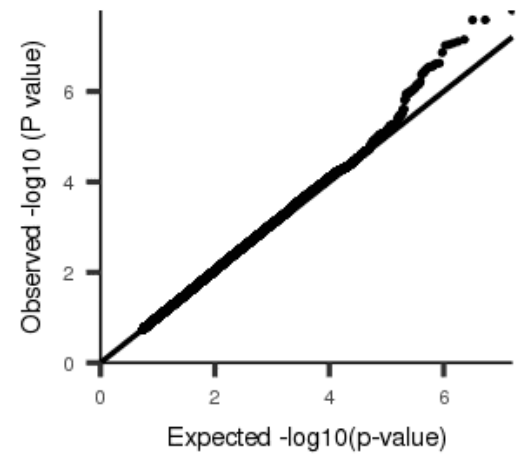

[back to list of plots](#)

Figure 612: dMRI TBSS ISOVF External capsule R

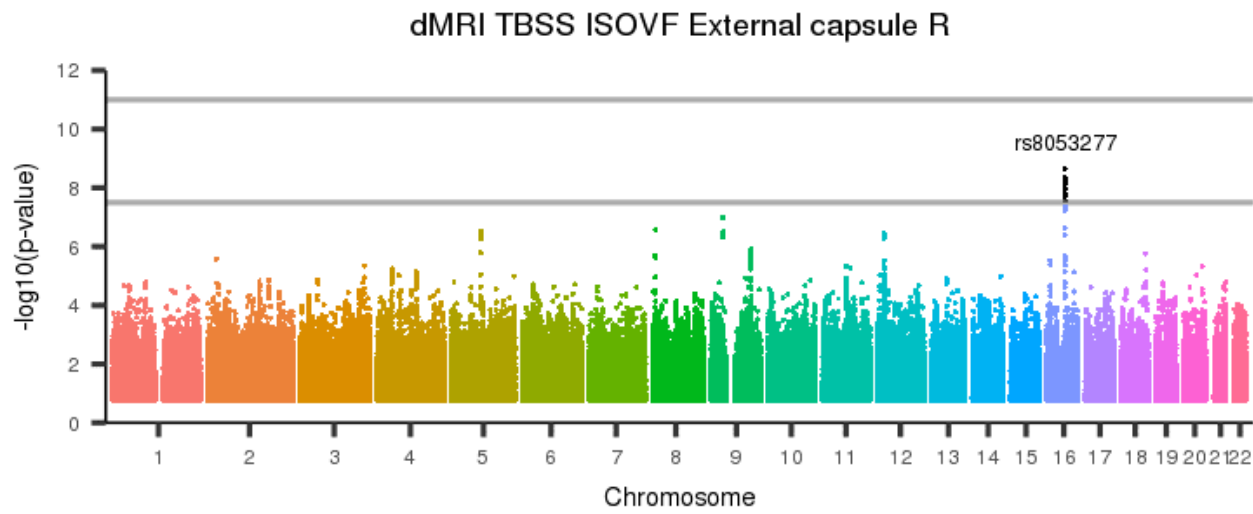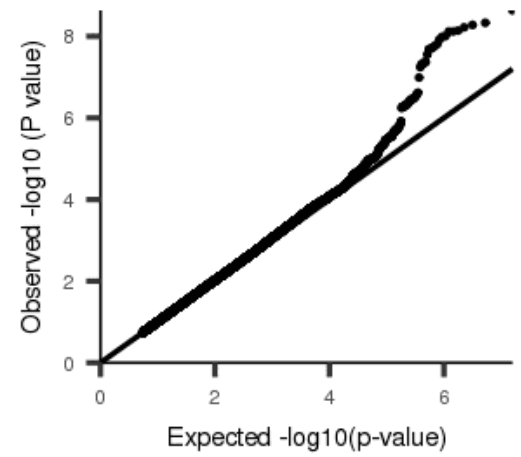

[back to list of plots](#)

Figure 613: dMRI TBSS ISOVF External capsule L

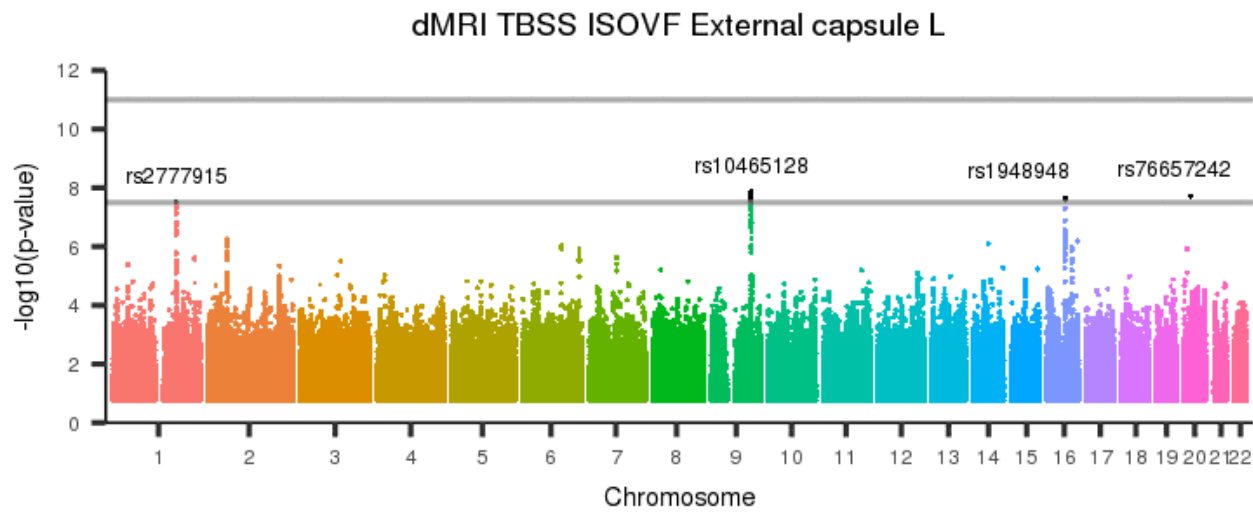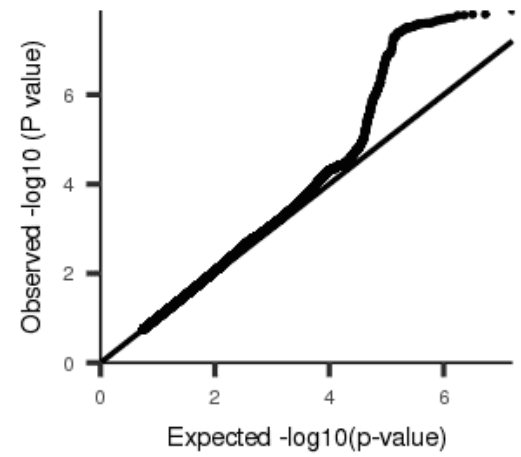

[back to list of plots](#)



Figure 614: dMRI TBSS ISOVF Cingulum cingulate gyrus R

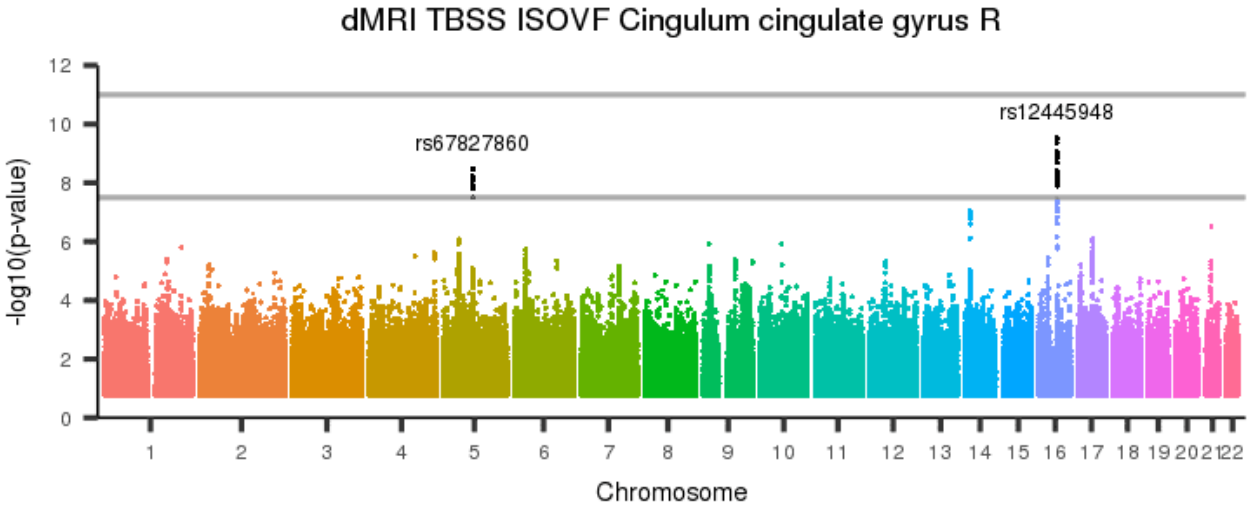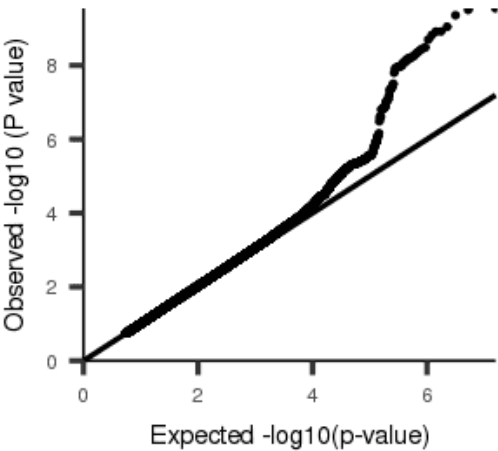

[back to list of plots](#)

Figure 615: dMRI TBSS ISOVF Cingulum cingulate gyrus L

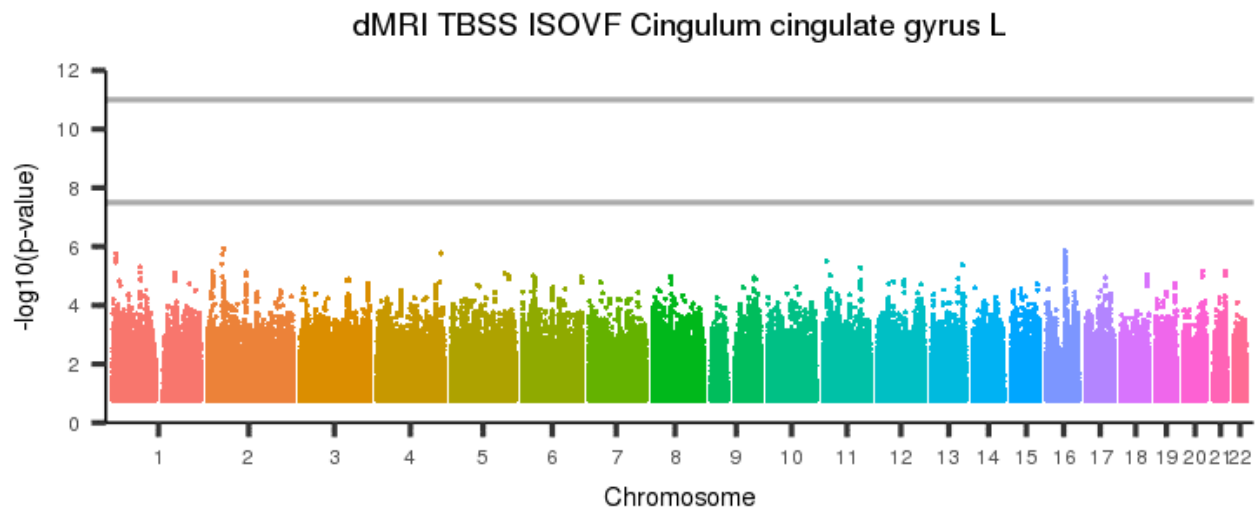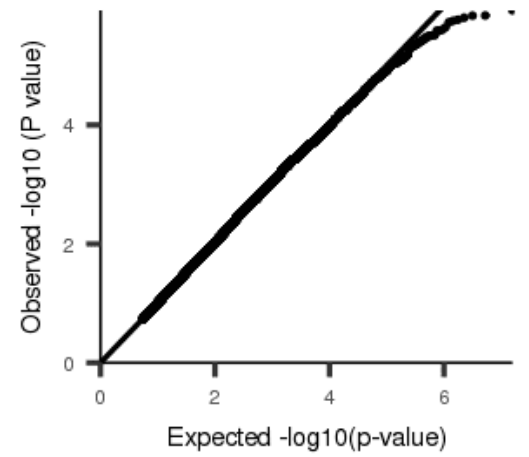

[back to list of plots](#)

Figure 616: dMRI TBSS ISOVF Cingulum hippocampus R

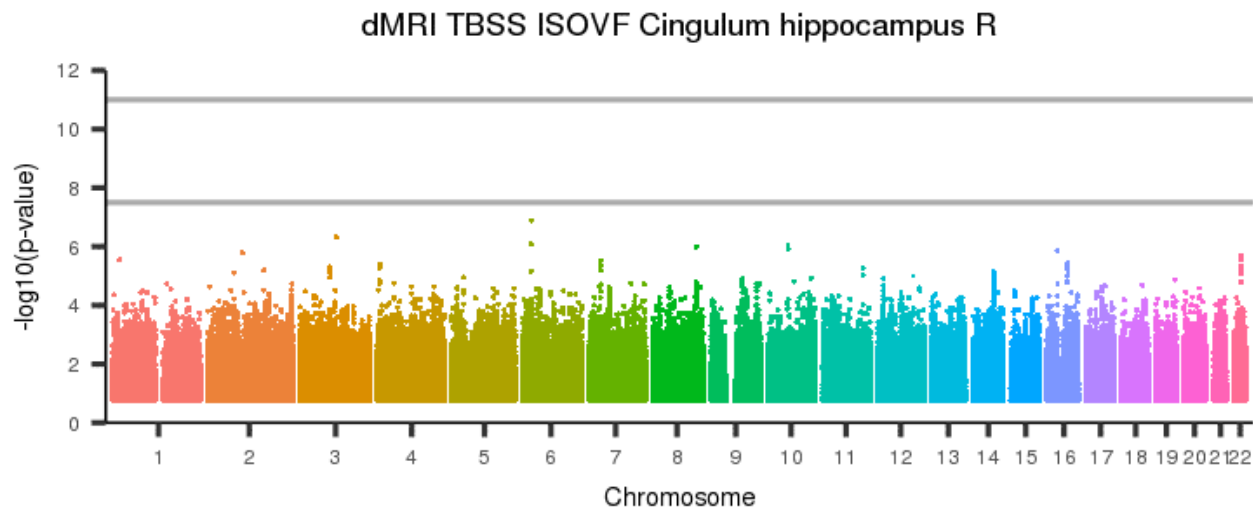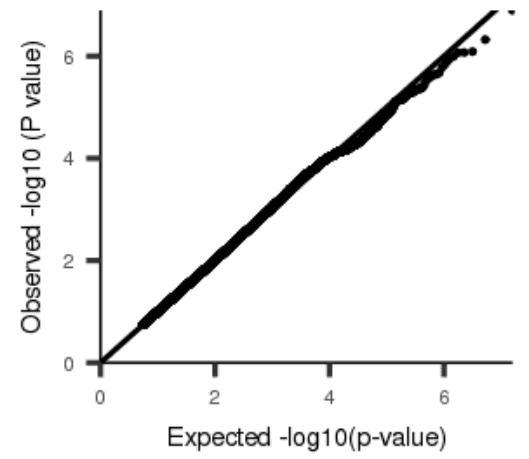

[back to list of plots](#)

Figure 617: dMRI TBSS ISOVF Cingulum hippocampus L

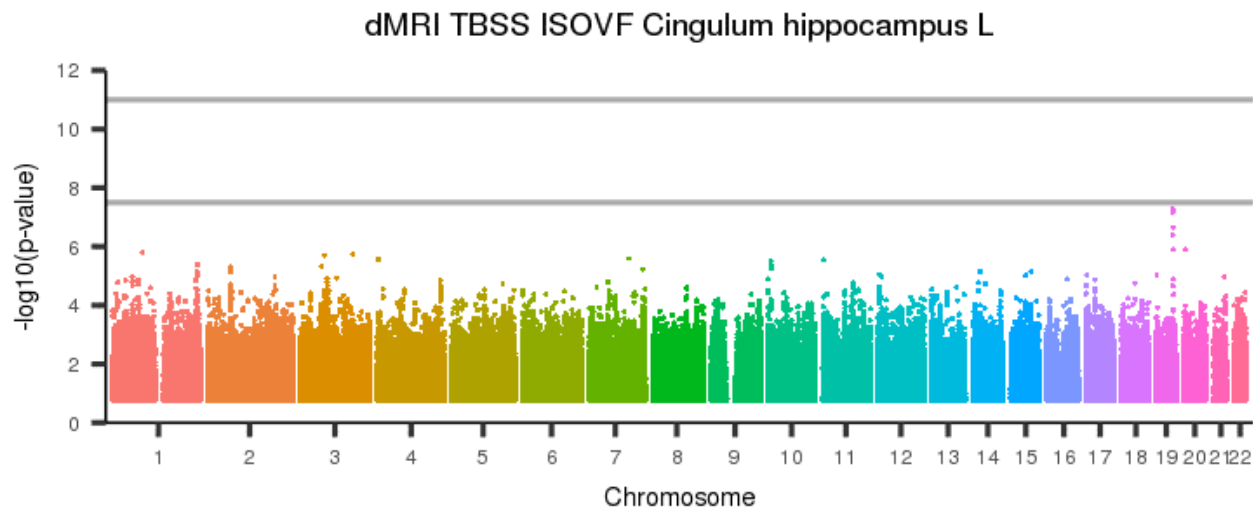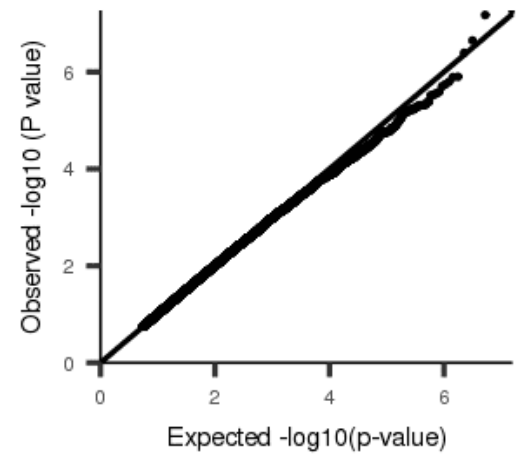

[back to list of plots](#)

Figure 618: dMRI TBSS ISOVF Fornix cres+Stria terminalis R

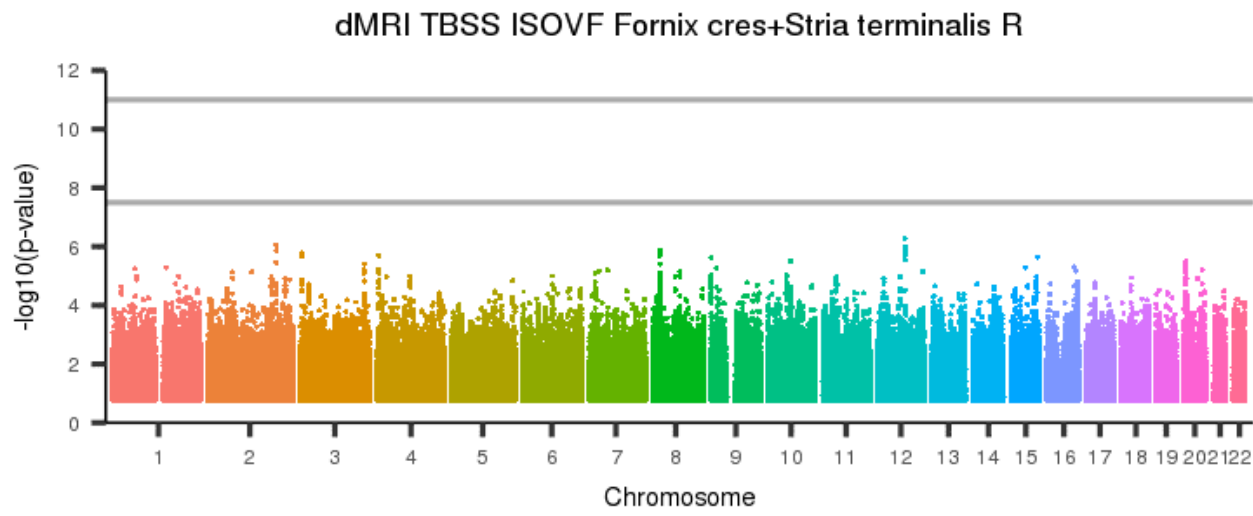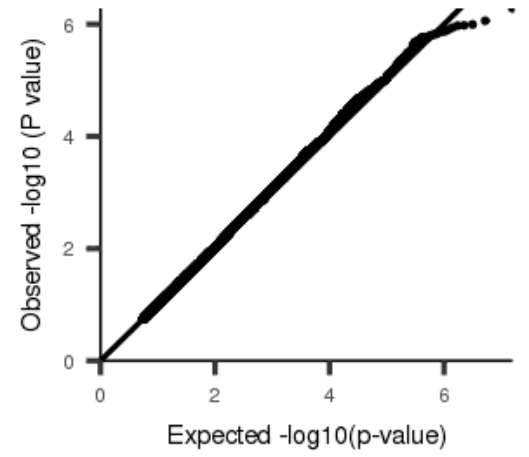

[back to list of plots](#)

Figure 619: dMRI TBSS ISOVF Fornix cres+Stria terminalis L

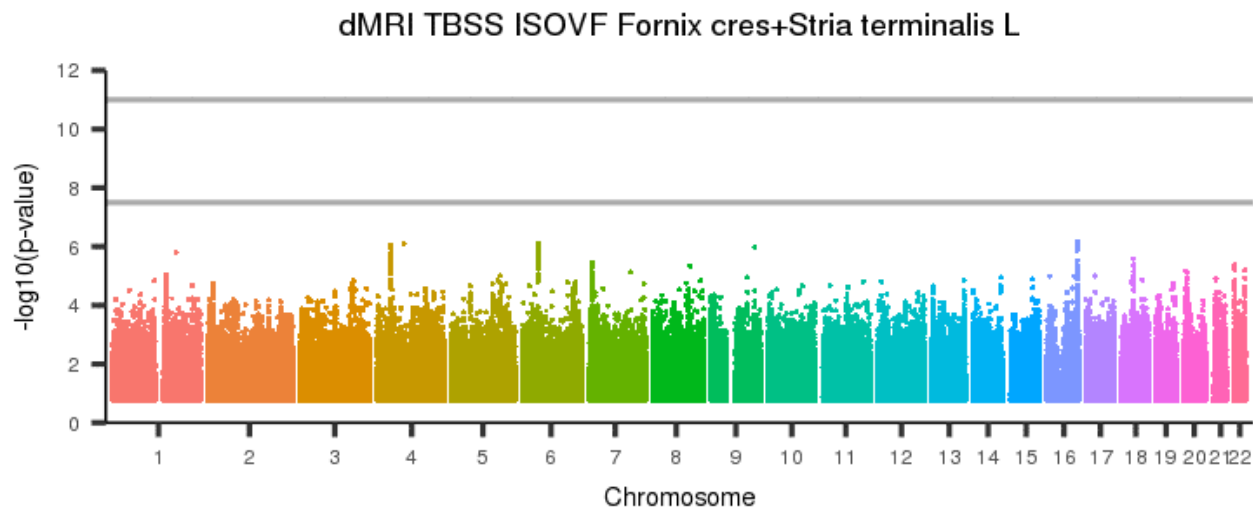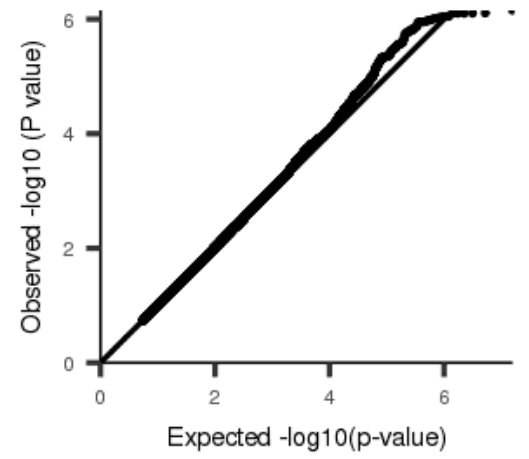

[back to list of plots](#)

Figure 620: dMRI TBSS ISOVF Superior longitudinal fasciculus R

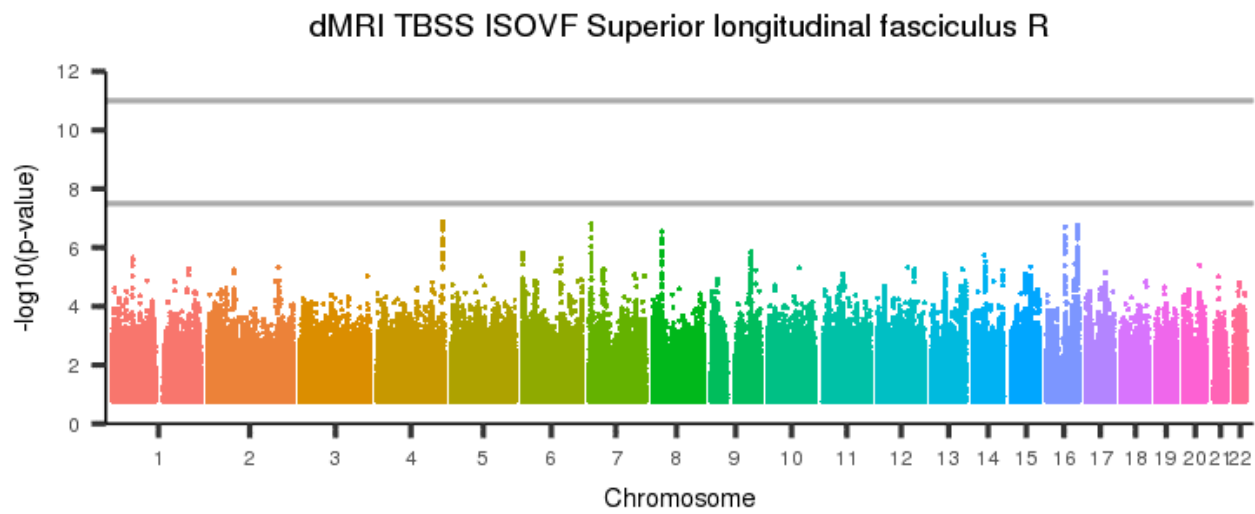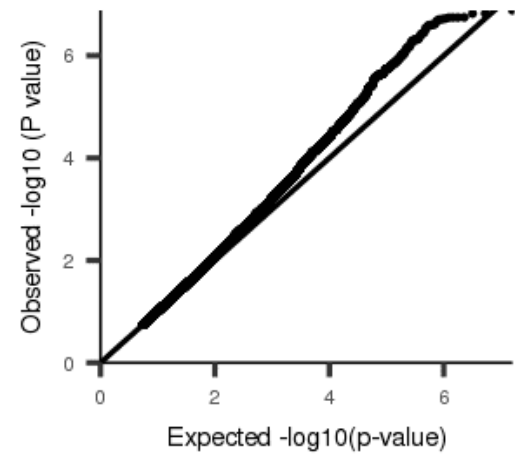

[back to list of plots](#)

Figure 621: dMRI TBSS ISOVF Superior longitudinal fasciculus L

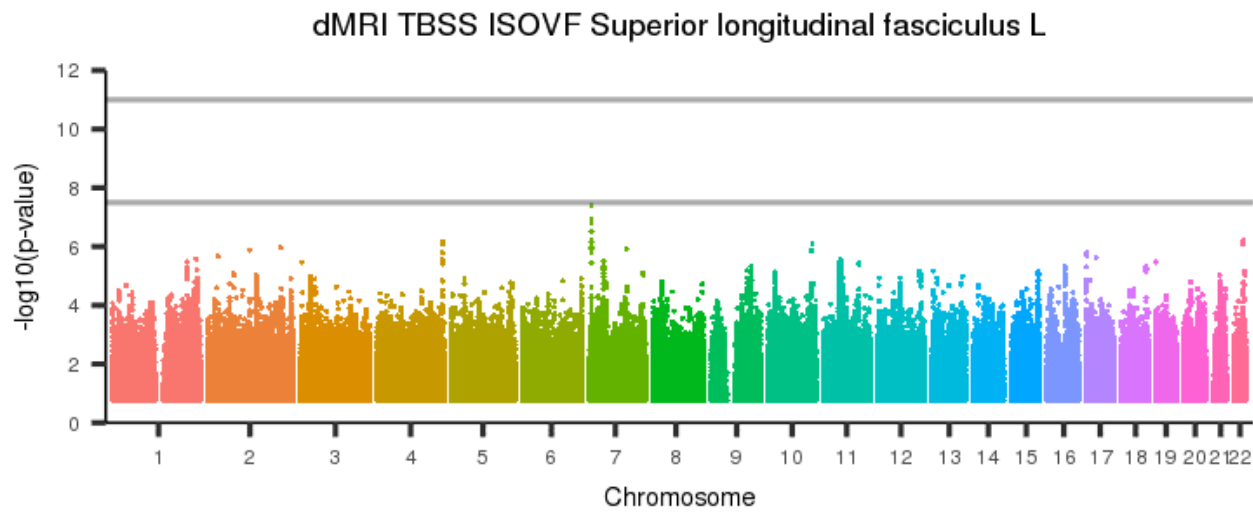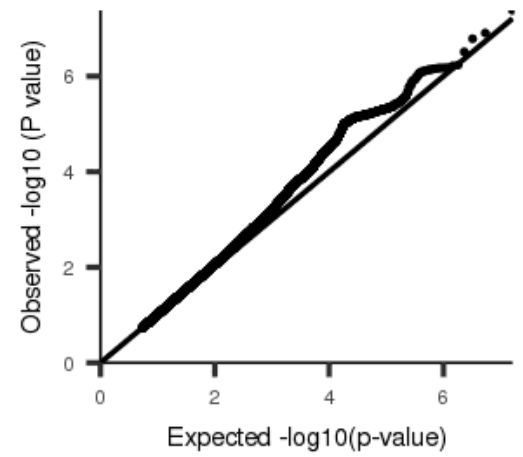

[back to list of plots](#)



Figure 622: dMRI TBSS ISOVF Superior fronto-occipital fasciculus R

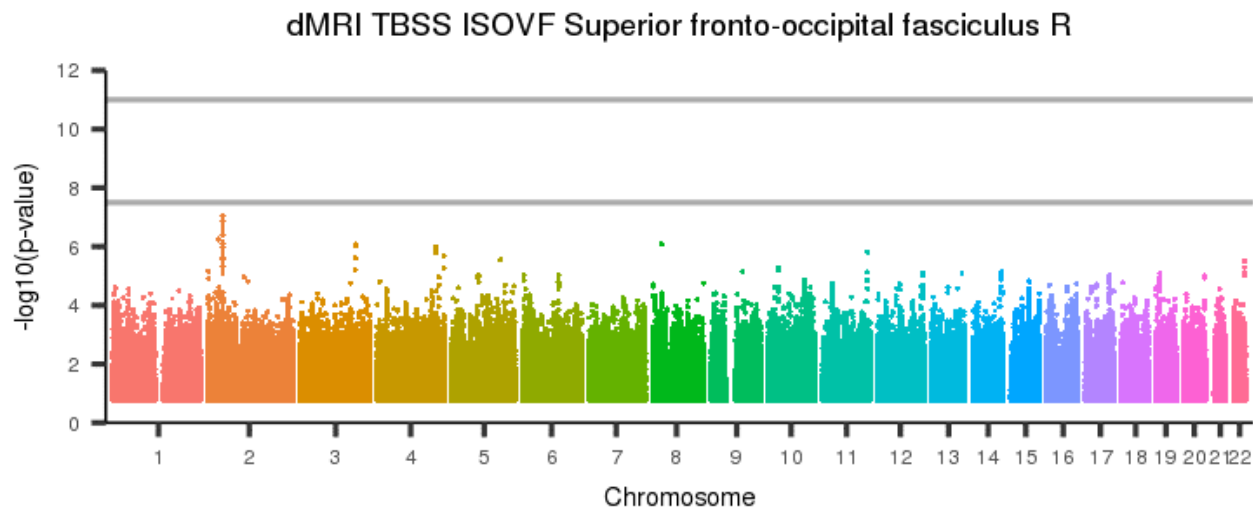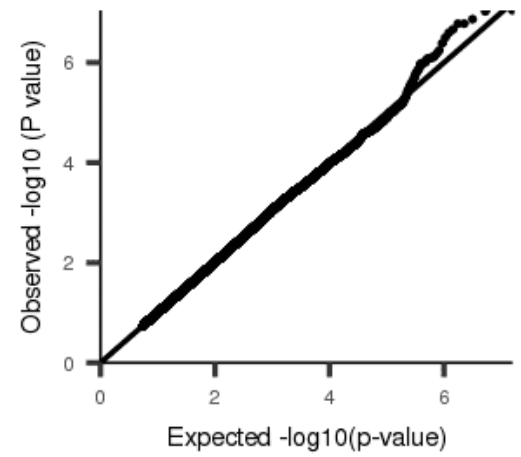

[back to list of plots](#)

Figure 623: dMRI TBSS ISOVF Superior fronto-occipital fasciculus L

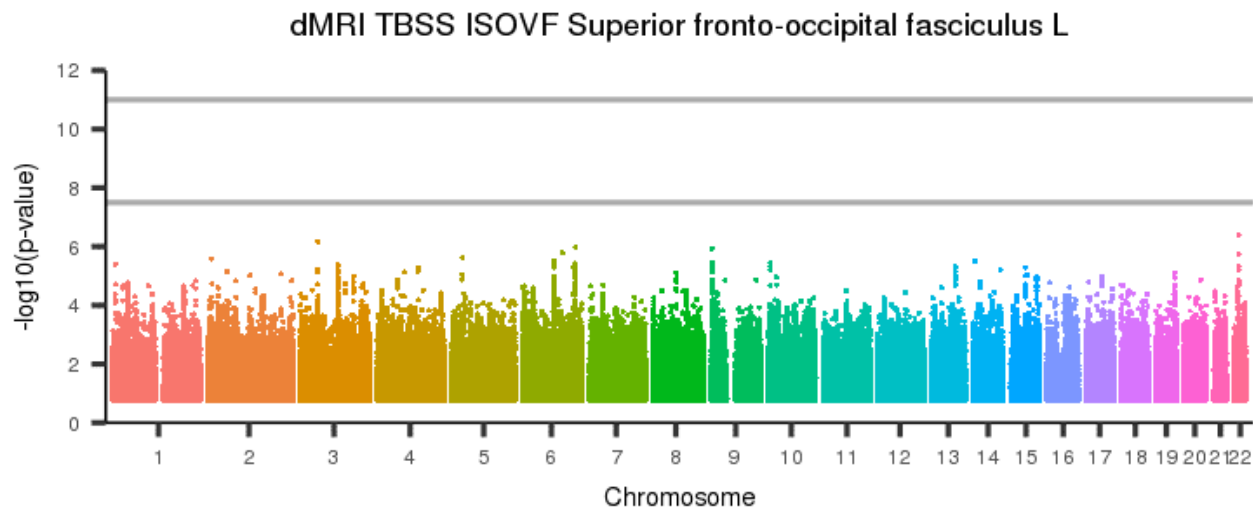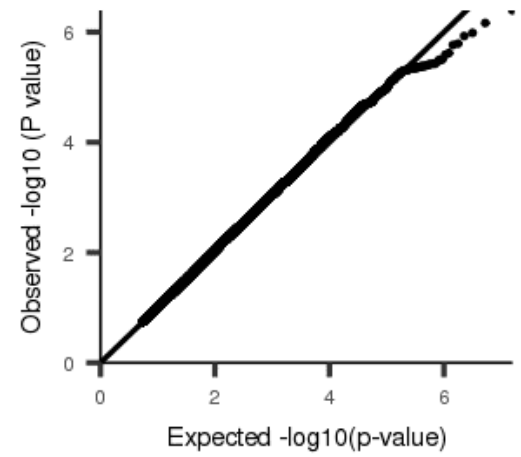

[back to list of plots](#)

Figure 624: dMRI TBSS ISOVF Uncinate fasciculus R

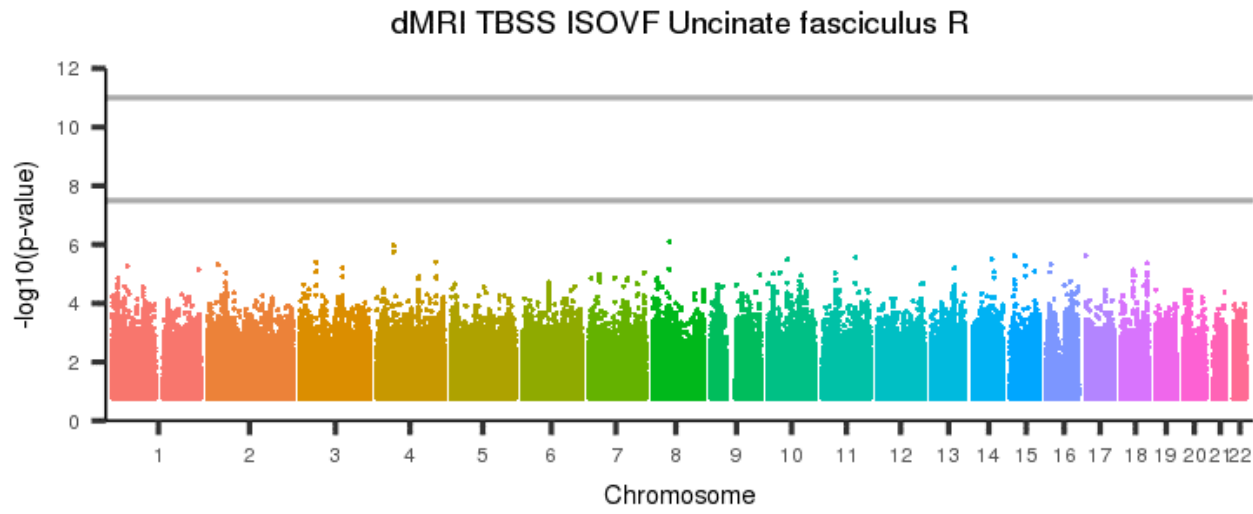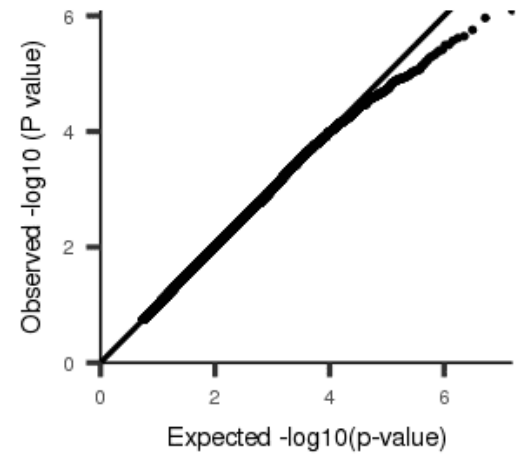

[back to list of plots](#)

Figure 625: dMRI TBSS ISOVF Uncinate fasciculus L

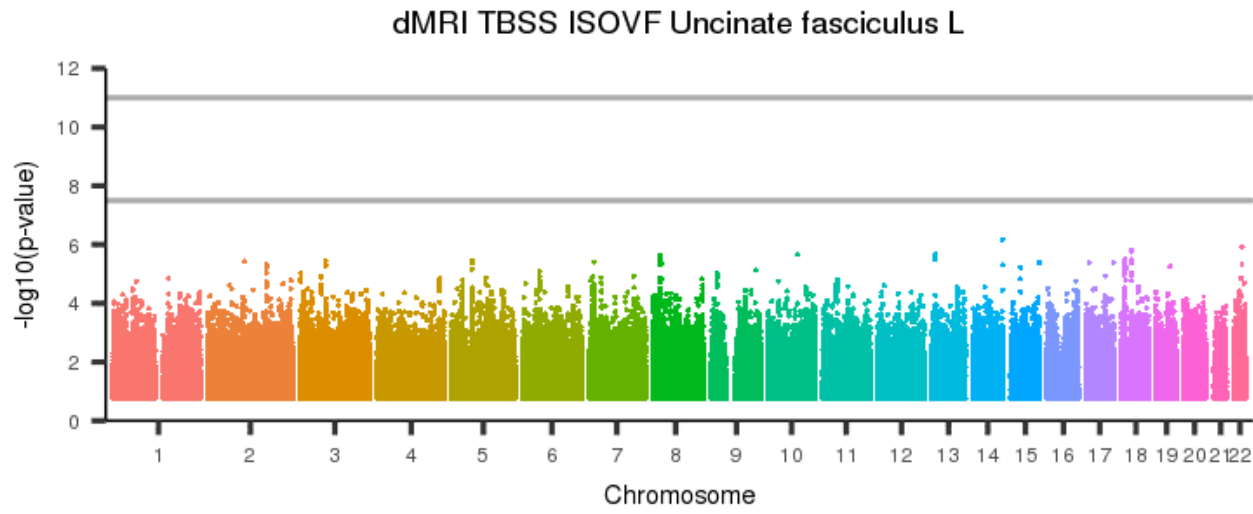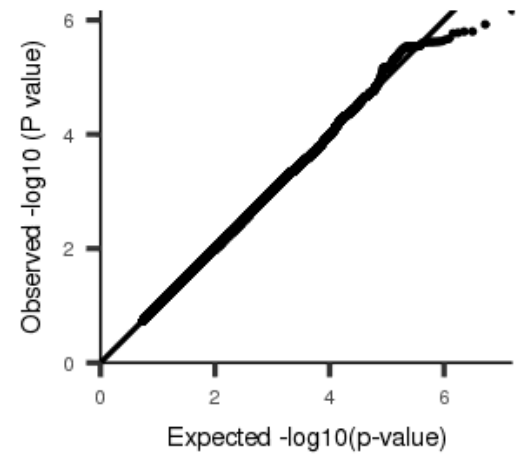

[back to list of plots](#)

Figure 626: dMRI TBSS ISOVF Tapetum R

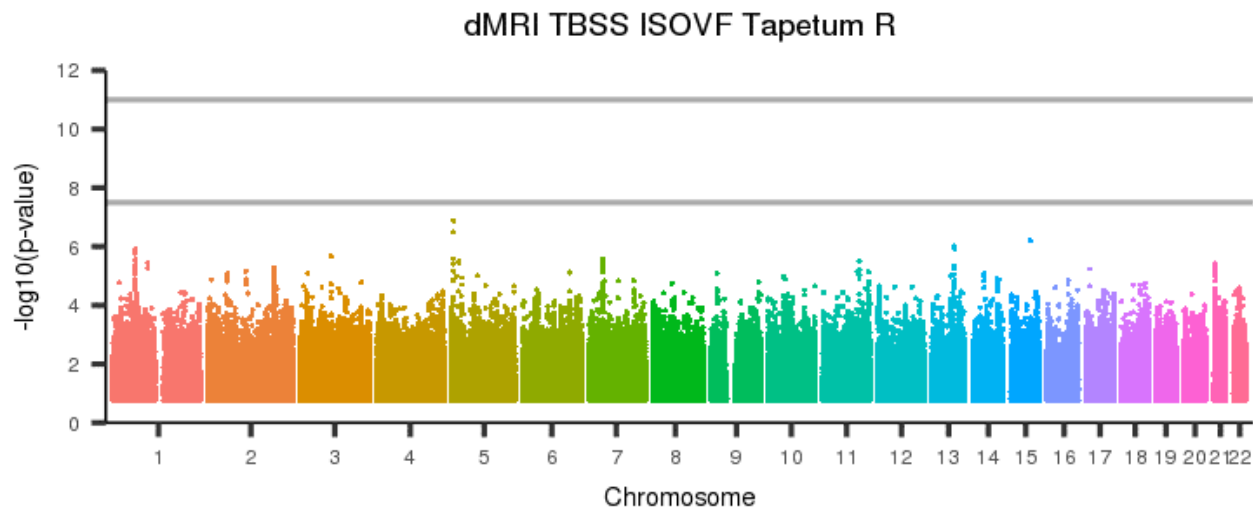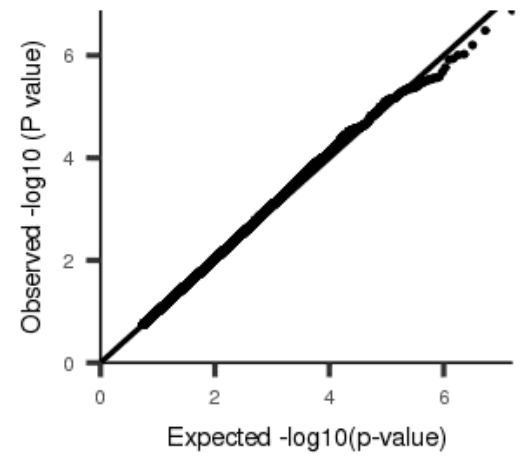

[back to list of plots](#)

Figure 627: dMRI TBSS ISOVF Tapetum L

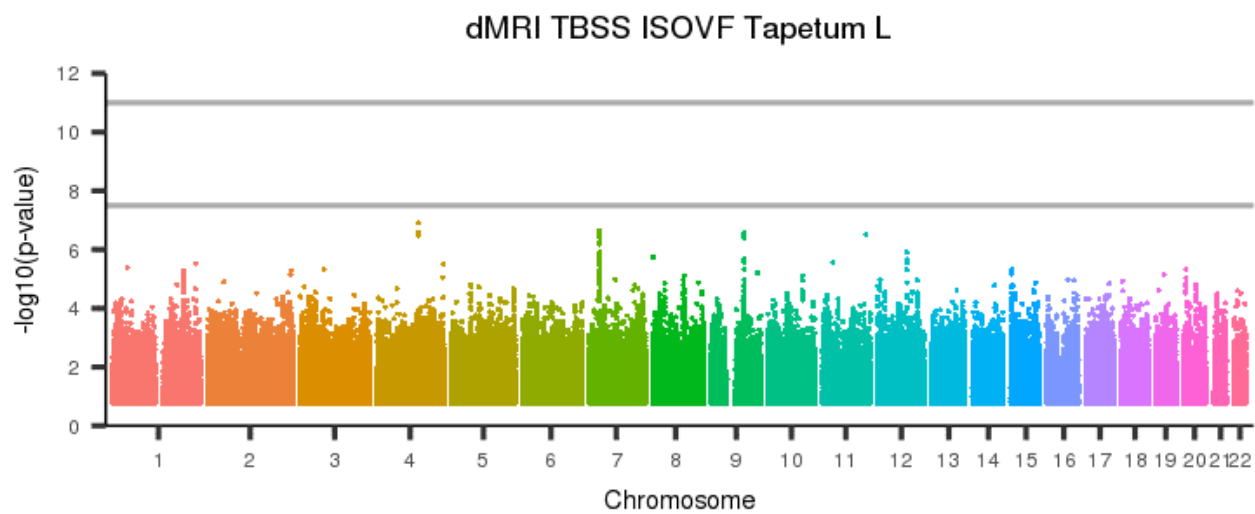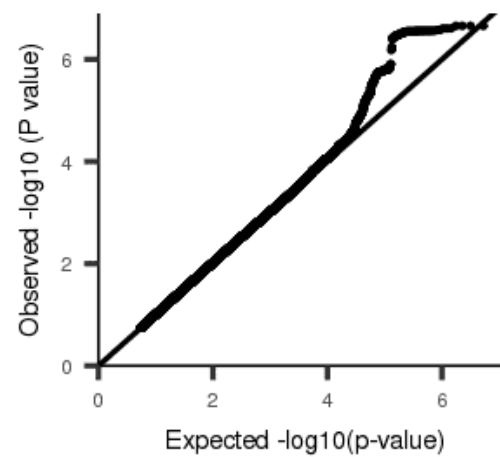

[back to list of plots](#)

Figure 628: dMRI ProbtrackX FA ar I

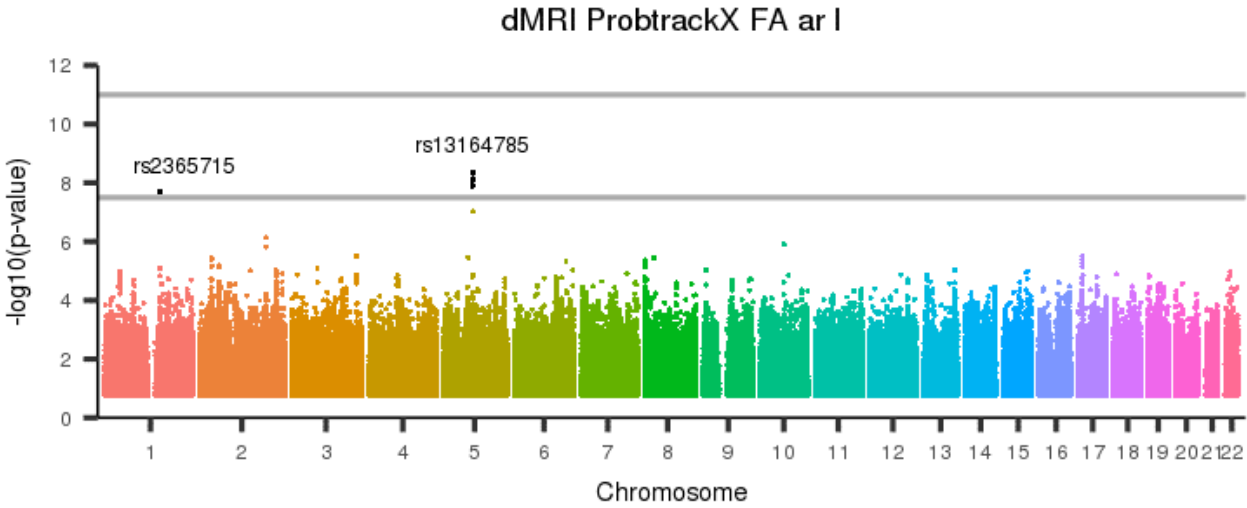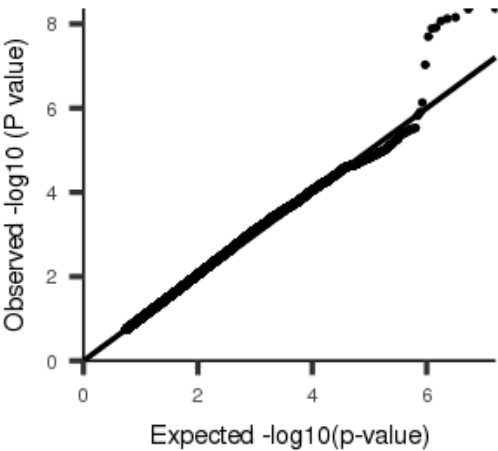

[back to list of plots](#)

Figure 629: dMRI ProbtrackX FA ar r

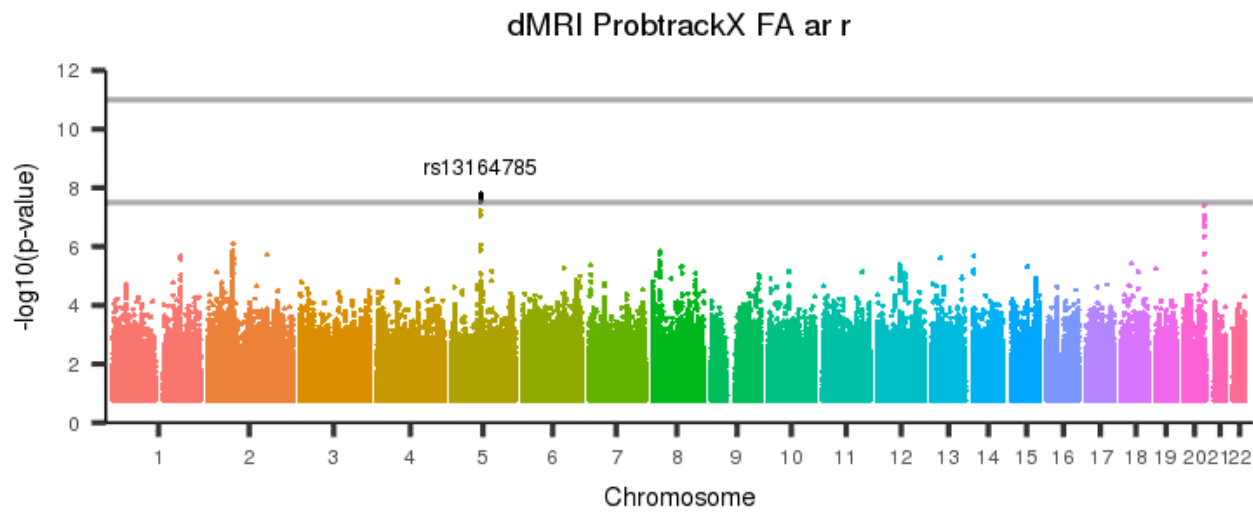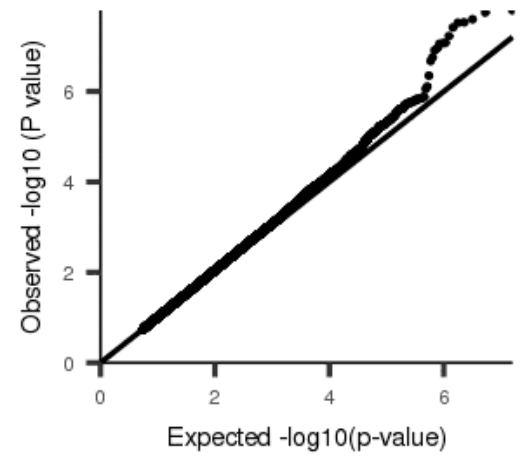

[back to list of plots](#)



Figure 630: dMRI ProbtrackX FA atr I

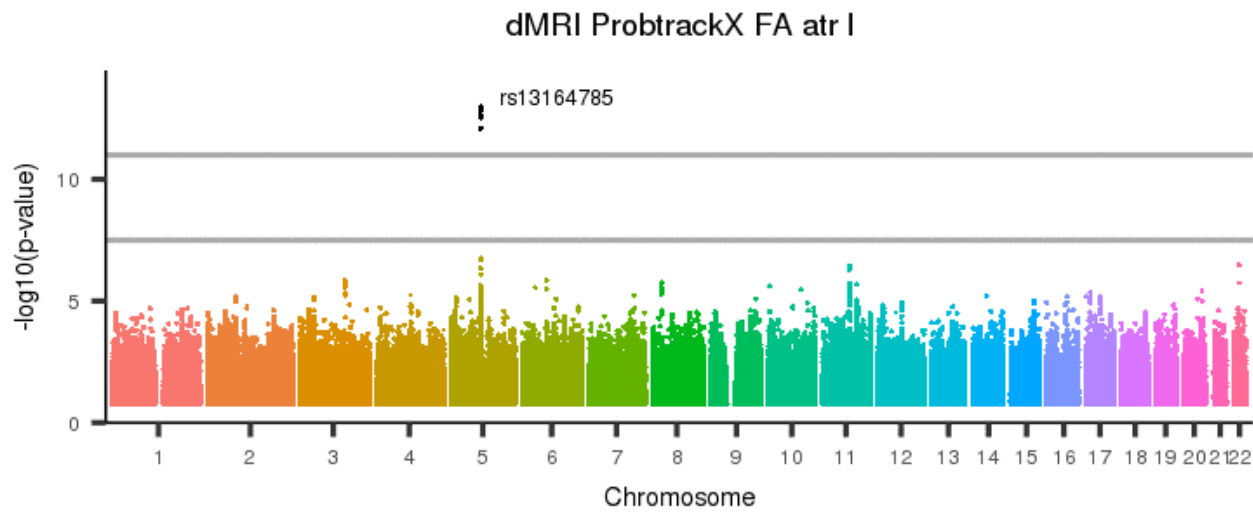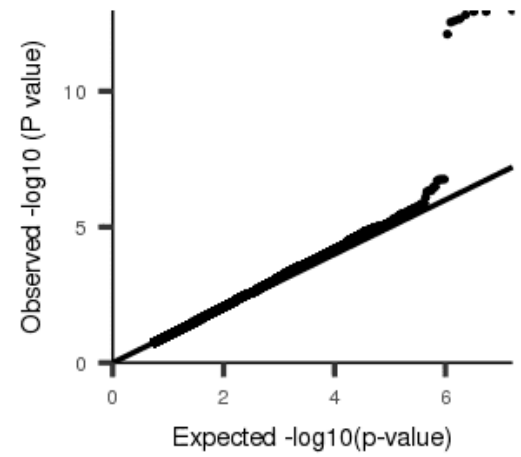

[back to list of plots](#)

Figure 631: dMRI ProbtrackX FA atr r

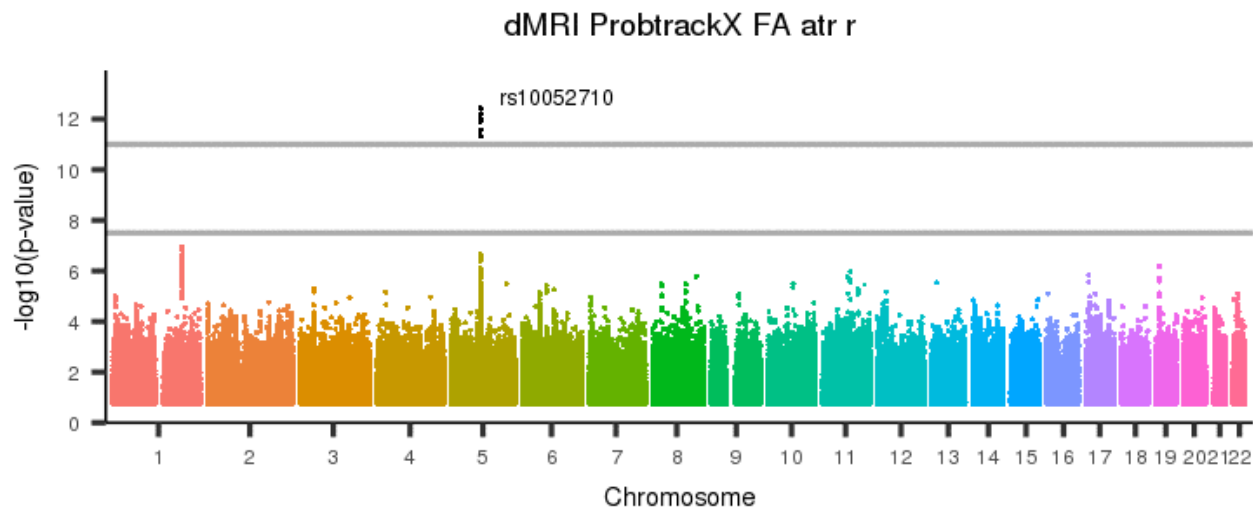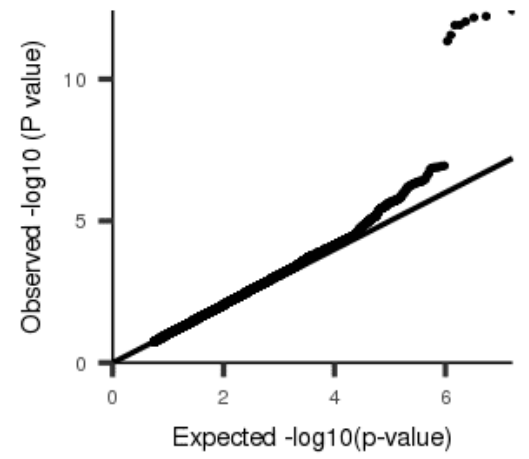

[back to list of plots](#)

Figure 632: dMRI ProbtrackX FA cgc I

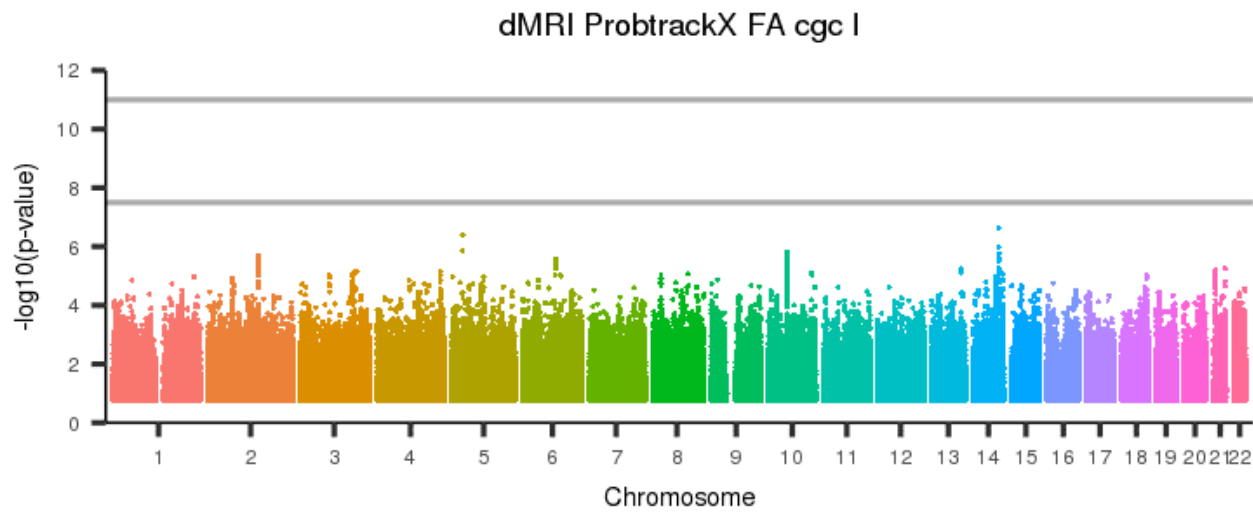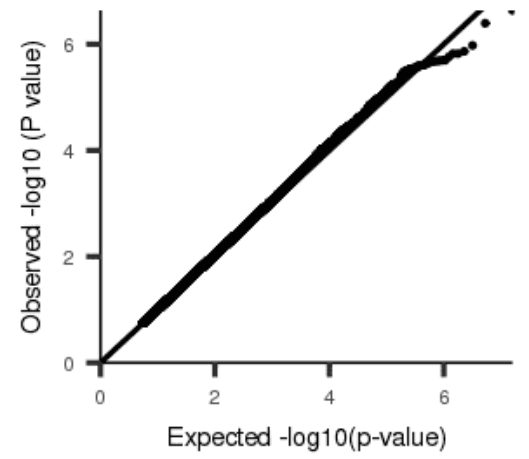

[back to list of plots](#)

Figure 633: dMRI ProbtrackX FA cgc r

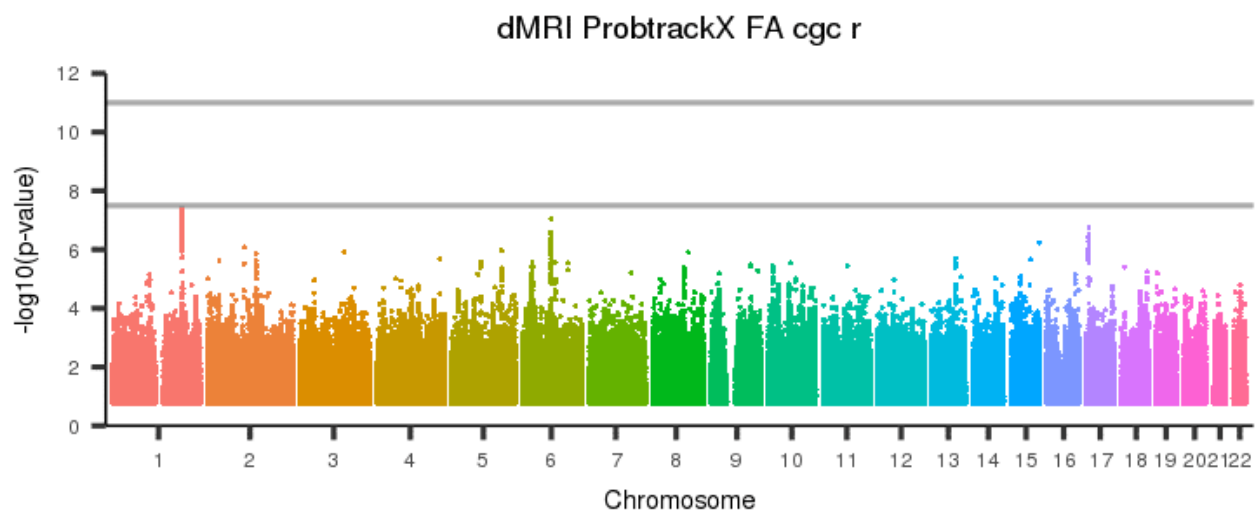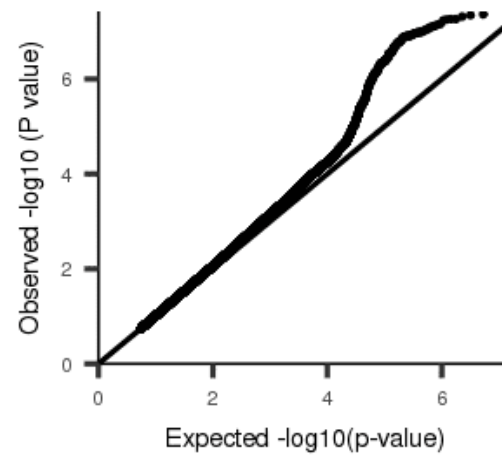

[back to list of plots](#)

Figure 634: dMRI ProbtrackX FA cgh I

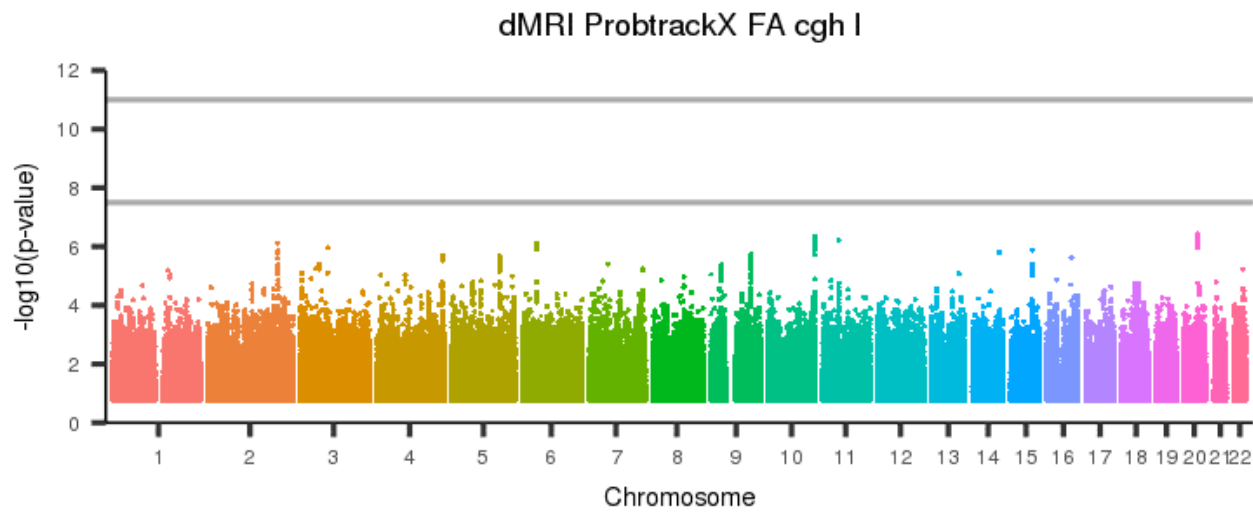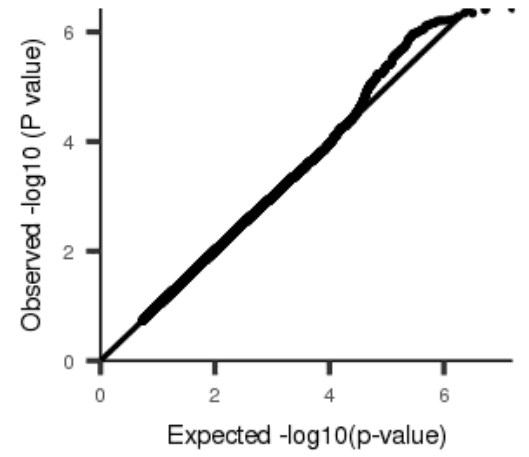

[back to list of plots](#)

Figure 635: dMRI ProbtrackX FA cgh r

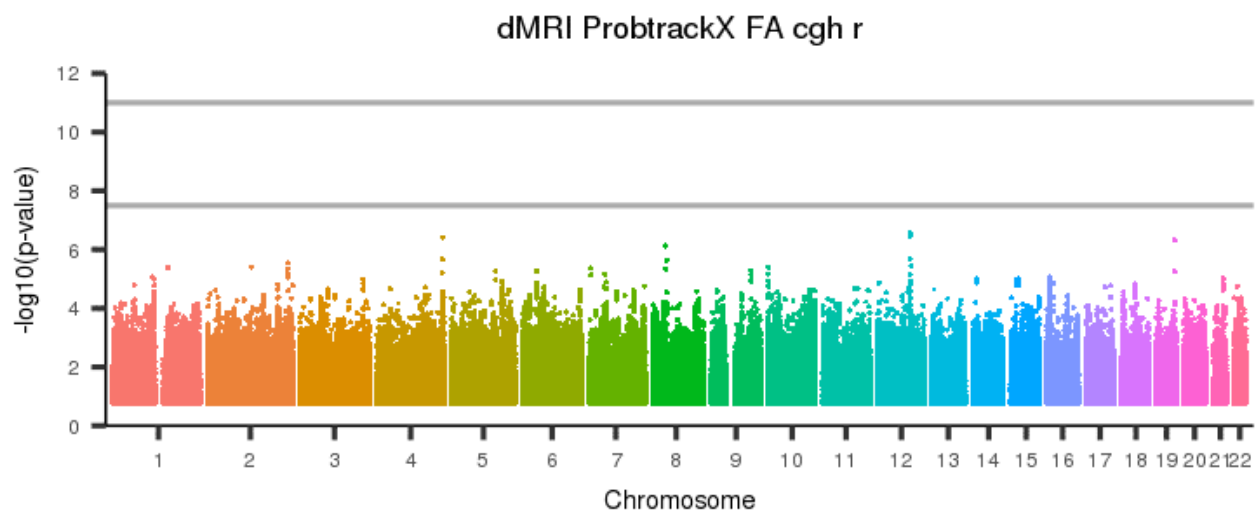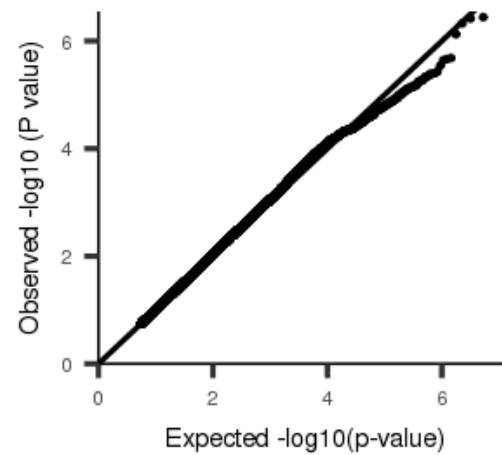

[back to list of plots](#)

Figure 636: dMRI ProbtrackX FA cst I

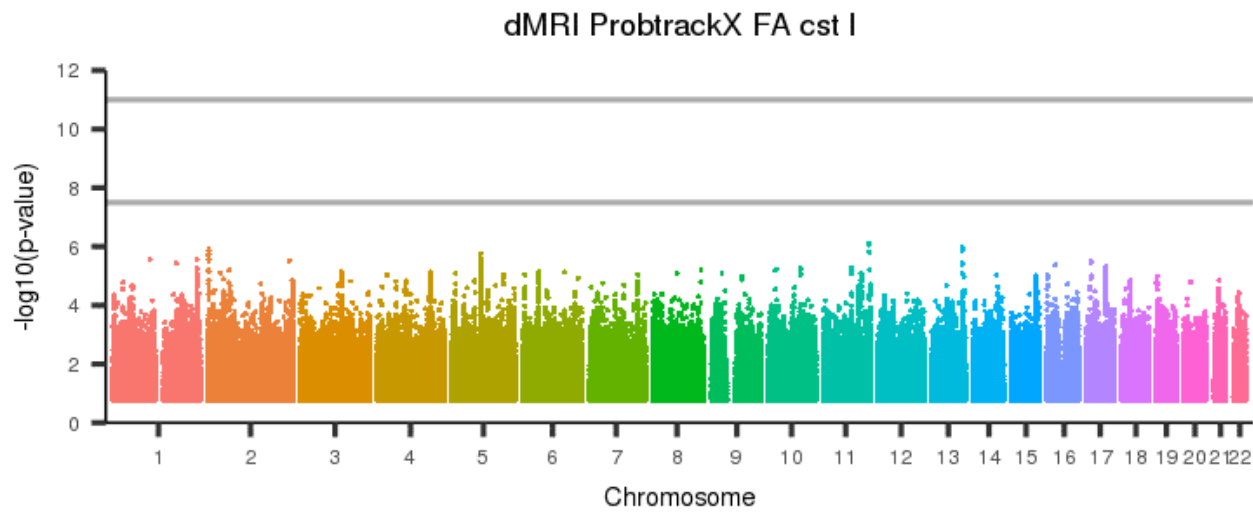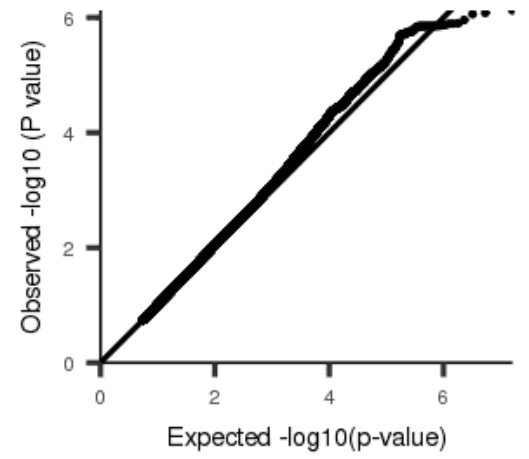

[back to list of plots](#)

Figure 637: dMRI ProbtrackX FA cst r

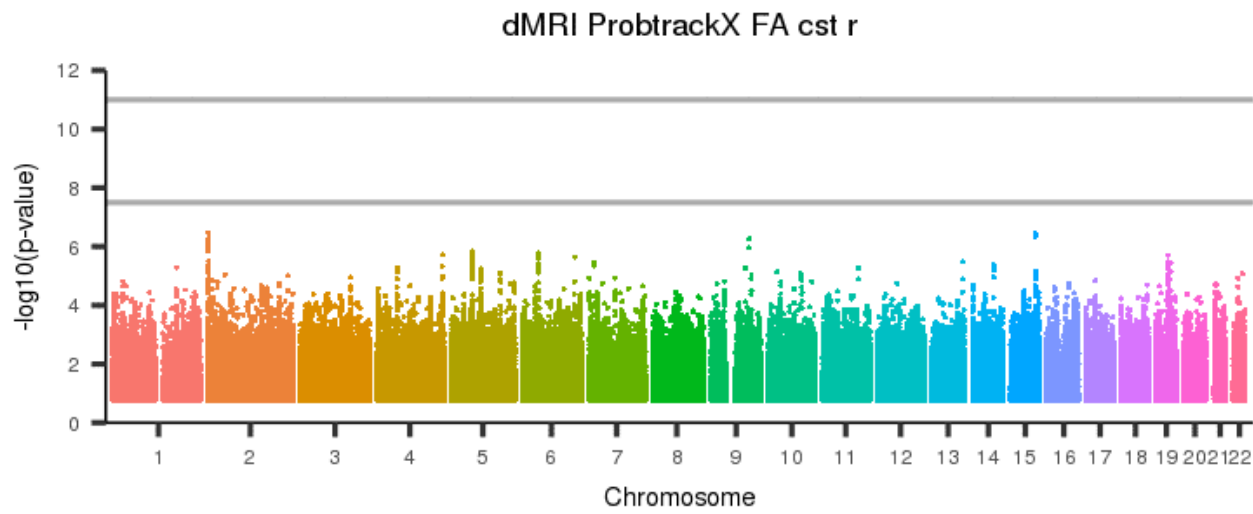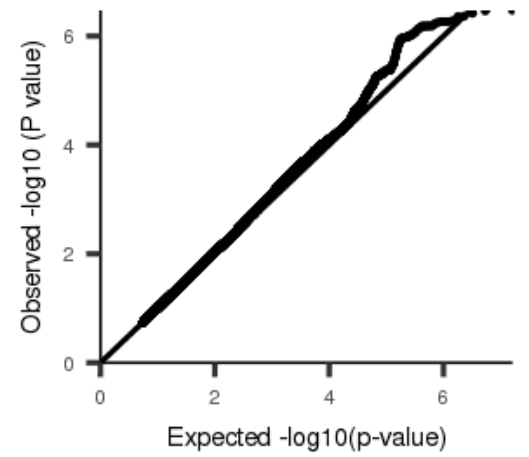

[back to list of plots](#)



Figure 638: dMRI ProbtrackX FA fma

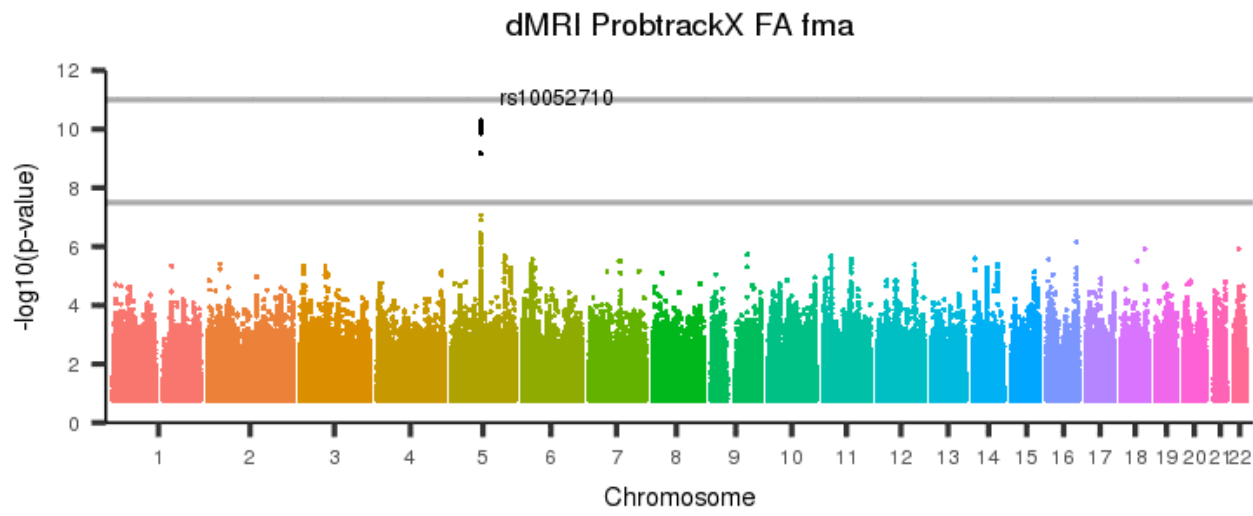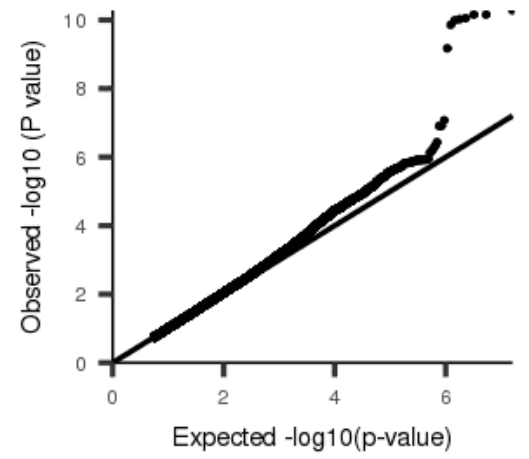

[back to list of plots](#)

Figure 639: dMRI ProbtrackX FA fmi

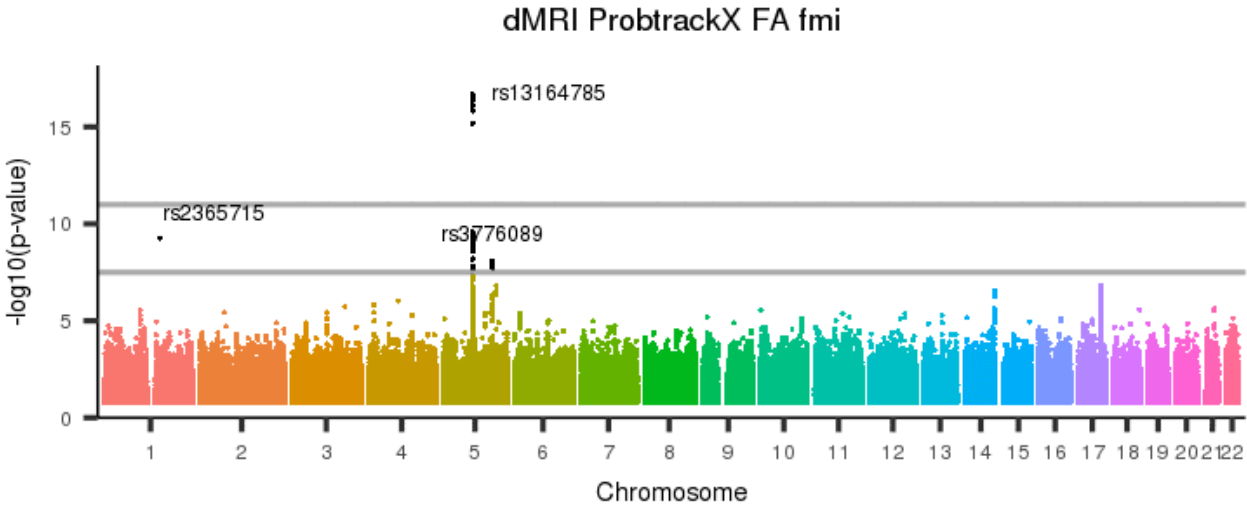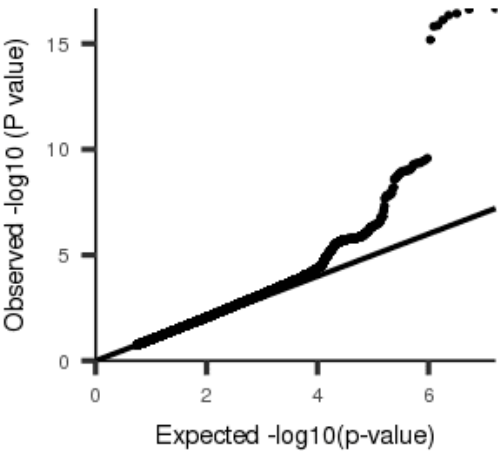

[back to list of plots](#)

Figure 640: dMRI ProbtrackX FA ifo I

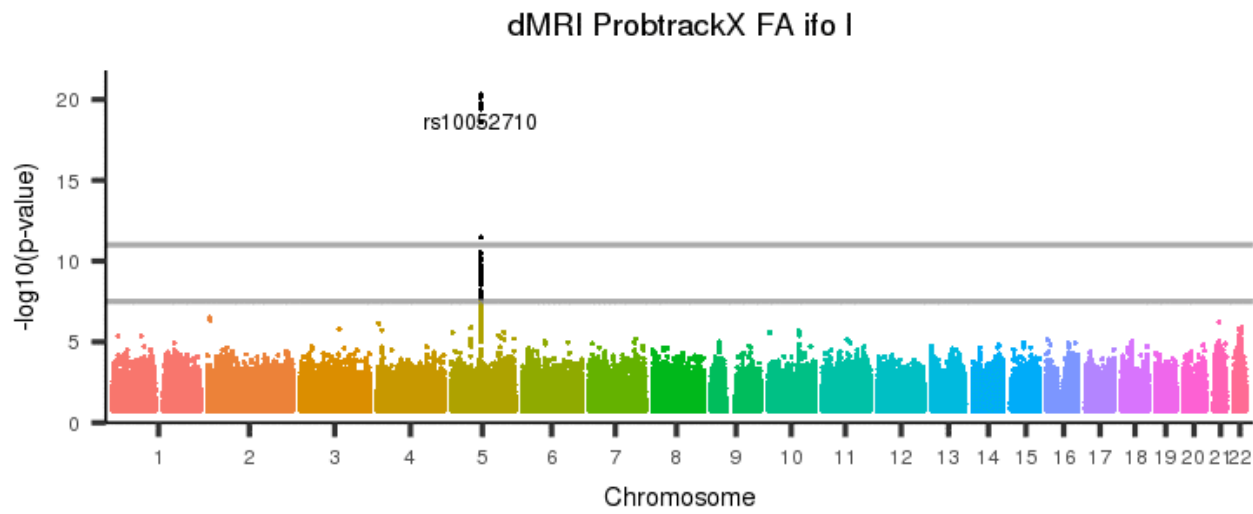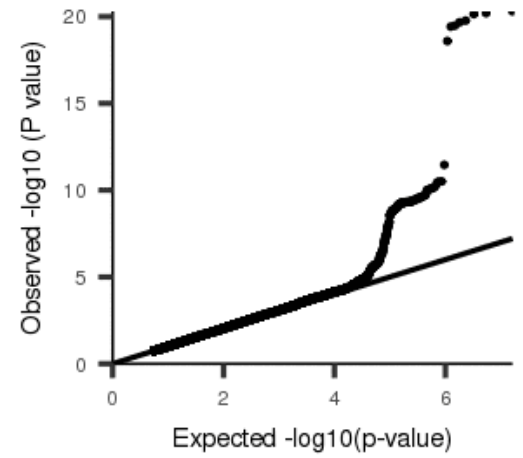

[back to list of plots](#)

Figure 641: dMRI ProbtrackX FA ifo r

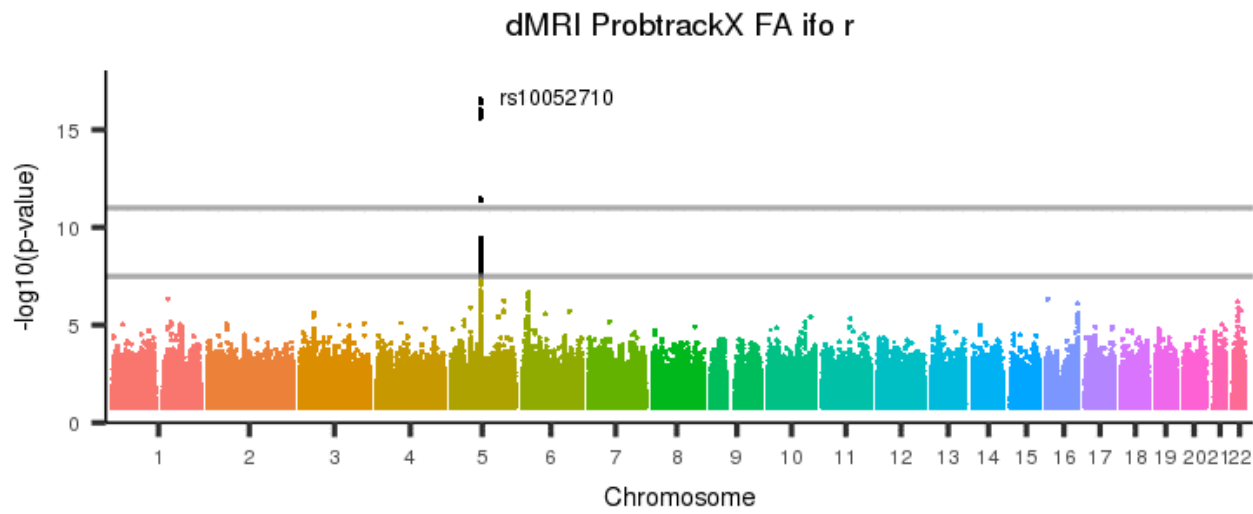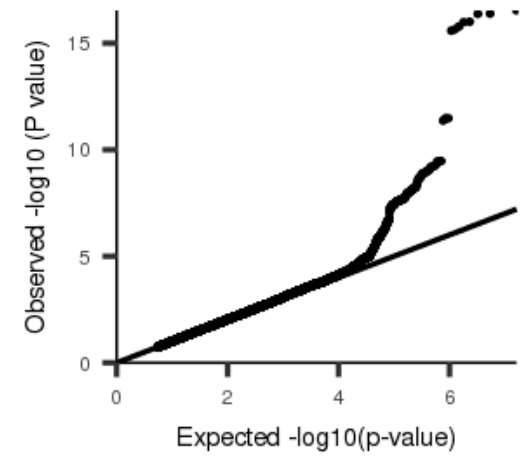

[back to list of plots](#)

Figure 642: dMRI ProbtrackX FA ilf I

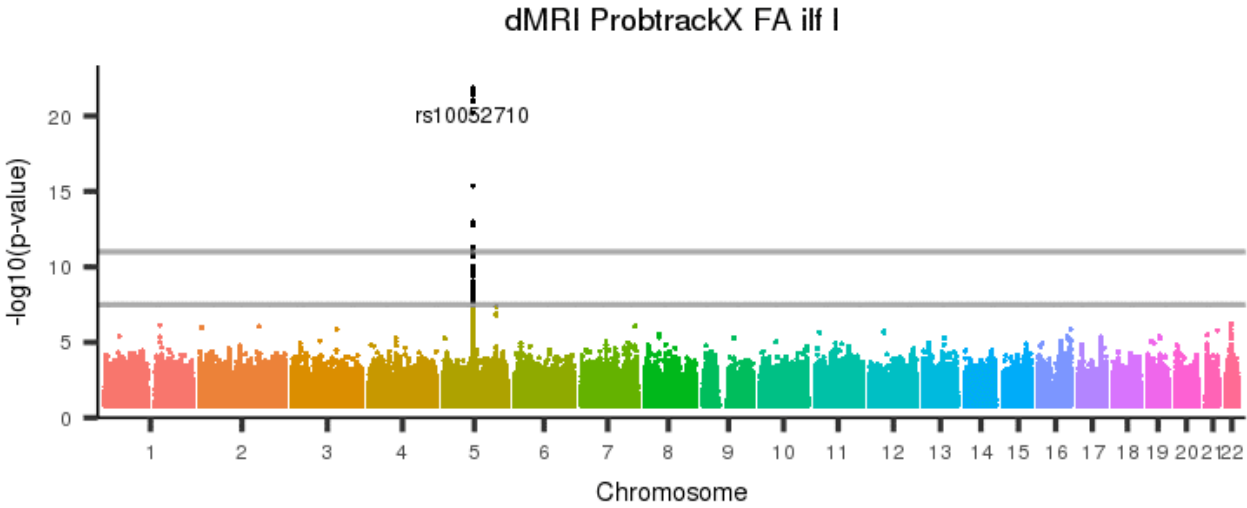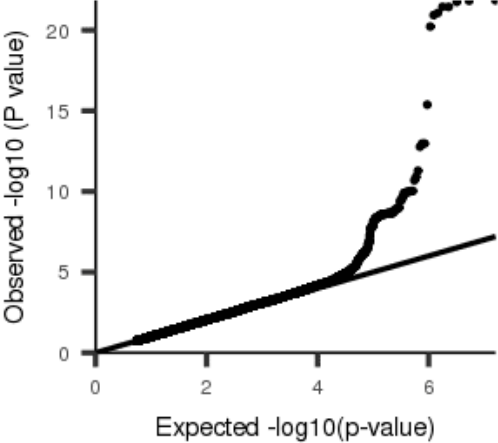

[back to list of plots](#)

Figure 643: dMRI ProbtrackX FA ilf r

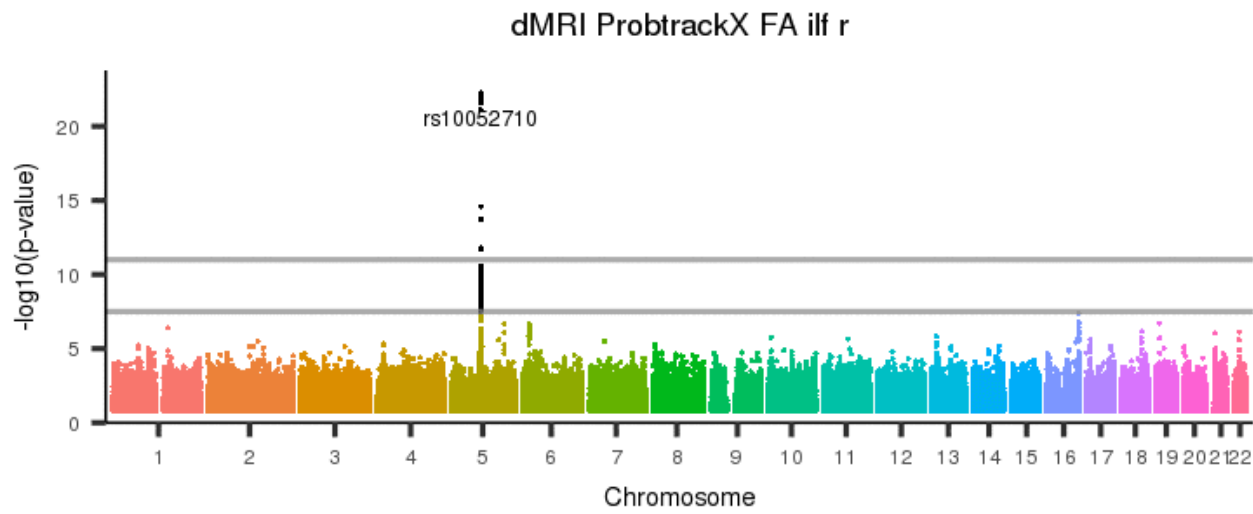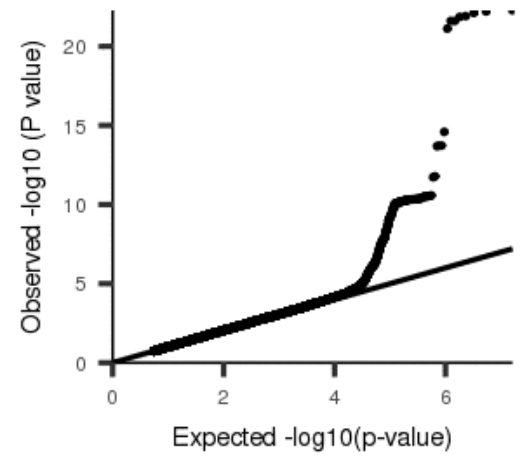

[back to list of plots](#)

Figure 644: dMRI ProbtrackX FA mcp

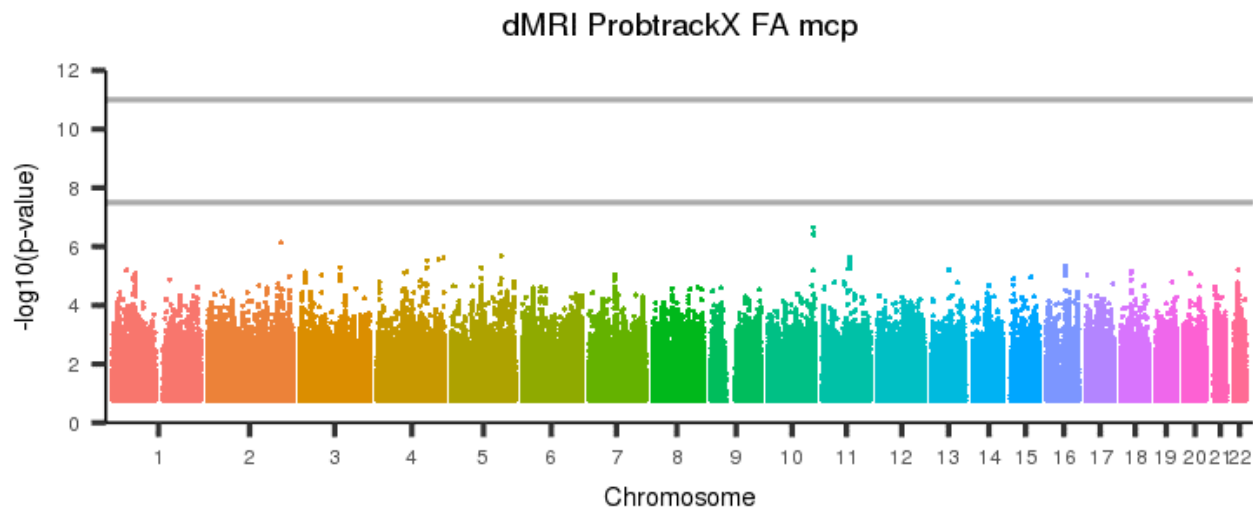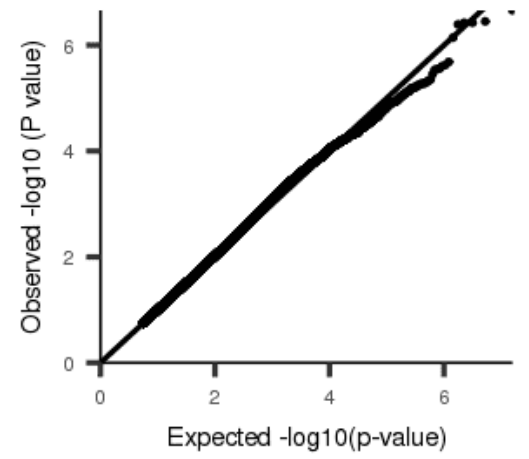

[back to list of plots](#)

Figure 645: dMRI ProbtrackX FA ml I

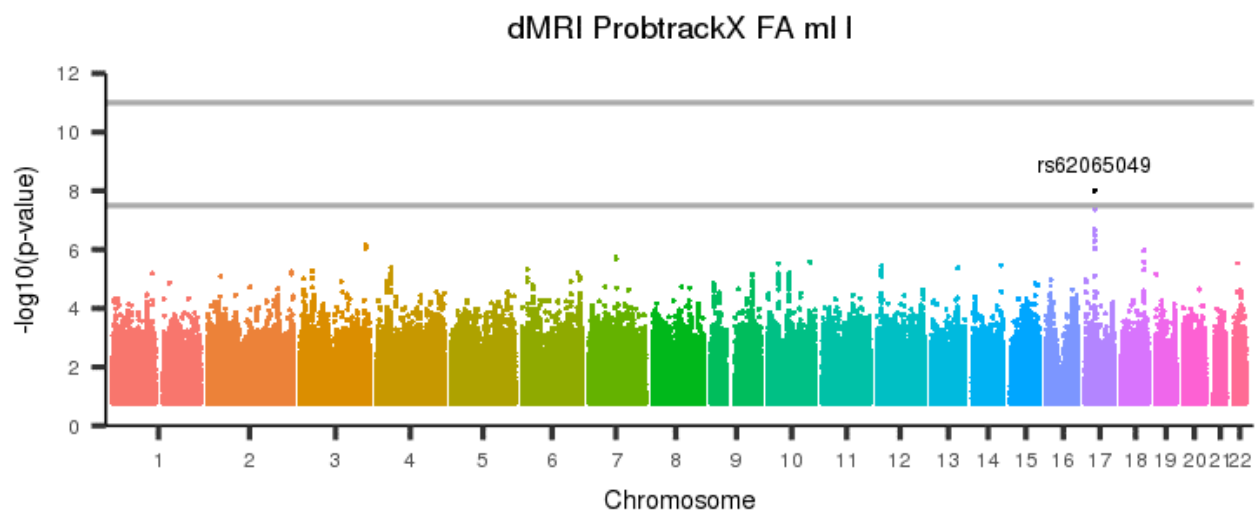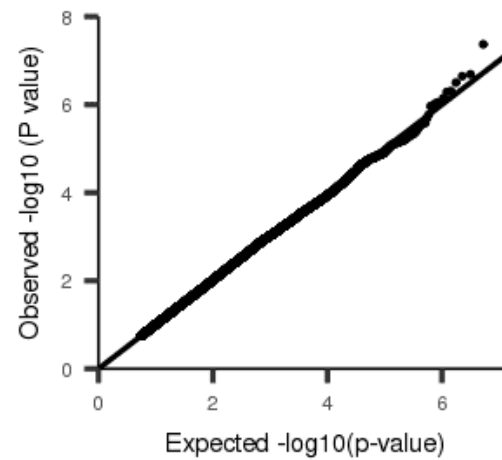

[back to list of plots](#)



Figure 646: dMRI ProbtrackX FA ml r

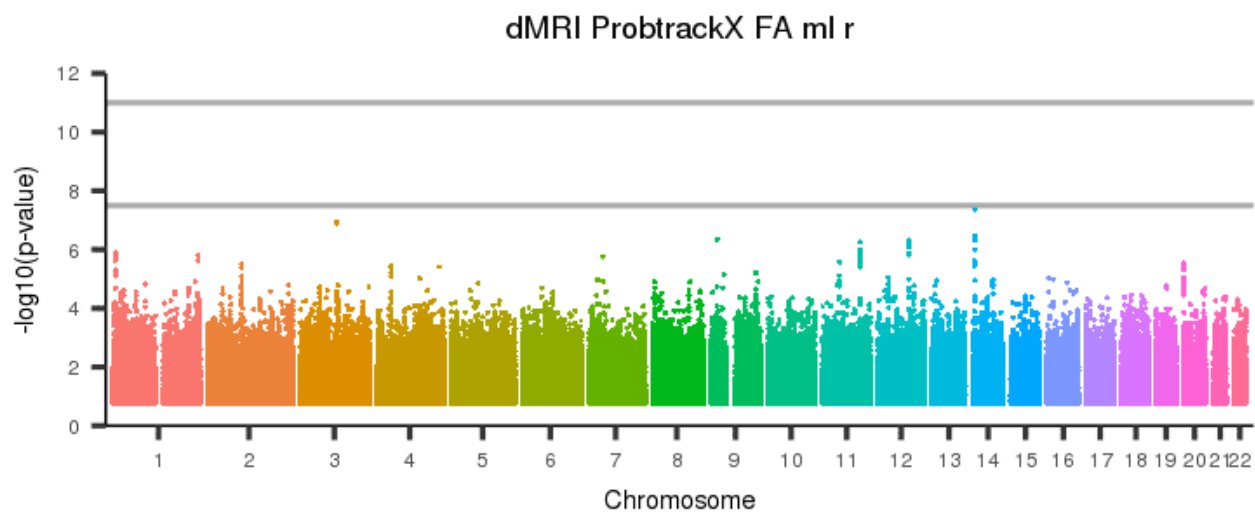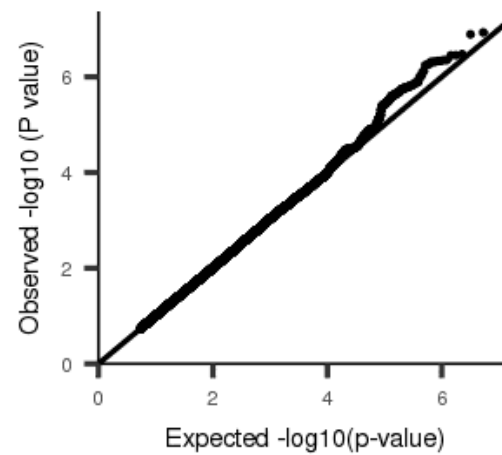

[back to list of plots](#)

Figure 647: dMRI ProbtrackX FA ptr I

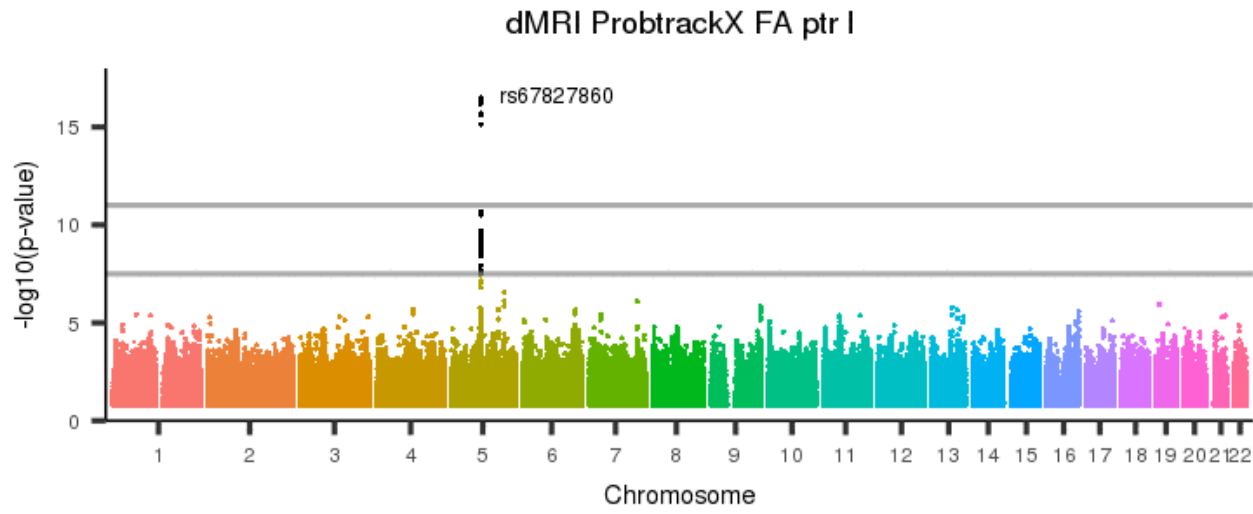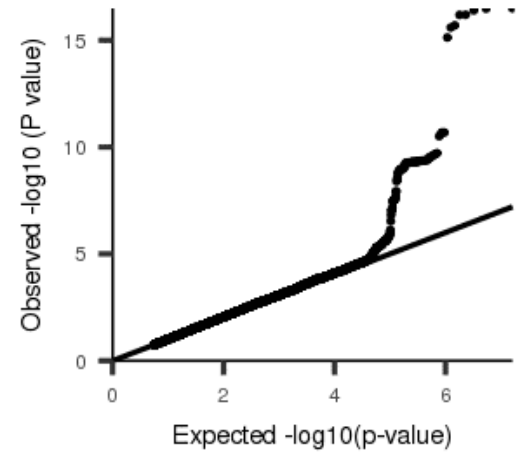

[back to list of plots](#)

Figure 648: dMRI ProbtrackX FA ptr r

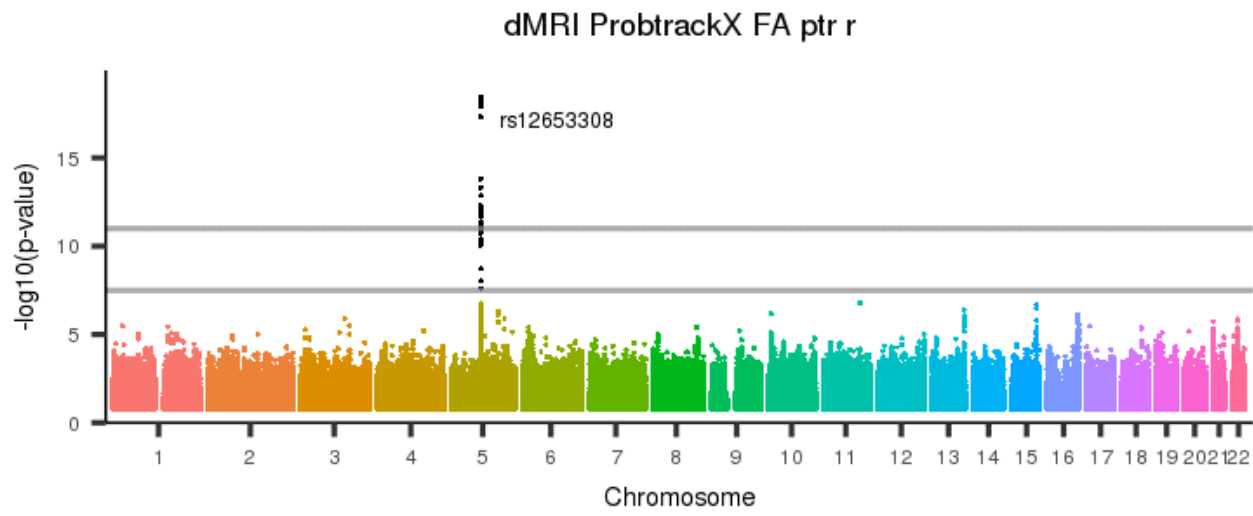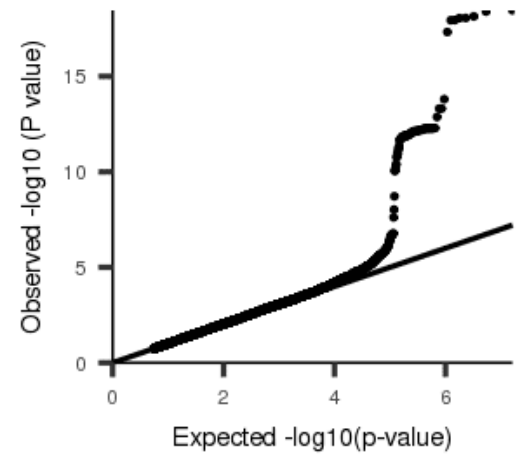

[back to list of plots](#)

Figure 649: dMRI ProbtrackX FA slf I

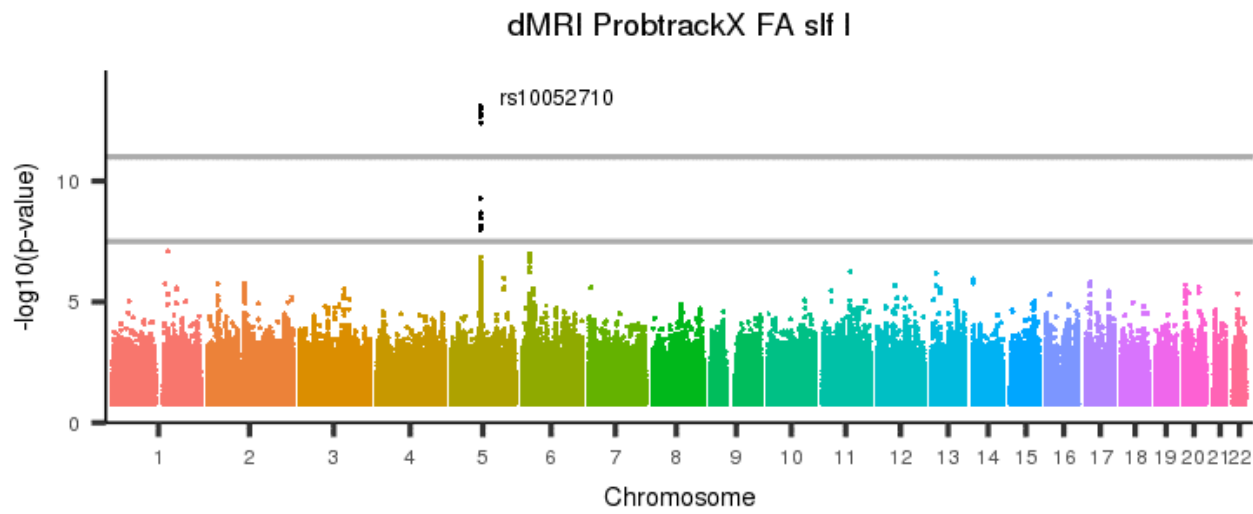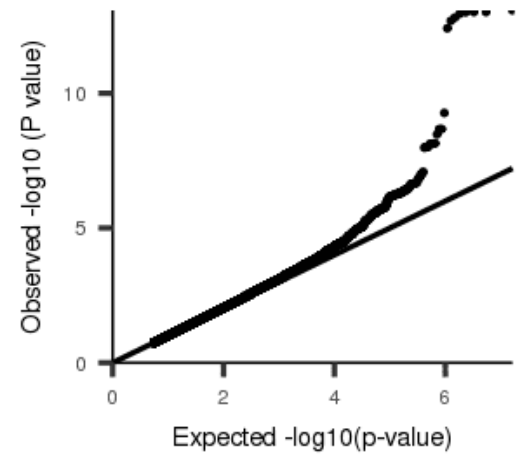

[back to list of plots](#)

Figure 650: dMRI ProbtrackX FA slf r

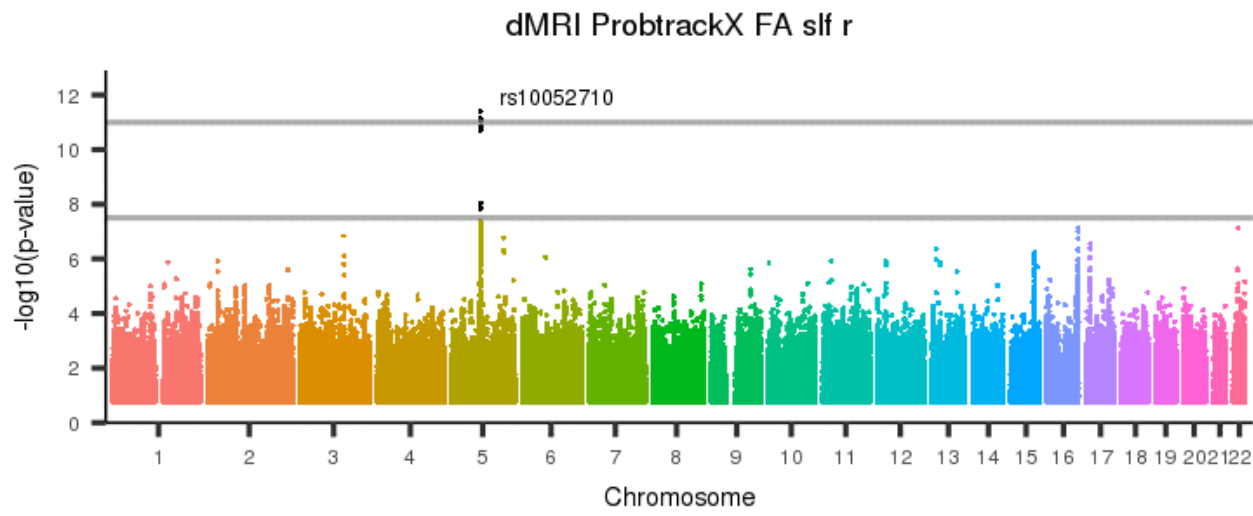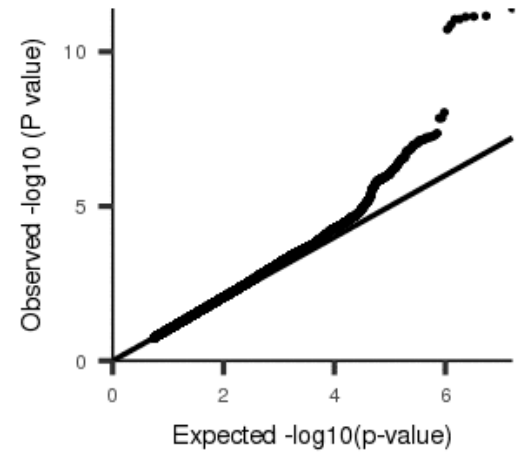

[back to list of plots](#)

Figure 651: dMRI ProbtrackX FA str I

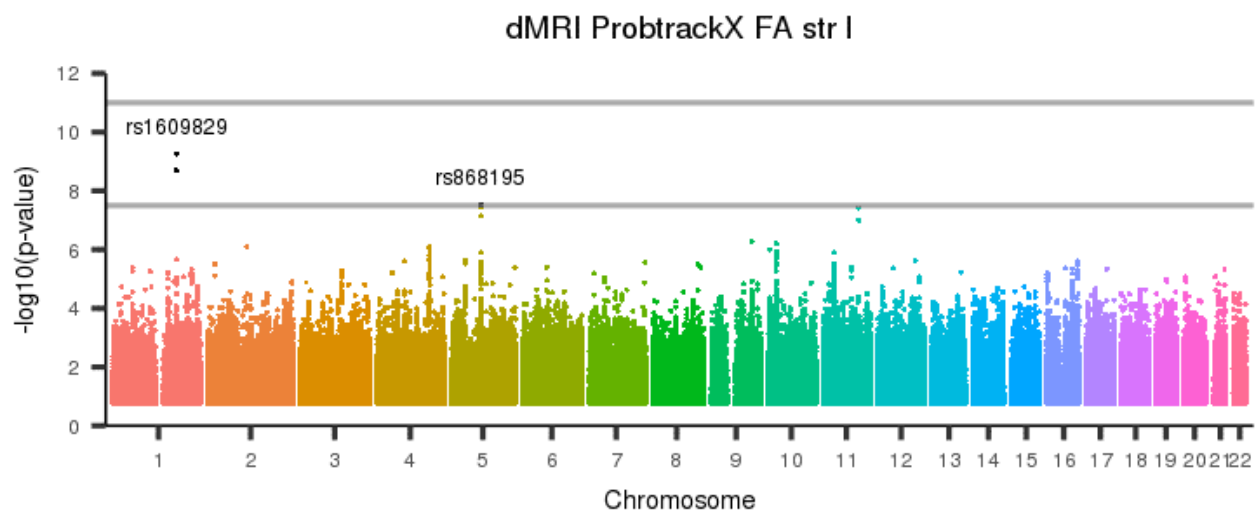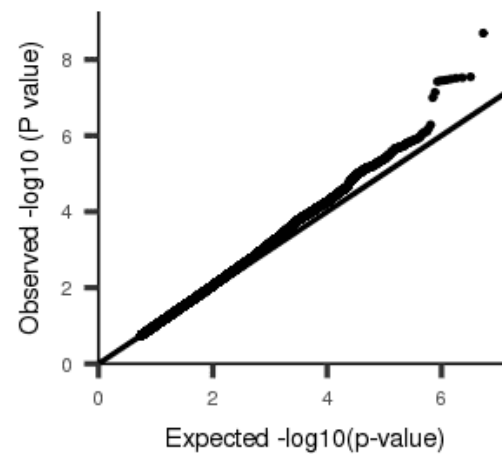

[back to list of plots](#)

Figure 652: dMRI ProbtrackX FA str r

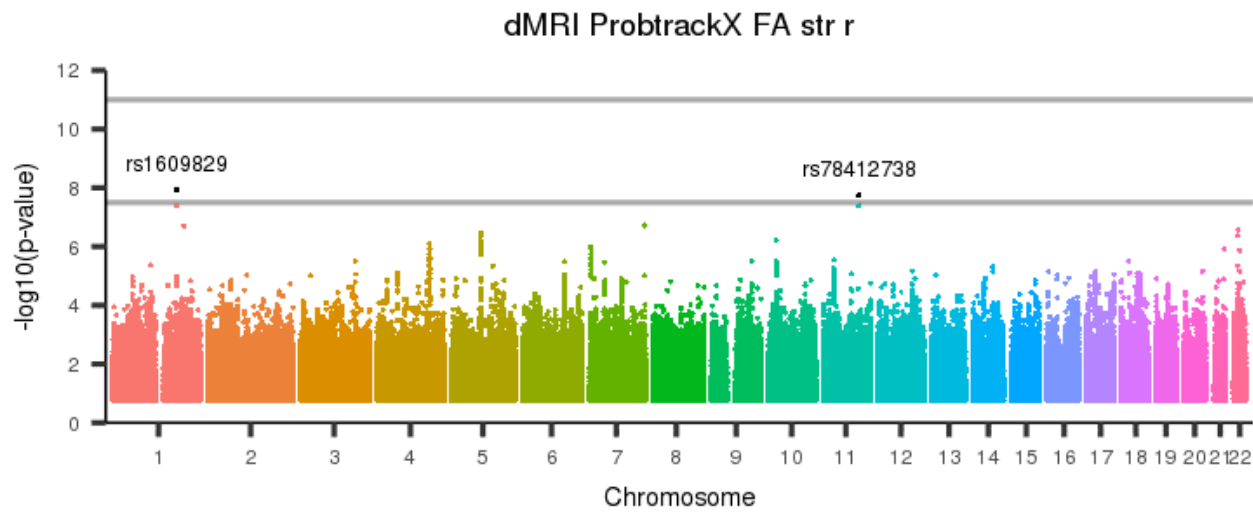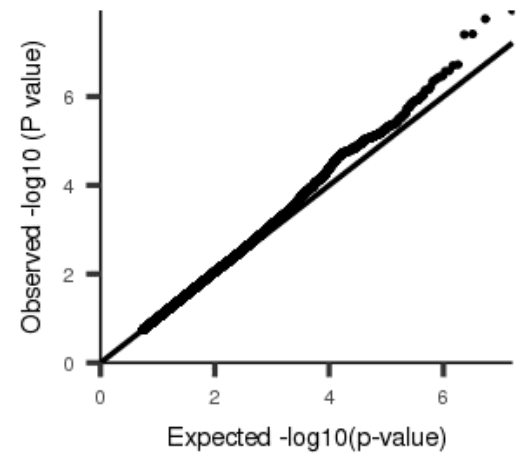

[back to list of plots](#)

Figure 653: dMRI ProbtrackX FA unc I

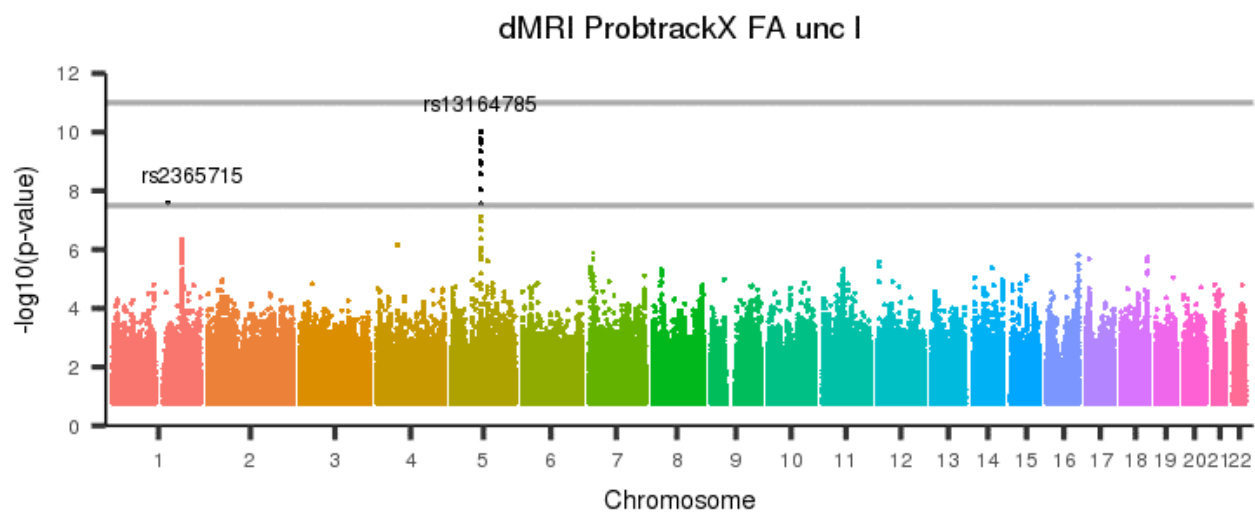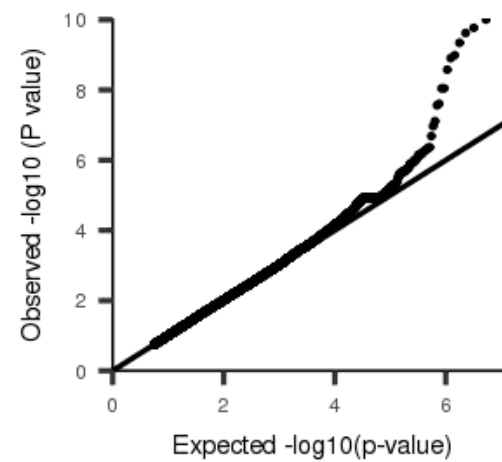

[back to list of plots](#)



Figure 654: dMRI ProbtrackX FA unc r

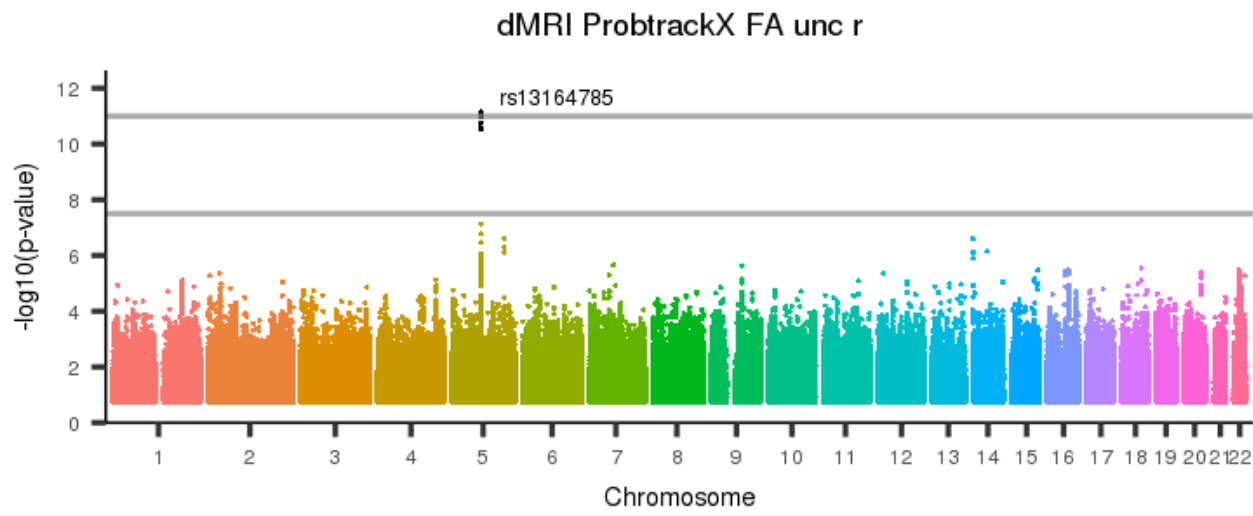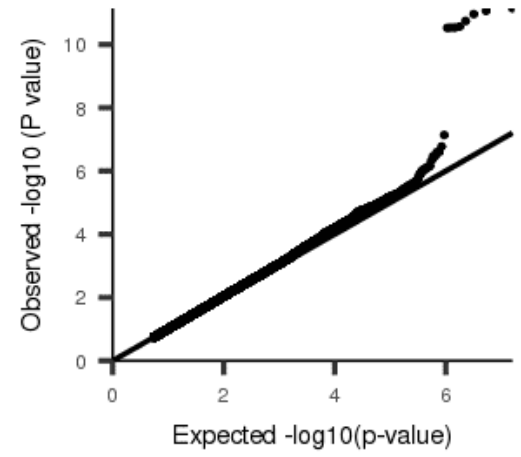

[back to list of plots](#)

Figure 655: dMRI ProbtrackX MD ar I

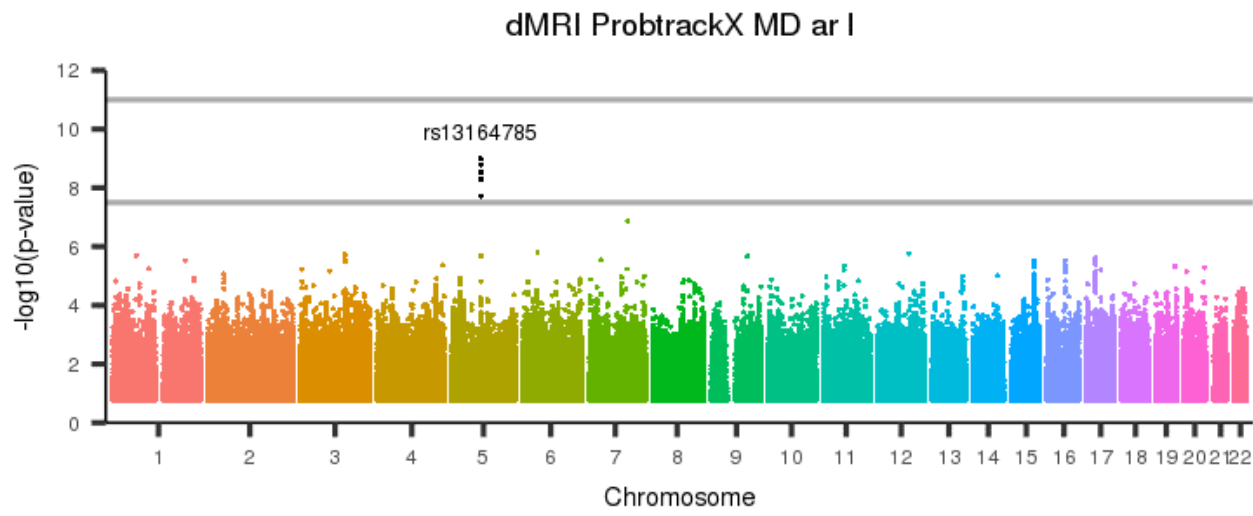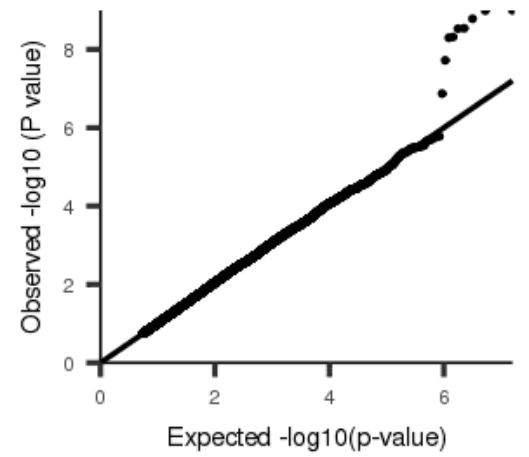

[back to list of plots](#)

Figure 656: dMRI ProbtrackX MD ar r

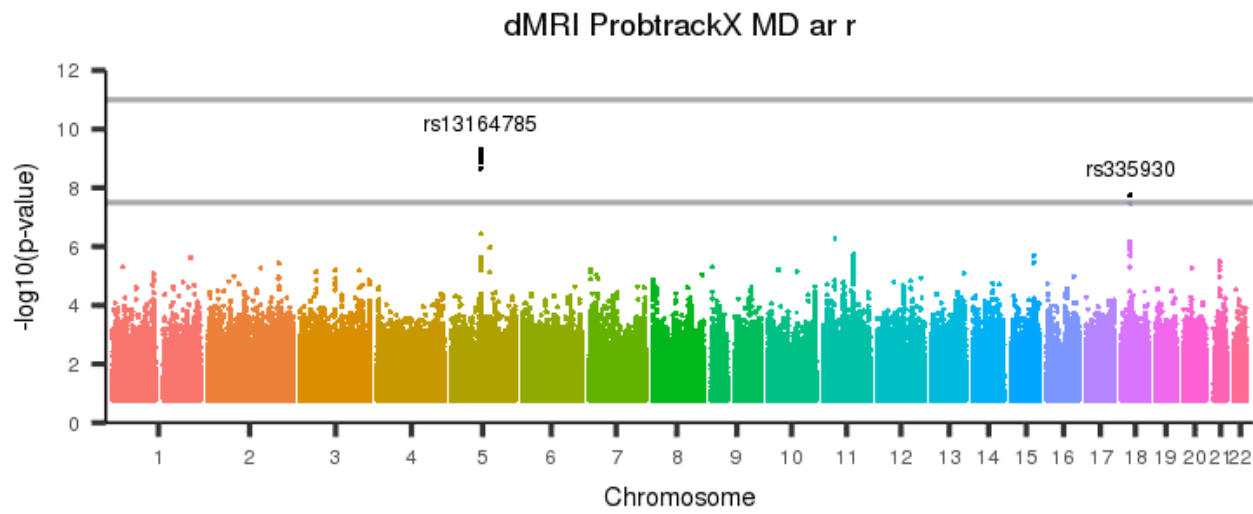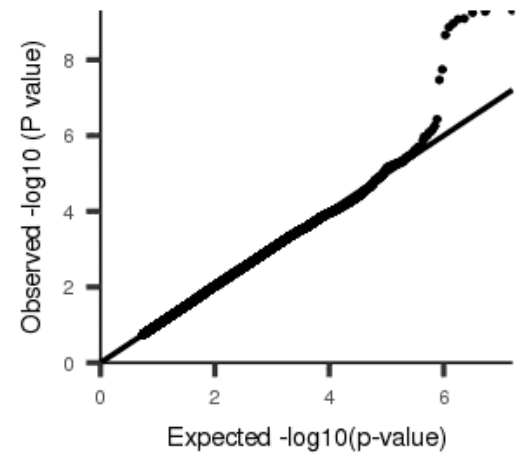

[back to list of plots](#)

Figure 657: dMRI ProbtrackX MD atr l

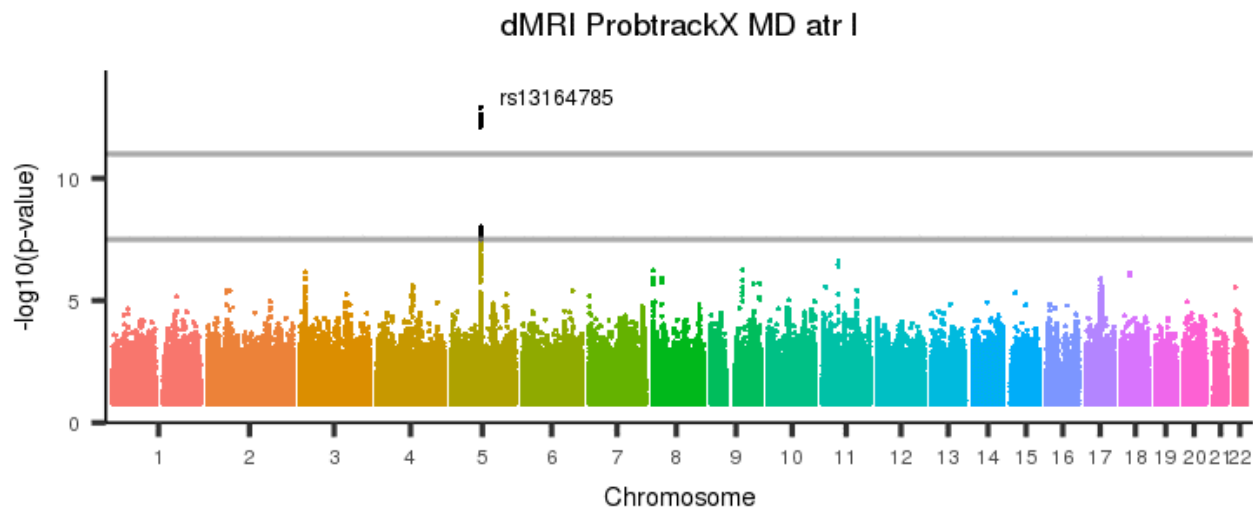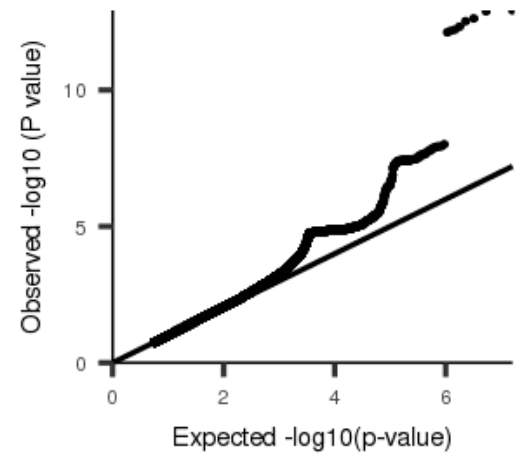

[back to list of plots](#)

Figure 658: dMRI ProbtrackX MD atr r

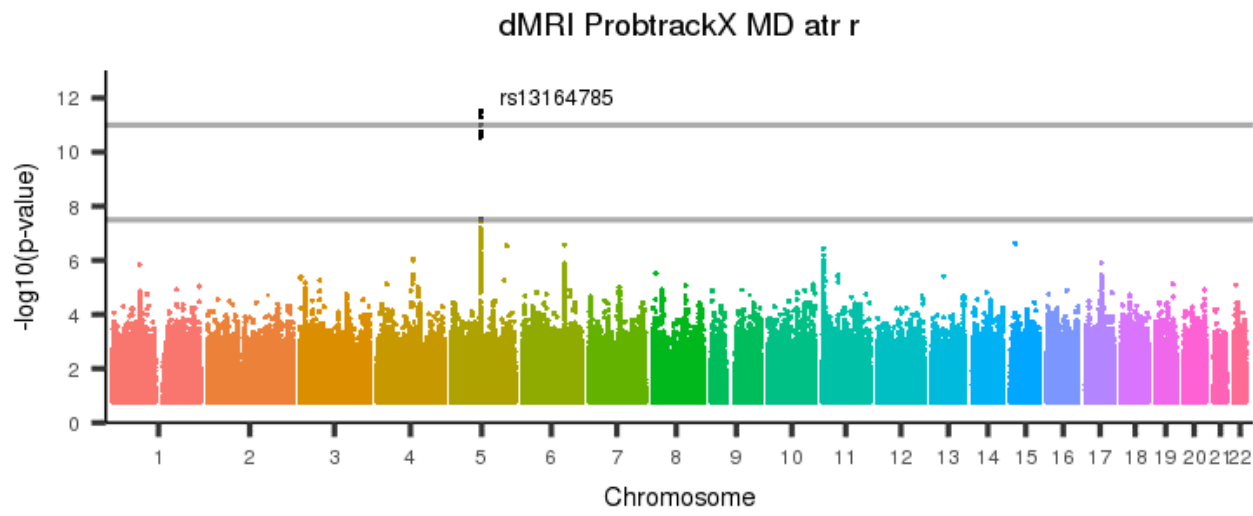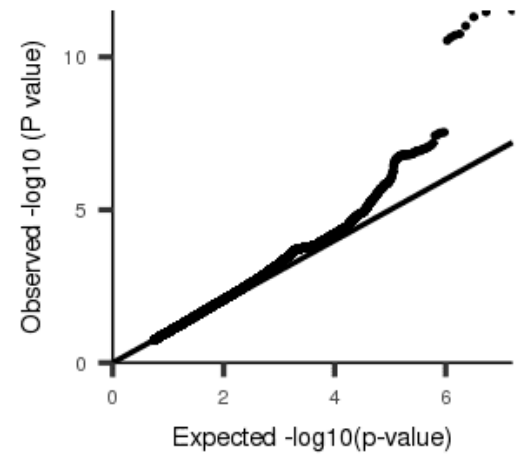

[back to list of plots](#)

Figure 659: dMRI ProbtrackX MD cgc I

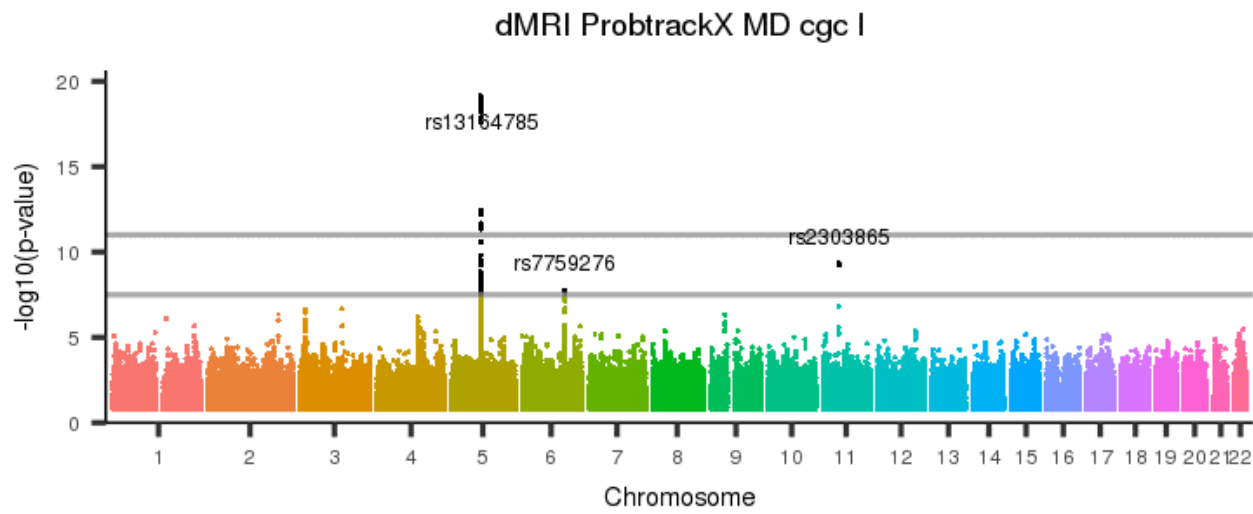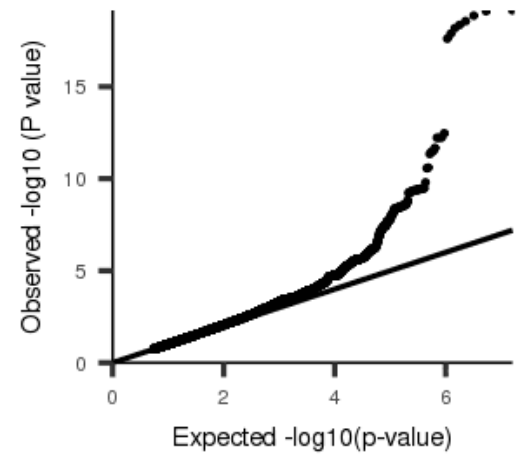

[back to list of plots](#)

Figure 660: dMRI ProbtrackX MD cgc r

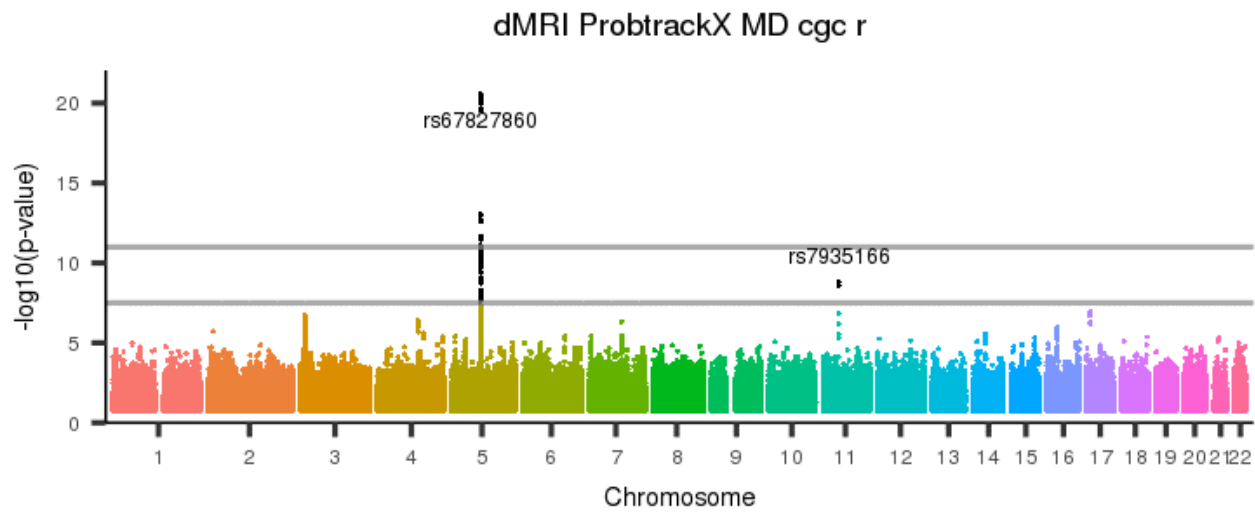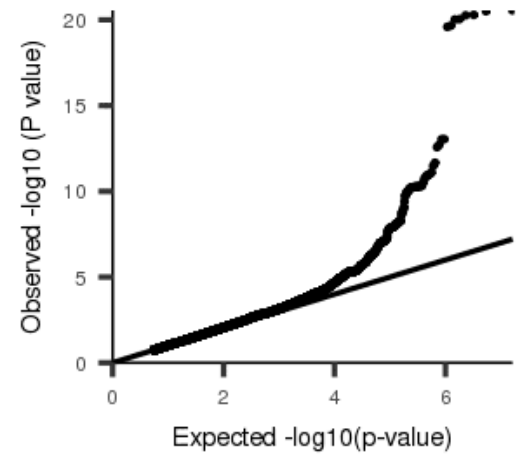

[back to list of plots](#)

Figure 661: dMRI ProbtrackX MD cgh I

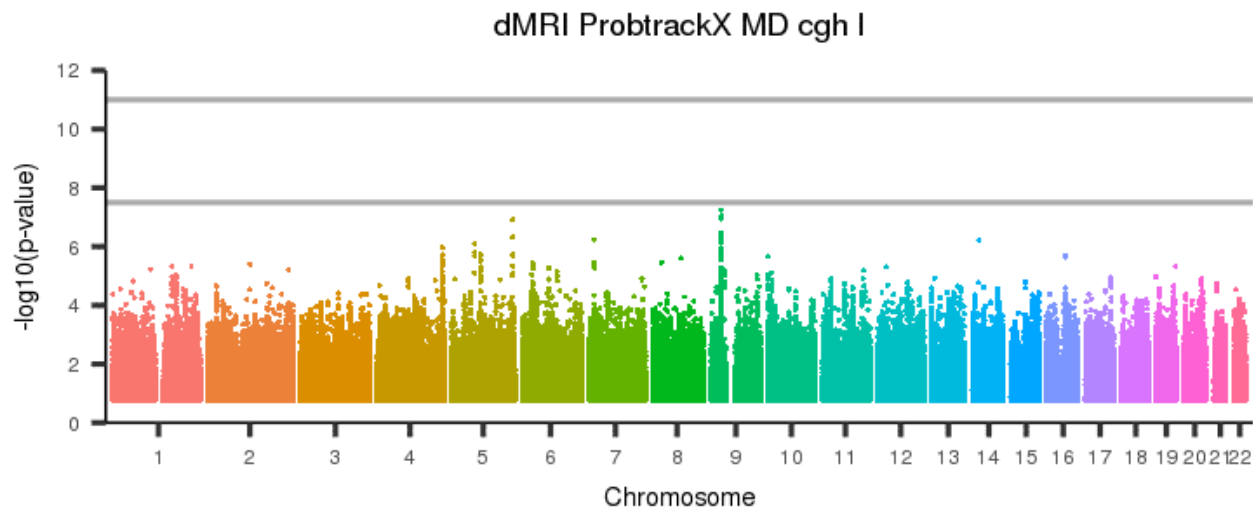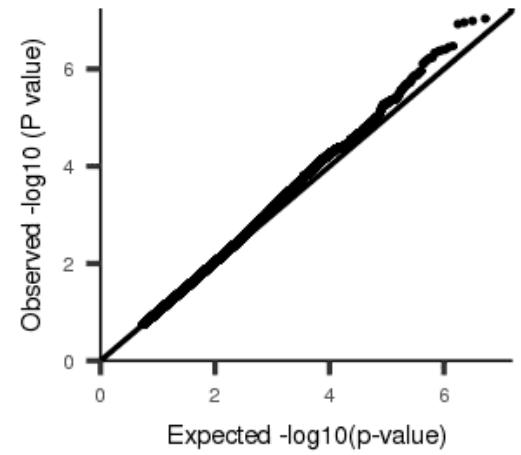

[back to list of plots](#)



Figure 662: dMRI ProbtrackX MD cgh r

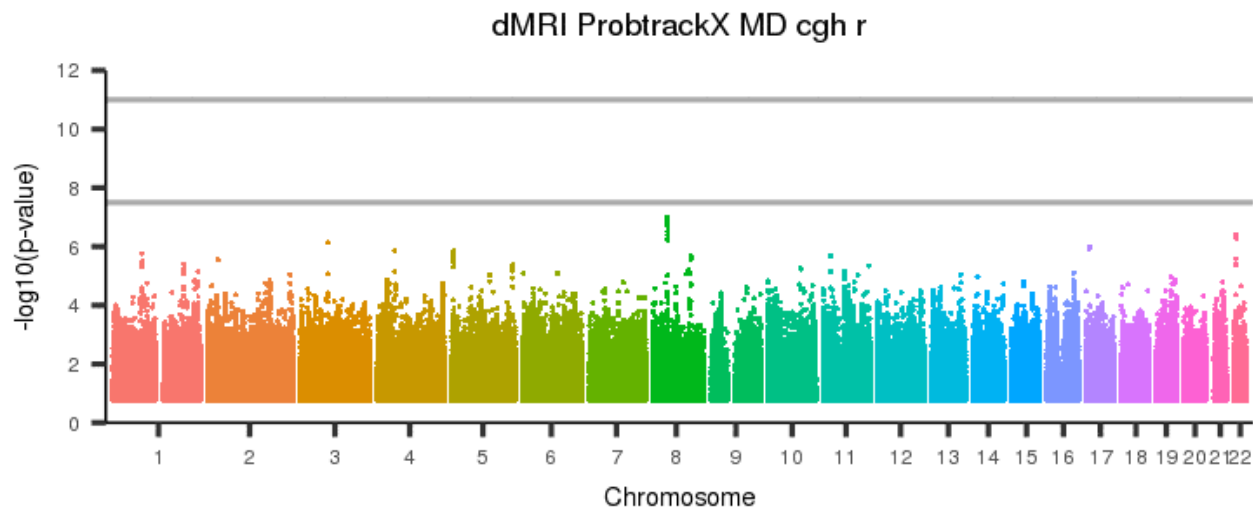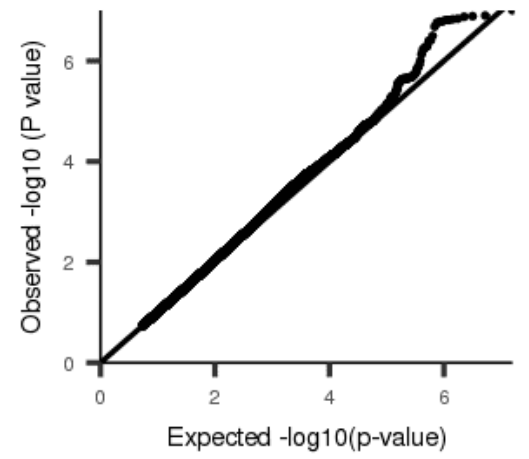

[back to list of plots](#)

Figure 663: dMRI ProbtrackX MD cst I

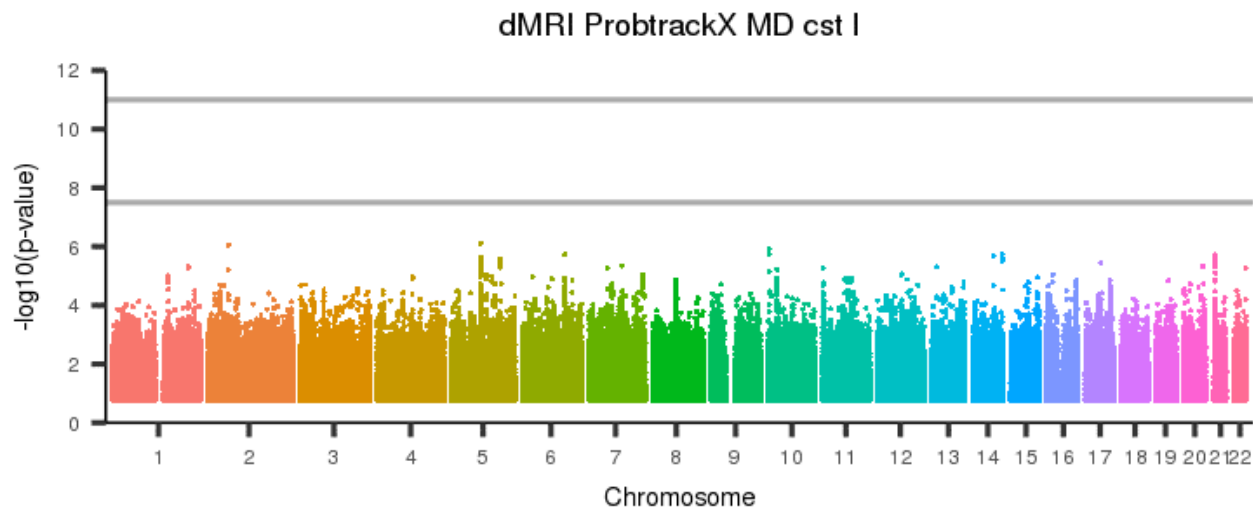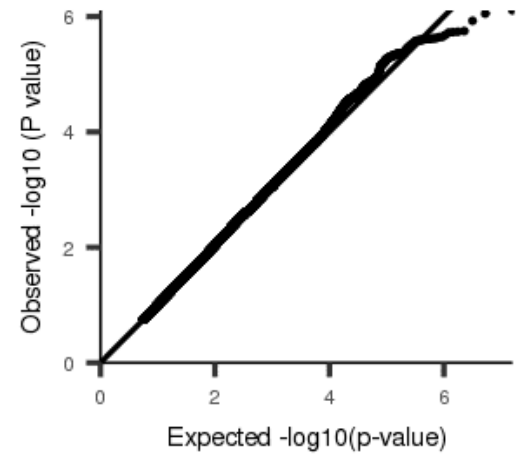

[back to list of plots](#)

Figure 664: dMRI ProbtrackX MD cst r

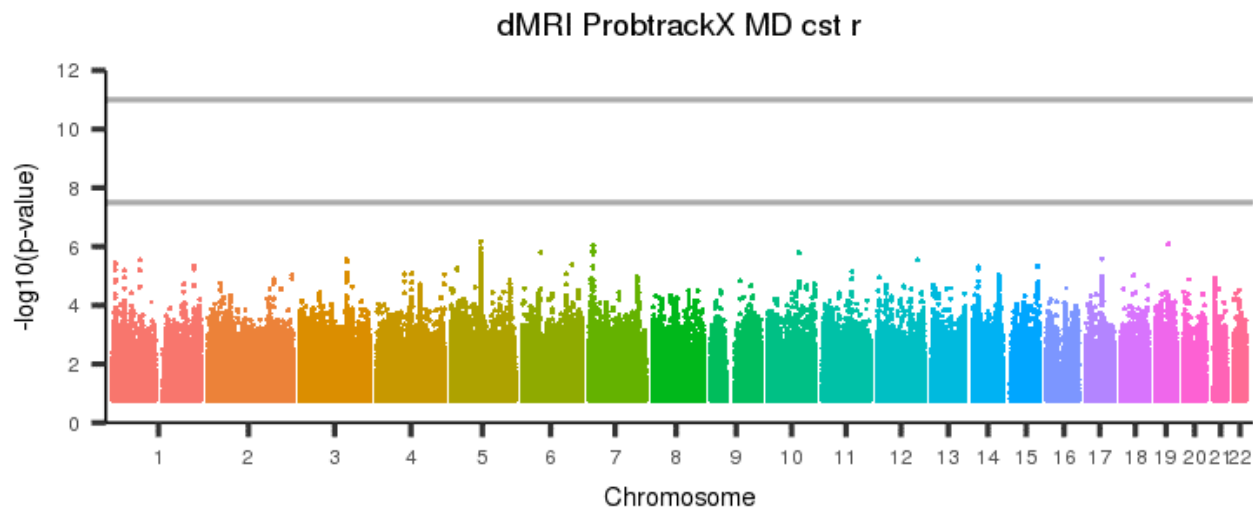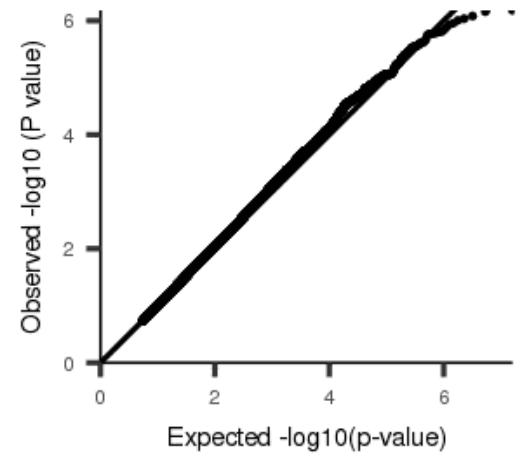

[back to list of plots](#)

Figure 665: dMRI ProbtrackX MD fma

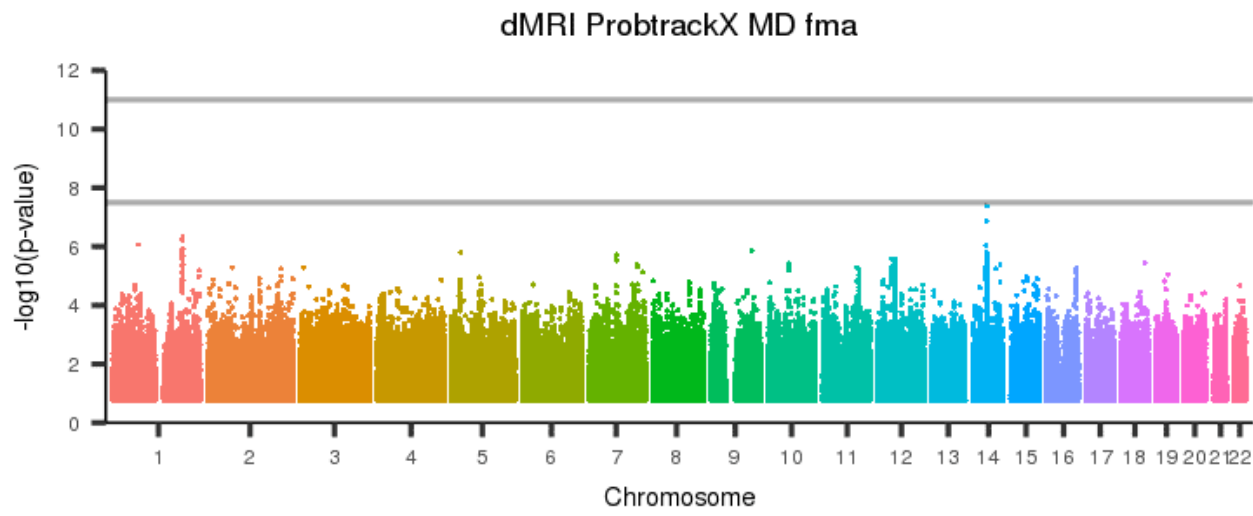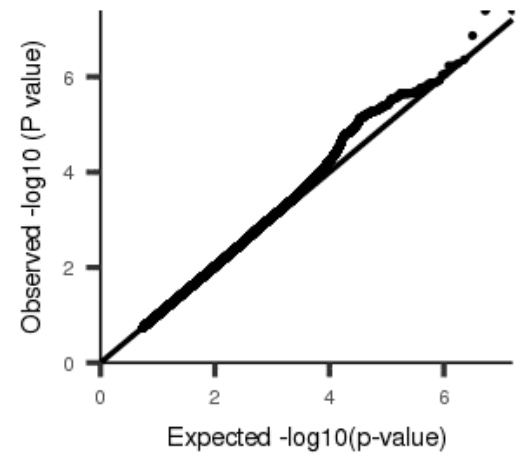

[back to list of plots](#)

Figure 666: dMRI ProbtrackX MD fmi

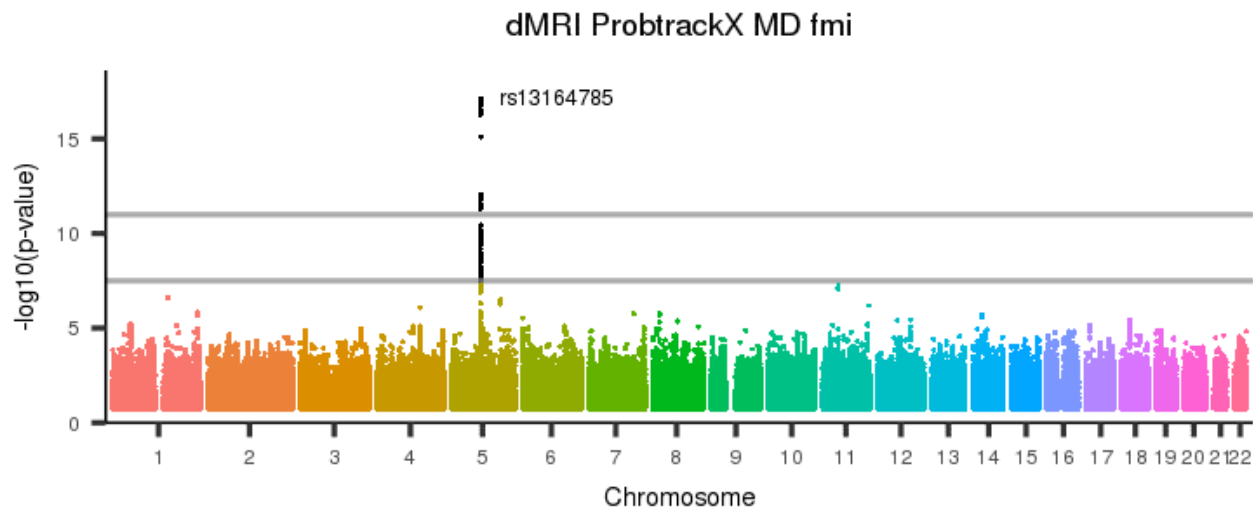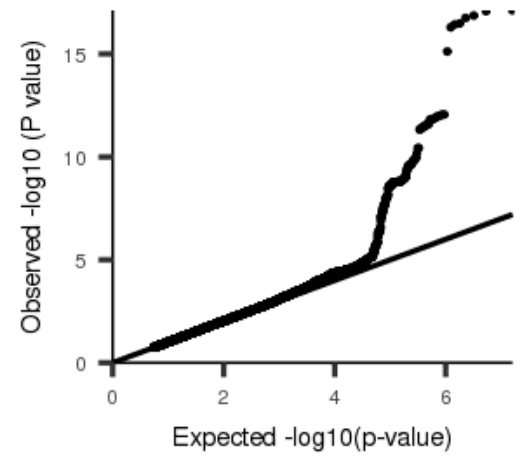

[back to list of plots](#)

Figure 667: dMRI ProbtrackX MD ifo I

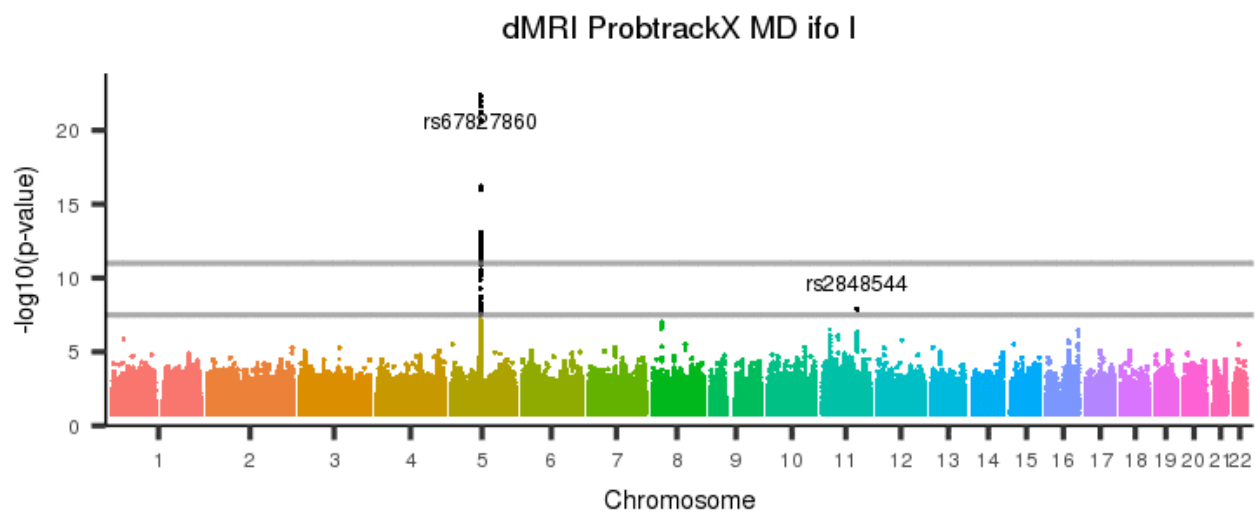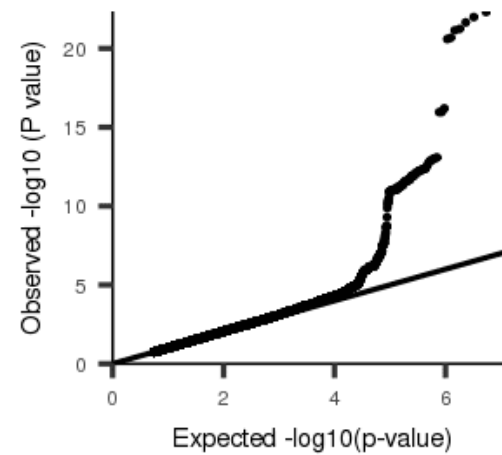

[back to list of plots](#)

Figure 668: dMRI ProbtrackX MD ifo r

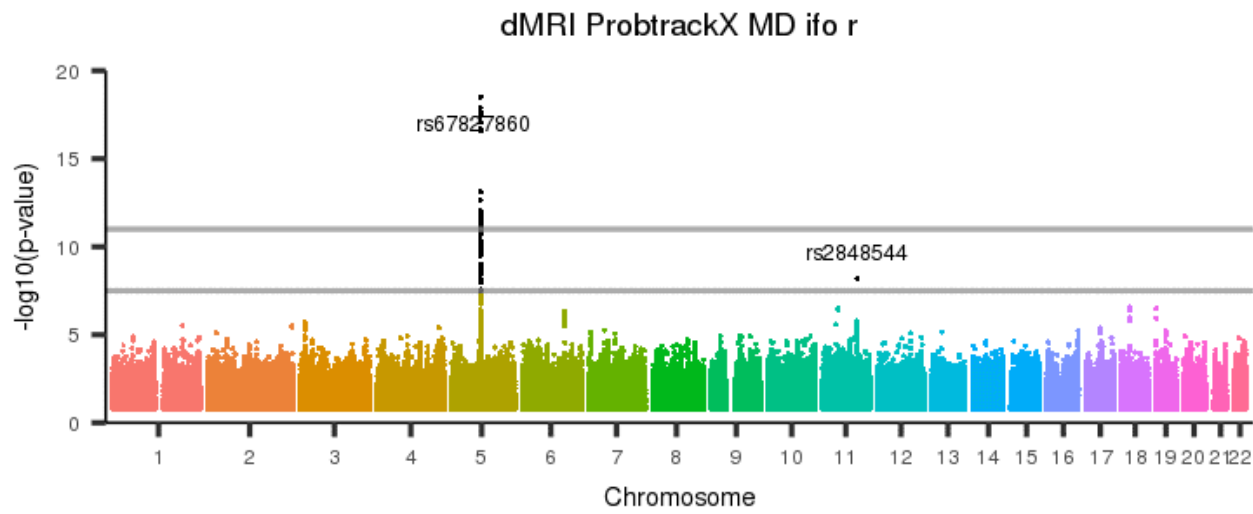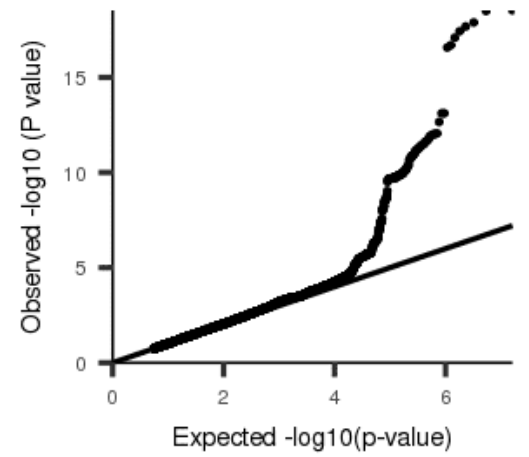

[back to list of plots](#)

Figure 669: dMRI ProbtrackX MD ilf I

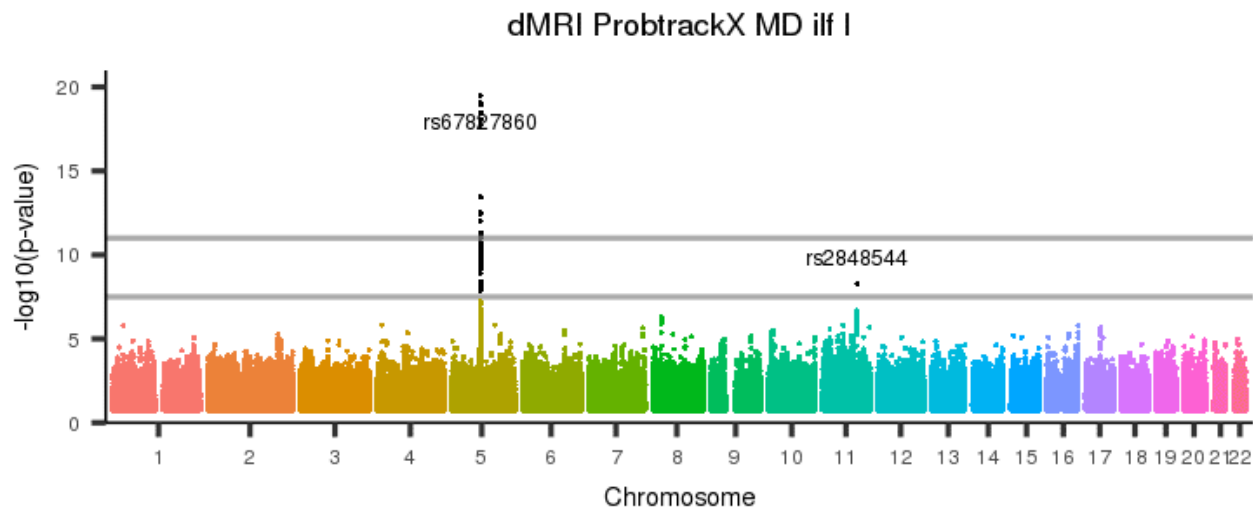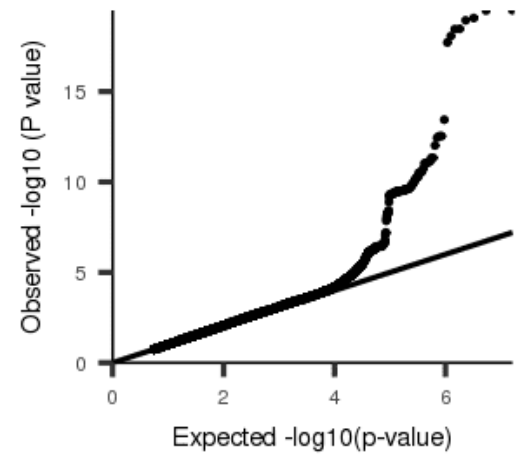

[back to list of plots](#)



Figure 670: dMRI ProbtrackX MD ilf r

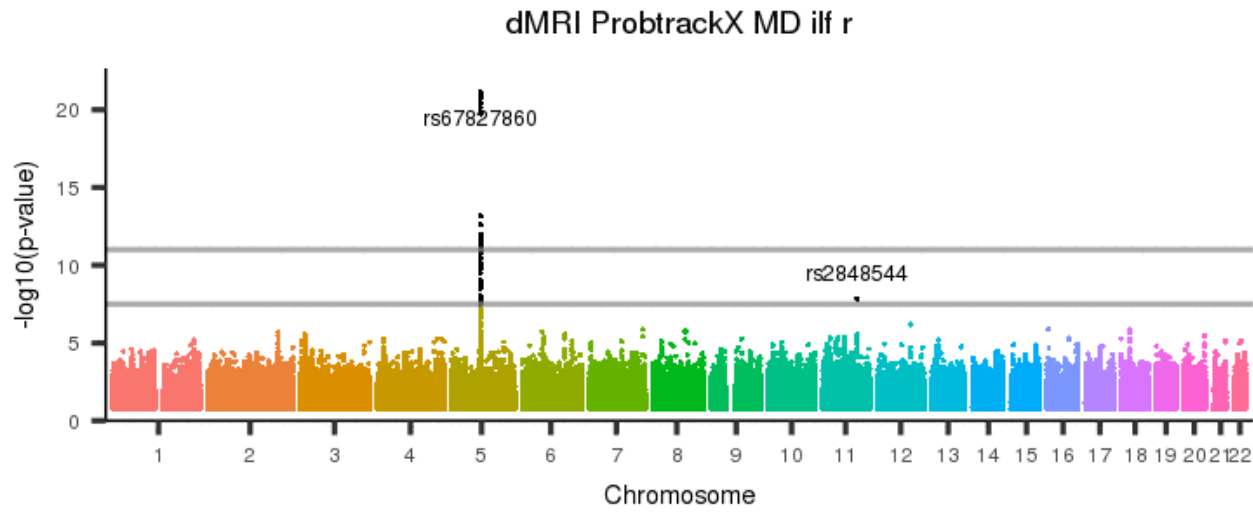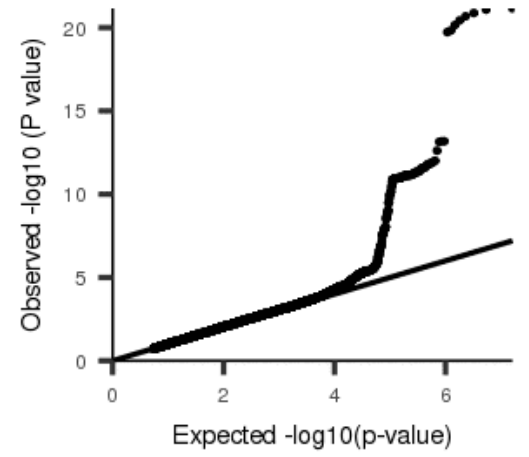

[back to list of plots](#)

Figure 671: dMRI ProbtrackX MD mcp

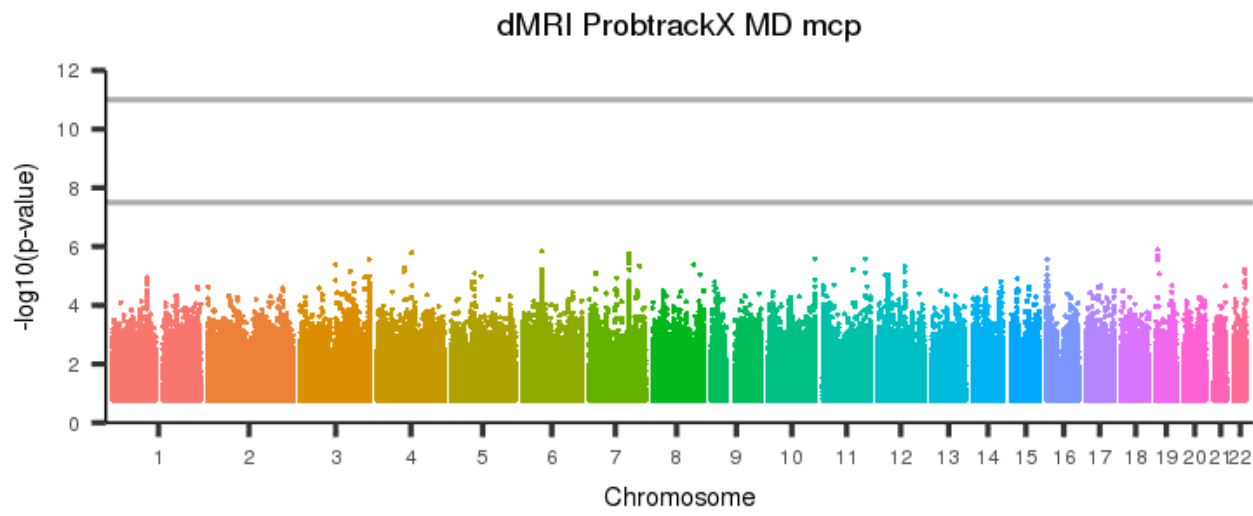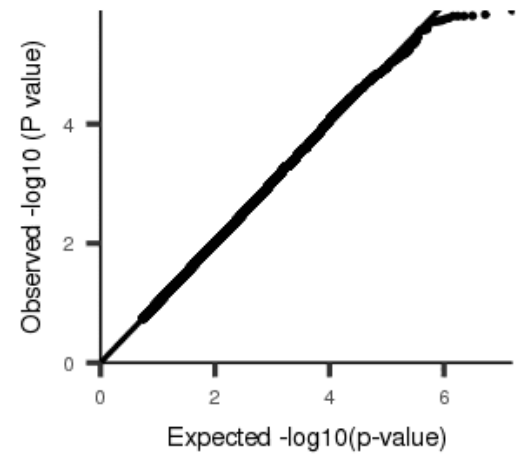

[back to list of plots](#)

Figure 672: dMRI ProbtrackX MD ml I

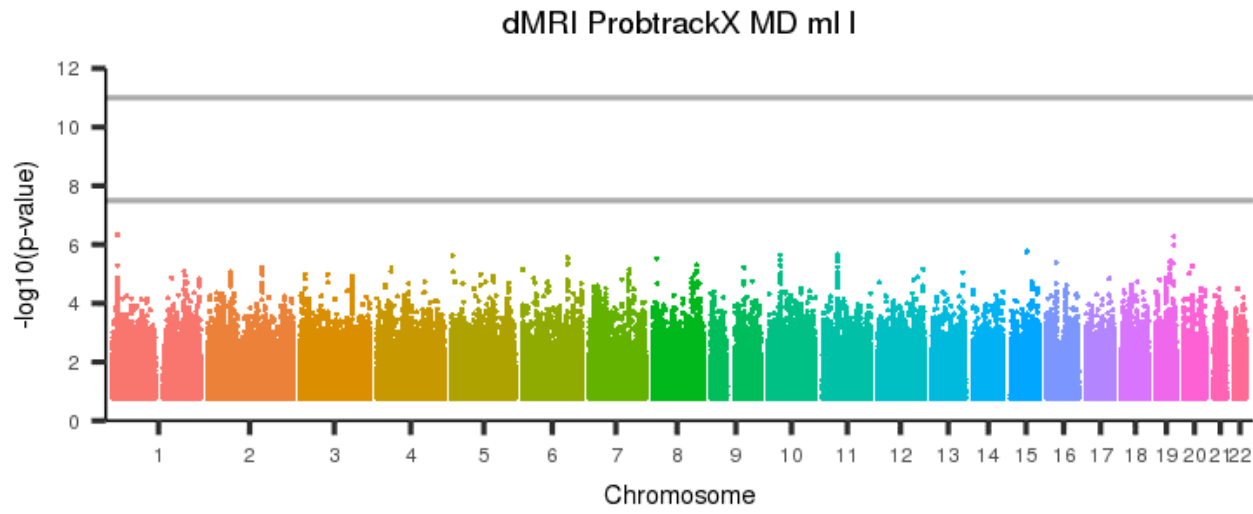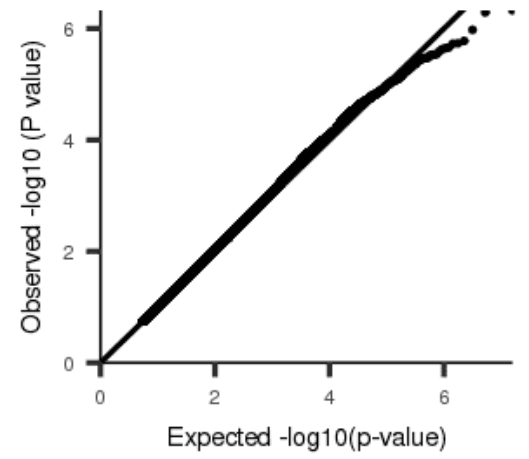

[back to list of plots](#)

Figure 673: dMRI ProbtrackX MD ml r

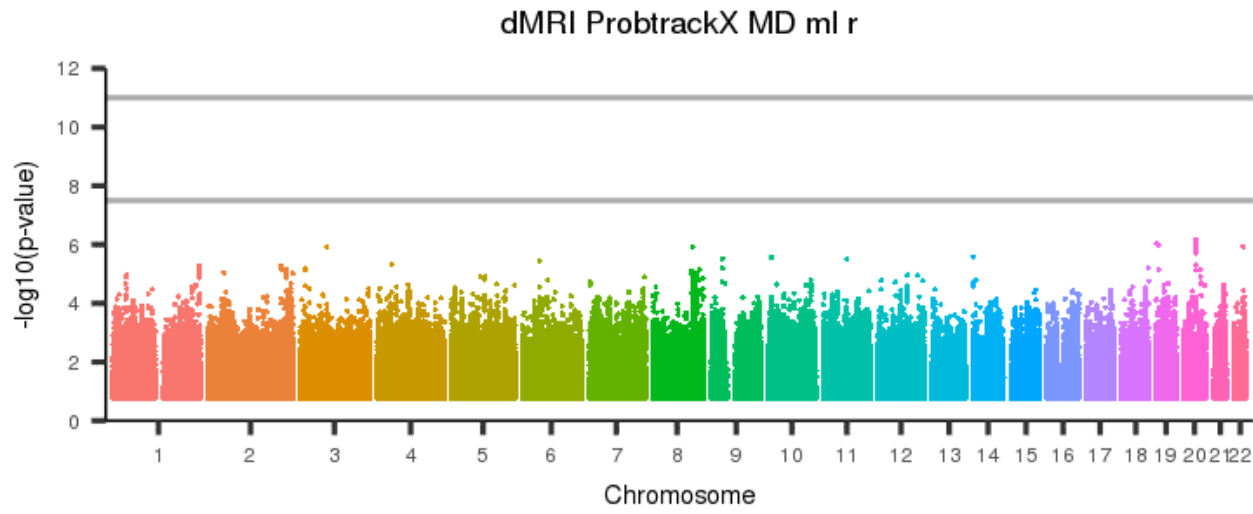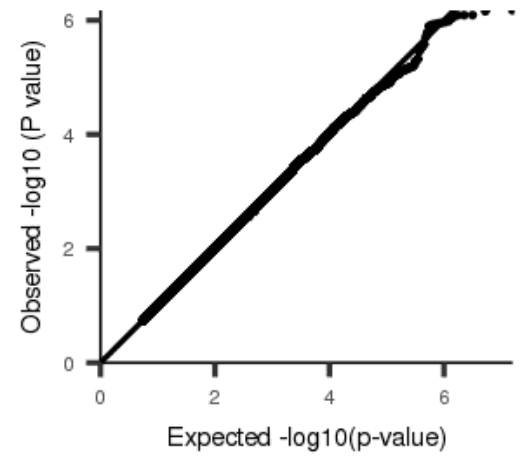

[back to list of plots](#)

Figure 674: dMRI ProbtrackX MD ptr I

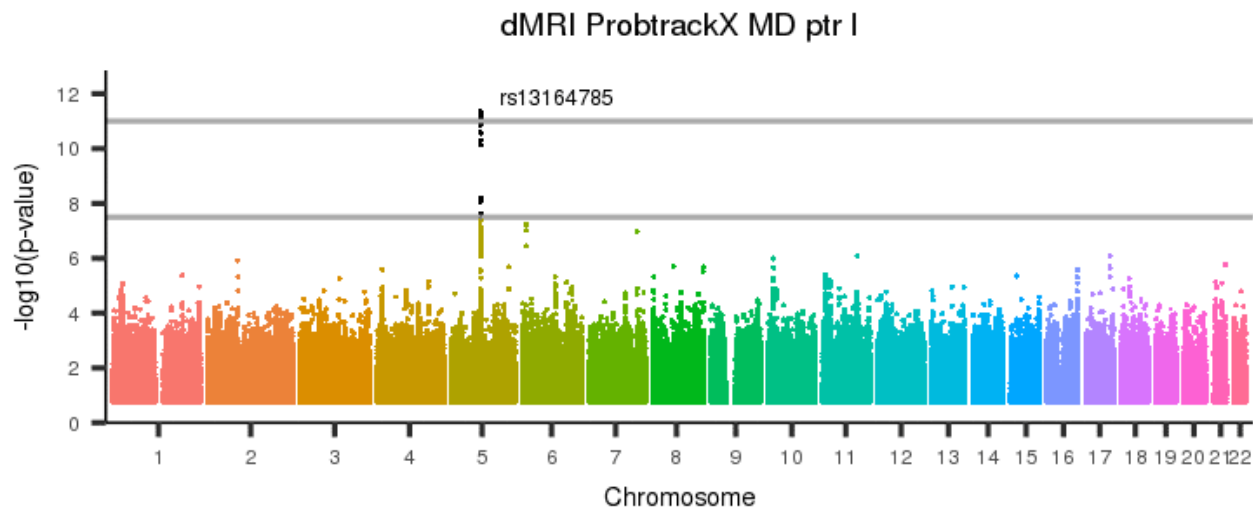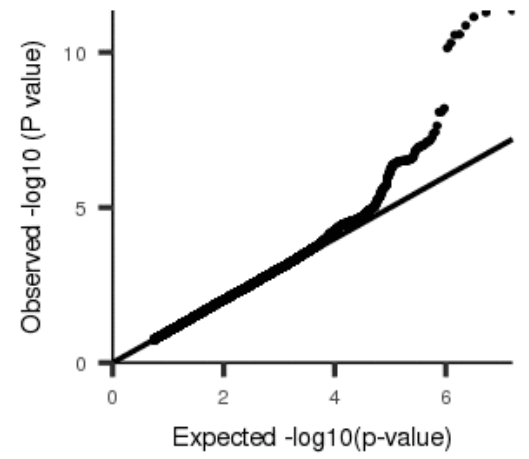

[back to list of plots](#)

Figure 675: dMRI ProbtrackX MD ptr r

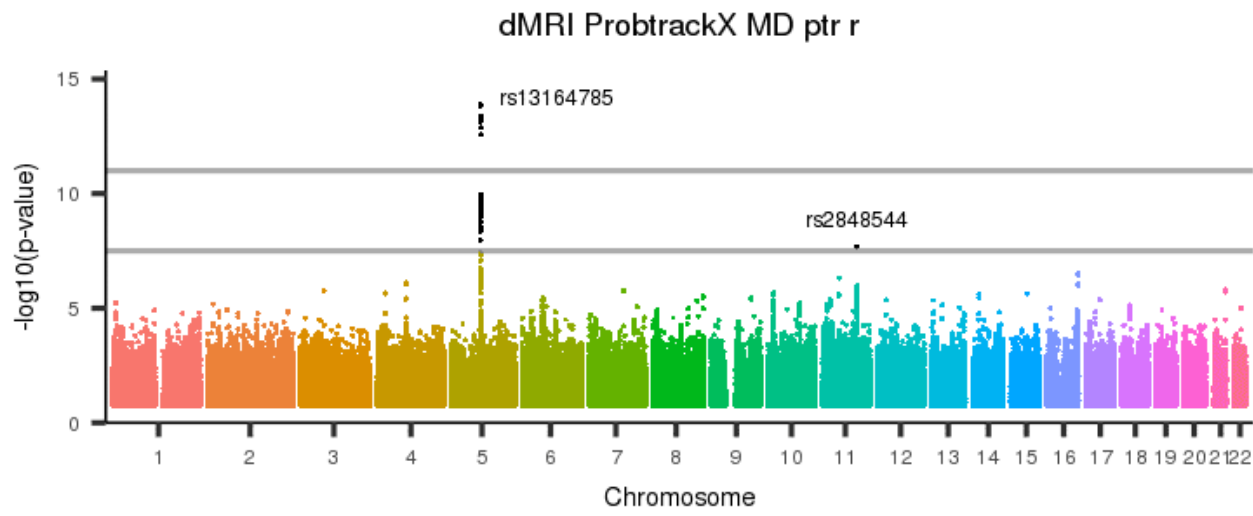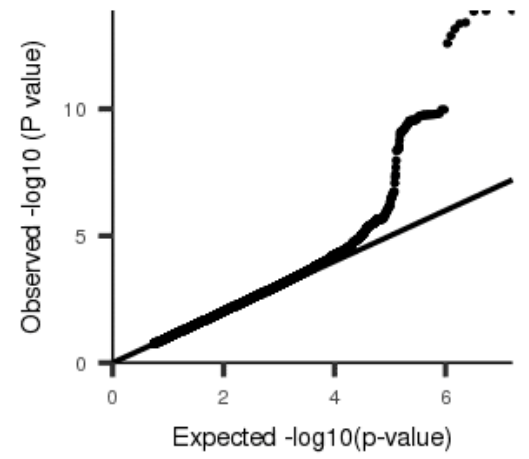

[back to list of plots](#)

Figure 676: dMRI ProbtrackX MD slf I

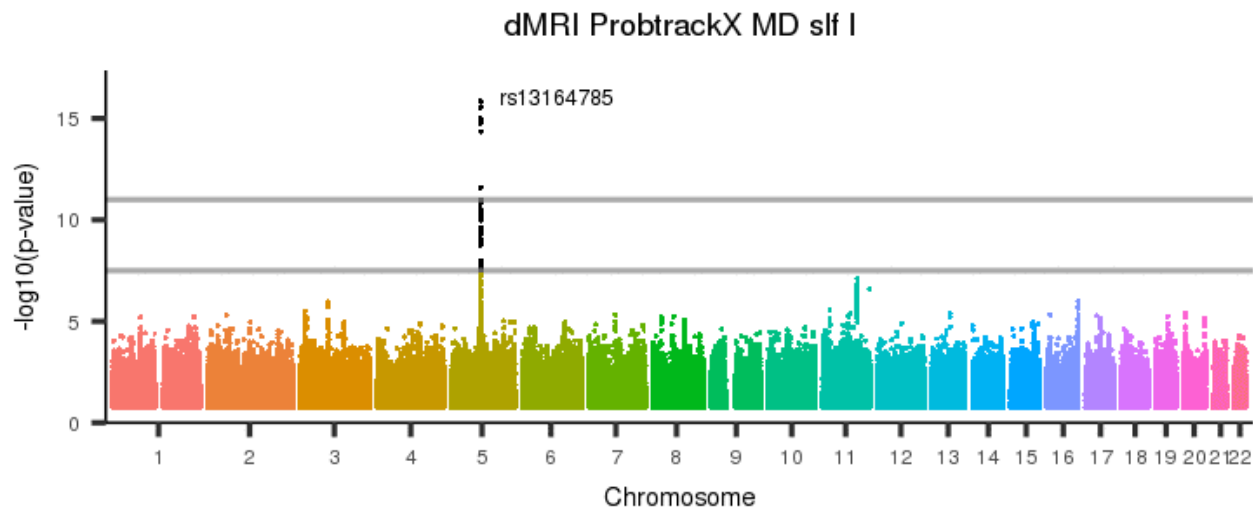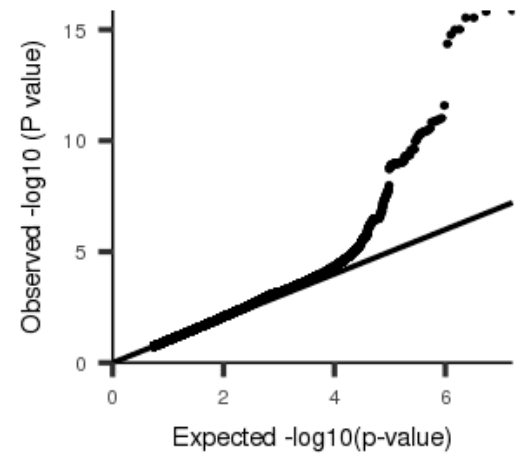

[back to list of plots](#)

Figure 677: dMRI ProbtrackX MD slf r

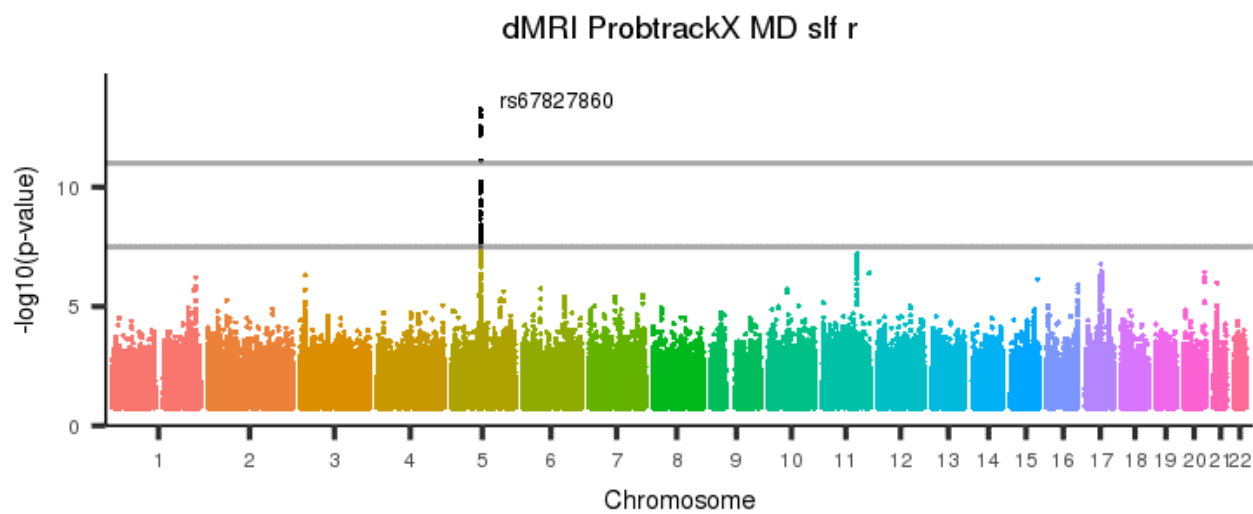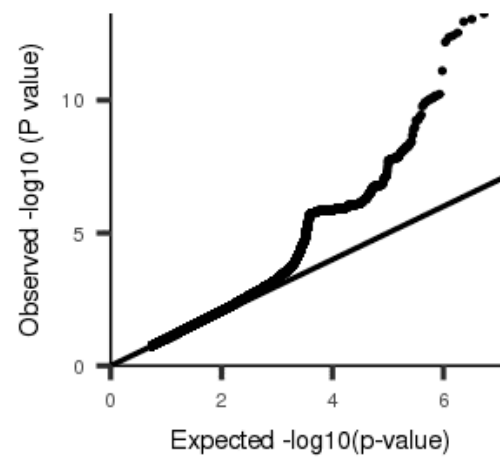

[back to list of plots](#)



Figure 678: dMRI ProbtrackX MD str I

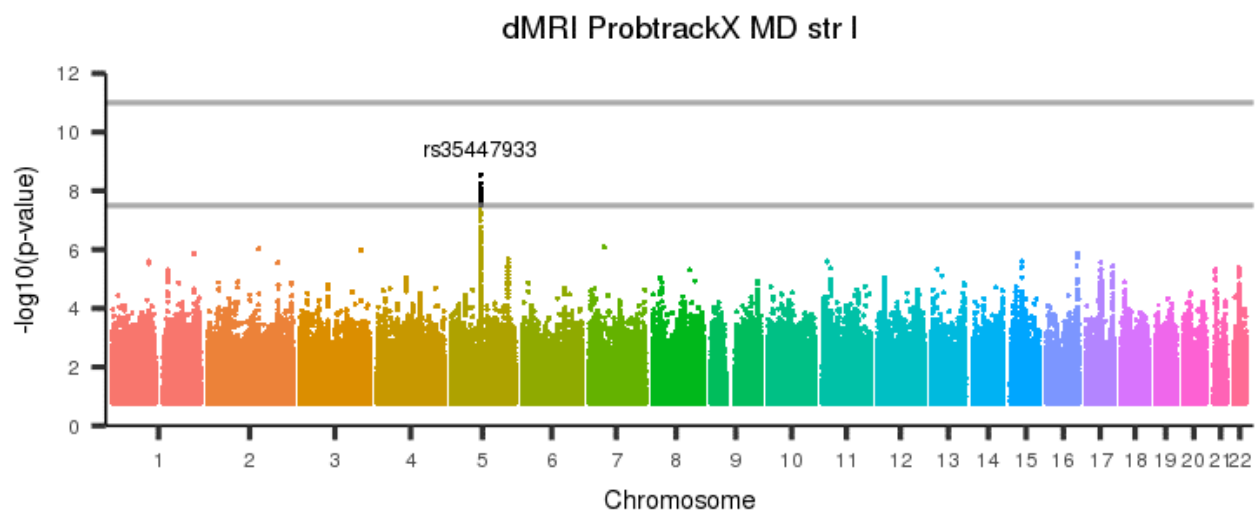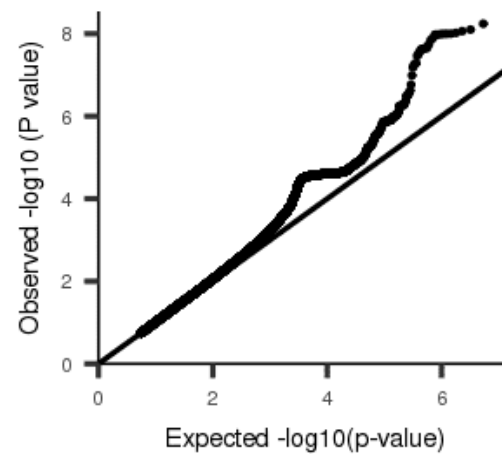

[back to list of plots](#)

Figure 679: dMRI ProbtrackX MD str r

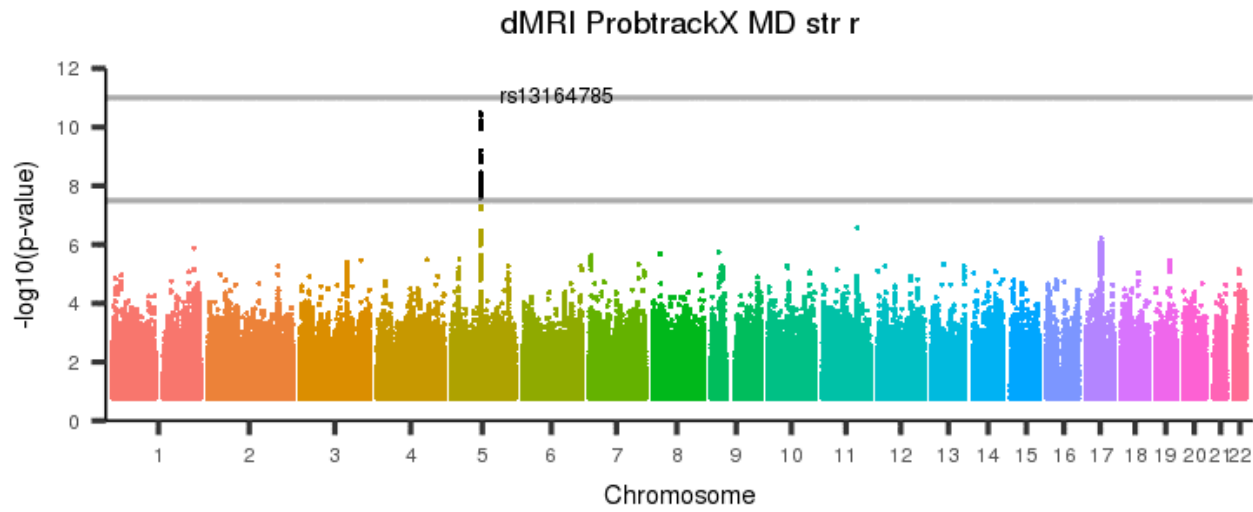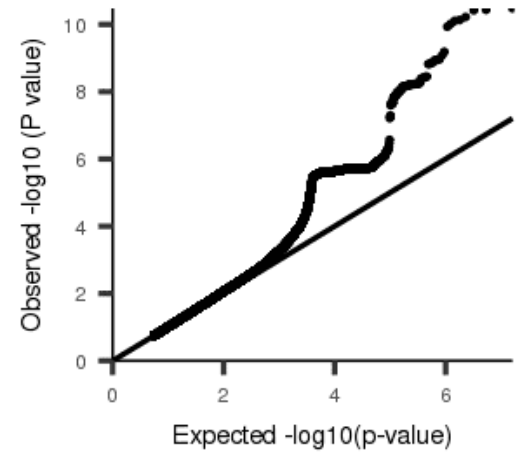

[back to list of plots](#)

Figure 680: dMRI ProbtrackX MD unc I

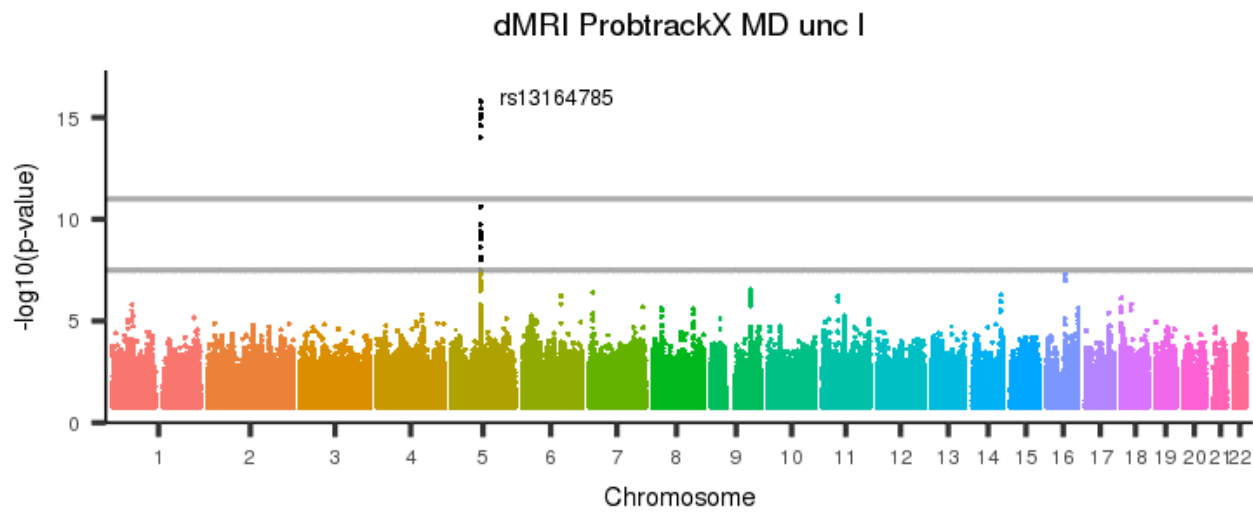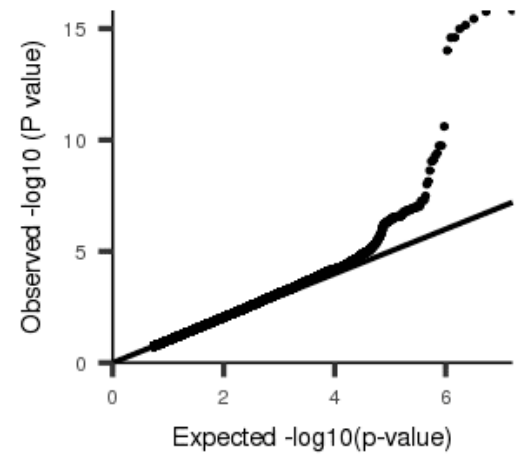

[back to list of plots](#)

Figure 681: dMRI ProbtrackX MD unc r

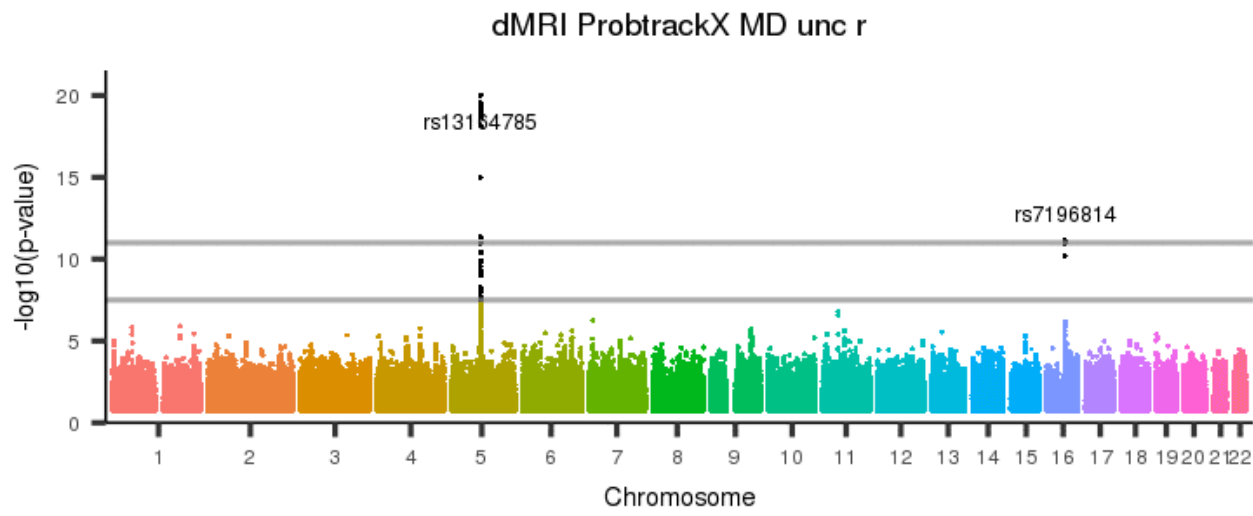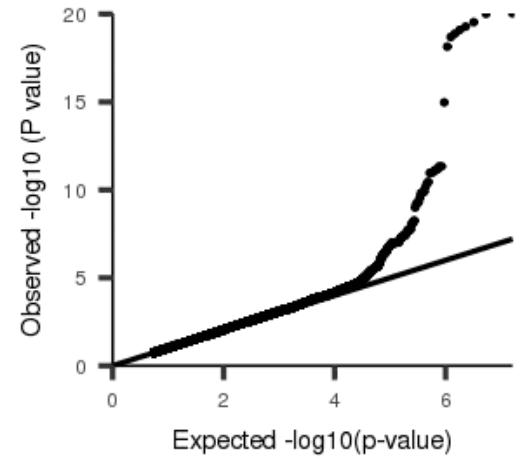

[back to list of plots](#)

Figure 682: dMRI ProbtrackX MO ar I

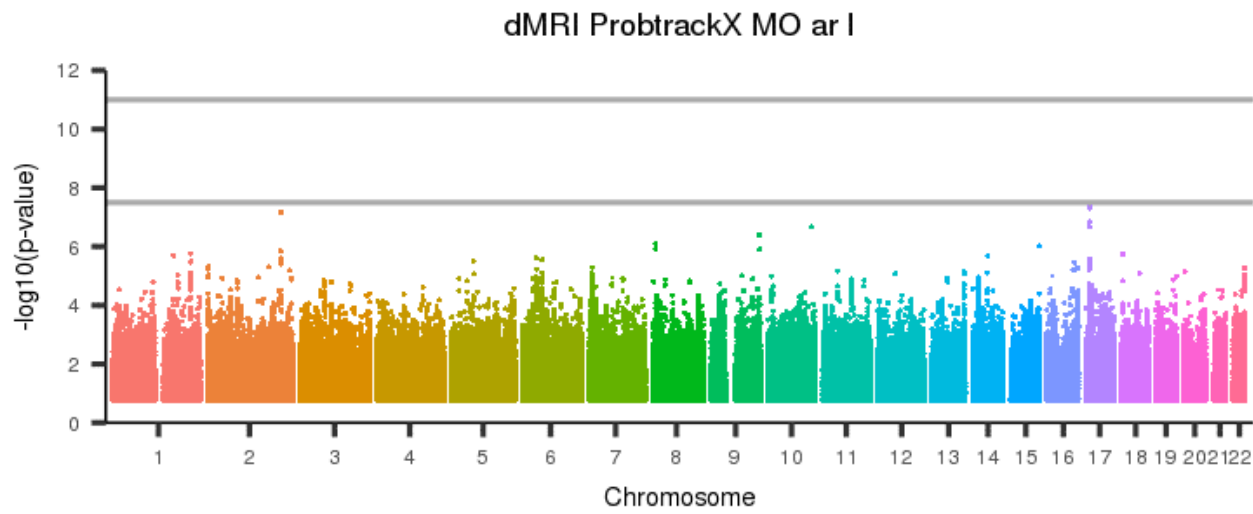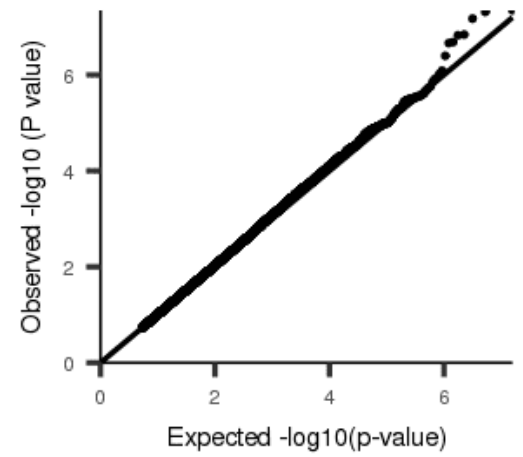

[back to list of plots](#)

Figure 683: dMRI ProbtrackX MO ar r

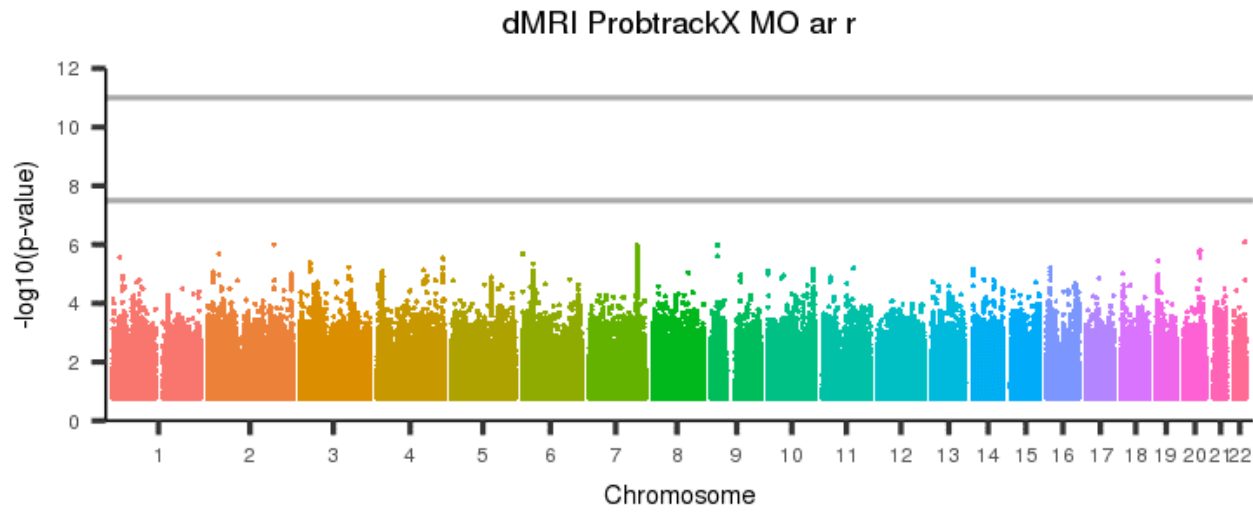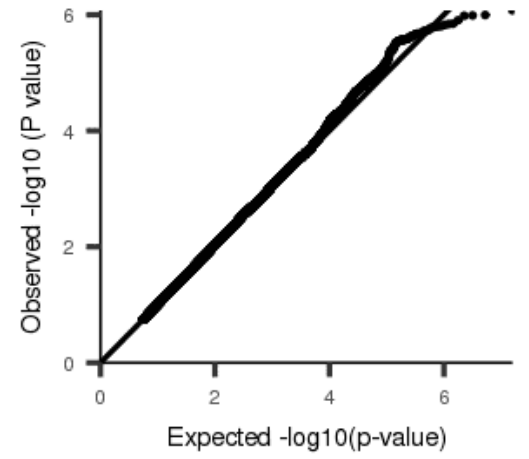

[back to list of plots](#)

Figure 684: dMRI ProbtrackX MO atr l

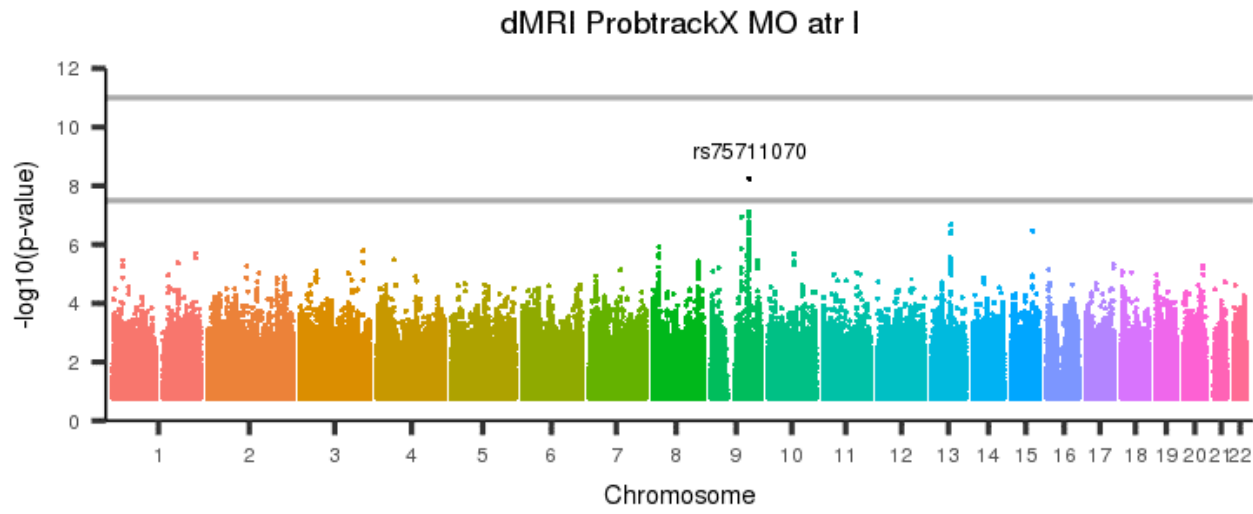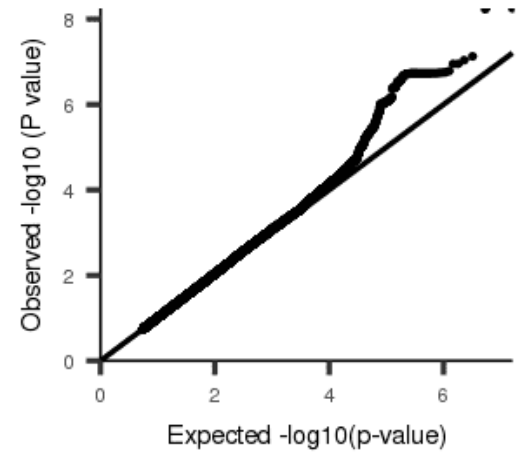

[back to list of plots](#)

Figure 685: dMRI ProbtrackX MO atr r

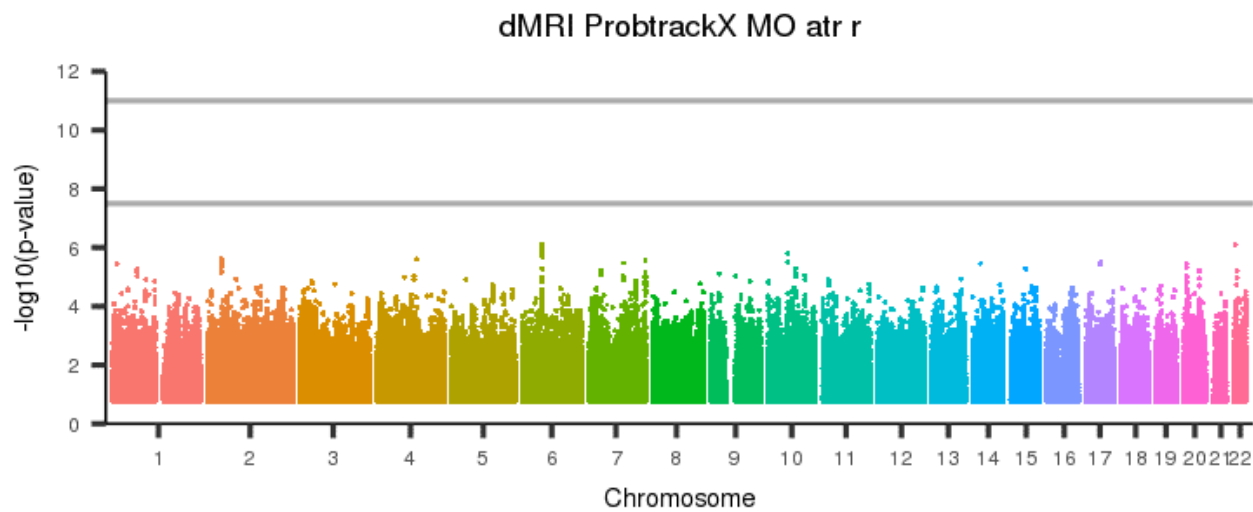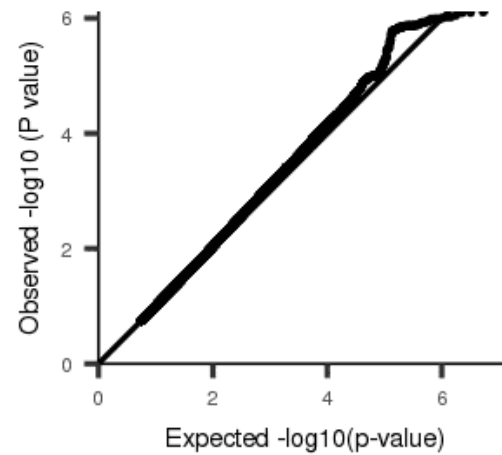

[back to list of plots](#)



Figure 686: dMRI ProbtrackX MO cgc I

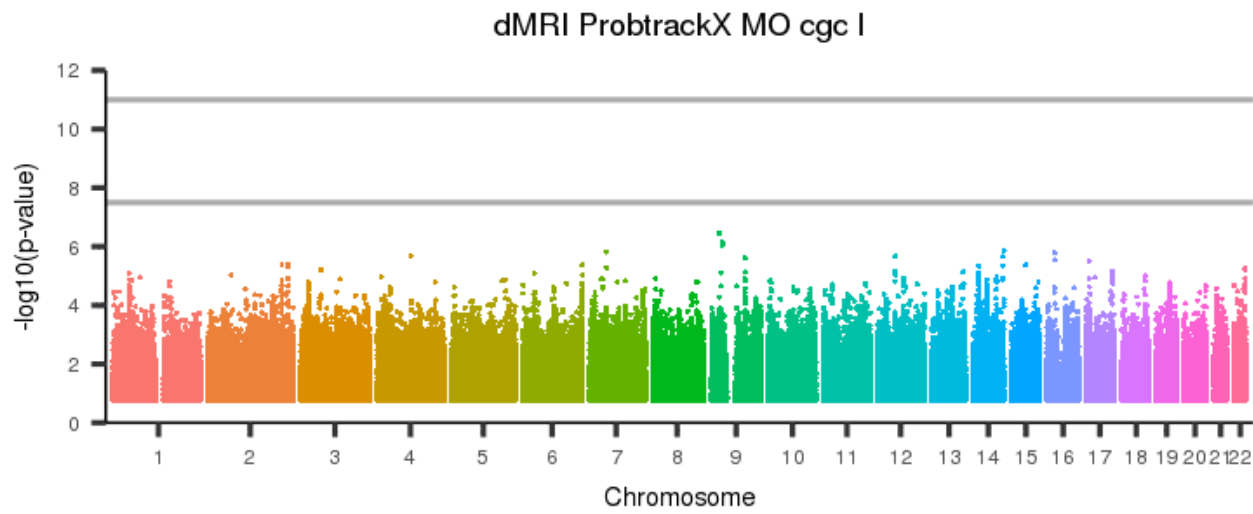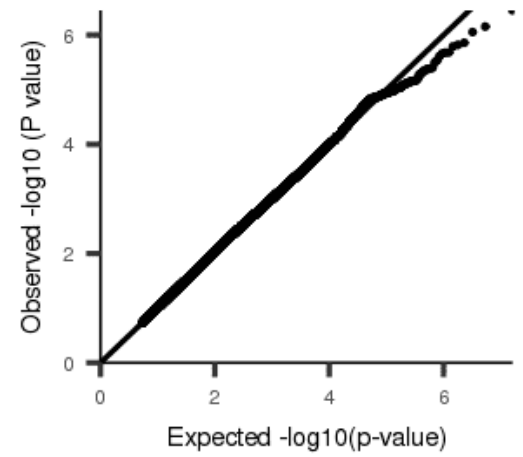

[back to list of plots](#)

Figure 687: dMRI ProbtrackX MO cgc r

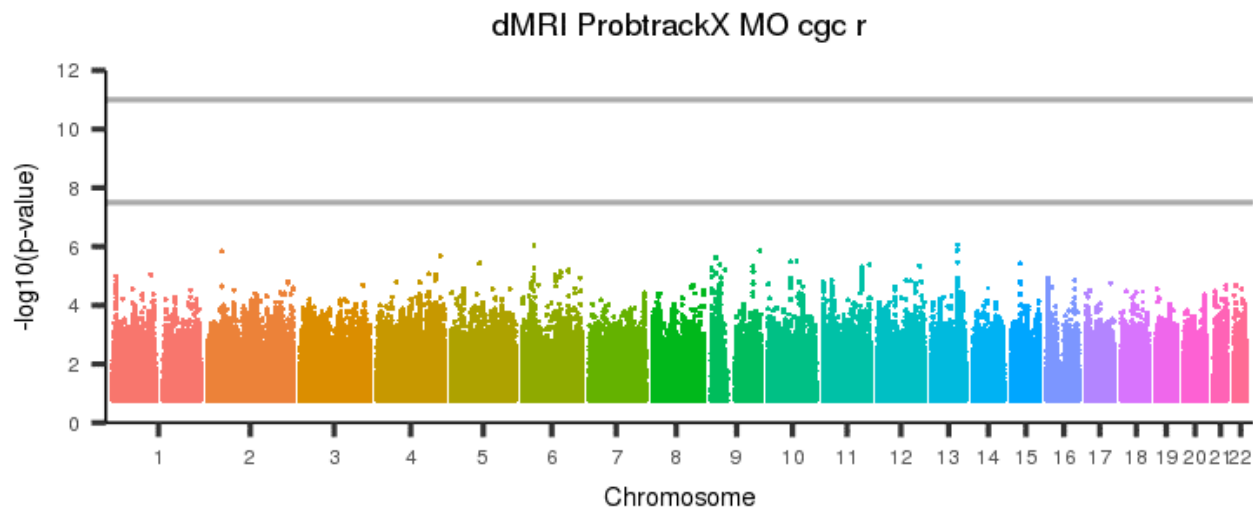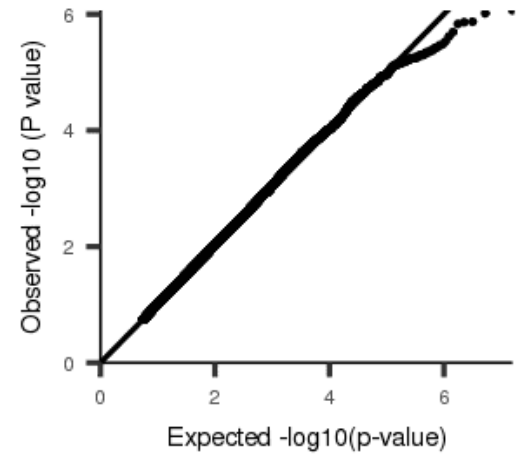

[back to list of plots](#)

Figure 688: dMRI ProbtrackX MO cgh I

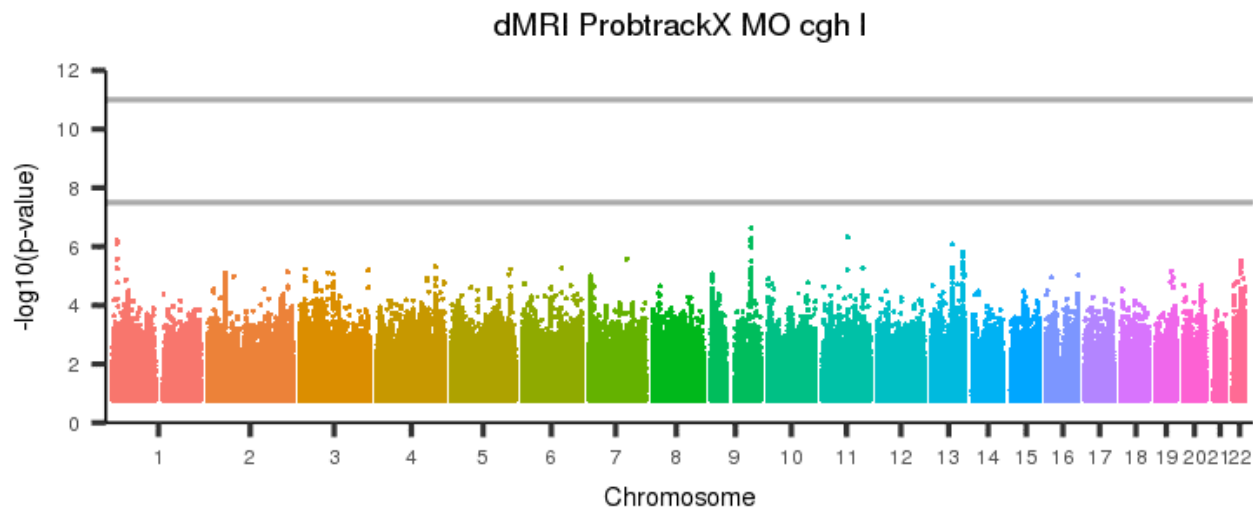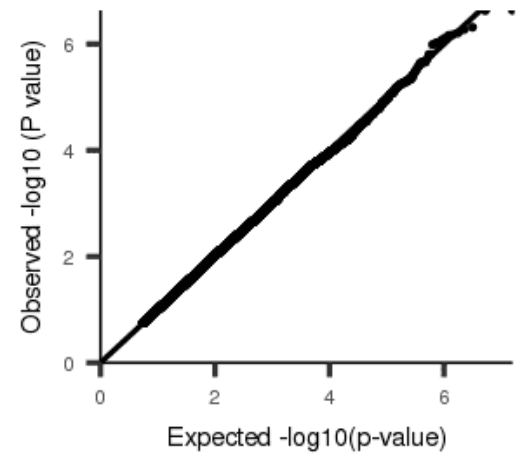

[back to list of plots](#)

Figure 689: dMRI ProbtrackX MO cgh r

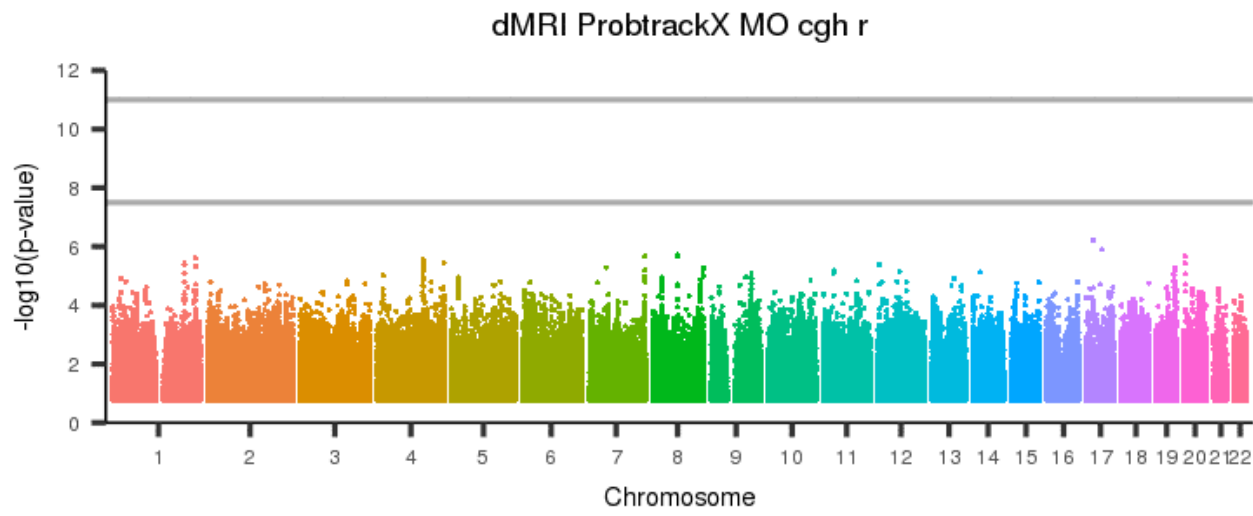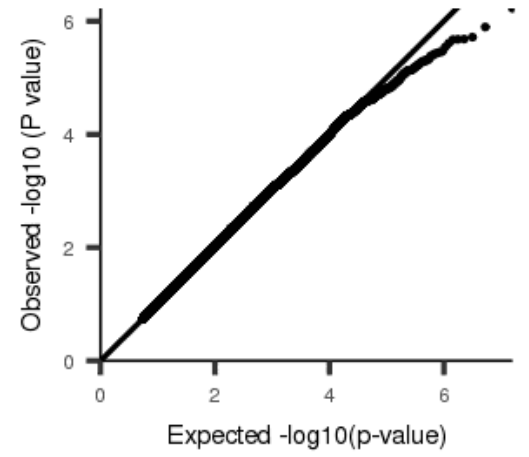

[back to list of plots](#)

Figure 690: dMRI ProbtrackX MO cst I

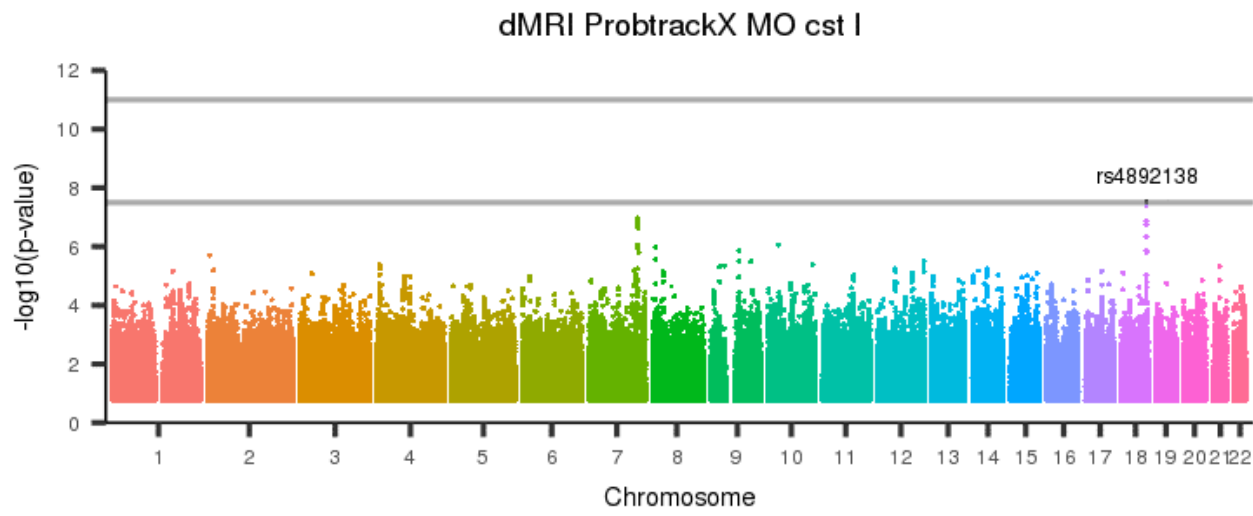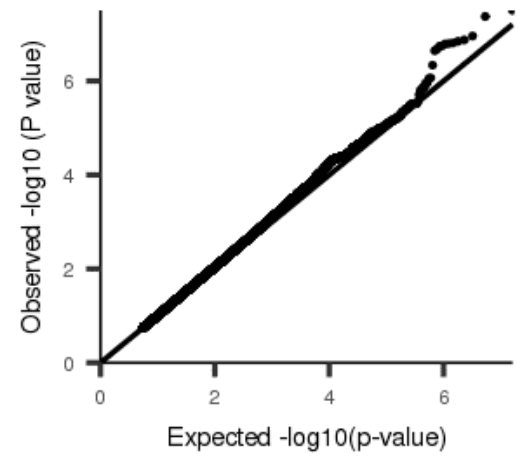

[back to list of plots](#)

Figure 691: dMRI ProbtrackX MO cst r

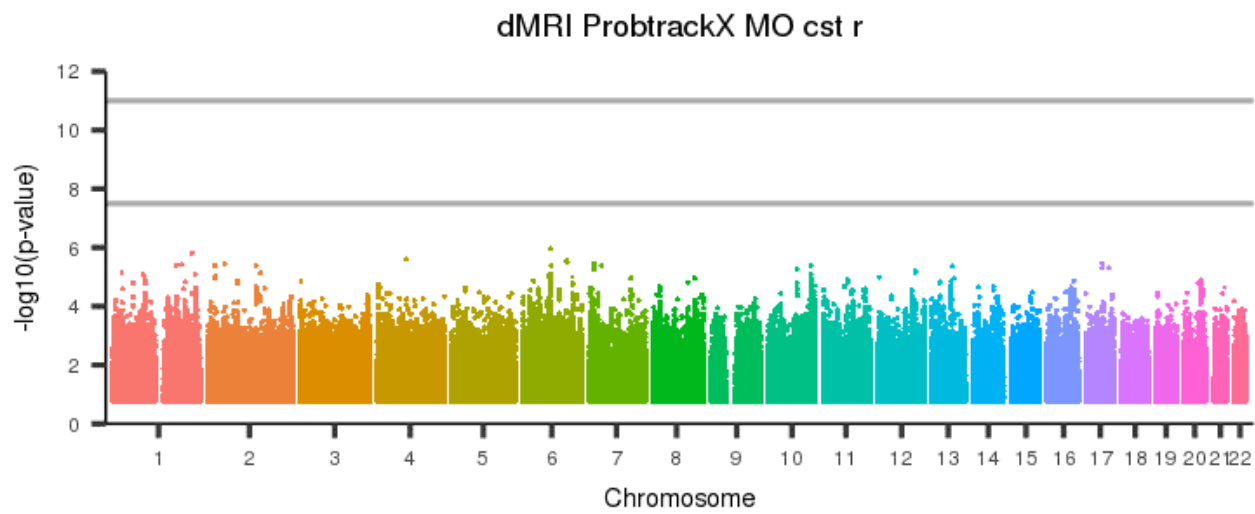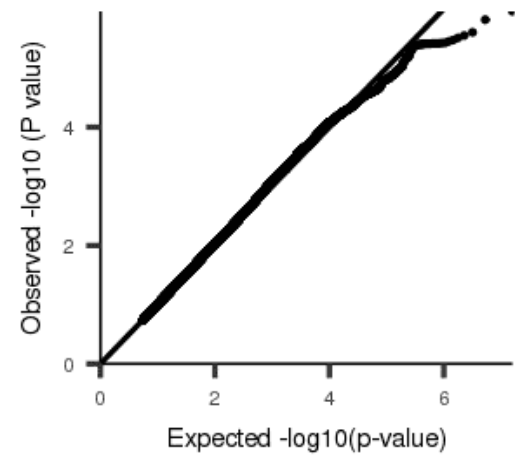

[back to list of plots](#)

Figure 692: dMRI ProbtrackX MO fma

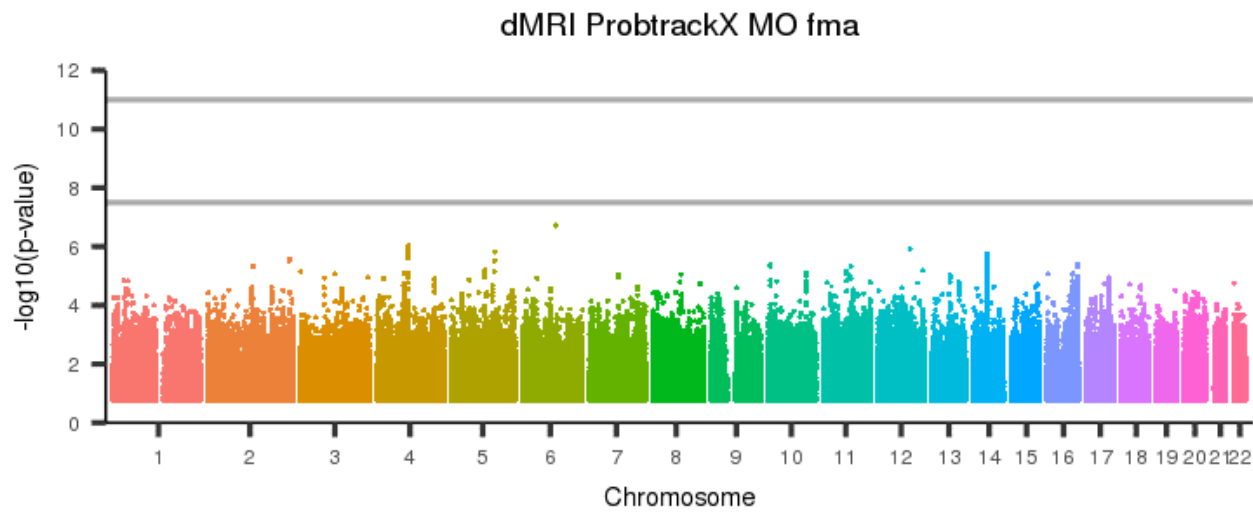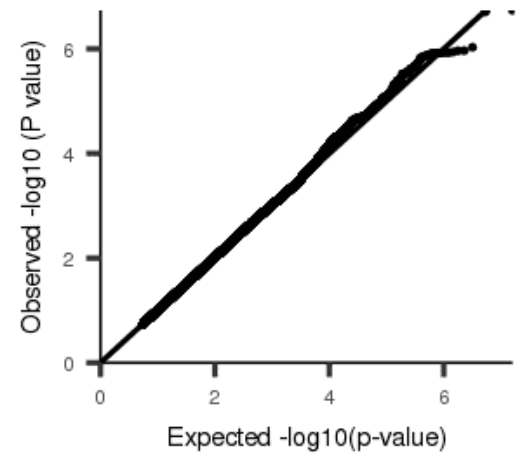

[back to list of plots](#)

Figure 693: dMRI ProbtrackX MO fmi

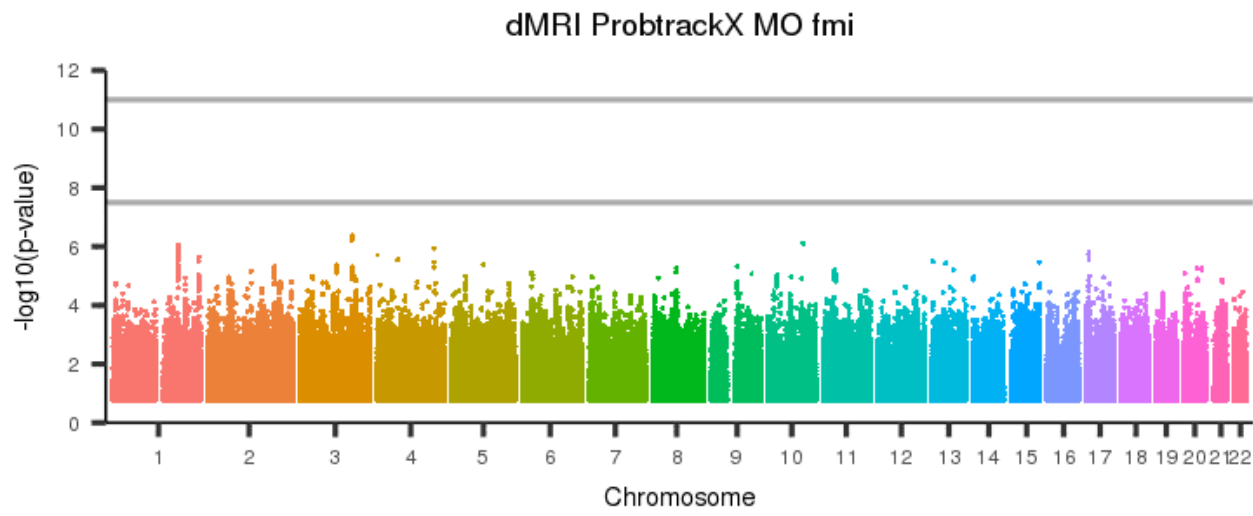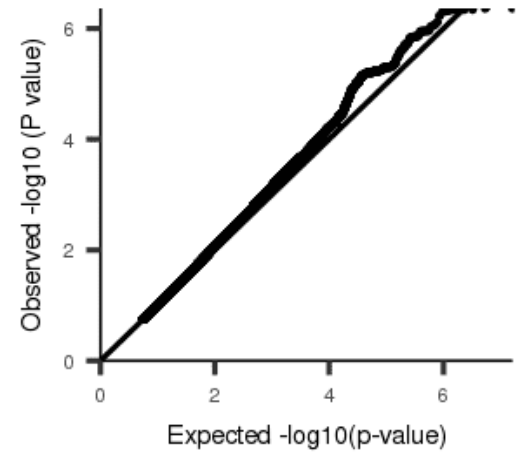

[back to list of plots](#)



Figure 694: dMRI ProbtrackX MO ifo I

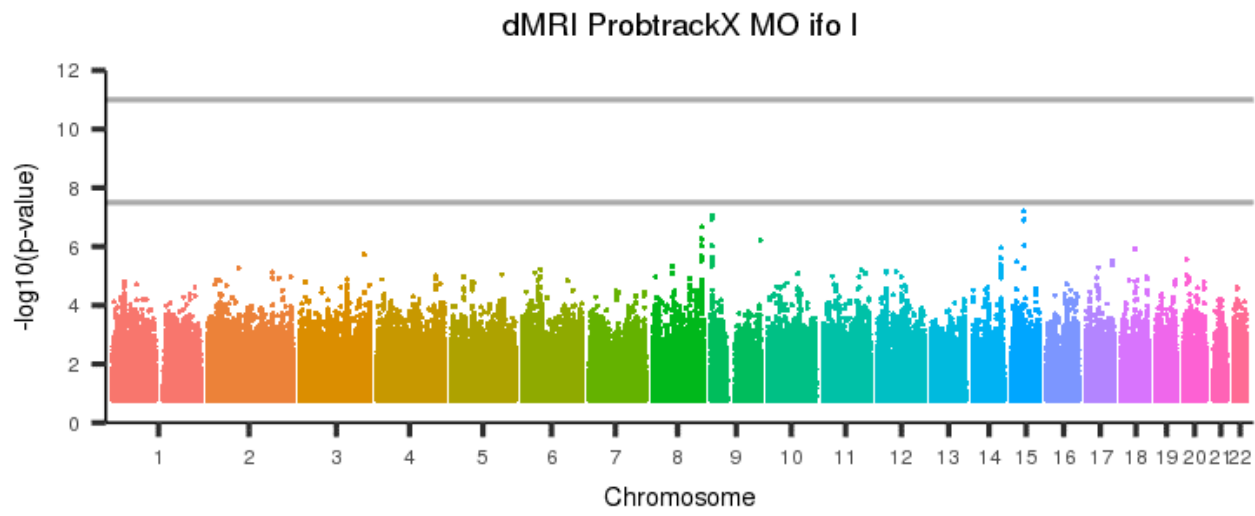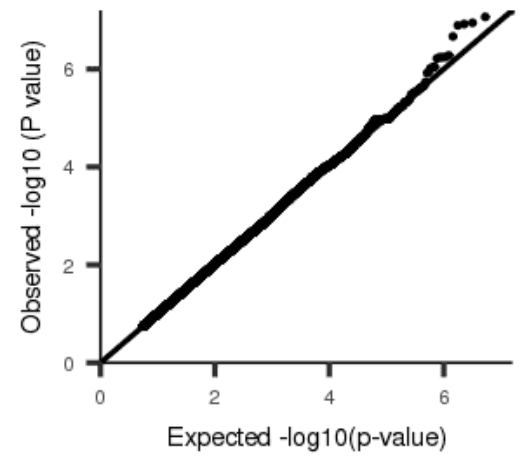

[back to list of plots](#)

Figure 695: dMRI ProbtrackX MO ifo r

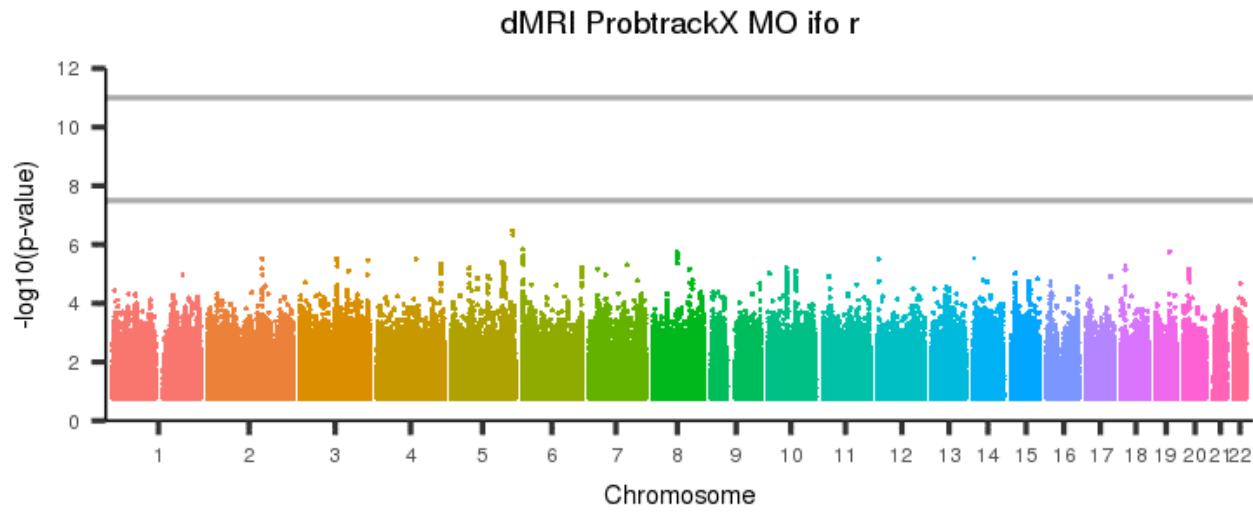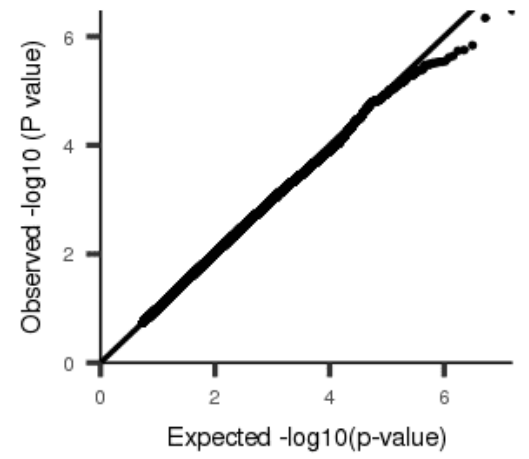

[back to list of plots](#)

Figure 696: dMRI ProbtrackX MO ilf I

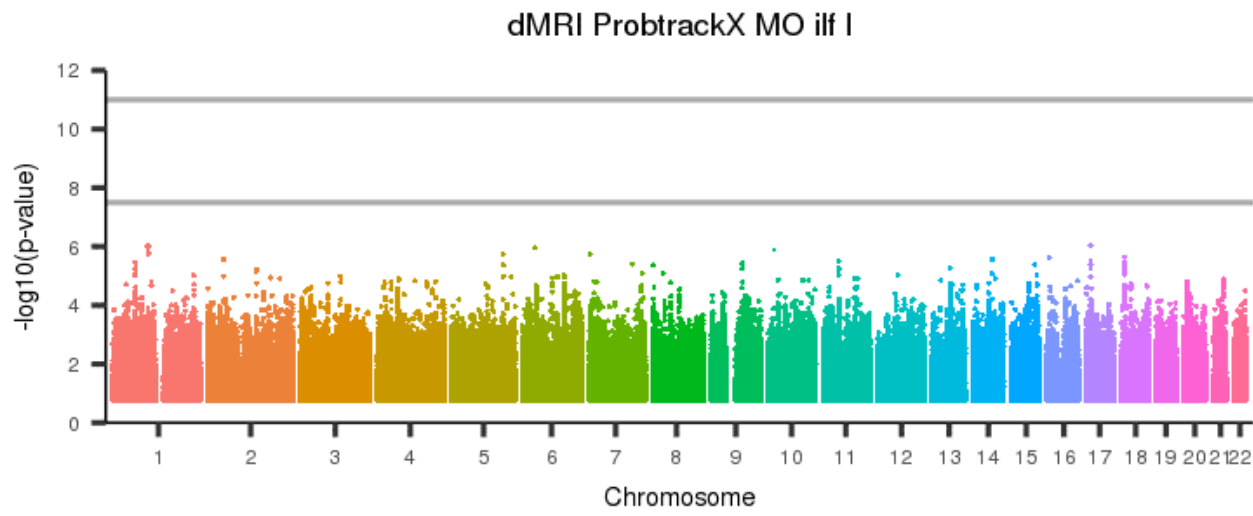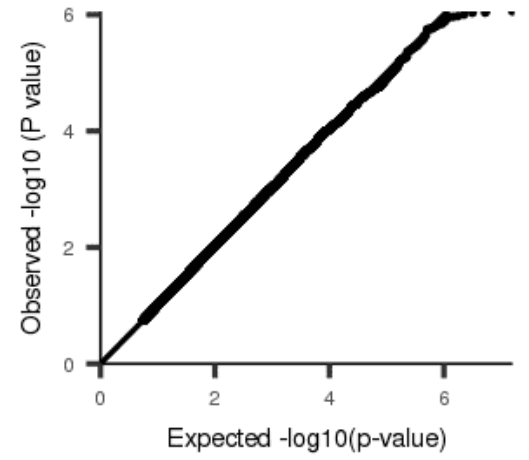

[back to list of plots](#)

Figure 697: dMRI ProbtrackX MO ilf r

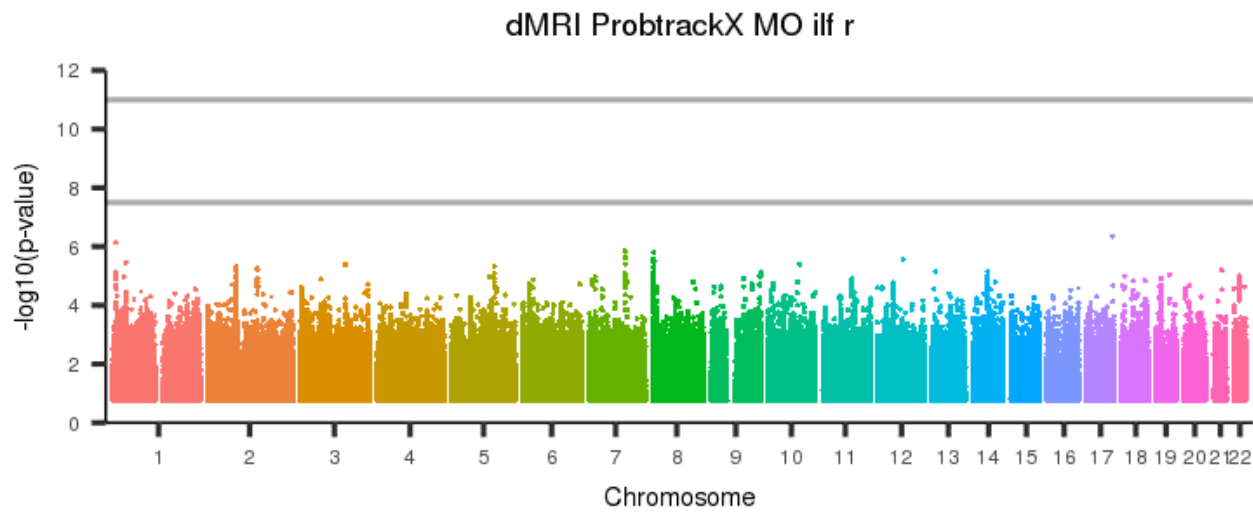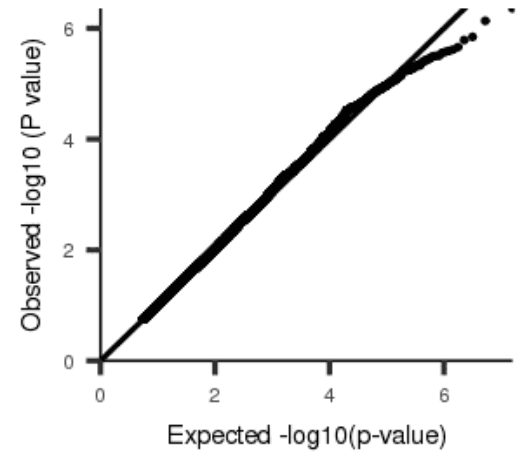

[back to list of plots](#)

Figure 698: dMRI ProbtrackX MO mcp

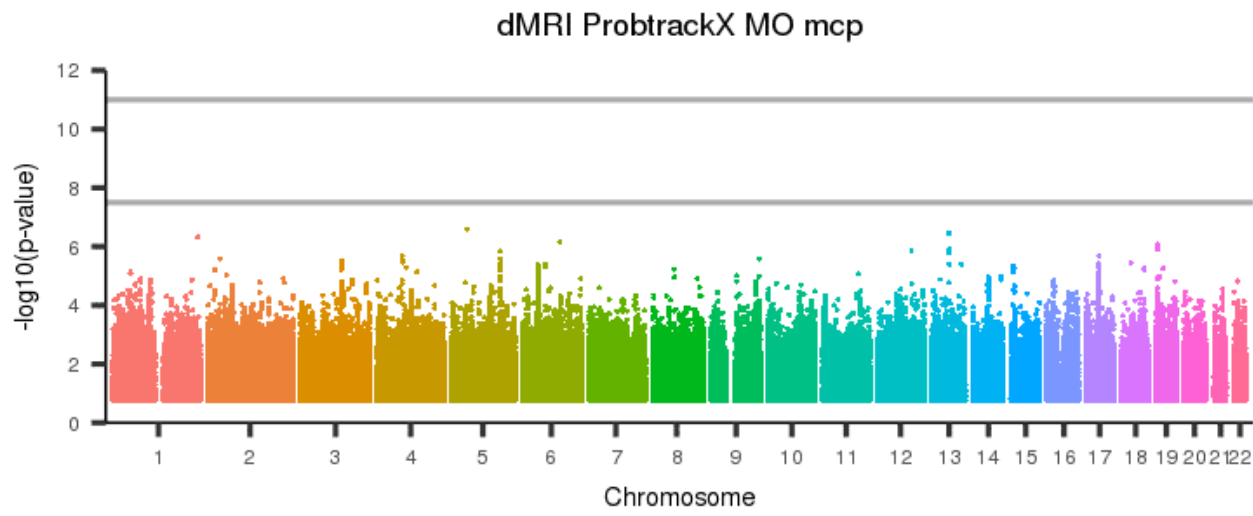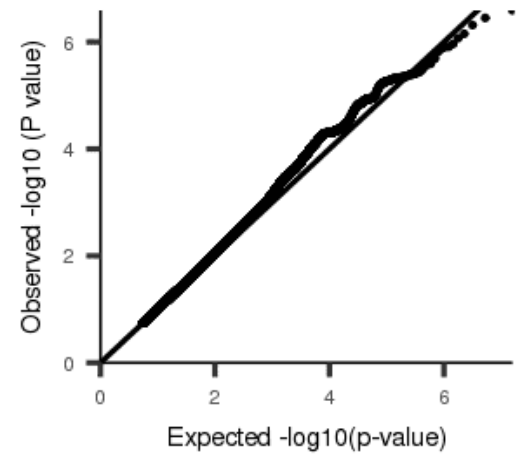

[back to list of plots](#)

Figure 699: dMRI ProbtrackX MO ml I

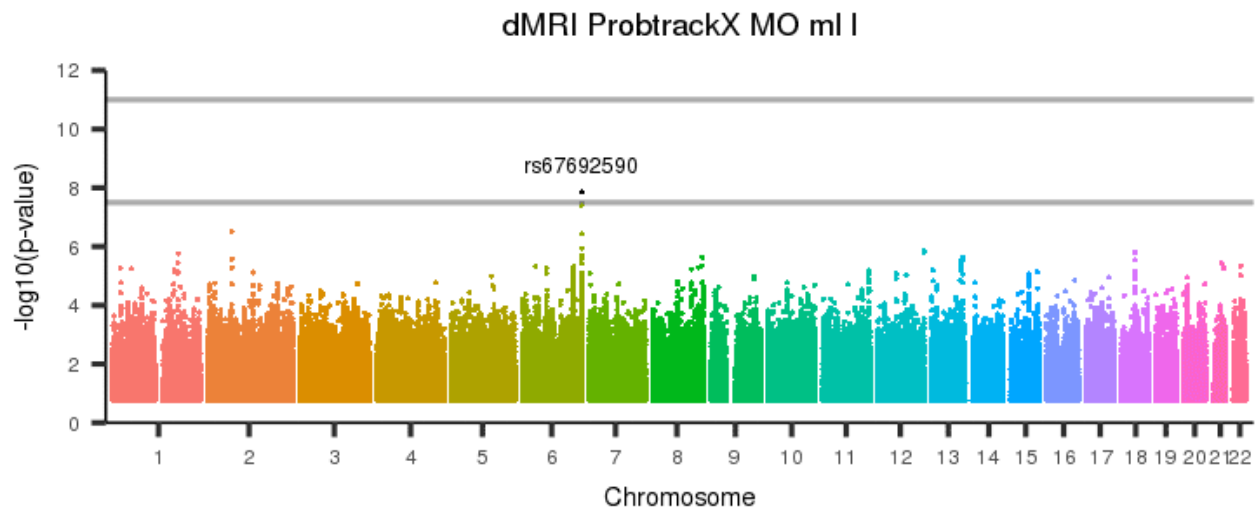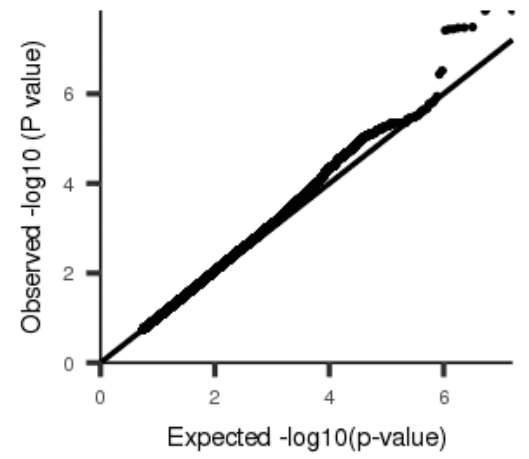

[back to list of plots](#)

Figure 700: dMRI ProbtrackX MO ml r

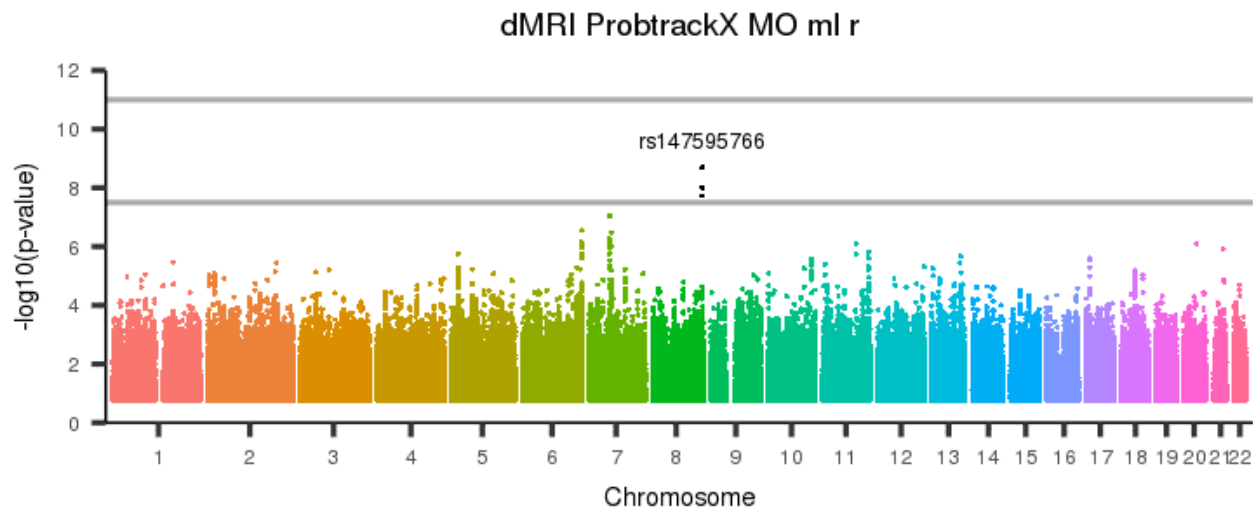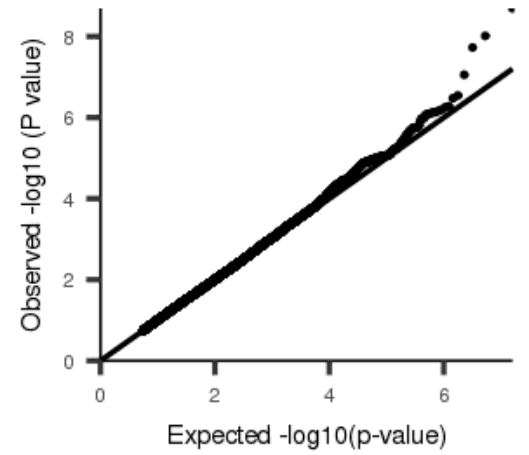

[back to list of plots](#)

Figure 701: dMRI ProbtrackX MO ptr I

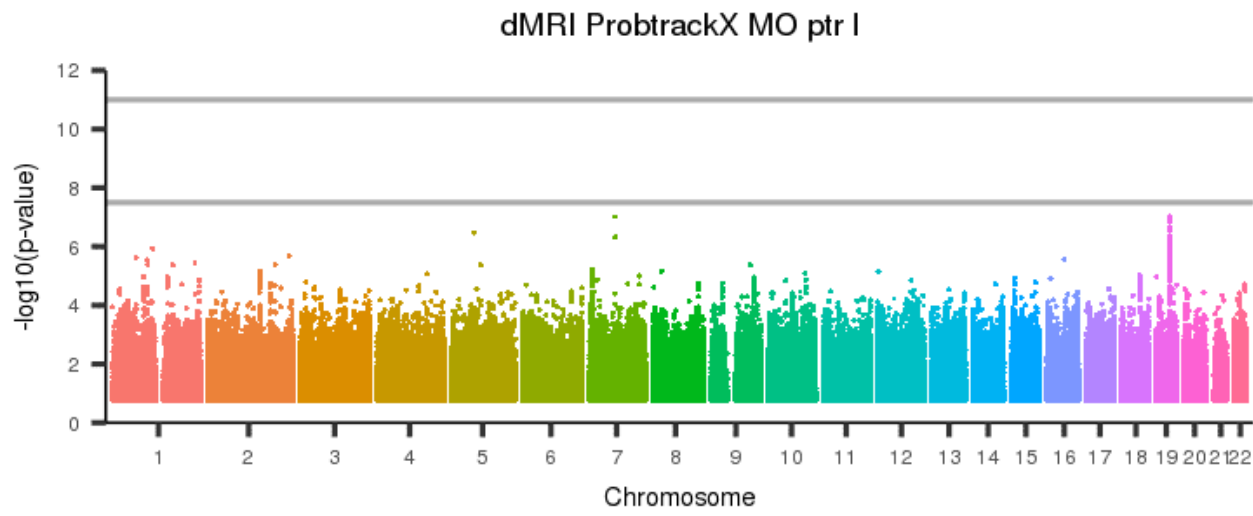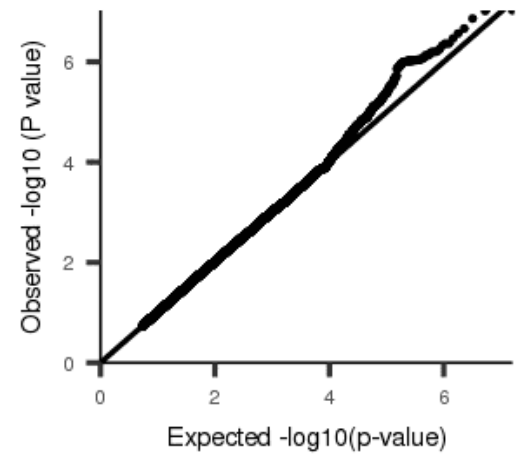

[back to list of plots](#)



Figure 702: dMRI ProbtrackX MO ptr r

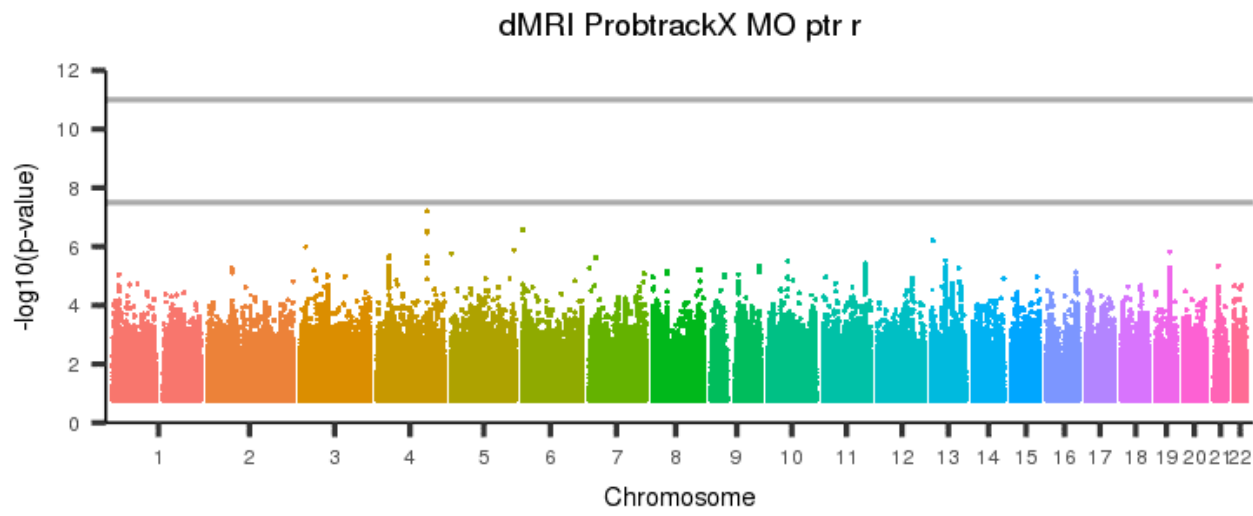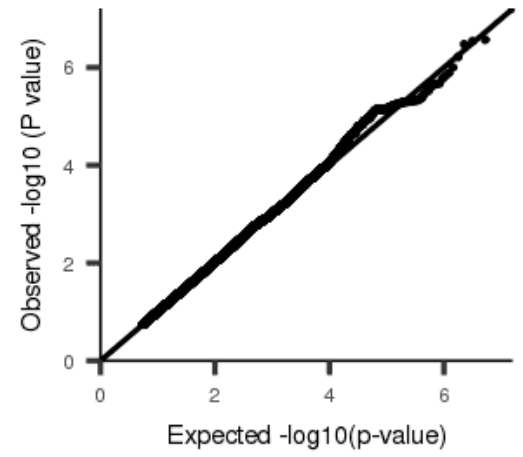

[back to list of plots](#)

Figure 703: dMRI ProbtrackX MO slf I

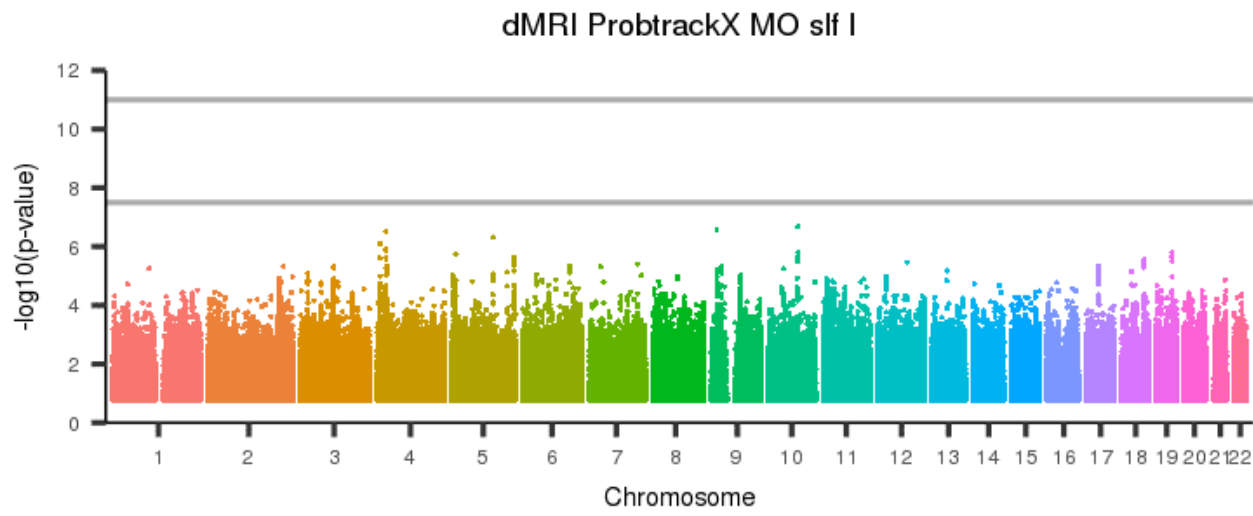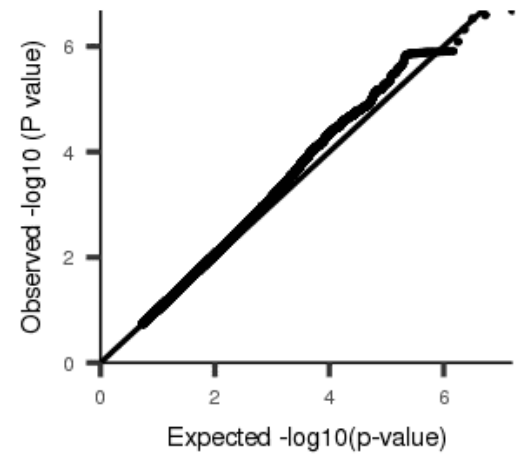

[back to list of plots](#)

Figure 704: dMRI ProbtrackX MO slf r

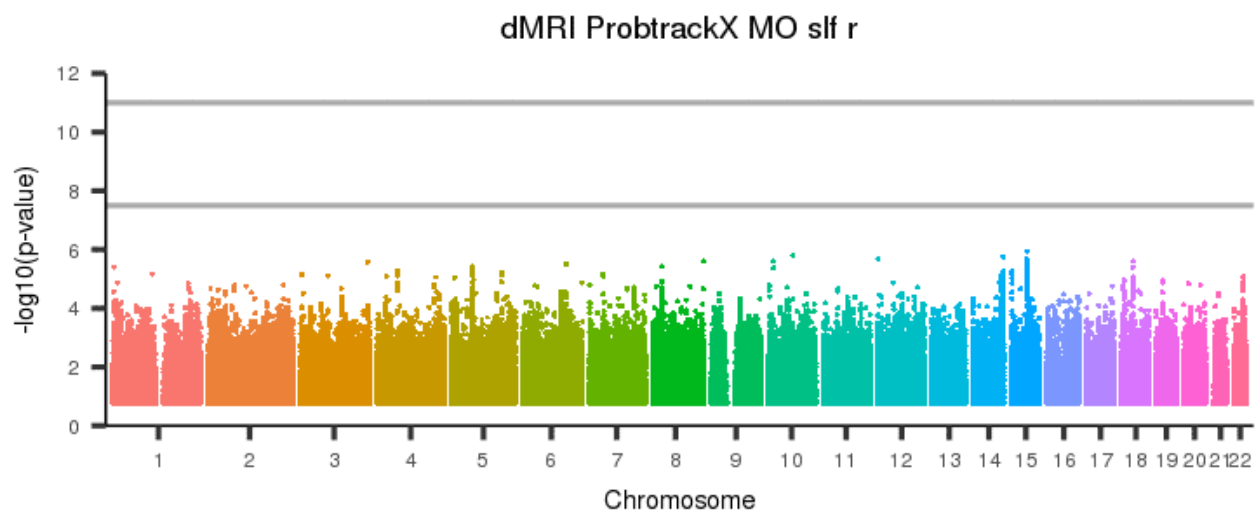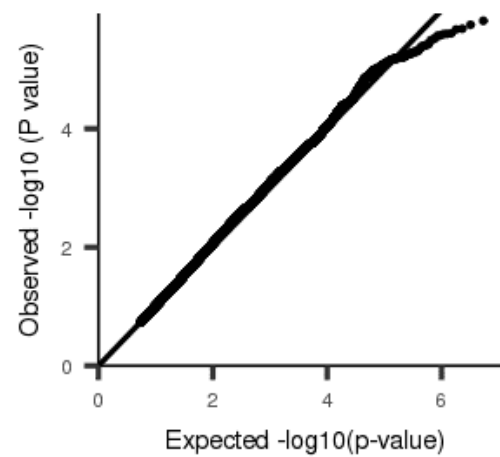

[back to list of plots](#)

Figure 705: dMRI ProbtrackX MO str I

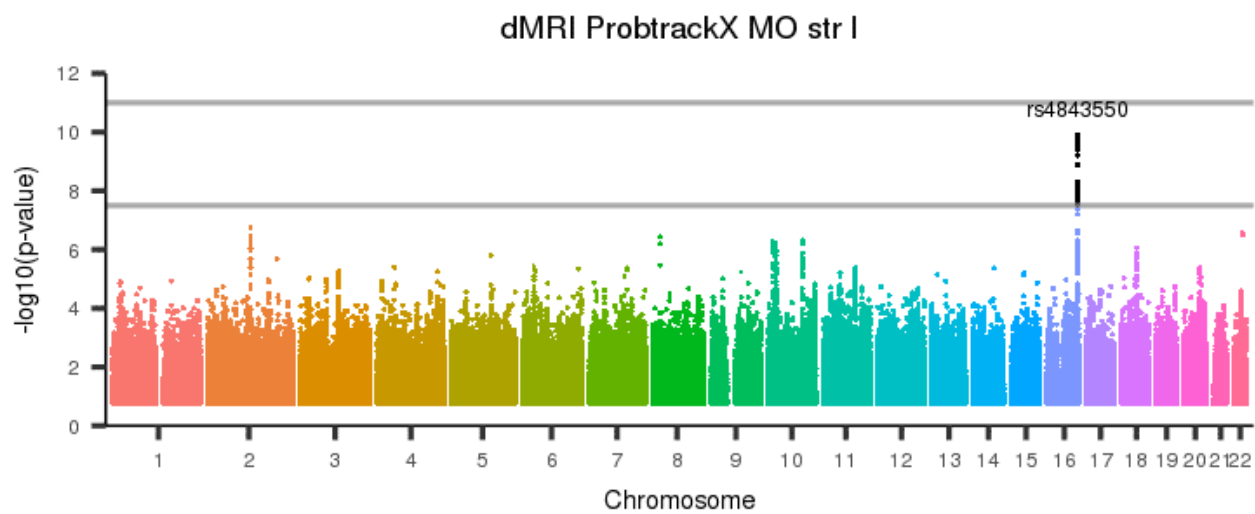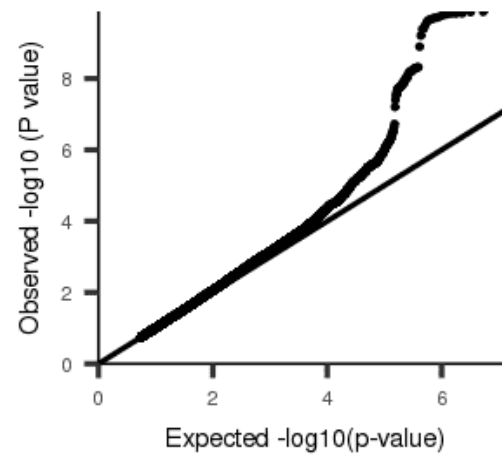

[back to list of plots](#)

Figure 706: dMRI ProbtrackX MO str r

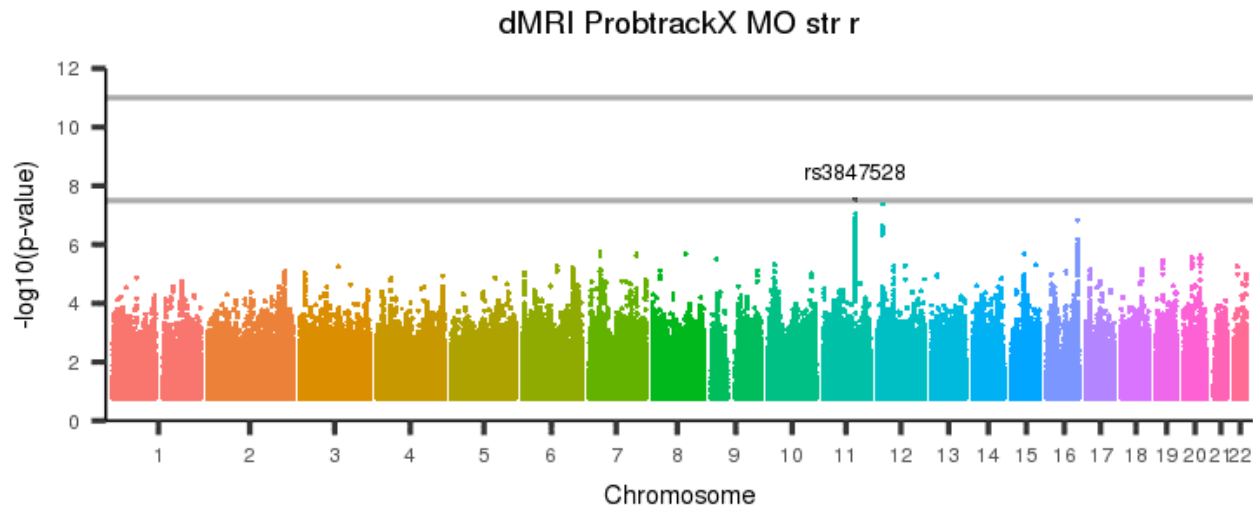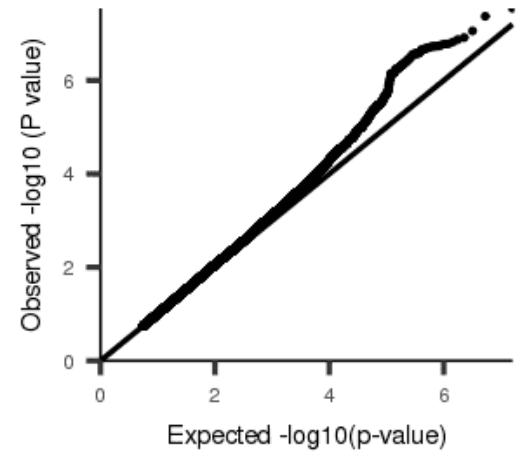

[back to list of plots](#)

Figure 707: dMRI ProbtrackX MO unc I

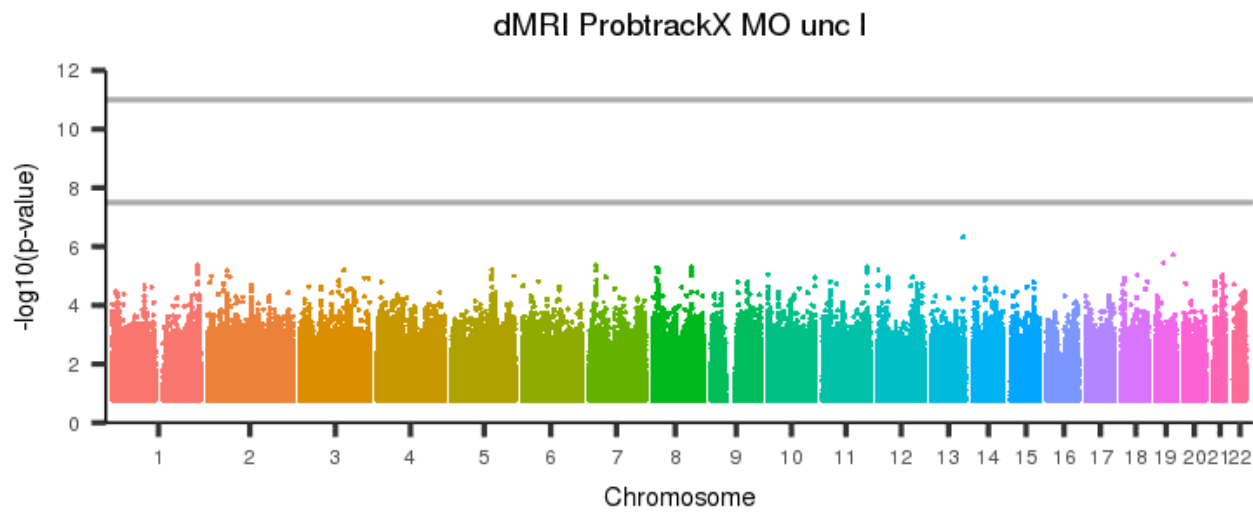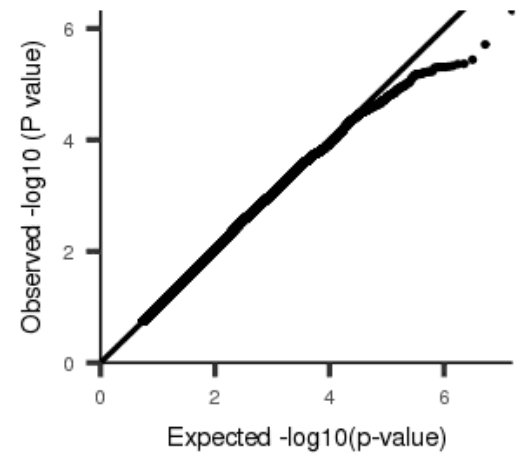

[back to list of plots](#)

Figure 708: dMRI ProbtrackX MO unc r

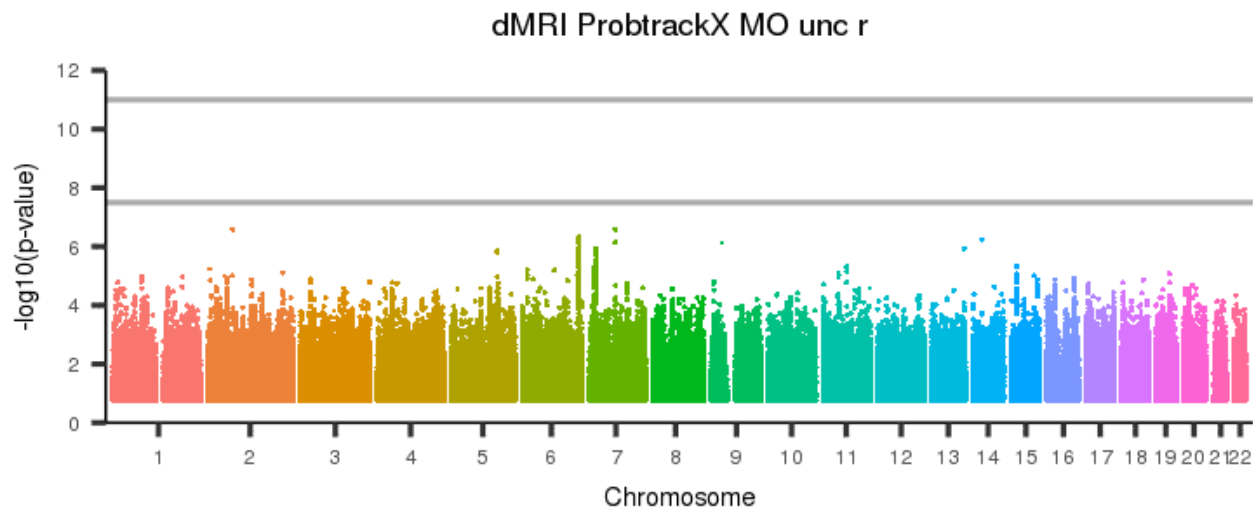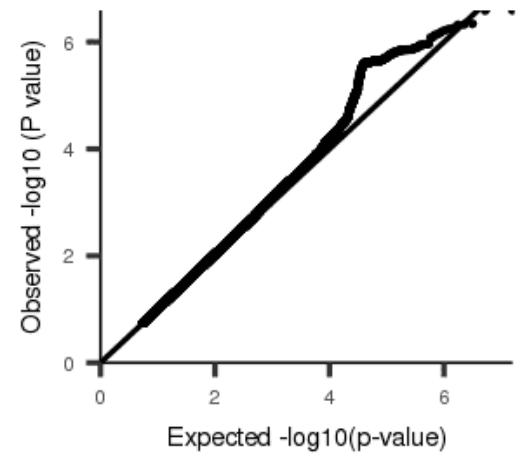

[back to list of plots](#)

Figure 709: dMRI ProbtrackX L1 ar l

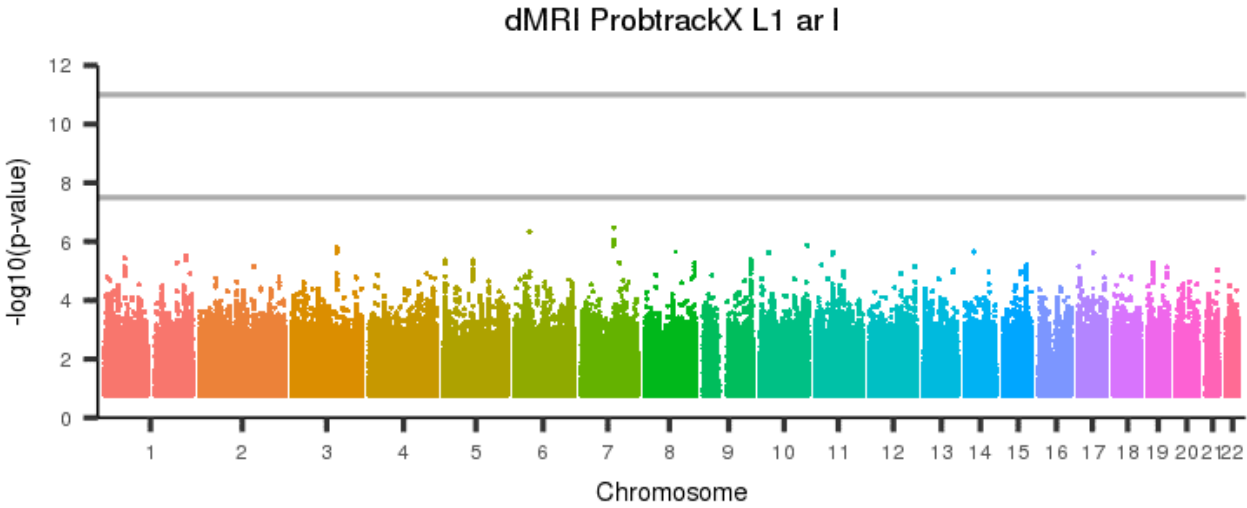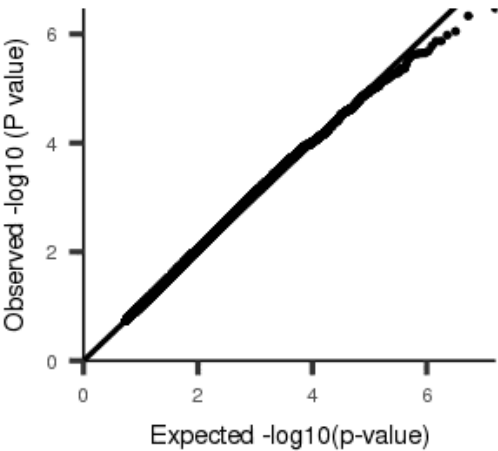

[back to list of plots](#)



Figure 710: dMRI ProbtrackX L1 ar r

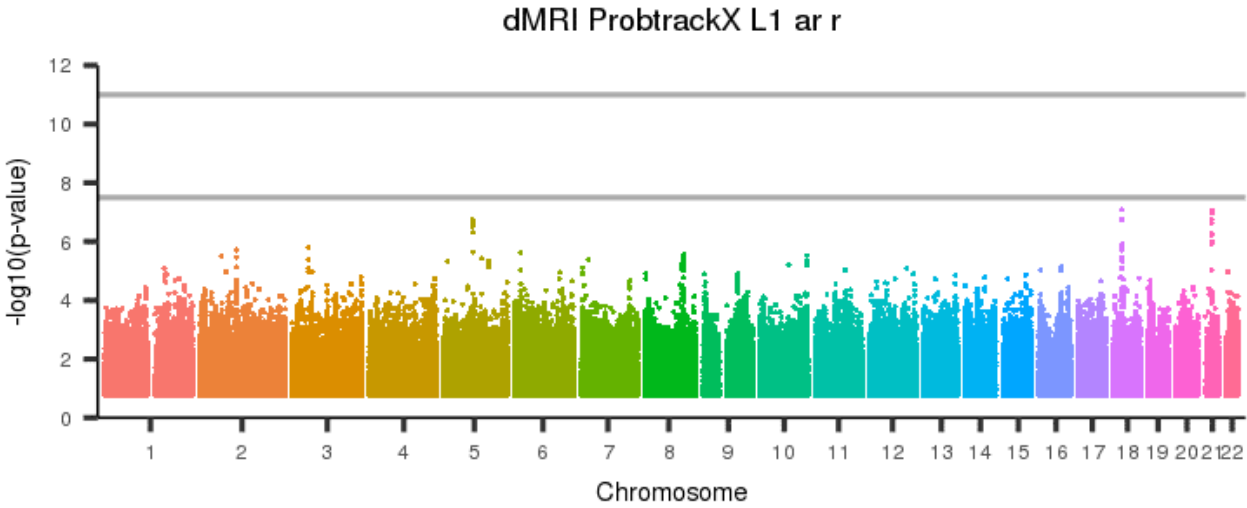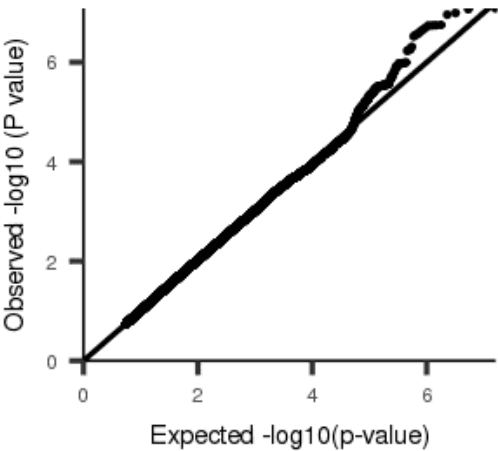

[back to list of plots](#)

Figure 711: dMRI ProbtrackX L1 atr l

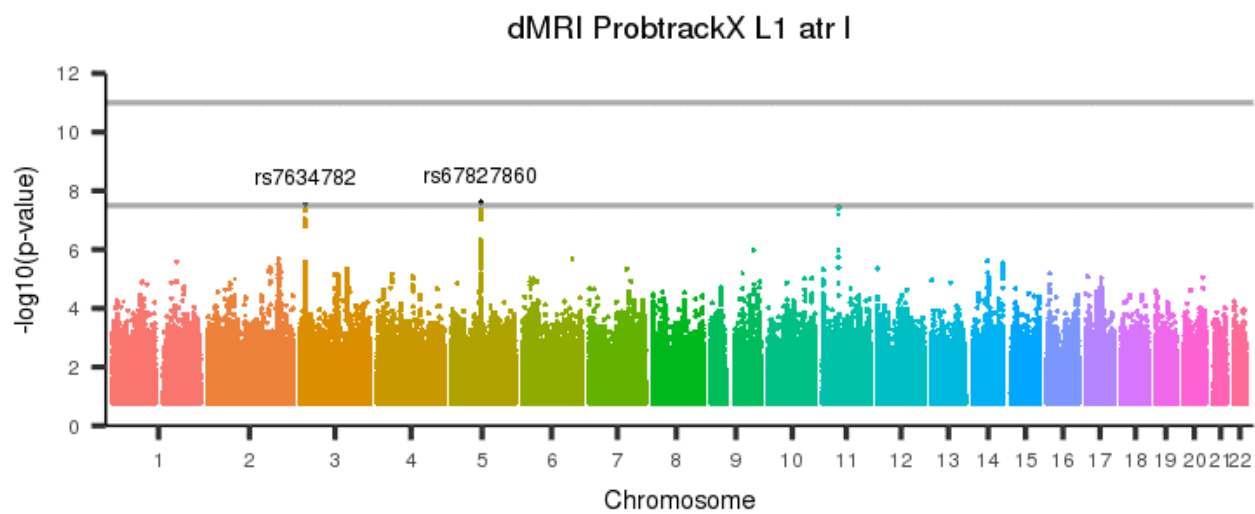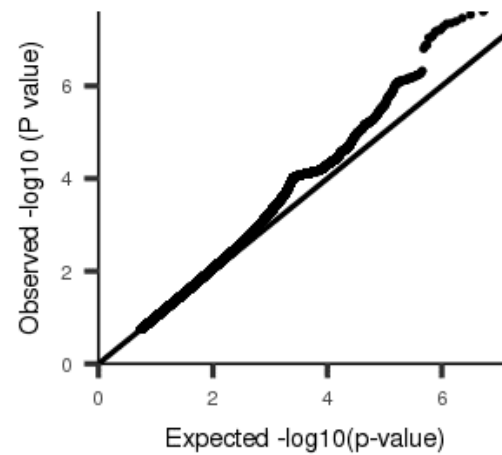

[back to list of plots](#)

Figure 712: dMRI ProbtrackX L1 atr r

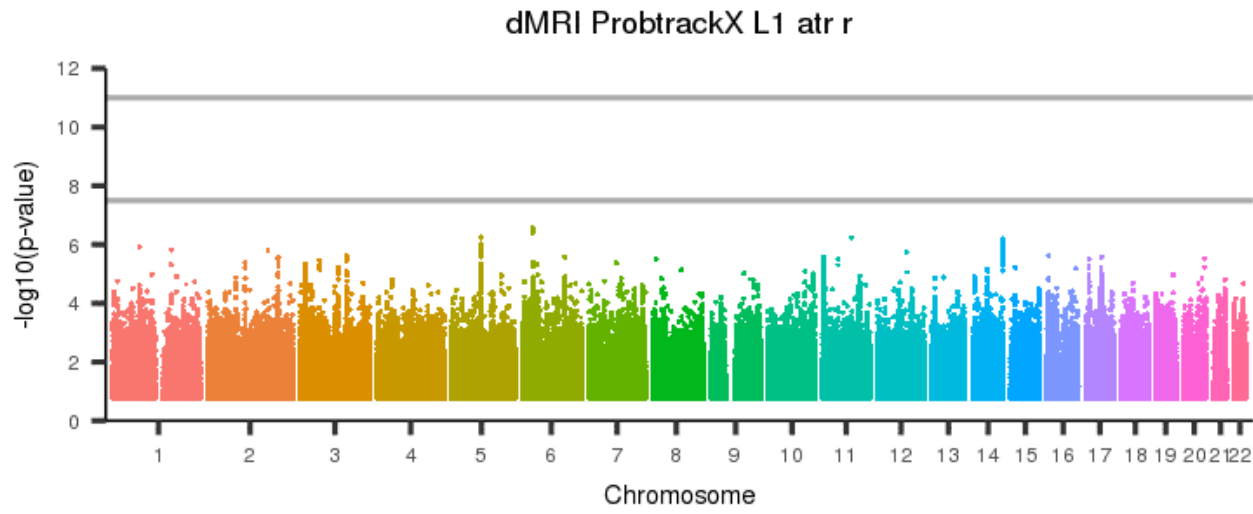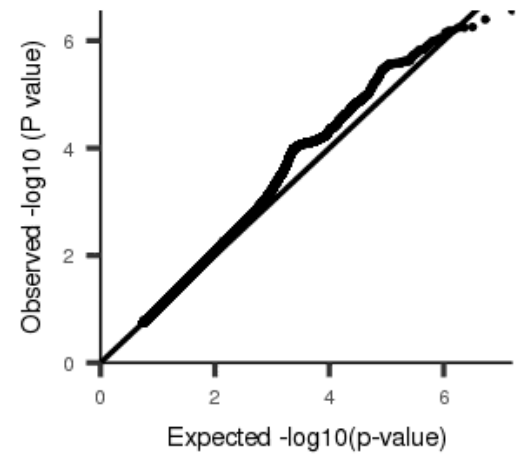

[back to list of plots](#)

Figure 713: dMRI ProbtrackX L1 cgc I

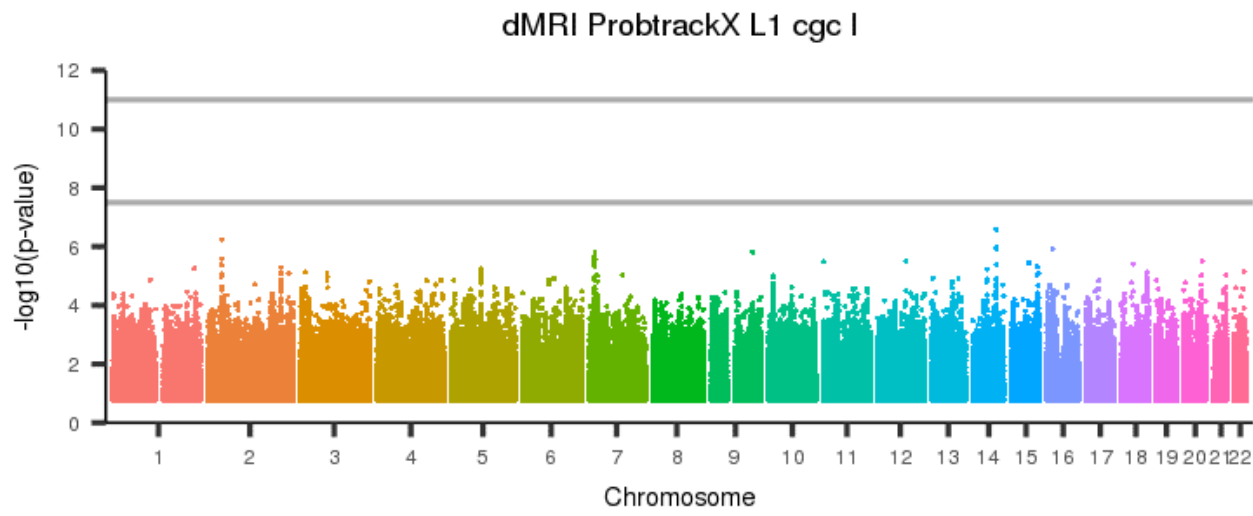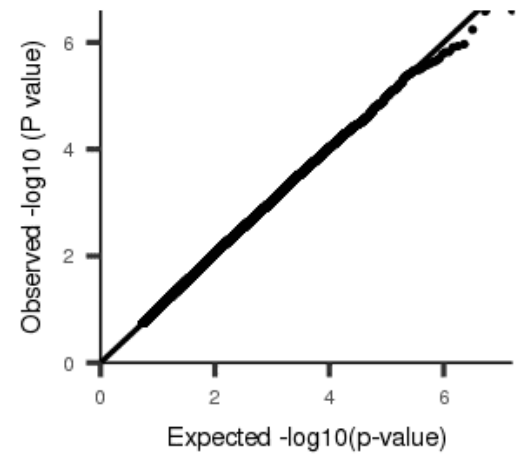

[back to list of plots](#)

Figure 714: dMRI ProbtrackX L1 cgc r

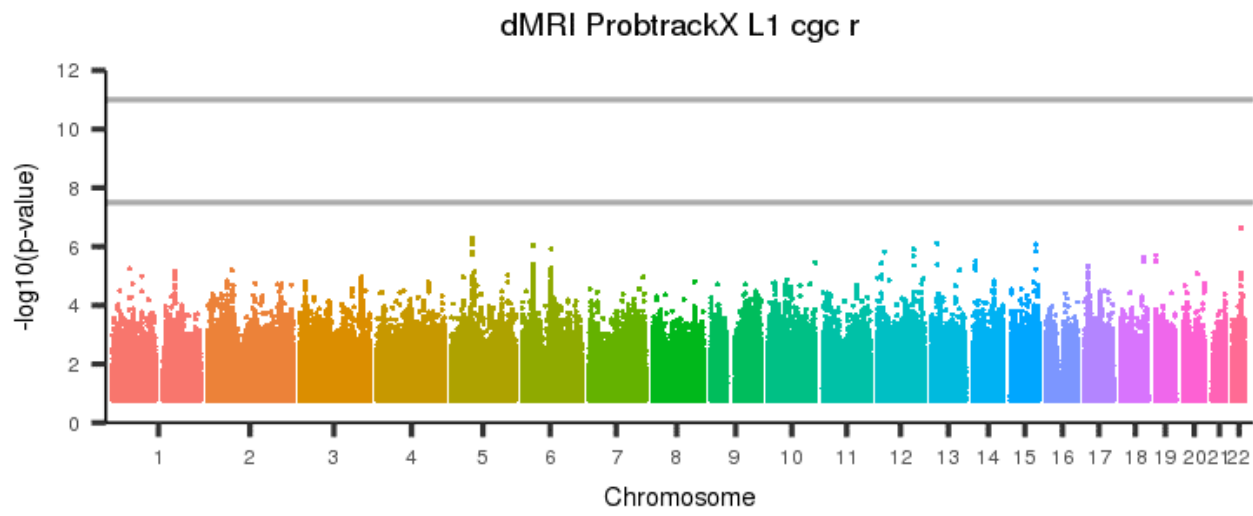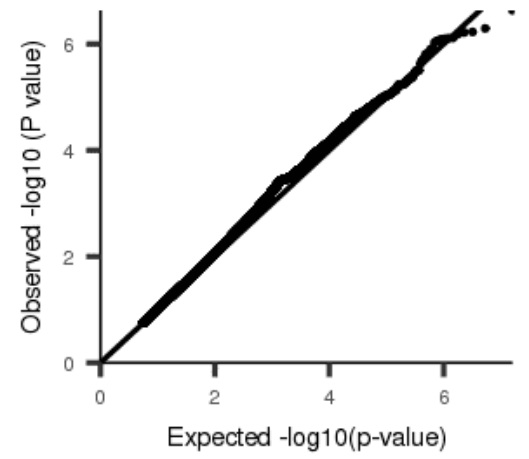

[back to list of plots](#)

Figure 715: dMRI ProbtrackX L1 cgh I

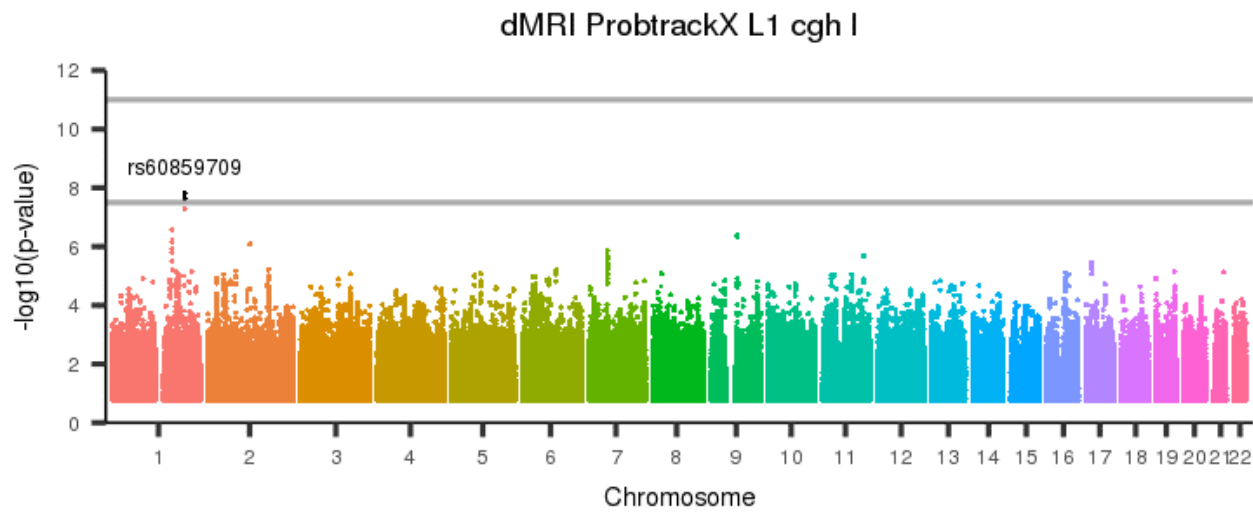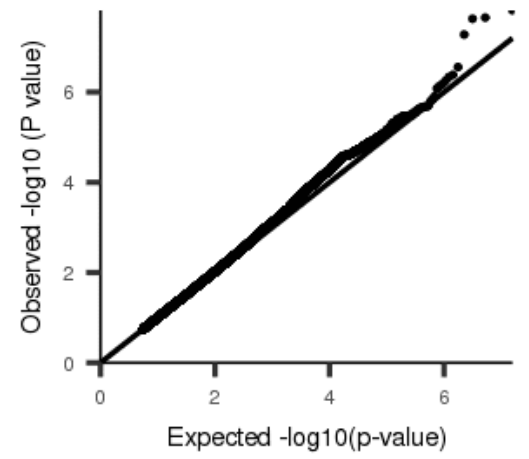

[back to list of plots](#)

Figure 716: dMRI ProbtrackX L1 cgh r

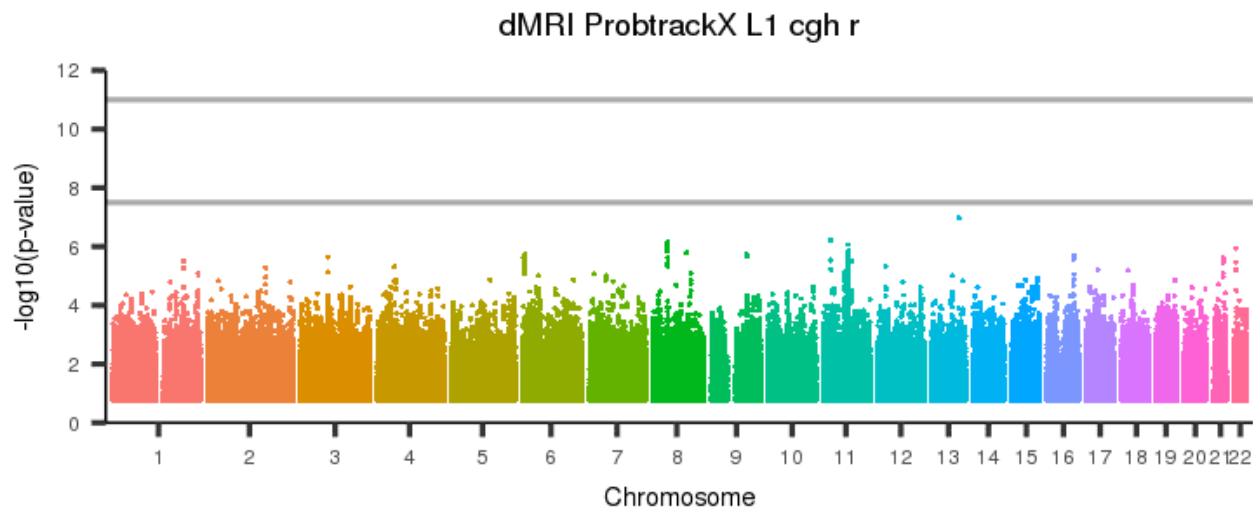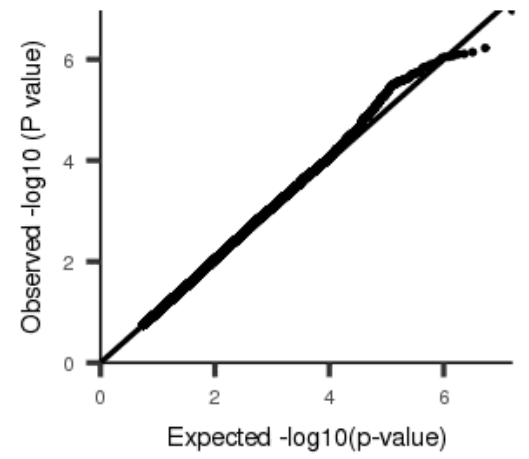

[back to list of plots](#)

Figure 717: dMRI ProbtrackX L1 cst I

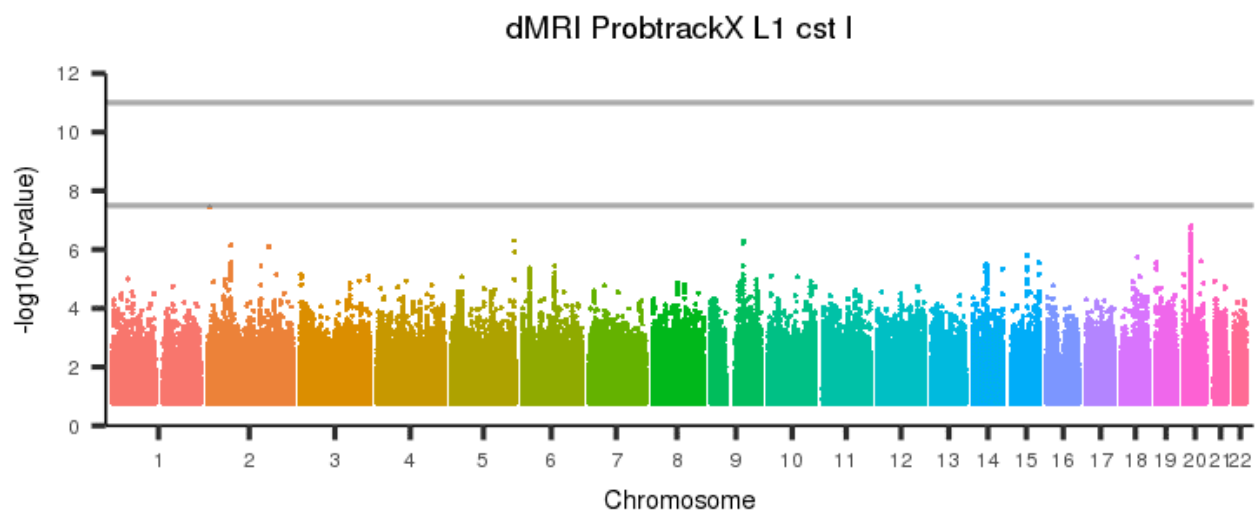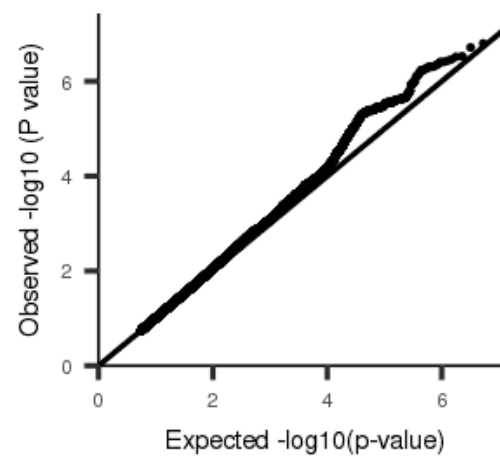

[back to list of plots](#)



Figure 718: dMRI ProbtrackX L1 cst r

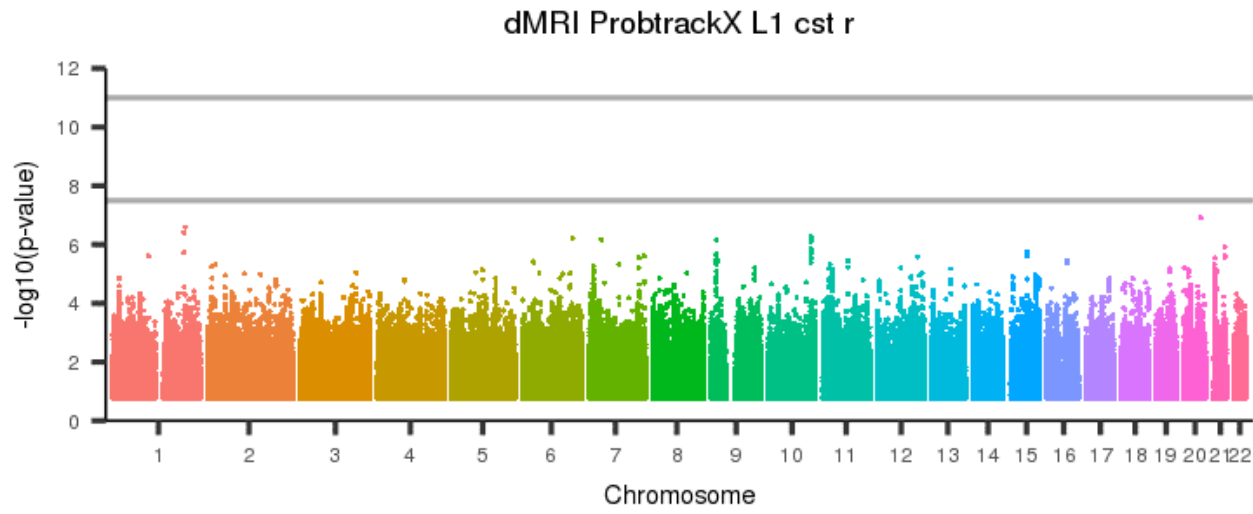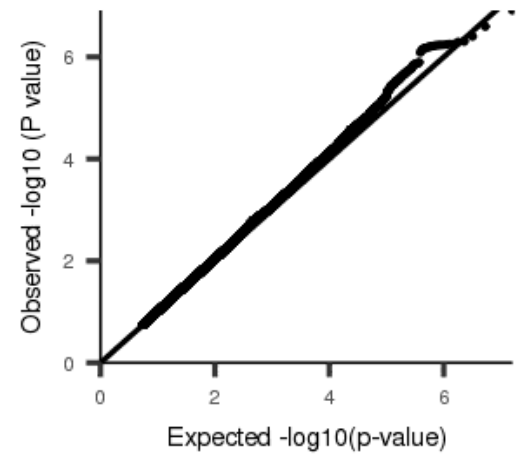

[back to list of plots](#)

Figure 719: dMRI ProbtrackX L1 fma

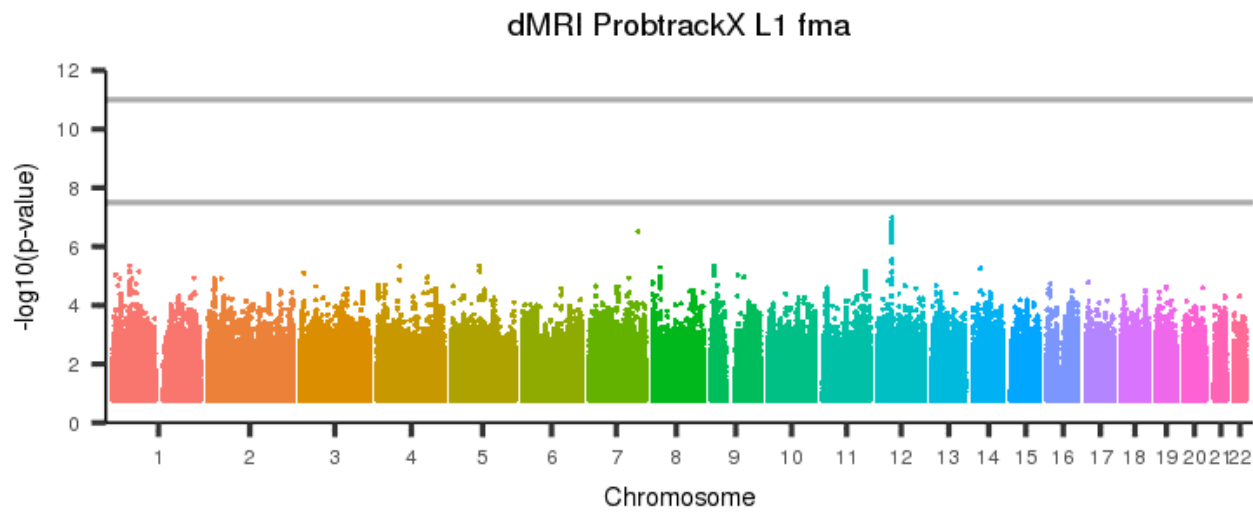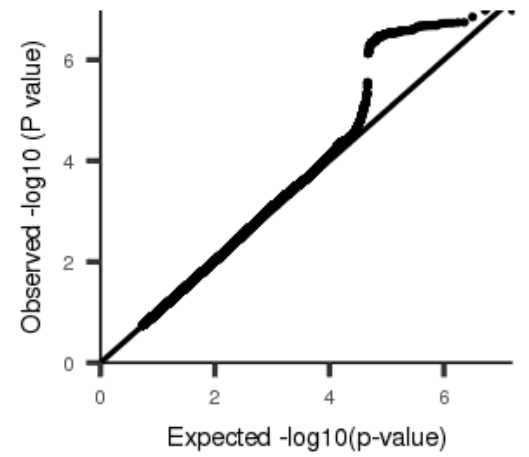

[back to list of plots](#)

Figure 720: dMRI ProbtrackX L1 fmi

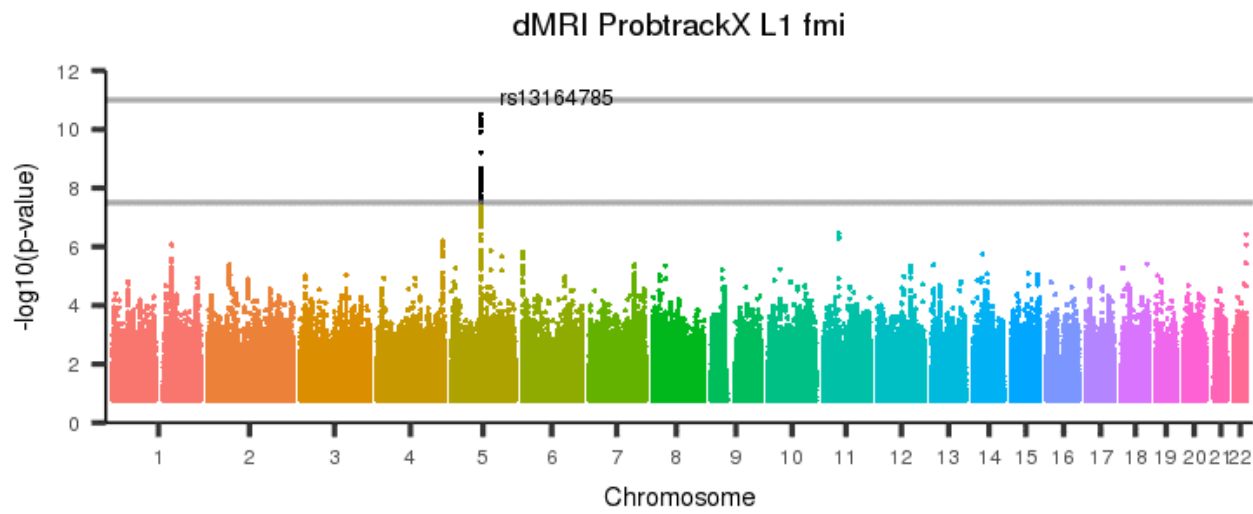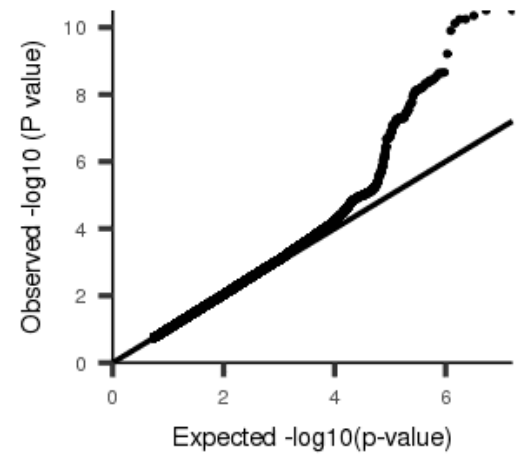

[back to list of plots](#)

Figure 721: dMRI ProbtrackX L1 ifo I

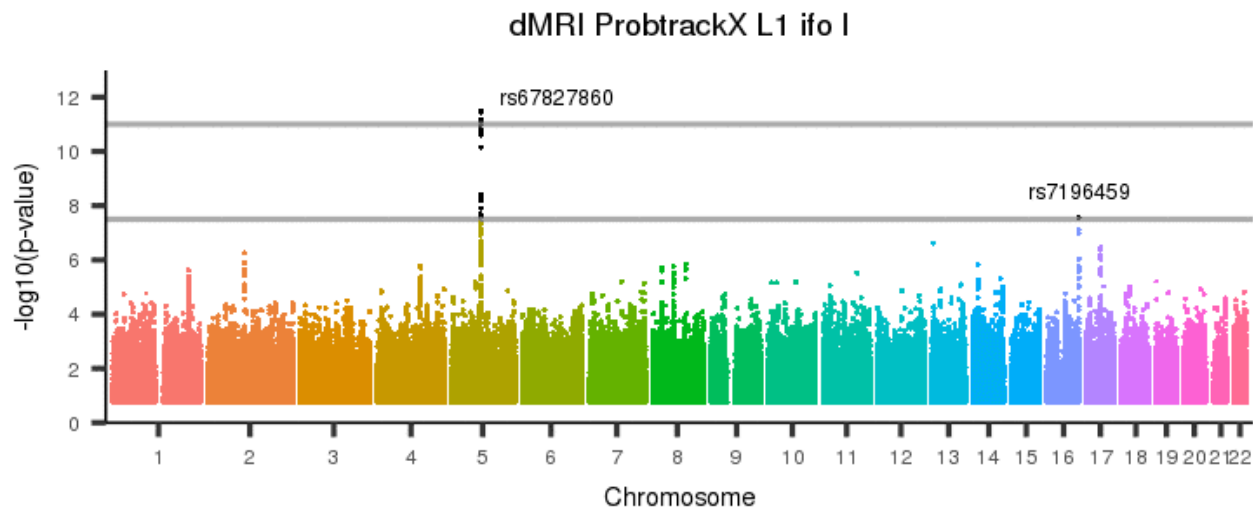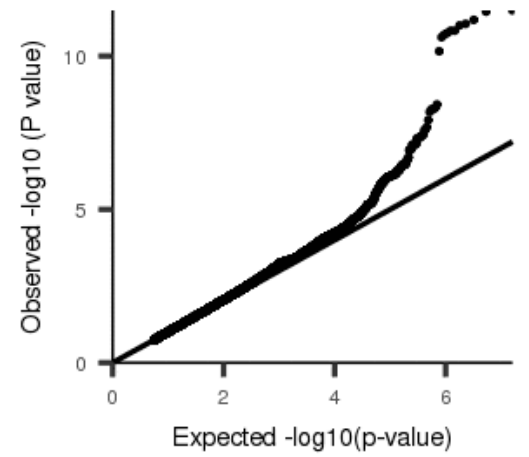

[back to list of plots](#)

Figure 722: dMRI ProbtrackX L1 ifo r

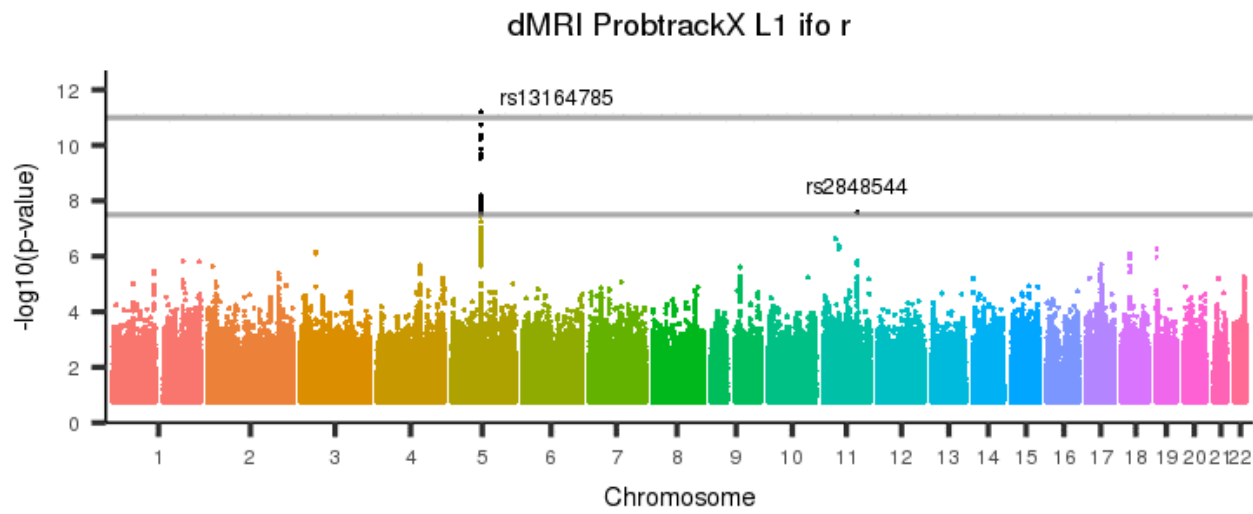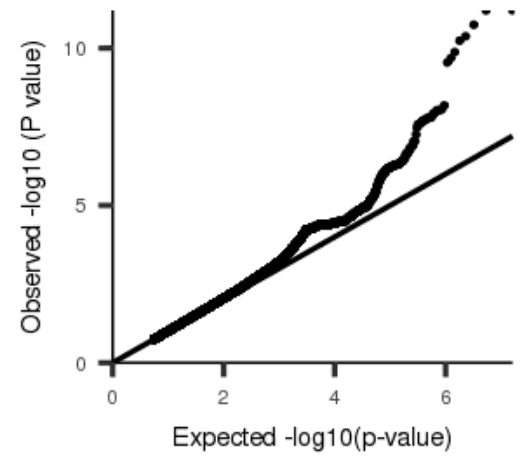

[back to list of plots](#)

Figure 723: dMRI ProbtrackX L1 ilf I

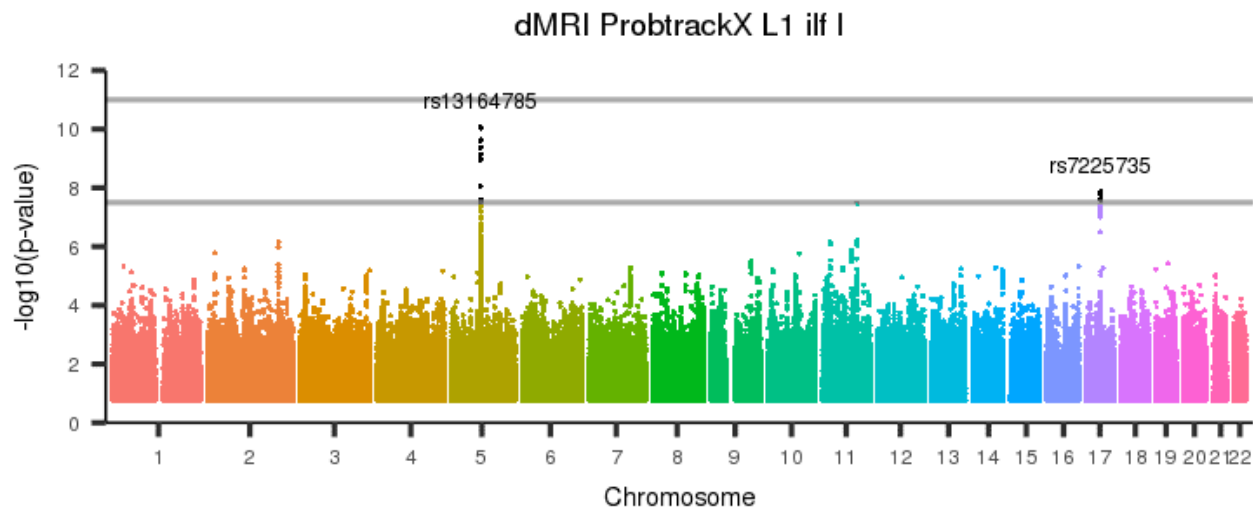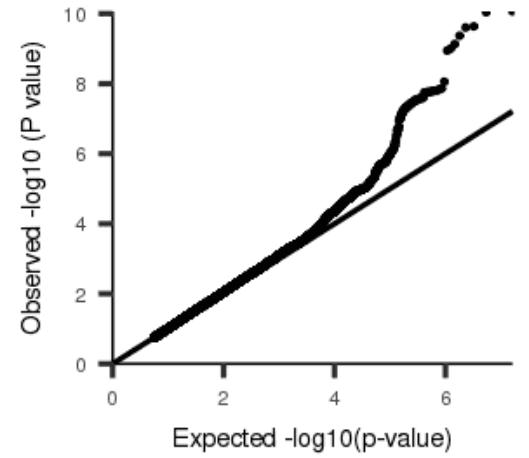

[back to list of plots](#)

Figure 724: dMRI ProbtrackX L1 ilf r

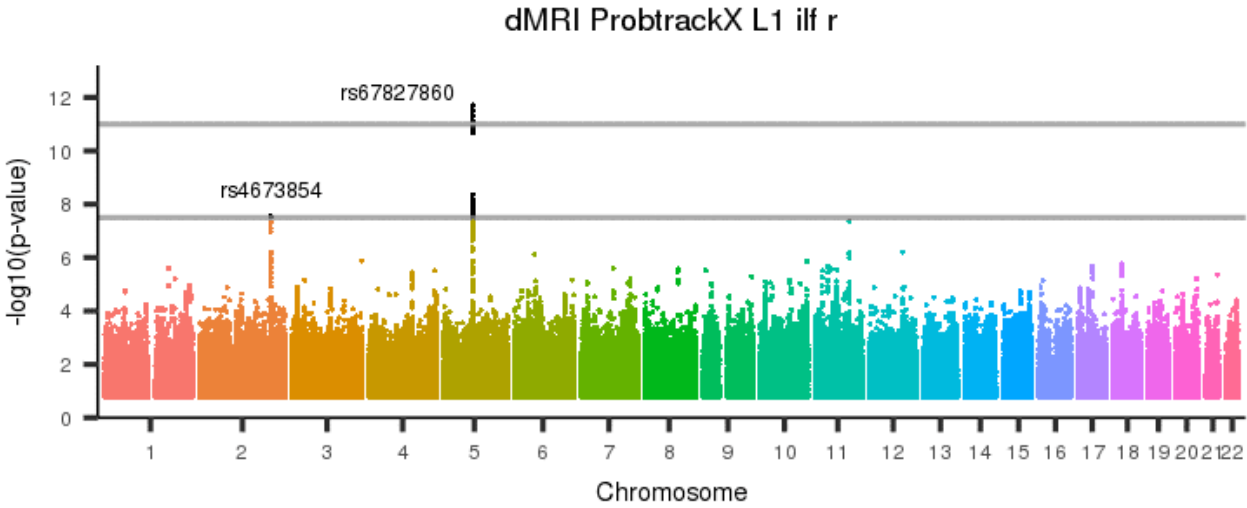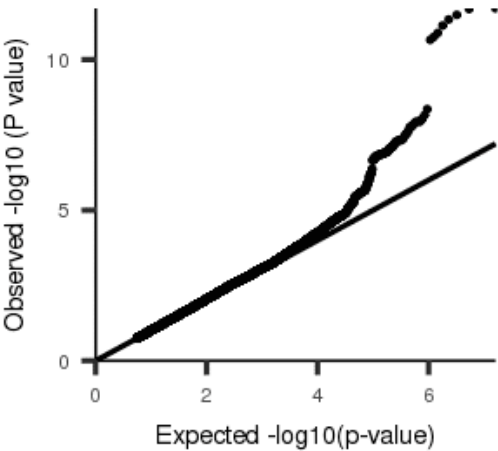

[back to list of plots](#)

Figure 725: dMRI ProbtrackX L1 mcp

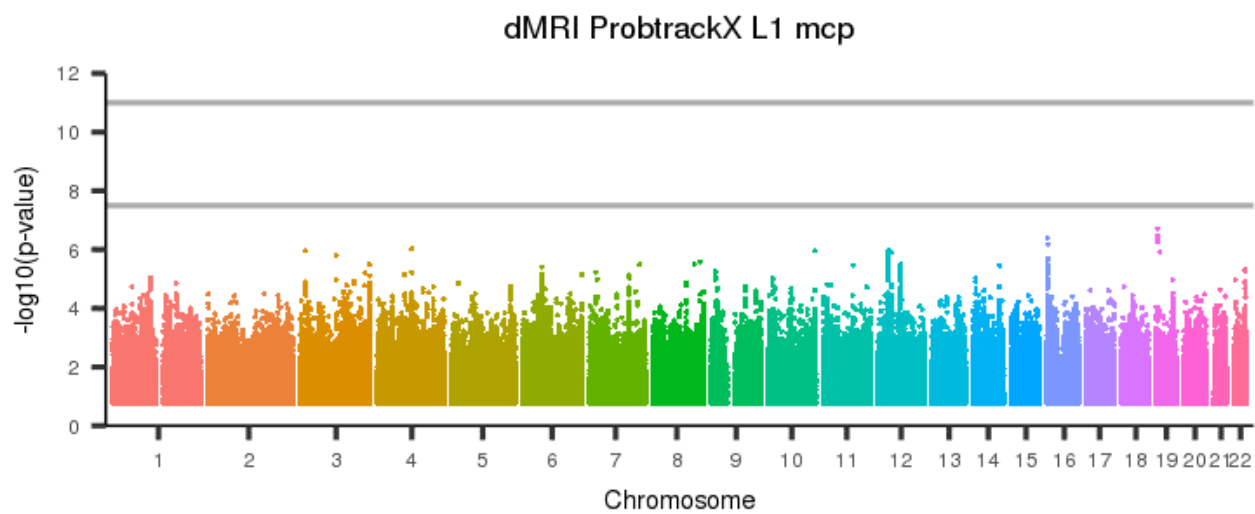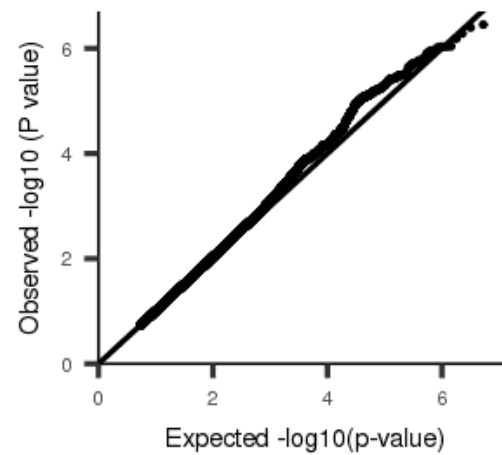

[back to list of plots](#)



Figure 726: dMRI ProbtrackX L1 ml I

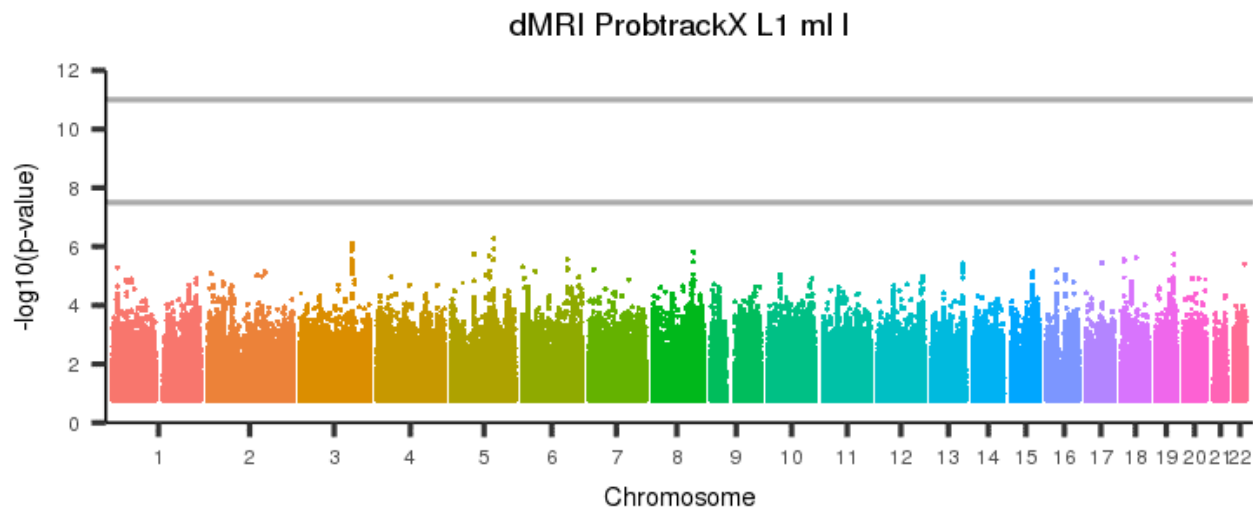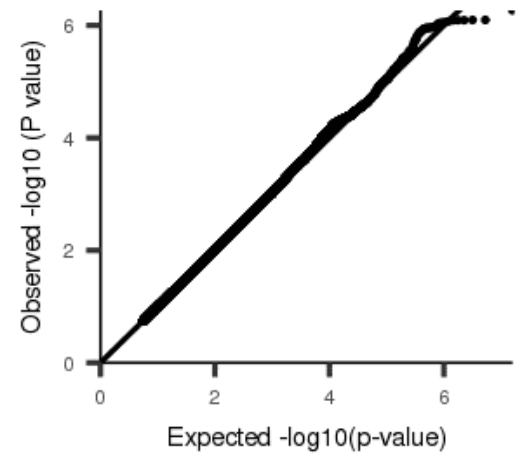

[back to list of plots](#)

Figure 727: dMRI ProbtrackX L1 ml r

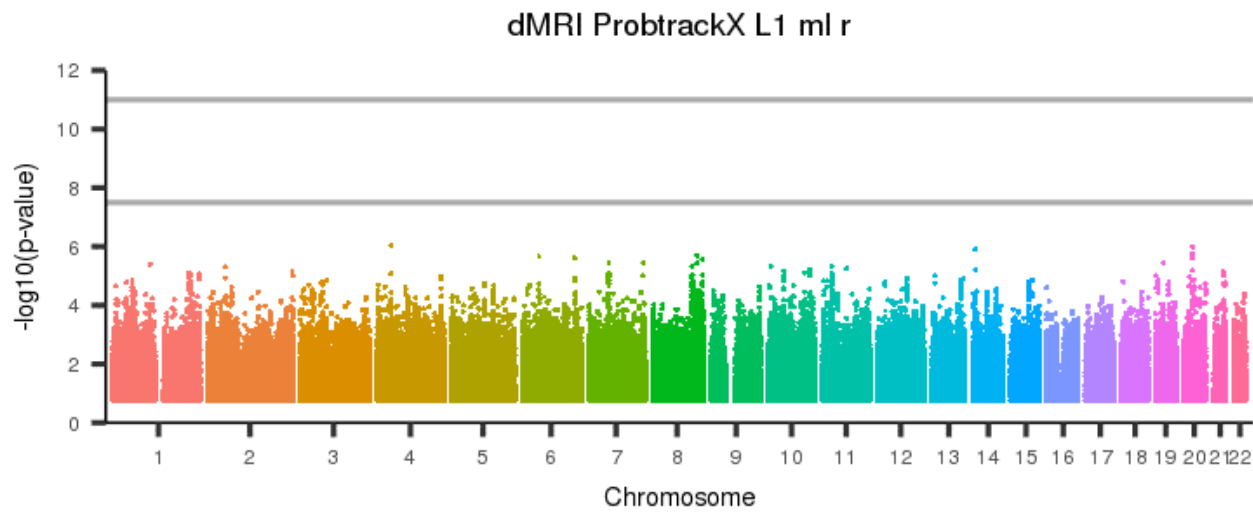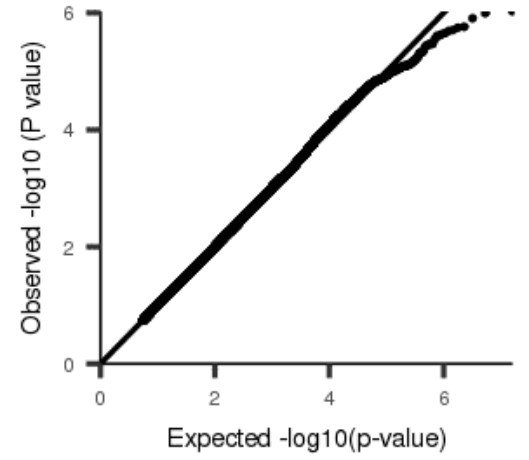

[back to list of plots](#)

Figure 728: dMRI ProbtrackX L1 ptr I

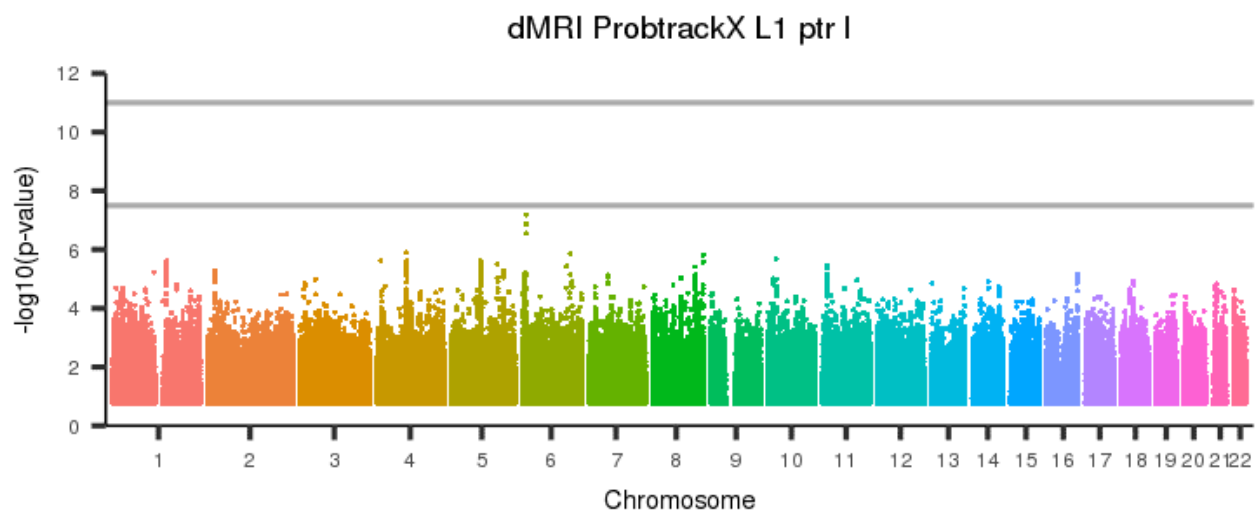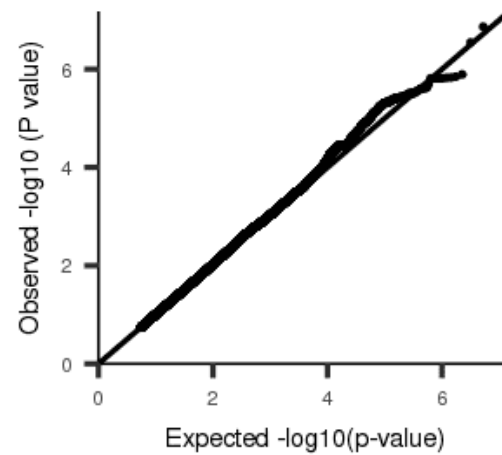

[back to list of plots](#)

Figure 729: dMRI ProbtrackX L1 ptr r

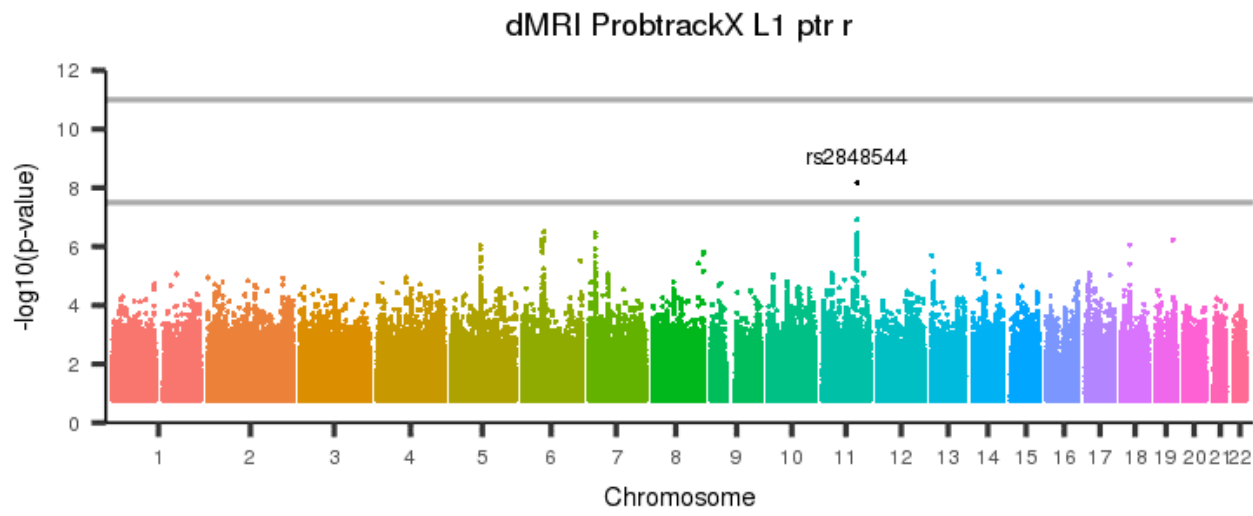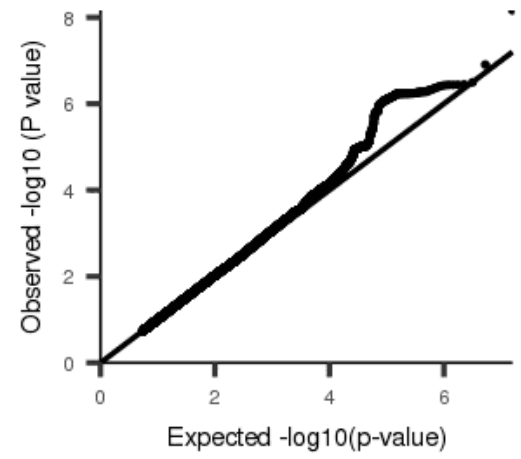

[back to list of plots](#)

Figure 730: dMRI ProbtrackX L1 slf I

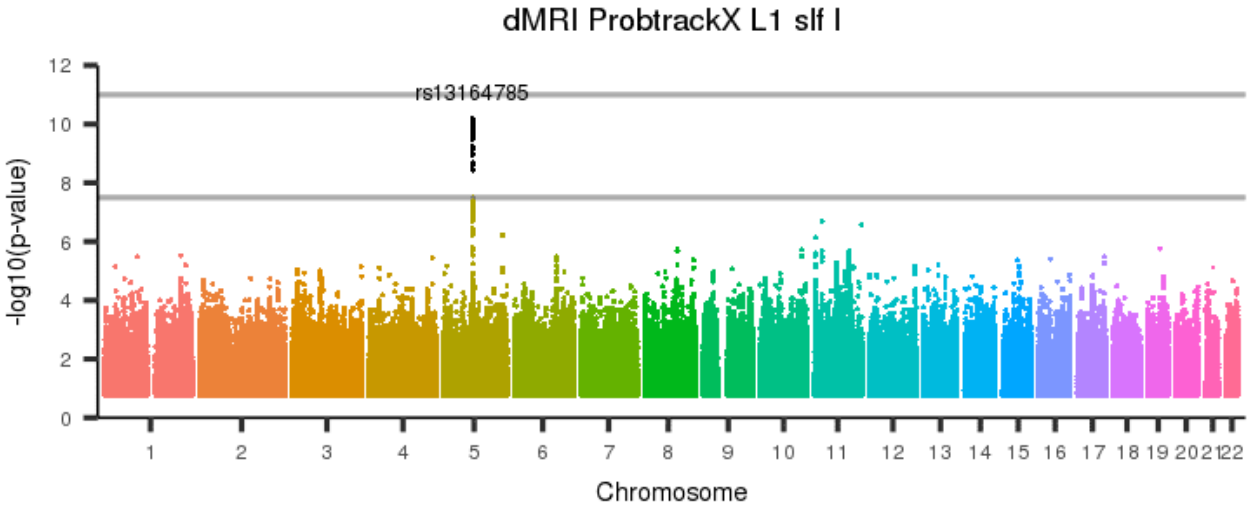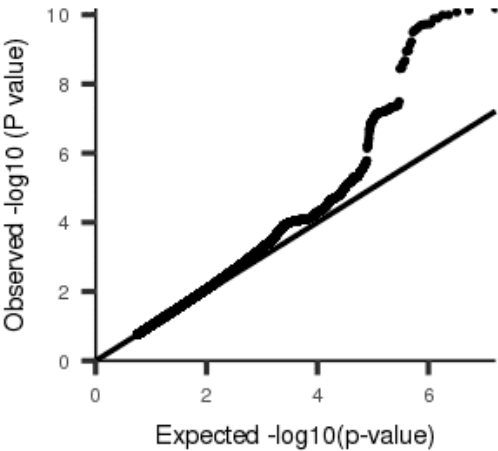

[back to list of plots](#)

Figure 731: dMRI ProbtrackX L1 slf r

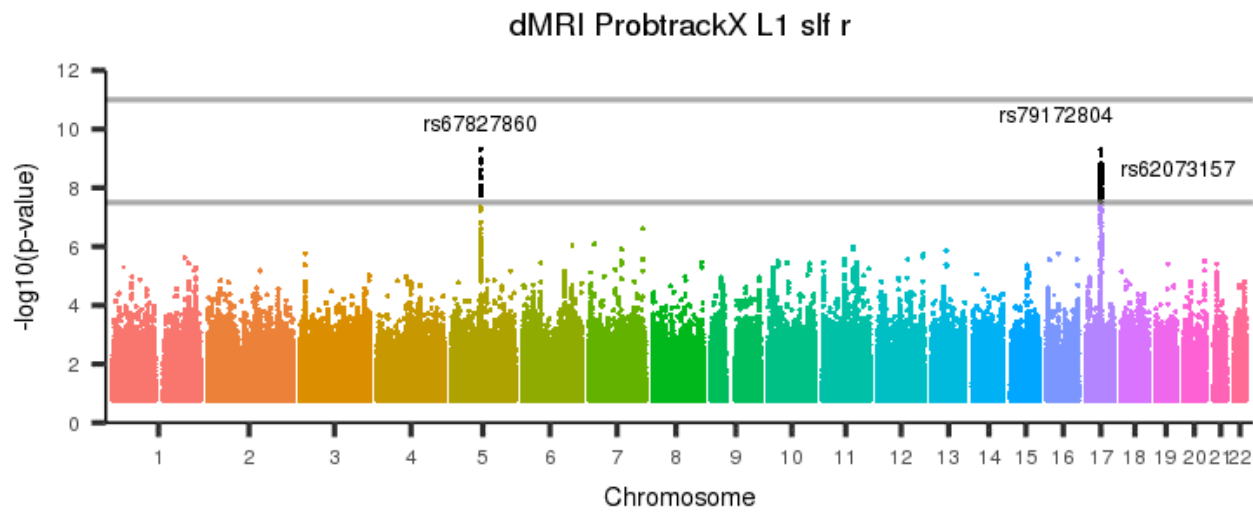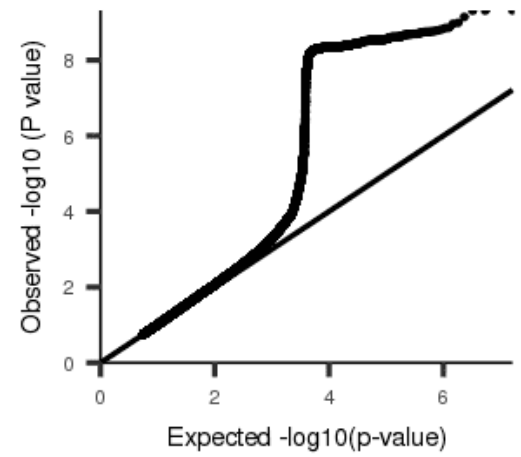

[back to list of plots](#)

Figure 732: dMRI ProbtrackX L1 str I

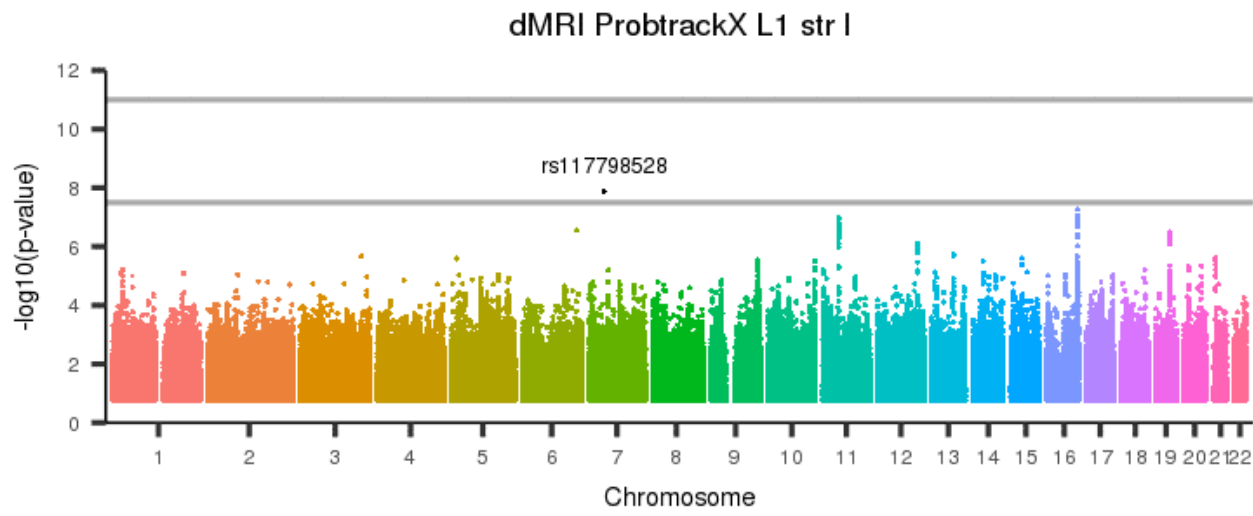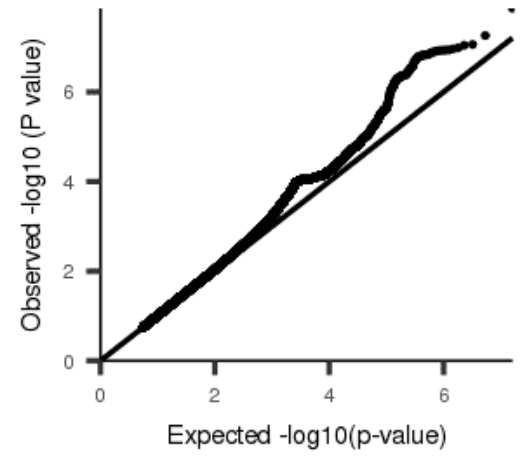

[back to list of plots](#)

Figure 733: dMRI ProbtrackX L1 str r

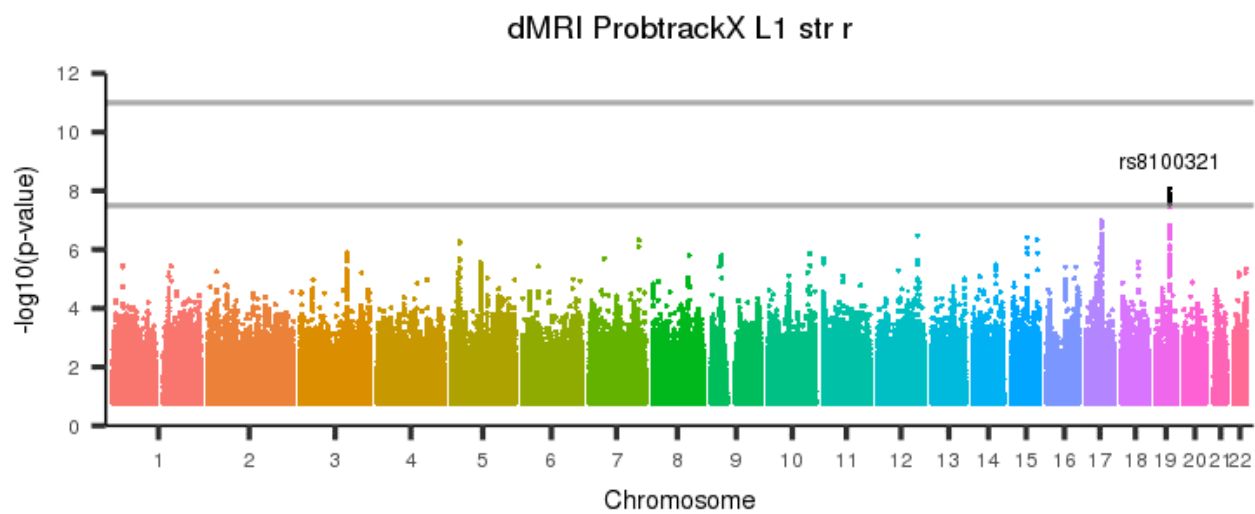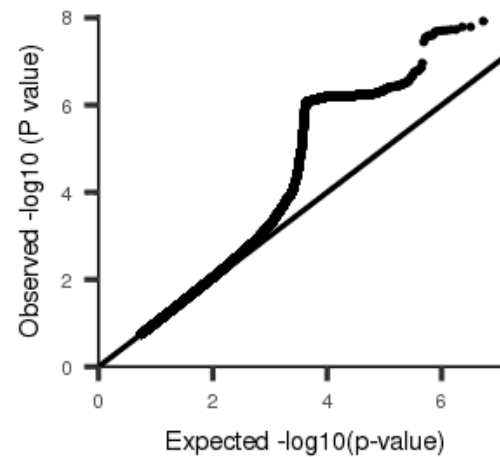

[back to list of plots](#)



Figure 734: dMRI ProbtrackX L1 unc l

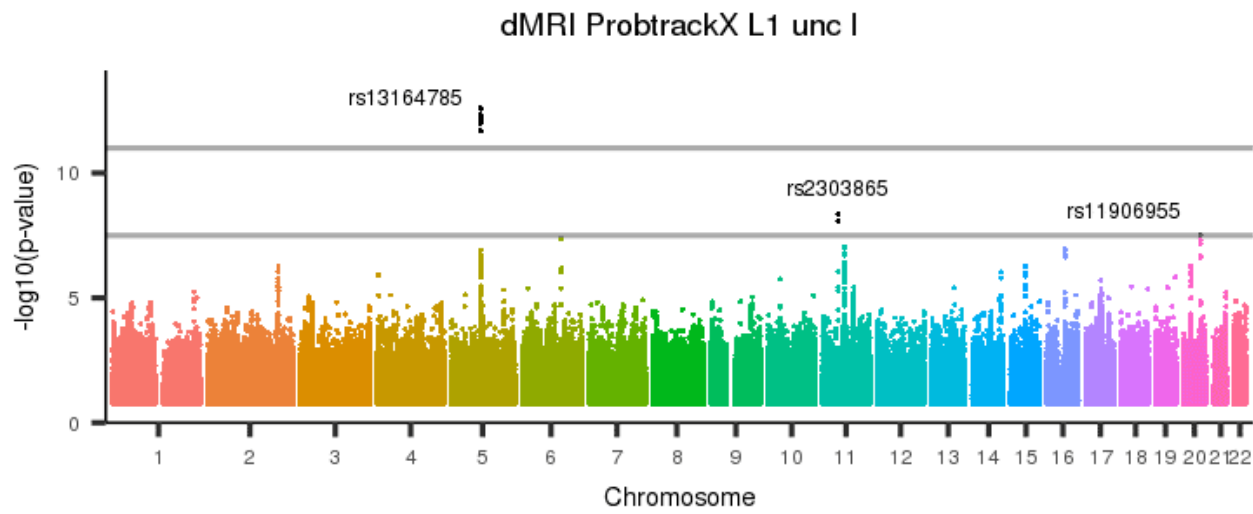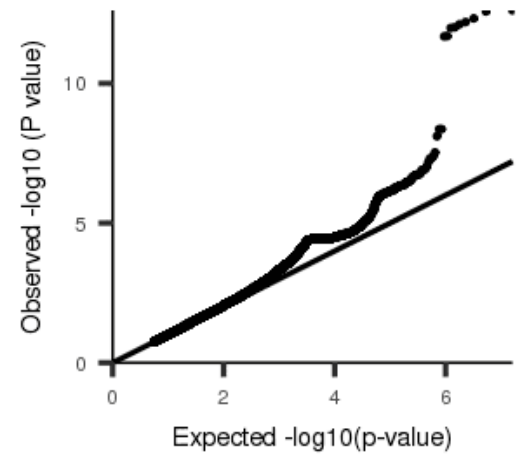

[back to list of plots](#)

Figure 735: dMRI ProbtrackX L1 unc r

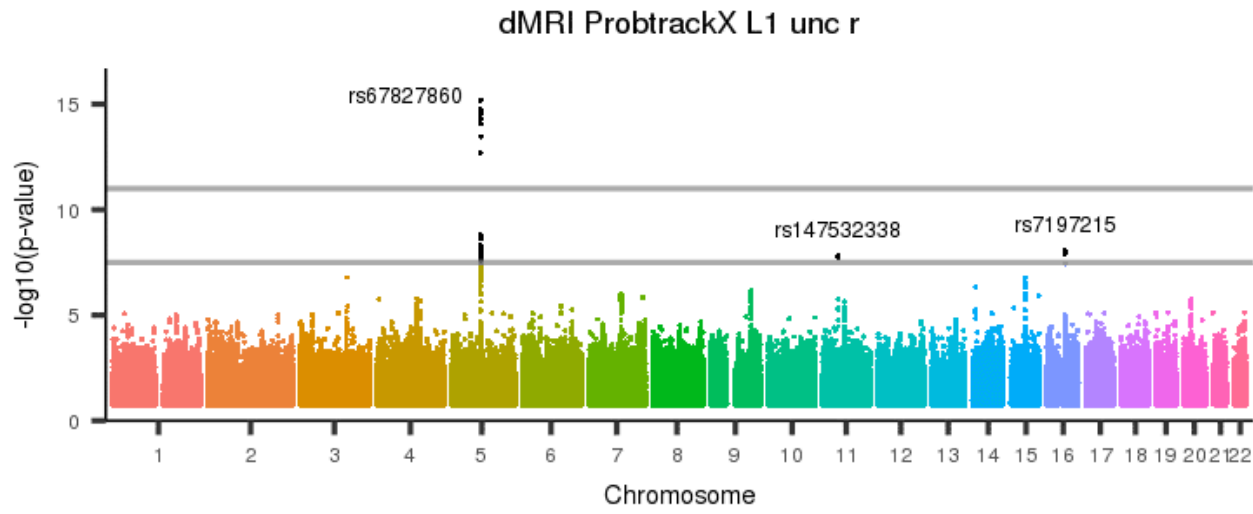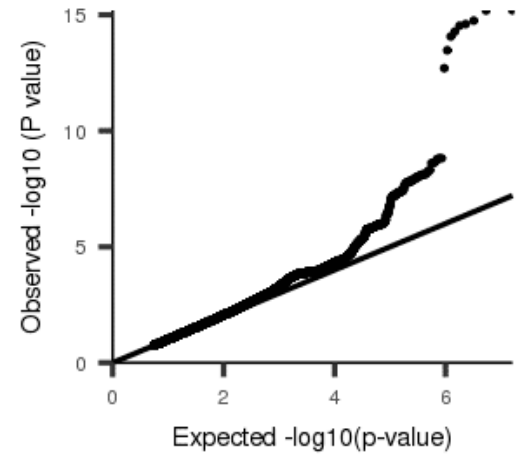

[back to list of plots](#)

Figure 736: dMRI ProbtrackX L2 ar l

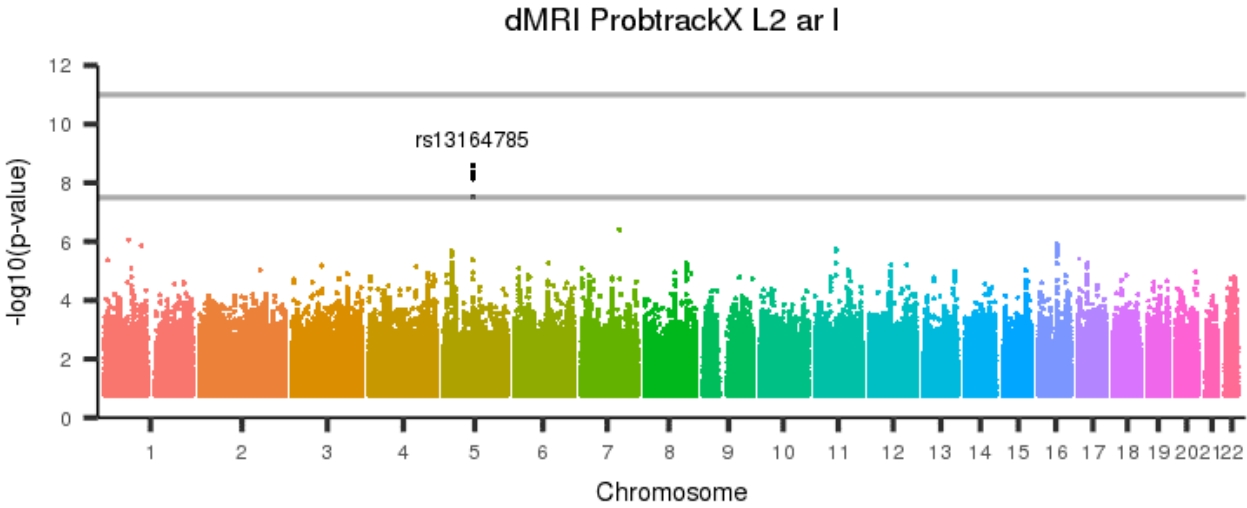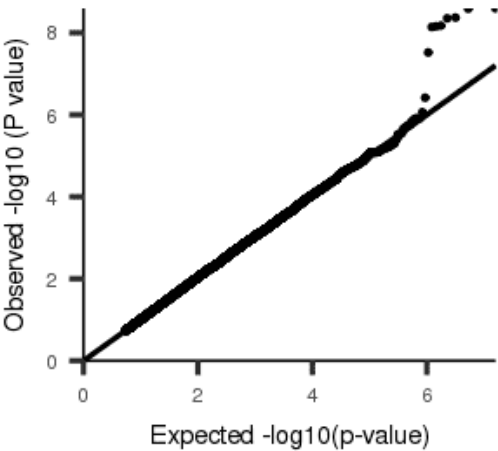

[back to list of plots](#)

Figure 737: dMRI ProbtrackX L2 ar r

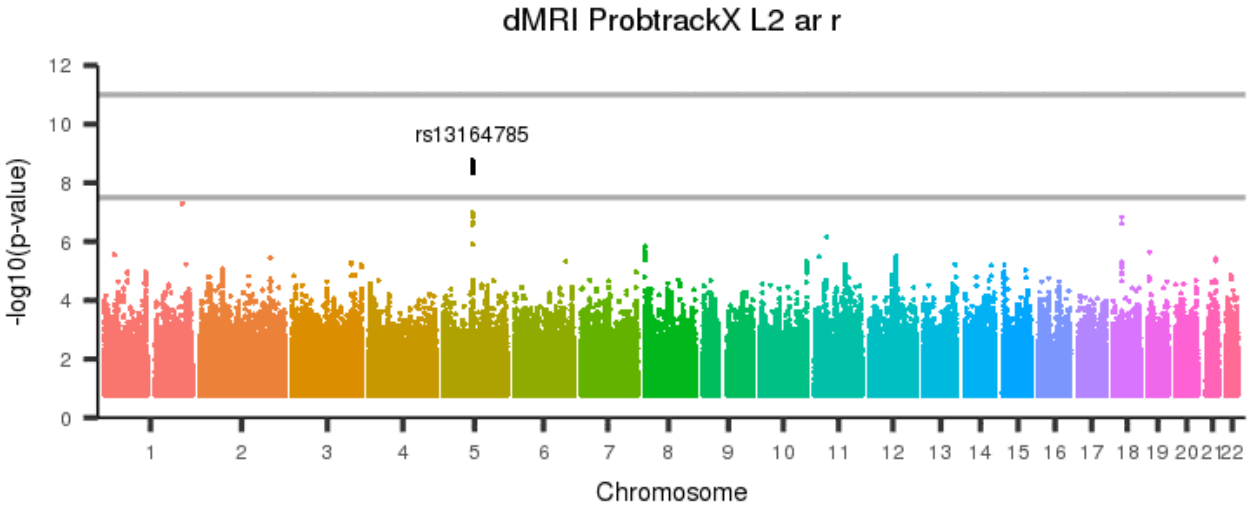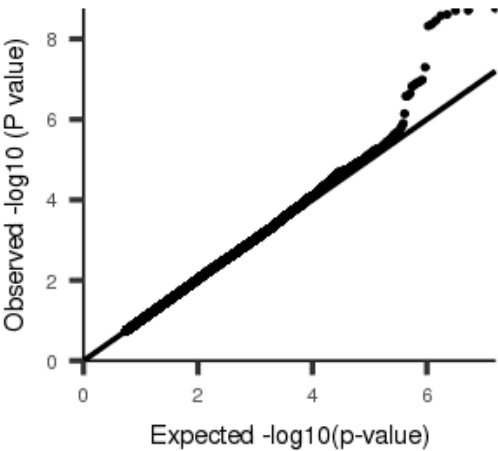

[back to list of plots](#)

Figure 738: dMRI ProbtrackX L2 atr l

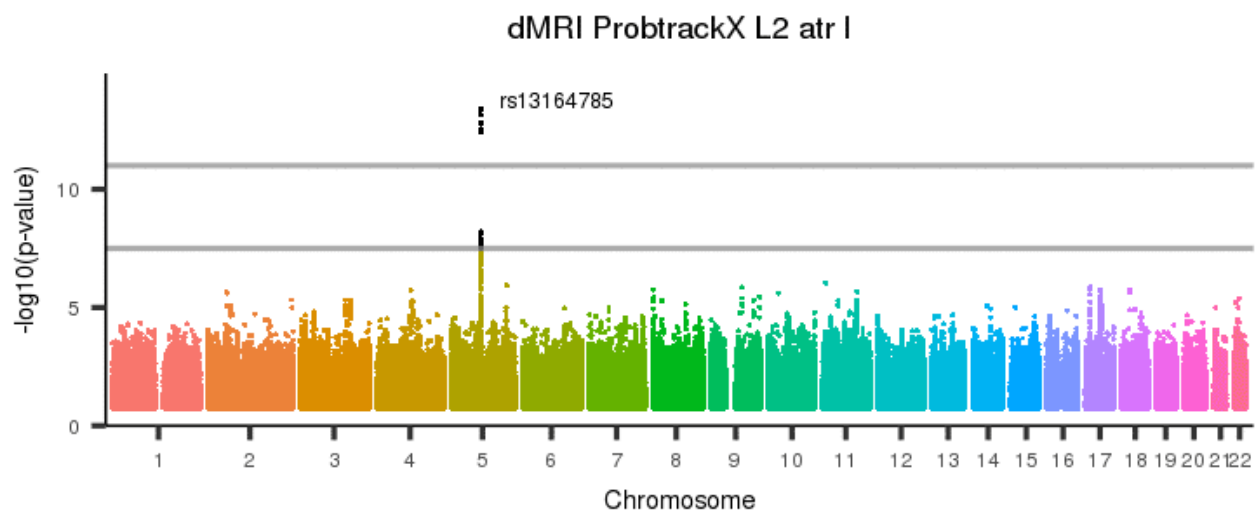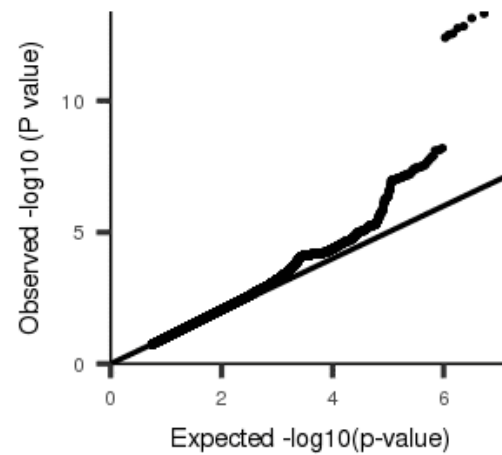

[back to list of plots](#)

Figure 739: dMRI ProbtrackX L2 atr r

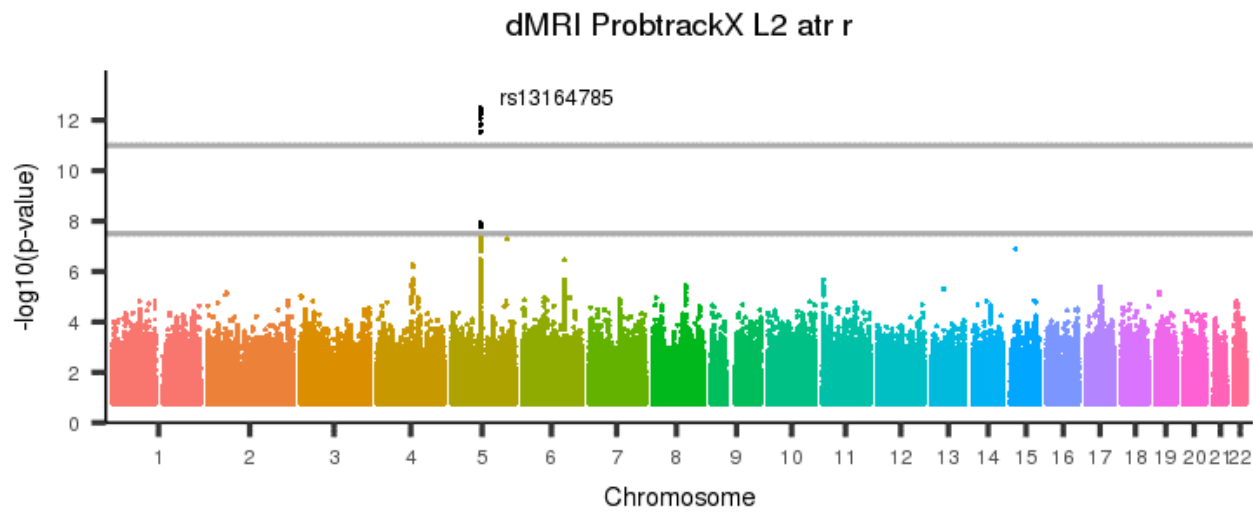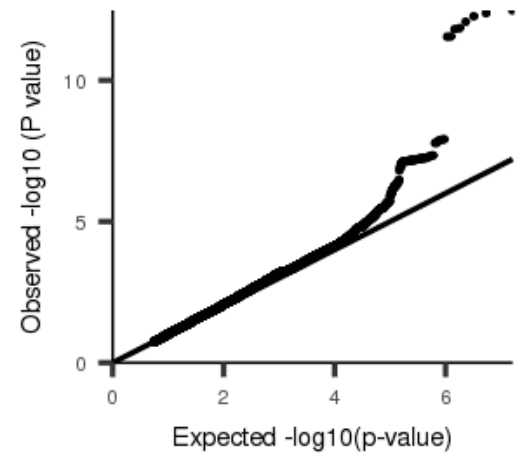

[back to list of plots](#)

Figure 740: dMRI ProbtrackX L2 cgc I

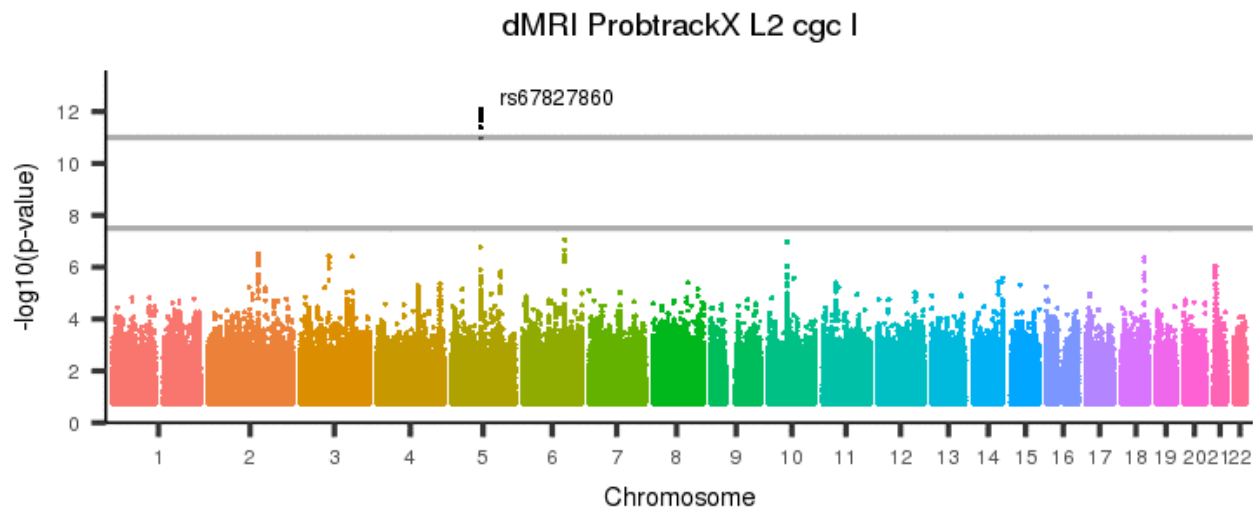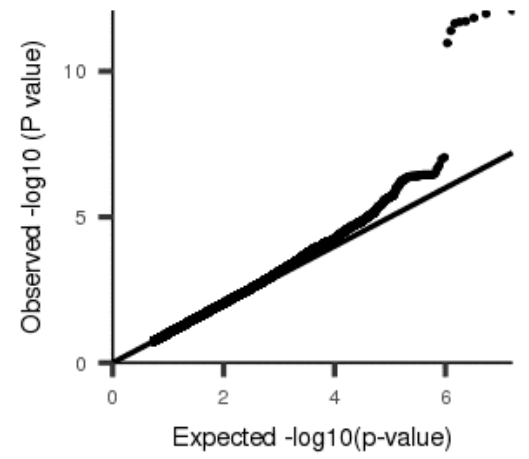

[back to list of plots](#)

Figure 741: dMRI ProbtrackX L2 cgc r

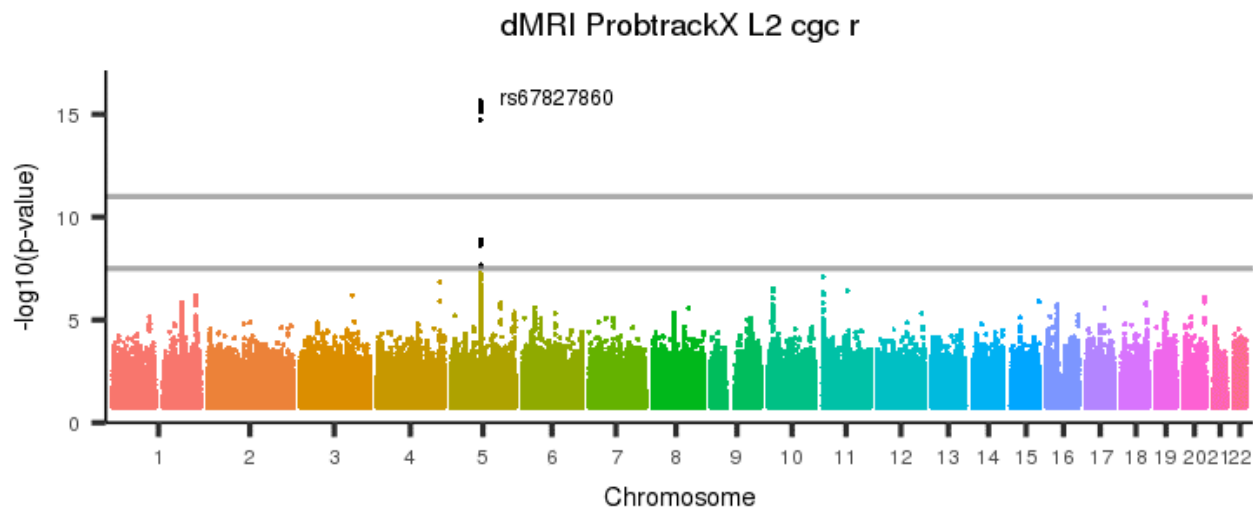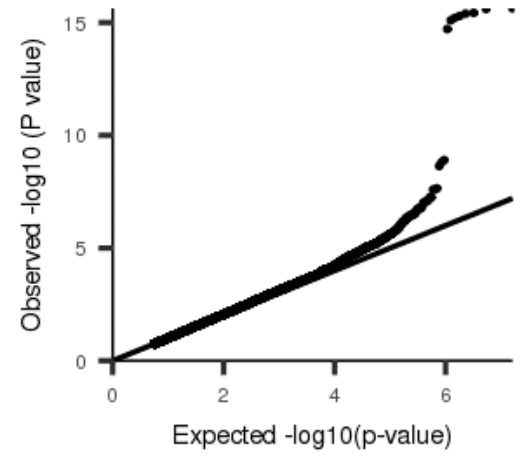

[back to list of plots](#)



Figure 742: dMRI ProbtrackX L2 cgh I

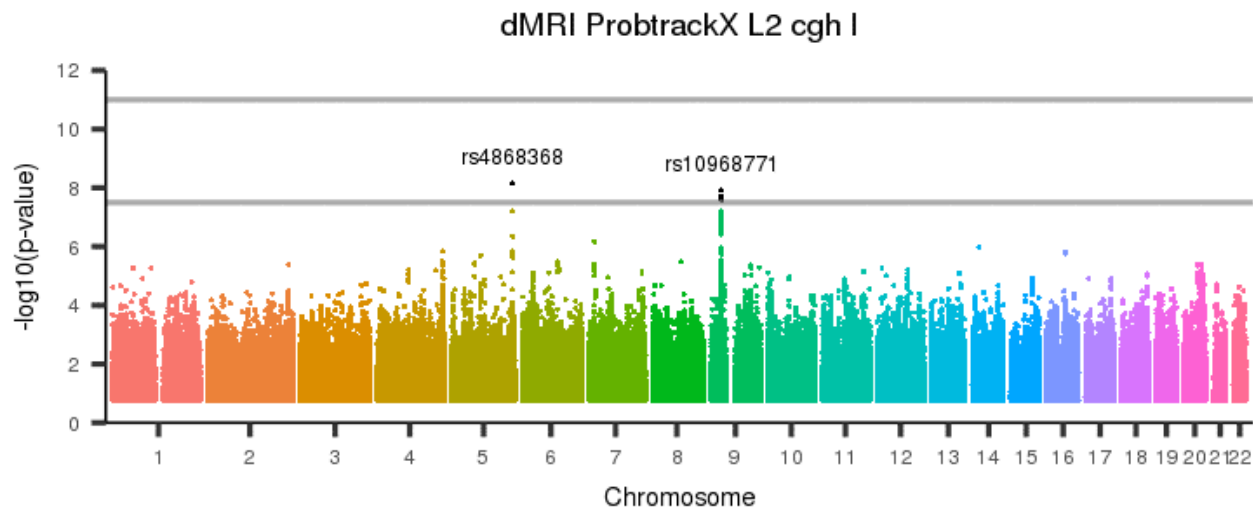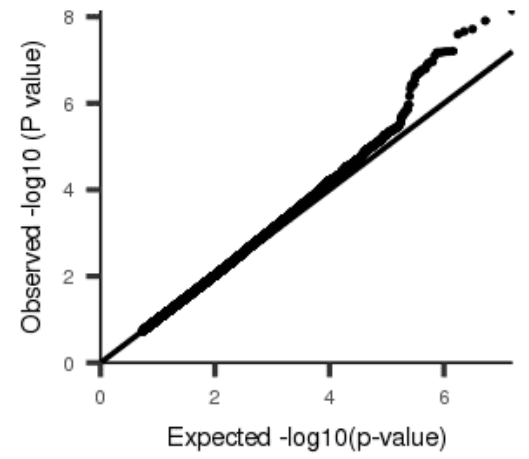

[back to list of plots](#)

Figure 743: dMRI ProbtrackX L2 cgh r

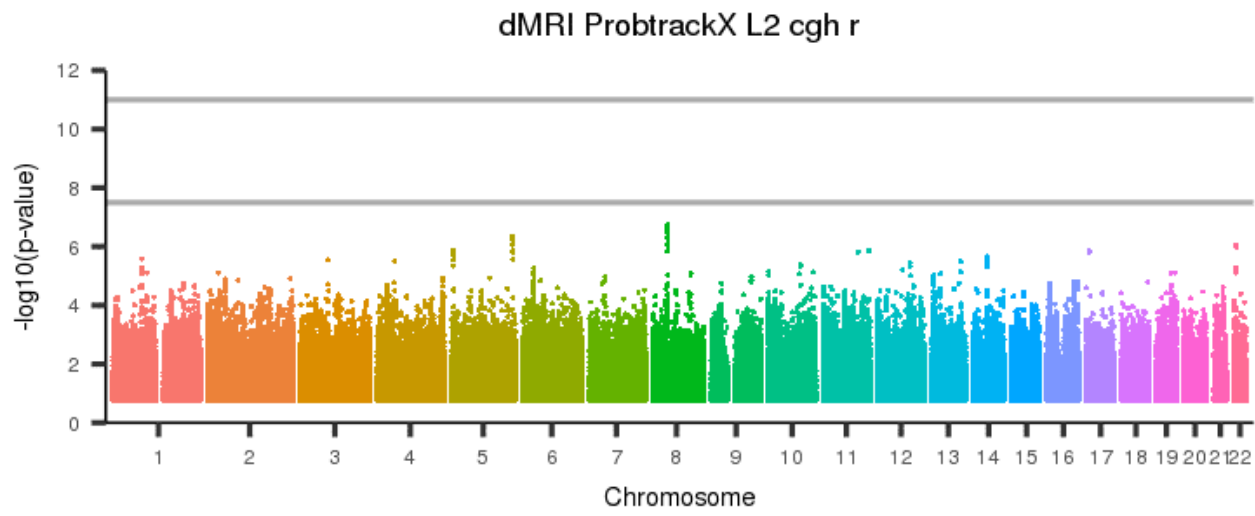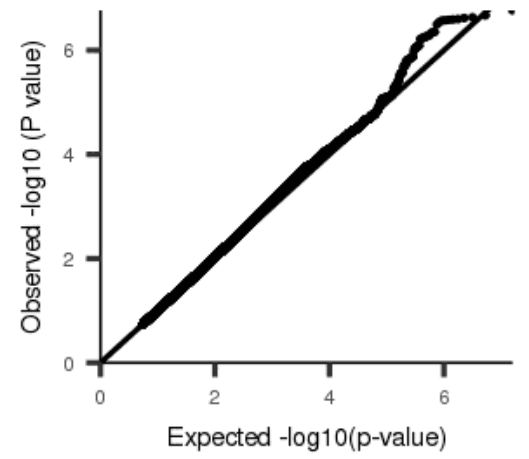

[back to list of plots](#)

Figure 744: dMRI ProbtrackX L2 cst I

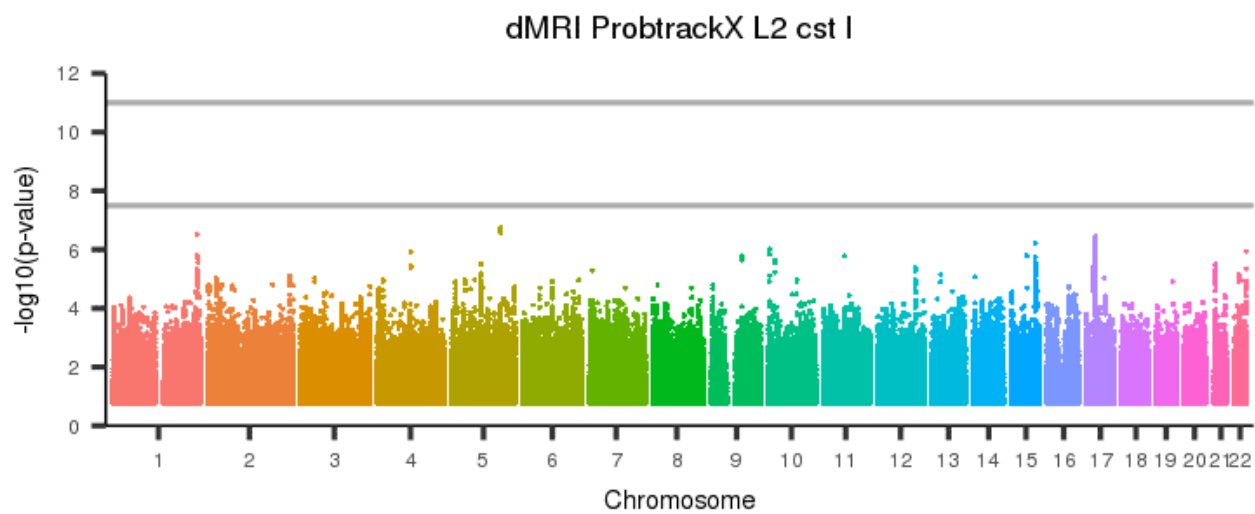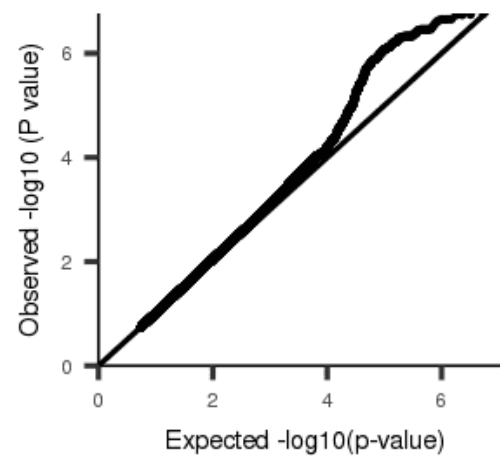

[back to list of plots](#)

Figure 745: dMRI ProbtrackX L2 cst r

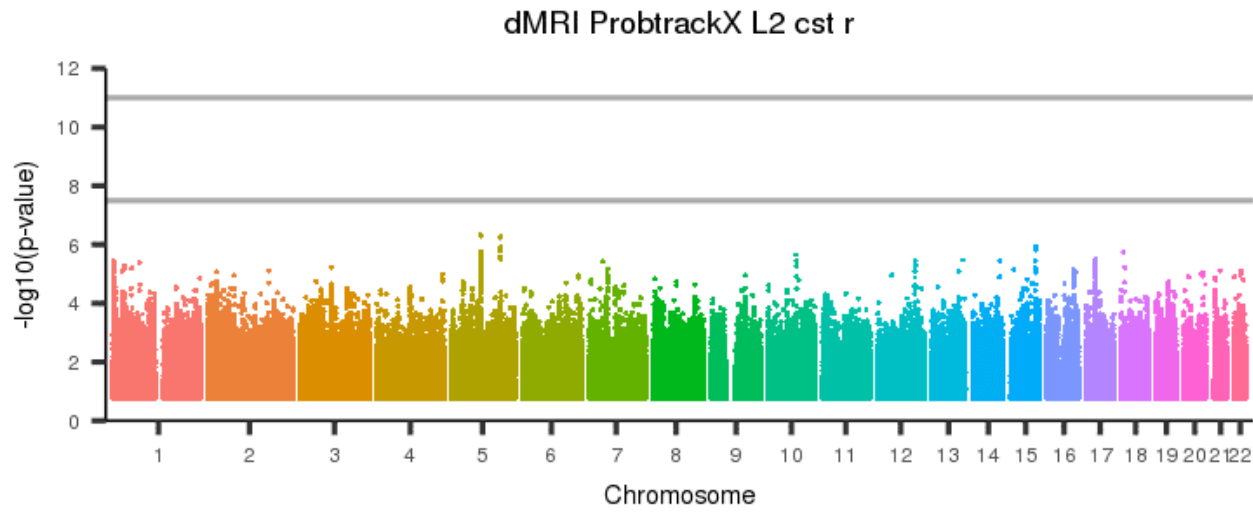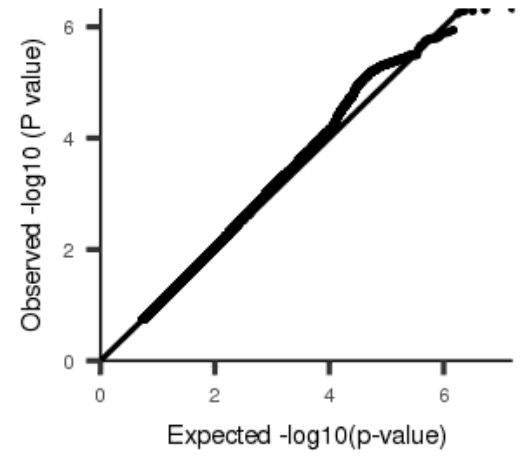

[back to list of plots](#)

Figure 746: dMRI ProbtrackX L2 fma

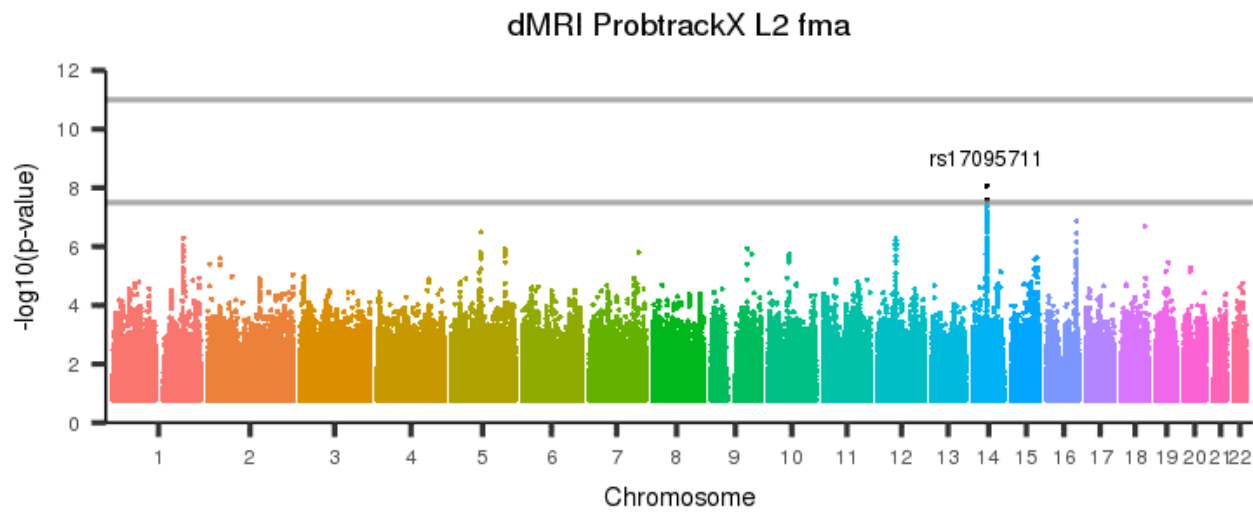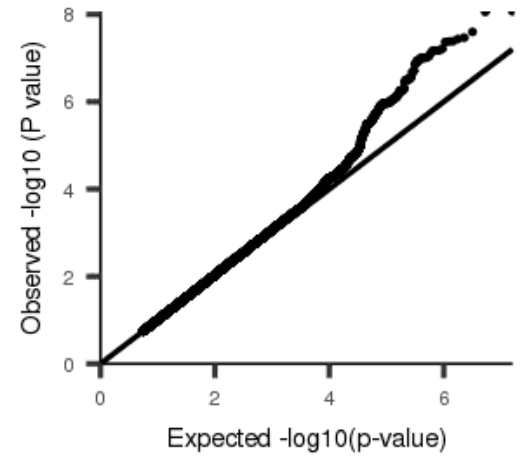

[back to list of plots](#)

Figure 747: dMRI ProbtrackX L2 fmi

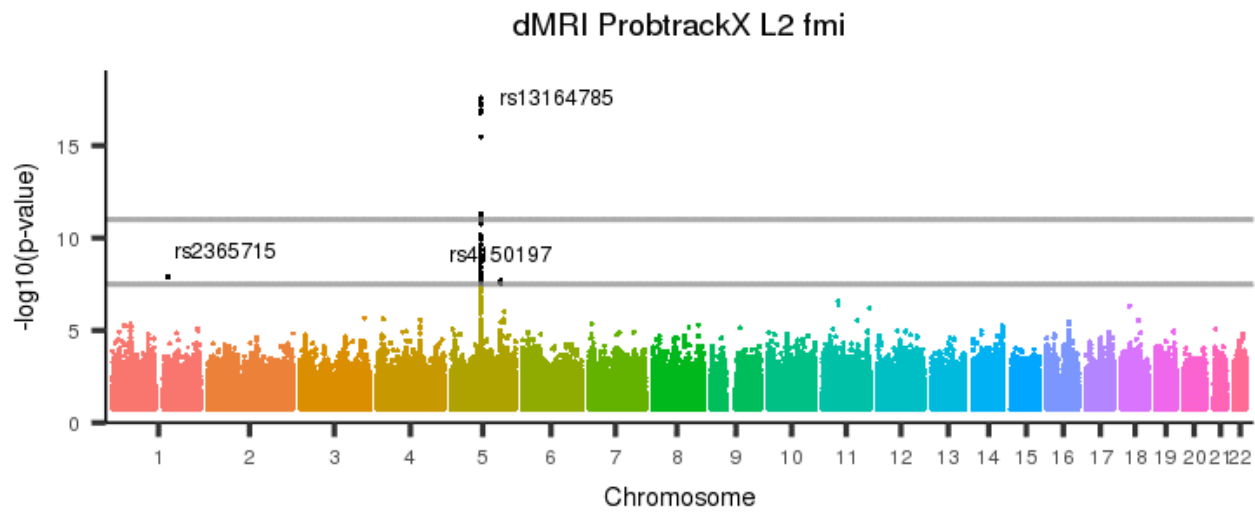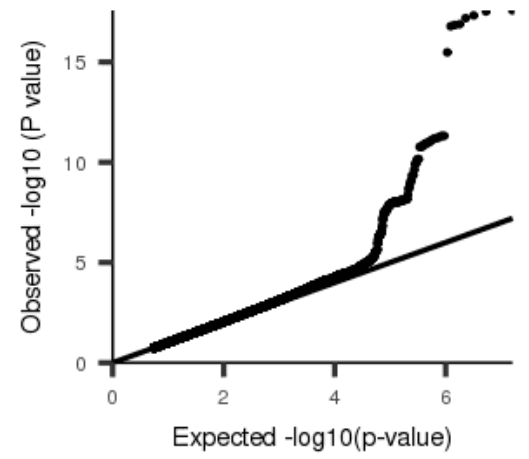

[back to list of plots](#)

Figure 748: dMRI ProbtrackX L2 ifo I

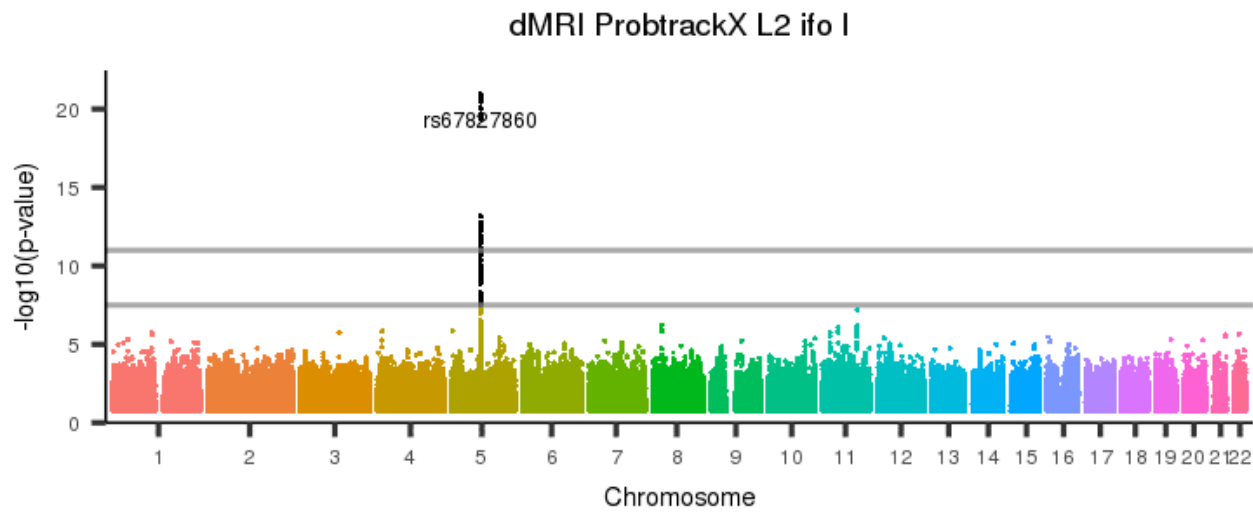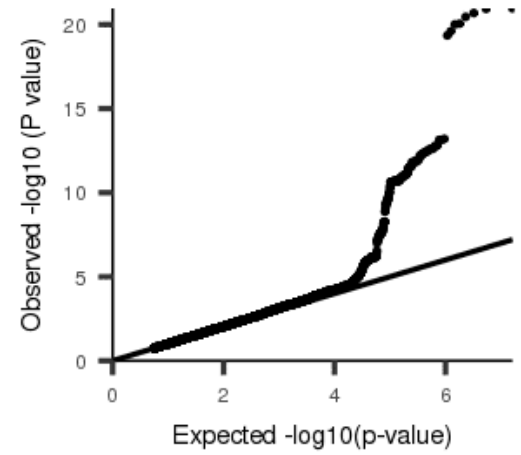

[back to list of plots](#)

Figure 749: dMRI ProbtrackX L2 ifo r

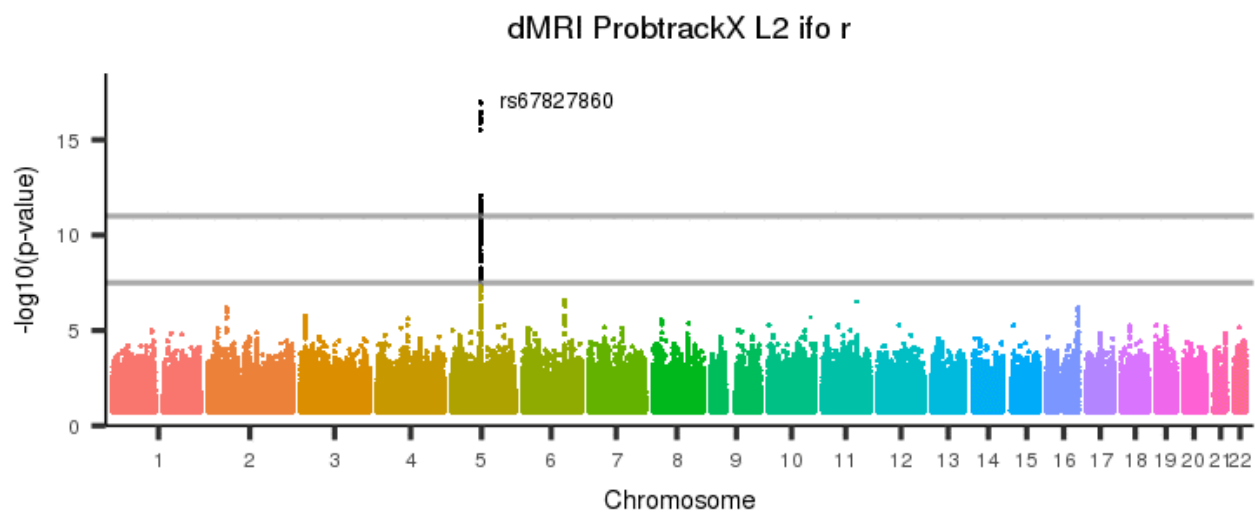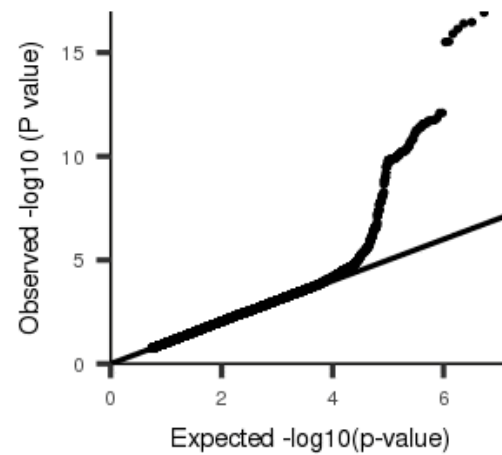

[back to list of plots](#)



Figure 750: dMRI ProbtrackX L2 ilf I

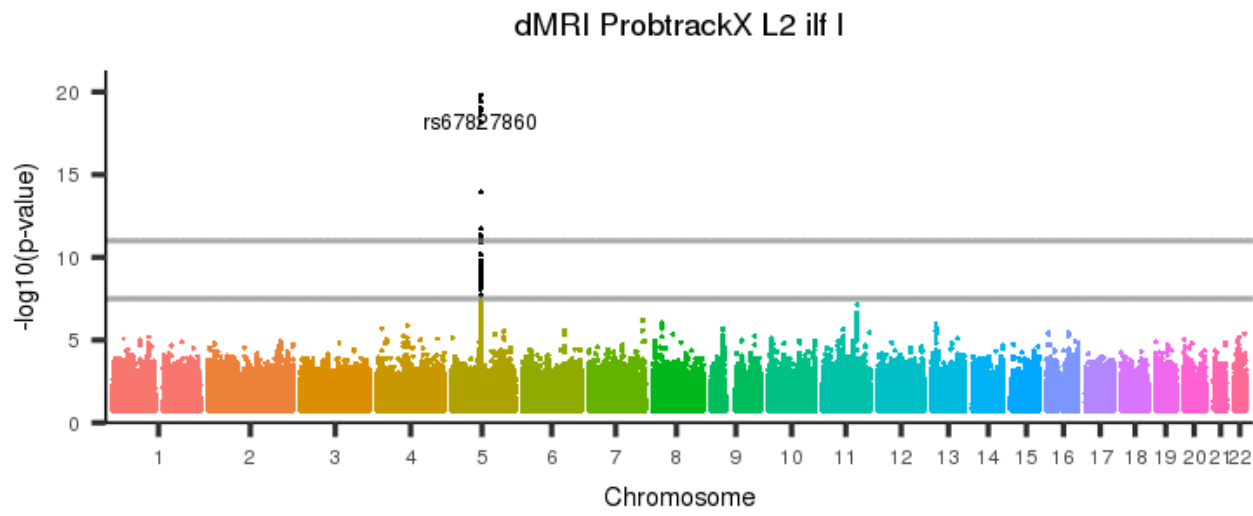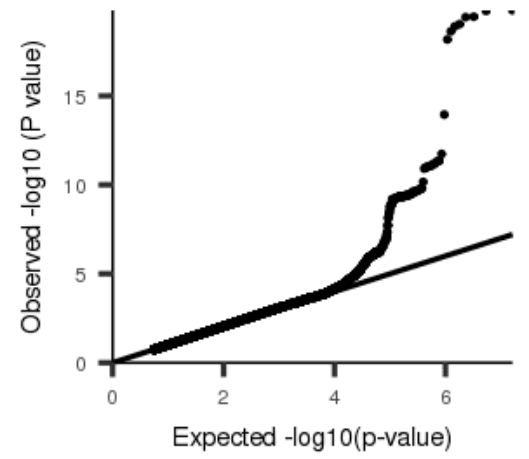

[back to list of plots](#)

Figure 751: dMRI ProbtrackX L2 ilf r

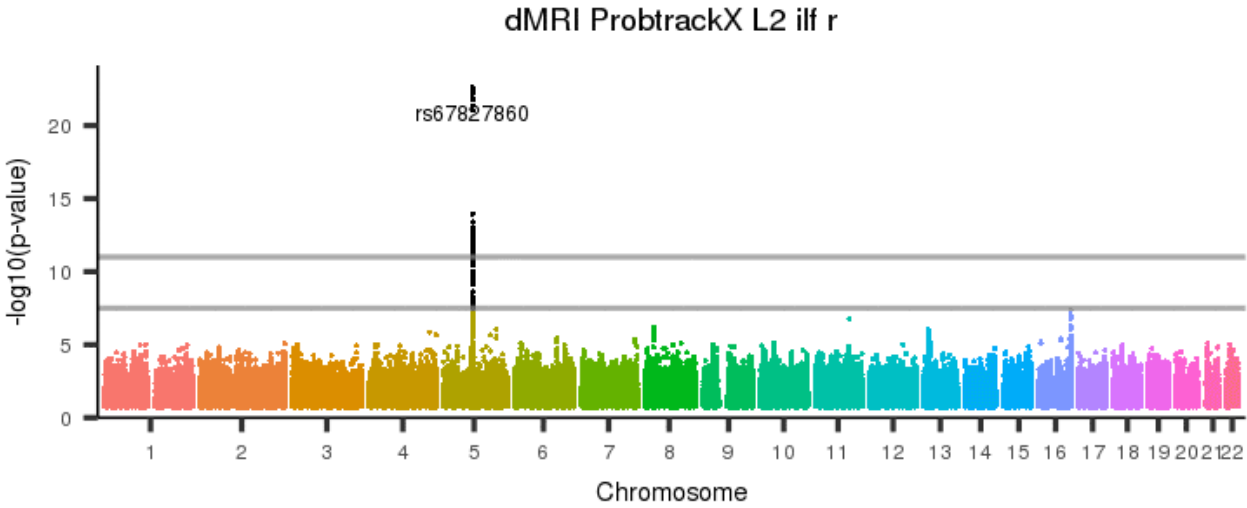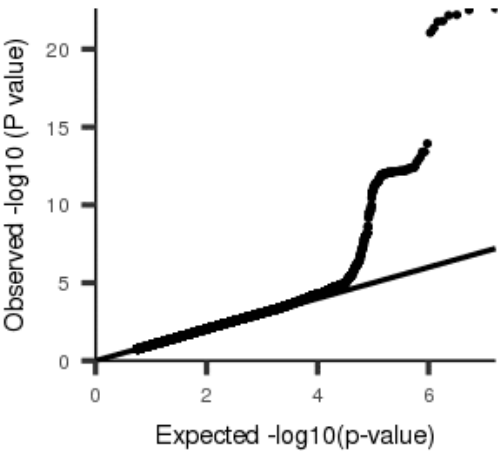

[back to list of plots](#)

Figure 752: dMRI ProbtrackX L2 mcp

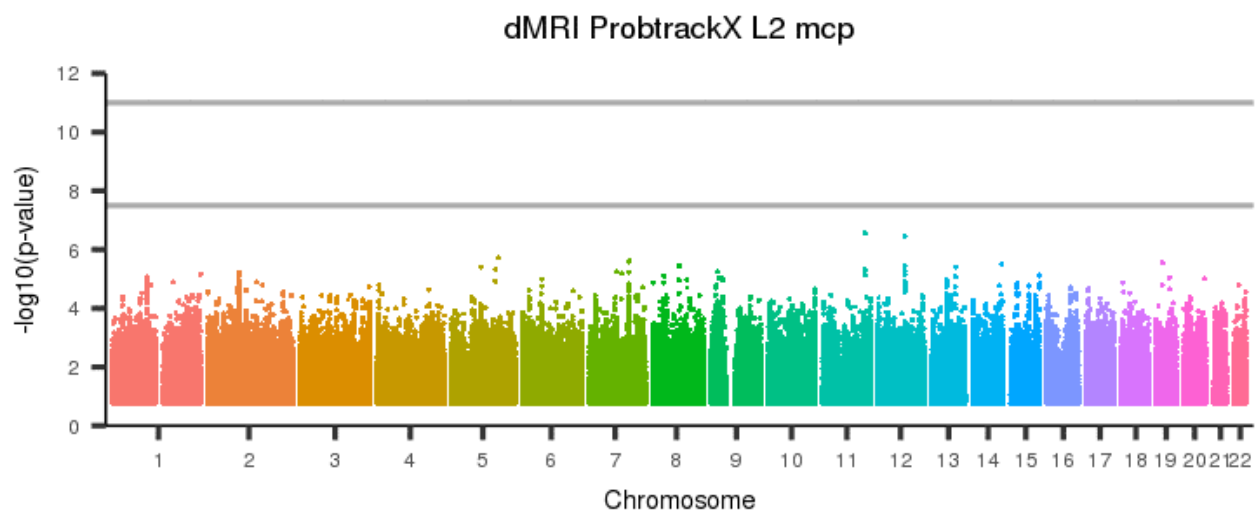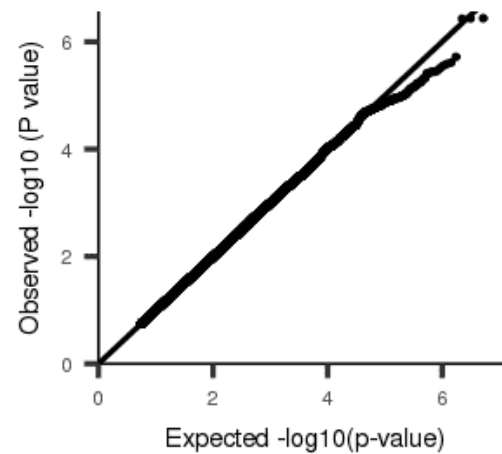

[back to list of plots](#)

Figure 753: dMRI ProbtrackX L2 ml I

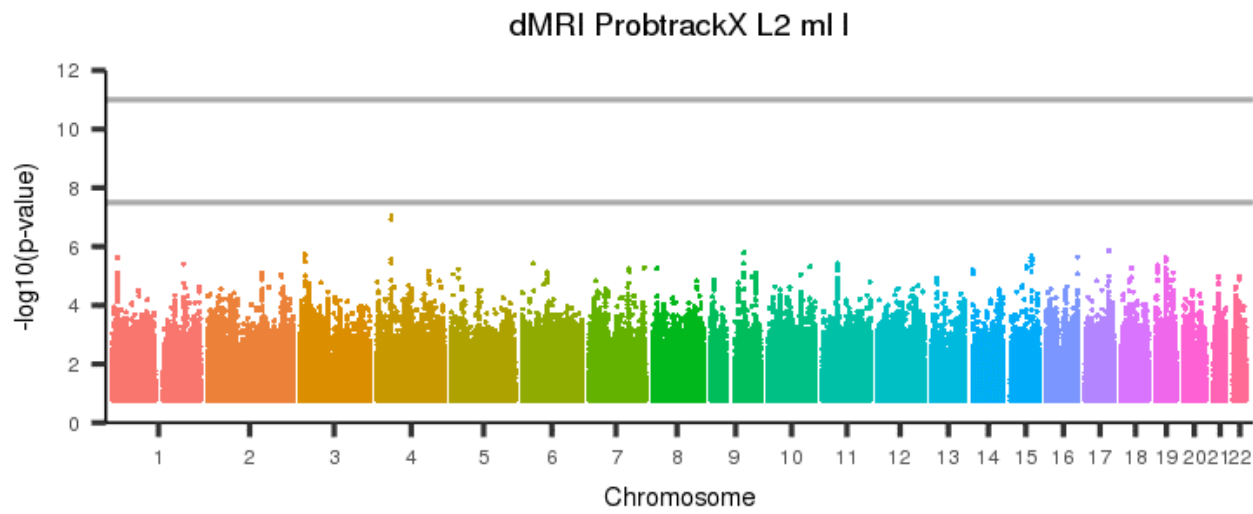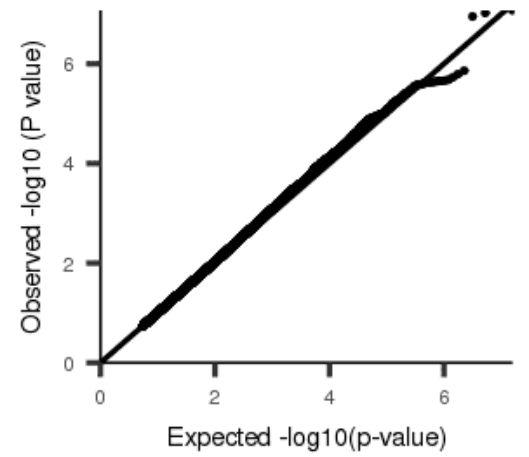

[back to list of plots](#)

Figure 754: dMRI ProbtrackX L2 ml r

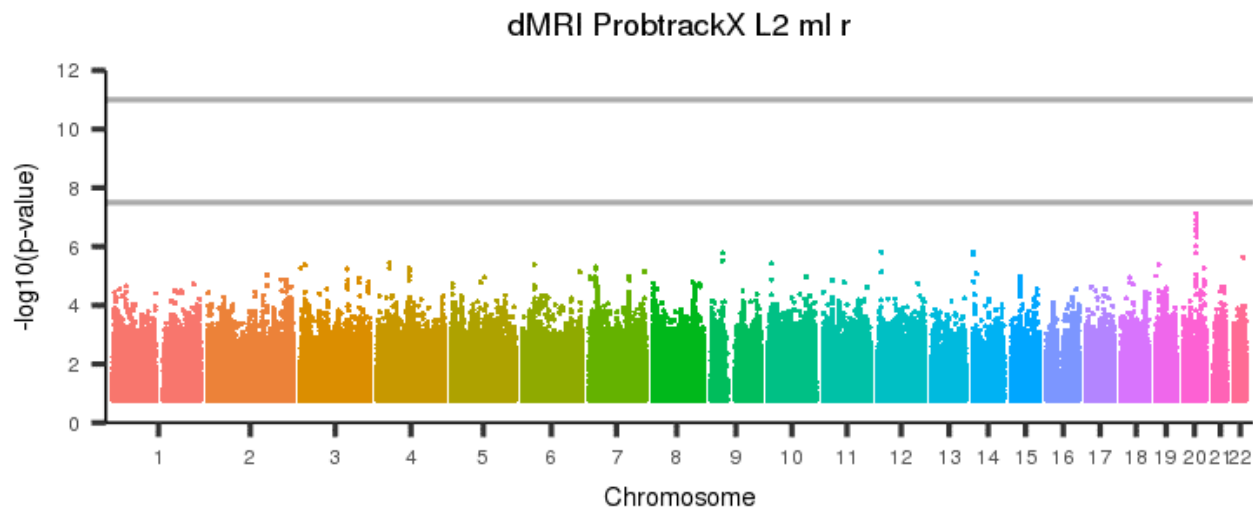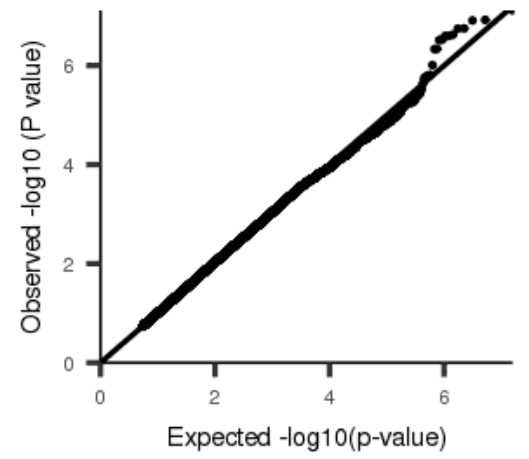

[back to list of plots](#)

Figure 755: dMRI ProbtrackX L2 ptr I

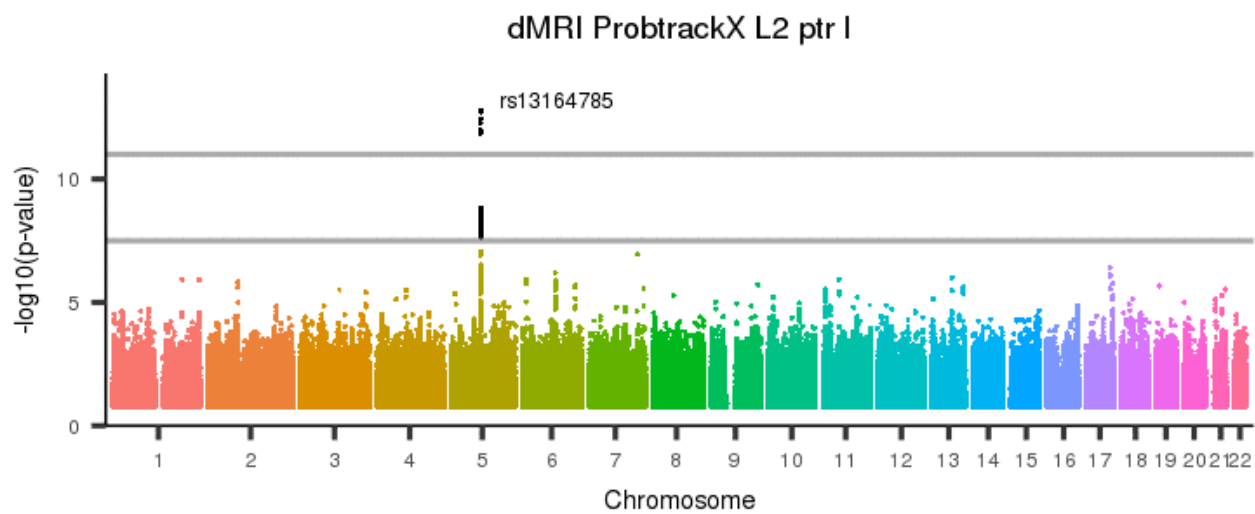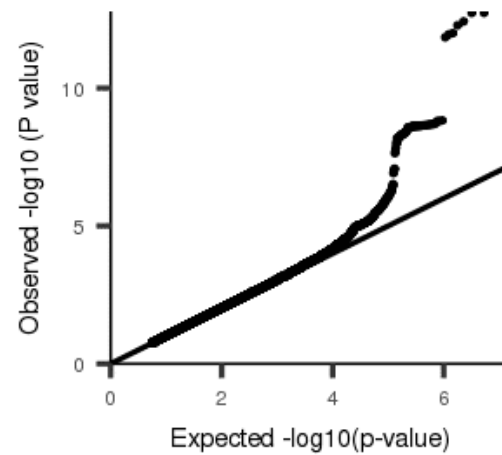

[back to list of plots](#)

Figure 756: dMRI ProbtrackX L2 ptr r

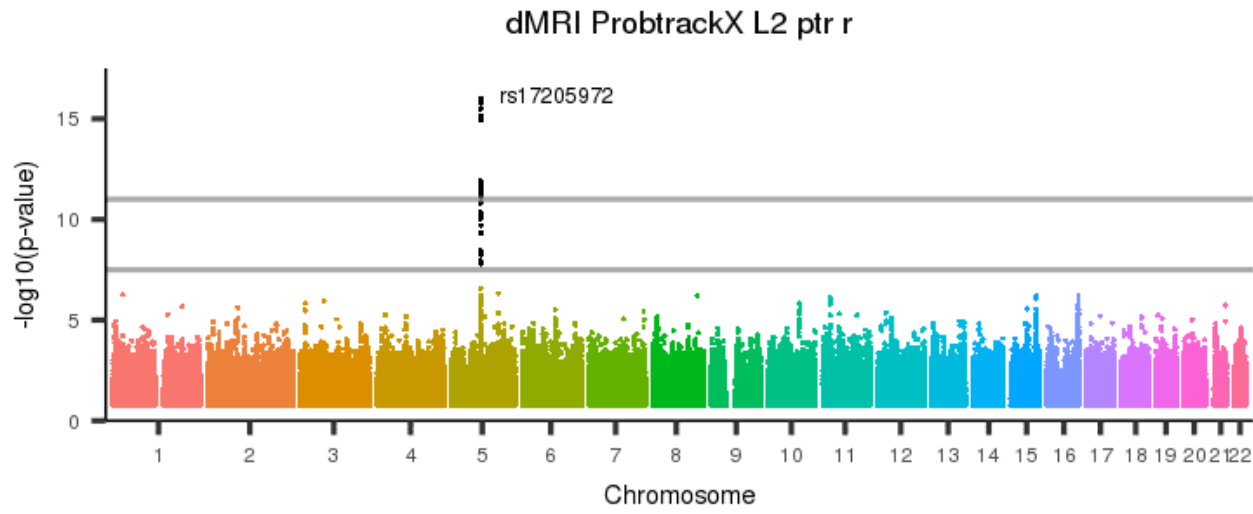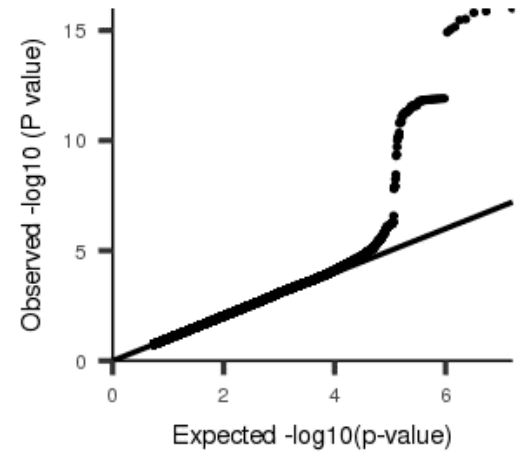

[back to list of plots](#)

Figure 757: dMRI ProbtrackX L2 slf I

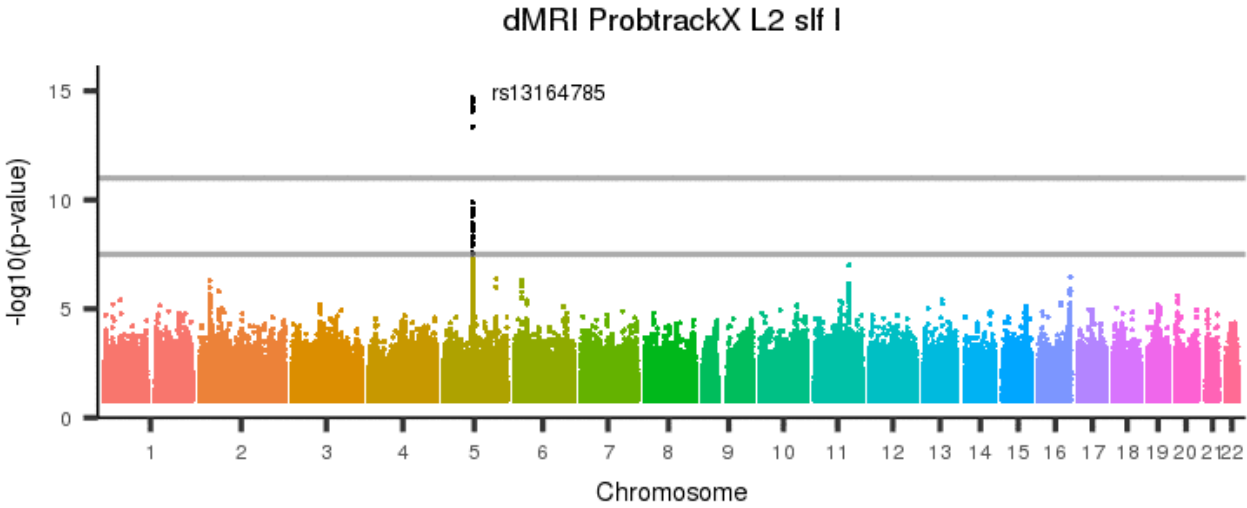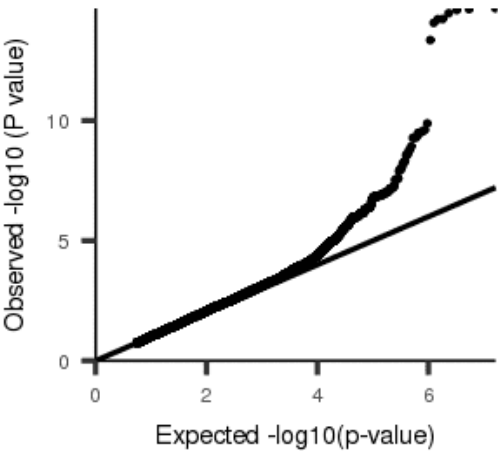

[back to list of plots](#)



Figure 758: dMRI ProbtrackX L2 slf r

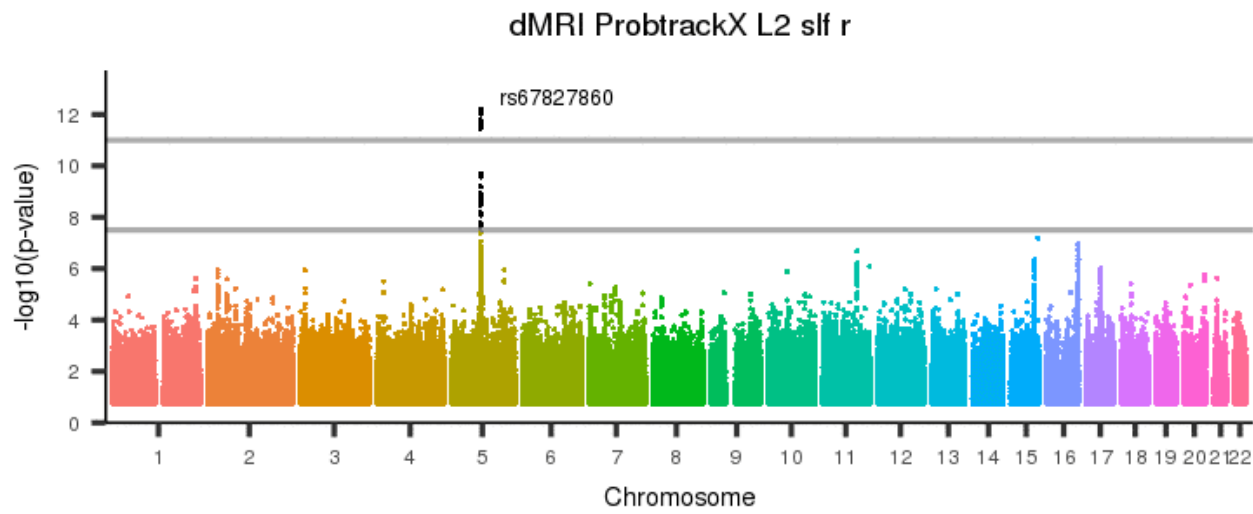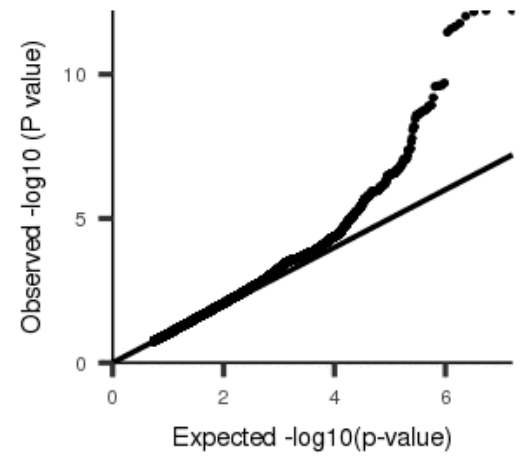

[back to list of plots](#)

Figure 759: dMRI ProbtrackX L2 str I

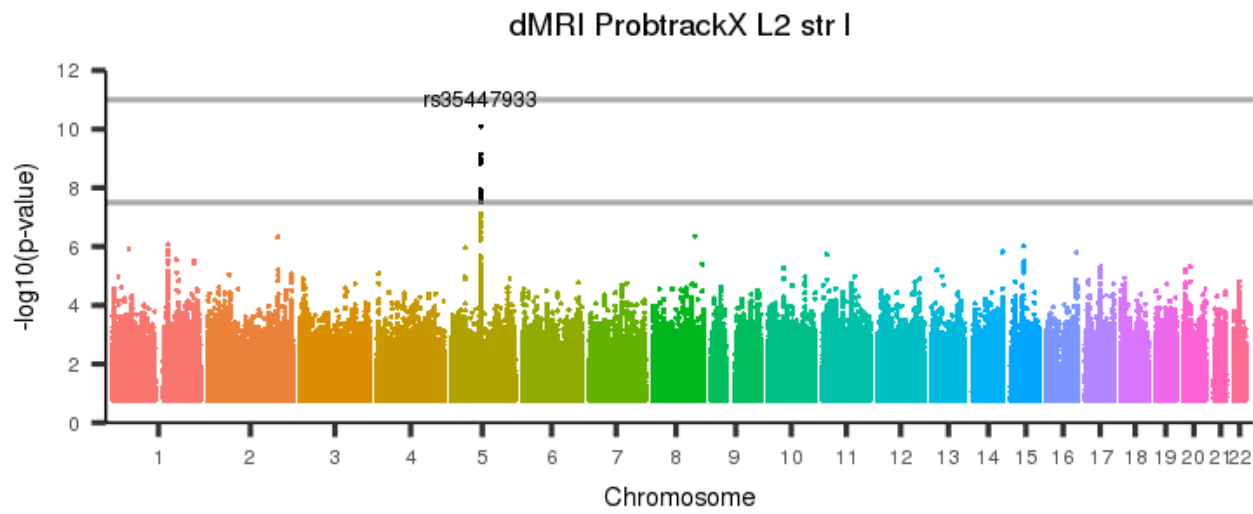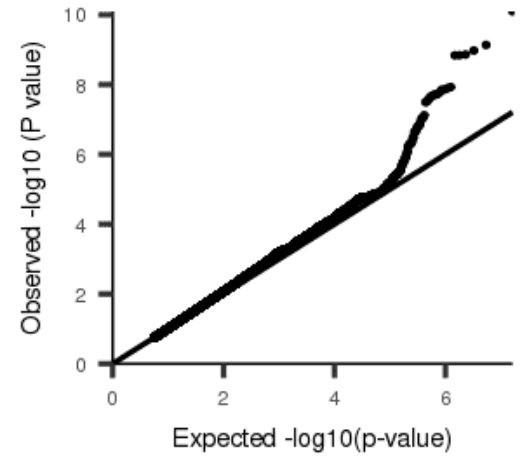

[back to list of plots](#)

Figure 760: dMRI ProbtrackX L2 str r

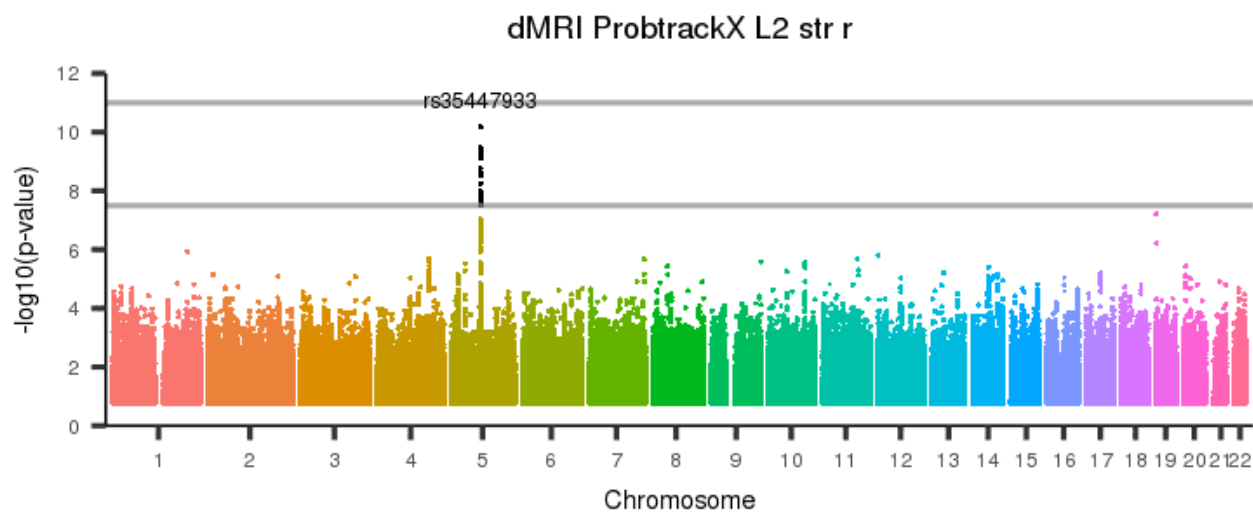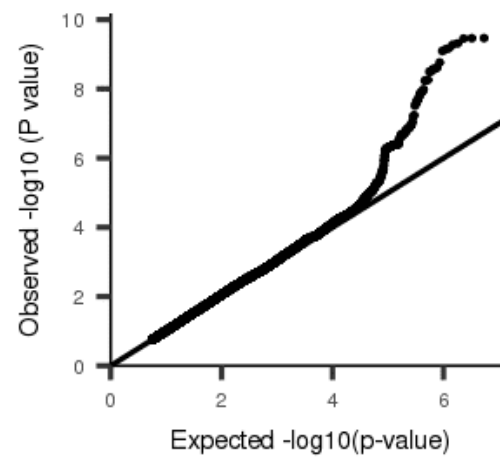

[back to list of plots](#)

Figure 761: dMRI ProbtrackX L2 unc l

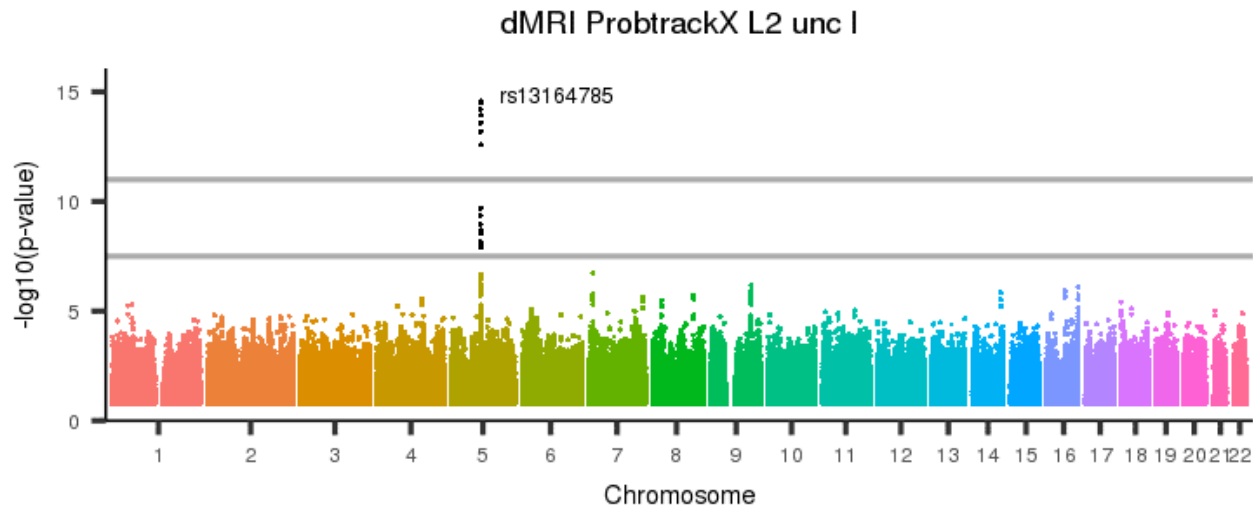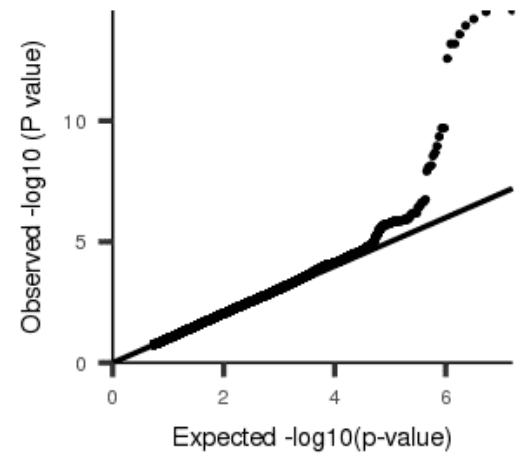

[back to list of plots](#)

Figure 762: dMRI ProbtrackX L2 unc r

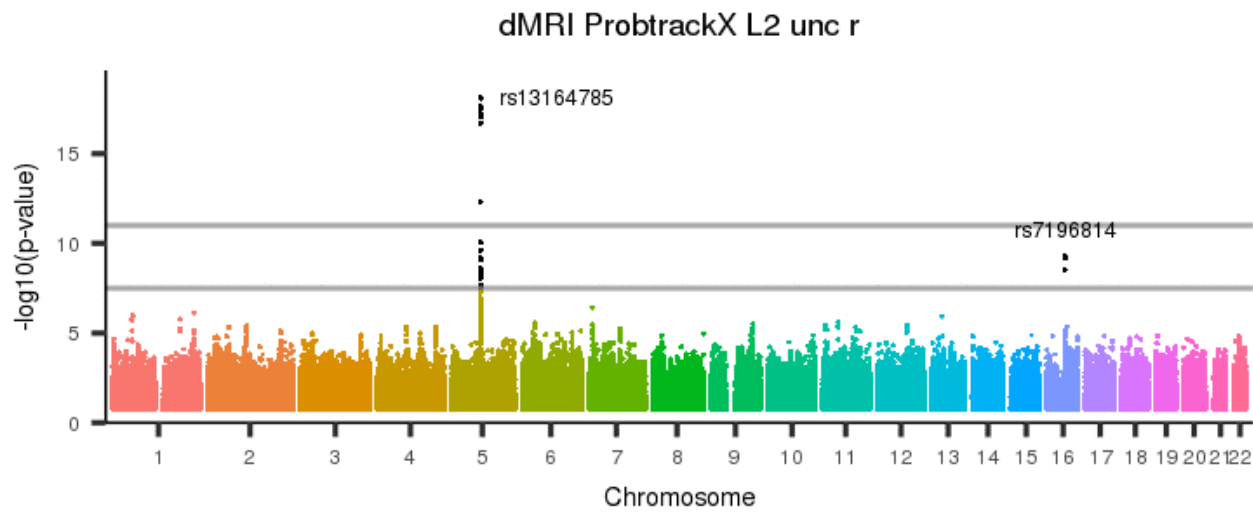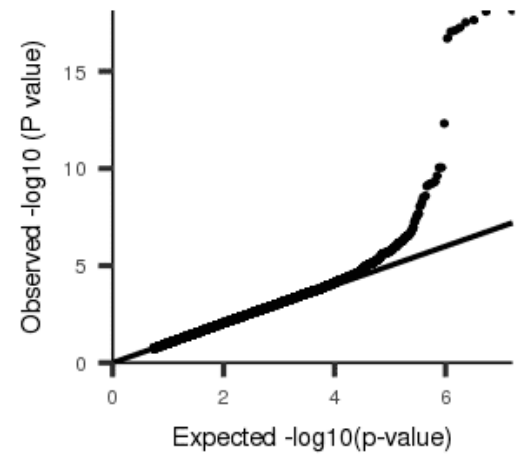

[back to list of plots](#)

Figure 763: dMRI ProbtrackX L3 ar I

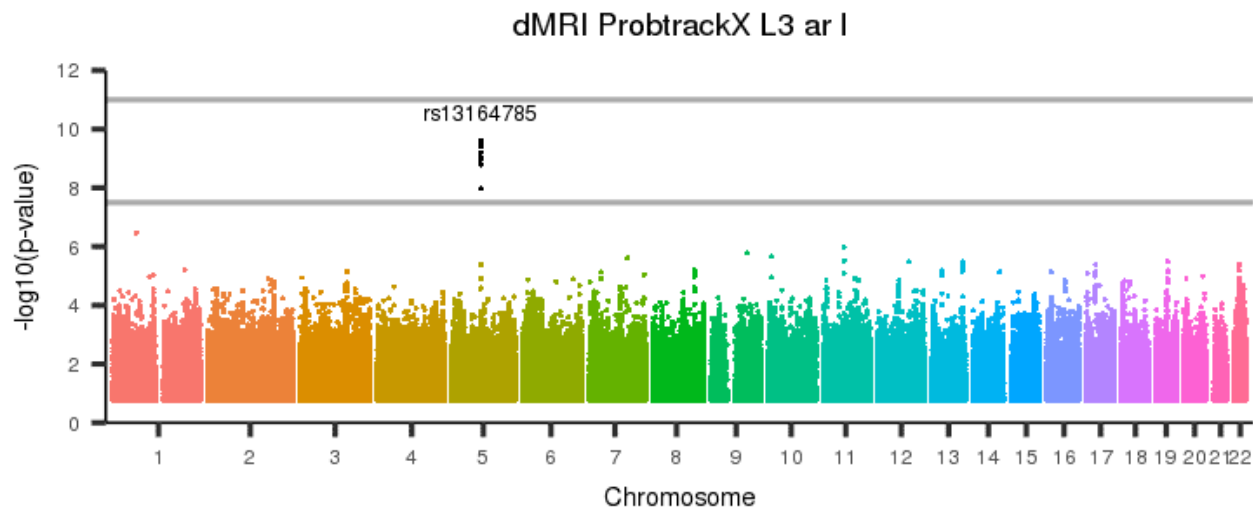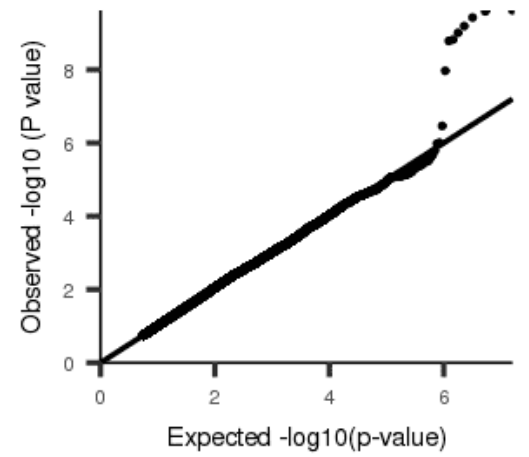

[back to list of plots](#)

Figure 764: dMRI ProbtrackX L3 ar r

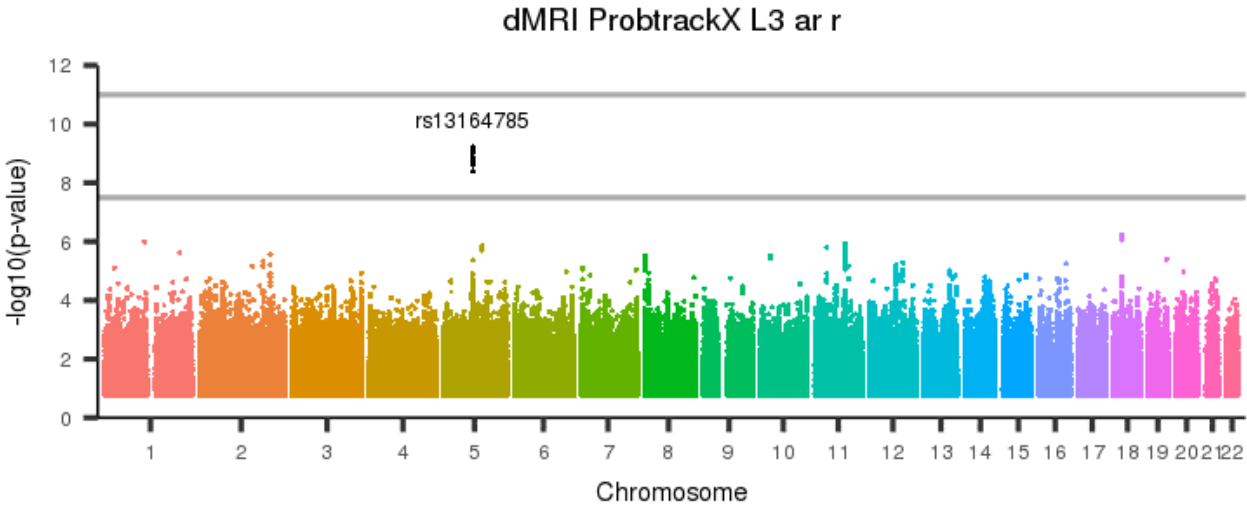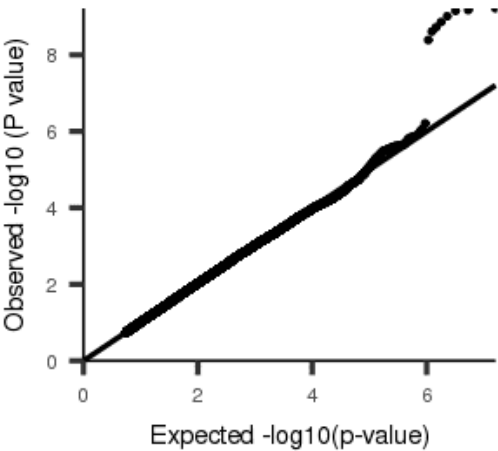

[back to list of plots](#)

Figure 765: dMRI ProbtrackX L3 atr l

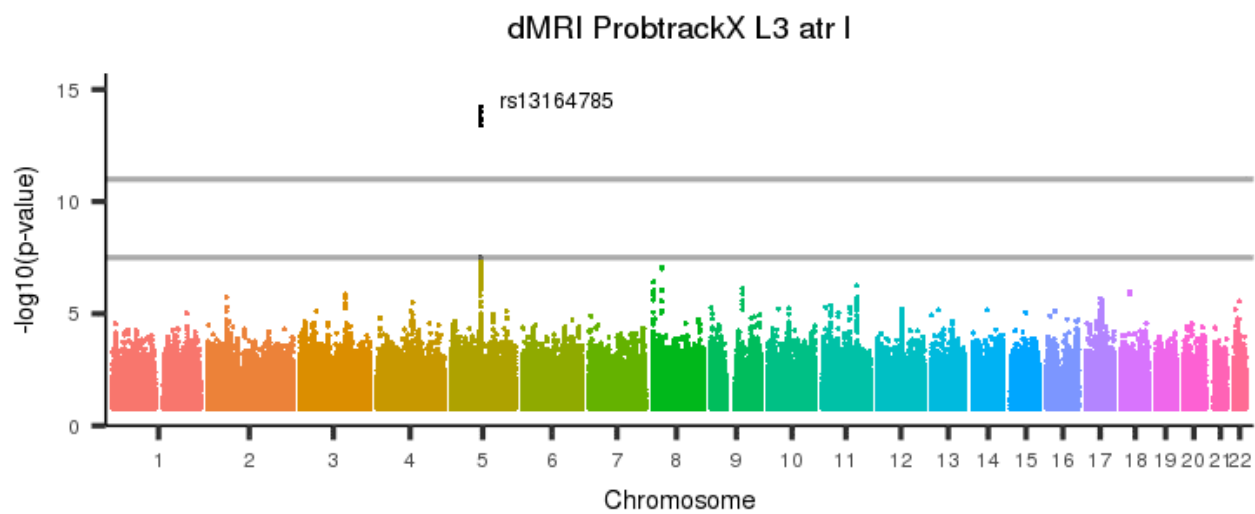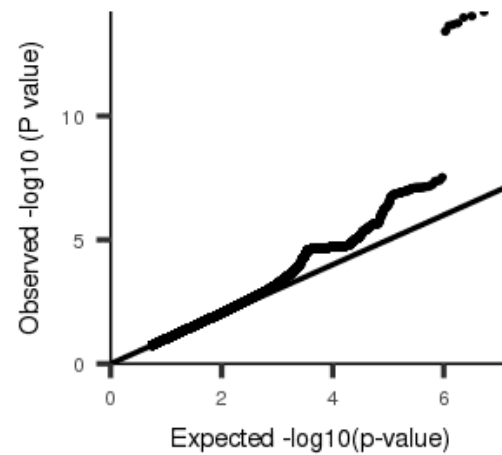

[back to list of plots](#)



Figure 766: dMRI ProbtrackX L3 atr r

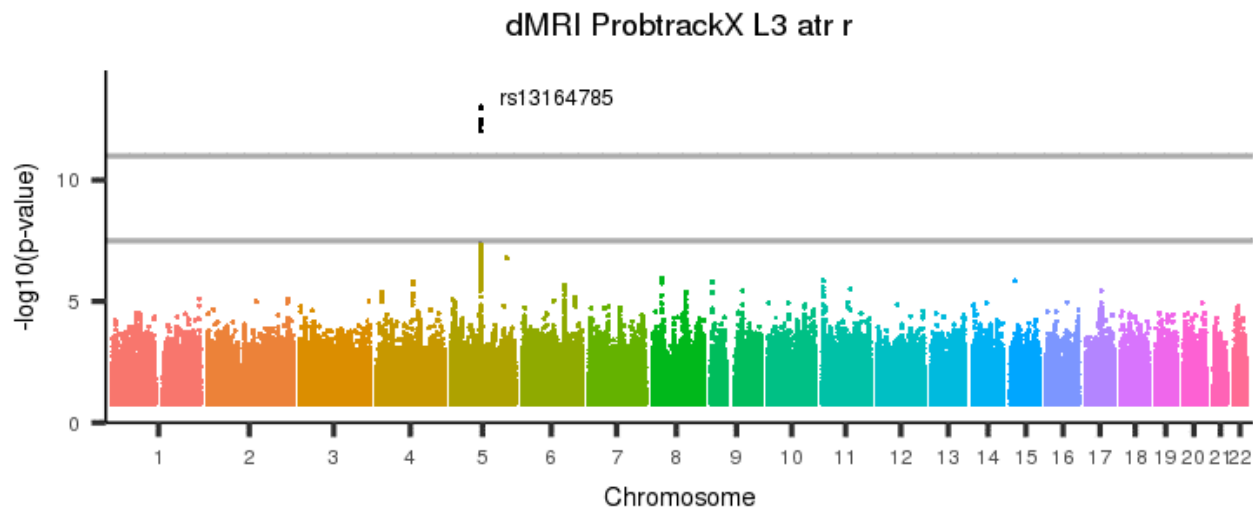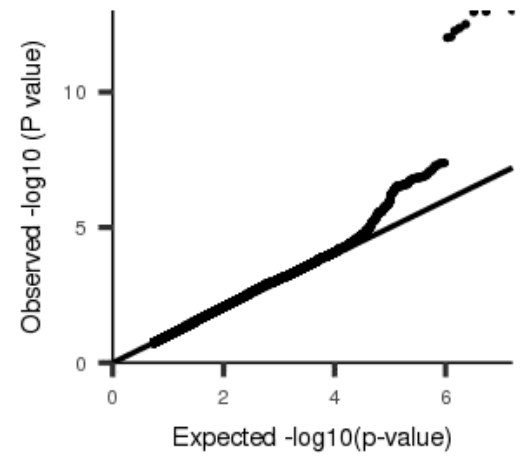

[back to list of plots](#)

Figure 767: dMRI ProbtrackX L3 cgc I

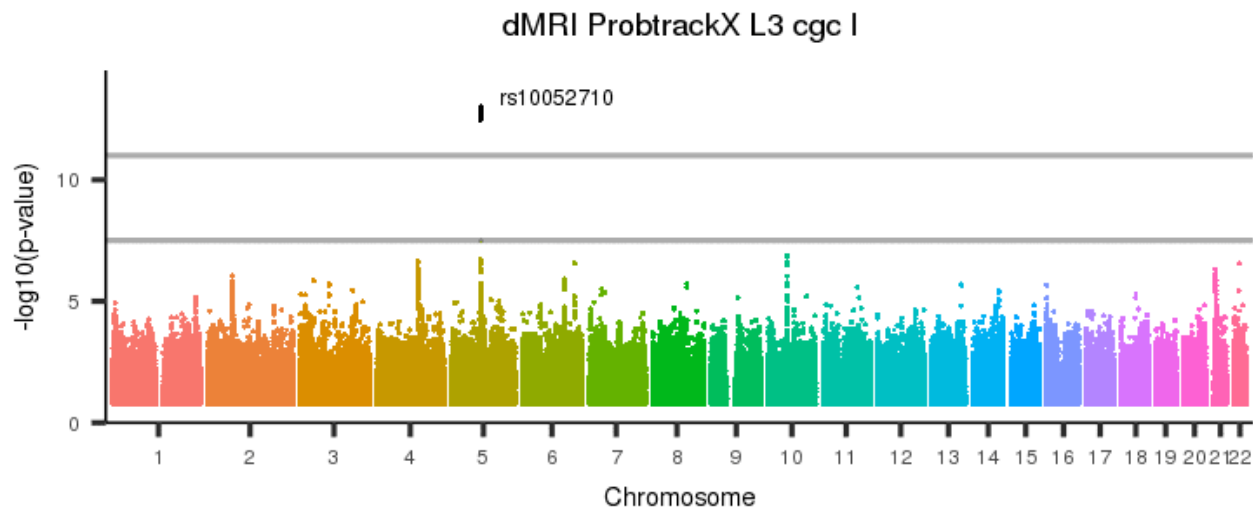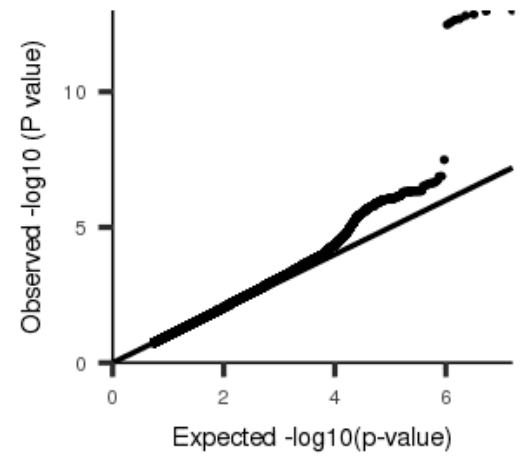

[back to list of plots](#)

Figure 768: dMRI ProbtrackX L3 cgc r

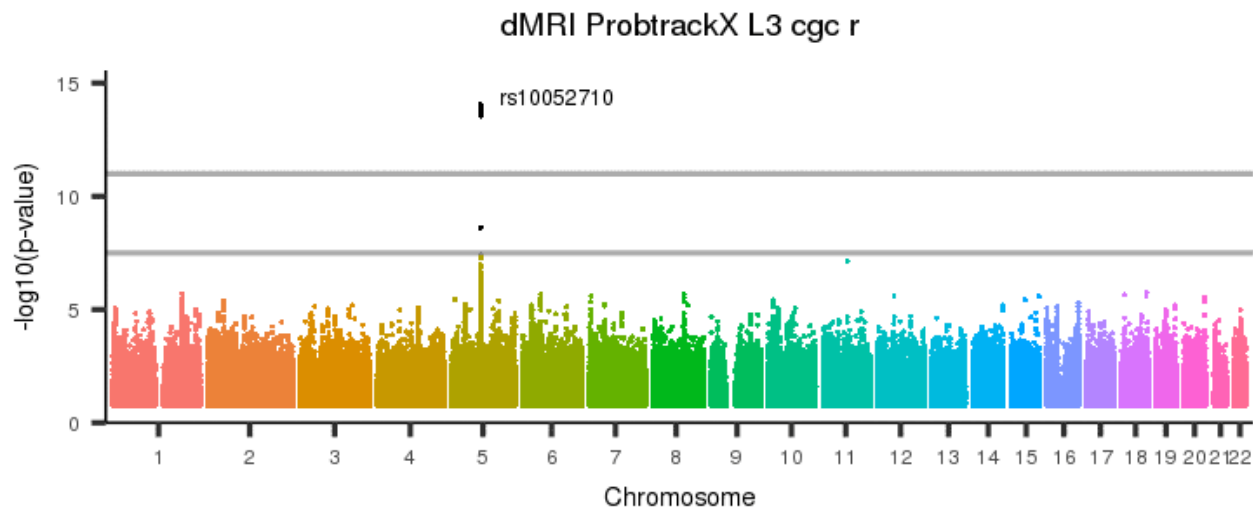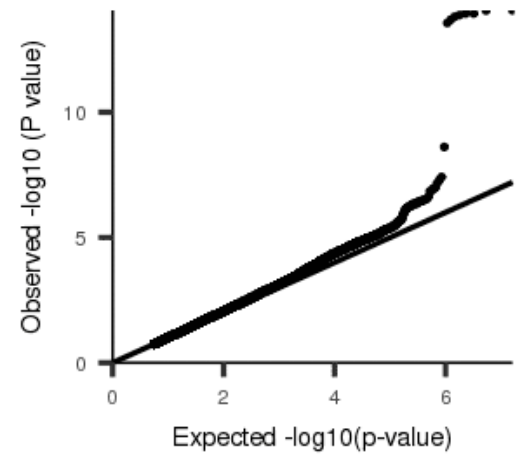

[back to list of plots](#)

Figure 769: dMRI ProbtrackX L3 cgh I

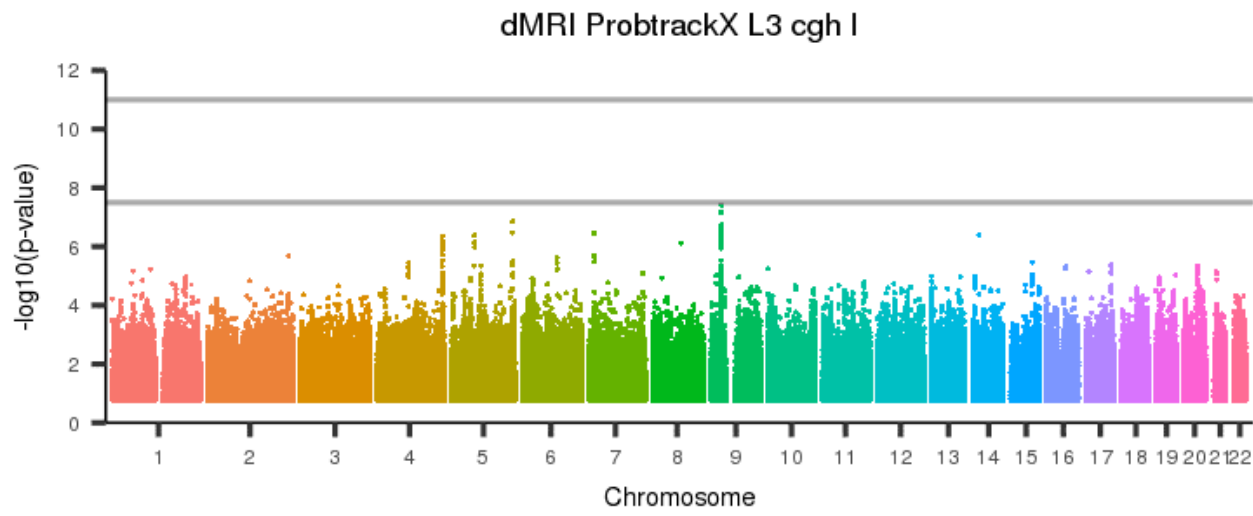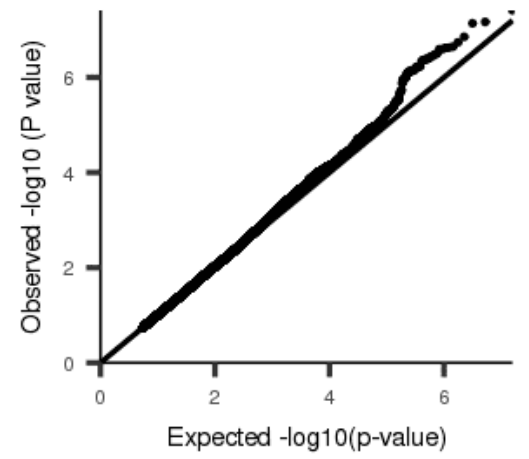

[back to list of plots](#)

Figure 770: dMRI ProbtrackX L3 cgh r

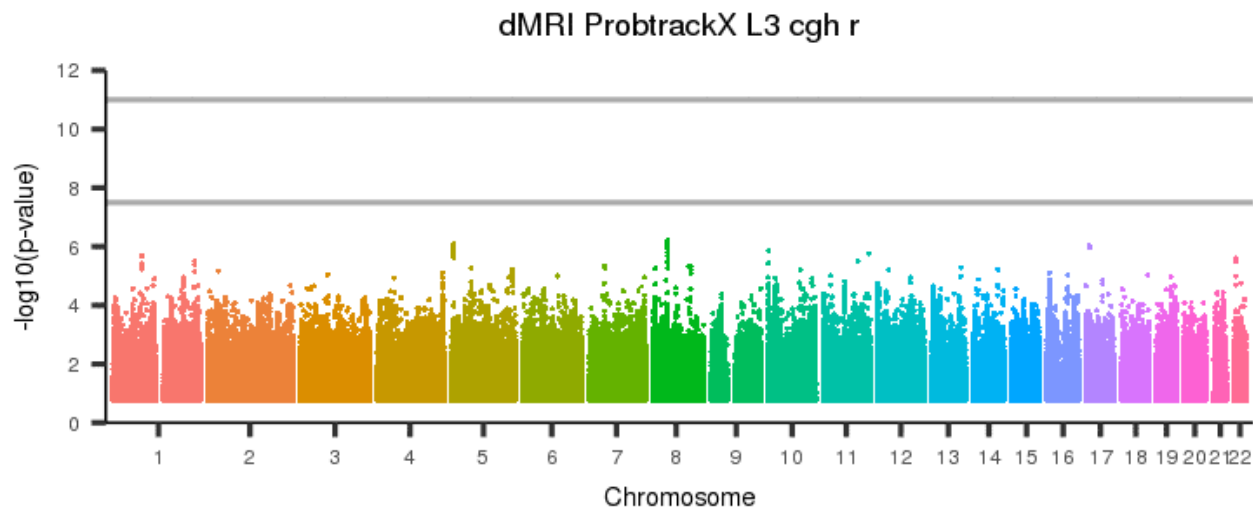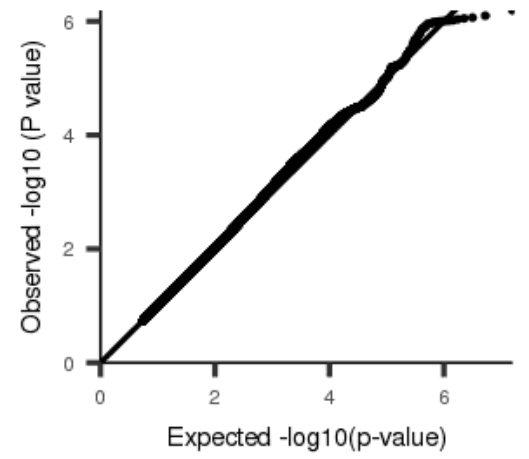

[back to list of plots](#)

Figure 771: dMRI ProbtrackX L3 cst I

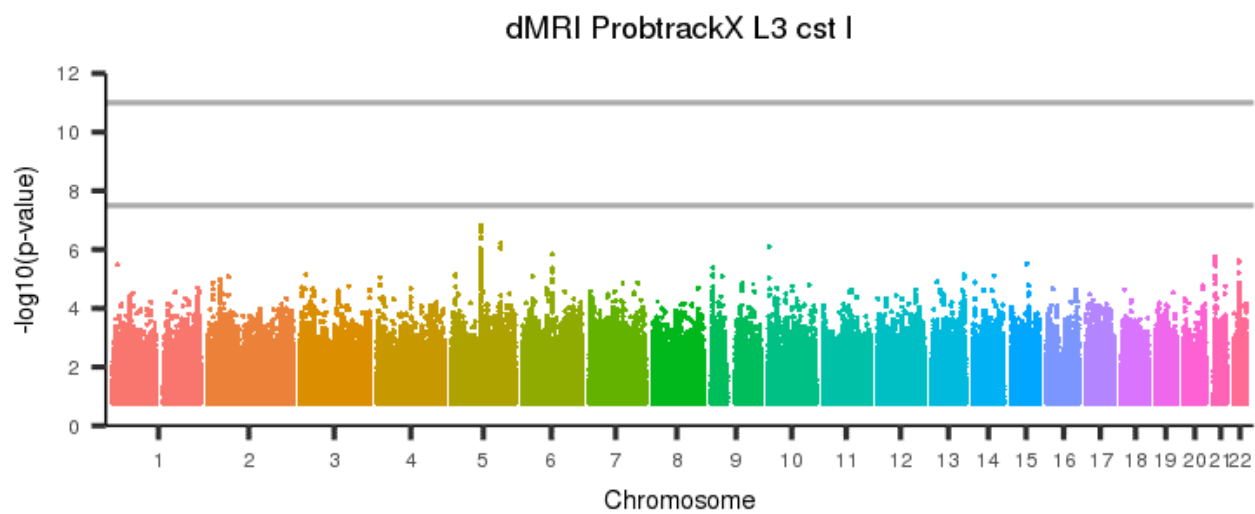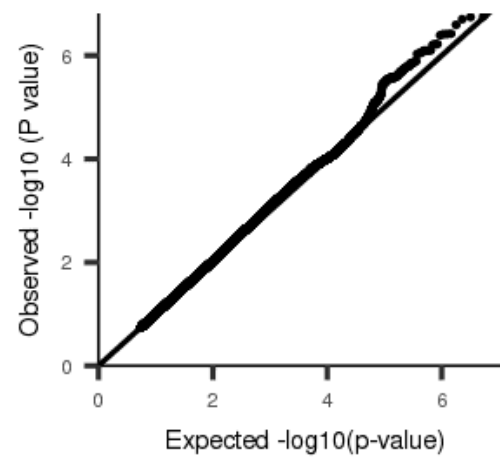

[back to list of plots](#)

Figure 772: dMRI ProbtrackX L3 cst r

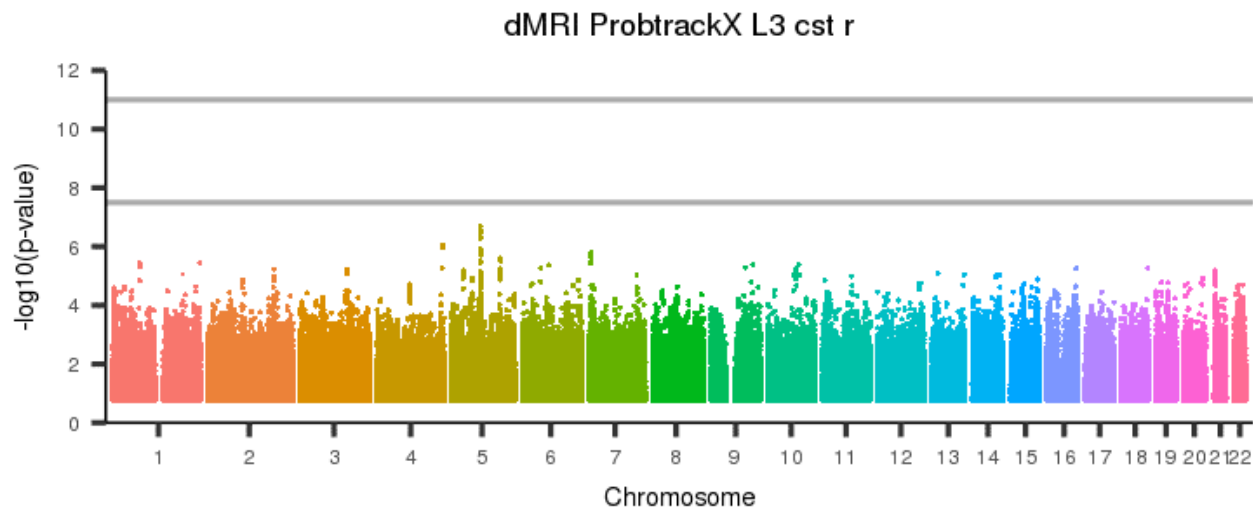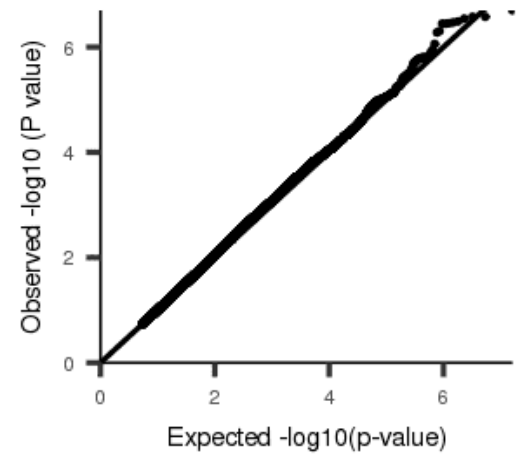

[back to list of plots](#)

Figure 773: dMRI ProbtrackX L3 fma

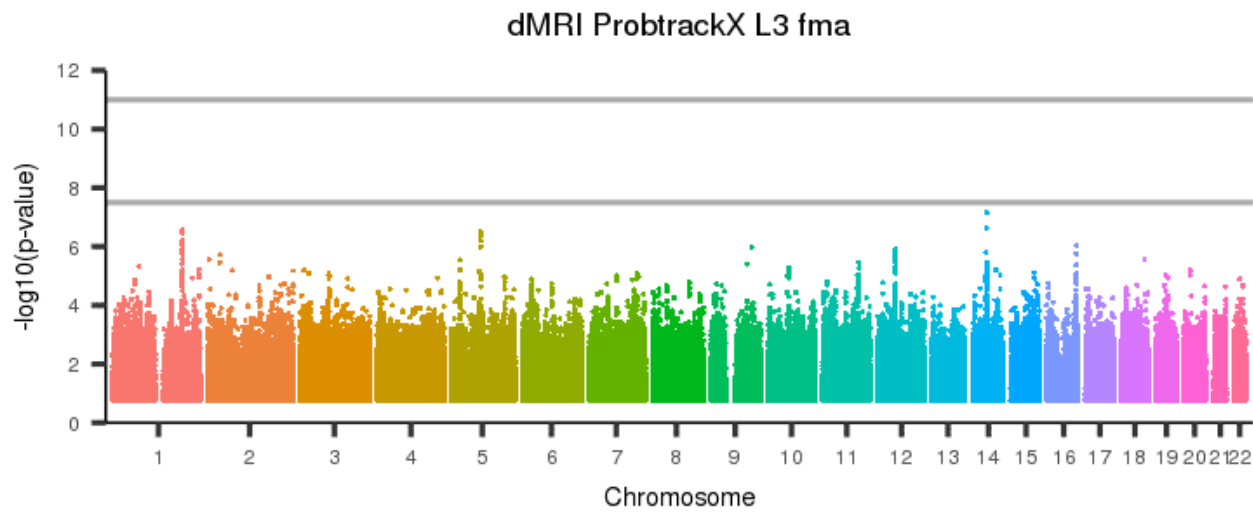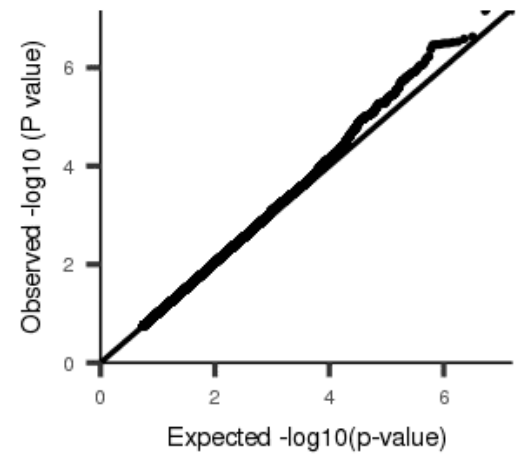

[back to list of plots](#)



Figure 774: dMRI ProbtrackX L3 fmi

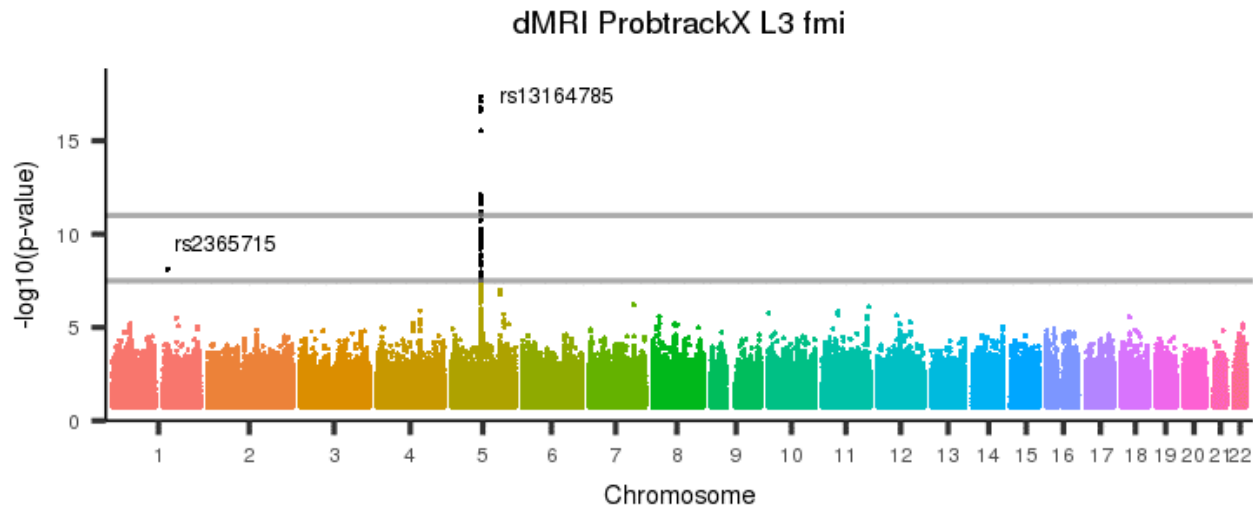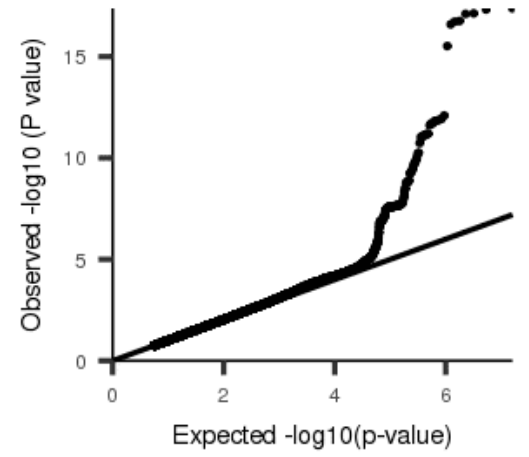

[back to list of plots](#)

Figure 775: dMRI ProbtrackX L3 ifo I

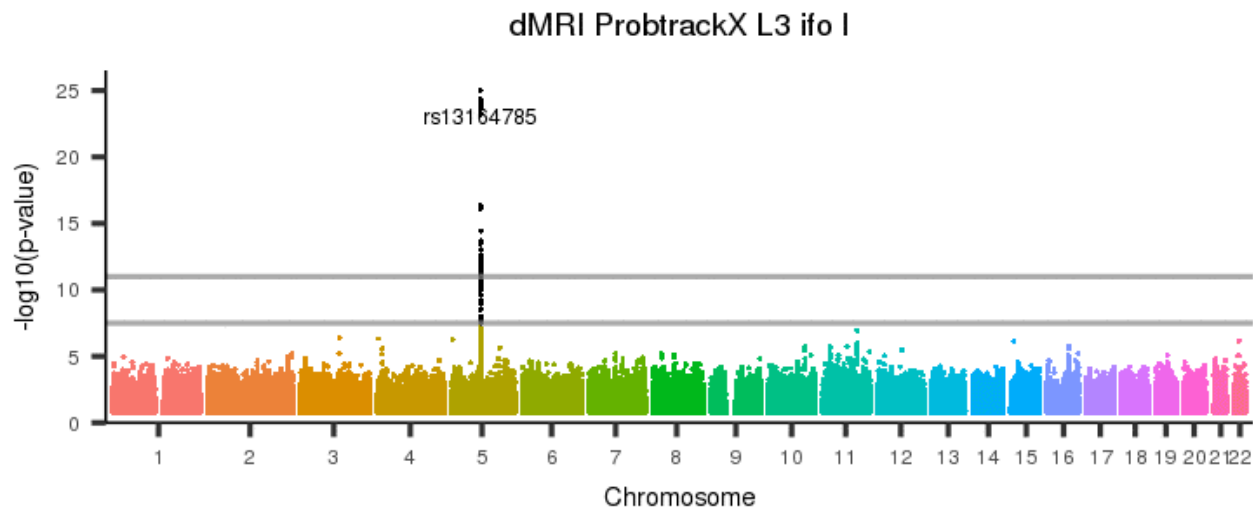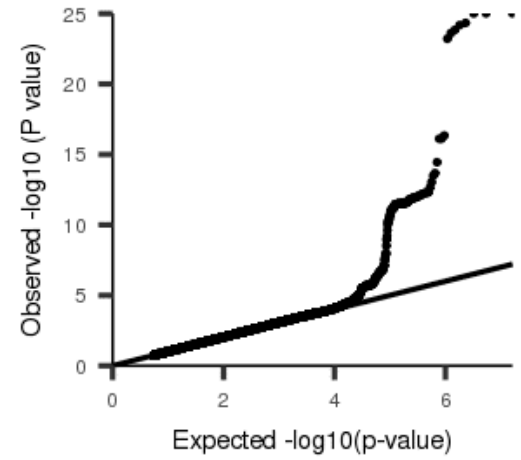

[back to list of plots](#)

Figure 776: dMRI ProbtrackX L3 ifo r

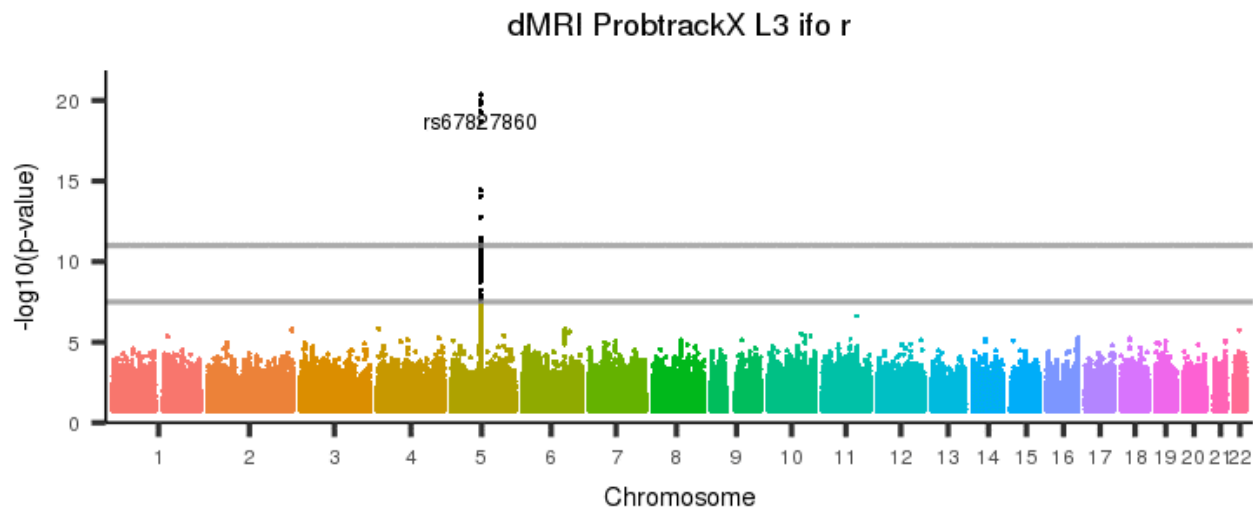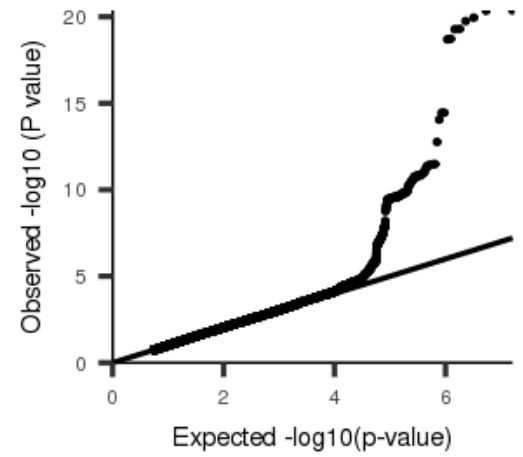

[back to list of plots](#)

Figure 777: dMRI ProbtrackX L3 ilf I

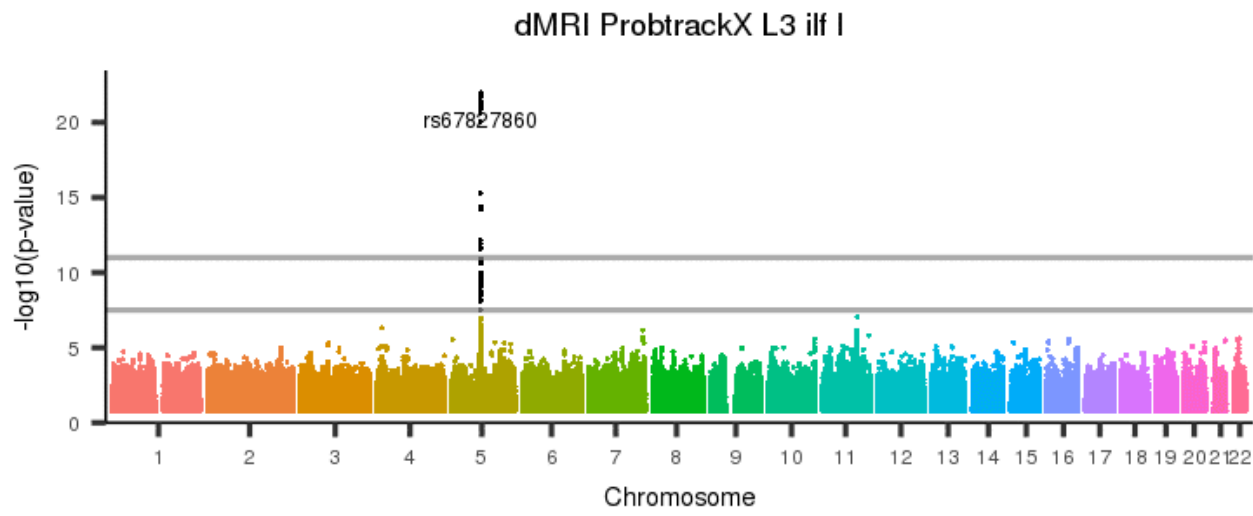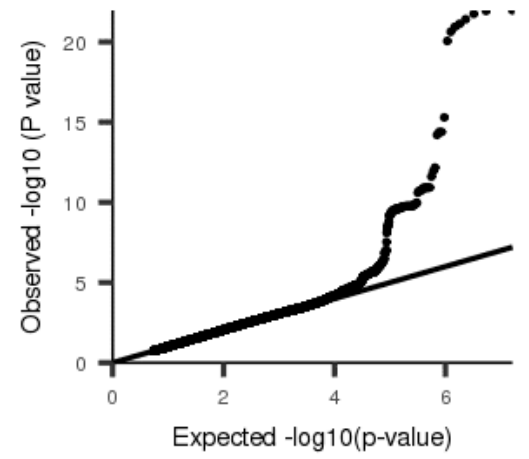

[back to list of plots](#)

Figure 778: dMRI ProbtrackX L3 ilf r

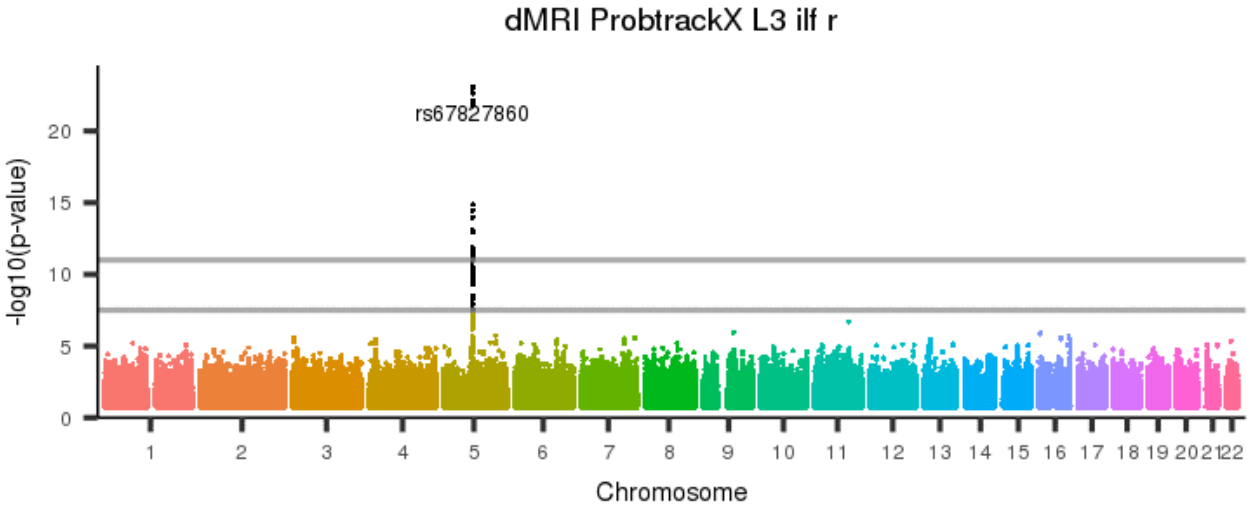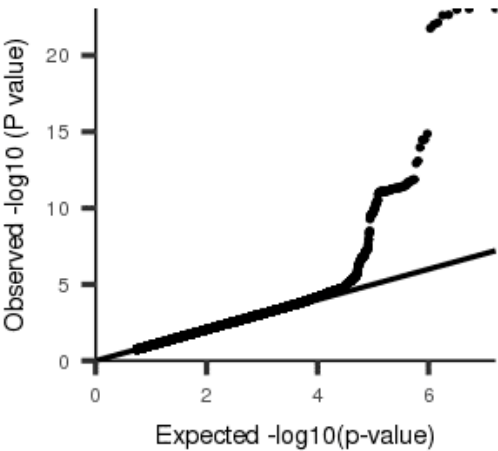

[back to list of plots](#)

Figure 779: dMRI ProbtrackX L3 mcp

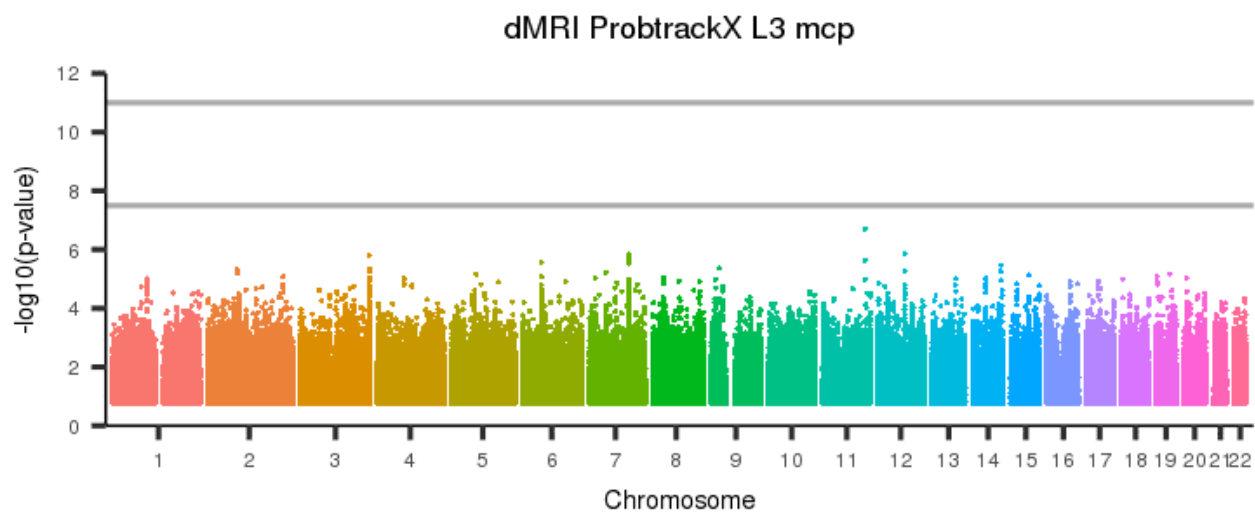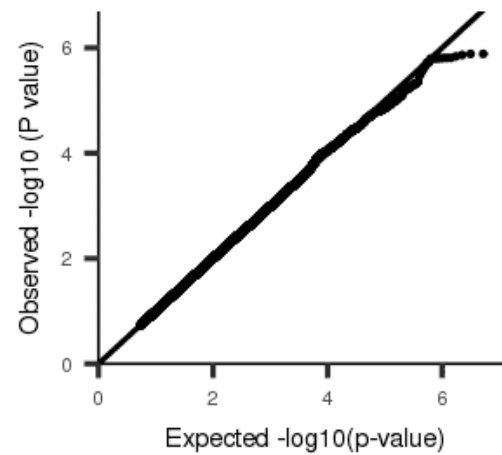

[back to list of plots](#)

Figure 780: dMRI ProbtrackX L3 ml I

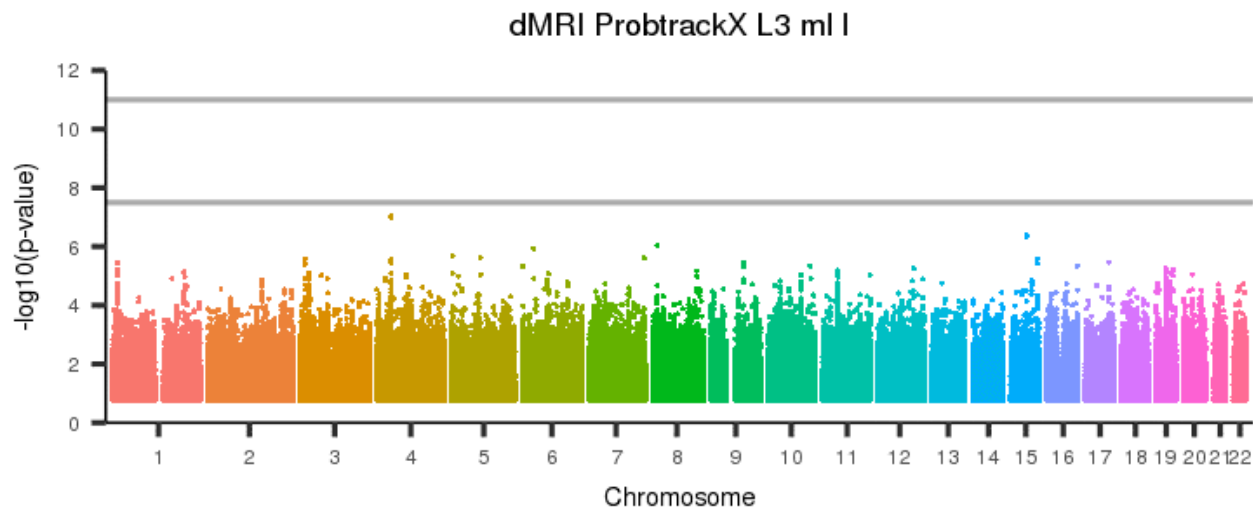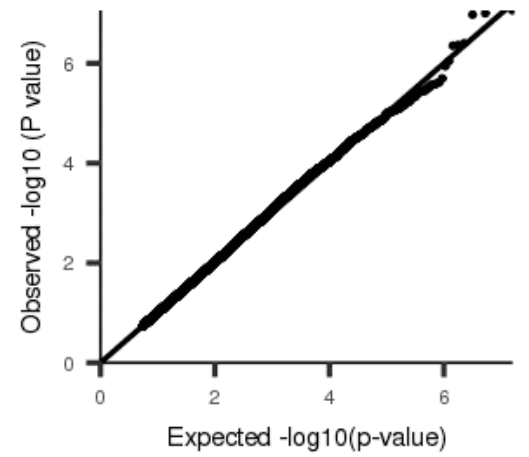

[back to list of plots](#)

Figure 781: dMRI ProbtrackX L3 ml r

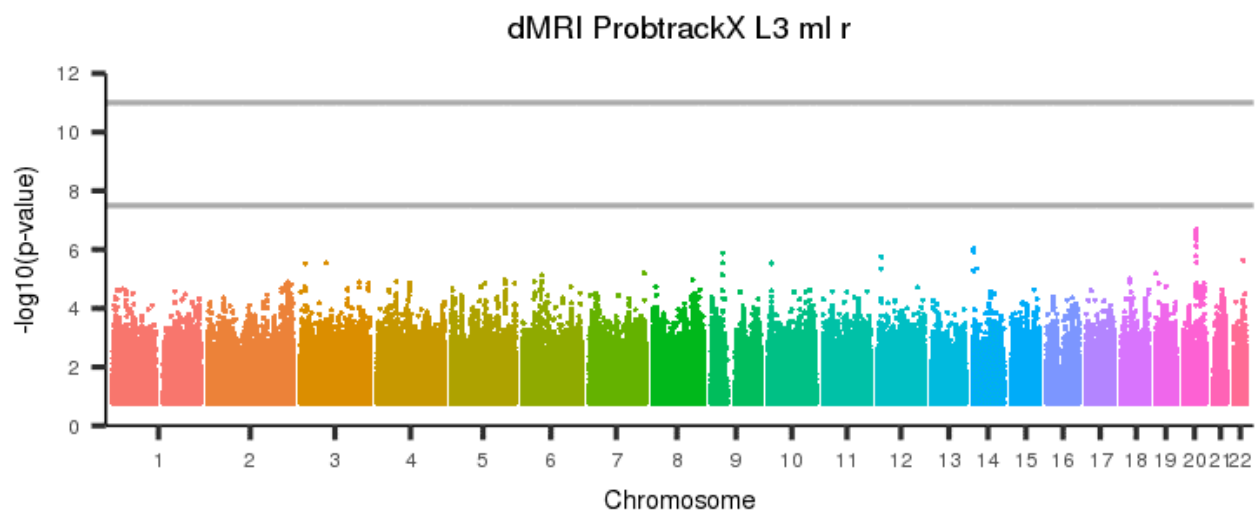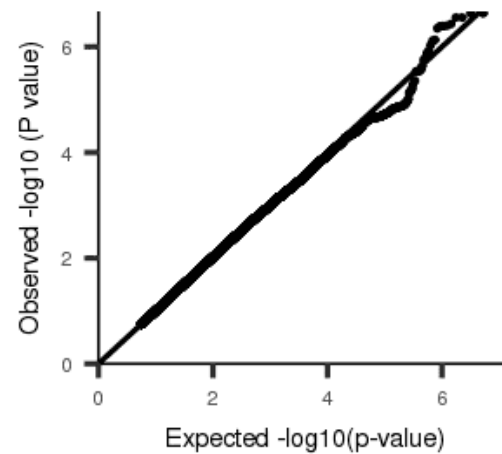

[back to list of plots](#)



Figure 782: dMRI ProbtrackX L3 ptr I

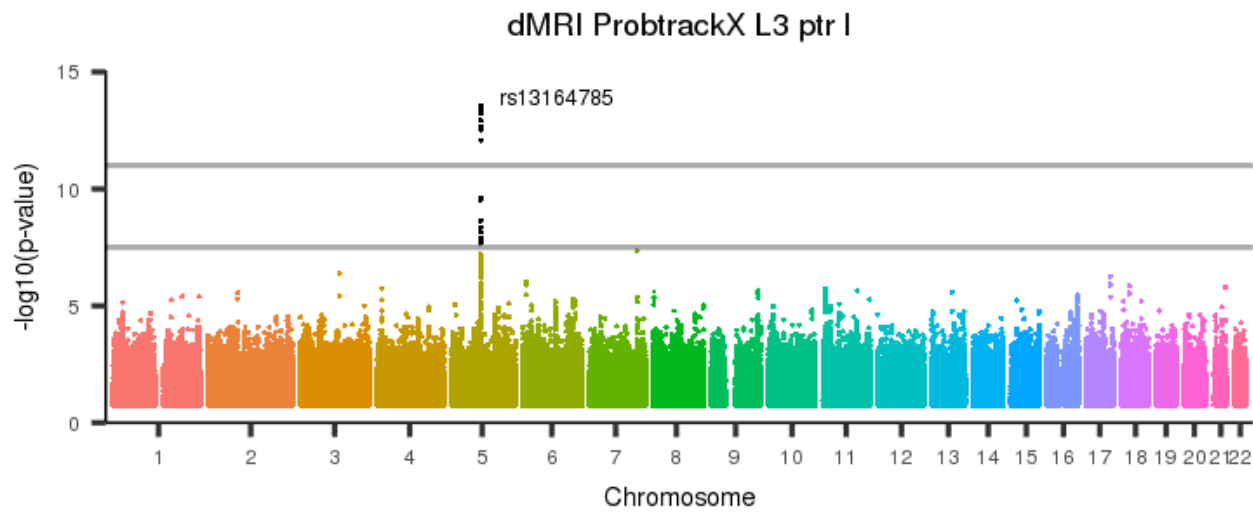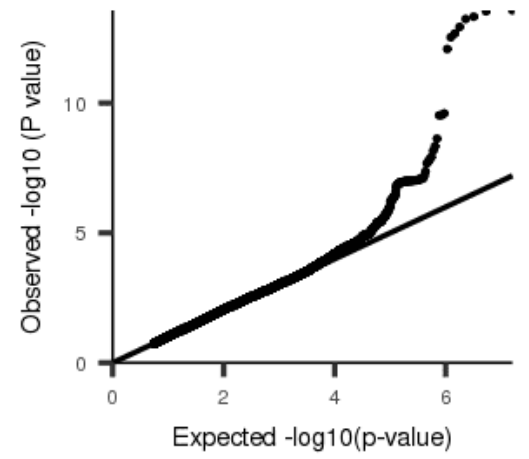

[back to list of plots](#)

Figure 783: dMRI ProbtrackX L3 ptr r

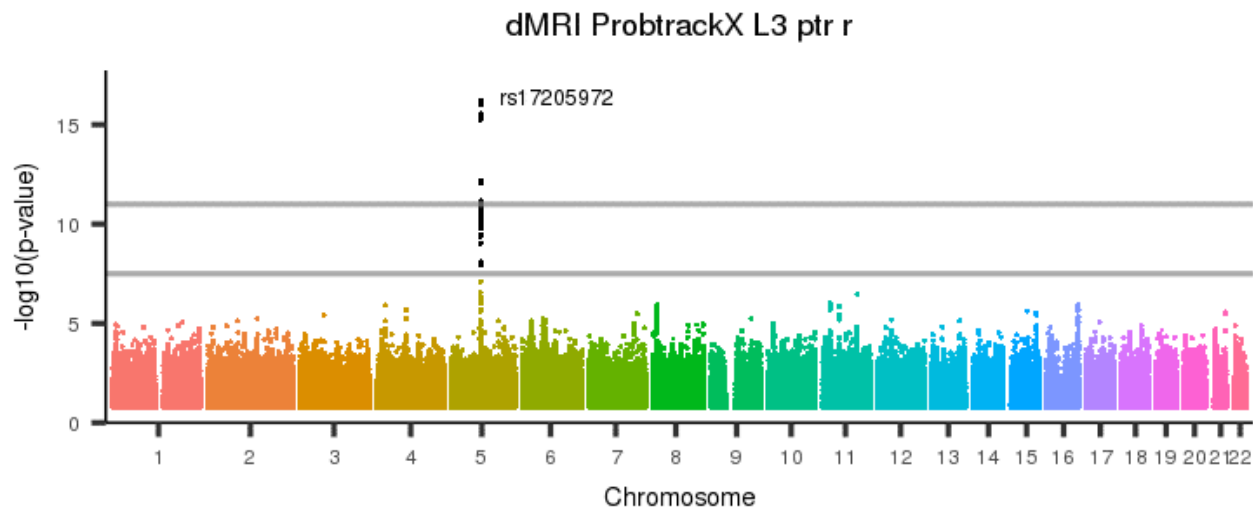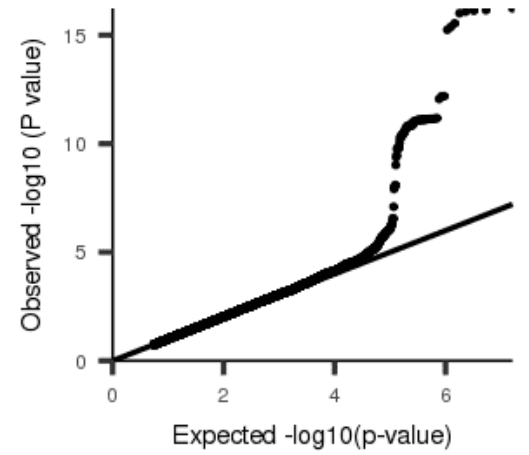

[back to list of plots](#)

Figure 784: dMRI ProbtrackX L3 slf I

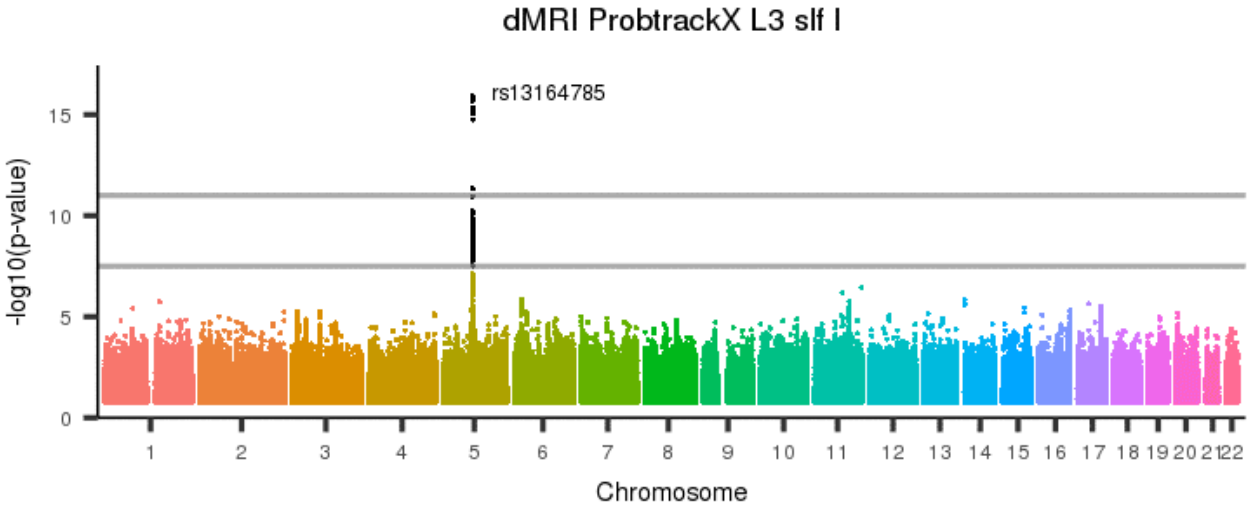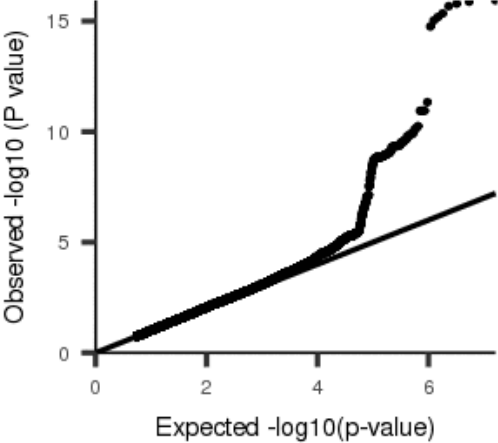

[back to list of plots](#)

Figure 785: dMRI ProbtrackX L3 slf r

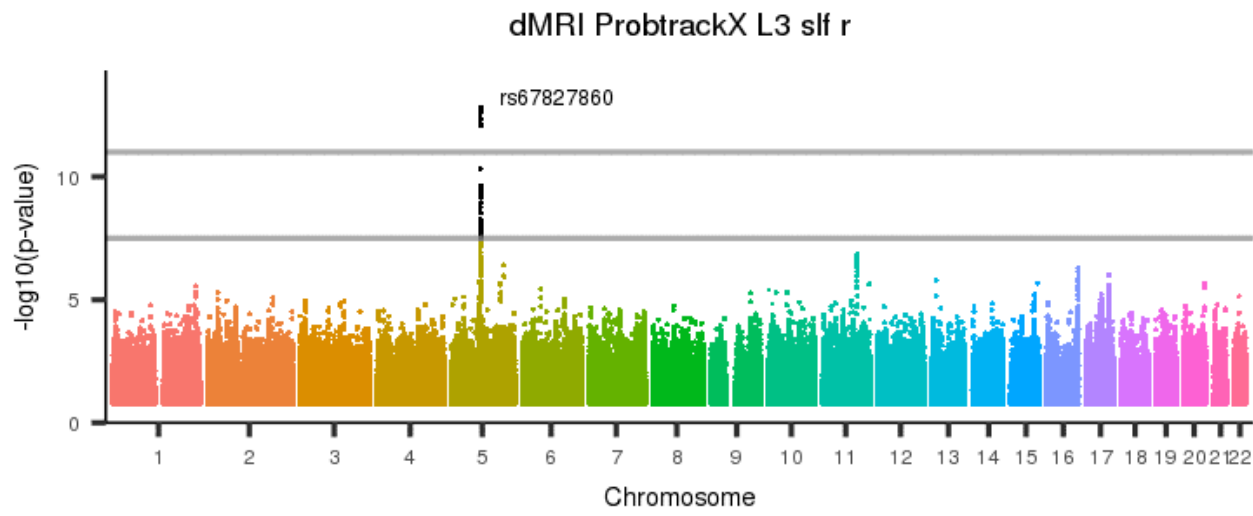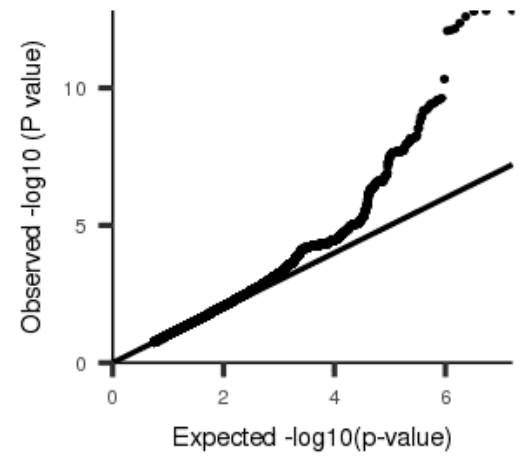

[back to list of plots](#)

Figure 786: dMRI ProbtrackX L3 str I

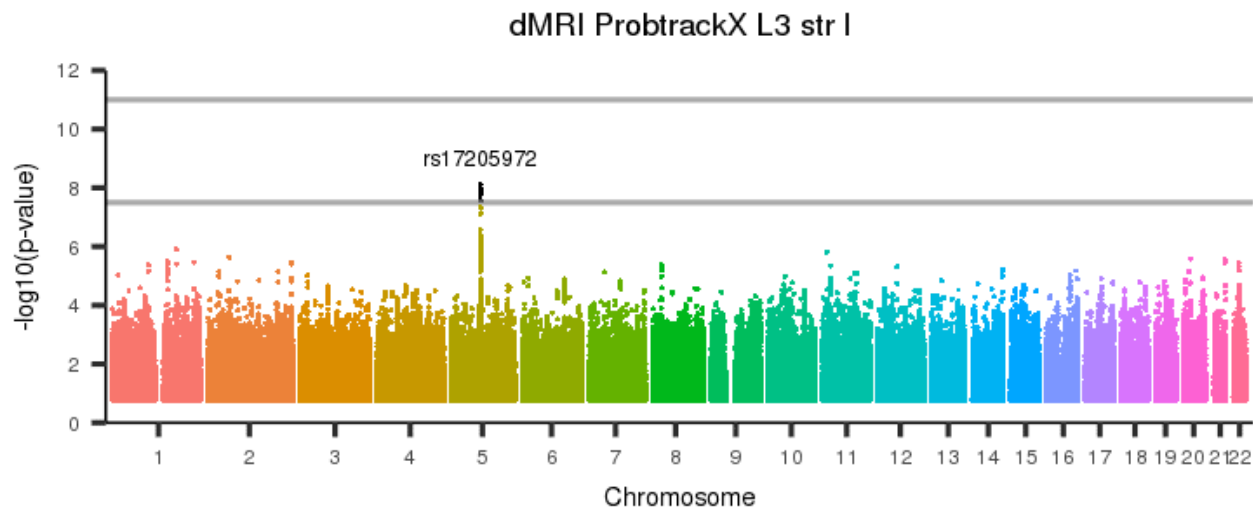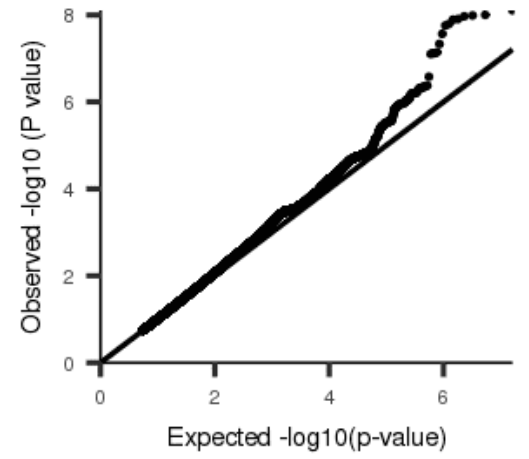

[back to list of plots](#)

Figure 787: dMRI ProbtrackX L3 str r

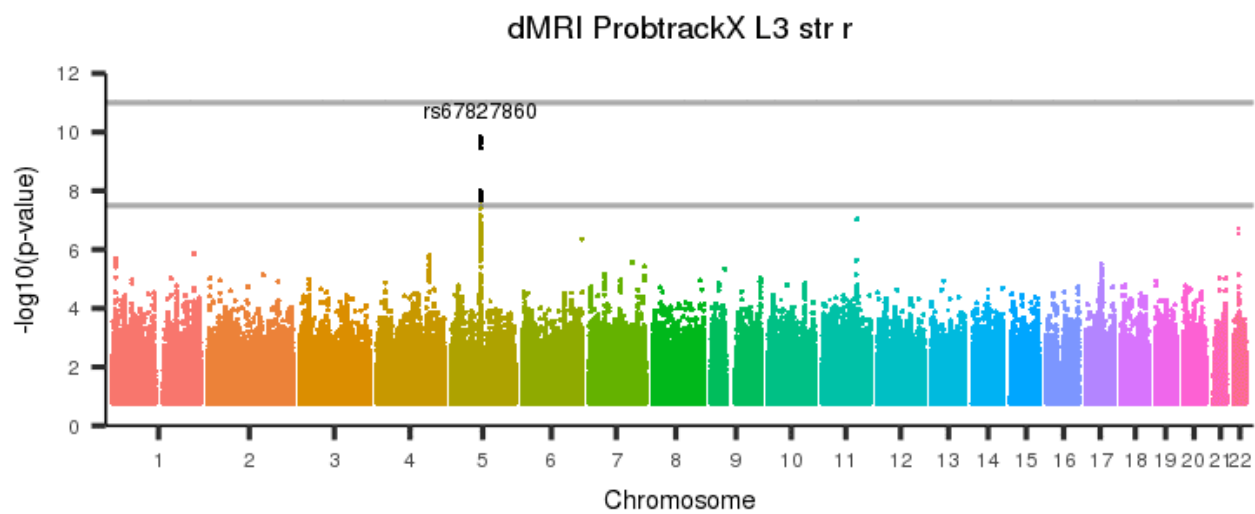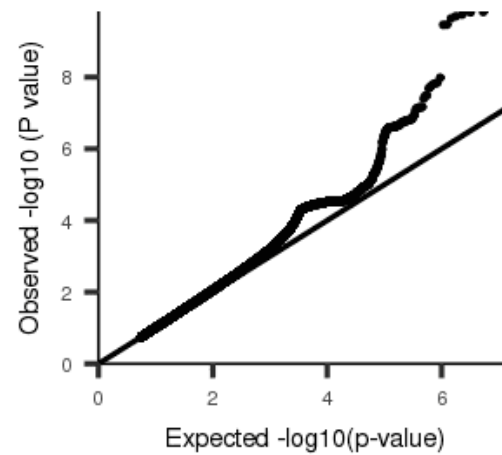

[back to list of plots](#)

Figure 788: dMRI ProbtrackX L3 unc I

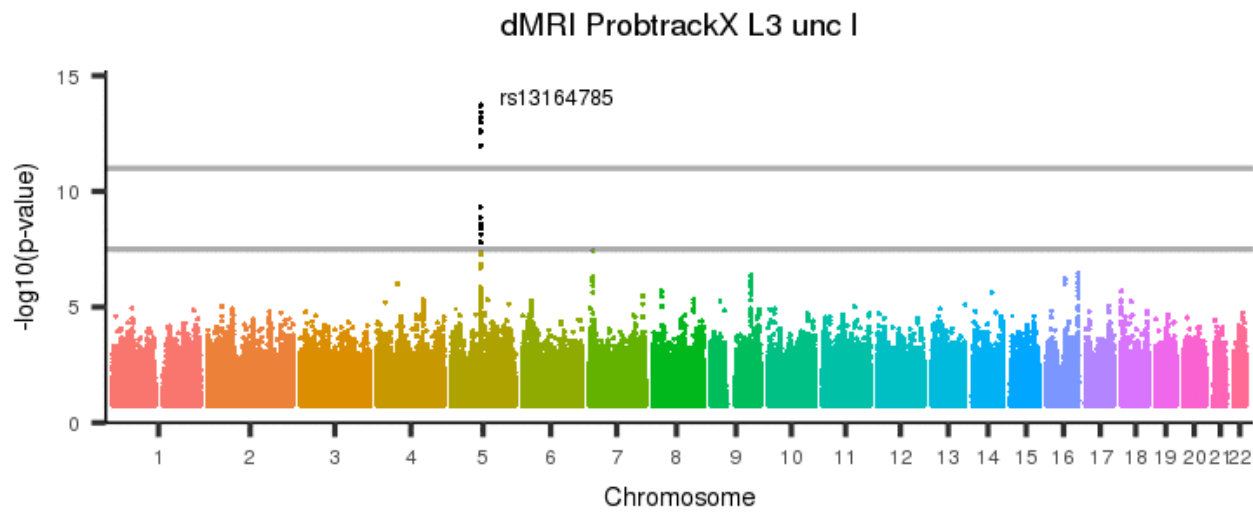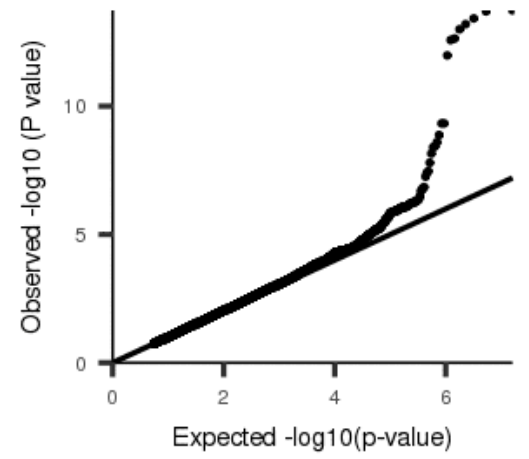

[back to list of plots](#)

Figure 789: dMRI ProbtrackX L3 unc r

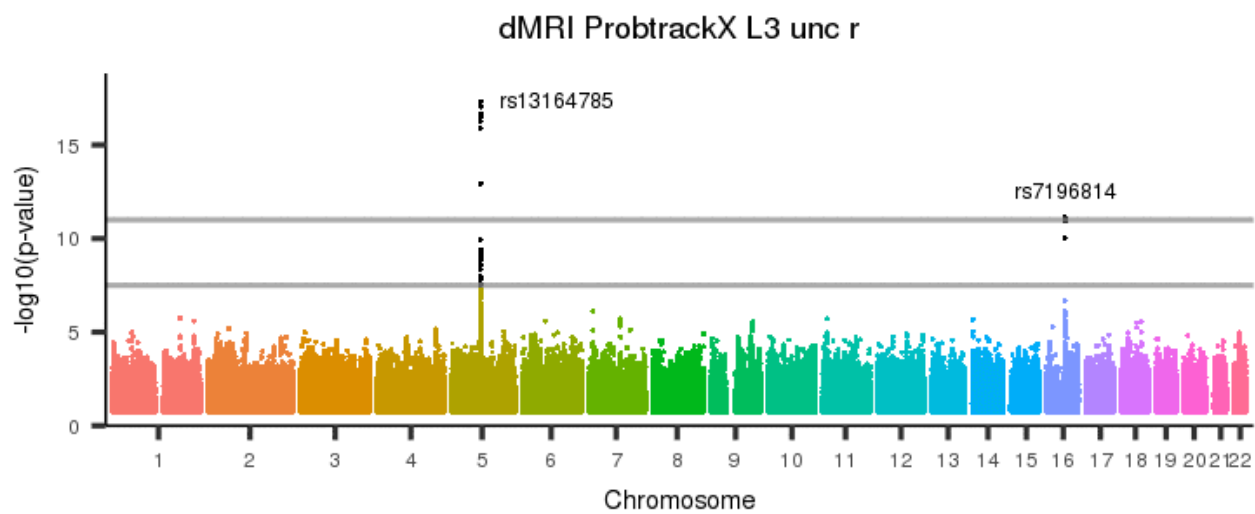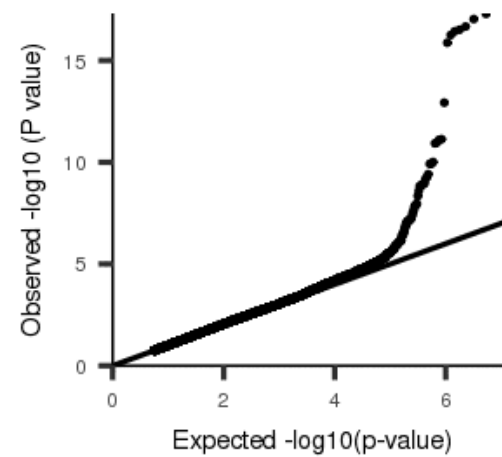

[back to list of plots](#)



Figure 790: dMRI ProbtrackX ICVF ar I

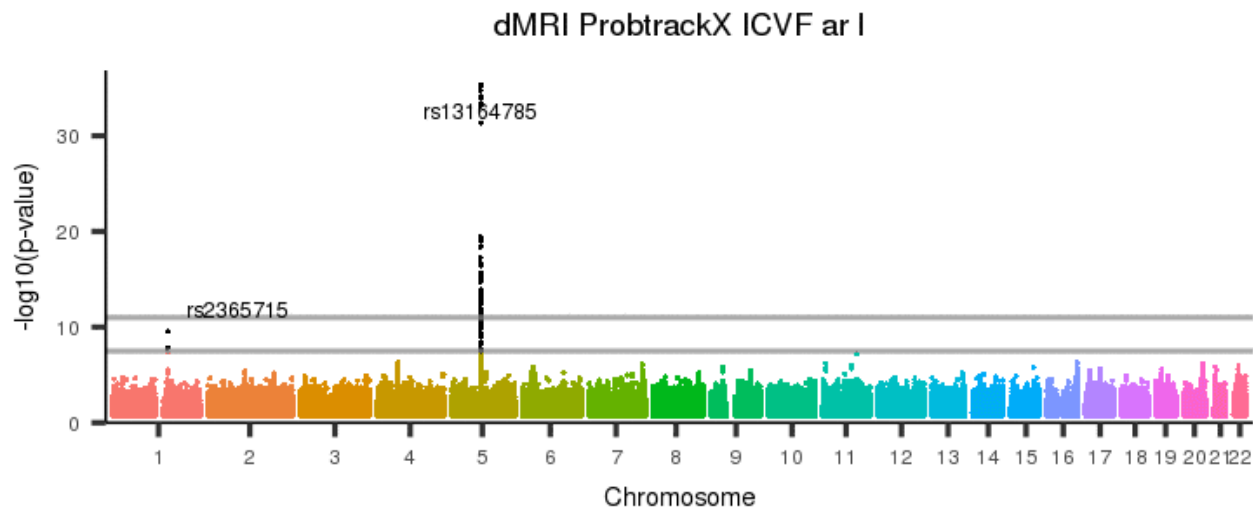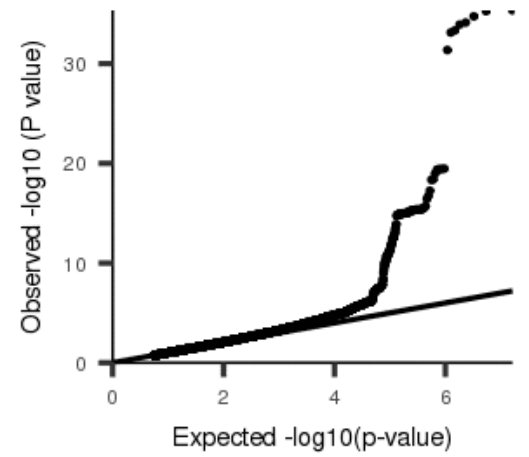

[back to list of plots](#)

Figure 791: dMRI ProbtrackX ICVF ar r

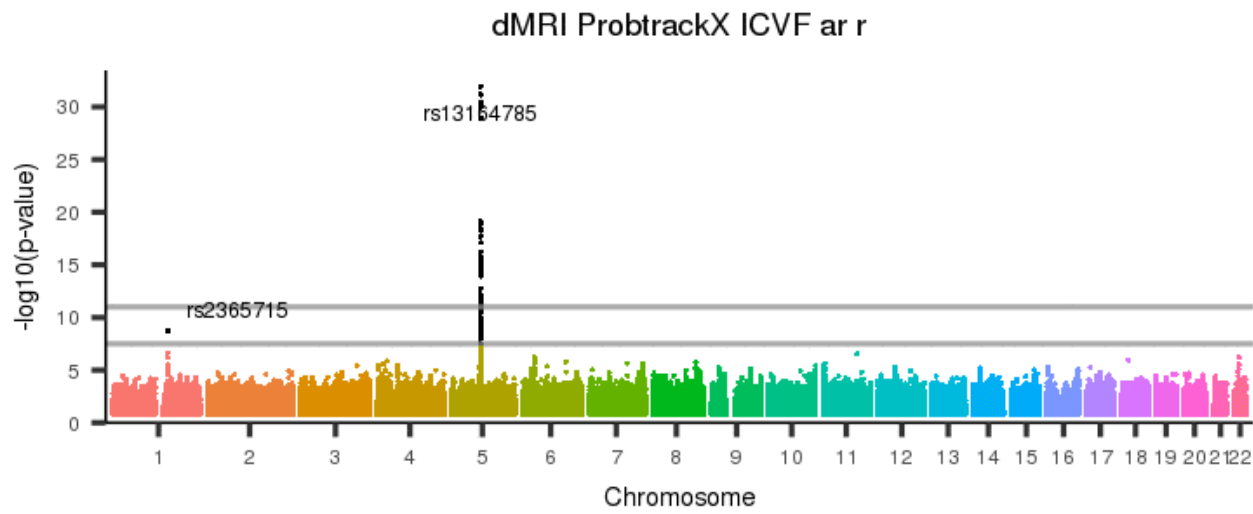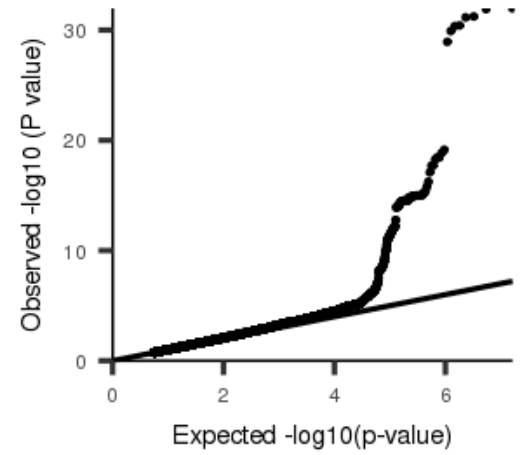

[back to list of plots](#)

Figure 792: dMRI ProbtrackX ICVF atr I

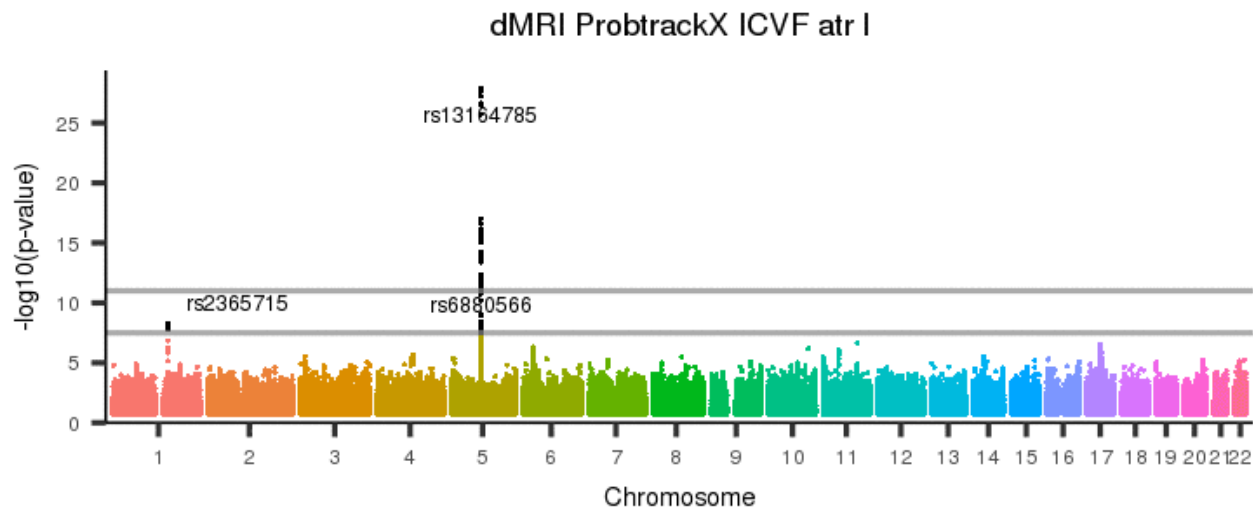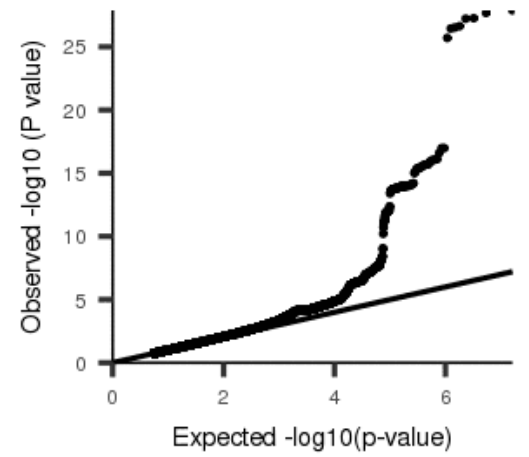

[back to list of plots](#)

Figure 793: dMRI ProbtrackX ICVF atr r

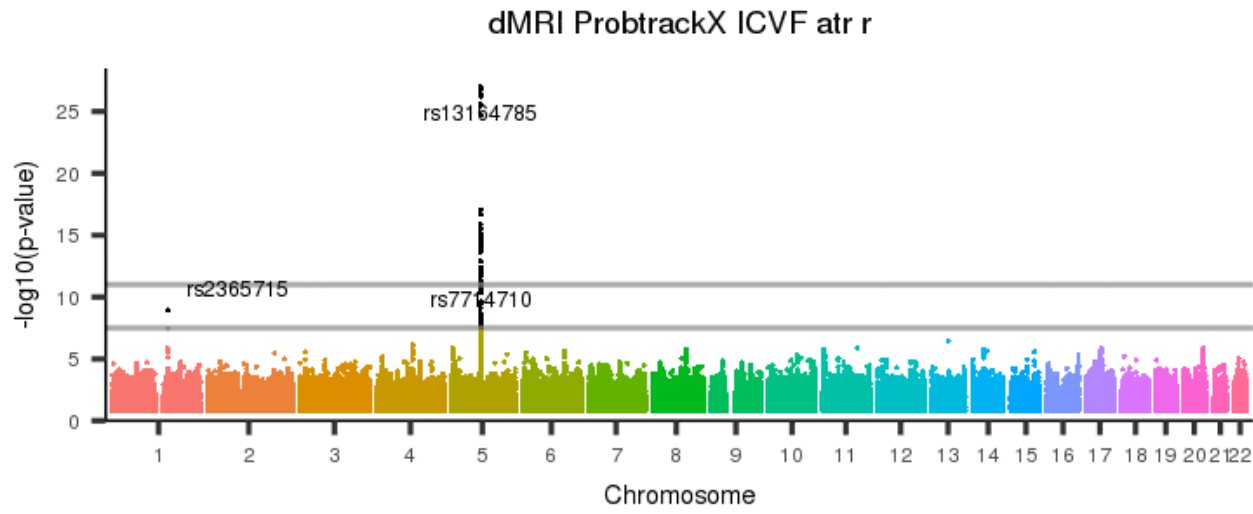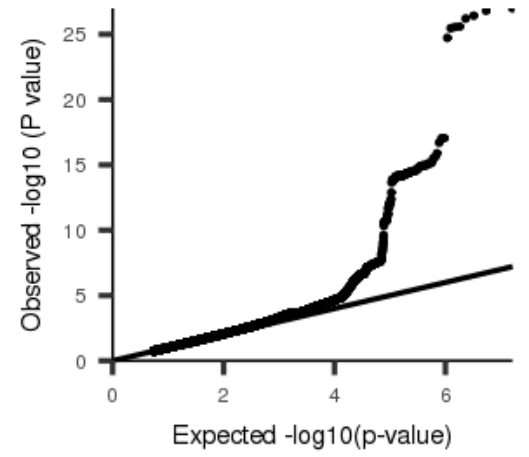

[back to list of plots](#)

Figure 794: dMRI ProbtrackX ICVF cgc I

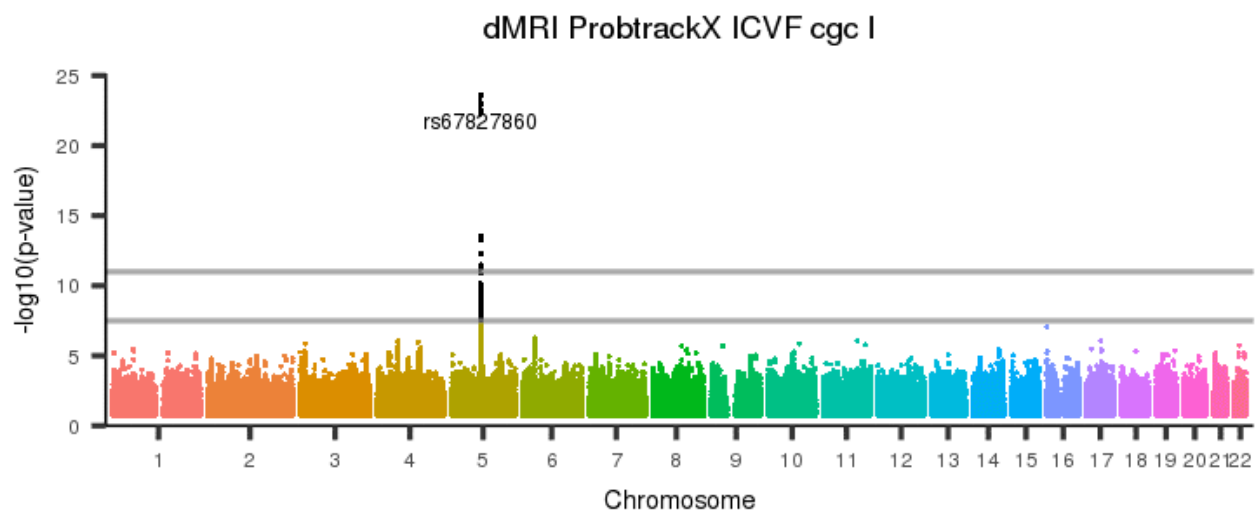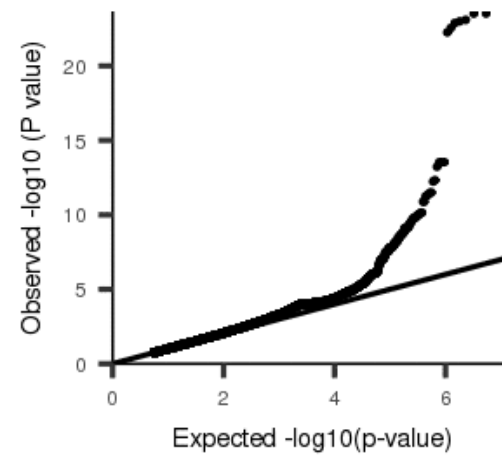

[back to list of plots](#)

Figure 795: dMRI ProbtrackX ICVF cgc r

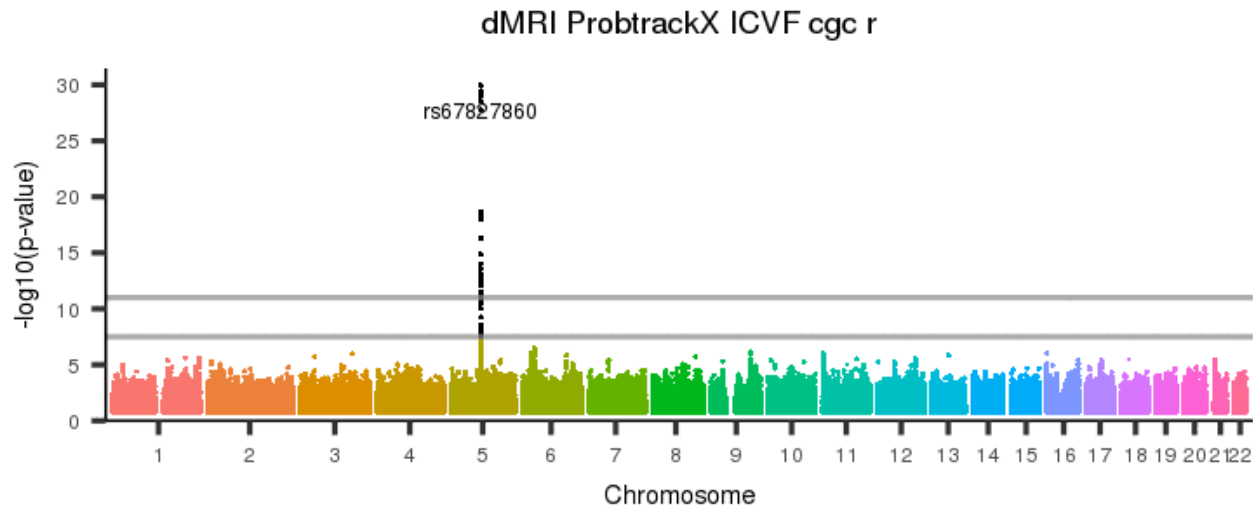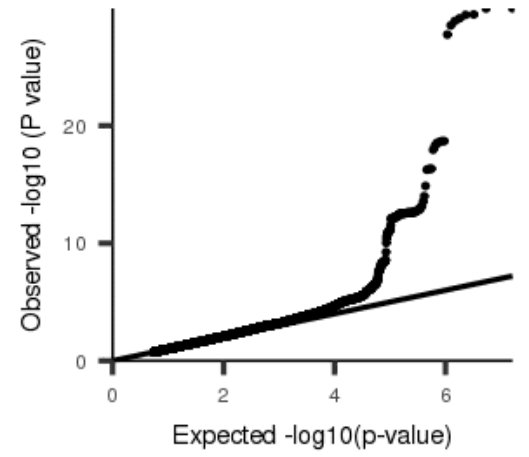

[back to list of plots](#)

Figure 796: dMRI ProbtrackX ICVF cgh I

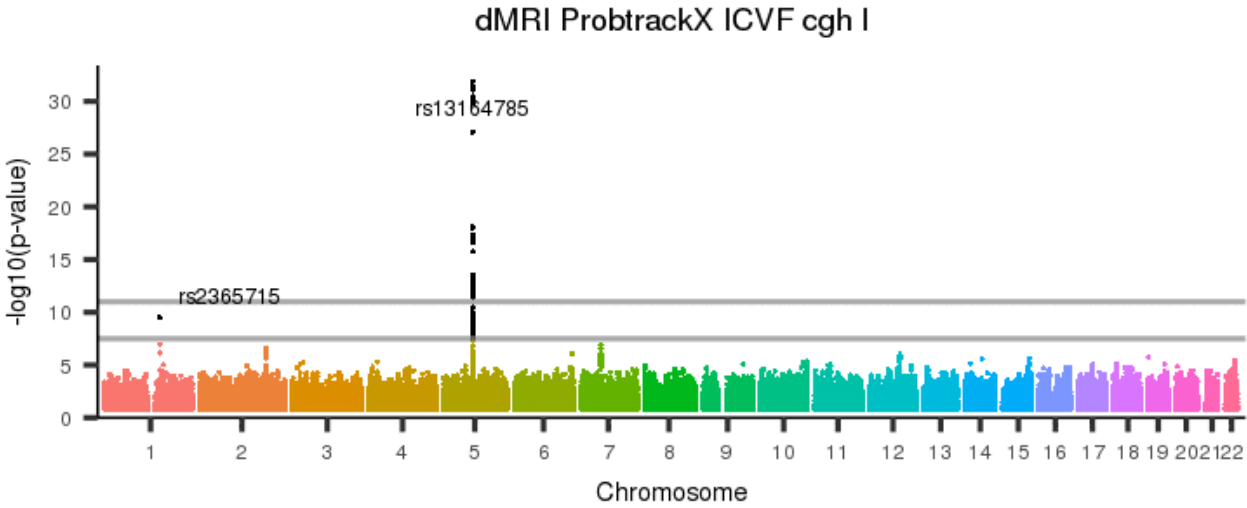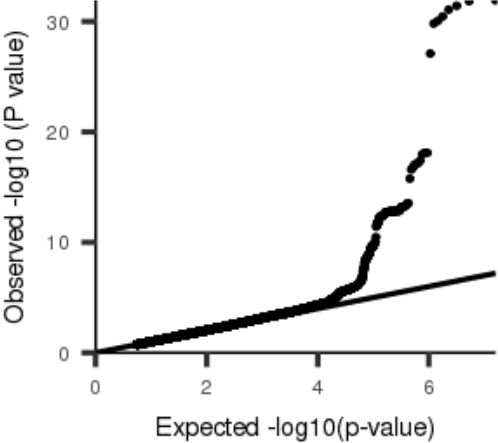

[back to list of plots](#)

Figure 797: dMRI ProbtrackX ICVF cgh r

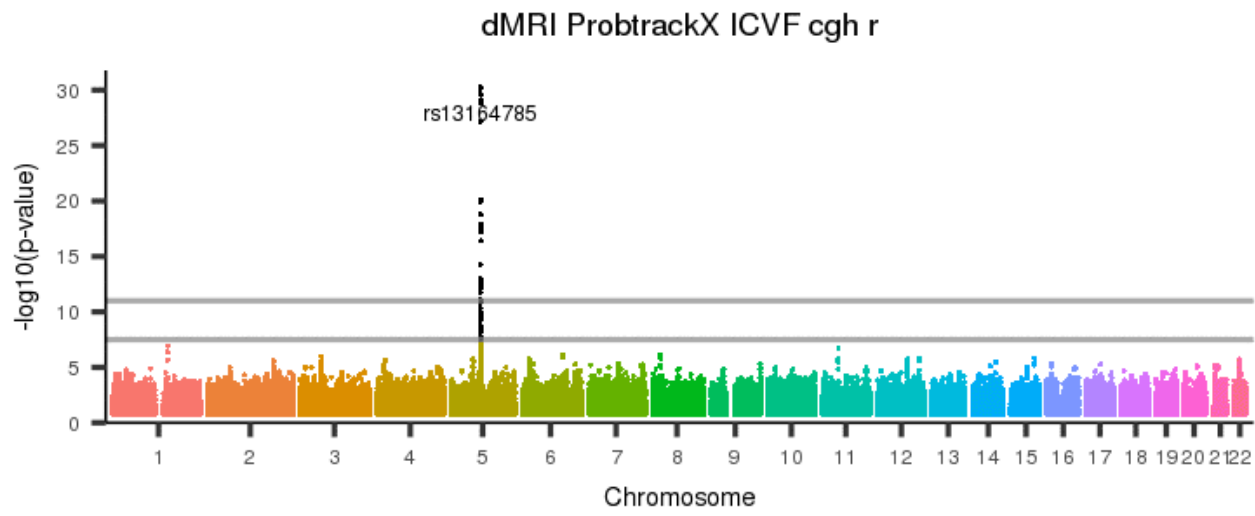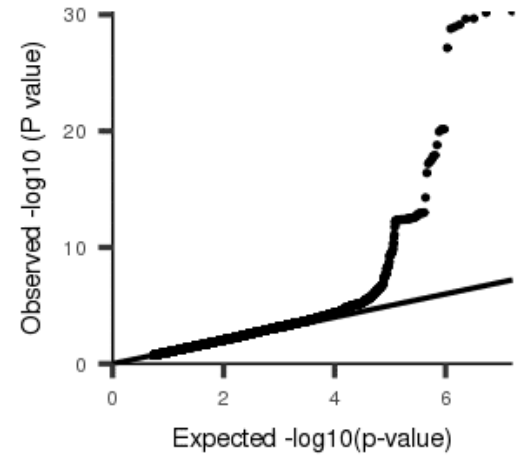

[back to list of plots](#)



Figure 798: dMRI ProbtrackX ICVF cst I

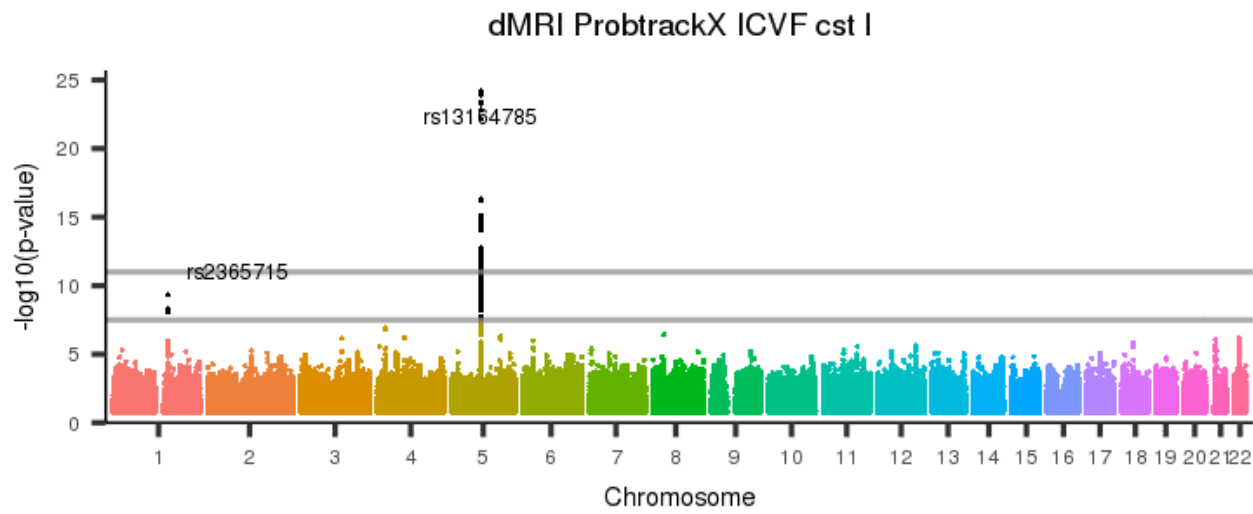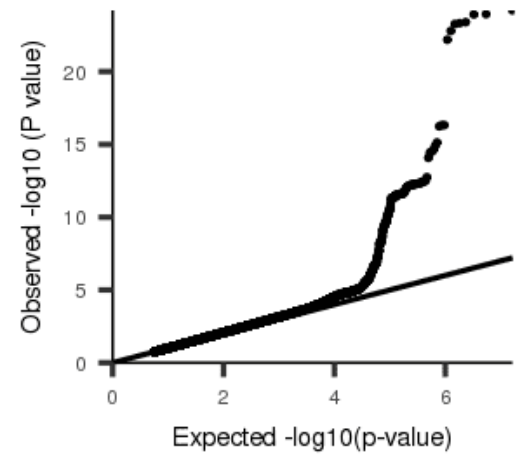

[back to list of plots](#)

Figure 799: dMRI ProbtrackX ICVF cst r

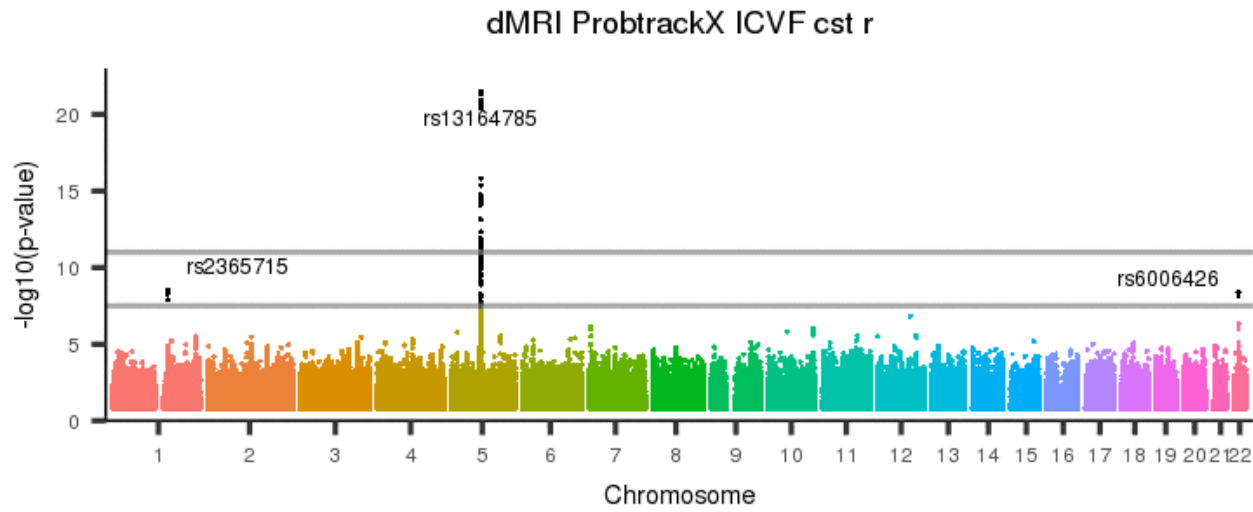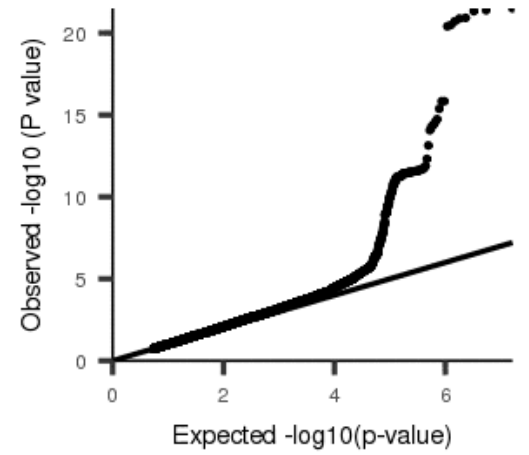

[back to list of plots](#)

Figure 800: dMRI ProbtrackX ICVF fma

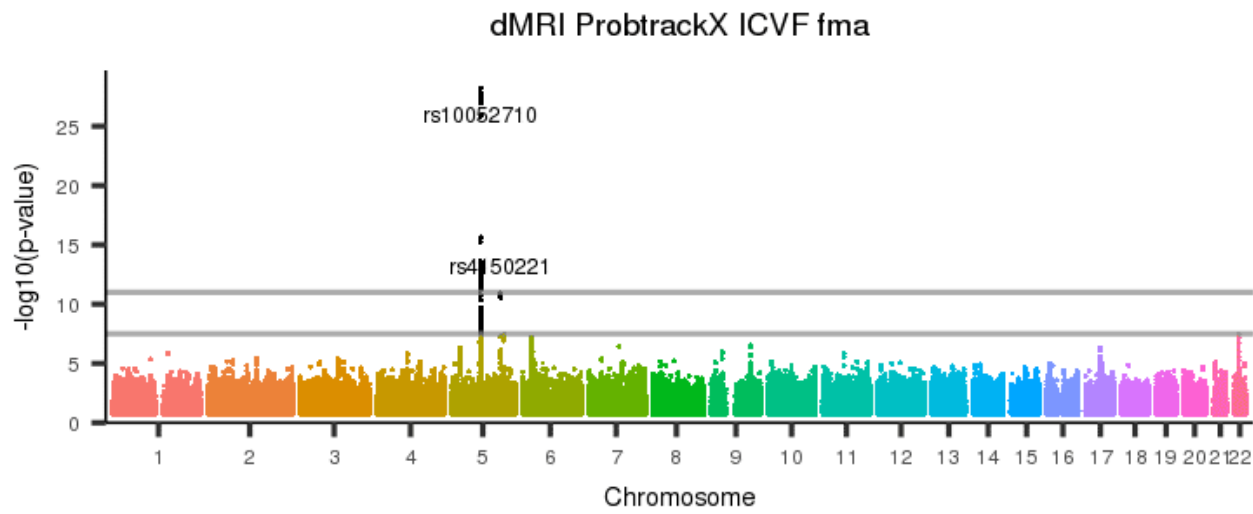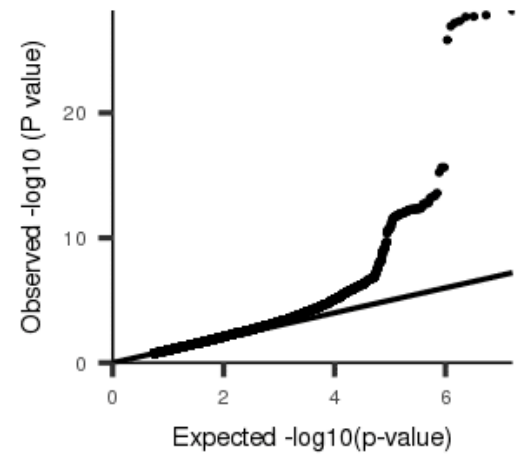

[back to list of plots](#)

Figure 801: dMRI ProbtrackX ICVF fmi

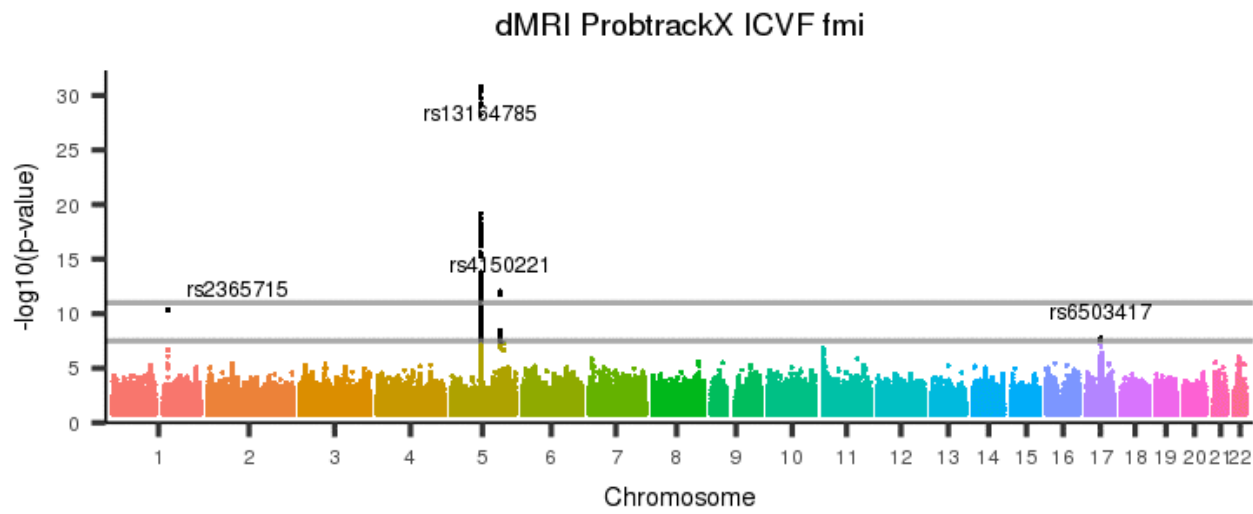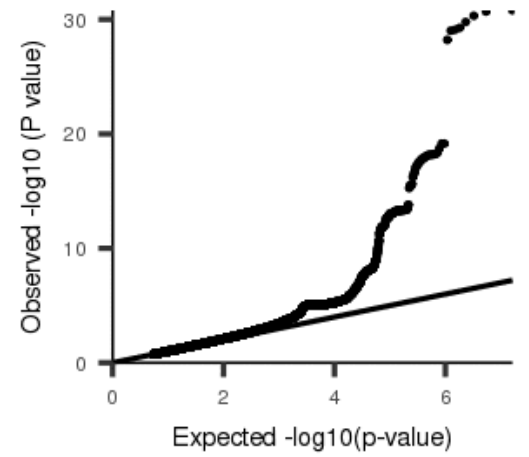

[back to list of plots](#)

Figure 802: dMRI ProbtrackX ICVF ifo I

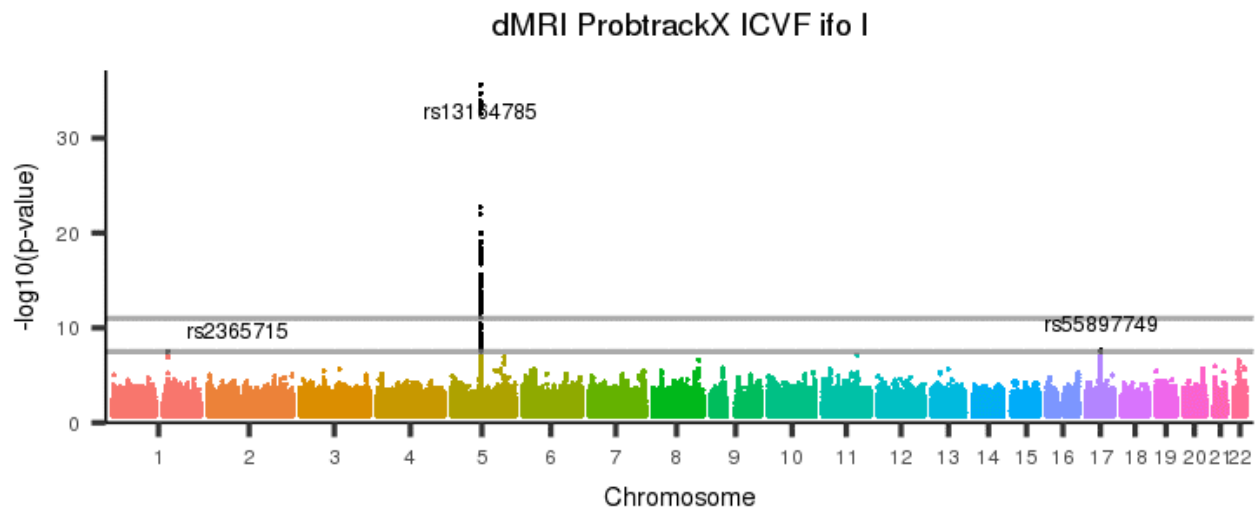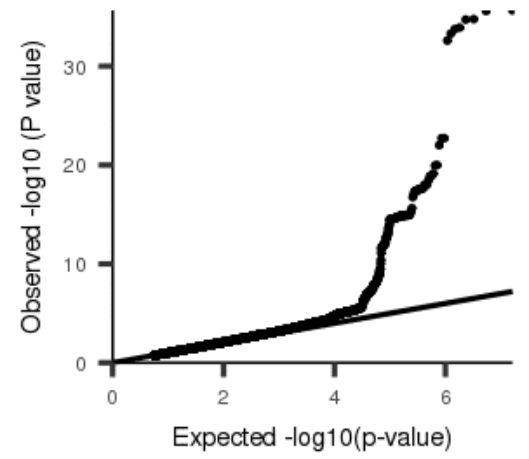

[back to list of plots](#)

Figure 803: dMRI ProbtrackX ICVF ifo r

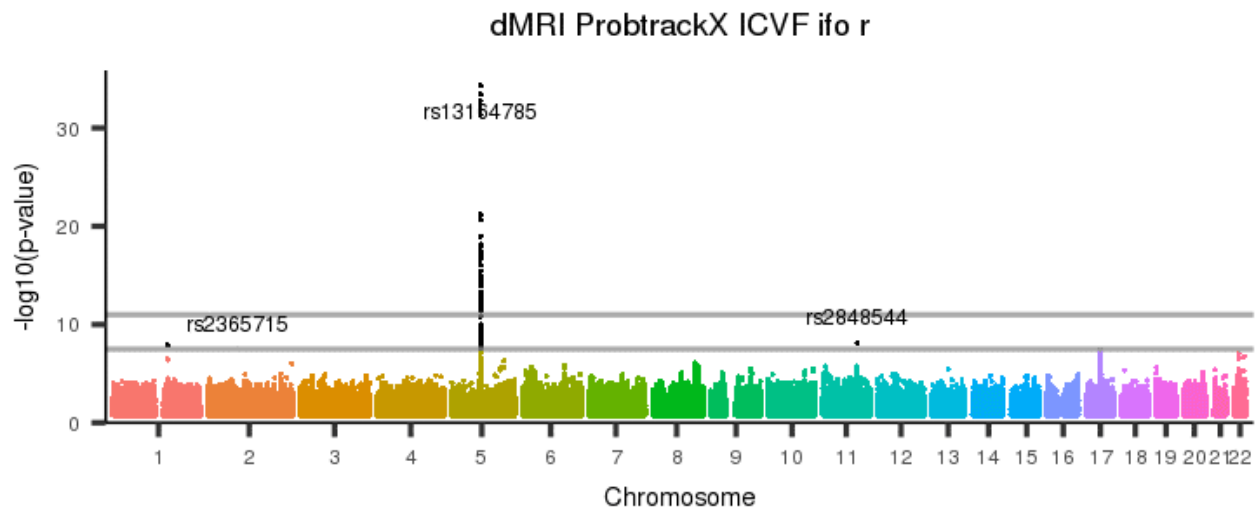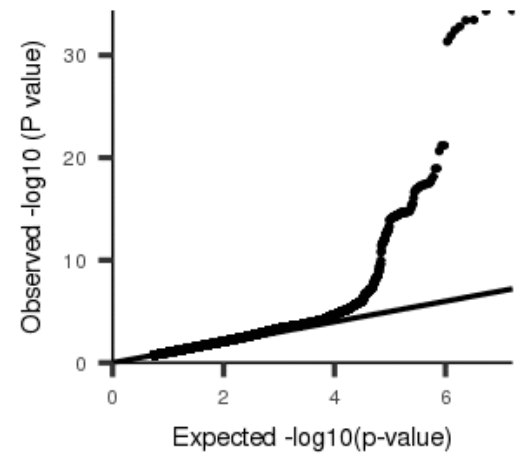

[back to list of plots](#)

Figure 804: dMRI ProbtrackX ICVF ilf I

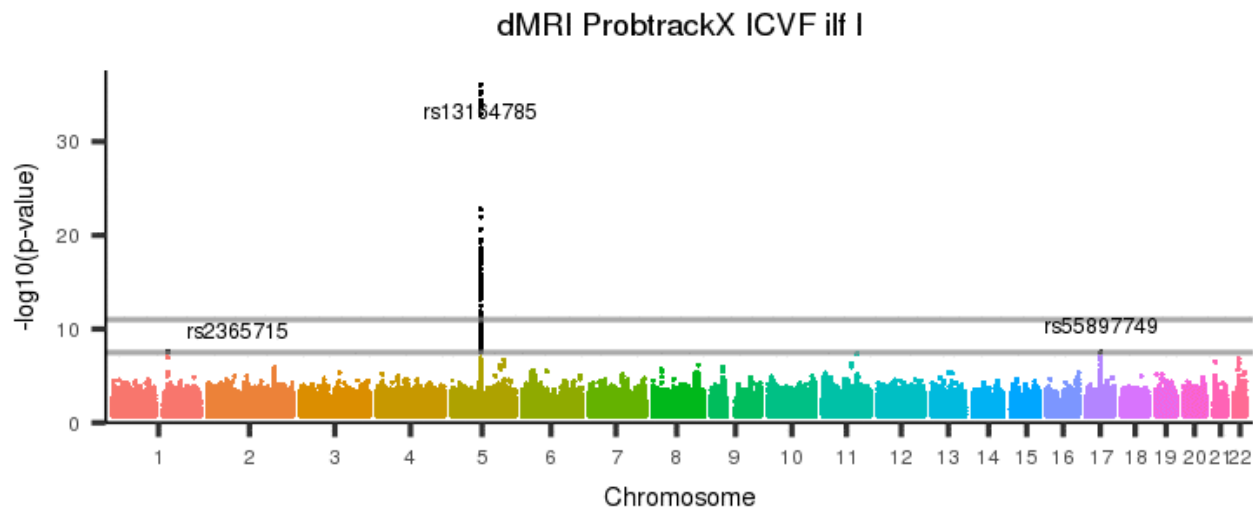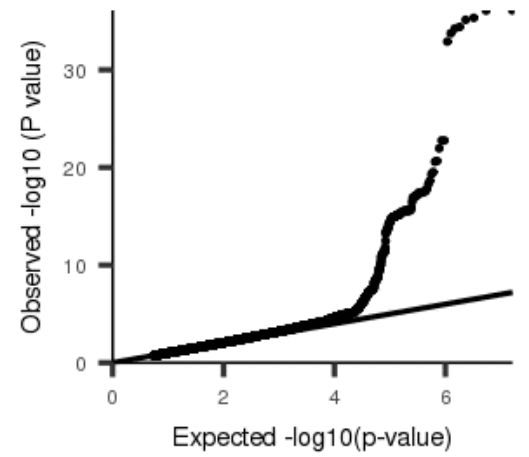

[back to list of plots](#)

Figure 805: dMRI ProbtrackX ICVF ilf r

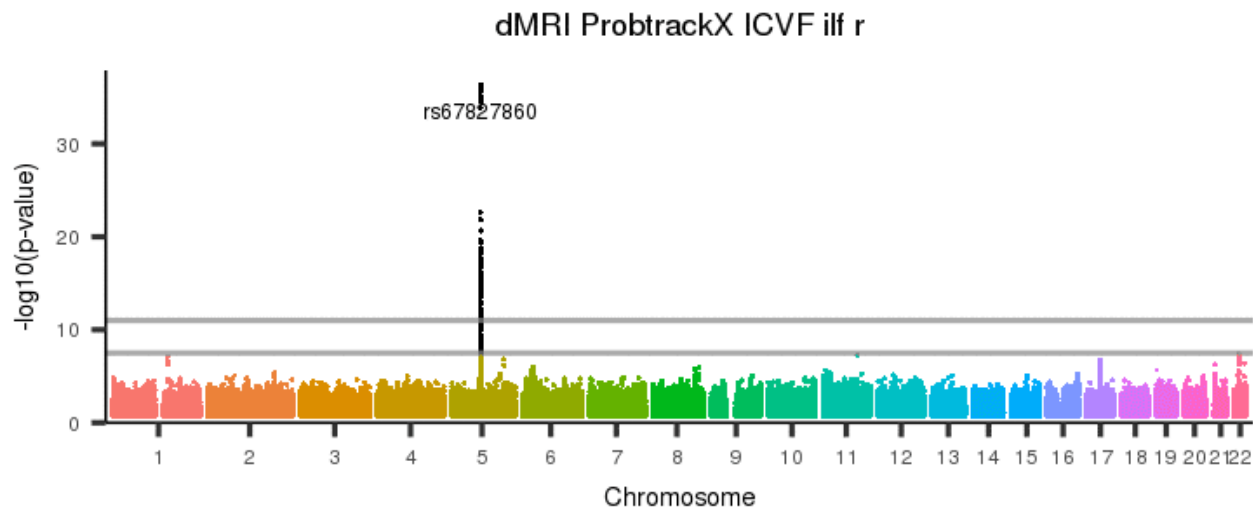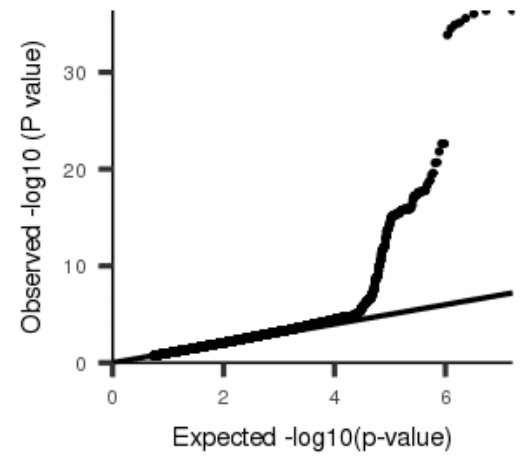

[back to list of plots](#)



Figure 806: dMRI ProbtrackX ICVF mcp

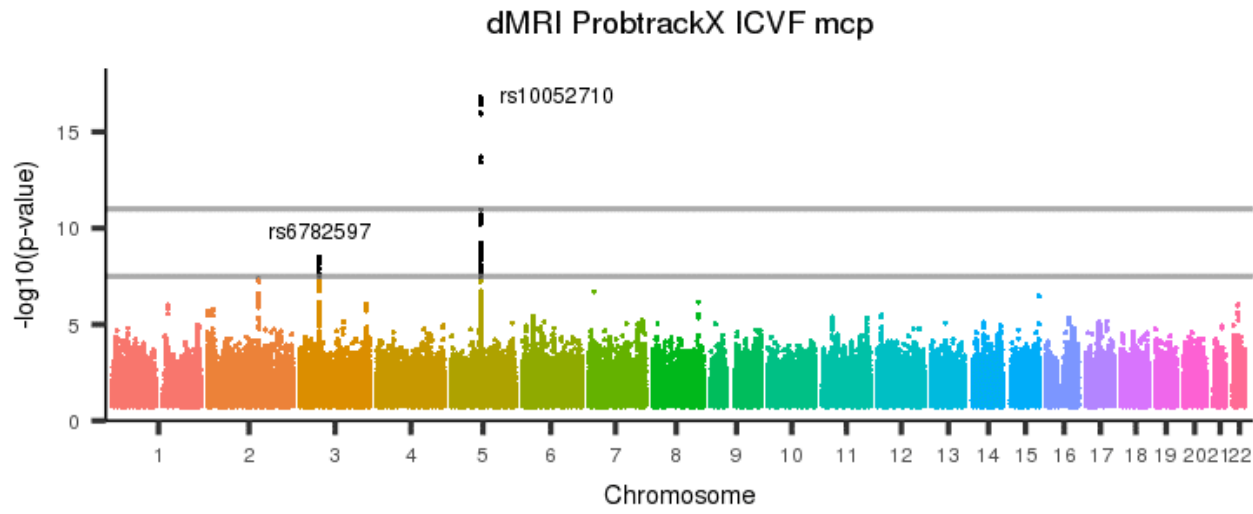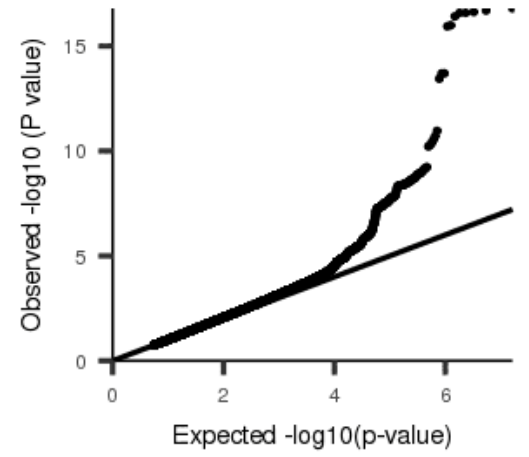

[back to list of plots](#)

Figure 807: dMRI ProbtrackX ICVF ml I

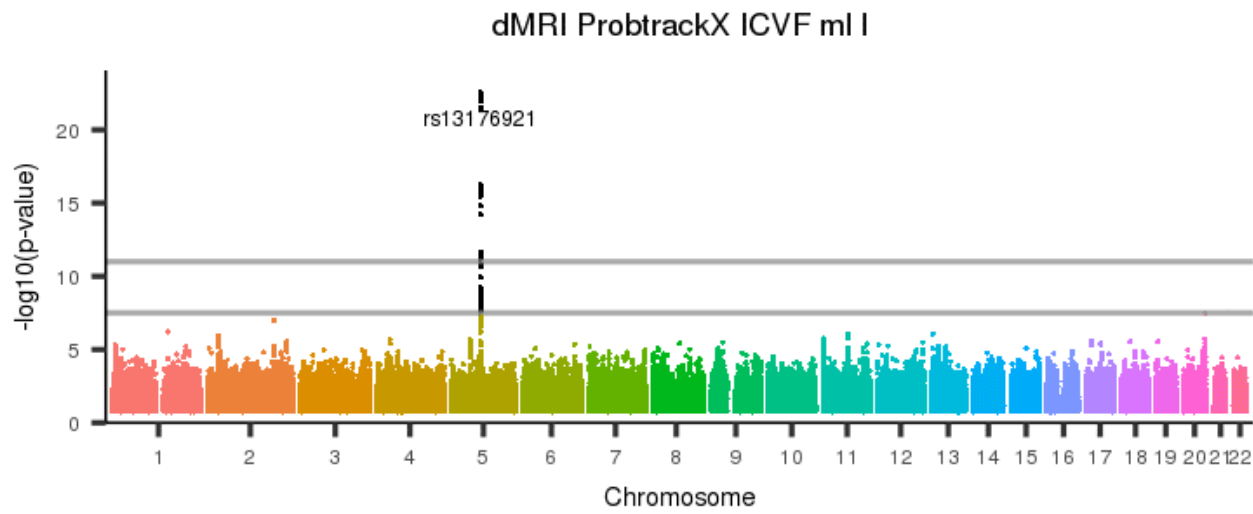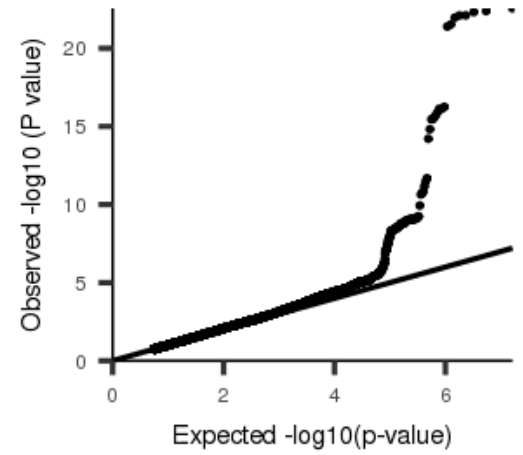

[back to list of plots](#)

Figure 808: dMRI ProbtrackX ICVF ml r

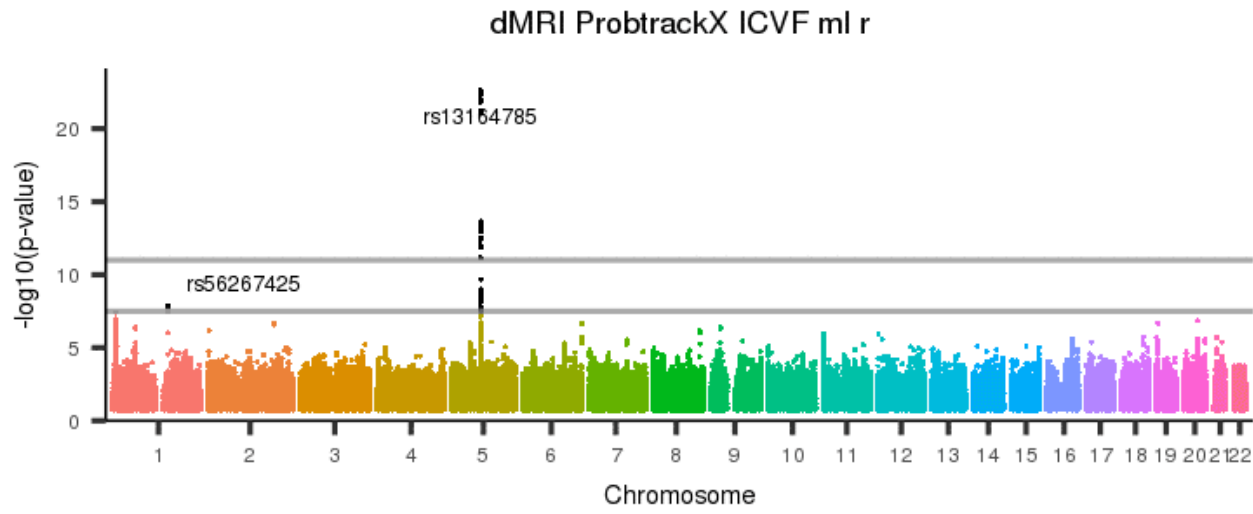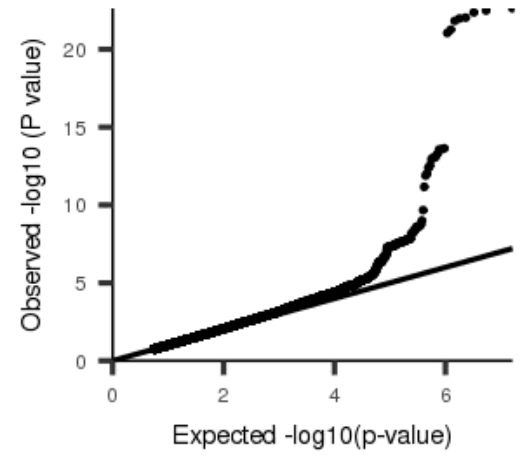

[back to list of plots](#)

Figure 809: dMRI ProbtrackX ICVF ptr I

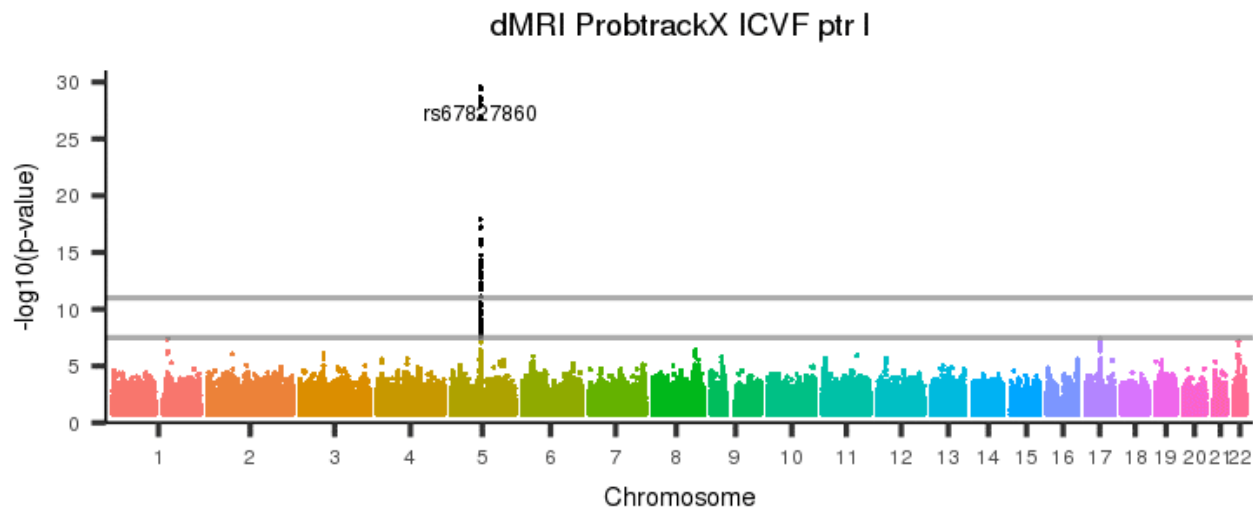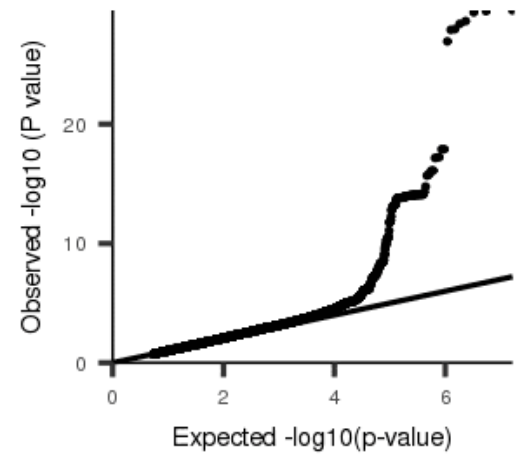

[back to list of plots](#)

Figure 810: dMRI ProbtrackX ICVF ptr r

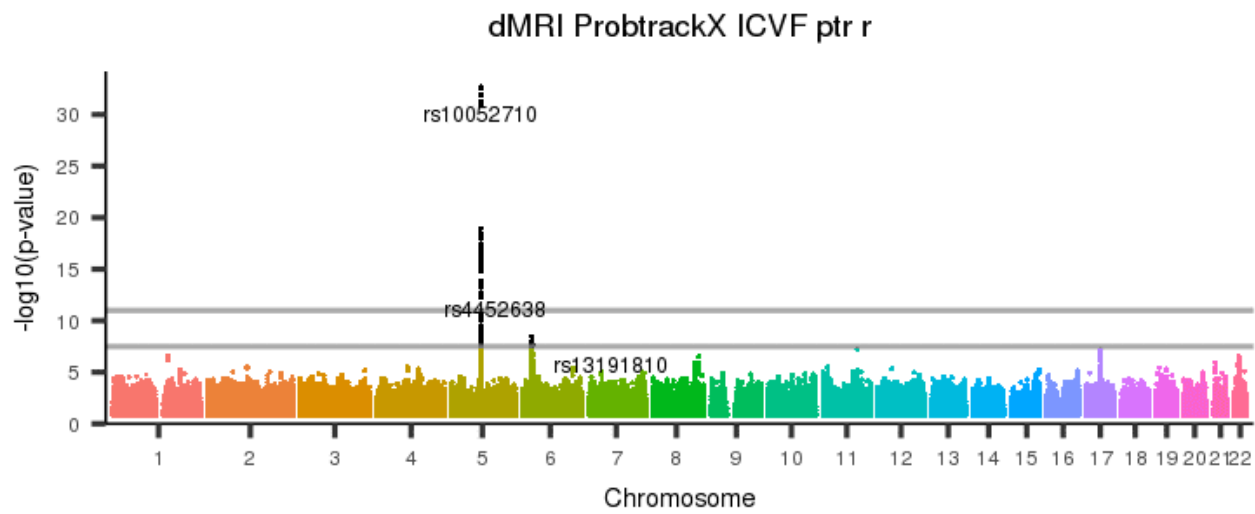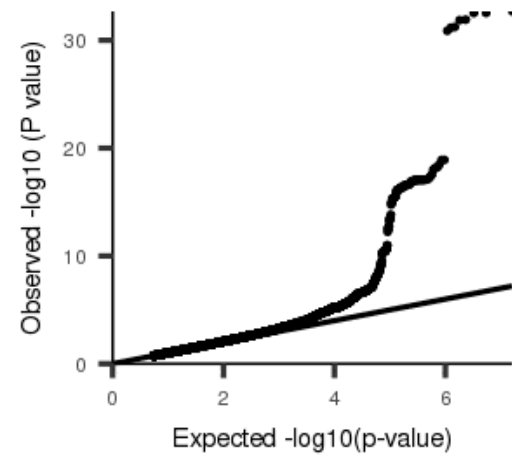

[back to list of plots](#)

Figure 811: dMRI ProbtrackX ICVF slf I

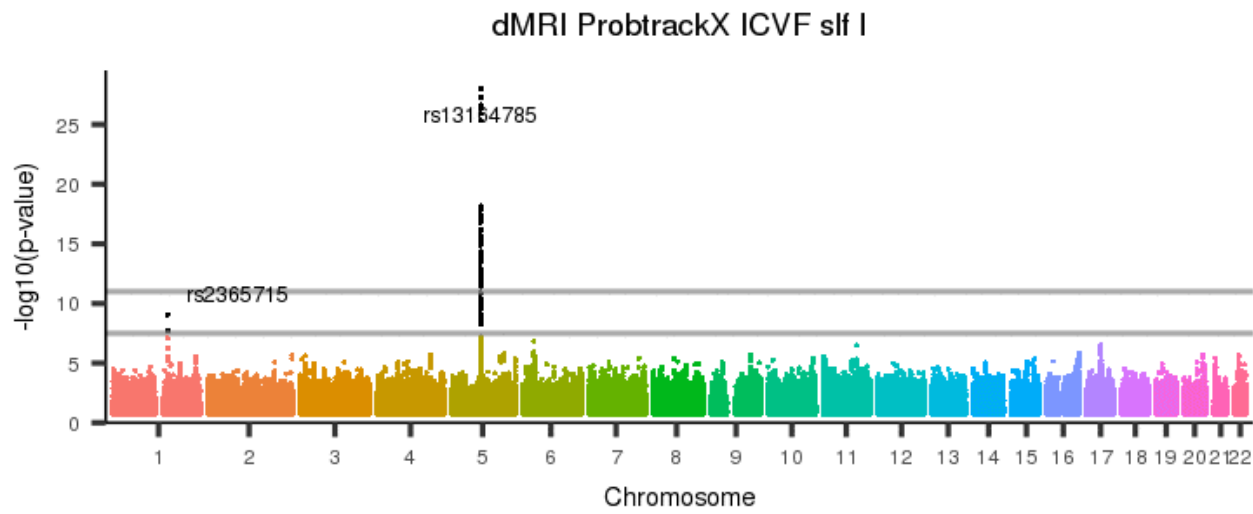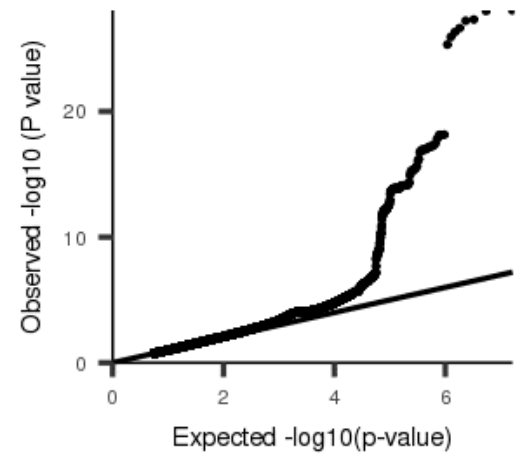

[back to list of plots](#)

Figure 812: dMRI ProbtrackX ICVF slf r

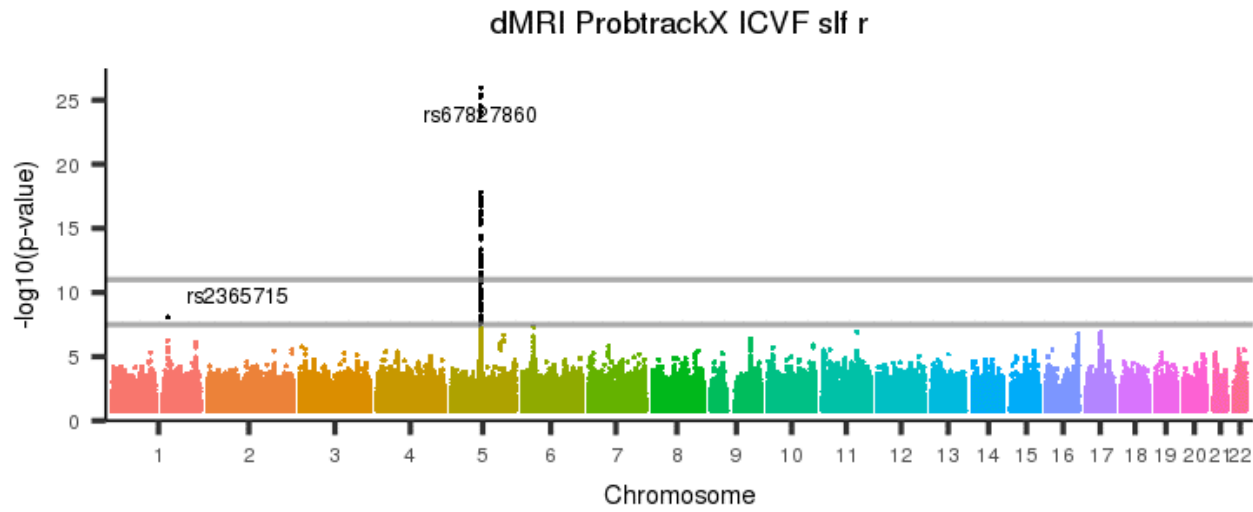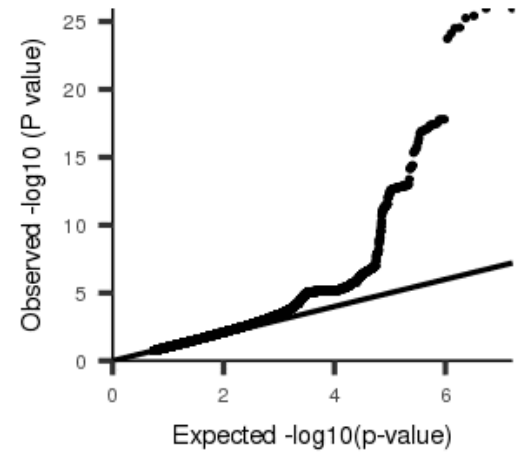

[back to list of plots](#)

Figure 813: dMRI ProbtrackX ICVF str I

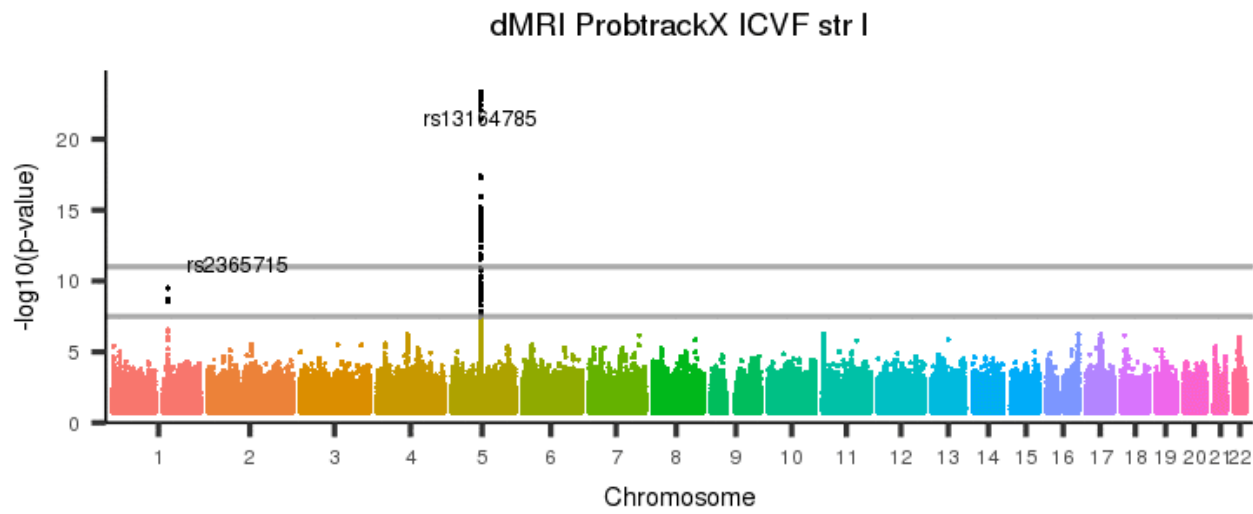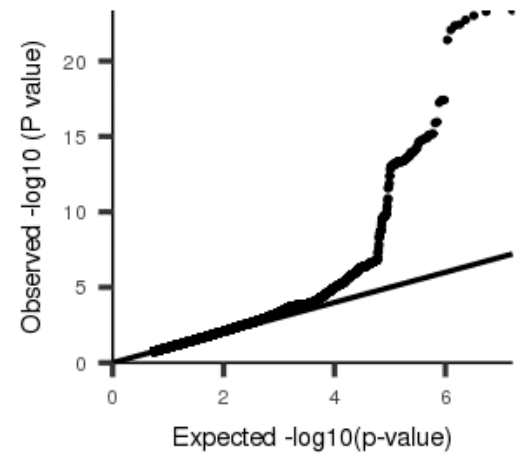

[back to list of plots](#)



Figure 814: dMRI ProbtrackX ICVF str r

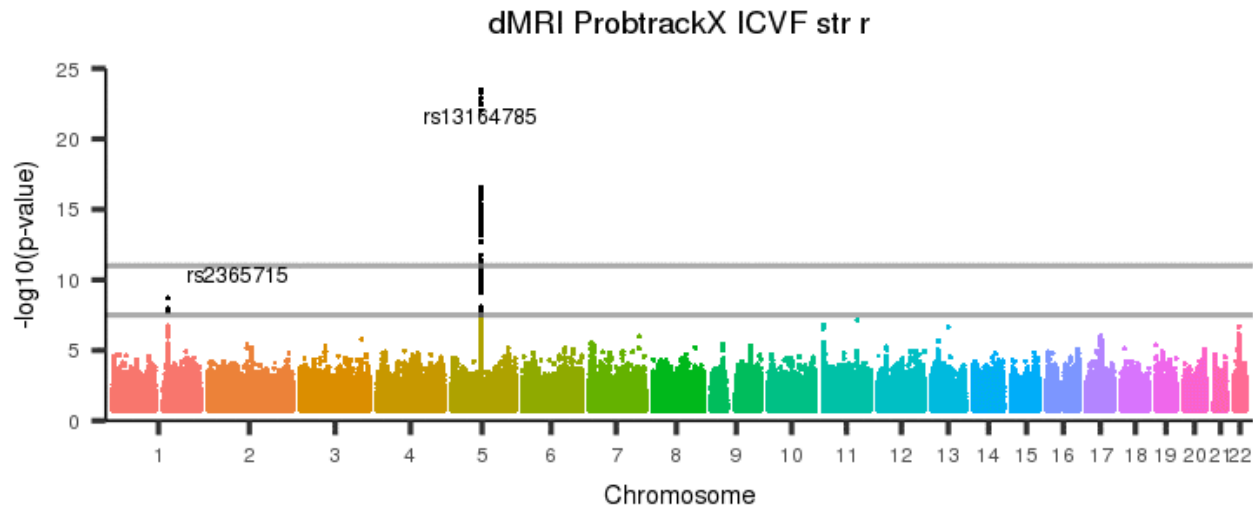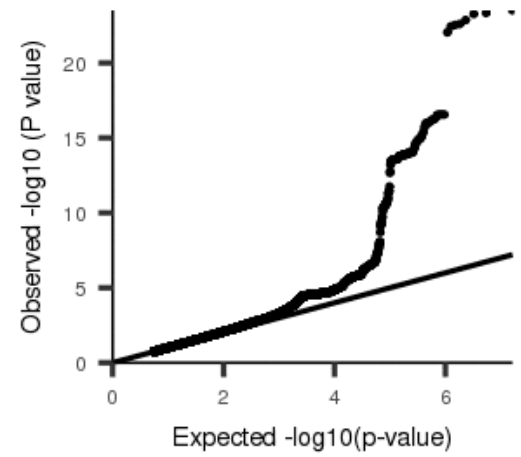

[back to list of plots](#)

Figure 815: dMRI ProbtrackX ICVF unc I

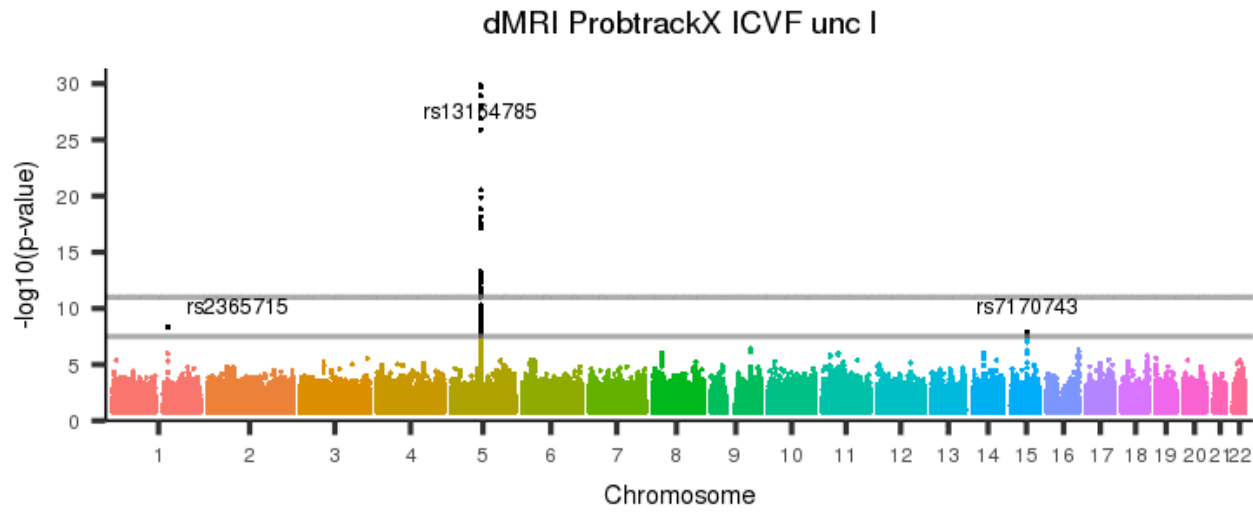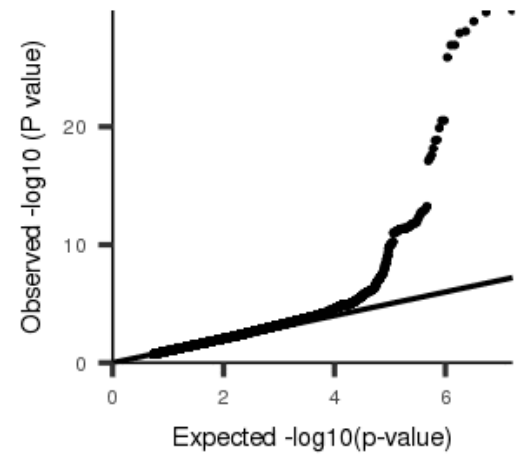

[back to list of plots](#)

Figure 816: dMRI ProbtrackX ICVF unc r

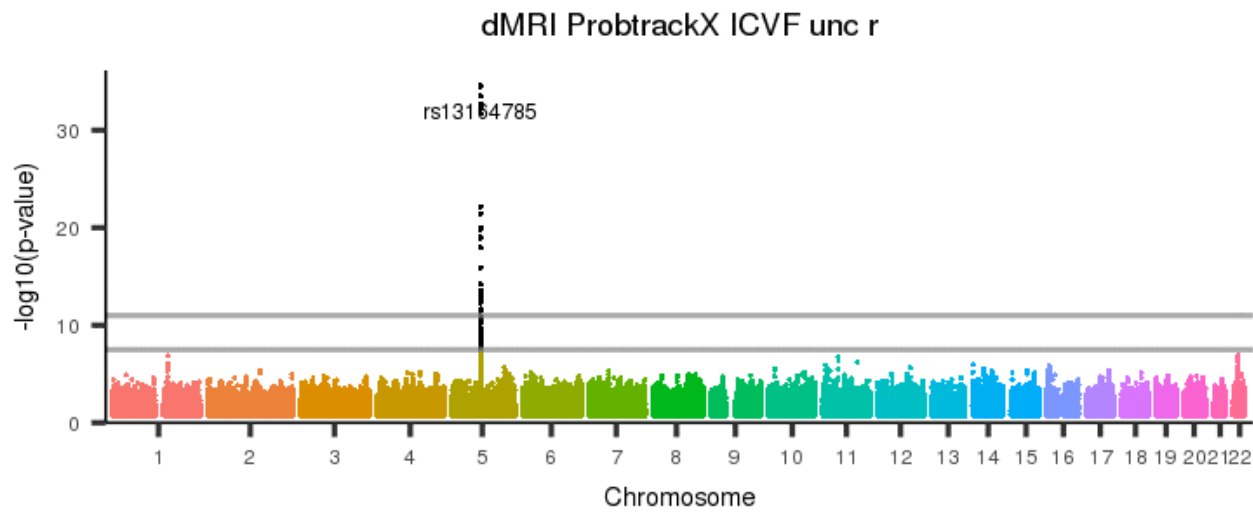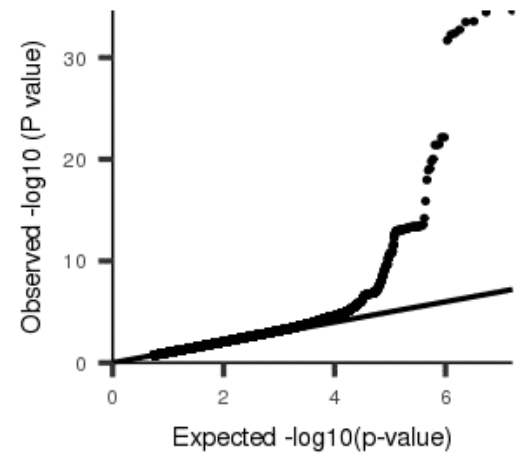

[back to list of plots](#)

Figure 817: dMRI ProbtrackX OD ar I

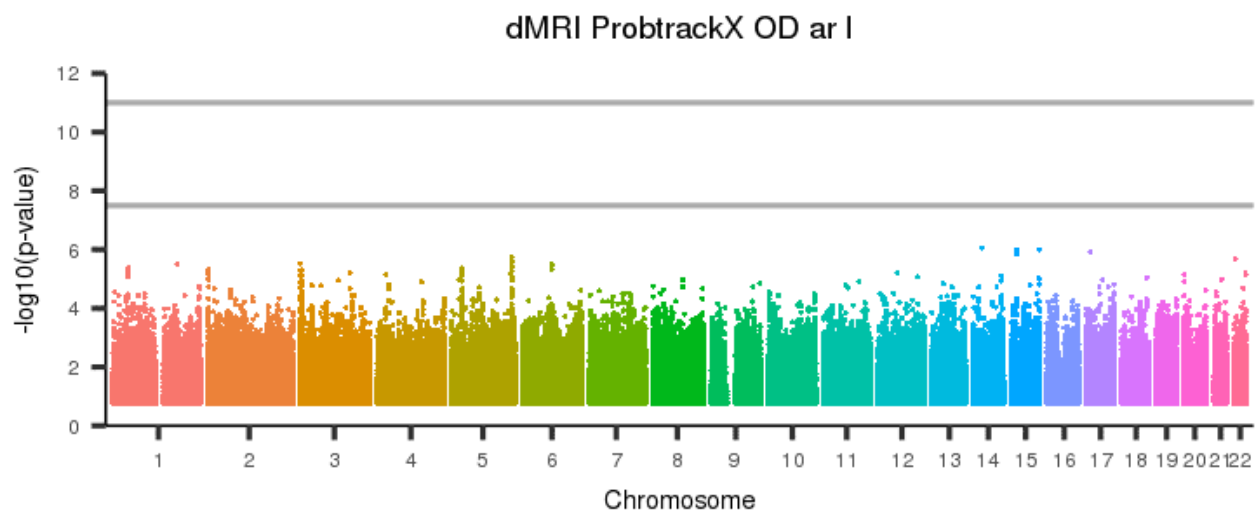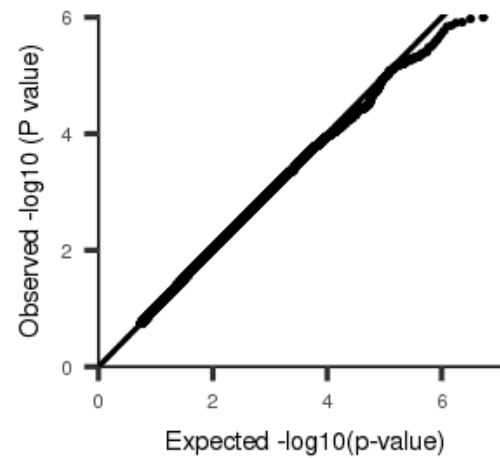

[back to list of plots](#)

Figure 818: dMRI ProbtrackX OD ar r

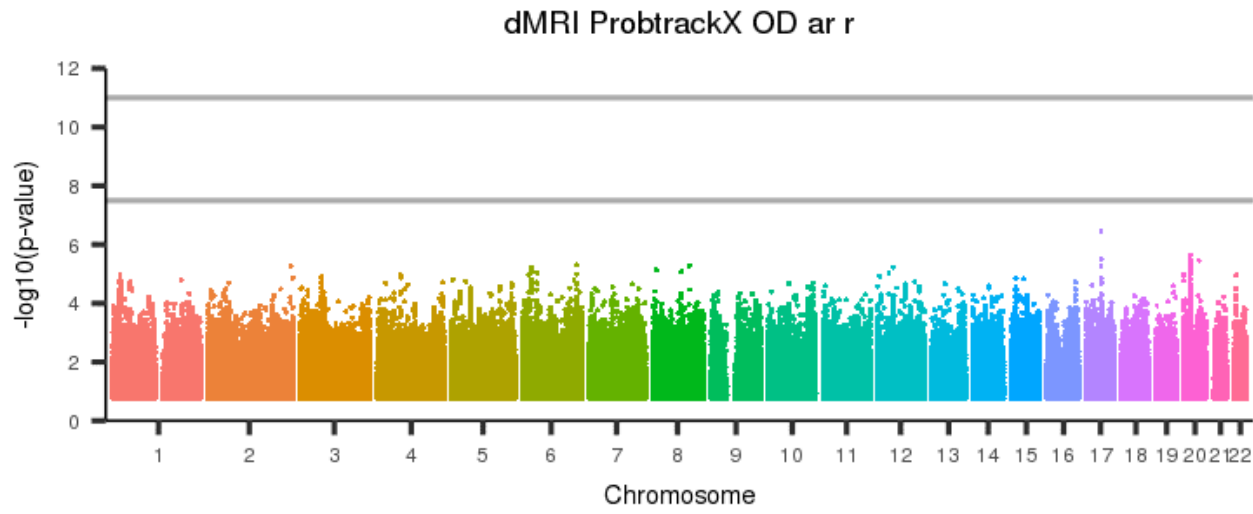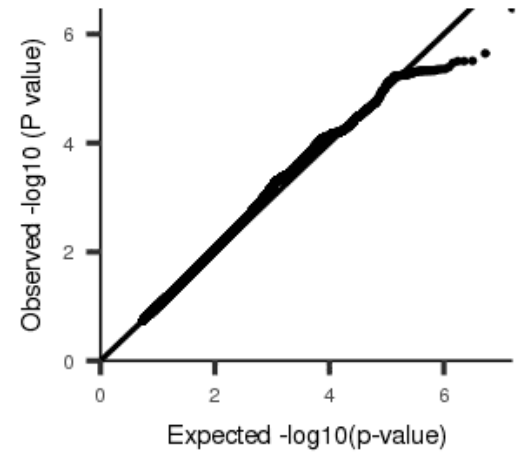

[back to list of plots](#)

Figure 819: dMRI ProbtrackX OD atr l

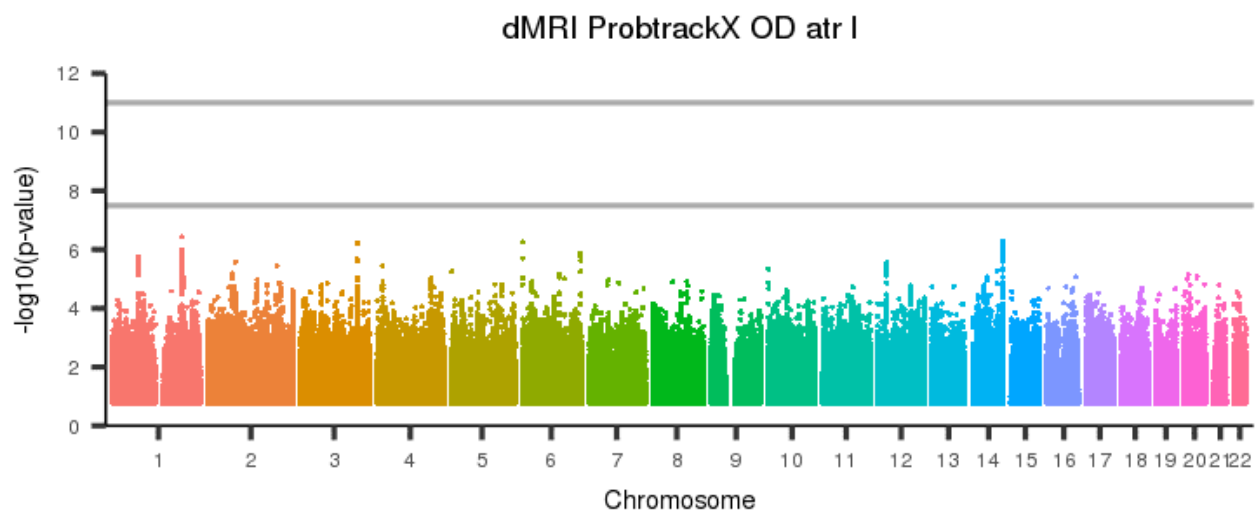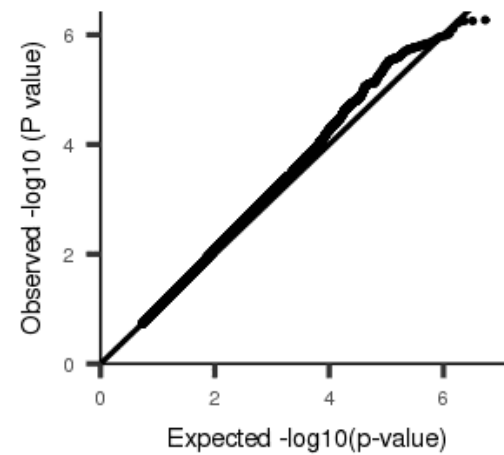

[back to list of plots](#)

Figure 820: dMRI ProbtrackX OD atr r

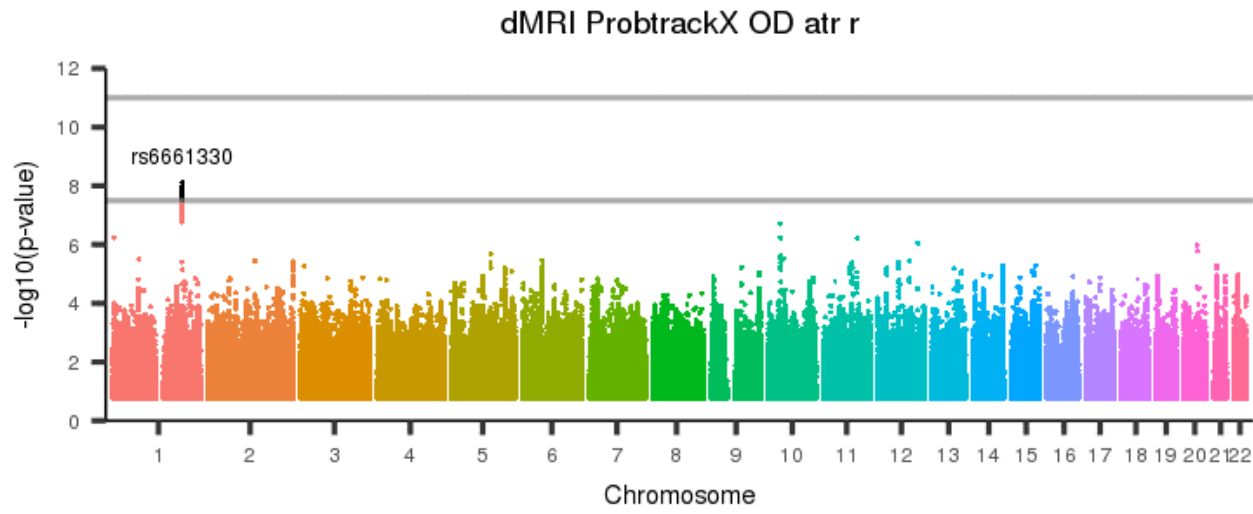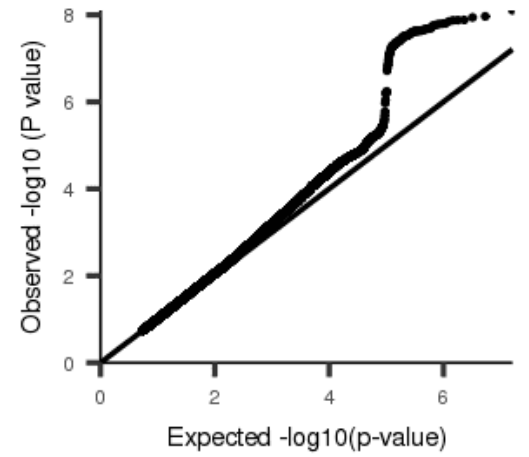

[back to list of plots](#)

Figure 821: dMRI ProbtrackX OD cgc I

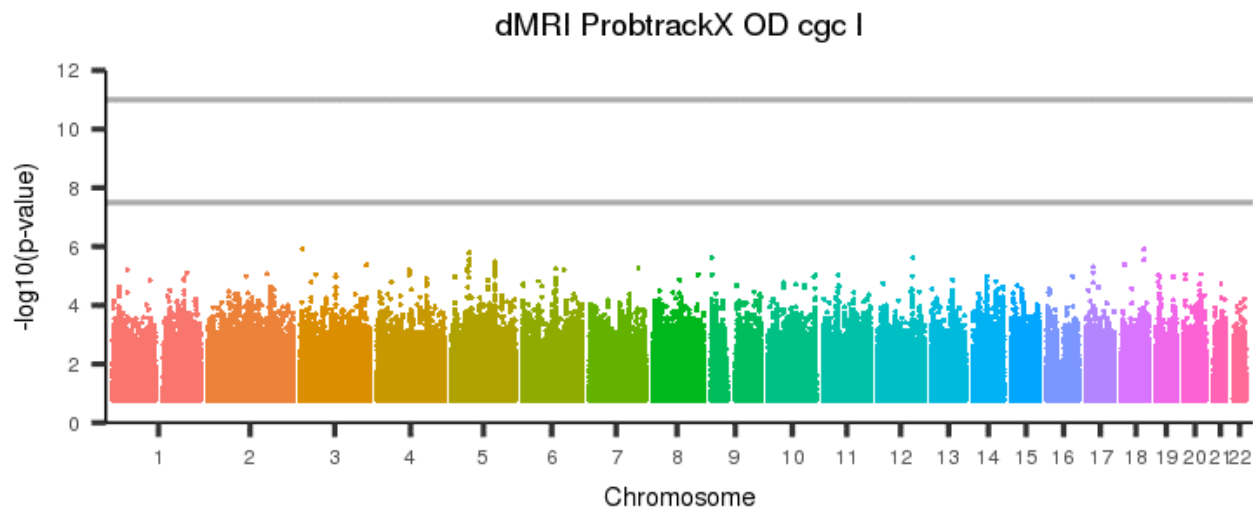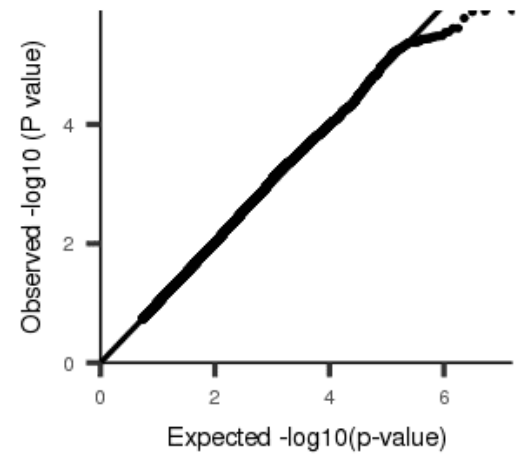

[back to list of plots](#)



Figure 822: dMRI ProbtrackX OD cgc r

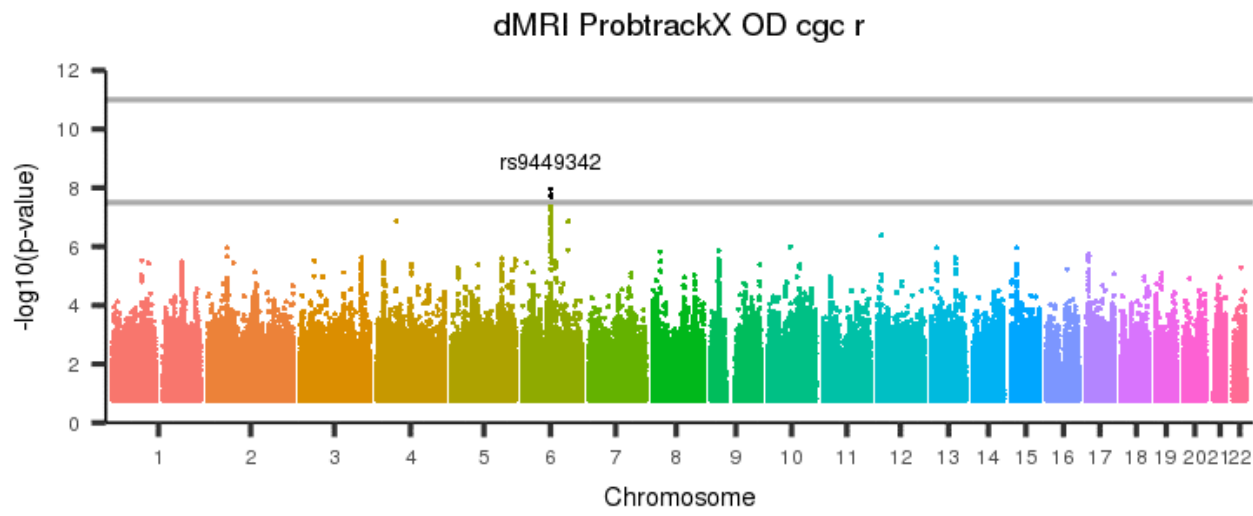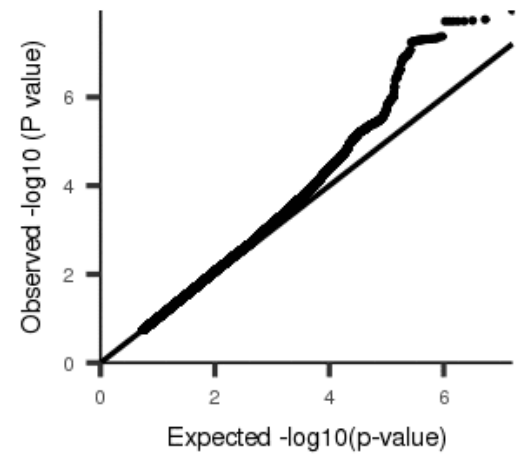

[back to list of plots](#)

Figure 823: dMRI ProbtrackX OD cgh I

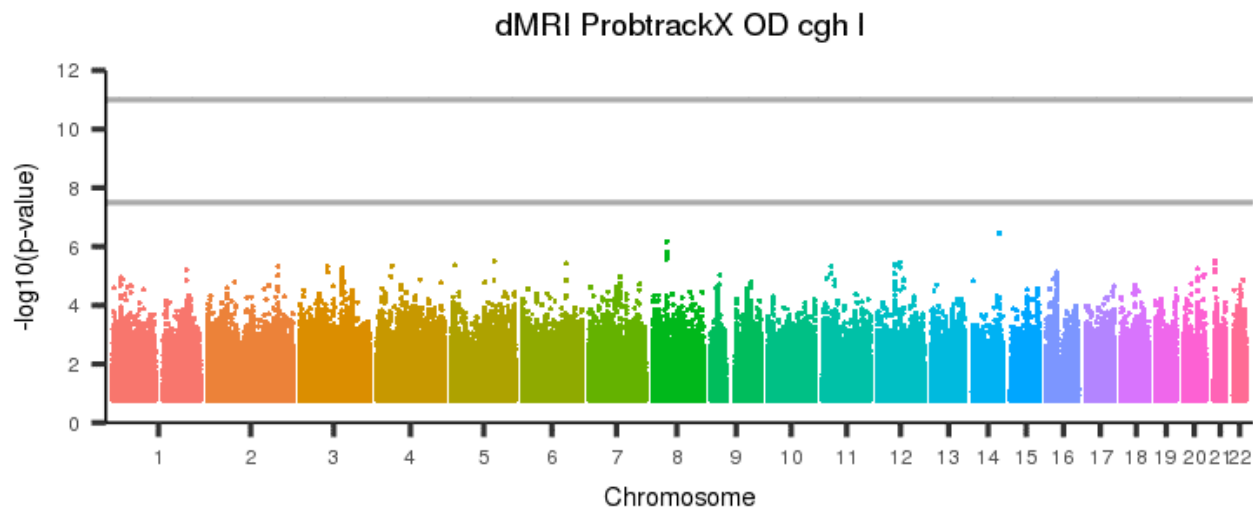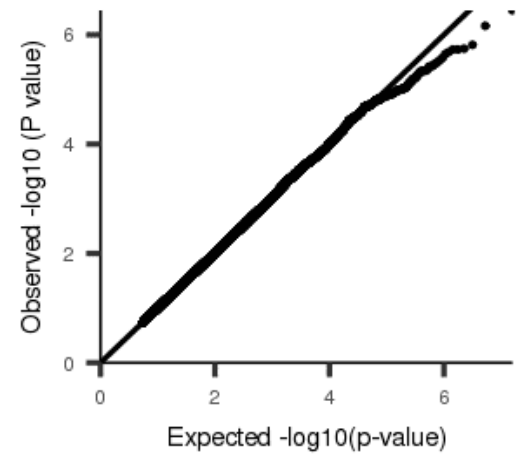

[back to list of plots](#)

Figure 824: dMRI ProbtrackX OD cgh r

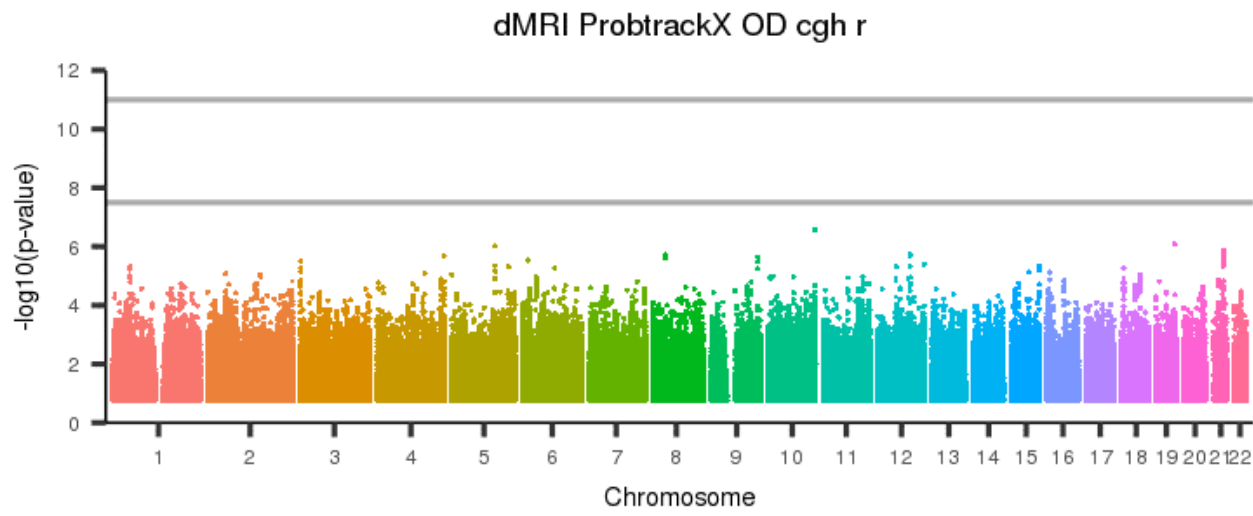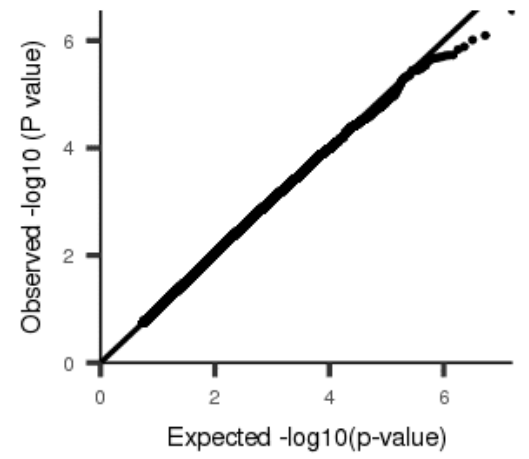

[back to list of plots](#)

Figure 825: dMRI ProbtrackX OD cst I

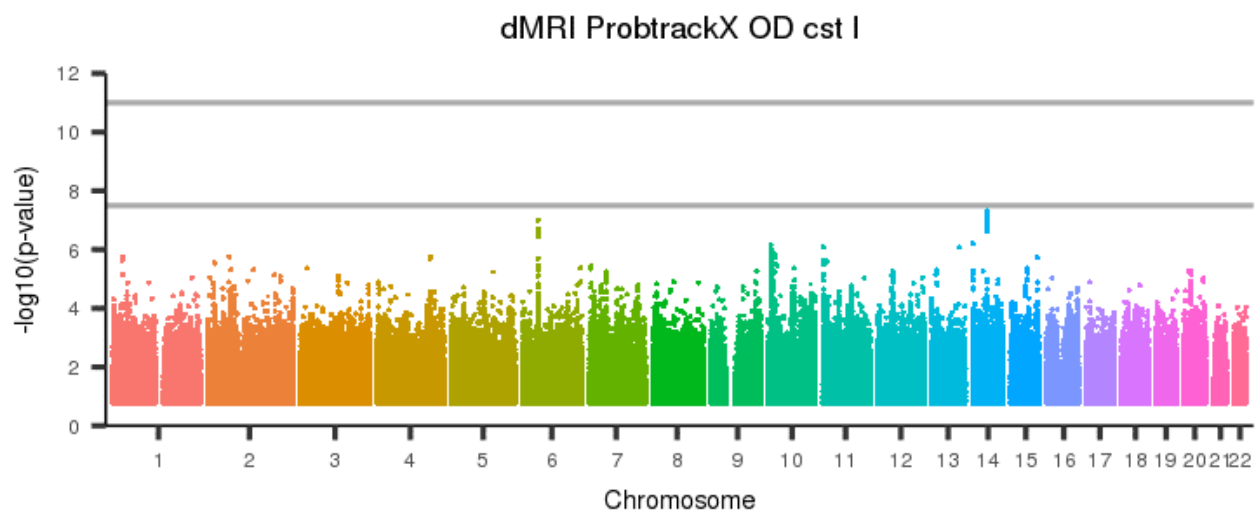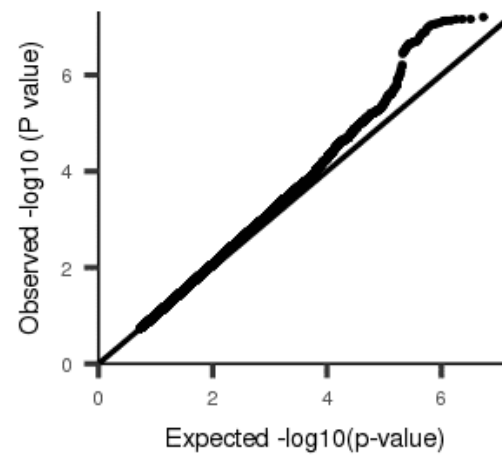

[back to list of plots](#)

Figure 826: dMRI ProbtrackX OD cst r

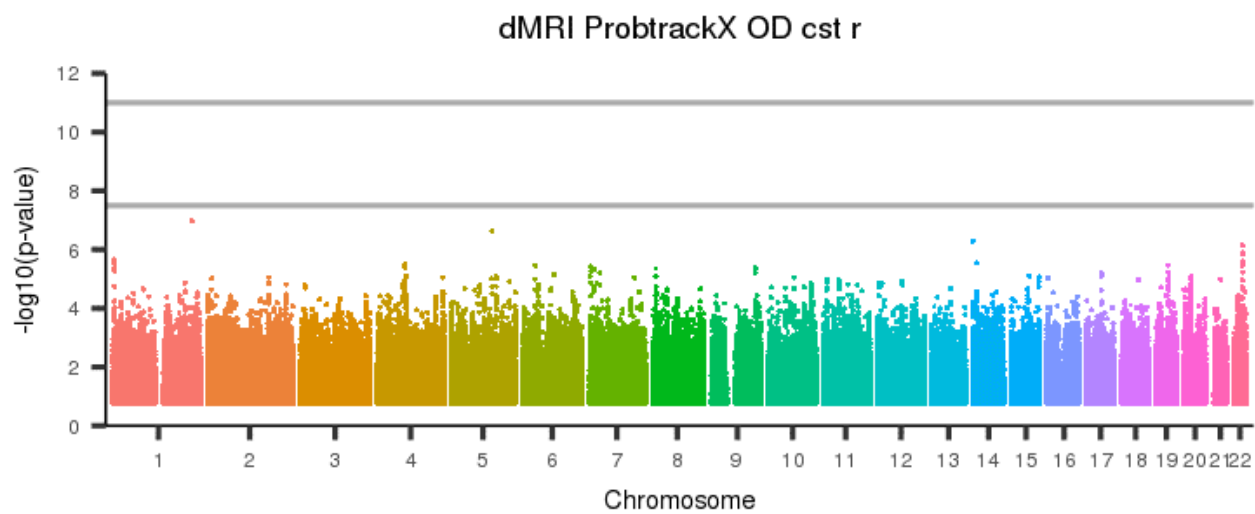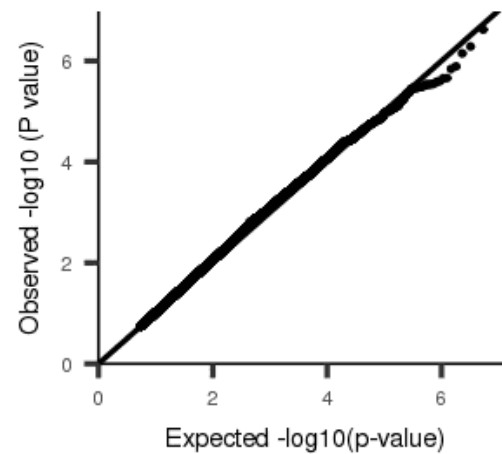

[back to list of plots](#)

Figure 827: dMRI ProbtrackX OD fma

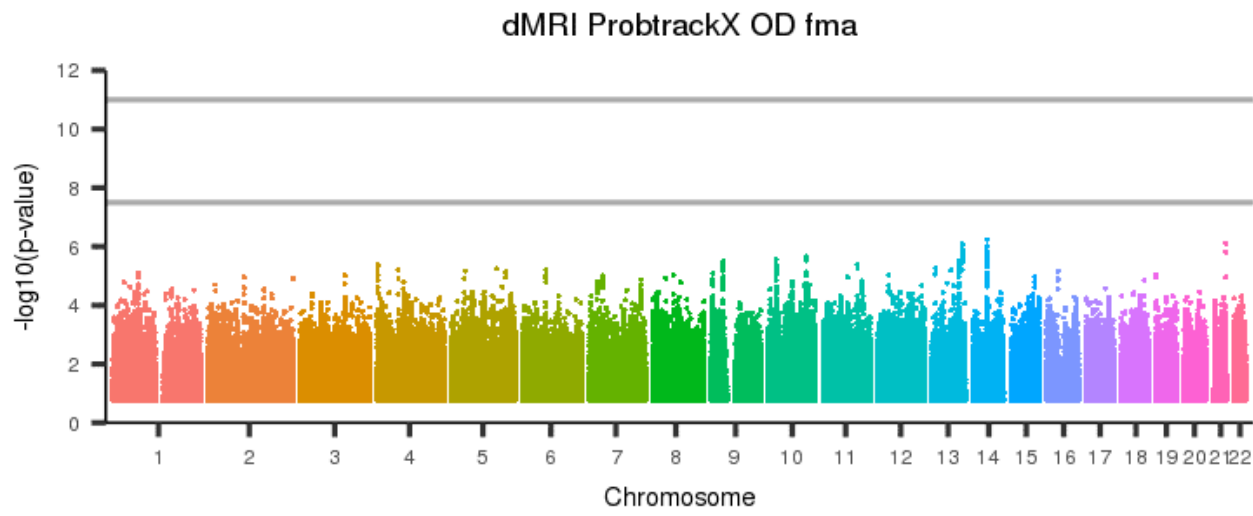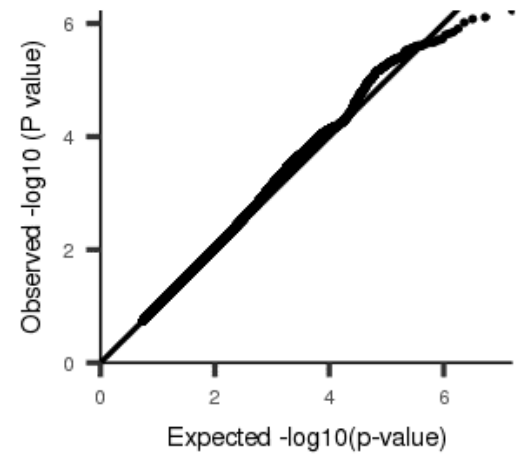

[back to list of plots](#)

Figure 828: dMRI ProbtrackX OD fmi

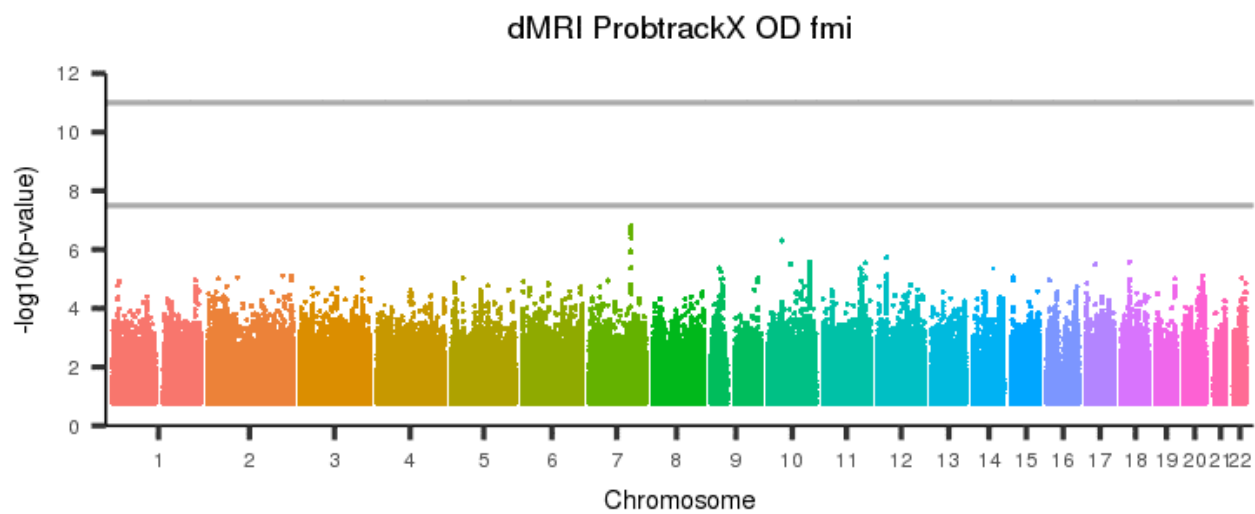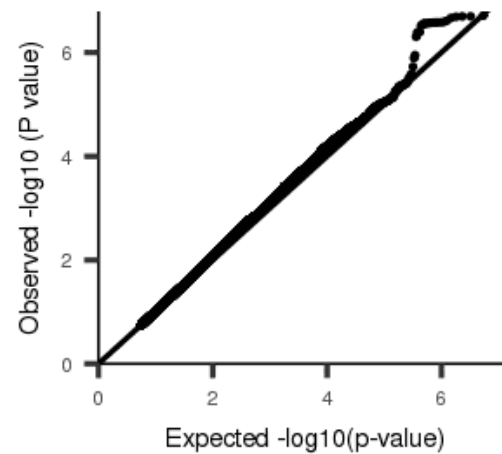

[back to list of plots](#)

Figure 829: dMRI ProbtrackX OD ifo I

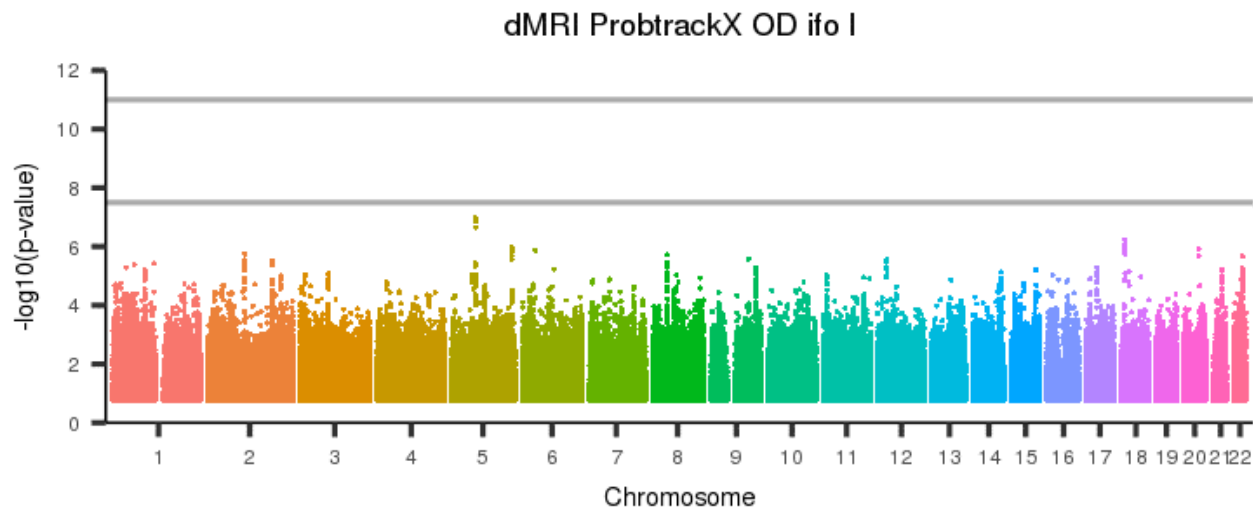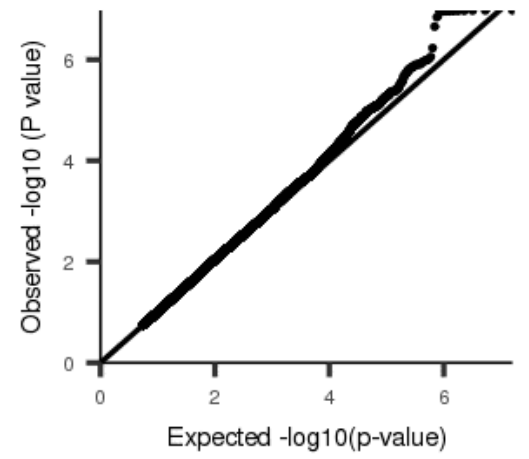

[back to list of plots](#)



Figure 830: dMRI ProbtrackX OD ifo r

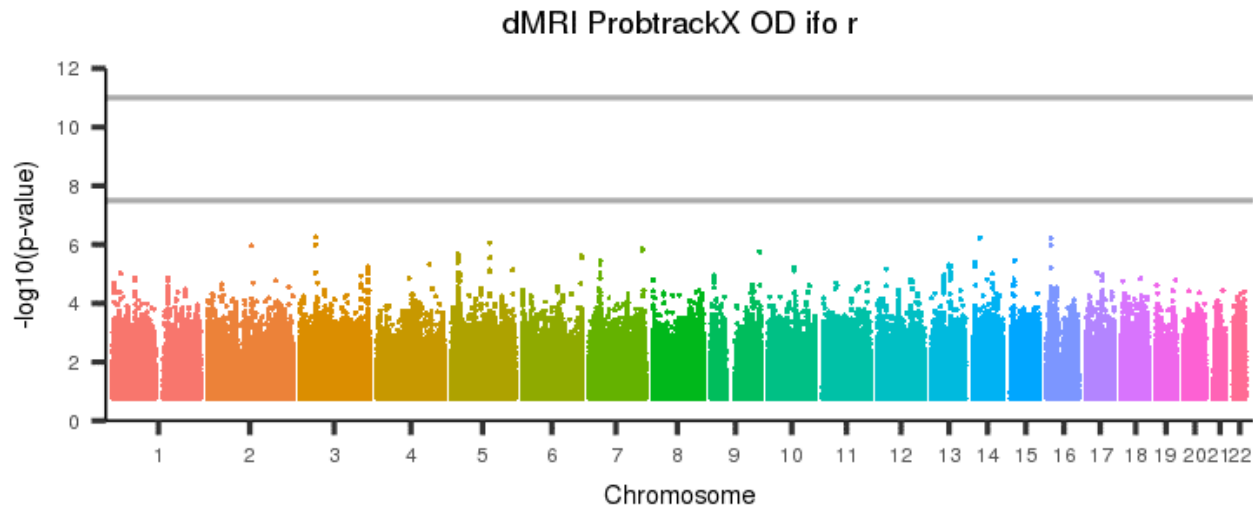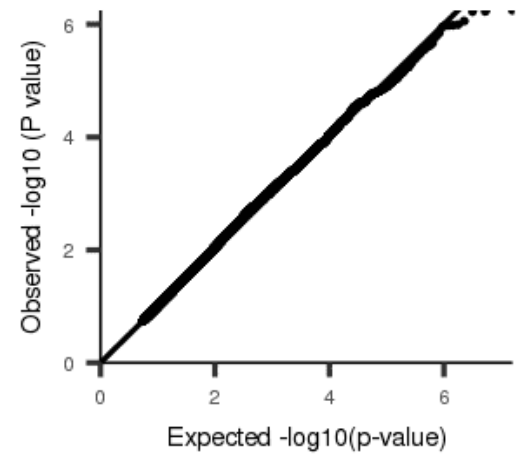

[back to list of plots](#)

Figure 831: dMRI ProbtrackX OD ilf I

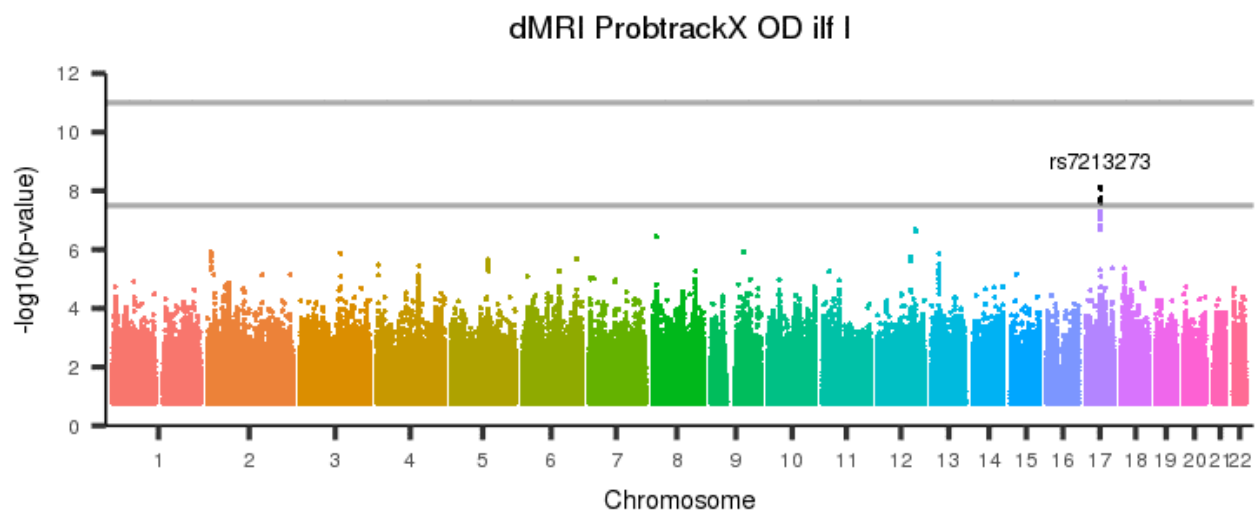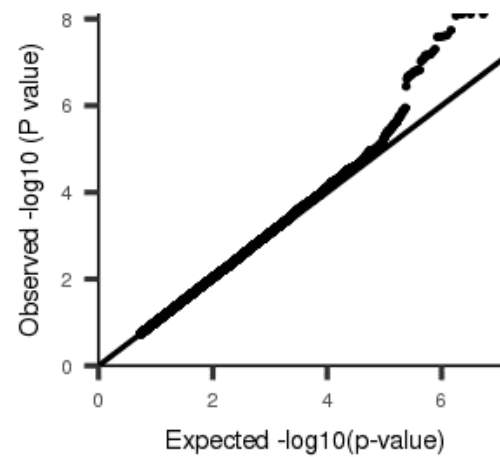

[back to list of plots](#)

Figure 832: dMRI ProbtrackX OD ilf r

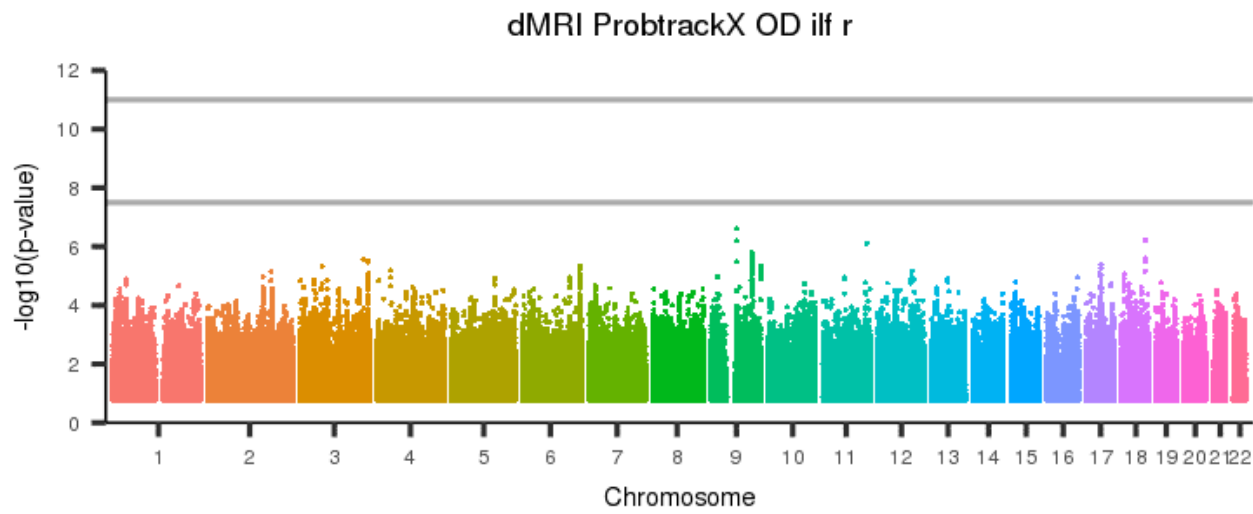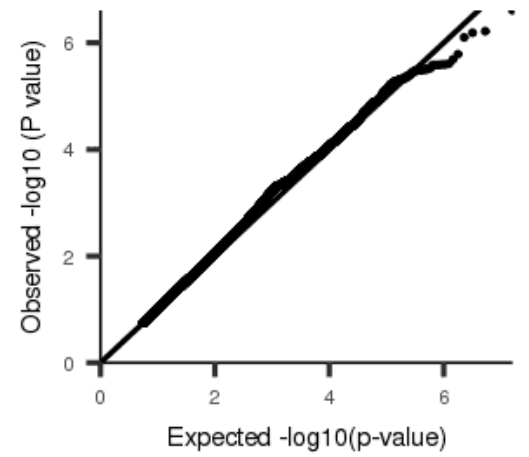

[back to list of plots](#)

Figure 833: dMRI ProbtrackX OD mcp

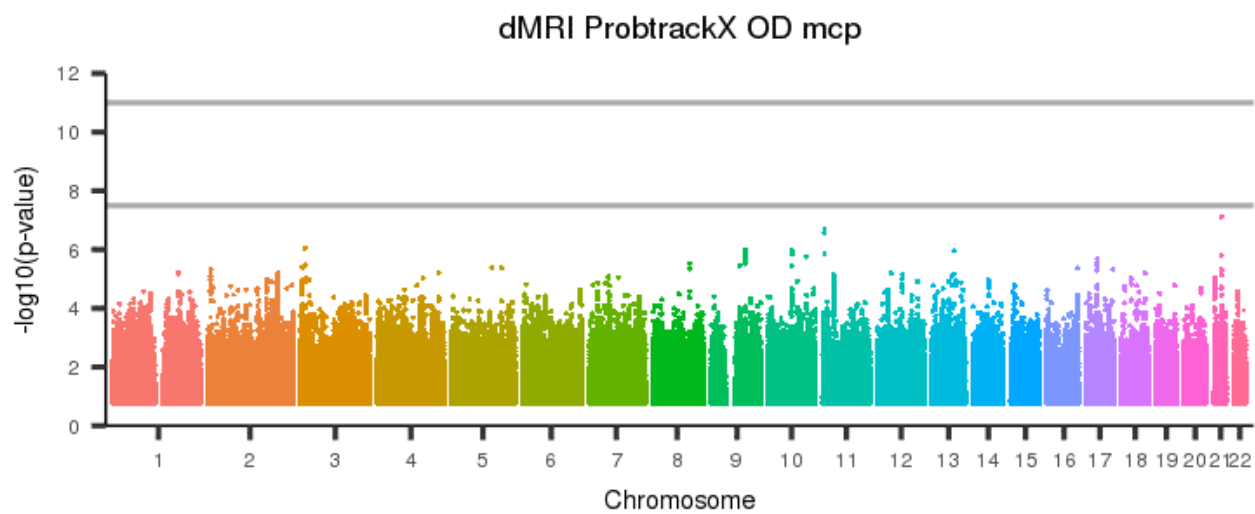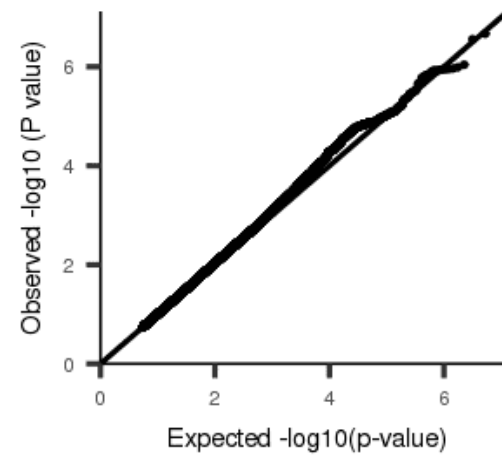

[back to list of plots](#)

Figure 834: dMRI ProbtrackX OD ml I

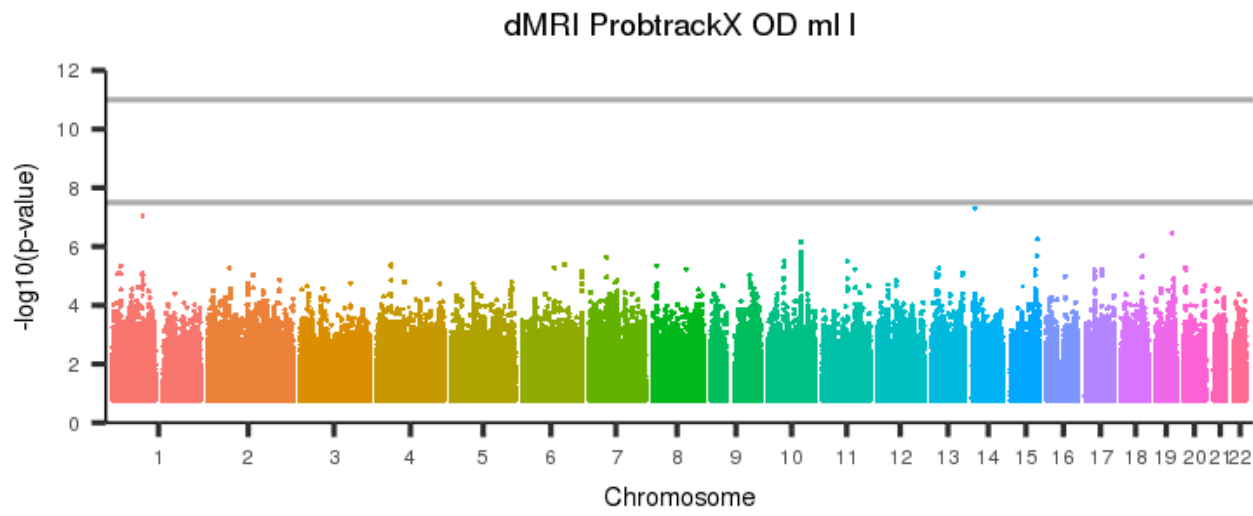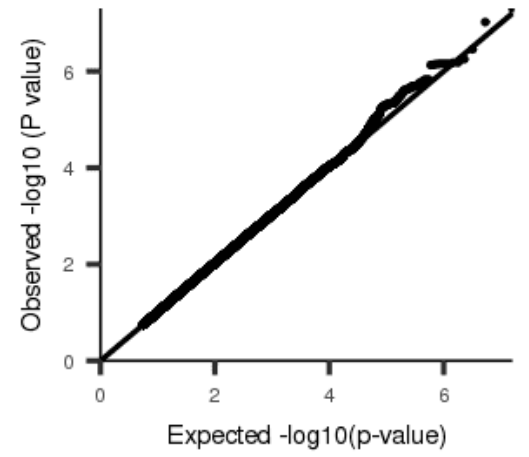

[back to list of plots](#)

Figure 835: dMRI ProbtrackX OD ml r

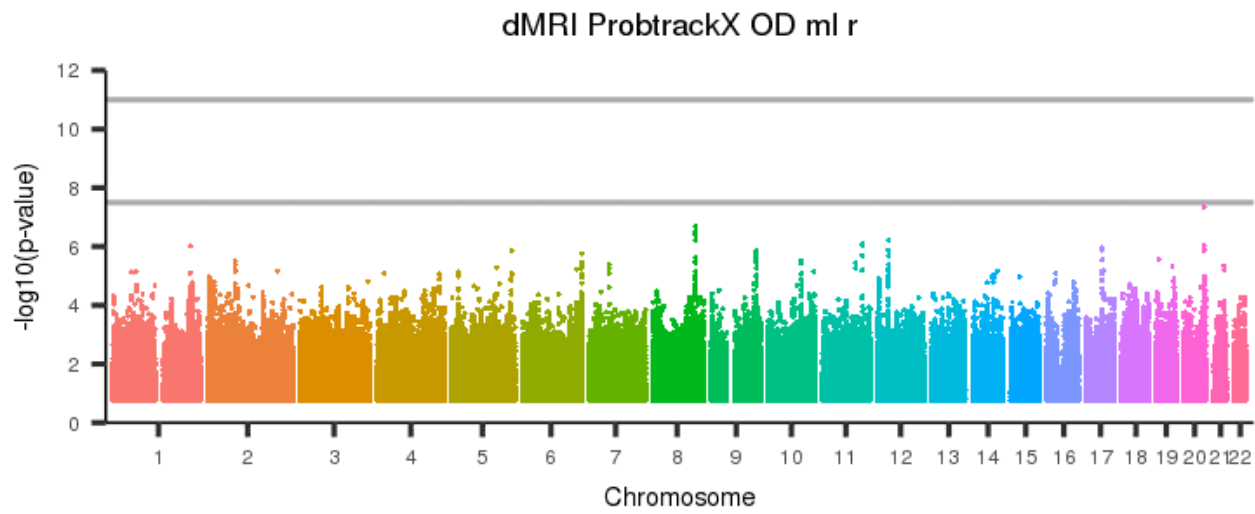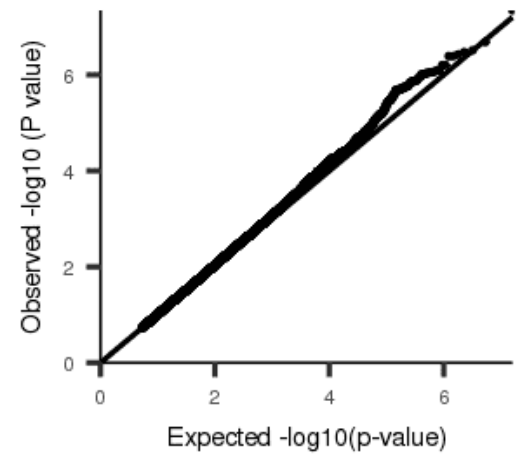

[back to list of plots](#)

Figure 836: dMRI ProbtrackX OD ptr I

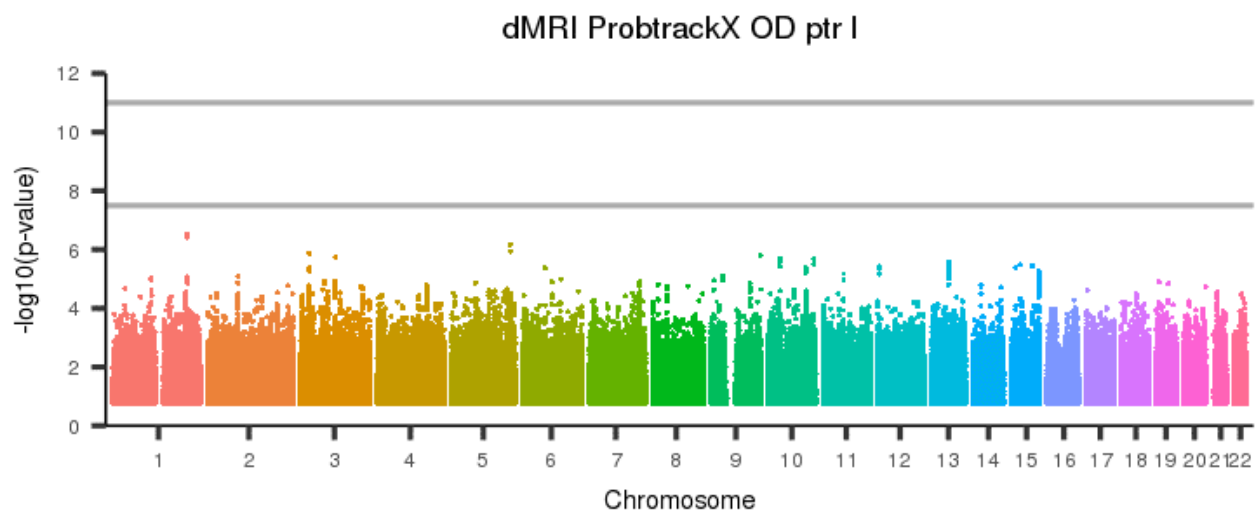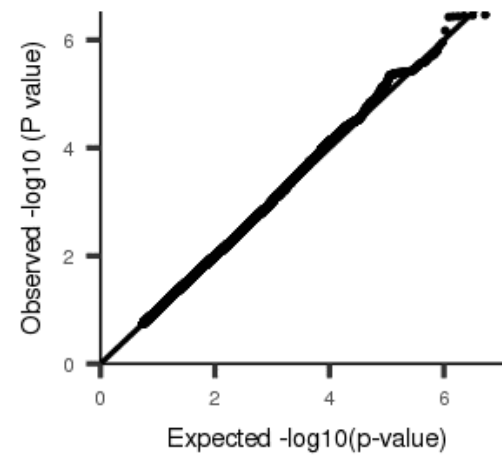

[back to list of plots](#)

Figure 837: dMRI ProbtrackX OD ptr r

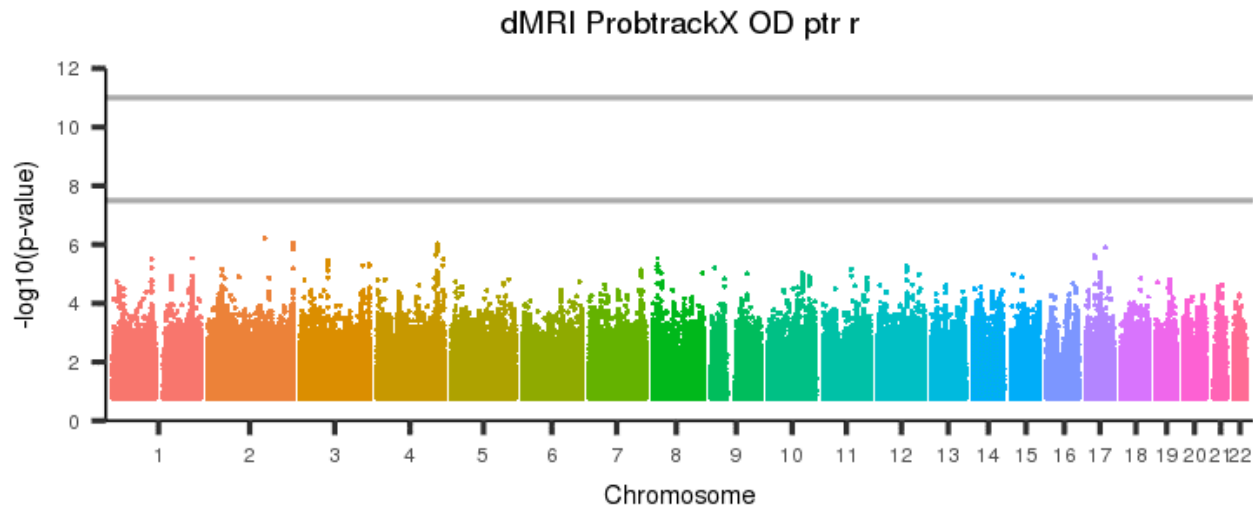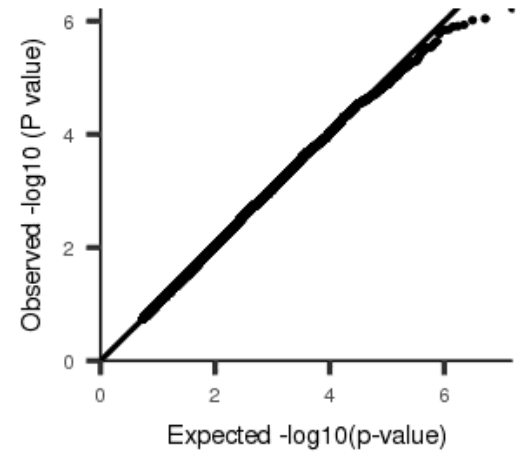

[back to list of plots](#)



Figure 838: dMRI ProbtrackX OD slf I

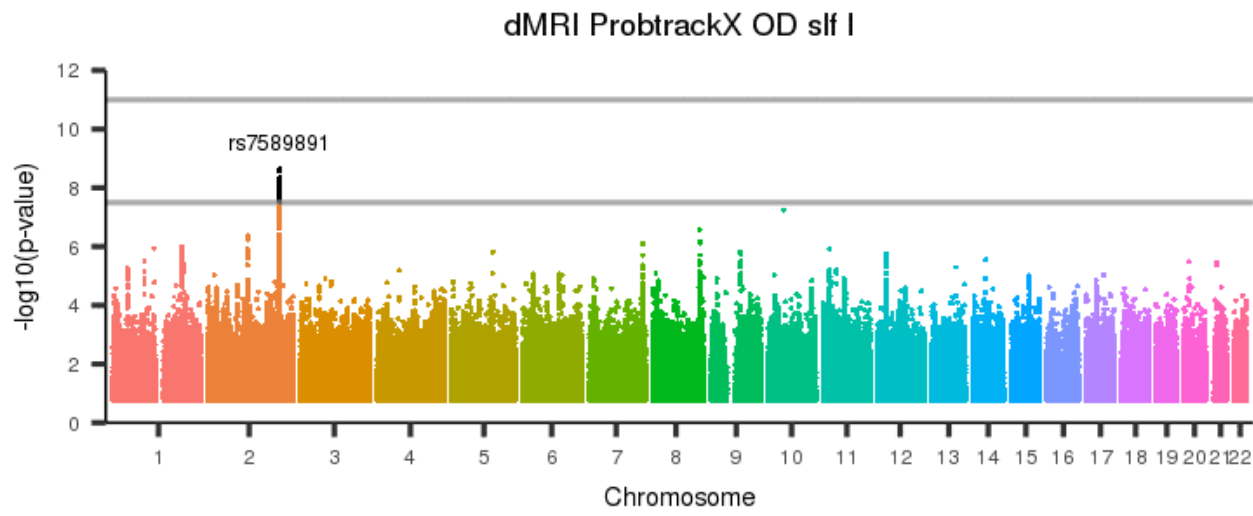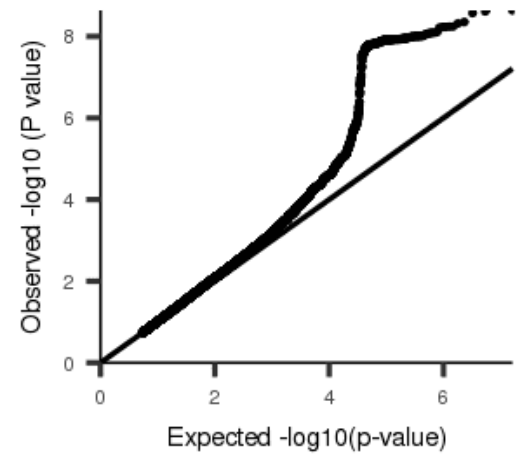

[back to list of plots](#)

Figure 839: dMRI ProbtrackX OD slf r

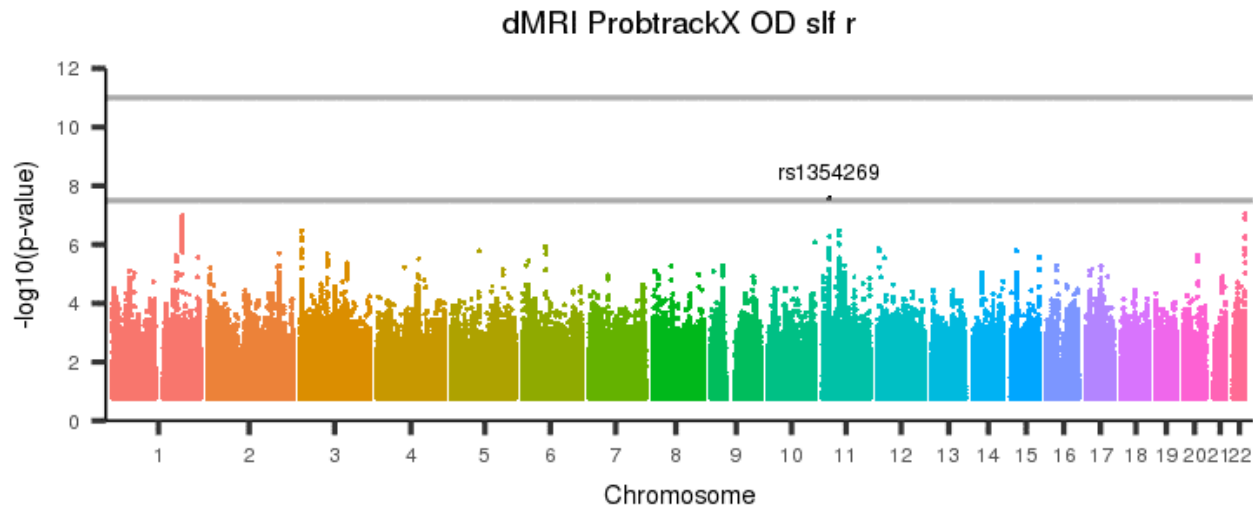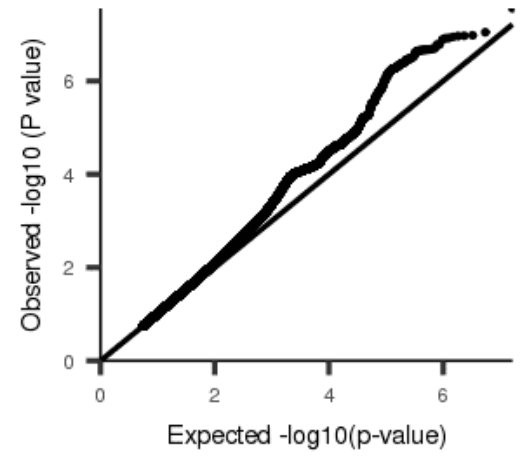

[back to list of plots](#)

Figure 840: dMRI ProbtrackX OD str I

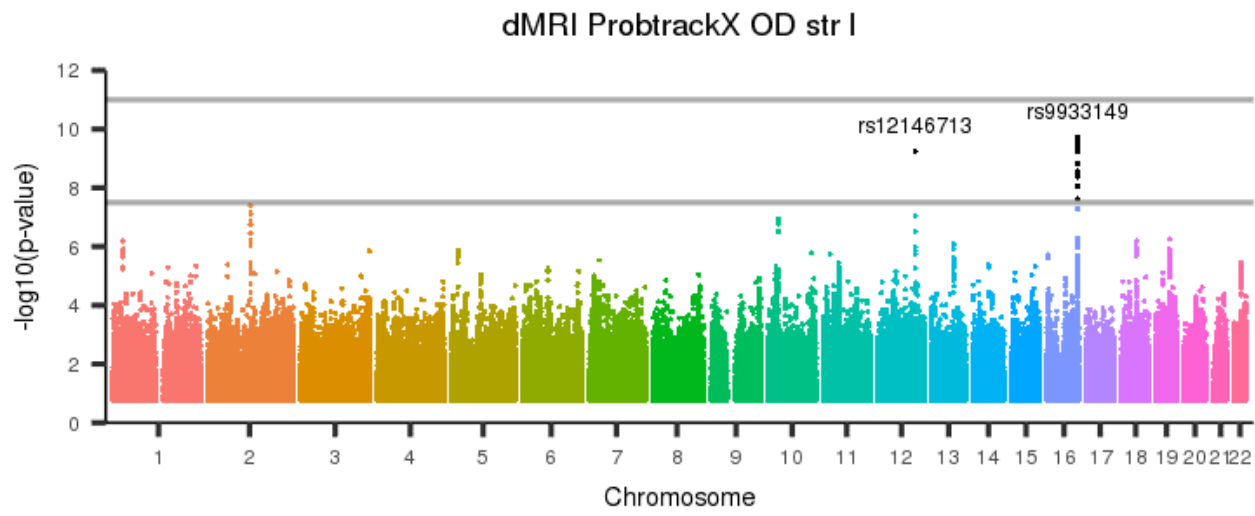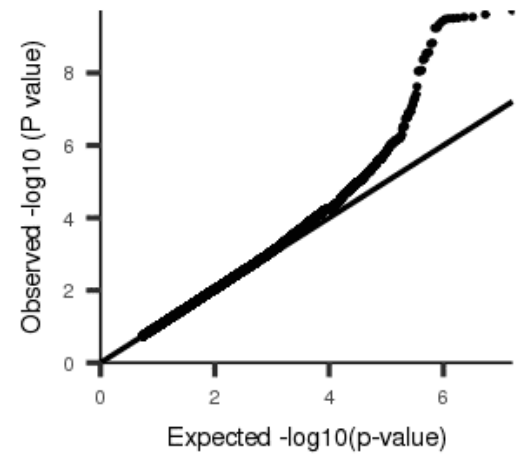

[back to list of plots](#)

Figure 841: dMRI ProbtrackX OD str r

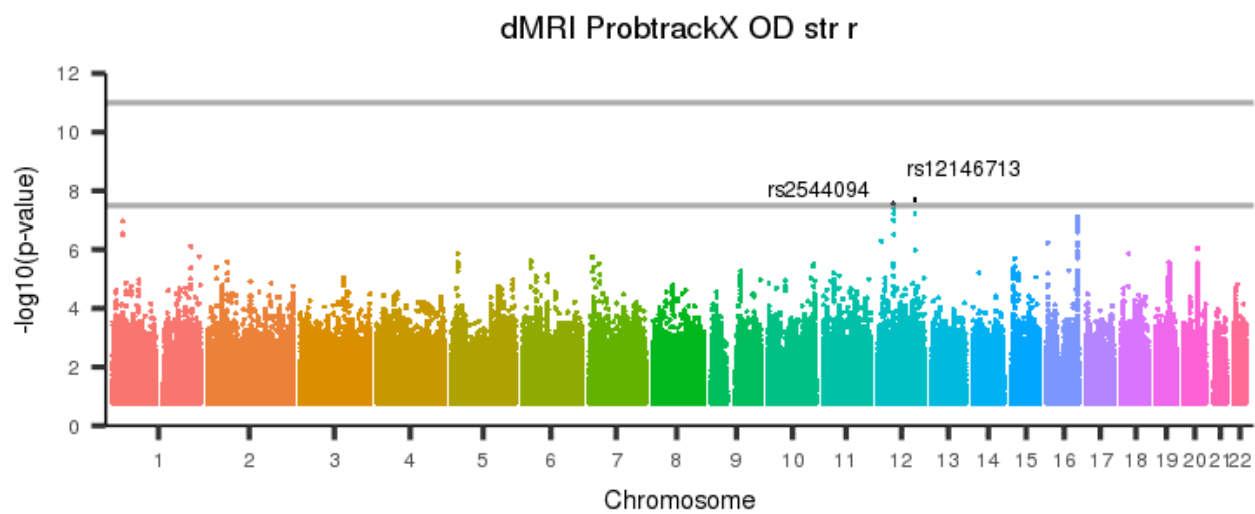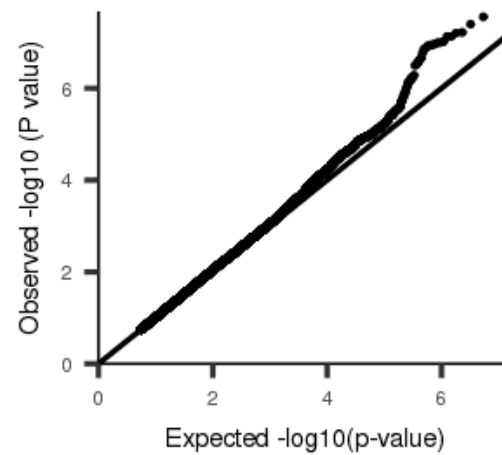

[back to list of plots](#)

Figure 842: dMRI ProbtrackX OD unc I

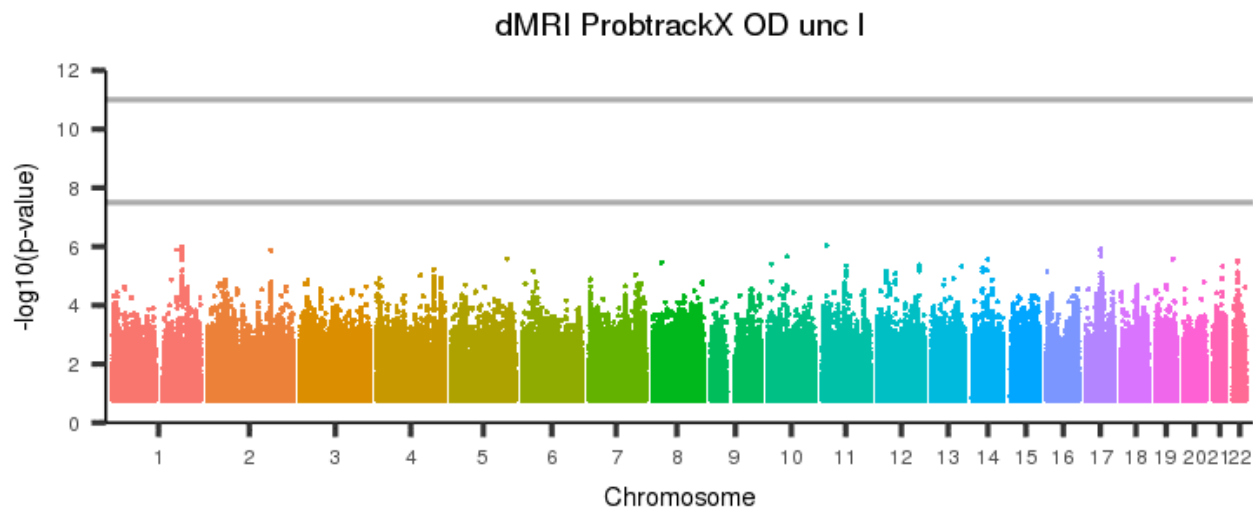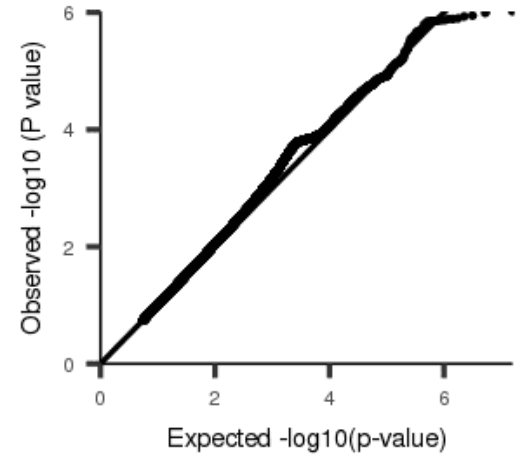

[back to list of plots](#)

Figure 843: dMRI ProbtrackX OD unc r

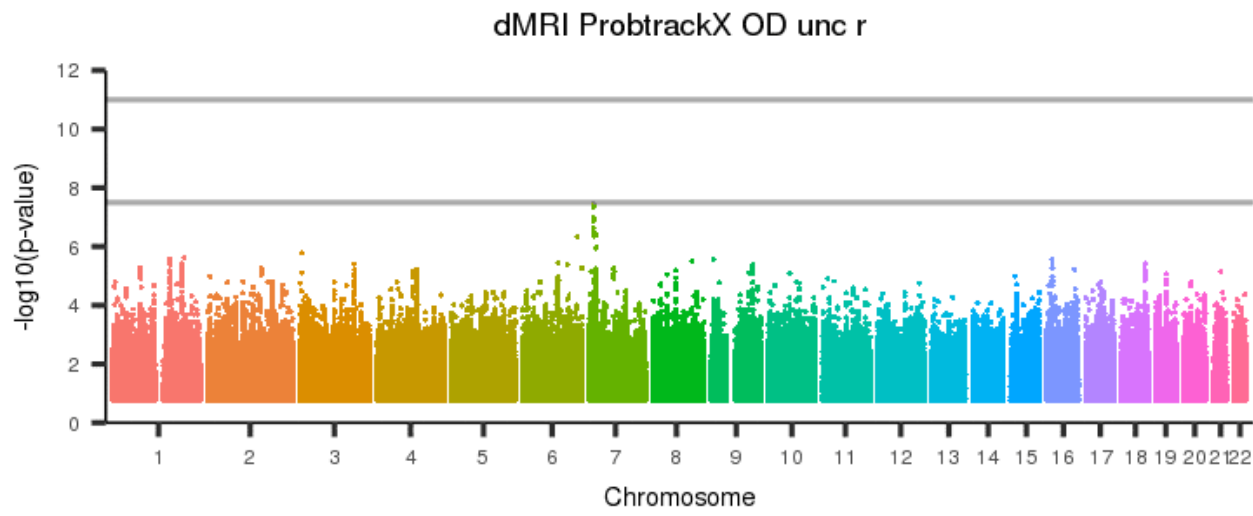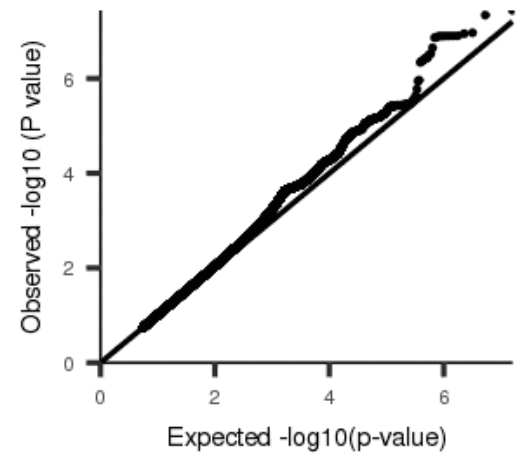

[back to list of plots](#)

Figure 844: dMRI ProbtrackX ISOVF ar I

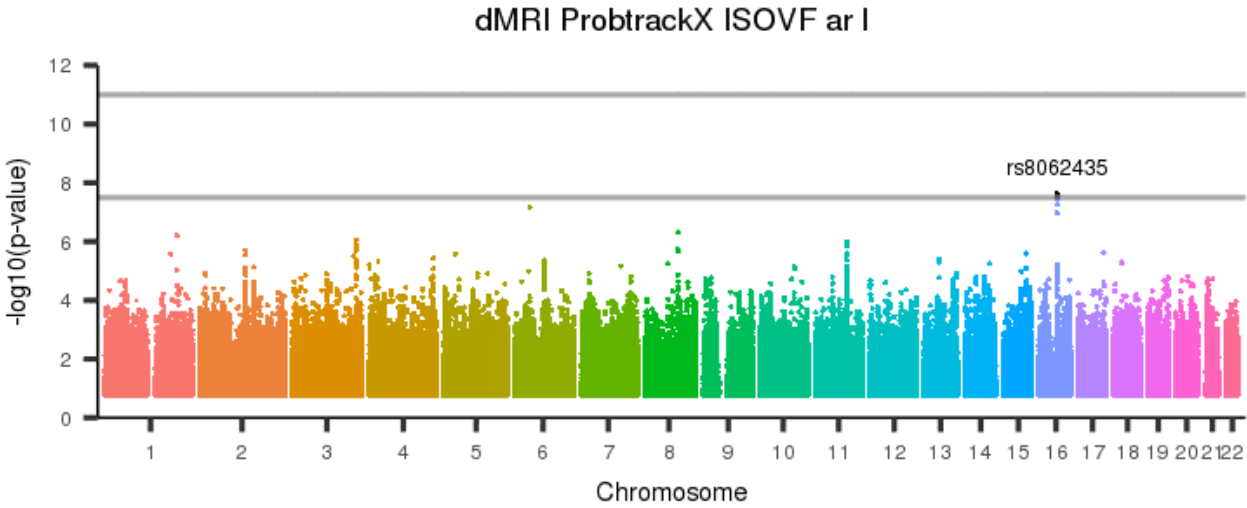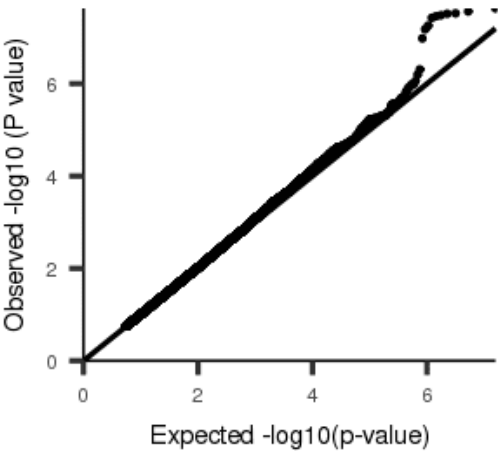

[back to list of plots](#)

Figure 845: dMRI ProbtrackX ISOVF ar r

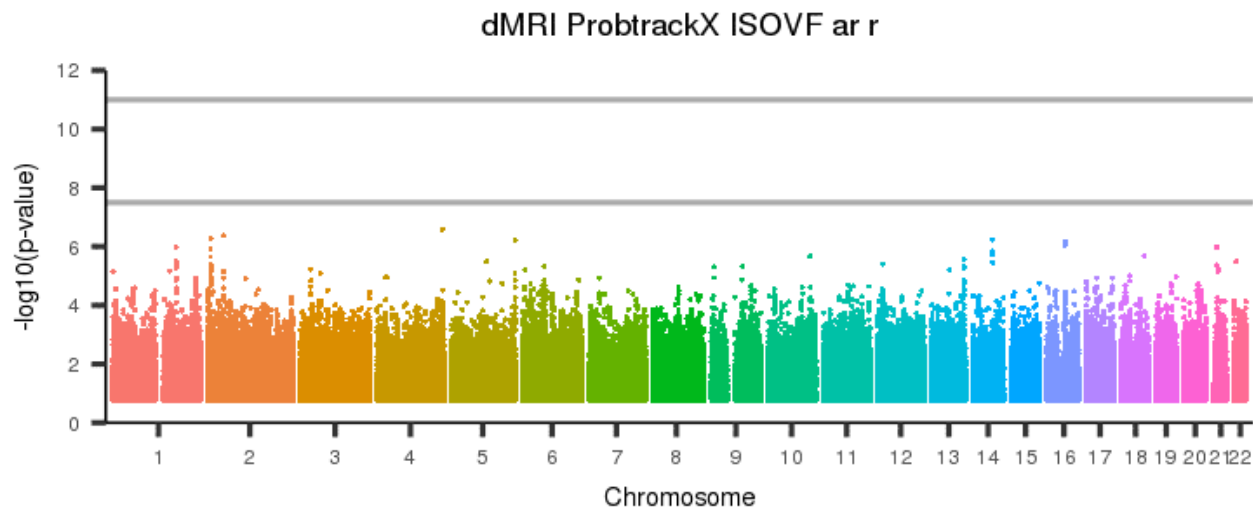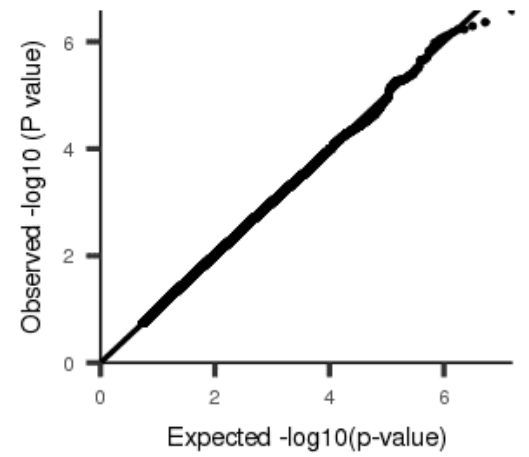

[back to list of plots](#)



Figure 846: dMRI ProbtrackX ISOVF atr I

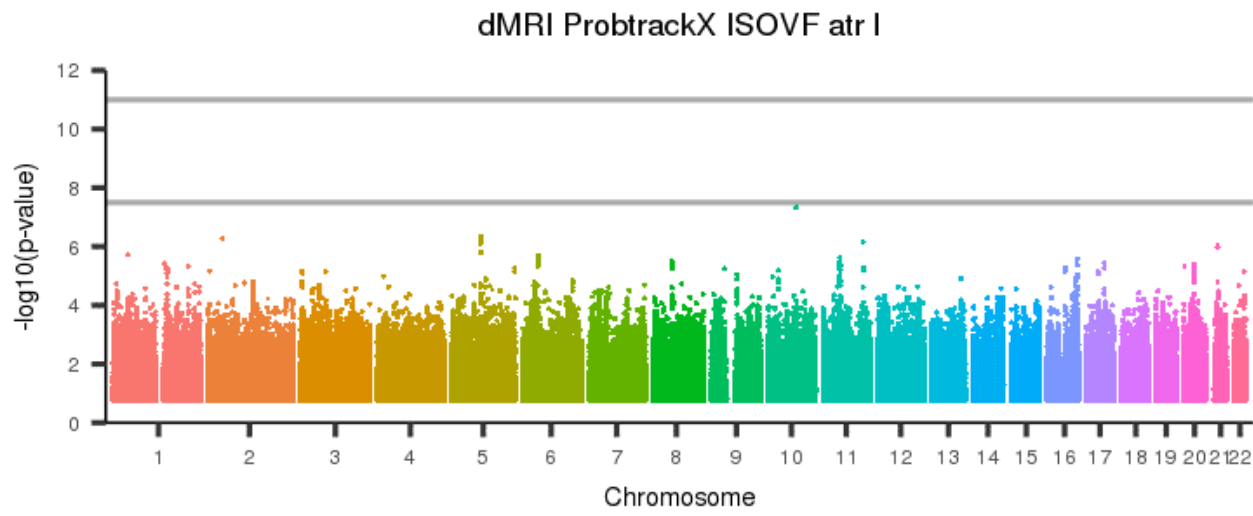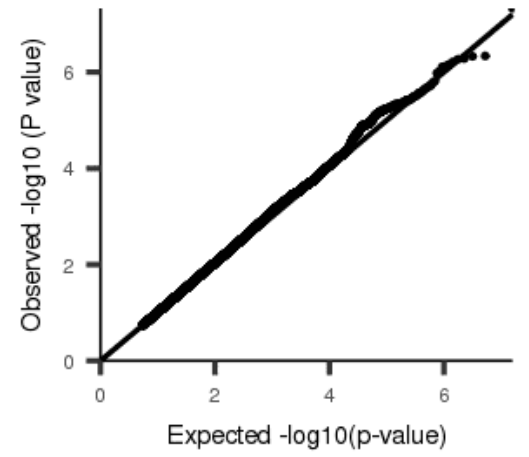

[back to list of plots](#)

Figure 847: dMRI ProbtrackX ISOVF atr r

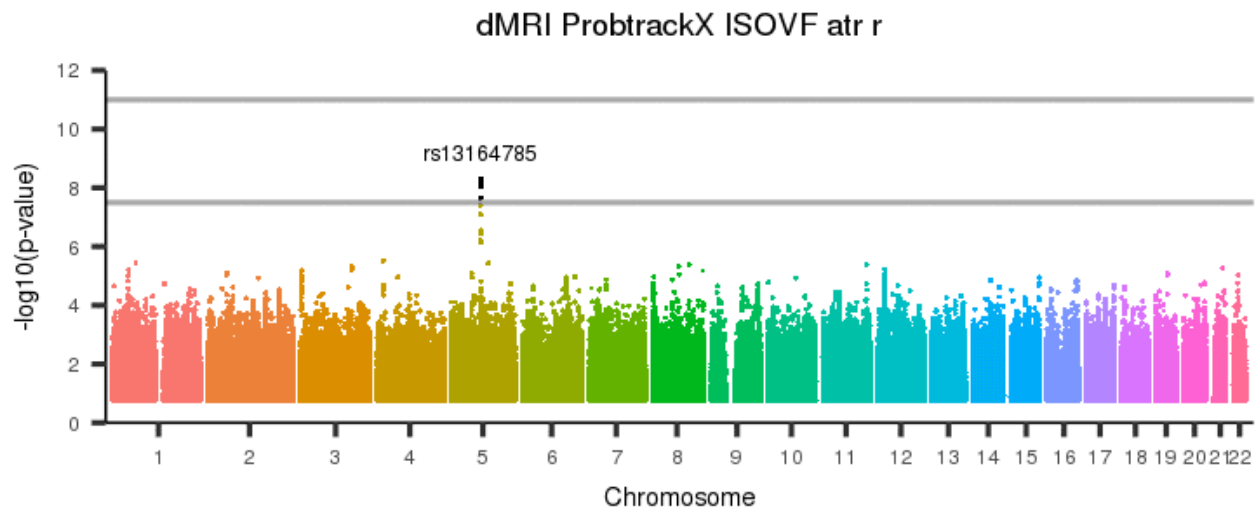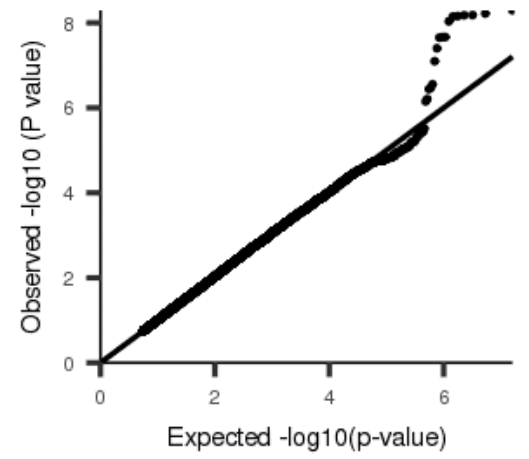

[back to list of plots](#)

Figure 848: dMRI ProbtrackX ISOVF cgc I

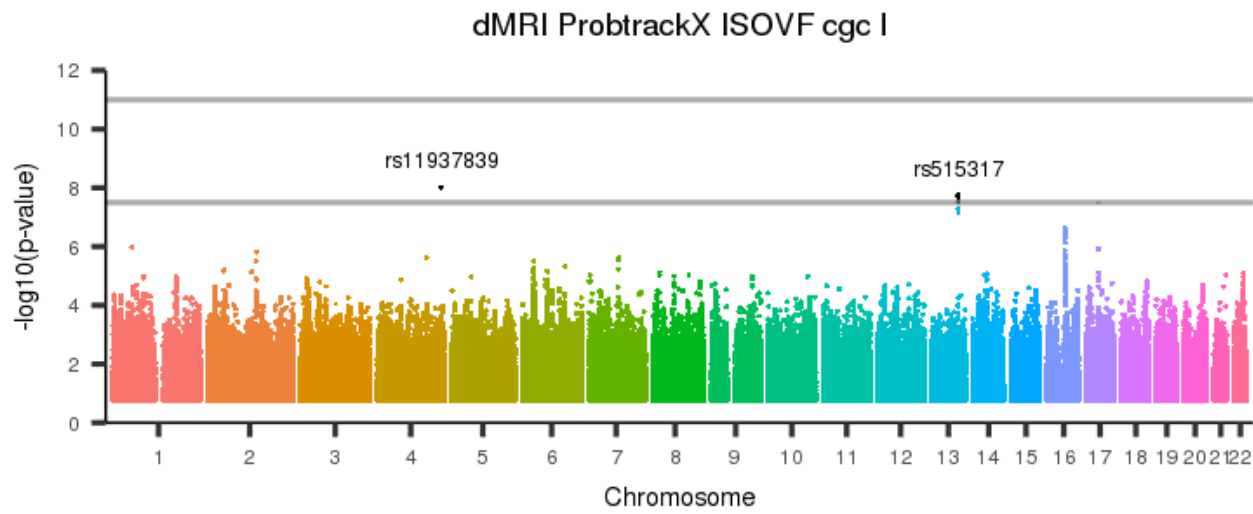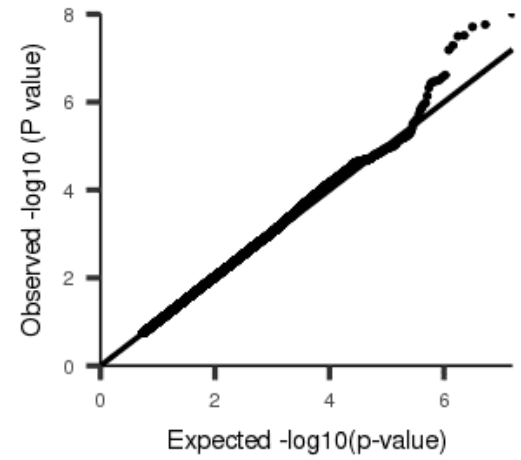

[back to list of plots](#)

Figure 849: dMRI ProbtrackX ISOVF cgc r

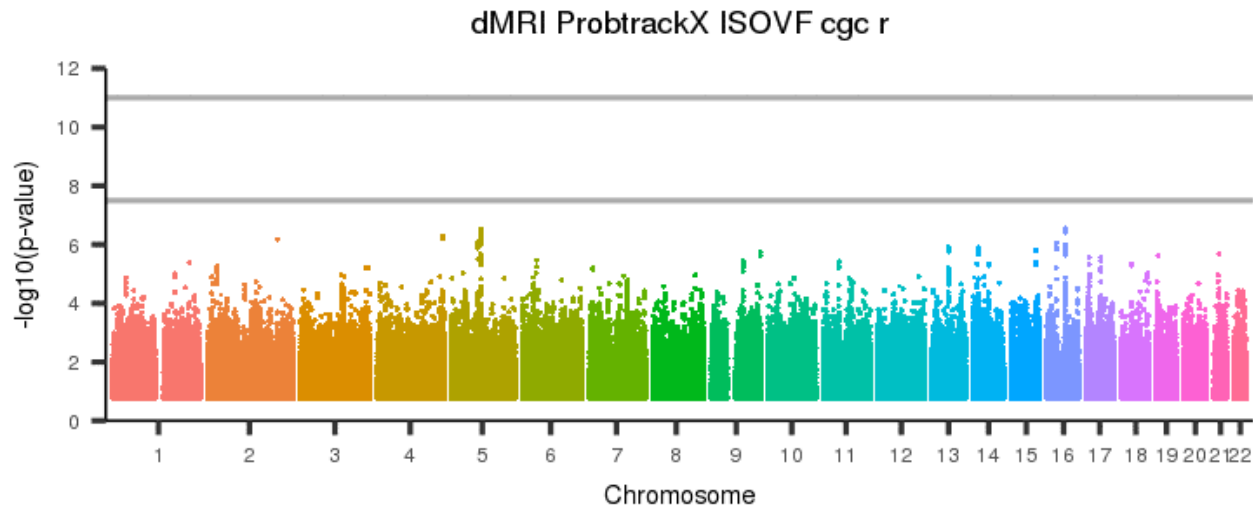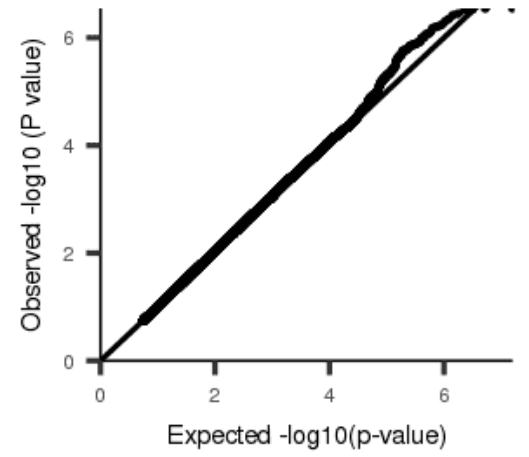

[back to list of plots](#)

Figure 850: dMRI ProbtrackX ISOVF cgh I

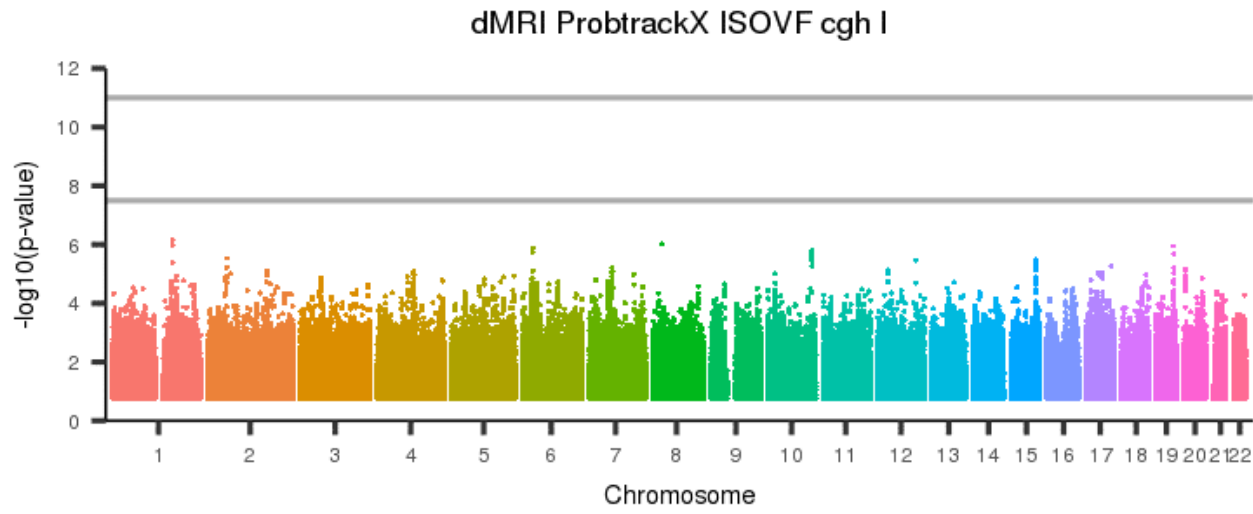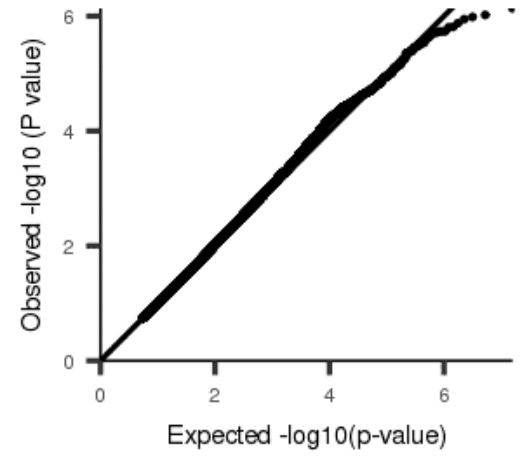

[back to list of plots](#)

Figure 851: dMRI ProbtrackX ISOVF cgh r

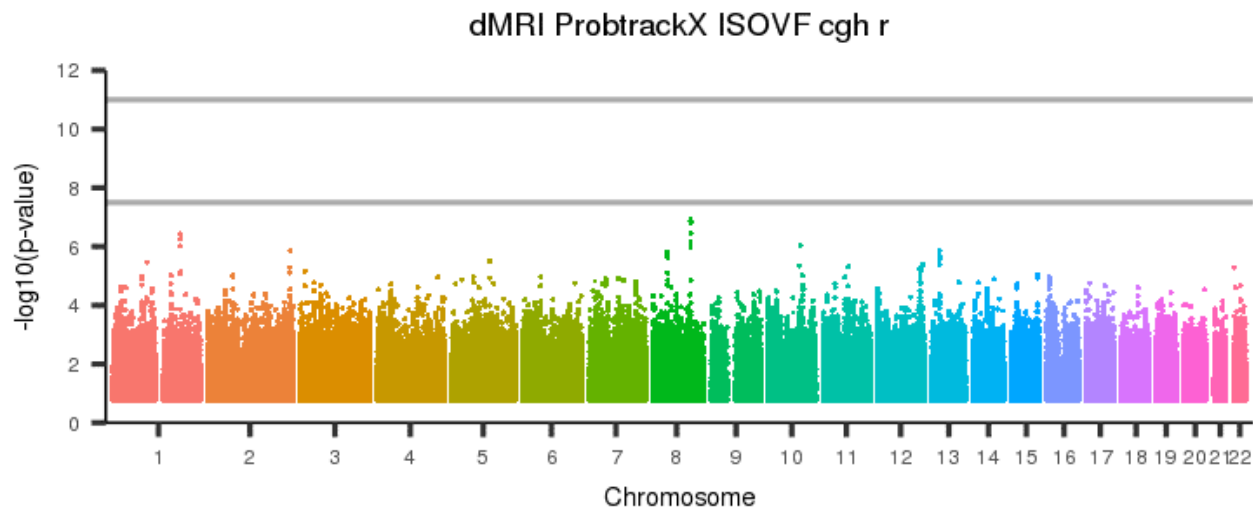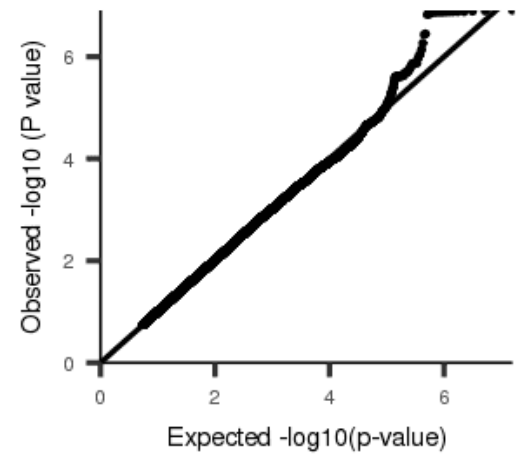

[back to list of plots](#)

Figure 852: dMRI ProbtrackX ISOVF cst I

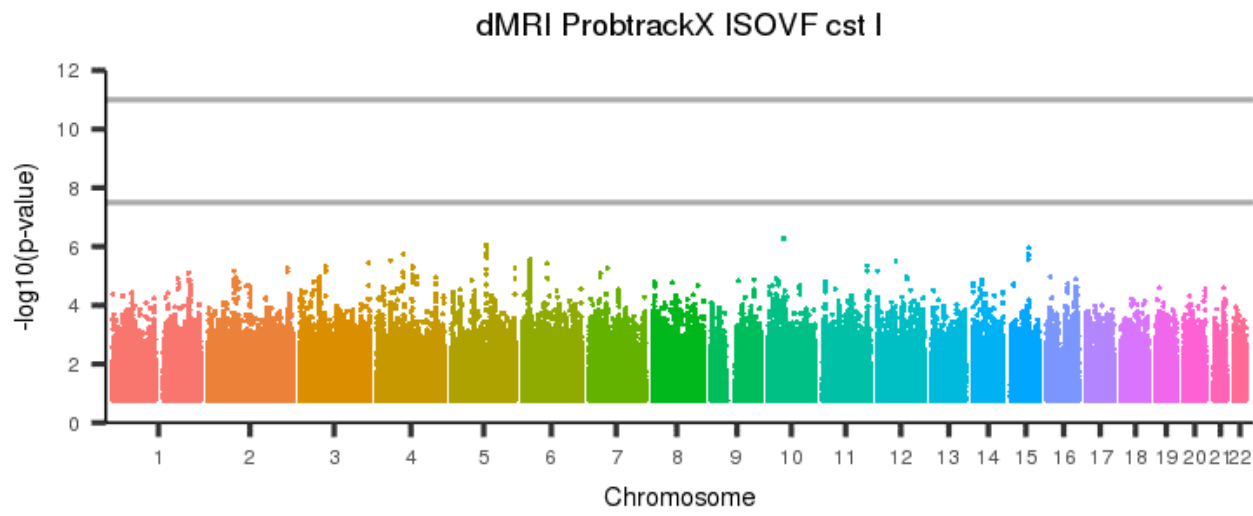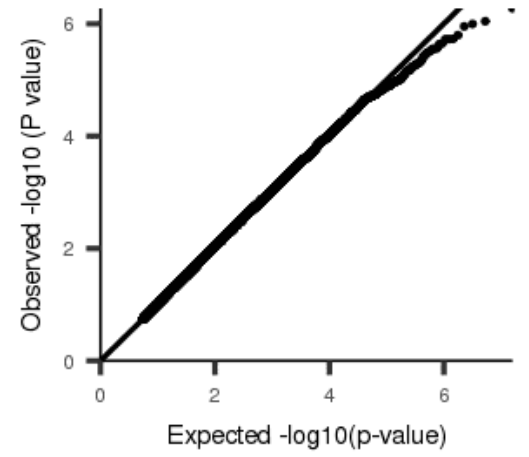

[back to list of plots](#)

Figure 853: dMRI ProbtrackX ISOVF cst r

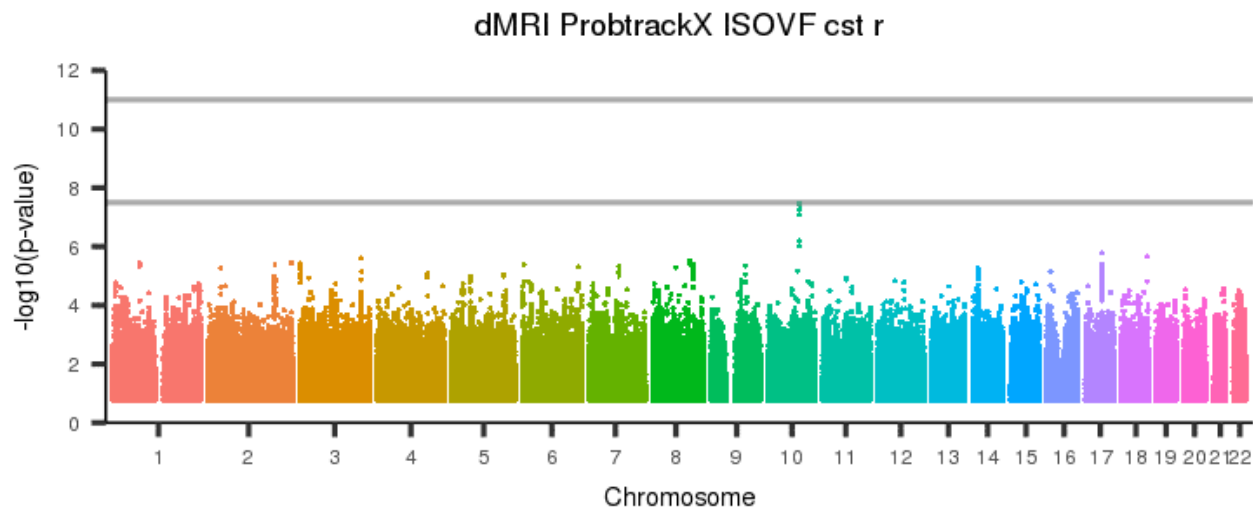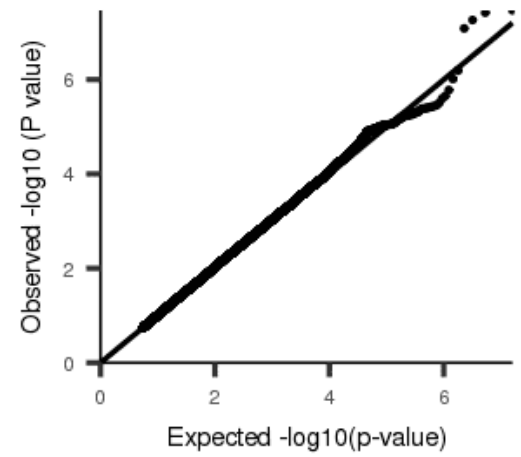

[back to list of plots](#)



Figure 854: dMRI ProbtrackX ISOVF fma

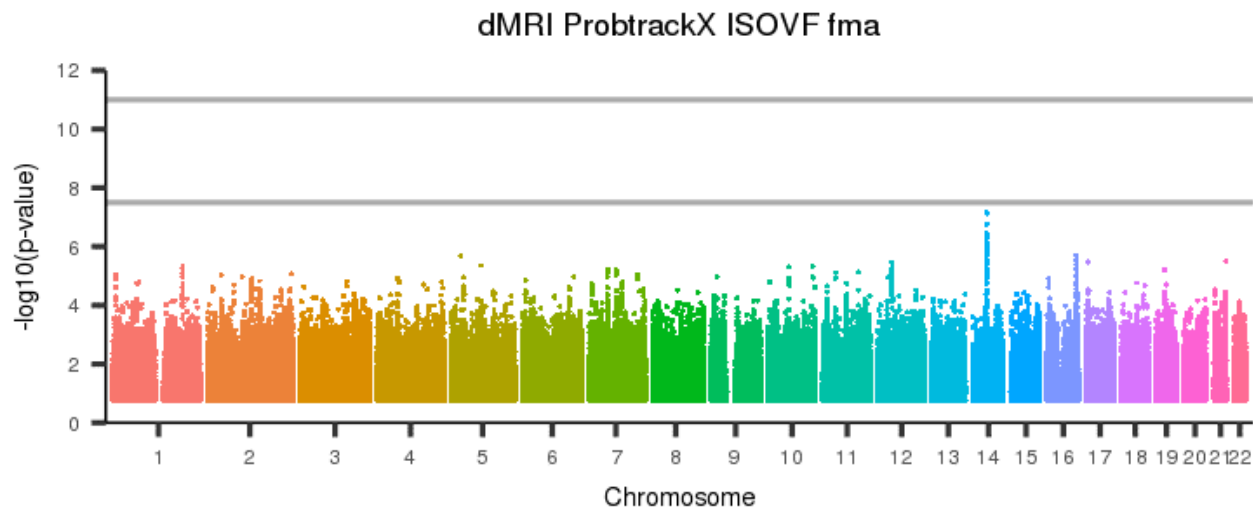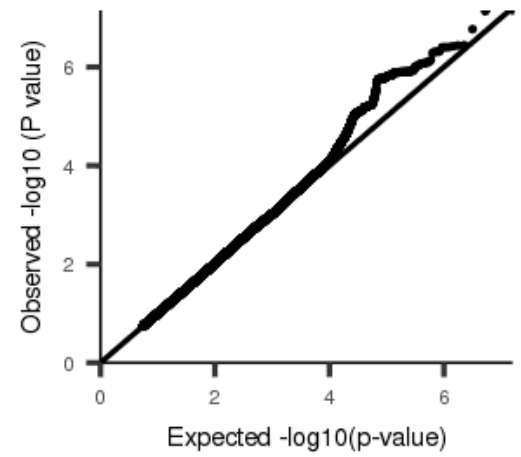

[back to list of plots](#)

Figure 855: dMRI ProbtrackX ISOVF fmi

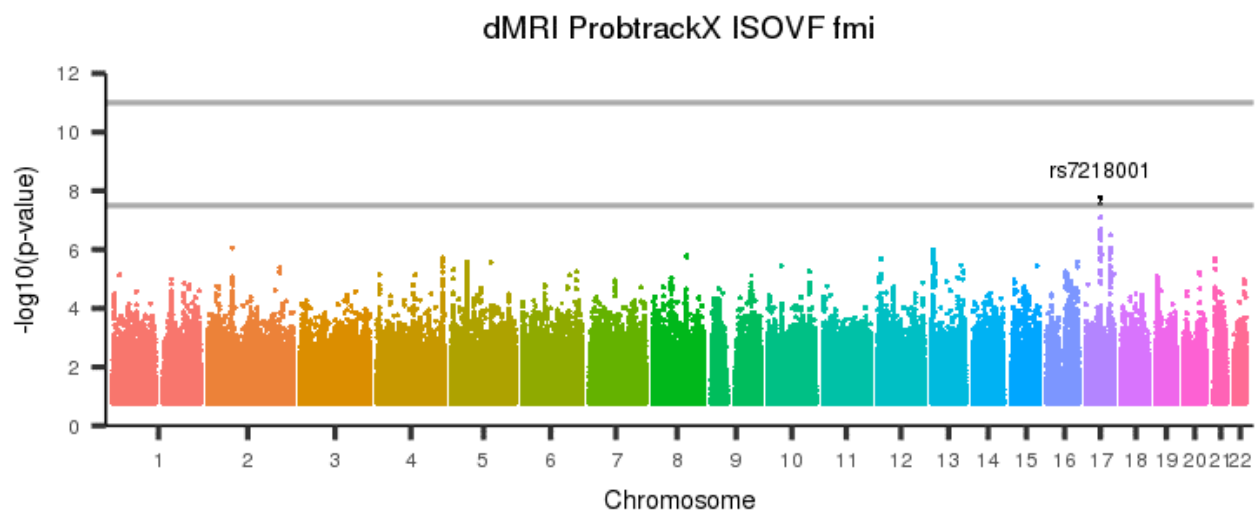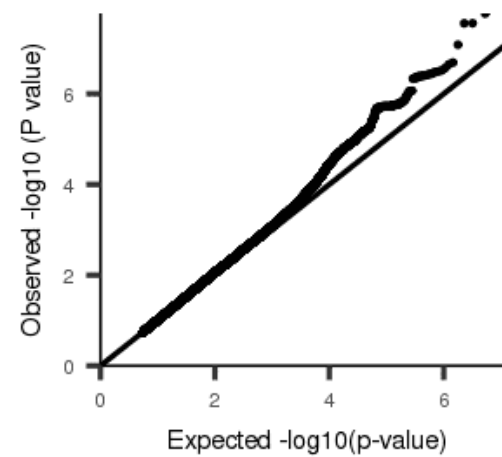

[back to list of plots](#)

Figure 856: dMRI ProtrackX ISOVF ifo I

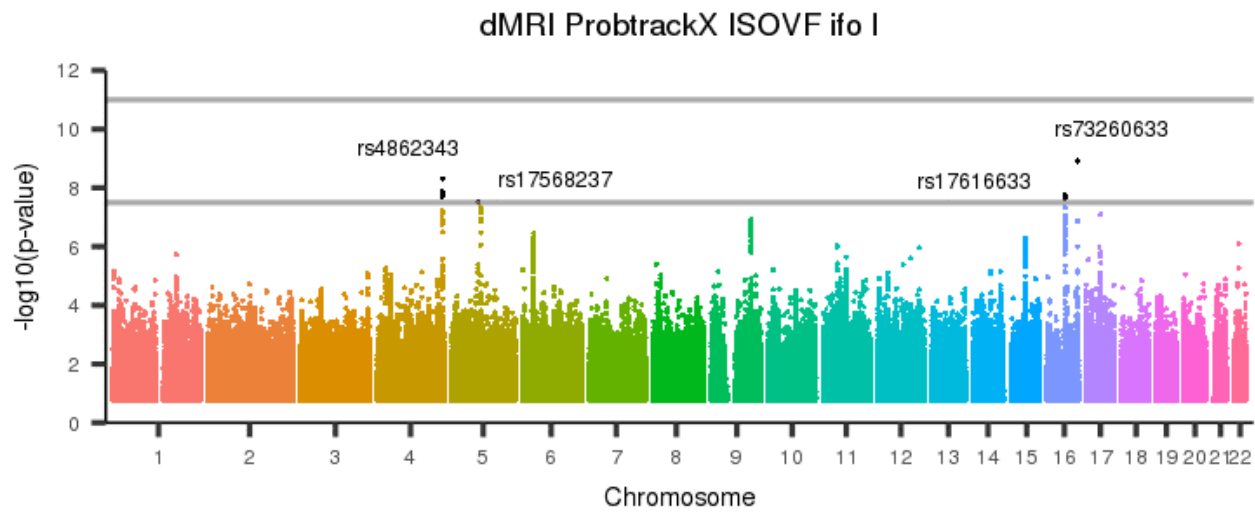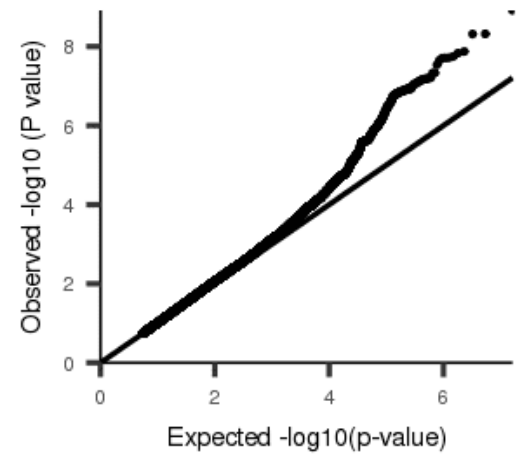

[back to list of plots](#)

Figure 857: dMRI ProbtrackX ISOVF ifo r

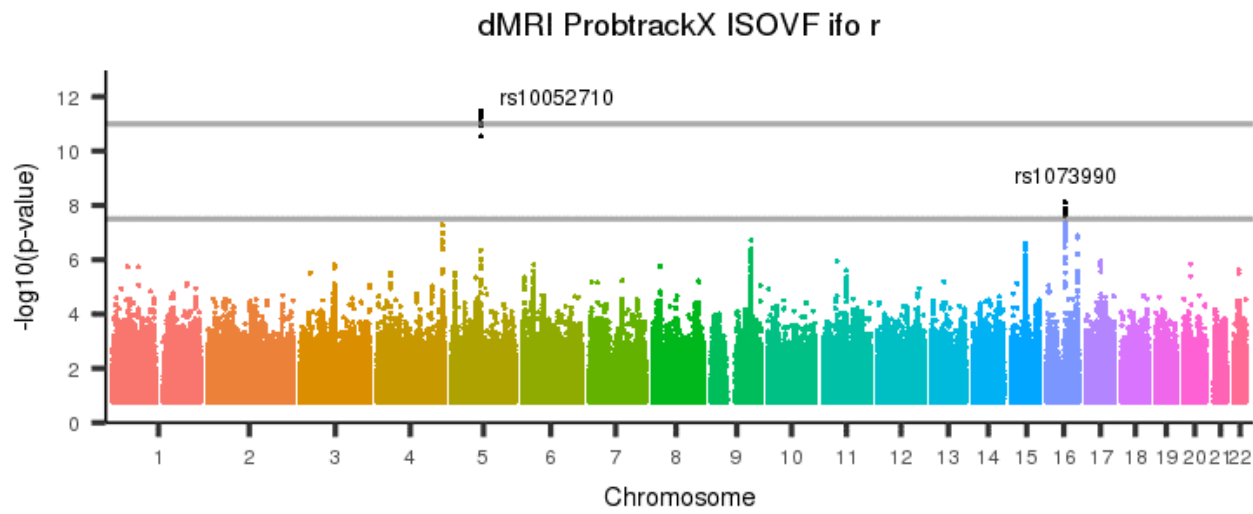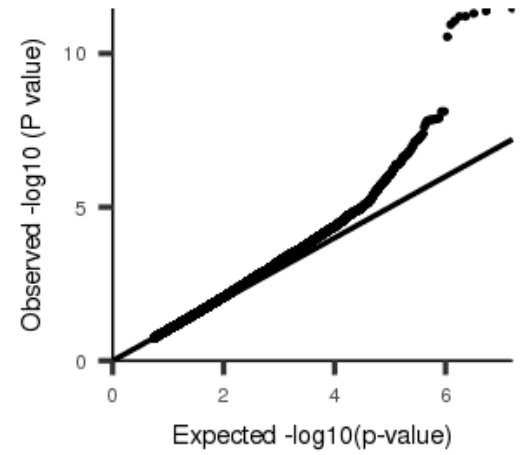

[back to list of plots](#)

Figure 858: dMRI ProbtrackX ISOVF ilf I

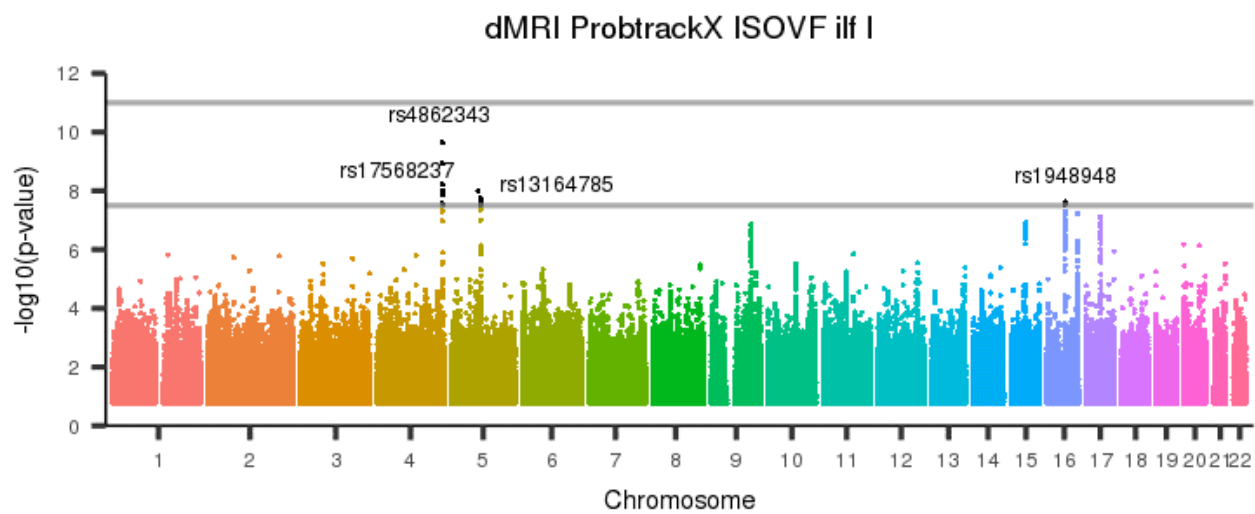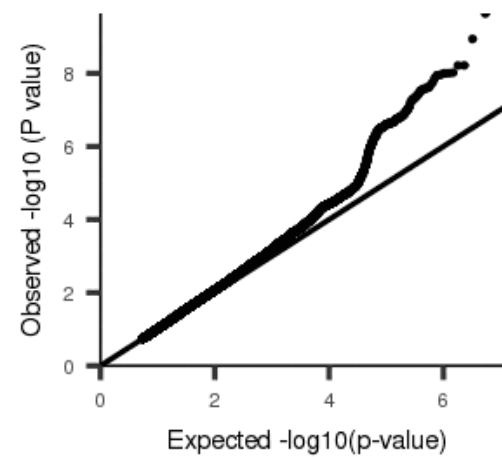

[back to list of plots](#)

Figure 859: dMRI ProbtrackX ISOVF ilf r

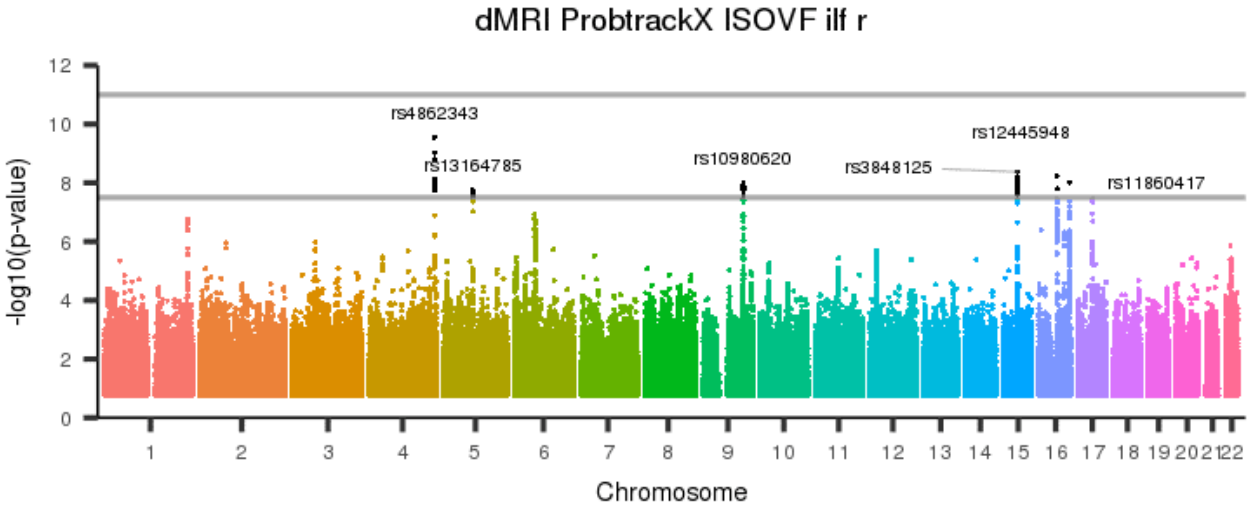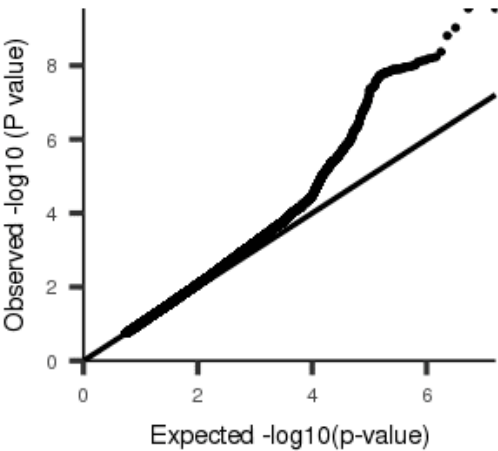

[back to list of plots](#)

Figure 860: dMRI ProbtrackX ISOVF mcp

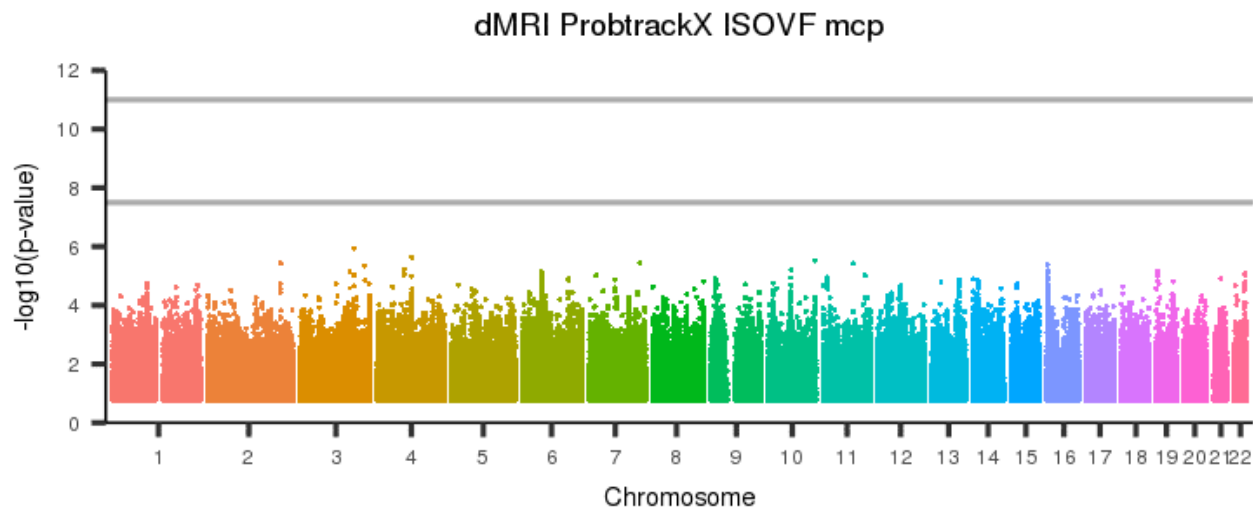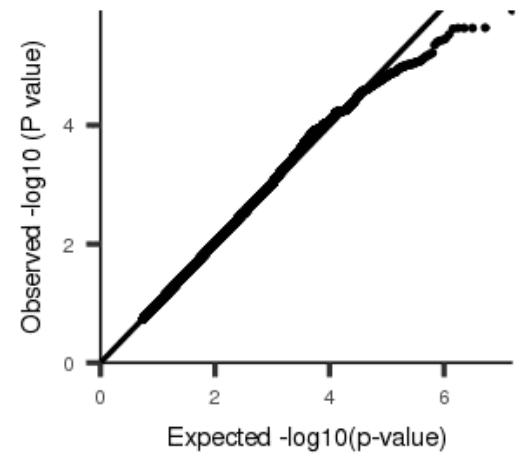

[back to list of plots](#)

Figure 861: dMRI ProbtrackX ISOVF ml I

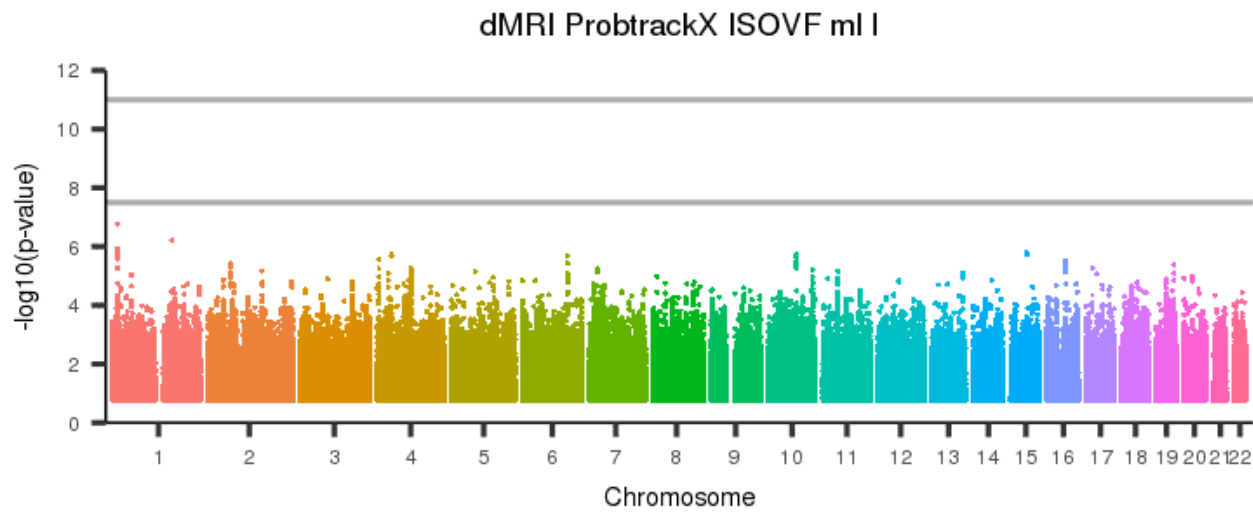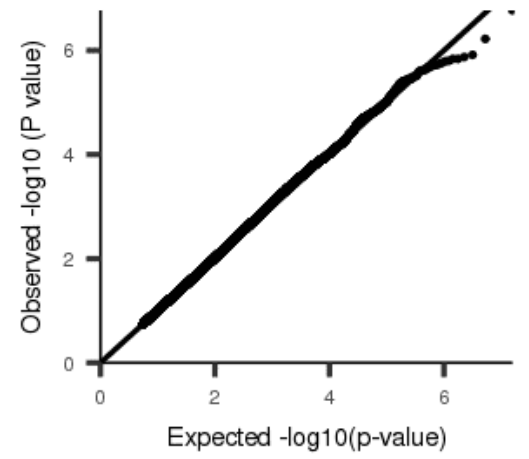

[back to list of plots](#)



Figure 862: dMRI ProbtrackX ISOVF ml r

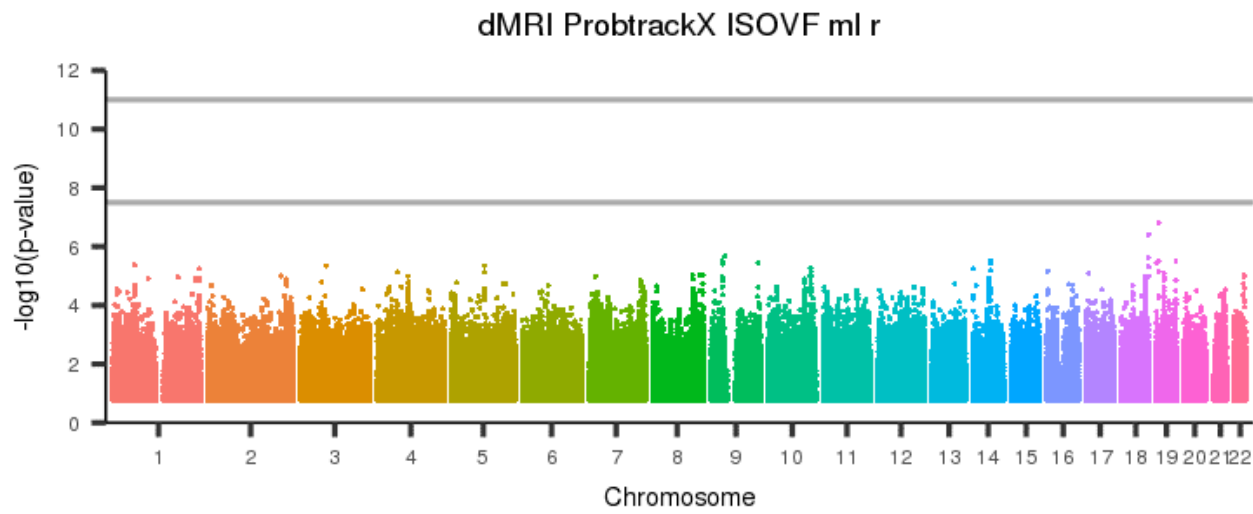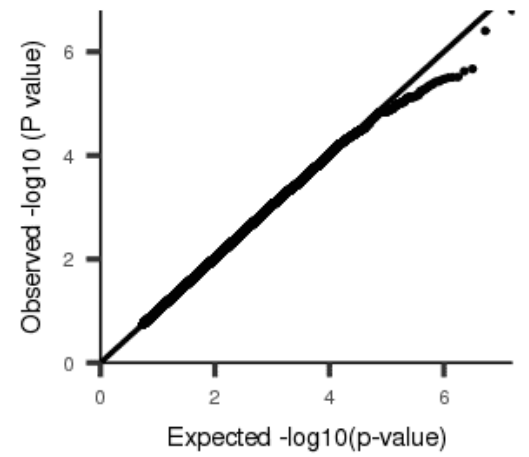

[back to list of plots](#)

Figure 863: dMRI ProbtrackX ISOVF ptr I

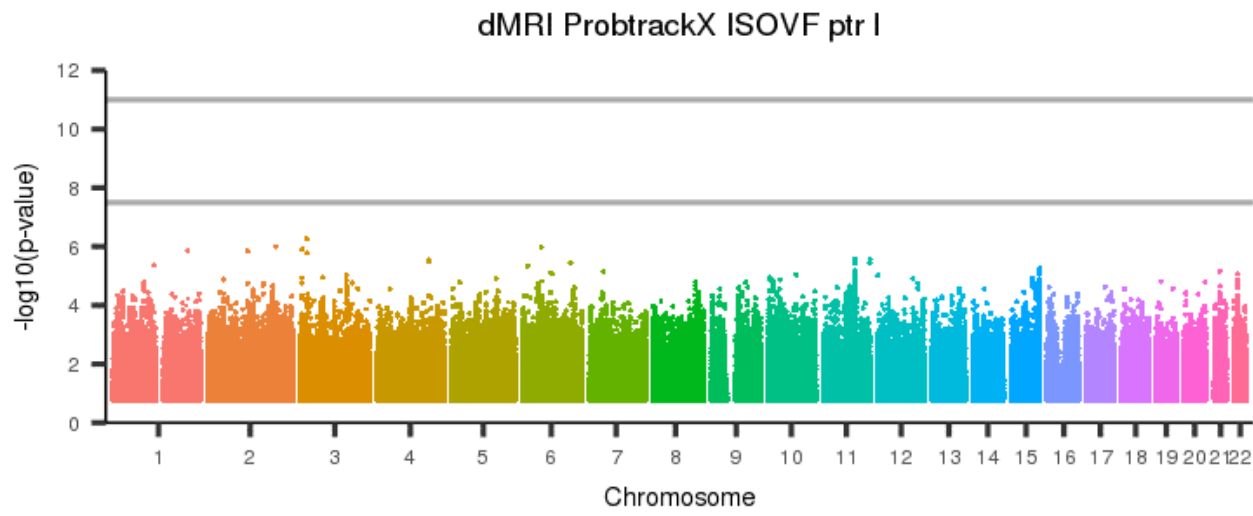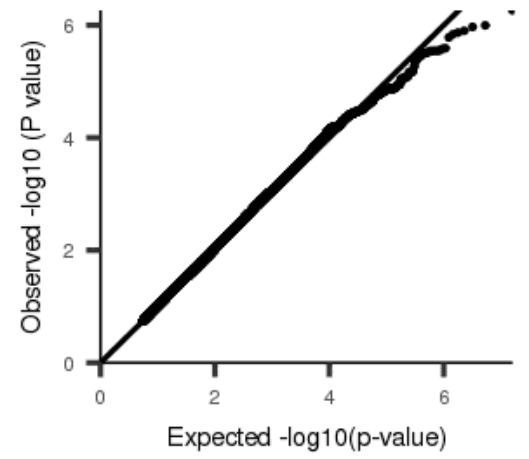

[back to list of plots](#)

Figure 864: dMRI ProbtrackX ISOVF ptr r

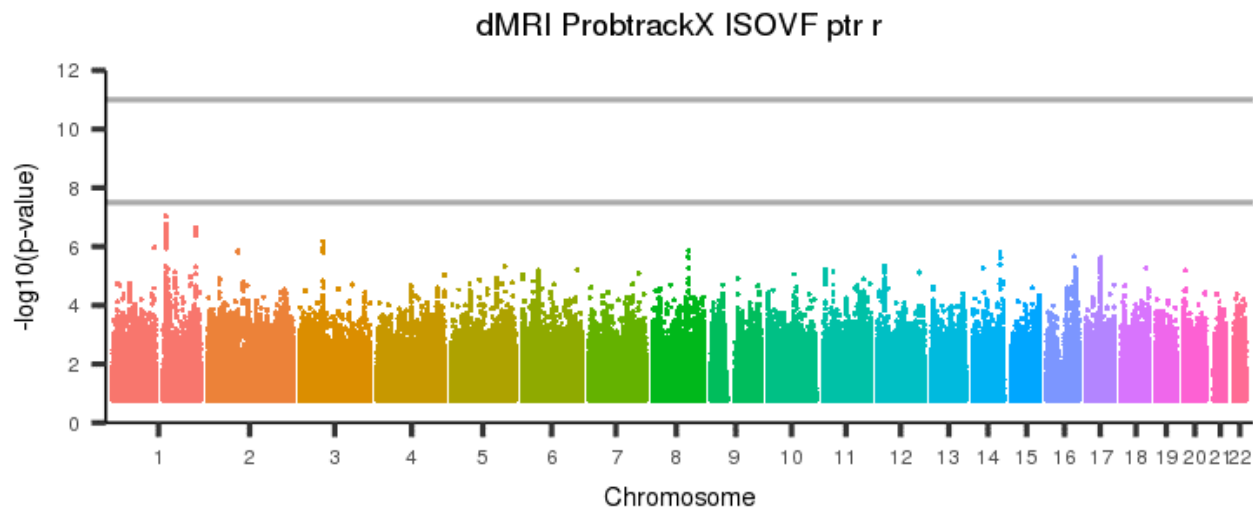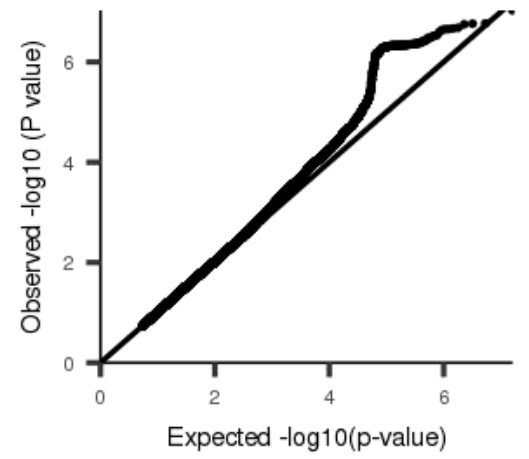

[back to list of plots](#)

Figure 865: dMRI ProbtrackX ISOVF slf I

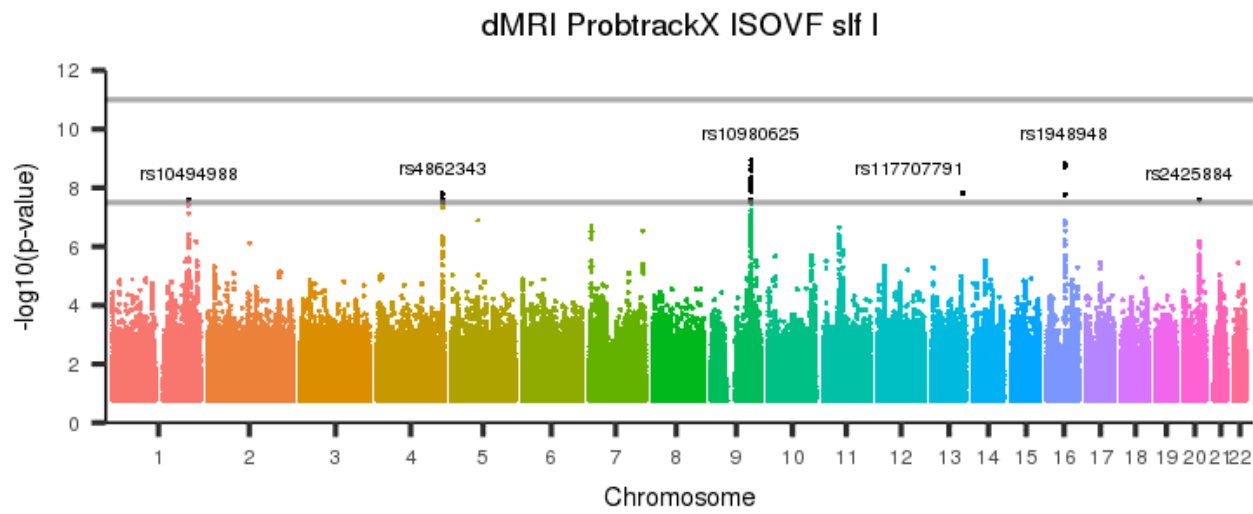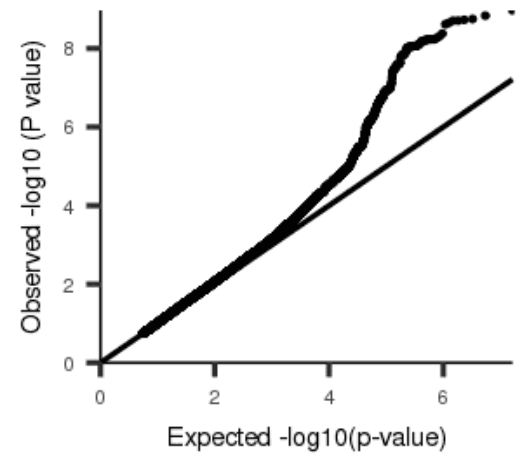

[back to list of plots](#)

Figure 866: dMRI ProbtrackX ISOVF slf r

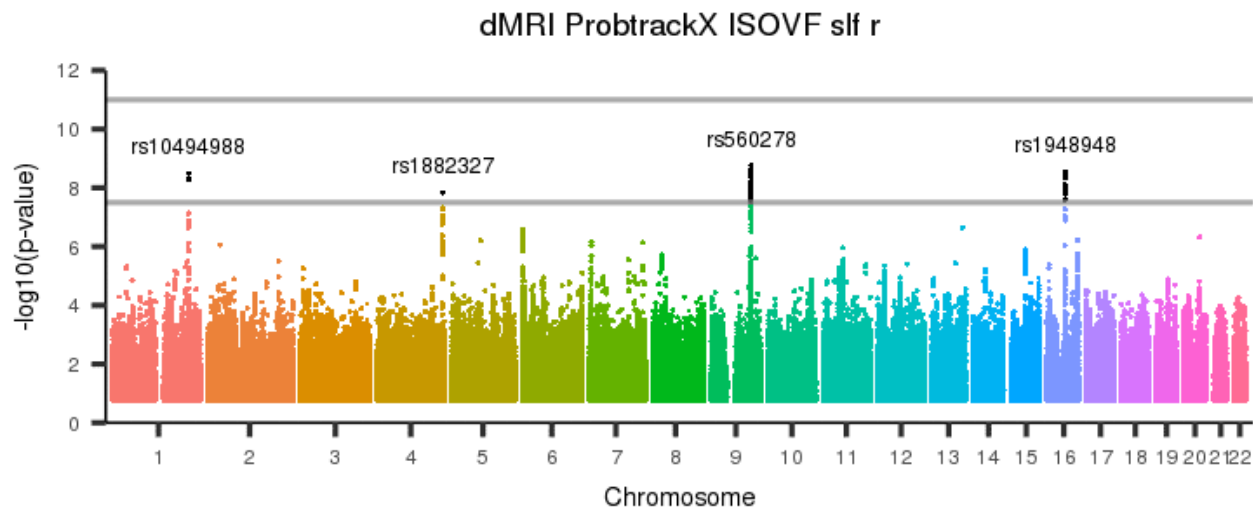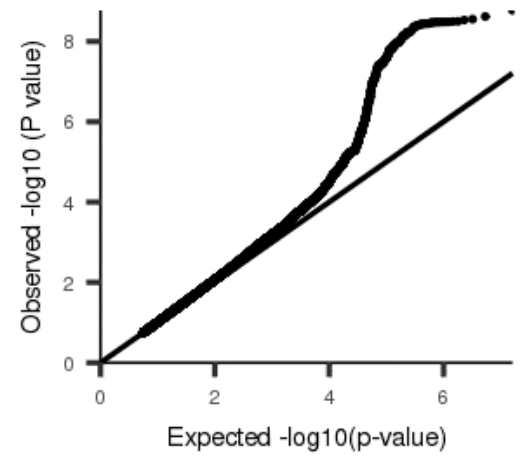

[back to list of plots](#)

Figure 867: dMRI ProbtrackX ISOVF str I

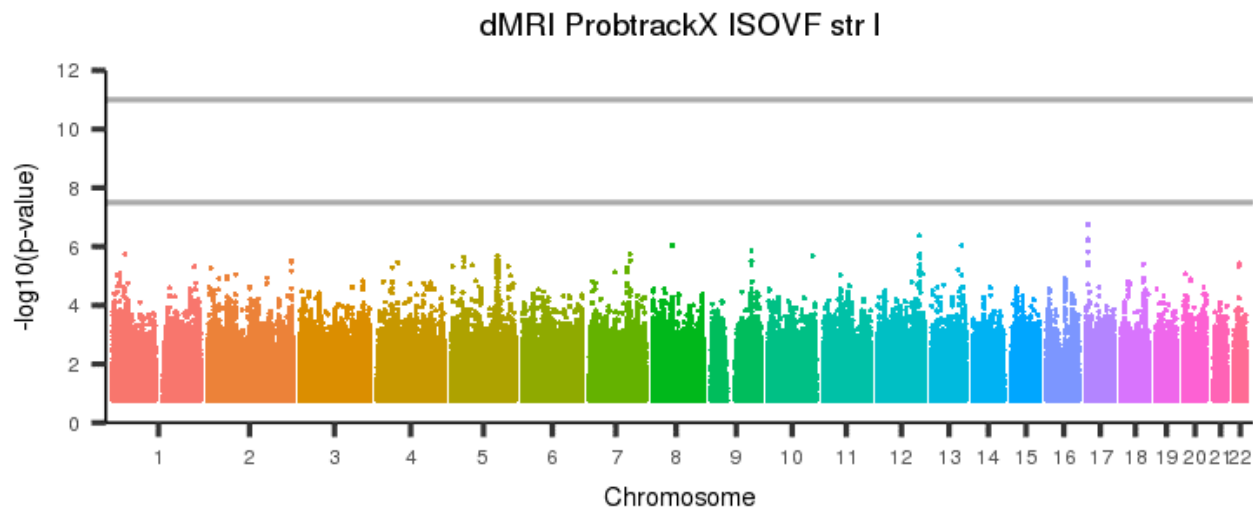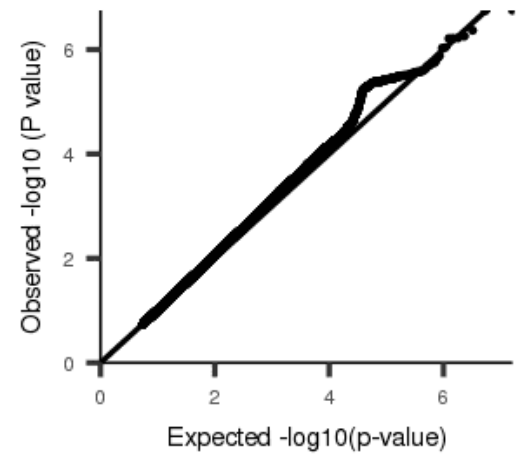

[back to list of plots](#)

Figure 868: dMRI ProbtrackX ISOVF str r

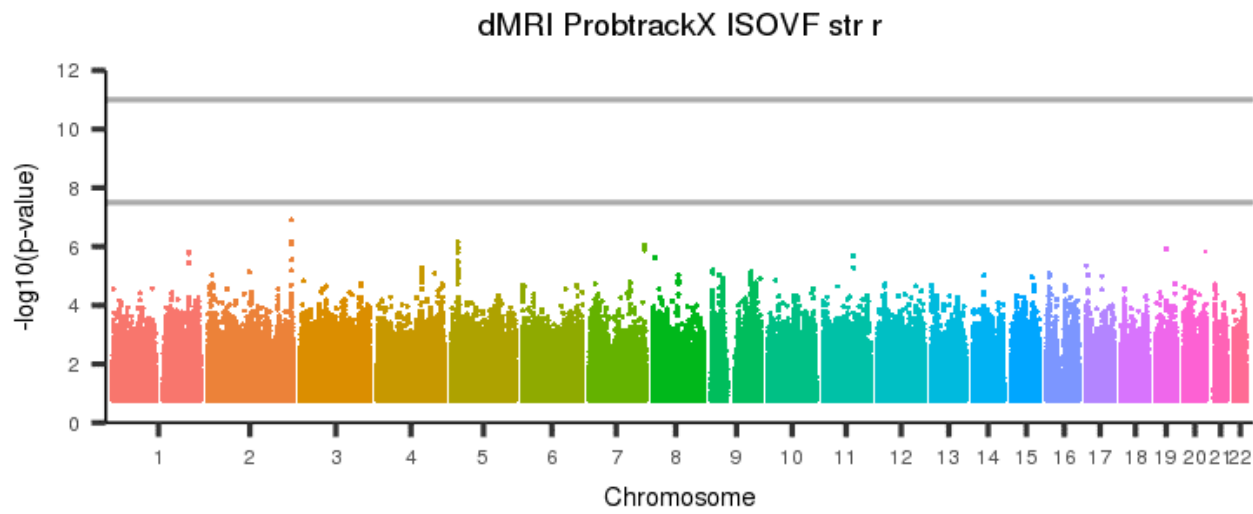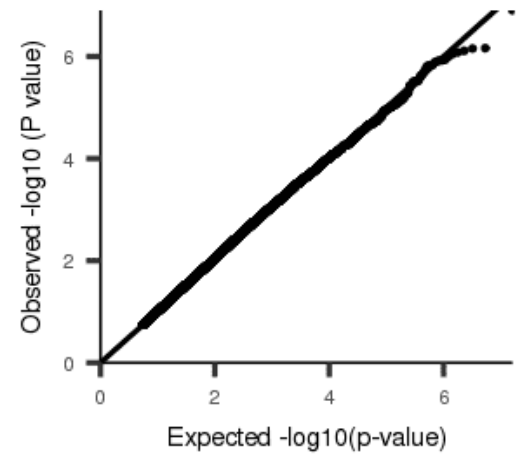

[back to list of plots](#)

Figure 869: dMRI ProbtrackX ISOVF unc I

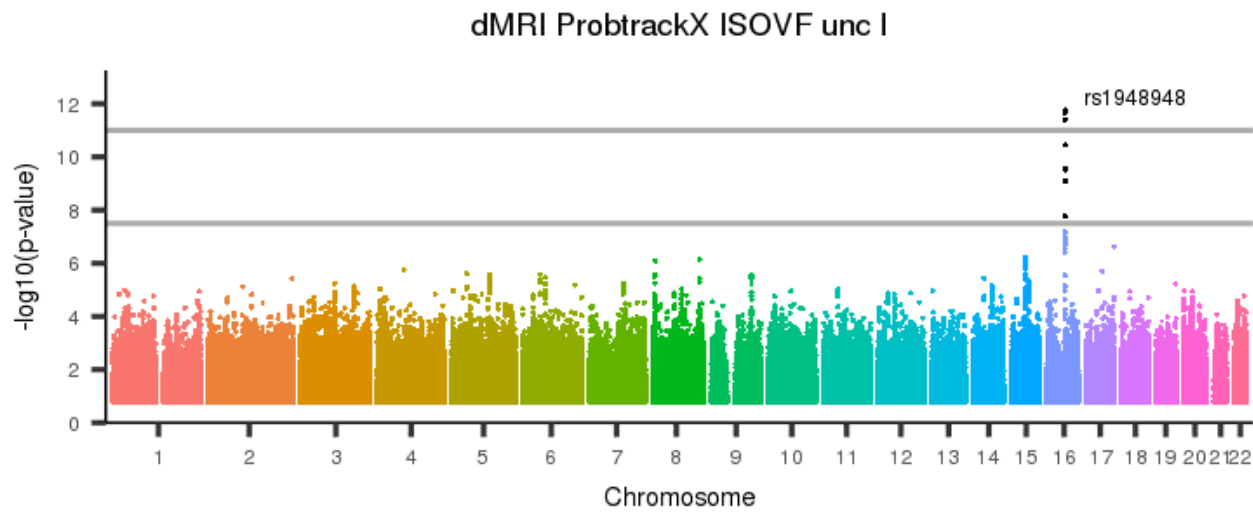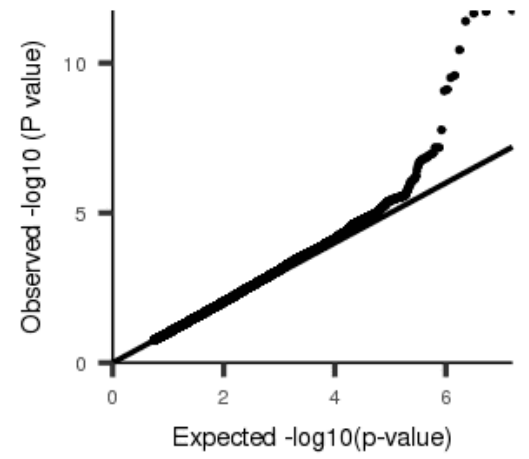

[back to list of plots](#)



Figure 870: dMRI ProbtrackX ISOVF unc r

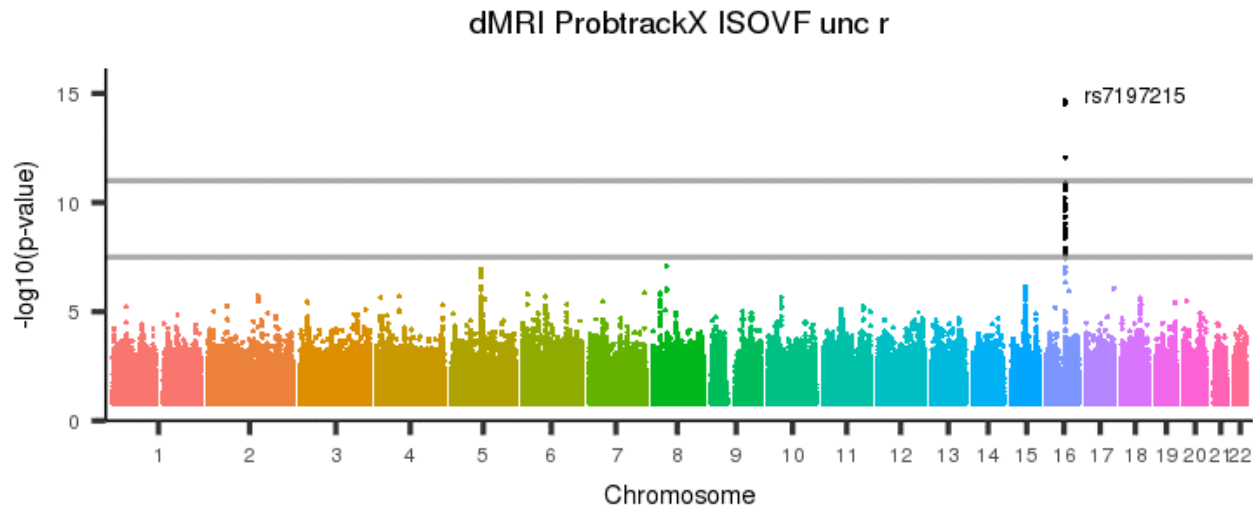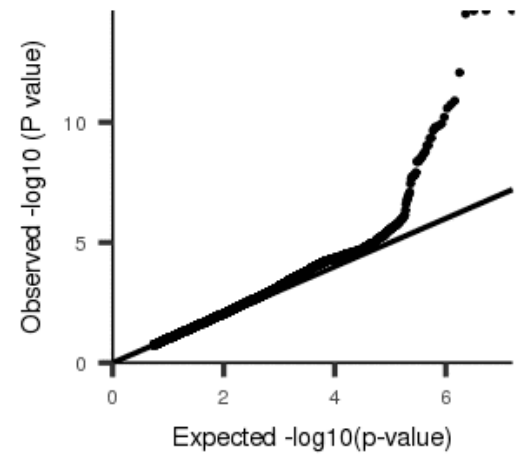

[back to list of plots](#)

Figure 871: NETMAT amplitudes (25) 01

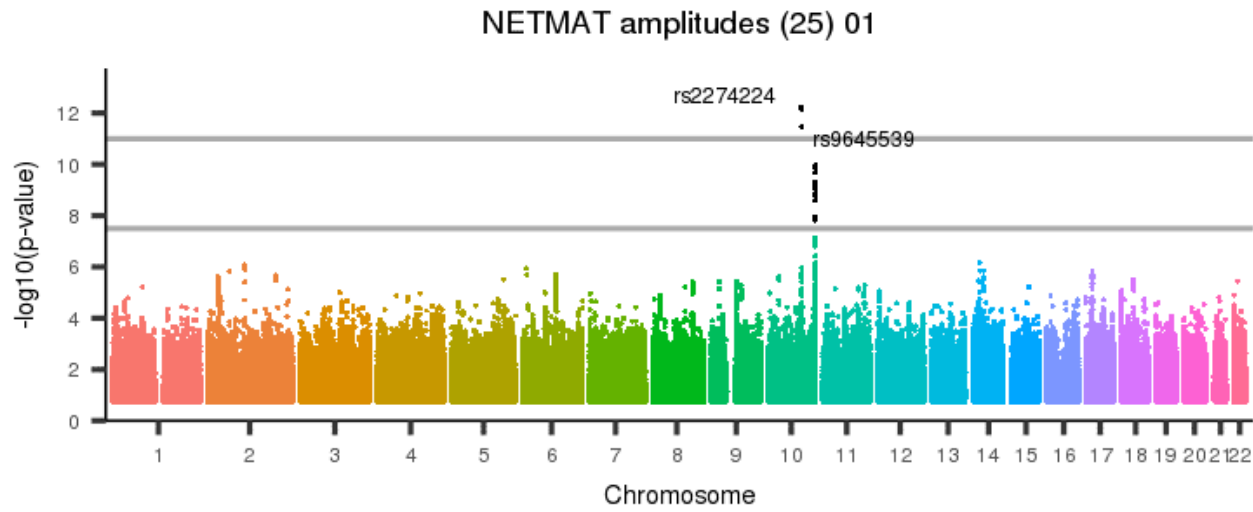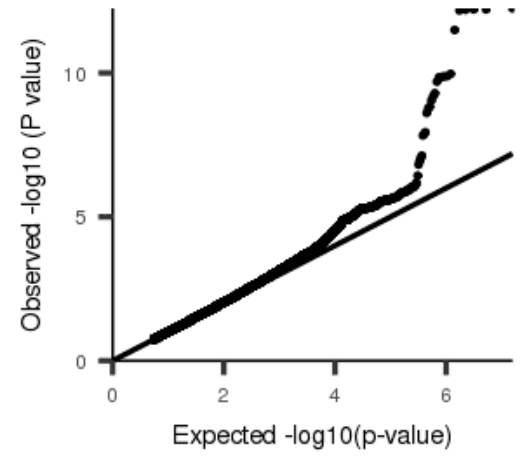

[back to list of plots](#)

Figure 872: NETMAT amplitudes (25) 02

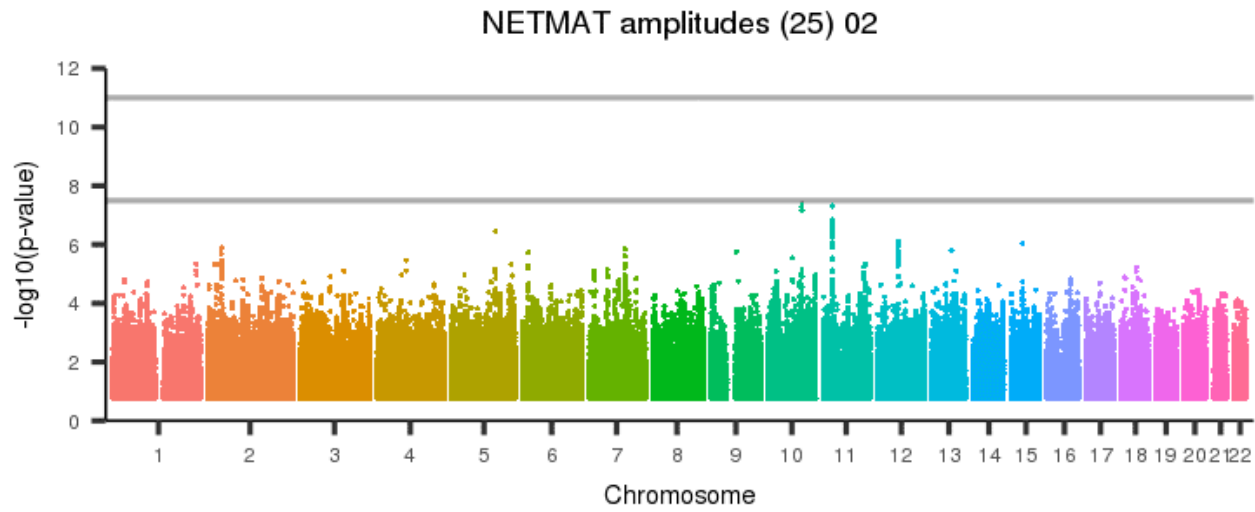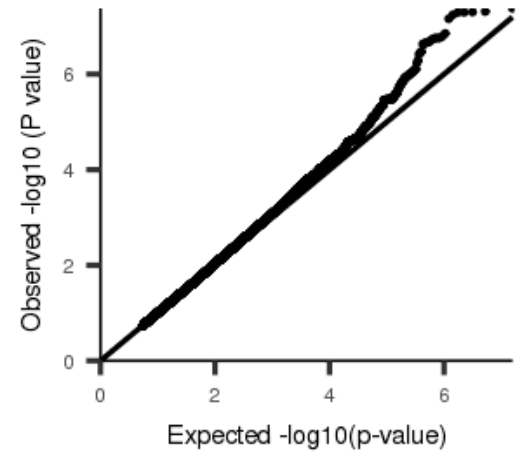

[back to list of plots](#)

Figure 873: NETMAT amplitudes (25) 03

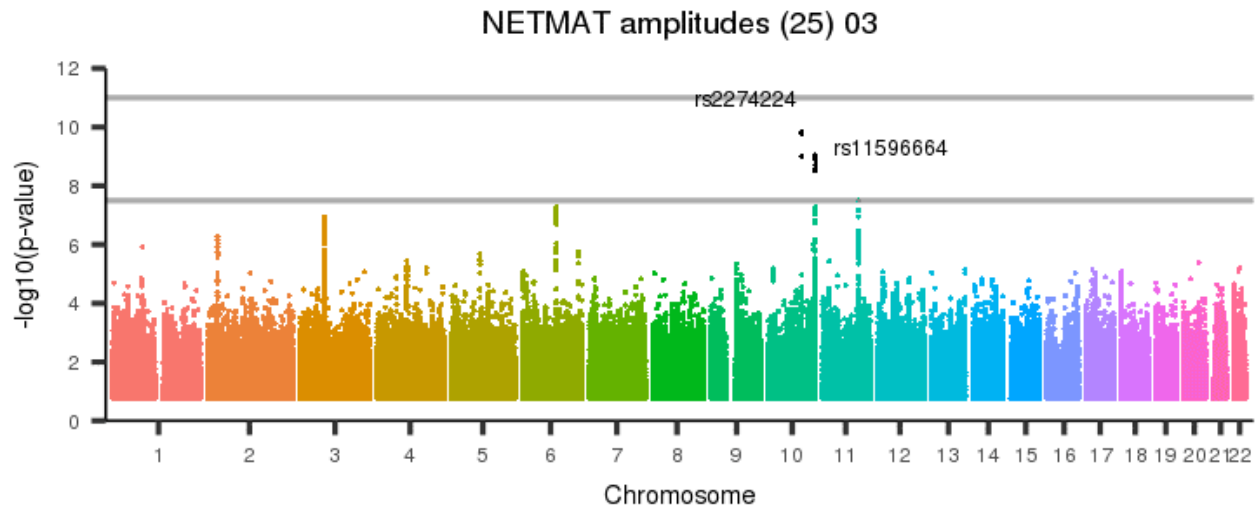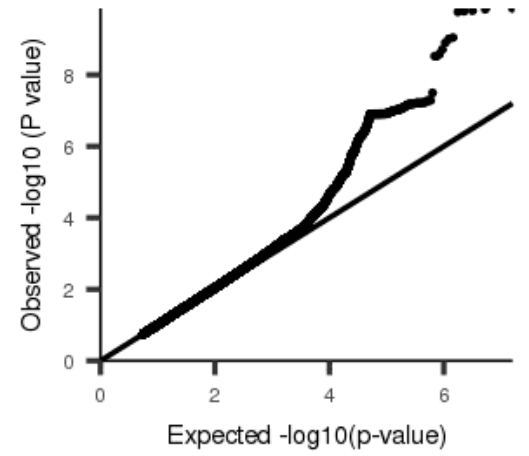

[back to list of plots](#)

Figure 874: NETMAT amplitudes (25) 04

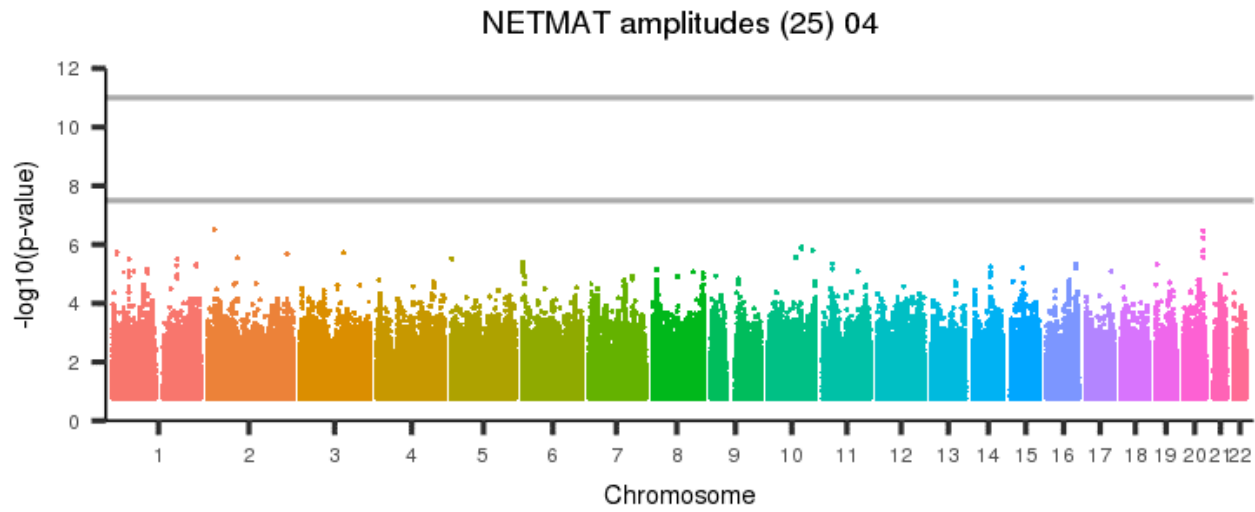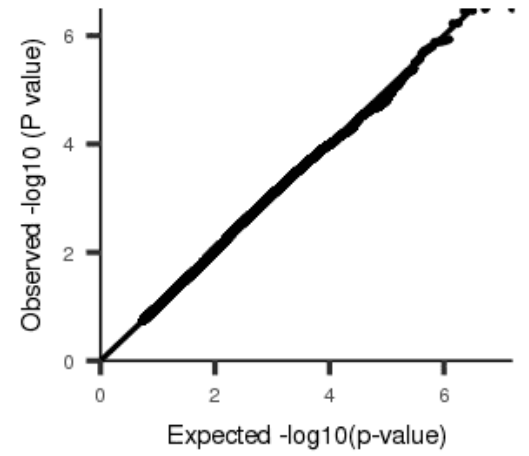

[back to list of plots](#)

Figure 875: NETMAT amplitudes (25) 05

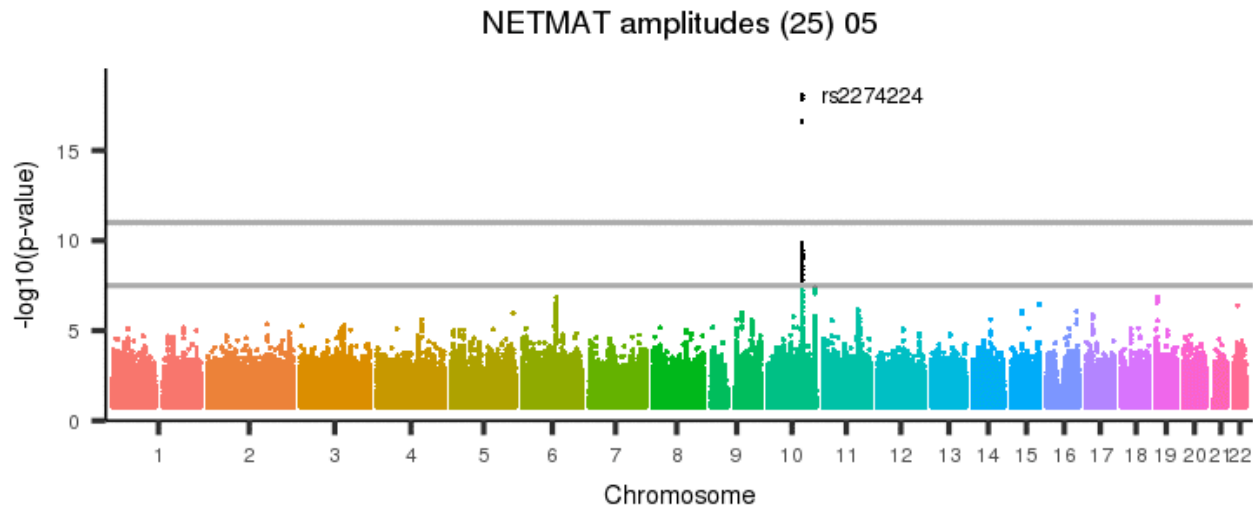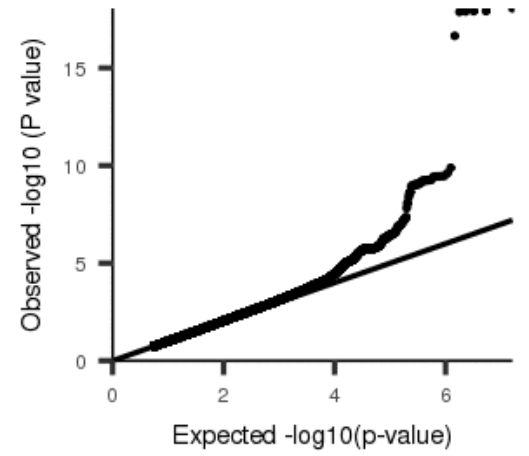

[back to list of plots](#)

Figure 876: NETMAT amplitudes (25) 06

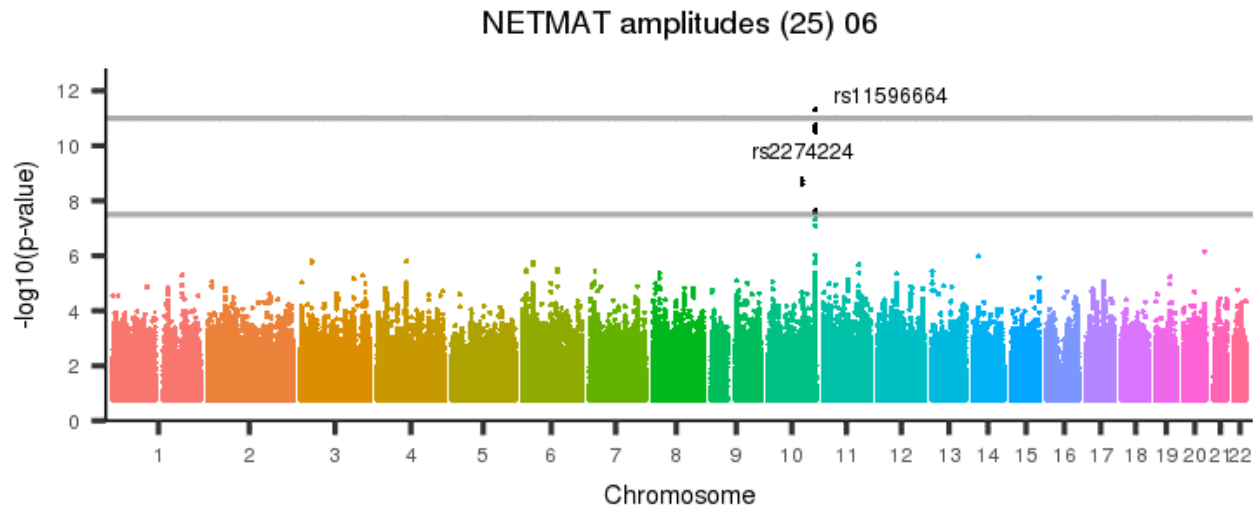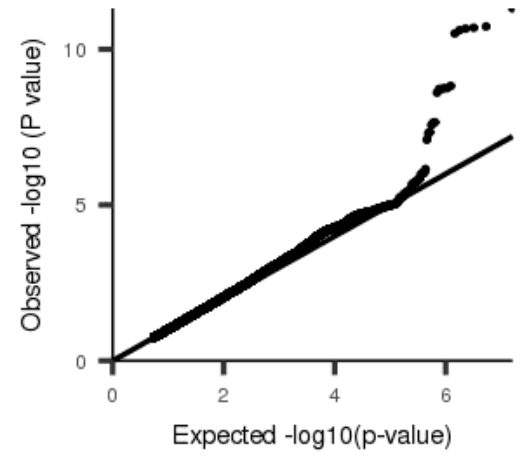

[back to list of plots](#)

Figure 877: NETMAT amplitudes (25) 07

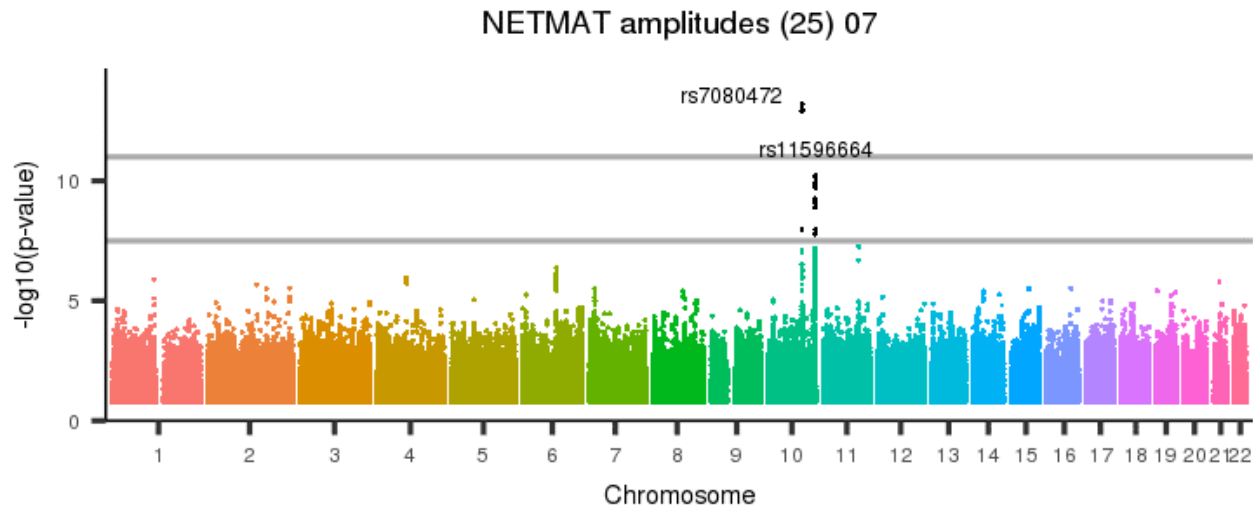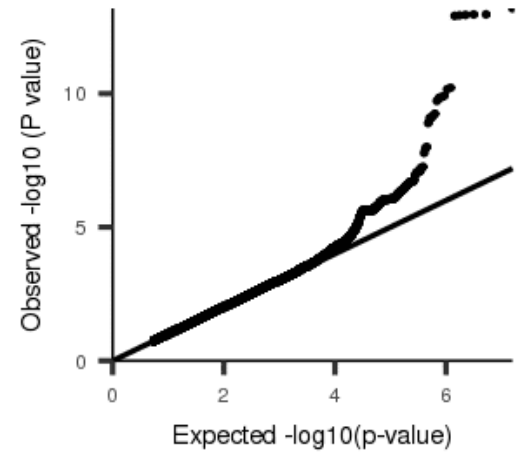

[back to list of plots](#)



Figure 878: NETMAT amplitudes (25) 08

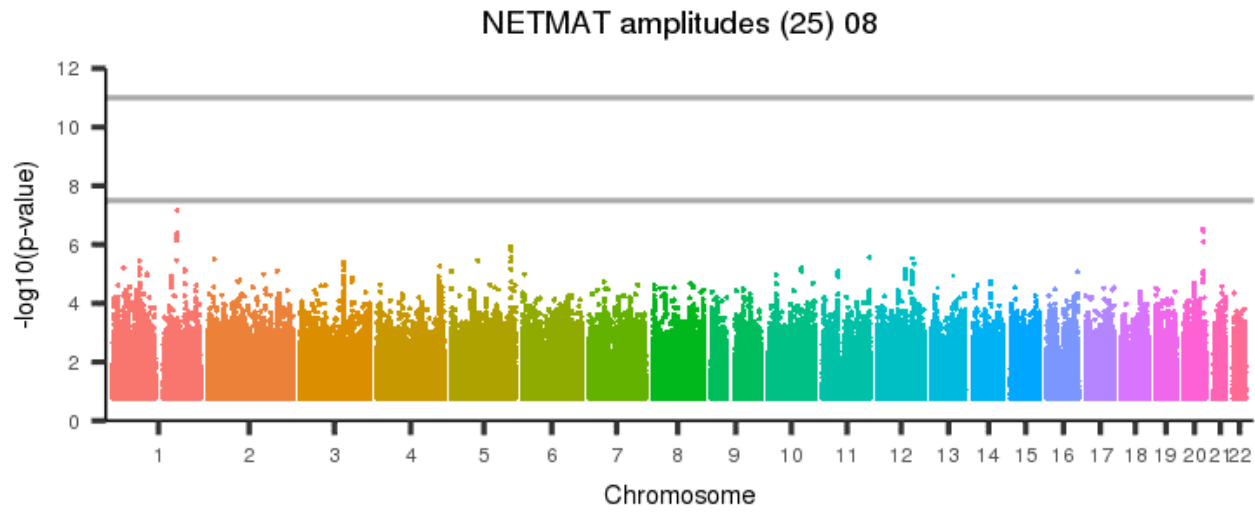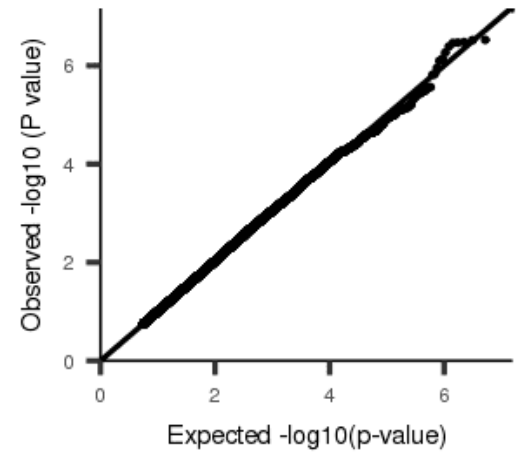

[back to list of plots](#)

Figure 879: NETMAT amplitudes (25) 09

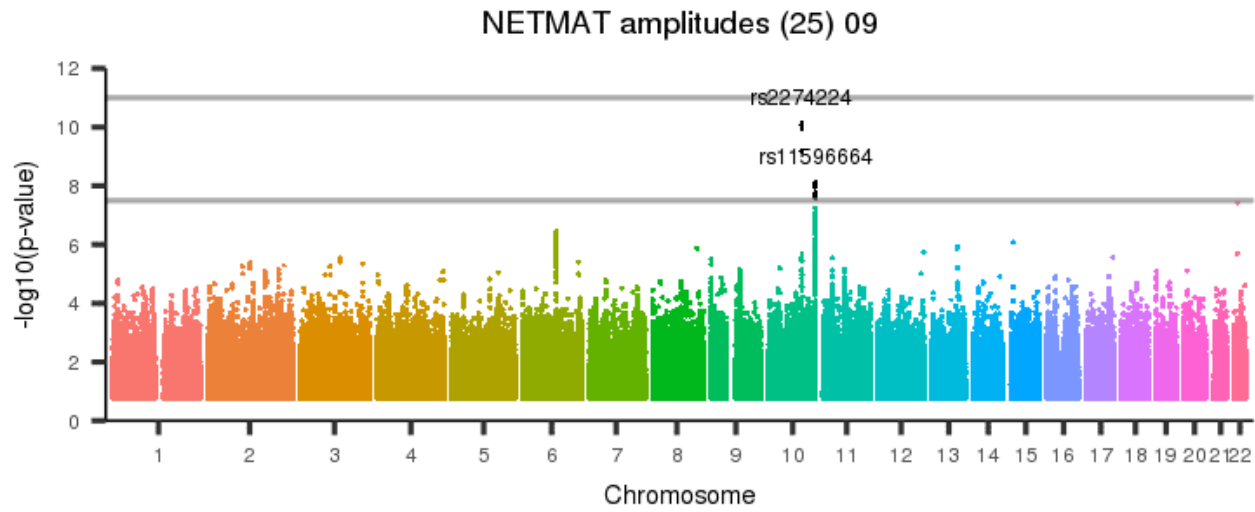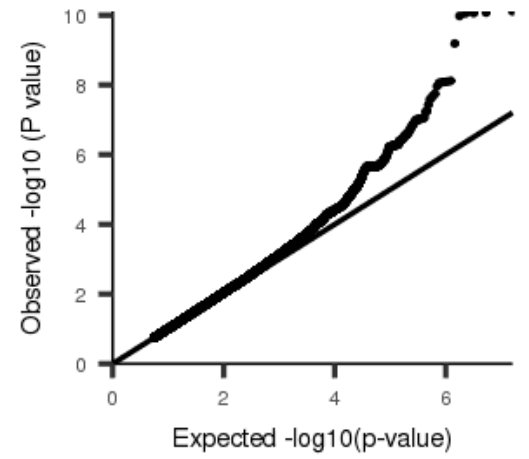

[back to list of plots](#)

Figure 880: NETMAT amplitudes (25) 10

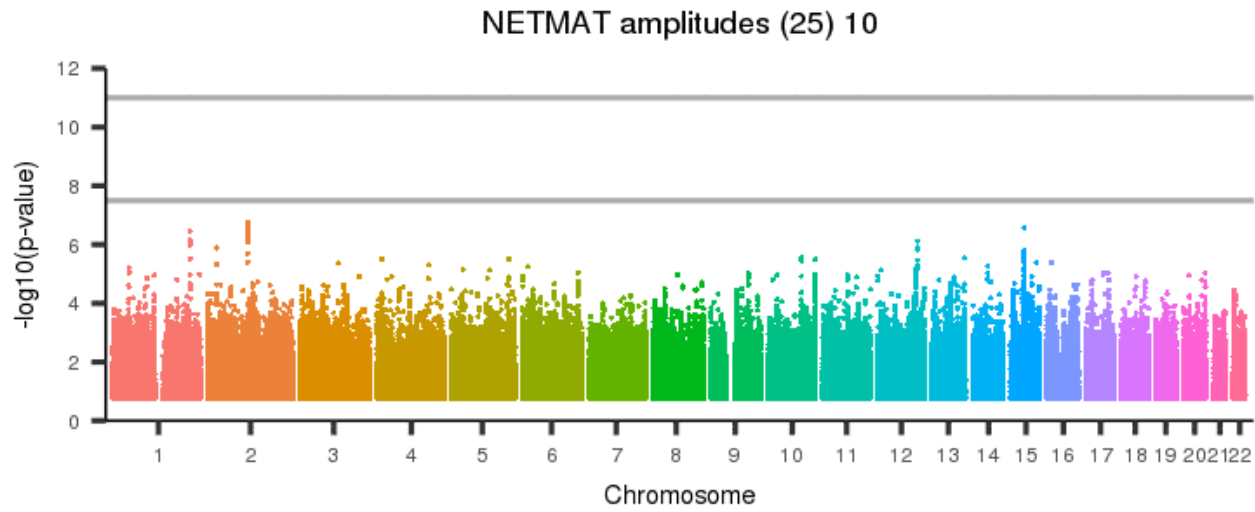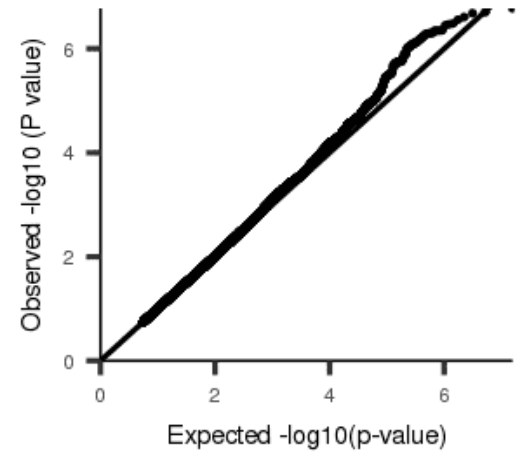

[back to list of plots](#)

Figure 881: NETMAT amplitudes (25) 11

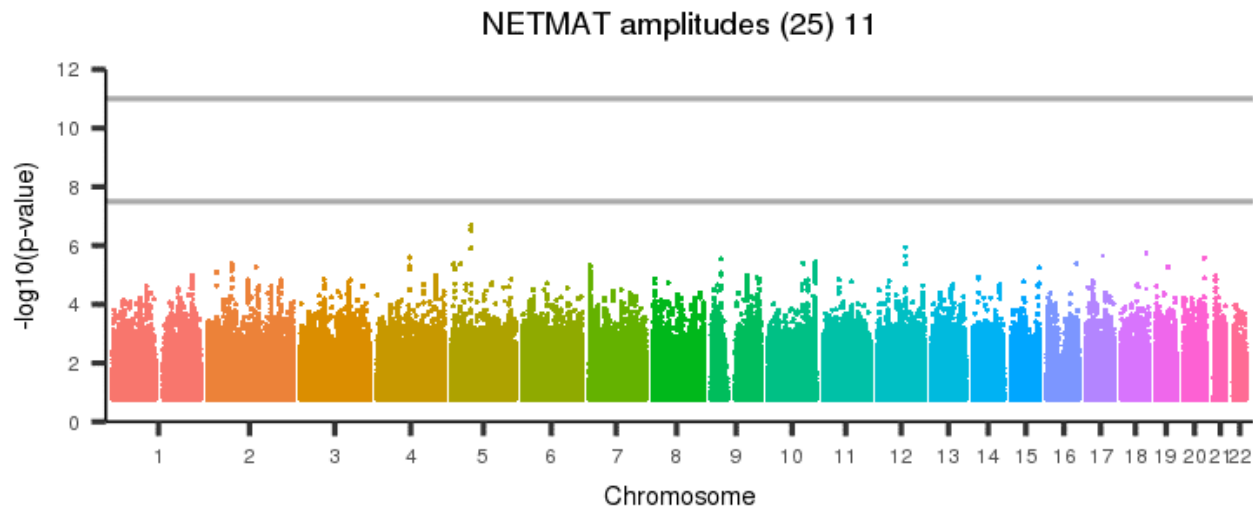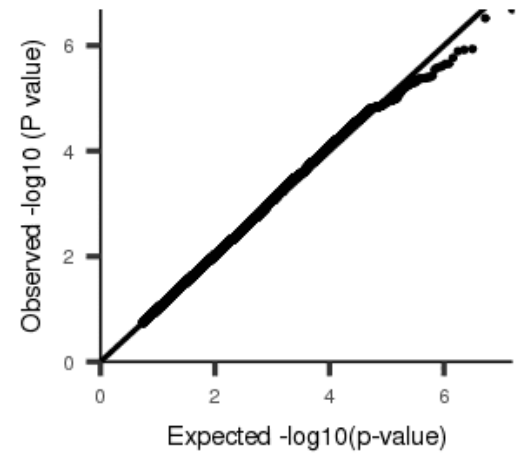

[back to list of plots](#)

Figure 882: NETMAT amplitudes (25) 12

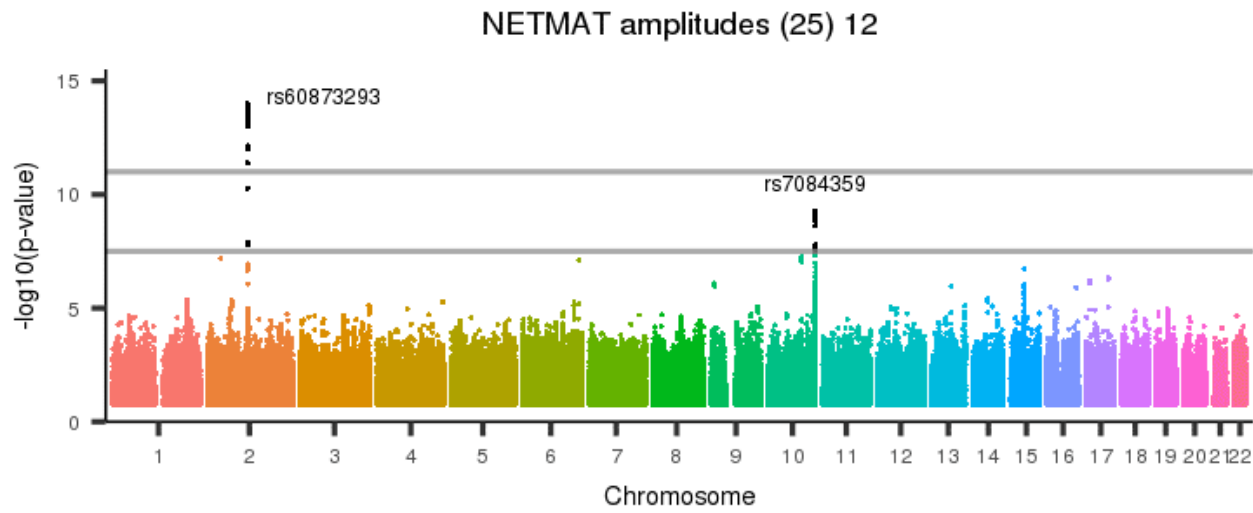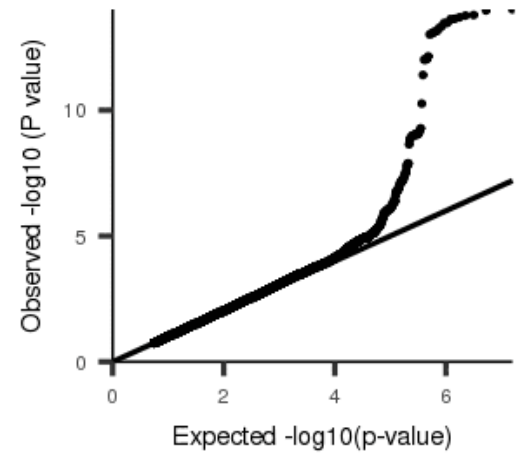

[back to list of plots](#)

Figure 883: NETMAT amplitudes (25) 13

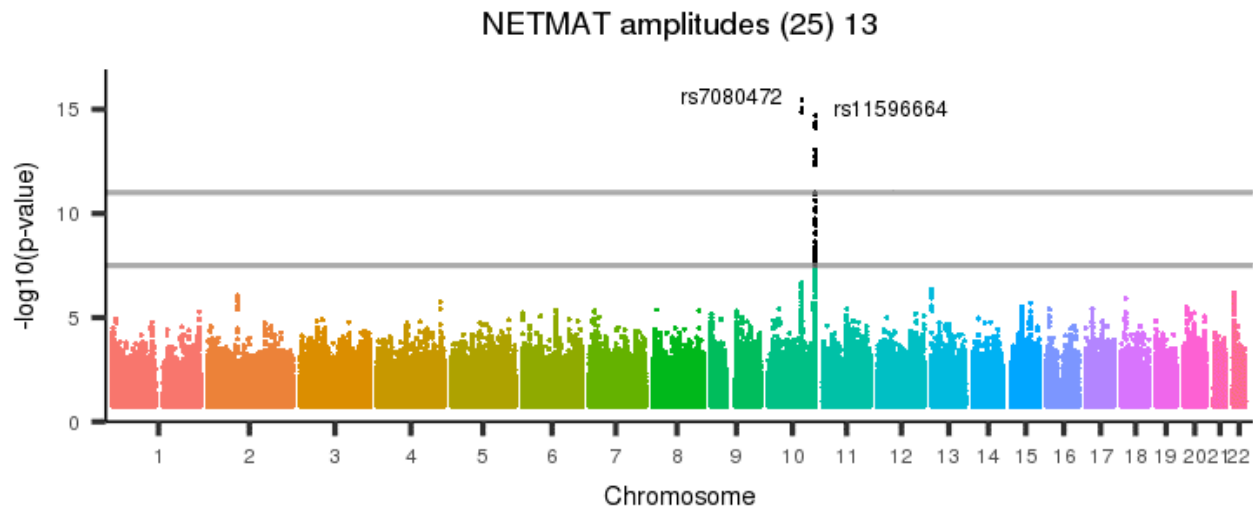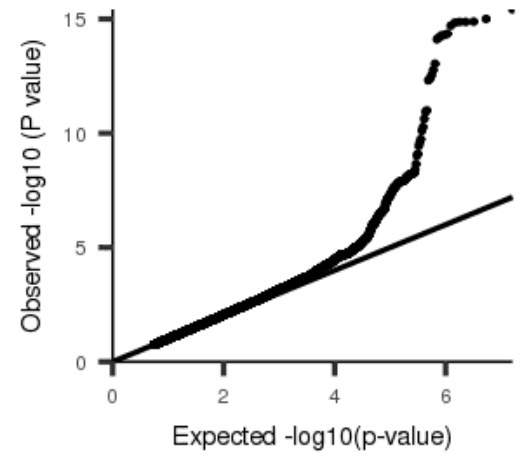

[back to list of plots](#)

Figure 884: NETMAT amplitudes (25) 14

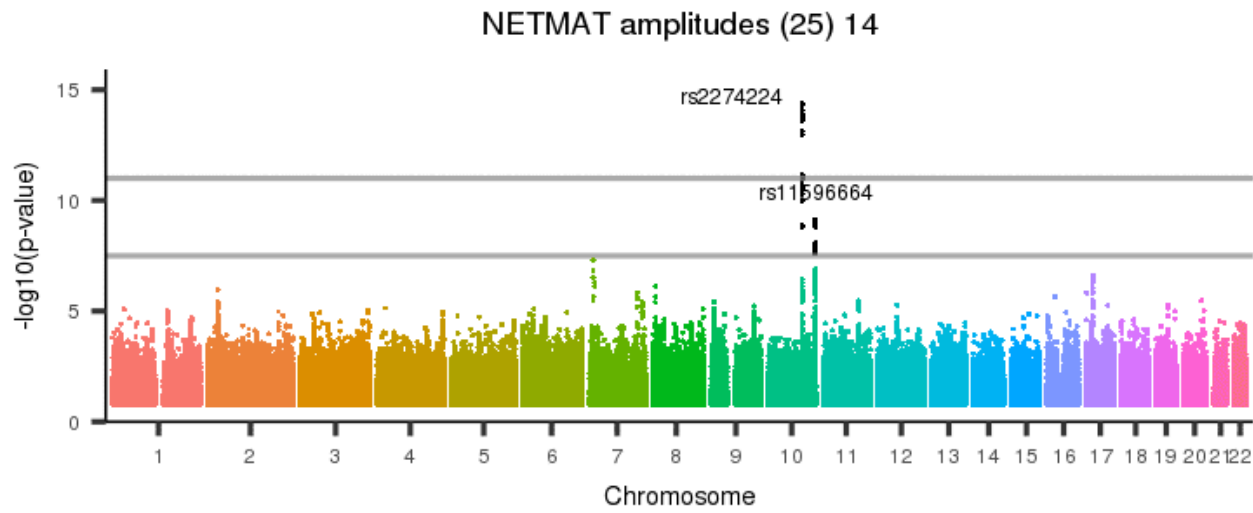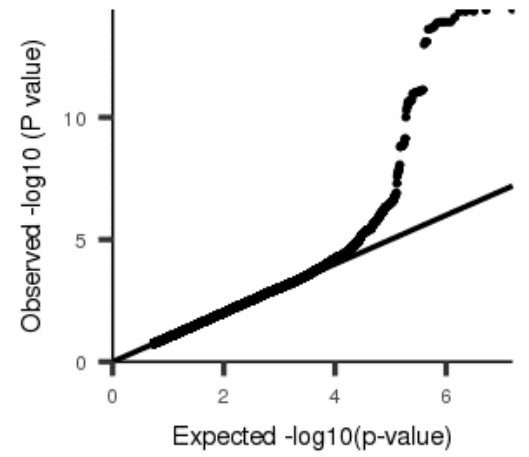

[back to list of plots](#)

Figure 885: NETMAT amplitudes (25) 15

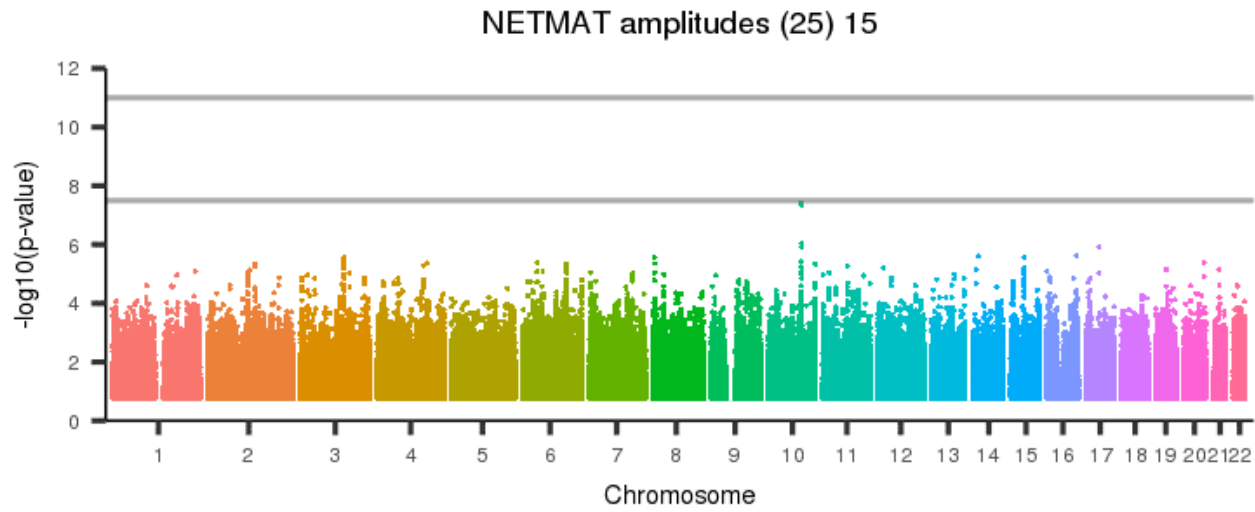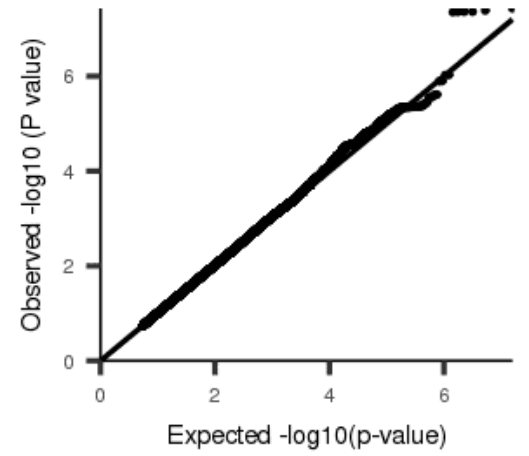

[back to list of plots](#)



Figure 886: NETMAT amplitudes (25) 16

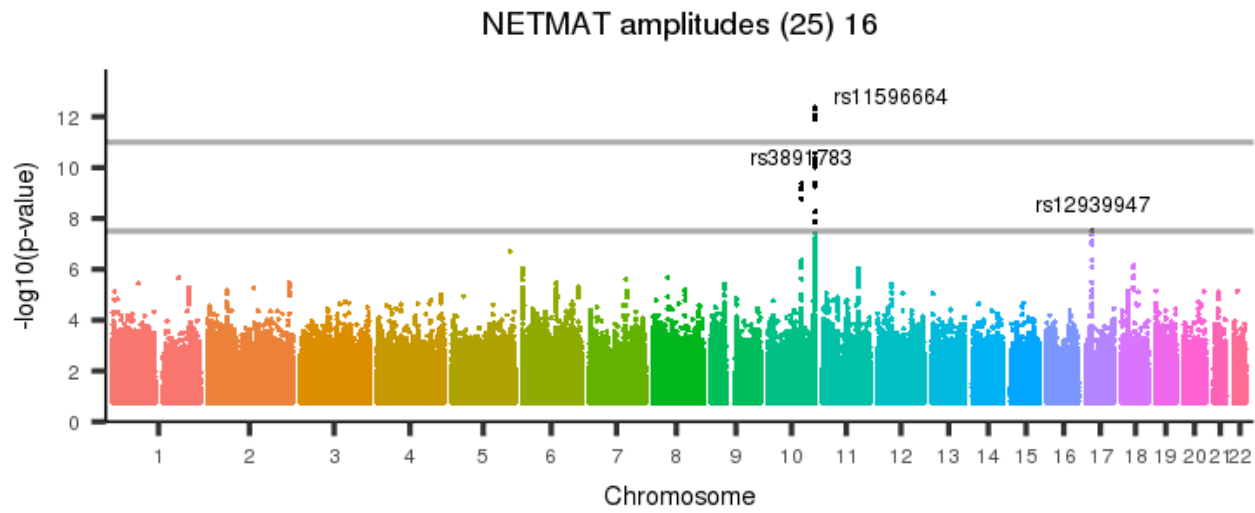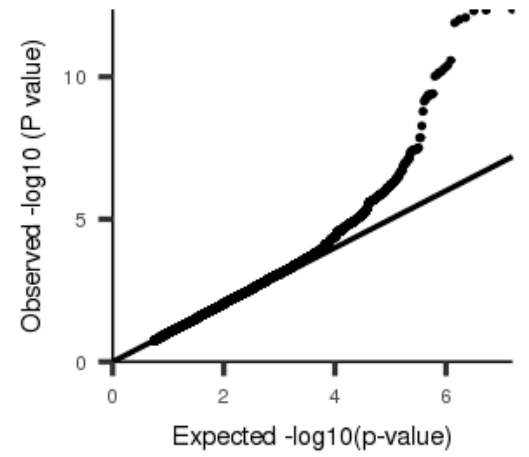

[back to list of plots](#)

Figure 887: NETMAT amplitudes (25) 17

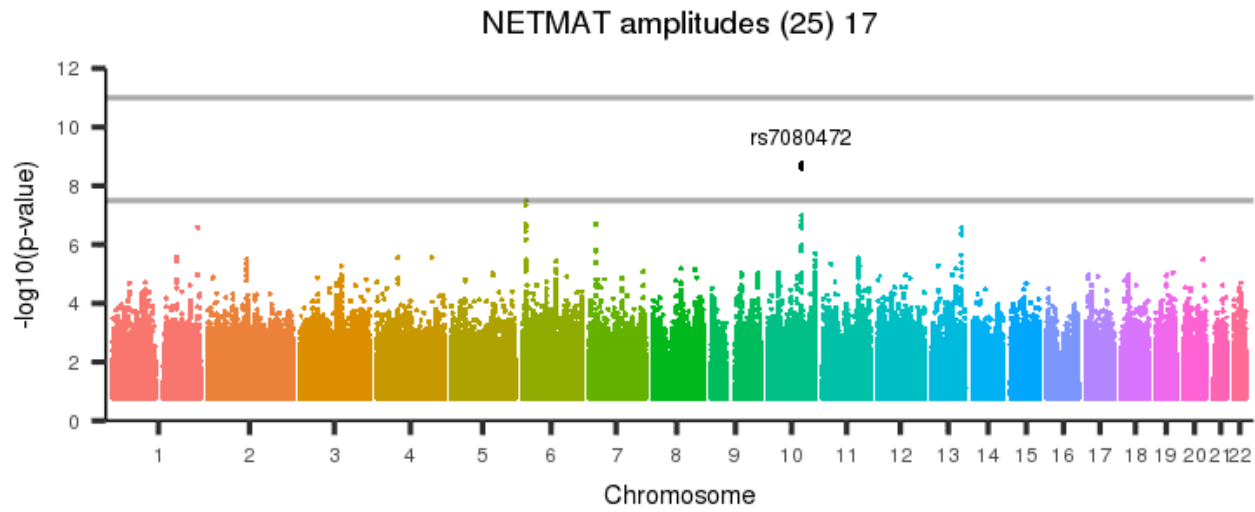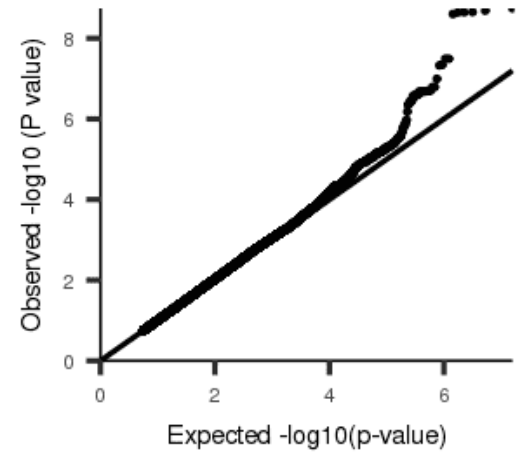

[back to list of plots](#)

Figure 888: NETMAT amplitudes (25) 18

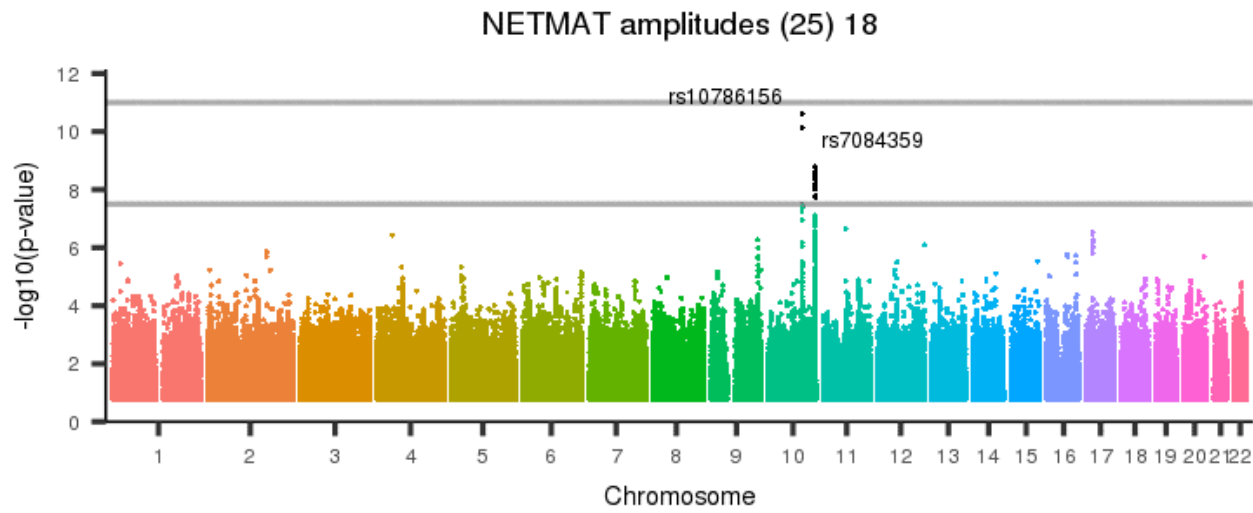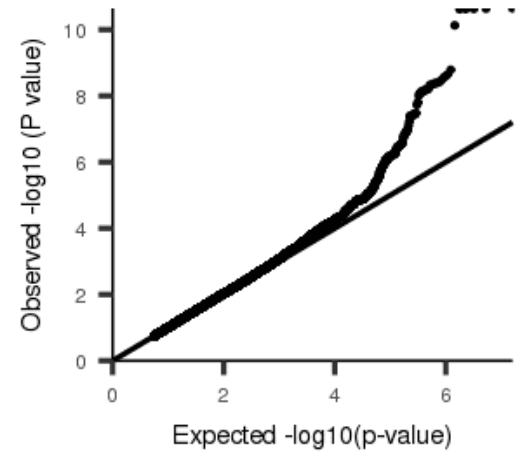

[back to list of plots](#)

Figure 889: NETMAT amplitudes (25) 19

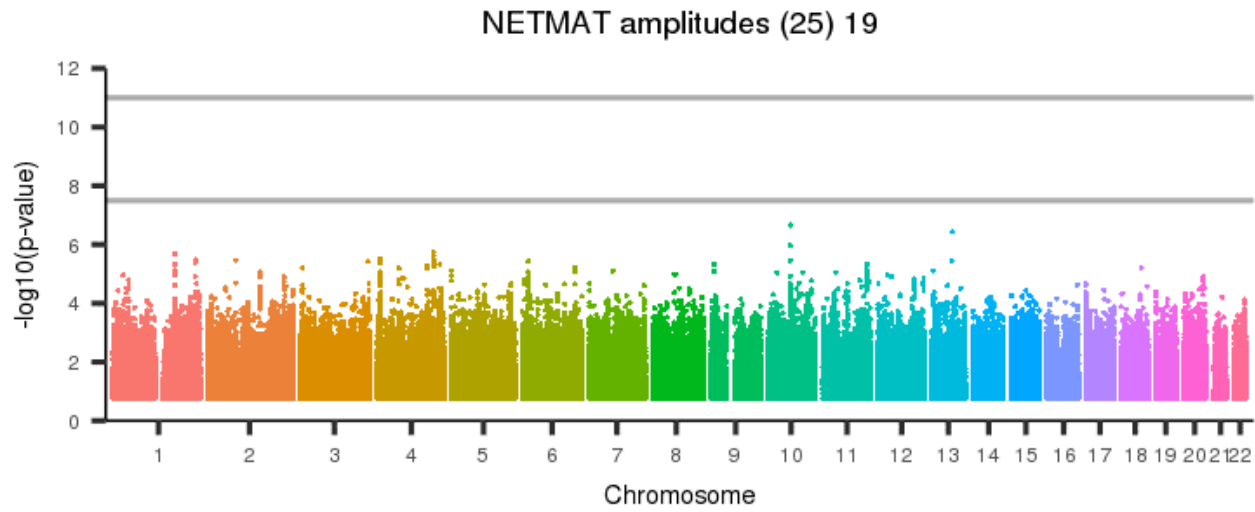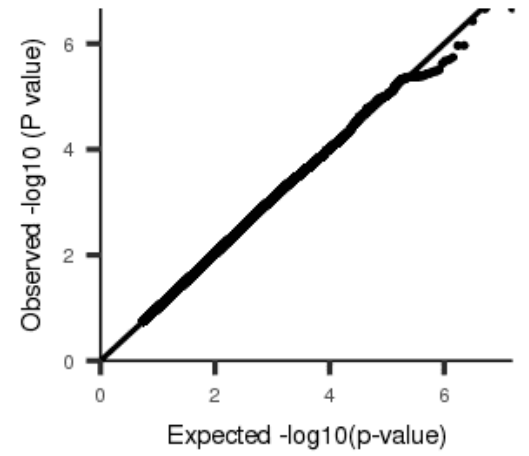

[back to list of plots](#)

Figure 890: NETMAT amplitudes (25) 20

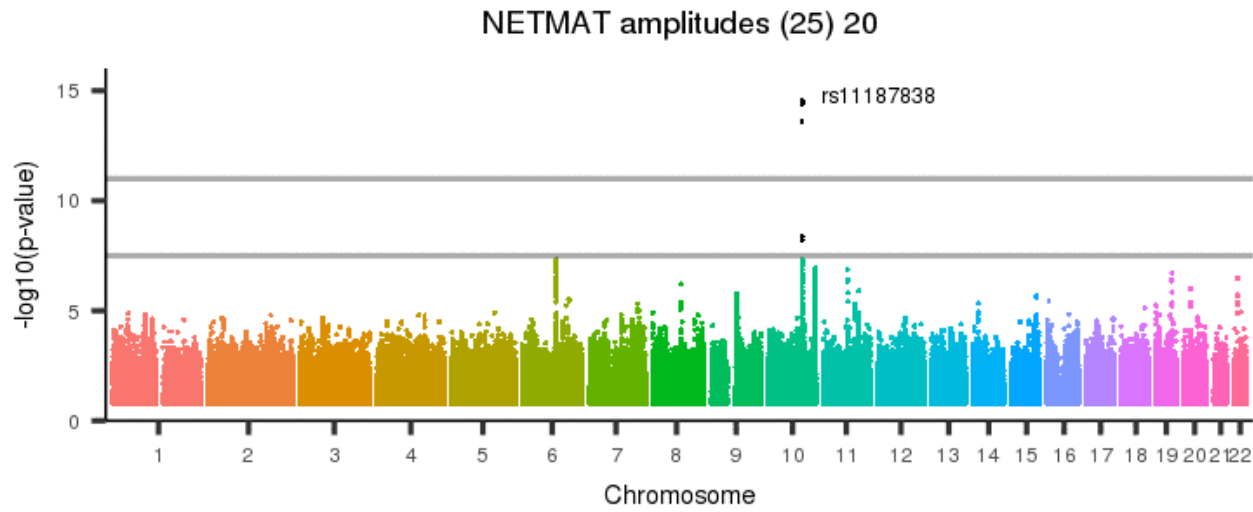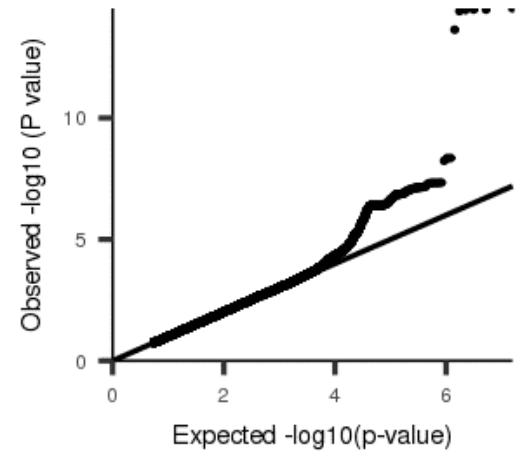

[back to list of plots](#)

Figure 891: NETMAT amplitudes (25) 21

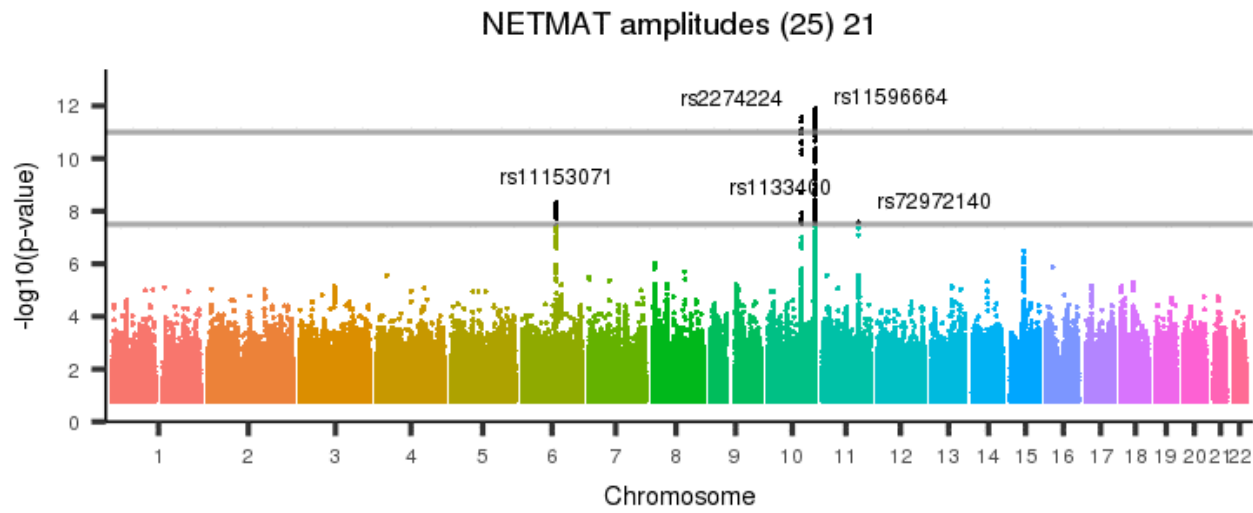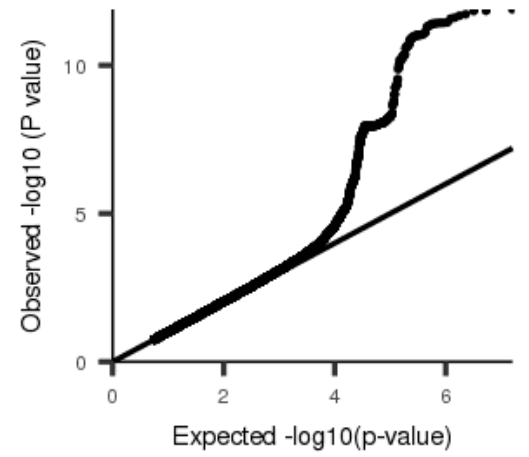

[back to list of plots](#)

Figure 892: NETMAT amplitudes (100) 01

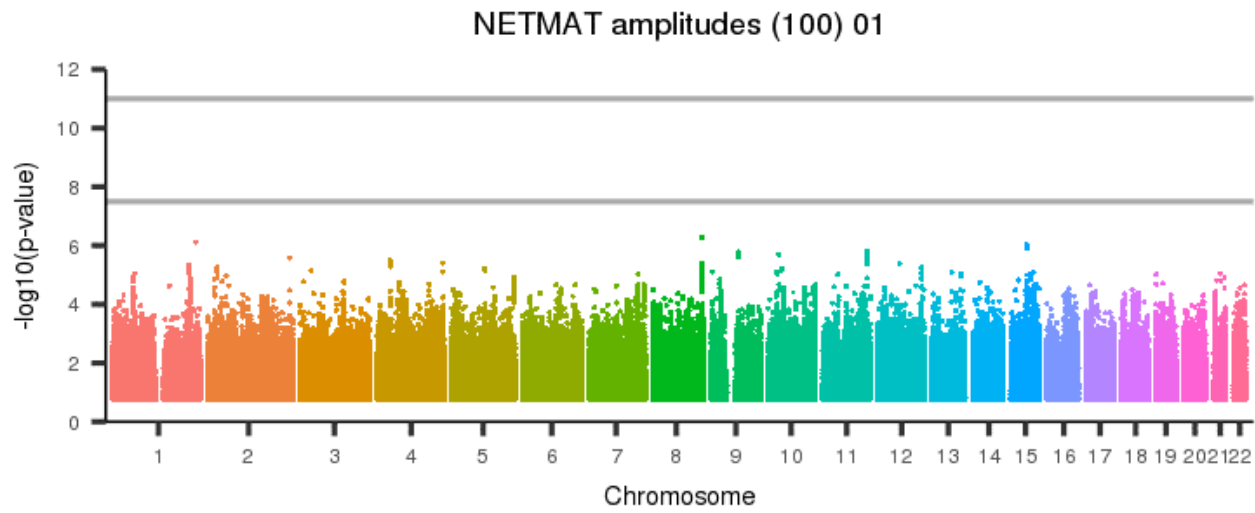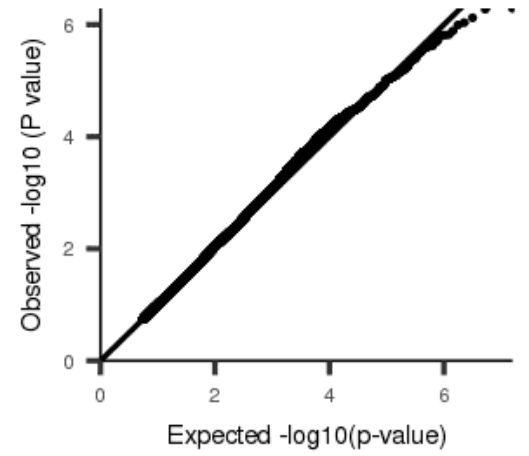

[back to list of plots](#)

Figure 893: NETMAT amplitudes (100) 02

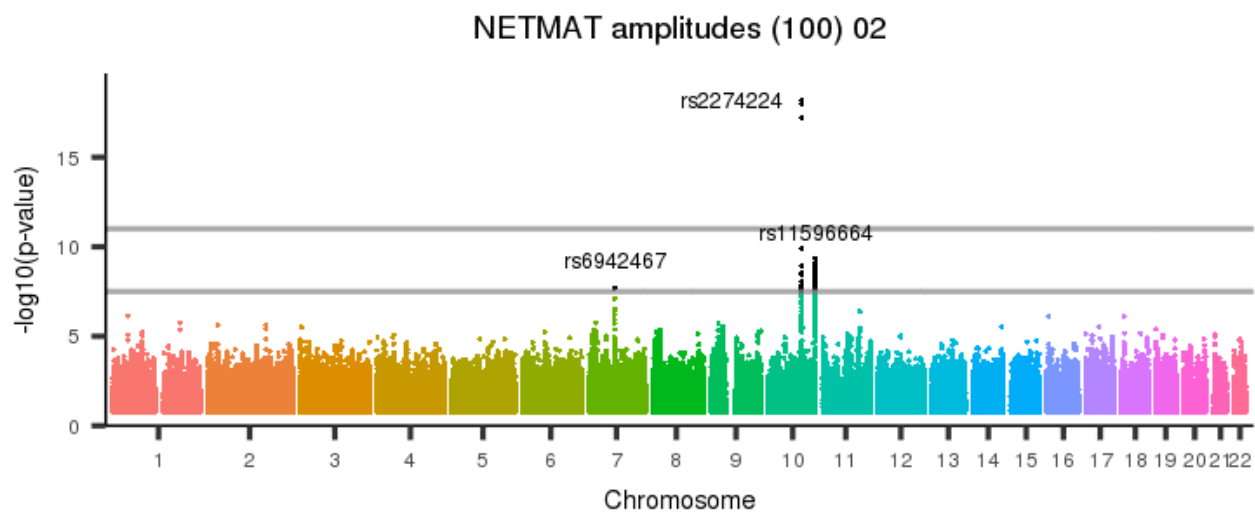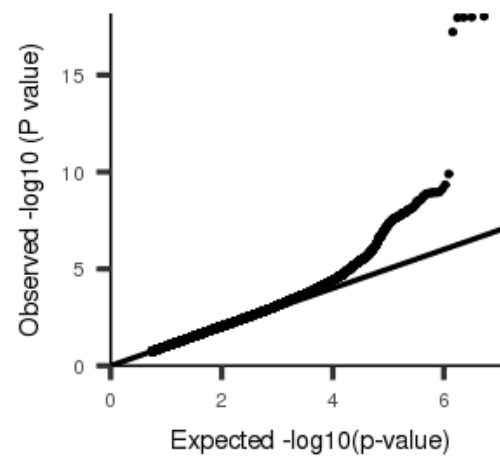

[back to list of plots](#)



Figure 894: NETMAT amplitudes (100) 03

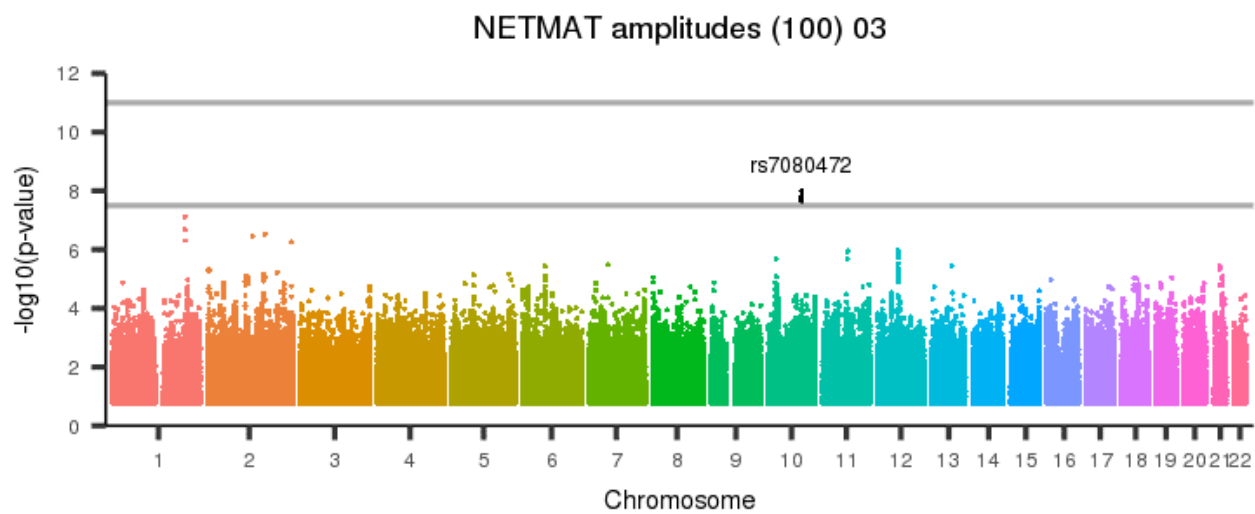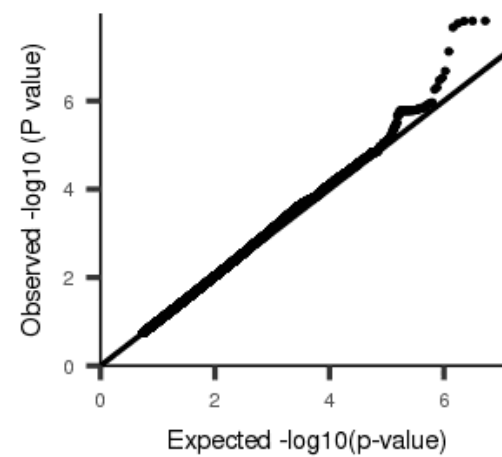

[back to list of plots](#)

Figure 895: NETMAT amplitudes (100) 04

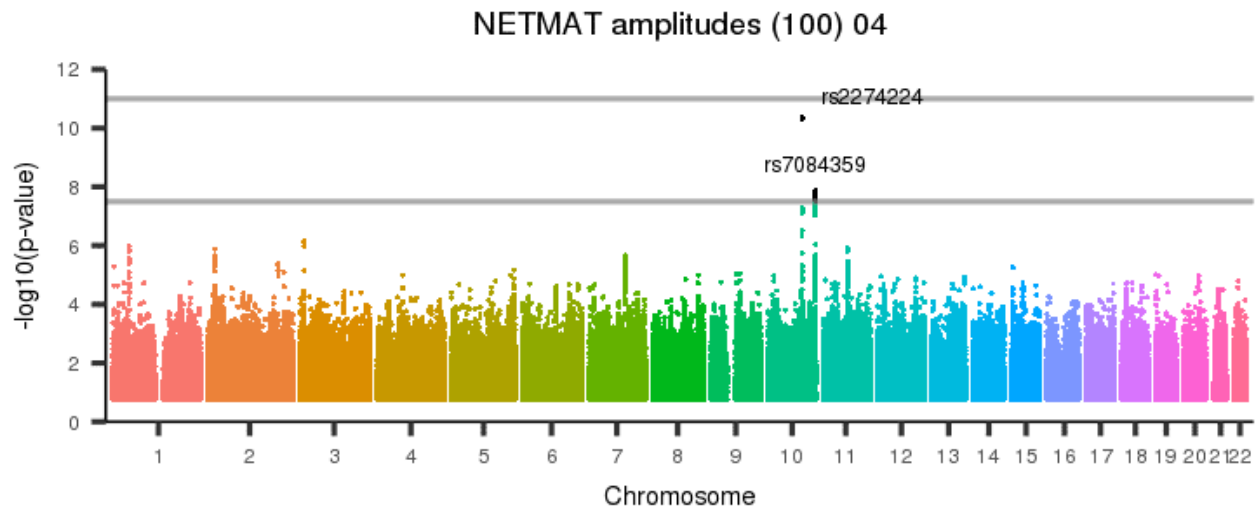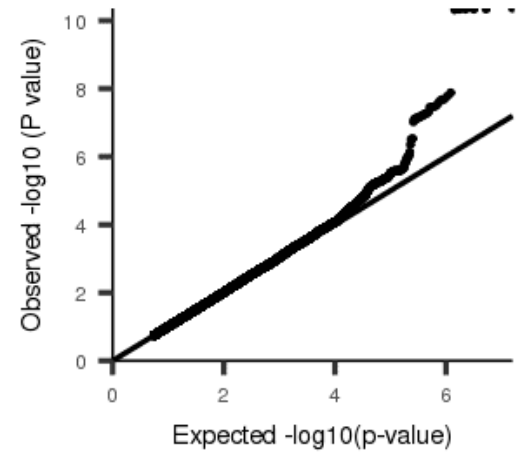

[back to list of plots](#)

Figure 896: NETMAT amplitudes (100) 05

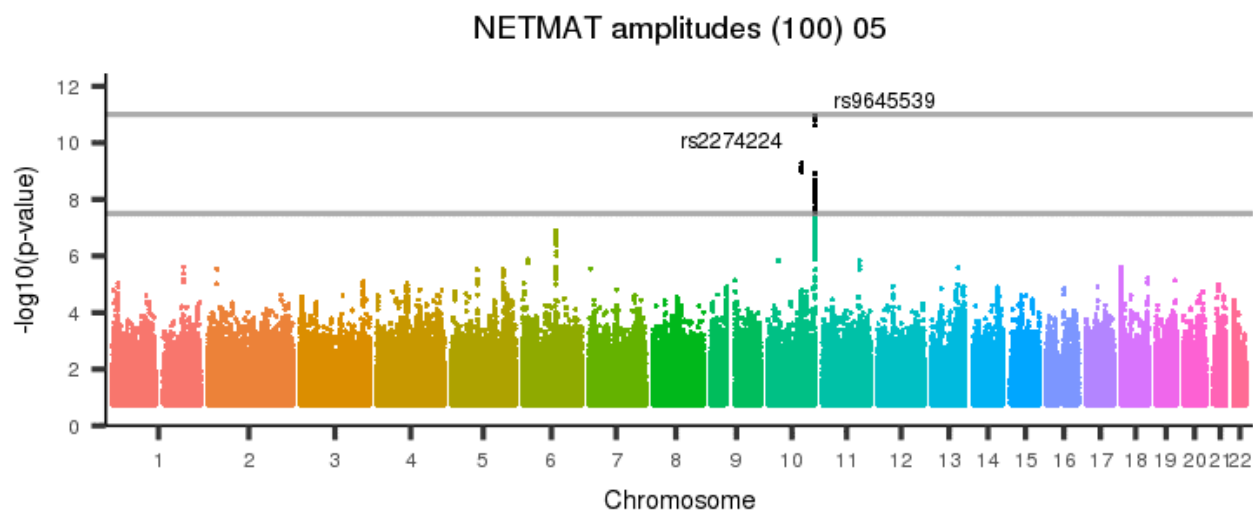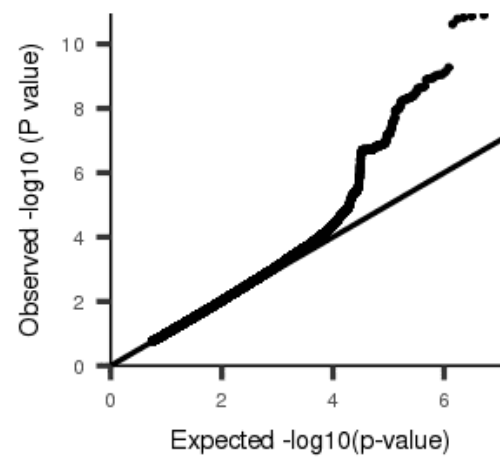

[back to list of plots](#)

Figure 897: NETMAT amplitudes (100) 06

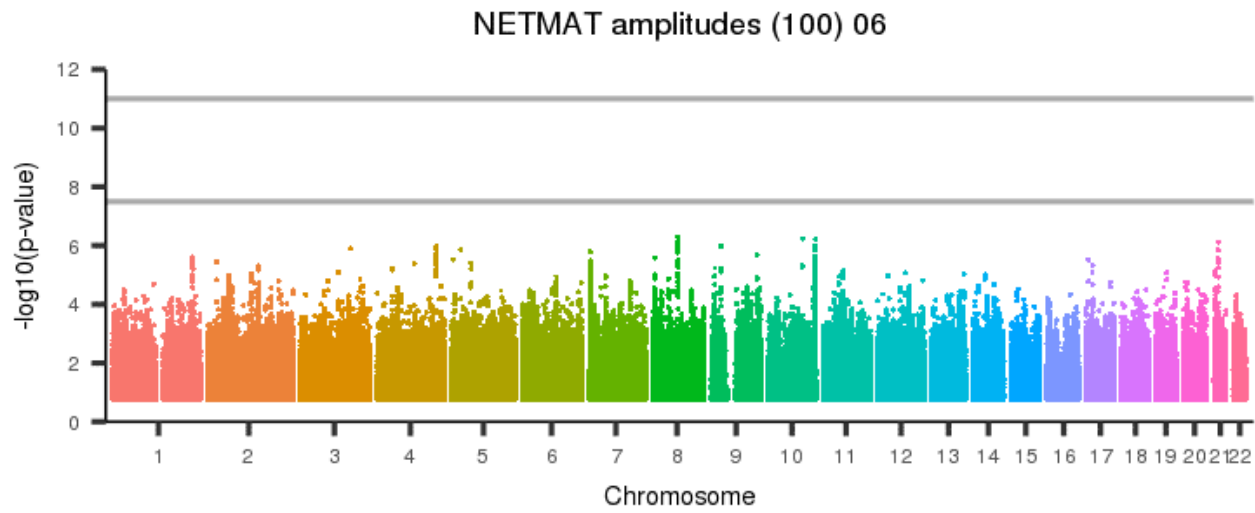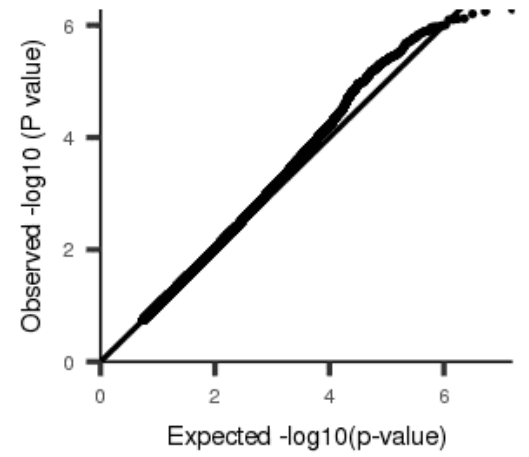

[back to list of plots](#)

Figure 898: NETMAT amplitudes (100) 07

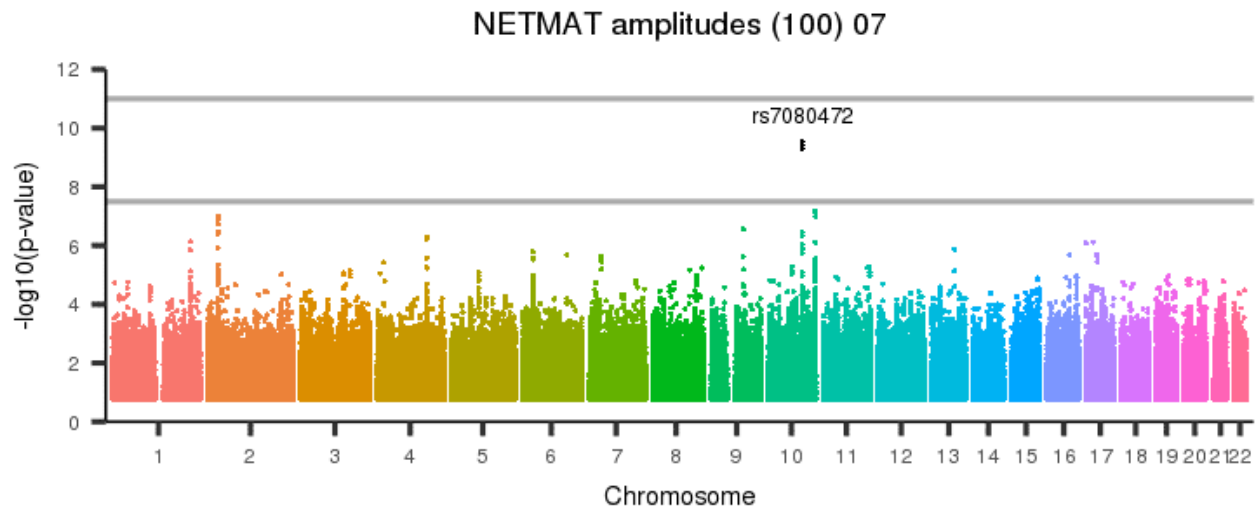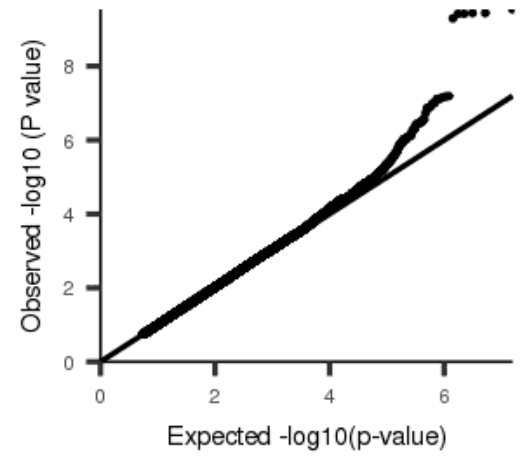

[back to list of plots](#)

Figure 899: NETMAT amplitudes (100) 08

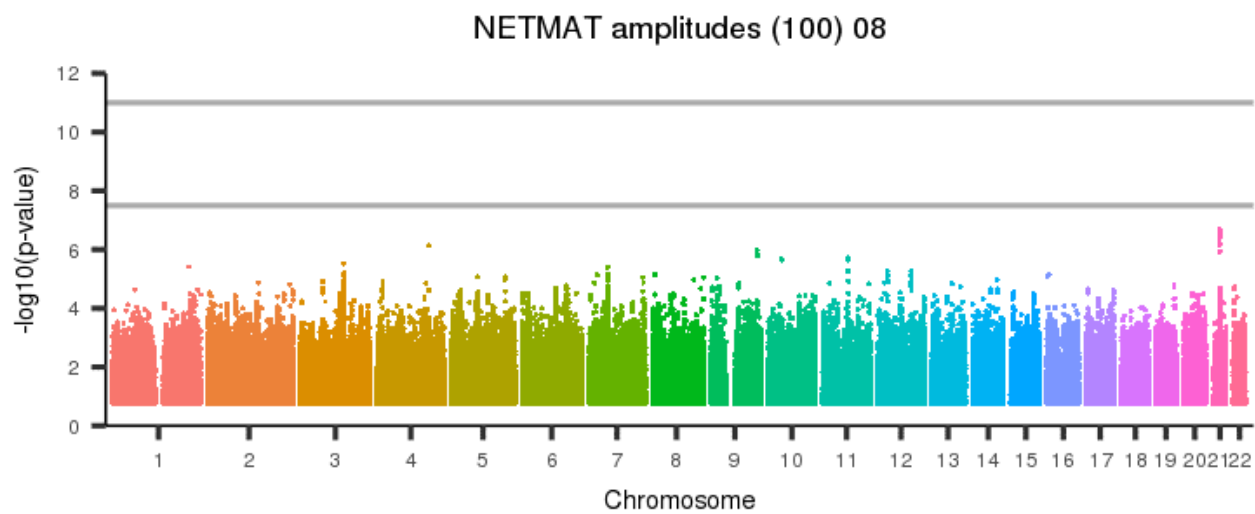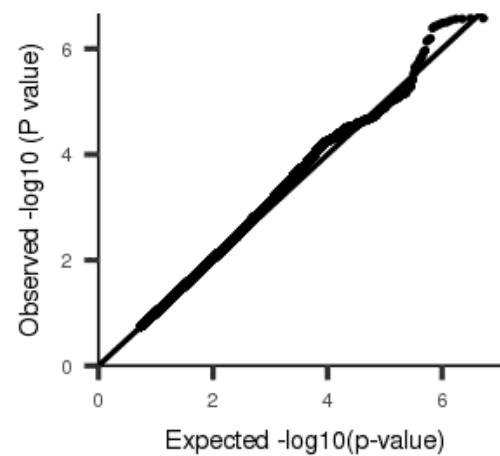

[back to list of plots](#)

Figure 900: NETMAT amplitudes (100) 09

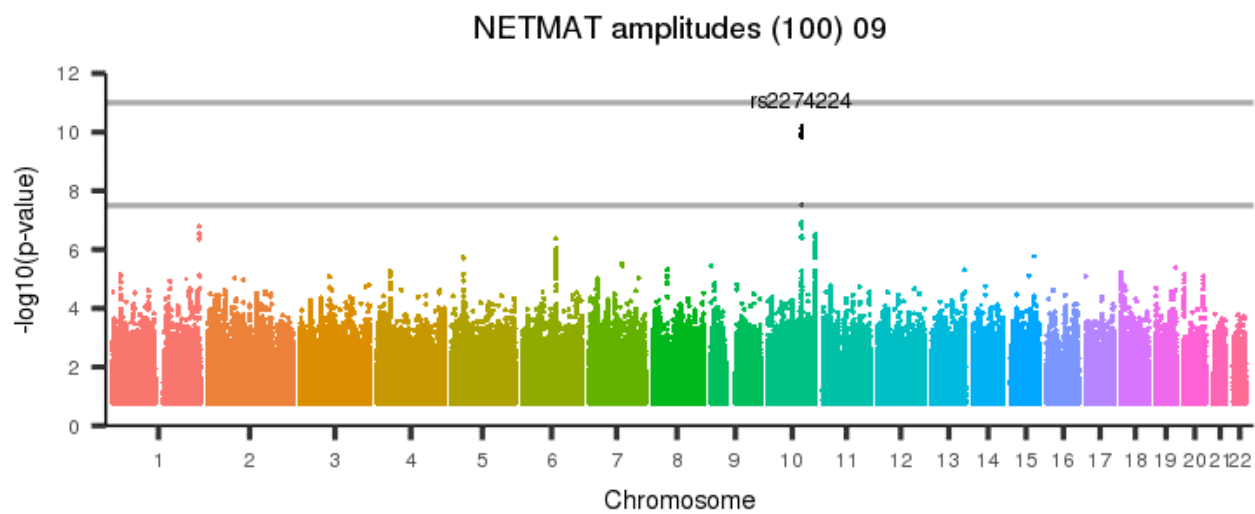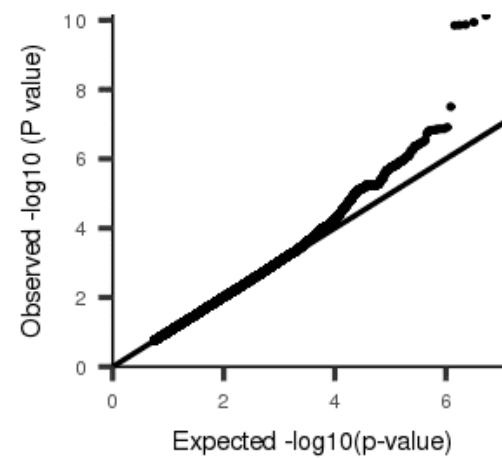

[back to list of plots](#)

Figure 901: NETMAT amplitudes (100) 10

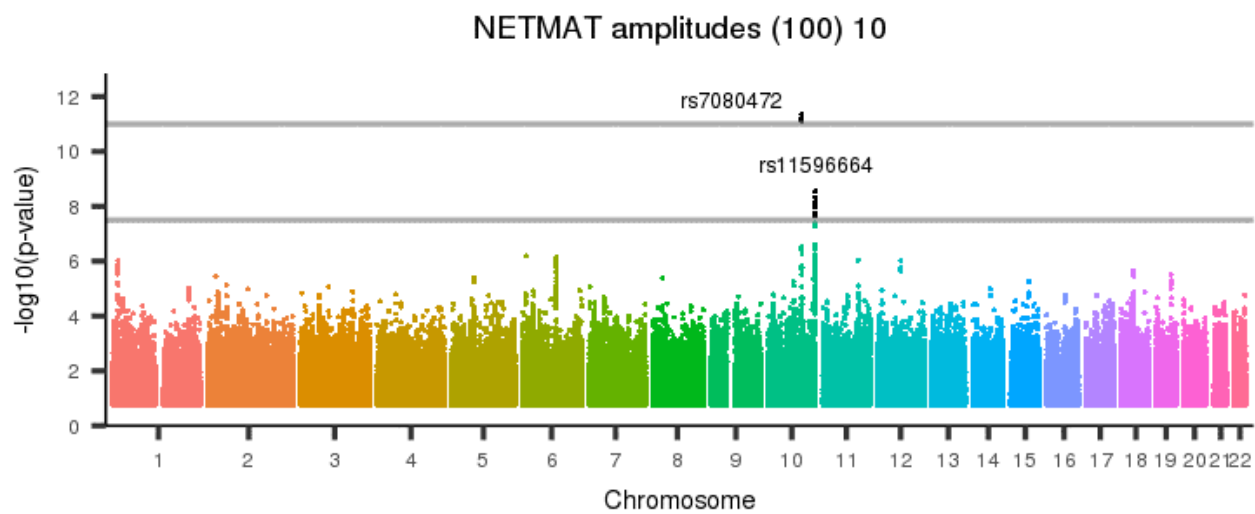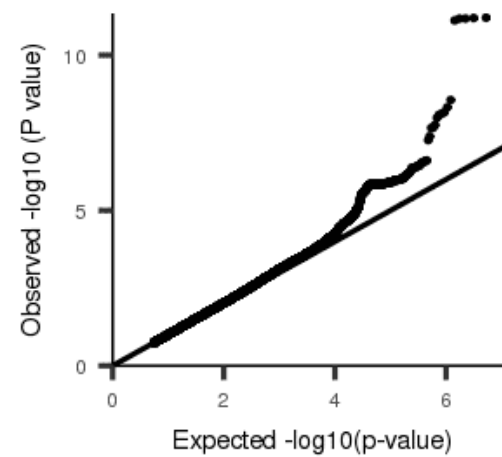

[back to list of plots](#)



Figure 902: NETMAT amplitudes (100) 11

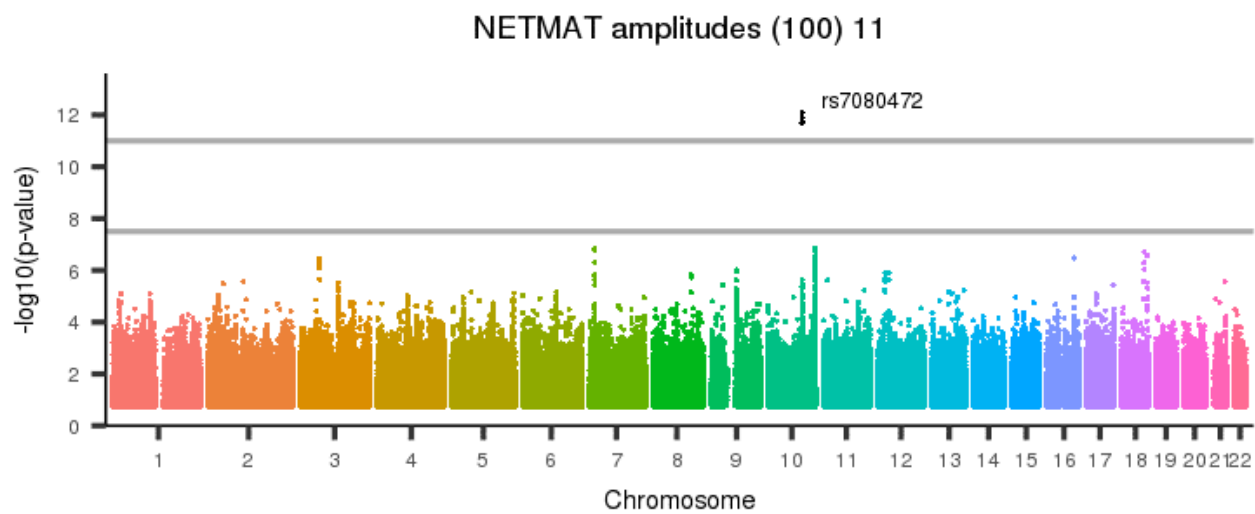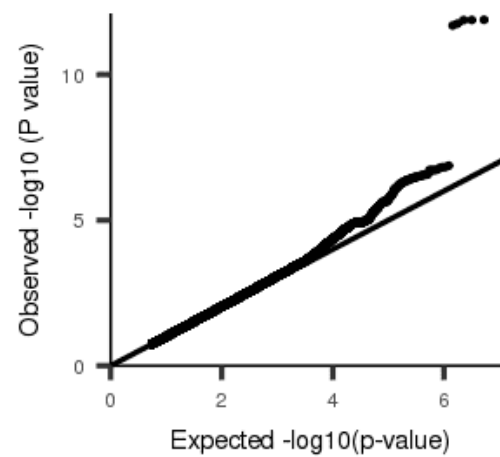

[back to list of plots](#)

Figure 903: NETMAT amplitudes (100) 12

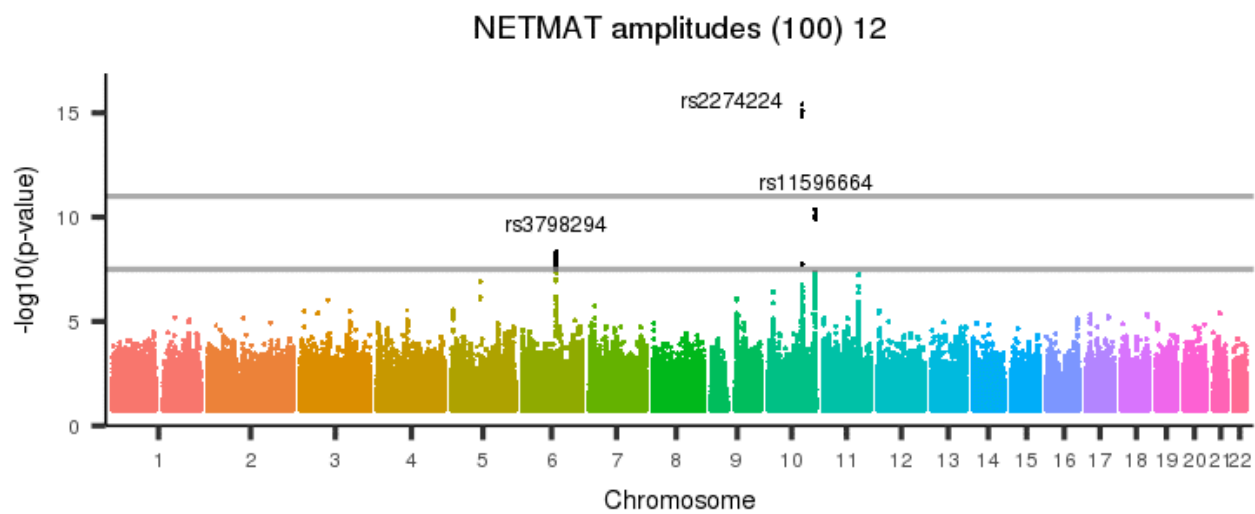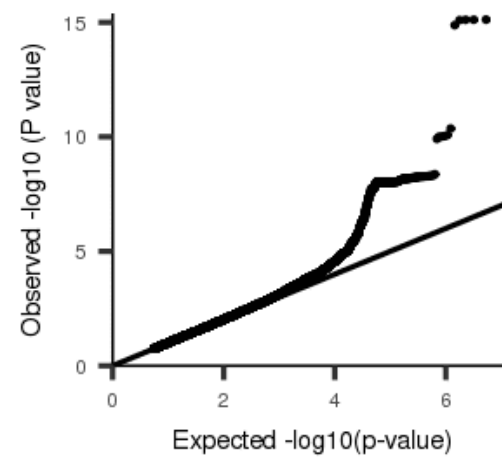

[back to list of plots](#)

Figure 904: NETMAT amplitudes (100) 13

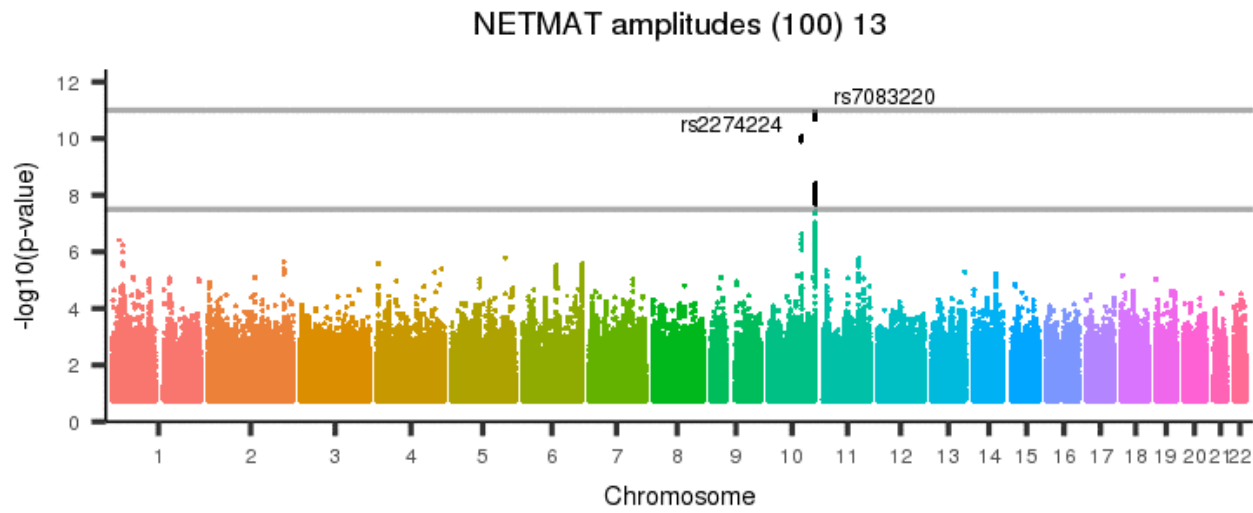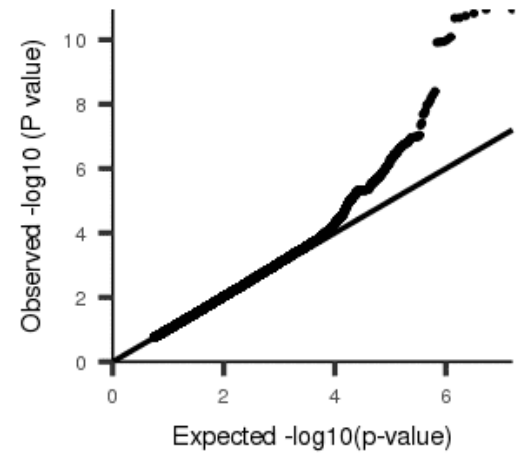

[back to list of plots](#)

Figure 905: NETMAT amplitudes (100) 14

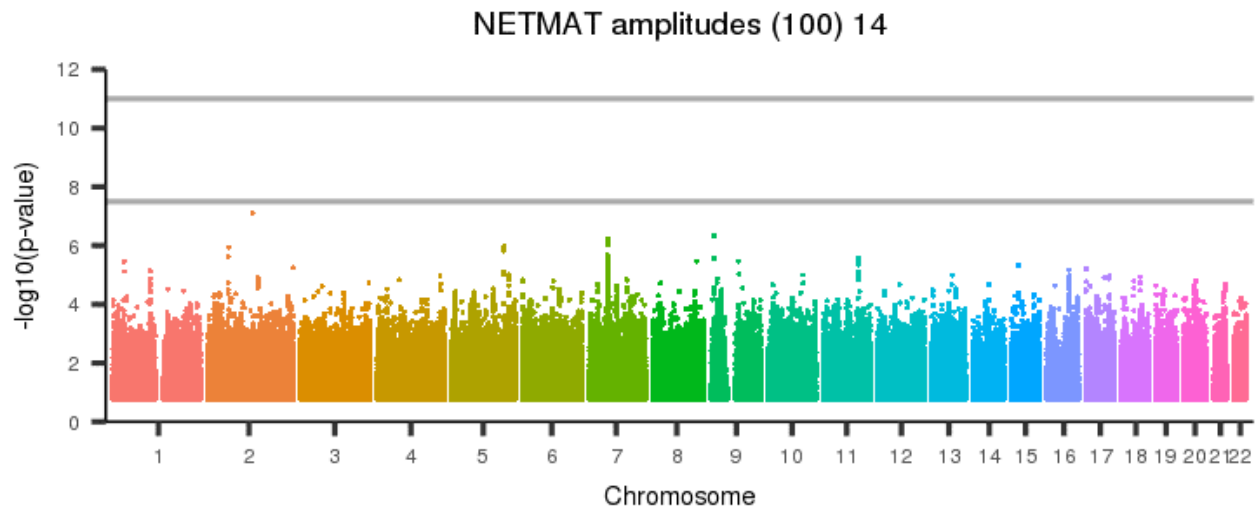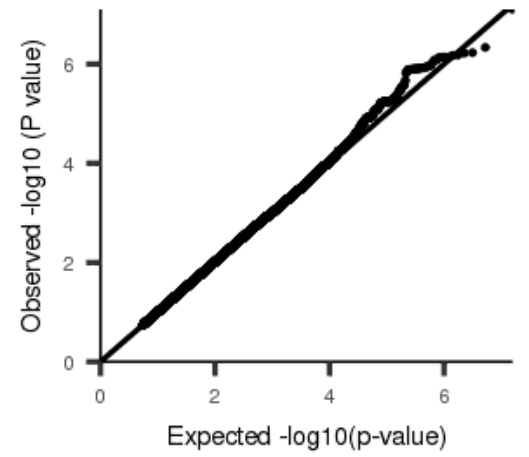

[back to list of plots](#)

Figure 906: NETMAT amplitudes (100) 15

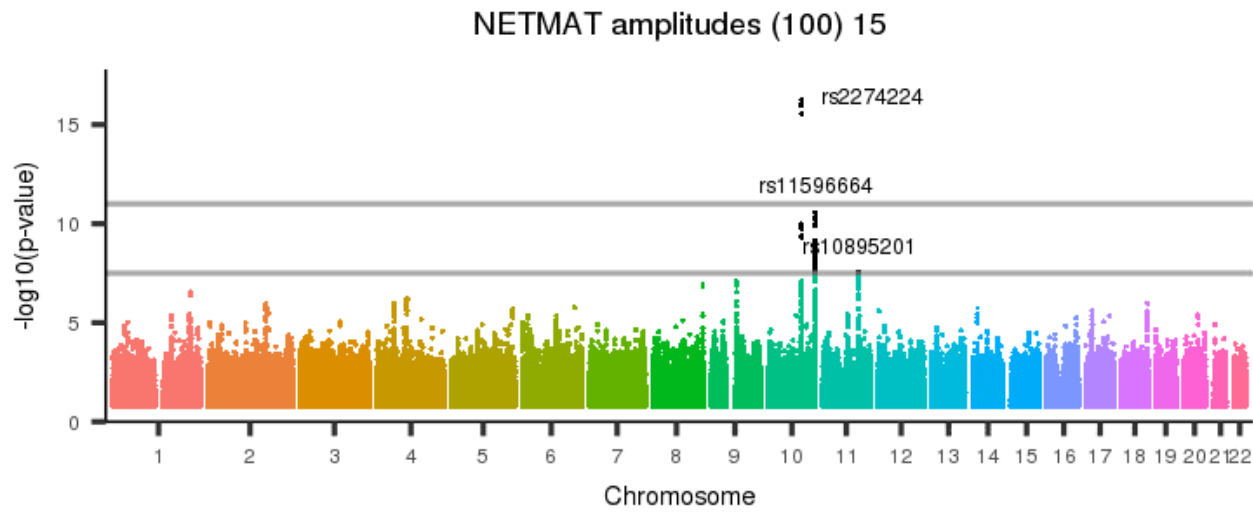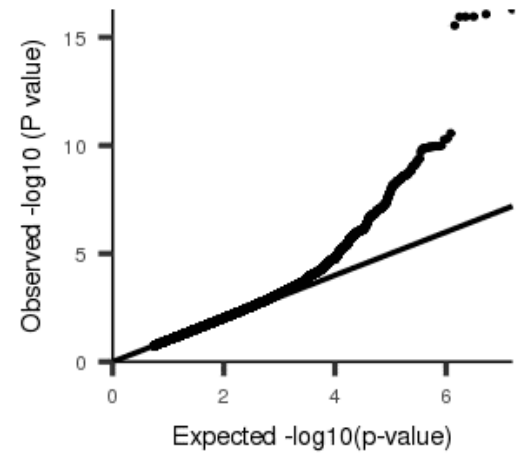

[back to list of plots](#)

Figure 907: NETMAT amplitudes (100) 16

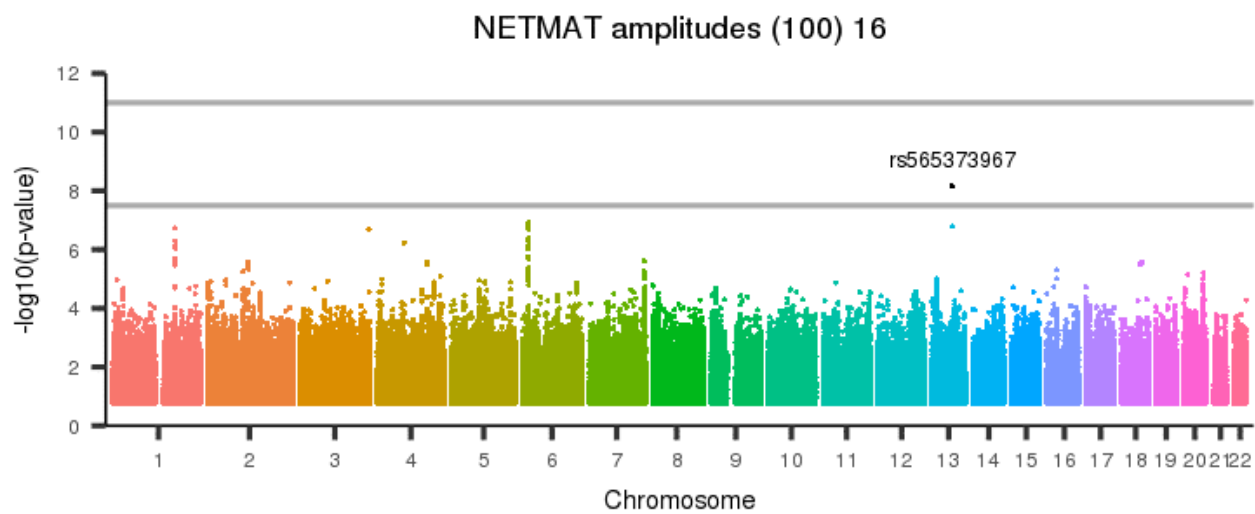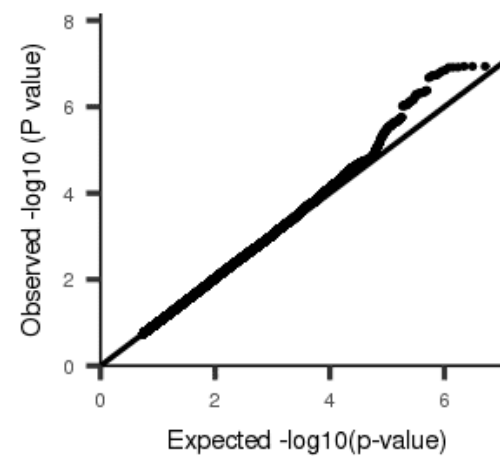

[back to list of plots](#)

Figure 908: NETMAT amplitudes (100) 17

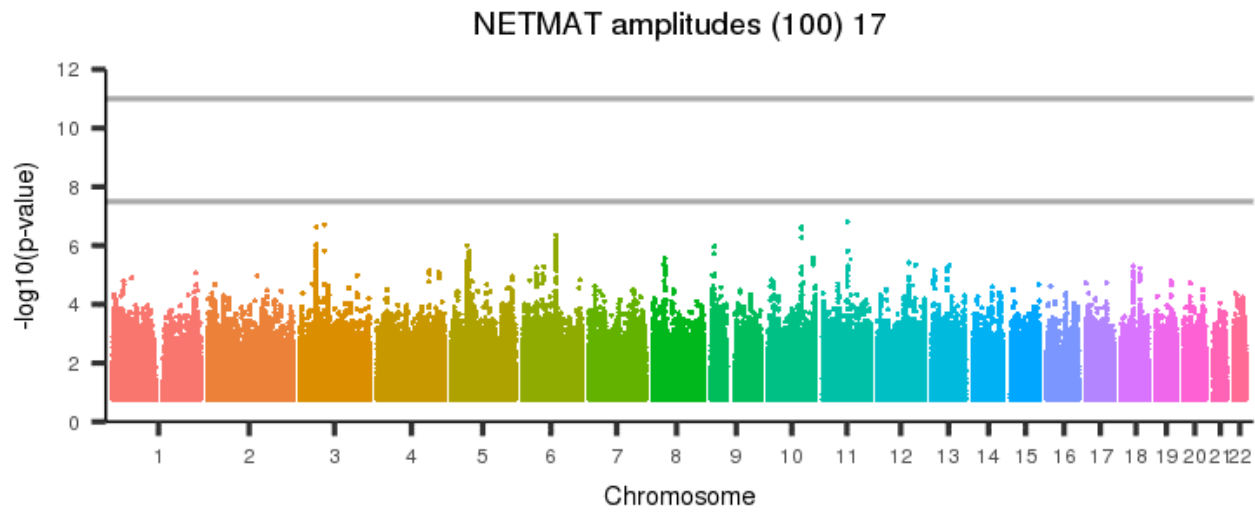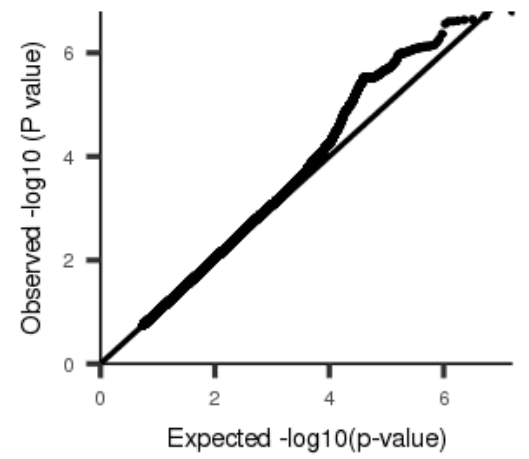

[back to list of plots](#)

Figure 909: NETMAT amplitudes (100) 18

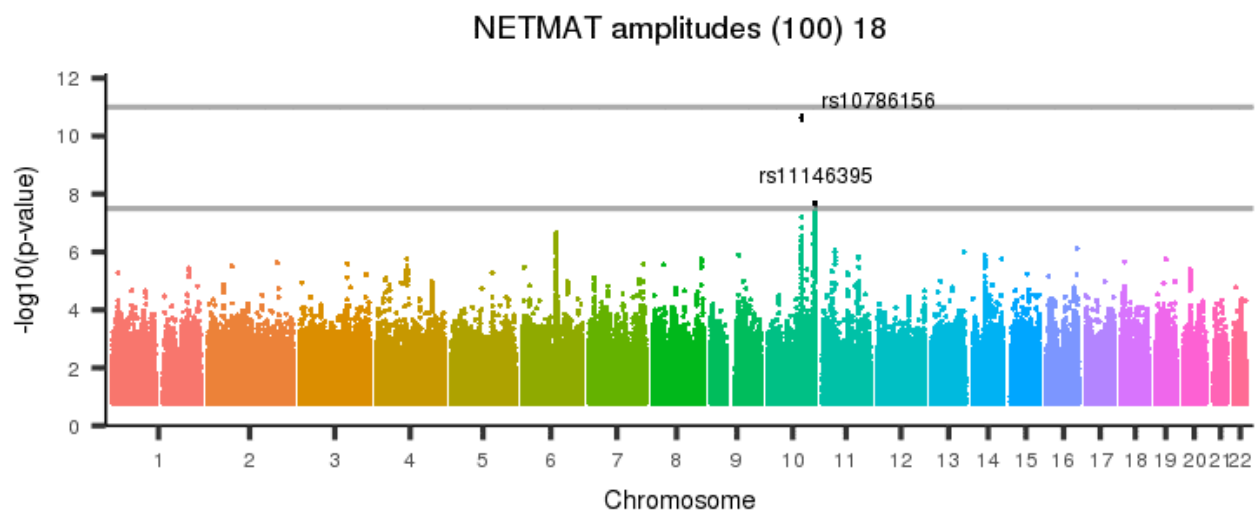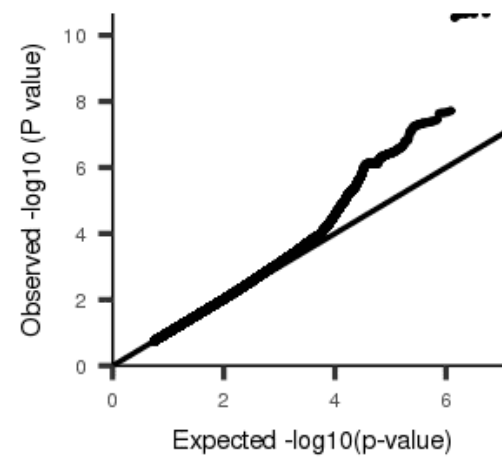

[back to list of plots](#)



Figure 910: NETMAT amplitudes (100) 19

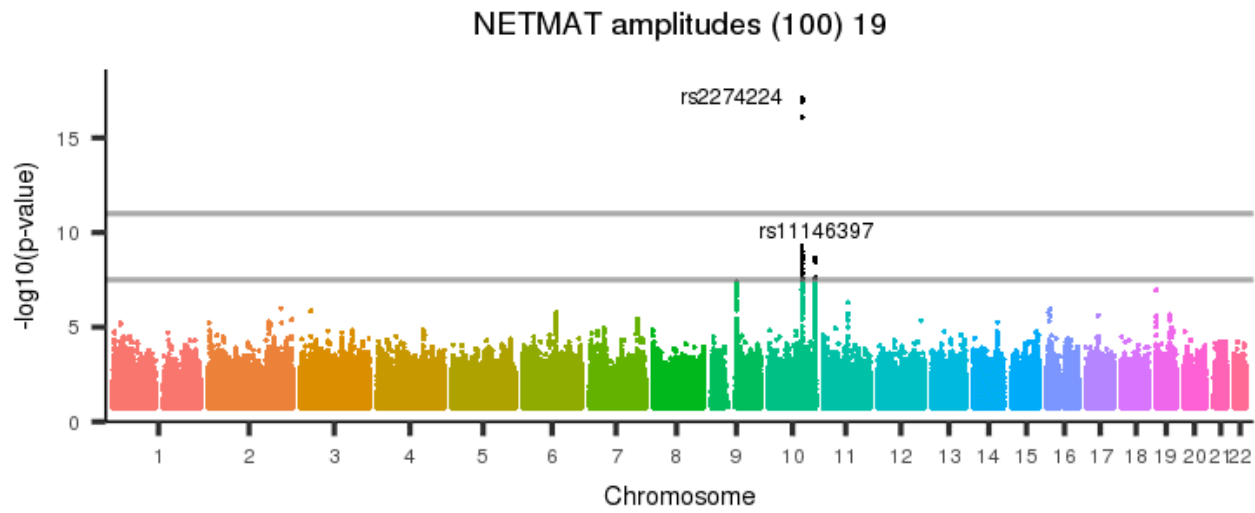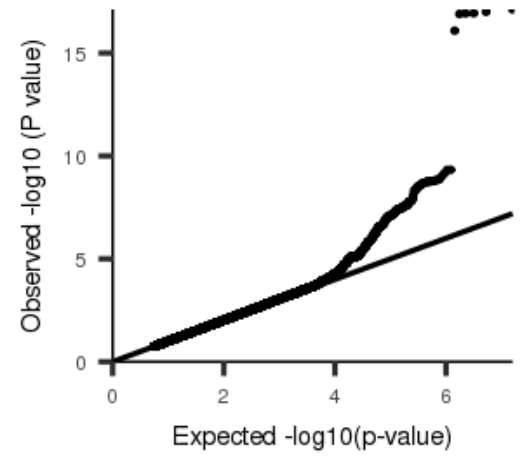

[back to list of plots](#)

Figure 911: NETMAT amplitudes (100) 20

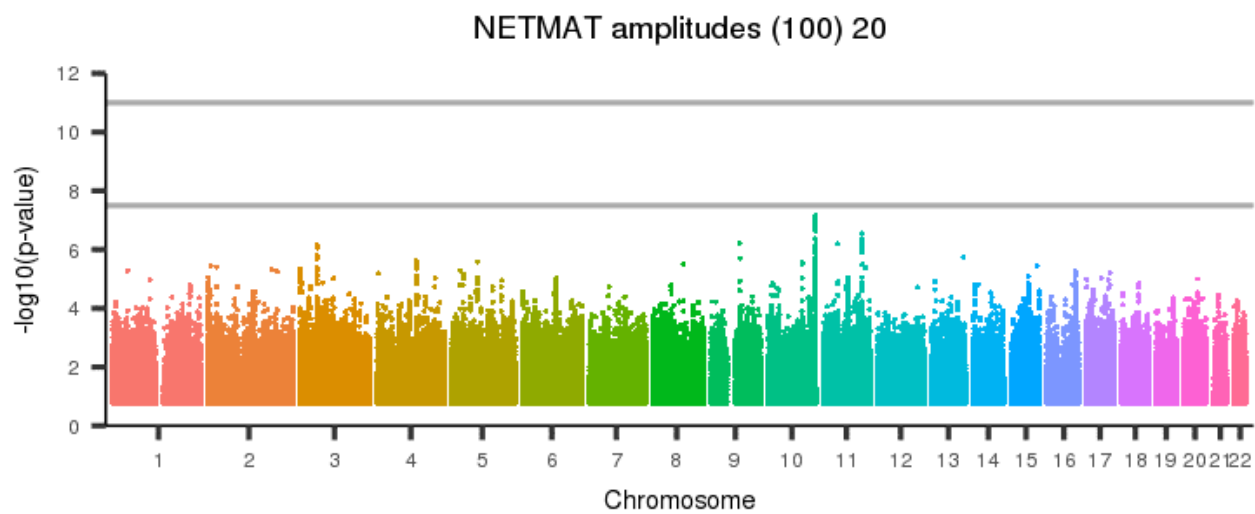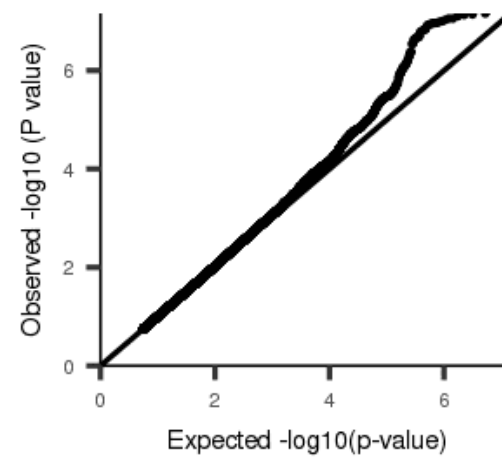

[back to list of plots](#)

Figure 912: NETMAT amplitudes (100) 21

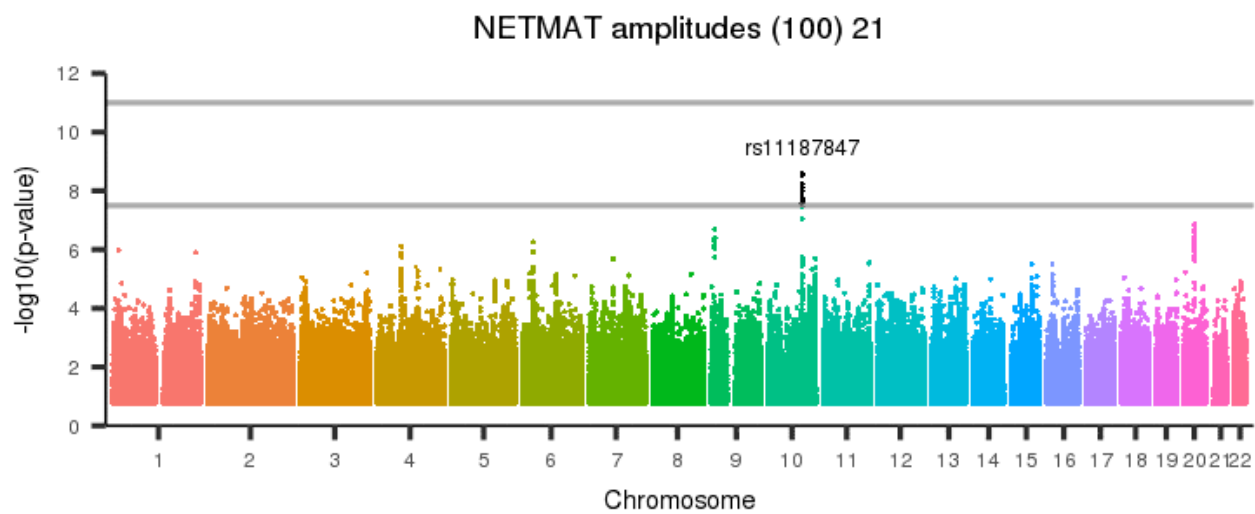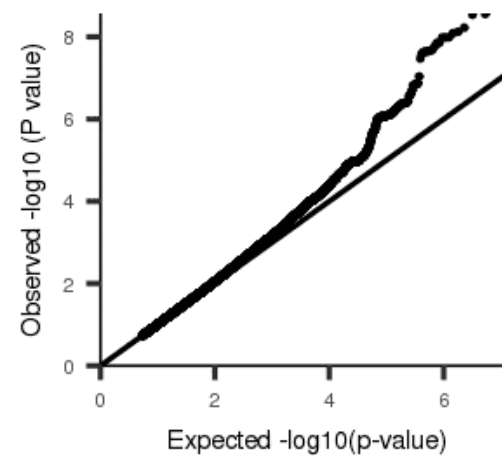

[back to list of plots](#)

Figure 913: NETMAT amplitudes (100) 22

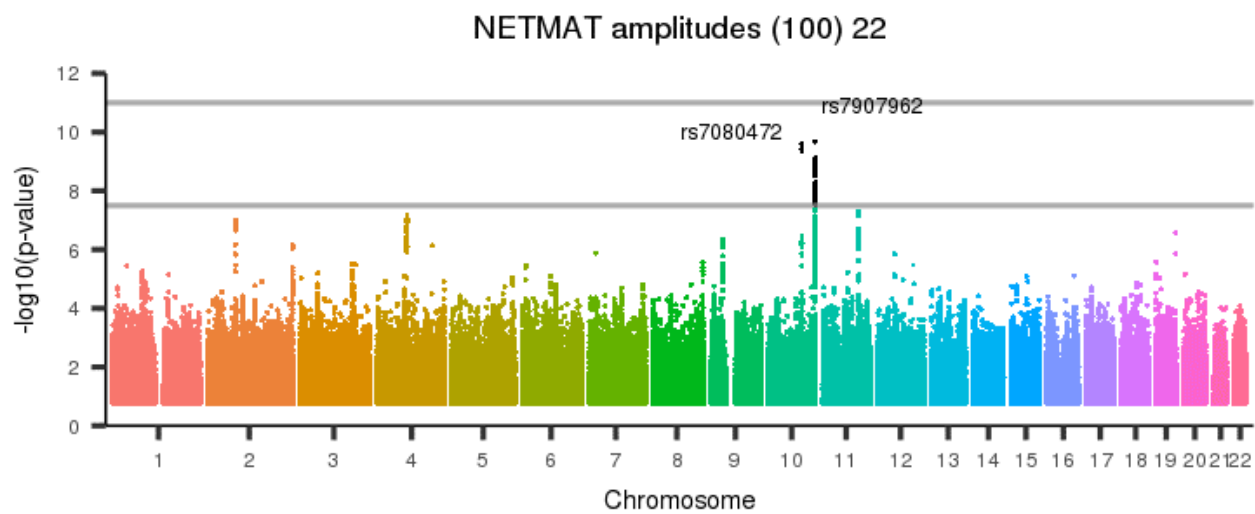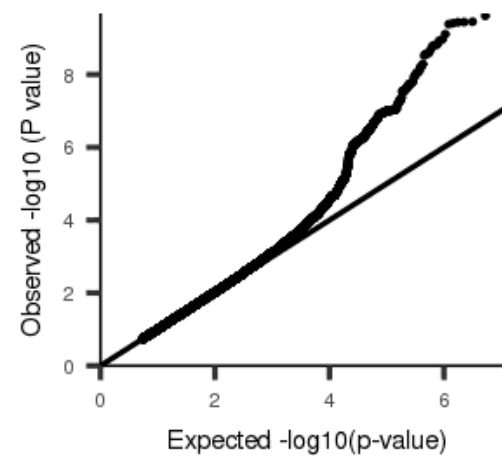

[back to list of plots](#)

Figure 914: NETMAT amplitudes (100) 23

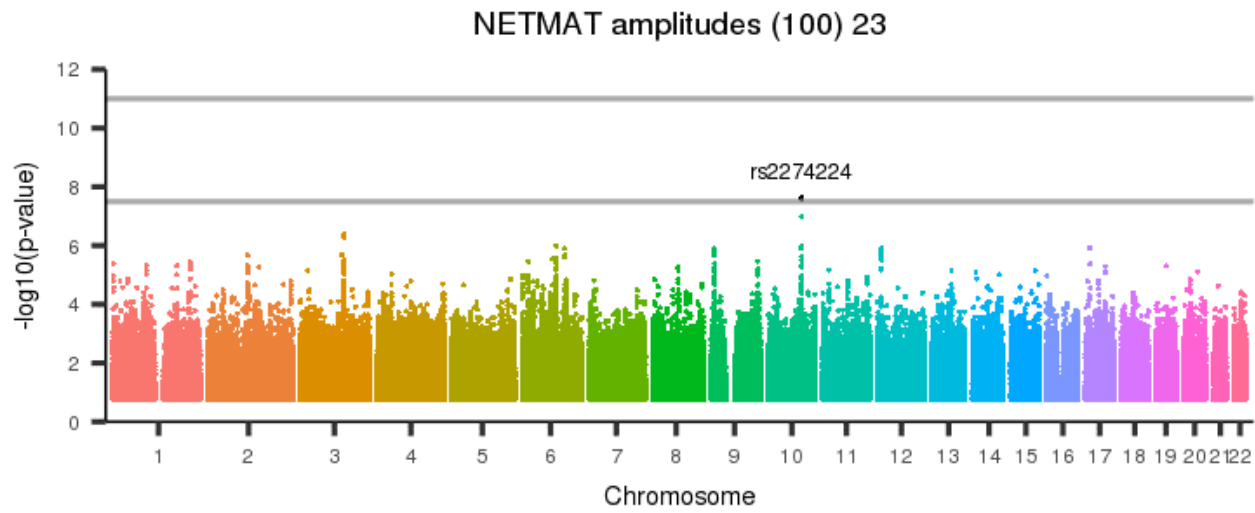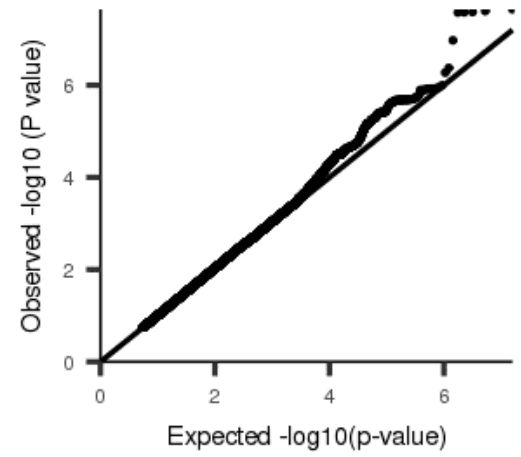

[back to list of plots](#)

Figure 915: NETMAT amplitudes (100) 24

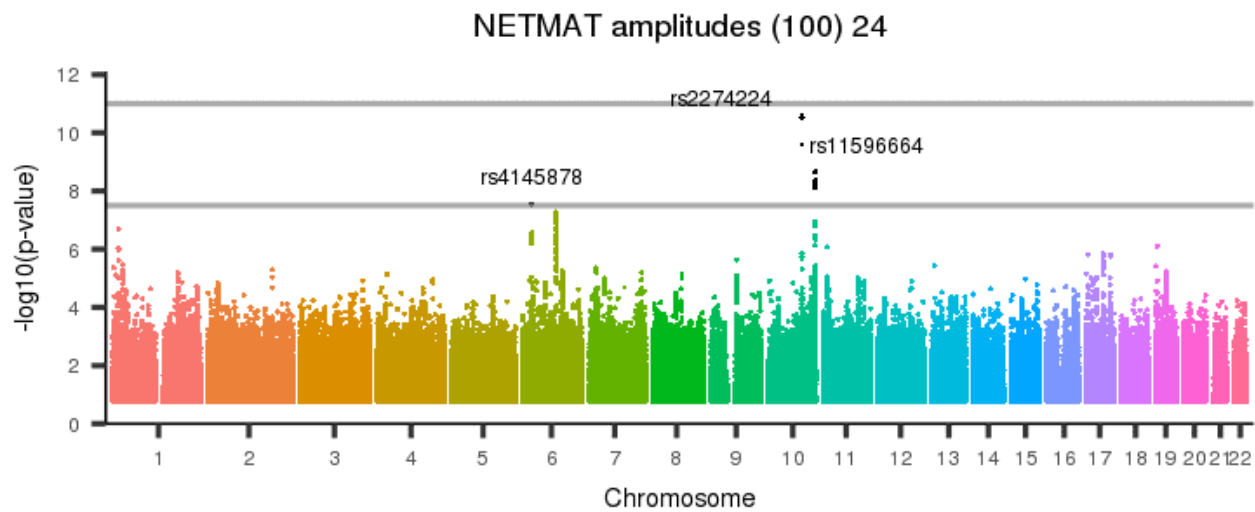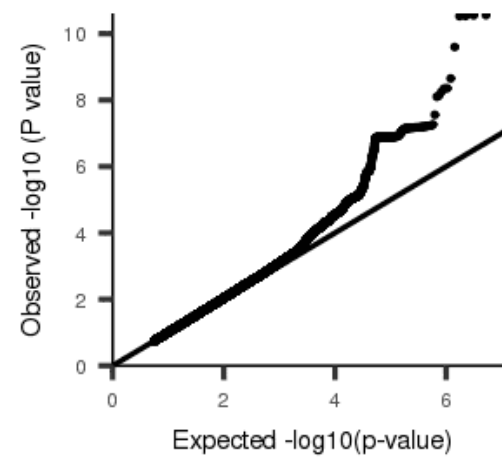

[back to list of plots](#)

Figure 916: NETMAT amplitudes (100) 25

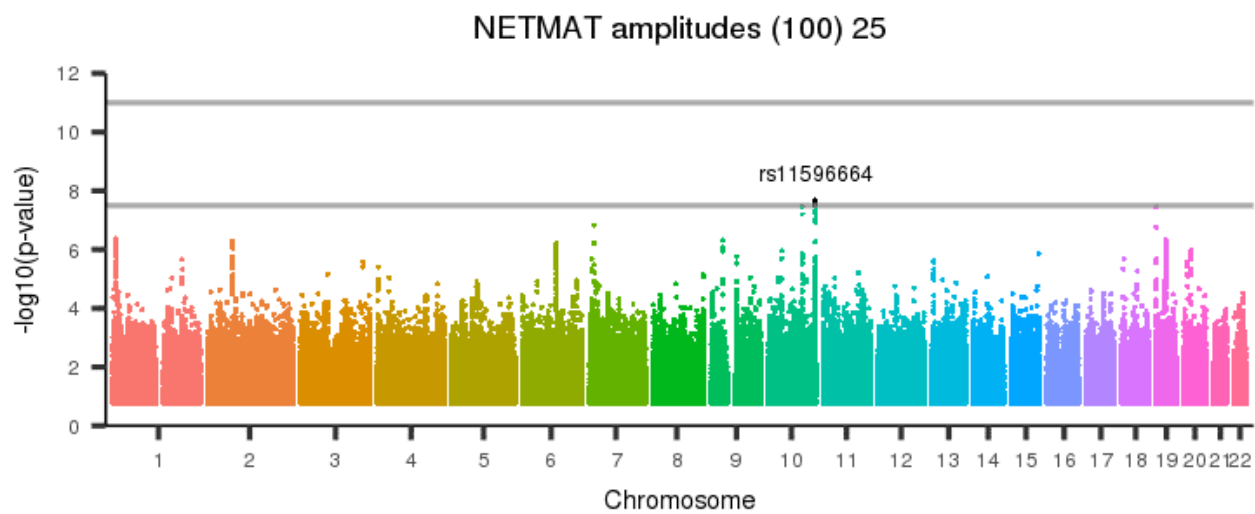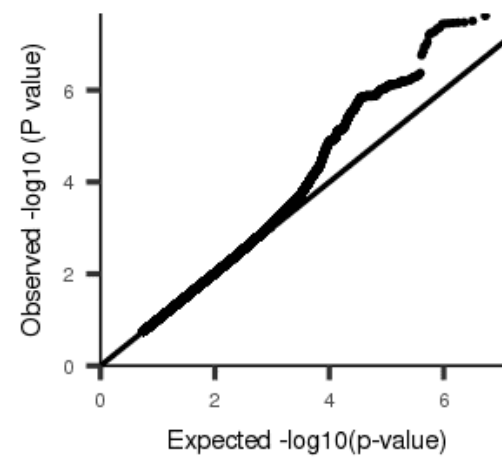

[back to list of plots](#)

Figure 917: NETMAT amplitudes (100) 26

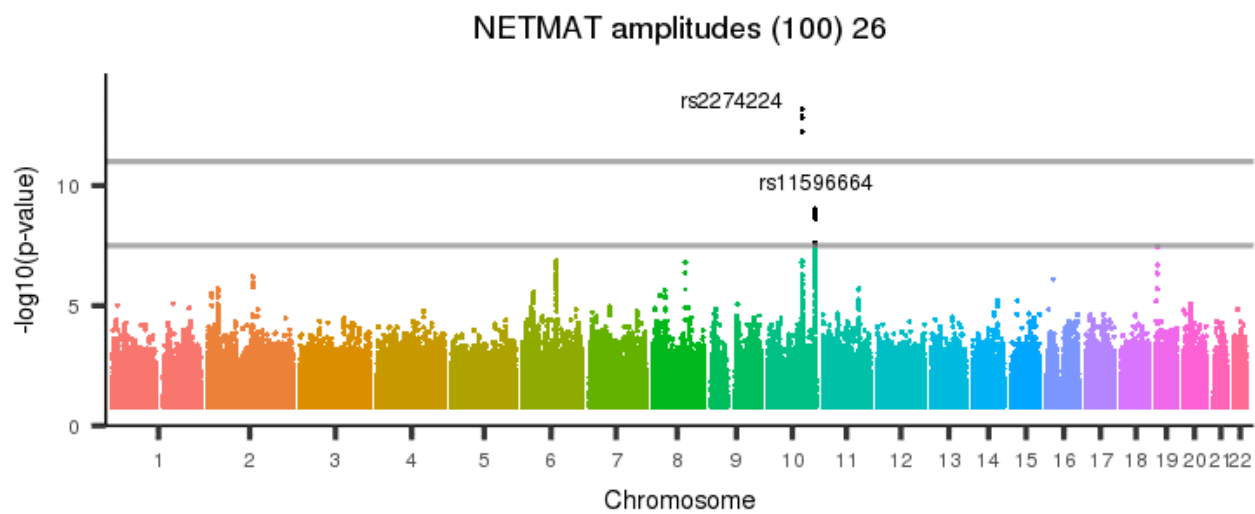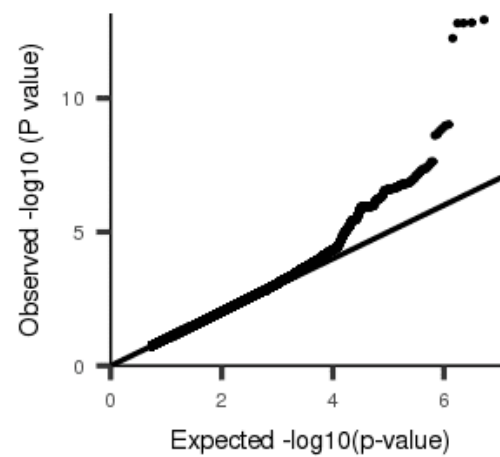

[back to list of plots](#)



Figure 918: NETMAT amplitudes (100) 27

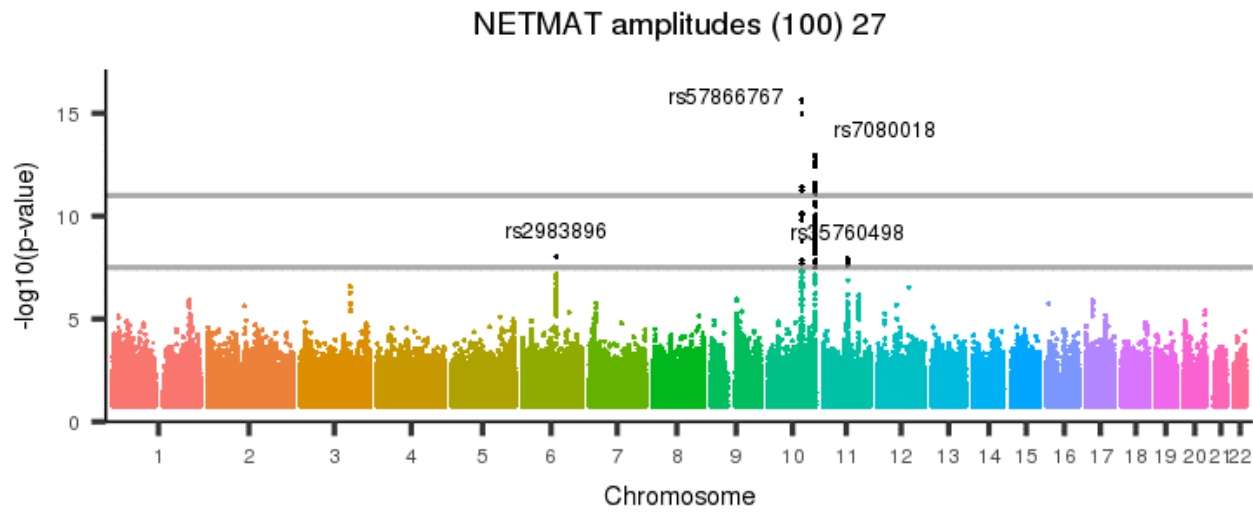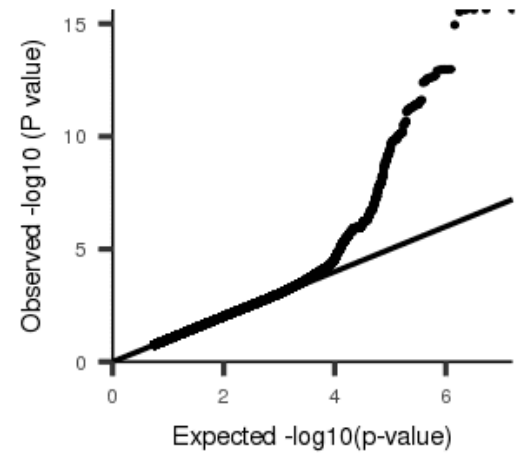

[back to list of plots](#)

Figure 919: NETMAT amplitudes (100) 28

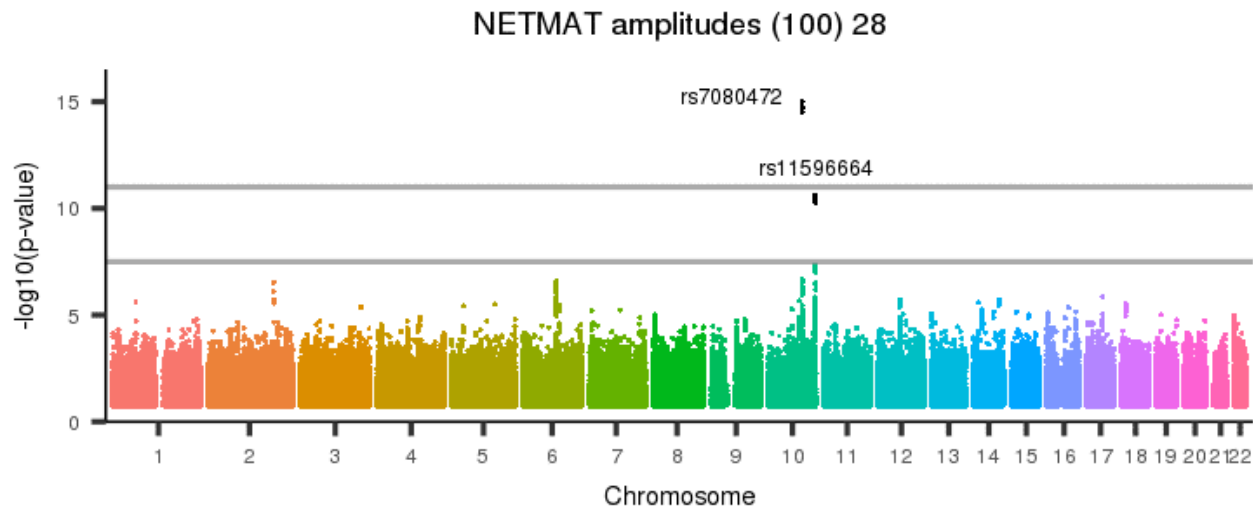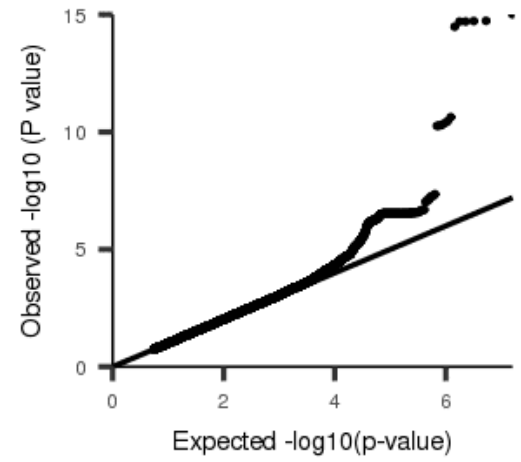

[back to list of plots](#)

Figure 920: NETMAT amplitudes (100) 29

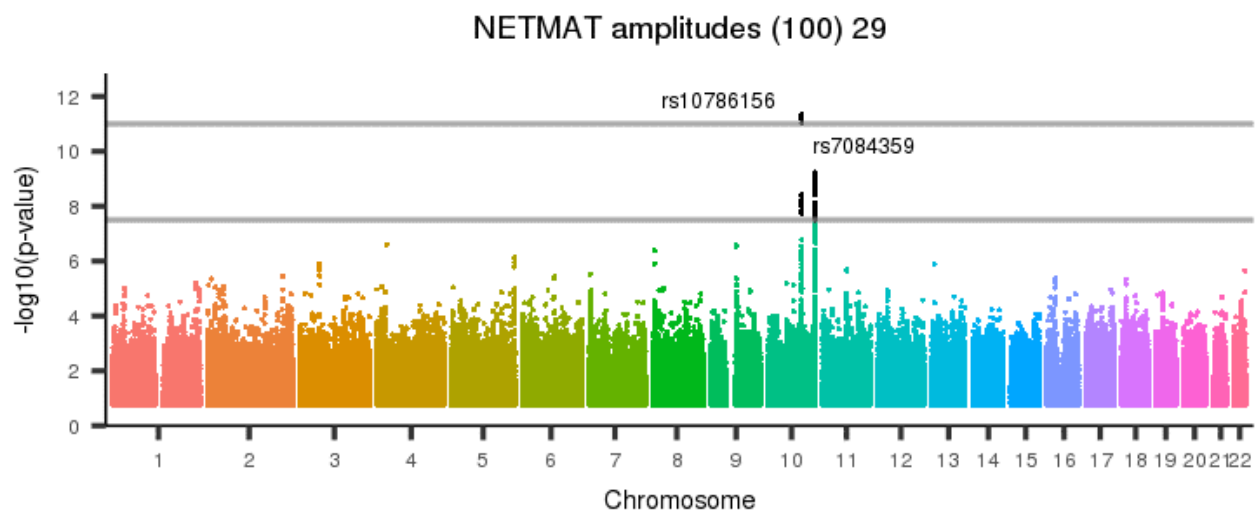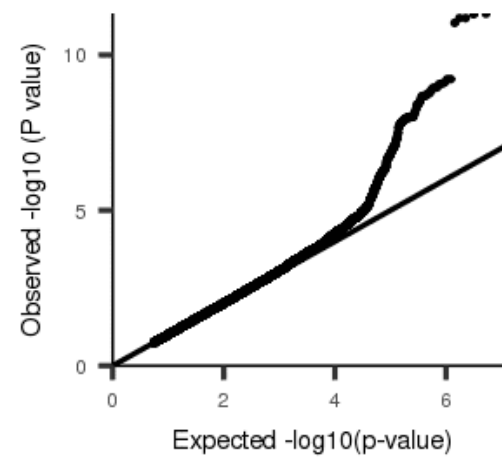

[back to list of plots](#)

Figure 921: NETMAT amplitudes (100) 30

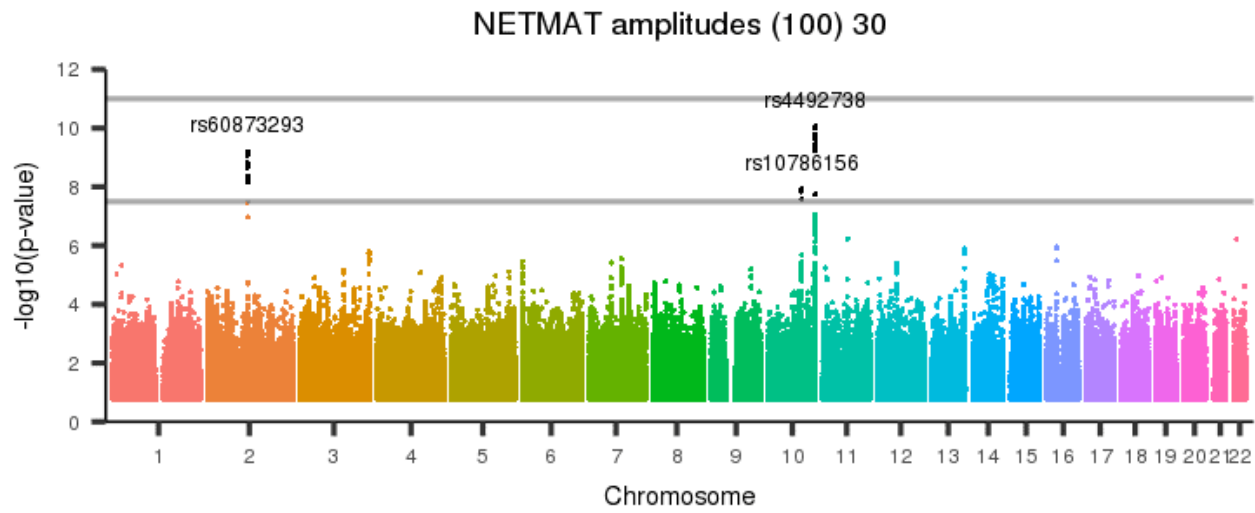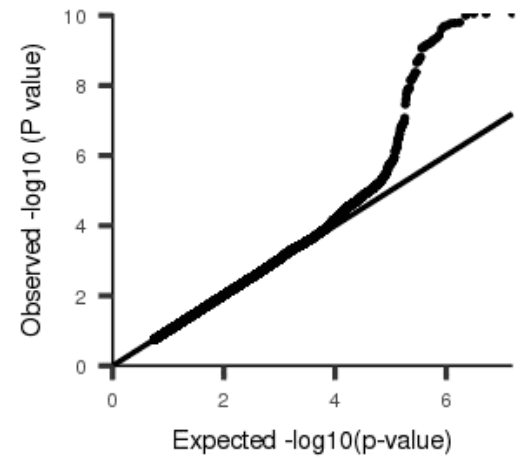

[back to list of plots](#)

Figure 922: NETMAT amplitudes (100) 31

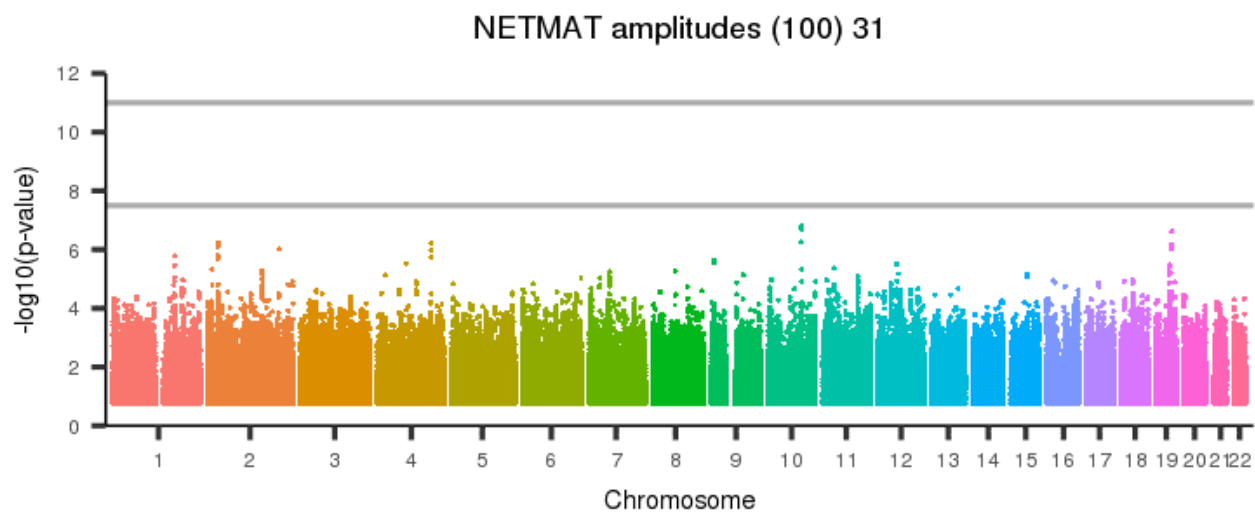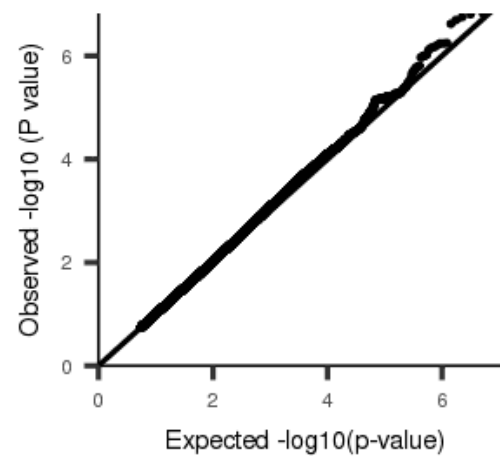

[back to list of plots](#)

Figure 923: NETMAT amplitudes (100) 32

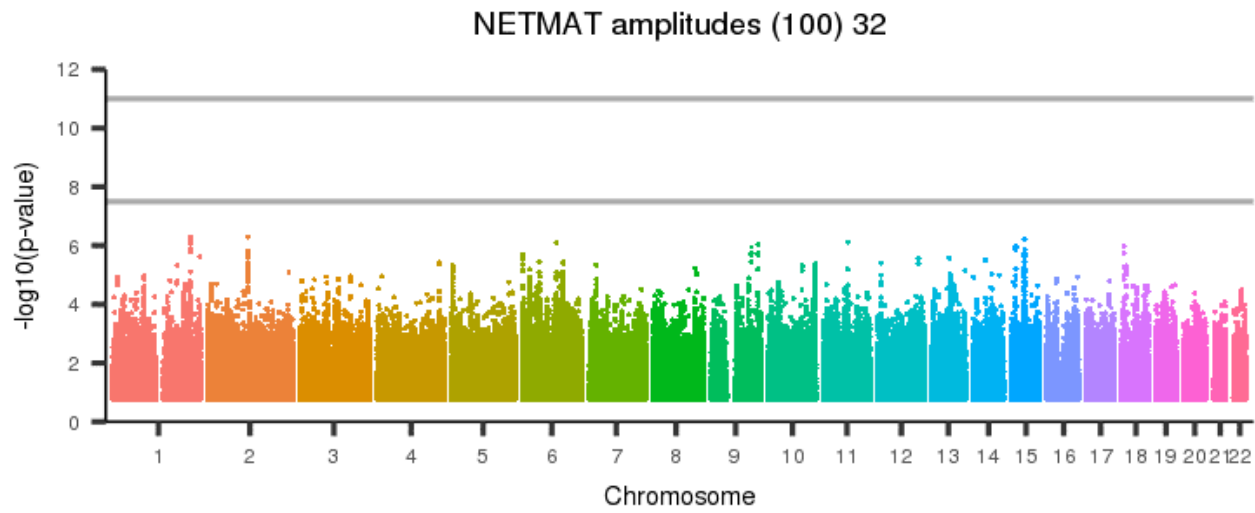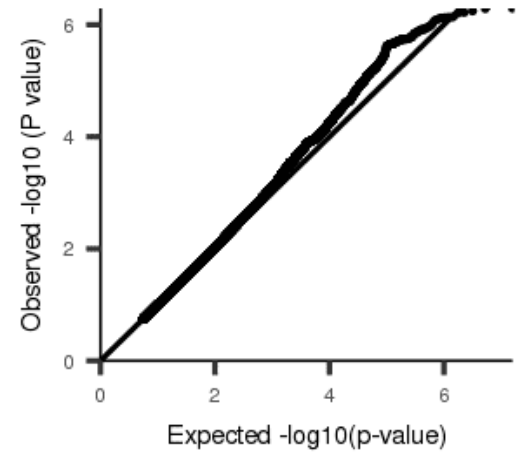

[back to list of plots](#)

Figure 924: NETMAT amplitudes (100) 33

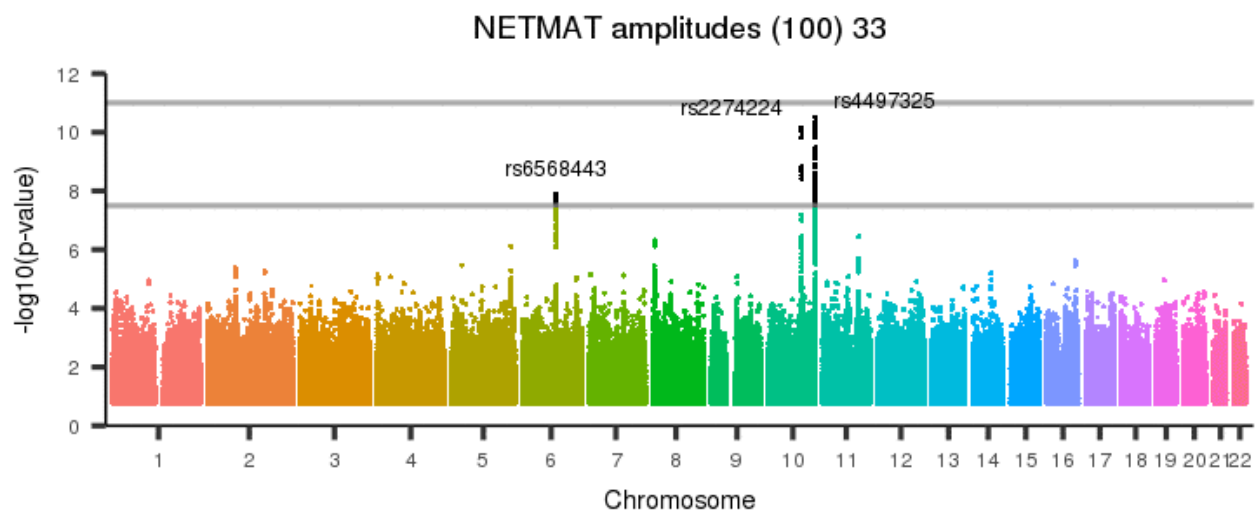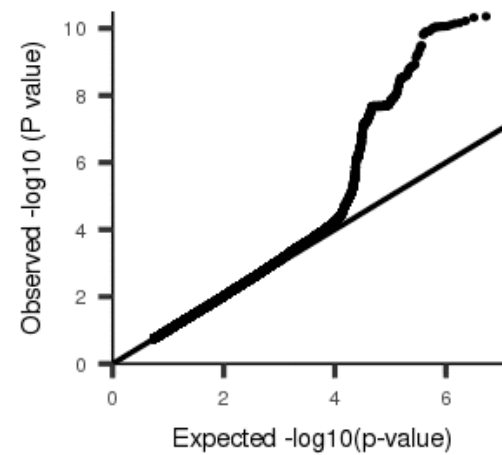

[back to list of plots](#)

Figure 925: NETMAT amplitudes (100) 34

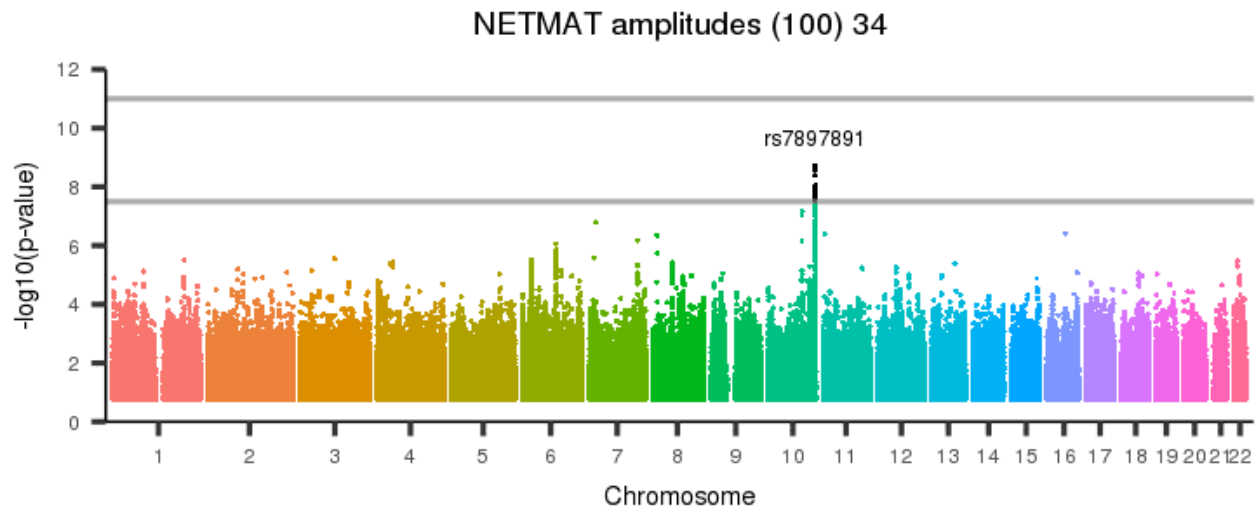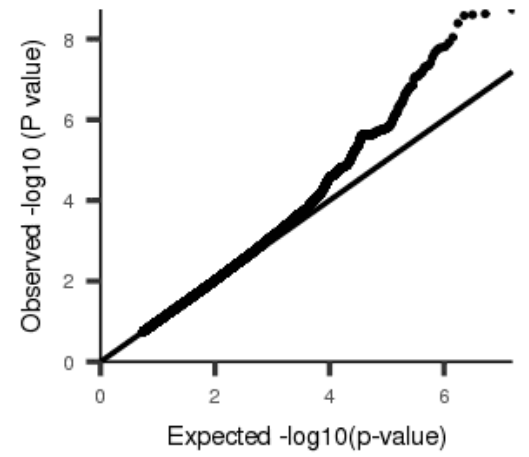

[back to list of plots](#)



Figure 926: NETMAT amplitudes (100) 35

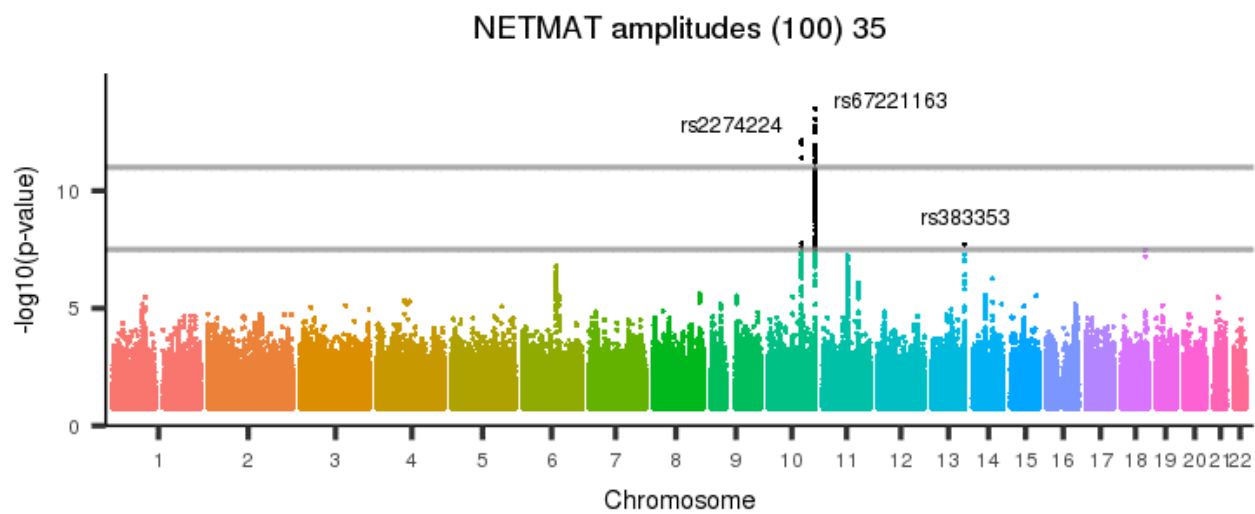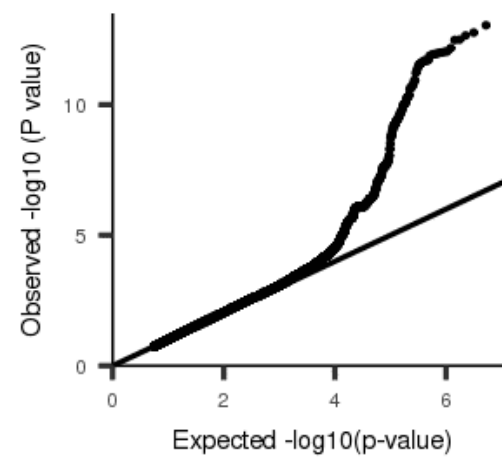

[back to list of plots](#)

Figure 927: NETMAT amplitudes (100) 36

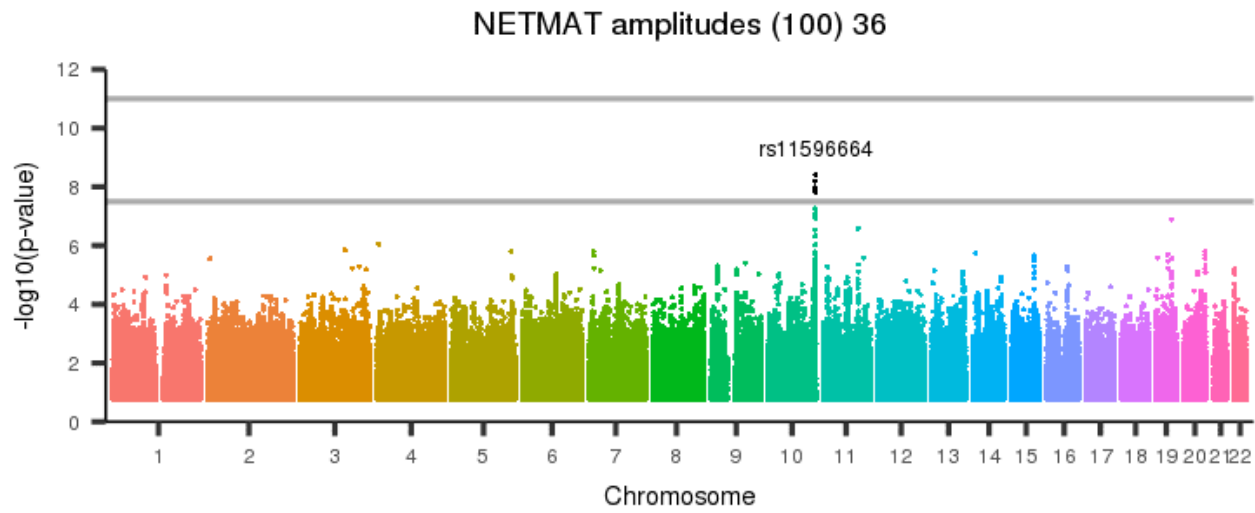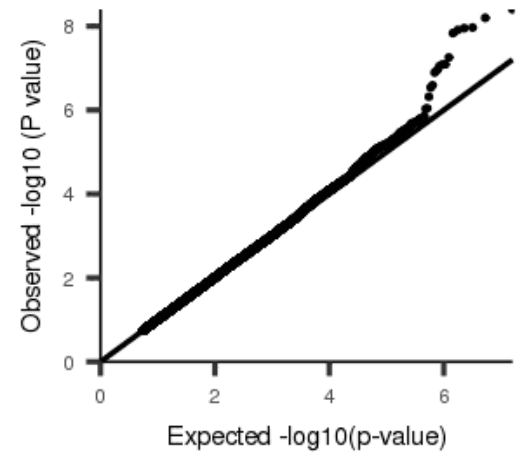

[back to list of plots](#)

Figure 928: NETMAT amplitudes (100) 37

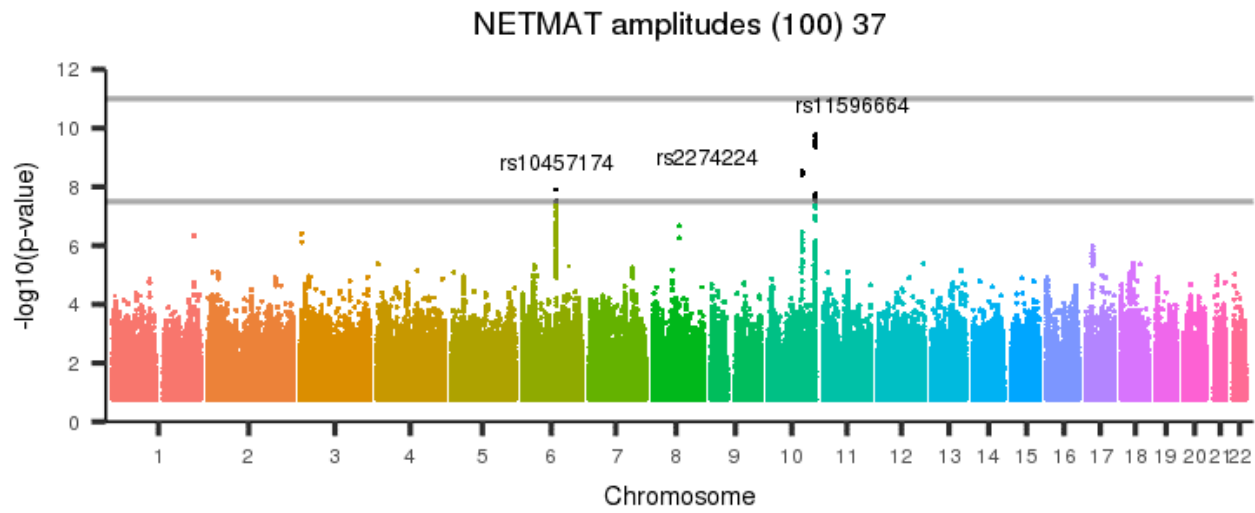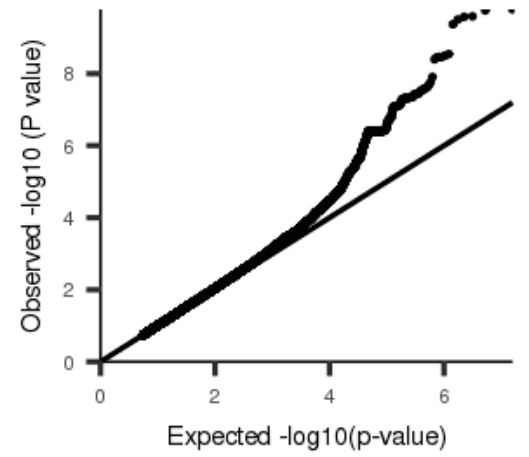

[back to list of plots](#)

Figure 929: NETMAT amplitudes (100) 38

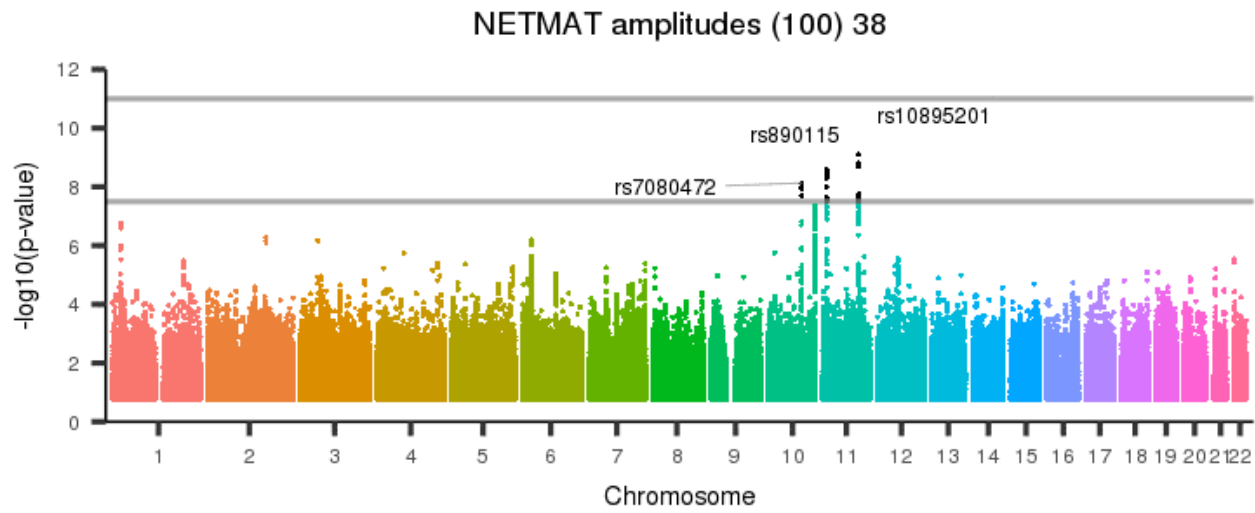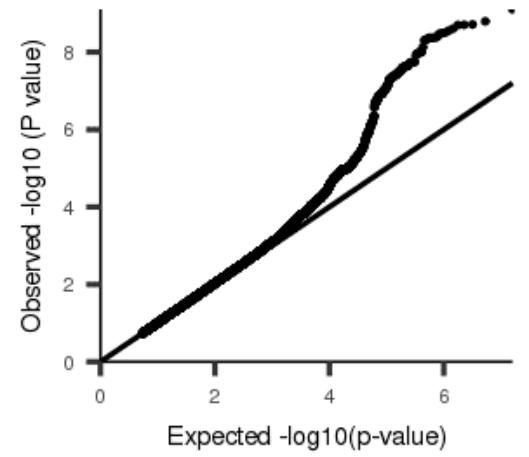

[back to list of plots](#)

Figure 930: NETMAT amplitudes (100) 39

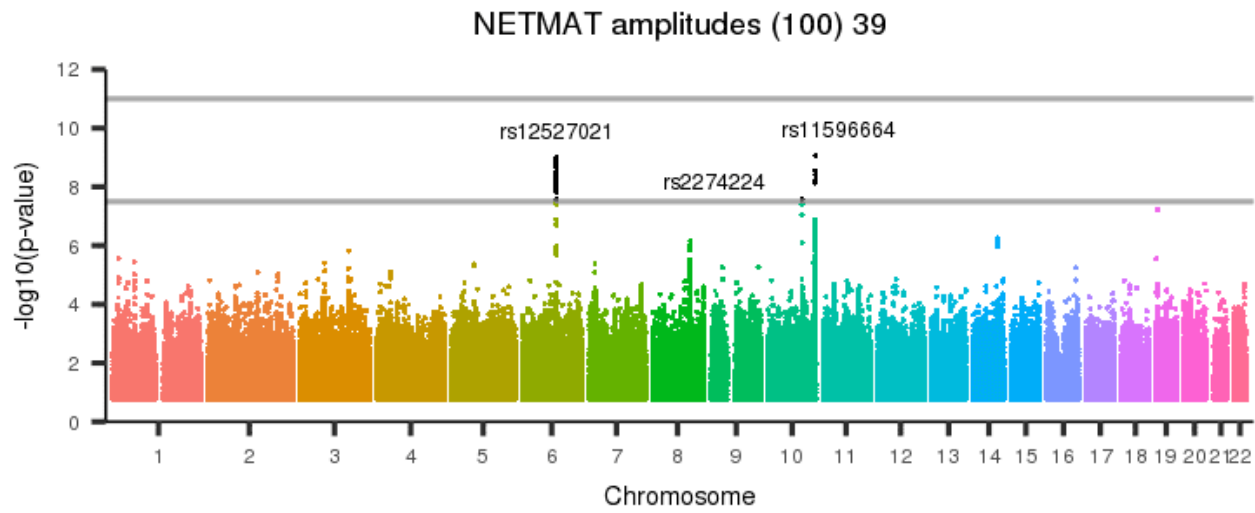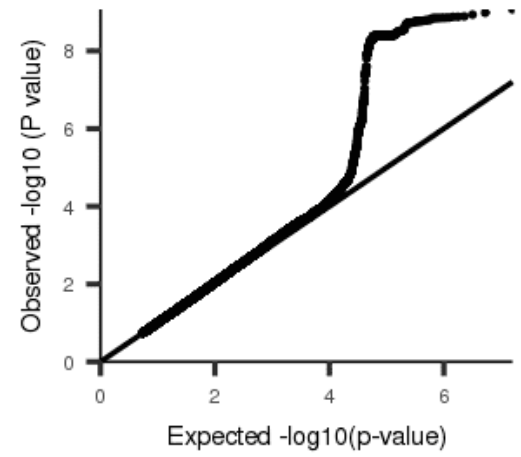

[back to list of plots](#)

Figure 931: NETMAT amplitudes (100) 40

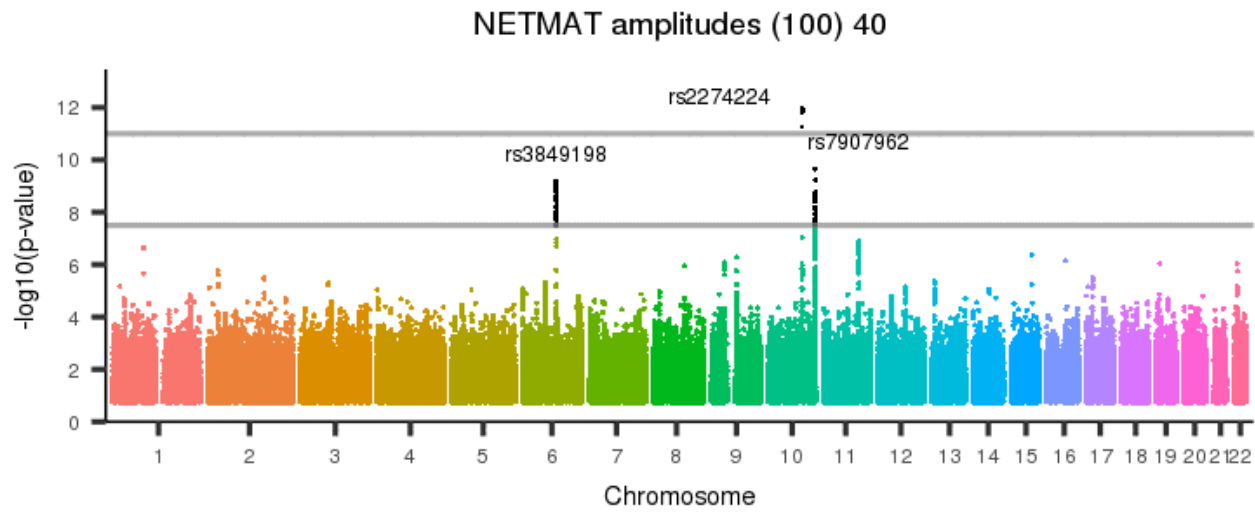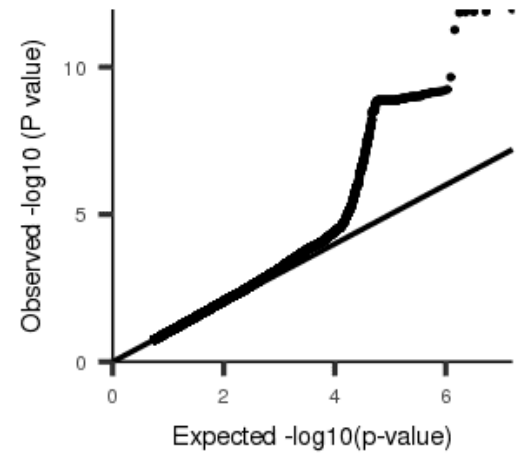

[back to list of plots](#)

Figure 932: NETMAT amplitudes (100) 41

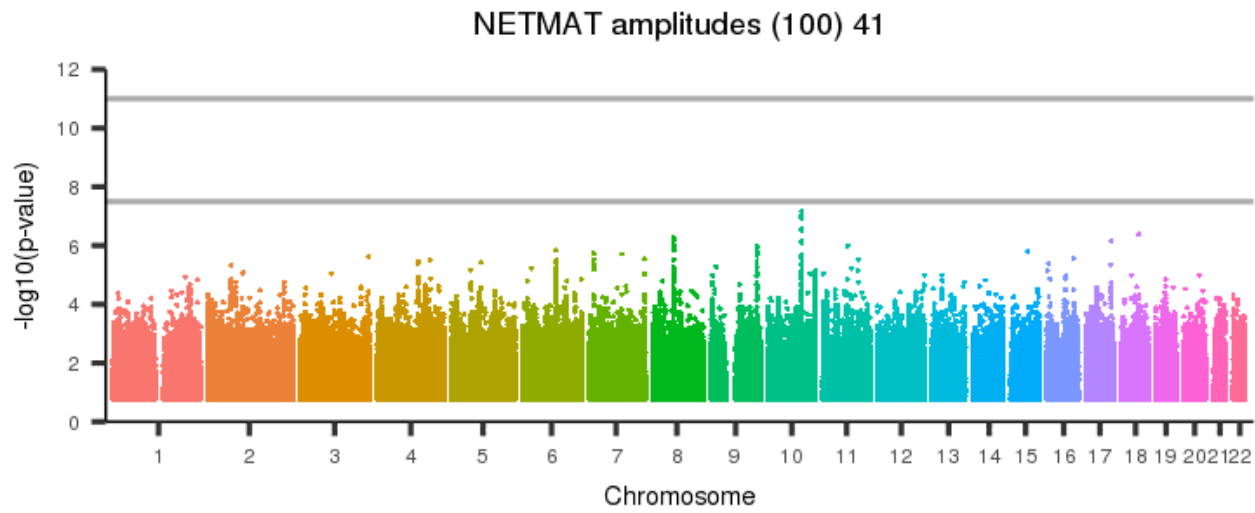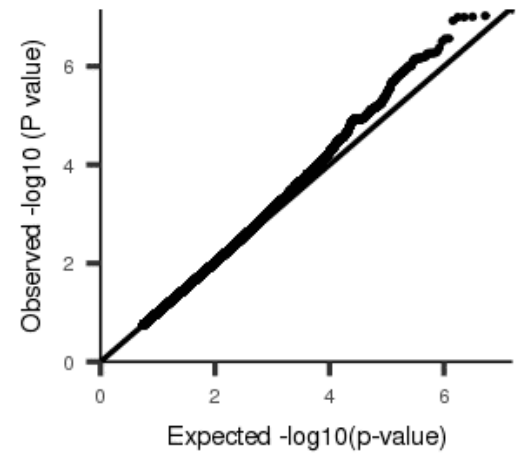

[back to list of plots](#)

Figure 933: NETMAT amplitudes (100) 42

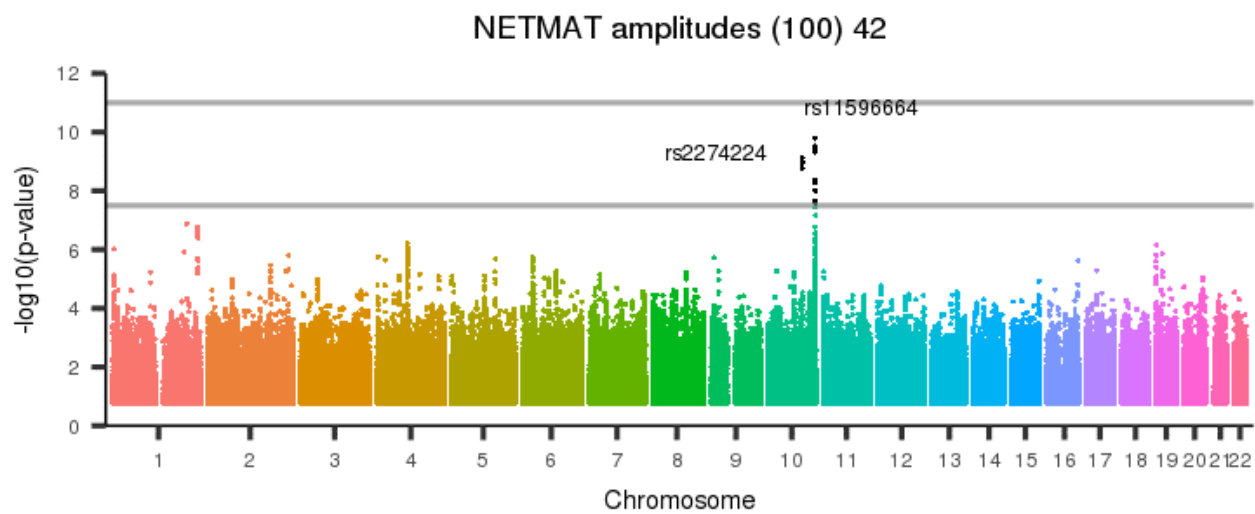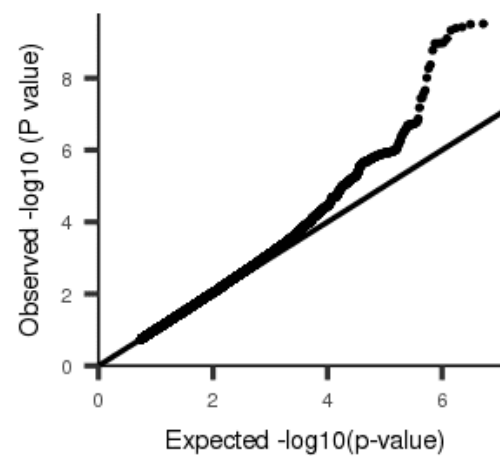

[back to list of plots](#)



Figure 934: NETMAT amplitudes (100) 43

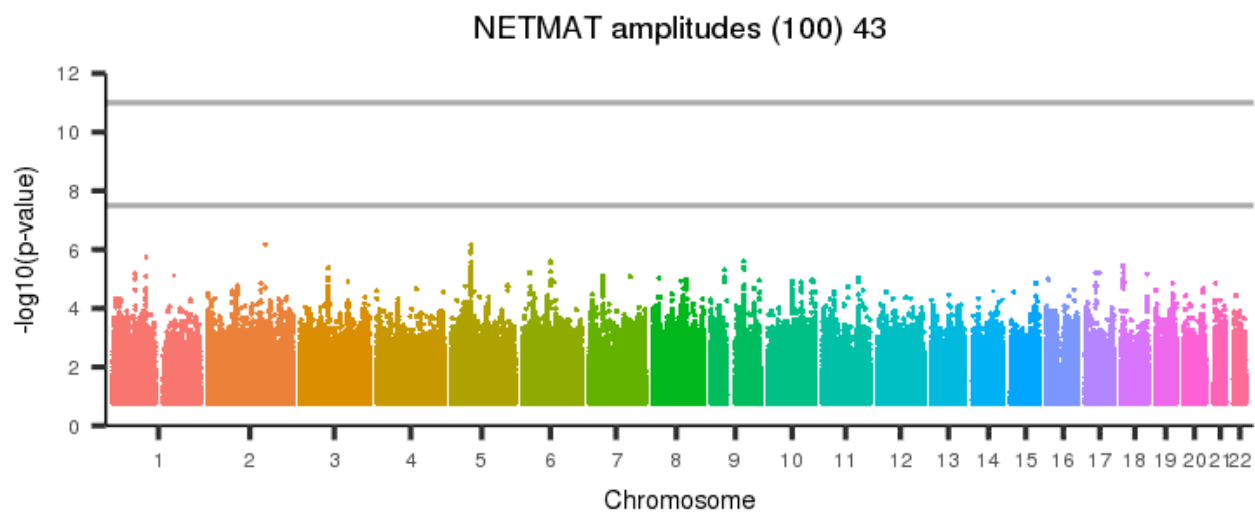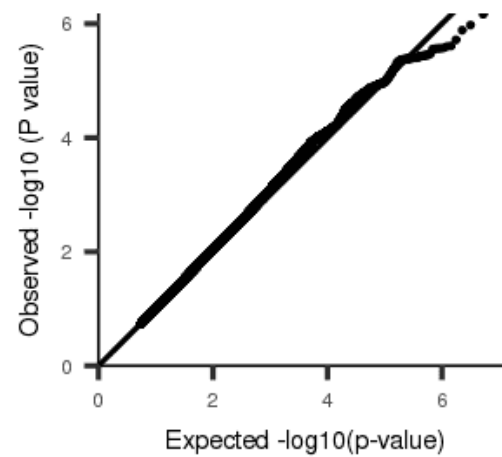

[back to list of plots](#)

Figure 935: NETMAT amplitudes (100) 44

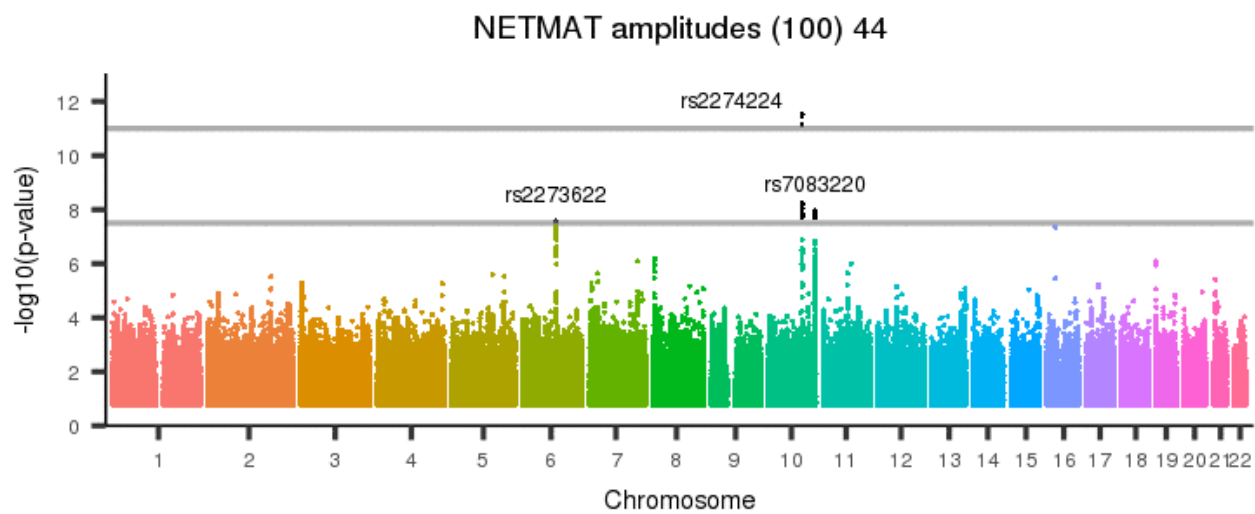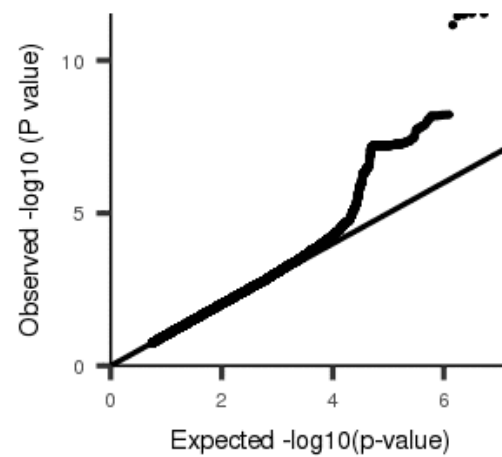

[back to list of plots](#)

Figure 936: NETMAT amplitudes (100) 45

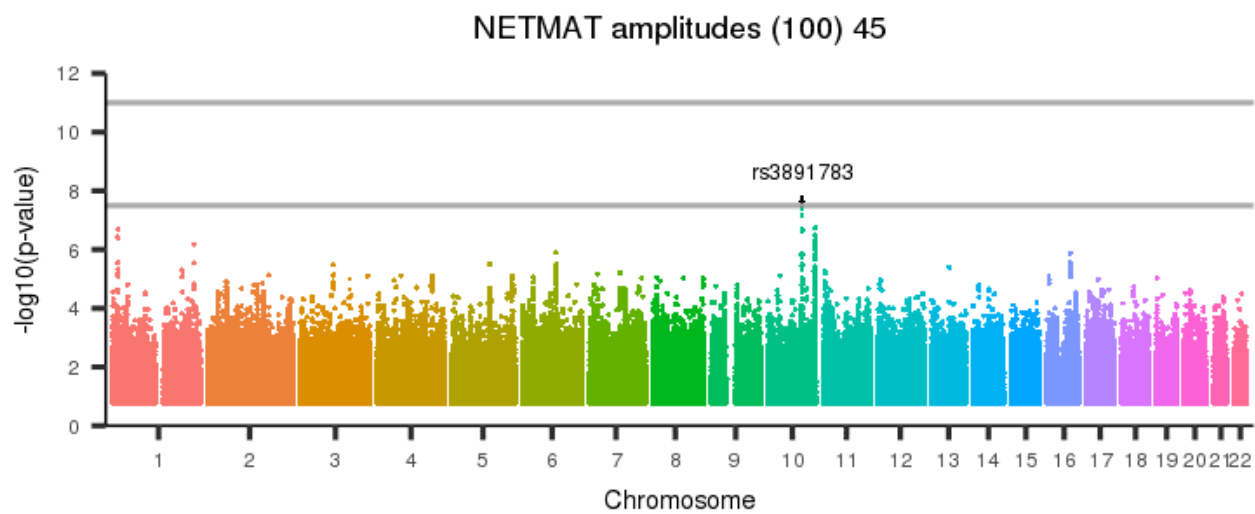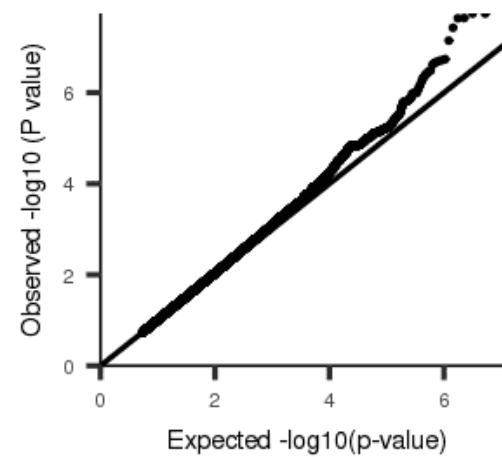

[back to list of plots](#)

Figure 937: NETMAT amplitudes (100) 46

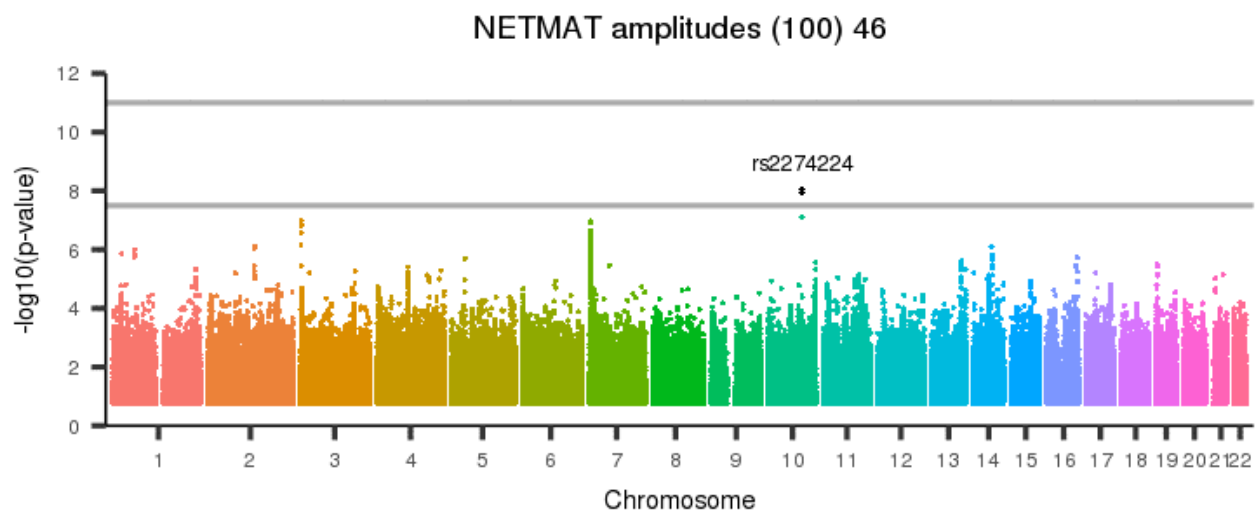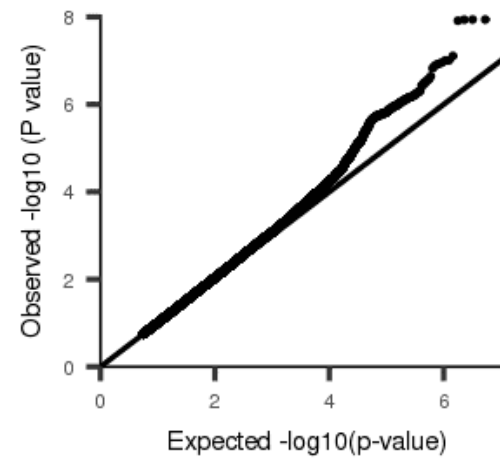

[back to list of plots](#)

Figure 938: NETMAT amplitudes (100) 47

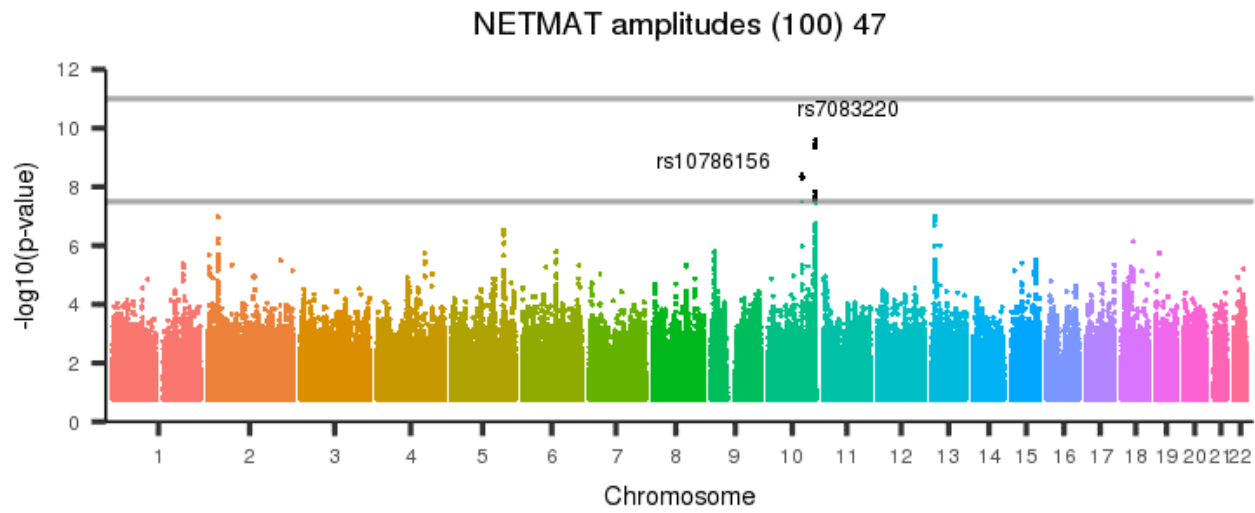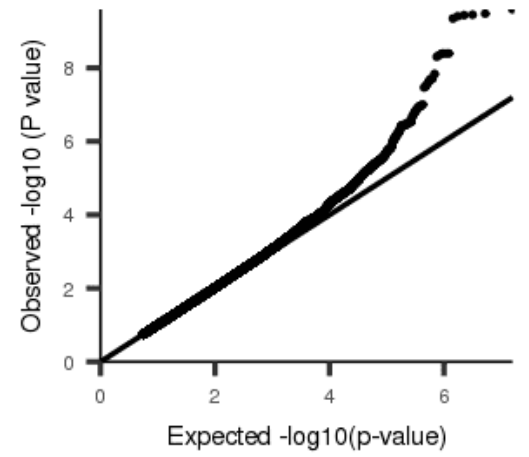

[back to list of plots](#)

Figure 939: NETMAT amplitudes (100) 48

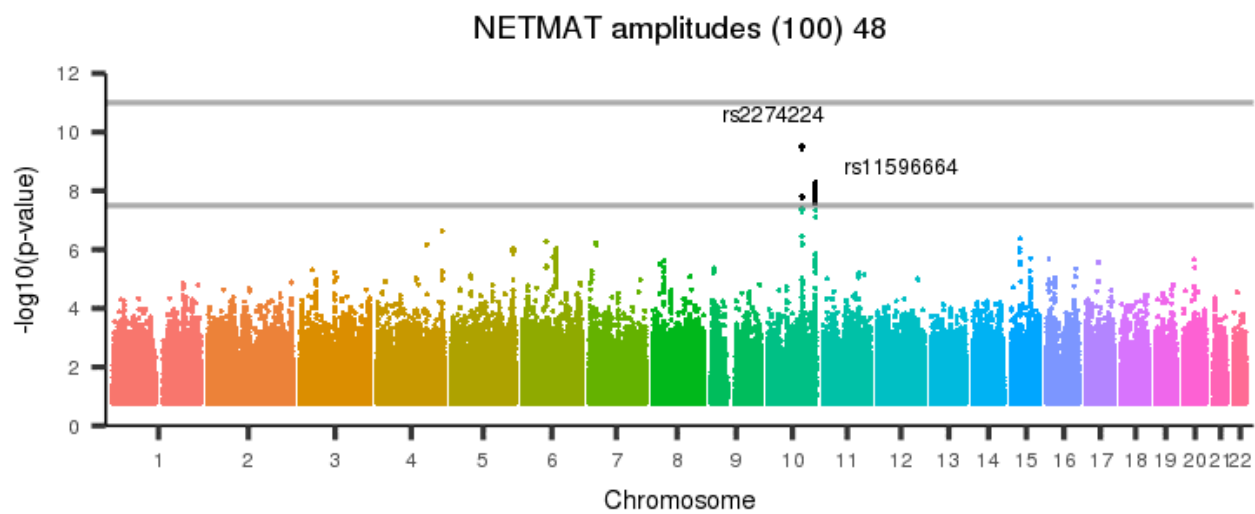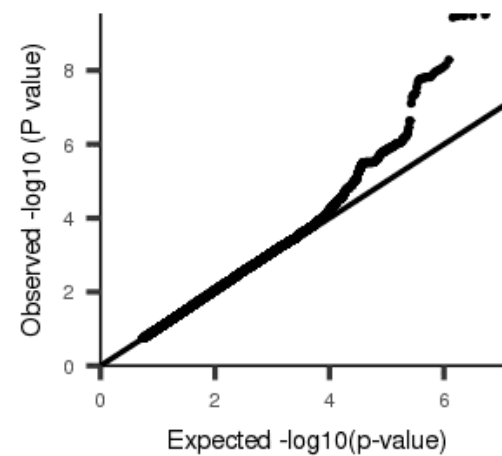

[back to list of plots](#)

Figure 940: NETMAT amplitudes (100) 49

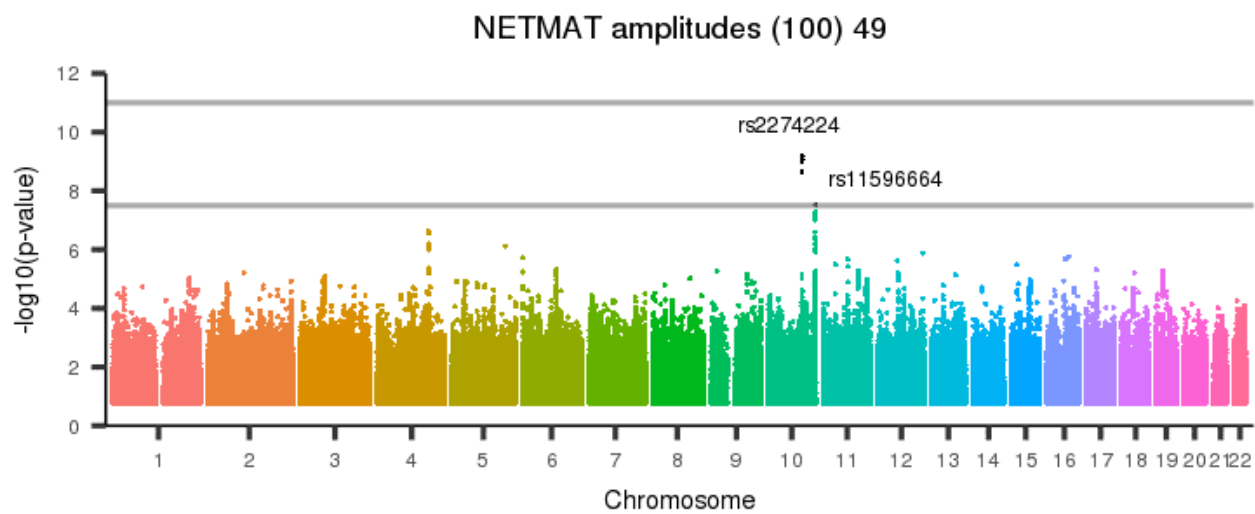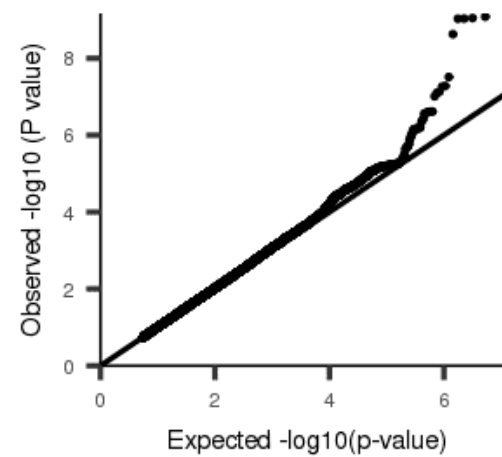

[back to list of plots](#)

Figure 941: NETMAT amplitudes (100) 50

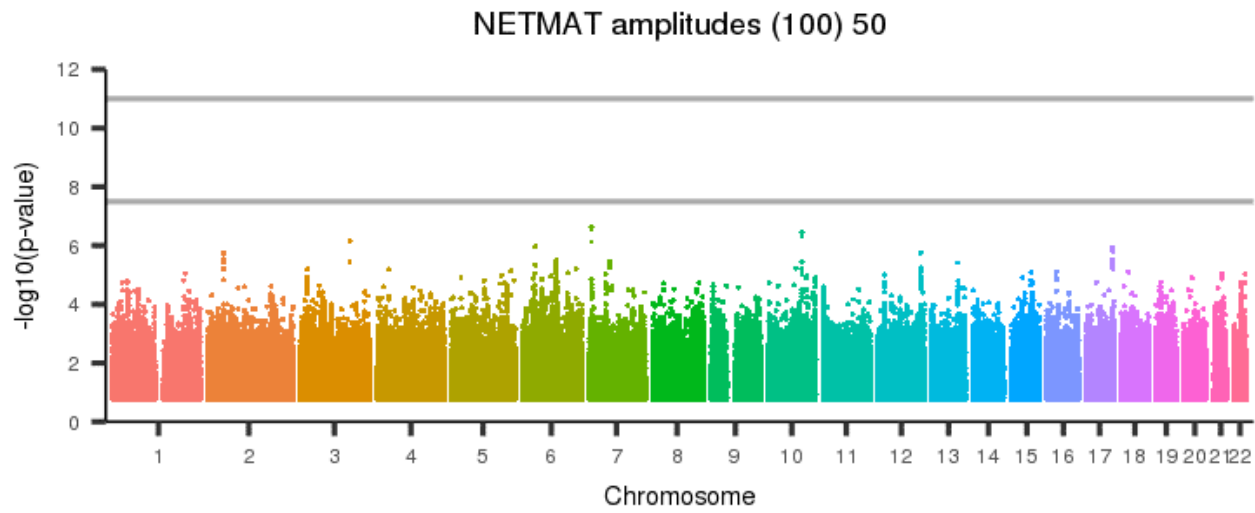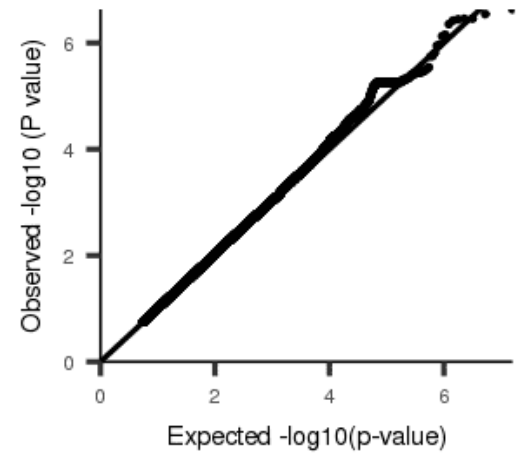

[back to list of plots](#)



Figure 942: NETMAT amplitudes (100) 51

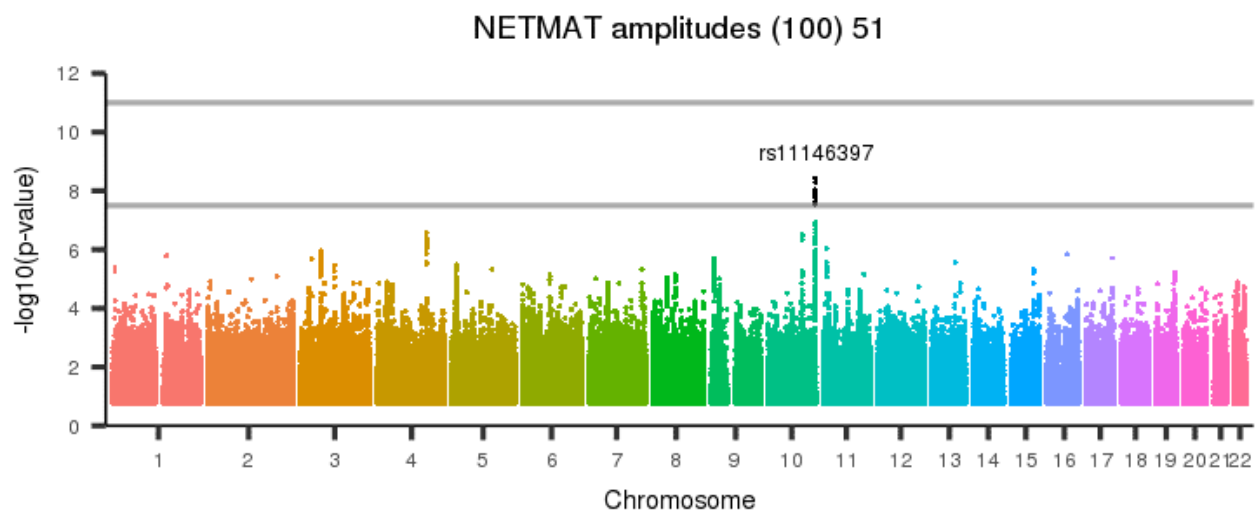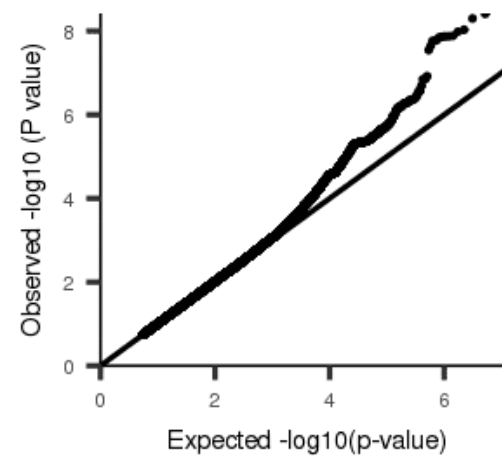

[back to list of plots](#)

Figure 943: NETMAT amplitudes (100) 52

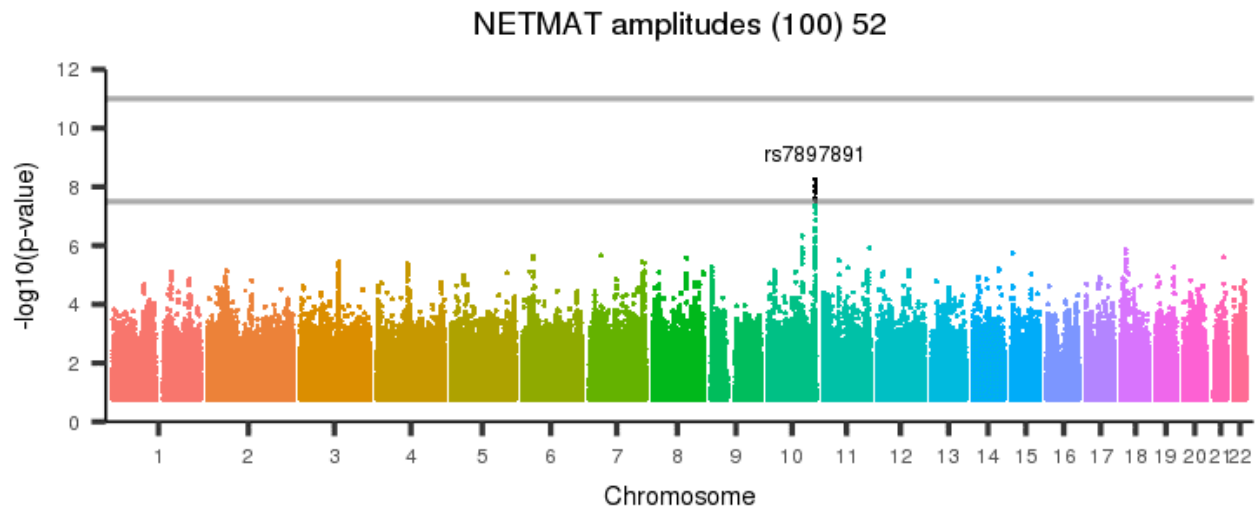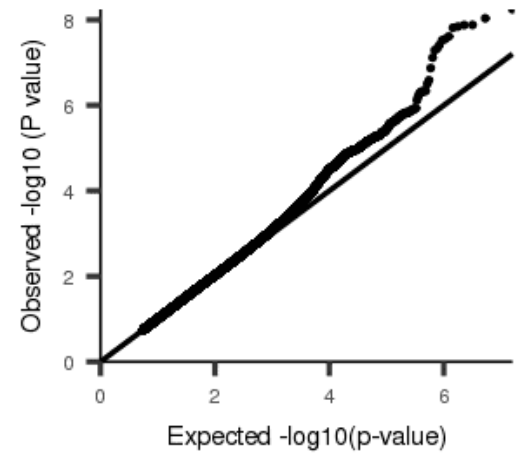

[back to list of plots](#)

Figure 944: NETMAT amplitudes (100) 53

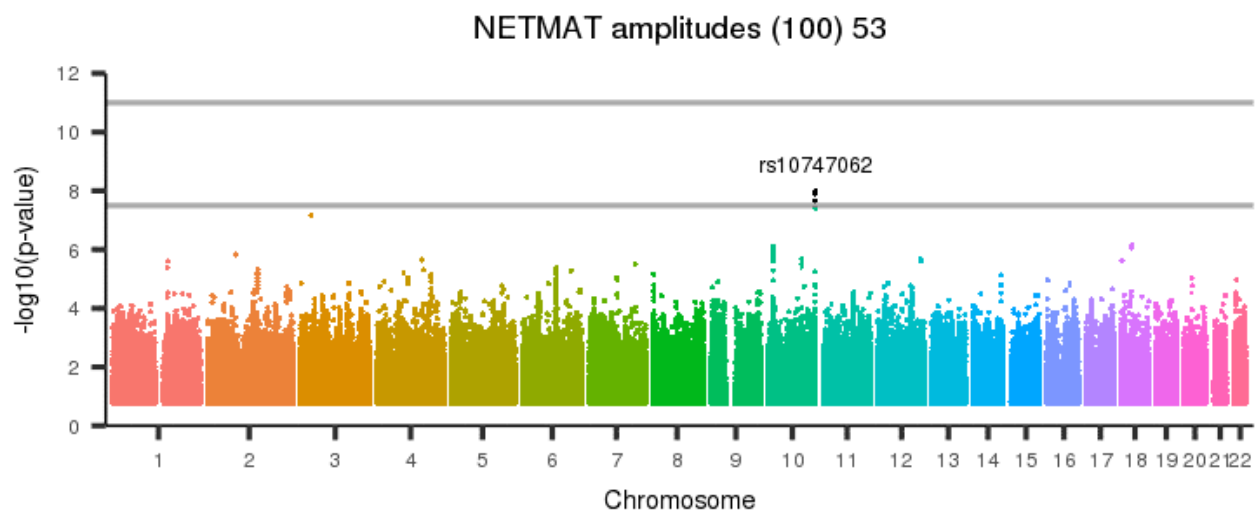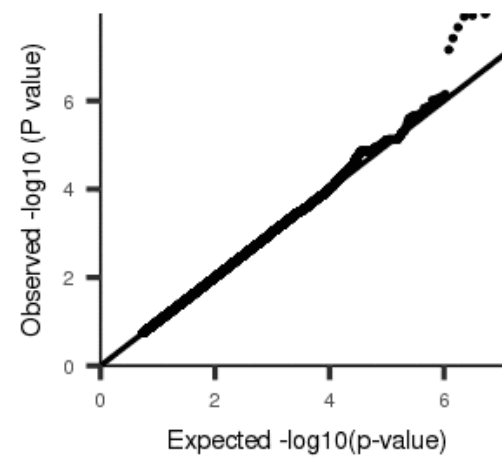

[back to list of plots](#)

Figure 945: NETMAT amplitudes (100) 54

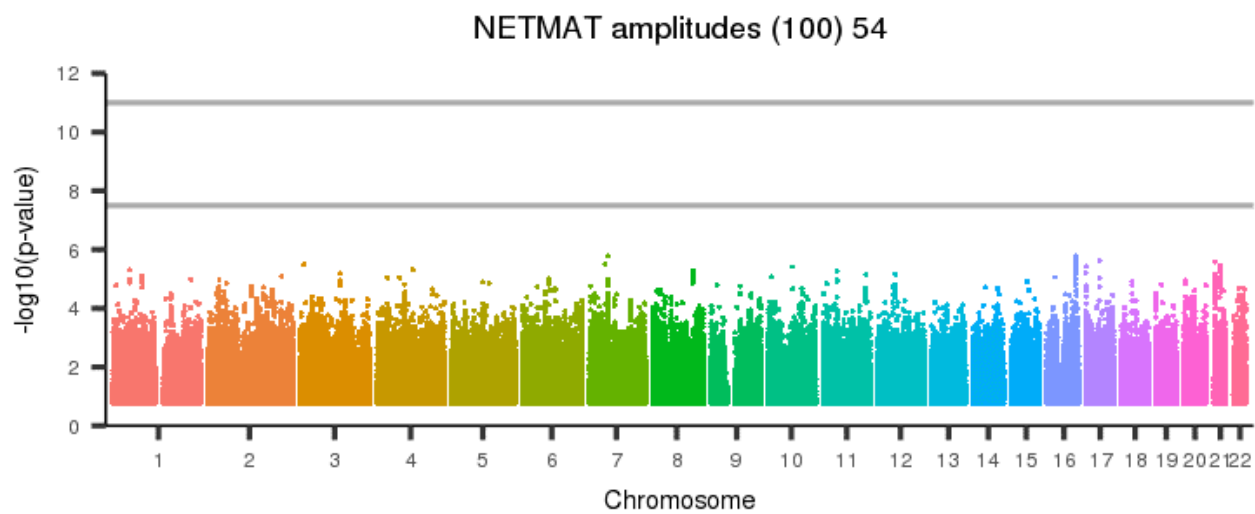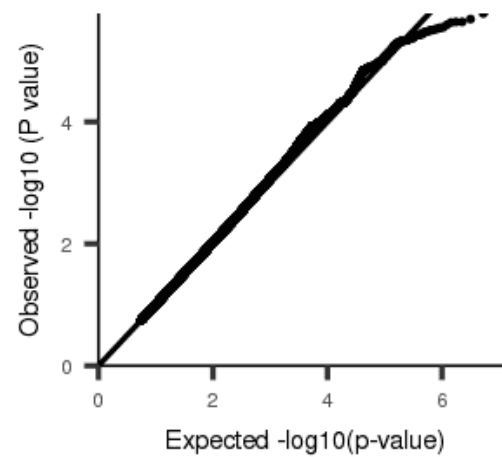

[back to list of plots](#)

Figure 946: NETMAT amplitudes (100) 55

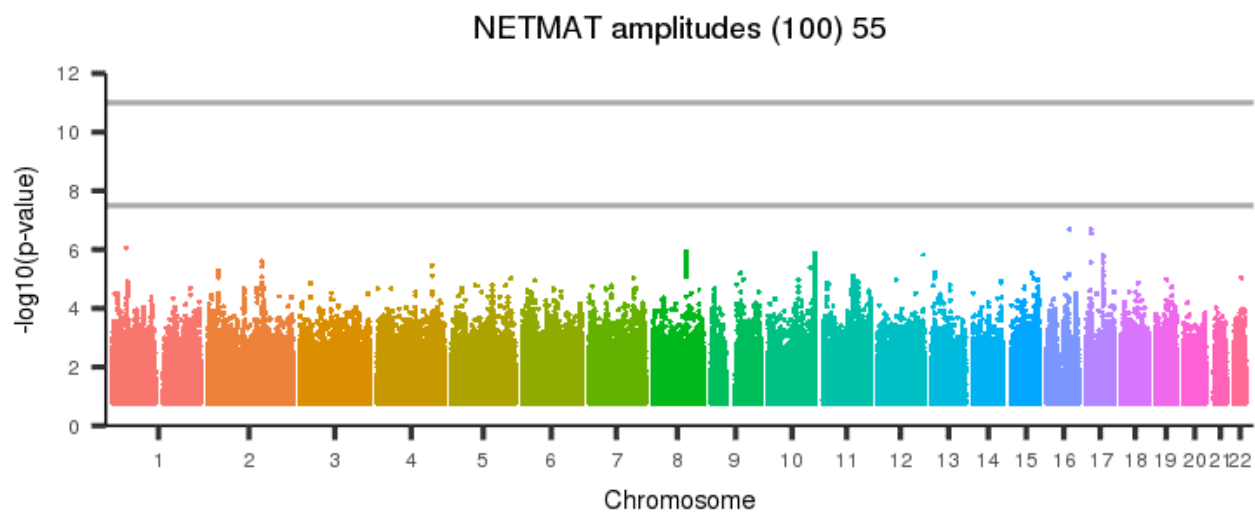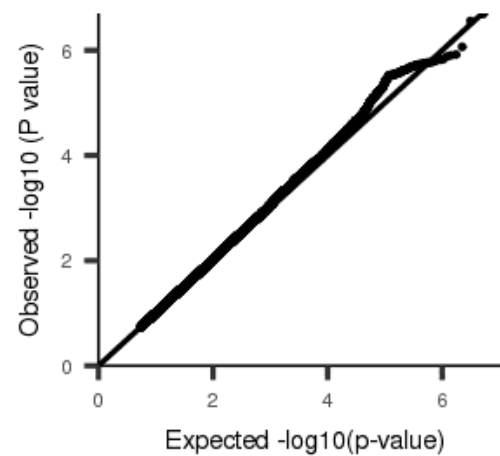

[back to list of plots](#)

Figure 947: NETMAT edge (25) 001

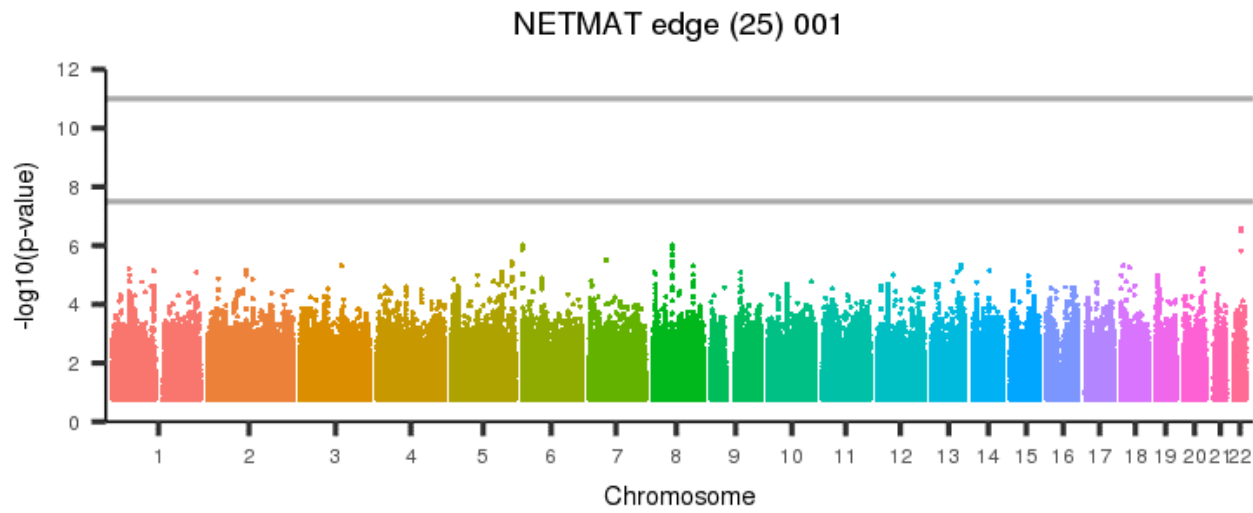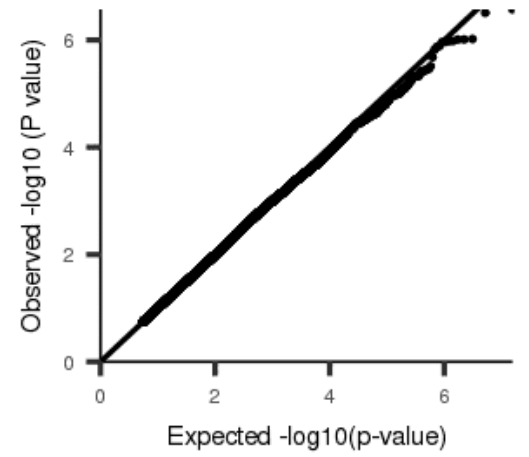

[back to list of plots](#)

Figure 948: NETMAT edge (25) 002

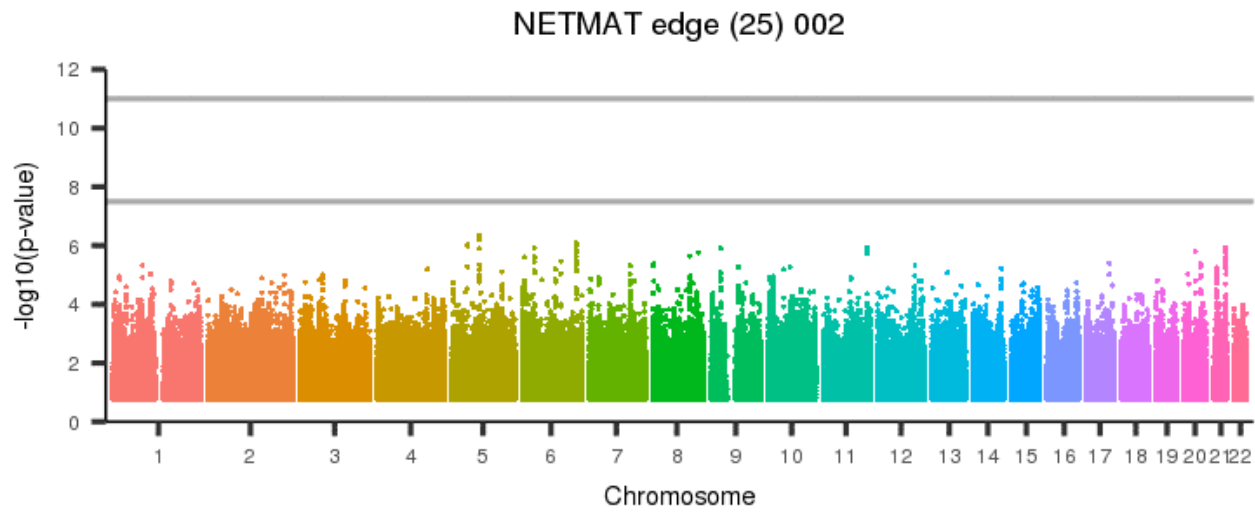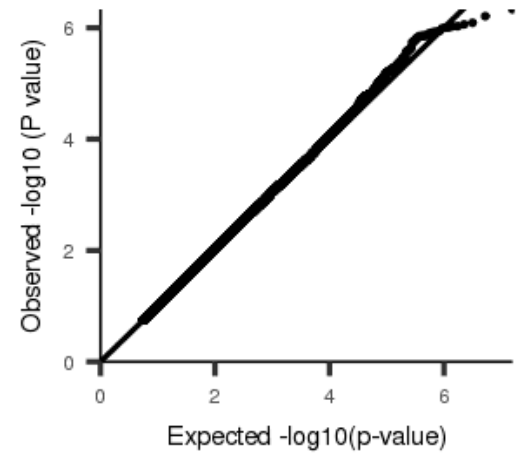

[back to list of plots](#)

Figure 949: NETMAT edge (25) 003

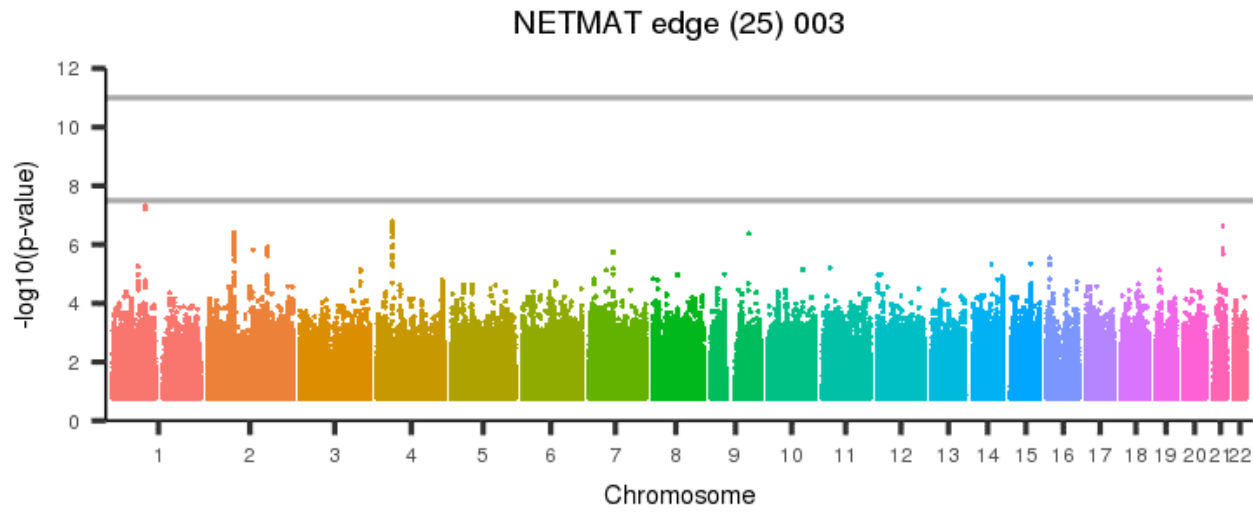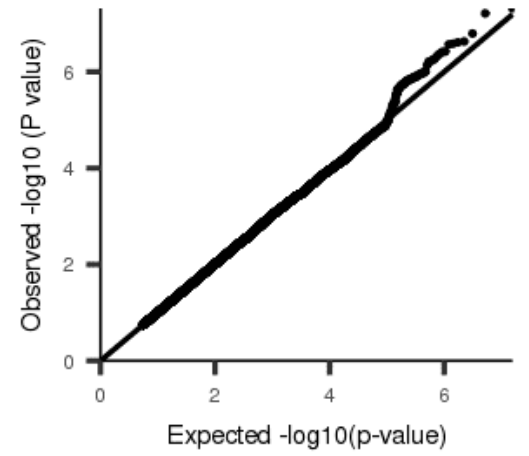

[back to list of plots](#)



Figure 950: NETMAT edge (25) 004

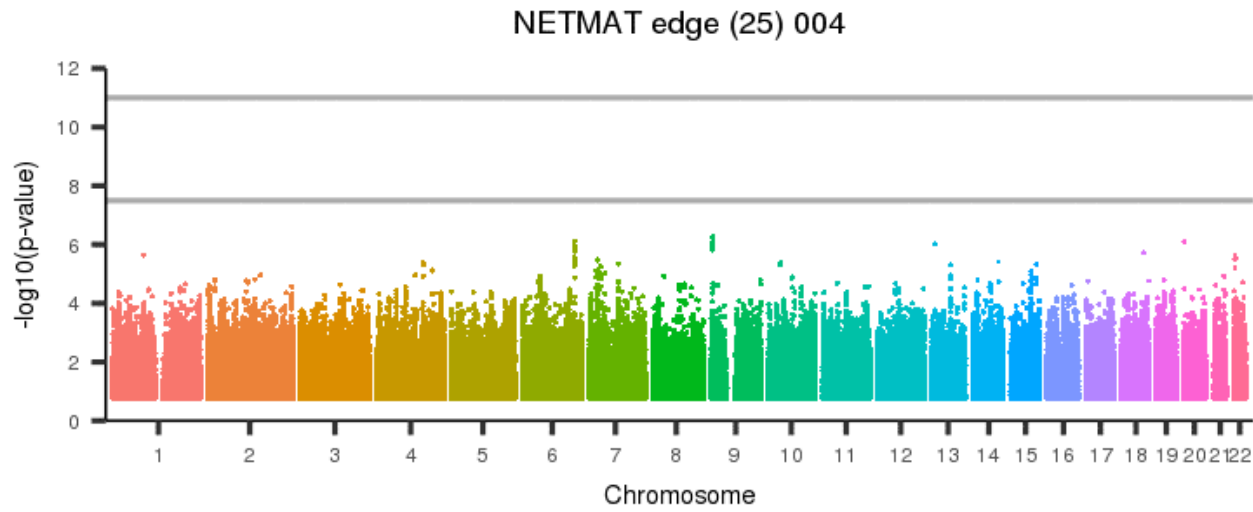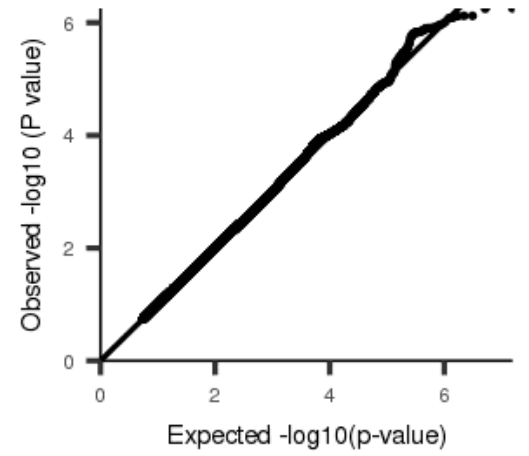

[back to list of plots](#)

Figure 951: NETMAT edge (25) 005

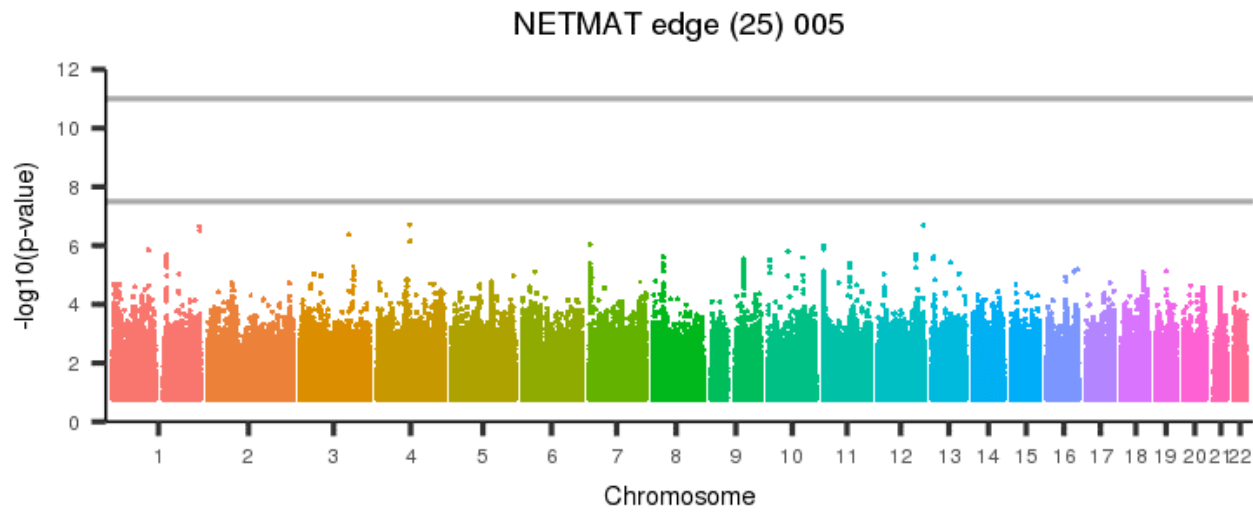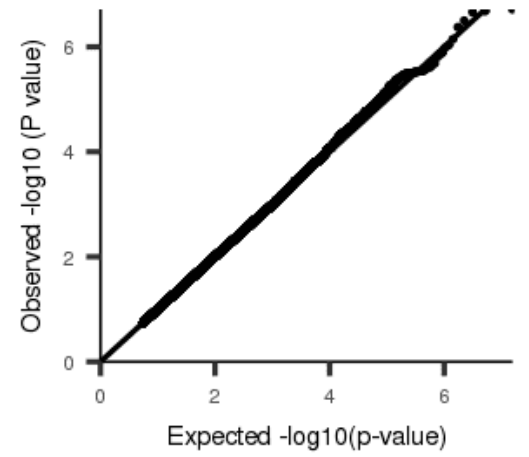

[back to list of plots](#)

Figure 952: NETMAT edge (25) 006

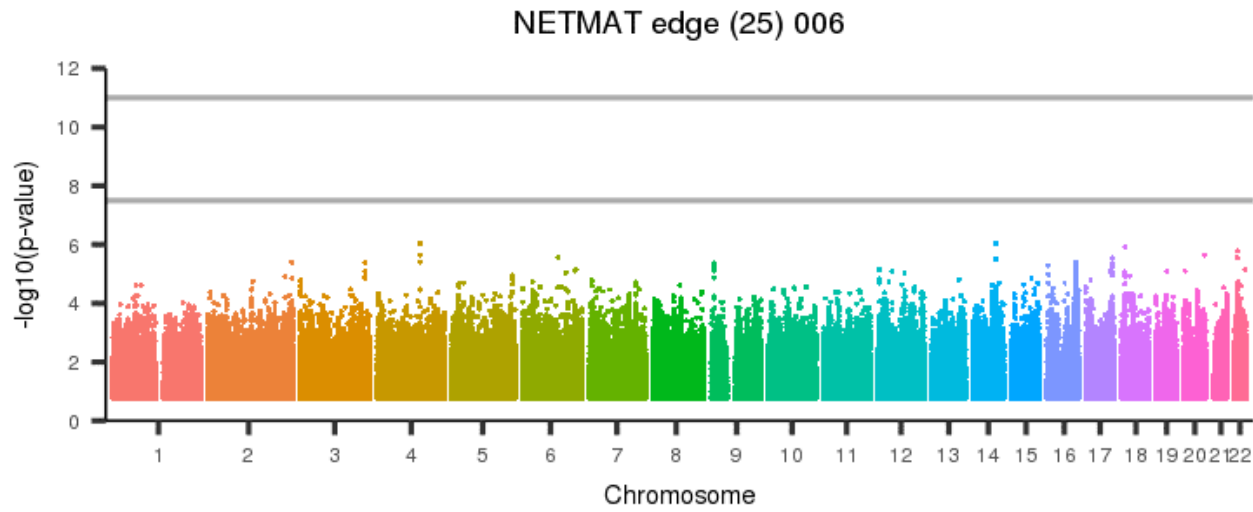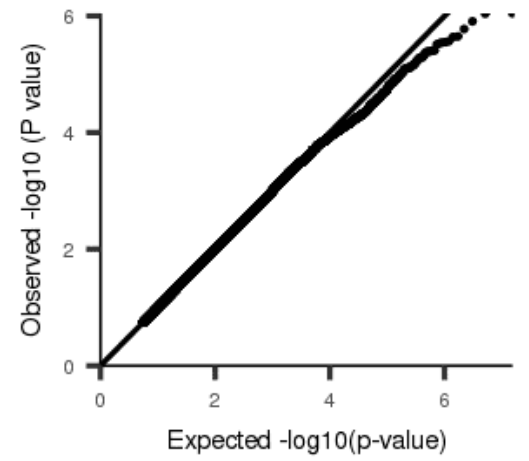

[back to list of plots](#)

Figure 953: NETMAT edge (25) 007

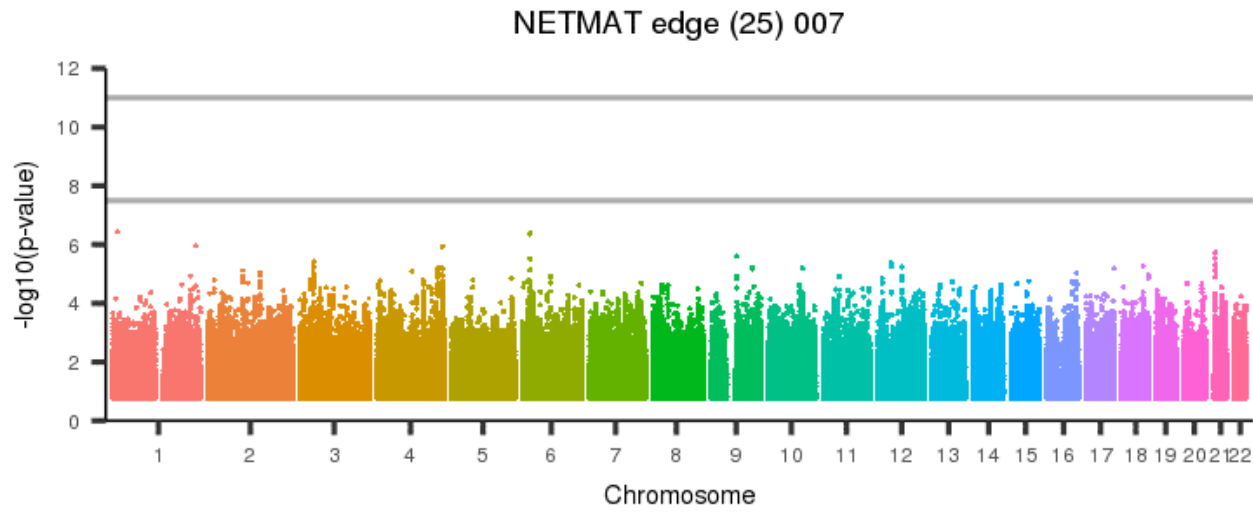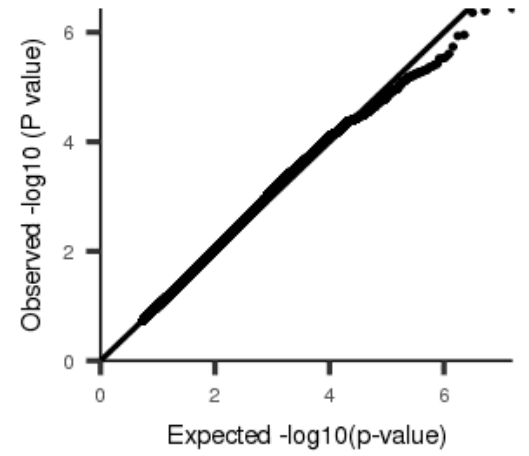

[back to list of plots](#)

Figure 954: NETMAT edge (25) 008

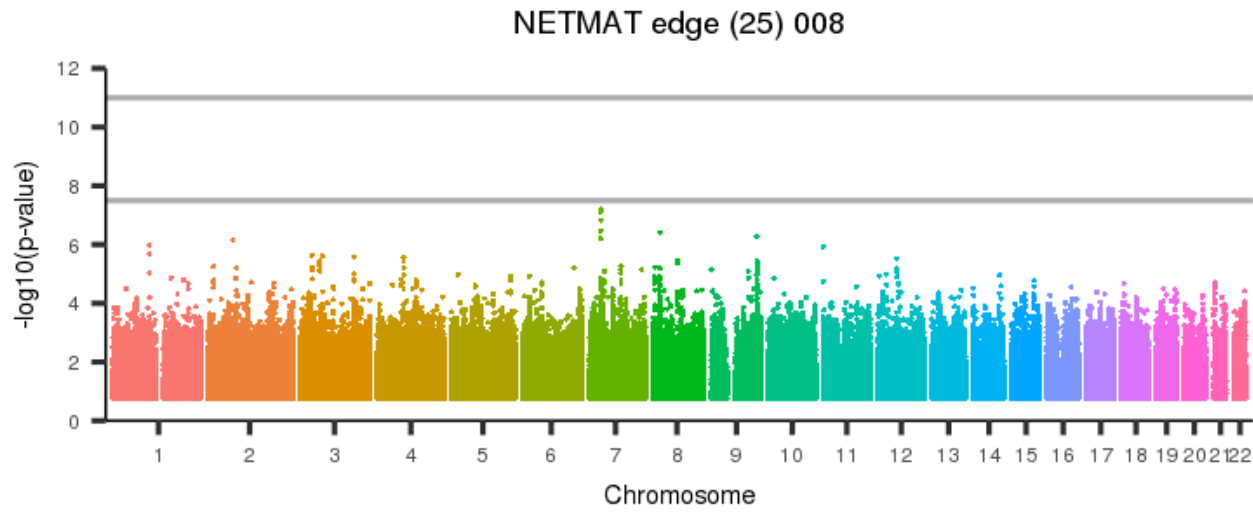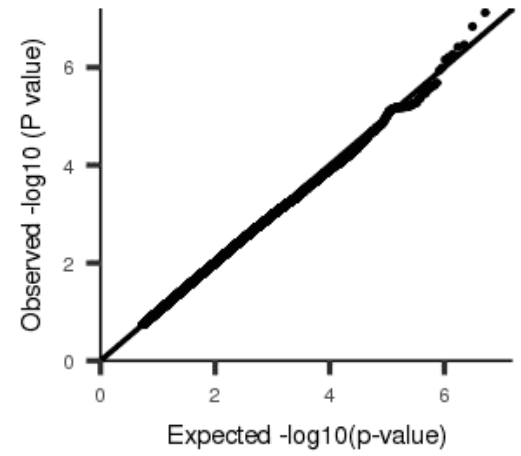

[back to list of plots](#)

Figure 955: NETMAT edge (25) 009

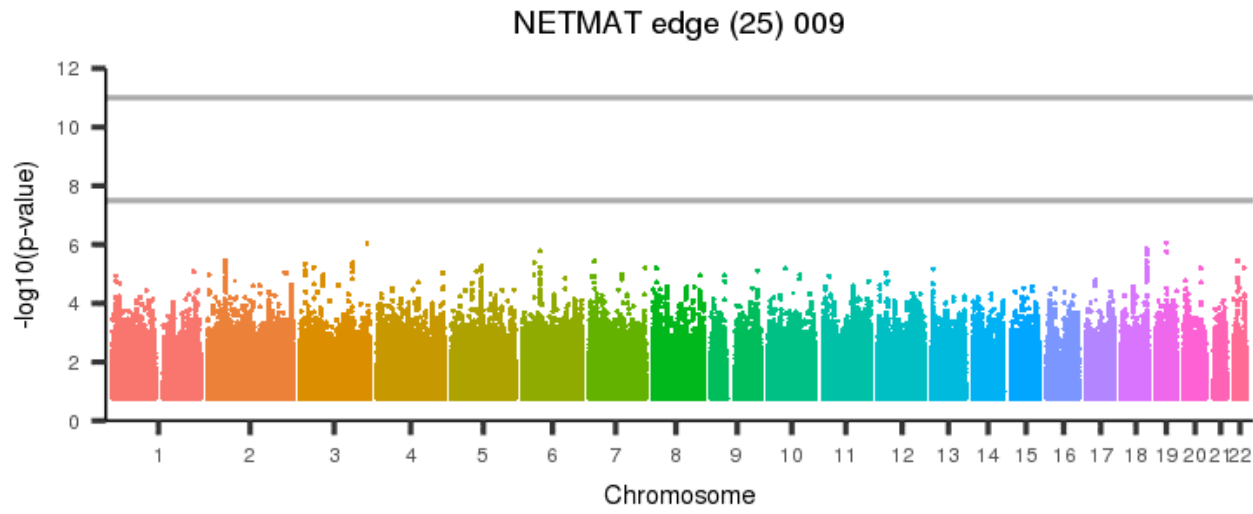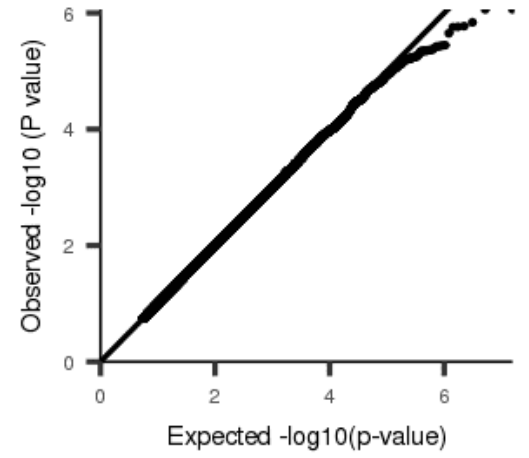

[back to list of plots](#)

Figure 956: NETMAT edge (25) 010

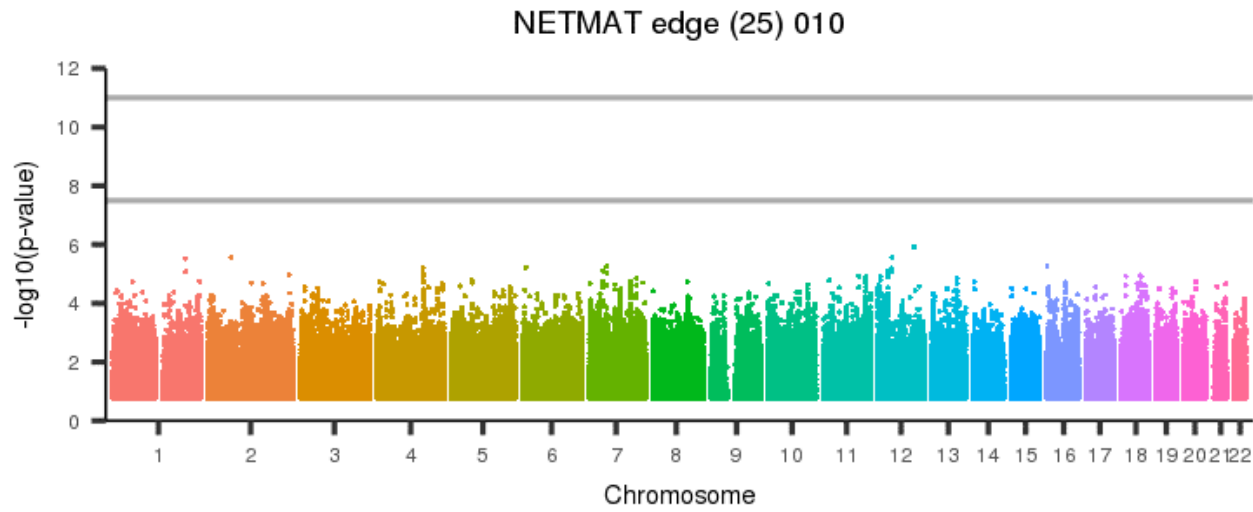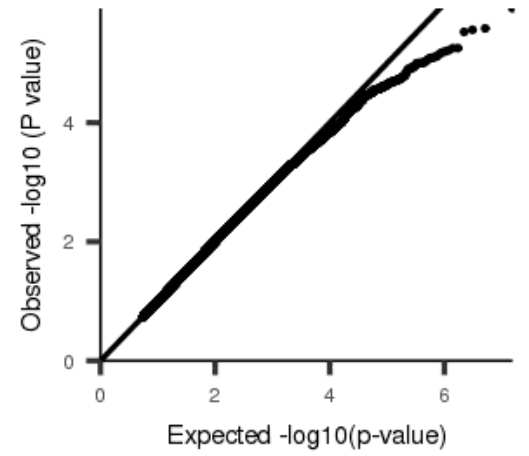

[back to list of plots](#)

Figure 957: NETMAT edge (25) 011

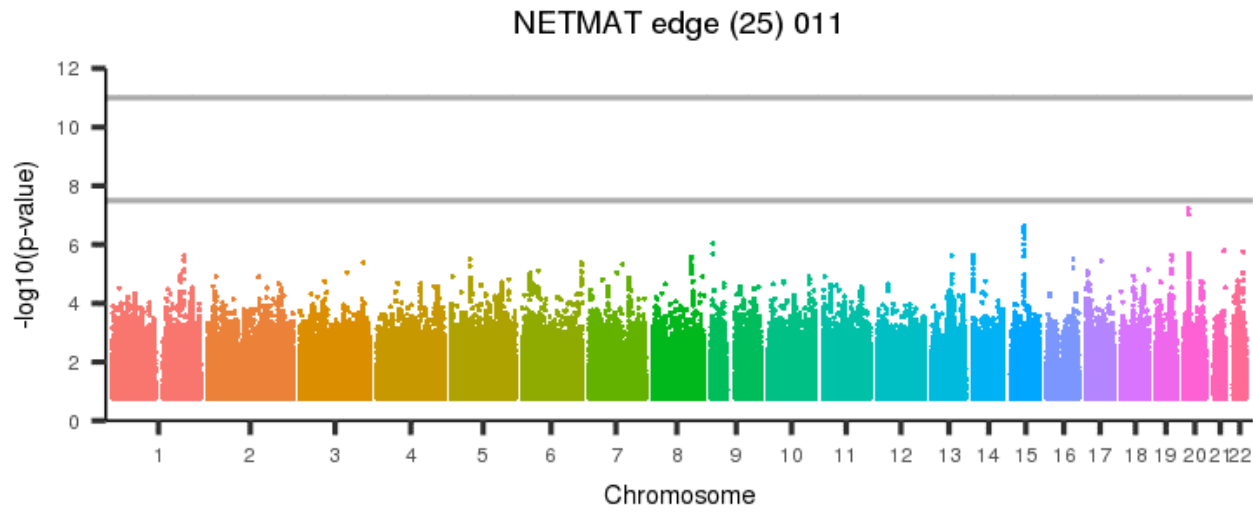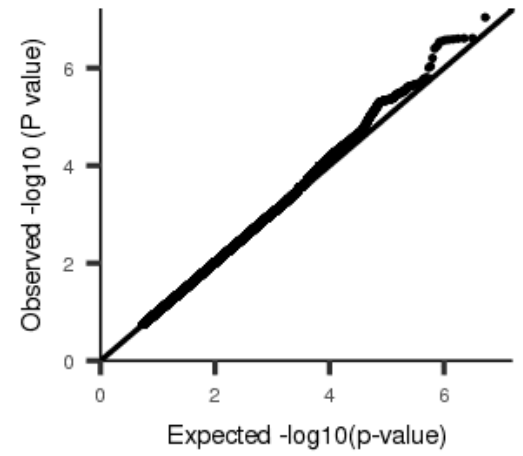

[back to list of plots](#)



Figure 958: NETMAT edge (25) 012

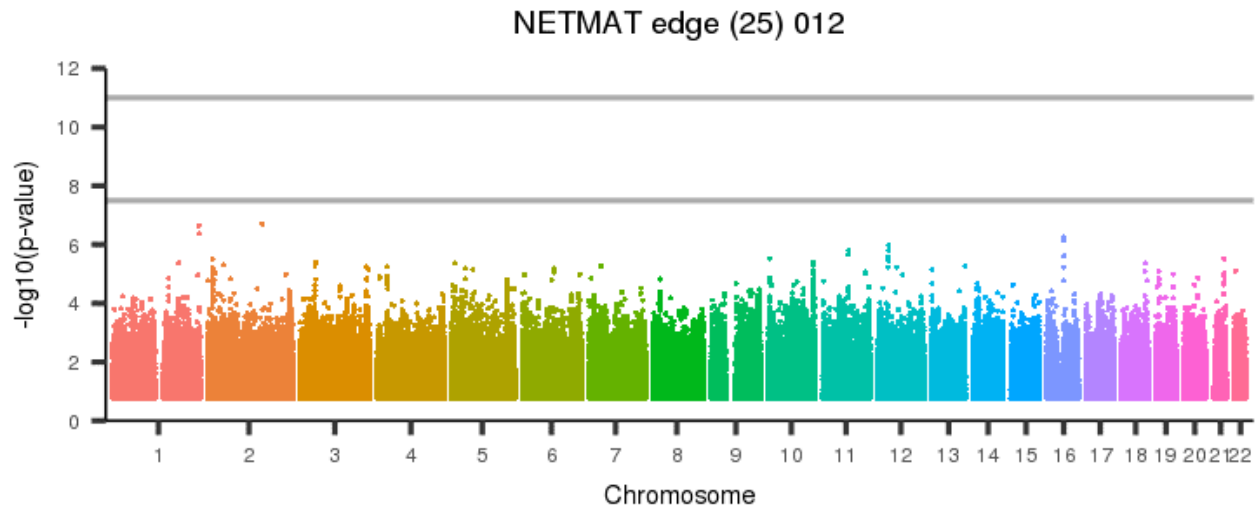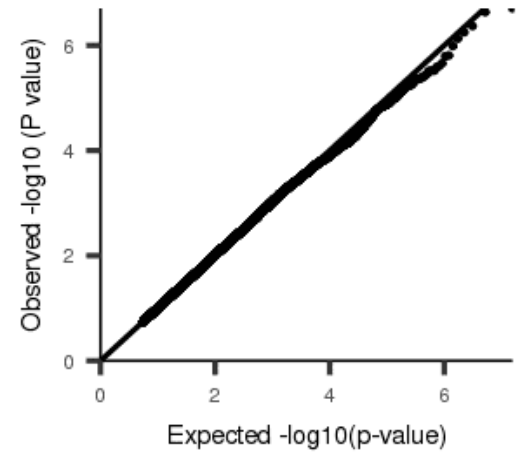

[back to list of plots](#)

Figure 959: NETMAT edge (25) 013

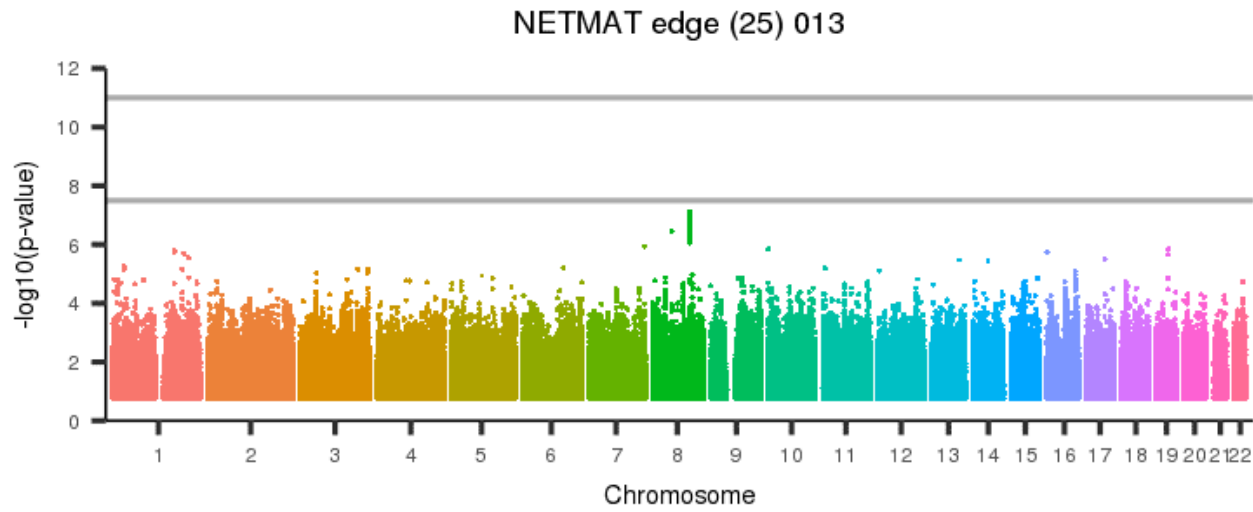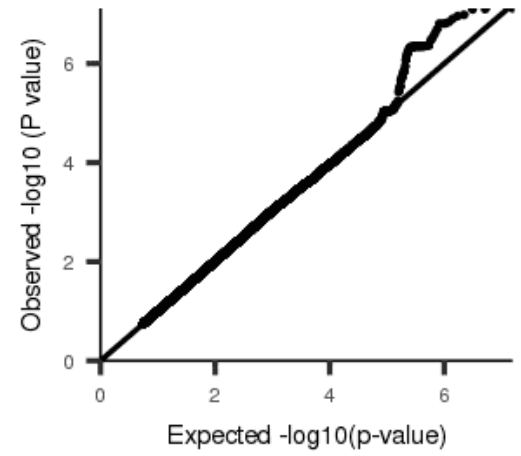

[back to list of plots](#)

Figure 960: NETMAT edge (25) 014

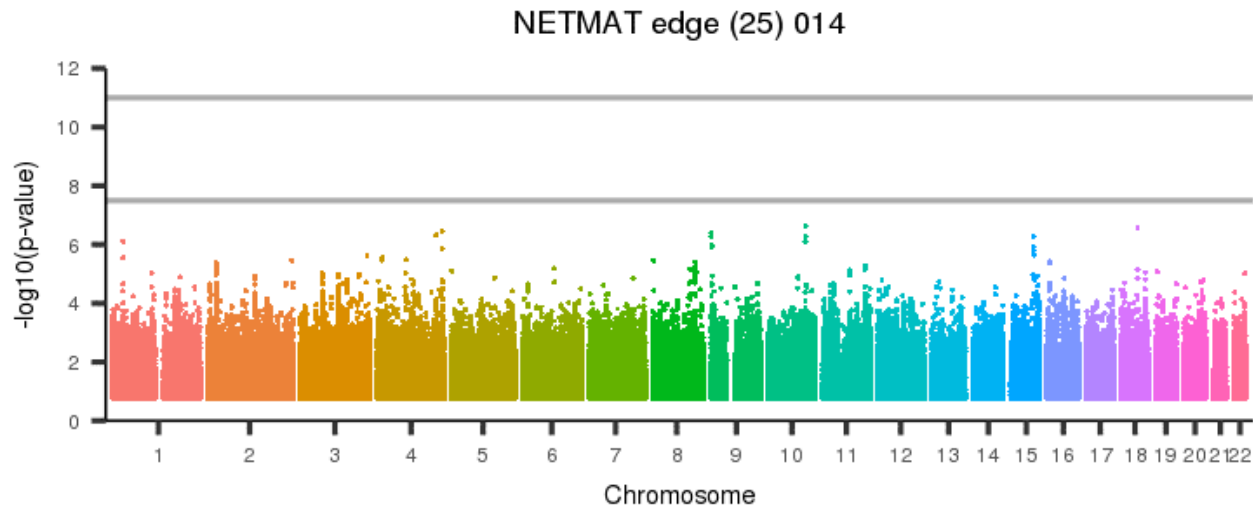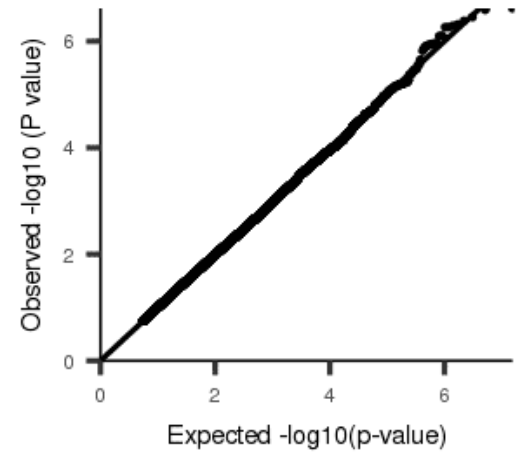

[back to list of plots](#)

Figure 961: NETMAT edge (25) 015

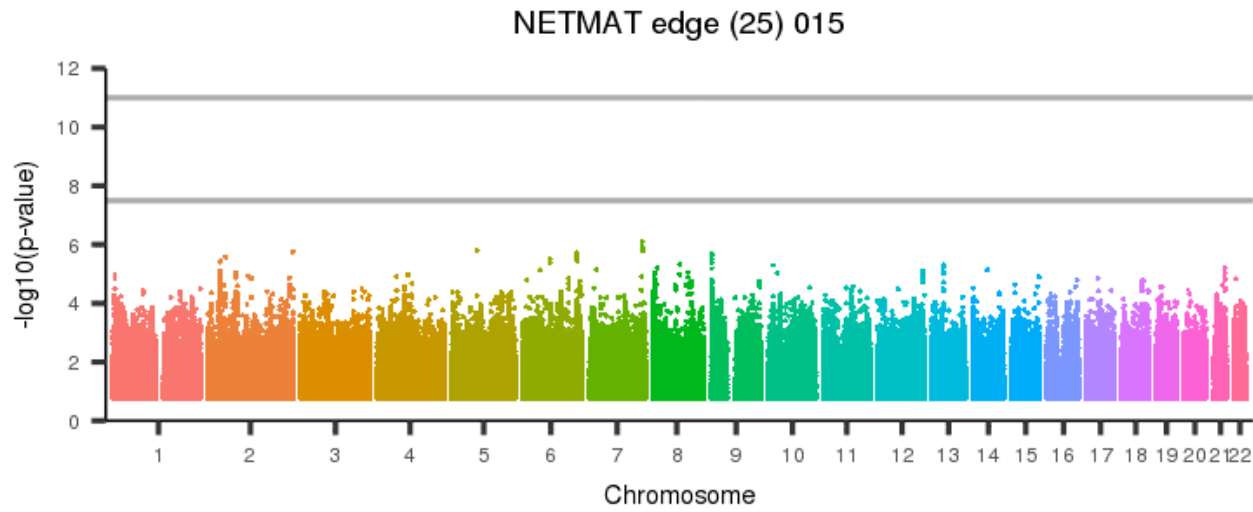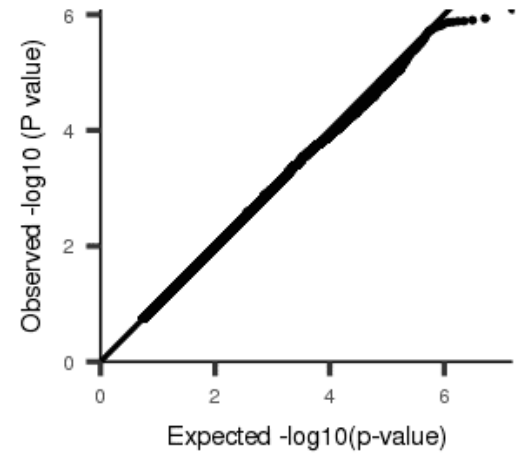

[back to list of plots](#)

Figure 962: NETMAT edge (25) 016

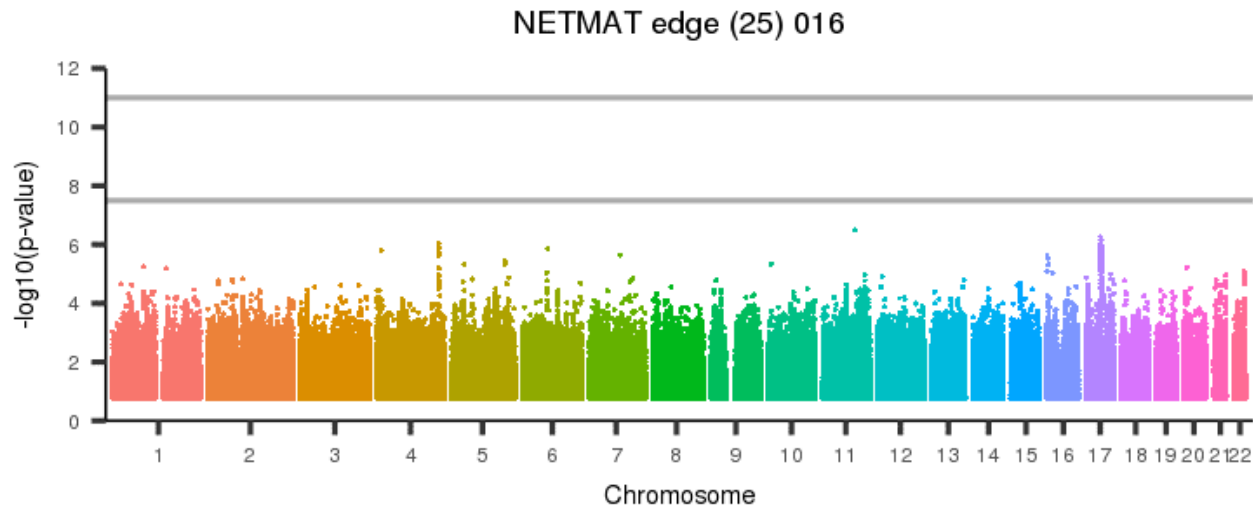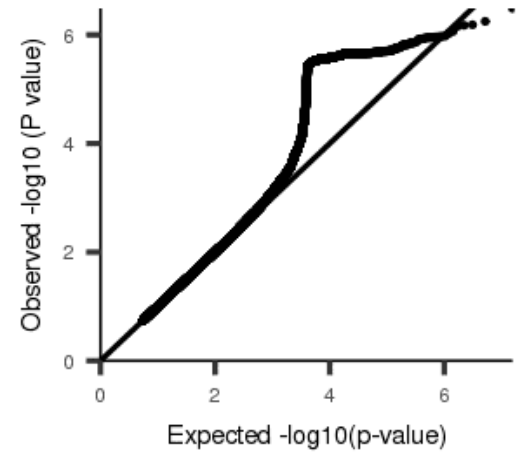

[back to list of plots](#)

Figure 963: NETMAT edge (25) 017

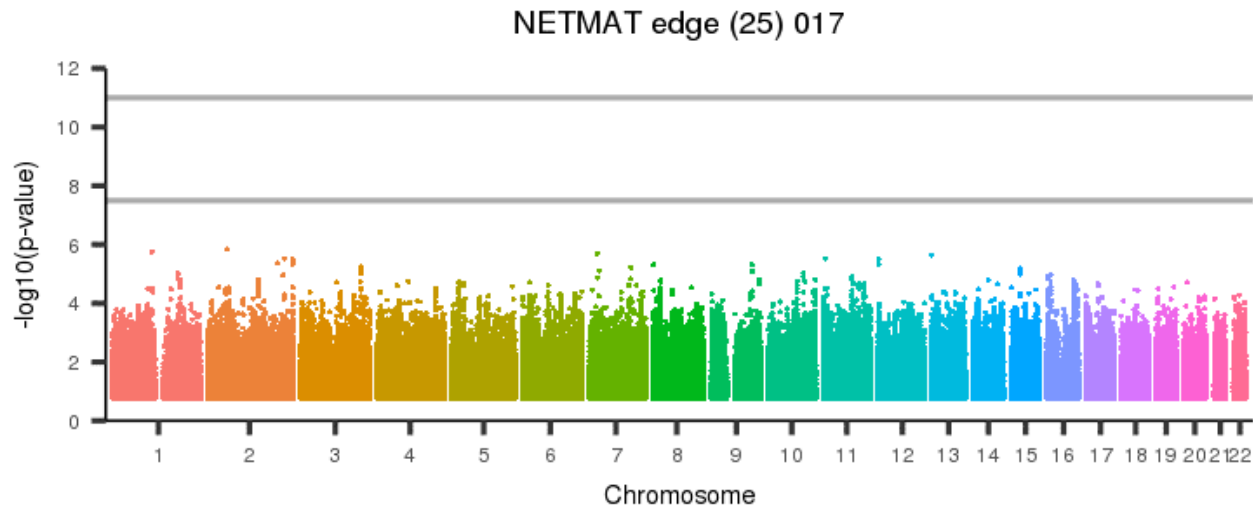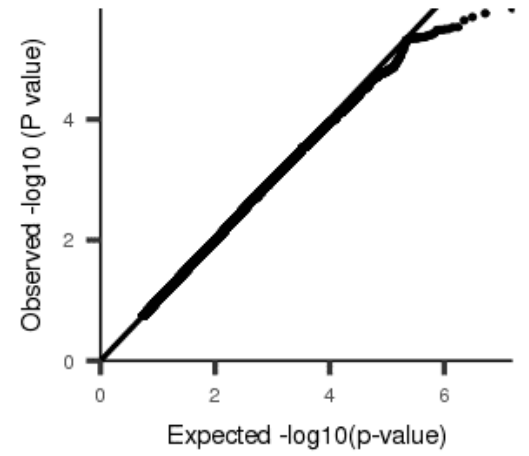

[back to list of plots](#)

Figure 964: NETMAT edge (25) 018

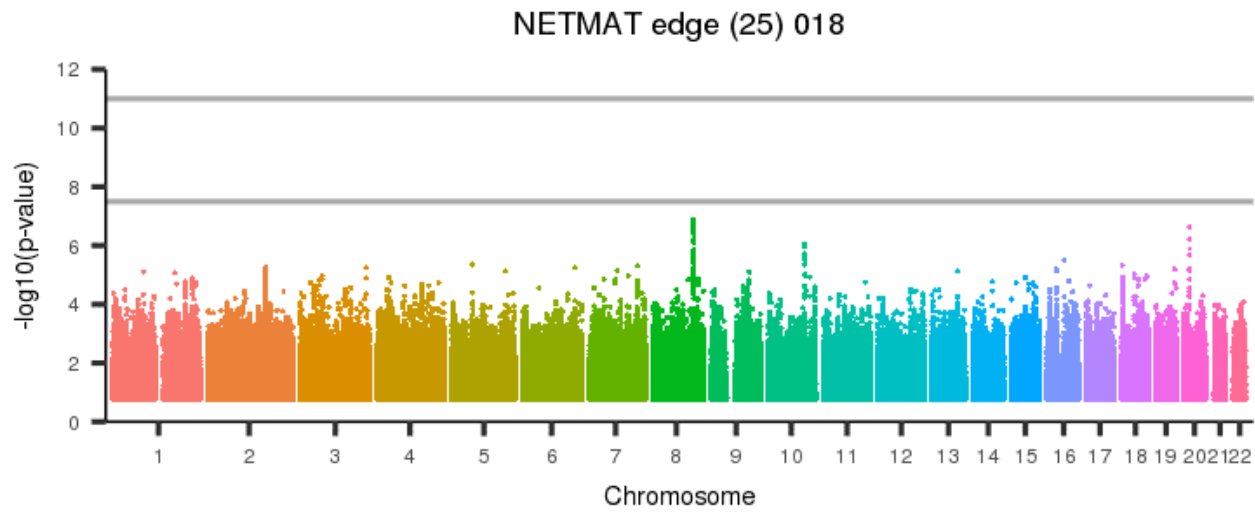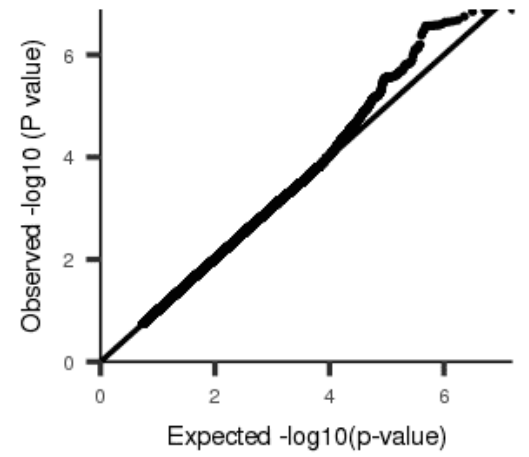

[back to list of plots](#)

Figure 965: NETMAT edge (25) 019

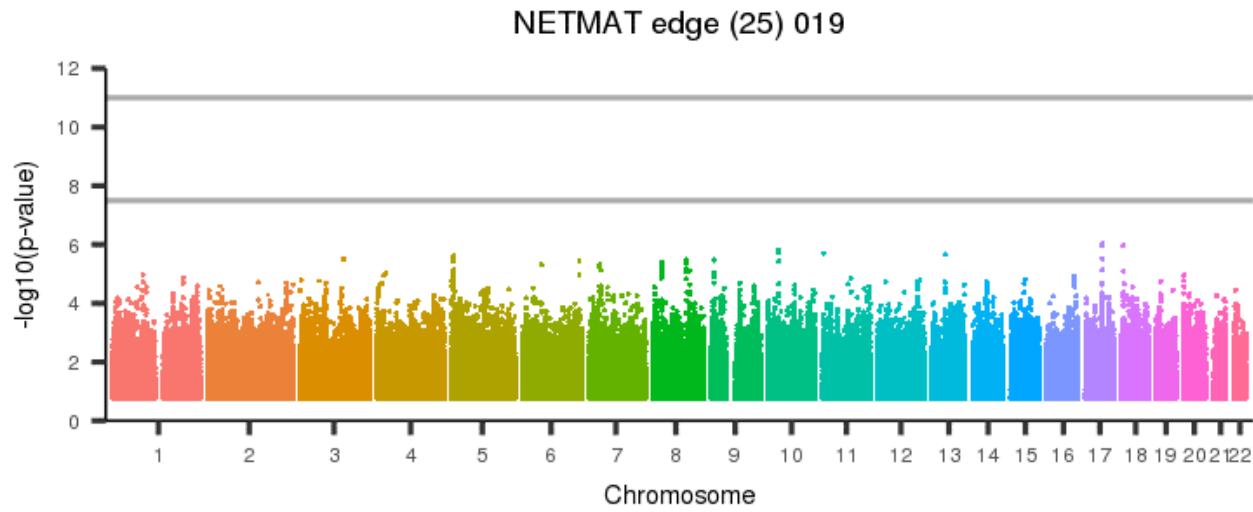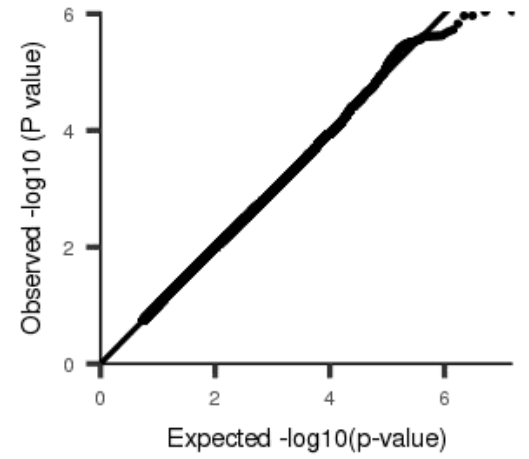

[back to list of plots](#)



Figure 966: NETMAT edge (25) 020

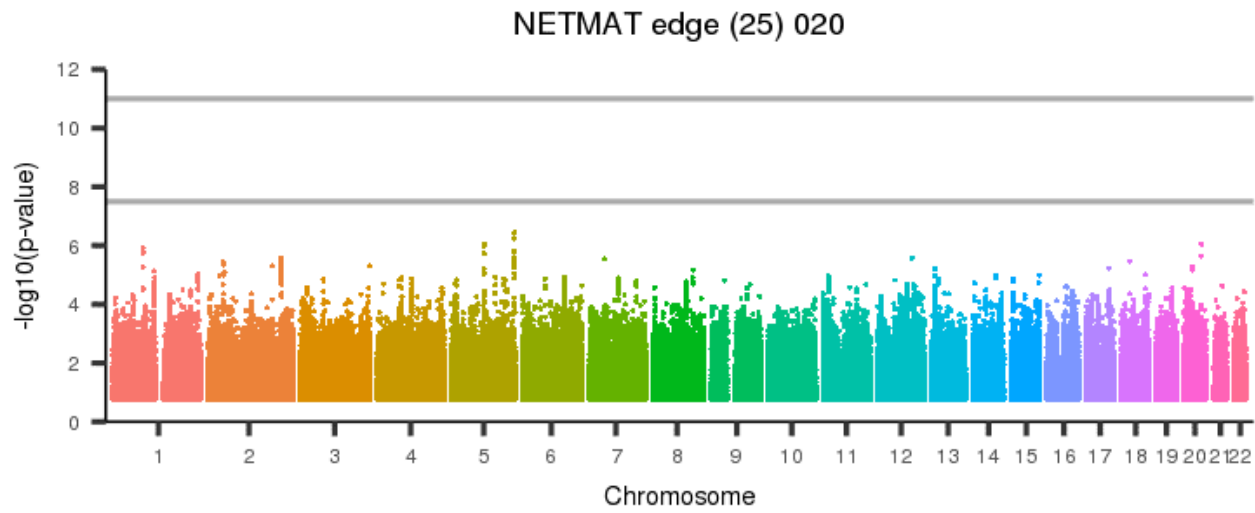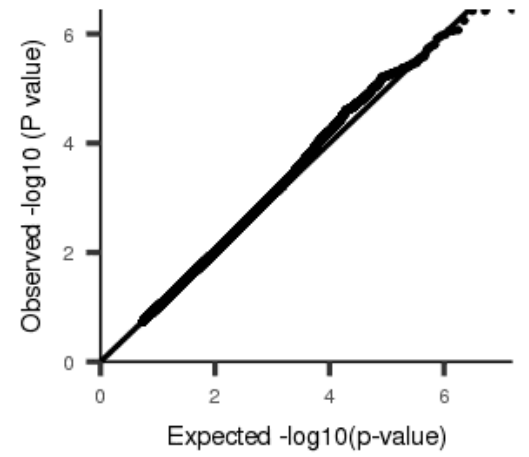

[back to list of plots](#)

Figure 967: NETMAT edge (25) 021

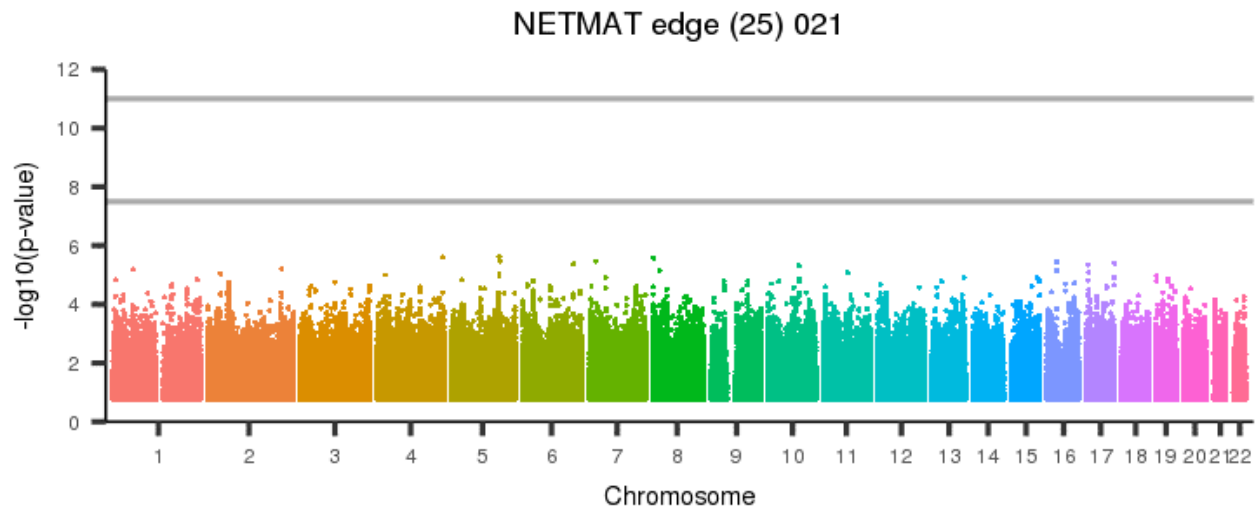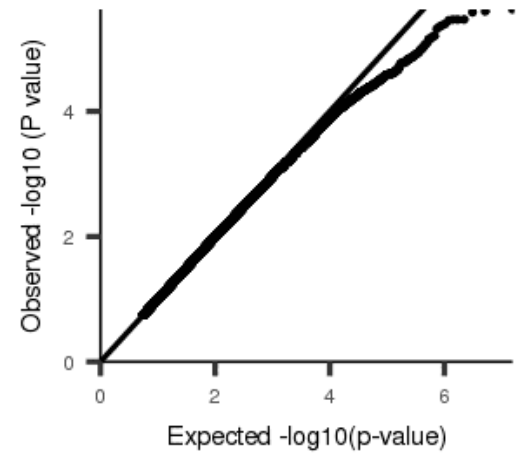

[back to list of plots](#)

Figure 968: NETMAT edge (25) 022

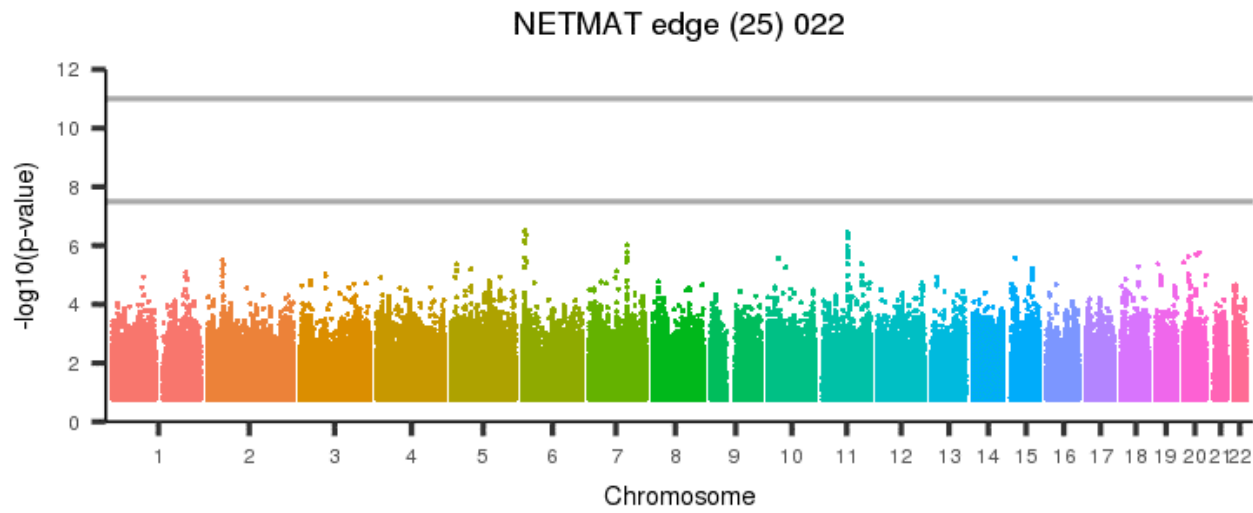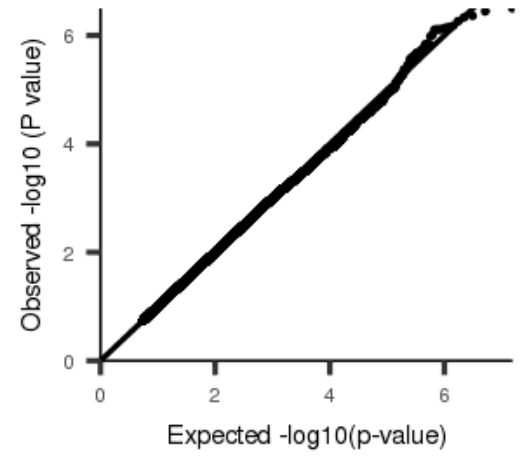

[back to list of plots](#)

Figure 969: NETMAT edge (25) 023

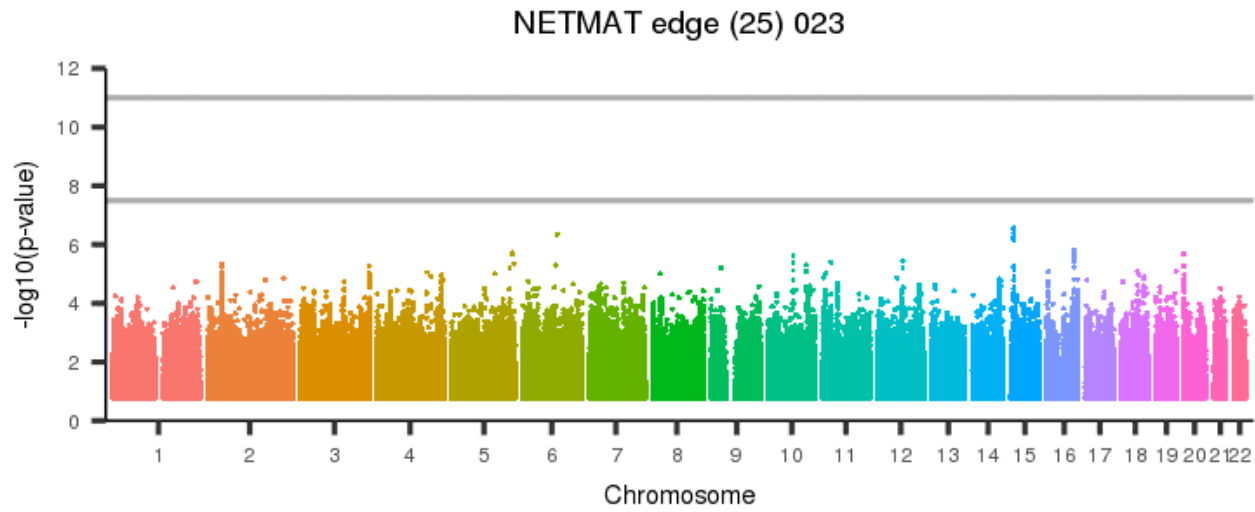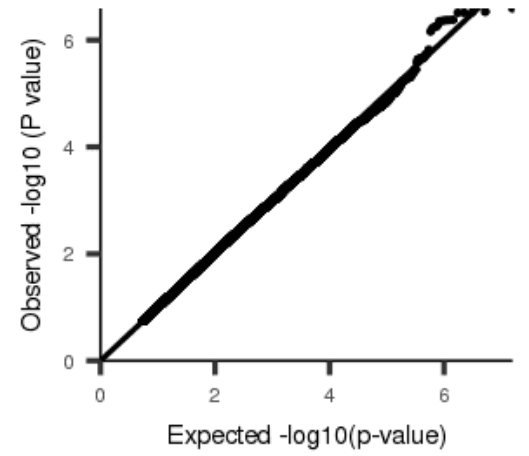

[back to list of plots](#)

Figure 970: NETMAT edge (25) 024

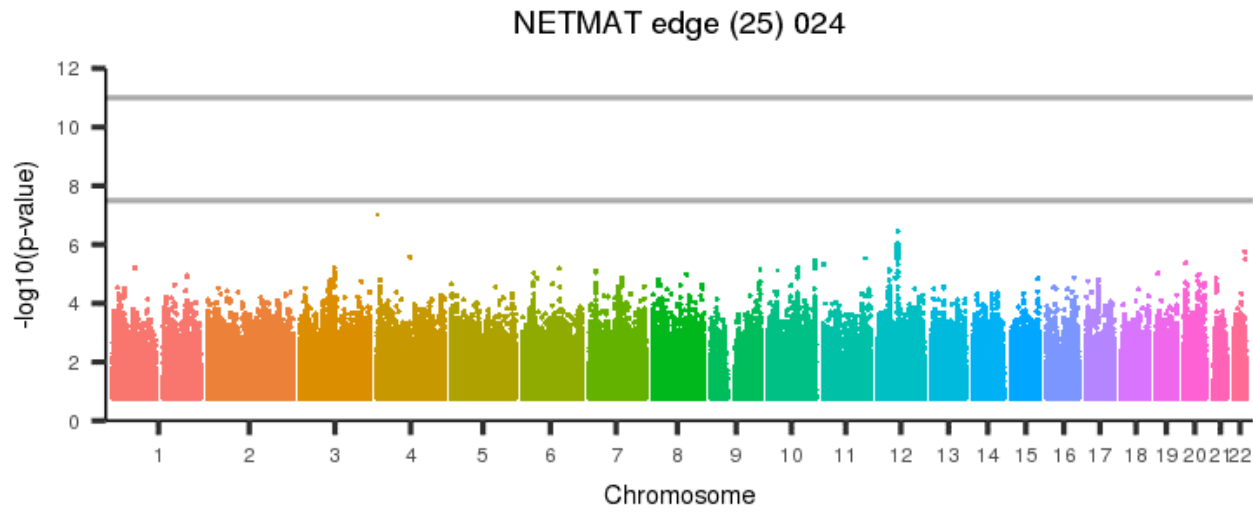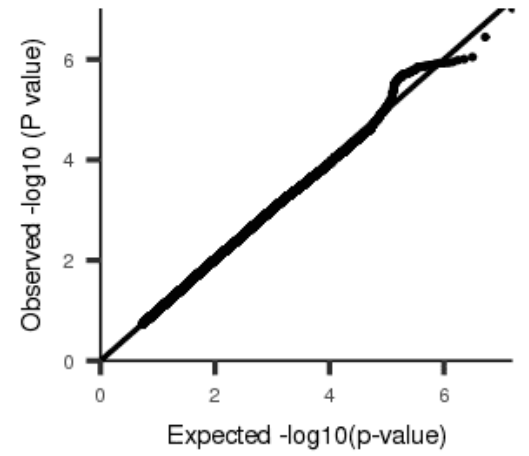

[back to list of plots](#)

Figure 971: NETMAT edge (25) 025

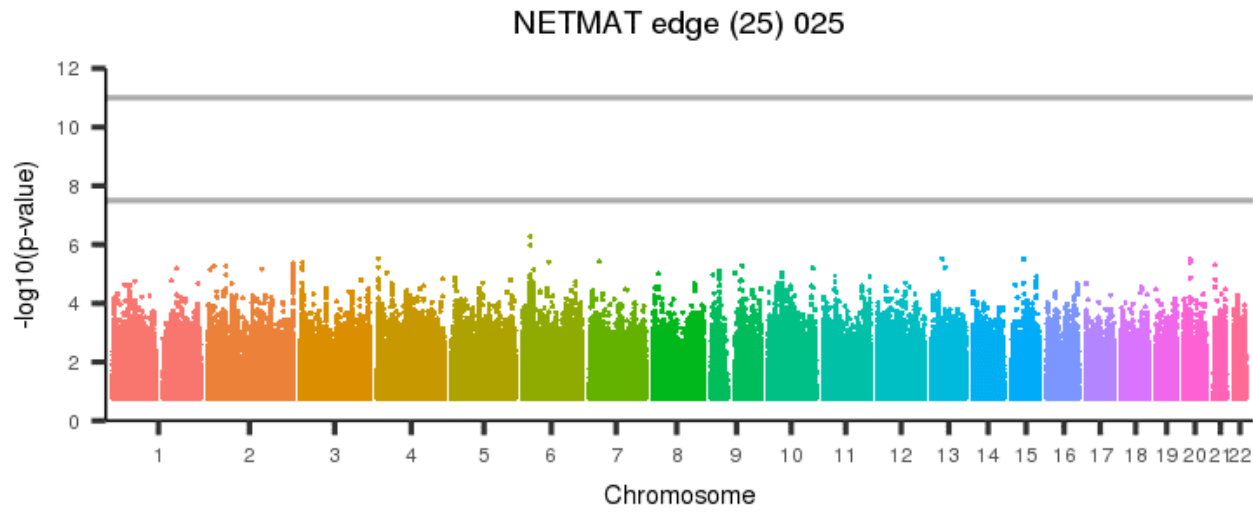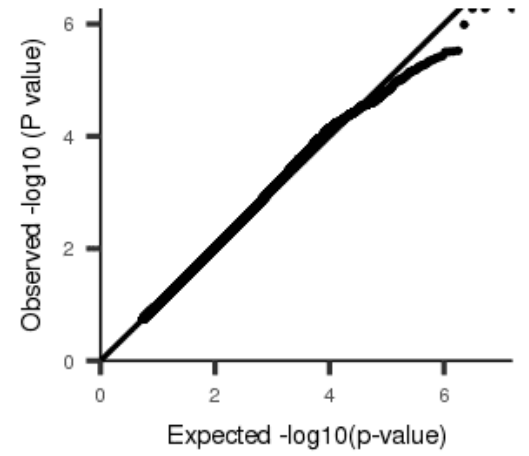

[back to list of plots](#)

Figure 972: NETMAT edge (25) 026

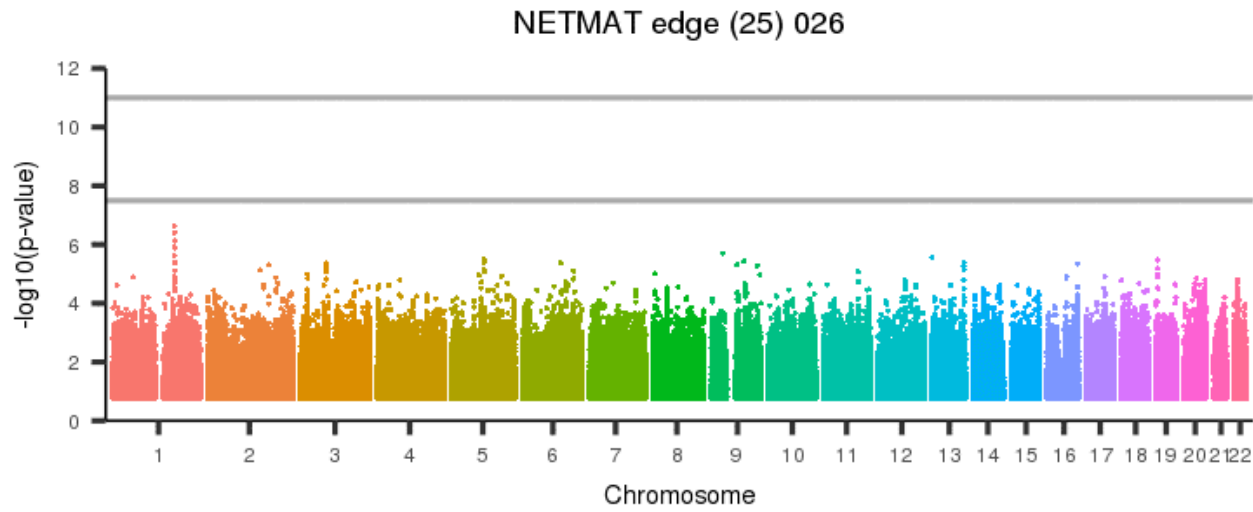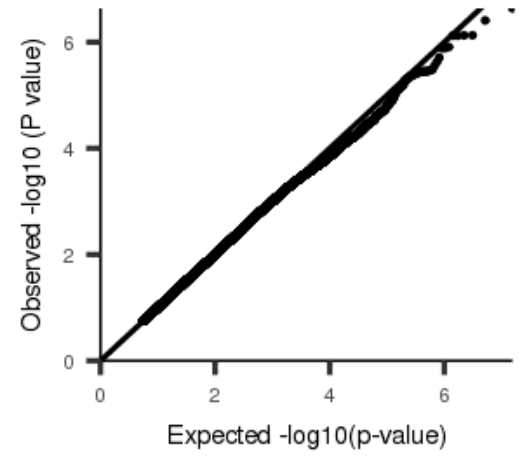

[back to list of plots](#)

Figure 973: NETMAT edge (25) 027

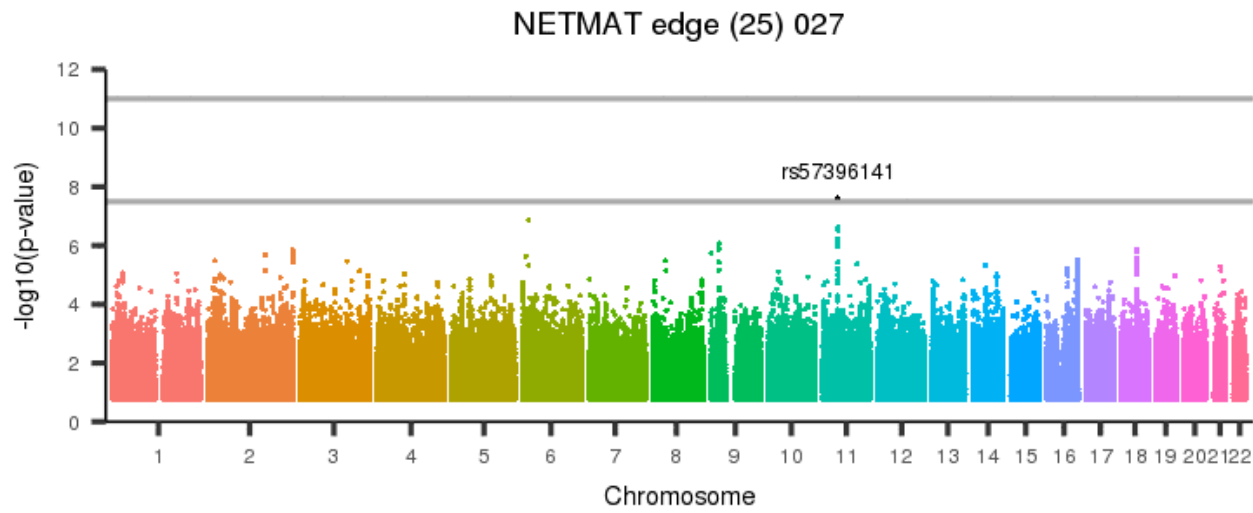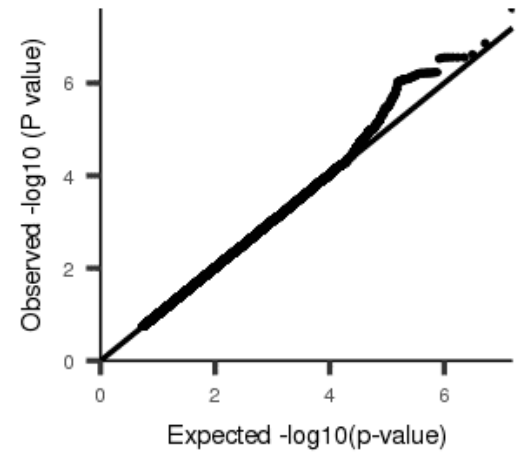

[back to list of plots](#)



Figure 974: NETMAT edge (25) 028

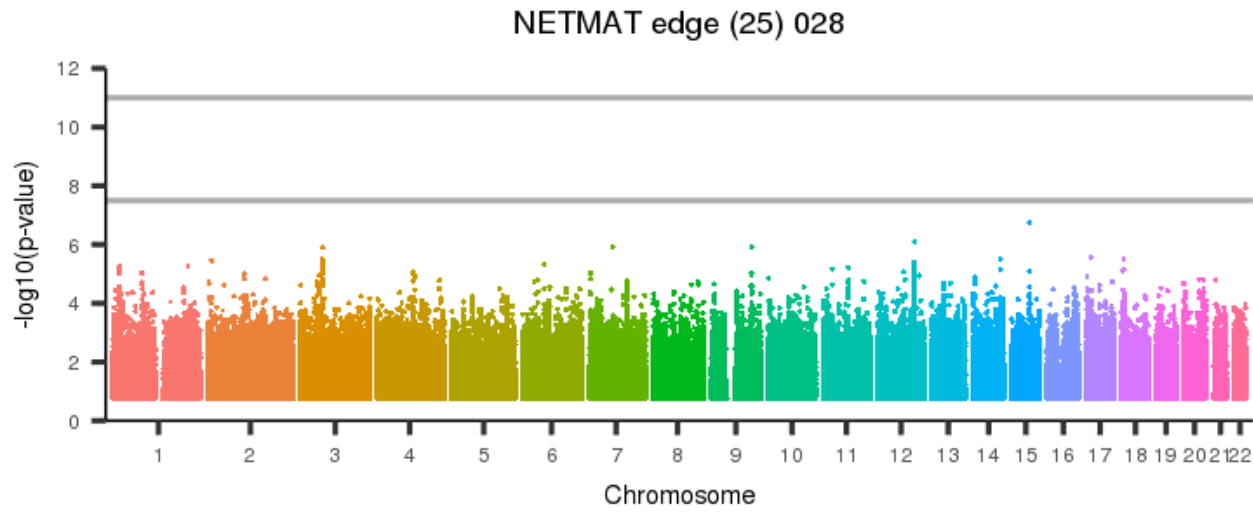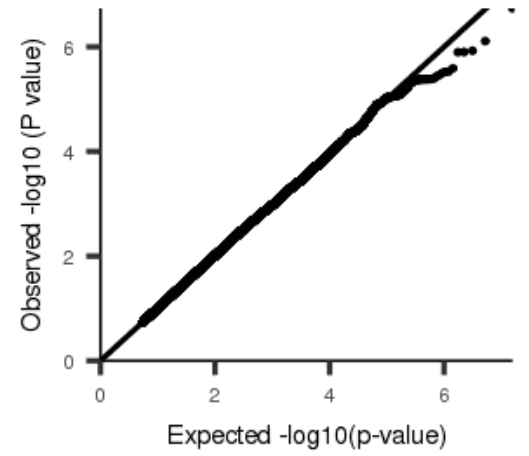

[back to list of plots](#)

Figure 975: NETMAT edge (25) 029

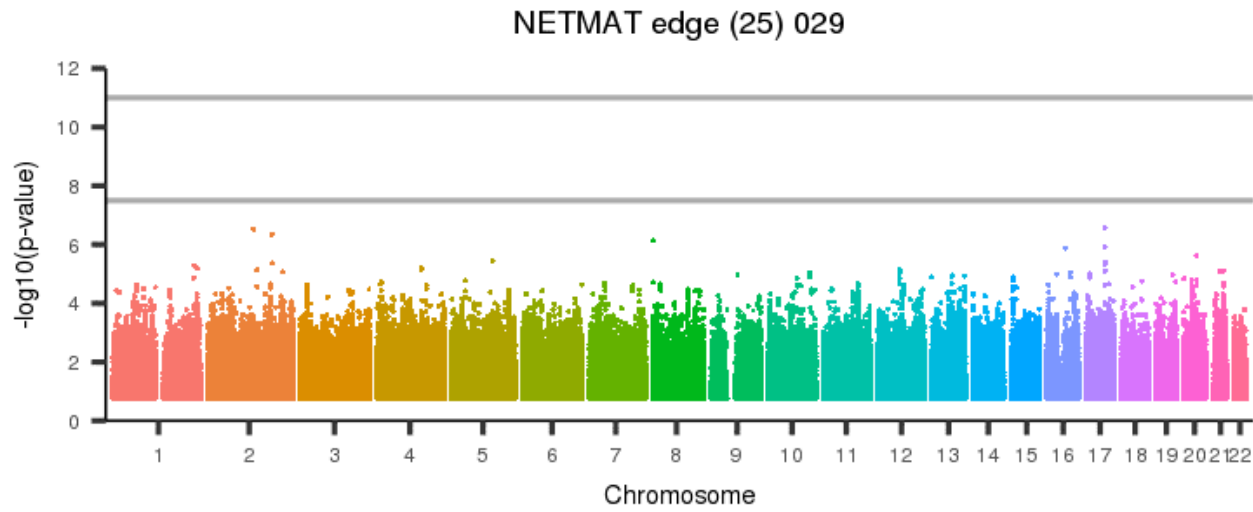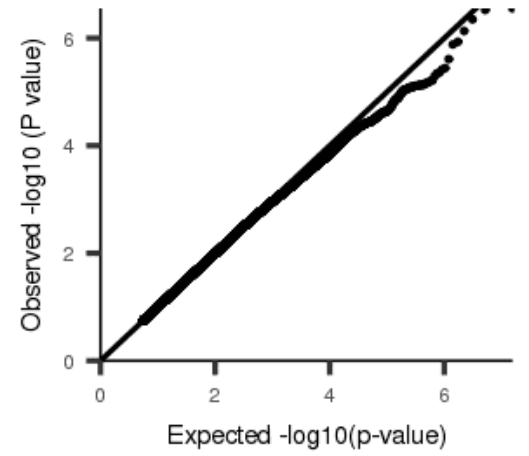

[back to list of plots](#)

Figure 976: NETMAT edge (25) 030

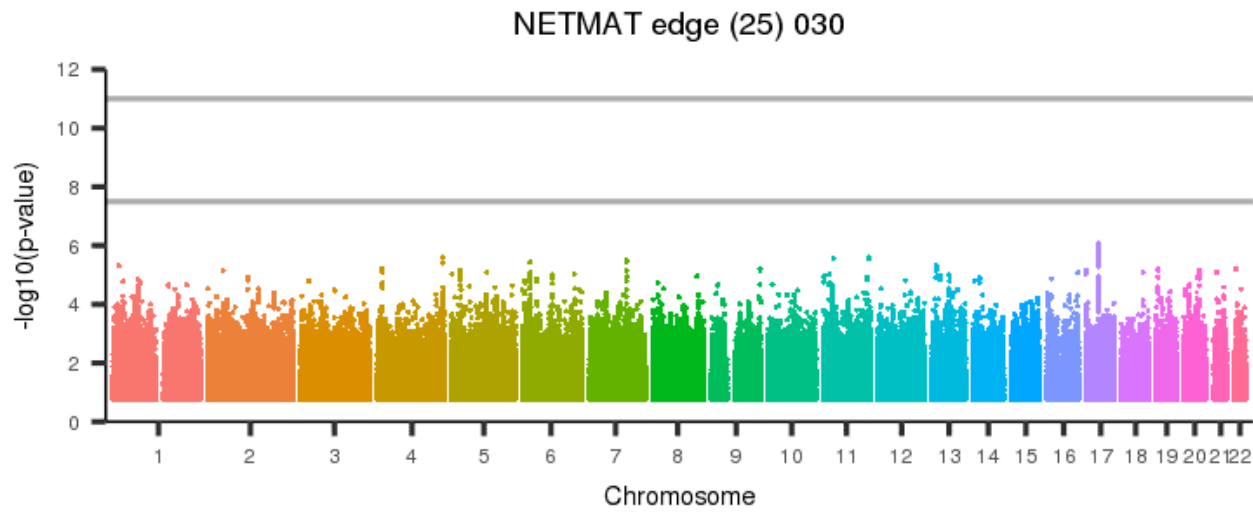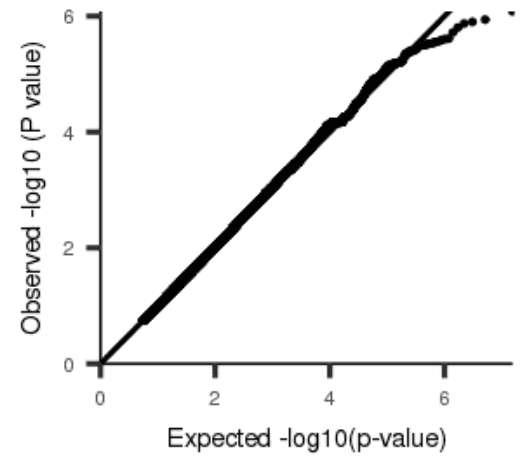

[back to list of plots](#)

Figure 977: NETMAT edge (25) 031

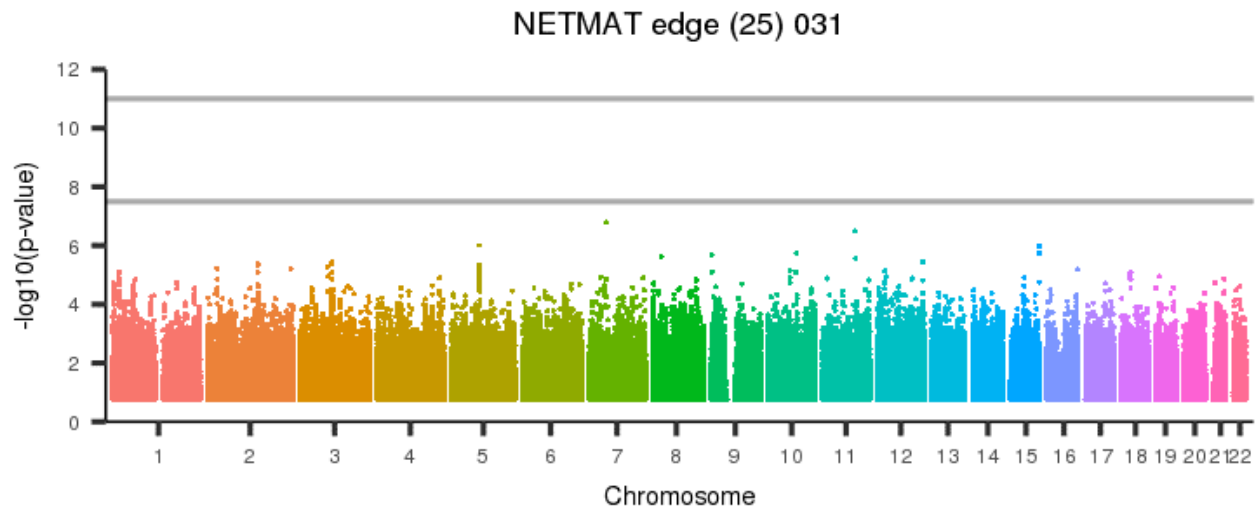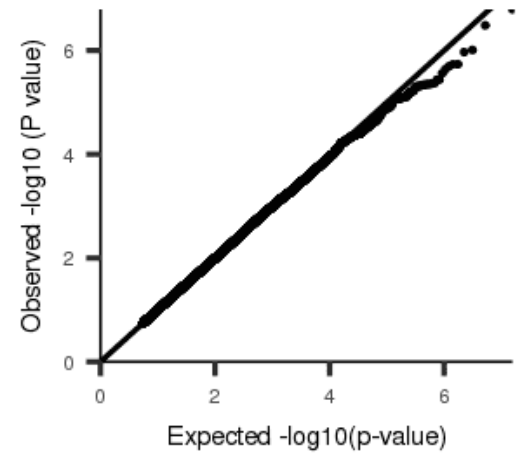

[back to list of plots](#)

Figure 978: NETMAT edge (25) 032

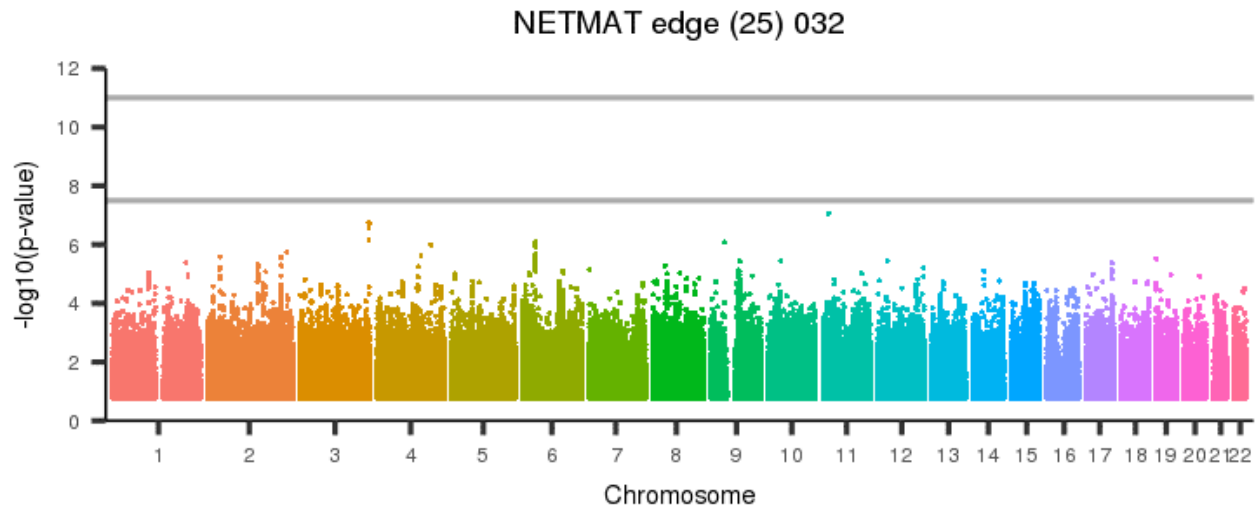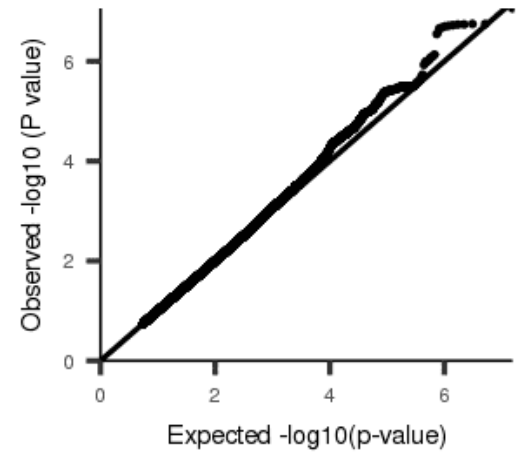

[back to list of plots](#)

Figure 979: NETMAT edge (25) 033

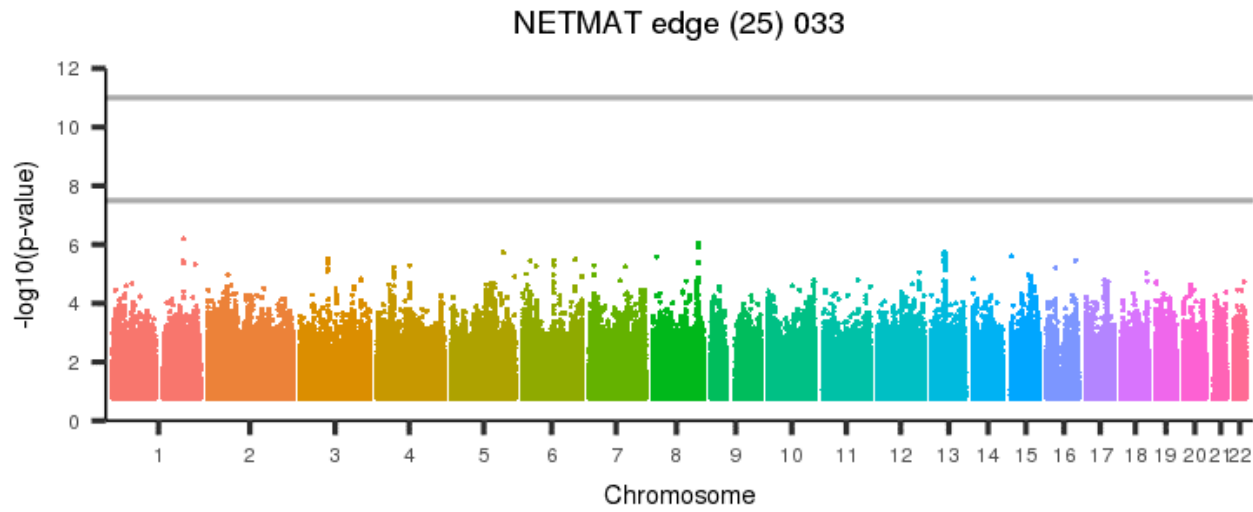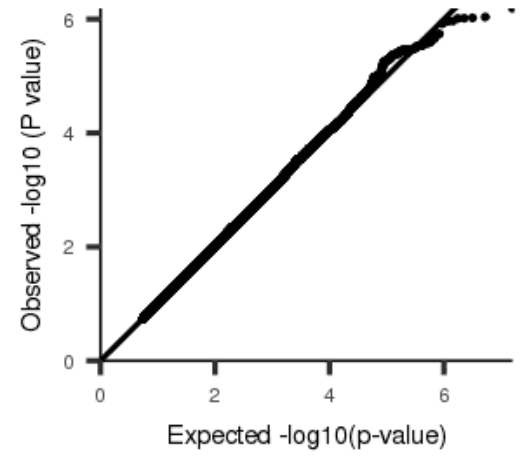

[back to list of plots](#)

Figure 980: NETMAT edge (25) 034

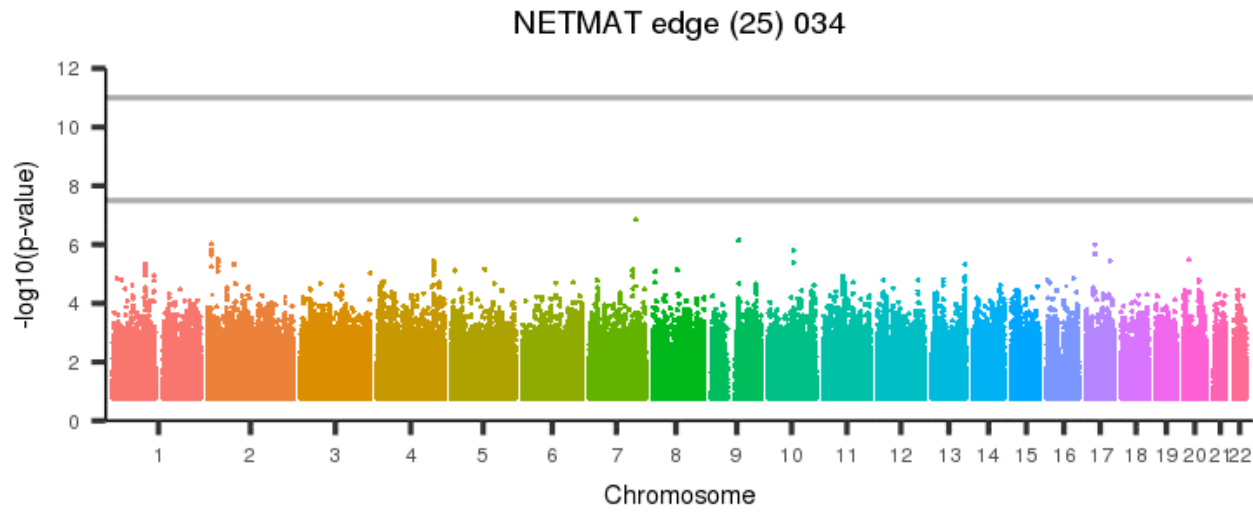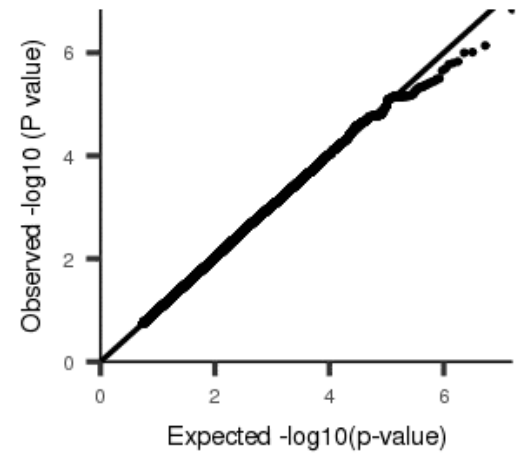

[back to list of plots](#)

Figure 981: NETMAT edge (25) 035

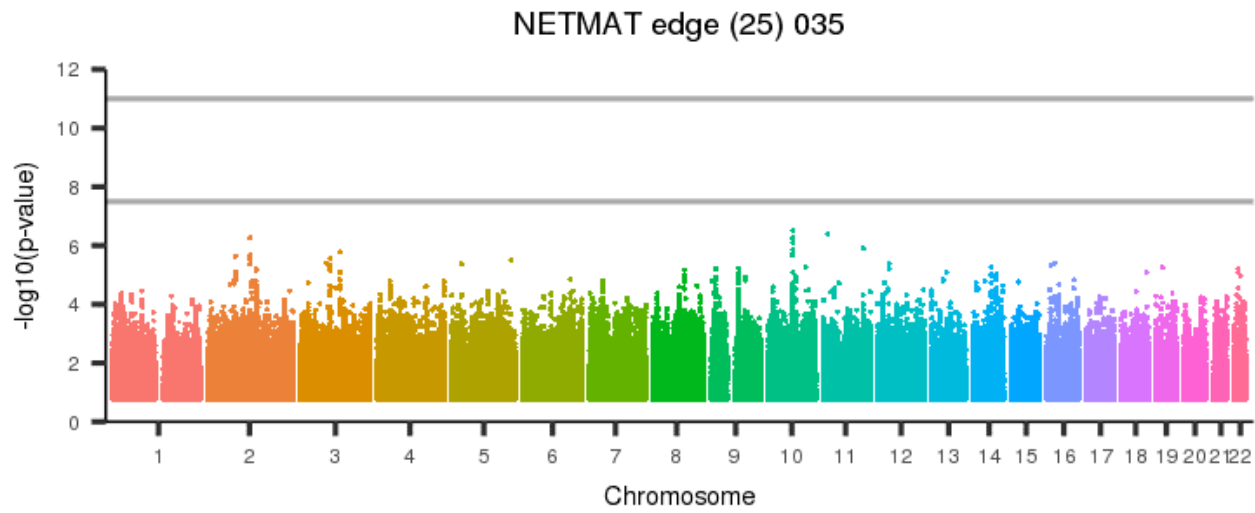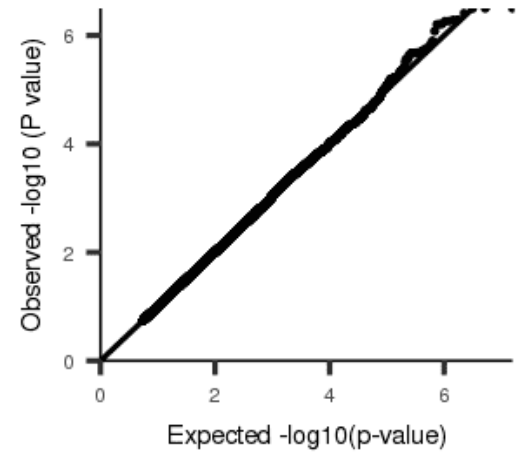

[back to list of plots](#)



Figure 982: NETMAT edge (25) 036

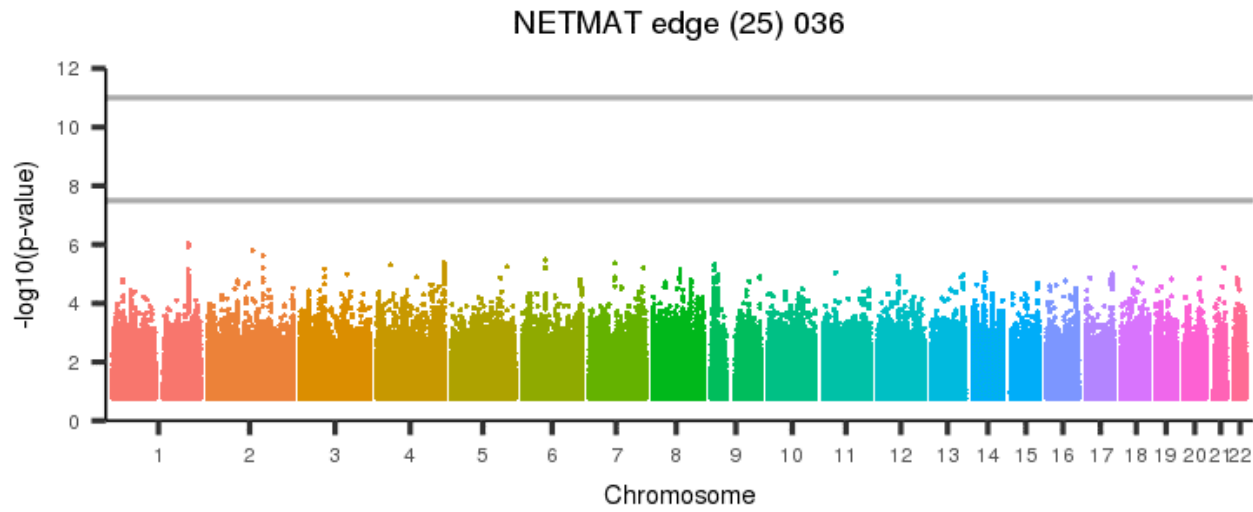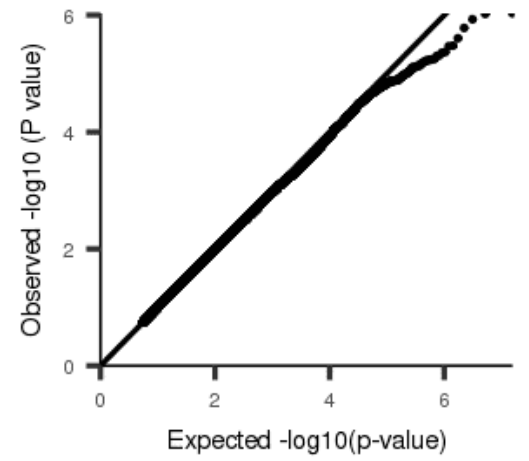

[back to list of plots](#)

Figure 983: NETMAT edge (25) 037

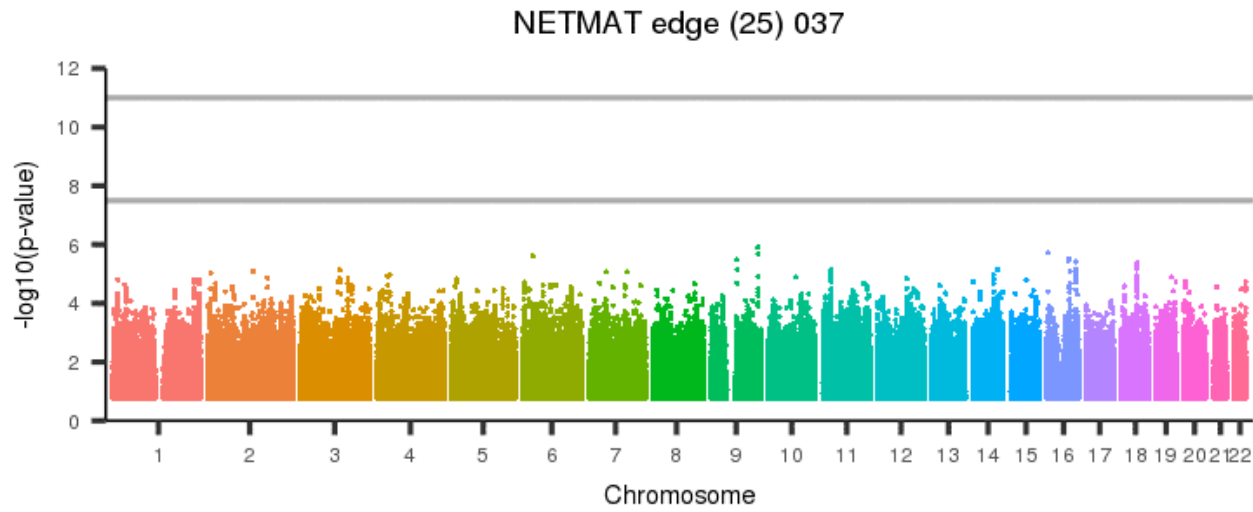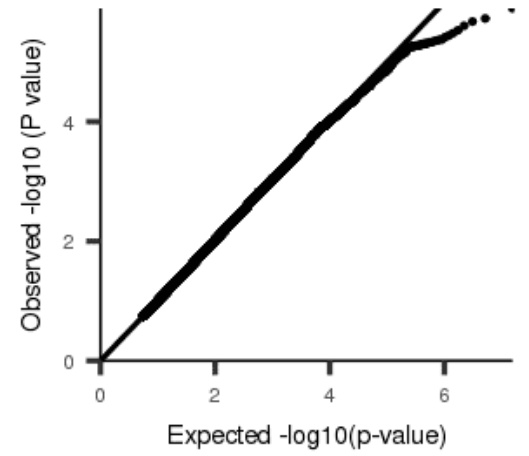

[back to list of plots](#)

Figure 984: NETMAT edge (25) 038

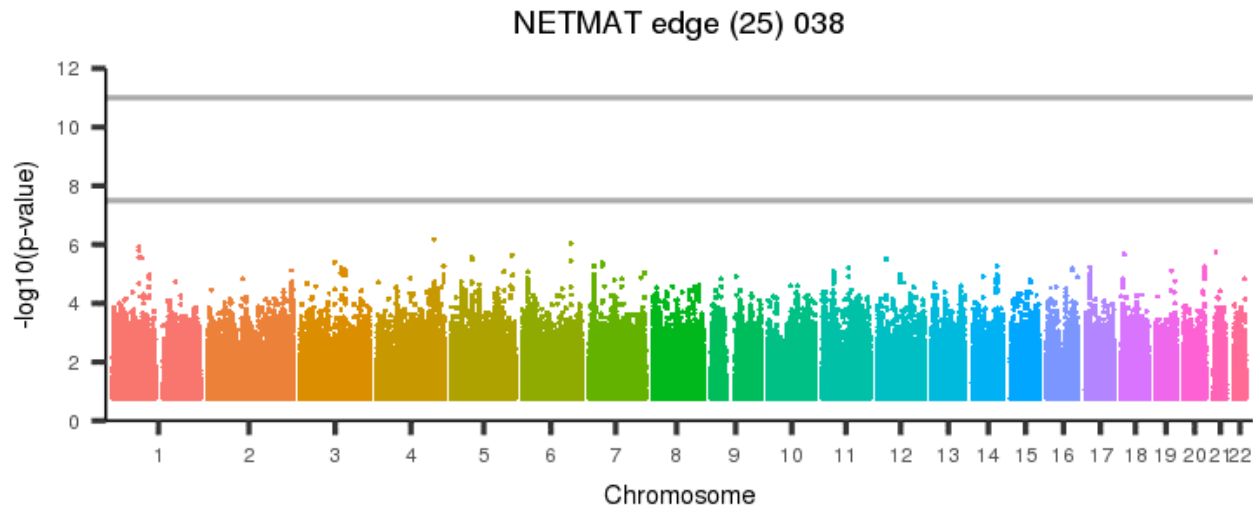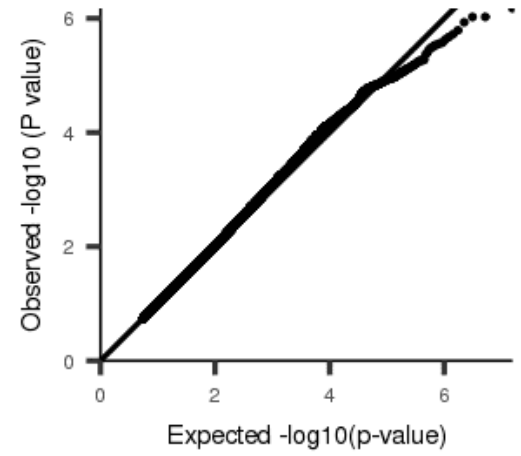

[back to list of plots](#)

Figure 985: NETMAT edge (25) 039

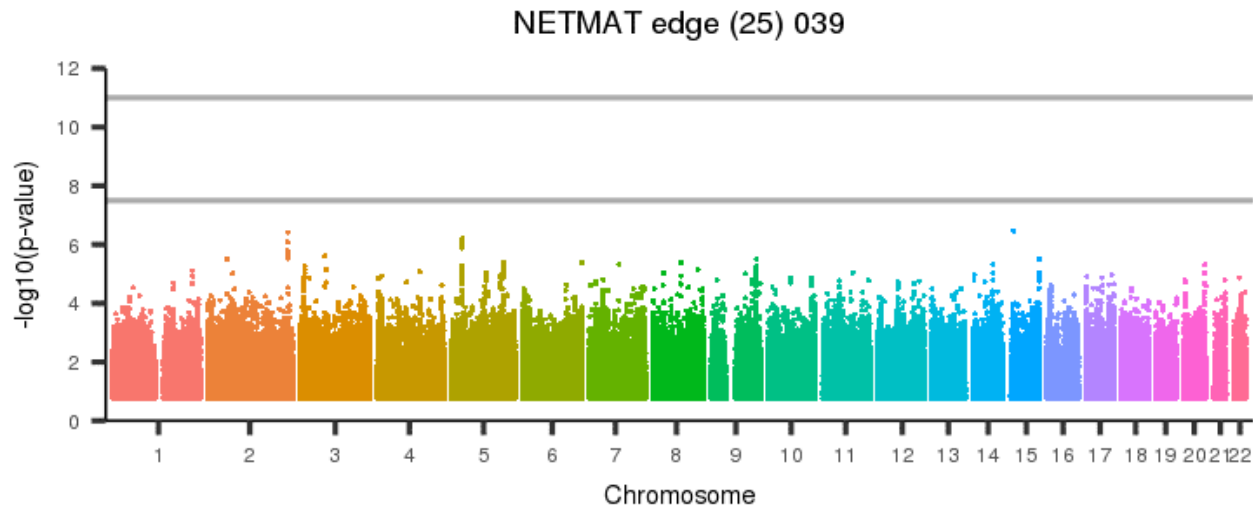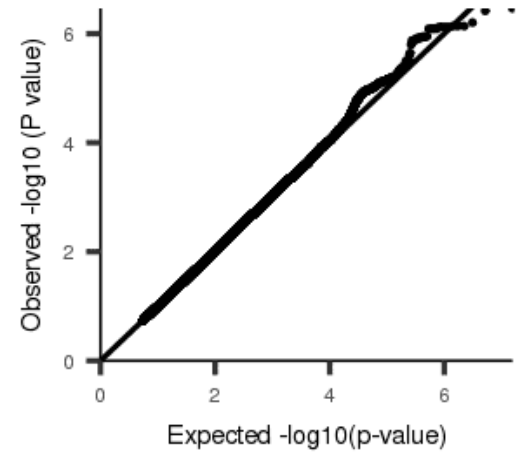

[back to list of plots](#)

Figure 986: NETMAT edge (25) 040

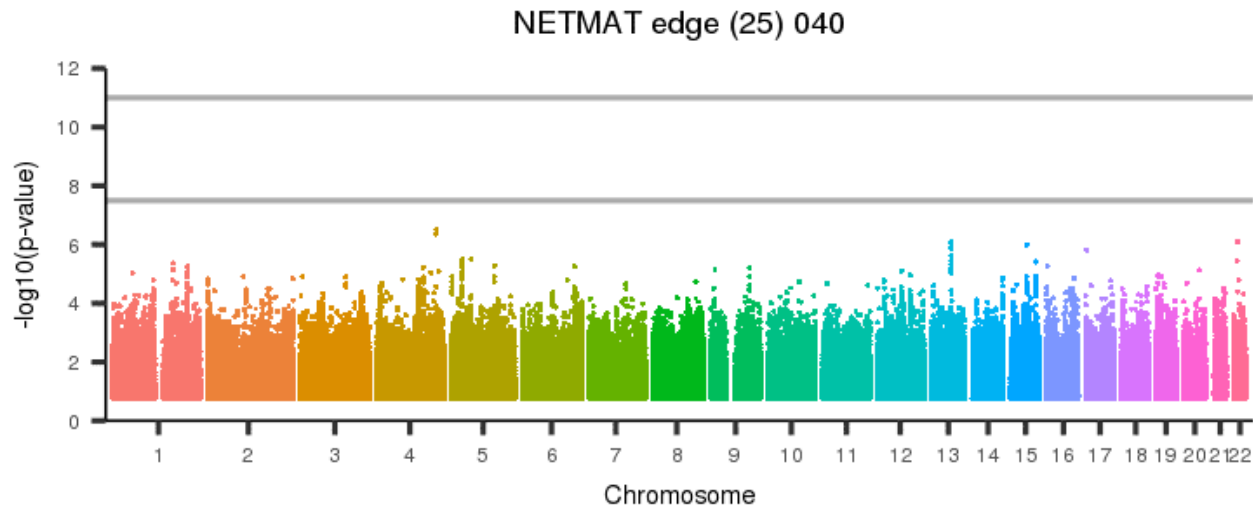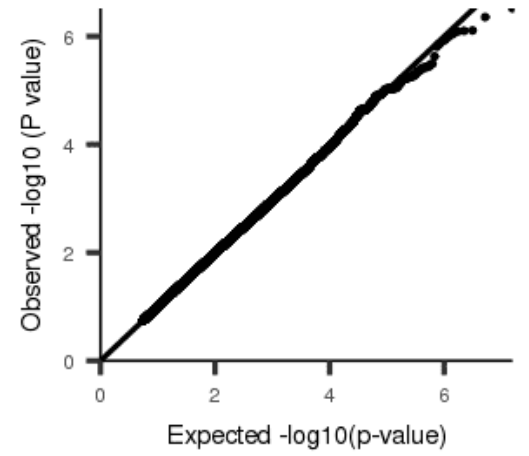

[back to list of plots](#)

Figure 987: NETMAT edge (25) 041

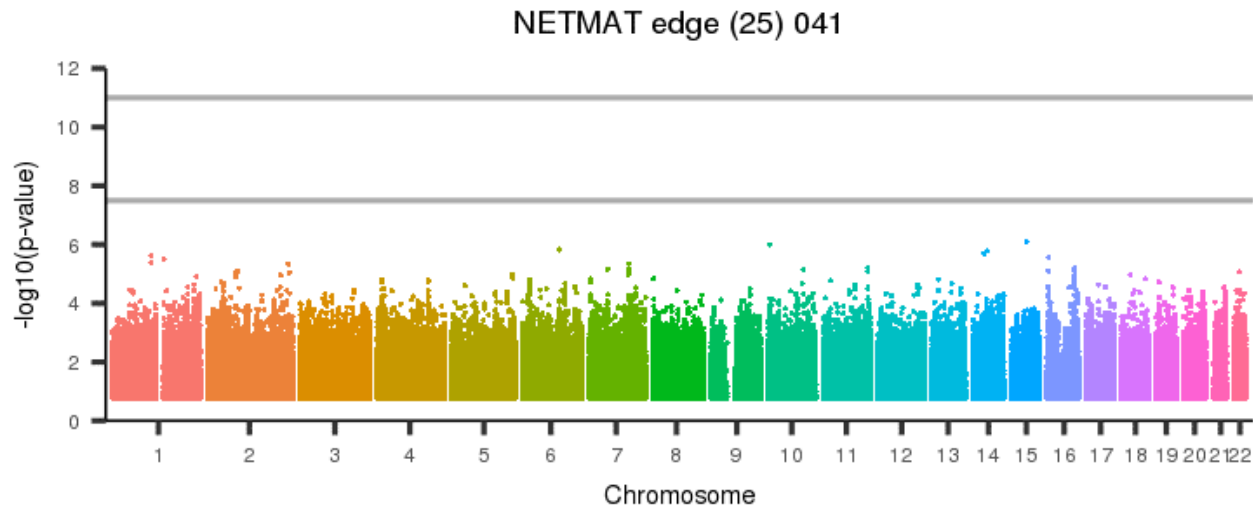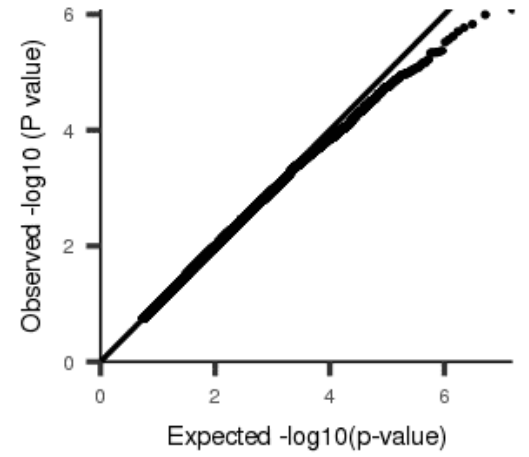

[back to list of plots](#)

Figure 988: NETMAT edge (25) 042

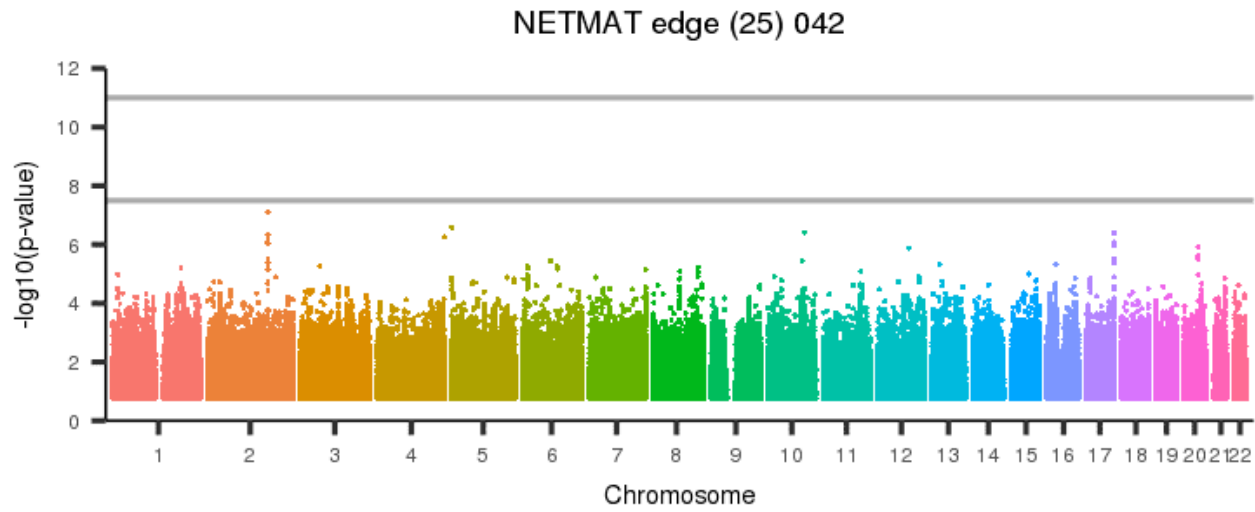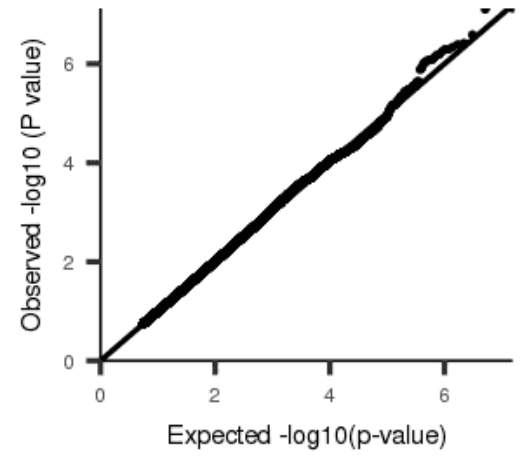

[back to list of plots](#)

Figure 989: NETMAT edge (25) 043

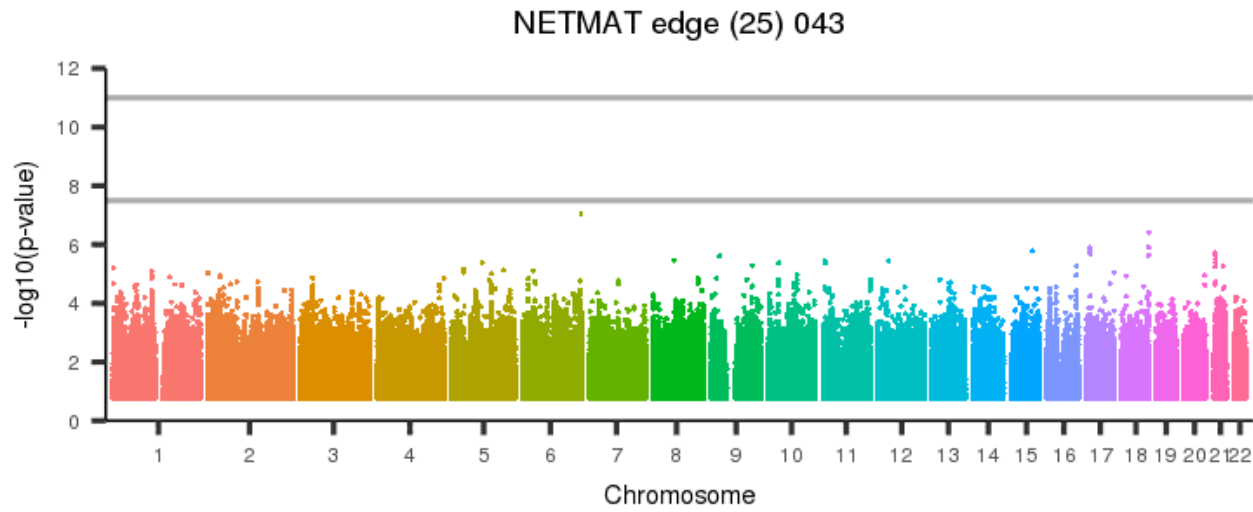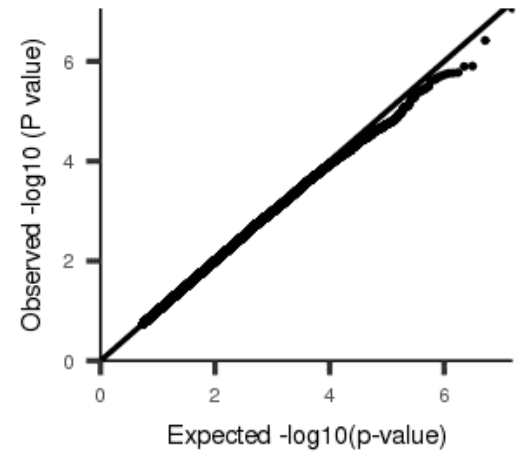

[back to list of plots](#)



Figure 990: NETMAT edge (25) 044

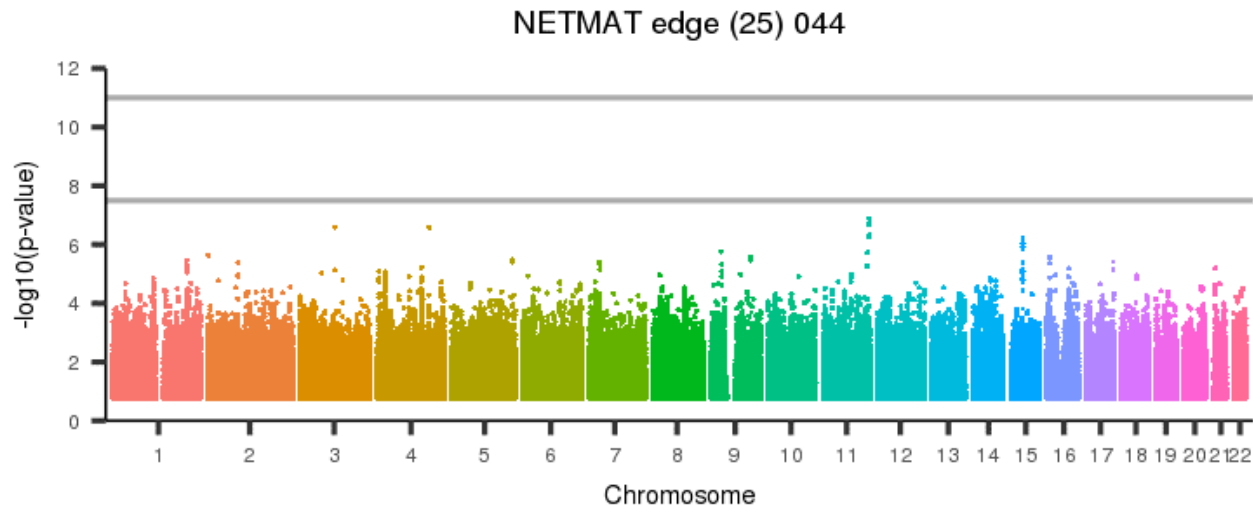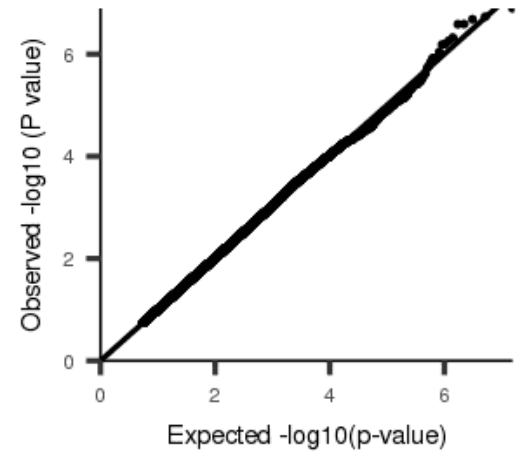

[back to list of plots](#)

Figure 991: NETMAT edge (25) 045

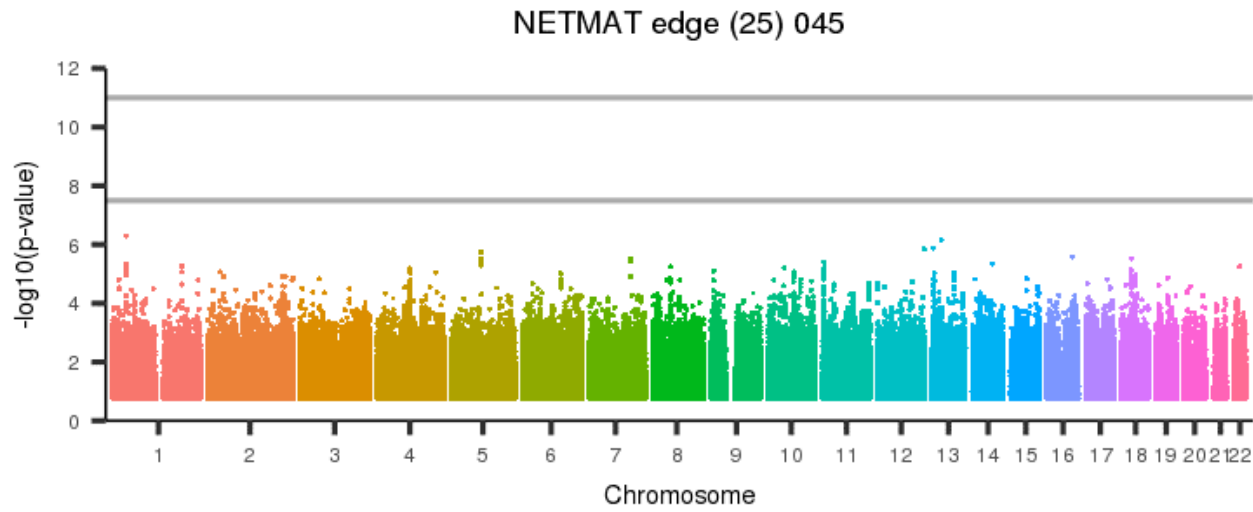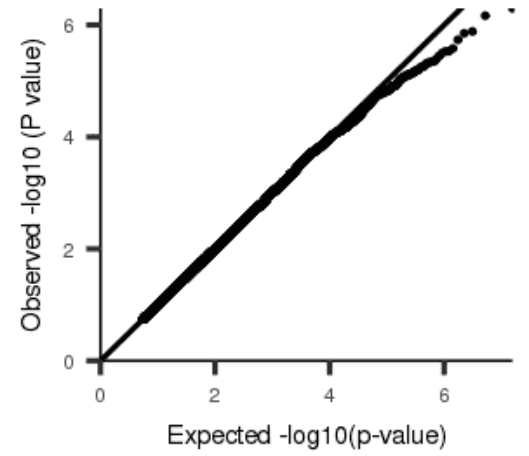

[back to list of plots](#)

Figure 992: NETMAT edge (25) 046

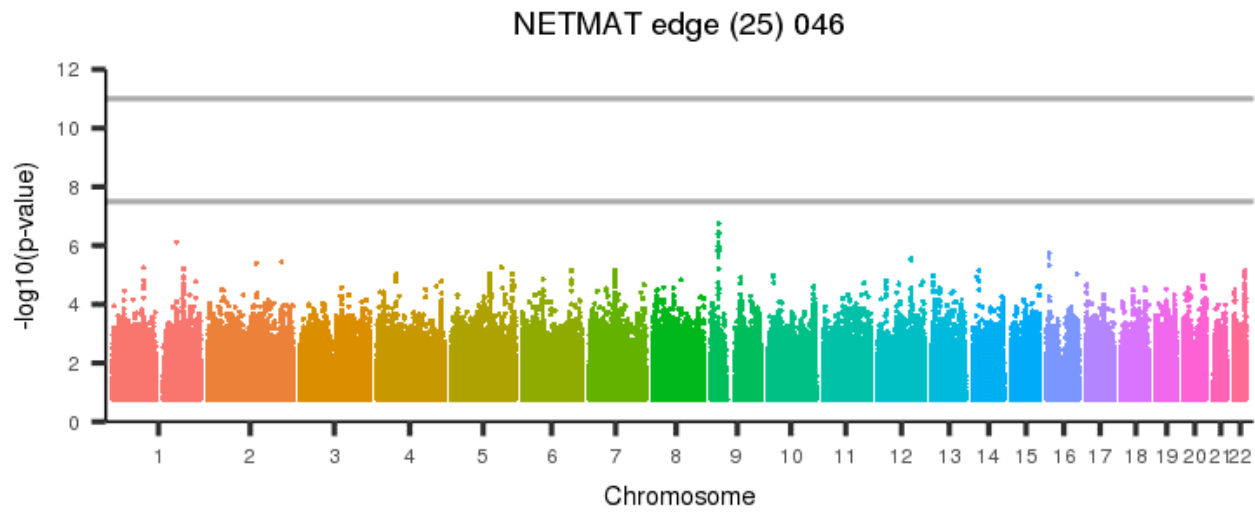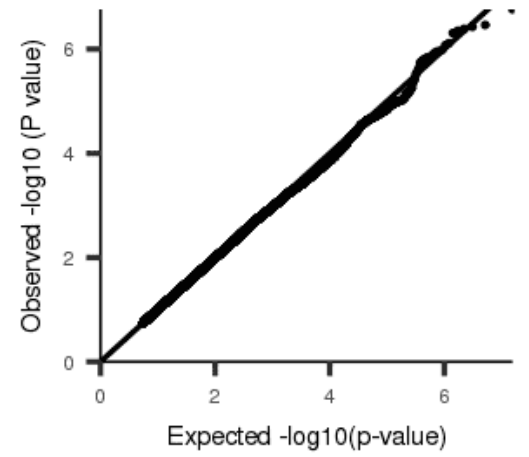

[back to list of plots](#)

Figure 993: NETMAT edge (25) 047

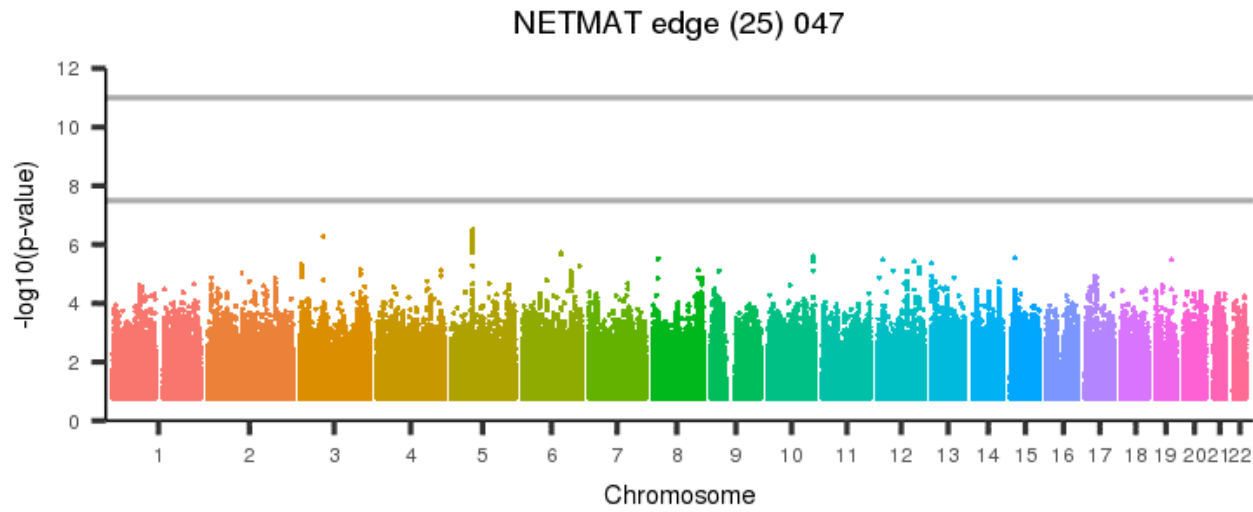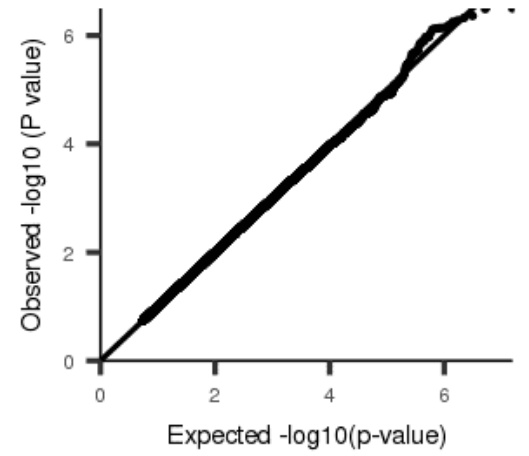

[back to list of plots](#)

Figure 994: NETMAT edge (25) 048

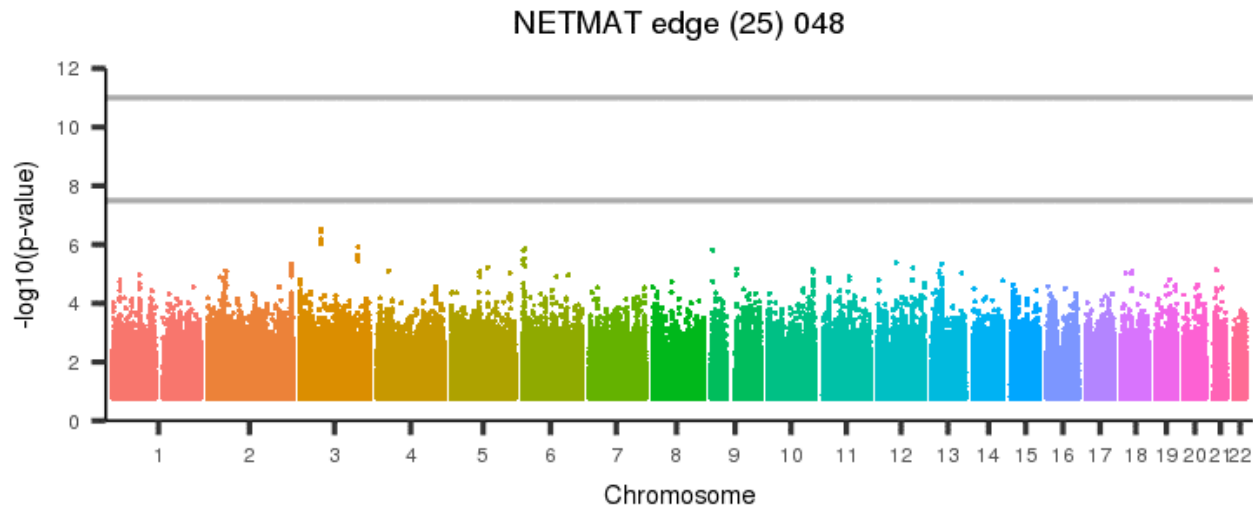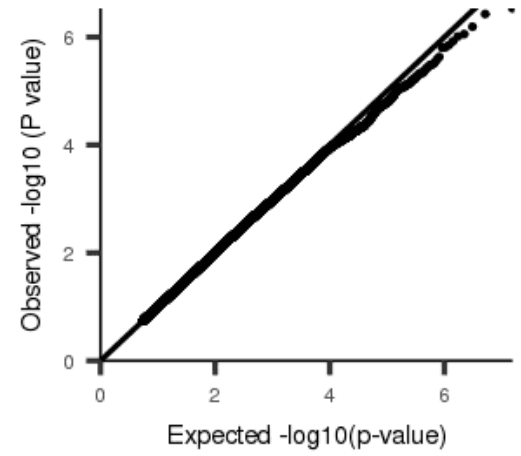

[back to list of plots](#)

Figure 995: NETMAT edge (25) 049

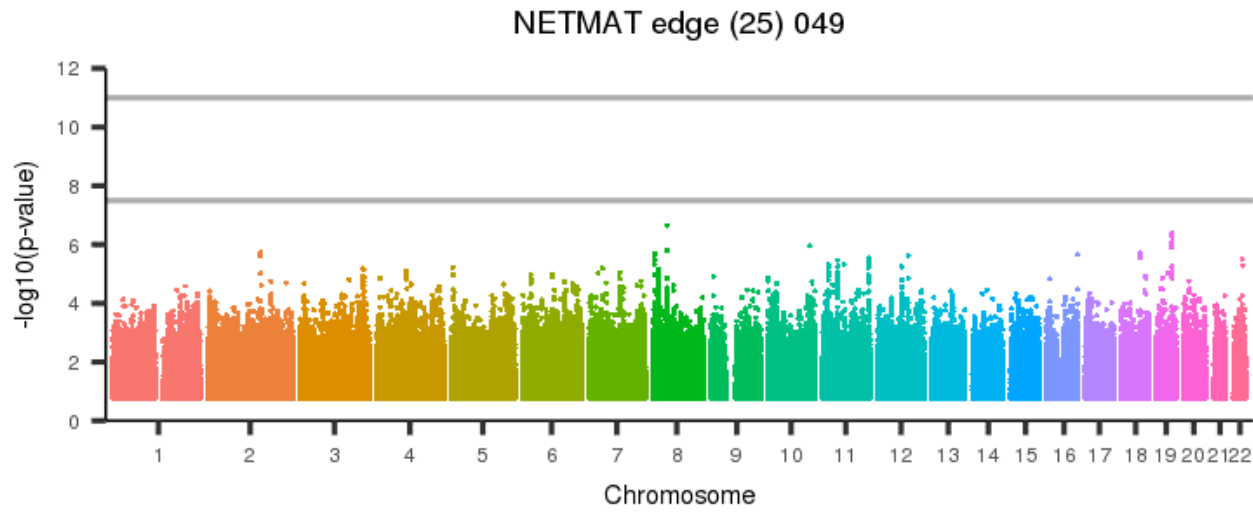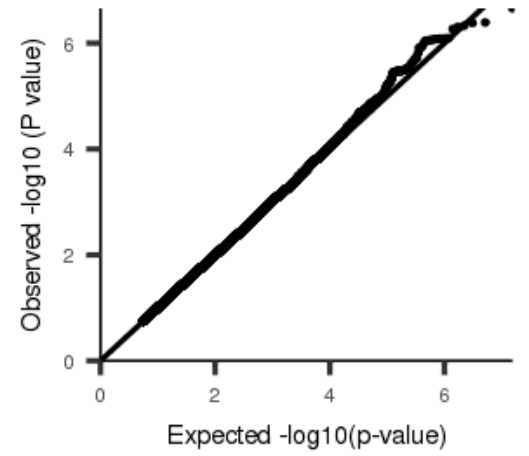

[back to list of plots](#)

Figure 996: NETMAT edge (25) 050

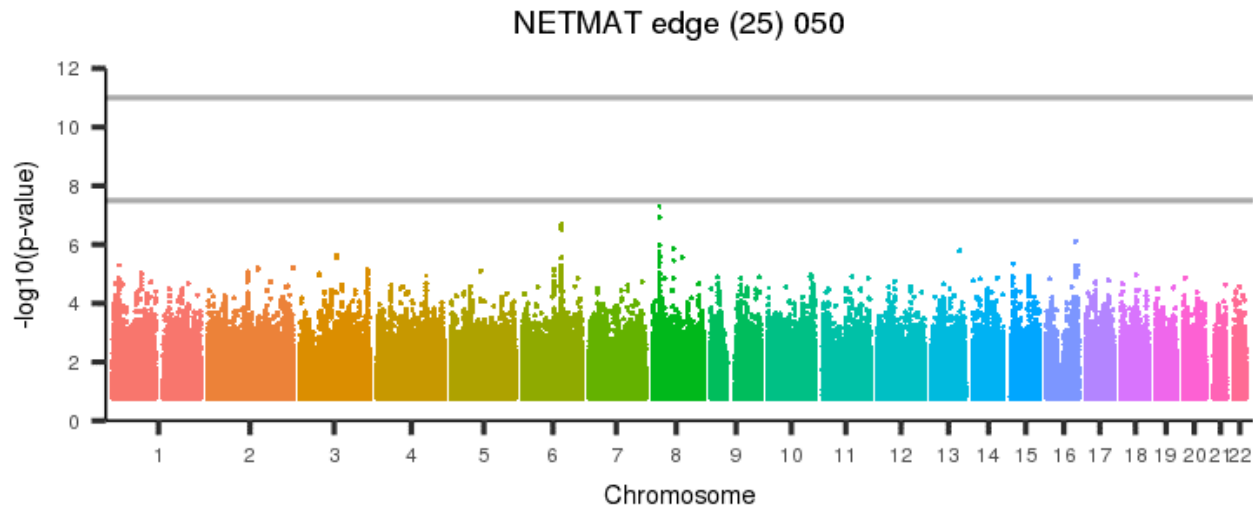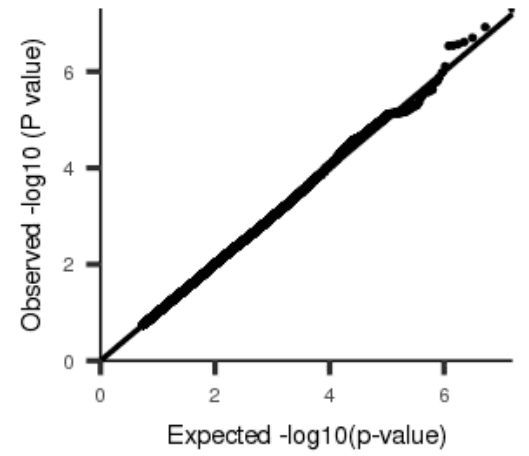

[back to list of plots](#)

Figure 997: NETMAT edge (25) 051

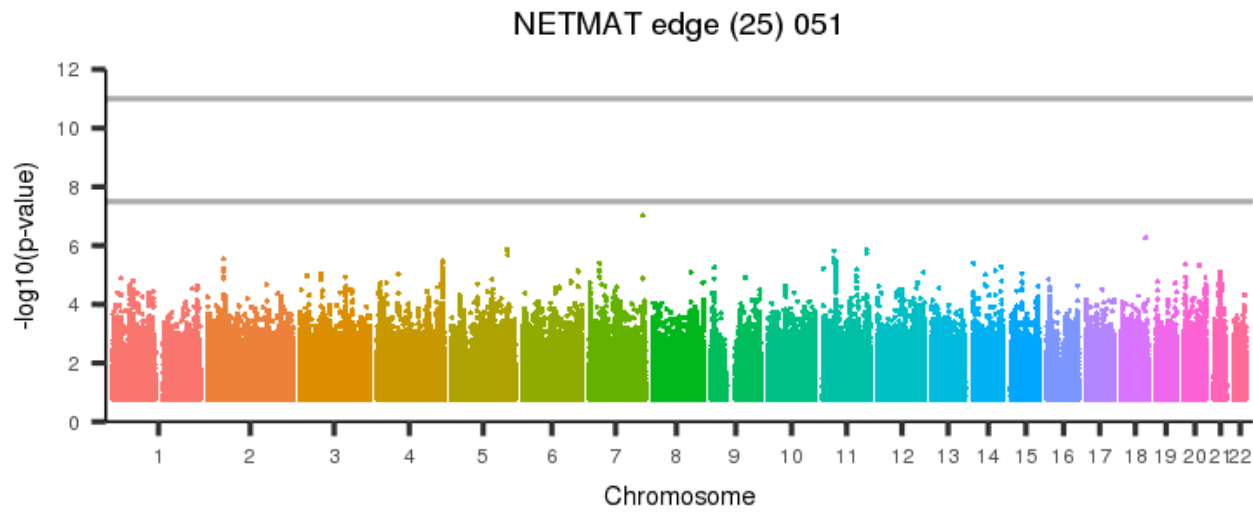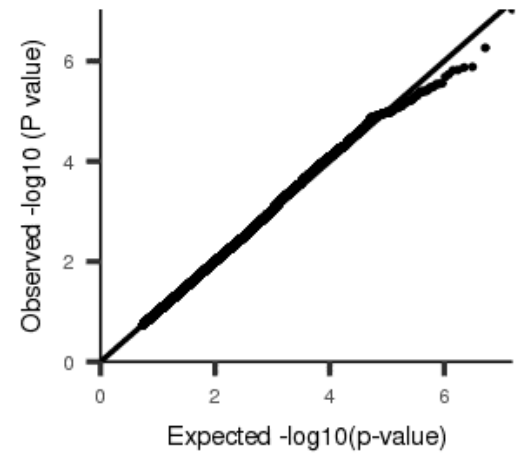

[back to list of plots](#)



Figure 998: NETMAT edge (25) 052

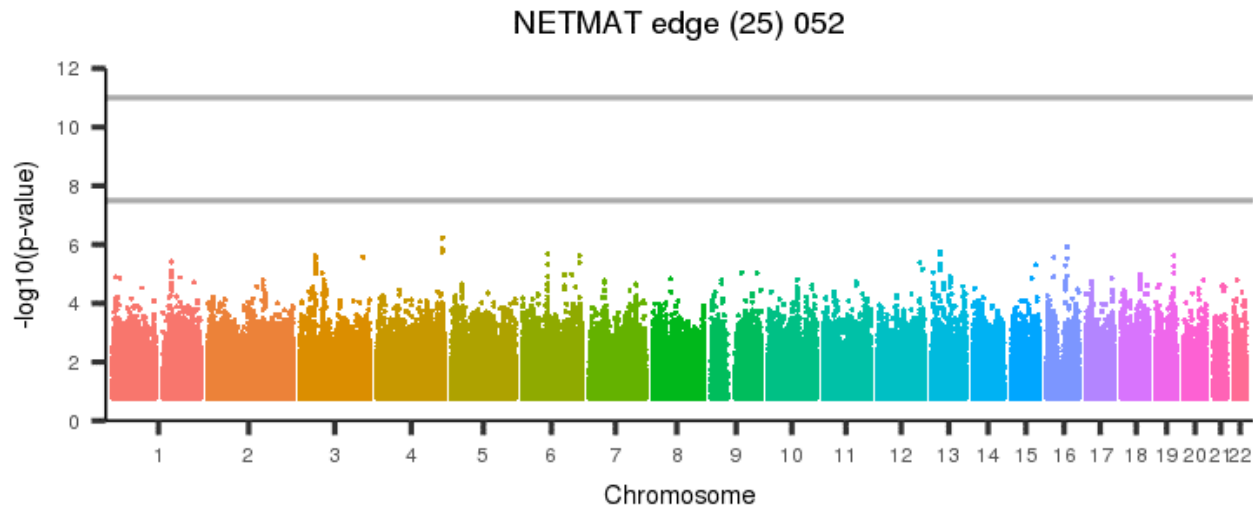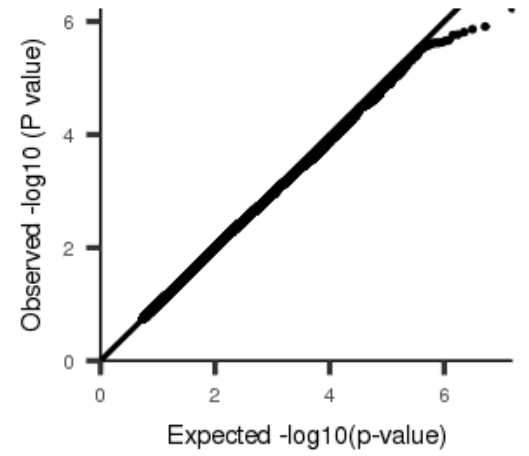

[back to list of plots](#)

Figure 999: NETMAT edge (25) 053

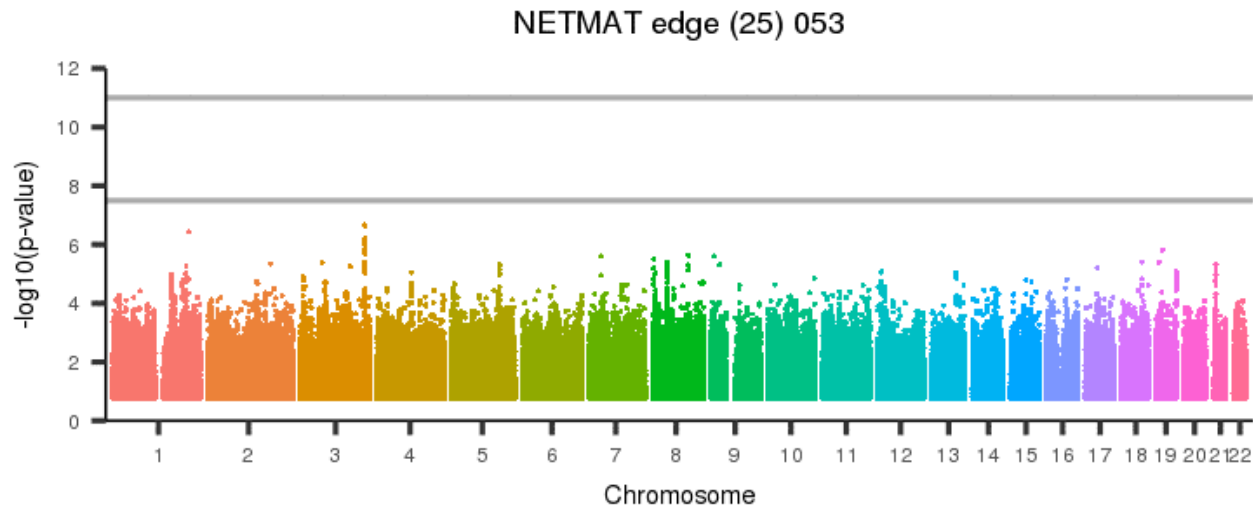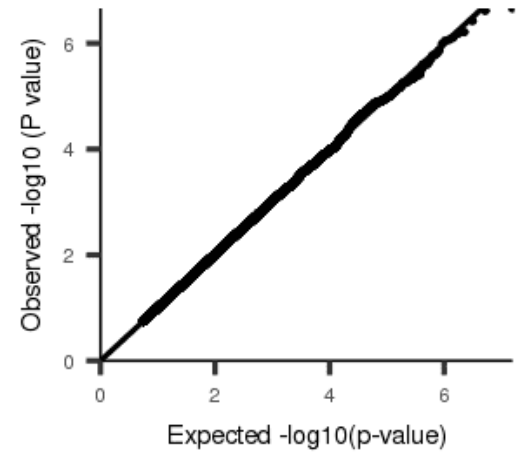

[back to list of plots](#)

Figure 1000: NETMAT edge (25) 054

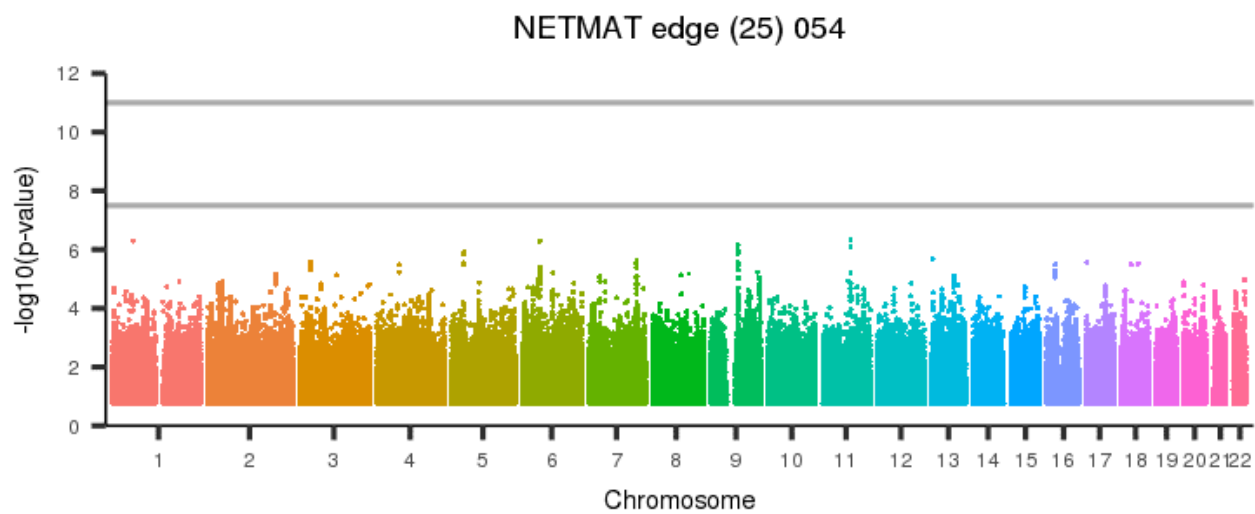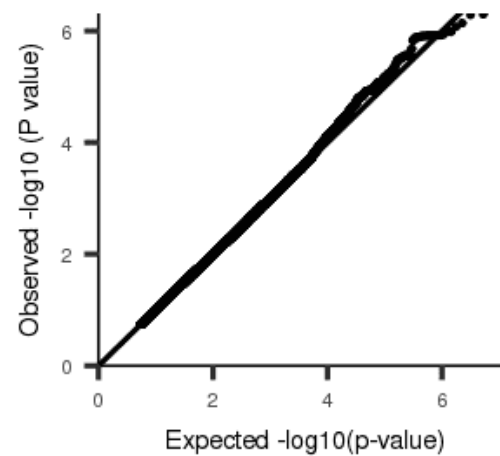

[back to list of plots](#)

Figure 1001: NETMAT edge (25) 055

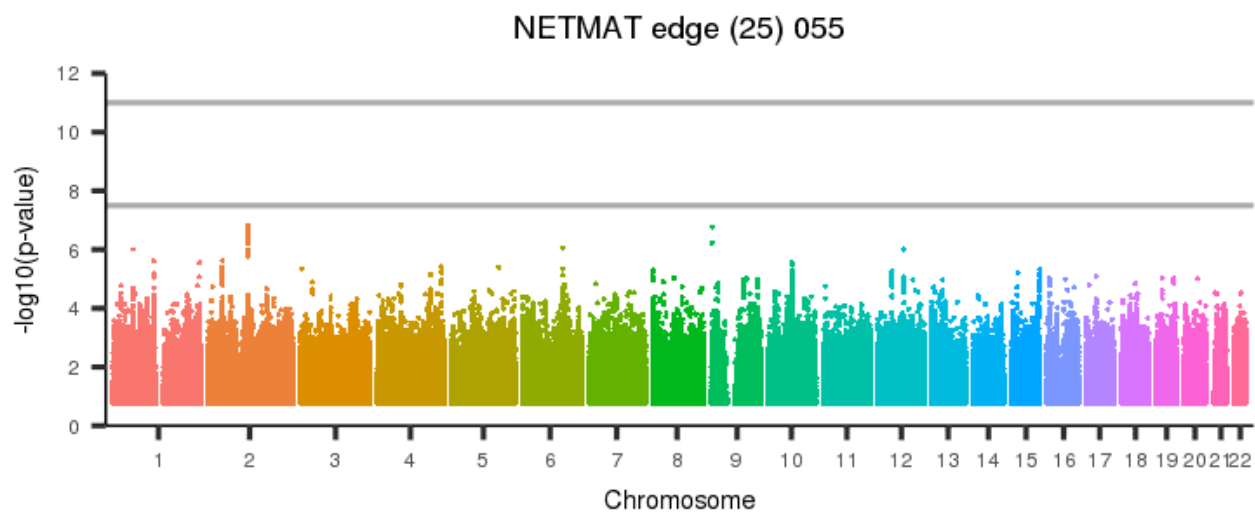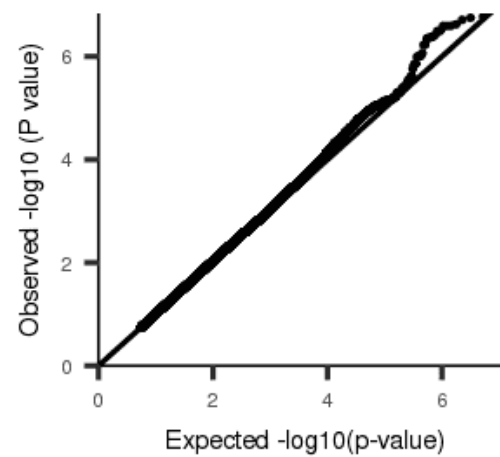

[back to list of plots](#)

Figure 1002: NETMAT edge (25) 056

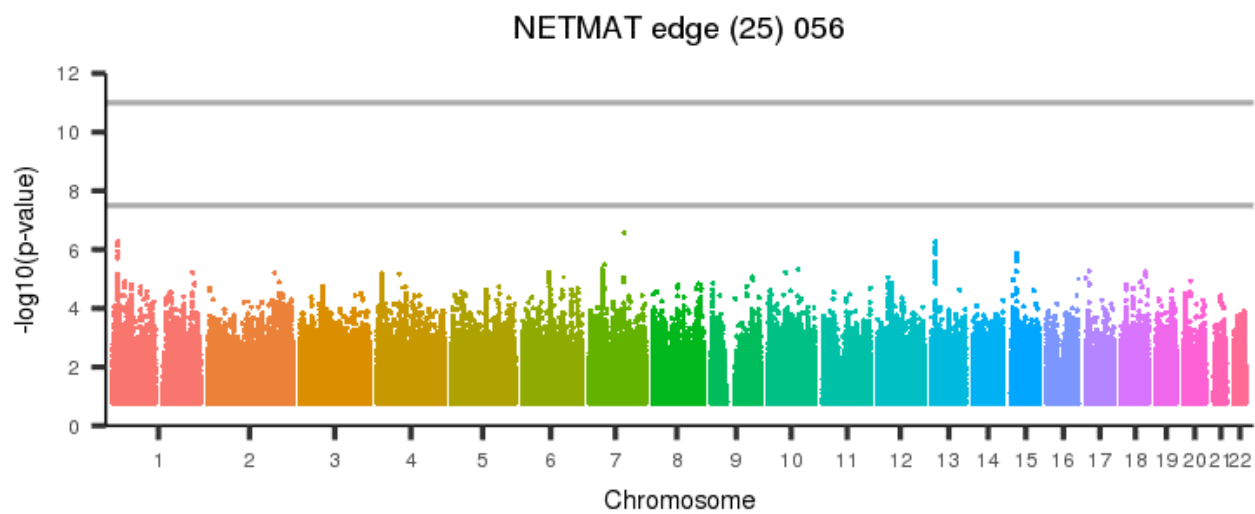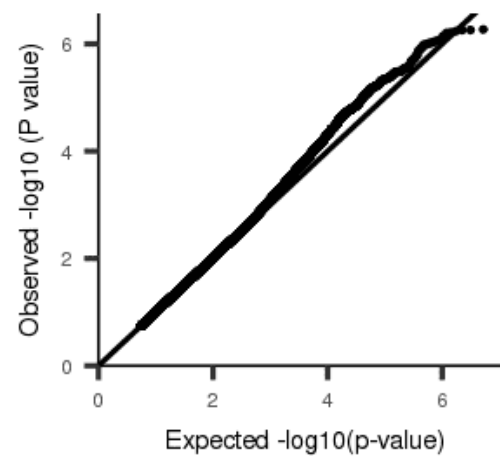

[back to list of plots](#)

Figure 1003: NETMAT edge (25) 057

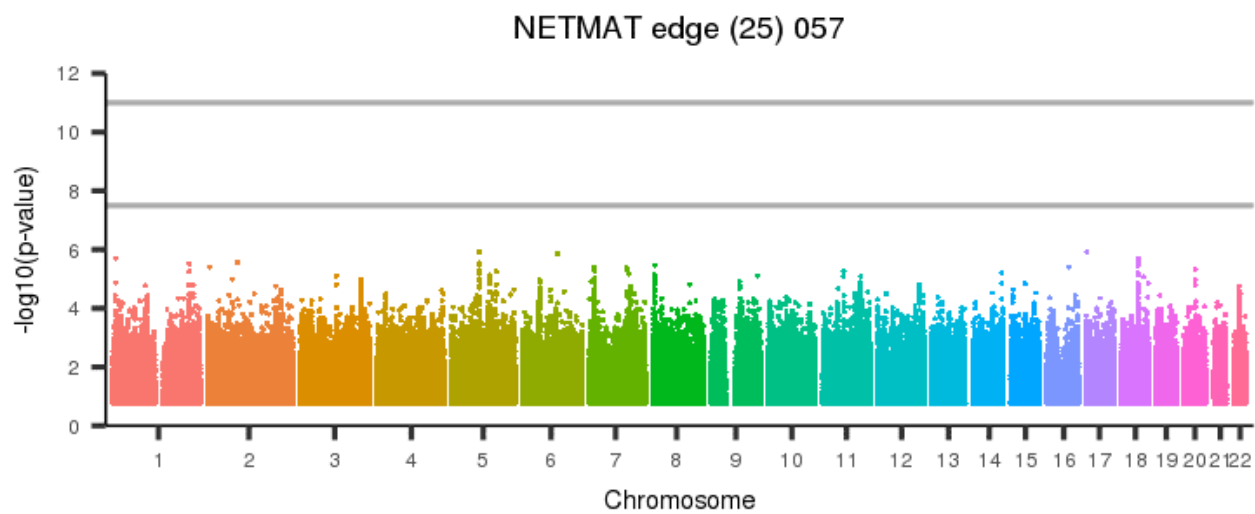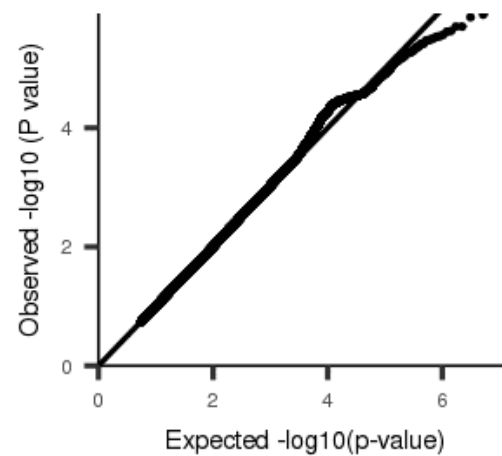

[back to list of plots](#)

Figure 1004: NETMAT edge (25) 058

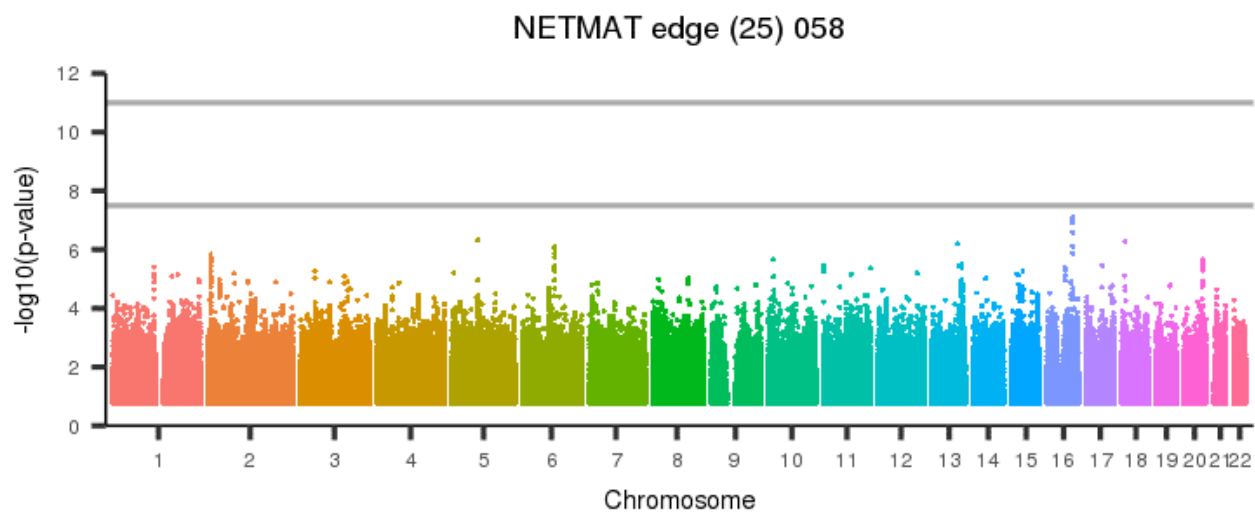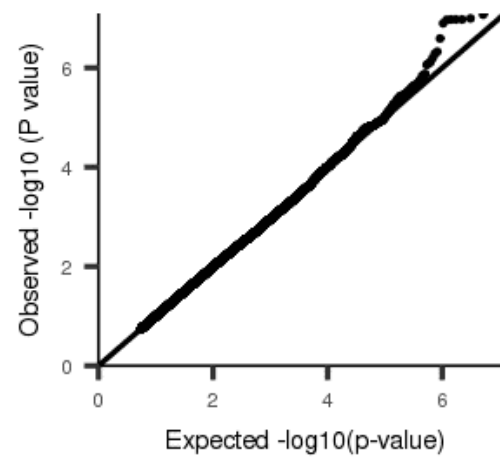

[back to list of plots](#)

Figure 1005: NETMAT edge (25) 059

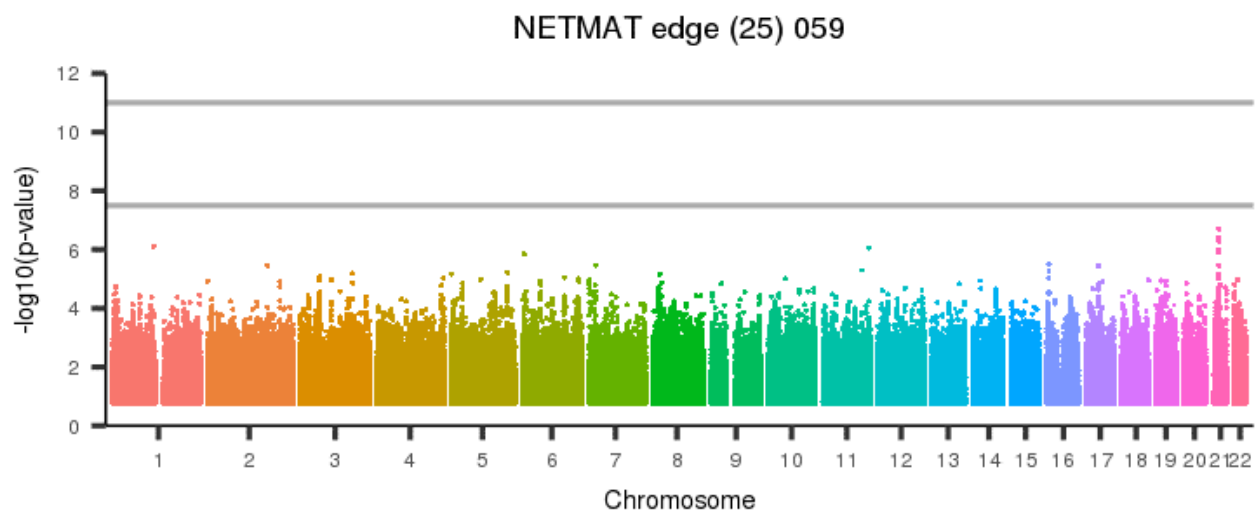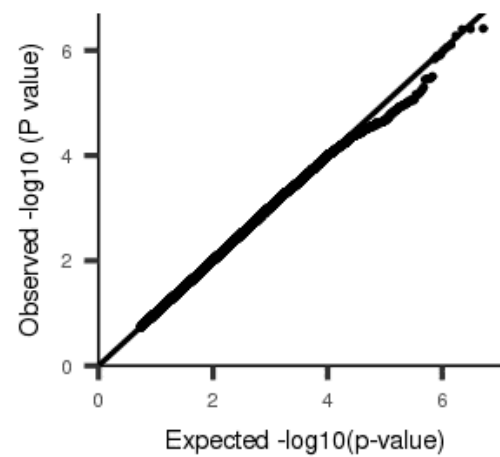

[back to list of plots](#)



Figure 1006: NETMAT edge (25) 060

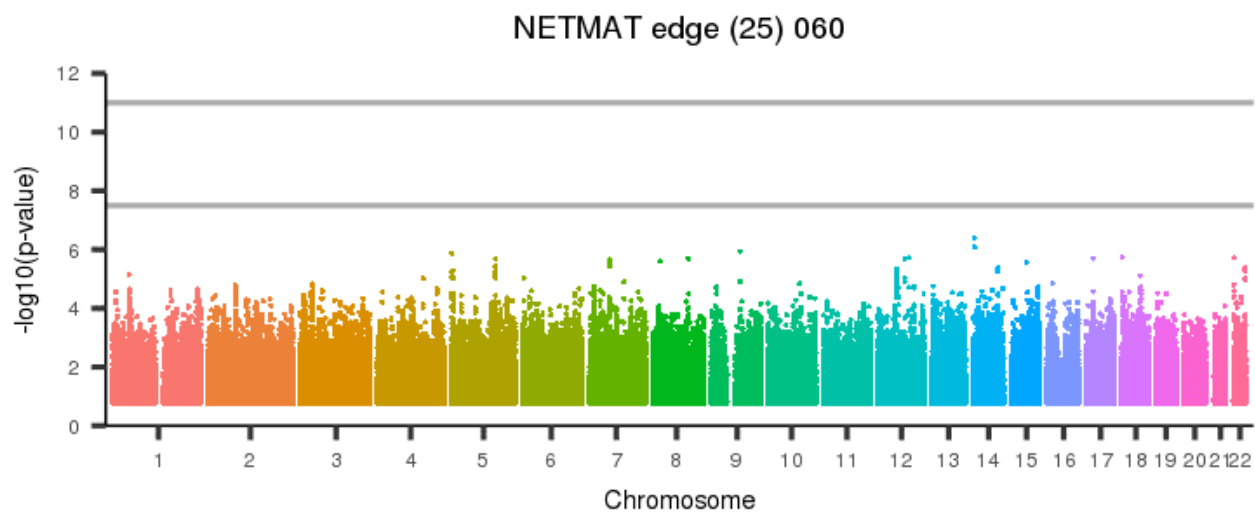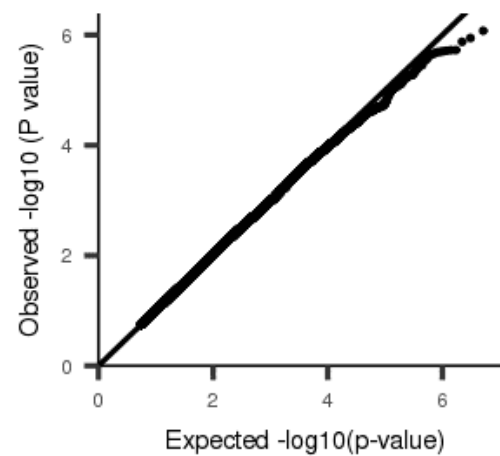

[back to list of plots](#)

Figure 1007: NETMAT edge (25) 061

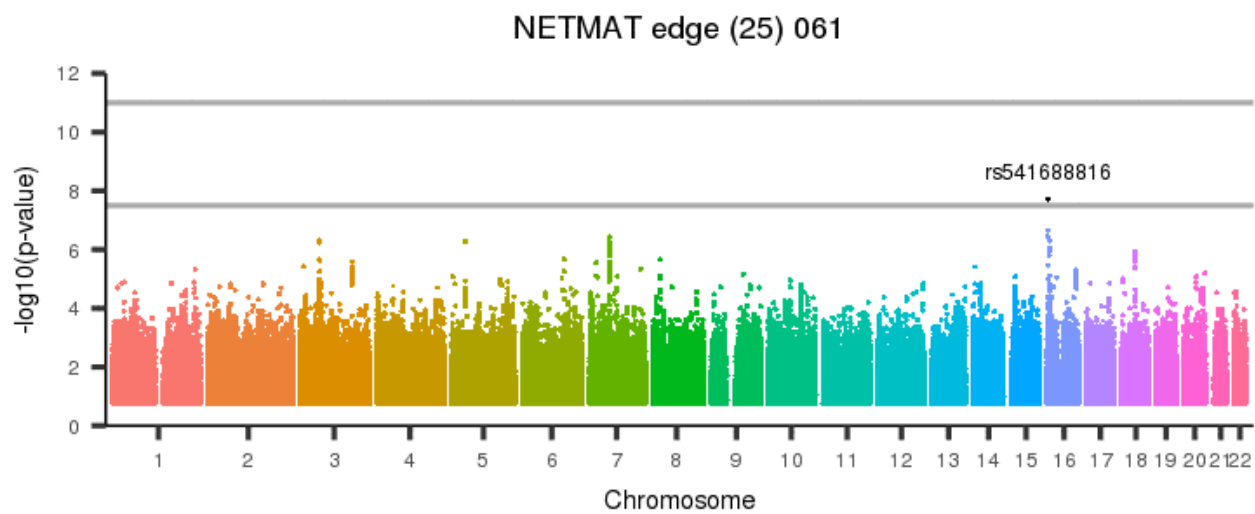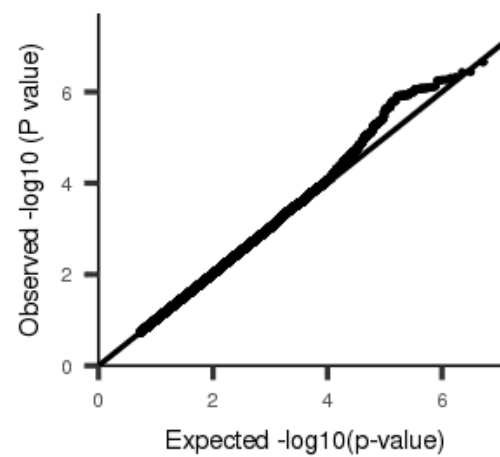

[back to list of plots](#)

Figure 1008: NETMAT edge (25) 062

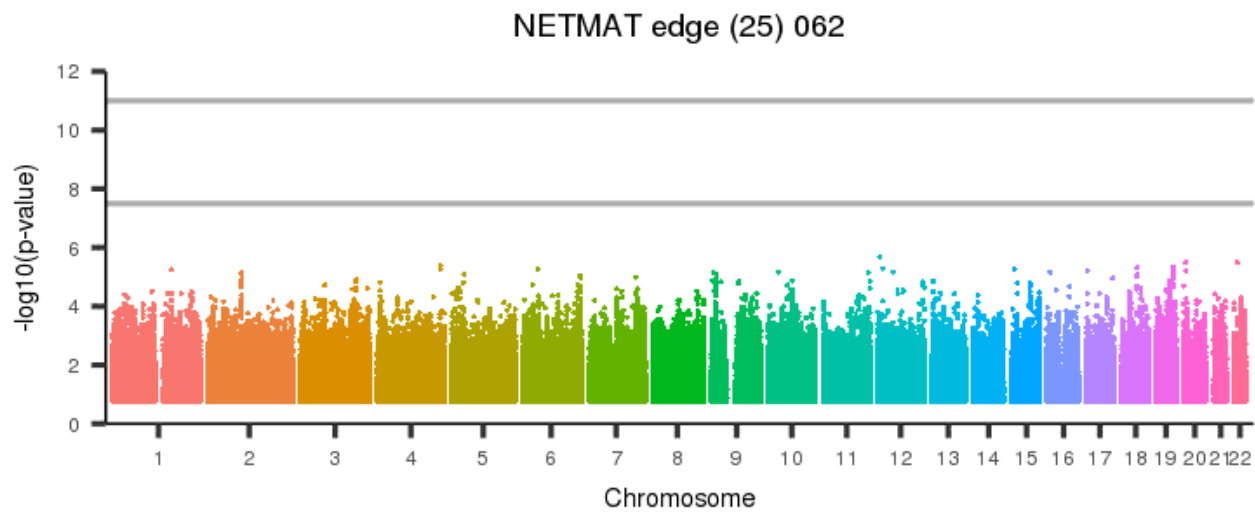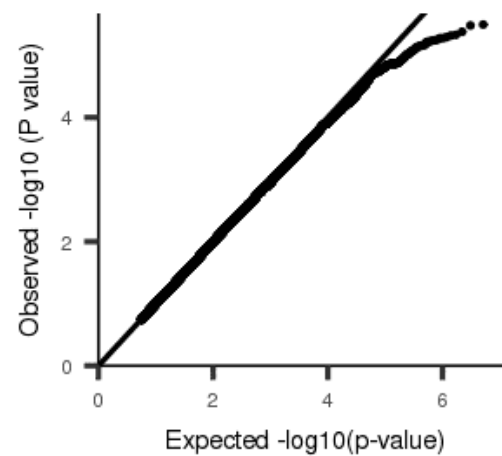

[back to list of plots](#)

Figure 1009: NETMAT edge (25) 063

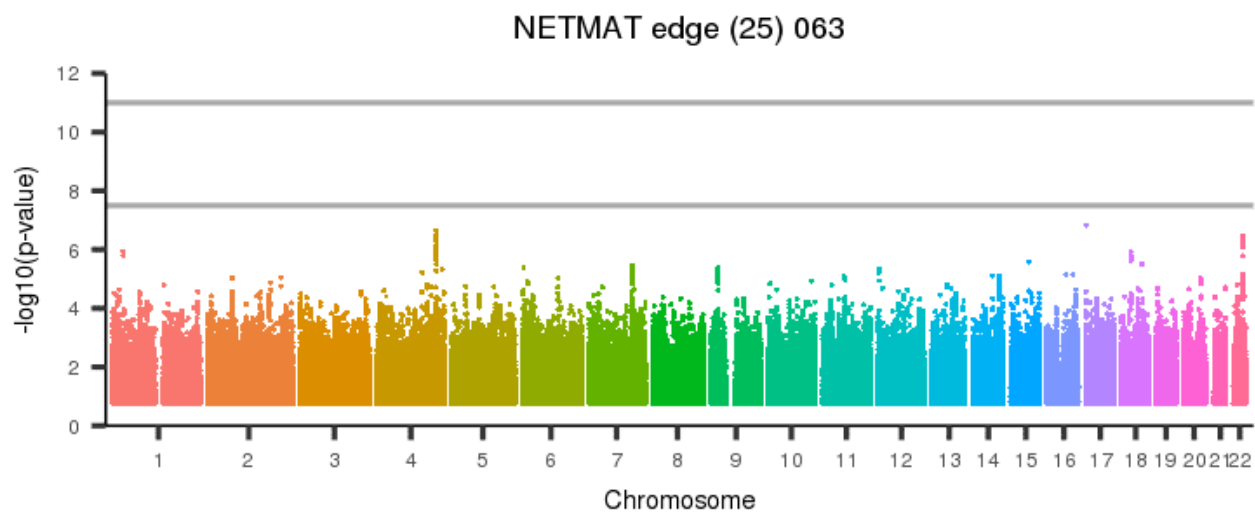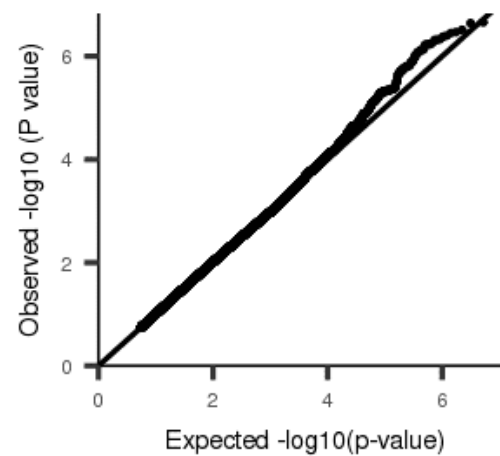

[back to list of plots](#)

Figure 1010: NETMAT edge (25) 064

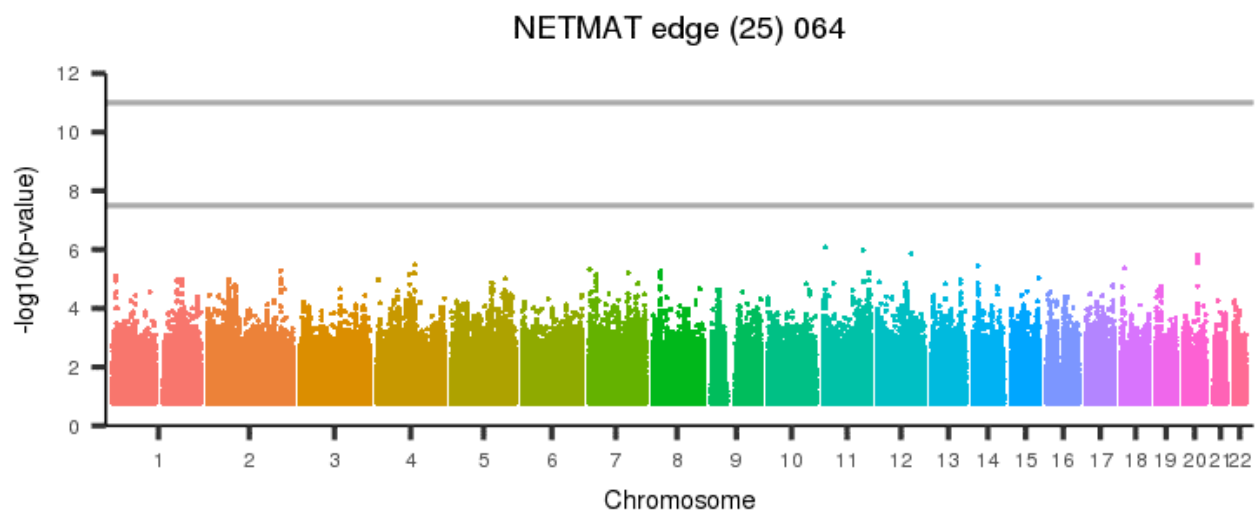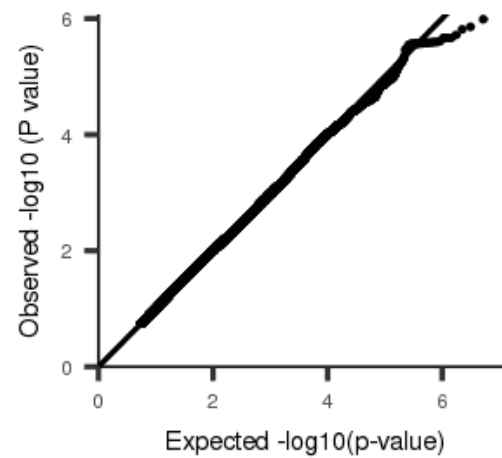

[back to list of plots](#)

Figure 1011: NETMAT edge (25) 065

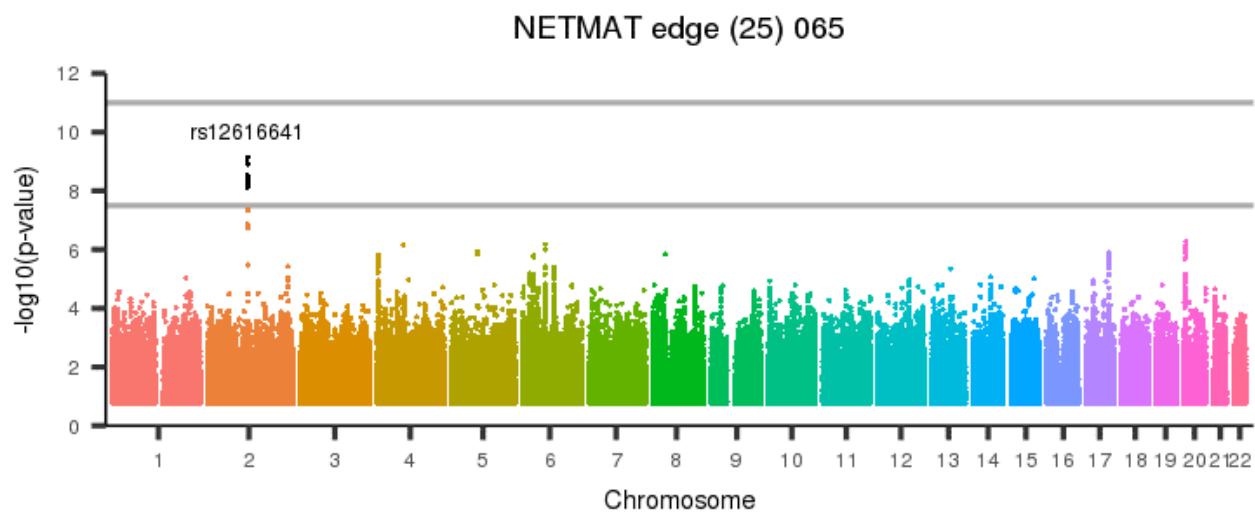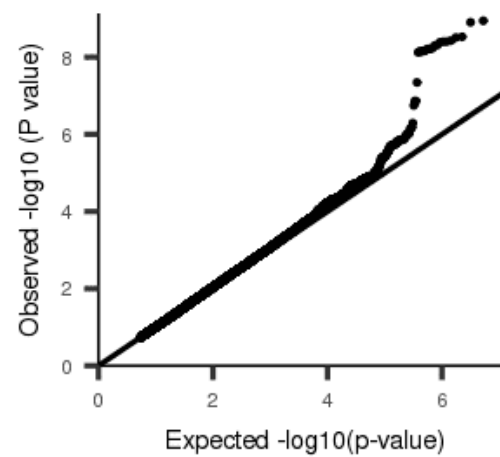

[back to list of plots](#)

Figure 1012: NETMAT edge (25) 066

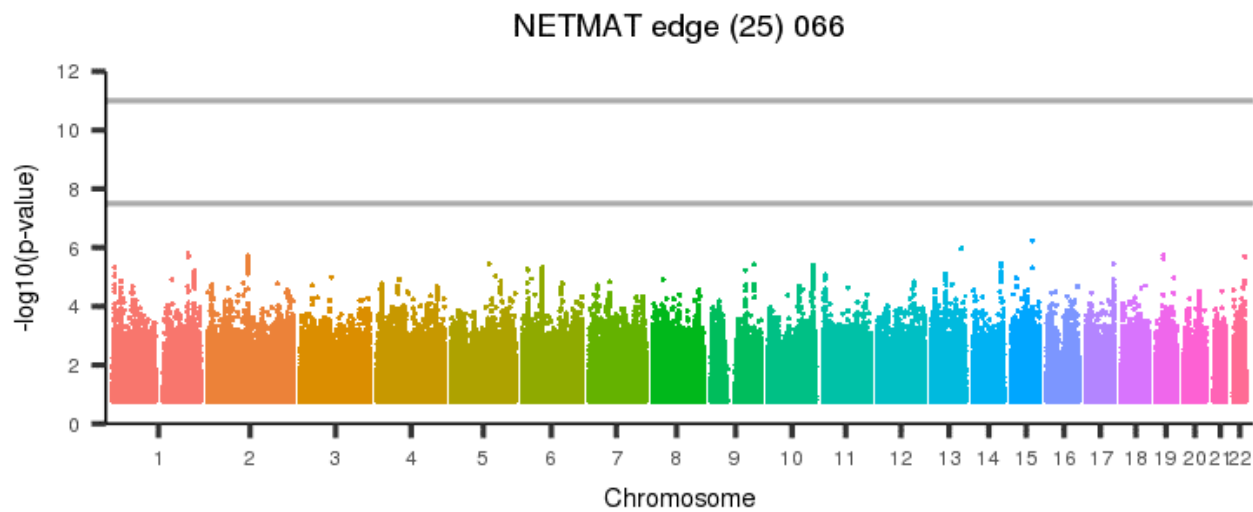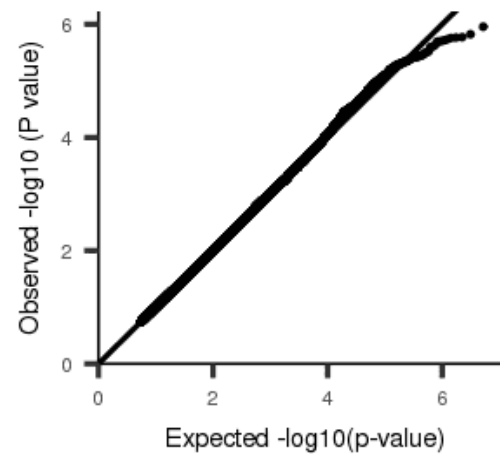

[back to list of plots](#)

Figure 1013: NETMAT edge (25) 067

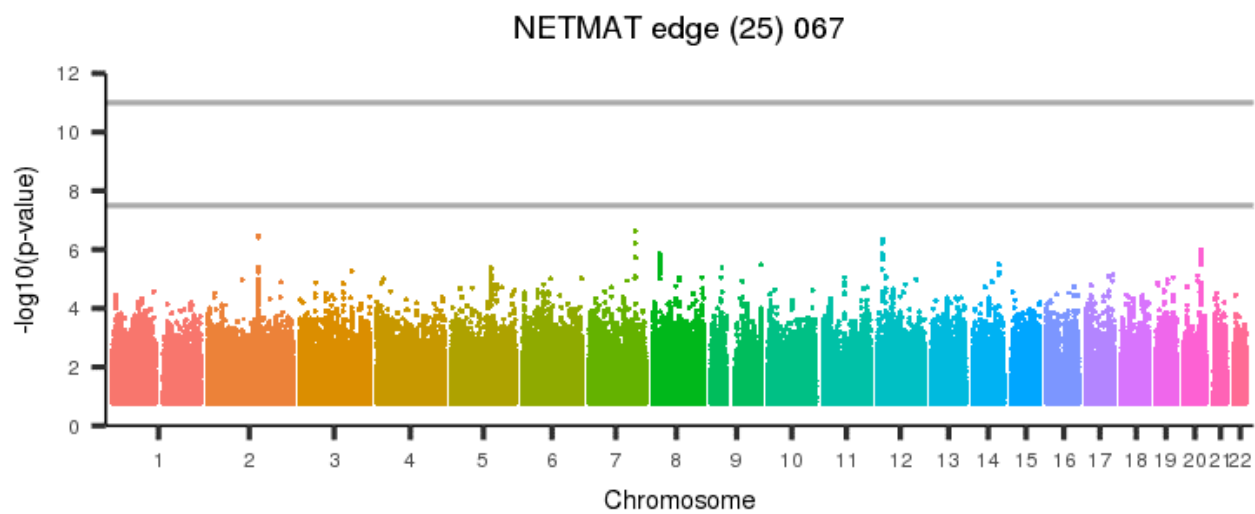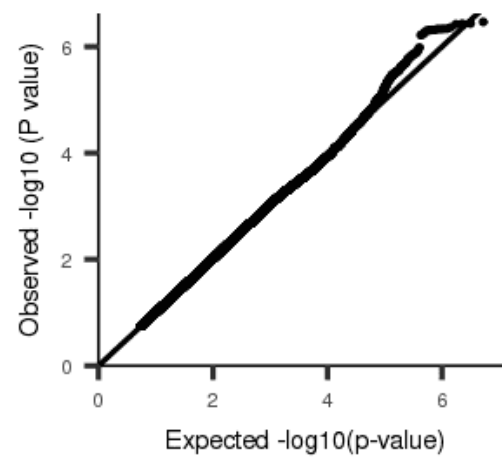

[back to list of plots](#)



Figure 1014: NETMAT edge (25) 068

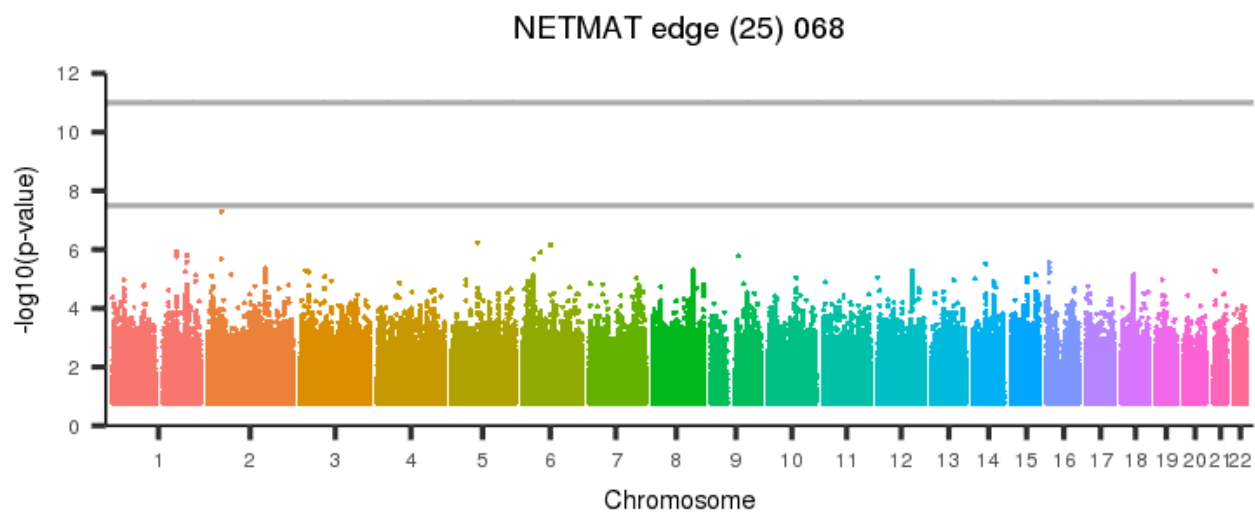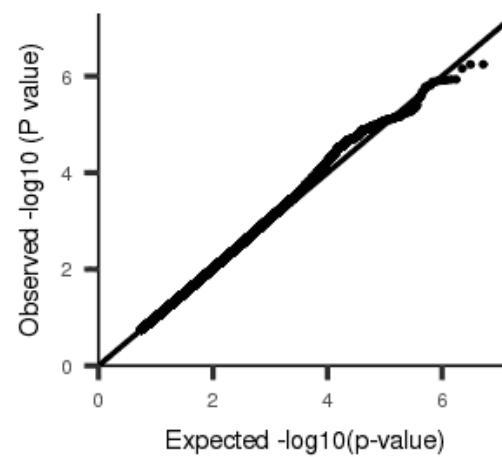

[back to list of plots](#)

Figure 1015: NETMAT edge (25) 069

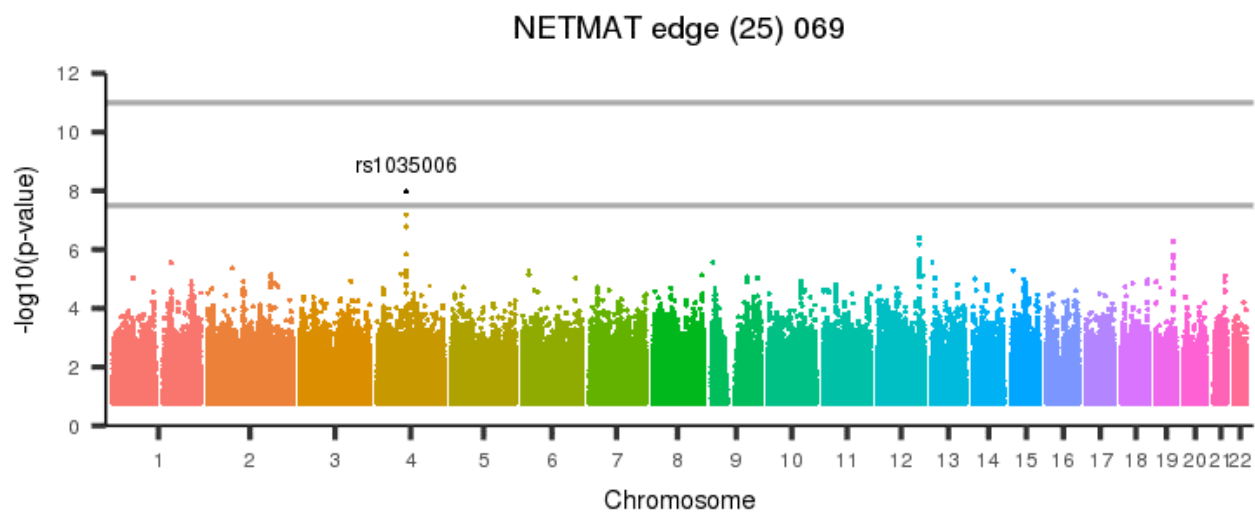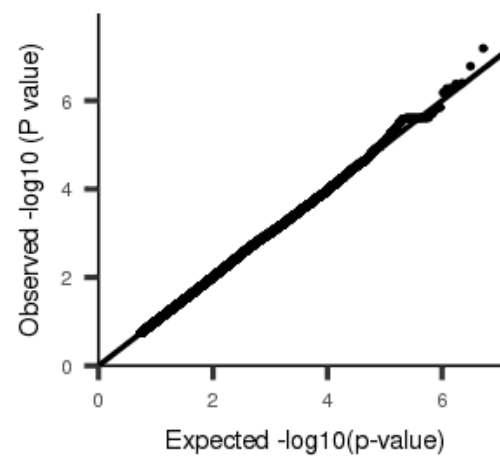

[back to list of plots](#)

Figure 1016: NETMAT edge (25) 070

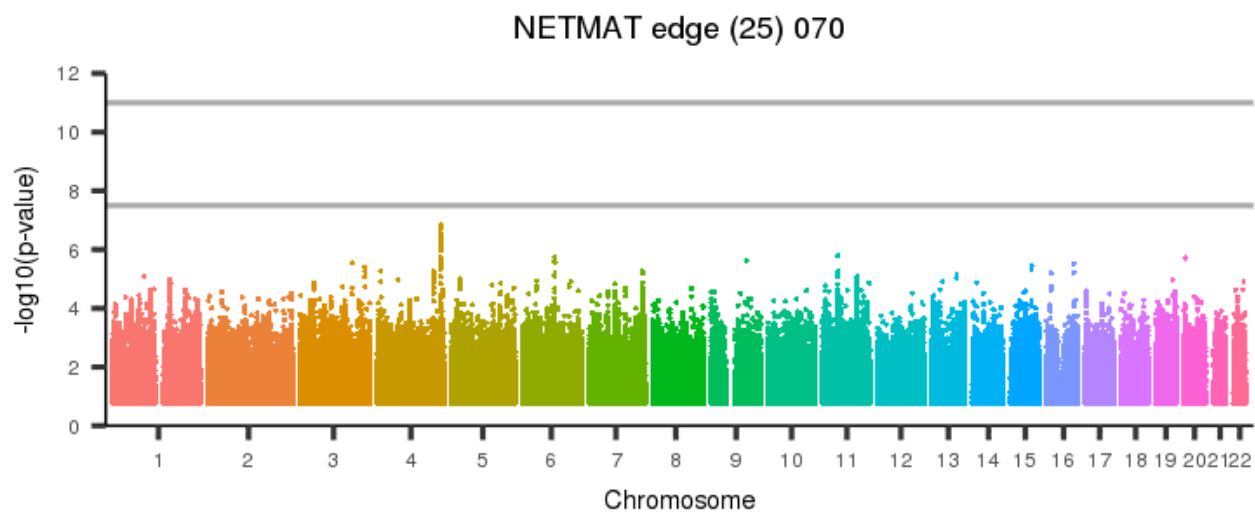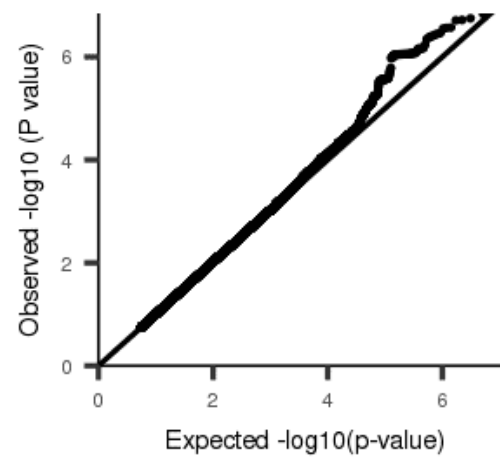

[back to list of plots](#)

Figure 1017: NETMAT edge (25) 071

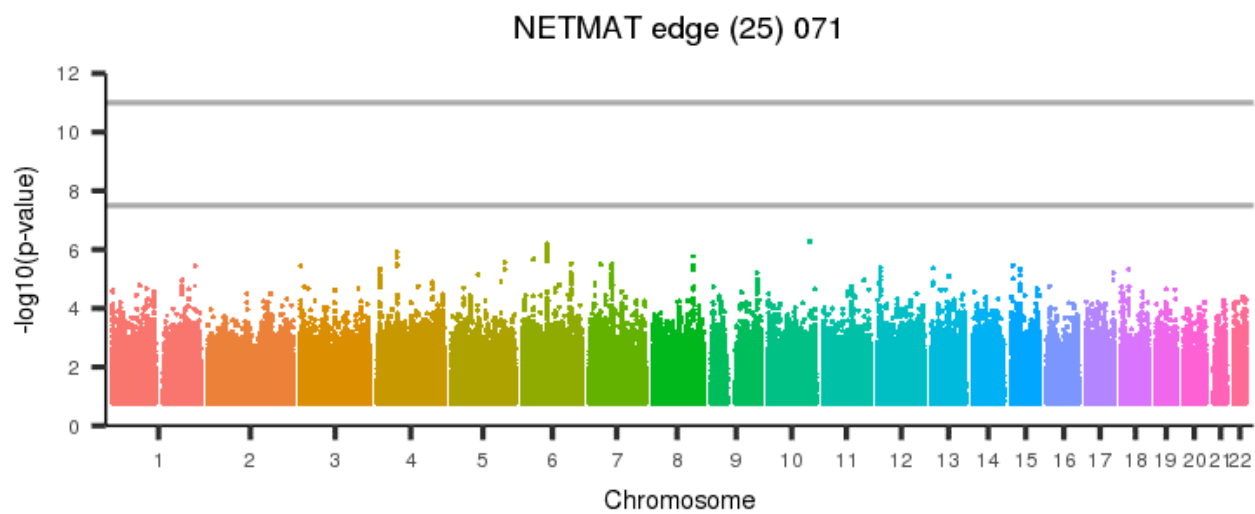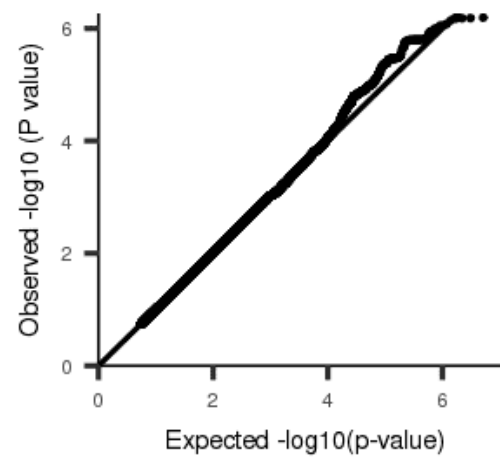

[back to list of plots](#)

Figure 1018: NETMAT edge (25) 072

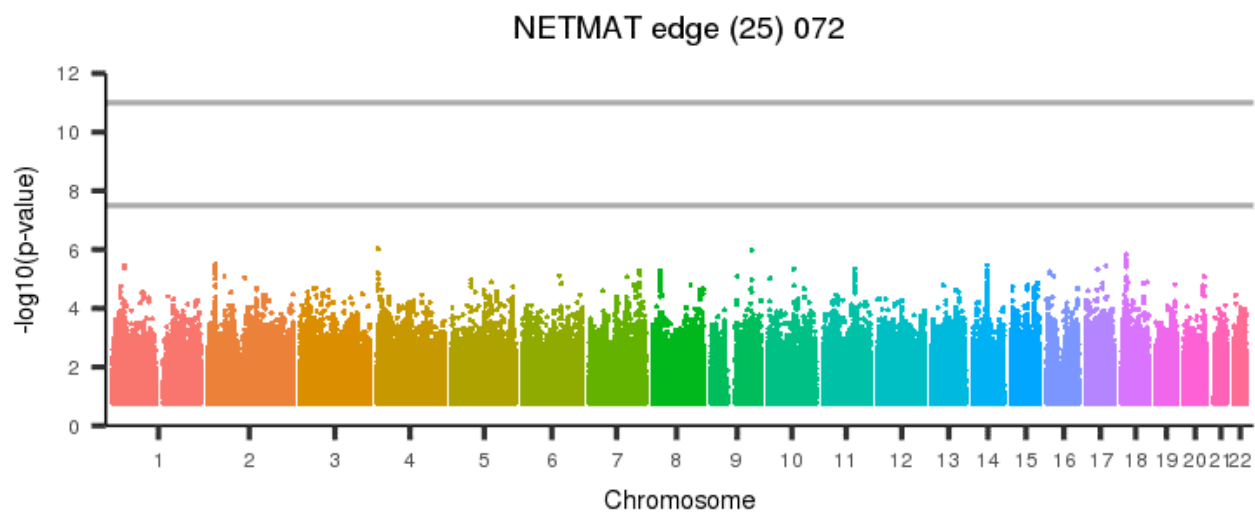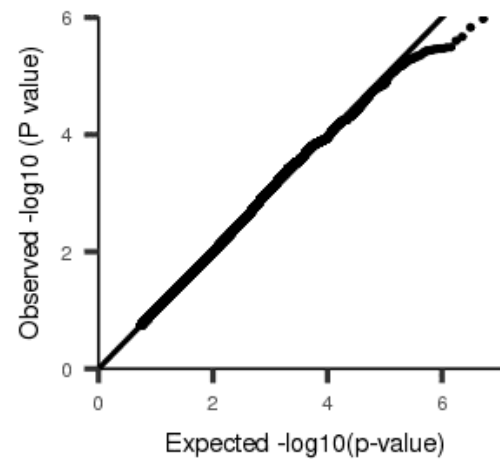

[back to list of plots](#)

Figure 1019: NETMAT edge (25) 073

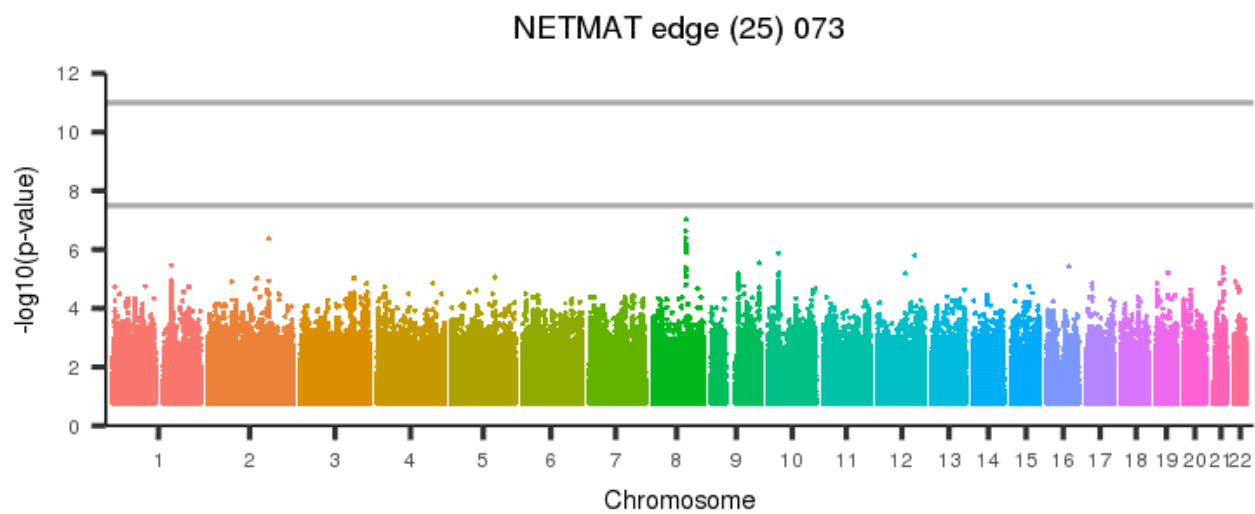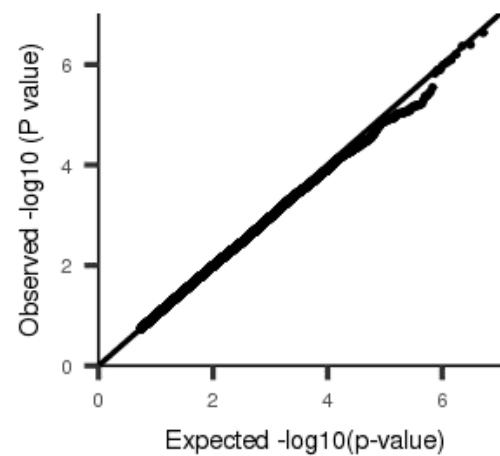

[back to list of plots](#)

Figure 1020: NETMAT edge (25) 074

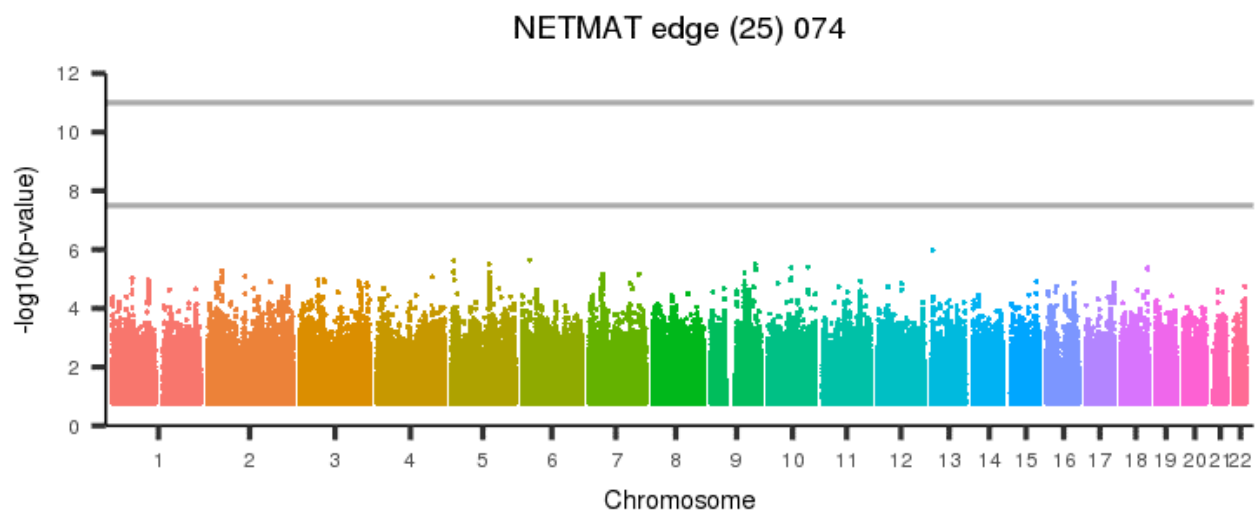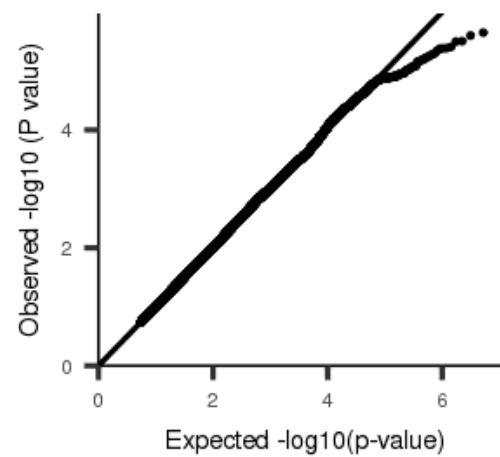

[back to list of plots](#)

Figure 1021: NETMAT edge (25) 075

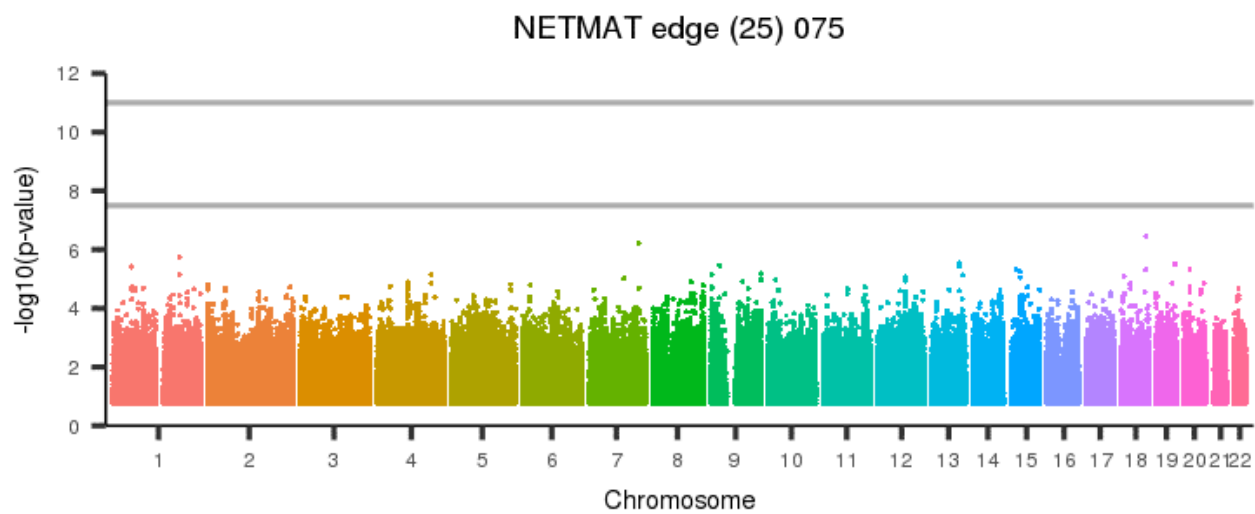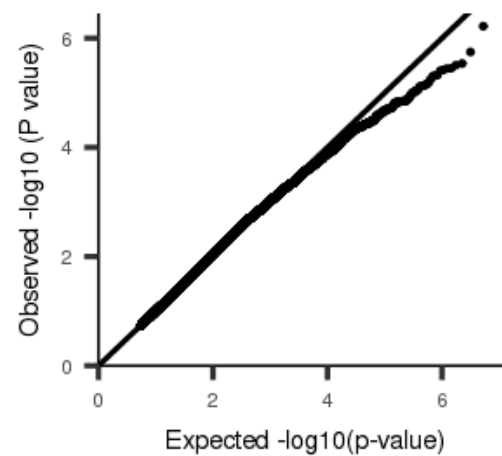

[back to list of plots](#)



Figure 1022: NETMAT edge (25) 076

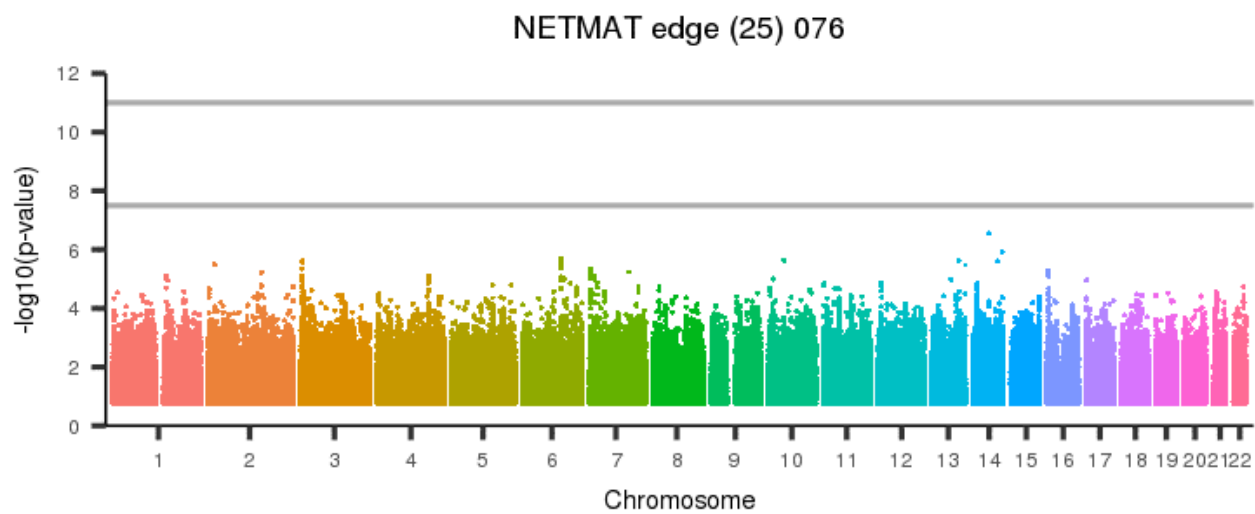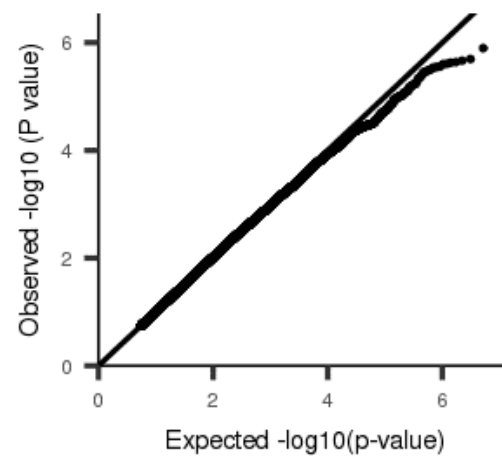

[back to list of plots](#)

Figure 1023: NETMAT edge (25) 077

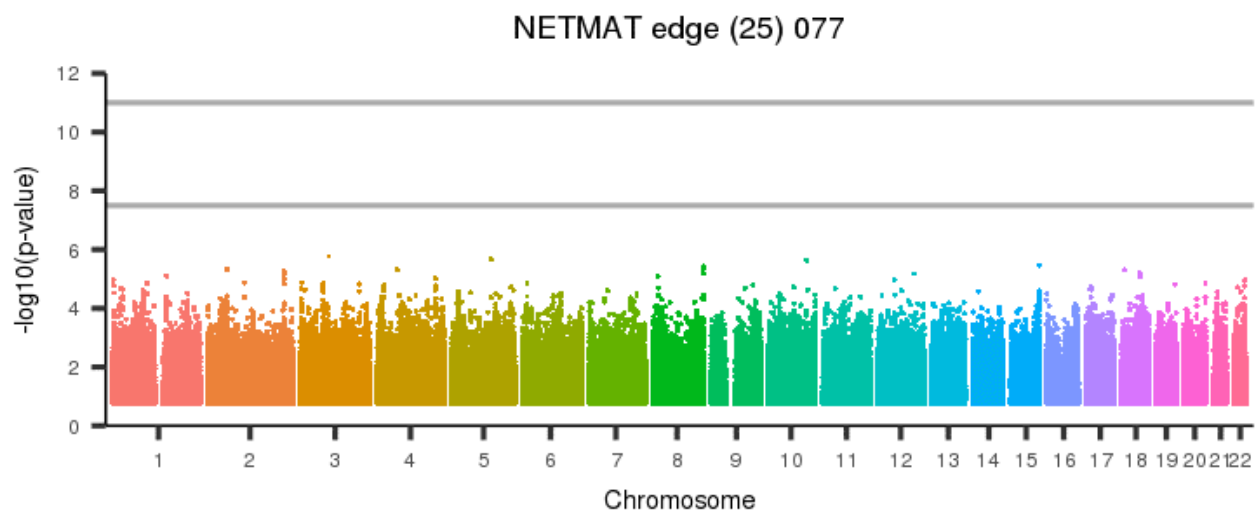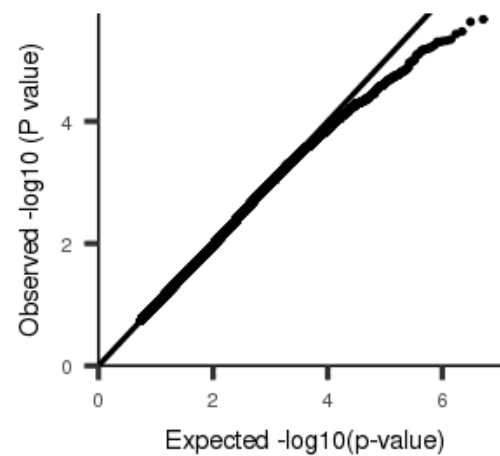

[back to list of plots](#)

Figure 1024: NETMAT edge (25) 078

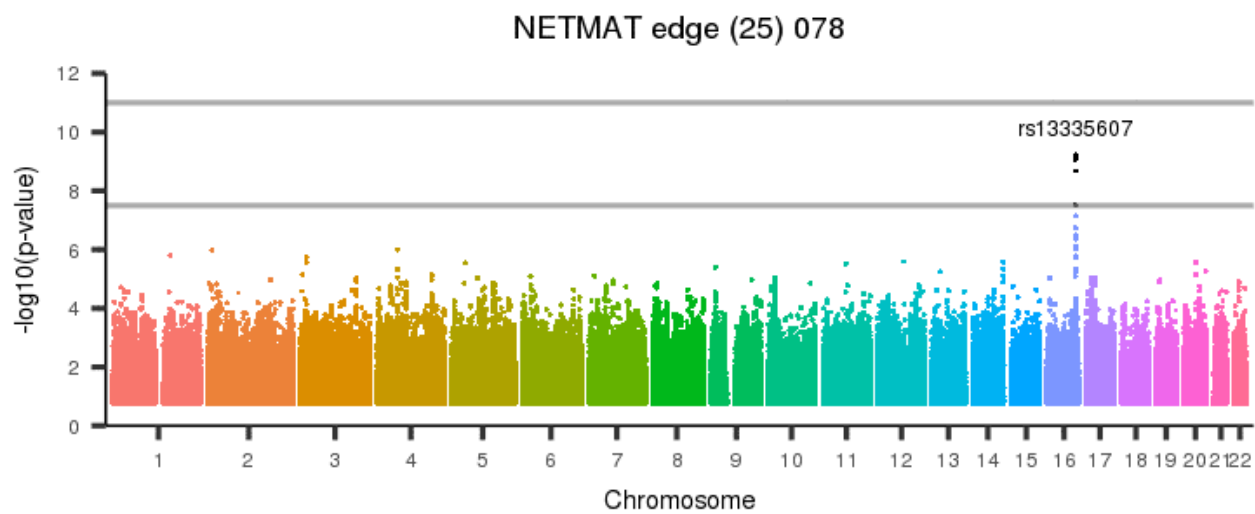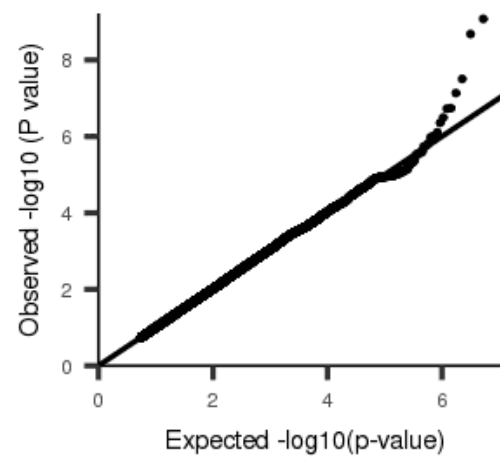

[back to list of plots](#)

Figure 1025: NETMAT edge (25) 079

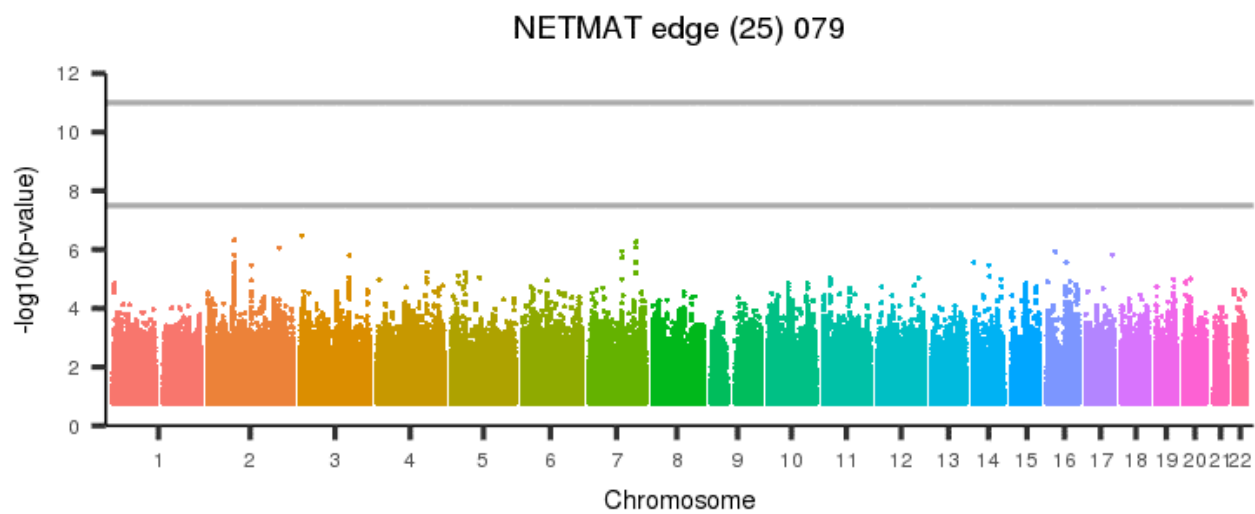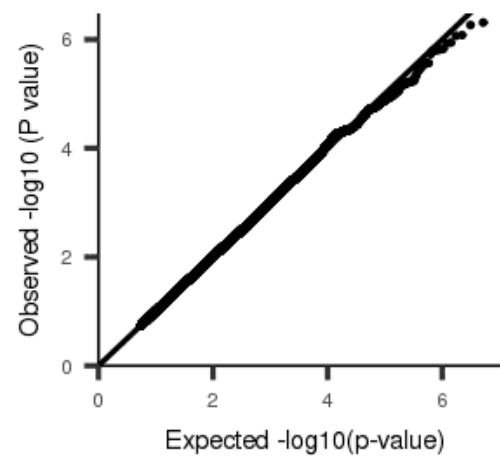

[back to list of plots](#)

Figure 1026: NETMAT edge (25) 080

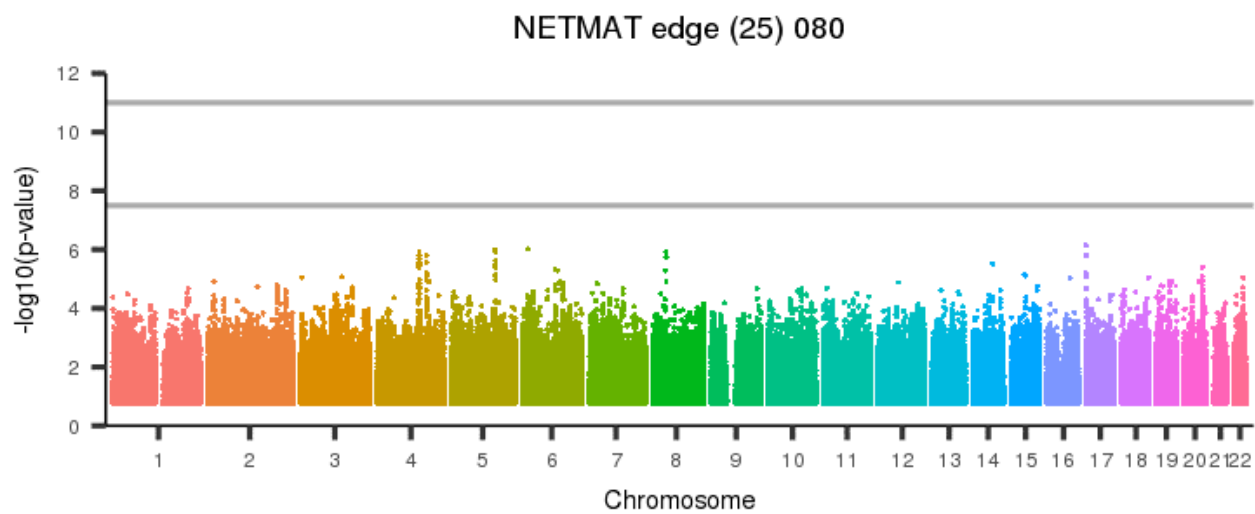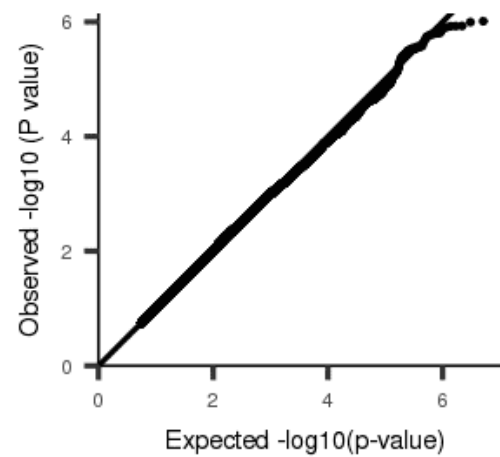

[back to list of plots](#)

Figure 1027: NETMAT edge (25) 081

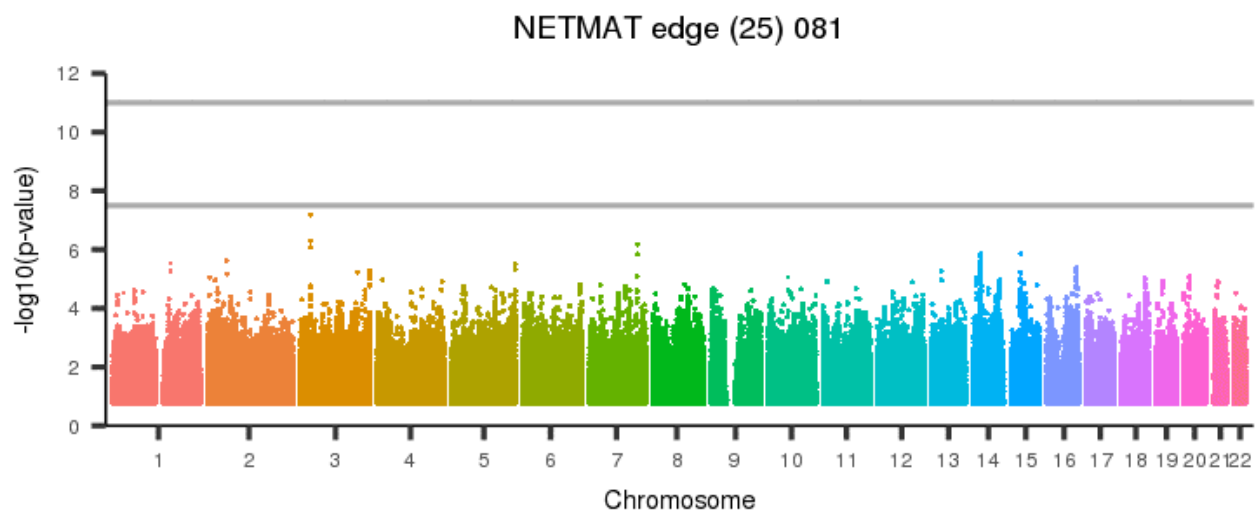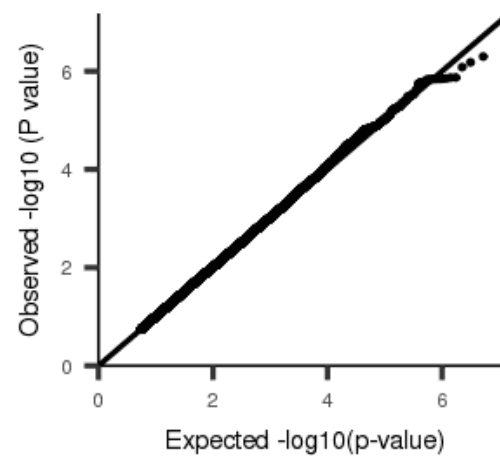

[back to list of plots](#)

Figure 1028: NETMAT edge (25) 082

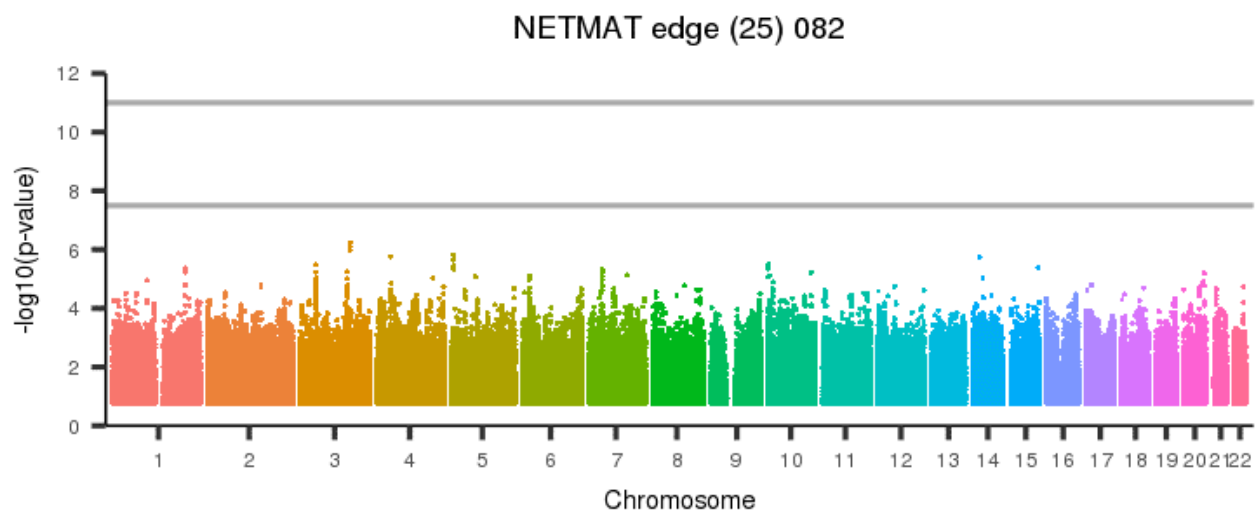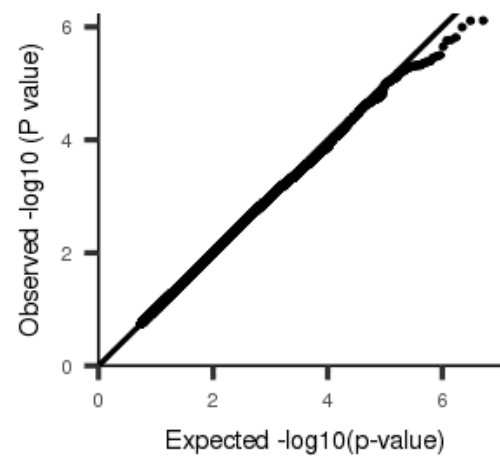

[back to list of plots](#)

Figure 1029: NETMAT edge (25) 083

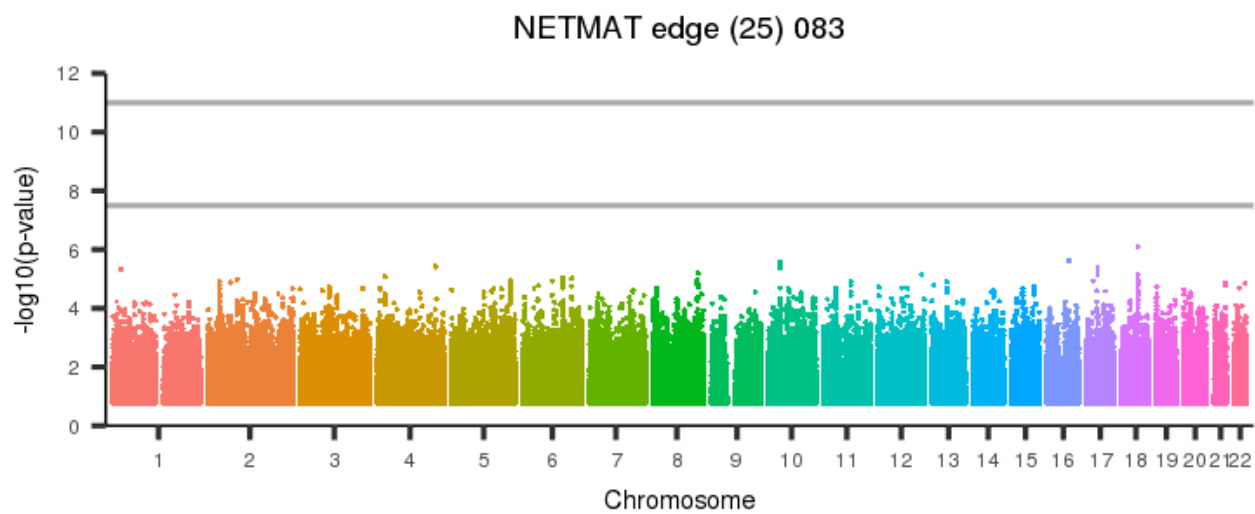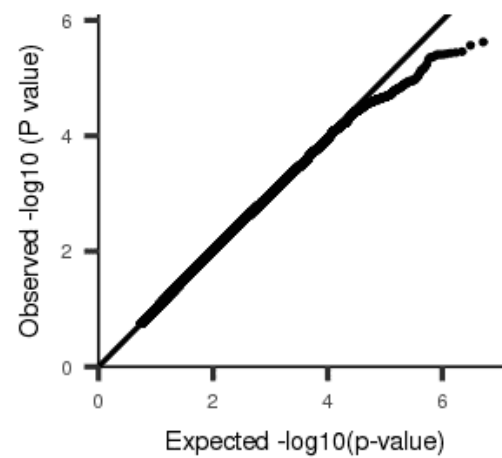

[back to list of plots](#)



Figure 1030: NETMAT edge (25) 084

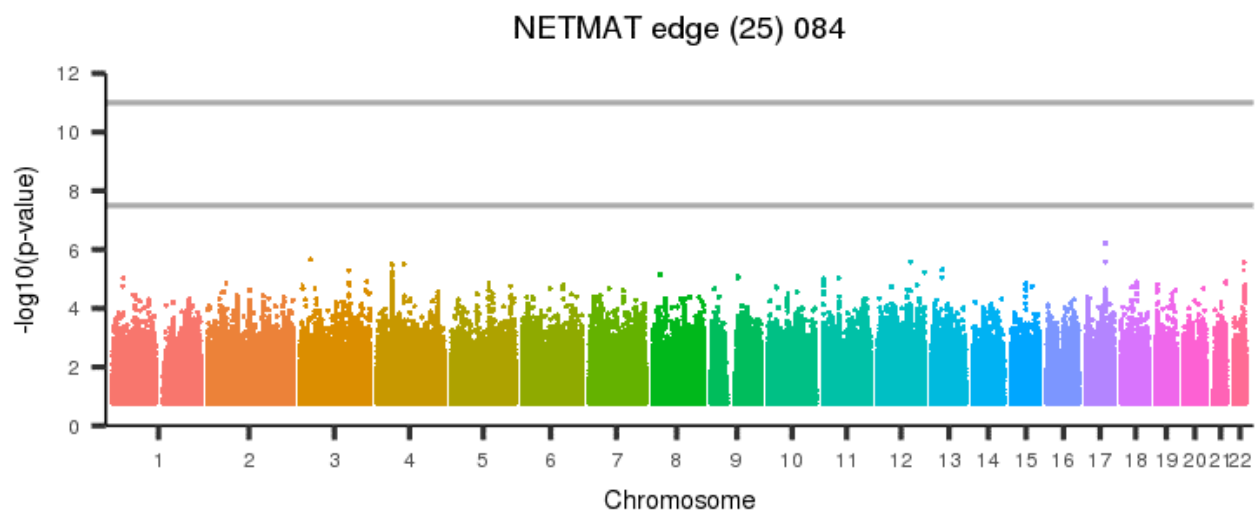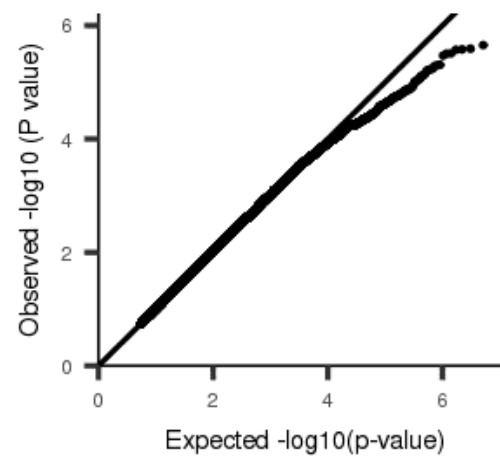

[back to list of plots](#)

Figure 1031: NETMAT edge (25) 085

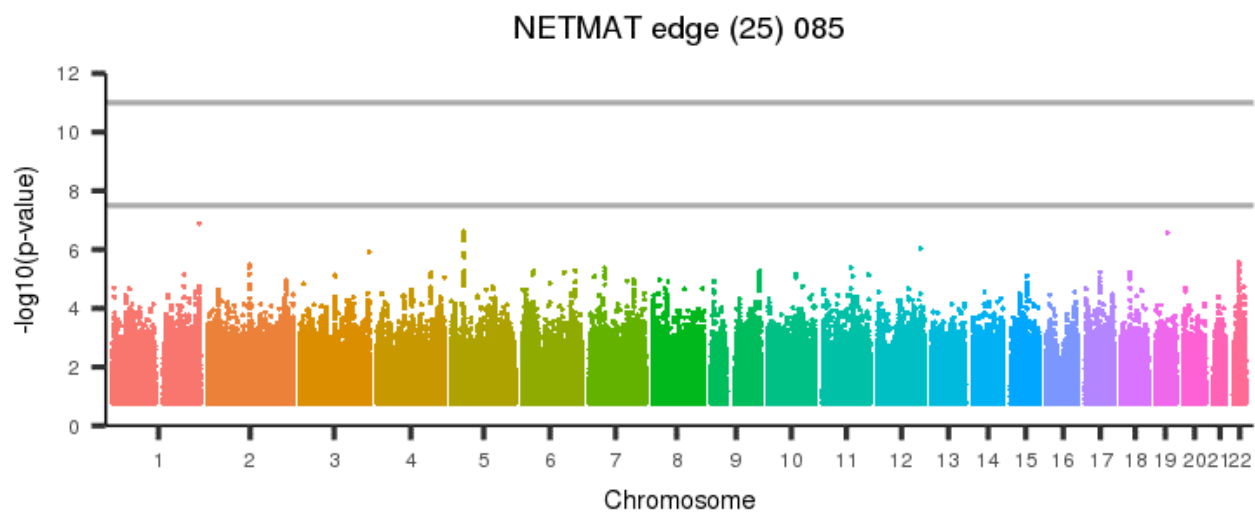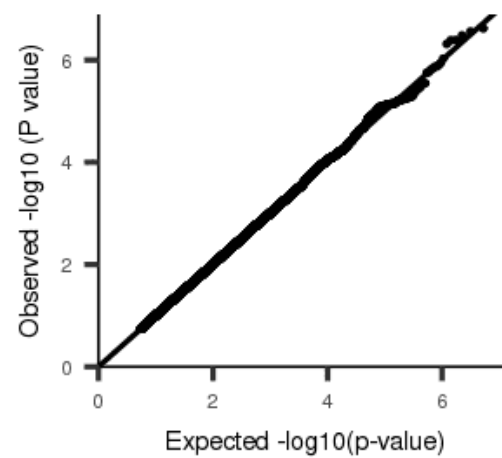

[back to list of plots](#)

Figure 1032: NETMAT edge (25) 086

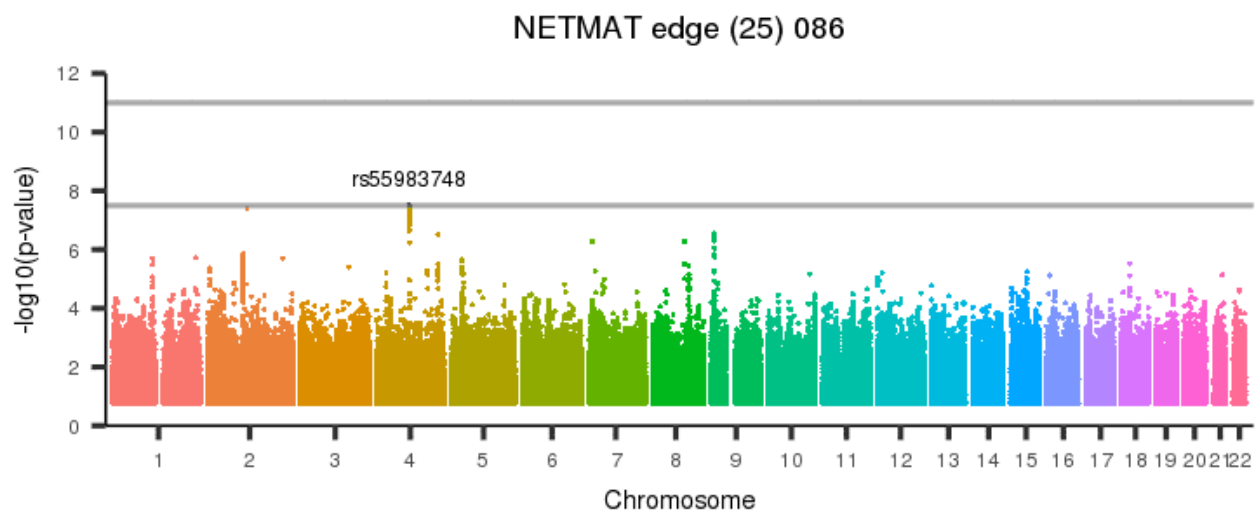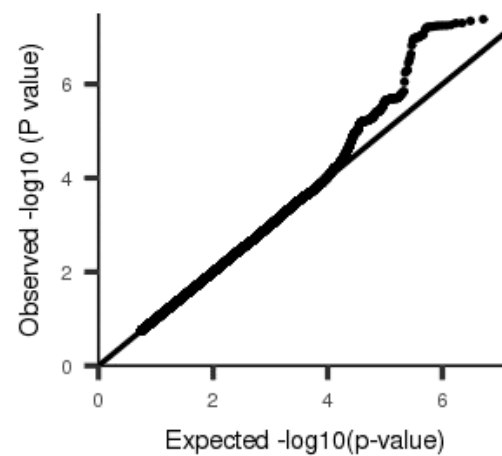

[back to list of plots](#)

Figure 1033: NETMAT edge (25) 087

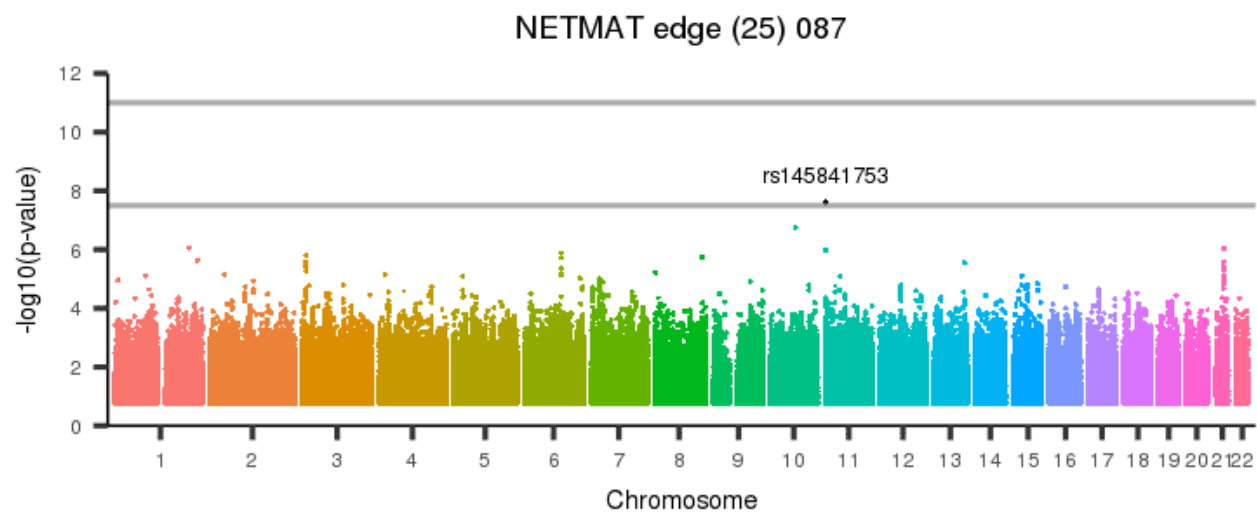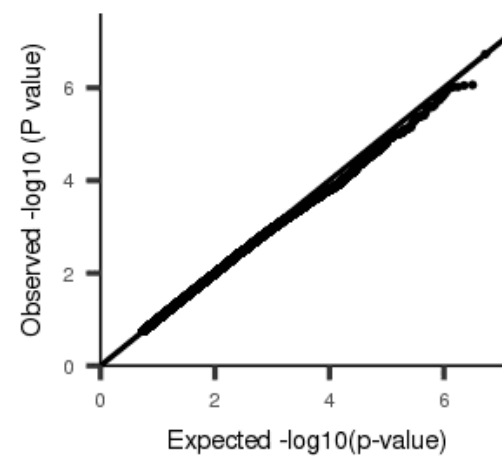

[back to list of plots](#)

Figure 1034: NETMAT edge (25) 088

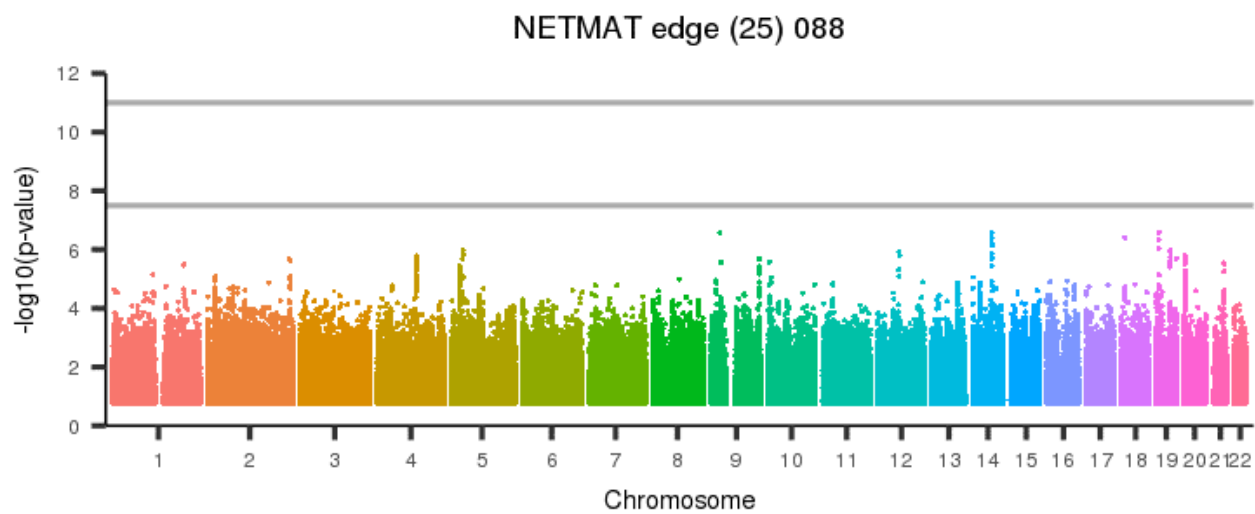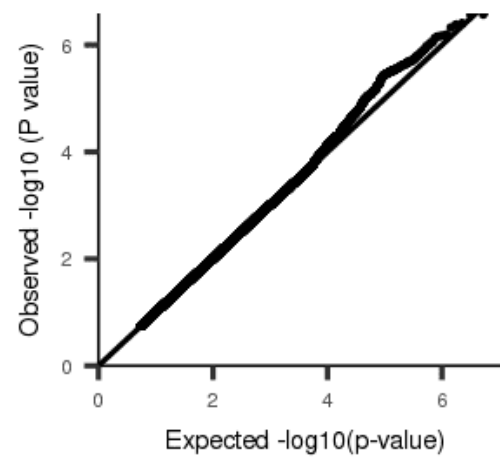

[back to list of plots](#)

Figure 1035: NETMAT edge (25) 089

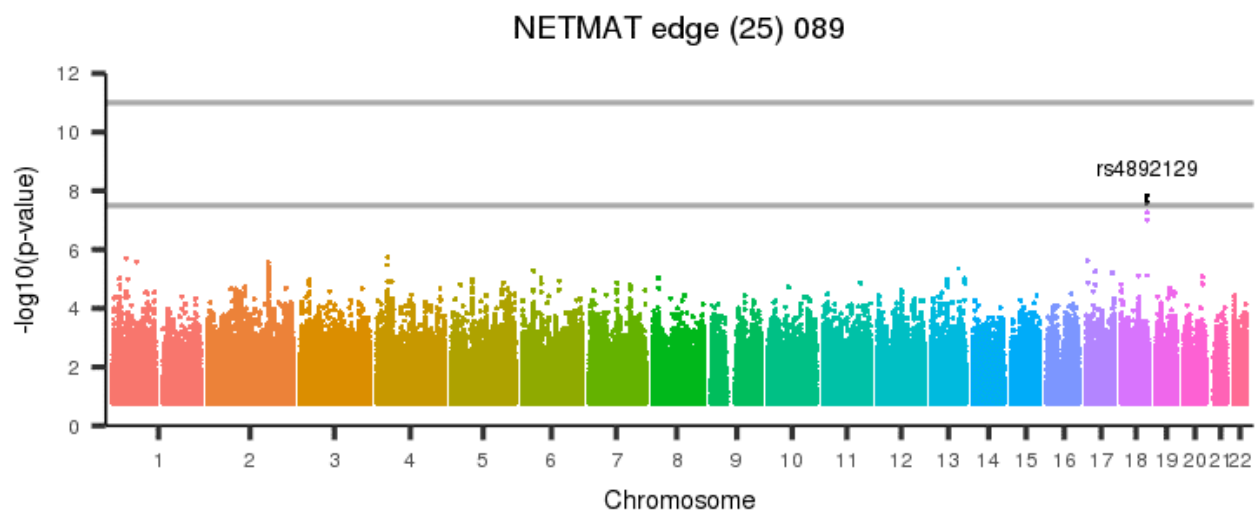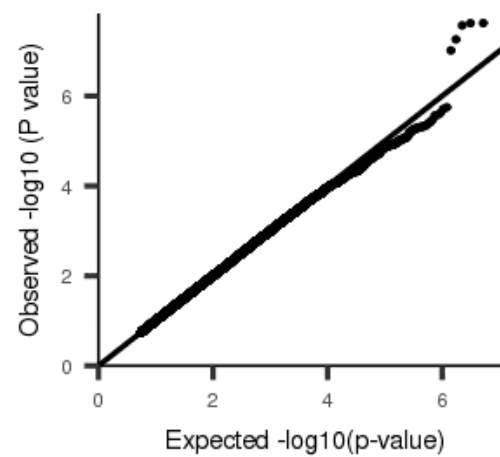

[back to list of plots](#)

Figure 1036: NETMAT edge (25) 090

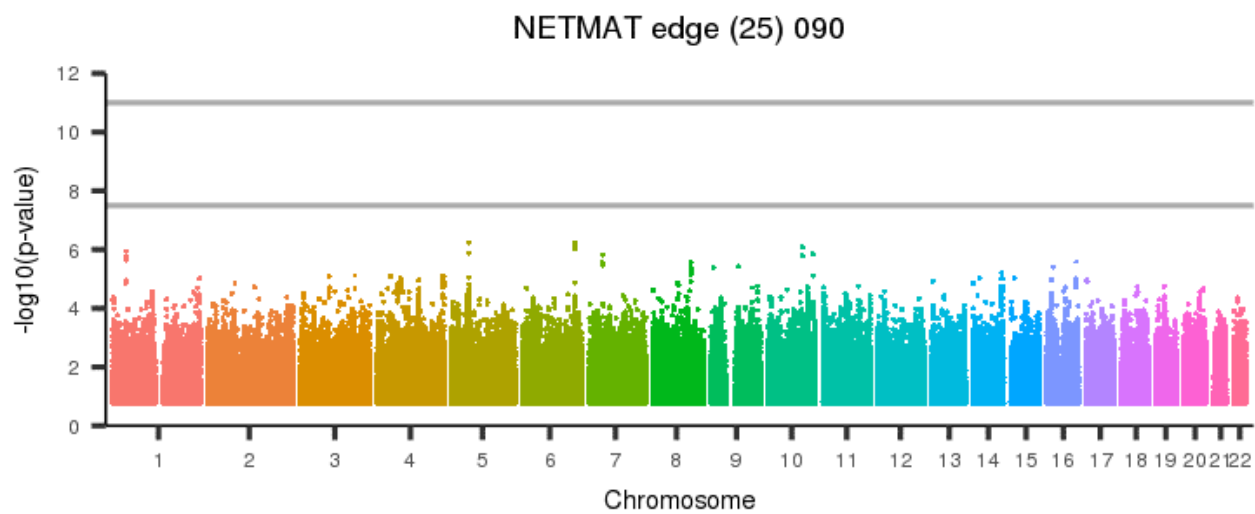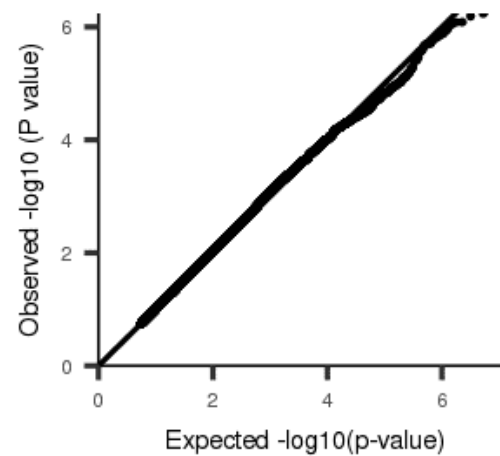

[back to list of plots](#)

Figure 1037: NETMAT edge (25) 091

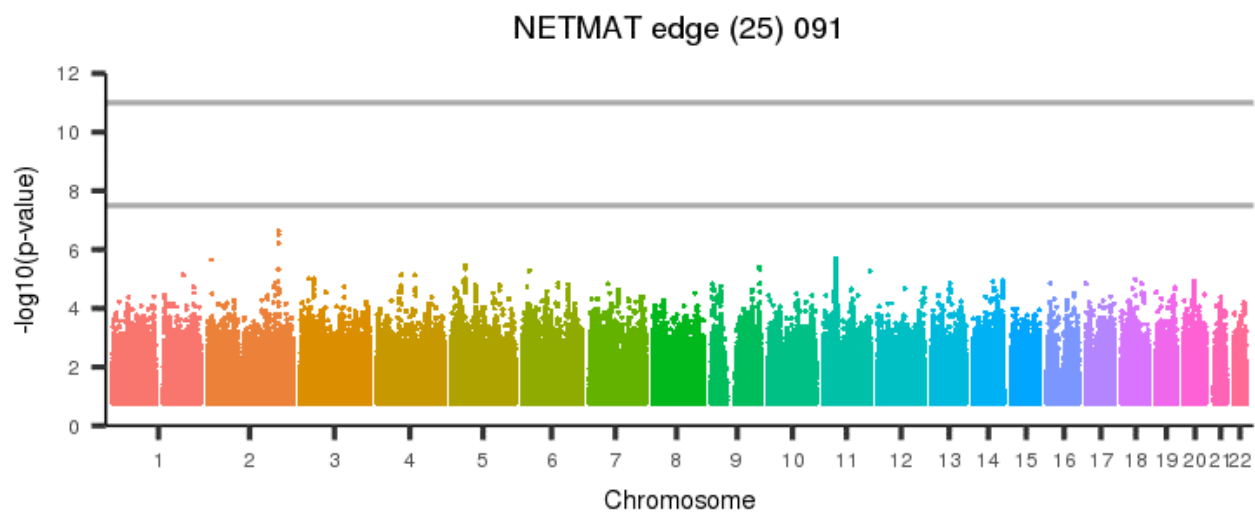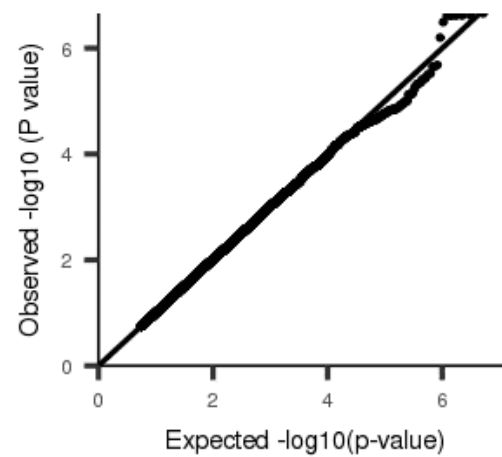

[back to list of plots](#)



Figure 1038: NETMAT edge (25) 092

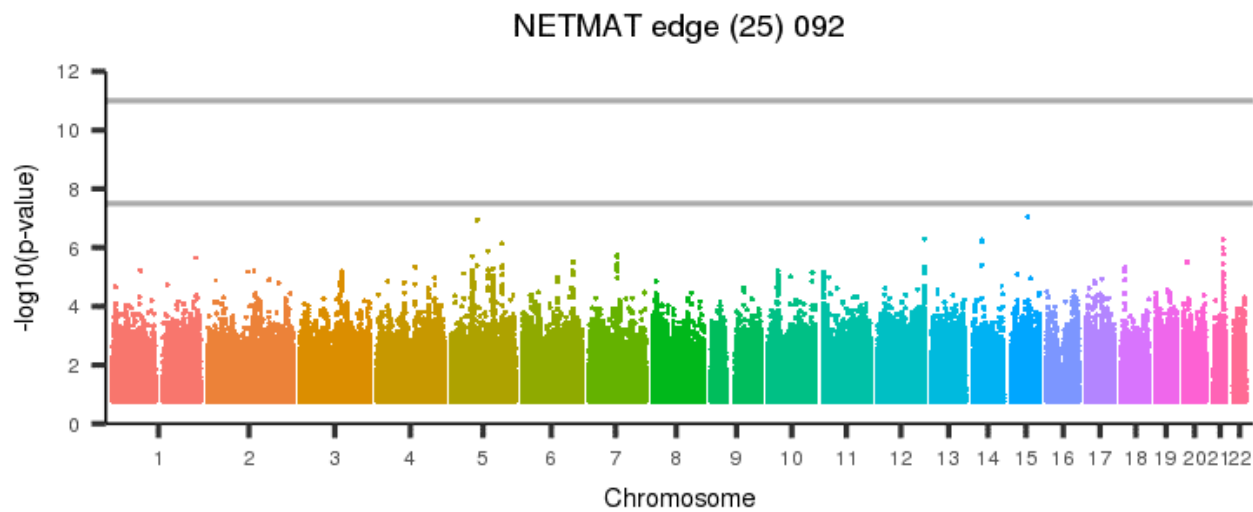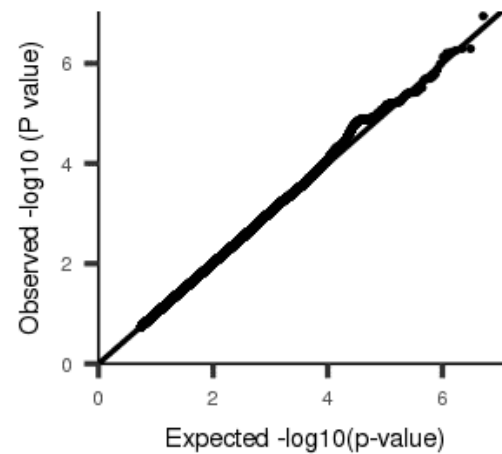

[back to list of plots](#)

Figure 1039: NETMAT edge (25) 093

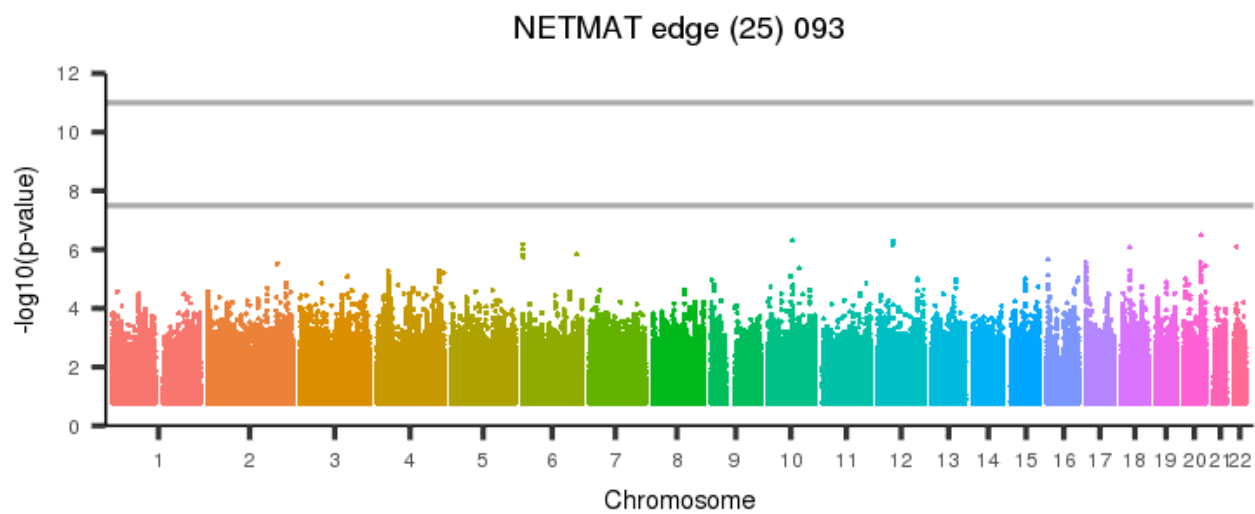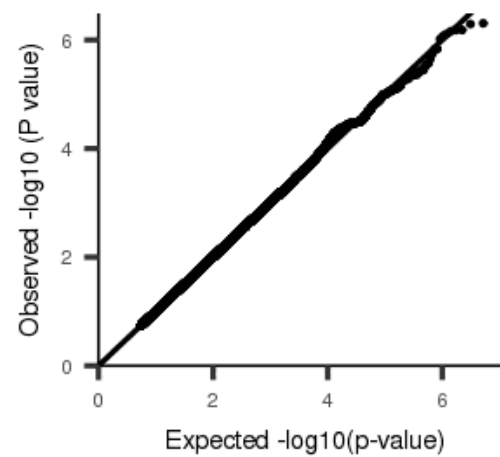

[back to list of plots](#)

Figure 1040: NETMAT edge (25) 094

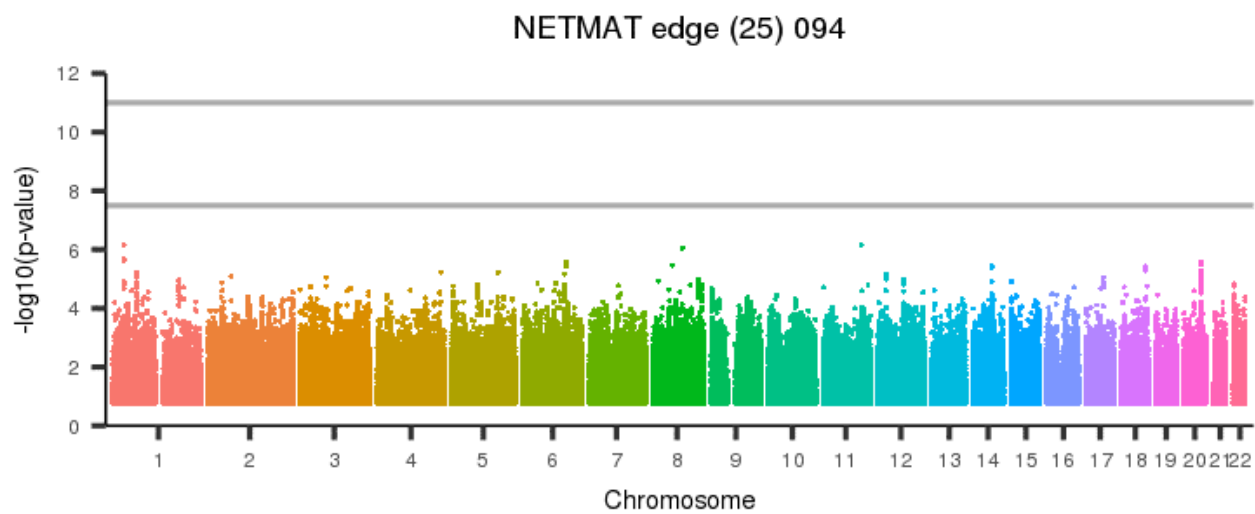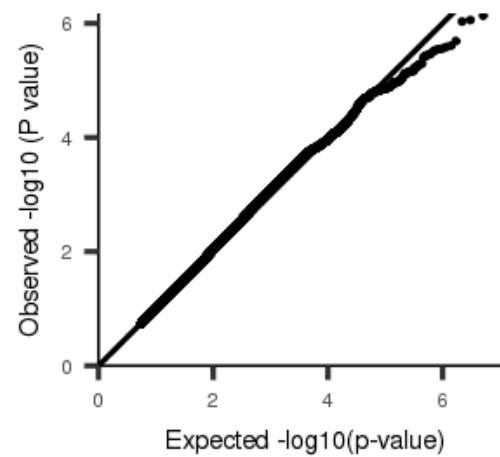

[back to list of plots](#)

Figure 1041: NETMAT edge (25) 095

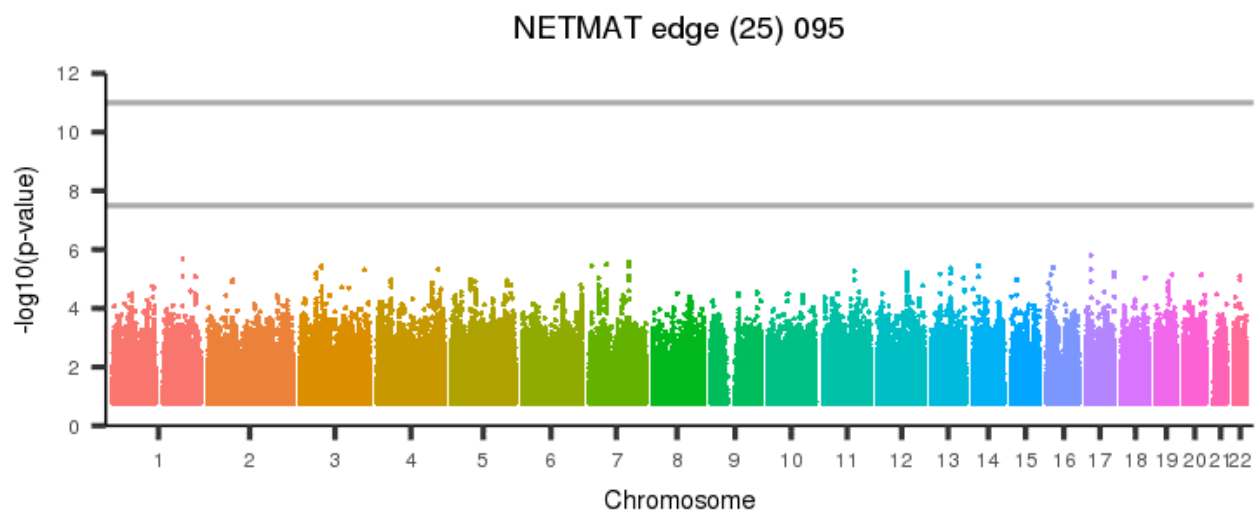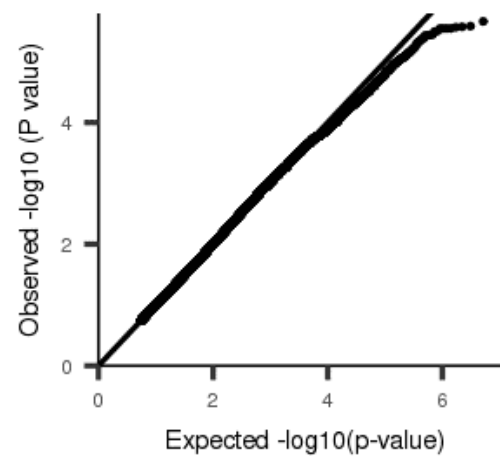

[back to list of plots](#)

Figure 1042: NETMAT edge (25) 096

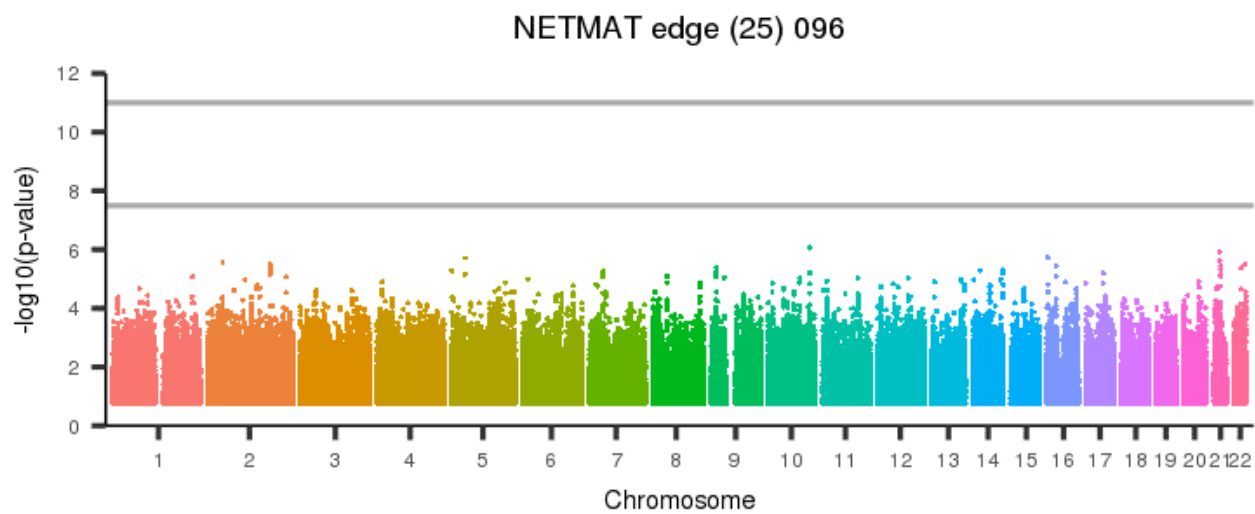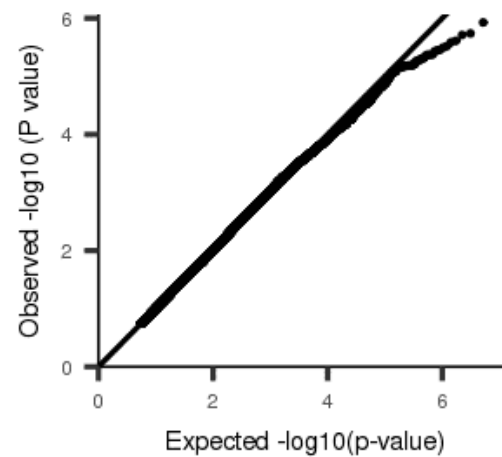

[back to list of plots](#)

Figure 1043: NETMAT edge (25) 097

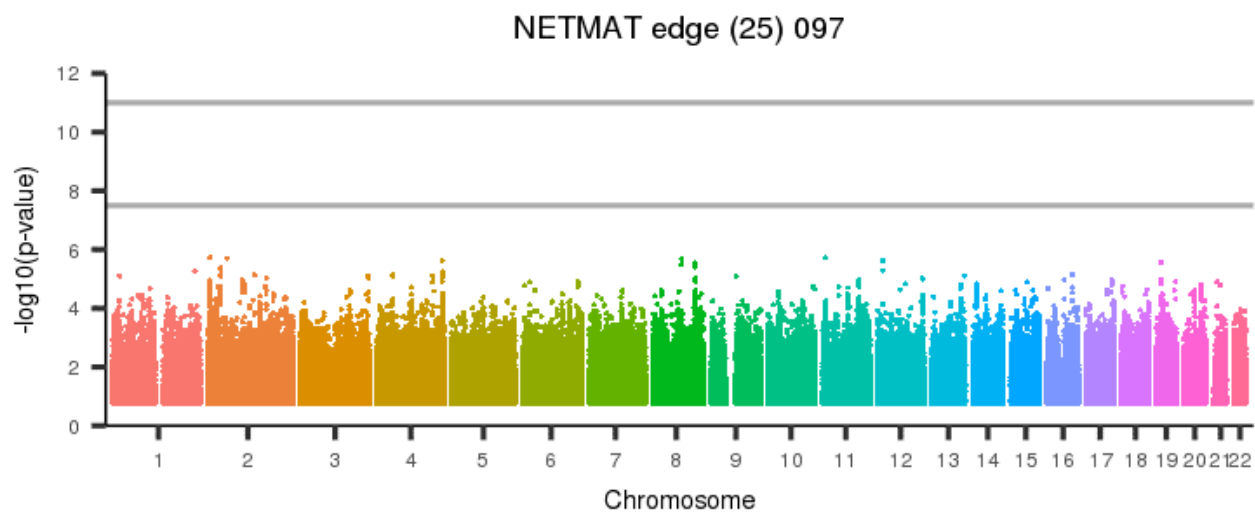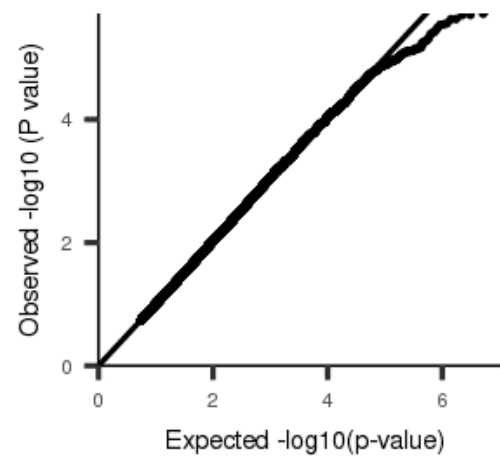

[back to list of plots](#)

Figure 1044: NETMAT edge (25) 098

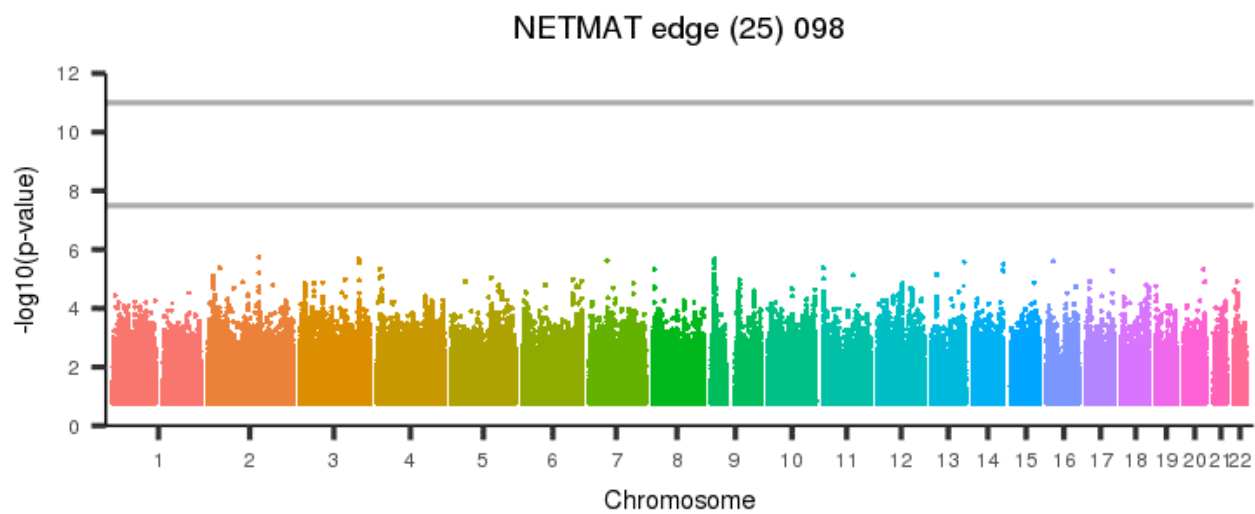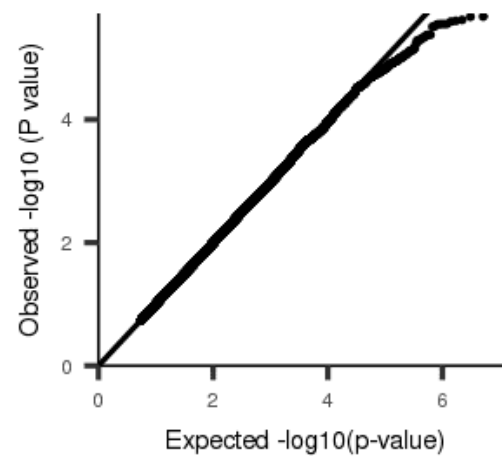

[back to list of plots](#)

Figure 1045: NETMAT edge (25) 099

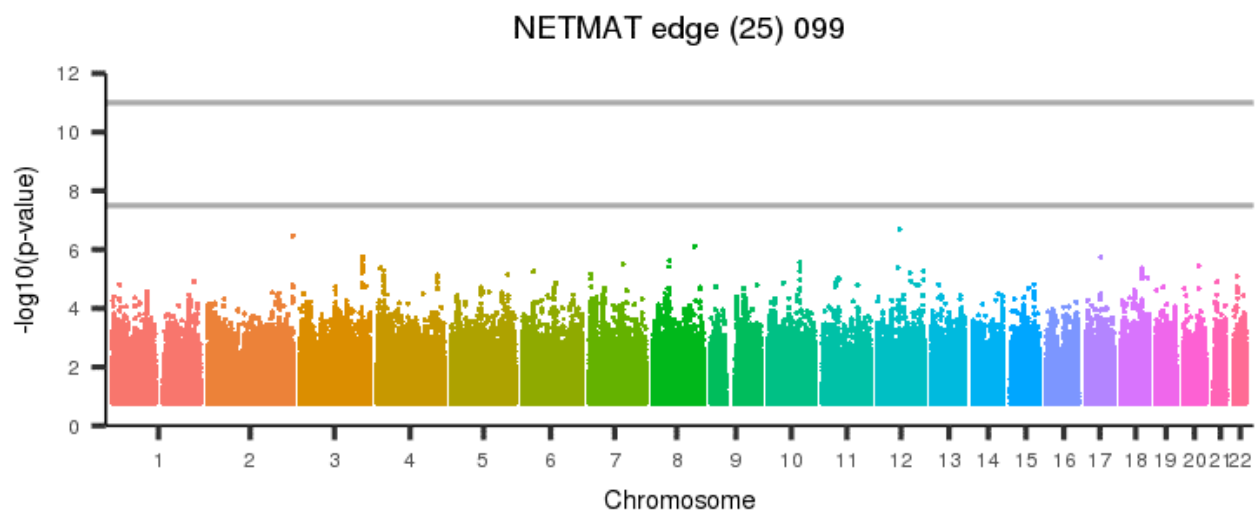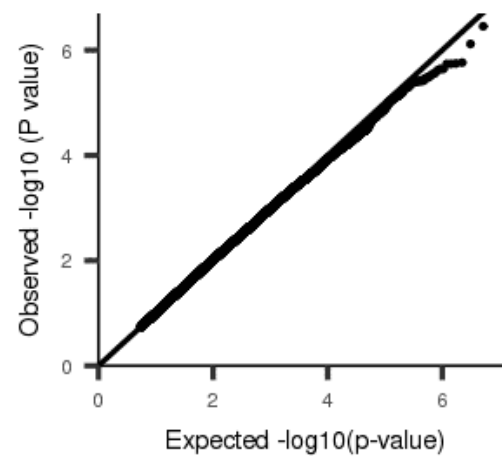

[back to list of plots](#)



Figure 1046: NETMAT edge (25) 100

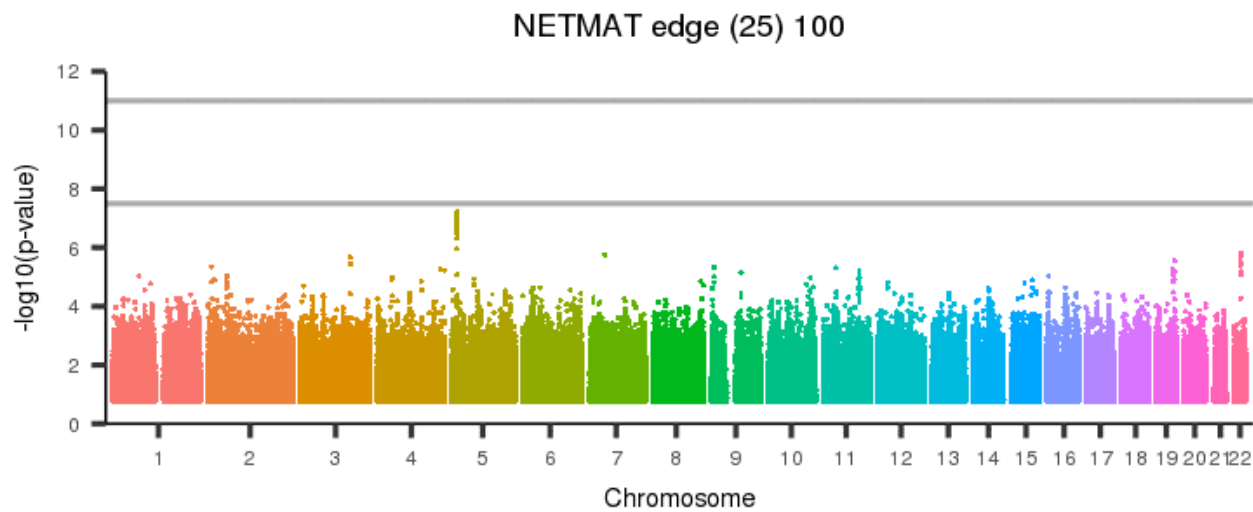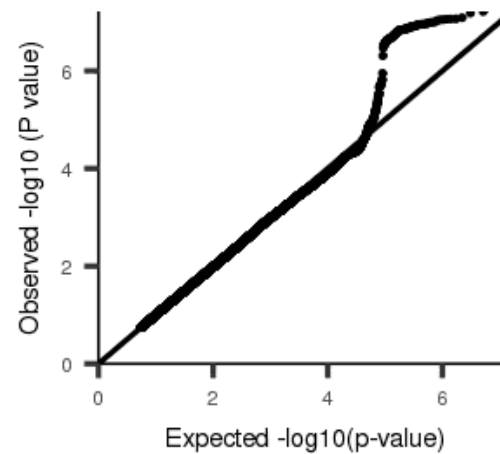

[back to list of plots](#)

Figure 1047: NETMAT edge (25) 101

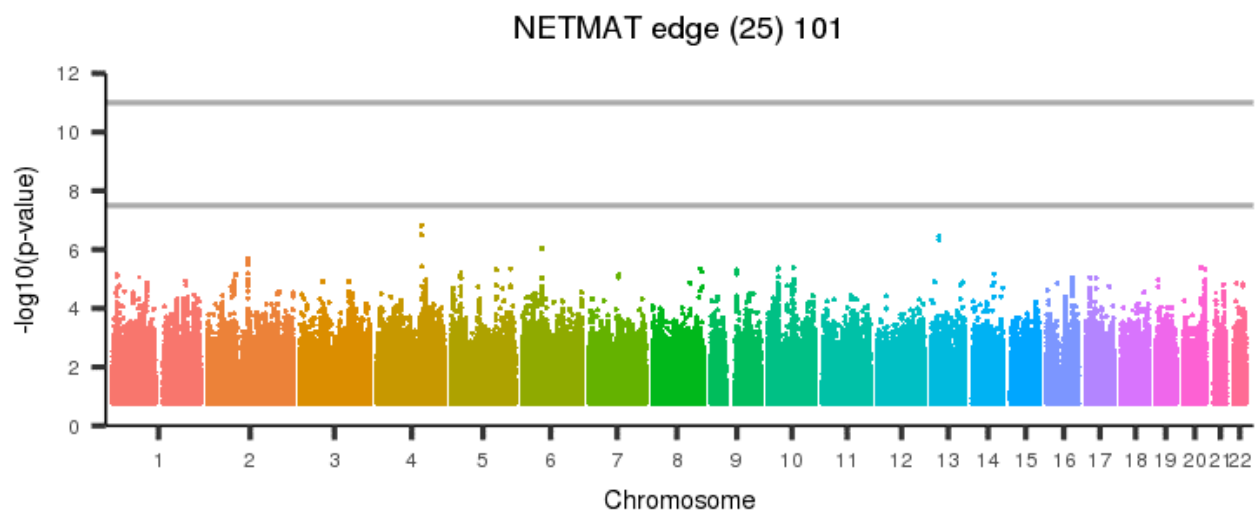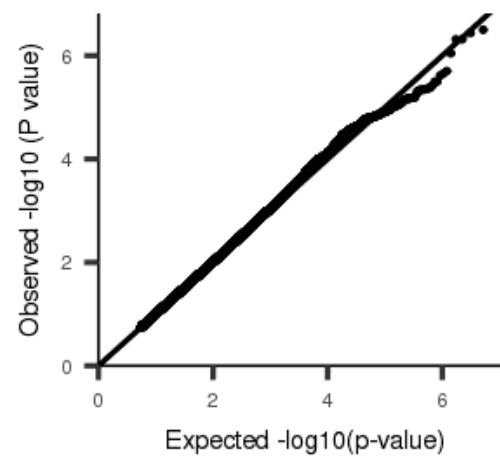

[back to list of plots](#)

Figure 1048: NETMAT edge (25) 102

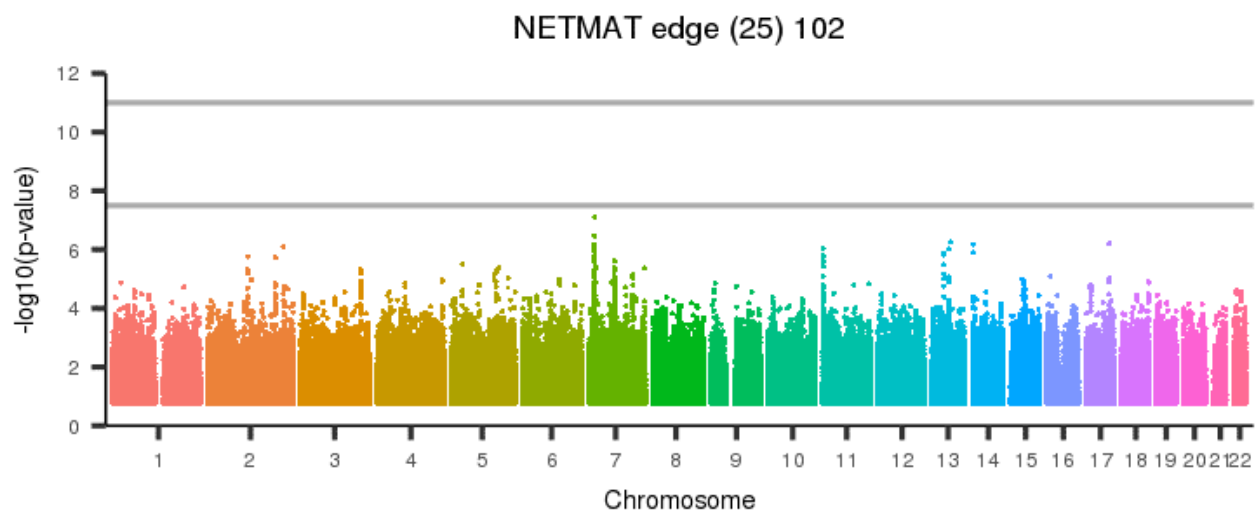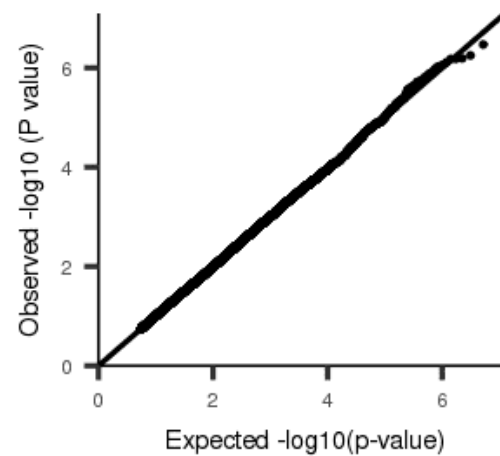

[back to list of plots](#)

Figure 1049: NETMAT edge (25) 103

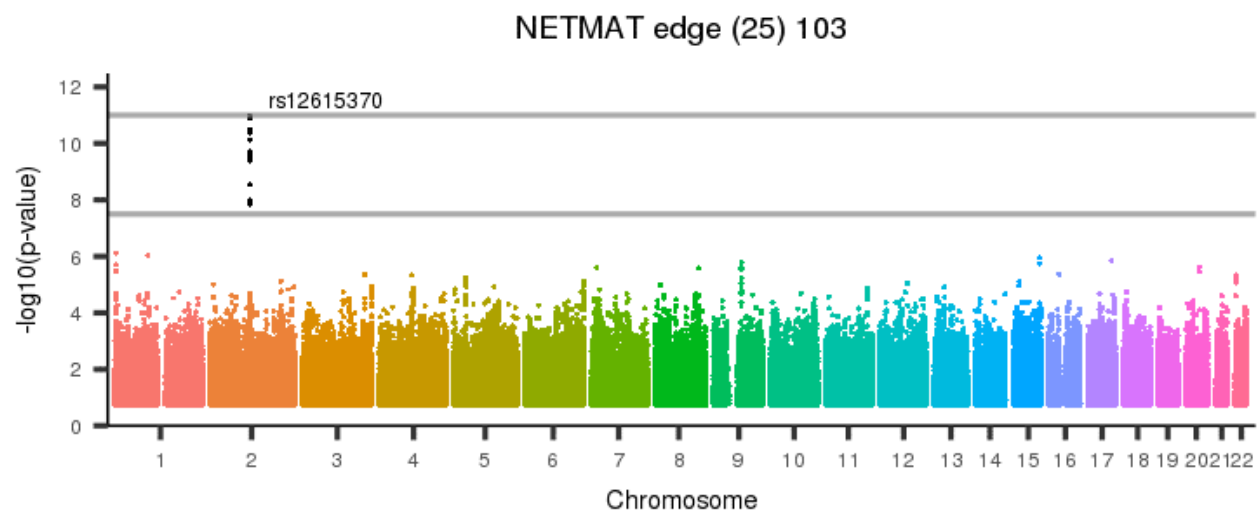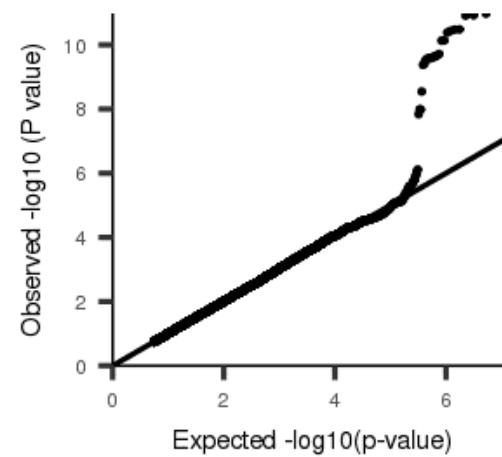

[back to list of plots](#)

Figure 1050: NETMAT edge (25) 104

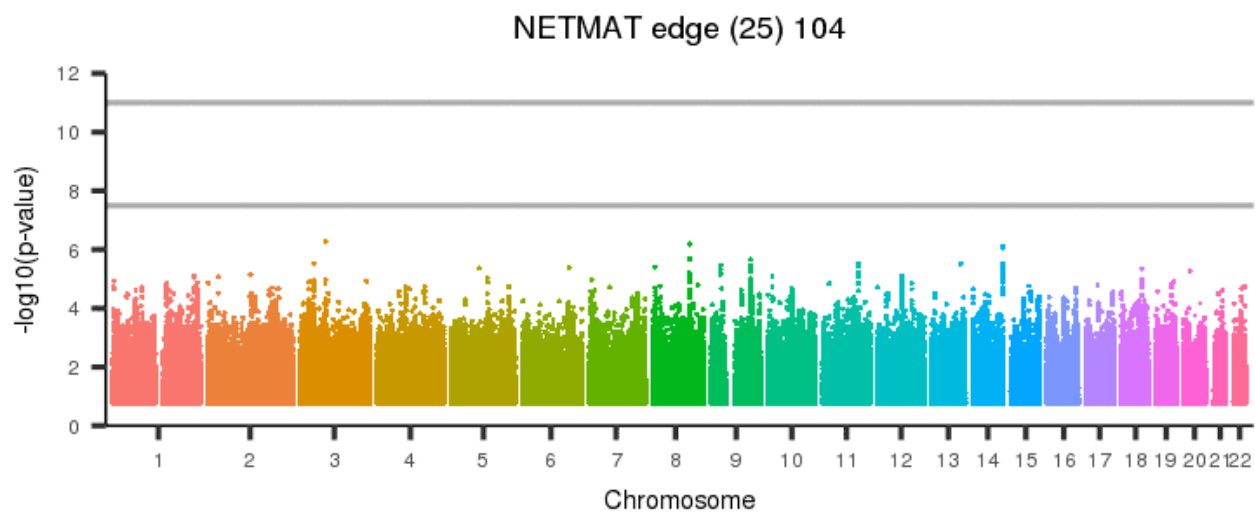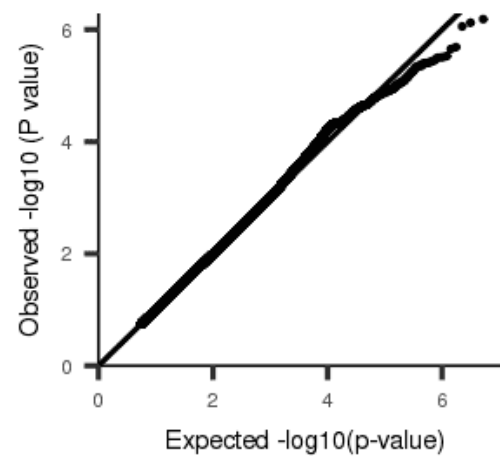

[back to list of plots](#)

Figure 1051: NETMAT edge (25) 105

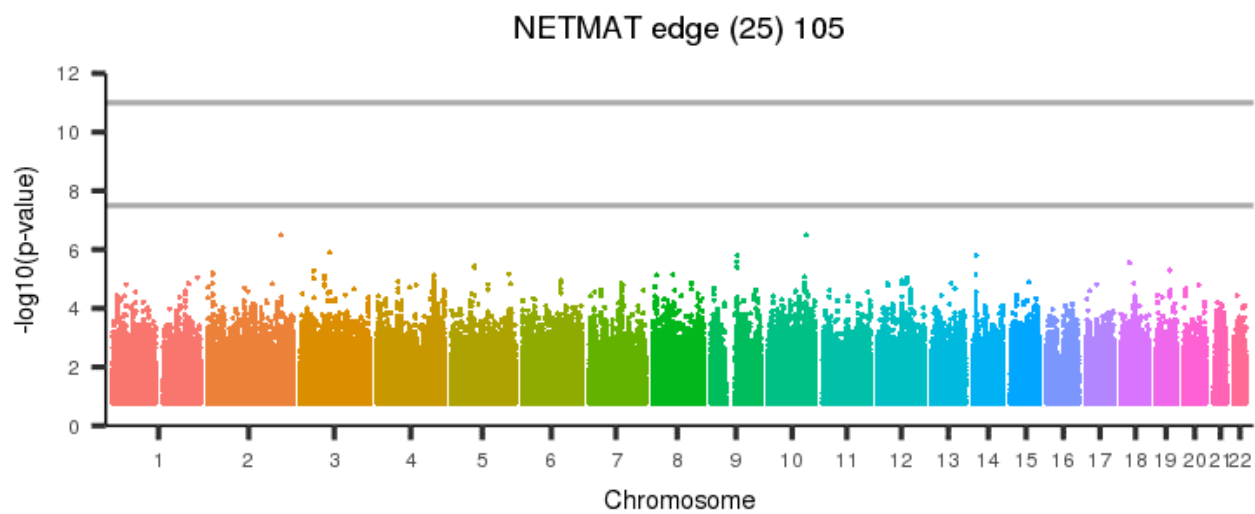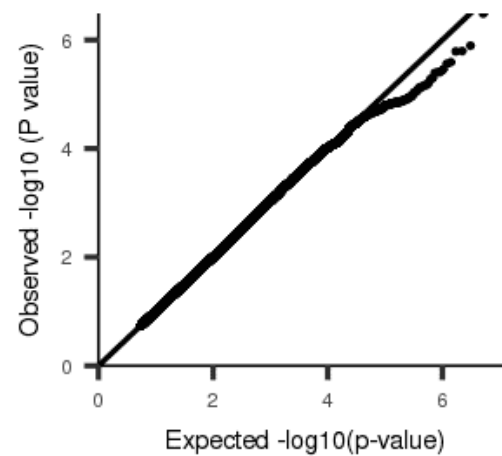

[back to list of plots](#)

Figure 1052: NETMAT edge (25) 106

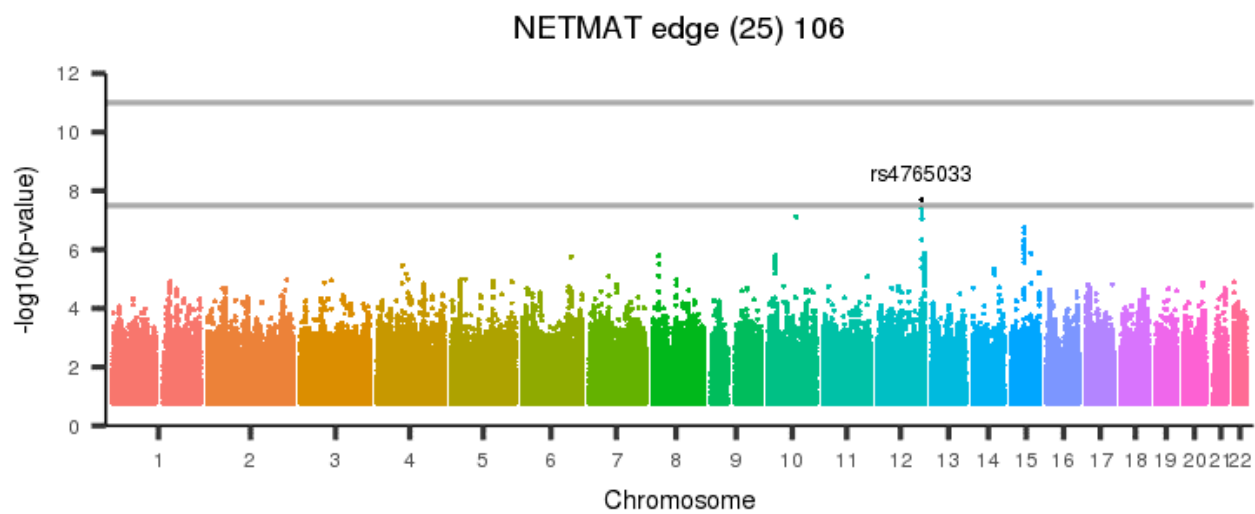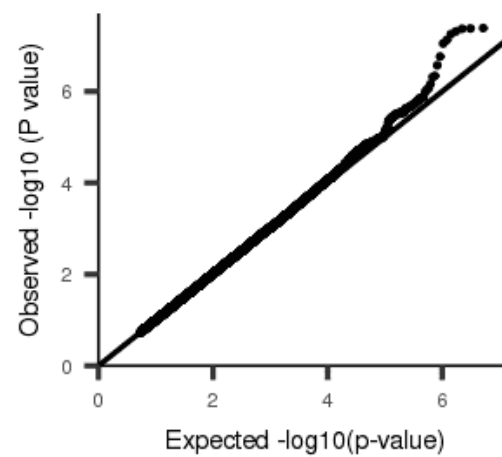

[back to list of plots](#)

Figure 1053: NETMAT edge (25) 107

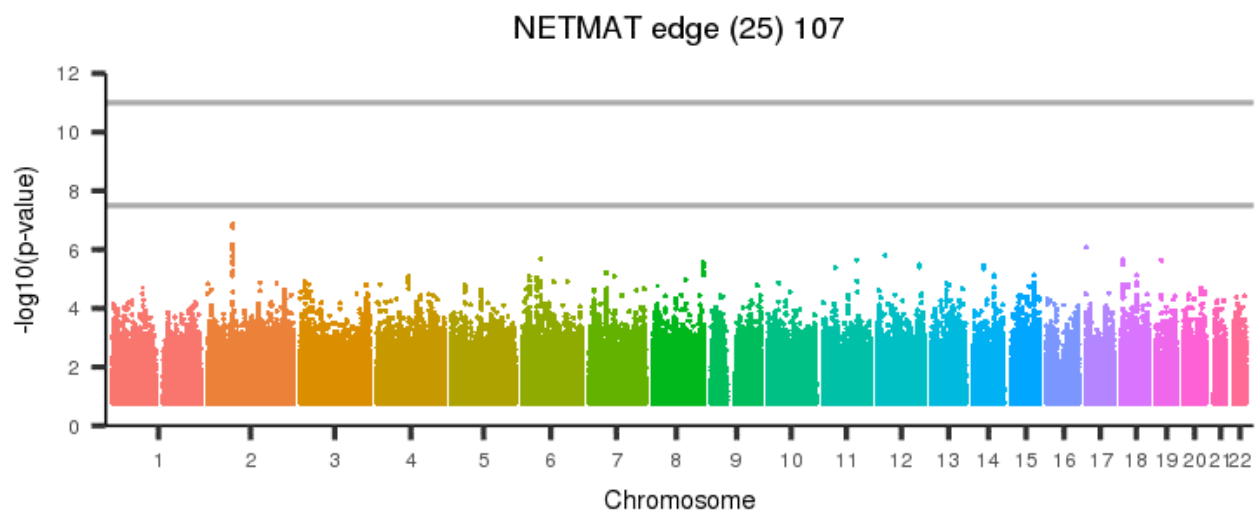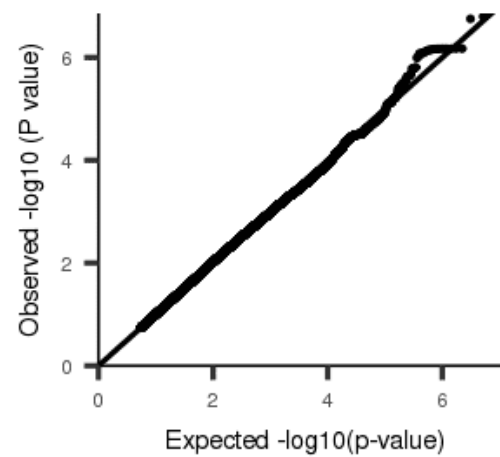

[back to list of plots](#)



Figure 1054: NETMAT edge (25) 108

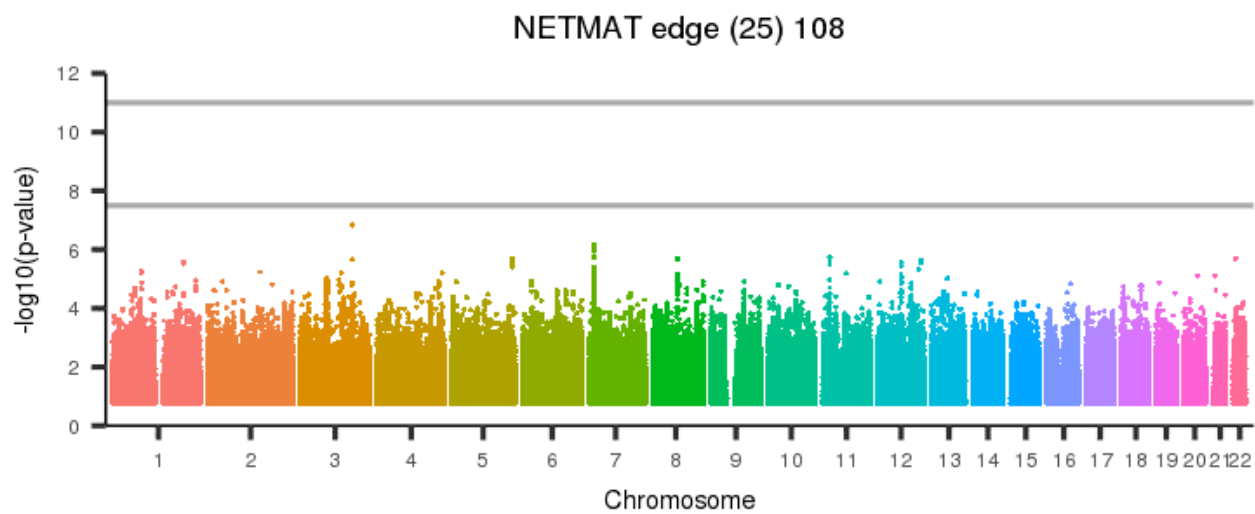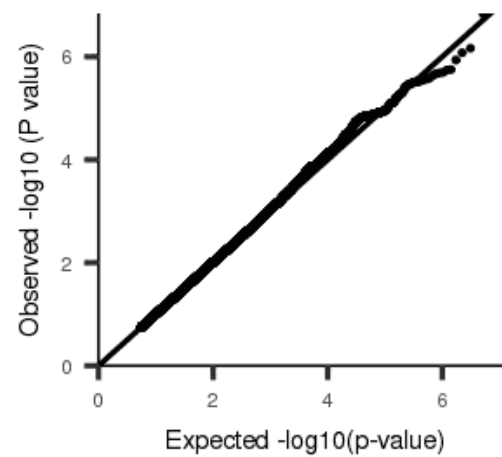

[back to list of plots](#)

Figure 1055: NETMAT edge (25) 109

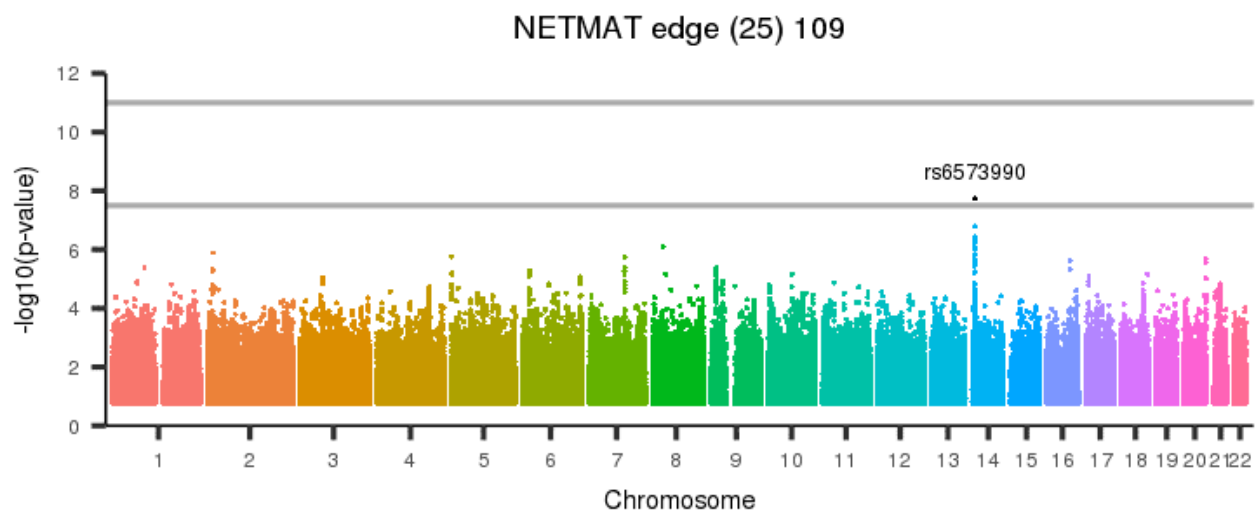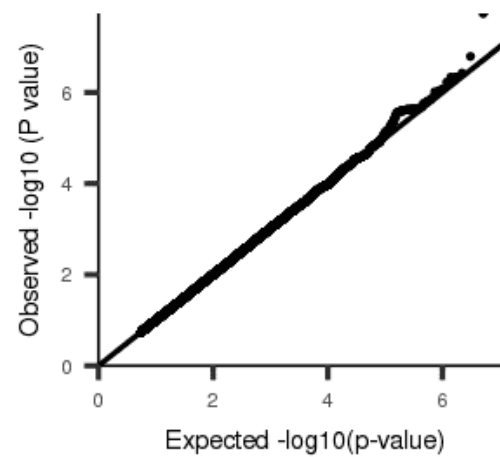

[back to list of plots](#)

Figure 1056: NETMAT edge (25) 110

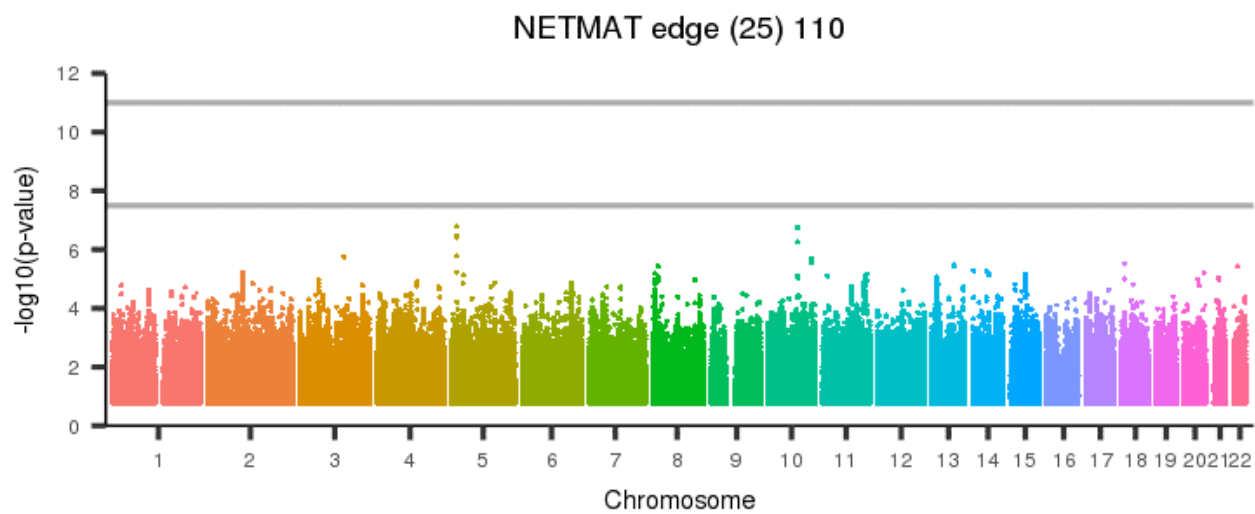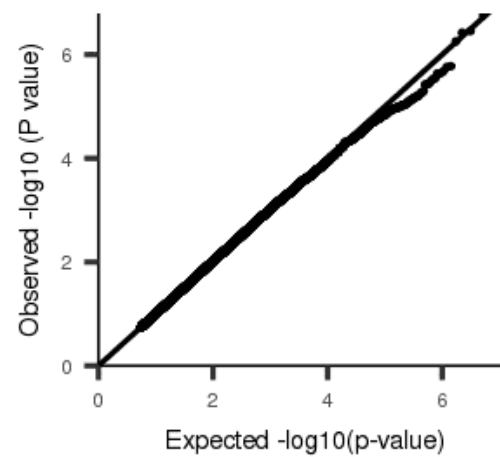

[back to list of plots](#)

Figure 1057: NETMAT edge (25) 111

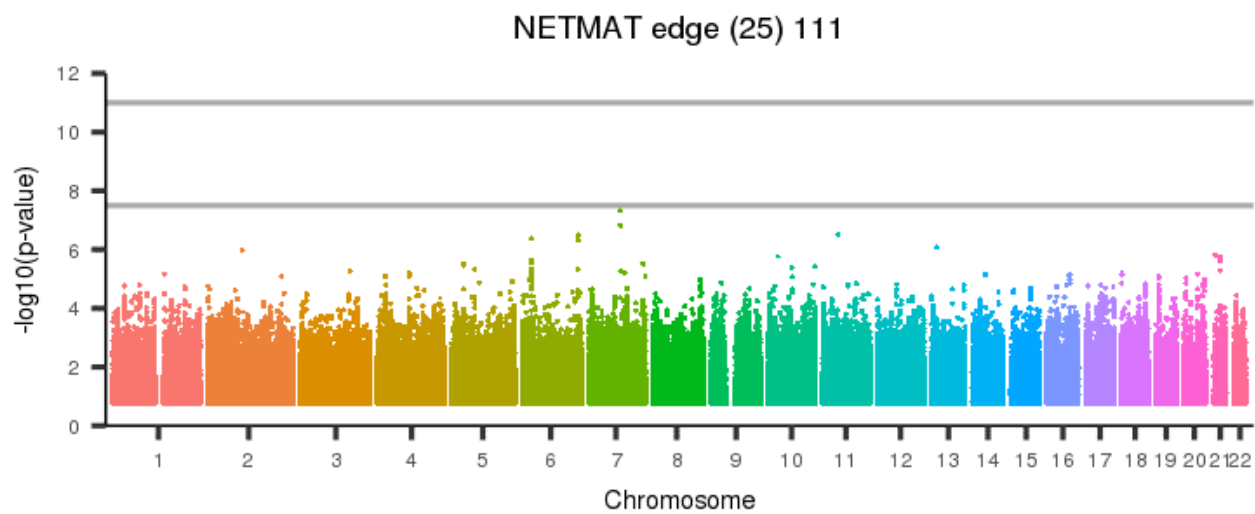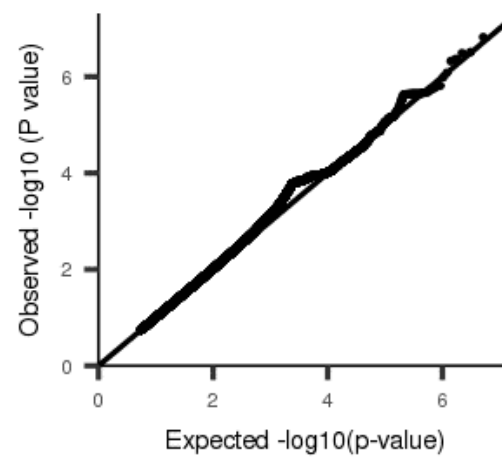

[back to list of plots](#)

Figure 1058: NETMAT edge (25) 112

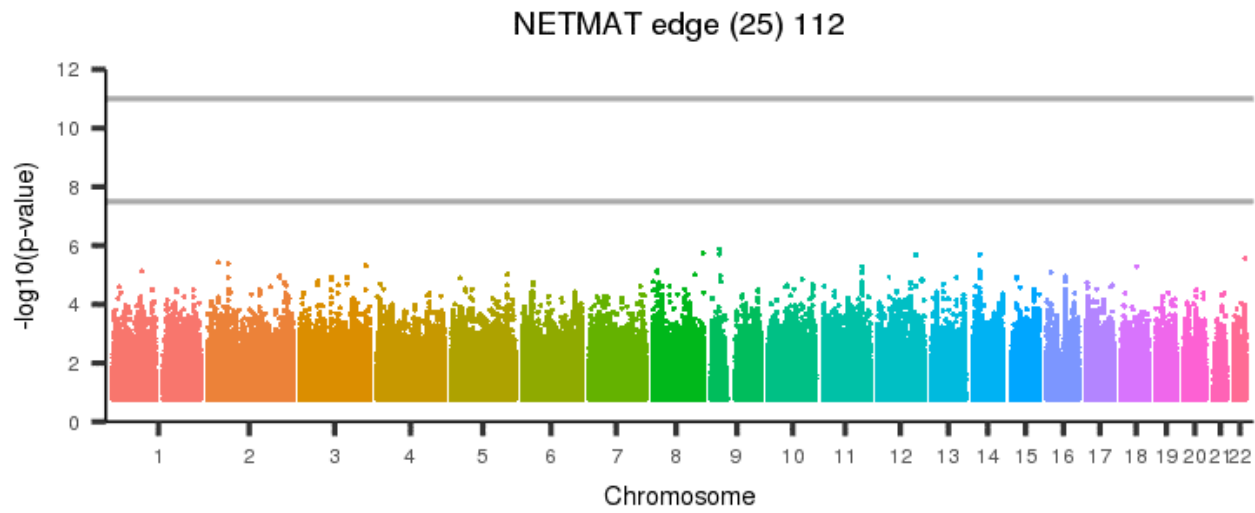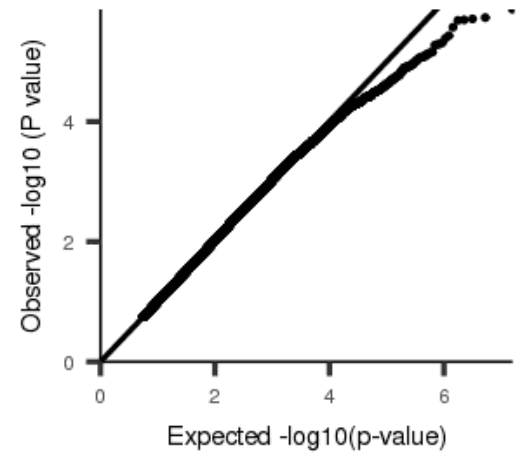

[back to list of plots](#)

Figure 1059: NETMAT edge (25) 113

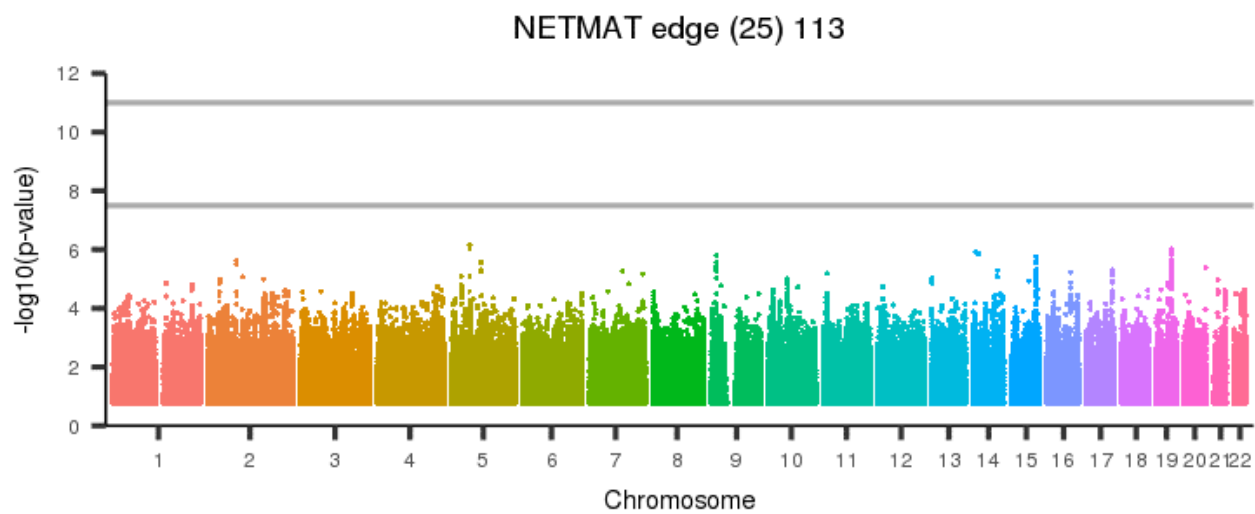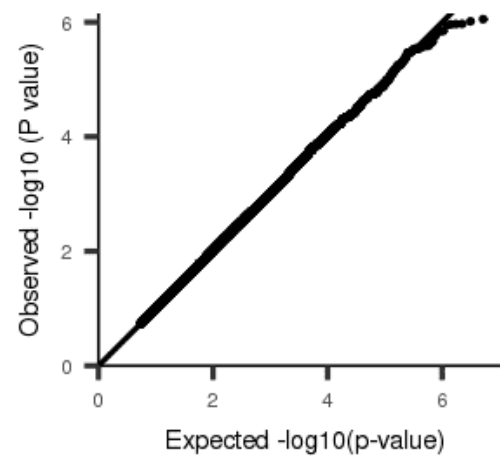

[back to list of plots](#)

Figure 1060: NETMAT edge (25) 114

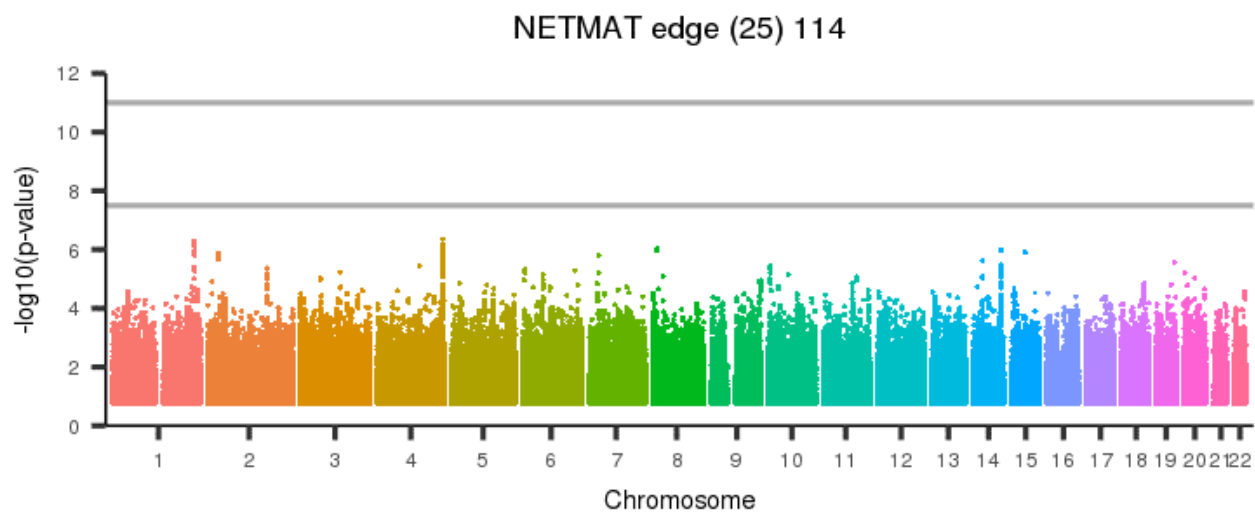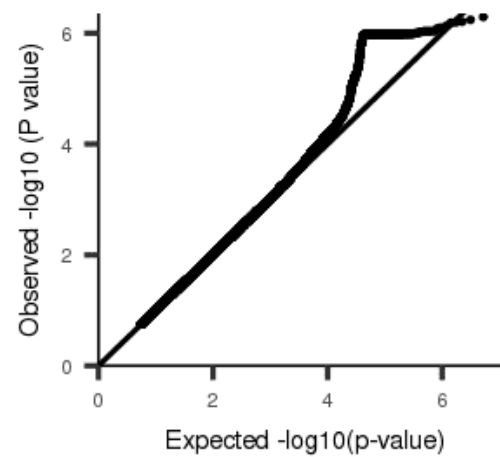

[back to list of plots](#)

Figure 1061: NETMAT edge (25) 115

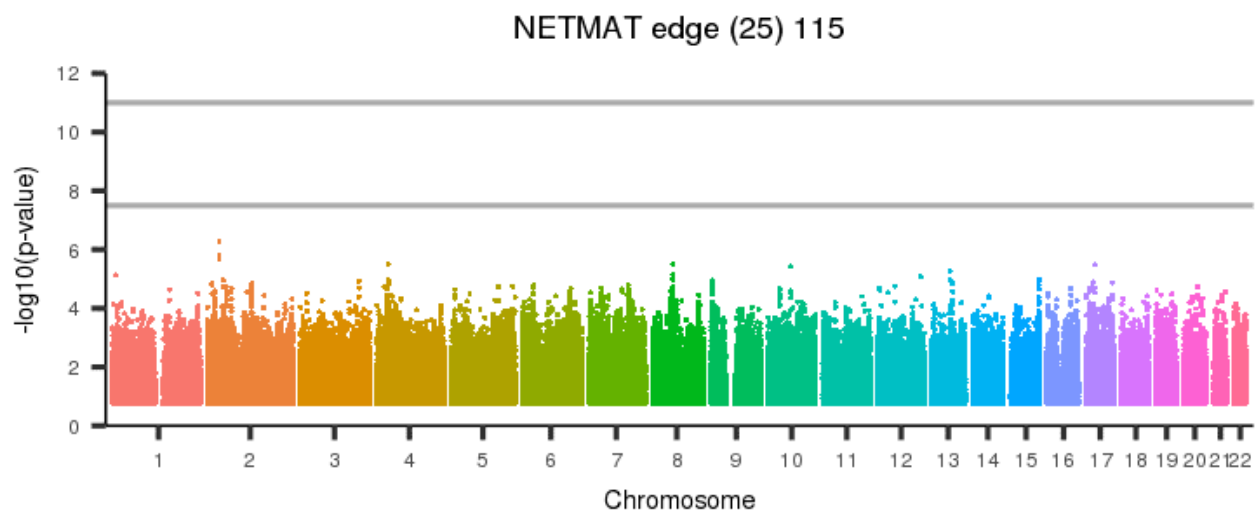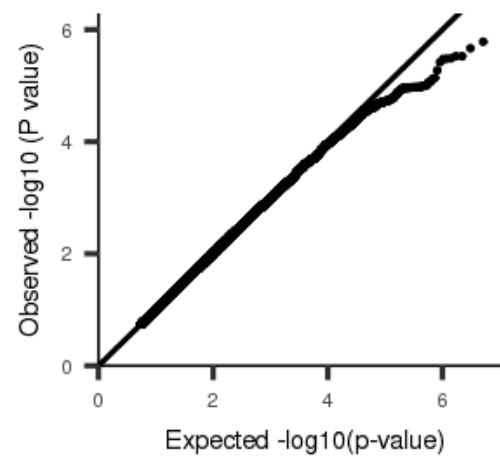

[back to list of plots](#)



Figure 1062: NETMAT edge (25) 116

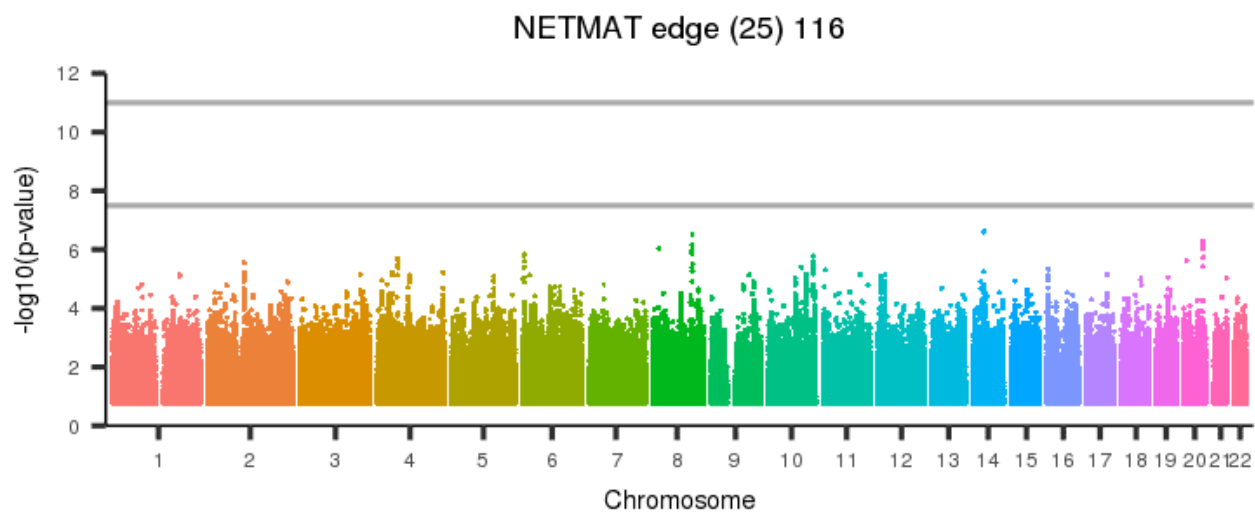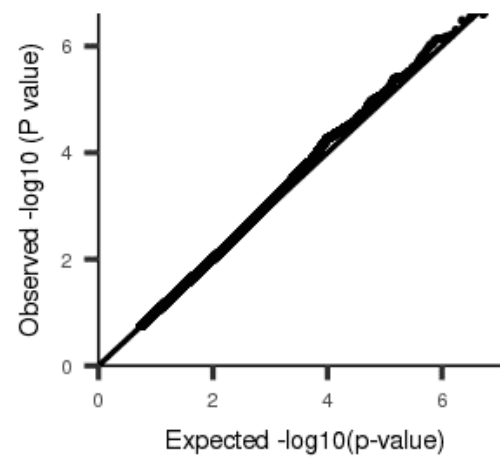

[back to list of plots](#)

Figure 1063: NETMAT edge (25) 117

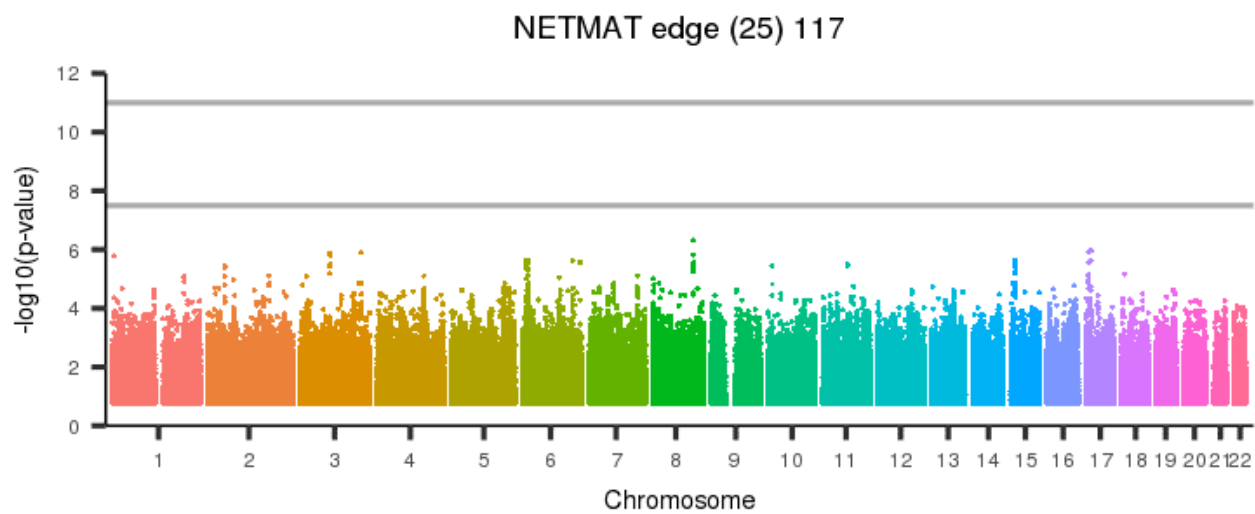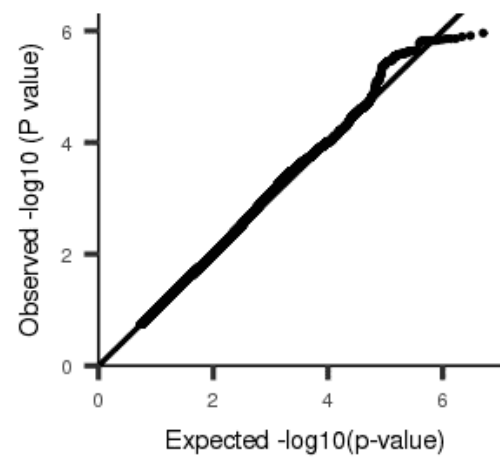

[back to list of plots](#)

Figure 1064: NETMAT edge (25) 118

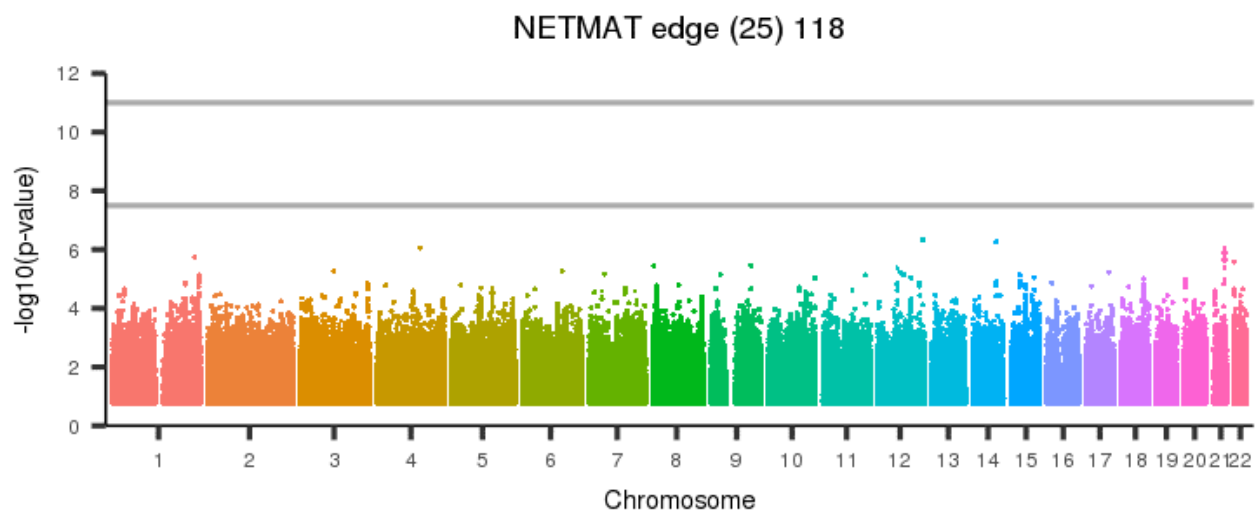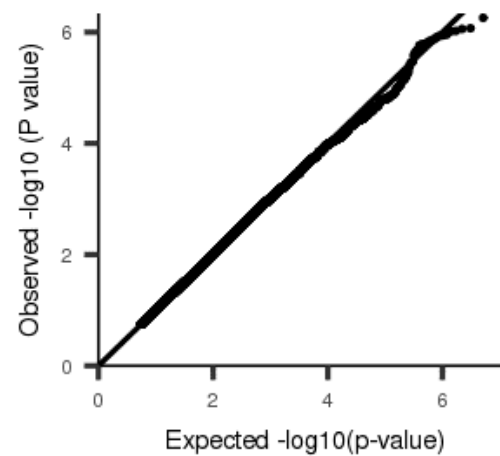

[back to list of plots](#)

Figure 1065: NETMAT edge (25) 119

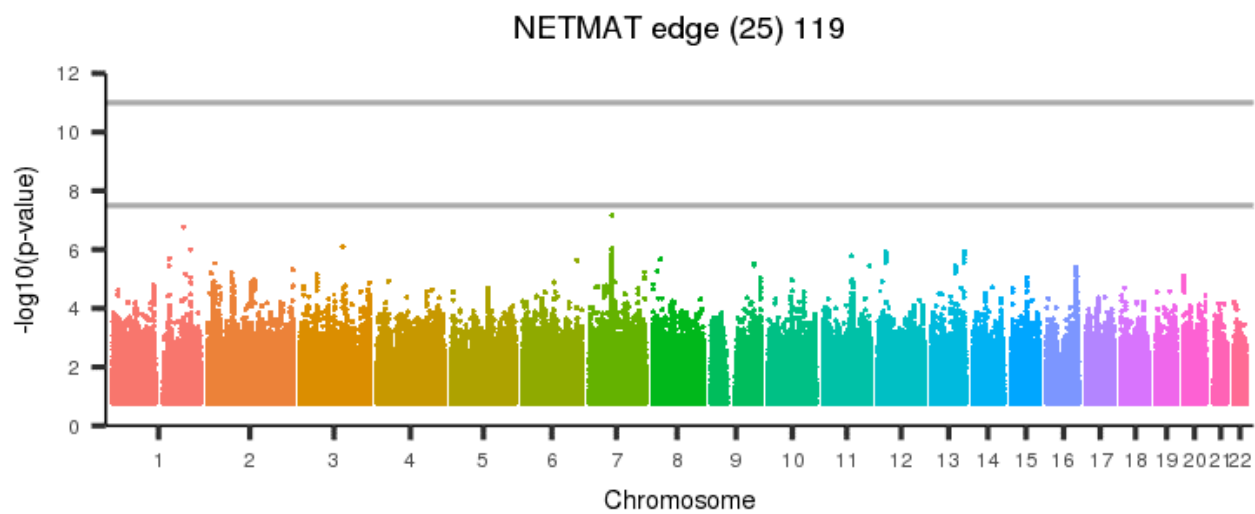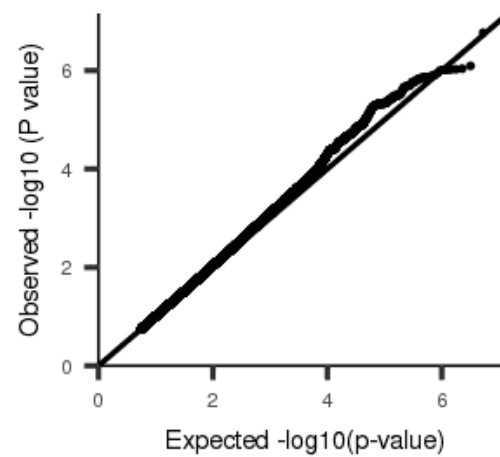

[back to list of plots](#)

Figure 1066: NETMAT edge (25) 120

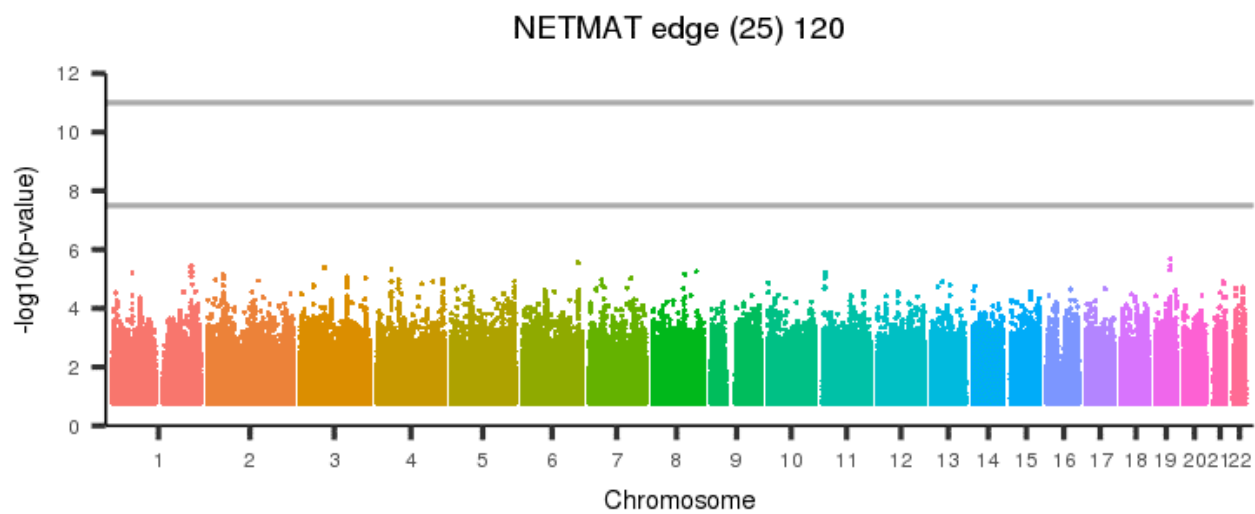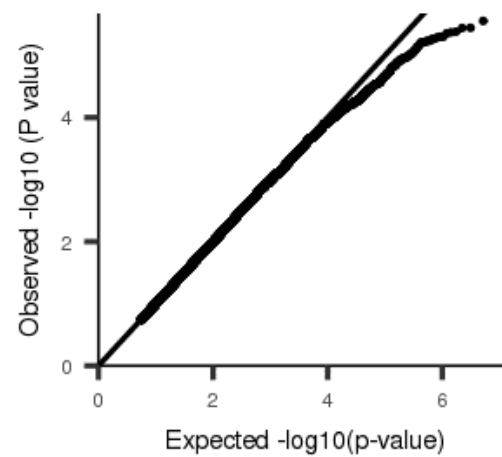

[back to list of plots](#)

Figure 1067: NETMAT edge (25) 121

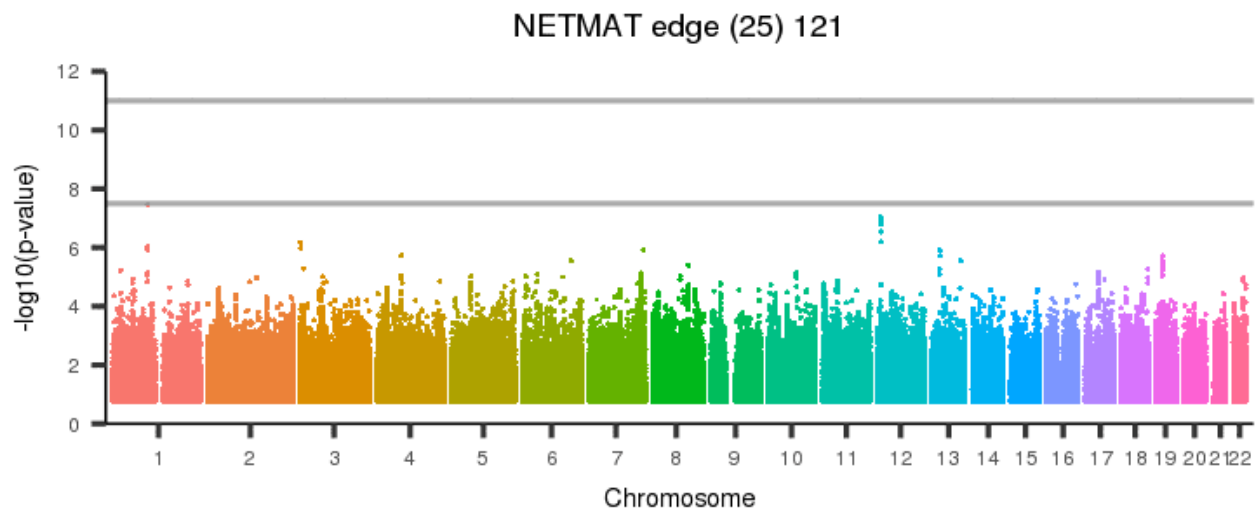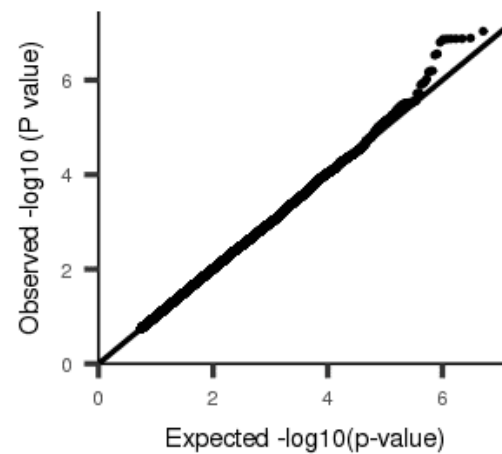

[back to list of plots](#)

Figure 1068: NETMAT edge (25) 122

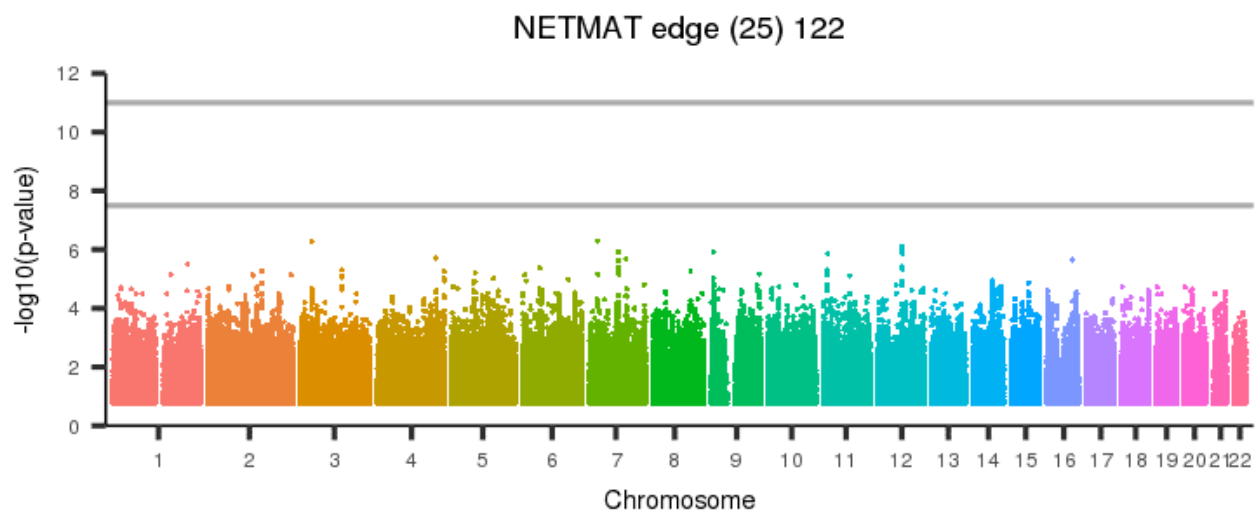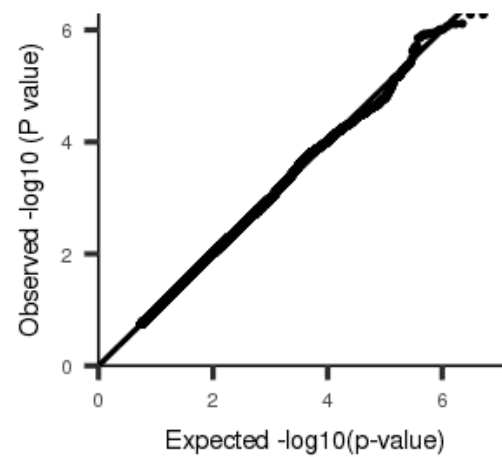

[back to list of plots](#)

Figure 1069: NETMAT edge (25) 123

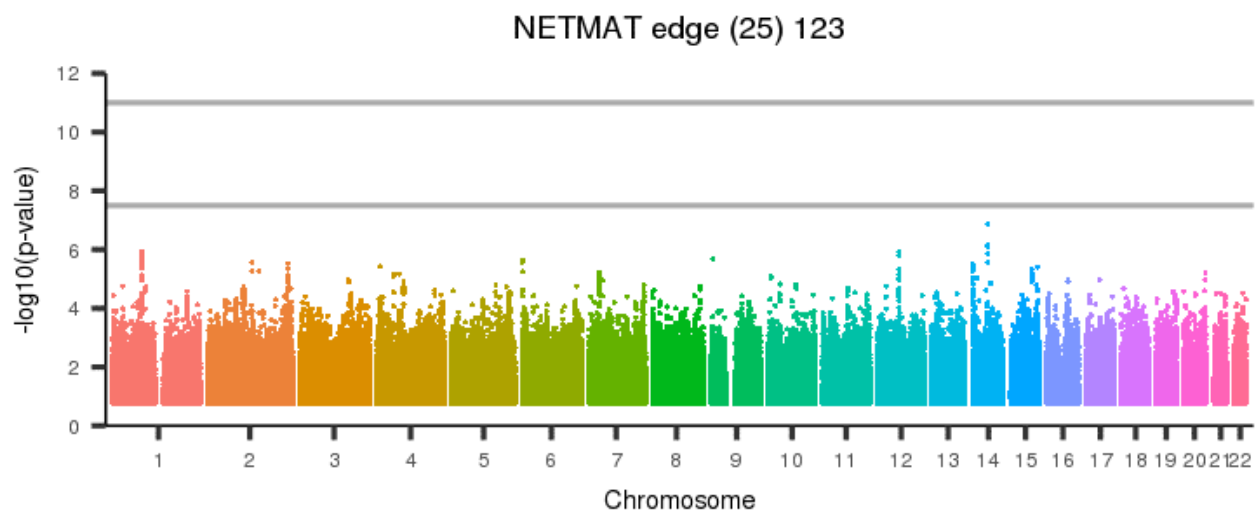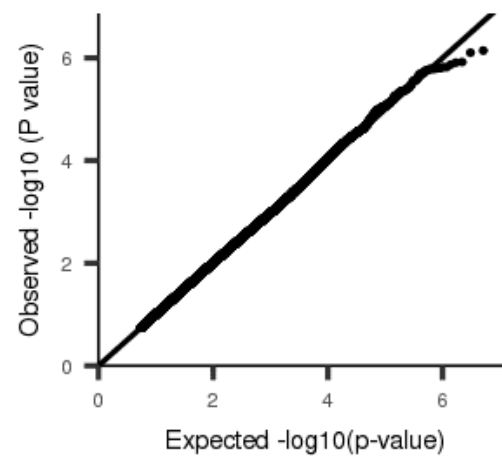

[back to list of plots](#)



Figure 1070: NETMAT edge (25) 124

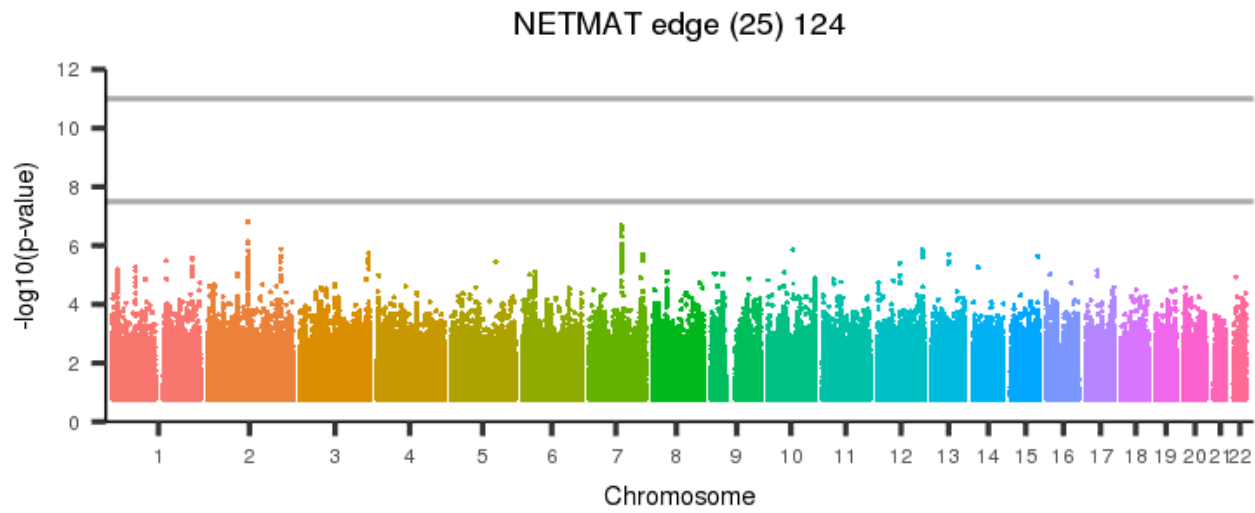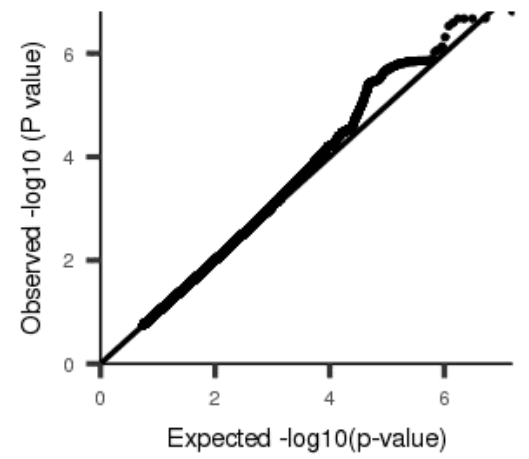

[back to list of plots](#)

Figure 1071: NETMAT edge (25) 125

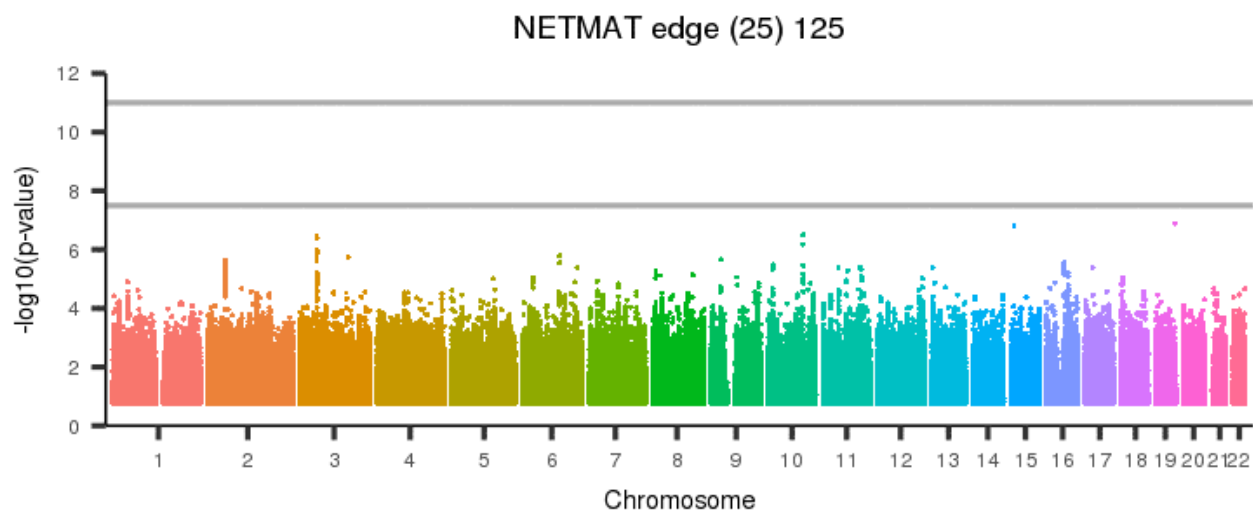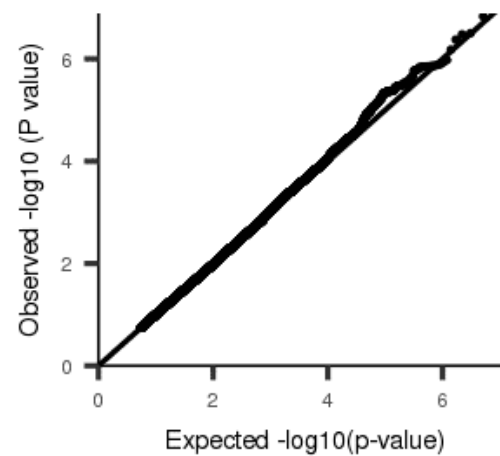

[back to list of plots](#)

Figure 1072: NETMAT edge (25) 126

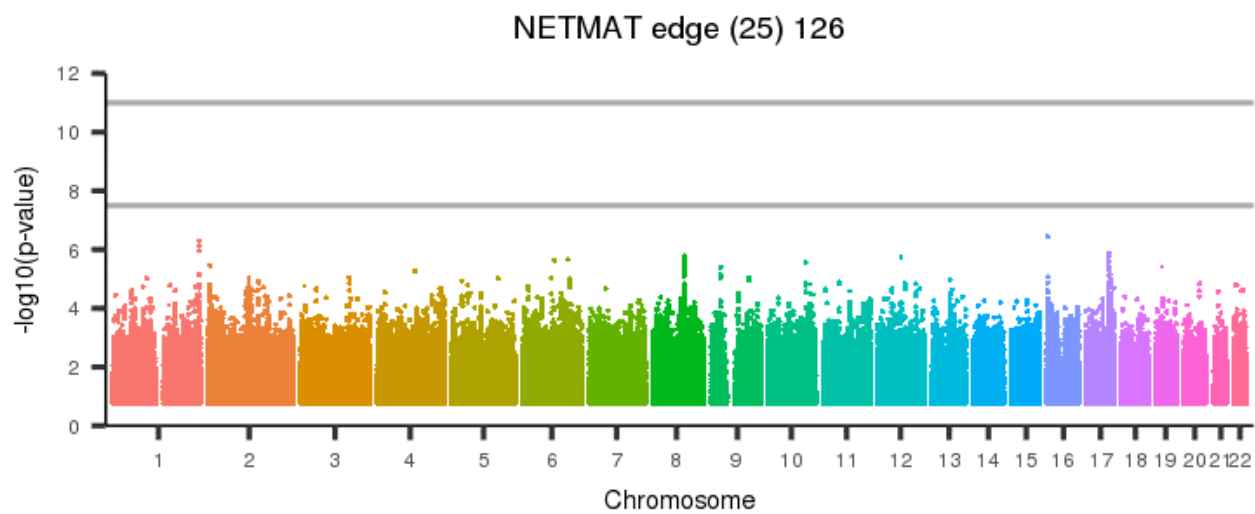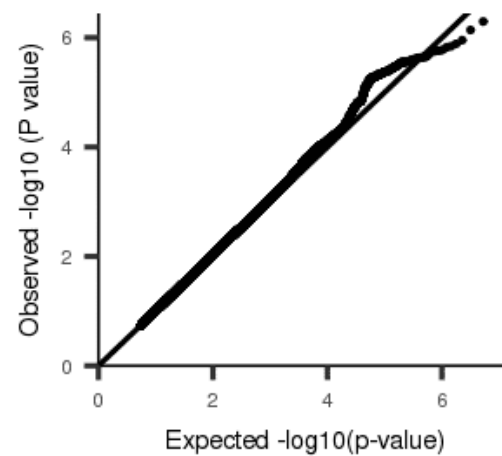

[back to list of plots](#)

Figure 1073: NETMAT edge (25) 127

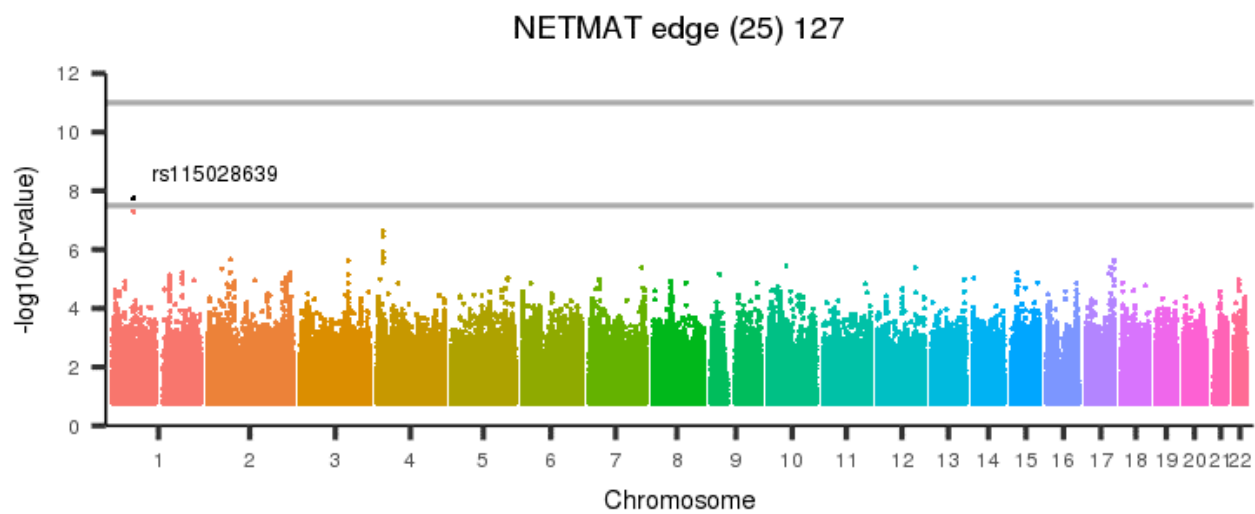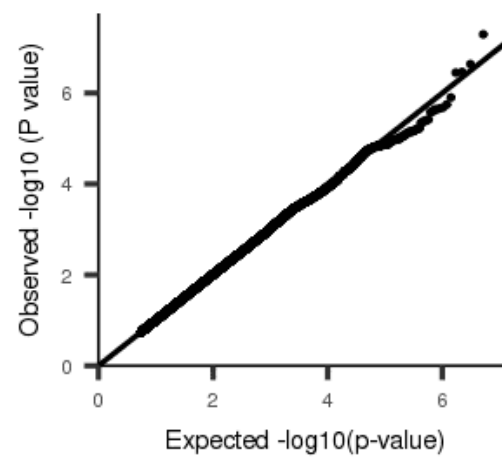

[back to list of plots](#)

Figure 1074: NETMAT edge (25) 128

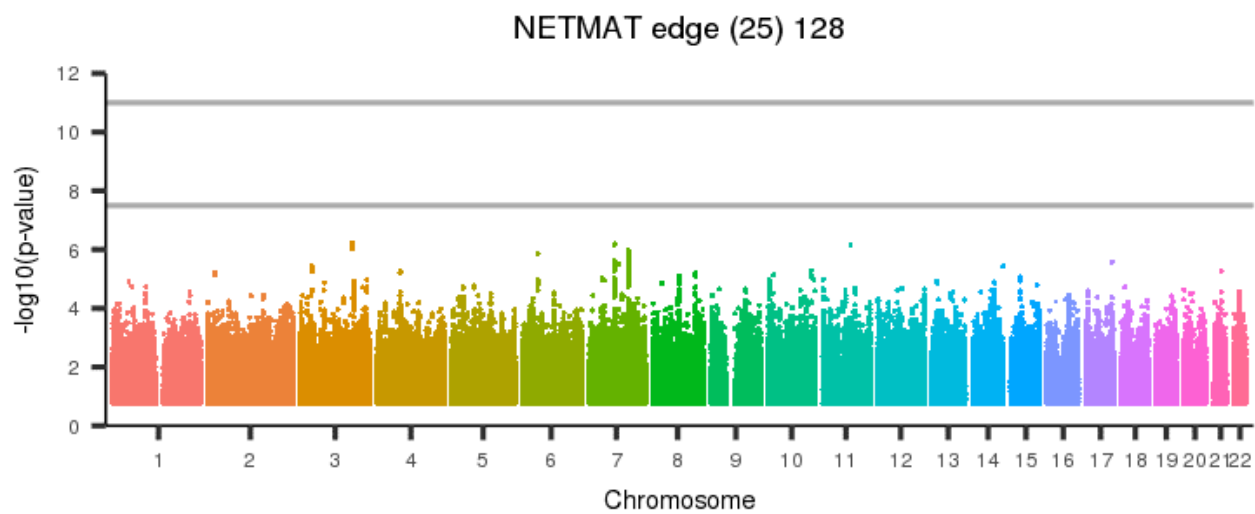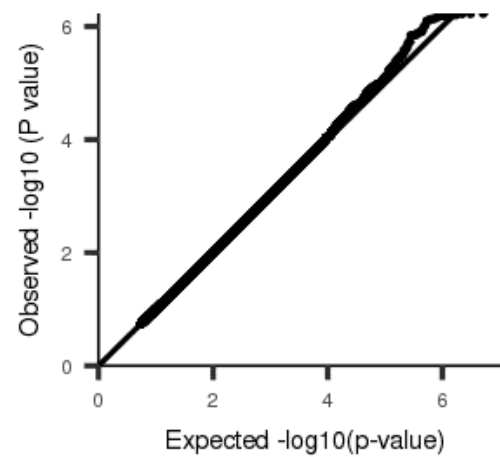

[back to list of plots](#)

Figure 1075: NETMAT edge (25) 129

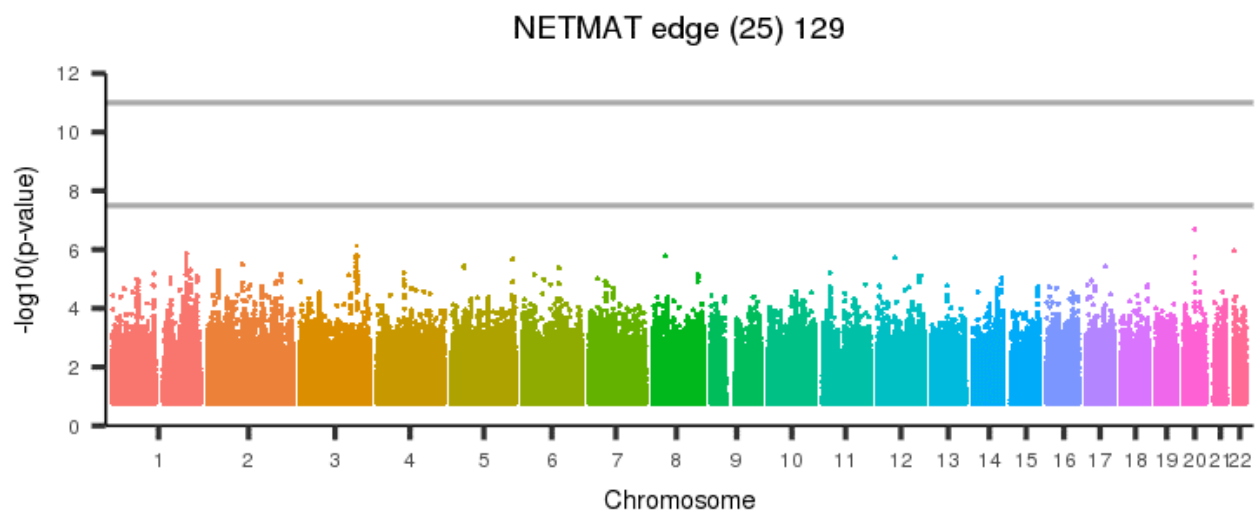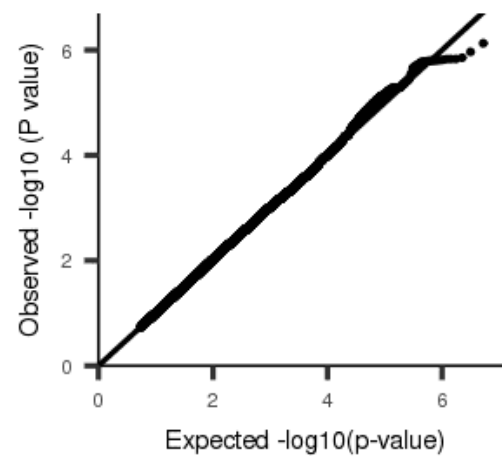

[back to list of plots](#)

Figure 1076: NETMAT edge (25) 130

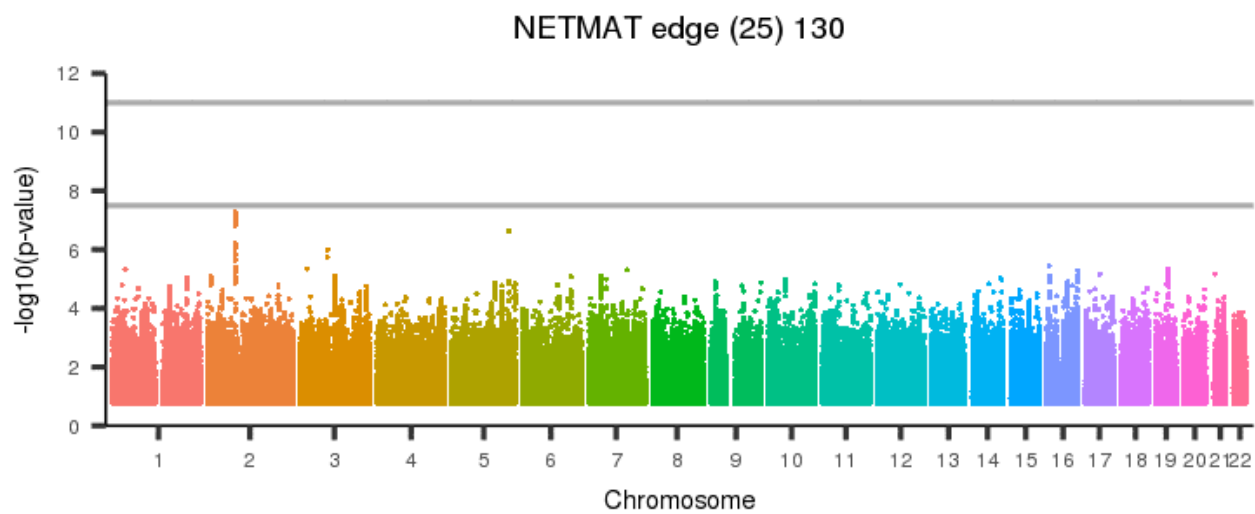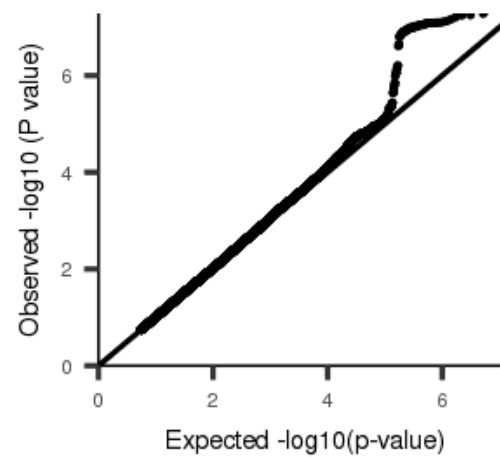

[back to list of plots](#)

Figure 1077: NETMAT edge (25) 131

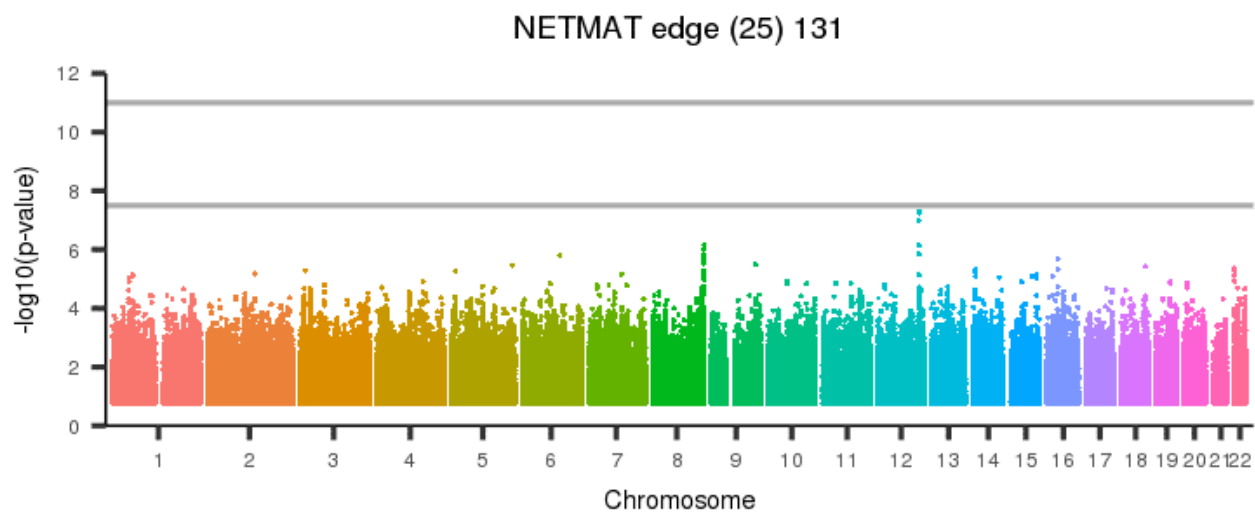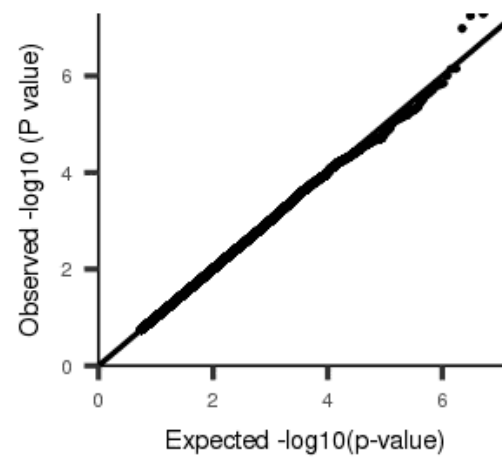

[back to list of plots](#)



Figure 1078: NETMAT edge (25) 132

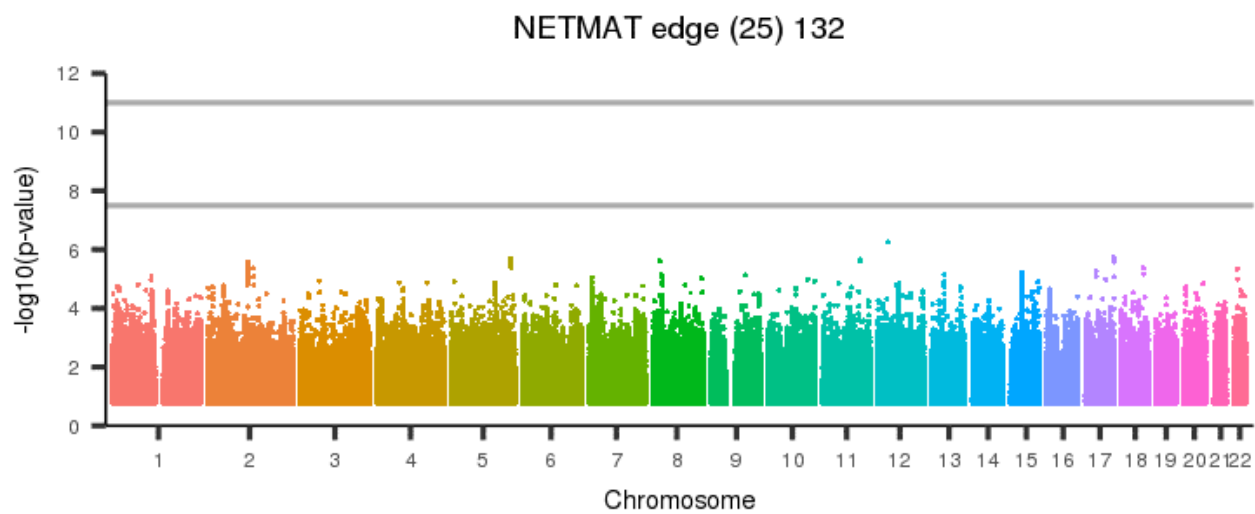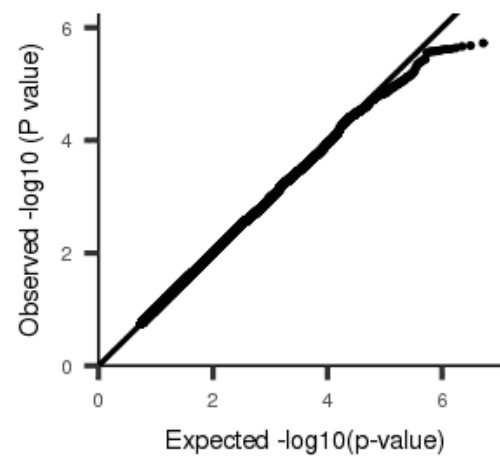

[back to list of plots](#)

Figure 1079: NETMAT edge (25) 133

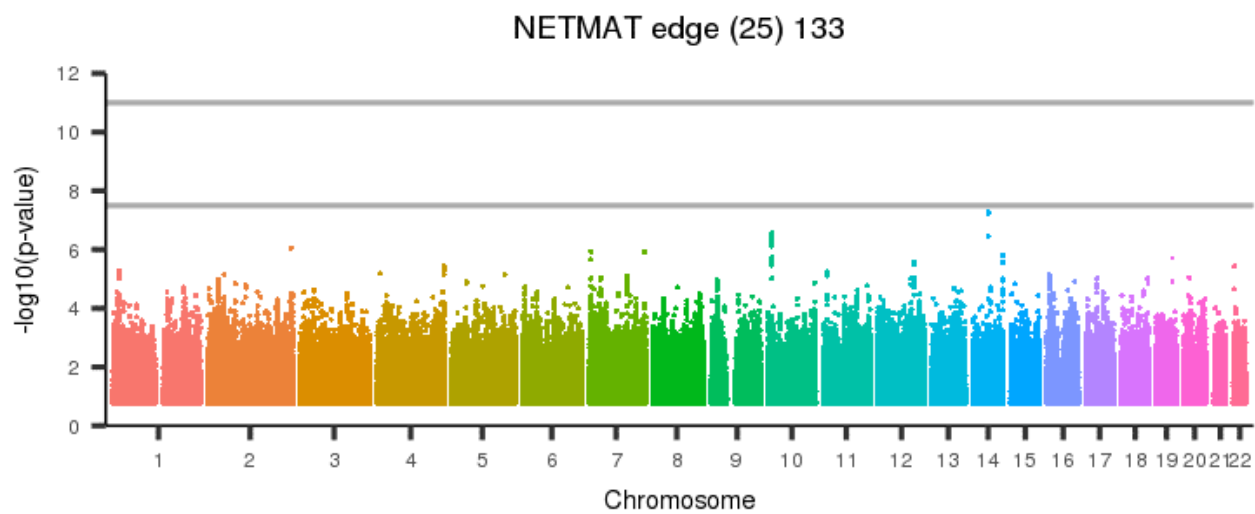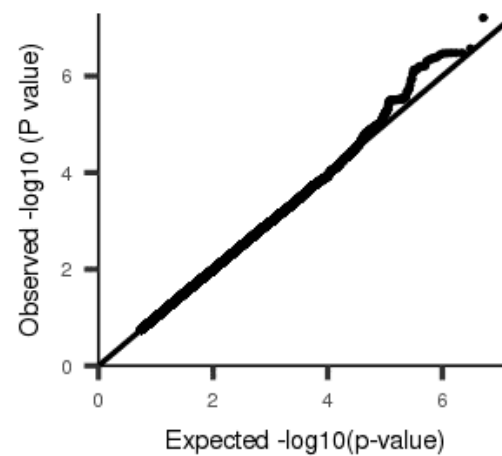

[back to list of plots](#)

Figure 1080: NETMAT edge (25) 134

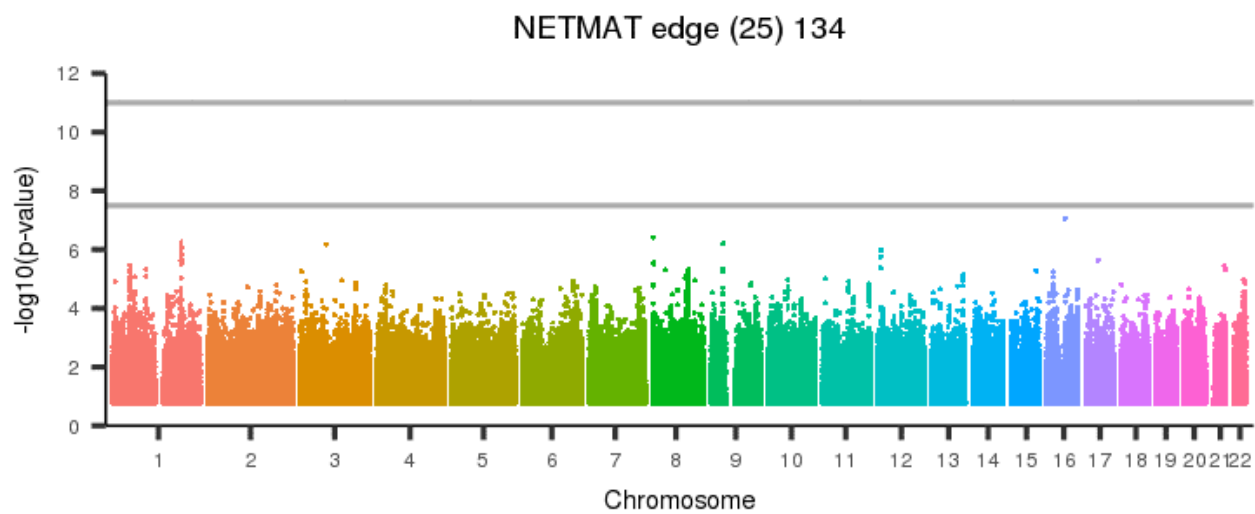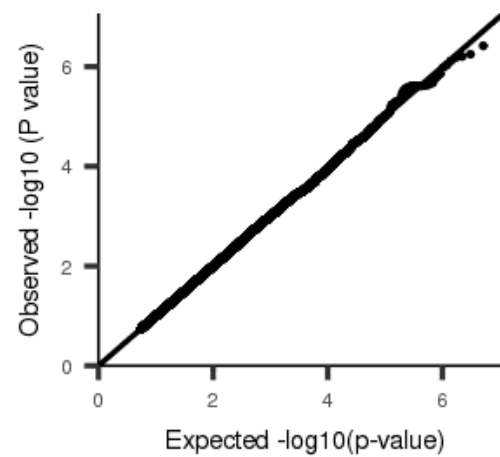

[back to list of plots](#)

Figure 1081: NETMAT edge (25) 135

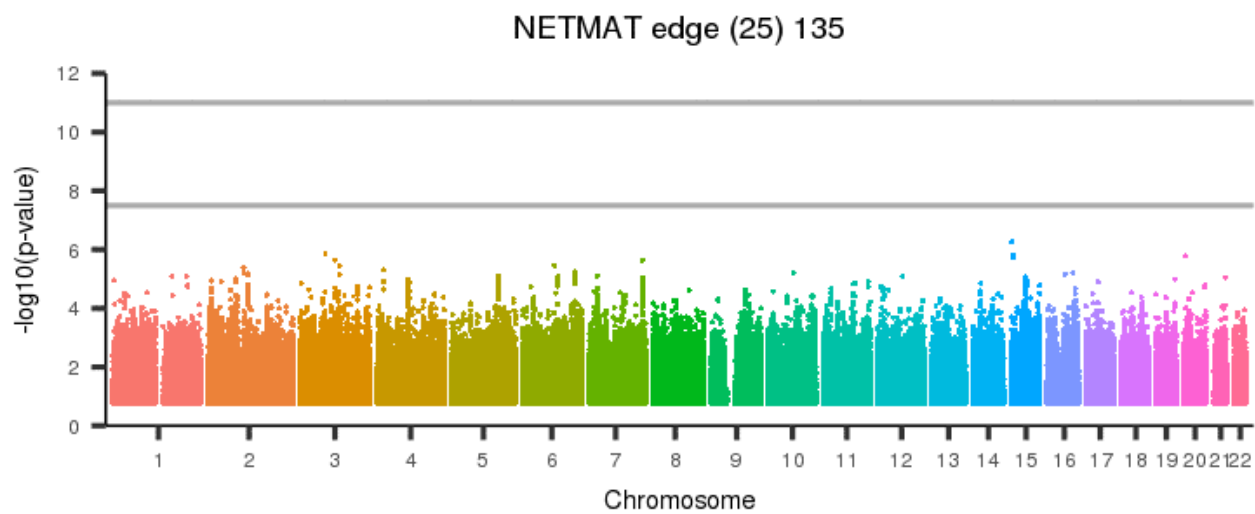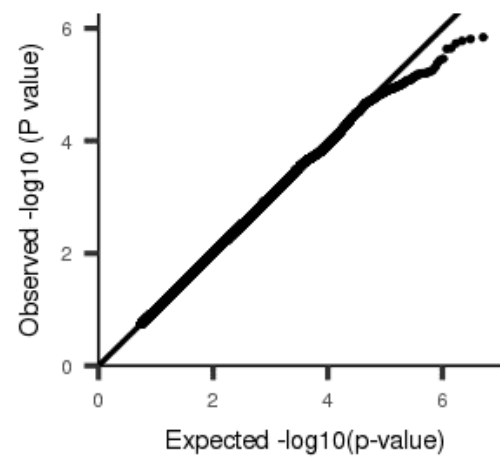

[back to list of plots](#)

Figure 1082: NETMAT edge (25) 136

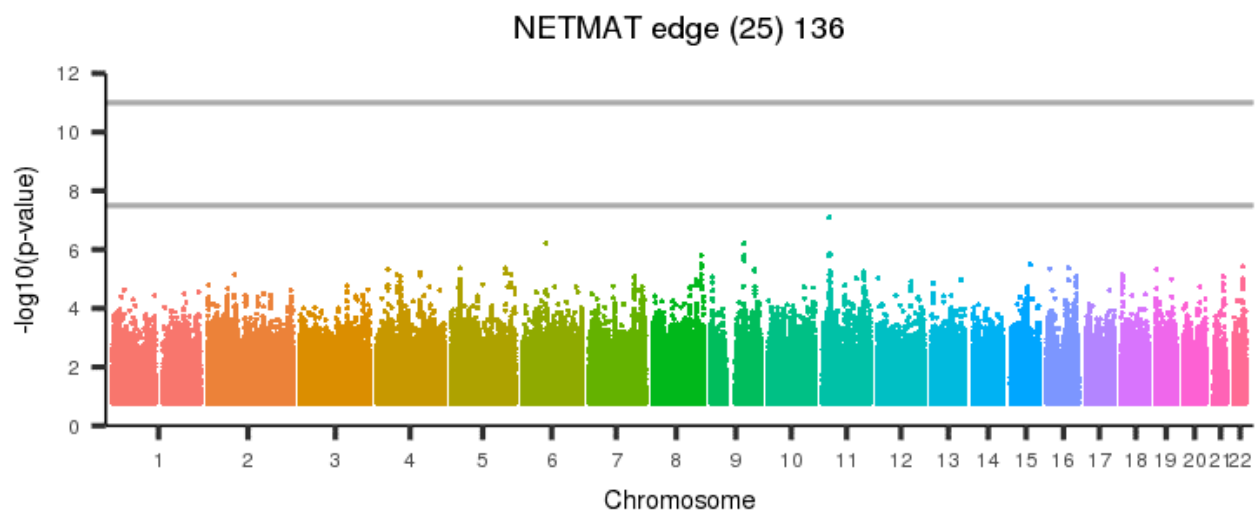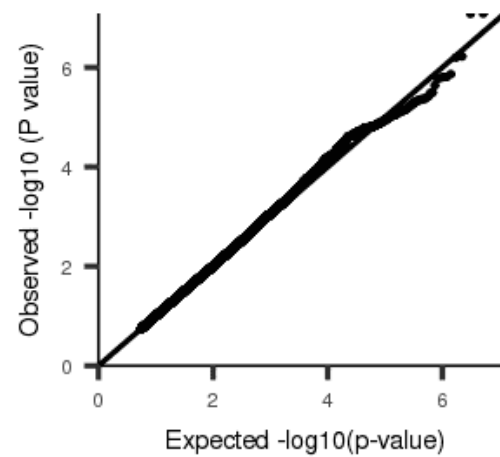

[back to list of plots](#)

Figure 1083: NETMAT edge (25) 137

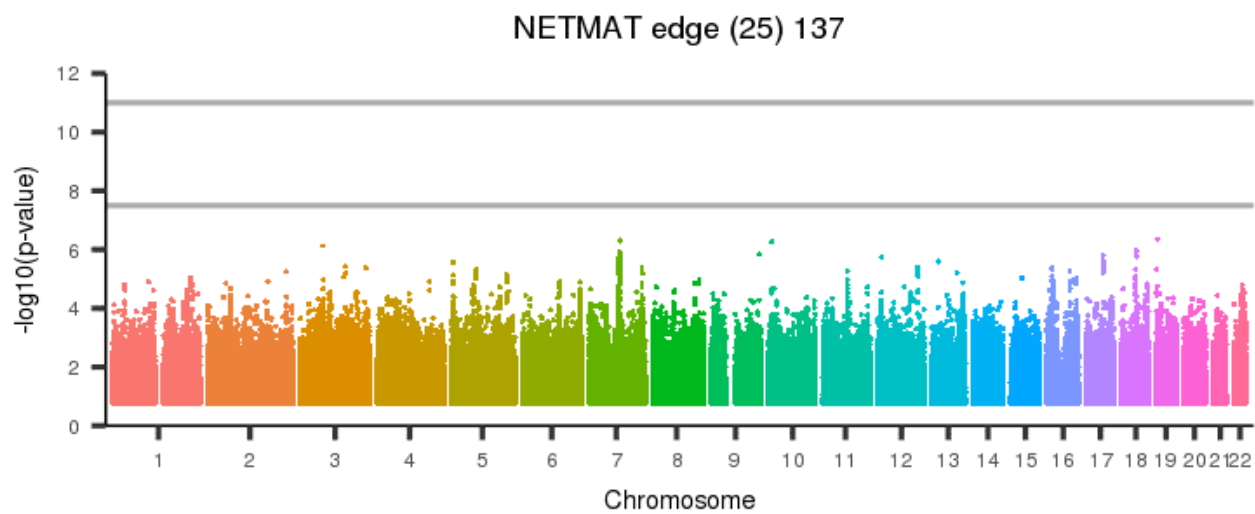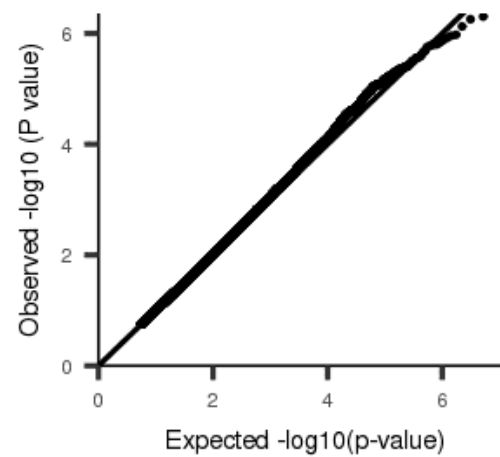

[back to list of plots](#)

Figure 1084: NETMAT edge (25) 138

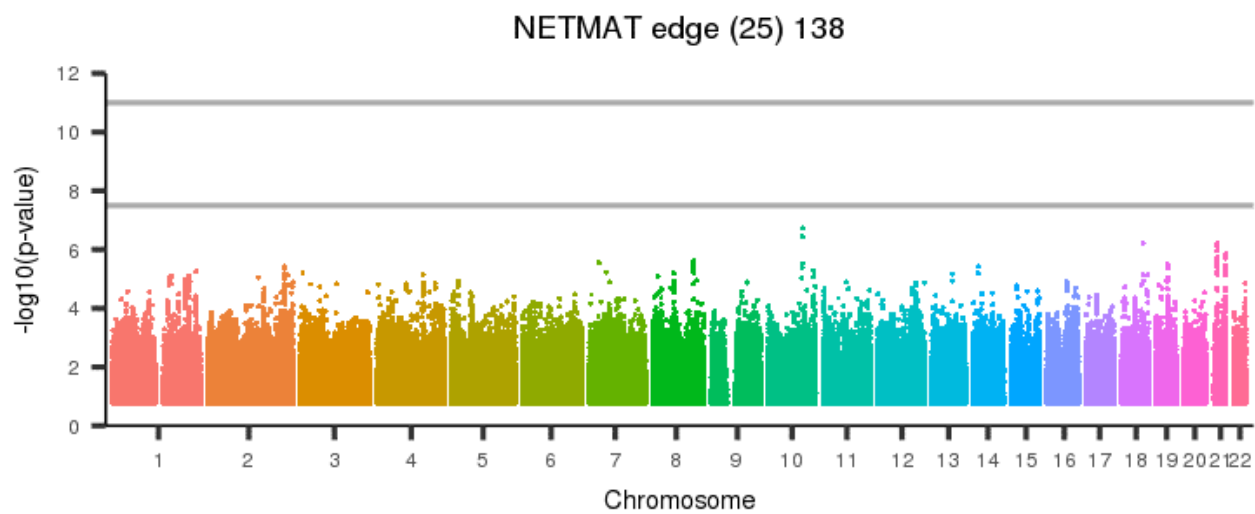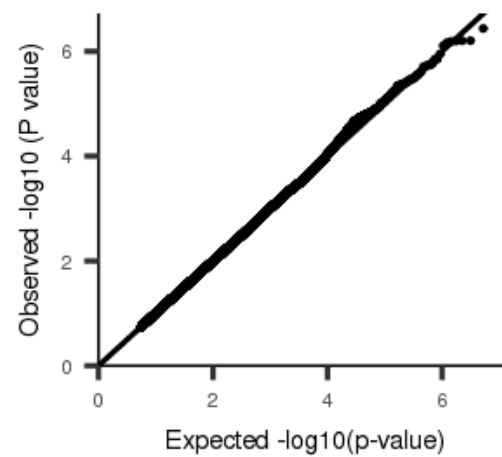

[back to list of plots](#)

Figure 1085: NETMAT edge (25) 139

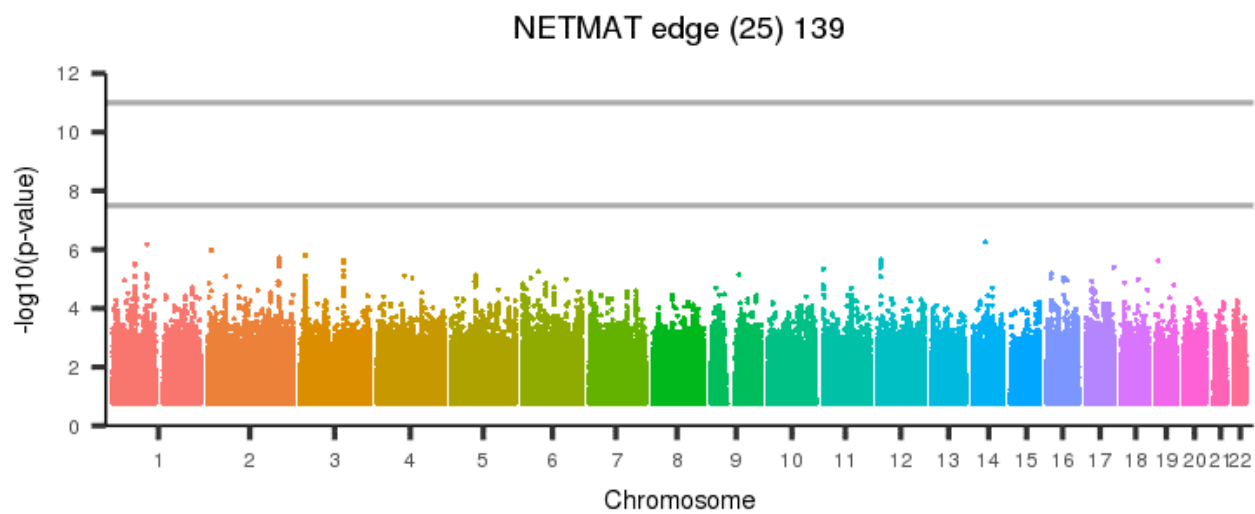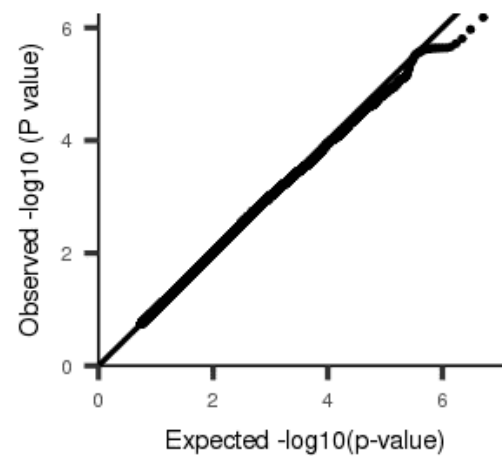

[back to list of plots](#)



Figure 1086: NETMAT edge (25) 140

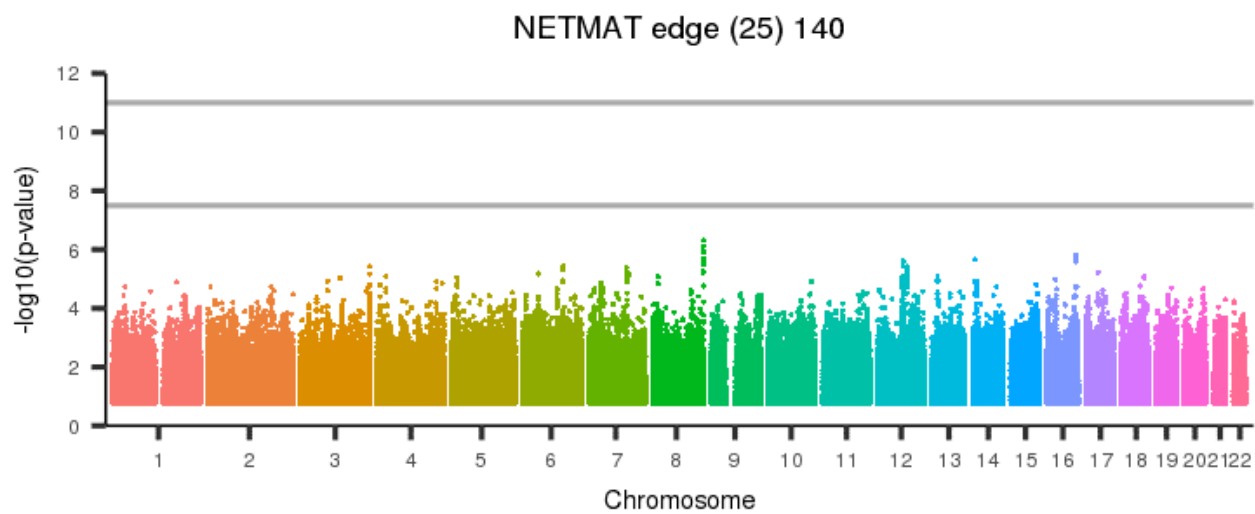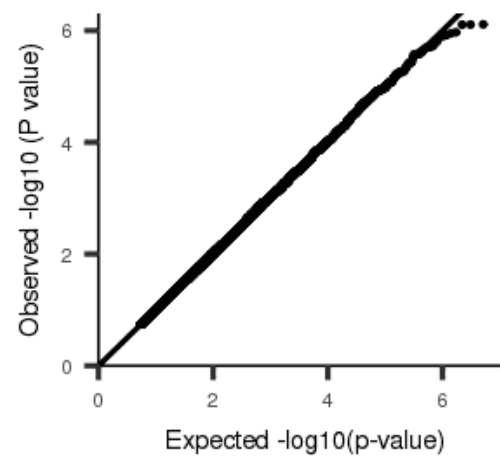

[back to list of plots](#)

Figure 1087: NETMAT edge (25) 141

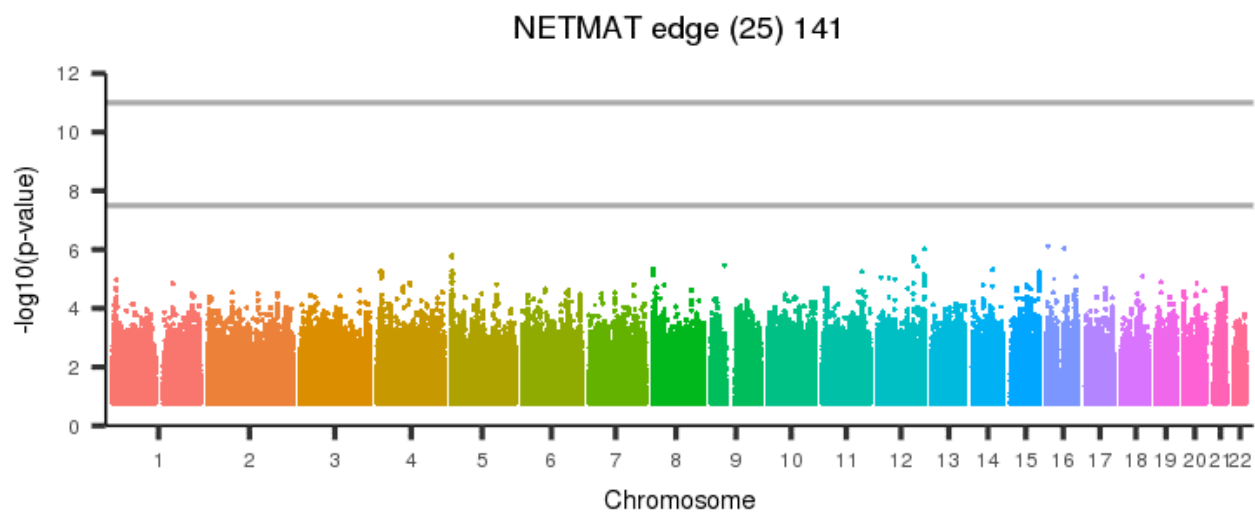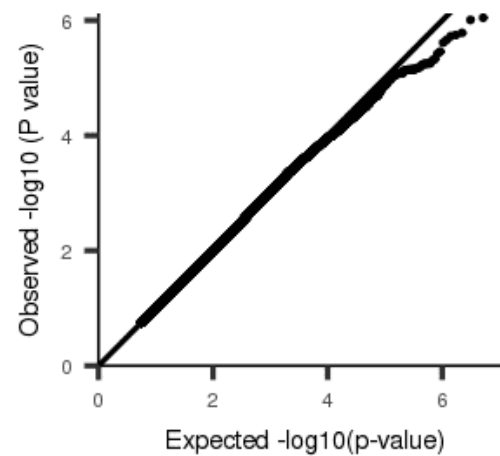

[back to list of plots](#)

Figure 1088: NETMAT edge (25) 142

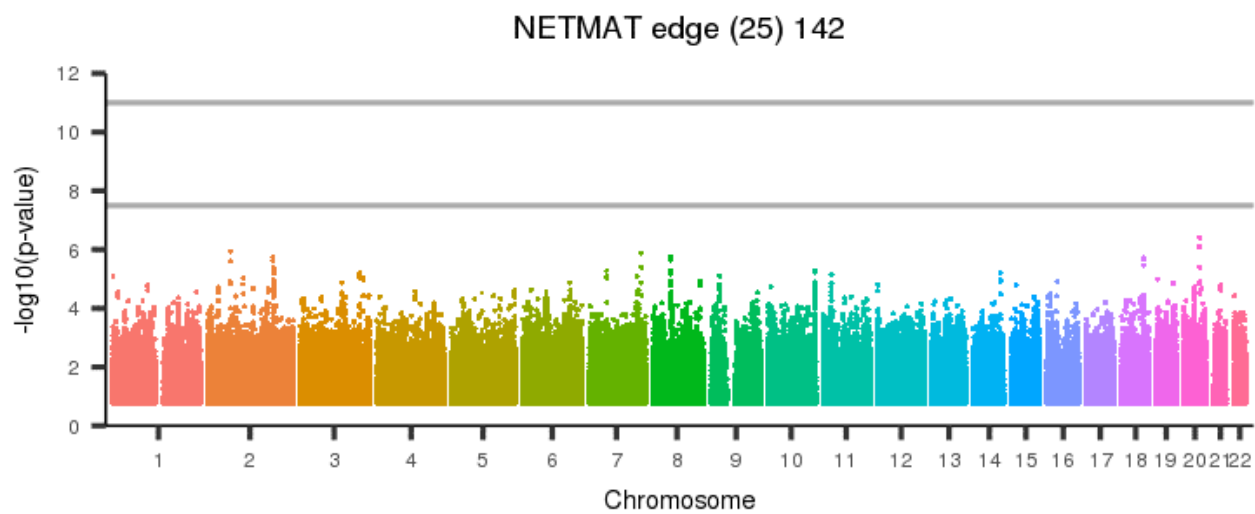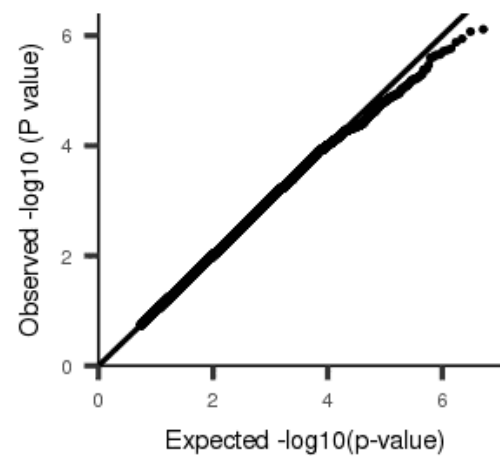

[back to list of plots](#)

Figure 1089: NETMAT edge (25) 143

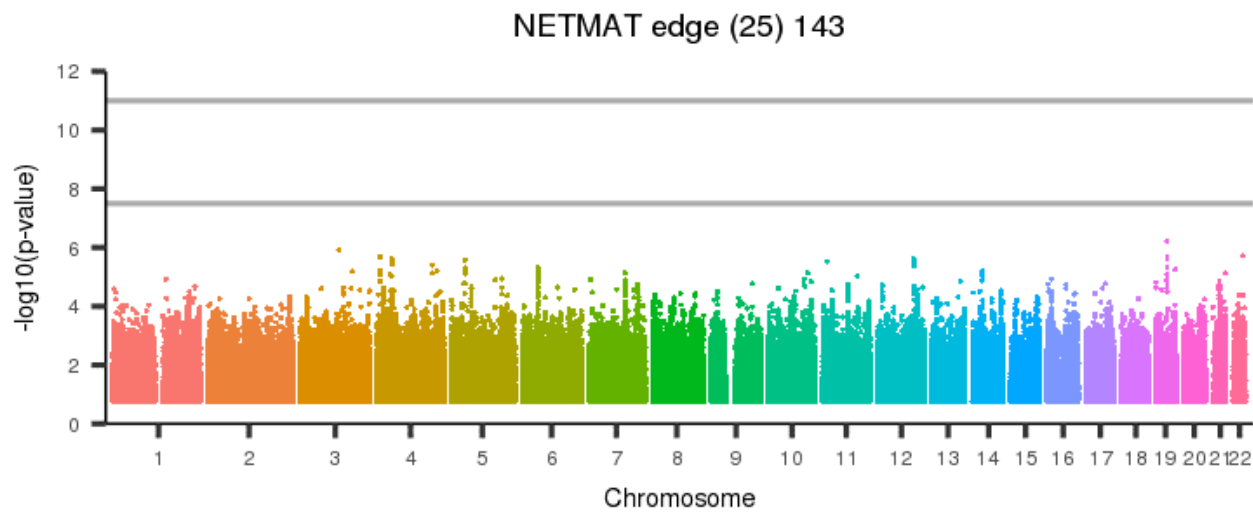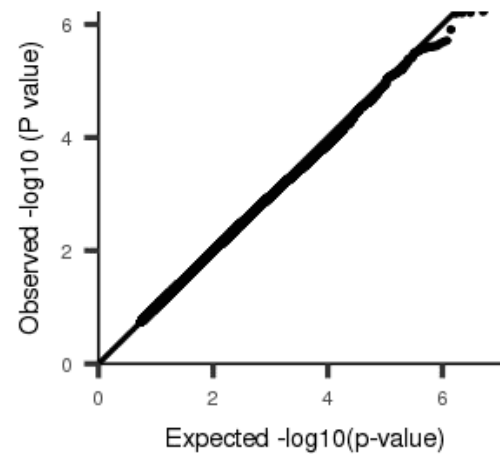

[back to list of plots](#)

Figure 1090: NETMAT edge (25) 144

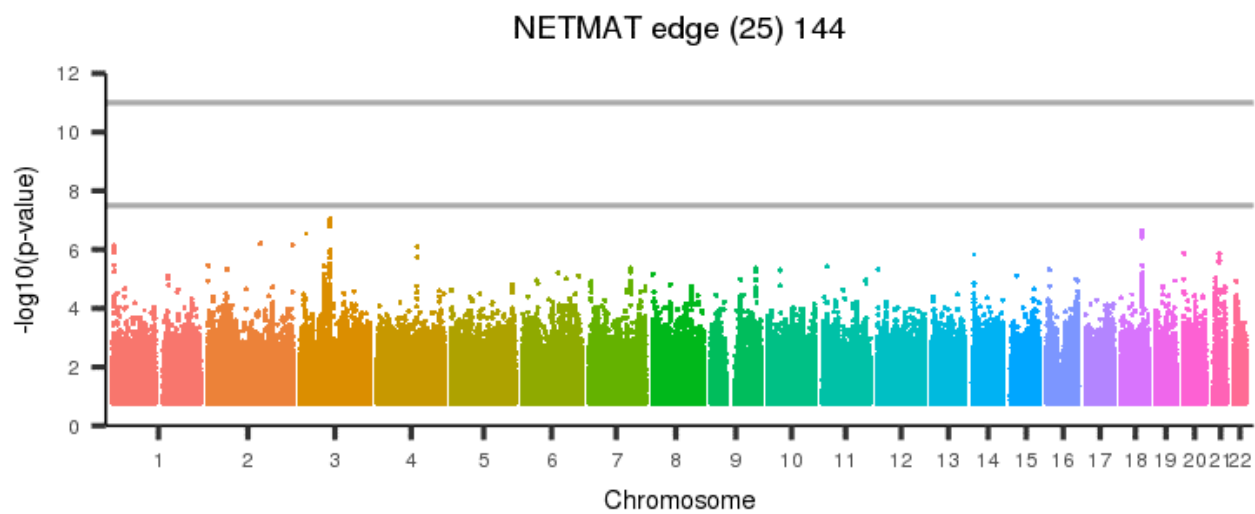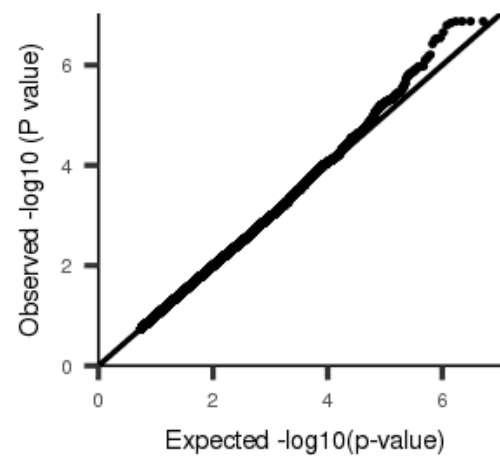

[back to list of plots](#)

Figure 1091: NETMAT edge (25) 145

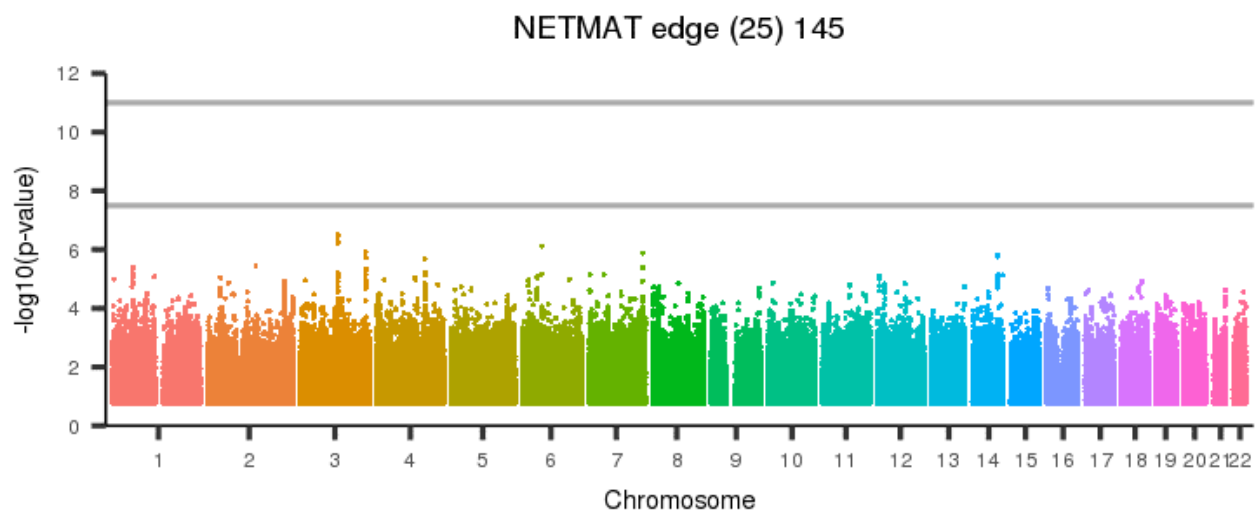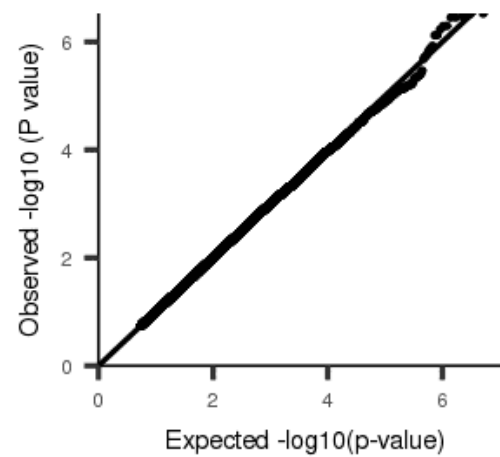

[back to list of plots](#)

Figure 1092: NETMAT edge (25) 146

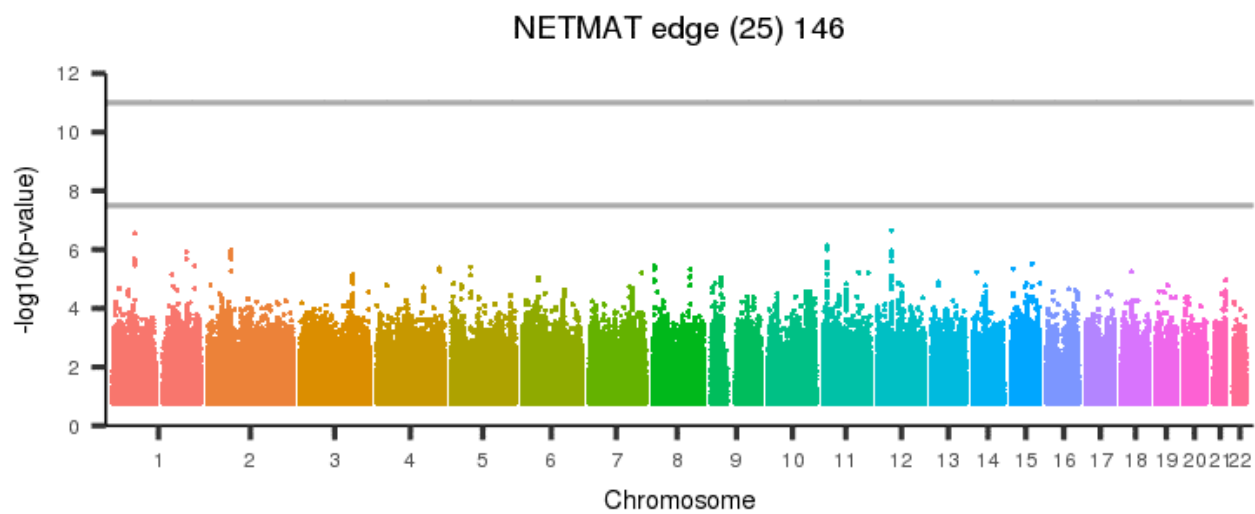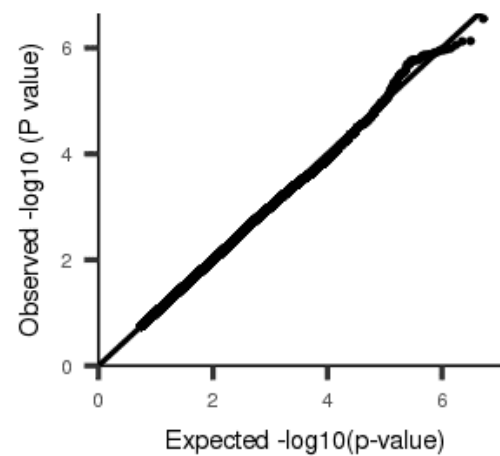

[back to list of plots](#)

Figure 1093: NETMAT edge (25) 147

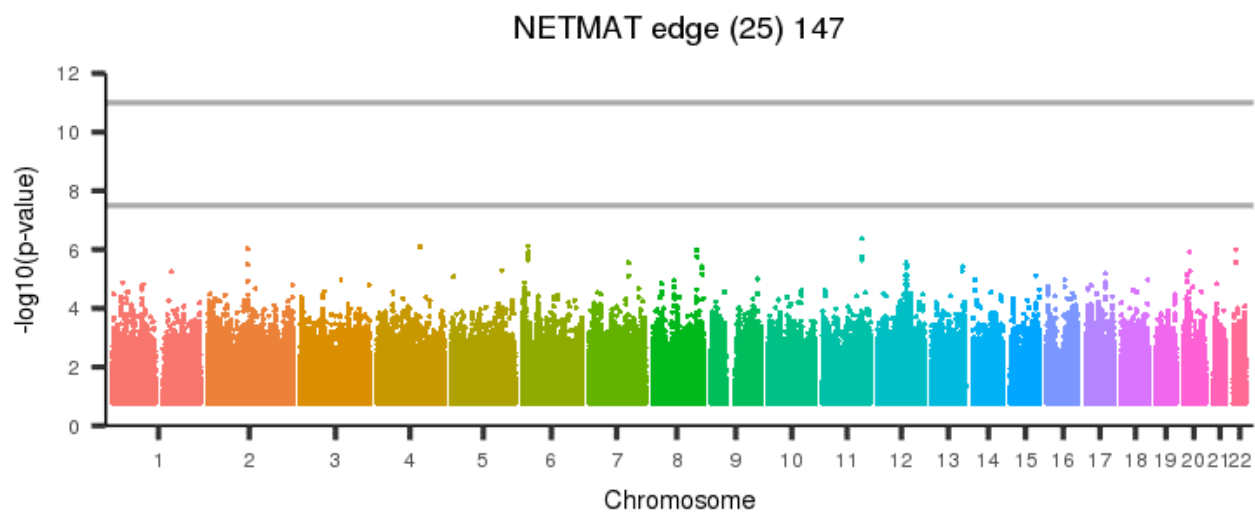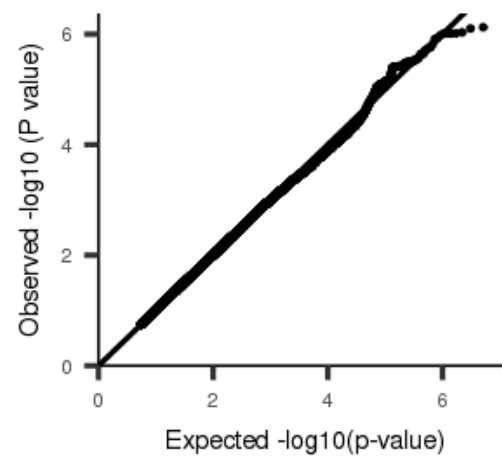

[back to list of plots](#)



Figure 1094: NETMAT edge (25) 148

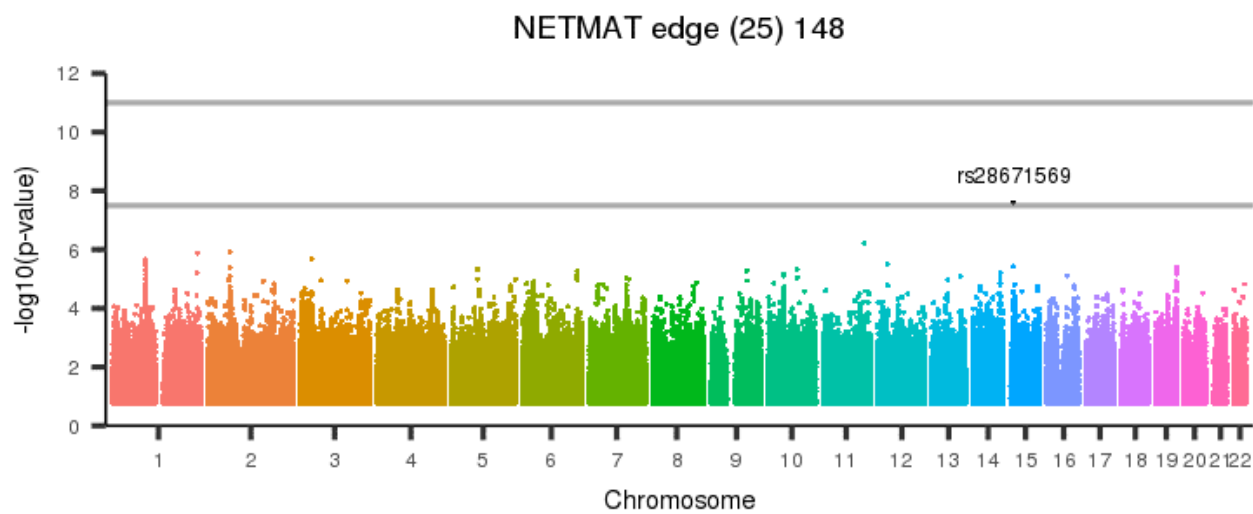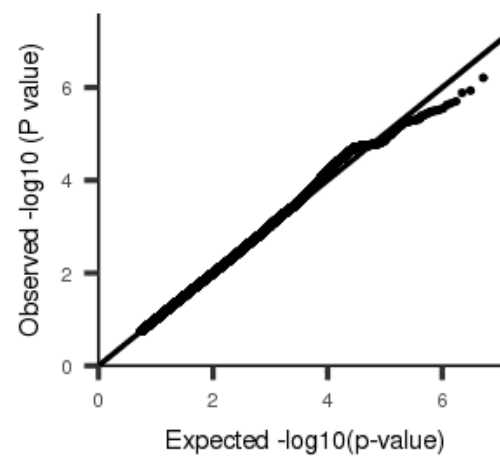

[back to list of plots](#)

Figure 1095: NETMAT edge (25) 149

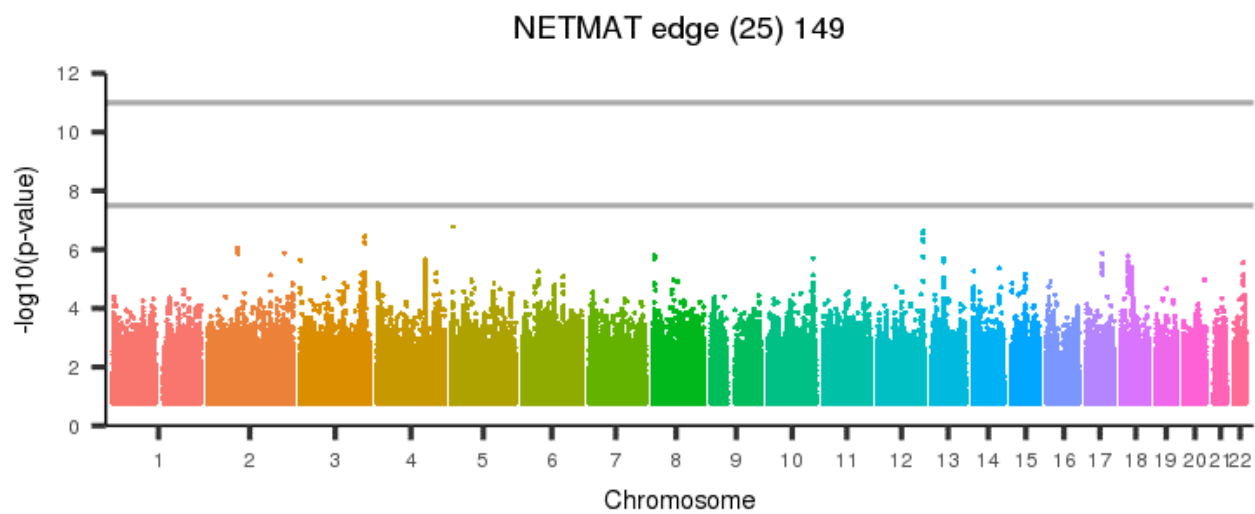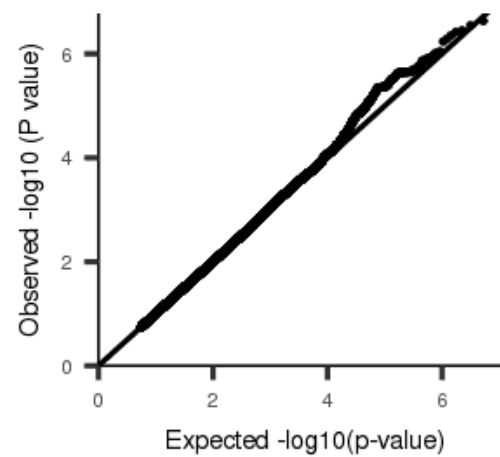

[back to list of plots](#)

Figure 1096: NETMAT edge (25) 150

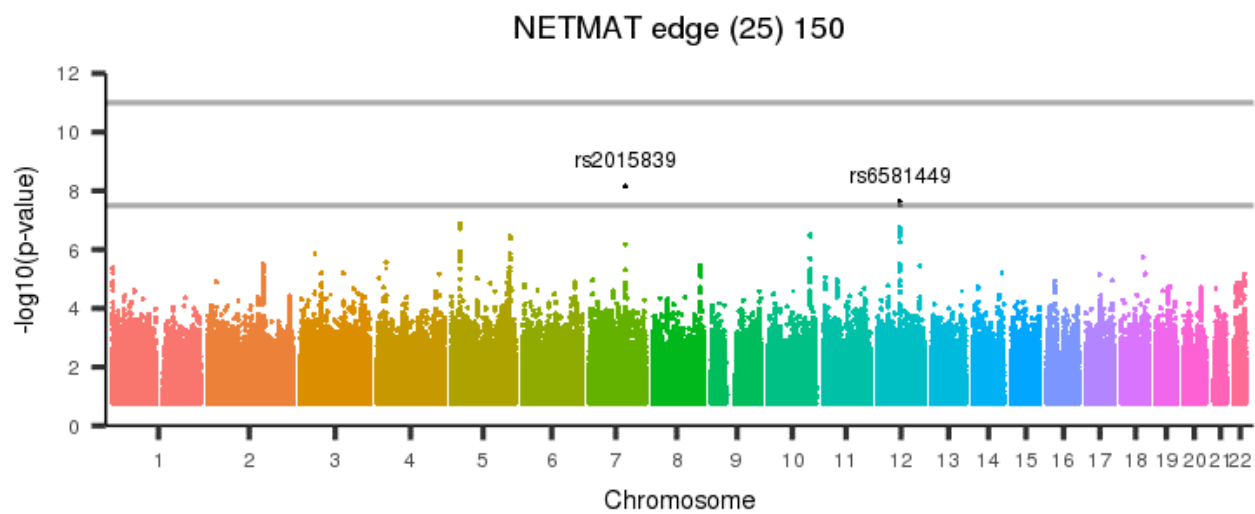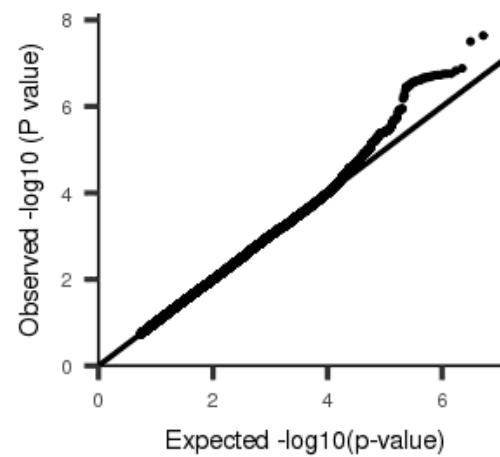

[back to list of plots](#)

Figure 1097: NETMAT edge (25) 151

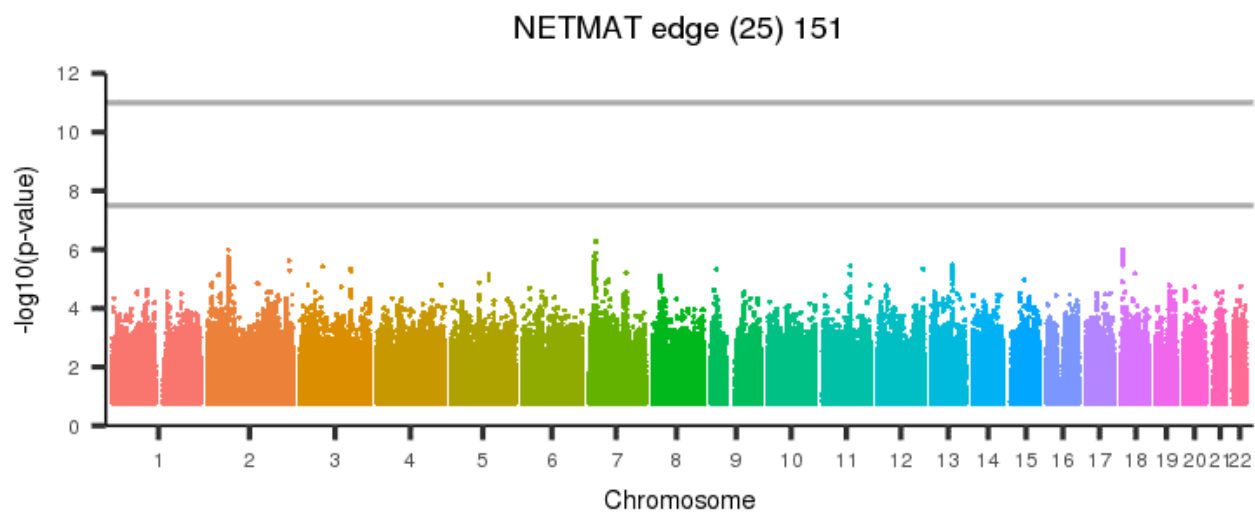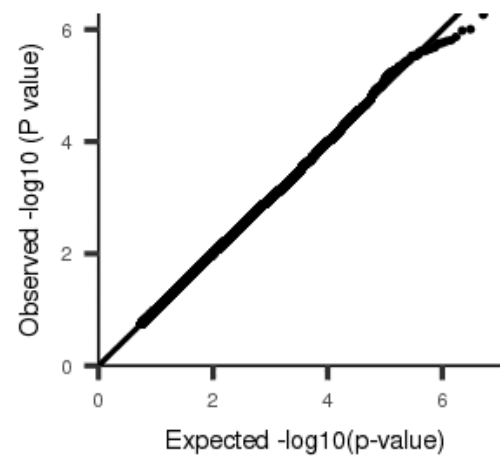

[back to list of plots](#)

Figure 1098: NETMAT edge (25) 152

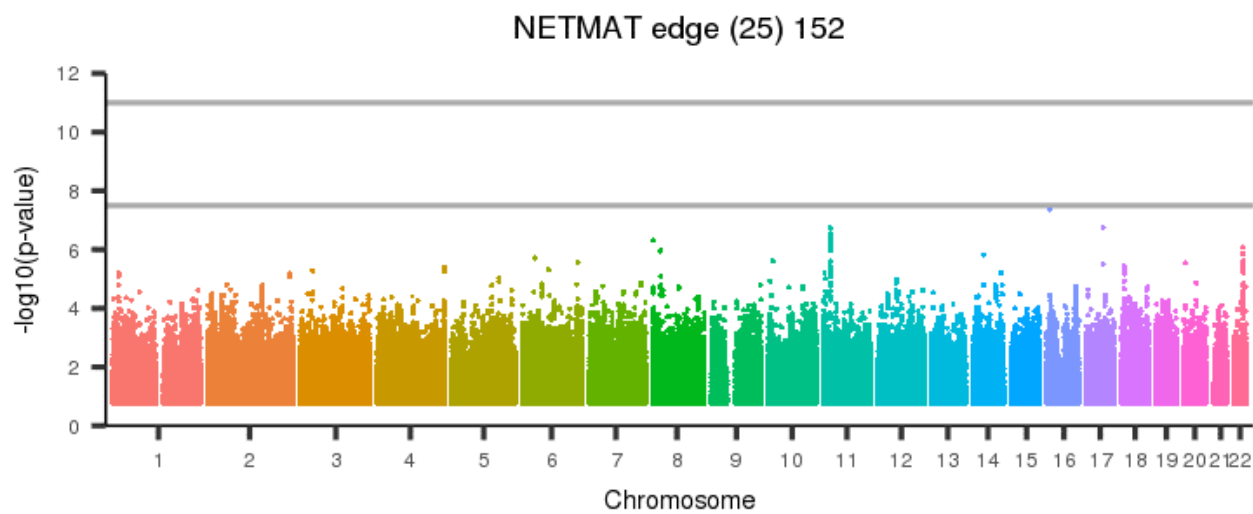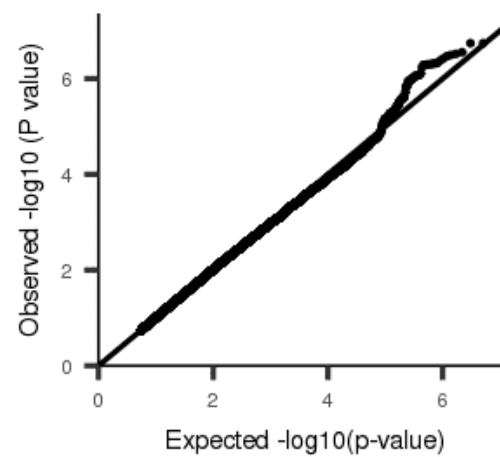

[back to list of plots](#)

Figure 1099: NETMAT edge (25) 153

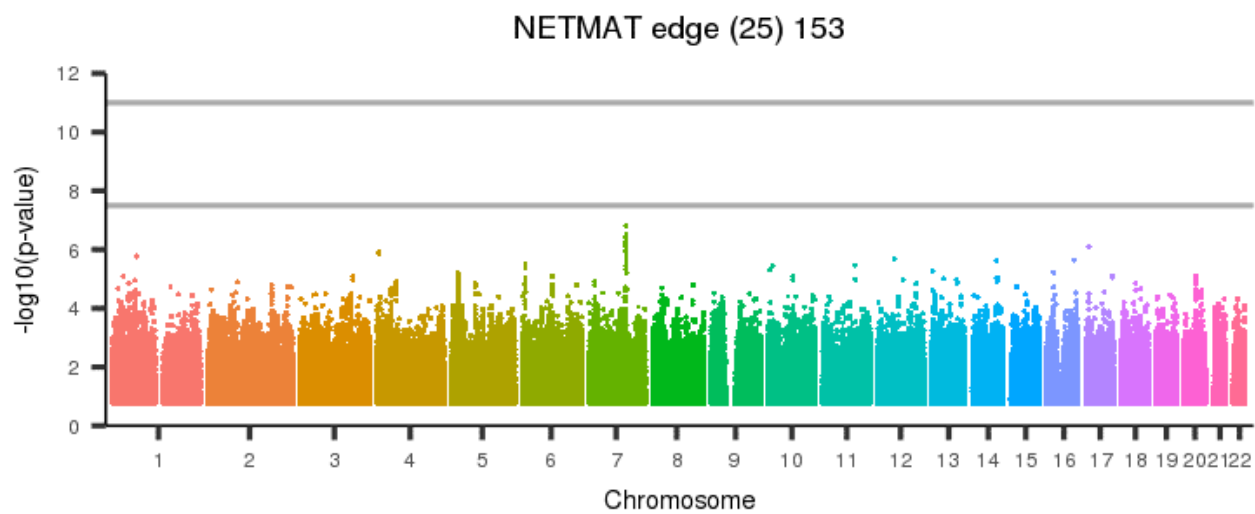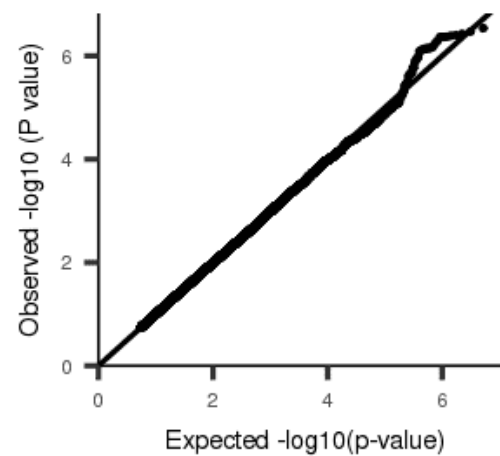

[back to list of plots](#)

Figure 1100: NETMAT edge (25) 154

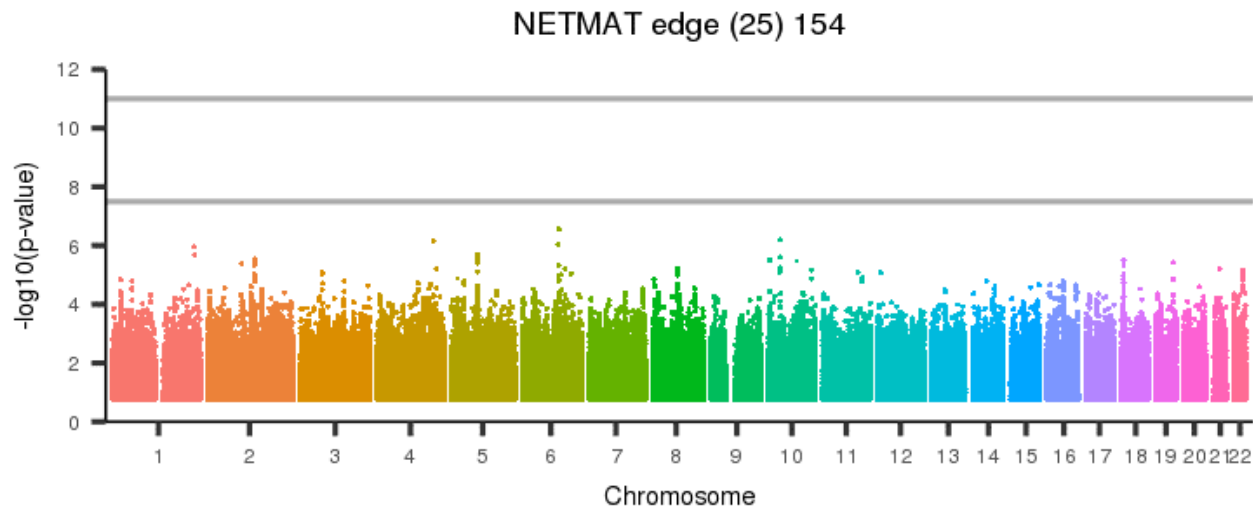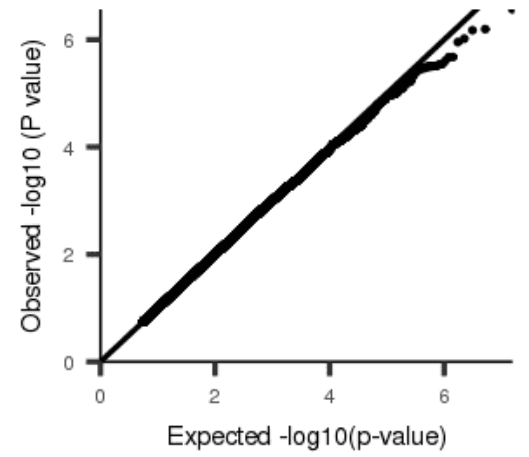

[back to list of plots](#)

Figure 1101: NETMAT edge (25) 155

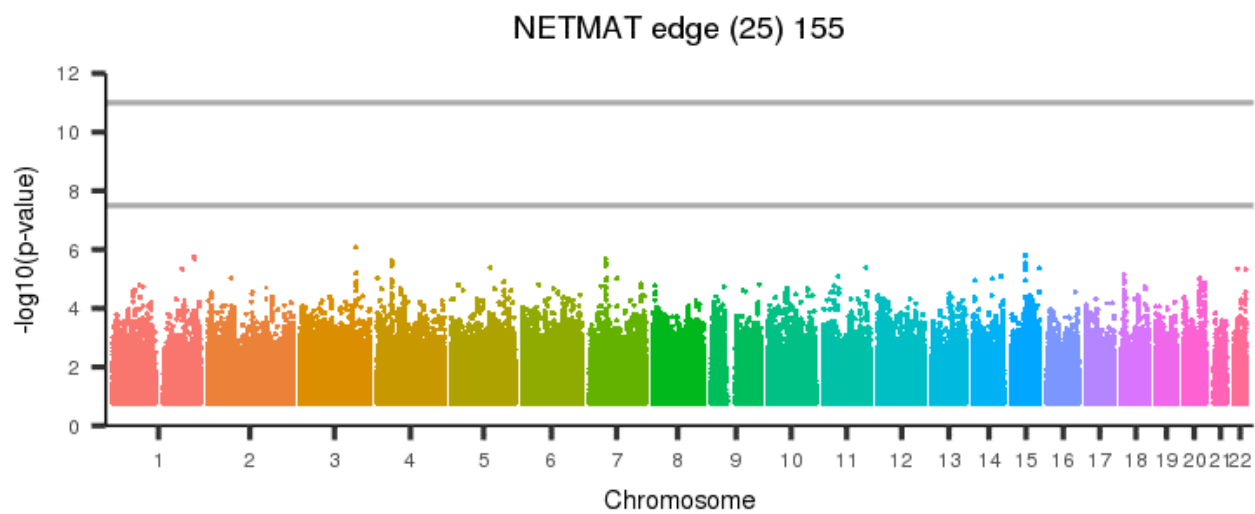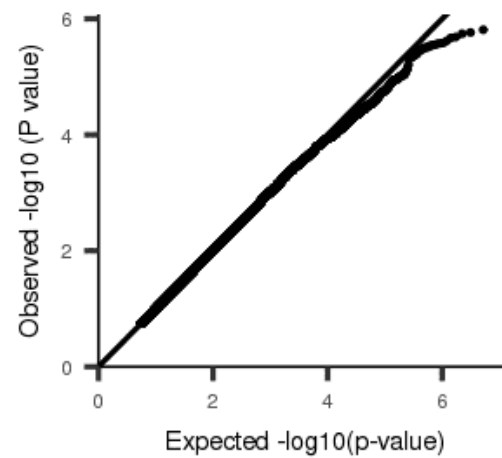

[back to list of plots](#)



Figure 1102: NETMAT edge (25) 156

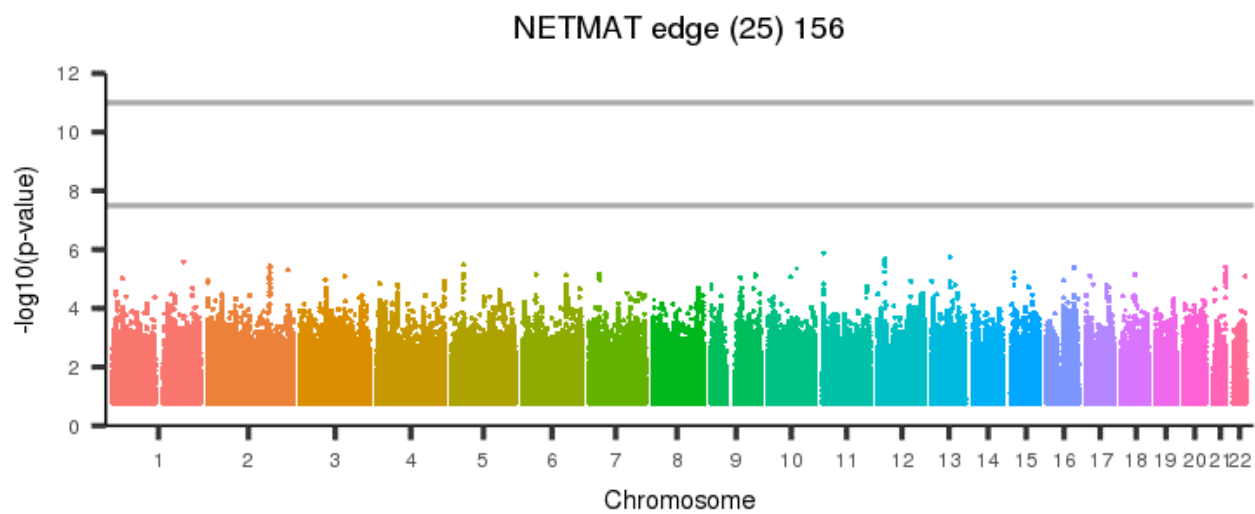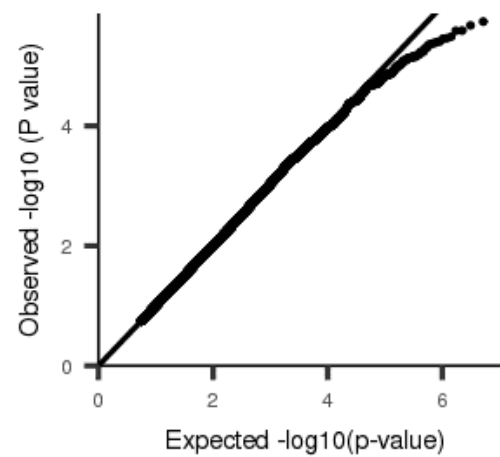

[back to list of plots](#)

Figure 1103: NETMAT edge (25) 157

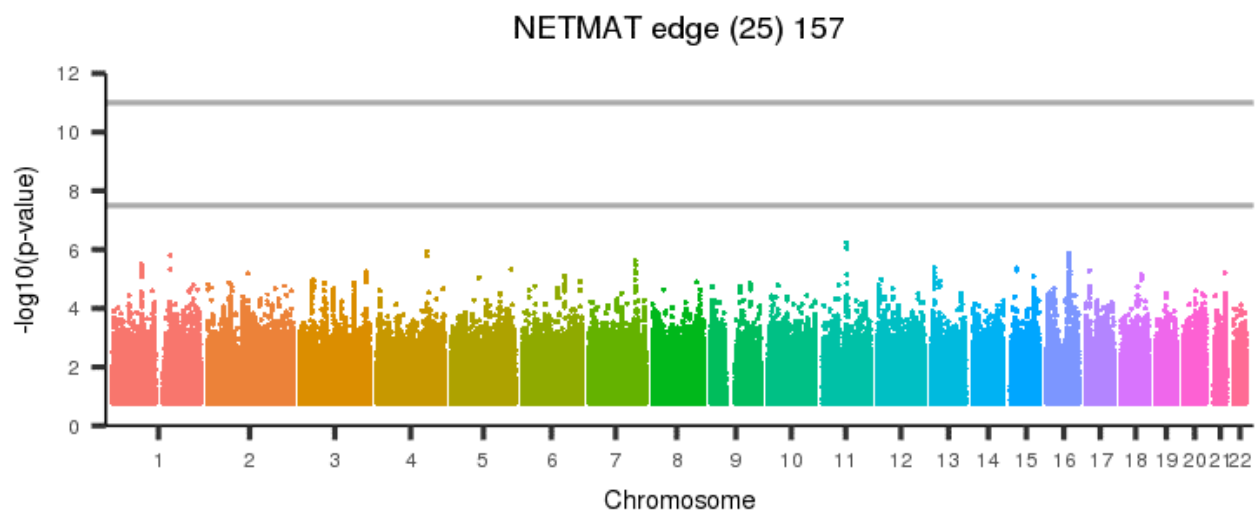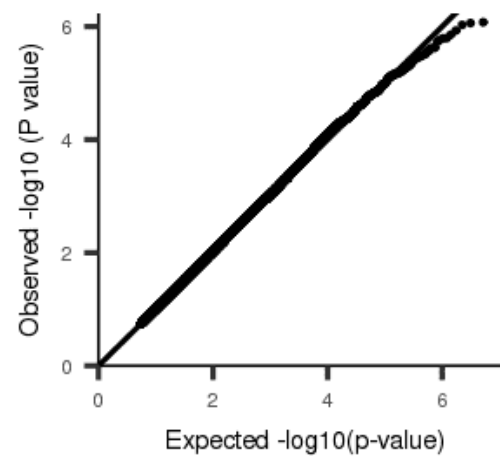

[back to list of plots](#)

Figure 1104: NETMAT edge (25) 158

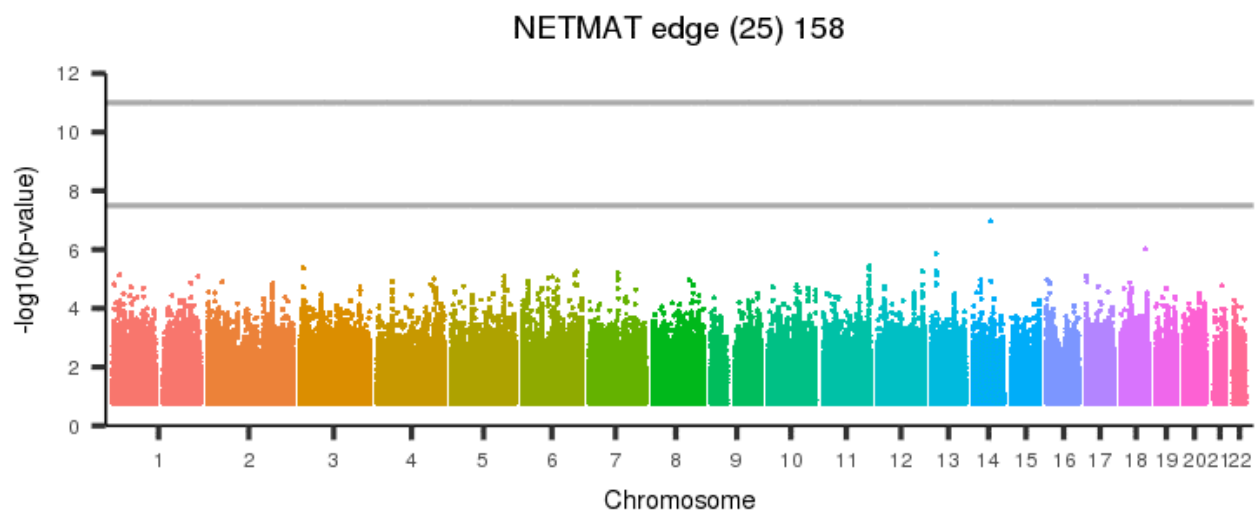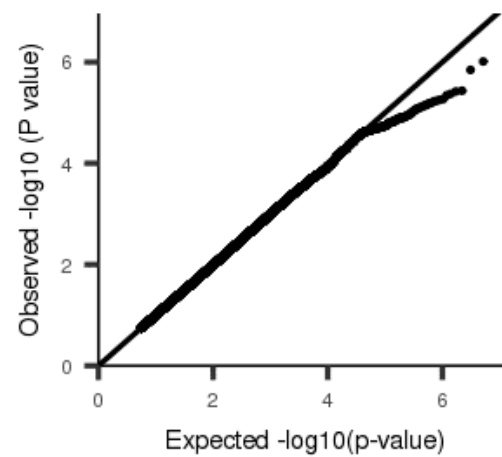

[back to list of plots](#)

Figure 1105: NETMAT edge (25) 159

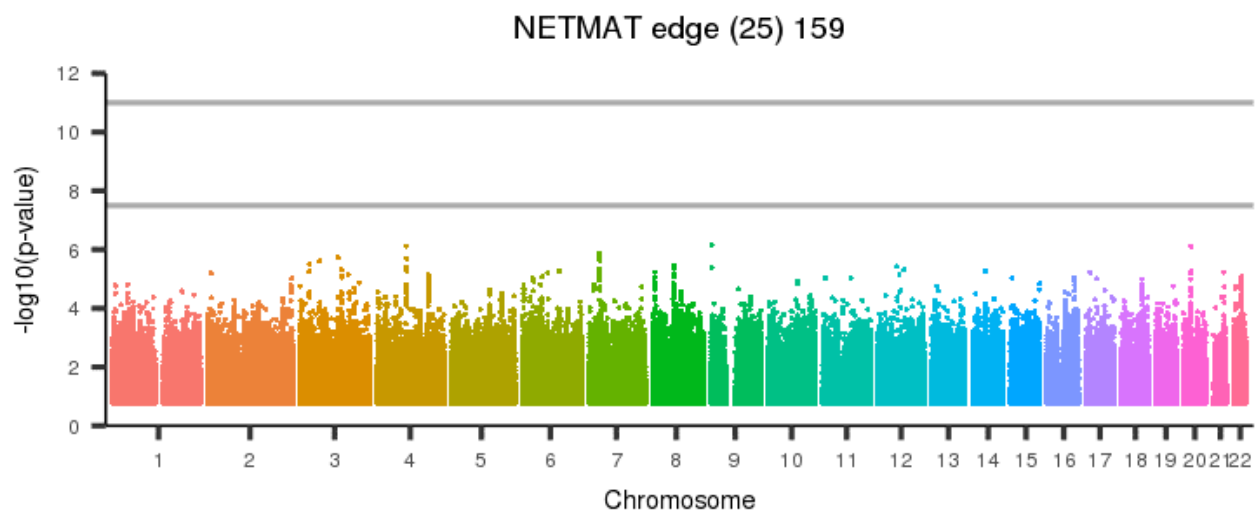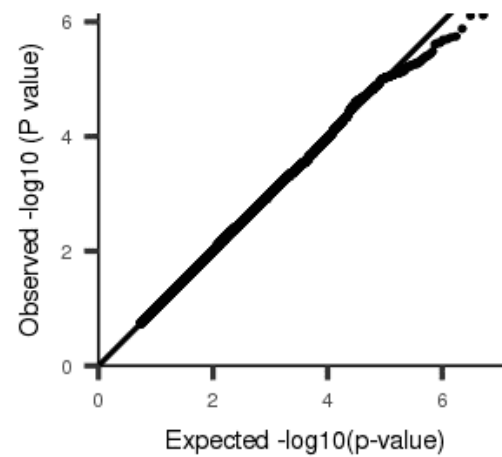

[back to list of plots](#)

Figure 1106: NETMAT edge (25) 160

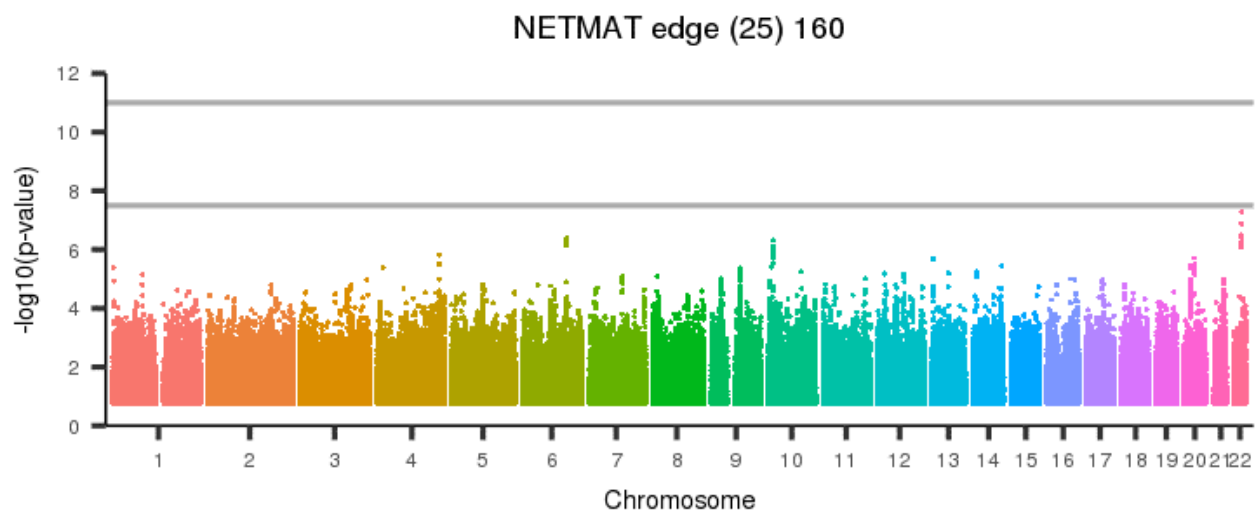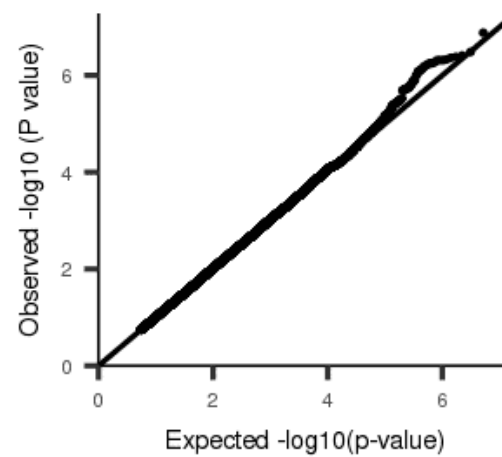

[back to list of plots](#)

Figure 1107: NETMAT edge (25) 161

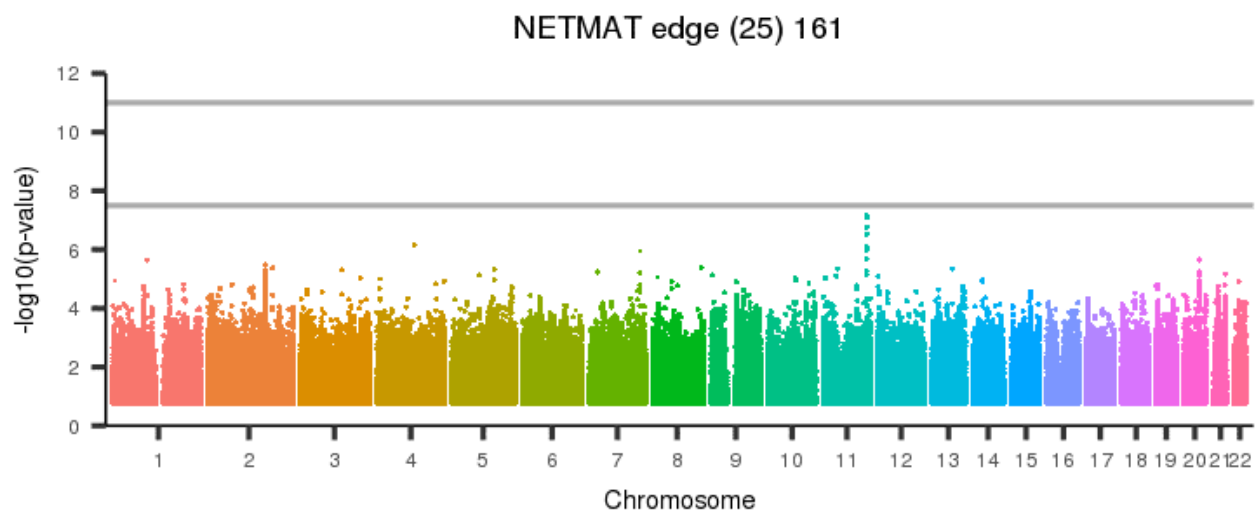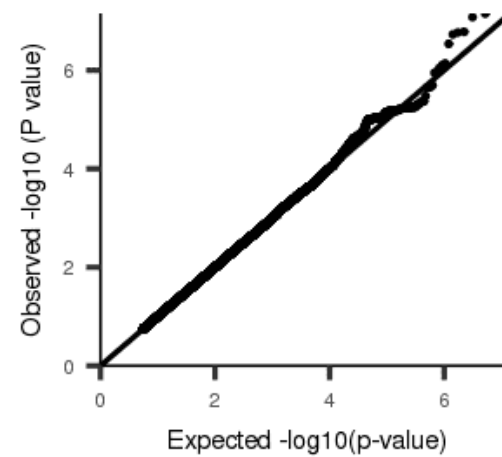

[back to list of plots](#)

Figure 1108: NETMAT edge (25) 162

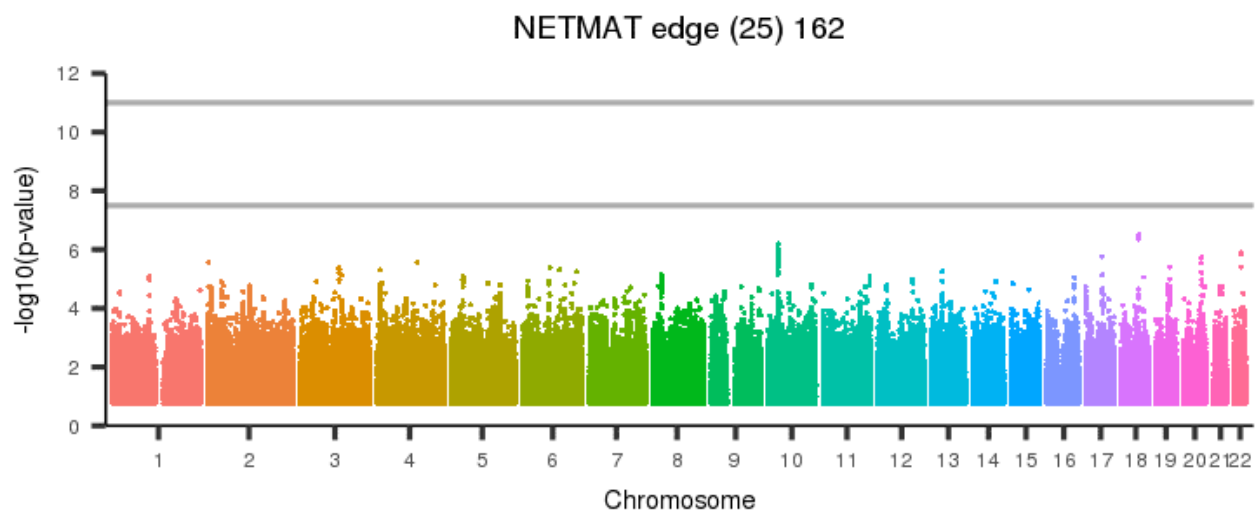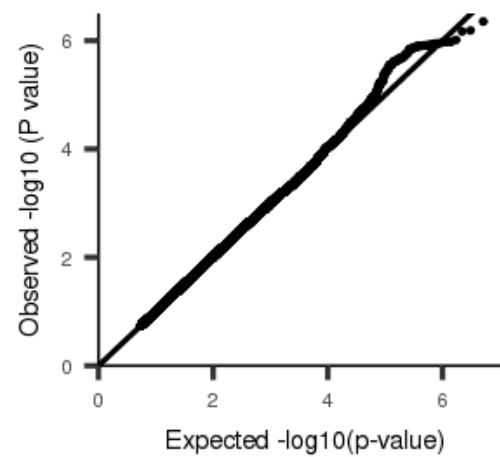

[back to list of plots](#)

Figure 1109: NETMAT edge (25) 163

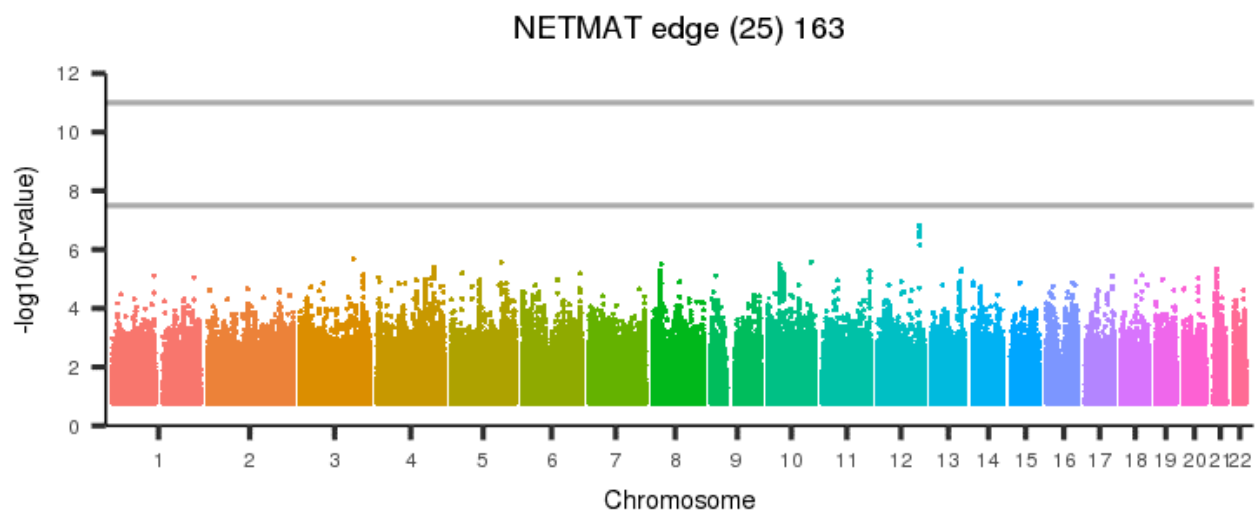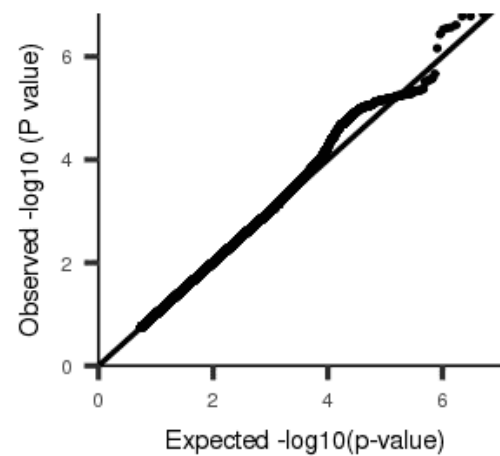

[back to list of plots](#)



Figure 1110: NETMAT edge (25) 164

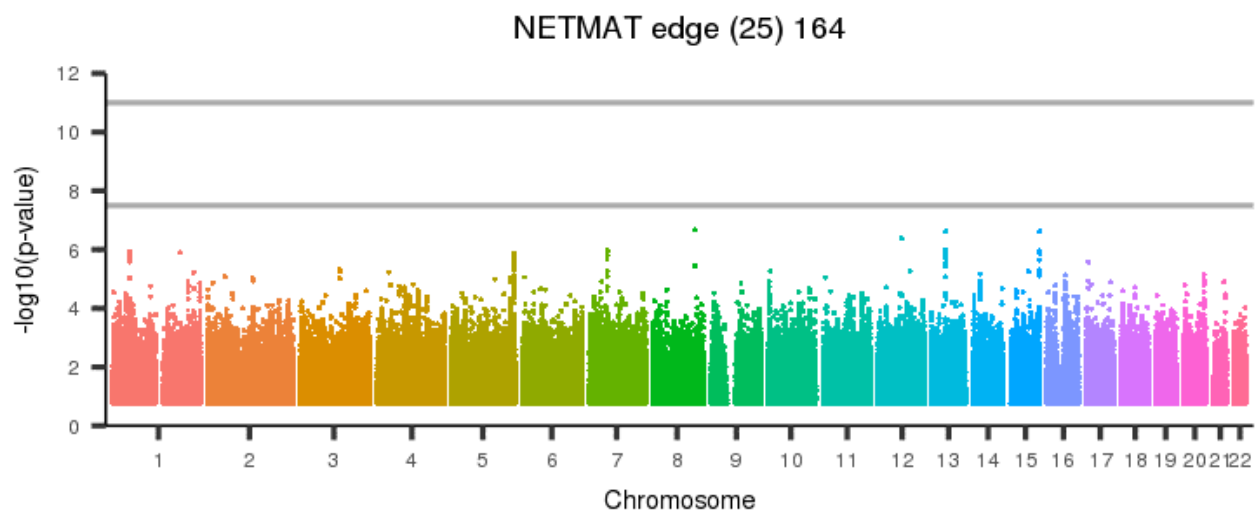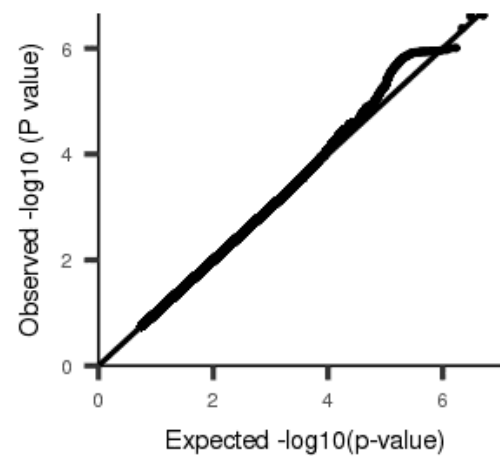

[back to list of plots](#)

Figure 1111: NETMAT edge (25) 165

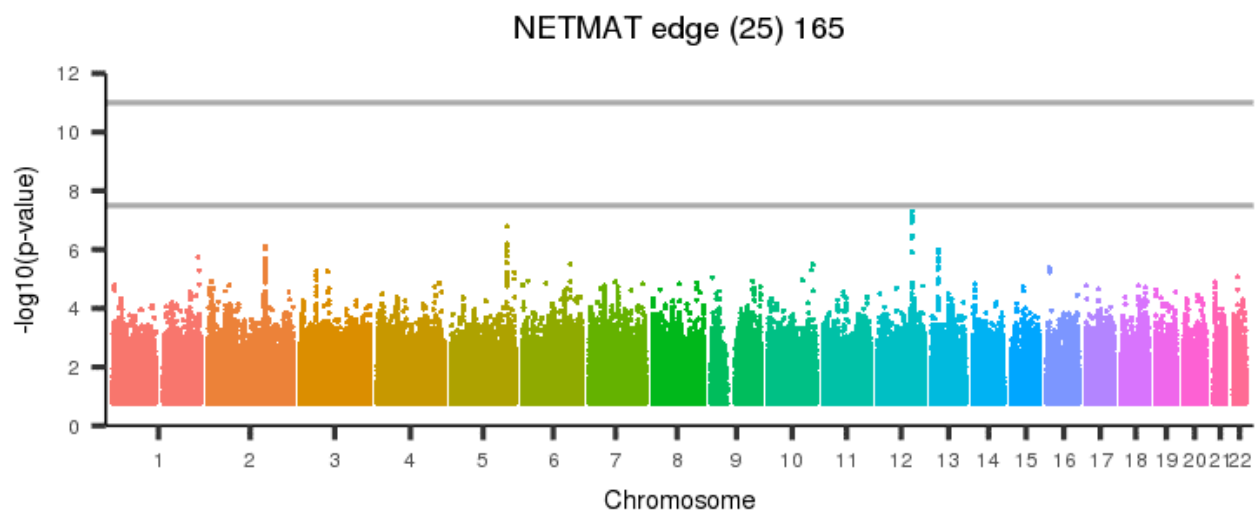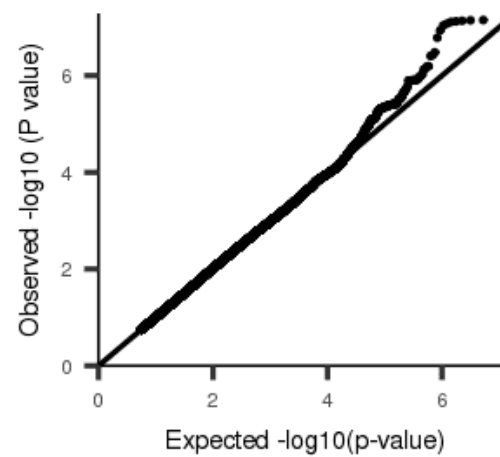

[back to list of plots](#)

Figure 1112: NETMAT edge (25) 166

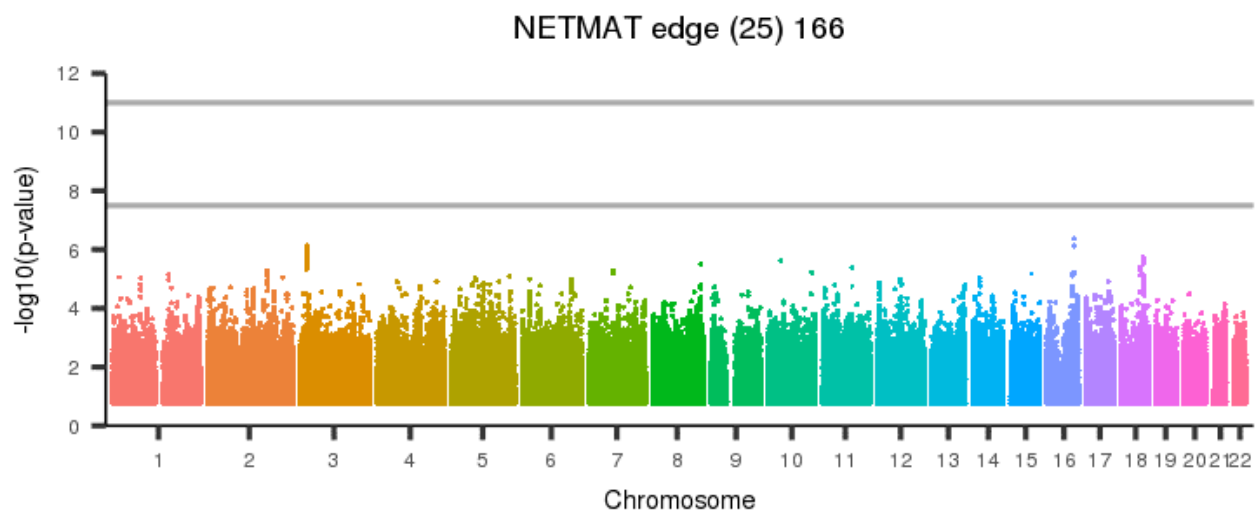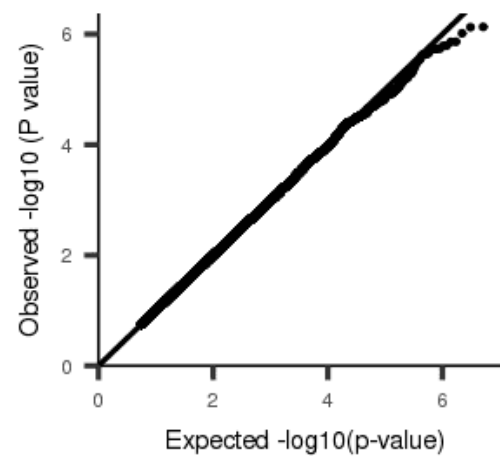

[back to list of plots](#)

Figure 1113: NETMAT edge (25) 167

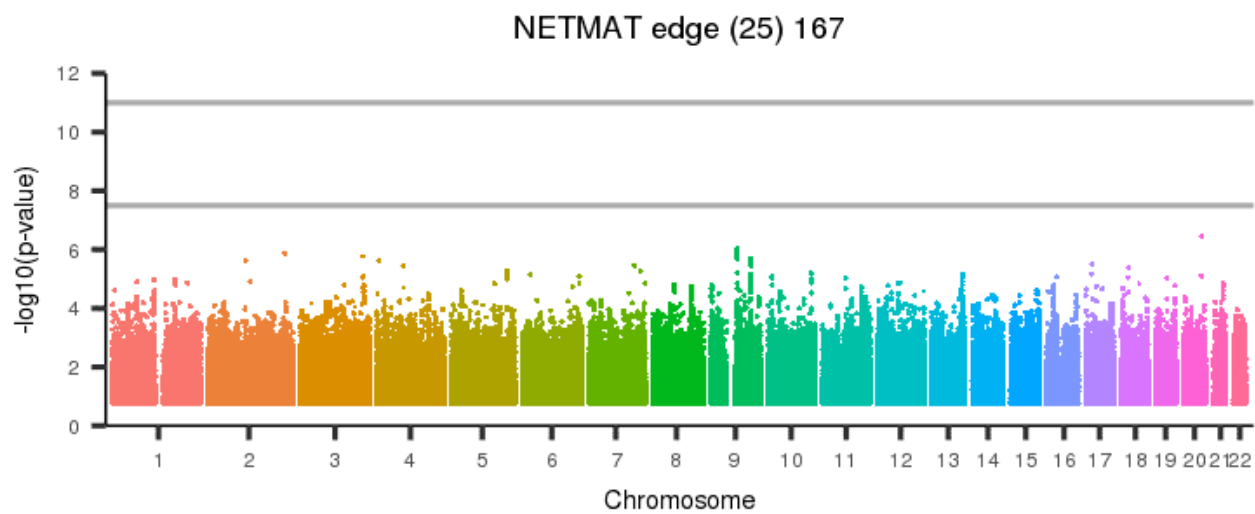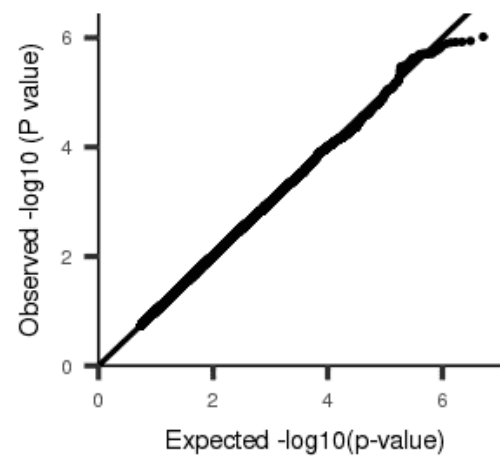

[back to list of plots](#)

Figure 1114: NETMAT edge (25) 168

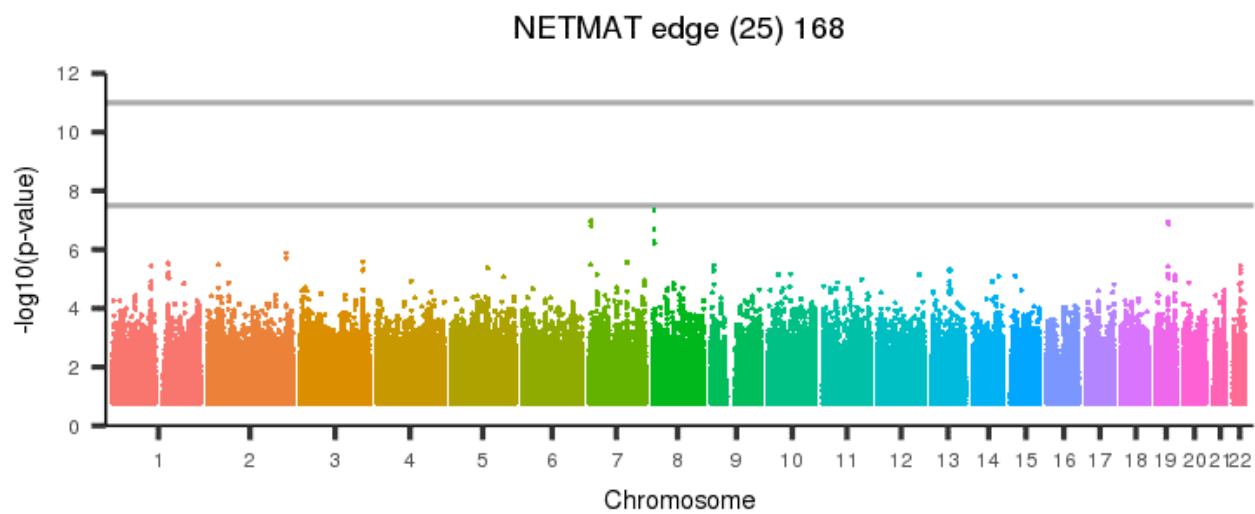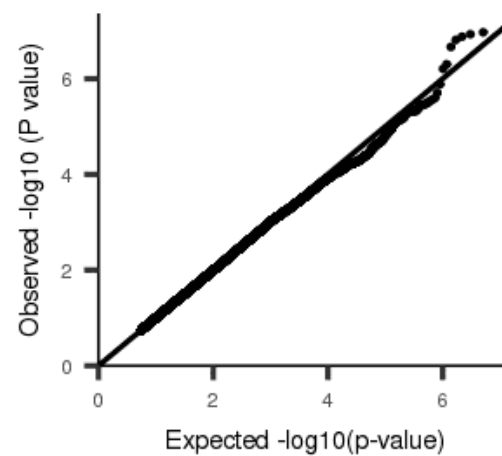

[back to list of plots](#)

Figure 1115: NETMAT edge (25) 169

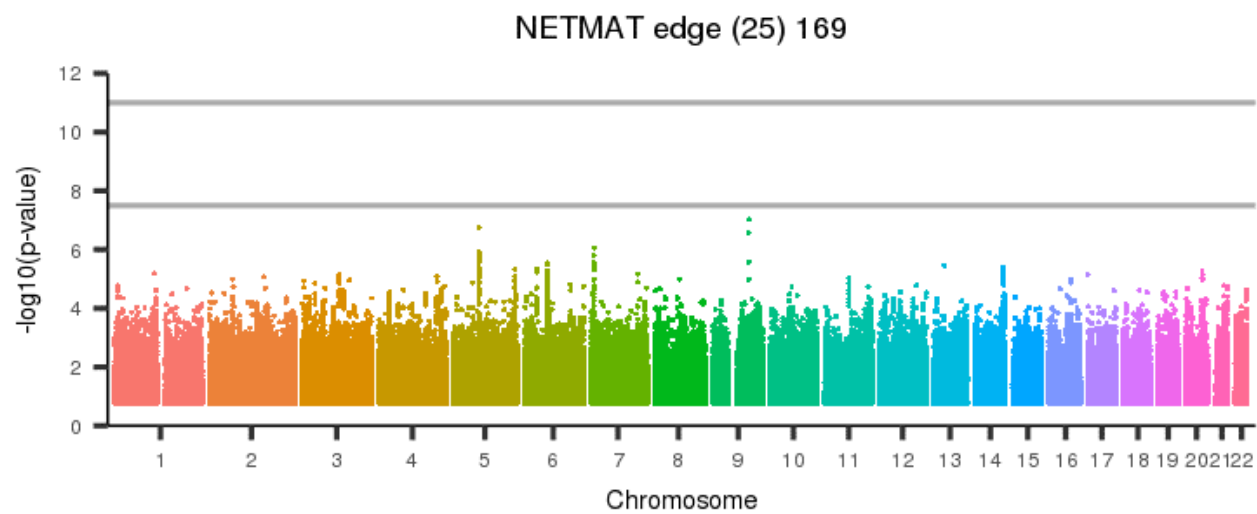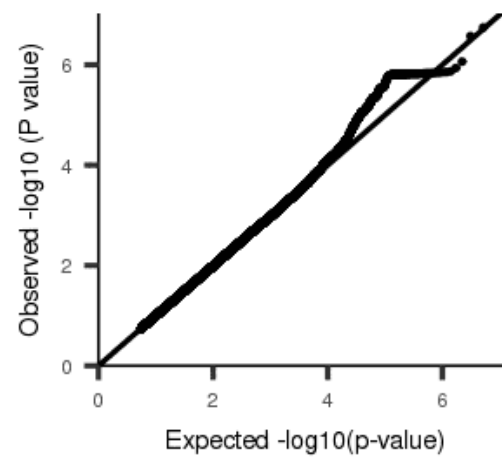

[back to list of plots](#)

Figure 1116: NETMAT edge (25) 170

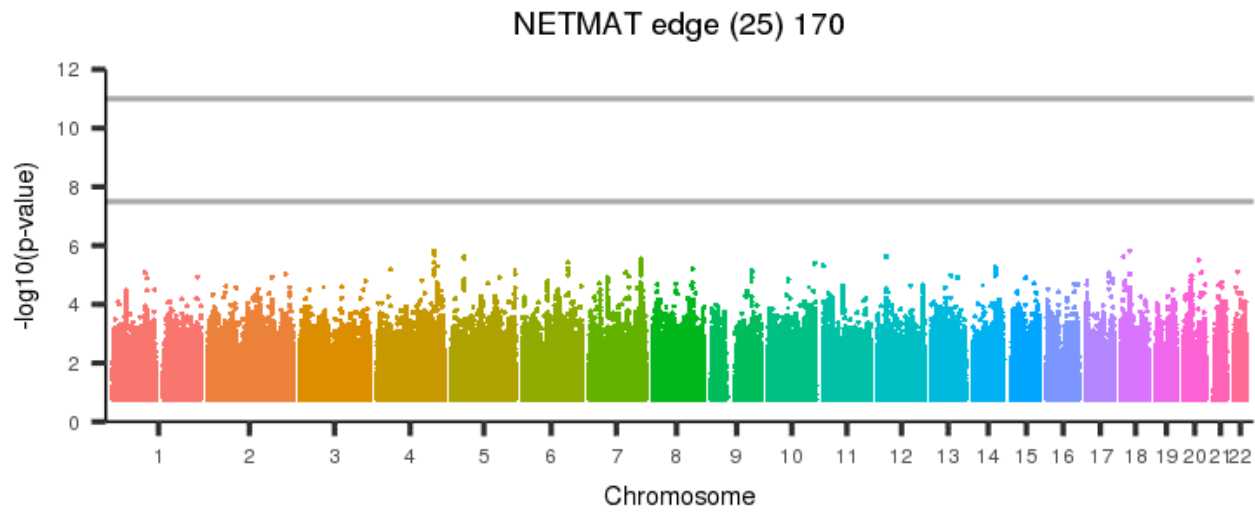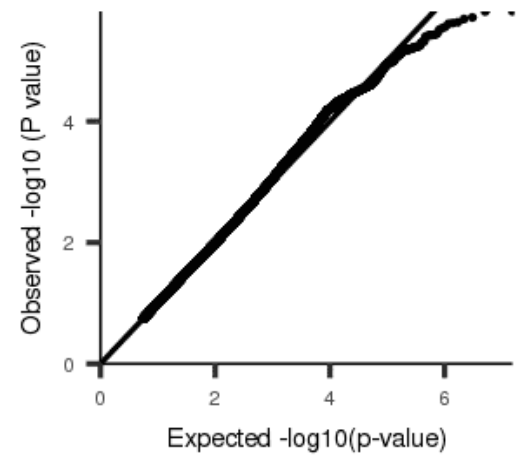

[back to list of plots](#)

Figure 1117: NETMAT edge (25) 171

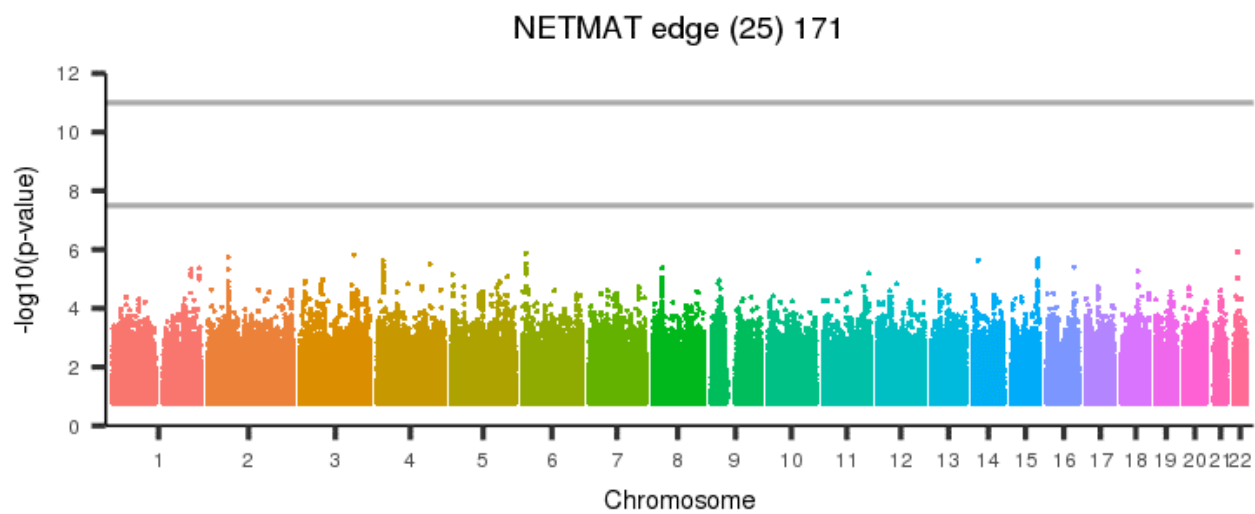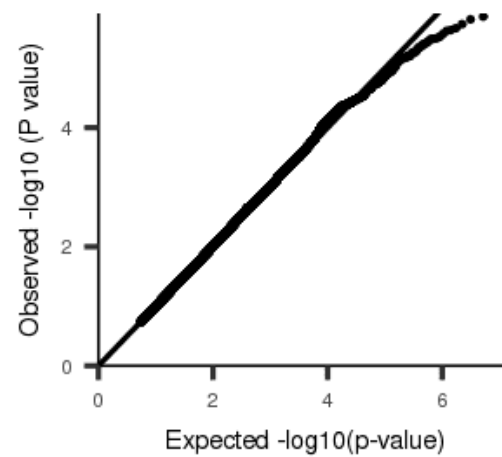

[back to list of plots](#)



Figure 1118: NETMAT edge (25) 172

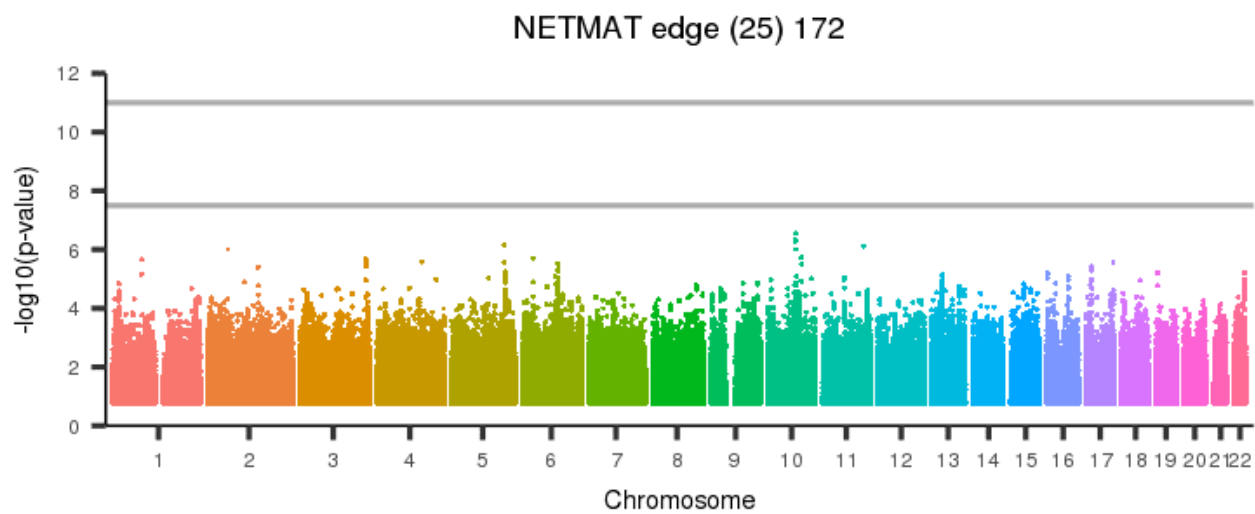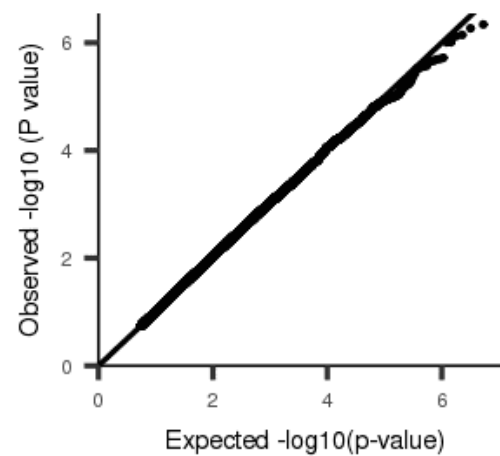

[back to list of plots](#)

Figure 1119: NETMAT edge (25) 173

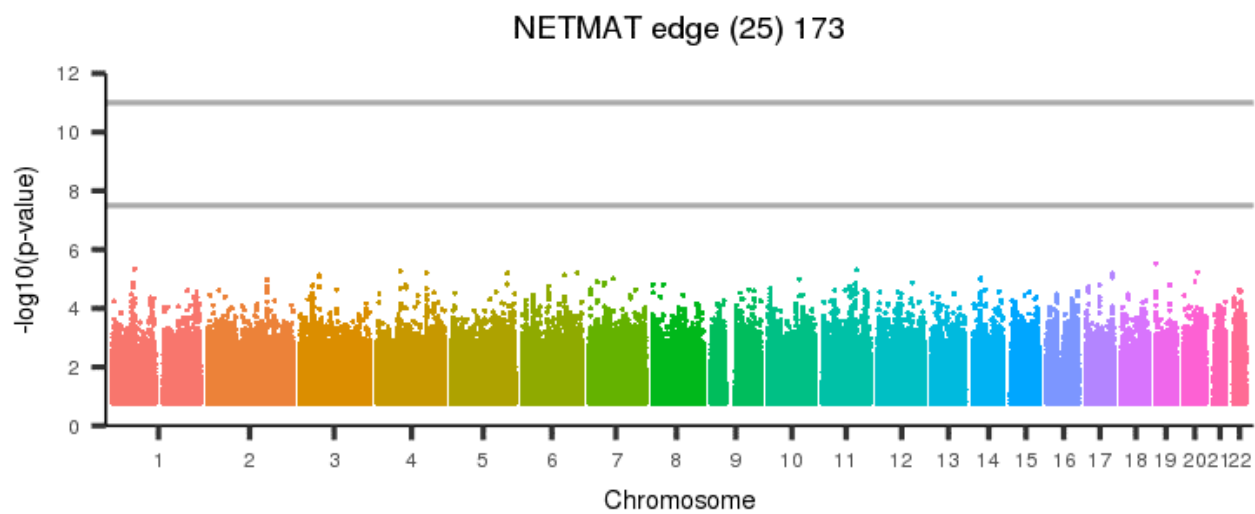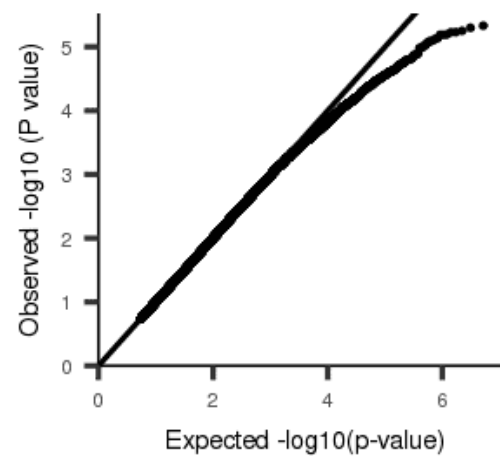

[back to list of plots](#)

Figure 1120: NETMAT edge (25) 174

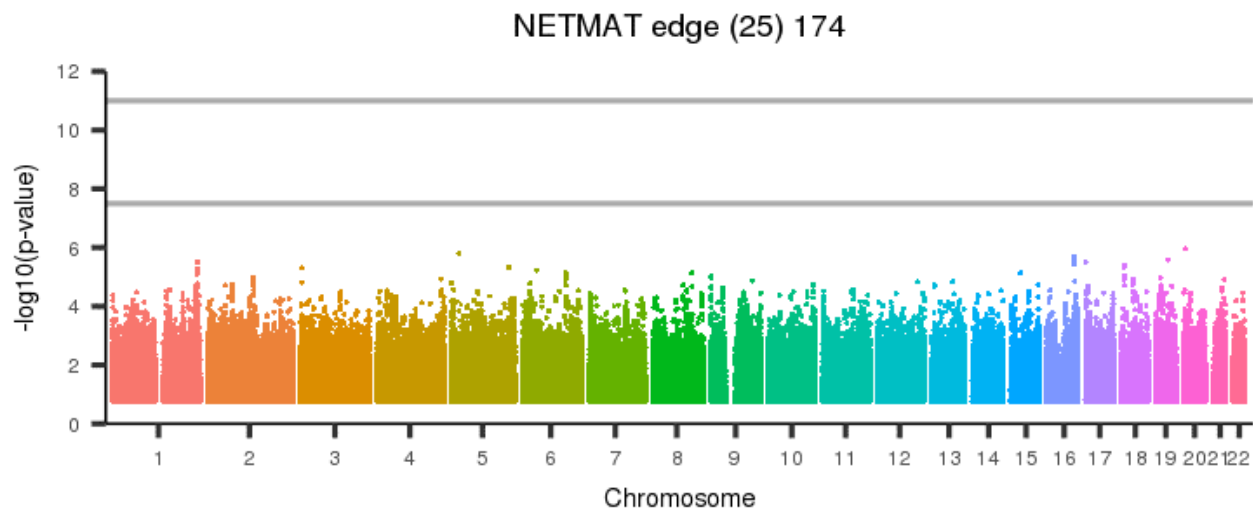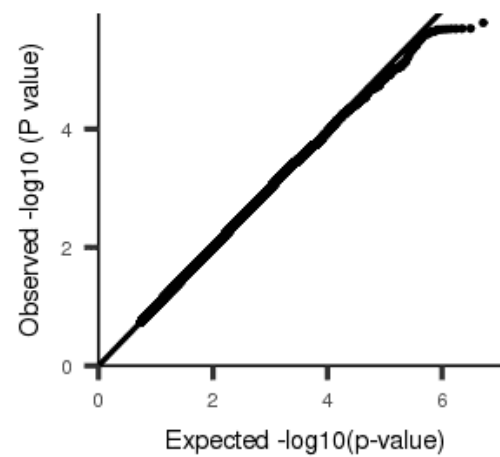

[back to list of plots](#)

Figure 1121: NETMAT edge (25) 175

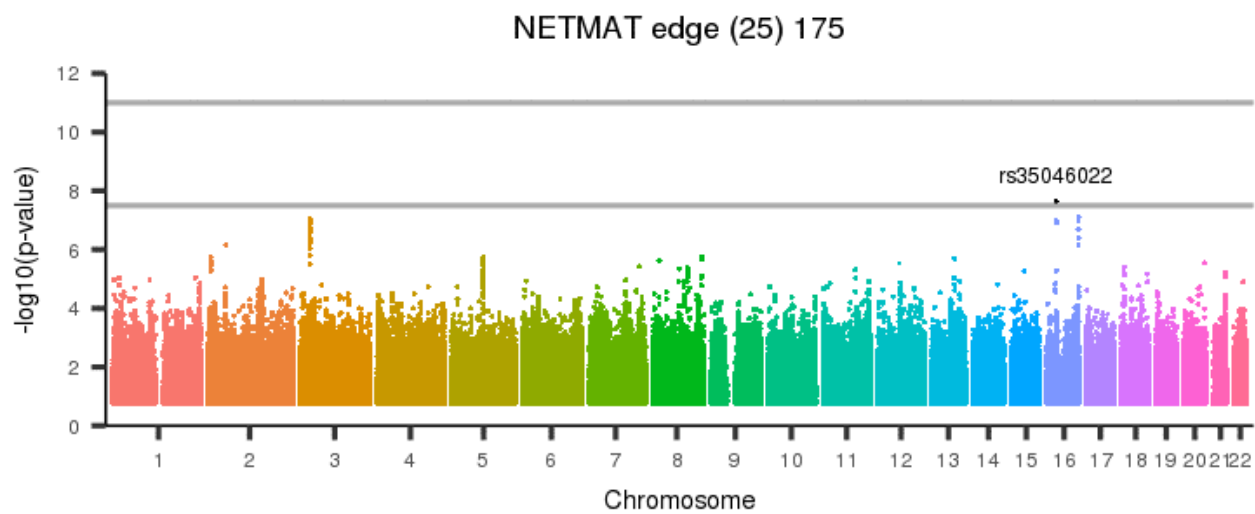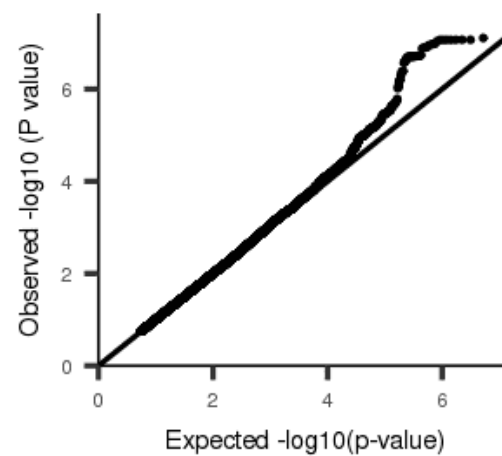

[back to list of plots](#)

Figure 1122: NETMAT edge (25) 176

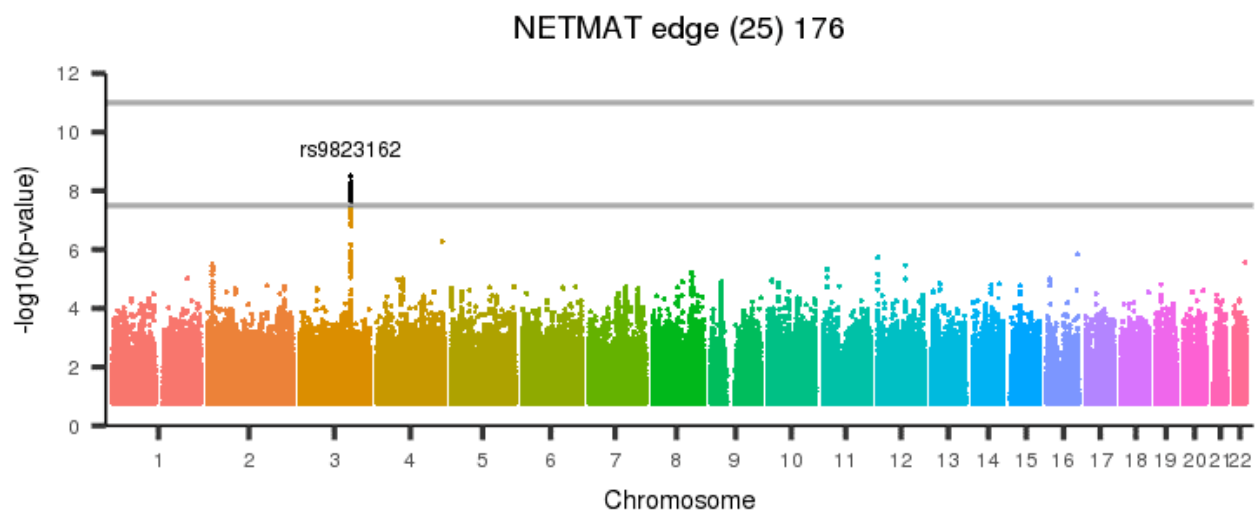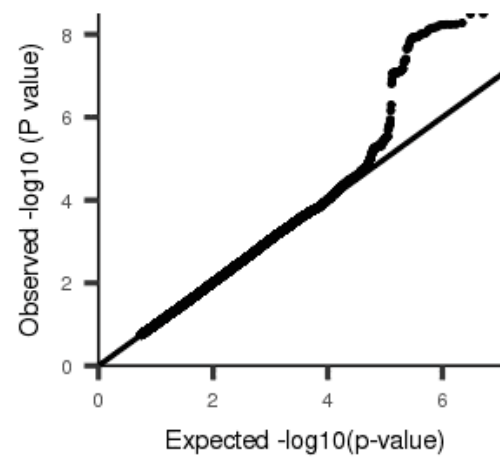

[back to list of plots](#)

Figure 1123: NETMAT edge (25) 177

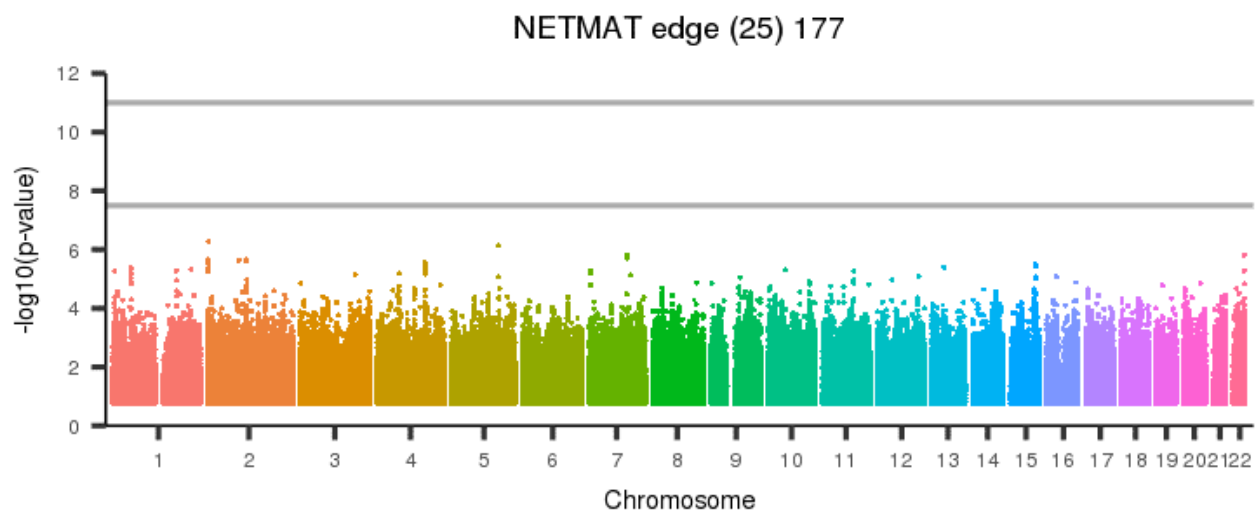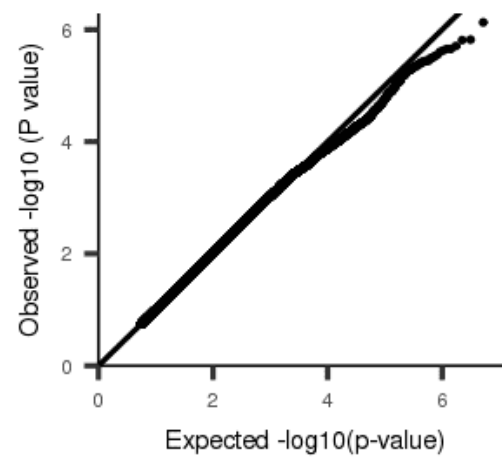

[back to list of plots](#)

Figure 1124: NETMAT edge (25) 178

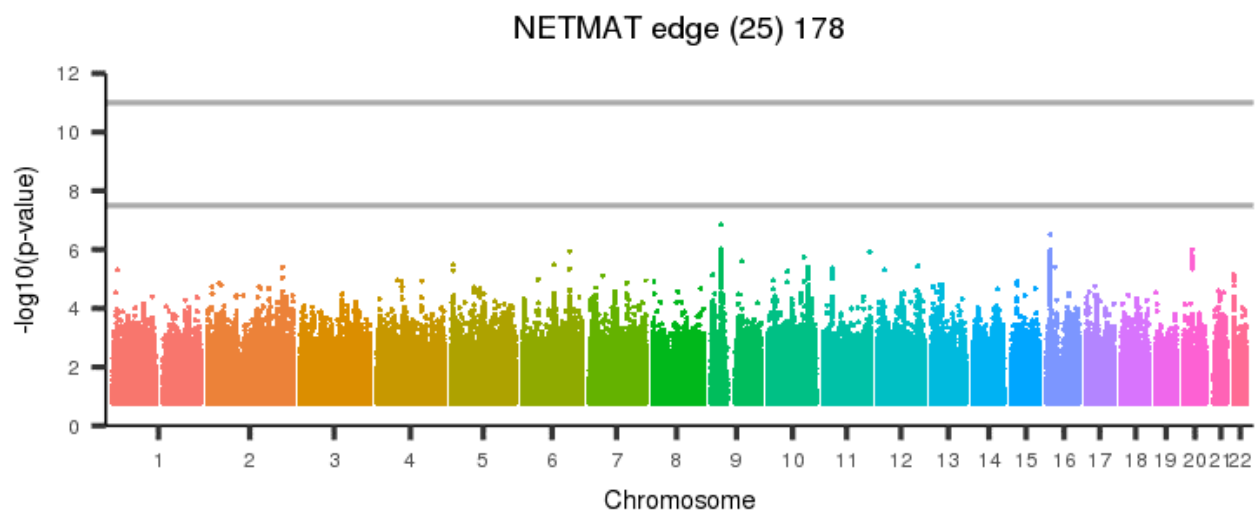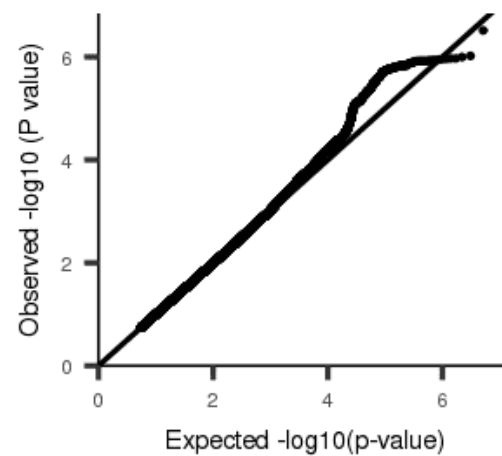

[back to list of plots](#)

Figure 1125: NETMAT edge (25) 179

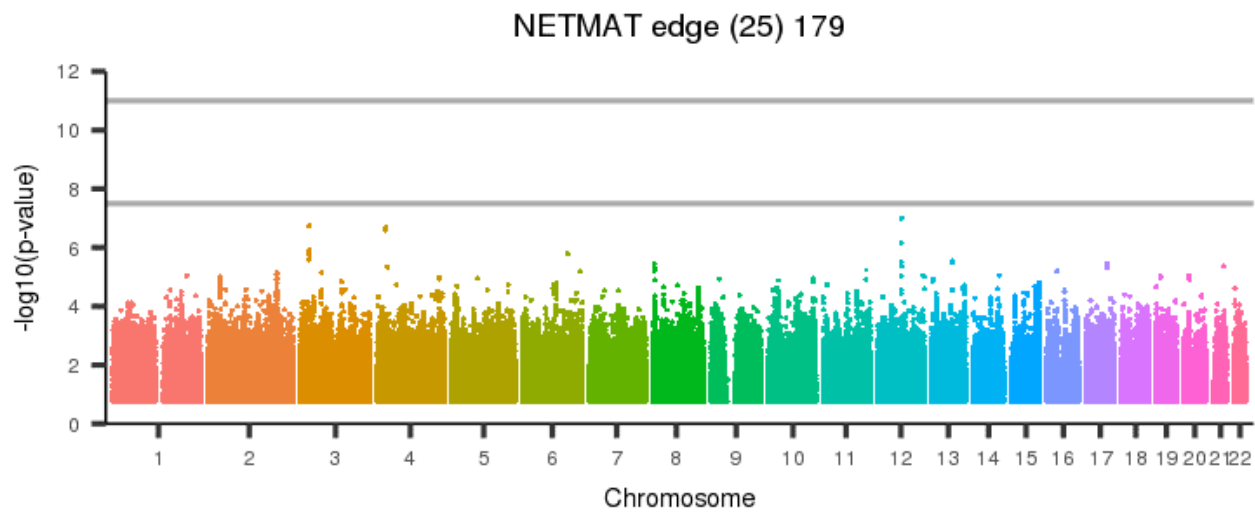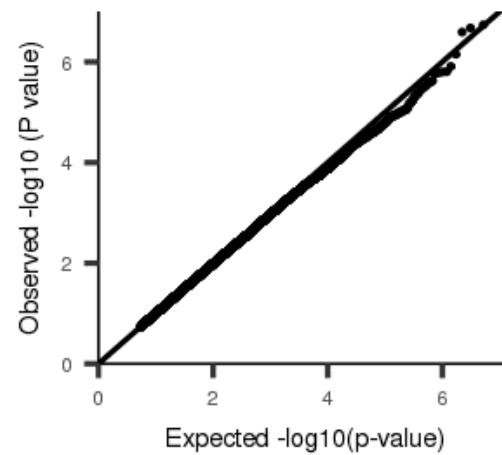

[back to list of plots](#)



Figure 1126: NETMAT edge (25) 180

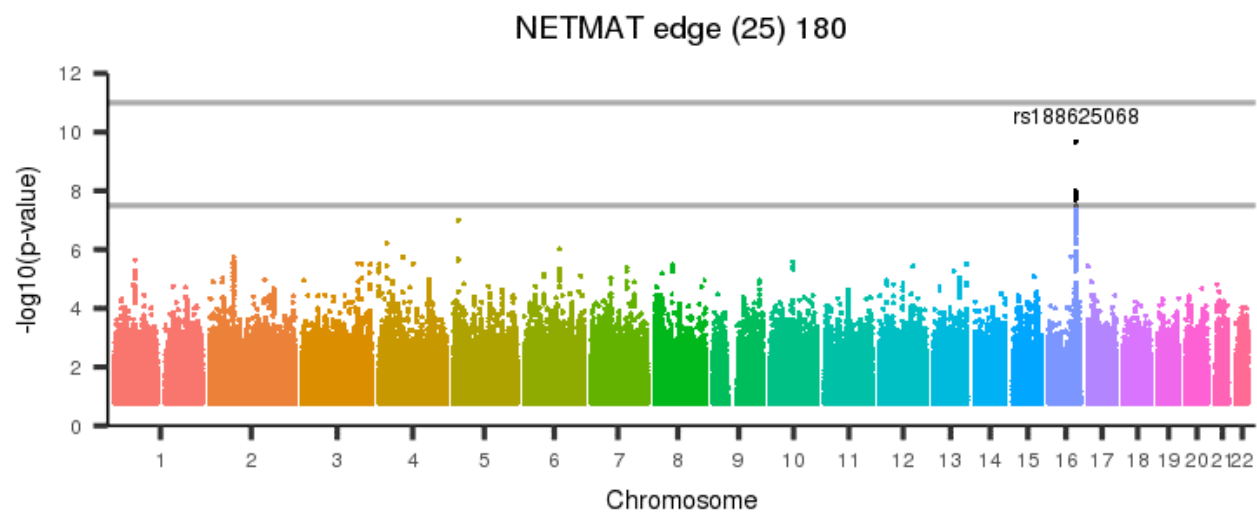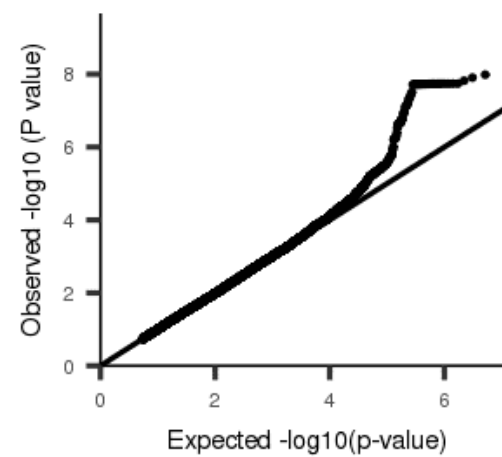

[back to list of plots](#)

Figure 1127: NETMAT edge (25) 181

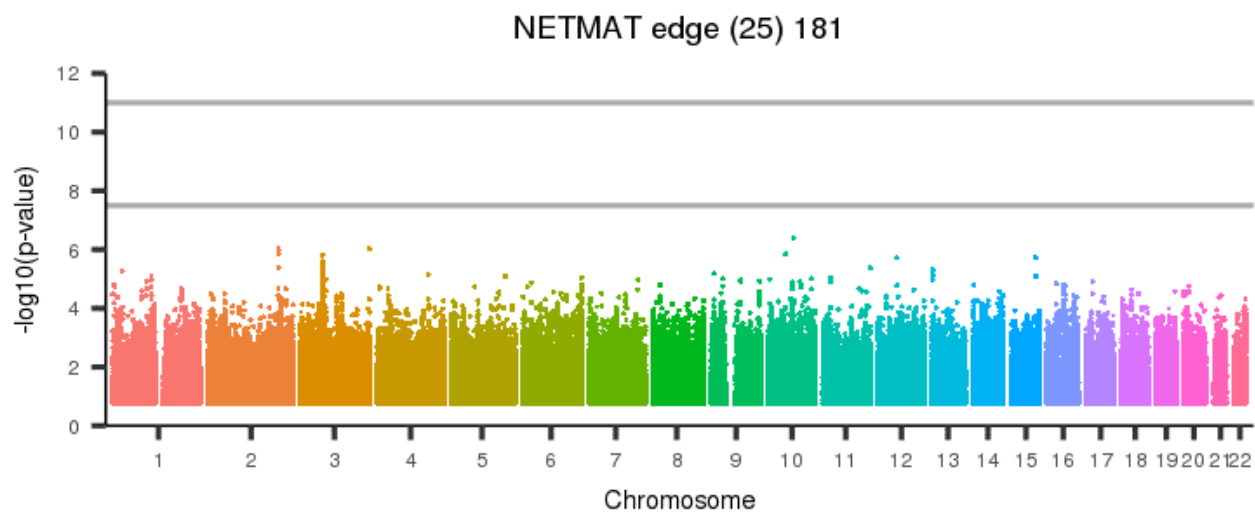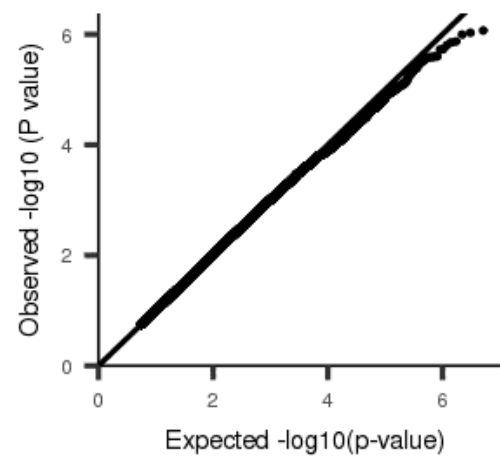

[back to list of plots](#)

Figure 1128: NETMAT edge (25) 182

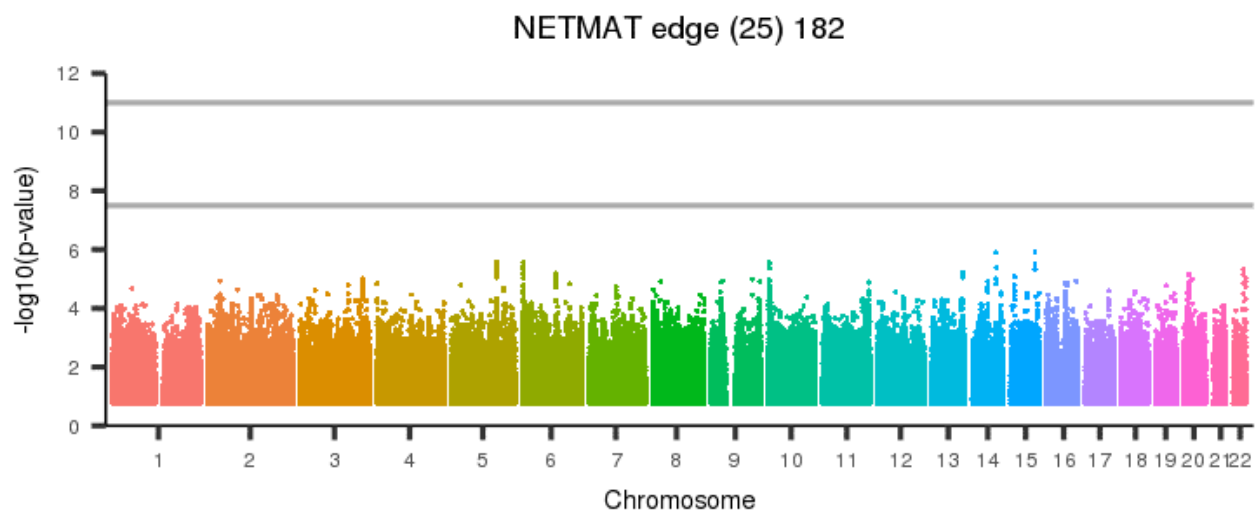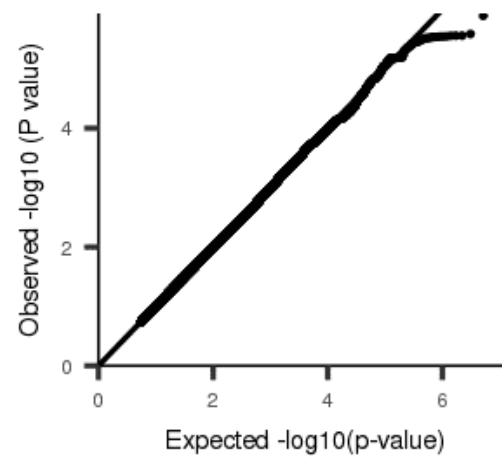

[back to list of plots](#)

Figure 1129: NETMAT edge (25) 183

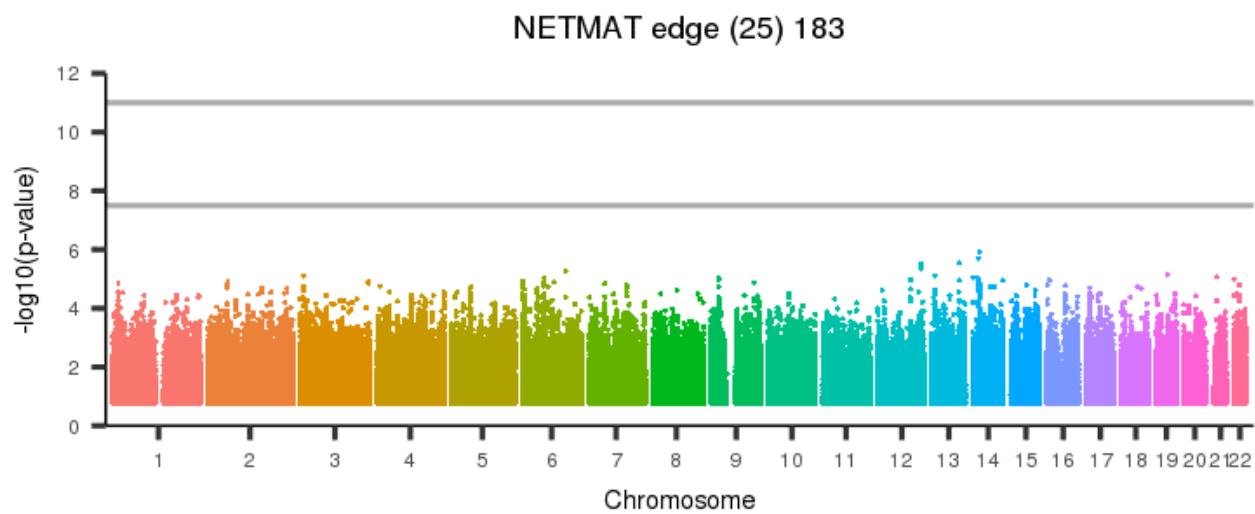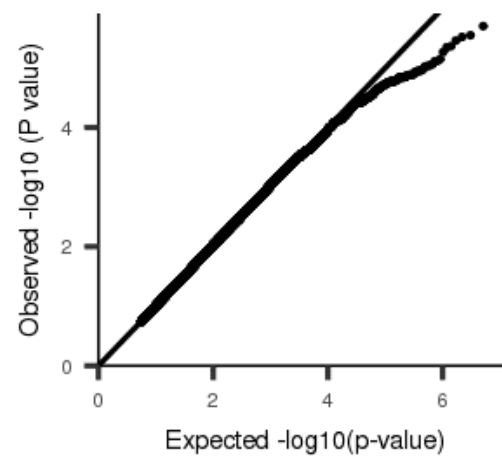

[back to list of plots](#)

Figure 1130: NETMAT edge (25) 184

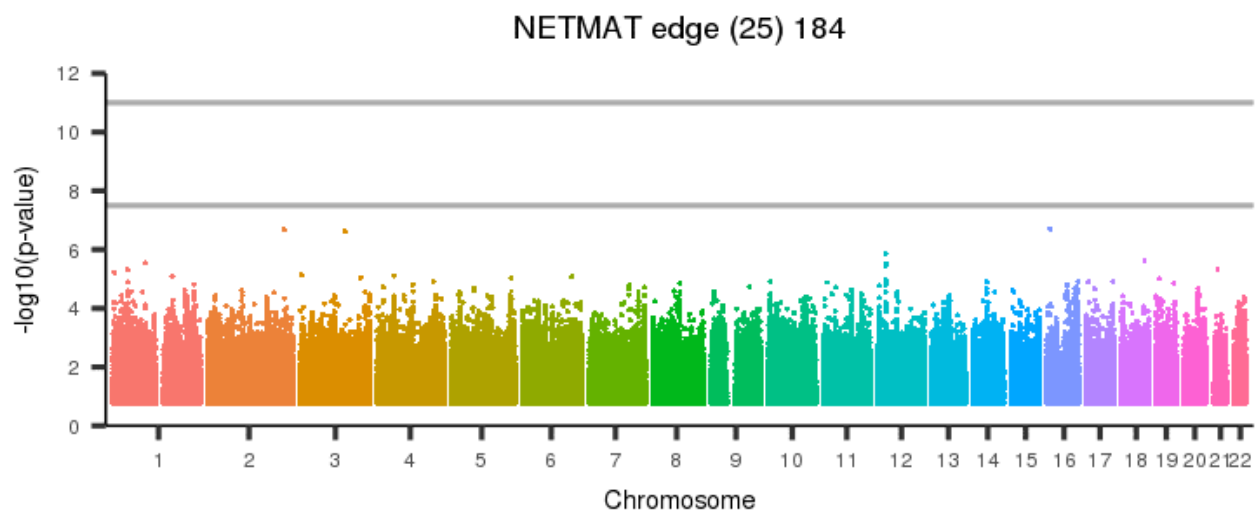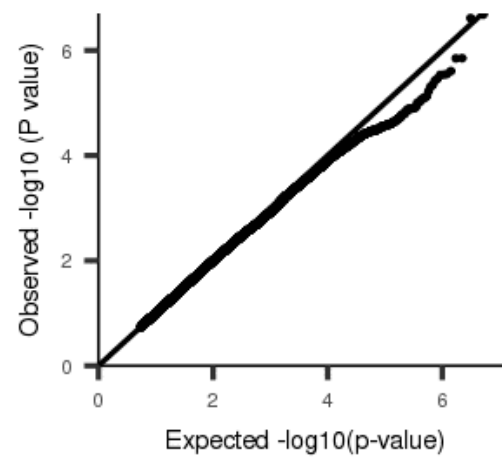

[back to list of plots](#)

Figure 1131: NETMAT edge (25) 185

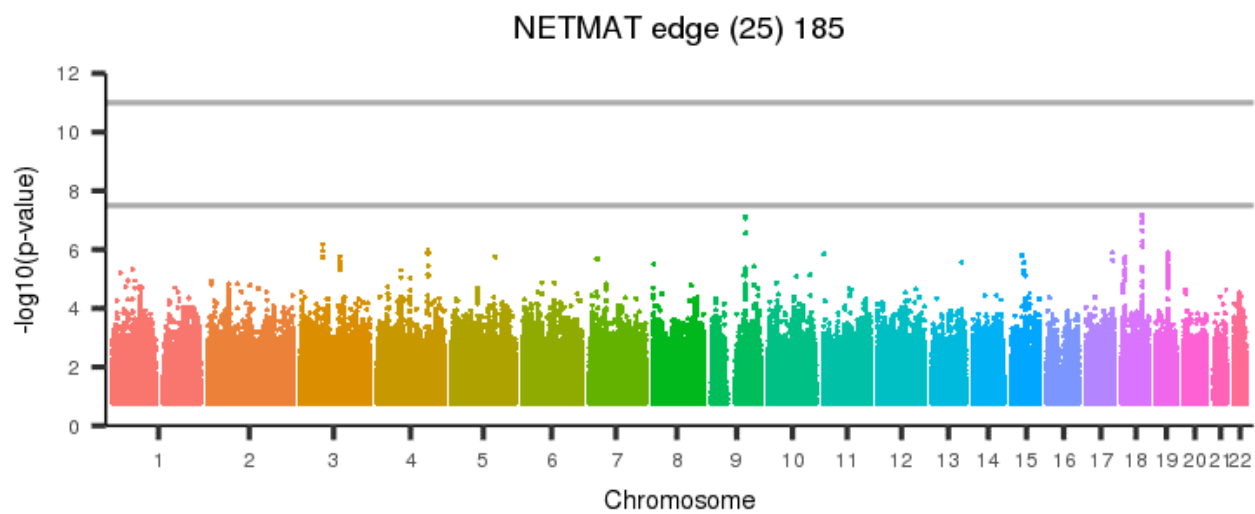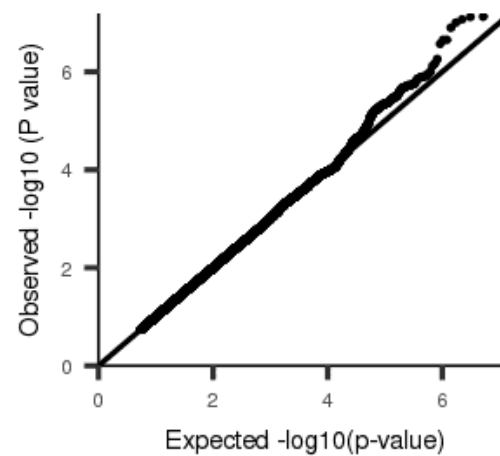

[back to list of plots](#)

Figure 1132: NETMAT edge (25) 186

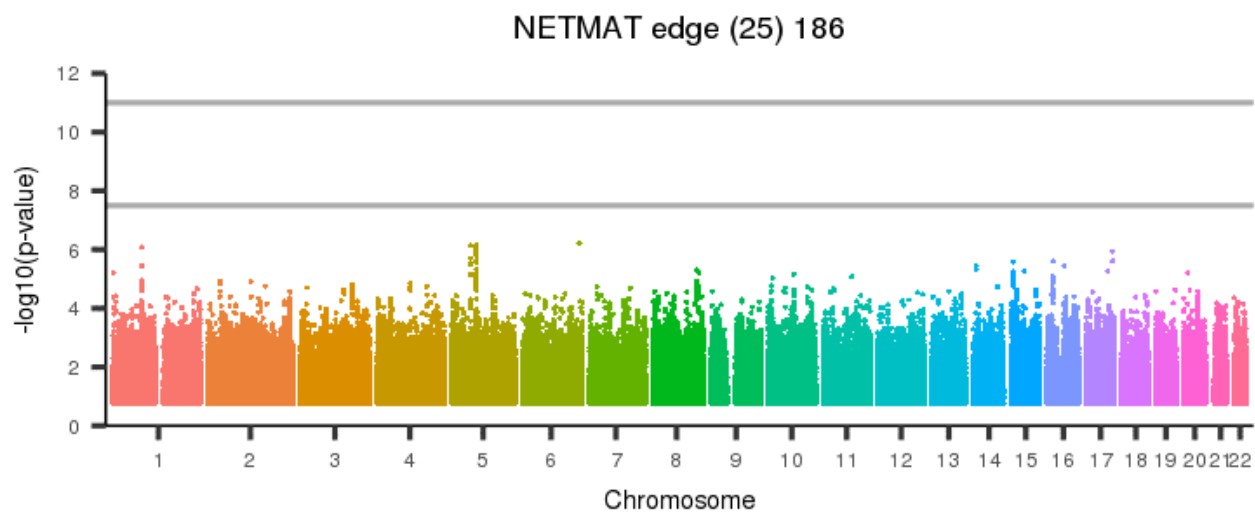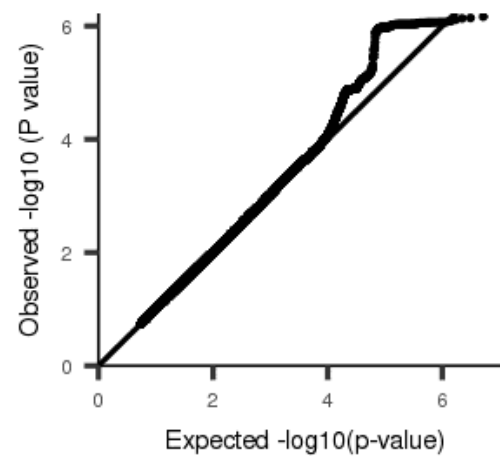

[back to list of plots](#)

Figure 1133: NETMAT edge (25) 187

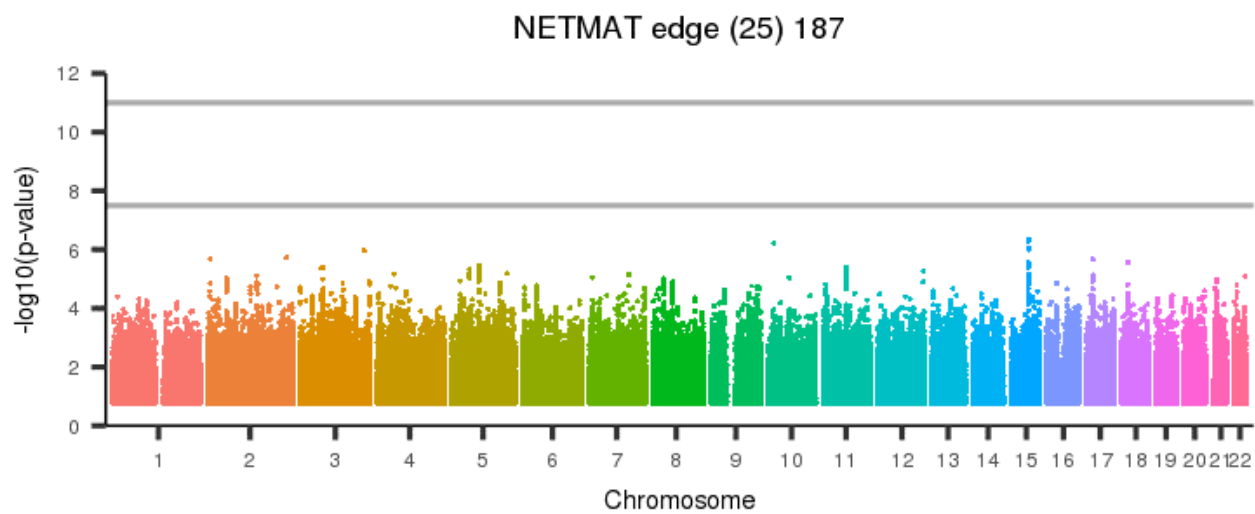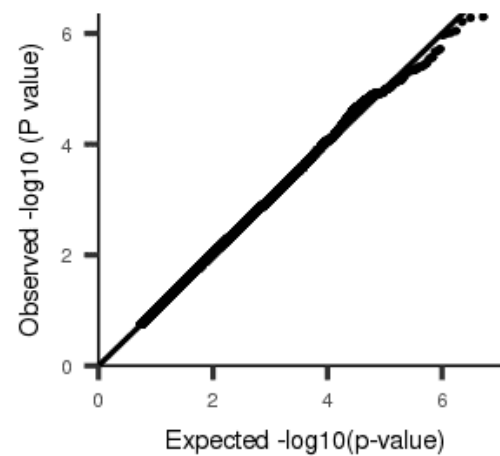

[back to list of plots](#)



Figure 1134: NETMAT edge (25) 188

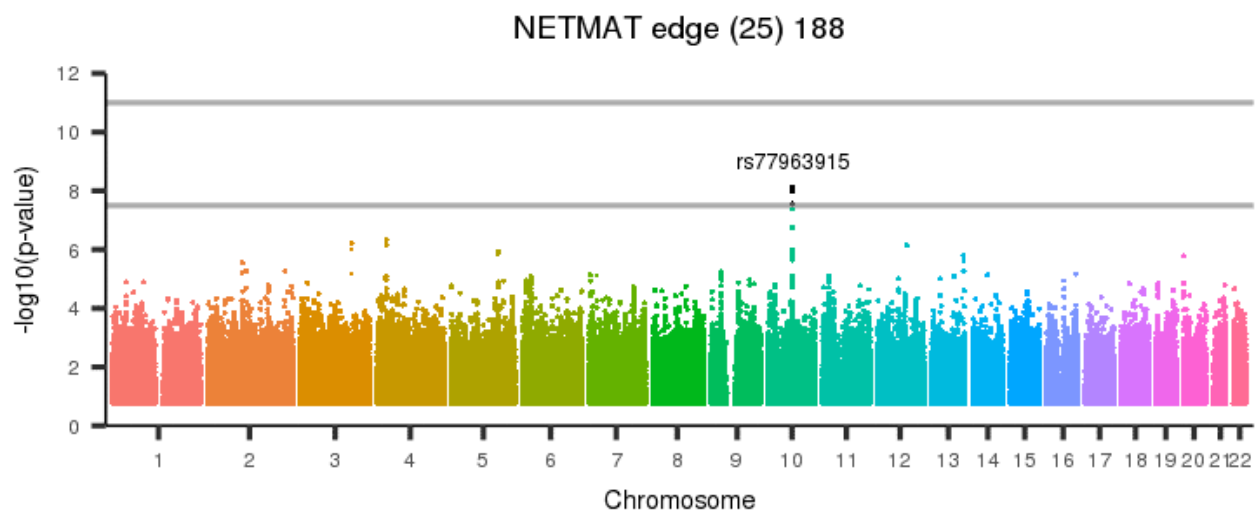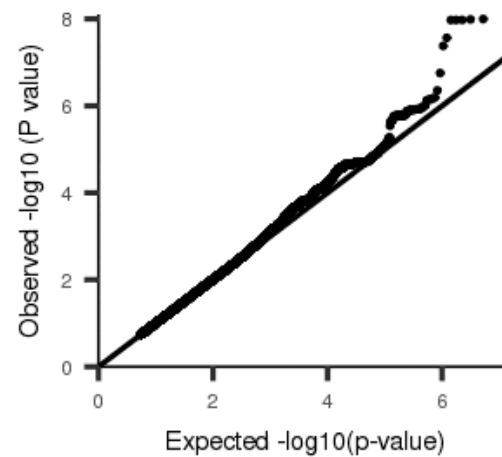

[back to list of plots](#)

Figure 1135: NETMAT edge (25) 189

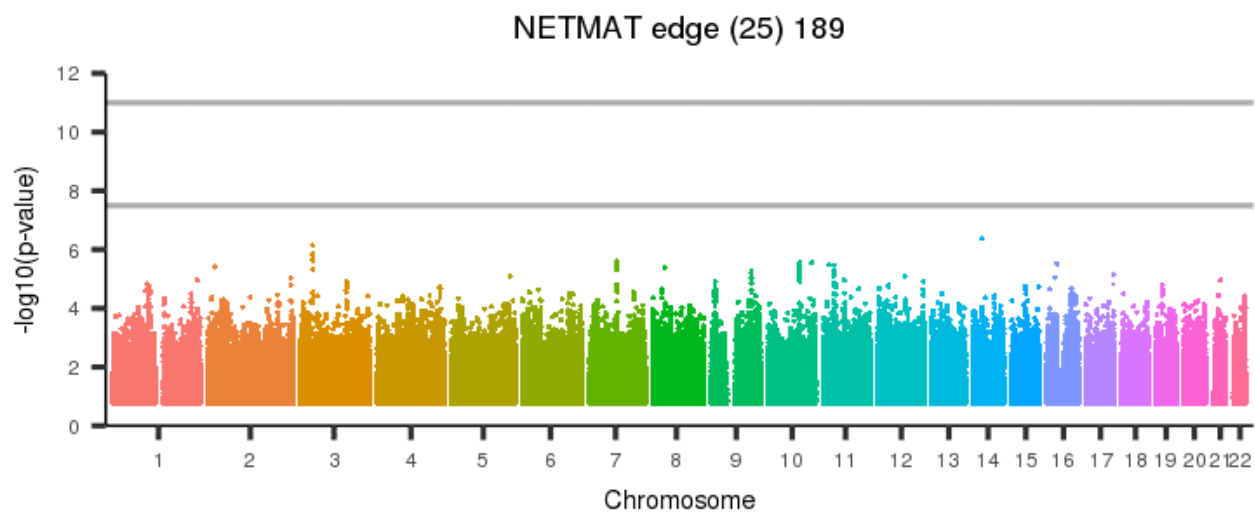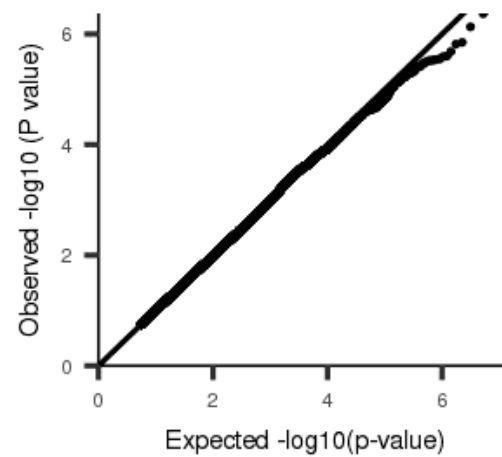

[back to list of plots](#)

Figure 1136: NETMAT edge (25) 190

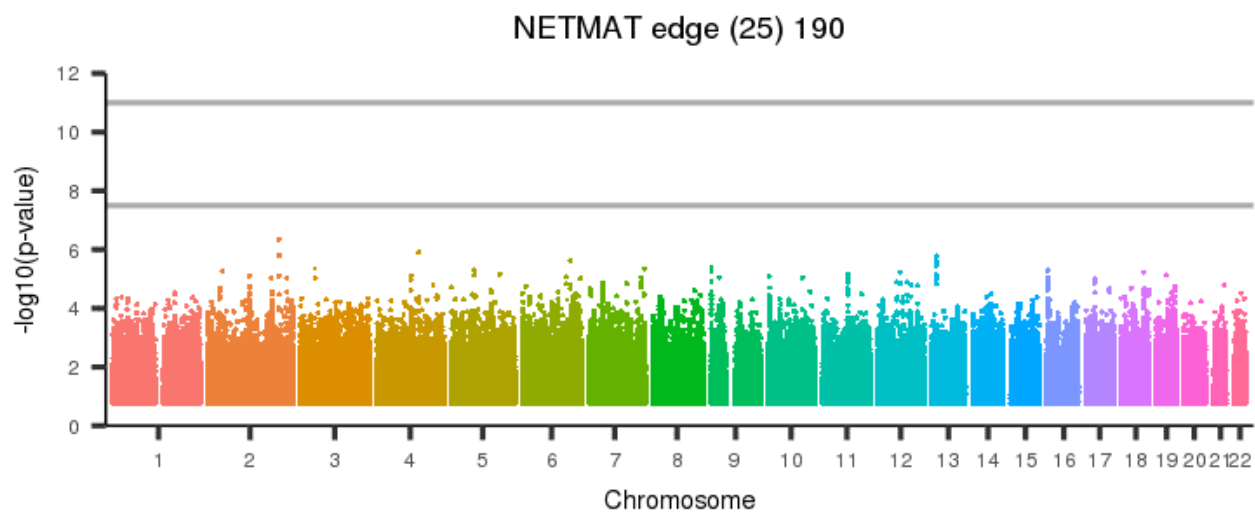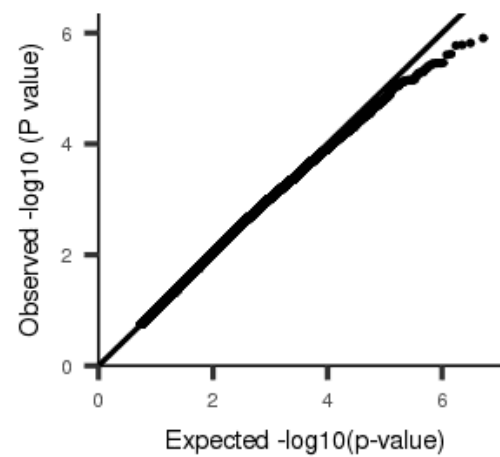

[back to list of plots](#)

Figure 1137: NETMAT edge (25) 191

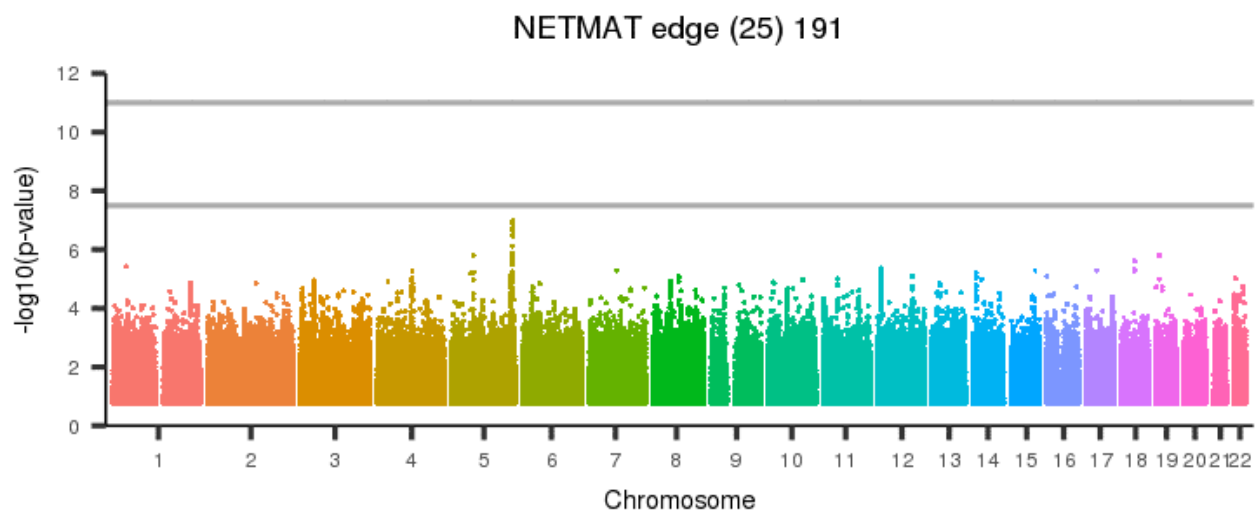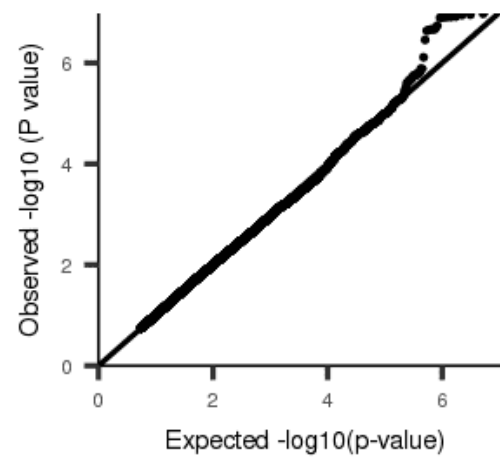

[back to list of plots](#)

Figure 1138: NETMAT edge (25) 192

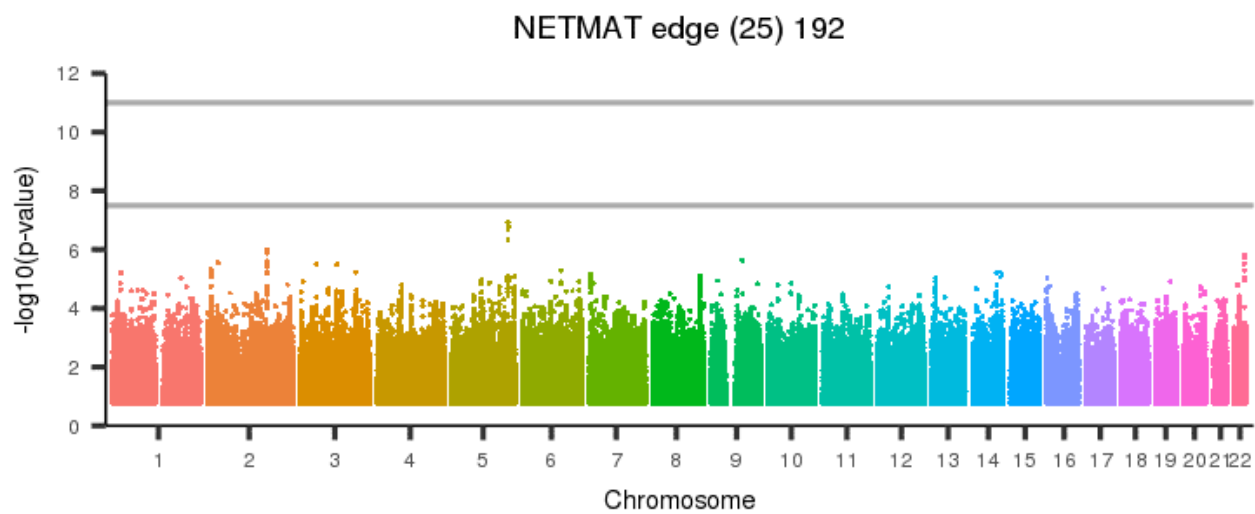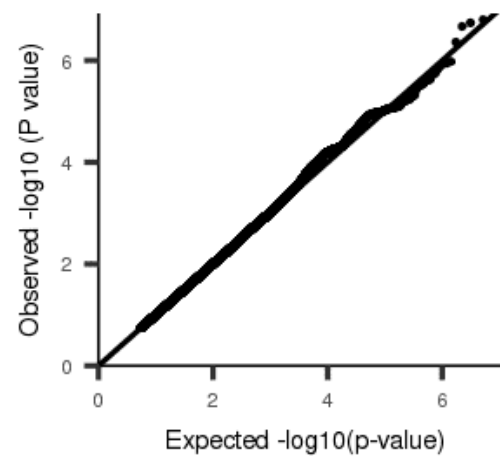

[back to list of plots](#)

Figure 1139: NETMAT edge (25) 193

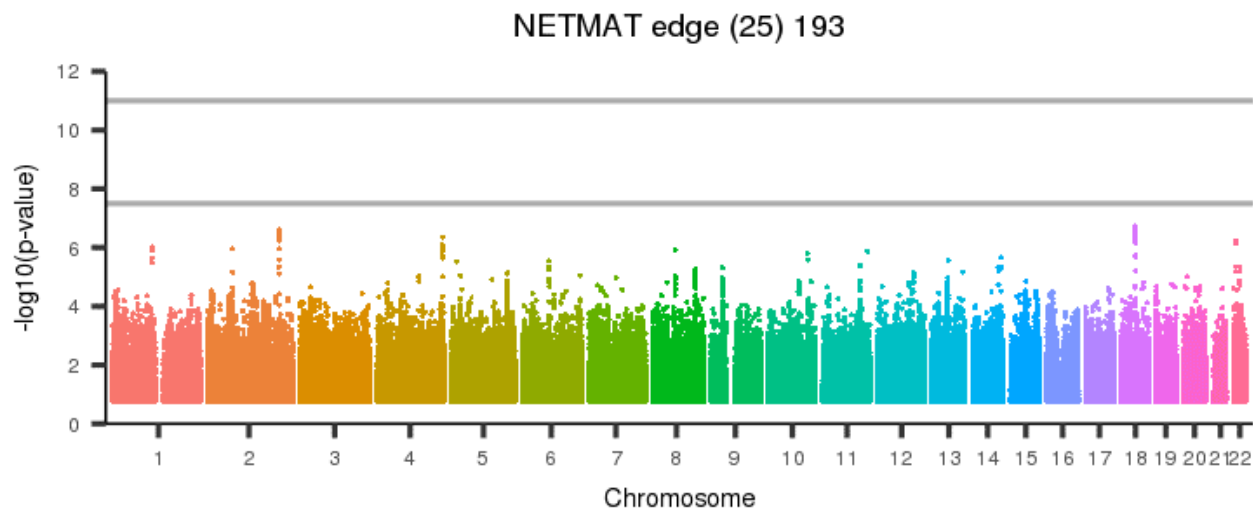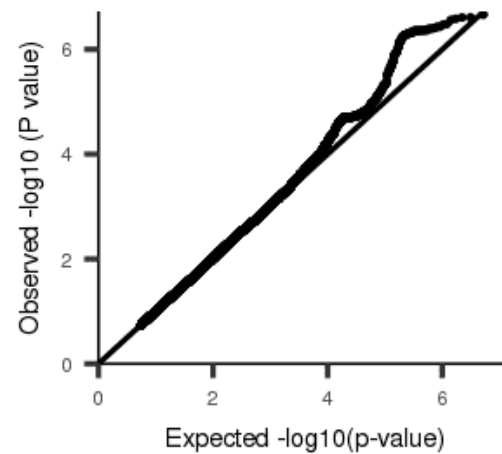

[back to list of plots](#)

Figure 1140: NETMAT edge (25) 194

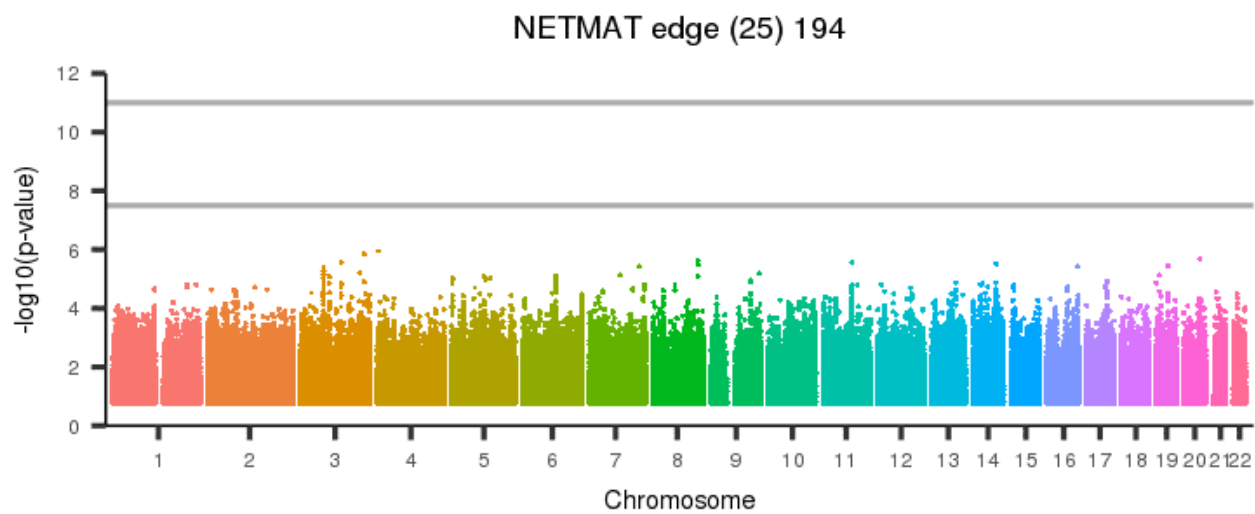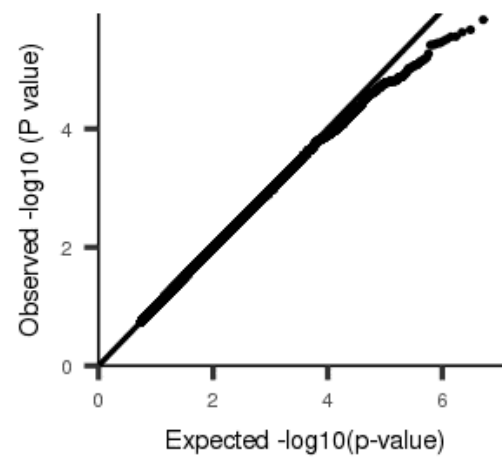

[back to list of plots](#)

Figure 1141: NETMAT edge (25) 195

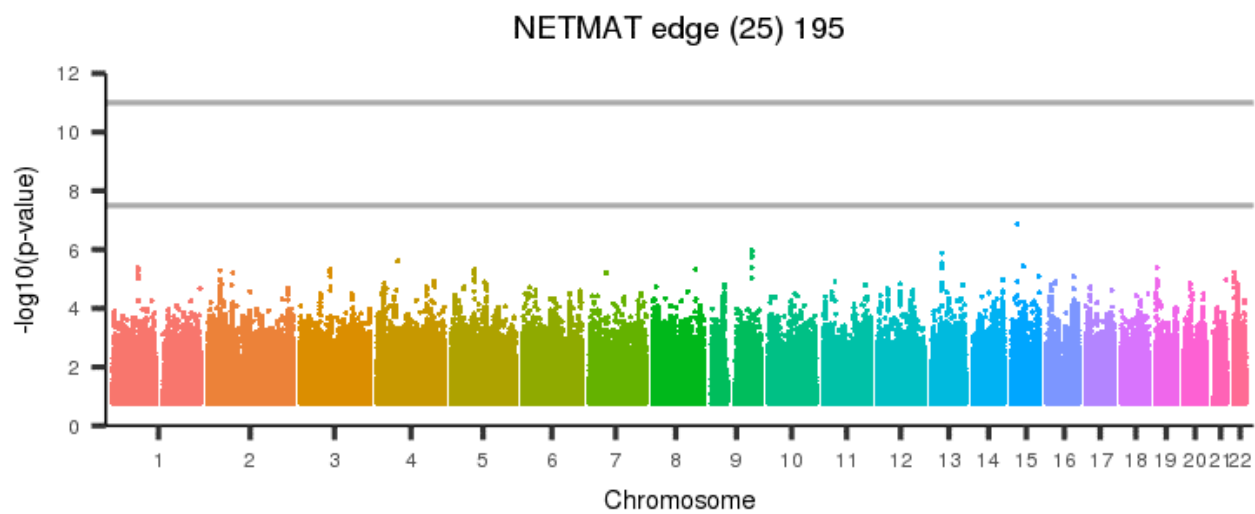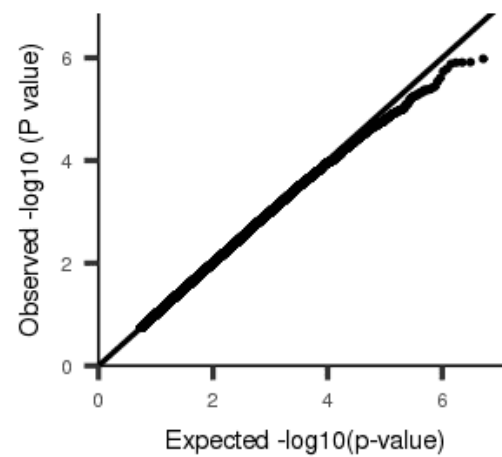

[back to list of plots](#)



Figure 1142: NETMAT edge (25) 196

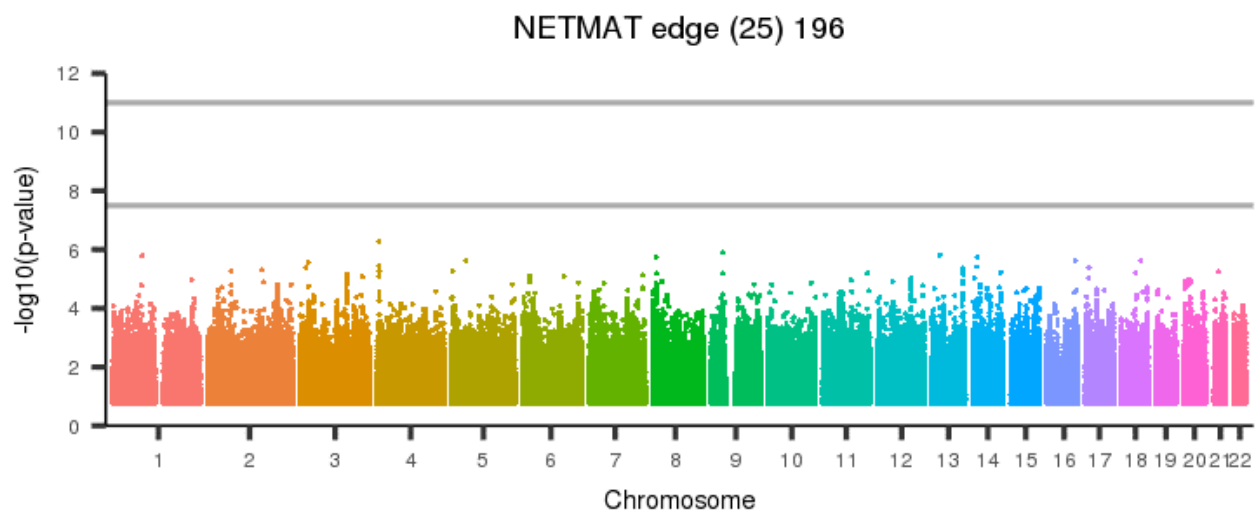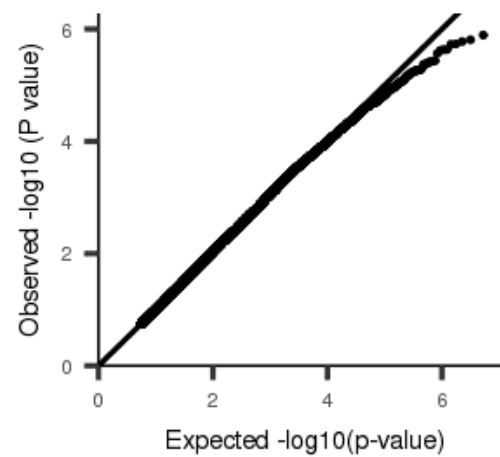

[back to list of plots](#)

Figure 1143: NETMAT edge (25) 197

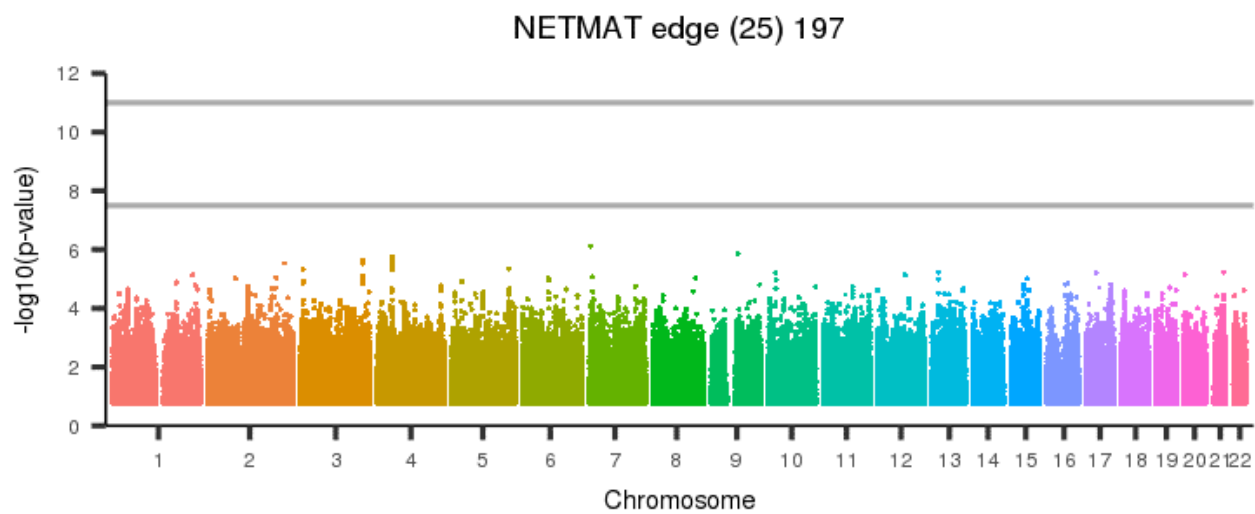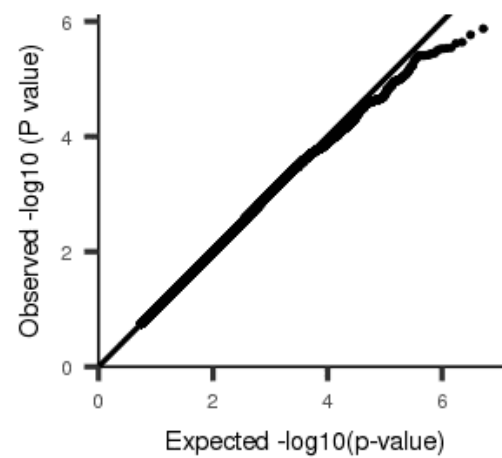

[back to list of plots](#)

Figure 1144: NETMAT edge (25) 198

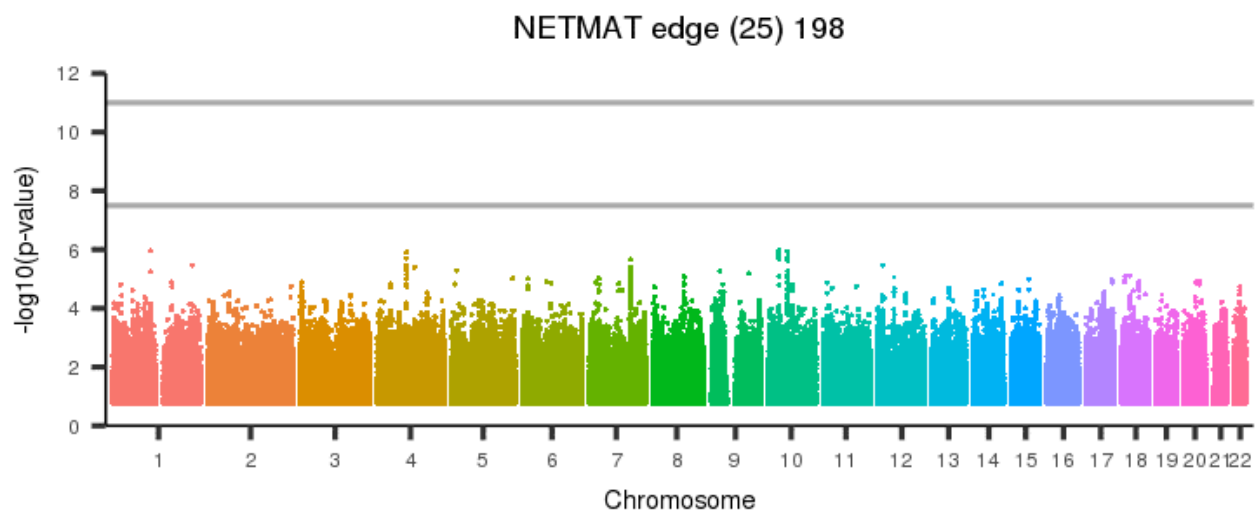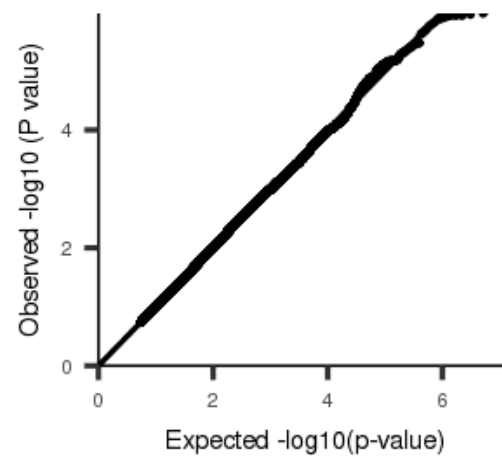

[back to list of plots](#)

Figure 1145: NETMAT edge (25) 199

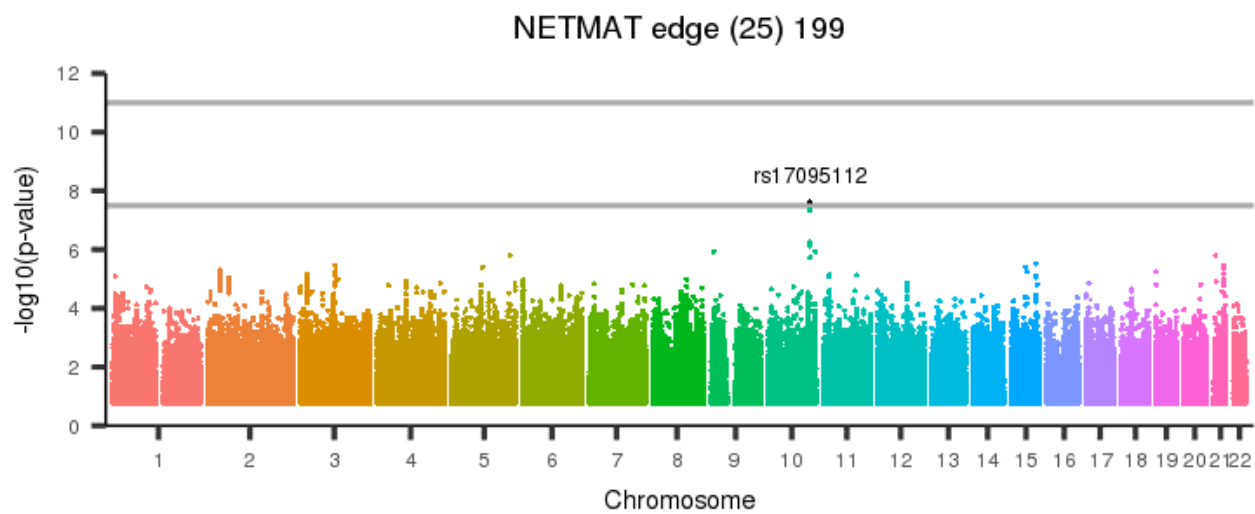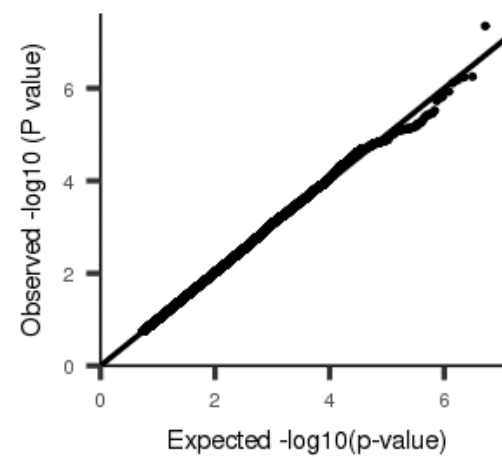

[back to list of plots](#)

Figure 1146: NETMAT edge (25) 200

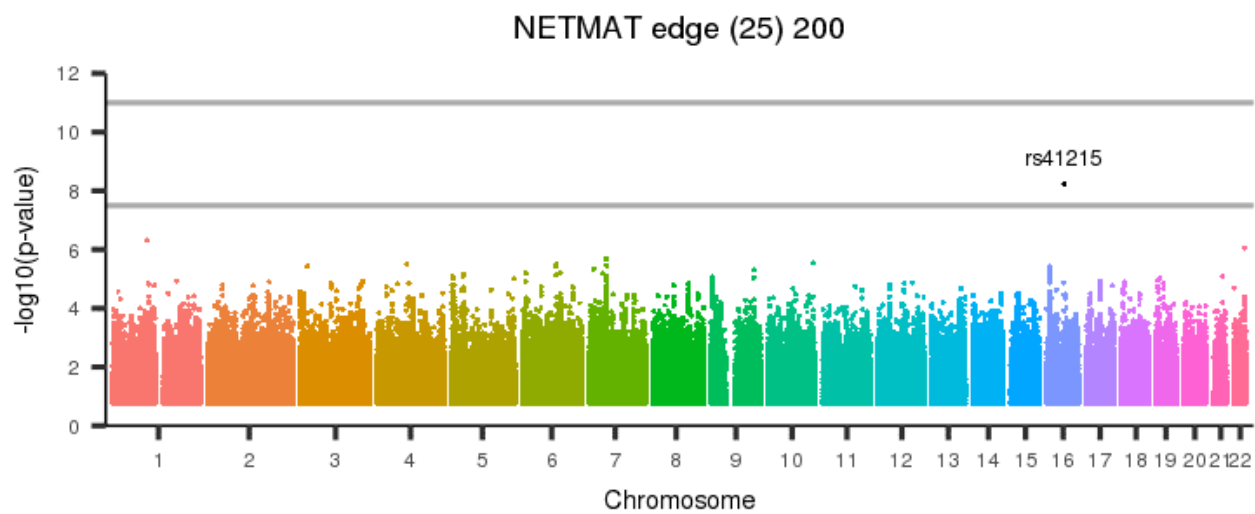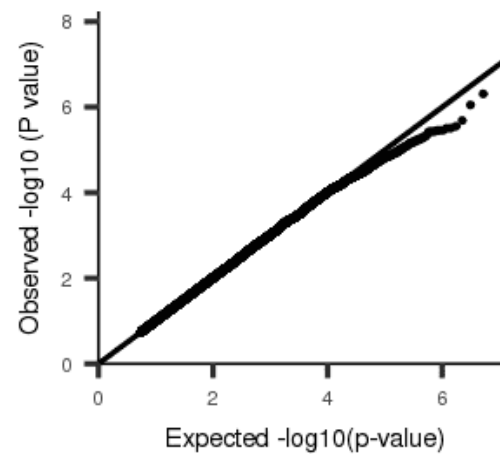

[back to list of plots](#)

Figure 1147: NETMAT edge (25) 201

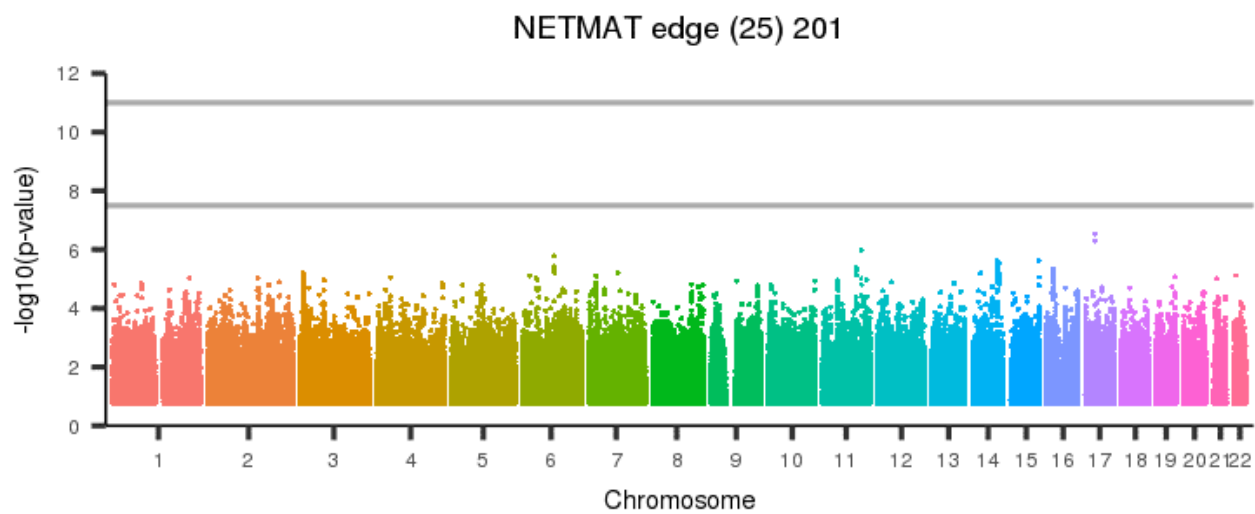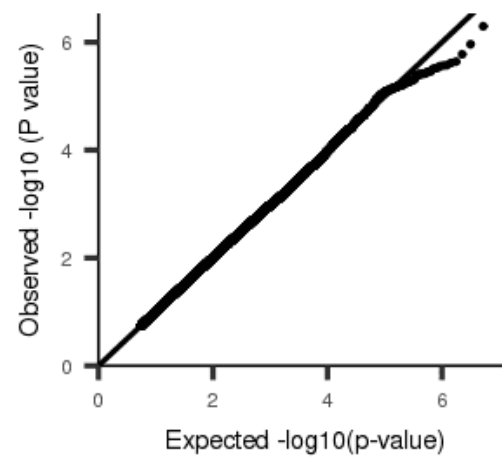

[back to list of plots](#)

Figure 1148: NETMAT edge (25) 202

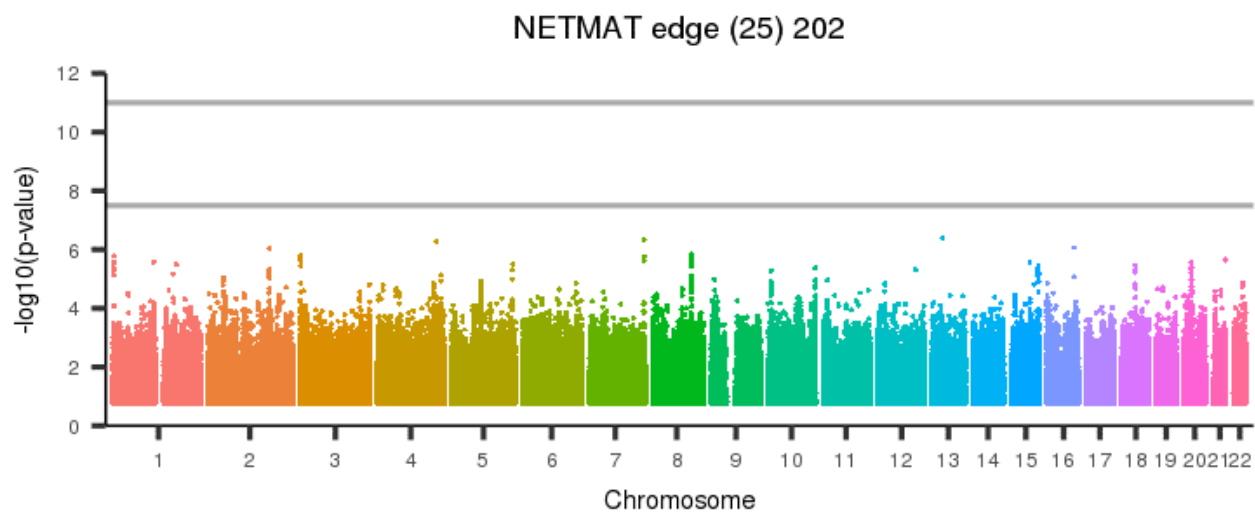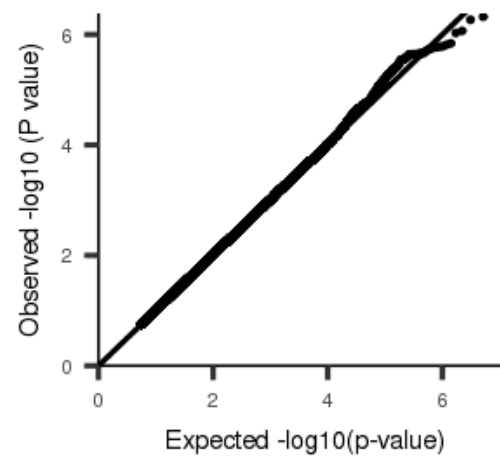

[back to list of plots](#)

Figure 1149: NETMAT edge (25) 203

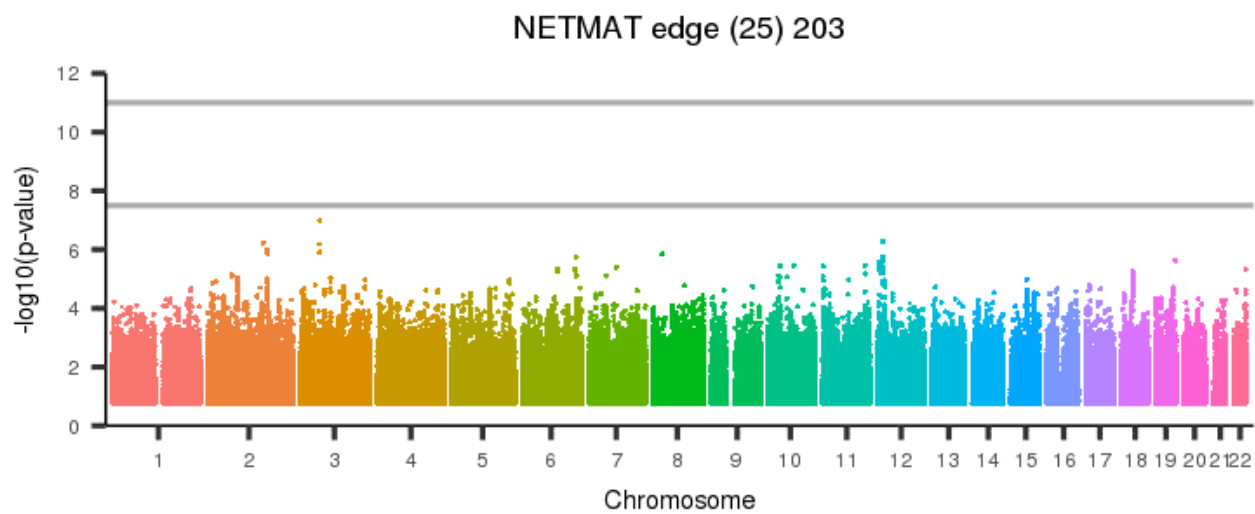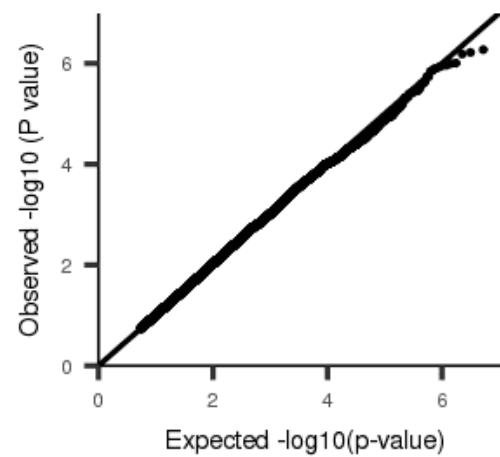

[back to list of plots](#)



Figure 1150: NETMAT edge (25) 204

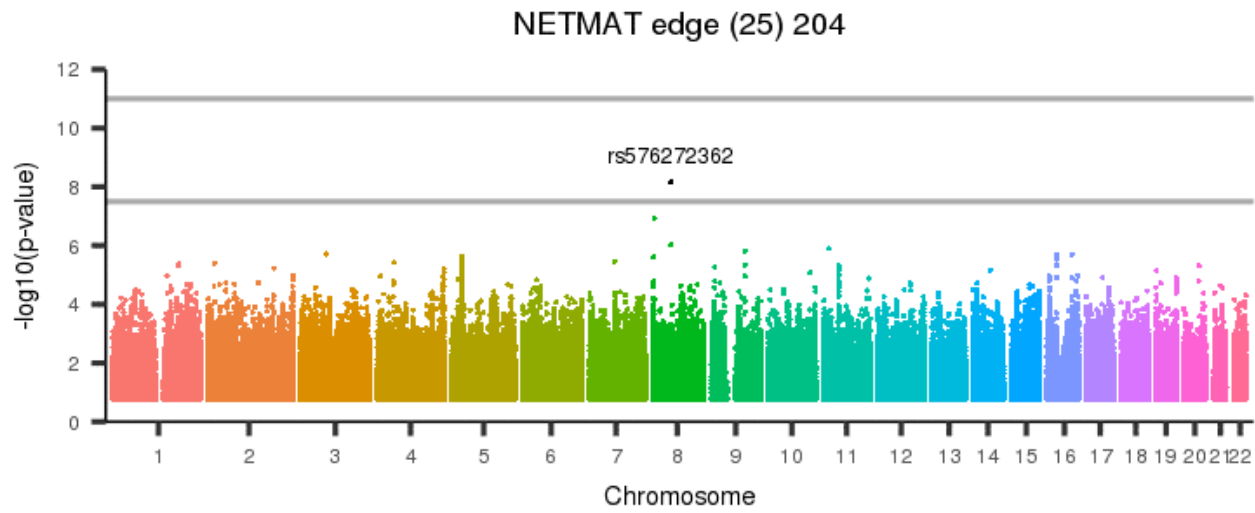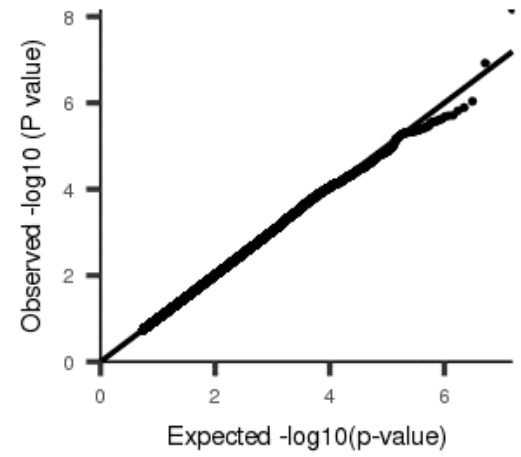

[back to list of plots](#)

Figure 1151: NETMAT edge (25) 205

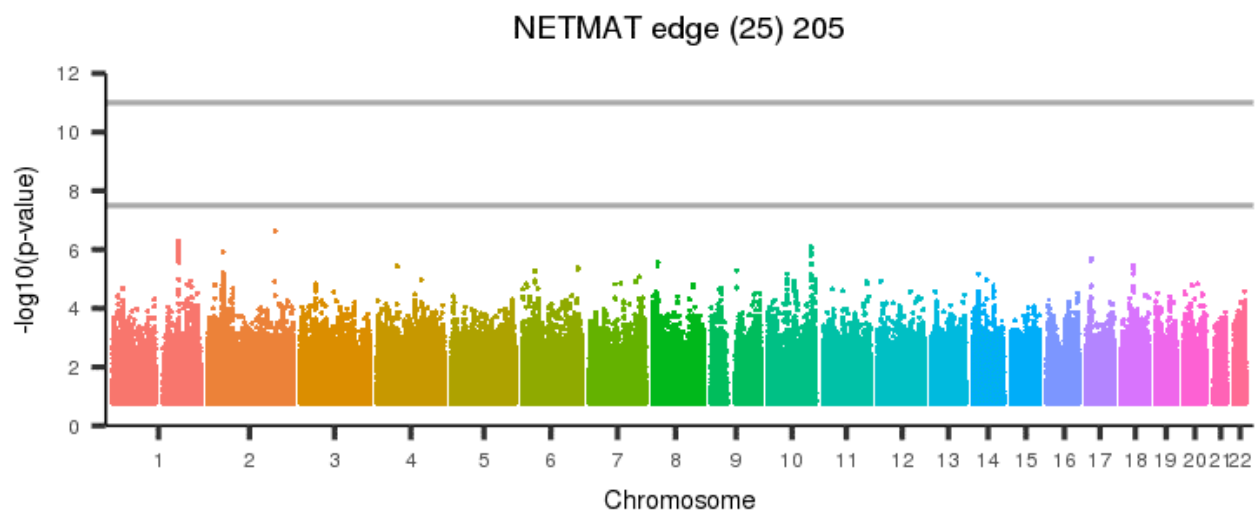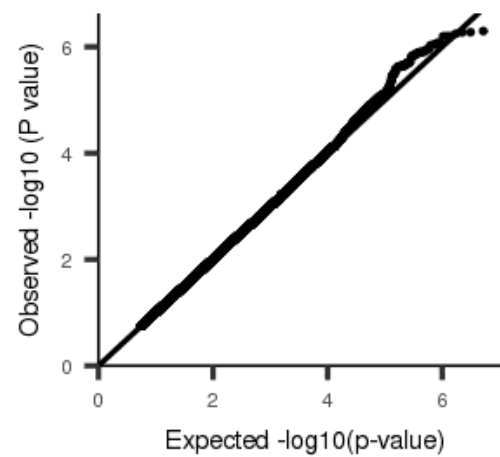

[back to list of plots](#)

Figure 1152: NETMAT edge (25) 206

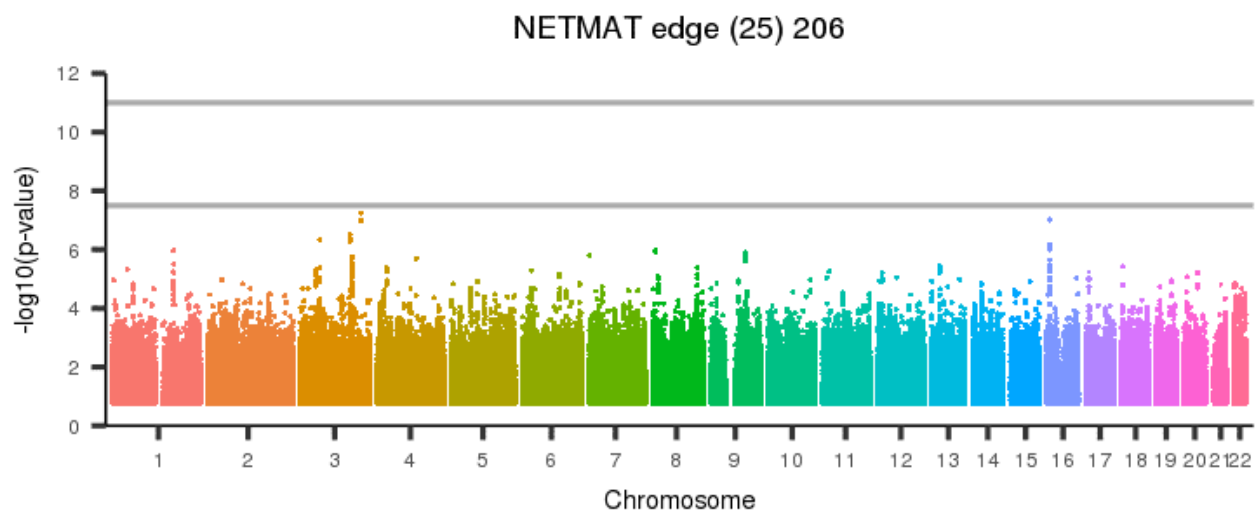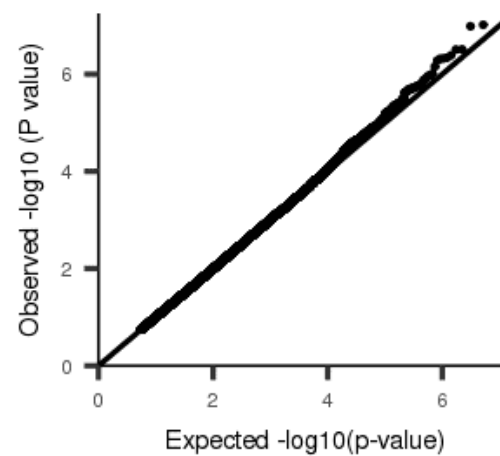

[back to list of plots](#)

Figure 1153: NETMAT edge (25) 207

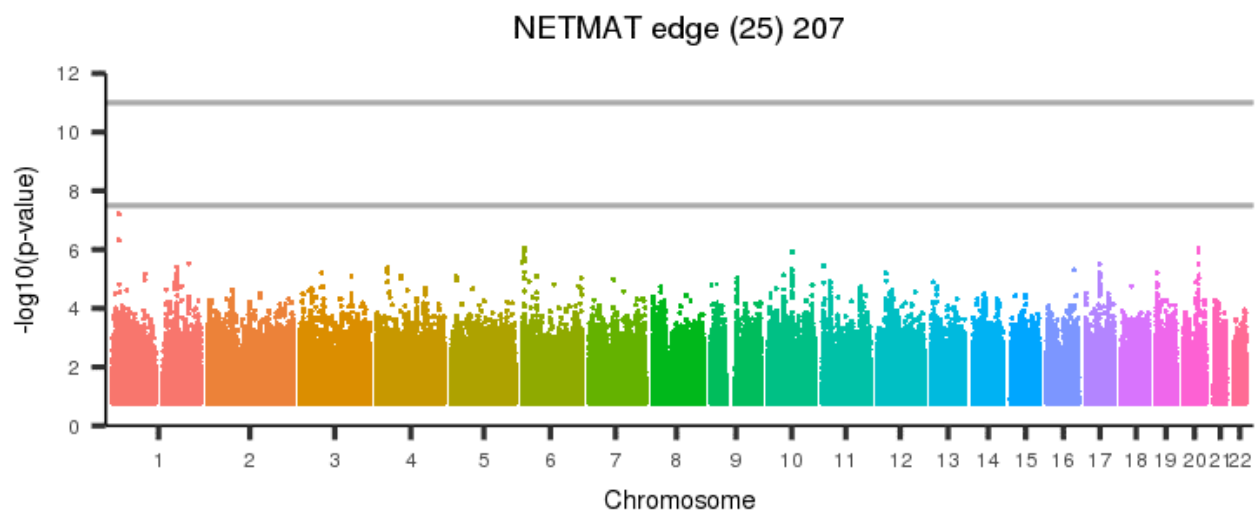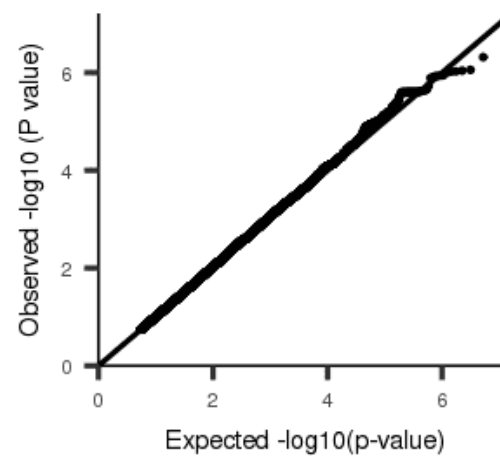

[back to list of plots](#)

Figure 1154: NETMAT edge (25) 208

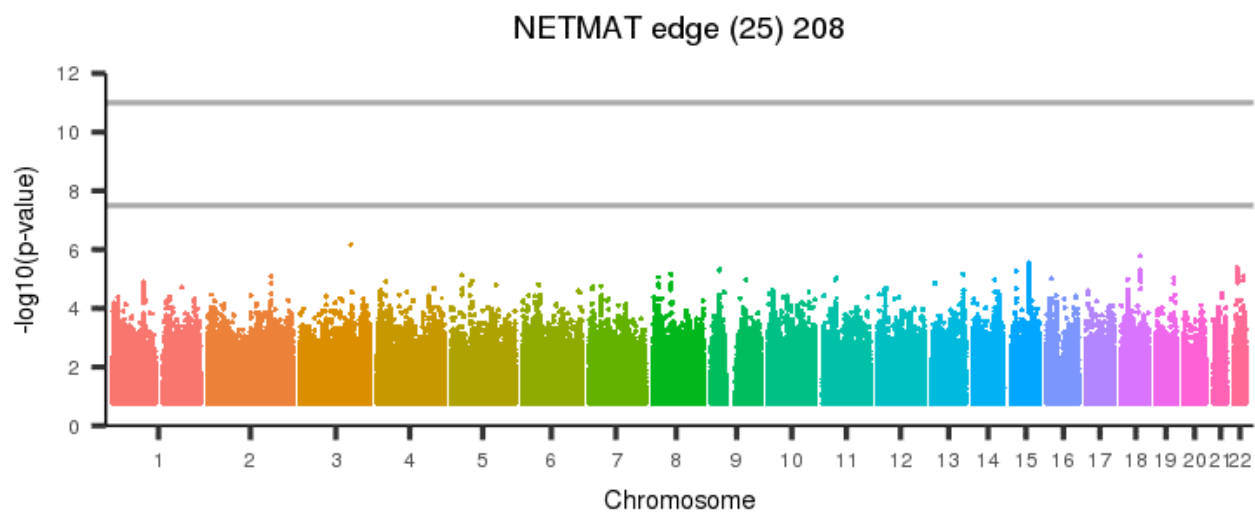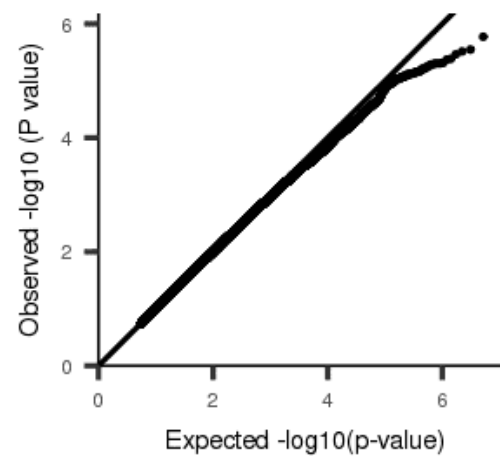

[back to list of plots](#)

Figure 1155: NETMAT edge (25) 209

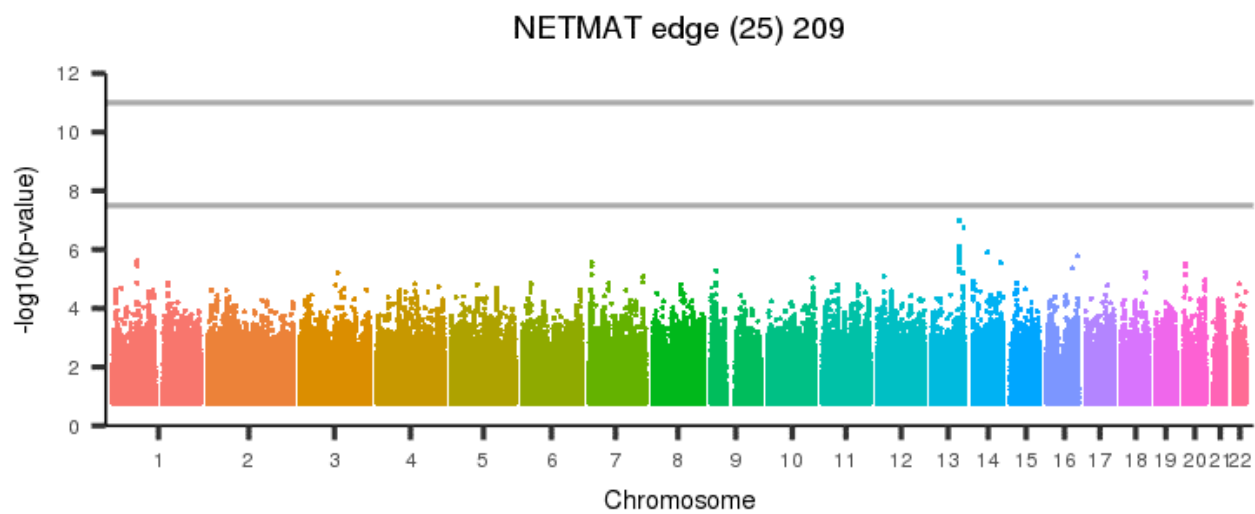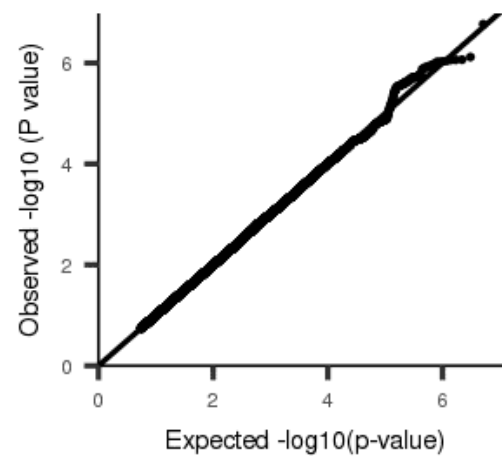

[back to list of plots](#)

Figure 1156: NETMAT edge (25) 210

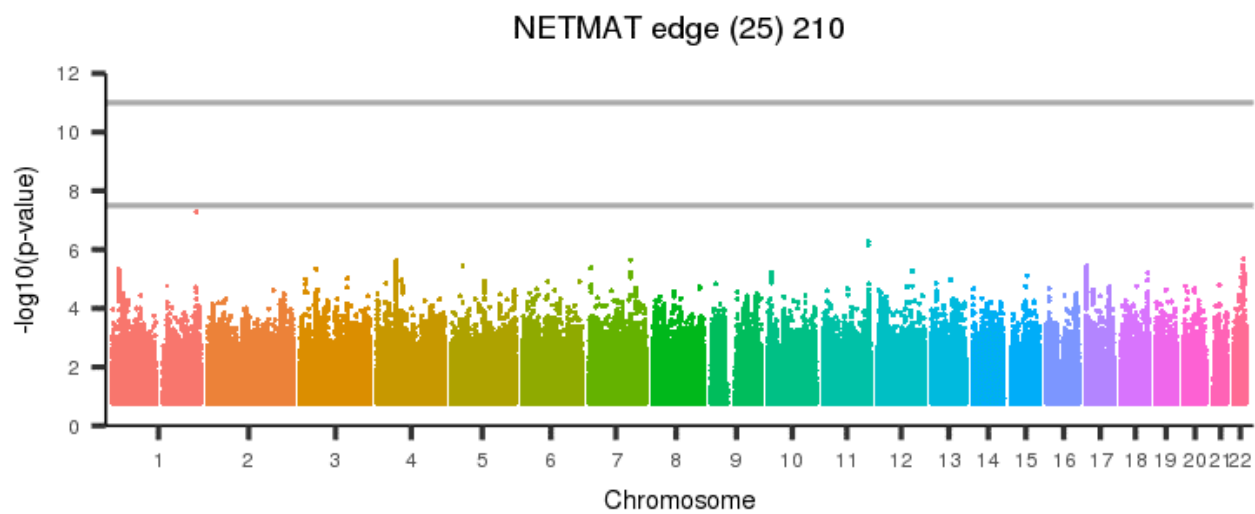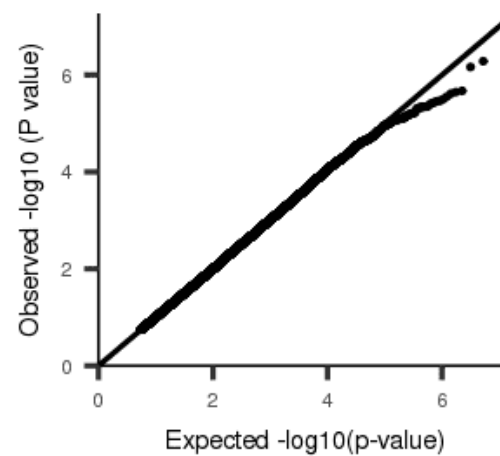

[back to list of plots](#)

Figure 1157: NETMAT edge (100) 0001

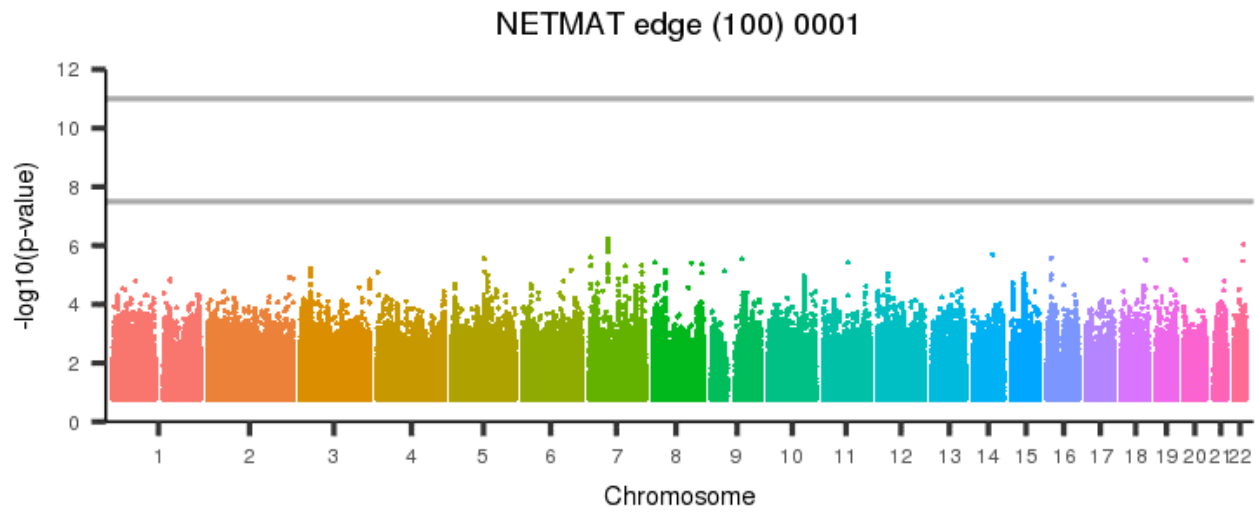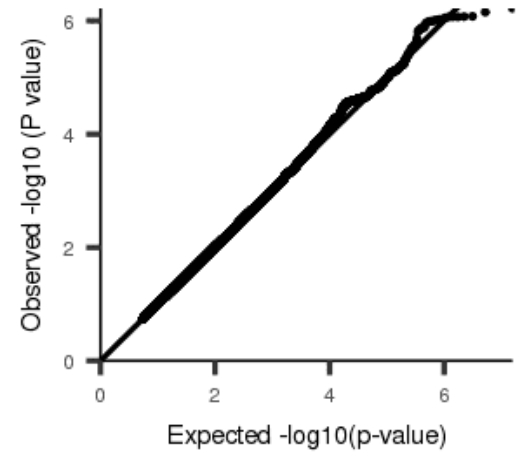

[back to list of plots](#)



Figure 1158: NETMAT edge (100) 0002

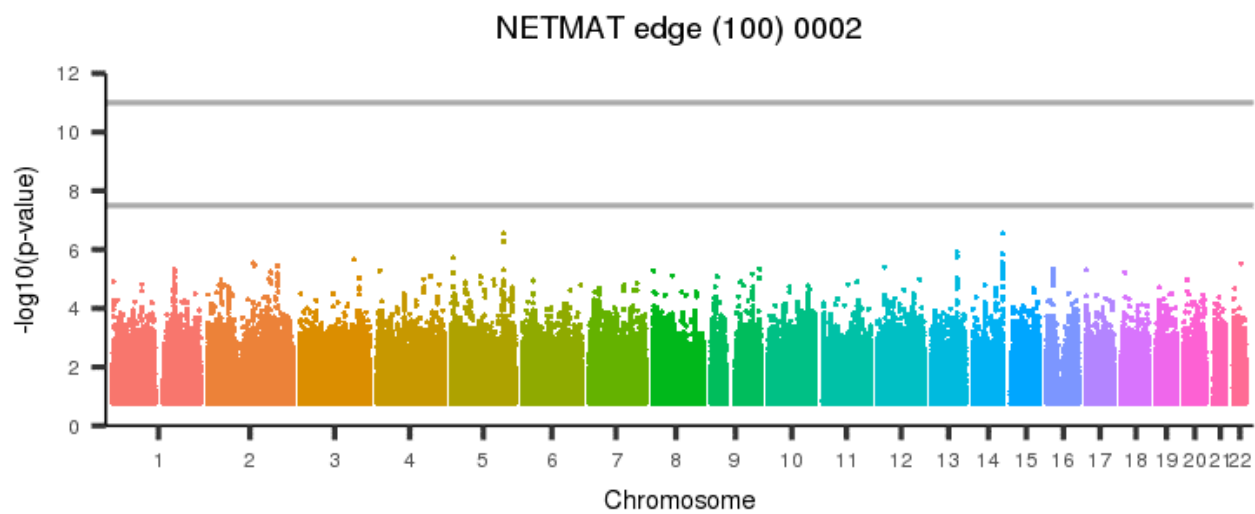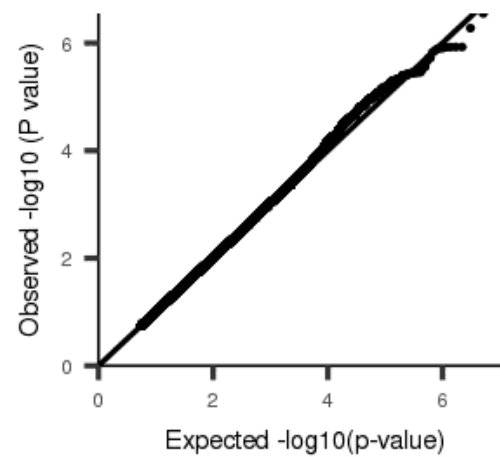

[back to list of plots](#)

Figure 1159: NETMAT edge (100) 0003

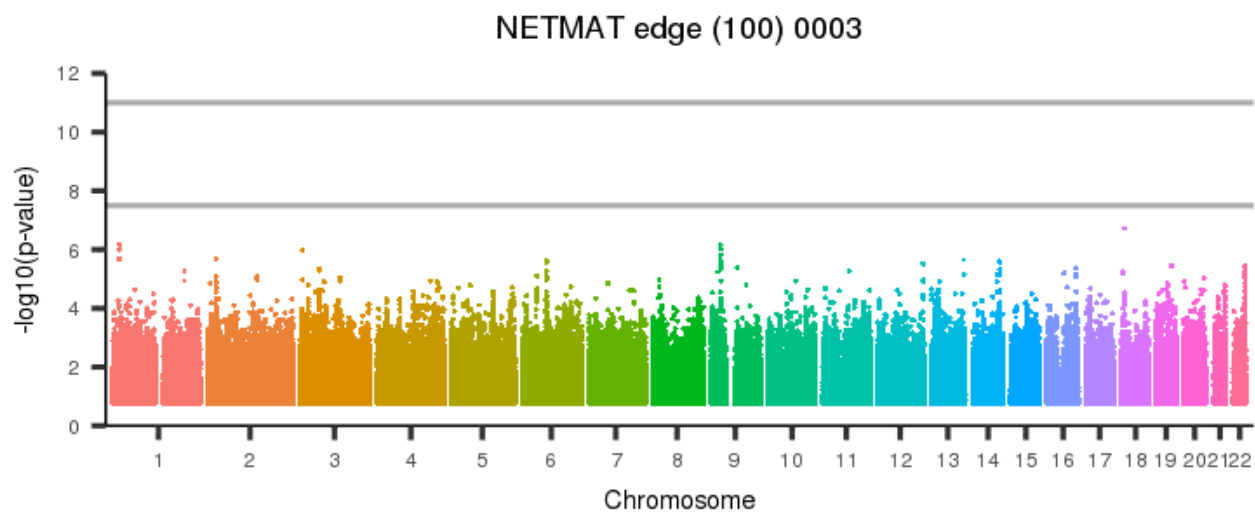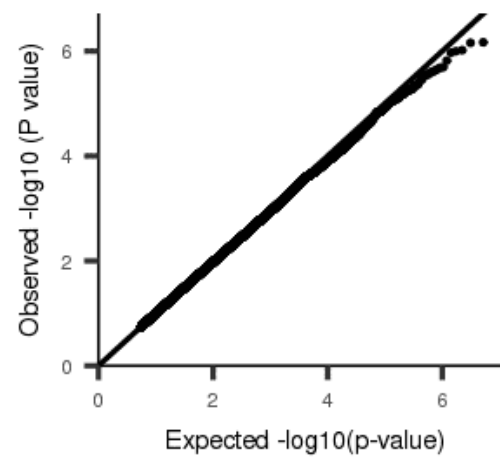

[back to list of plots](#)

Figure 1160: NETMAT edge (100) 0004

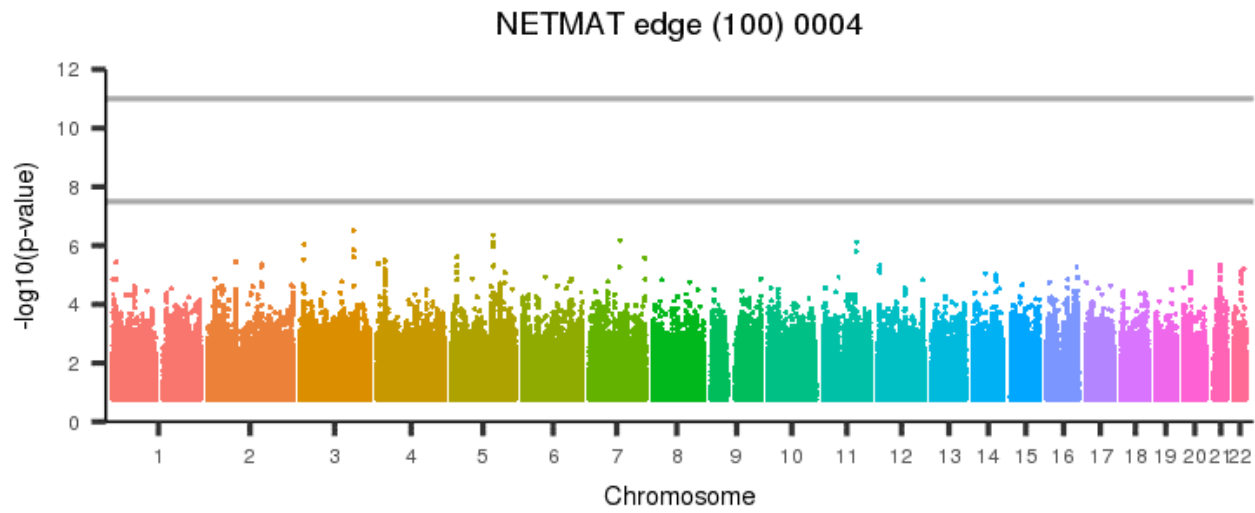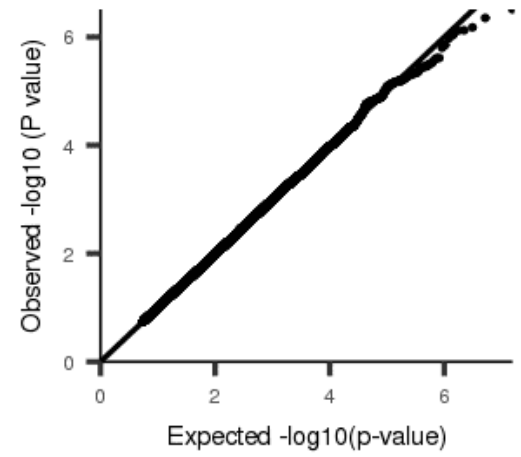

[back to list of plots](#)

Figure 1161: NETMAT edge (100) 0005

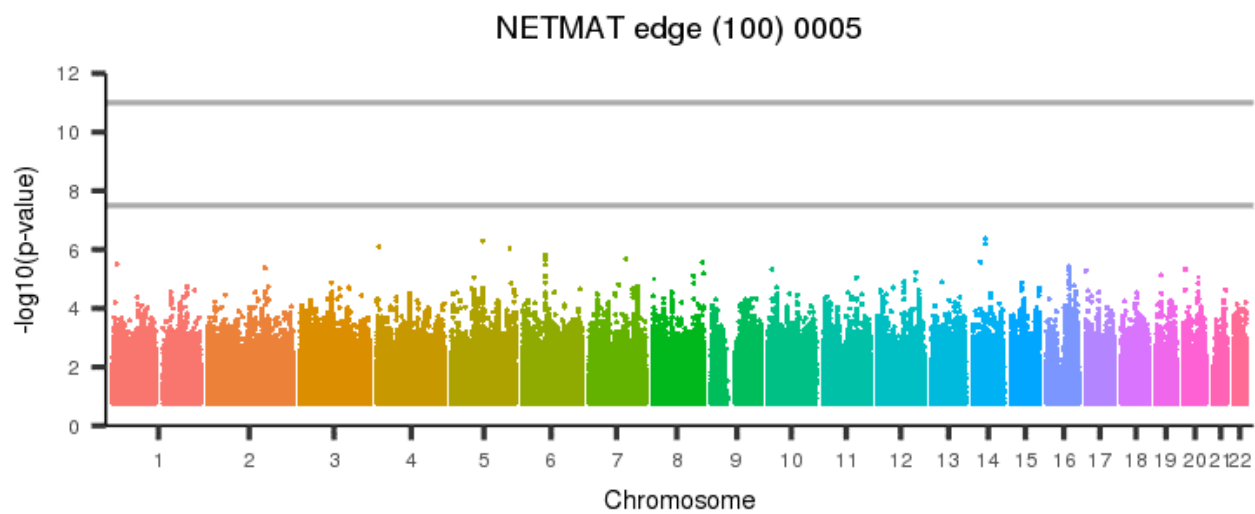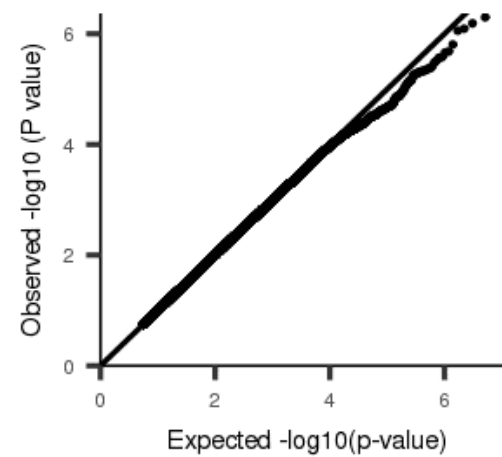

[back to list of plots](#)

Figure 1162: NETMAT edge (100) 0006

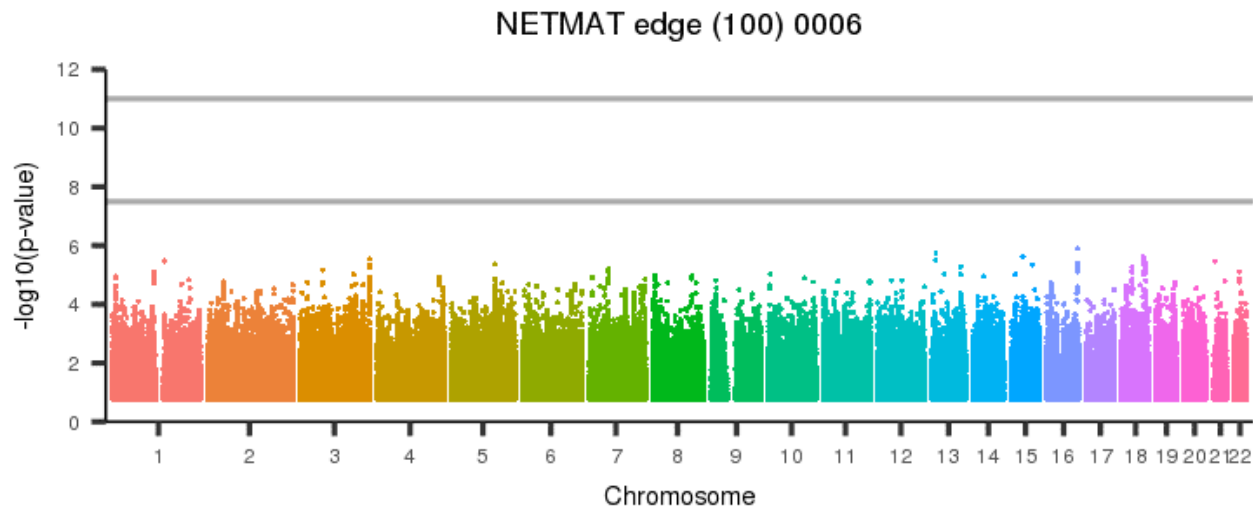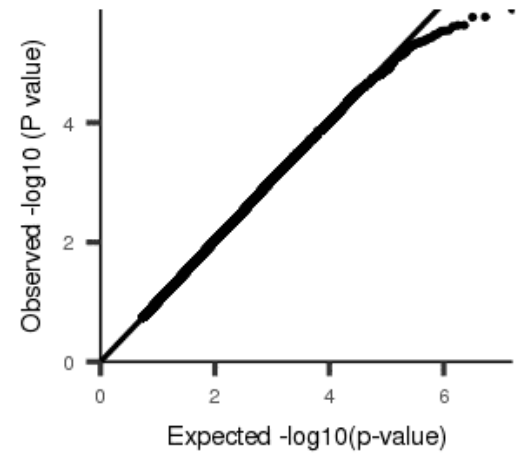

[back to list of plots](#)

Figure 1163: NETMAT edge (100) 0007

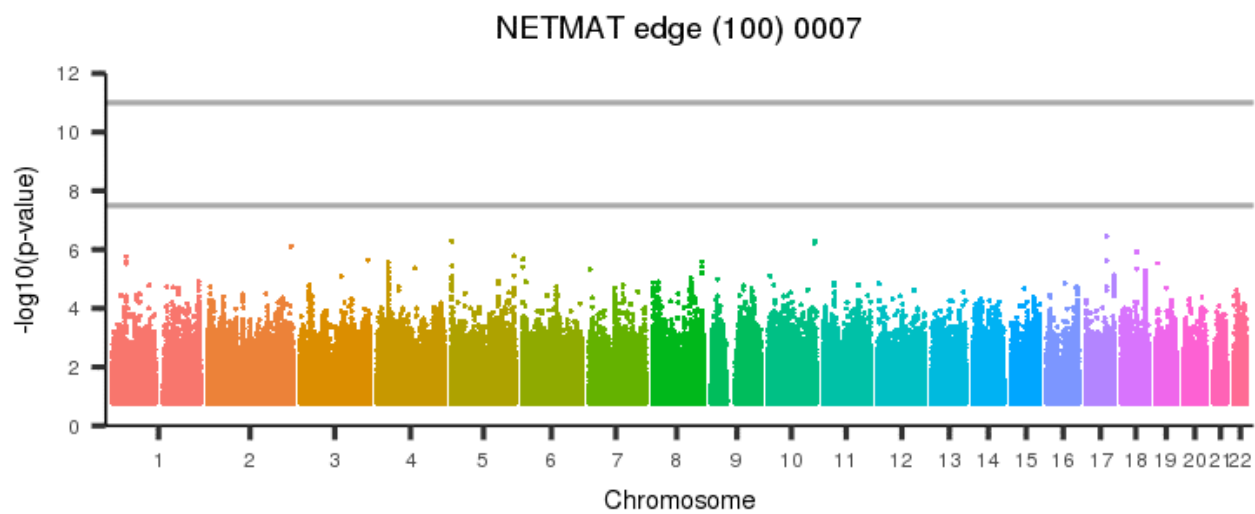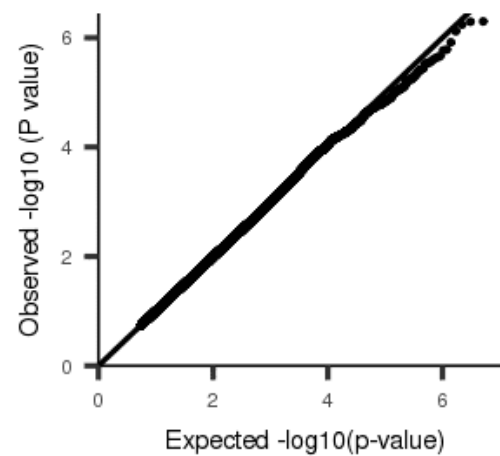

[back to list of plots](#)

Figure 1164: NETMAT edge (100) 0008

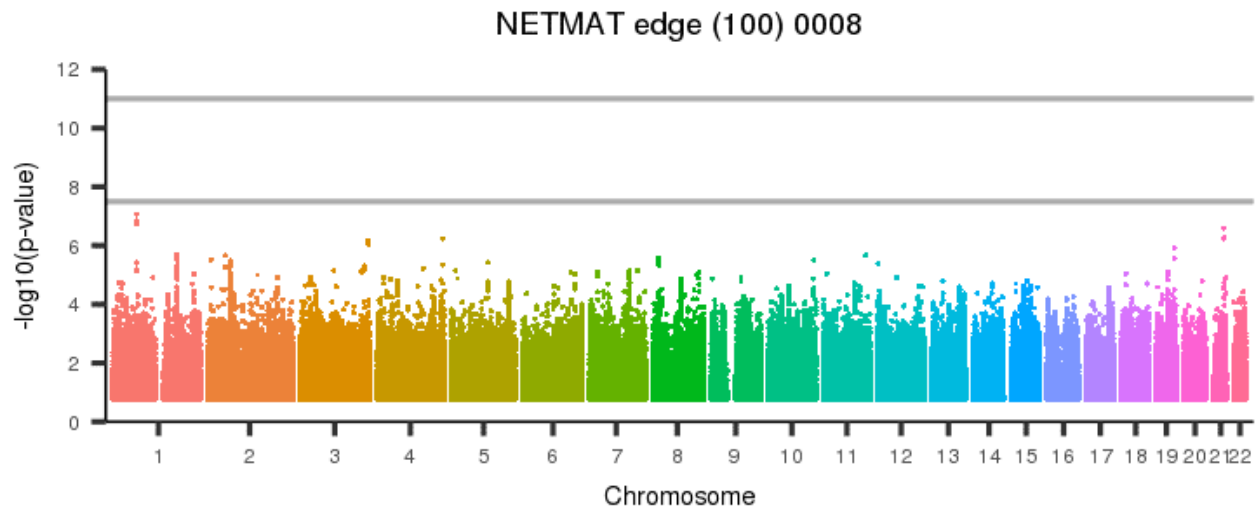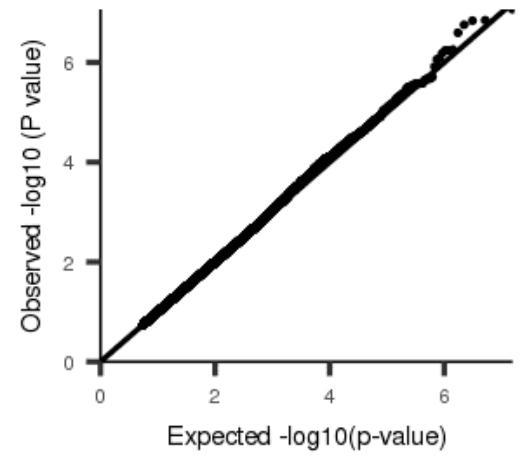

[back to list of plots](#)

Figure 1165: NETMAT edge (100) 0009

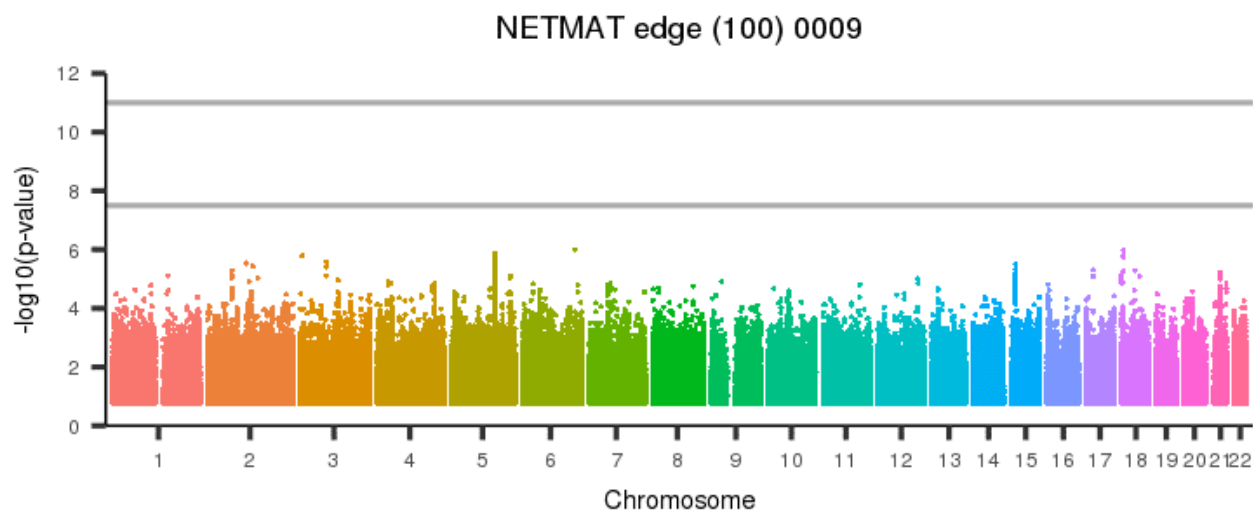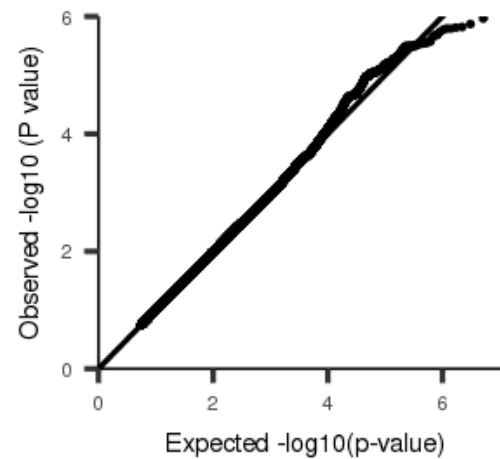

[back to list of plots](#)



Figure 1166: NETMAT edge (100) 0010

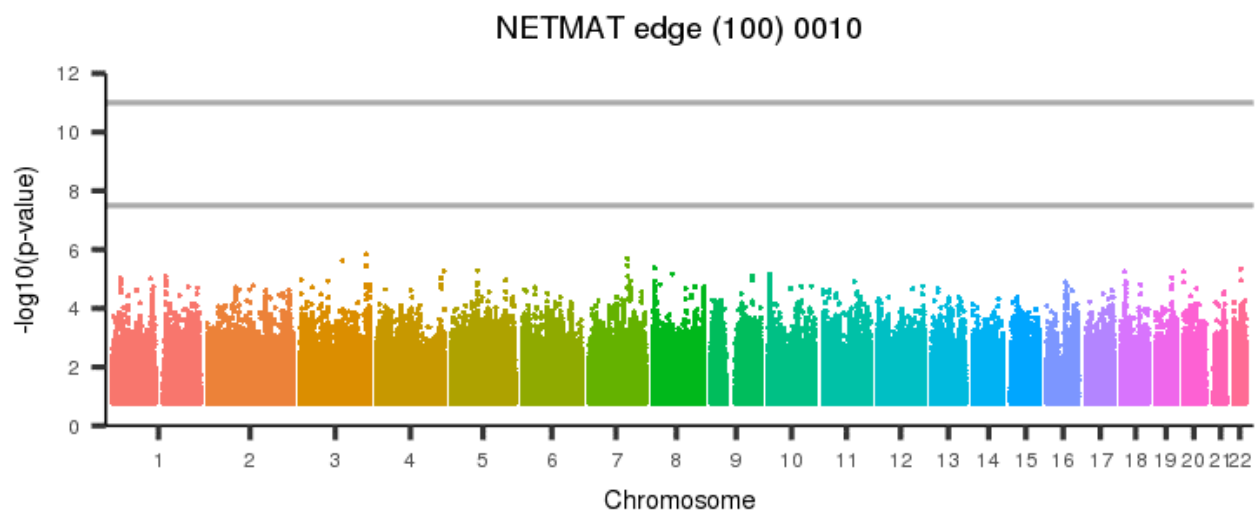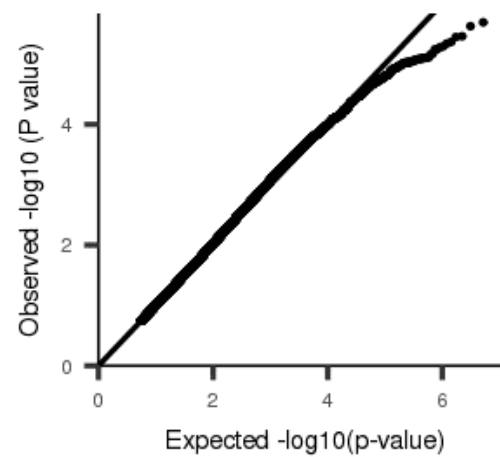

[back to list of plots](#)

Figure 1167: NETMAT edge (100) 0011

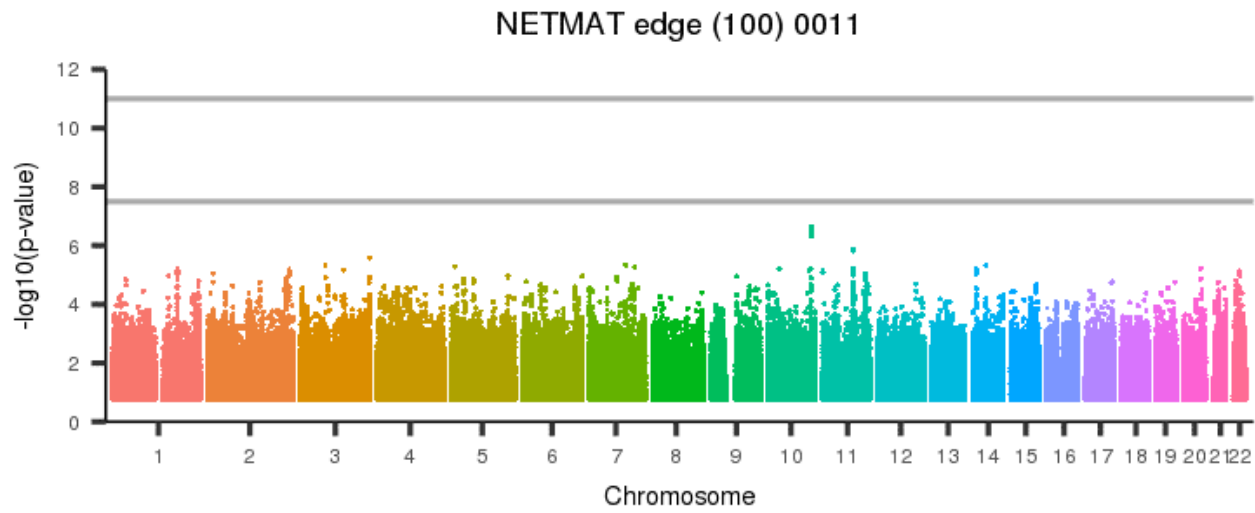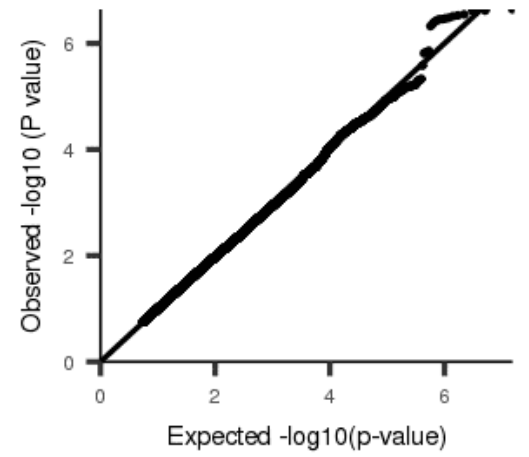

[back to list of plots](#)

Figure 1168: NETMAT edge (100) 0012

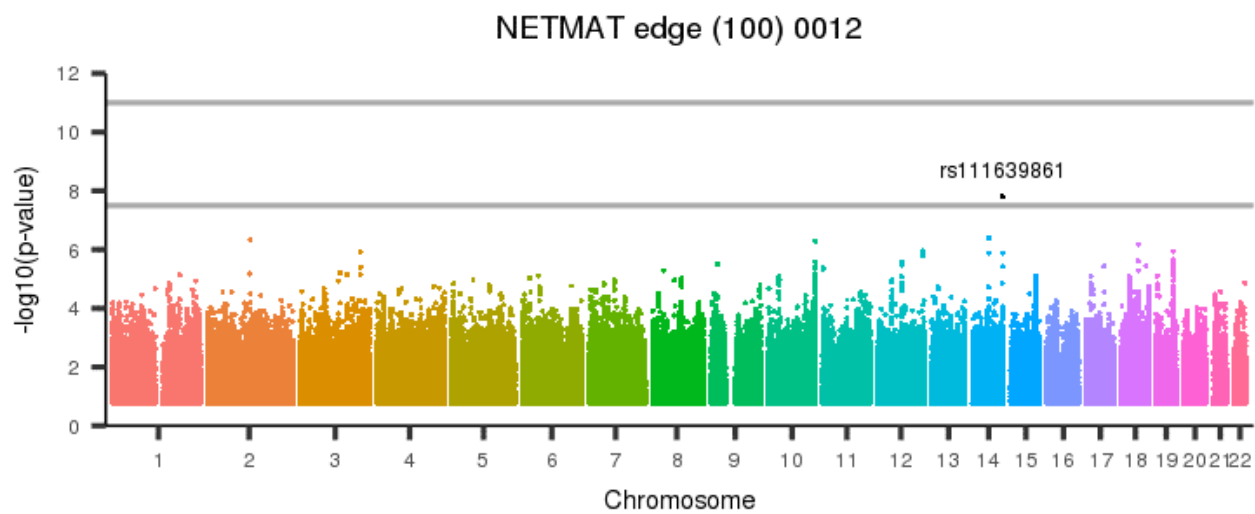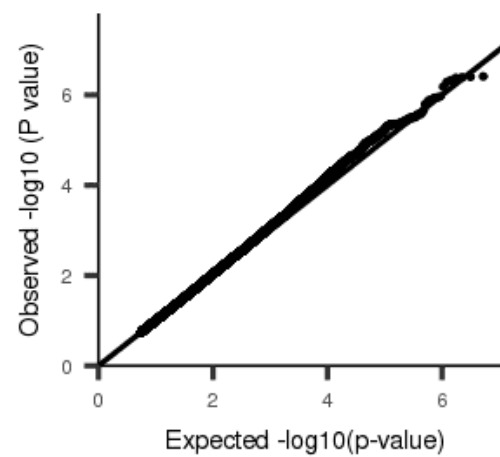

[back to list of plots](#)

Figure 1169: NETMAT edge (100) 0013

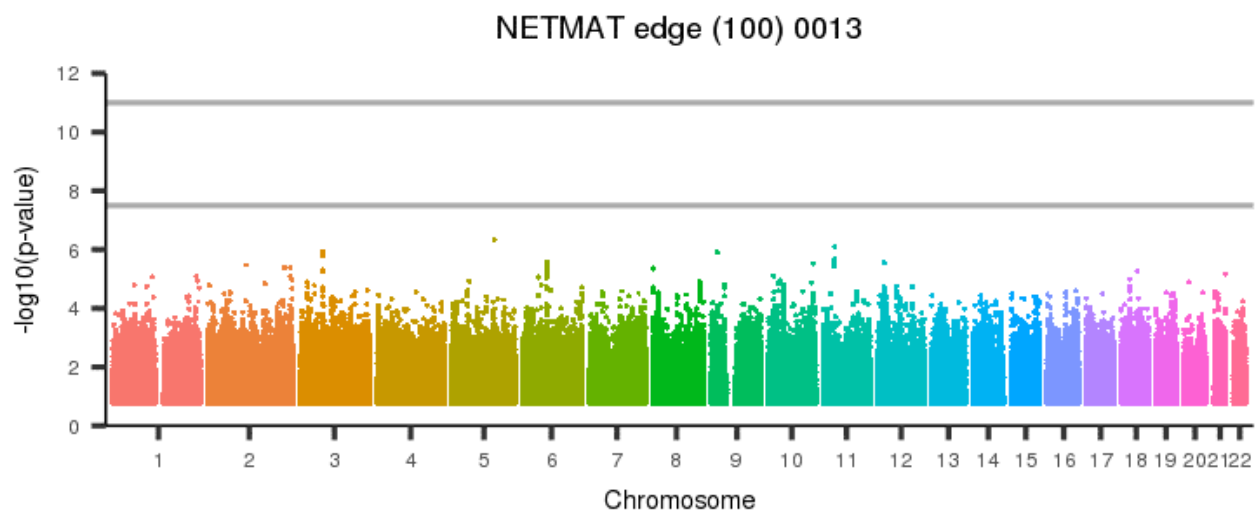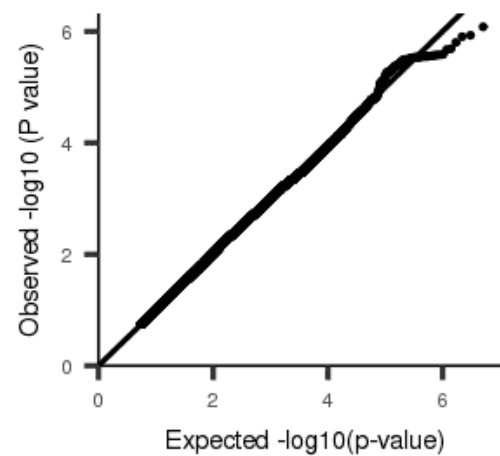

[back to list of plots](#)

Figure 1170: NETMAT edge (100) 0014

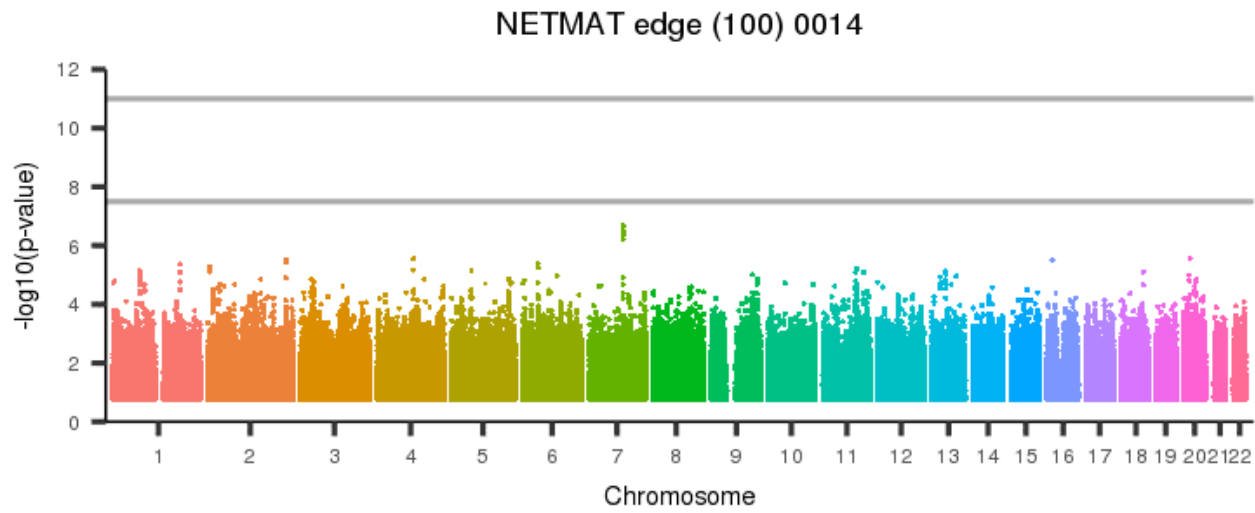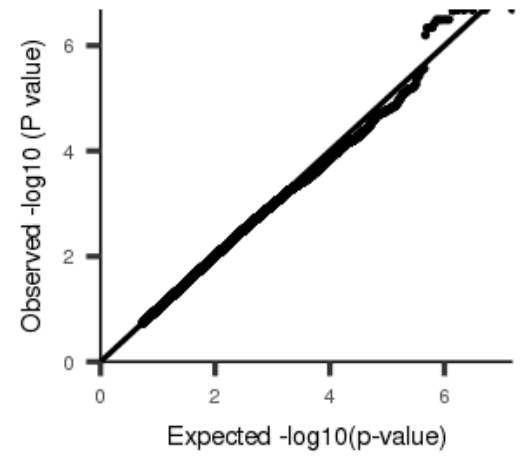

[back to list of plots](#)

Figure 1171: NETMAT edge (100) 0015

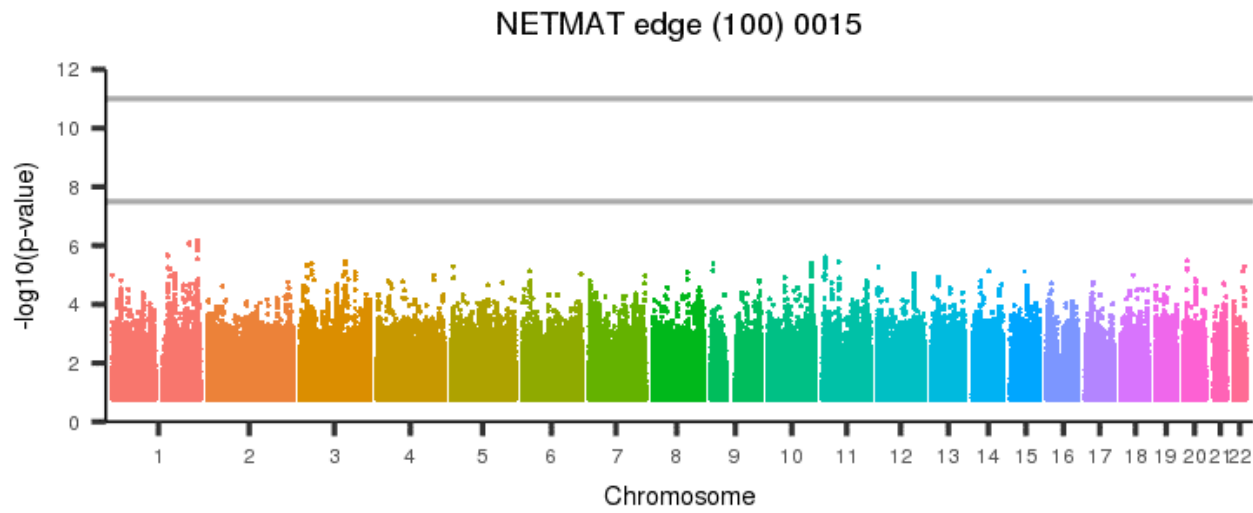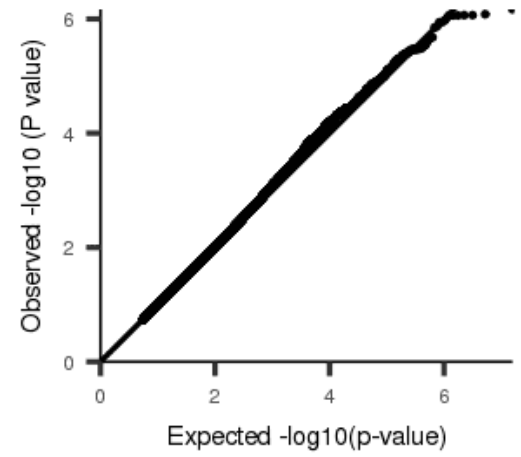

[back to list of plots](#)

Figure 1172: NETMAT edge (100) 0016

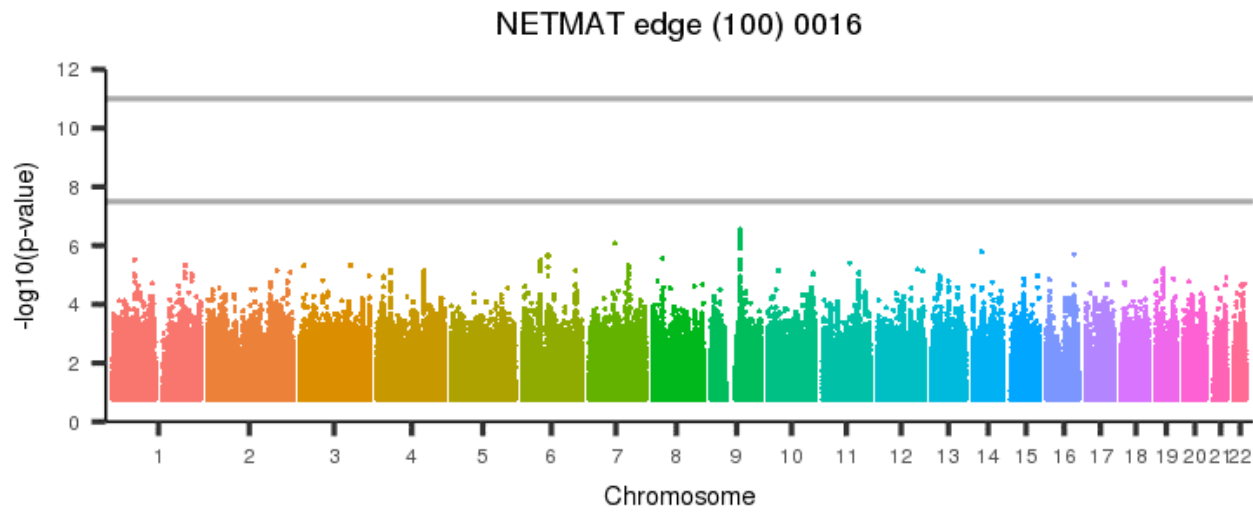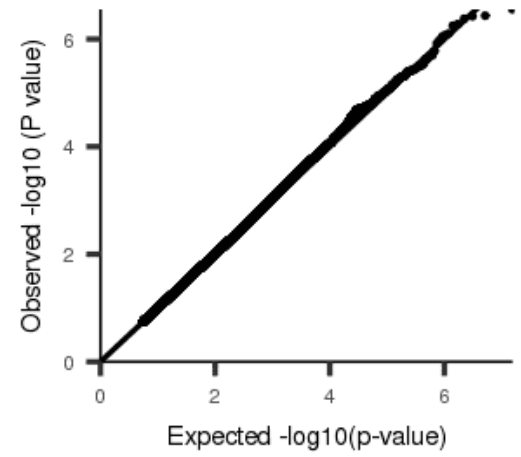

[back to list of plots](#)

Figure 1173: NETMAT edge (100) 0017

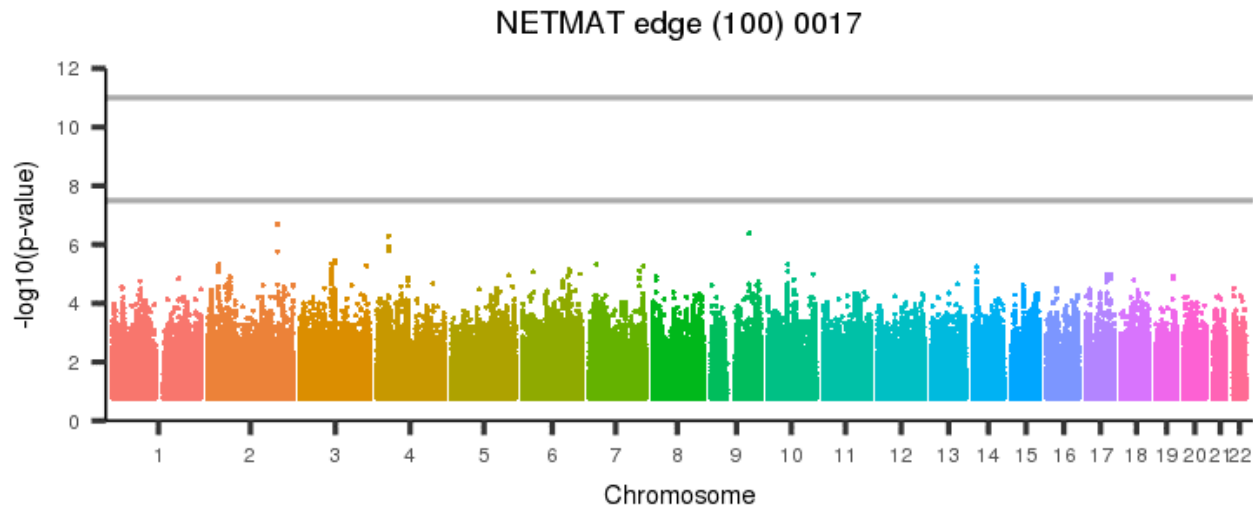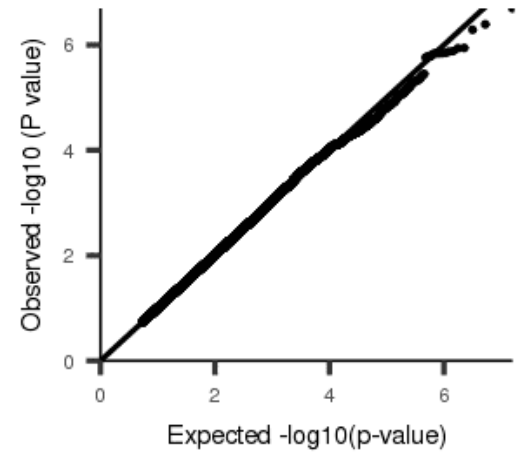

[back to list of plots](#)



Figure 1174: NETMAT edge (100) 0018

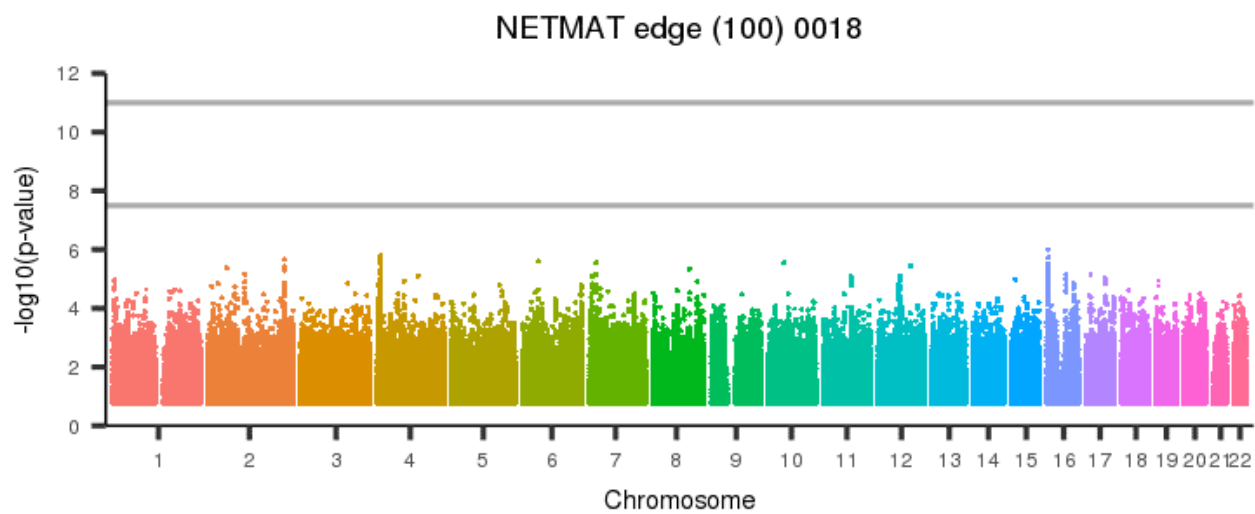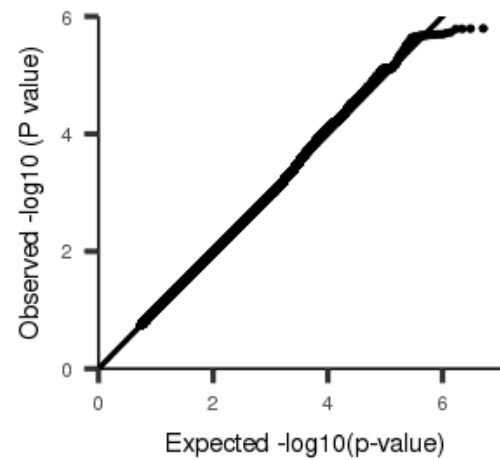

[back to list of plots](#)

Figure 1175: NETMAT edge (100) 0019

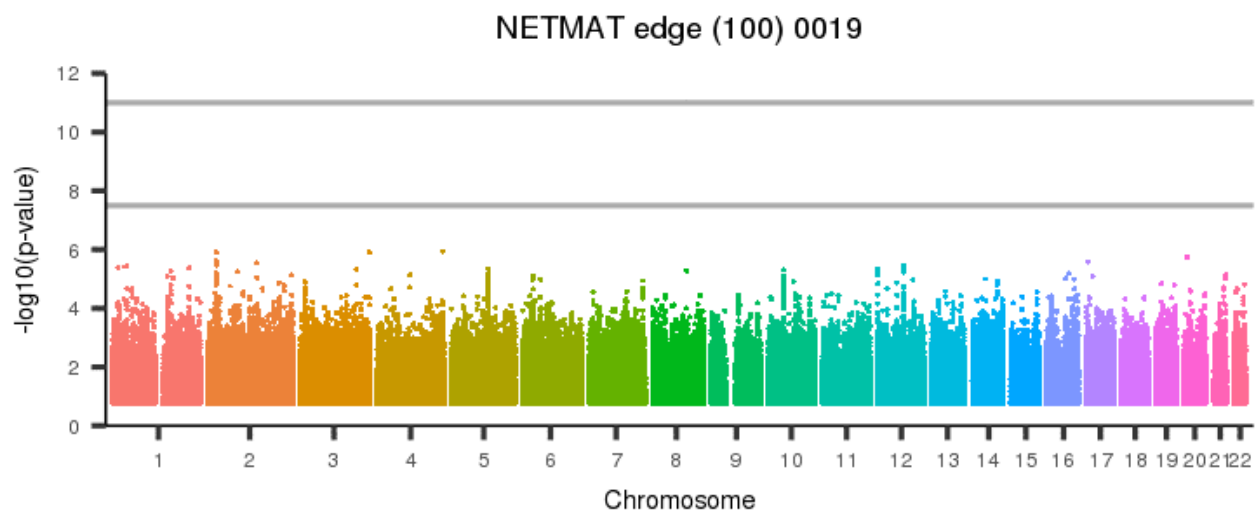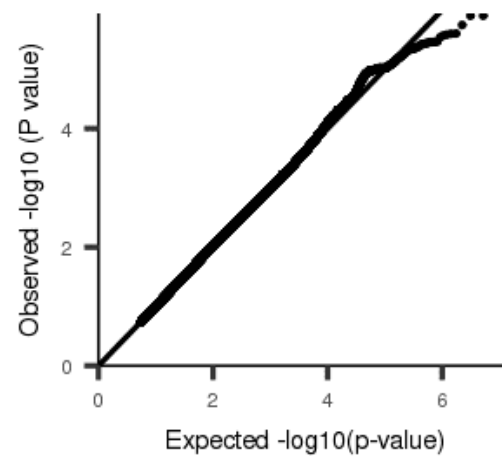

[back to list of plots](#)

Figure 1176: NETMAT edge (100) 0020

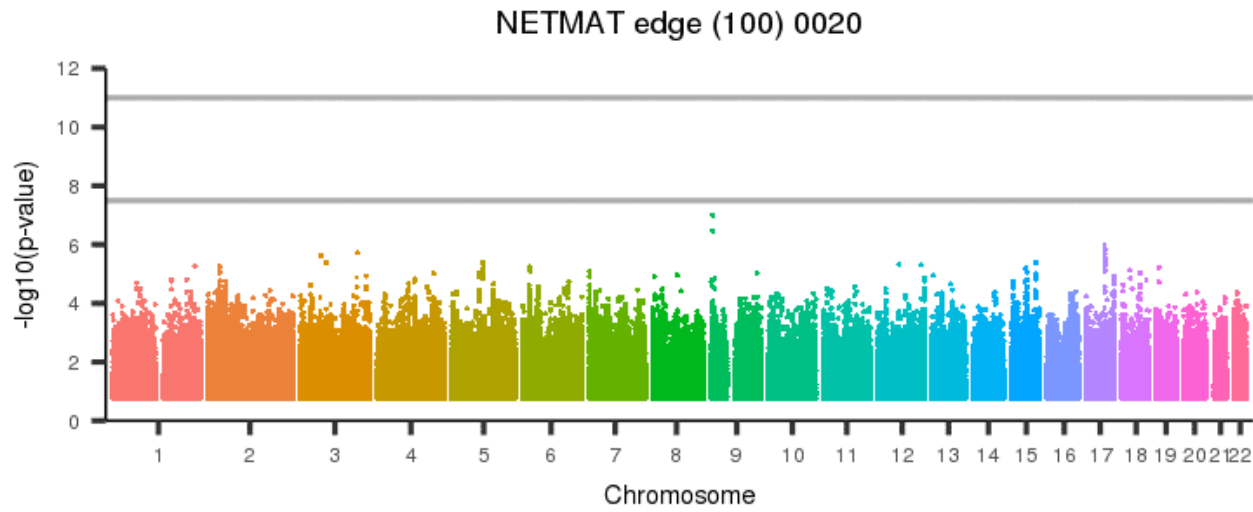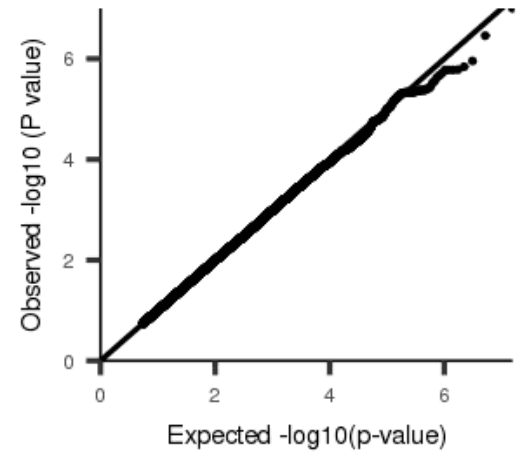

[back to list of plots](#)

Figure 1177: NETMAT edge (100) 0021

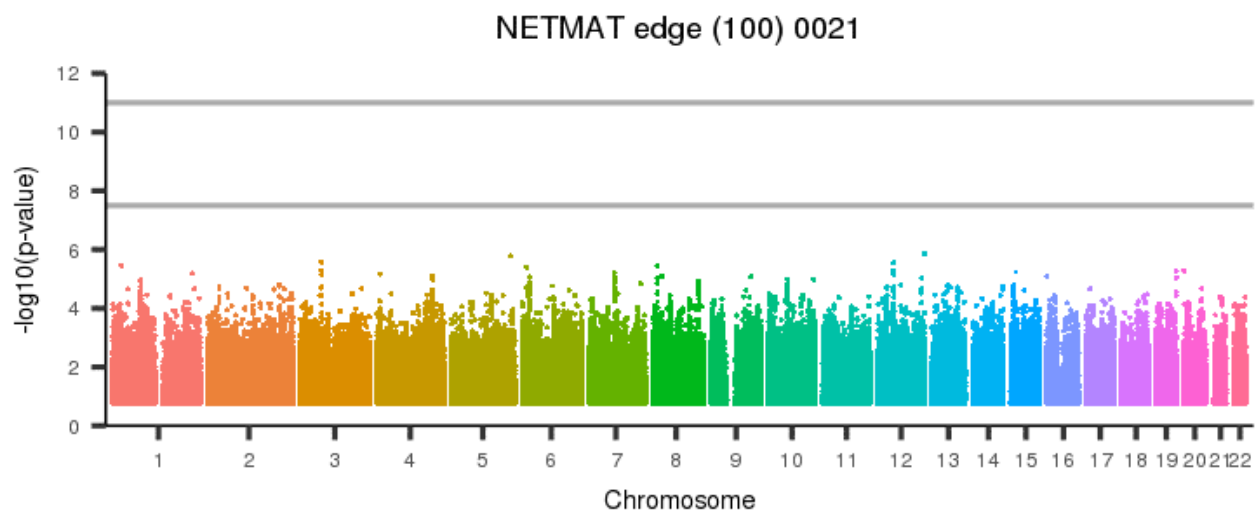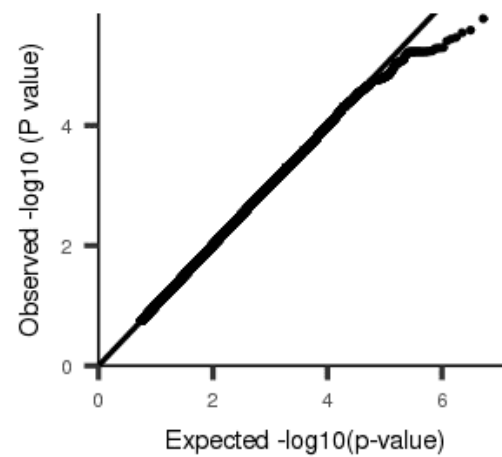

[back to list of plots](#)

Figure 1178: NETMAT edge (100) 0022

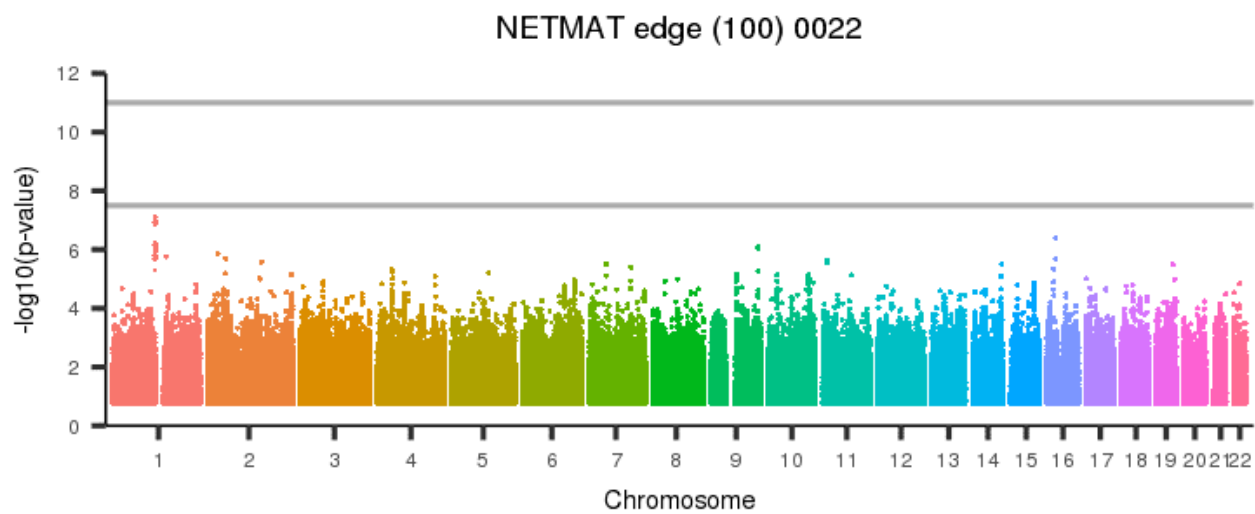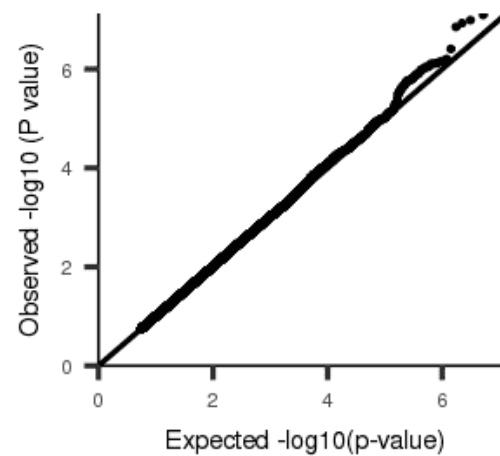

[back to list of plots](#)

Figure 1179: NETMAT edge (100) 0023

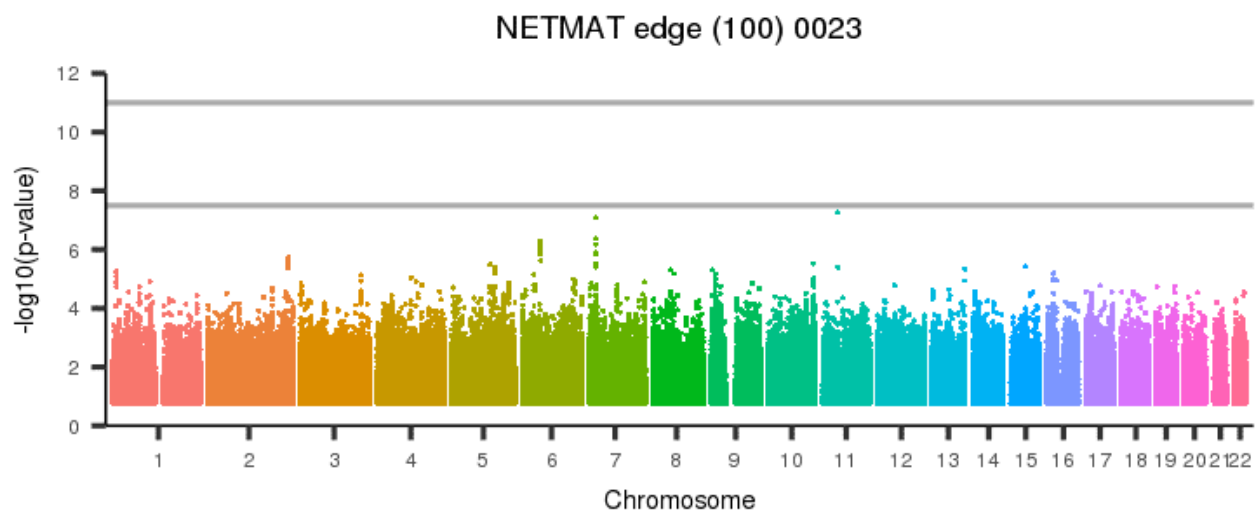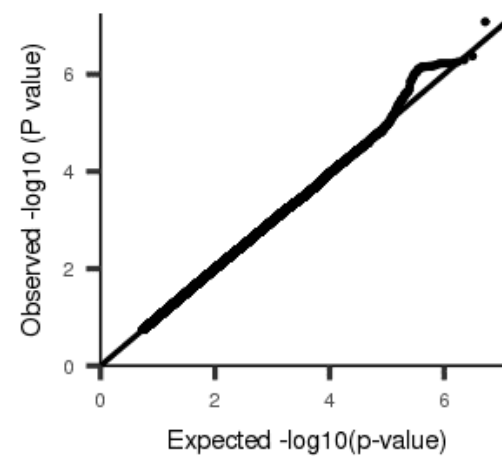

[back to list of plots](#)

Figure 1180: NETMAT edge (100) 0024

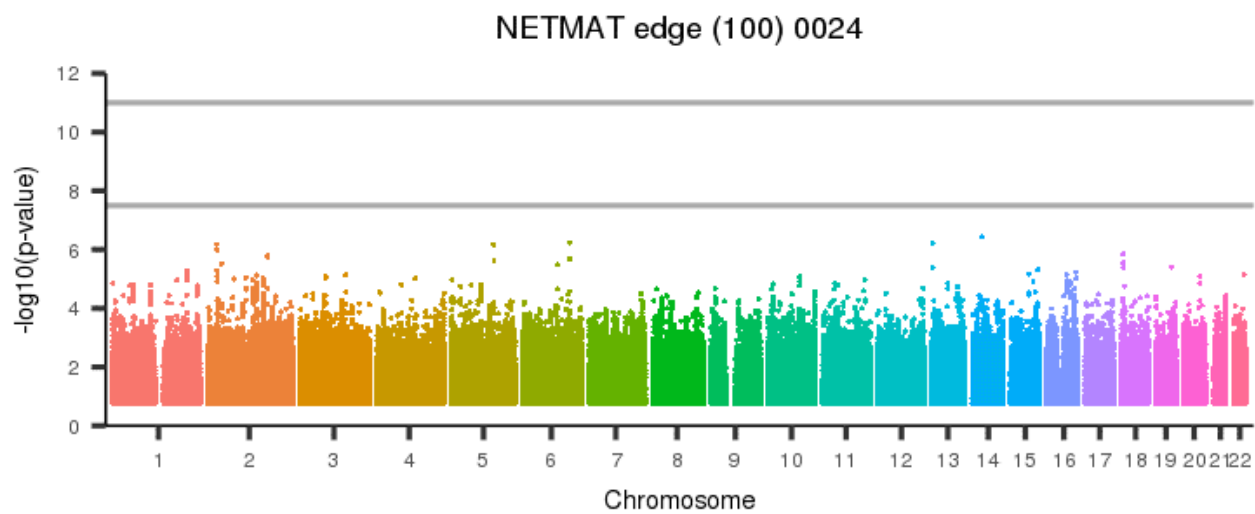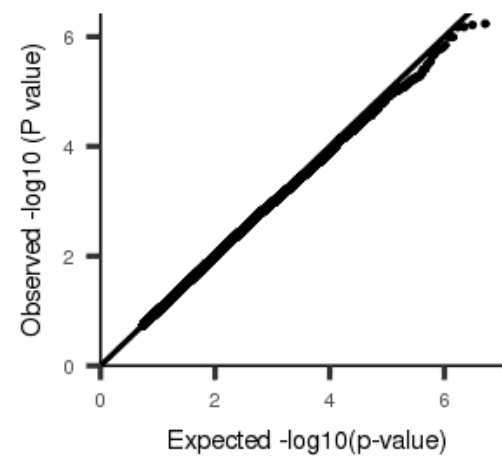

[back to list of plots](#)

Figure 1181: NETMAT edge (100) 0025

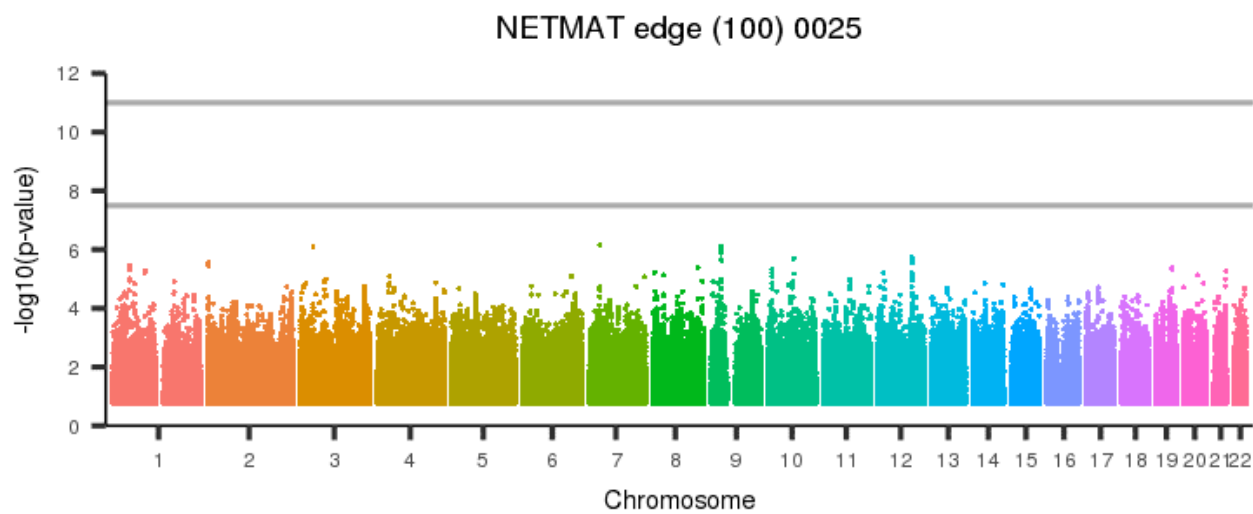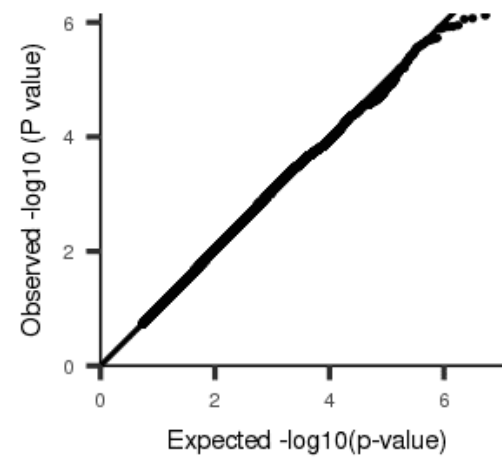

[back to list of plots](#)



Figure 1182: NETMAT edge (100) 0026

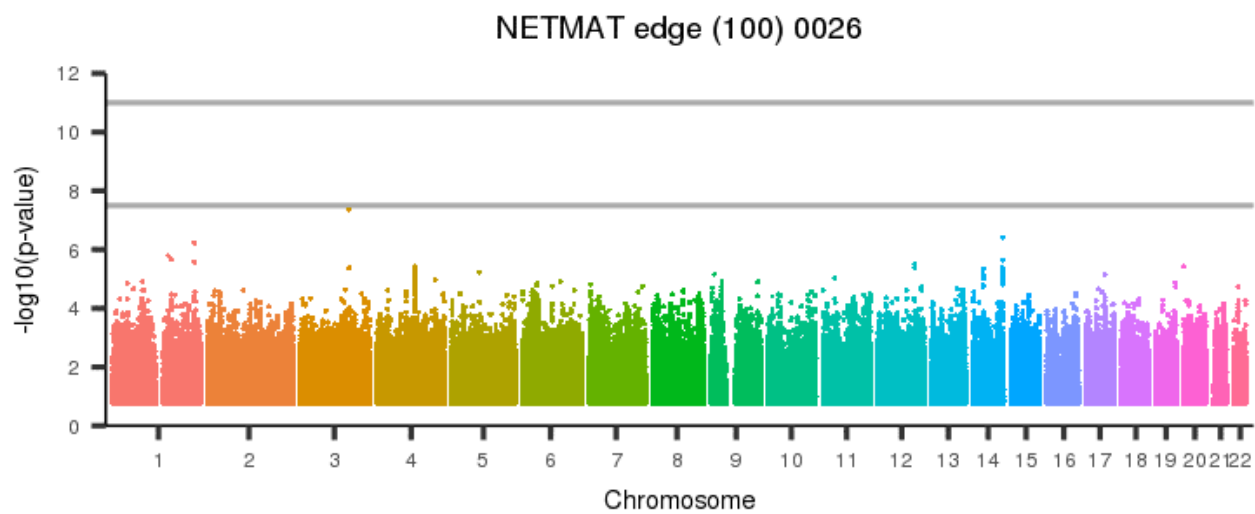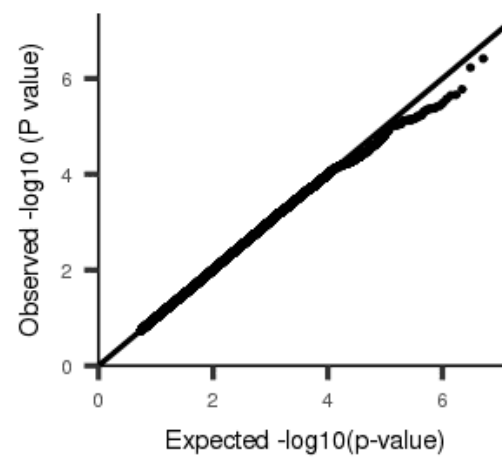

[back to list of plots](#)

Figure 1183: NETMAT edge (100) 0027

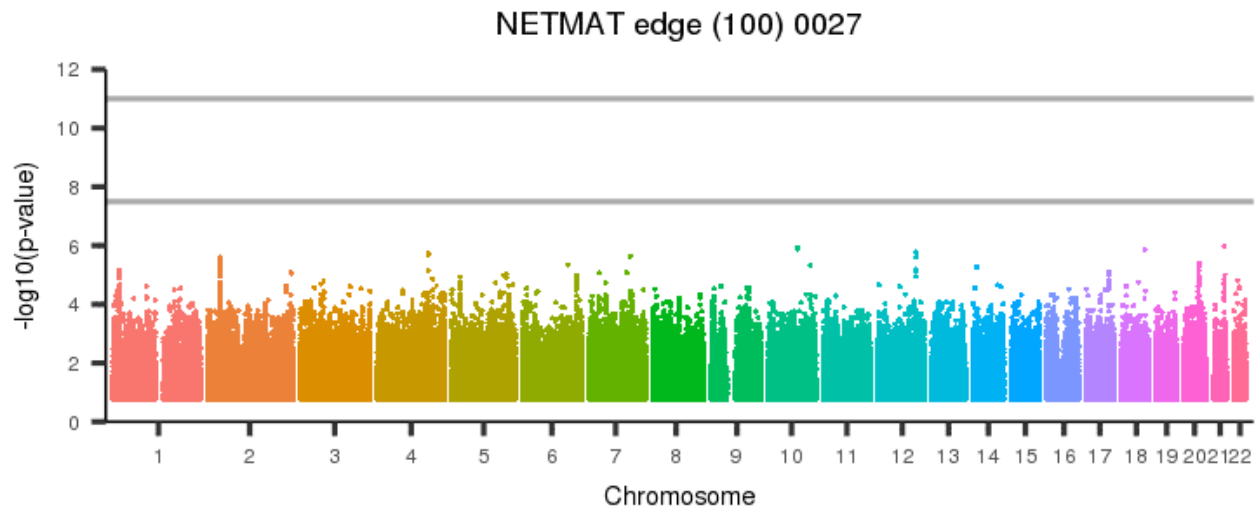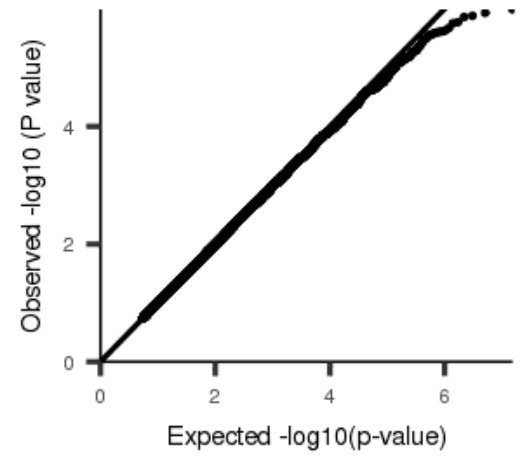

[back to list of plots](#)

Figure 1184: NETMAT edge (100) 0028

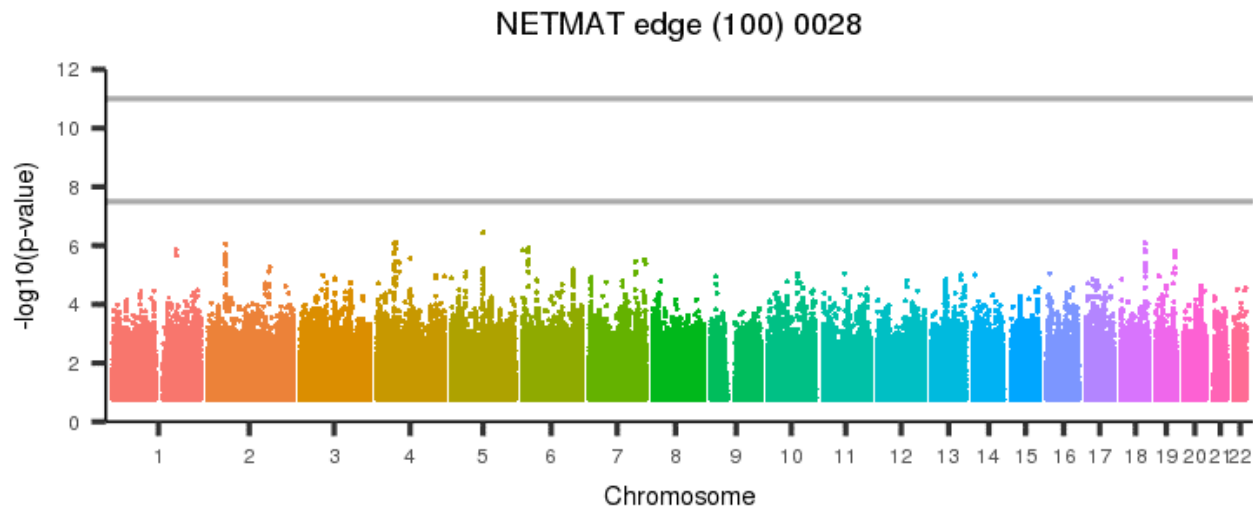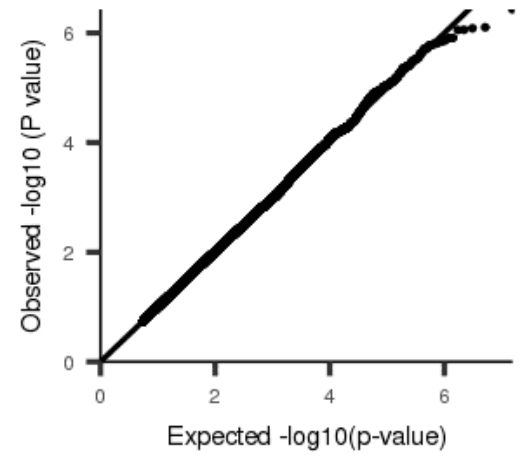

[back to list of plots](#)

Figure 1185: NETMAT edge (100) 0029

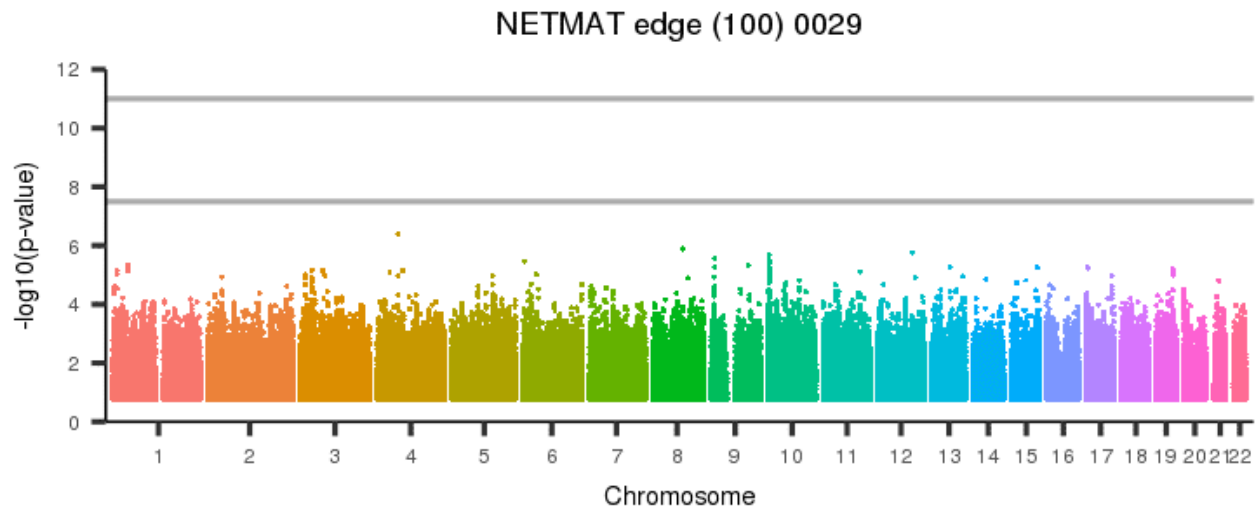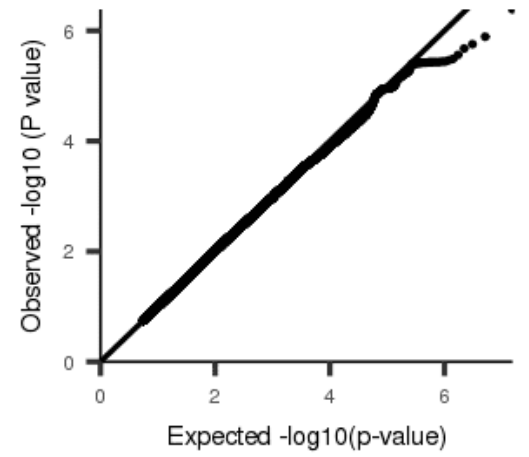

[back to list of plots](#)

Figure 1186: NETMAT edge (100) 0030

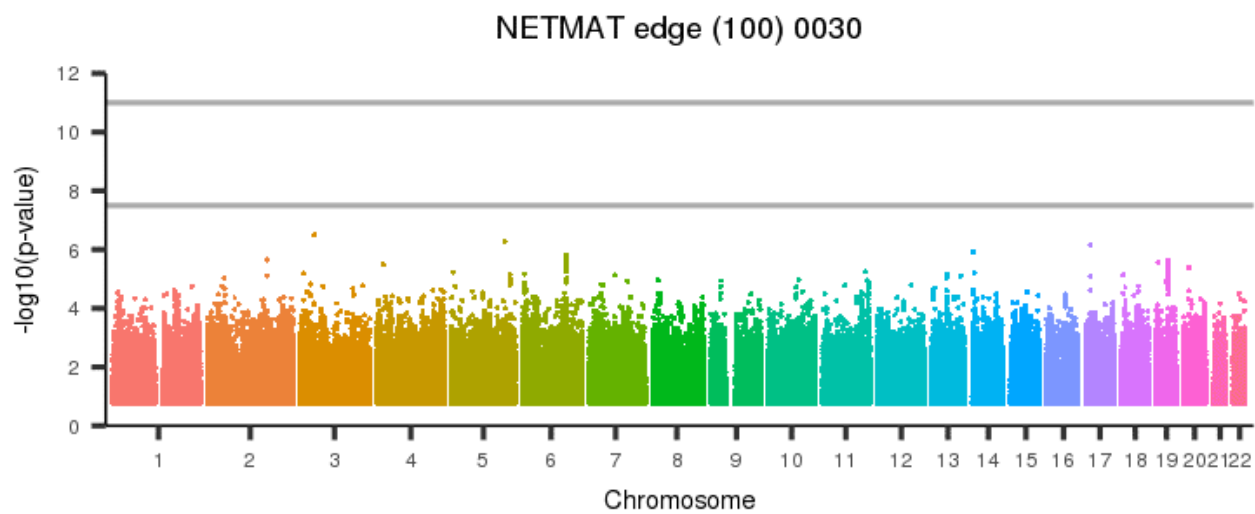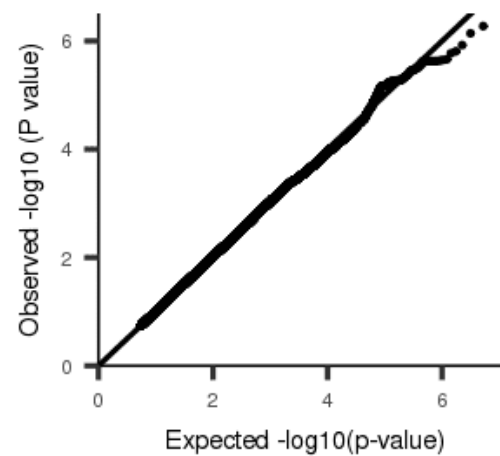

[back to list of plots](#)

Figure 1187: NETMAT edge (100) 0031

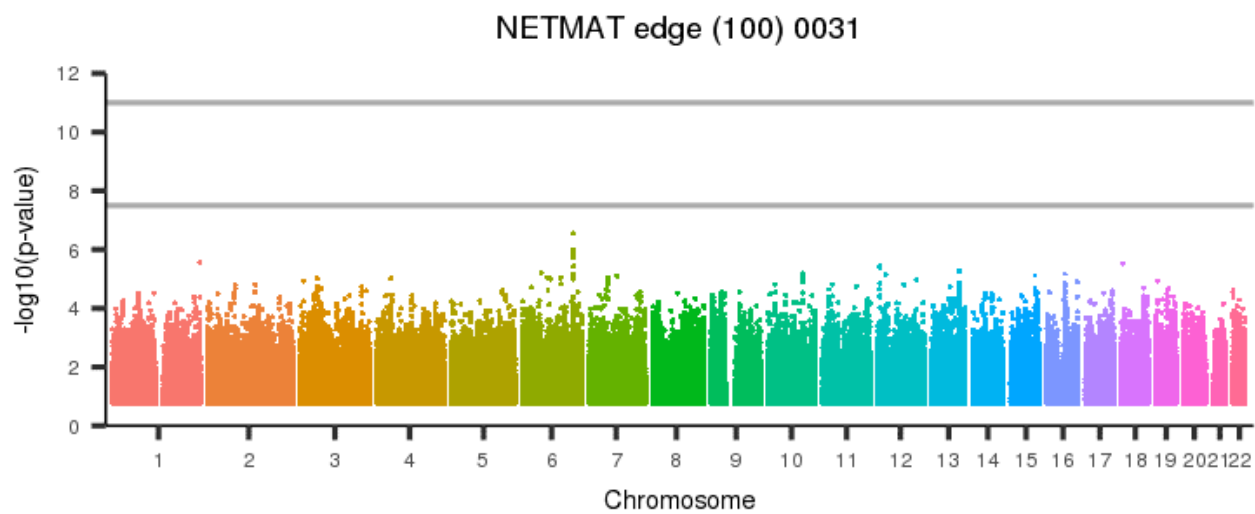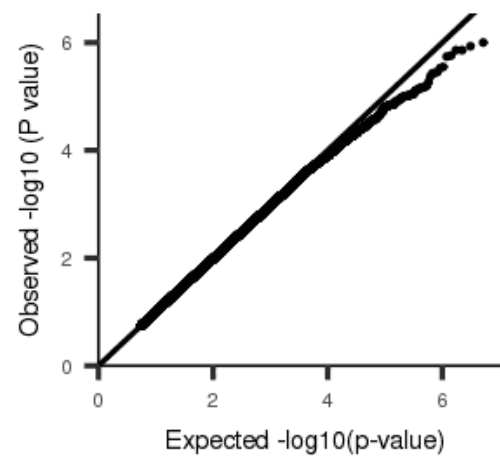

[back to list of plots](#)

Figure 1188: NETMAT edge (100) 0032

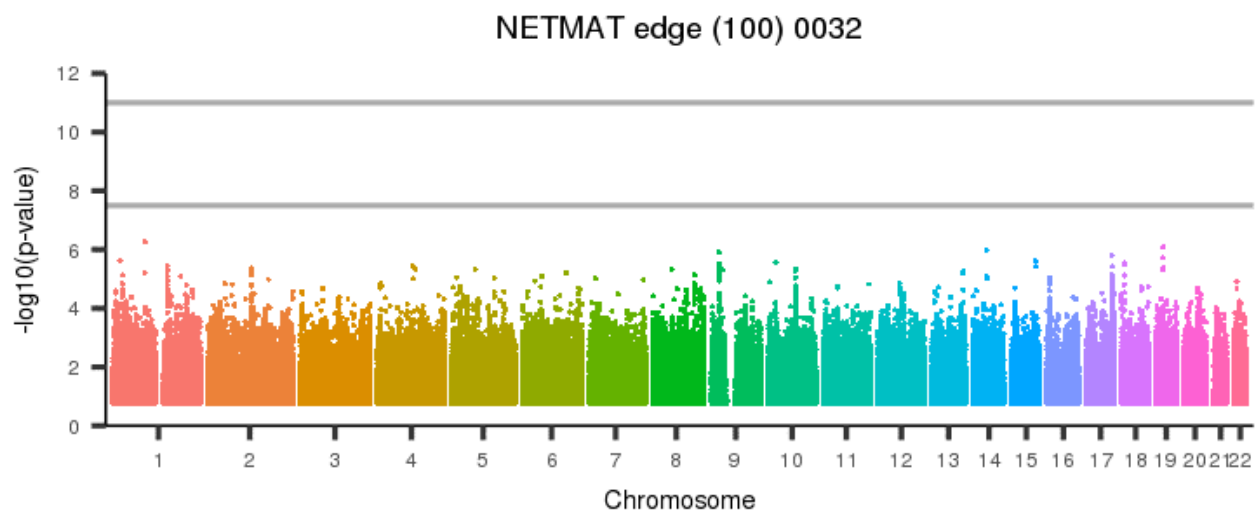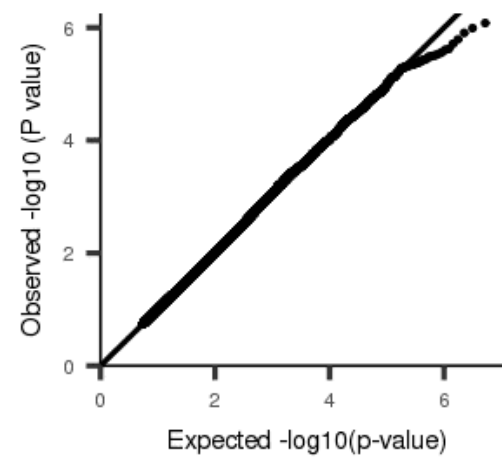

[back to list of plots](#)

Figure 1189: NETMAT edge (100) 0033

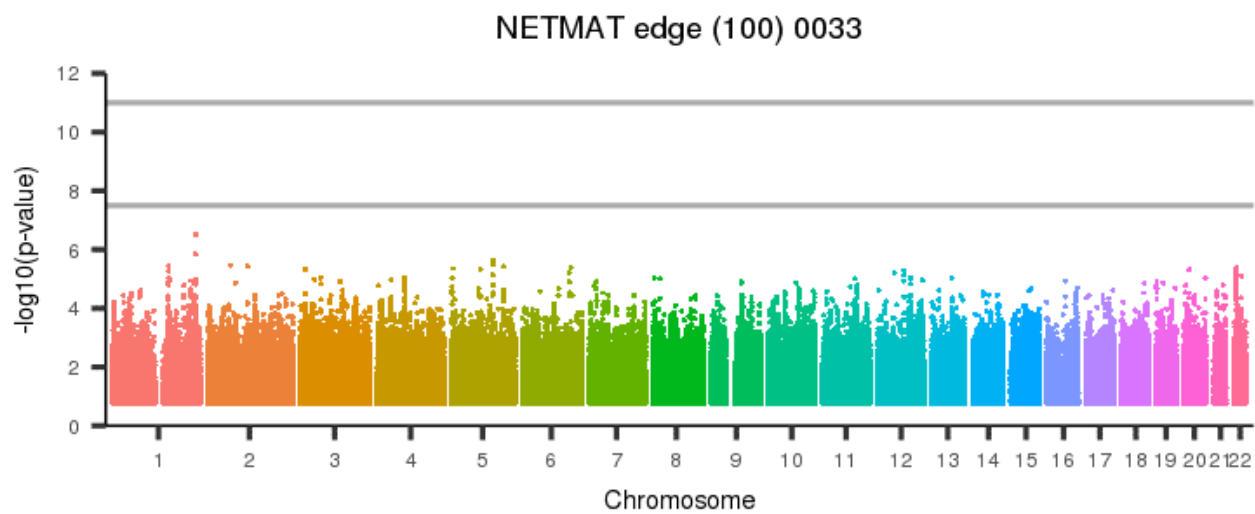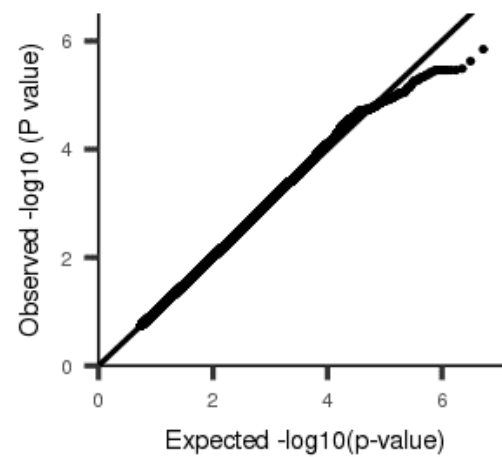

[back to list of plots](#)



Figure 1190: NETMAT edge (100) 0034

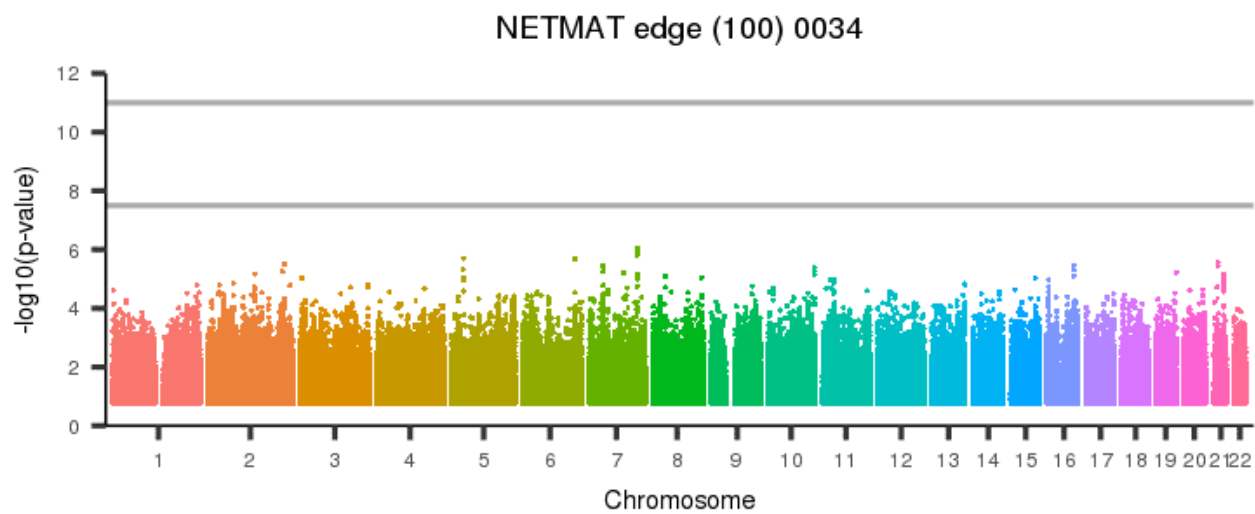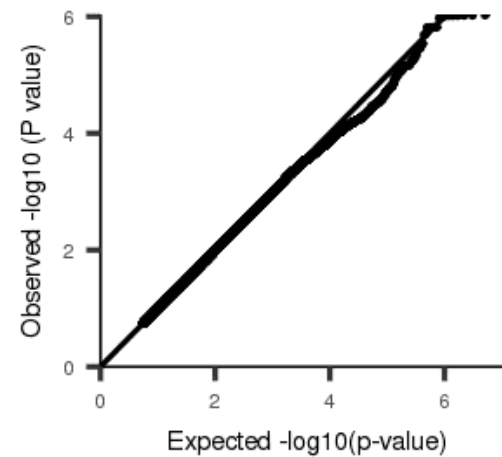

[back to list of plots](#)

Figure 1191: NETMAT edge (100) 0035

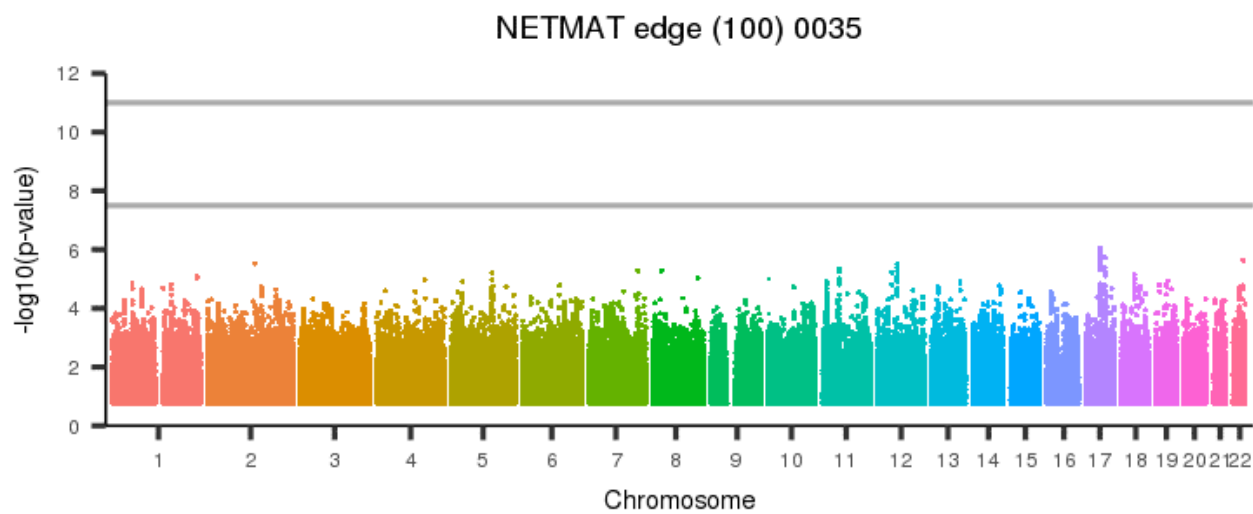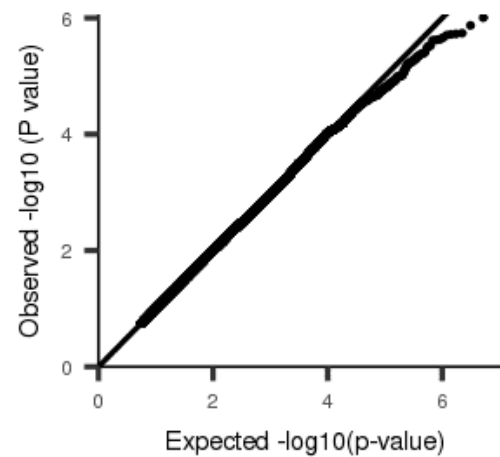

[back to list of plots](#)

Figure 1192: NETMAT edge (100) 0036

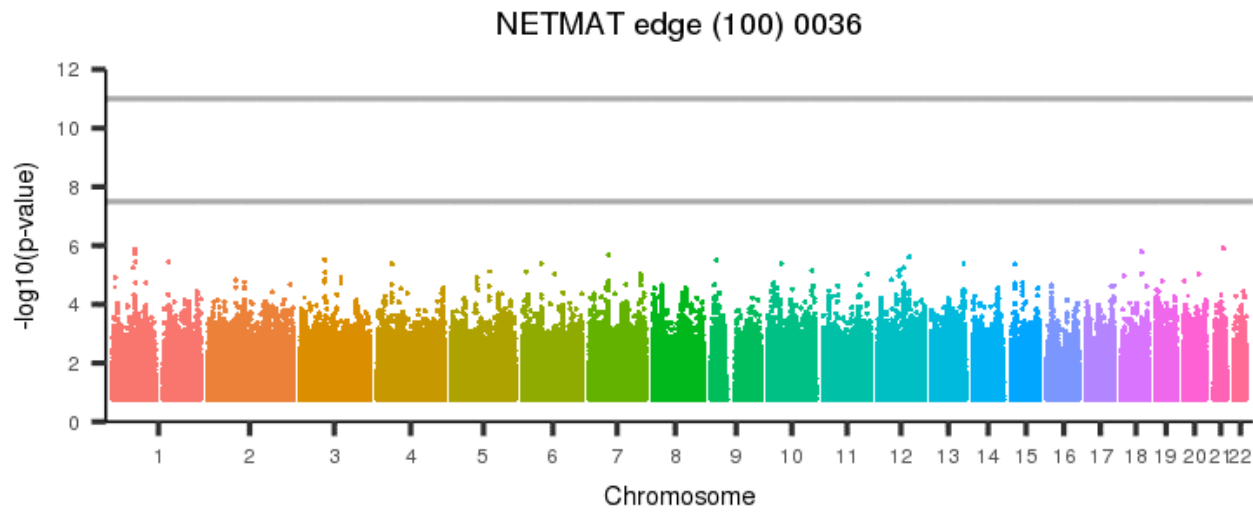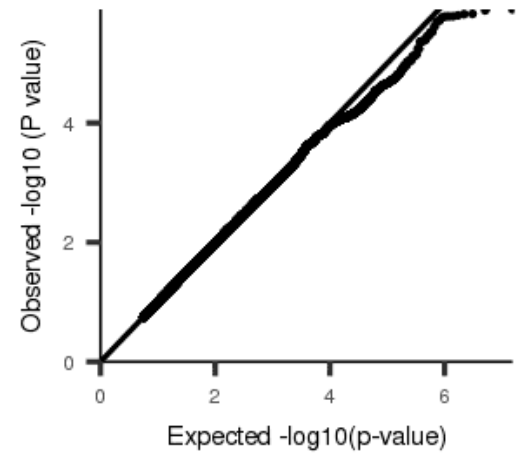

[back to list of plots](#)

Figure 1193: NETMAT edge (100) 0037

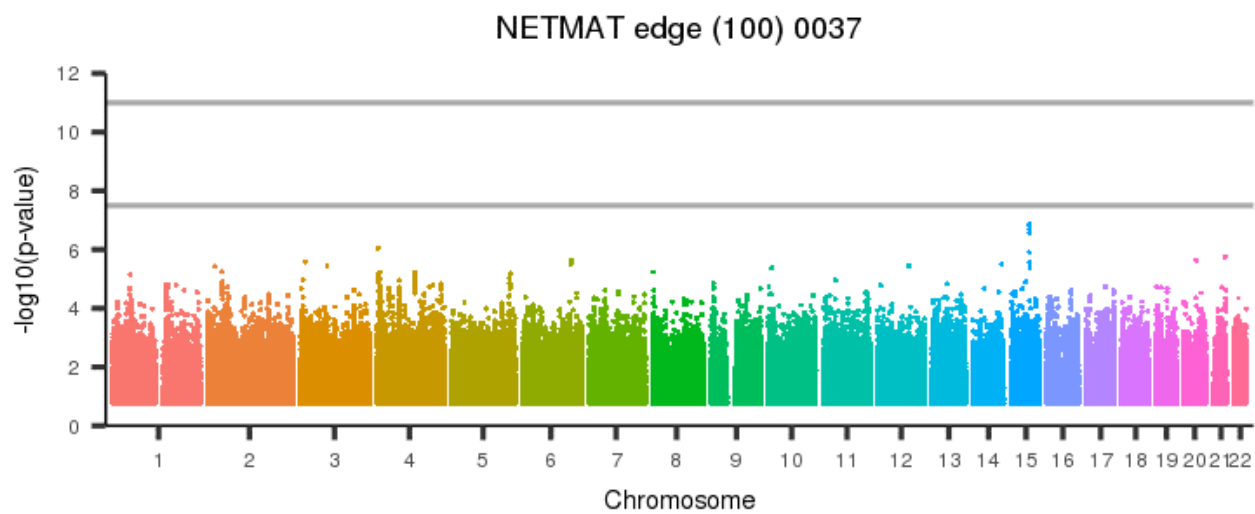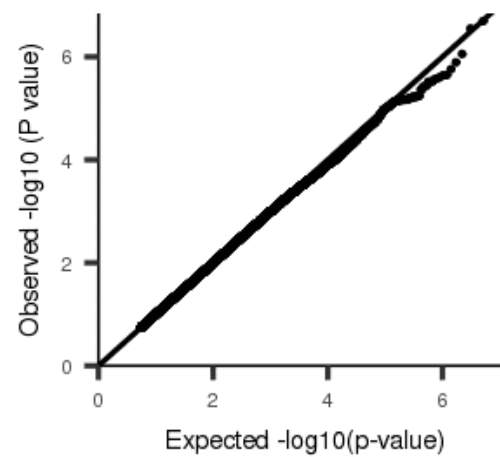

[back to list of plots](#)

Figure 1194: NETMAT edge (100) 0038

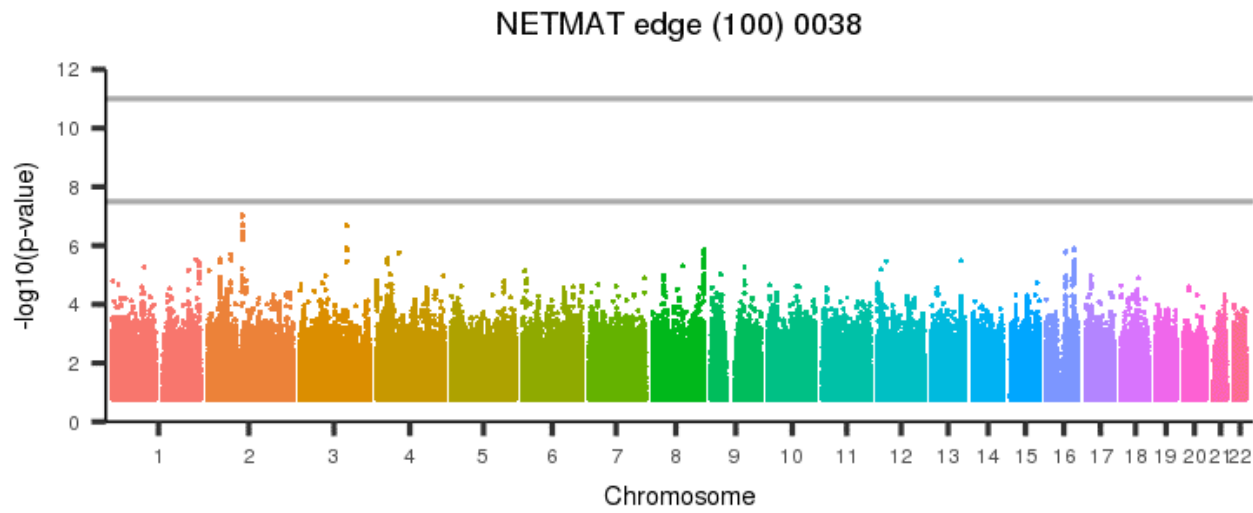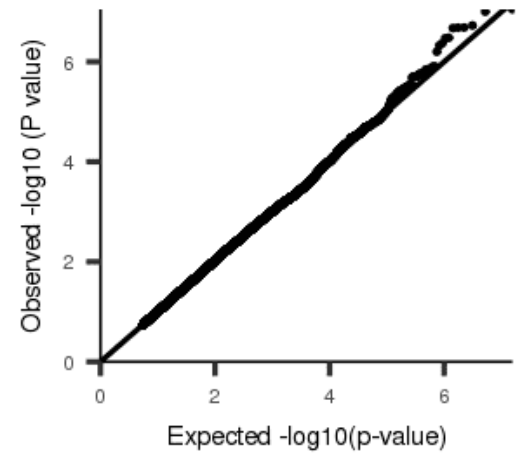

[back to list of plots](#)

Figure 1195: NETMAT edge (100) 0039

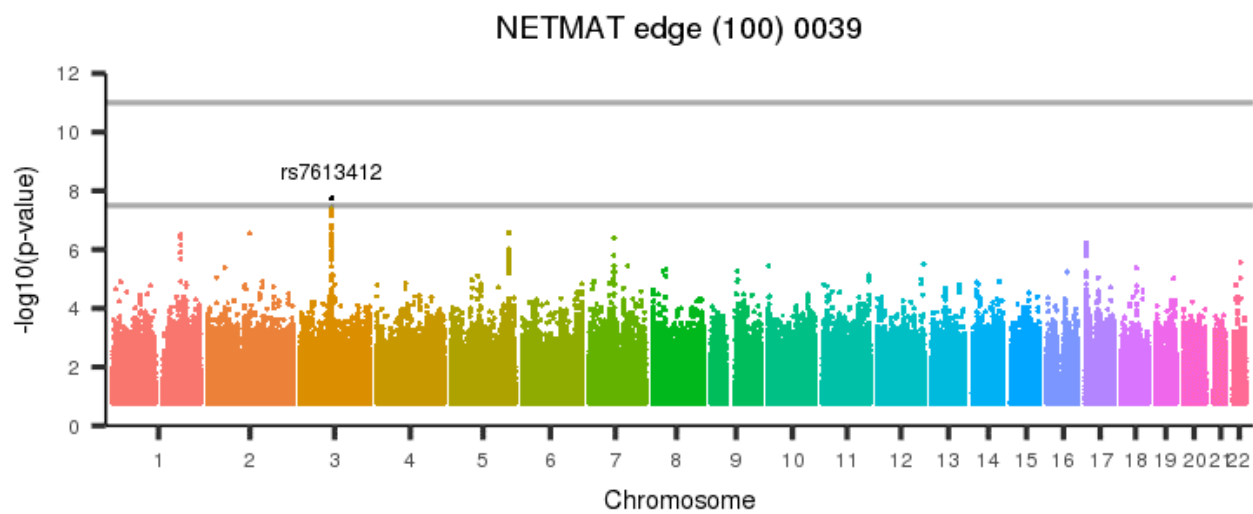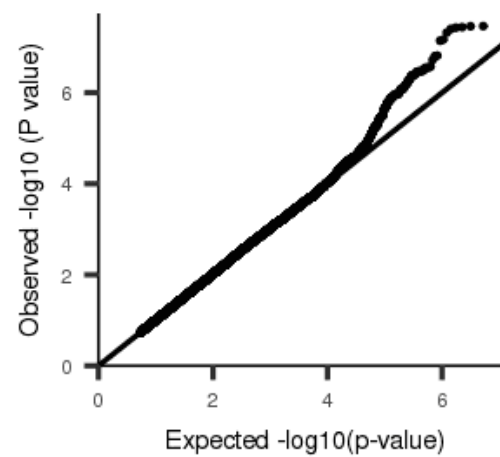

[back to list of plots](#)

Figure 1196: NETMAT edge (100) 0040

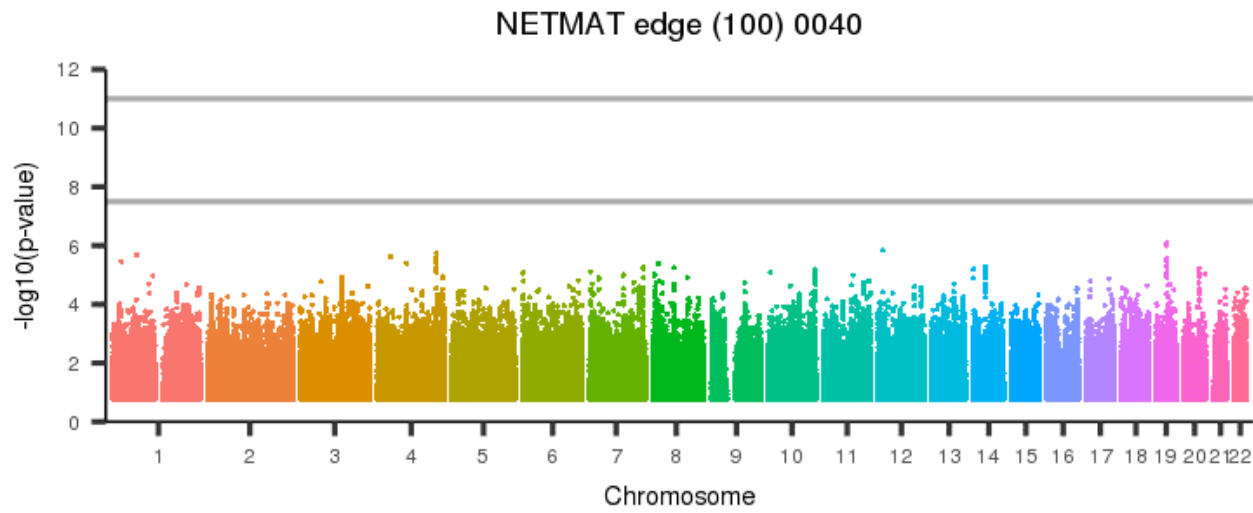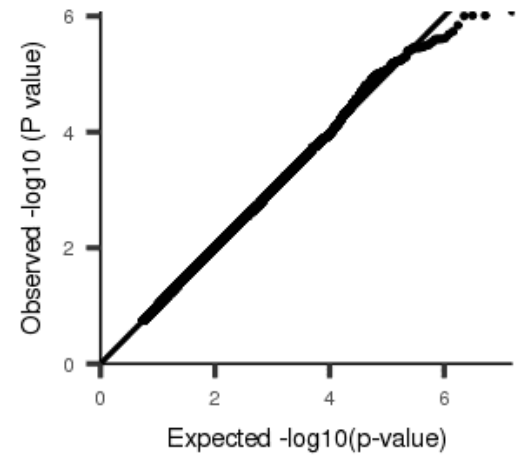

[back to list of plots](#)

Figure 1197: NETMAT edge (100) 0041

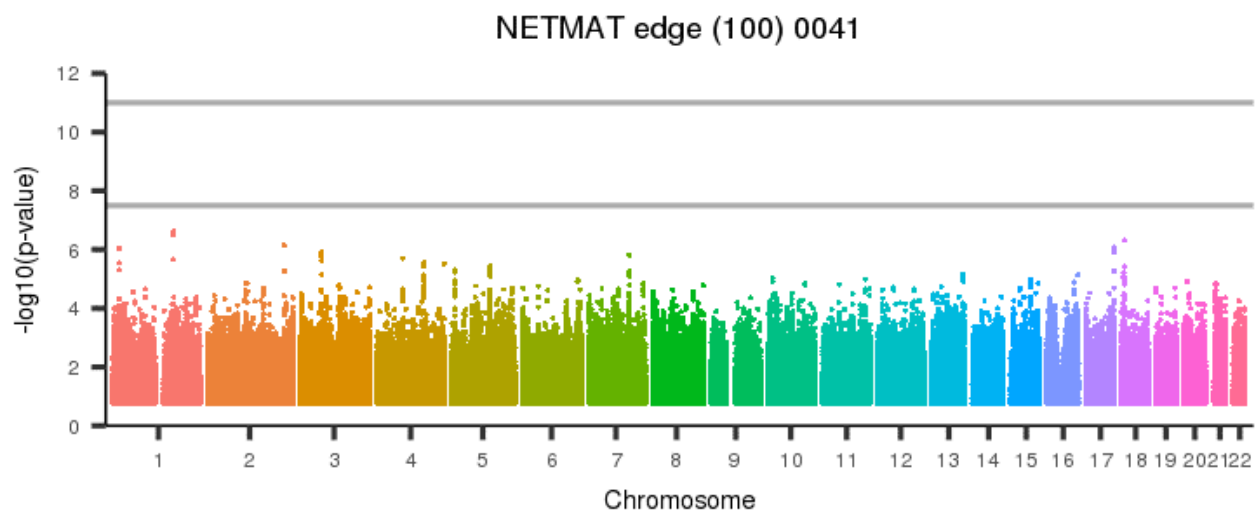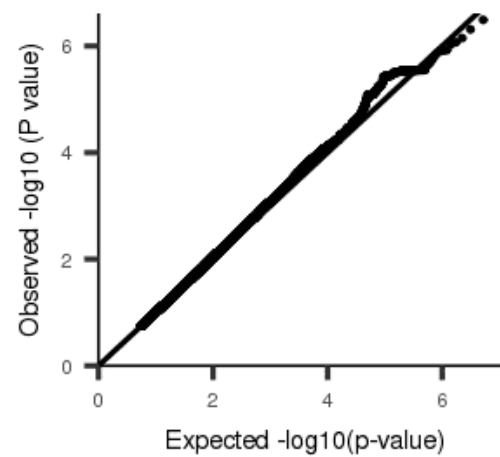

[back to list of plots](#)



Figure 1198: NETMAT edge (100) 0042

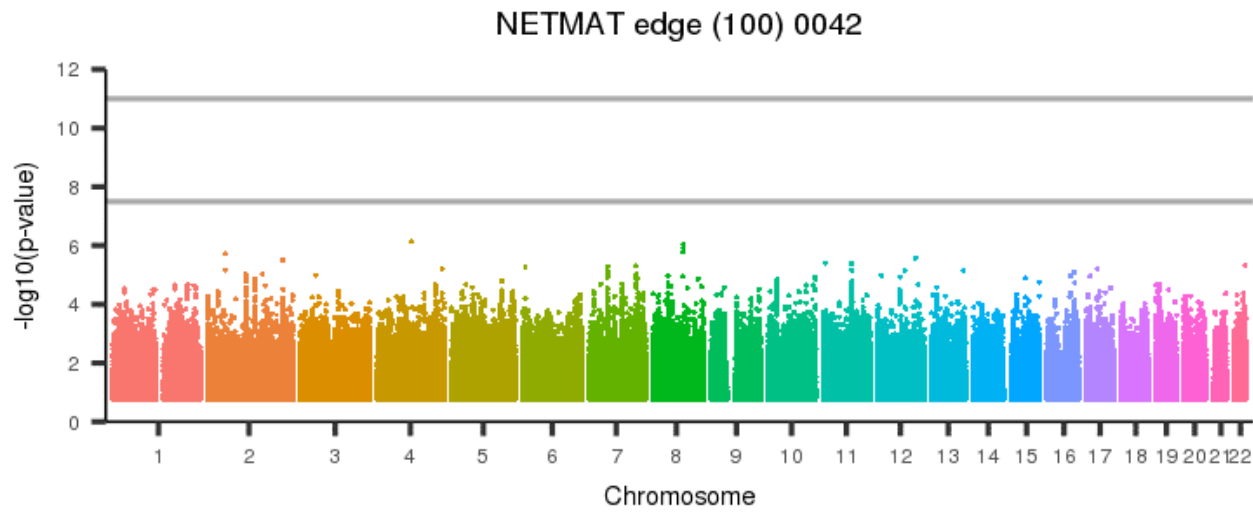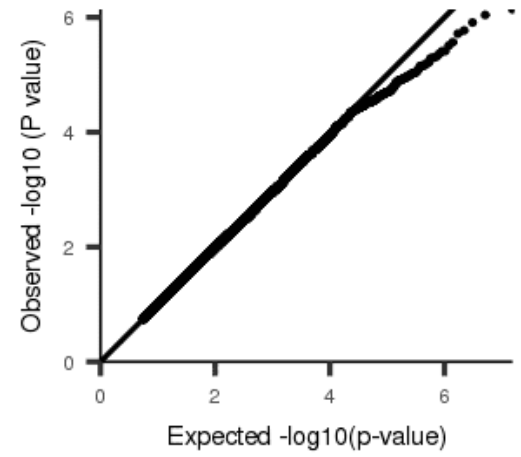

[back to list of plots](#)

Figure 1199: NETMAT edge (100) 0043

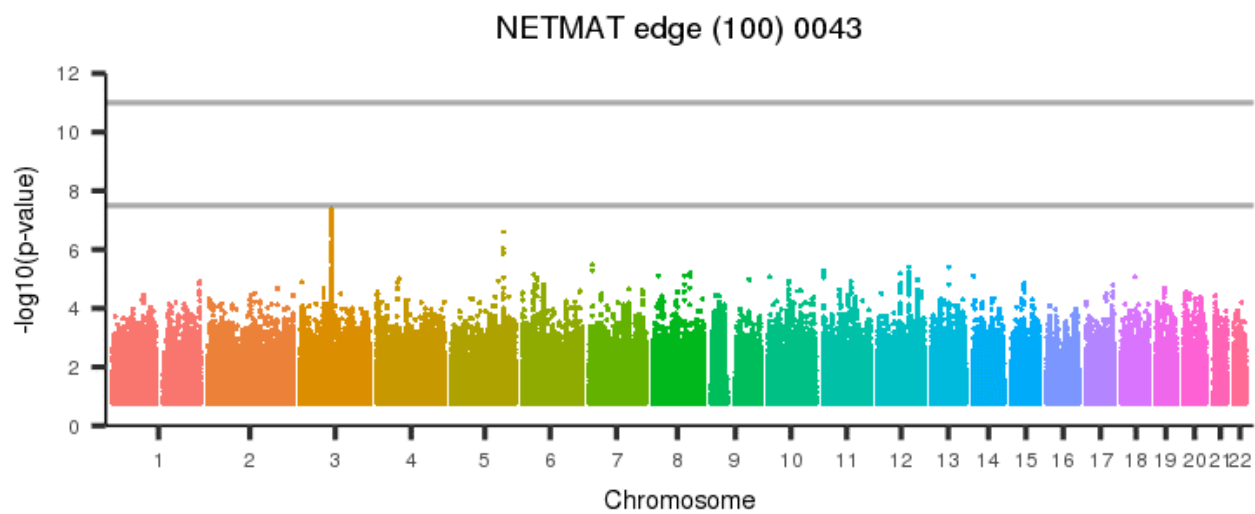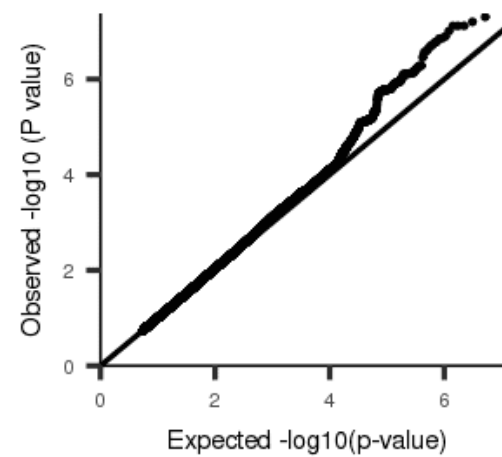

[back to list of plots](#)

Figure 1200: NETMAT edge (100) 0044

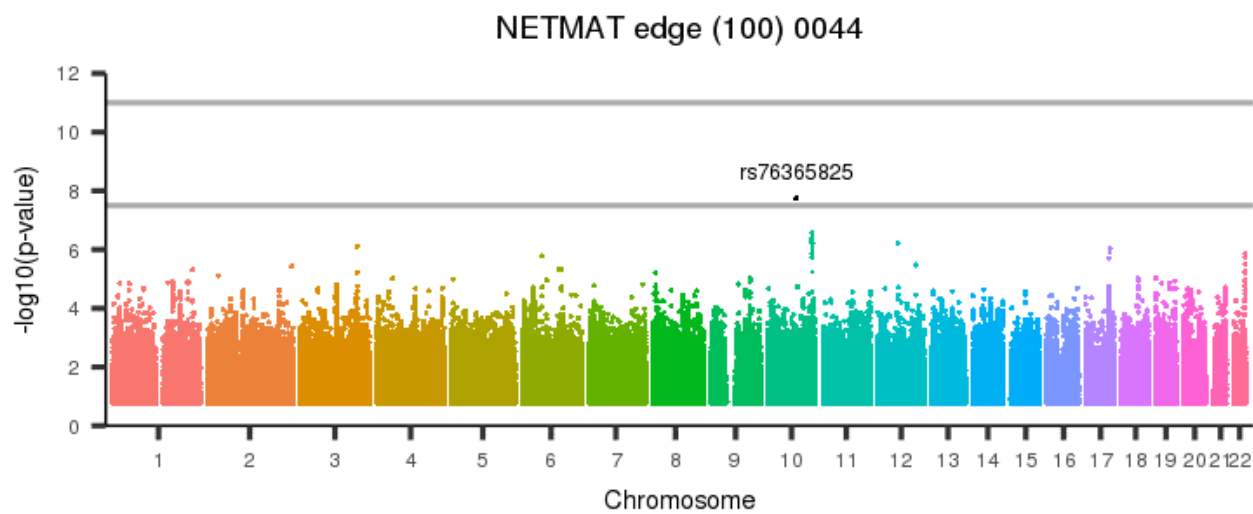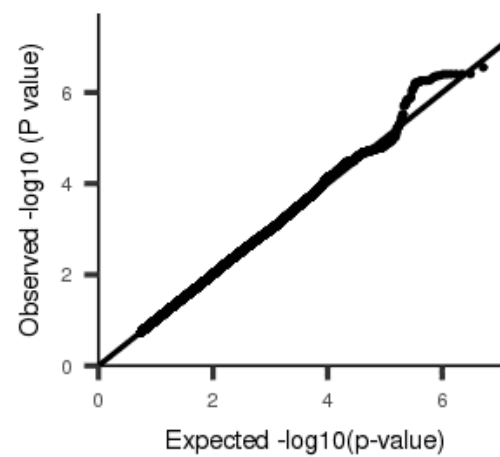

[back to list of plots](#)

Figure 1201: NETMAT edge (100) 0045

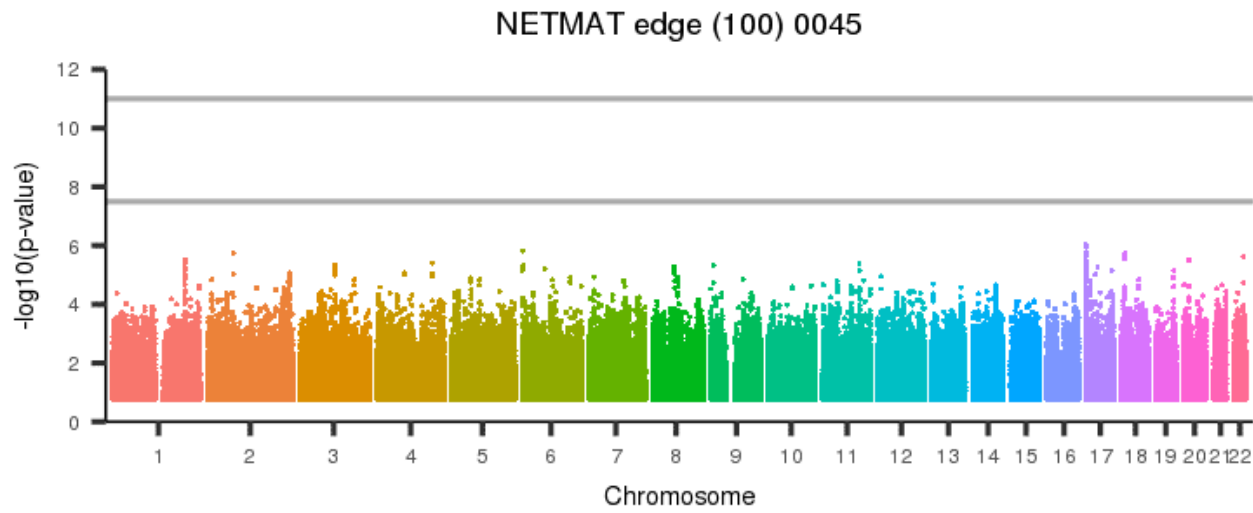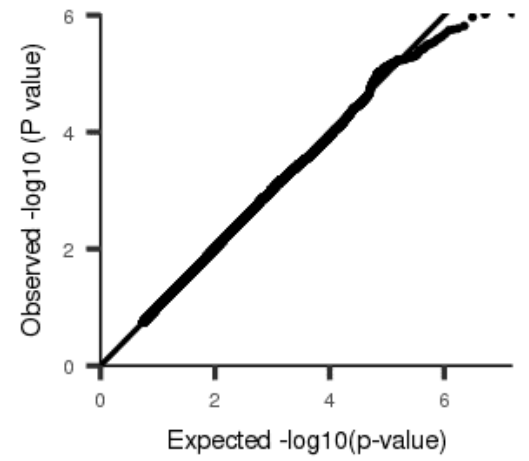

[back to list of plots](#)

Figure 1202: NETMAT edge (100) 0046

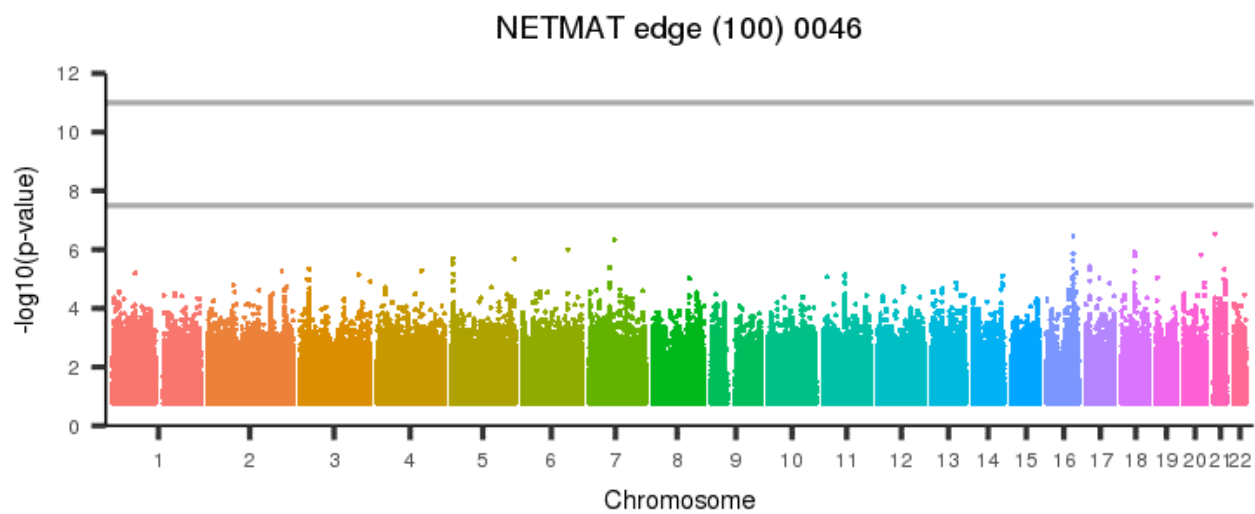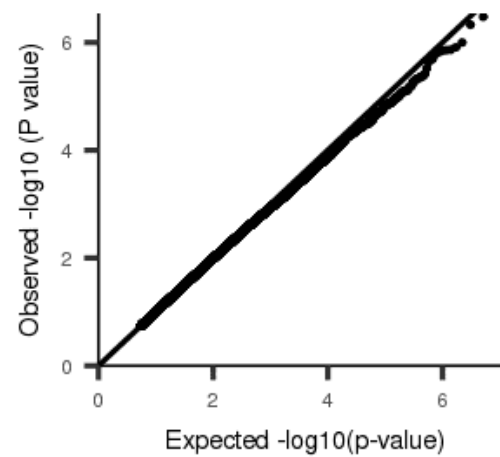

[back to list of plots](#)

Figure 1203: NETMAT edge (100) 0047

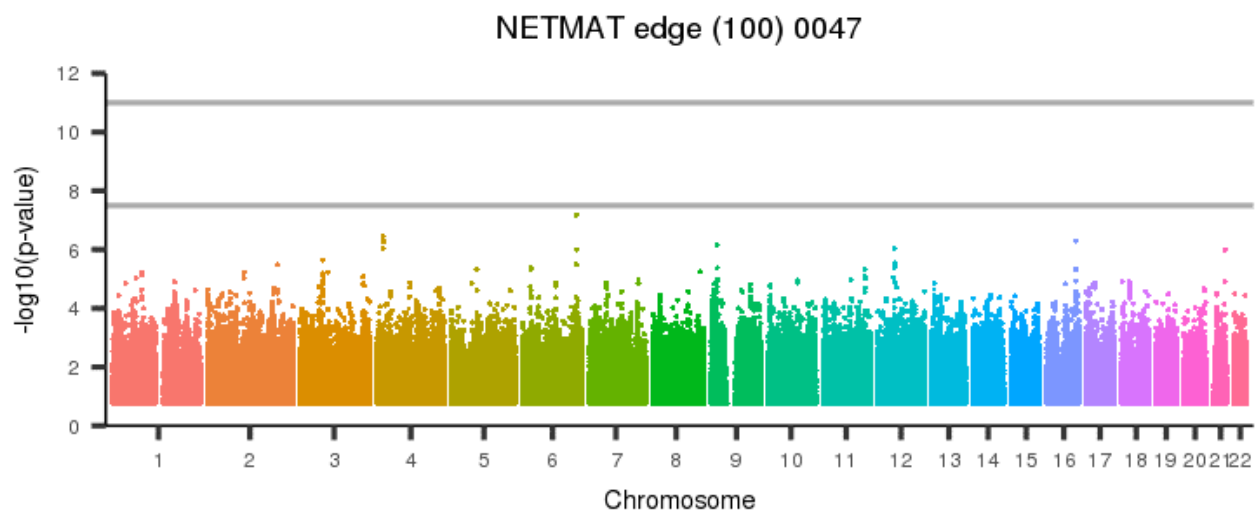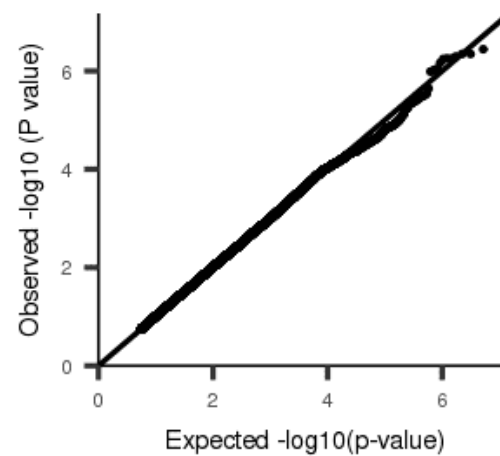

[back to list of plots](#)

Figure 1204: NETMAT edge (100) 0048

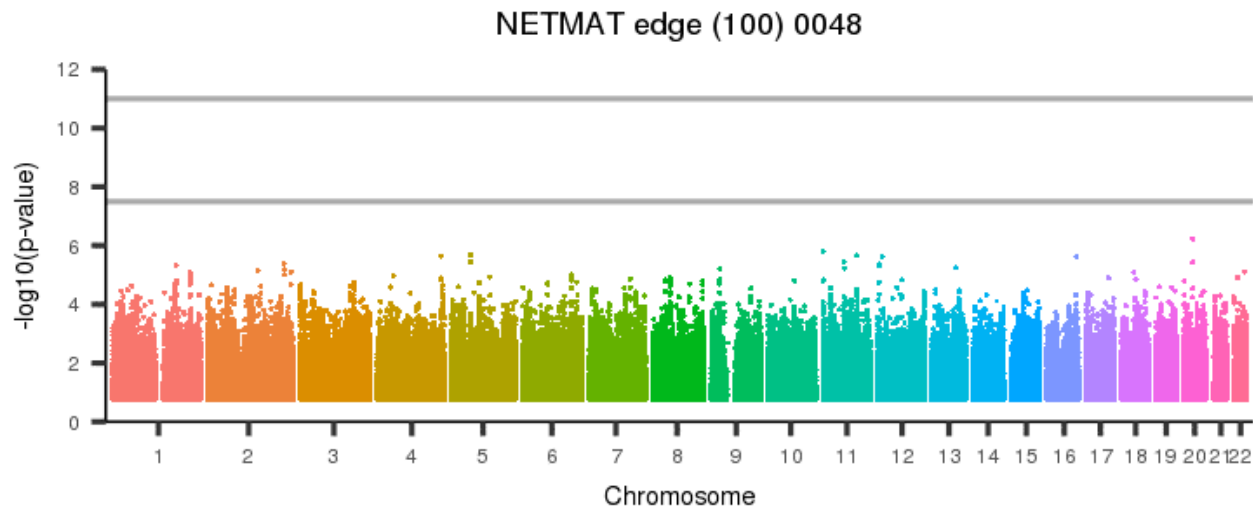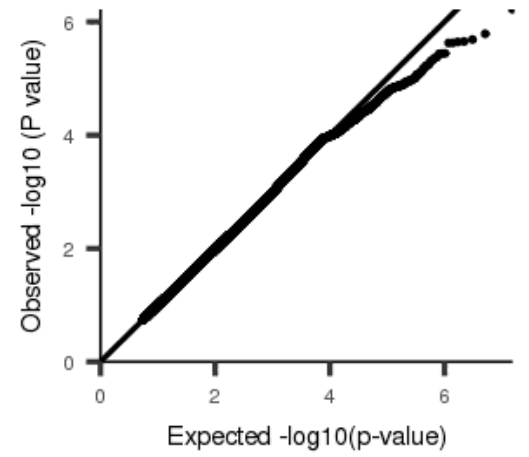

[back to list of plots](#)

Figure 1205: NETMAT edge (100) 0049

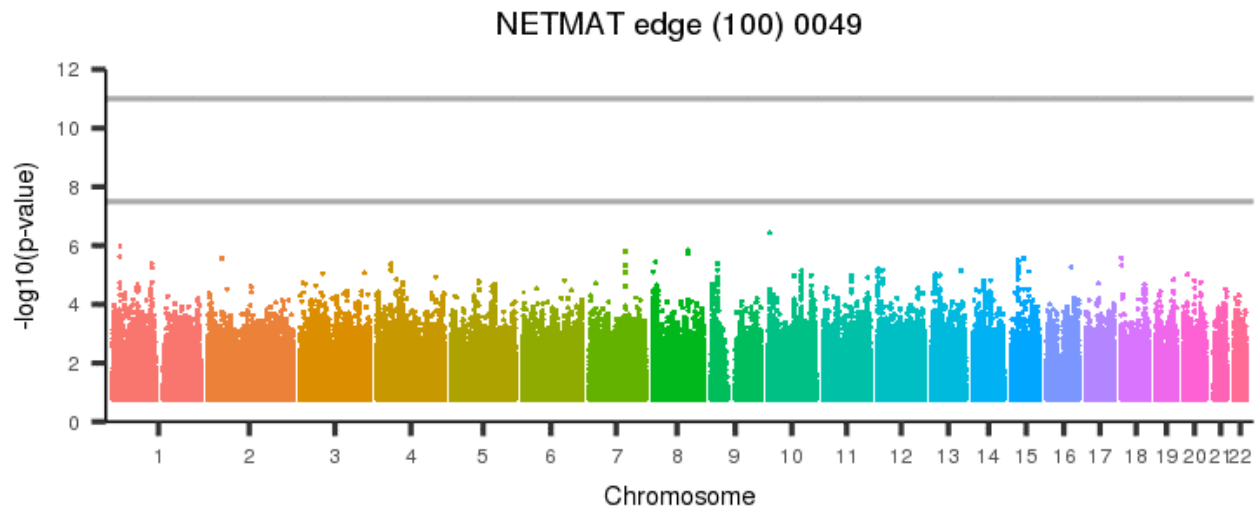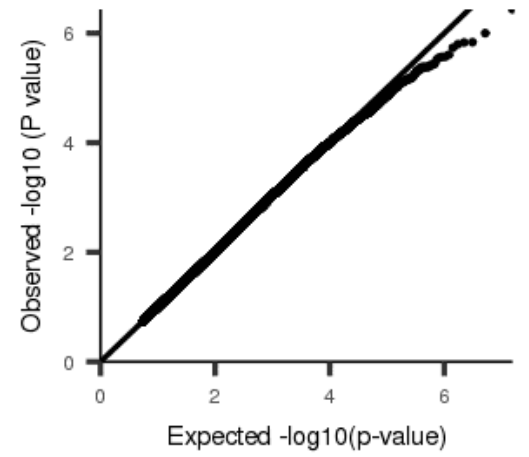

[back to list of plots](#)



Figure 1206: NETMAT edge (100) 0050

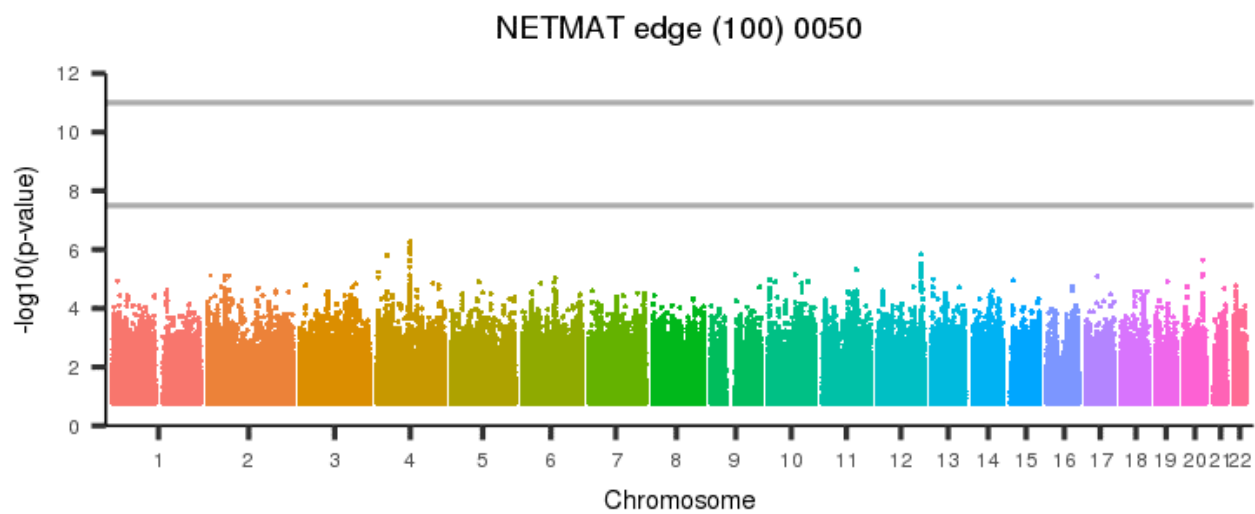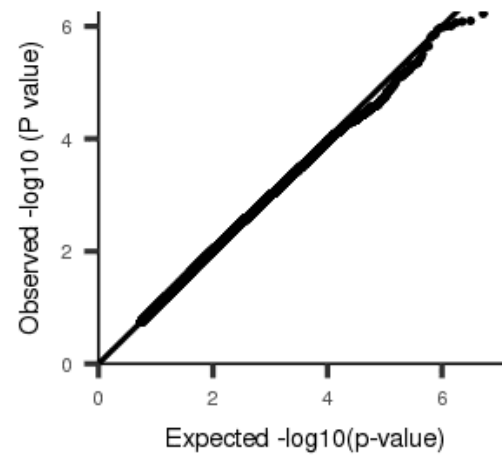

[back to list of plots](#)

Figure 1207: NETMAT edge (100) 0051

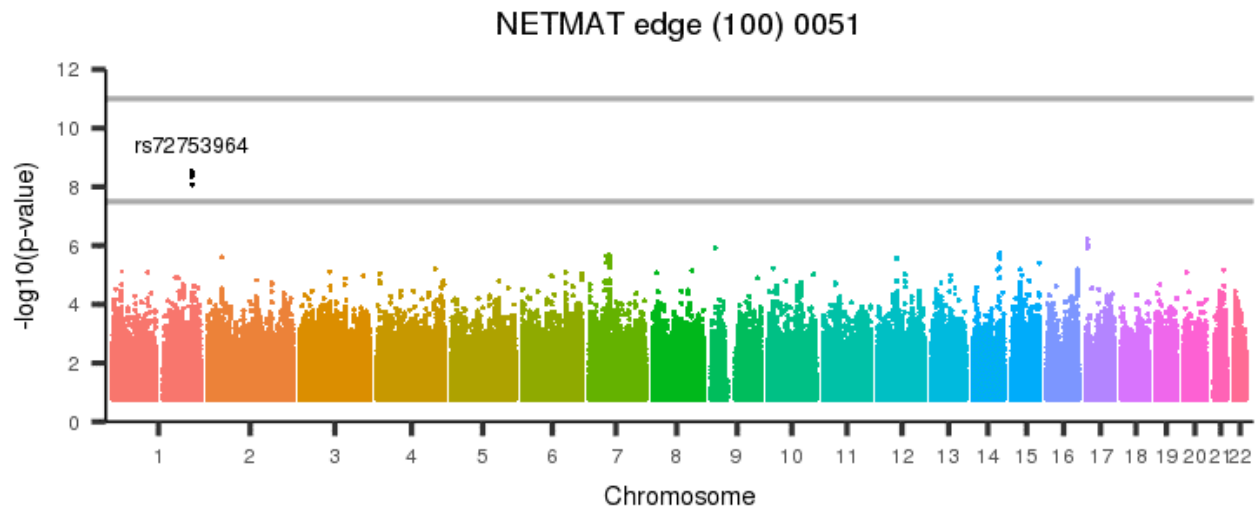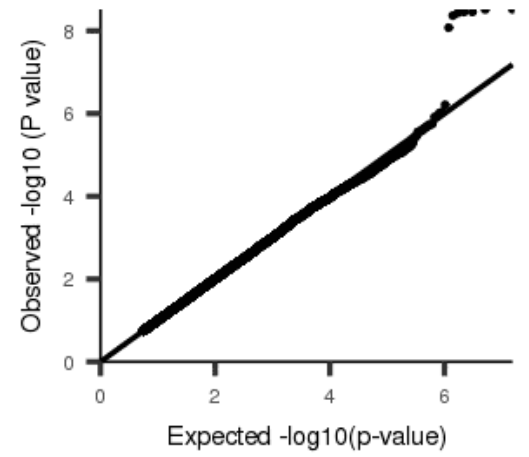

[back to list of plots](#)

Figure 1208: NETMAT edge (100) 0052

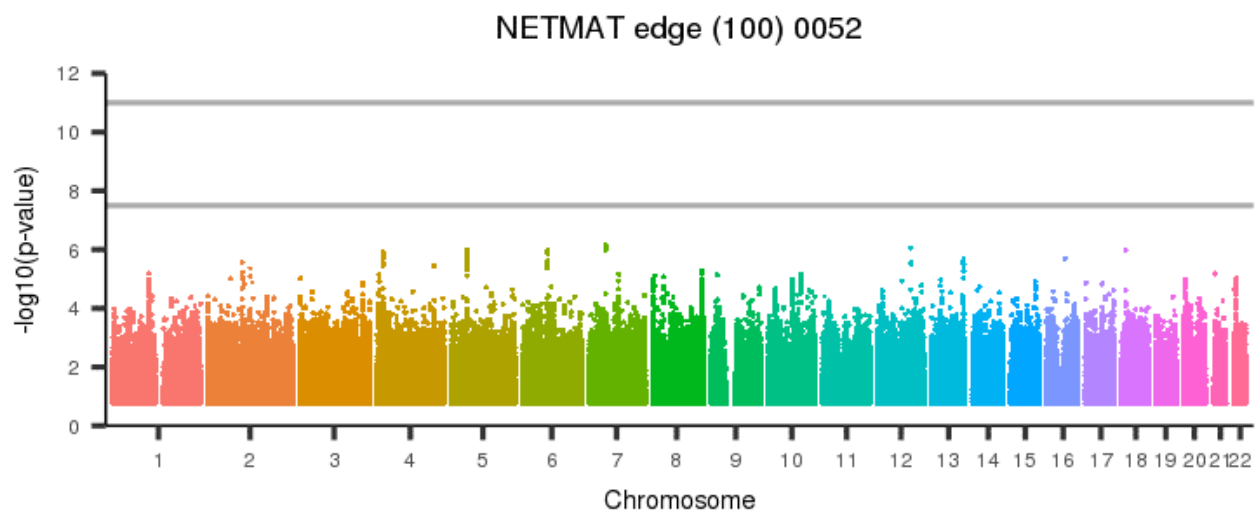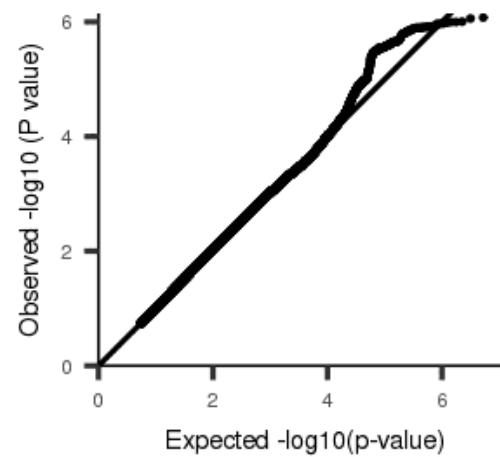

[back to list of plots](#)

Figure 1209: NETMAT edge (100) 0053

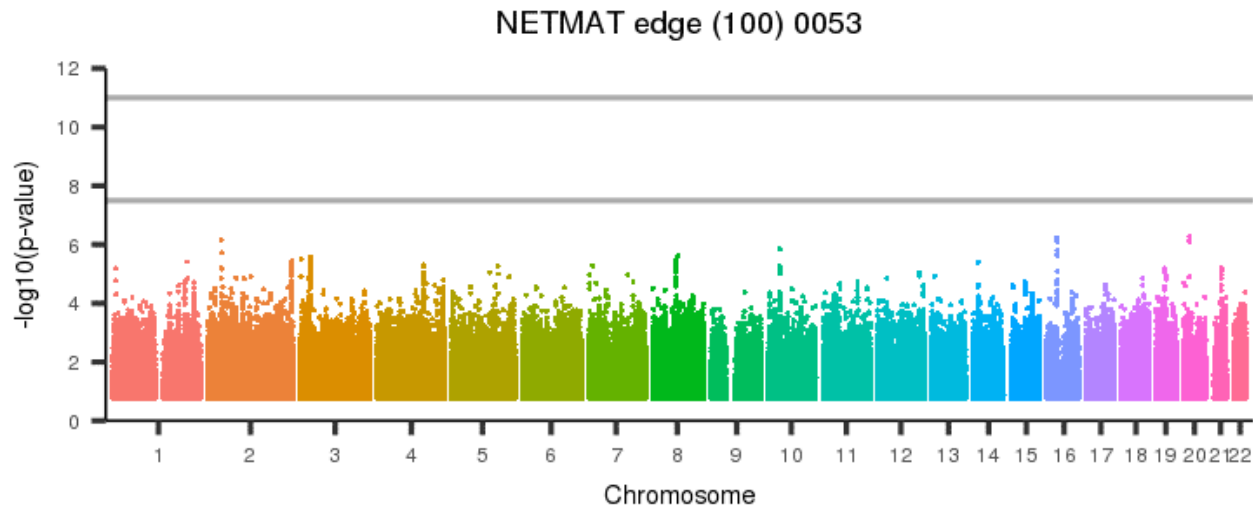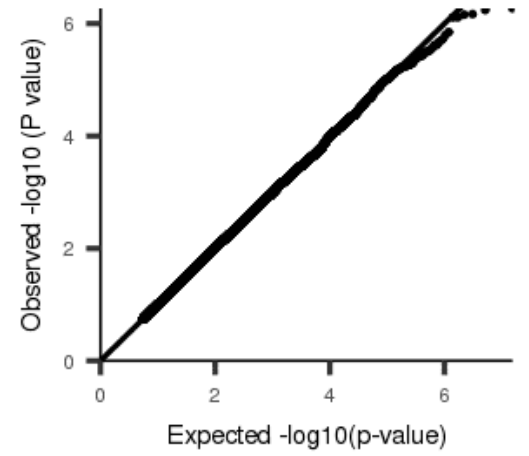

[back to list of plots](#)

Figure 1210: NETMAT edge (100) 0054

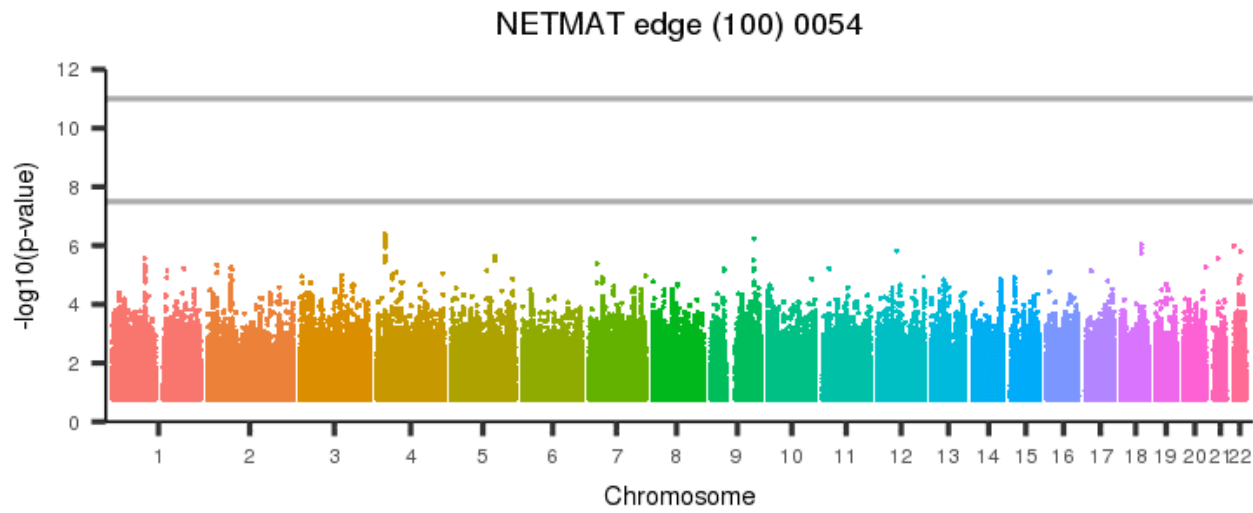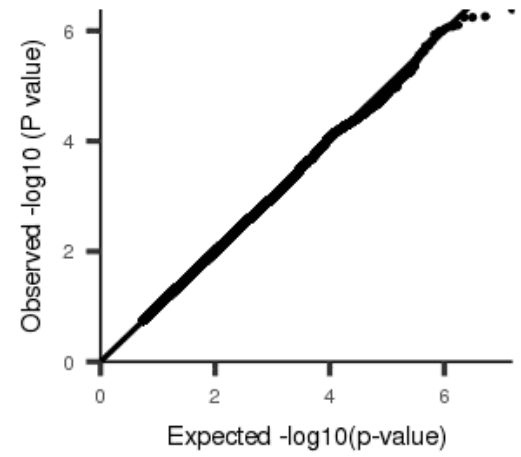

[back to list of plots](#)

Figure 1211: NETMAT edge (100) 0055

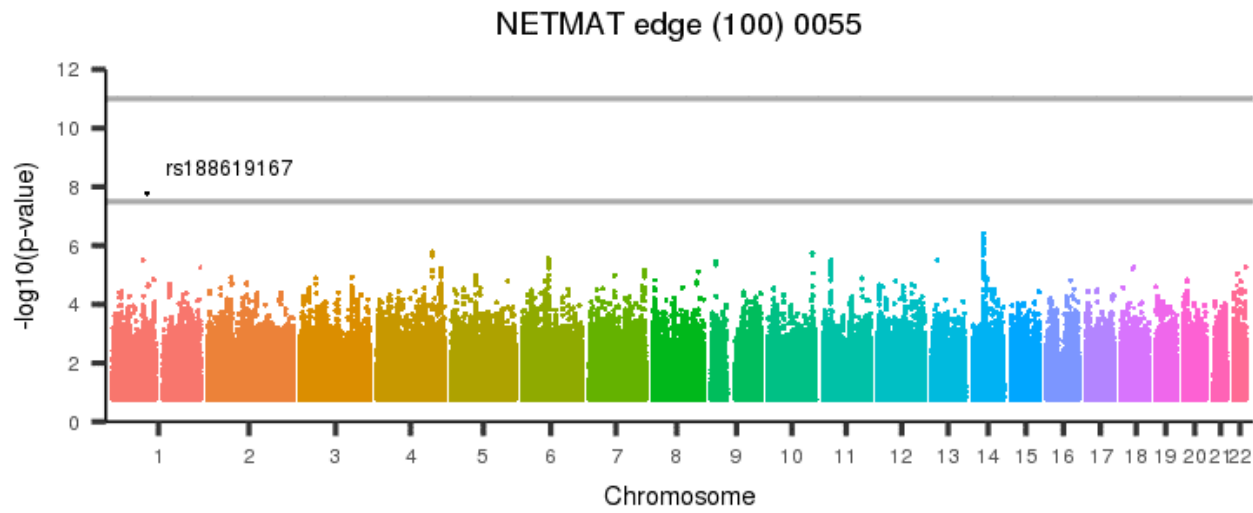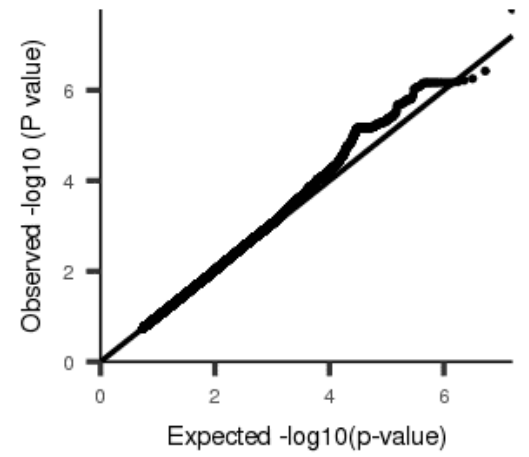

[back to list of plots](#)

Figure 1212: NETMAT edge (100) 0056

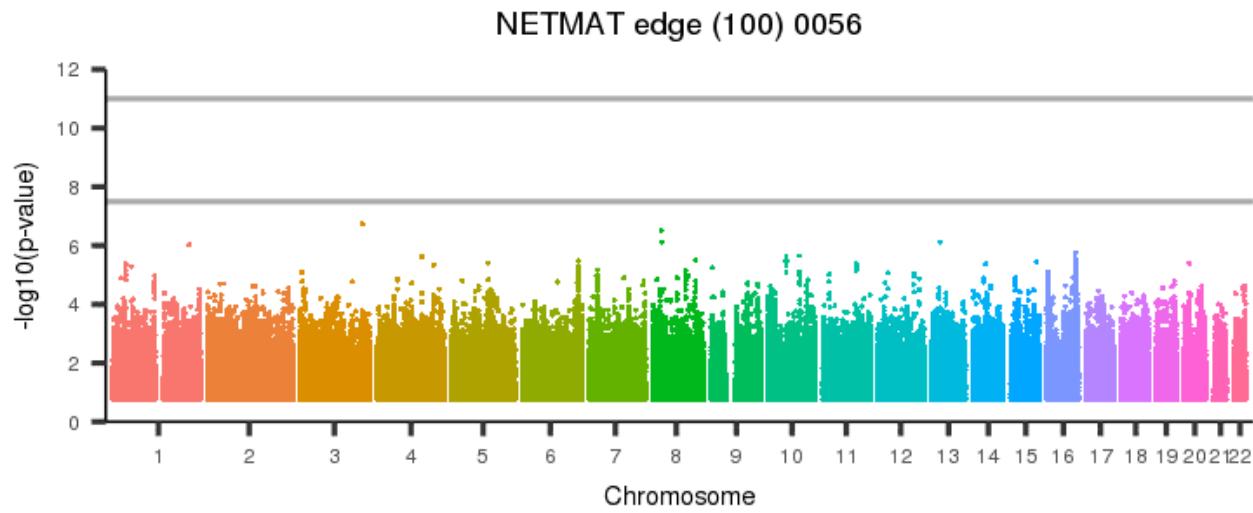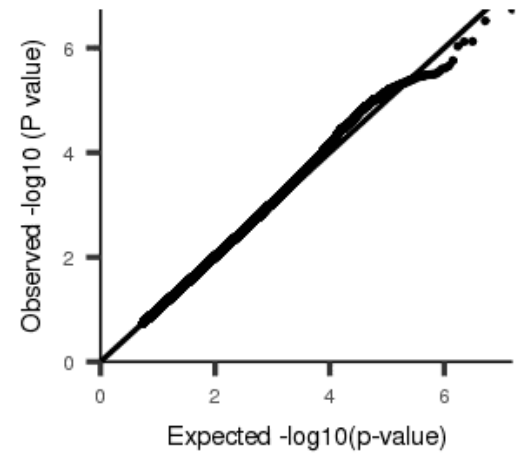

[back to list of plots](#)

Figure 1213: NETMAT edge (100) 0057

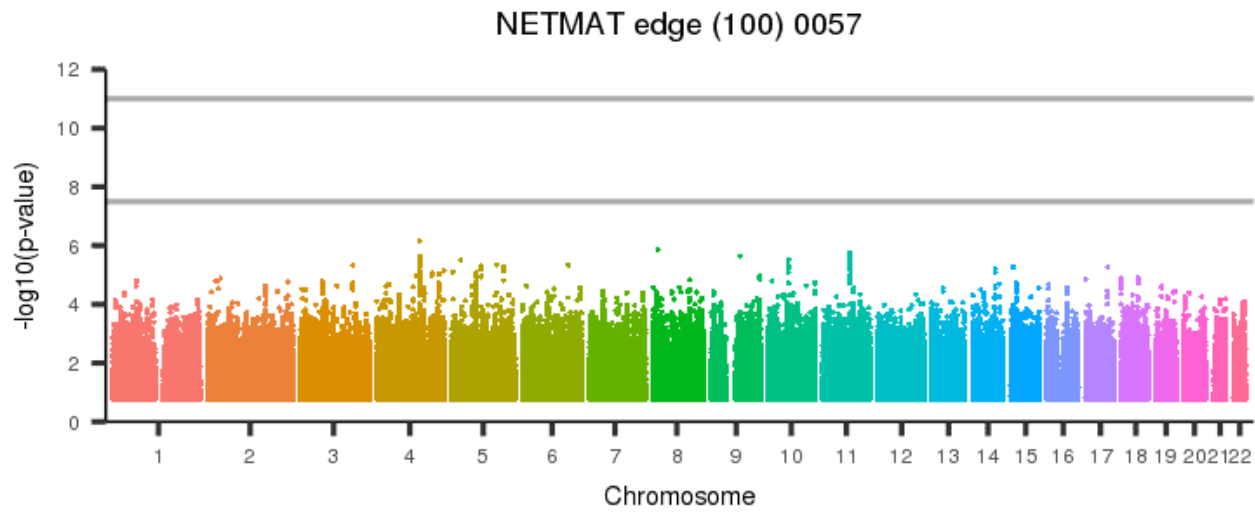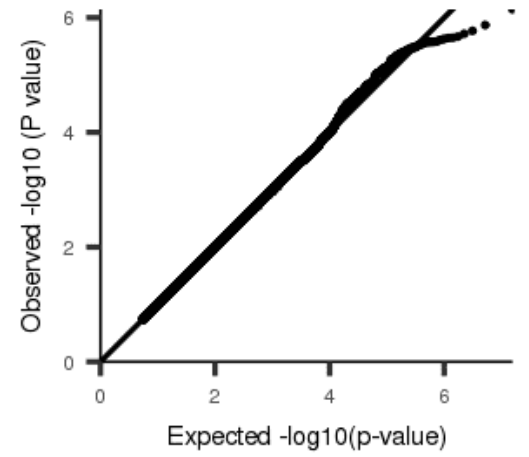

[back to list of plots](#)



Figure 1214: NETMAT edge (100) 0058

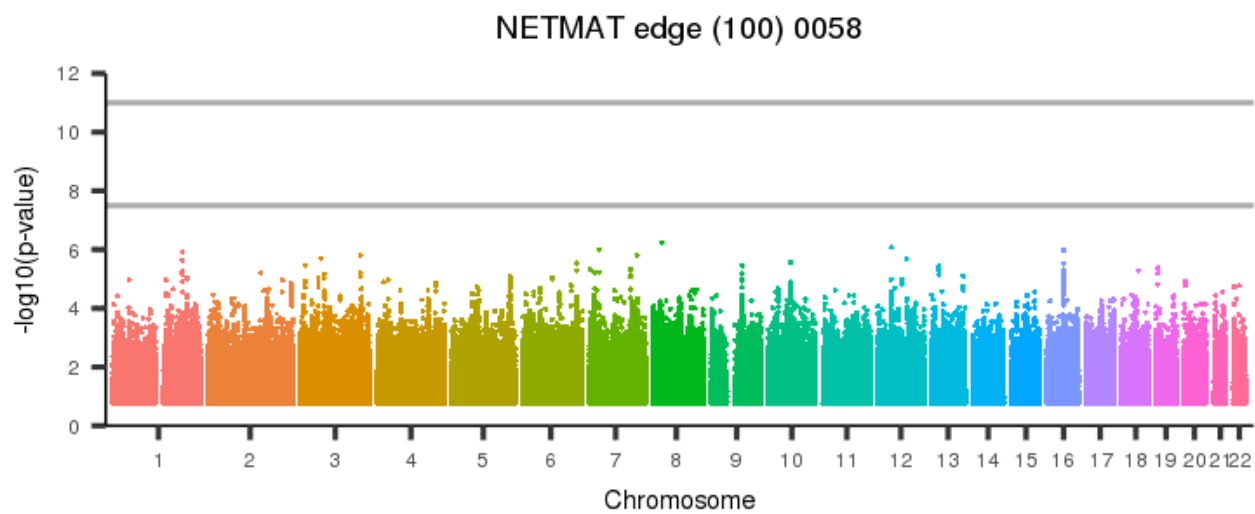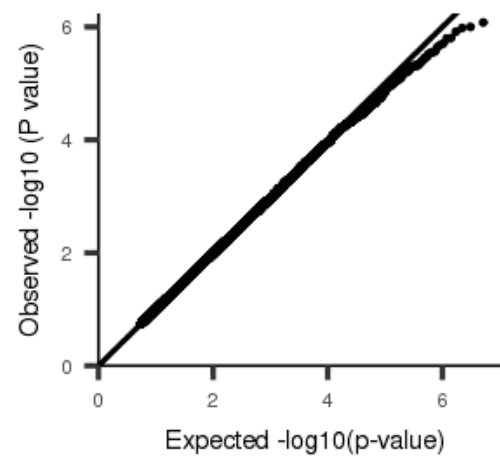

[back to list of plots](#)

Figure 1215: NETMAT edge (100) 0059

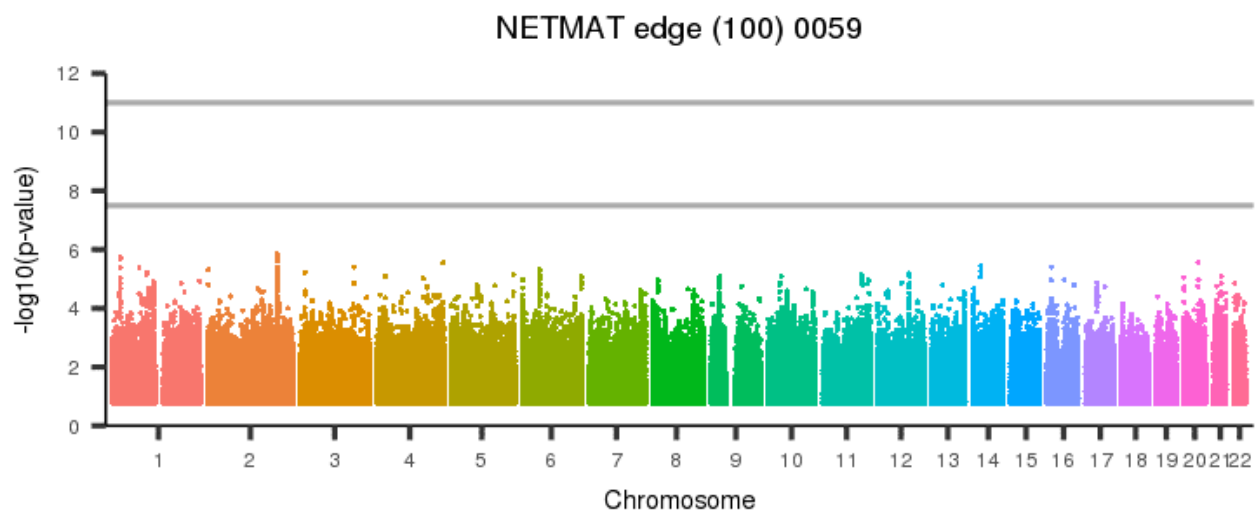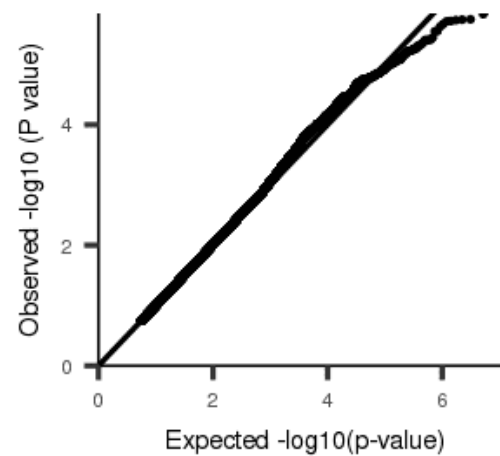

[back to list of plots](#)

Figure 1216: NETMAT edge (100) 0060

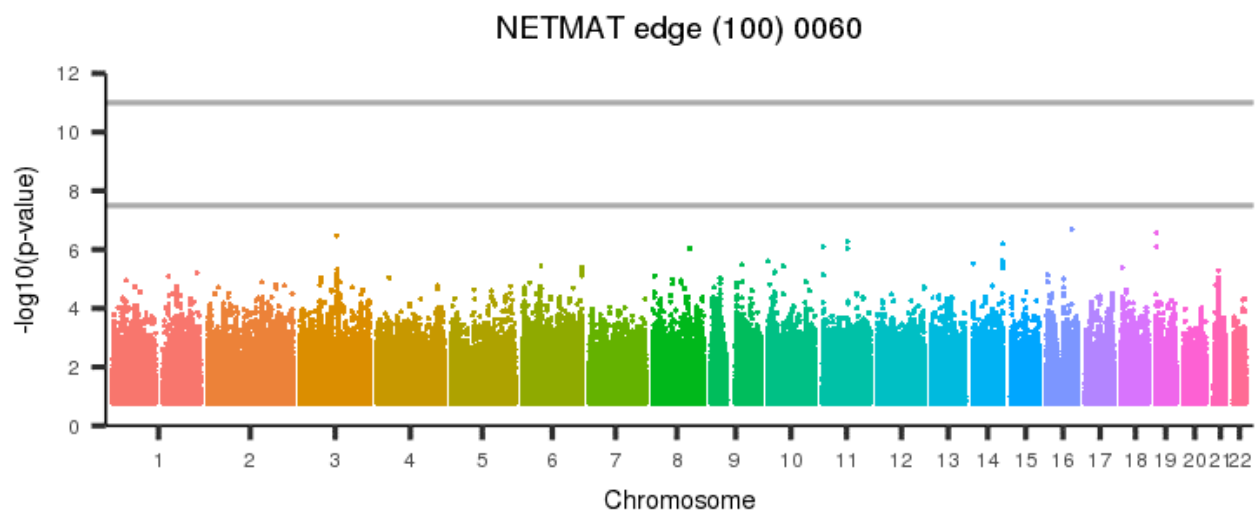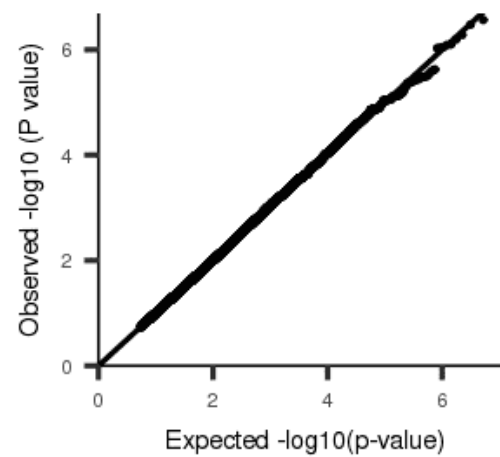

[back to list of plots](#)

Figure 1217: NETMAT edge (100) 0061

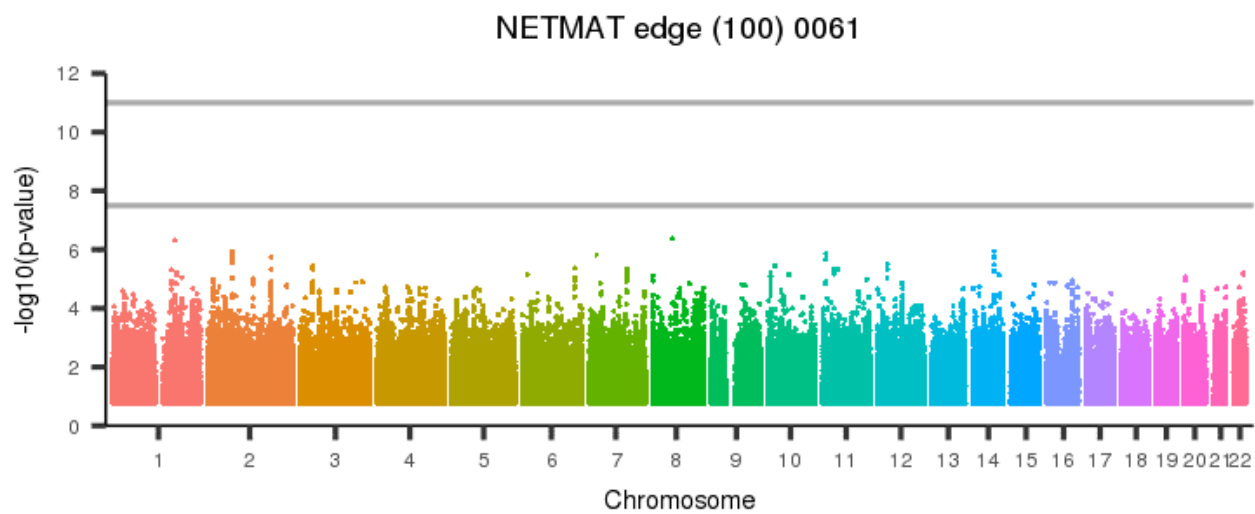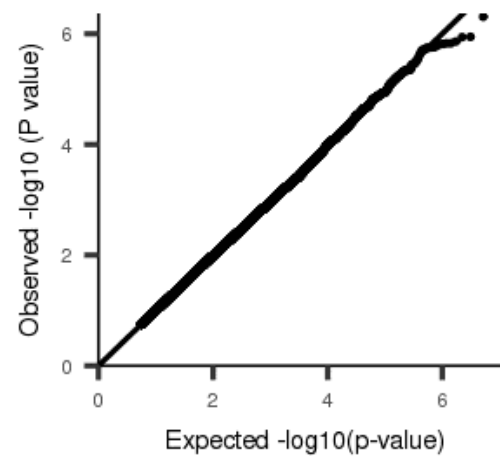

[back to list of plots](#)

Figure 1218: NETMAT edge (100) 0062

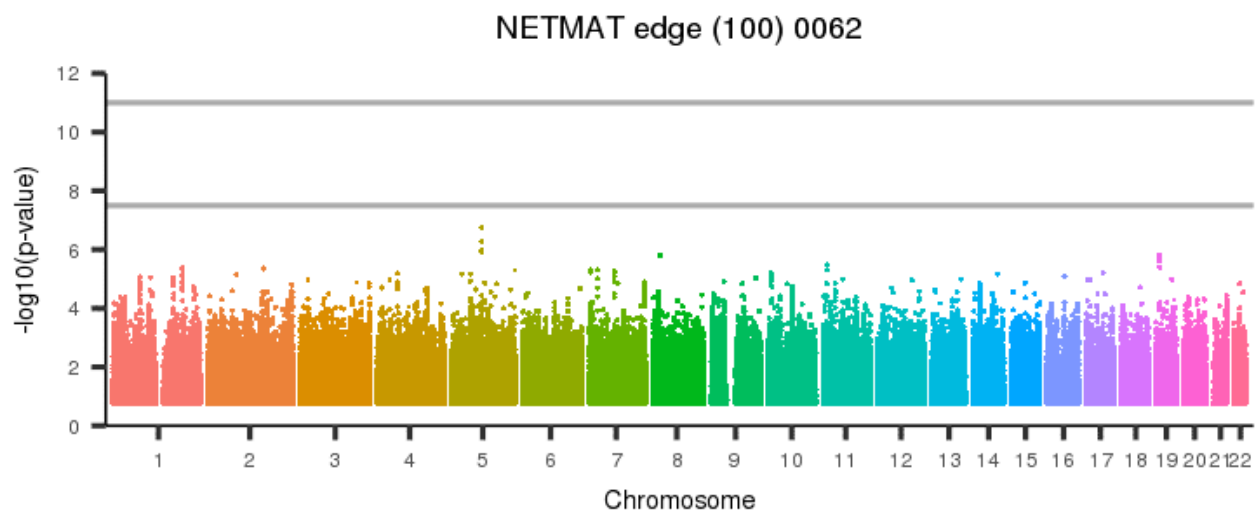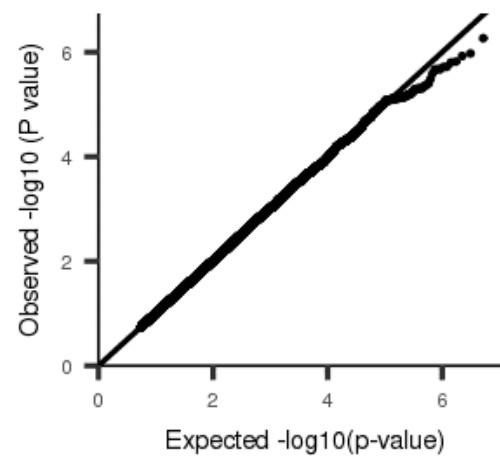

[back to list of plots](#)

Figure 1219: NETMAT edge (100) 0063

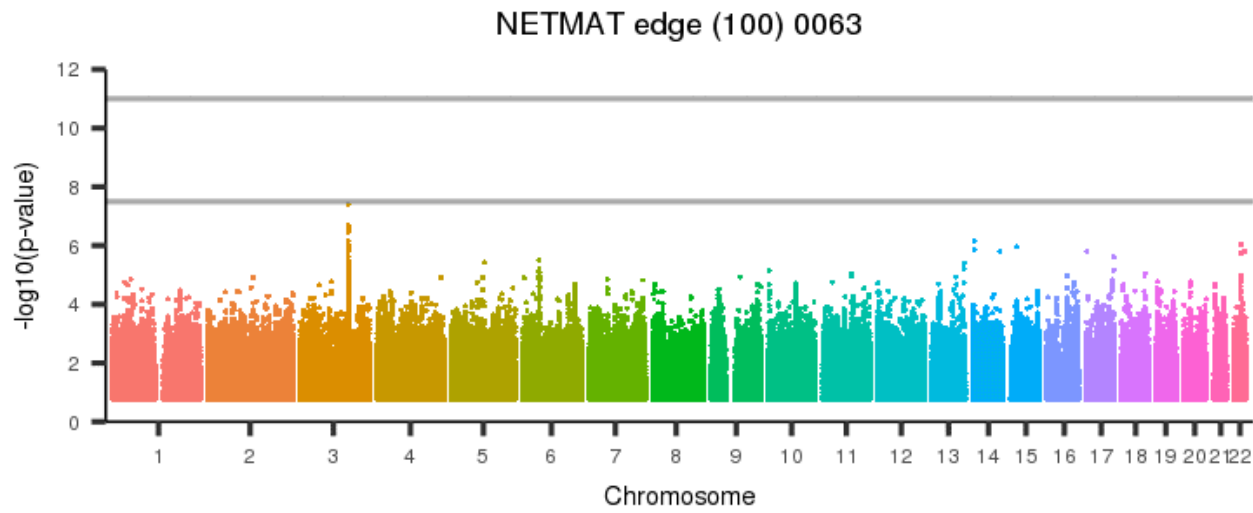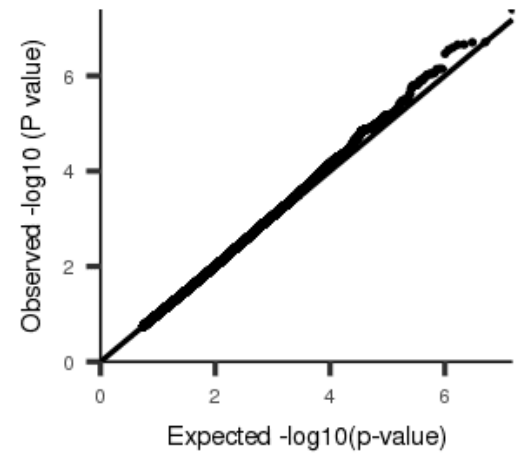

[back to list of plots](#)

Figure 1220: NETMAT edge (100) 0064

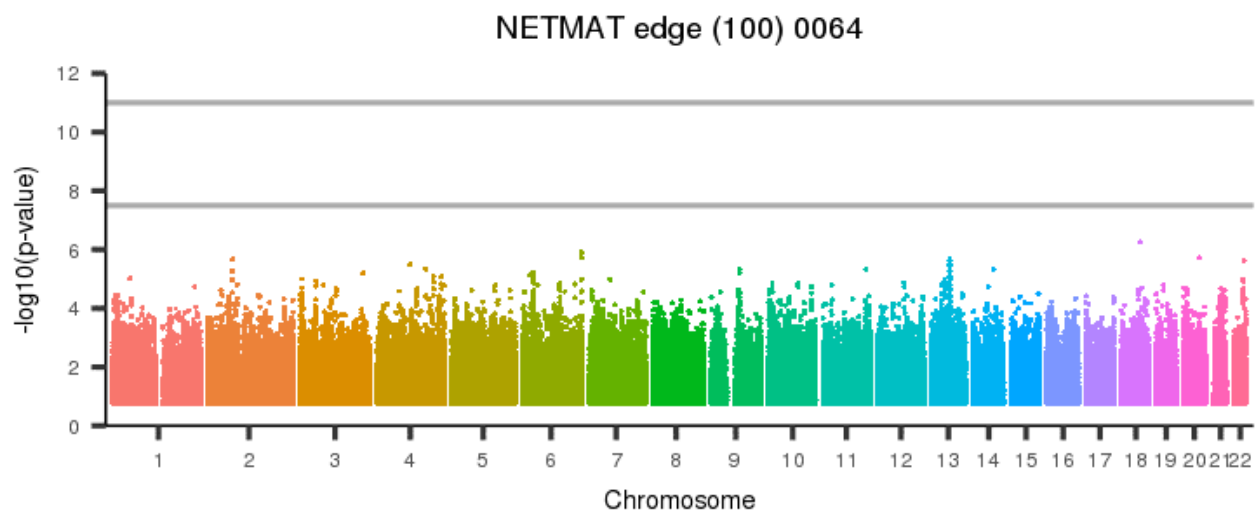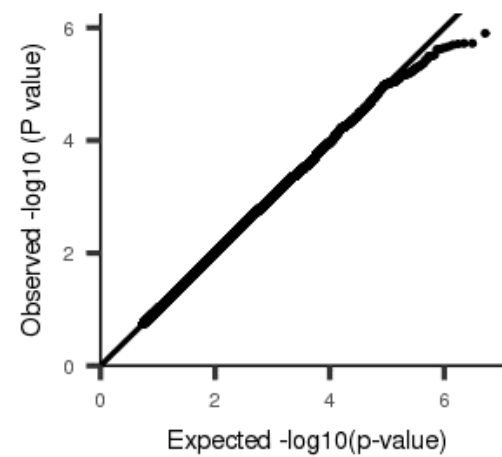

[back to list of plots](#)

Figure 1221: NETMAT edge (100) 0065

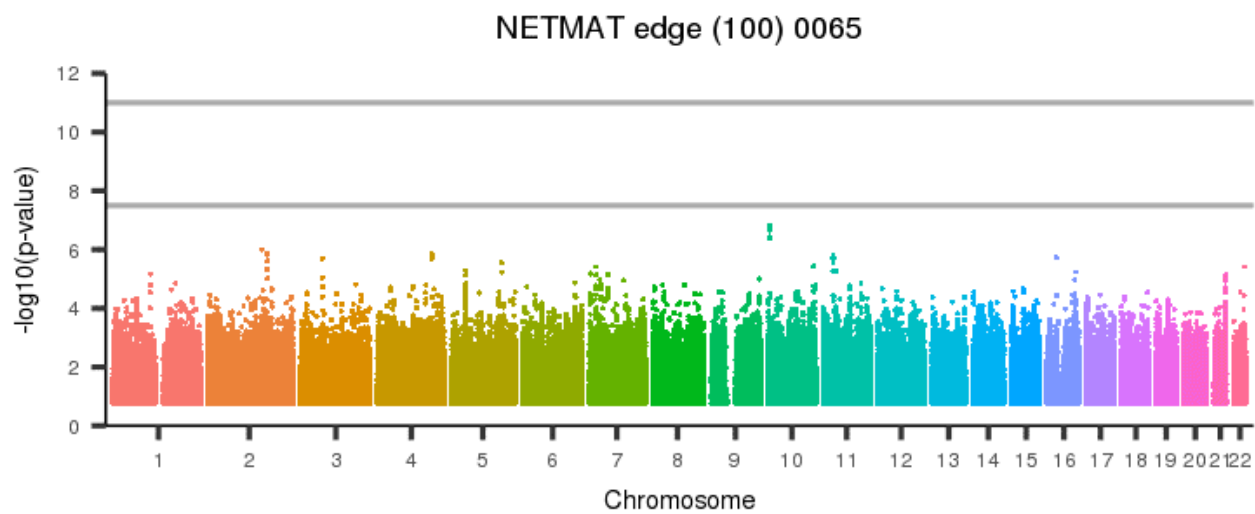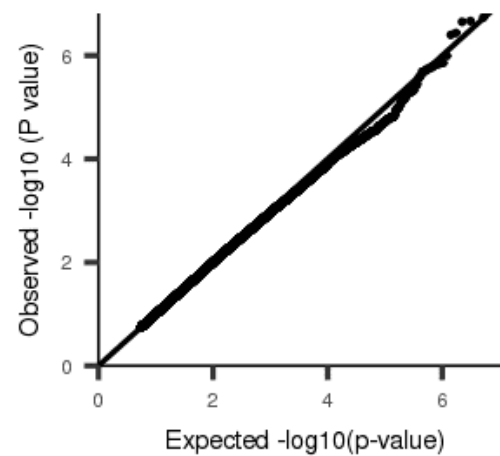

[back to list of plots](#)



Figure 1222: NETMAT edge (100) 0066

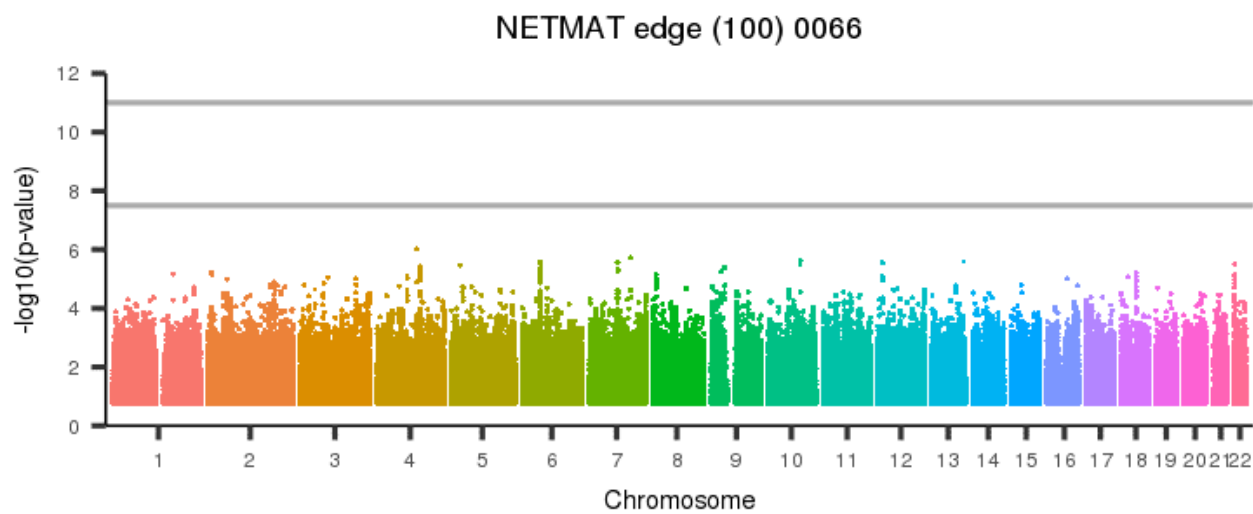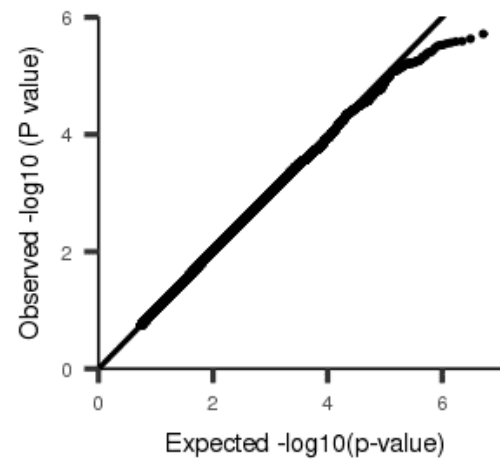

[back to list of plots](#)

Figure 1223: NETMAT edge (100) 0067

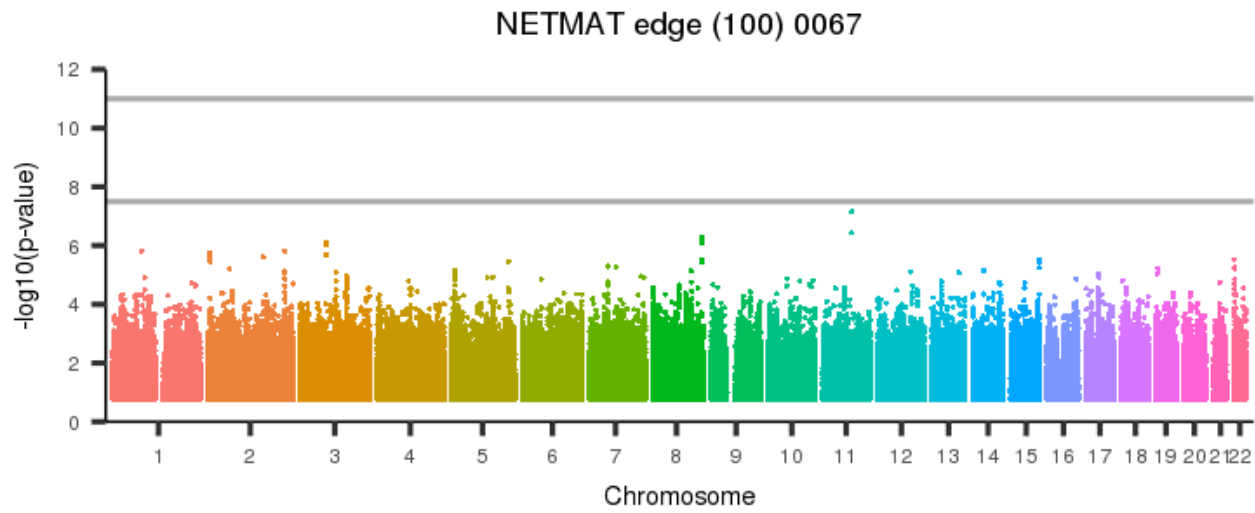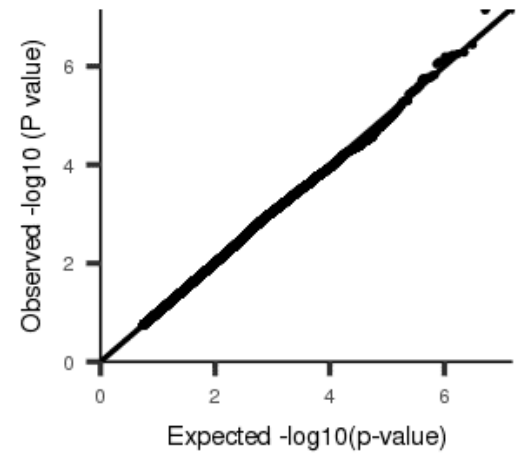

[back to list of plots](#)

Figure 1224: NETMAT edge (100) 0068

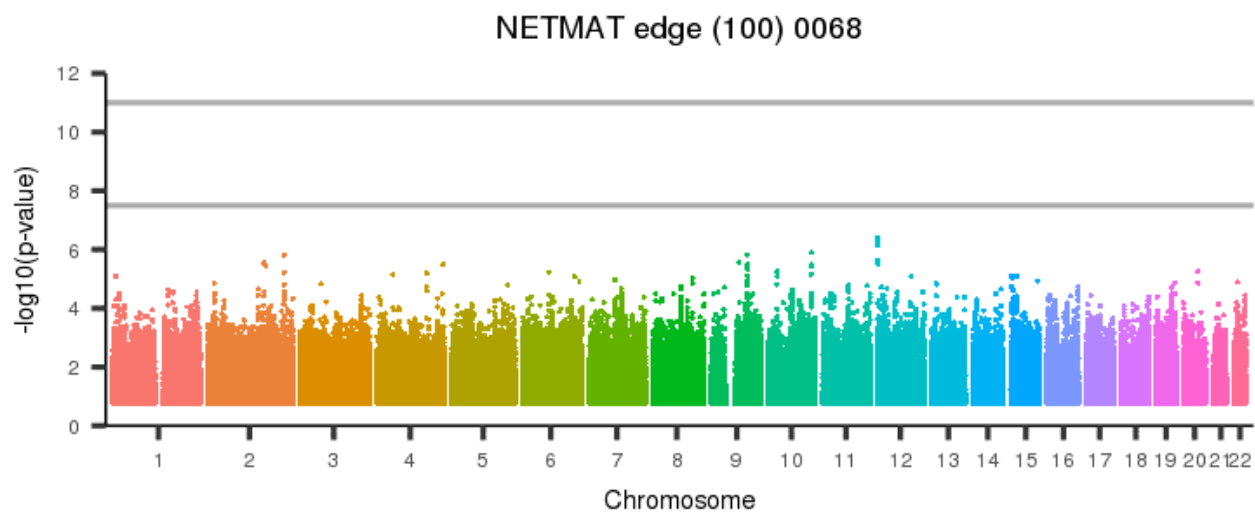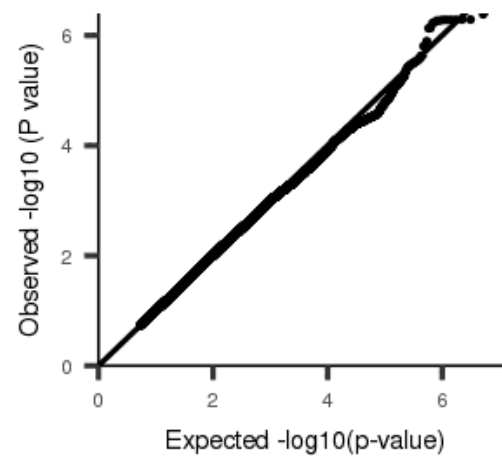

[back to list of plots](#)

Figure 1225: NETMAT edge (100) 0069

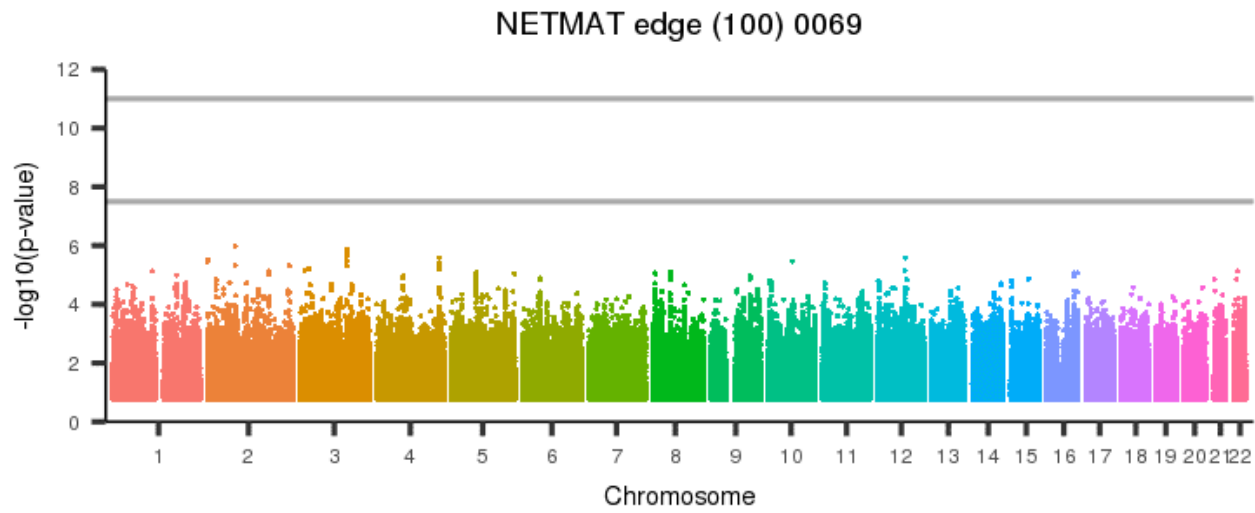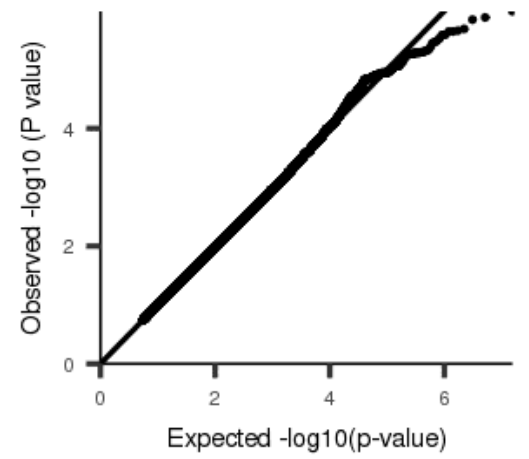

[back to list of plots](#)

Figure 1226: NETMAT edge (100) 0070

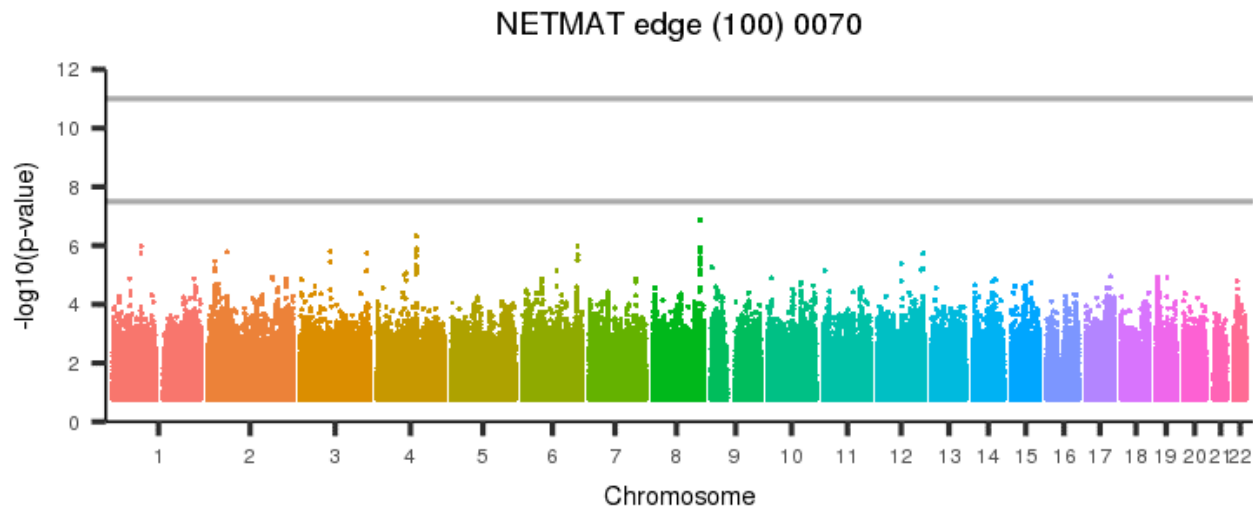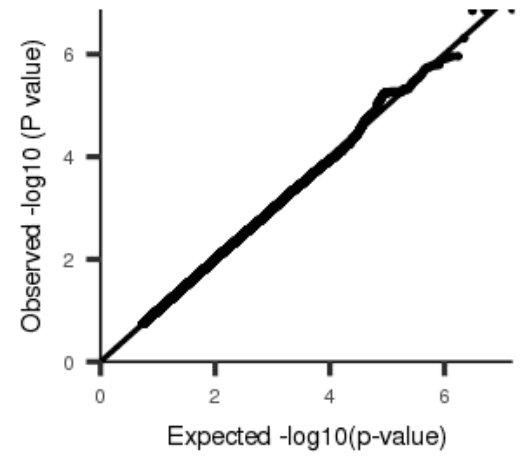

[back to list of plots](#)

Figure 1227: NETMAT edge (100) 0071

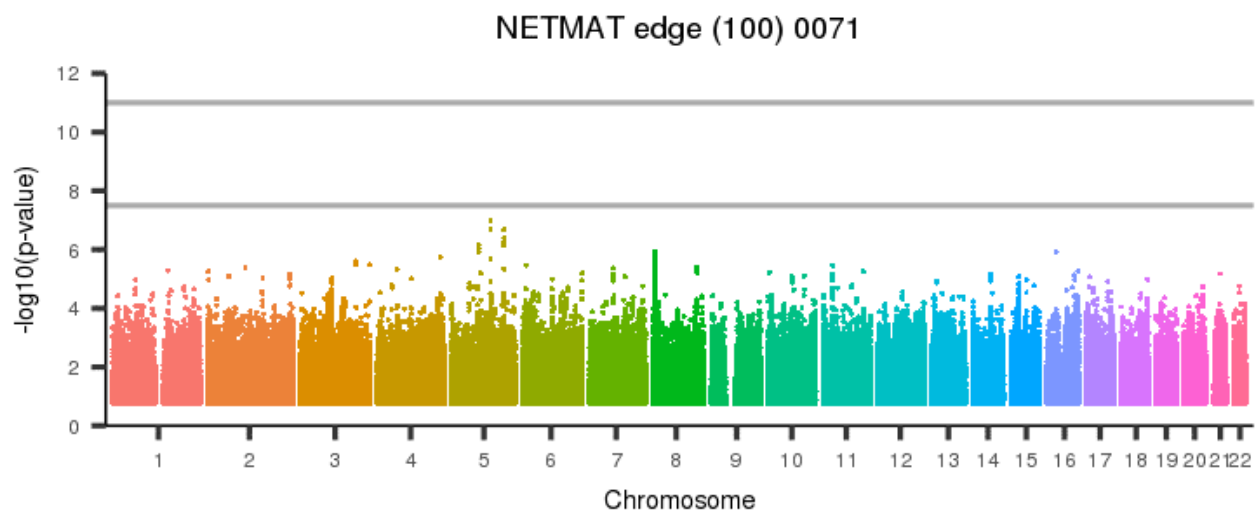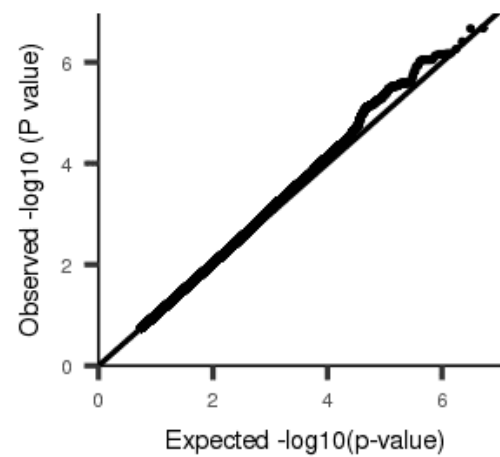

[back to list of plots](#)

Figure 1228: NETMAT edge (100) 0072

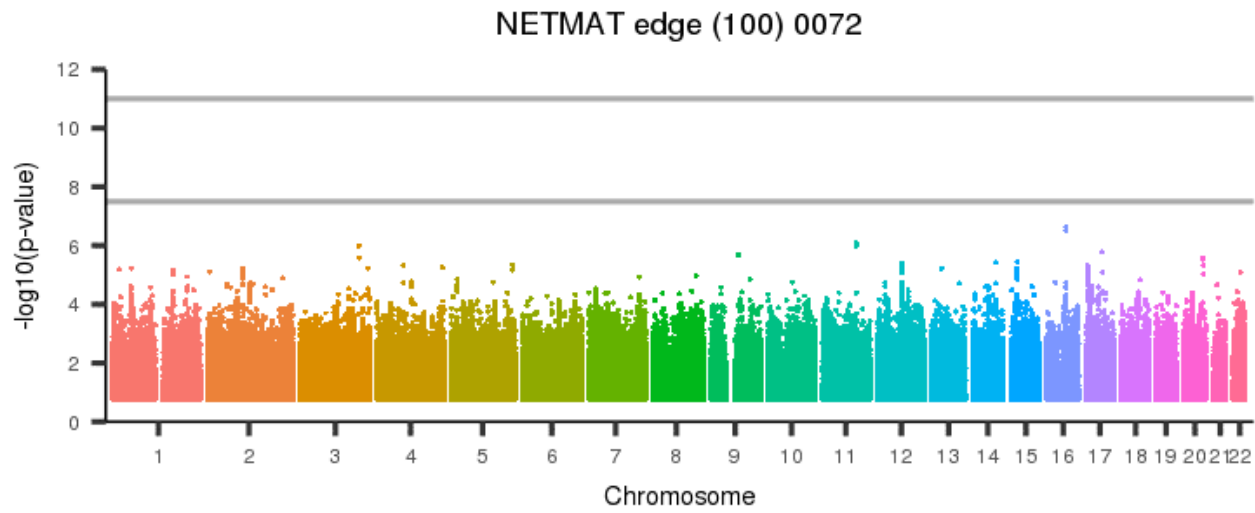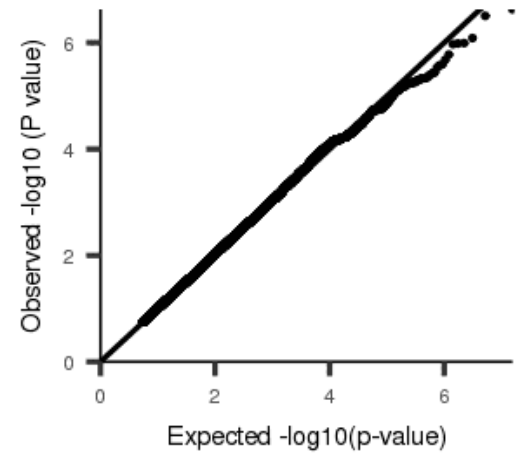

[back to list of plots](#)

Figure 1229: NETMAT edge (100) 0073

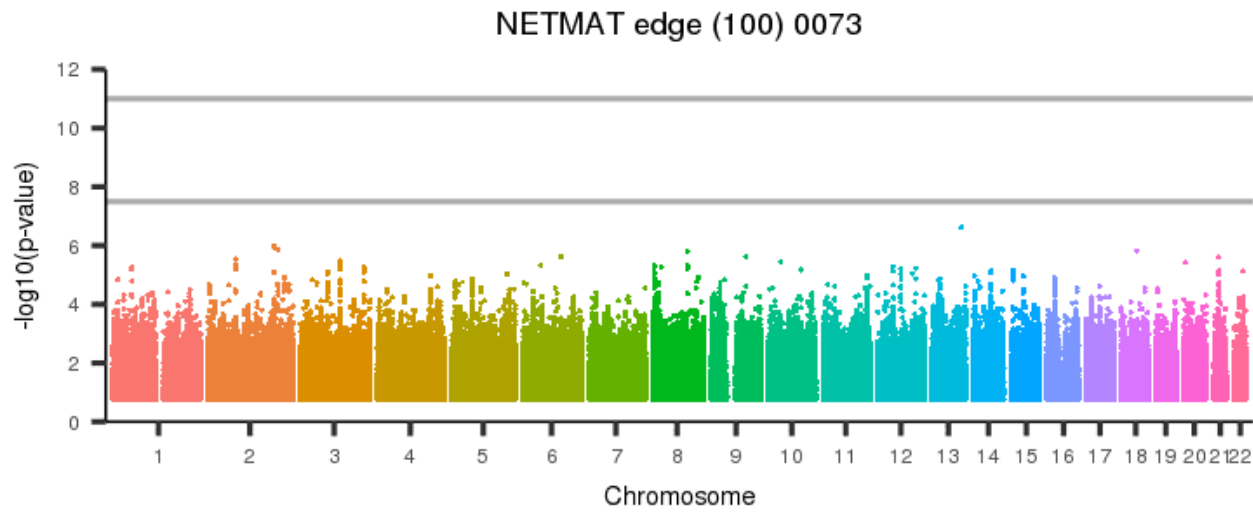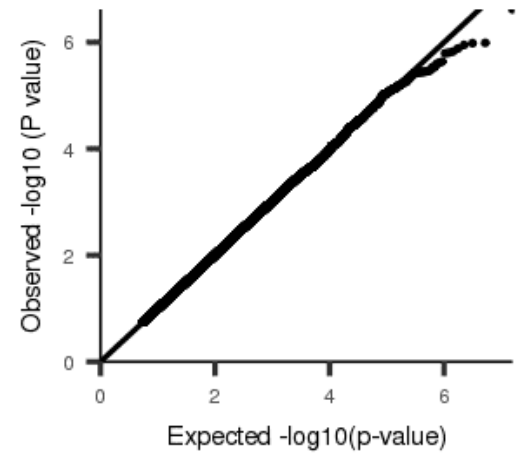

[back to list of plots](#)



Figure 1230: NETMAT edge (100) 0074

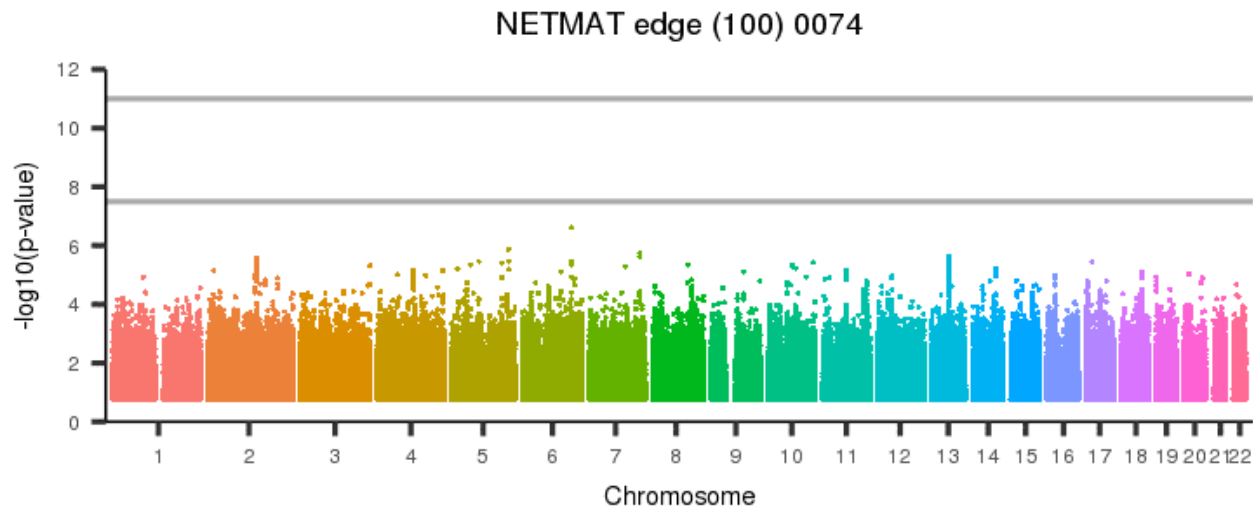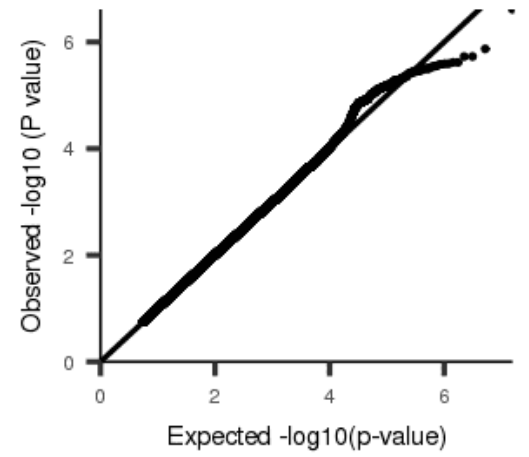

[back to list of plots](#)

Figure 1231: NETMAT edge (100) 0075

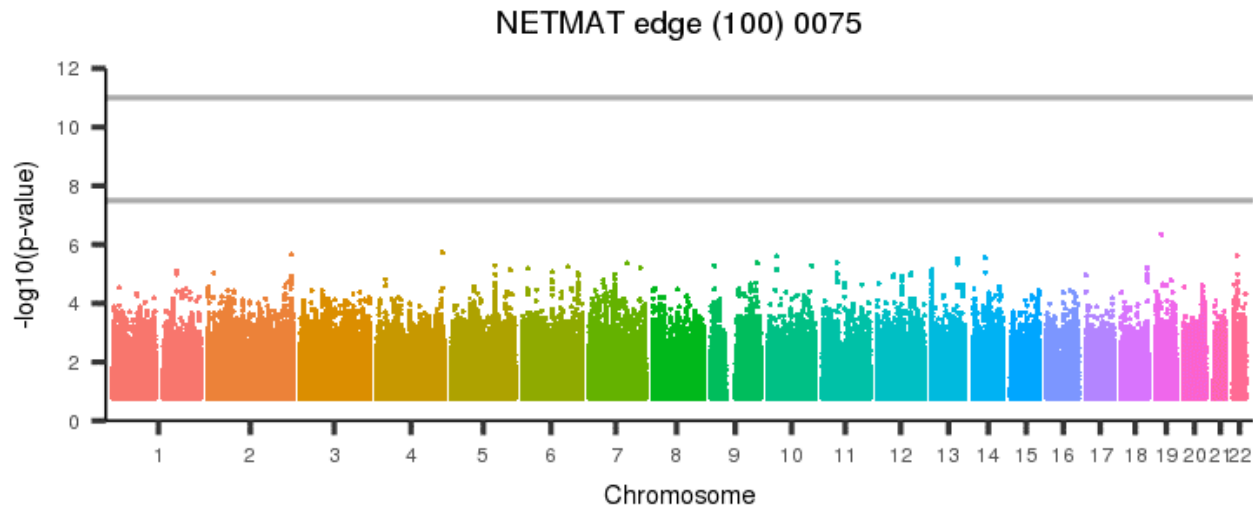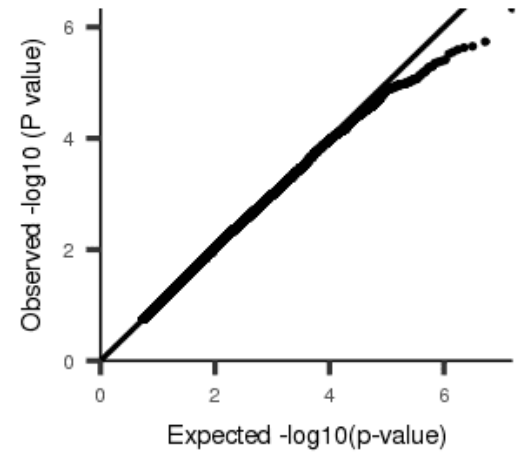

[back to list of plots](#)

Figure 1232: NETMAT edge (100) 0076

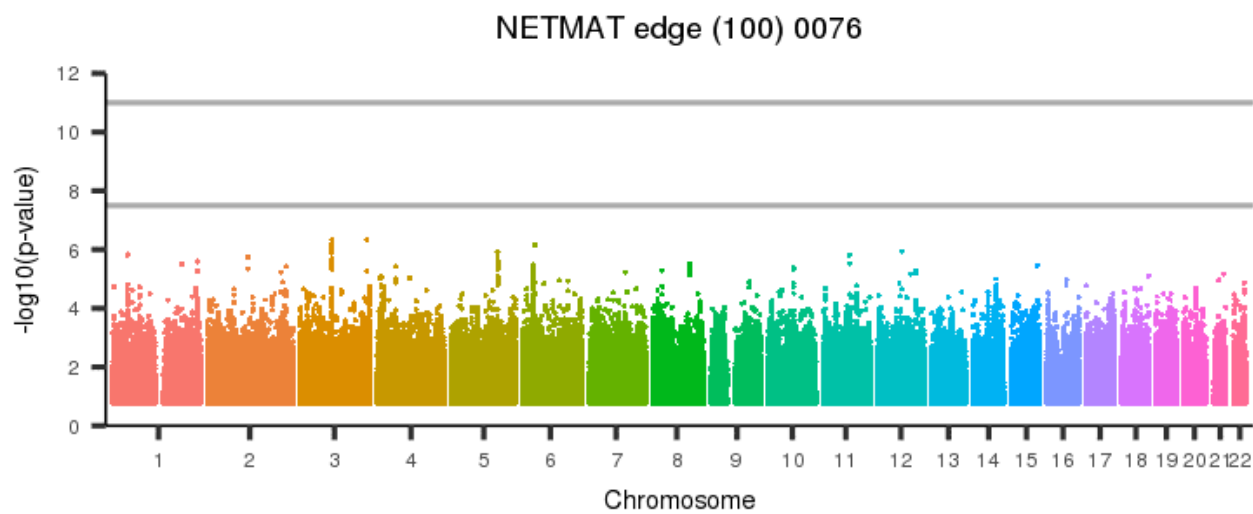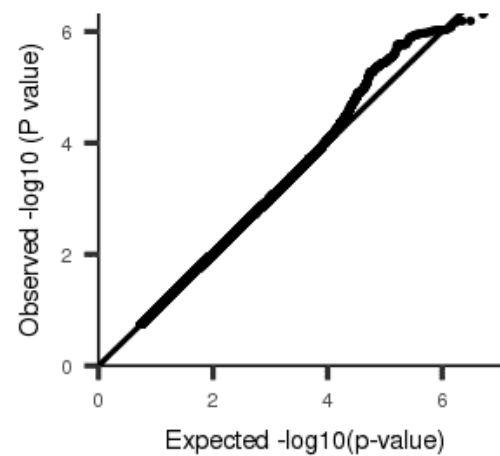

[back to list of plots](#)

Figure 1233: NETMAT edge (100) 0077

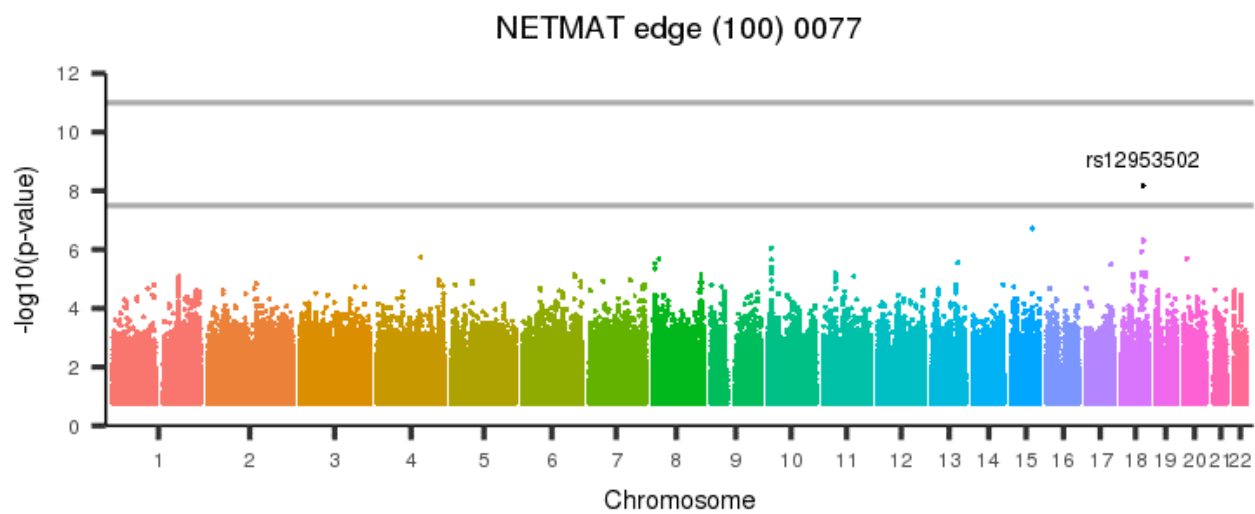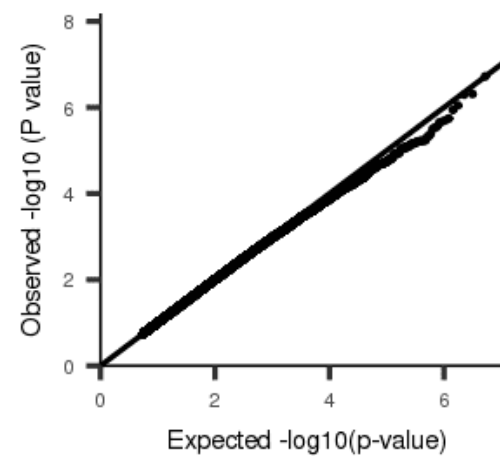

[back to list of plots](#)

Figure 1234: NETMAT edge (100) 0078

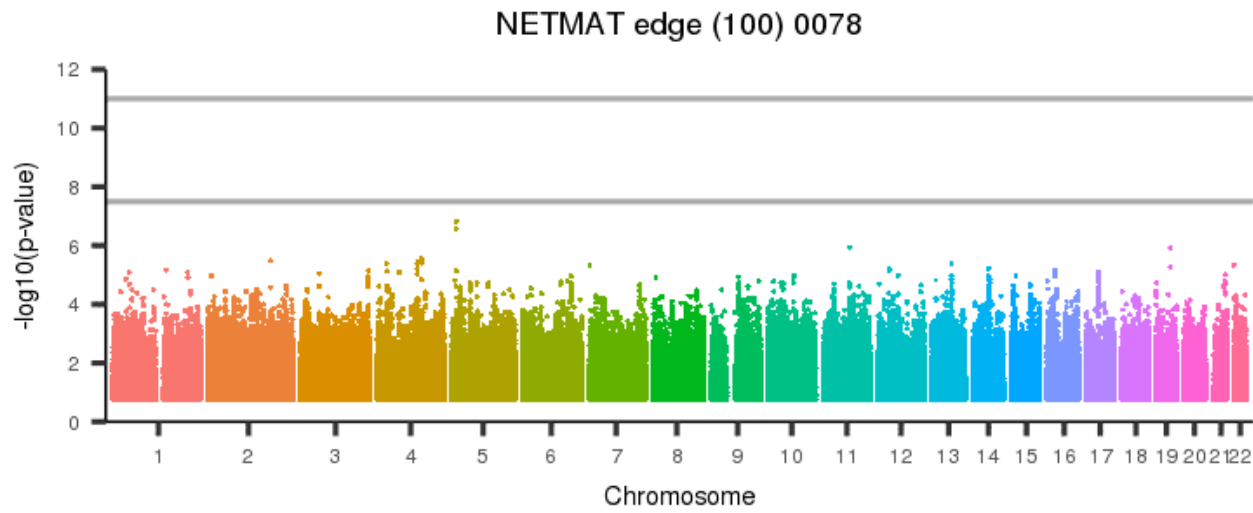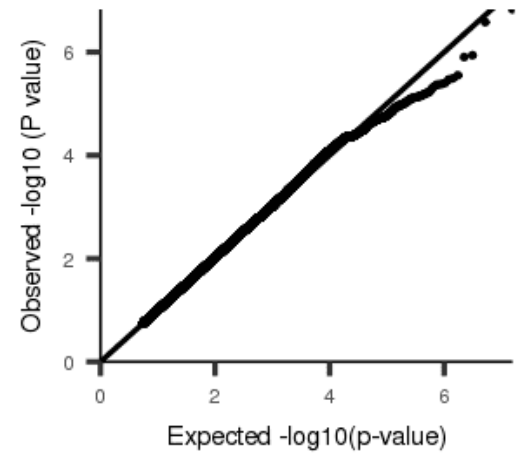

[back to list of plots](#)

Figure 1235: NETMAT edge (100) 0079

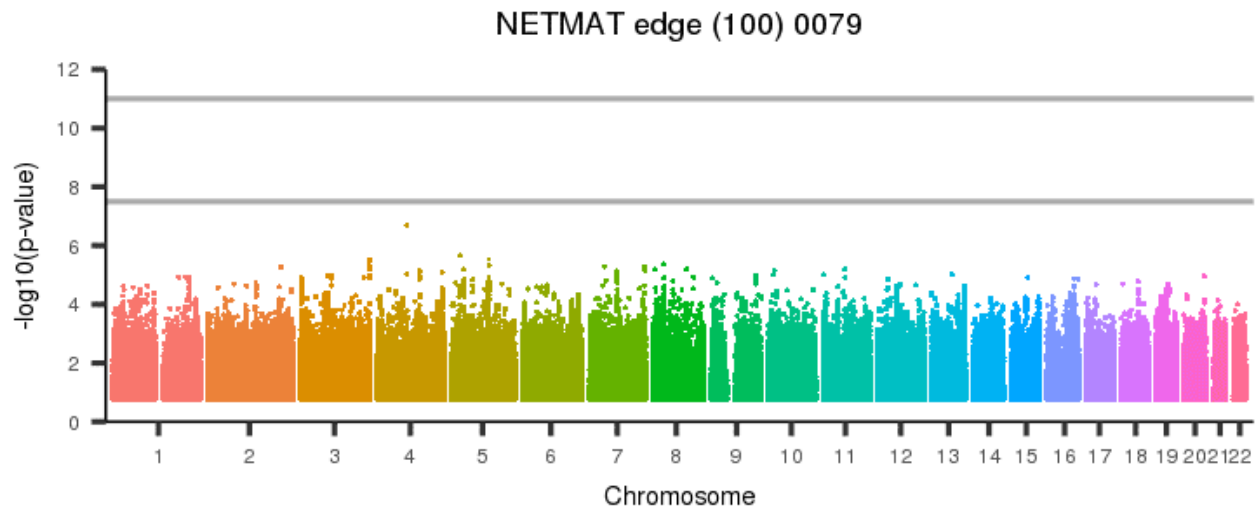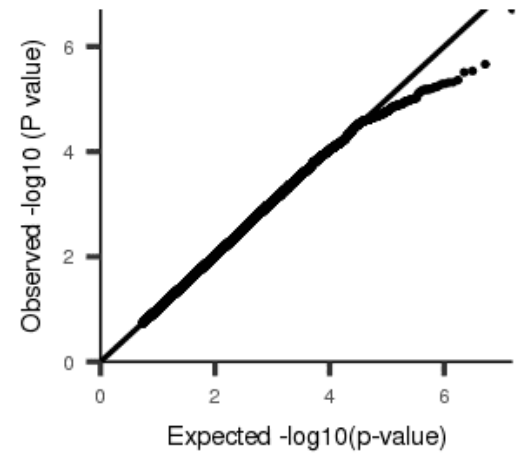

[back to list of plots](#)

Figure 1236: NETMAT edge (100) 0080

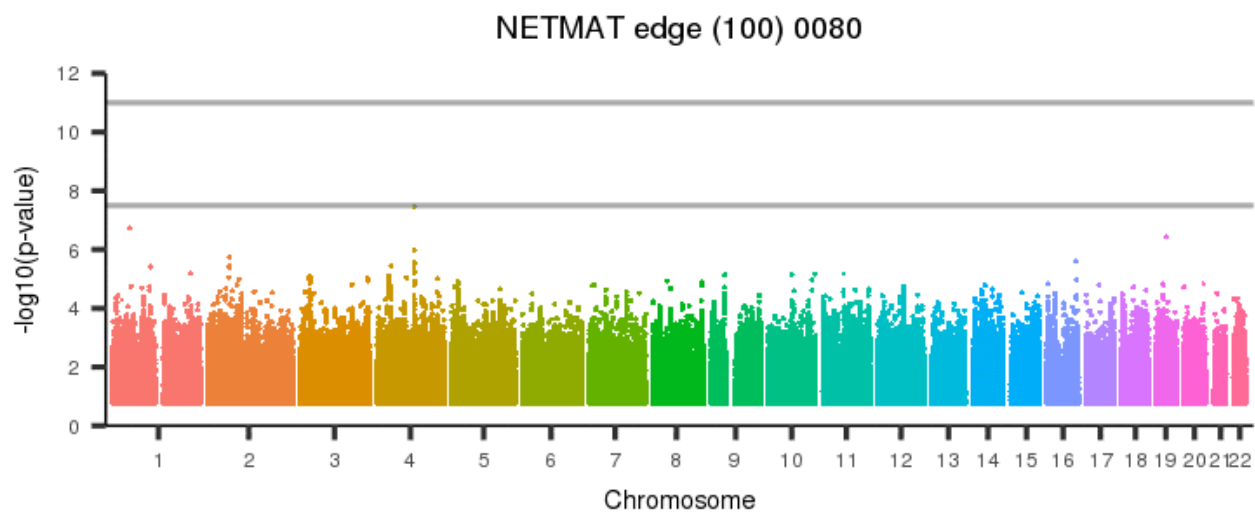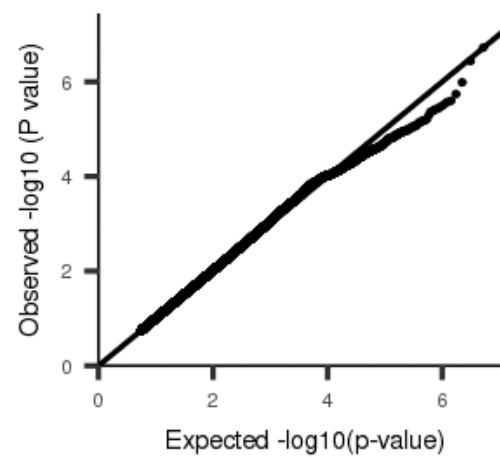

[back to list of plots](#)

Figure 1237: NETMAT edge (100) 0081

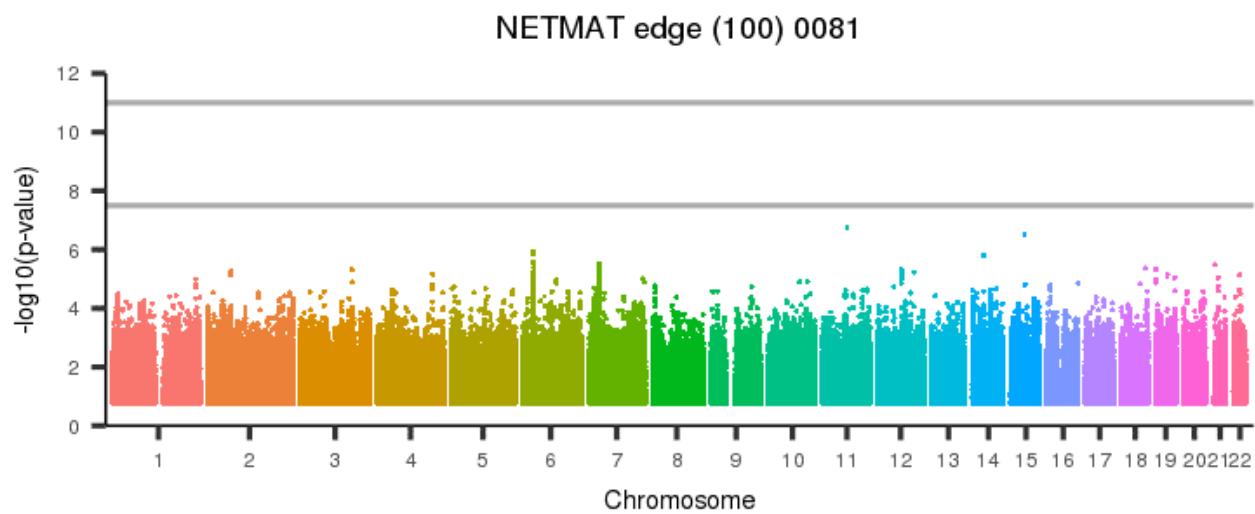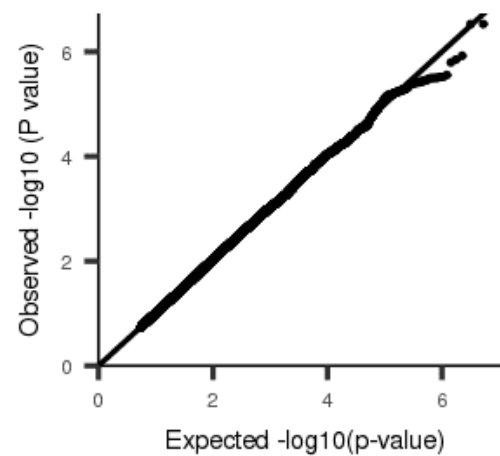

[back to list of plots](#)



Figure 1238: NETMAT edge (100) 0082

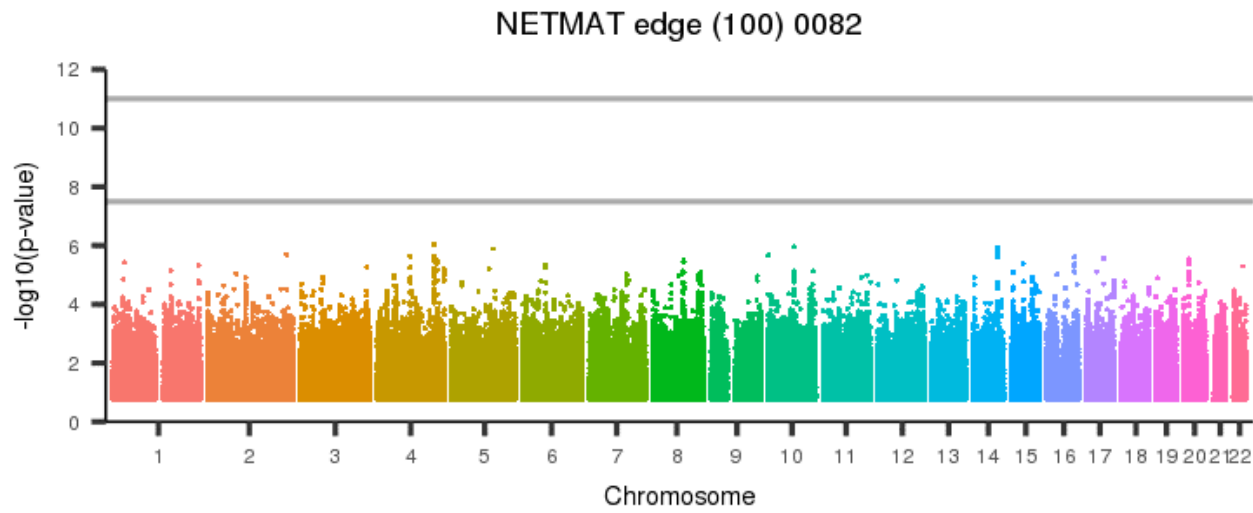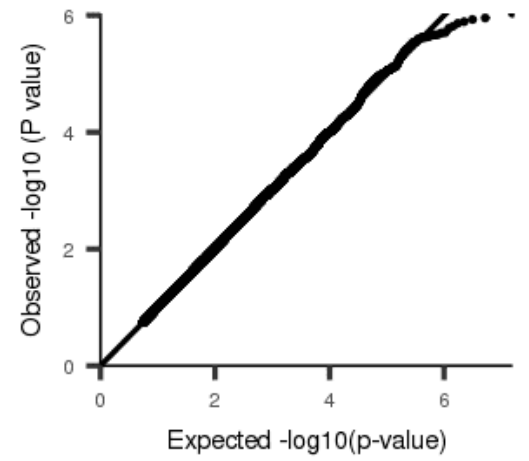

[back to list of plots](#)

Figure 1239: NETMAT edge (100) 0083

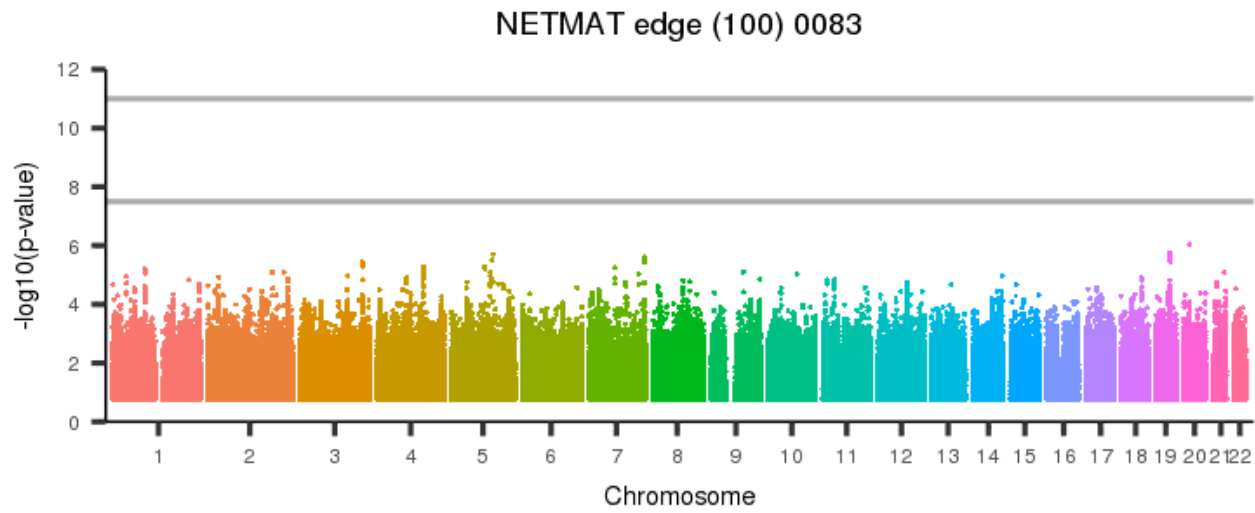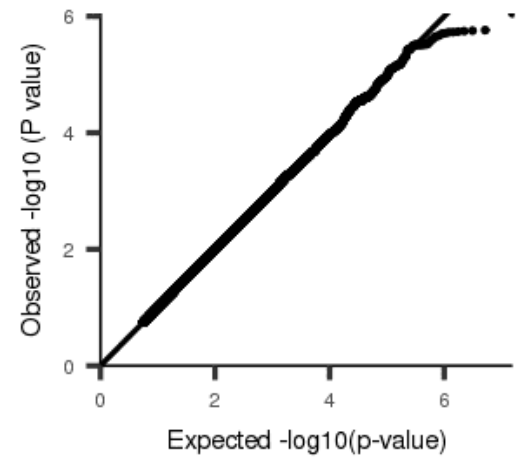

[back to list of plots](#)

Figure 1240: NETMAT edge (100) 0084

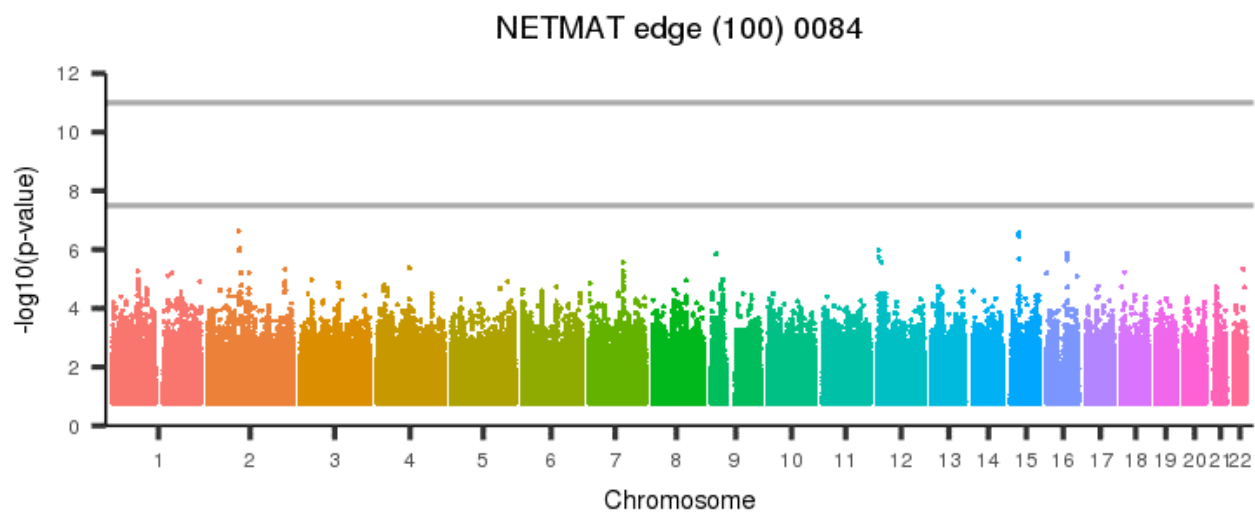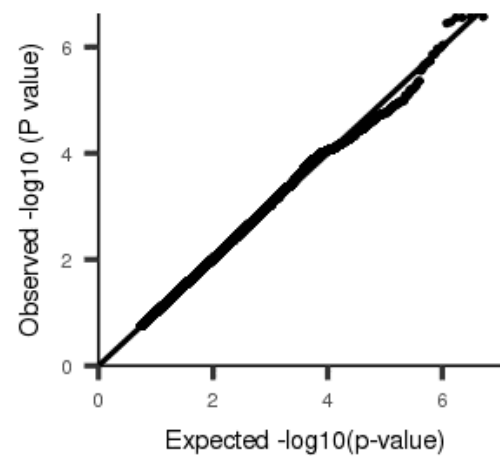

[back to list of plots](#)

Figure 1241: NETMAT edge (100) 0085

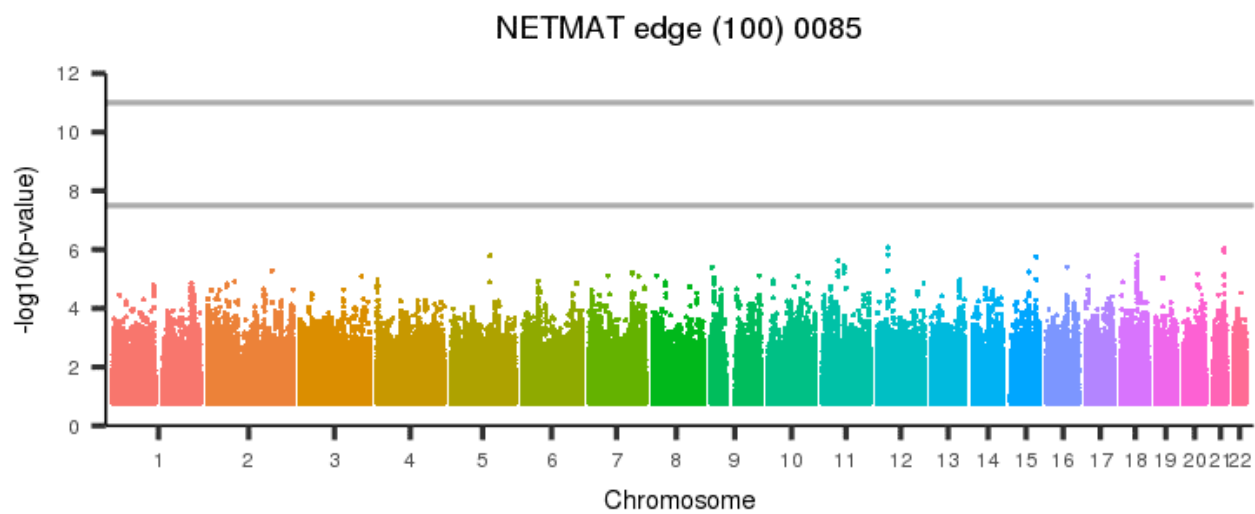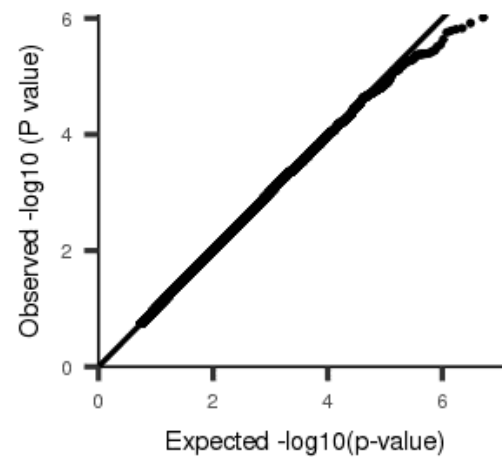

[back to list of plots](#)

Figure 1242: NETMAT edge (100) 0086

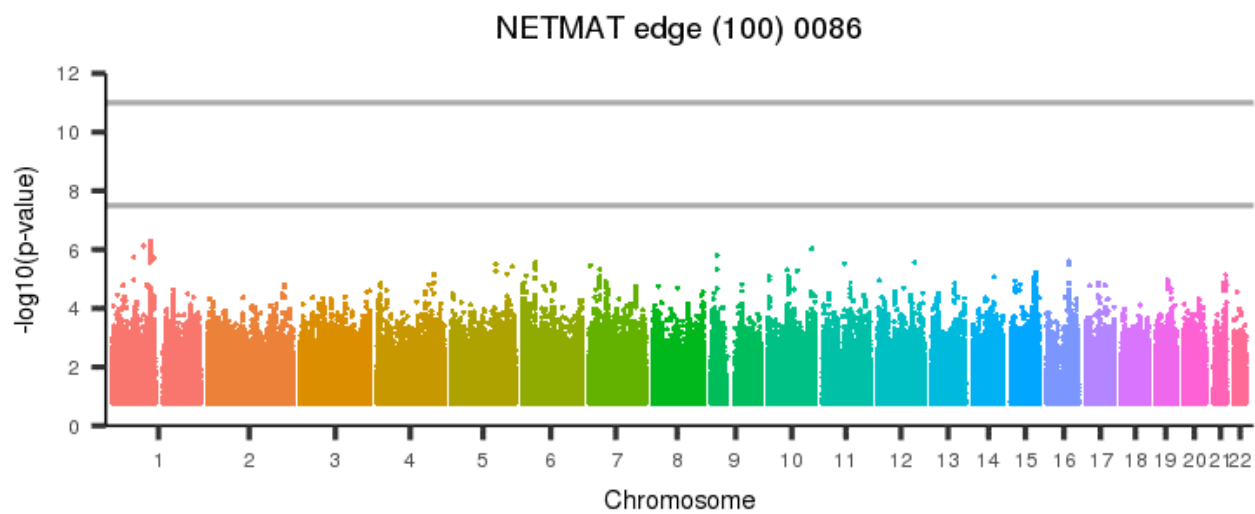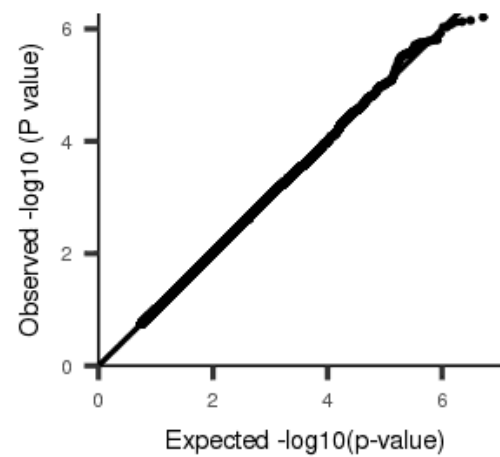

[back to list of plots](#)

Figure 1243: NETMAT edge (100) 0087

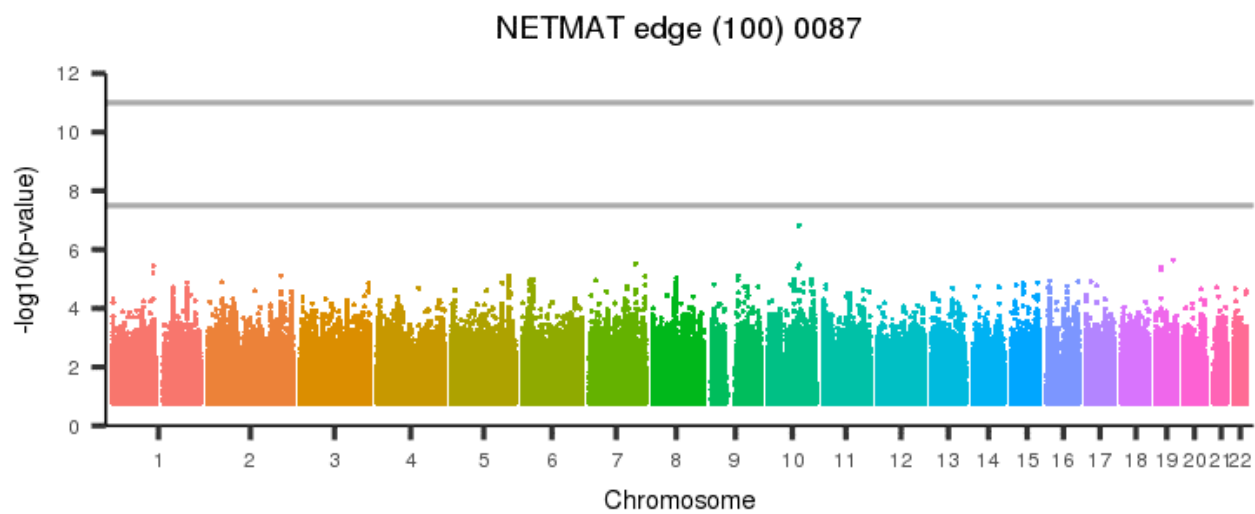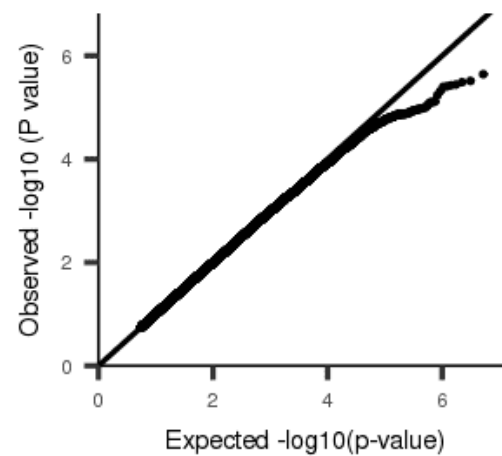

[back to list of plots](#)

Figure 1244: NETMAT edge (100) 0088

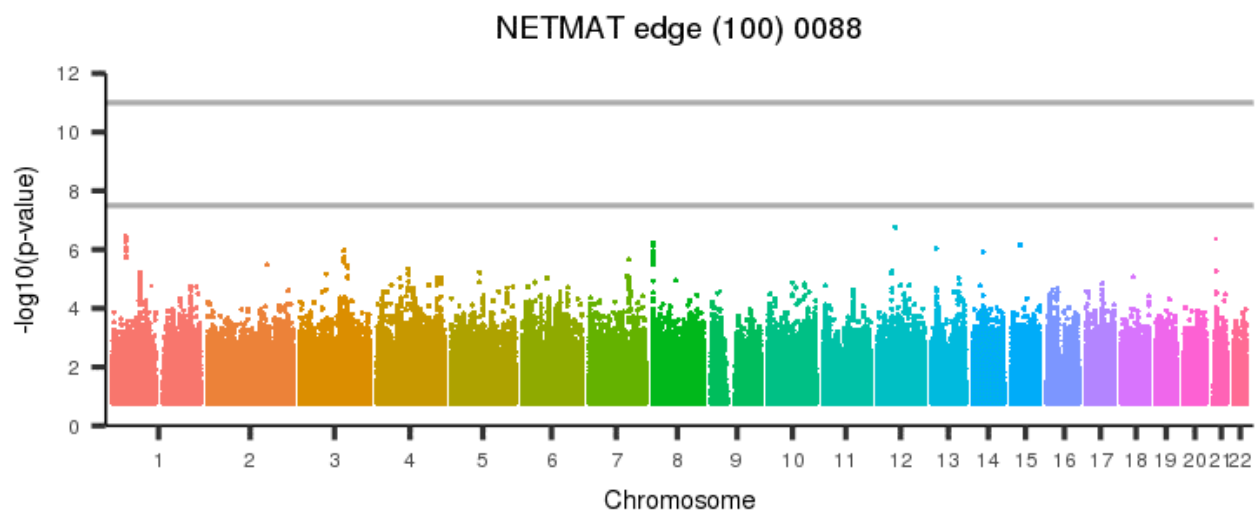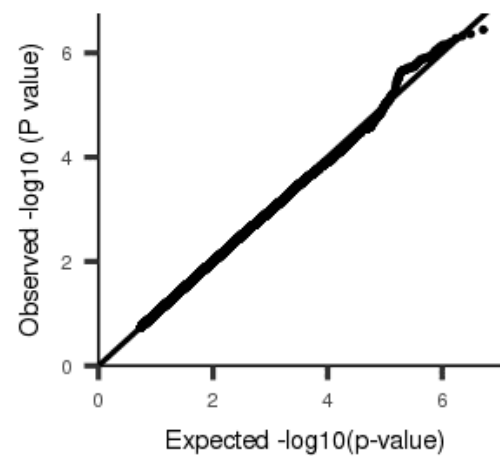

[back to list of plots](#)

Figure 1245: NETMAT edge (100) 0089

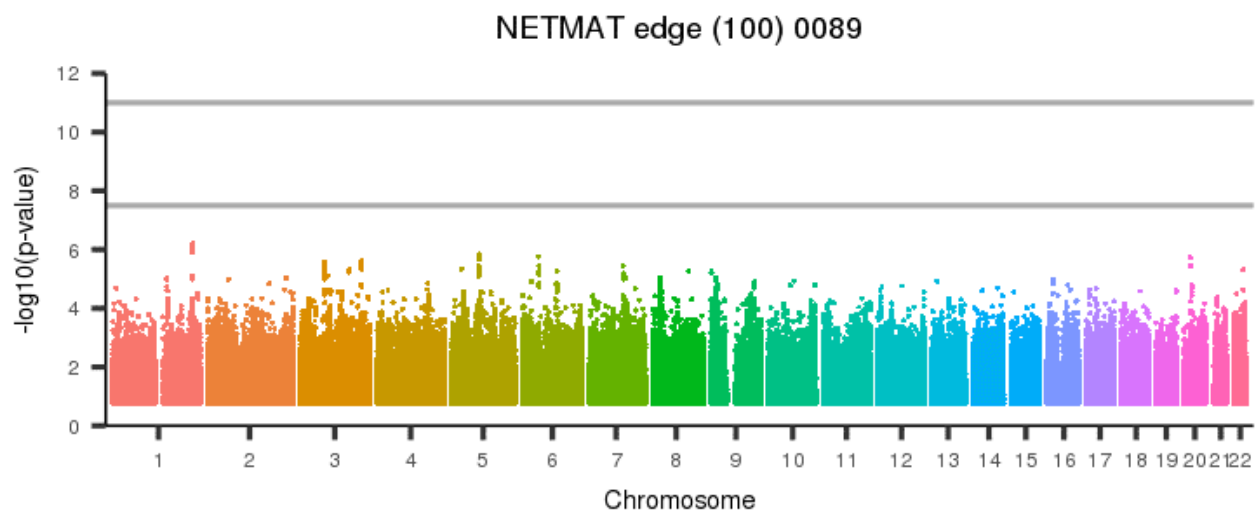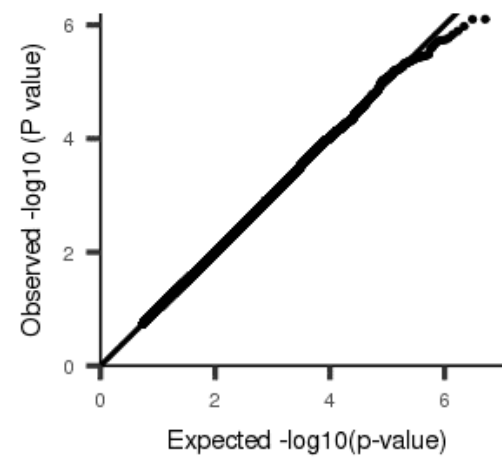

[back to list of plots](#)



Figure 1246: NETMAT edge (100) 0090

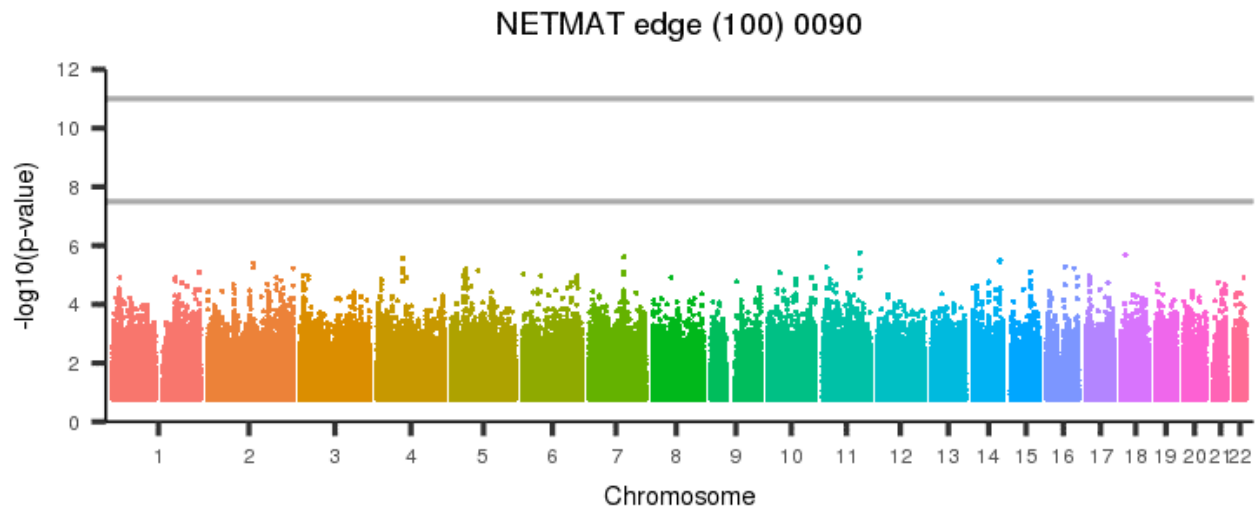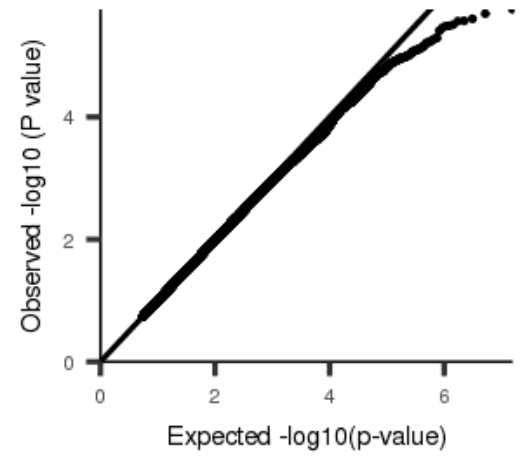

[back to list of plots](#)

Figure 1247: NETMAT edge (100) 0091

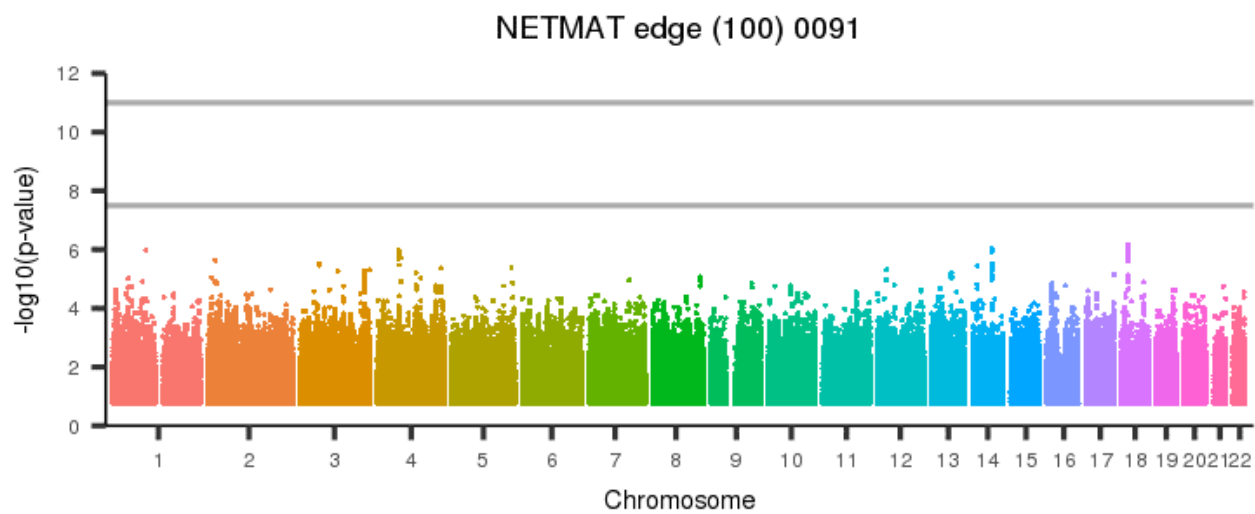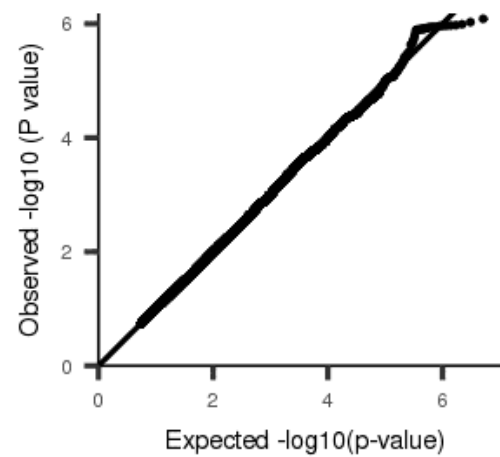

[back to list of plots](#)

Figure 1248: NETMAT edge (100) 0092

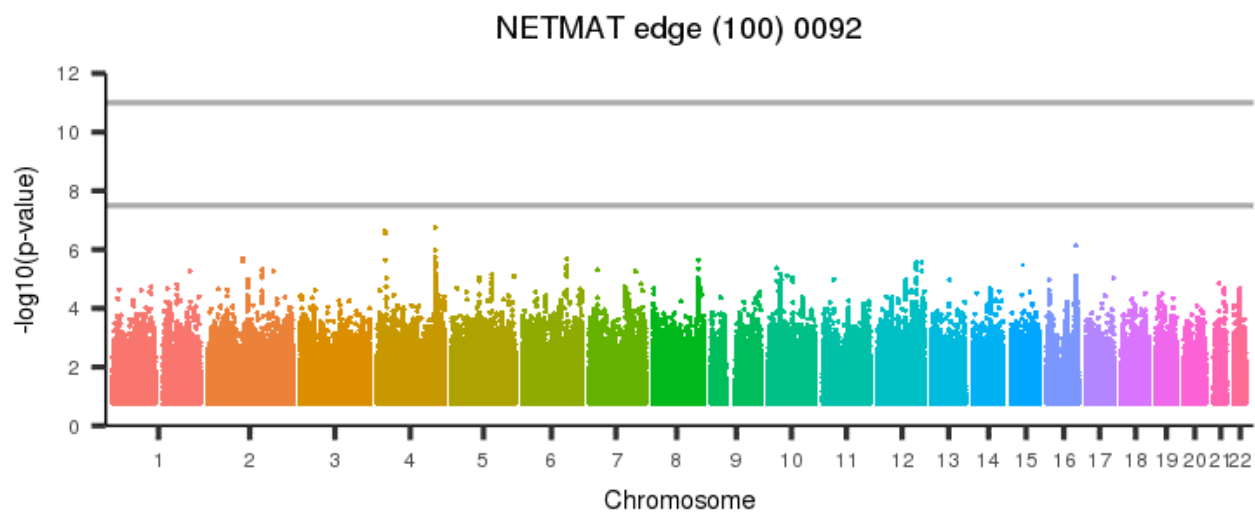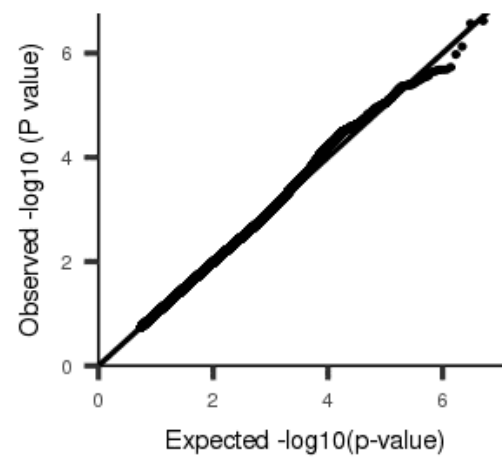

[back to list of plots](#)

Figure 1249: NETMAT edge (100) 0093

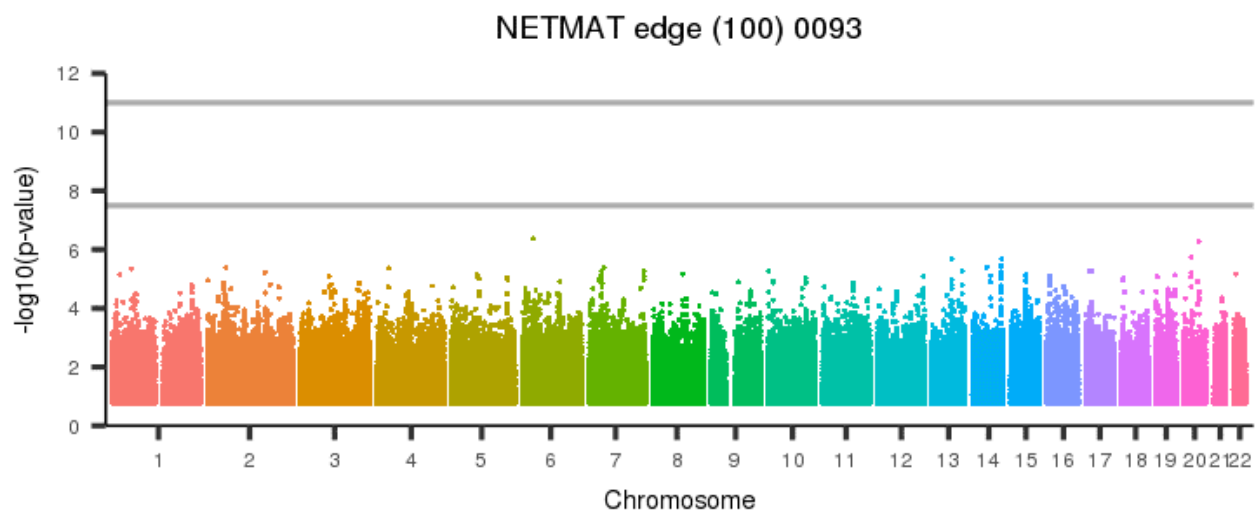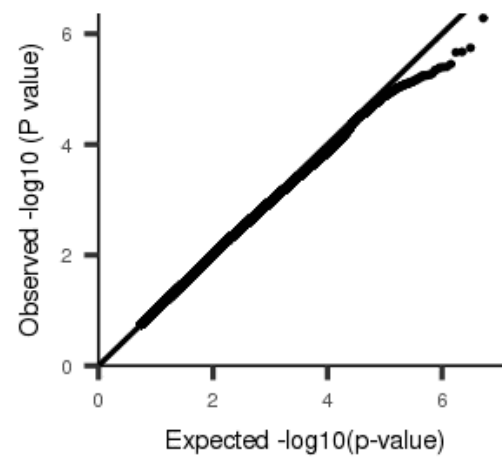

[back to list of plots](#)

Figure 1250: NETMAT edge (100) 0094

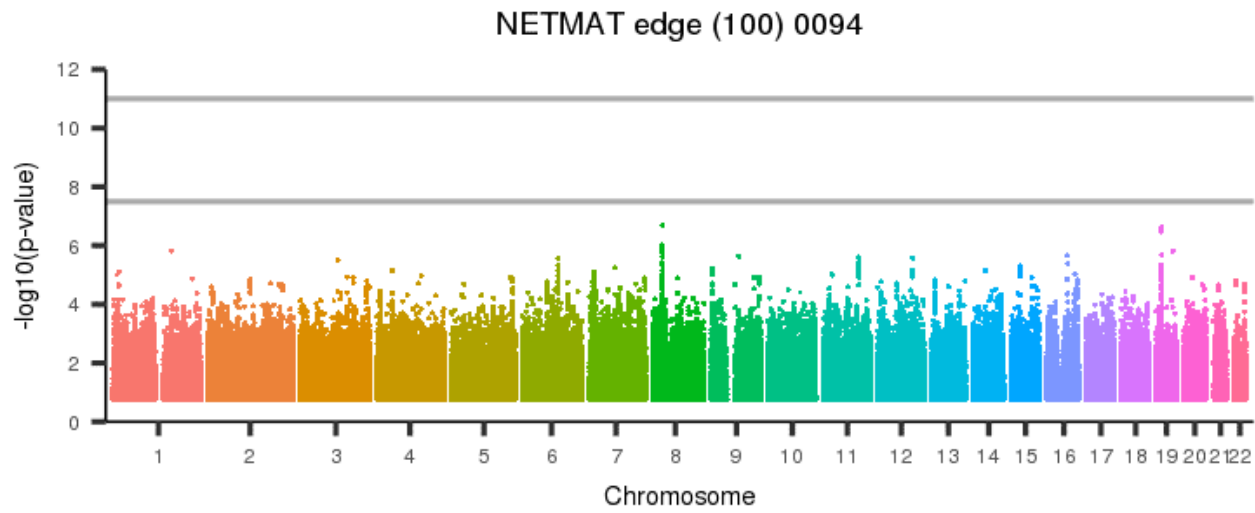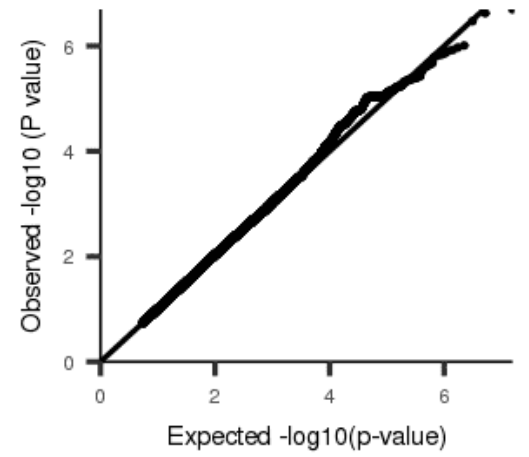

[back to list of plots](#)

Figure 1251: NETMAT edge (100) 0095

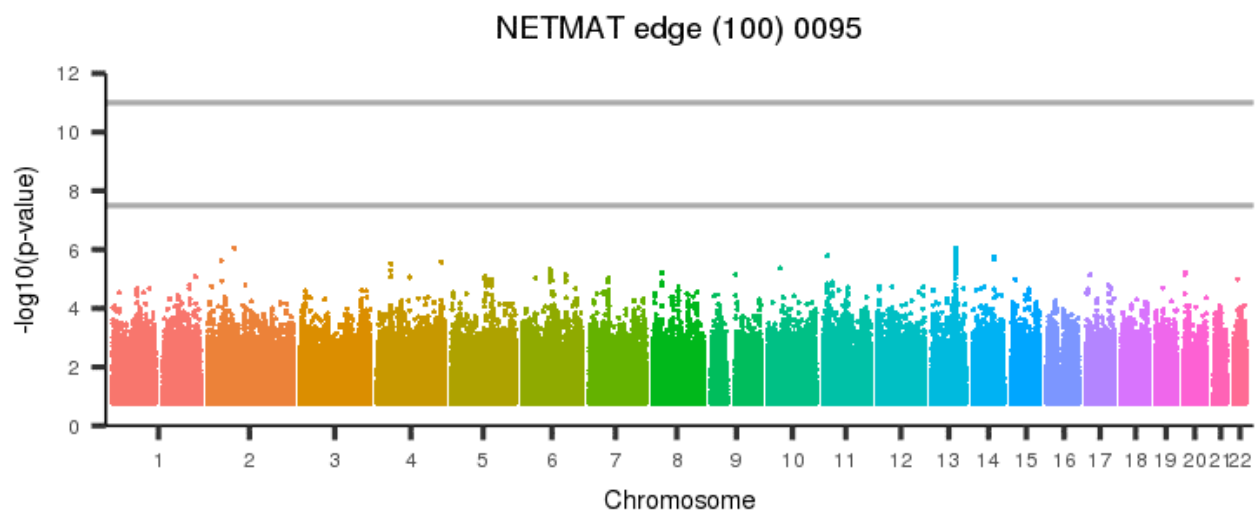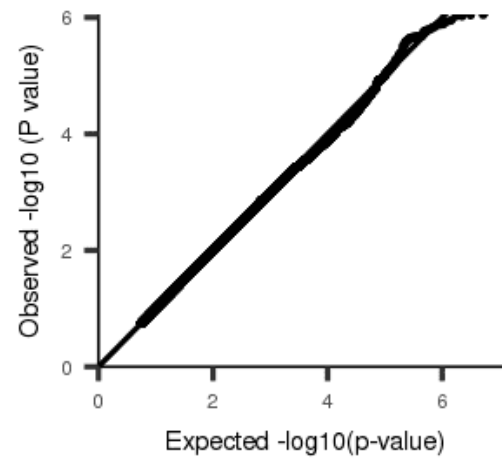

[back to list of plots](#)

Figure 1252: NETMAT edge (100) 0096

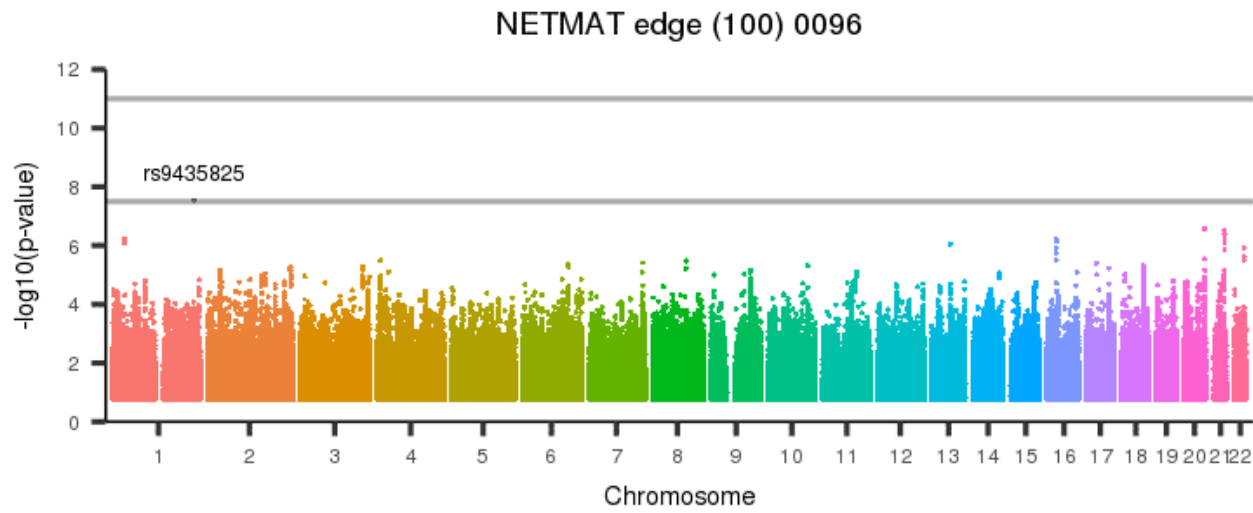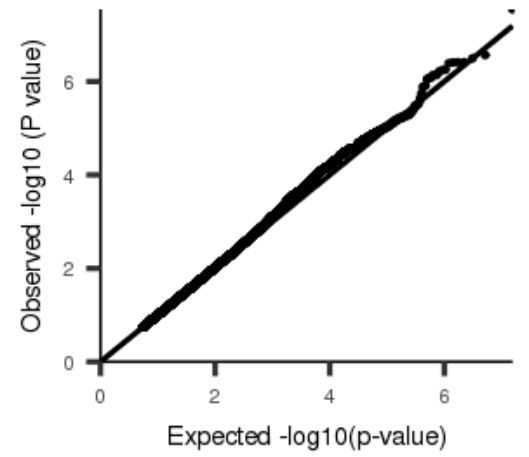

[back to list of plots](#)

Figure 1253: NETMAT edge (100) 0097

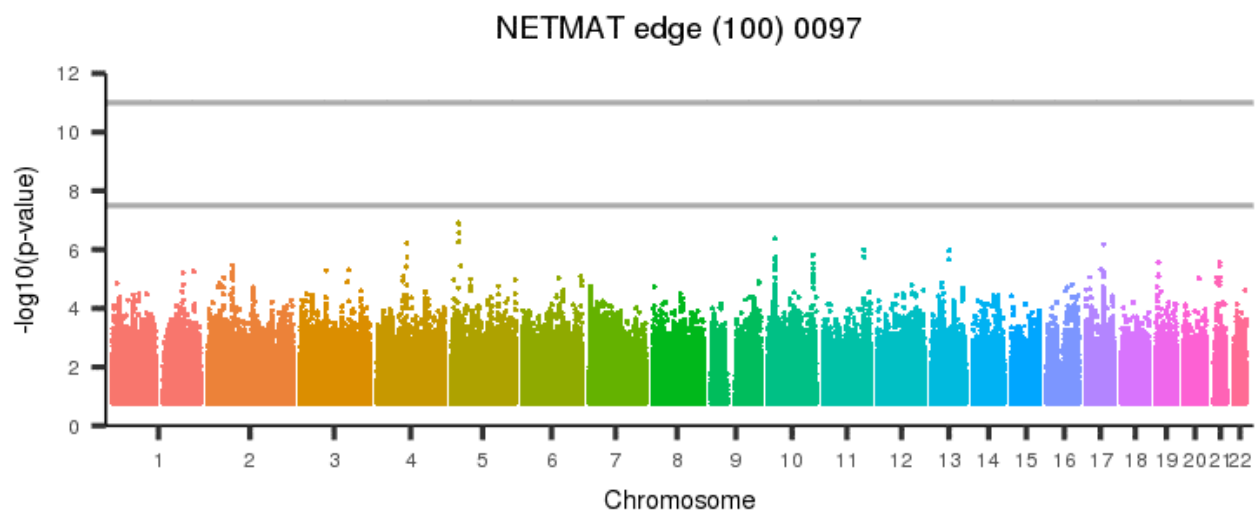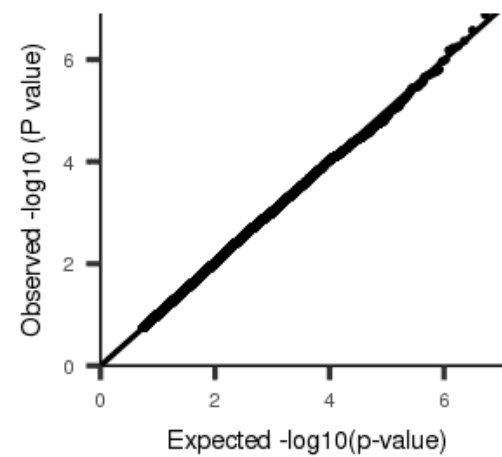

[back to list of plots](#)



Figure 1254: NETMAT edge (100) 0098

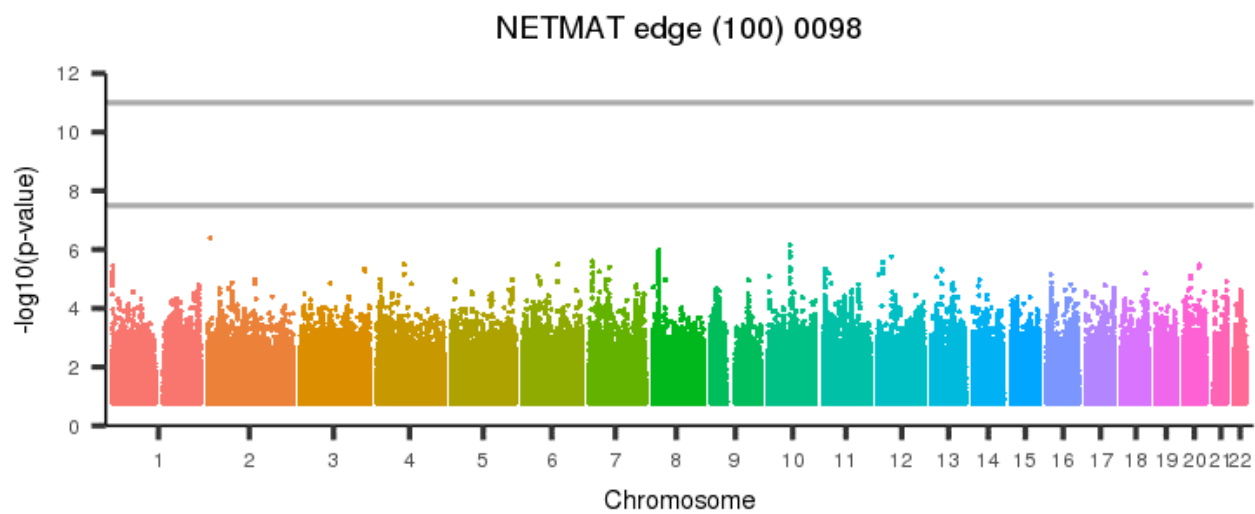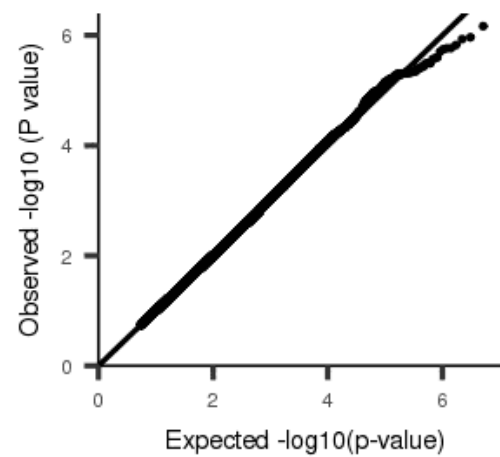

[back to list of plots](#)

Figure 1255: NETMAT edge (100) 0099

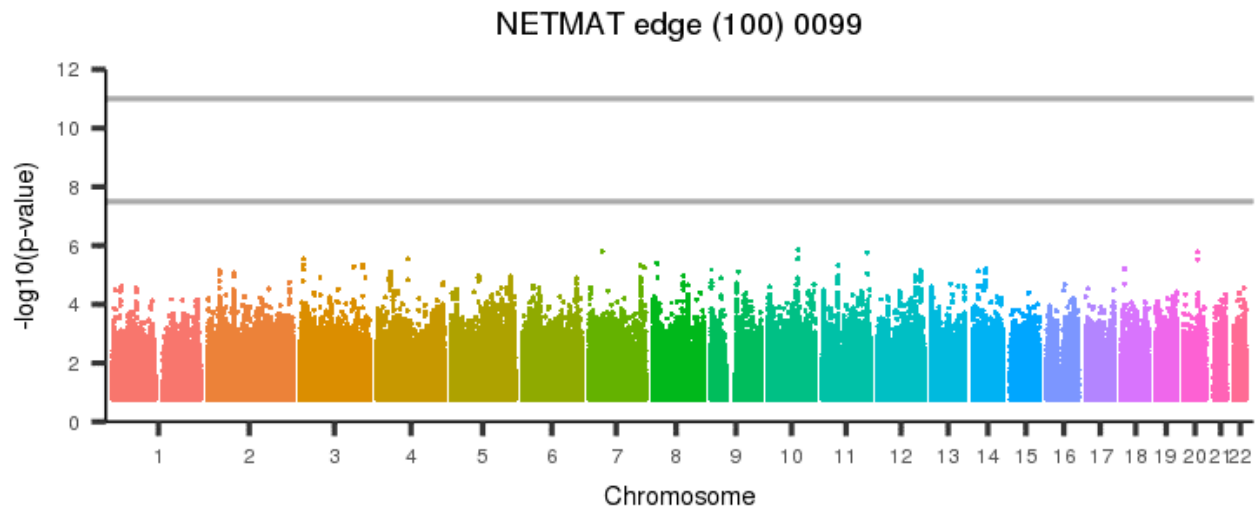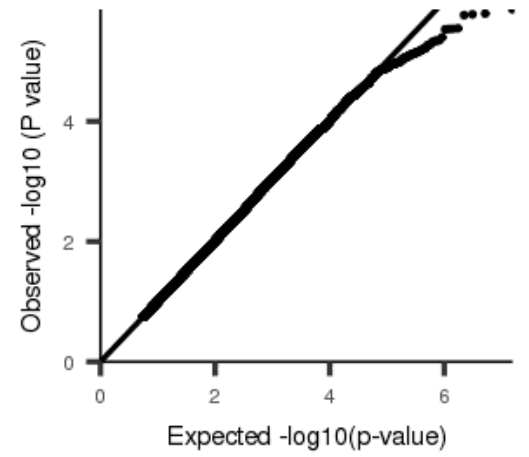

[back to list of plots](#)

Figure 1256: NETMAT edge (100) 0100

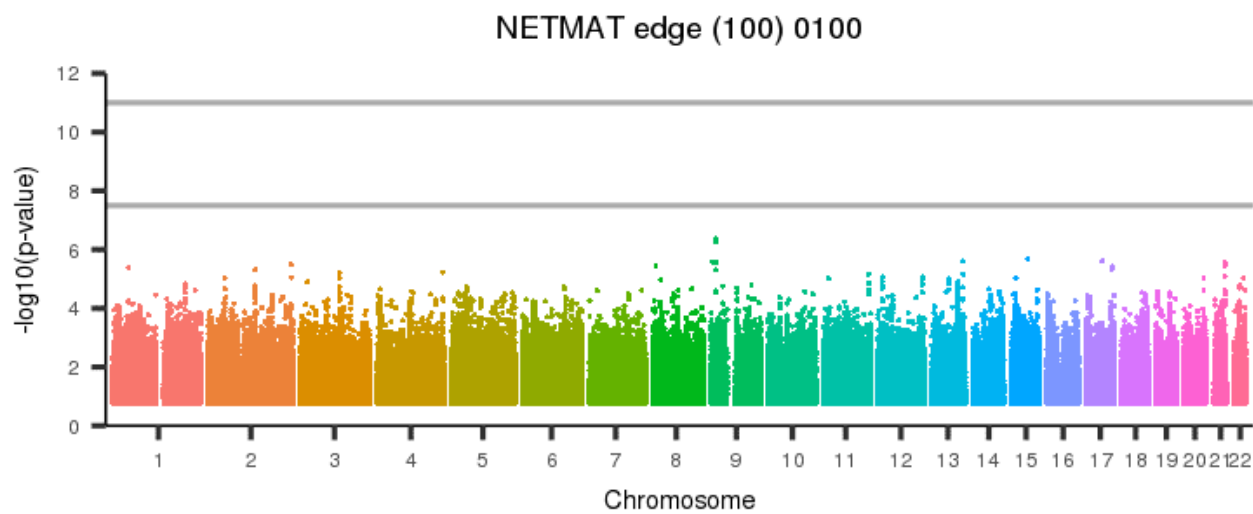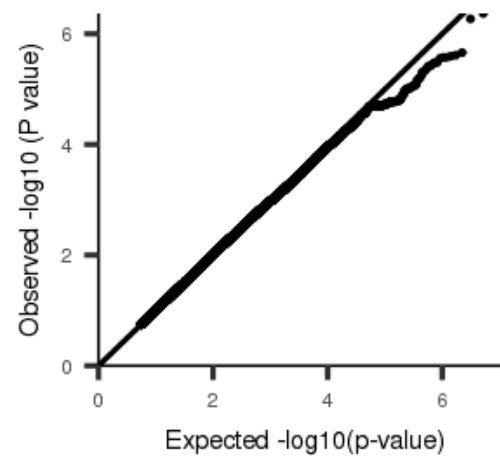

[back to list of plots](#)

Figure 1257: NETMAT edge (100) 0101

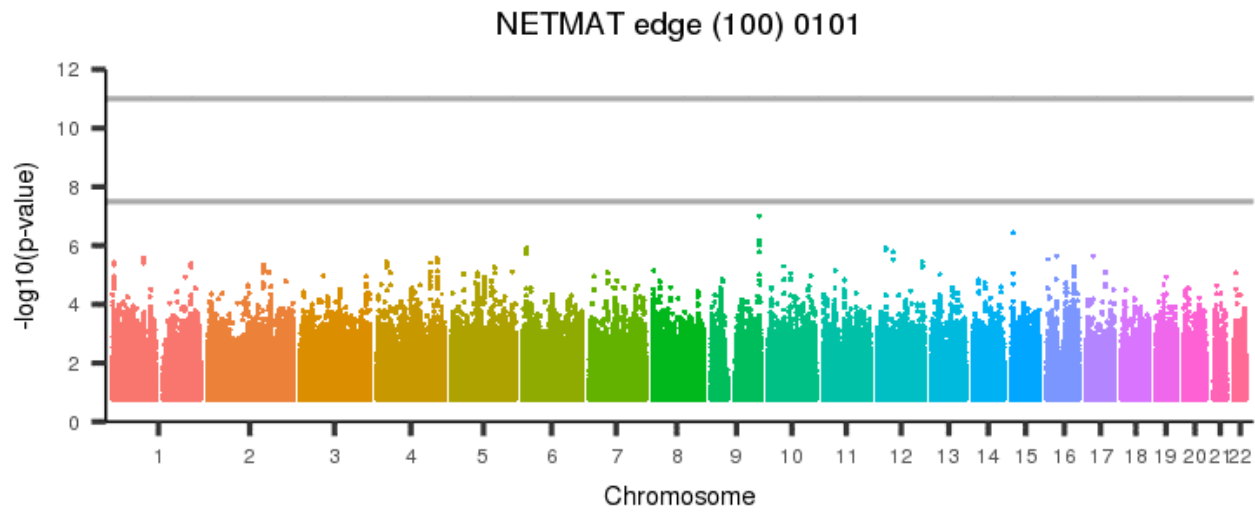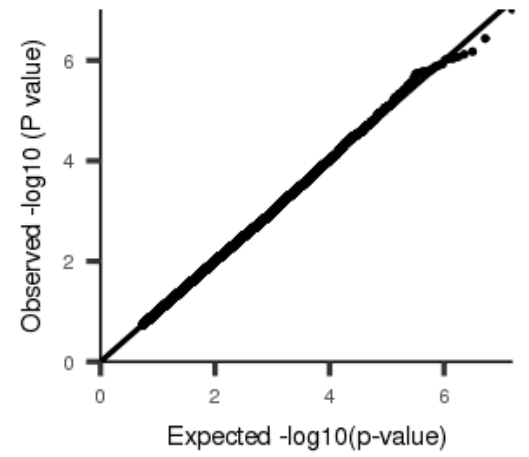

[back to list of plots](#)

Figure 1258: NETMAT edge (100) 0102

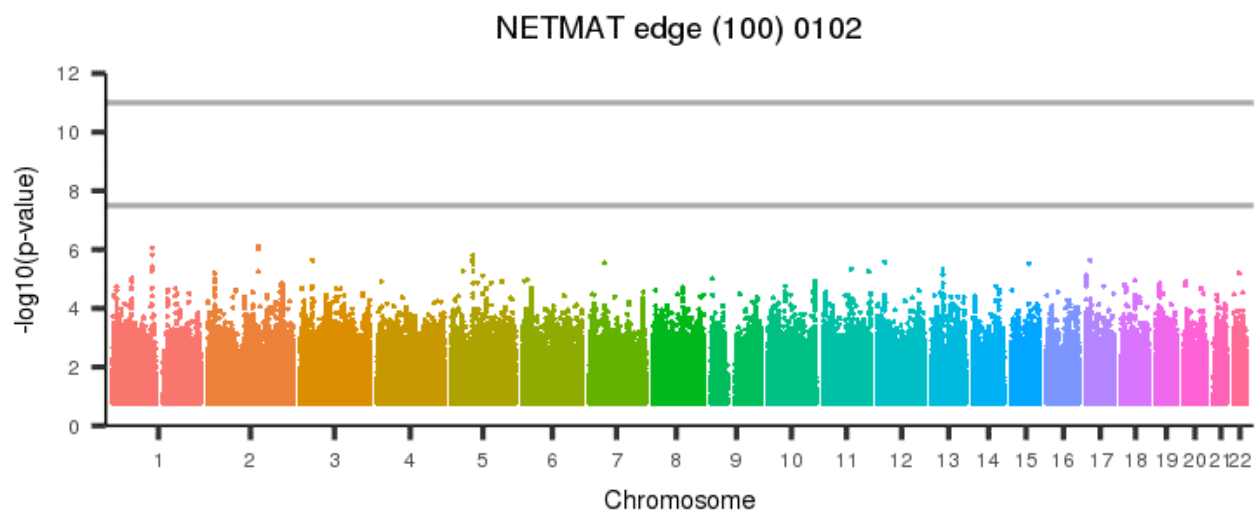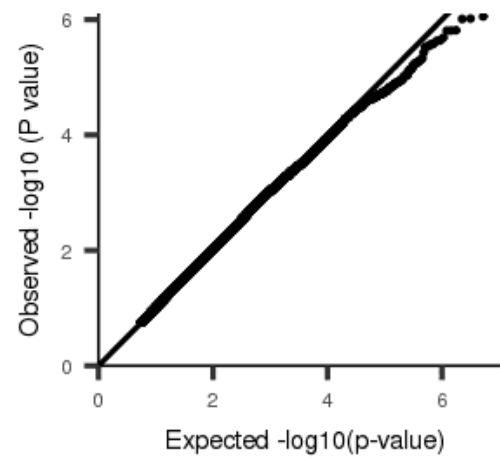

[back to list of plots](#)

Figure 1259: NETMAT edge (100) 0103

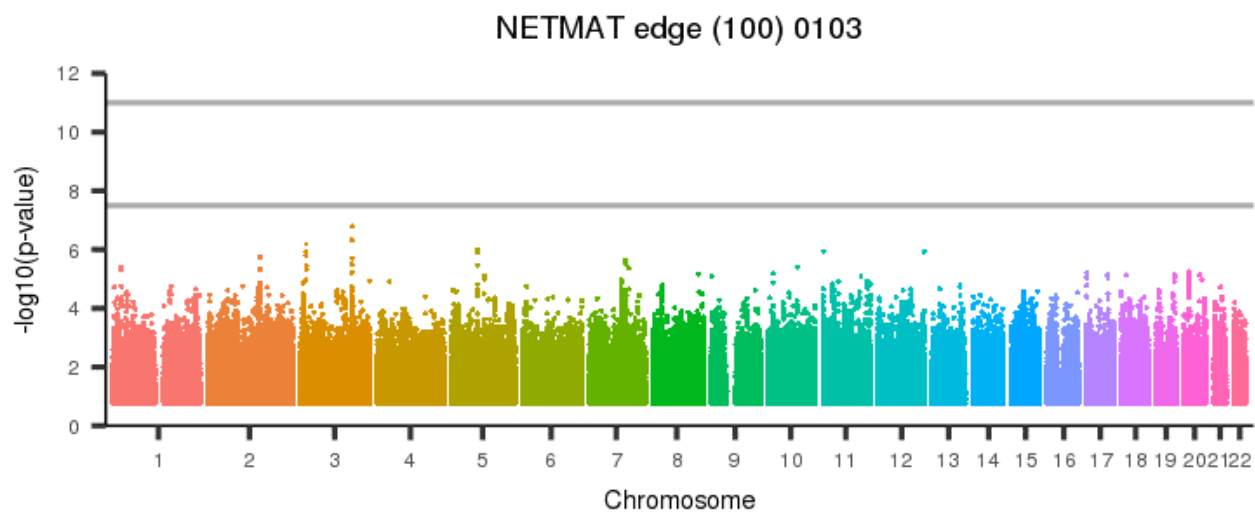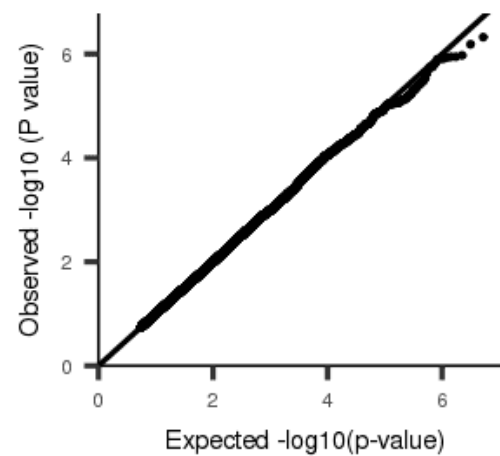

[back to list of plots](#)

Figure 1260: NETMAT edge (100) 0104

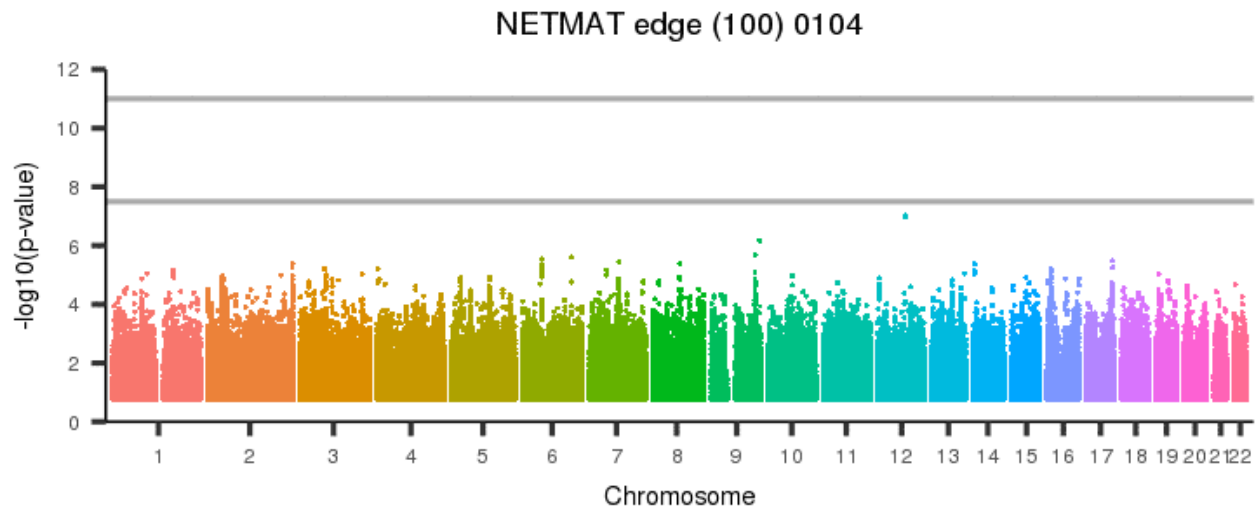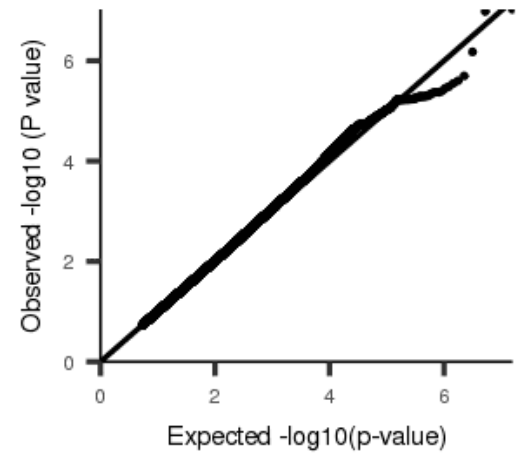

[back to list of plots](#)

Figure 1261: NETMAT edge (100) 0105

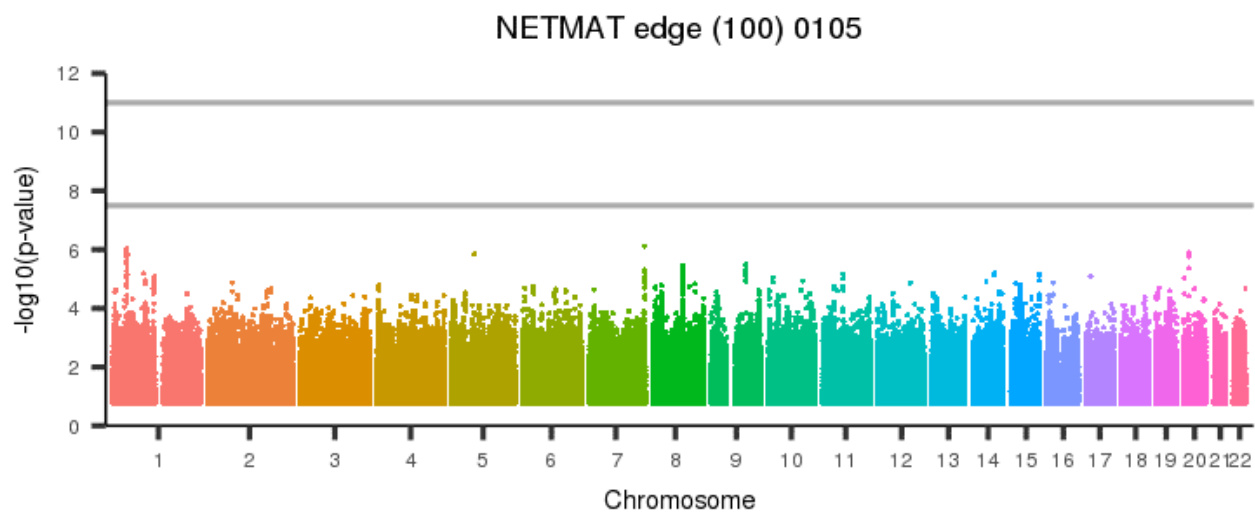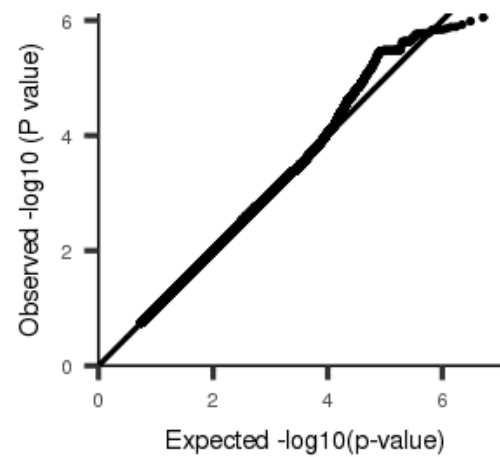

[back to list of plots](#)



Figure 1262: NETMAT edge (100) 0106

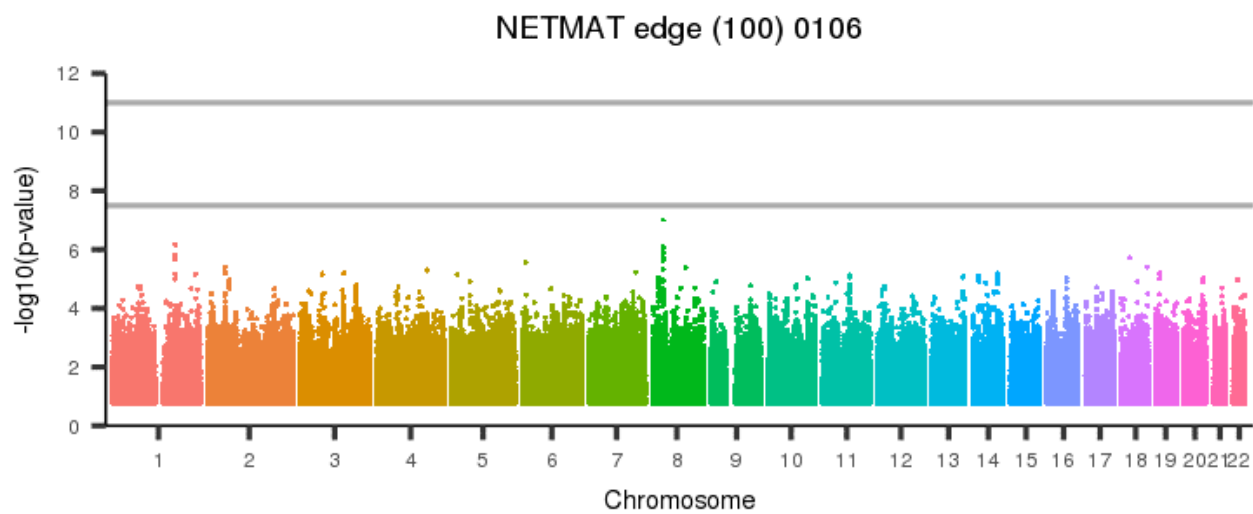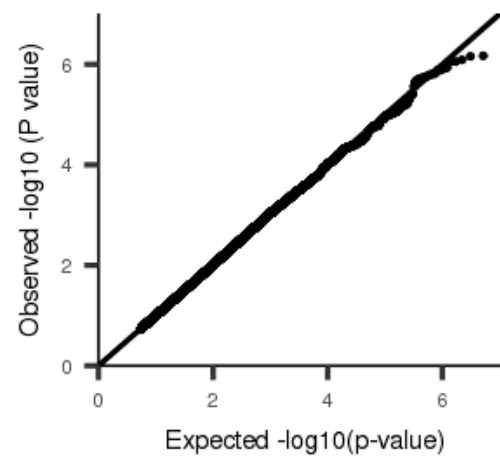

[back to list of plots](#)

Figure 1263: NETMAT edge (100) 0107

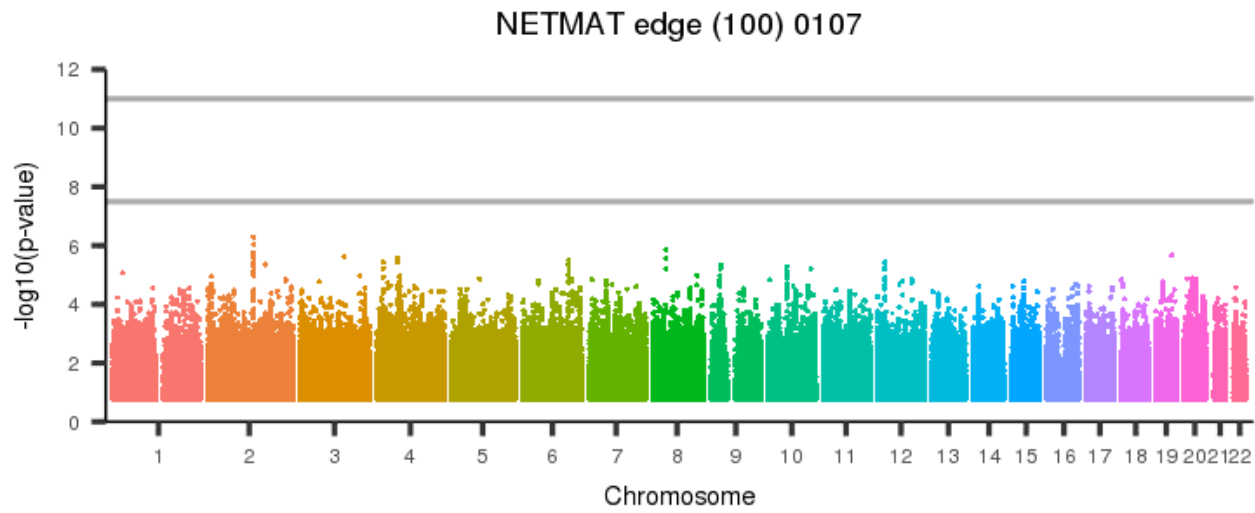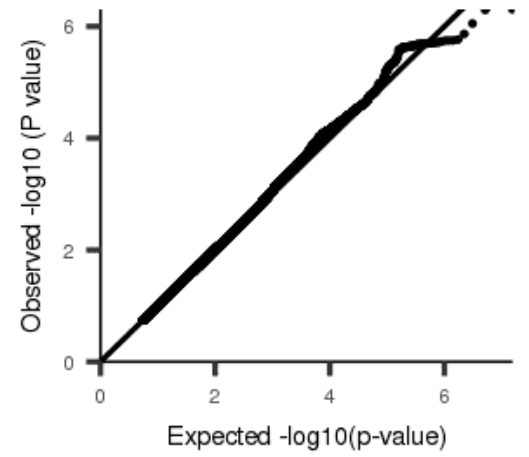

[back to list of plots](#)

Figure 1264: NETMAT edge (100) 0108

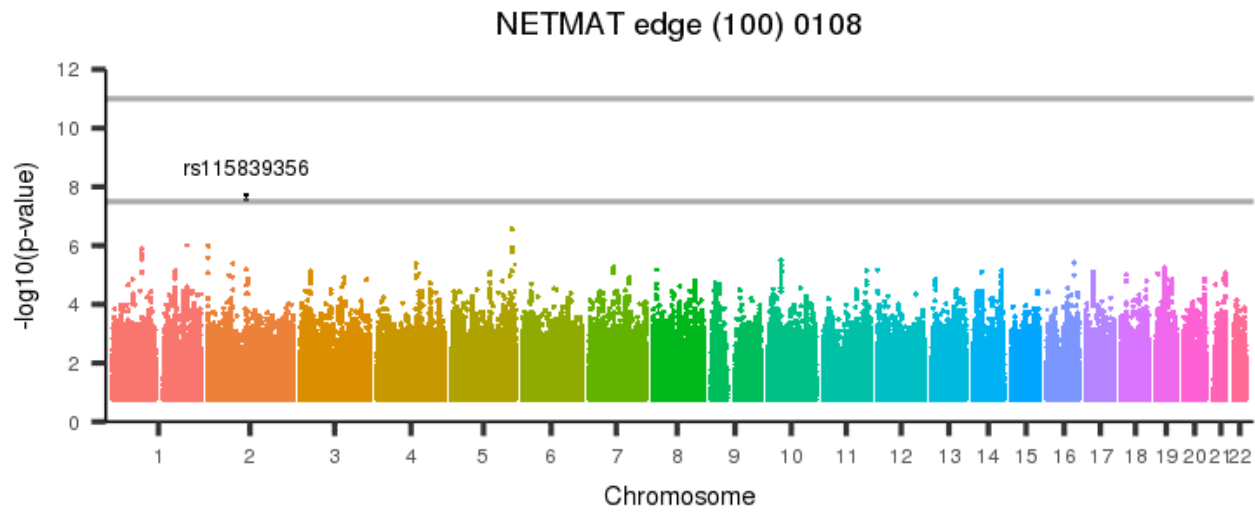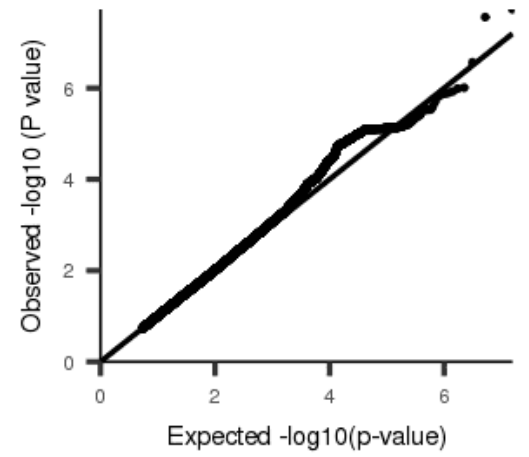

[back to list of plots](#)

Figure 1265: NETMAT edge (100) 0109

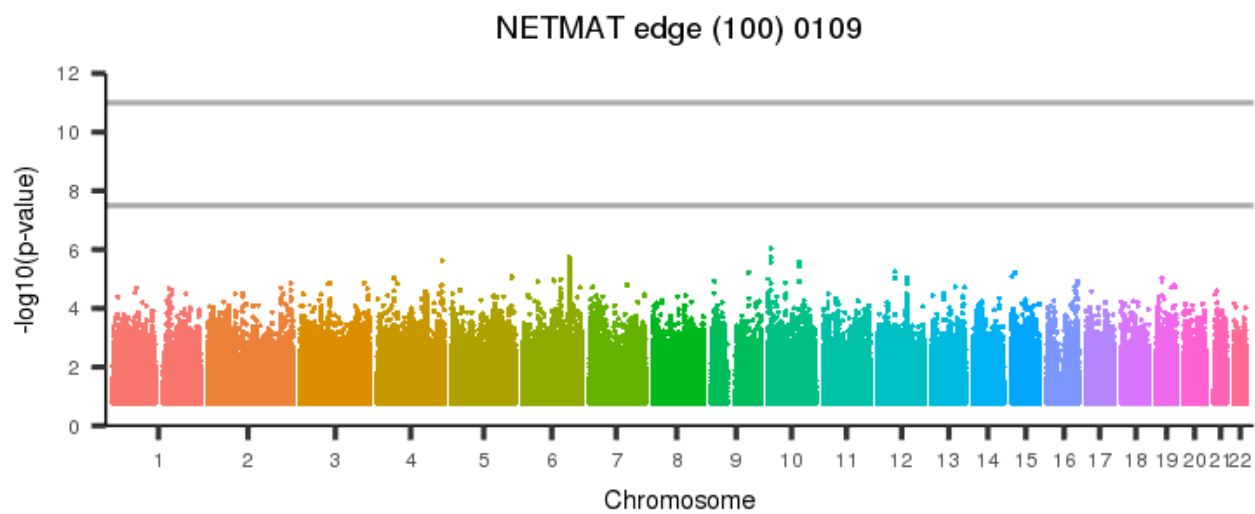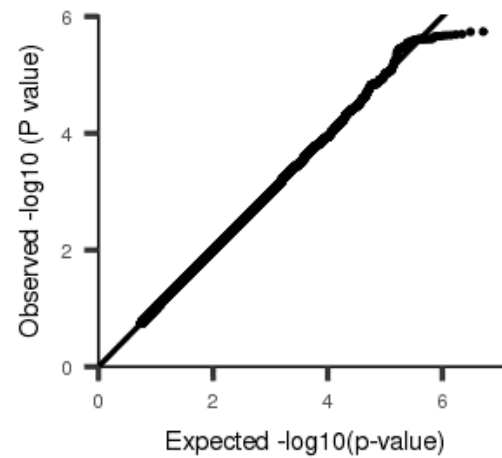

[back to list of plots](#)

Figure 1266: NETMAT edge (100) 0110

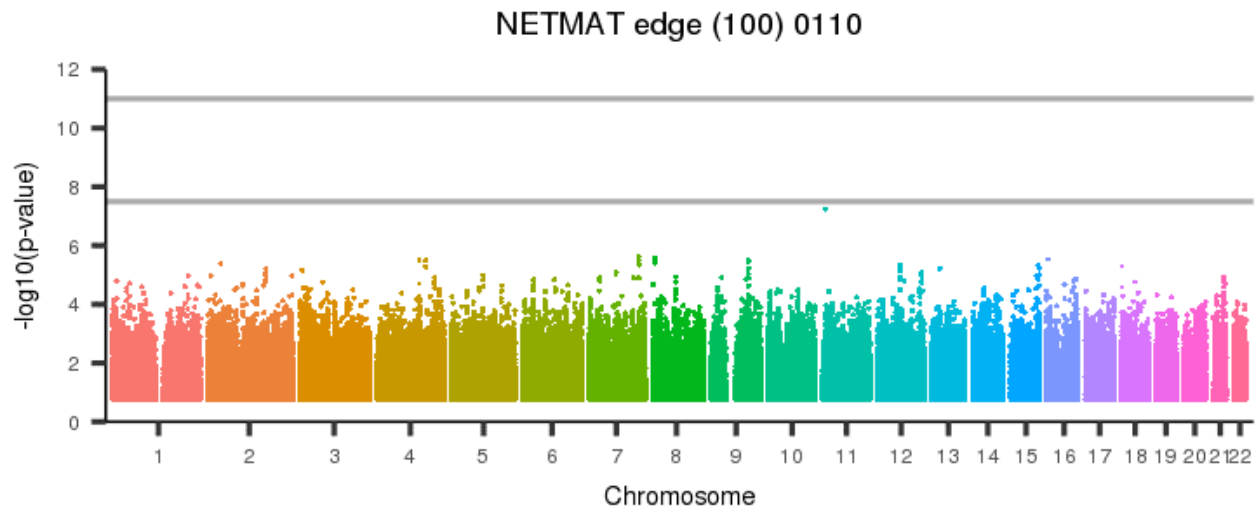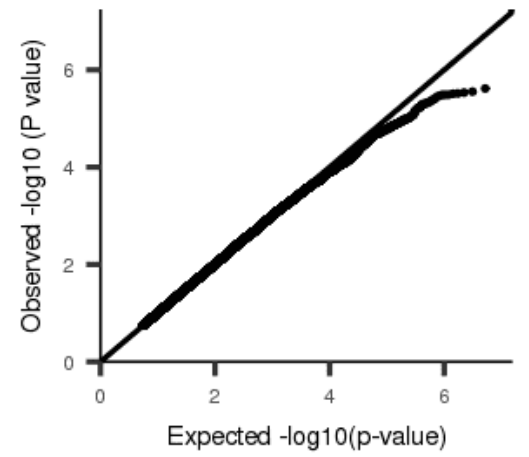

[back to list of plots](#)

Figure 1267: NETMAT edge (100) 0111

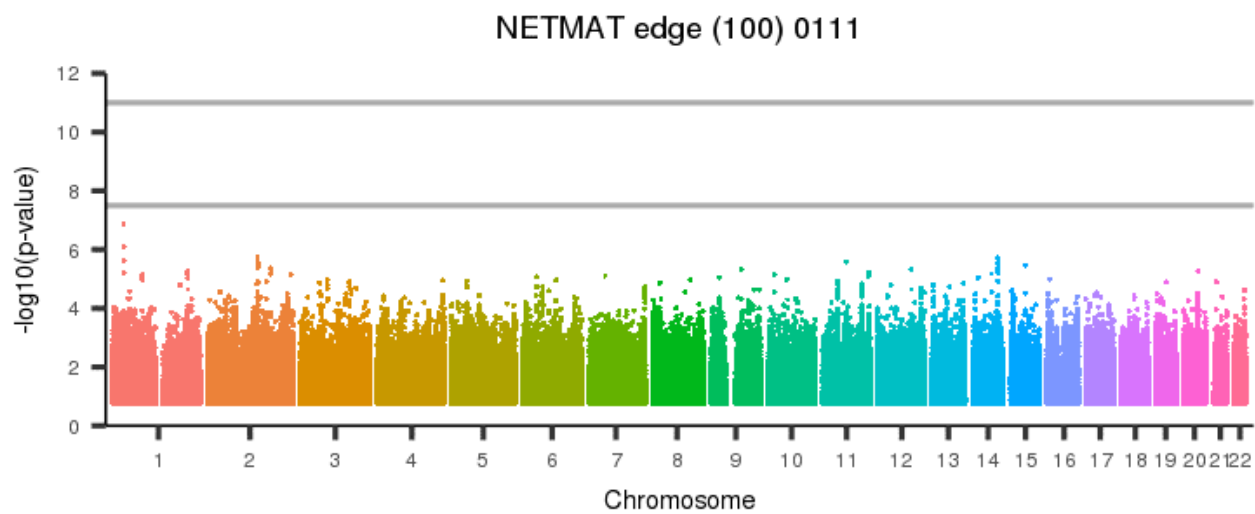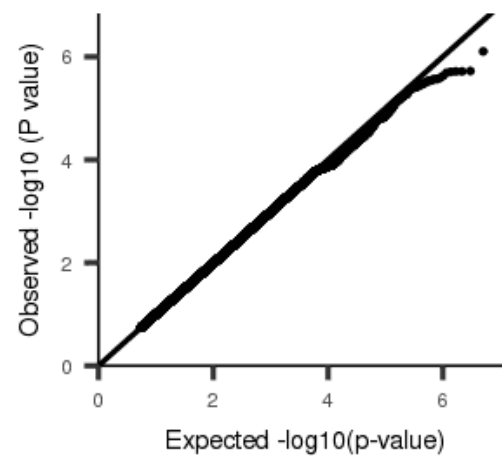

[back to list of plots](#)

Figure 1268: NETMAT edge (100) 0112

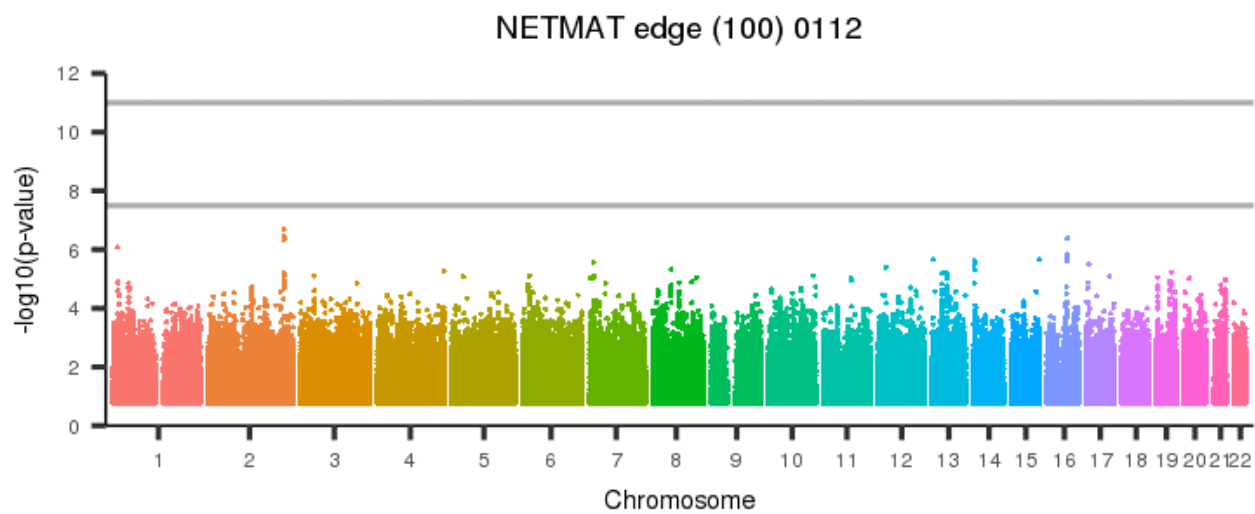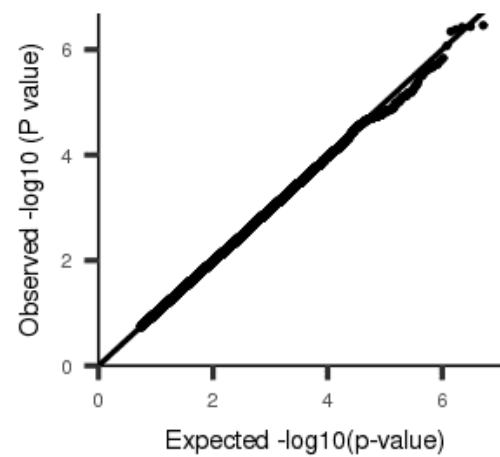

[back to list of plots](#)

Figure 1269: NETMAT edge (100) 0113

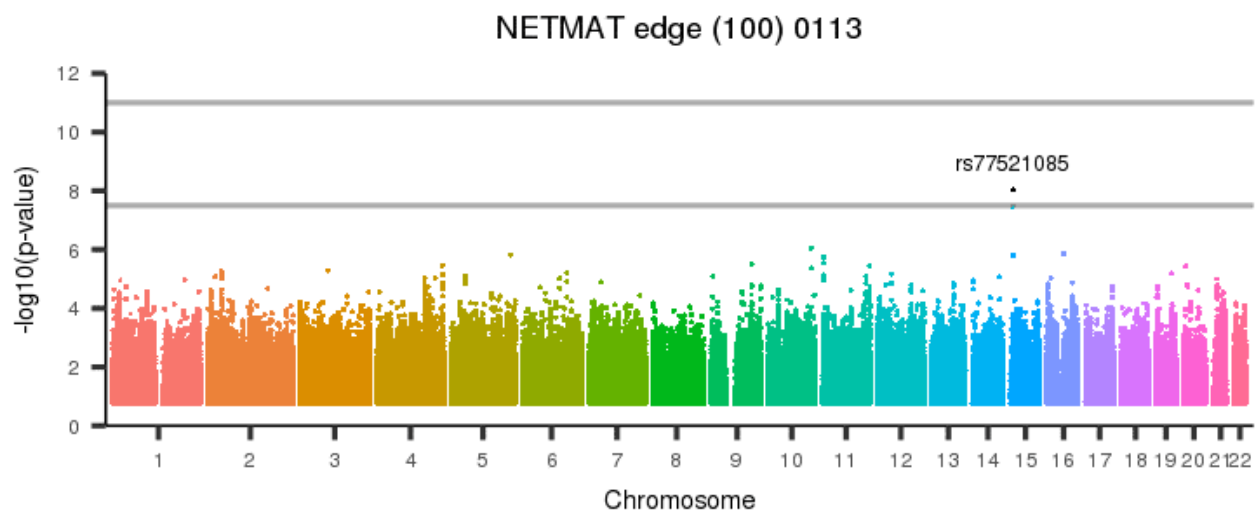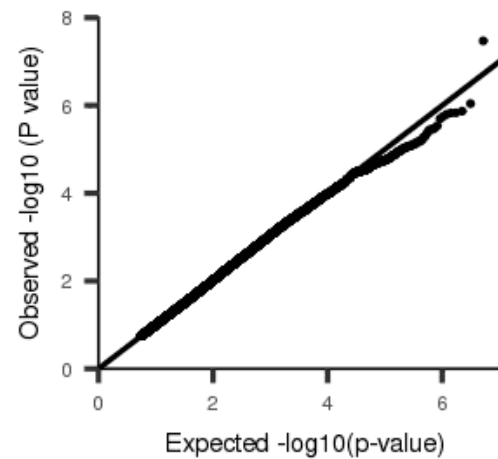

[back to list of plots](#)



Figure 1270: NETMAT edge (100) 0114

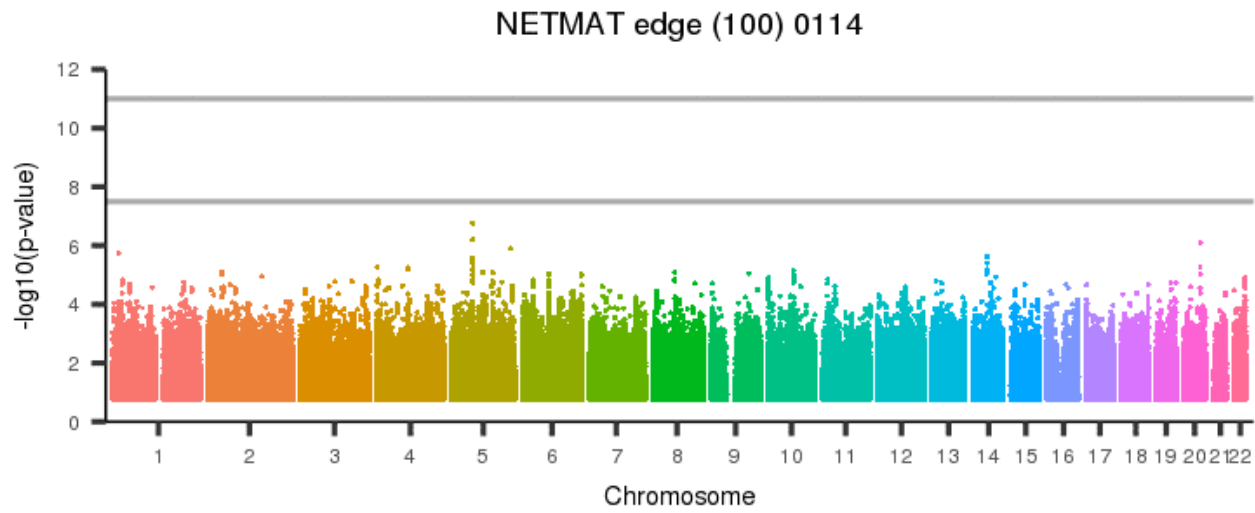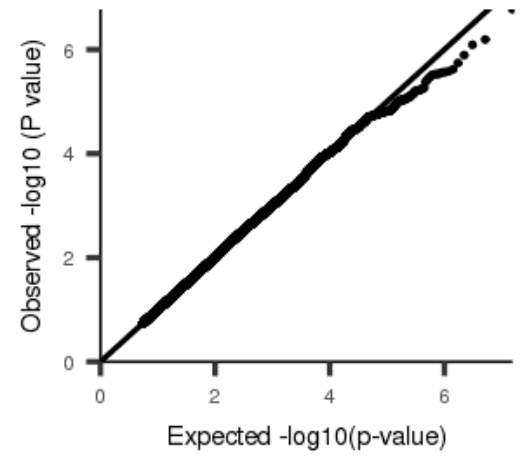

[back to list of plots](#)

Figure 1271: NETMAT edge (100) 0115

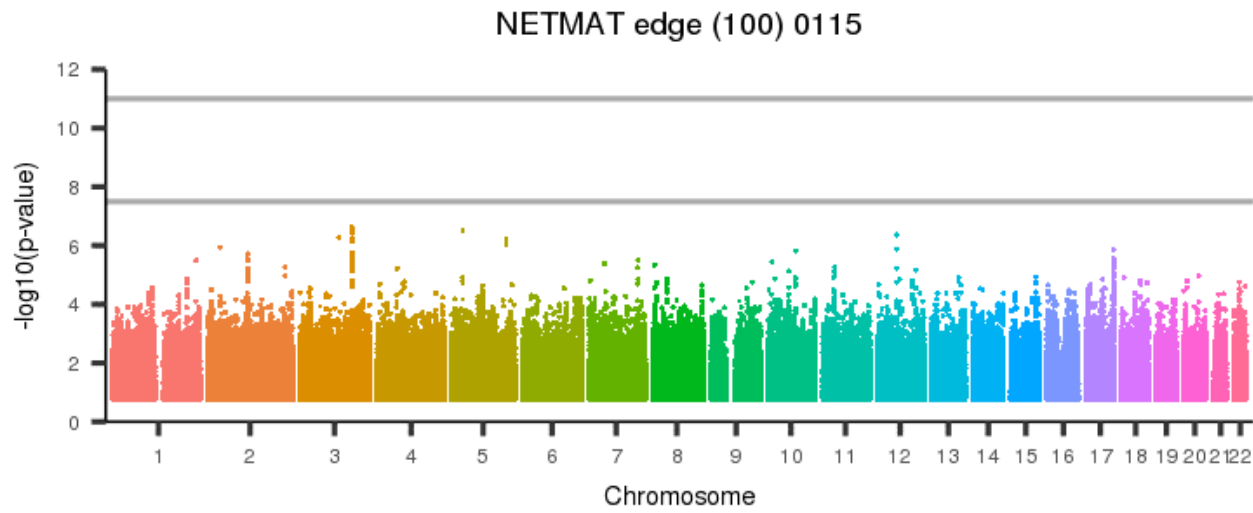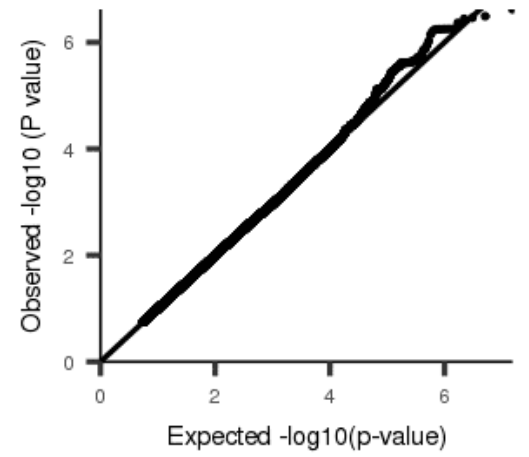

[back to list of plots](#)

Figure 1272: NETMAT edge (100) 0116

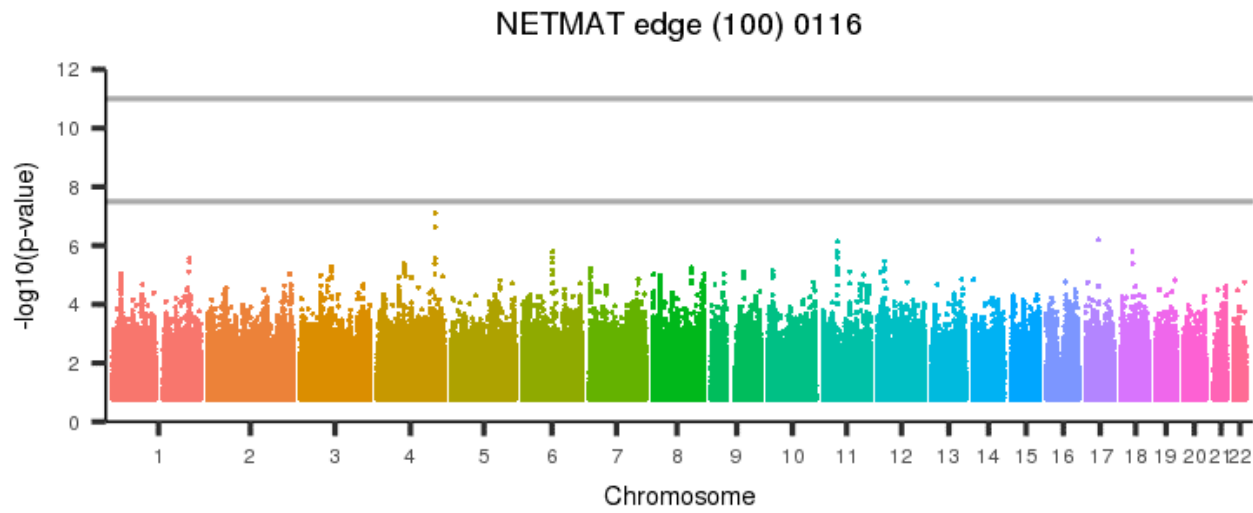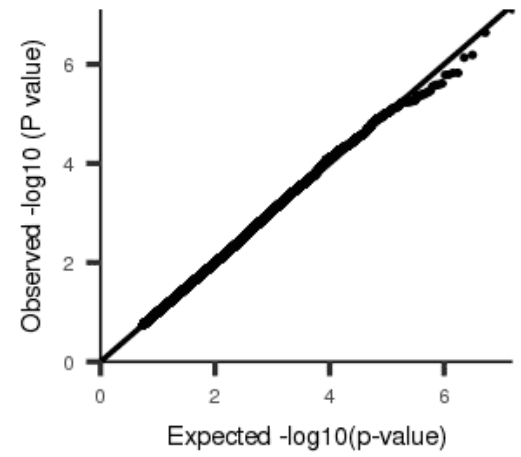

[back to list of plots](#)

Figure 1273: NETMAT edge (100) 0117

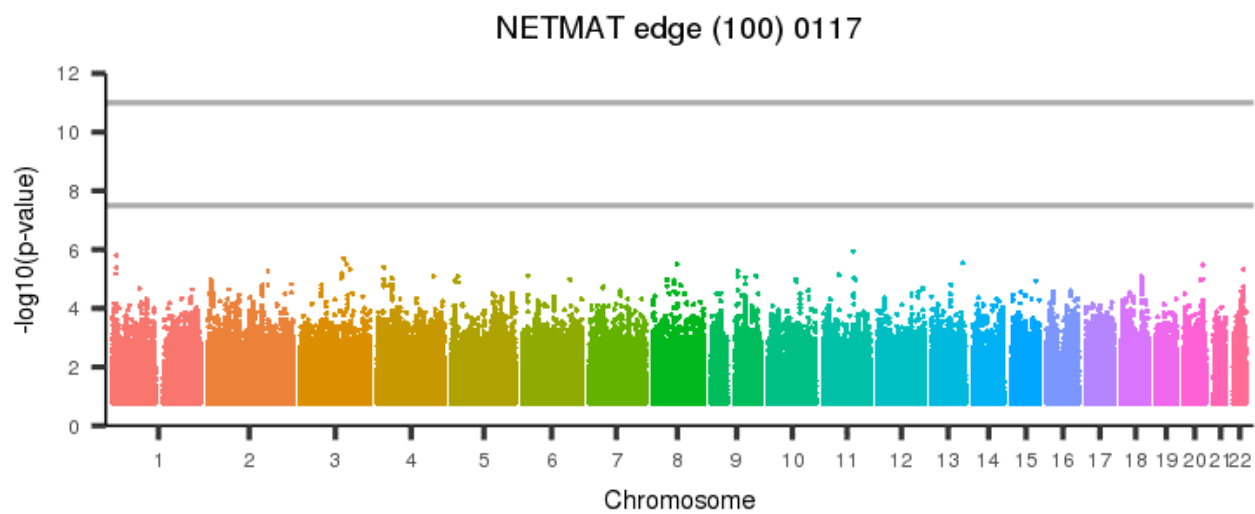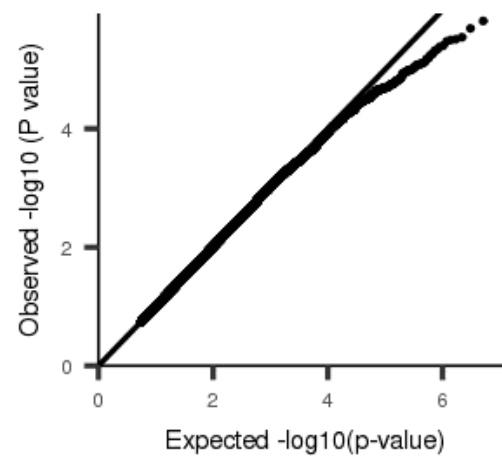

[back to list of plots](#)

Figure 1274: NETMAT edge (100) 0118

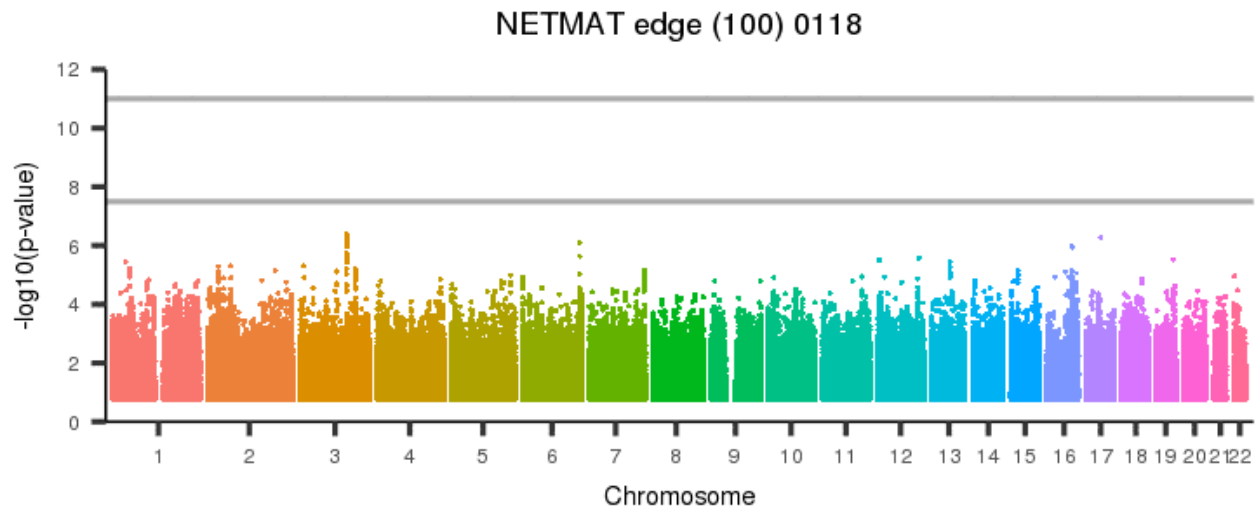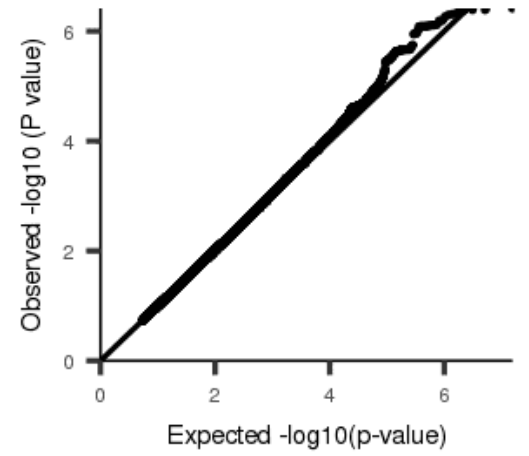

[back to list of plots](#)

Figure 1275: NETMAT edge (100) 0119

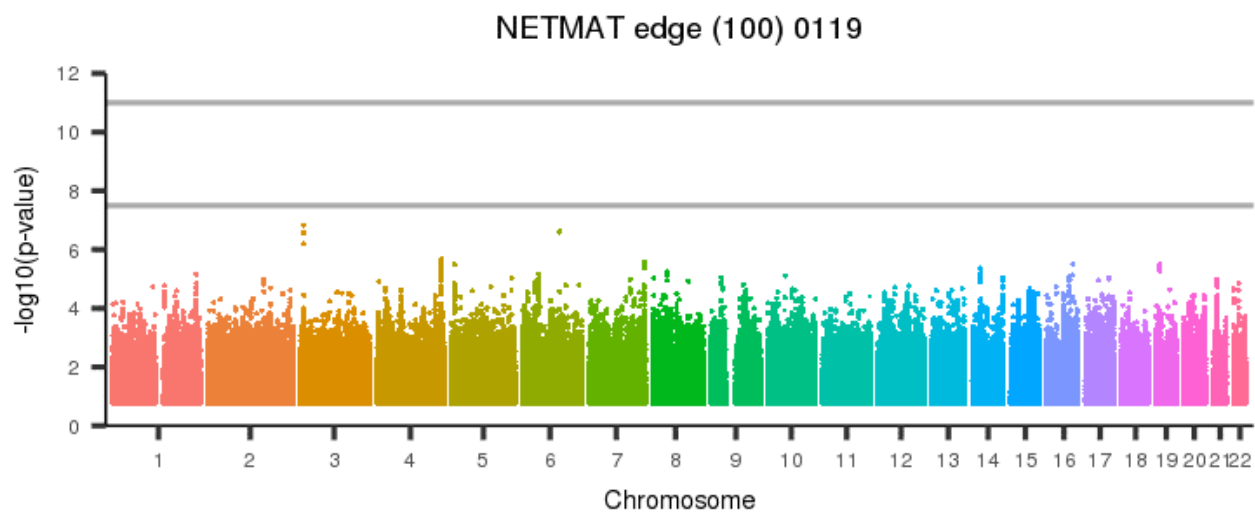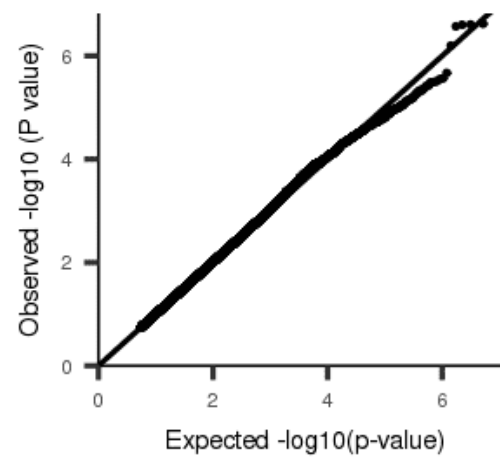

[back to list of plots](#)

Figure 1276: NETMAT edge (100) 0120

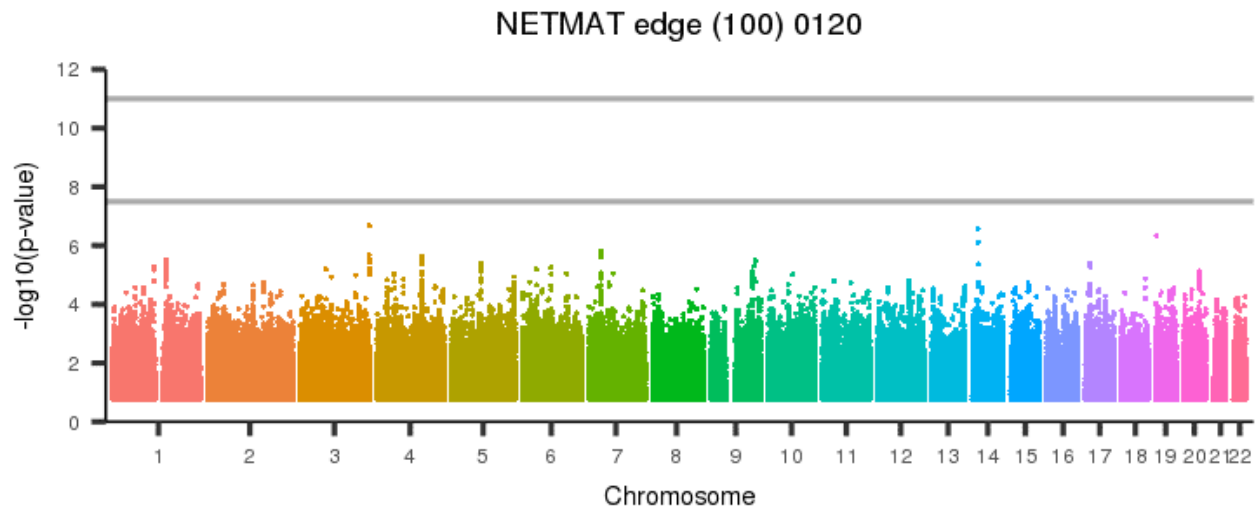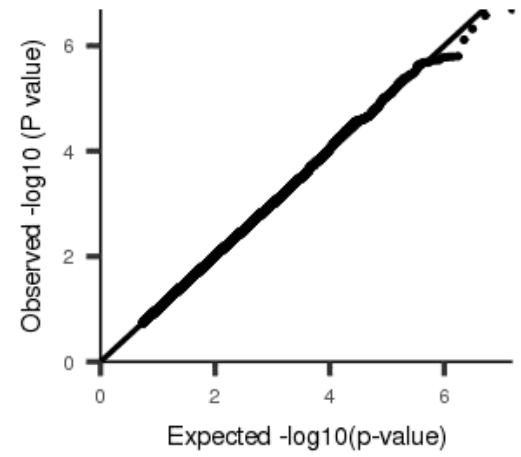

[back to list of plots](#)

Figure 1277: NETMAT edge (100) 0121

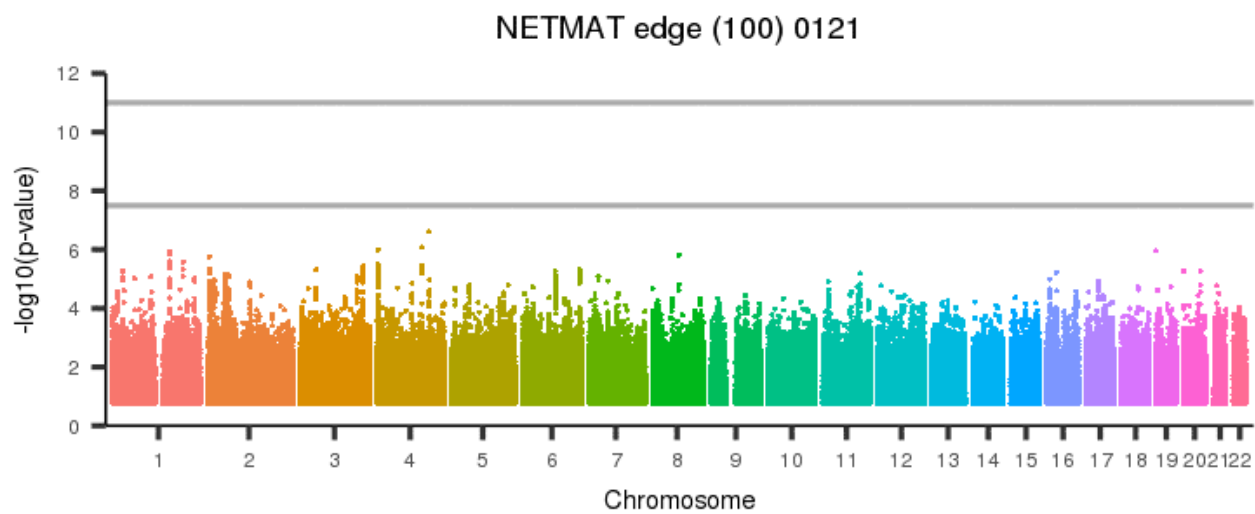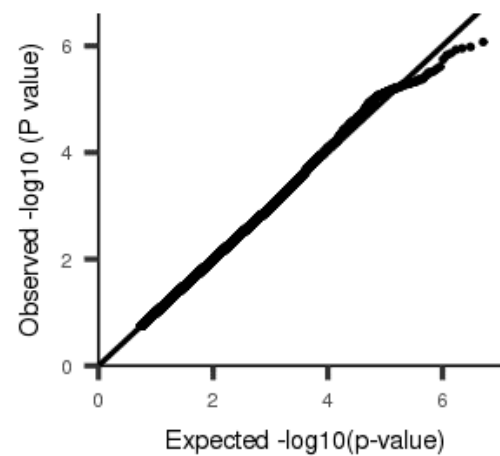

[back to list of plots](#)



Figure 1278: NETMAT edge (100) 0122

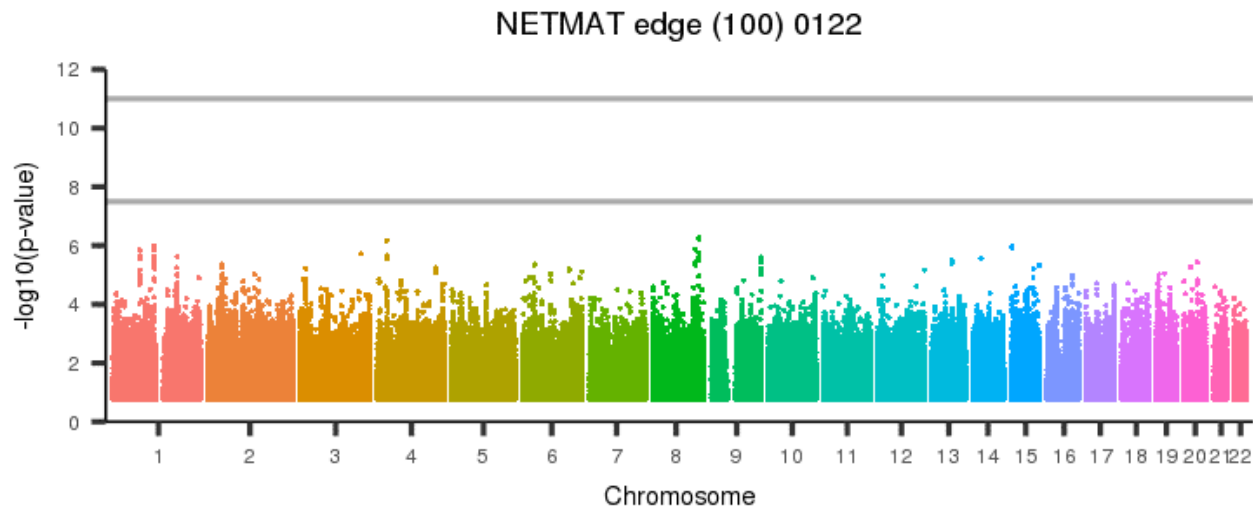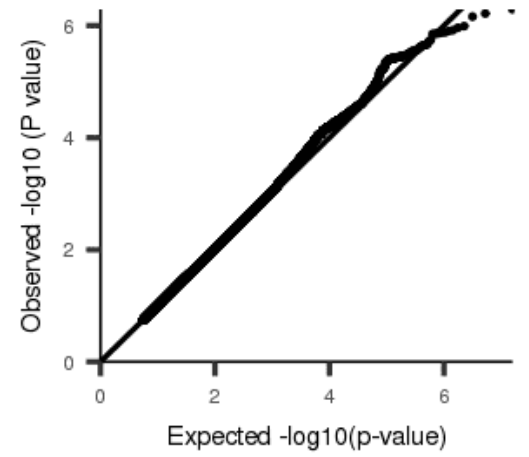

[back to list of plots](#)

Figure 1279: NETMAT edge (100) 0123

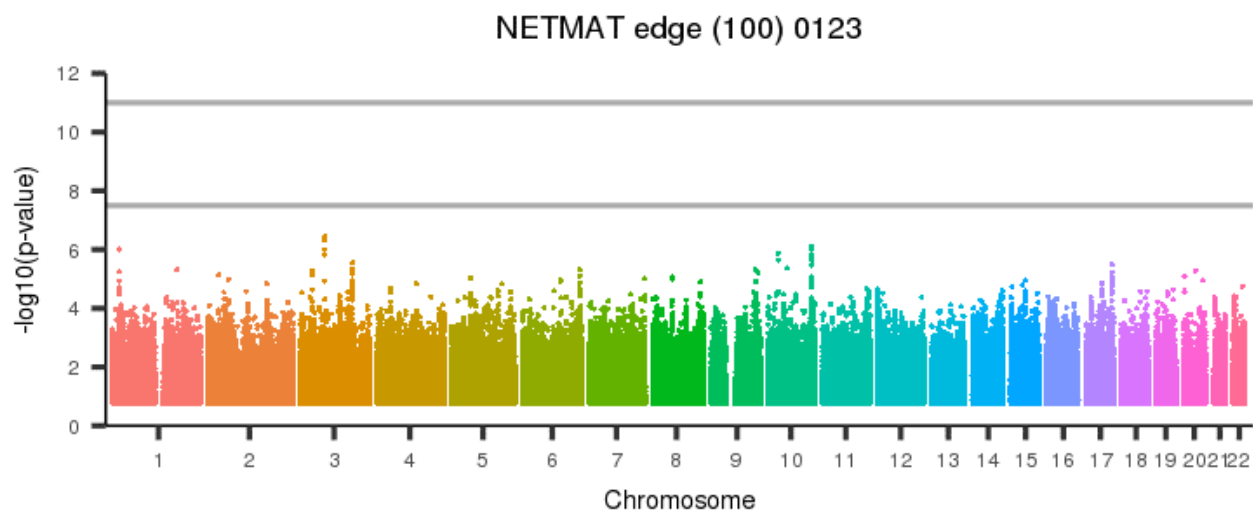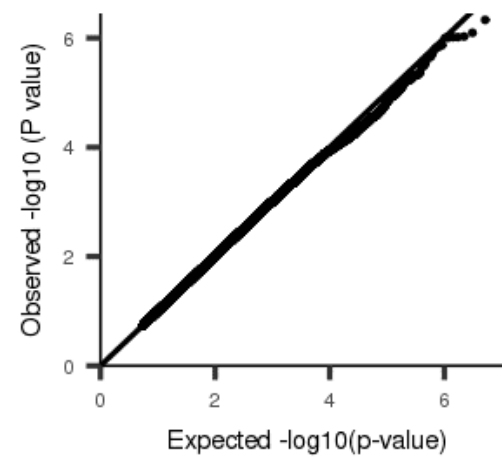

[back to list of plots](#)

Figure 1280: NETMAT edge (100) 0124

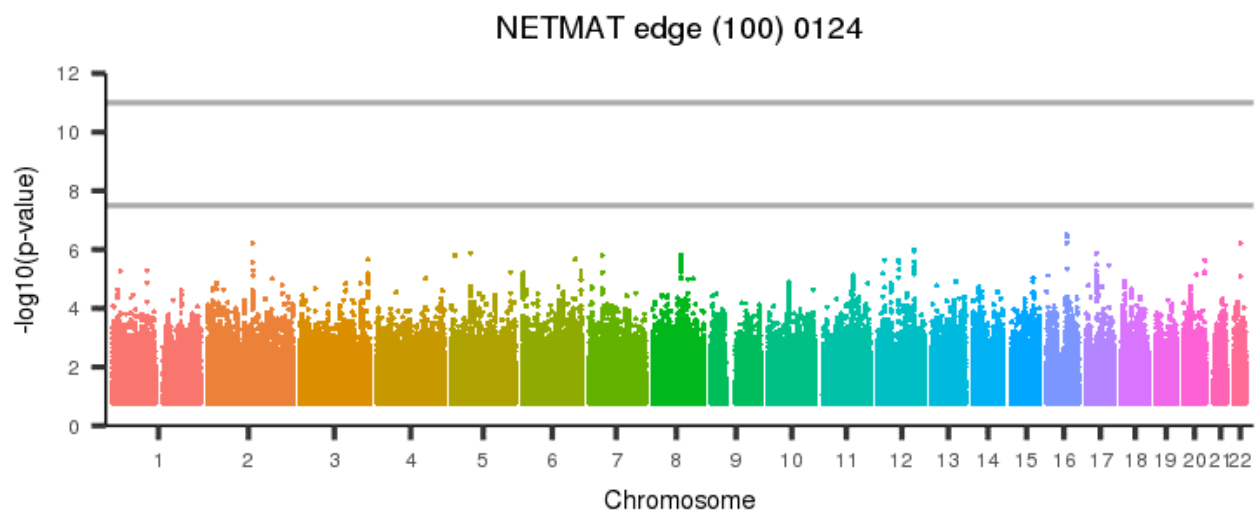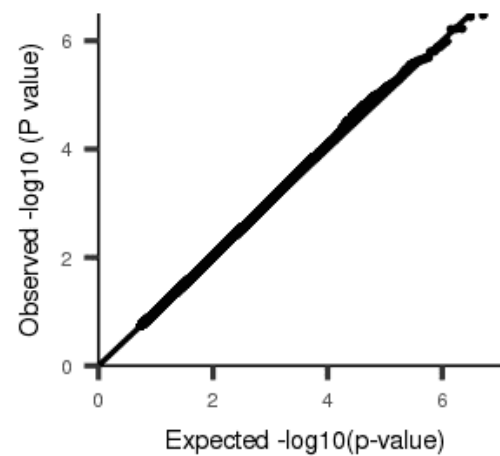

[back to list of plots](#)

Figure 1281: NETMAT edge (100) 0125

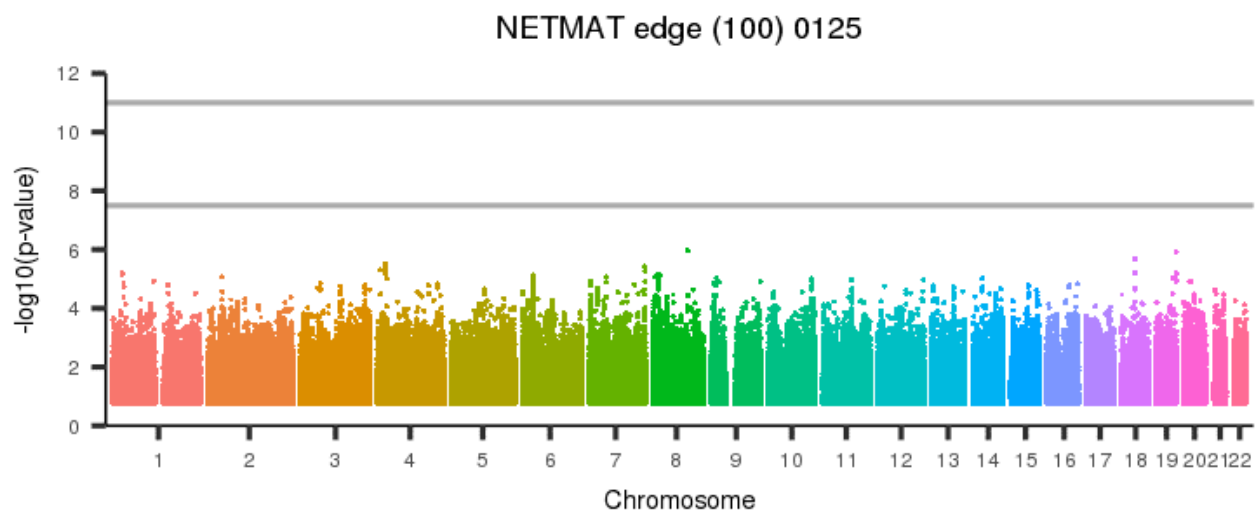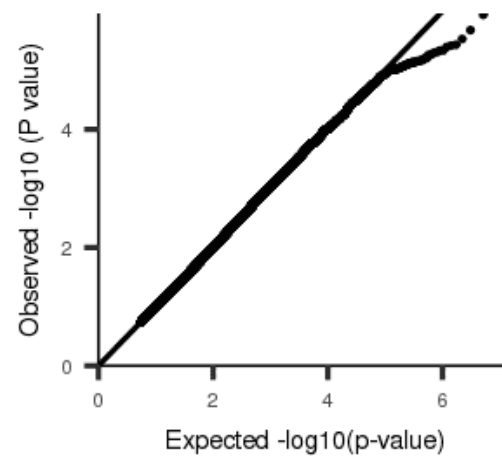

[back to list of plots](#)

Figure 1282: NETMAT edge (100) 0126

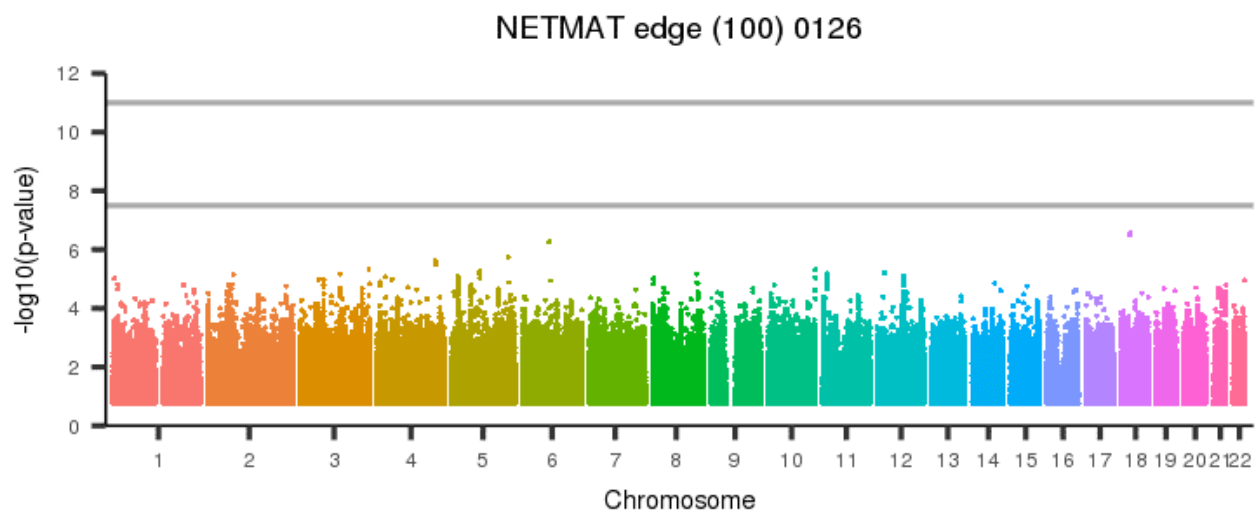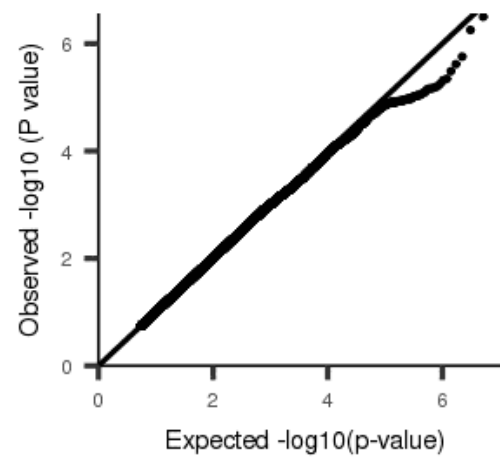

[back to list of plots](#)

Figure 1283: NETMAT edge (100) 0127

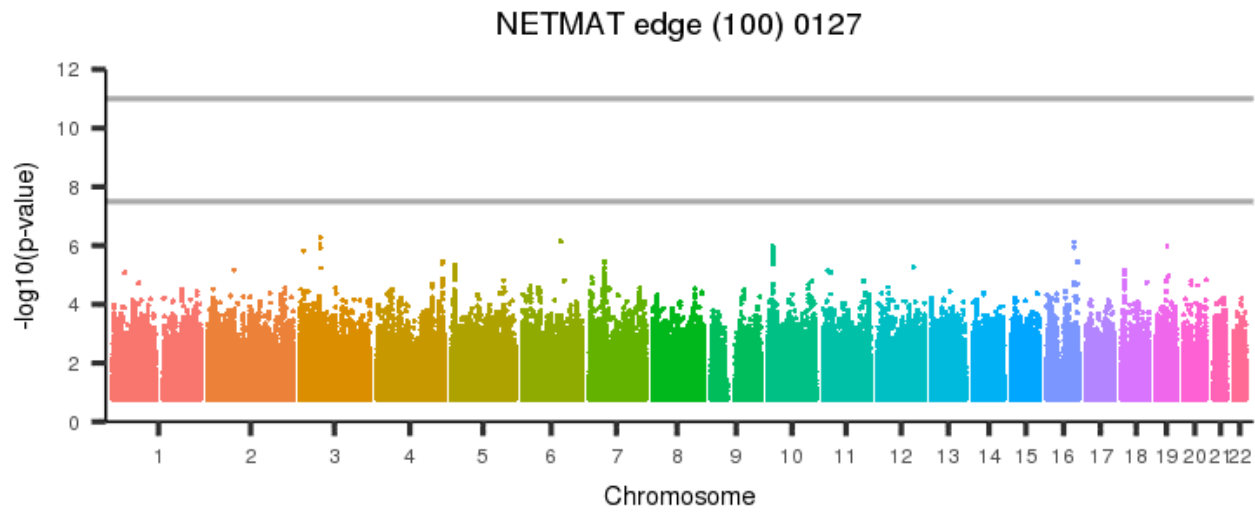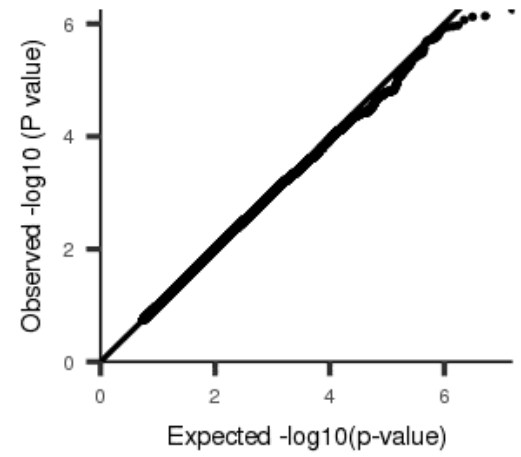

[back to list of plots](#)

Figure 1284: NETMAT edge (100) 0128

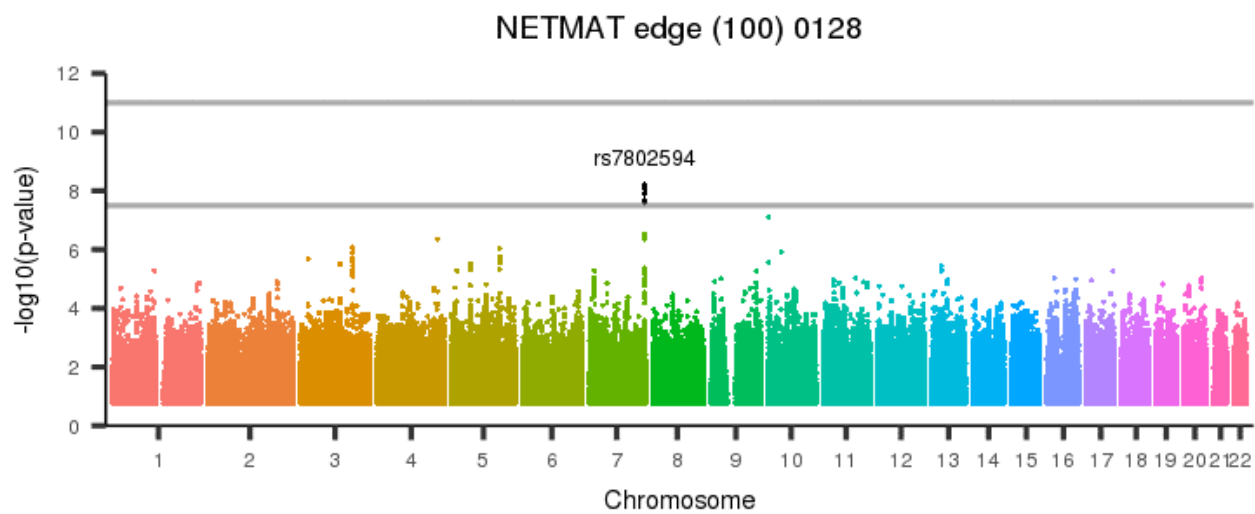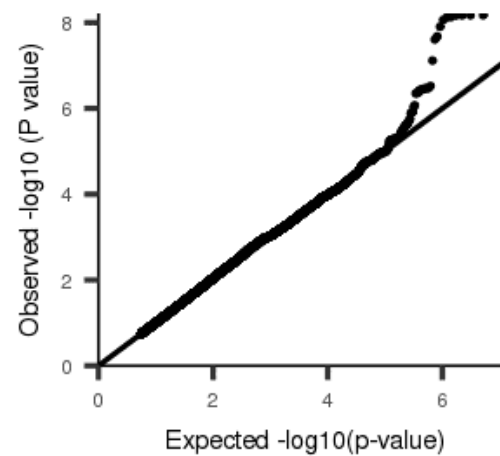

[back to list of plots](#)

Figure 1285: NETMAT edge (100) 0129

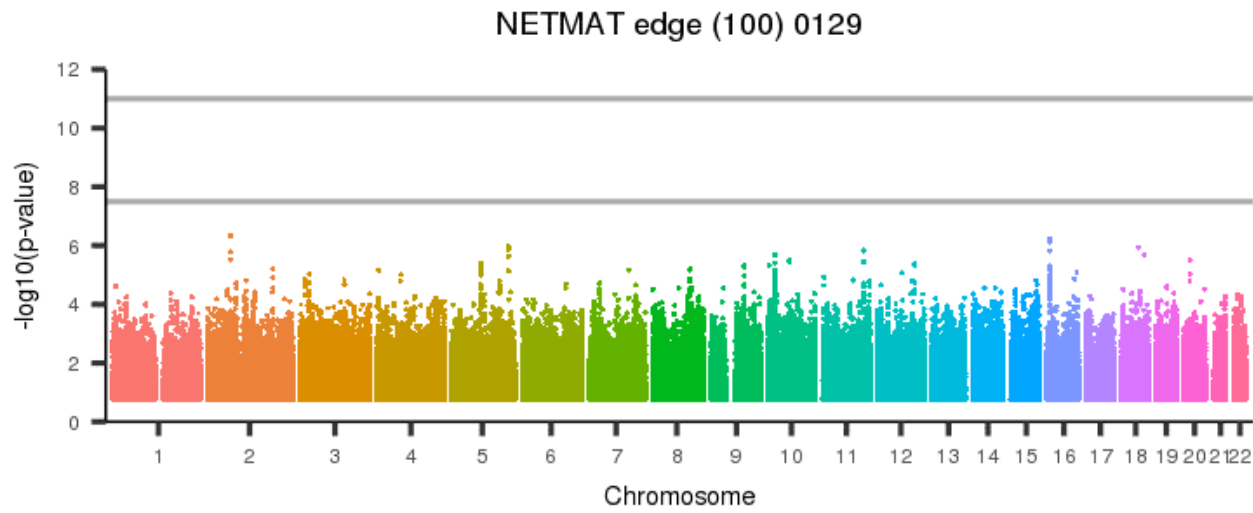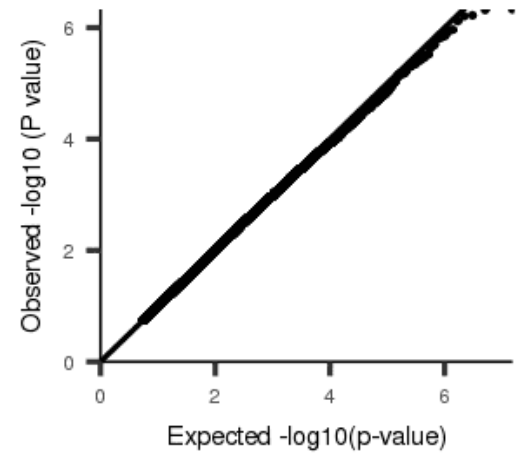

[back to list of plots](#)



Figure 1286: NETMAT edge (100) 0130

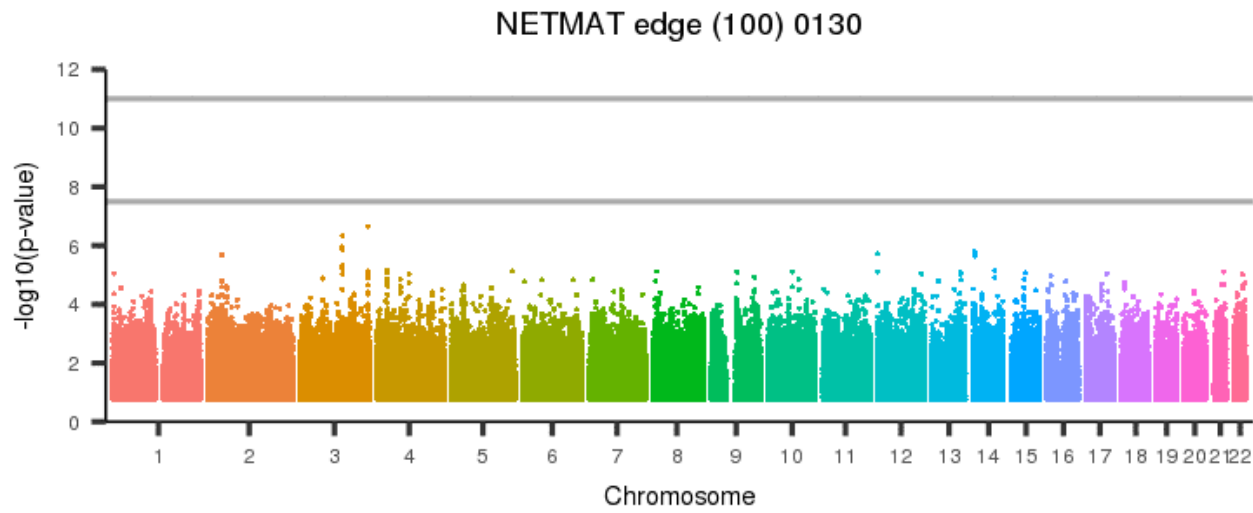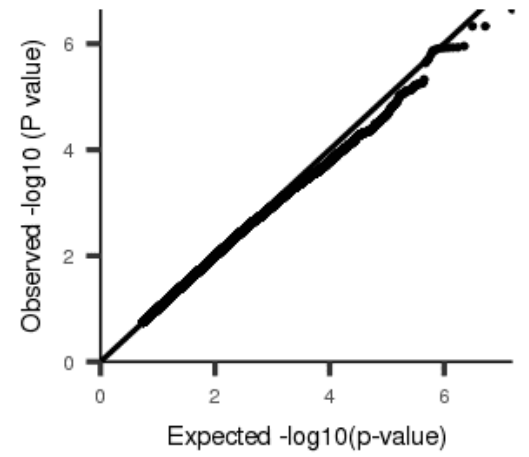

[back to list of plots](#)

Figure 1287: NETMAT edge (100) 0131

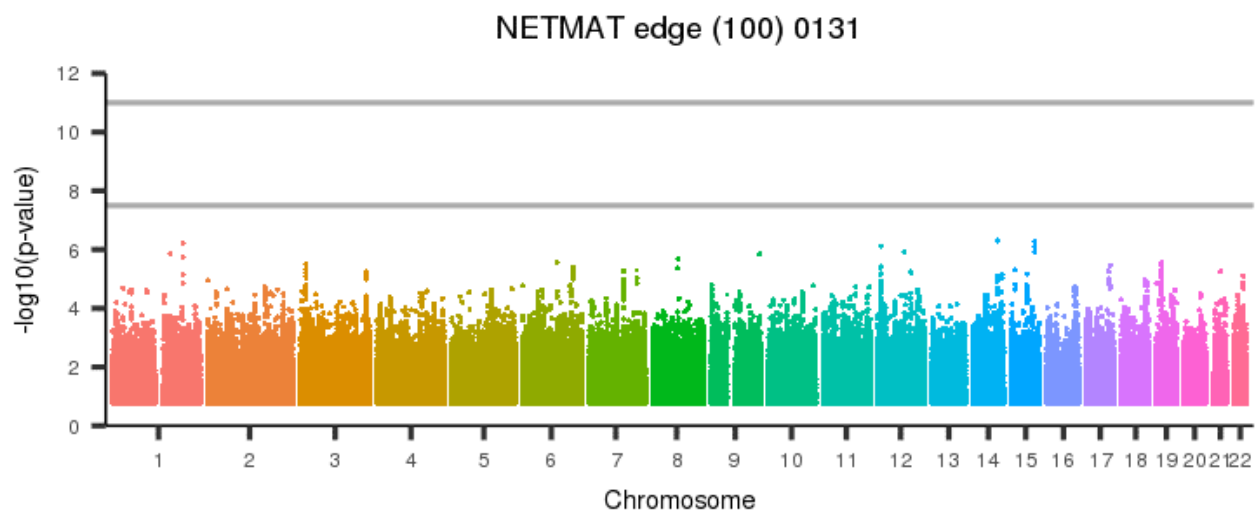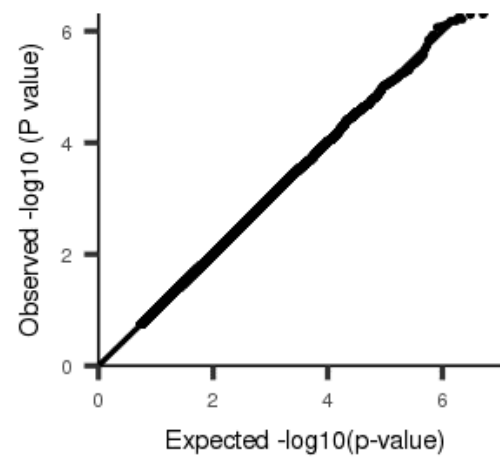

[back to list of plots](#)

Figure 1288: NETMAT edge (100) 0132

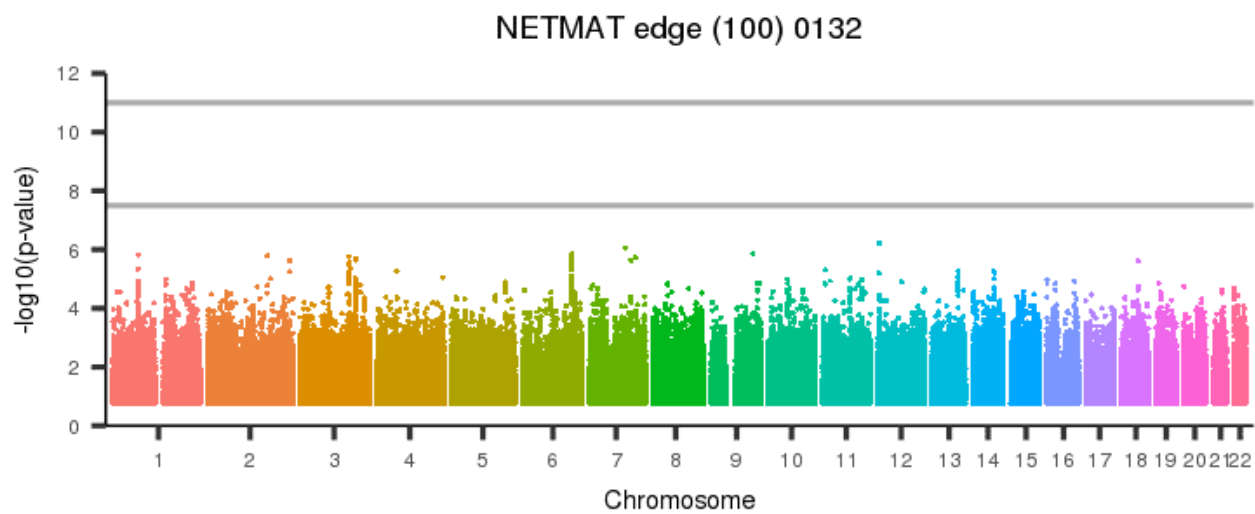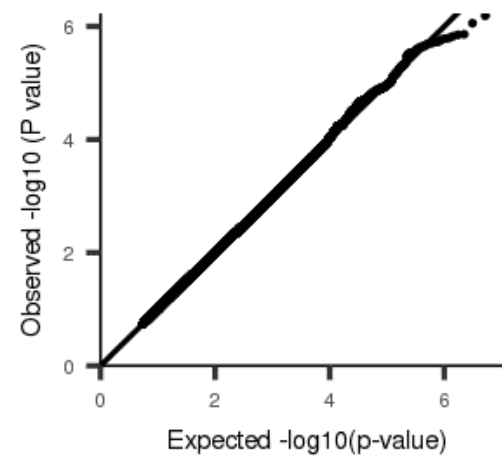

[back to list of plots](#)

Figure 1289: NETMAT edge (100) 0133

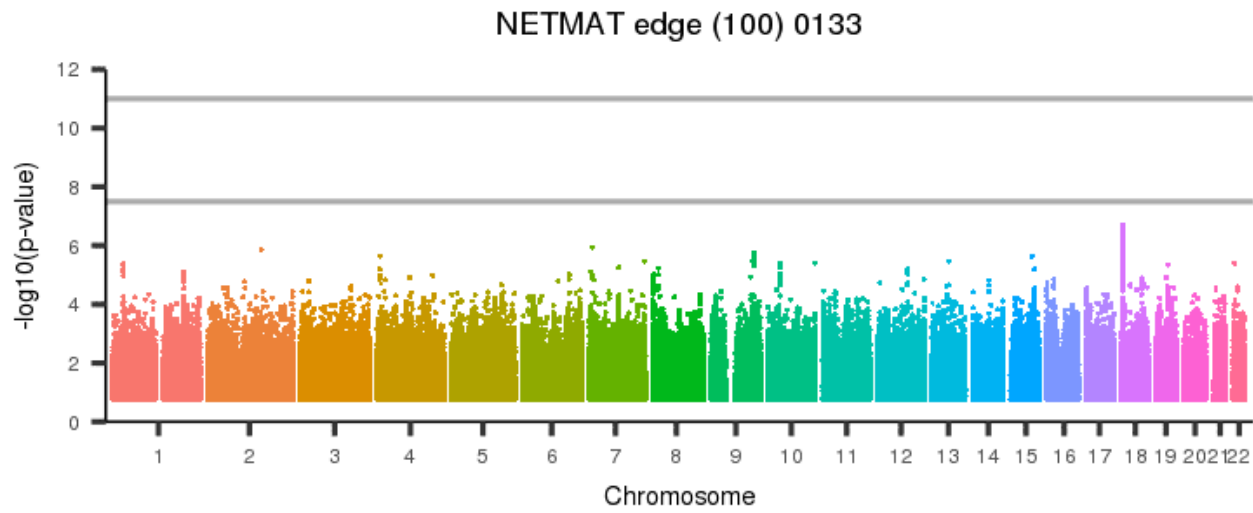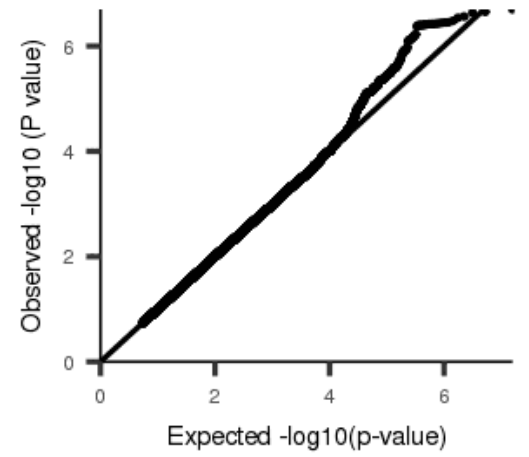

[back to list of plots](#)

Figure 1290: NETMAT edge (100) 0134

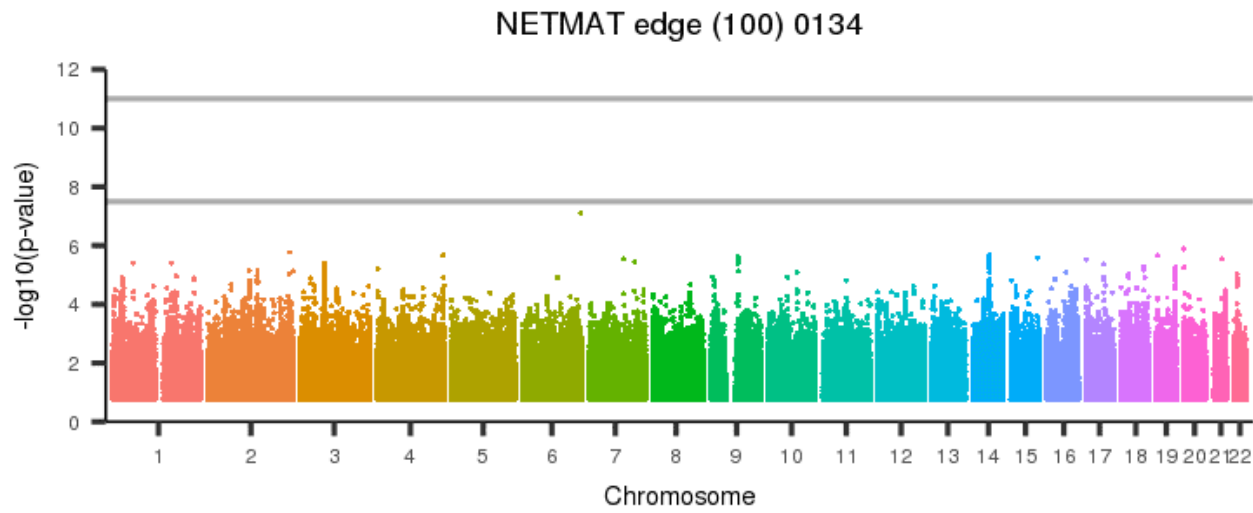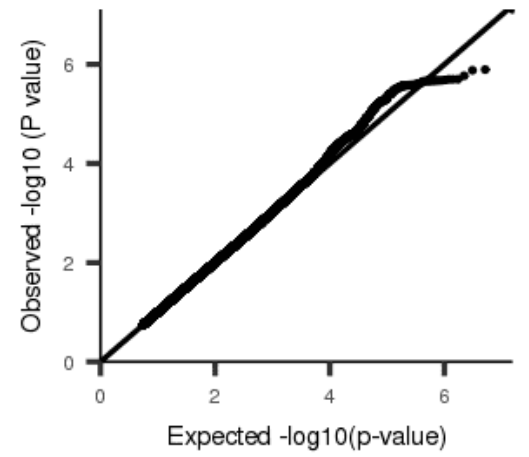

[back to list of plots](#)

Figure 1291: NETMAT edge (100) 0135

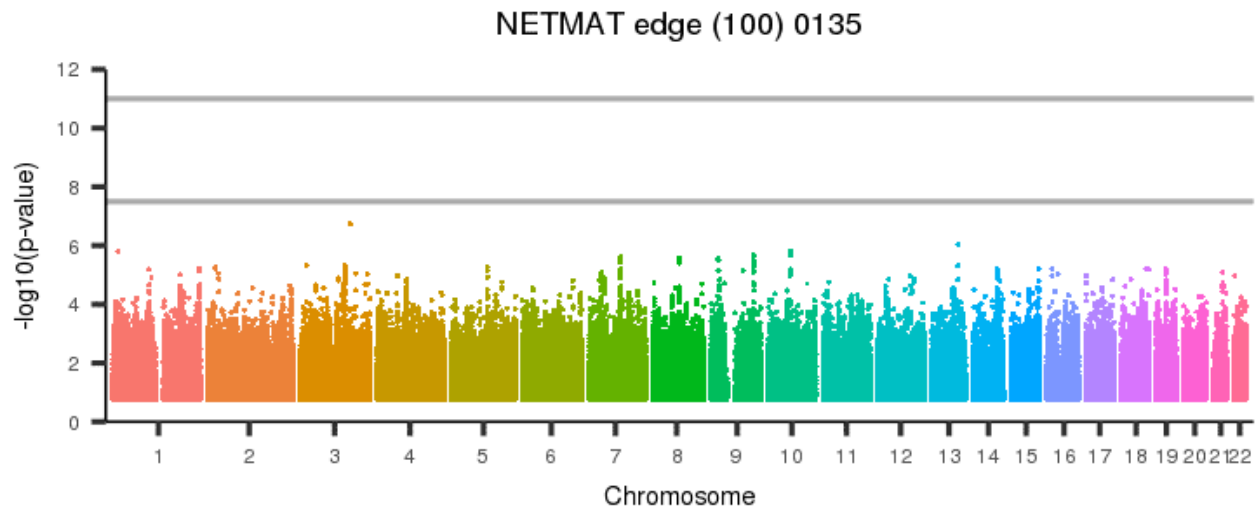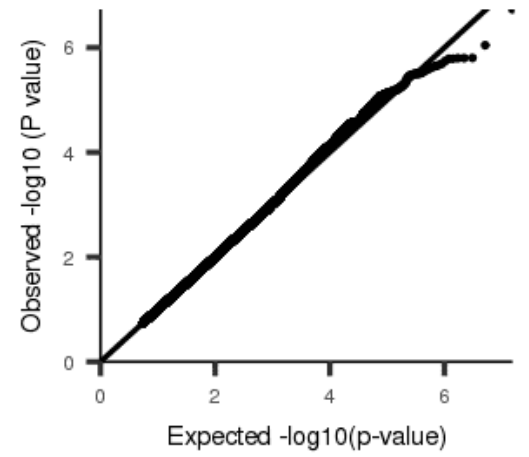

[back to list of plots](#)

Figure 1292: NETMAT edge (100) 0136

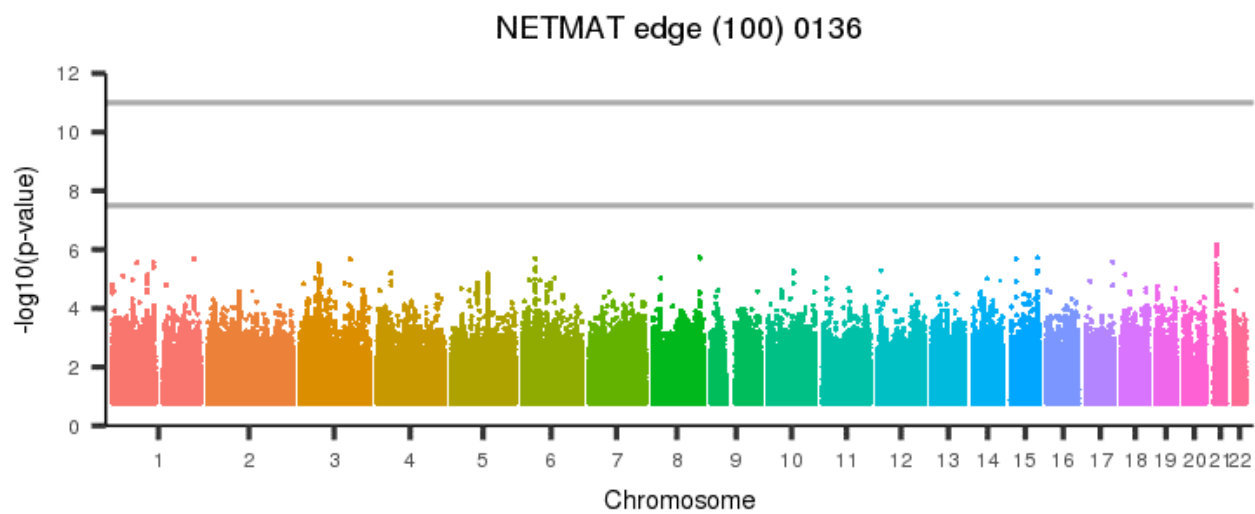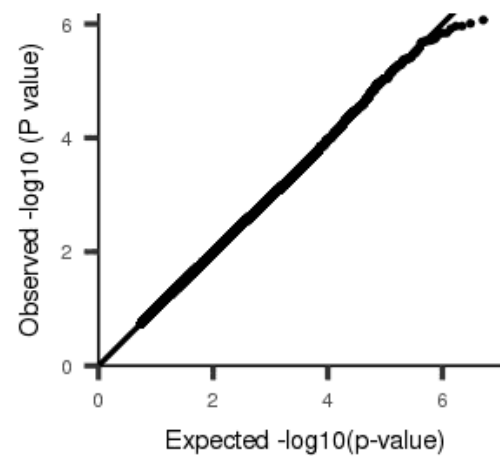

[back to list of plots](#)

Figure 1293: NETMAT edge (100) 0137

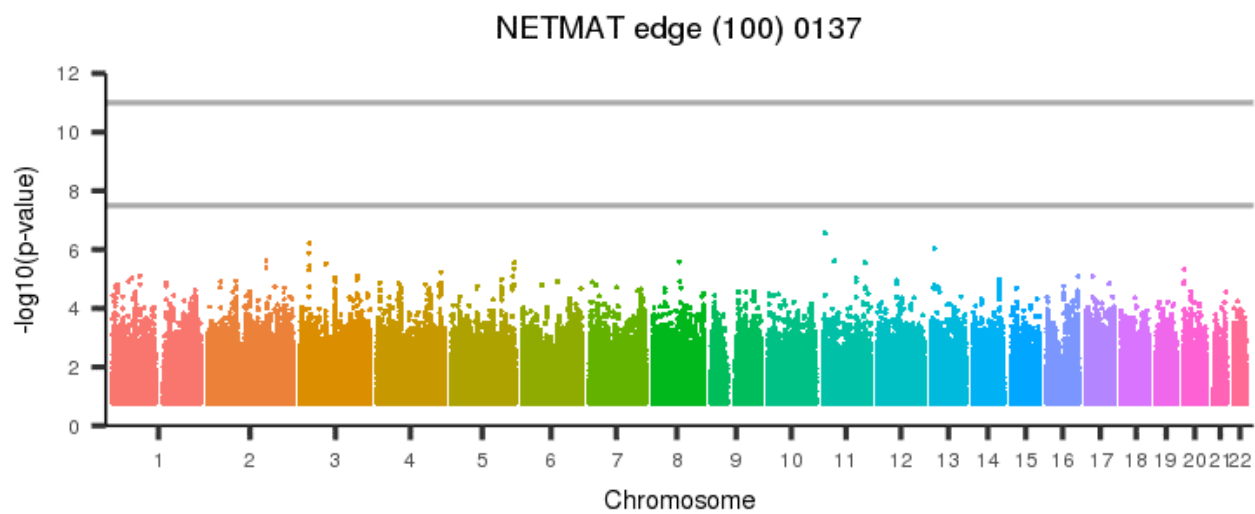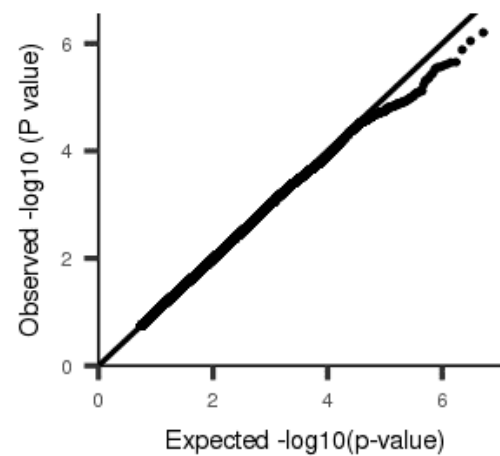

[back to list of plots](#)



Figure 1294: NETMAT edge (100) 0138

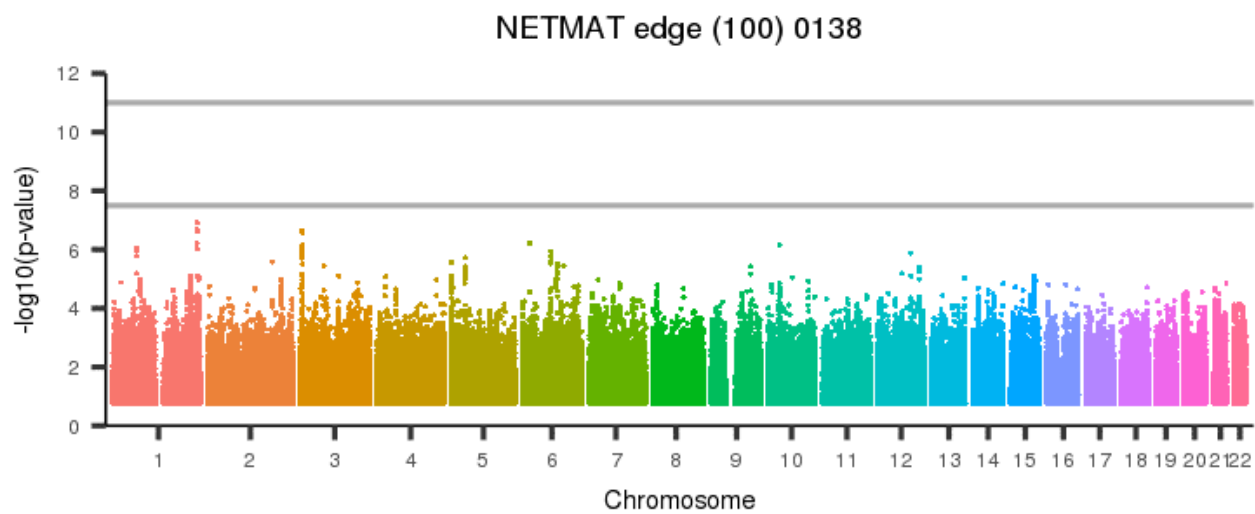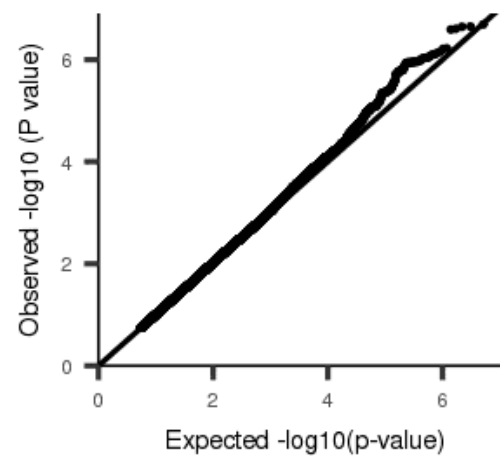

[back to list of plots](#)

Figure 1295: NETMAT edge (100) 0139

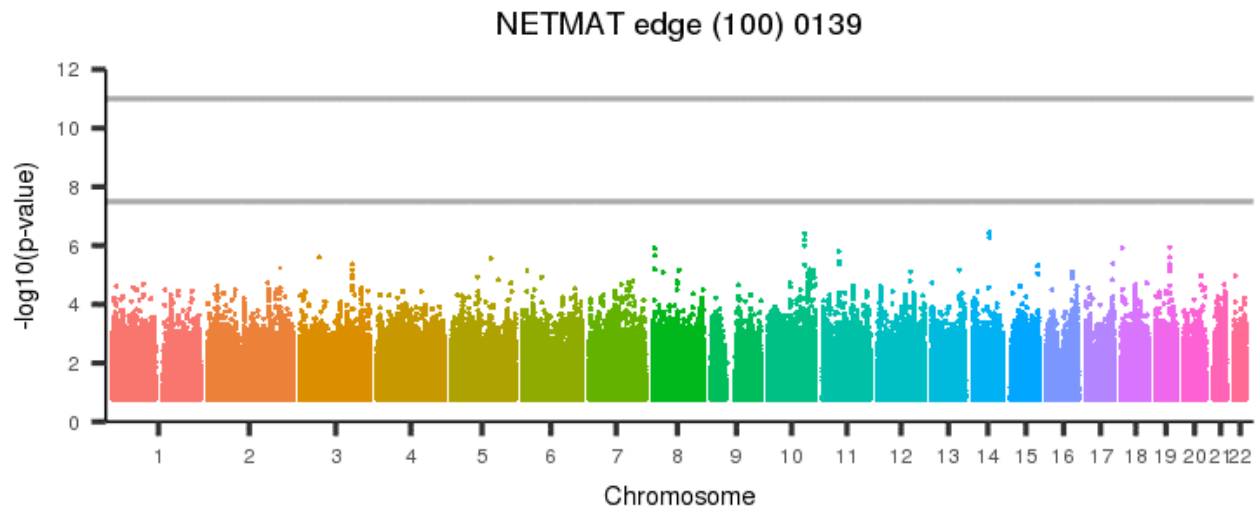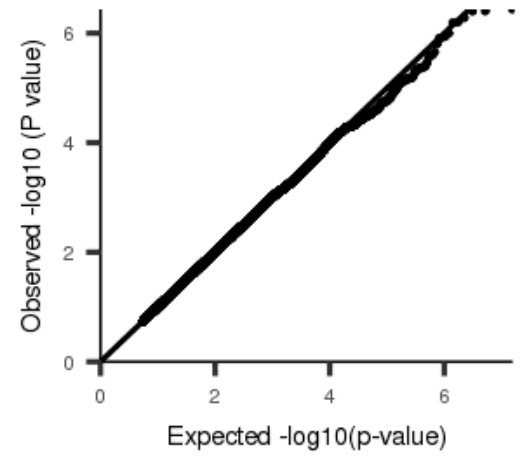

[back to list of plots](#)

Figure 1296: NETMAT edge (100) 0140

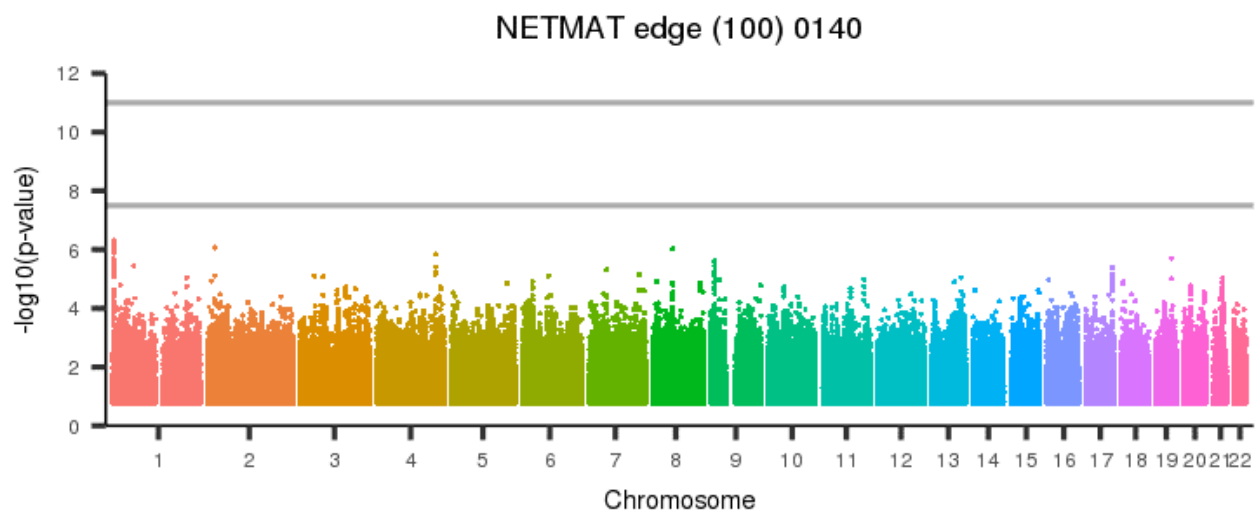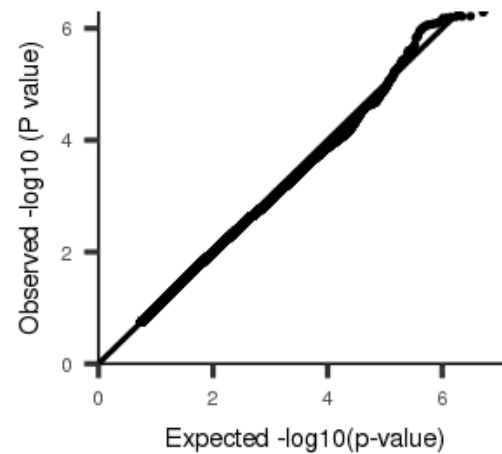

[back to list of plots](#)

Figure 1297: NETMAT edge (100) 0141

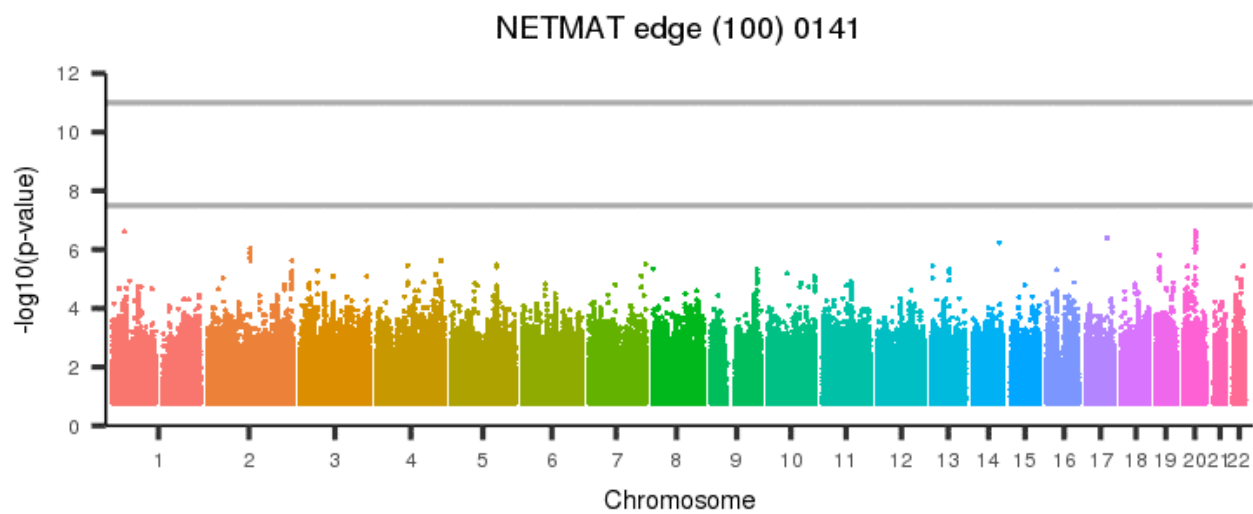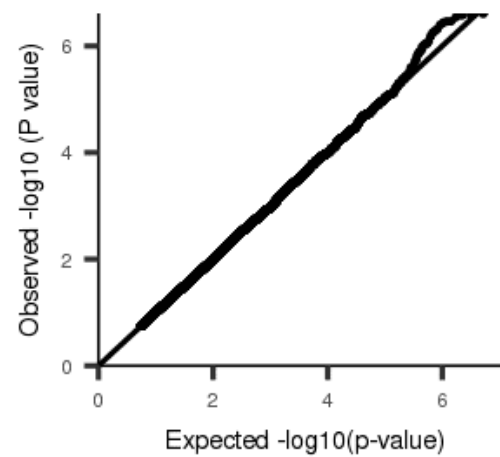

[back to list of plots](#)

Figure 1298: NETMAT edge (100) 0142

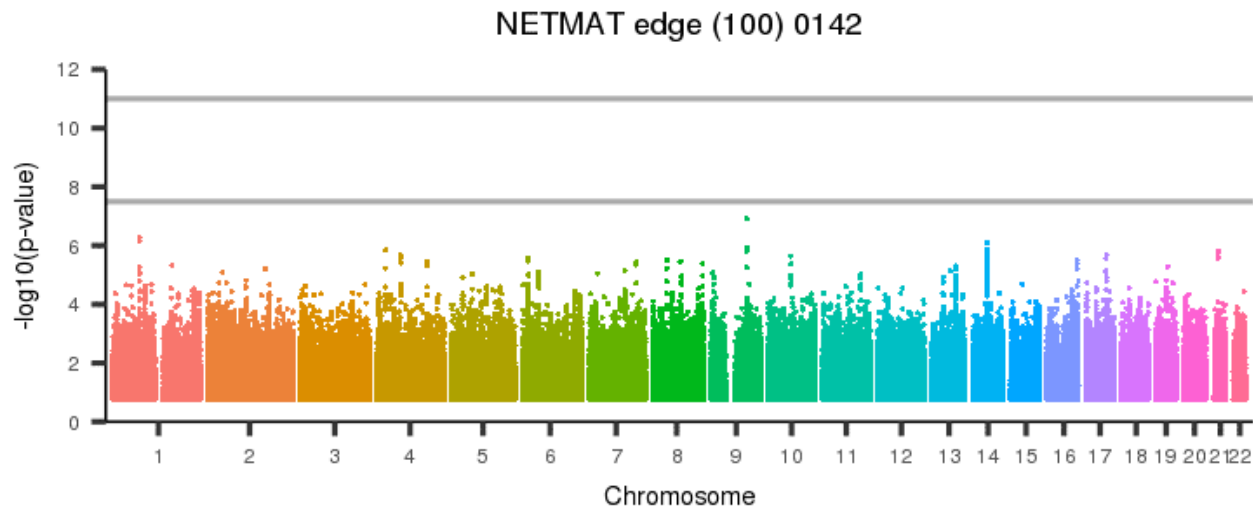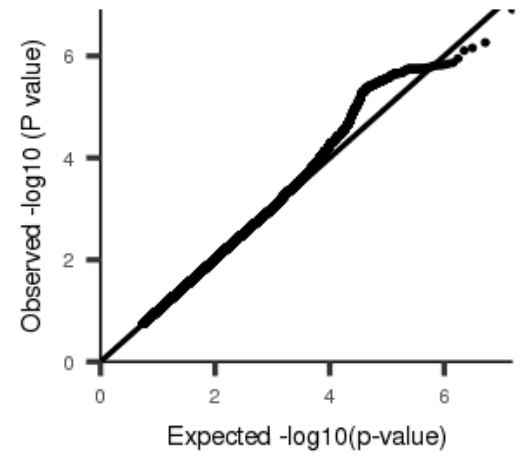

[back to list of plots](#)

Figure 1299: NETMAT edge (100) 0143

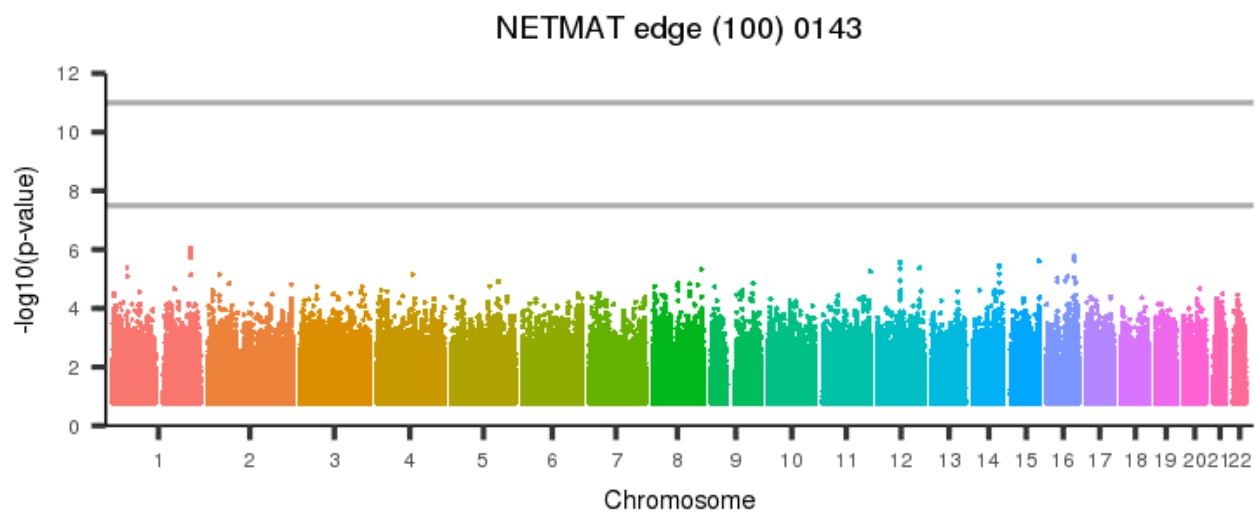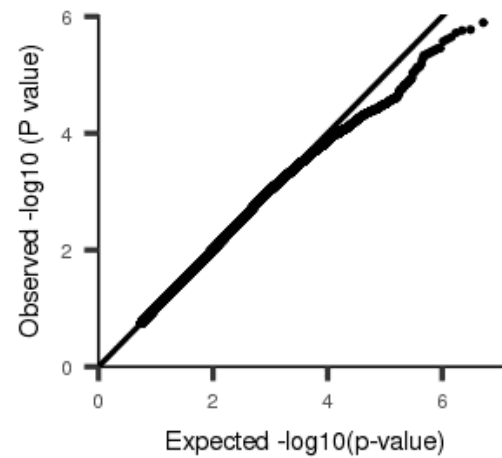

[back to list of plots](#)

Figure 1300: NETMAT edge (100) 0144

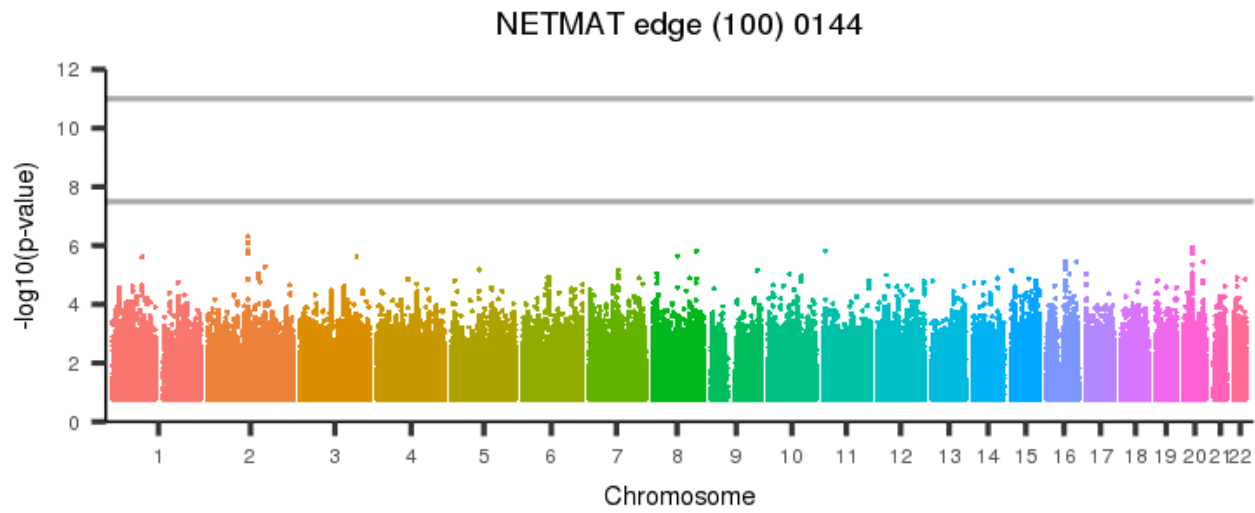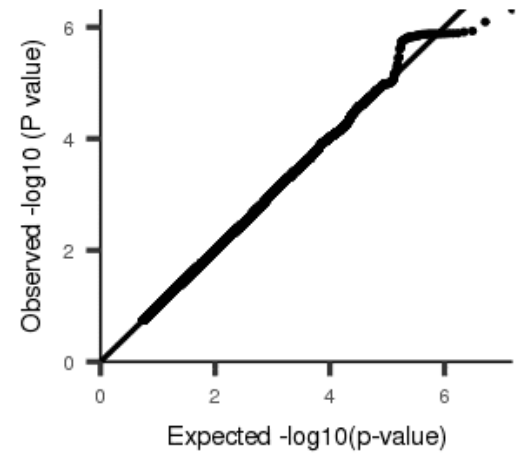

[back to list of plots](#)

Figure 1301: NETMAT edge (100) 0145

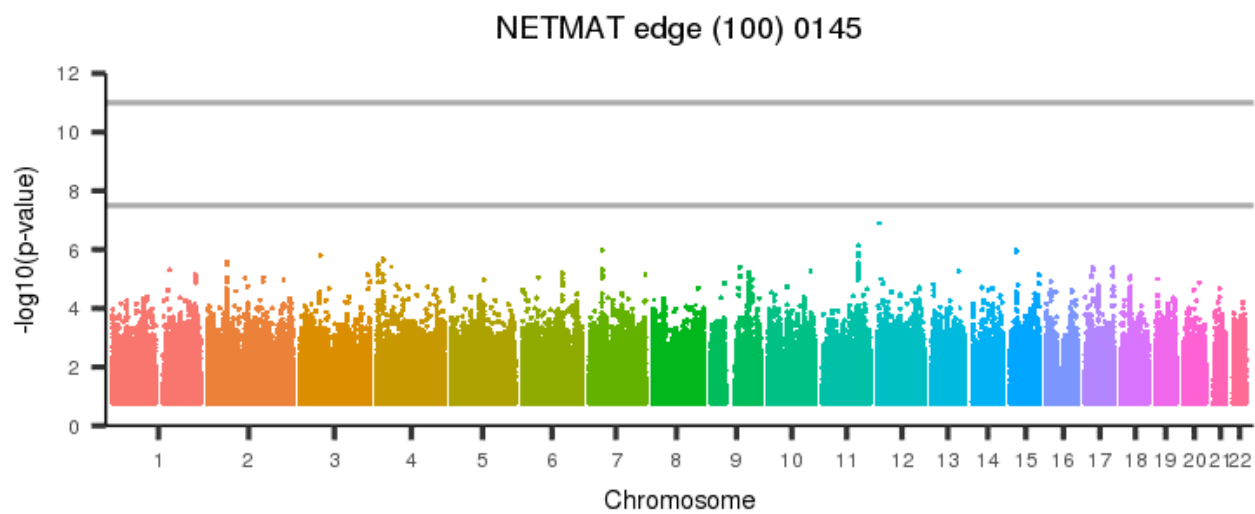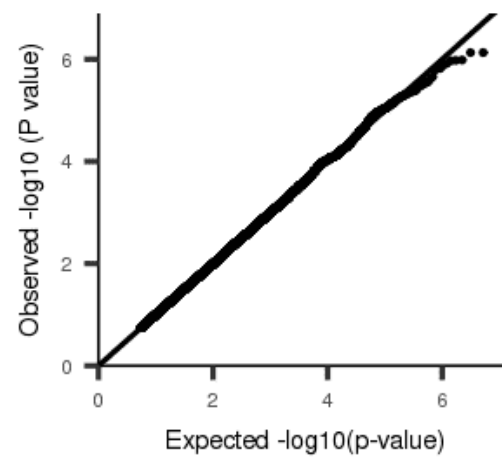

[back to list of plots](#)



Figure 1302: NETMAT edge (100) 0146

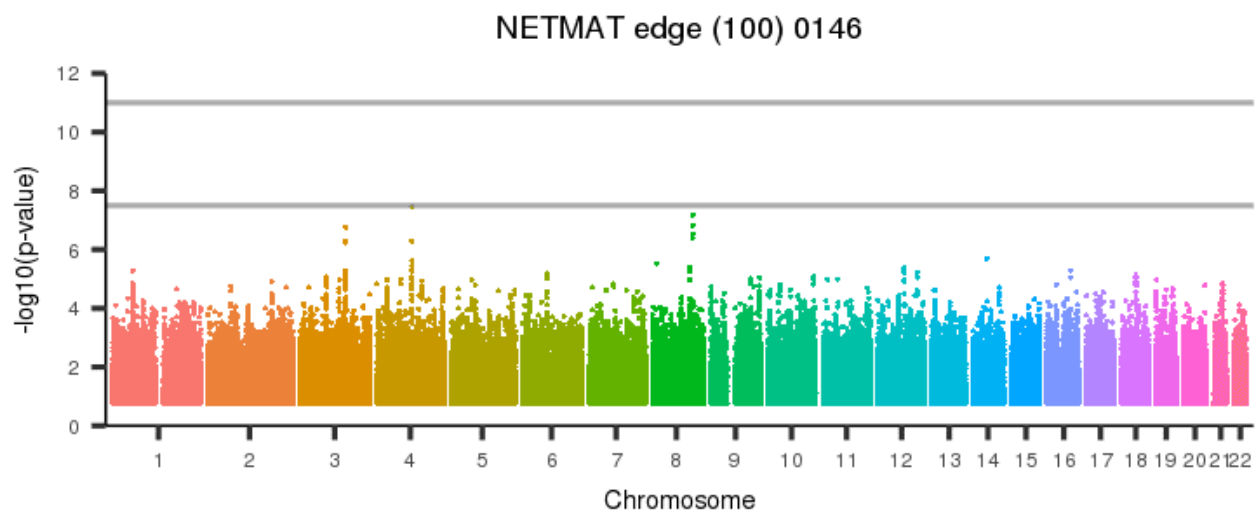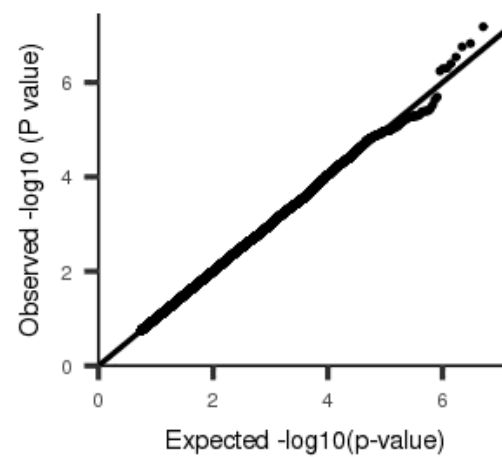

[back to list of plots](#)

Figure 1303: NETMAT edge (100) 0147

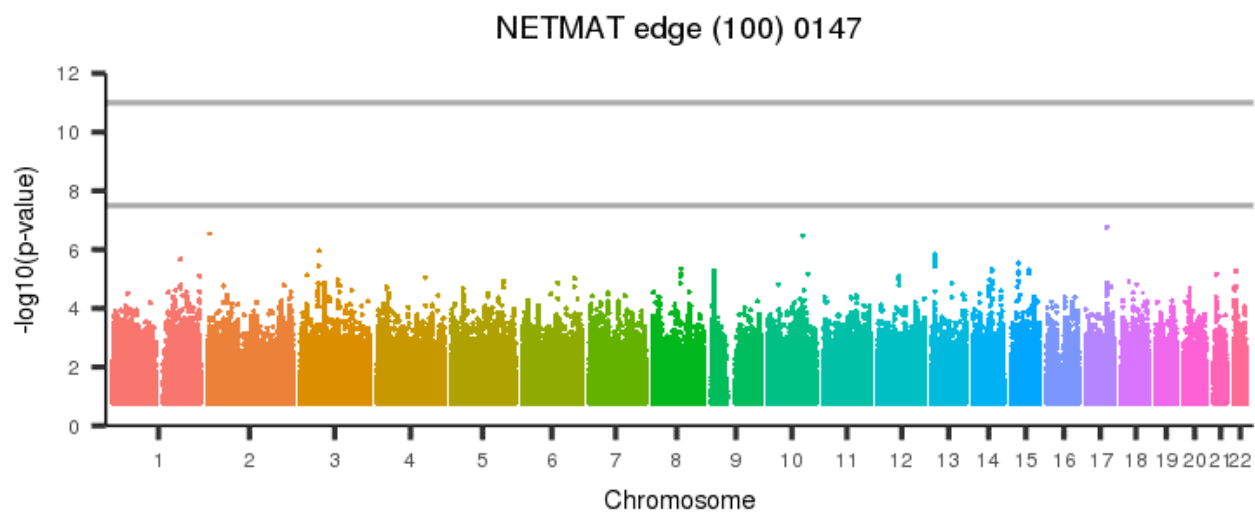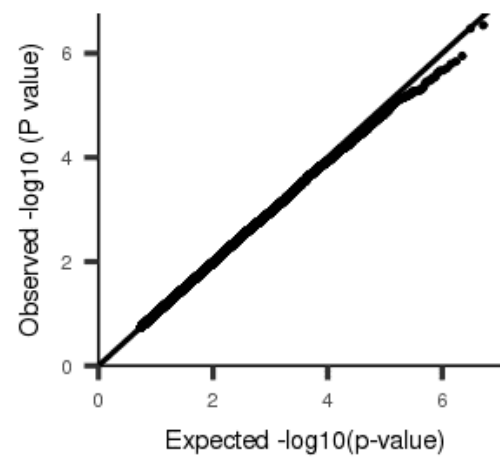

[back to list of plots](#)

Figure 1304: NETMAT edge (100) 0148

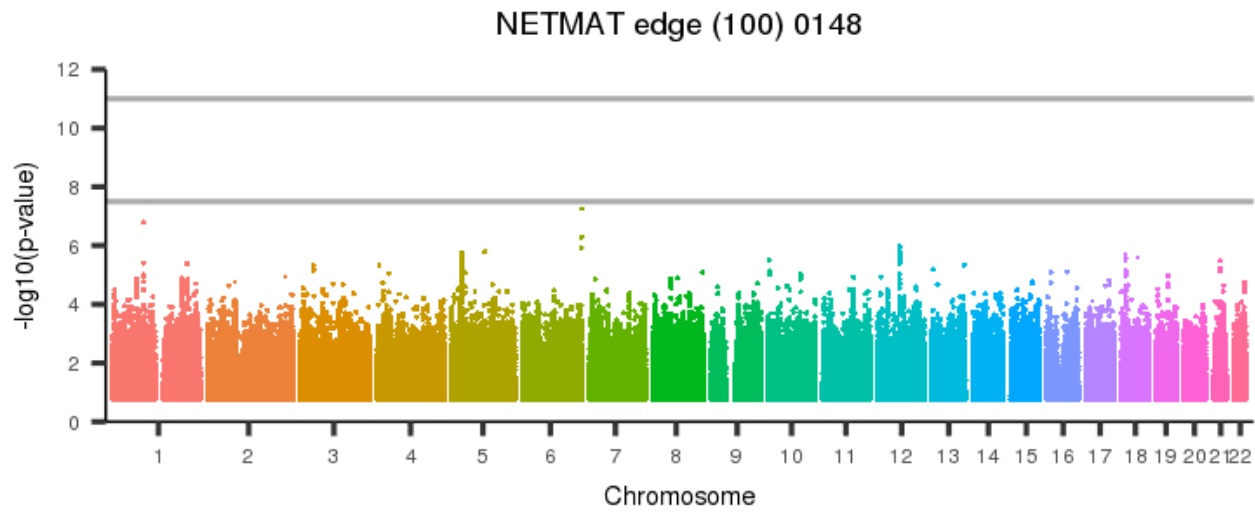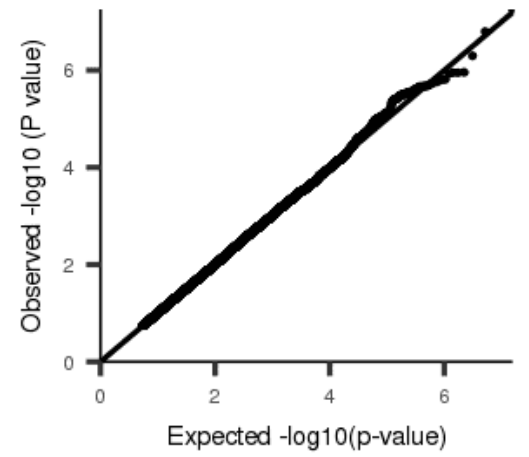

[back to list of plots](#)

Figure 1305: NETMAT edge (100) 0149

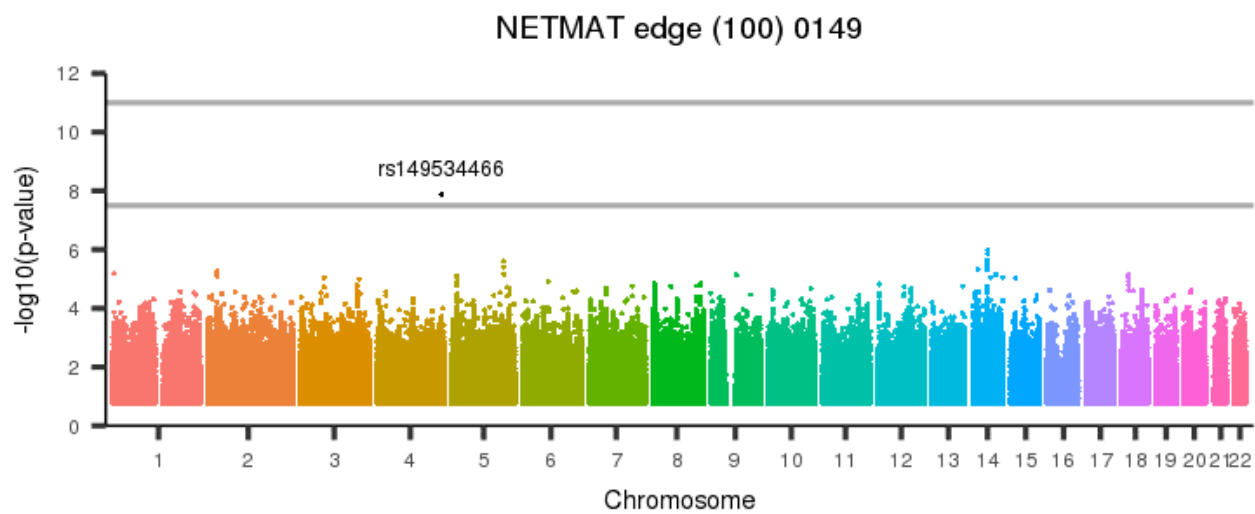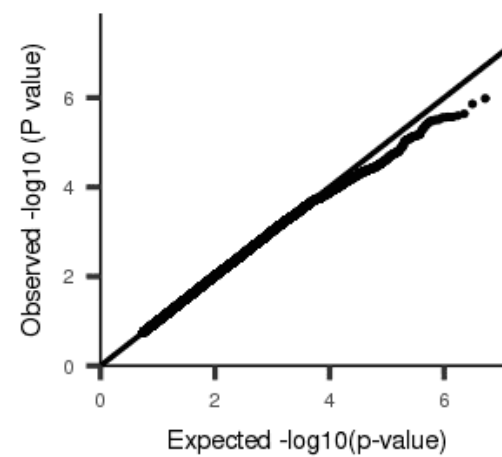

[back to list of plots](#)

Figure 1306: NETMAT edge (100) 0150

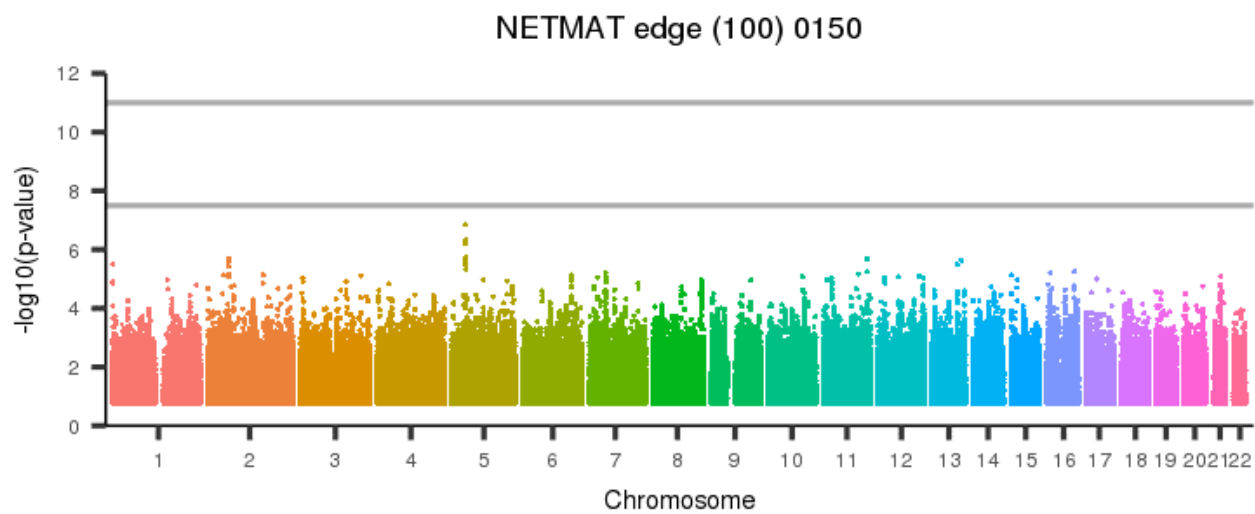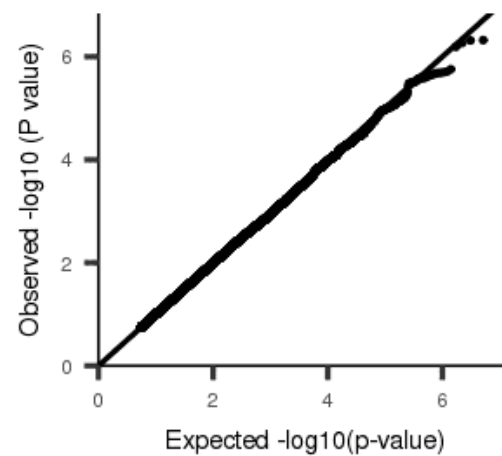

[back to list of plots](#)

Figure 1307: NETMAT edge (100) 0151

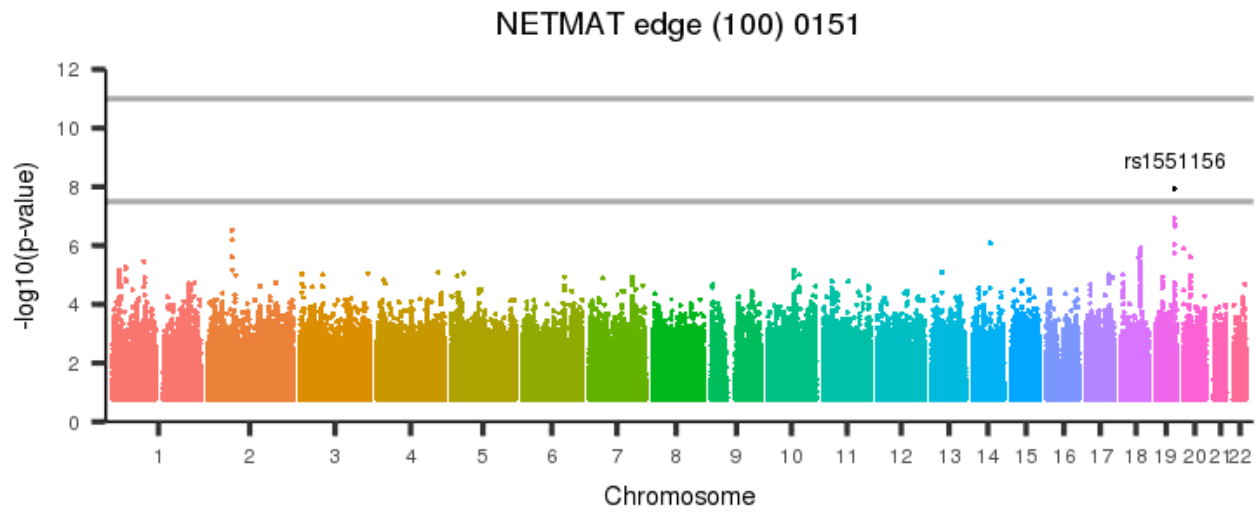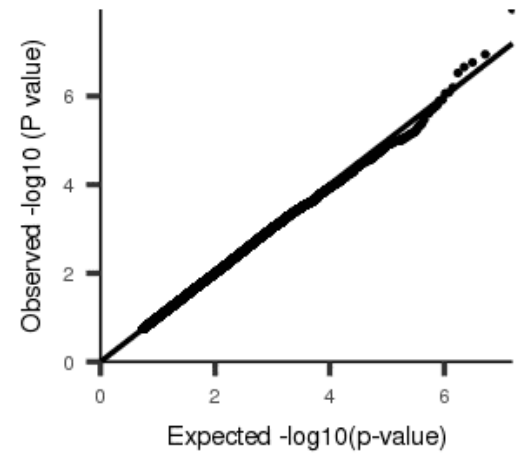

[back to list of plots](#)

Figure 1308: NETMAT edge (100) 0152

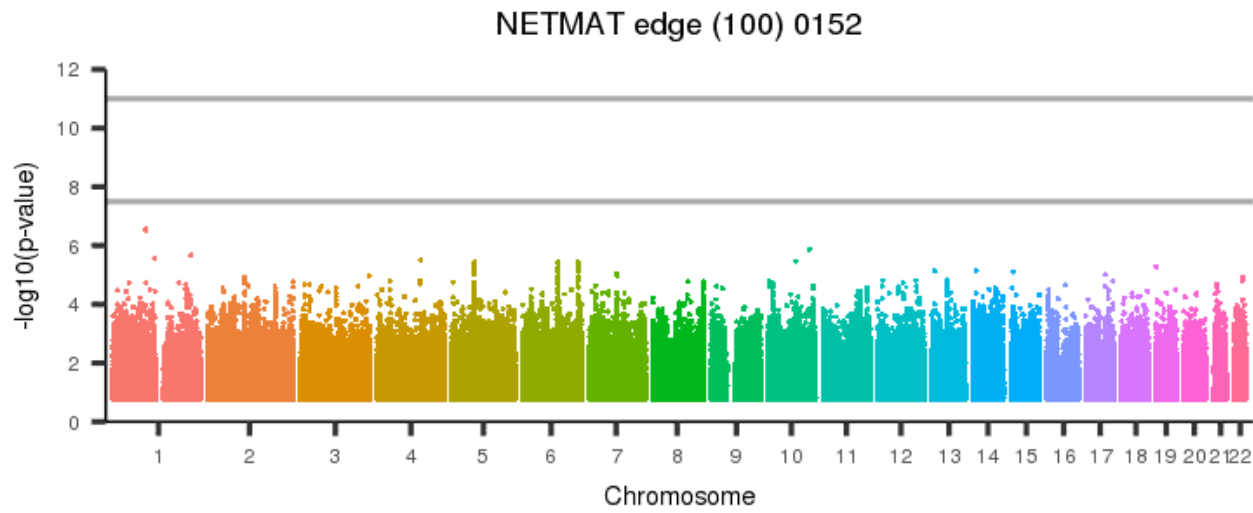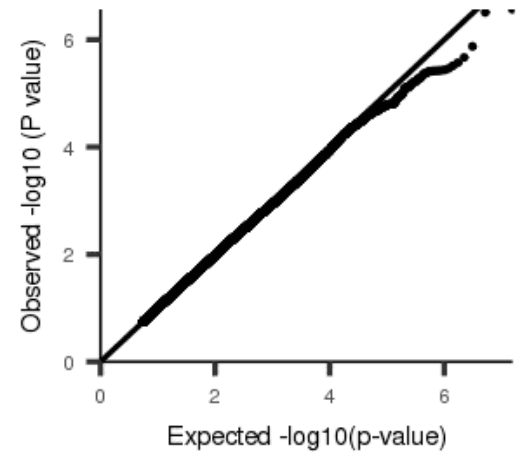

[back to list of plots](#)

Figure 1309: NETMAT edge (100) 0153

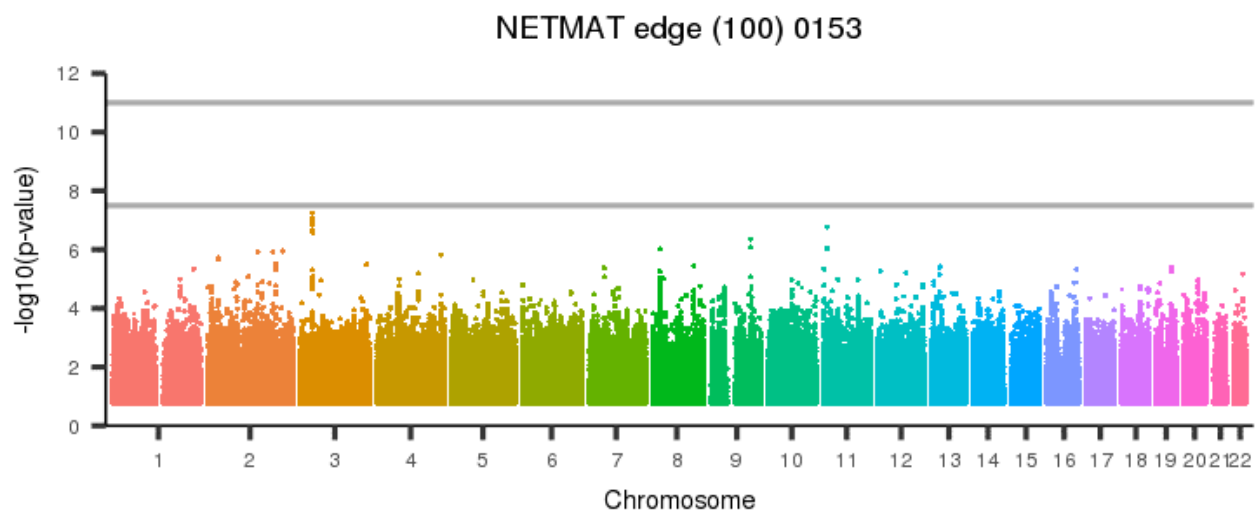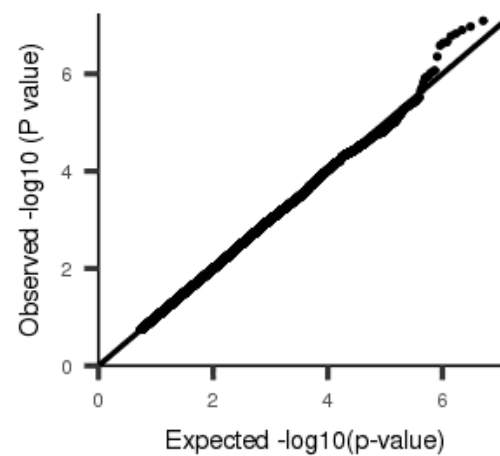

[back to list of plots](#)



Figure 1310: NETMAT edge (100) 0154

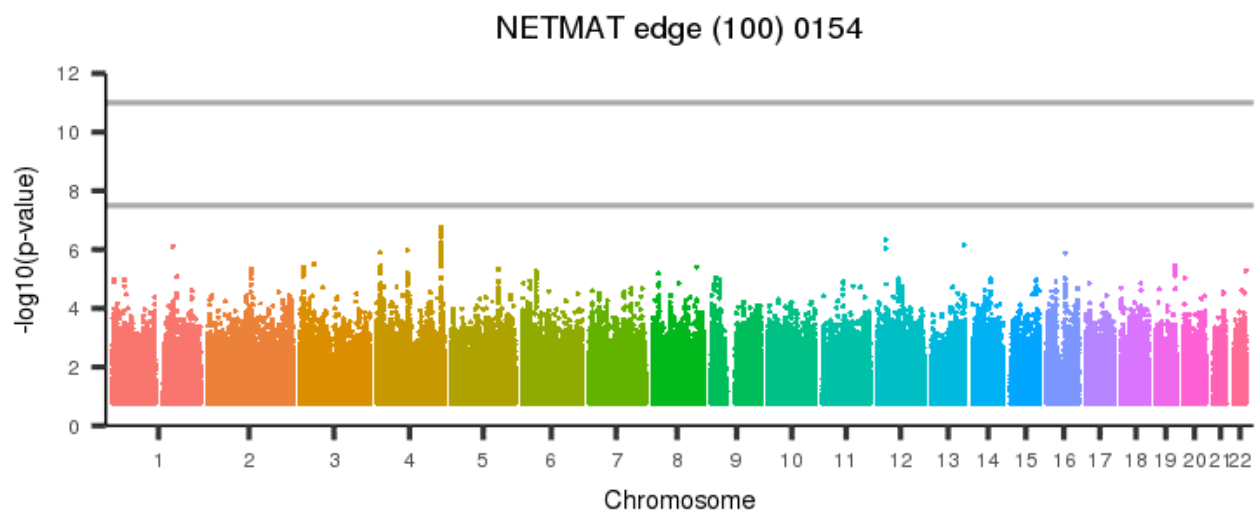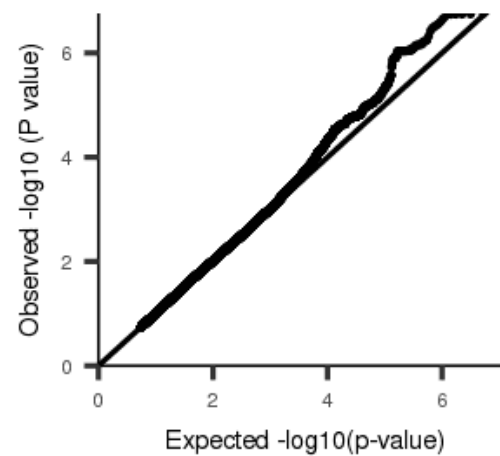

[back to list of plots](#)

Figure 1311: NETMAT edge (100) 0155

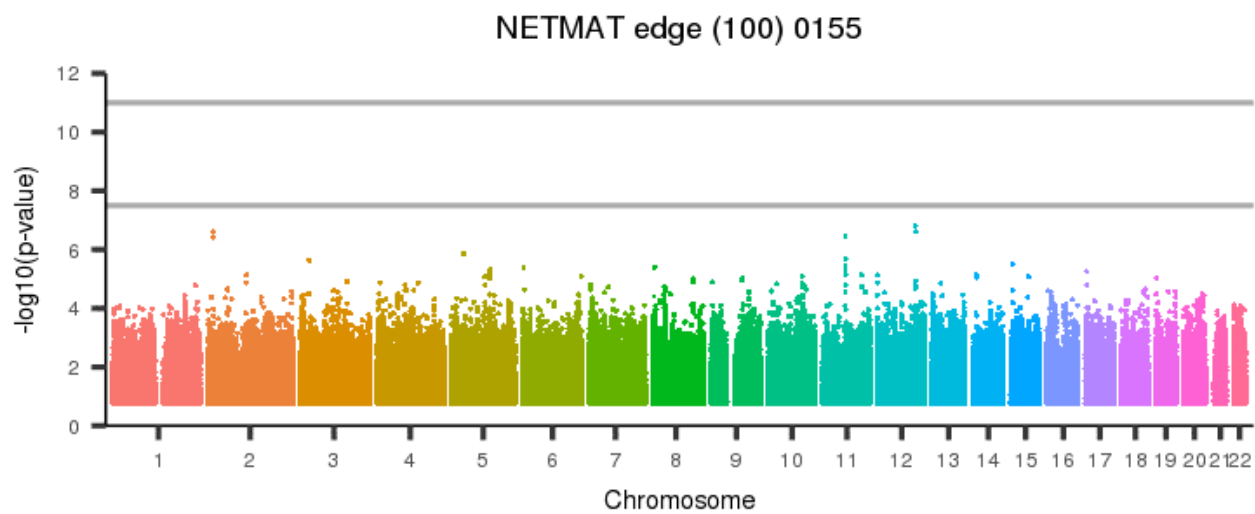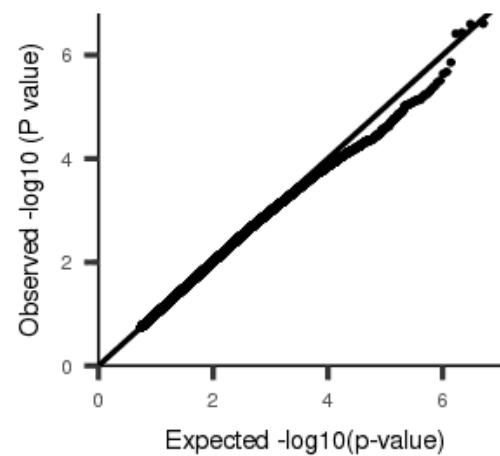

[back to list of plots](#)

Figure 1312: NETMAT edge (100) 0156

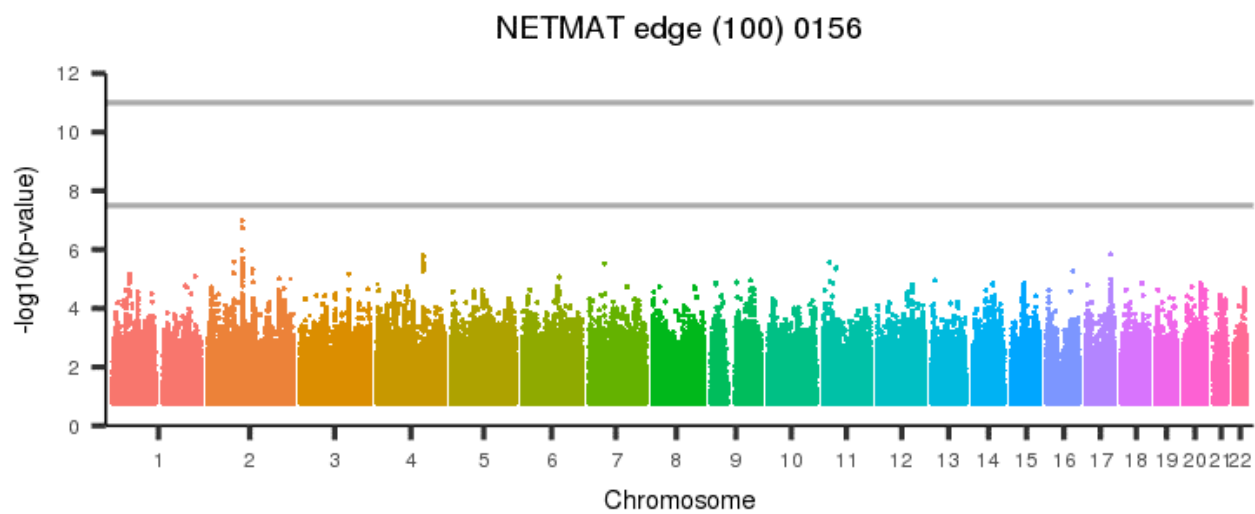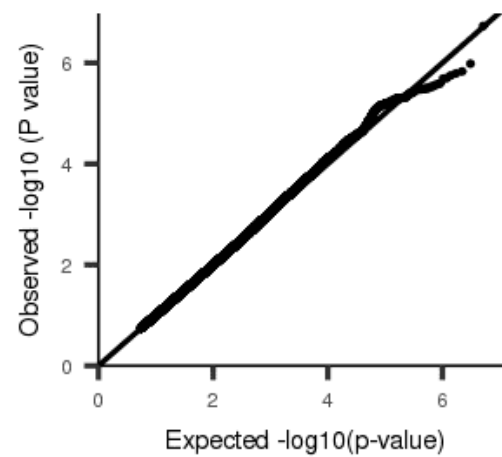

[back to list of plots](#)

Figure 1313: NETMAT edge (100) 0157

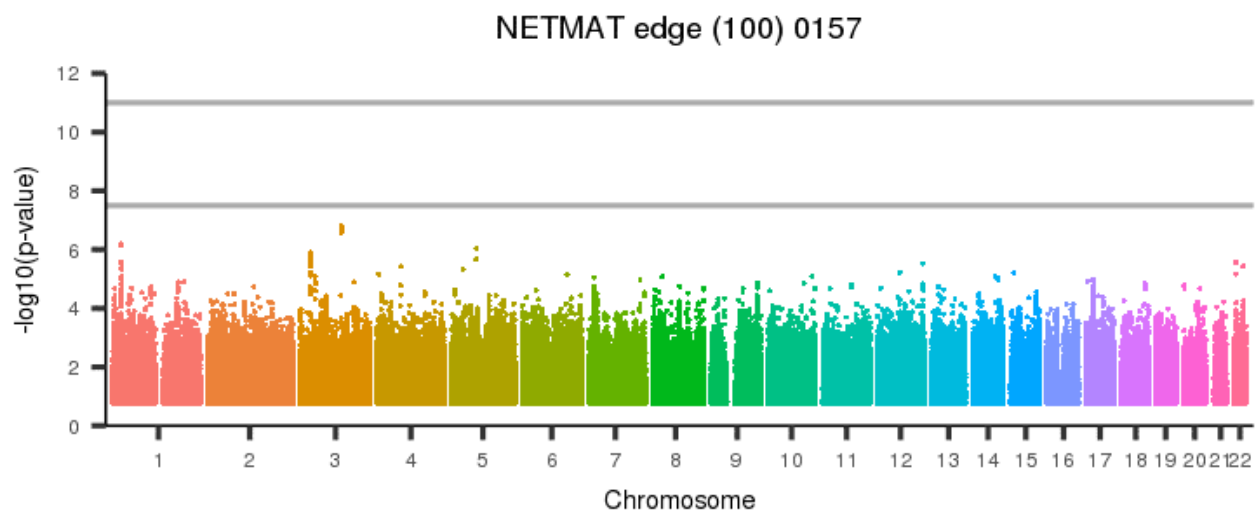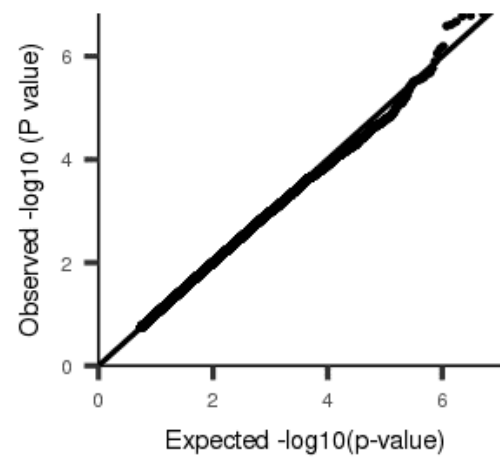

[back to list of plots](#)

Figure 1314: NETMAT edge (100) 0158

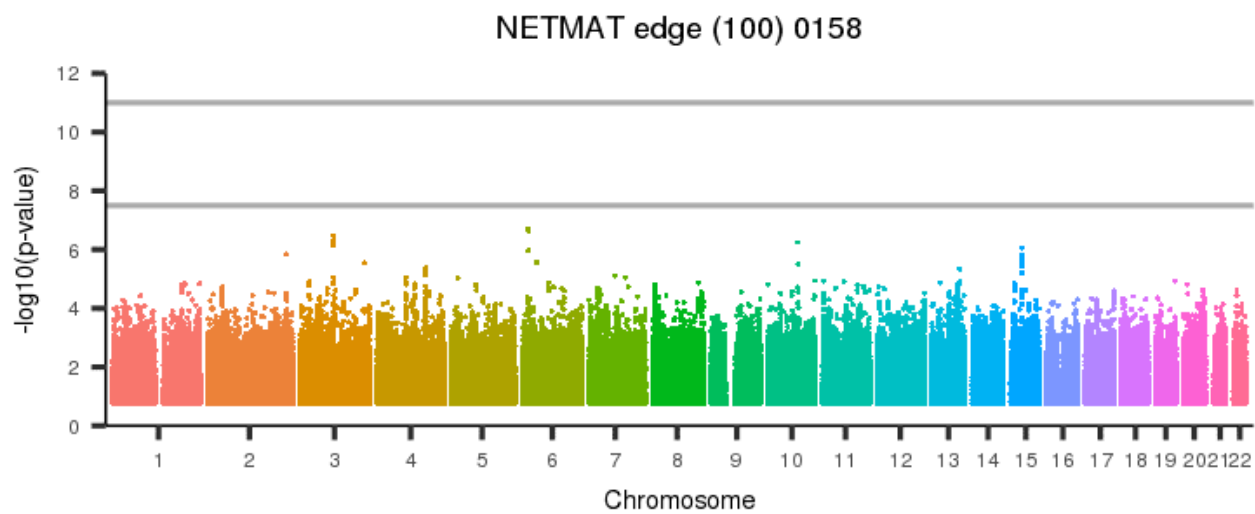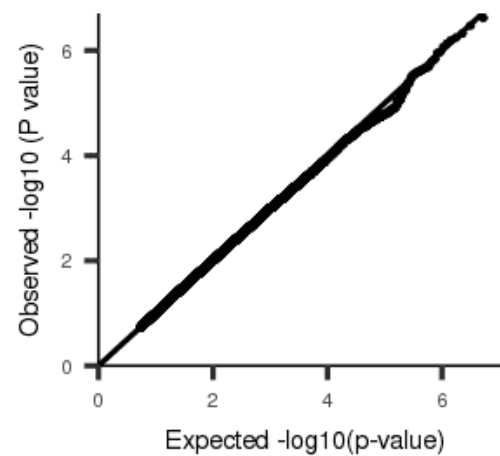

[back to list of plots](#)

Figure 1315: NETMAT edge (100) 0159

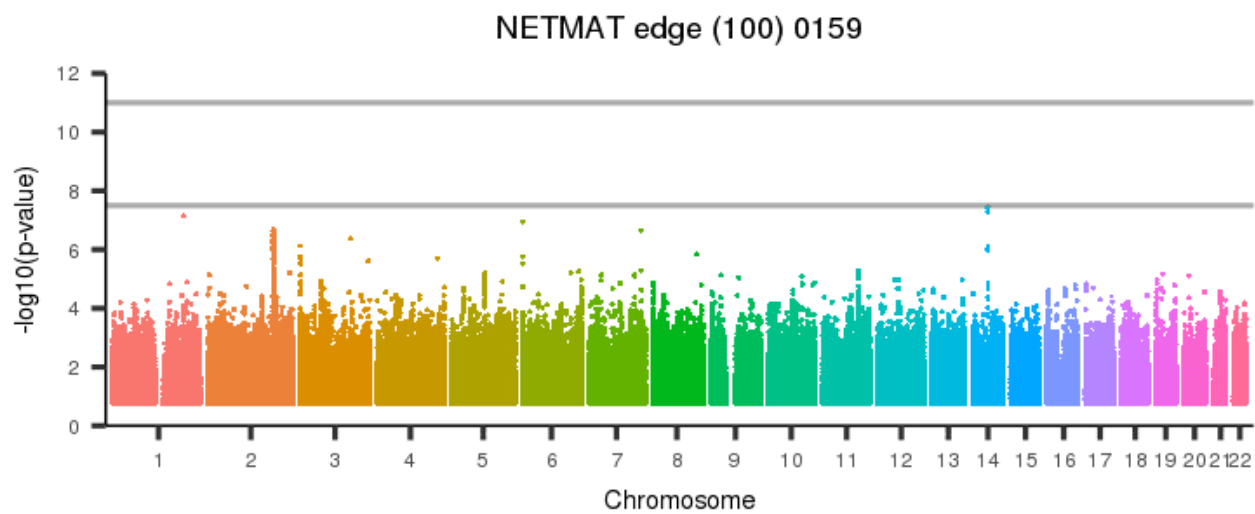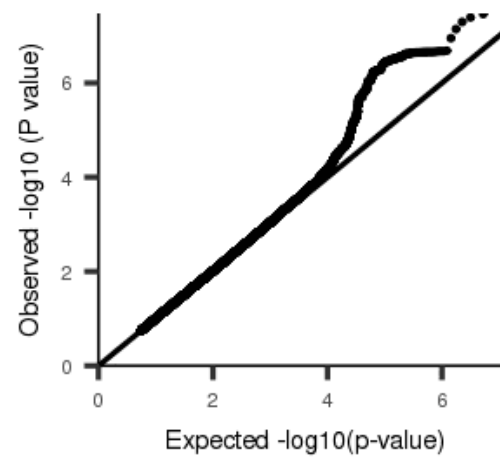

[back to list of plots](#)

Figure 1316: NETMAT edge (100) 0160

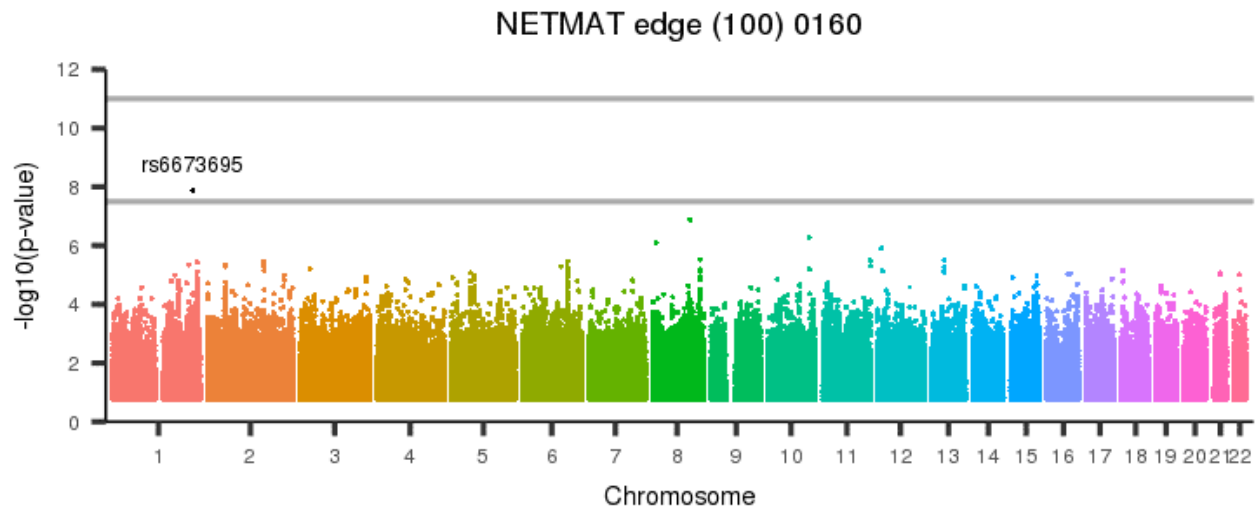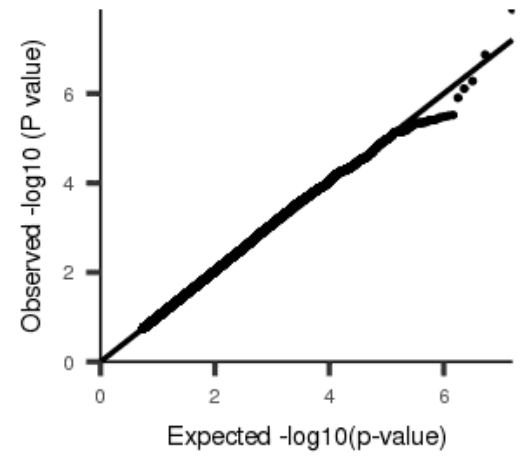

[back to list of plots](#)

Figure 1317: NETMAT edge (100) 0161

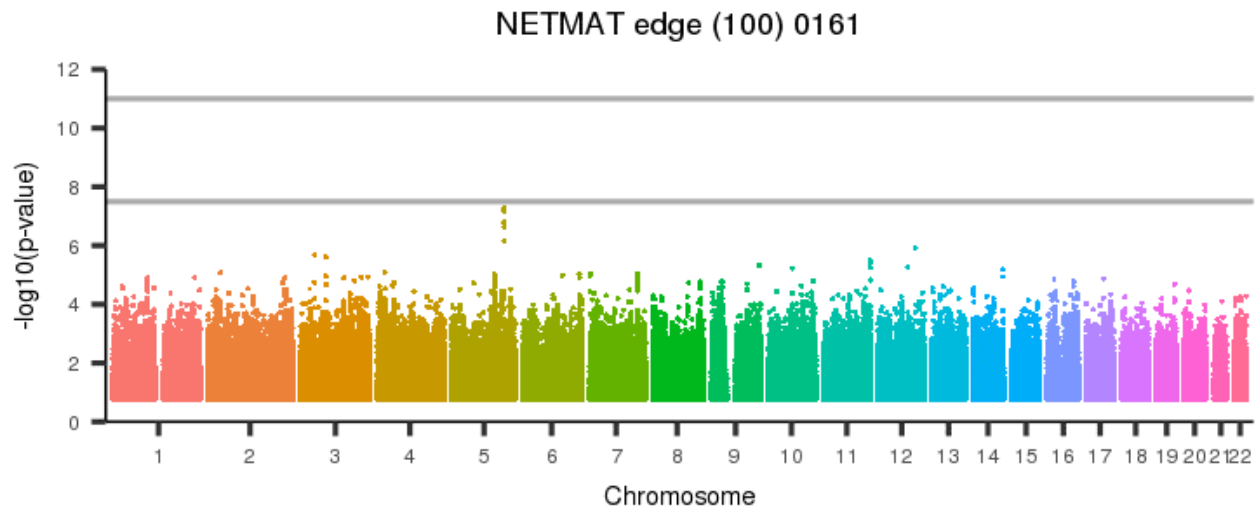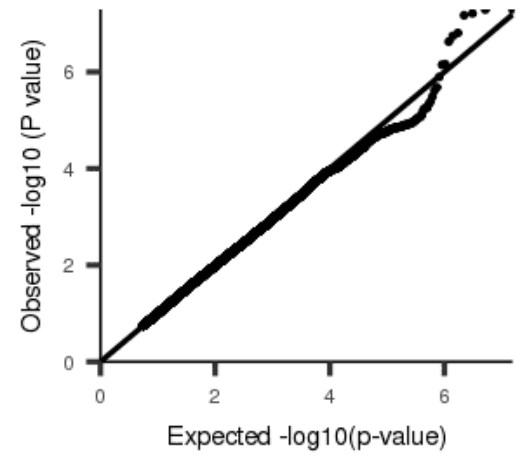

[back to list of plots](#)



Figure 1318: NETMAT edge (100) 0162

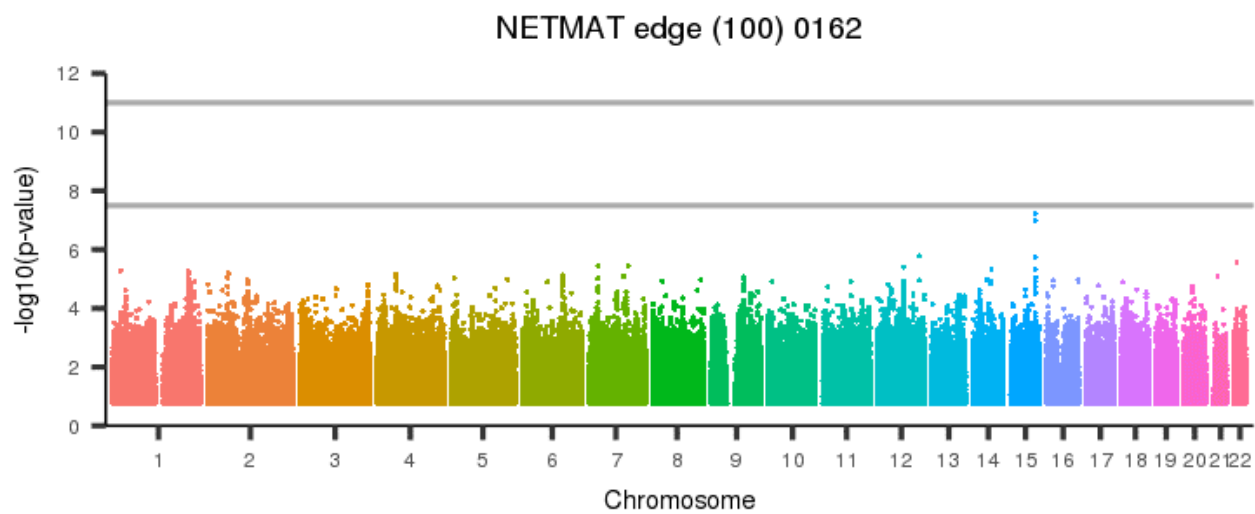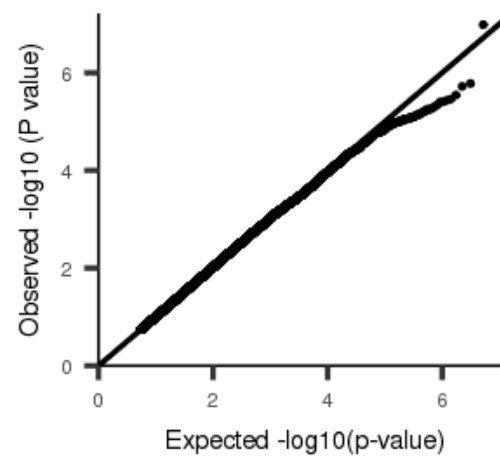

[back to list of plots](#)

Figure 1319: NETMAT edge (100) 0163

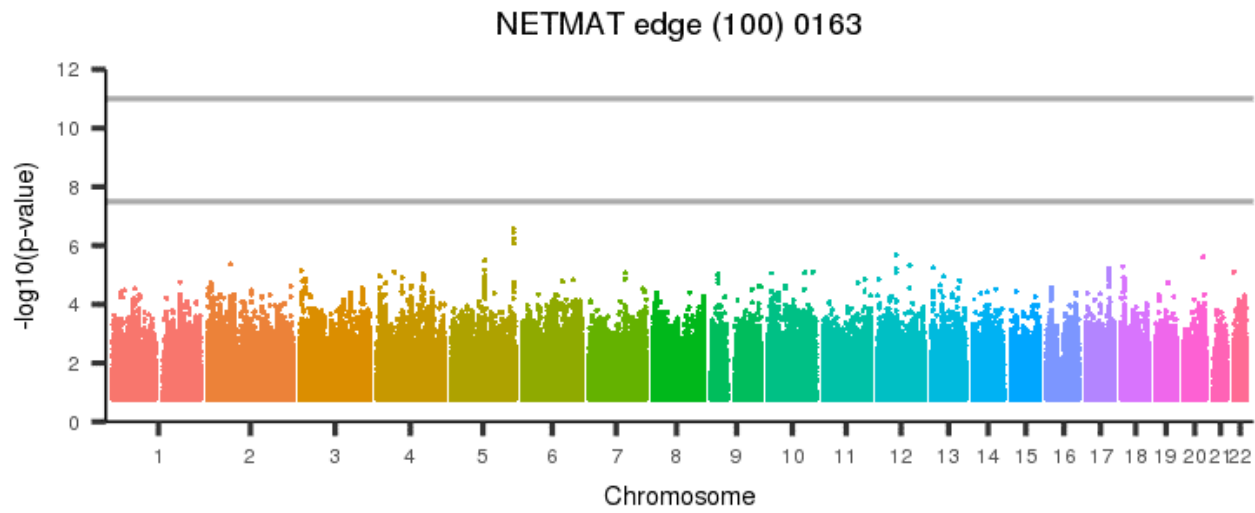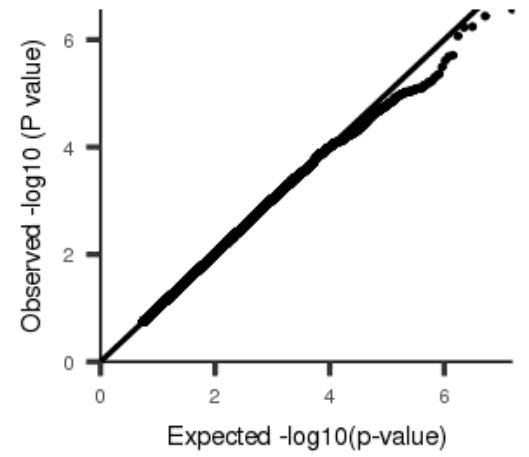

[back to list of plots](#)

Figure 1320: NETMAT edge (100) 0164

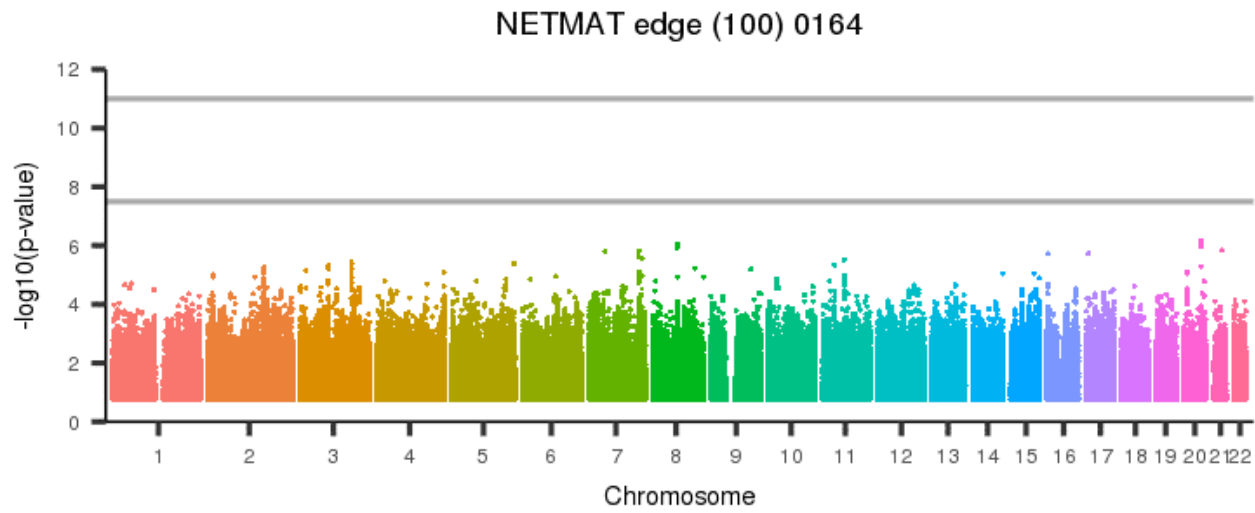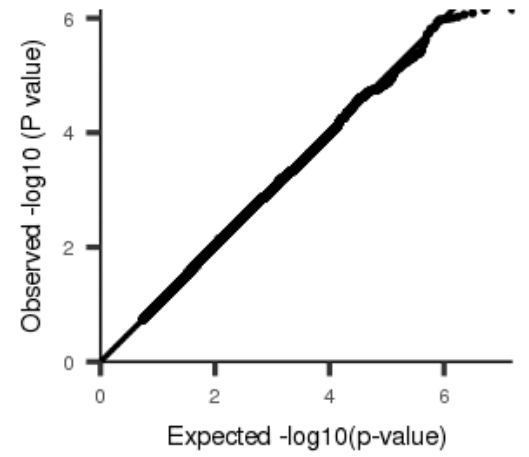

[back to list of plots](#)

Figure 1321: NETMAT edge (100) 0165

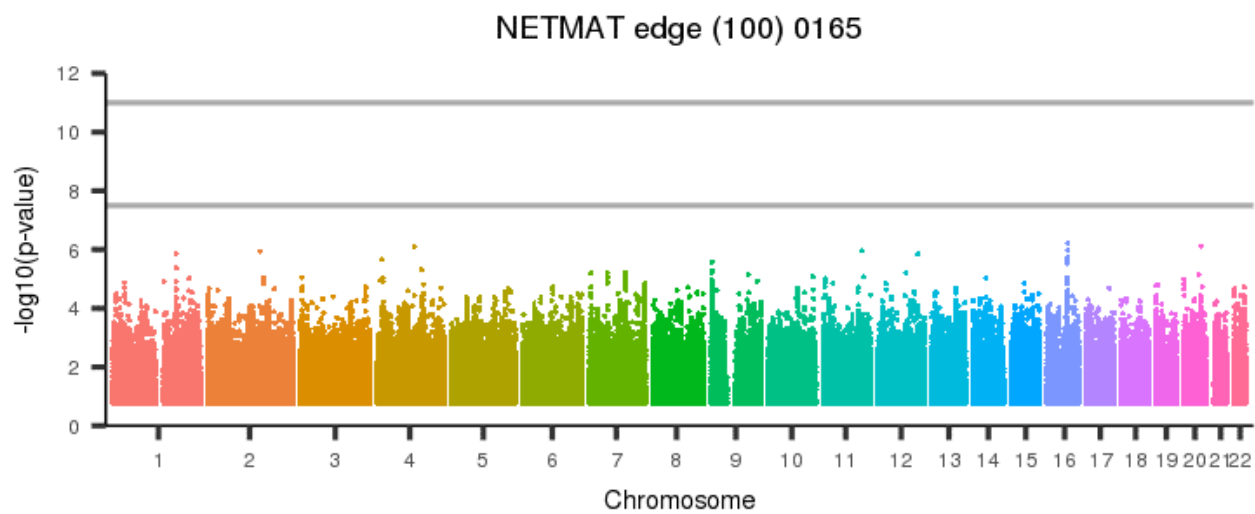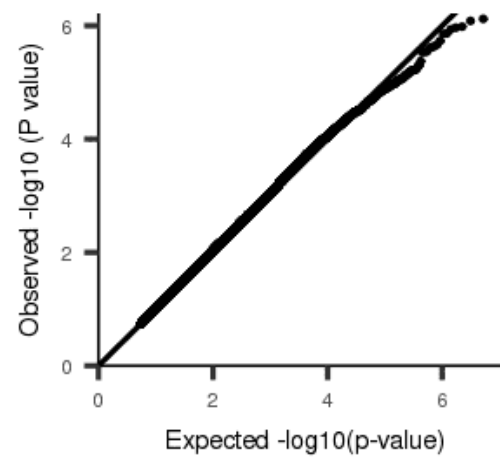

[back to list of plots](#)

Figure 1322: NETMAT edge (100) 0166

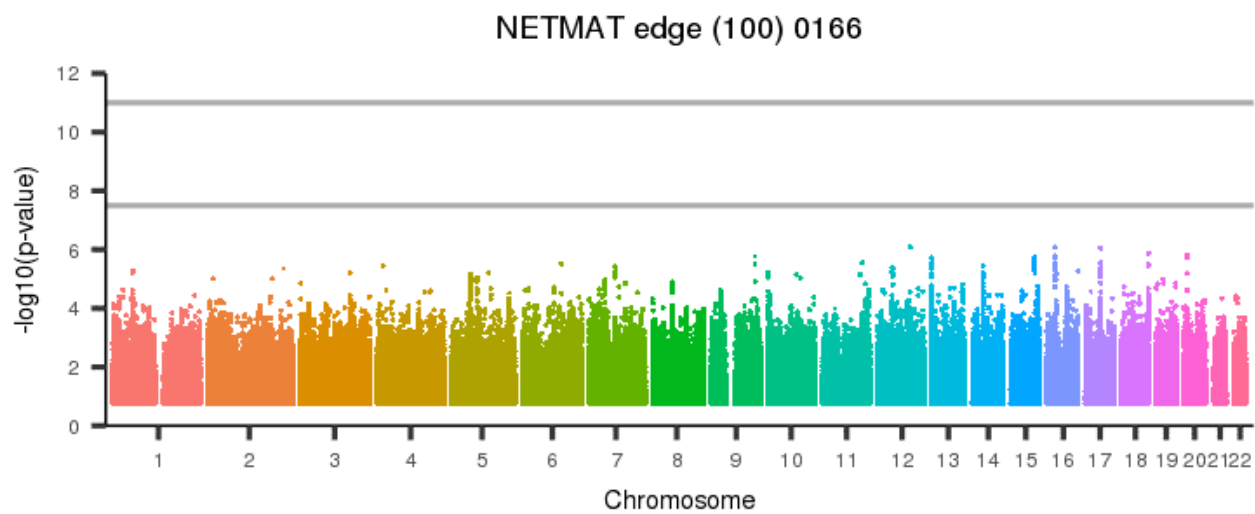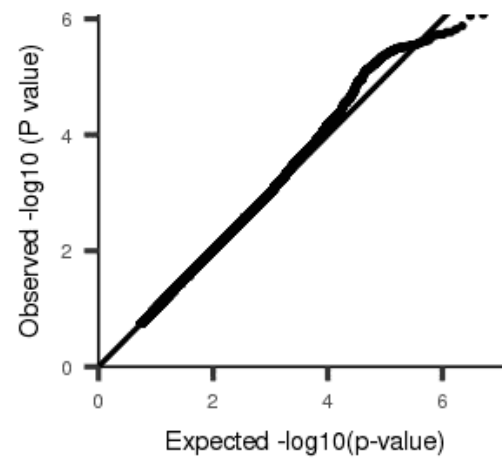

[back to list of plots](#)

Figure 1323: NETMAT edge (100) 0167

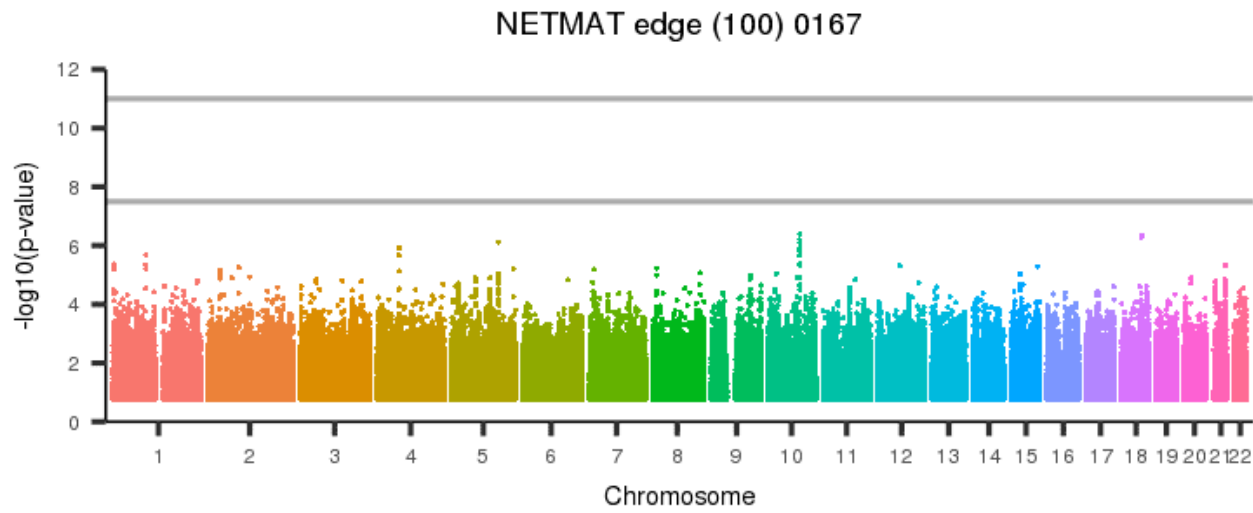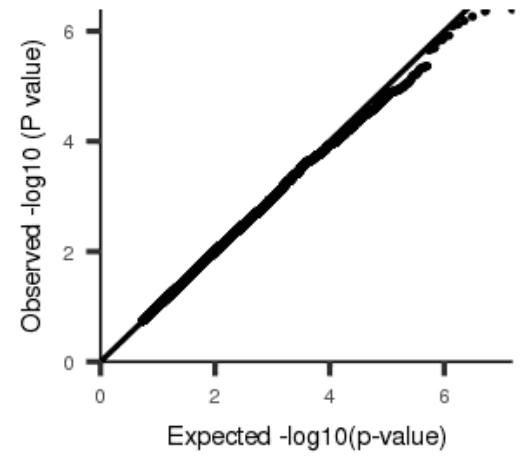

[back to list of plots](#)

Figure 1324: NETMAT edge (100) 0168

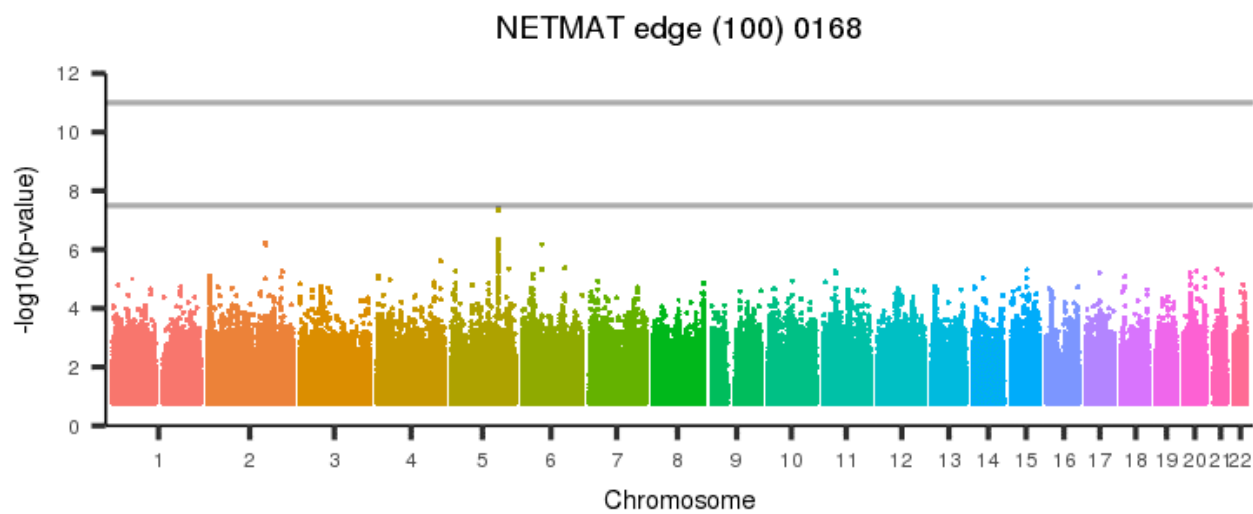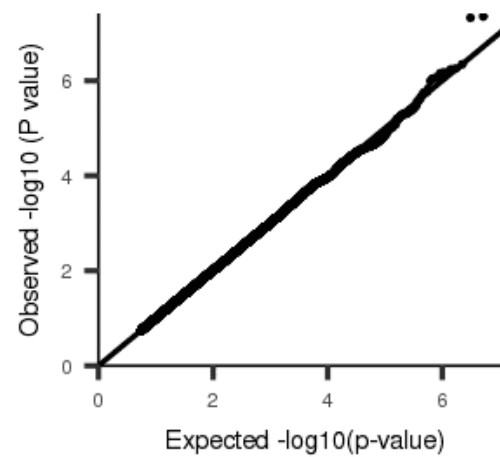

[back to list of plots](#)

Figure 1325: NETMAT edge (100) 0169

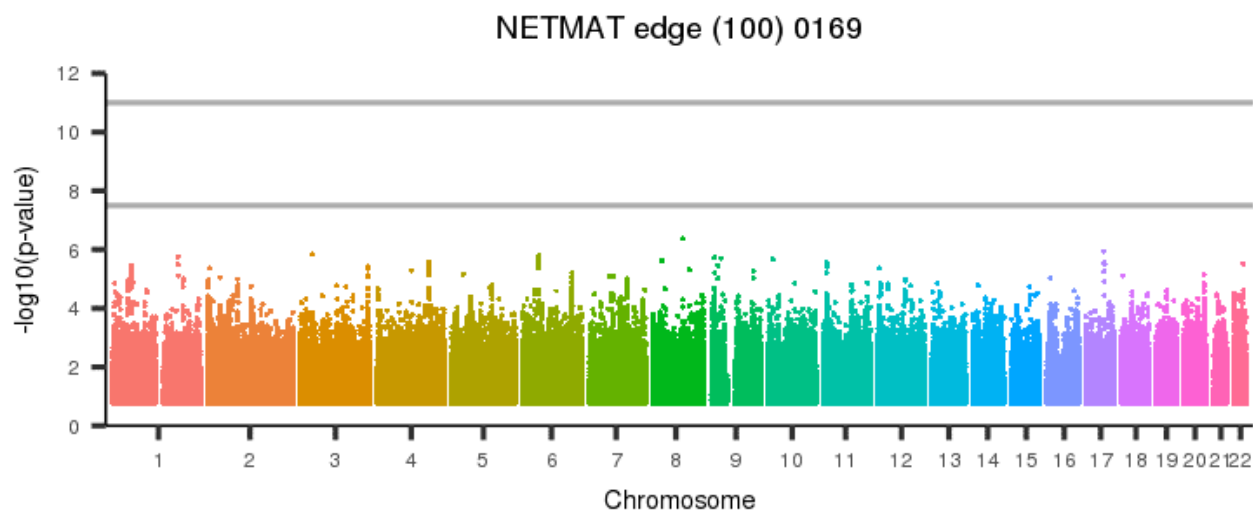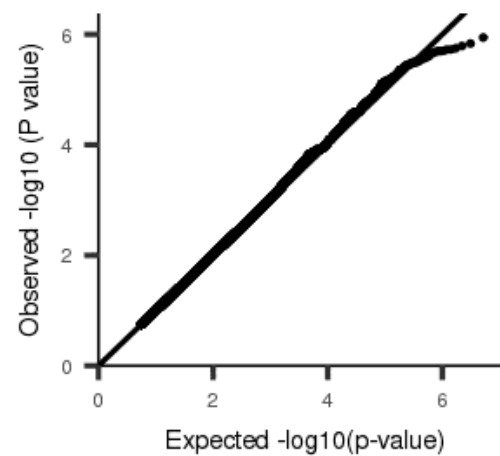

[back to list of plots](#)



Figure 1326: NETMAT edge (100) 0170

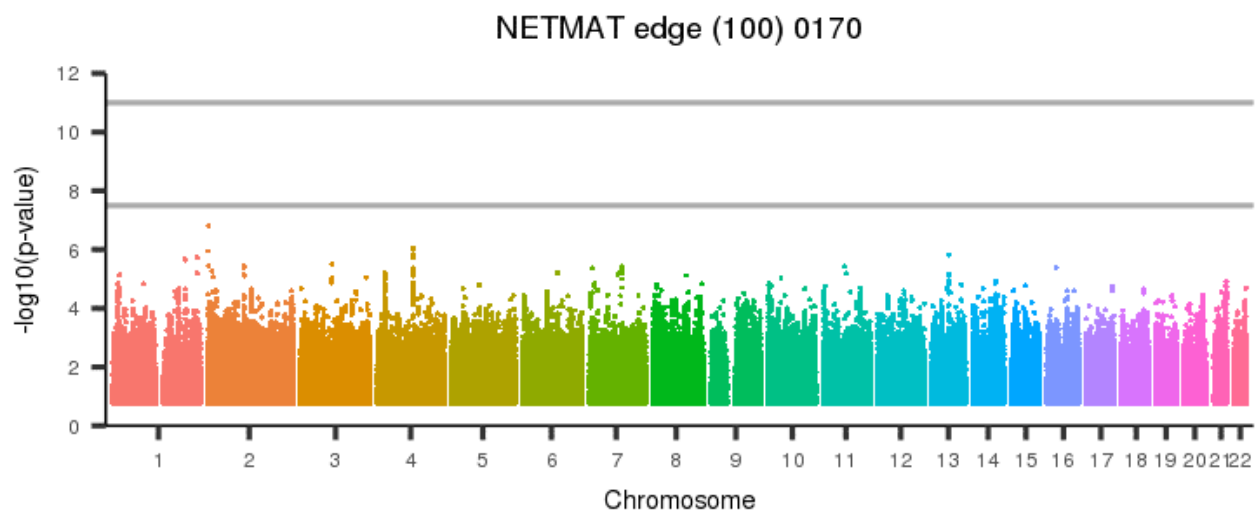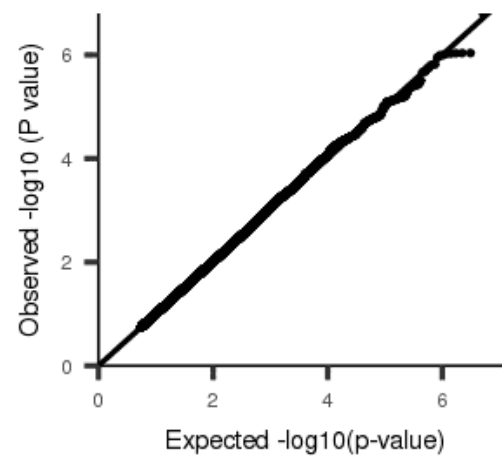

[back to list of plots](#)

Figure 1327: NETMAT edge (100) 0171

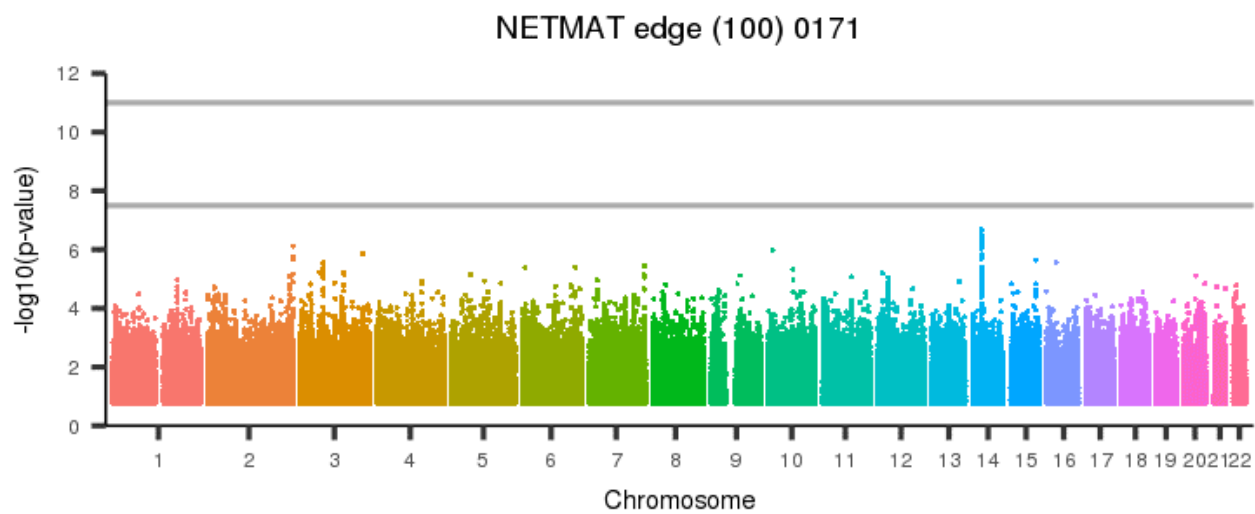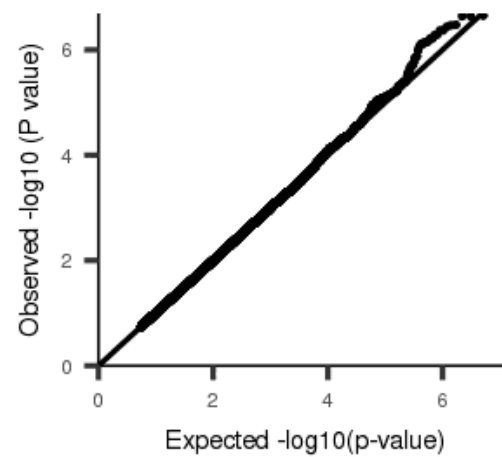

[back to list of plots](#)

Figure 1328: NETMAT edge (100) 0172

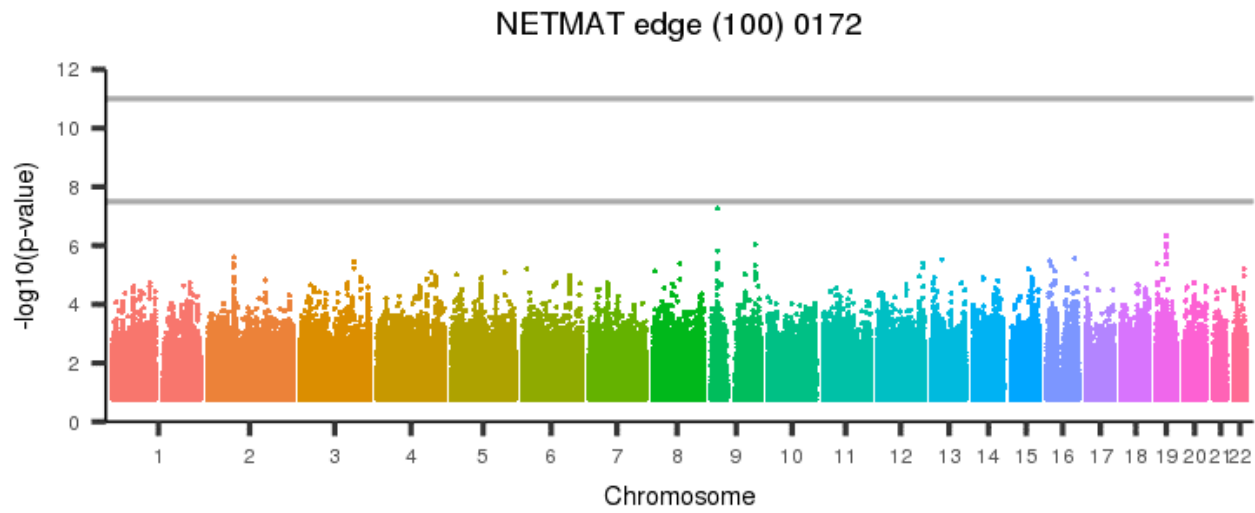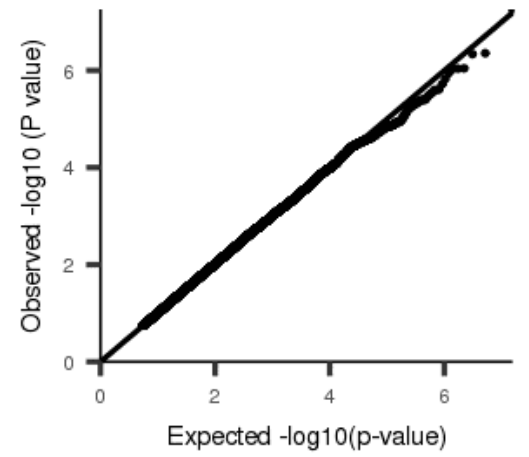

[back to list of plots](#)

Figure 1329: NETMAT edge (100) 0173

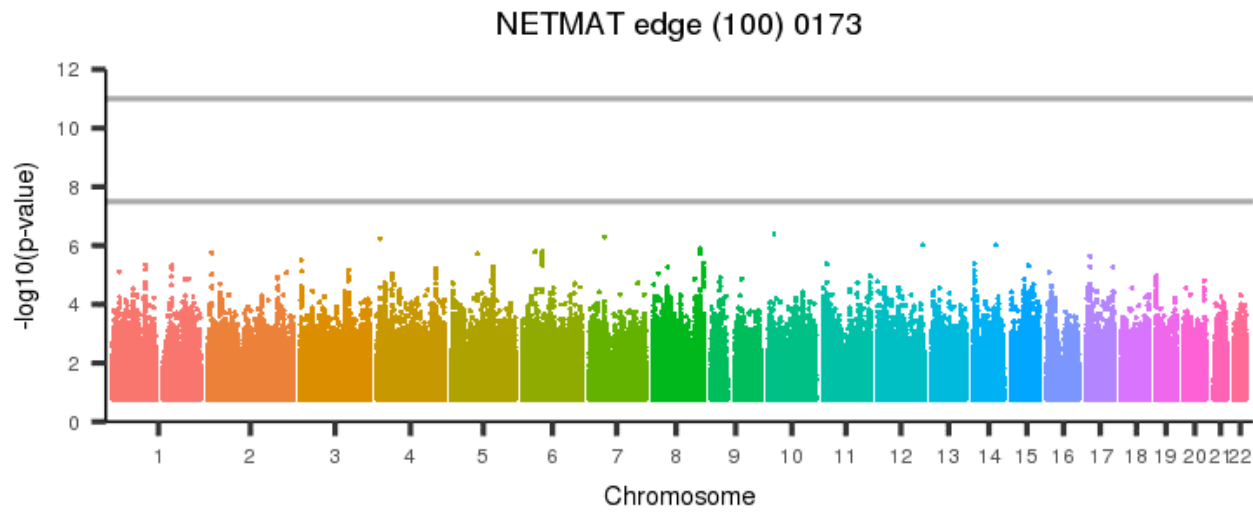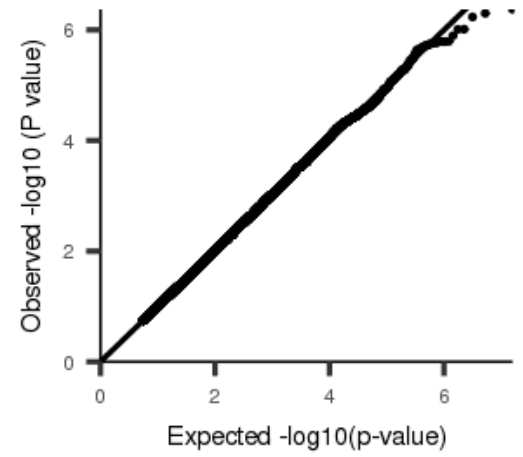

[back to list of plots](#)

Figure 1330: NETMAT edge (100) 0174

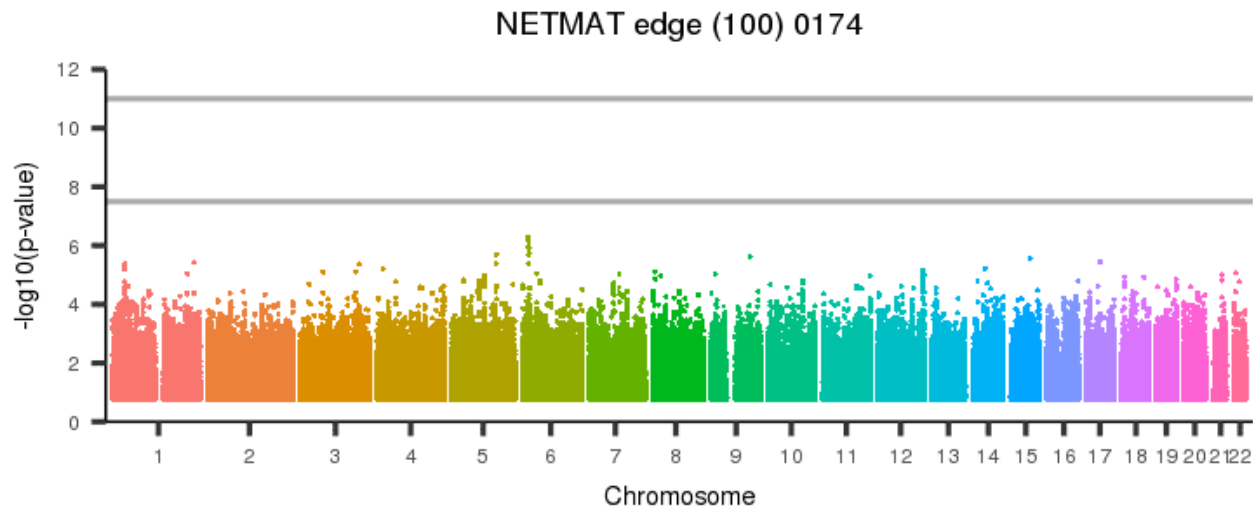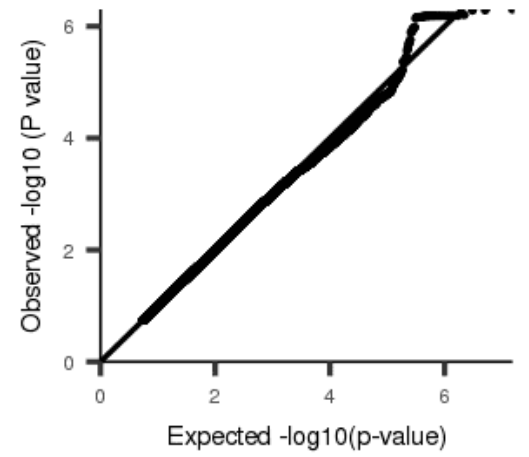

[back to list of plots](#)

Figure 1331: NETMAT edge (100) 0175

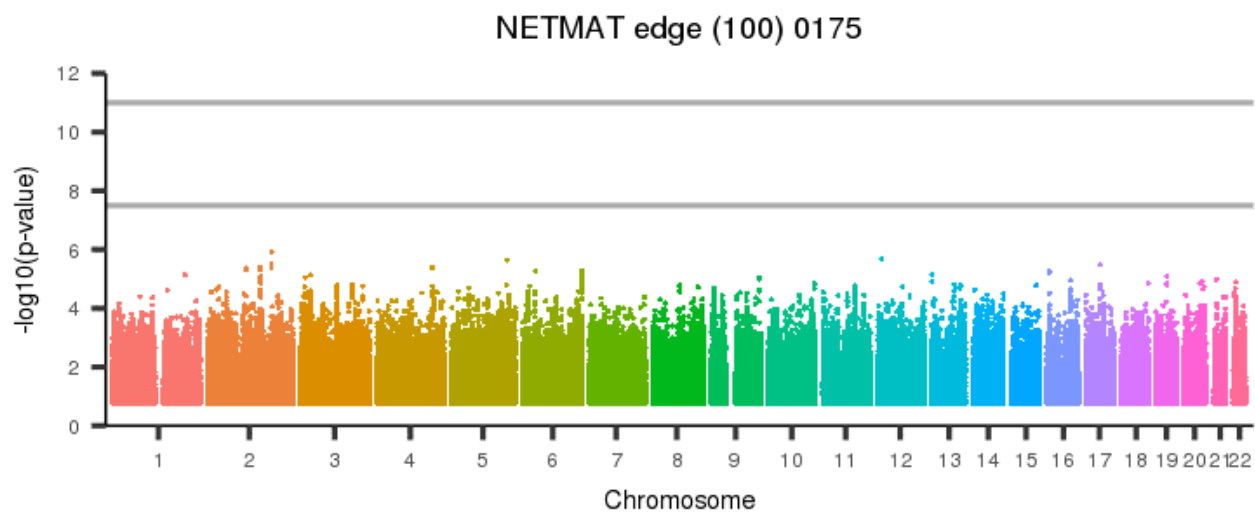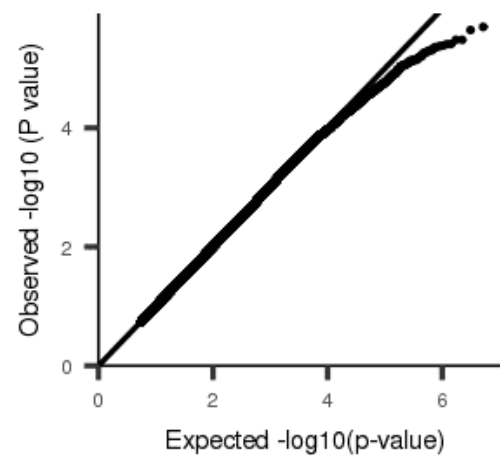

[back to list of plots](#)

Figure 1332: NETMAT edge (100) 0176

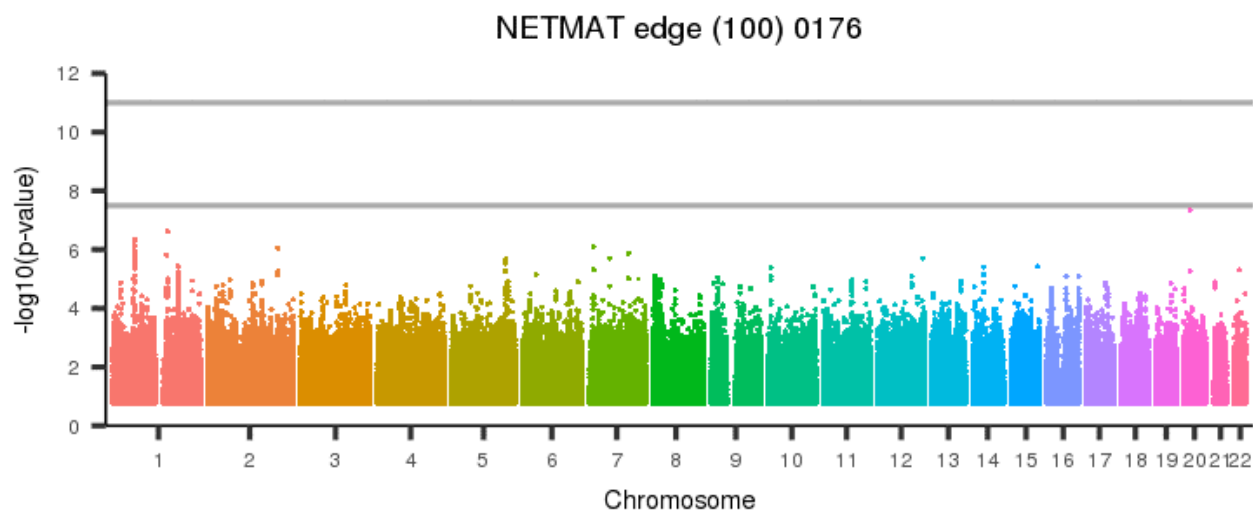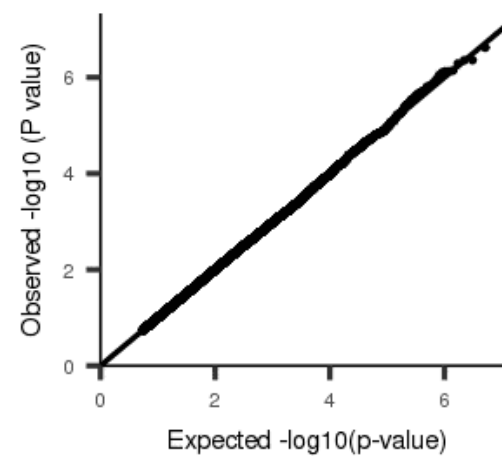

[back to list of plots](#)

Figure 1333: NETMAT edge (100) 0177

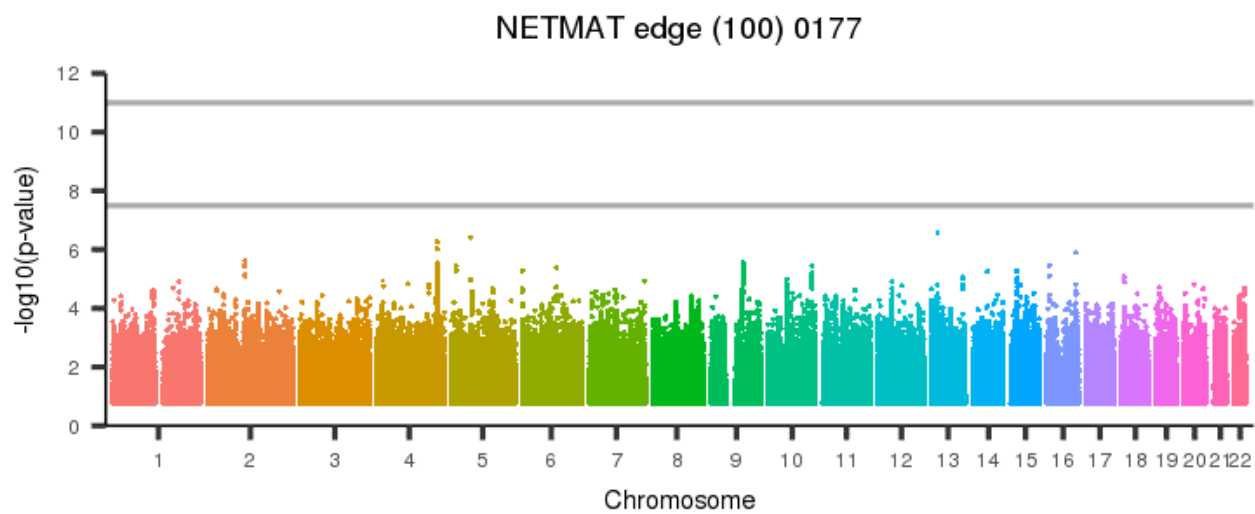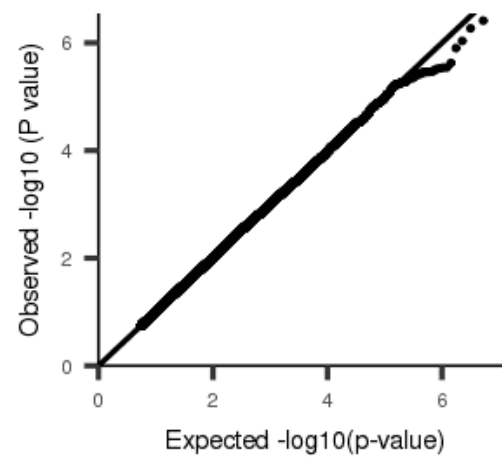

[back to list of plots](#)



Figure 1334: NETMAT edge (100) 0178

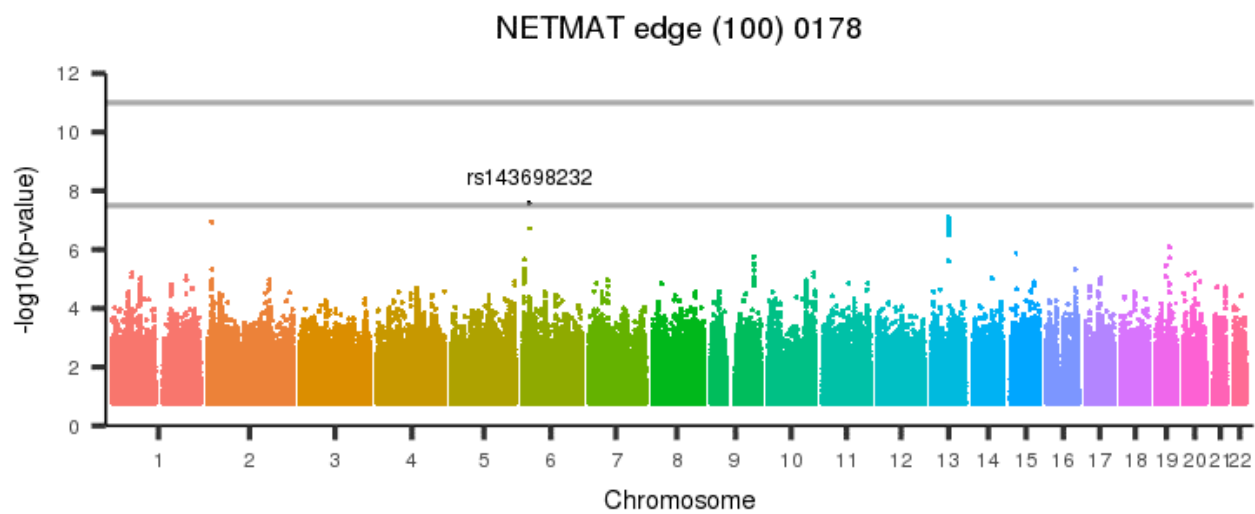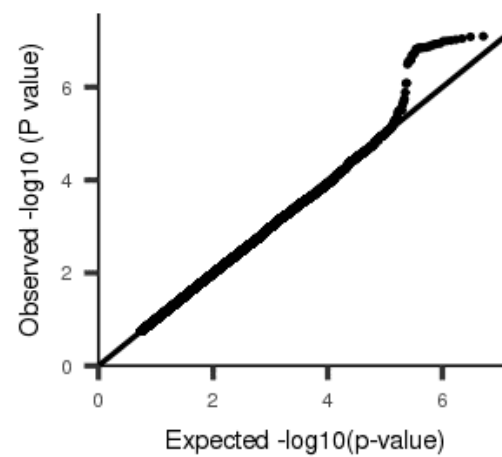

[back to list of plots](#)

Figure 1335: NETMAT edge (100) 0179

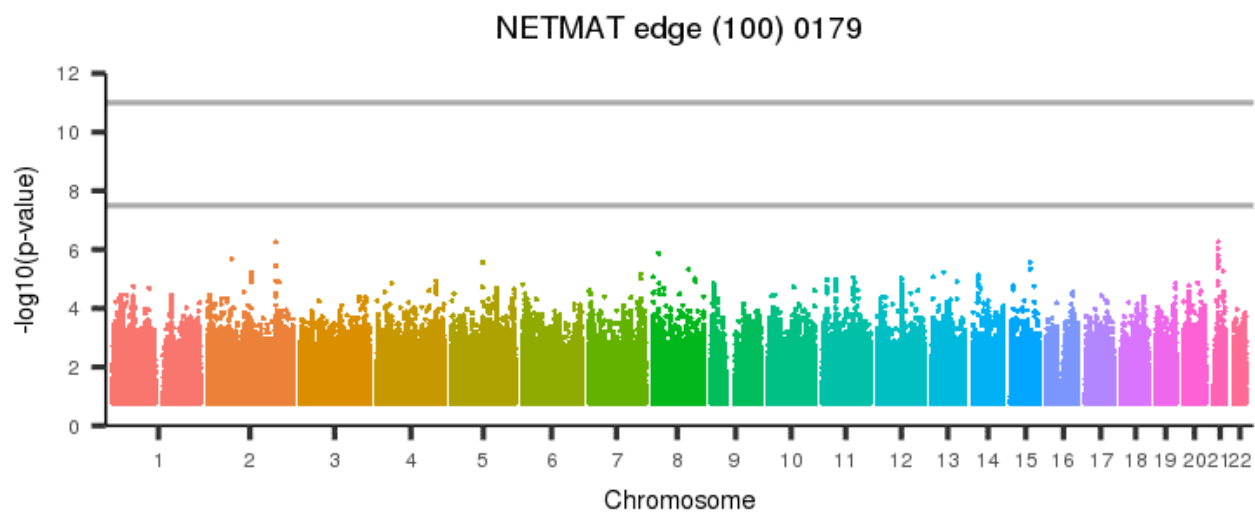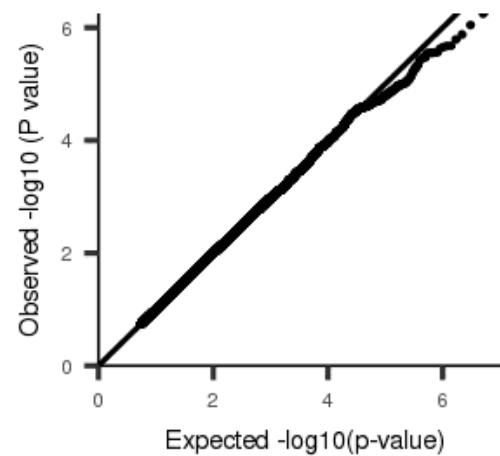

[back to list of plots](#)

Figure 1336: NETMAT edge (100) 0180

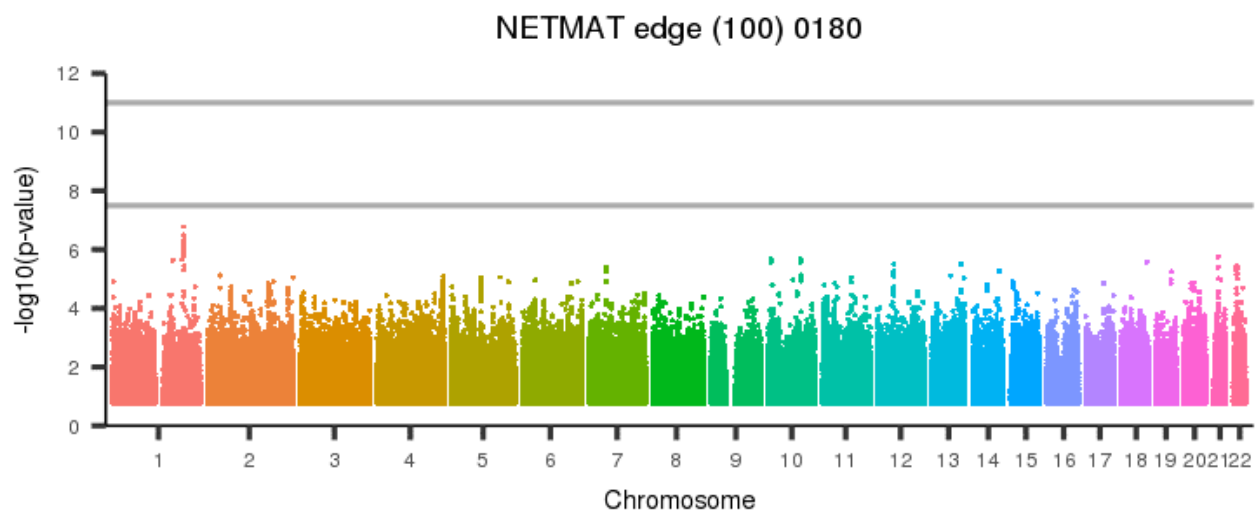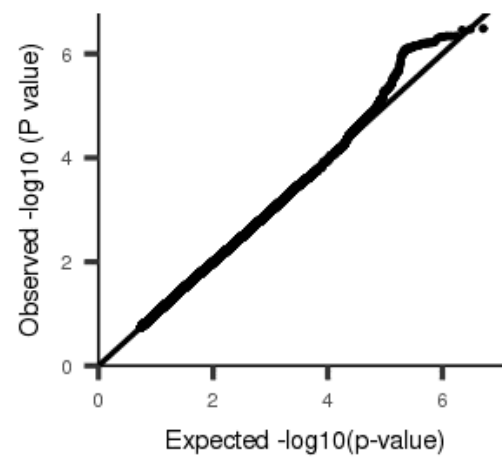

[back to list of plots](#)

Figure 1337: NETMAT edge (100) 0181

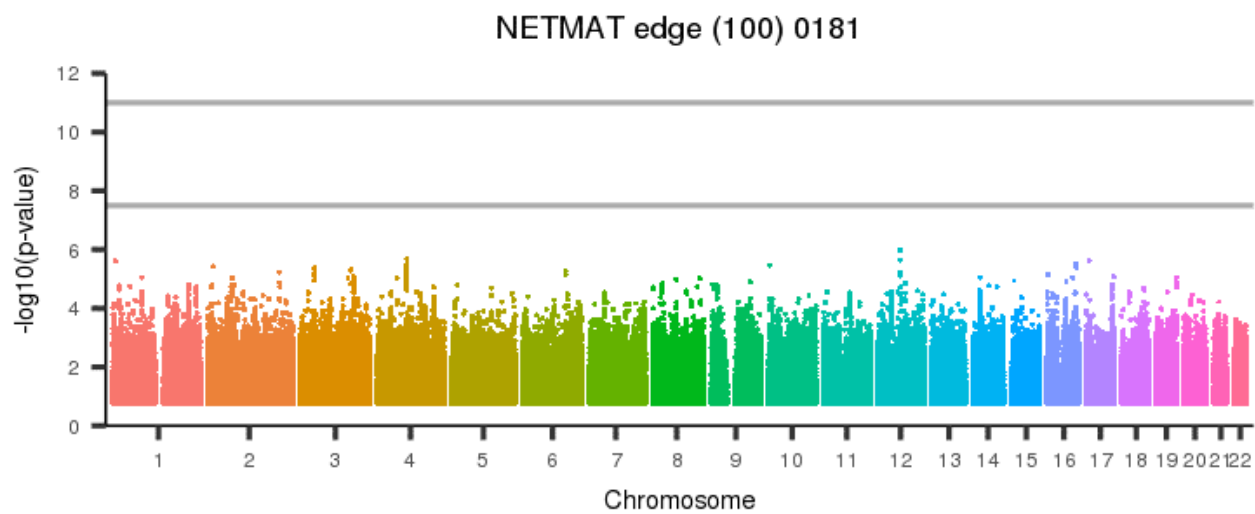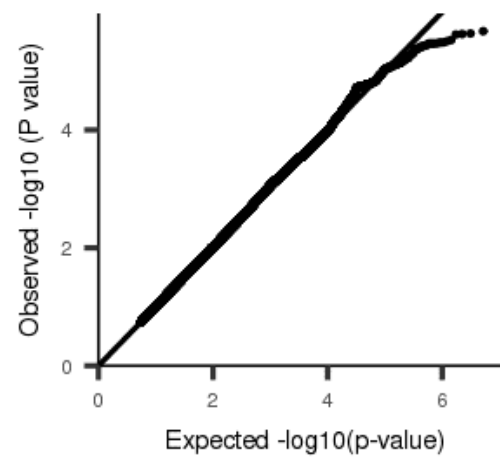

[back to list of plots](#)

Figure 1338: NETMAT edge (100) 0182

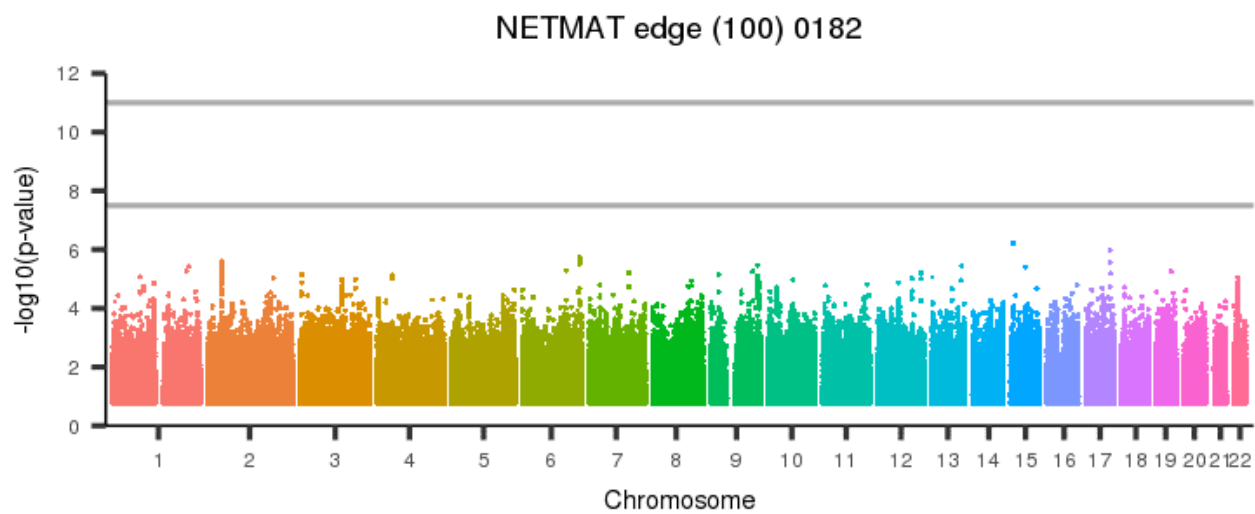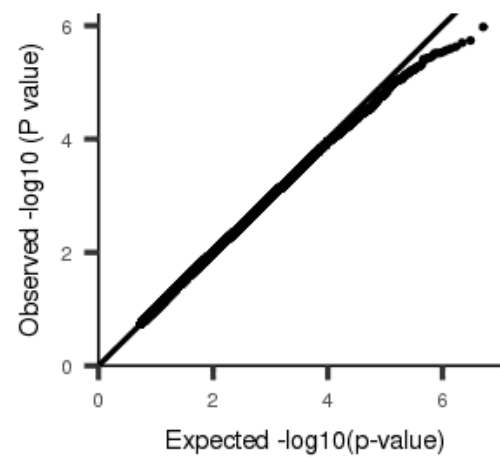

[back to list of plots](#)

Figure 1339: NETMAT edge (100) 0183

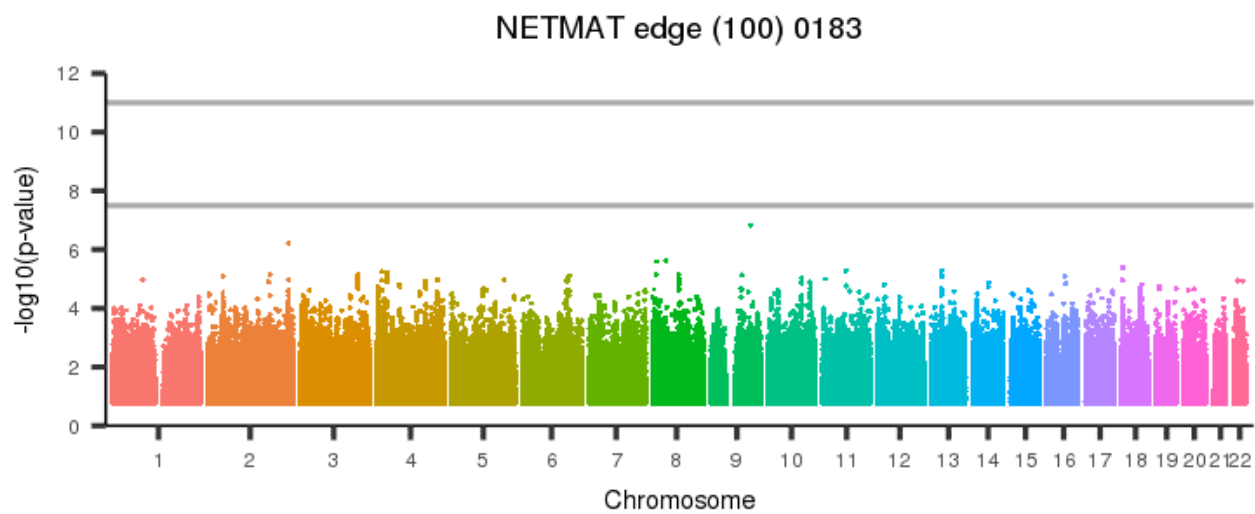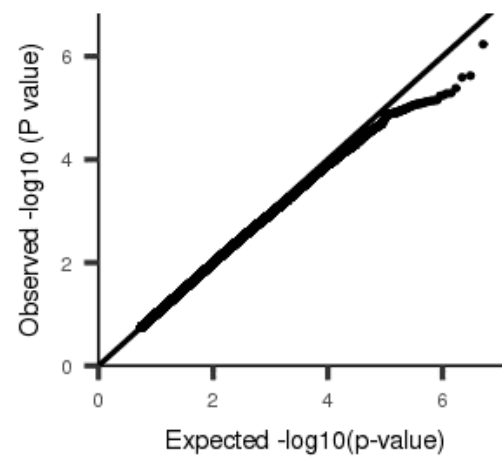

[back to list of plots](#)

Figure 1340: NETMAT edge (100) 0184

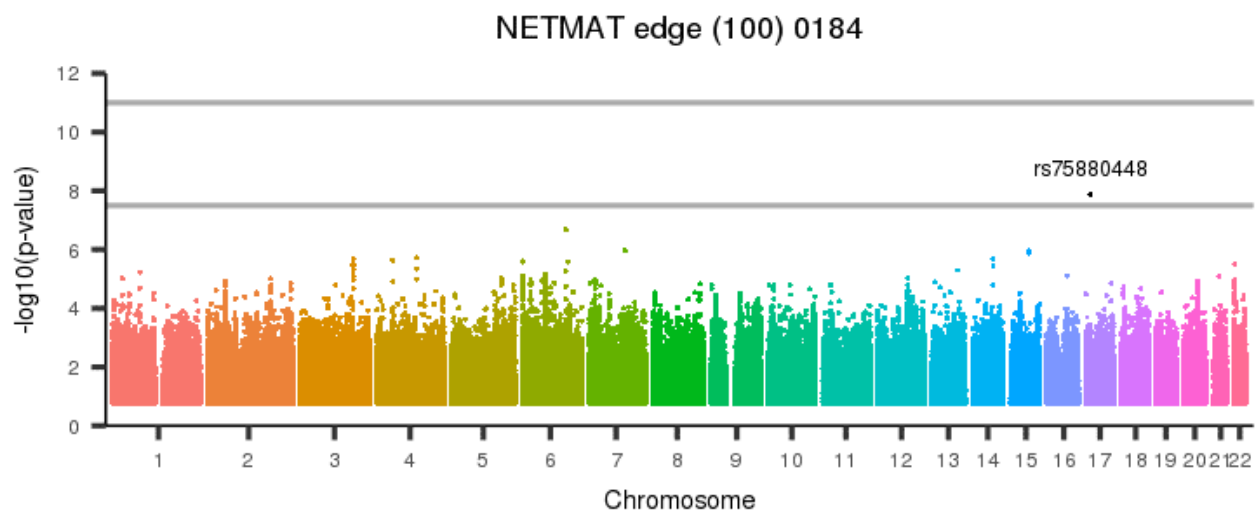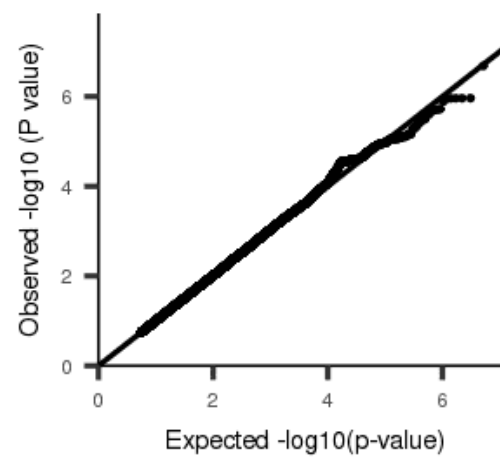

[back to list of plots](#)

Figure 1341: NETMAT edge (100) 0185

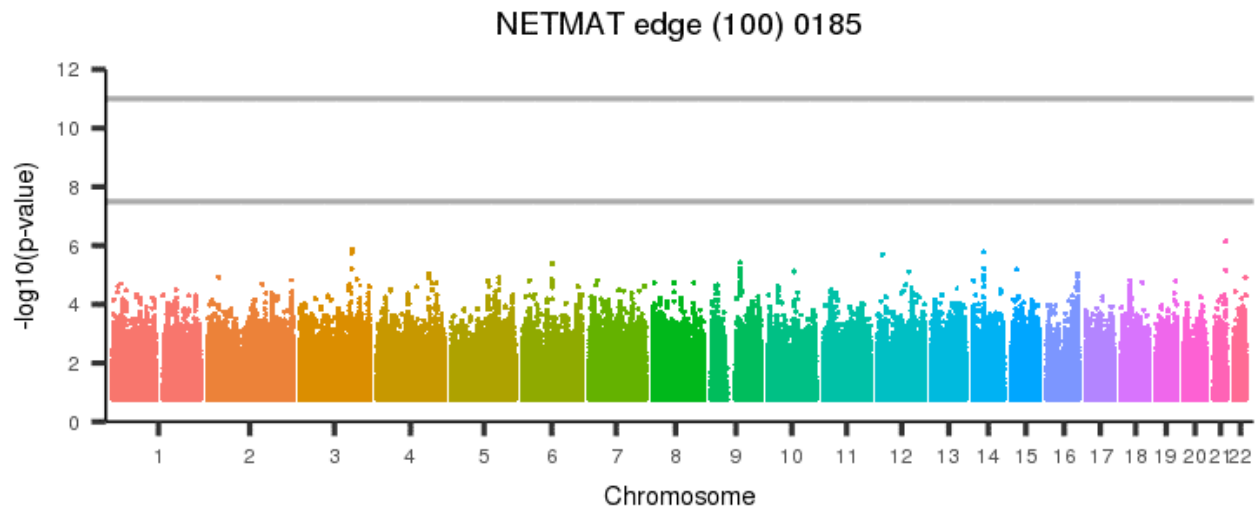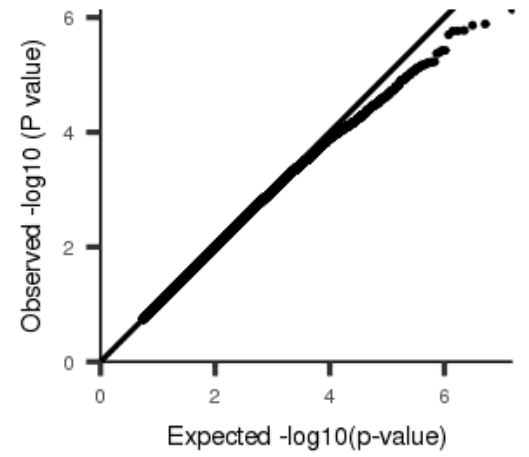

[back to list of plots](#)



Figure 1342: NETMAT edge (100) 0186

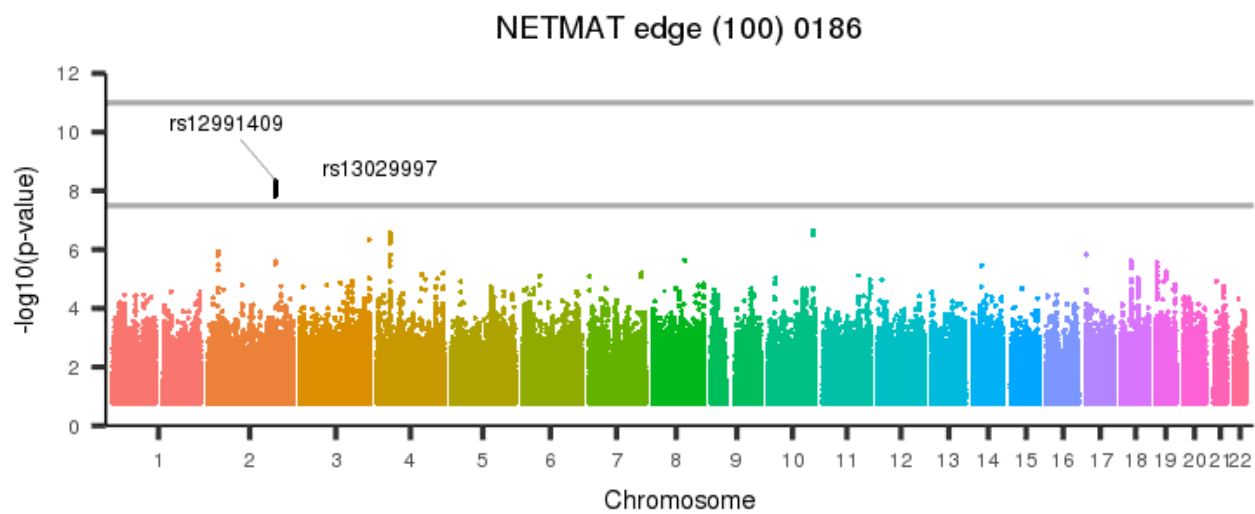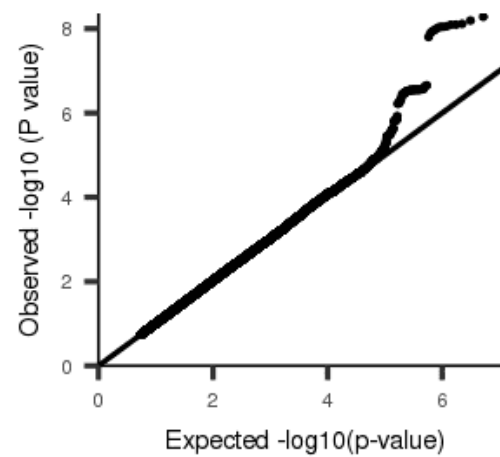

[back to list of plots](#)

Figure 1343: NETMAT edge (100) 0187

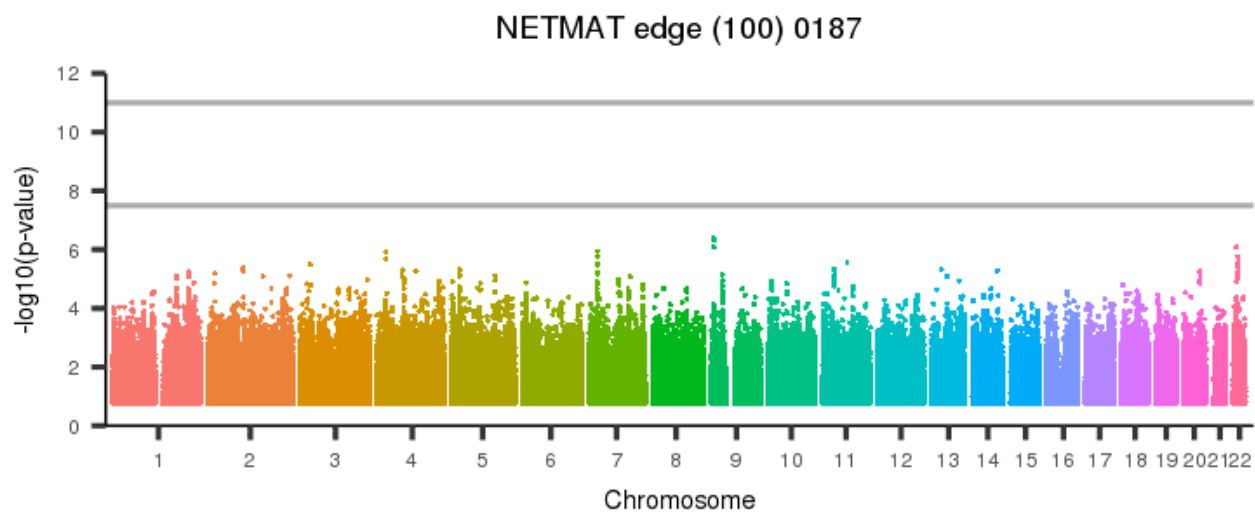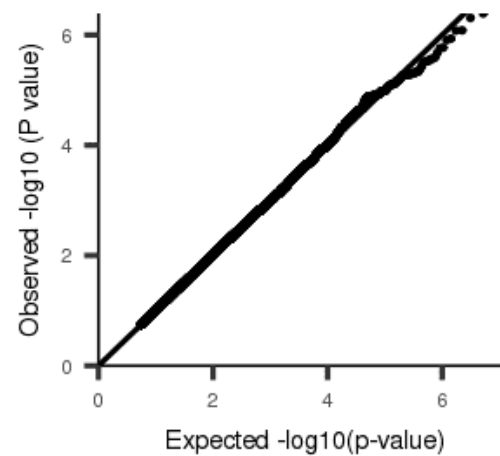

[back to list of plots](#)

Figure 1344: NETMAT edge (100) 0188

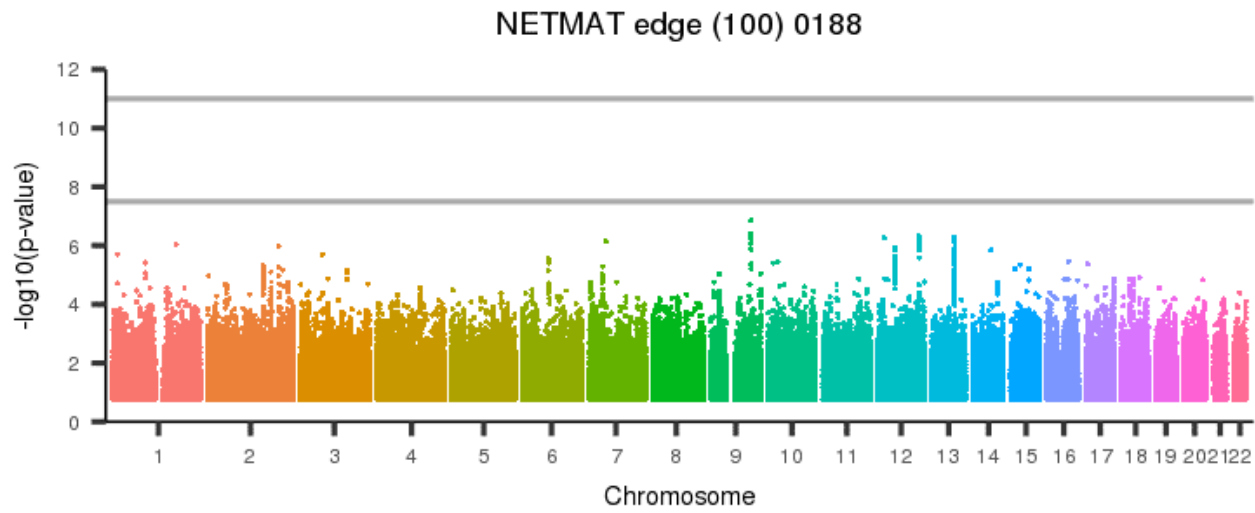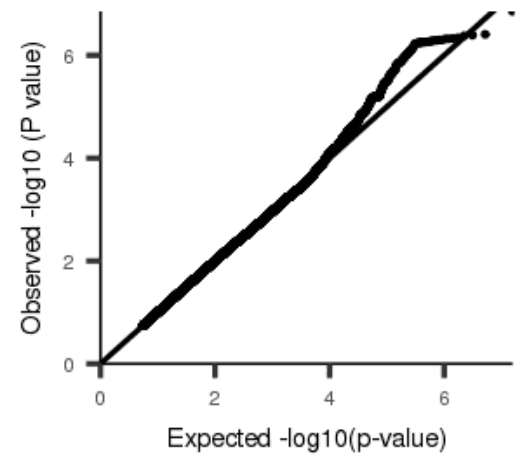

[back to list of plots](#)

Figure 1345: NETMAT edge (100) 0189

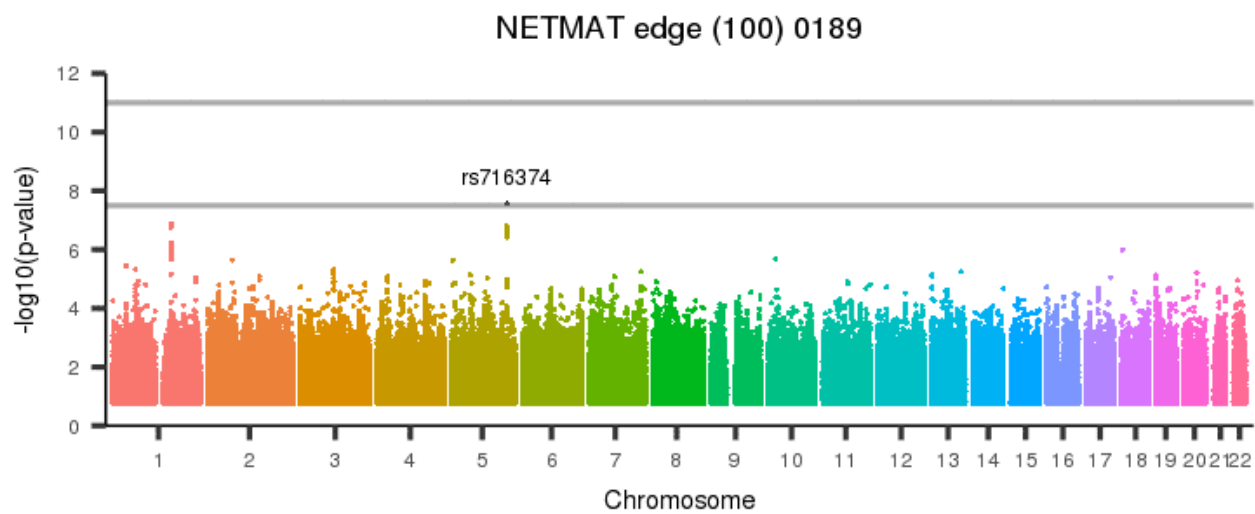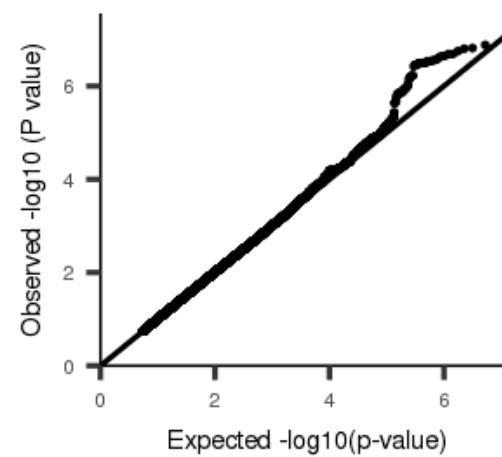

[back to list of plots](#)

Figure 1346: NETMAT edge (100) 0190

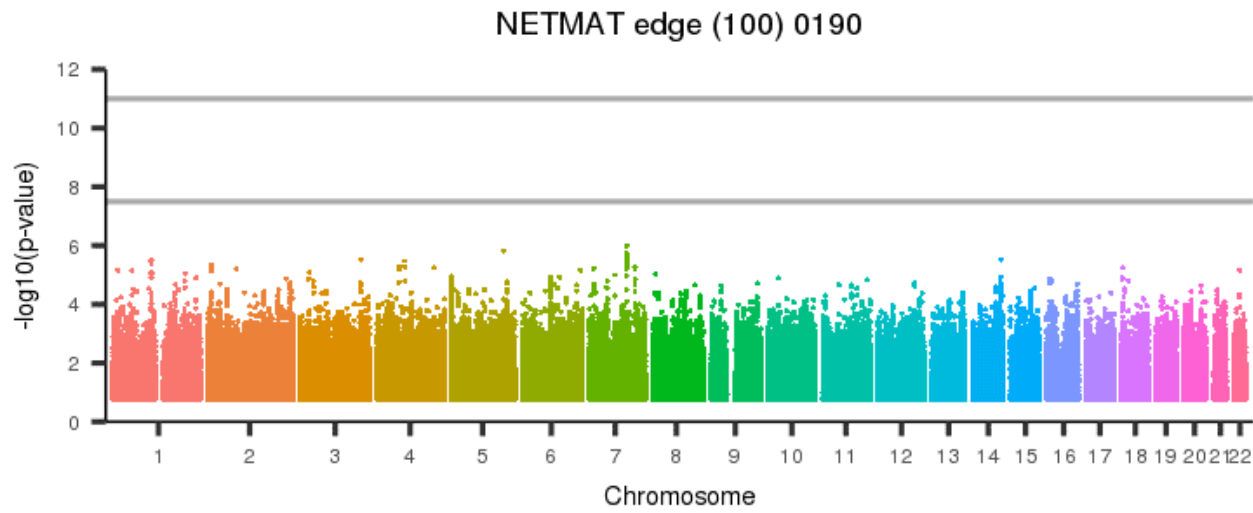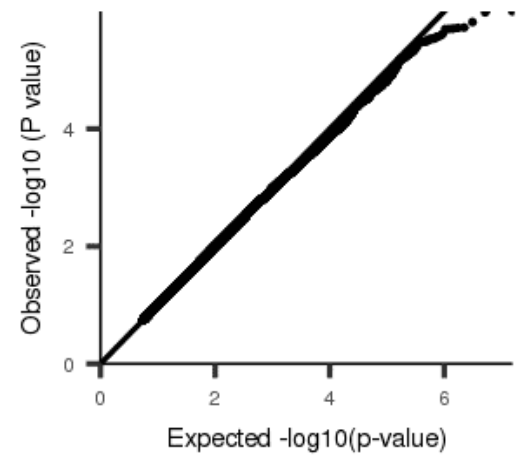

[back to list of plots](#)

Figure 1347: NETMAT edge (100) 0191

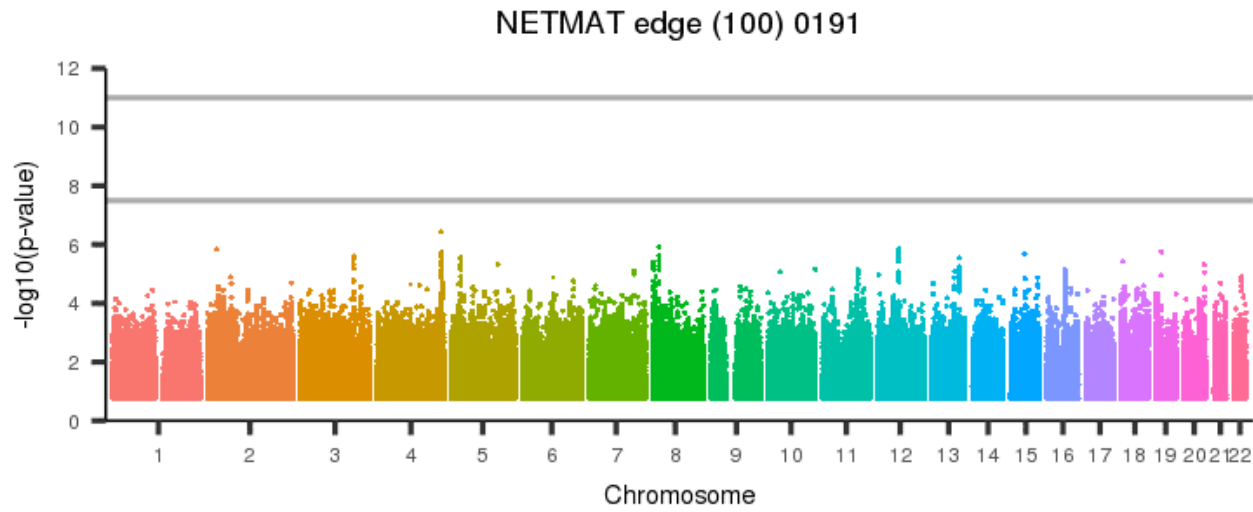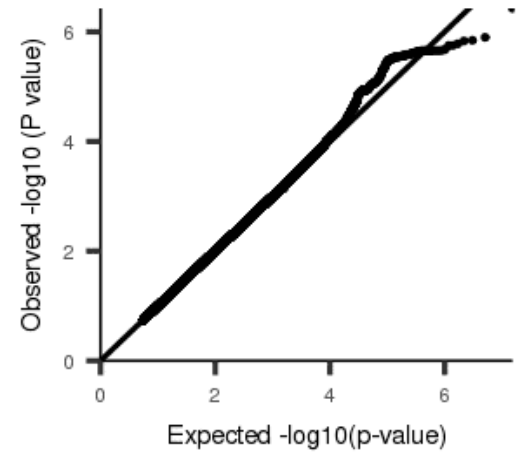

[back to list of plots](#)

Figure 1348: NETMAT edge (100) 0192

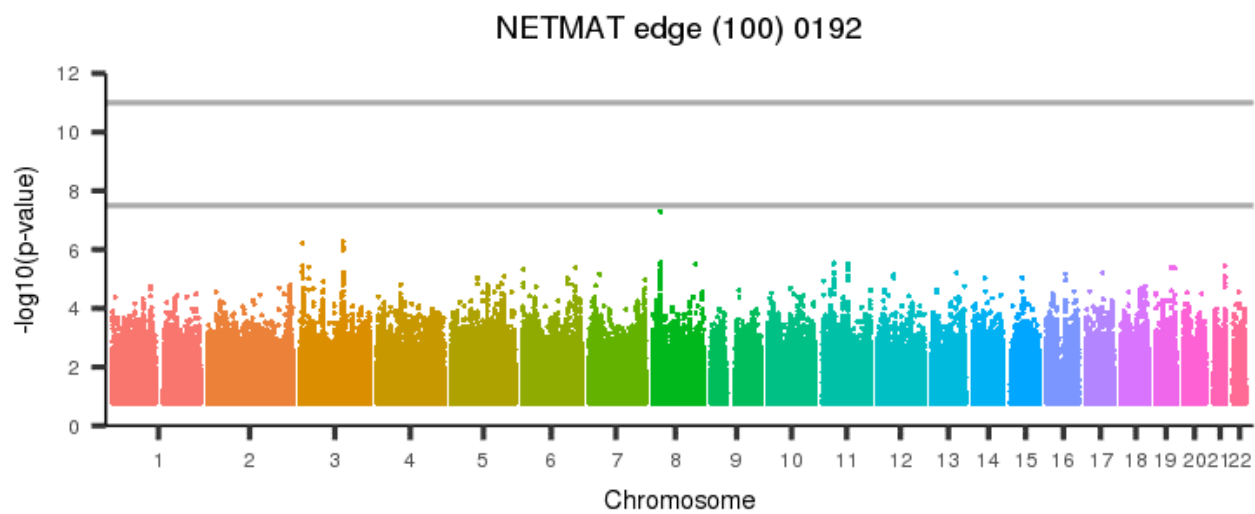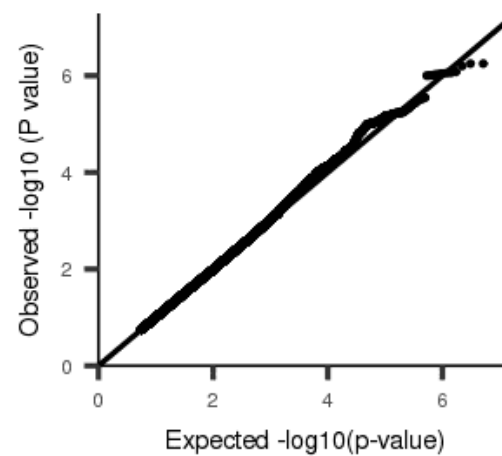

[back to list of plots](#)

Figure 1349: NETMAT edge (100) 0193

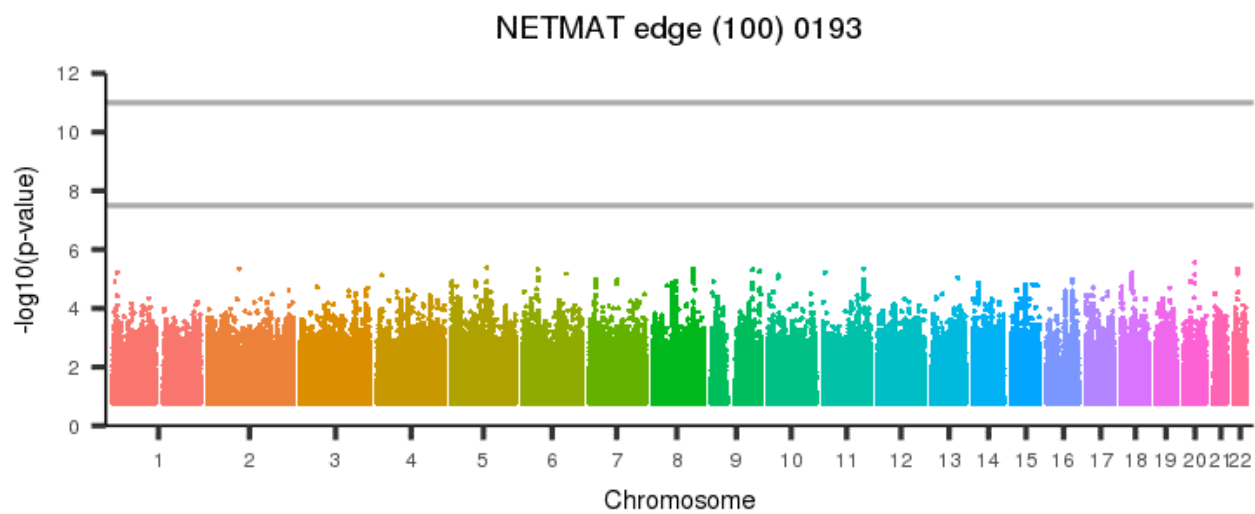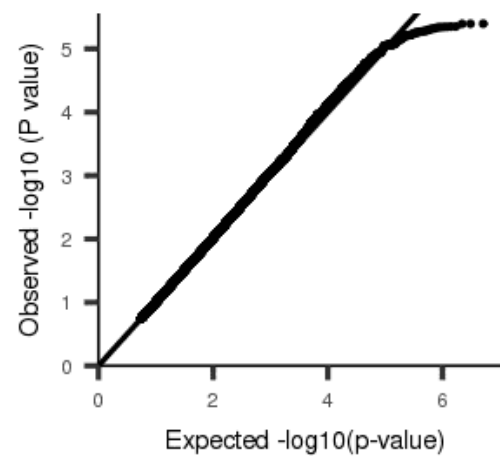

[back to list of plots](#)



Figure 1350: NETMAT edge (100) 0194

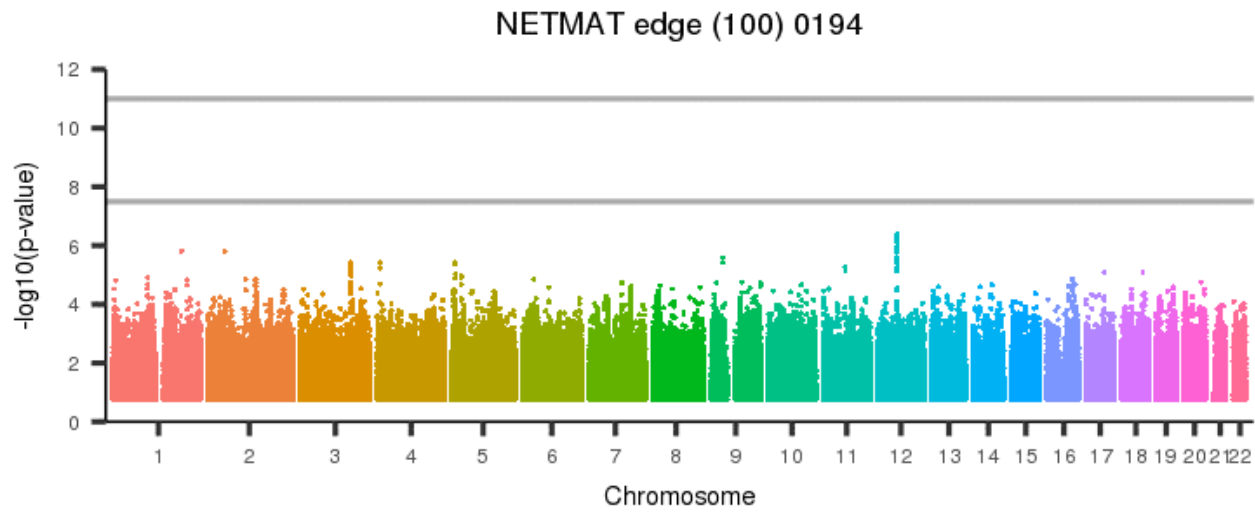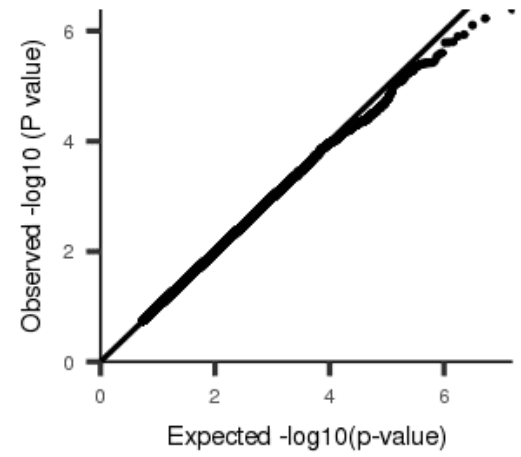

[back to list of plots](#)

Figure 1351: NETMAT edge (100) 0195

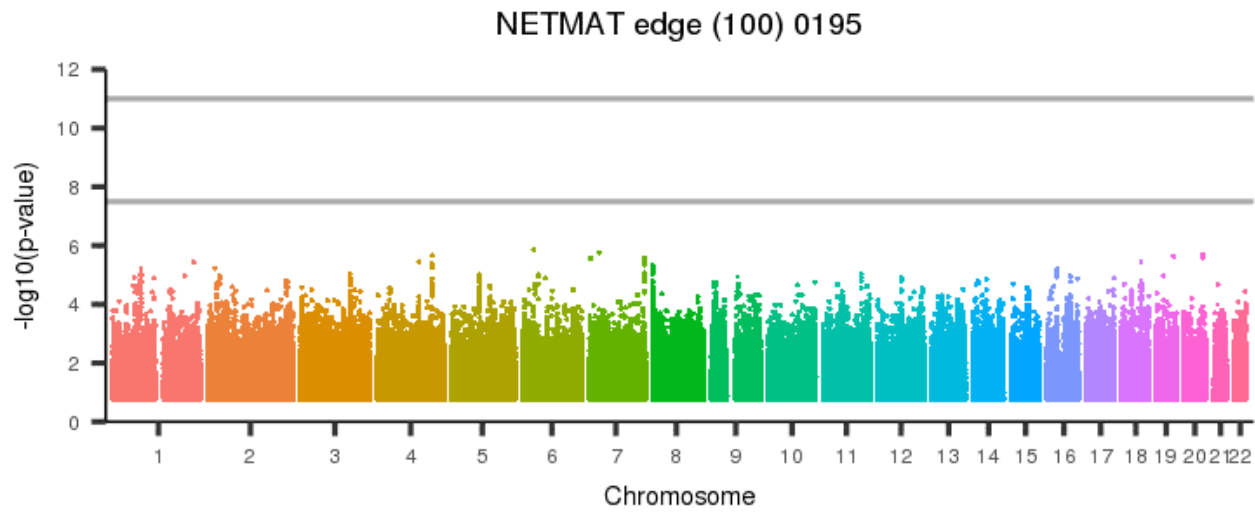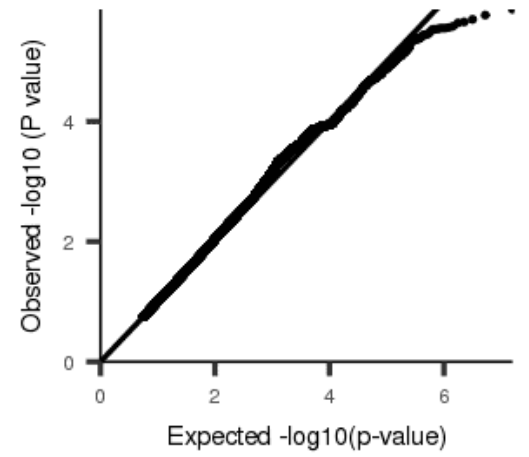

[back to list of plots](#)

Figure 1352: NETMAT edge (100) 0196

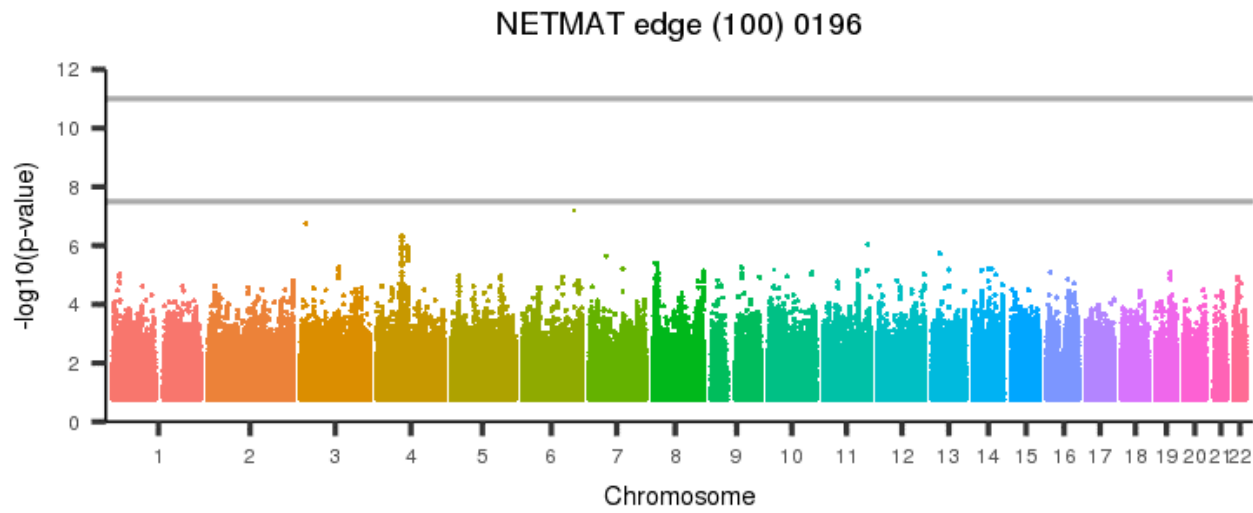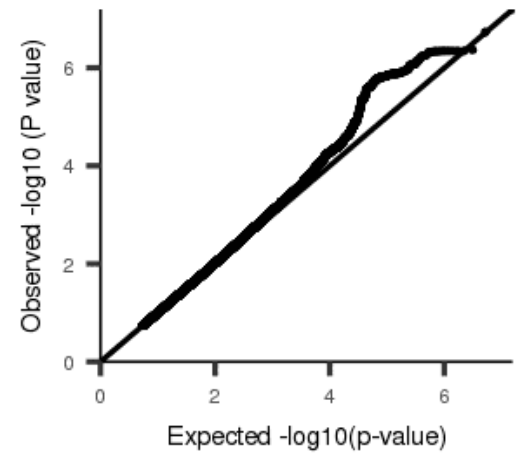

[back to list of plots](#)

Figure 1353: NETMAT edge (100) 0197

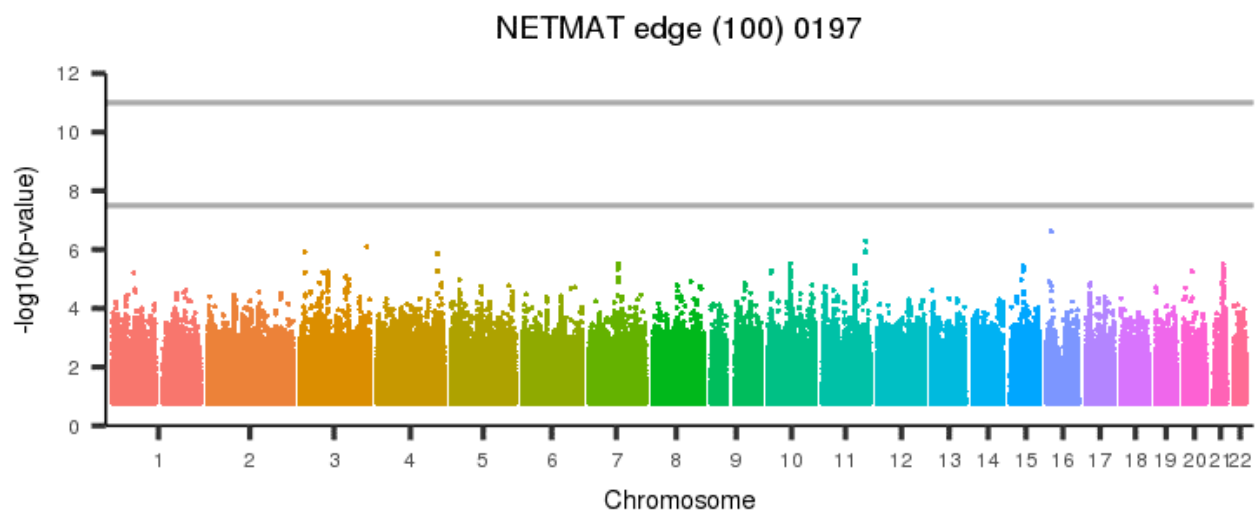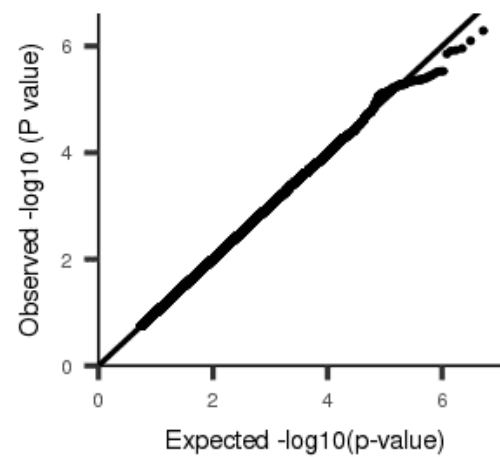

[back to list of plots](#)

Figure 1354: NETMAT edge (100) 0198

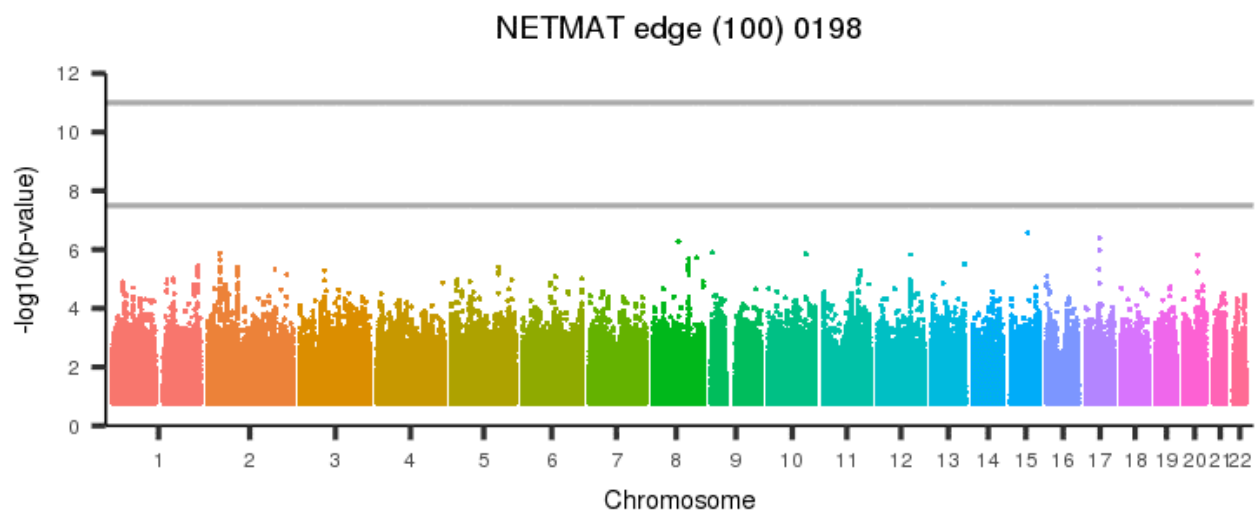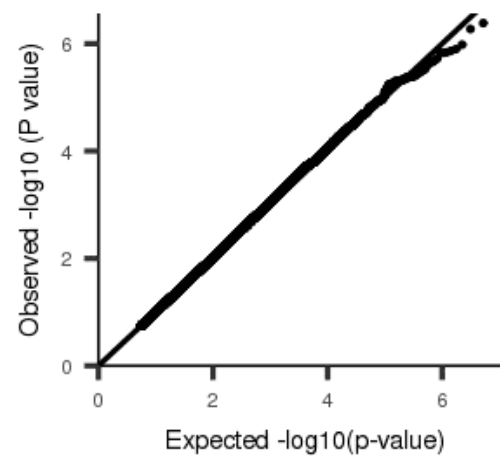

[back to list of plots](#)

Figure 1355: NETMAT edge (100) 0199

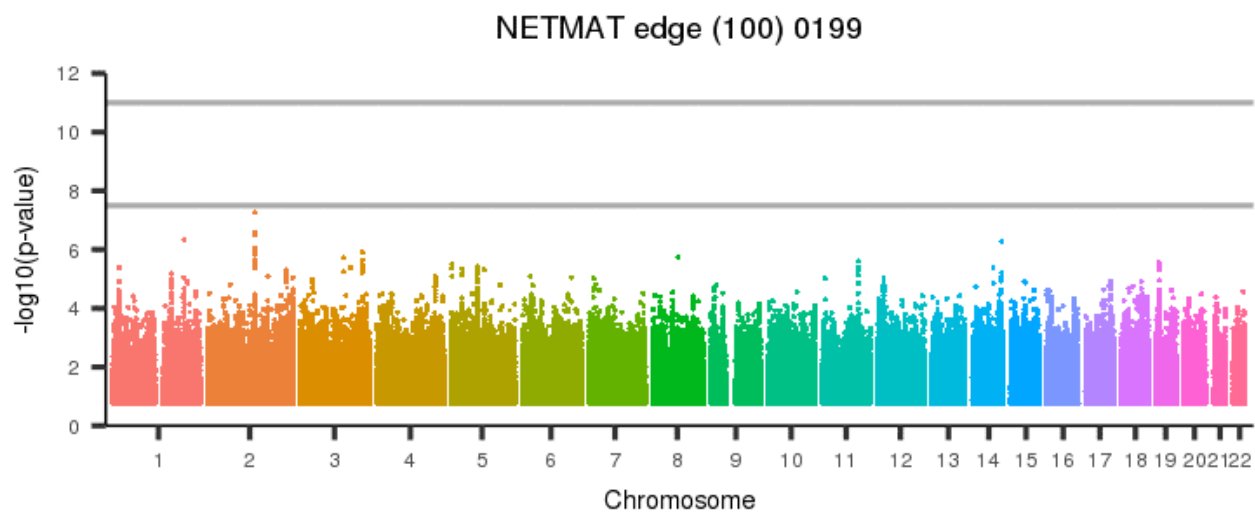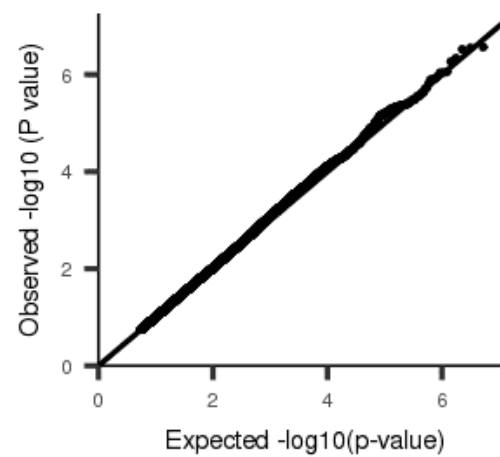

[back to list of plots](#)

Figure 1356: NETMAT edge (100) 0200

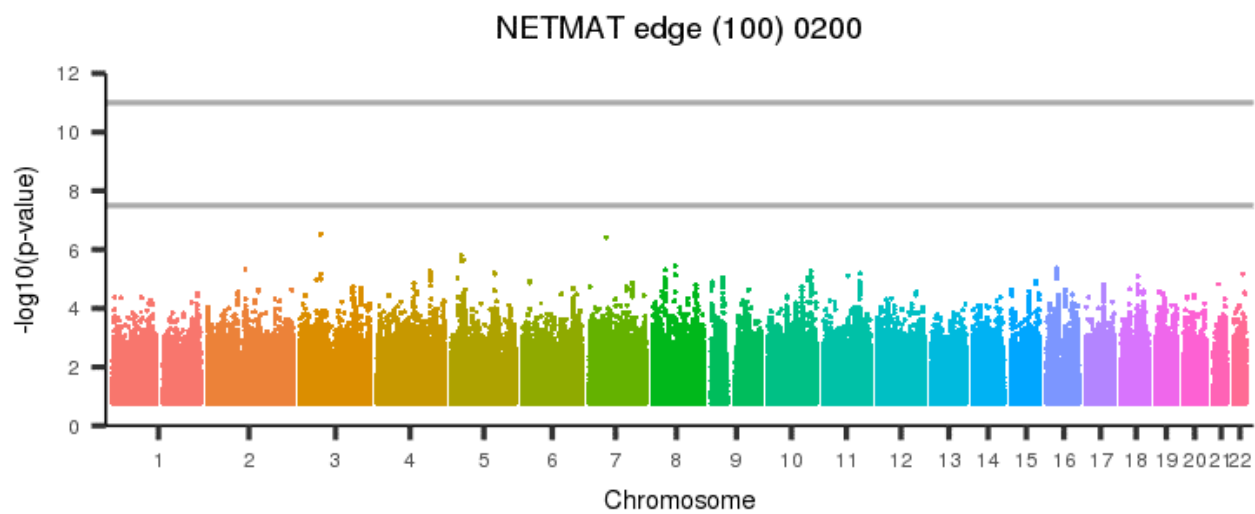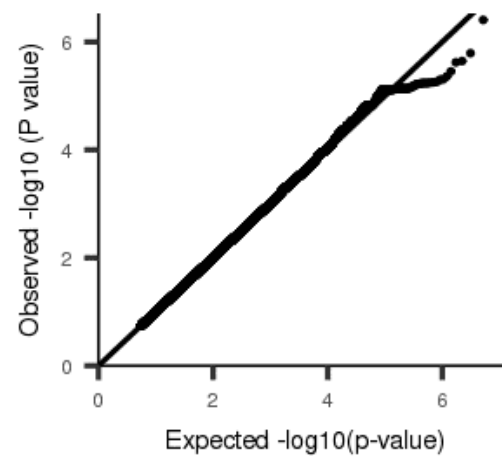

[back to list of plots](#)

Figure 1357: NETMAT edge (100) 0201

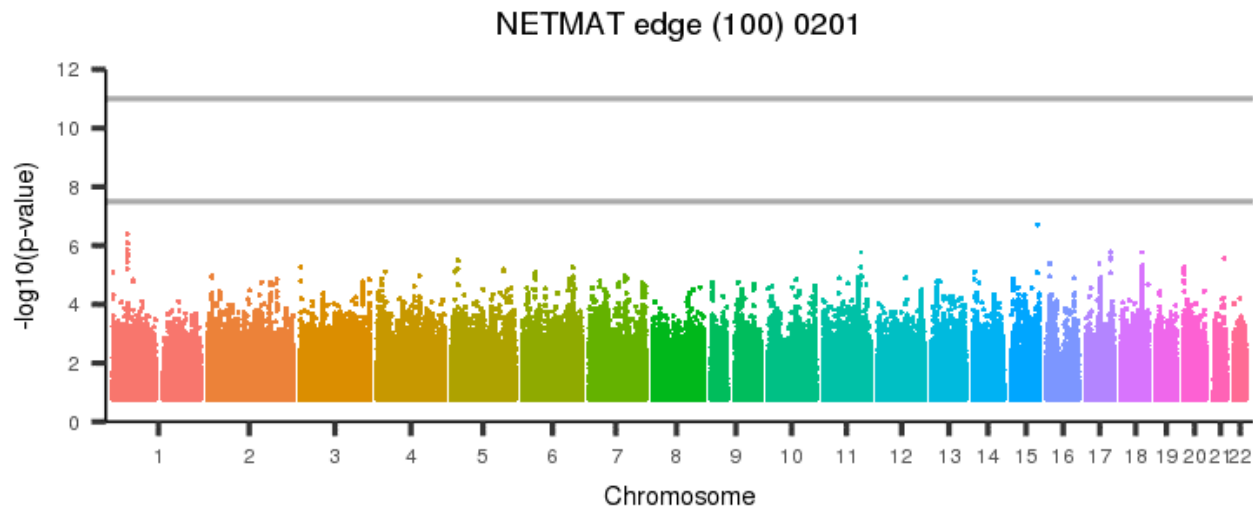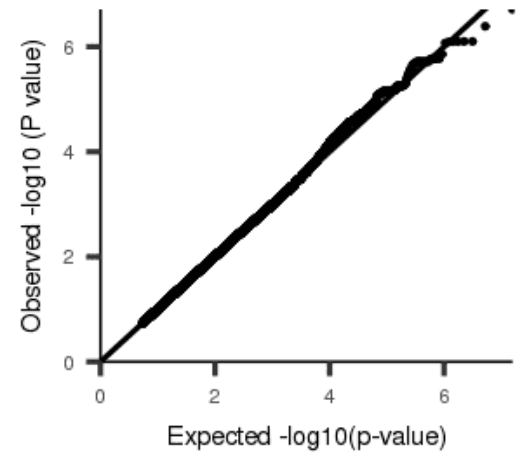

[back to list of plots](#)



Figure 1358: NETMAT edge (100) 0202

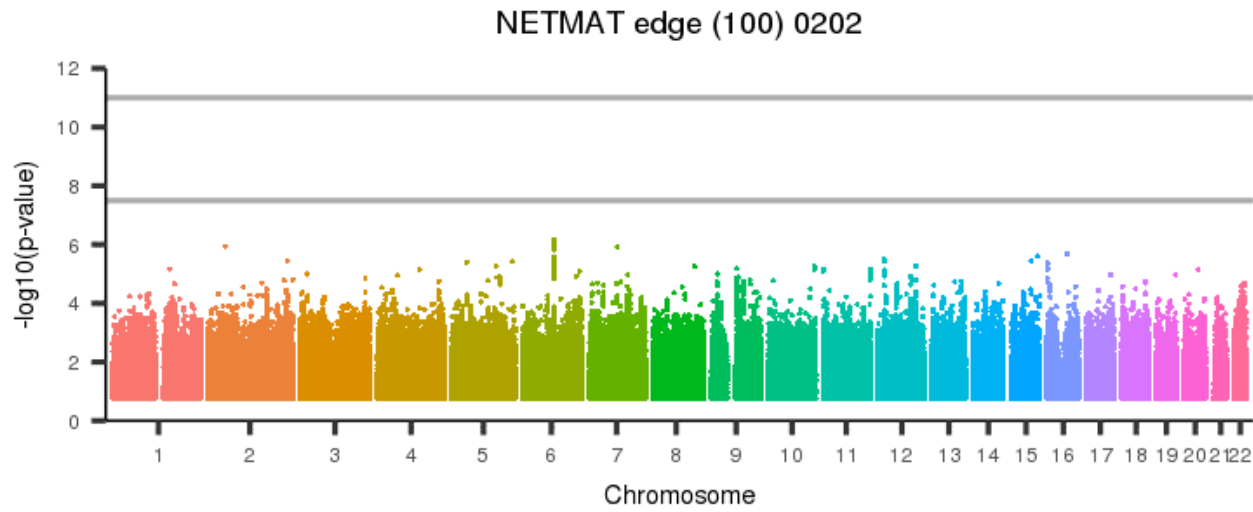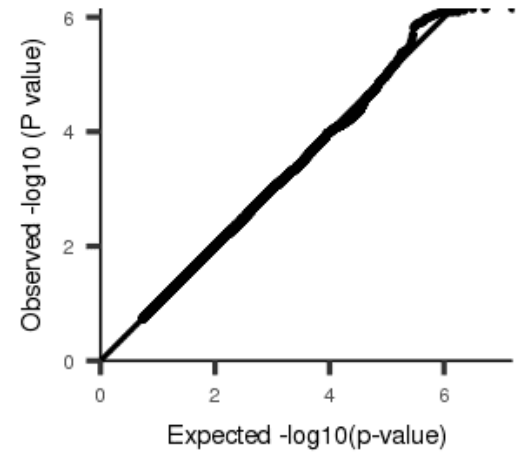

[back to list of plots](#)

Figure 1359: NETMAT edge (100) 0203

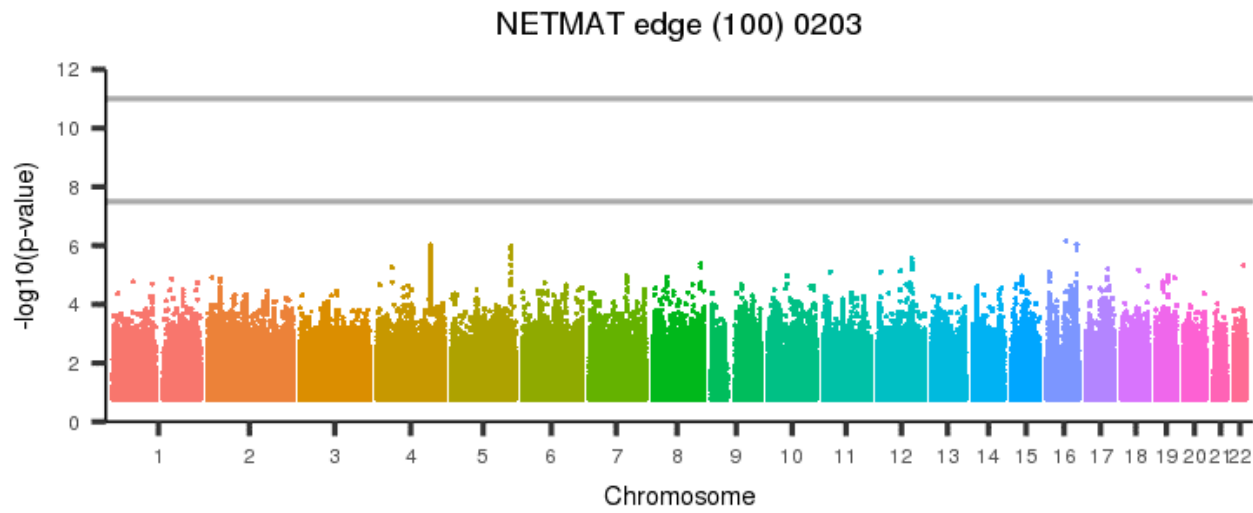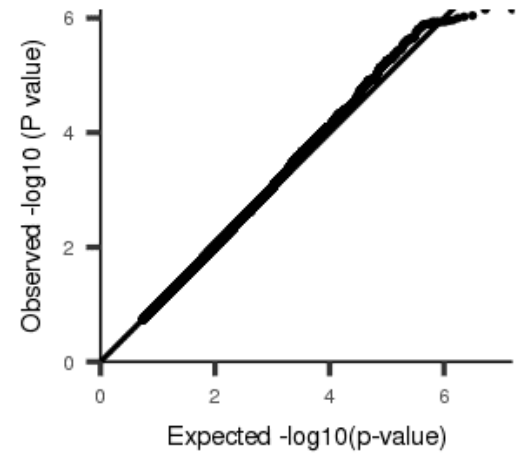

[back to list of plots](#)

Figure 1360: NETMAT edge (100) 0204

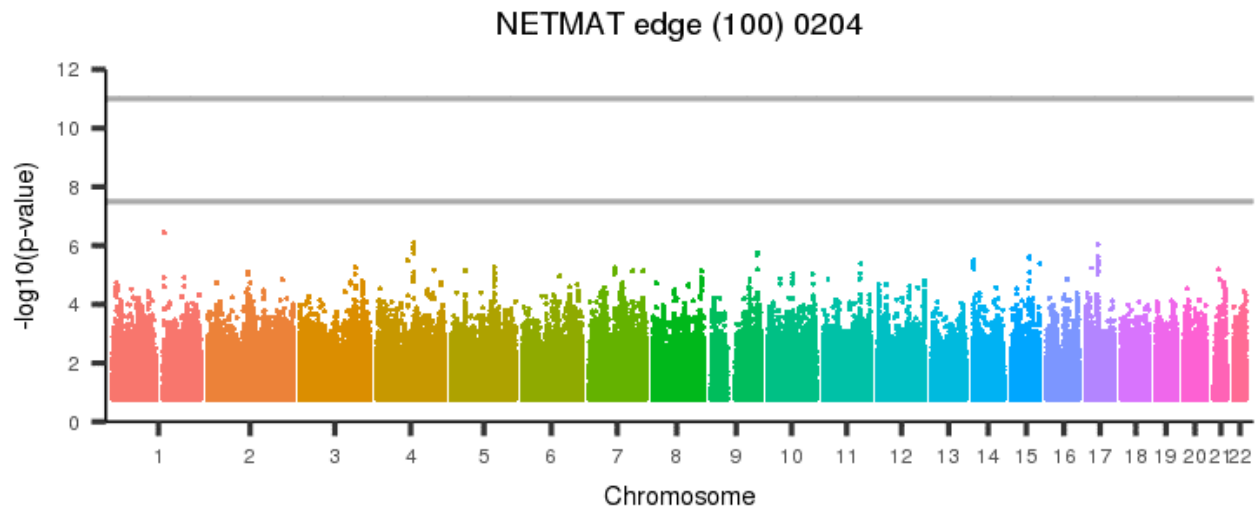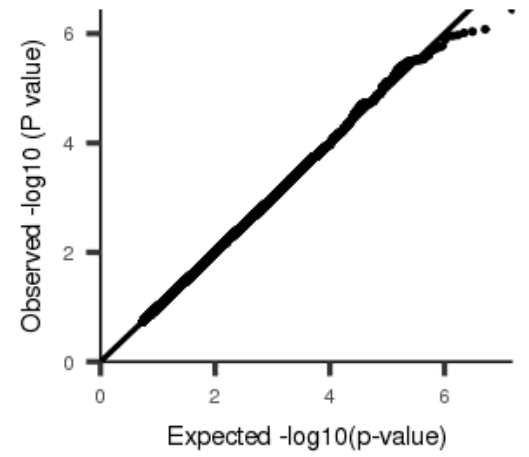

[back to list of plots](#)

Figure 1361: NETMAT edge (100) 0205

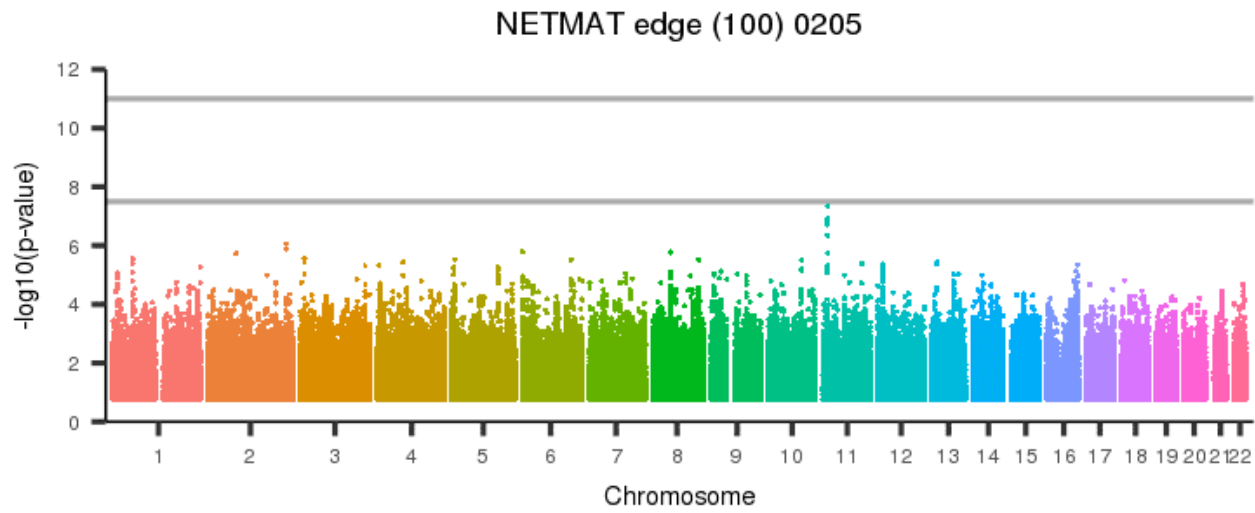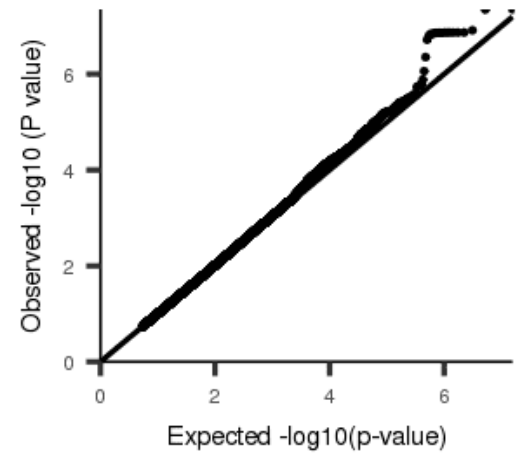

[back to list of plots](#)

Figure 1362: NETMAT edge (100) 0206

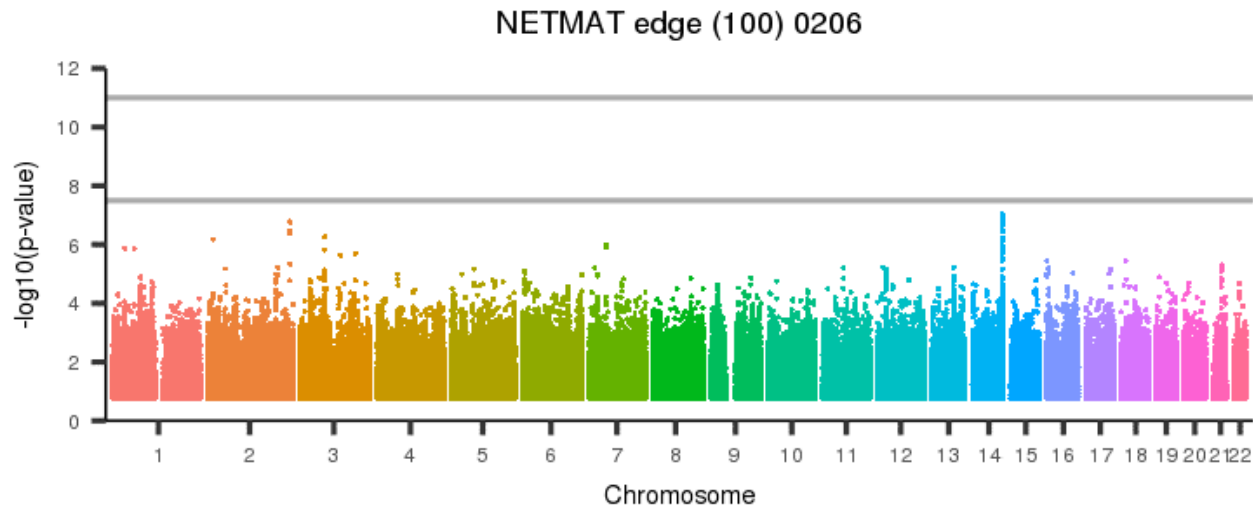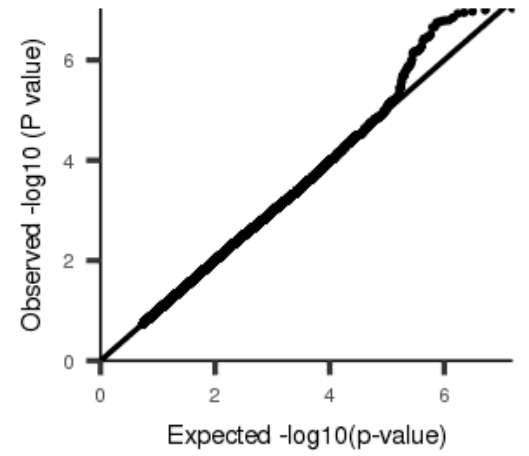

[back to list of plots](#)

Figure 1363: NETMAT edge (100) 0207

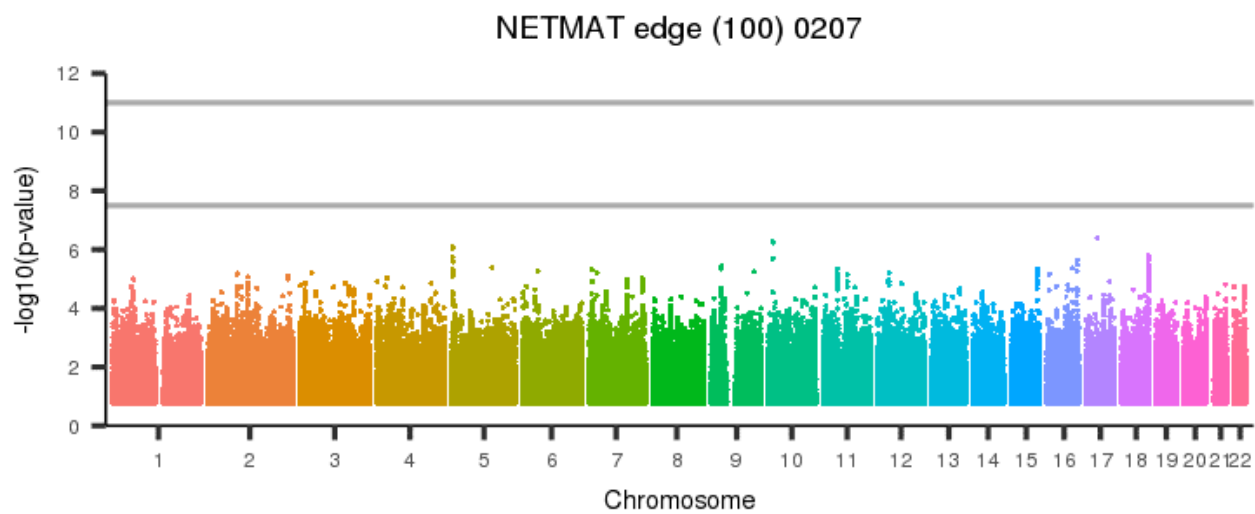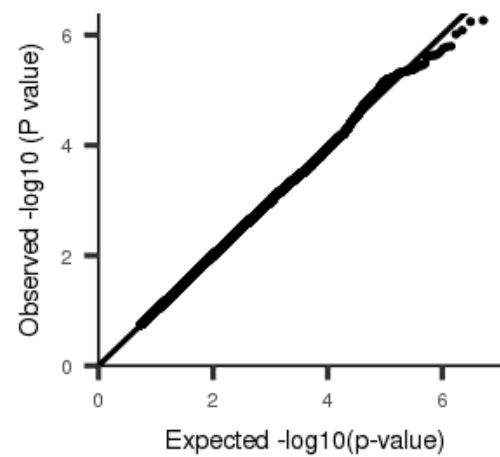

[back to list of plots](#)

Figure 1364: NETMAT edge (100) 0208

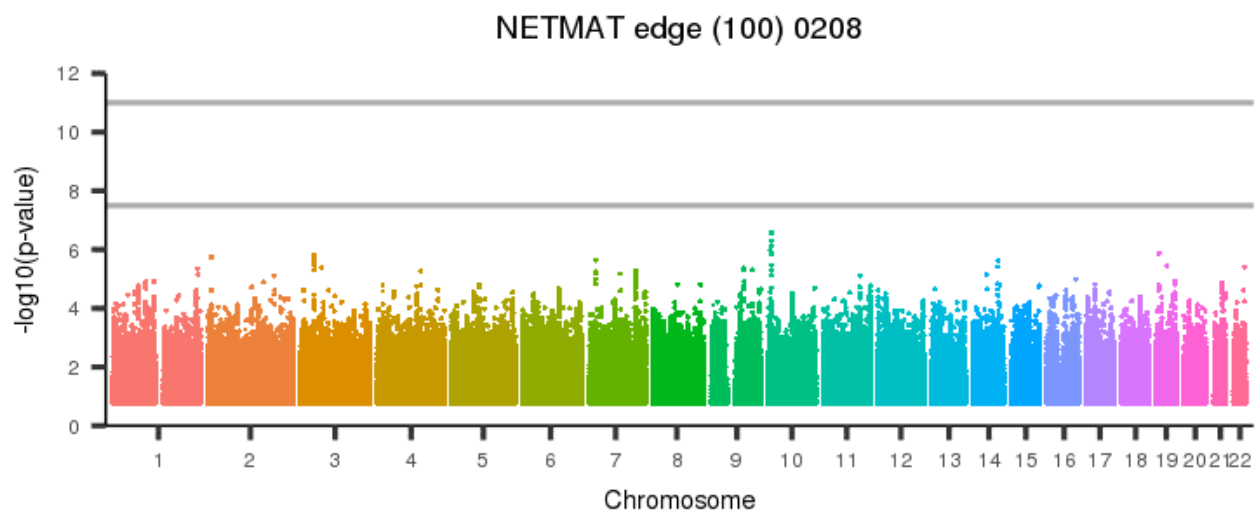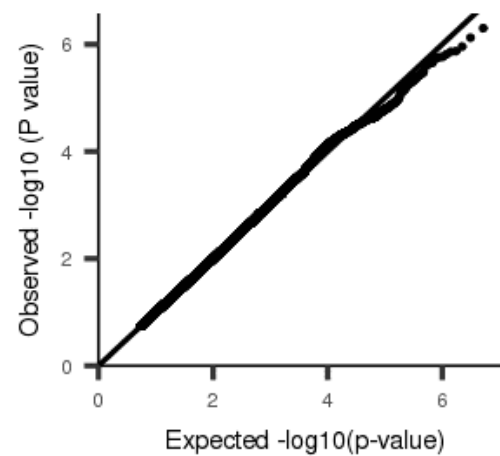

[back to list of plots](#)

Figure 1365: NETMAT edge (100) 0209

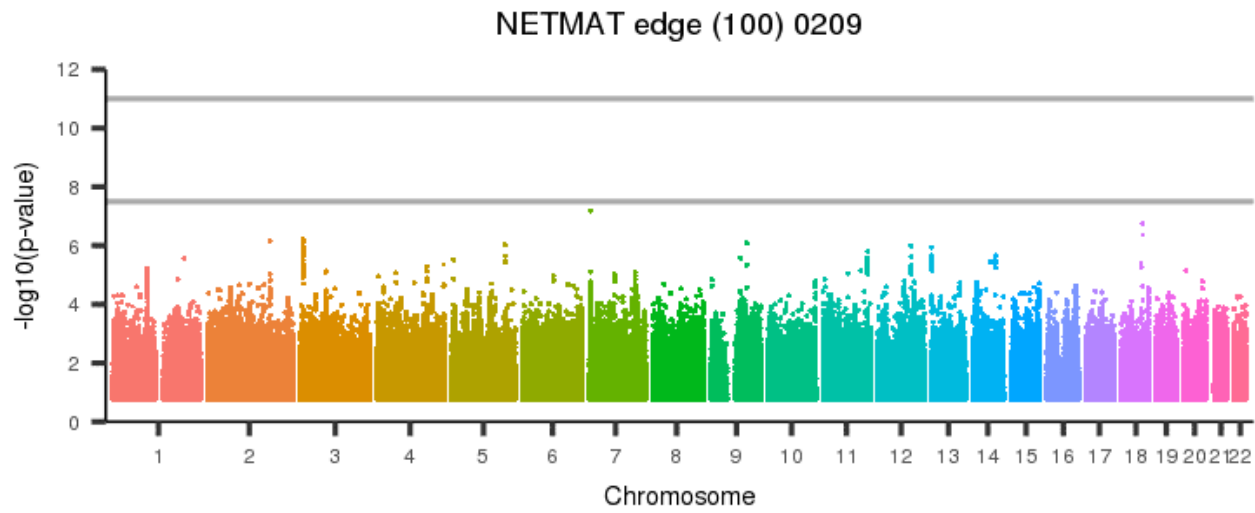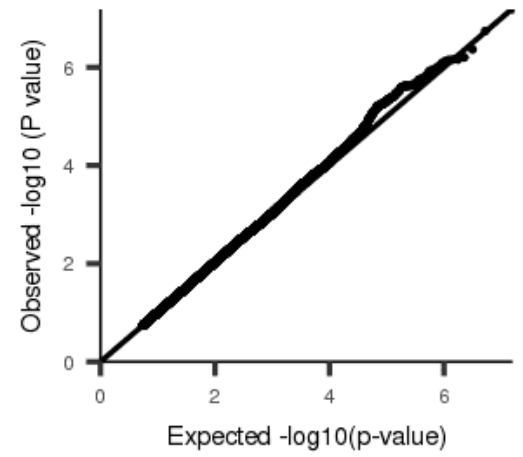

[back to list of plots](#)



Figure 1366: NETMAT edge (100) 0210

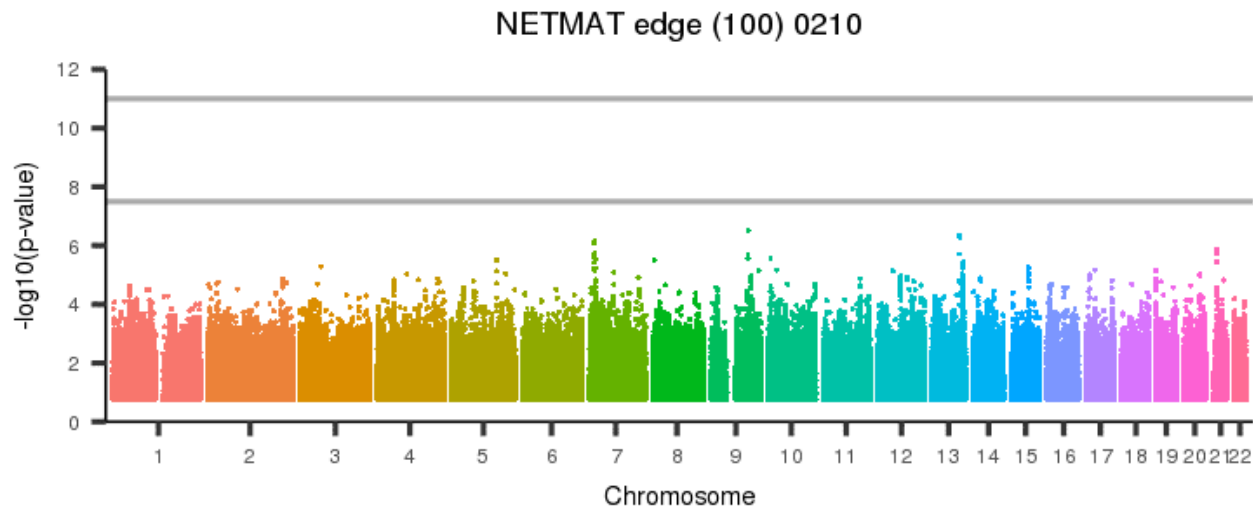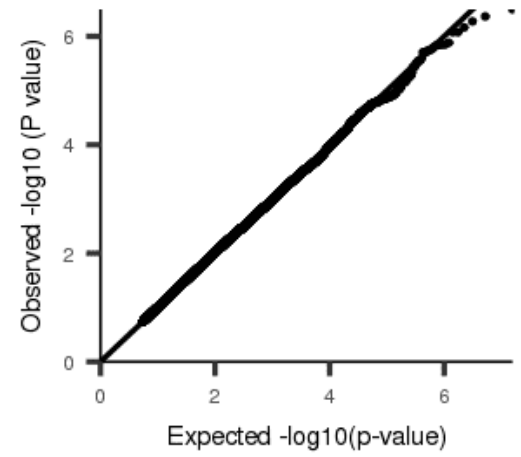

[back to list of plots](#)

Figure 1367: NETMAT edge (100) 0211

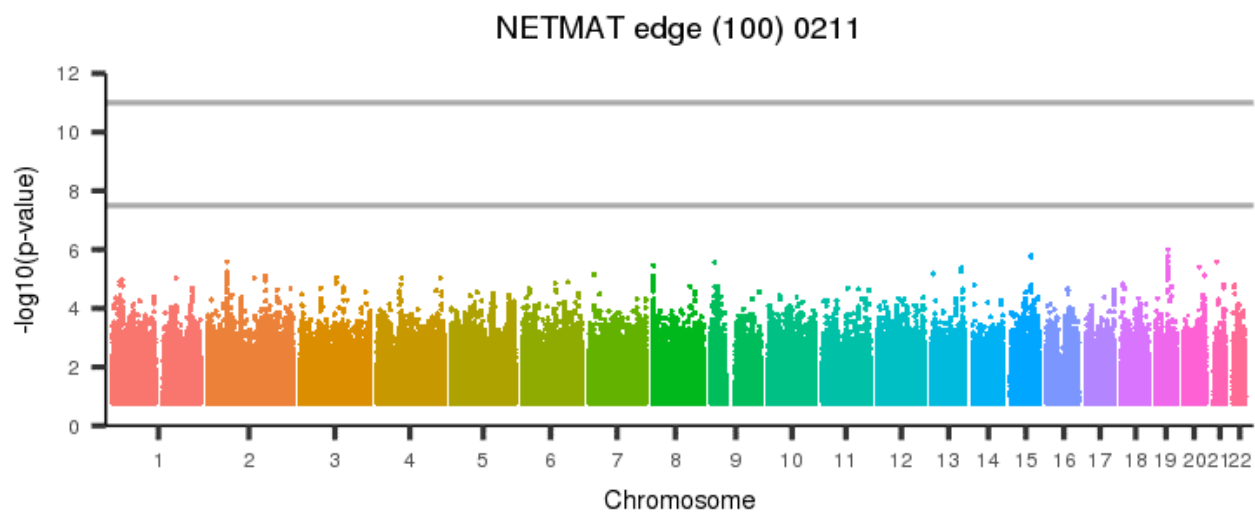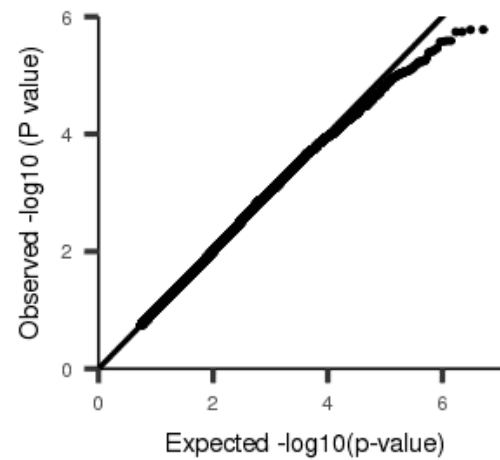

[back to list of plots](#)

Figure 1368: NETMAT edge (100) 0212

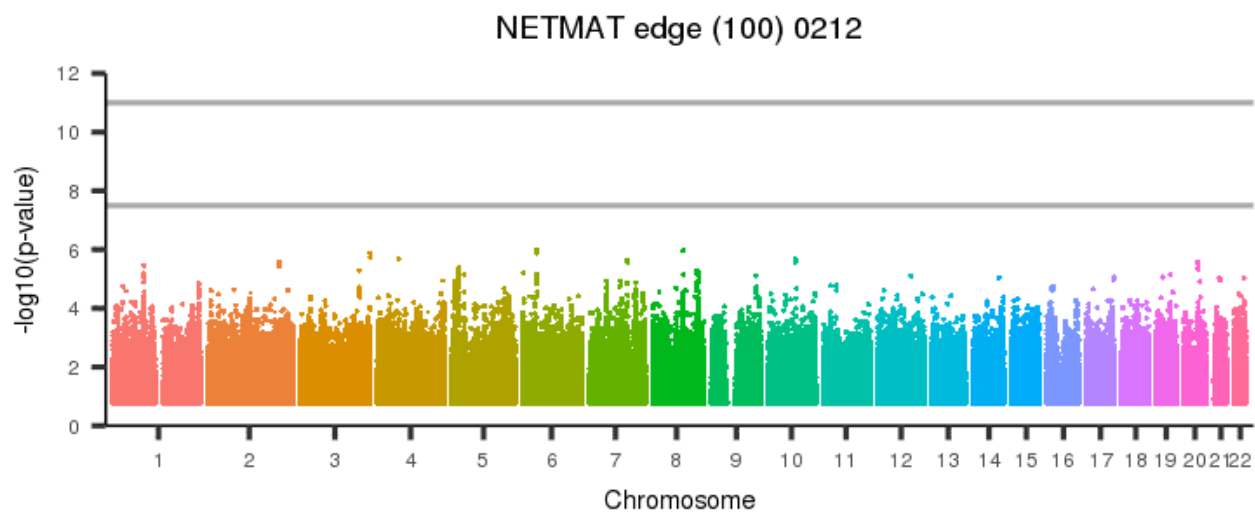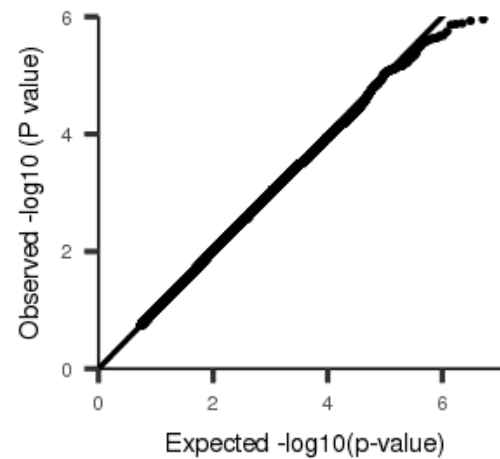

[back to list of plots](#)

Figure 1369: NETMAT edge (100) 0213

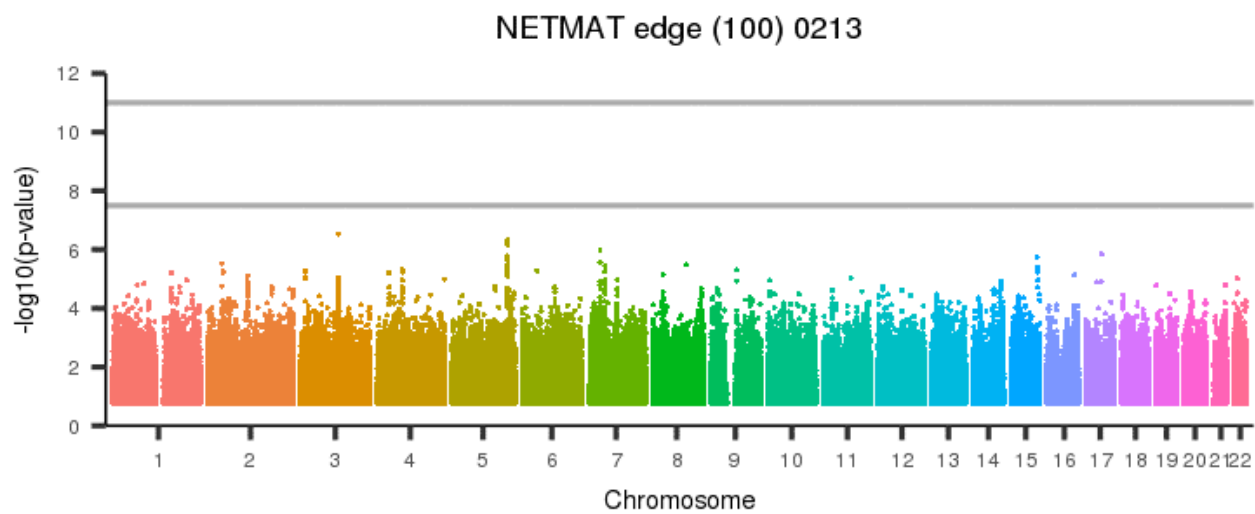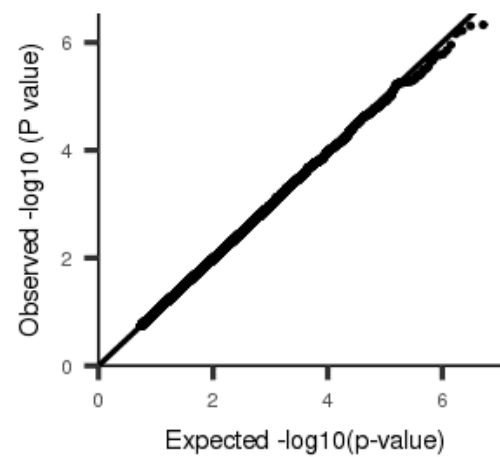

[back to list of plots](#)

Figure 1370: NETMAT edge (100) 0214

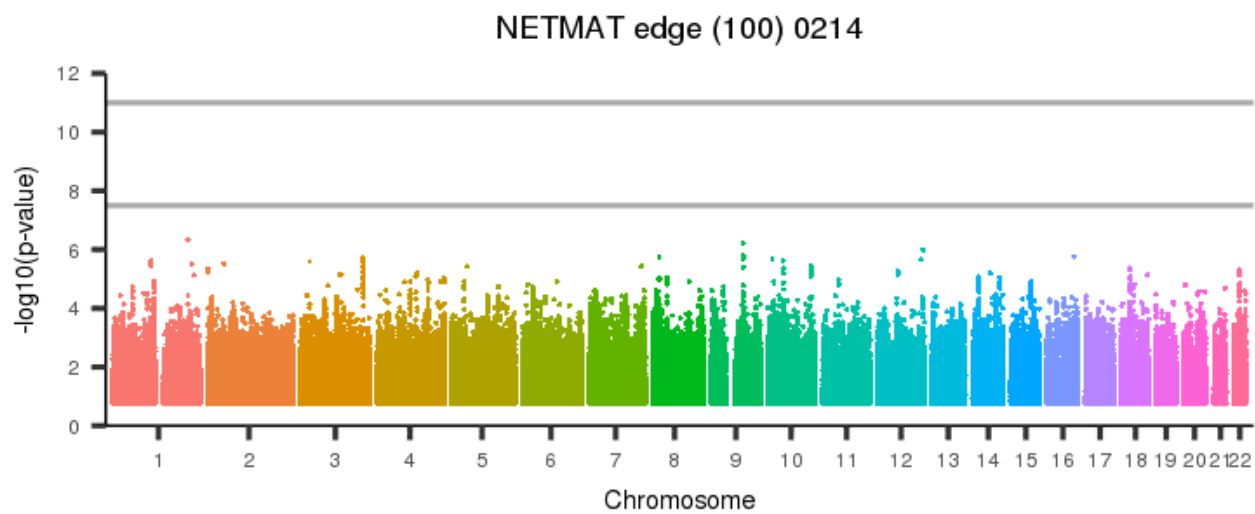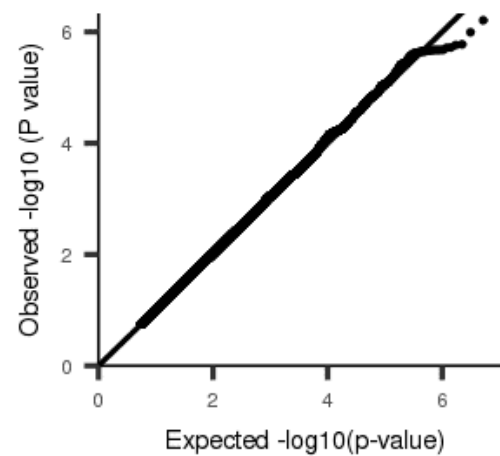

[back to list of plots](#)

Figure 1371: NETMAT edge (100) 0215

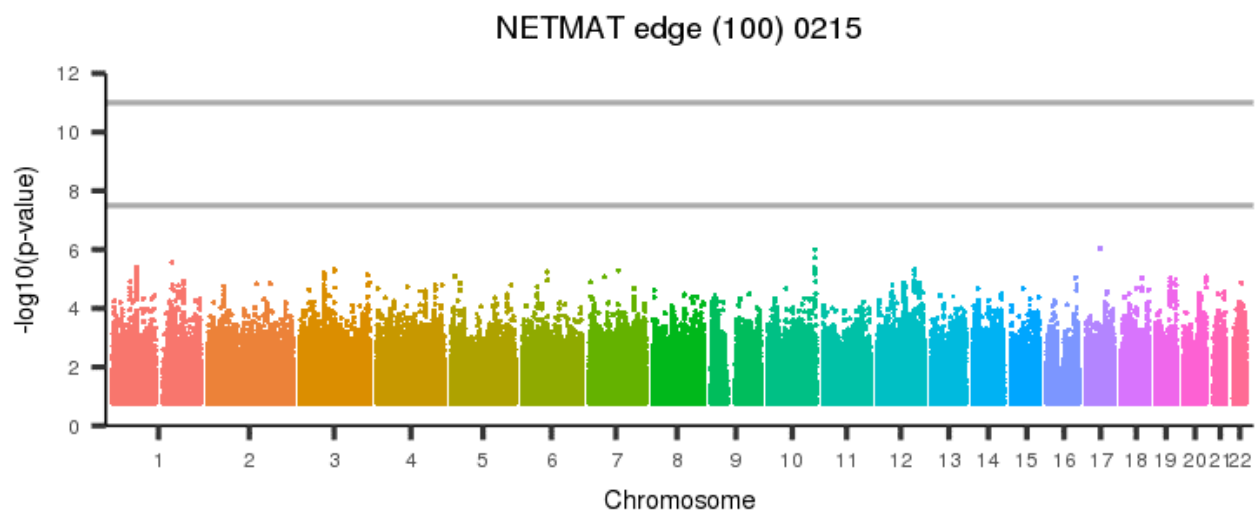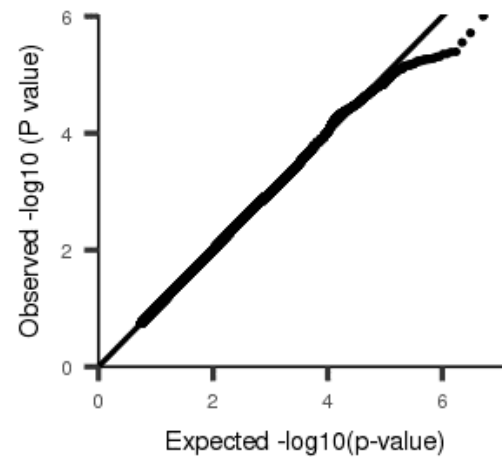

[back to list of plots](#)

Figure 1372: NETMAT edge (100) 0216

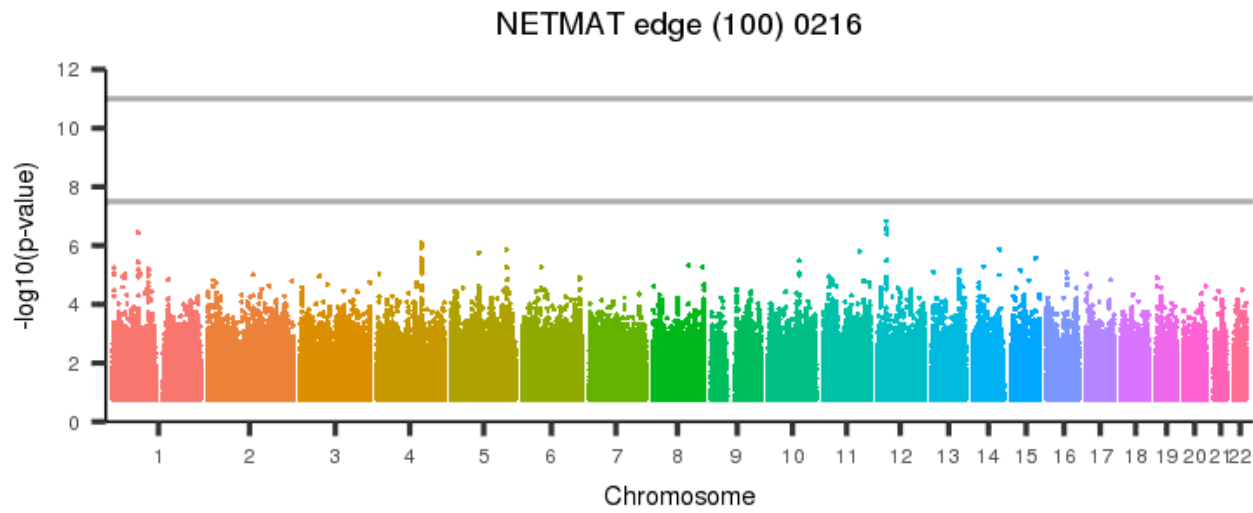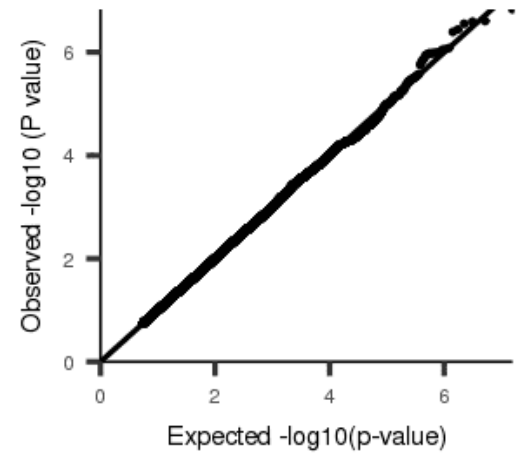

[back to list of plots](#)

Figure 1373: NETMAT edge (100) 0217

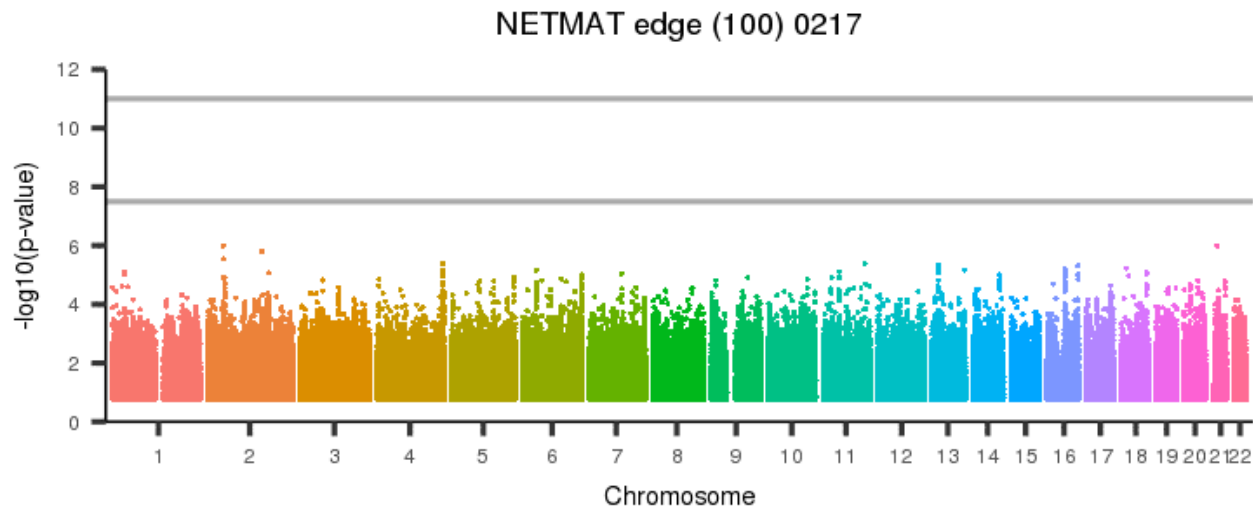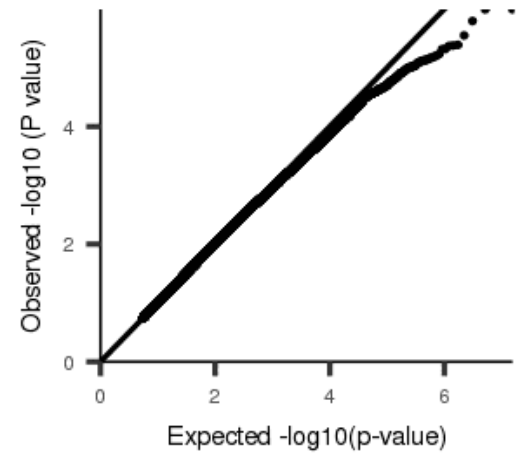

[back to list of plots](#)



Figure 1374: NETMAT edge (100) 0218

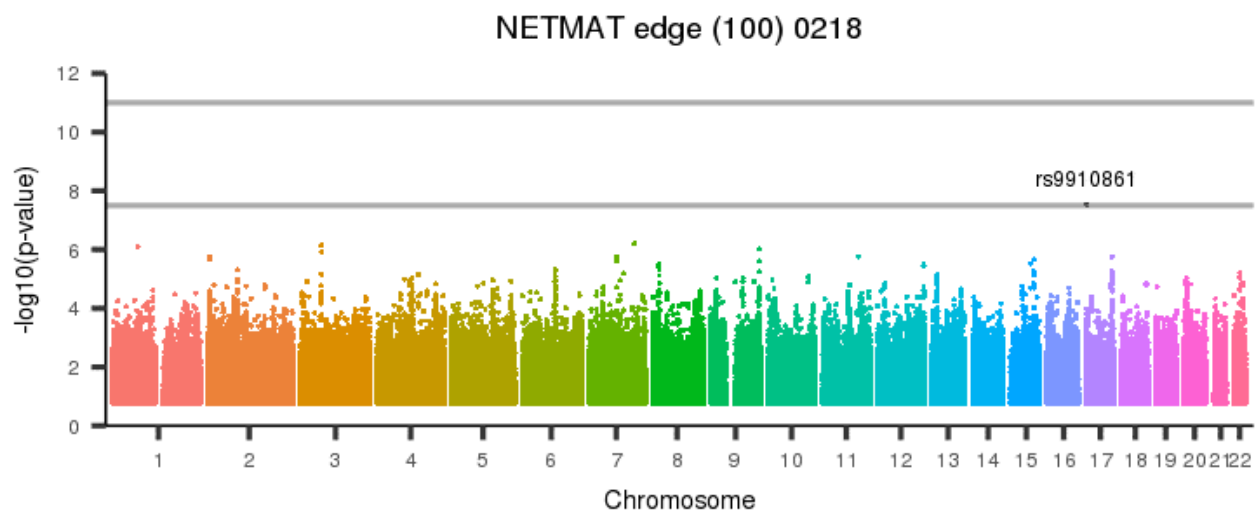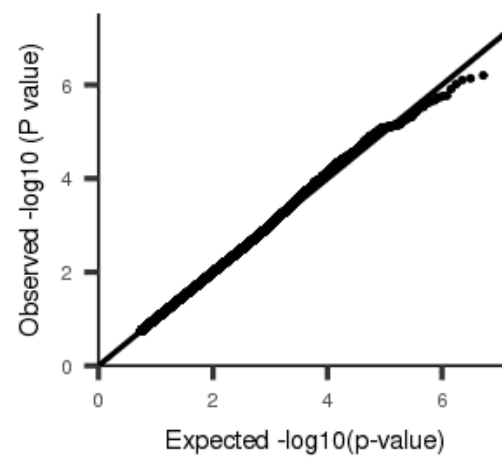

[back to list of plots](#)

Figure 1375: NETMAT edge (100) 0219

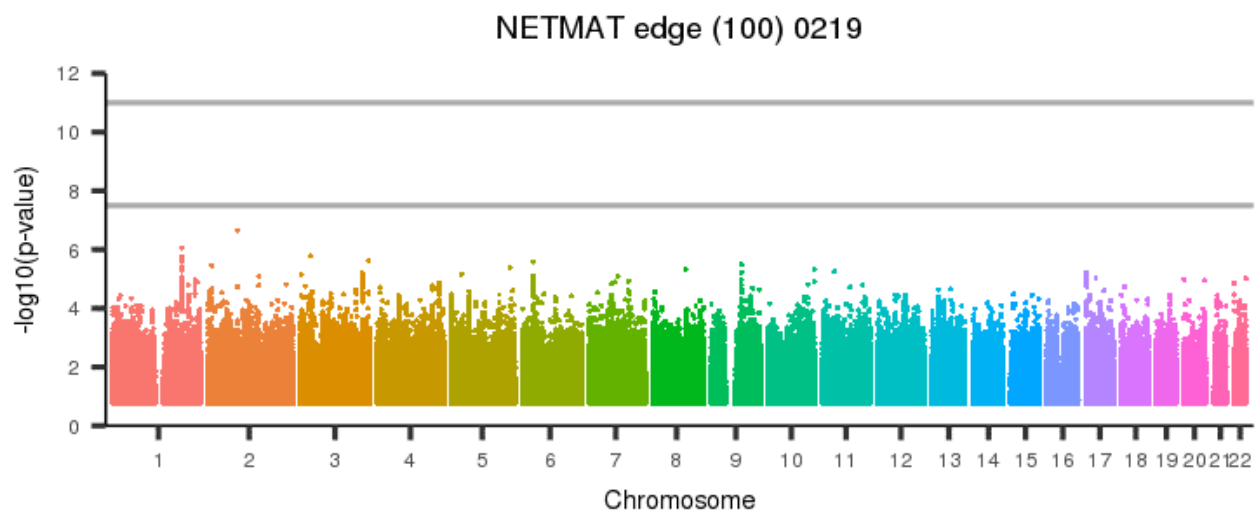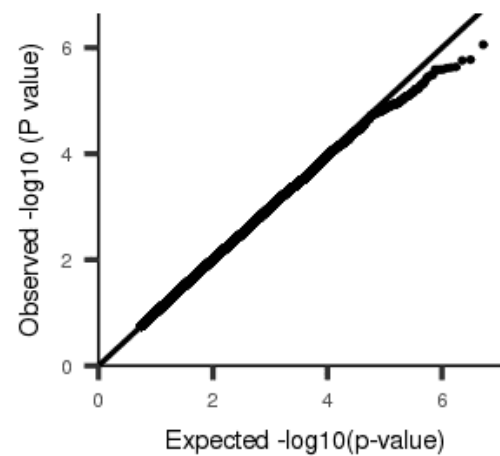

[back to list of plots](#)

Figure 1376: NETMAT edge (100) 0220

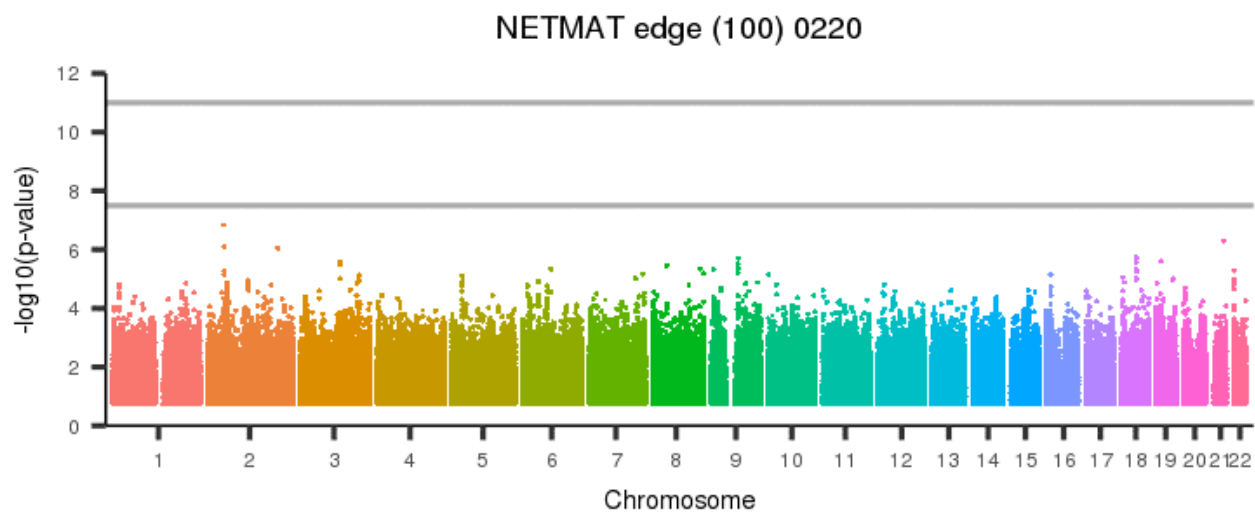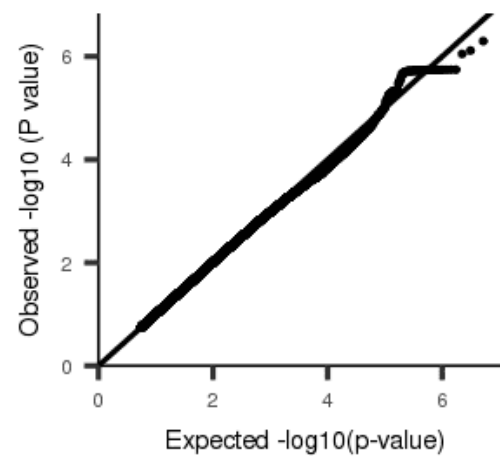

[back to list of plots](#)

Figure 1377: NETMAT edge (100) 0221

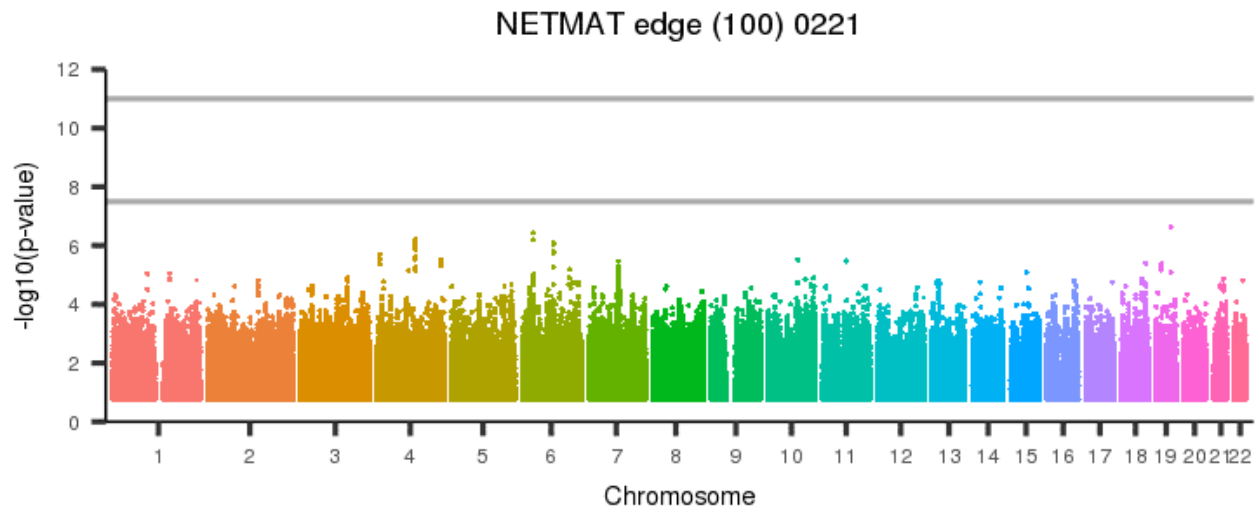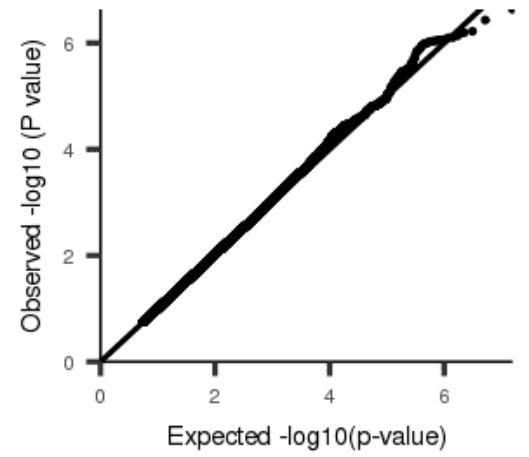

[back to list of plots](#)

Figure 1378: NETMAT edge (100) 0222

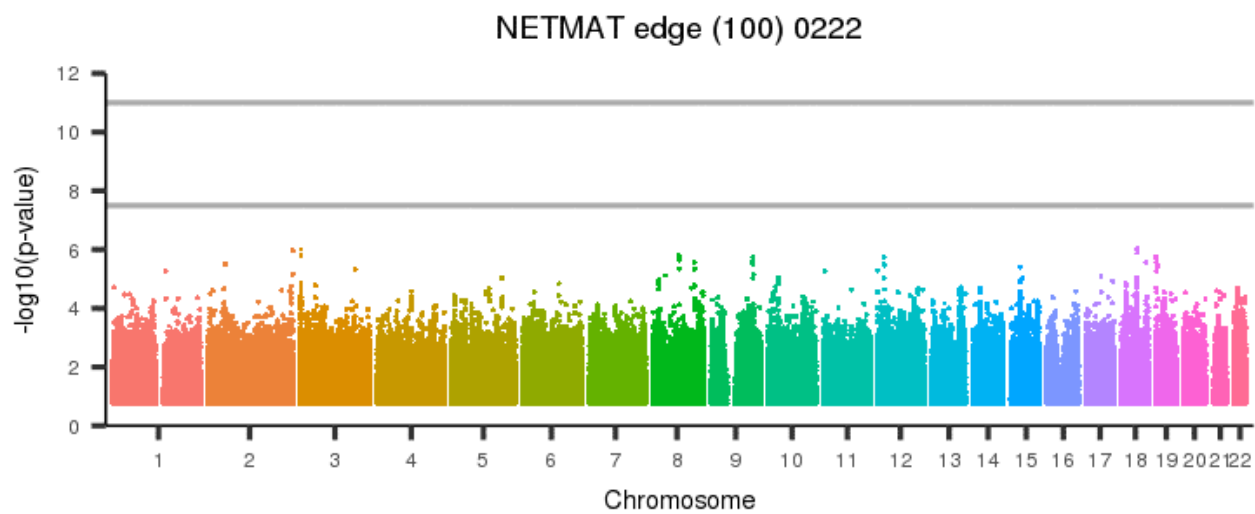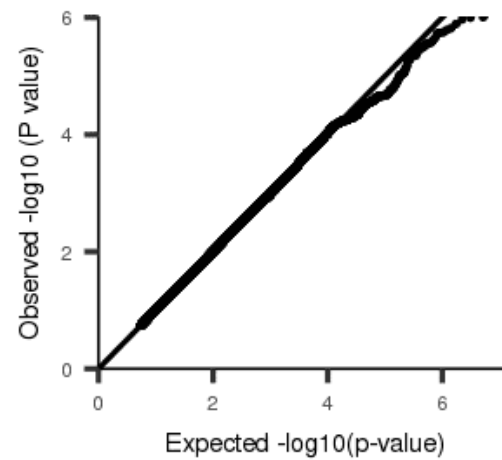

[back to list of plots](#)

Figure 1379: NETMAT edge (100) 0223

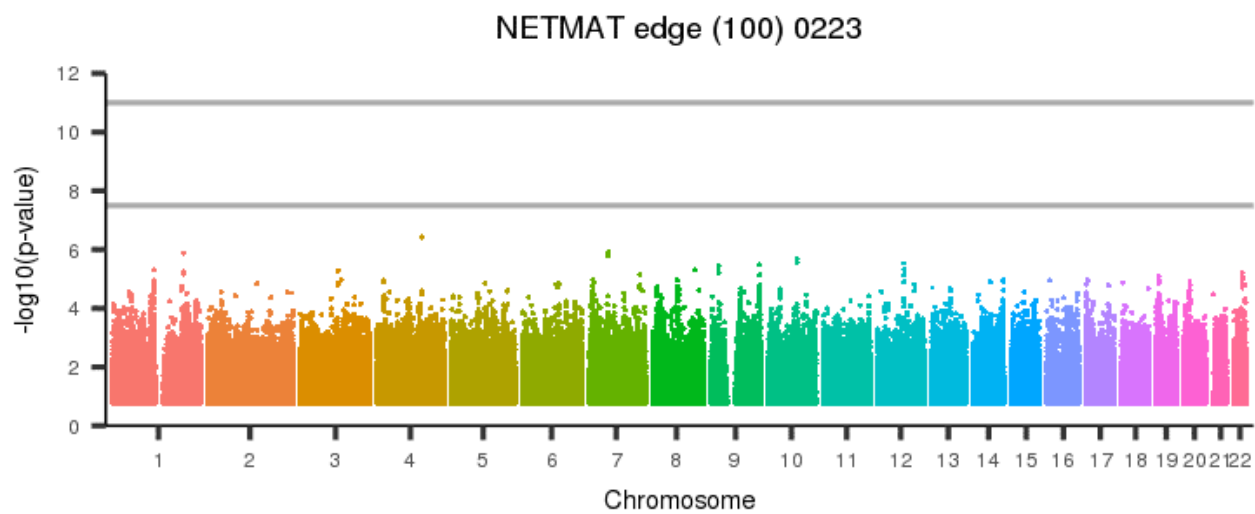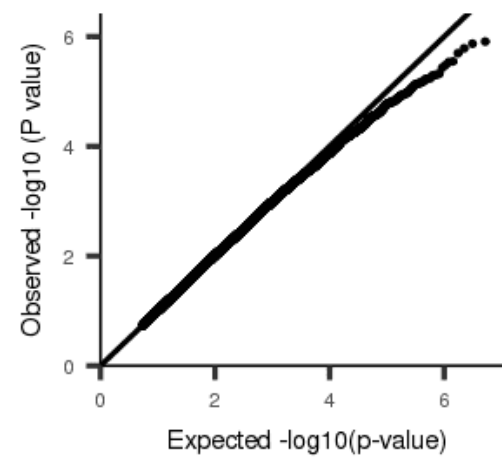

[back to list of plots](#)

Figure 1380: NETMAT edge (100) 0224

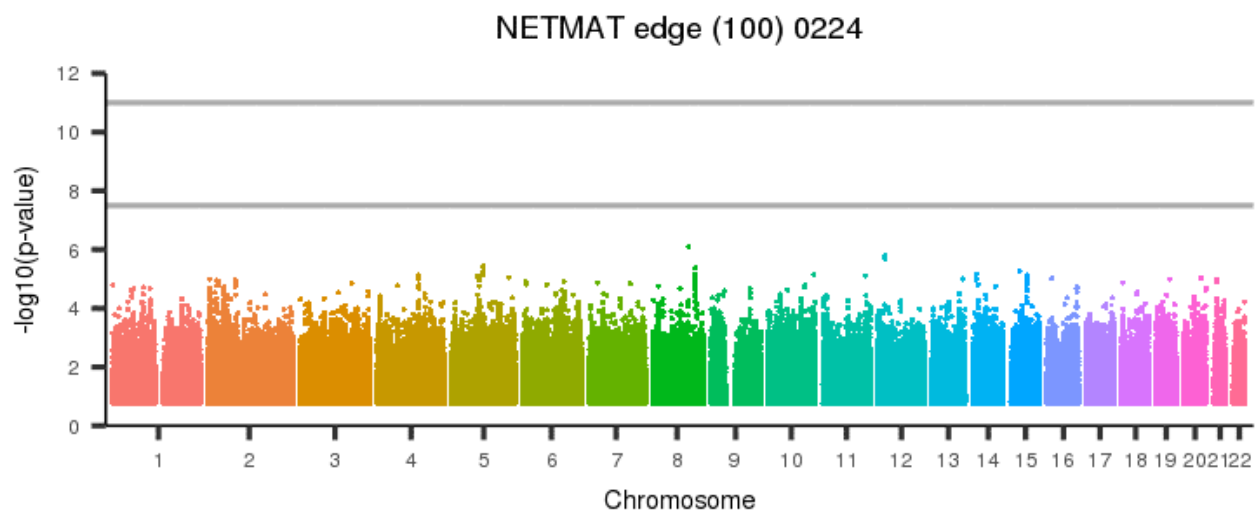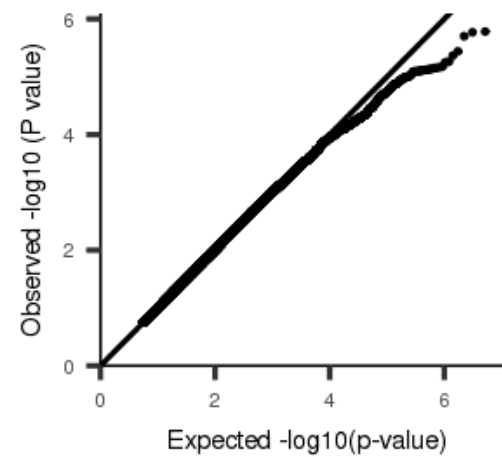

[back to list of plots](#)

Figure 1381: NETMAT edge (100) 0225

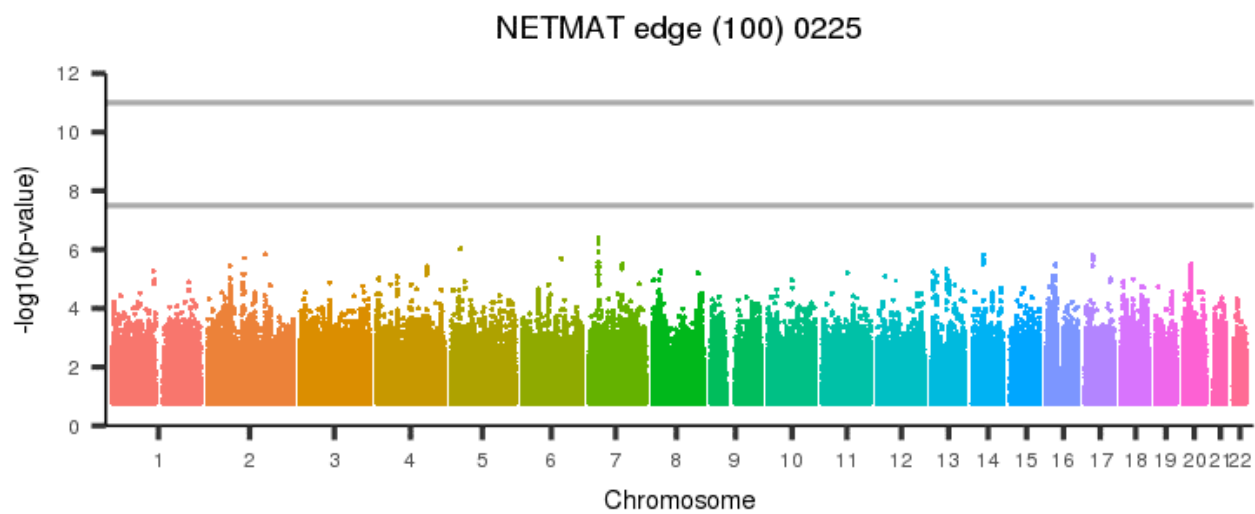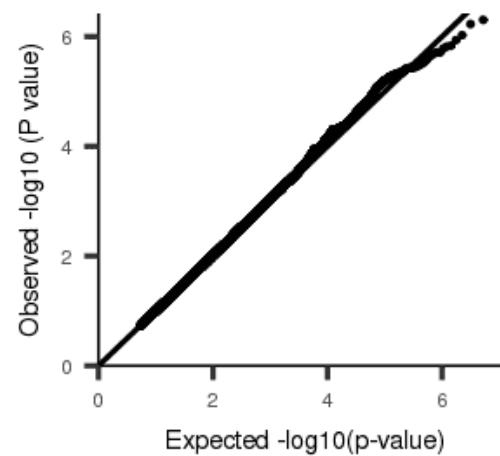

[back to list of plots](#)



Figure 1382: NETMAT edge (100) 0226

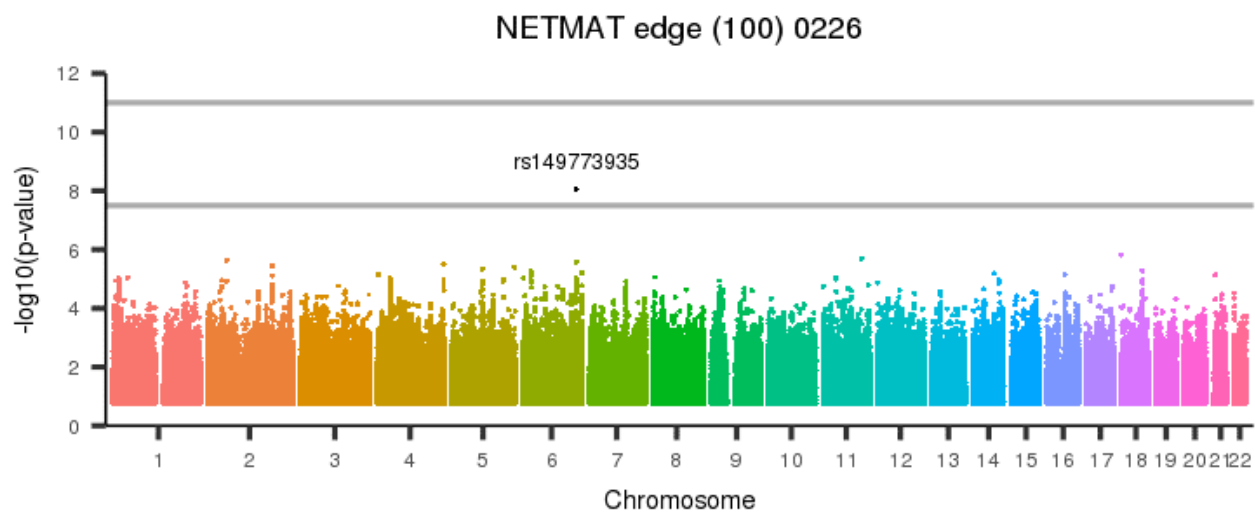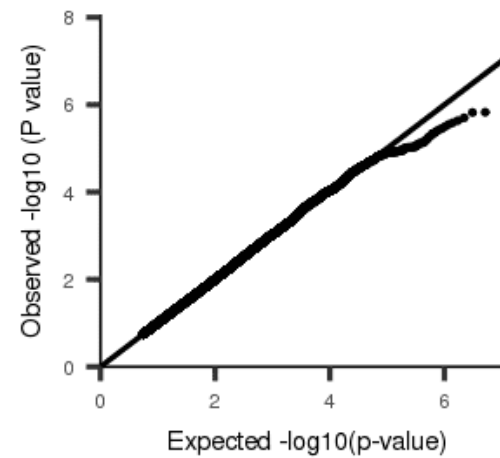

[back to list of plots](#)

Figure 1383: NETMAT edge (100) 0227

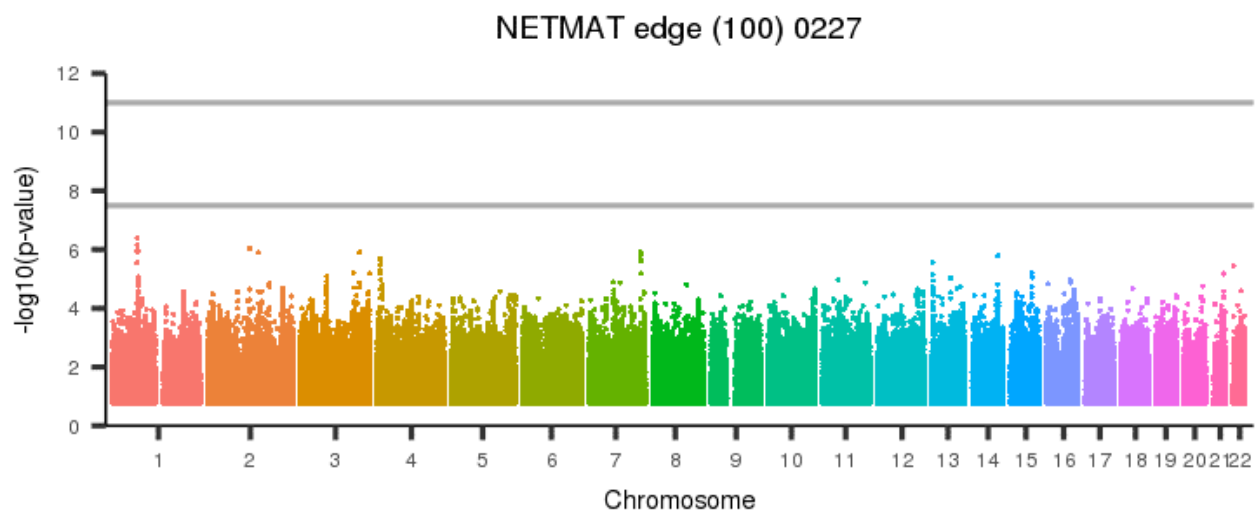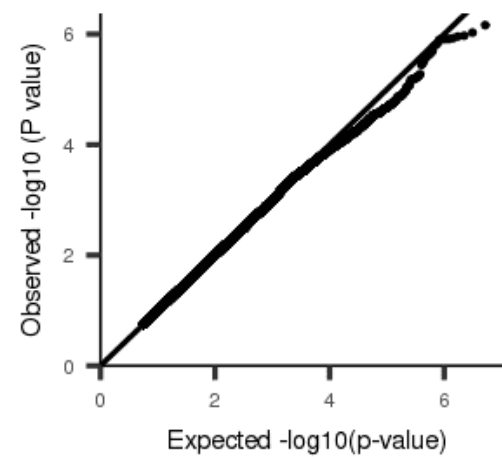

[back to list of plots](#)

Figure 1384: NETMAT edge (100) 0228

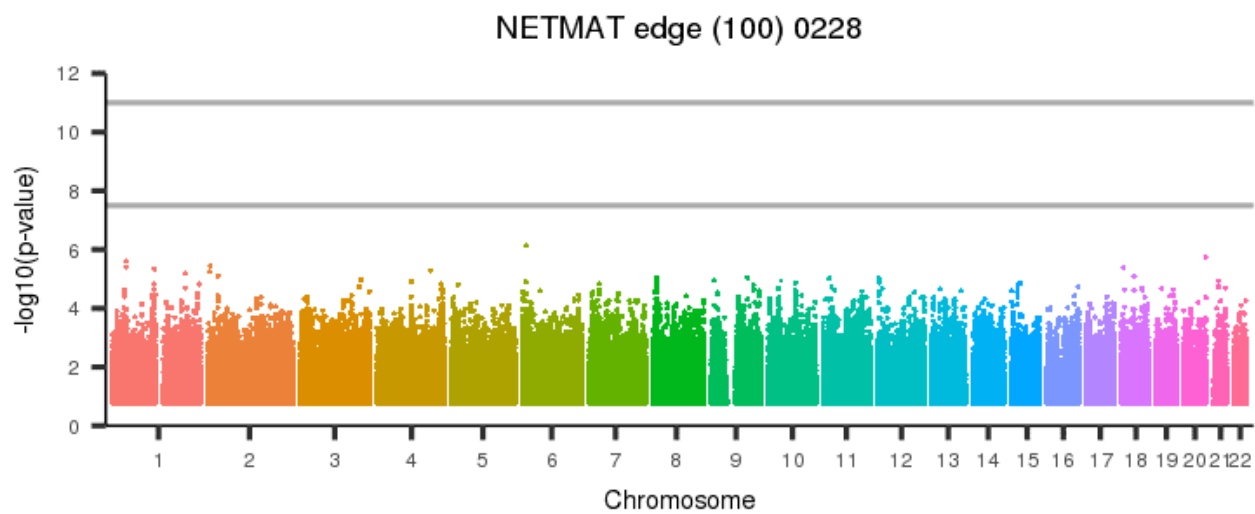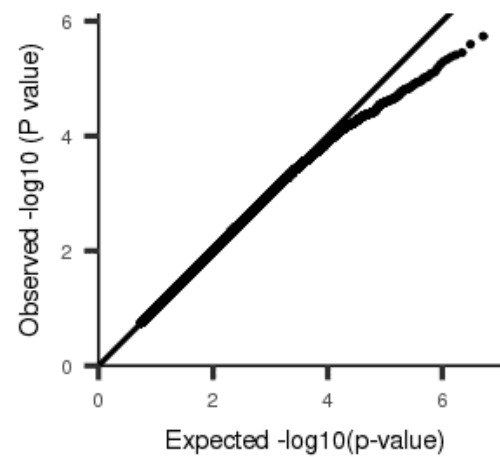

[back to list of plots](#)

Figure 1385: NETMAT edge (100) 0229

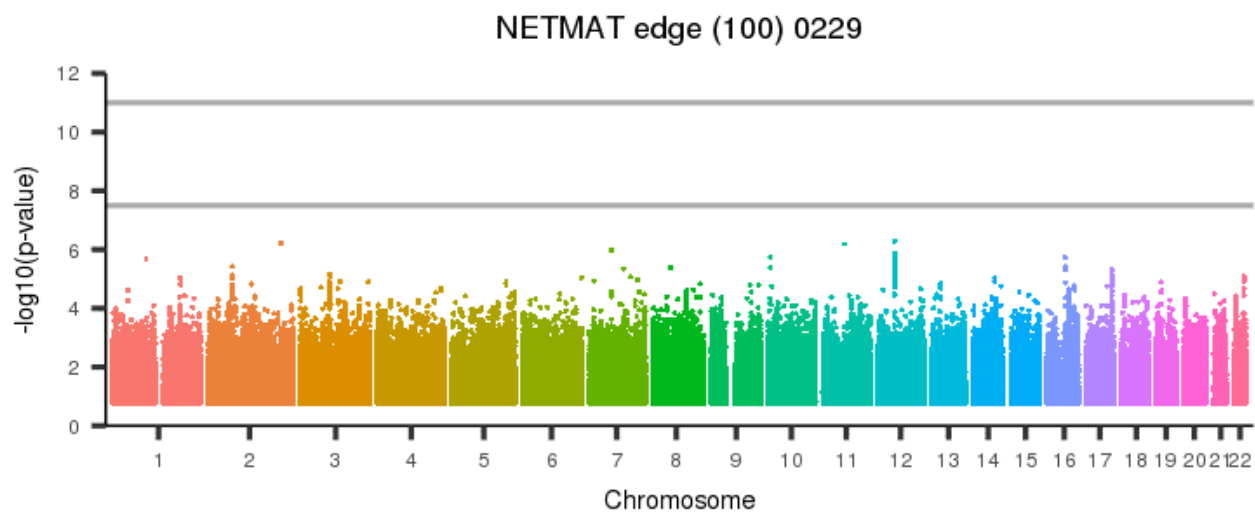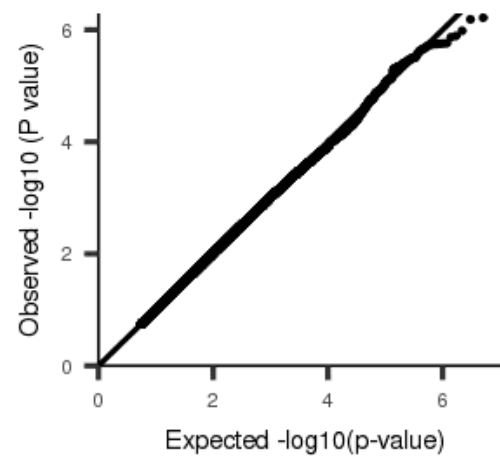

[back to list of plots](#)

Figure 1386: NETMAT edge (100) 0230

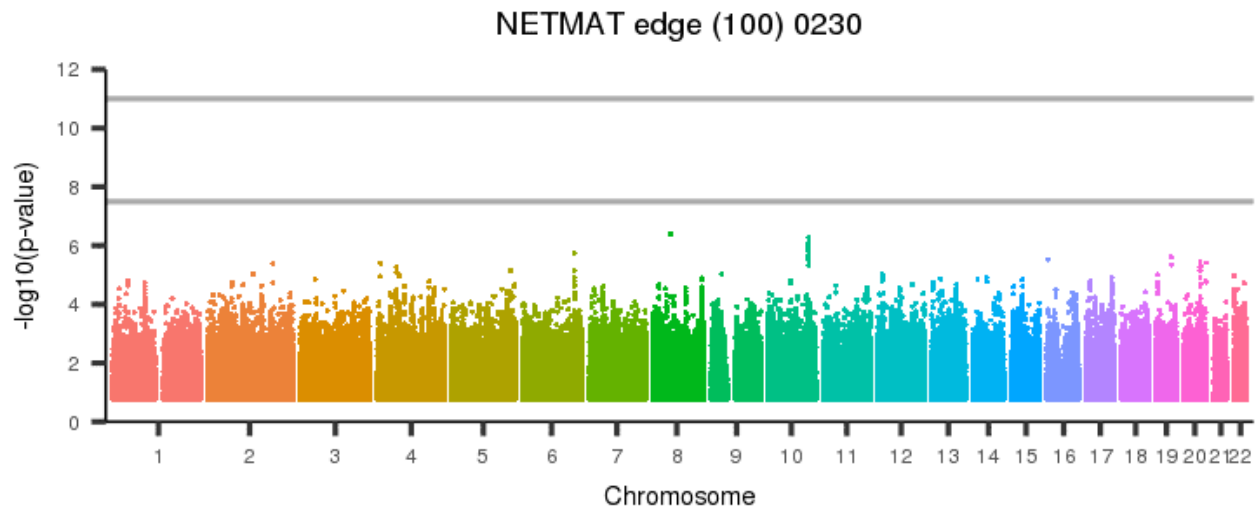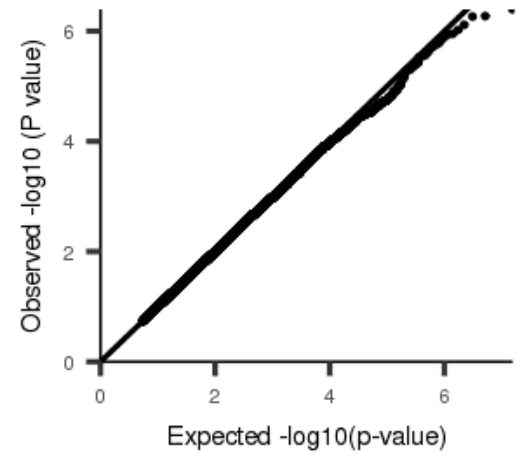

[back to list of plots](#)

Figure 1387: NETMAT edge (100) 0231

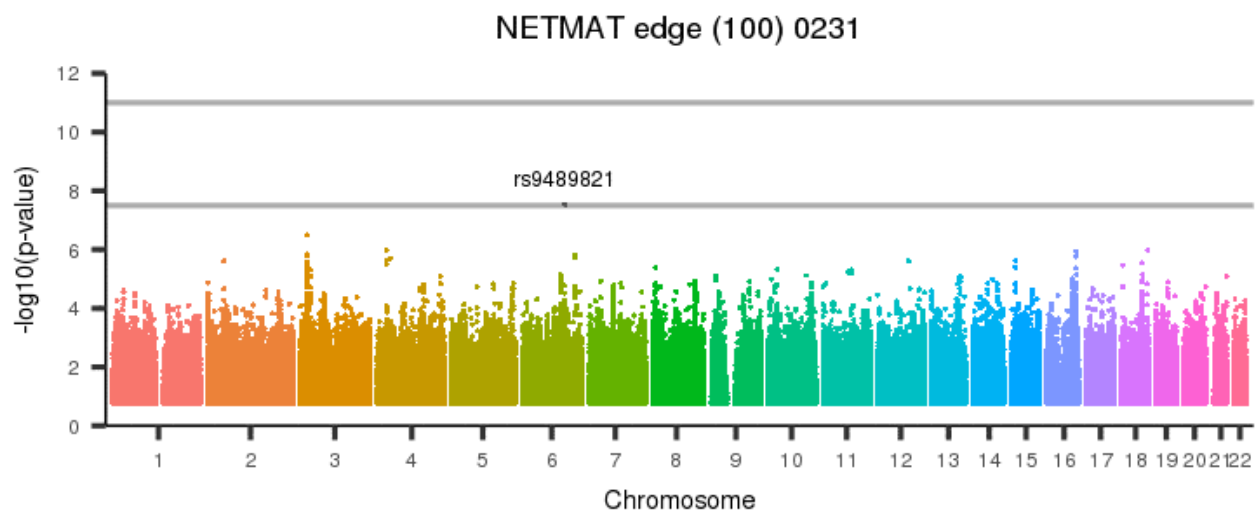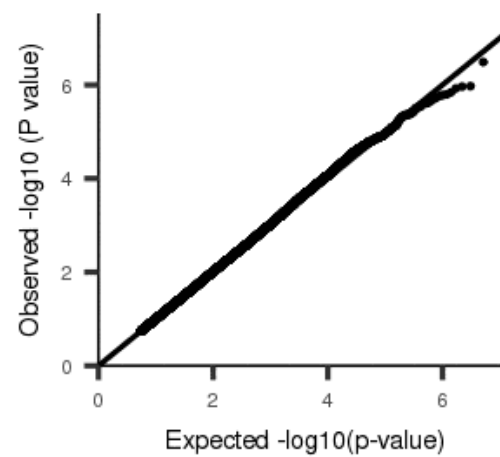

[back to list of plots](#)

Figure 1388: NETMAT edge (100) 0232

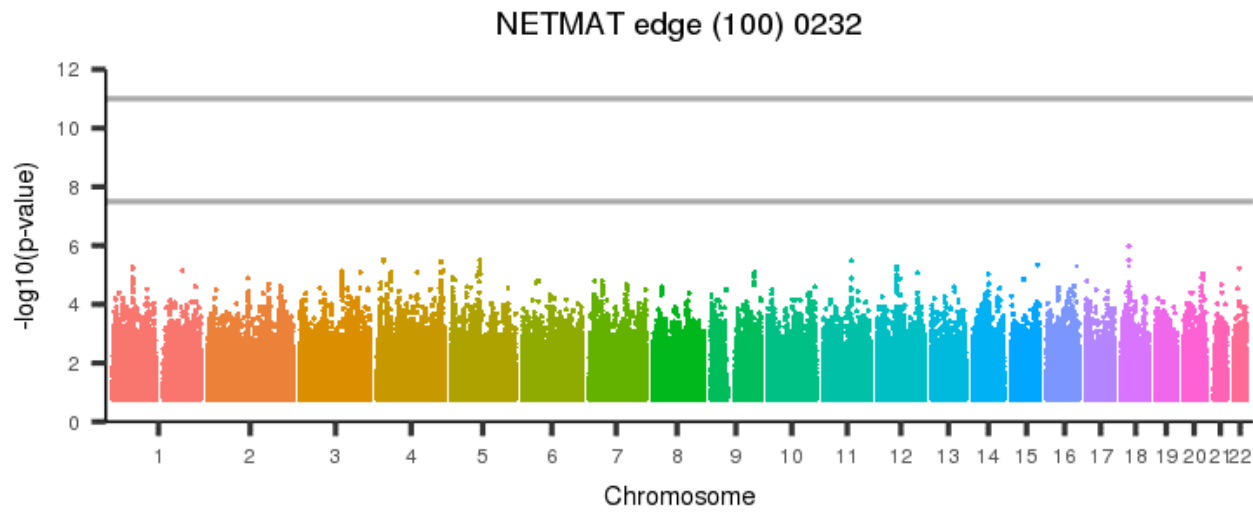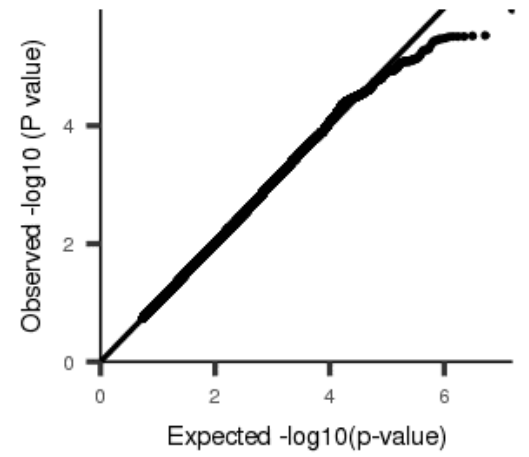

[back to list of plots](#)

Figure 1389: NETMAT edge (100) 0233

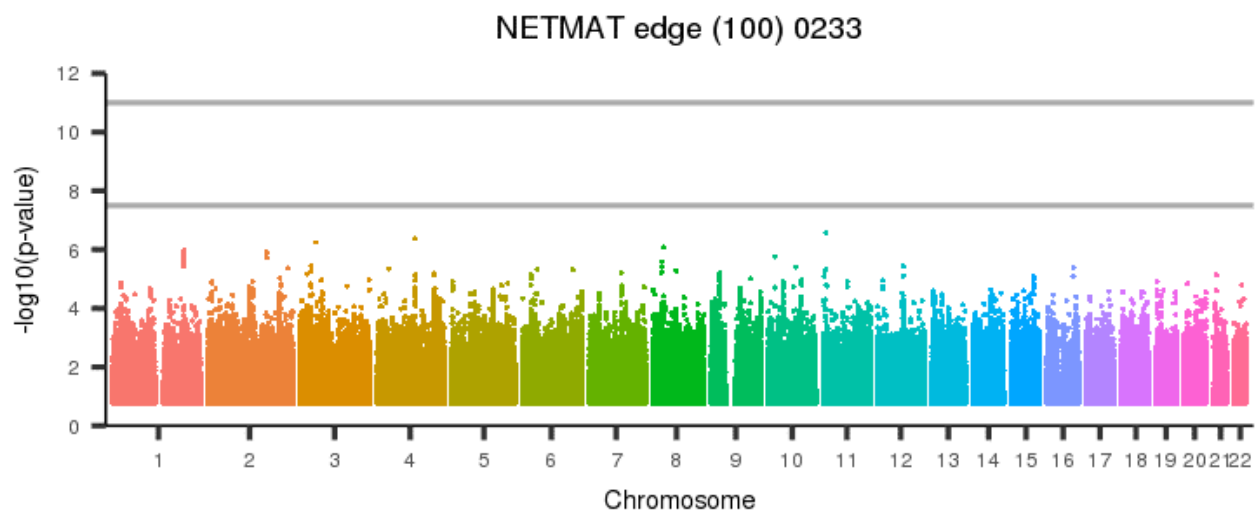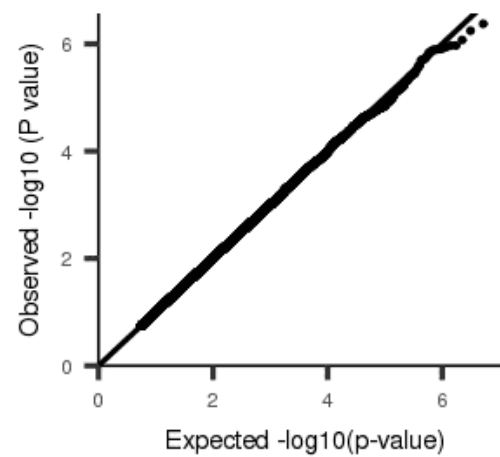

[back to list of plots](#)



Figure 1390: NETMAT edge (100) 0234

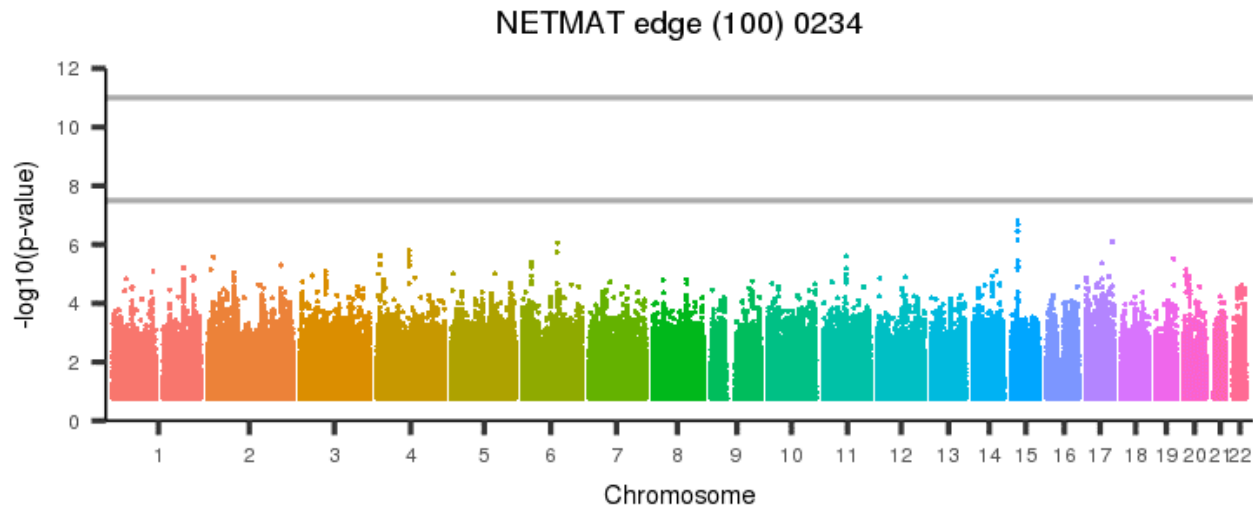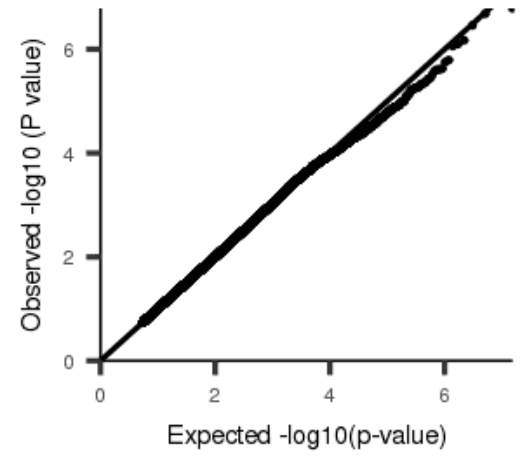

[back to list of plots](#)

Figure 1391: NETMAT edge (100) 0235

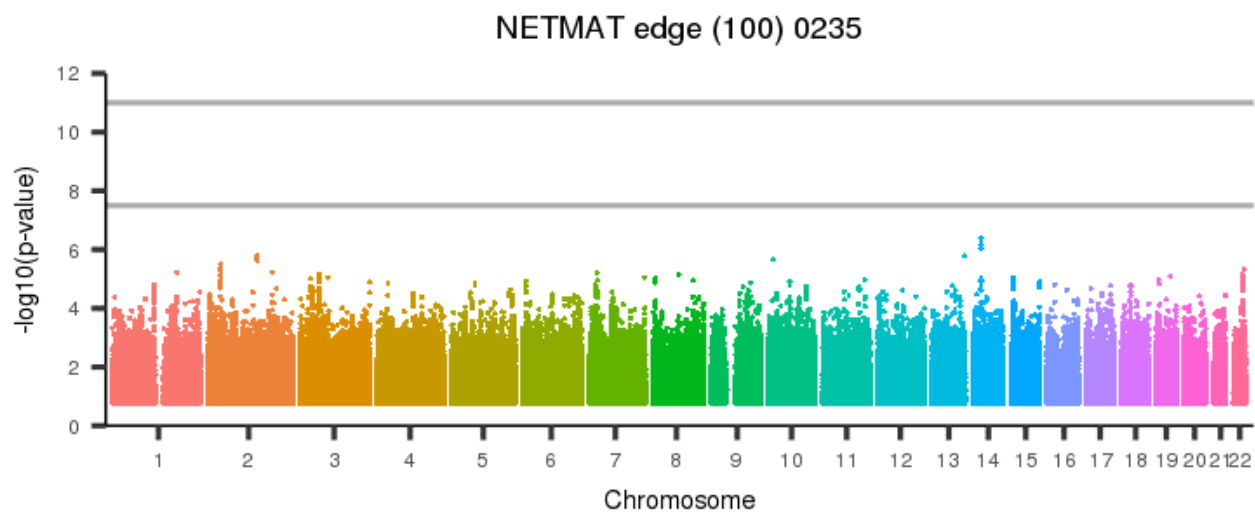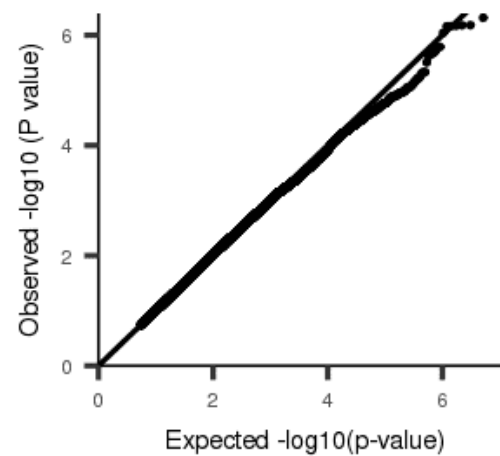

[back to list of plots](#)

Figure 1392: NETMAT edge (100) 0236

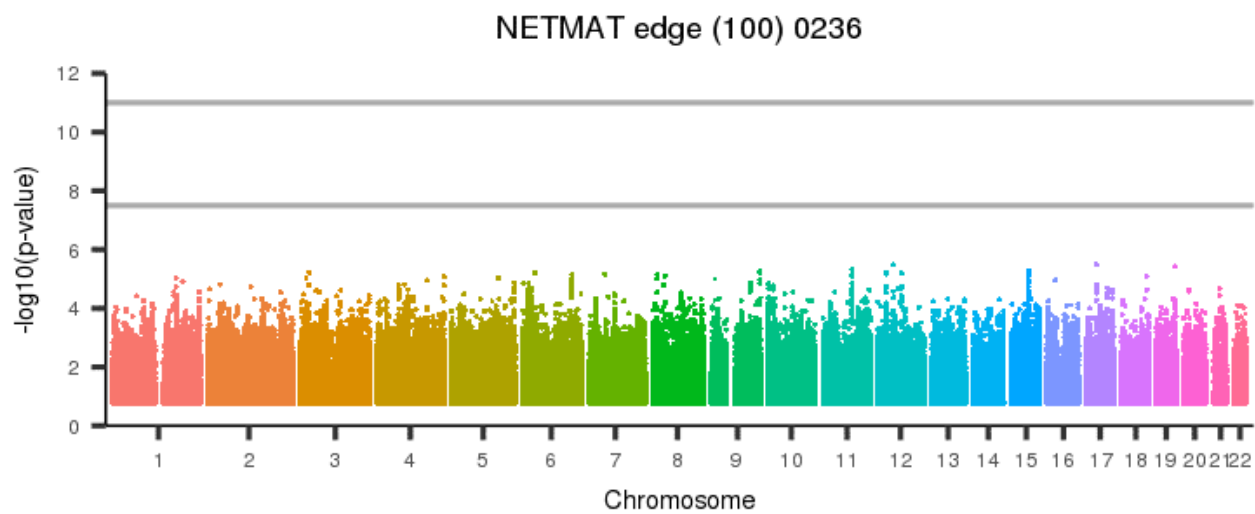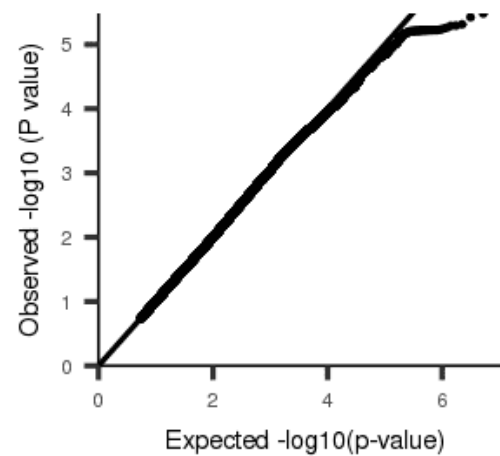

[back to list of plots](#)

Figure 1393: NETMAT edge (100) 0237

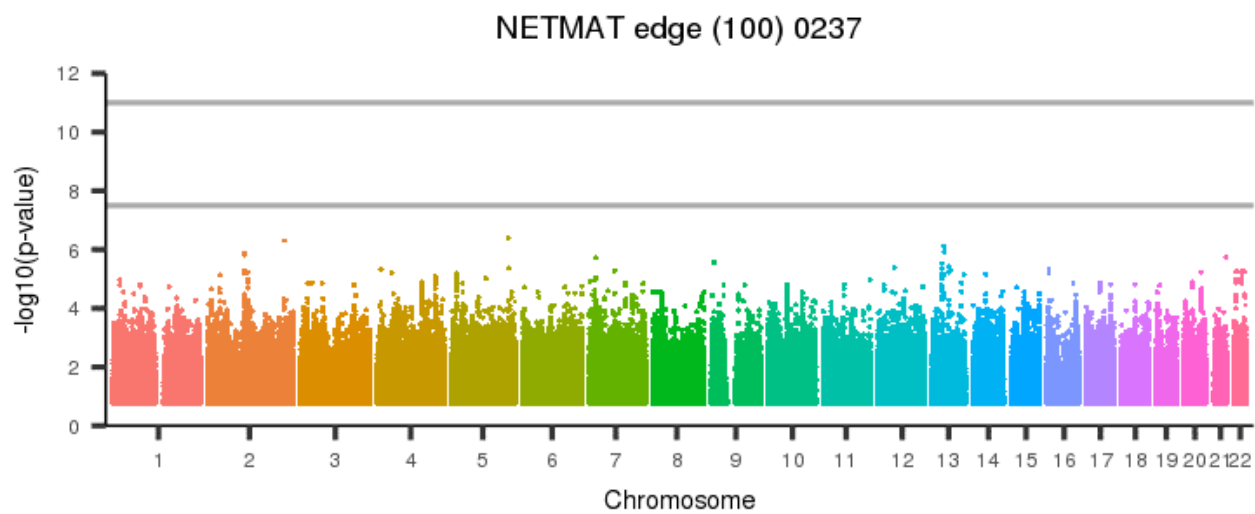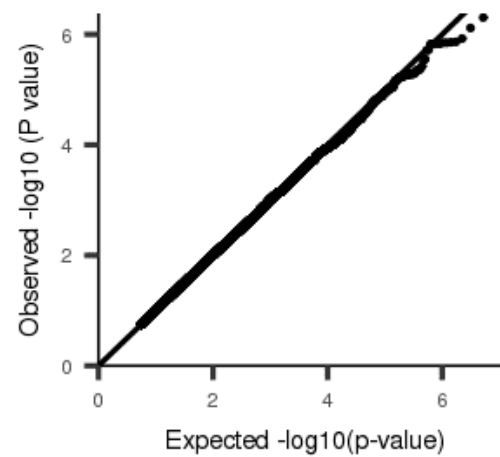

[back to list of plots](#)

Figure 1394: NETMAT edge (100) 0238

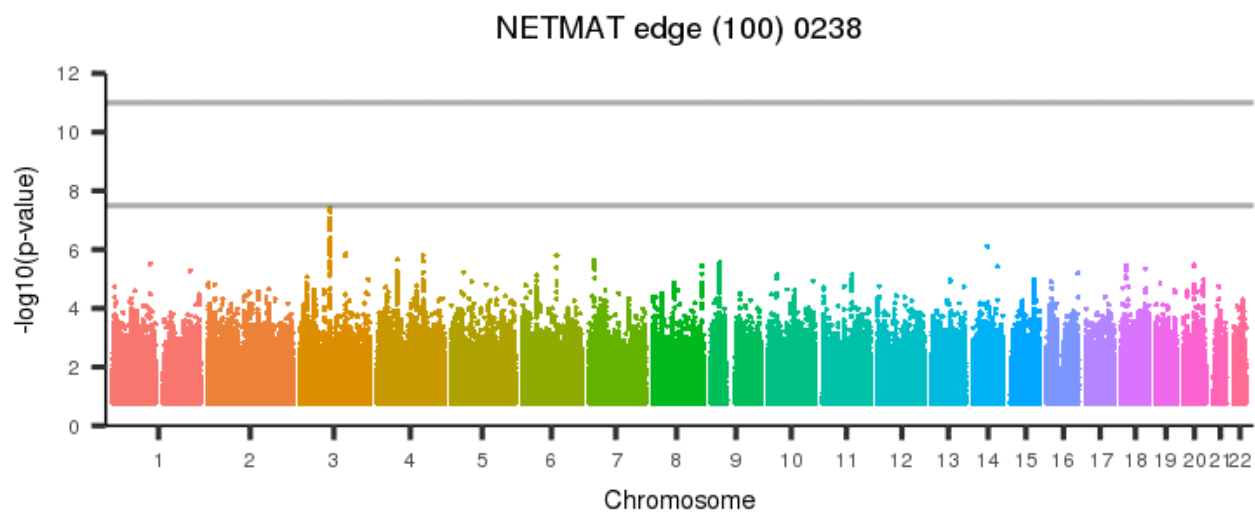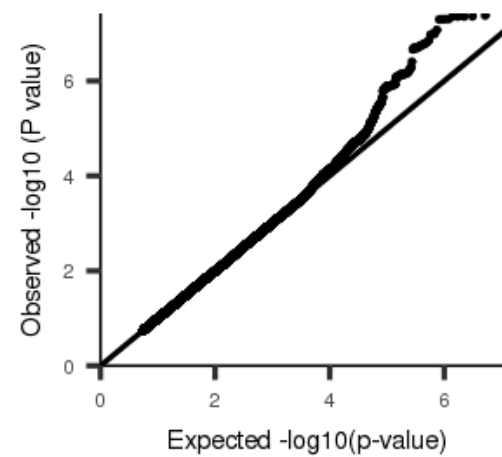

[back to list of plots](#)

Figure 1395: NETMAT edge (100) 0239

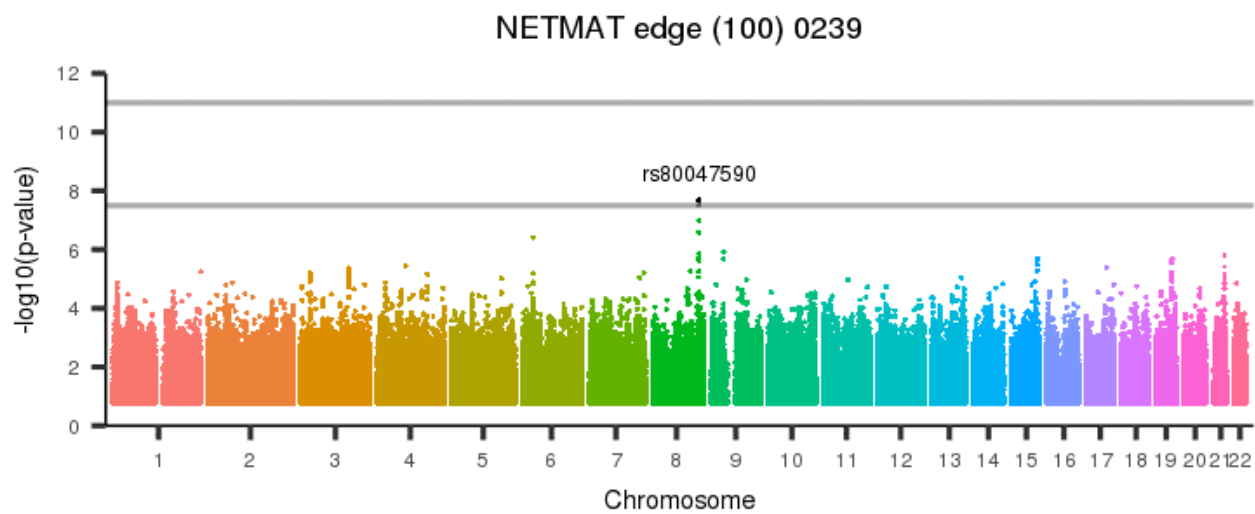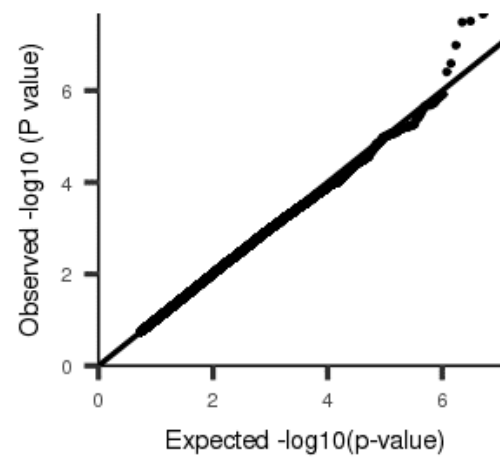

[back to list of plots](#)

Figure 1396: NETMAT edge (100) 0240

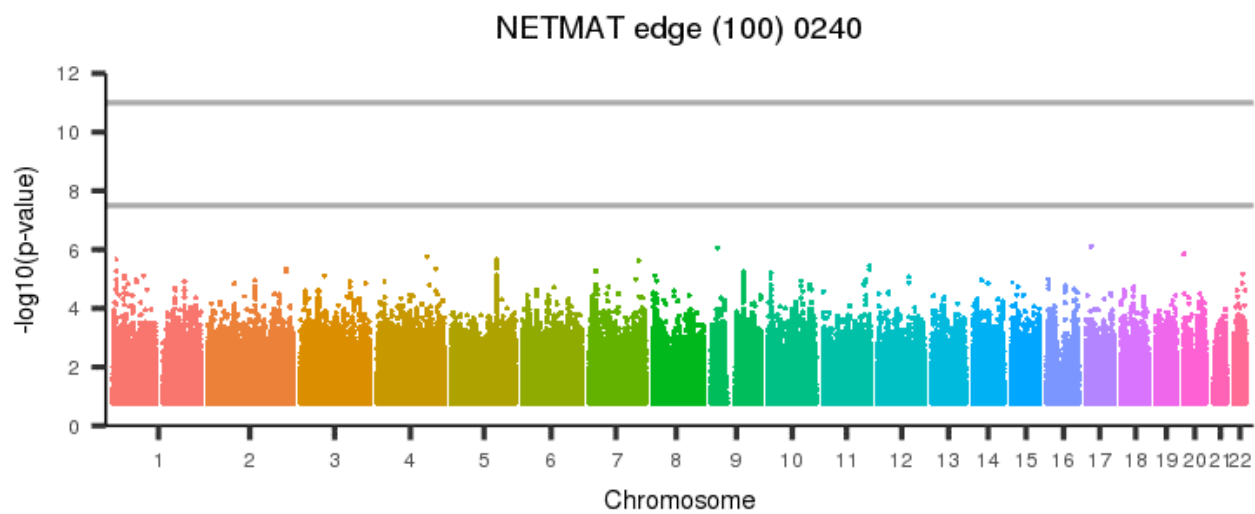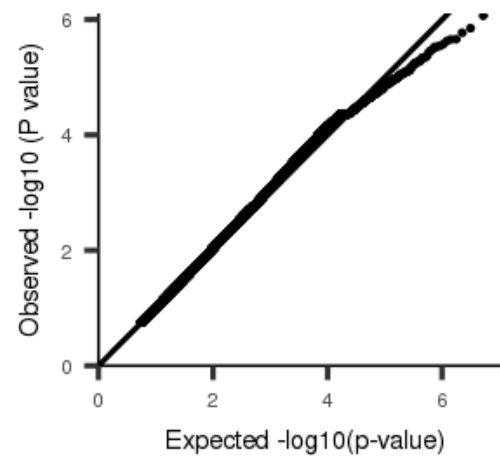

[back to list of plots](#)

Figure 1397: NETMAT edge (100) 0241

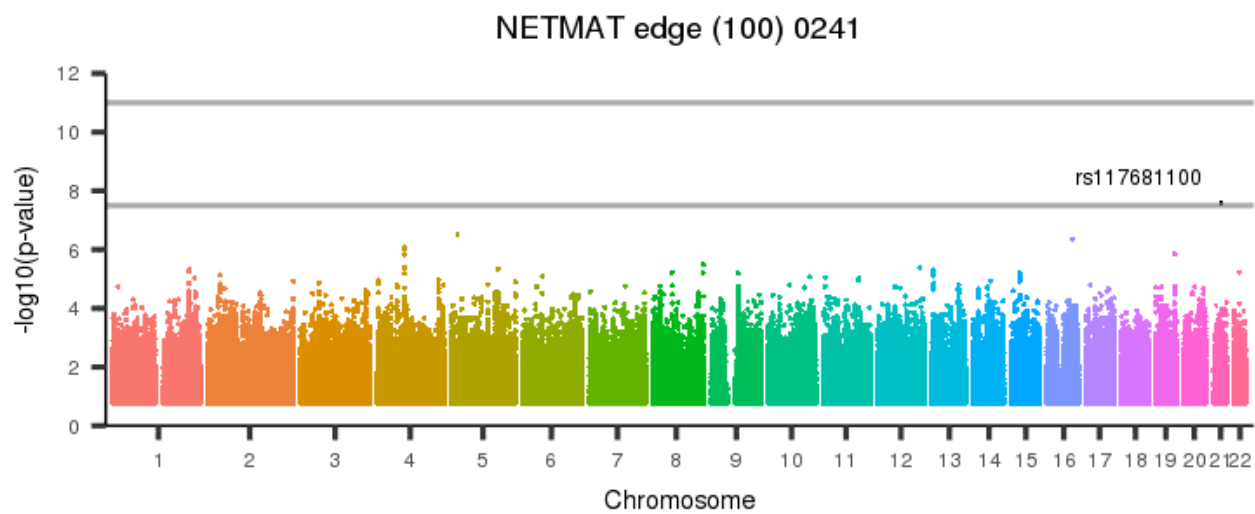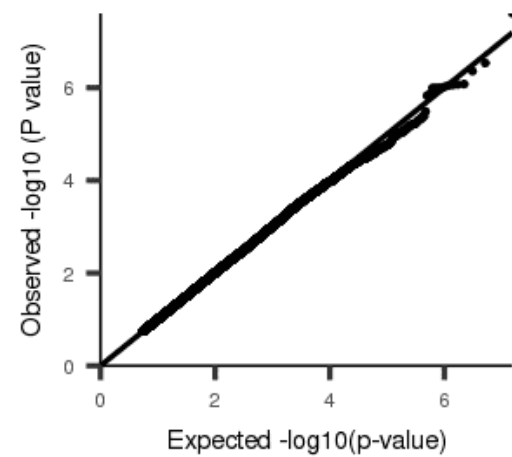

[back to list of plots](#)



Figure 1398: NETMAT edge (100) 0242

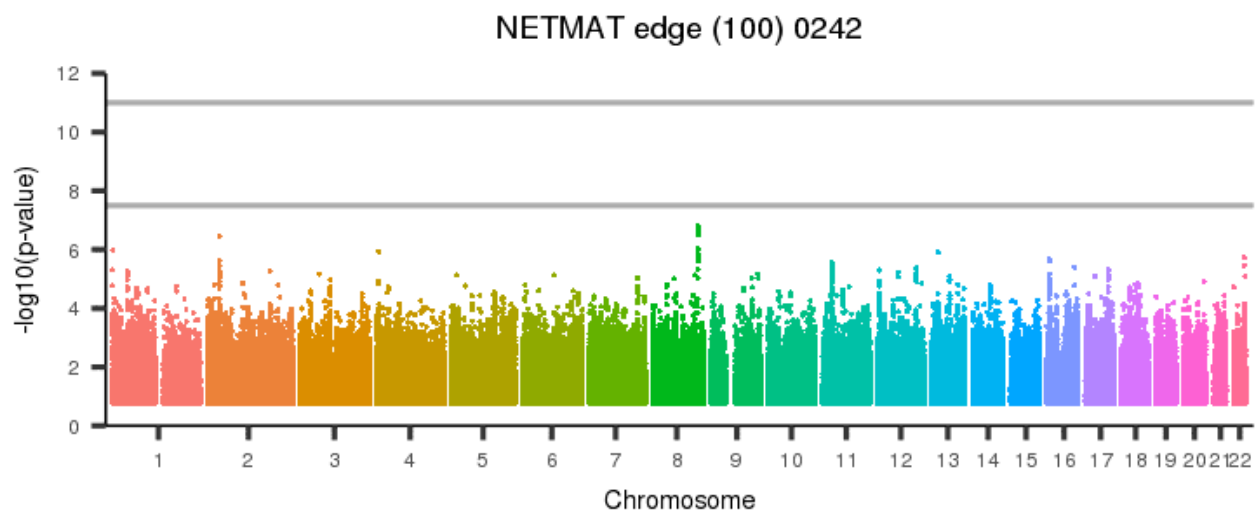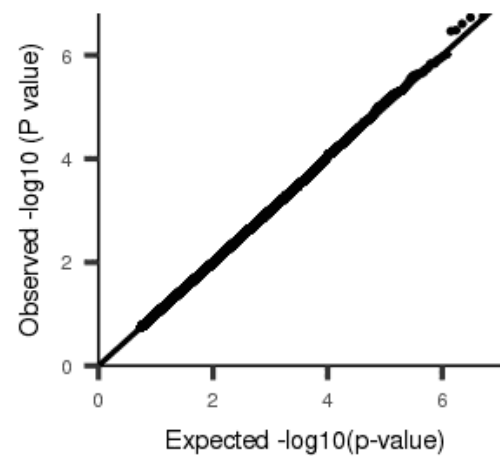

[back to list of plots](#)

Figure 1399: NETMAT edge (100) 0243

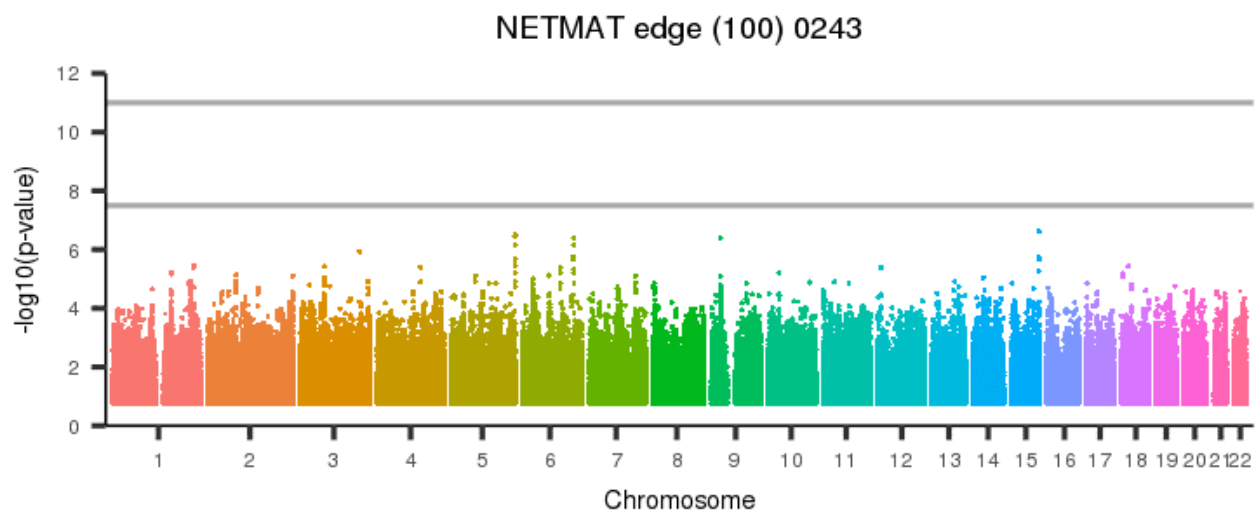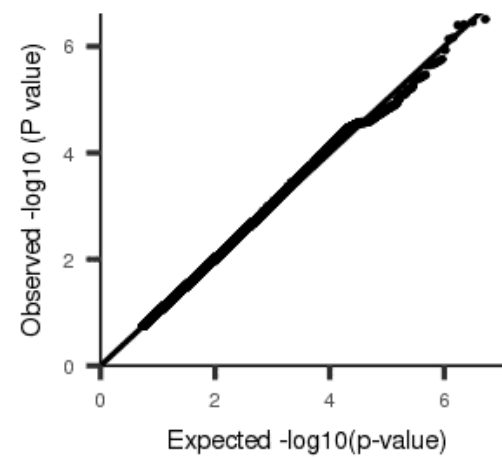

[back to list of plots](#)

Figure 1400: NETMAT edge (100) 0244

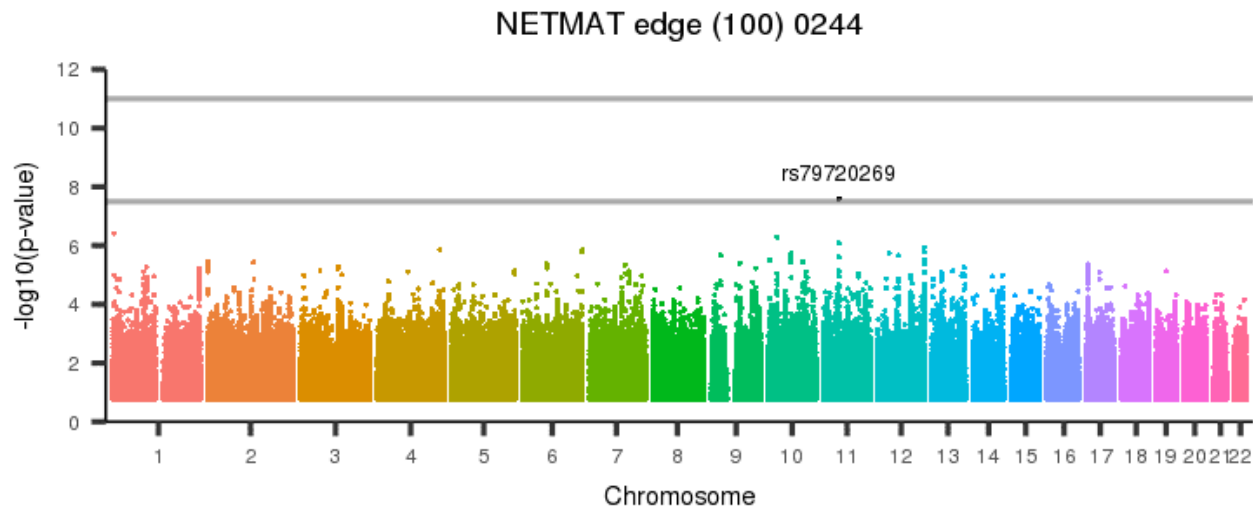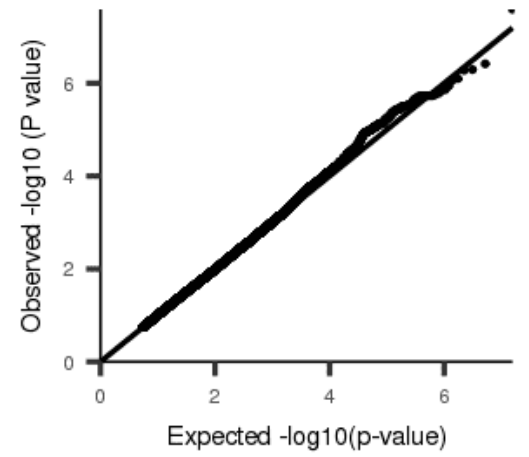

[back to list of plots](#)

Figure 1401: NETMAT edge (100) 0245

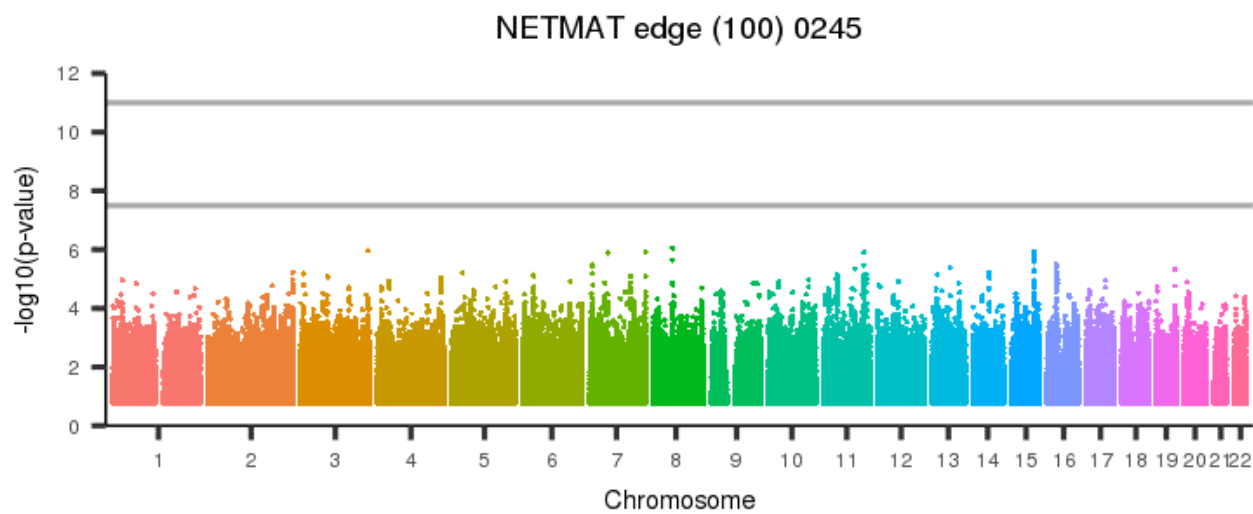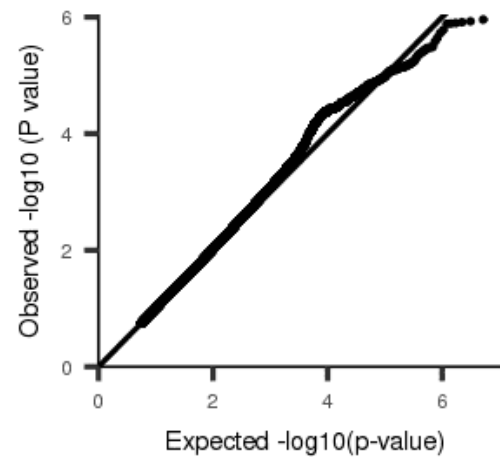

[back to list of plots](#)

Figure 1402: NETMAT edge (100) 0246

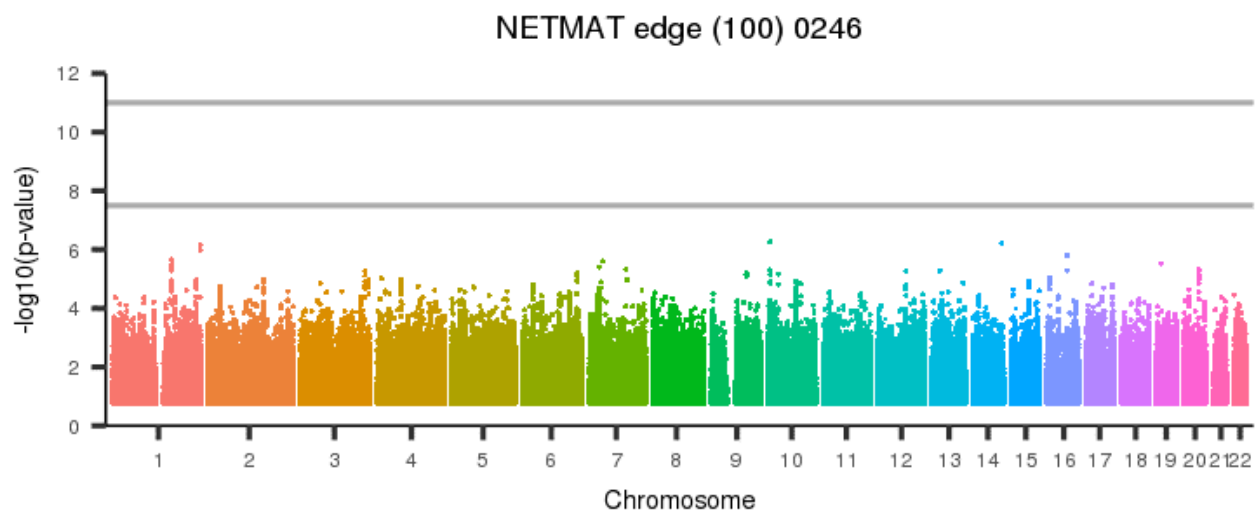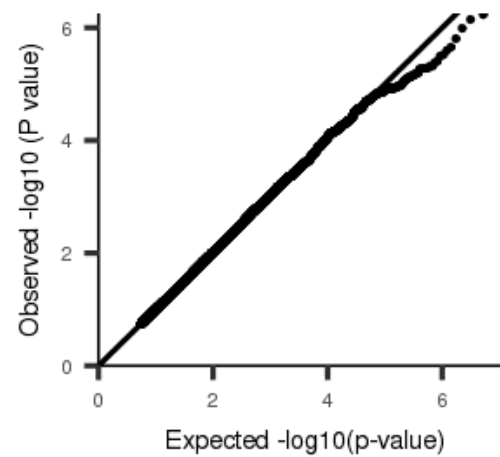

[back to list of plots](#)

Figure 1403: NETMAT edge (100) 0247

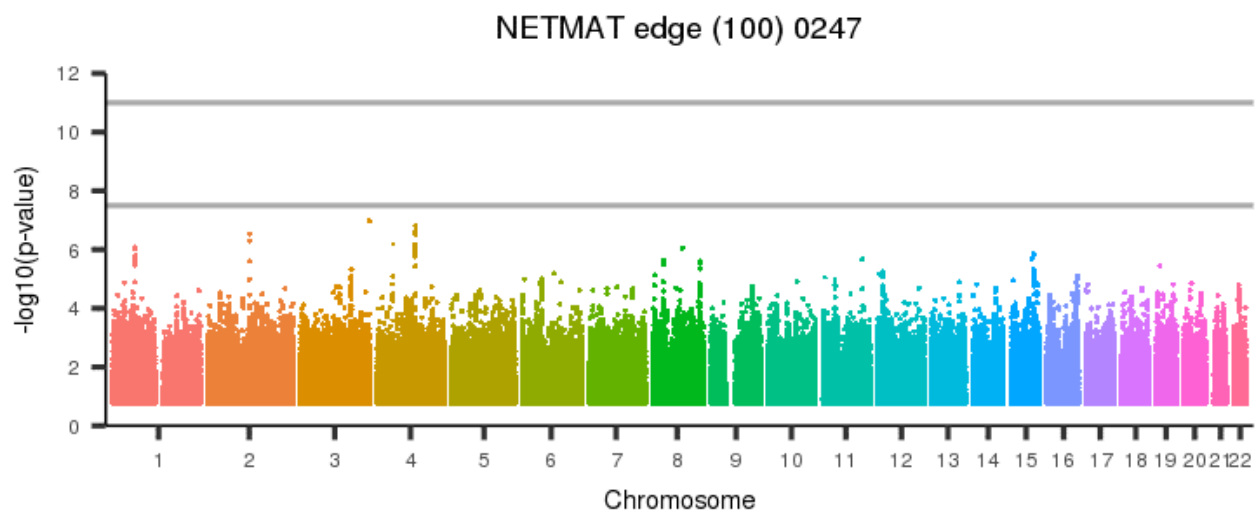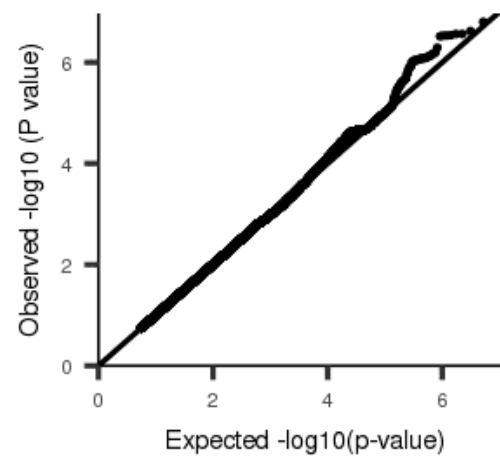

[back to list of plots](#)

Figure 1404: NETMAT edge (100) 0248

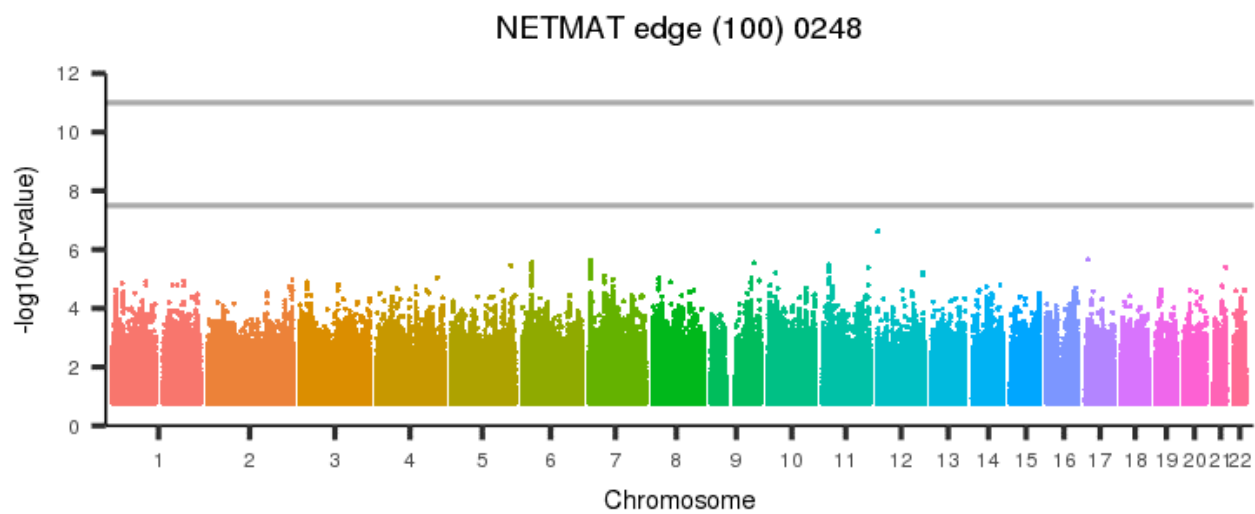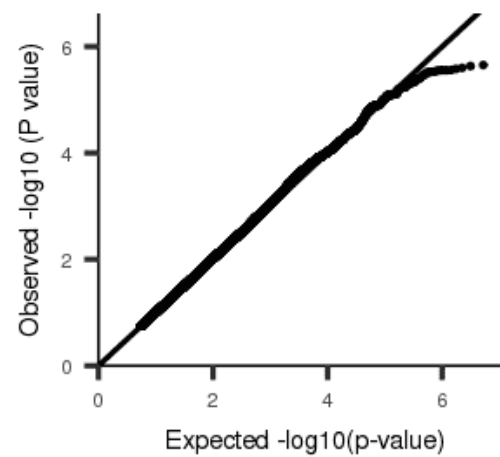

[back to list of plots](#)

Figure 1405: NETMAT edge (100) 0249

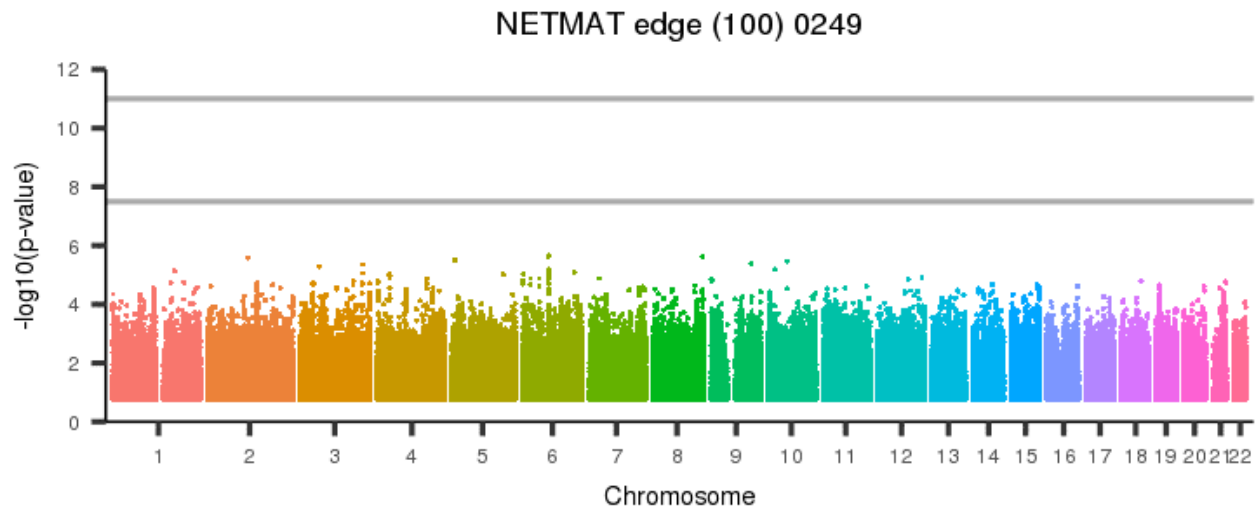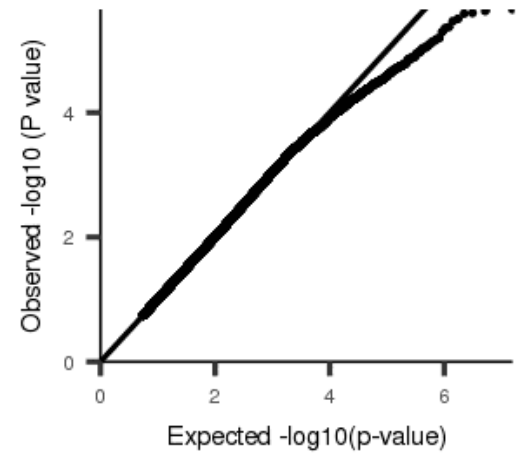

[back to list of plots](#)



Figure 1406: NETMAT edge (100) 0250

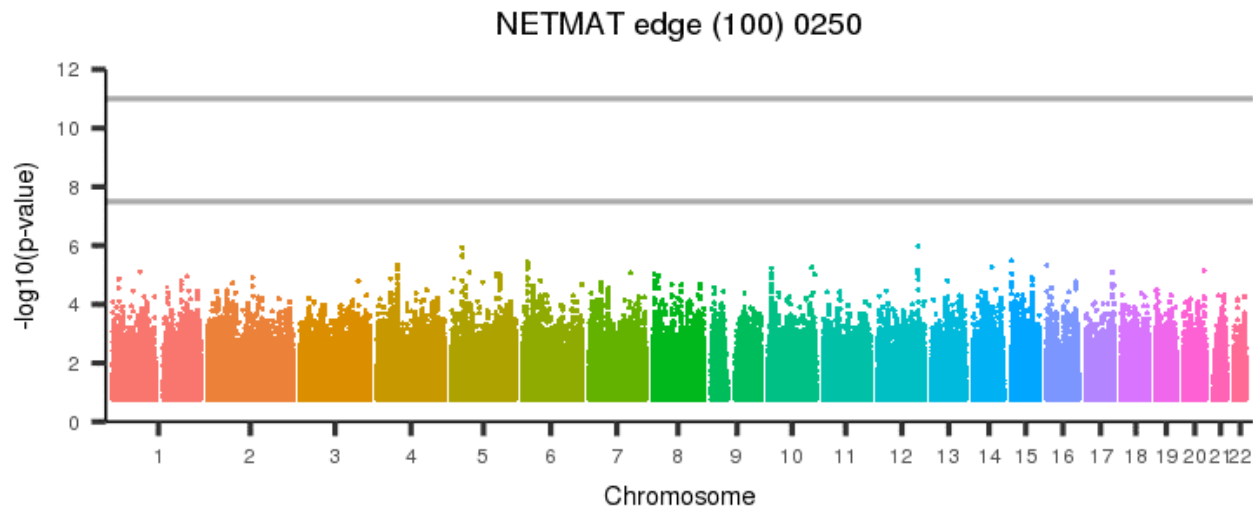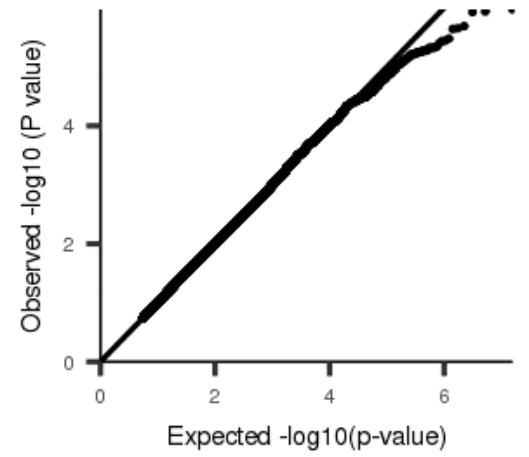

[back to list of plots](#)

Figure 1407: NETMAT edge (100) 0251

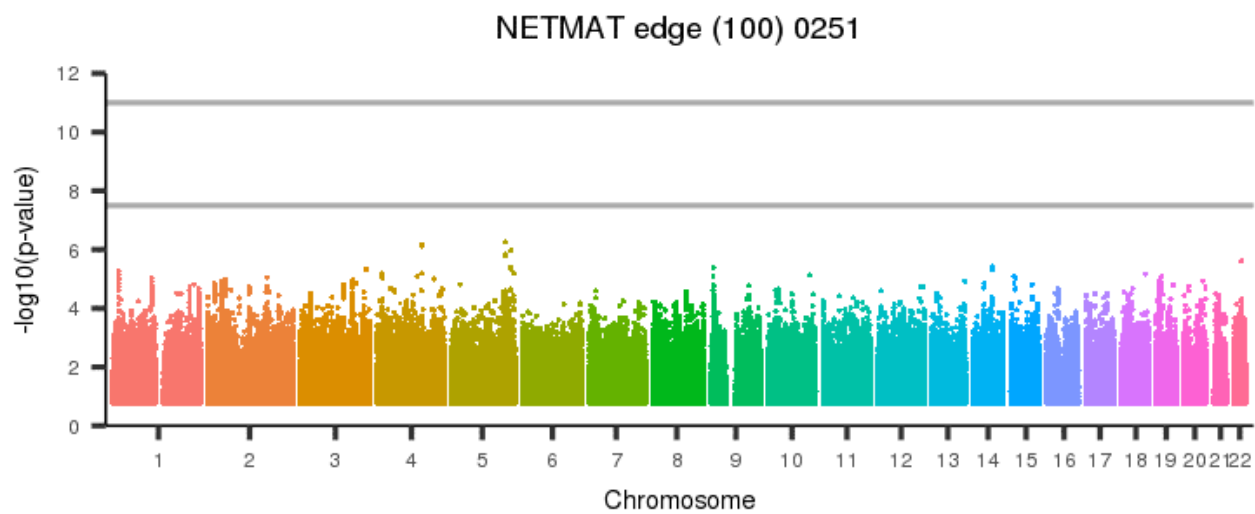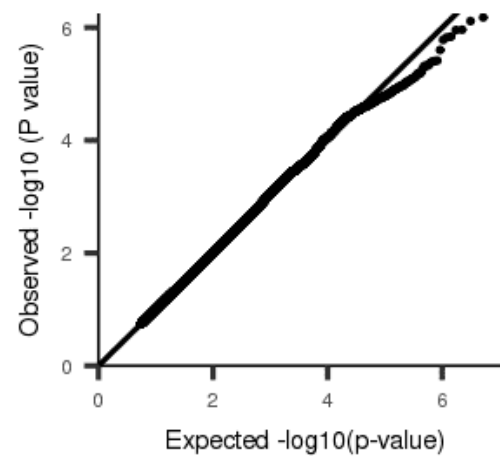

[back to list of plots](#)

Figure 1408: NETMAT edge (100) 0252

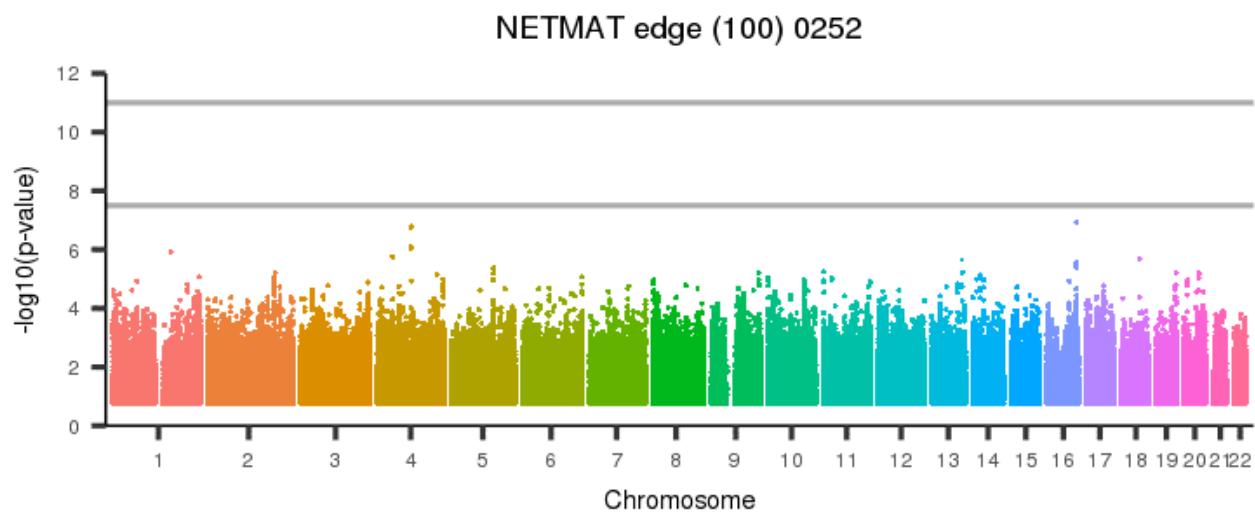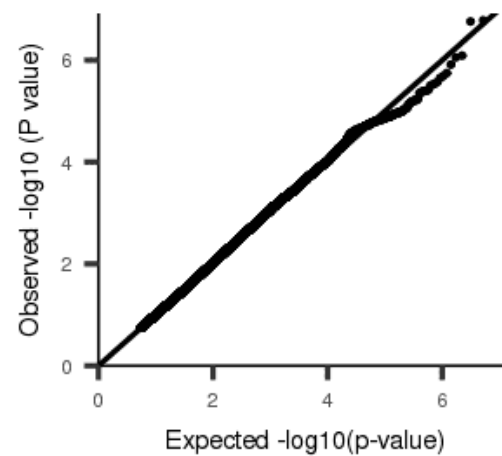

[back to list of plots](#)

Figure 1409: NETMAT edge (100) 0253

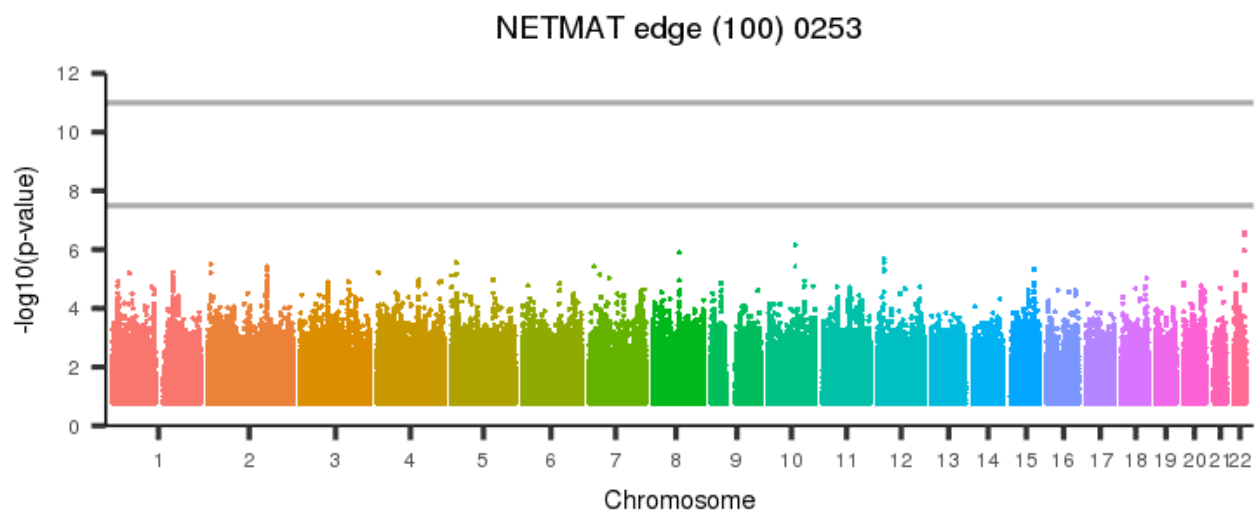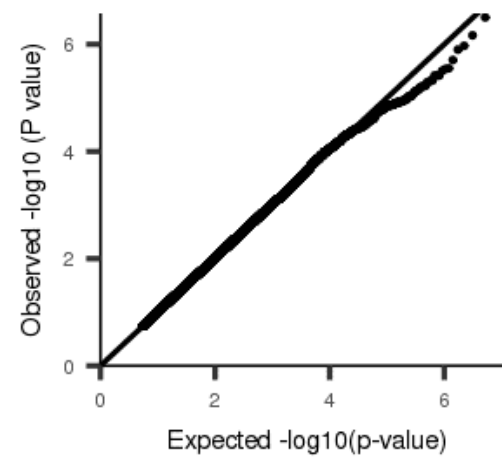

[back to list of plots](#)

Figure 1410: NETMAT edge (100) 0254

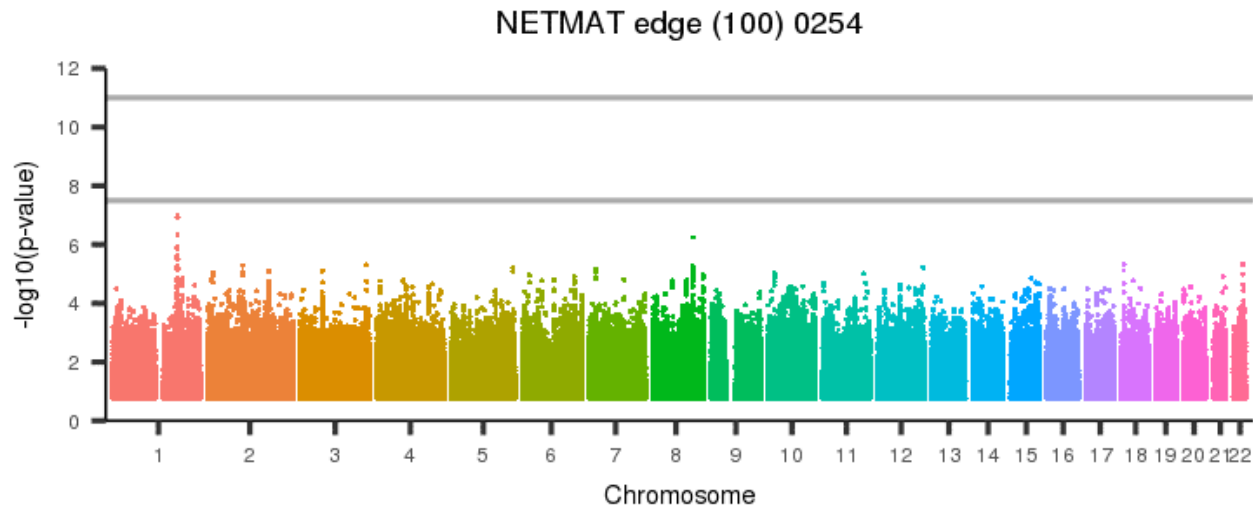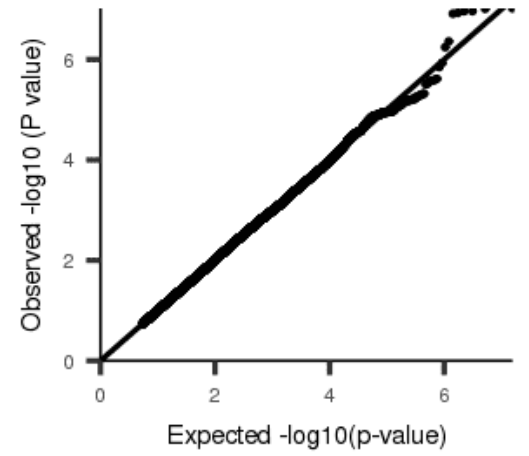

[back to list of plots](#)

Figure 1411: NETMAT edge (100) 0255

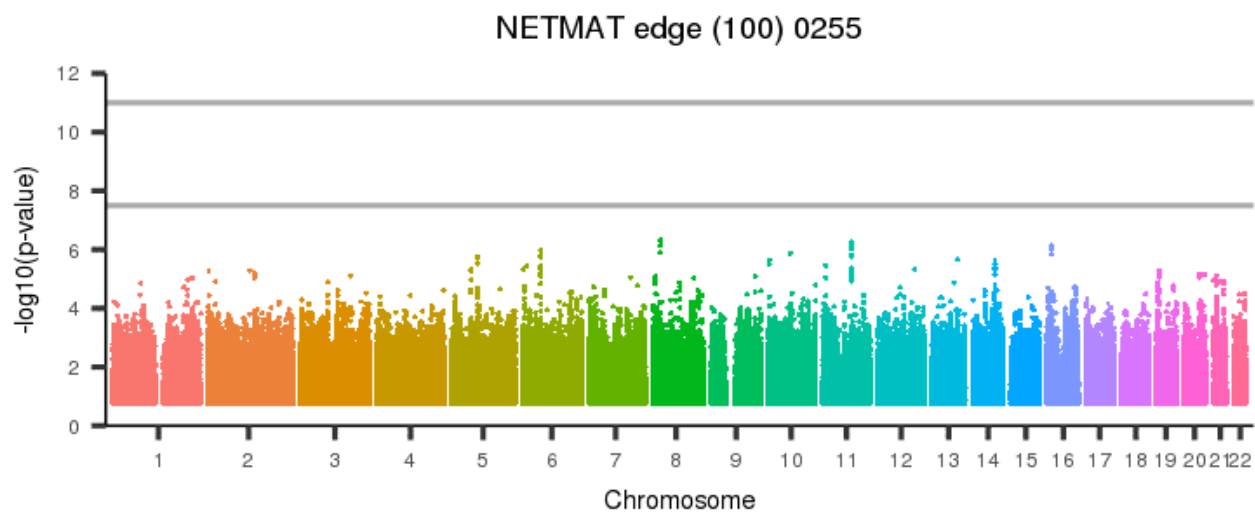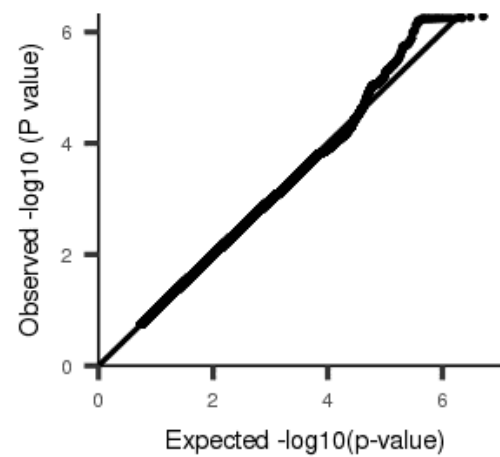

[back to list of plots](#)

Figure 1412: NETMAT edge (100) 0256

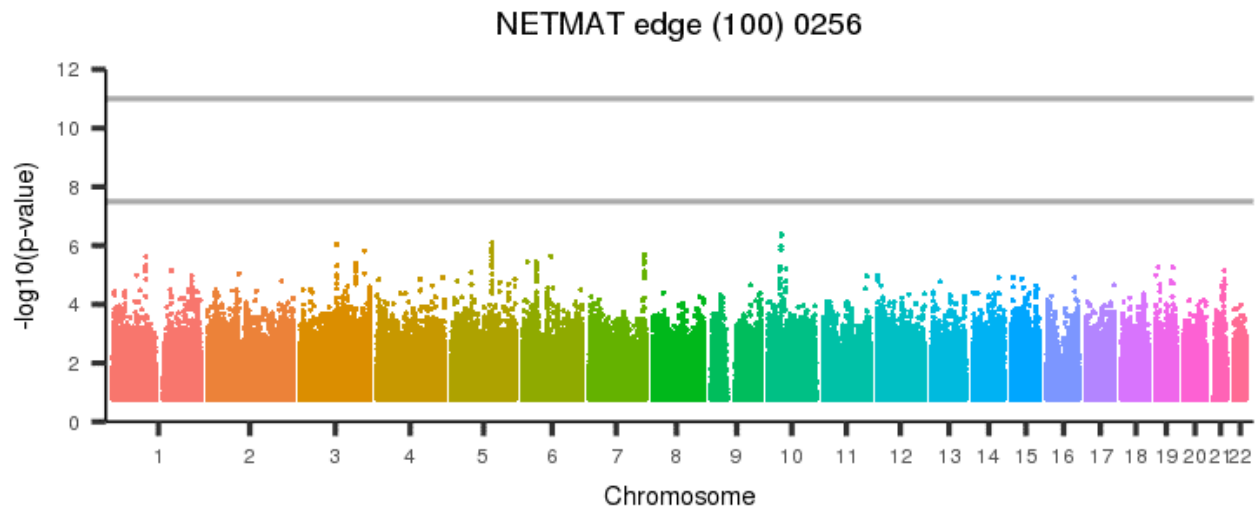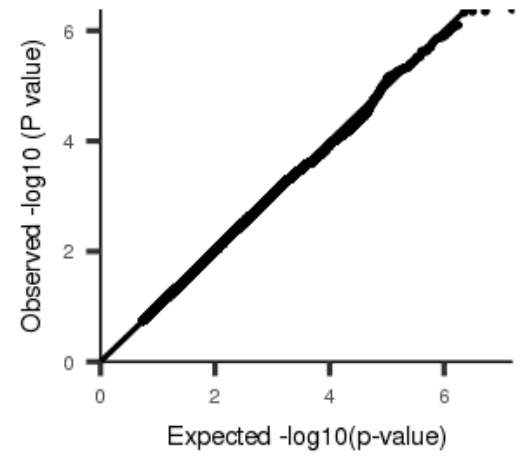

[back to list of plots](#)

Figure 1413: NETMAT edge (100) 0257

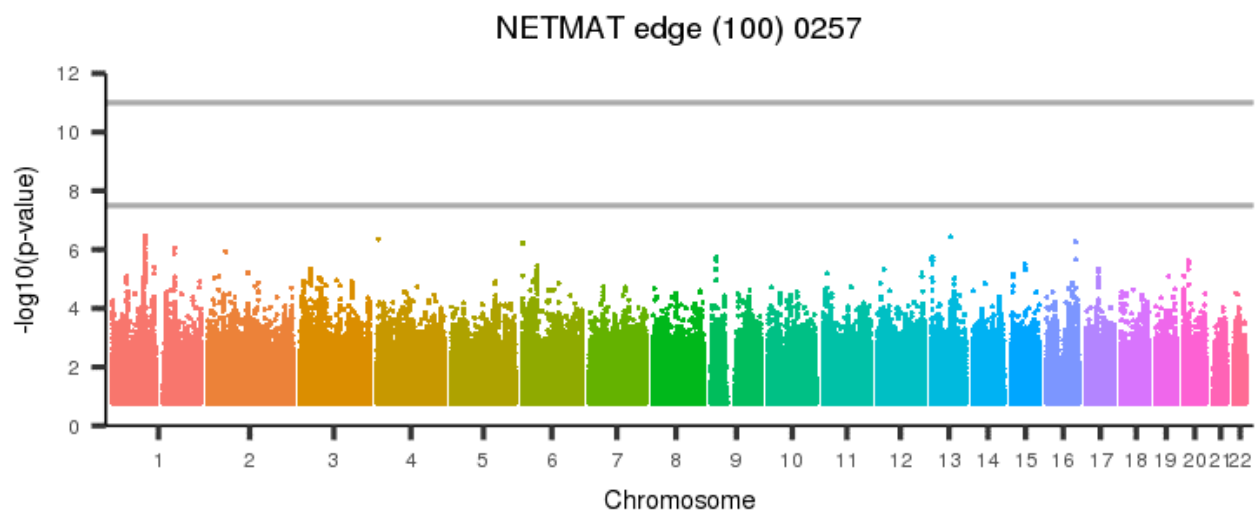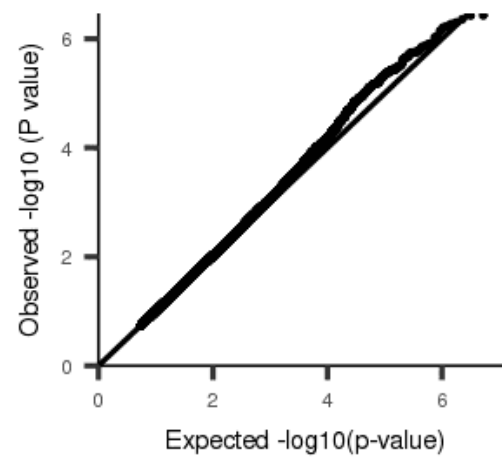

[back to list of plots](#)



Figure 1414: NETMAT edge (100) 0258

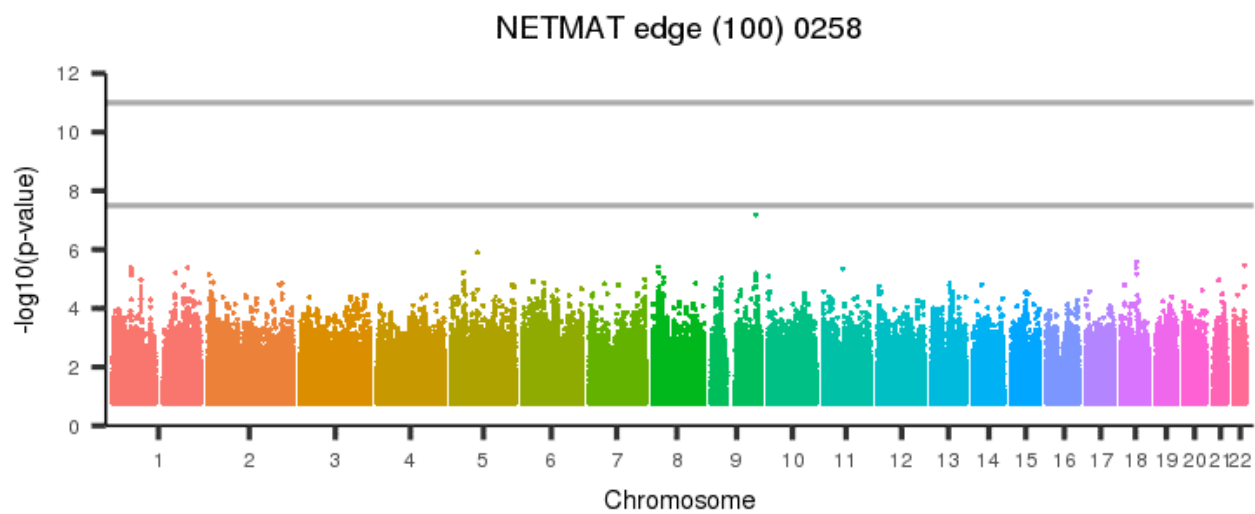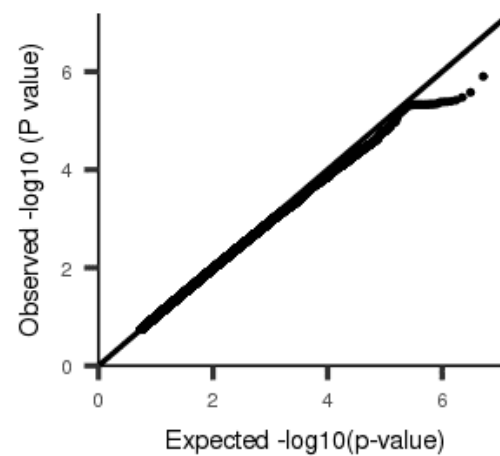

[back to list of plots](#)

Figure 1415: NETMAT edge (100) 0259

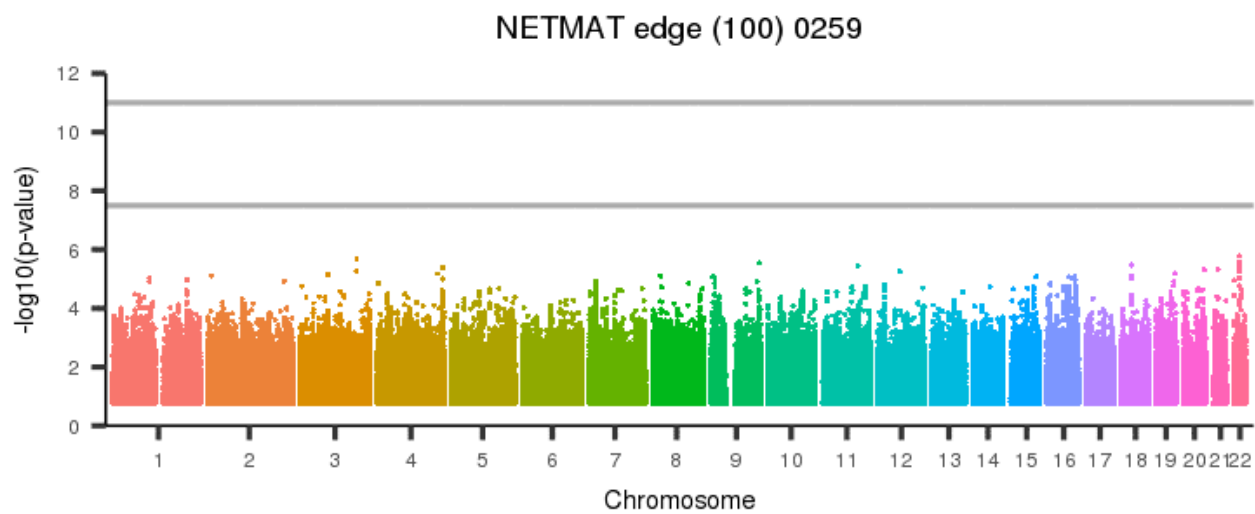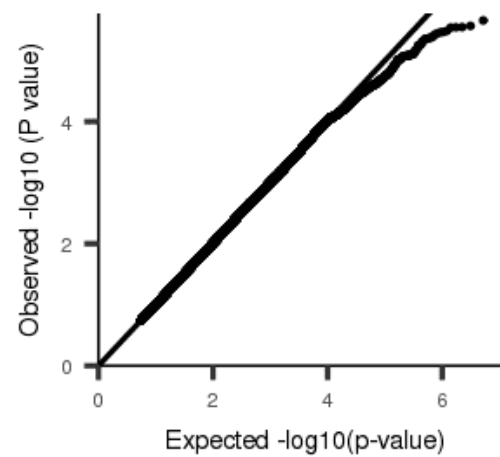

[back to list of plots](#)

Figure 1416: NETMAT edge (100) 0260

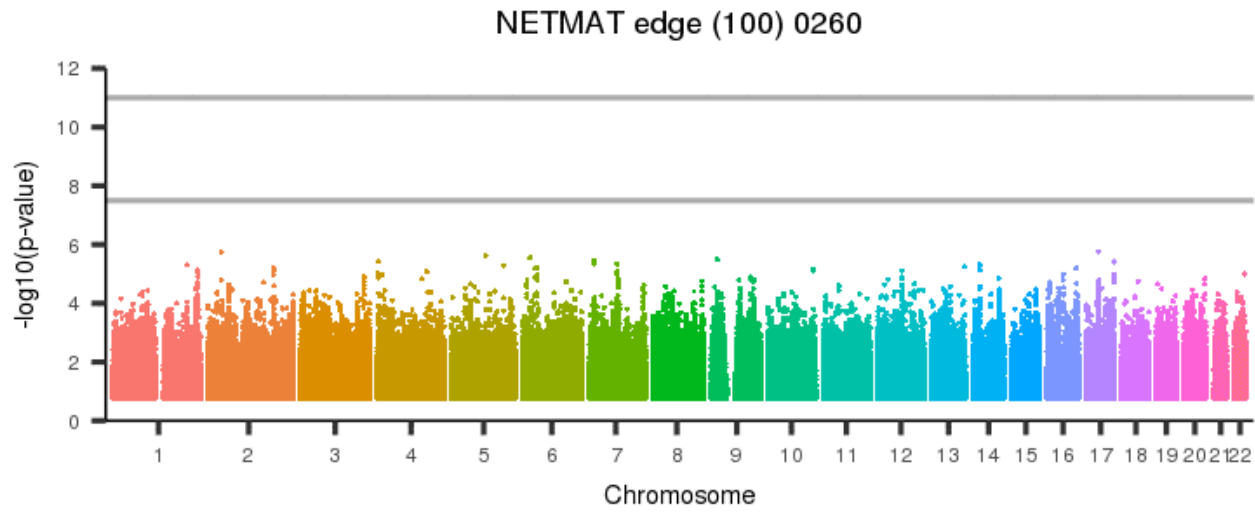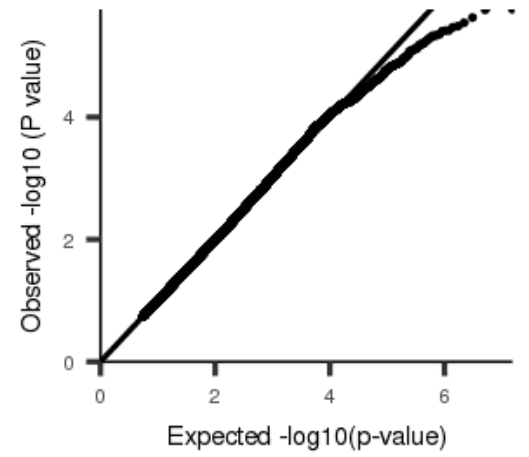

[back to list of plots](#)

Figure 1417: NETMAT edge (100) 0261

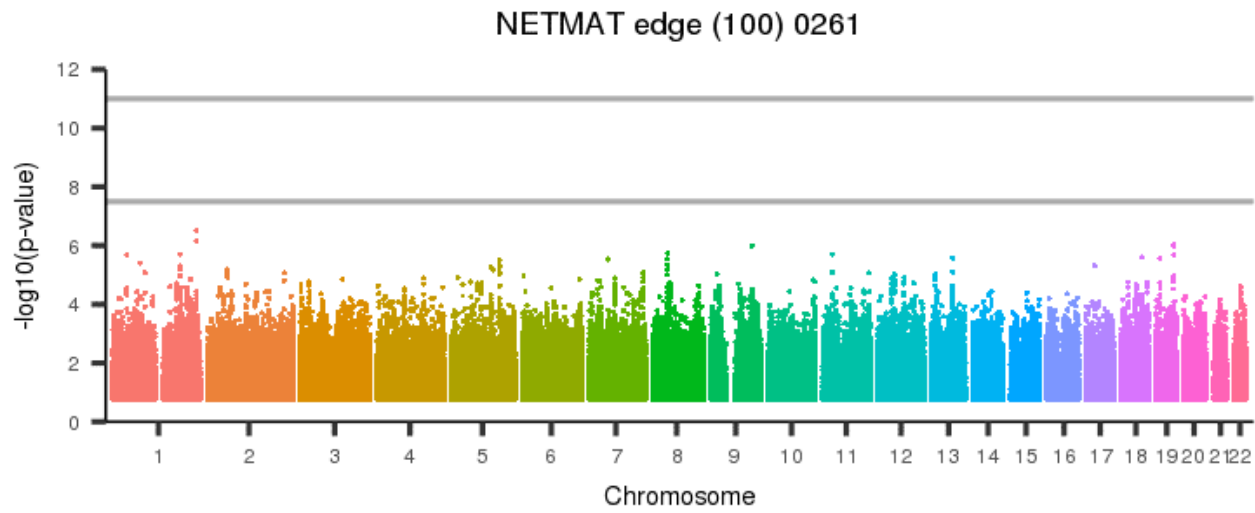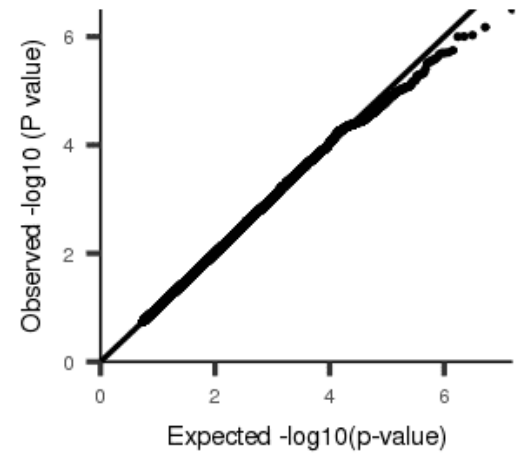

[back to list of plots](#)

Figure 1418: NETMAT edge (100) 0262

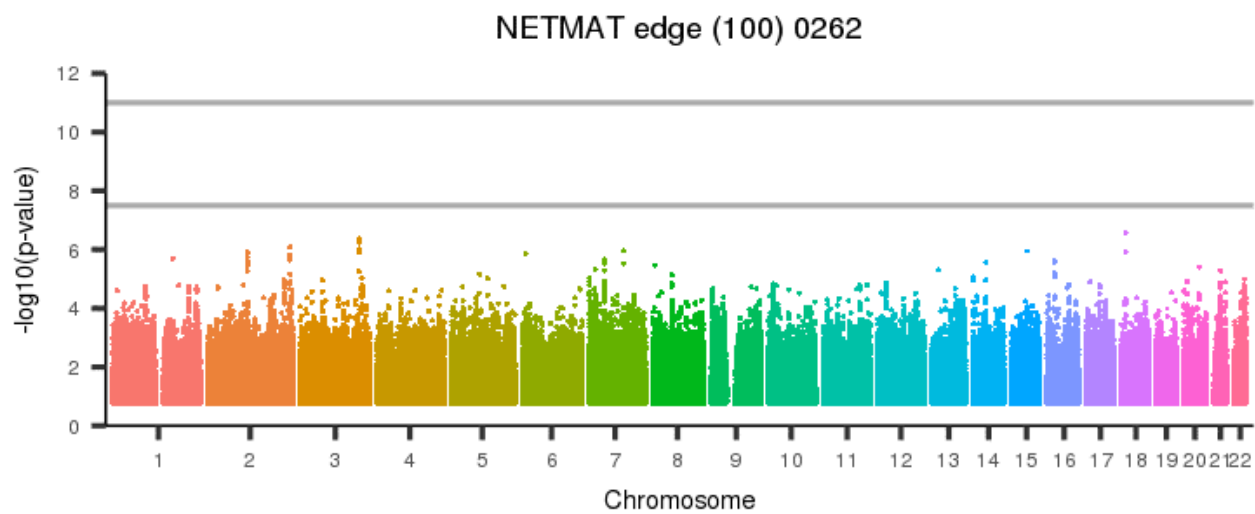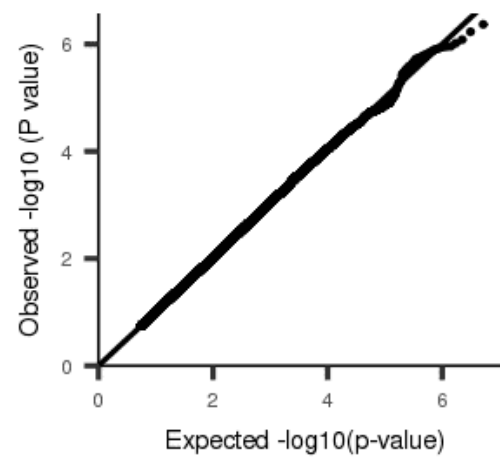

[back to list of plots](#)

Figure 1419: NETMAT edge (100) 0263

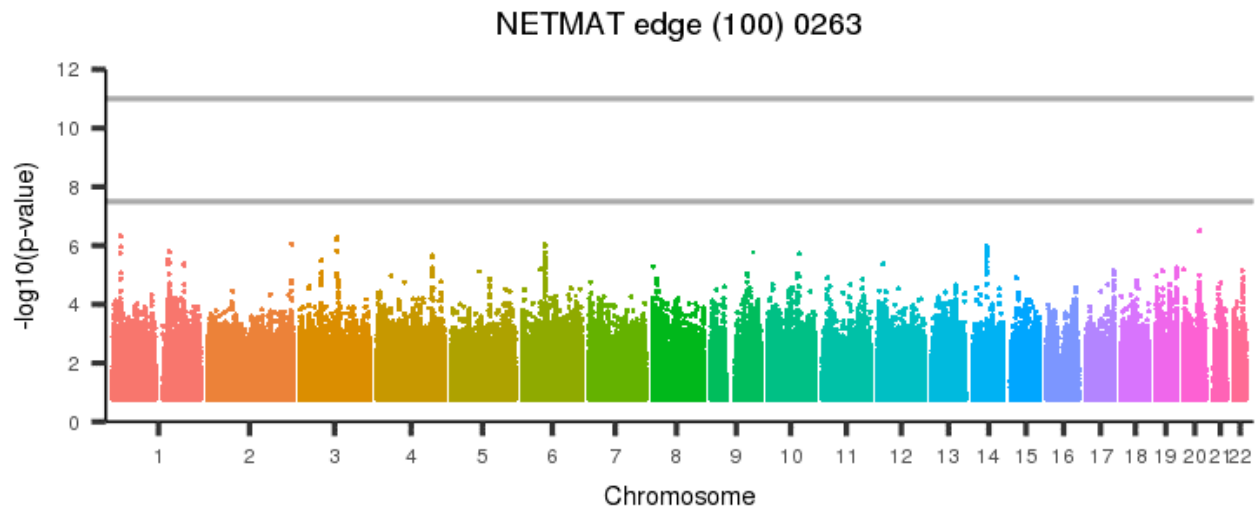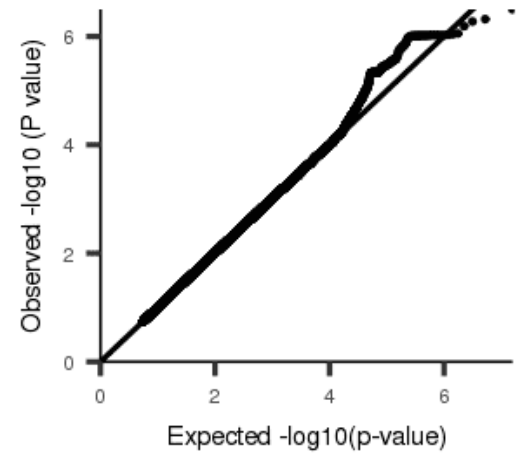

[back to list of plots](#)

Figure 1420: NETMAT edge (100) 0264

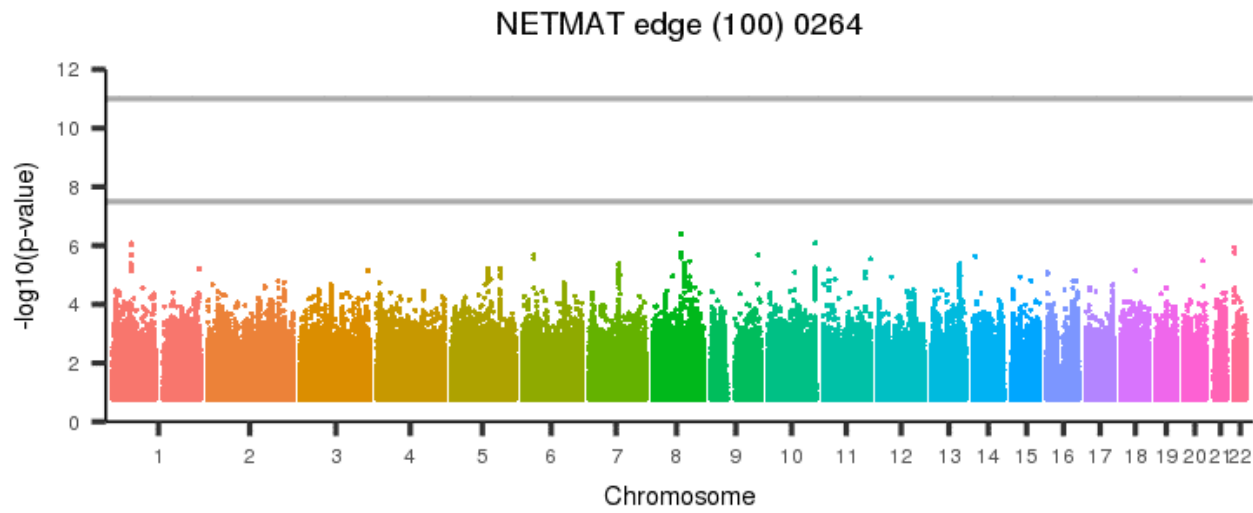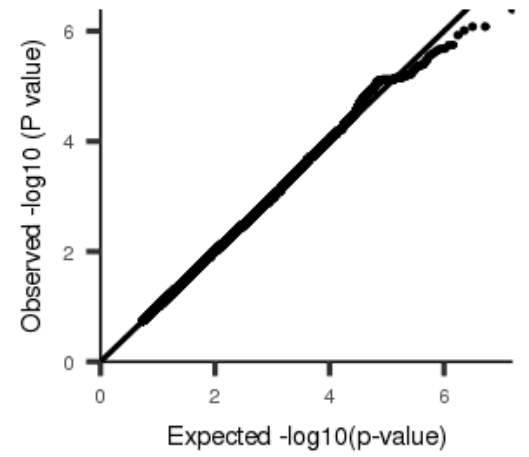

[back to list of plots](#)

Figure 1421: NETMAT edge (100) 0265

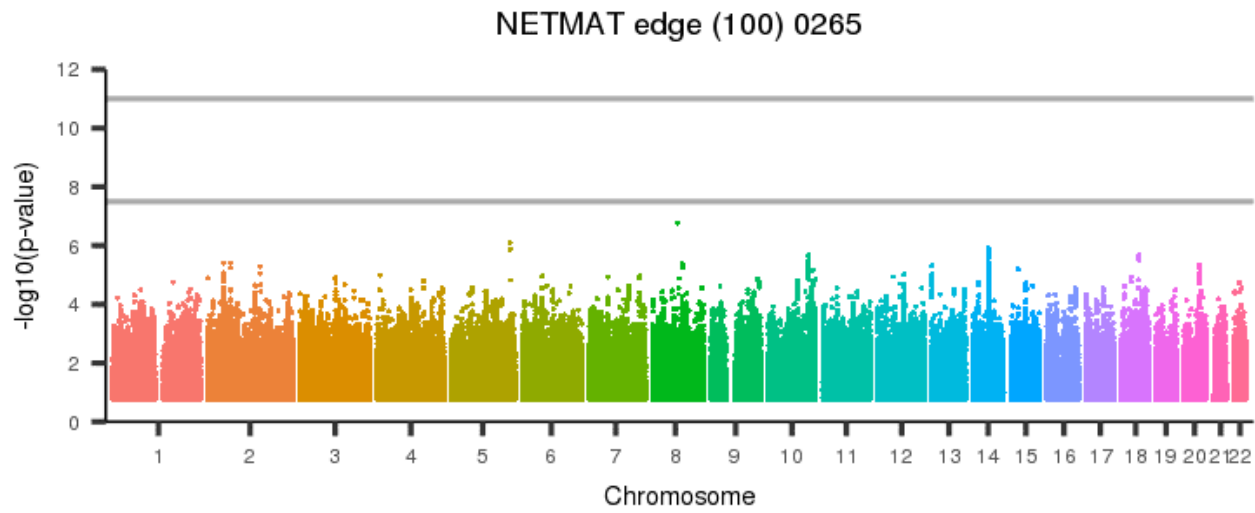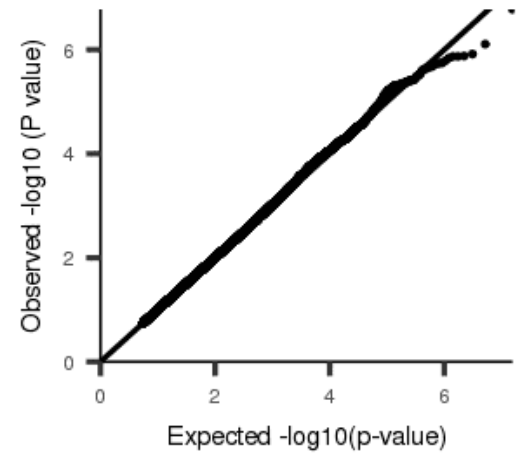

[back to list of plots](#)



Figure 1422: NETMAT edge (100) 0266

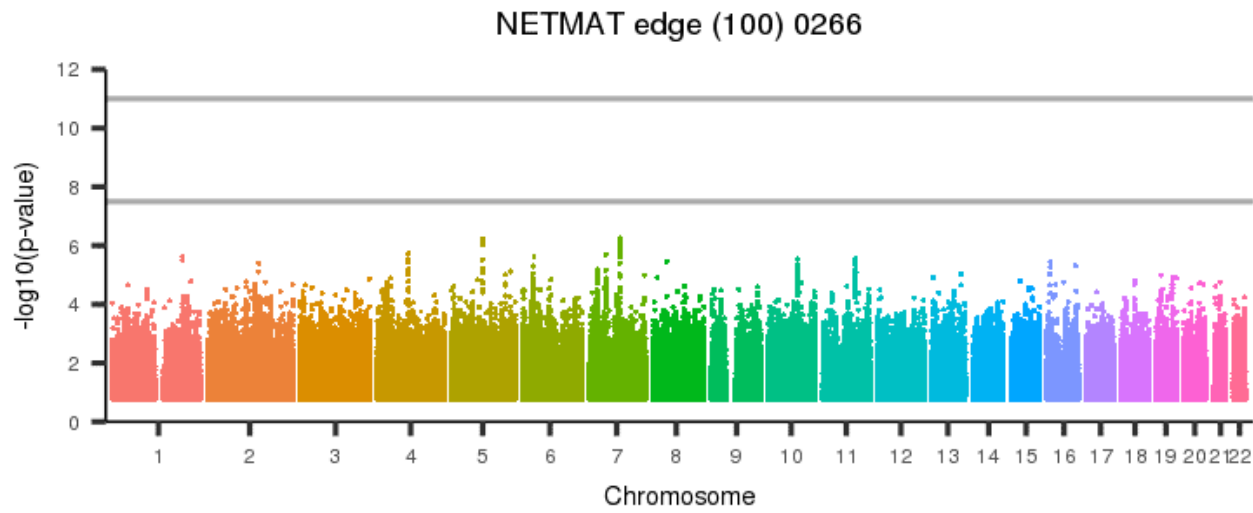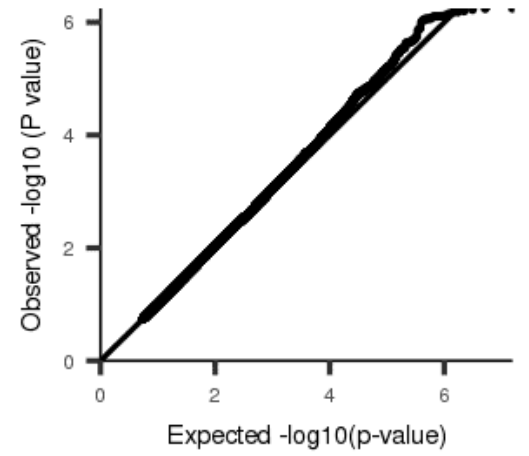

[back to list of plots](#)

Figure 1423: NETMAT edge (100) 0267

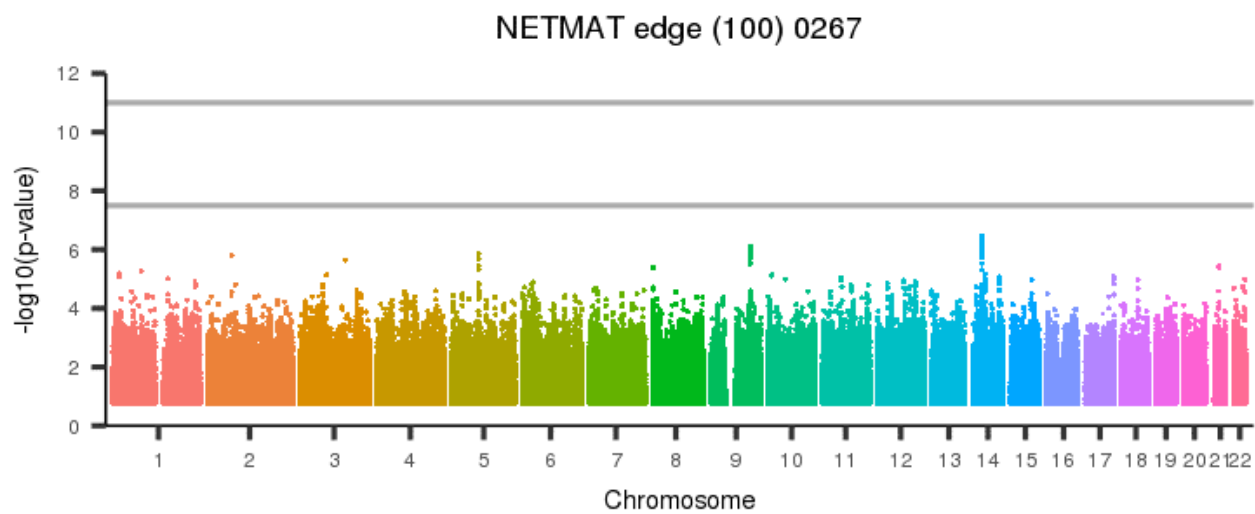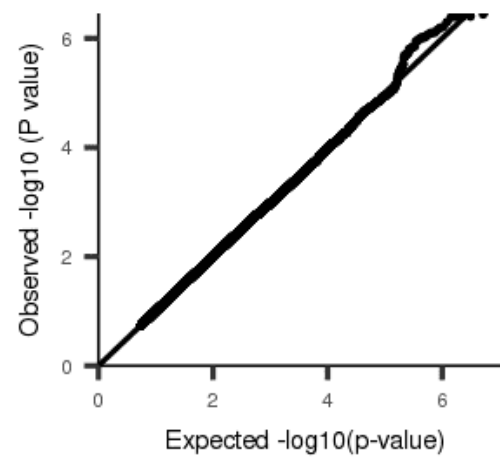

[back to list of plots](#)

Figure 1424: NETMAT edge (100) 0268

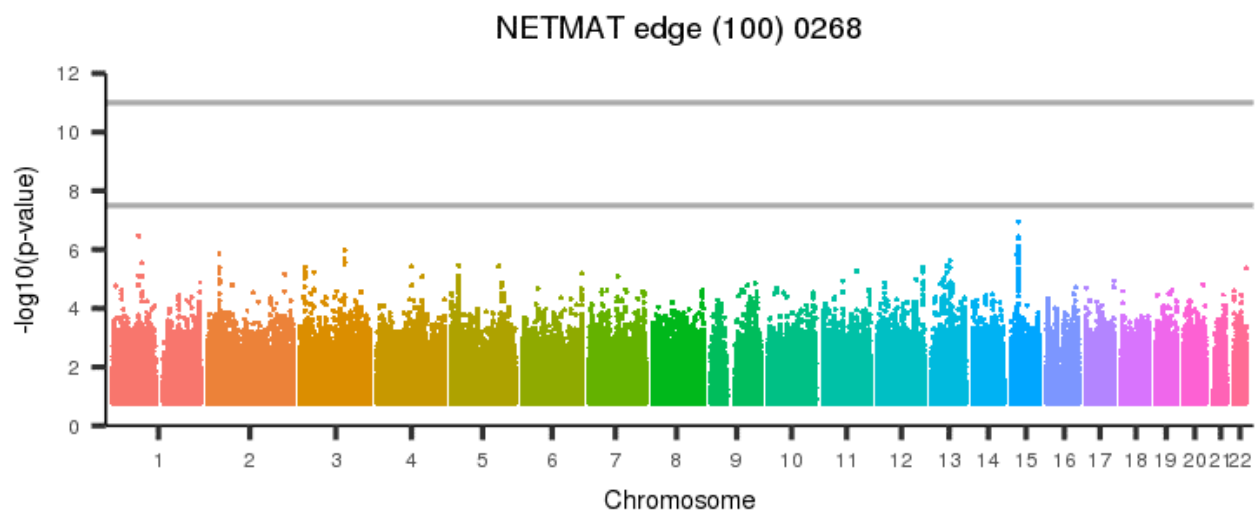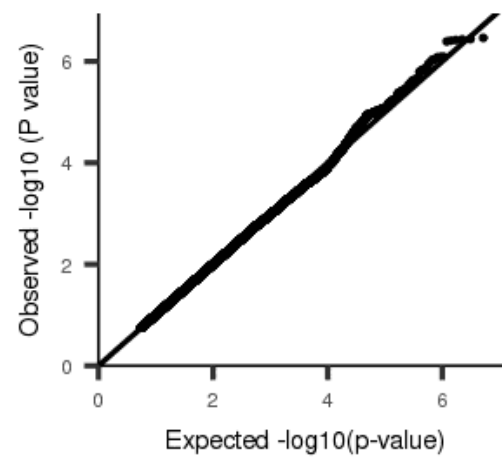

[back to list of plots](#)

Figure 1425: NETMAT edge (100) 0269

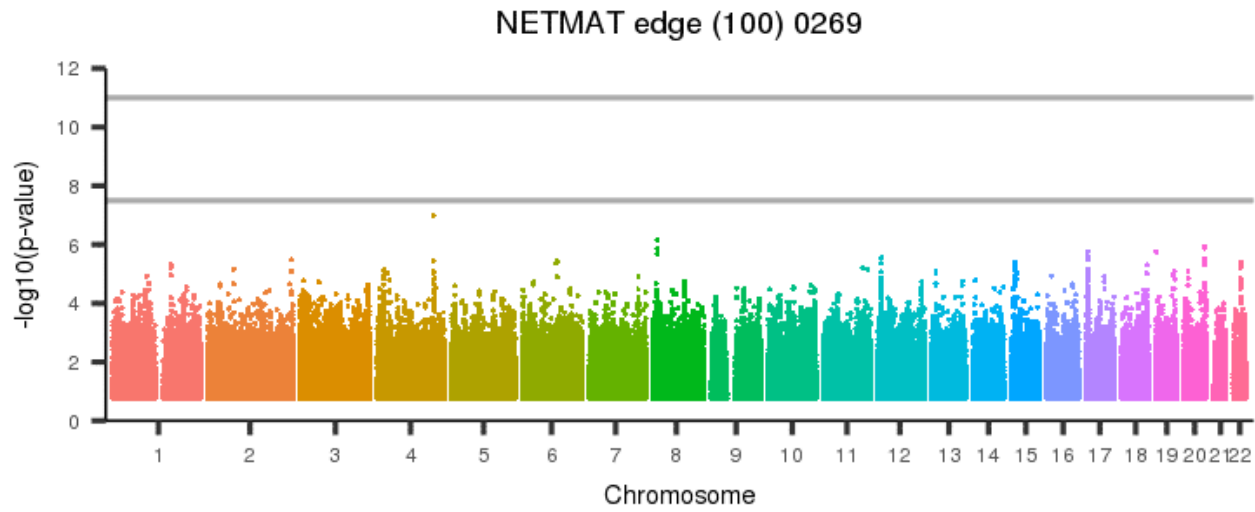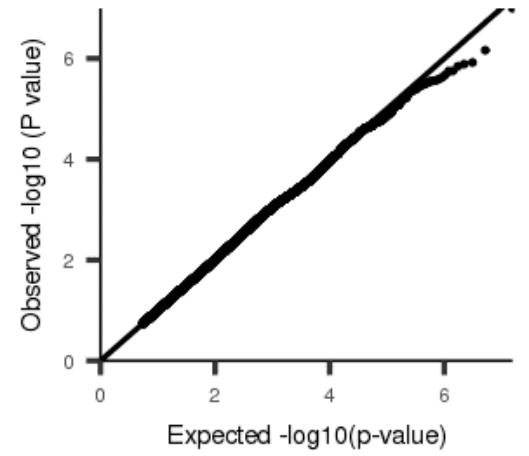

[back to list of plots](#)

Figure 1426: NETMAT edge (100) 0270

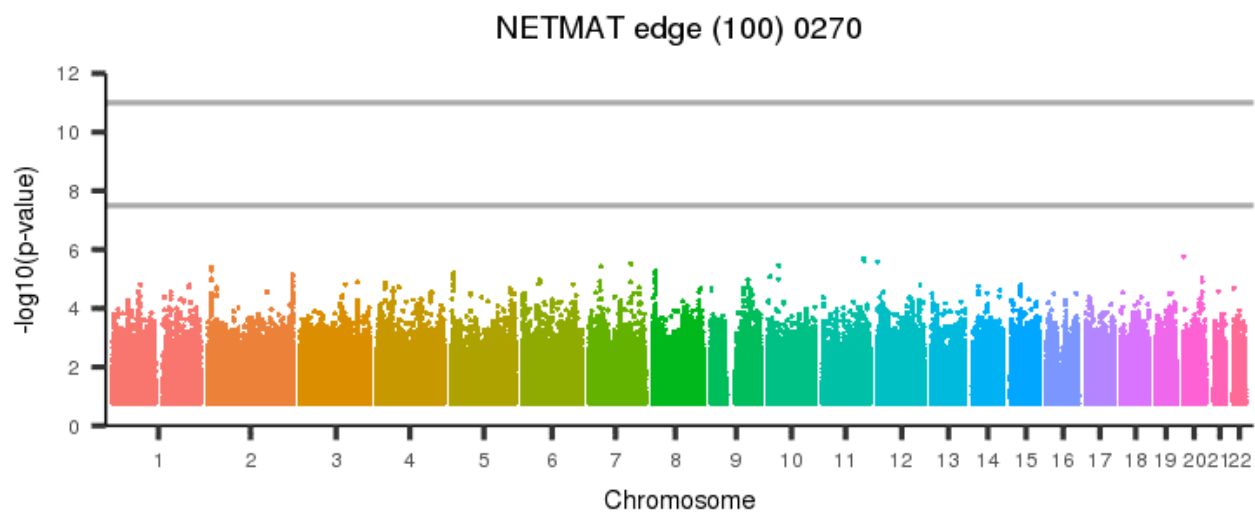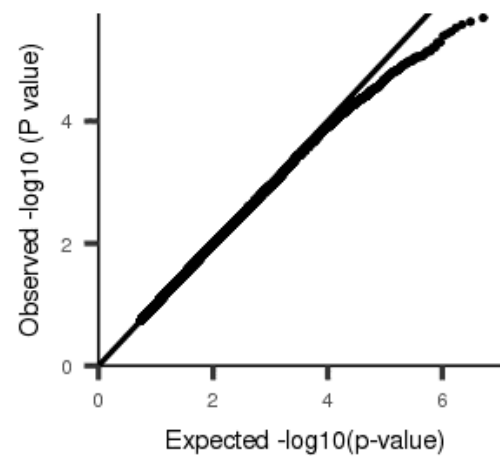

[back to list of plots](#)

Figure 1427: NETMAT edge (100) 0271

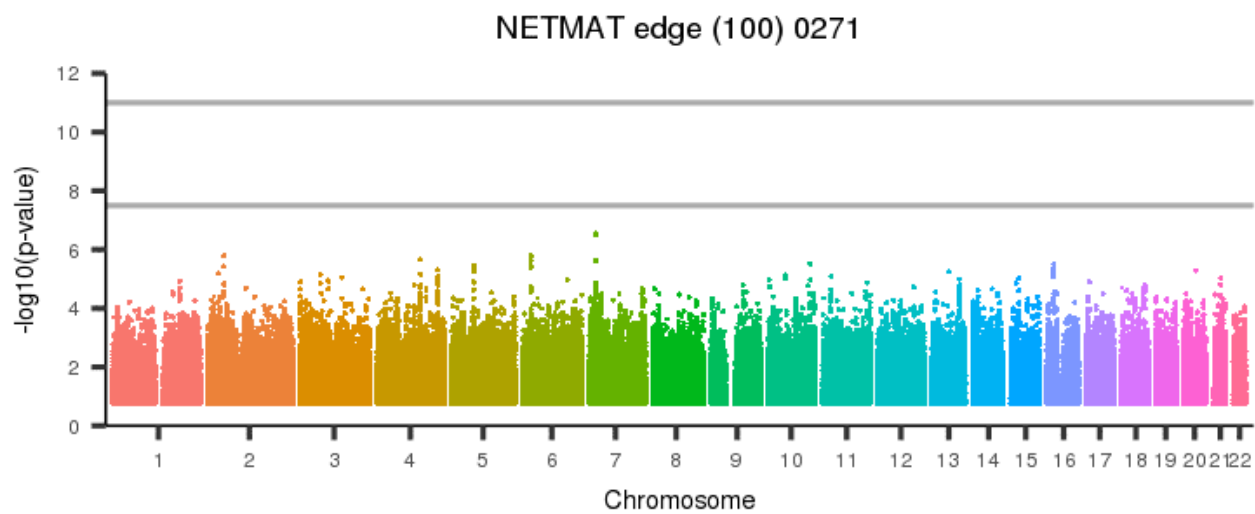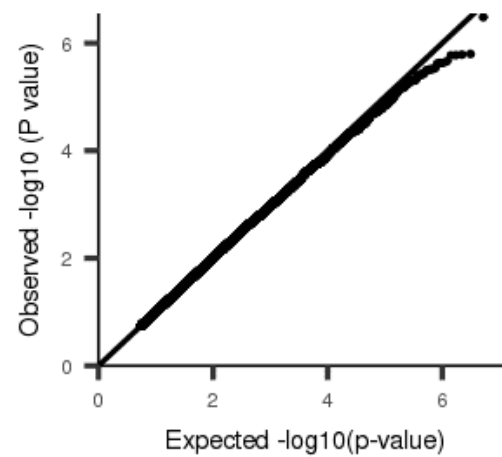

[back to list of plots](#)

Figure 1428: NETMAT edge (100) 0272

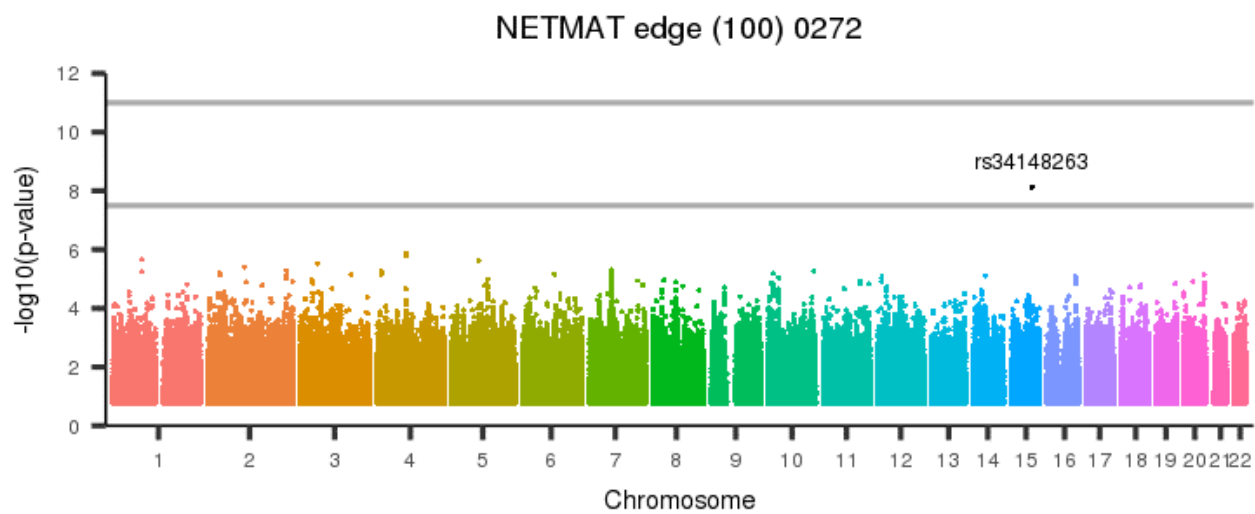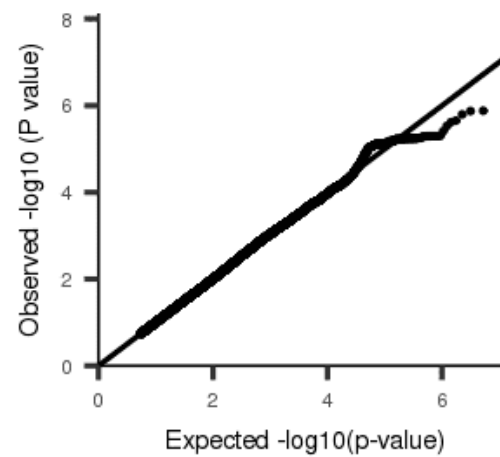

[back to list of plots](#)

Figure 1429: NETMAT edge (100) 0273

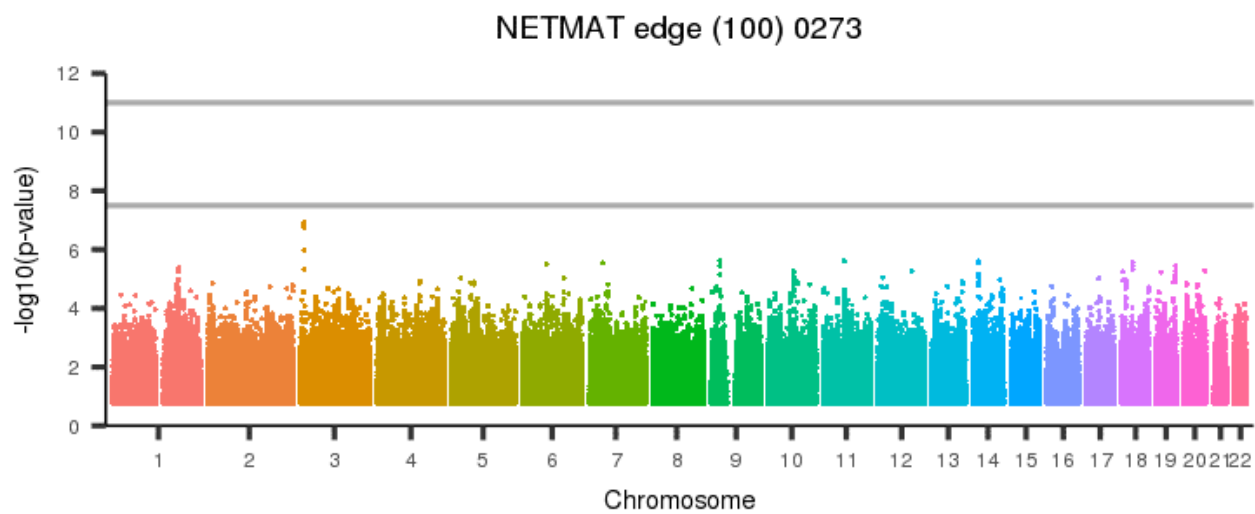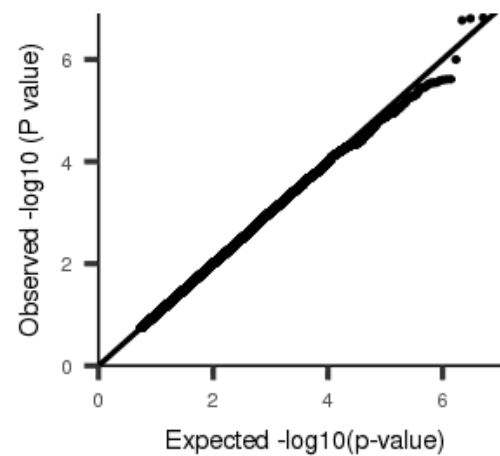

[back to list of plots](#)



Figure 1430: NETMAT edge (100) 0274

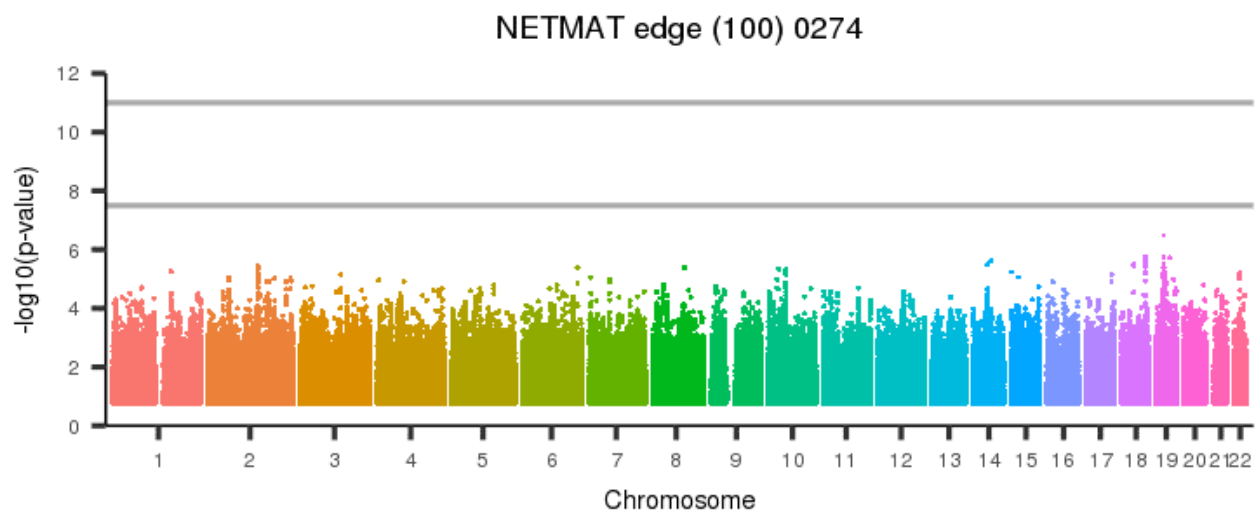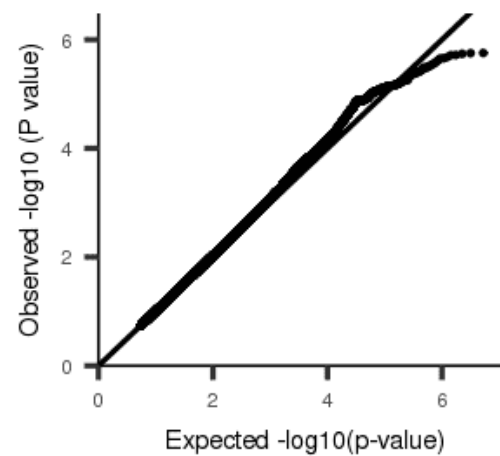

[back to list of plots](#)

Figure 1431: NETMAT edge (100) 0275

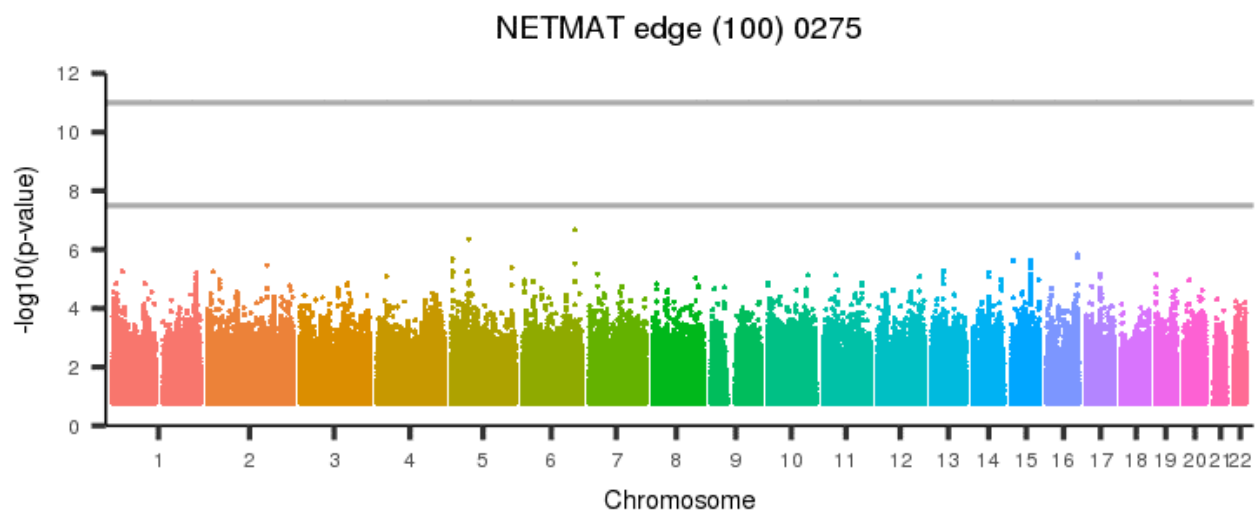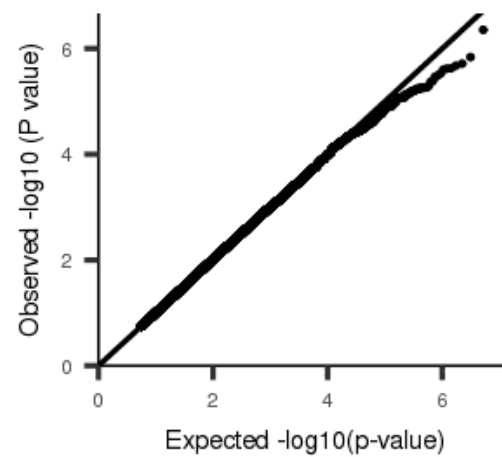

[back to list of plots](#)

Figure 1432: NETMAT edge (100) 0276

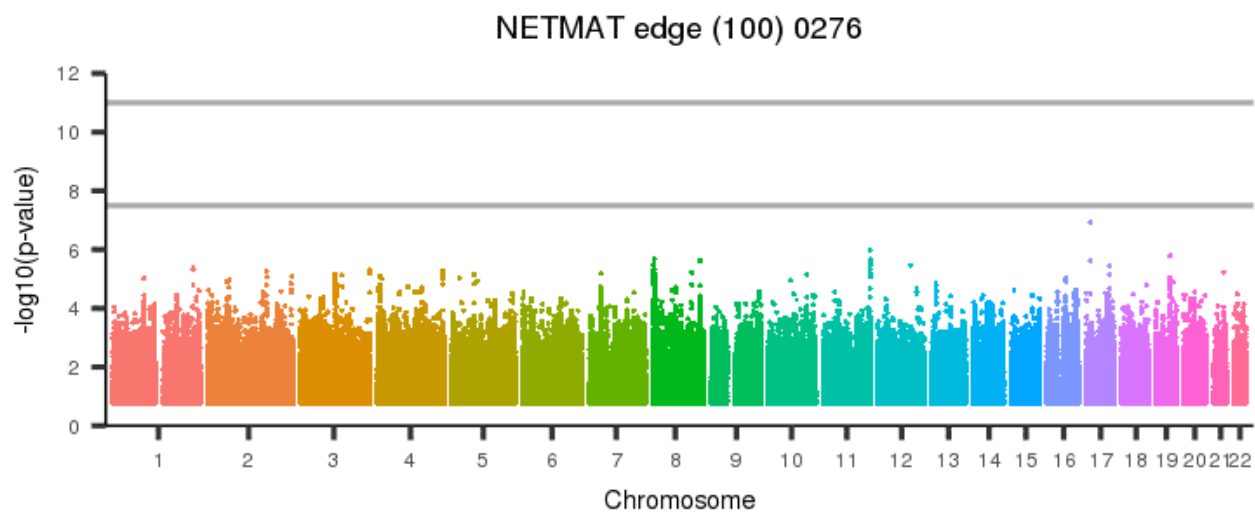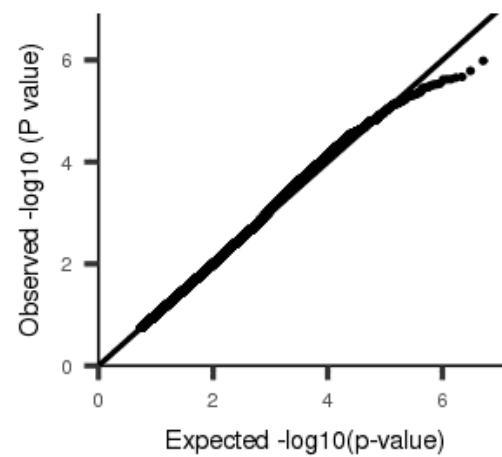

[back to list of plots](#)

Figure 1433: NETMAT edge (100) 0277

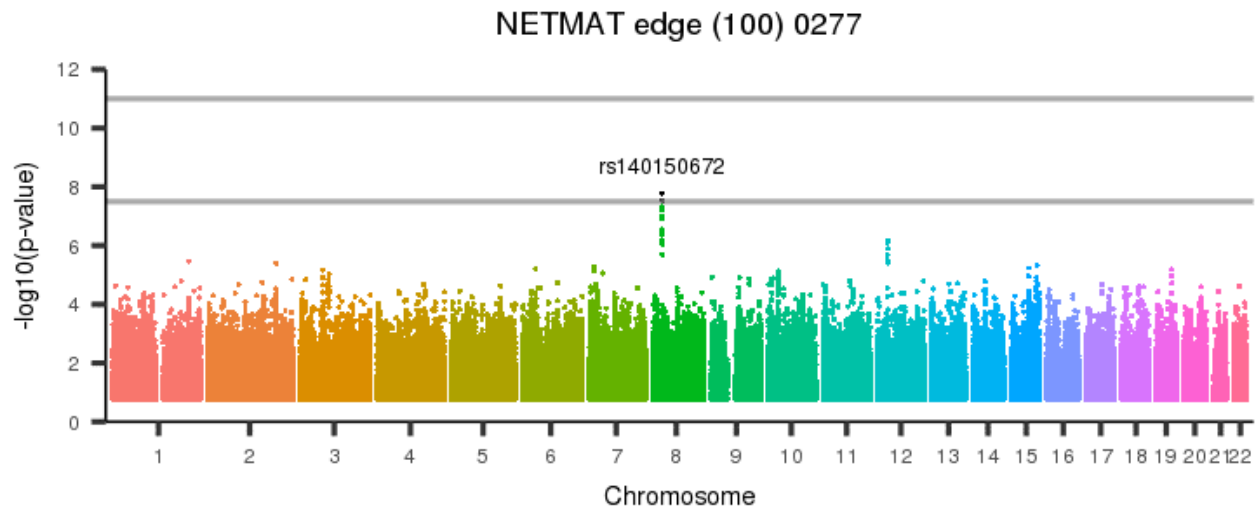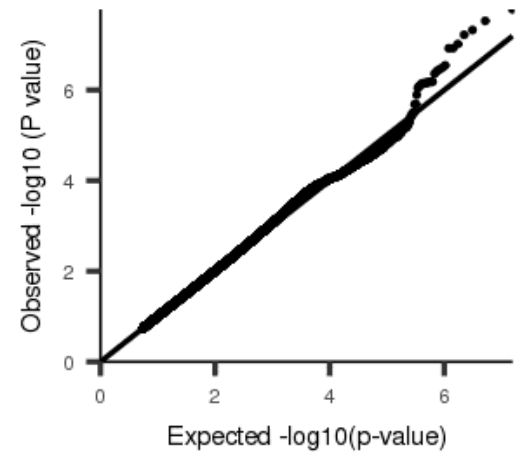

[back to list of plots](#)

Figure 1434: NETMAT edge (100) 0278

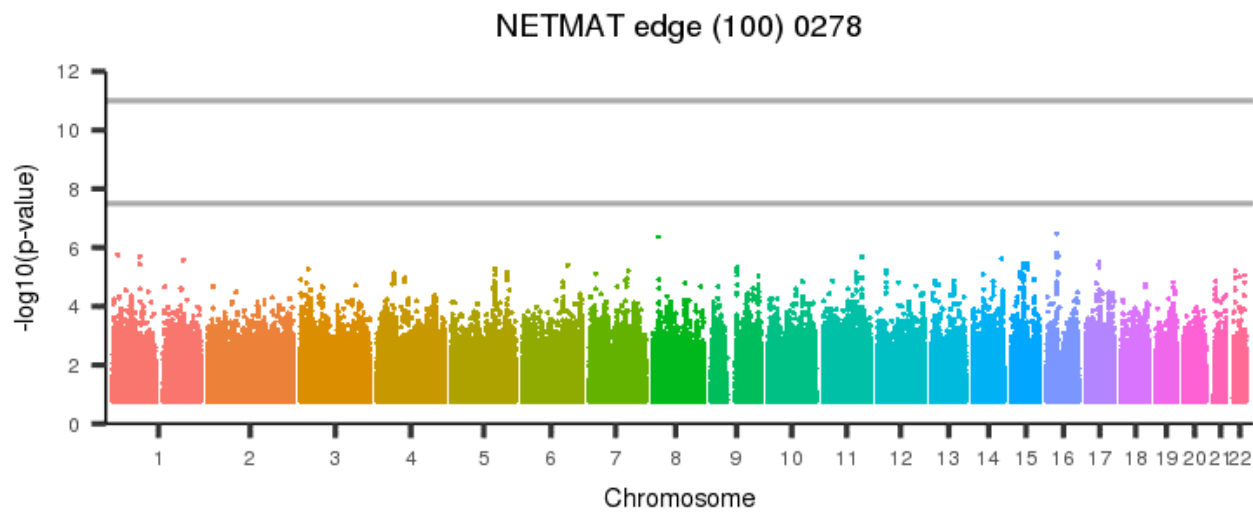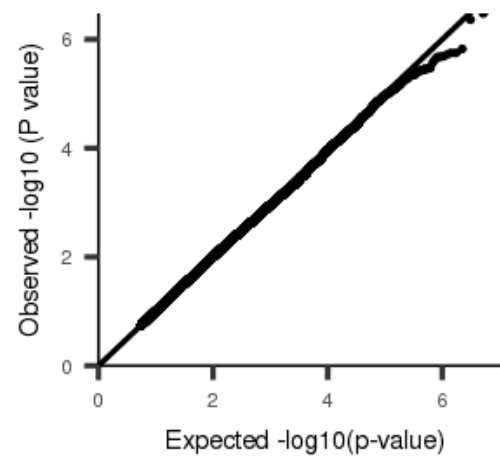

[back to list of plots](#)

Figure 1435: NETMAT edge (100) 0279

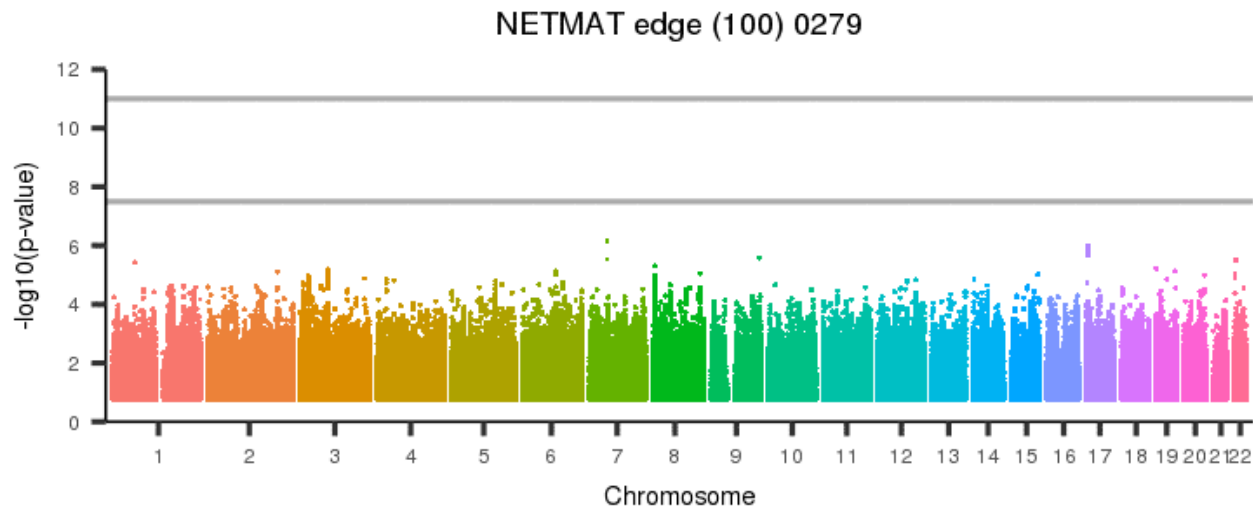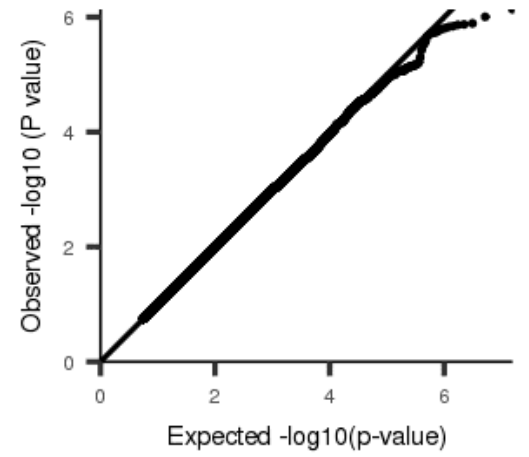

[back to list of plots](#)

Figure 1436: NETMAT edge (100) 0280

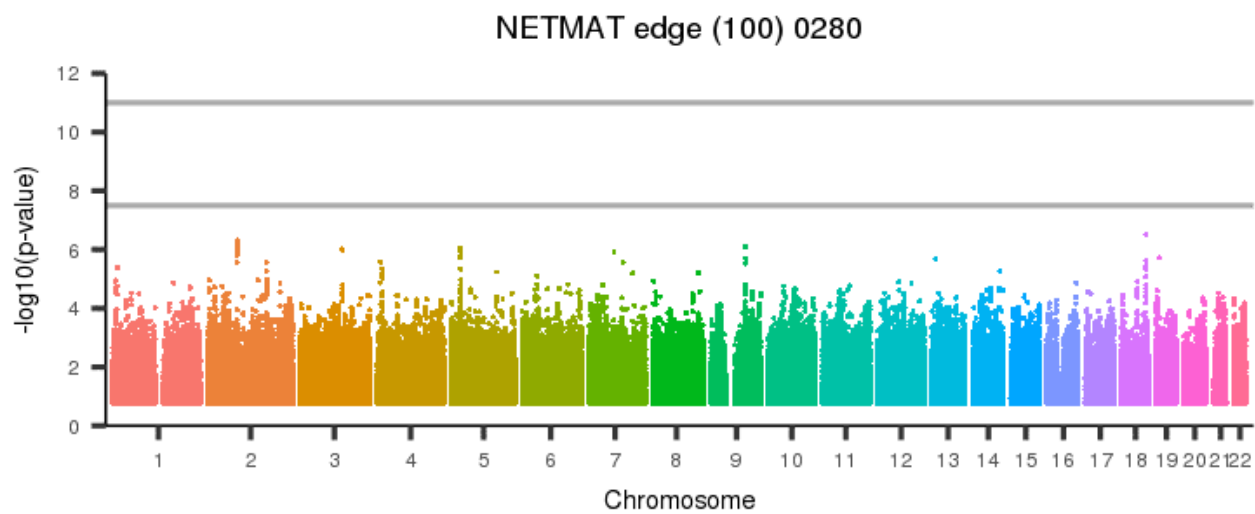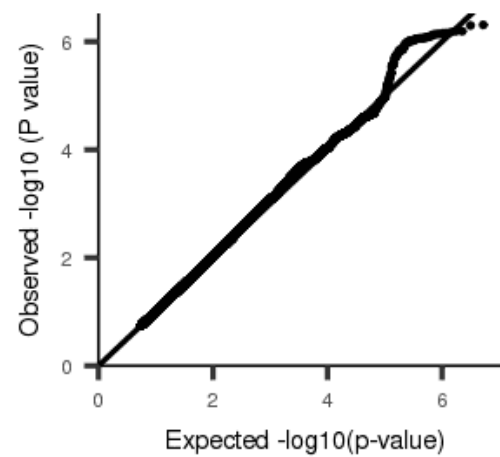

[back to list of plots](#)

Figure 1437: NETMAT edge (100) 0281

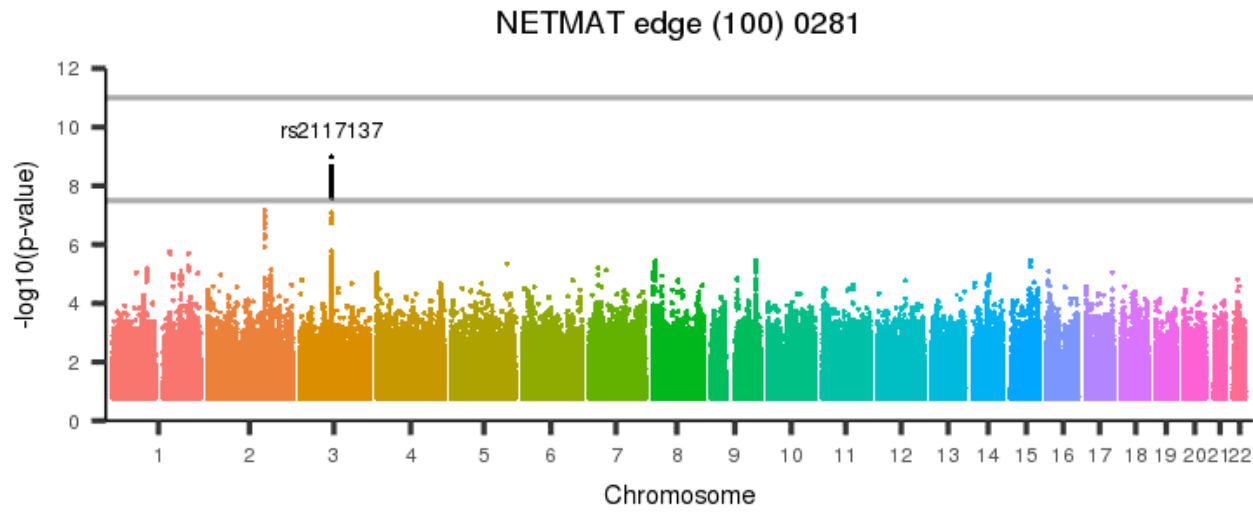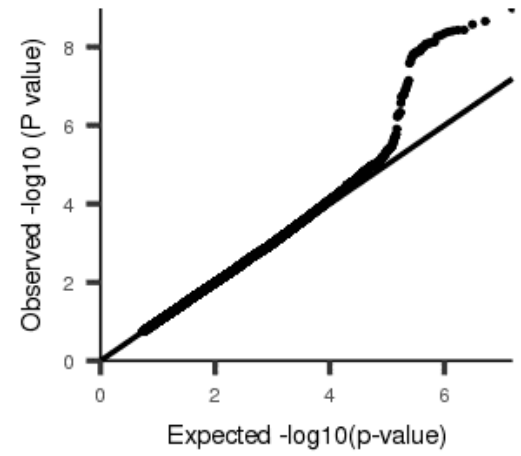

[back to list of plots](#)



Figure 1438: NETMAT edge (100) 0282

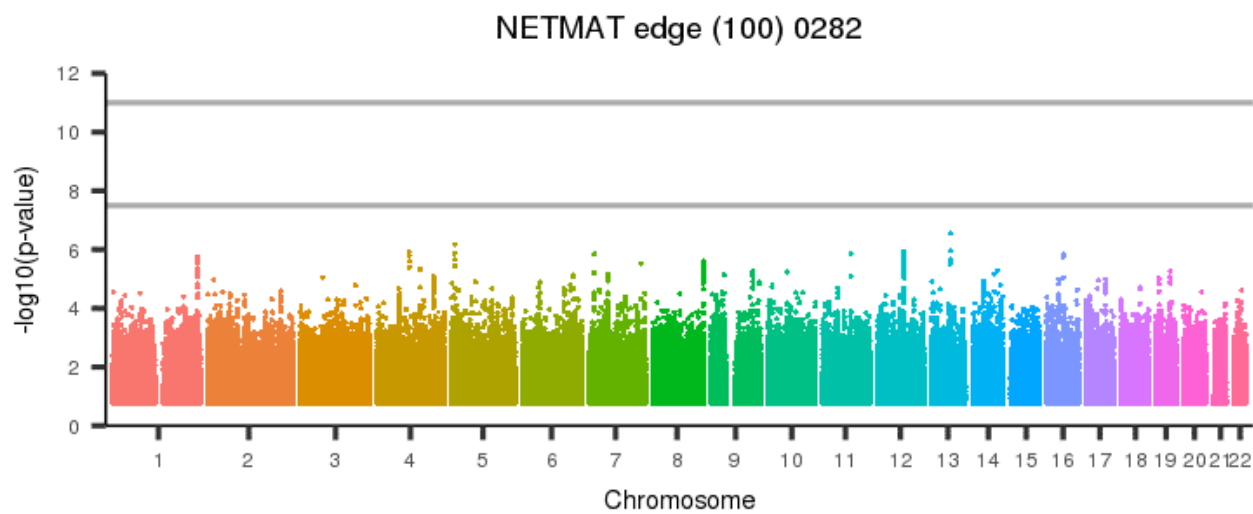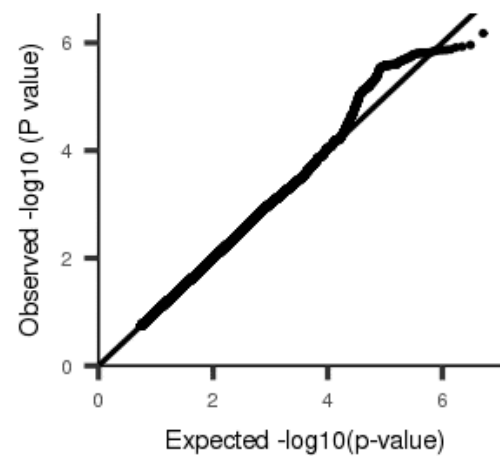

[back to list of plots](#)

Figure 1439: NETMAT edge (100) 0283

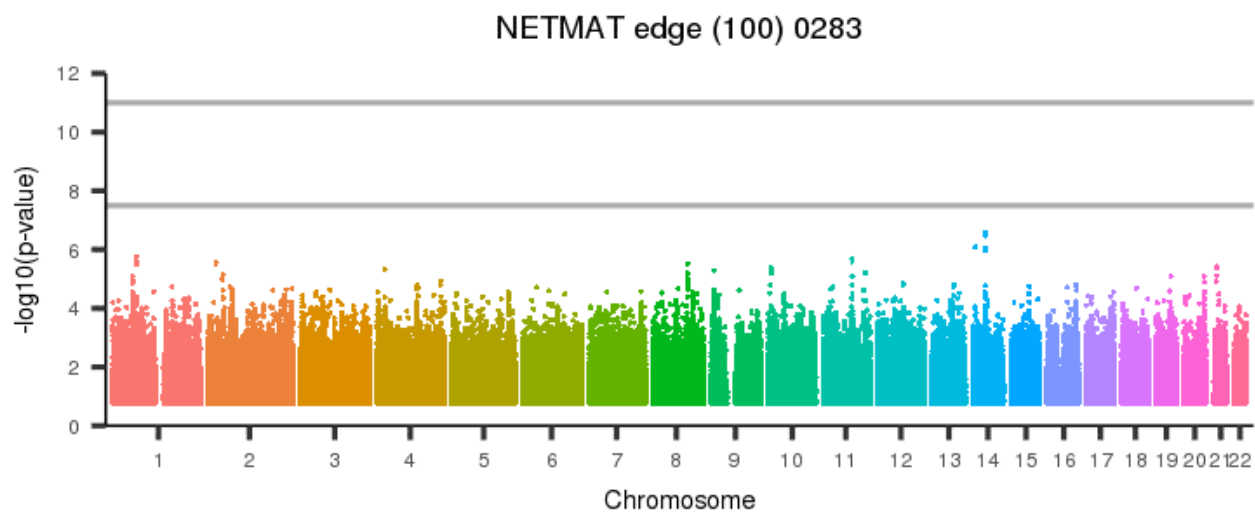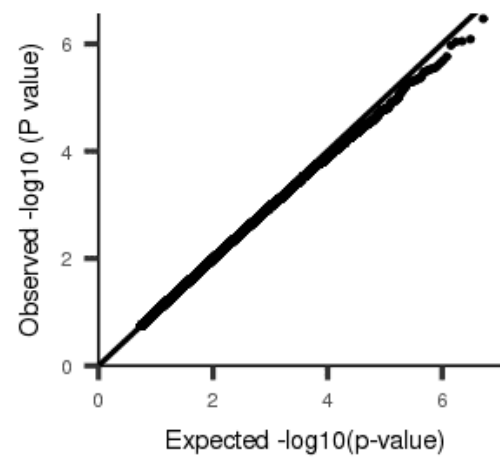

[back to list of plots](#)

Figure 1440: NETMAT edge (100) 0284

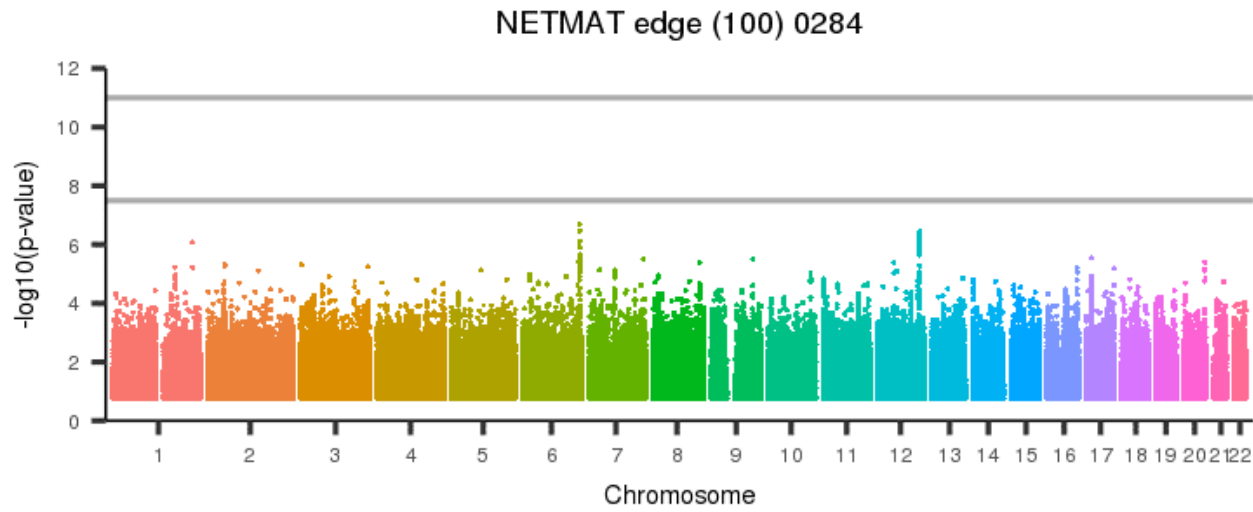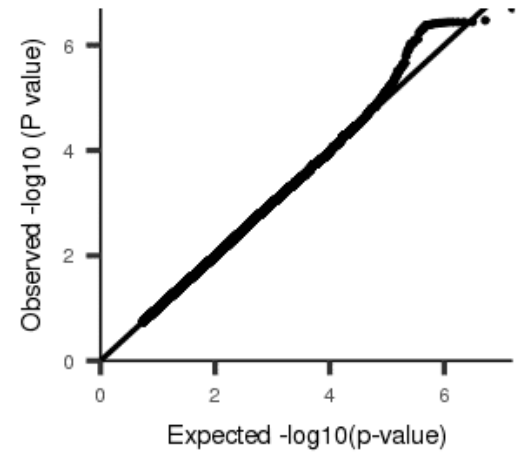

[back to list of plots](#)

Figure 1441: NETMAT edge (100) 0285

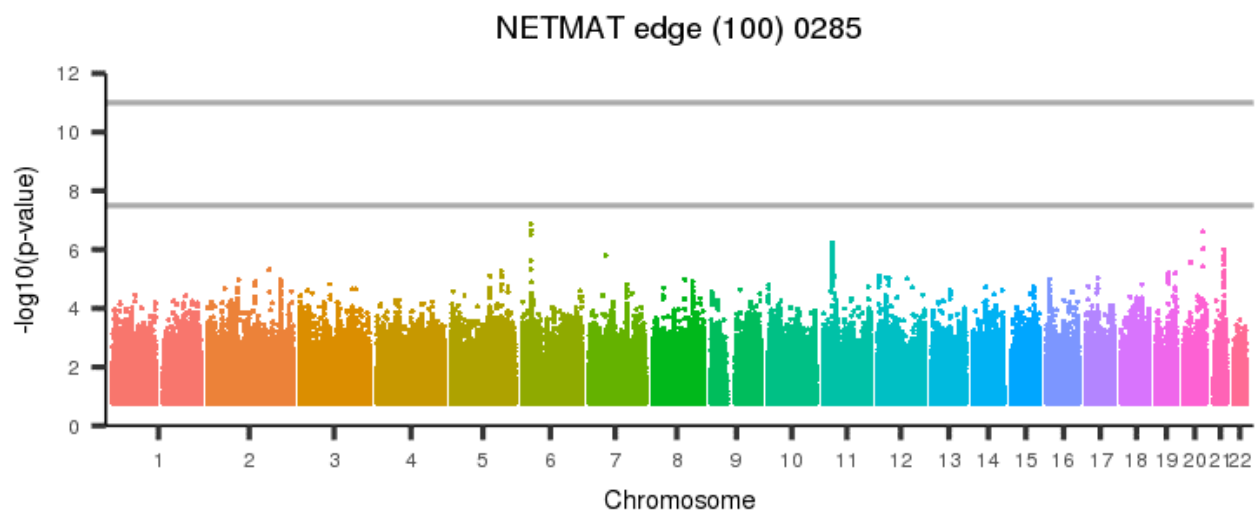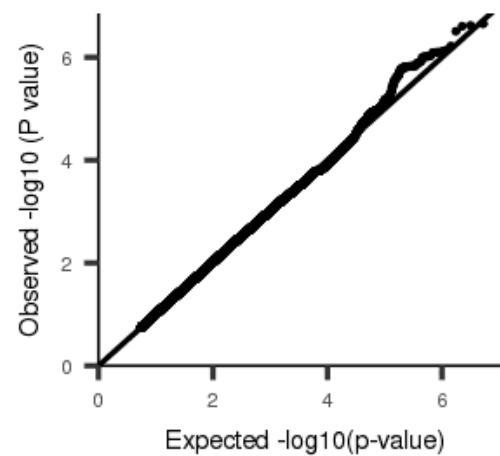

[back to list of plots](#)

Figure 1442: NETMAT edge (100) 0286

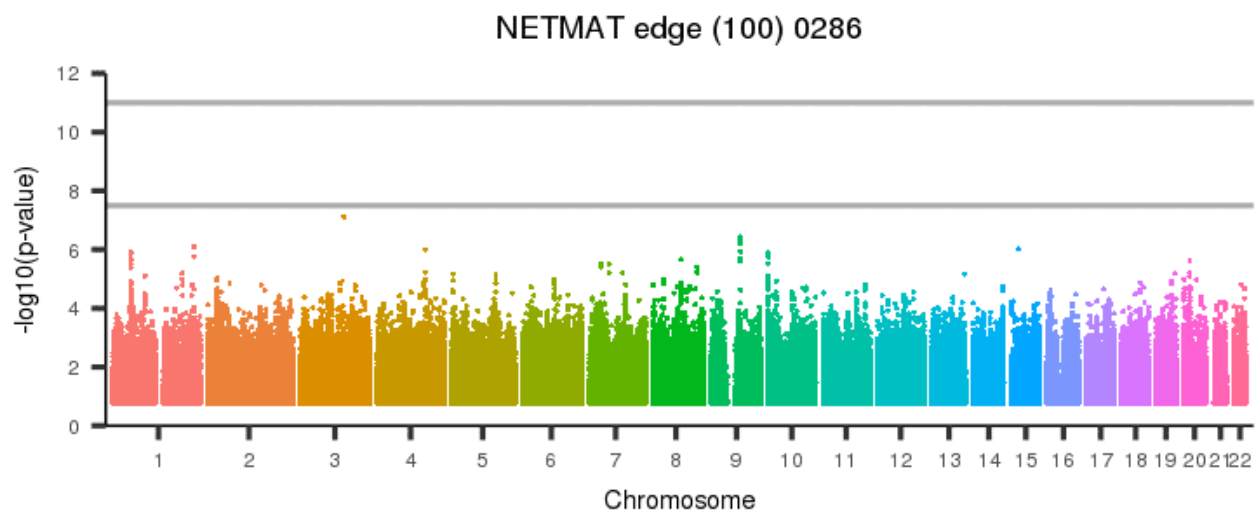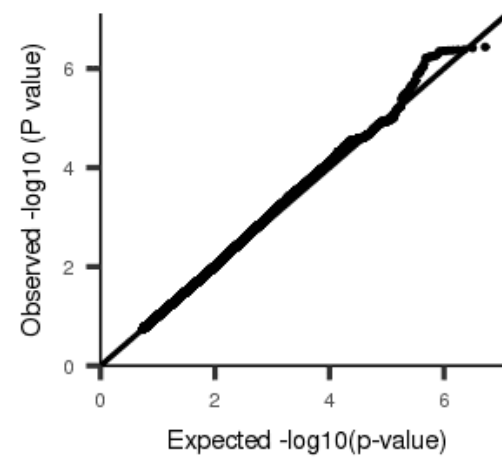

[back to list of plots](#)

Figure 1443: NETMAT edge (100) 0287

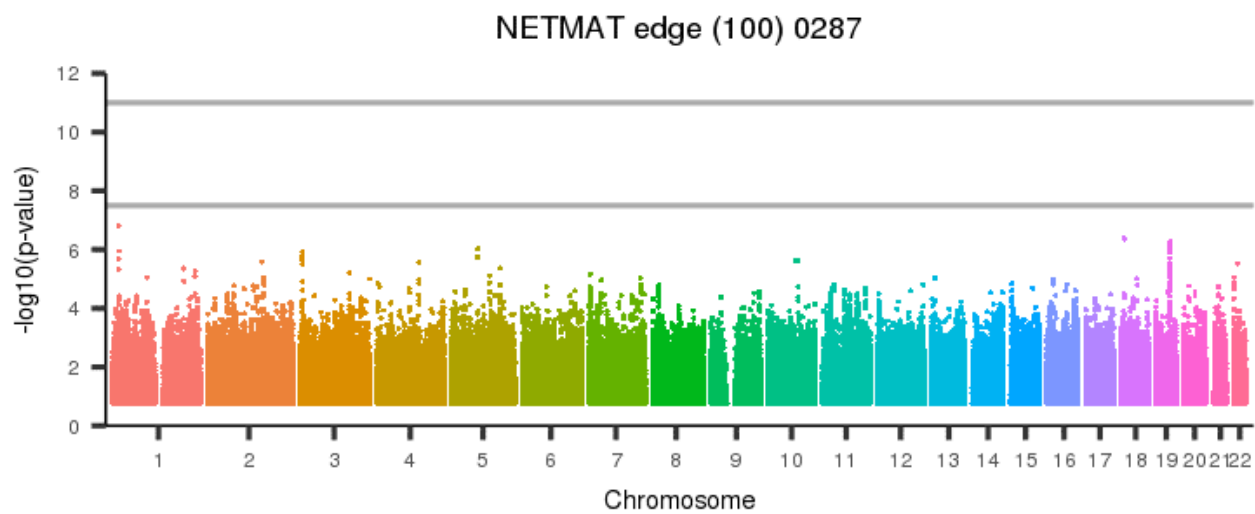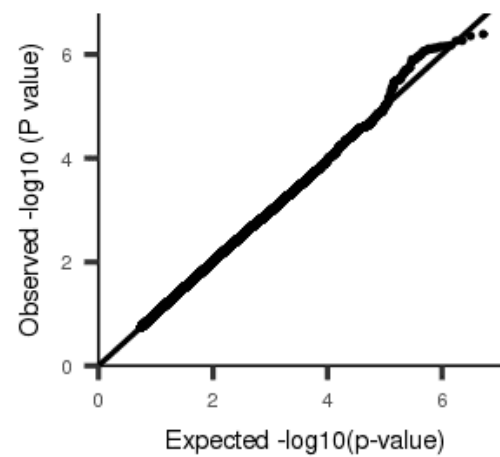

[back to list of plots](#)

Figure 1444: NETMAT edge (100) 0288

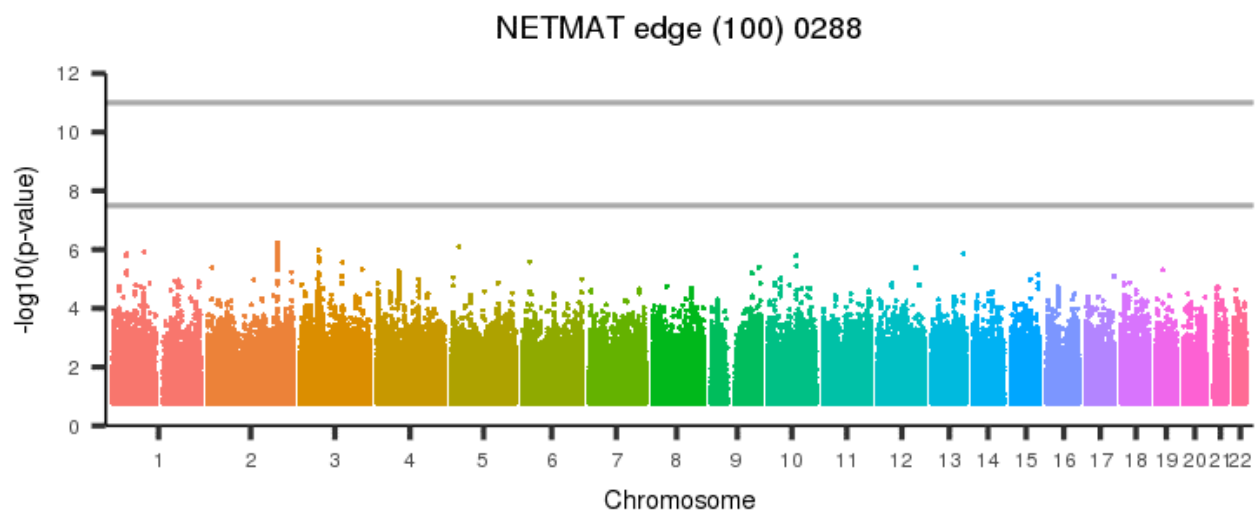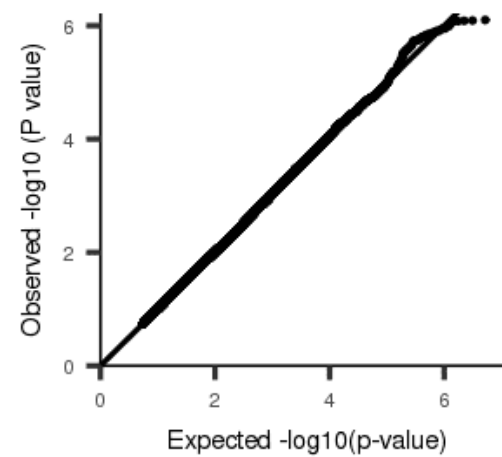

[back to list of plots](#)

Figure 1445: NETMAT edge (100) 0289

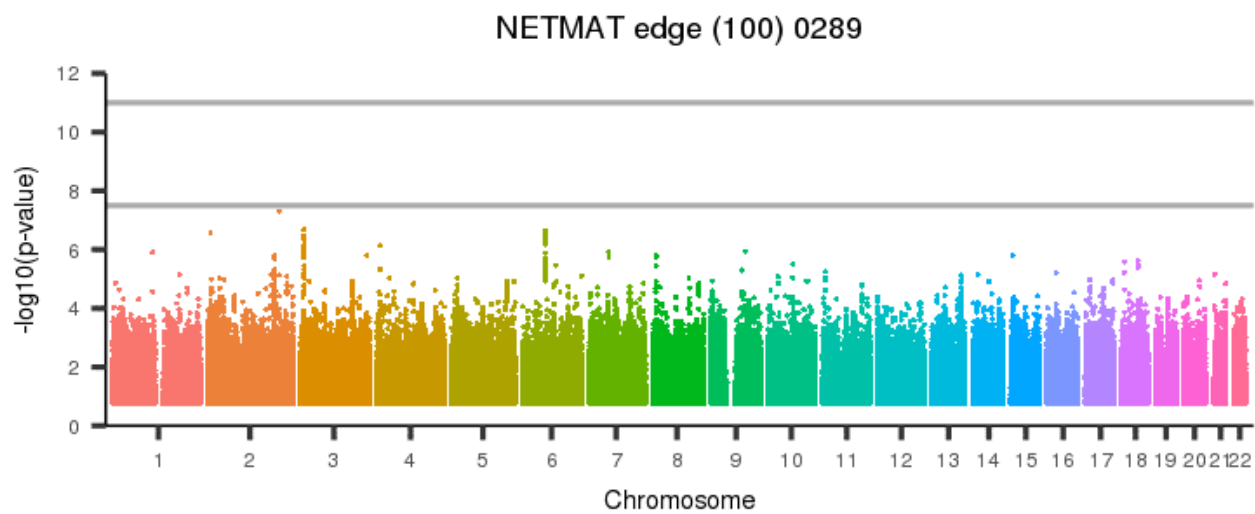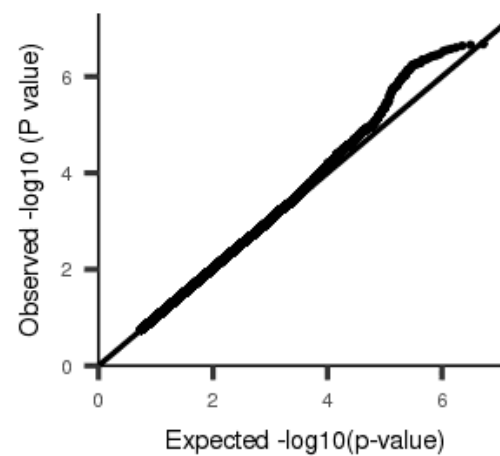

[back to list of plots](#)



Figure 1446: NETMAT edge (100) 0290

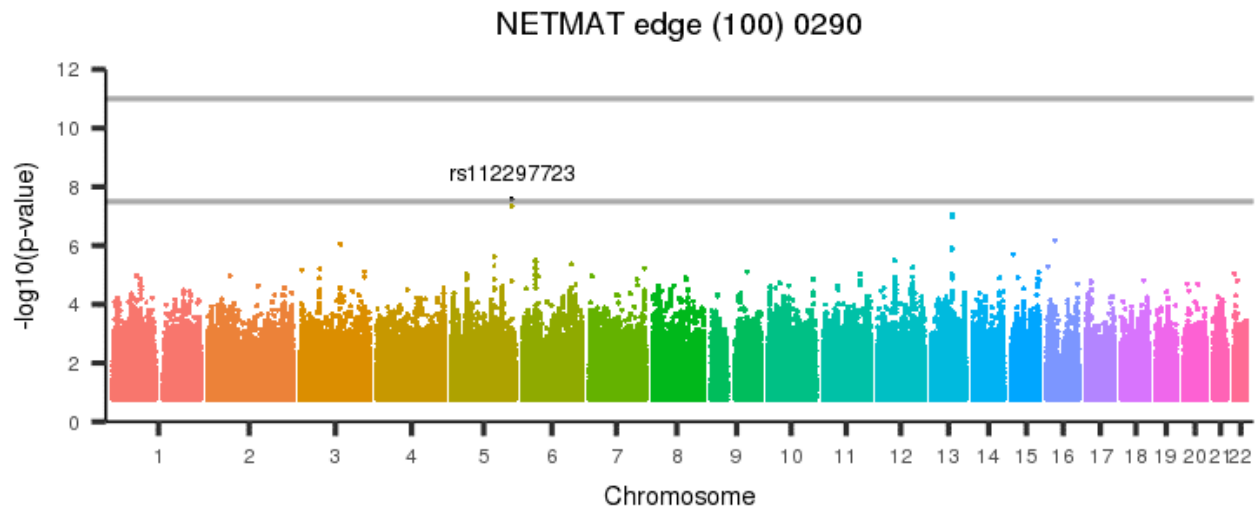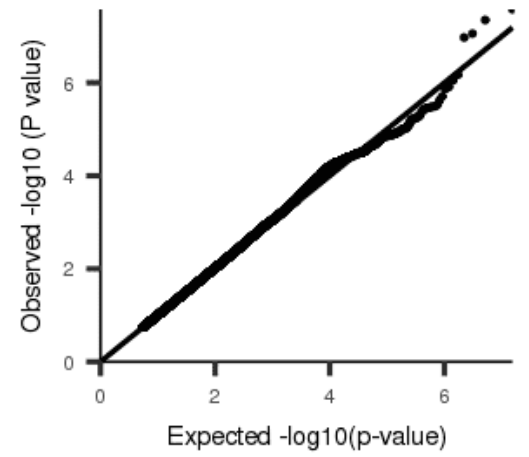

[back to list of plots](#)

Figure 1447: NETMAT edge (100) 0291

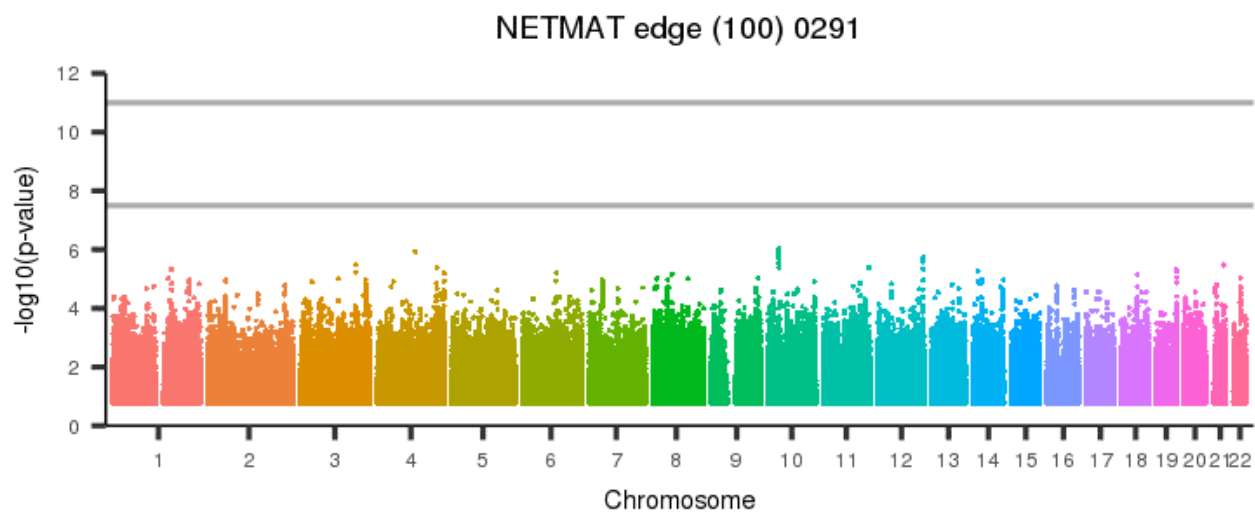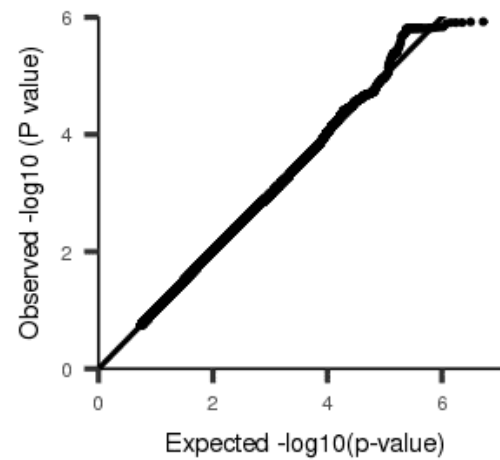

[back to list of plots](#)

Figure 1448: NETMAT edge (100) 0292

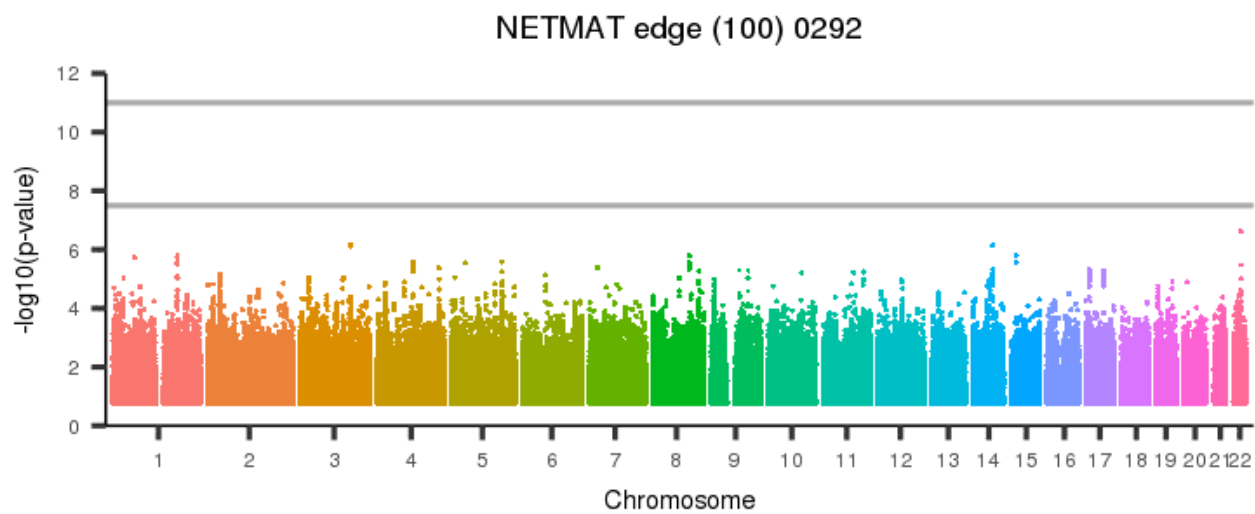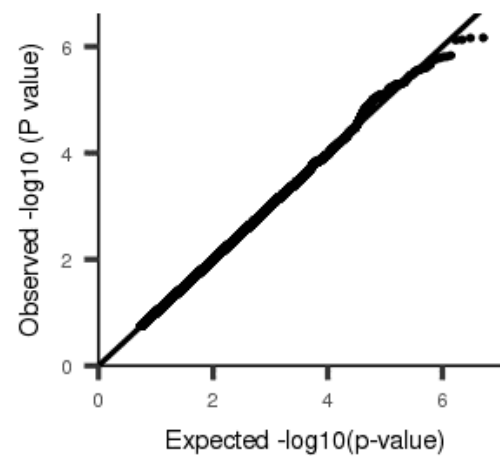

[back to list of plots](#)

Figure 1449: NETMAT edge (100) 0293

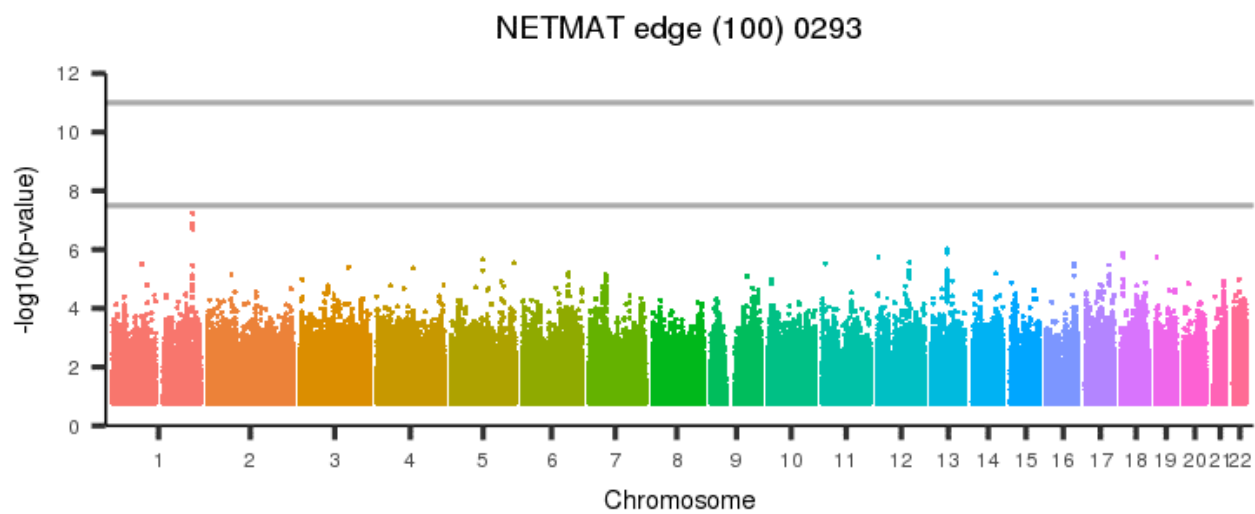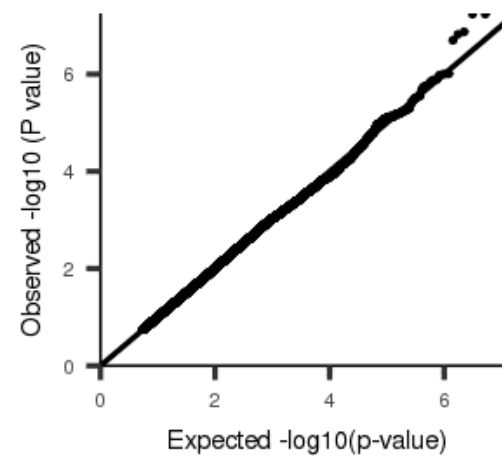

[back to list of plots](#)

Figure 1450: NETMAT edge (100) 0294

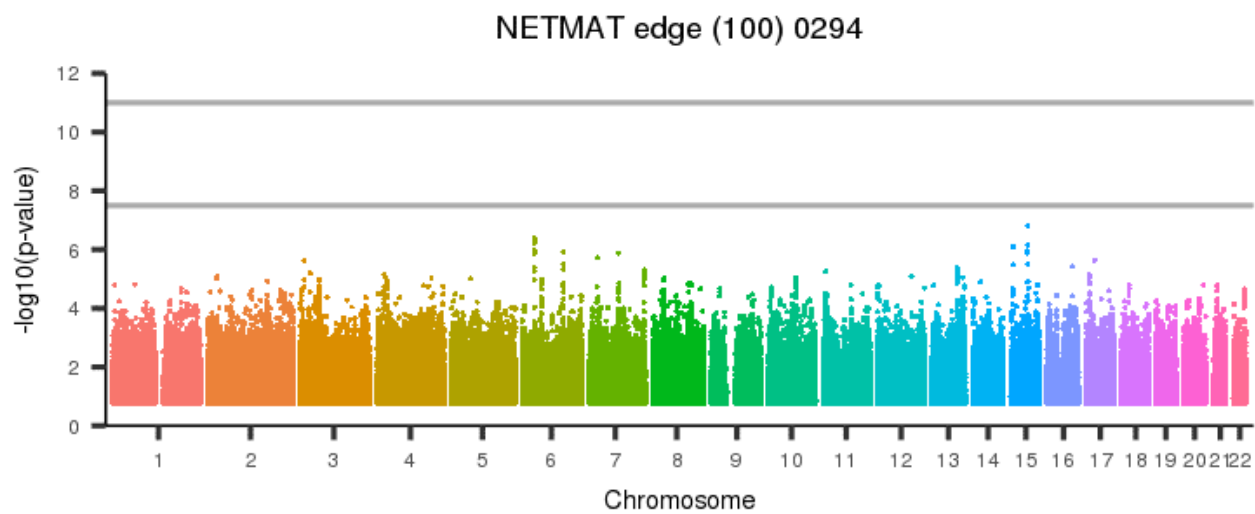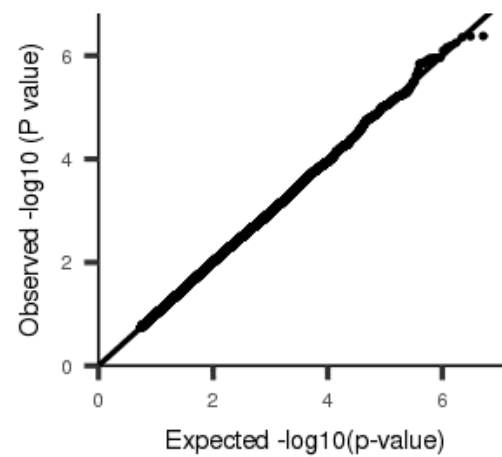

[back to list of plots](#)

Figure 1451: NETMAT edge (100) 0295

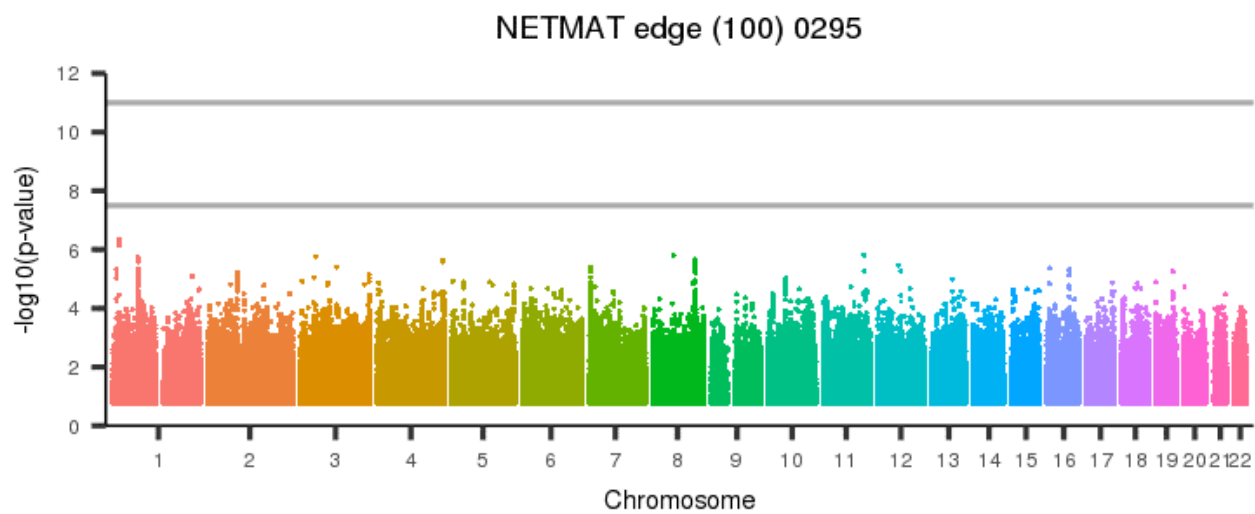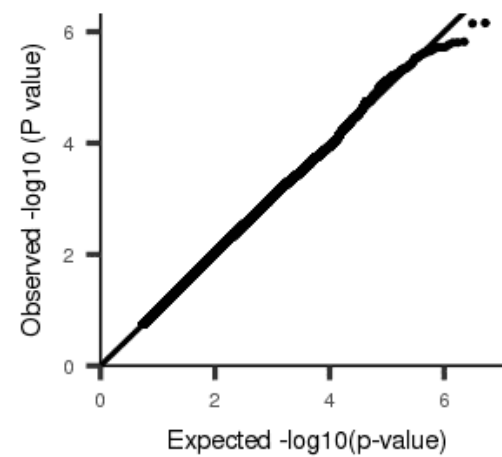

[back to list of plots](#)

Figure 1452: NETMAT edge (100) 0296

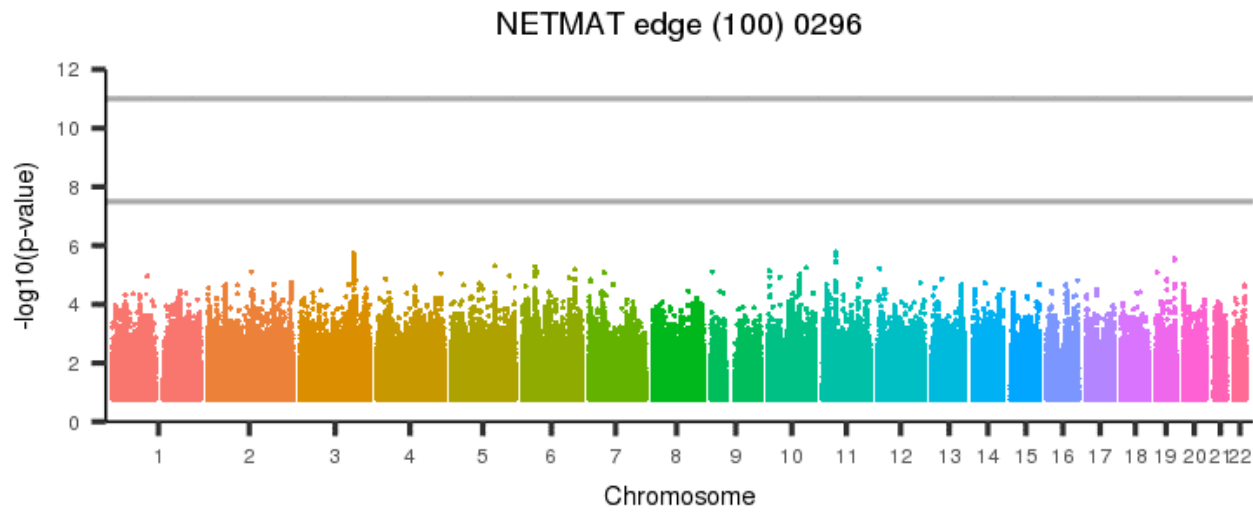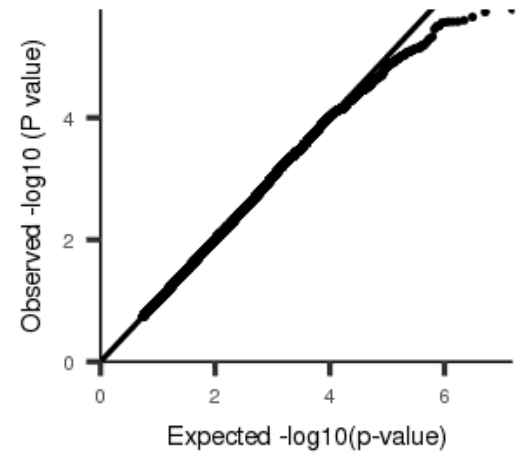

[back to list of plots](#)

Figure 1453: NETMAT edge (100) 0297

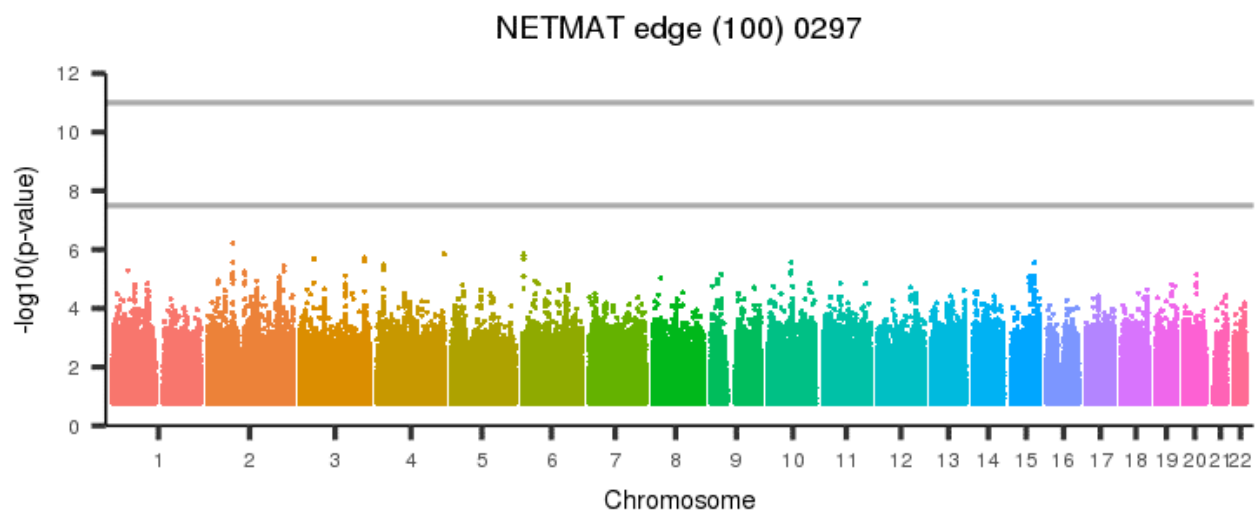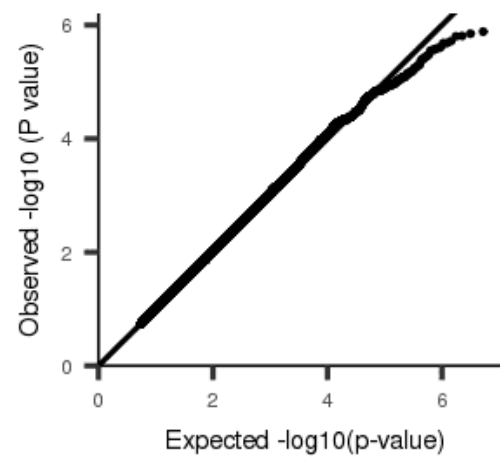

[back to list of plots](#)



Figure 1454: NETMAT edge (100) 0298

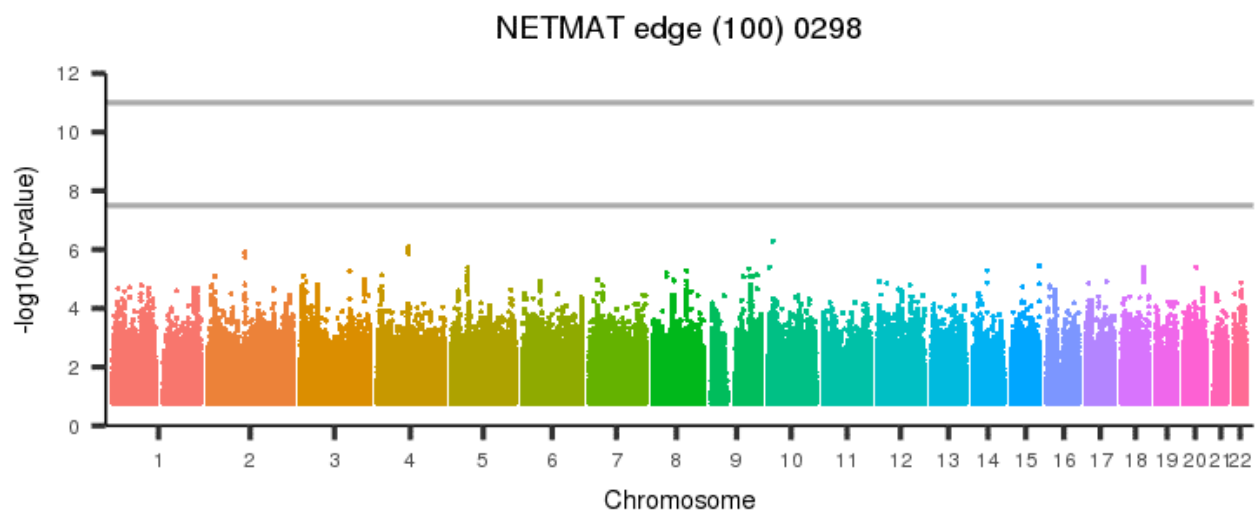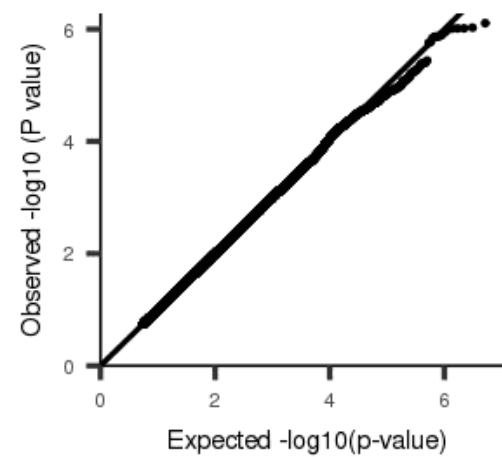

[back to list of plots](#)

Figure 1455: NETMAT edge (100) 0299

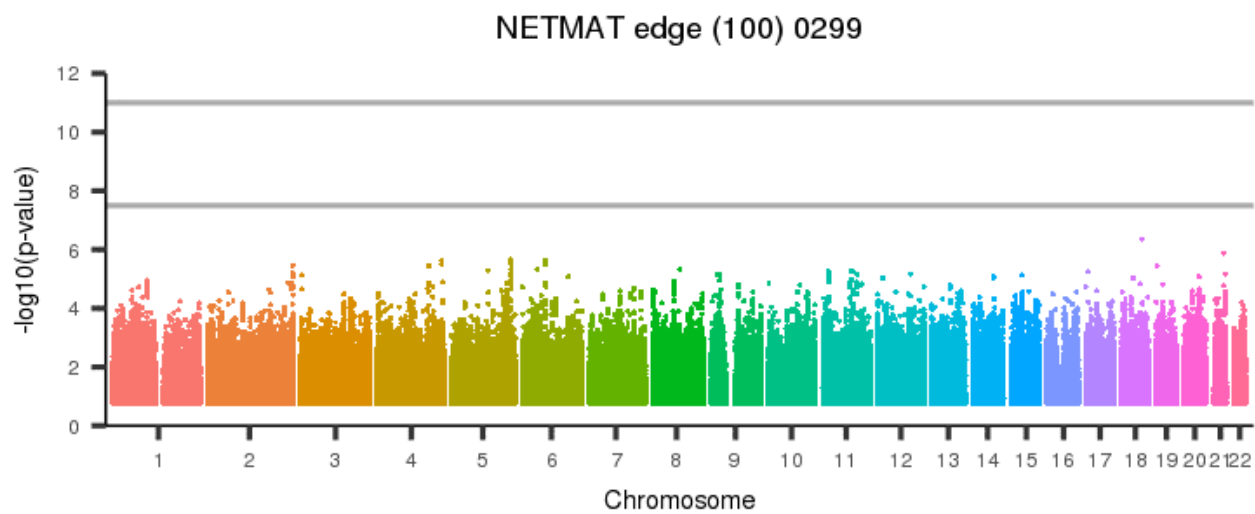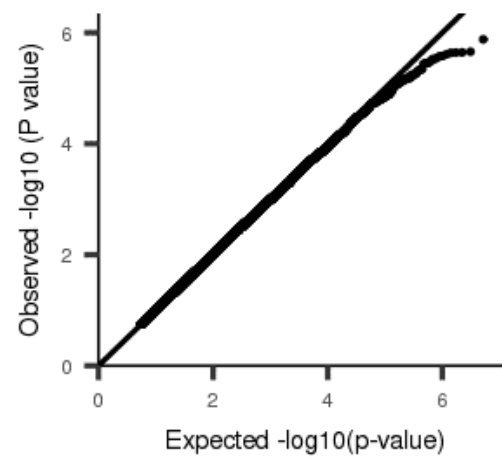

[back to list of plots](#)

Figure 1456: NETMAT edge (100) 0300

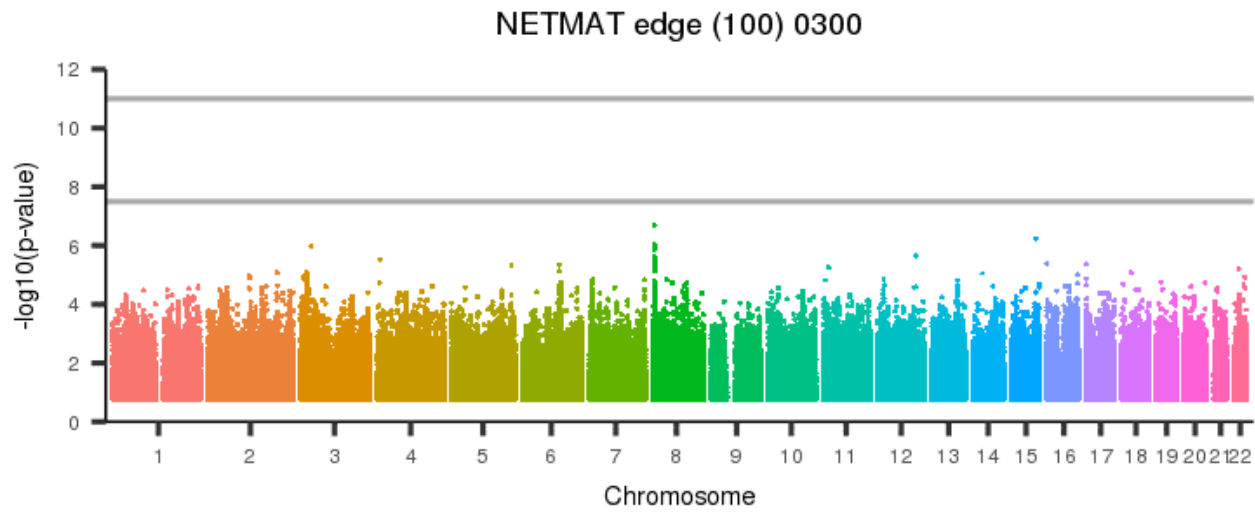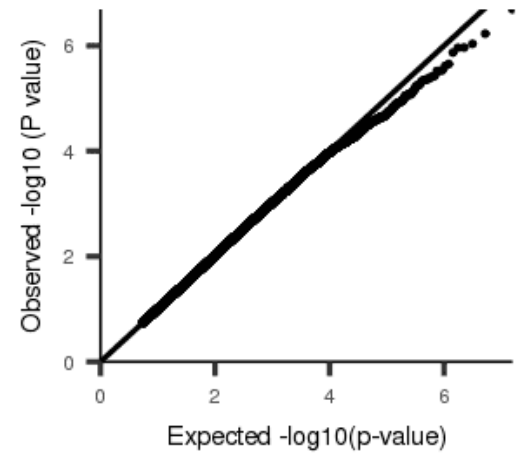

[back to list of plots](#)

Figure 1457: NETMAT edge (100) 0301

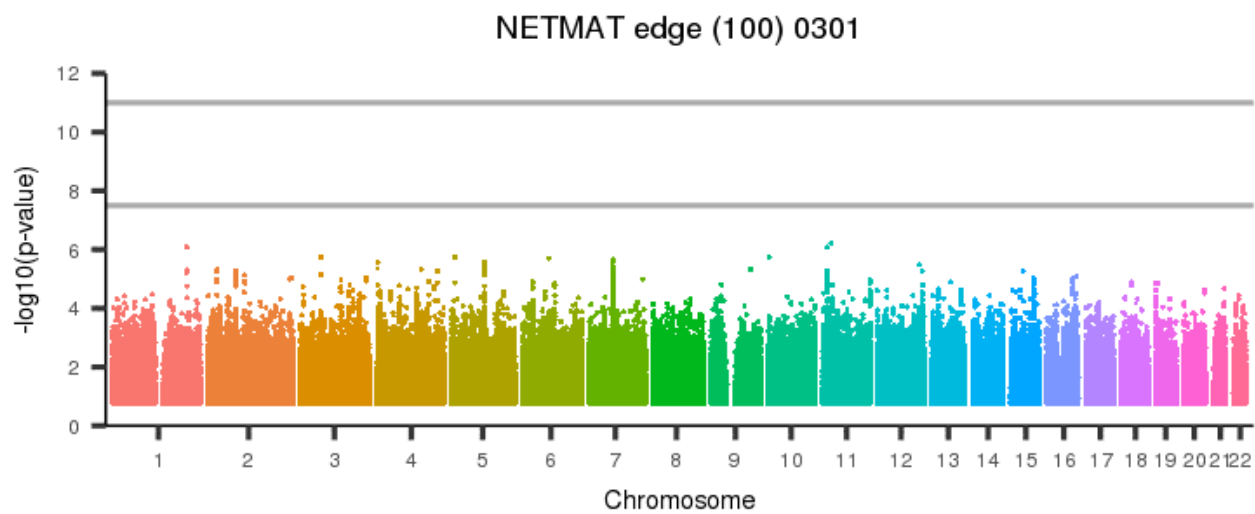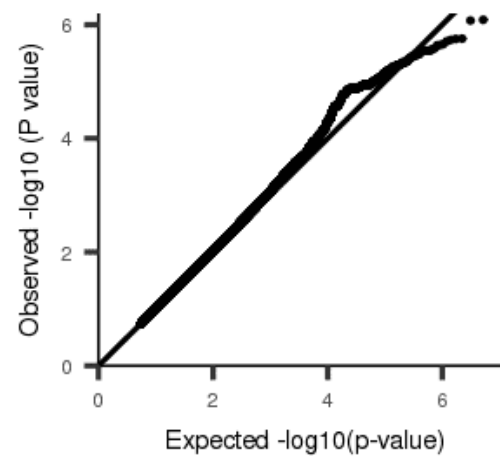

[back to list of plots](#)

Figure 1458: NETMAT edge (100) 0302

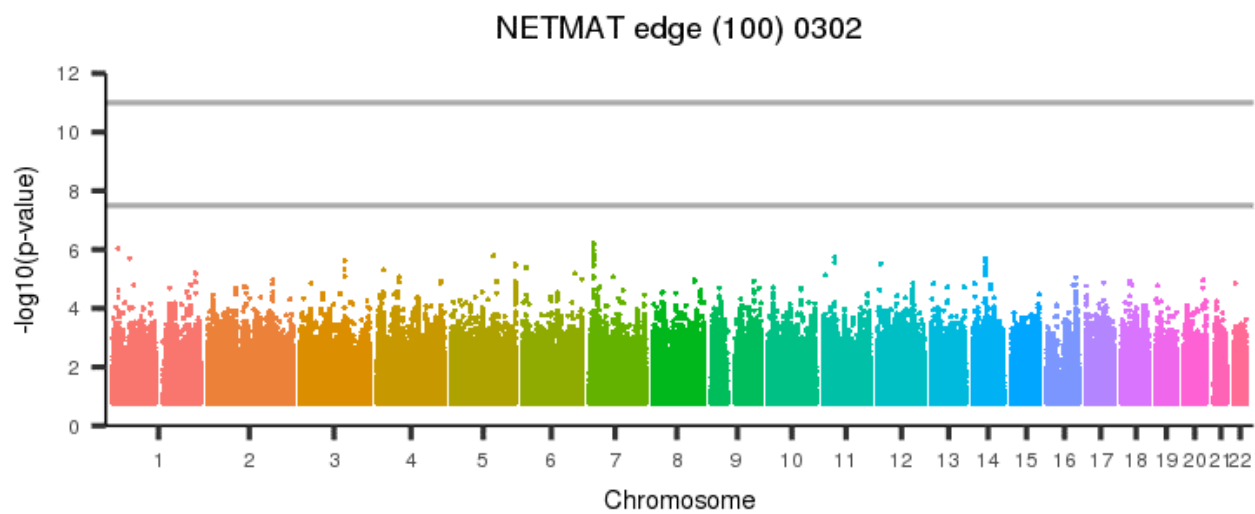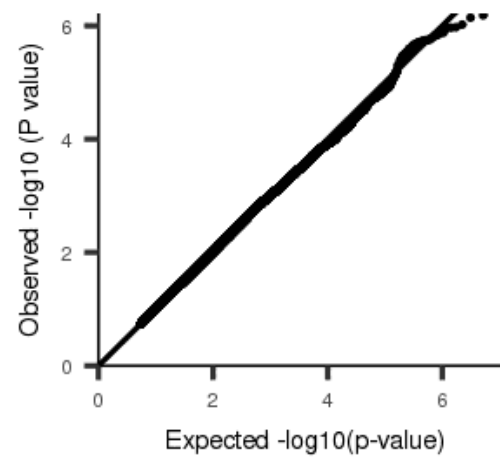

[back to list of plots](#)

Figure 1459: NETMAT edge (100) 0303

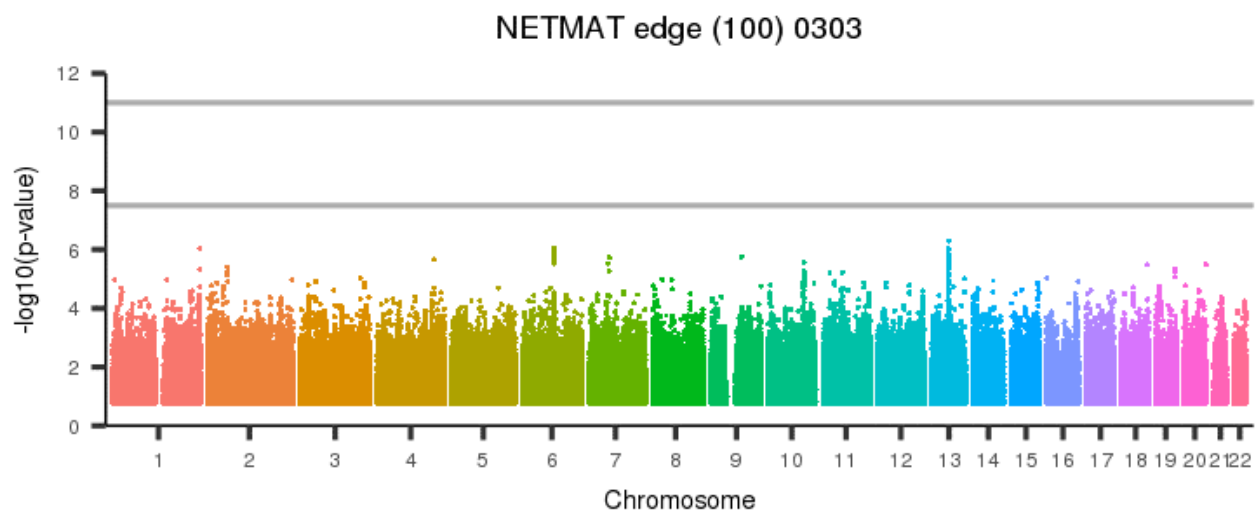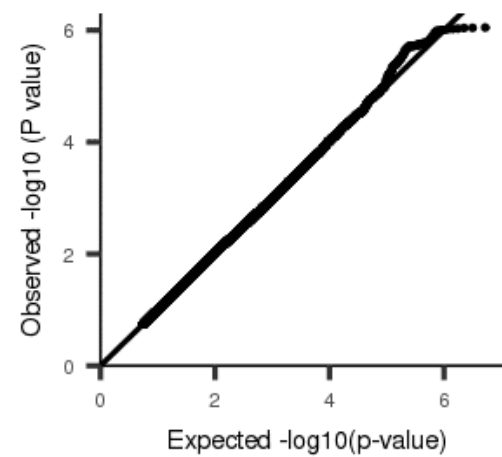

[back to list of plots](#)

Figure 1460: NETMAT edge (100) 0304

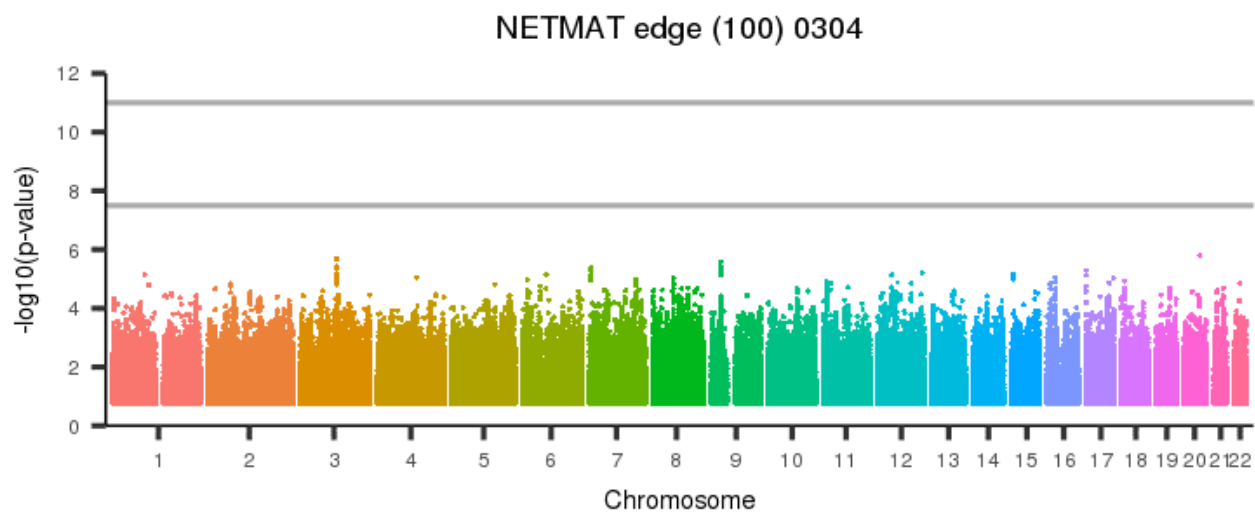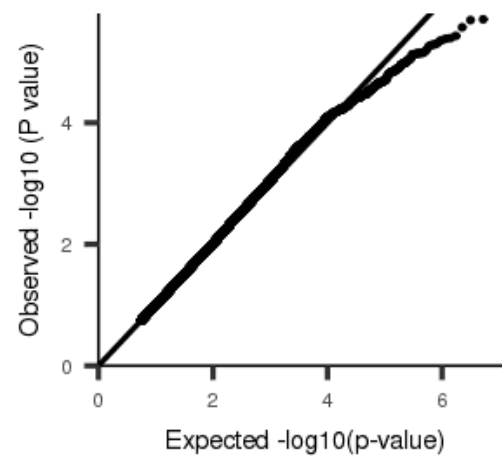

[back to list of plots](#)

Figure 1461: NETMAT edge (100) 0305

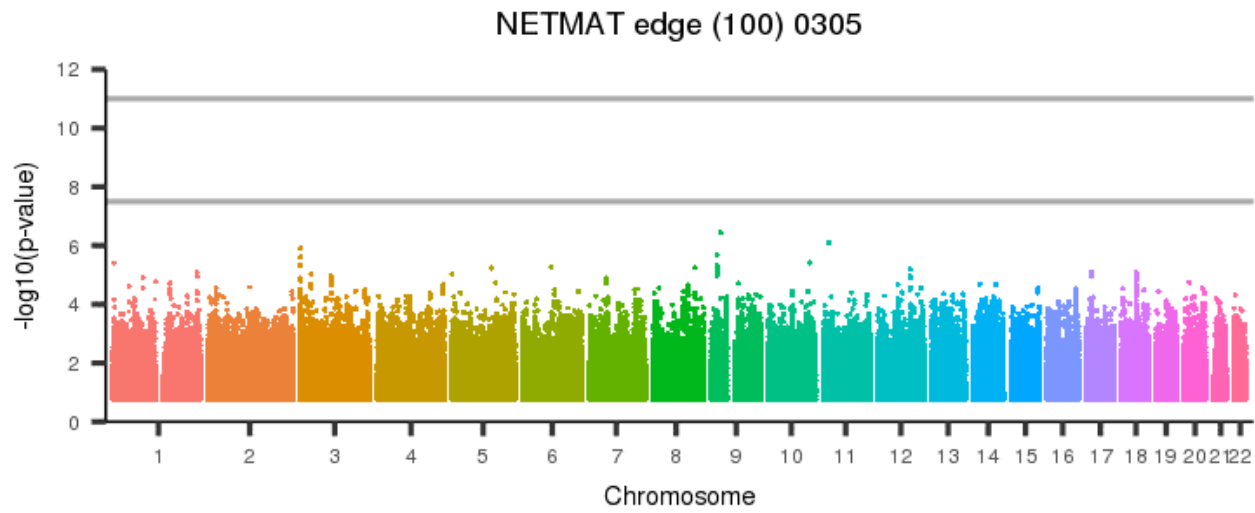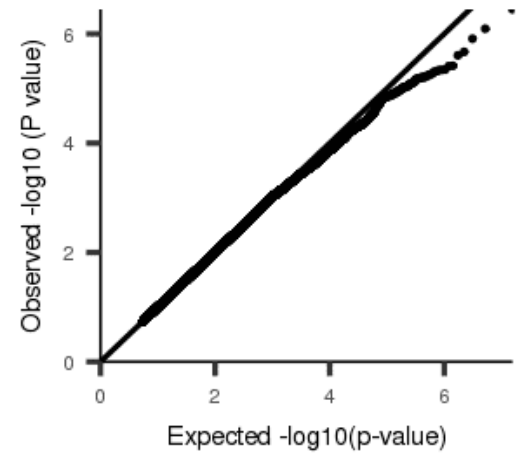

[back to list of plots](#)



Figure 1462: NETMAT edge (100) 0306

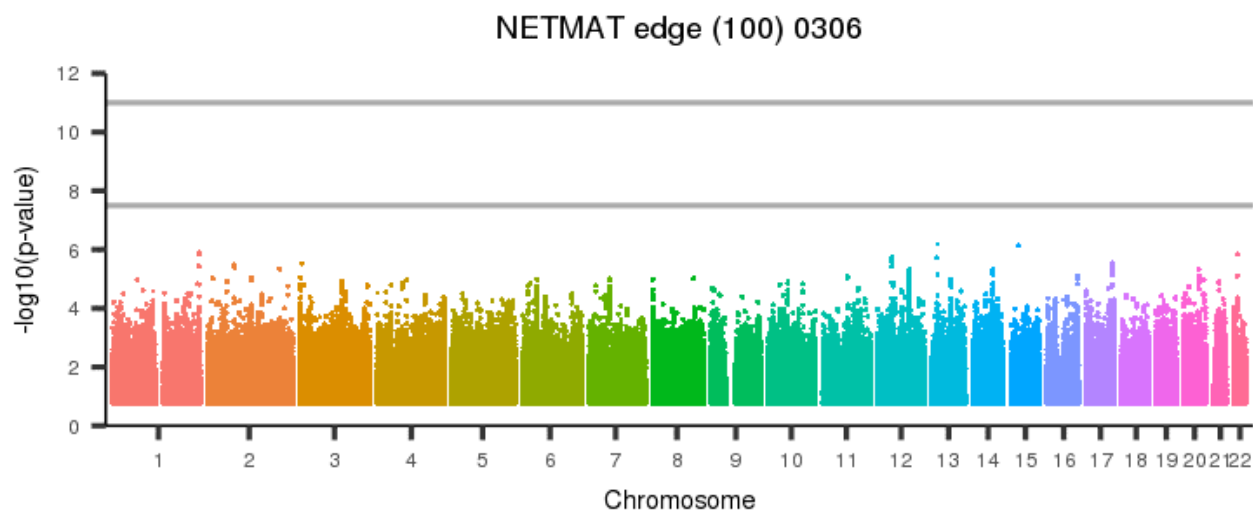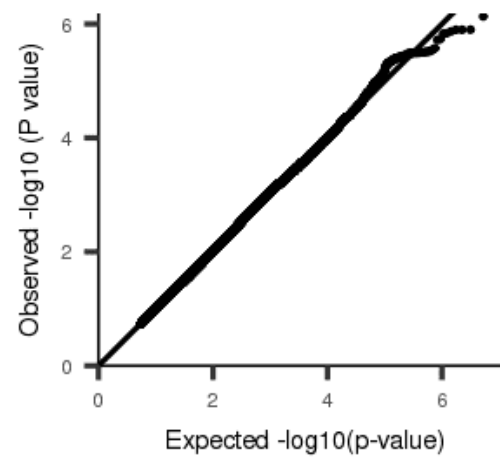

[back to list of plots](#)

Figure 1463: NETMAT edge (100) 0307

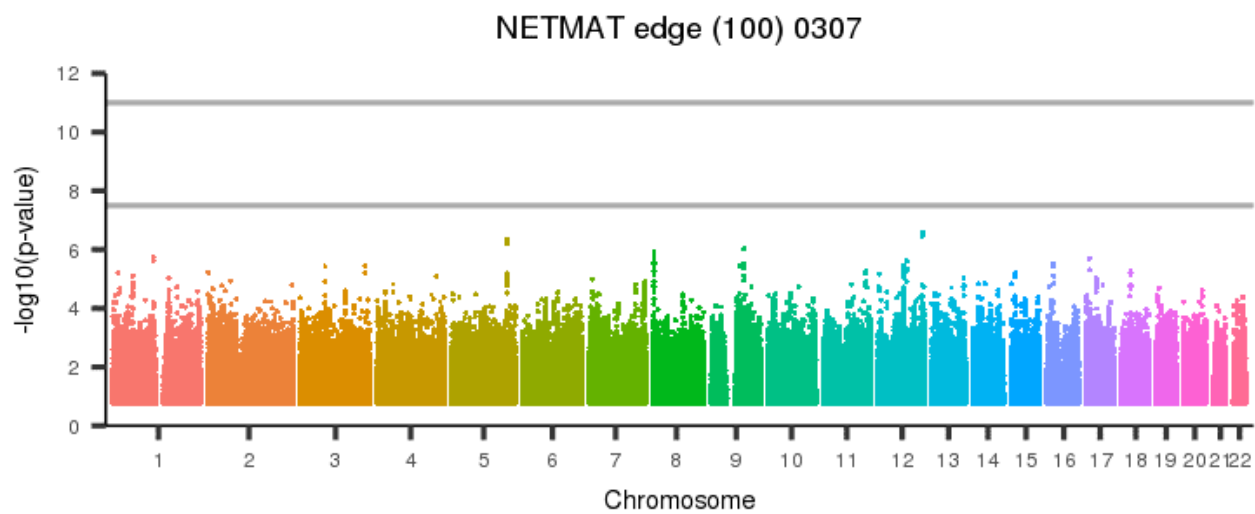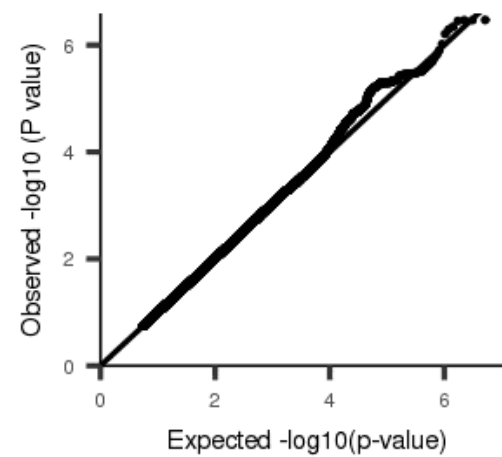

[back to list of plots](#)

Figure 1464: NETMAT edge (100) 0308

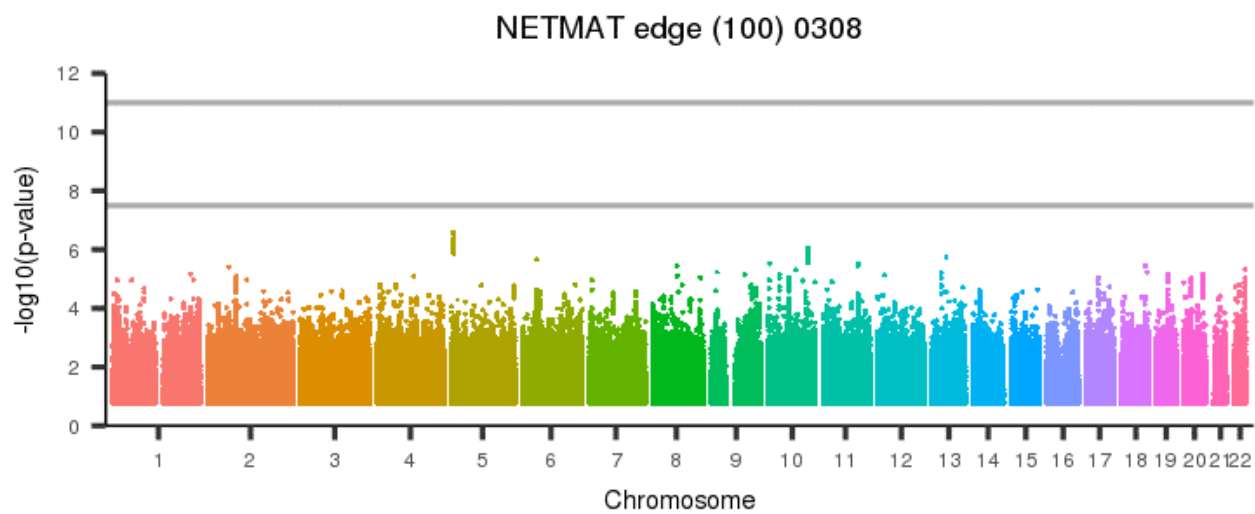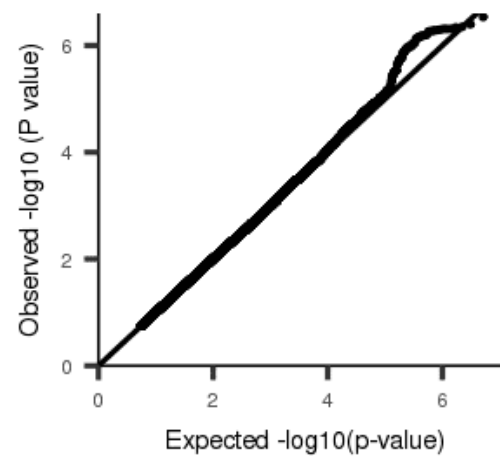

[back to list of plots](#)

Figure 1465: NETMAT edge (100) 0309

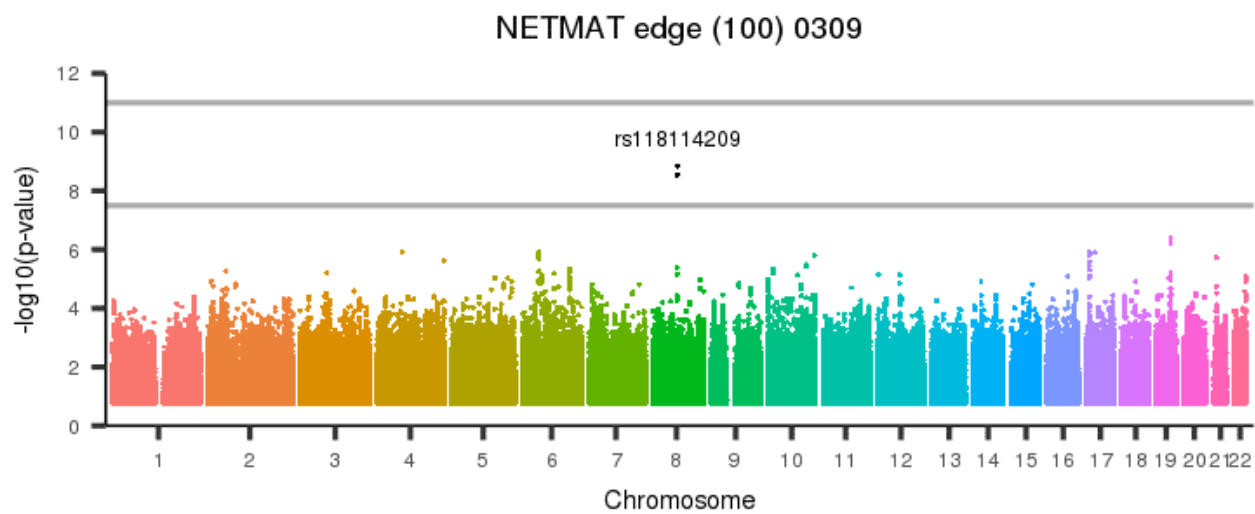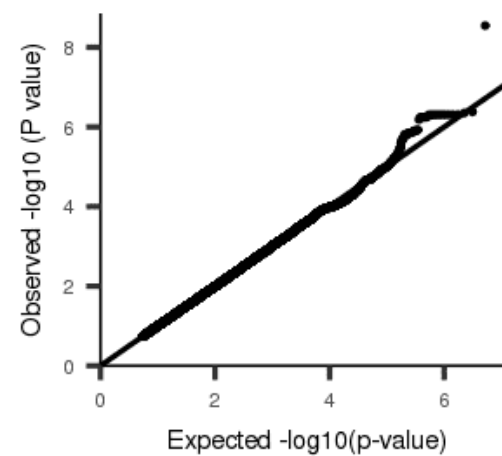

[back to list of plots](#)

Figure 1466: NETMAT edge (100) 0310

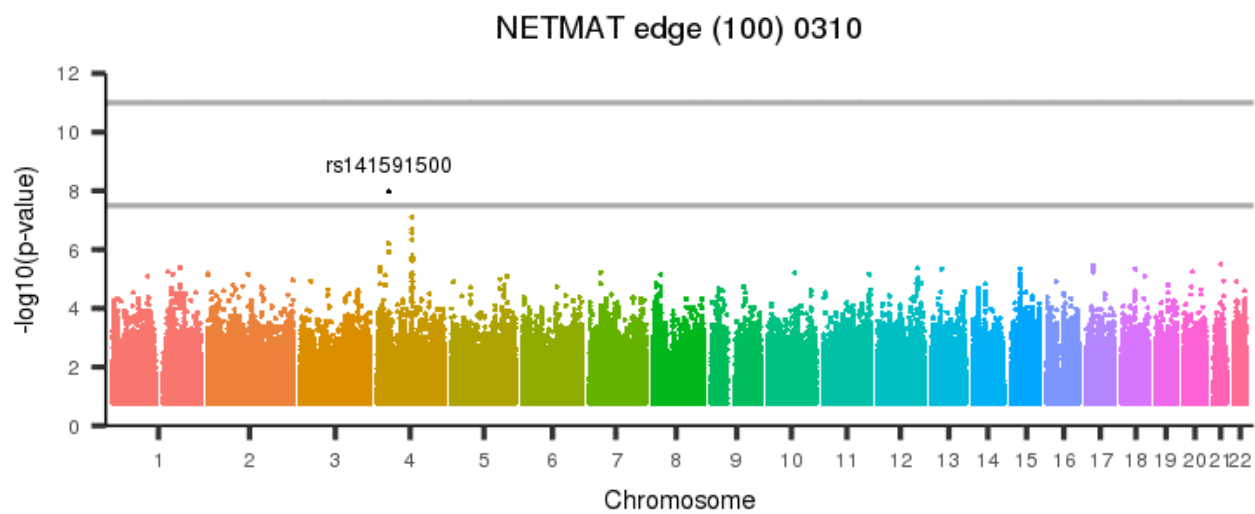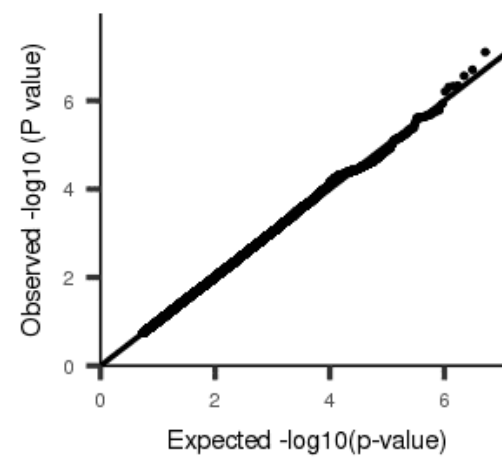

[back to list of plots](#)

Figure 1467: NETMAT edge (100) 0311

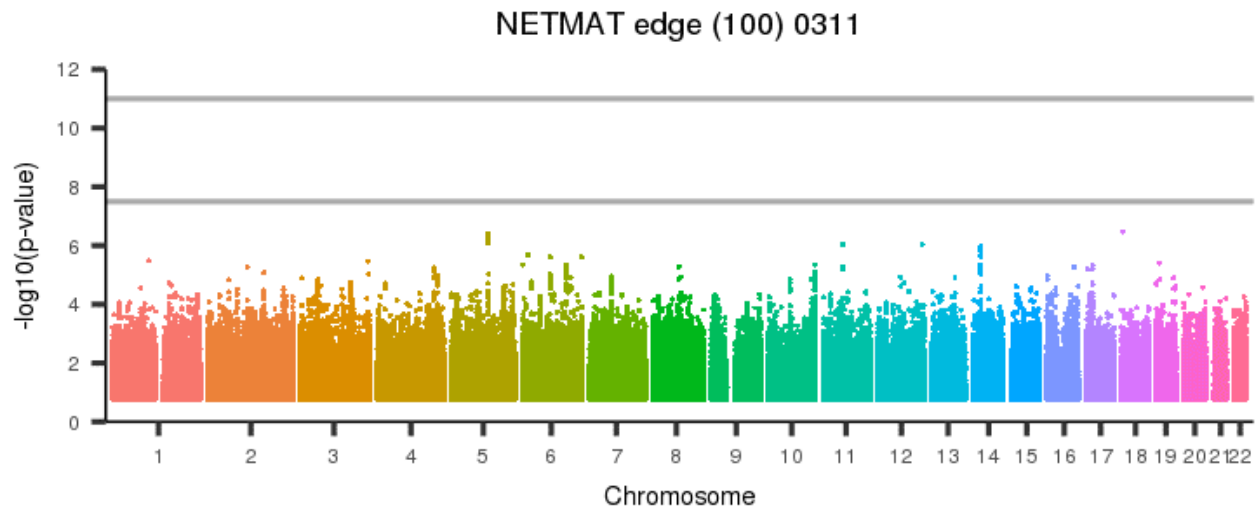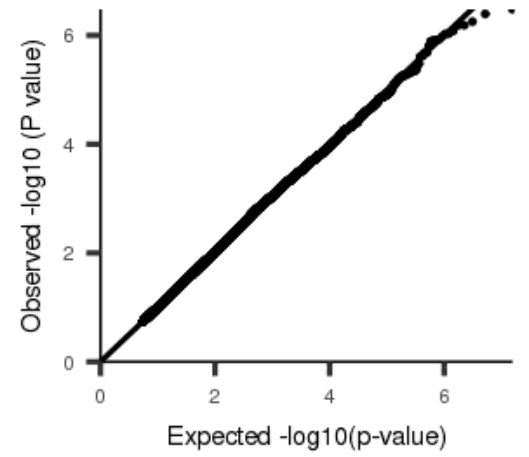

[back to list of plots](#)

Figure 1468: NETMAT edge (100) 0312

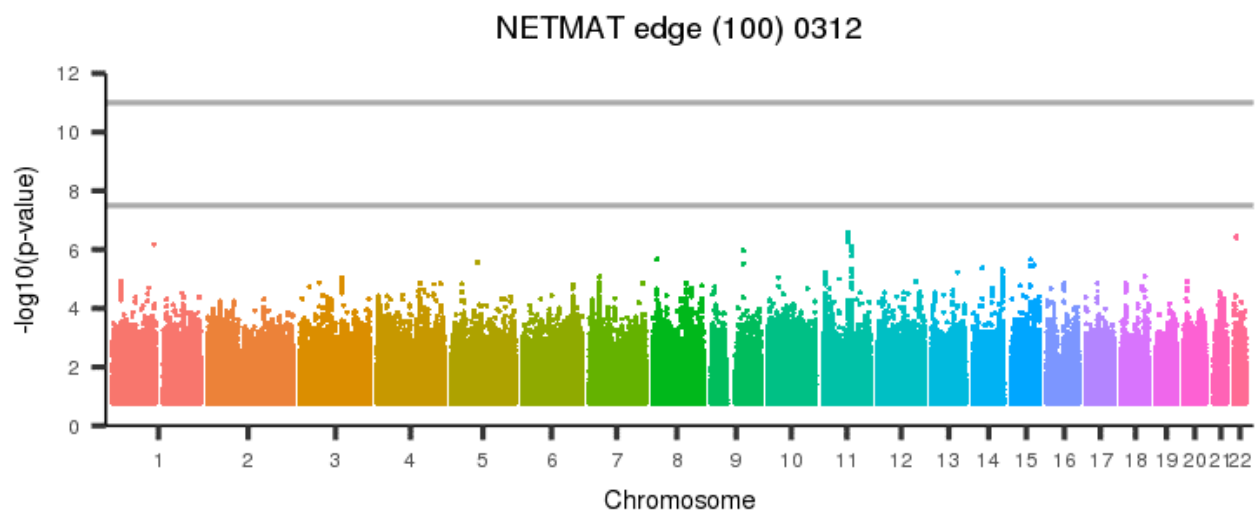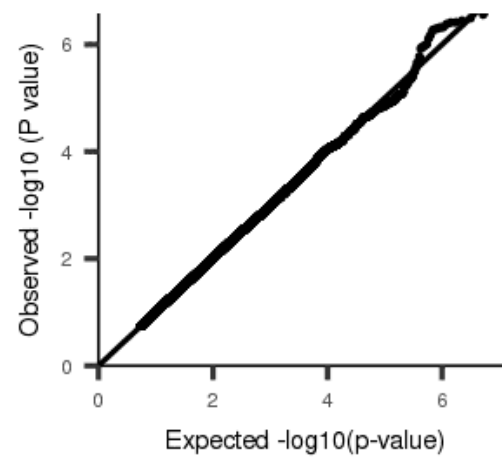

[back to list of plots](#)

Figure 1469: NETMAT edge (100) 0313

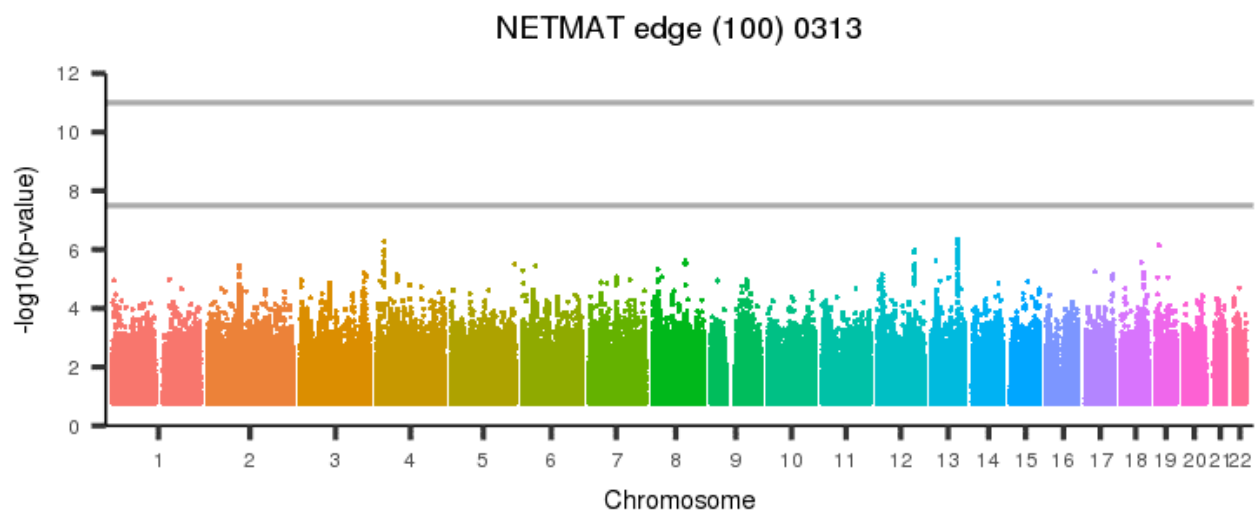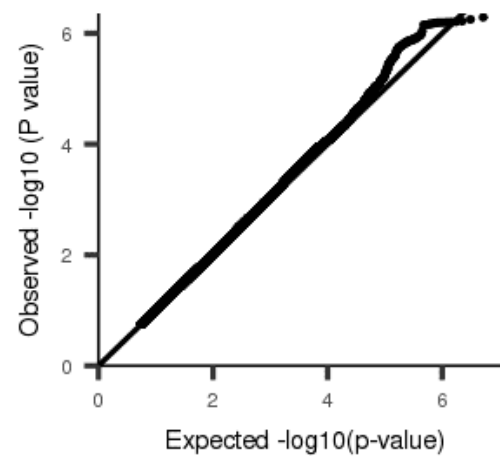

[back to list of plots](#)



Figure 1470: NETMAT edge (100) 0314

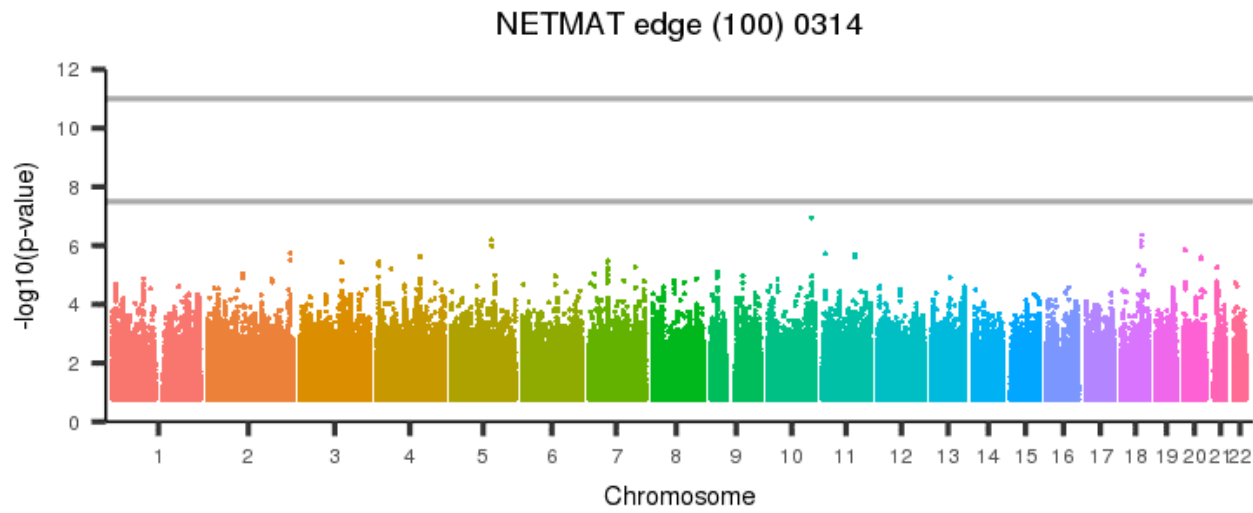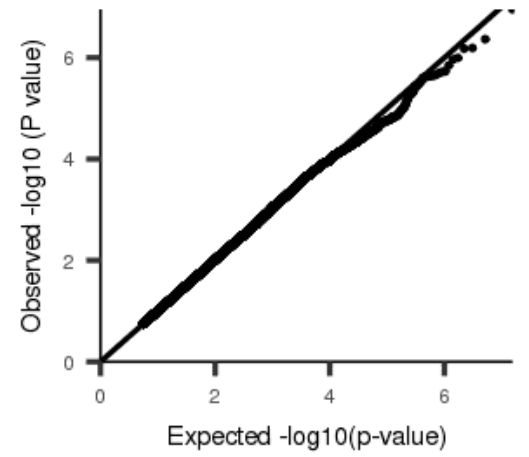

[back to list of plots](#)

Figure 1471: NETMAT edge (100) 0315

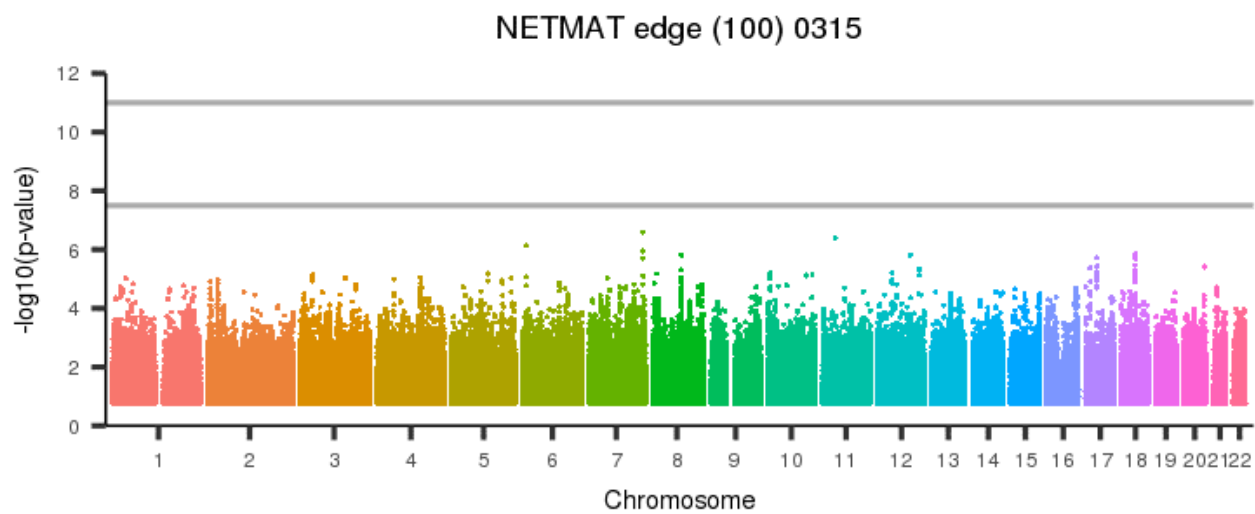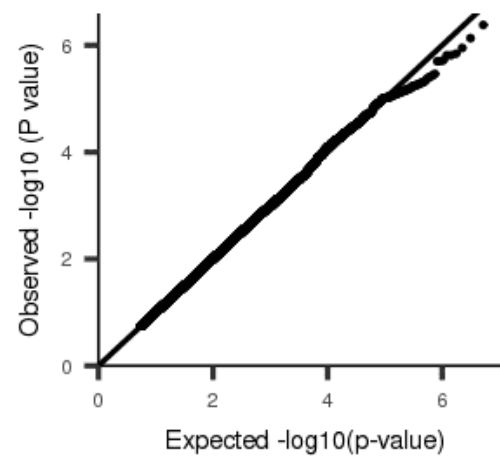

[back to list of plots](#)

Figure 1472: NETMAT edge (100) 0316

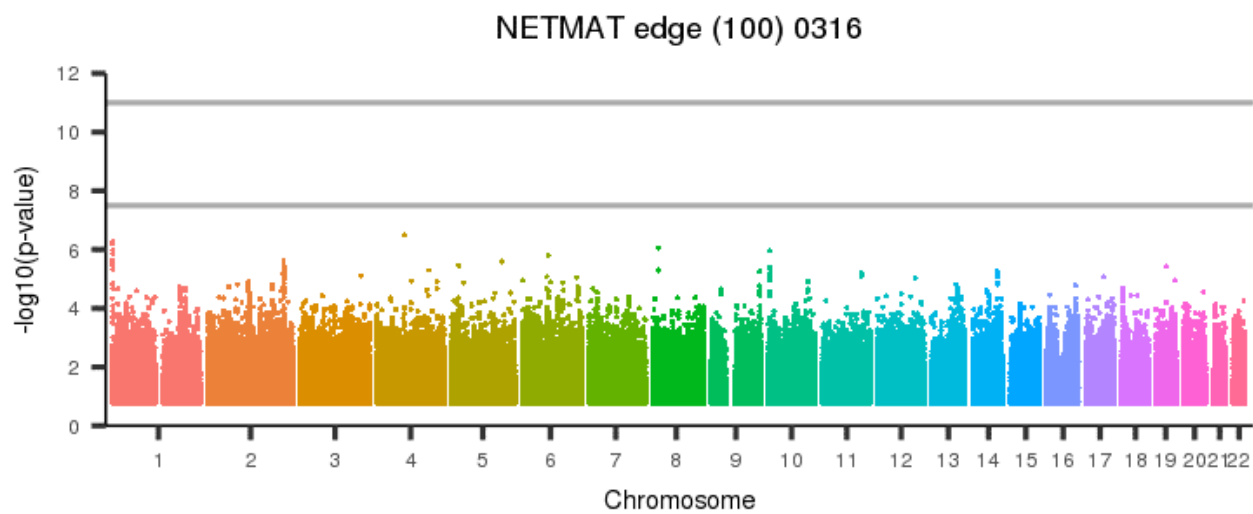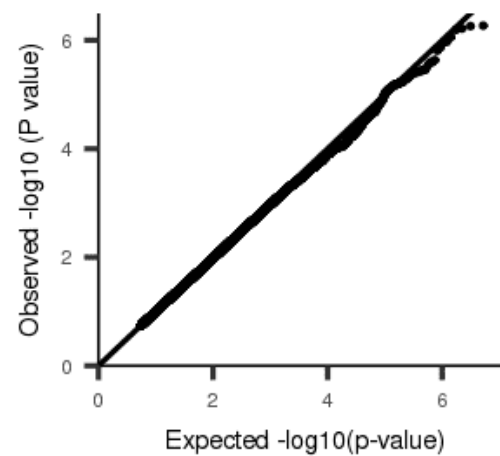

[back to list of plots](#)

Figure 1473: NETMAT edge (100) 0317

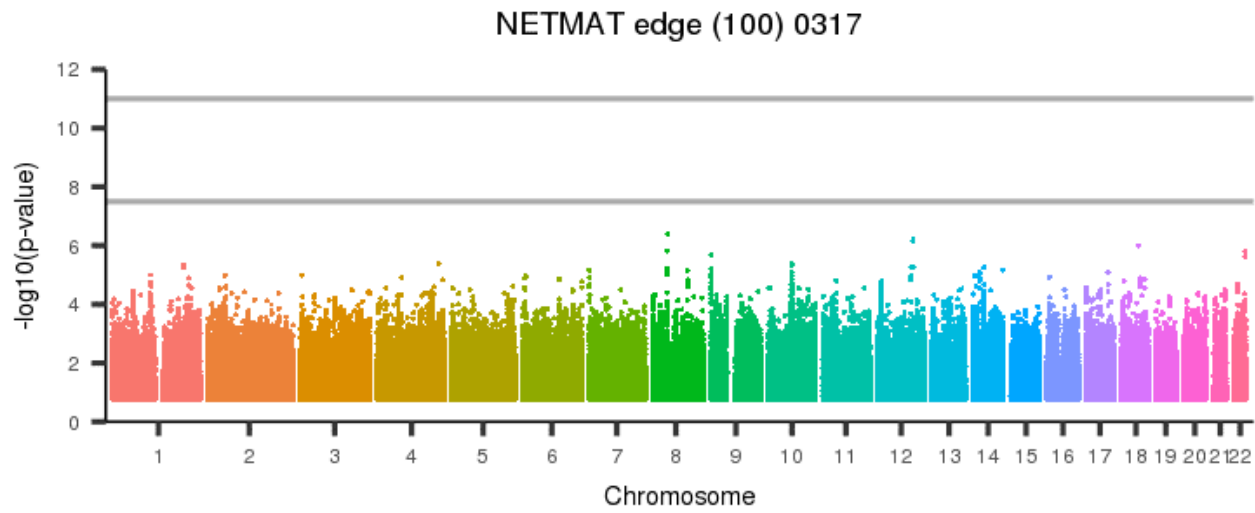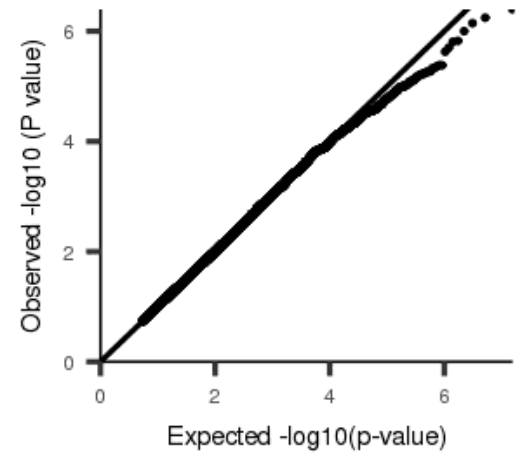

[back to list of plots](#)

Figure 1474: NETMAT edge (100) 0318

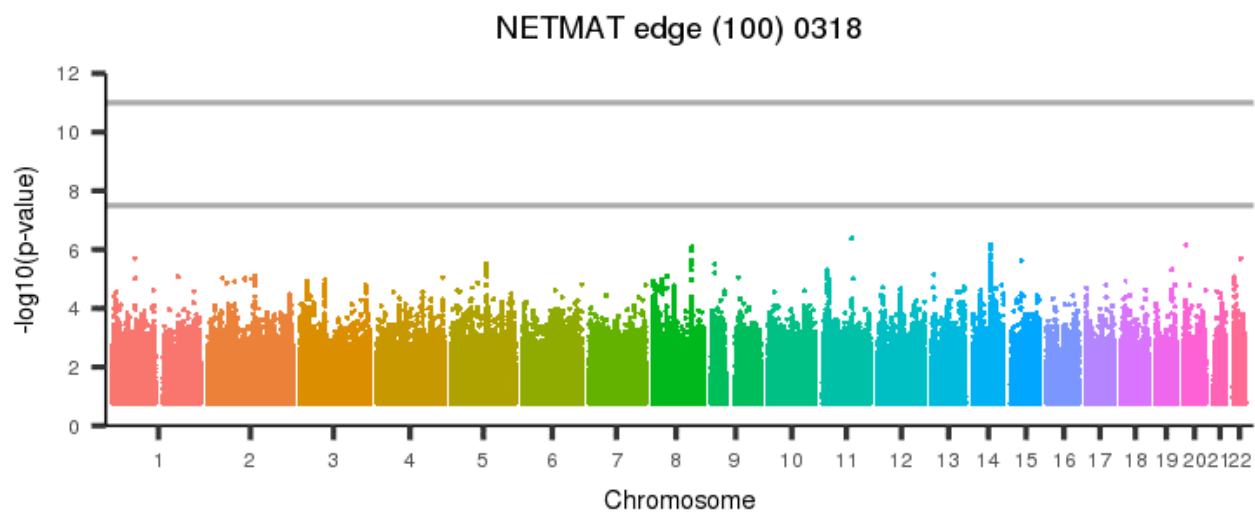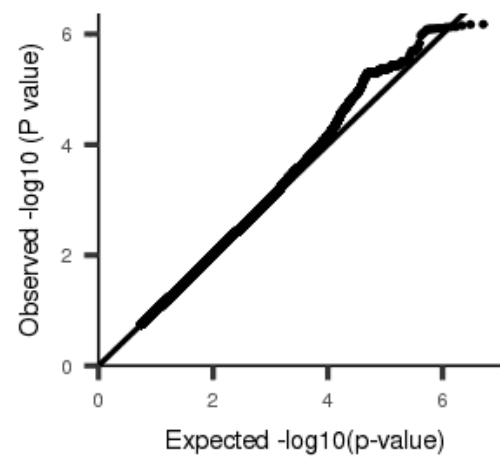

[back to list of plots](#)

Figure 1475: NETMAT edge (100) 0319

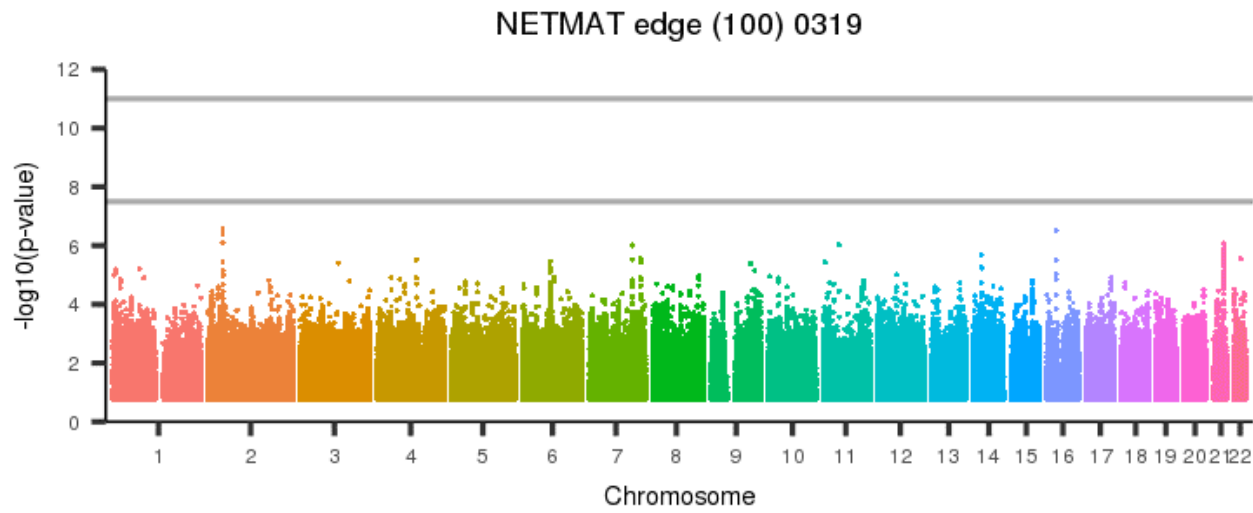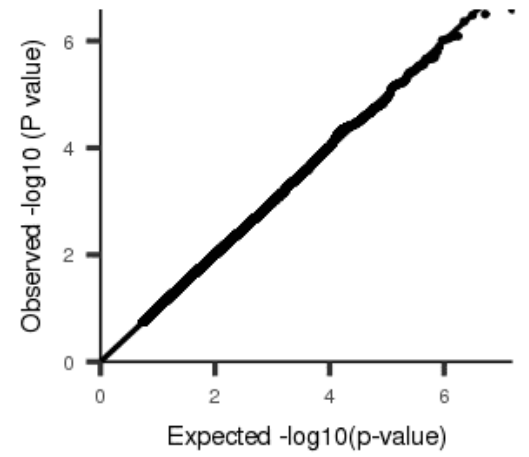

[back to list of plots](#)

Figure 1476: NETMAT edge (100) 0320

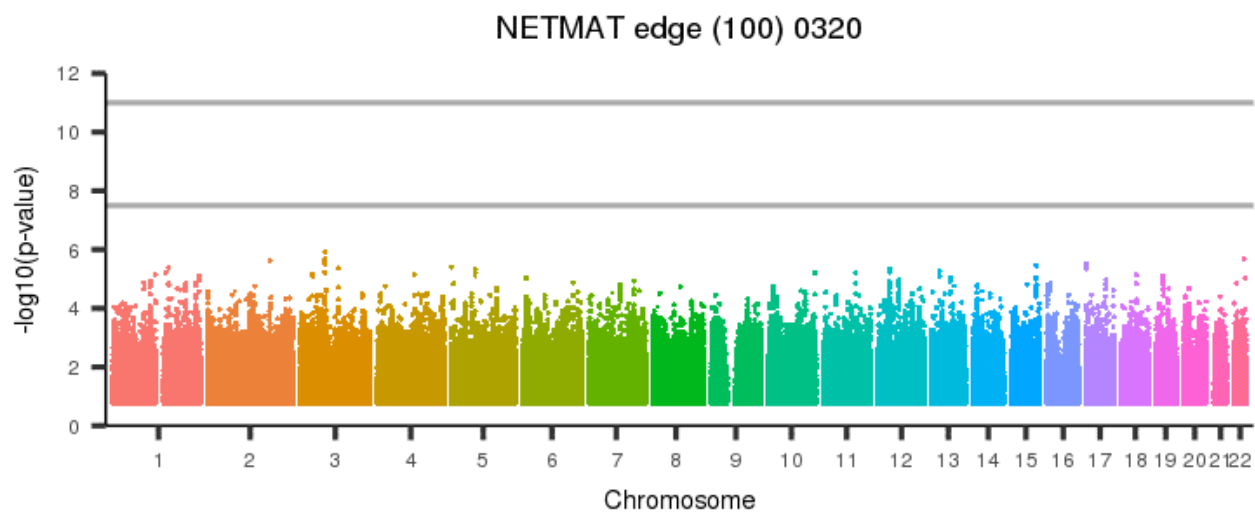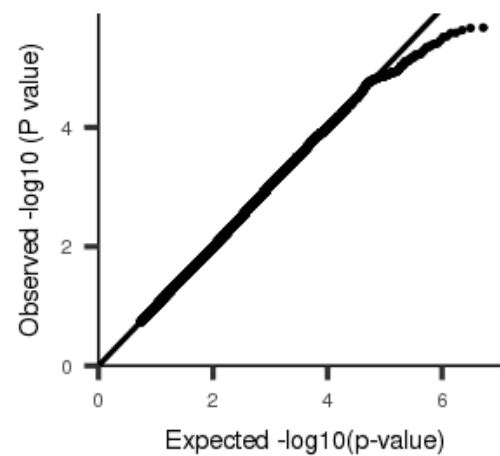

[back to list of plots](#)

Figure 1477: NETMAT edge (100) 0321

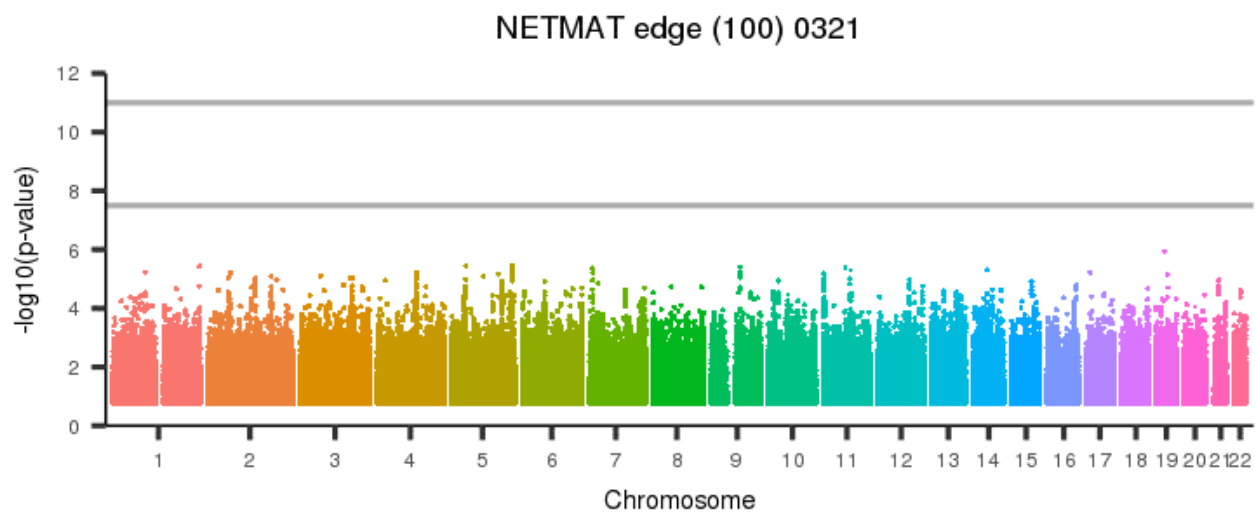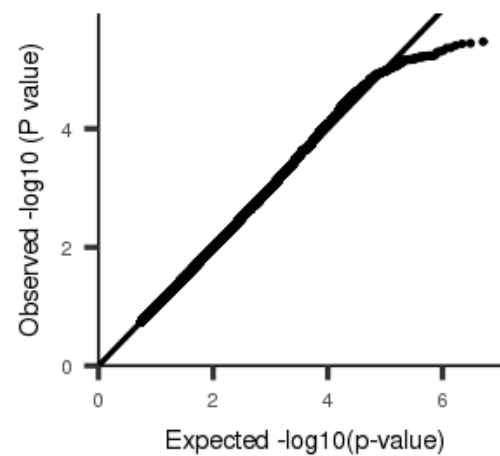

[back to list of plots](#)



Figure 1478: NETMAT edge (100) 0322

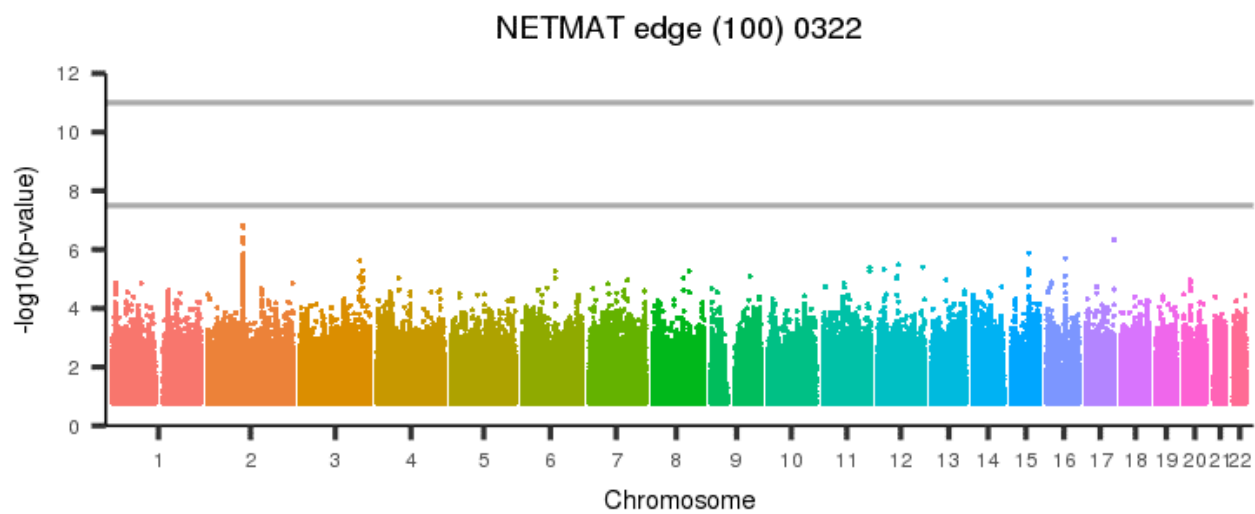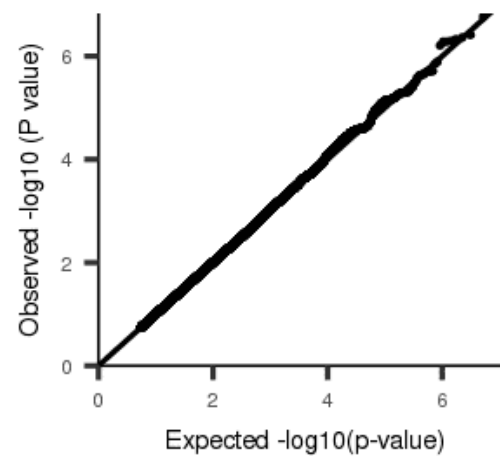

[back to list of plots](#)

Figure 1479: NETMAT edge (100) 0323

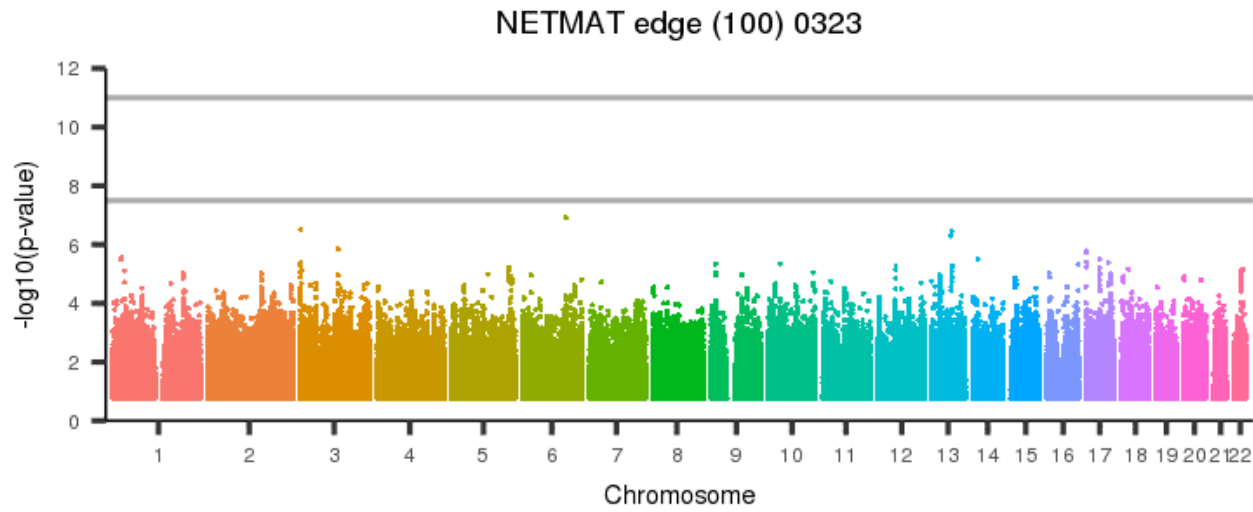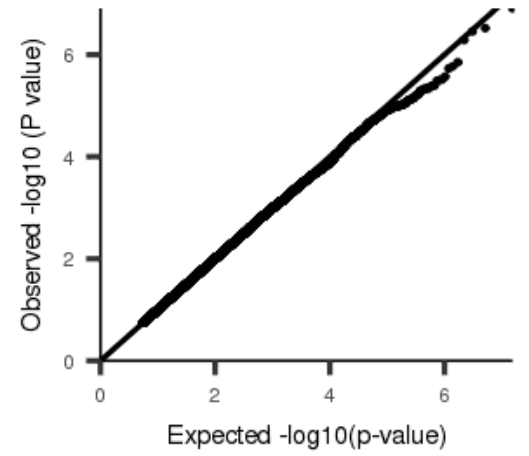

[back to list of plots](#)

Figure 1480: NETMAT edge (100) 0324

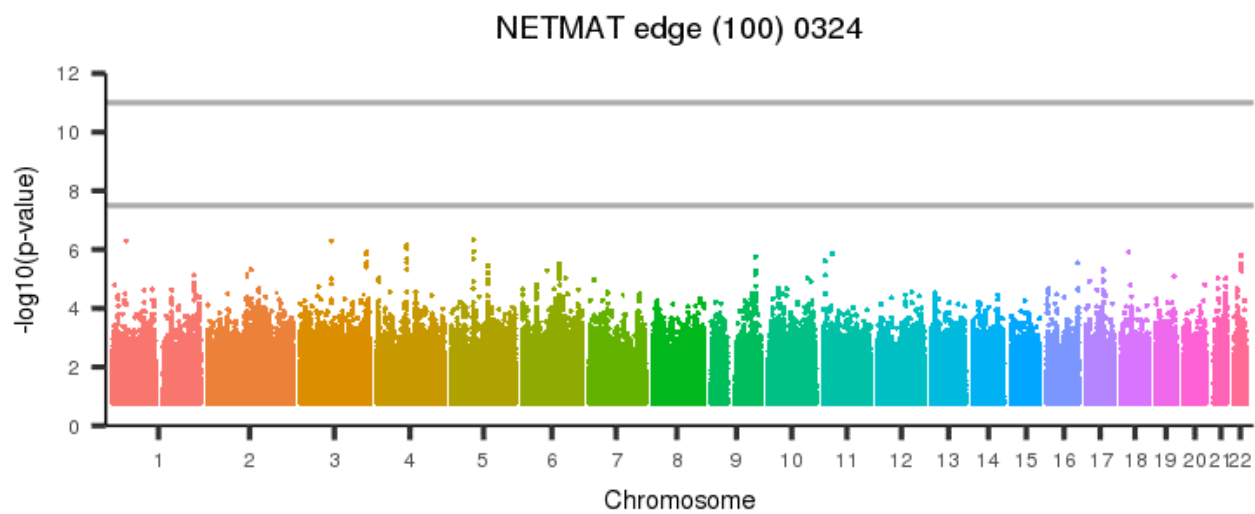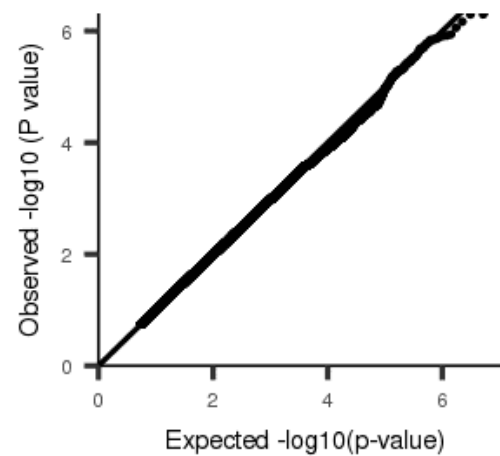

[back to list of plots](#)

Figure 1481: NETMAT edge (100) 0325

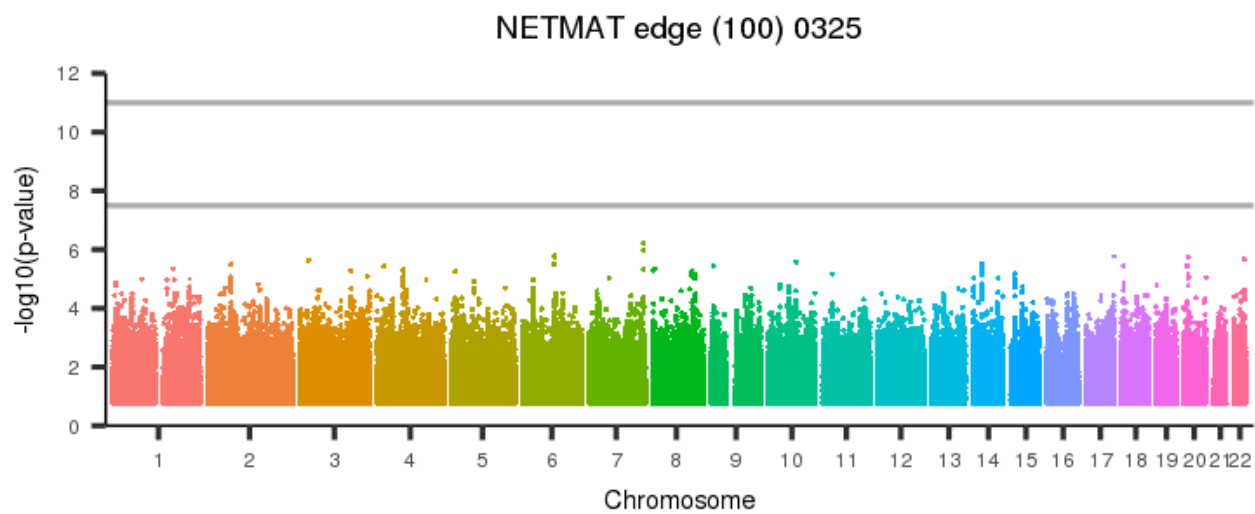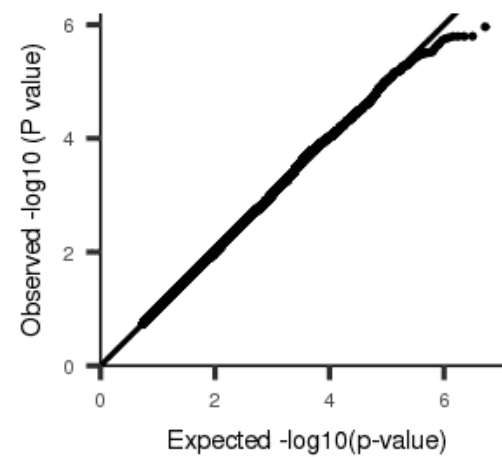

[back to list of plots](#)

Figure 1482: NETMAT edge (100) 0326

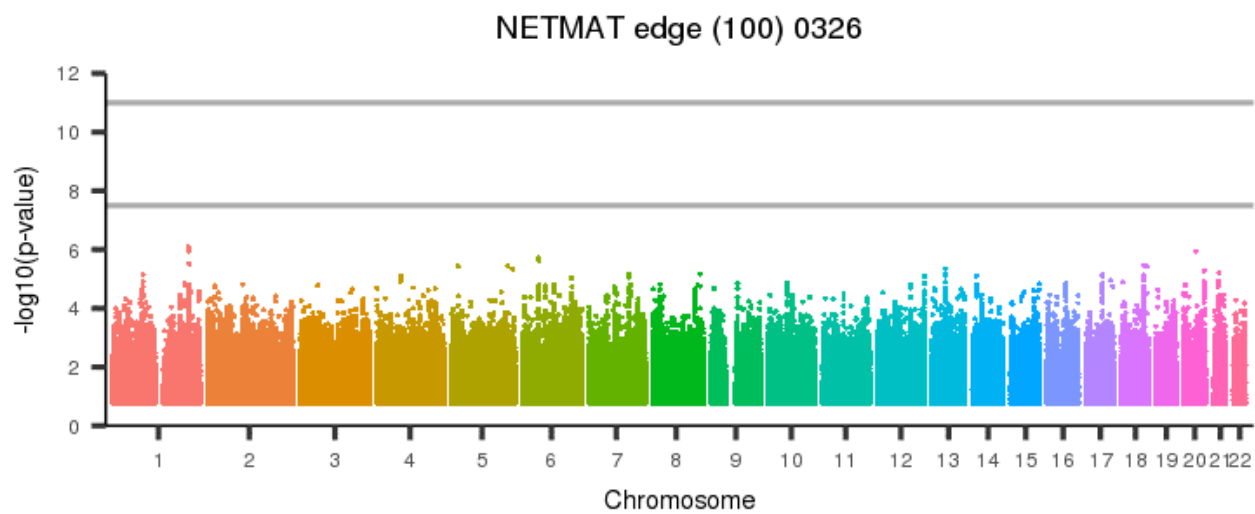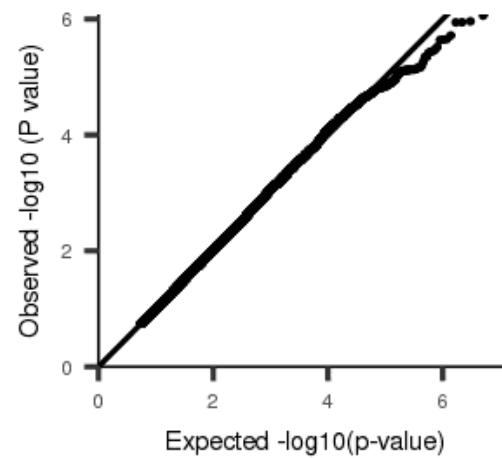

[back to list of plots](#)

Figure 1483: NETMAT edge (100) 0327

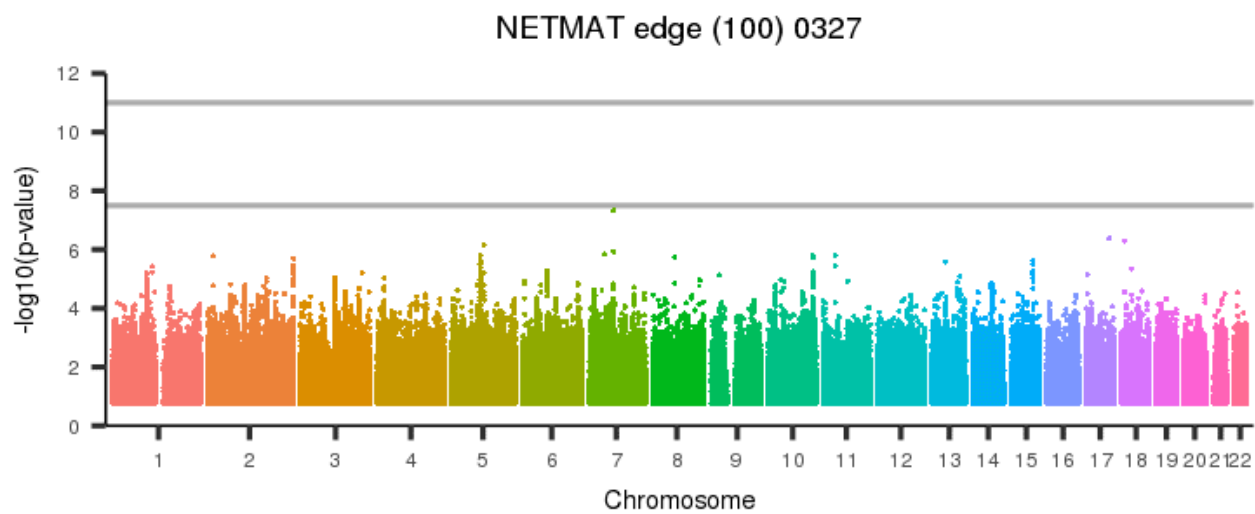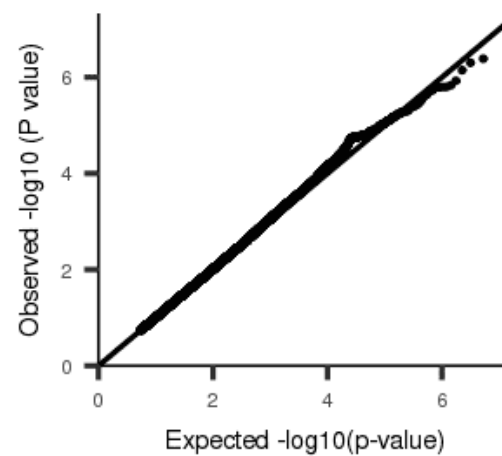

[back to list of plots](#)

Figure 1484: NETMAT edge (100) 0328

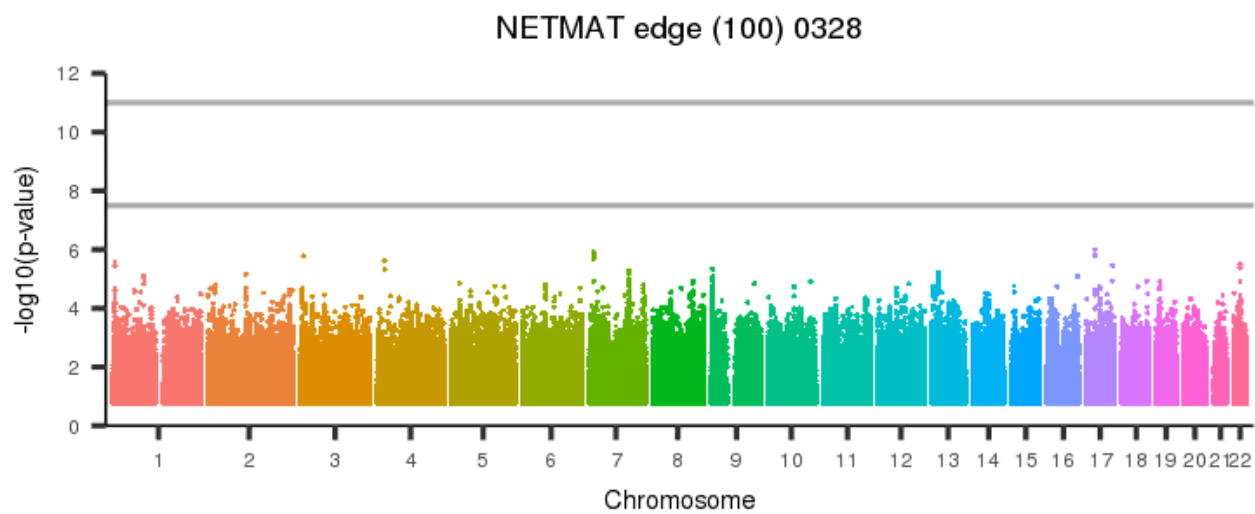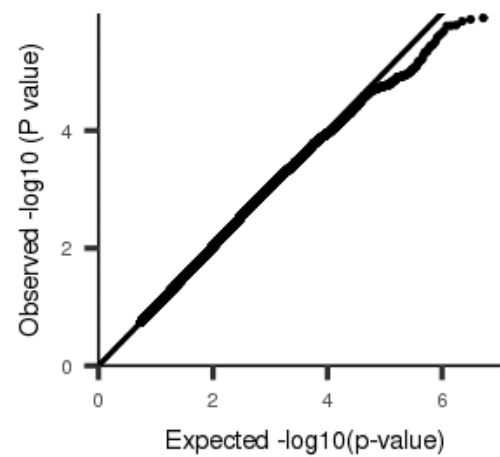

[back to list of plots](#)

Figure 1485: NETMAT edge (100) 0329

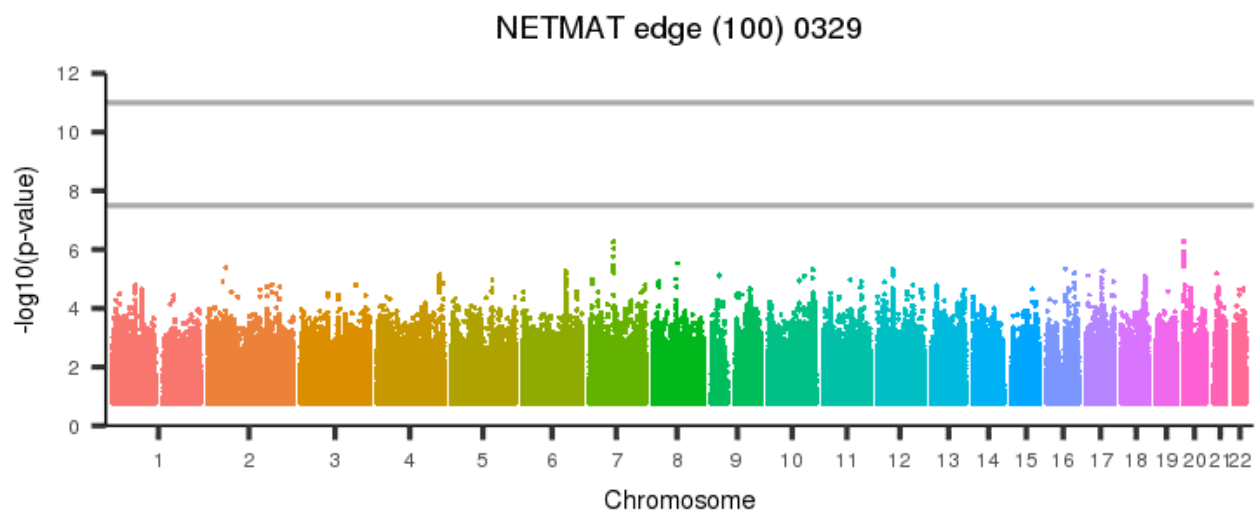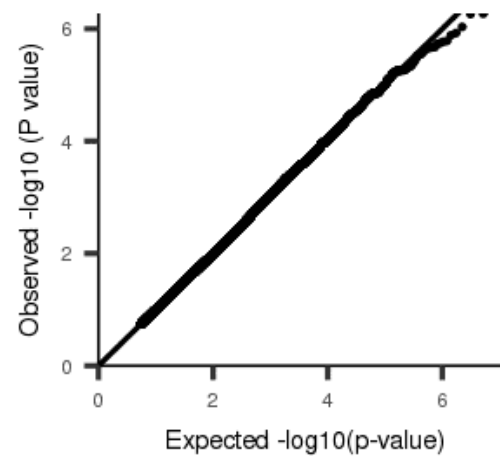

[back to list of plots](#)



Figure 1486: NETMAT edge (100) 0330

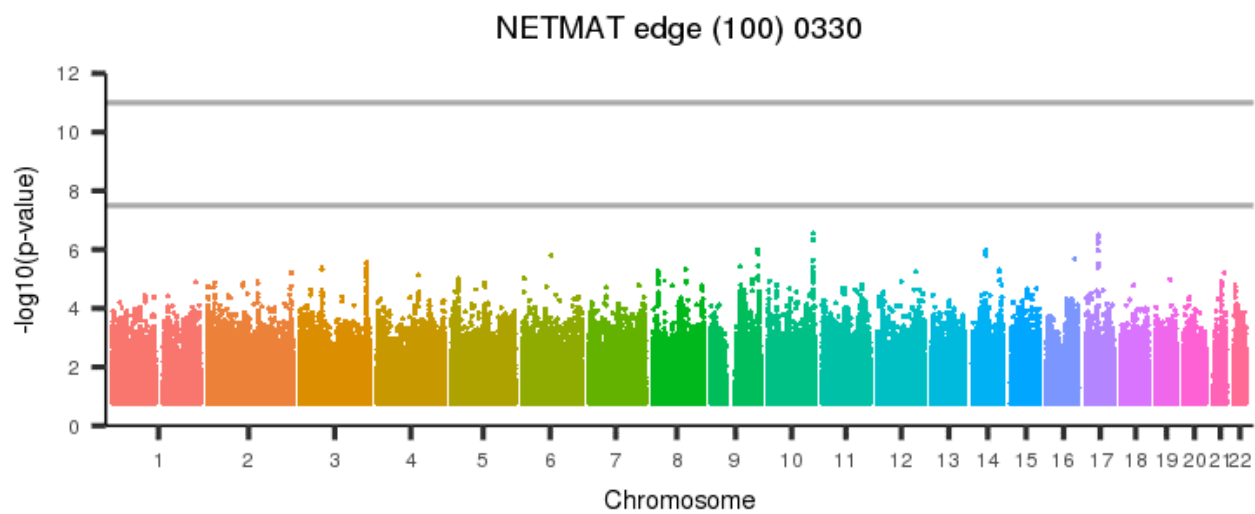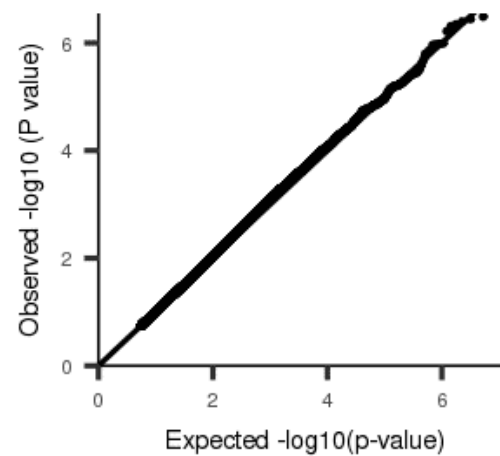

[back to list of plots](#)

Figure 1487: NETMAT edge (100) 0331

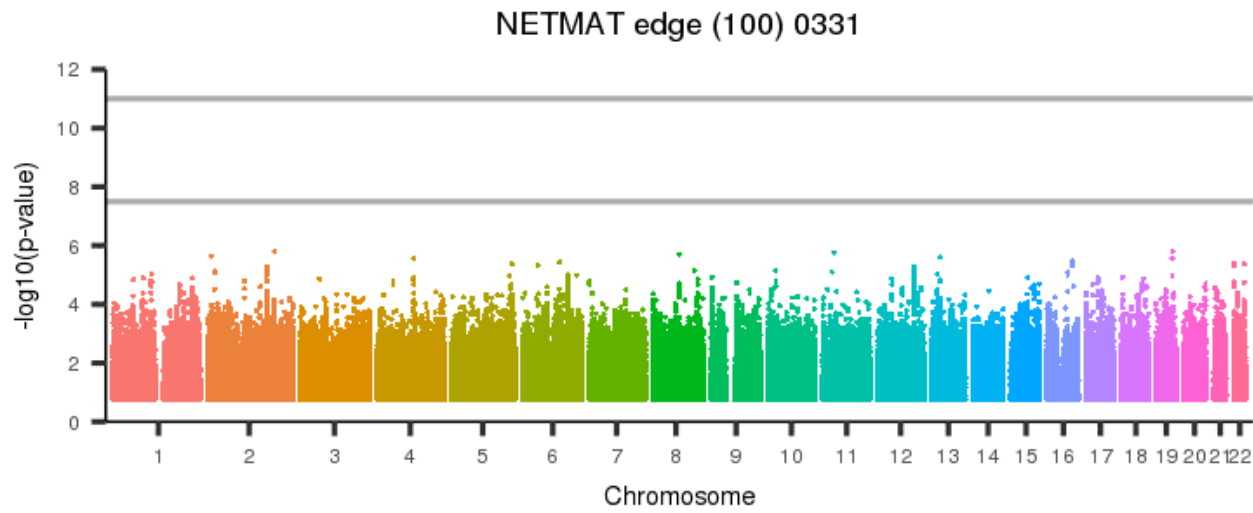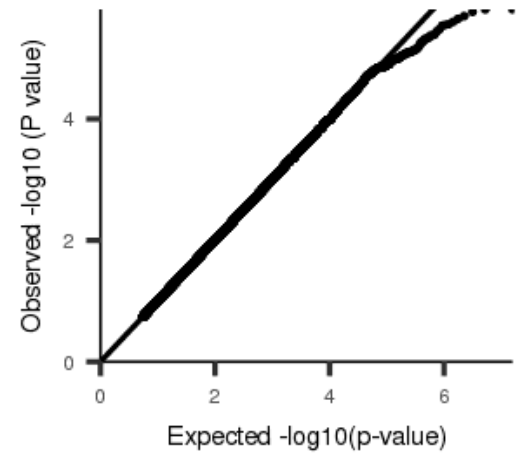

[back to list of plots](#)

Figure 1488: NETMAT edge (100) 0332

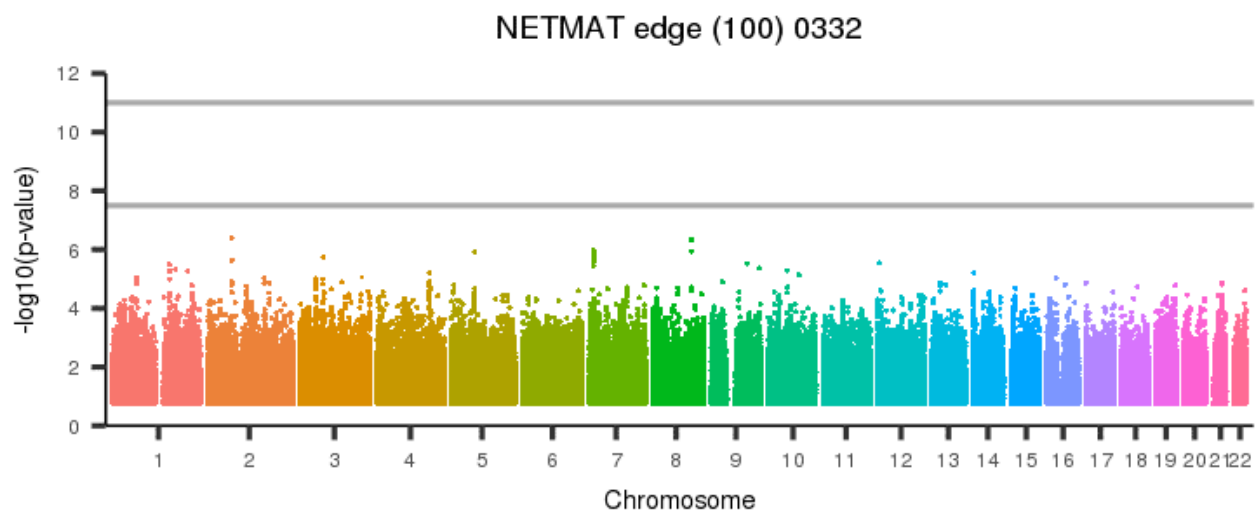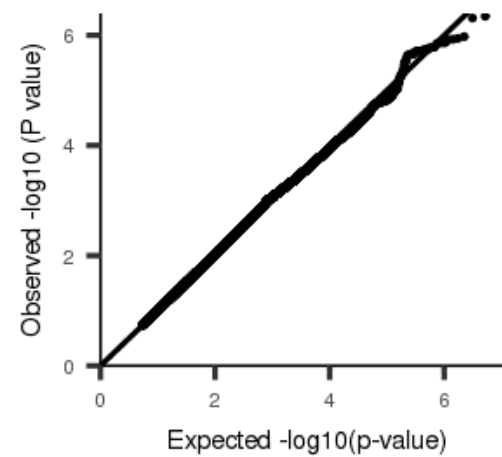

[back to list of plots](#)

Figure 1489: NETMAT edge (100) 0333

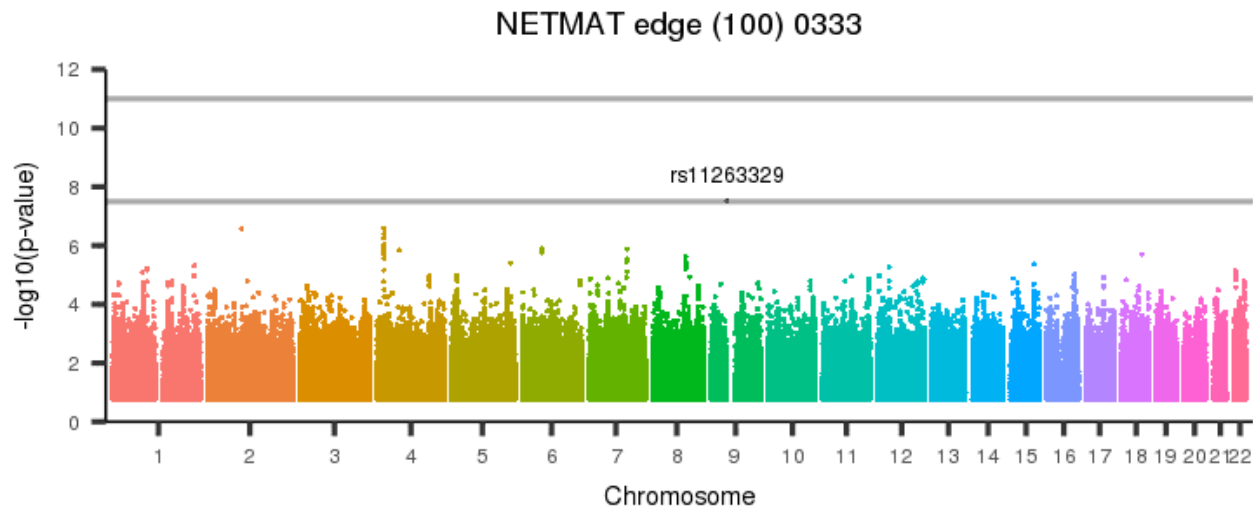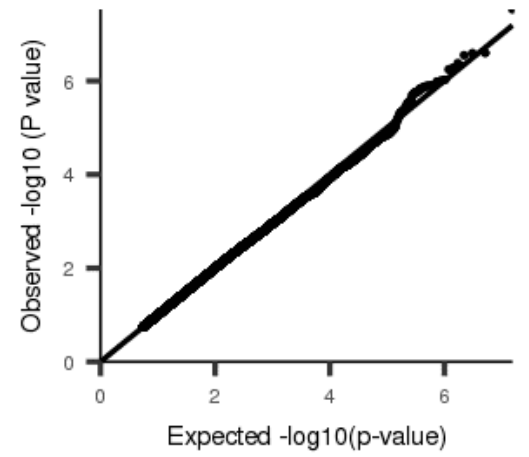

[back to list of plots](#)

Figure 1490: NETMAT edge (100) 0334

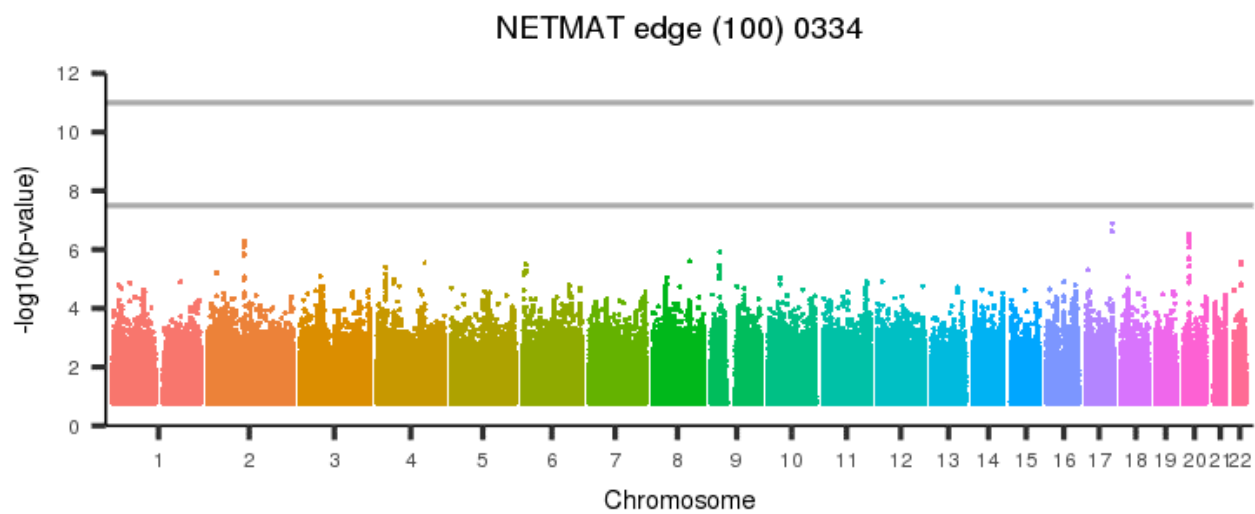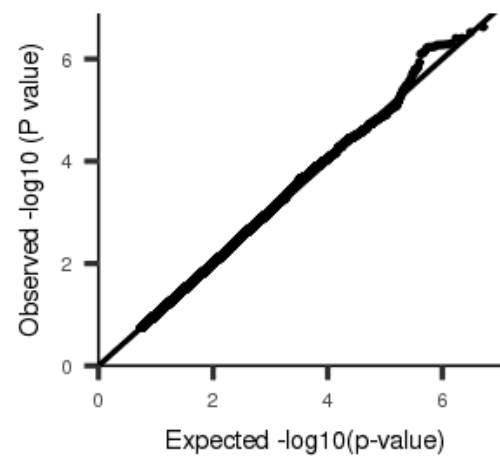

[back to list of plots](#)

Figure 1491: NETMAT edge (100) 0335

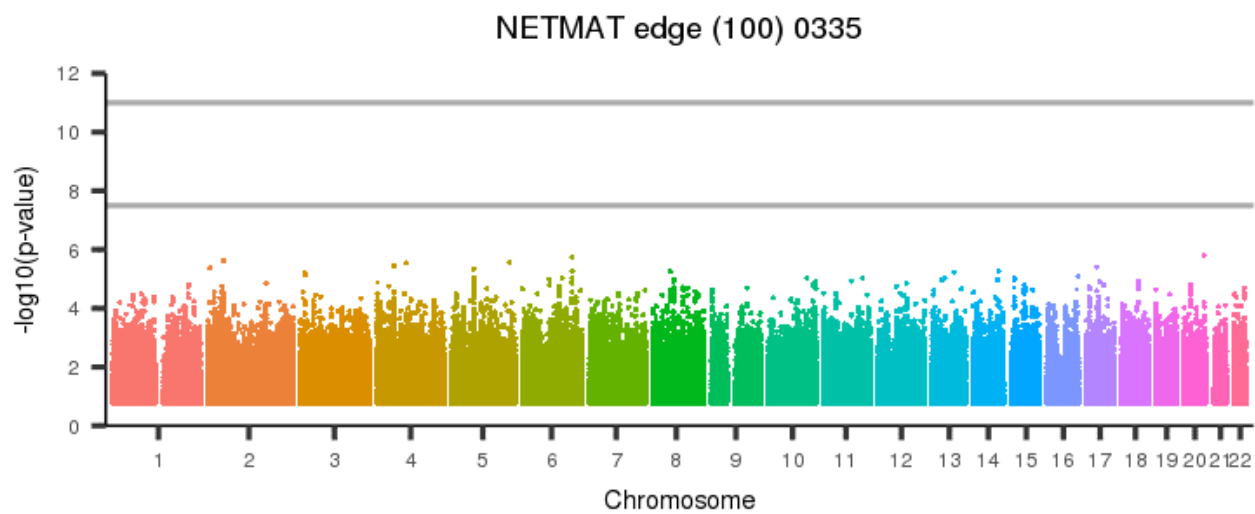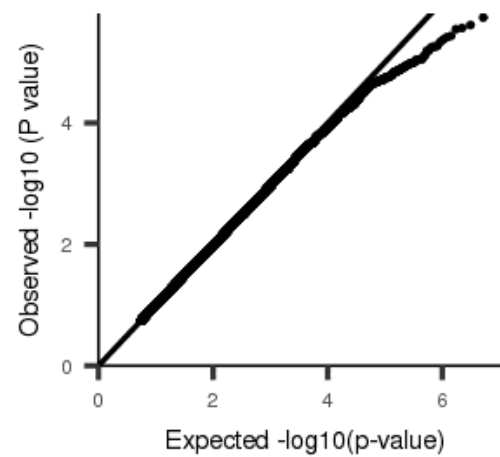

[back to list of plots](#)

Figure 1492: NETMAT edge (100) 0336

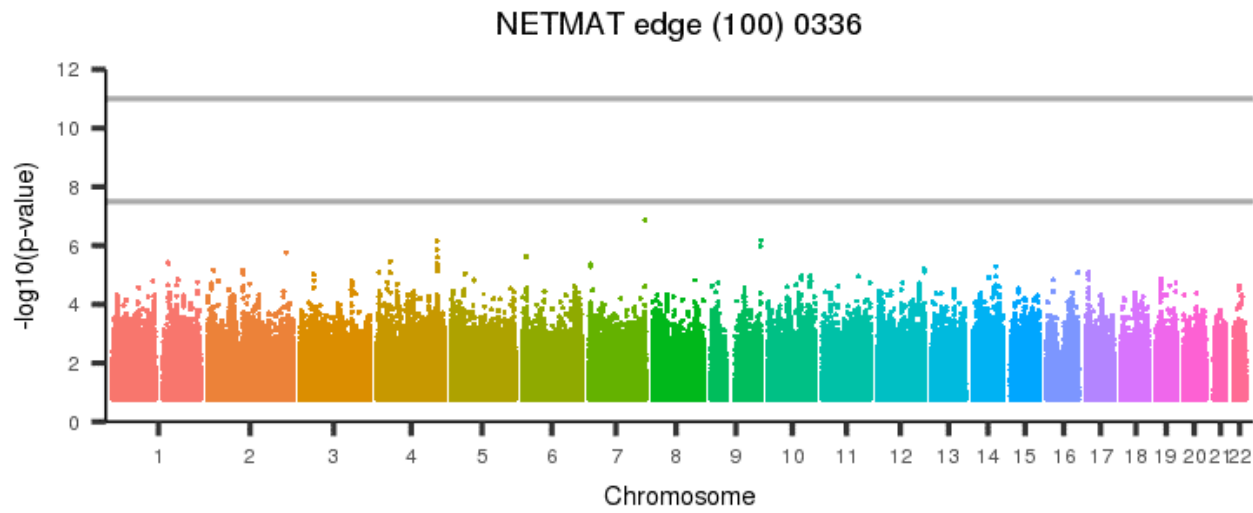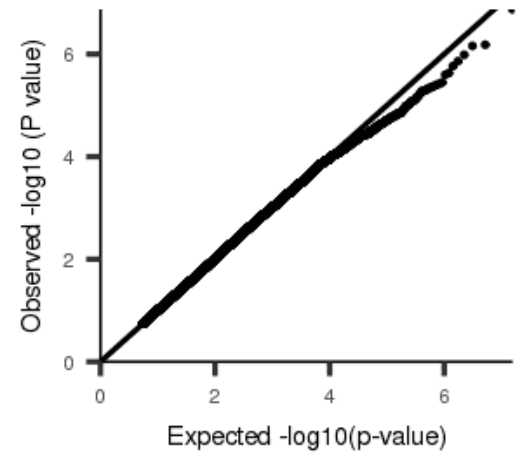

[back to list of plots](#)

Figure 1493: NETMAT edge (100) 0337

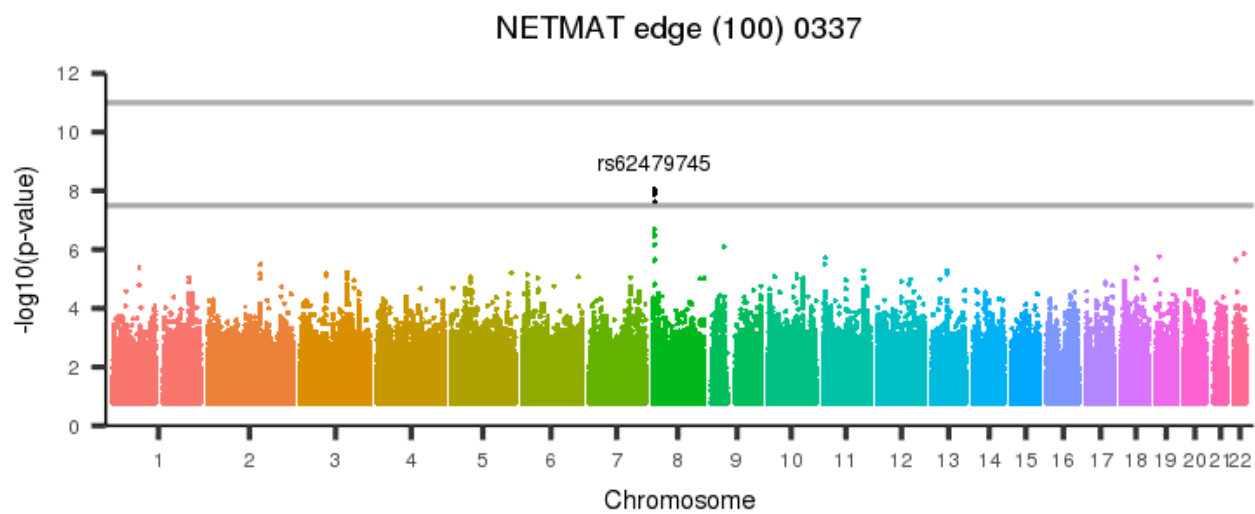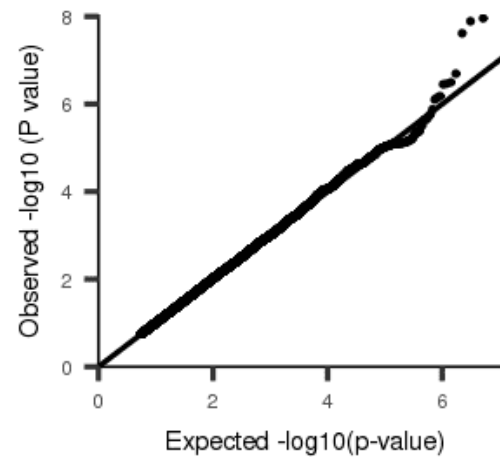

[back to list of plots](#)



Figure 1494: NETMAT edge (100) 0338

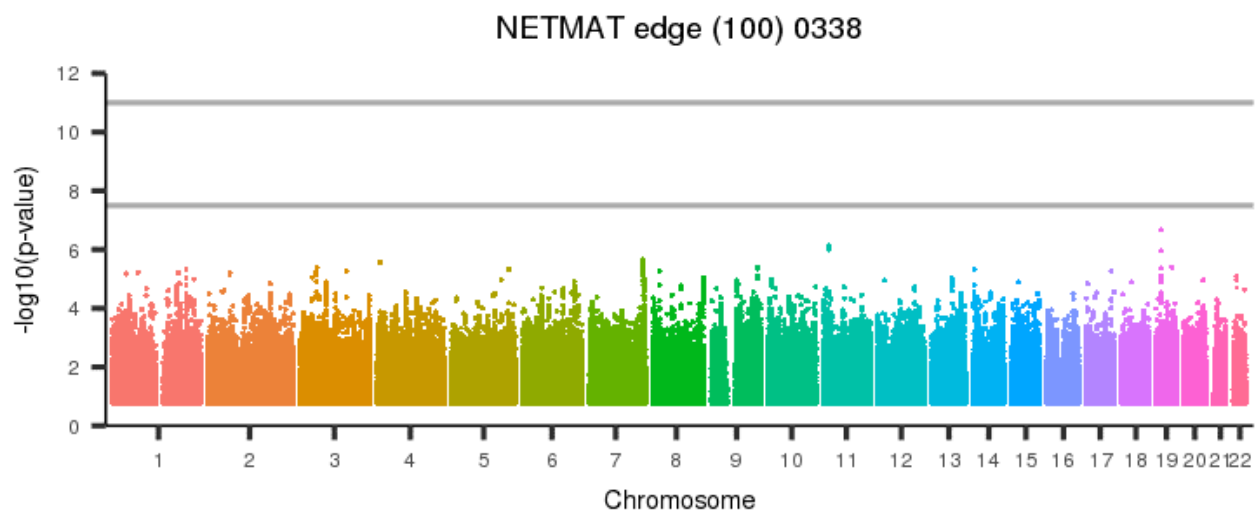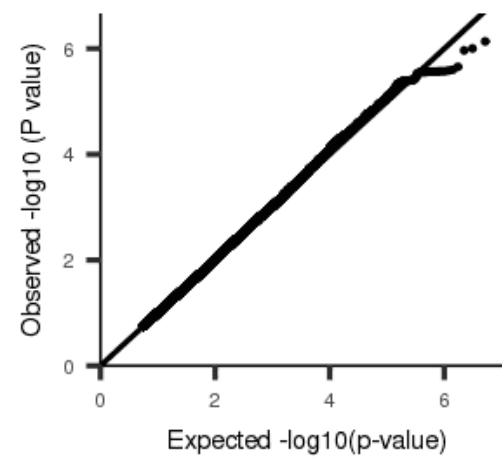

[back to list of plots](#)

Figure 1495: NETMAT edge (100) 0339

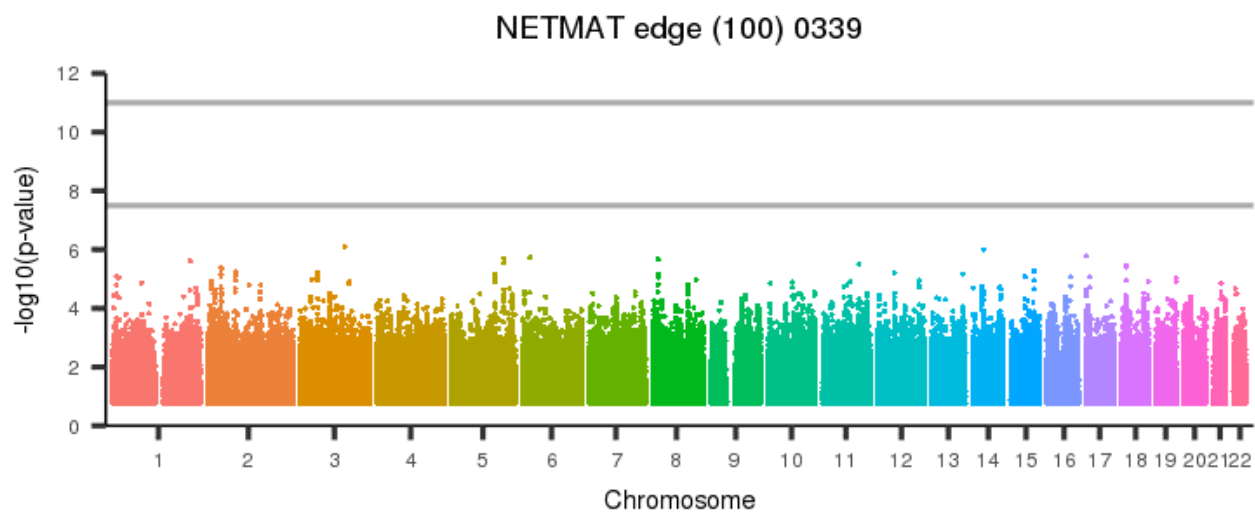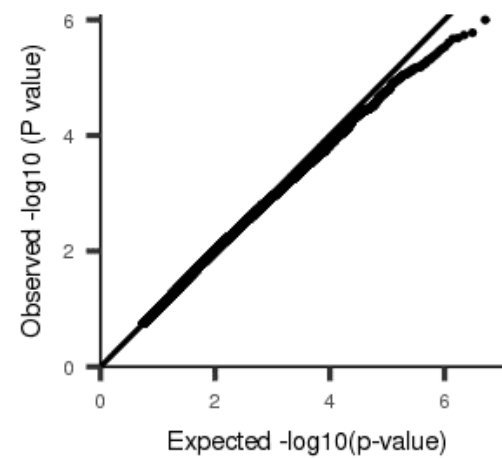

[back to list of plots](#)

Figure 1496: NETMAT edge (100) 0340

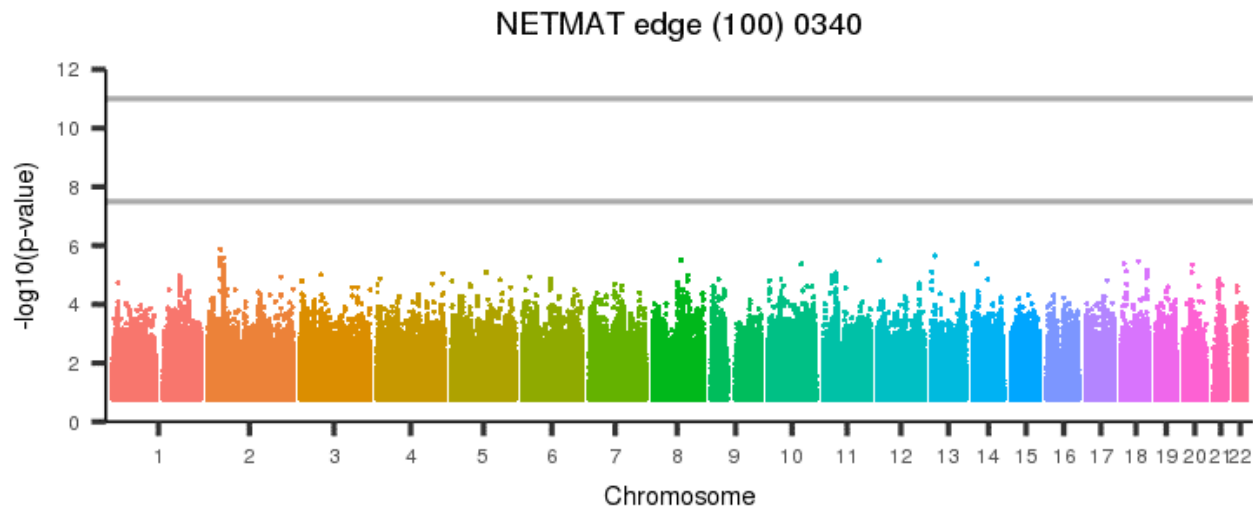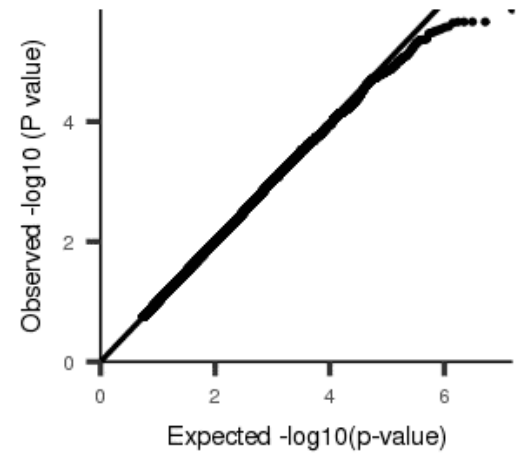

[back to list of plots](#)

Figure 1497: NETMAT edge (100) 0341

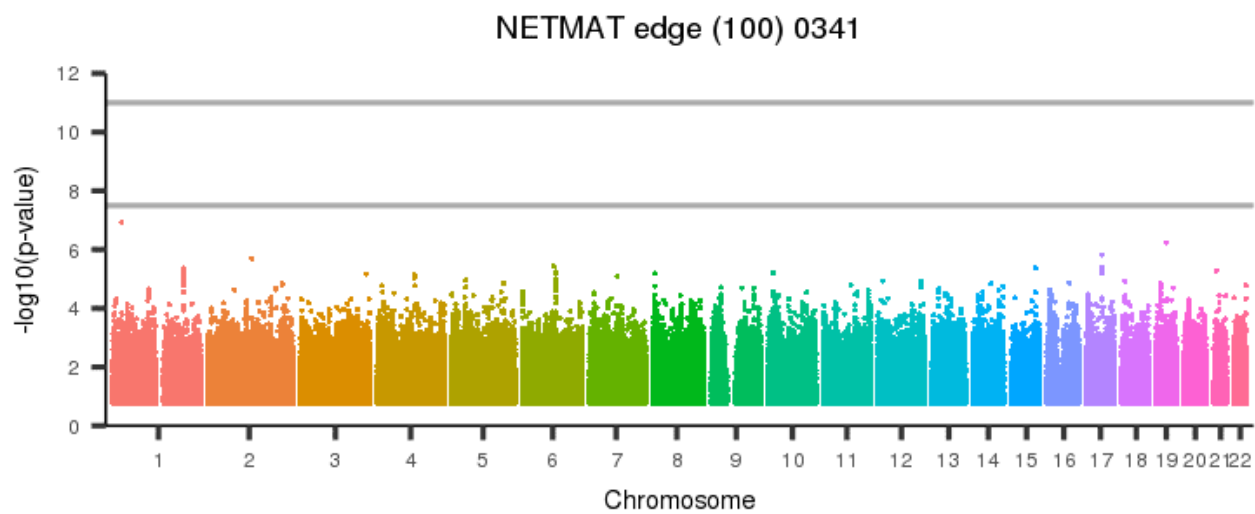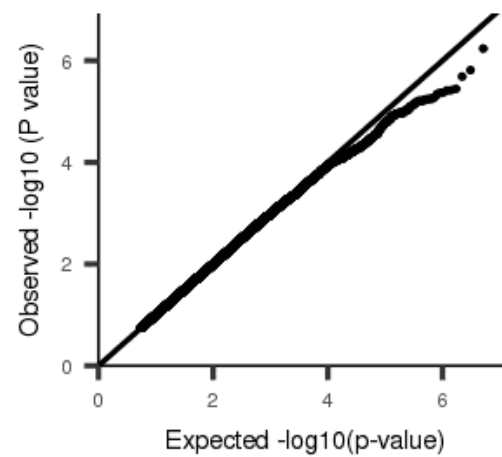

[back to list of plots](#)

Figure 1498: NETMAT edge (100) 0342

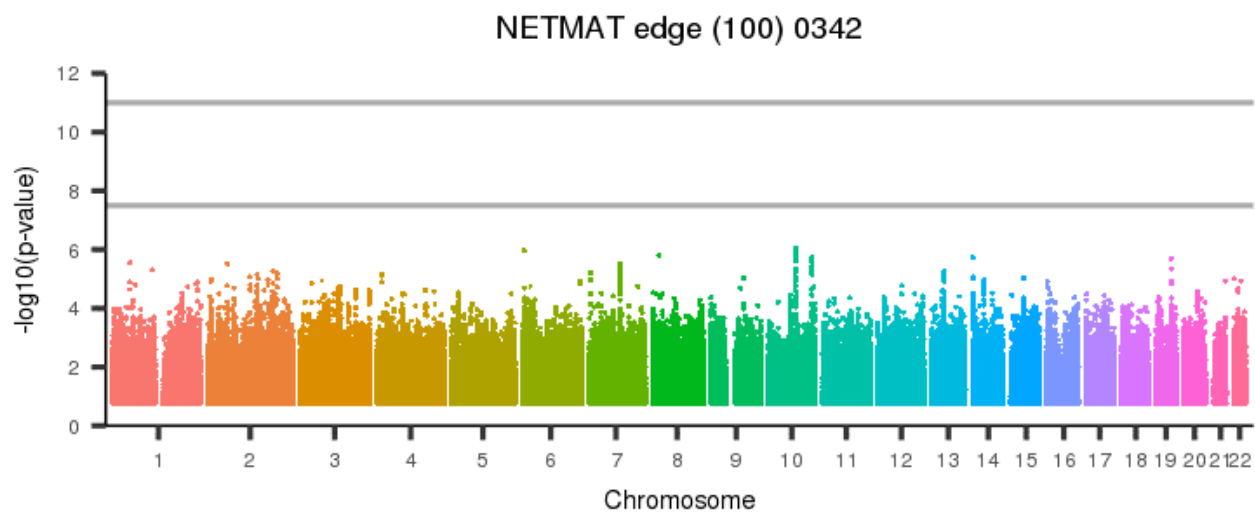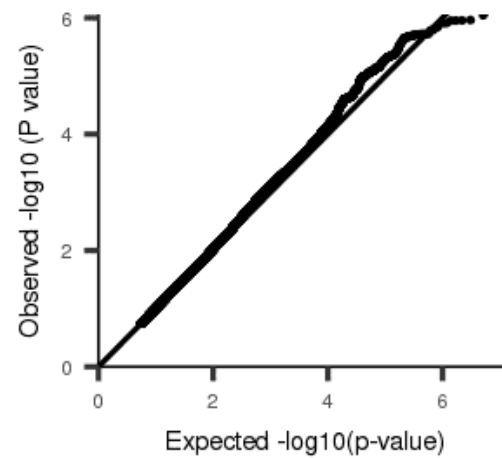

[back to list of plots](#)

Figure 1499: NETMAT edge (100) 0343

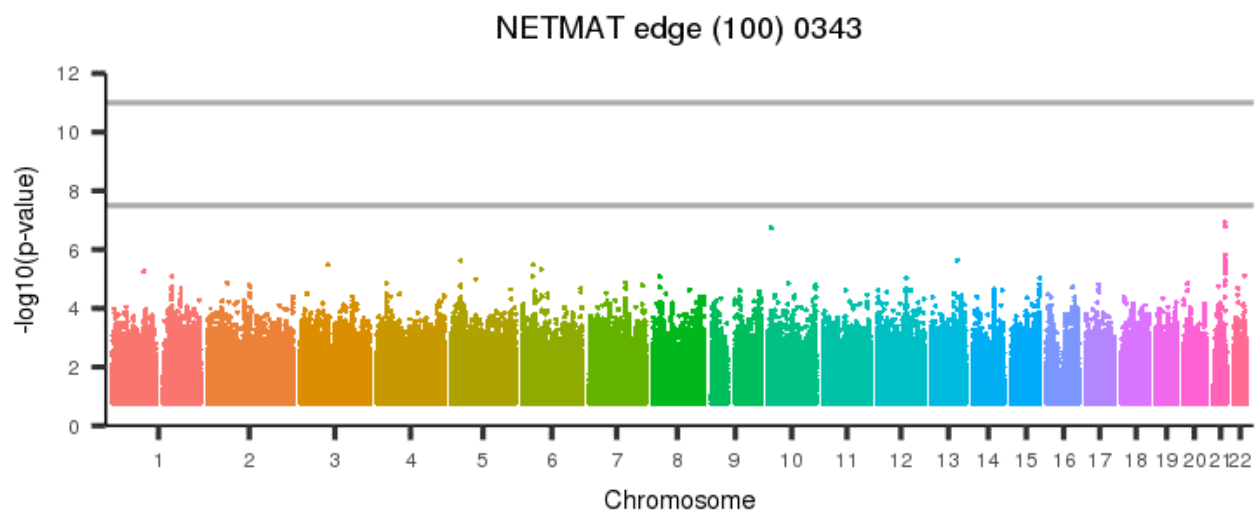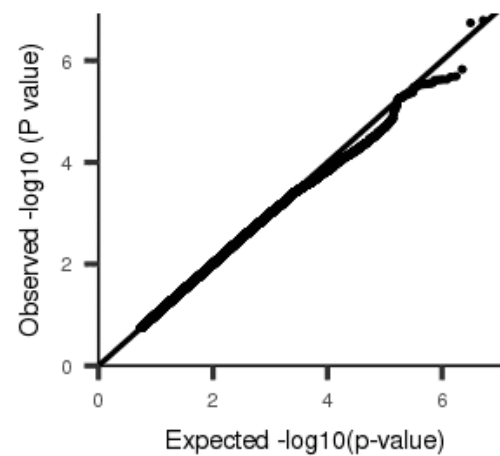

[back to list of plots](#)

Figure 1500: NETMAT edge (100) 0344

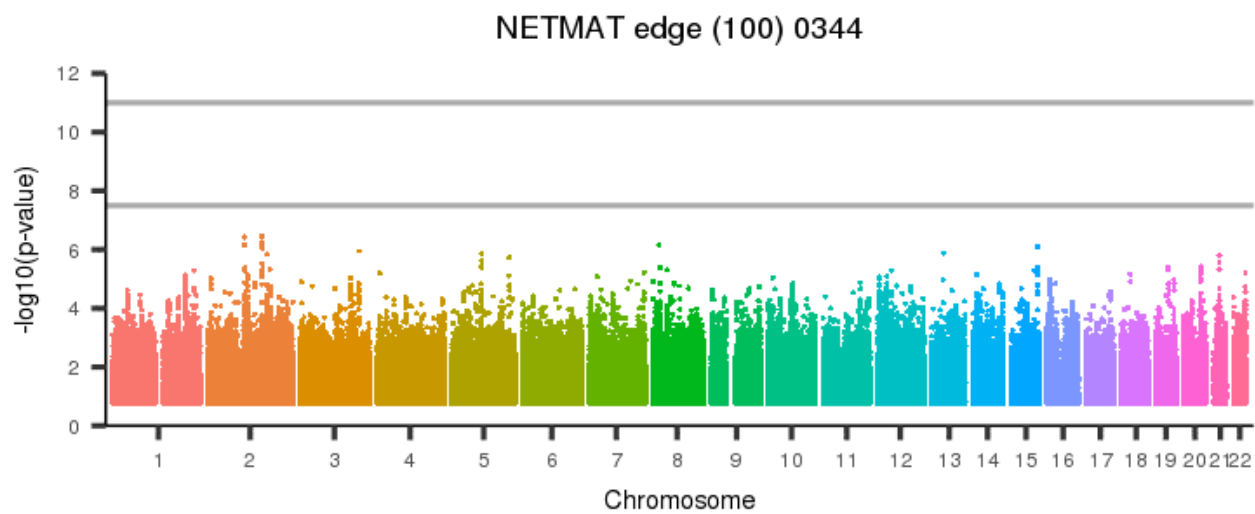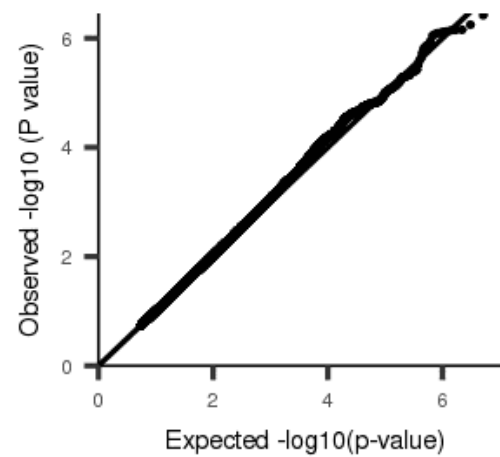

[back to list of plots](#)

Figure 1501: NETMAT edge (100) 0345

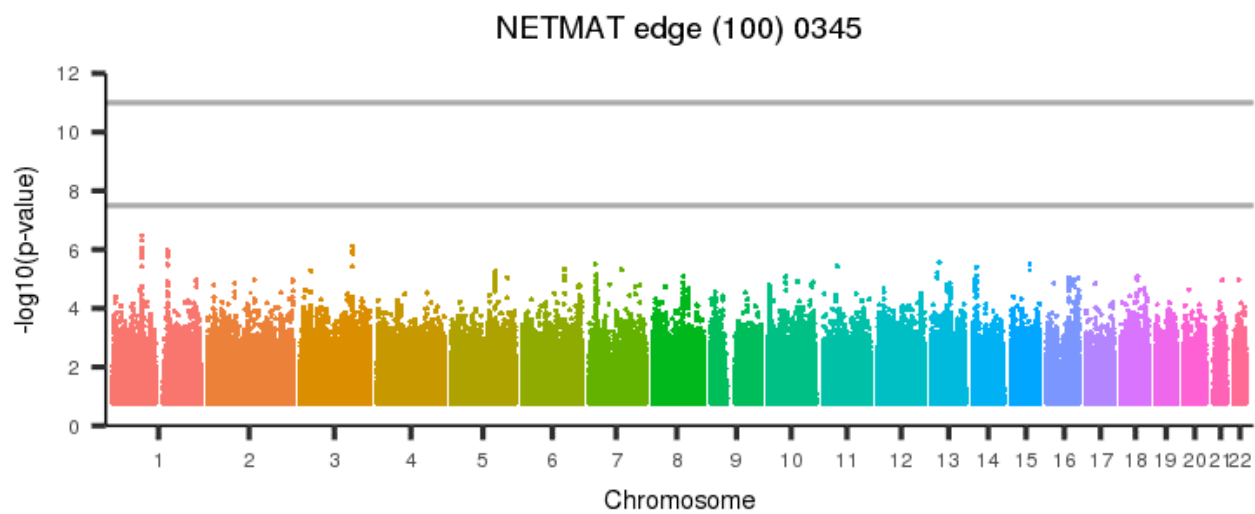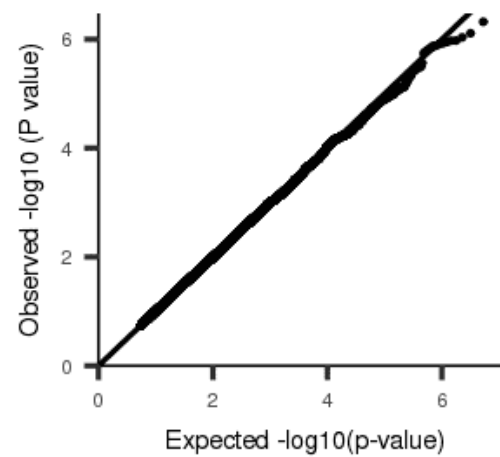

[back to list of plots](#)



Figure 1502: NETMAT edge (100) 0346

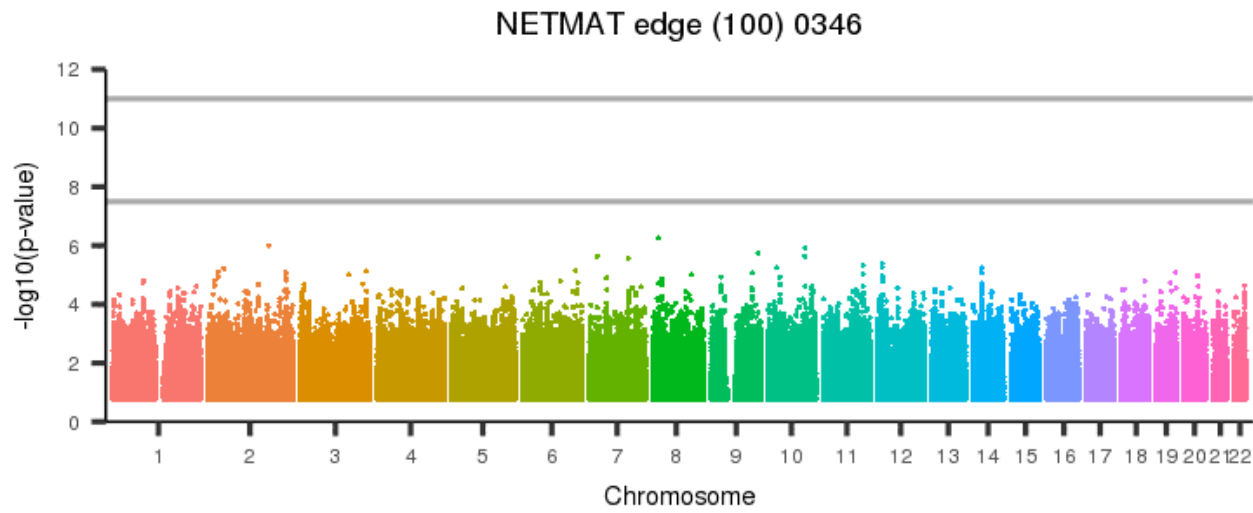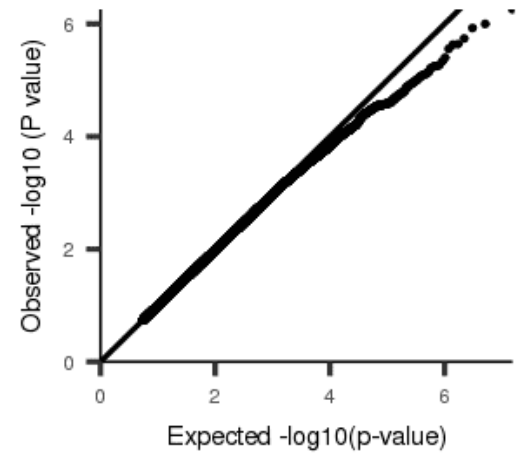

[back to list of plots](#)

Figure 1503: NETMAT edge (100) 0347

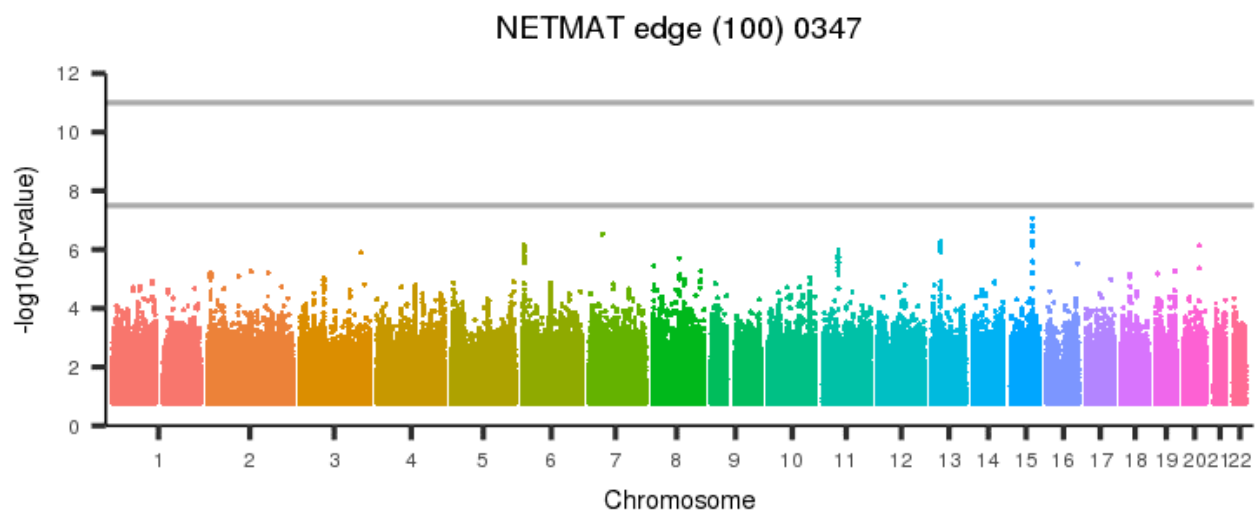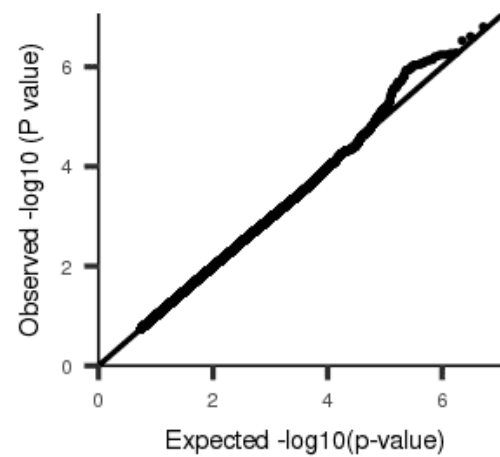

[back to list of plots](#)

Figure 1504: NETMAT edge (100) 0348

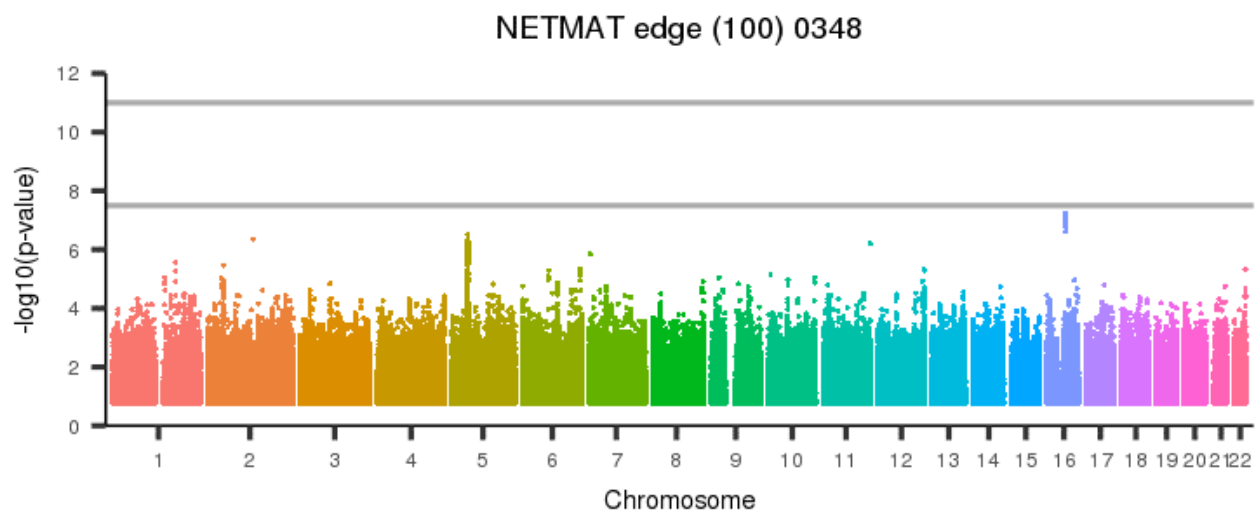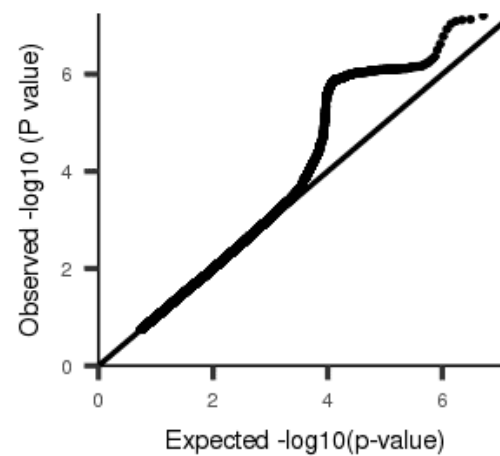

[back to list of plots](#)

Figure 1505: NETMAT edge (100) 0349

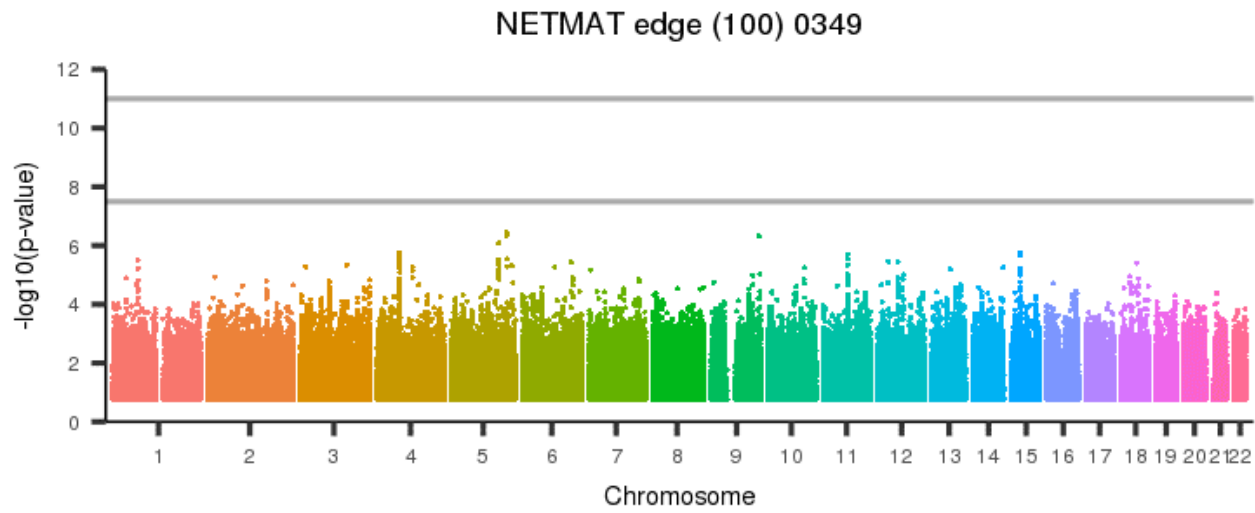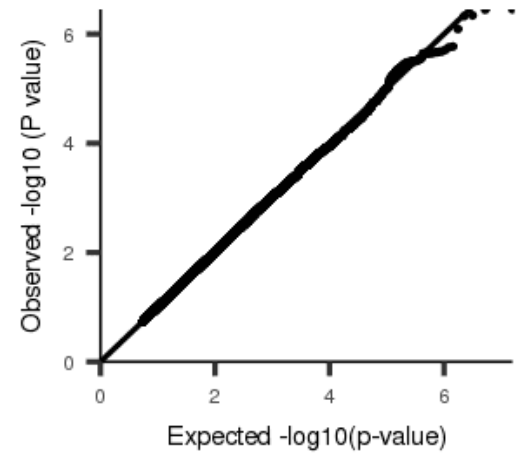

[back to list of plots](#)

Figure 1506: NETMAT edge (100) 0350

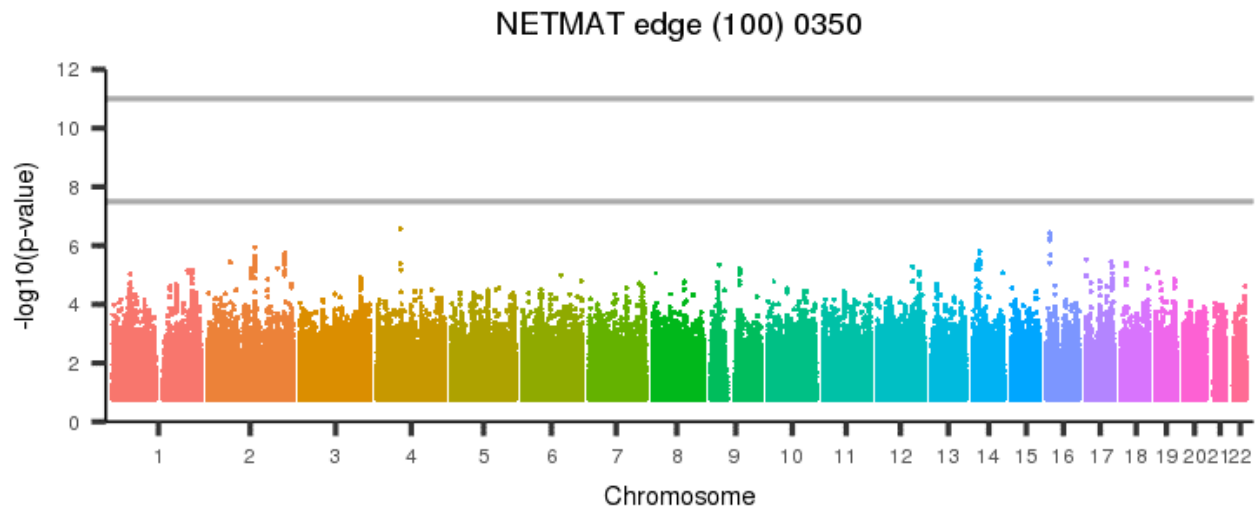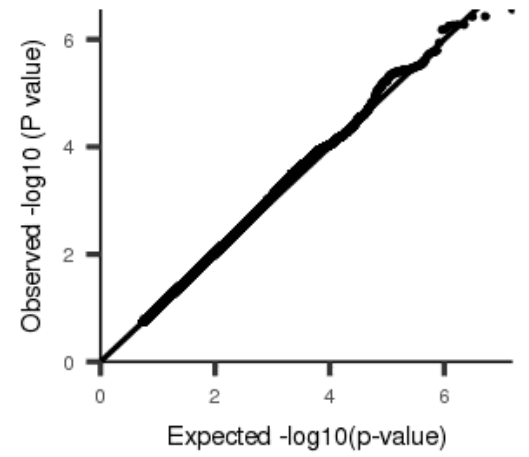

[back to list of plots](#)

Figure 1507: NETMAT edge (100) 0351

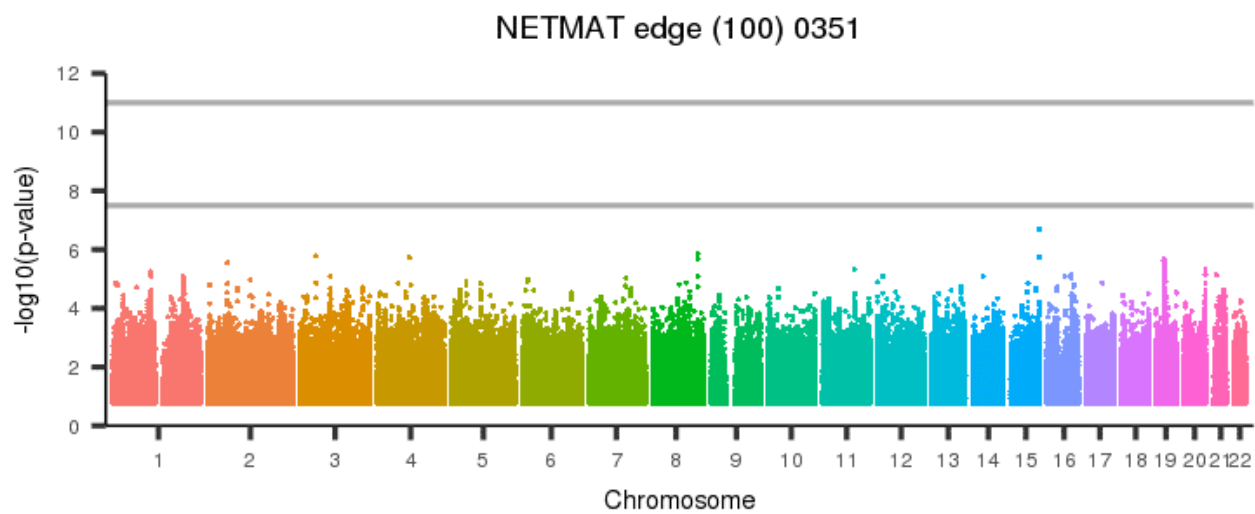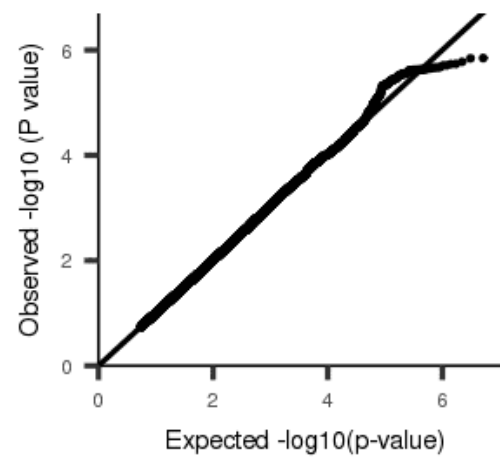

[back to list of plots](#)

Figure 1508: NETMAT edge (100) 0352

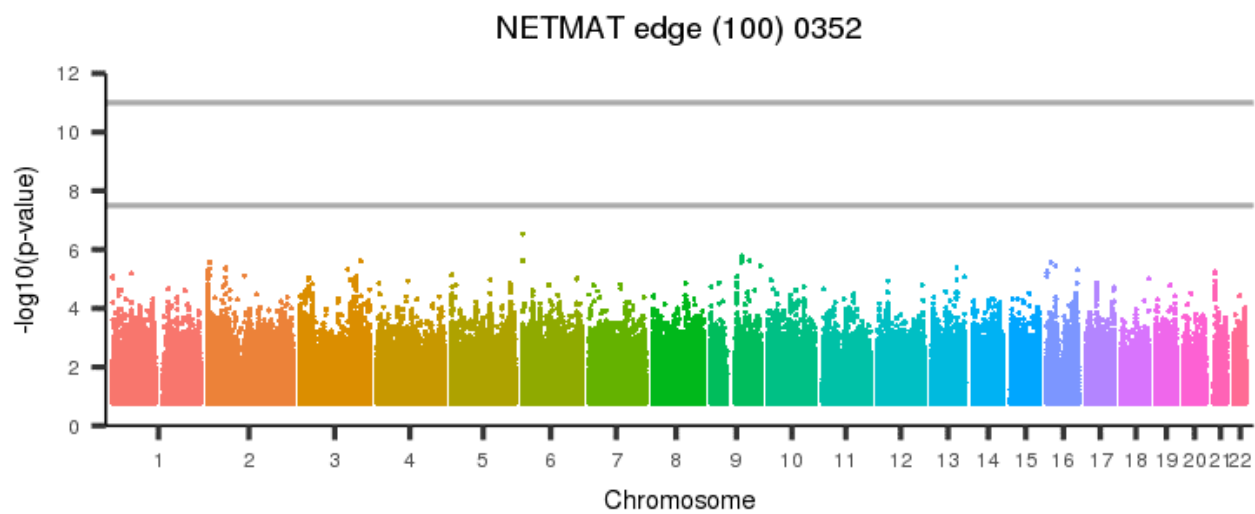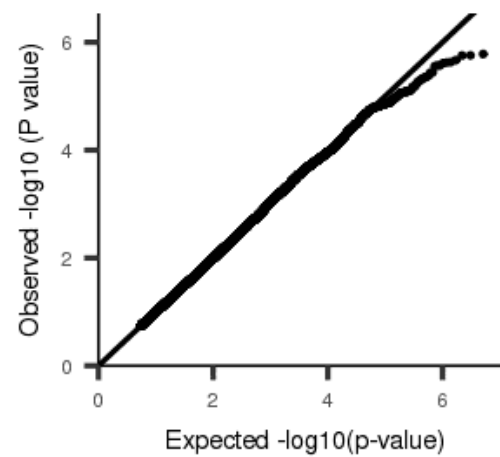

[back to list of plots](#)

Figure 1509: NETMAT edge (100) 0353

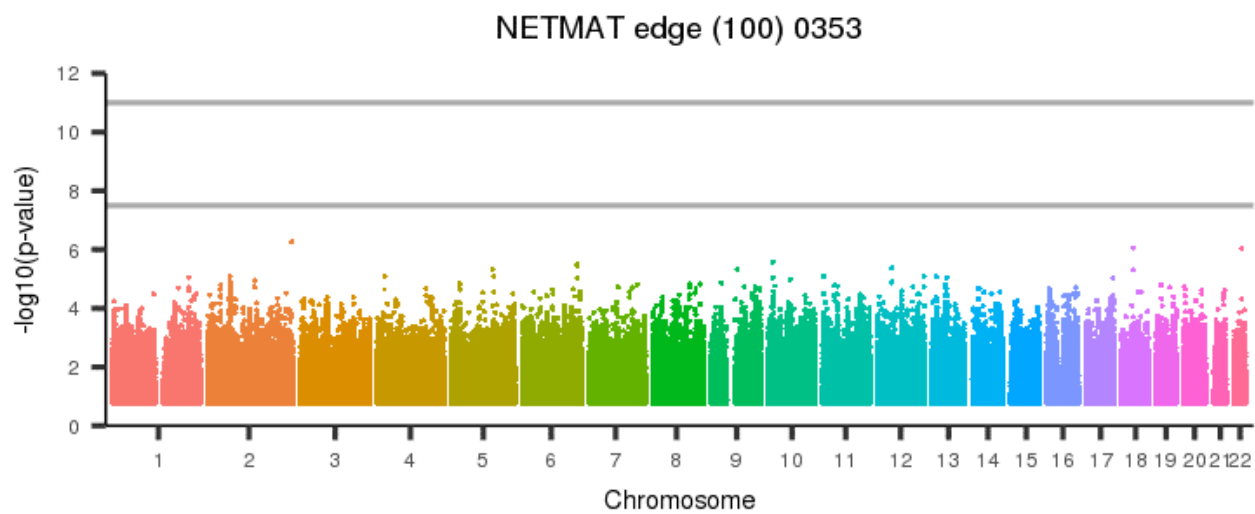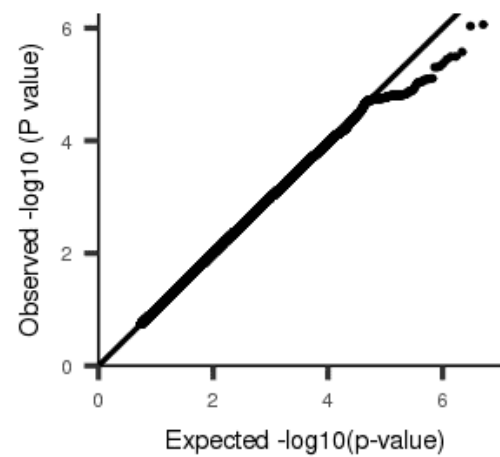

[back to list of plots](#)



Figure 1510: NETMAT edge (100) 0354

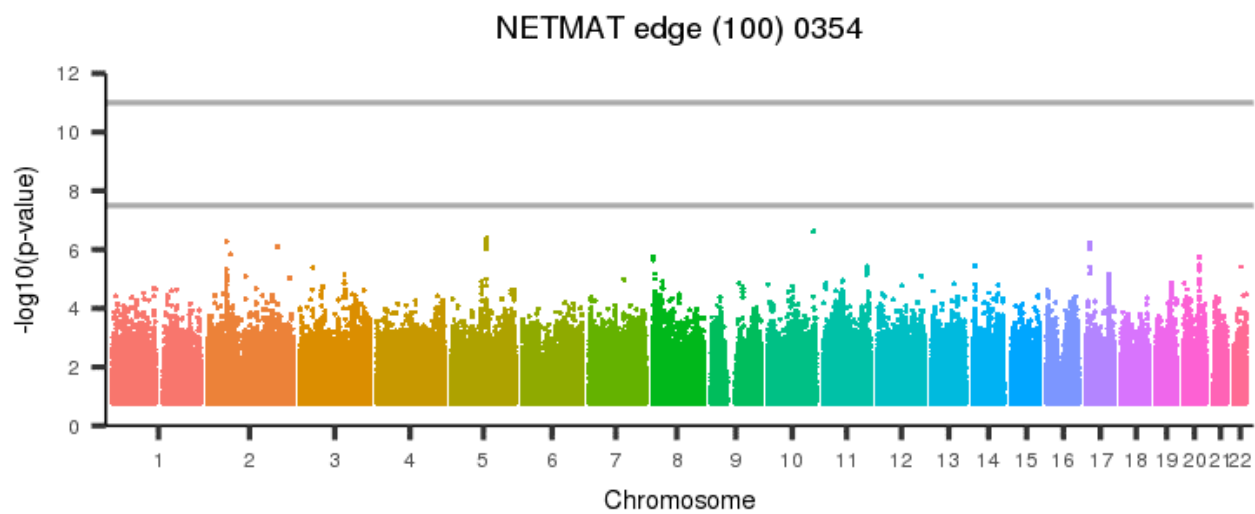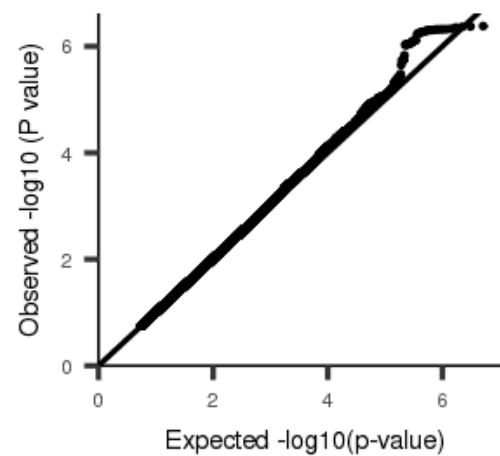

[back to list of plots](#)

Figure 1511: NETMAT edge (100) 0355

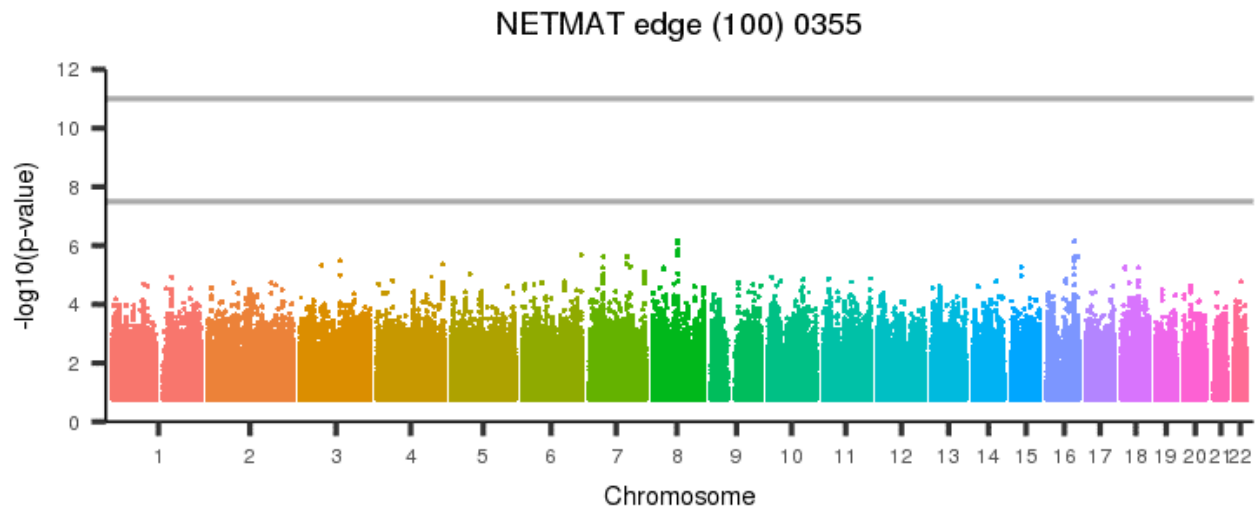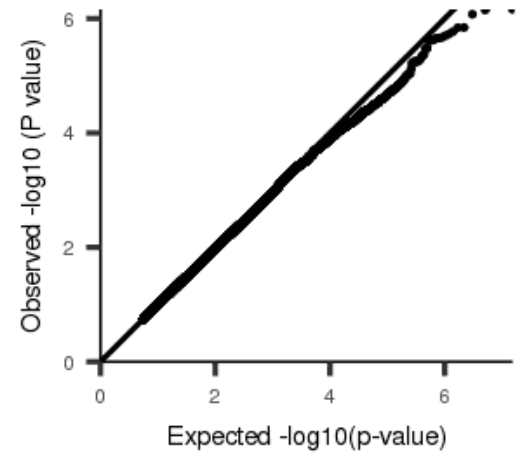

[back to list of plots](#)

Figure 1512: NETMAT edge (100) 0356

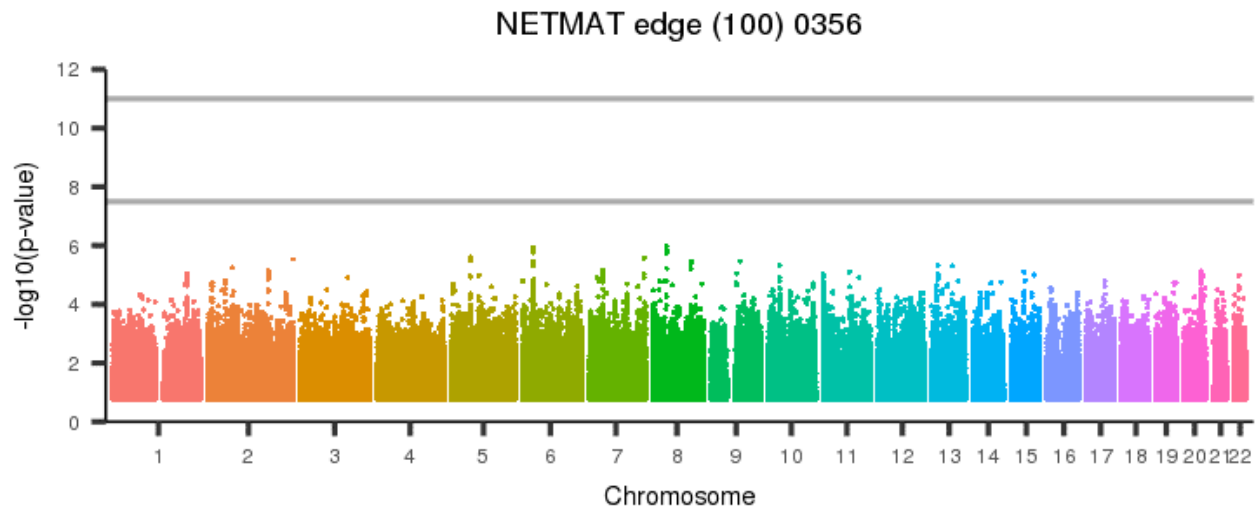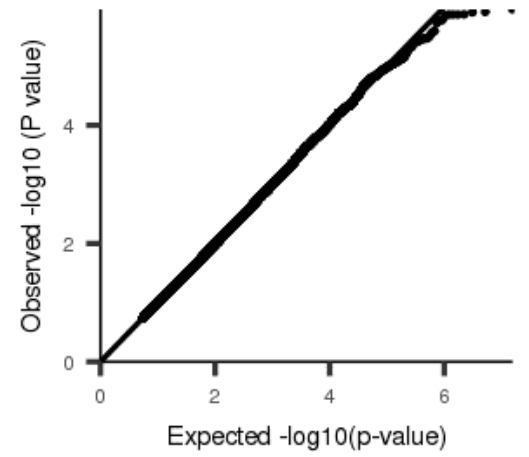

[back to list of plots](#)

Figure 1513: NETMAT edge (100) 0357

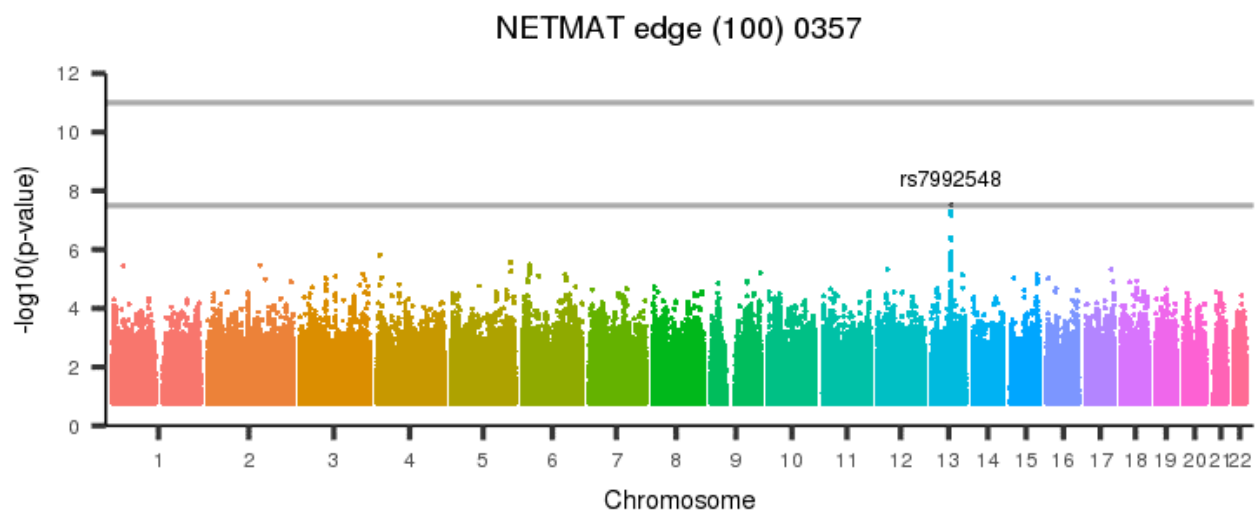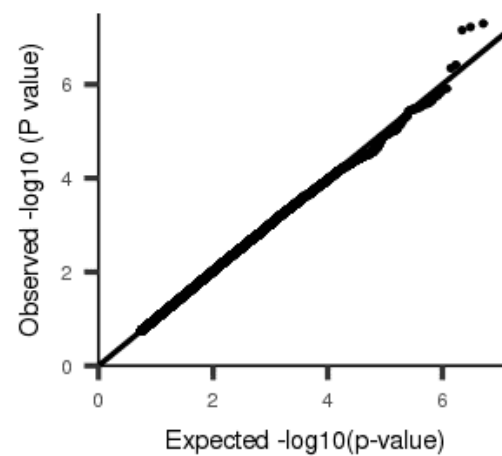

[back to list of plots](#)

Figure 1514: NETMAT edge (100) 0358

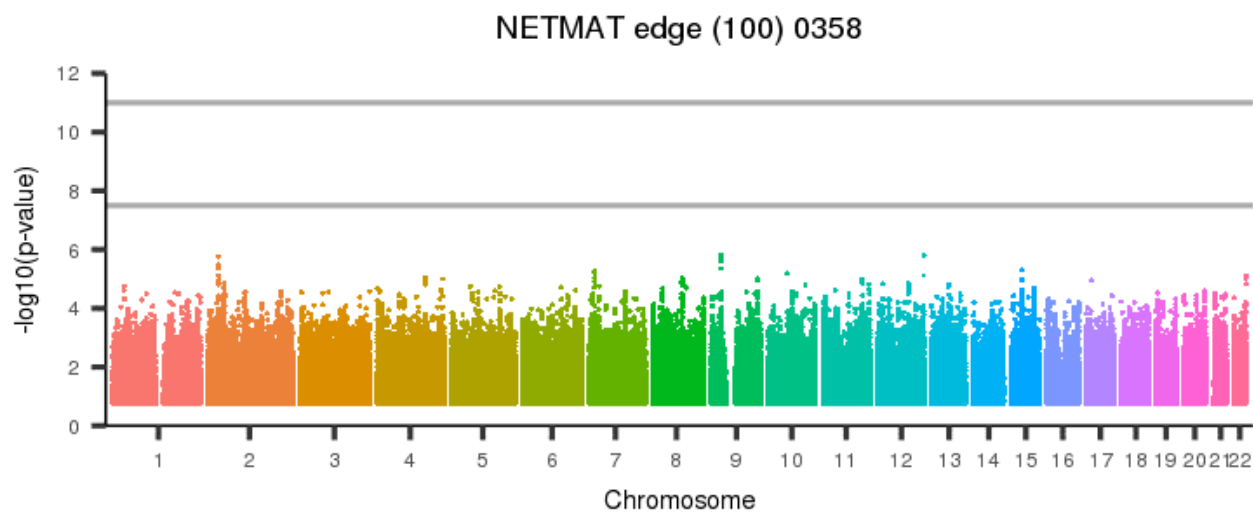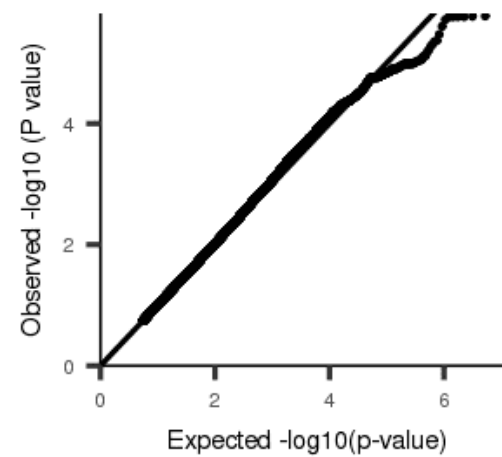

[back to list of plots](#)

Figure 1515: NETMAT edge (100) 0359

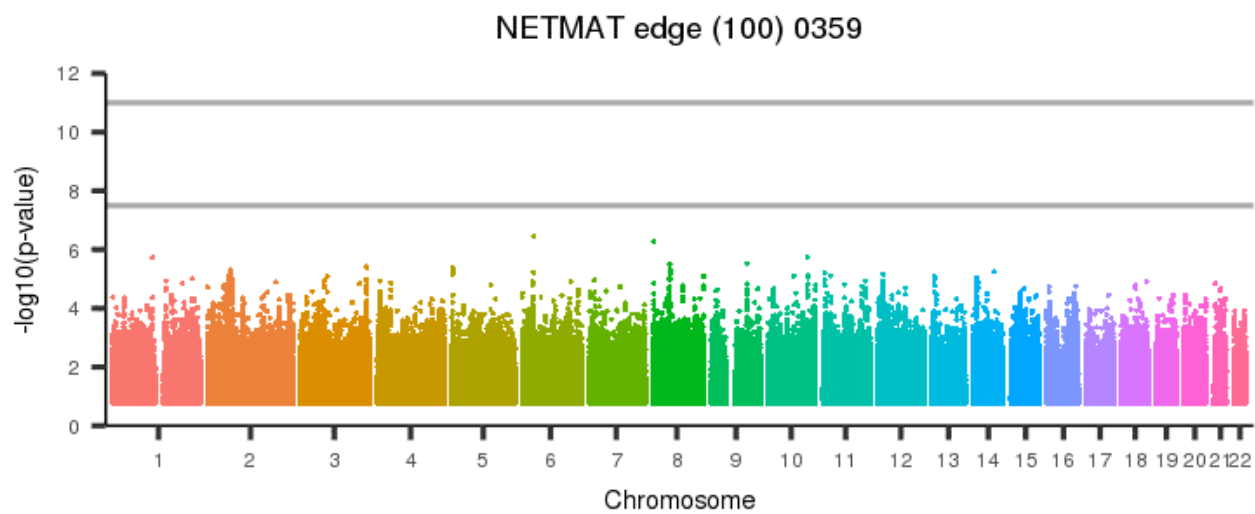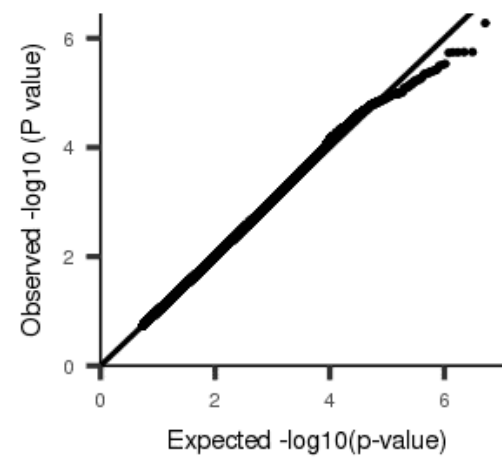

[back to list of plots](#)

Figure 1516: NETMAT edge (100) 0360

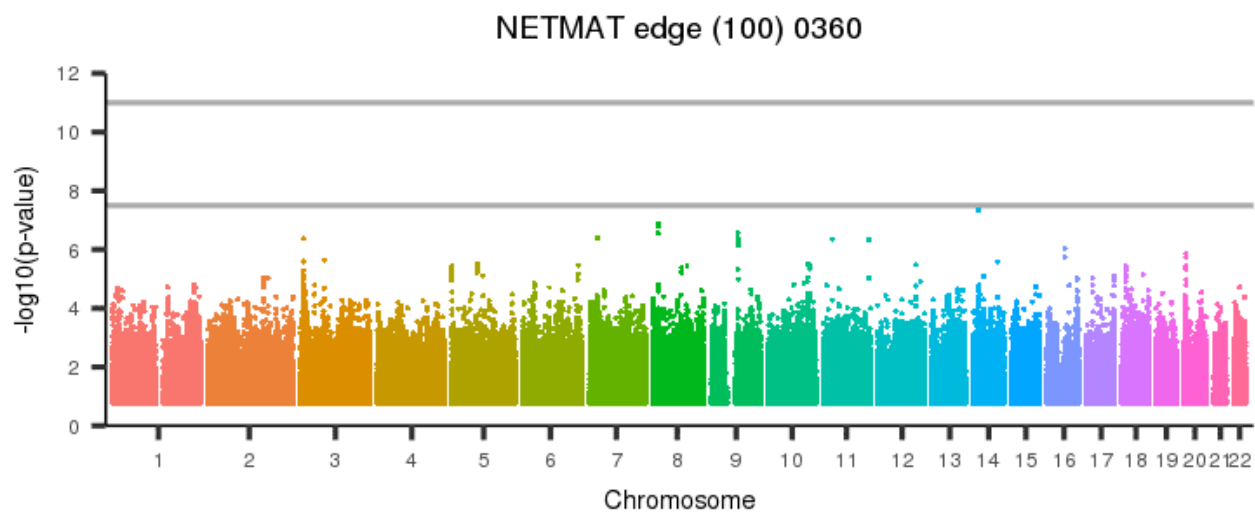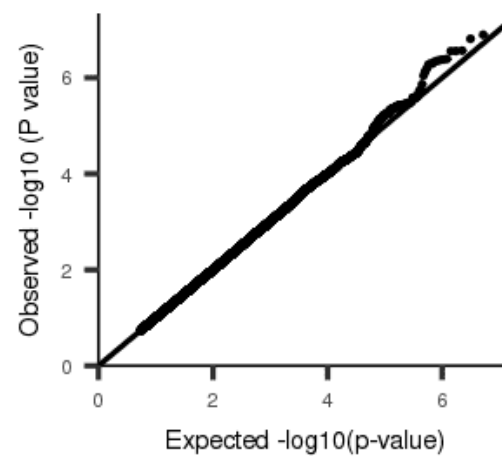

[back to list of plots](#)

Figure 1517: NETMAT edge (100) 0361

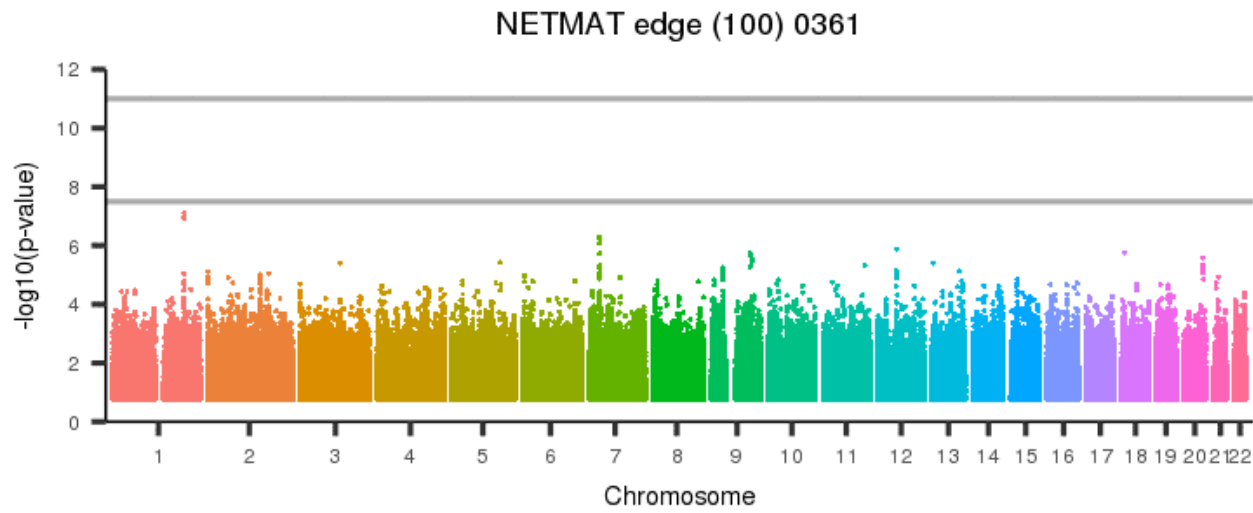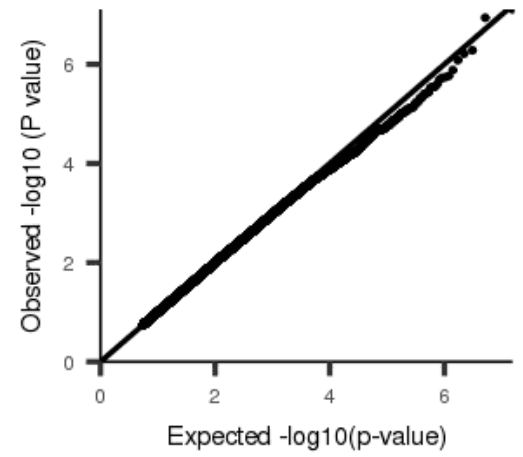

[back to list of plots](#)



Figure 1518: NETMAT edge (100) 0362

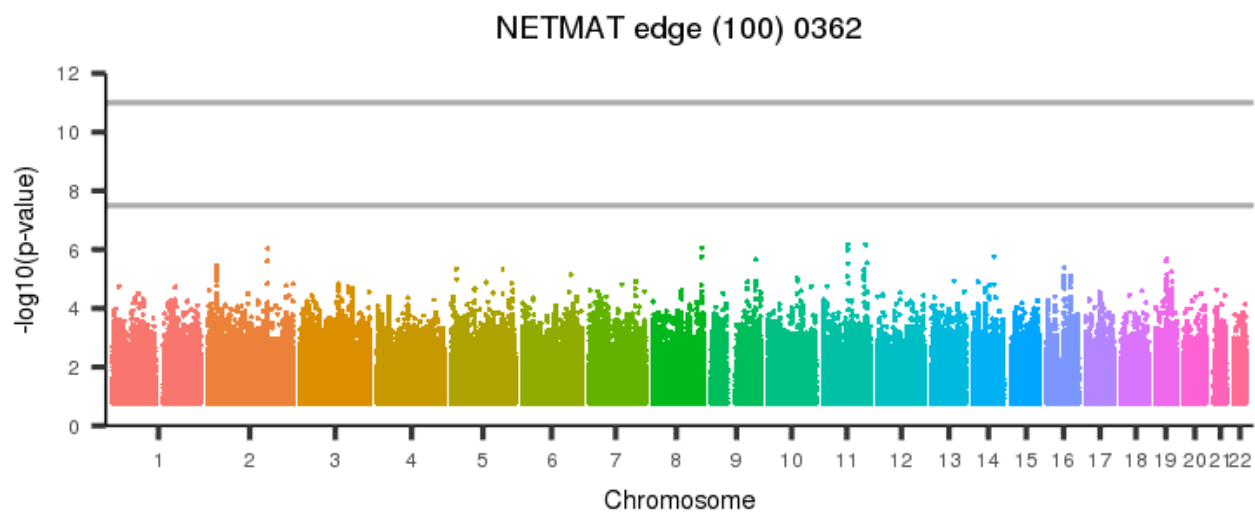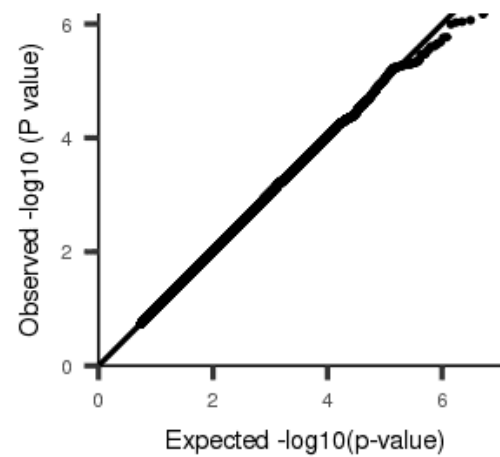

[back to list of plots](#)

Figure 1519: NETMAT edge (100) 0363

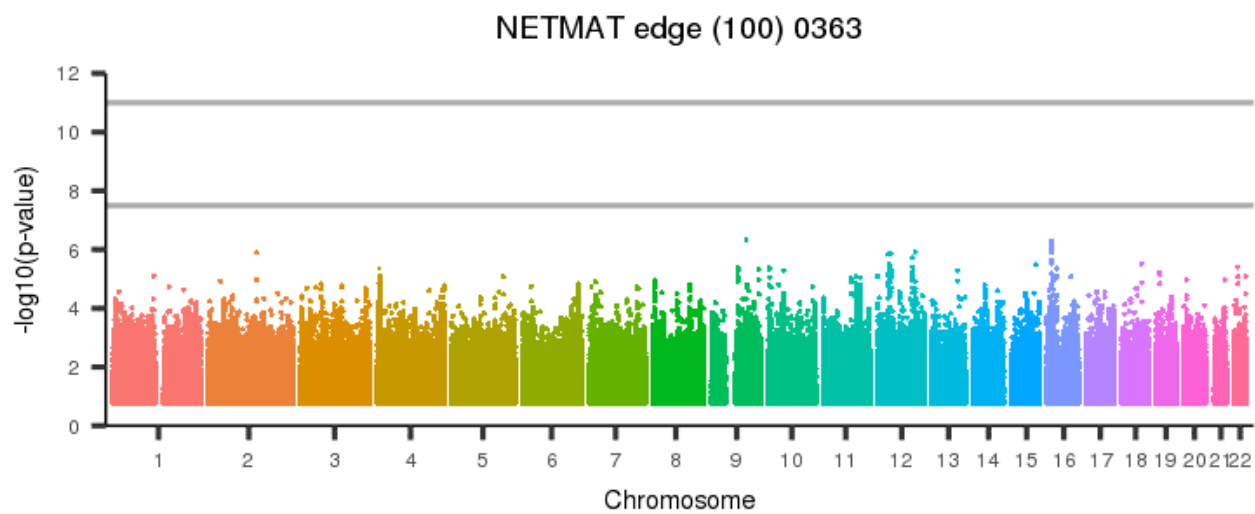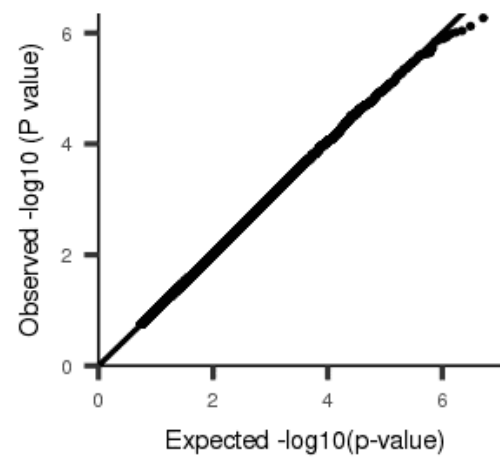

[back to list of plots](#)

Figure 1520: NETMAT edge (100) 0364

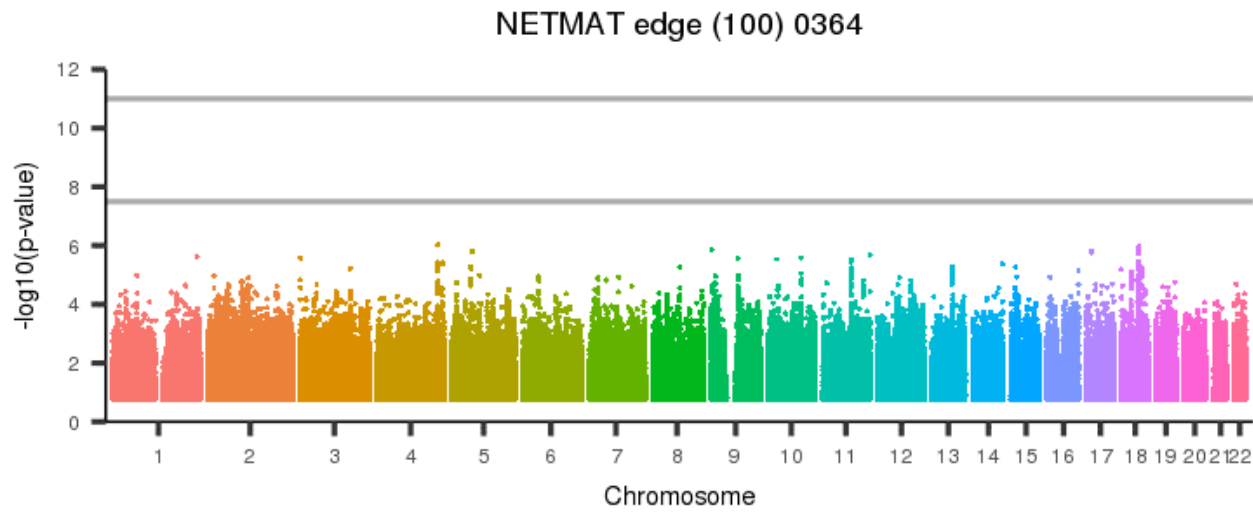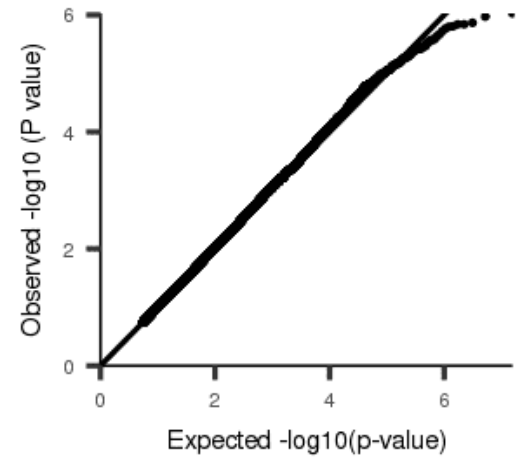

[back to list of plots](#)

Figure 1521: NETMAT edge (100) 0365

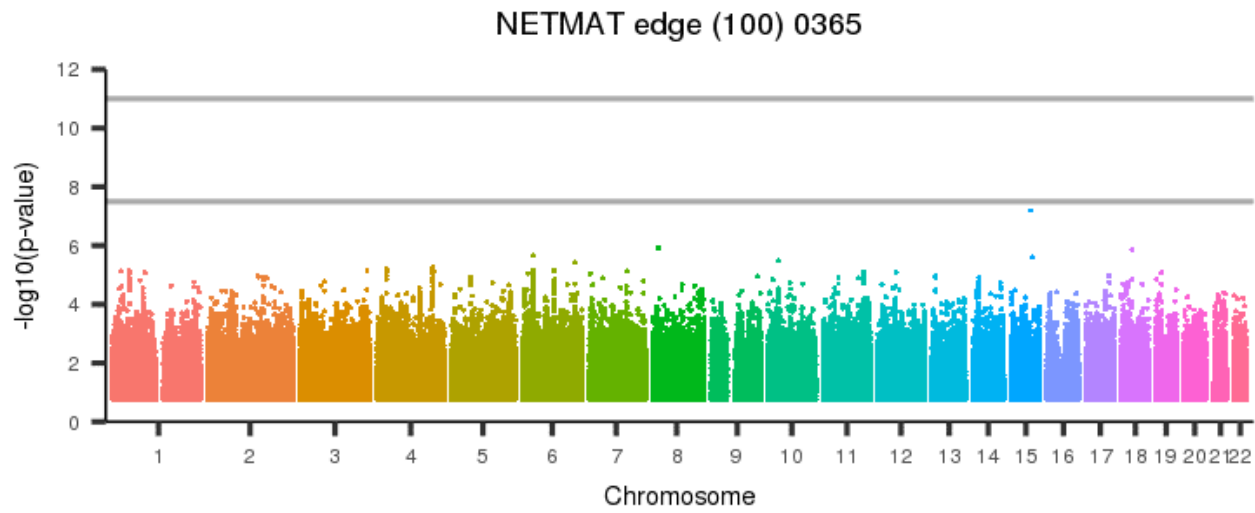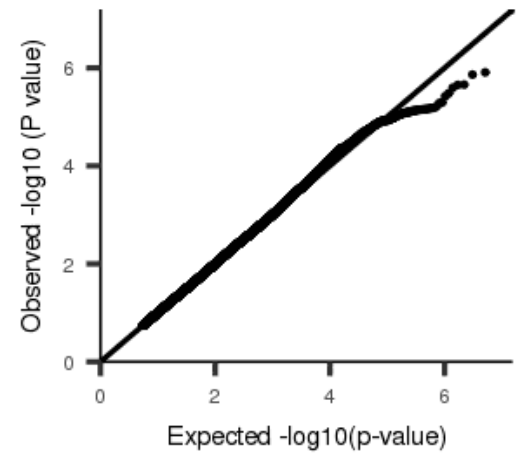

[back to list of plots](#)

Figure 1522: NETMAT edge (100) 0366

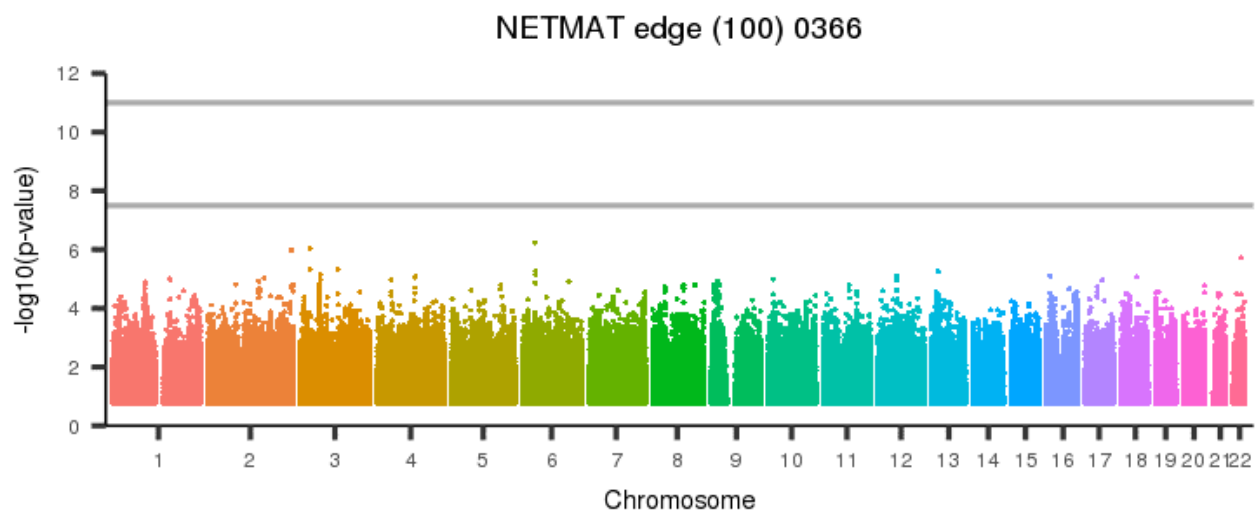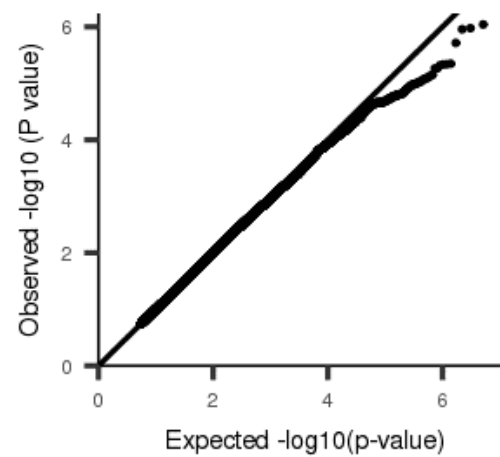

[back to list of plots](#)

Figure 1523: NETMAT edge (100) 0367

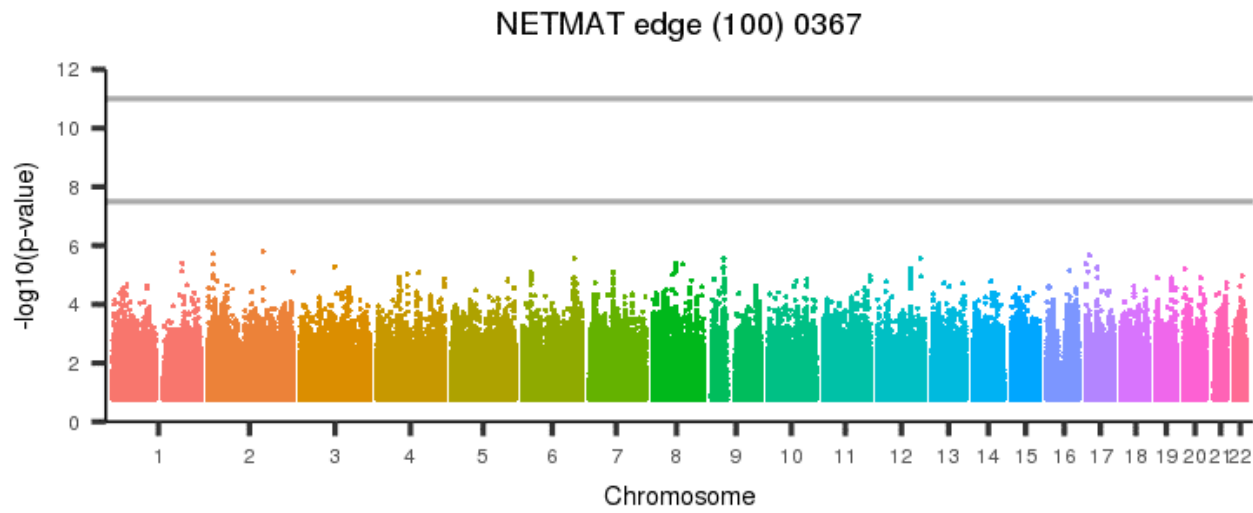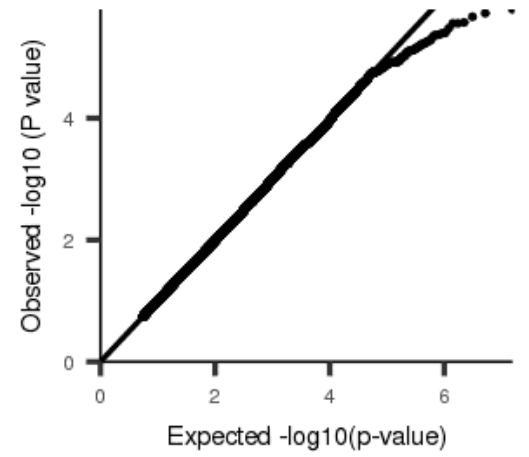

[back to list of plots](#)

Figure 1524: NETMAT edge (100) 0368

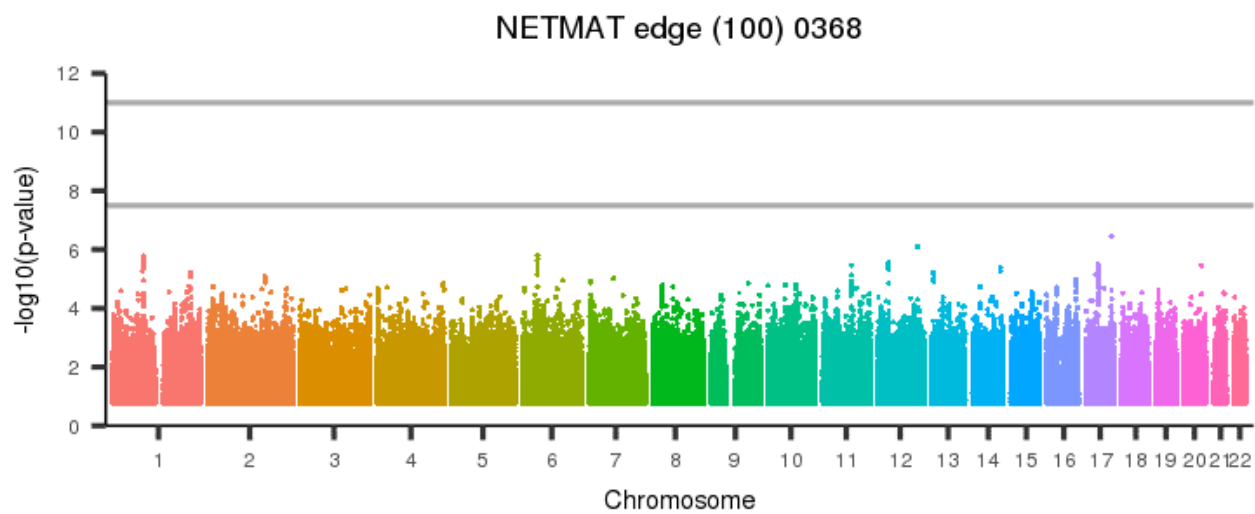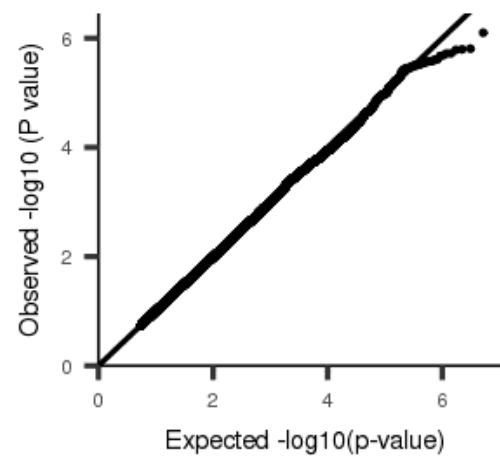

[back to list of plots](#)

Figure 1525: NETMAT edge (100) 0369

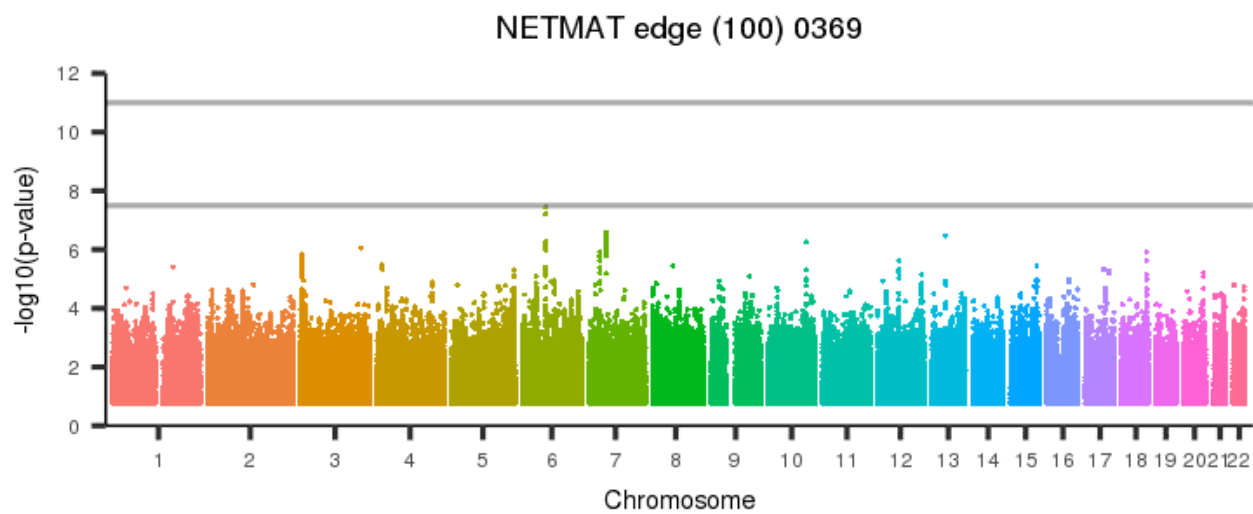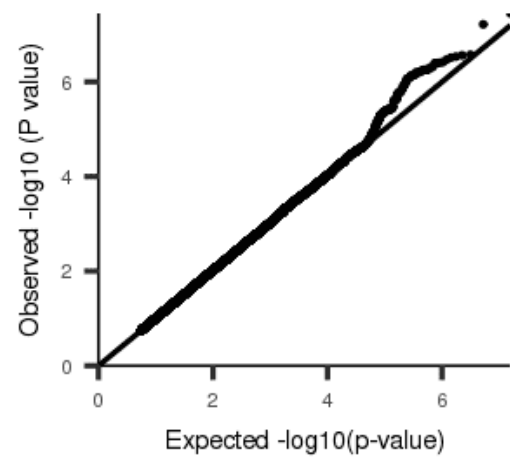

[back to list of plots](#)



Figure 1526: NETMAT edge (100) 0370

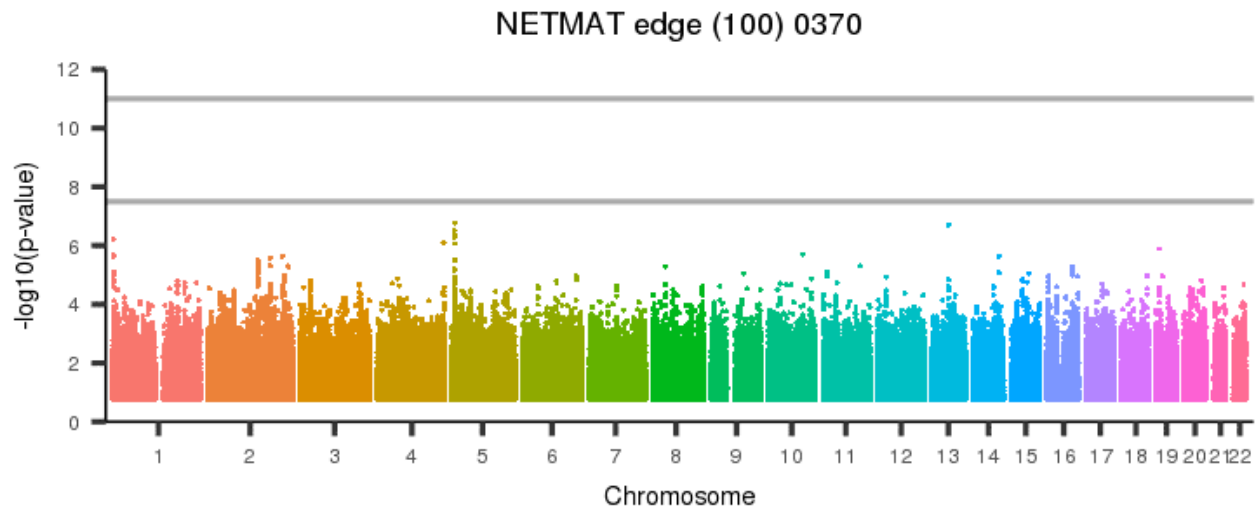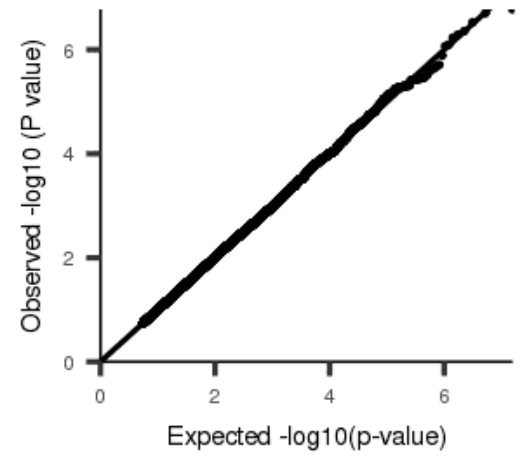

[back to list of plots](#)

Figure 1527: NETMAT edge (100) 0371

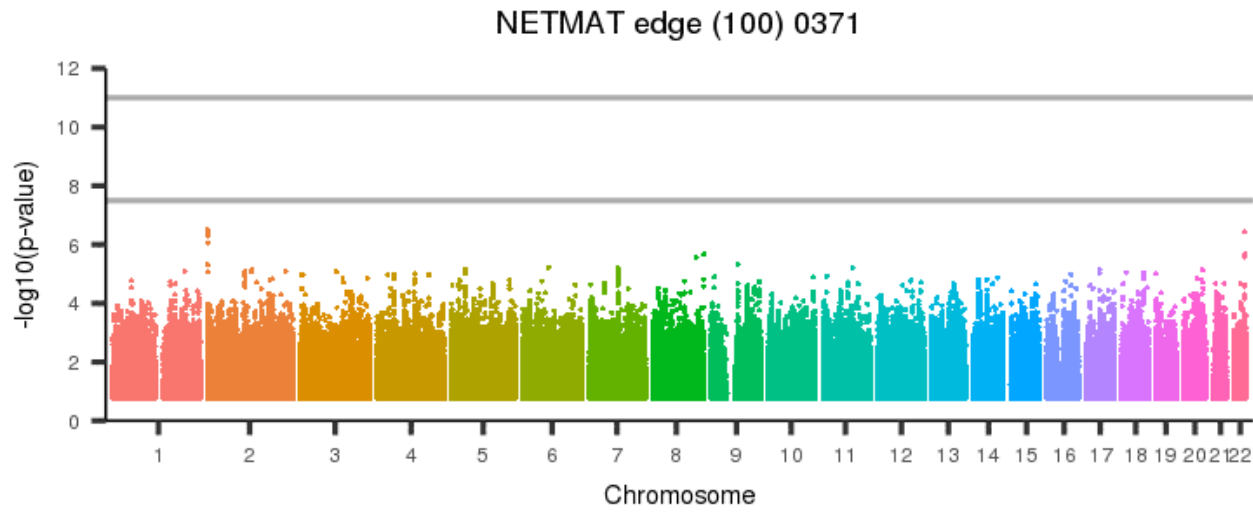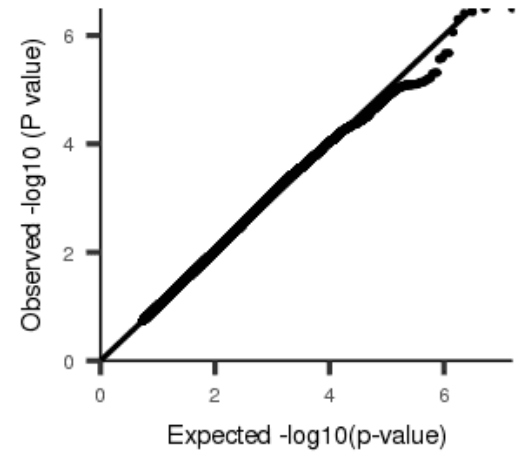

[back to list of plots](#)

Figure 1528: NETMAT edge (100) 0372

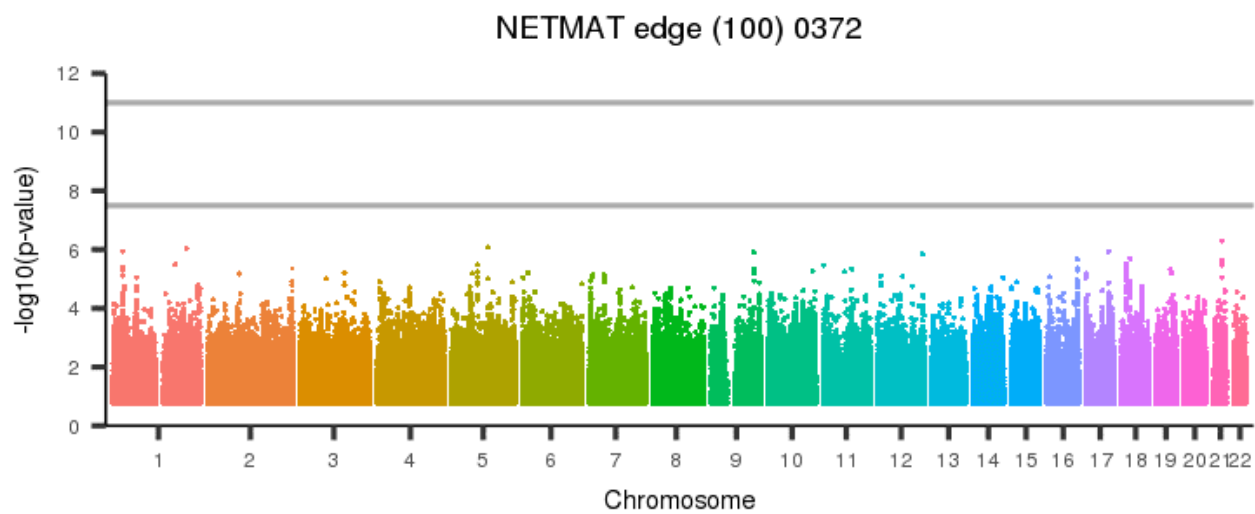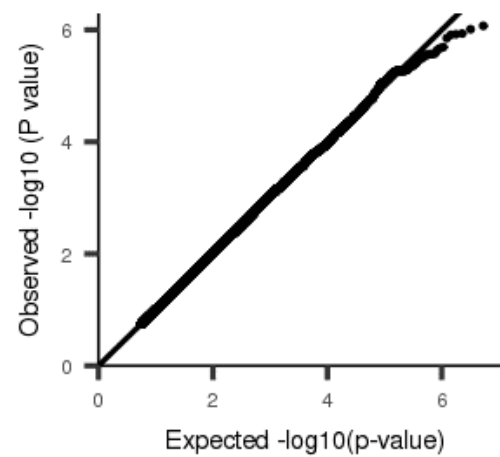

[back to list of plots](#)

Figure 1529: NETMAT edge (100) 0373

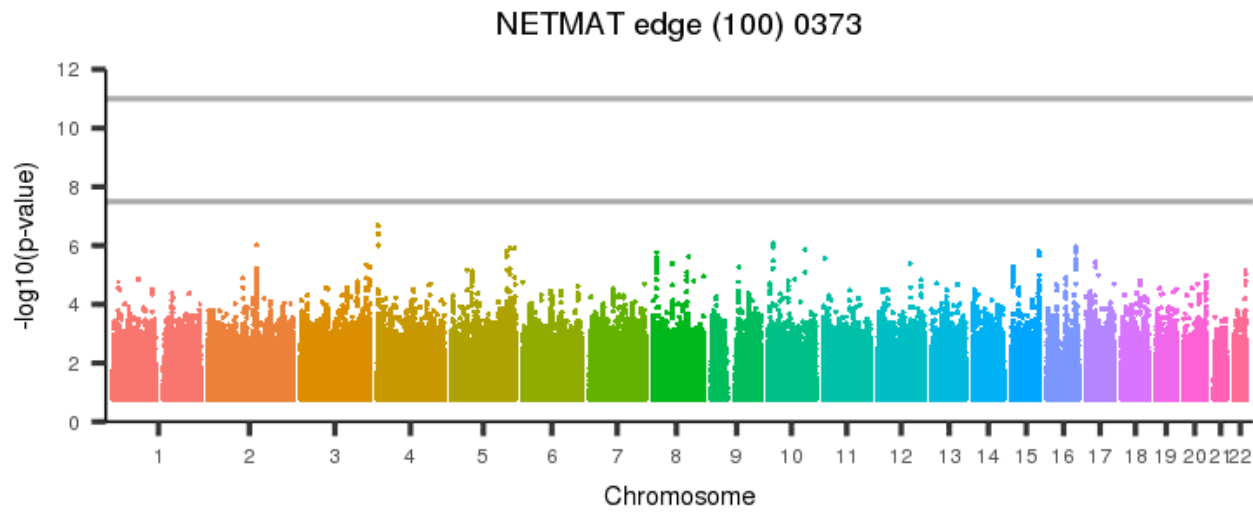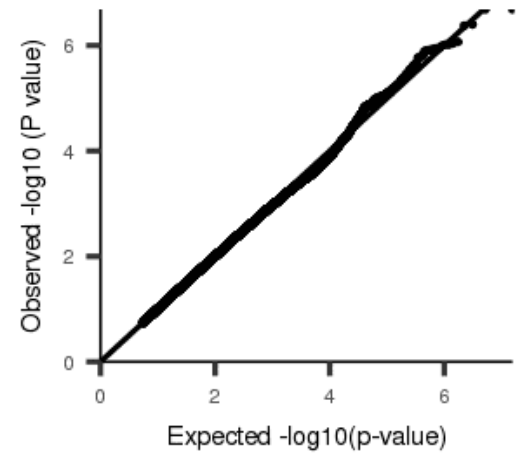

[back to list of plots](#)

Figure 1530: NETMAT edge (100) 0374

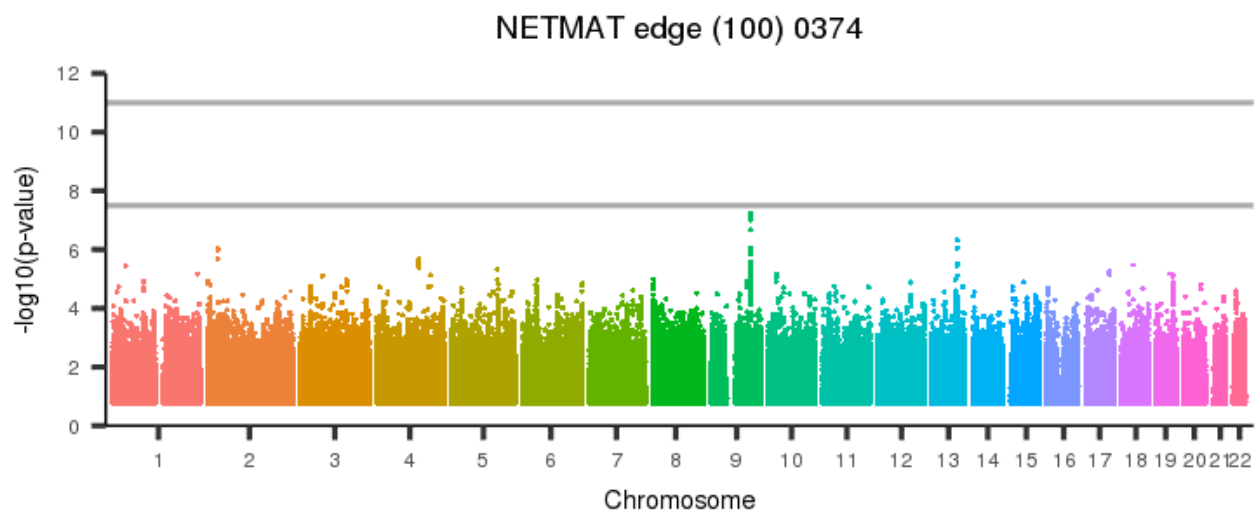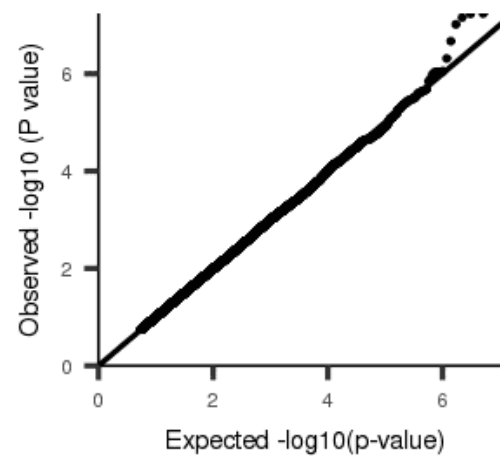

[back to list of plots](#)

Figure 1531: NETMAT edge (100) 0375

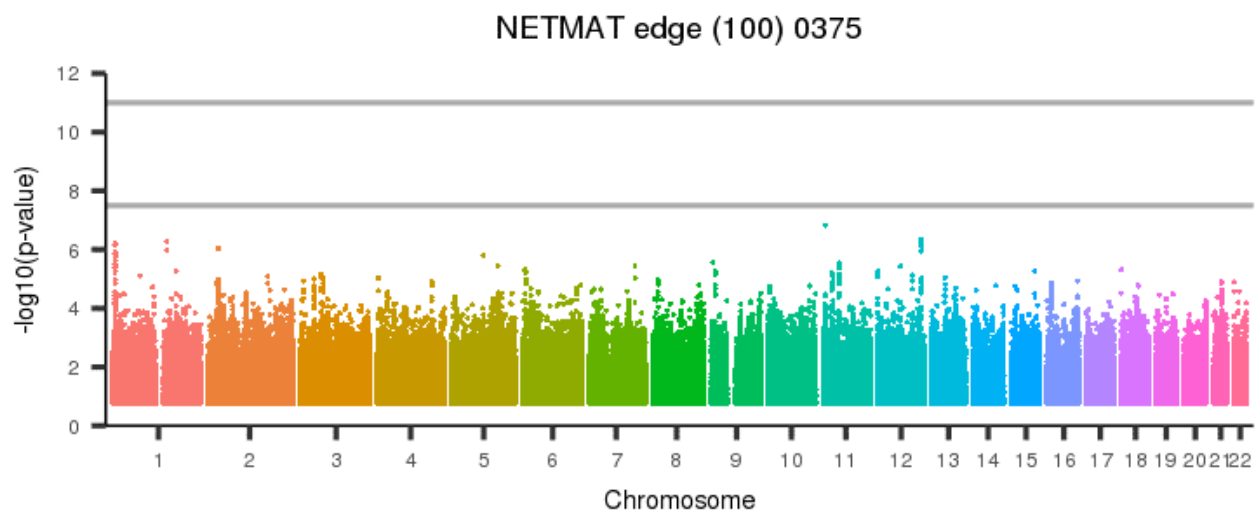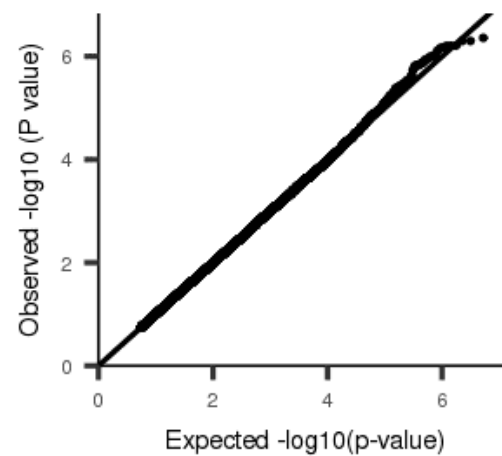

[back to list of plots](#)

Figure 1532: NETMAT edge (100) 0376

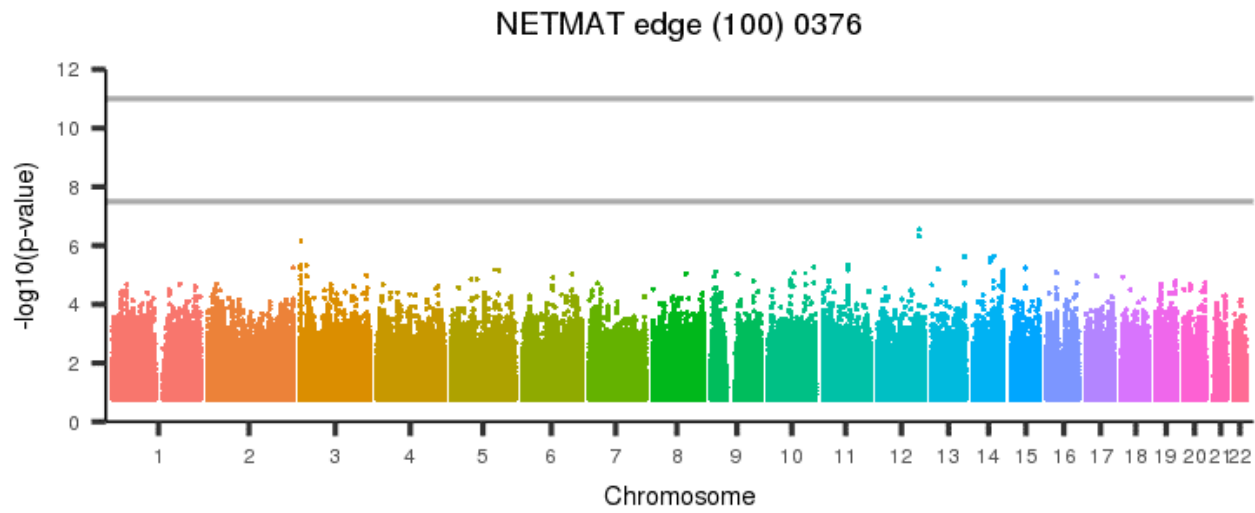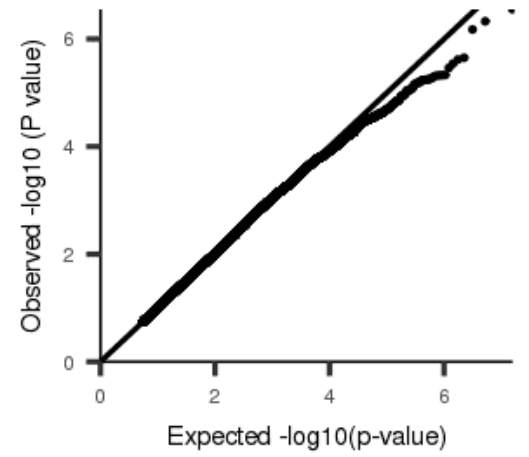

[back to list of plots](#)

Figure 1533: NETMAT edge (100) 0377

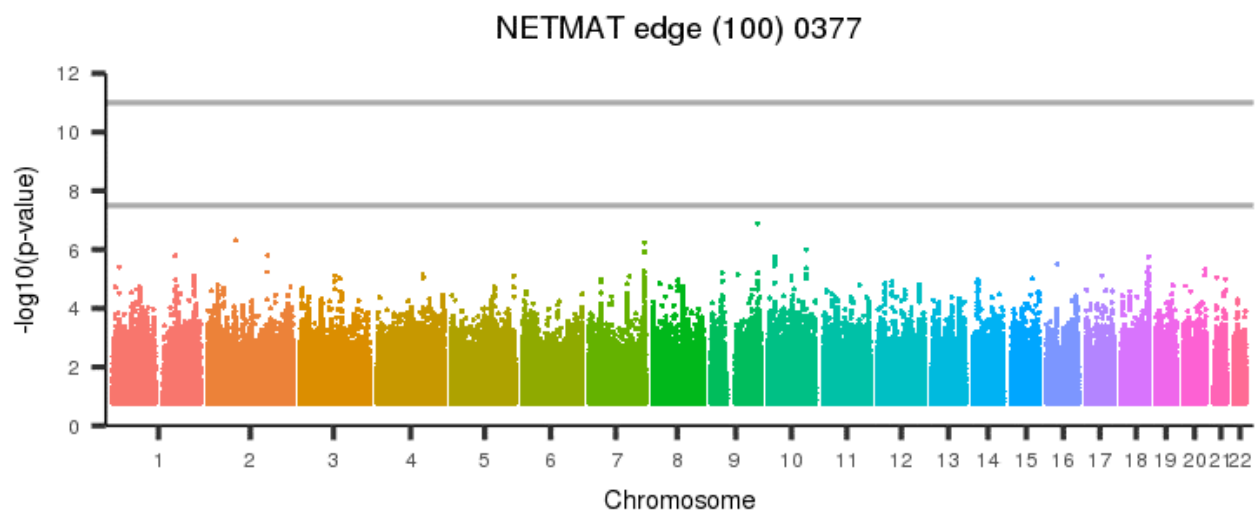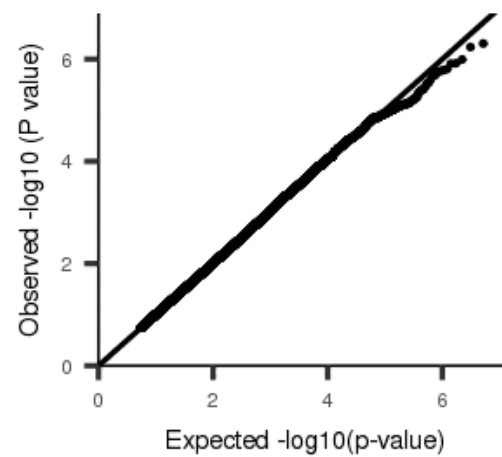

[back to list of plots](#)



Figure 1534: NETMAT edge (100) 0378

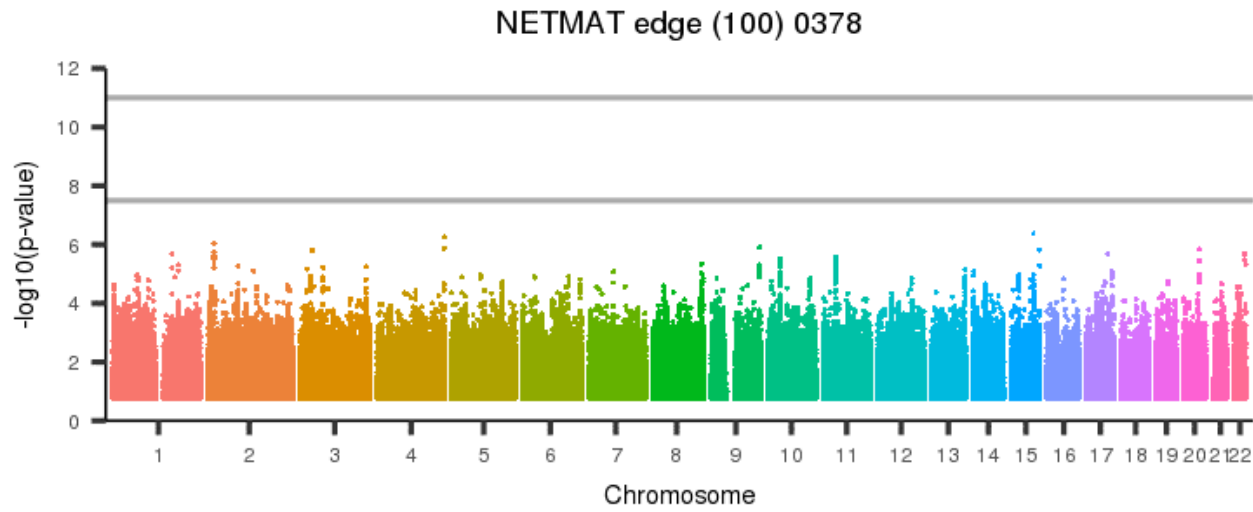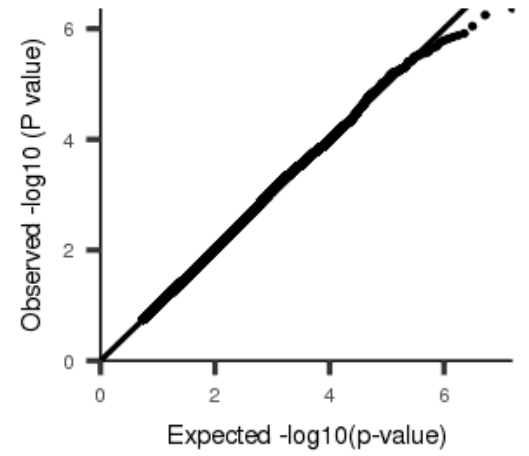

[back to list of plots](#)

Figure 1535: NETMAT edge (100) 0379

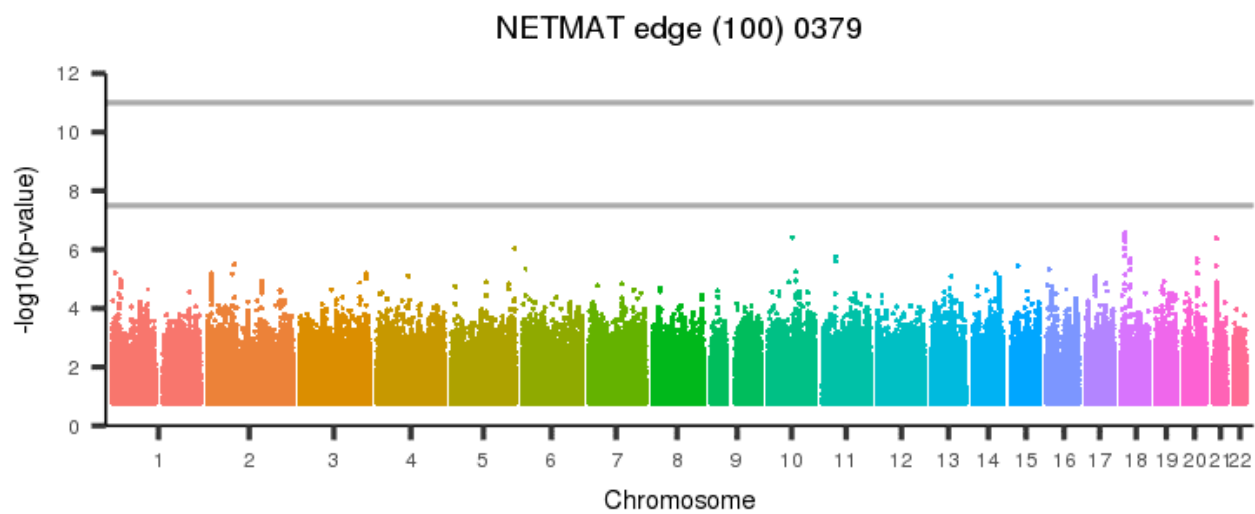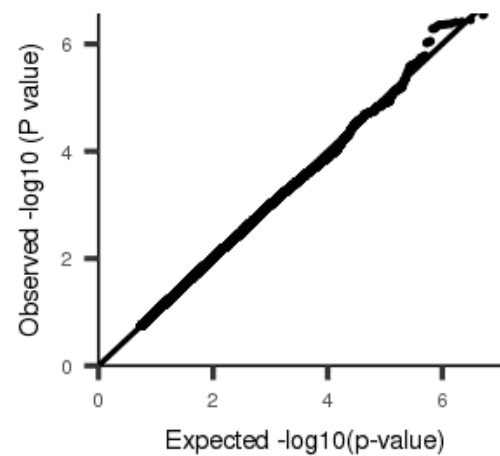

[back to list of plots](#)

Figure 1536: NETMAT edge (100) 0380

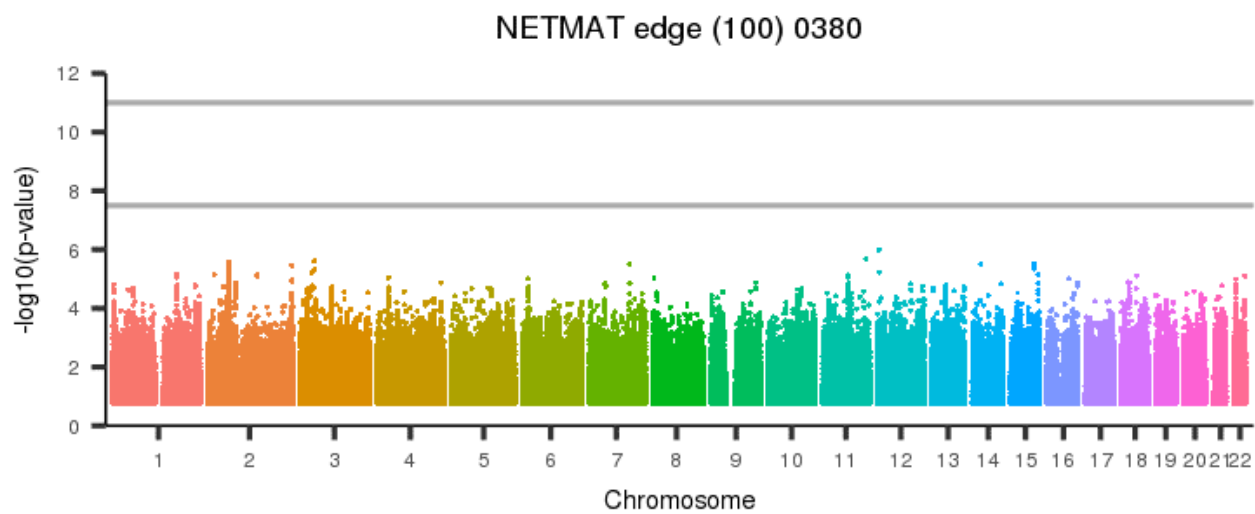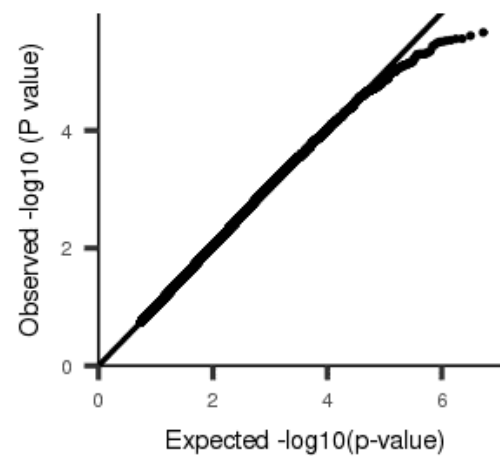

[back to list of plots](#)

Figure 1537: NETMAT edge (100) 0381

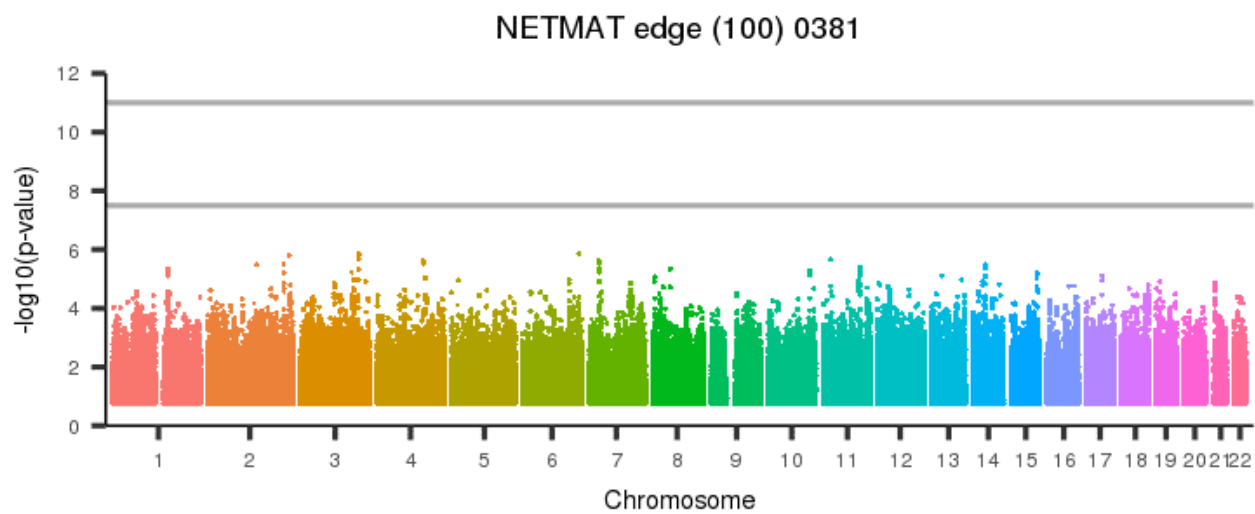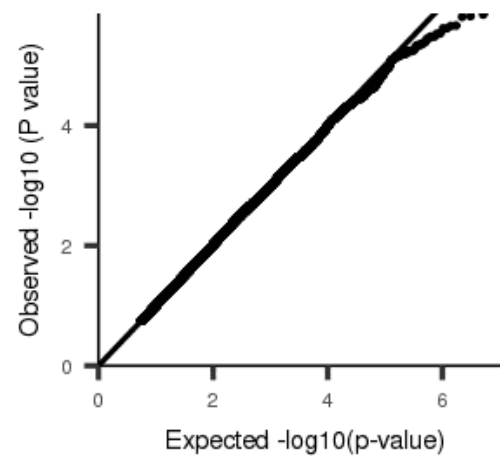

[back to list of plots](#)

Figure 1538: NETMAT edge (100) 0382

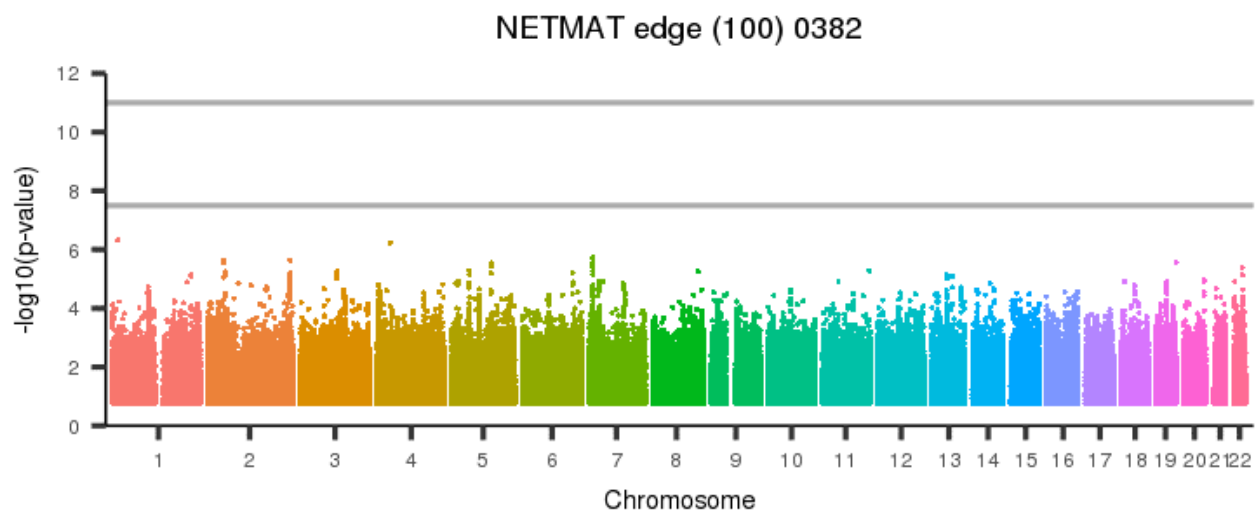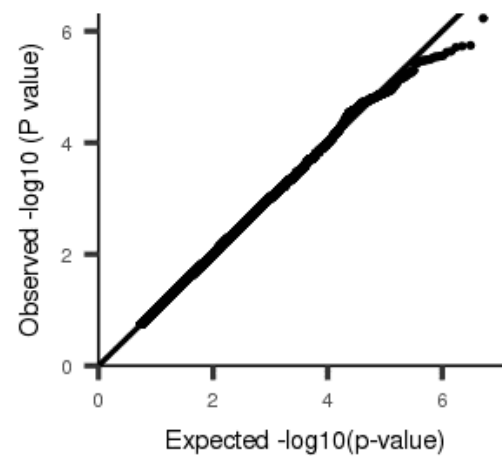

[back to list of plots](#)

Figure 1539: NETMAT edge (100) 0383

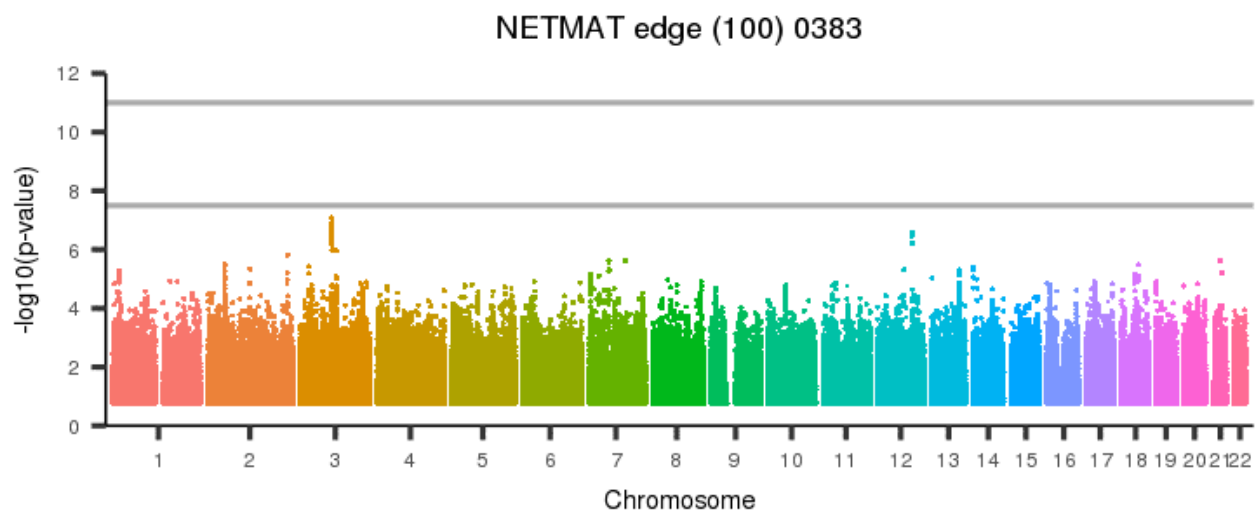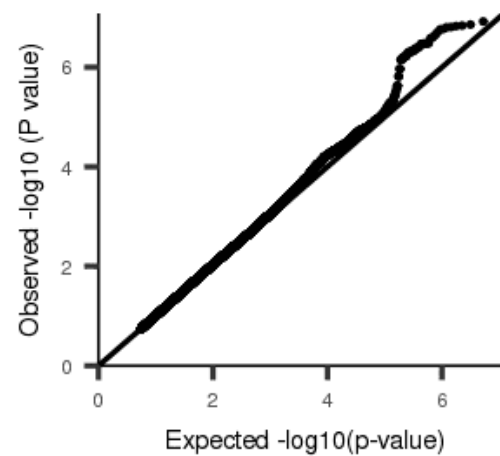

[back to list of plots](#)

Figure 1540: NETMAT edge (100) 0384

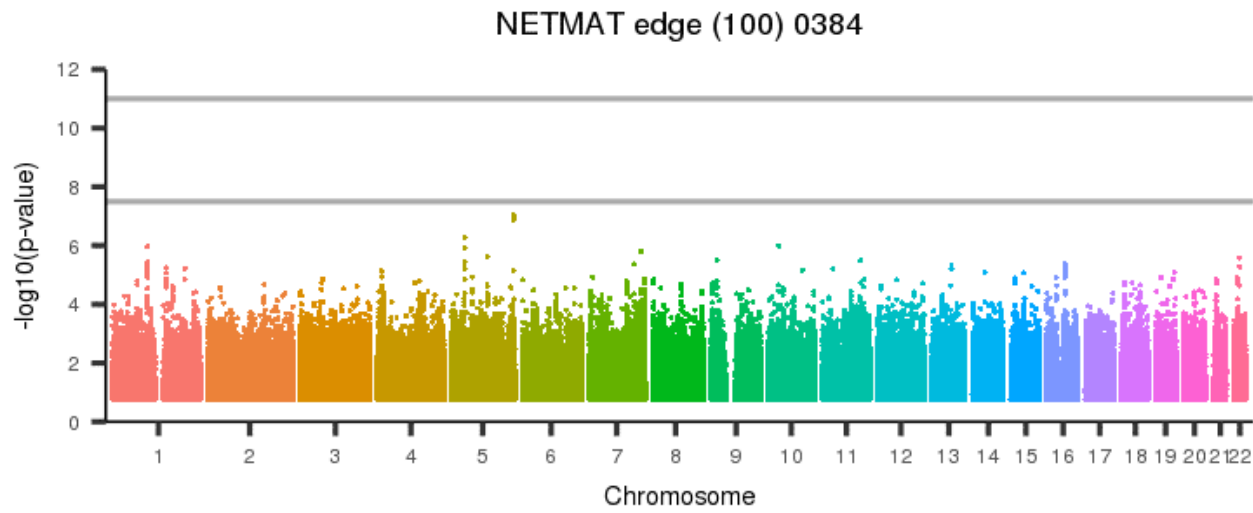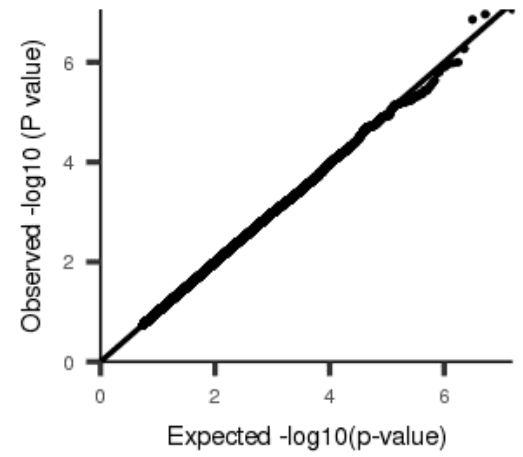

[back to list of plots](#)

Figure 1541: NETMAT edge (100) 0385

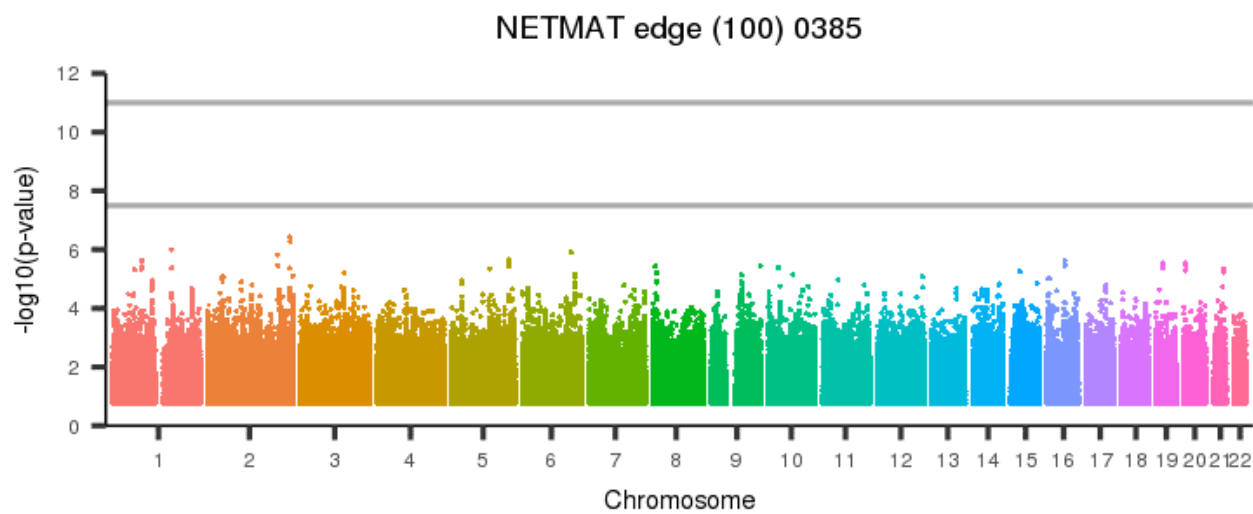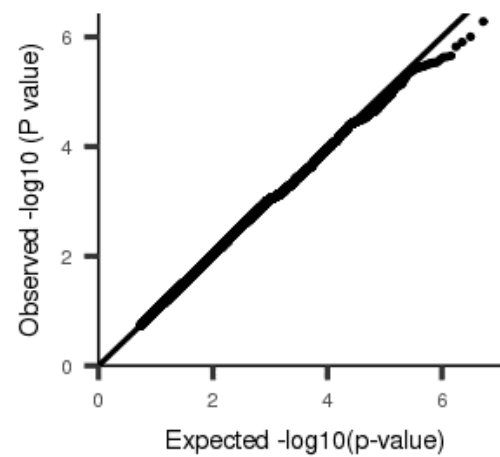

[back to list of plots](#)



Figure 1542: NETMAT edge (100) 0386

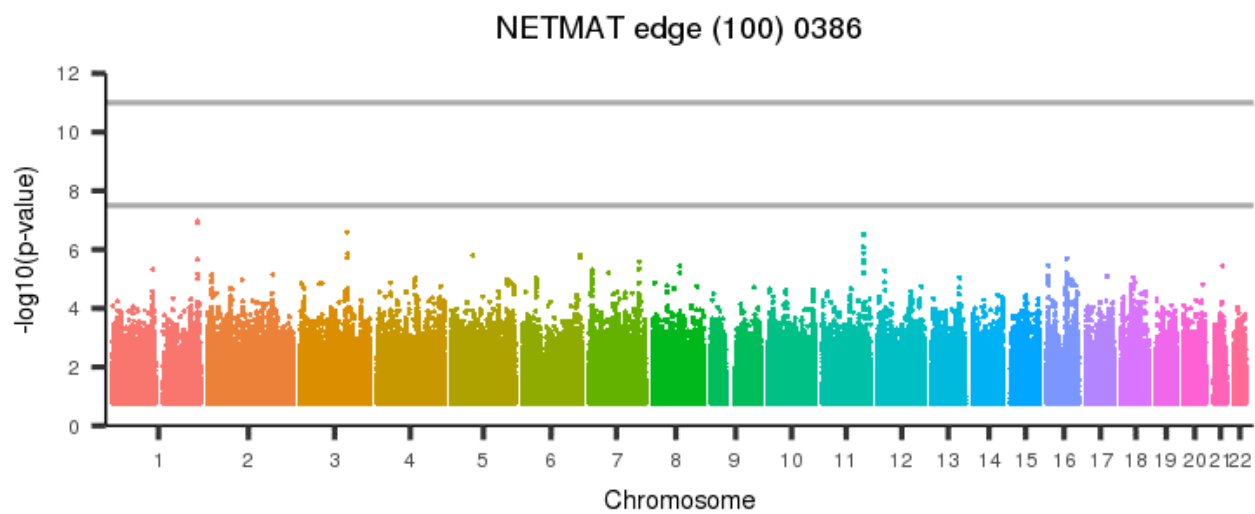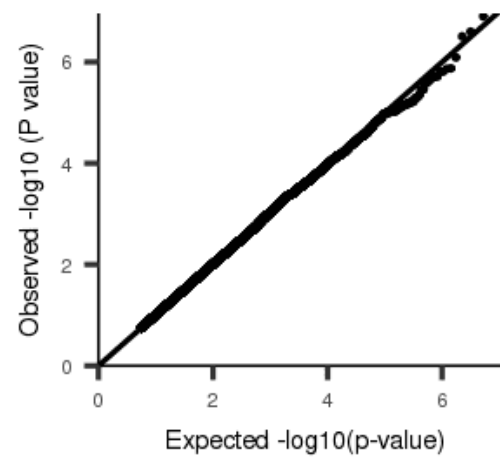

[back to list of plots](#)

Figure 1543: NETMAT edge (100) 0387

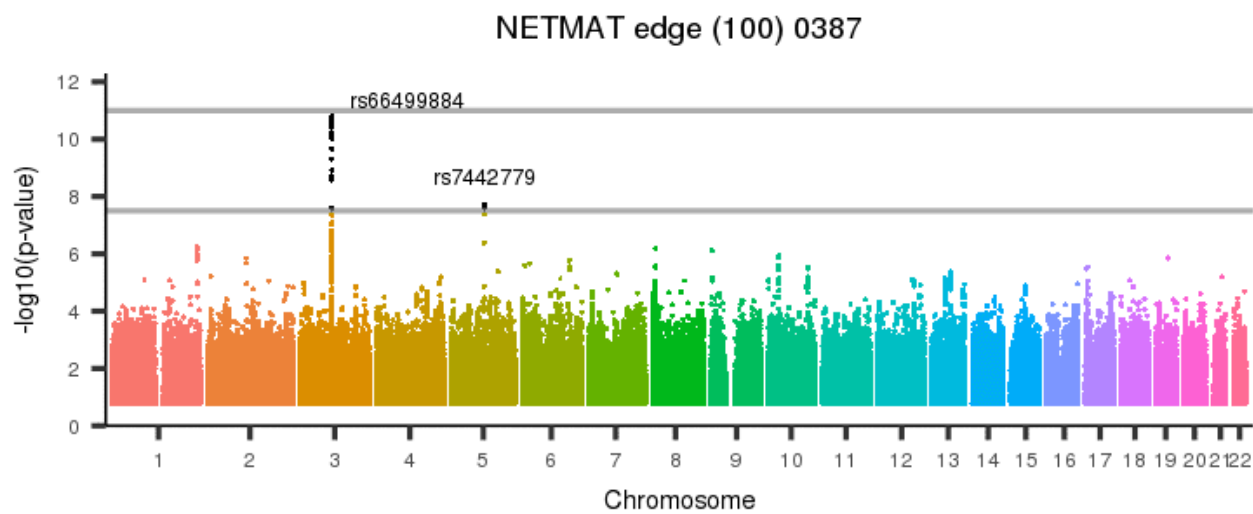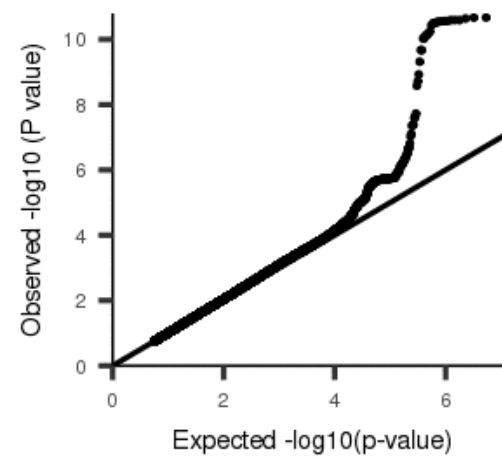

[back to list of plots](#)

Figure 1544: NETMAT edge (100) 0388

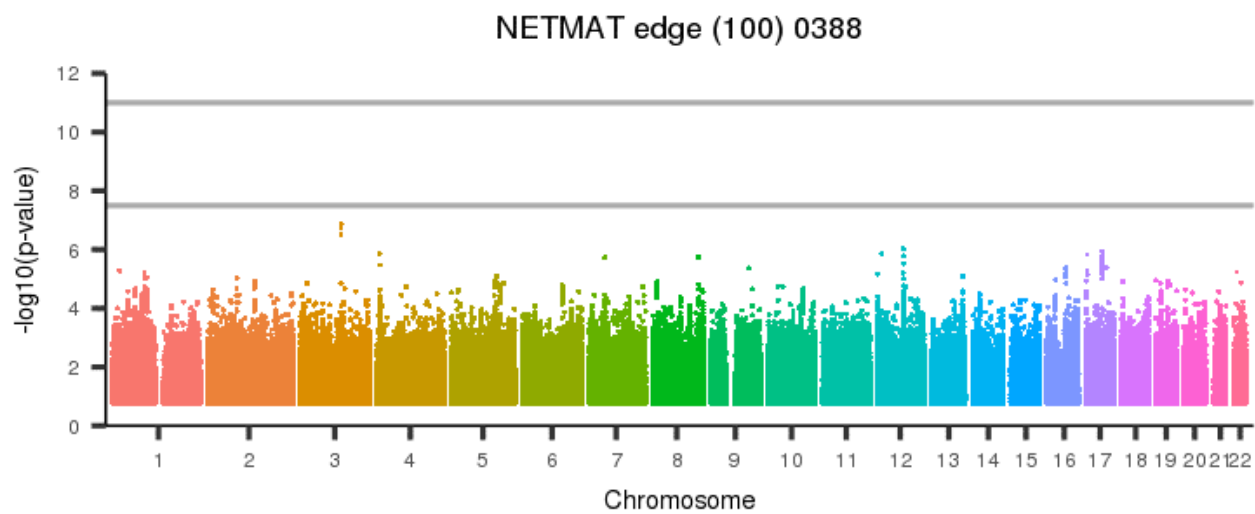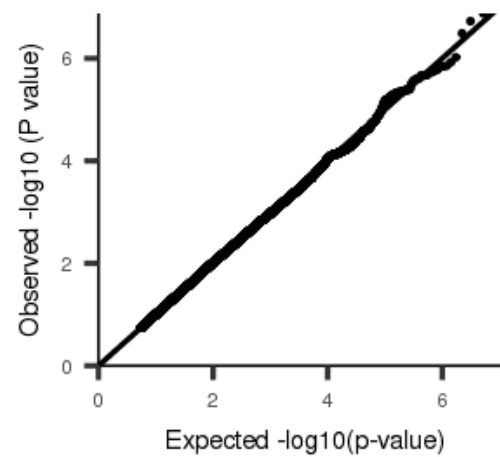

[back to list of plots](#)

Figure 1545: NETMAT edge (100) 0389

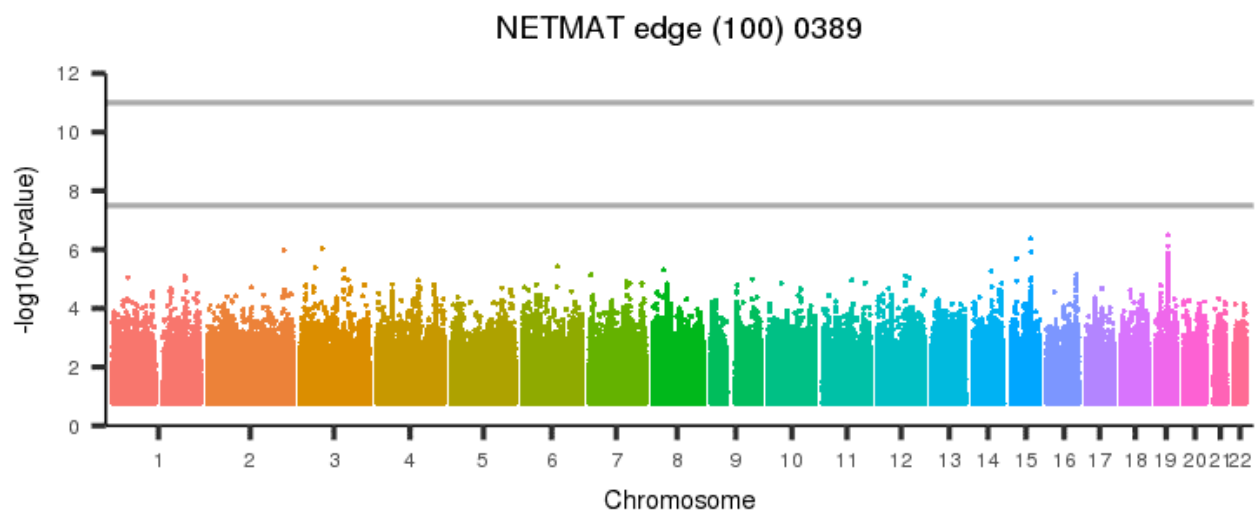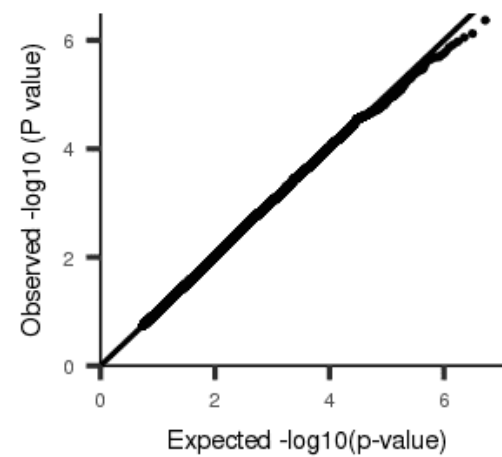

[back to list of plots](#)

Figure 1546: NETMAT edge (100) 0390

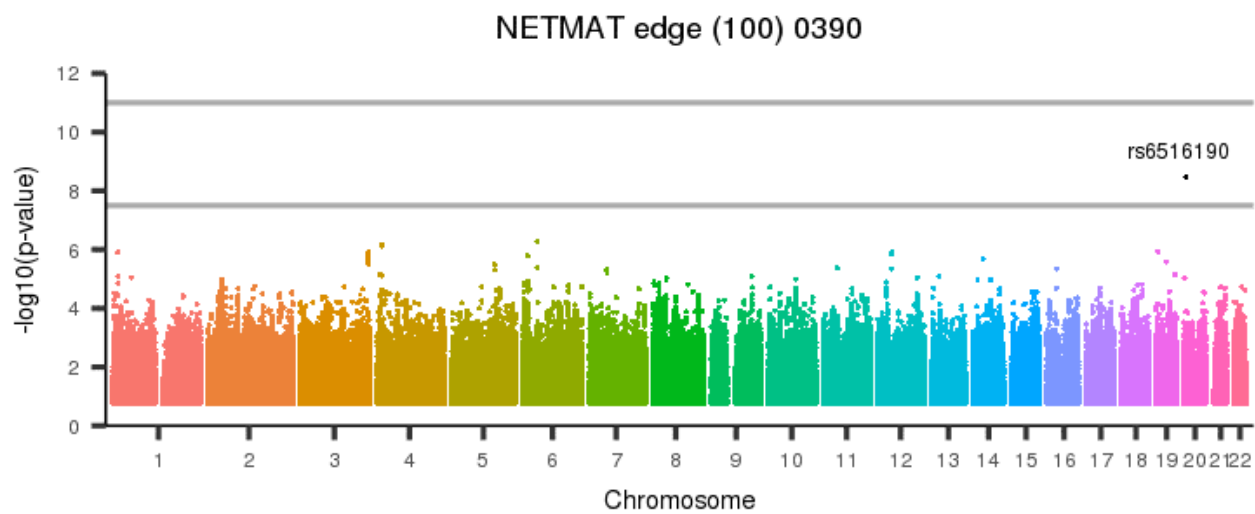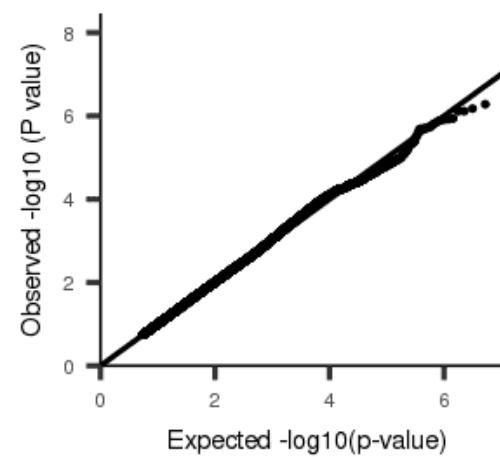

[back to list of plots](#)

Figure 1547: NETMAT edge (100) 0391

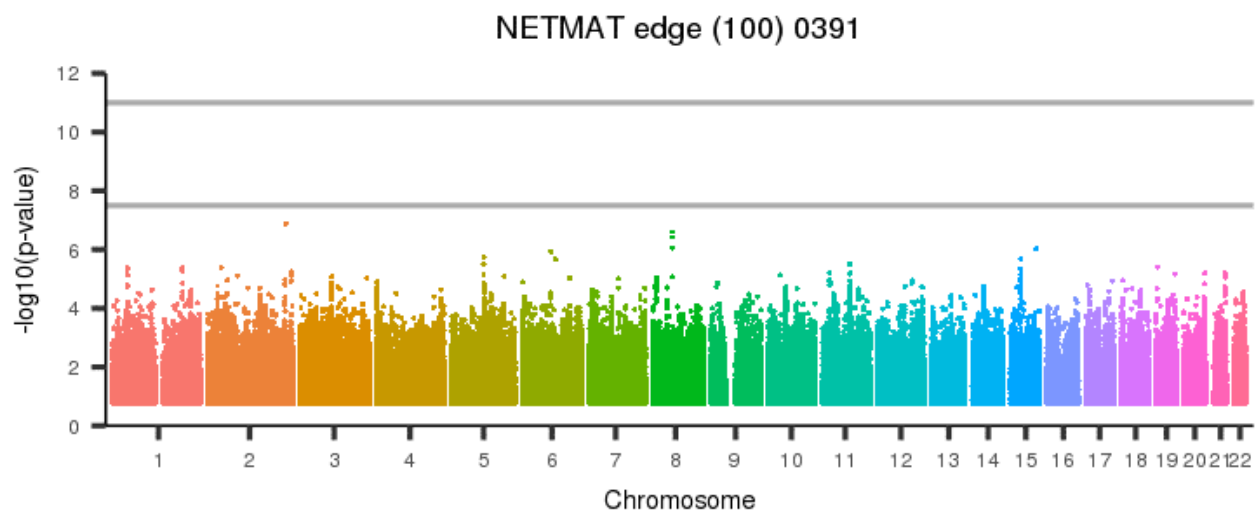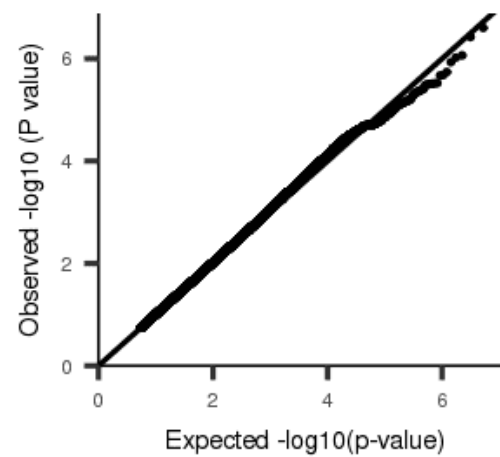

[back to list of plots](#)

Figure 1548: NETMAT edge (100) 0392

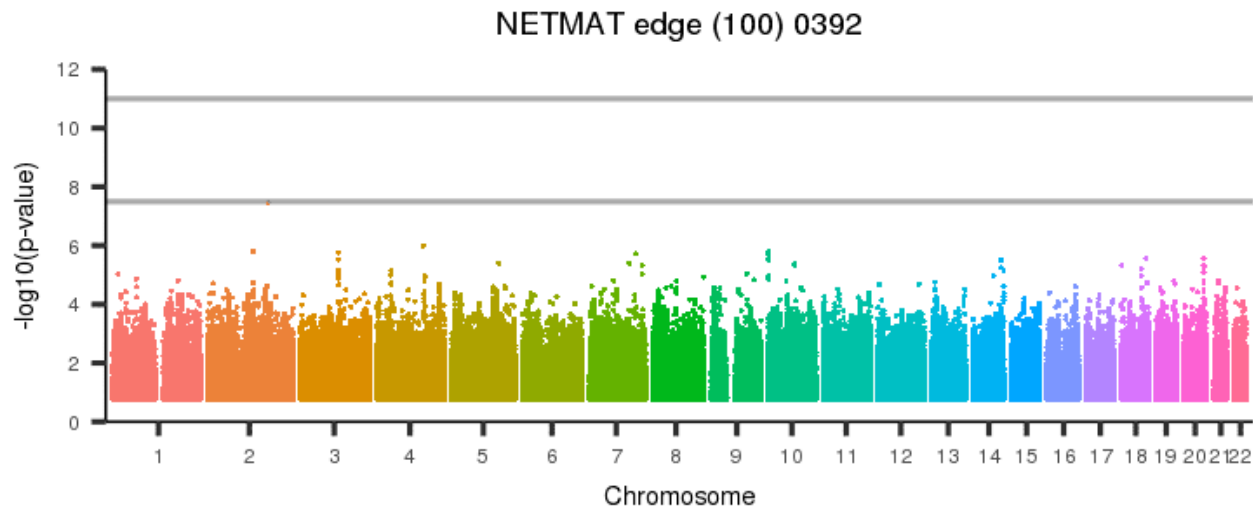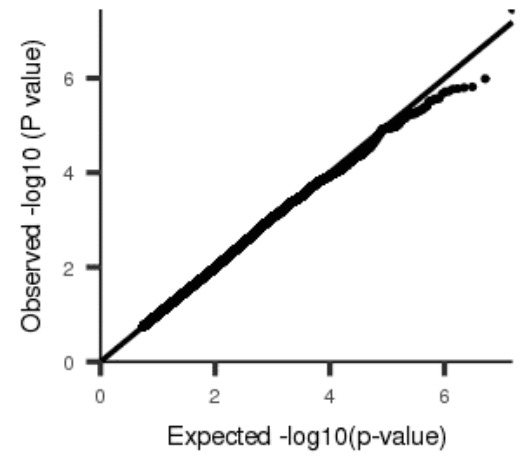

[back to list of plots](#)

Figure 1549: NETMAT edge (100) 0393

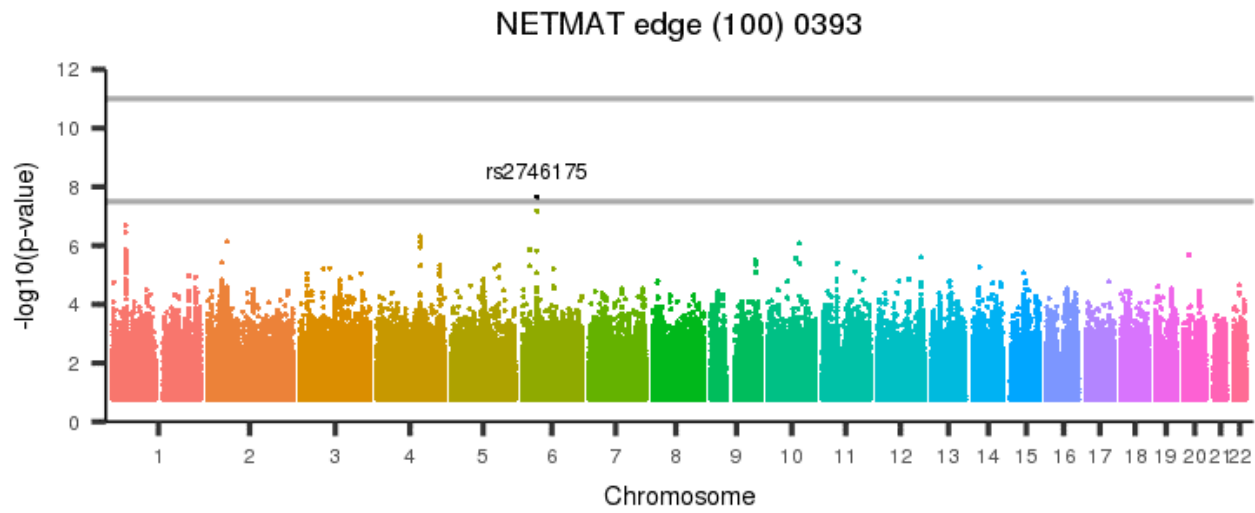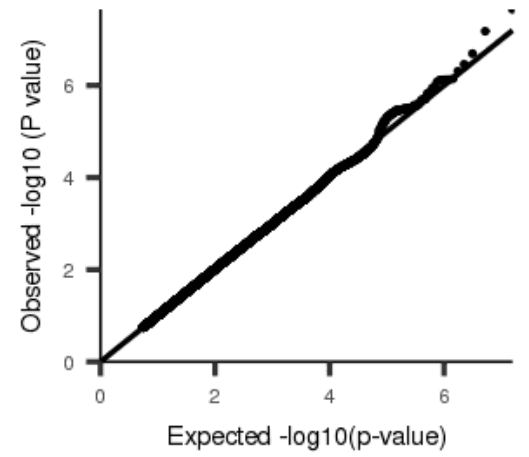

[back to list of plots](#)



Figure 1550: NETMAT edge (100) 0394

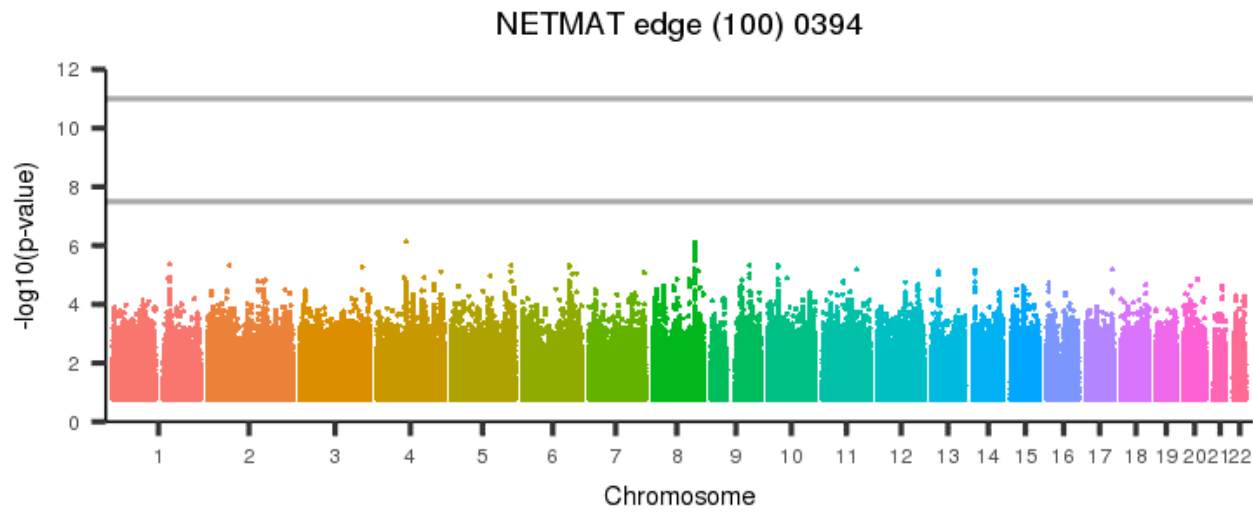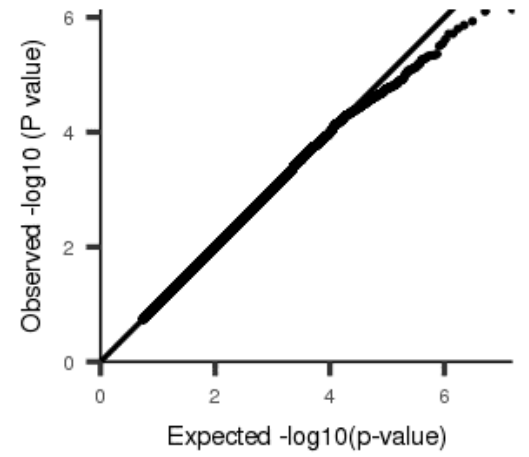

[back to list of plots](#)

Figure 1551: NETMAT edge (100) 0395

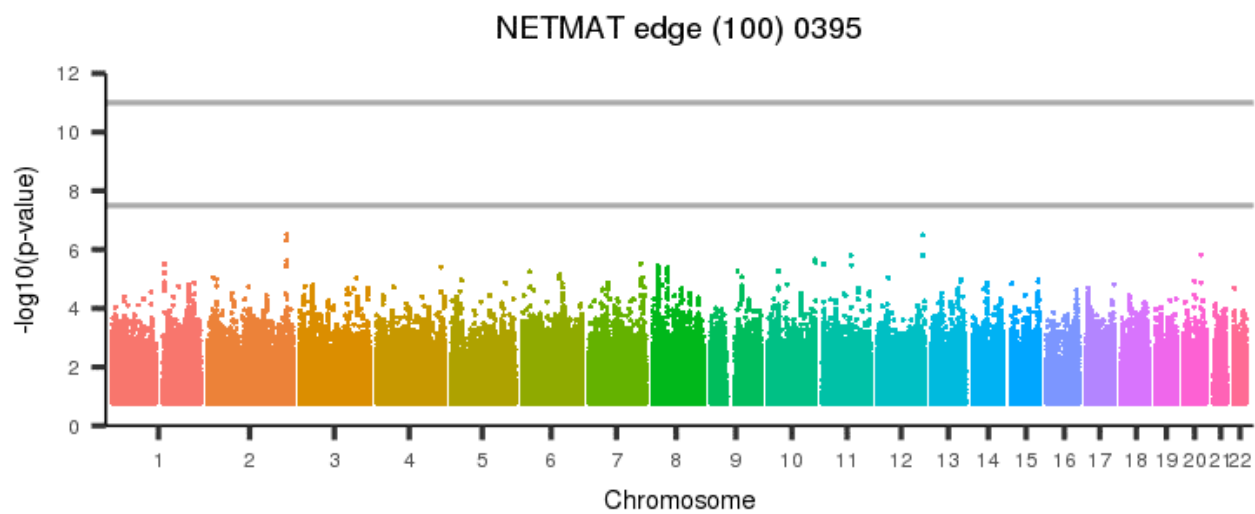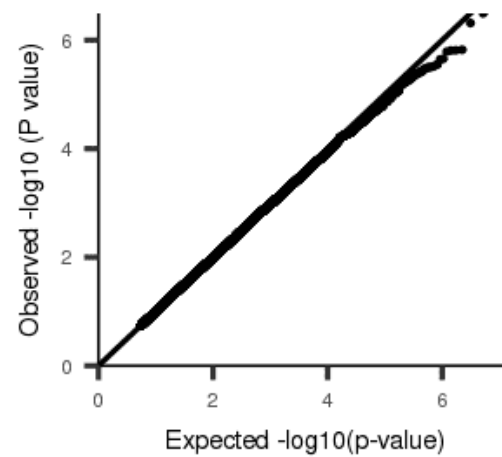

[back to list of plots](#)

Figure 1552: NETMAT edge (100) 0396

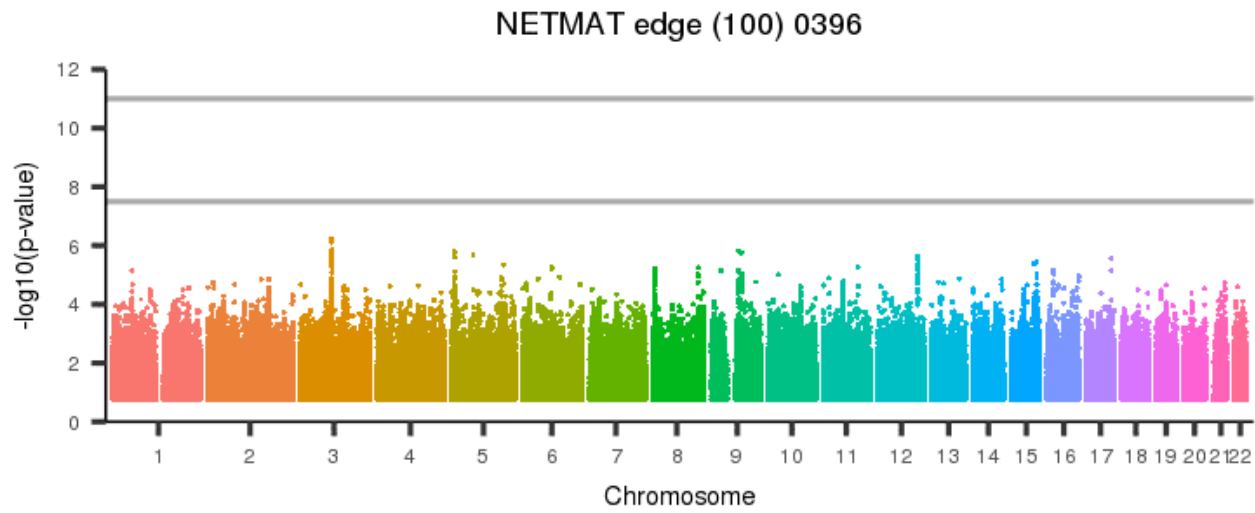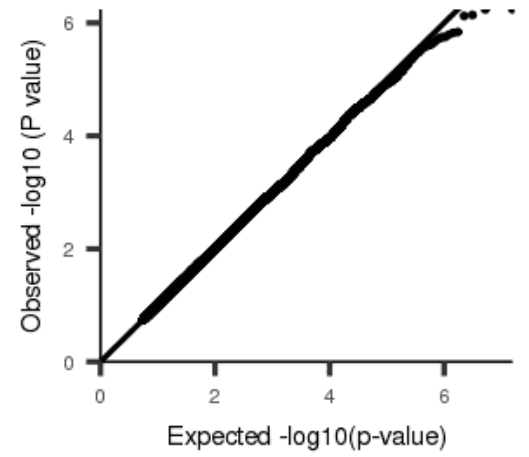

[back to list of plots](#)

Figure 1553: NETMAT edge (100) 0397

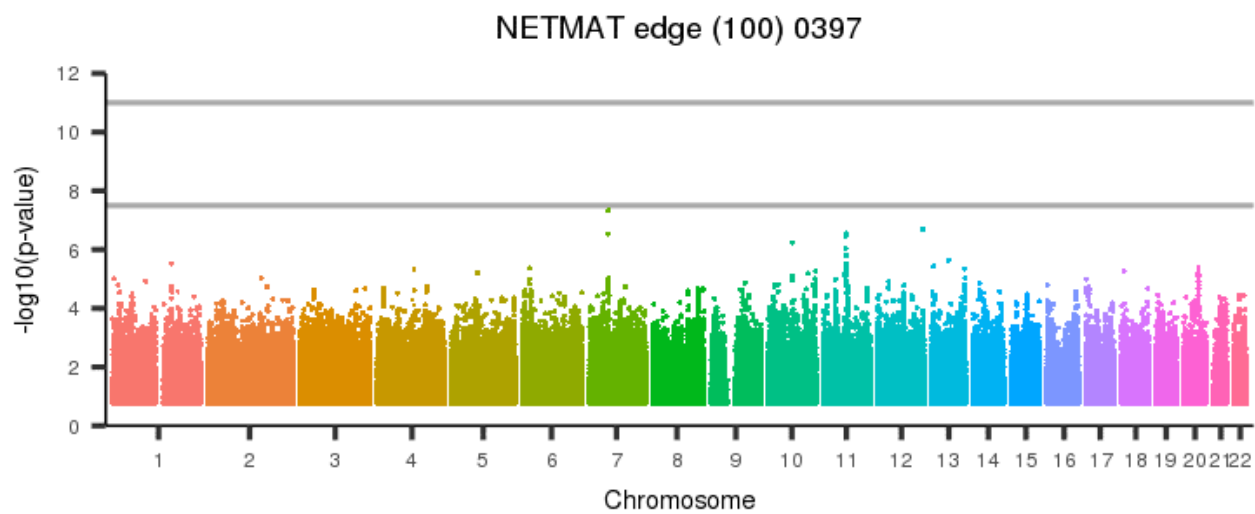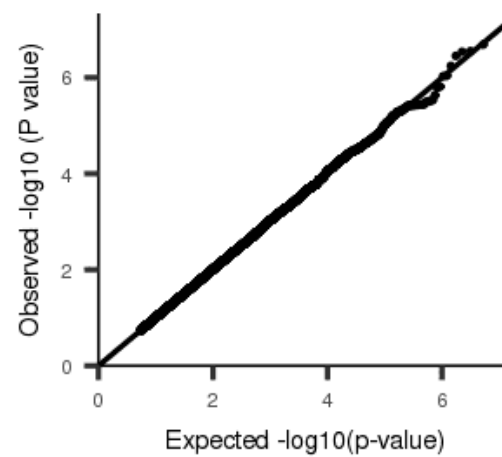

[back to list of plots](#)

Figure 1554: NETMAT edge (100) 0398

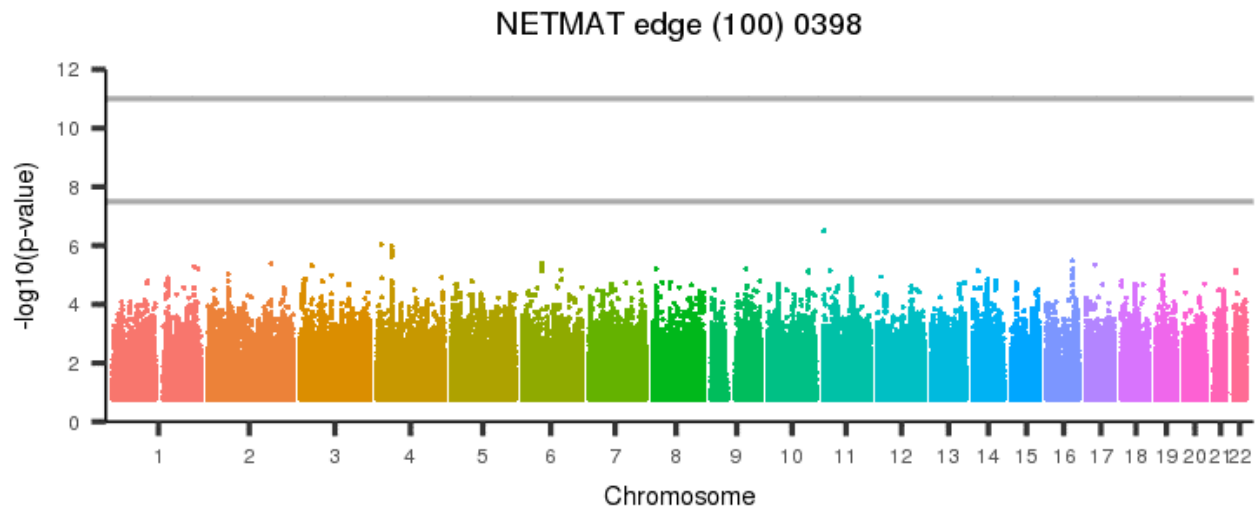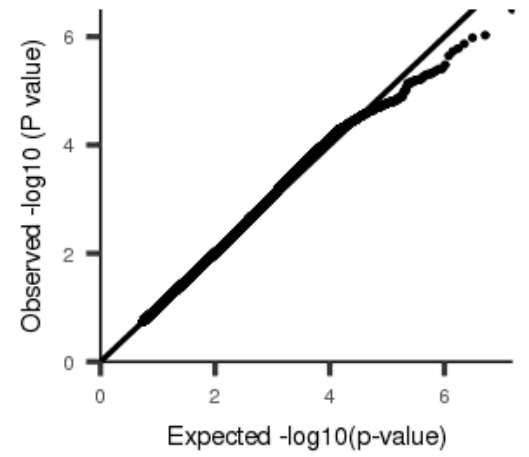

[back to list of plots](#)

Figure 1555: NETMAT edge (100) 0399

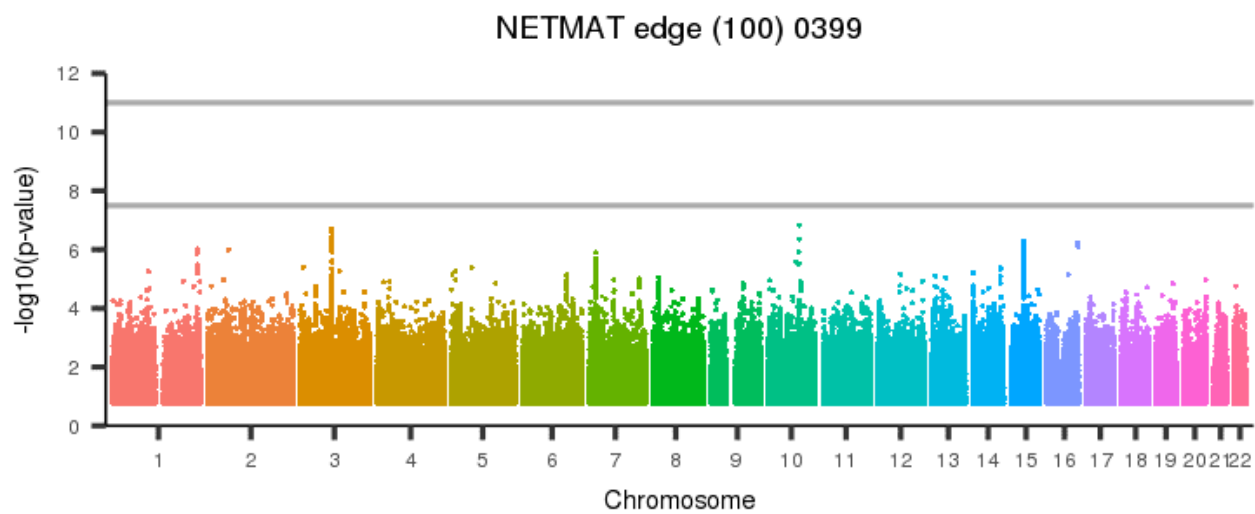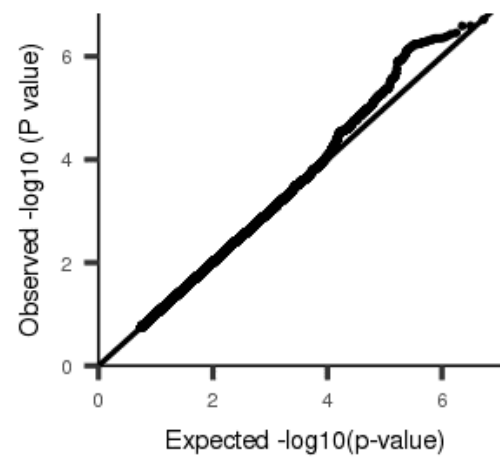

[back to list of plots](#)

Figure 1556: NETMAT edge (100) 0400

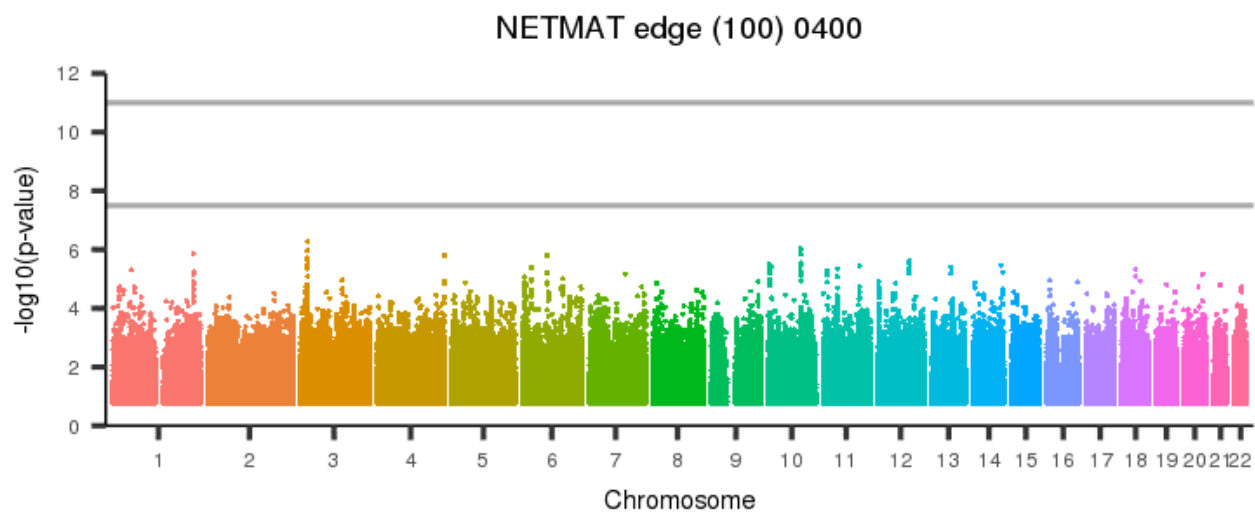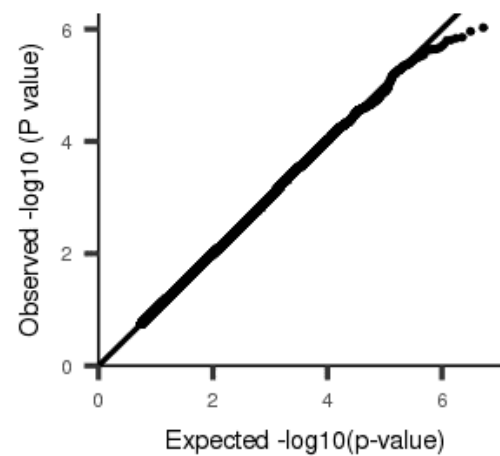

[back to list of plots](#)

Figure 1557: NETMAT edge (100) 0401

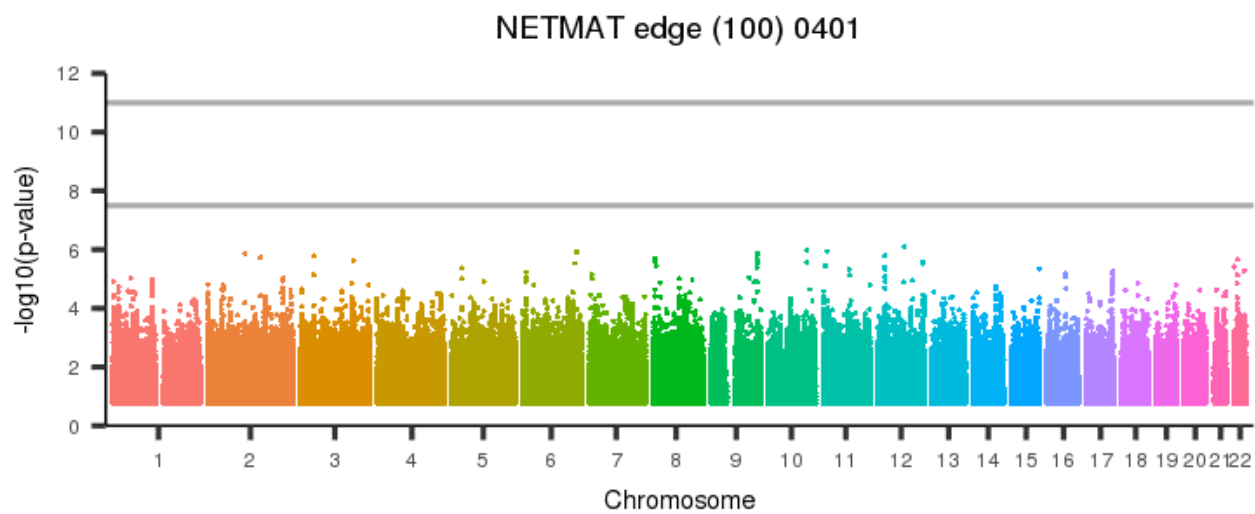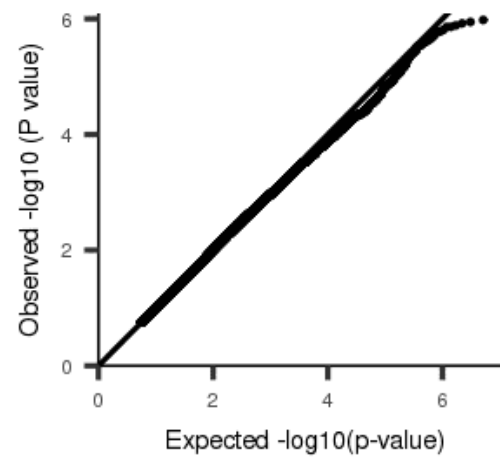

[back to list of plots](#)



Figure 1558: NETMAT edge (100) 0402

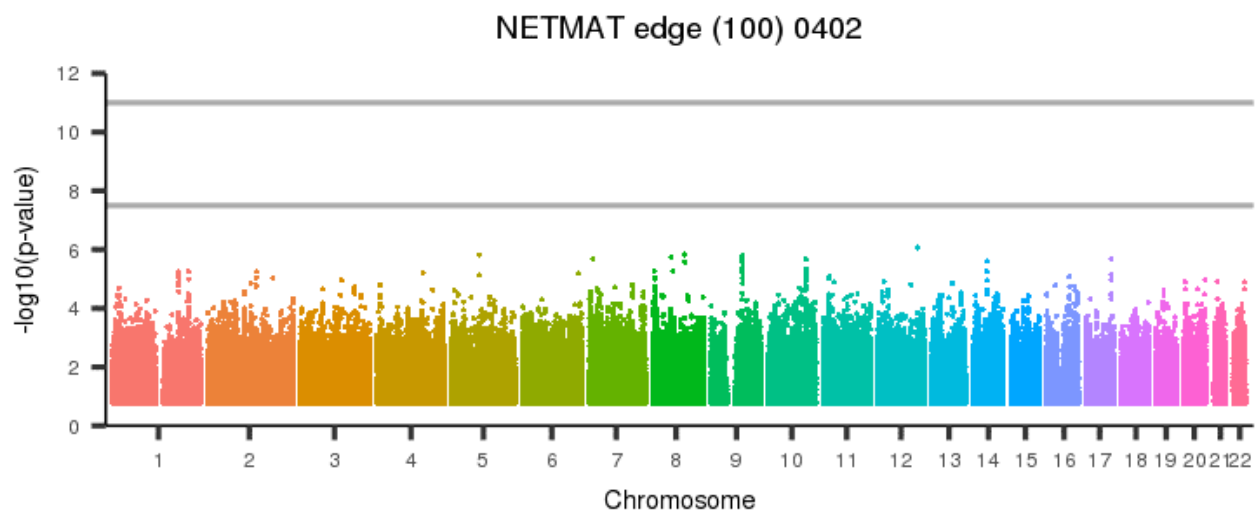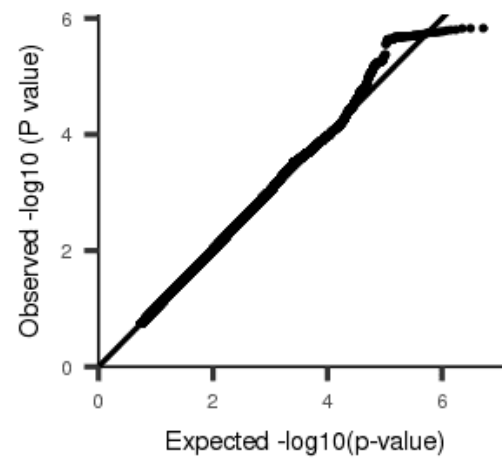

[back to list of plots](#)

Figure 1559: NETMAT edge (100) 0403

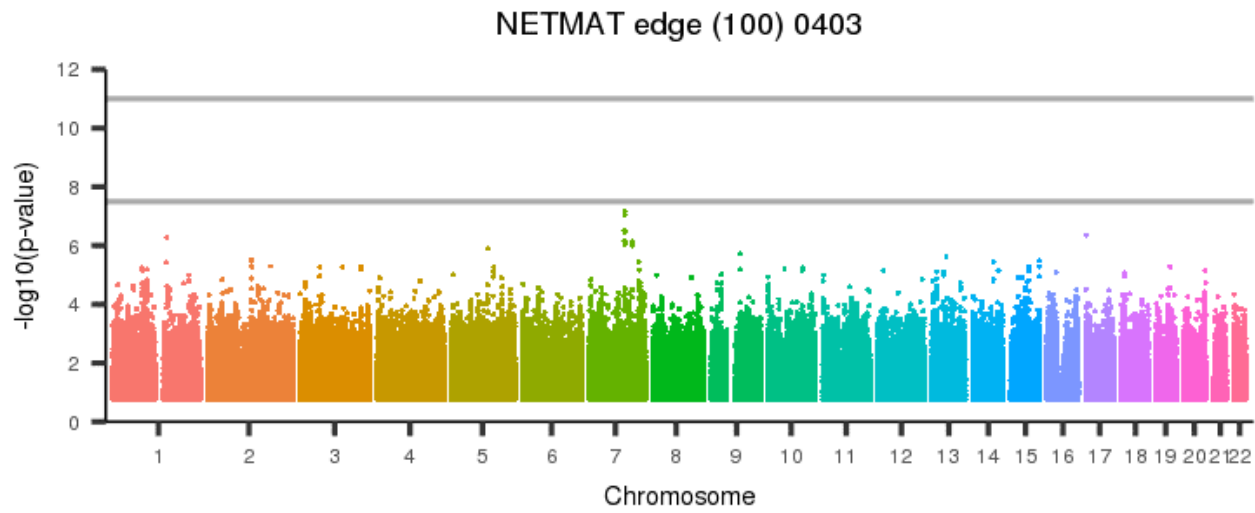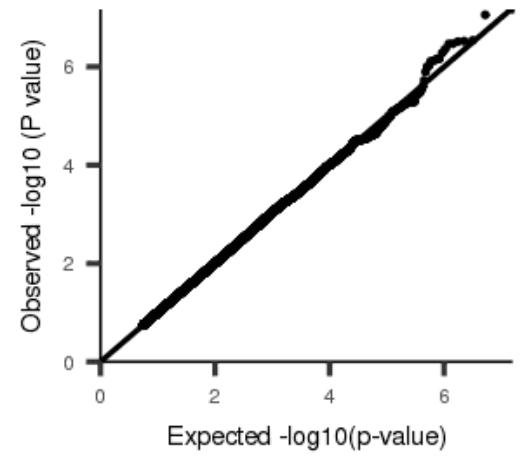

[back to list of plots](#)

Figure 1560: NETMAT edge (100) 0404

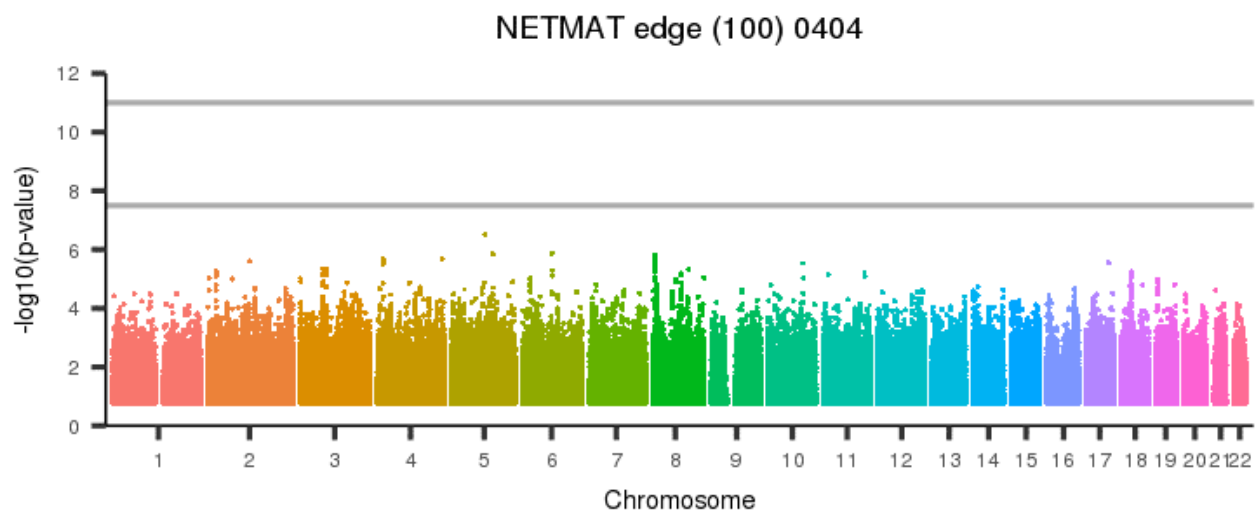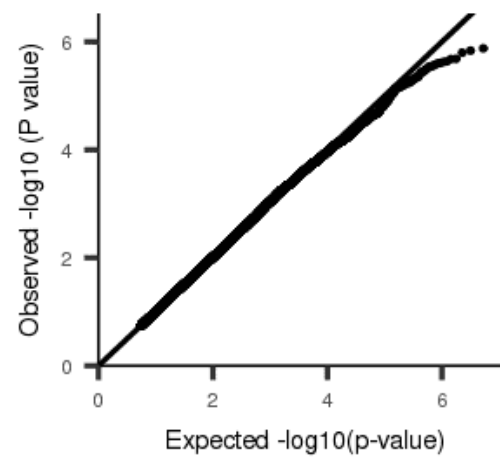

[back to list of plots](#)

Figure 1561: NETMAT edge (100) 0405

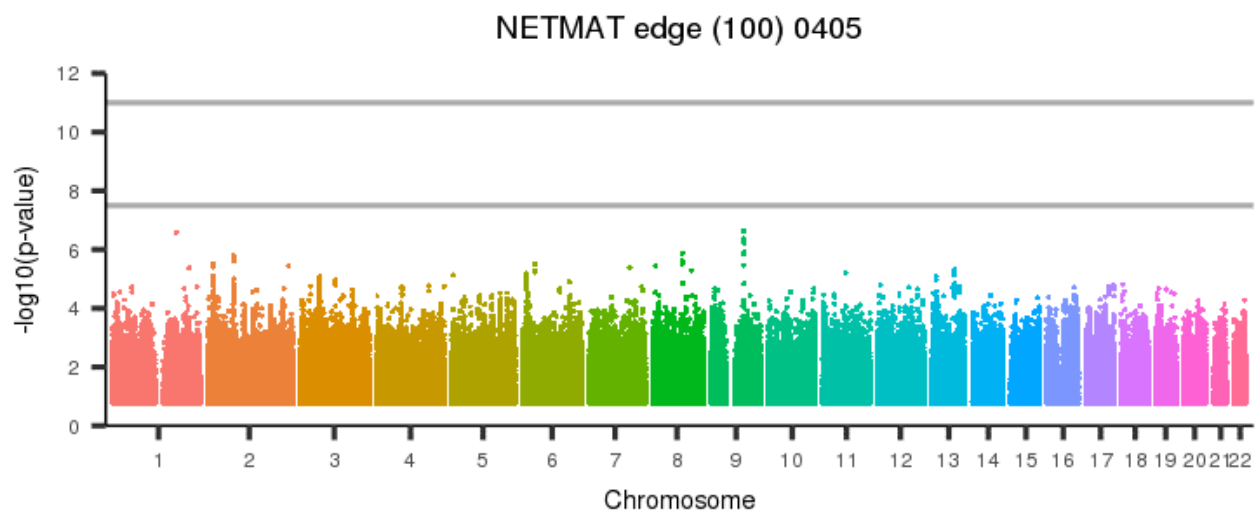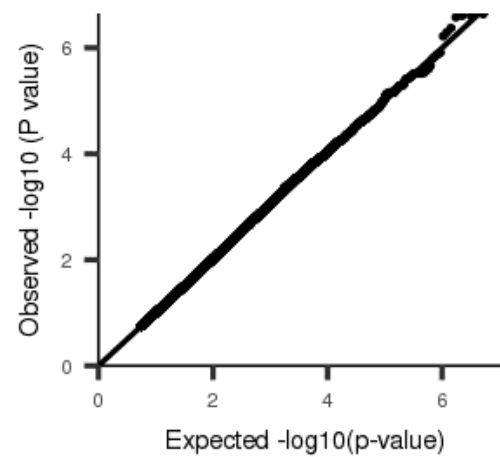

[back to list of plots](#)

Figure 1562: NETMAT edge (100) 0406

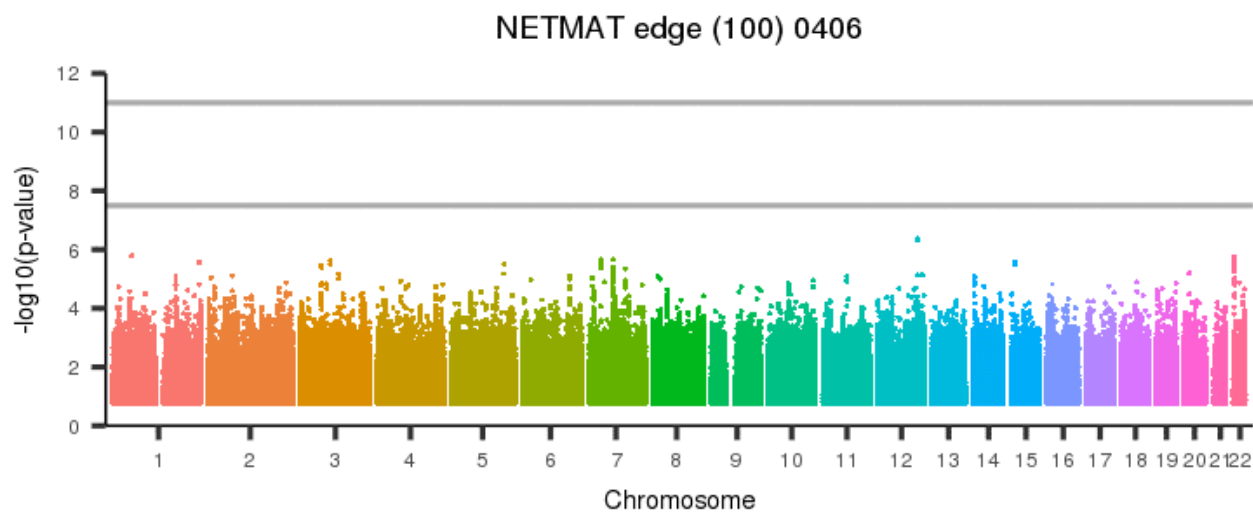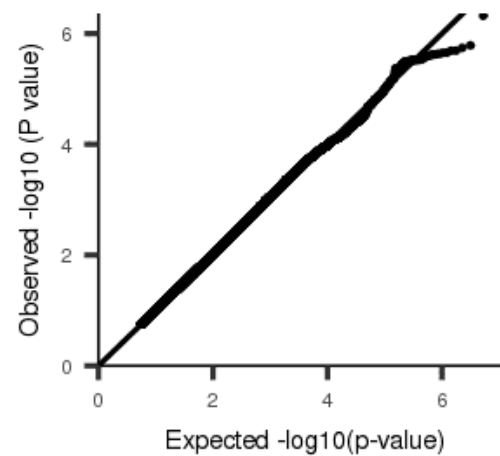

[back to list of plots](#)

Figure 1563: NETMAT edge (100) 0407

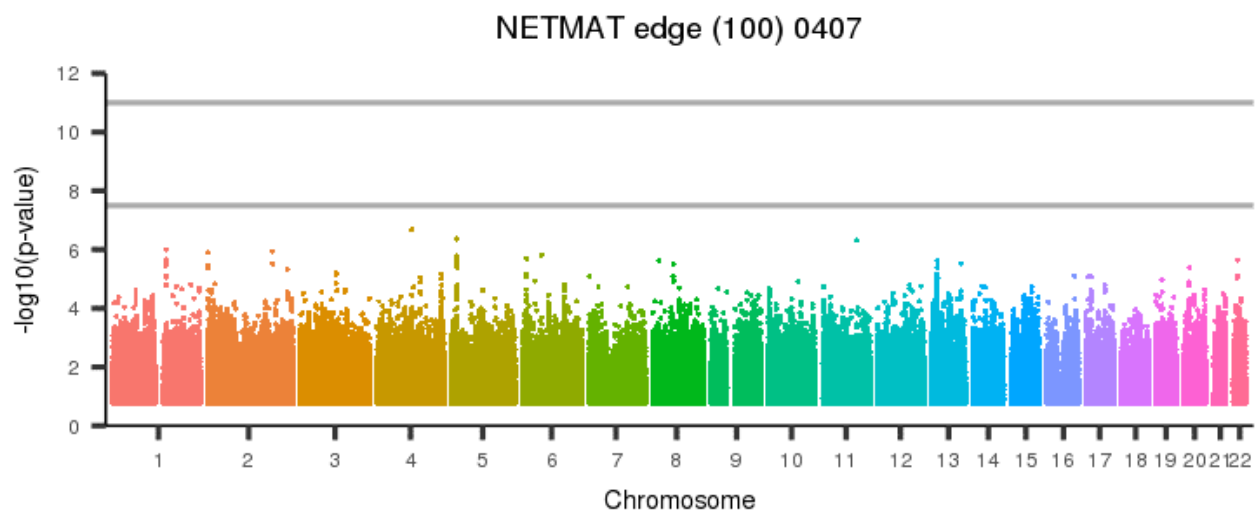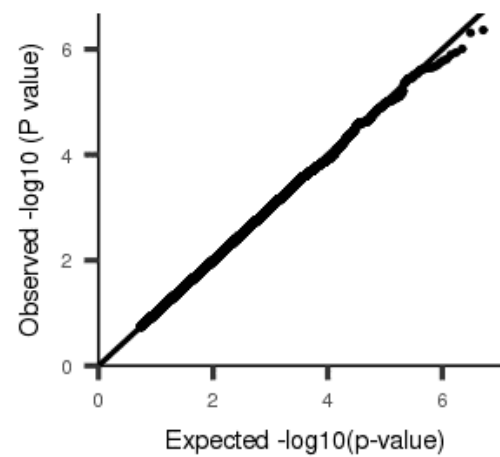

[back to list of plots](#)

Figure 1564: NETMAT edge (100) 0408

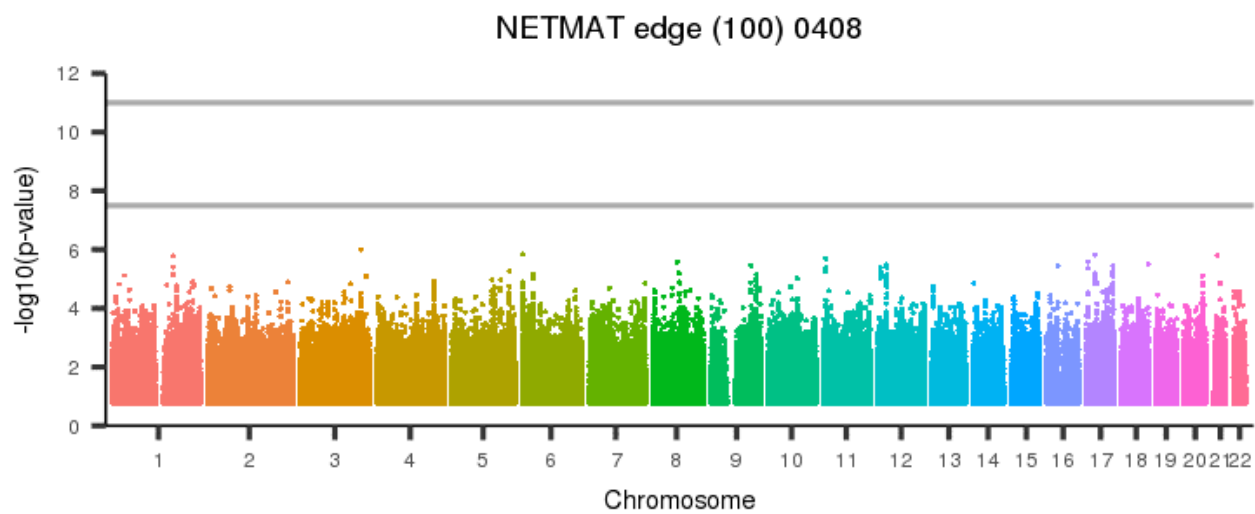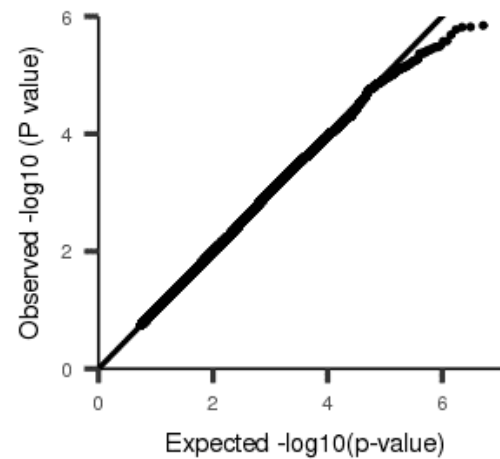

[back to list of plots](#)

Figure 1565: NETMAT edge (100) 0409

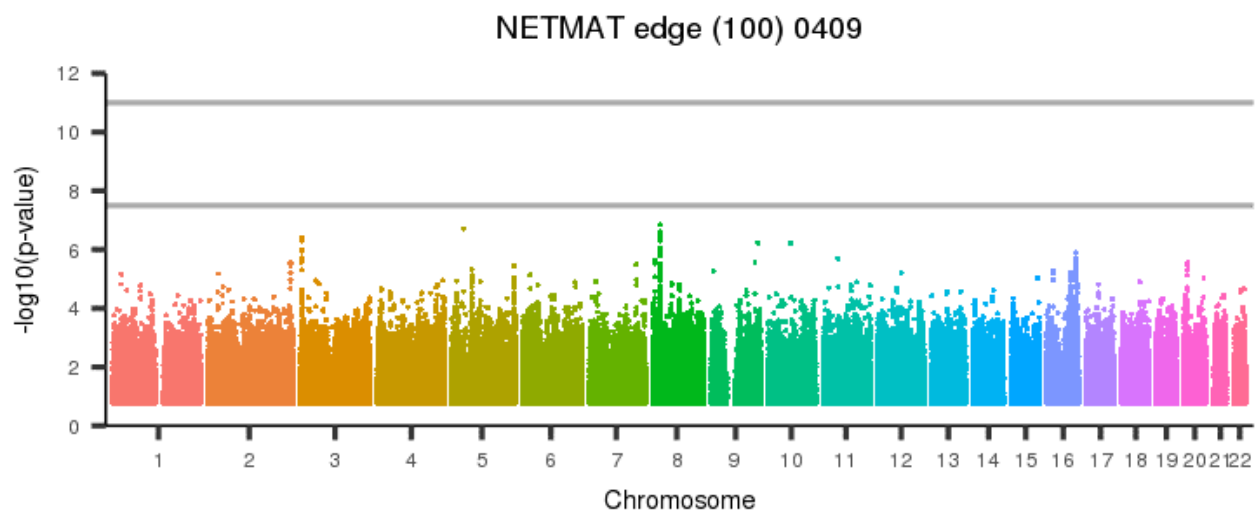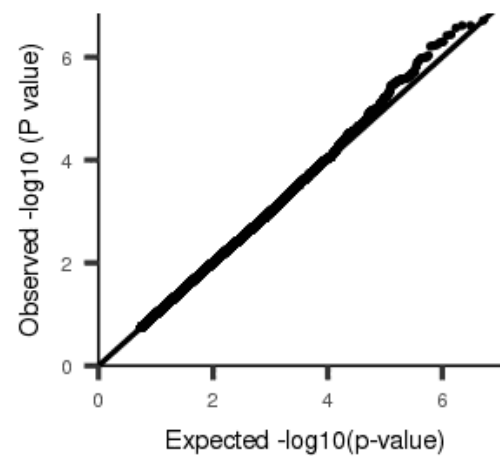

[back to list of plots](#)



Figure 1566: NETMAT edge (100) 0410

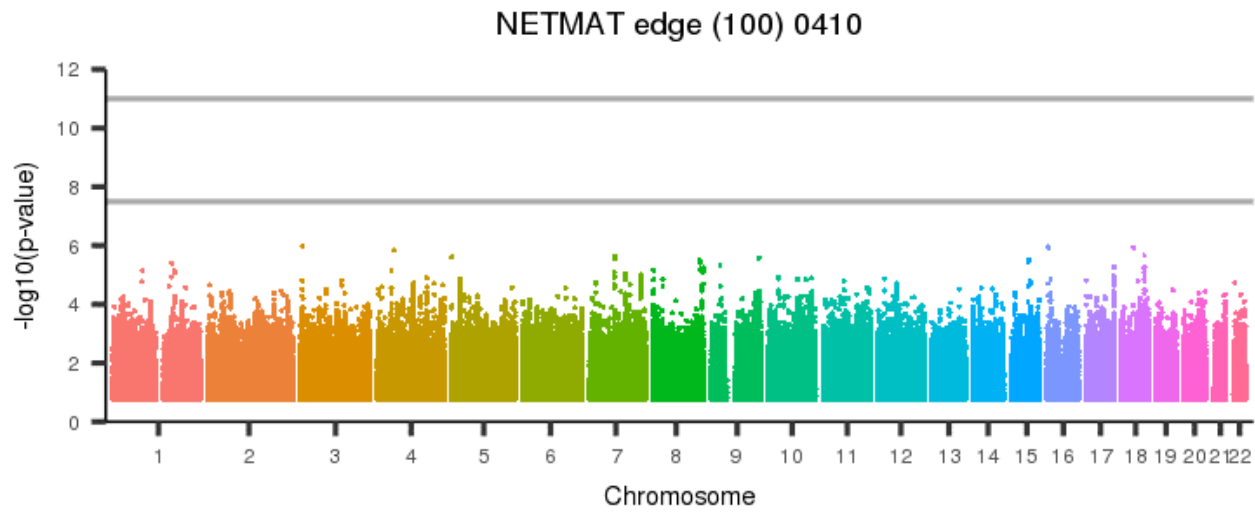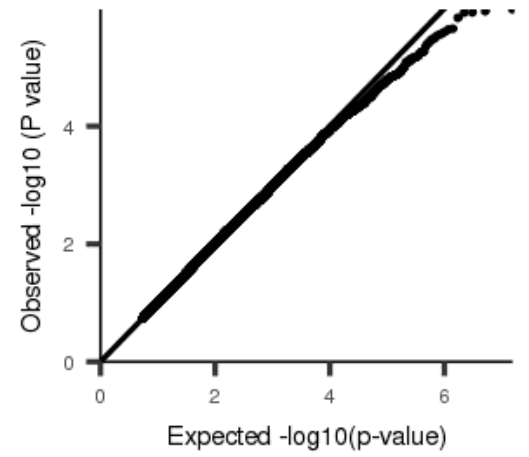

[back to list of plots](#)

Figure 1567: NETMAT edge (100) 0411

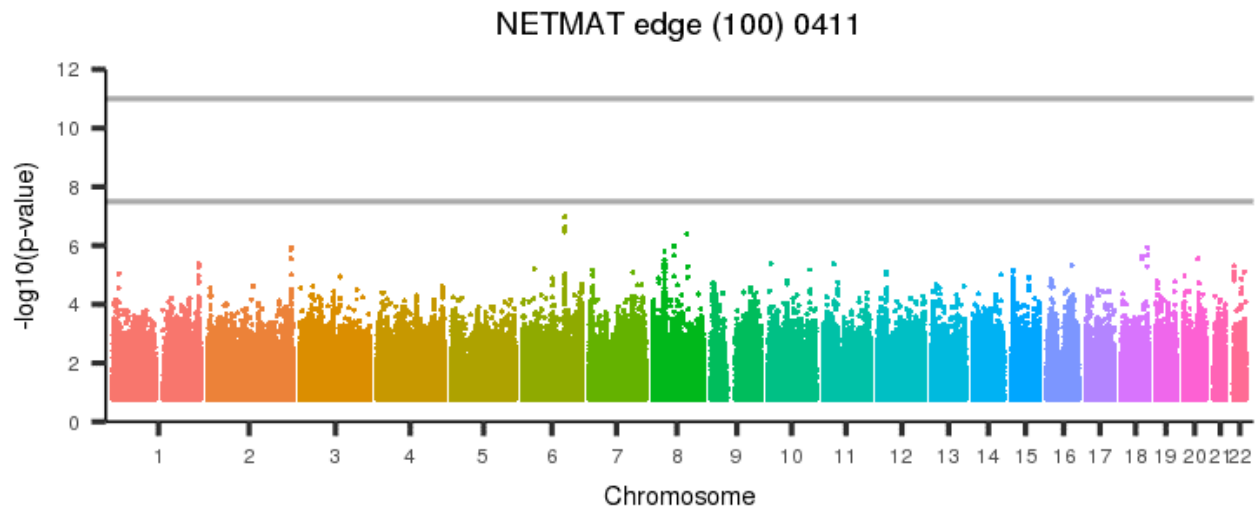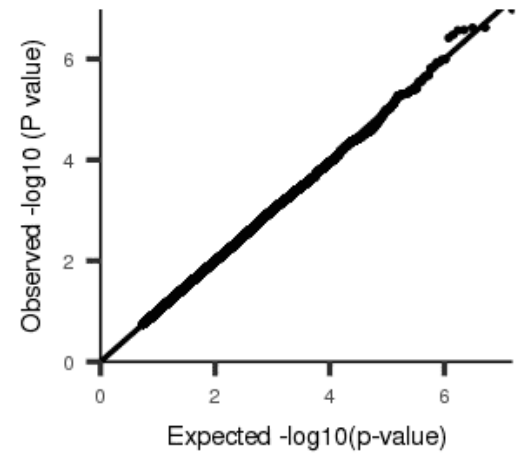

[back to list of plots](#)

Figure 1568: NETMAT edge (100) 0412

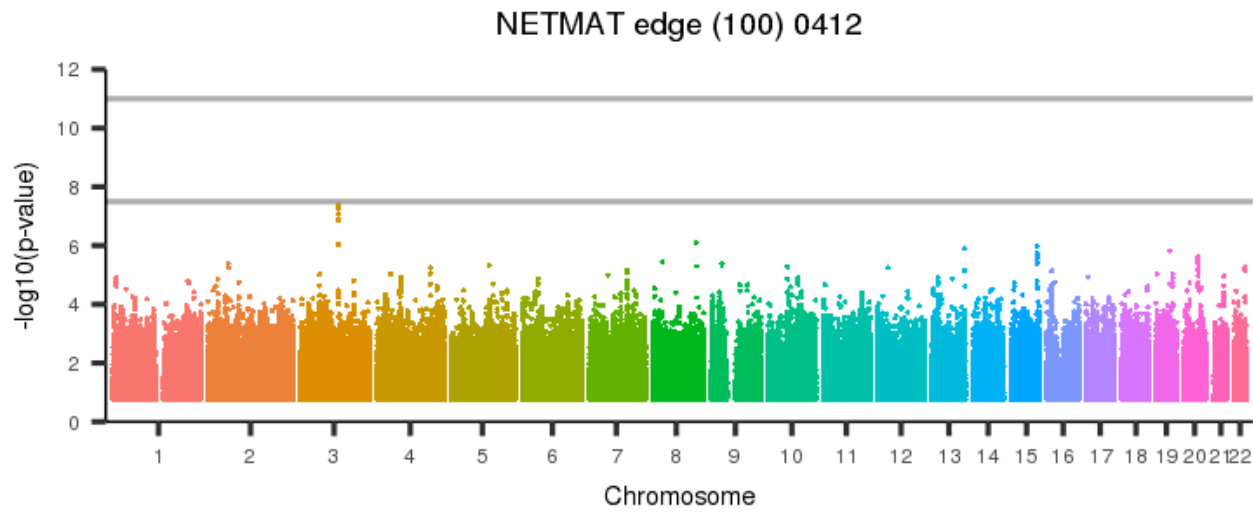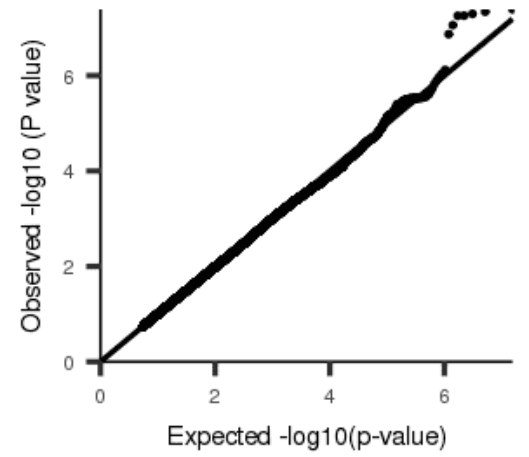

[back to list of plots](#)

Figure 1569: NETMAT edge (100) 0413

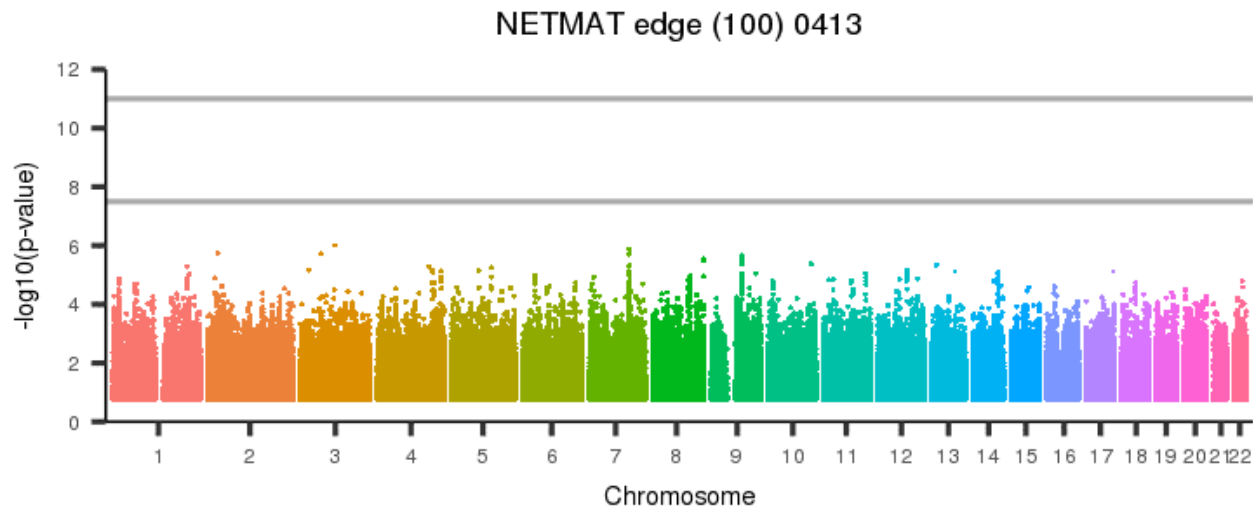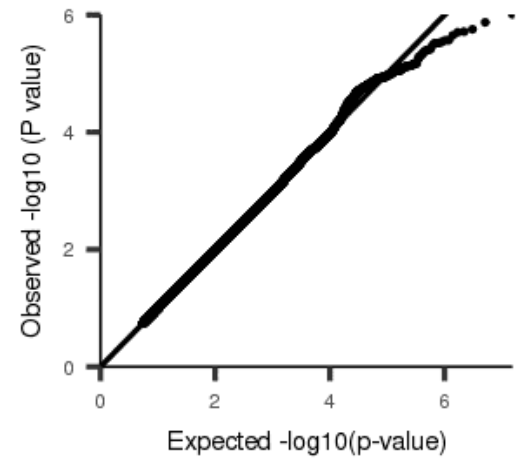

[back to list of plots](#)

Figure 1570: NETMAT edge (100) 0414

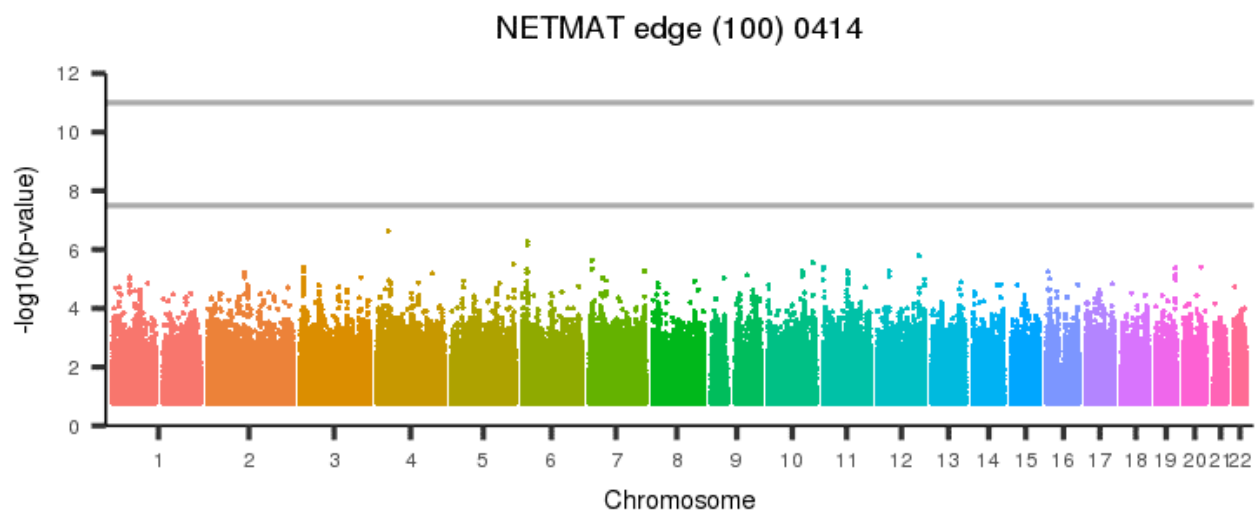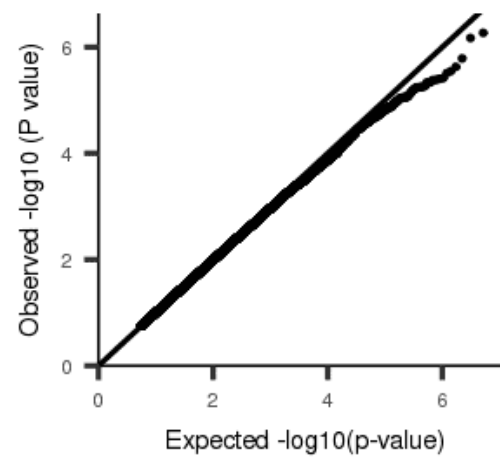

[back to list of plots](#)

Figure 1571: NETMAT edge (100) 0415

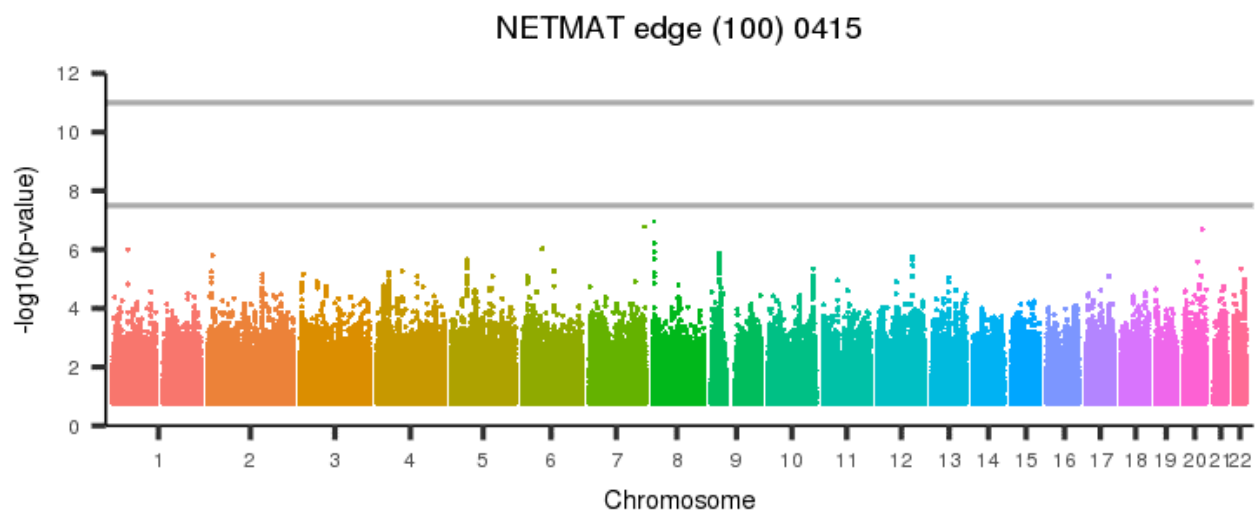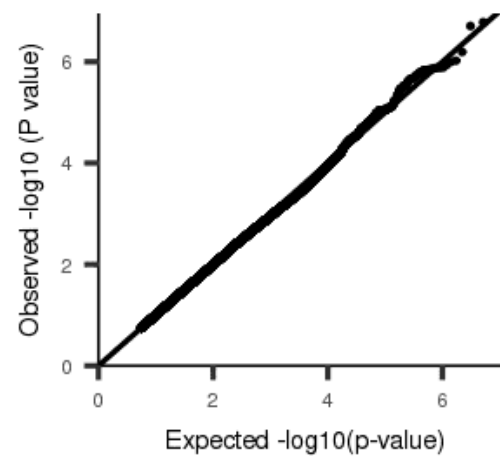

[back to list of plots](#)

Figure 1572: NETMAT edge (100) 0416

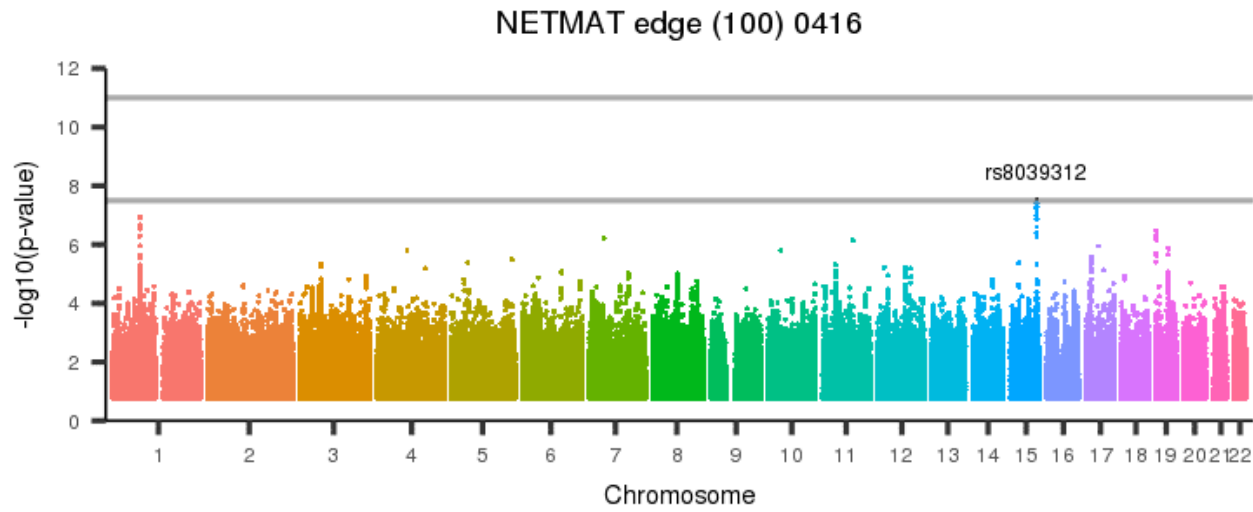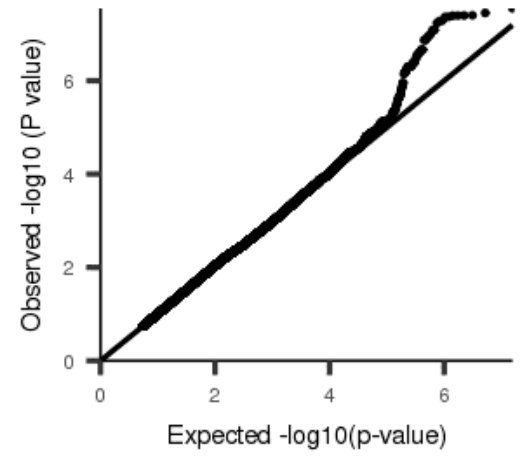

[back to list of plots](#)

Figure 1573: NETMAT edge (100) 0417

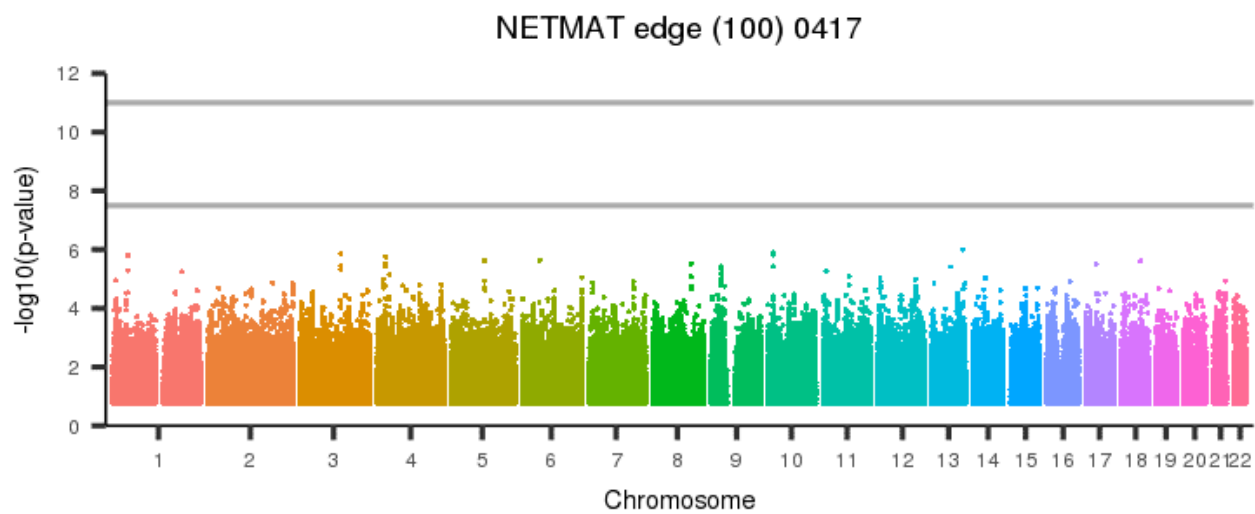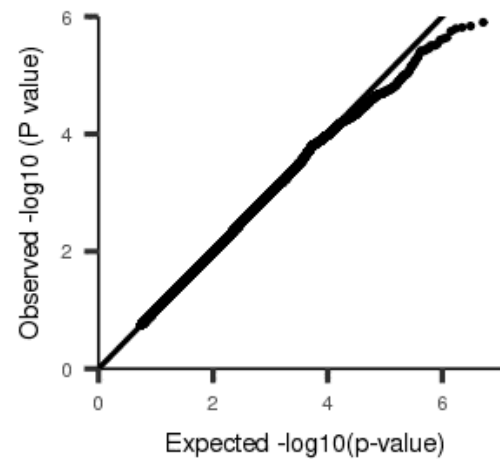

[back to list of plots](#)



Figure 1574: NETMAT edge (100) 0418

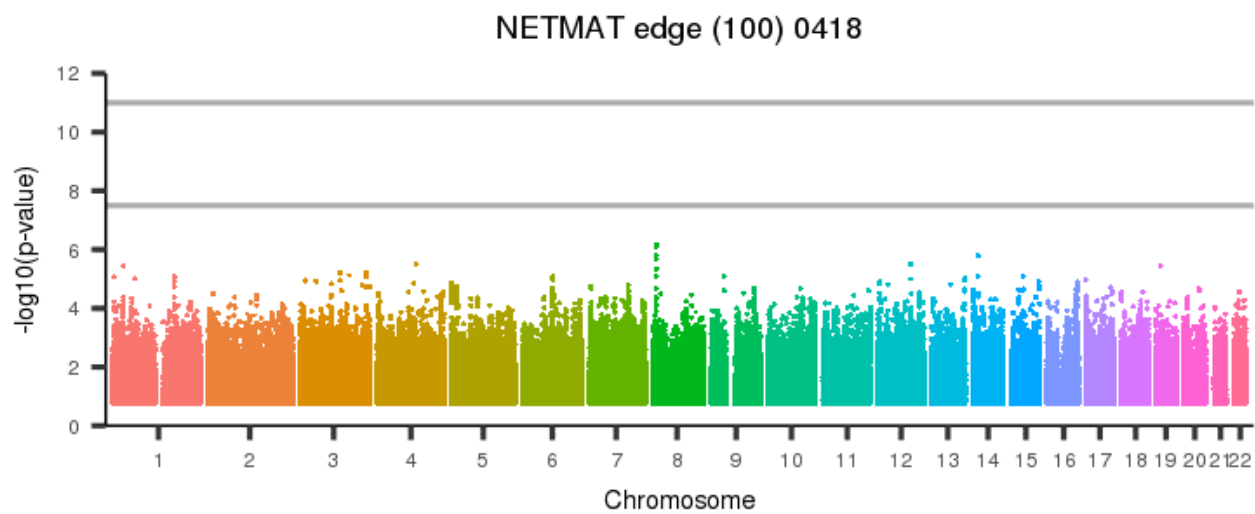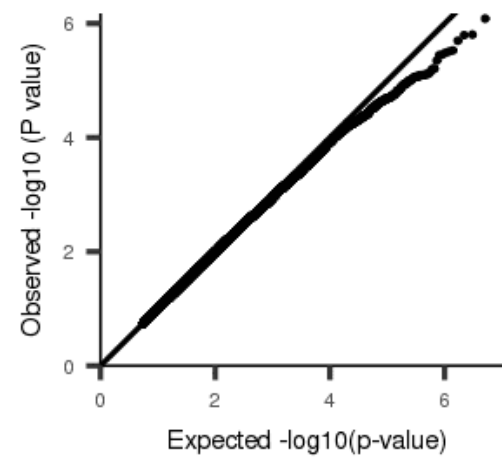

[back to list of plots](#)

Figure 1575: NETMAT edge (100) 0419

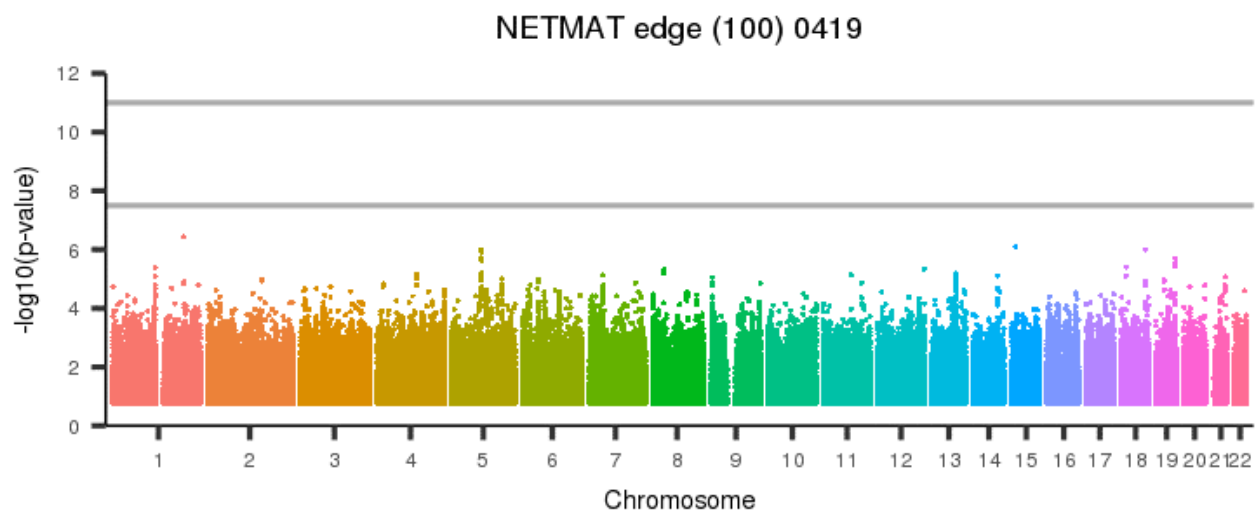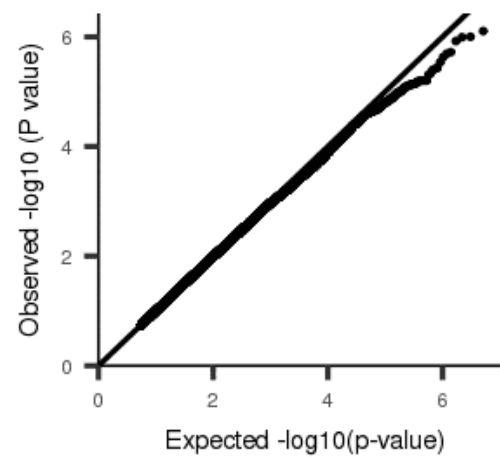

[back to list of plots](#)

Figure 1576: NETMAT edge (100) 0420

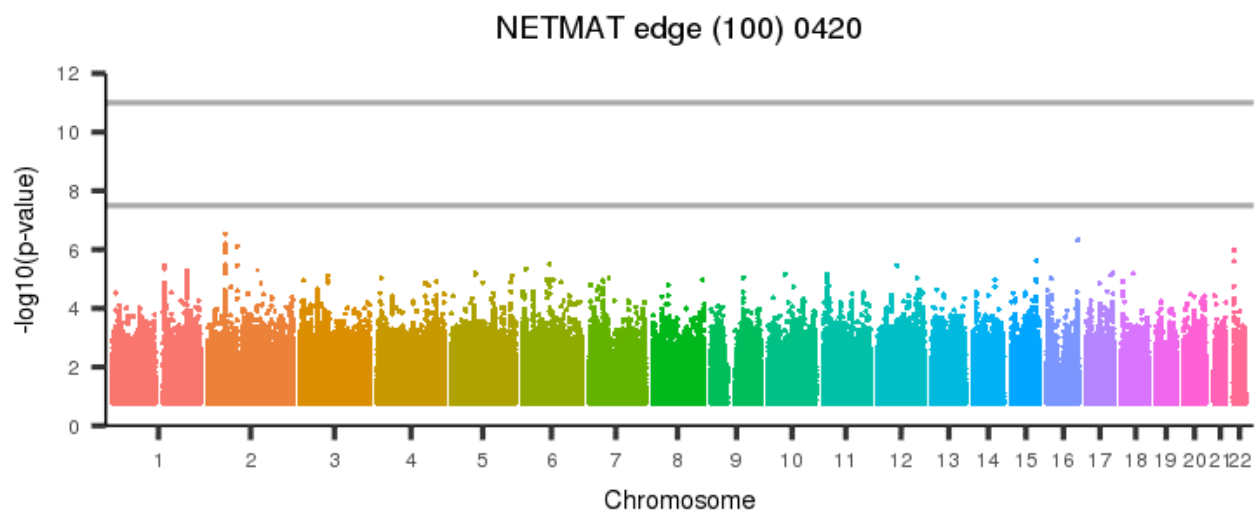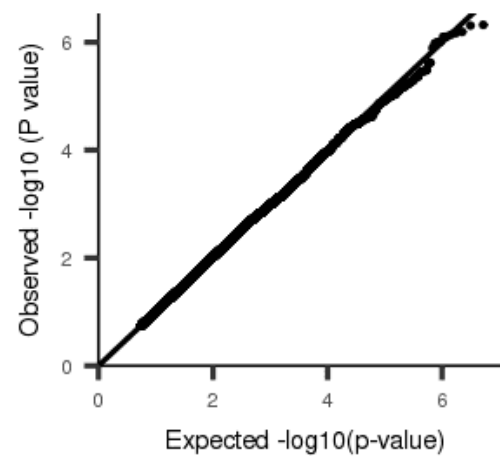

[back to list of plots](#)

Figure 1577: NETMAT edge (100) 0421

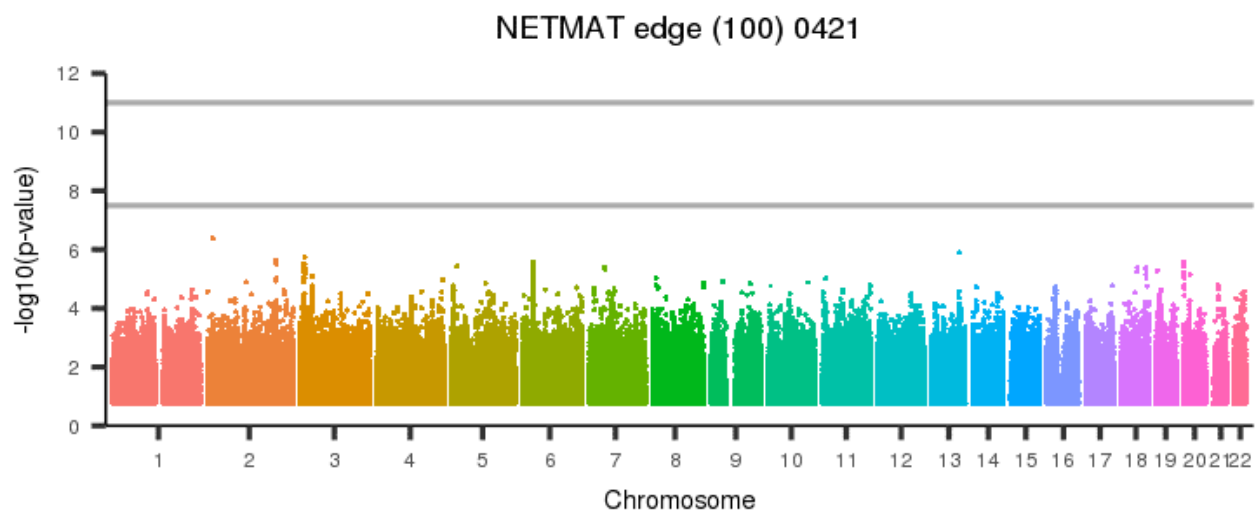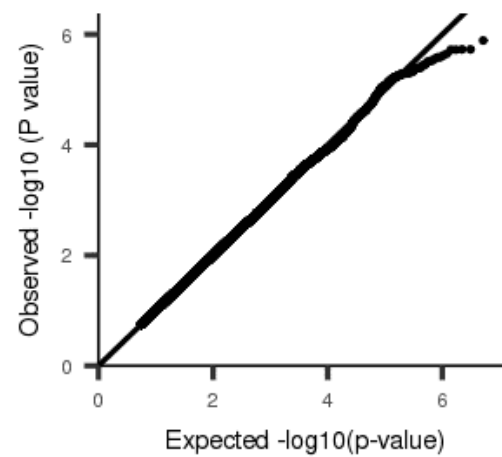

[back to list of plots](#)

Figure 1578: NETMAT edge (100) 0422

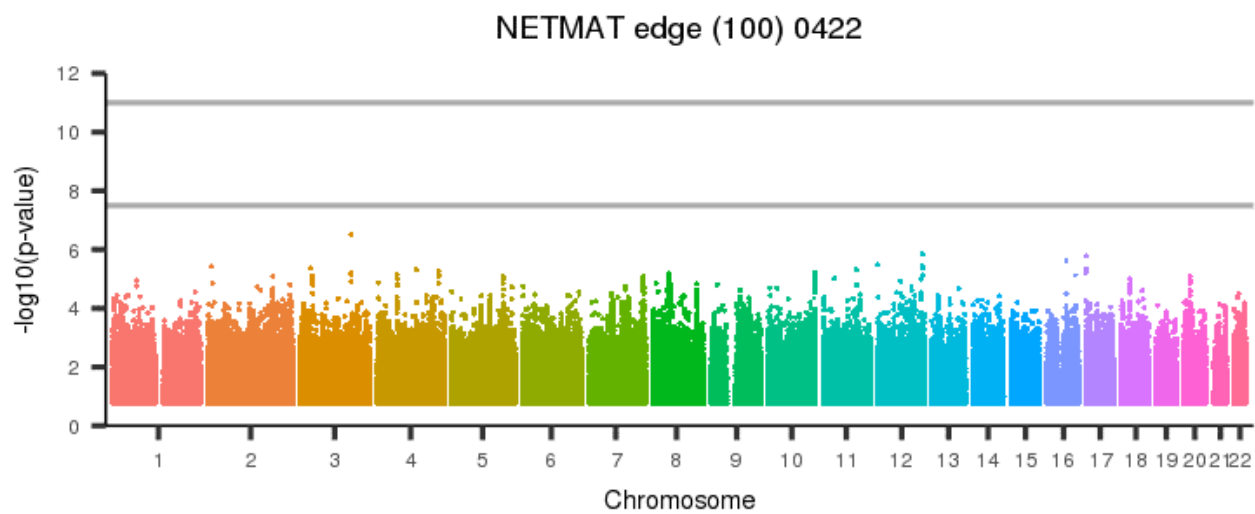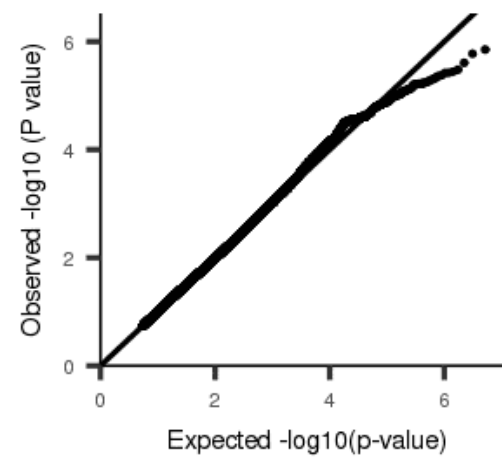

[back to list of plots](#)

Figure 1579: NETMAT edge (100) 0423

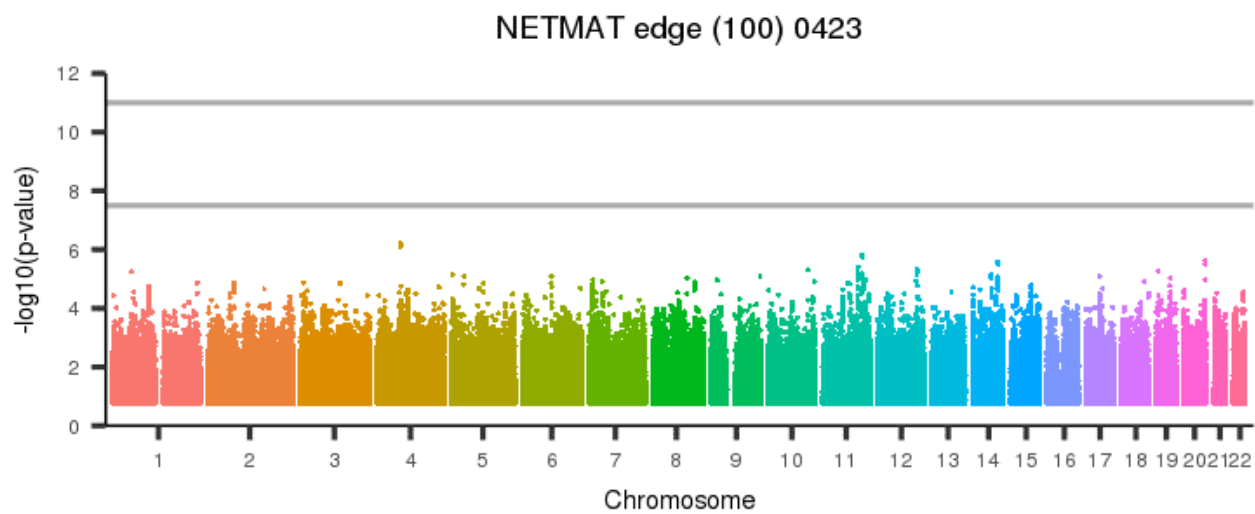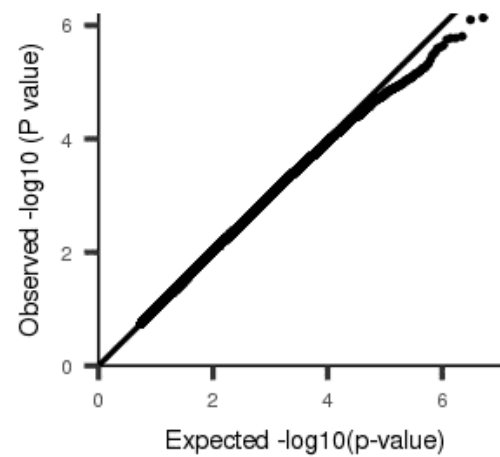

[back to list of plots](#)

Figure 1580: NETMAT edge (100) 0424

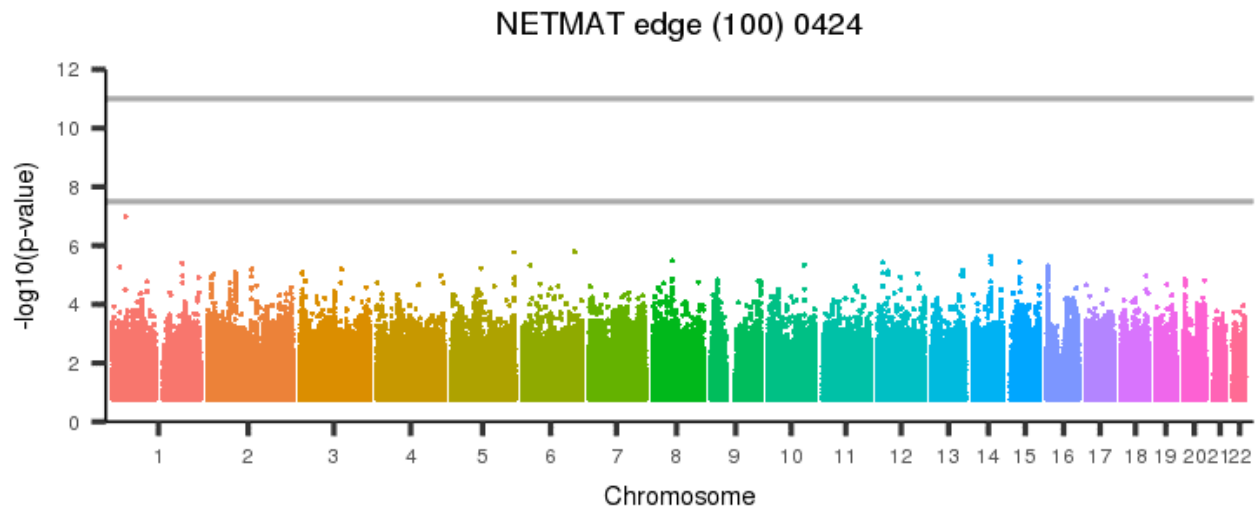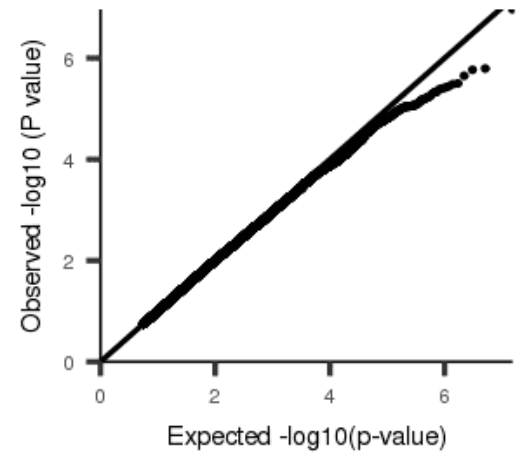

[back to list of plots](#)

Figure 1581: NETMAT edge (100) 0425

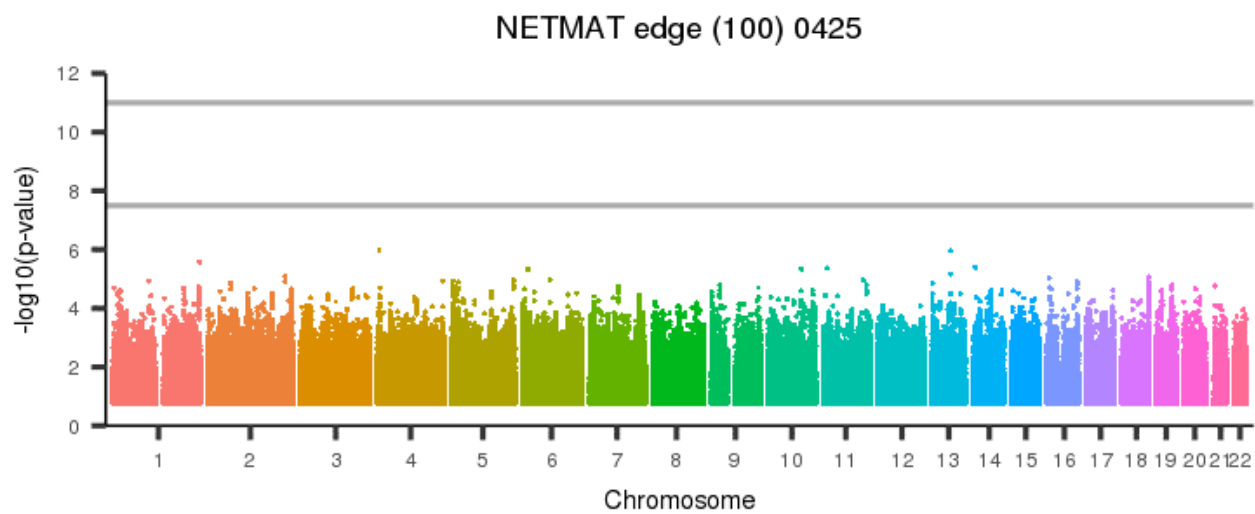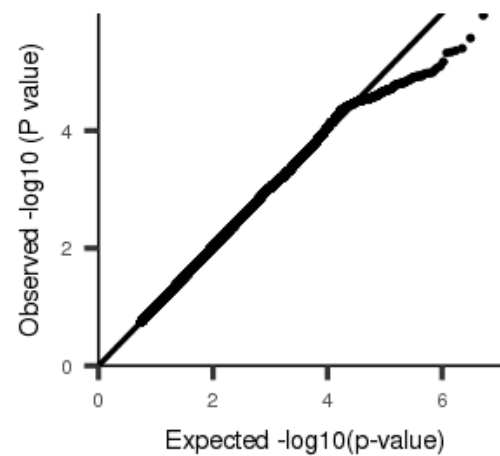

[back to list of plots](#)



Figure 1582: NETMAT edge (100) 0426

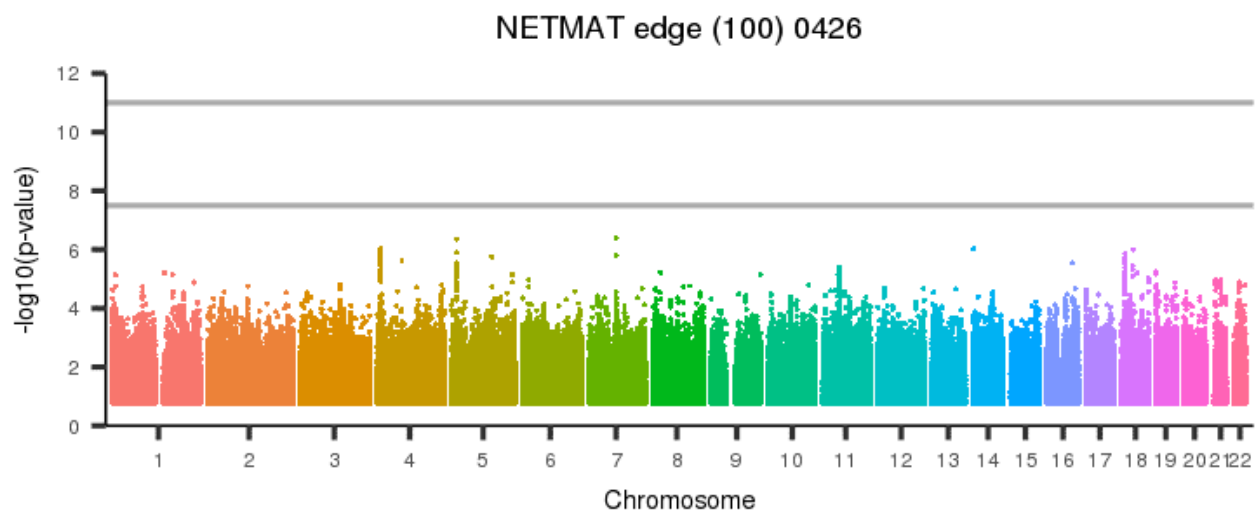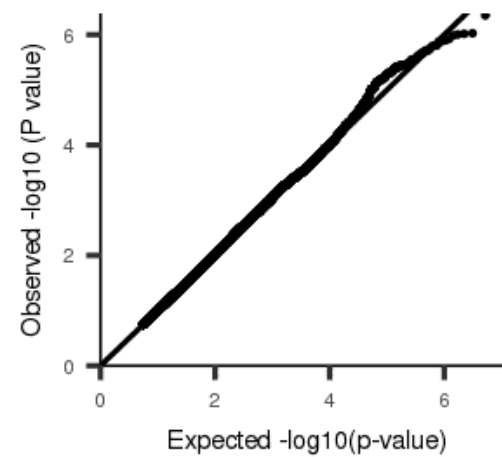

[back to list of plots](#)

Figure 1583: NETMAT edge (100) 0427

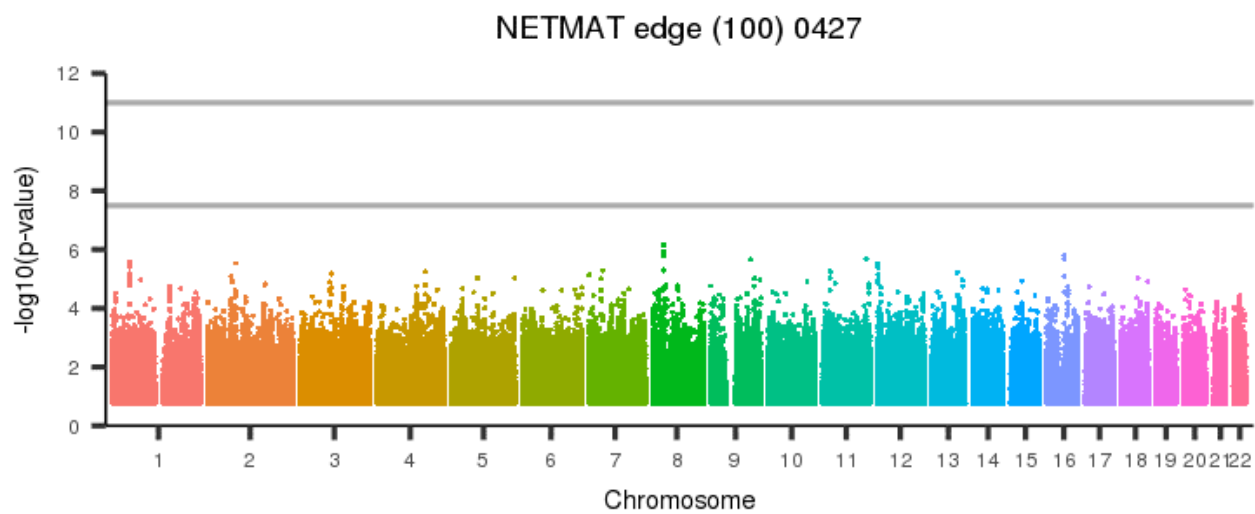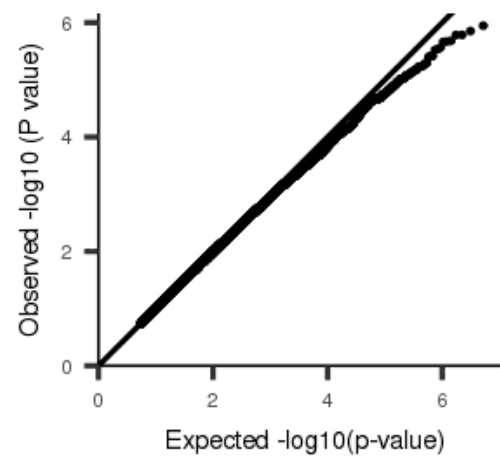

[back to list of plots](#)

Figure 1584: NETMAT edge (100) 0428

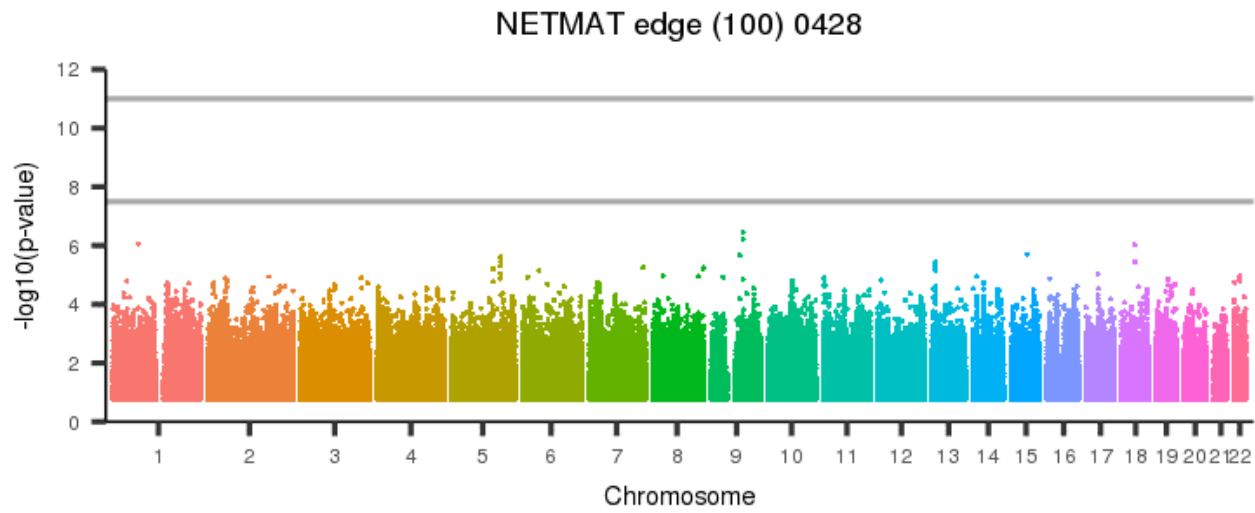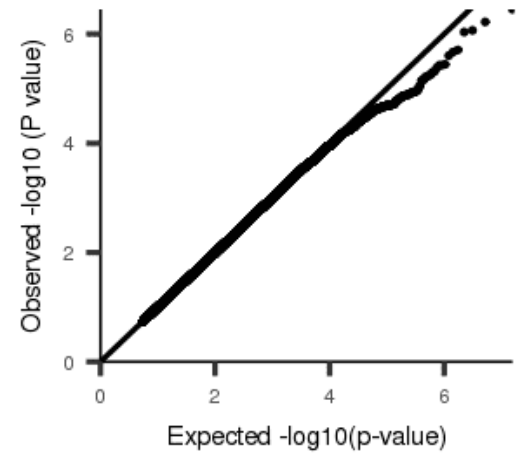

[back to list of plots](#)

Figure 1585: NETMAT edge (100) 0429

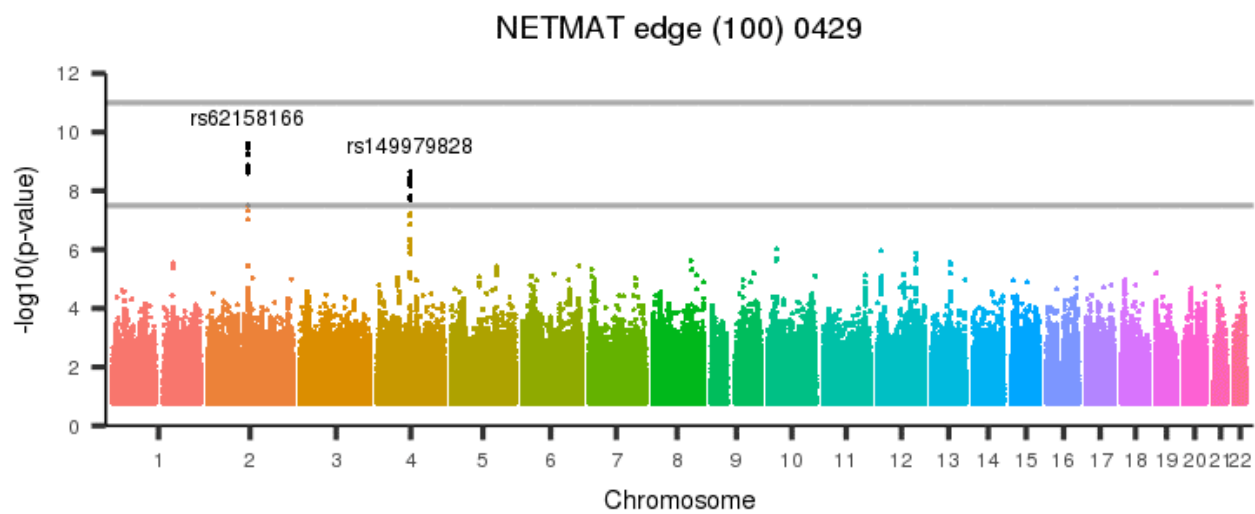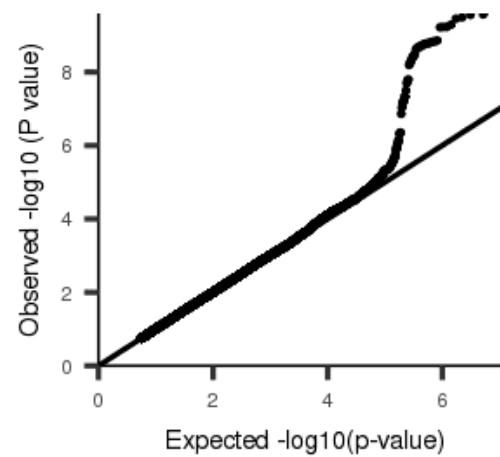

[back to list of plots](#)

Figure 1586: NETMAT edge (100) 0430

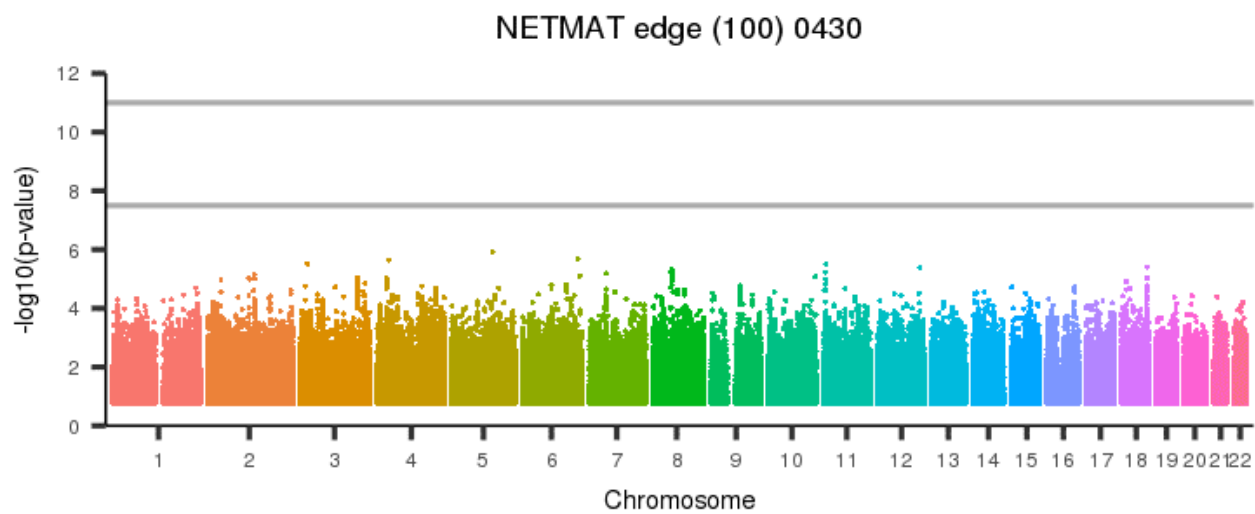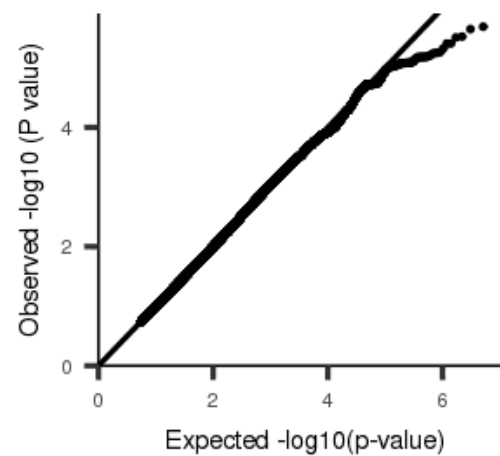

[back to list of plots](#)

Figure 1587: NETMAT edge (100) 0431

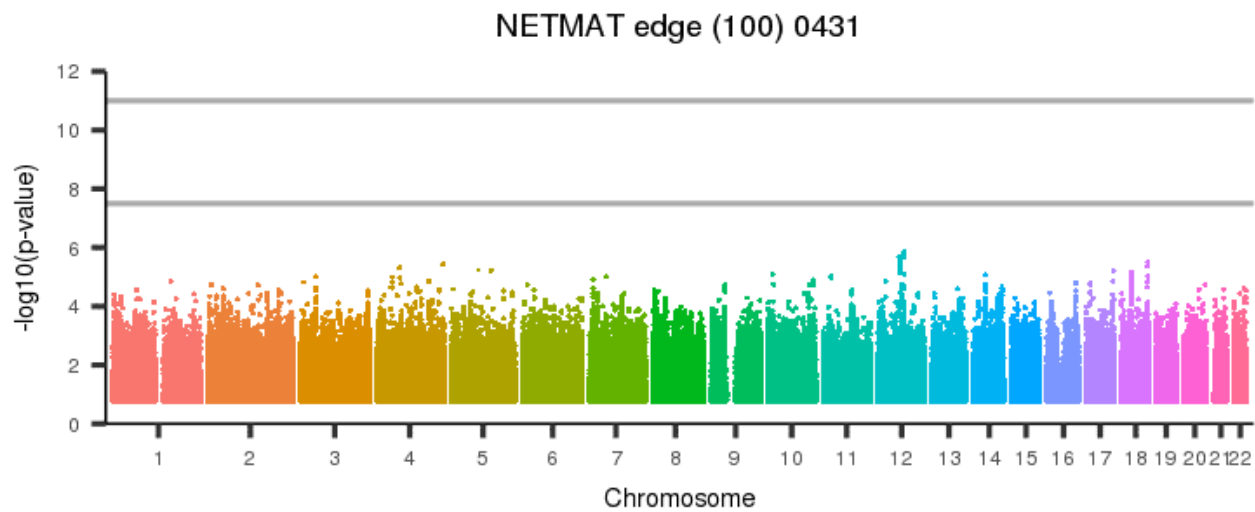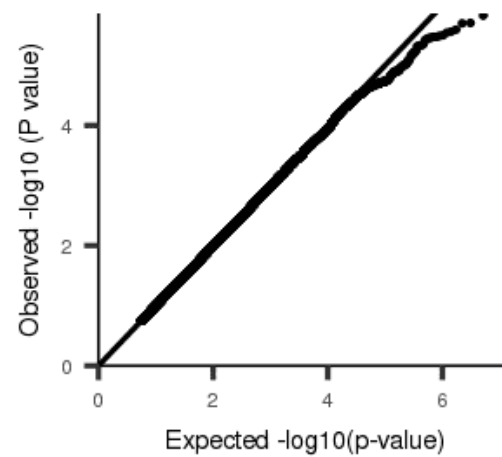

[back to list of plots](#)

Figure 1588: NETMAT edge (100) 0432

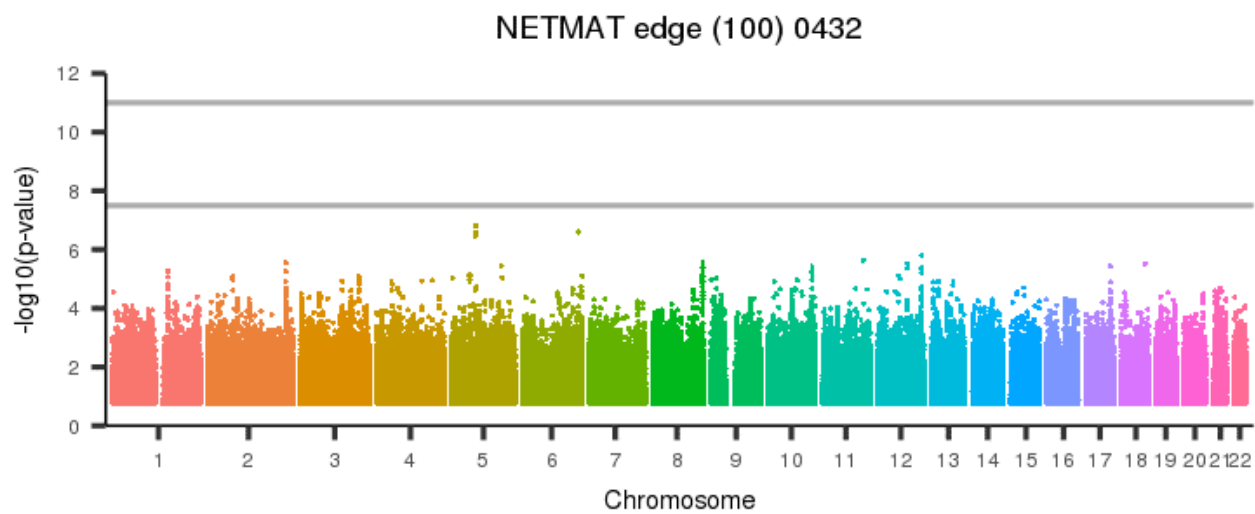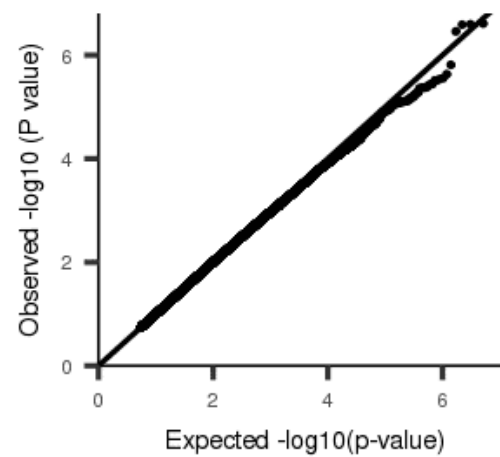

[back to list of plots](#)

Figure 1589: NETMAT edge (100) 0433

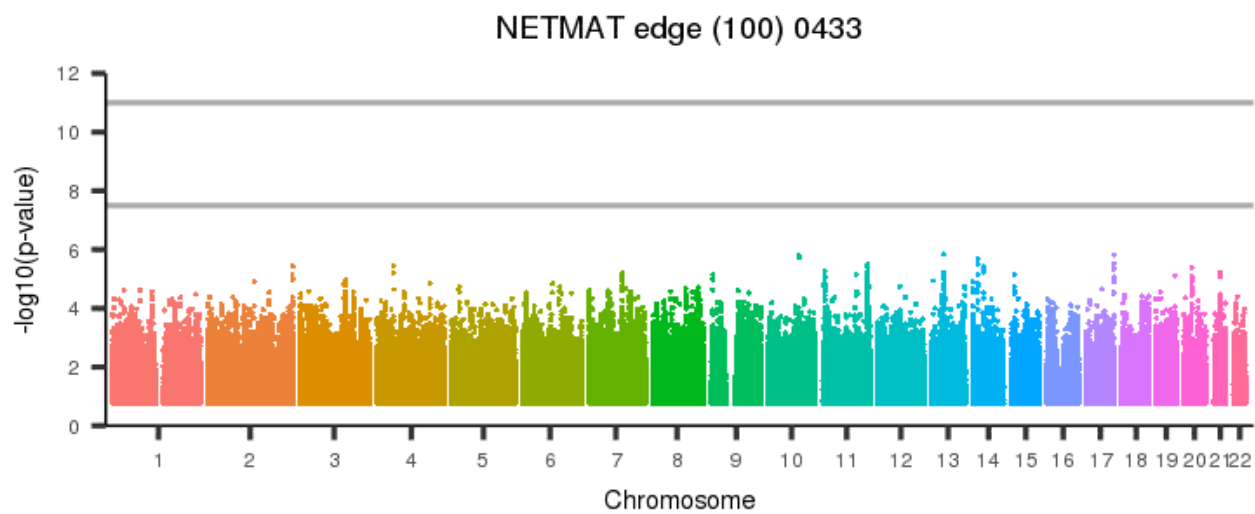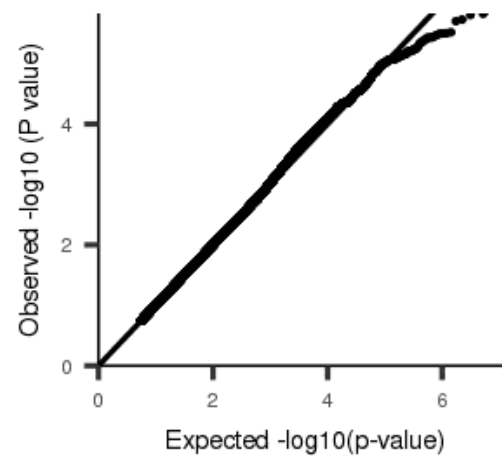

[back to list of plots](#)



Figure 1590: NETMAT edge (100) 0434

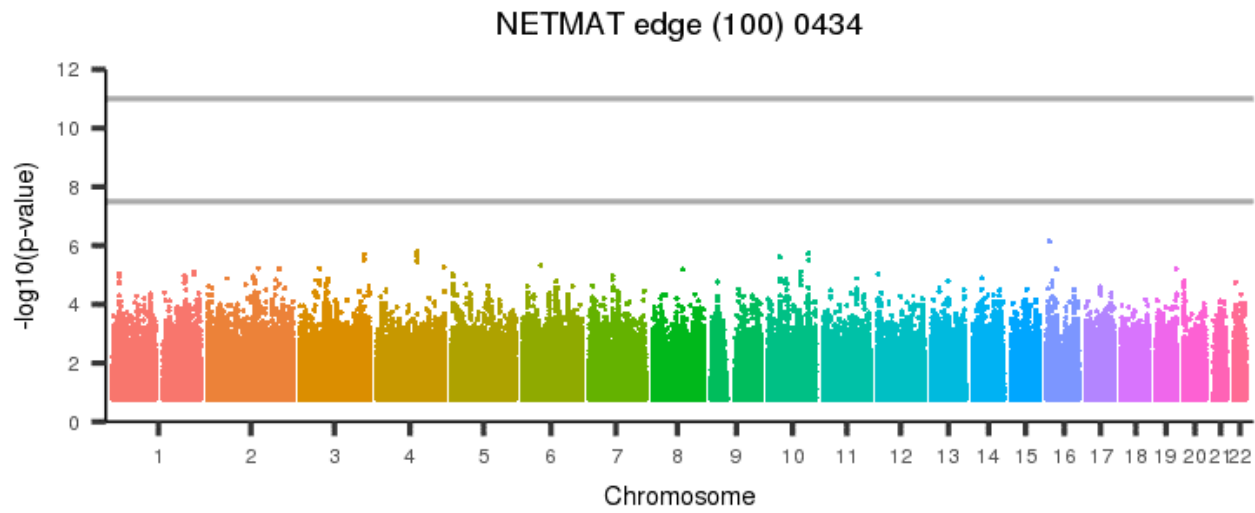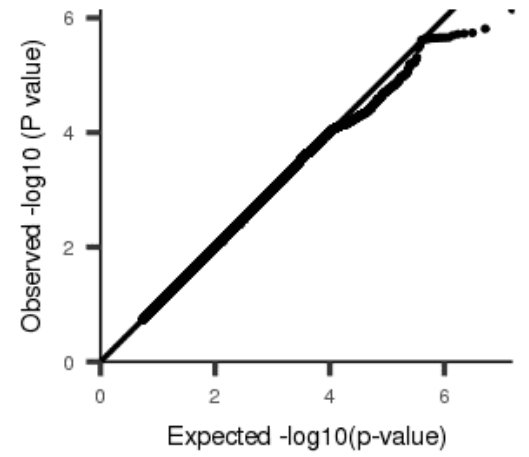

[back to list of plots](#)

Figure 1591: NETMAT edge (100) 0435

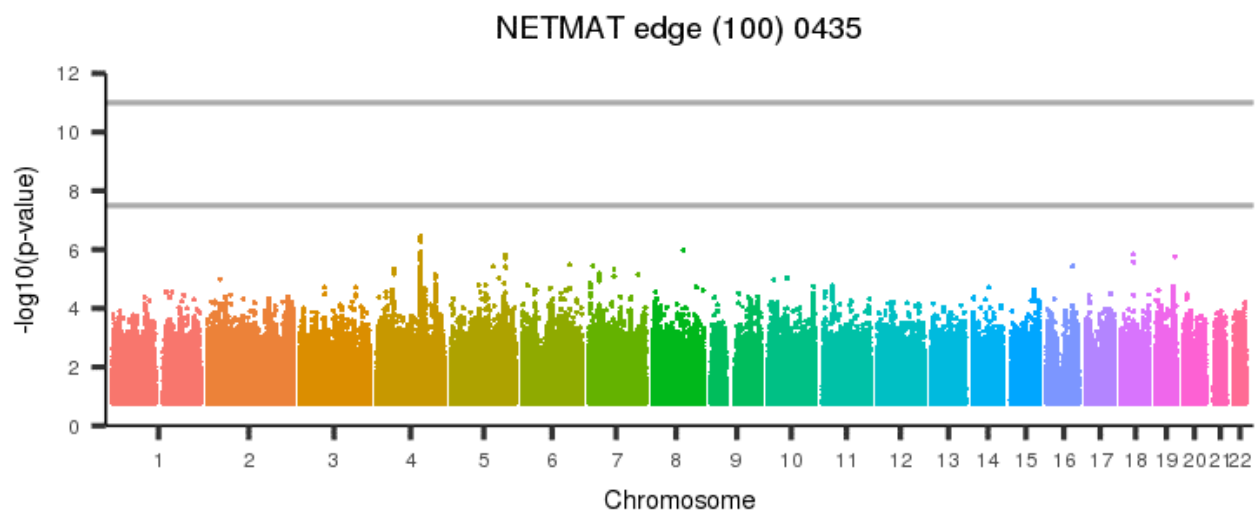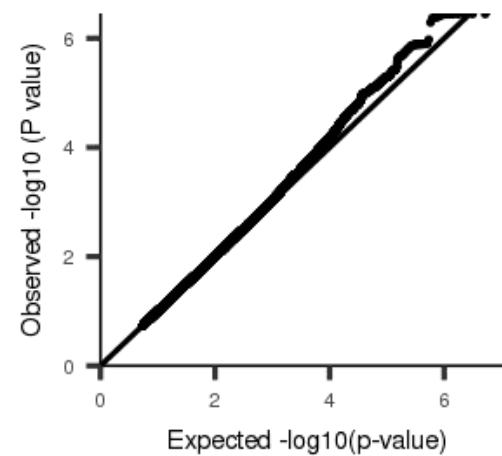

[back to list of plots](#)

Figure 1592: NETMAT edge (100) 0436

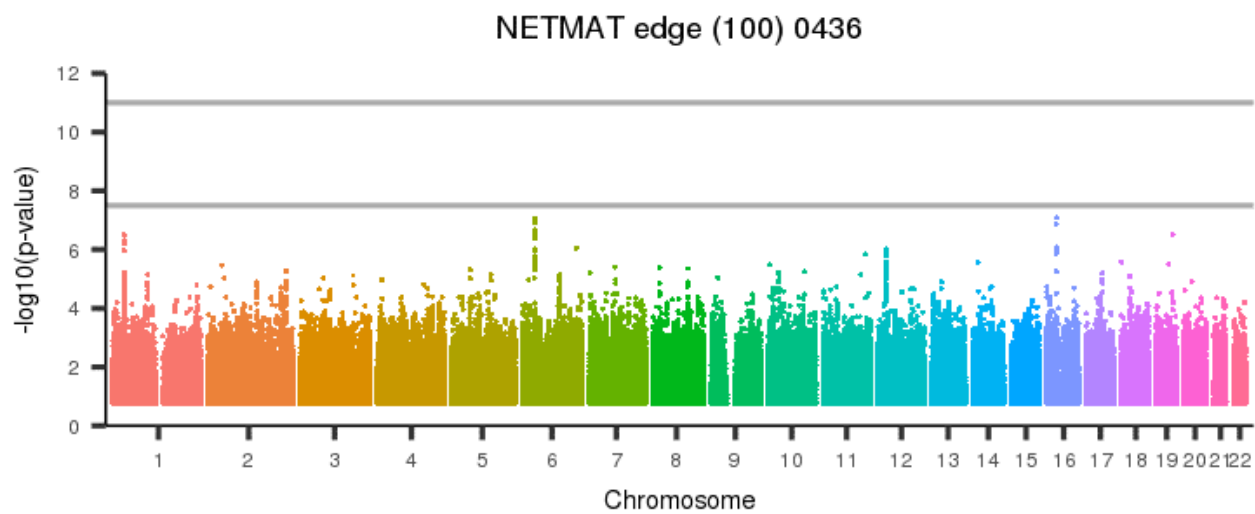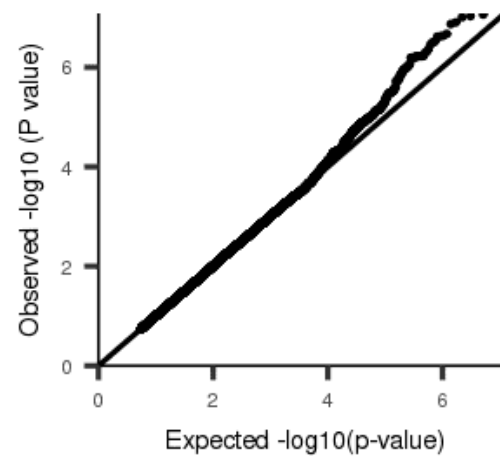

[back to list of plots](#)

Figure 1593: NETMAT edge (100) 0437

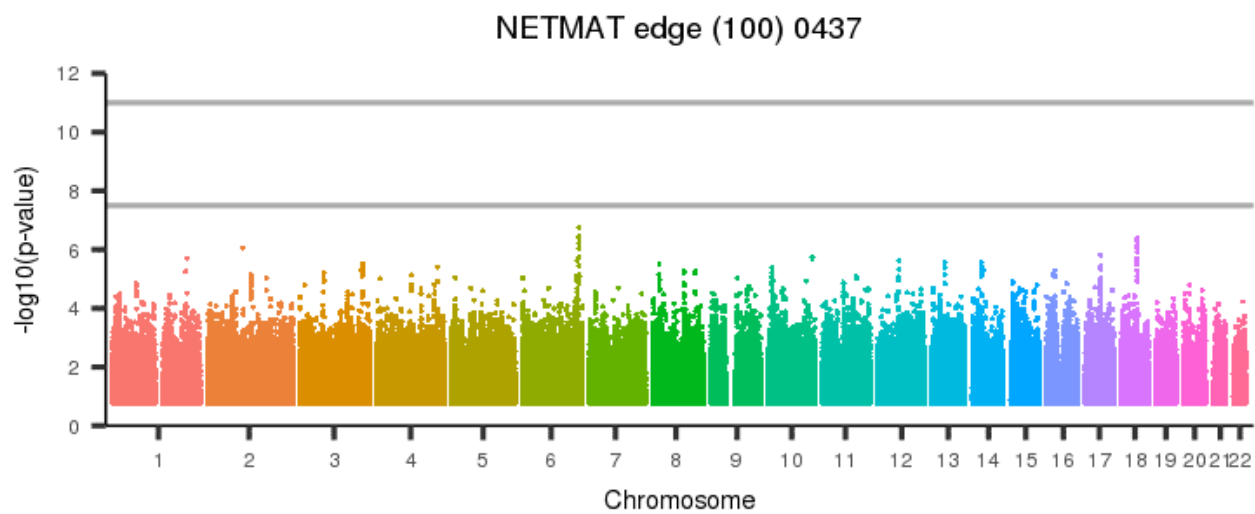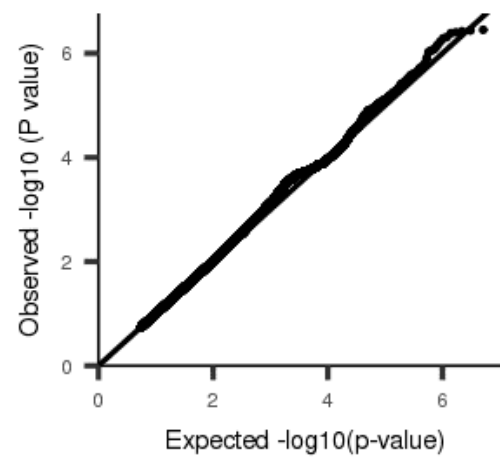

[back to list of plots](#)

Figure 1594: NETMAT edge (100) 0438

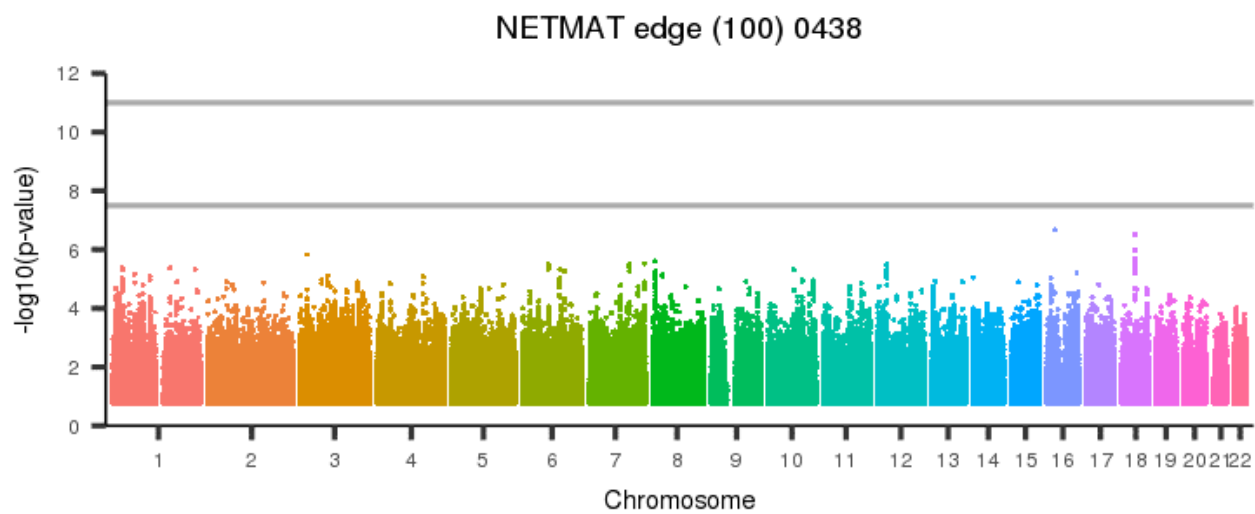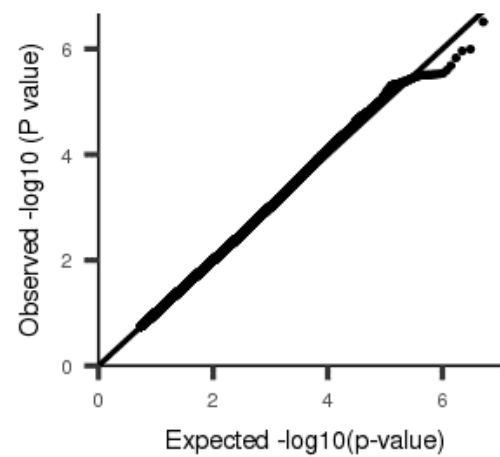

[back to list of plots](#)

Figure 1595: NETMAT edge (100) 0439

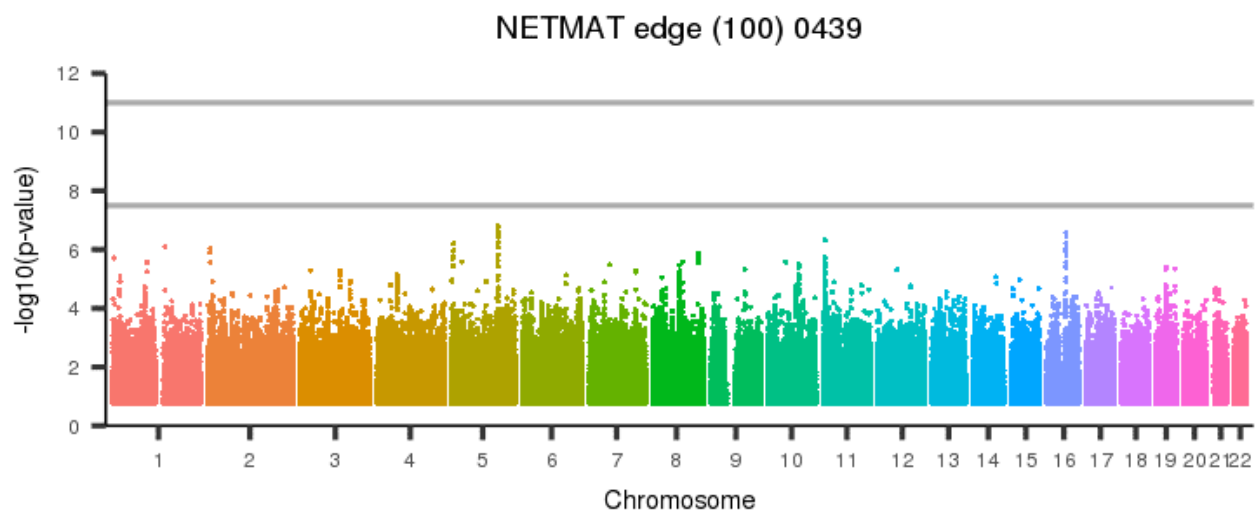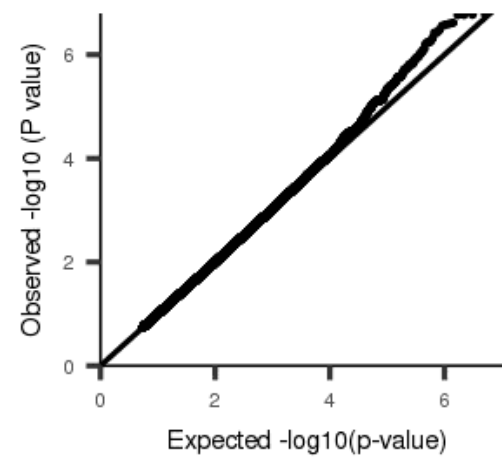

[back to list of plots](#)

Figure 1596: NETMAT edge (100) 0440

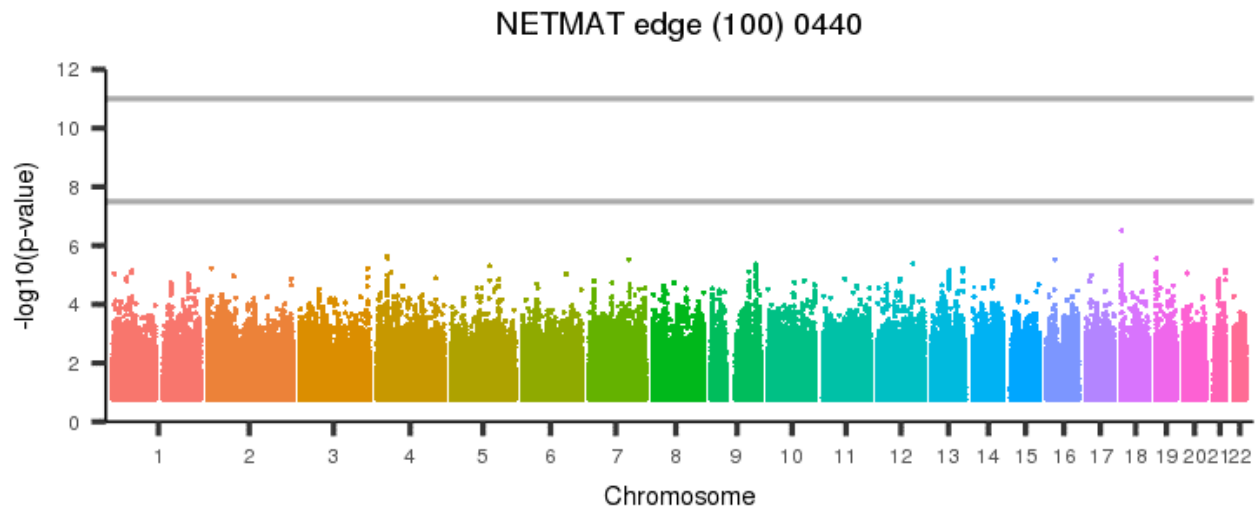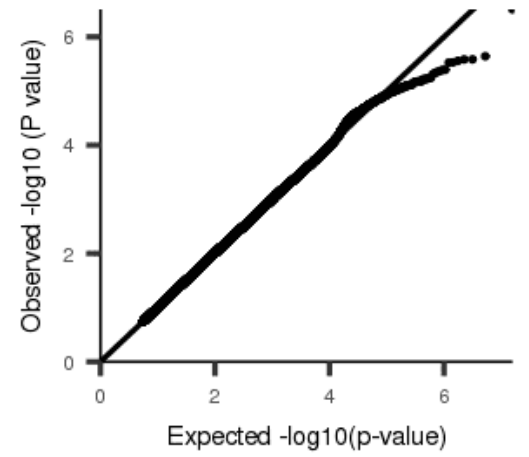

[back to list of plots](#)

Figure 1597: NETMAT edge (100) 0441

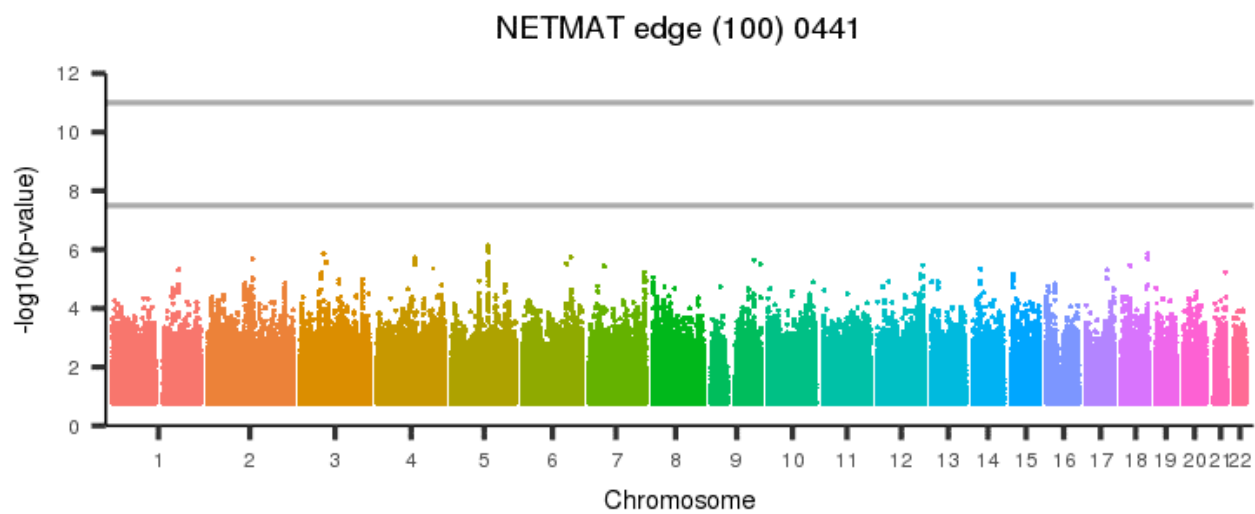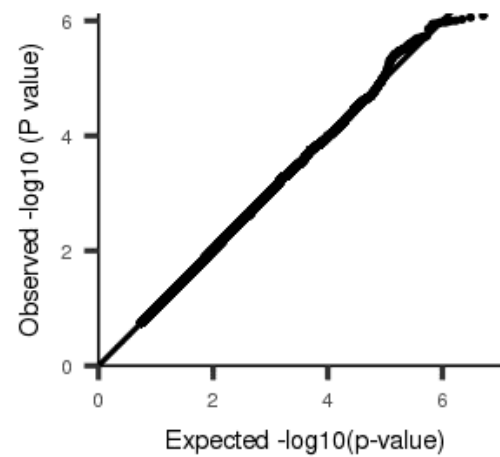

[back to list of plots](#)



Figure 1598: NETMAT edge (100) 0442

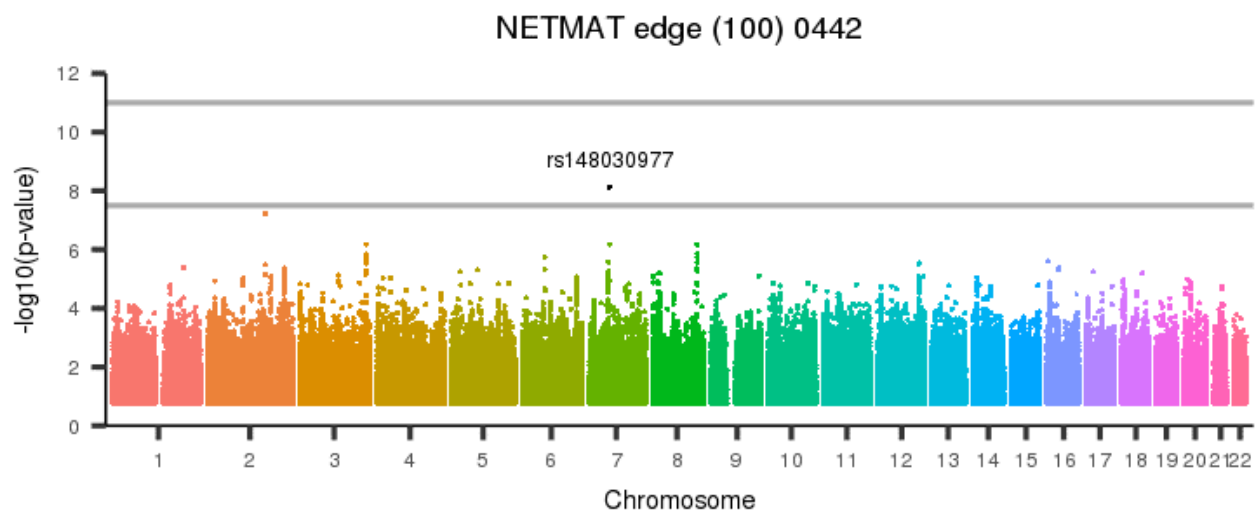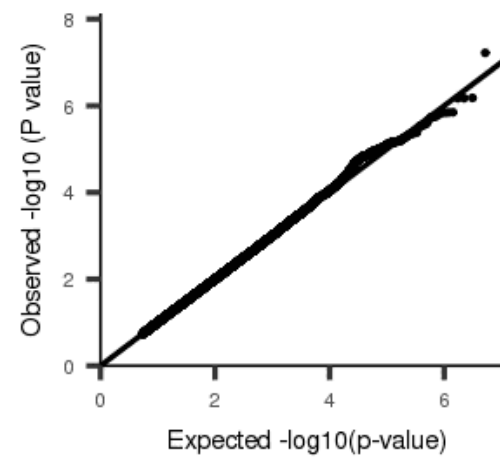

[back to list of plots](#)

Figure 1599: NETMAT edge (100) 0443

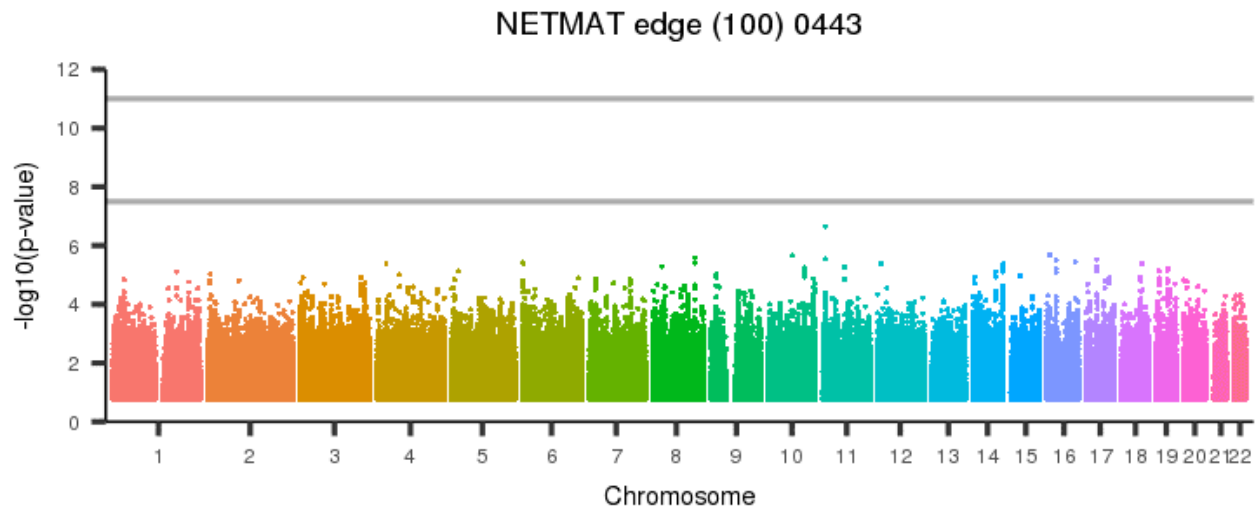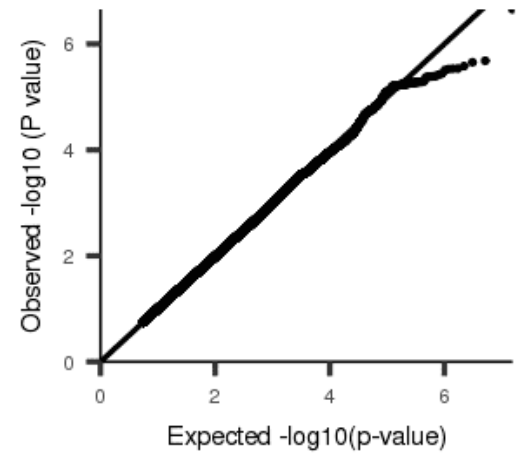

[back to list of plots](#)

Figure 1600: NETMAT edge (100) 0444

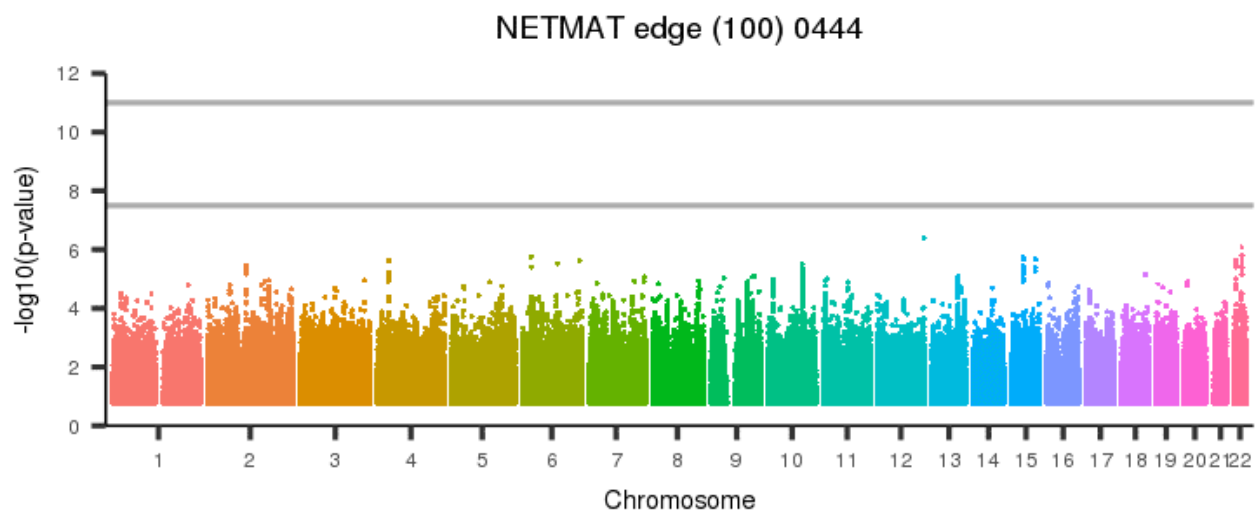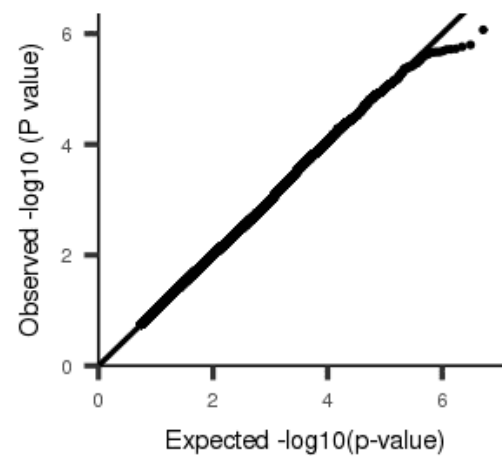

[back to list of plots](#)

Figure 1601: NETMAT edge (100) 0445

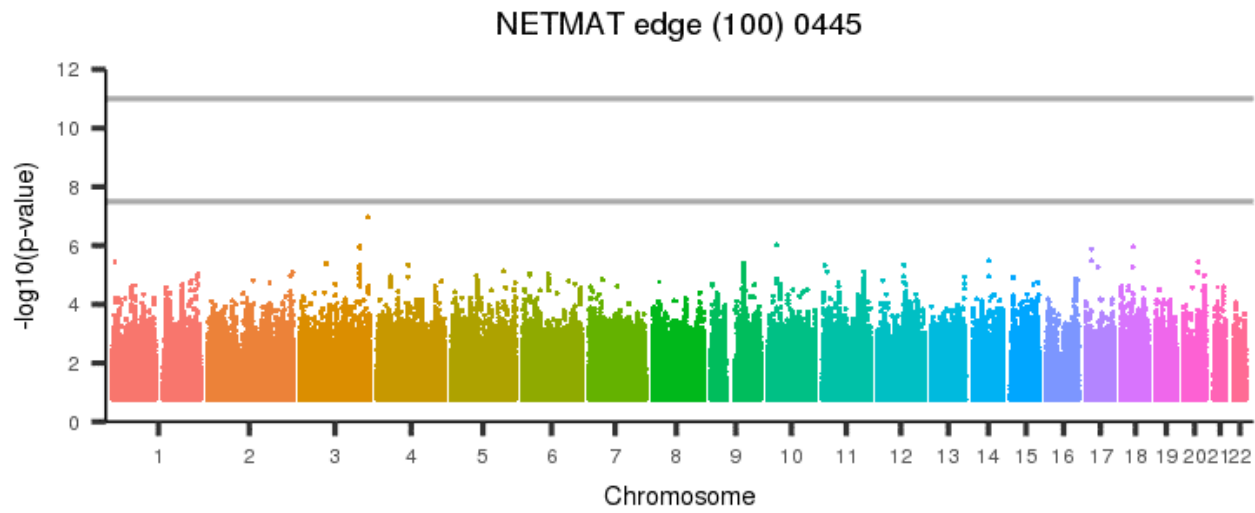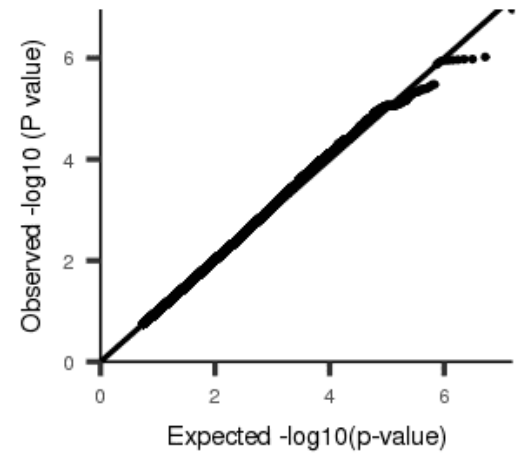

[back to list of plots](#)

Figure 1602: NETMAT edge (100) 0446

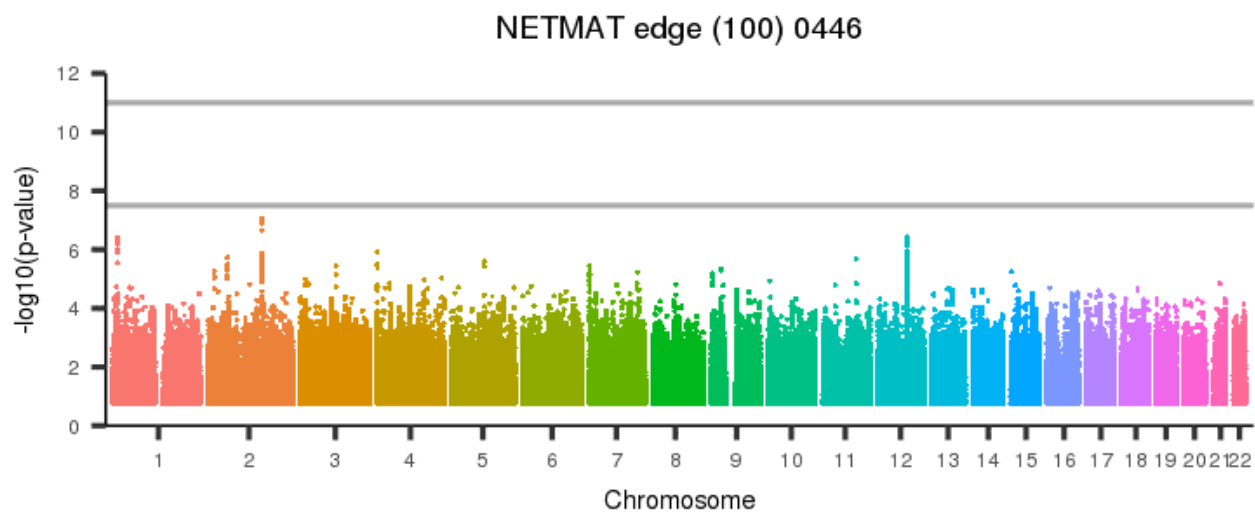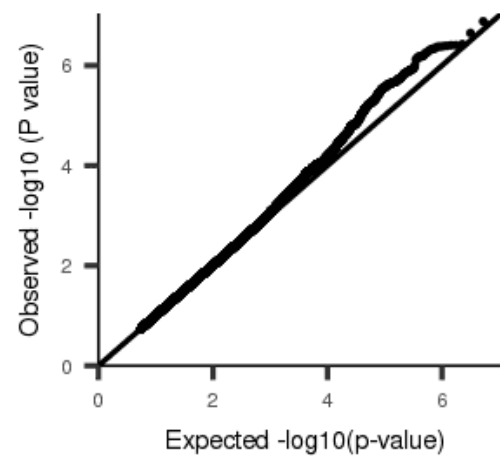

[back to list of plots](#)

Figure 1603: NETMAT edge (100) 0447

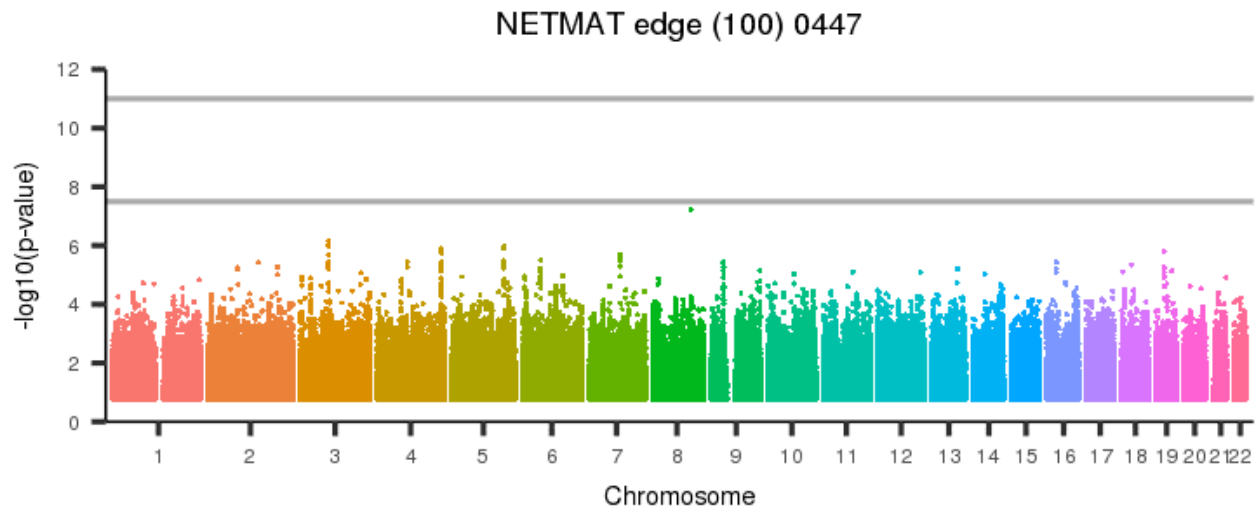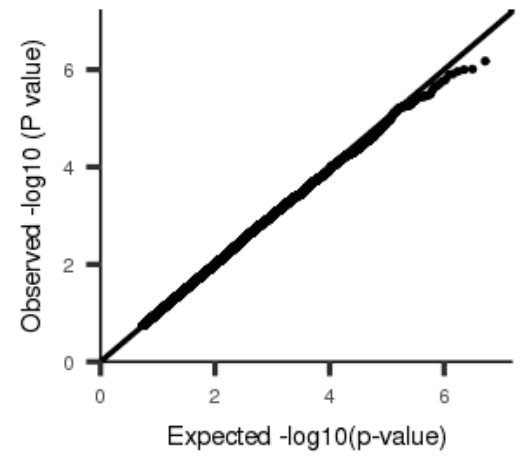

[back to list of plots](#)

Figure 1604: NETMAT edge (100) 0448

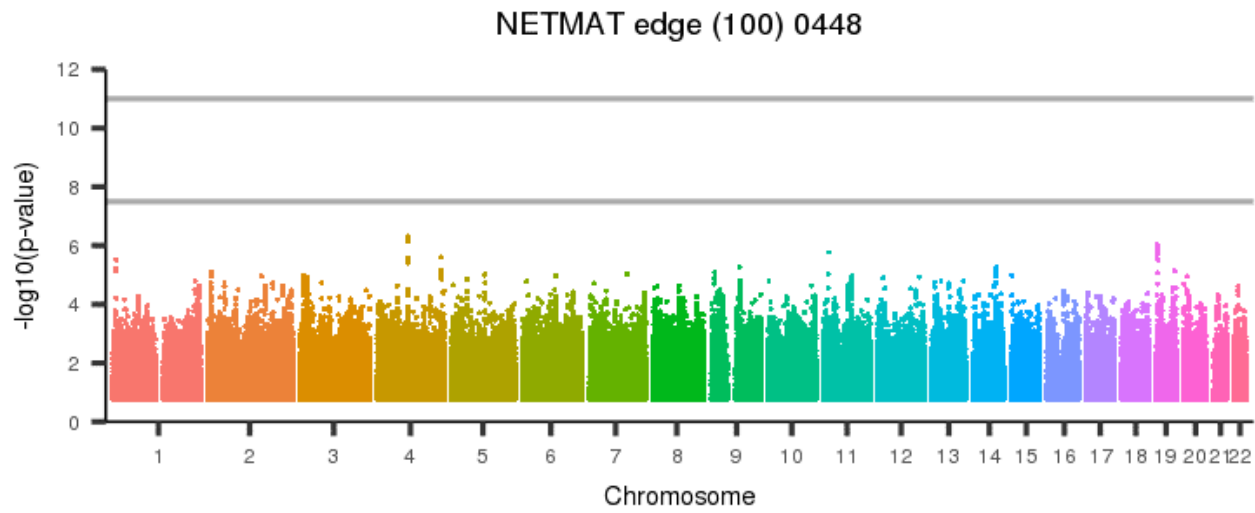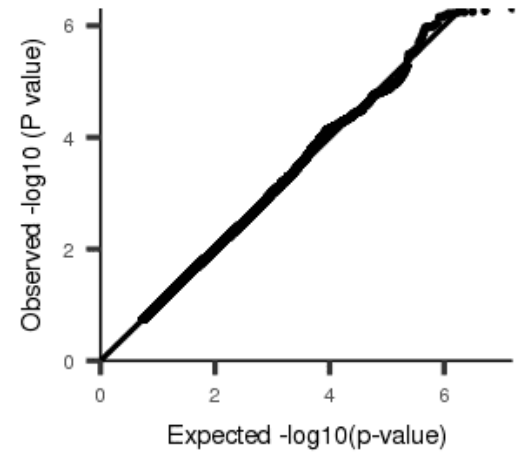

[back to list of plots](#)

Figure 1605: NETMAT edge (100) 0449

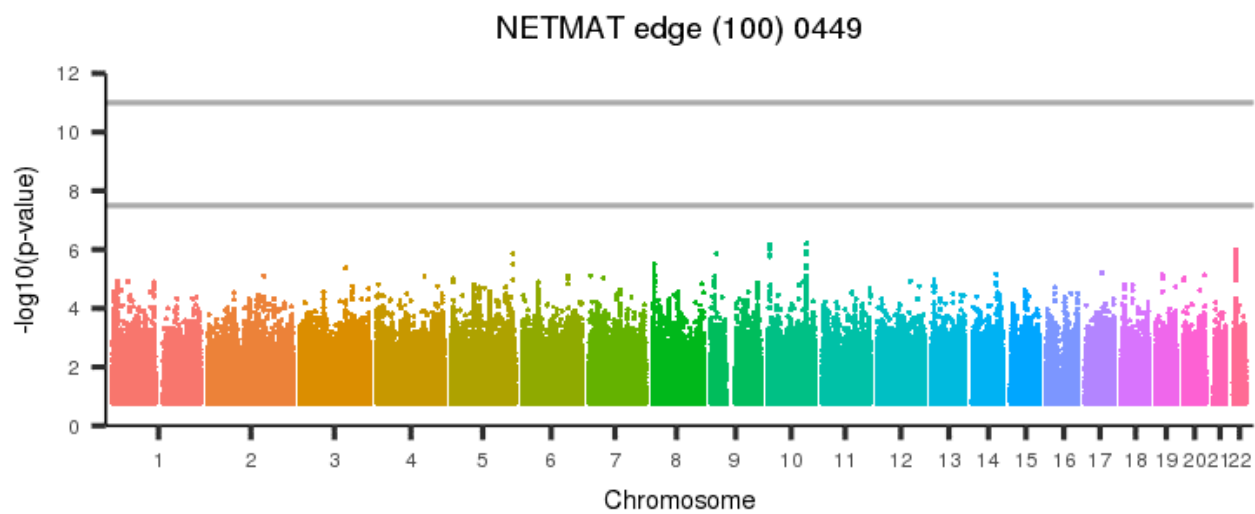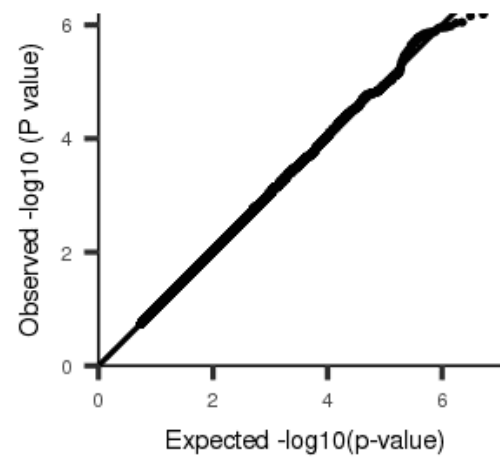

[back to list of plots](#)



Figure 1606: NETMAT edge (100) 0450

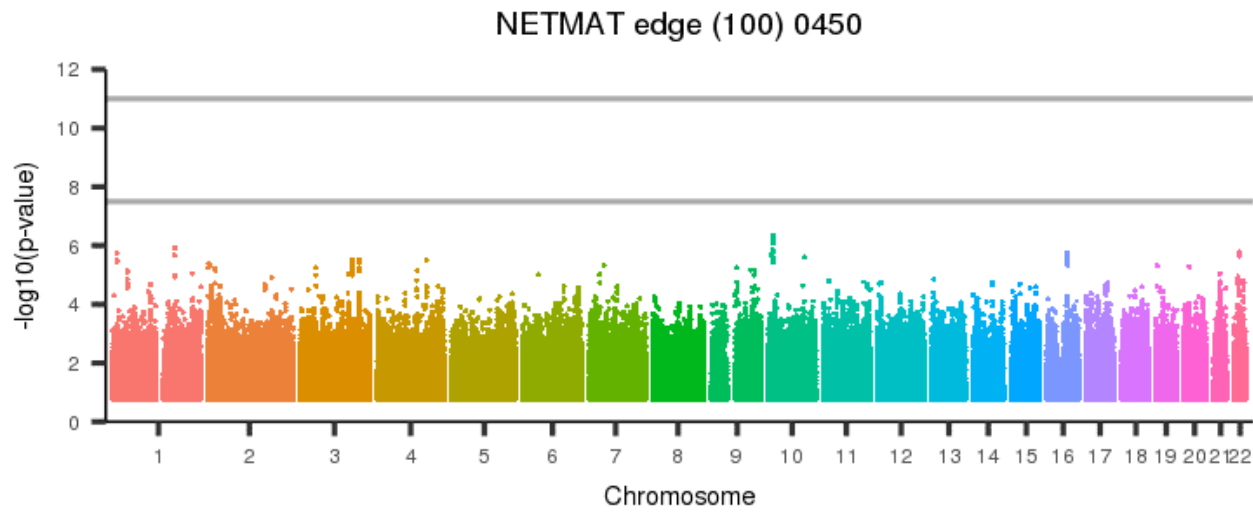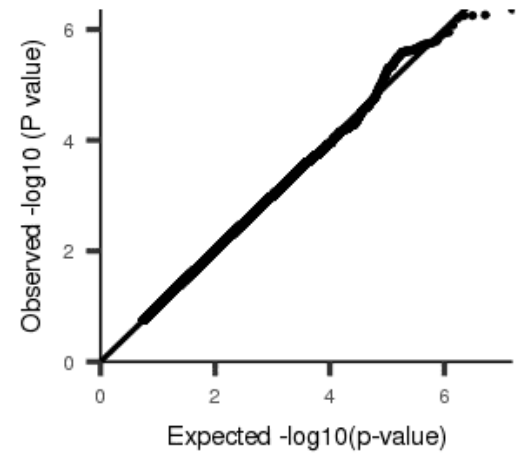

[back to list of plots](#)

Figure 1607: NETMAT edge (100) 0451

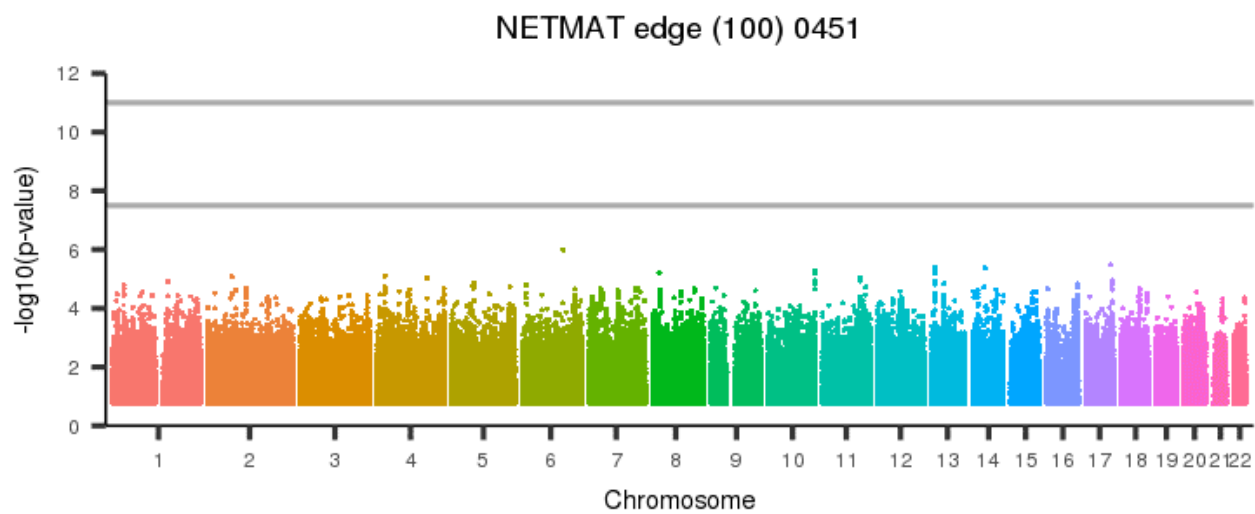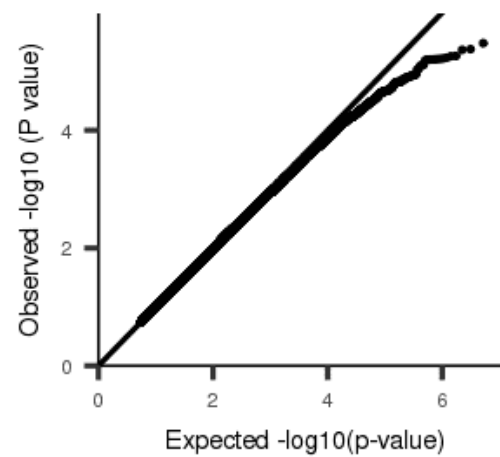

[back to list of plots](#)

Figure 1608: NETMAT edge (100) 0452

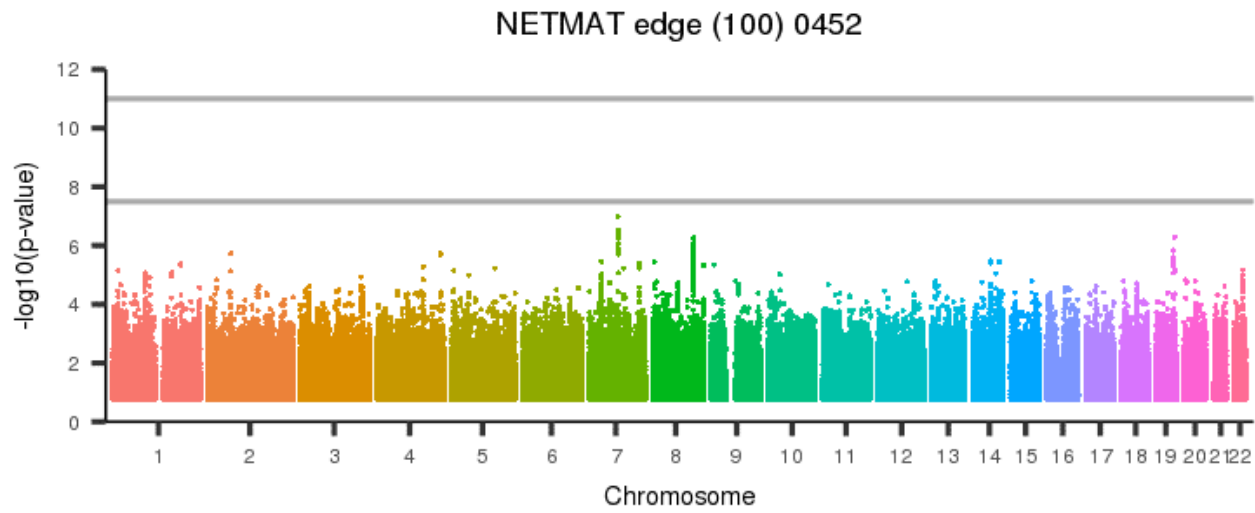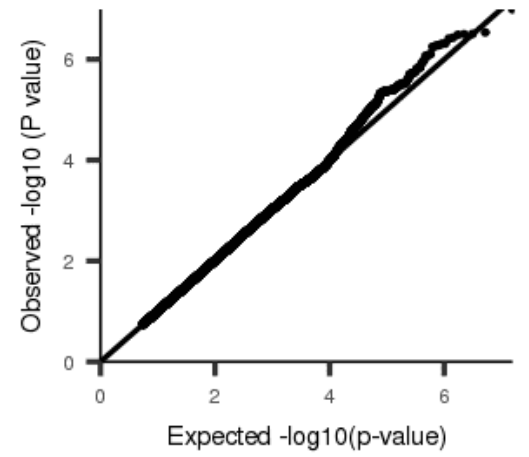

[back to list of plots](#)

Figure 1609: NETMAT edge (100) 0453

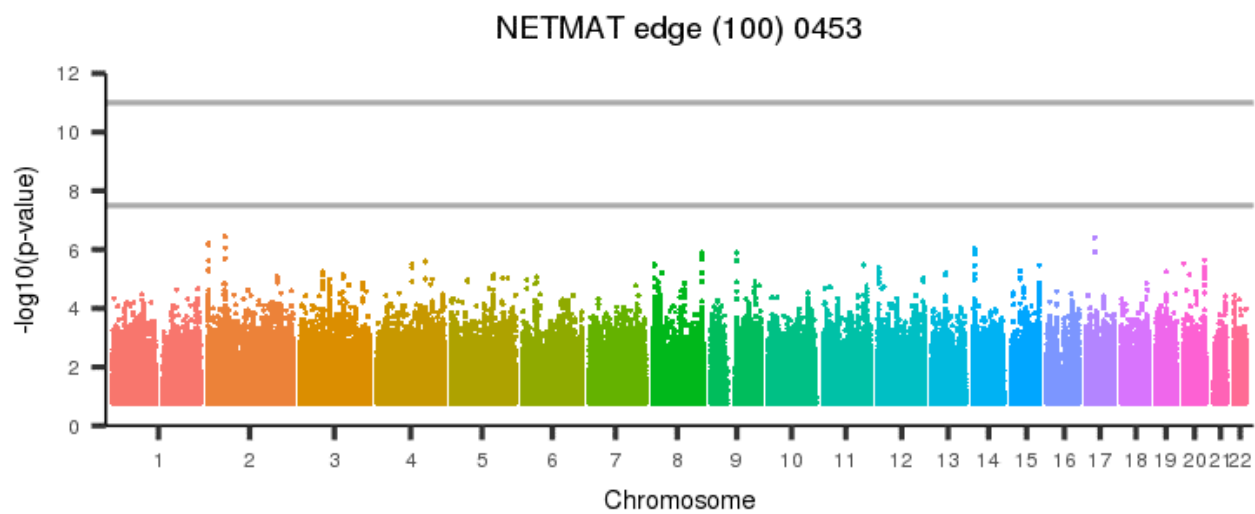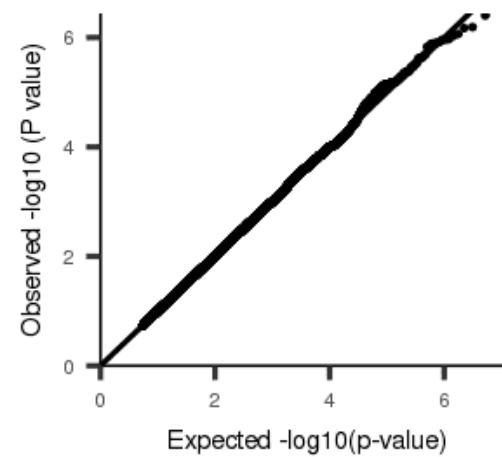

[back to list of plots](#)

Figure 1610: NETMAT edge (100) 0454

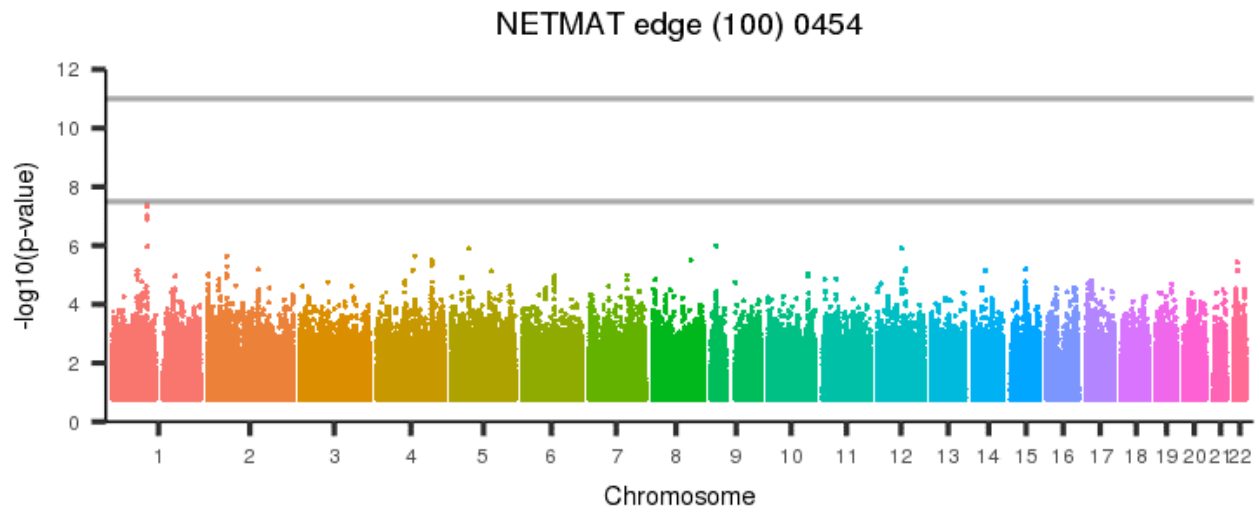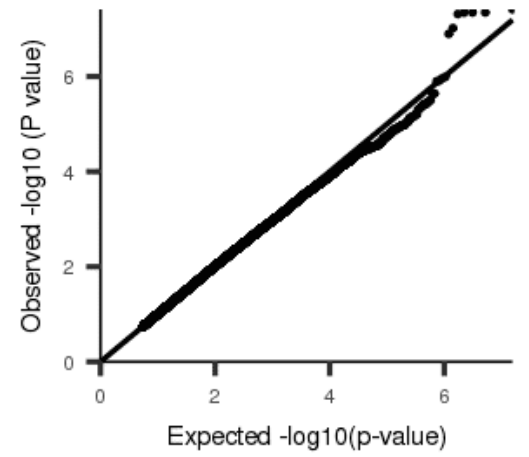

[back to list of plots](#)

Figure 1611: NETMAT edge (100) 0455

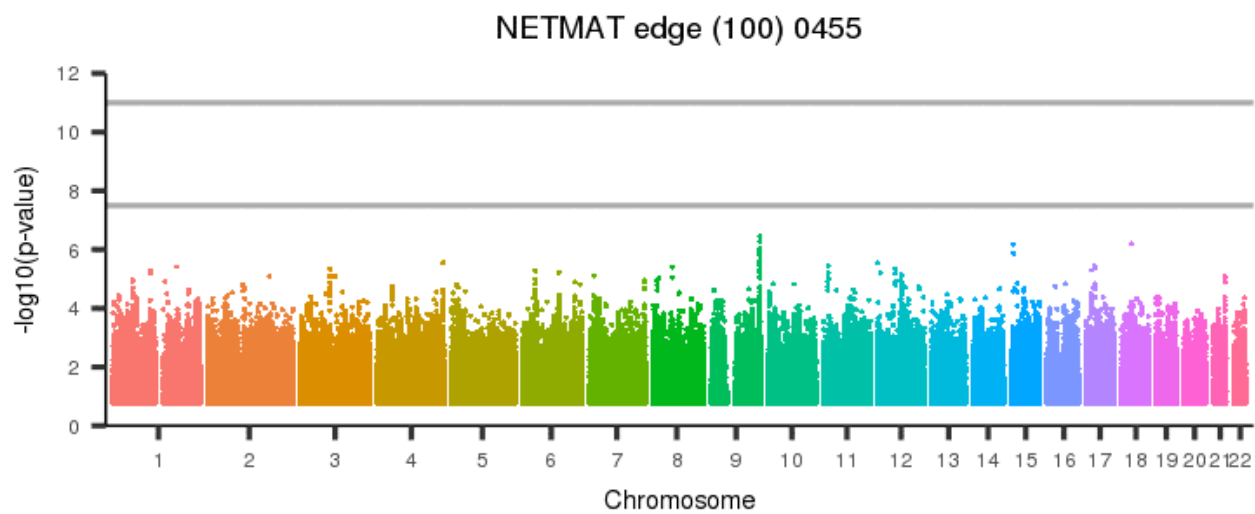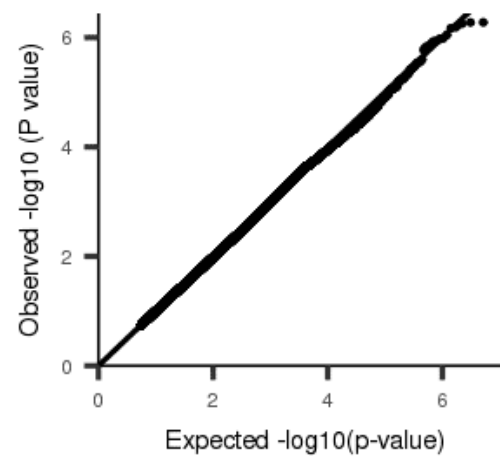

[back to list of plots](#)

Figure 1612: NETMAT edge (100) 0456

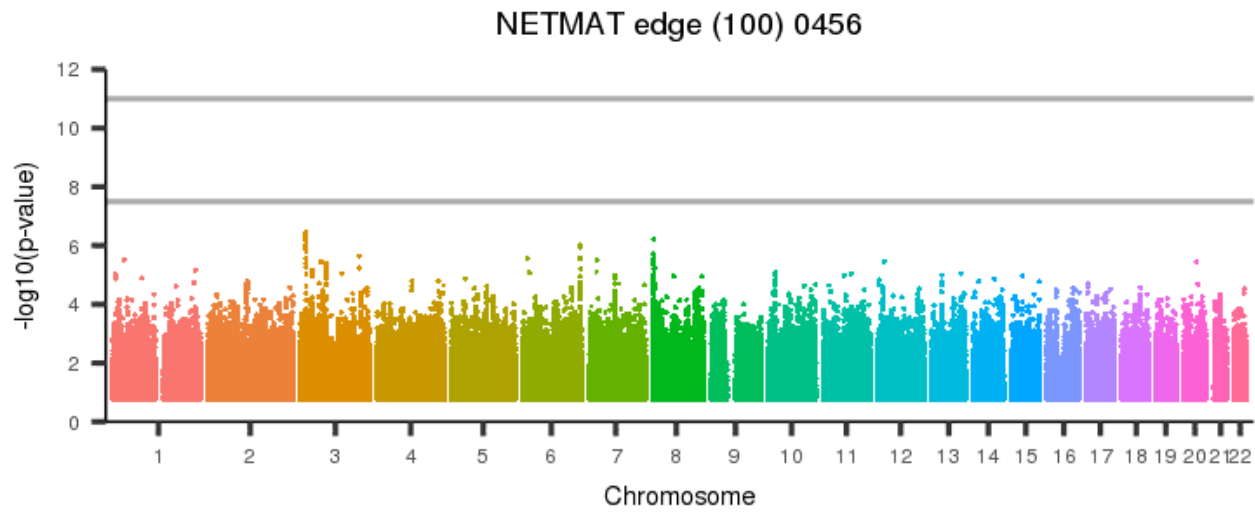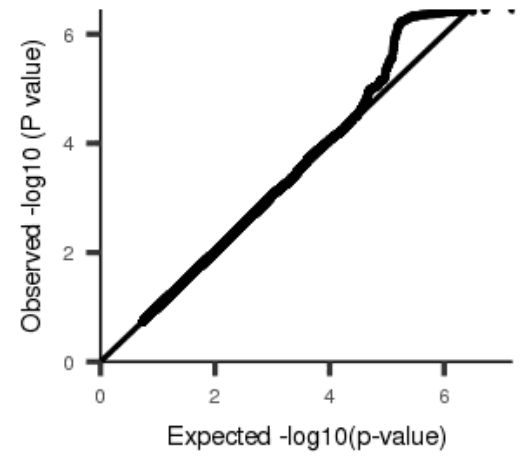

[back to list of plots](#)

Figure 1613: NETMAT edge (100) 0457

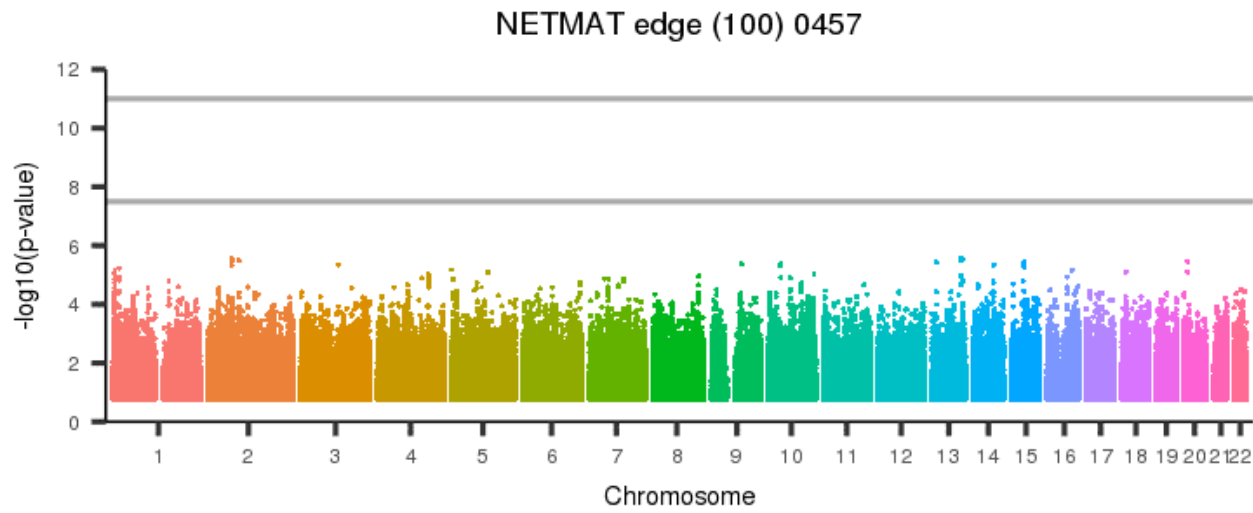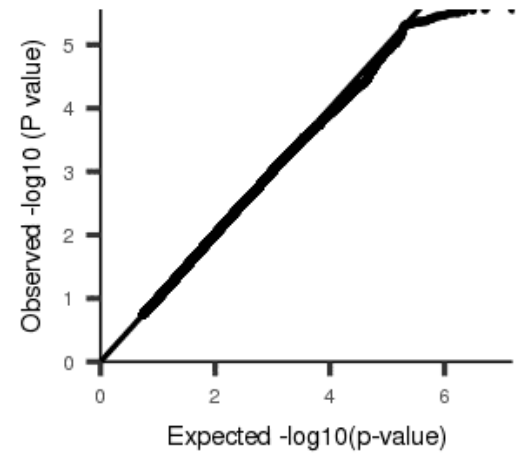

[back to list of plots](#)



Figure 1614: NETMAT edge (100) 0458

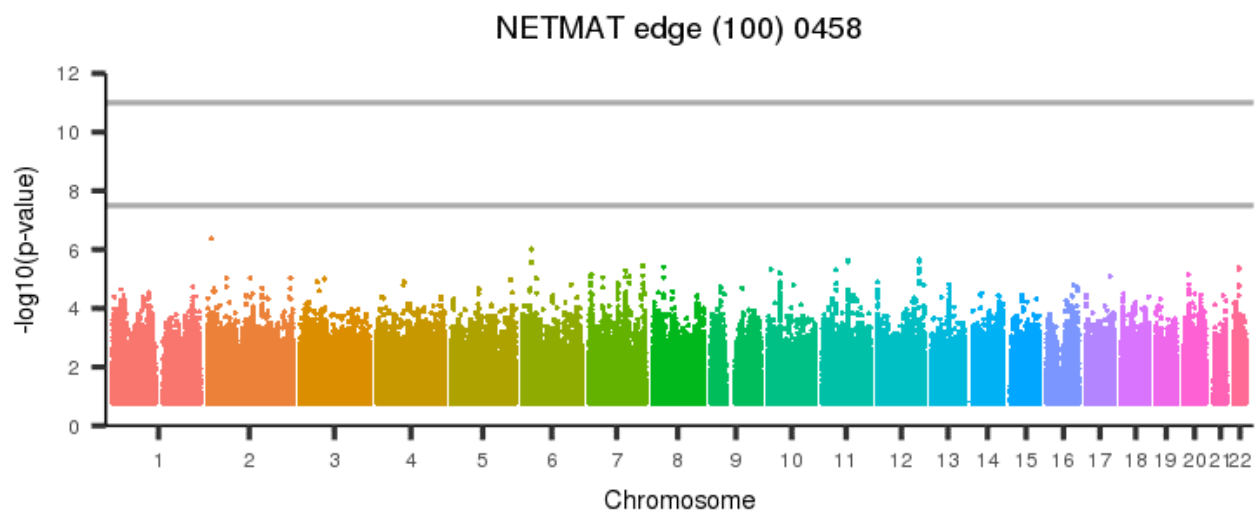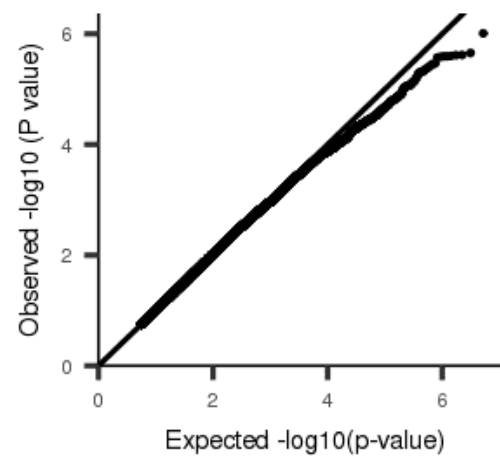

[back to list of plots](#)

Figure 1615: NETMAT edge (100) 0459

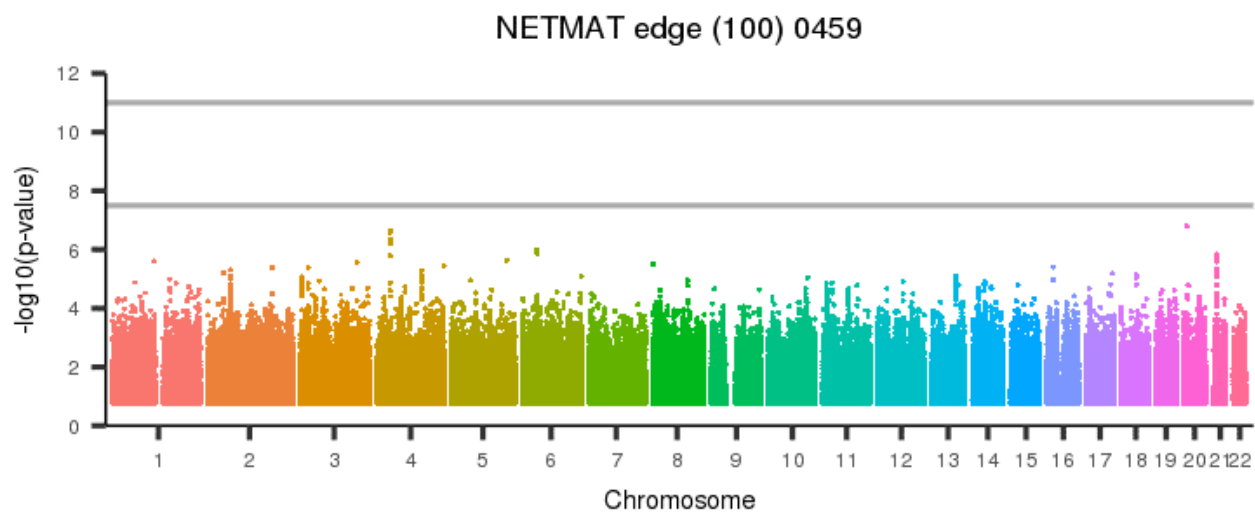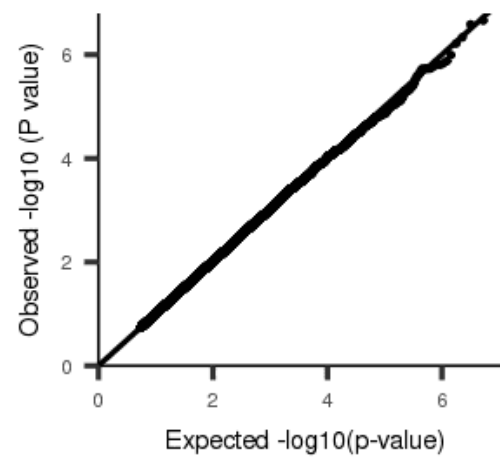

[back to list of plots](#)

Figure 1616: NETMAT edge (100) 0460

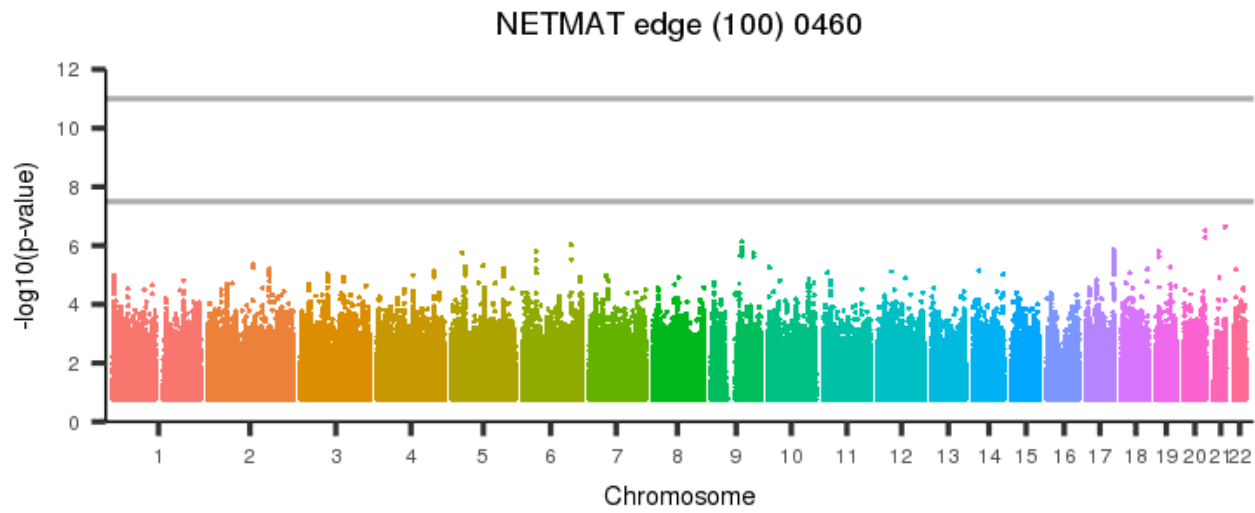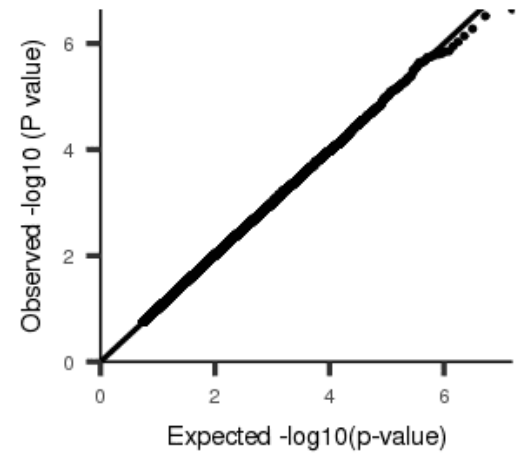

[back to list of plots](#)

Figure 1617: NETMAT edge (100) 0461

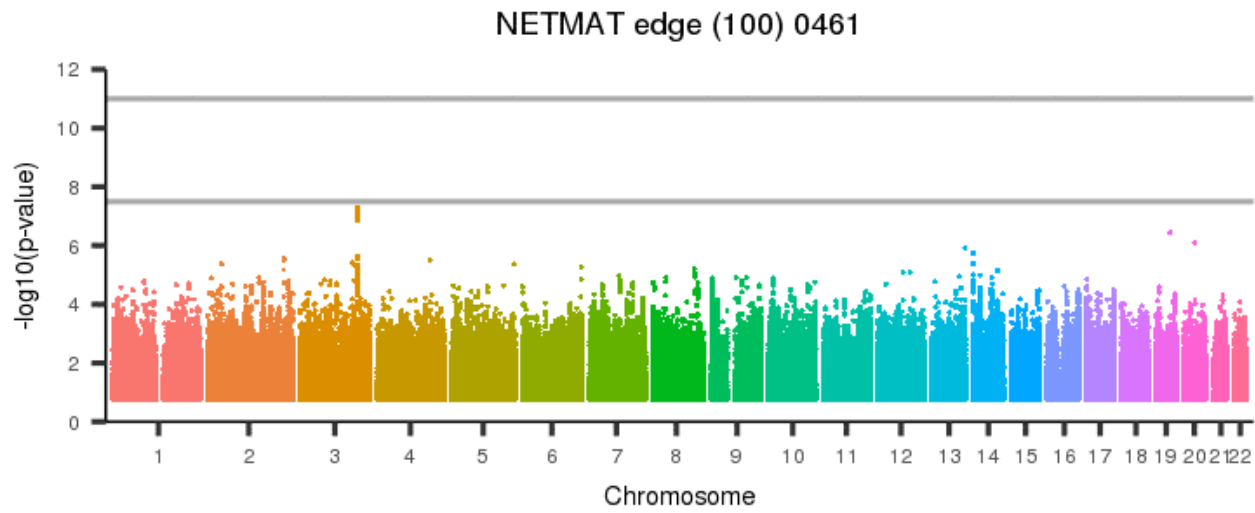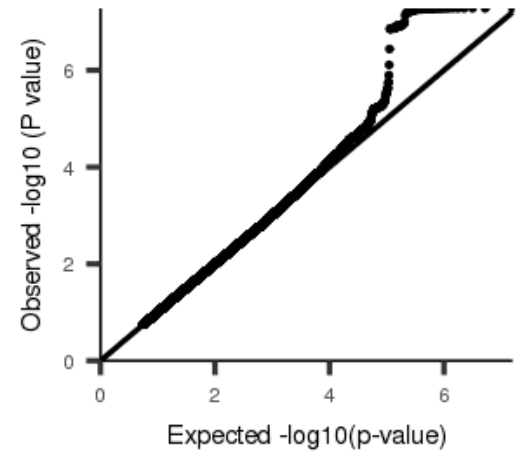

[back to list of plots](#)

Figure 1618: NETMAT edge (100) 0462

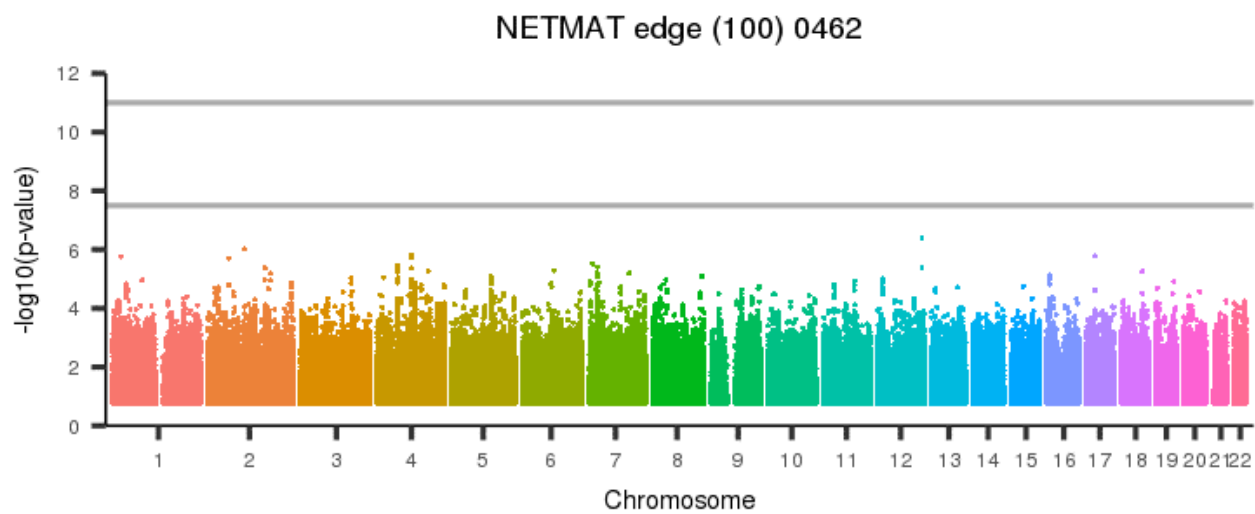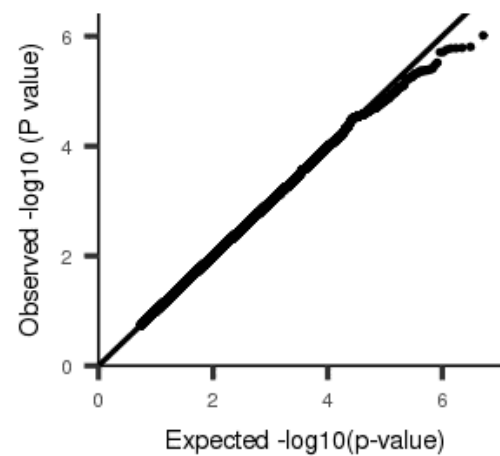

[back to list of plots](#)

Figure 1619: NETMAT edge (100) 0463

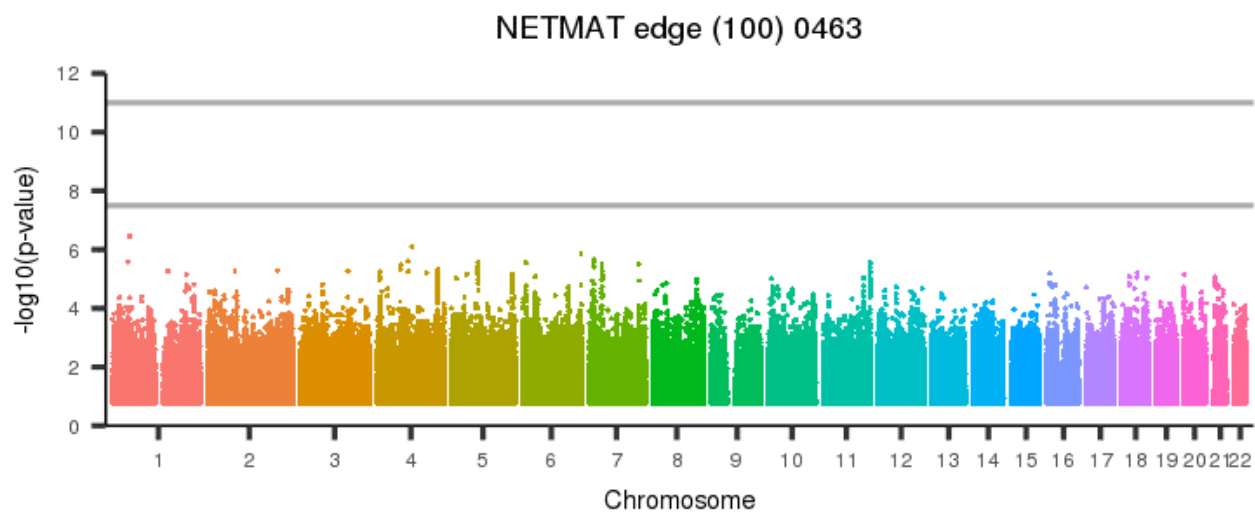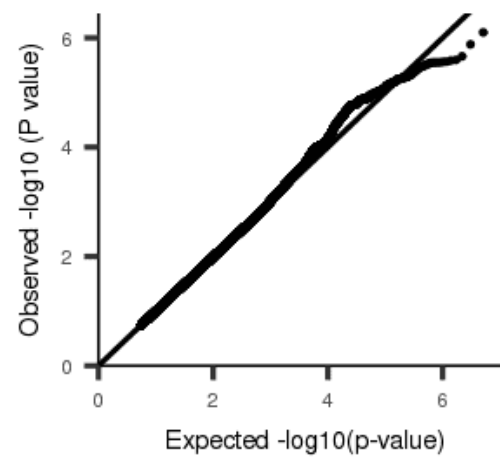

[back to list of plots](#)

Figure 1620: NETMAT edge (100) 0464

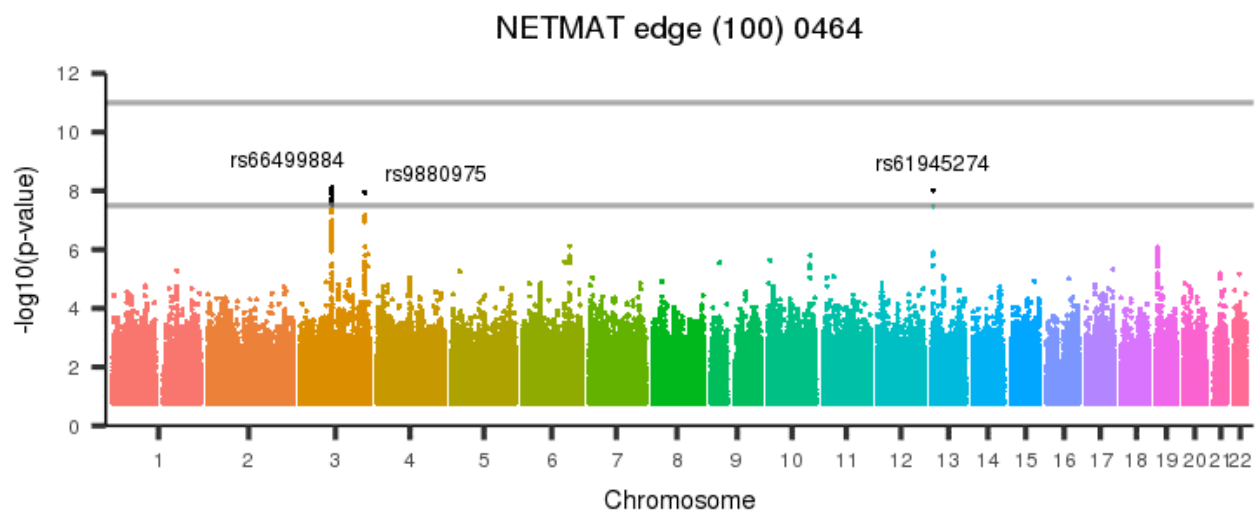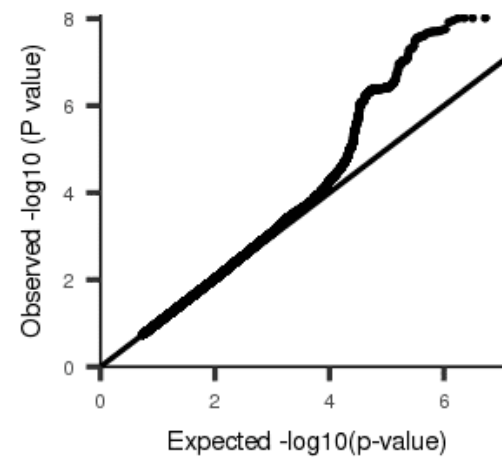

[back to list of plots](#)

Figure 1621: NETMAT edge (100) 0465

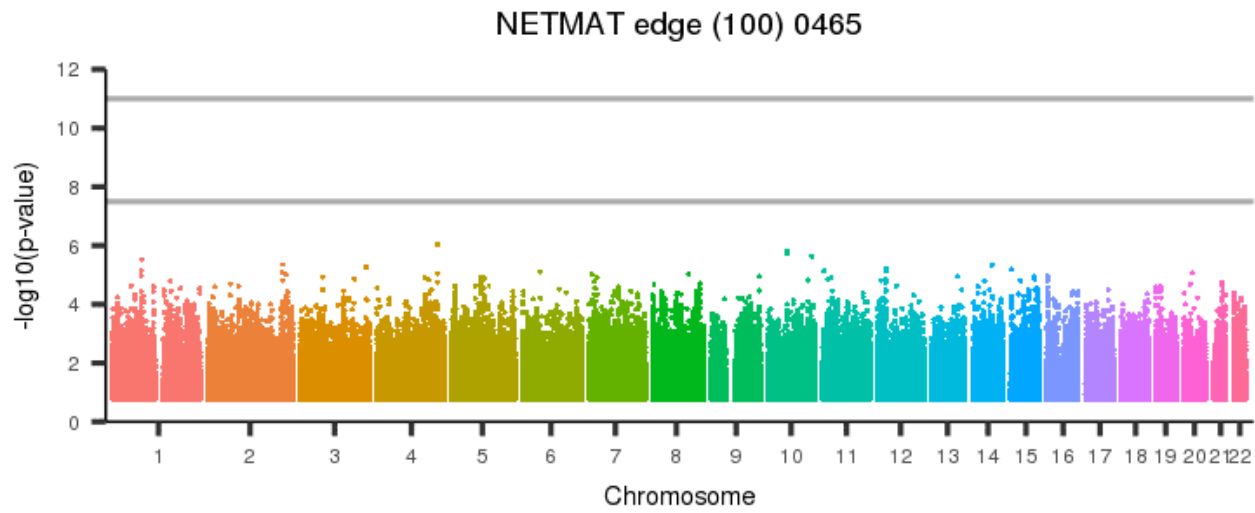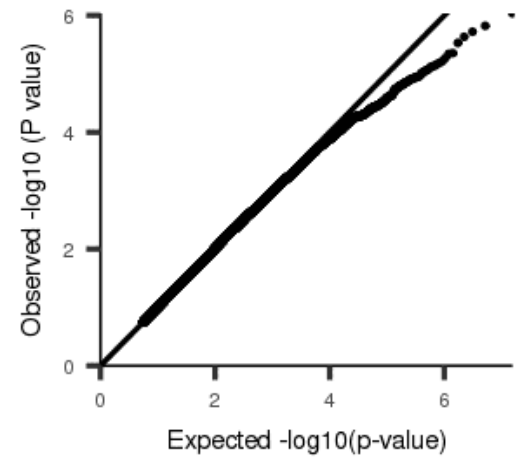

[back to list of plots](#)



Figure 1622: NETMAT edge (100) 0466

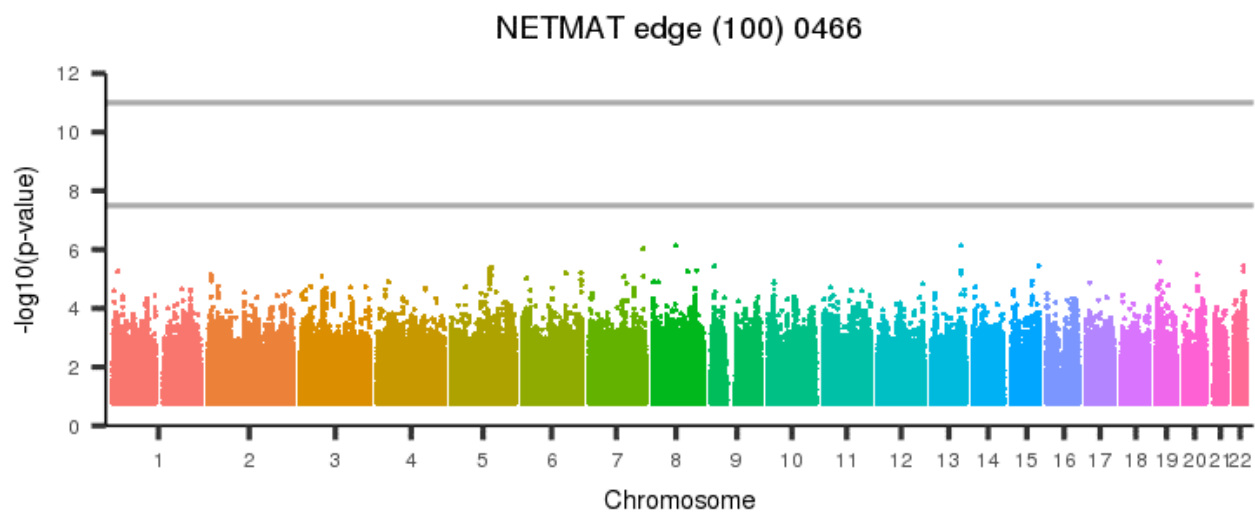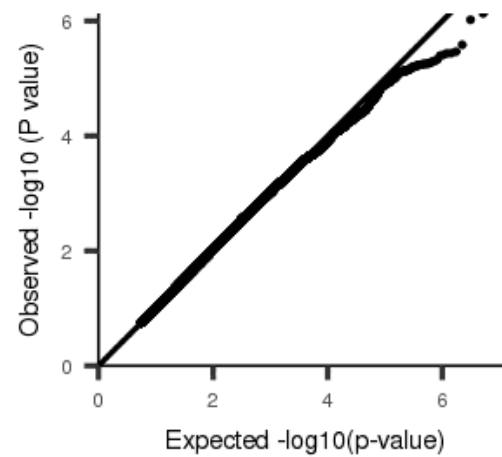

[back to list of plots](#)

Figure 1623: NETMAT edge (100) 0467

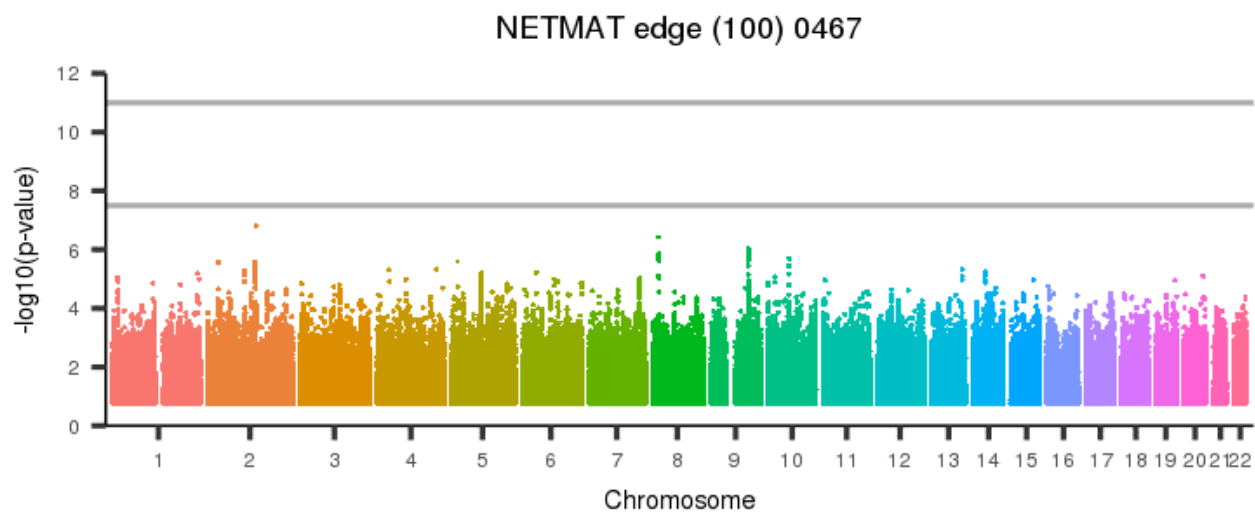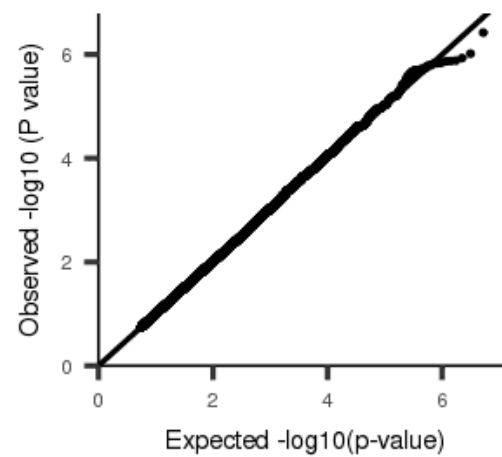

[back to list of plots](#)

Figure 1624: NETMAT edge (100) 0468

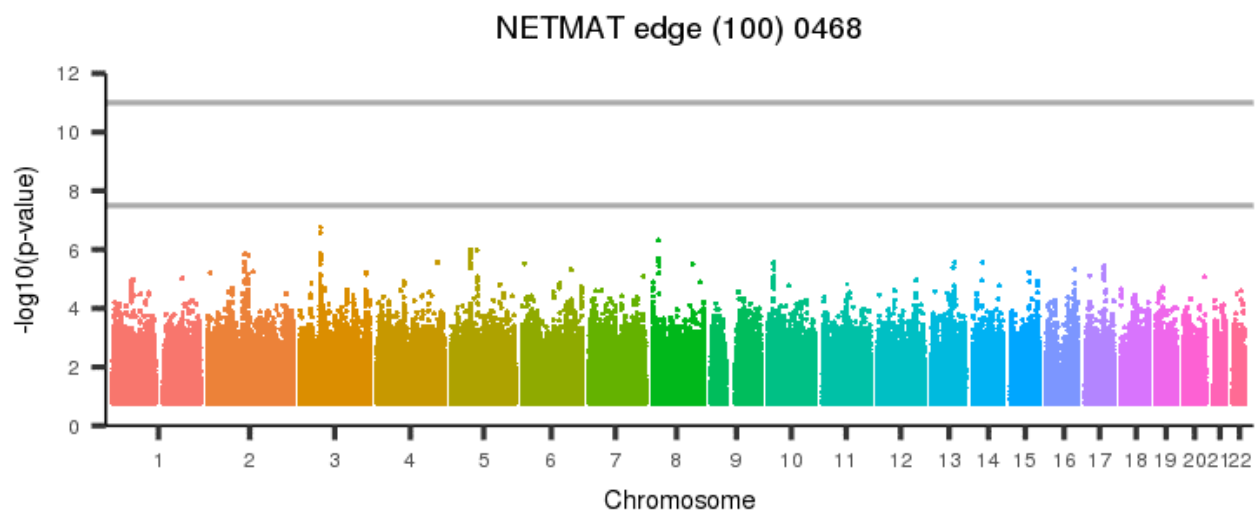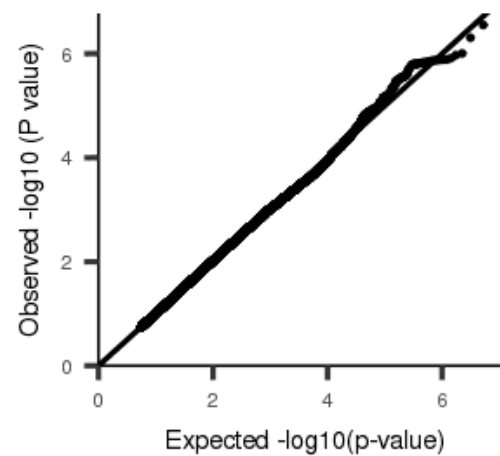

[back to list of plots](#)

Figure 1625: NETMAT edge (100) 0469

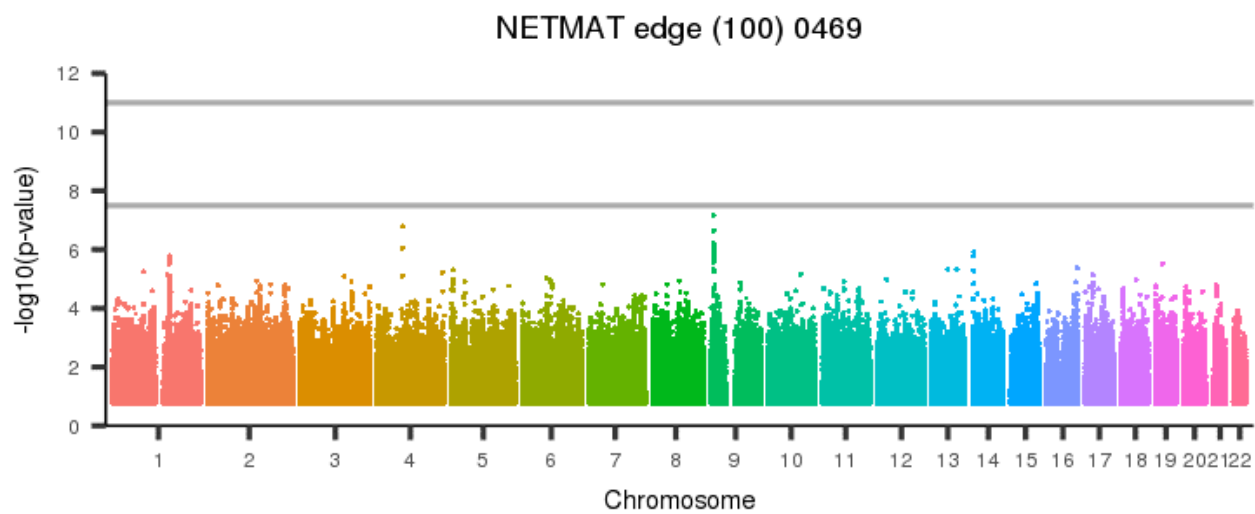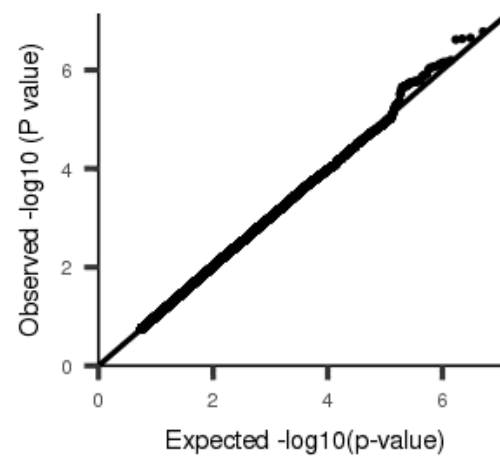

[back to list of plots](#)

Figure 1626: NETMAT edge (100) 0470

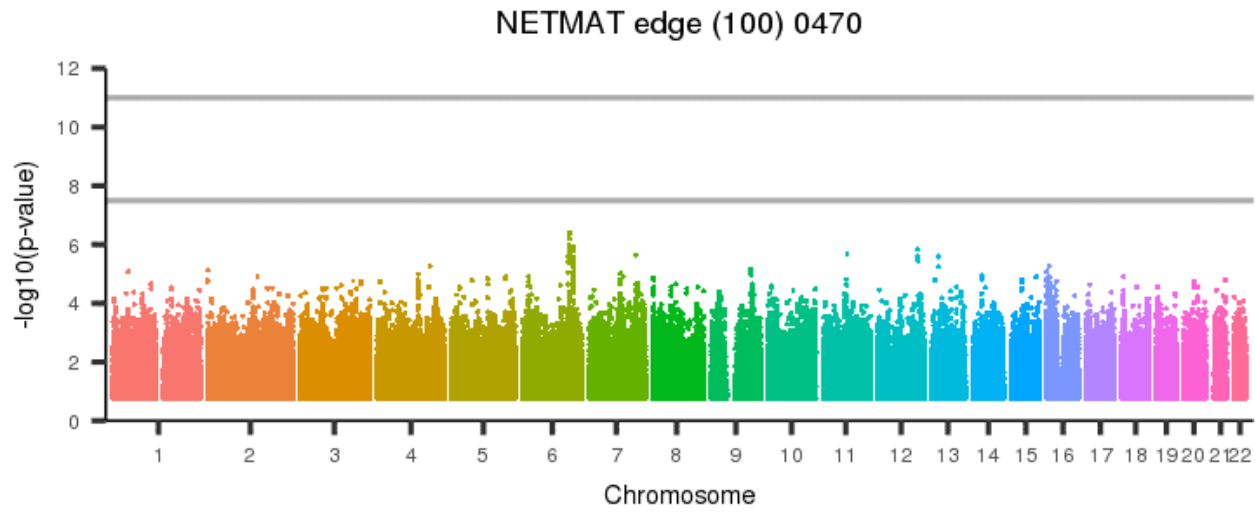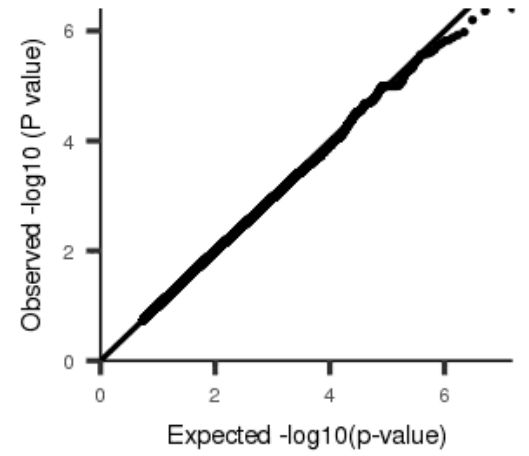

[back to list of plots](#)

Figure 1627: NETMAT edge (100) 0471

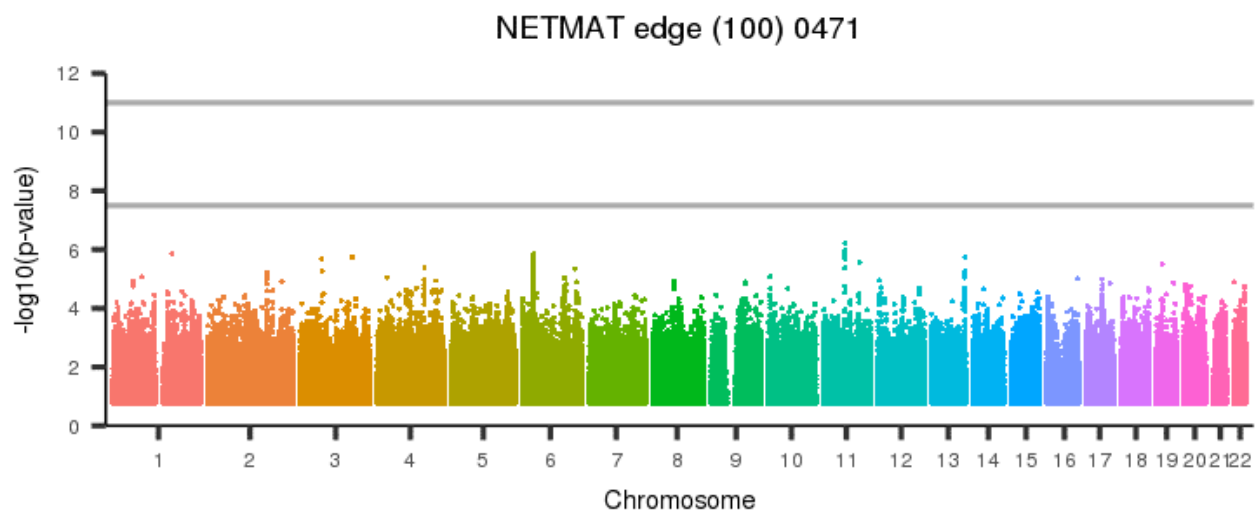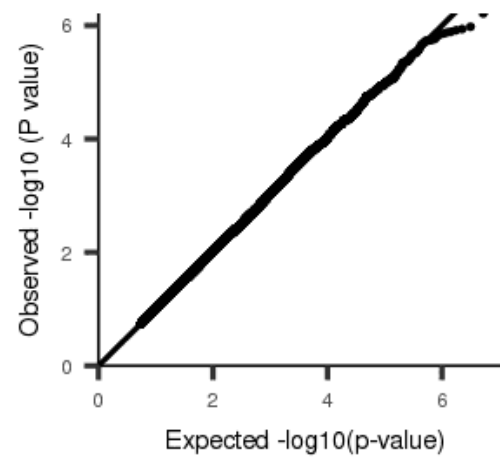

[back to list of plots](#)

Figure 1628: NETMAT edge (100) 0472

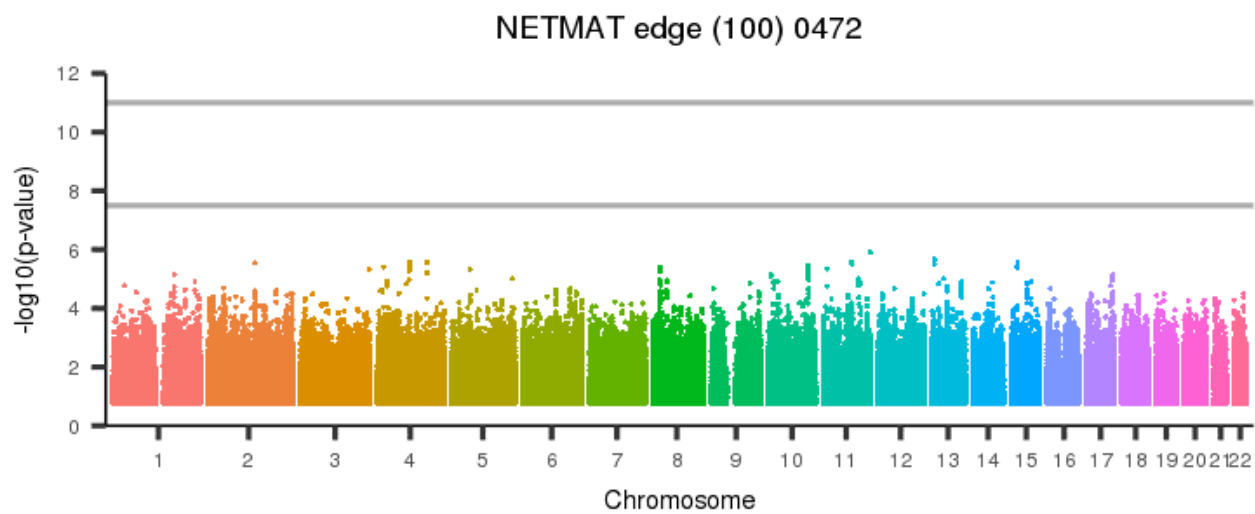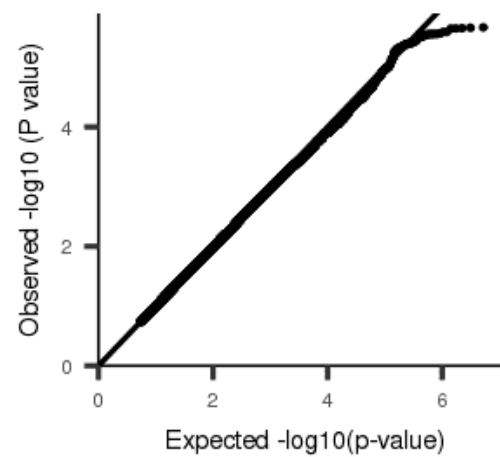

[back to list of plots](#)

Figure 1629: NETMAT edge (100) 0473

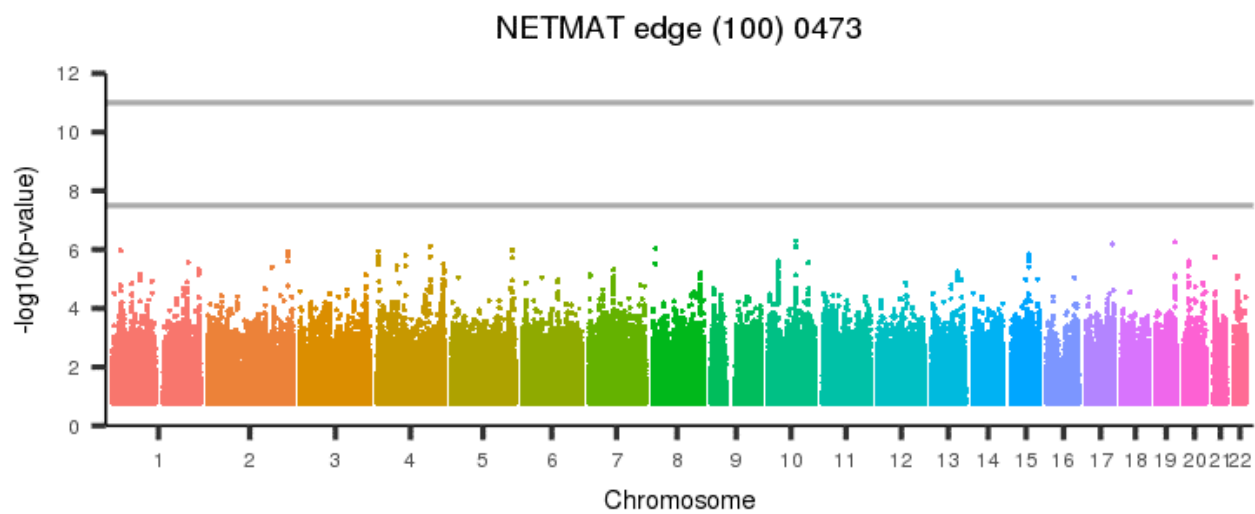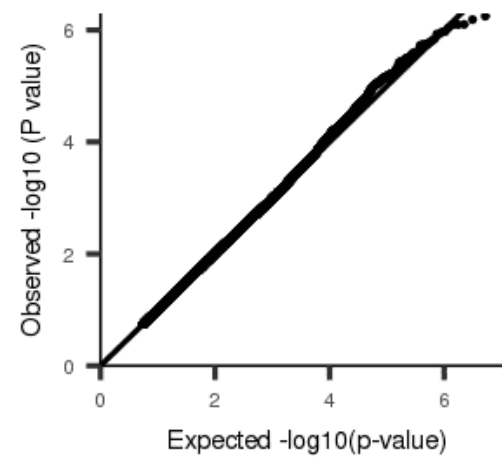

[back to list of plots](#)



Figure 1630: NETMAT edge (100) 0474

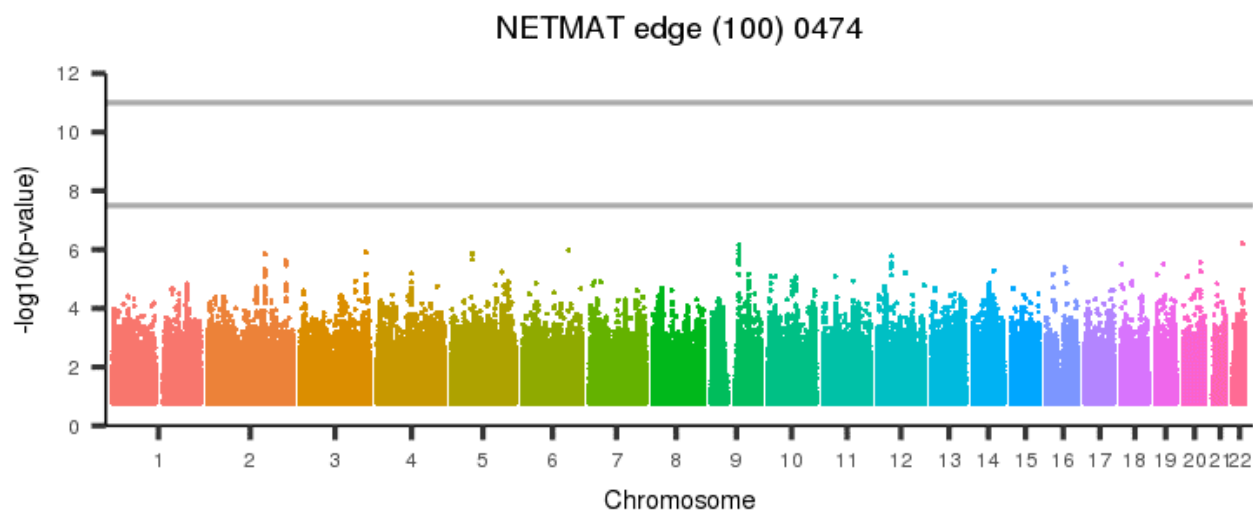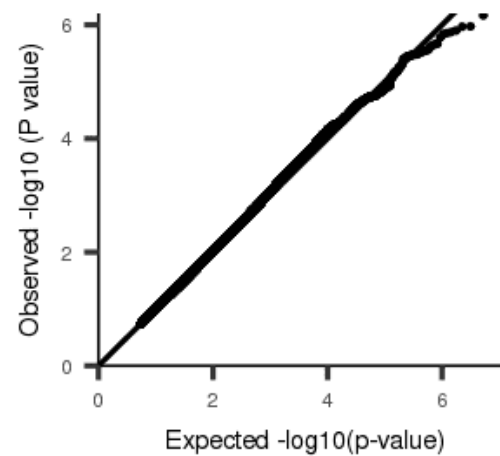

[back to list of plots](#)

Figure 1631: NETMAT edge (100) 0475

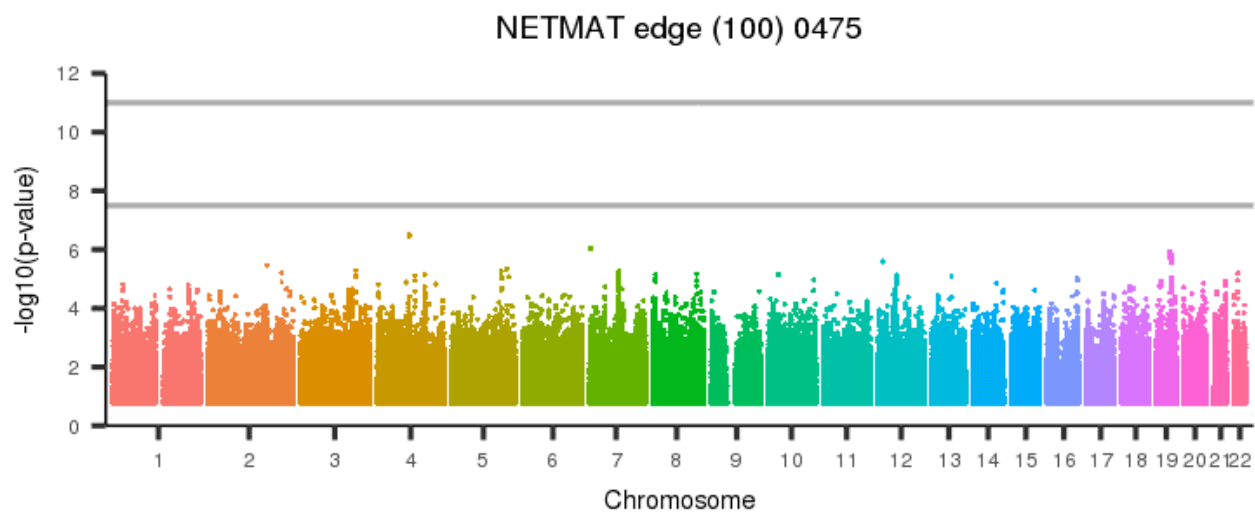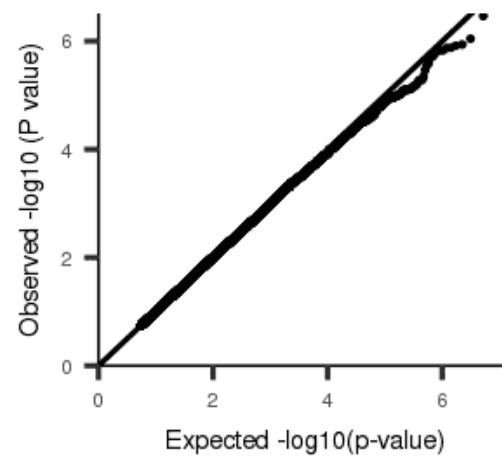

[back to list of plots](#)

Figure 1632: NETMAT edge (100) 0476

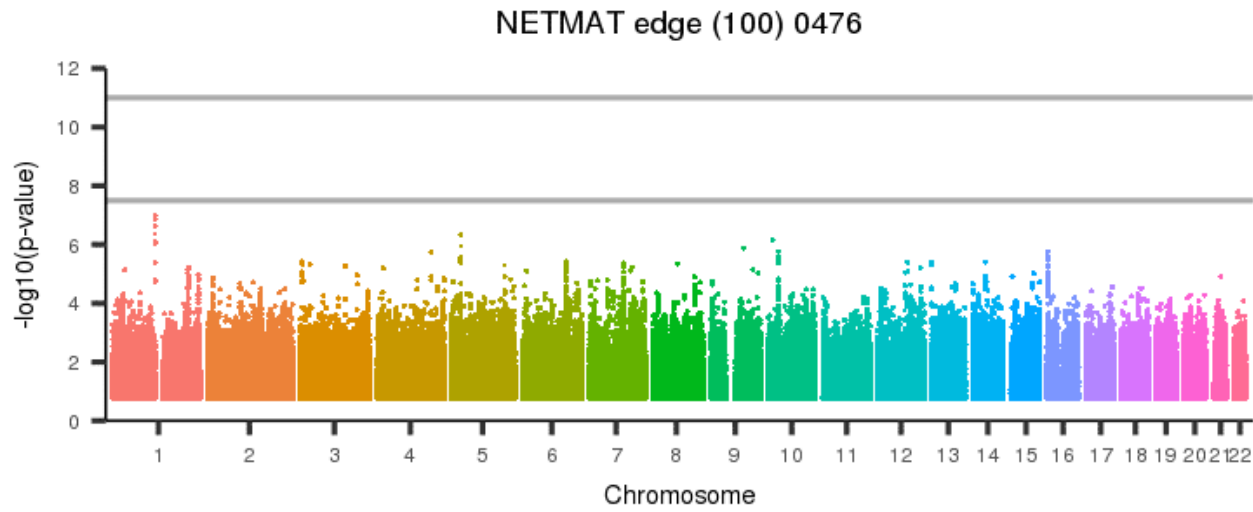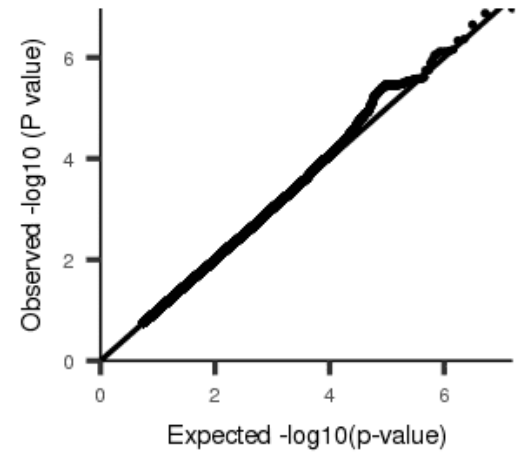

[back to list of plots](#)

Figure 1633: NETMAT edge (100) 0477

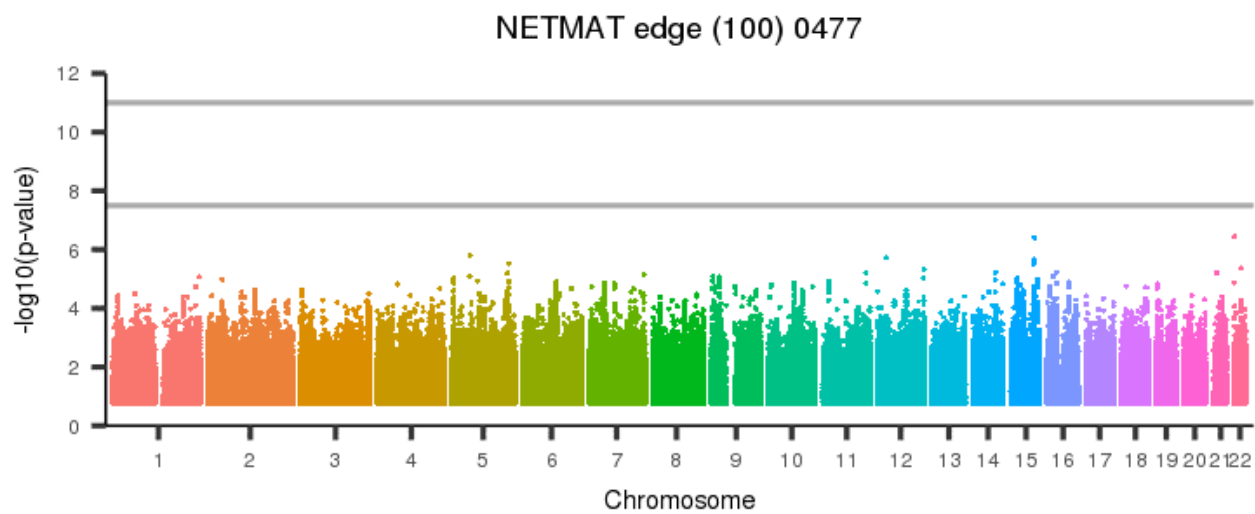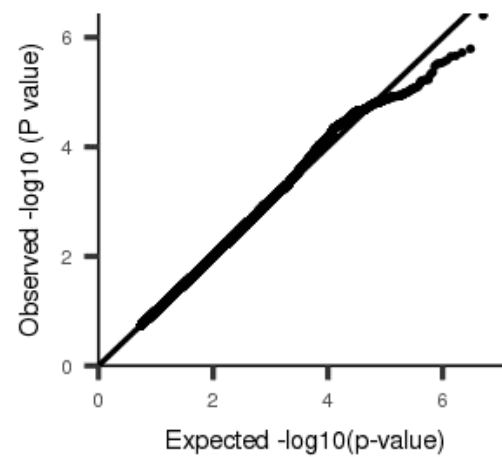

[back to list of plots](#)

Figure 1634: NETMAT edge (100) 0478

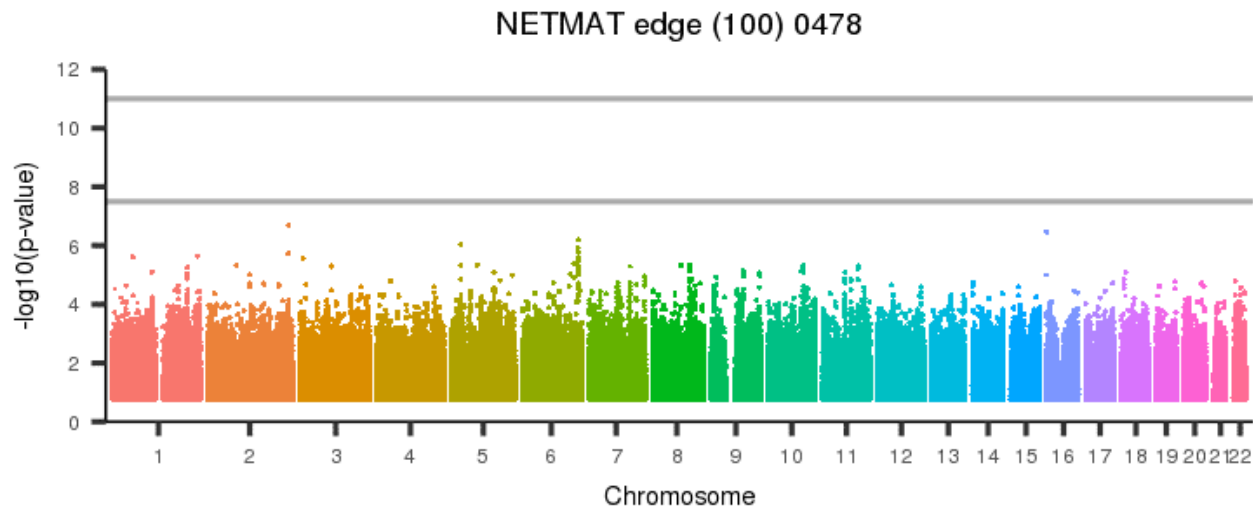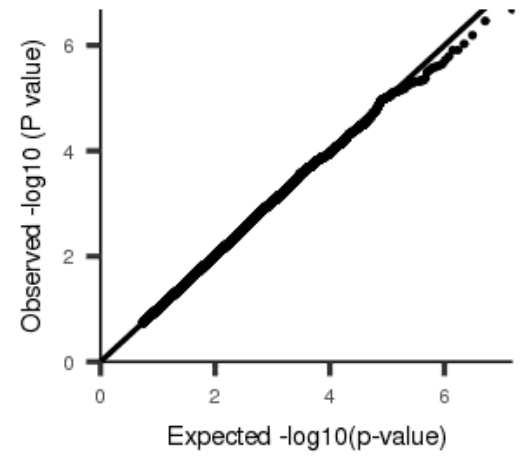

[back to list of plots](#)

Figure 1635: NETMAT edge (100) 0479

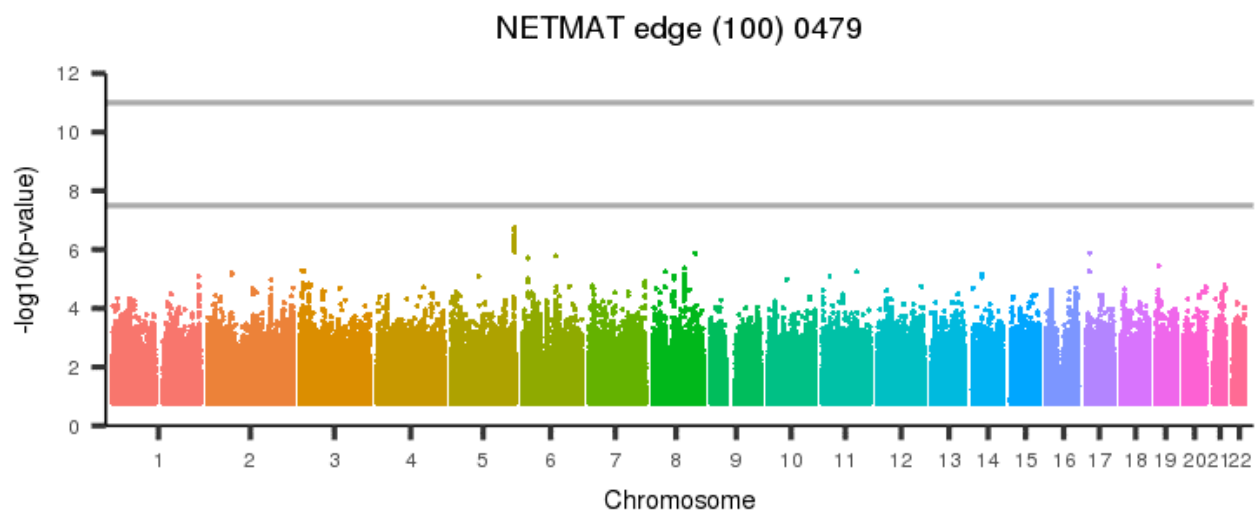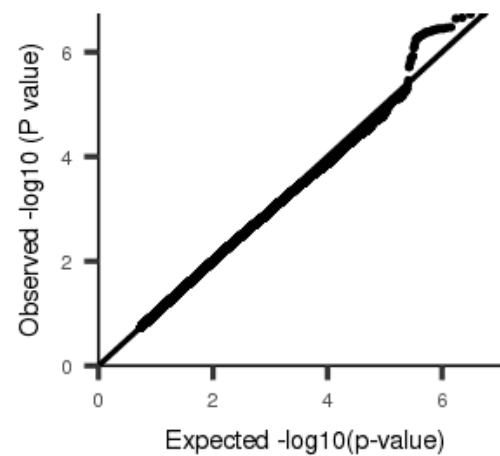

[back to list of plots](#)

Figure 1636: NETMAT edge (100) 0480

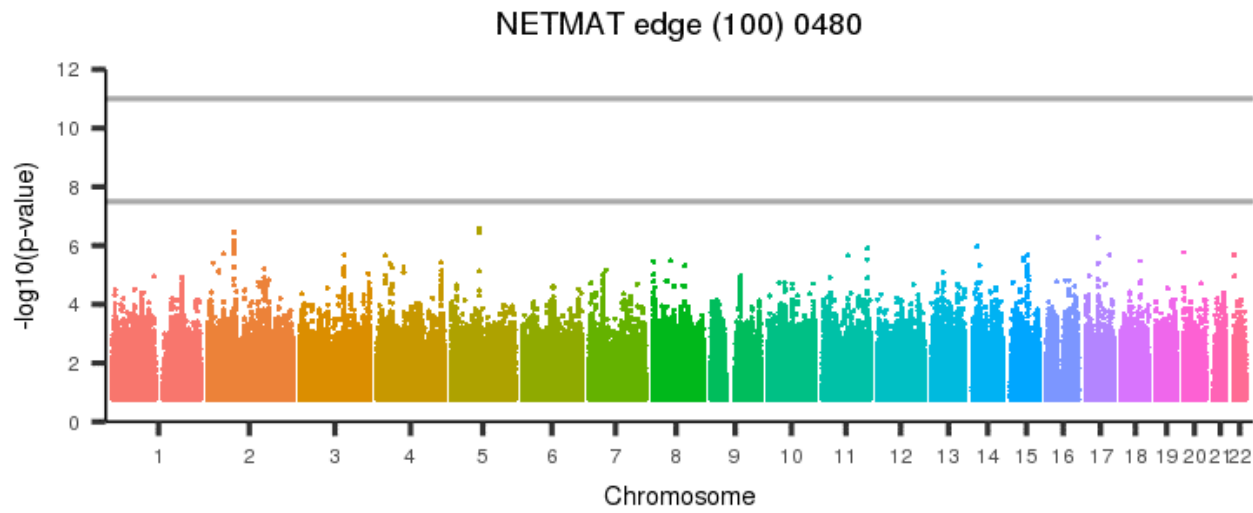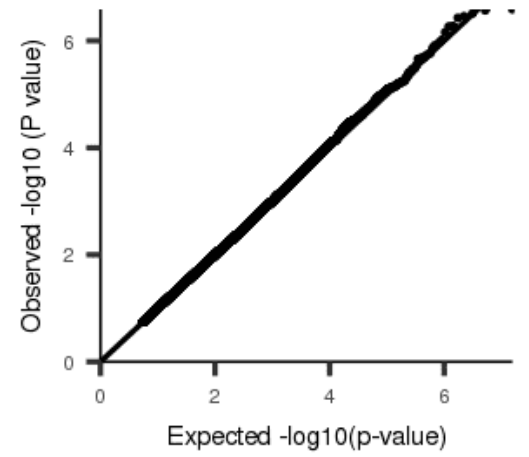

[back to list of plots](#)

Figure 1637: NETMAT edge (100) 0481

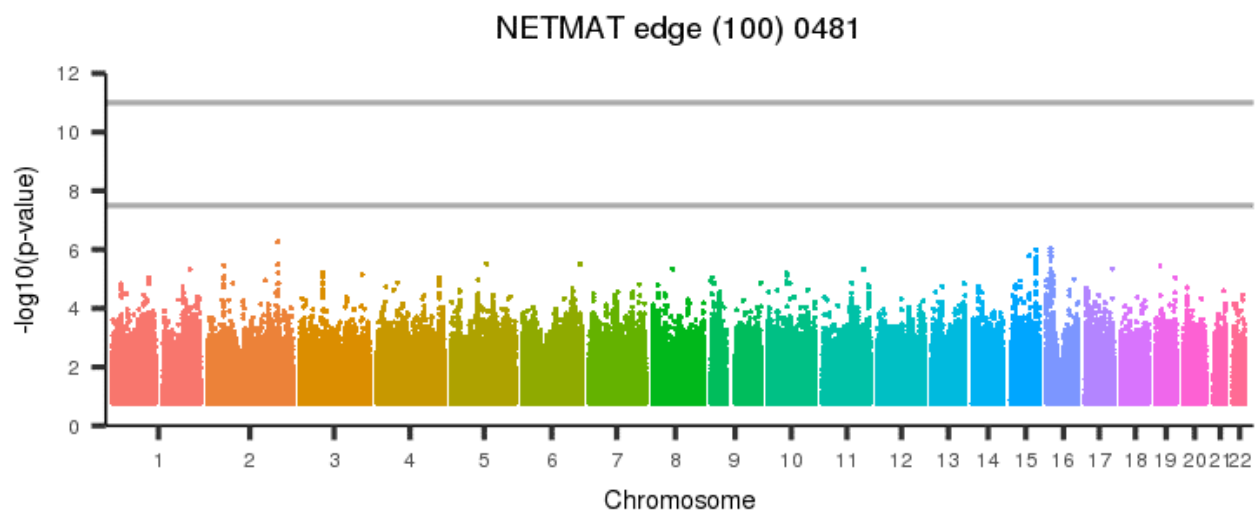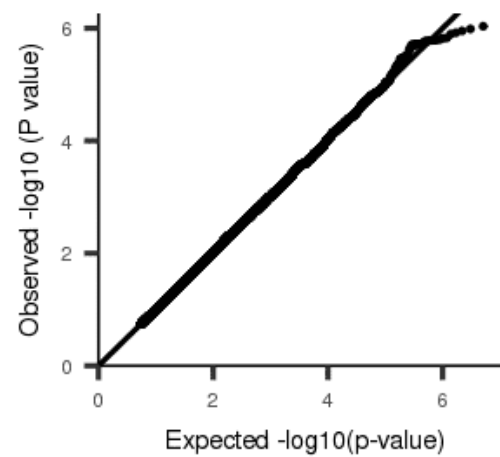

[back to list of plots](#)



Figure 1638: NETMAT edge (100) 0482

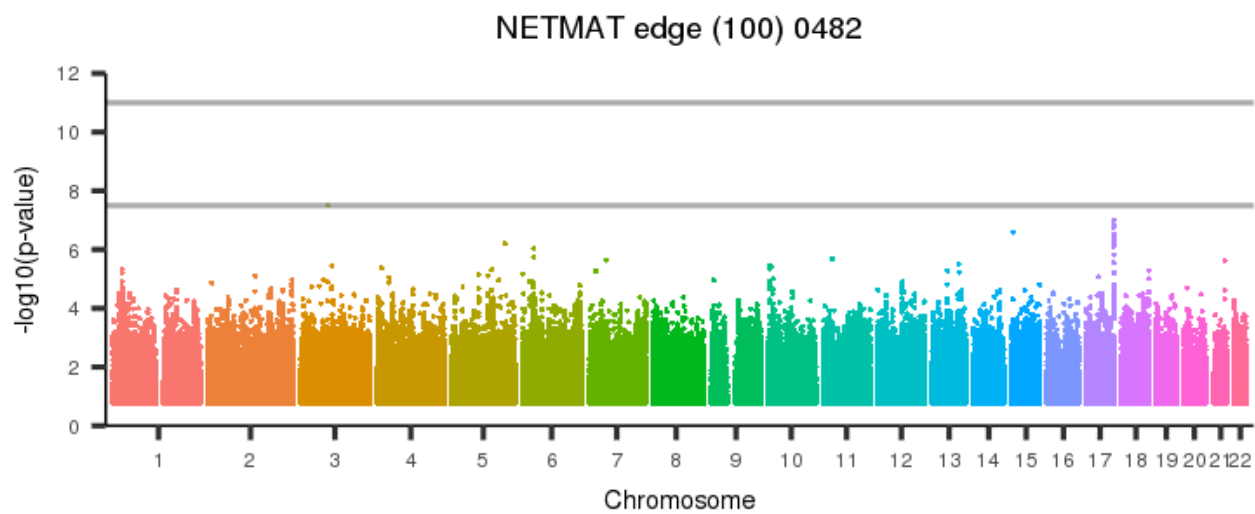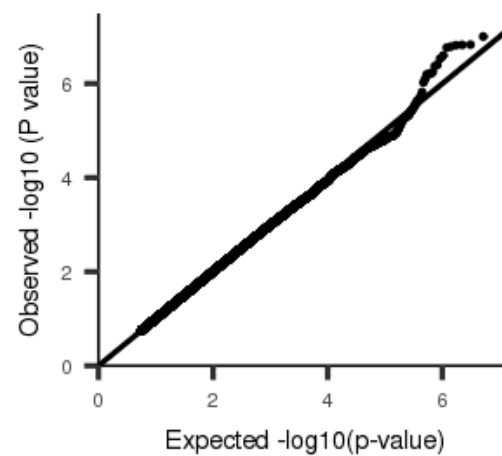

[back to list of plots](#)

Figure 1639: NETMAT edge (100) 0483

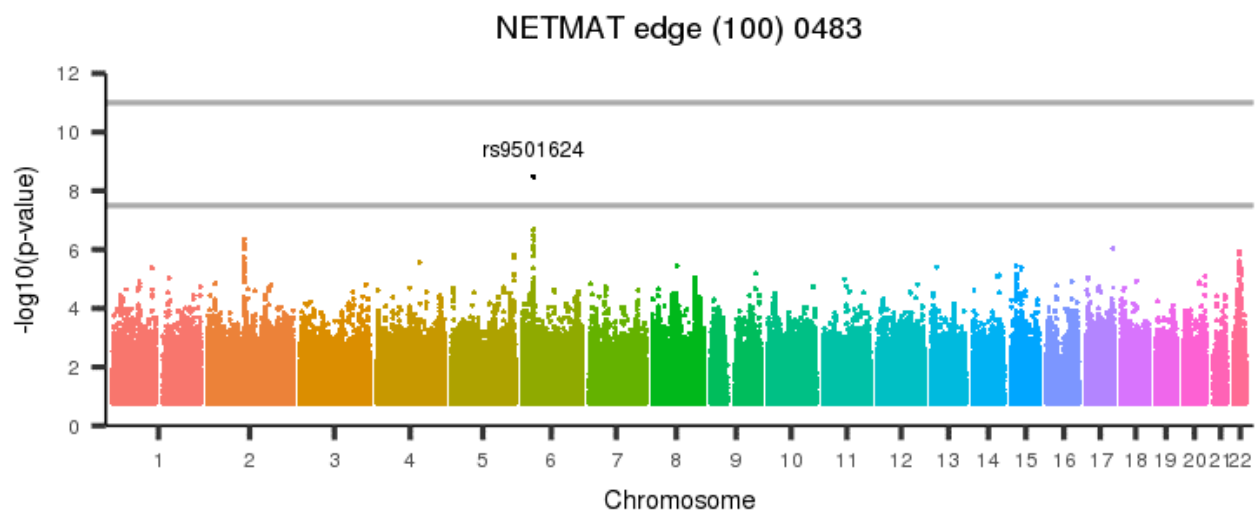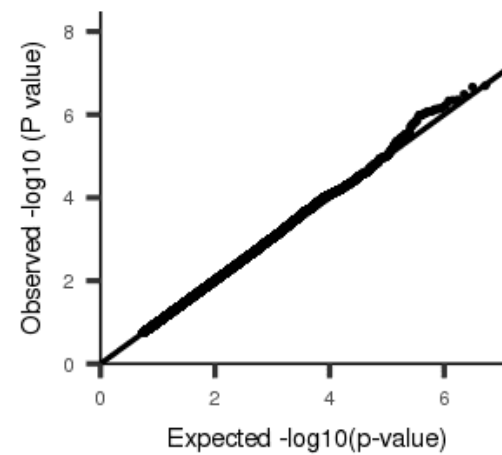

[back to list of plots](#)

Figure 1640: NETMAT edge (100) 0484

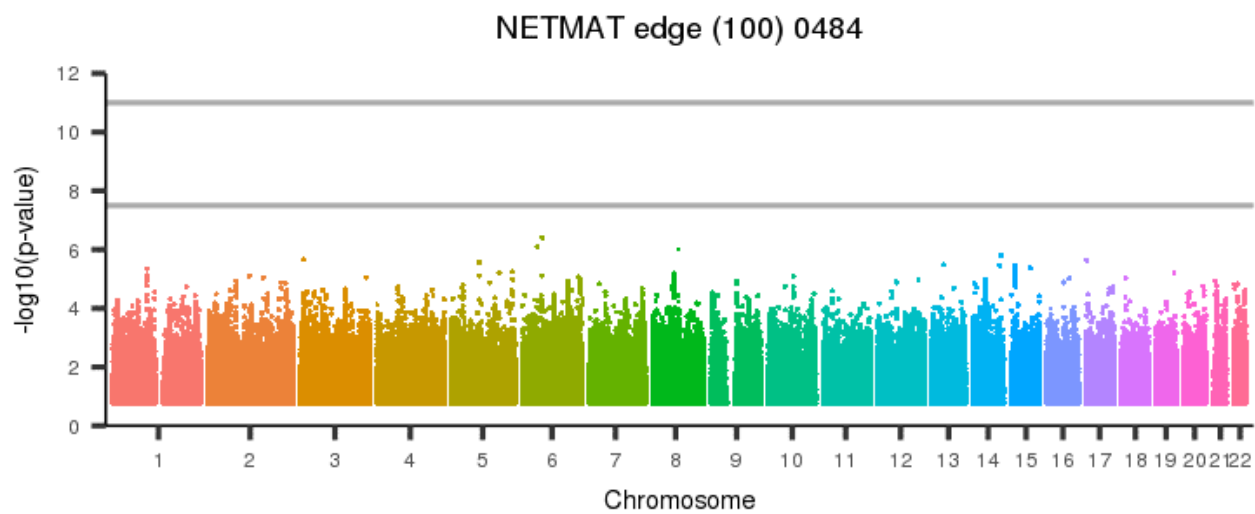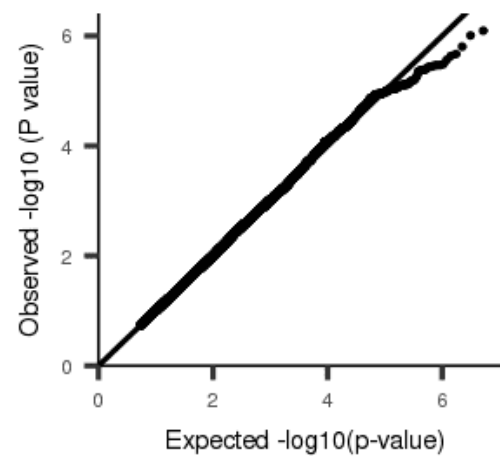

[back to list of plots](#)

Figure 1641: NETMAT edge (100) 0485

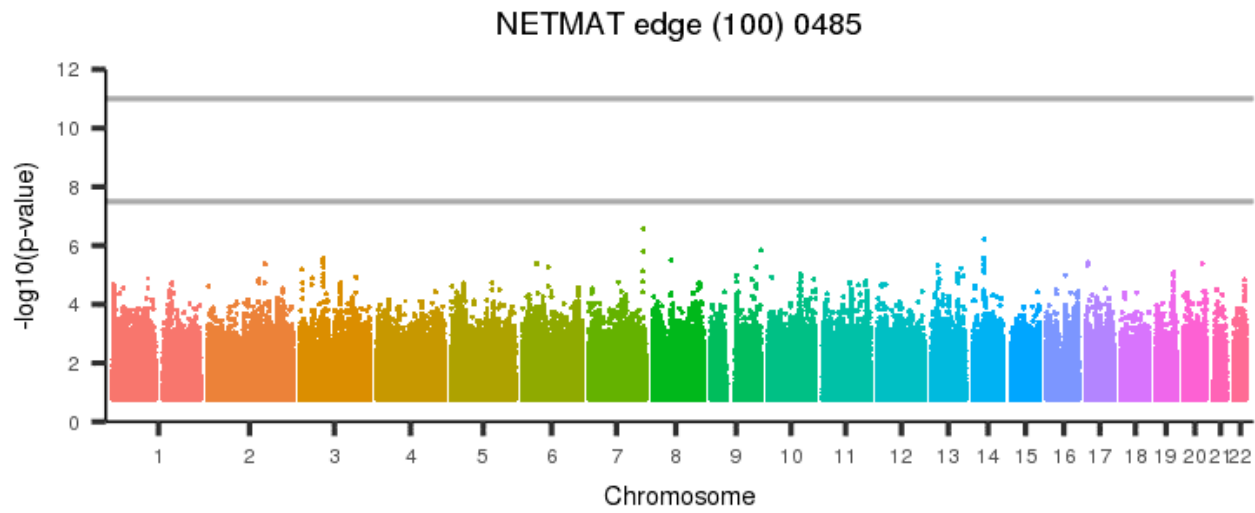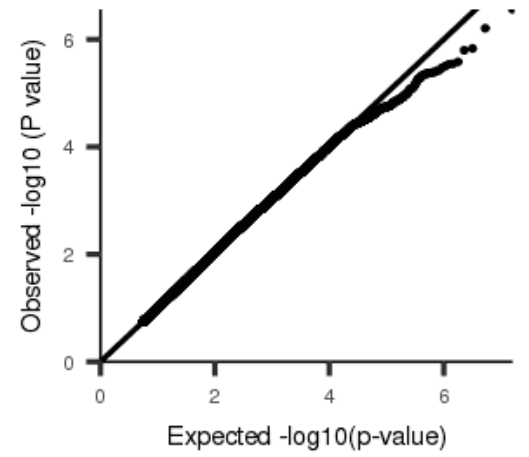

[back to list of plots](#)

Figure 1642: NETMAT edge (100) 0486

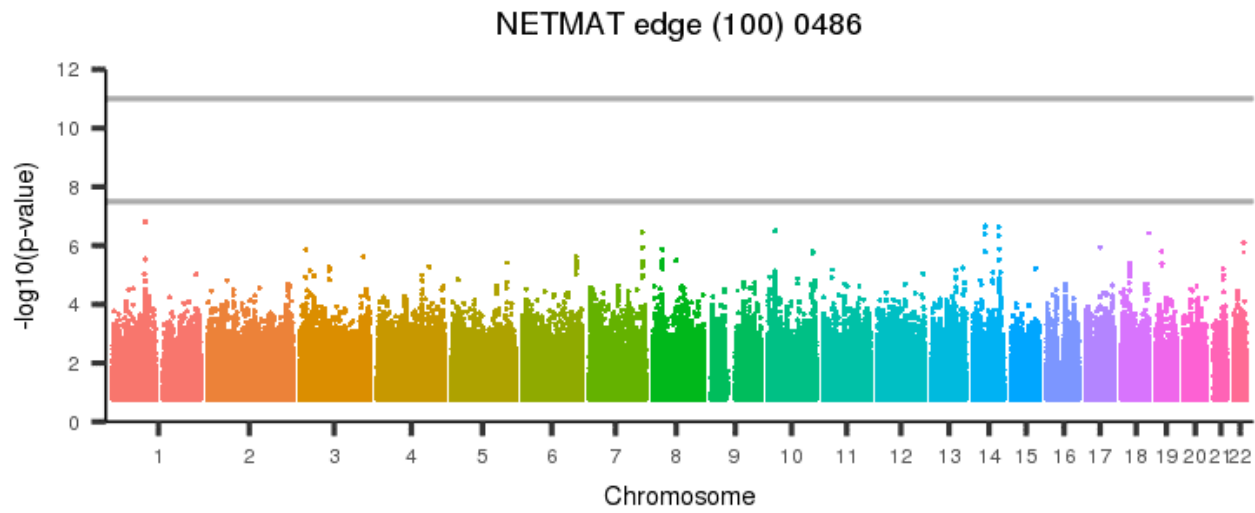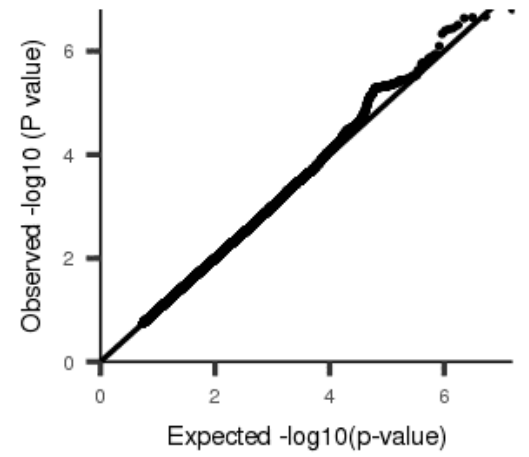

[back to list of plots](#)

Figure 1643: NETMAT edge (100) 0487

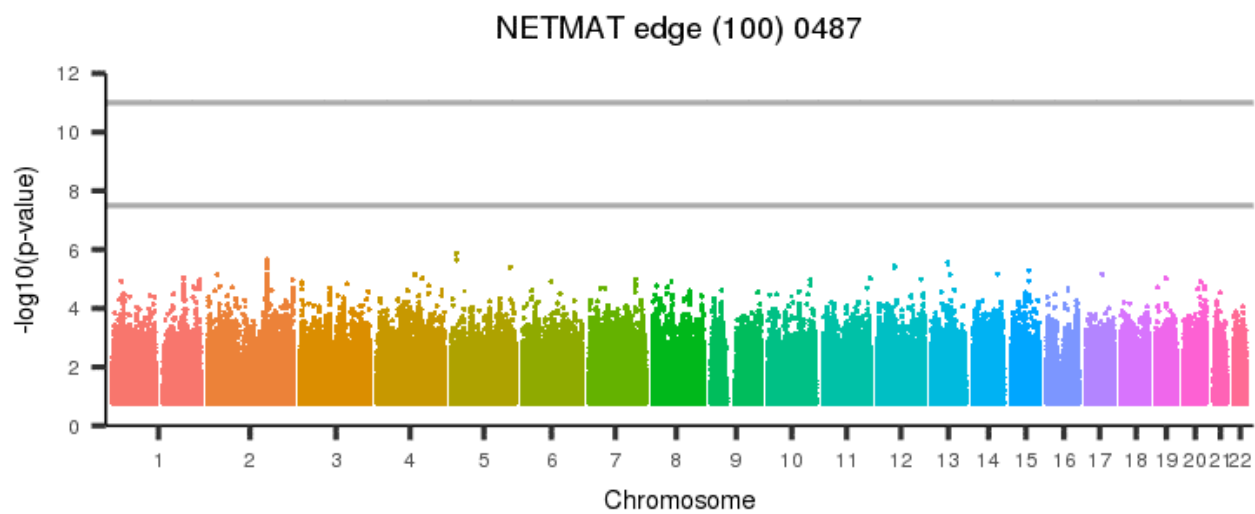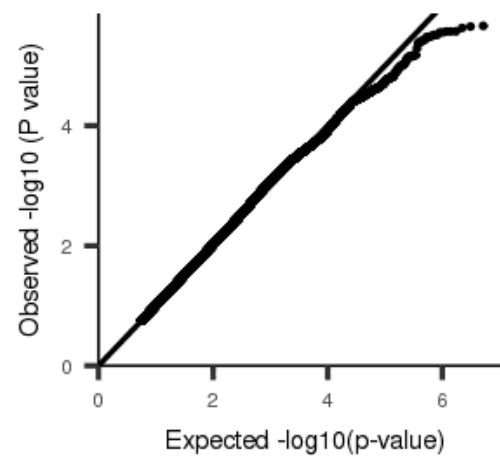

[back to list of plots](#)

Figure 1644: NETMAT edge (100) 0488

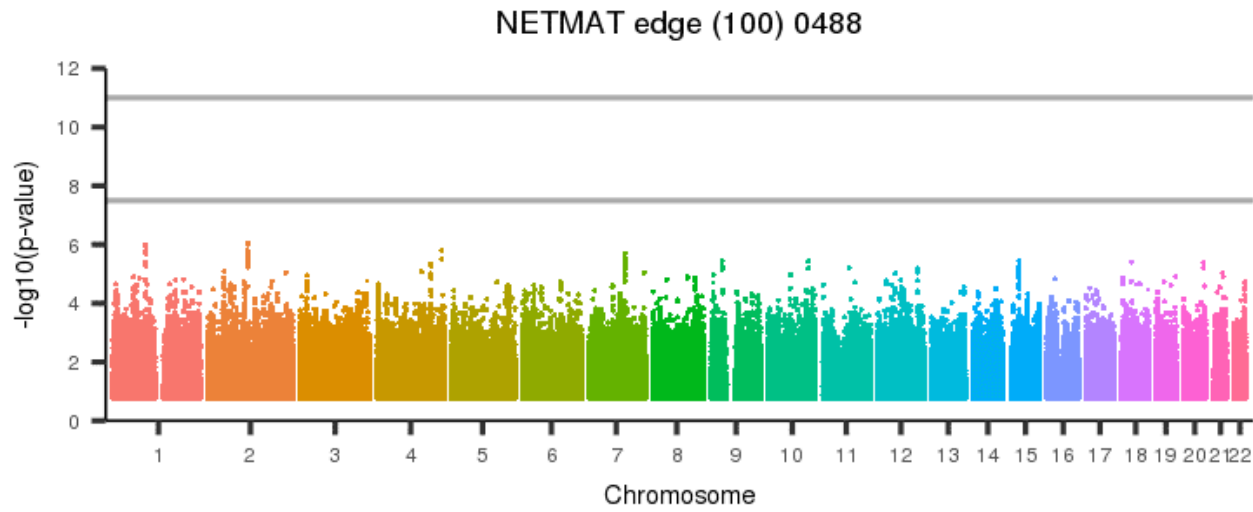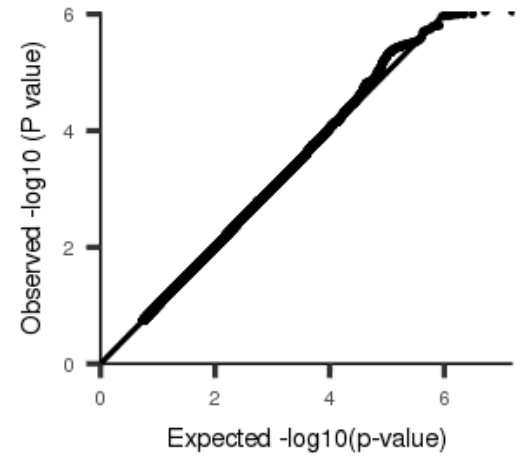

[back to list of plots](#)

Figure 1645: NETMAT edge (100) 0489

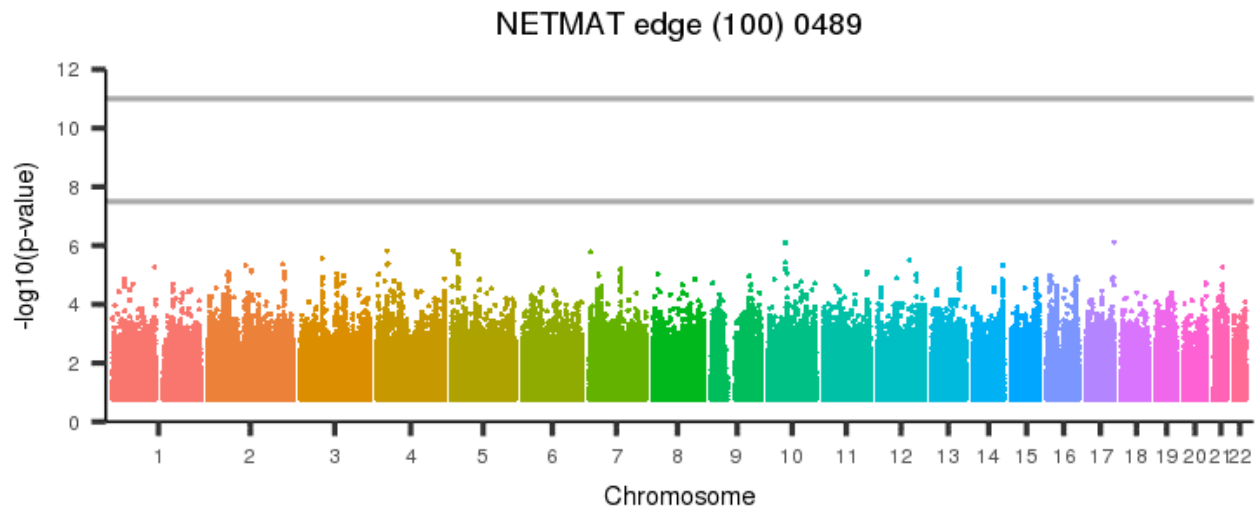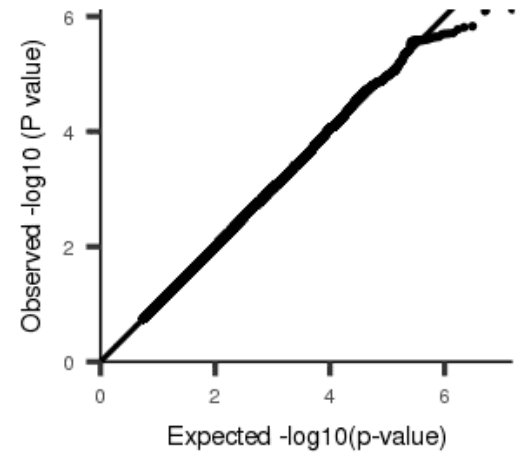

[back to list of plots](#)



Figure 1646: NETMAT edge (100) 0490

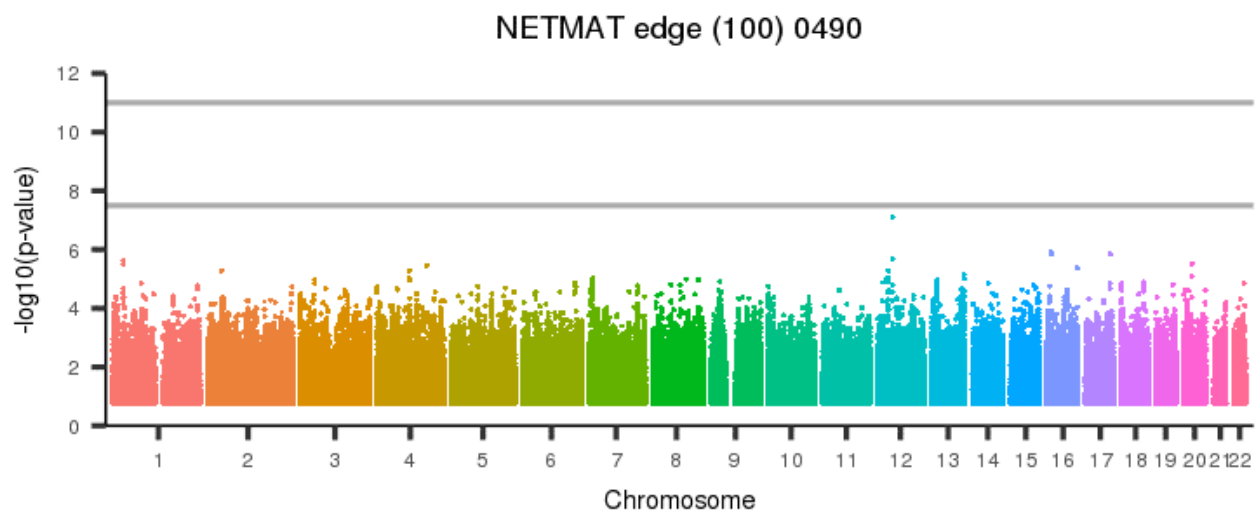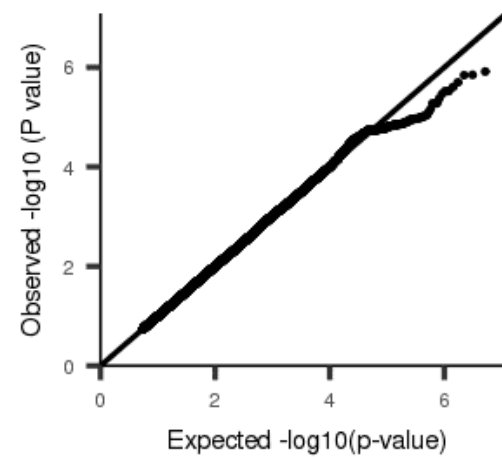

[back to list of plots](#)

Figure 1647: NETMAT edge (100) 0491

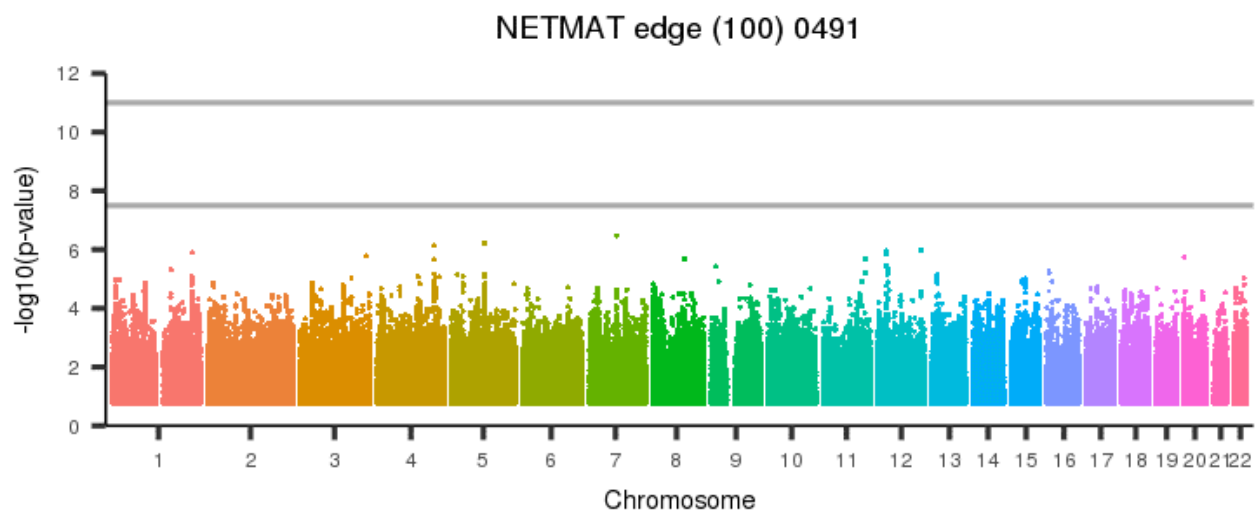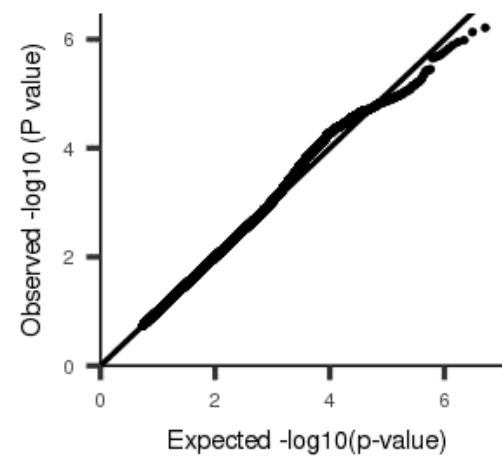

[back to list of plots](#)

Figure 1648: NETMAT edge (100) 0492

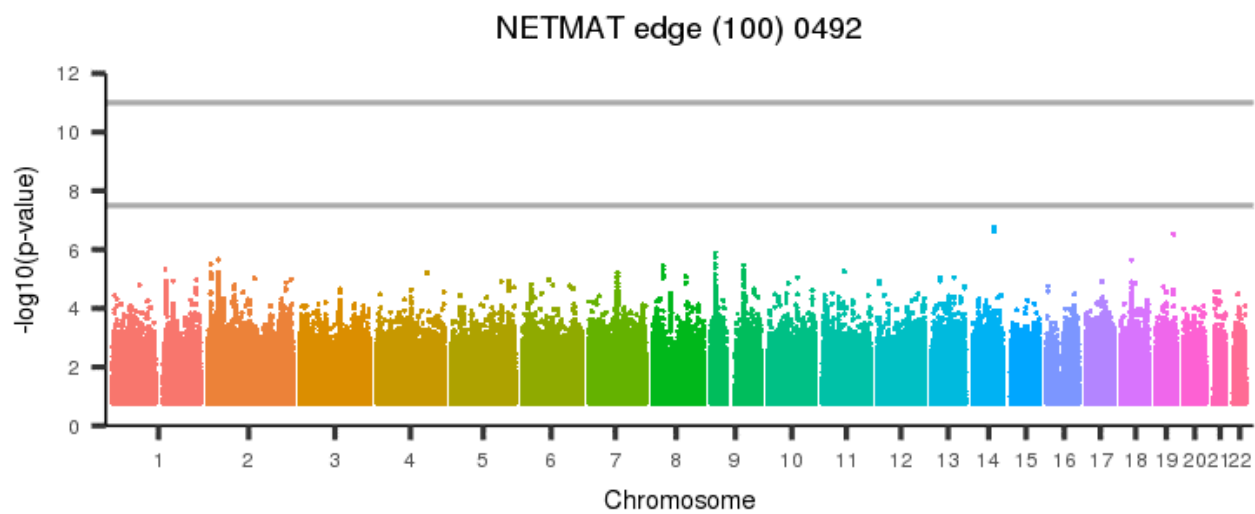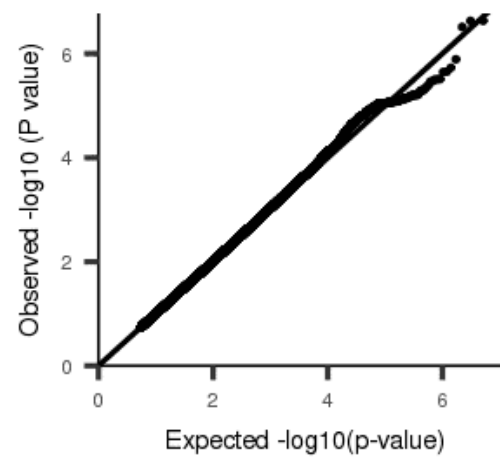

[back to list of plots](#)

Figure 1649: NETMAT edge (100) 0493

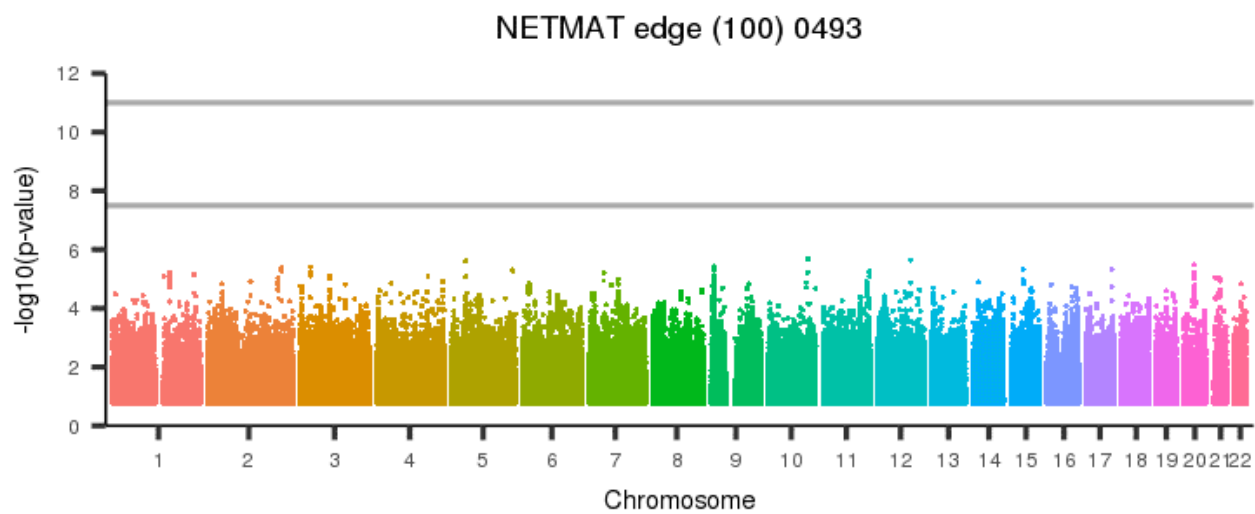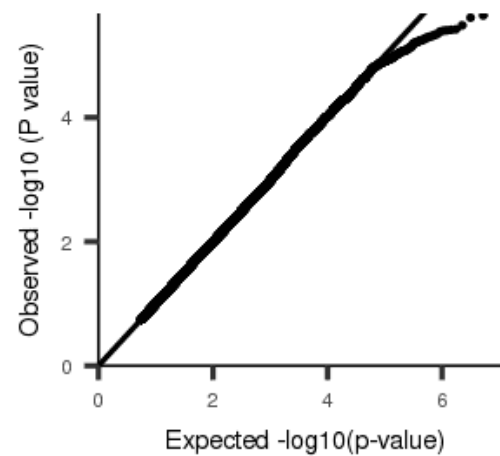

[back to list of plots](#)

Figure 1650: NETMAT edge (100) 0494

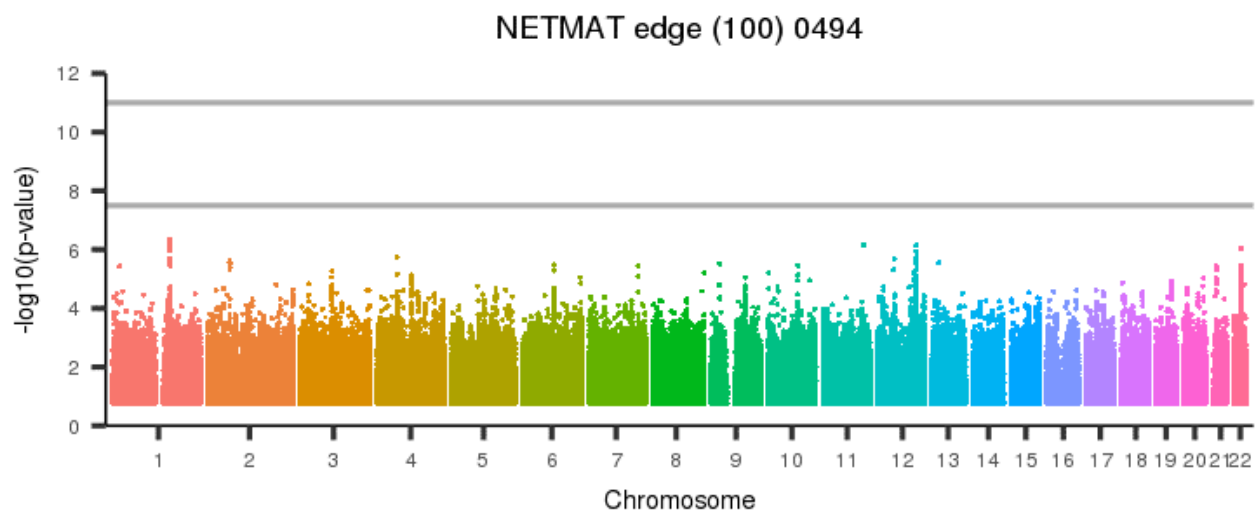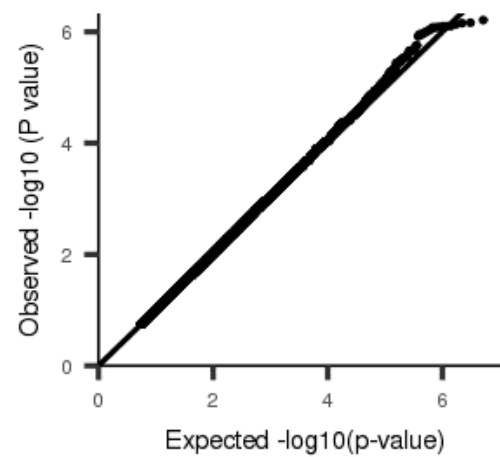

[back to list of plots](#)

Figure 1651: NETMAT edge (100) 0495

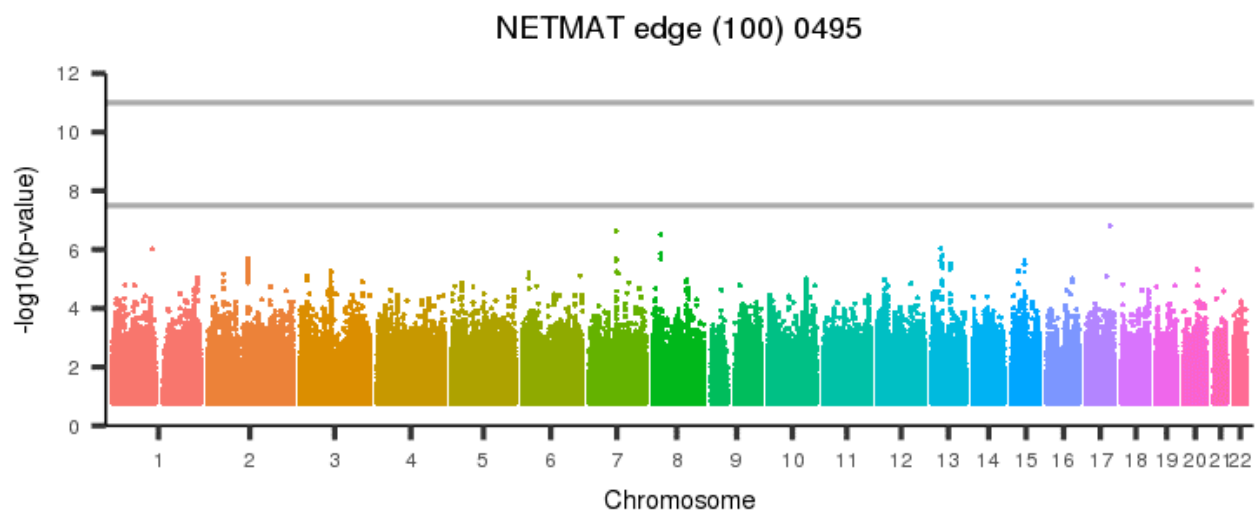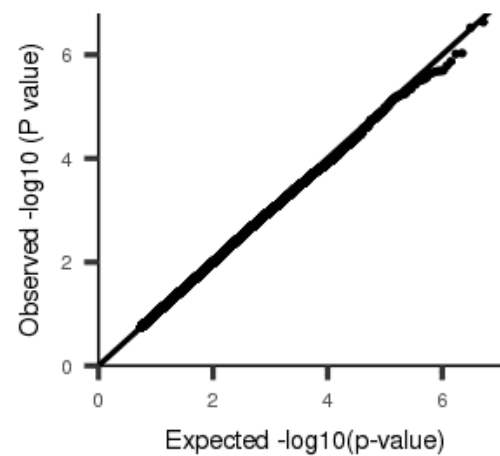

[back to list of plots](#)

Figure 1652: NETMAT edge (100) 0496

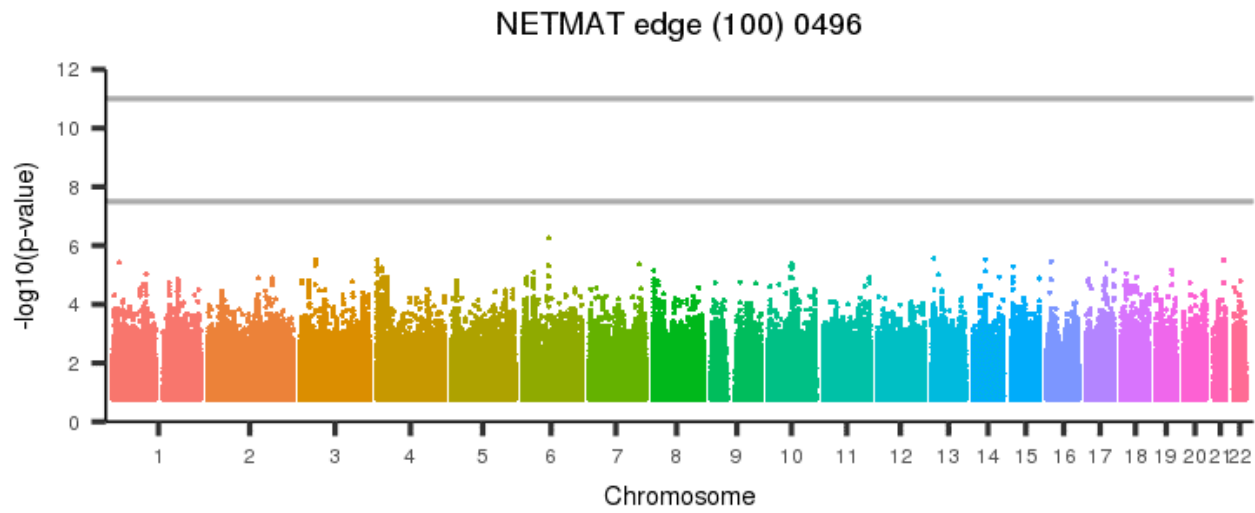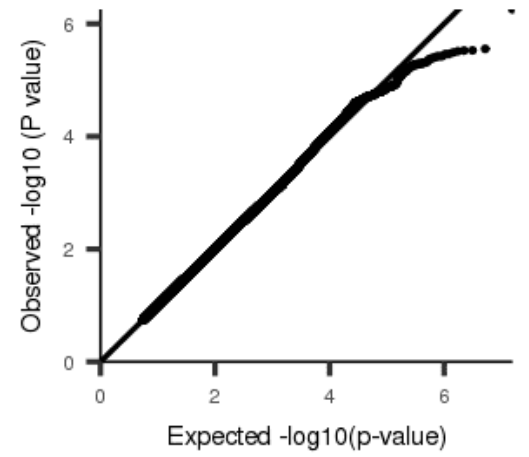

[back to list of plots](#)

Figure 1653: NETMAT edge (100) 0497

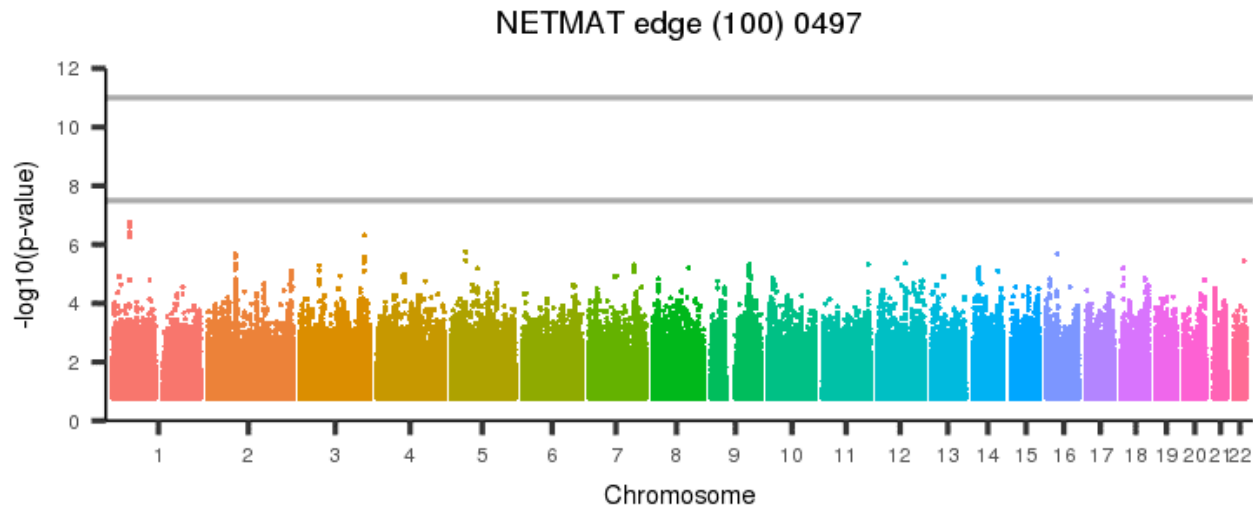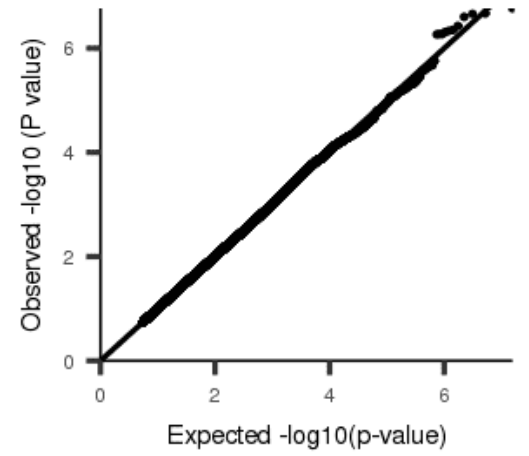

[back to list of plots](#)



Figure 1654: NETMAT edge (100) 0498

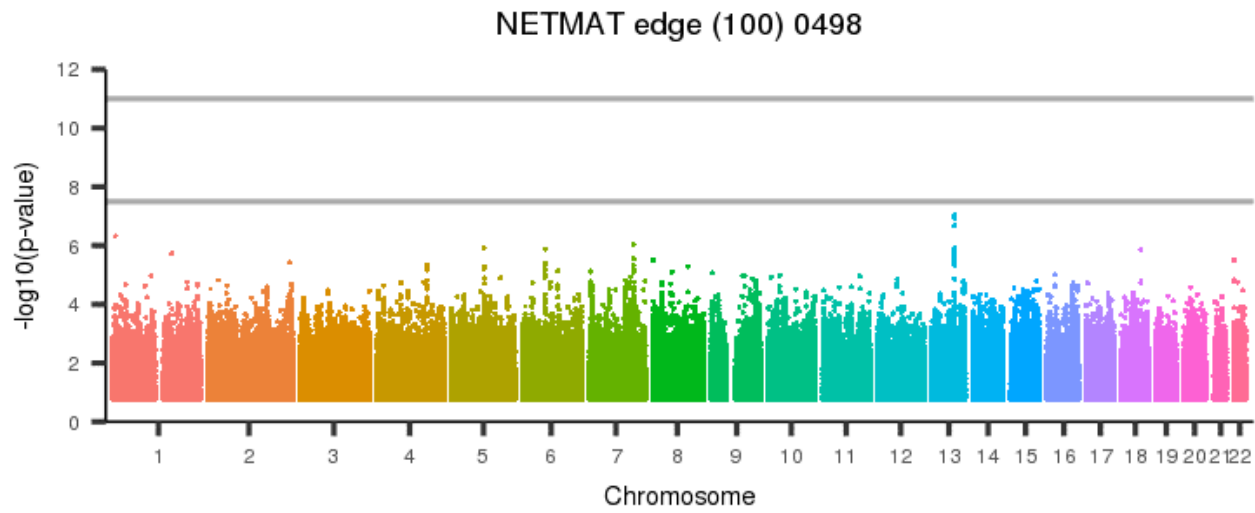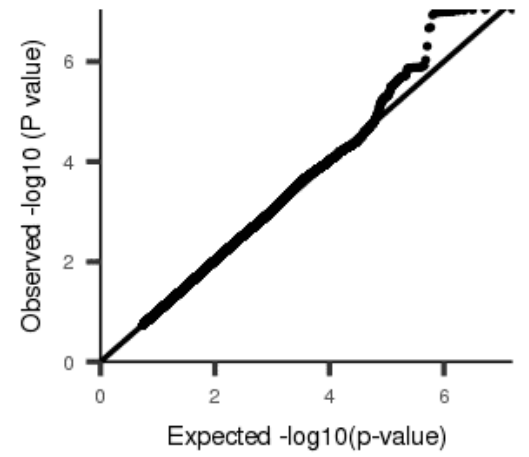

[back to list of plots](#)

Figure 1655: NETMAT edge (100) 0499

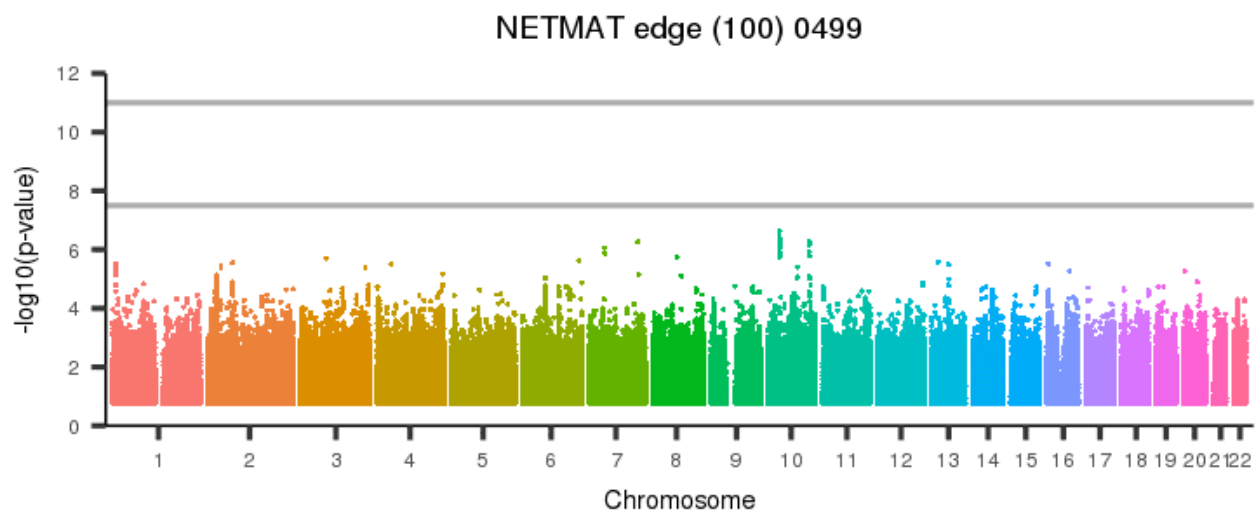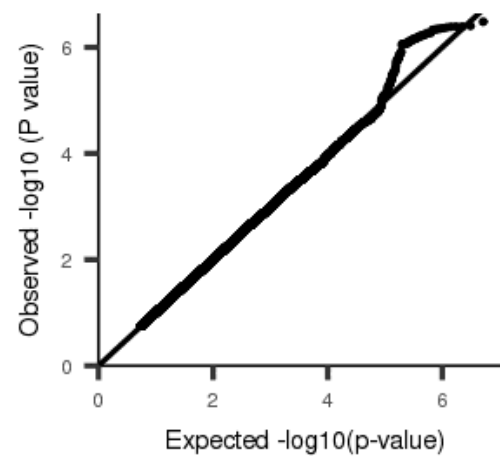

[back to list of plots](#)

Figure 1656: NETMAT edge (100) 0500

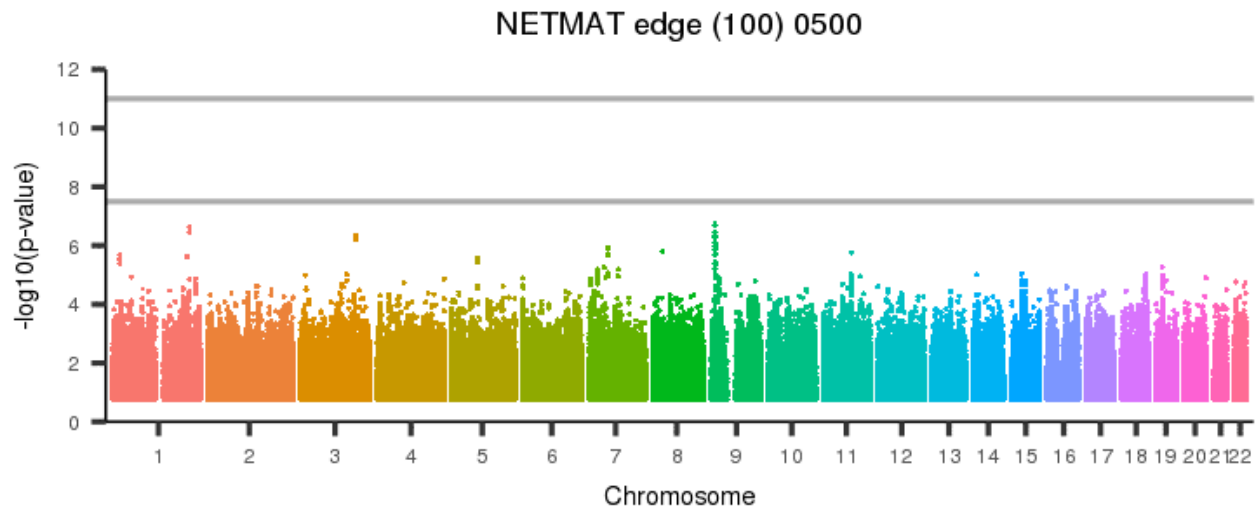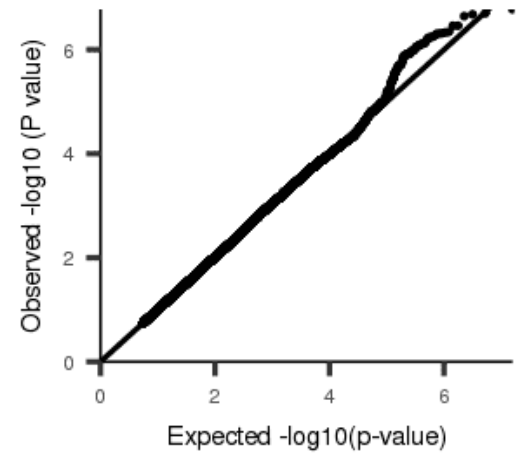

[back to list of plots](#)

Figure 1657: NETMAT edge (100) 0501

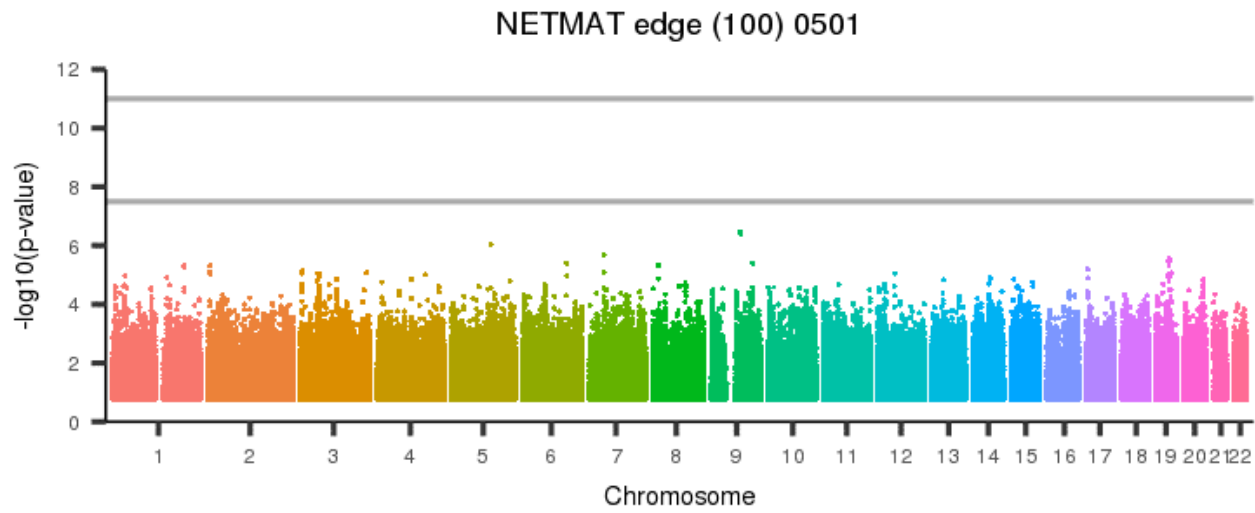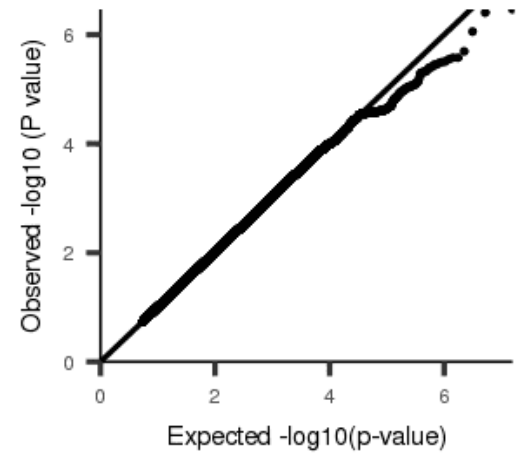

[back to list of plots](#)

Figure 1658: NETMAT edge (100) 0502

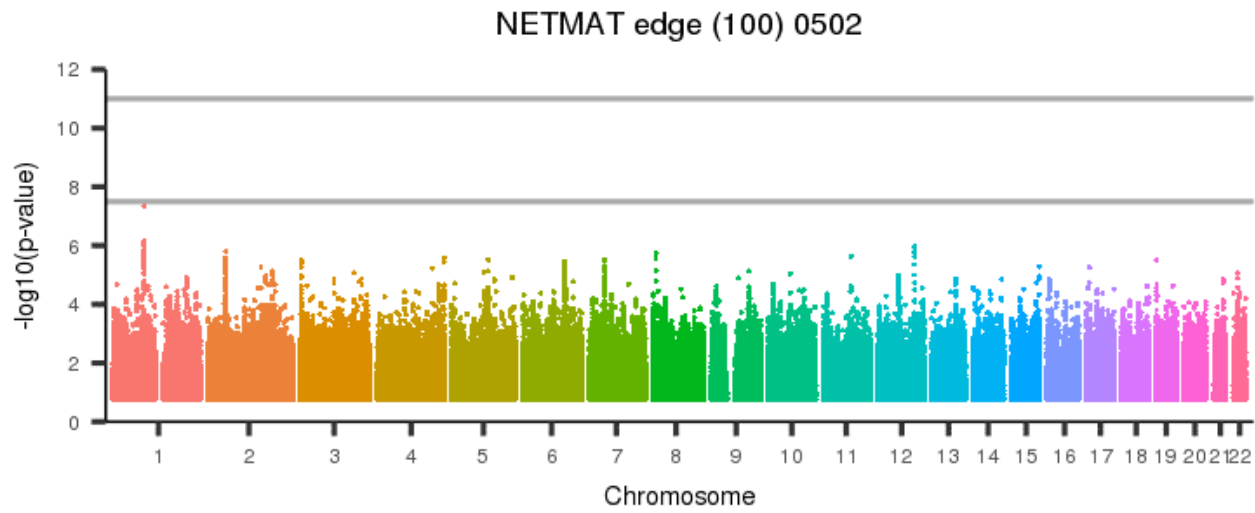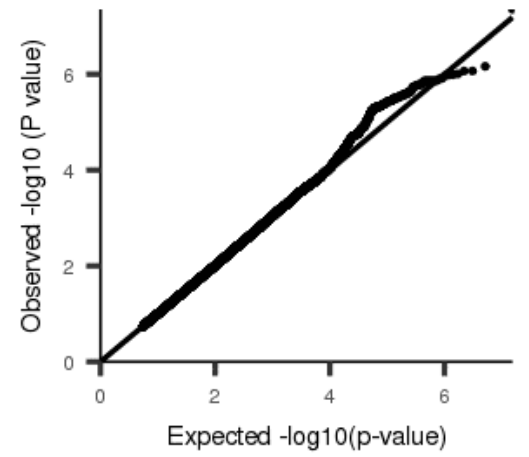

[back to list of plots](#)

Figure 1659: NETMAT edge (100) 0503

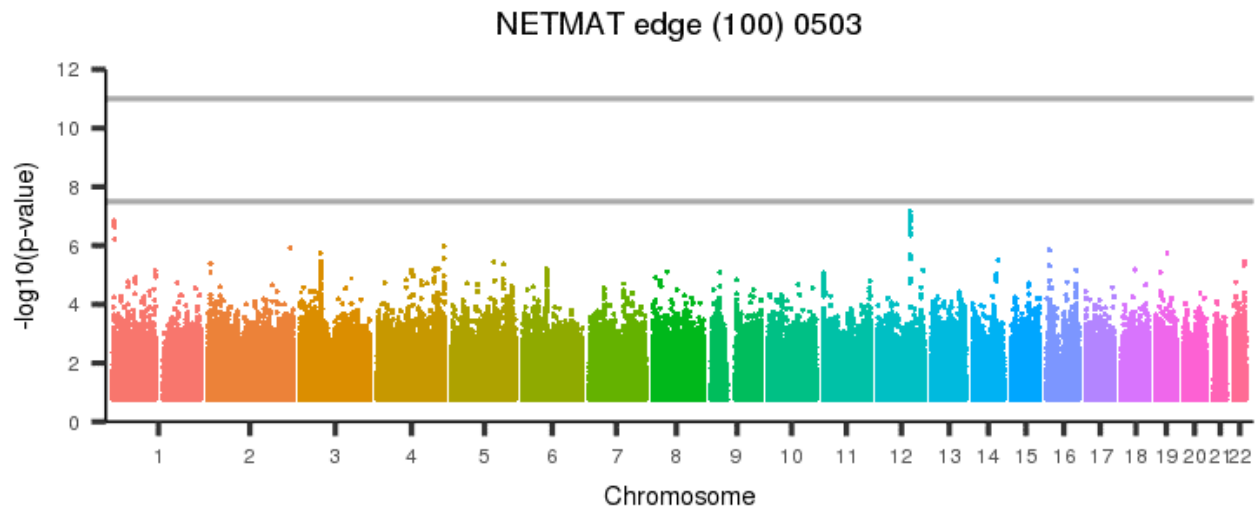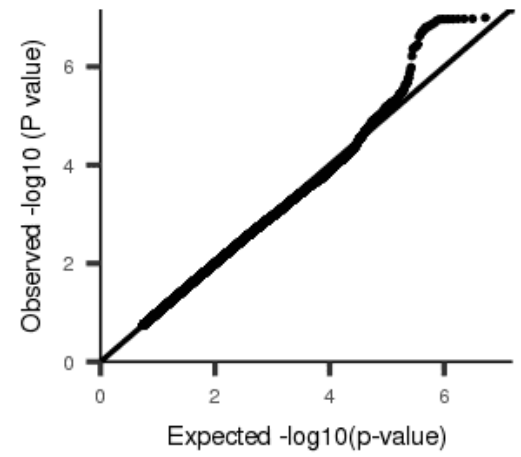

[back to list of plots](#)

Figure 1660: NETMAT edge (100) 0504

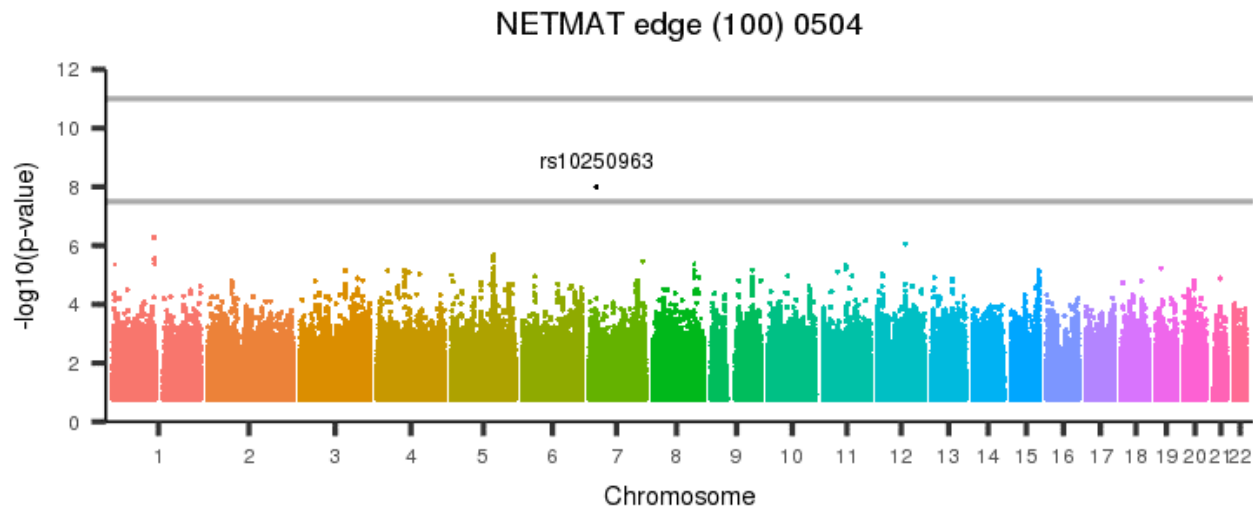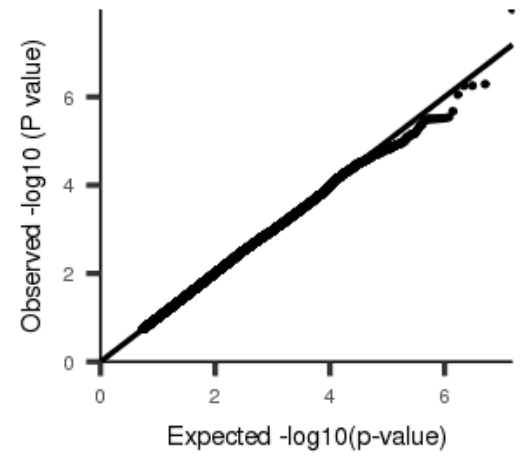

[back to list of plots](#)

Figure 1661: NETMAT edge (100) 0505

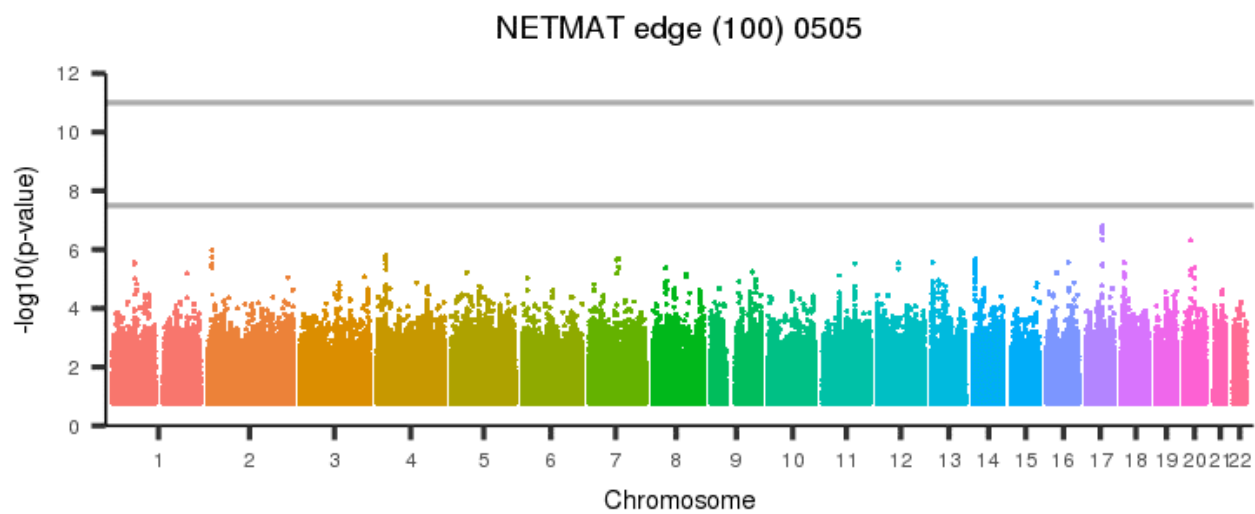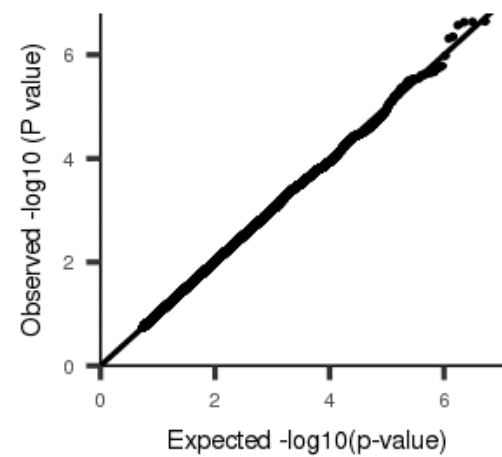

[back to list of plots](#)



Figure 1662: NETMAT edge (100) 0506

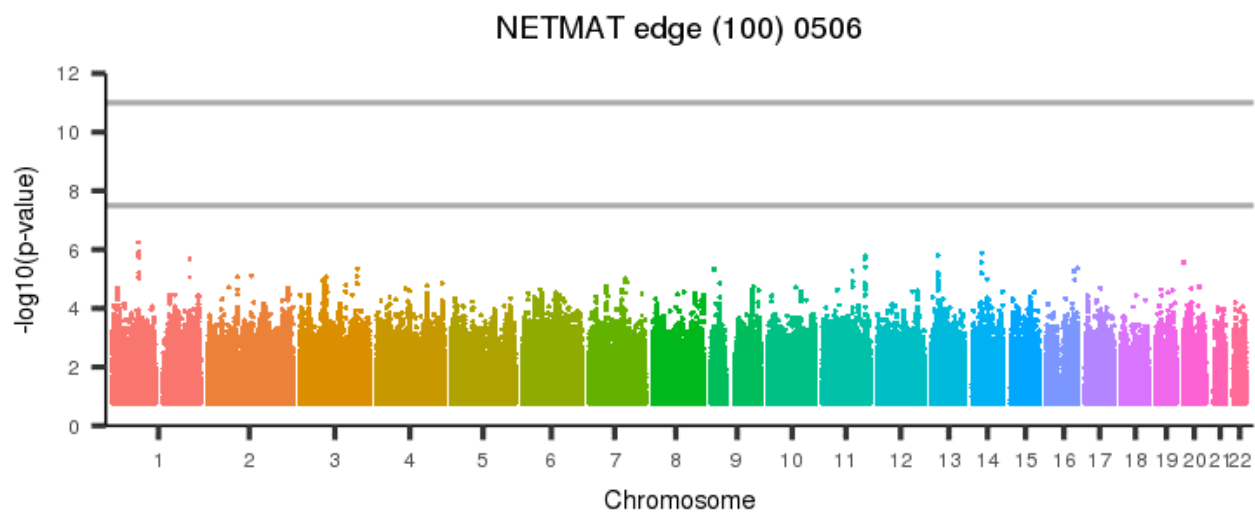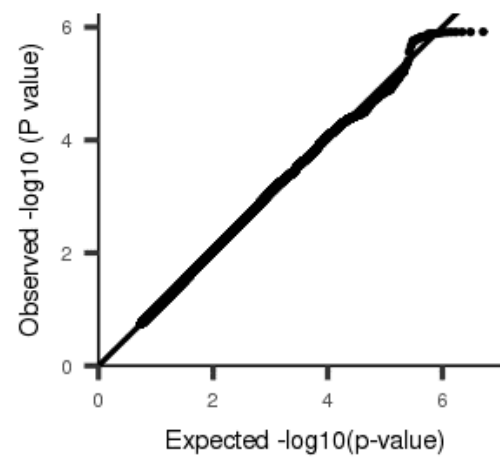

[back to list of plots](#)

Figure 1663: NETMAT edge (100) 0507

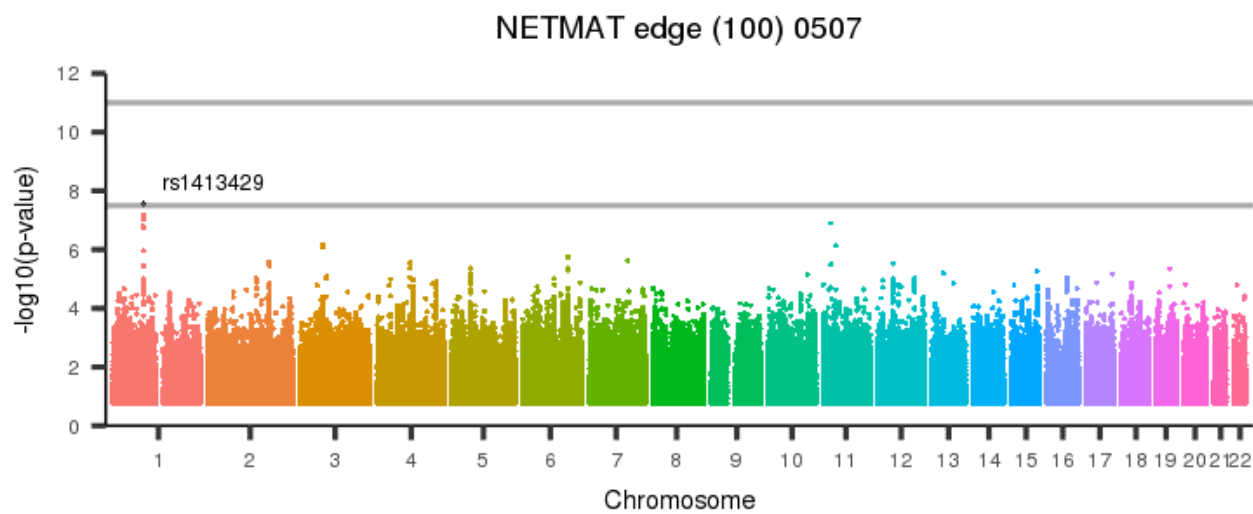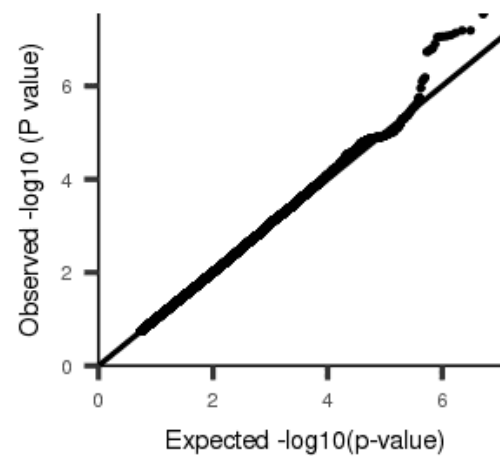

[back to list of plots](#)

Figure 1664: NETMAT edge (100) 0508

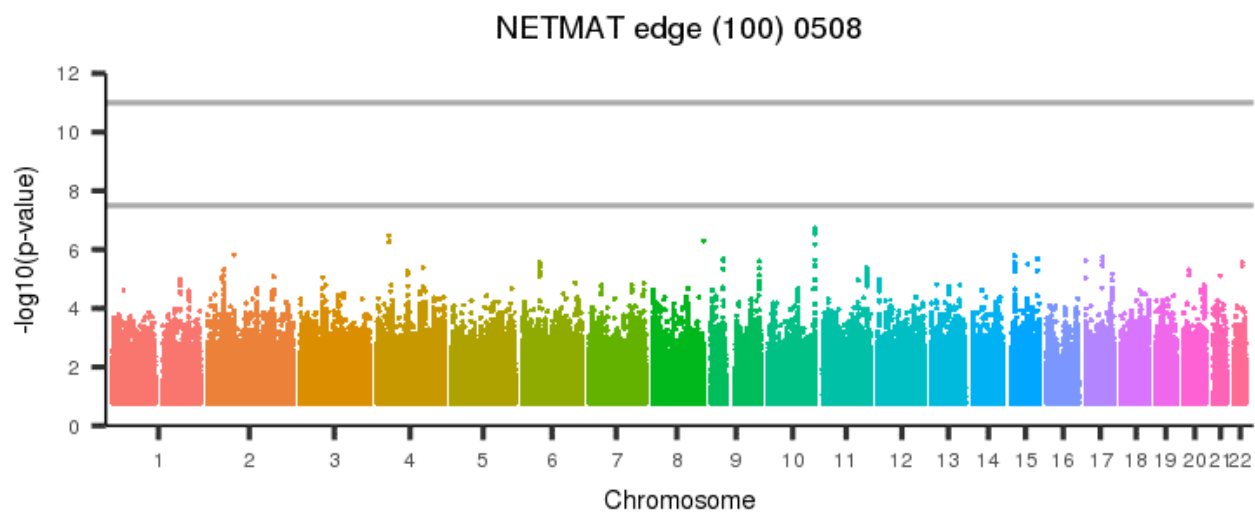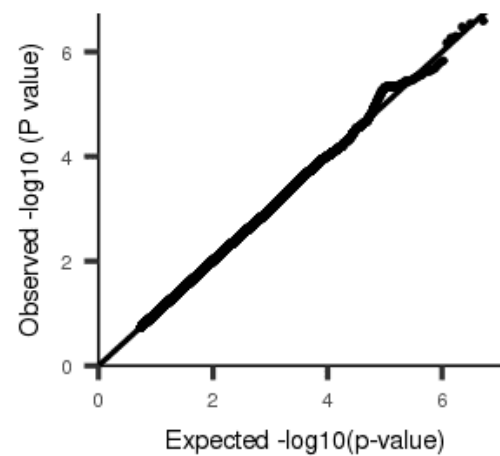

[back to list of plots](#)

Figure 1665: NETMAT edge (100) 0509

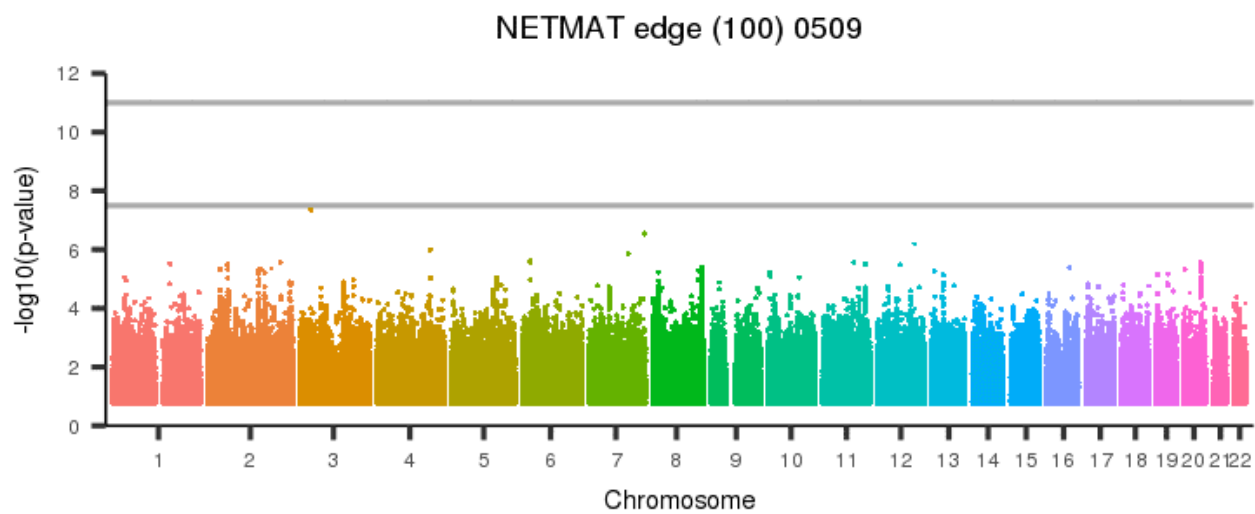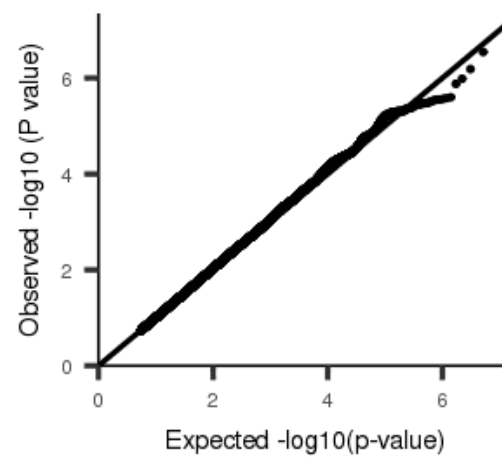

[back to list of plots](#)

Figure 1666: NETMAT edge (100) 0510

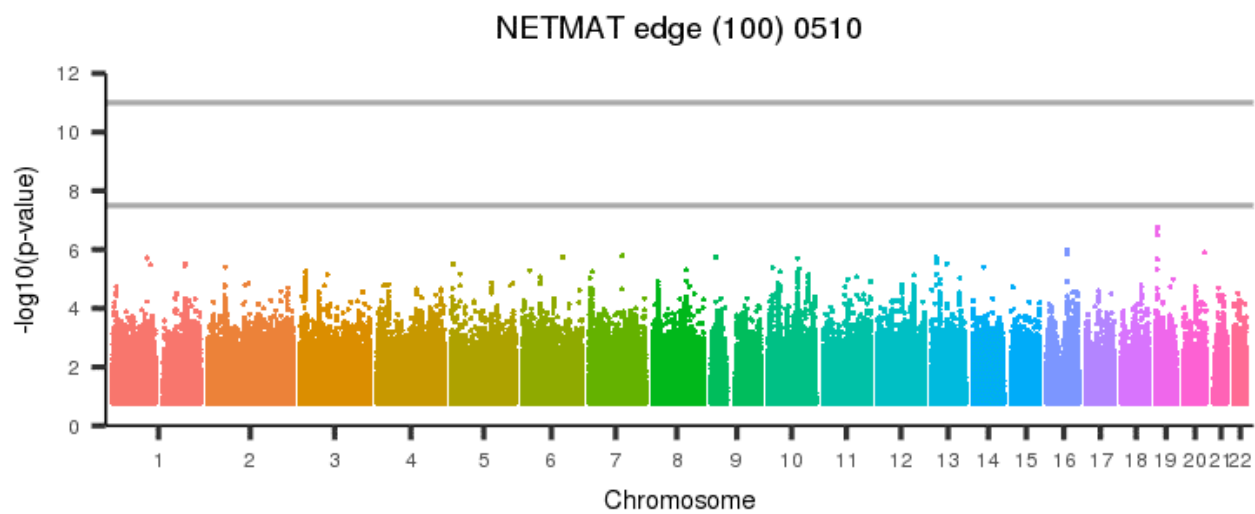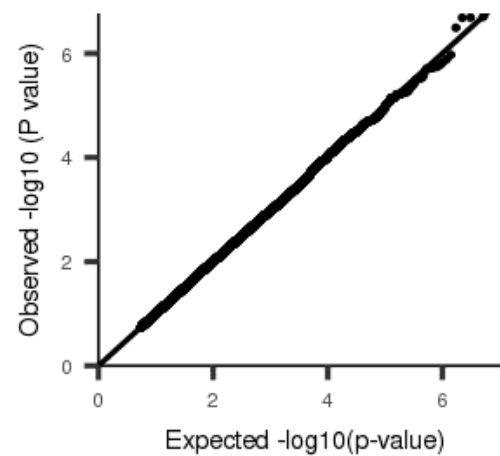

[back to list of plots](#)

Figure 1667: NETMAT edge (100) 0511

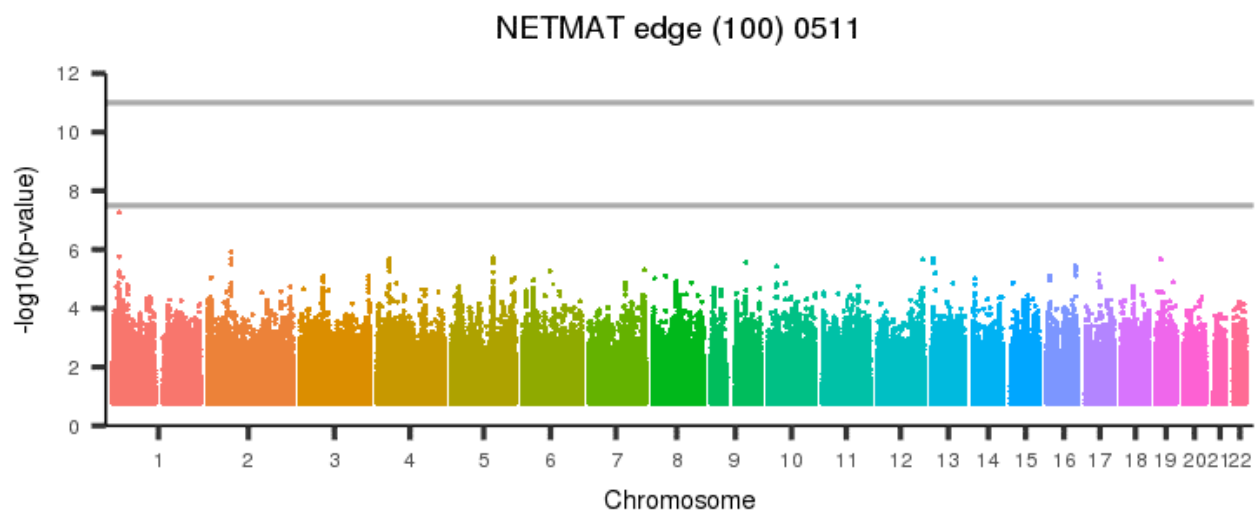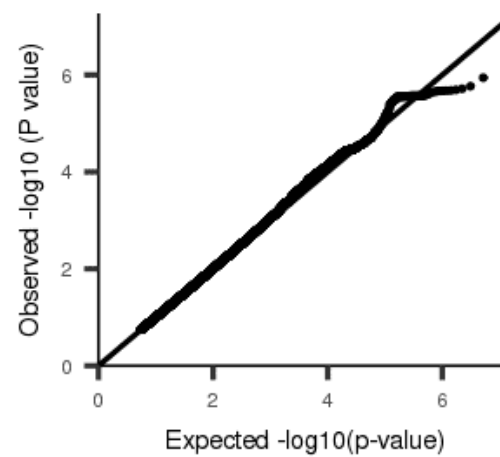

[back to list of plots](#)

Figure 1668: NETMAT edge (100) 0512

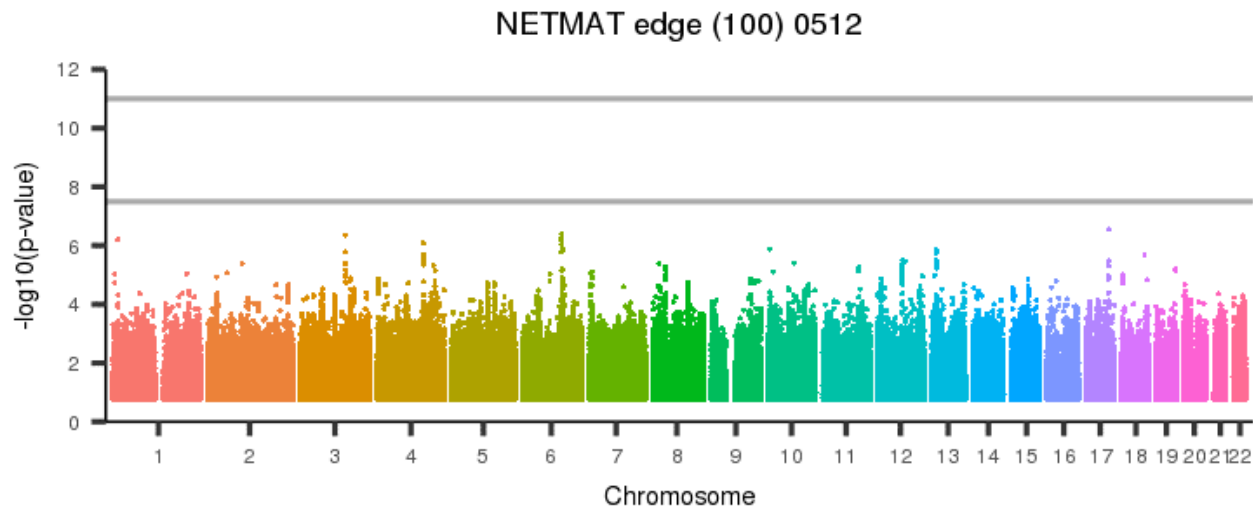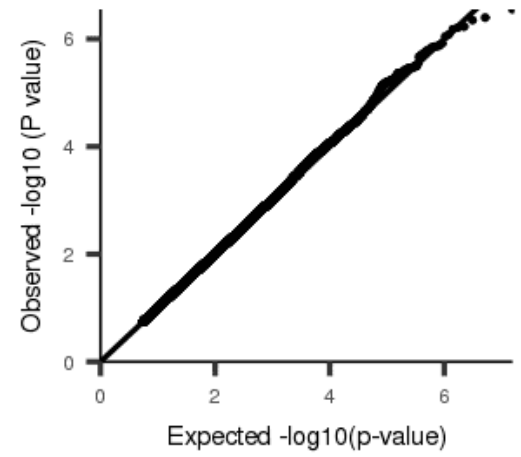

[back to list of plots](#)

Figure 1669: NETMAT edge (100) 0513

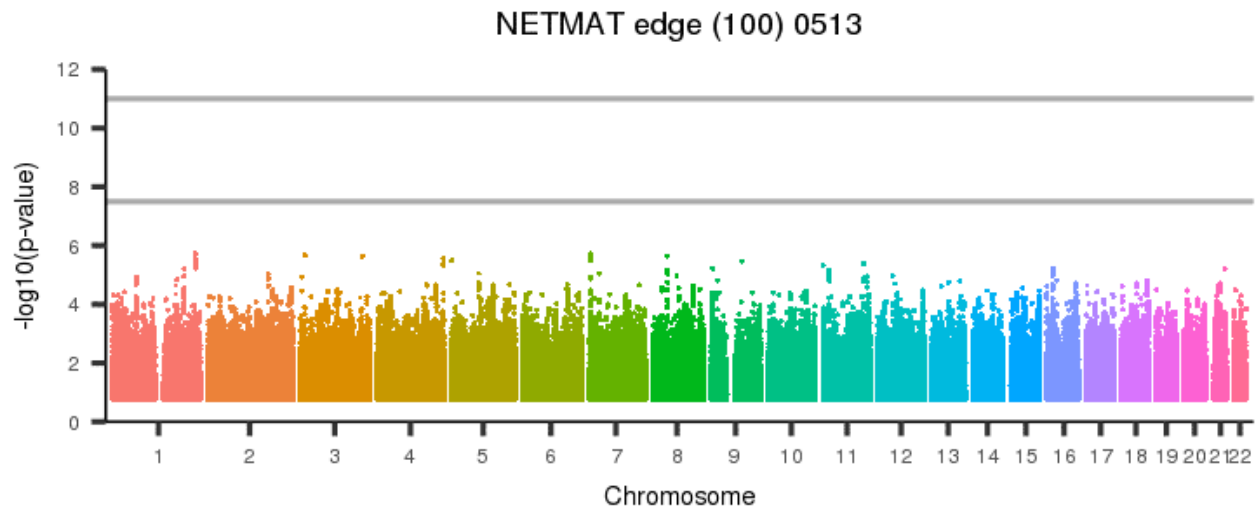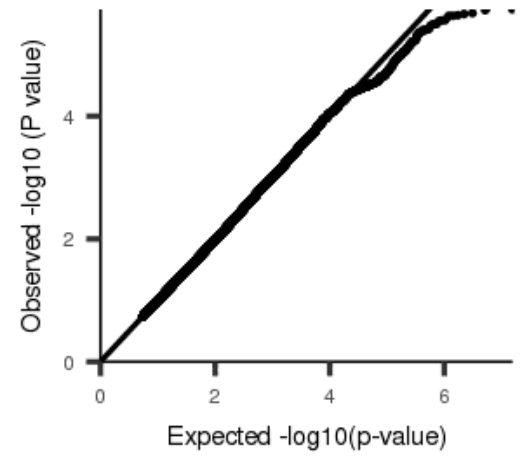

[back to list of plots](#)



Figure 1670: NETMAT edge (100) 0514

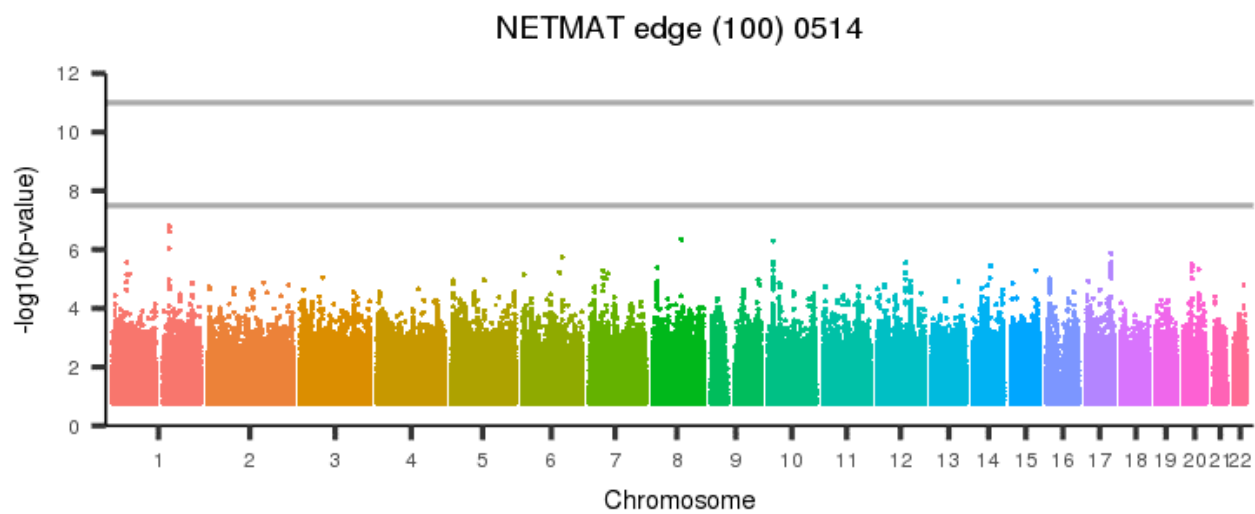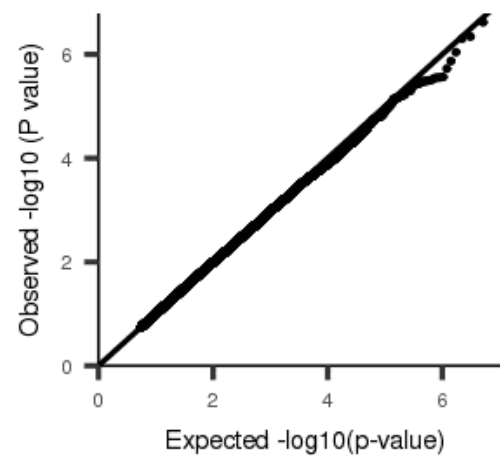

[back to list of plots](#)

Figure 1671: NETMAT edge (100) 0515

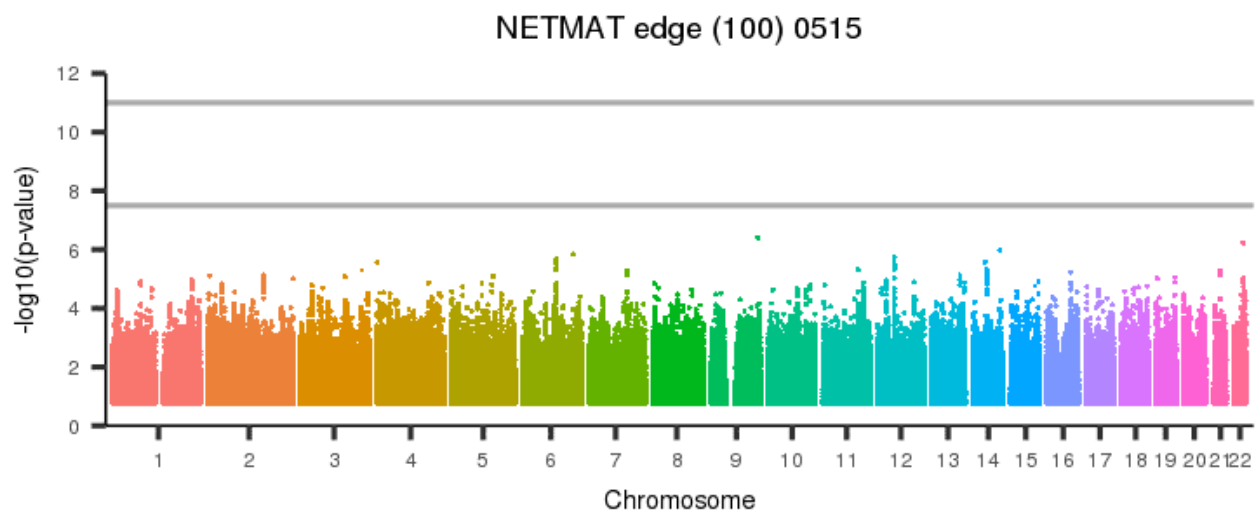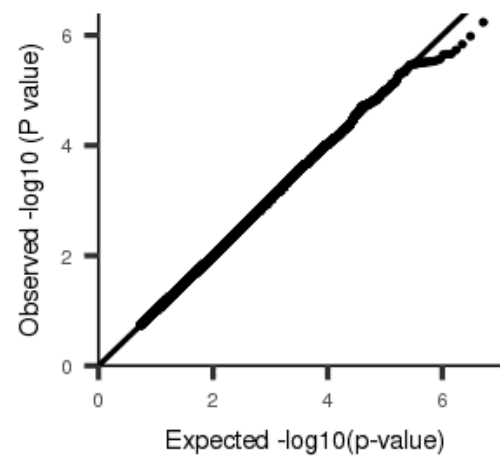

[back to list of plots](#)

Figure 1672: NETMAT edge (100) 0516

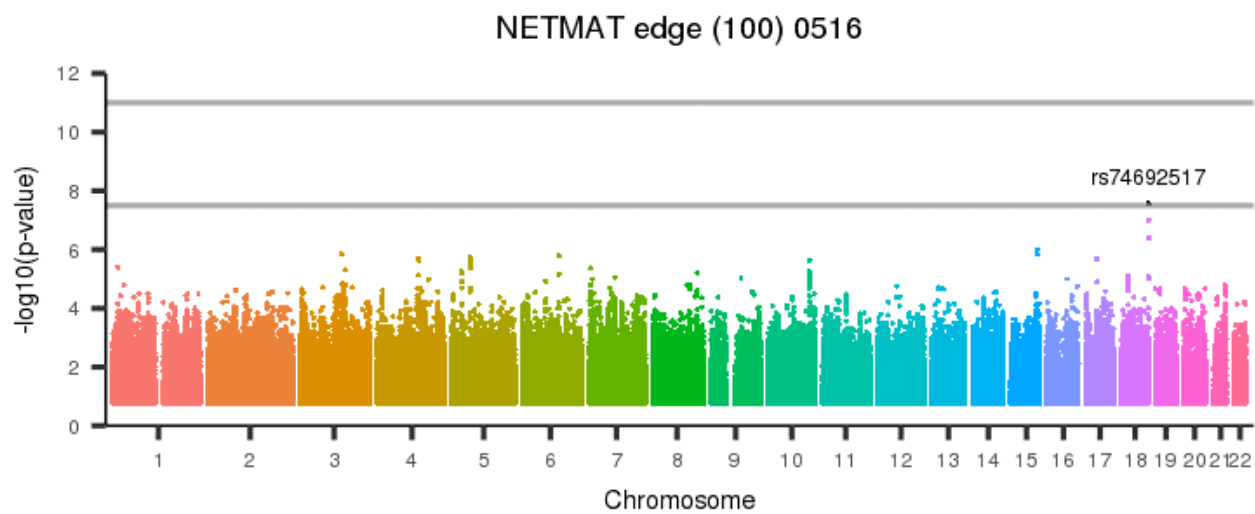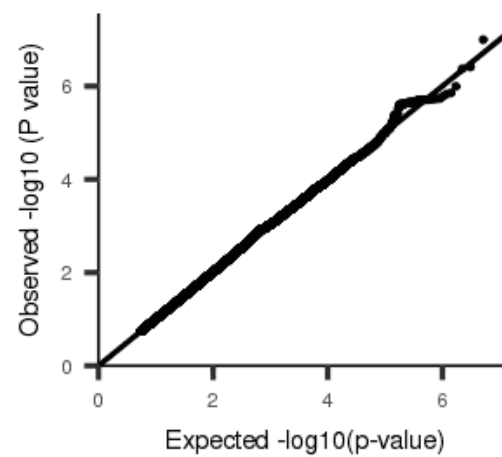

[back to list of plots](#)

Figure 1673: NETMAT edge (100) 0517

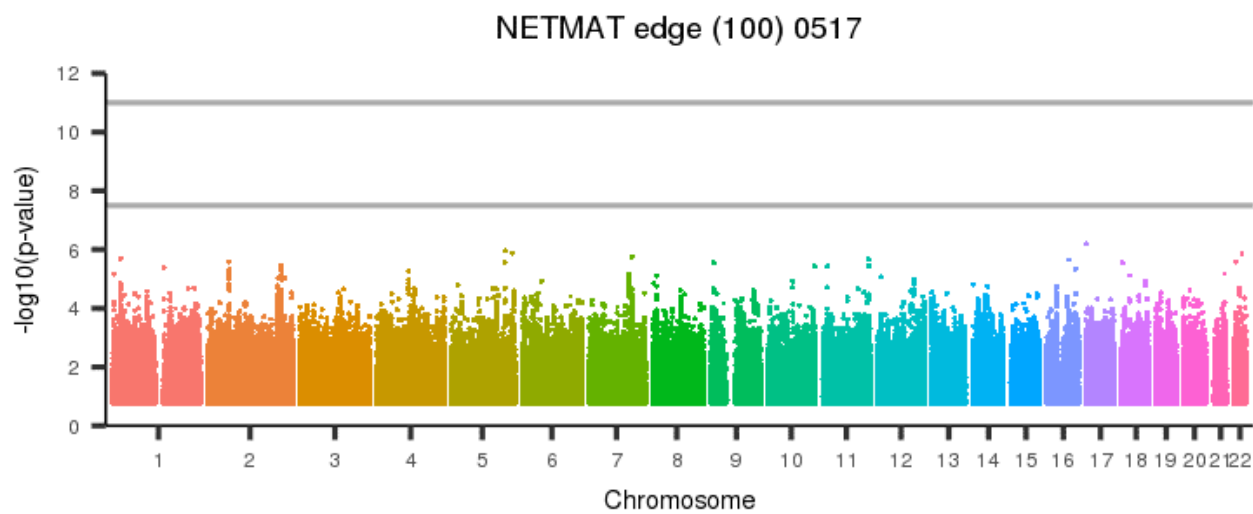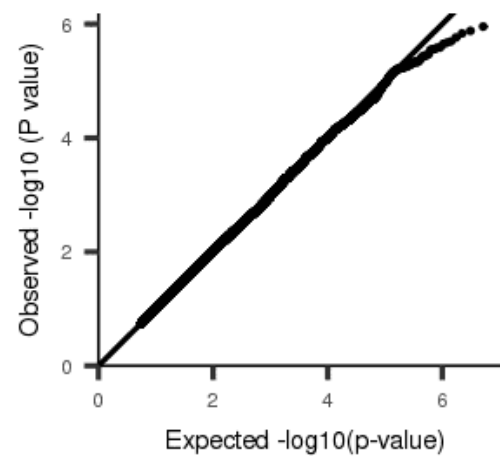

[back to list of plots](#)

Figure 1674: NETMAT edge (100) 0518

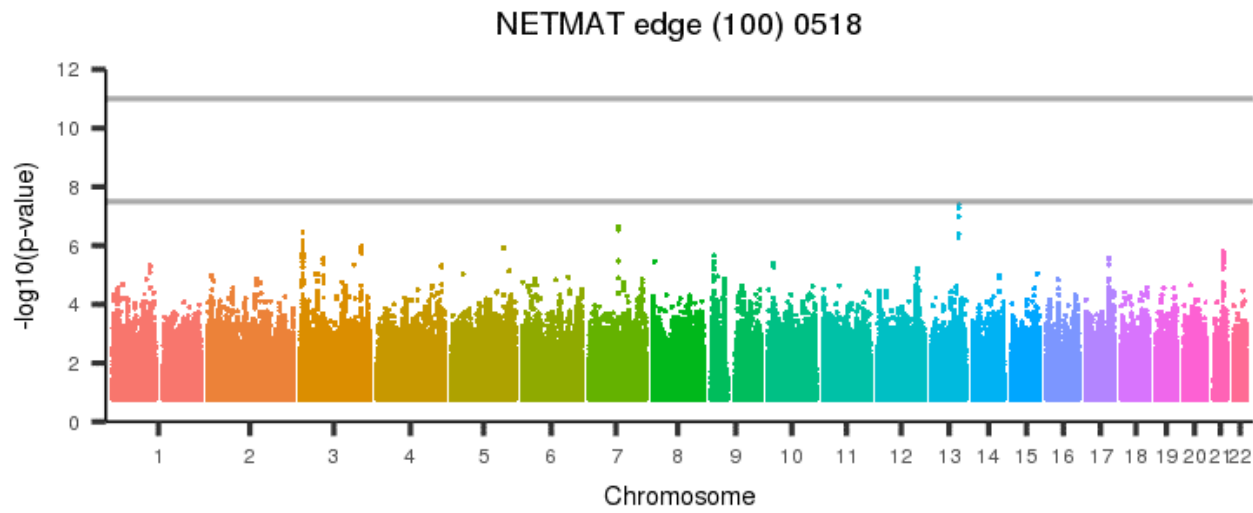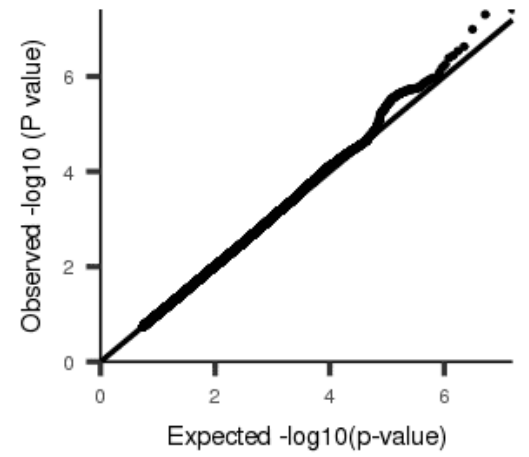

[back to list of plots](#)

Figure 1675: NETMAT edge (100) 0519

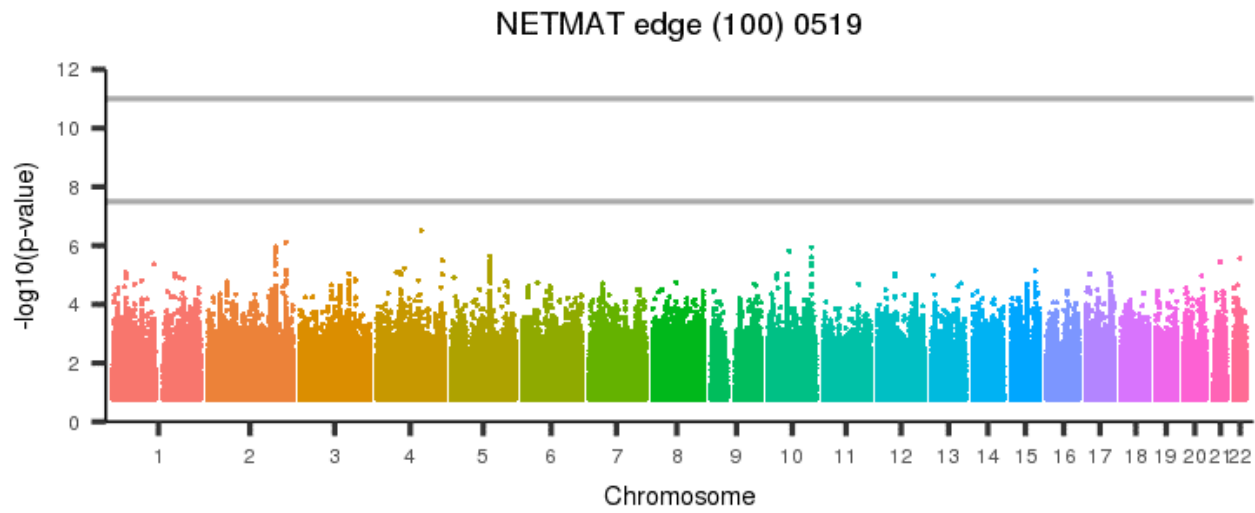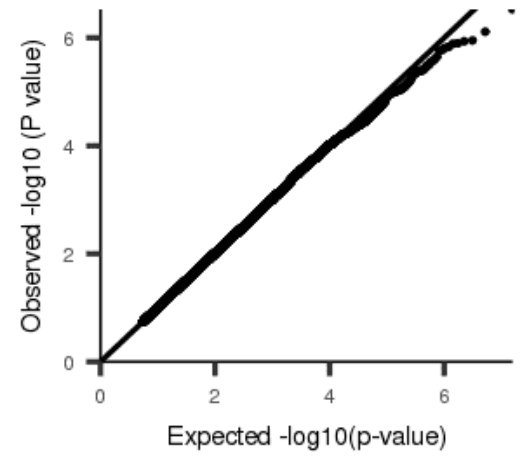

[back to list of plots](#)

Figure 1676: NETMAT edge (100) 0520

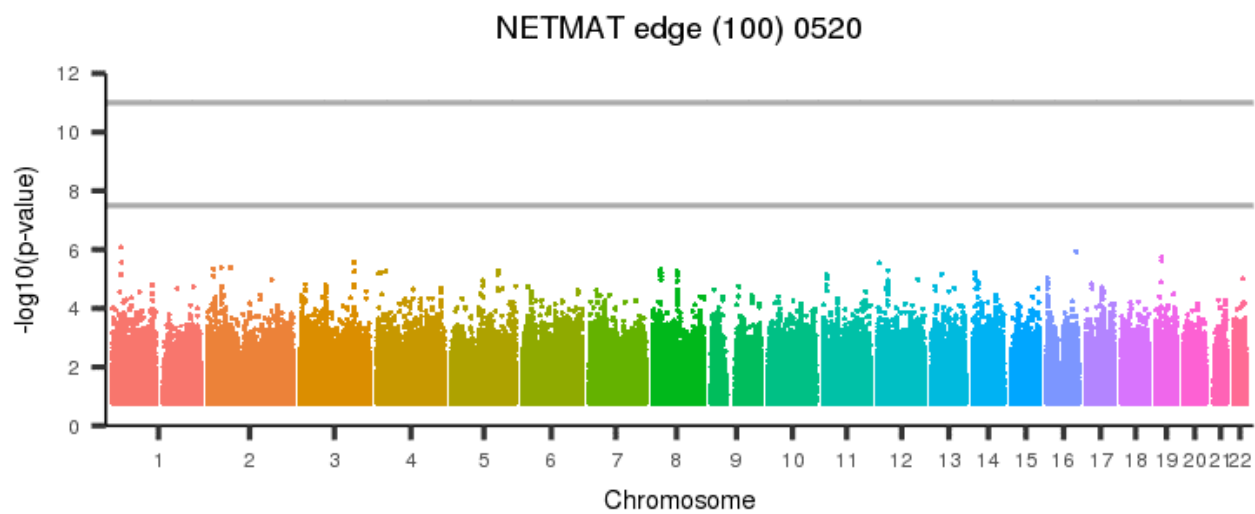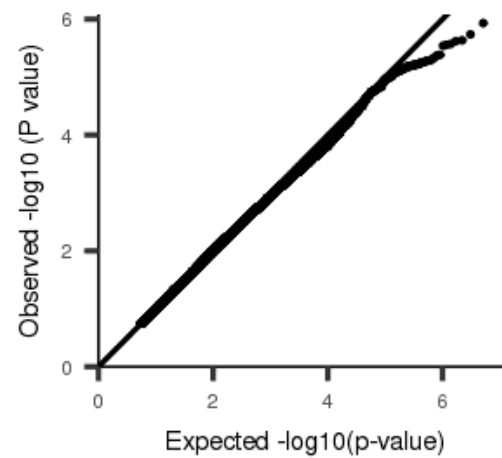

[back to list of plots](#)

Figure 1677: NETMAT edge (100) 0521

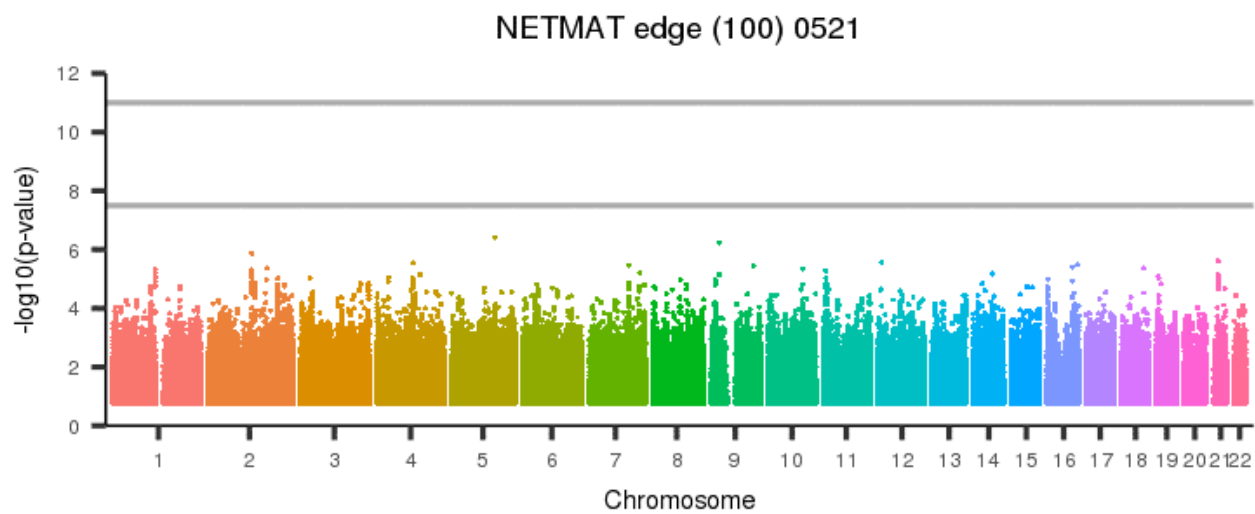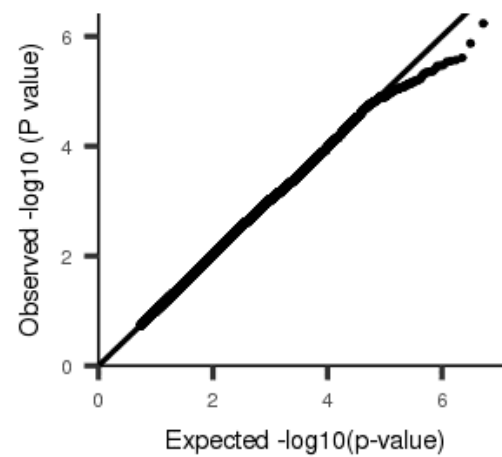

[back to list of plots](#)



Figure 1678: NETMAT edge (100) 0522

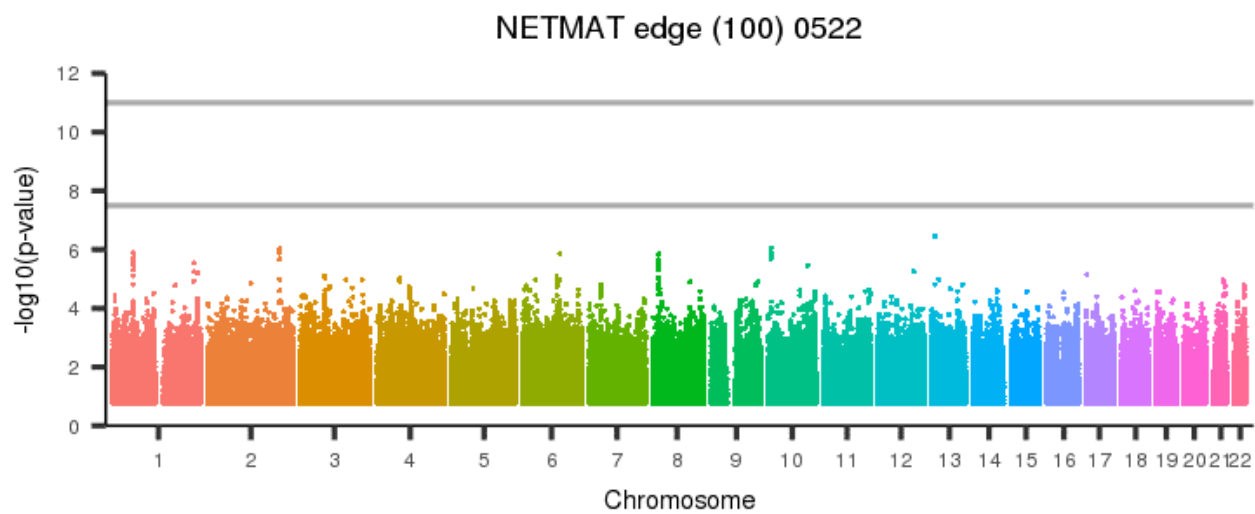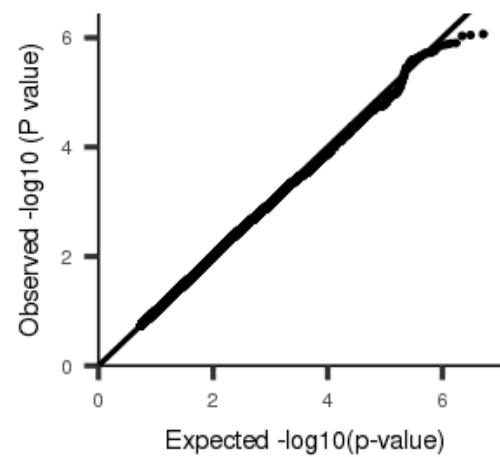

[back to list of plots](#)

Figure 1679: NETMAT edge (100) 0523

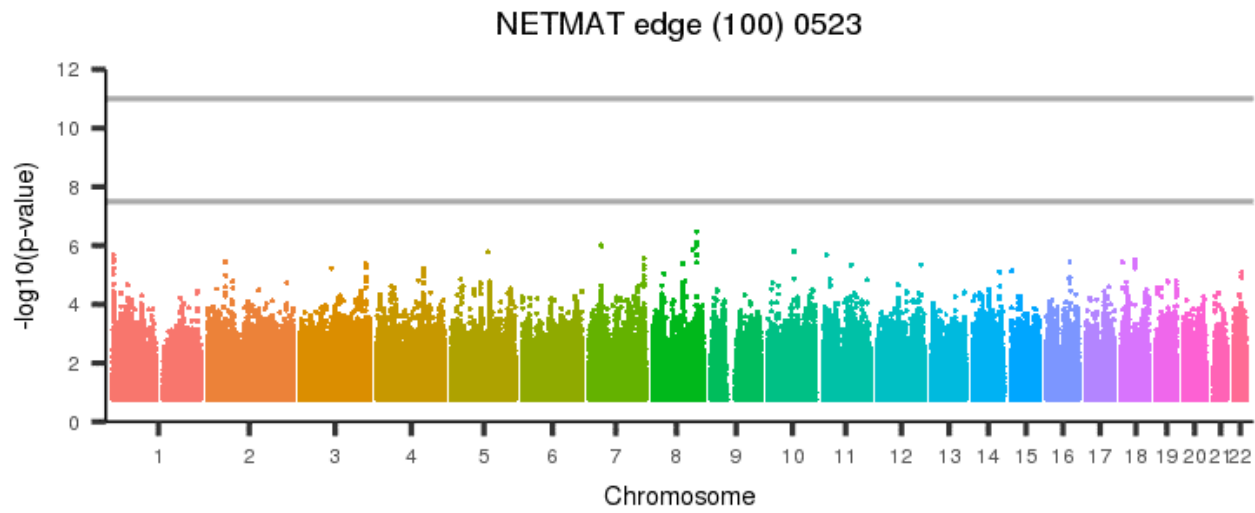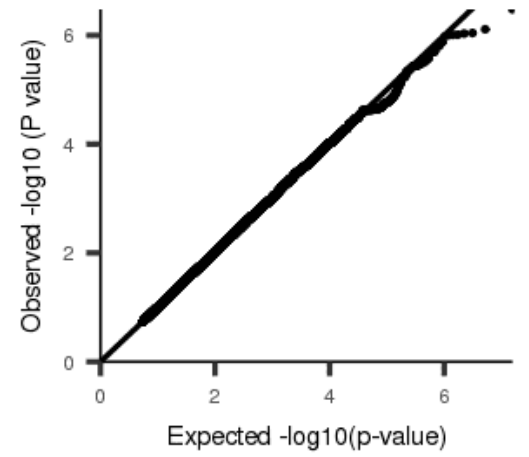

[back to list of plots](#)

Figure 1680: NETMAT edge (100) 0524

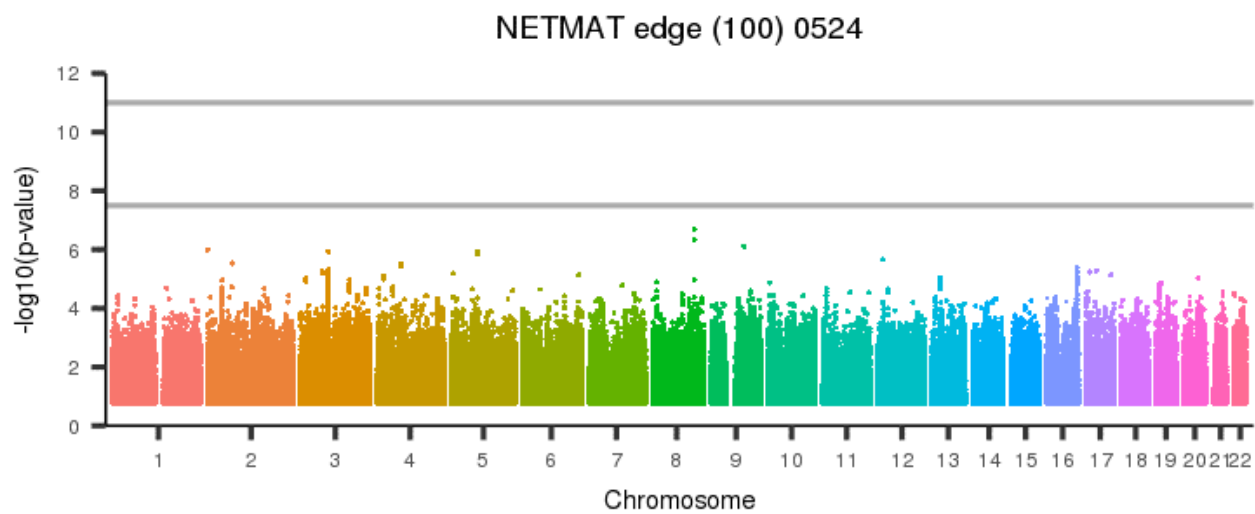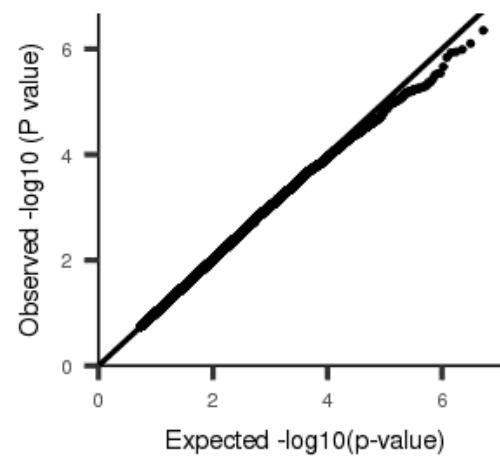

[back to list of plots](#)

Figure 1681: NETMAT edge (100) 0525

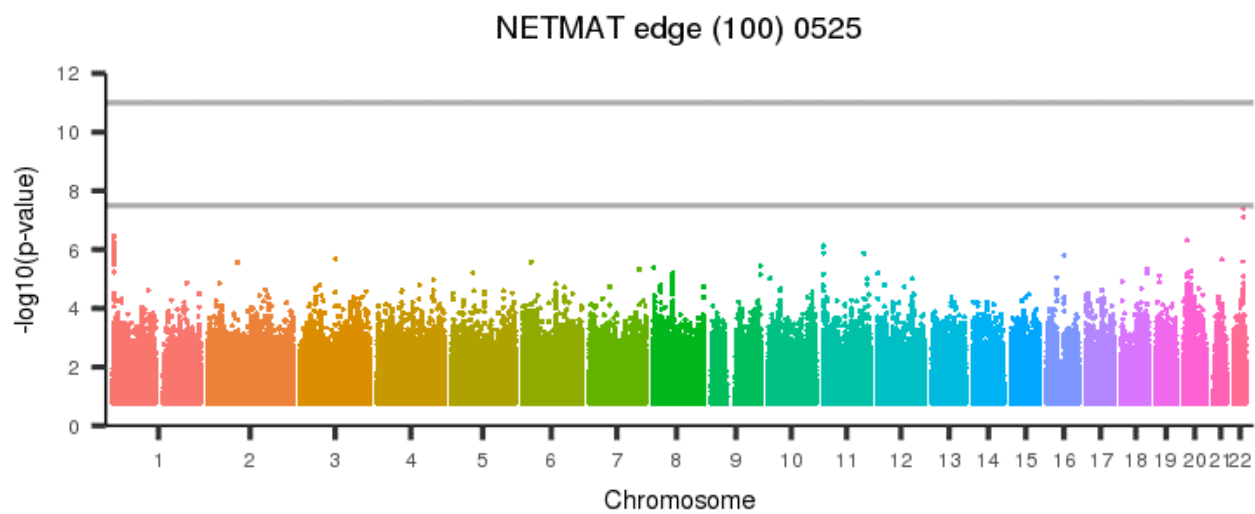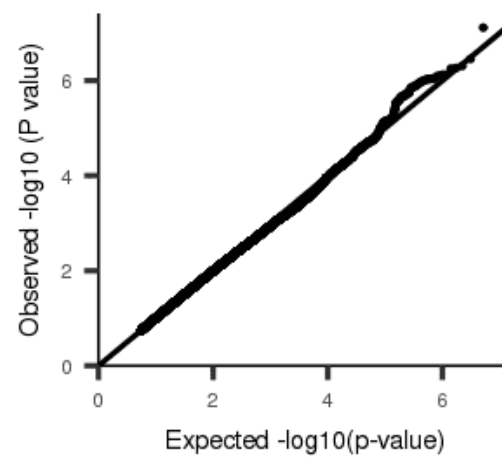

[back to list of plots](#)

Figure 1682: NETMAT edge (100) 0526

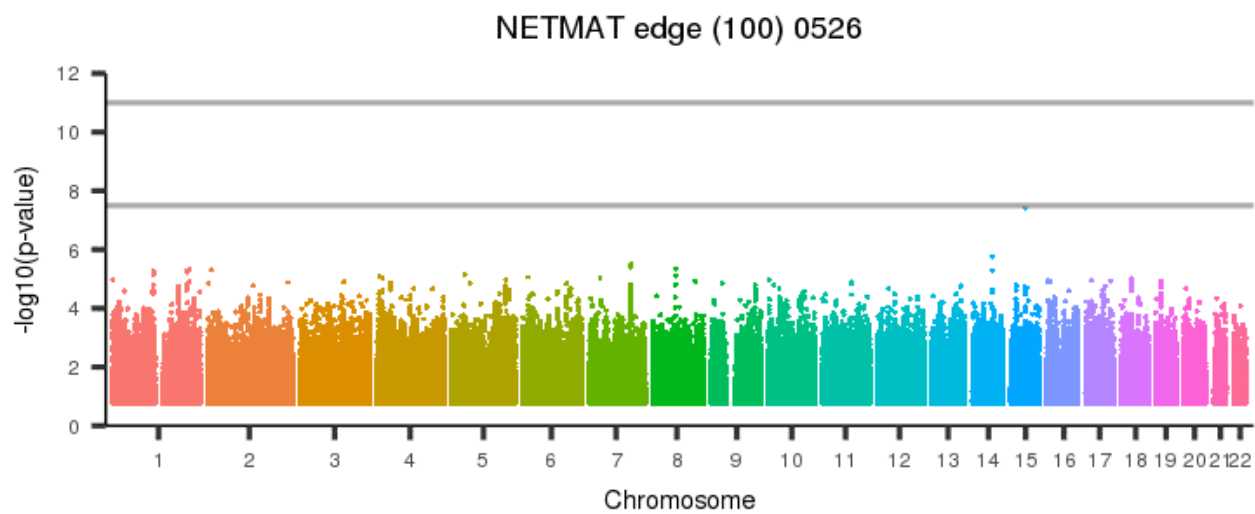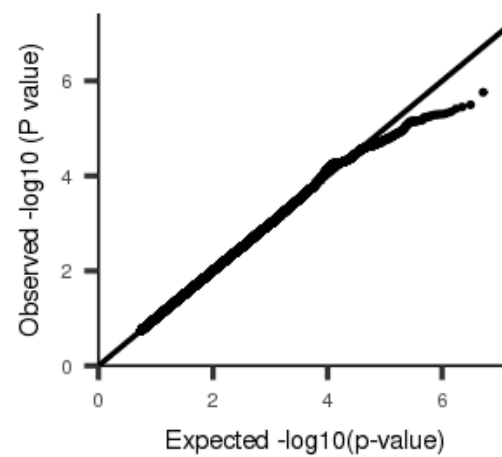

[back to list of plots](#)

Figure 1683: NETMAT edge (100) 0527

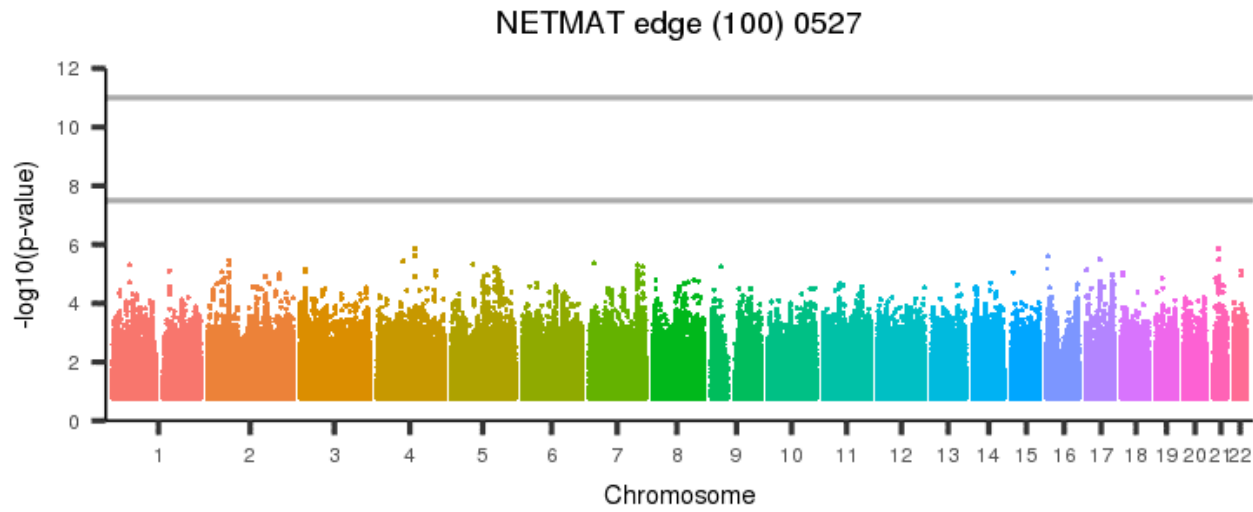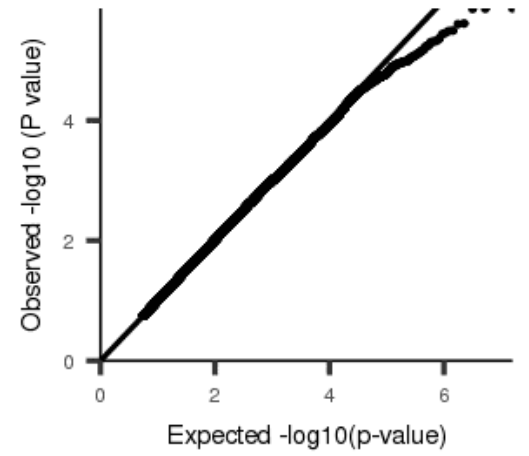

[back to list of plots](#)

Figure 1684: NETMAT edge (100) 0528

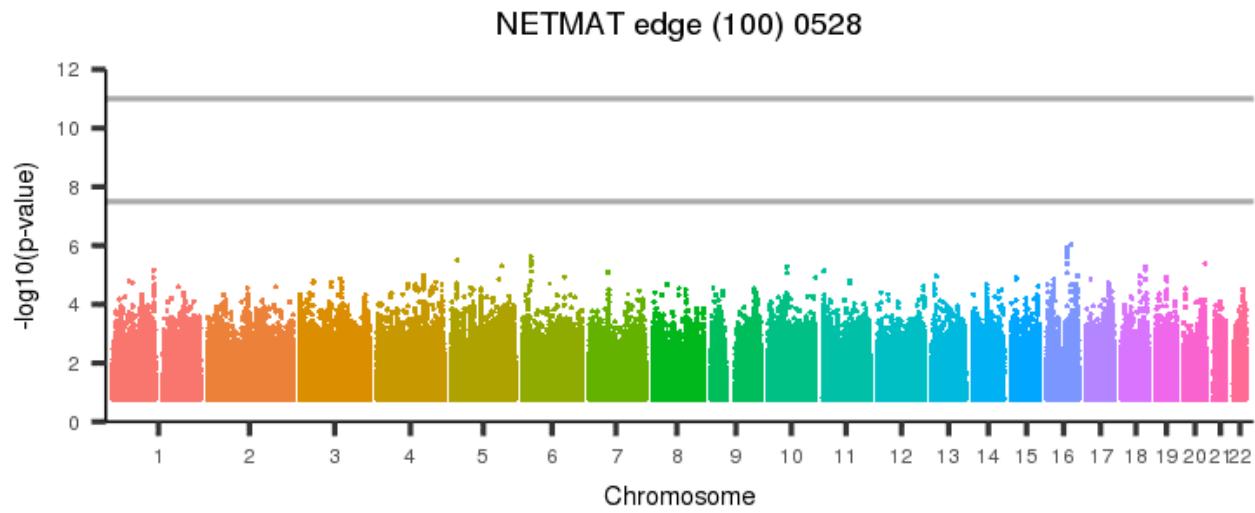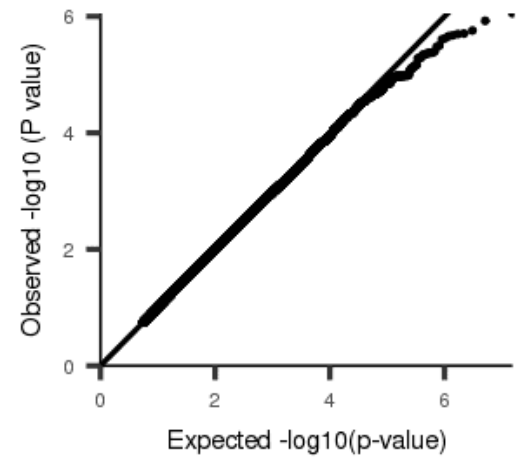

[back to list of plots](#)

Figure 1685: NETMAT edge (100) 0529

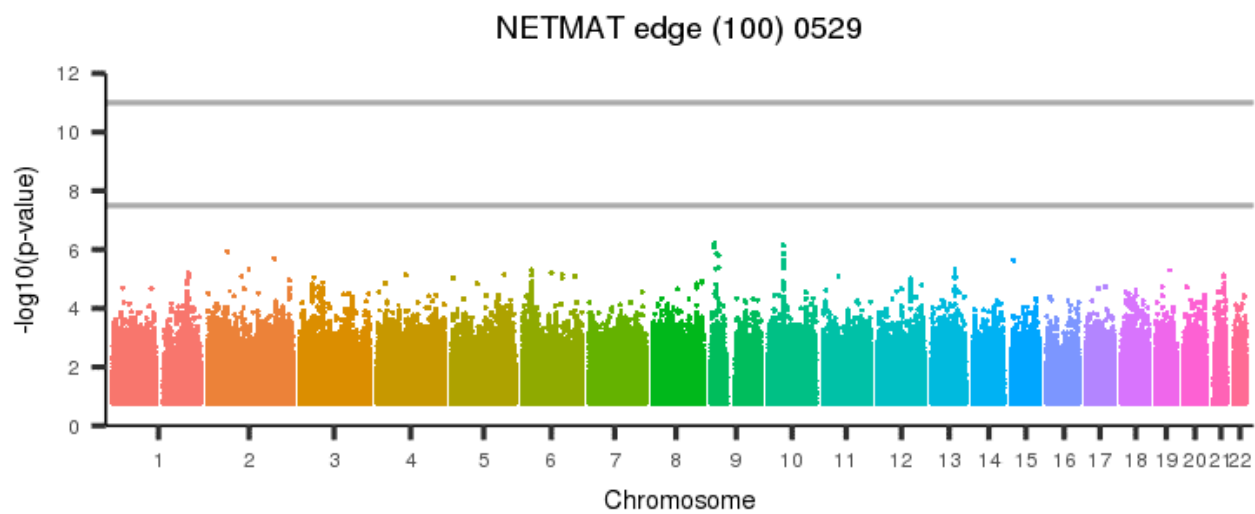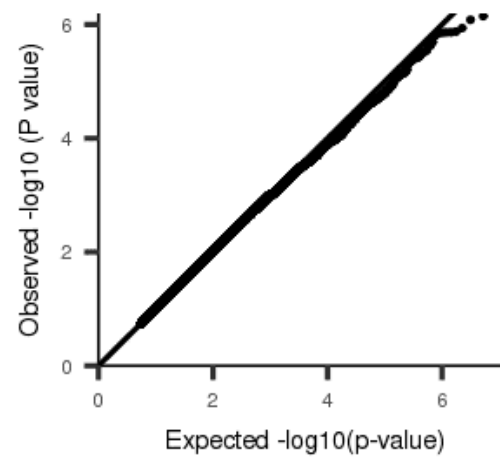

[back to list of plots](#)



Figure 1686: NETMAT edge (100) 0530

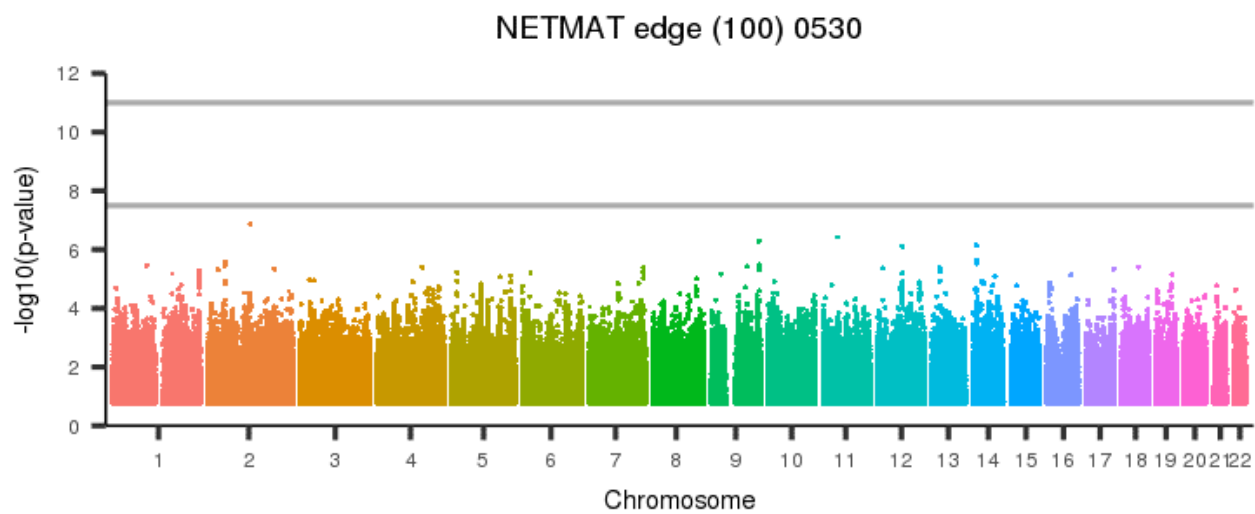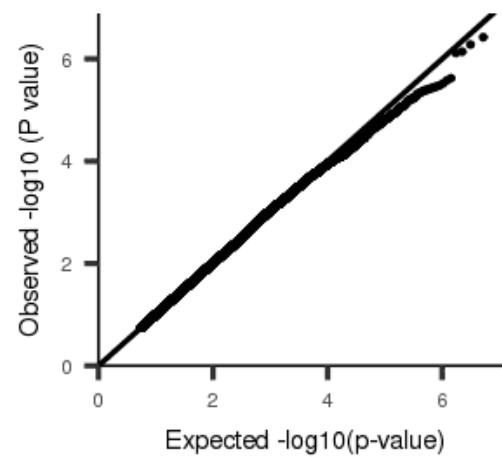

[back to list of plots](#)

Figure 1687: NETMAT edge (100) 0531

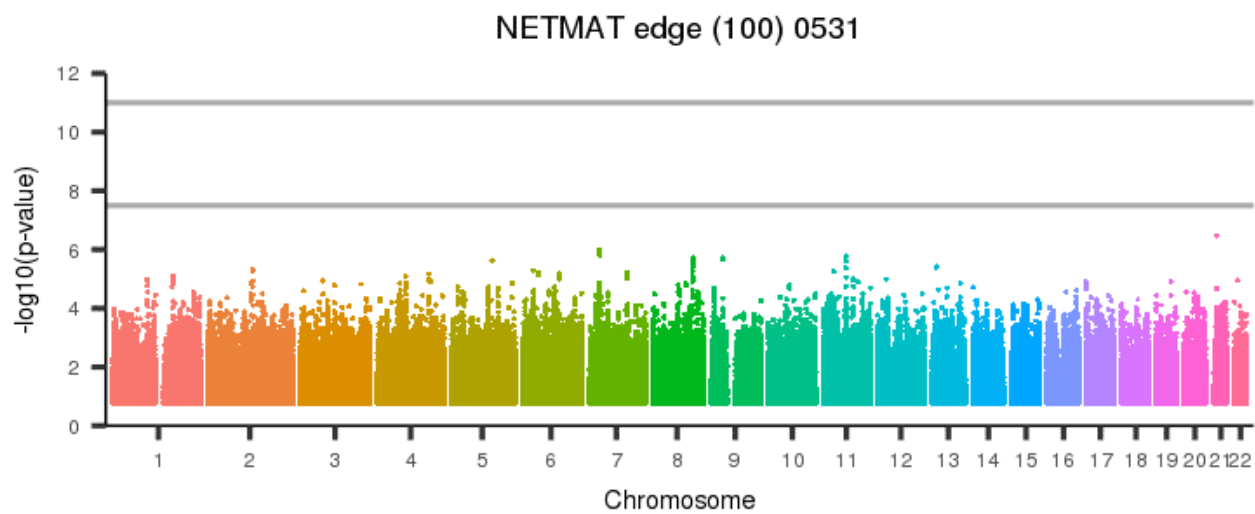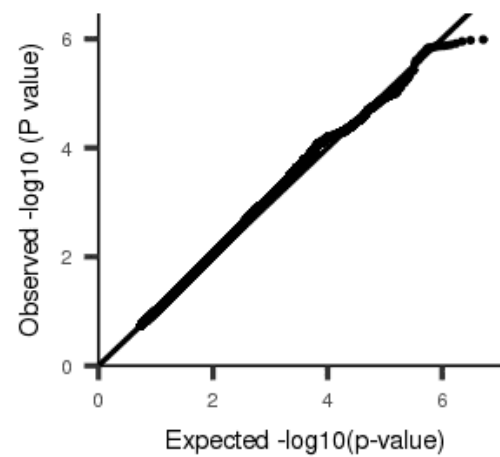

[back to list of plots](#)

Figure 1688: NETMAT edge (100) 0532

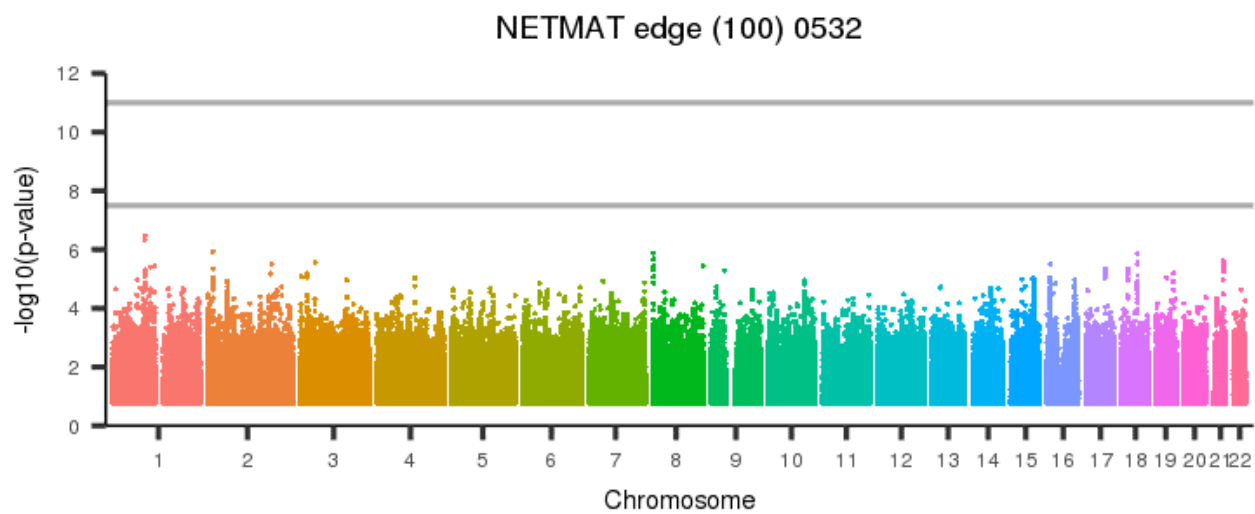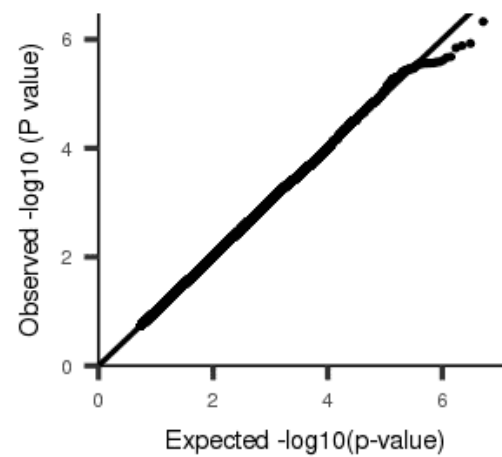

[back to list of plots](#)

Figure 1689: NETMAT edge (100) 0533

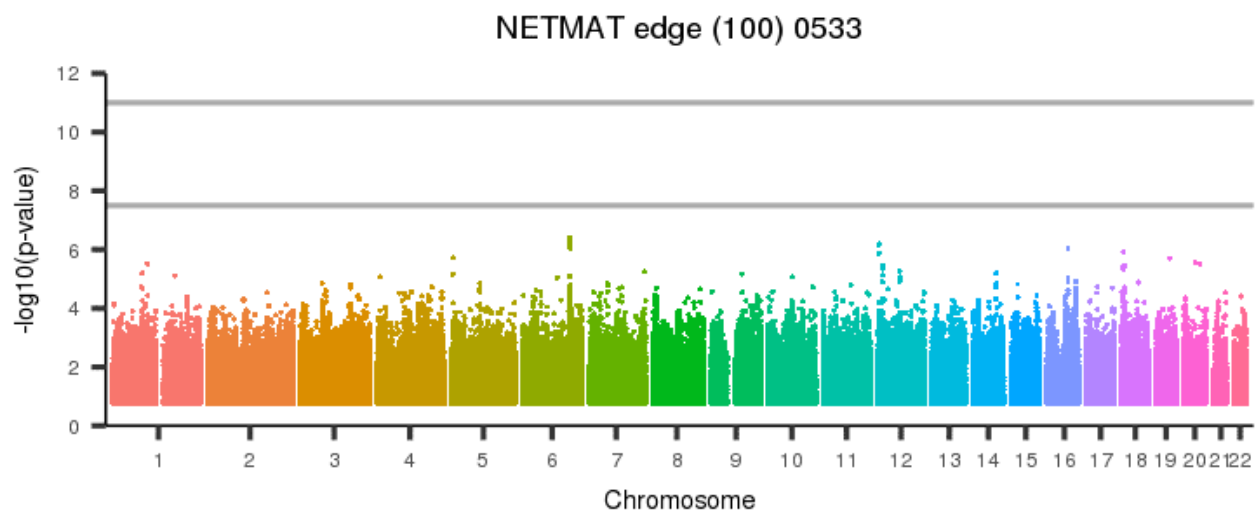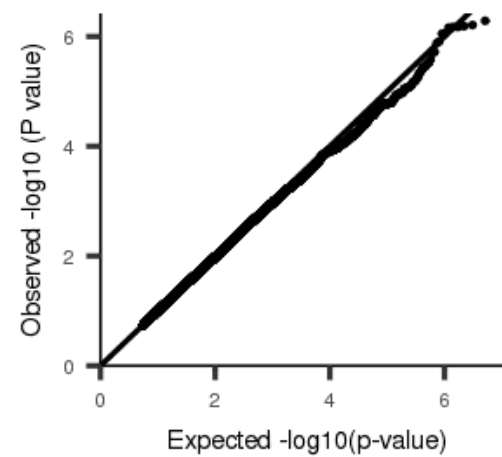

[back to list of plots](#)

Figure 1690: NETMAT edge (100) 0534

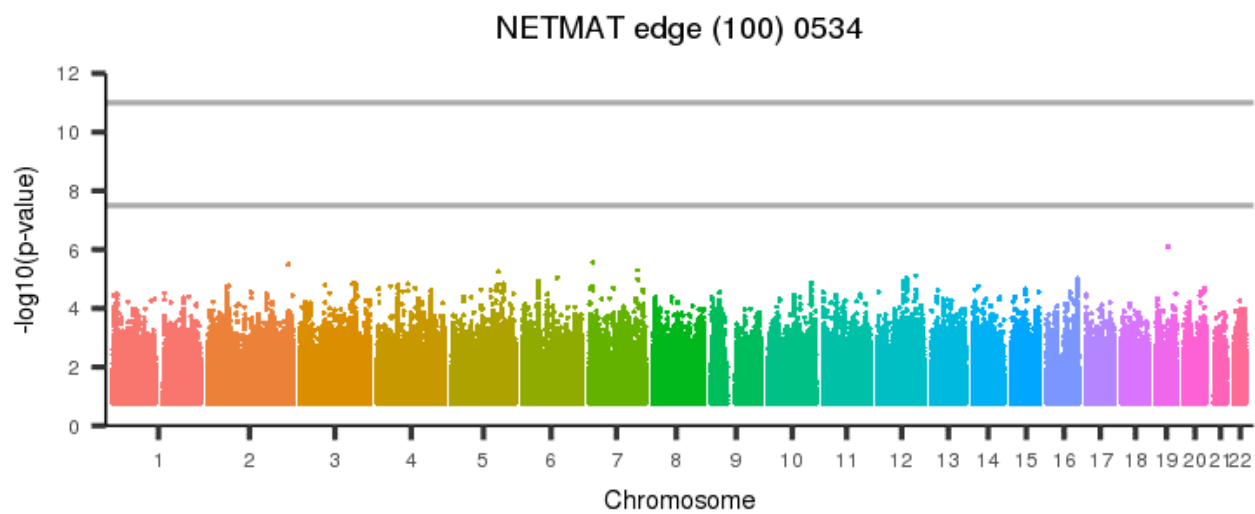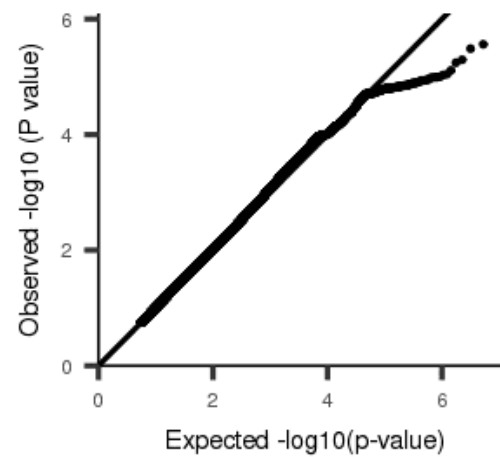

[back to list of plots](#)

Figure 1691: NETMAT edge (100) 0535

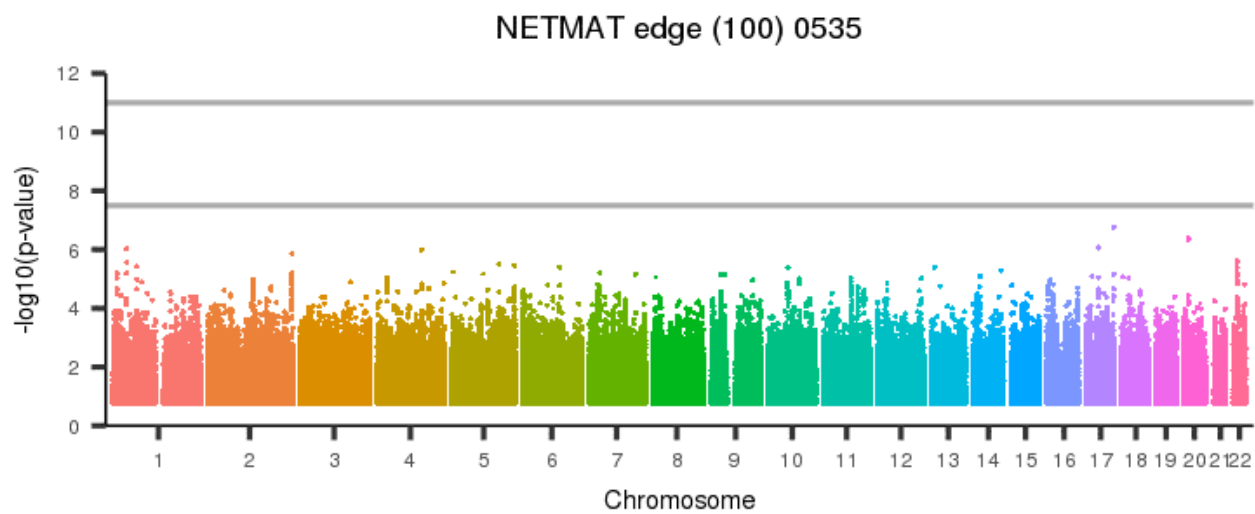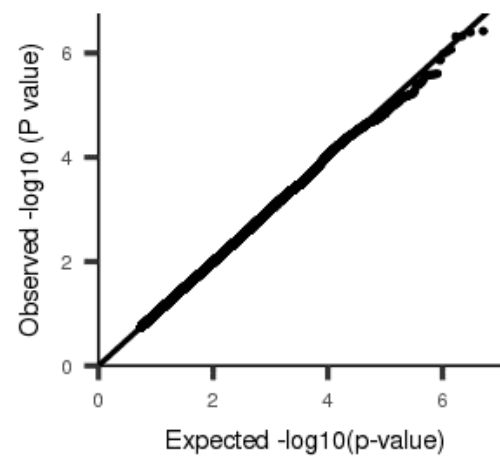

[back to list of plots](#)

Figure 1692: NETMAT edge (100) 0536

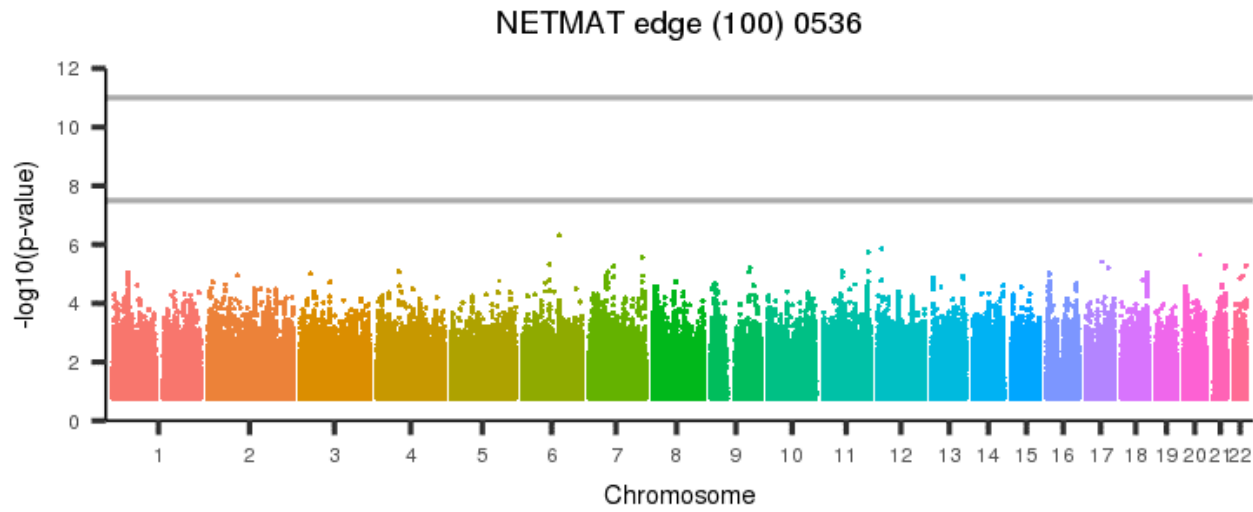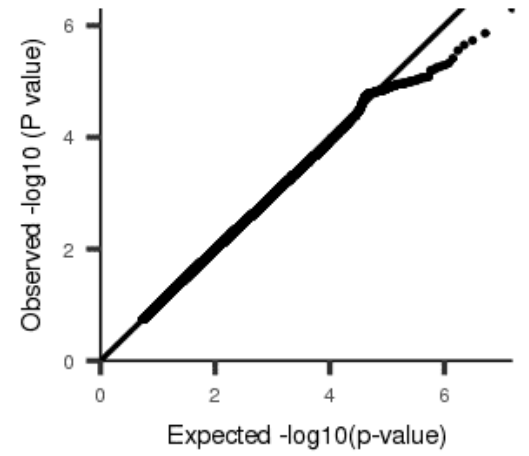

[back to list of plots](#)

Figure 1693: NETMAT edge (100) 0537

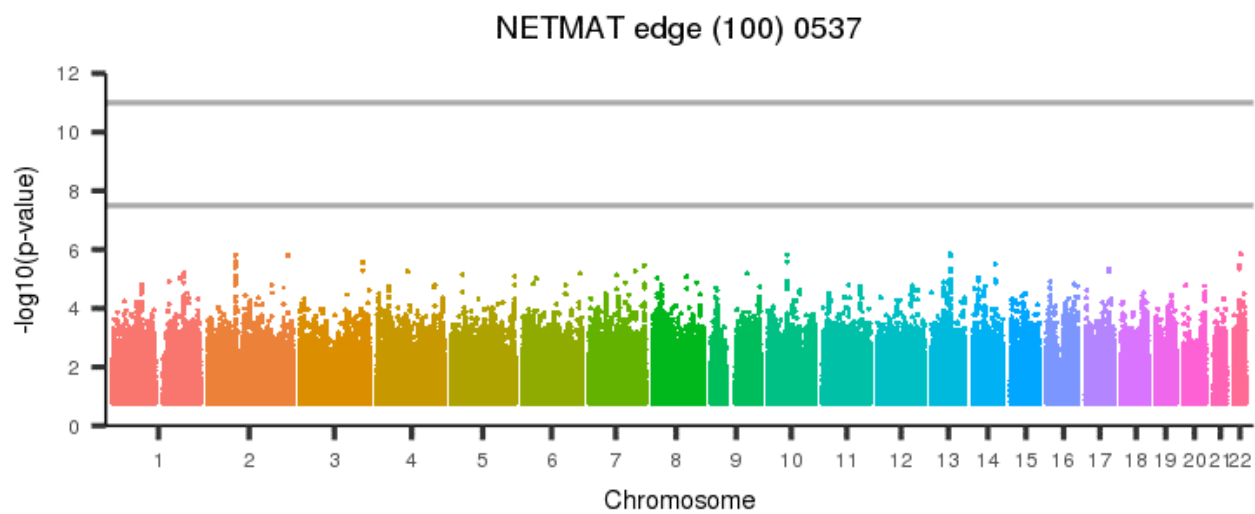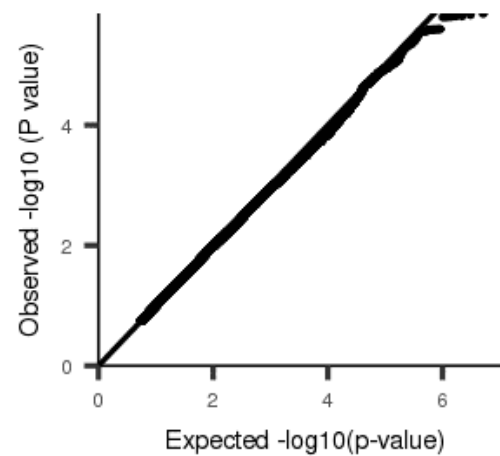

[back to list of plots](#)



Figure 1694: NETMAT edge (100) 0538

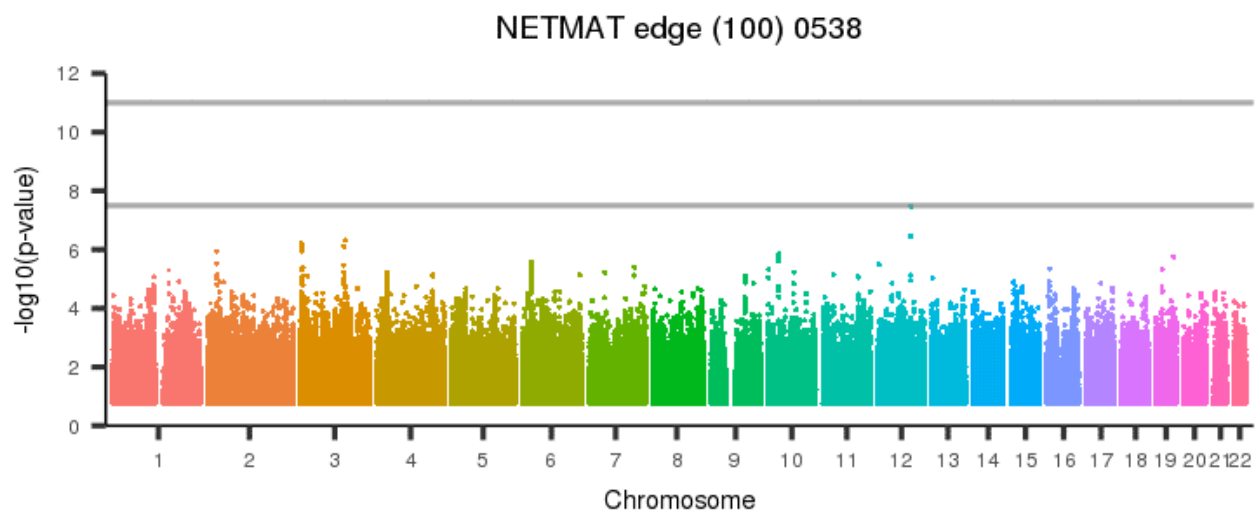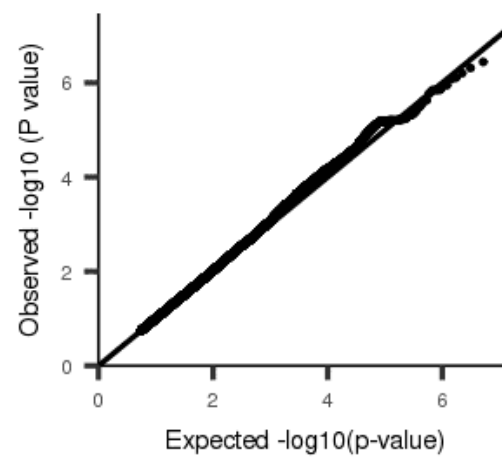

[back to list of plots](#)

Figure 1695: NETMAT edge (100) 0539

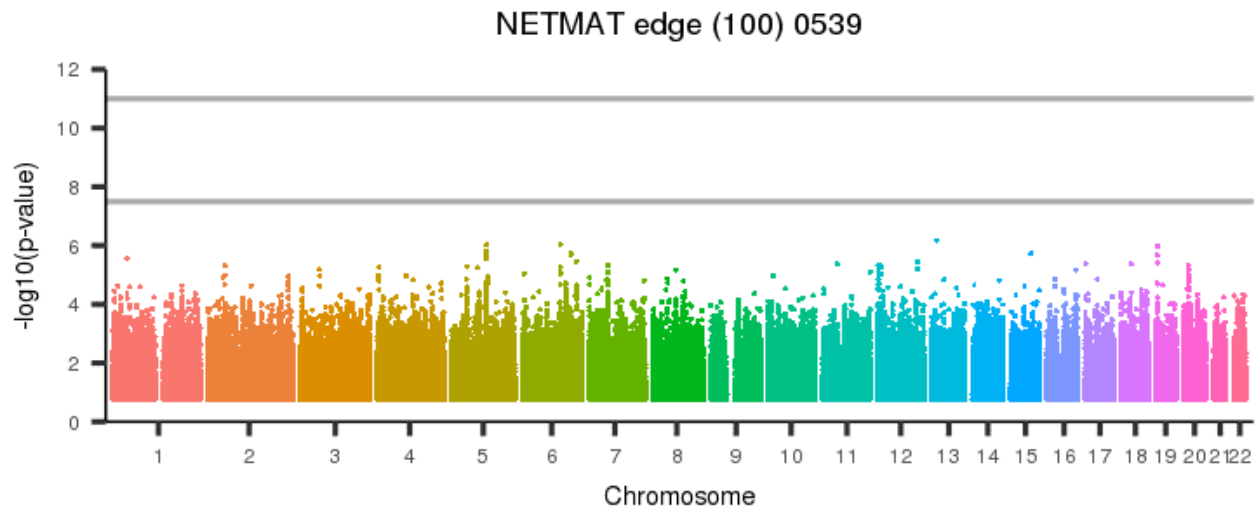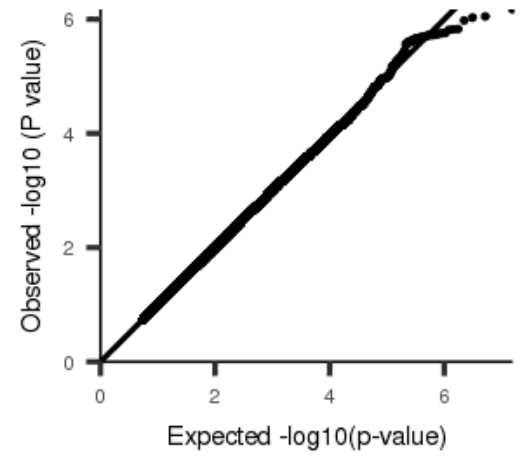

[back to list of plots](#)

Figure 1696: NETMAT edge (100) 0540

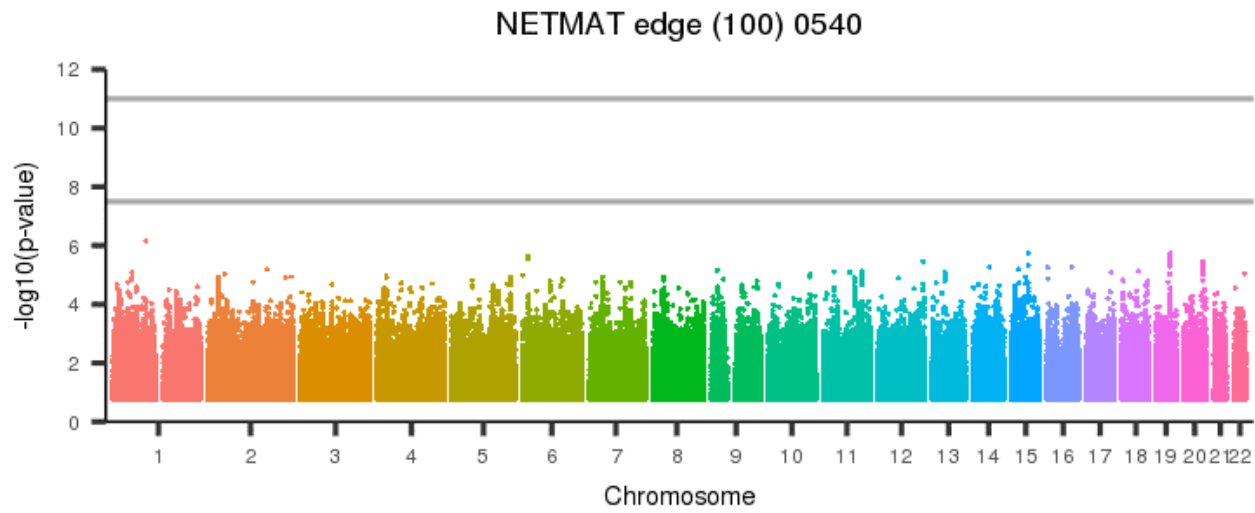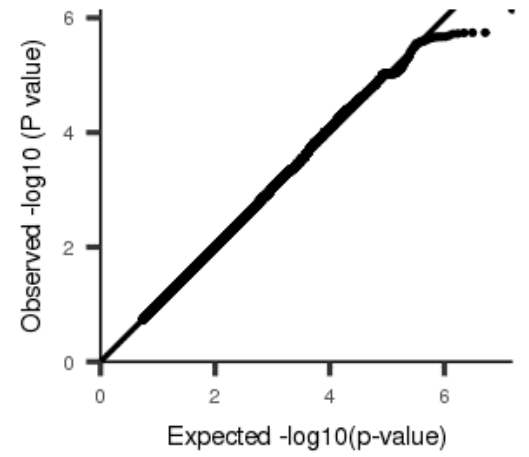

[back to list of plots](#)

Figure 1697: NETMAT edge (100) 0541

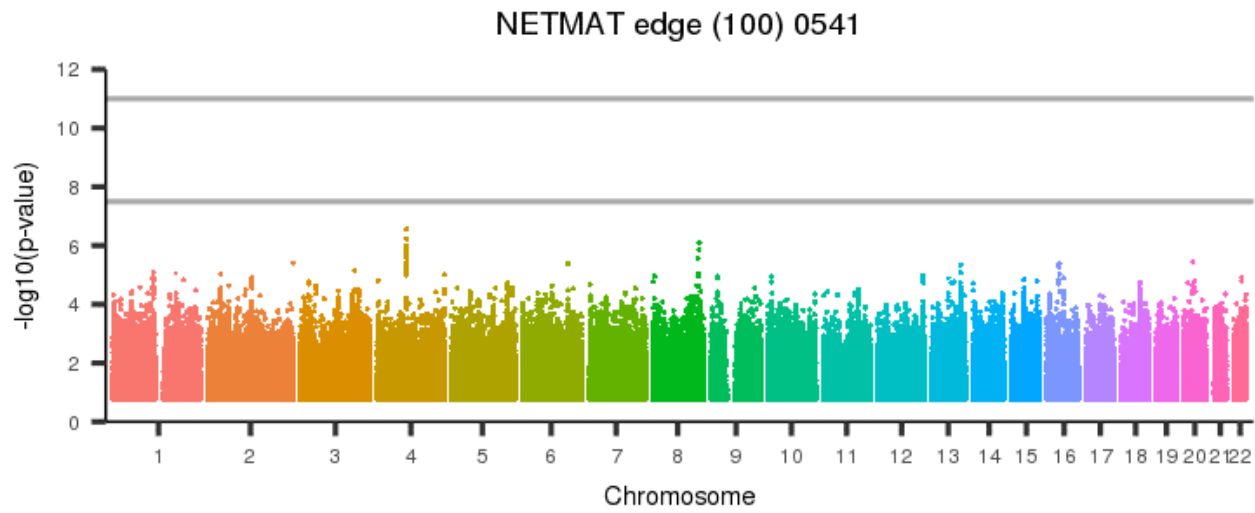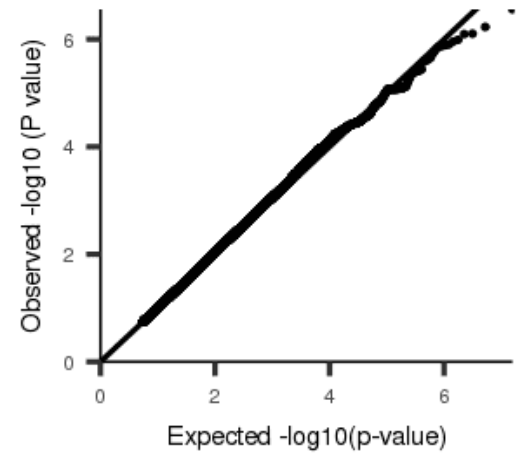

[back to list of plots](#)

Figure 1698: NETMAT edge (100) 0542

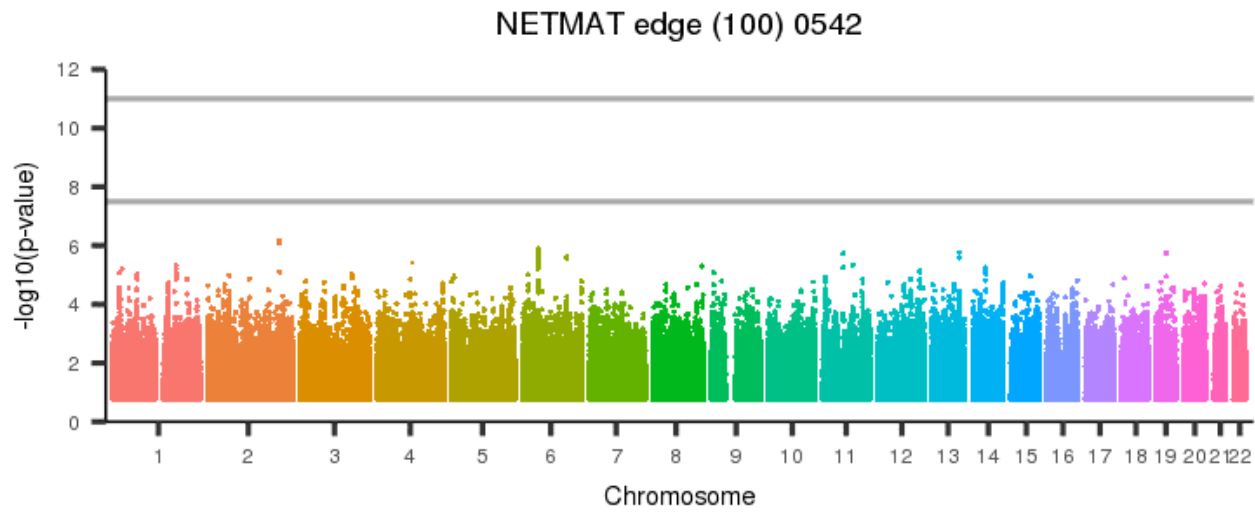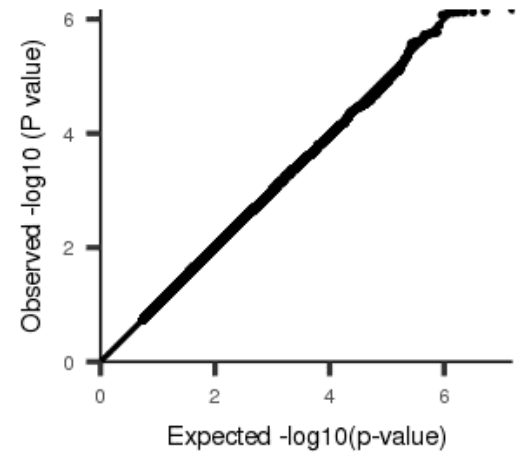

[back to list of plots](#)

Figure 1699: NETMAT edge (100) 0543

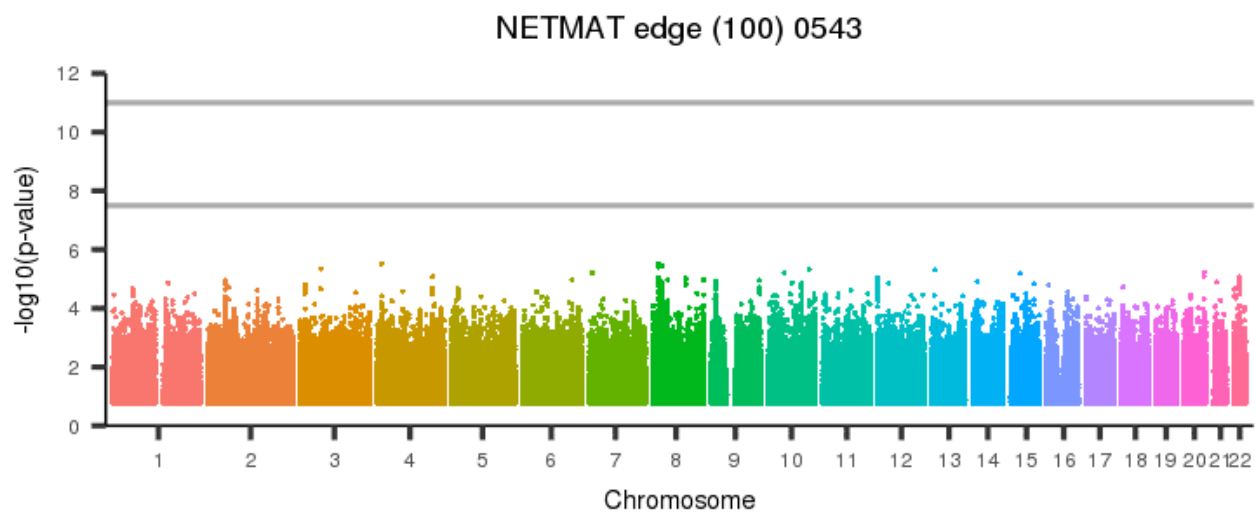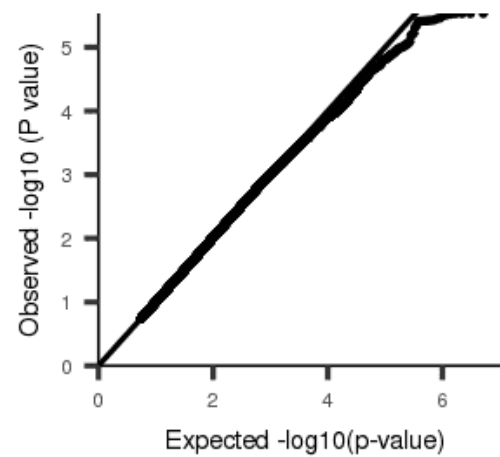

[back to list of plots](#)

Figure 1700: NETMAT edge (100) 0544

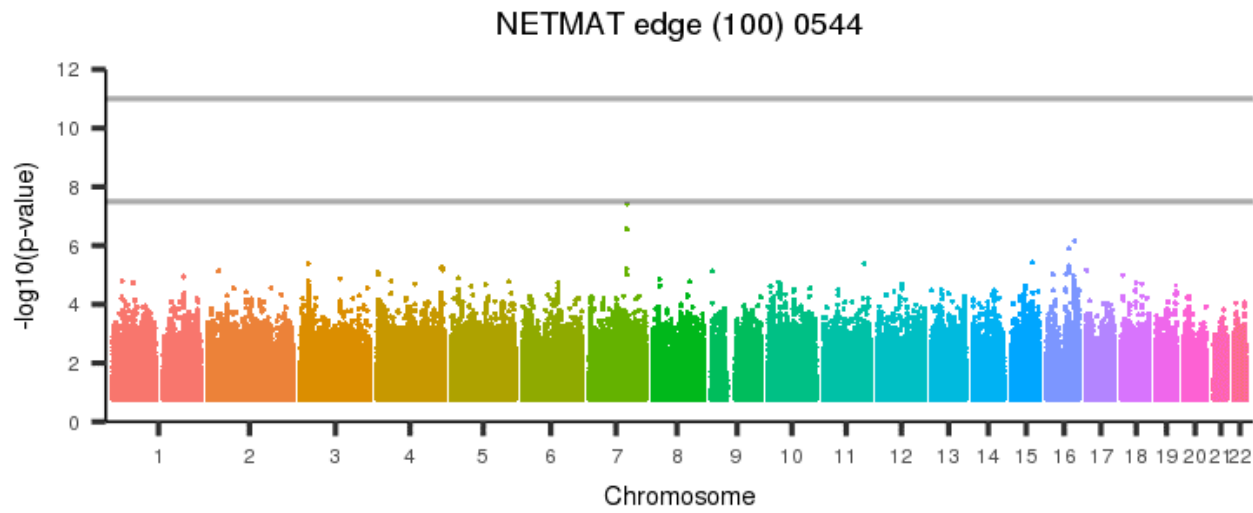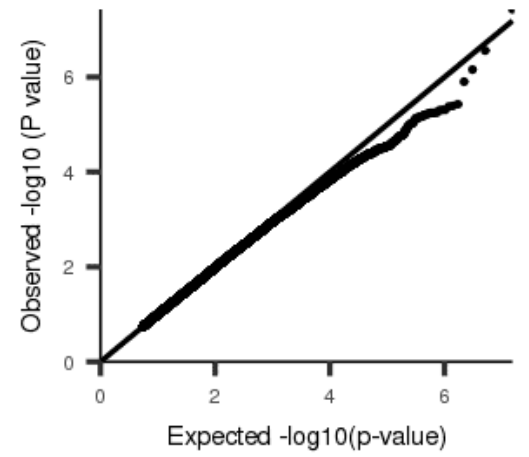

[back to list of plots](#)

Figure 1701: NETMAT edge (100) 0545

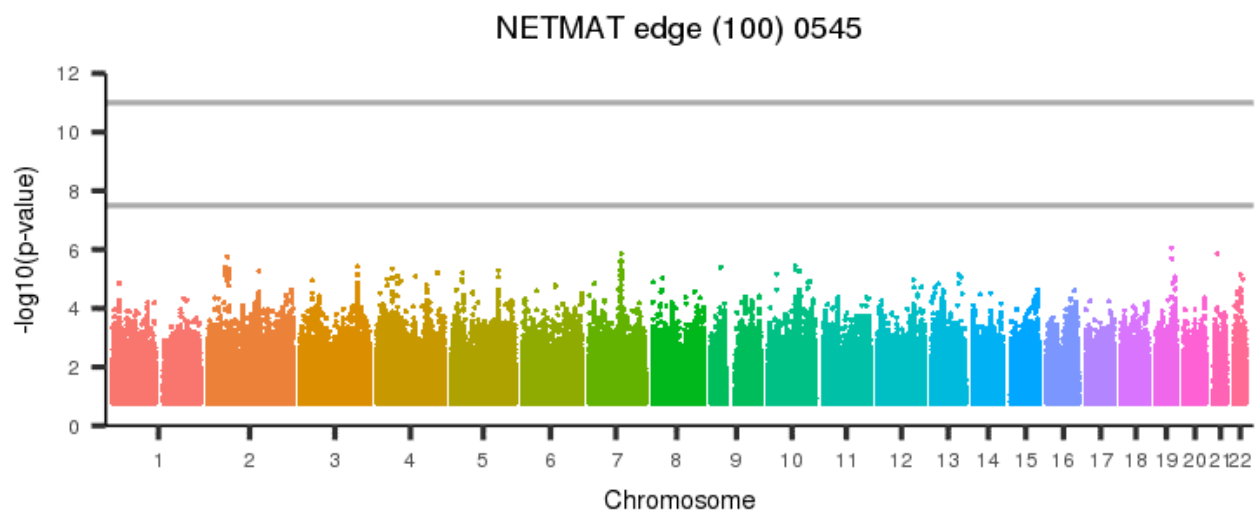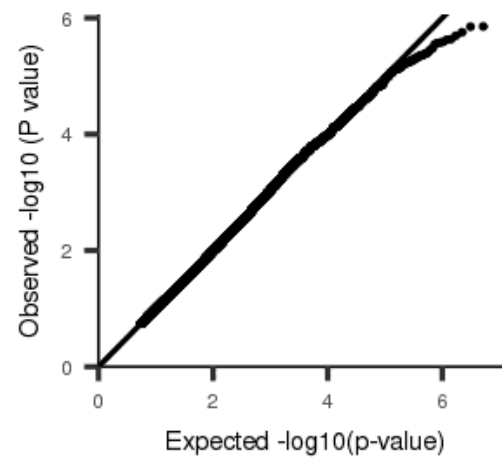

[back to list of plots](#)



Figure 1702: NETMAT edge (100) 0546

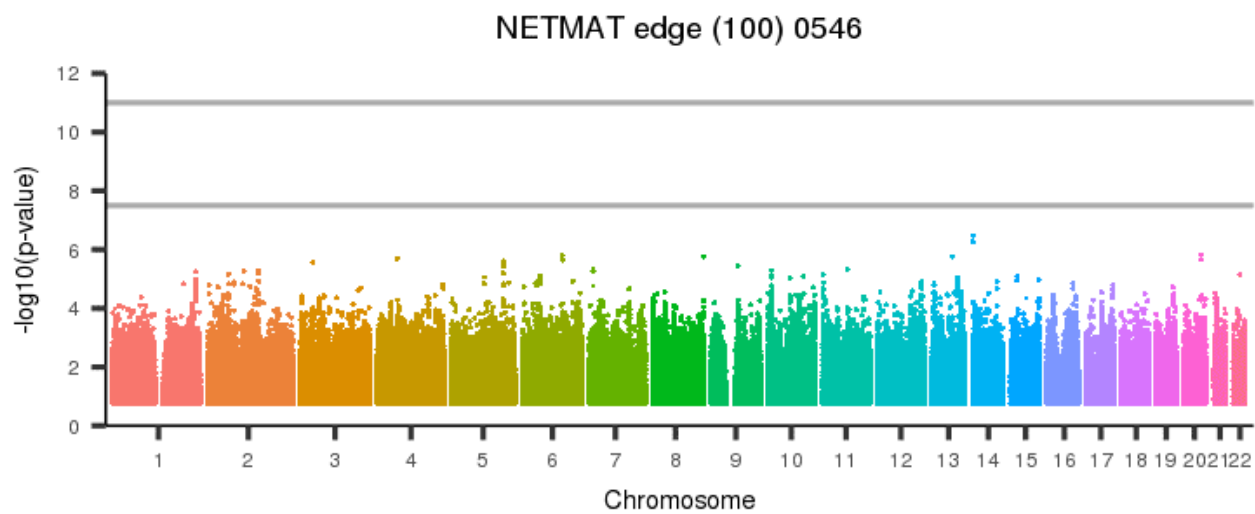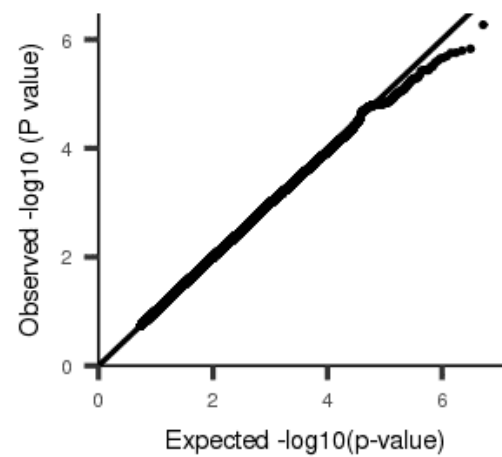

[back to list of plots](#)

Figure 1703: NETMAT edge (100) 0547

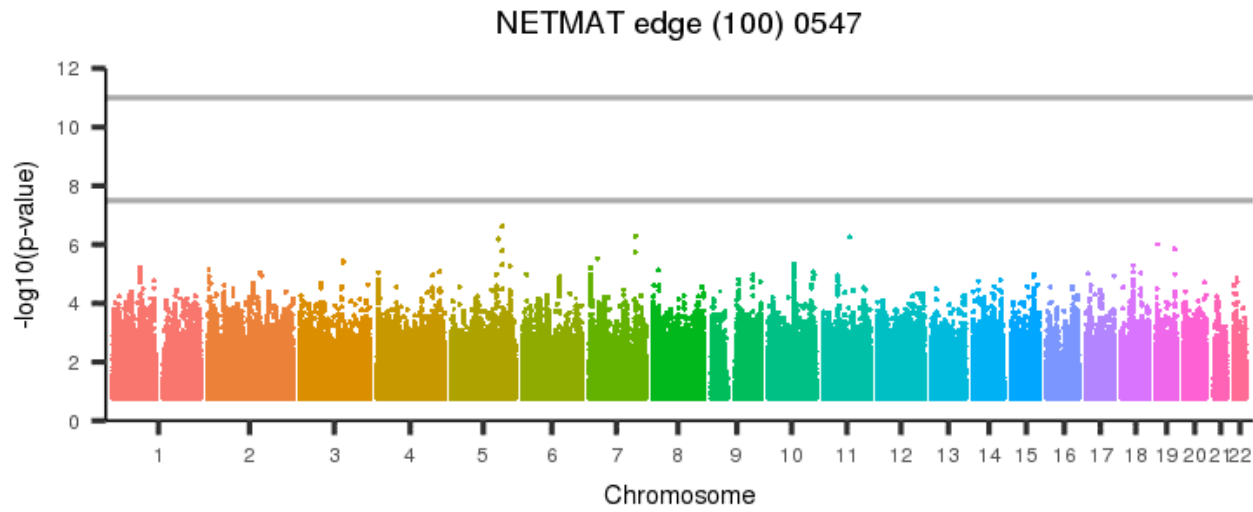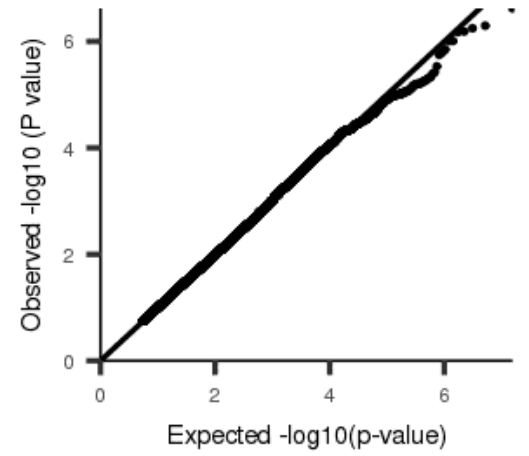

[back to list of plots](#)

Figure 1704: NETMAT edge (100) 0548

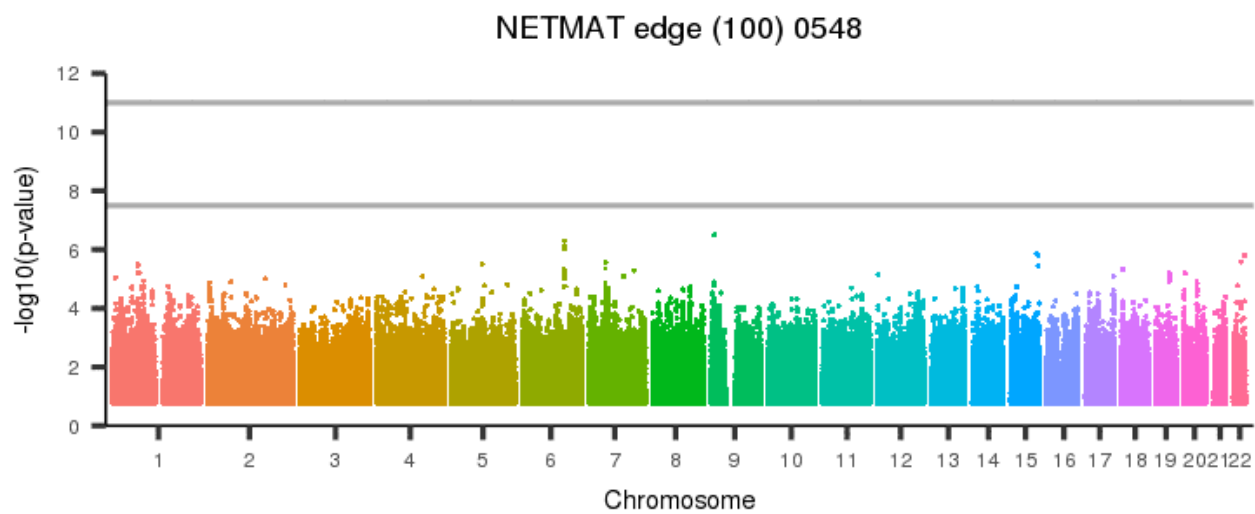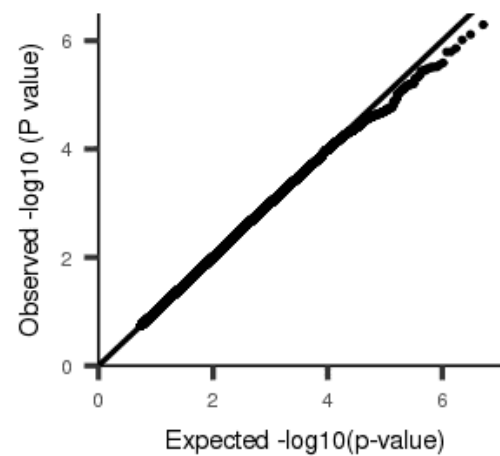

[back to list of plots](#)

Figure 1705: NETMAT edge (100) 0549

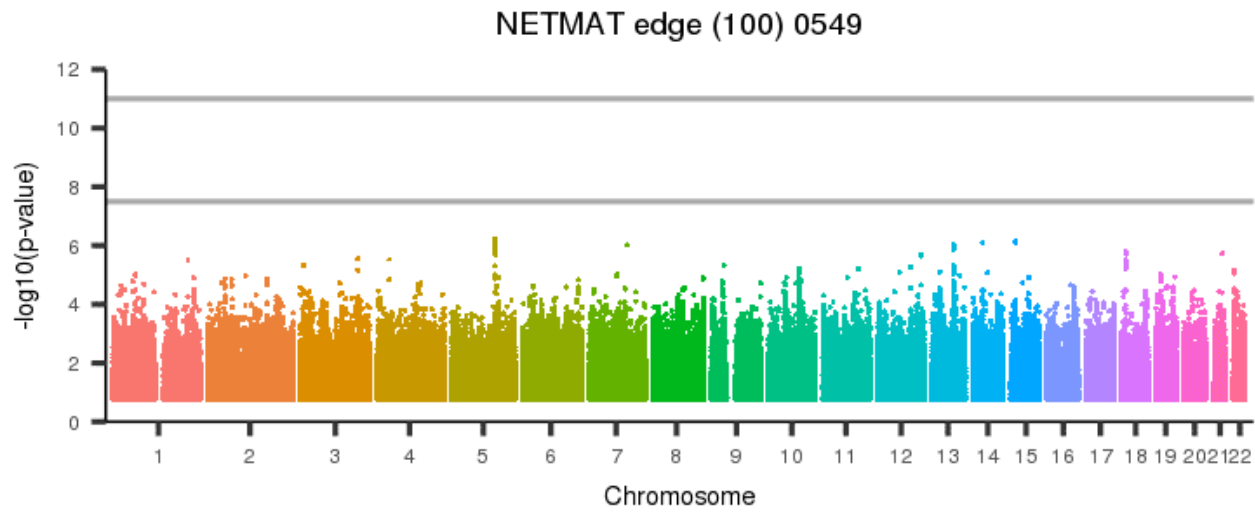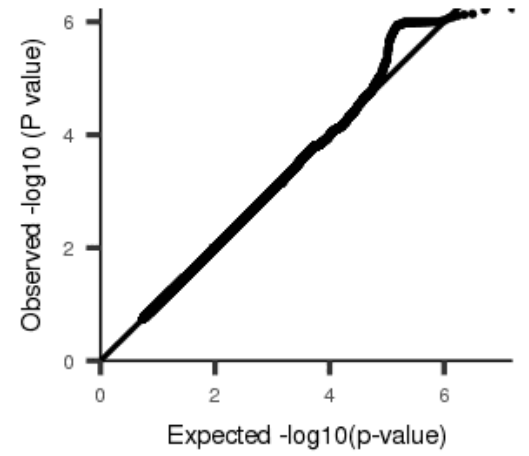

[back to list of plots](#)

Figure 1706: NETMAT edge (100) 0550

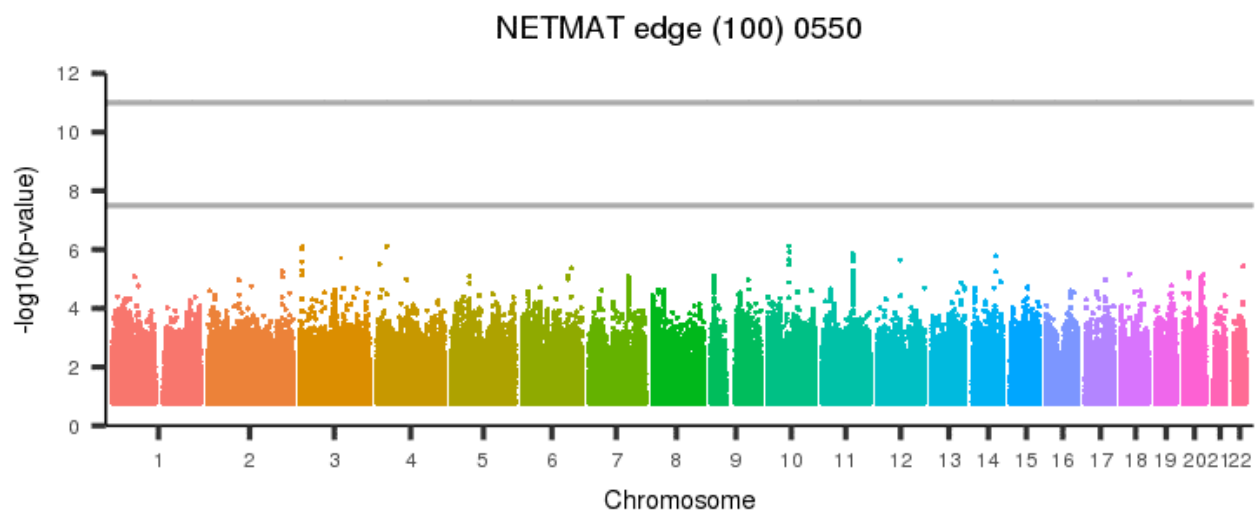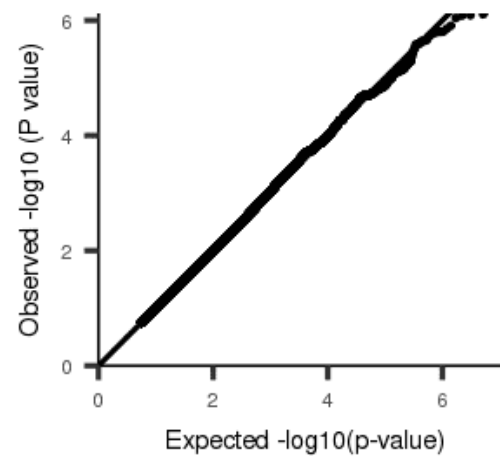

[back to list of plots](#)

Figure 1707: NETMAT edge (100) 0551

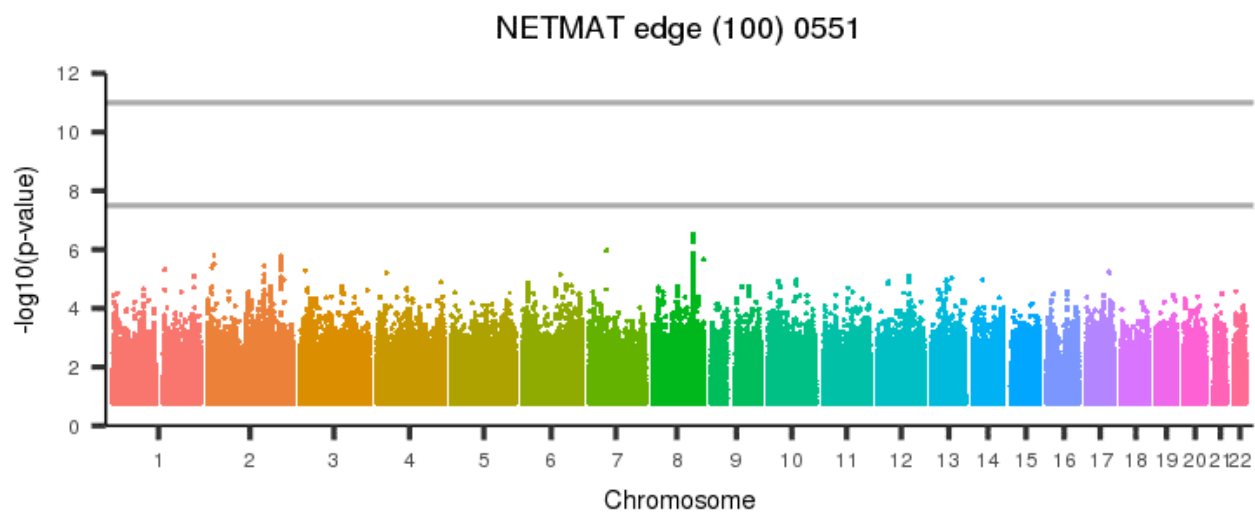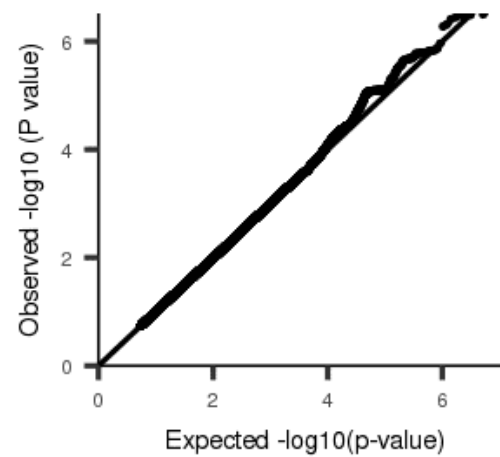

[back to list of plots](#)

Figure 1708: NETMAT edge (100) 0552

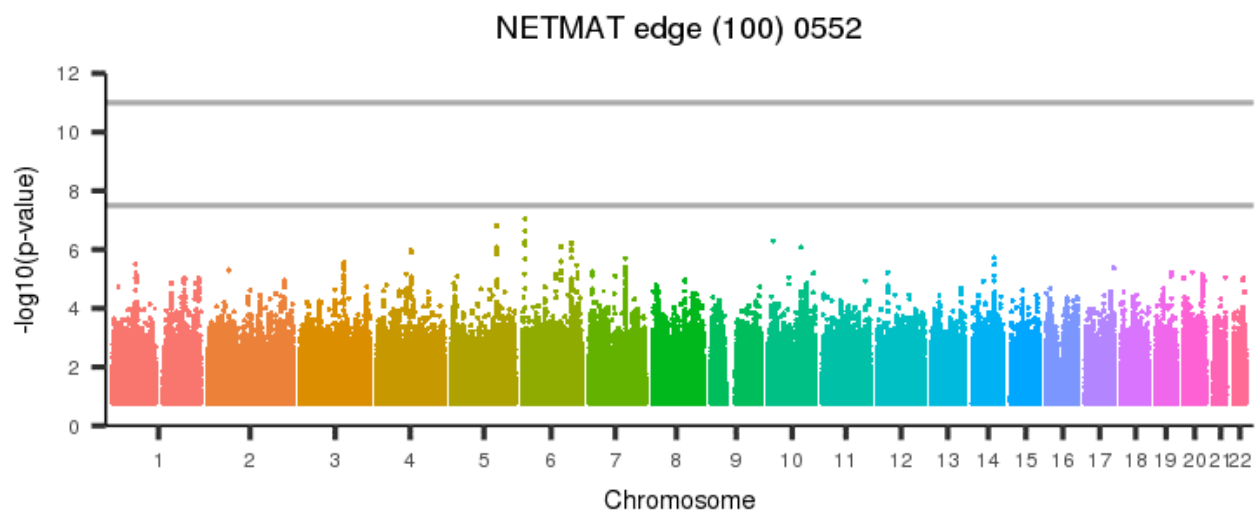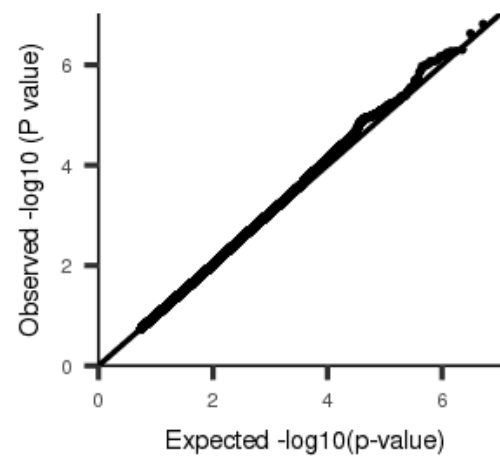

[back to list of plots](#)

Figure 1709: NETMAT edge (100) 0553

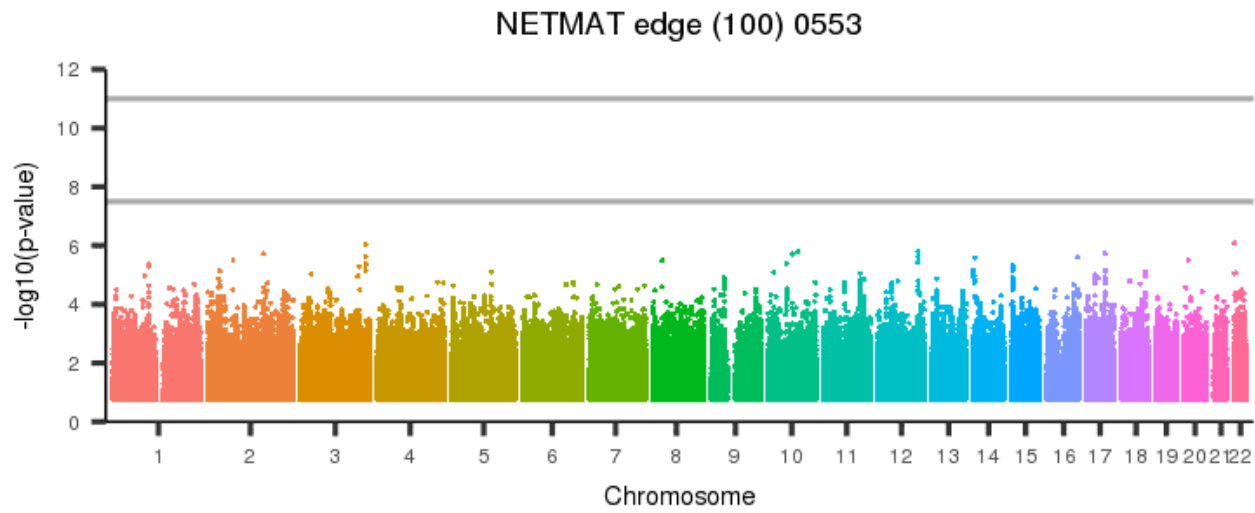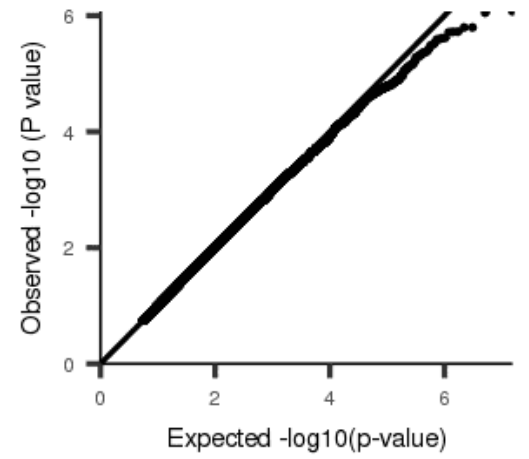

[back to list of plots](#)



Figure 1710: NETMAT edge (100) 0554

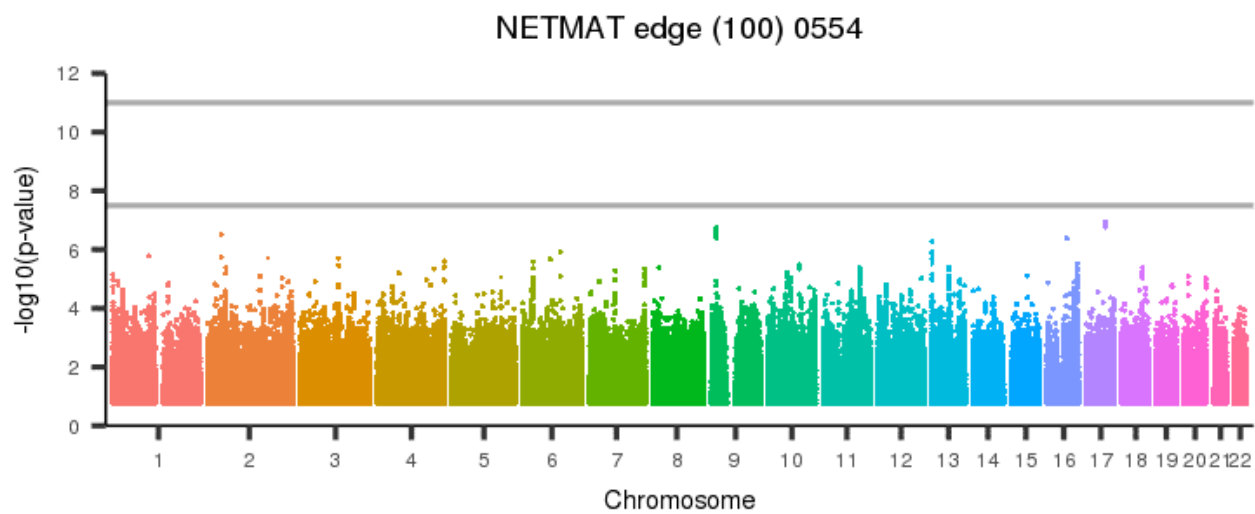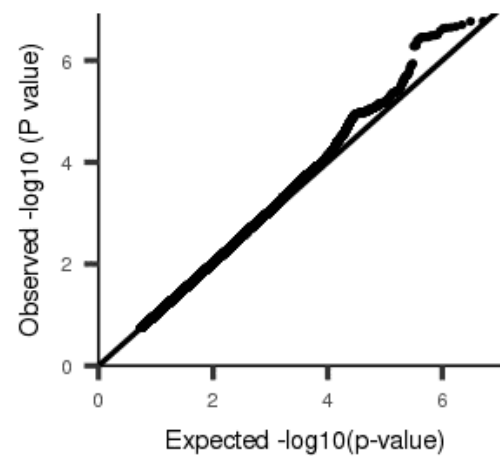

[back to list of plots](#)

Figure 1711: NETMAT edge (100) 0555

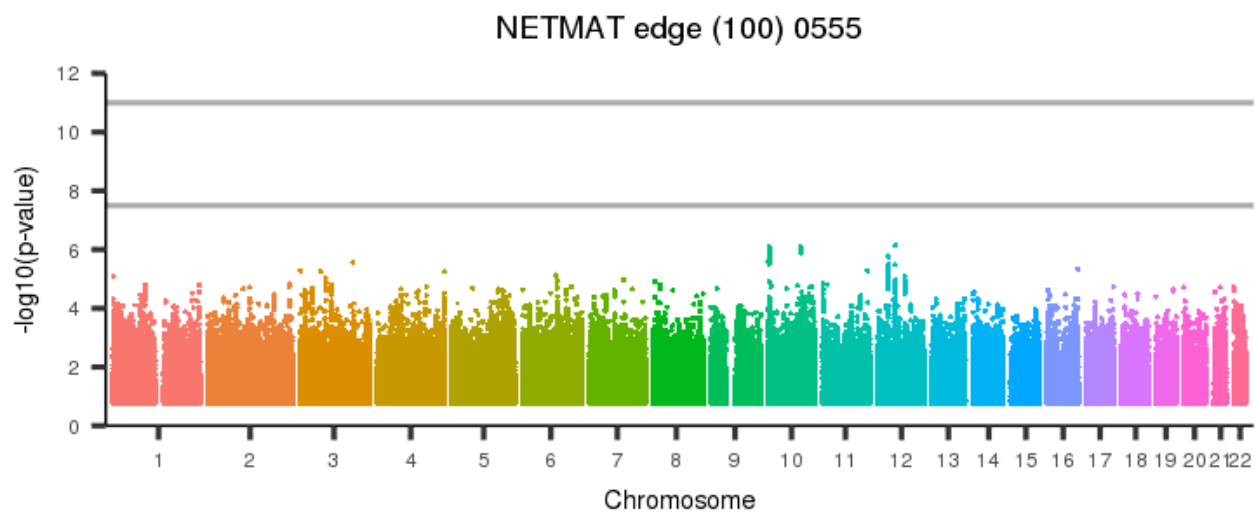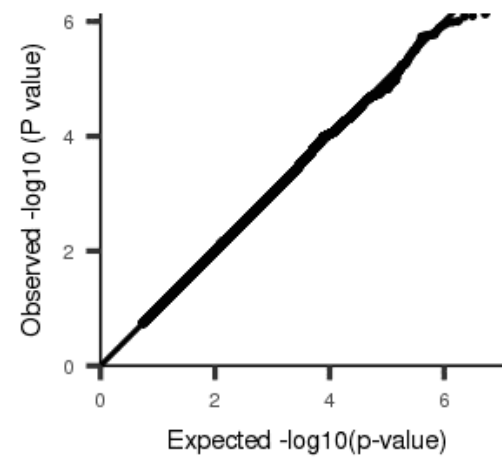

[back to list of plots](#)

Figure 1712: NETMAT edge (100) 0556

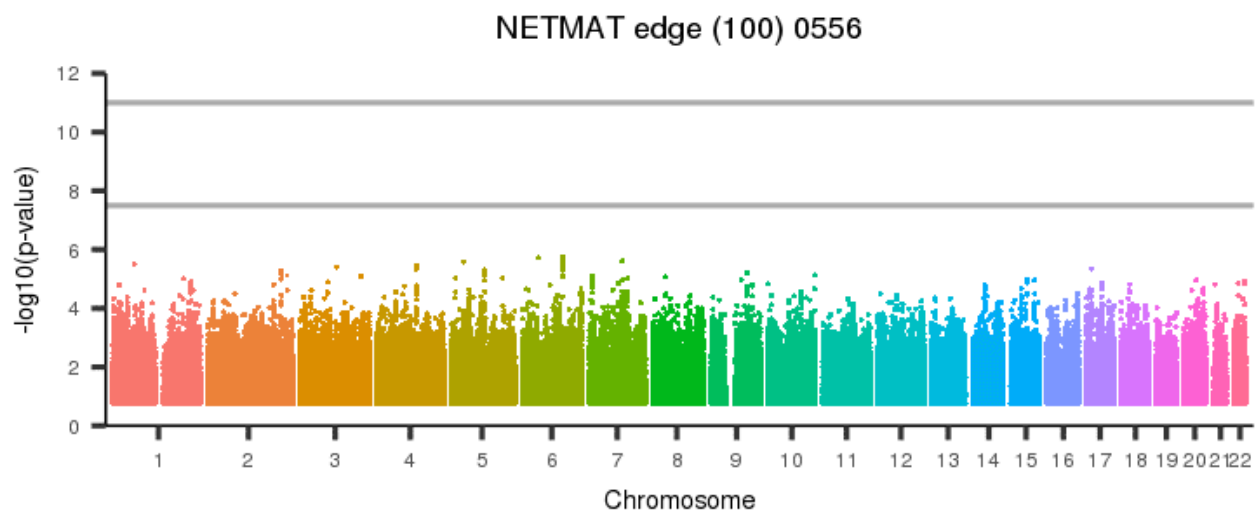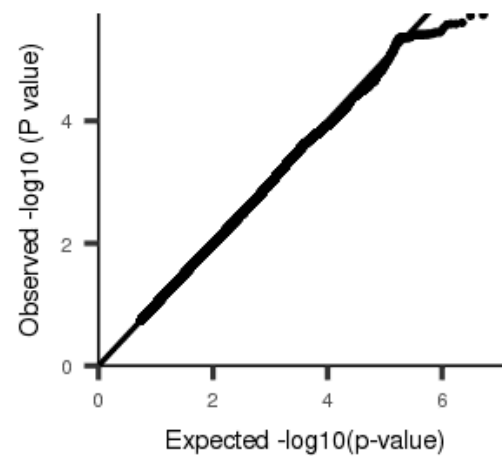

[back to list of plots](#)

Figure 1713: NETMAT edge (100) 0557

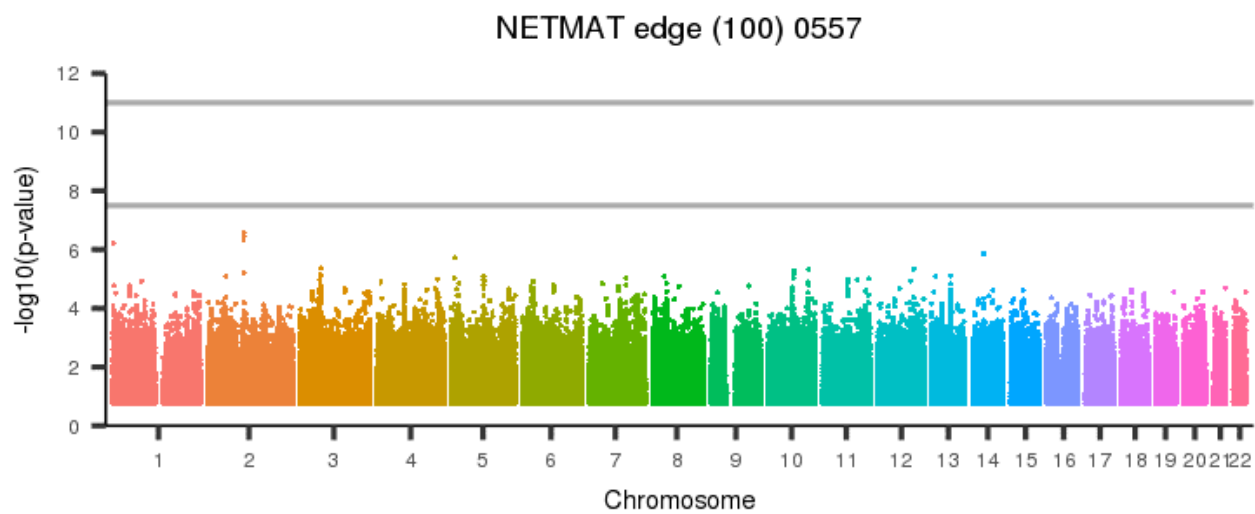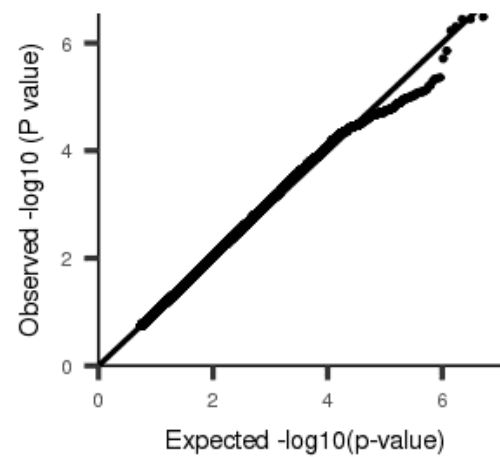

[back to list of plots](#)

Figure 1714: NETMAT edge (100) 0558

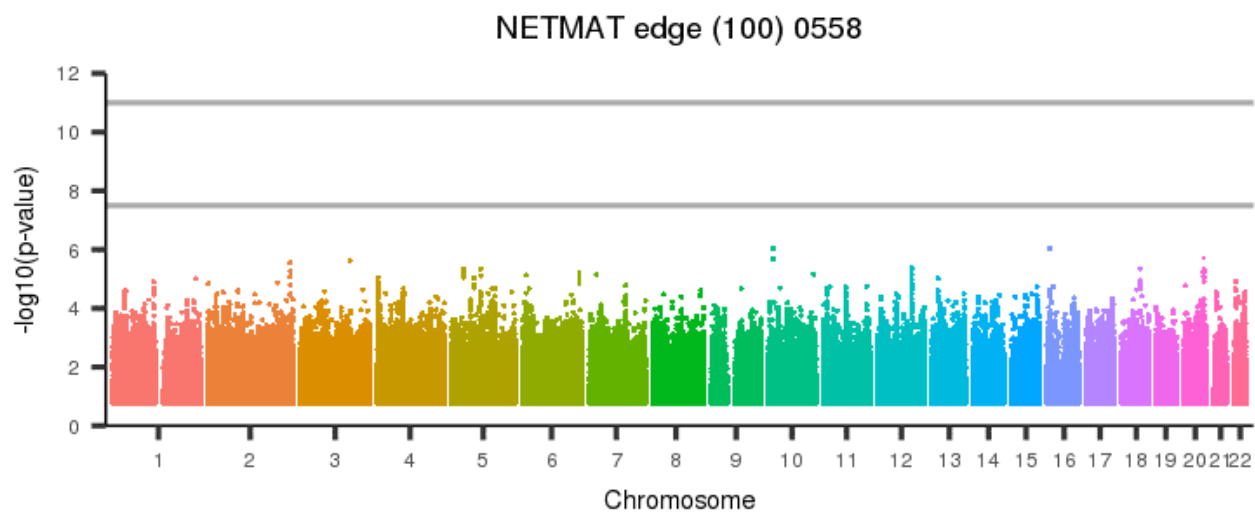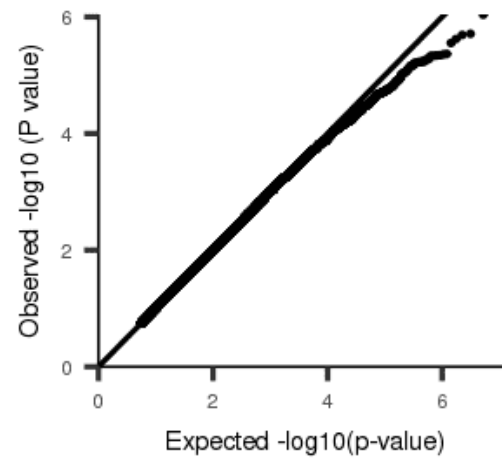

[back to list of plots](#)

Figure 1715: NETMAT edge (100) 0559

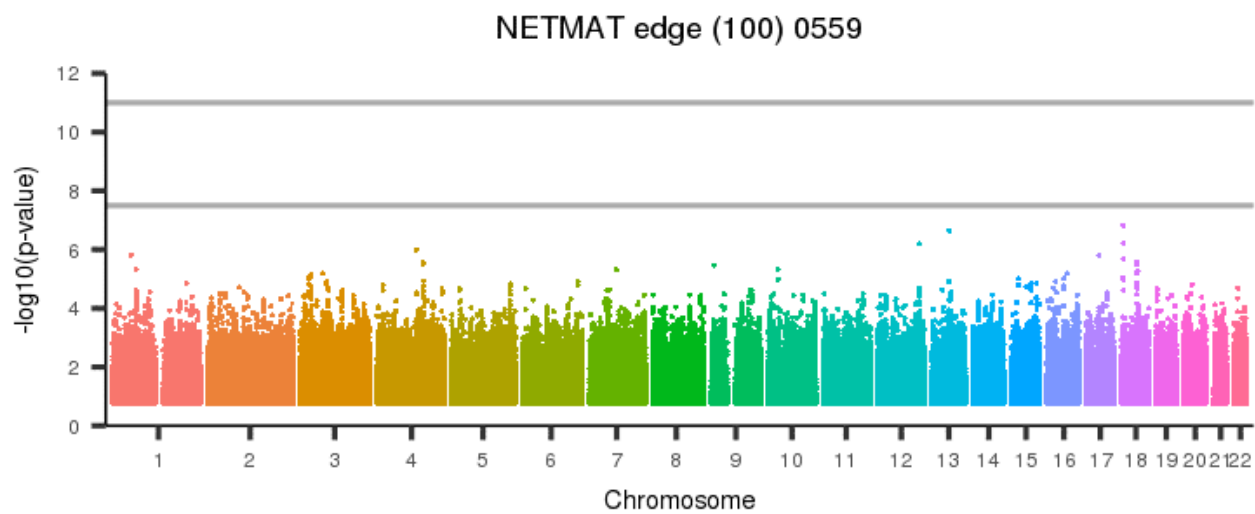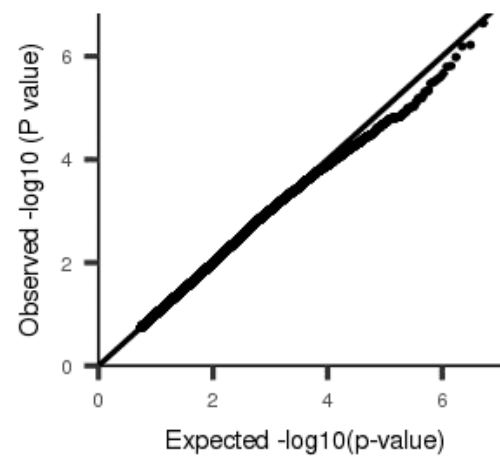

[back to list of plots](#)

Figure 1716: NETMAT edge (100) 0560

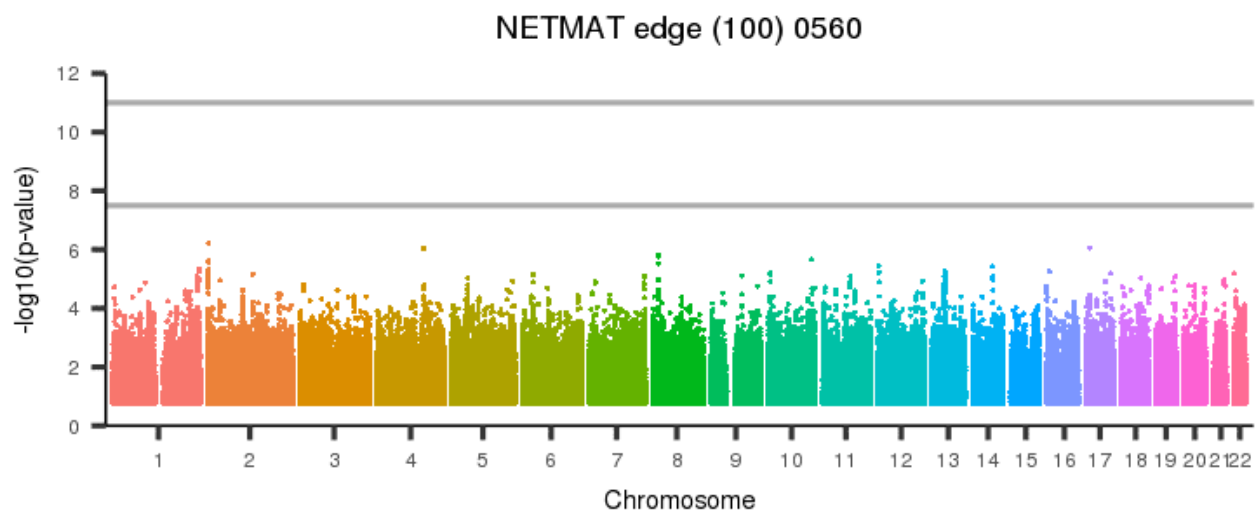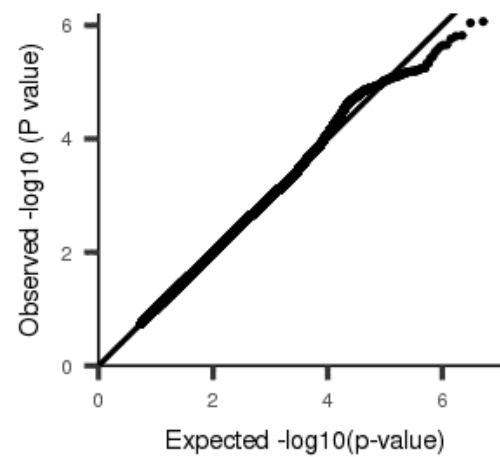

[back to list of plots](#)

Figure 1717: NETMAT edge (100) 0561

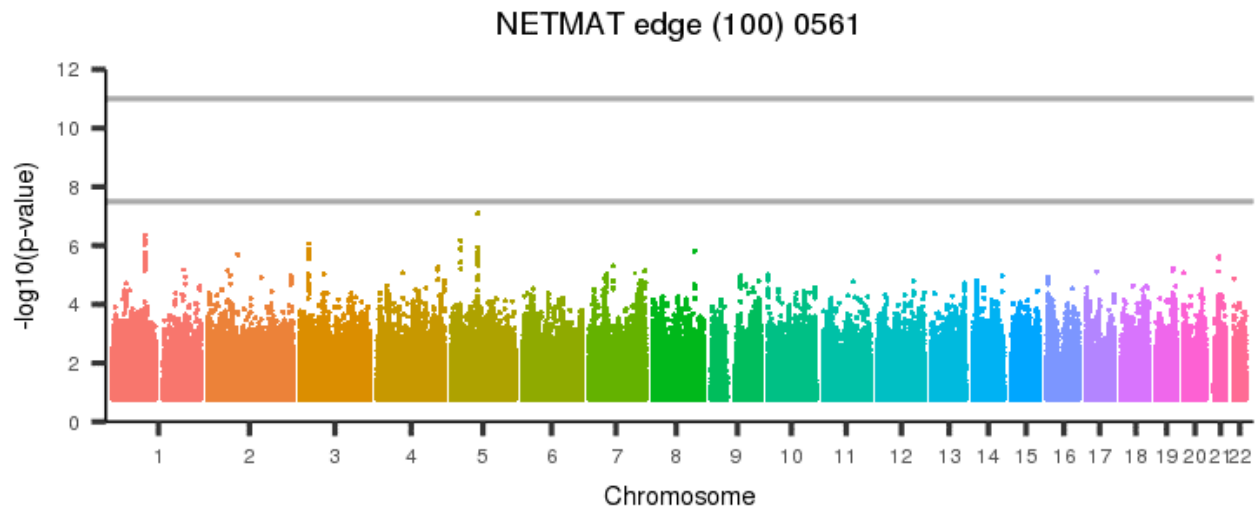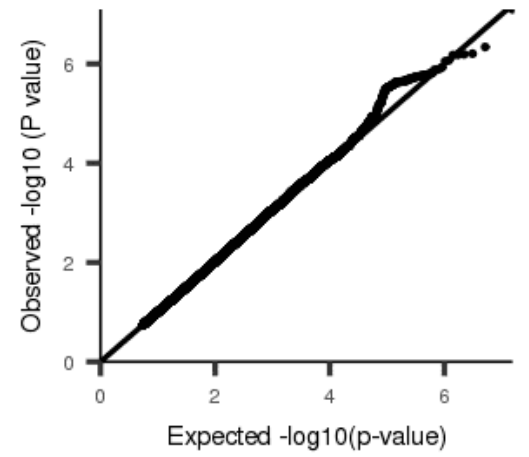

[back to list of plots](#)



Figure 1718: NETMAT edge (100) 0562

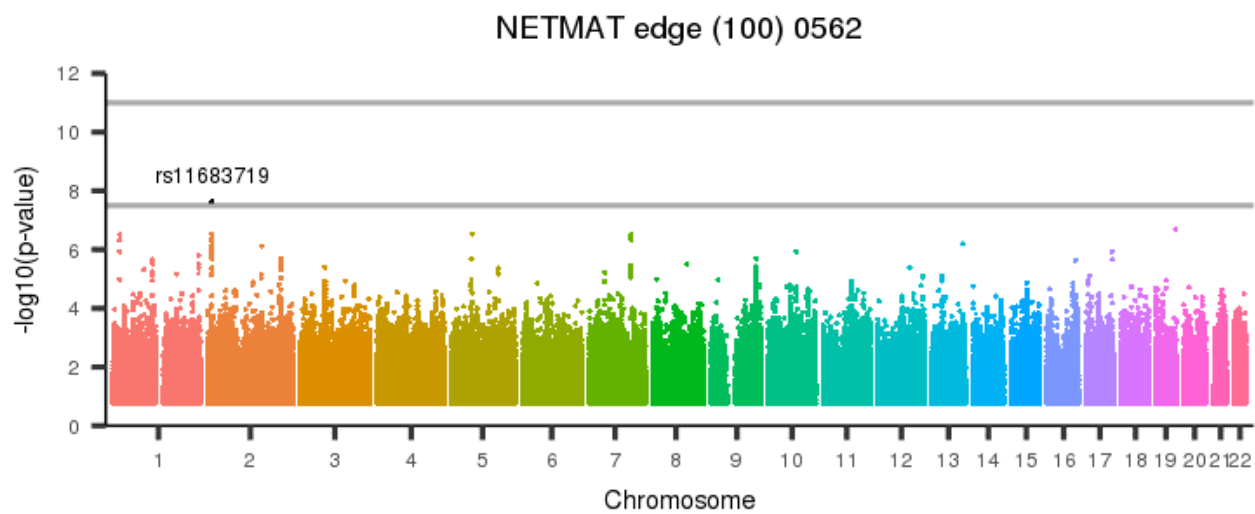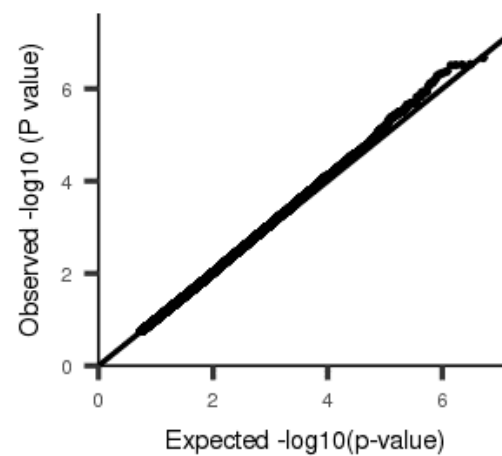

[back to list of plots](#)

Figure 1719: NETMAT edge (100) 0563

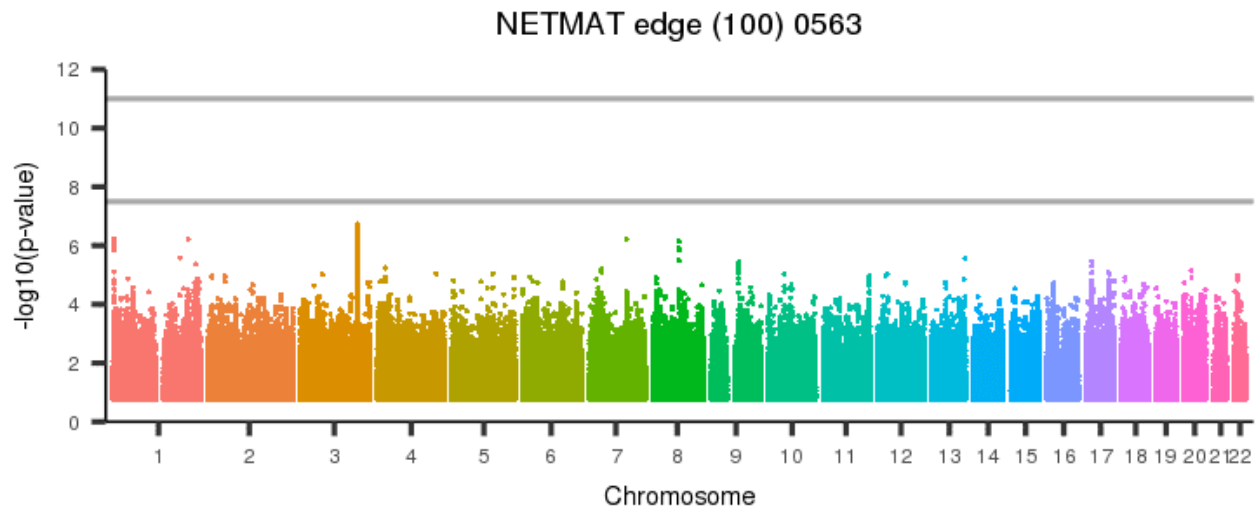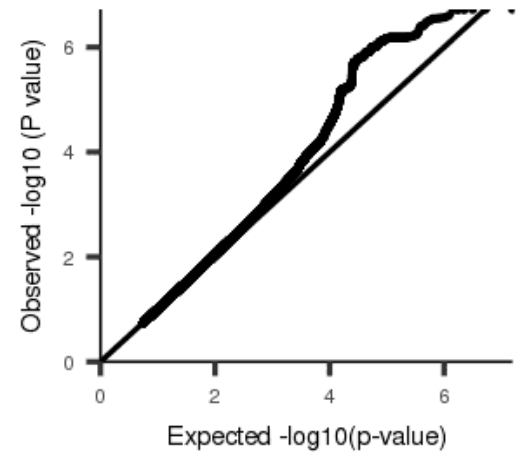

[back to list of plots](#)

Figure 1720: NETMAT edge (100) 0564

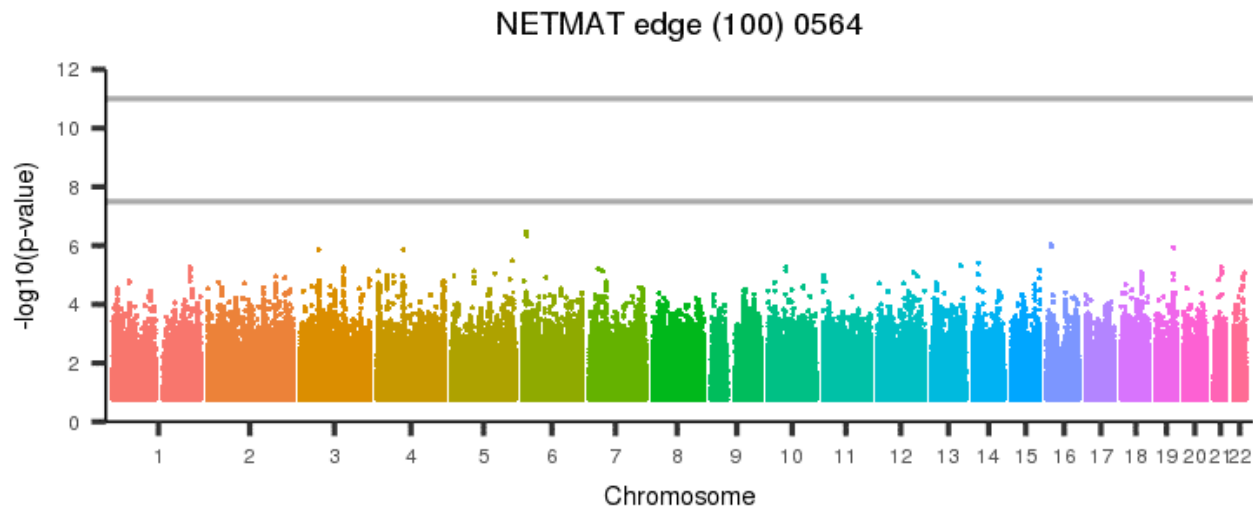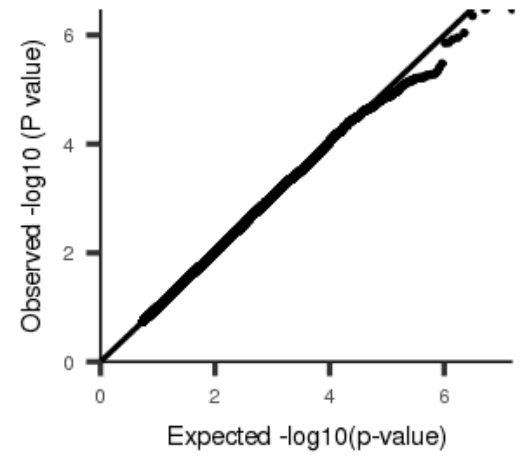

[back to list of plots](#)

Figure 1721: NETMAT edge (100) 0565

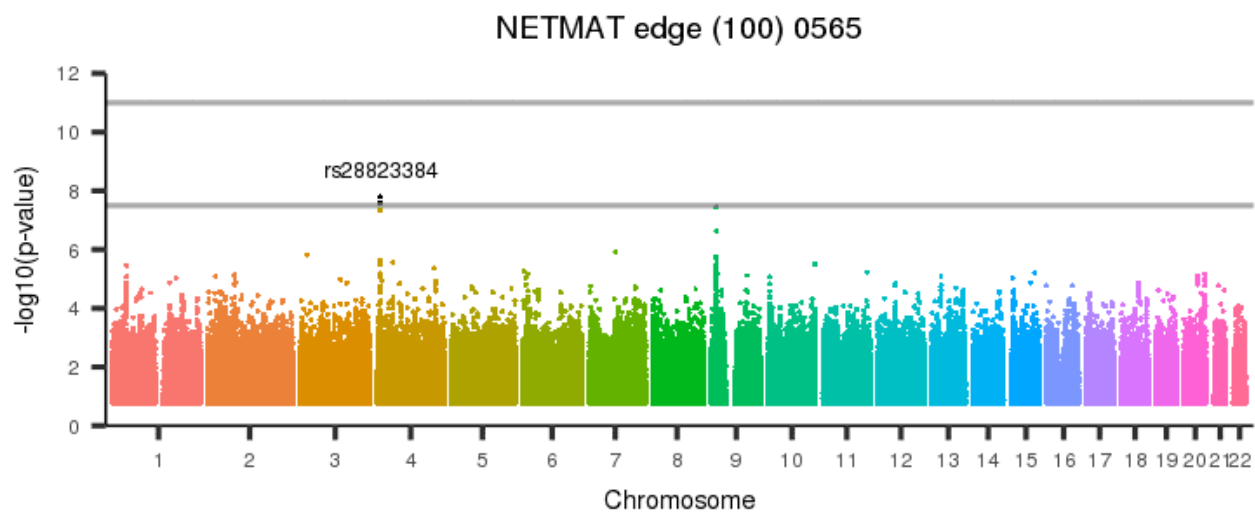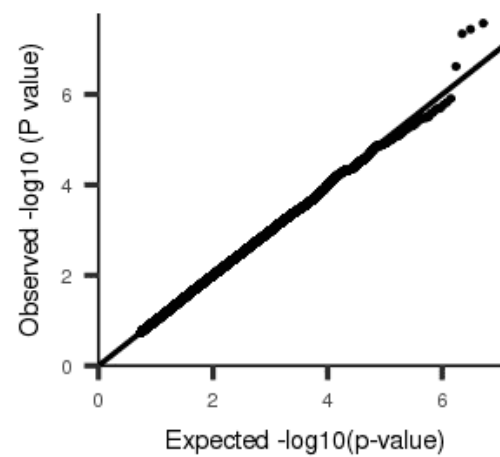

[back to list of plots](#)

Figure 1722: NETMAT edge (100) 0566

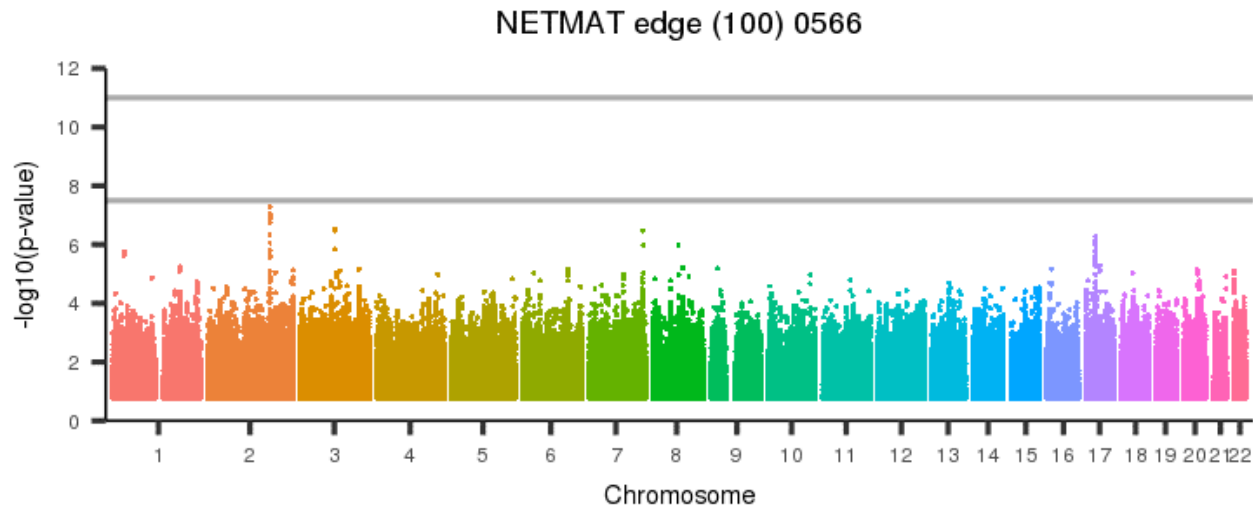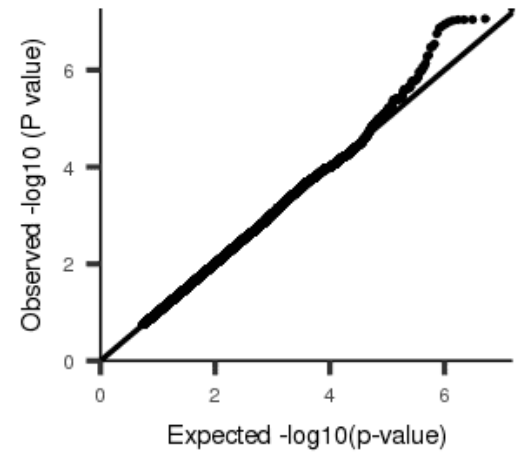

[back to list of plots](#)

Figure 1723: NETMAT edge (100) 0567

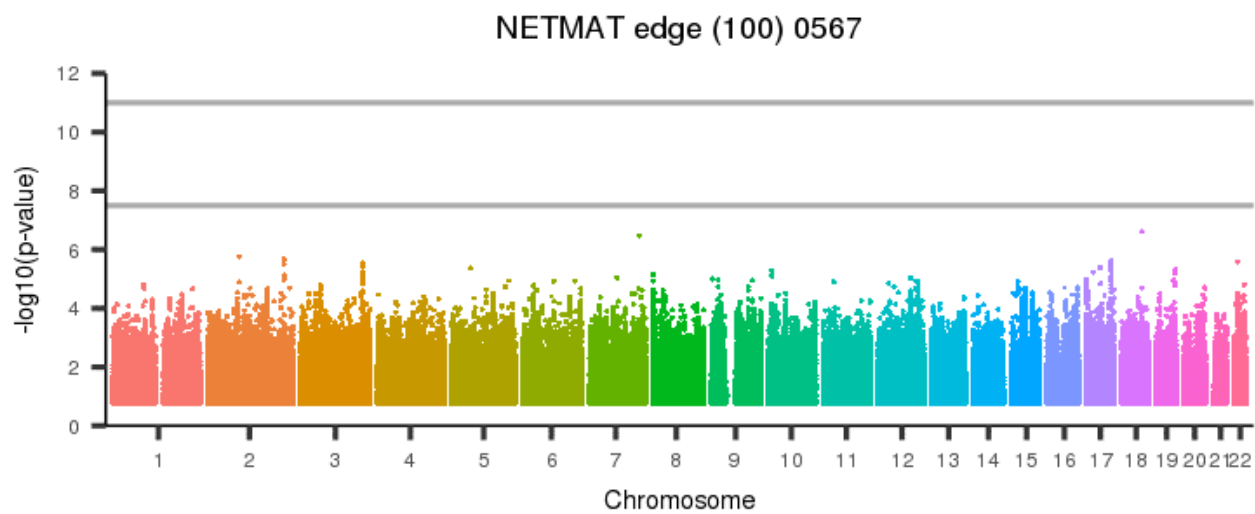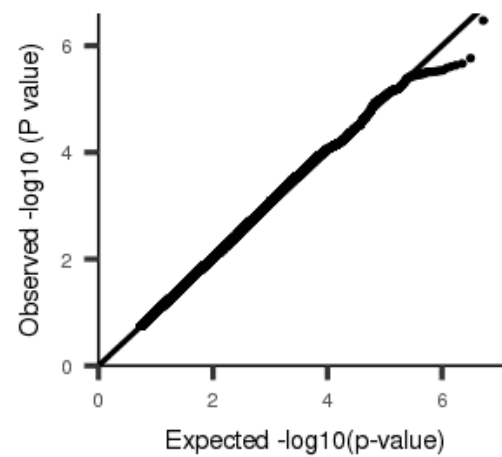

[back to list of plots](#)

Figure 1724: NETMAT edge (100) 0568

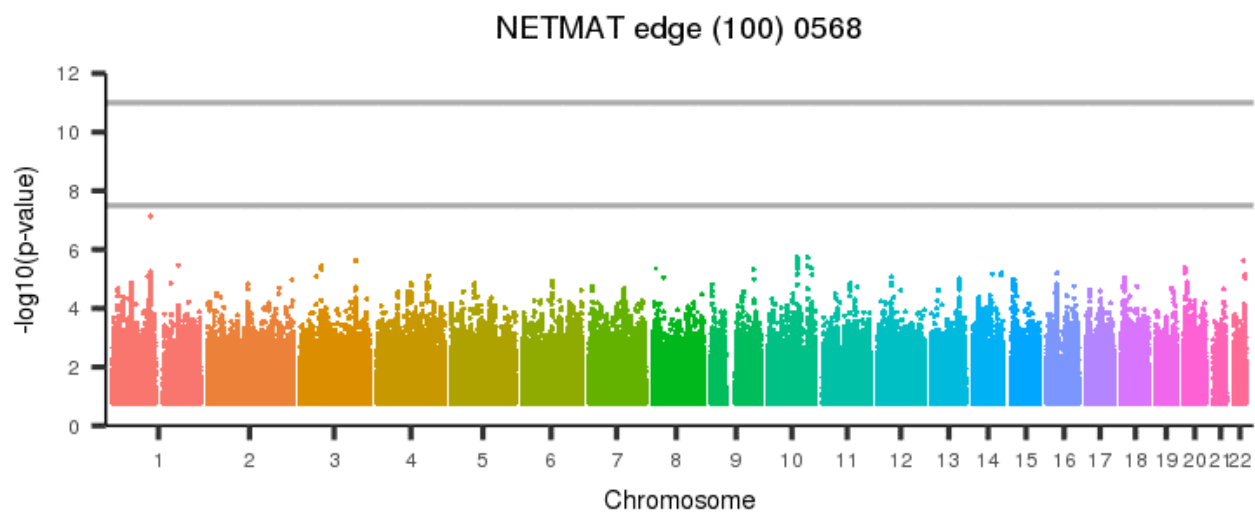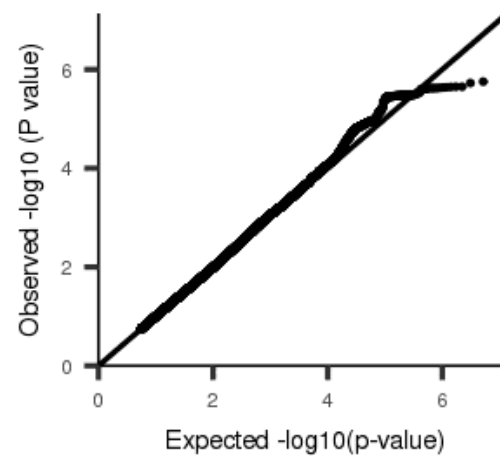

[back to list of plots](#)

Figure 1725: NETMAT edge (100) 0569

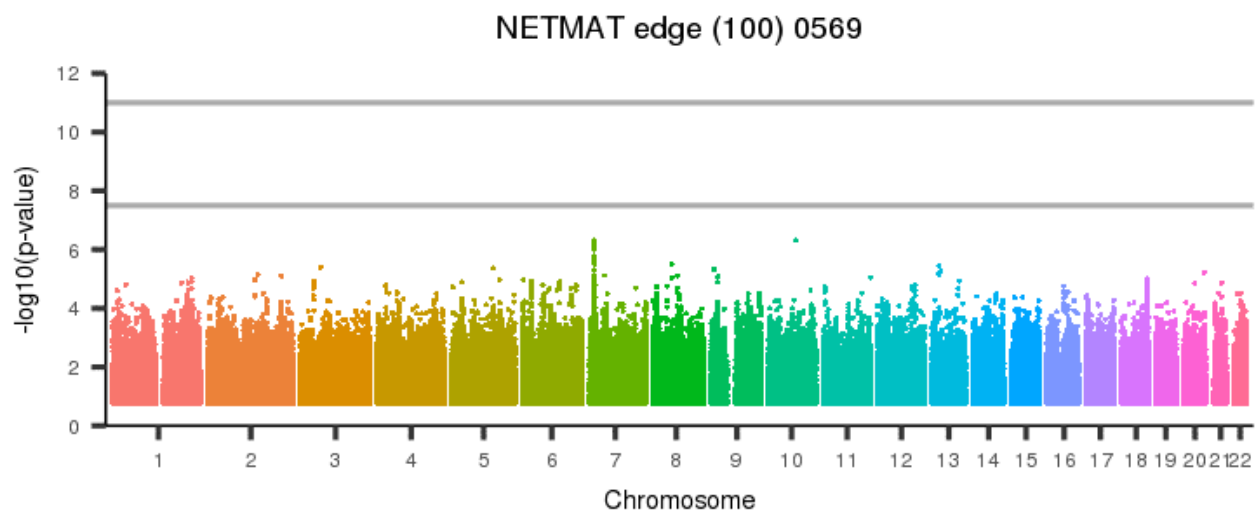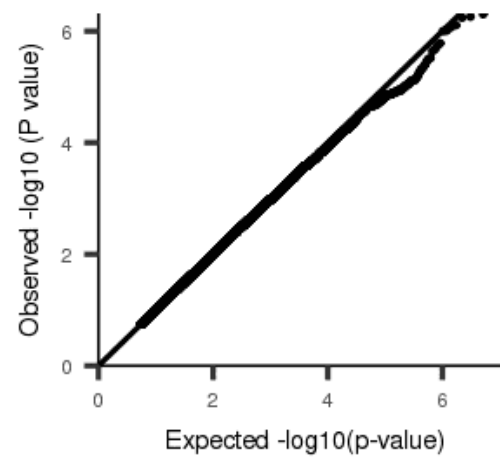

[back to list of plots](#)



Figure 1726: NETMAT edge (100) 0570

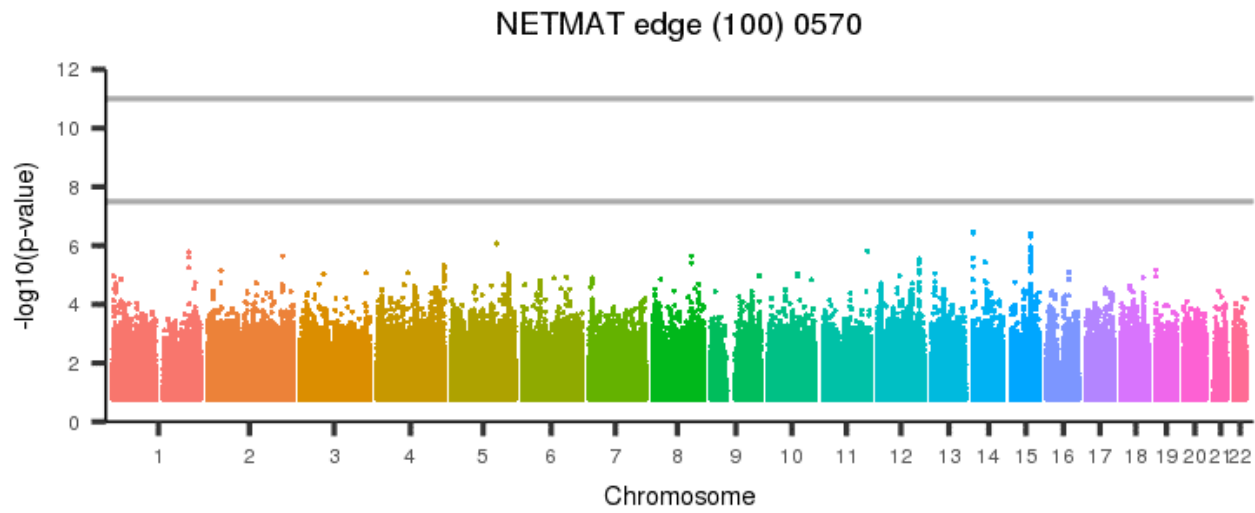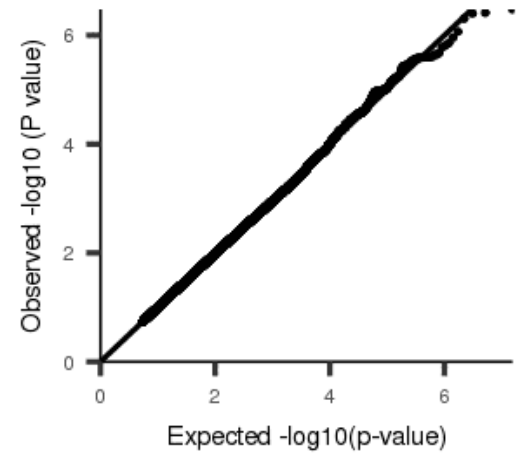

[back to list of plots](#)

Figure 1727: NETMAT edge (100) 0571

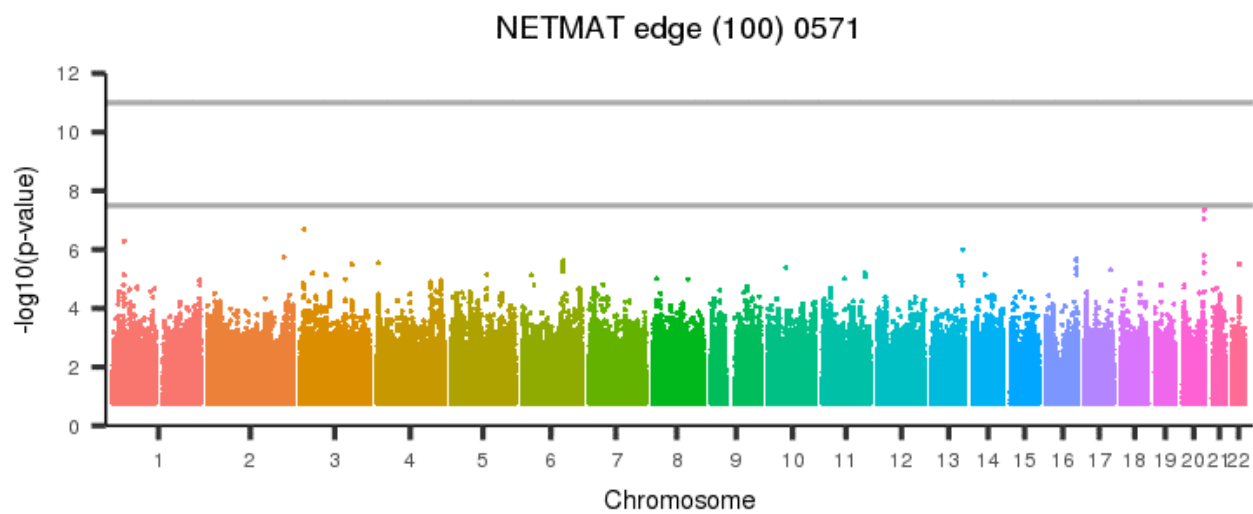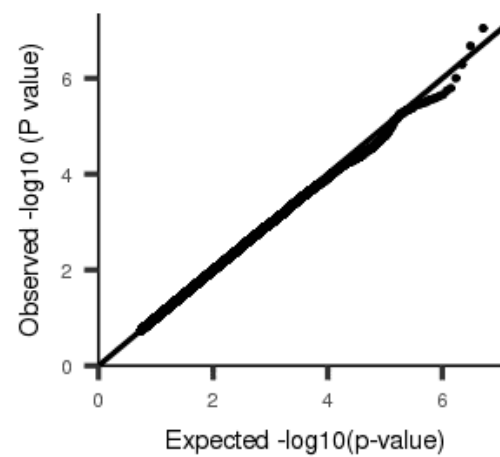

[back to list of plots](#)

Figure 1728: NETMAT edge (100) 0572

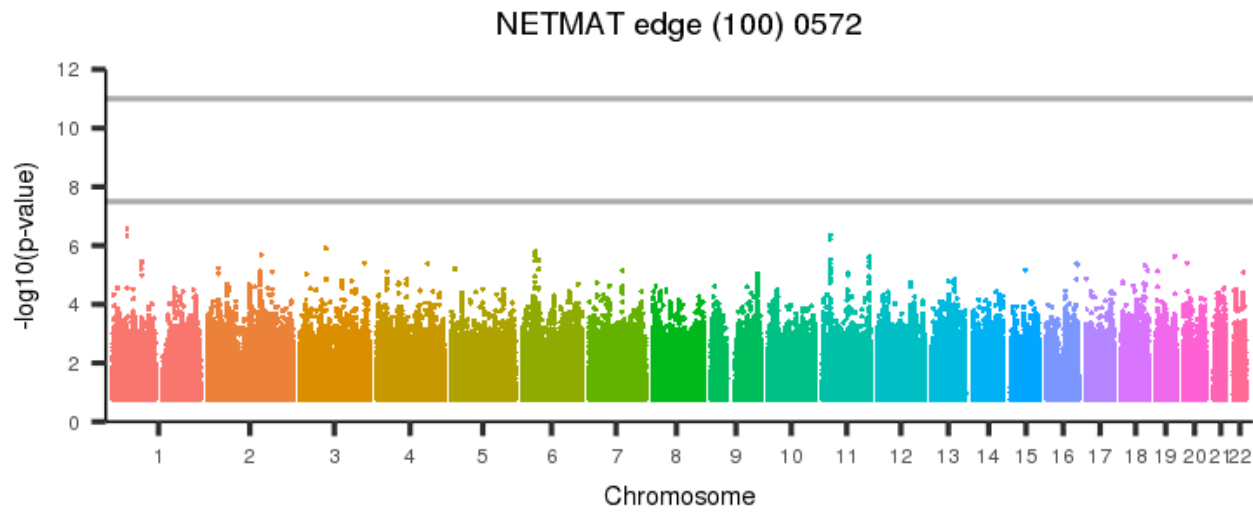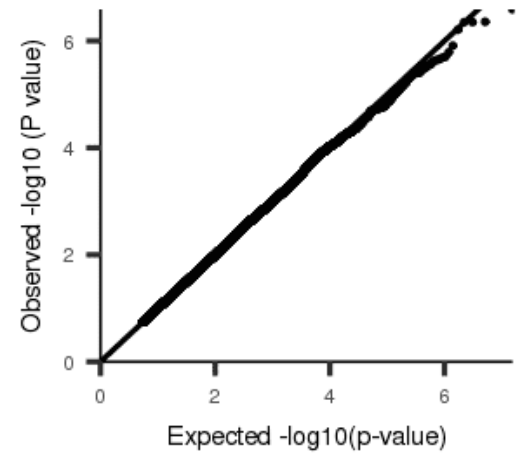

[back to list of plots](#)

Figure 1729: NETMAT edge (100) 0573

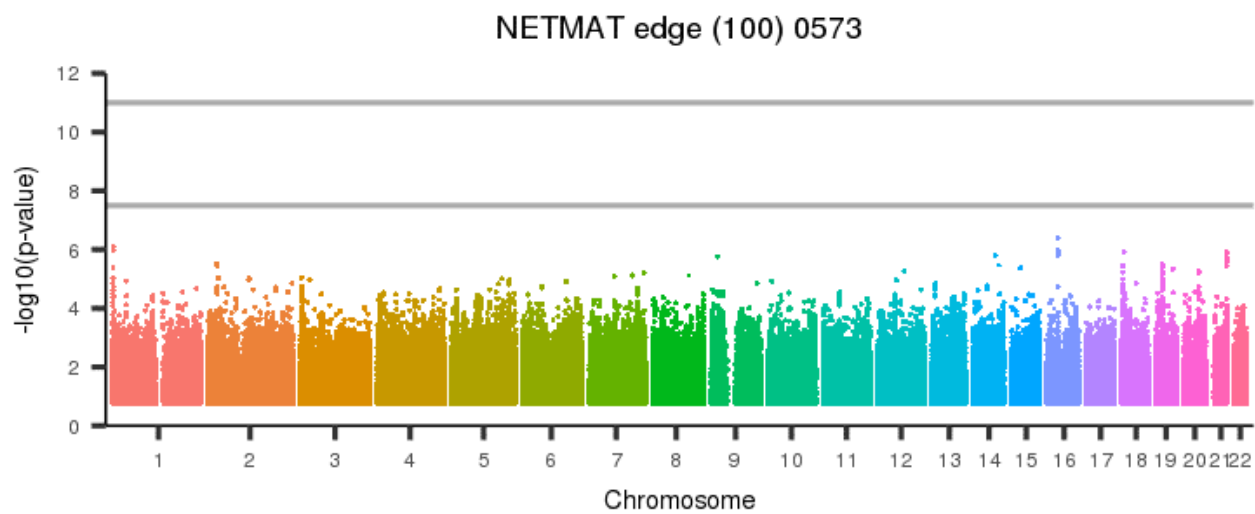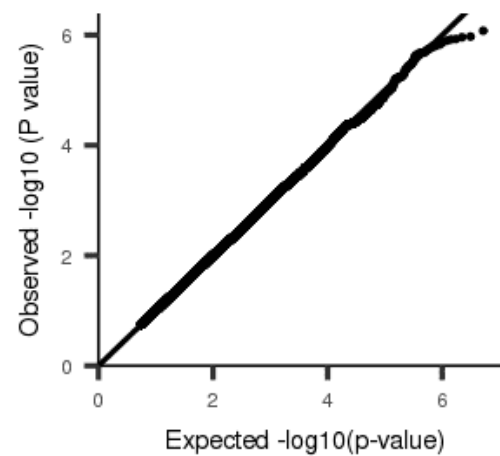

[back to list of plots](#)

Figure 1730: NETMAT edge (100) 0574

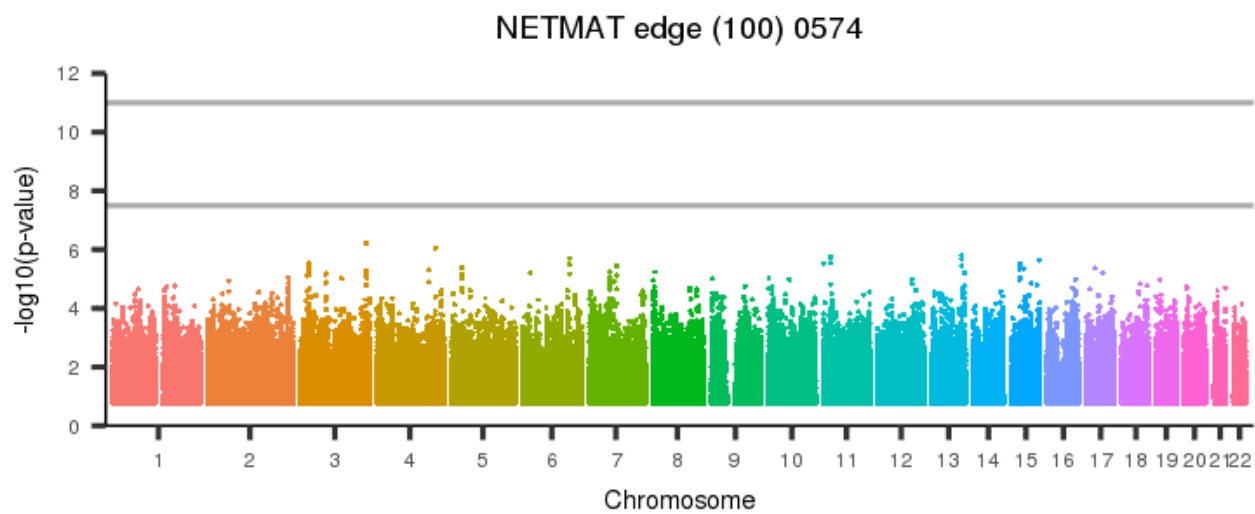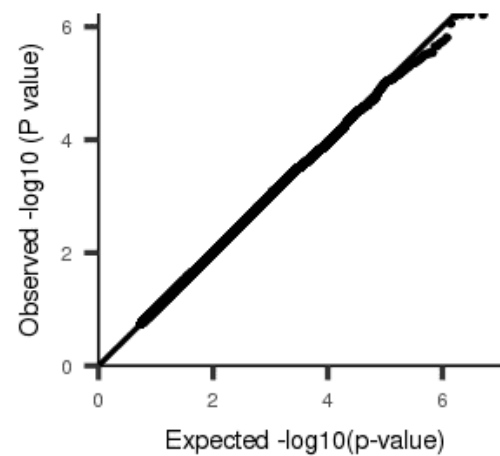

[back to list of plots](#)

Figure 1731: NETMAT edge (100) 0575

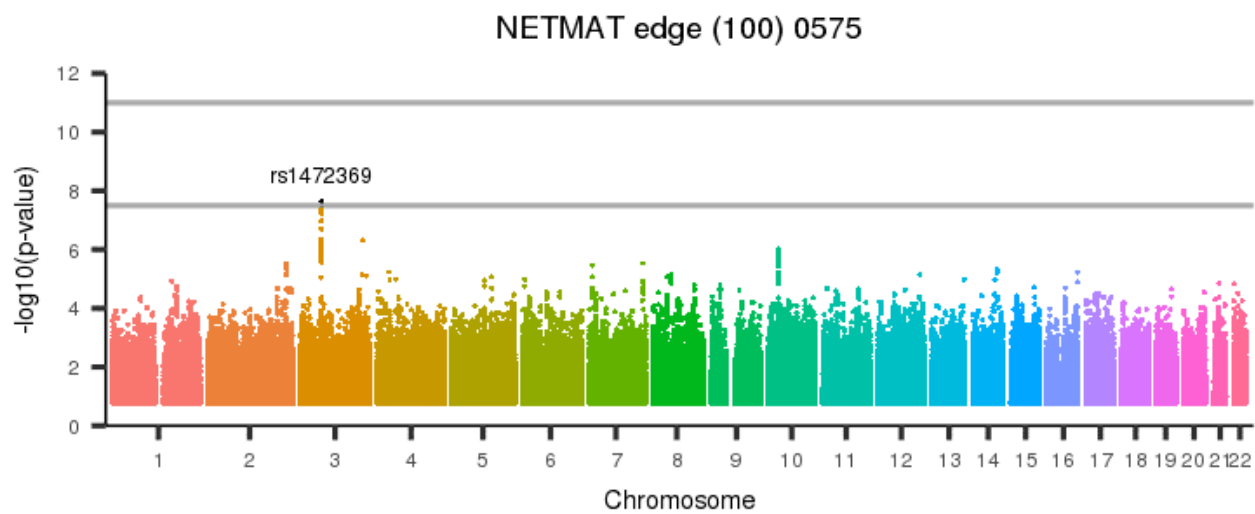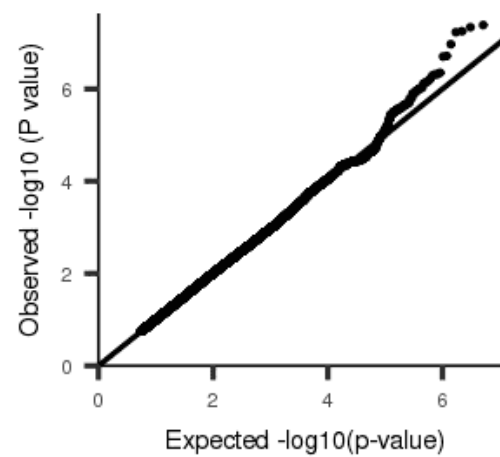

[back to list of plots](#)

Figure 1732: NETMAT edge (100) 0576

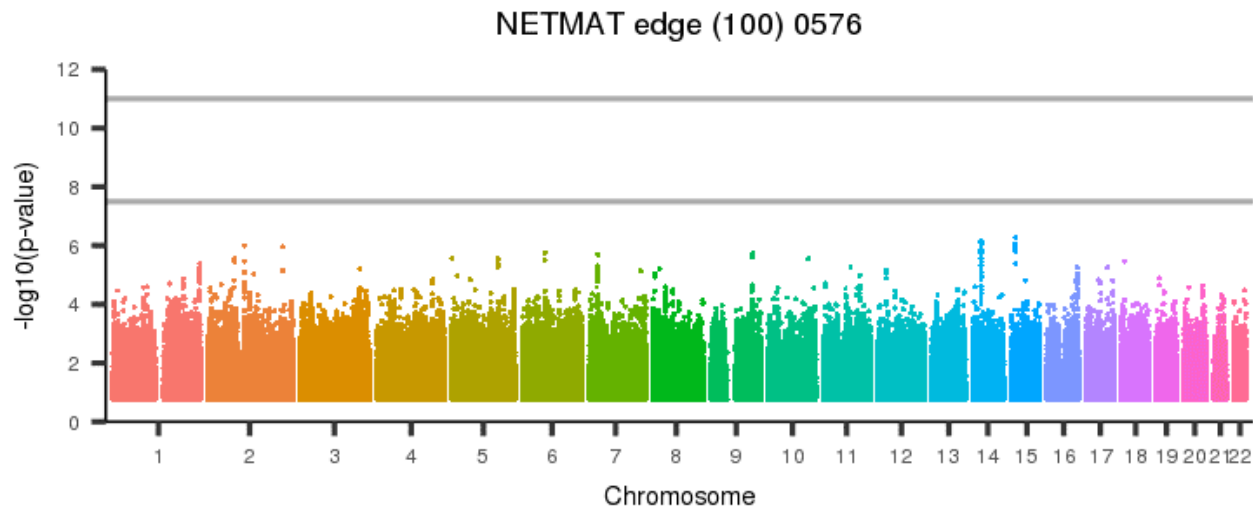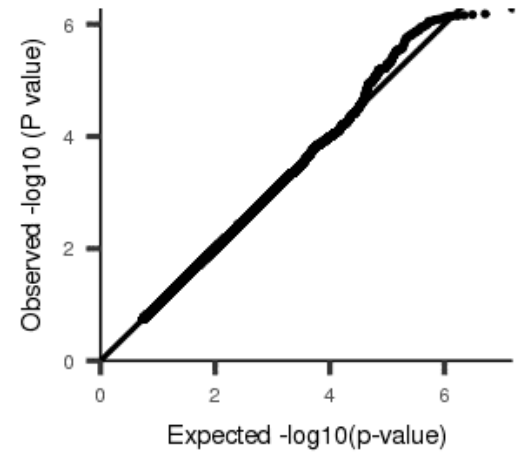

[back to list of plots](#)

Figure 1733: NETMAT edge (100) 0577

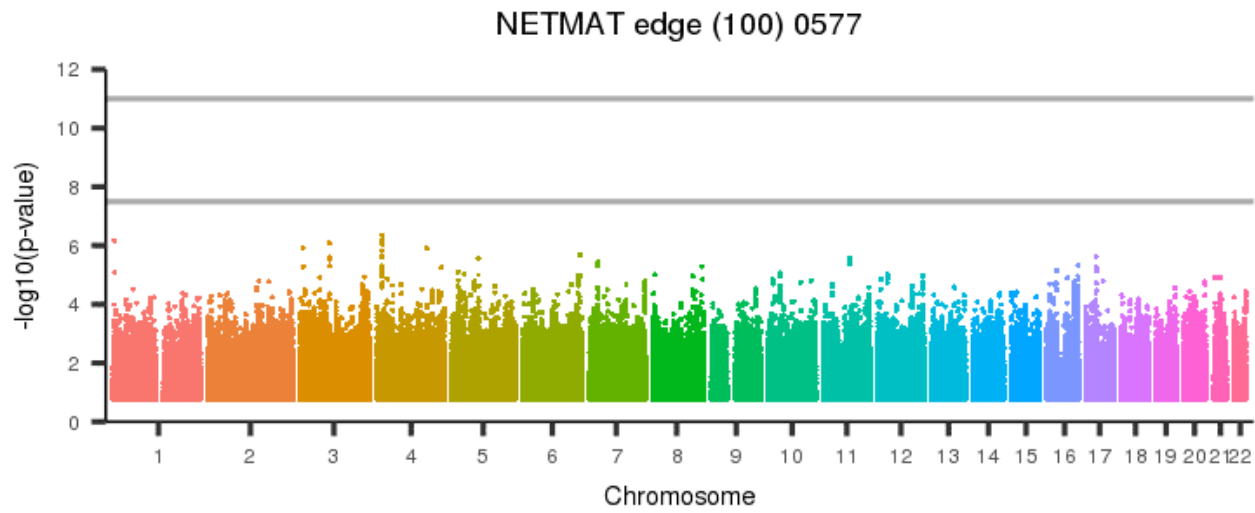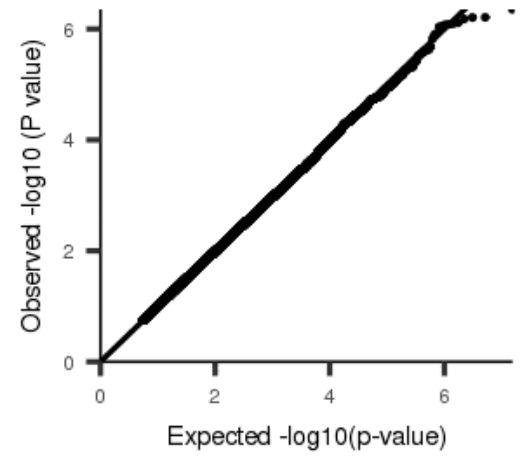

[back to list of plots](#)



Figure 1734: NETMAT edge (100) 0578

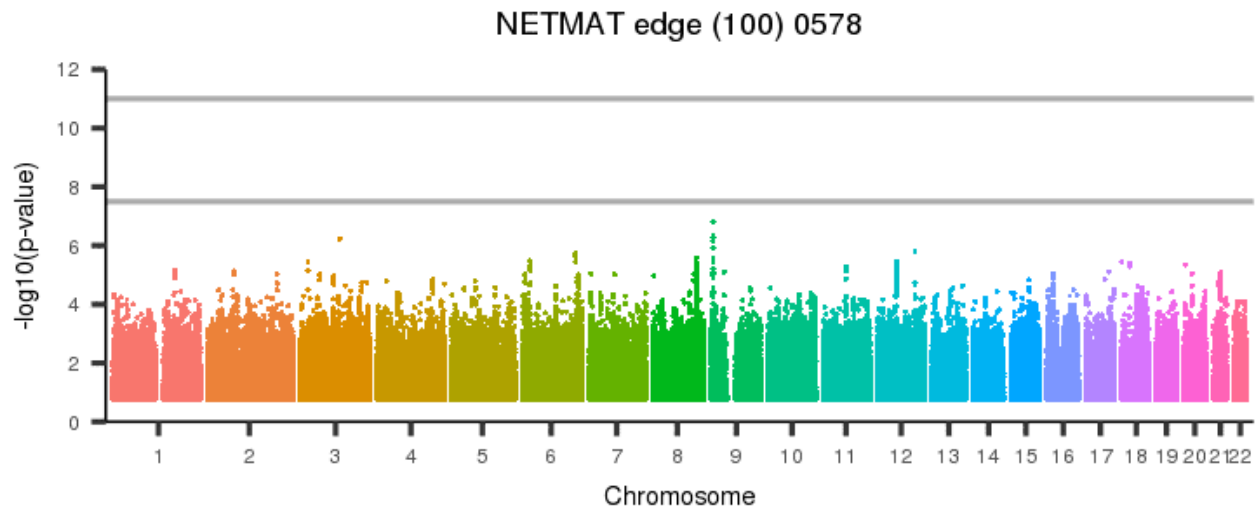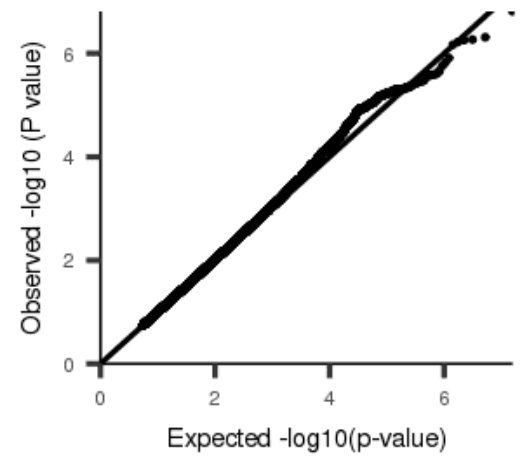

[back to list of plots](#)

Figure 1735: NETMAT edge (100) 0579

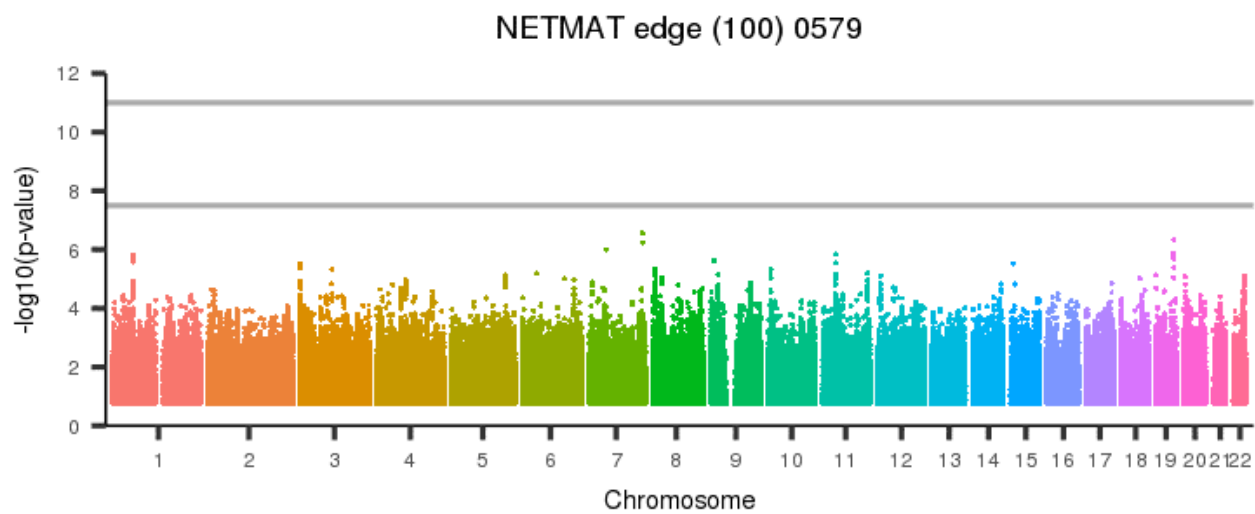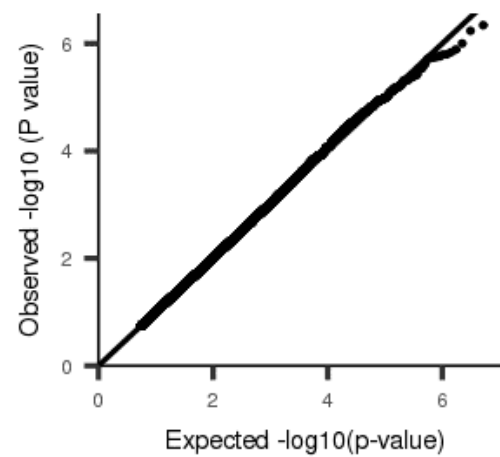

[back to list of plots](#)

Figure 1736: NETMAT edge (100) 0580

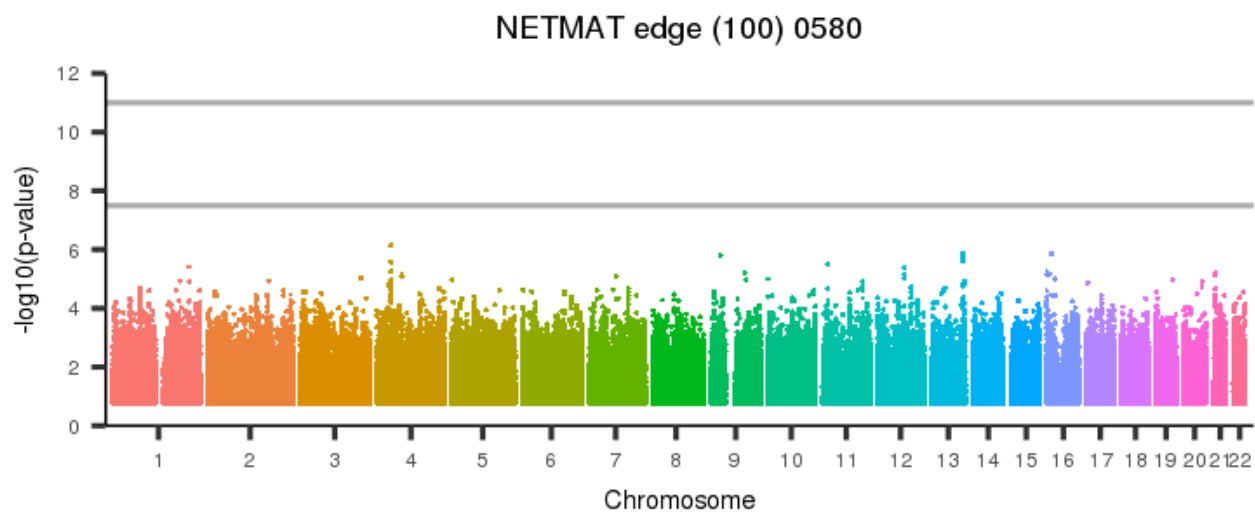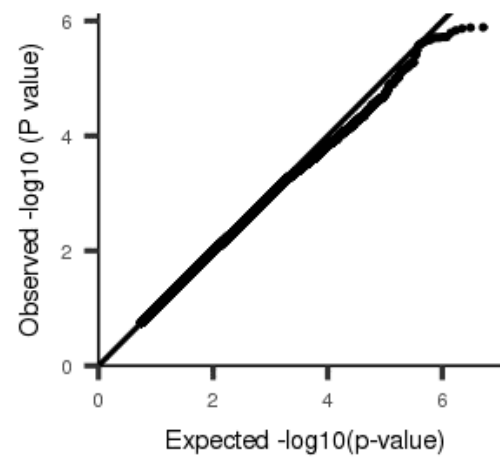

[back to list of plots](#)

Figure 1737: NETMAT edge (100) 0581

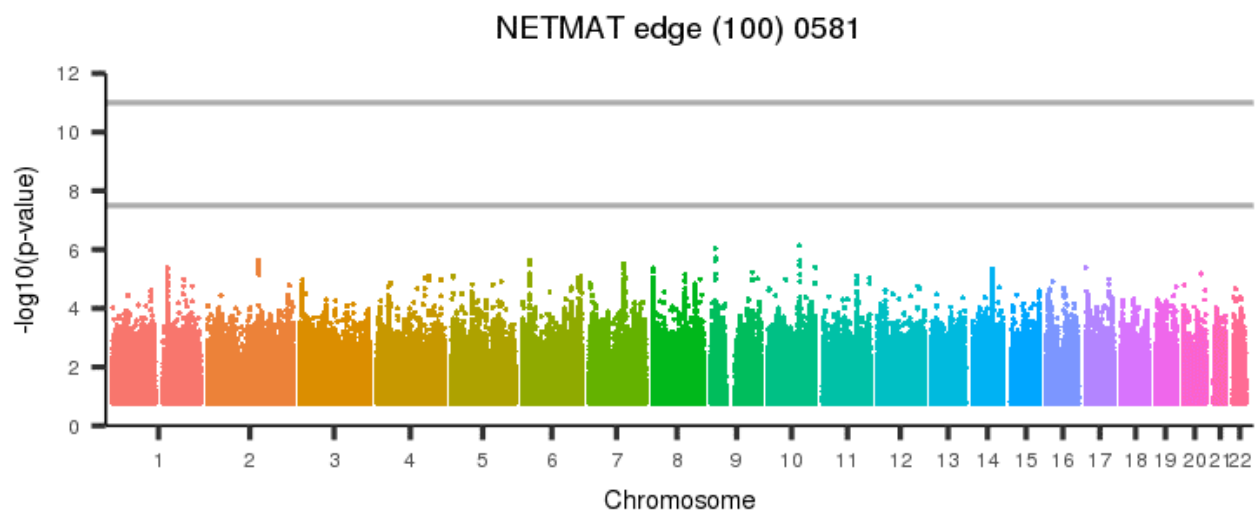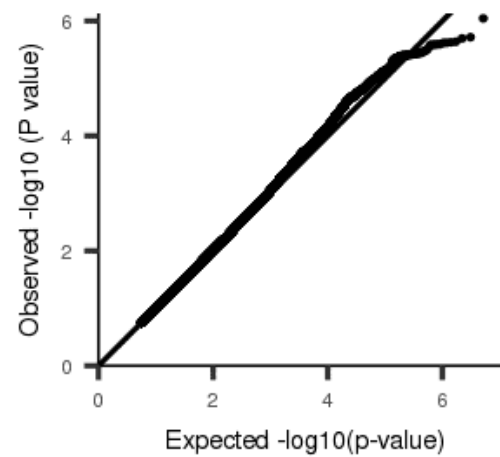

[back to list of plots](#)

Figure 1738: NETMAT edge (100) 0582

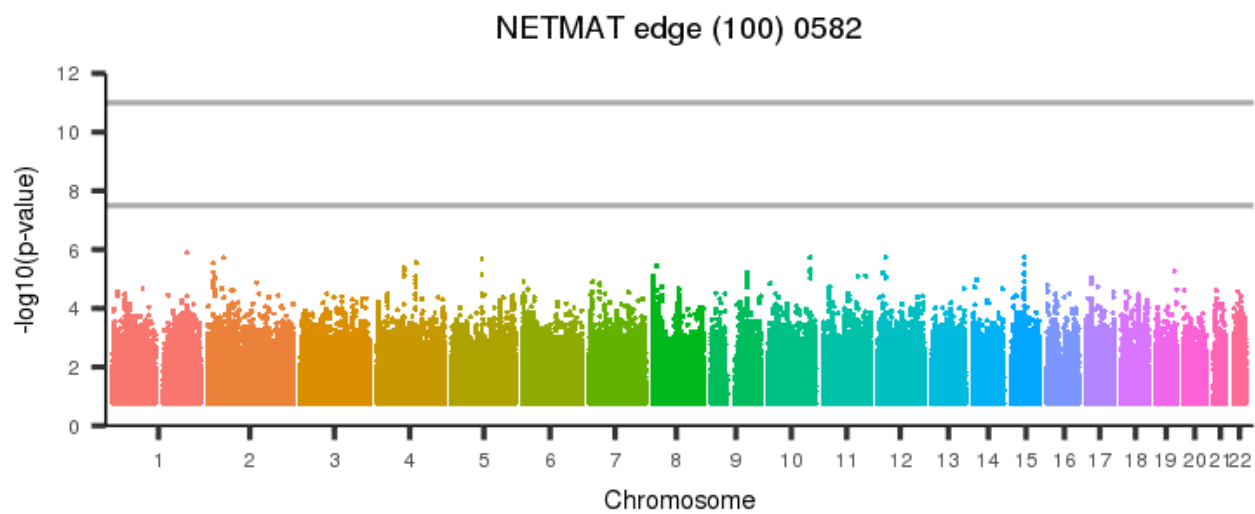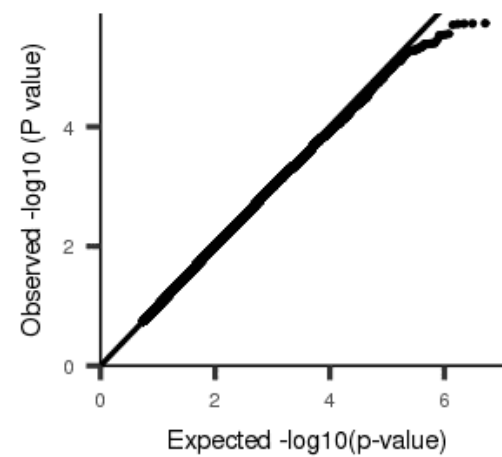

[back to list of plots](#)

Figure 1739: NETMAT edge (100) 0583

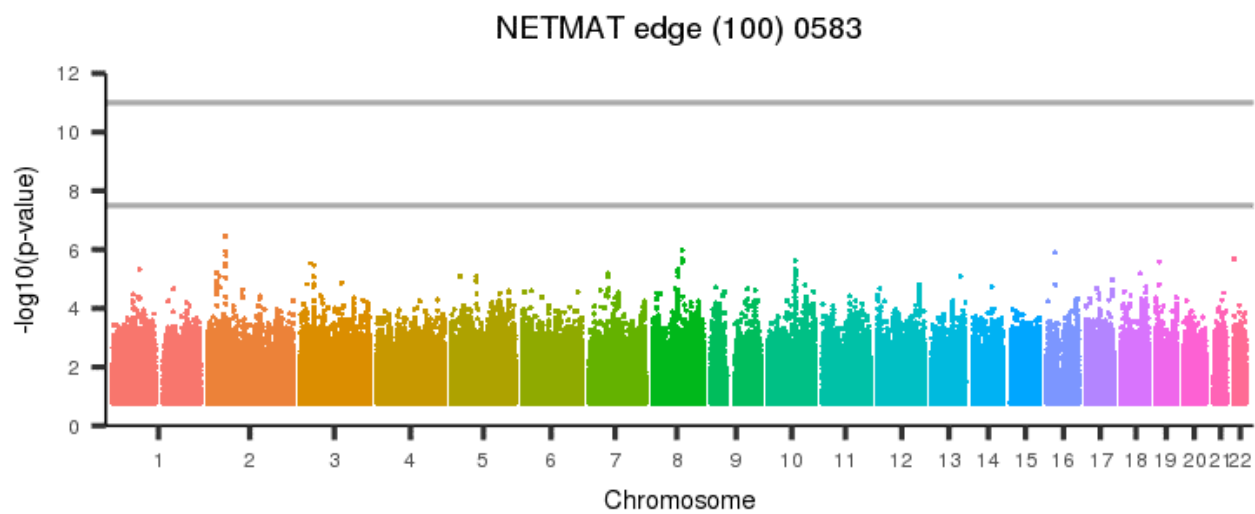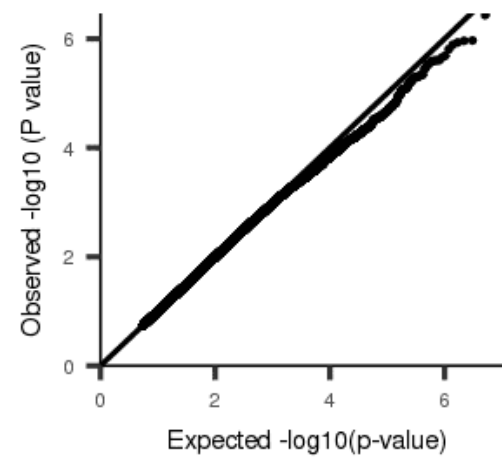

[back to list of plots](#)

Figure 1740: NETMAT edge (100) 0584

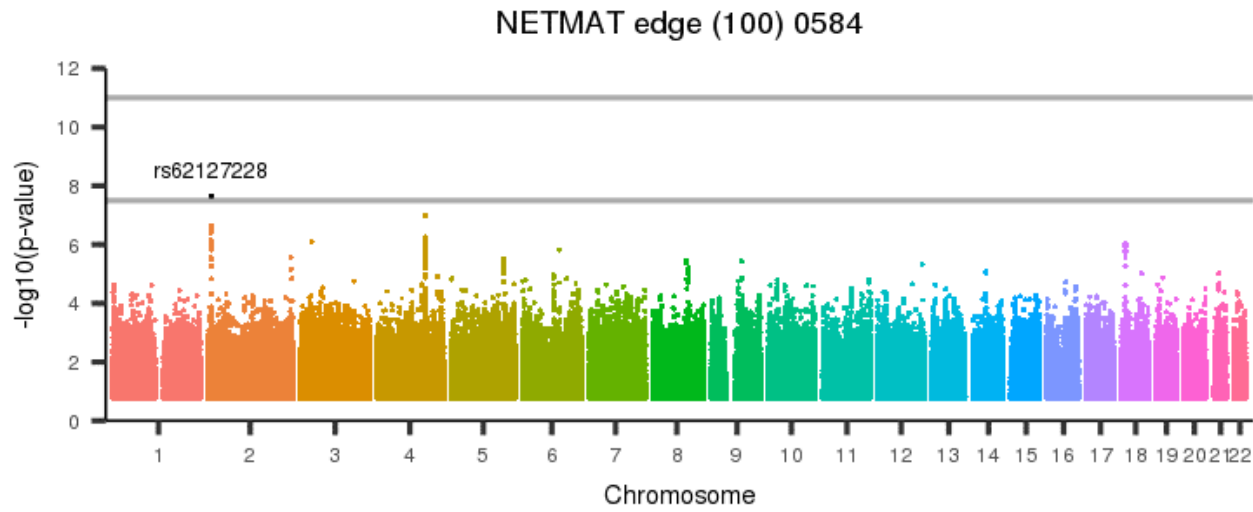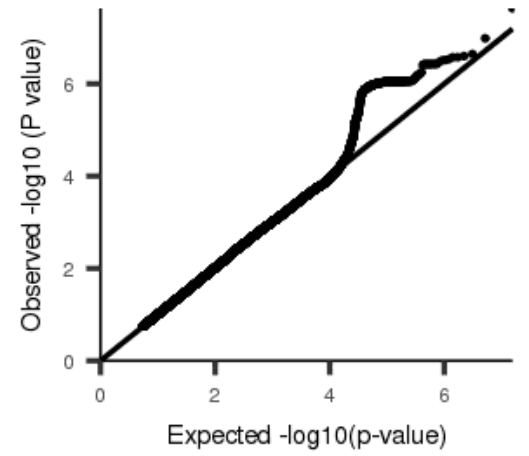

[back to list of plots](#)

Figure 1741: NETMAT edge (100) 0585

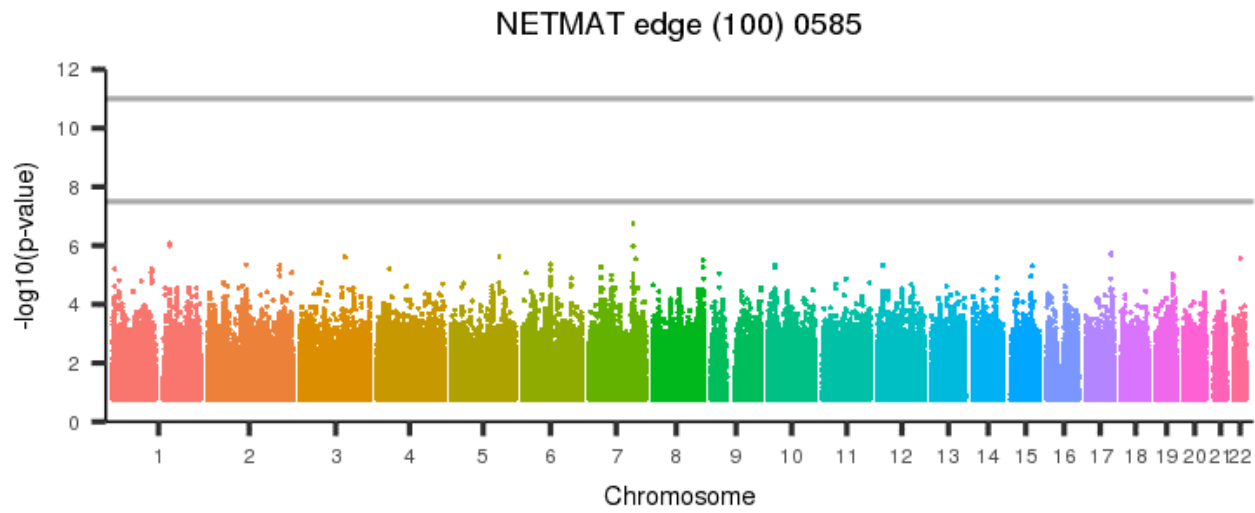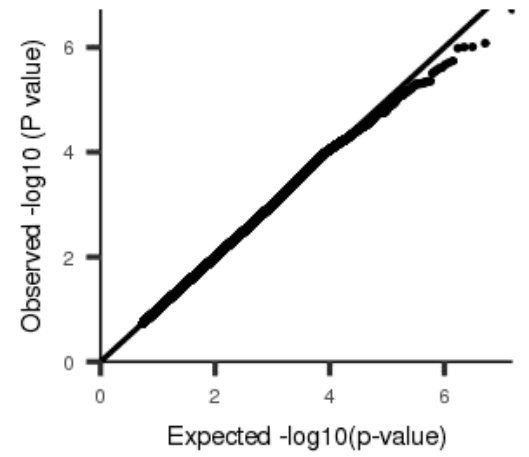

[back to list of plots](#)



Figure 1742: NETMAT edge (100) 0586

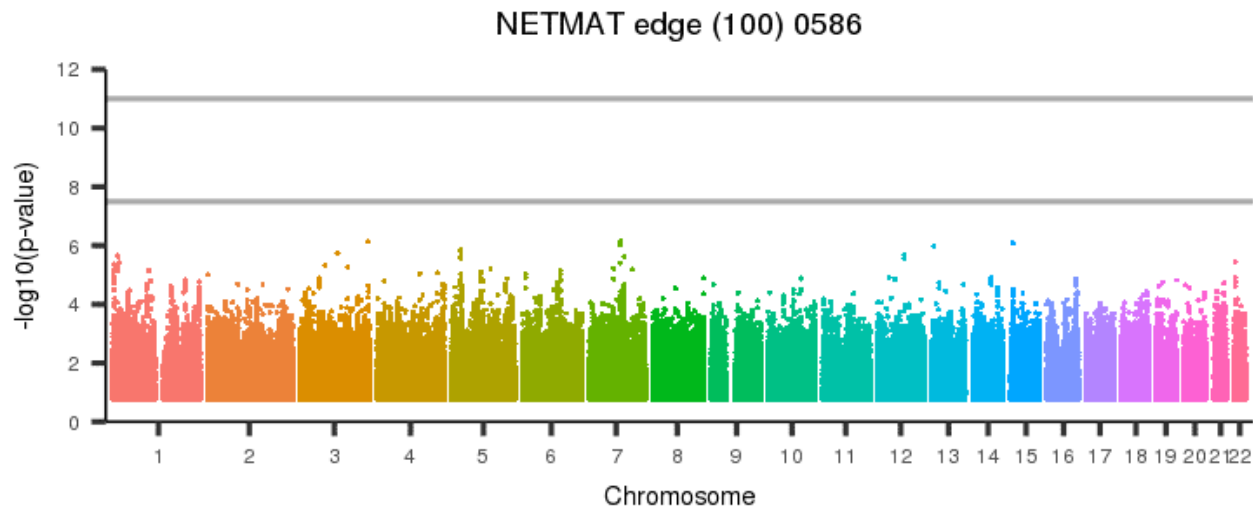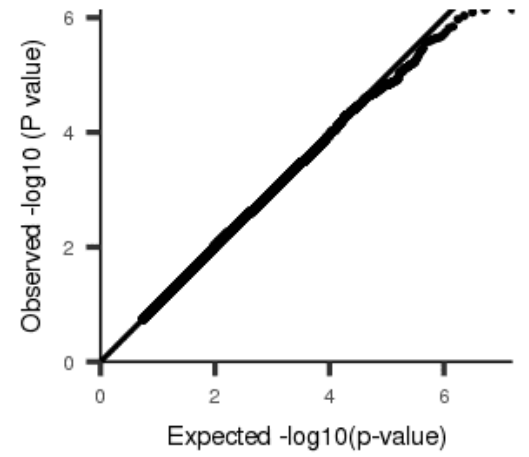

[back to list of plots](#)

Figure 1743: NETMAT edge (100) 0587

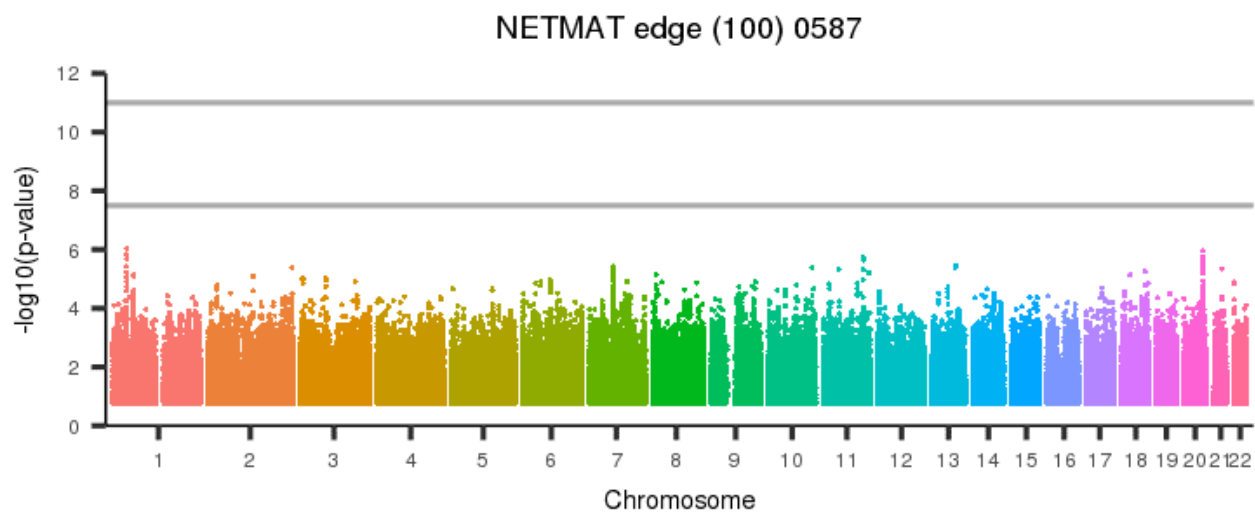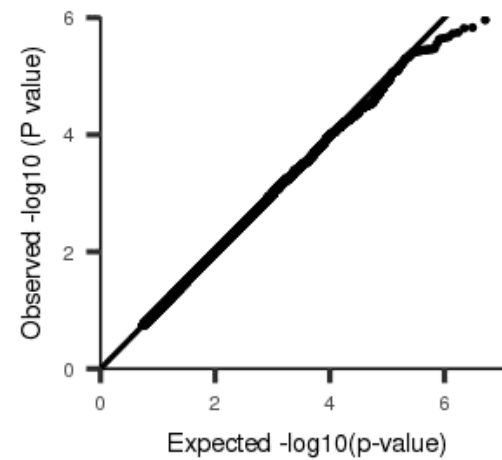

[back to list of plots](#)

Figure 1744: NETMAT edge (100) 0588

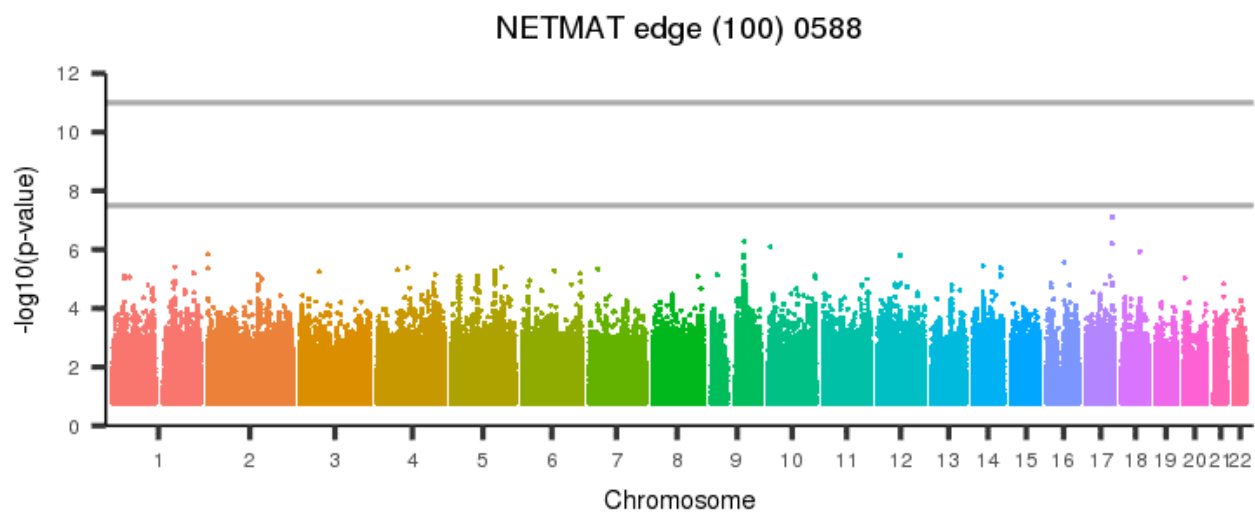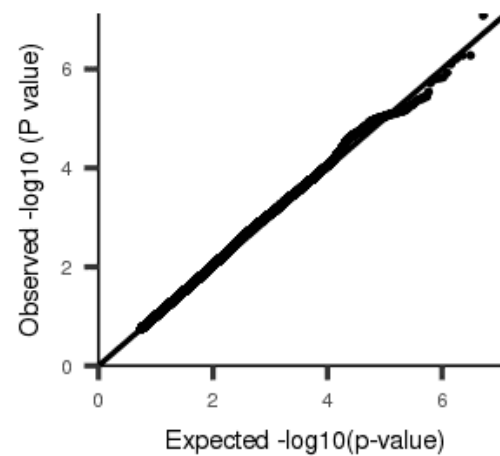

[back to list of plots](#)

Figure 1745: NETMAT edge (100) 0589

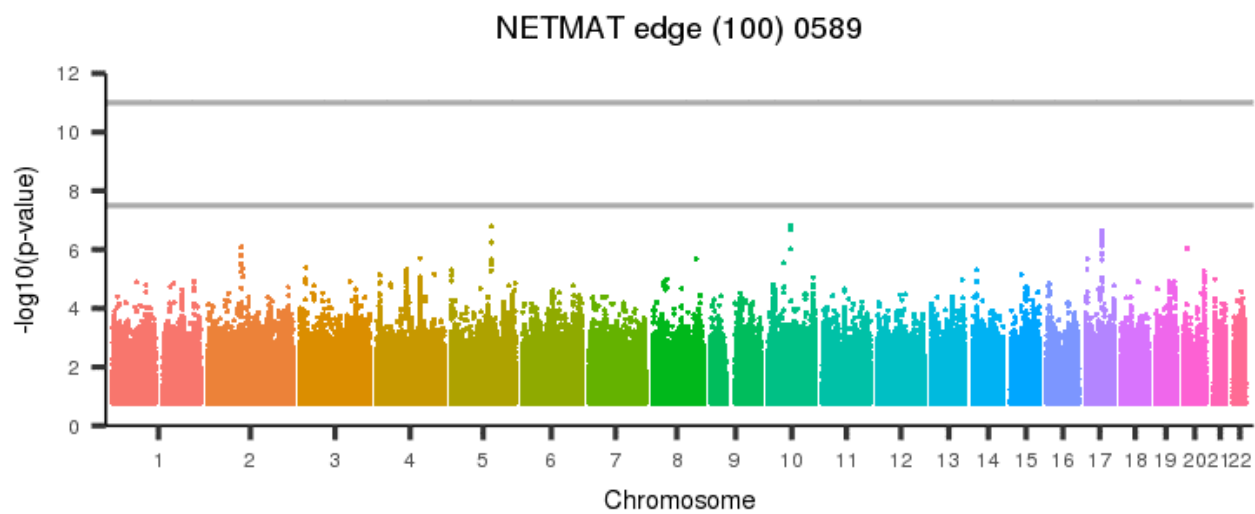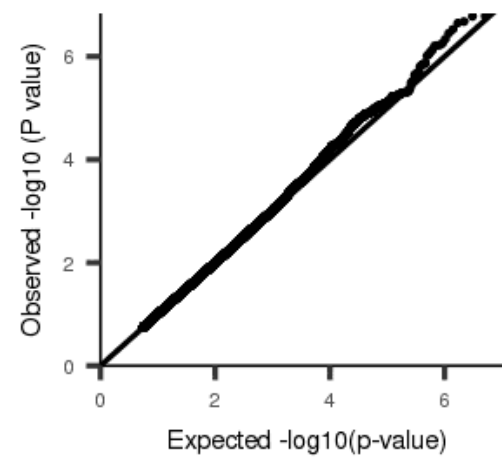

[back to list of plots](#)

Figure 1746: NETMAT edge (100) 0590

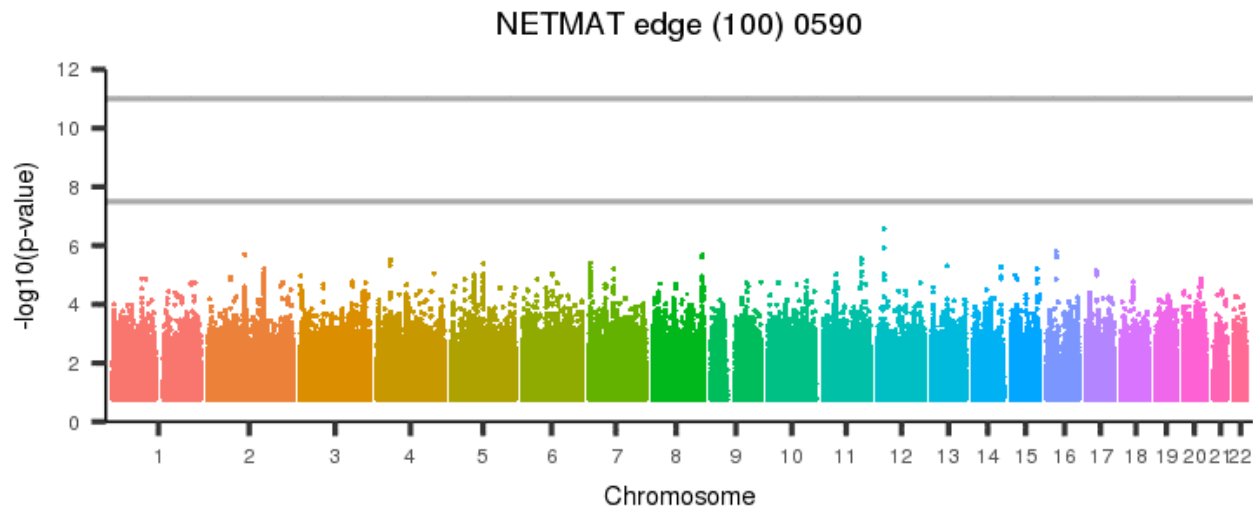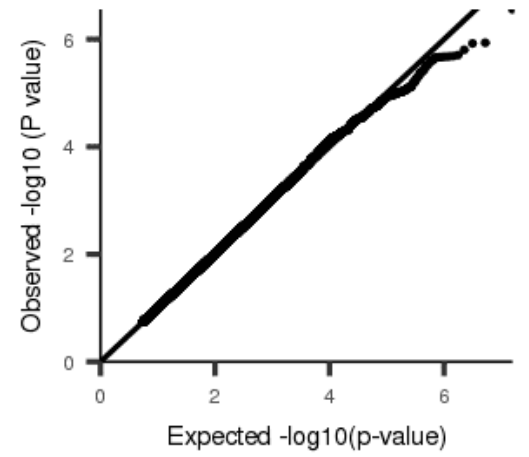

[back to list of plots](#)

Figure 1747: NETMAT edge (100) 0591

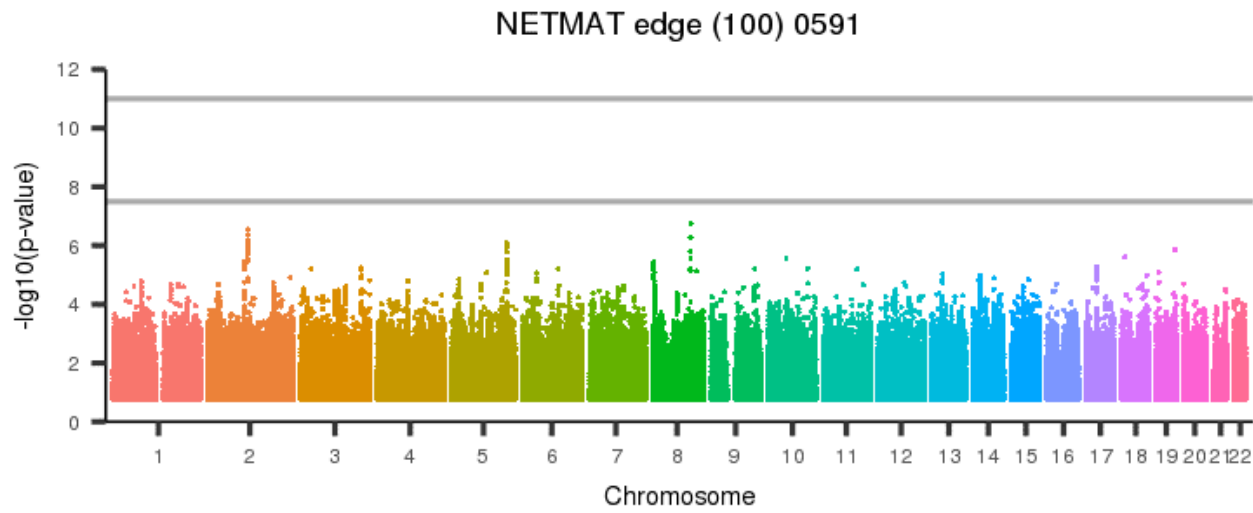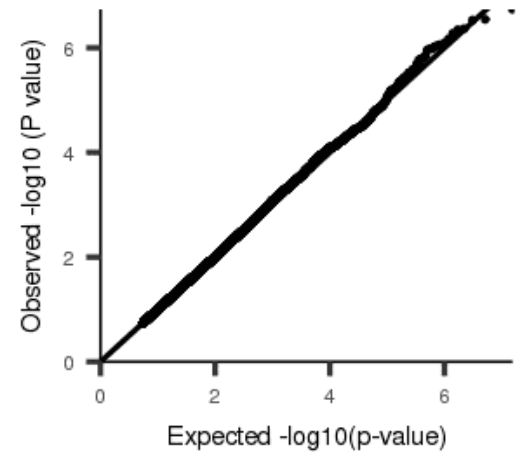

[back to list of plots](#)

Figure 1748: NETMAT edge (100) 0592

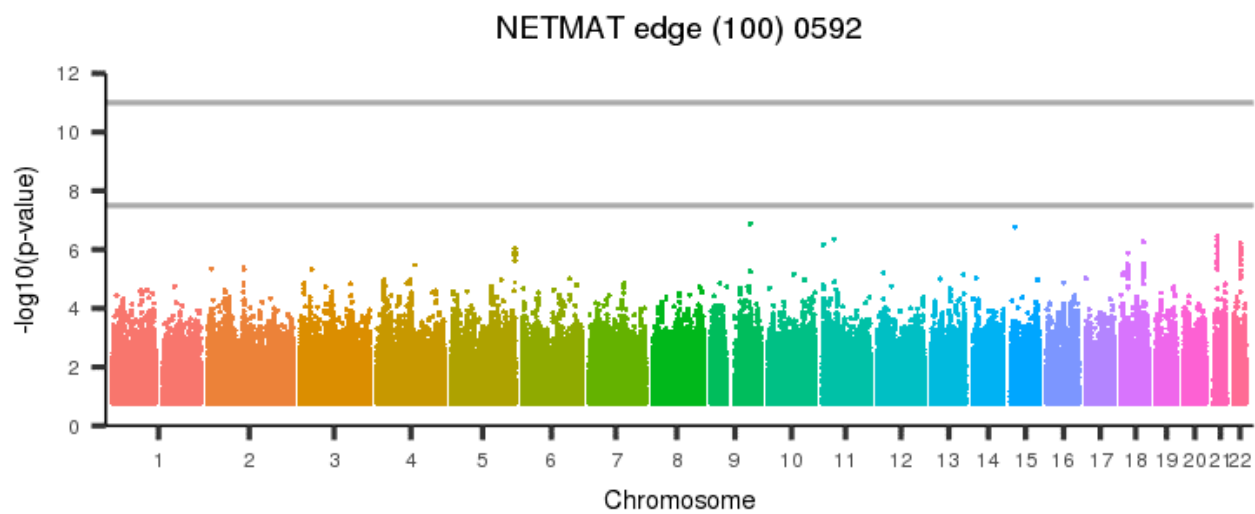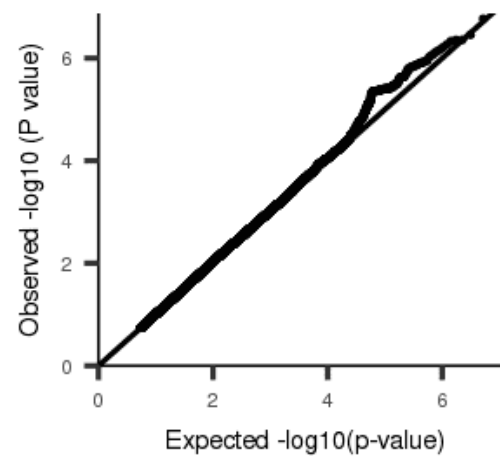

[back to list of plots](#)

Figure 1749: NETMAT edge (100) 0593

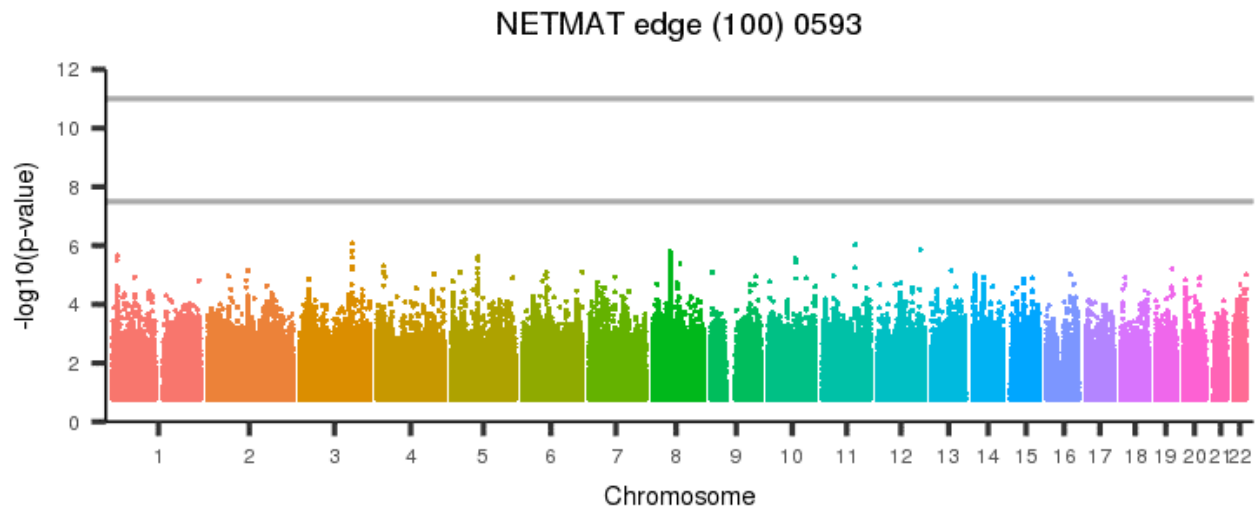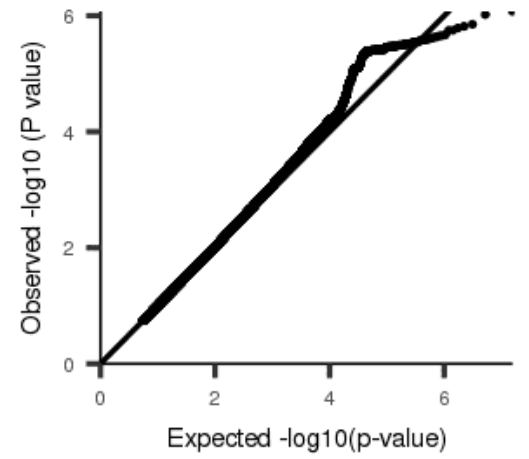

[back to list of plots](#)



Figure 1750: NETMAT edge (100) 0594

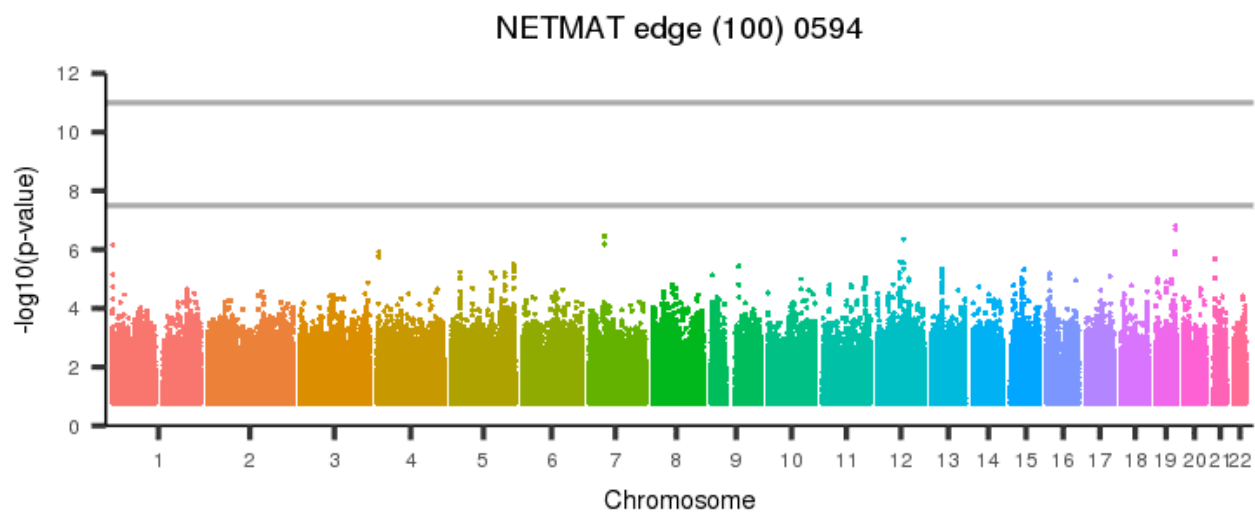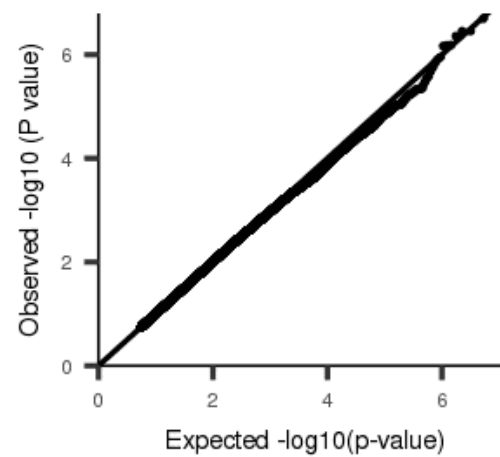

[back to list of plots](#)

Figure 1751: NETMAT edge (100) 0595

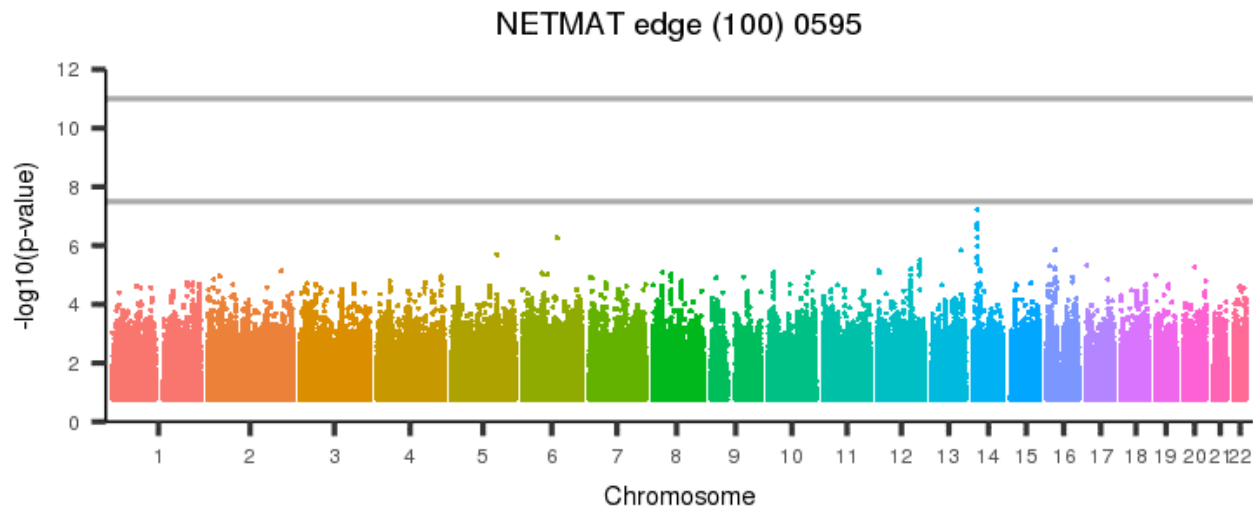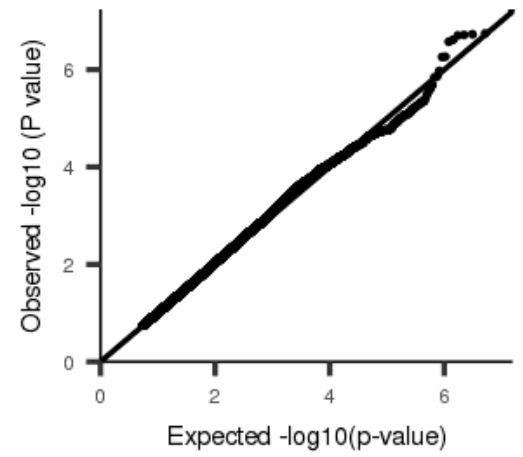

[back to list of plots](#)

Figure 1752: NETMAT edge (100) 0596

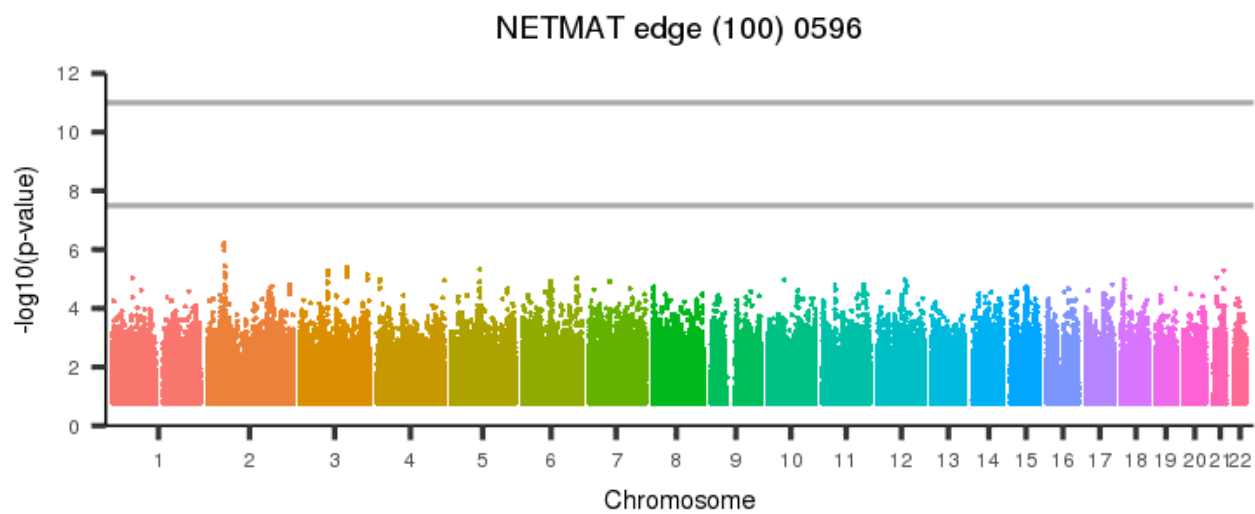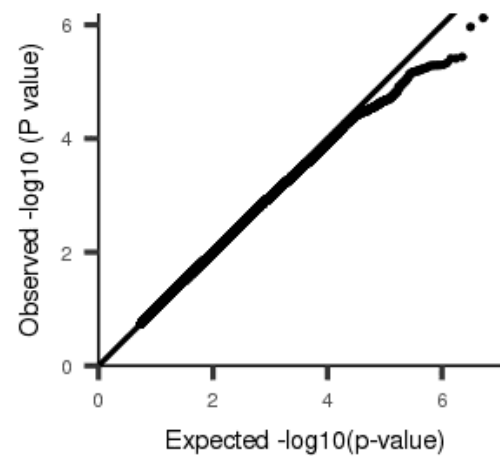

[back to list of plots](#)

Figure 1753: NETMAT edge (100) 0597

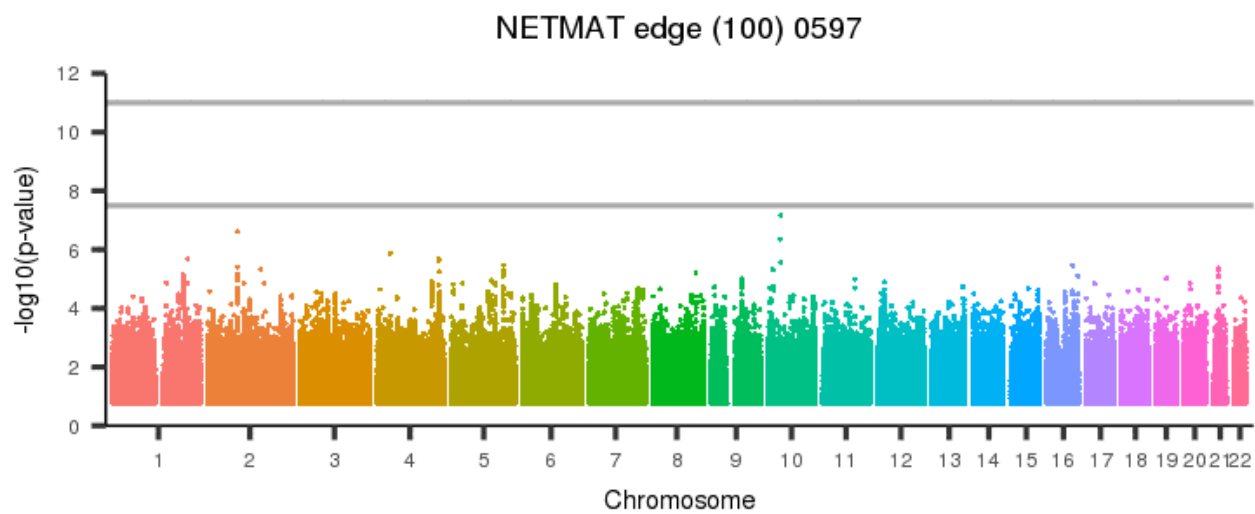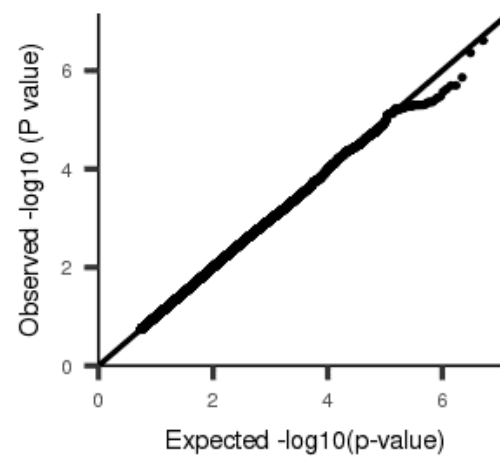

[back to list of plots](#)

Figure 1754: NETMAT edge (100) 0598

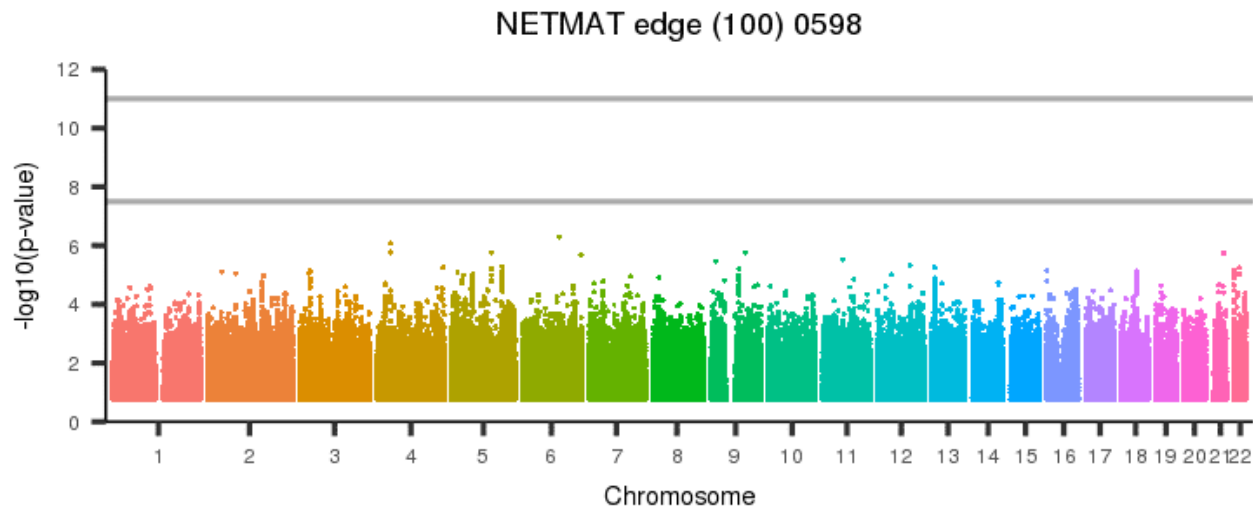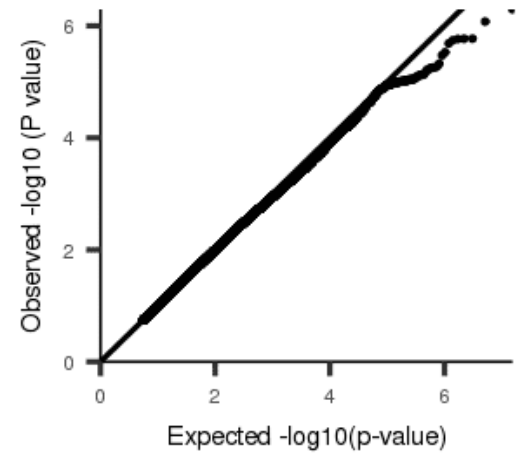

[back to list of plots](#)

Figure 1755: NETMAT edge (100) 0599

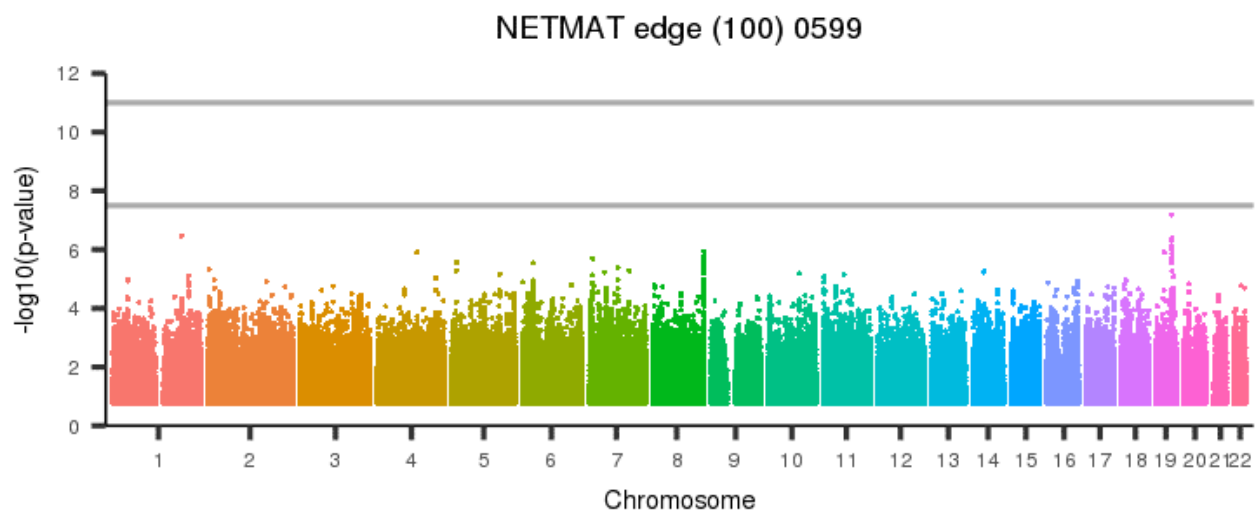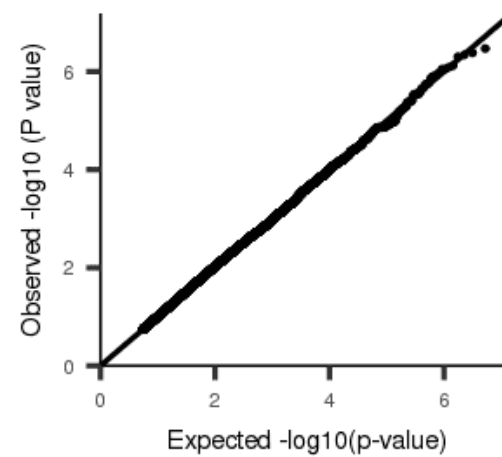

[back to list of plots](#)

Figure 1756: NETMAT edge (100) 0600

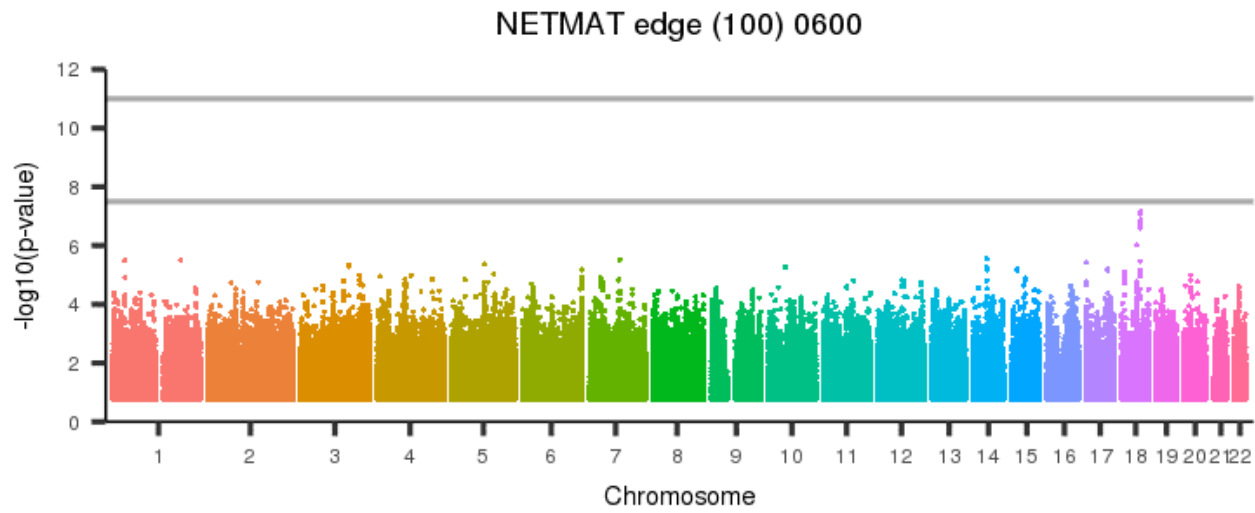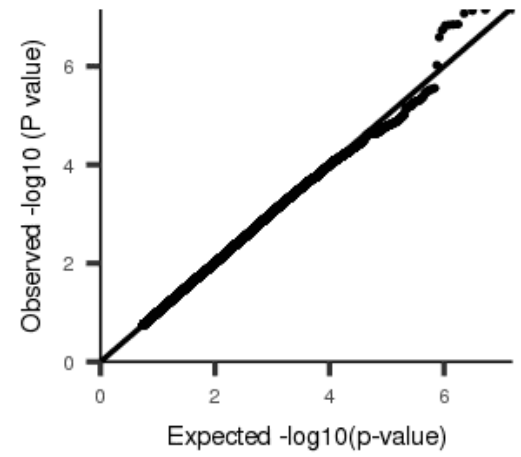

[back to list of plots](#)

Figure 1757: NETMAT edge (100) 0601

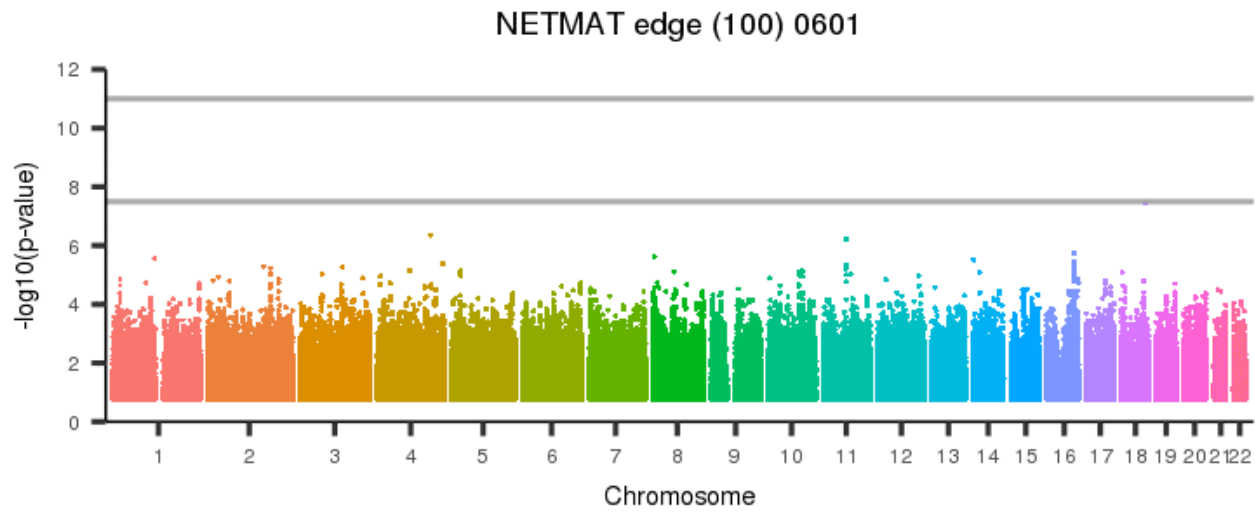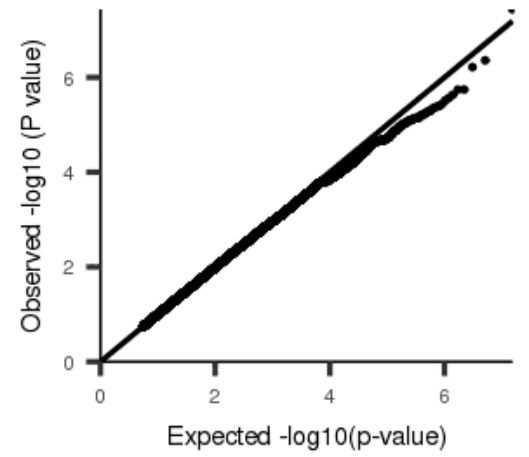

[back to list of plots](#)



Figure 1758: NETMAT edge (100) 0602

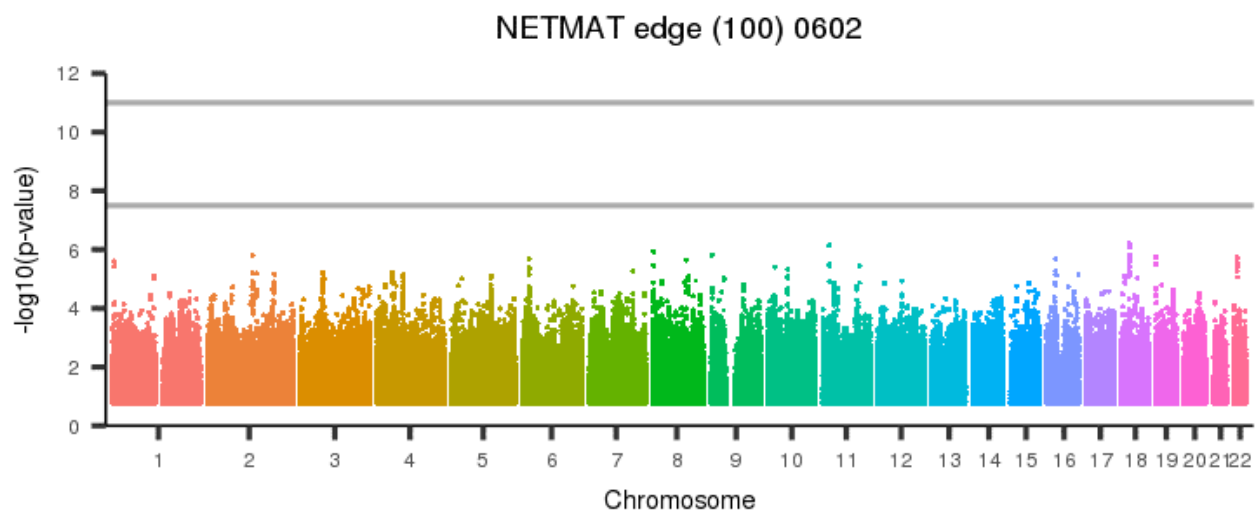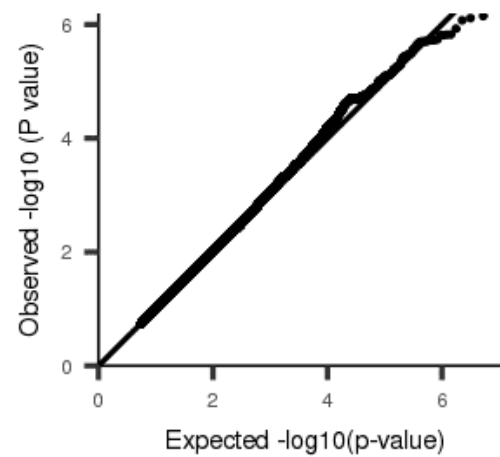

[back to list of plots](#)

Figure 1759: NETMAT edge (100) 0603

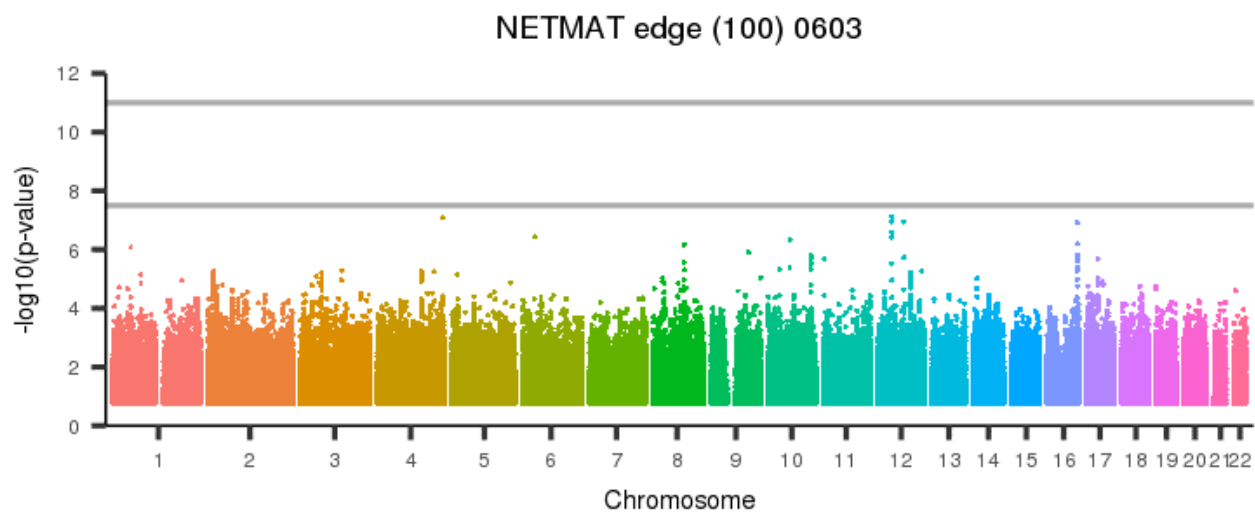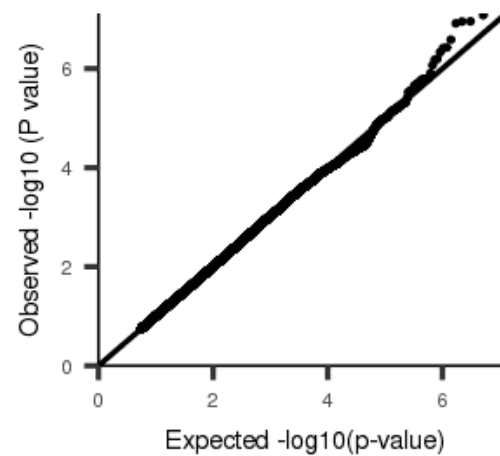

[back to list of plots](#)

Figure 1760: NETMAT edge (100) 0604

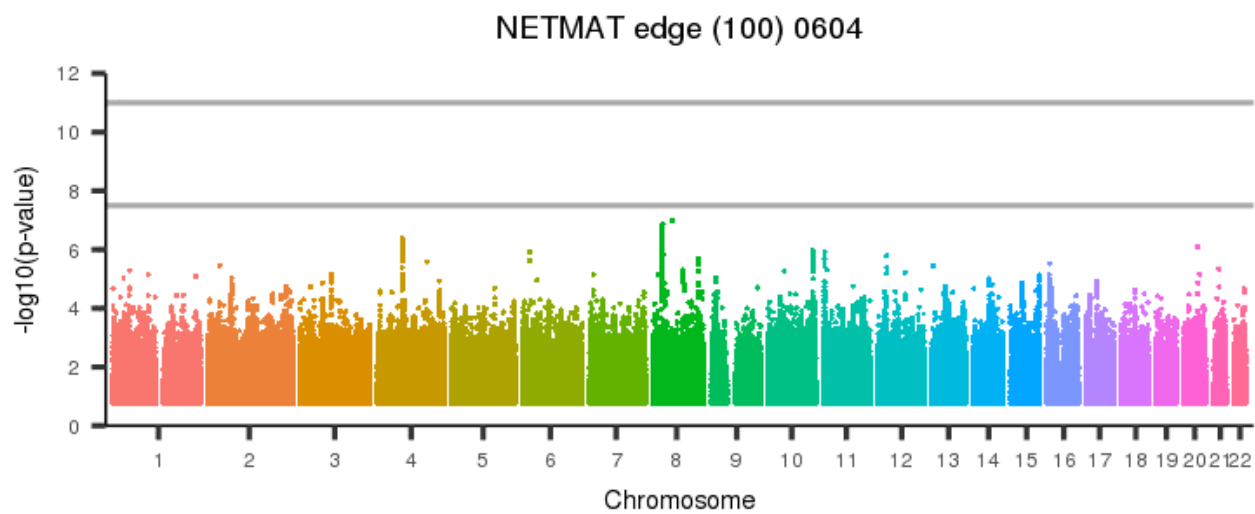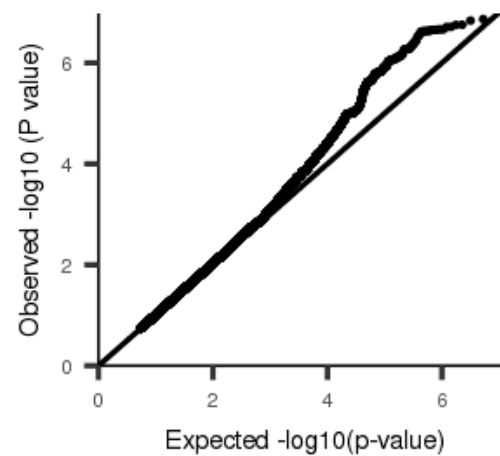

[back to list of plots](#)

Figure 1761: NETMAT edge (100) 0605

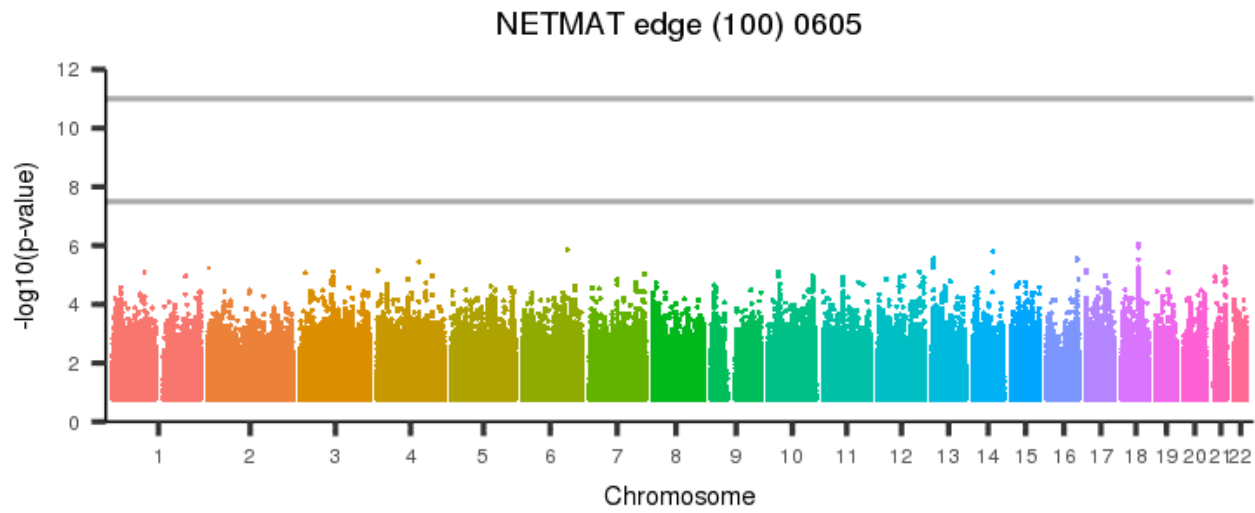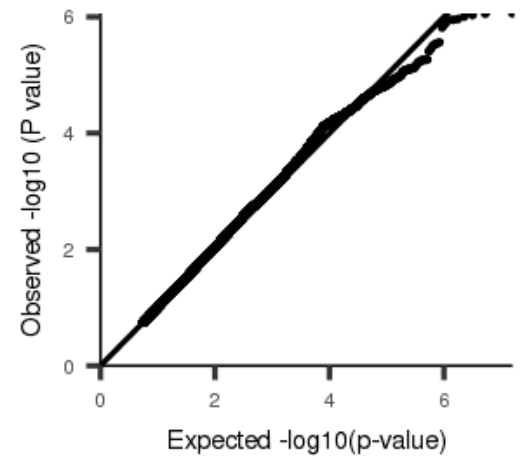

[back to list of plots](#)

Figure 1762: NETMAT edge (100) 0606

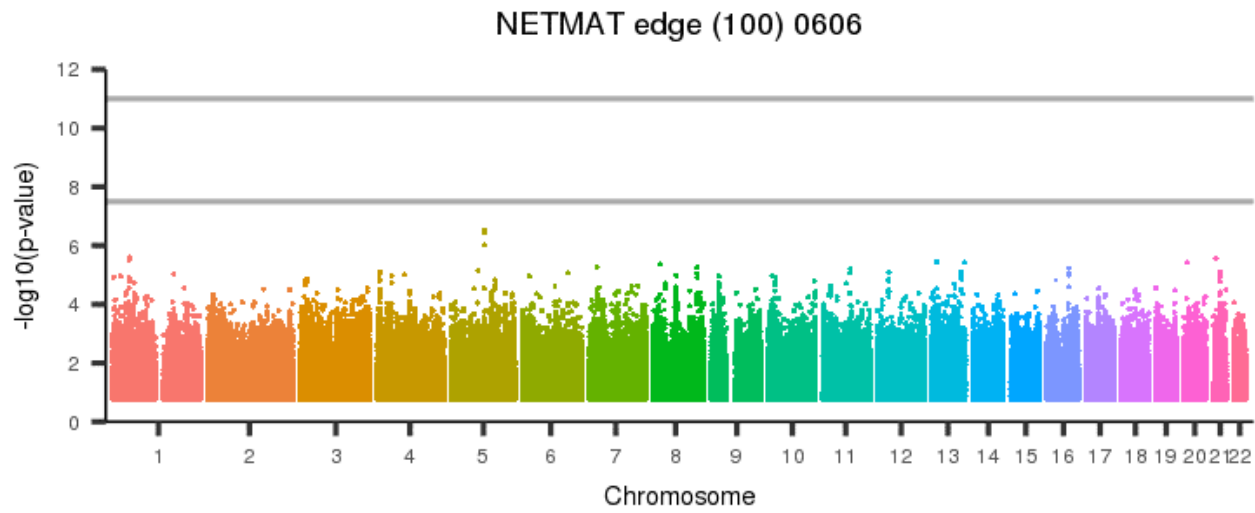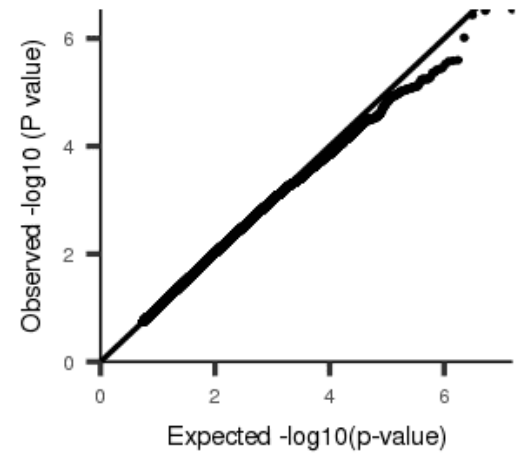

[back to list of plots](#)

Figure 1763: NETMAT edge (100) 0607

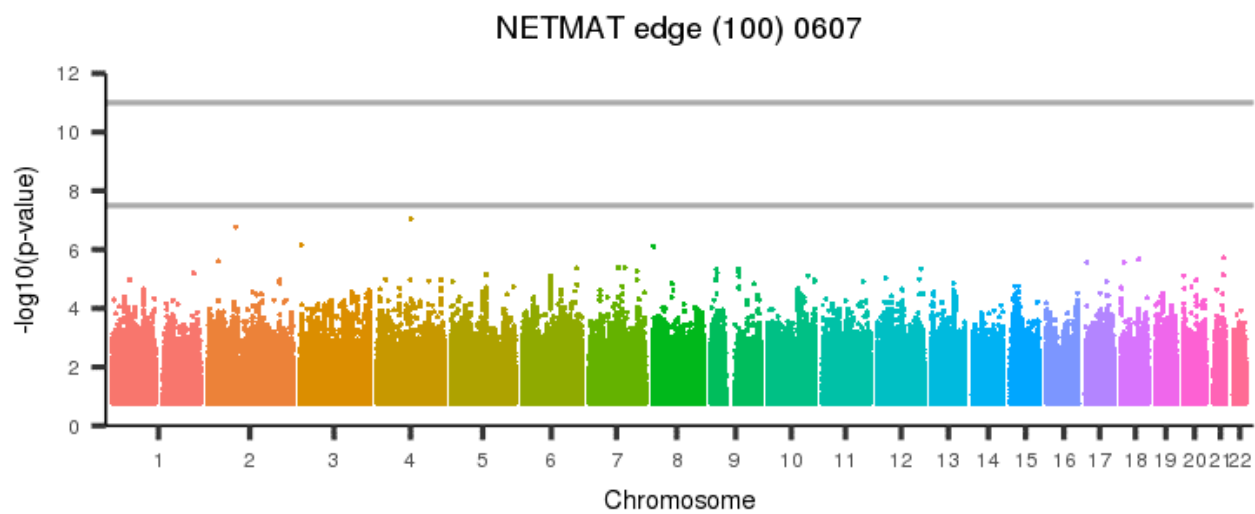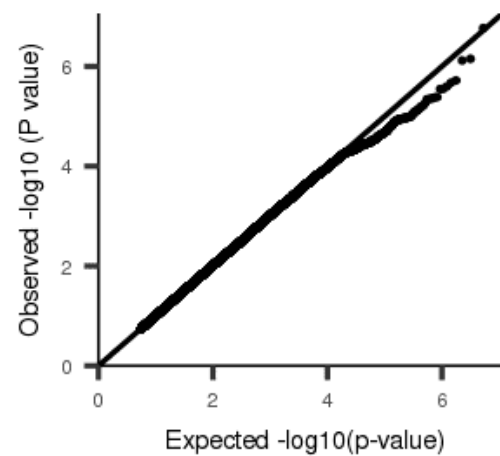

[back to list of plots](#)

Figure 1764: NETMAT edge (100) 0608

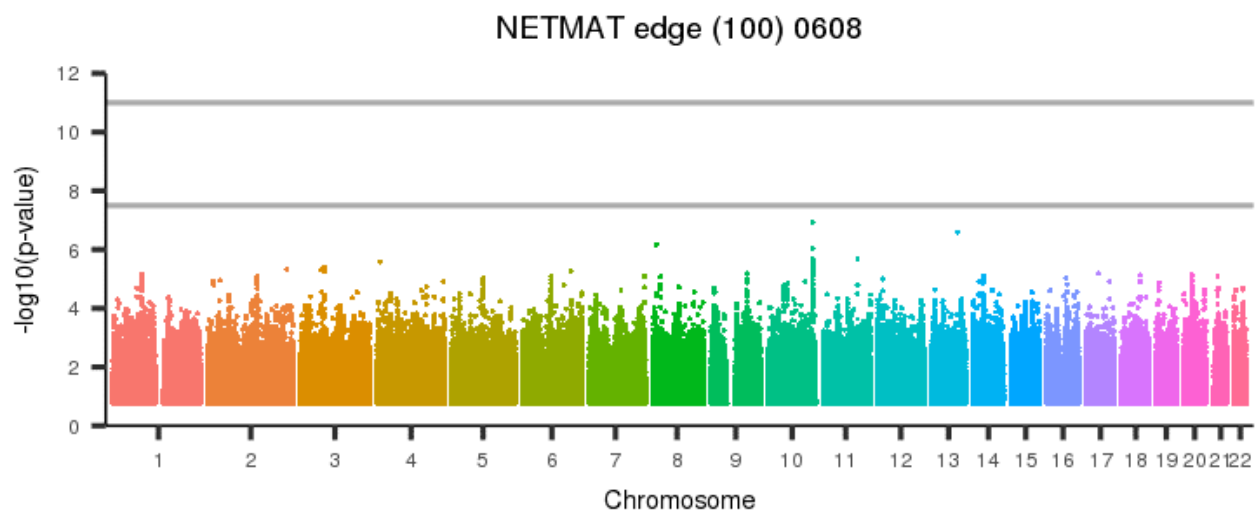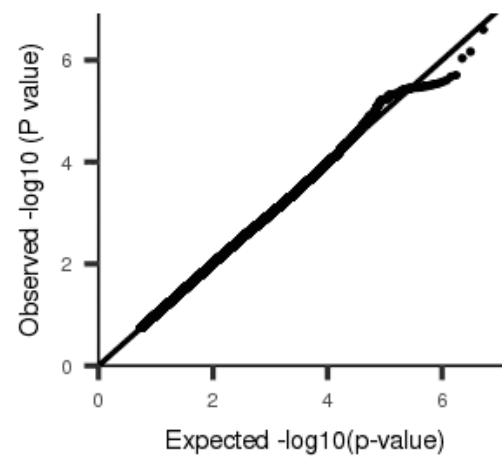

[back to list of plots](#)

Figure 1765: NETMAT edge (100) 0609

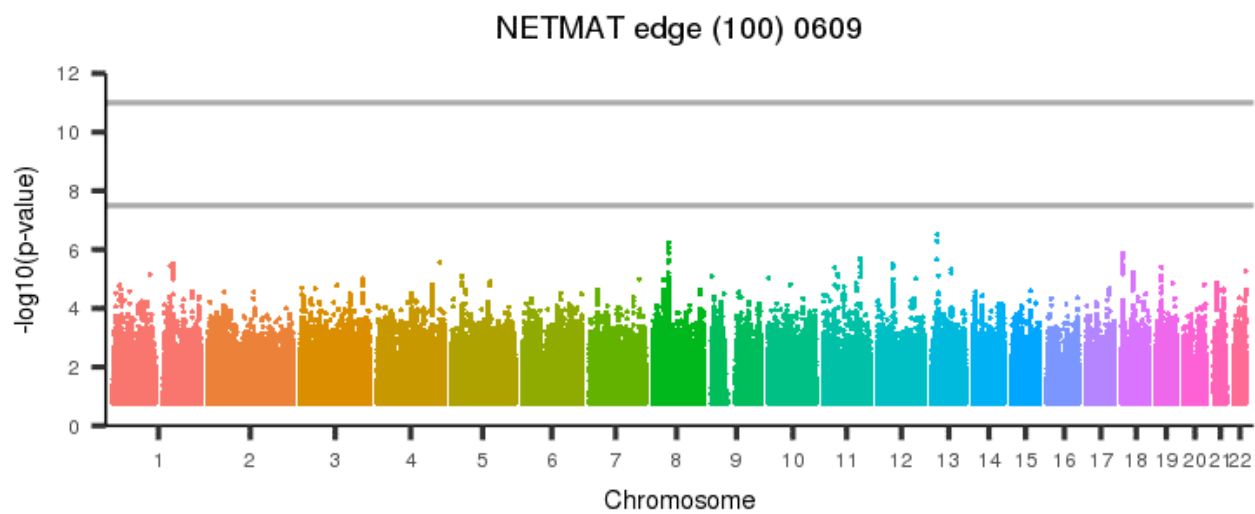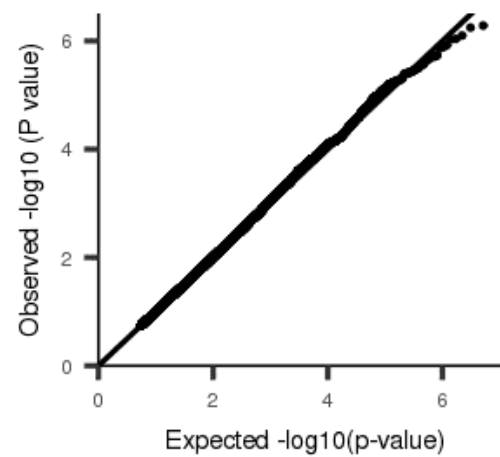

[back to list of plots](#)



Figure 1766: NETMAT edge (100) 0610

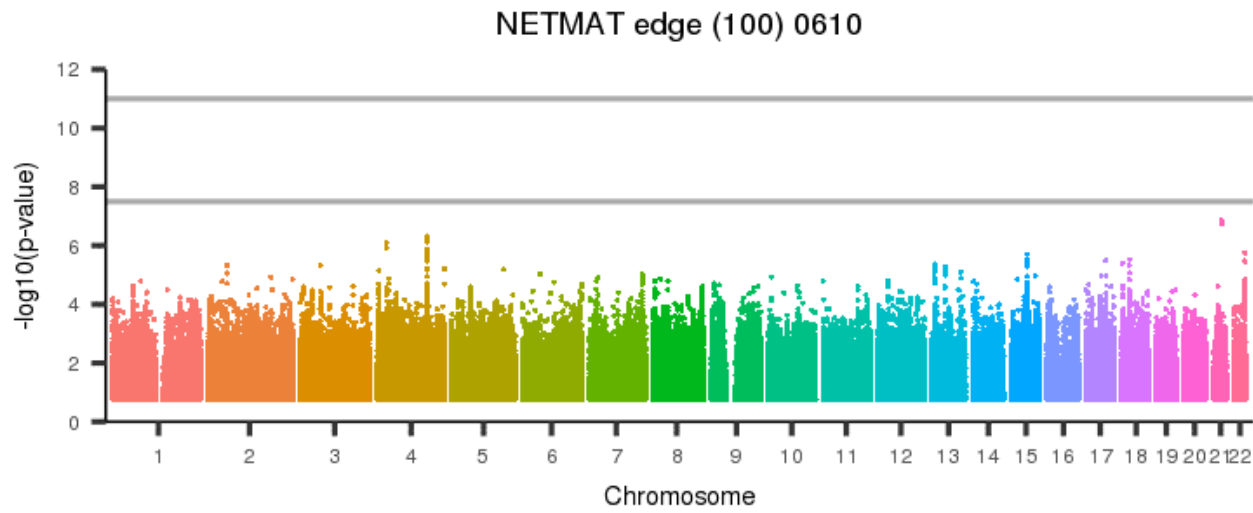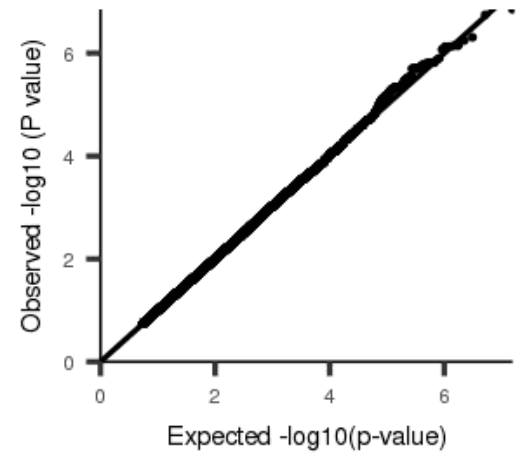

[back to list of plots](#)

Figure 1767: NETMAT edge (100) 0611

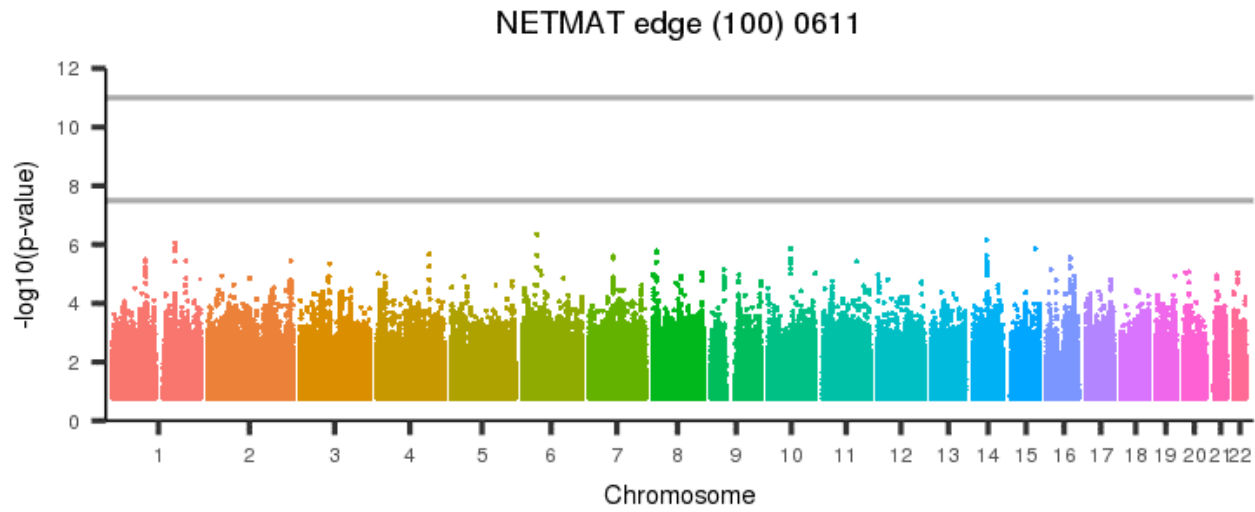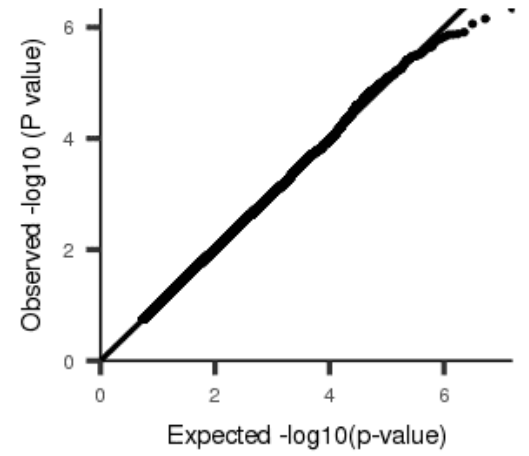

[back to list of plots](#)

Figure 1768: NETMAT edge (100) 0612

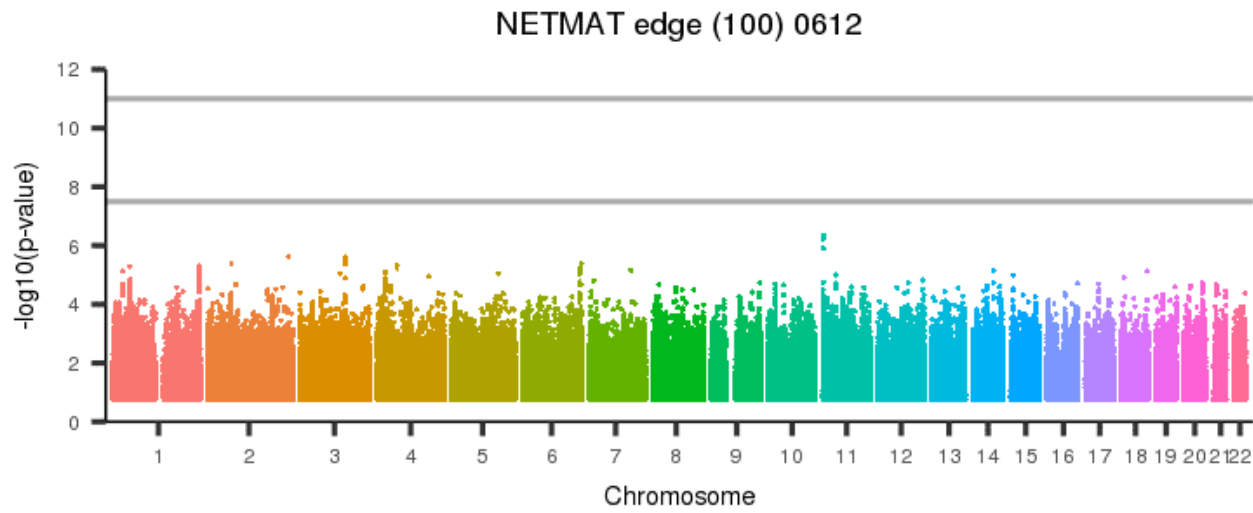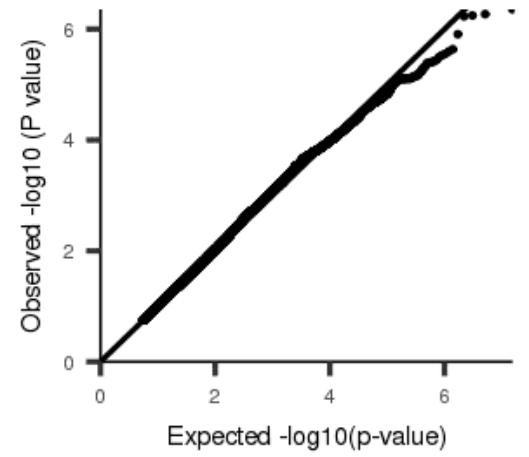

[back to list of plots](#)

Figure 1769: NETMAT edge (100) 0613

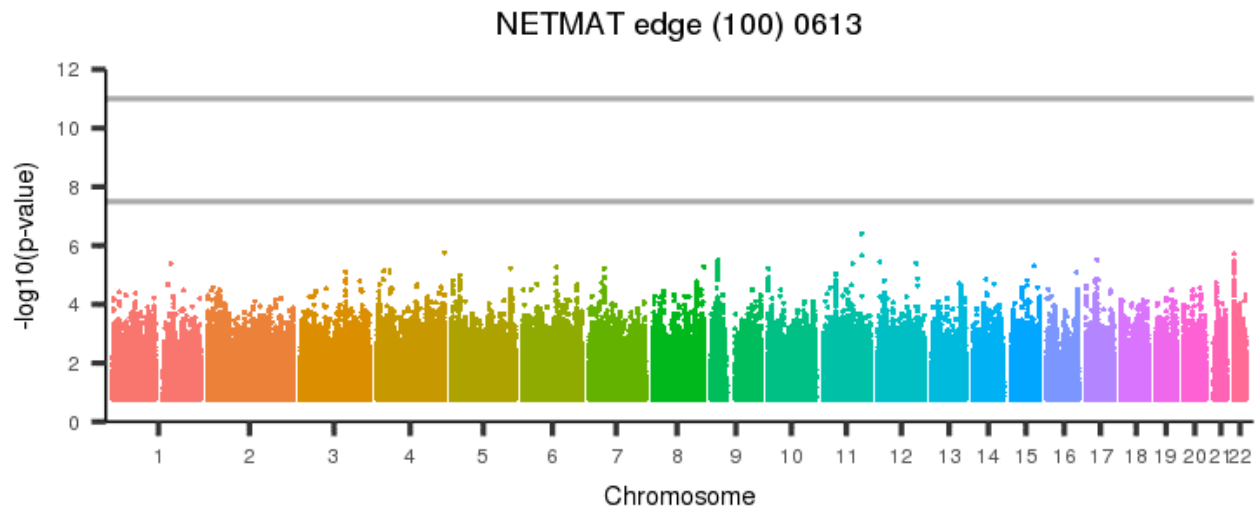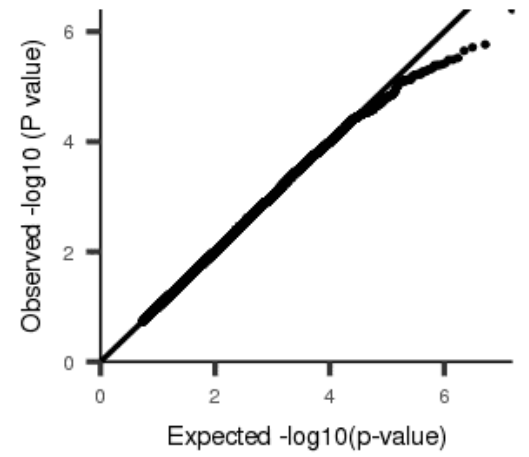

[back to list of plots](#)

Figure 1770: NETMAT edge (100) 0614

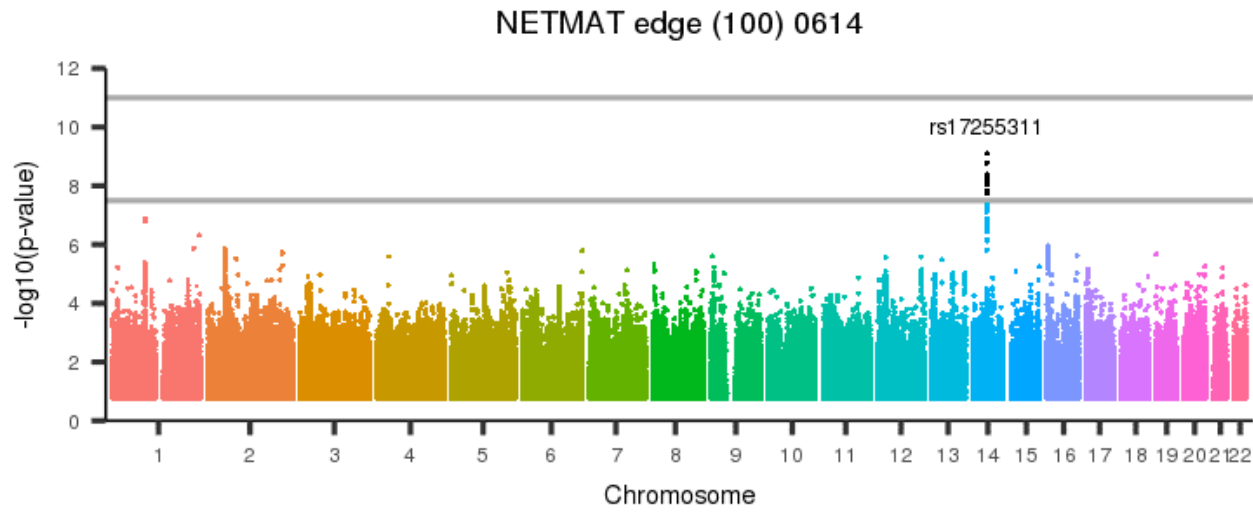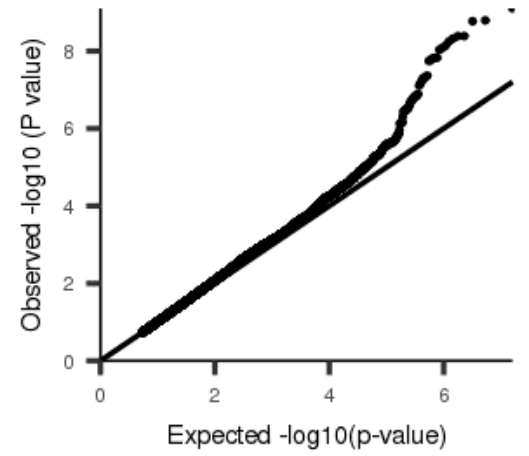

[back to list of plots](#)

Figure 1771: NETMAT edge (100) 0615

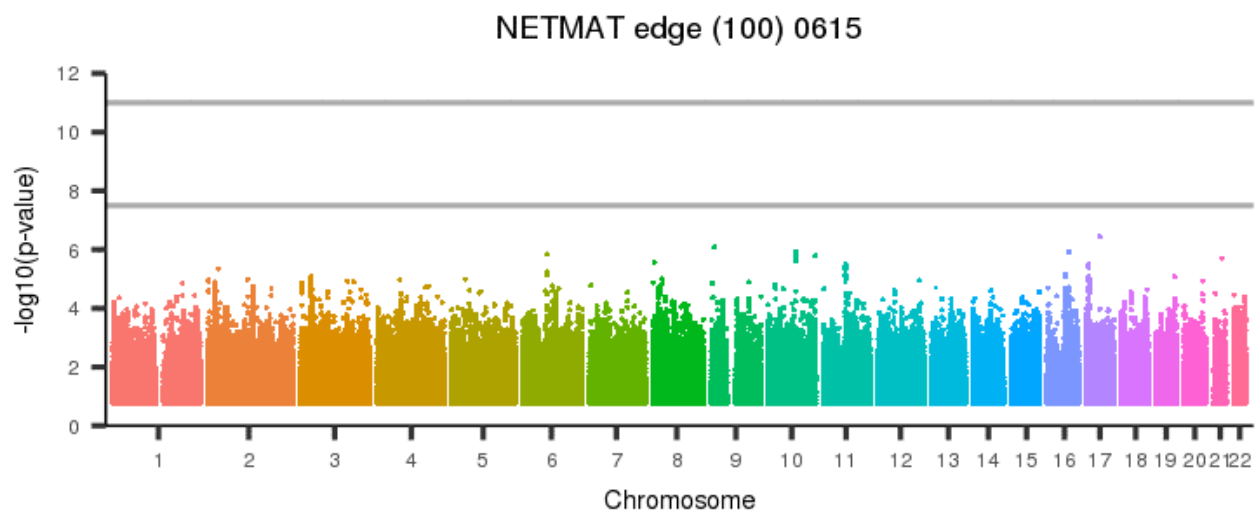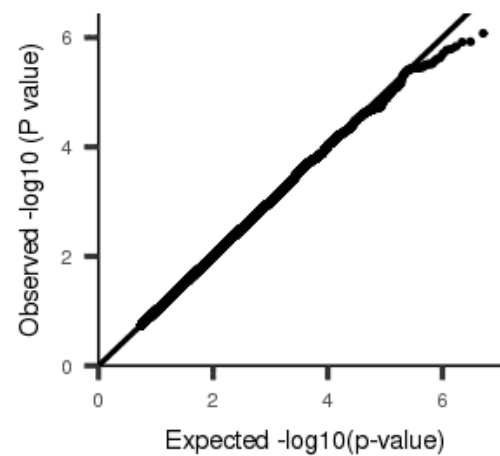

[back to list of plots](#)

Figure 1772: NETMAT edge (100) 0616

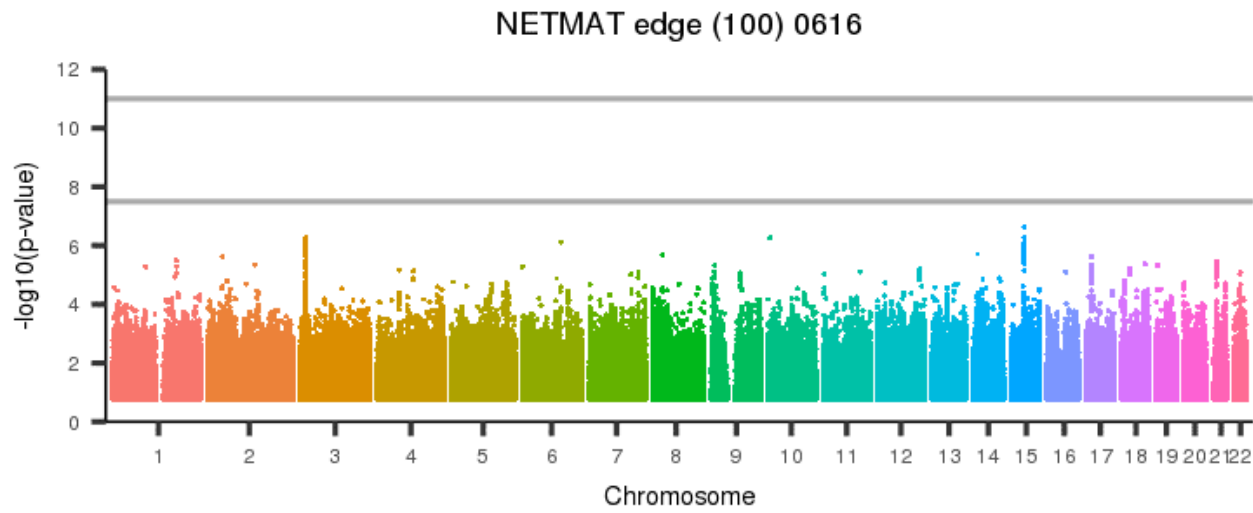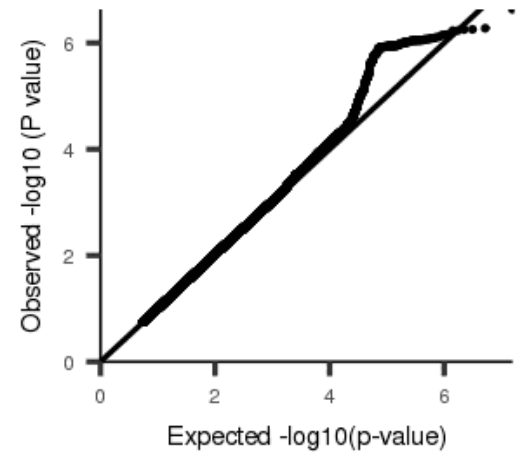

[back to list of plots](#)

Figure 1773: NETMAT edge (100) 0617

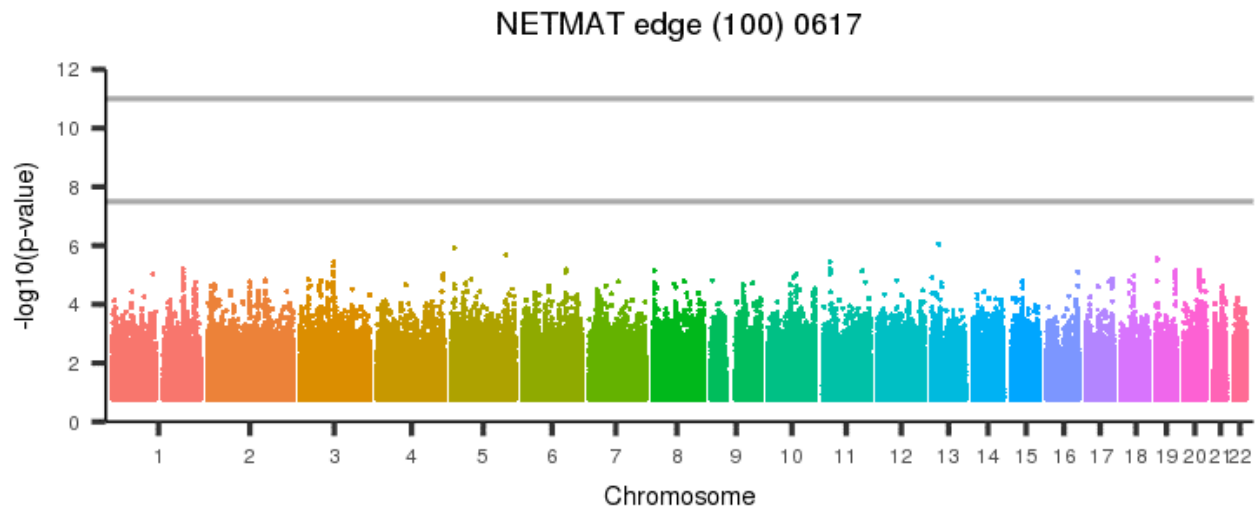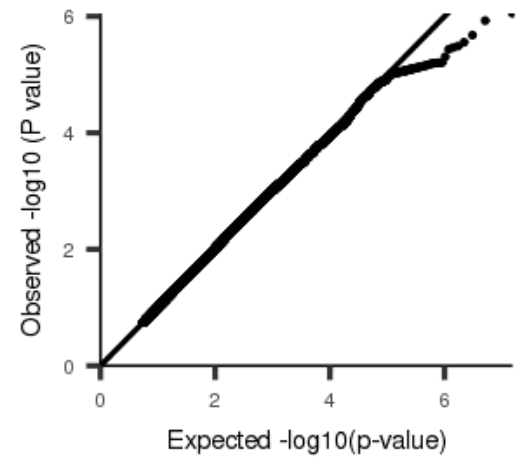

[back to list of plots](#)



Figure 1774: NETMAT edge (100) 0618

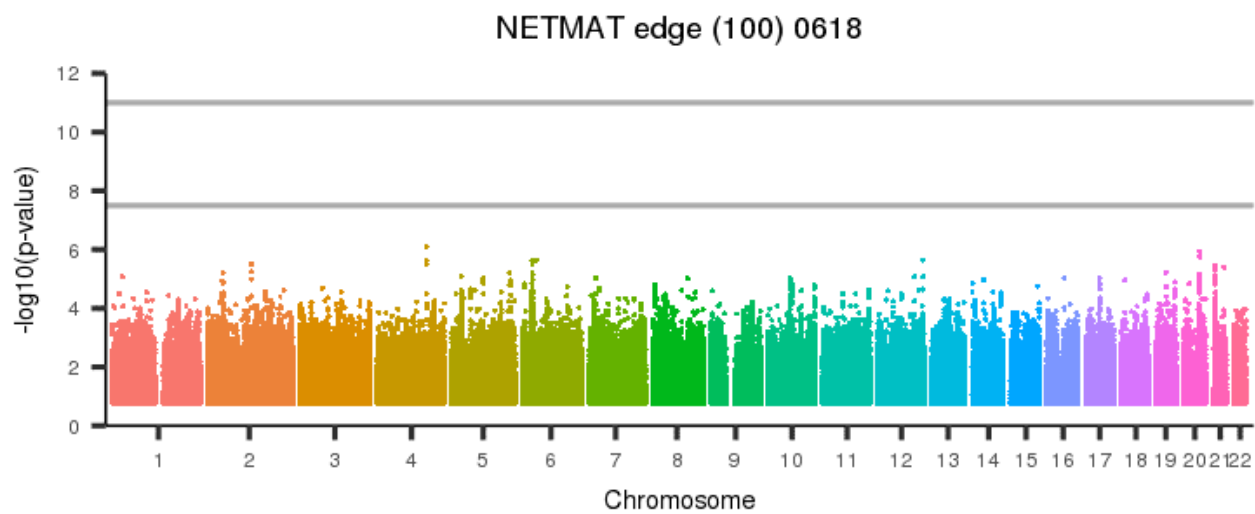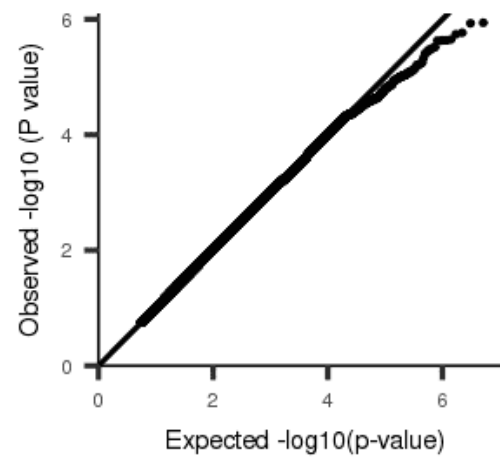

[back to list of plots](#)

Figure 1775: NETMAT edge (100) 0619

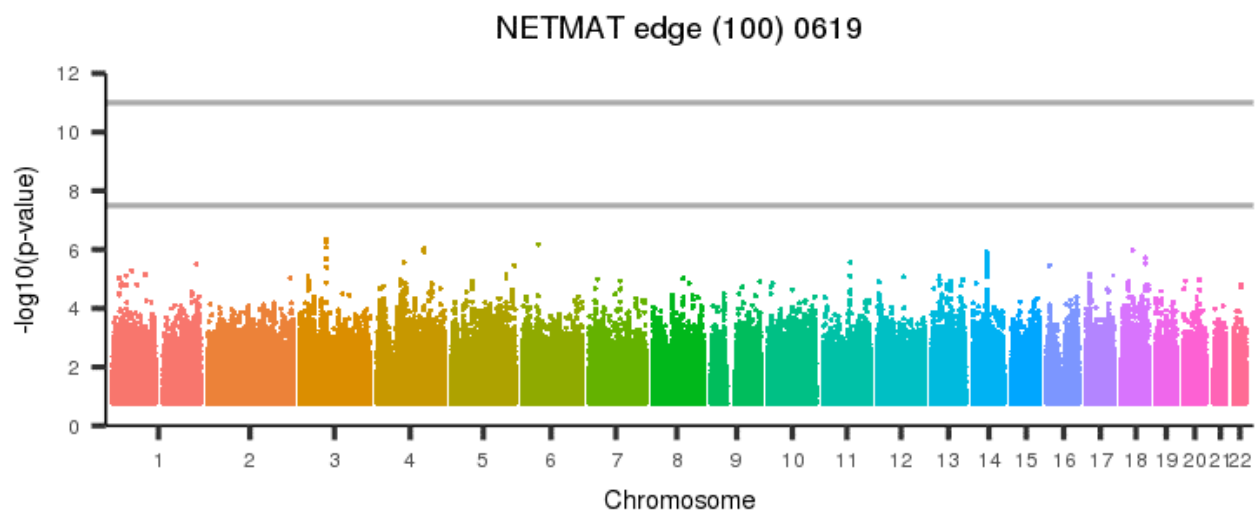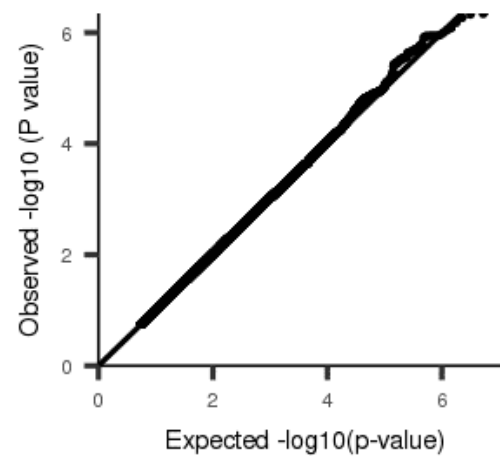

[back to list of plots](#)

Figure 1776: NETMAT edge (100) 0620

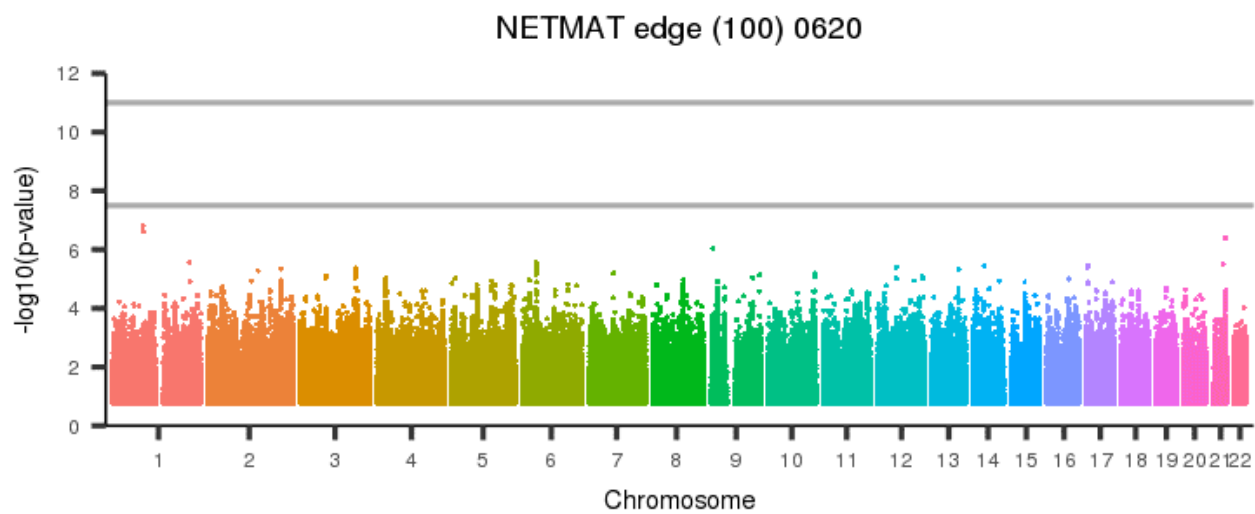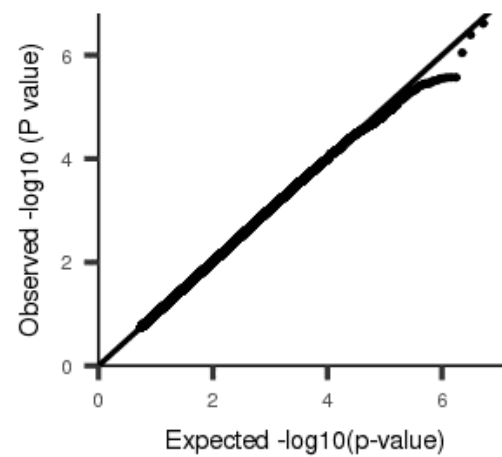

[back to list of plots](#)

Figure 1777: NETMAT edge (100) 0621

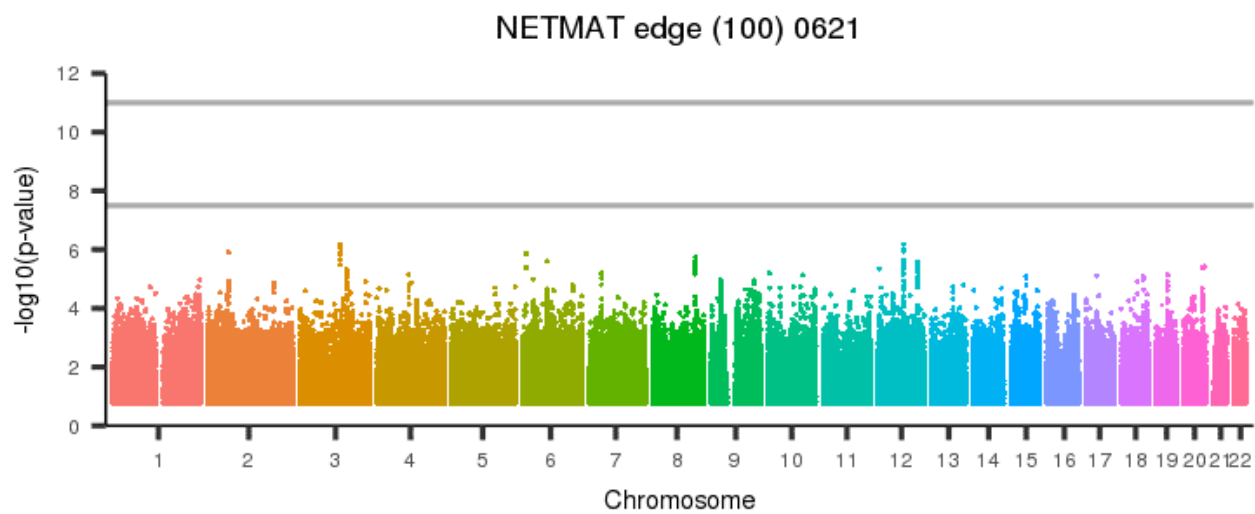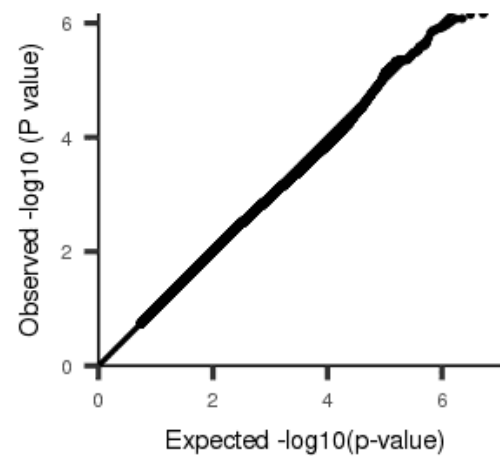

[back to list of plots](#)

Figure 1778: NETMAT edge (100) 0622

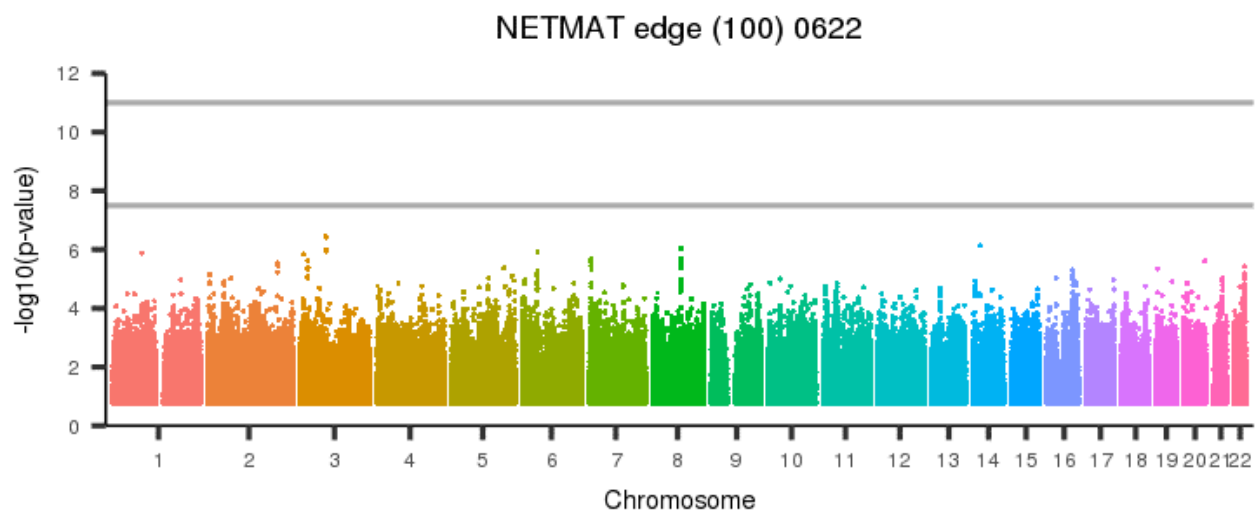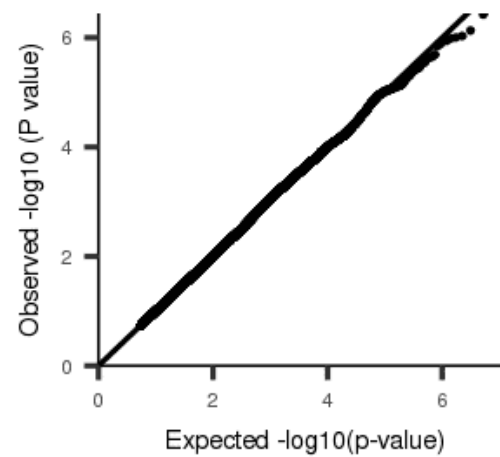

[back to list of plots](#)

Figure 1779: NETMAT edge (100) 0623

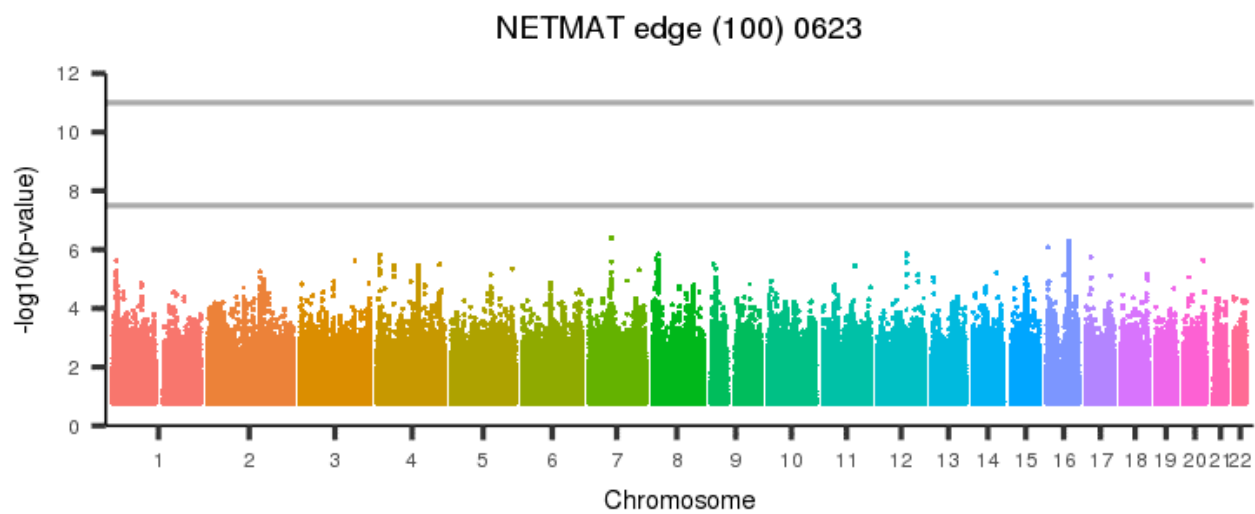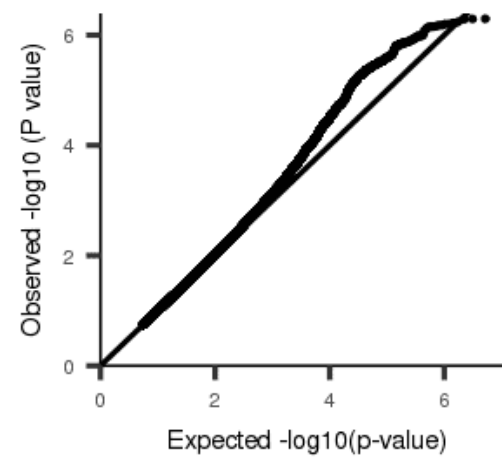

[back to list of plots](#)

Figure 1780: NETMAT edge (100) 0624

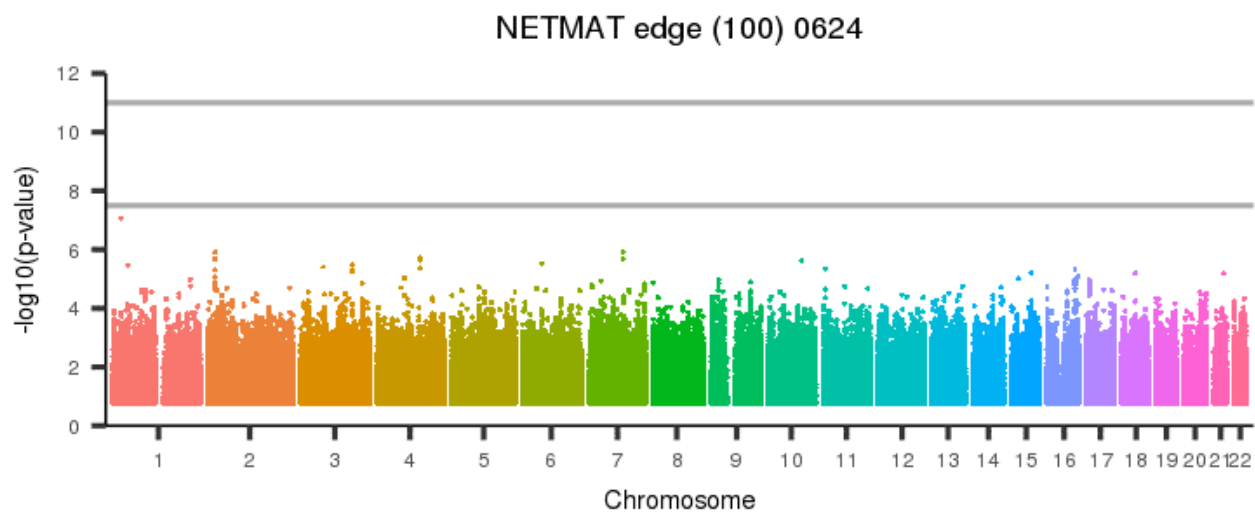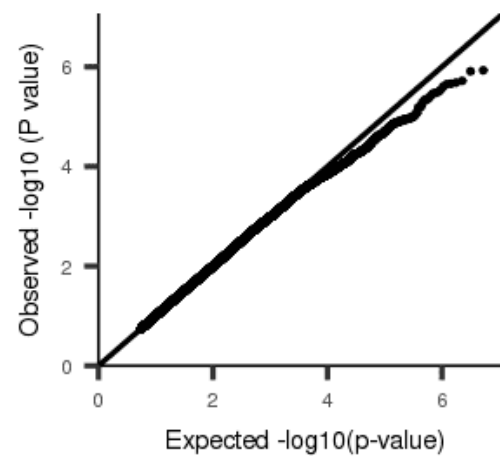

[back to list of plots](#)

Figure 1781: NETMAT edge (100) 0625

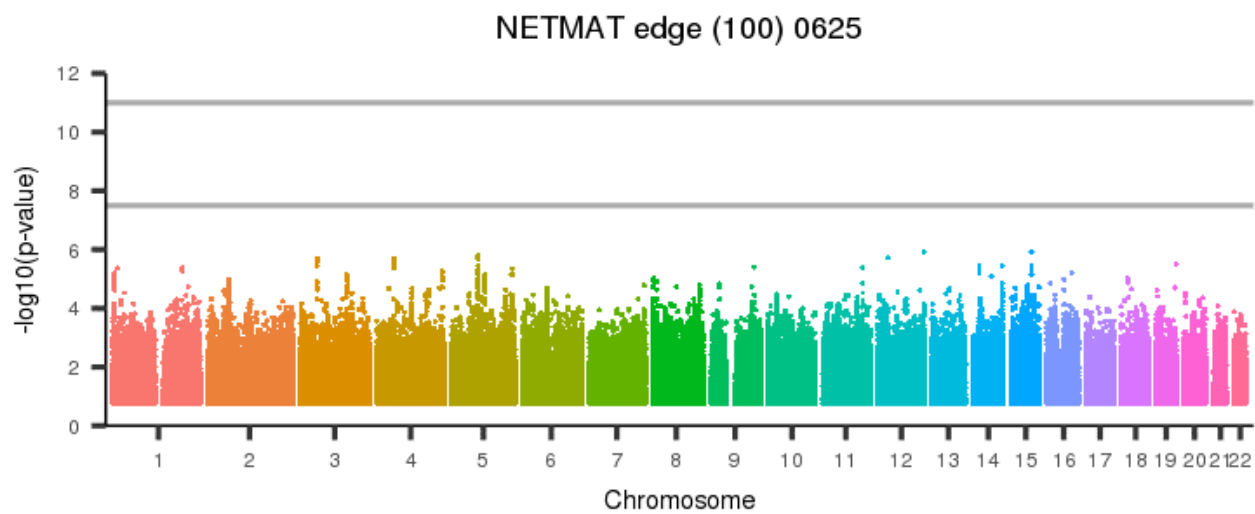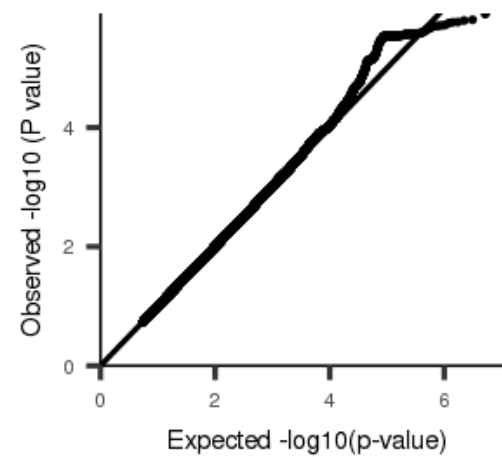

[back to list of plots](#)



Figure 1782: NETMAT edge (100) 0626

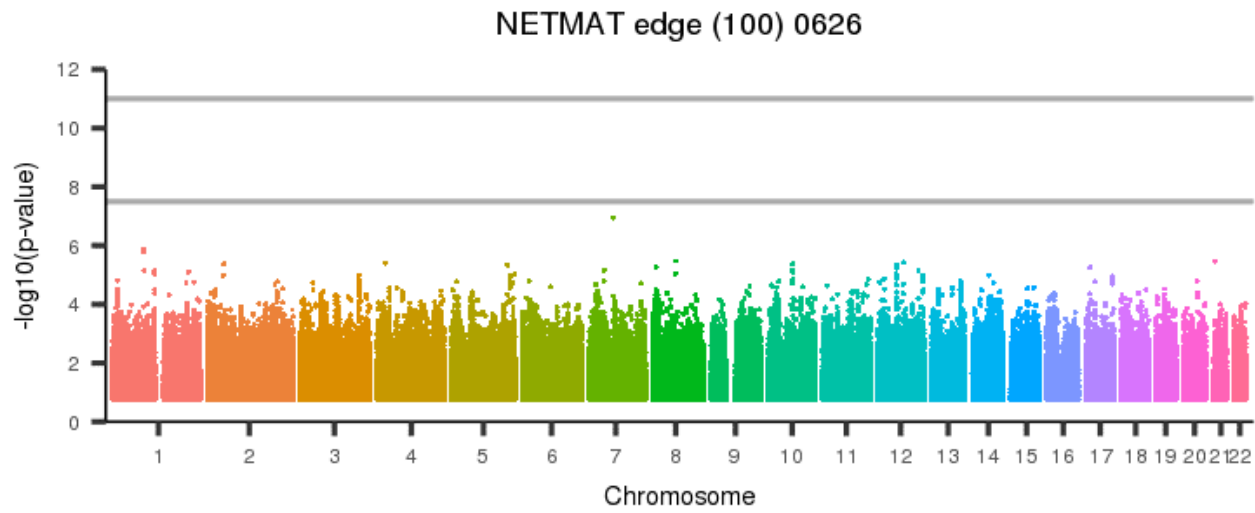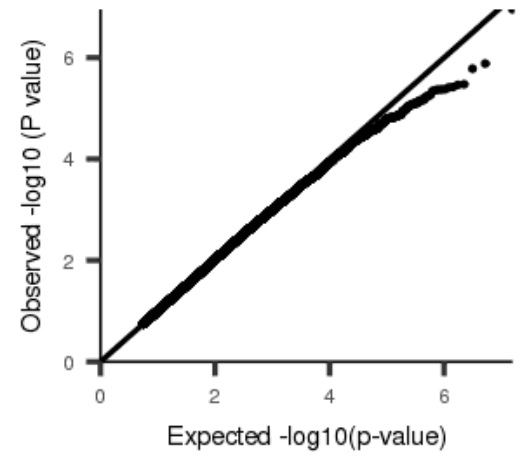

[back to list of plots](#)

Figure 1783: NETMAT edge (100) 0627

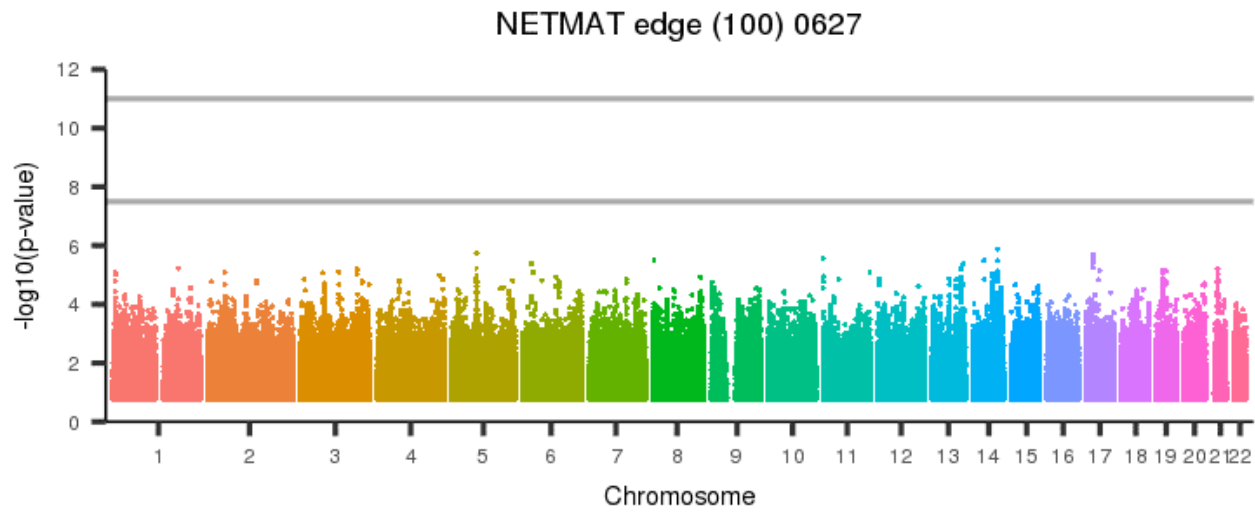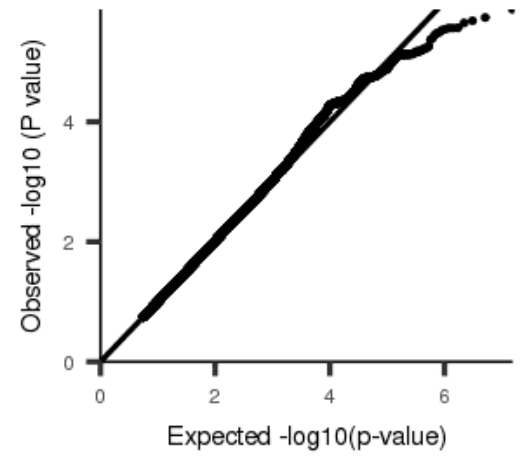

[back to list of plots](#)

Figure 1784: NETMAT edge (100) 0628

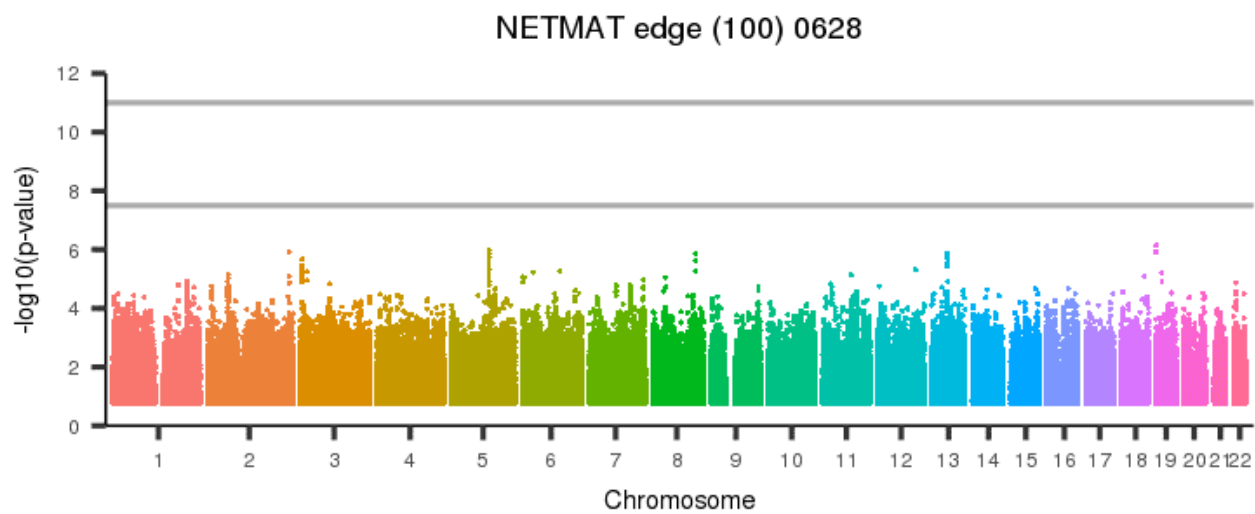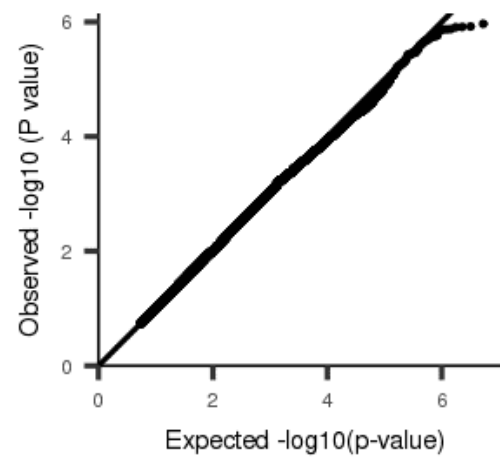

[back to list of plots](#)

Figure 1785: NETMAT edge (100) 0629

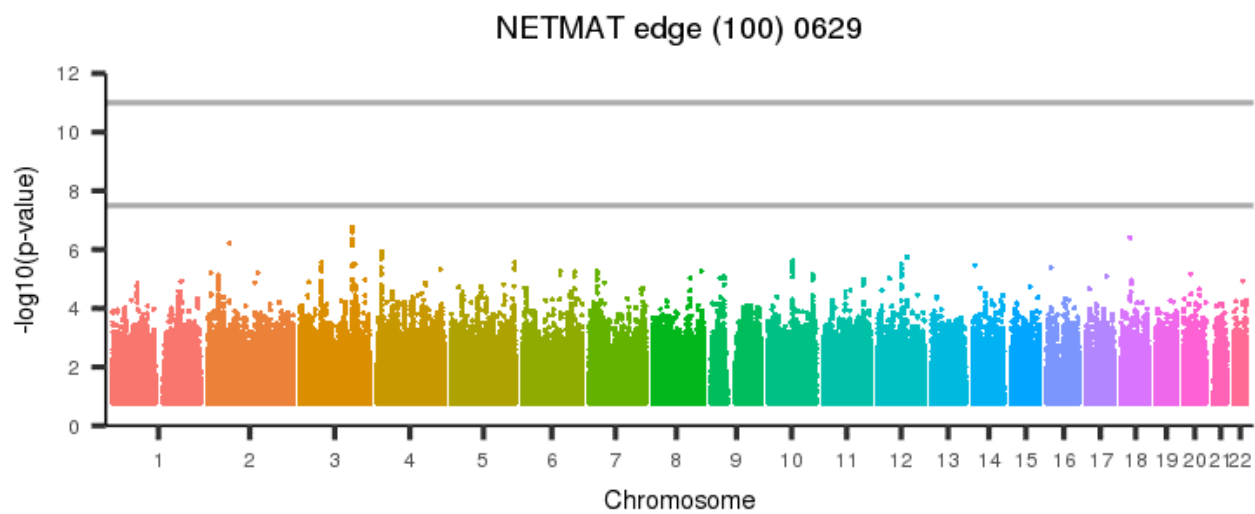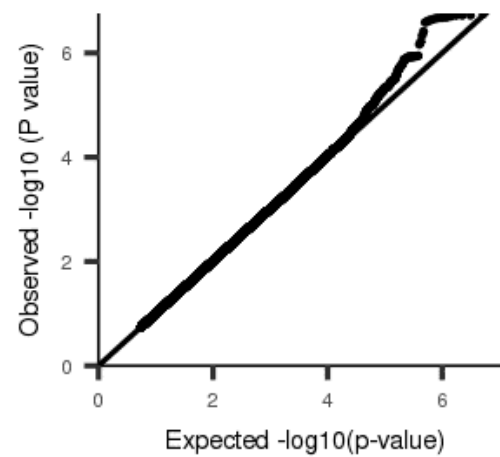

[back to list of plots](#)

Figure 1786: NETMAT edge (100) 0630

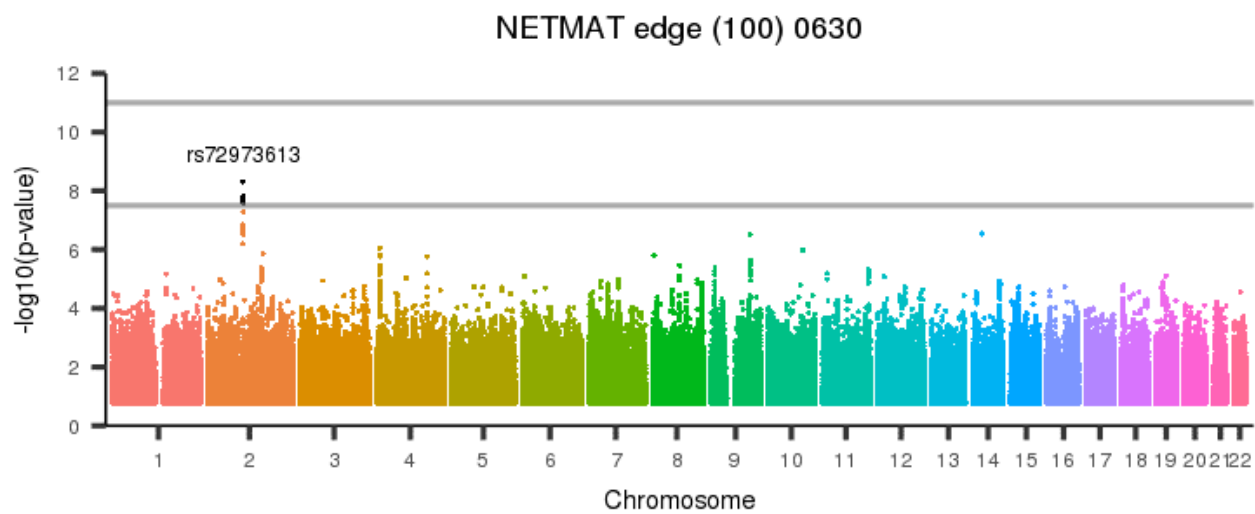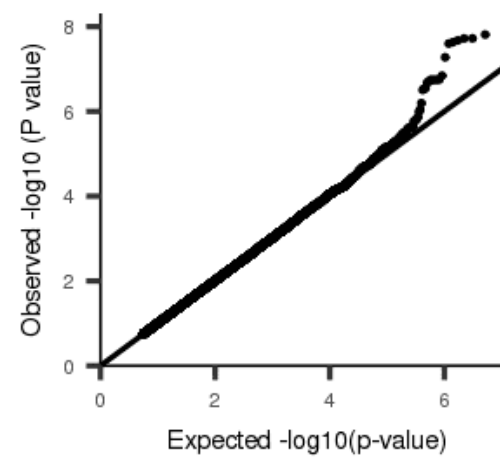

[back to list of plots](#)

Figure 1787: NETMAT edge (100) 0631

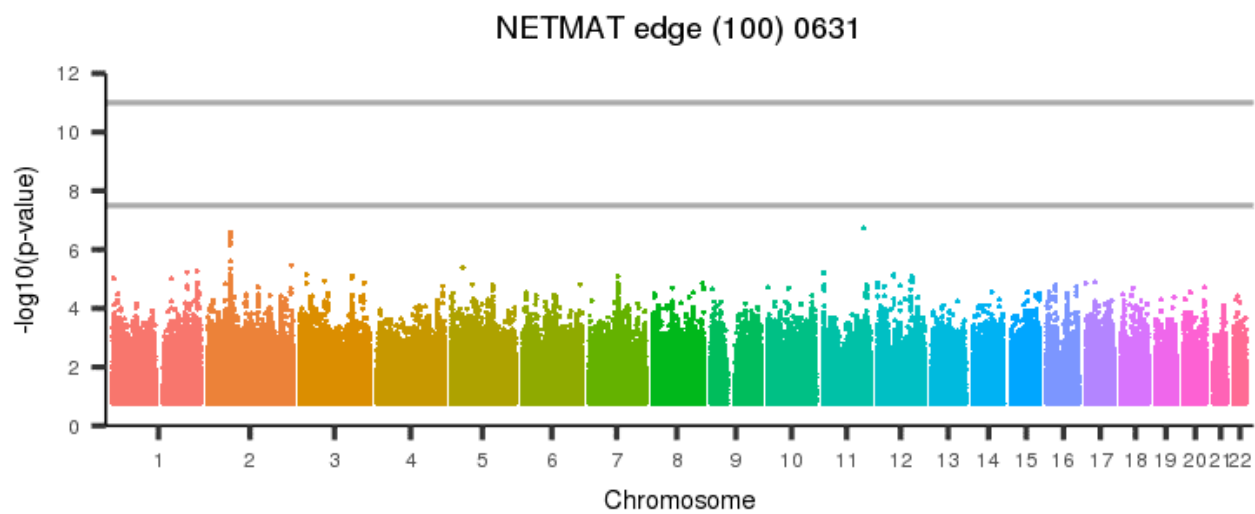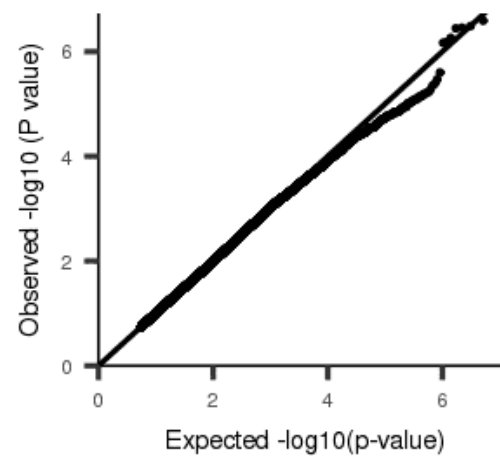

[back to list of plots](#)

Figure 1788: NETMAT edge (100) 0632

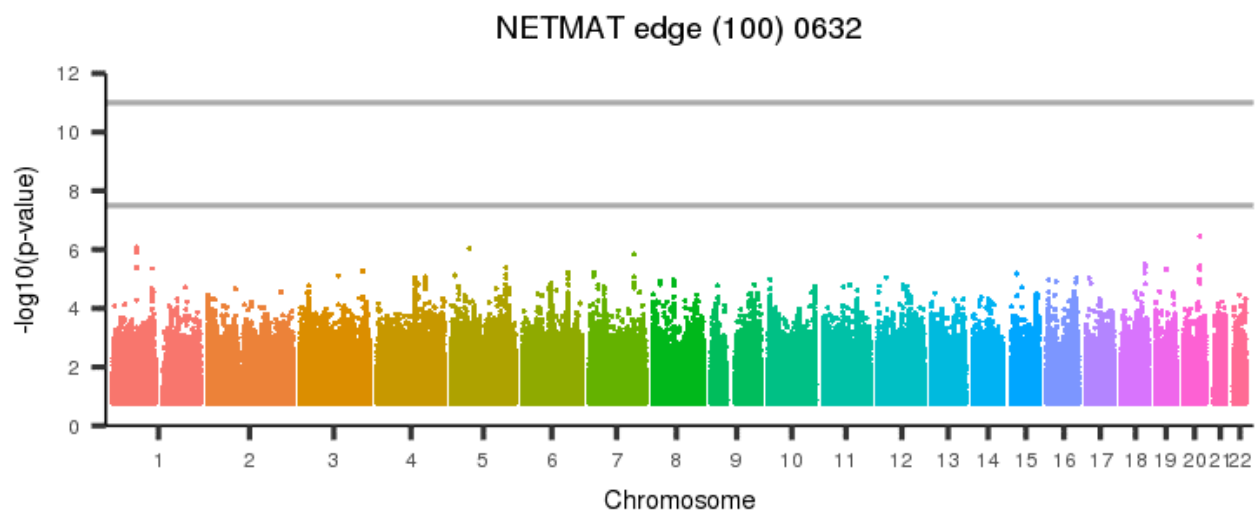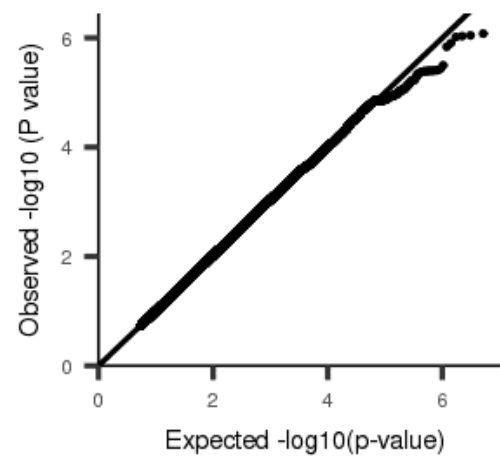

[back to list of plots](#)

Figure 1789: NETMAT edge (100) 0633

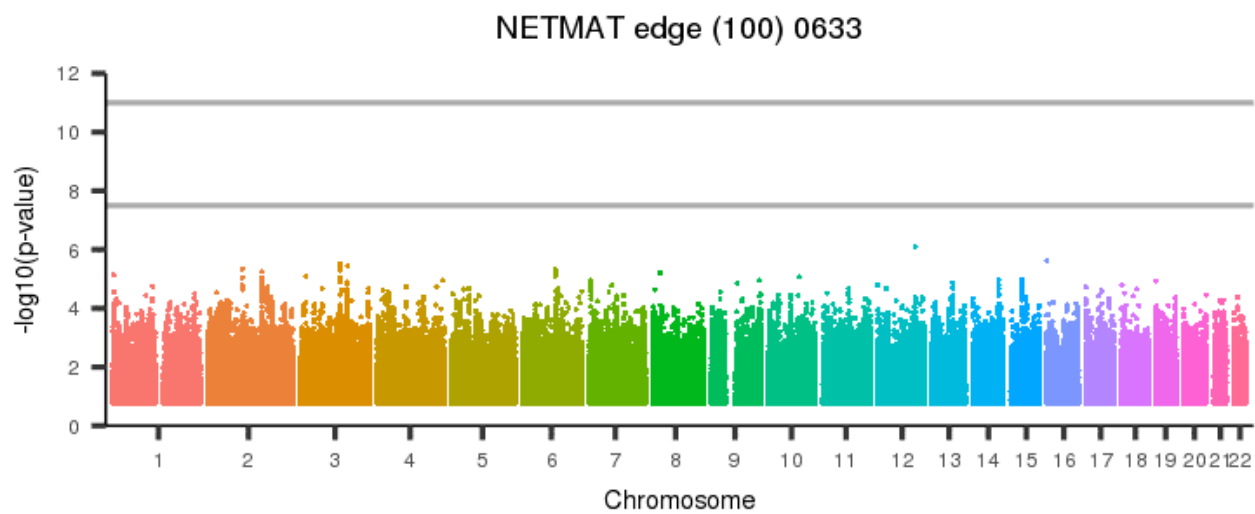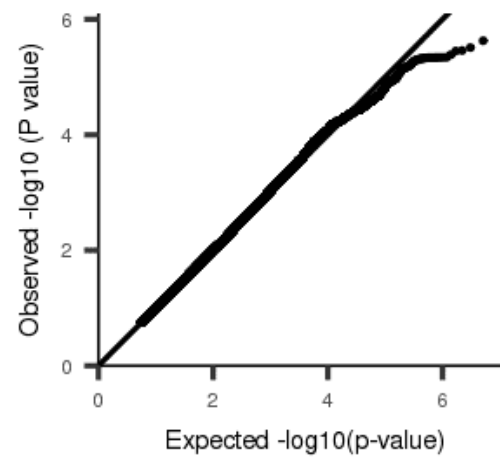

[back to list of plots](#)



Figure 1790: NETMAT edge (100) 0634

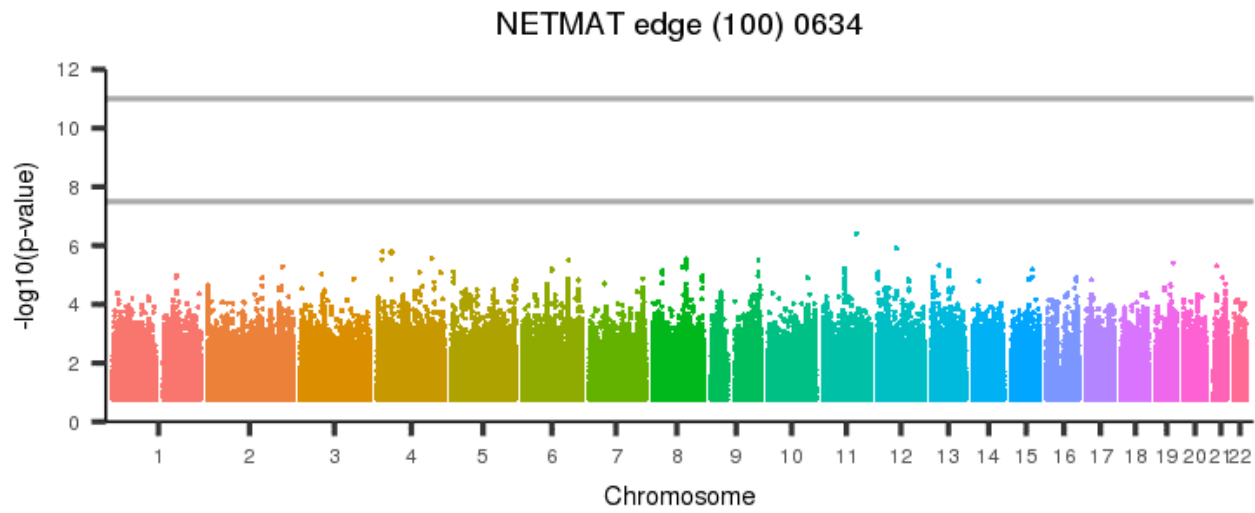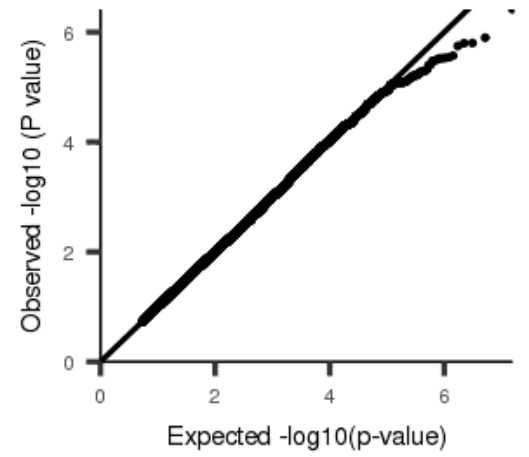

[back to list of plots](#)

Figure 1791: NETMAT edge (100) 0635

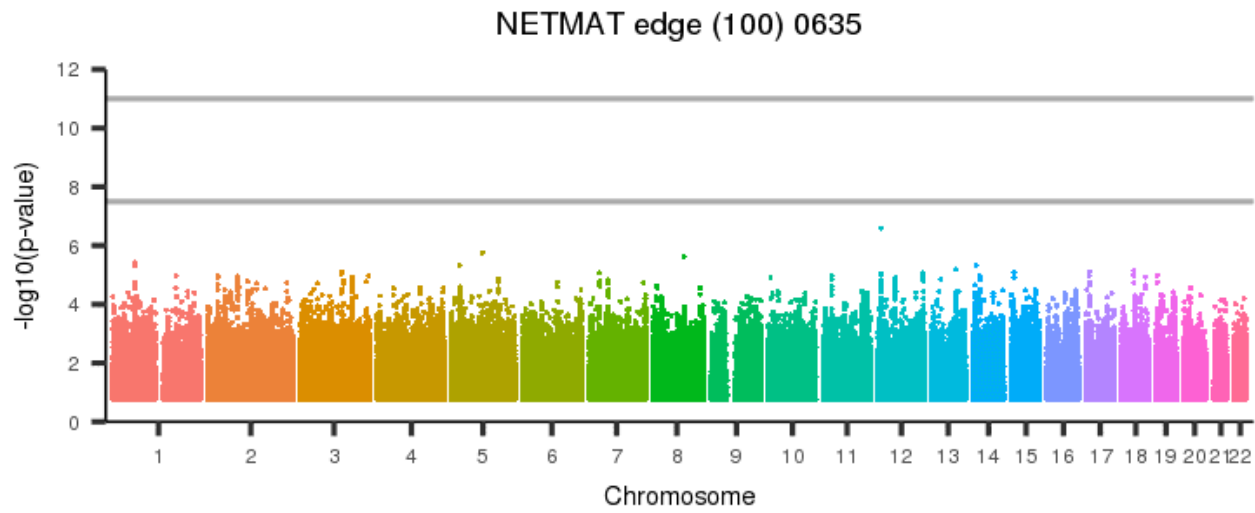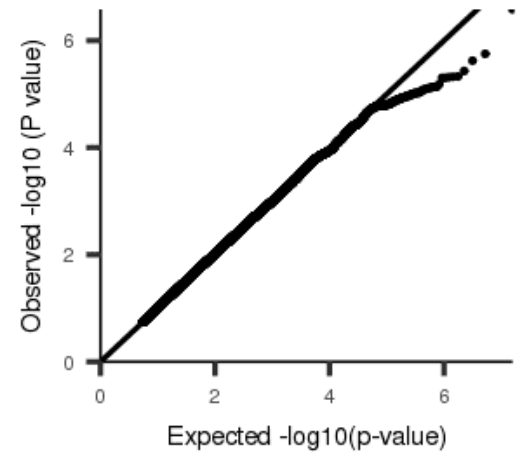

[back to list of plots](#)

Figure 1792: NETMAT edge (100) 0636

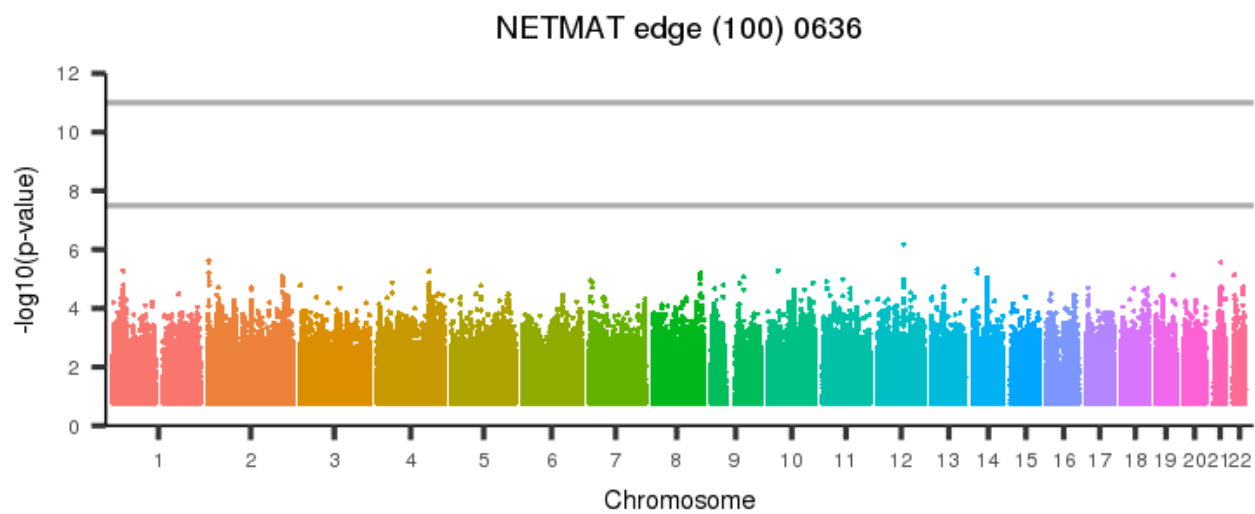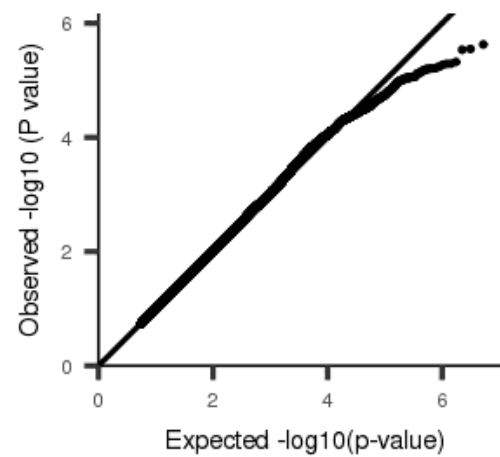

[back to list of plots](#)

Figure 1793: NETMAT edge (100) 0637

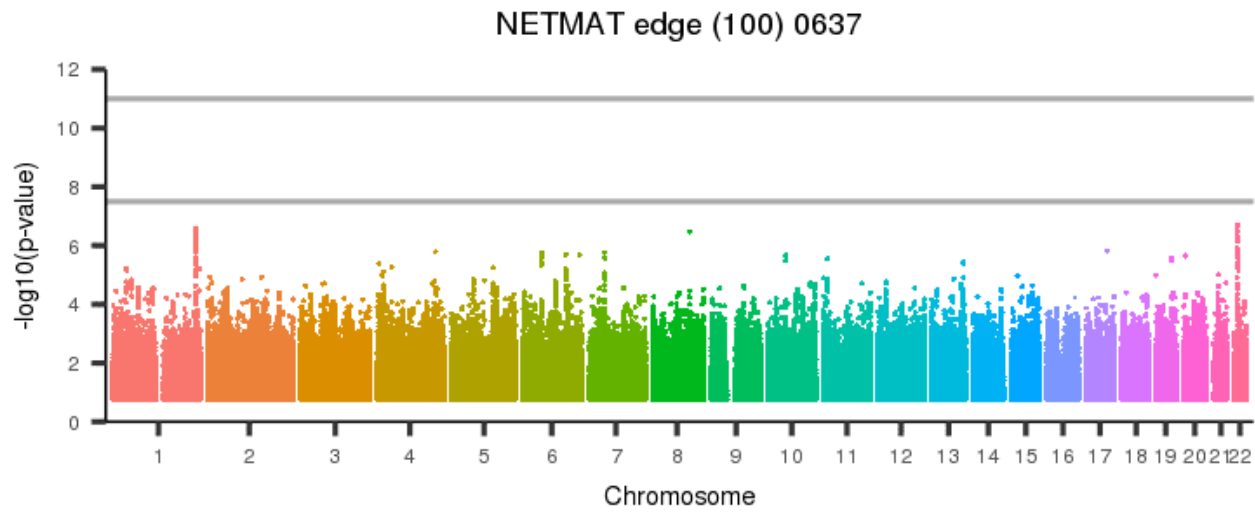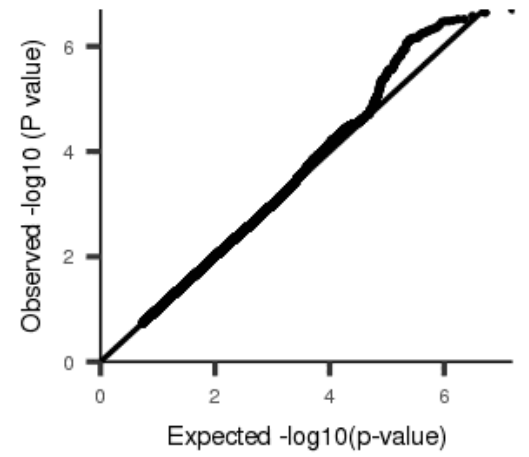

[back to list of plots](#)

Figure 1794: NETMAT edge (100) 0638

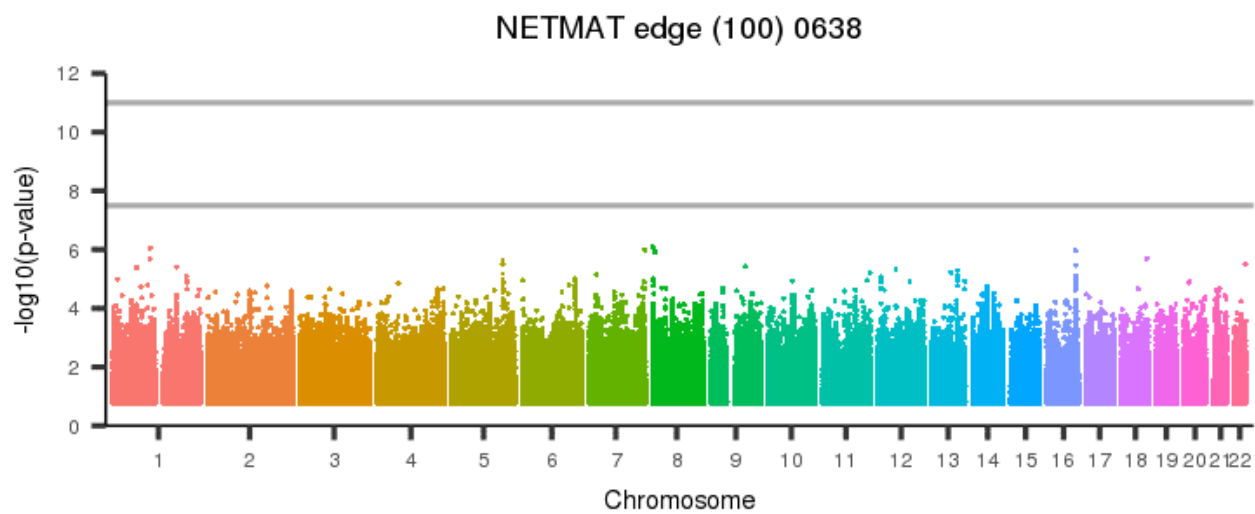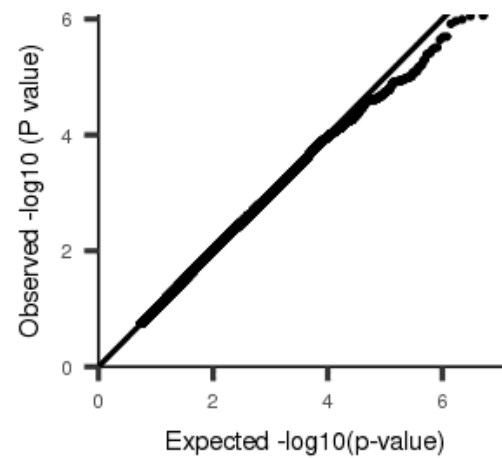

[back to list of plots](#)

Figure 1795: NETMAT edge (100) 0639

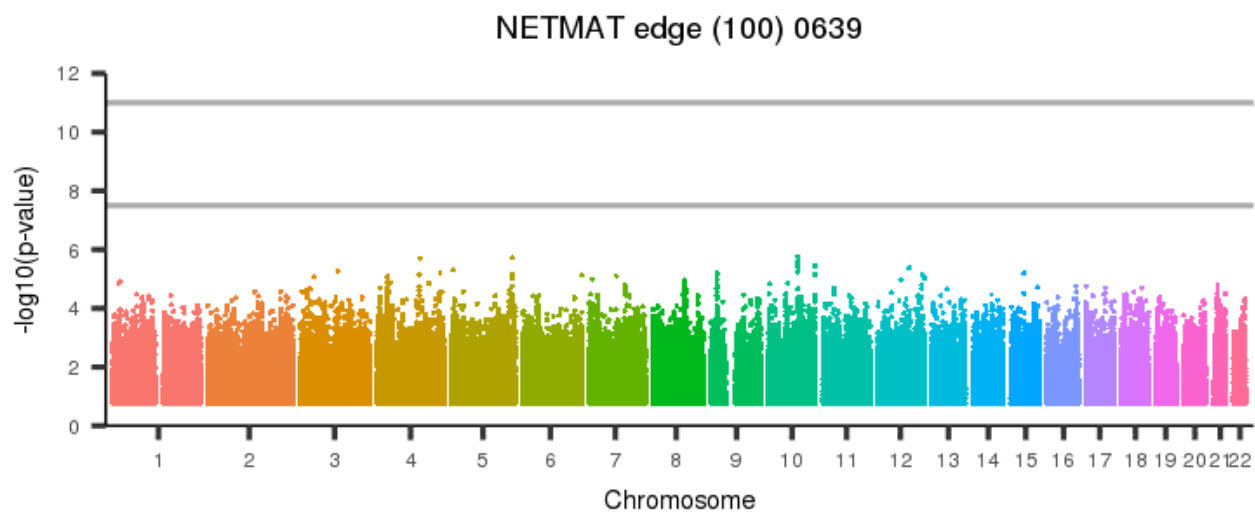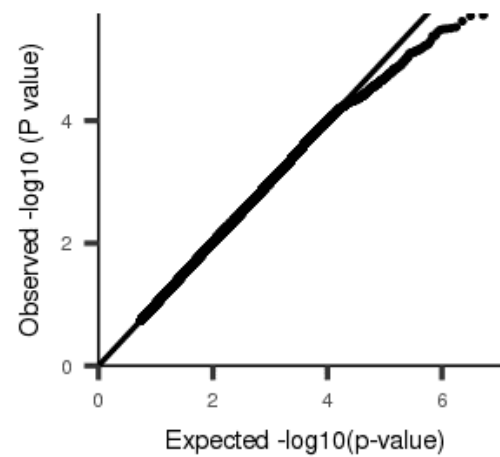

[back to list of plots](#)

Figure 1796: NETMAT edge (100) 0640

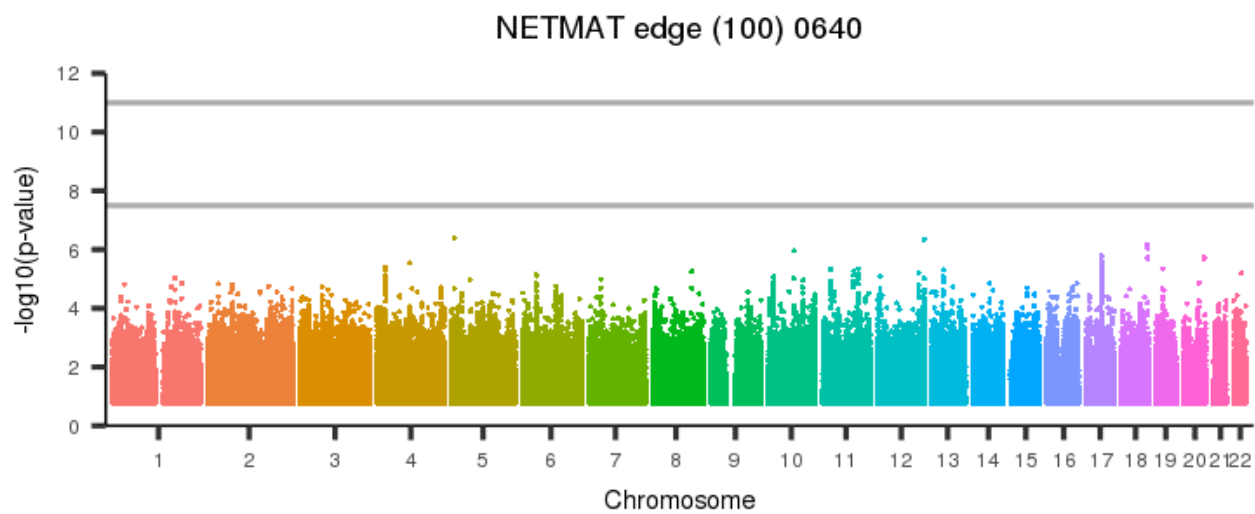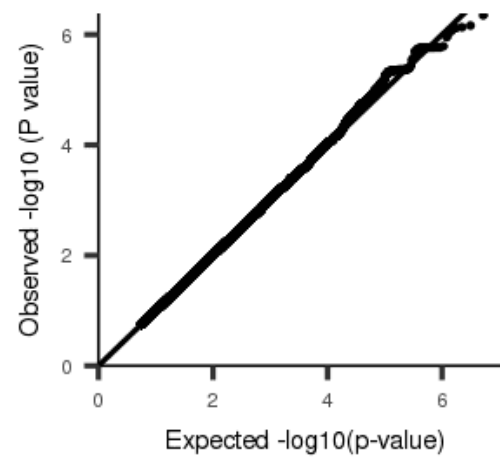

[back to list of plots](#)

Figure 1797: NETMAT edge (100) 0641

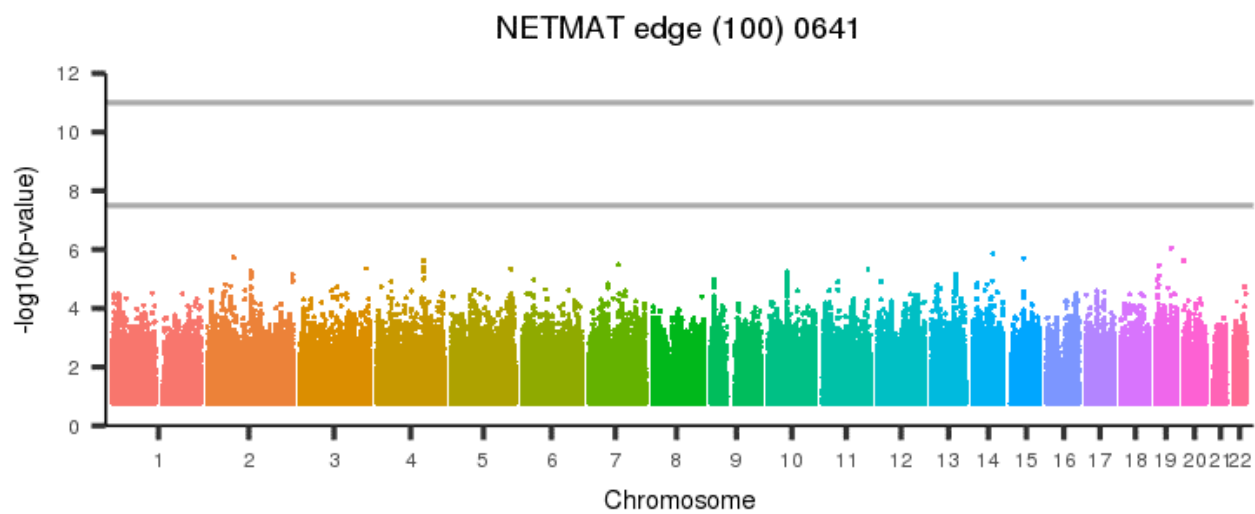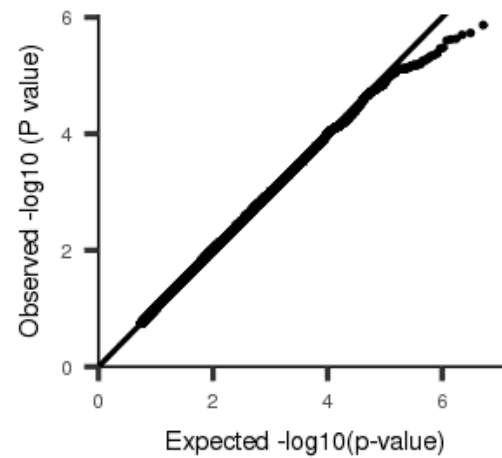

[back to list of plots](#)



Figure 1798: NETMAT edge (100) 0642

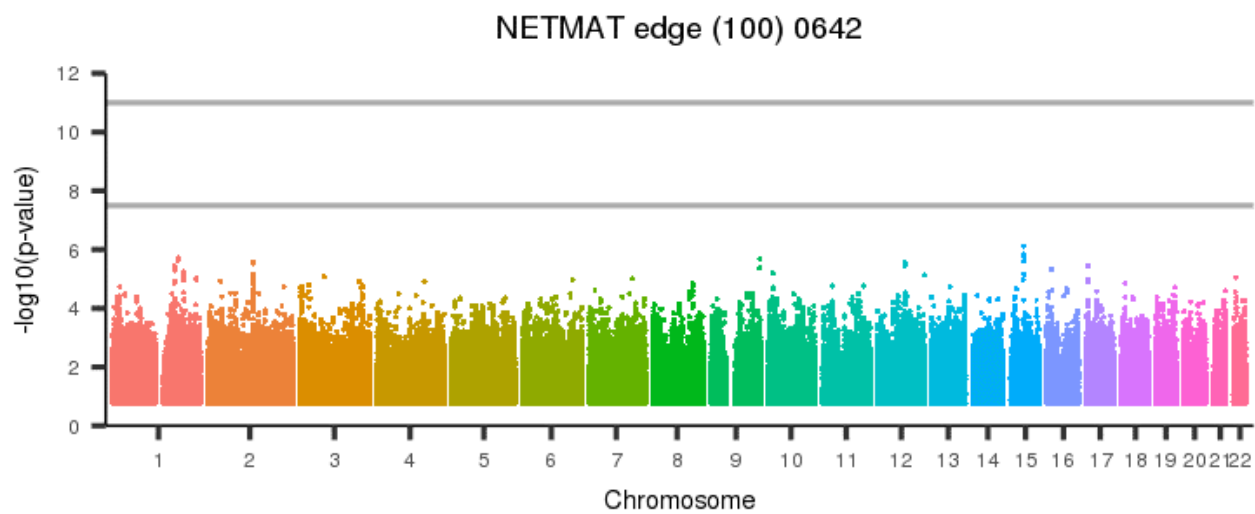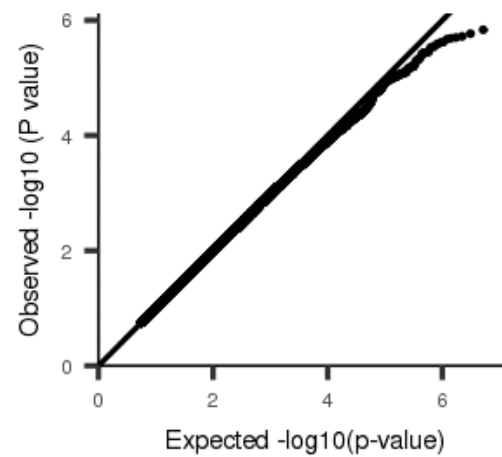

[back to list of plots](#)

Figure 1799: NETMAT edge (100) 0643

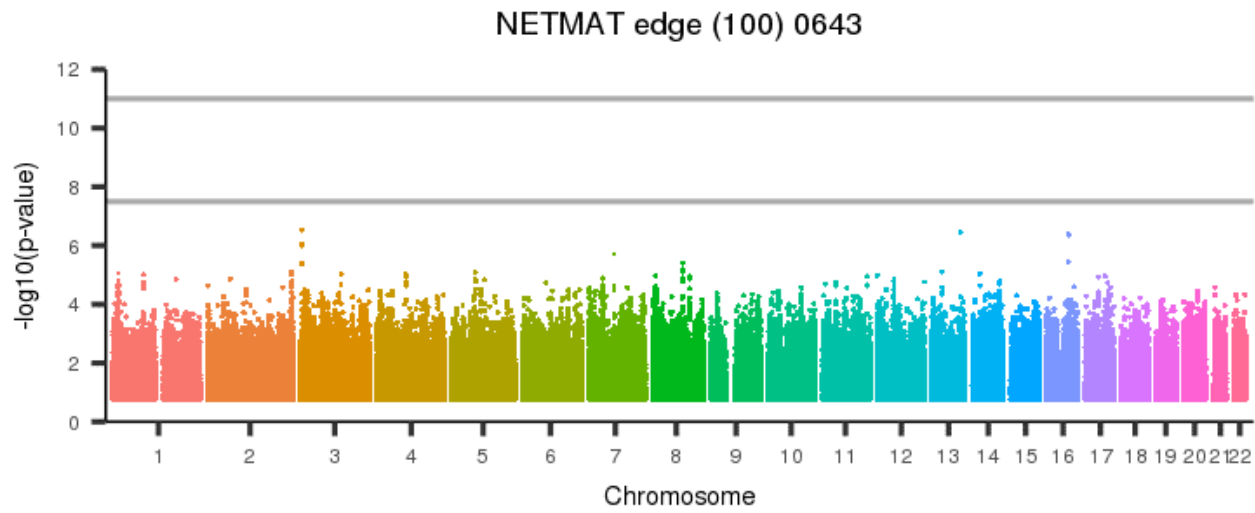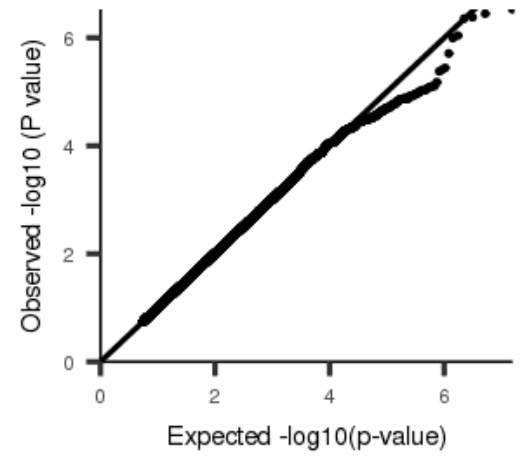

[back to list of plots](#)

Figure 1800: NETMAT edge (100) 0644

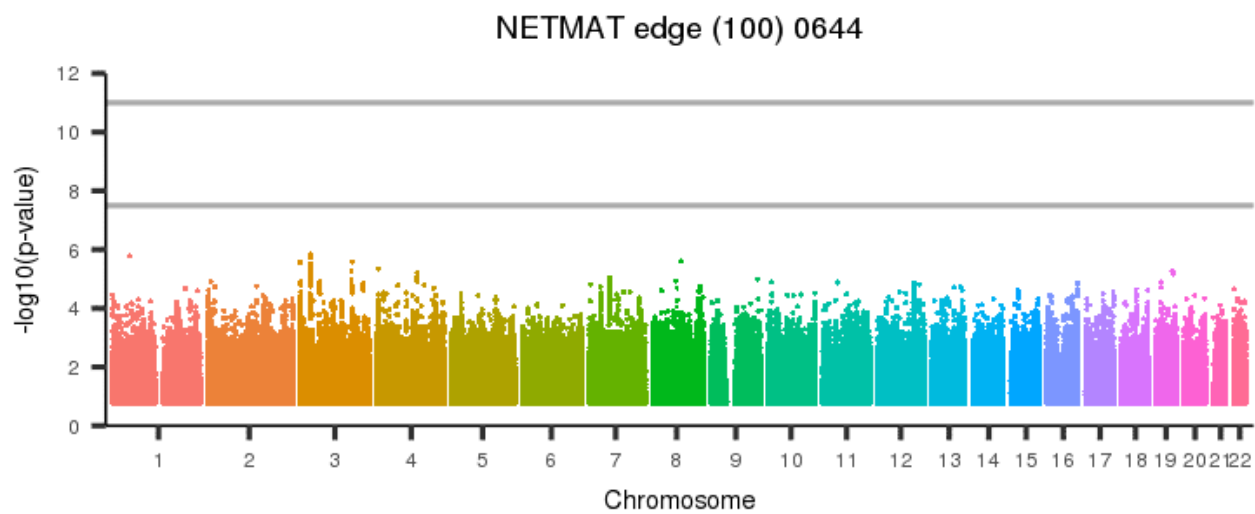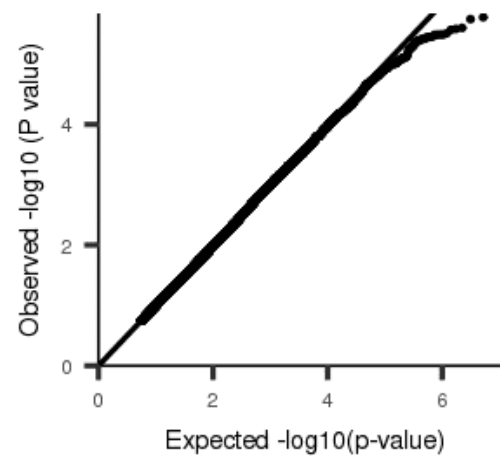

[back to list of plots](#)

Figure 1801: NETMAT edge (100) 0645

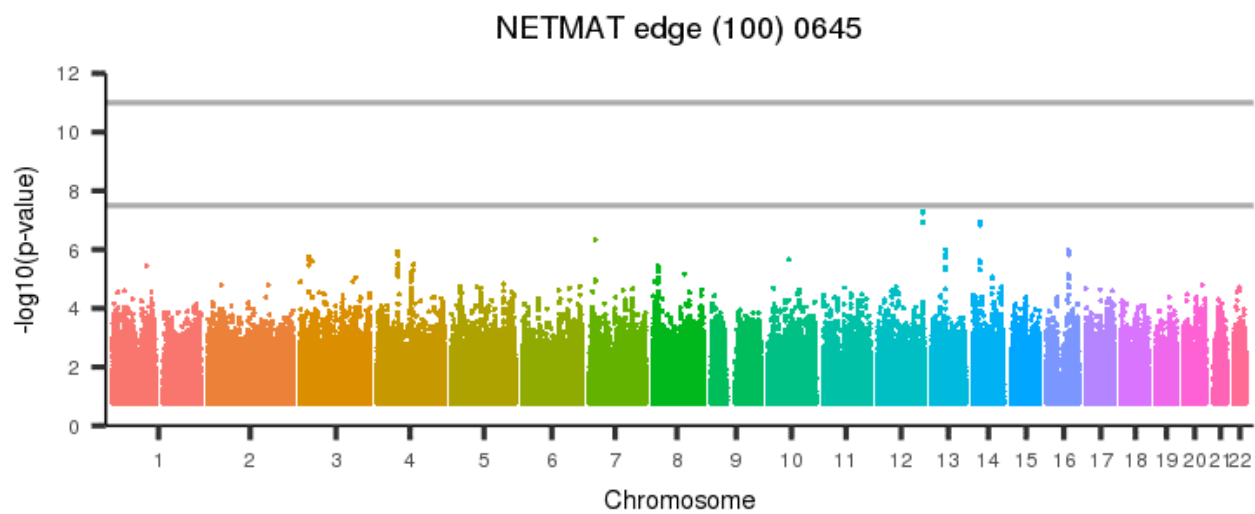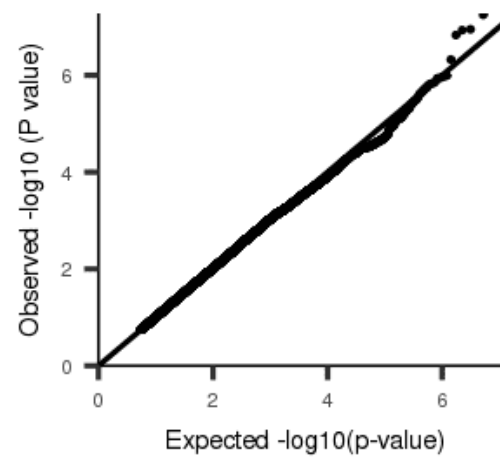

[back to list of plots](#)

Figure 1802: NETMAT edge (100) 0646

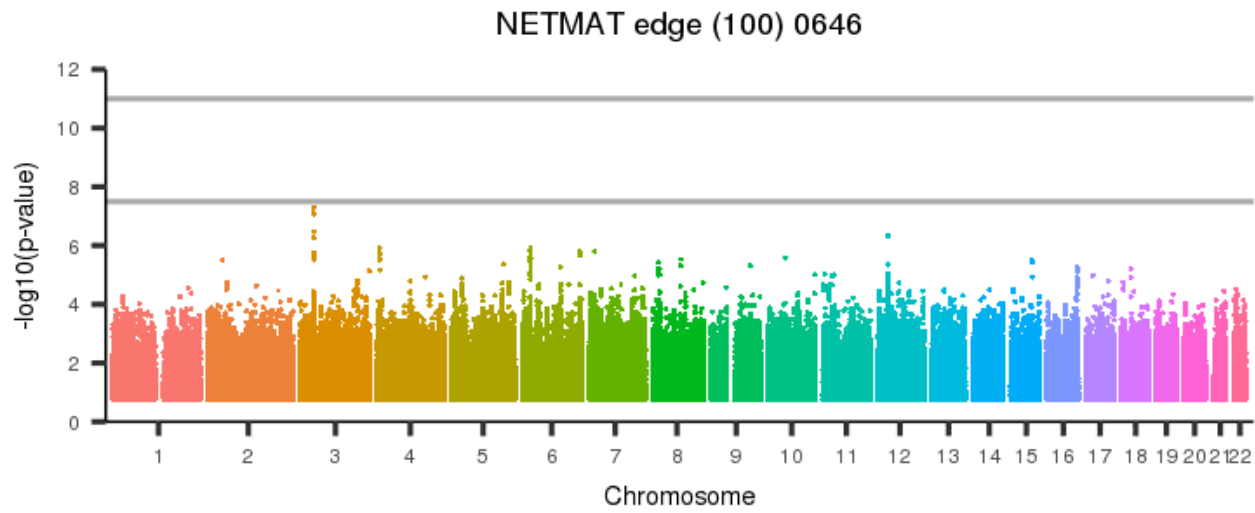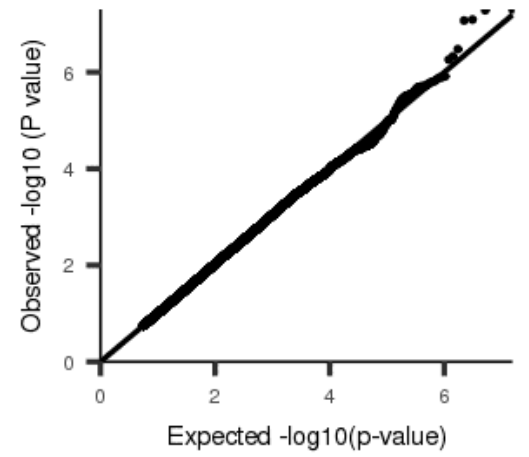

[back to list of plots](#)

Figure 1803: NETMAT edge (100) 0647

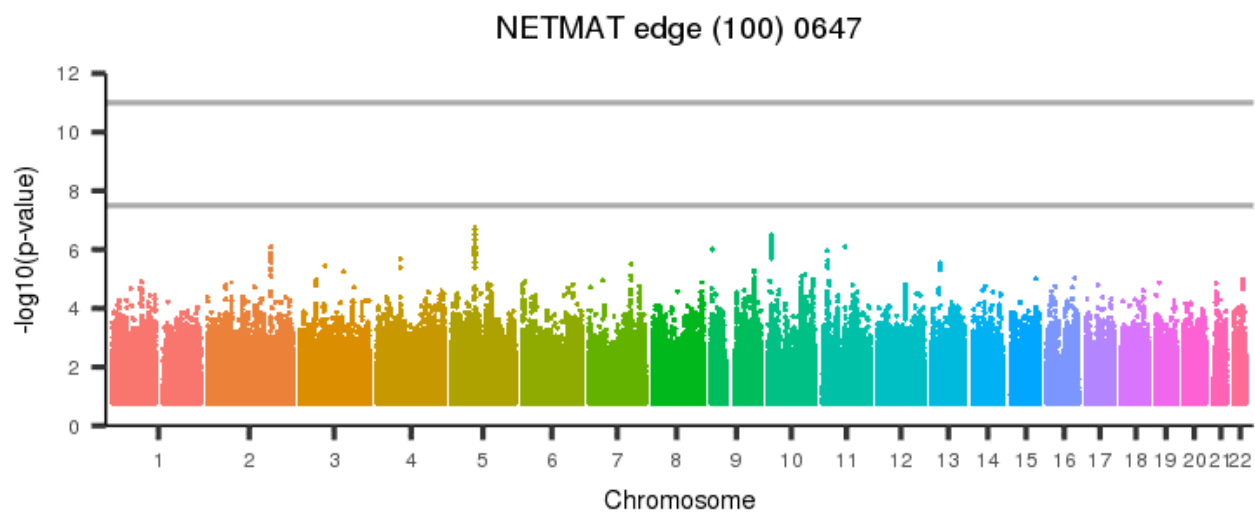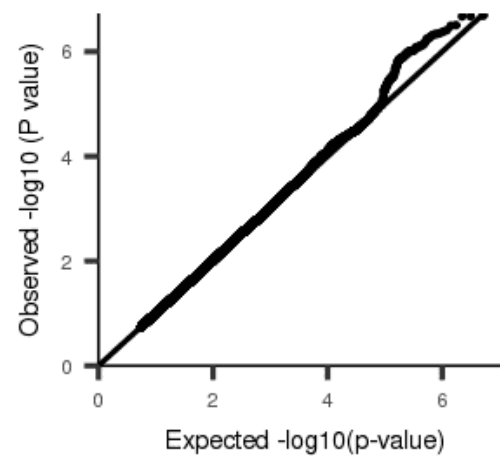

[back to list of plots](#)

Figure 1804: NETMAT edge (100) 0648

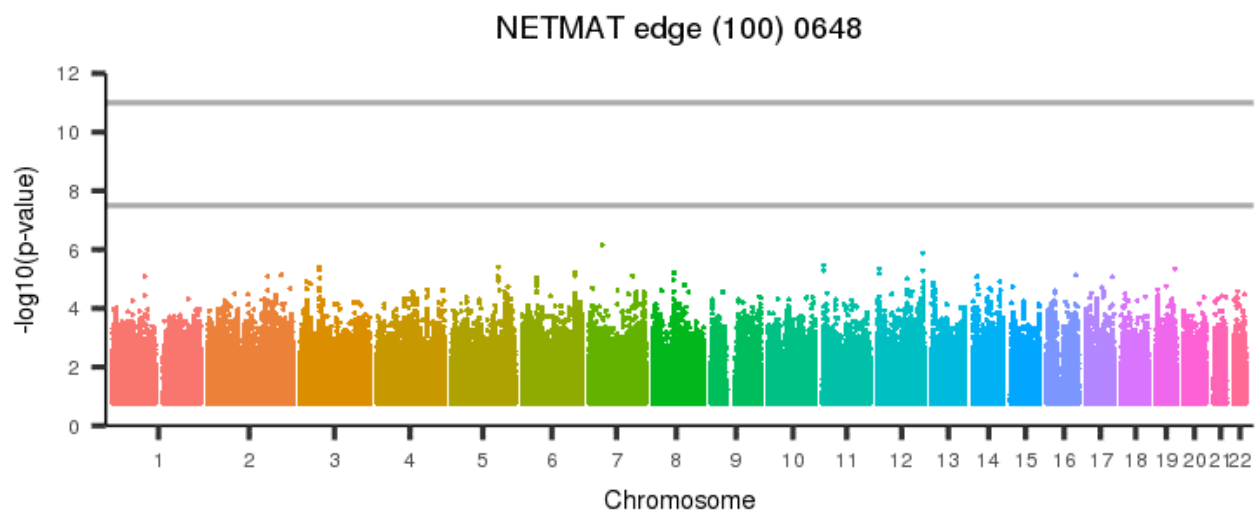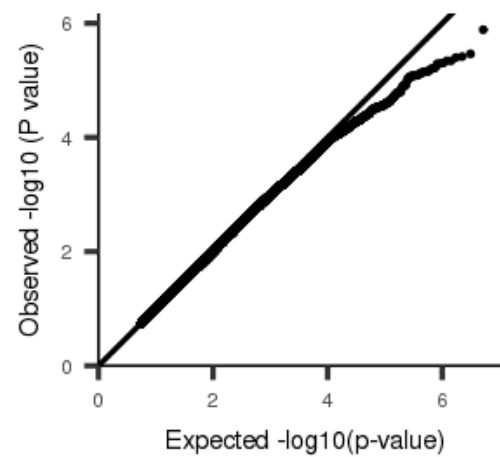

[back to list of plots](#)

Figure 1805: NETMAT edge (100) 0649

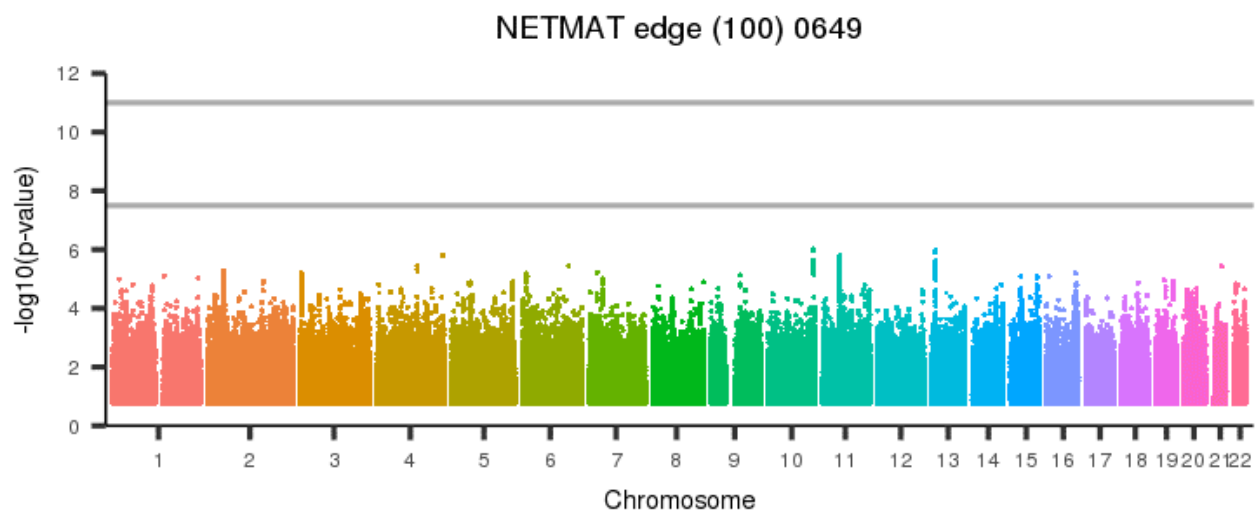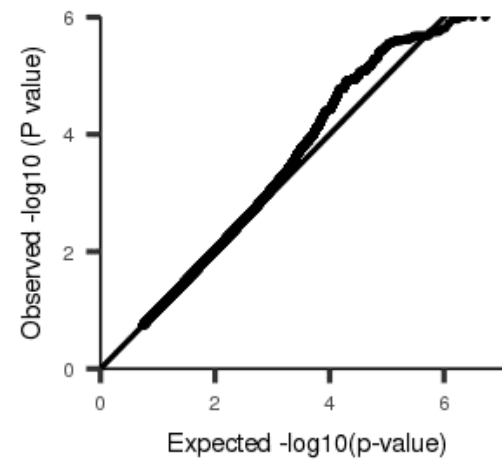

[back to list of plots](#)



Figure 1806: NETMAT edge (100) 0650

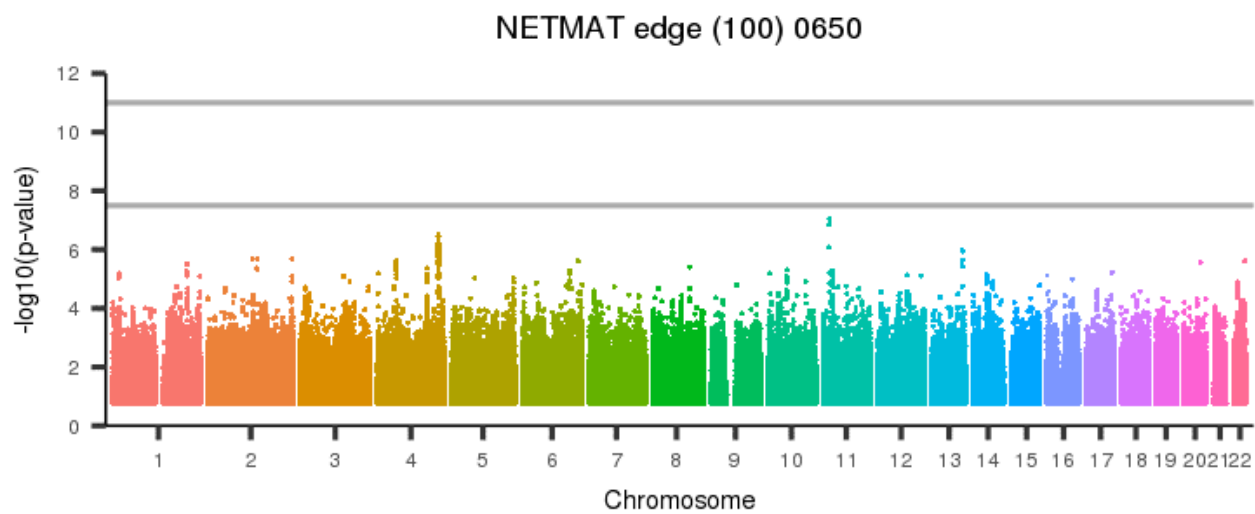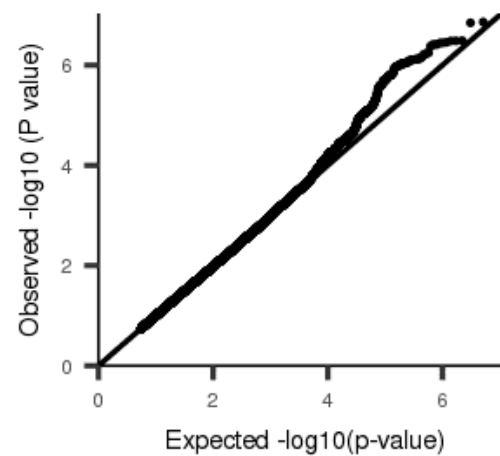

[back to list of plots](#)

Figure 1807: NETMAT edge (100) 0651

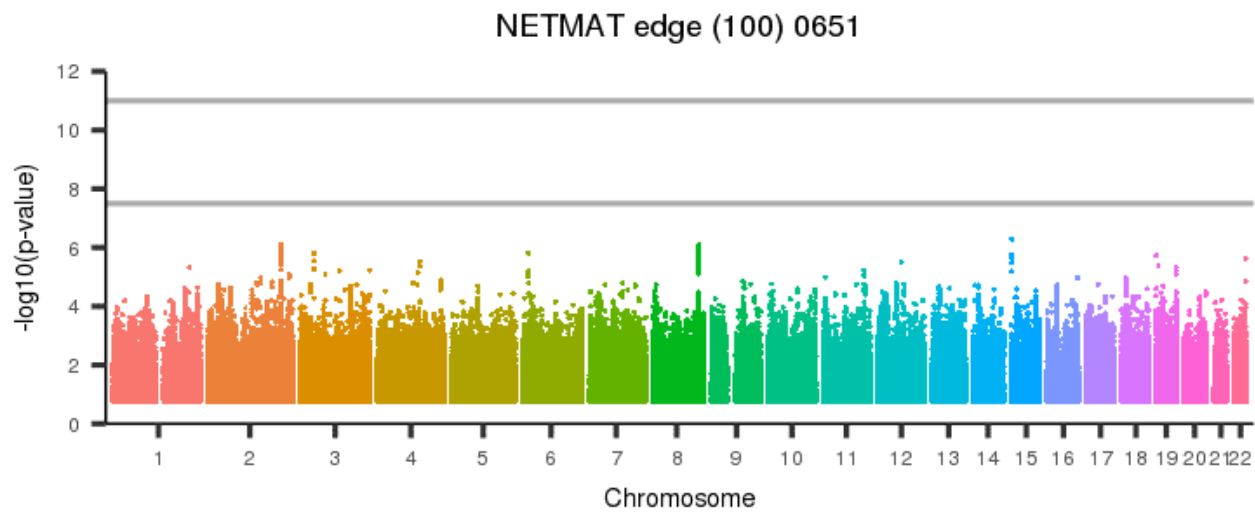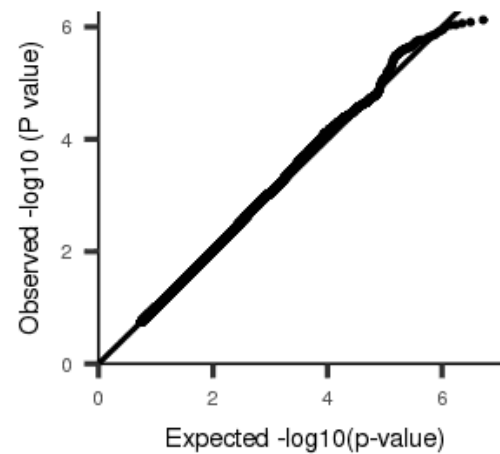

[back to list of plots](#)

Figure 1808: NETMAT edge (100) 0652

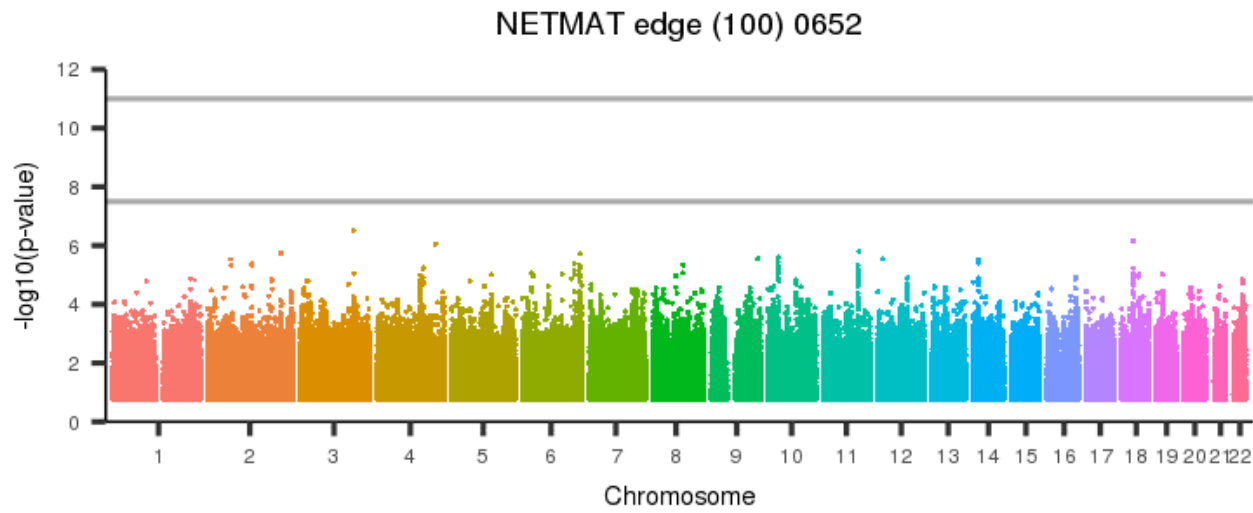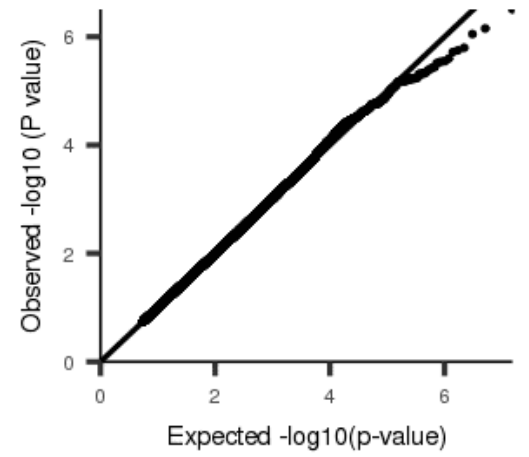

[back to list of plots](#)

Figure 1809: NETMAT edge (100) 0653

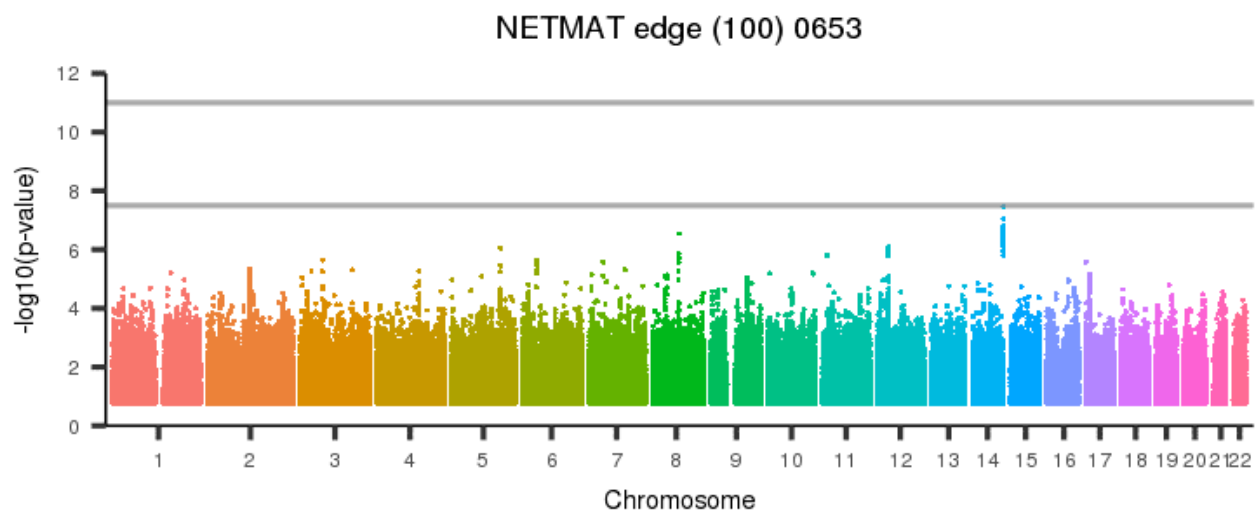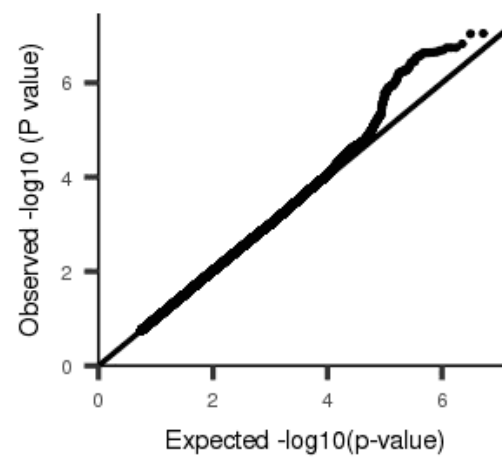

[back to list of plots](#)

Figure 1810: NETMAT edge (100) 0654

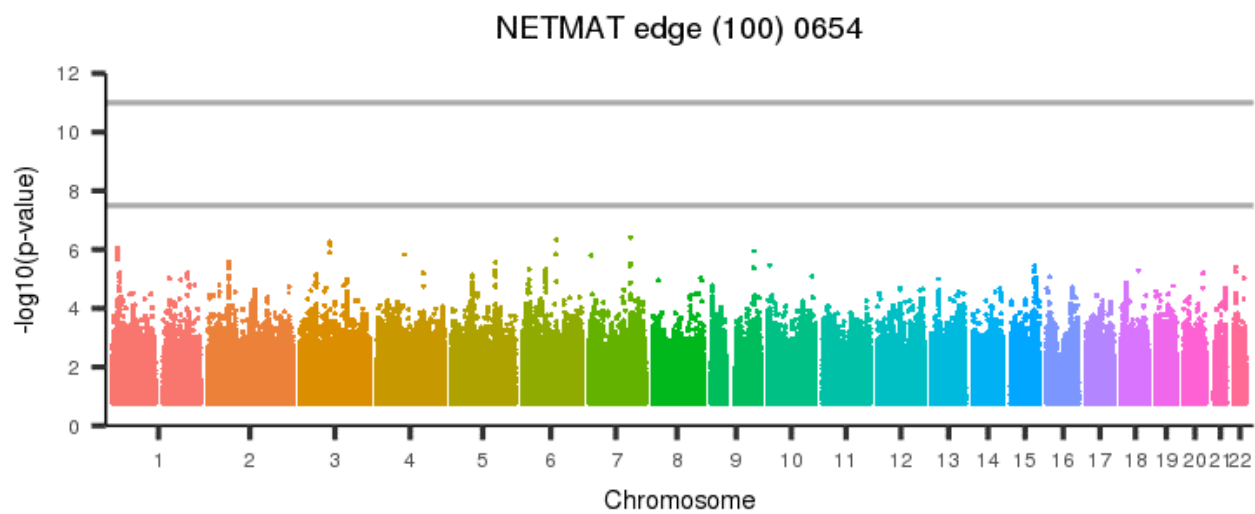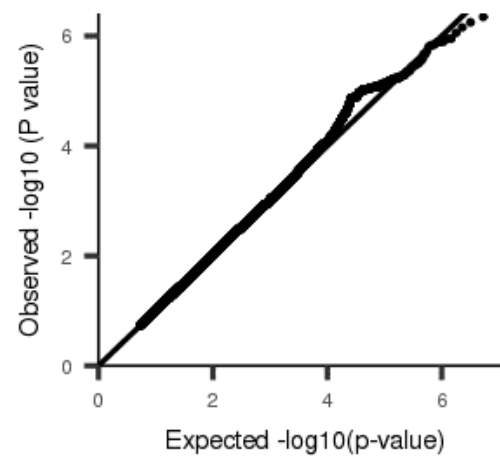

[back to list of plots](#)

Figure 1811: NETMAT edge (100) 0655

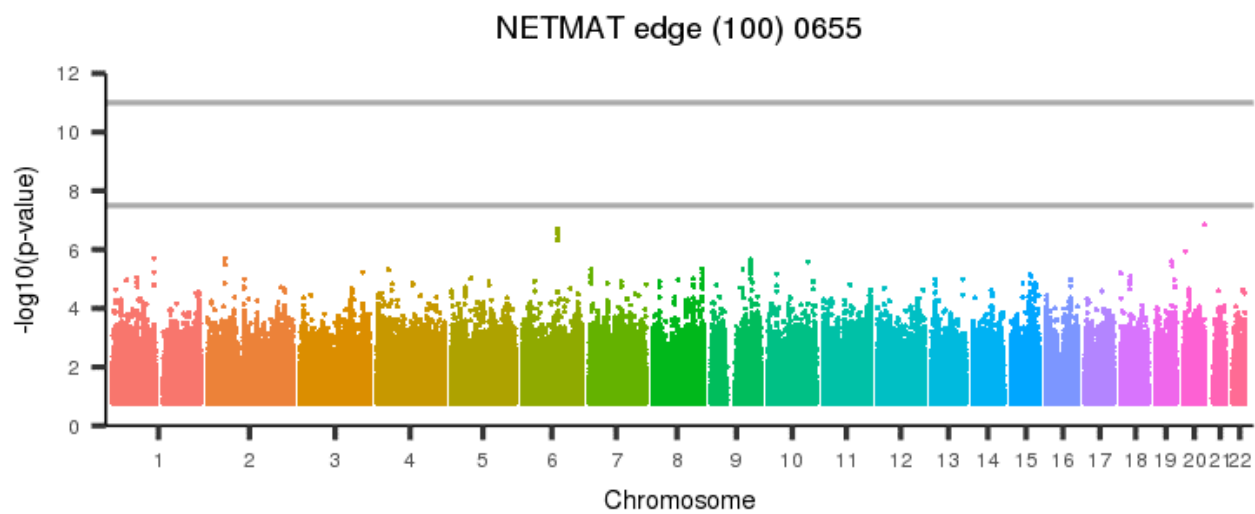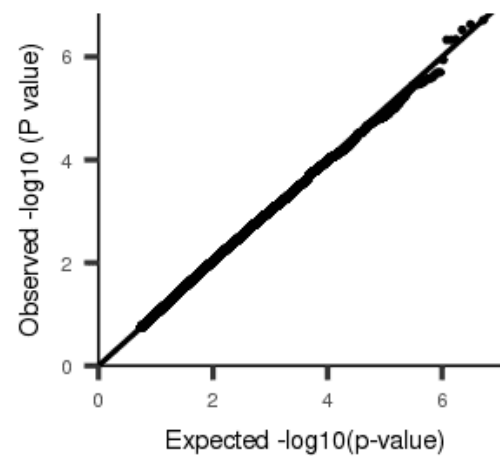

[back to list of plots](#)

Figure 1812: NETMAT edge (100) 0656

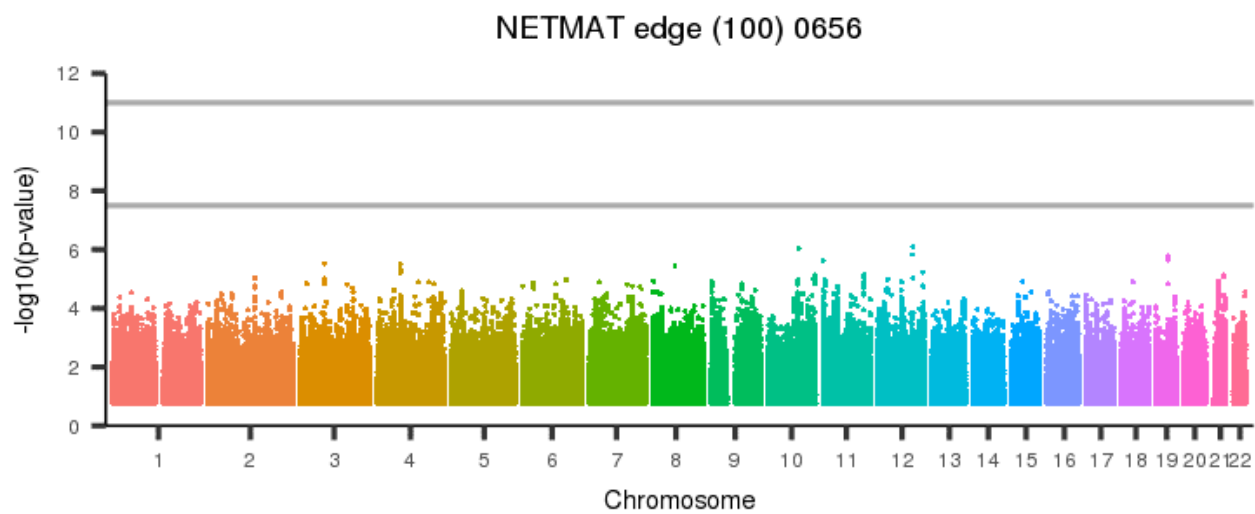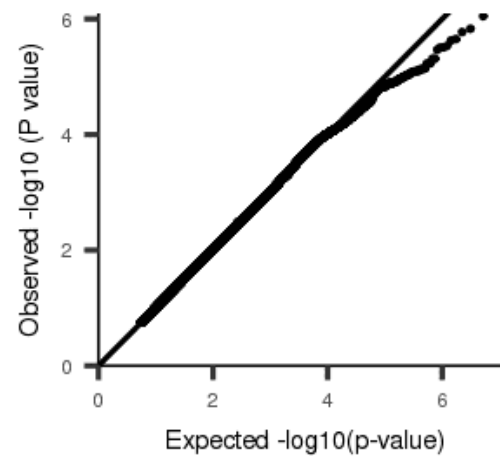

[back to list of plots](#)

Figure 1813: NETMAT edge (100) 0657

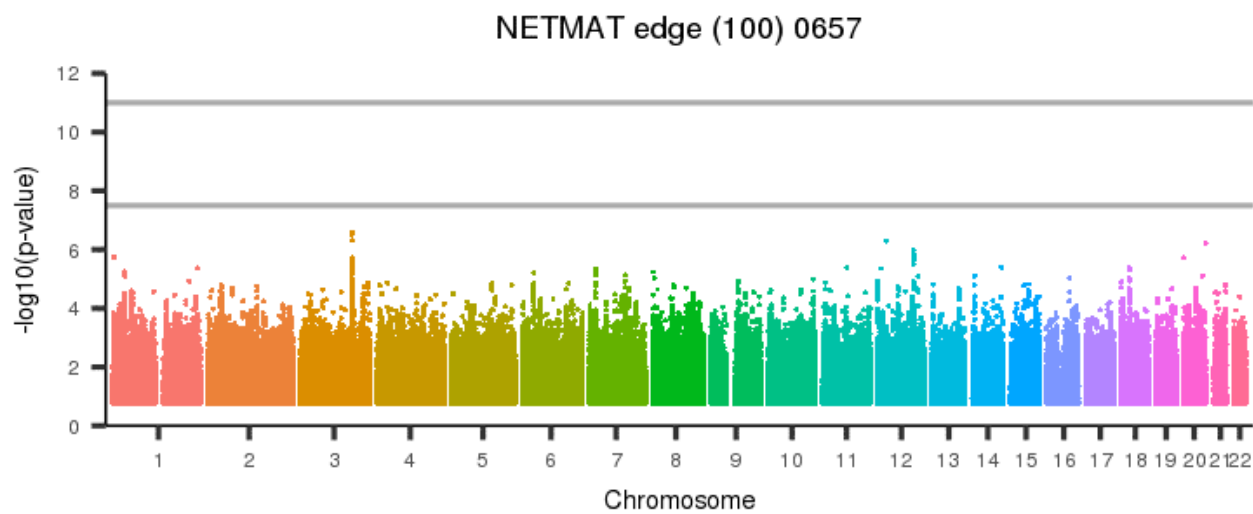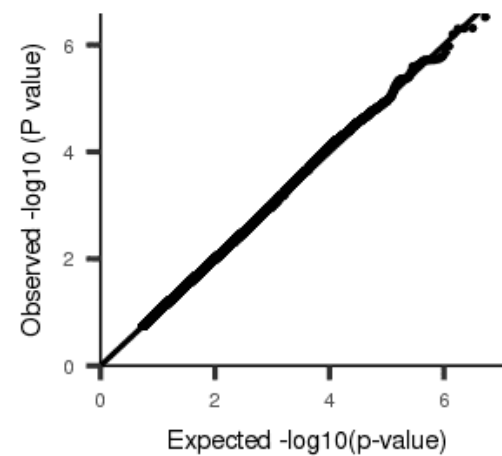

[back to list of plots](#)



Figure 1814: NETMAT edge (100) 0658

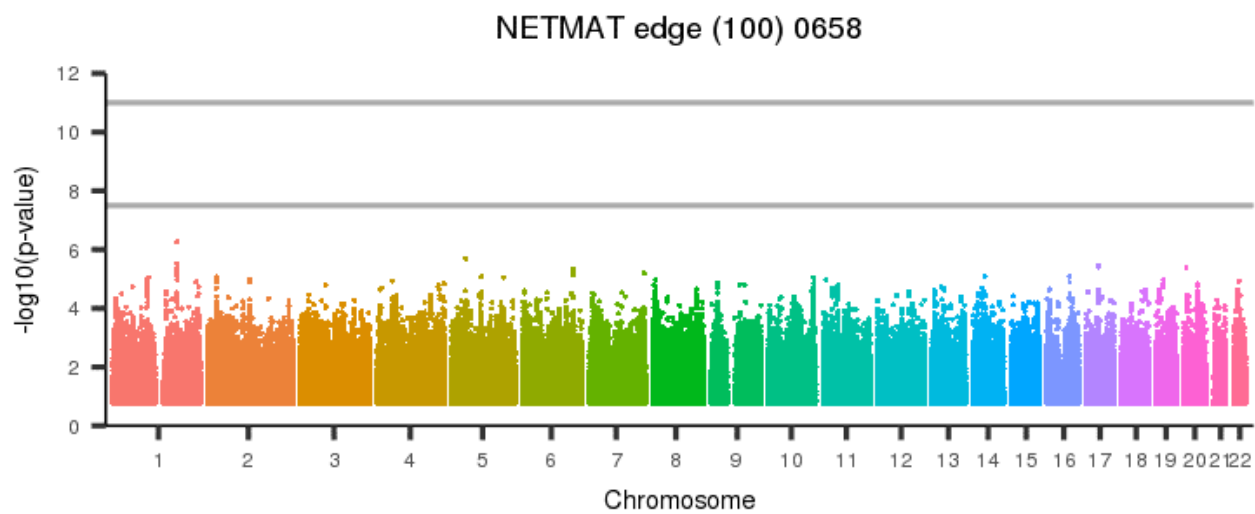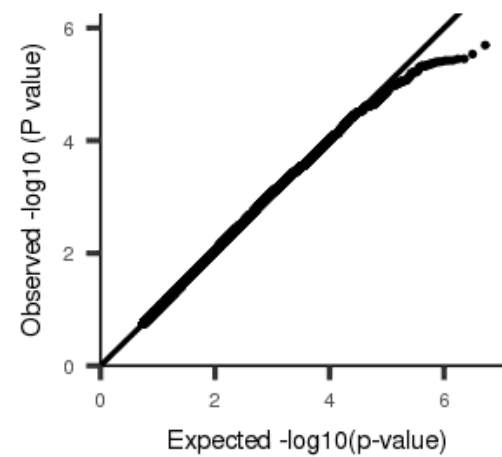

[back to list of plots](#)

Figure 1815: NETMAT edge (100) 0659

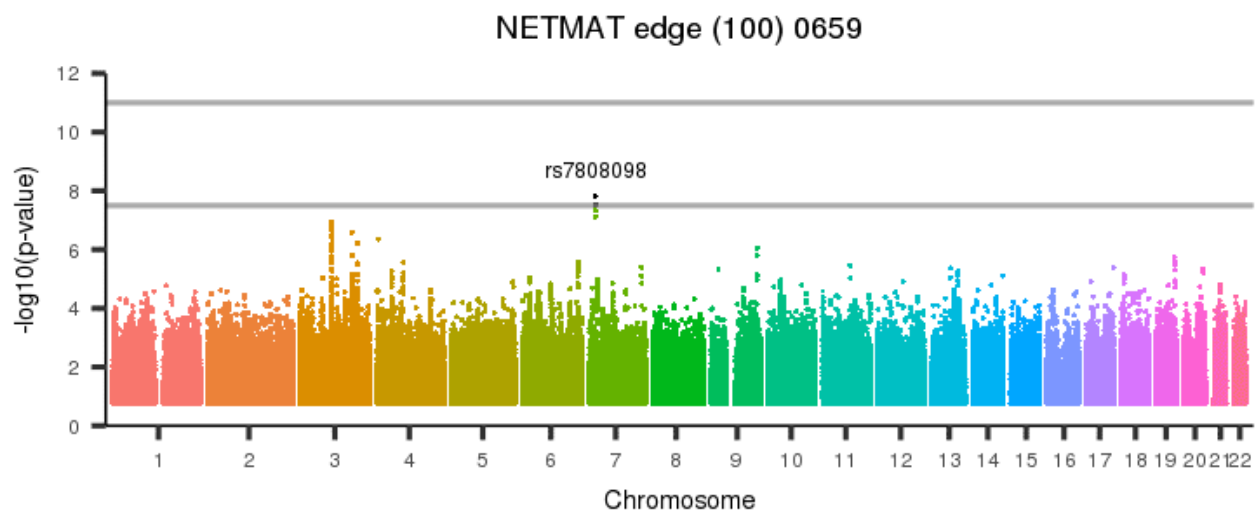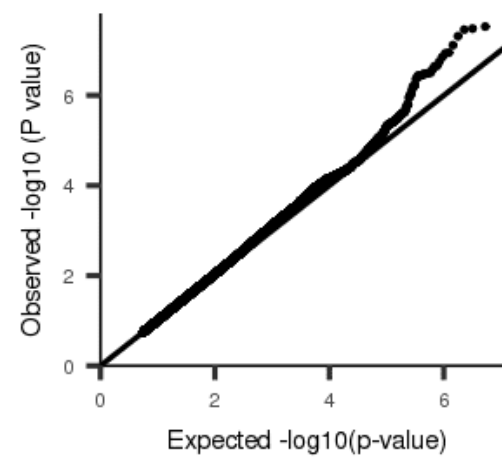

[back to list of plots](#)

Figure 1816: NETMAT edge (100) 0660

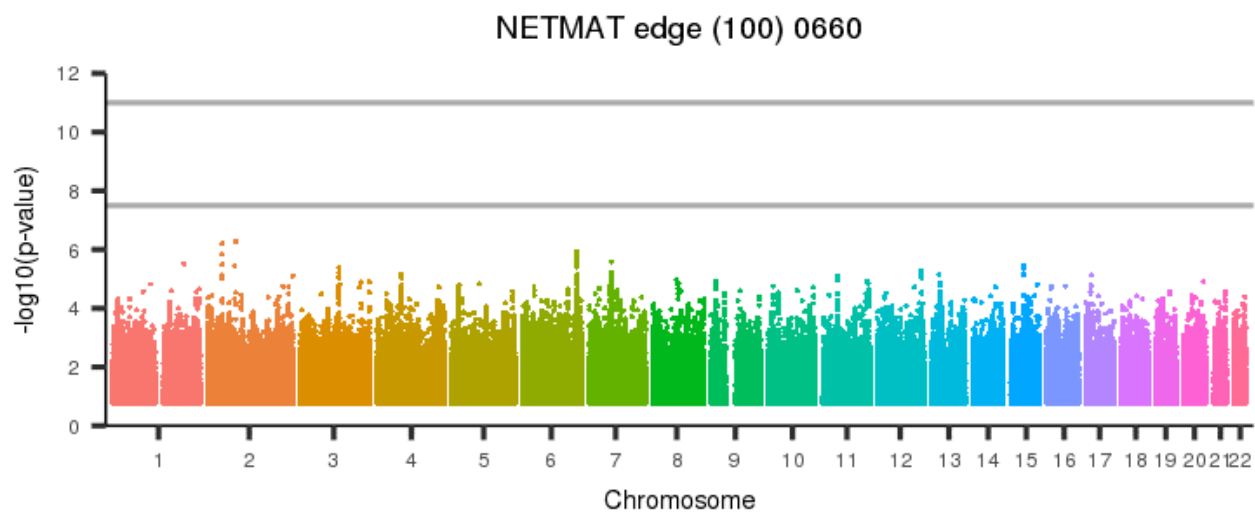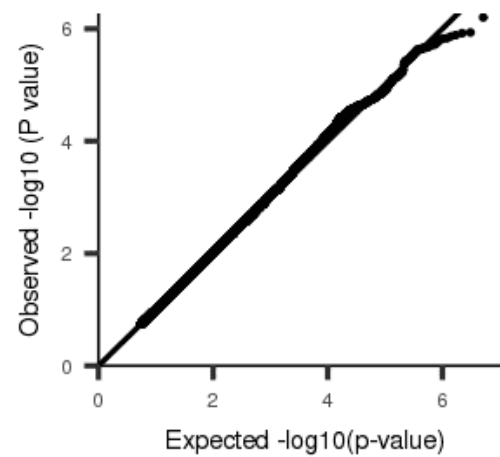

[back to list of plots](#)

Figure 1817: NETMAT edge (100) 0661

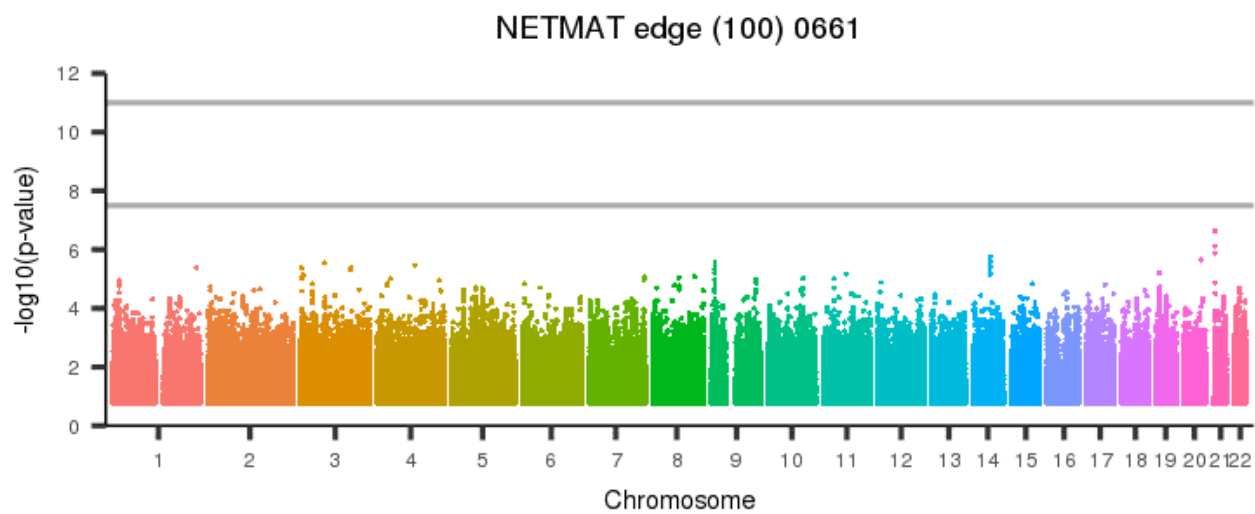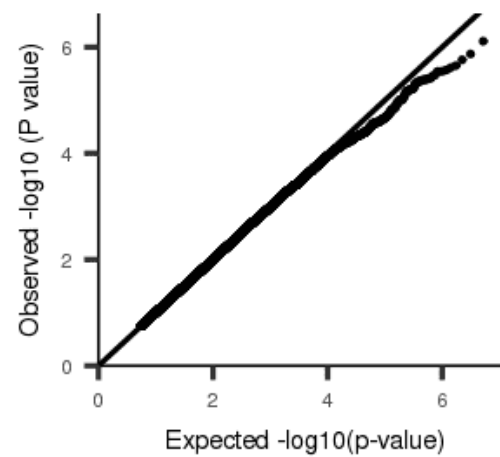

[back to list of plots](#)

Figure 1818: NETMAT edge (100) 0662

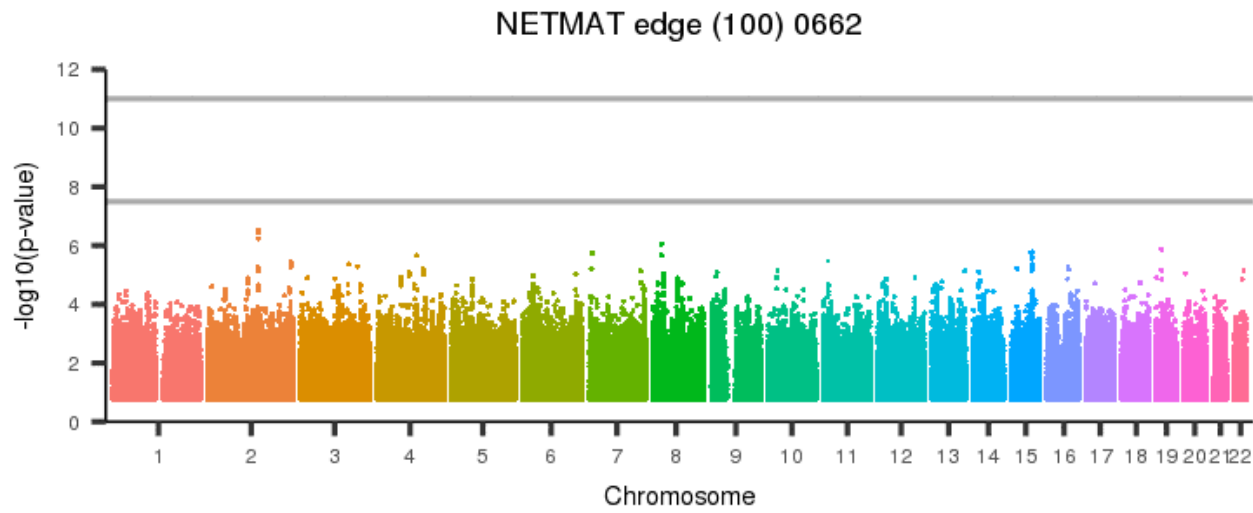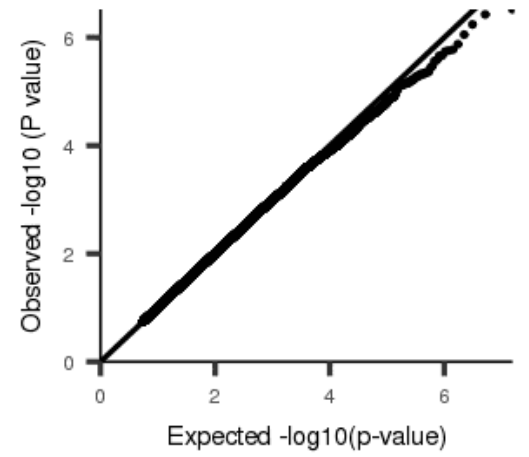

[back to list of plots](#)

Figure 1819: NETMAT edge (100) 0663

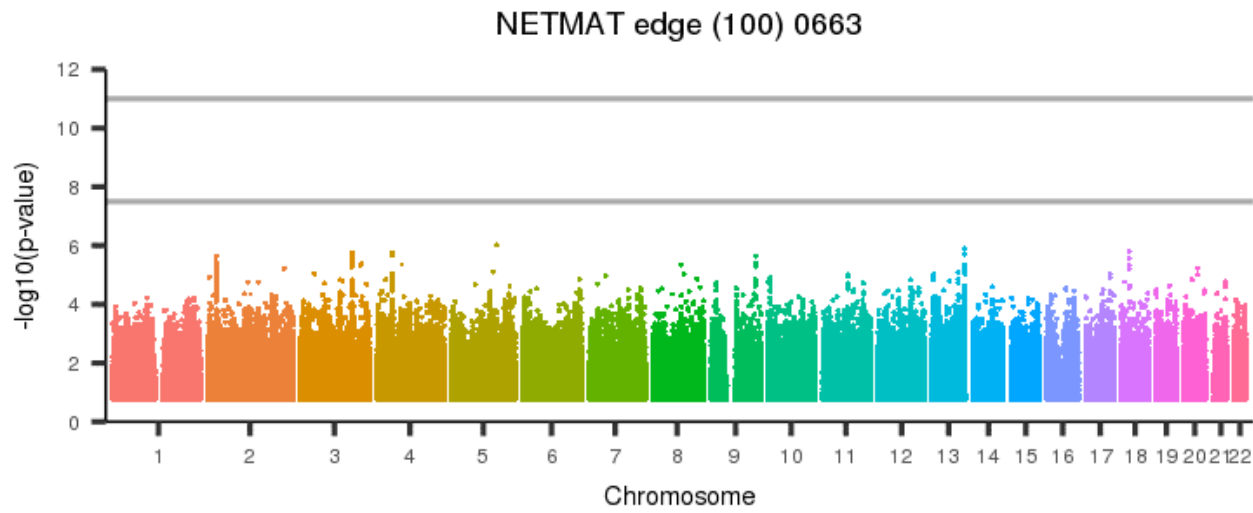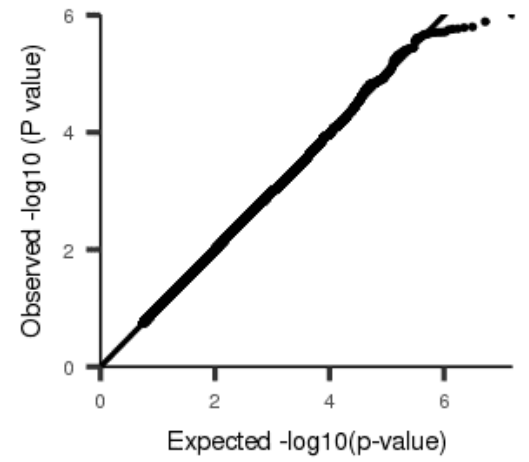

[back to list of plots](#)

Figure 1820: NETMAT edge (100) 0664

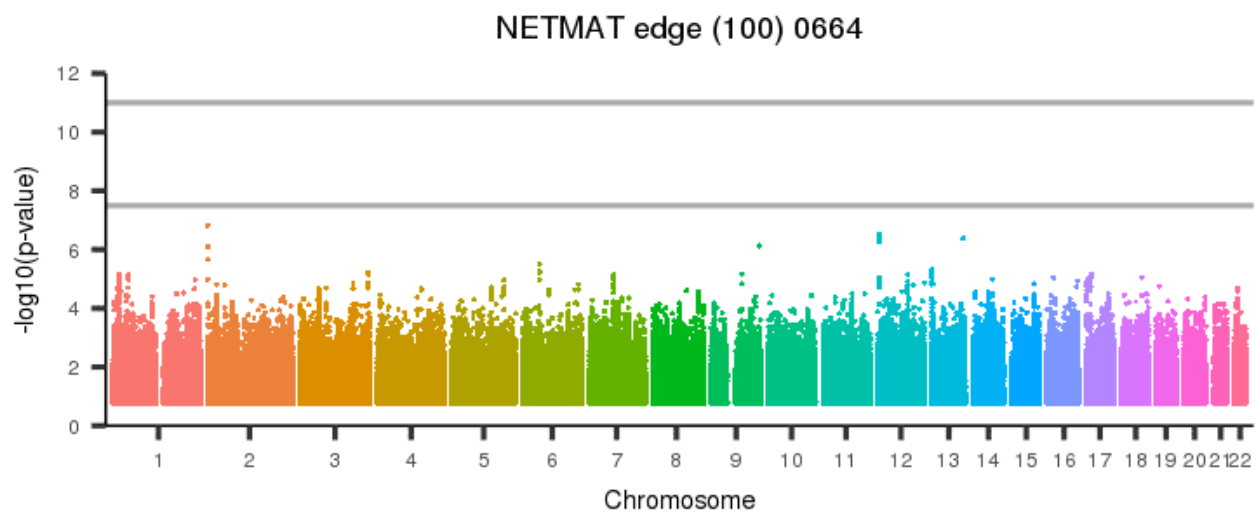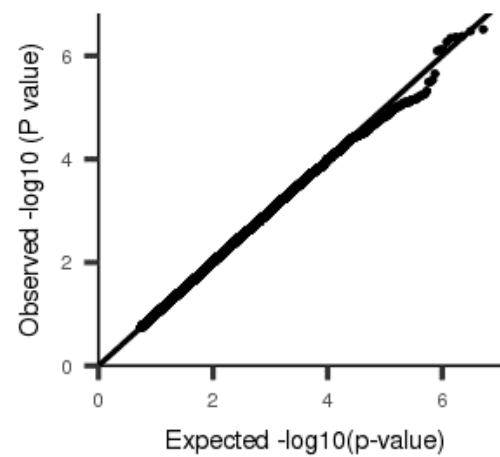

[back to list of plots](#)

Figure 1821: NETMAT edge (100) 0665

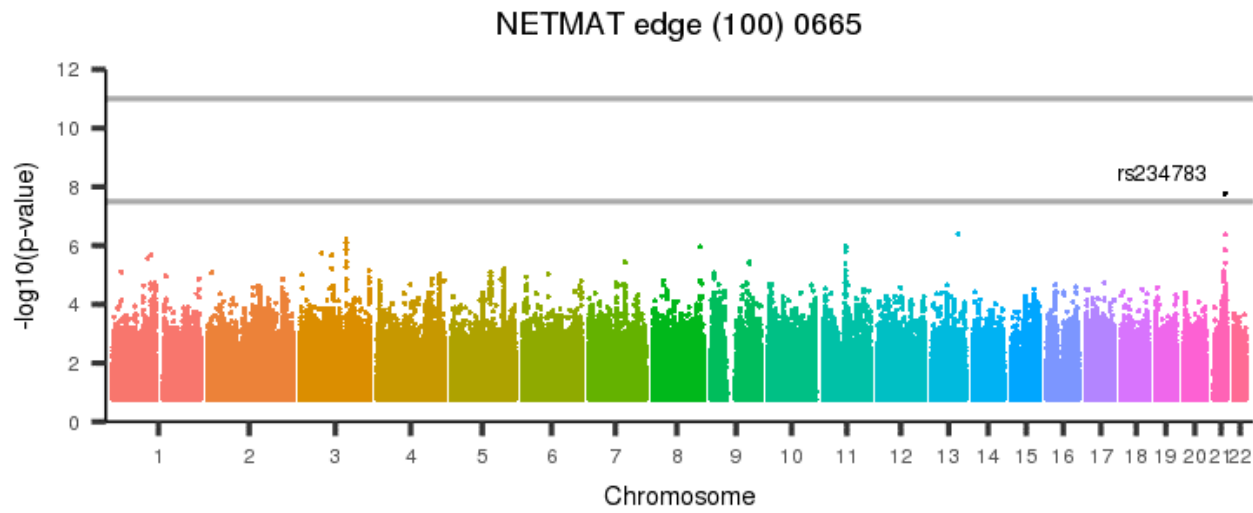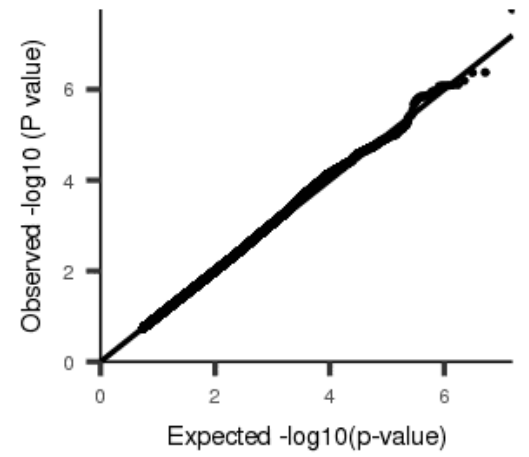

[back to list of plots](#)



Figure 1822: NETMAT edge (100) 0666

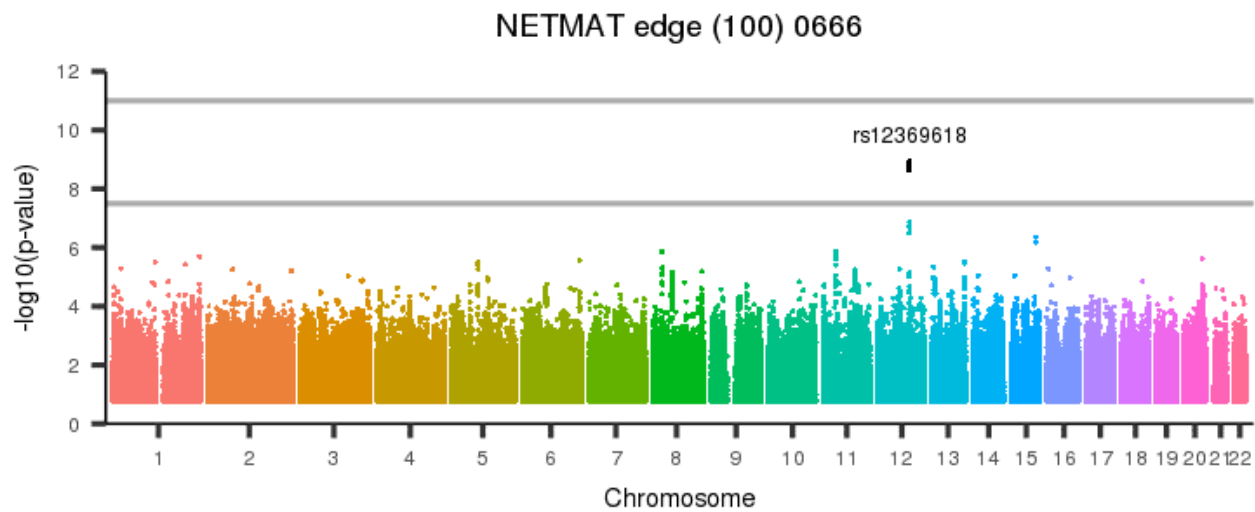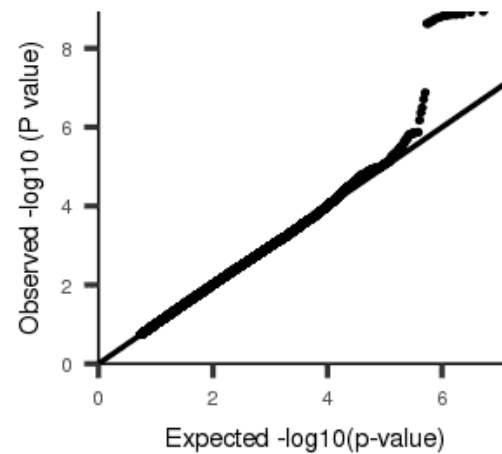

[back to list of plots](#)

Figure 1823: NETMAT edge (100) 0667

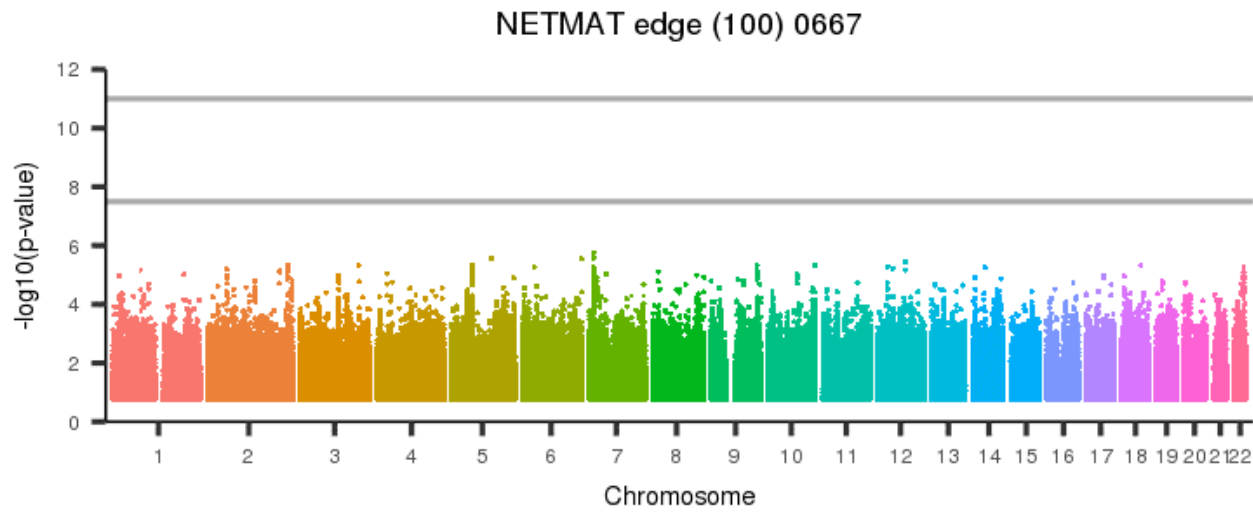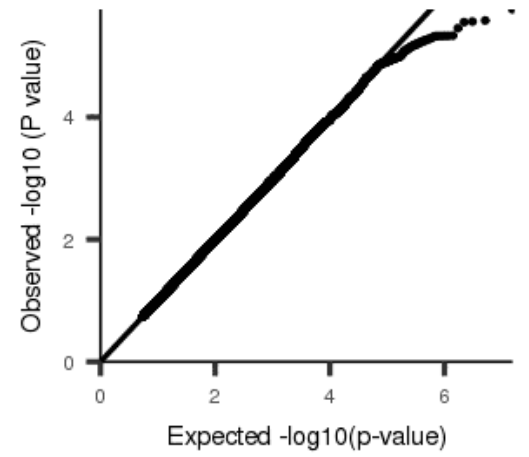

[back to list of plots](#)

Figure 1824: NETMAT edge (100) 0668

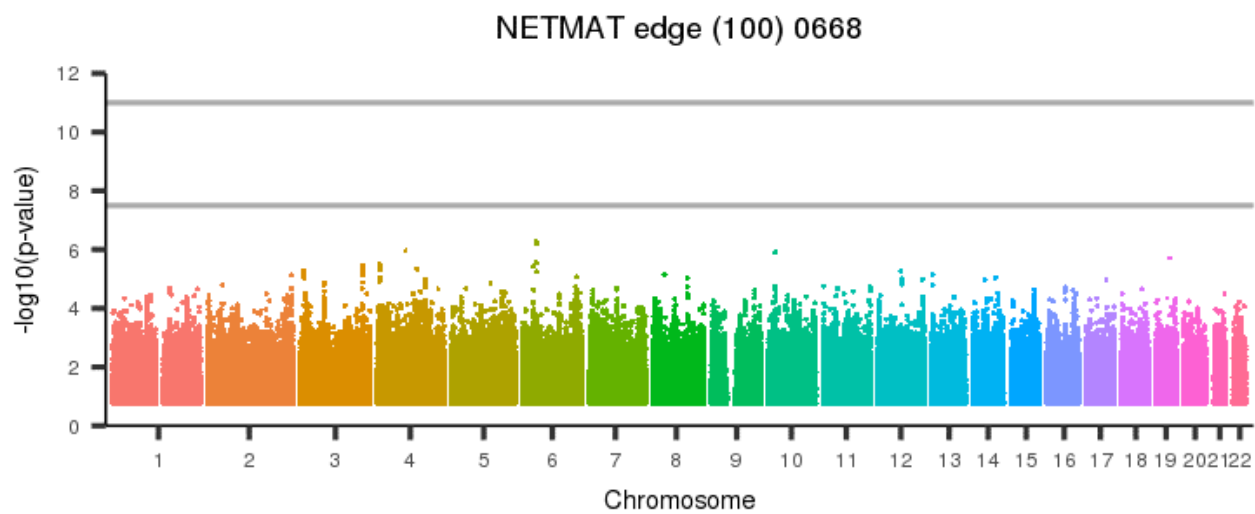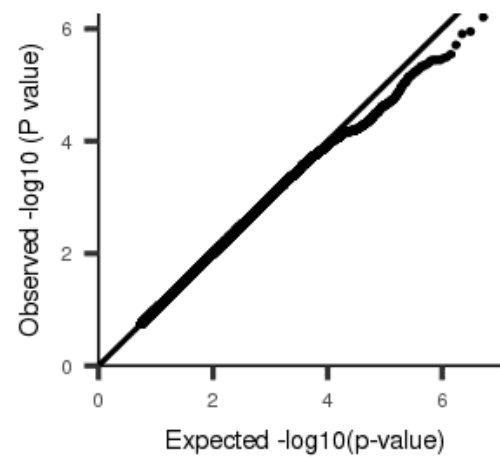

[back to list of plots](#)

Figure 1825: NETMAT edge (100) 0669

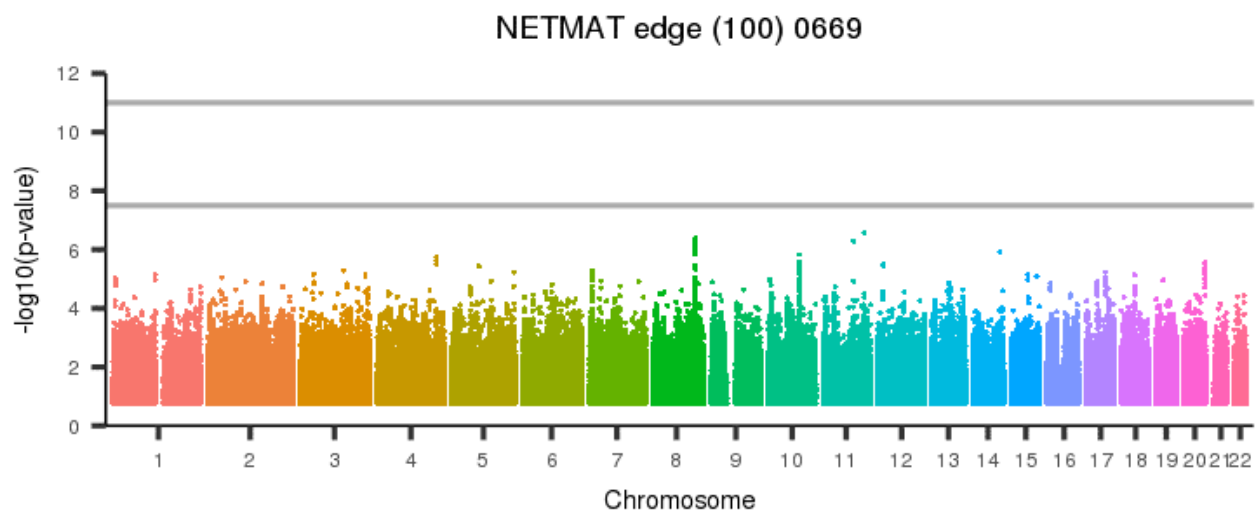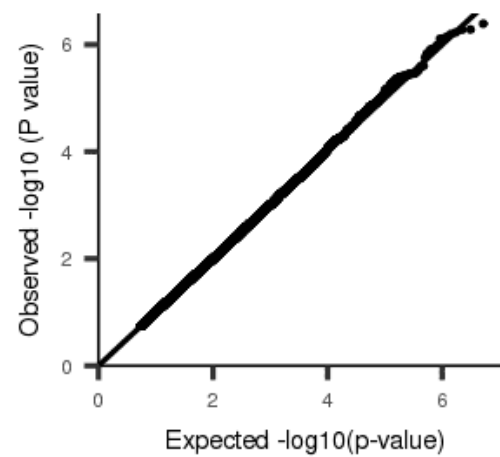

[back to list of plots](#)

Figure 1826: NETMAT edge (100) 0670

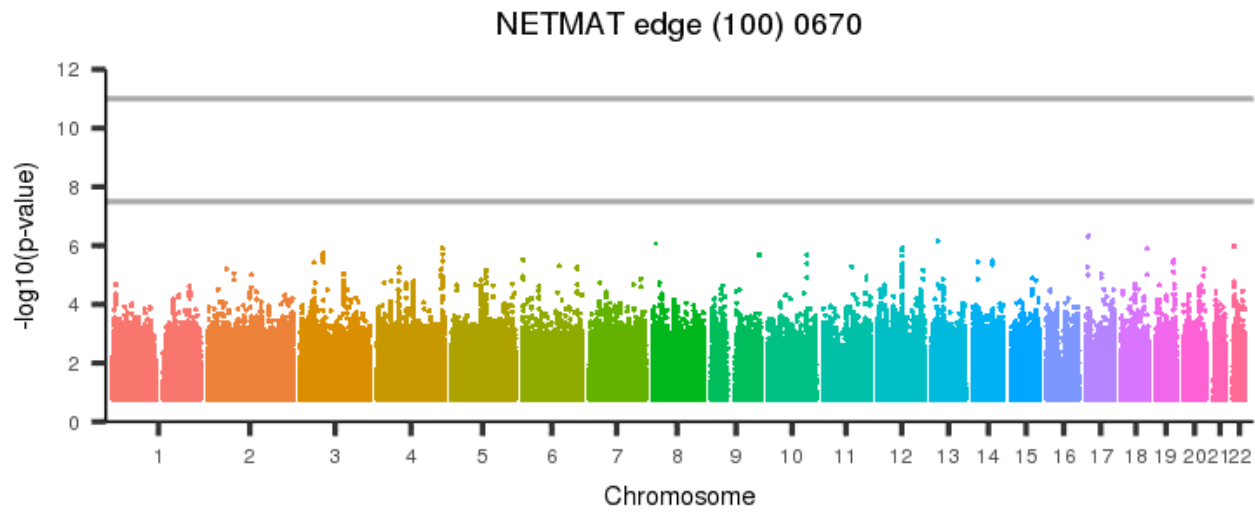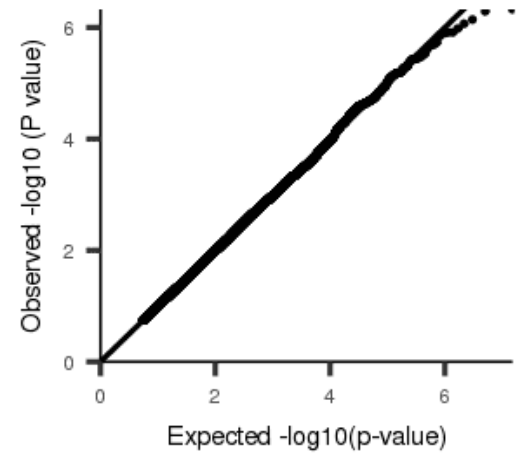

[back to list of plots](#)

Figure 1827: NETMAT edge (100) 0671

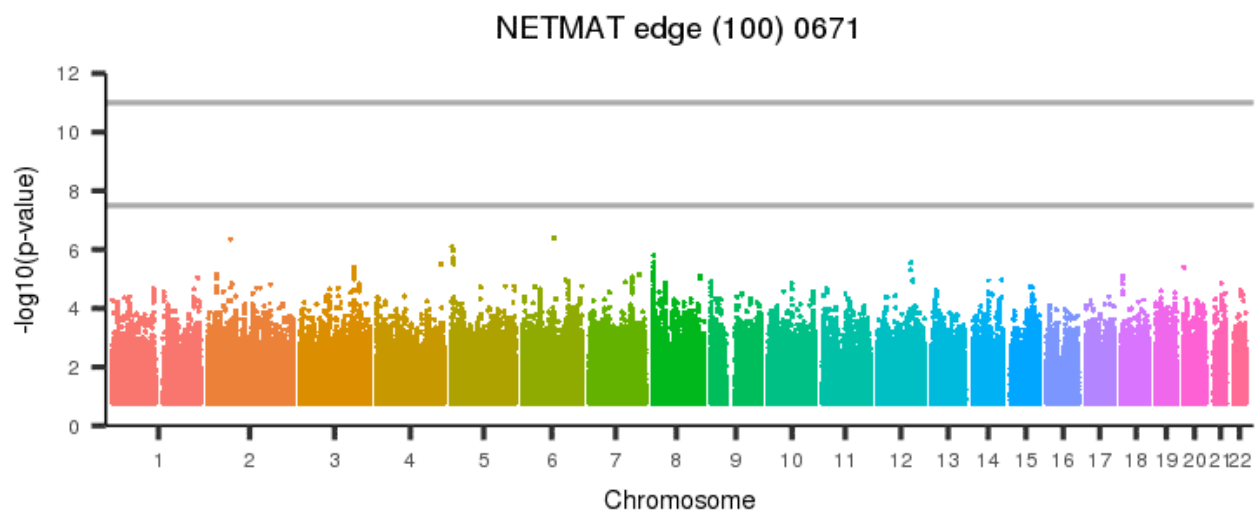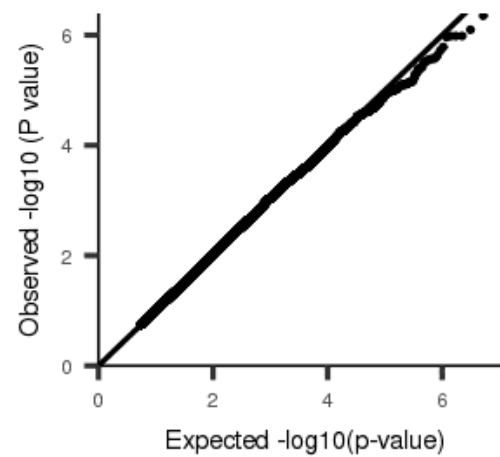

[back to list of plots](#)

Figure 1828: NETMAT edge (100) 0672

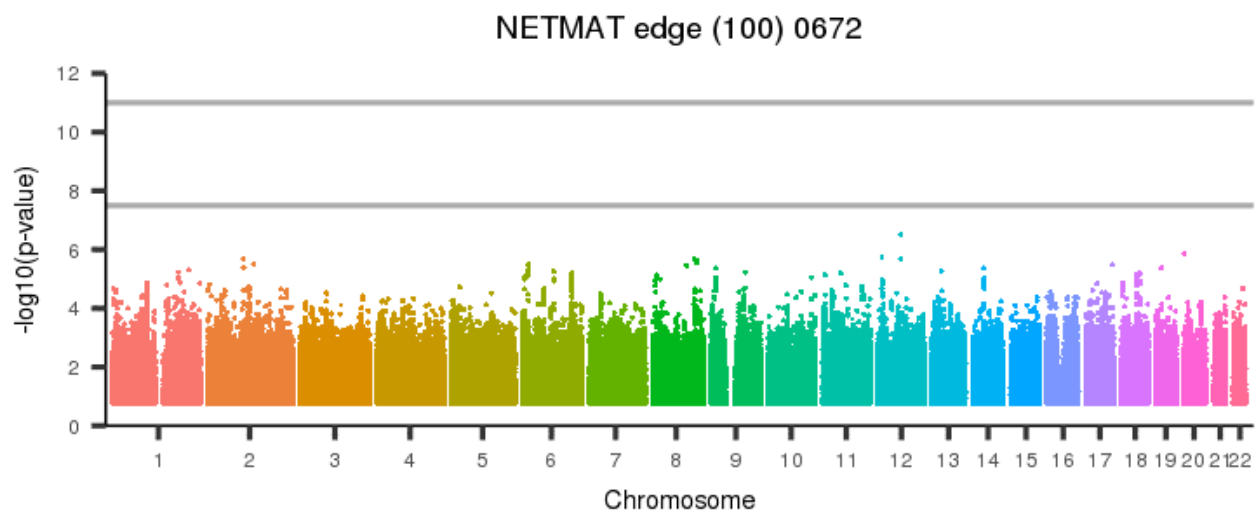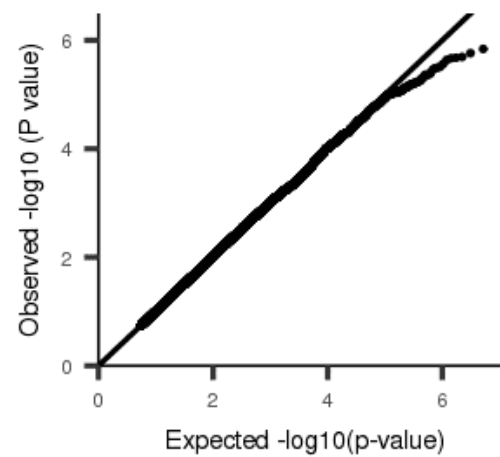

[back to list of plots](#)

Figure 1829: NETMAT edge (100) 0673

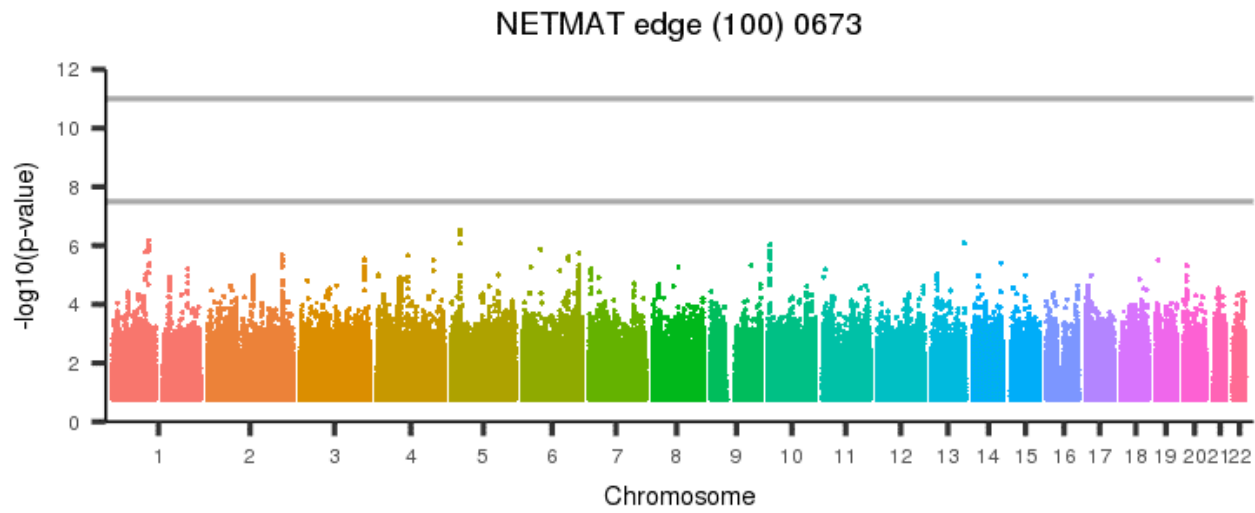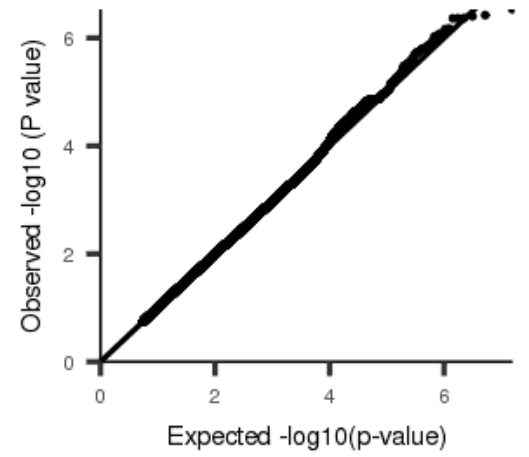

[back to list of plots](#)



Figure 1830: NETMAT edge (100) 0674

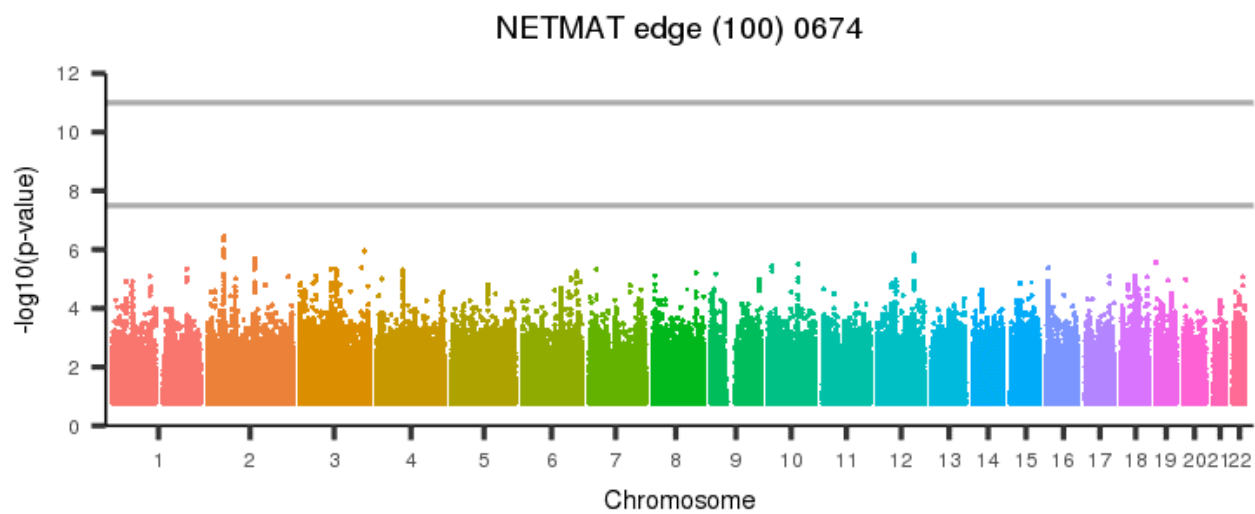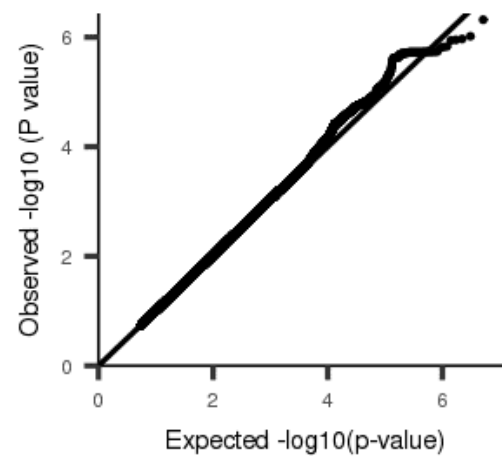

[back to list of plots](#)

Figure 1831: NETMAT edge (100) 0675

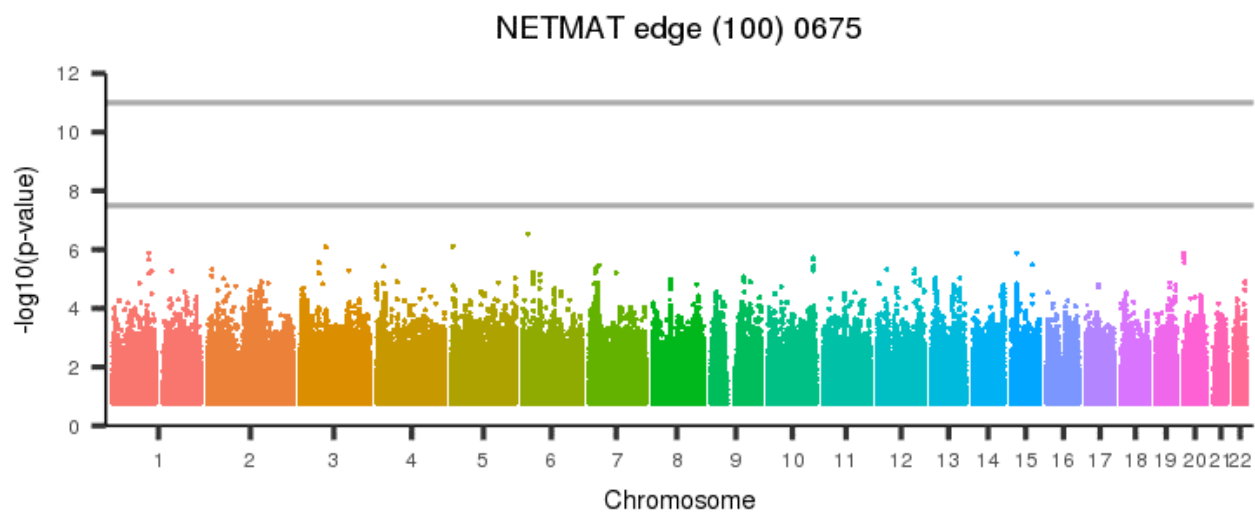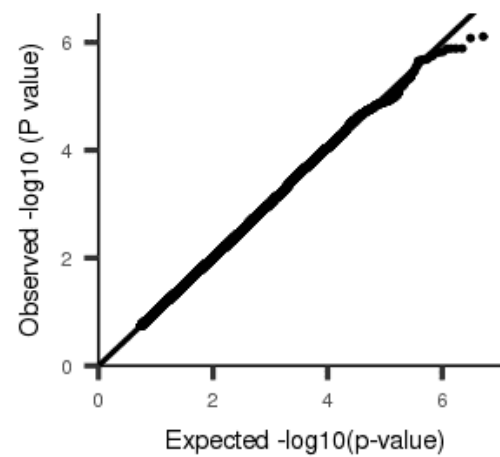

[back to list of plots](#)

Figure 1832: NETMAT edge (100) 0676

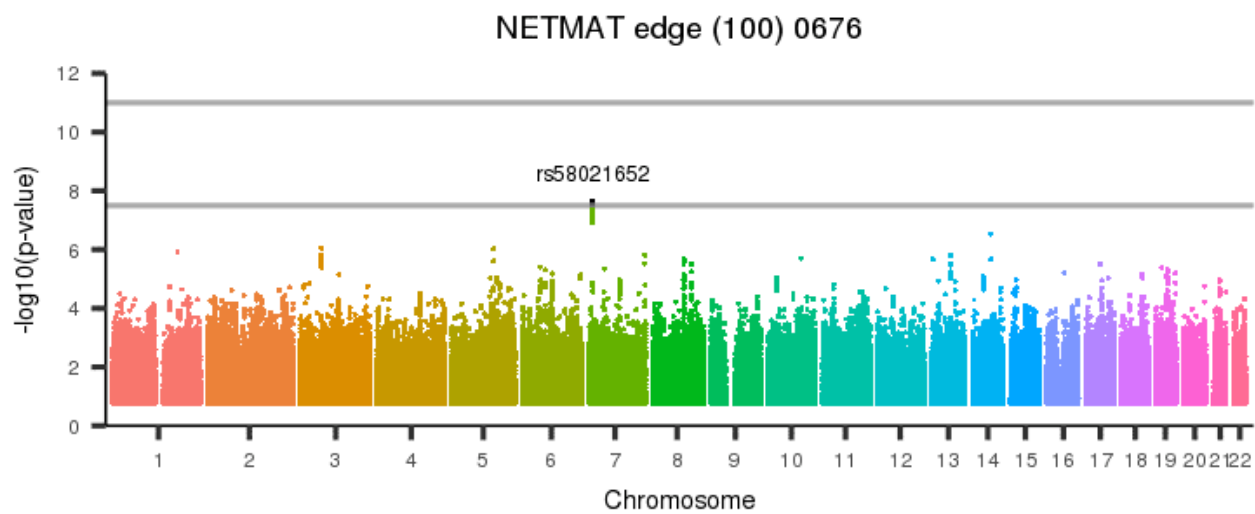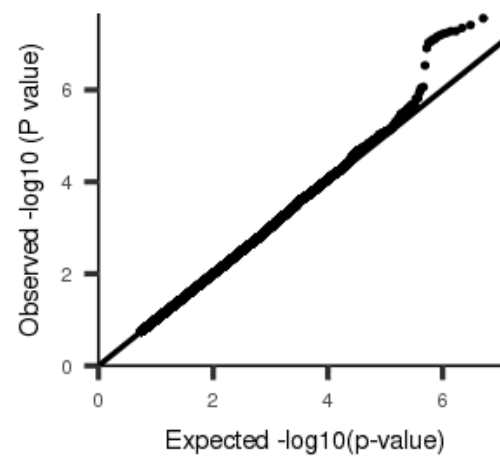

[back to list of plots](#)

Figure 1833: NETMAT edge (100) 0677

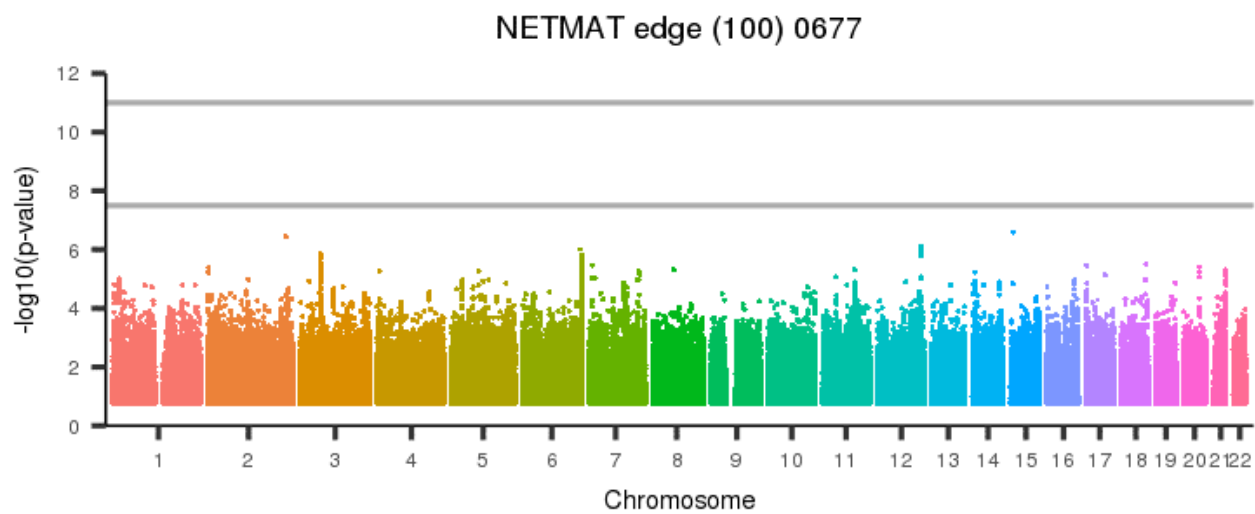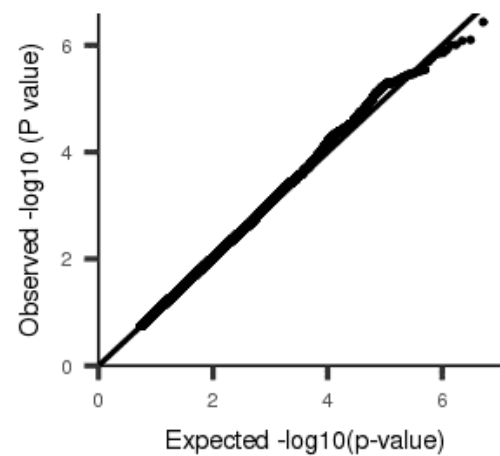

[back to list of plots](#)

Figure 1834: NETMAT edge (100) 0678

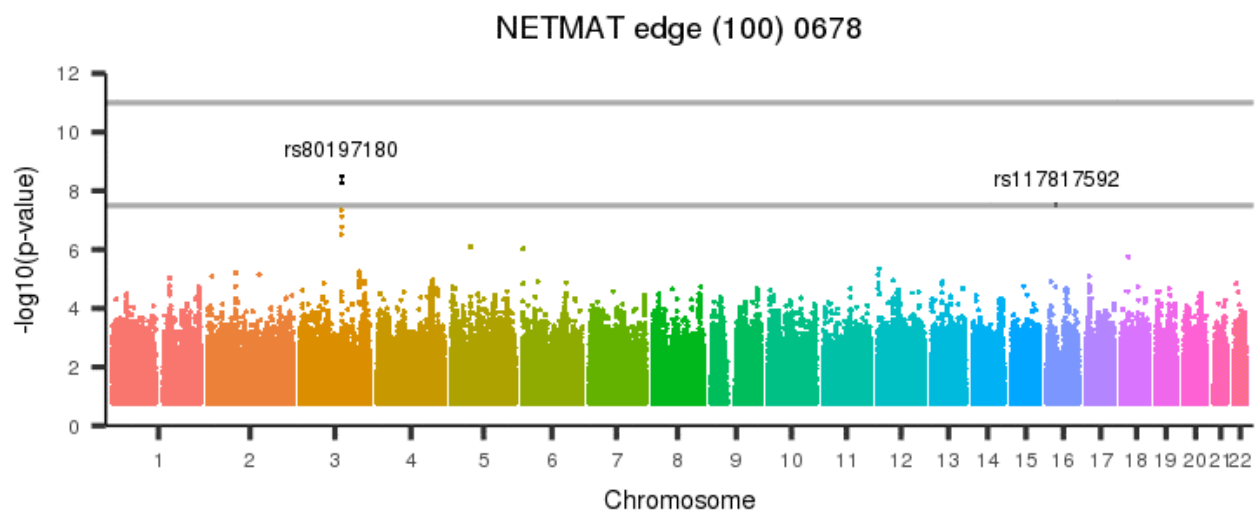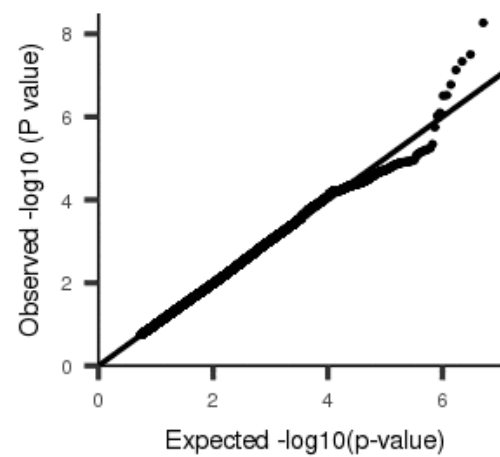

[back to list of plots](#)

Figure 1835: NETMAT edge (100) 0679

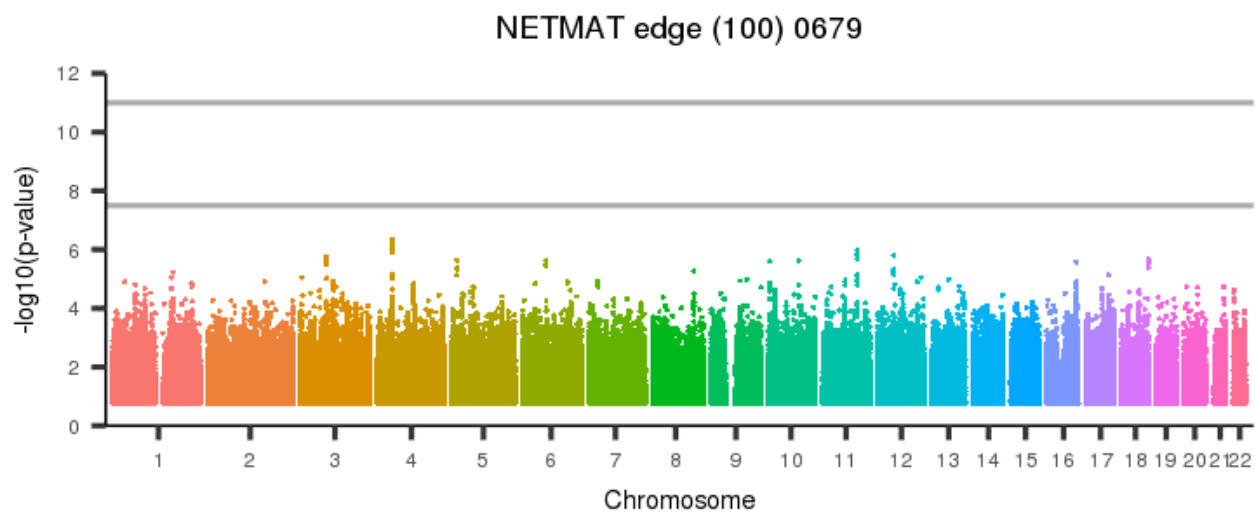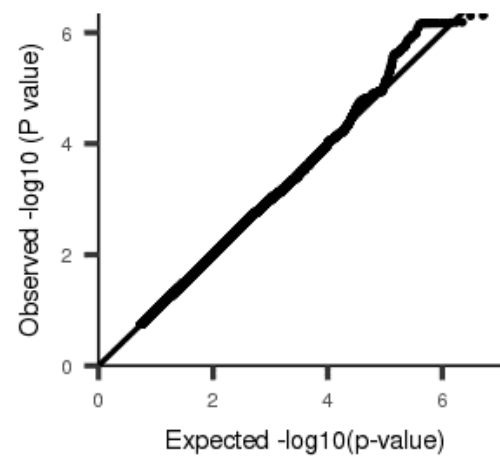

[back to list of plots](#)

Figure 1836: NETMAT edge (100) 0680

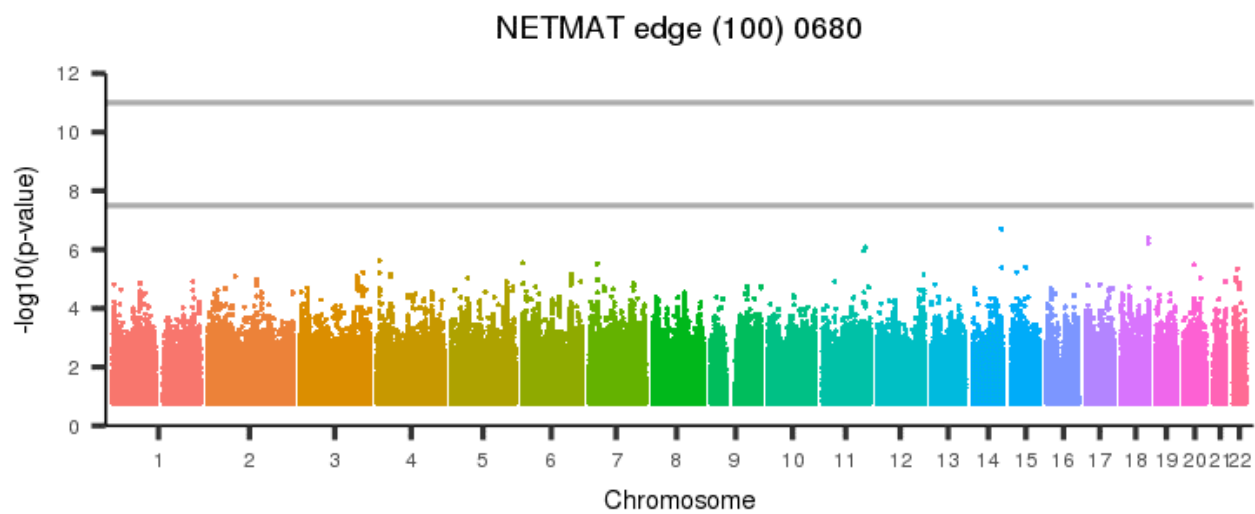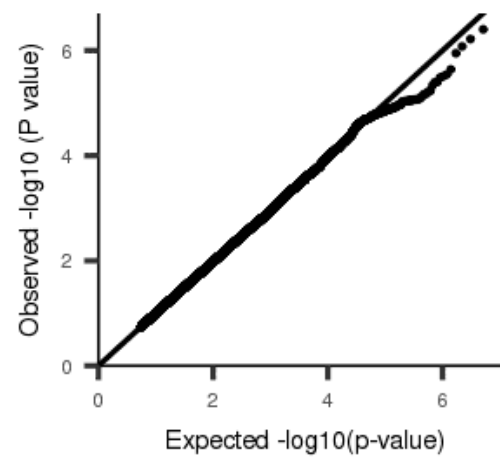

[back to list of plots](#)

Figure 1837: NETMAT edge (100) 0681

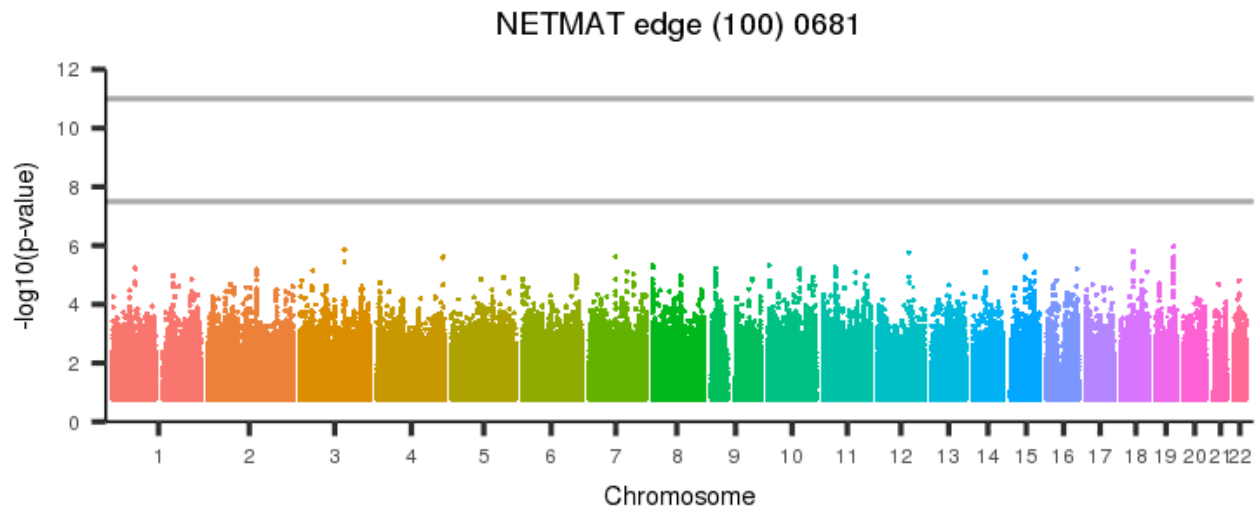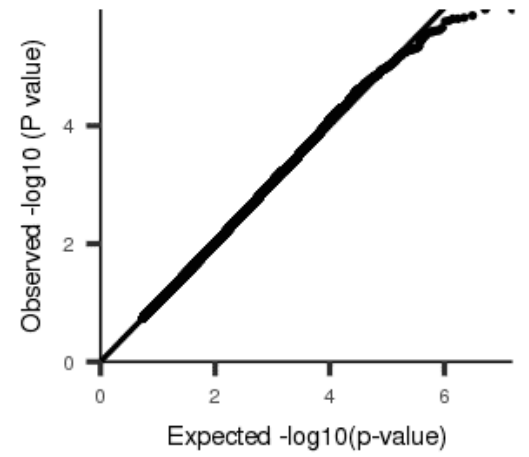

[back to list of plots](#)



Figure 1838: NETMAT edge (100) 0682

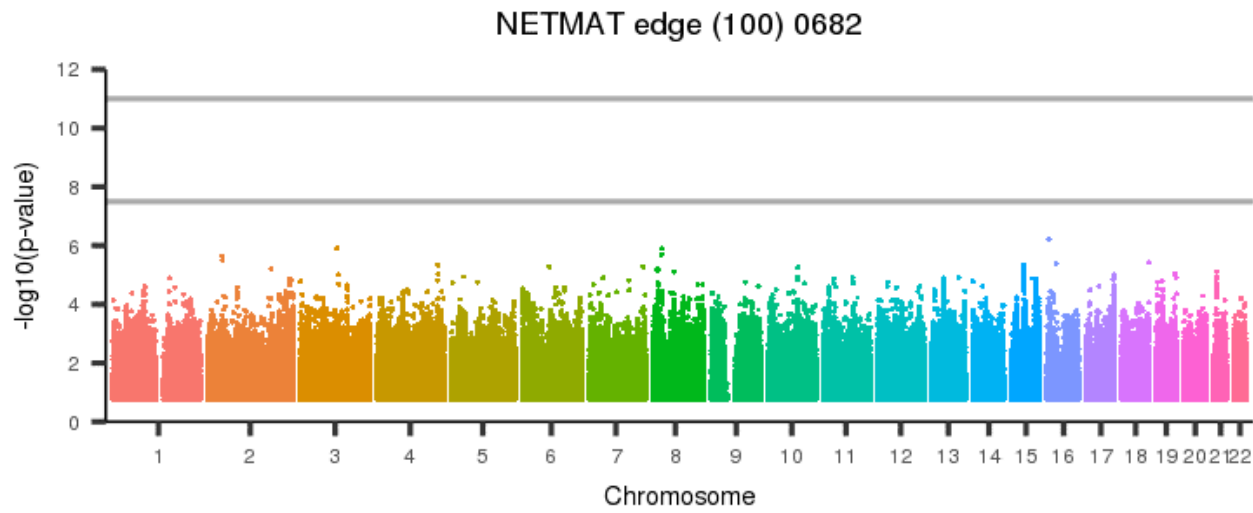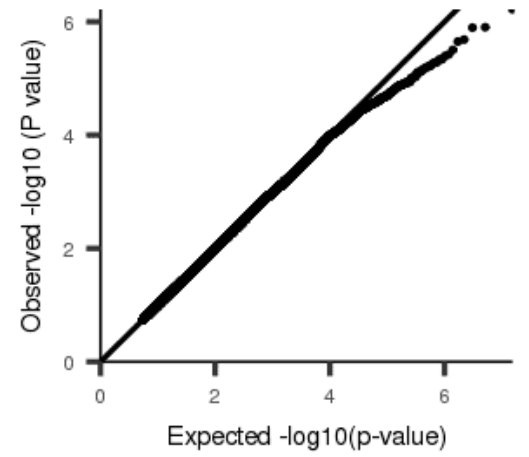

[back to list of plots](#)

Figure 1839: NETMAT edge (100) 0683

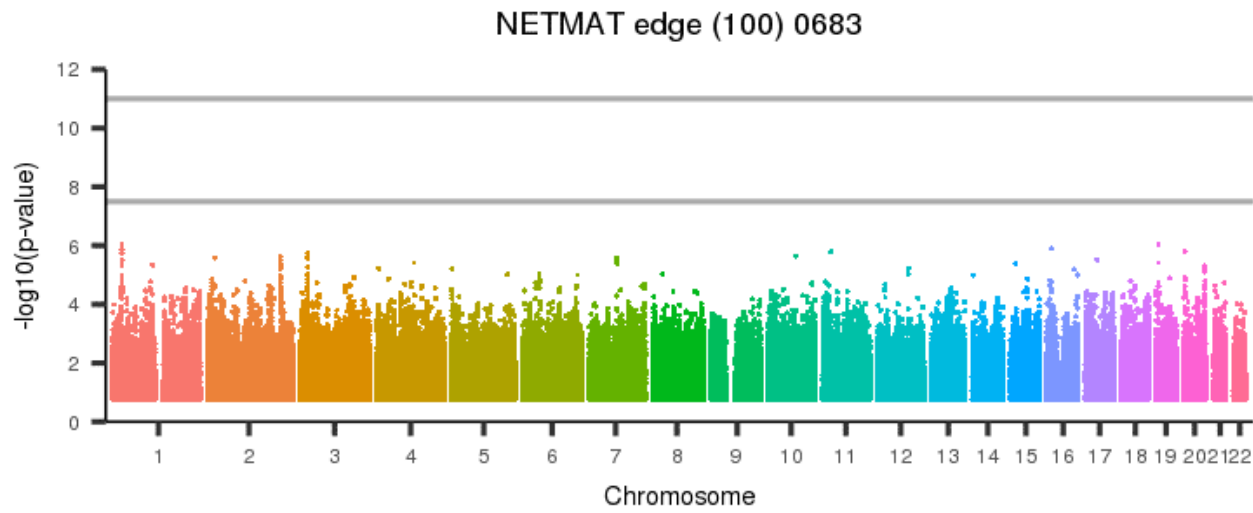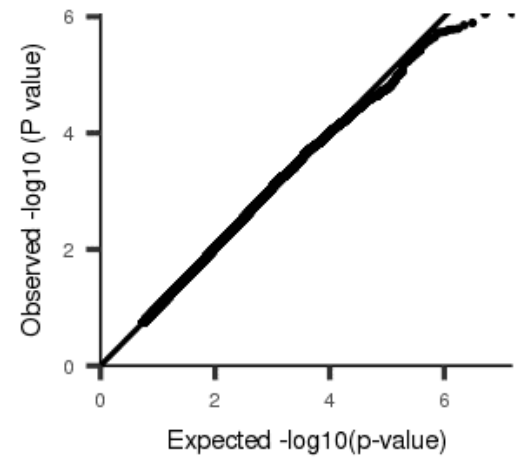

[back to list of plots](#)

Figure 1840: NETMAT edge (100) 0684

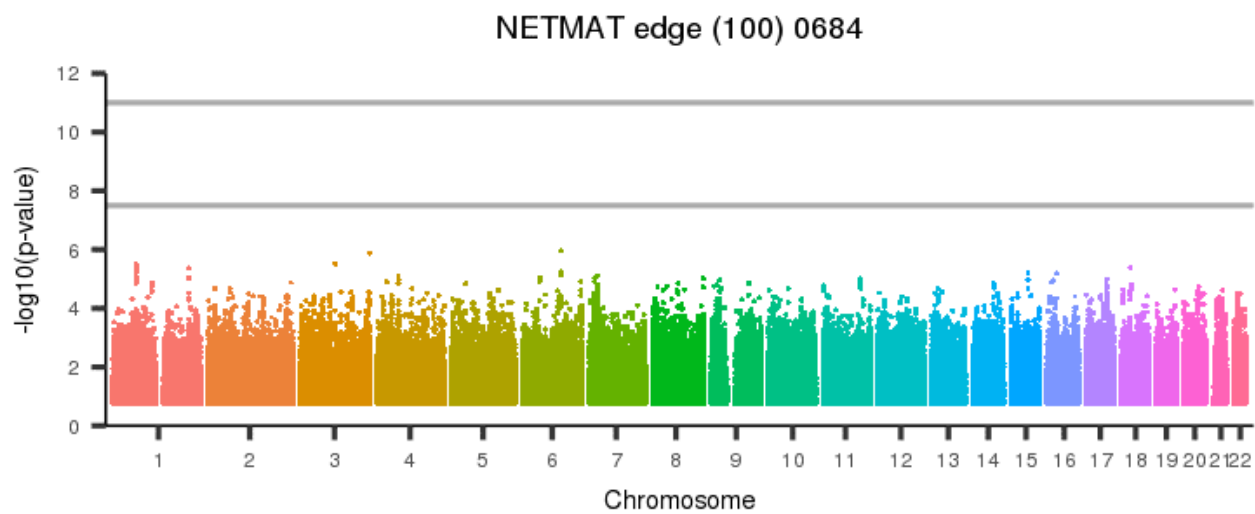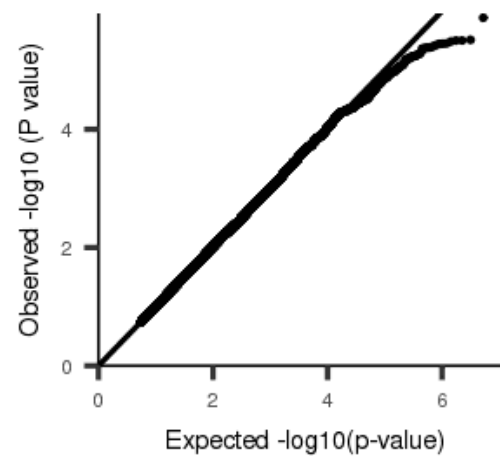

[back to list of plots](#)

Figure 1841: NETMAT edge (100) 0685

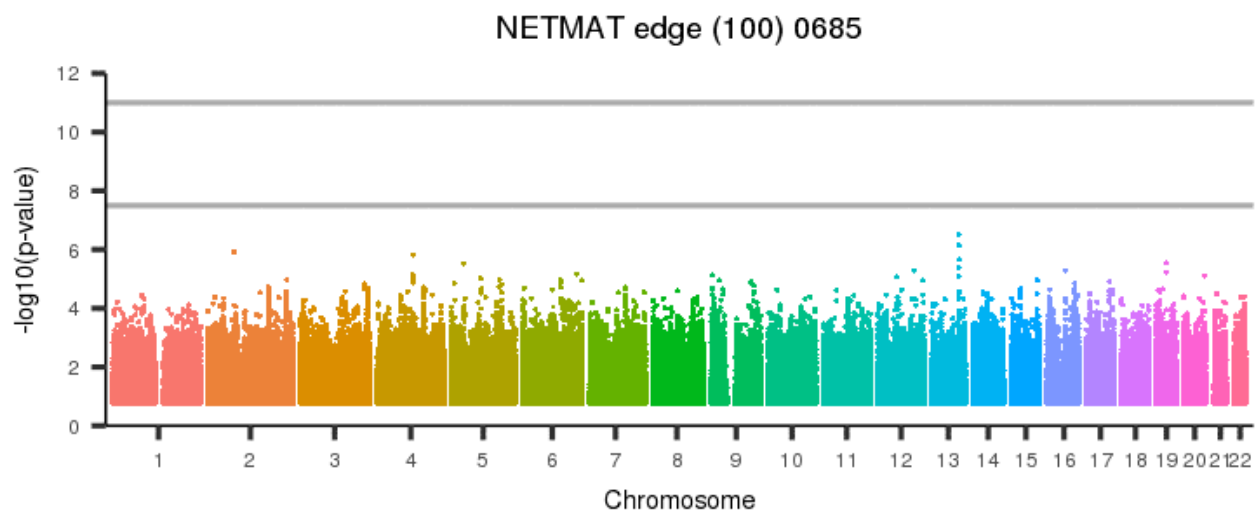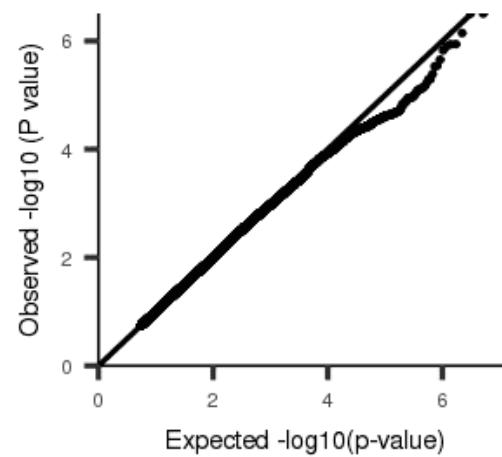

[back to list of plots](#)

Figure 1842: NETMAT edge (100) 0686

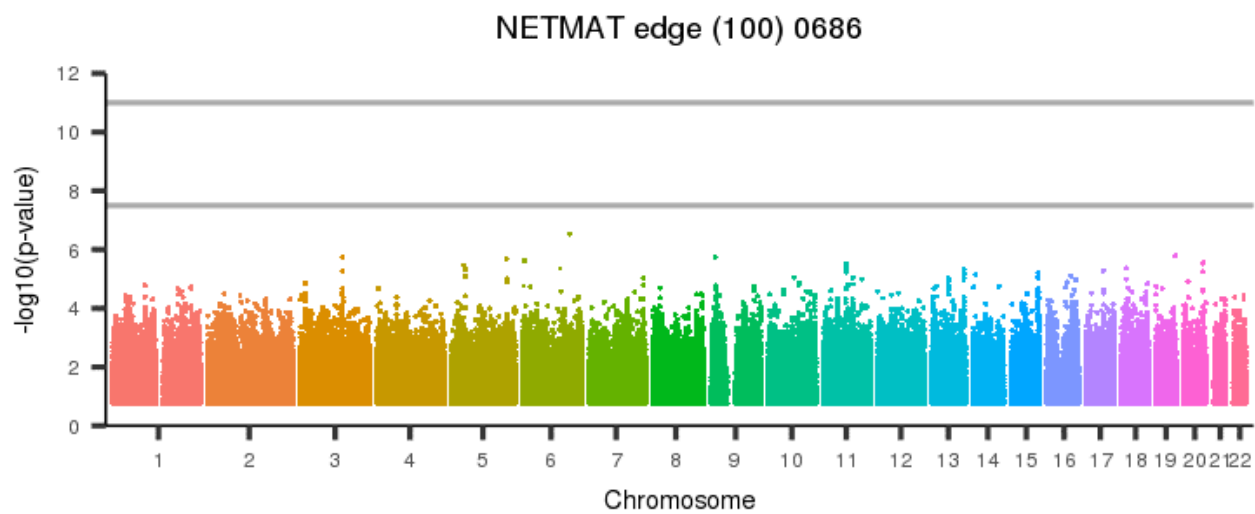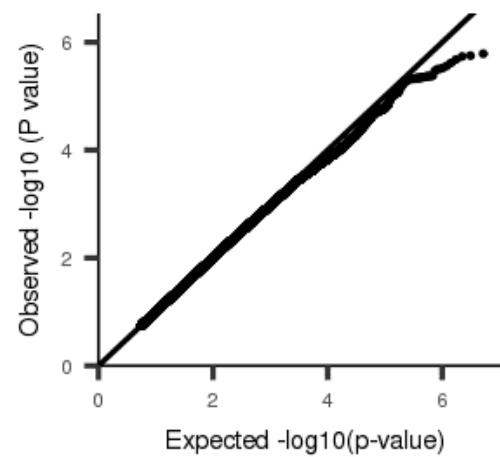

[back to list of plots](#)

Figure 1843: NETMAT edge (100) 0687

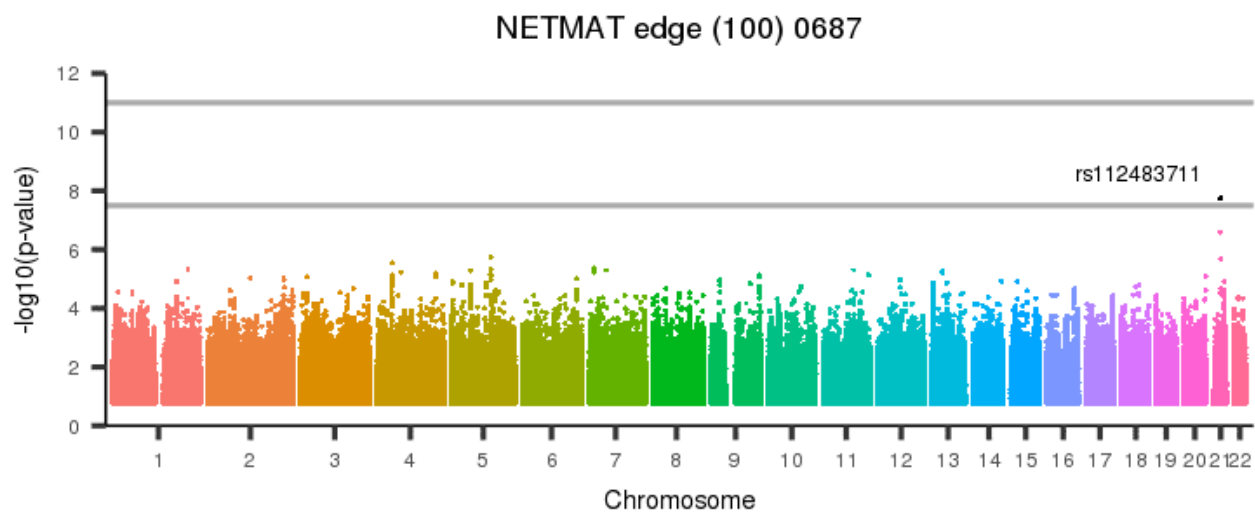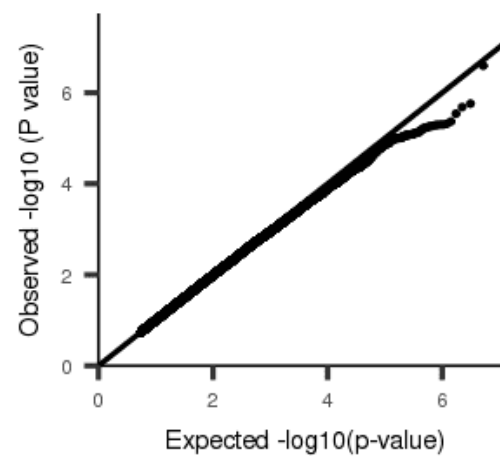

[back to list of plots](#)

Figure 1844: NETMAT edge (100) 0688

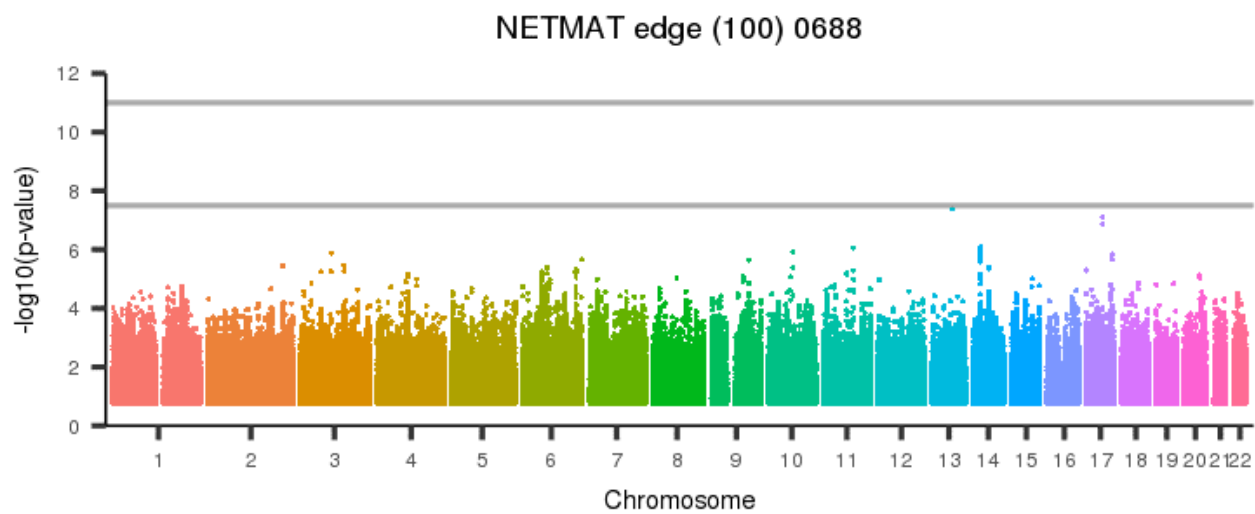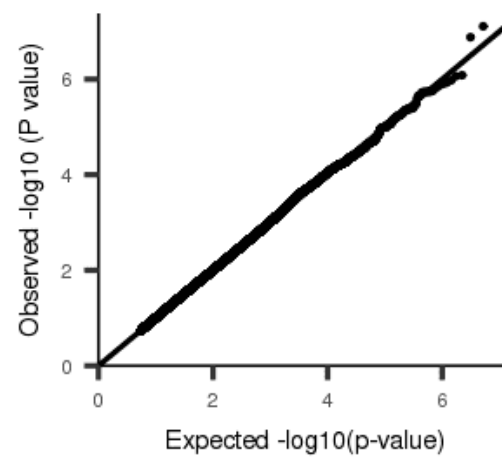

[back to list of plots](#)

Figure 1845: NETMAT edge (100) 0689

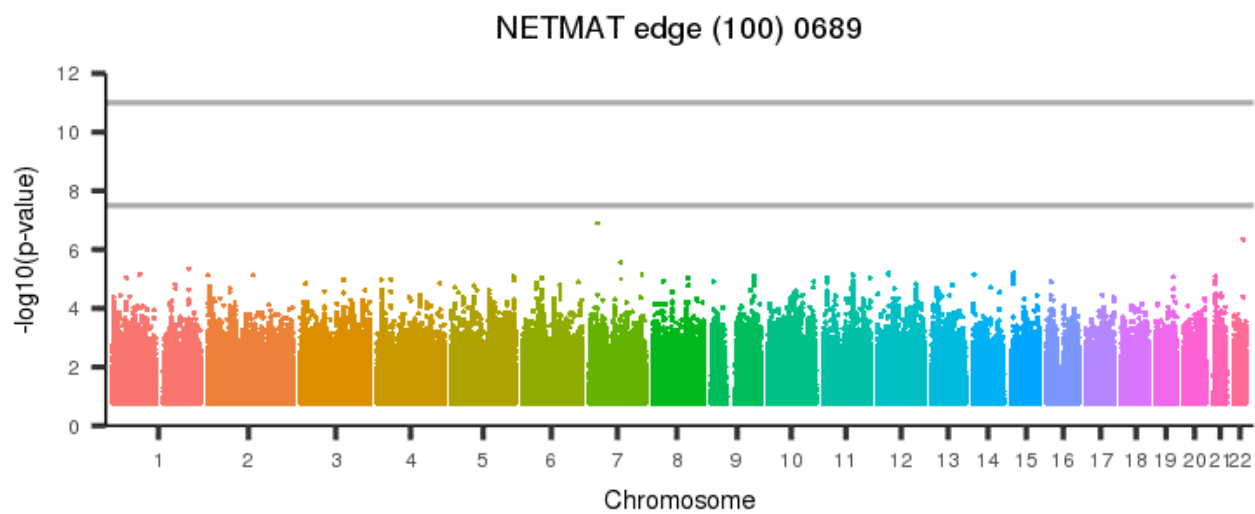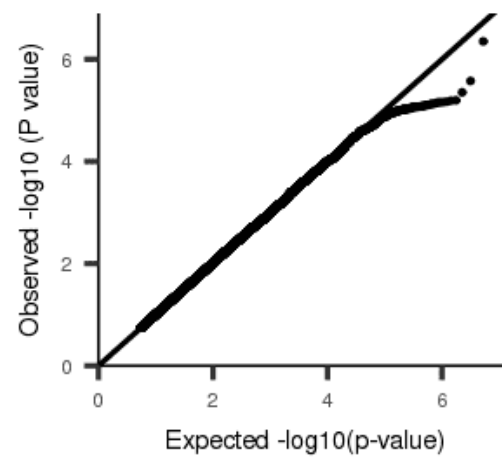

[back to list of plots](#)



Figure 1846: NETMAT edge (100) 0690

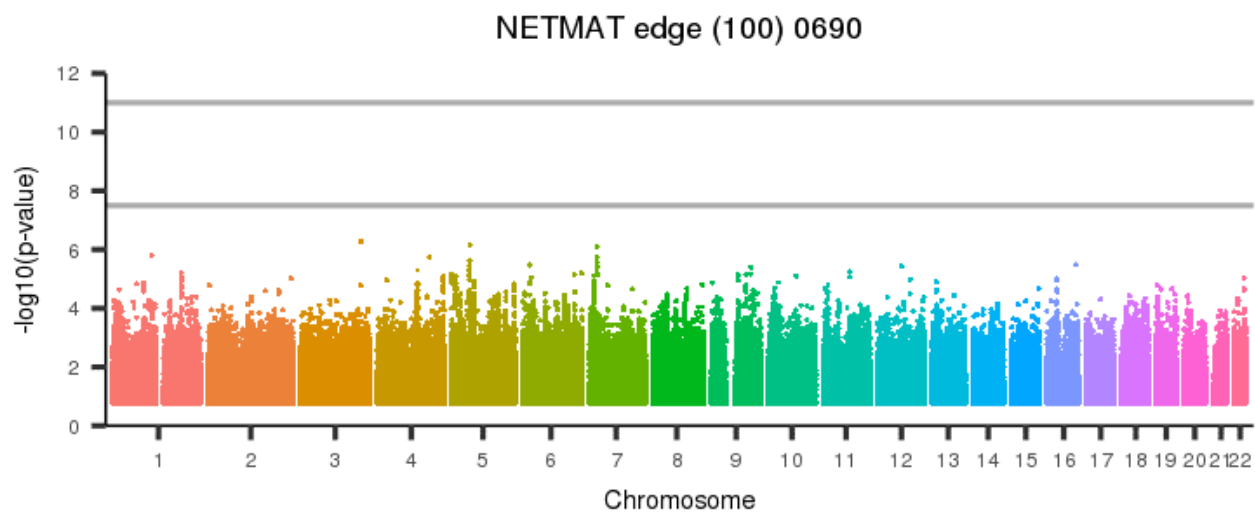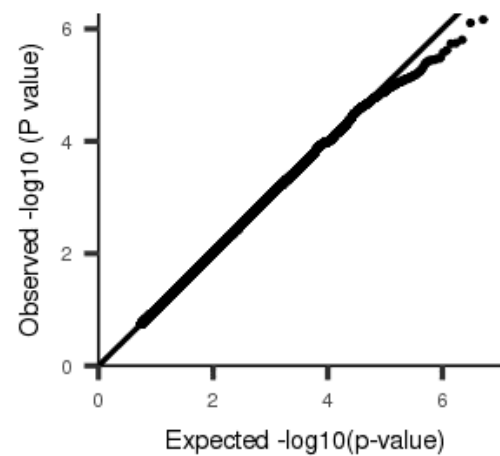

[back to list of plots](#)

Figure 1847: NETMAT edge (100) 0691

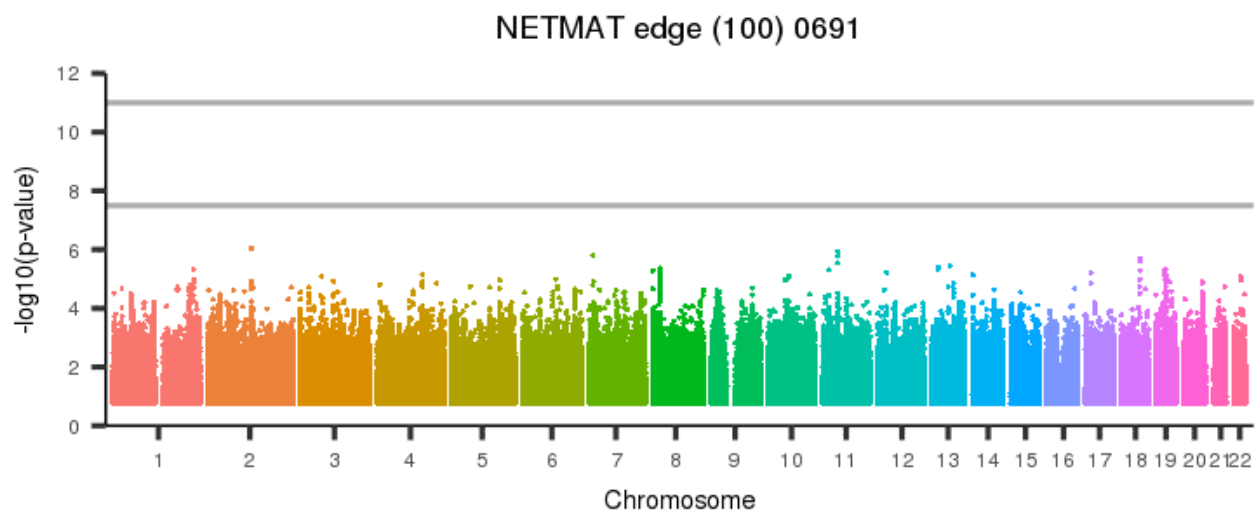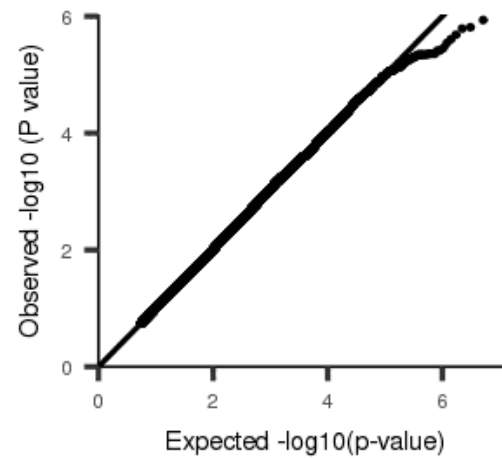

[back to list of plots](#)

Figure 1848: NETMAT edge (100) 0692

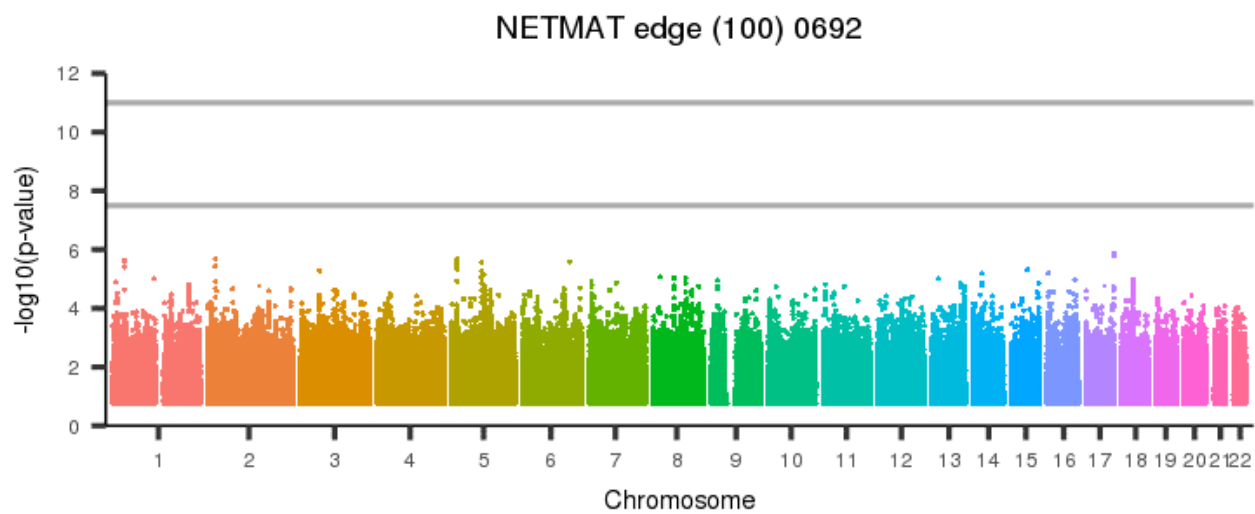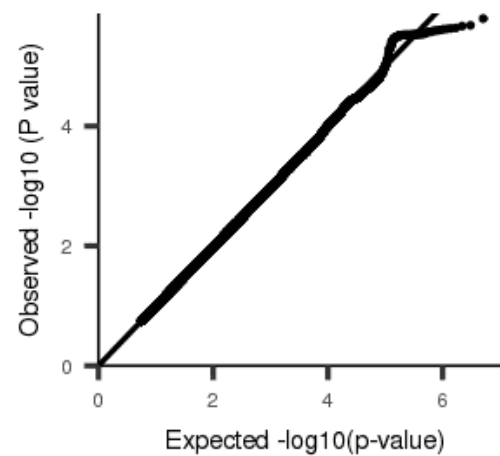

[back to list of plots](#)

Figure 1849: NETMAT edge (100) 0693

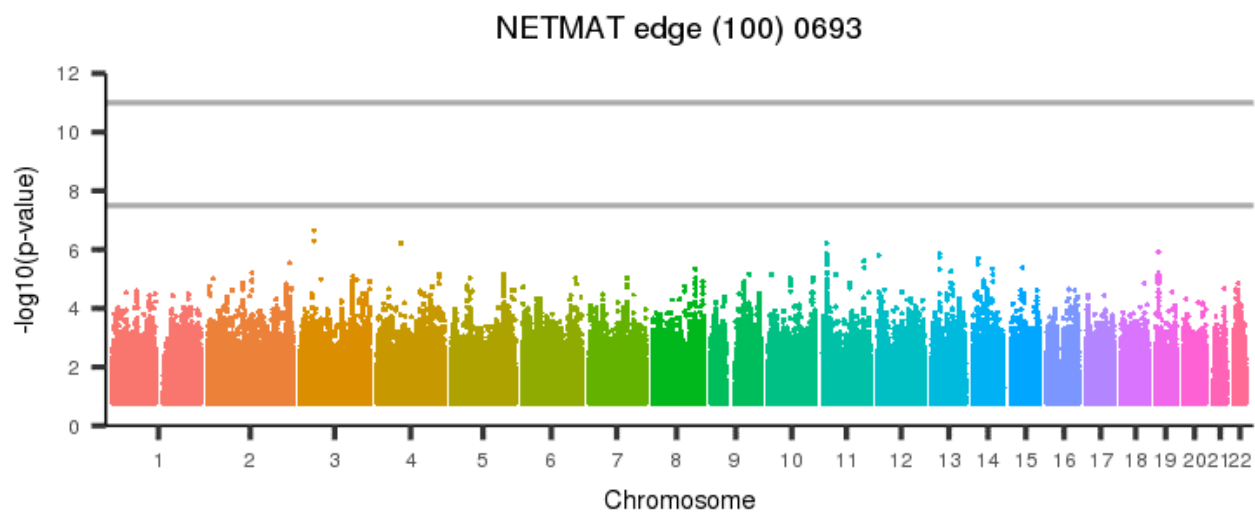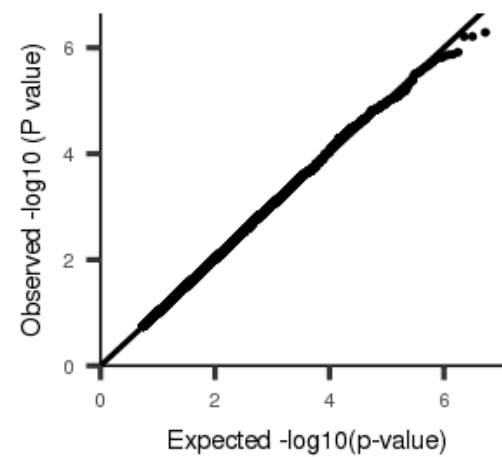

[back to list of plots](#)

Figure 1850: NETMAT edge (100) 0694

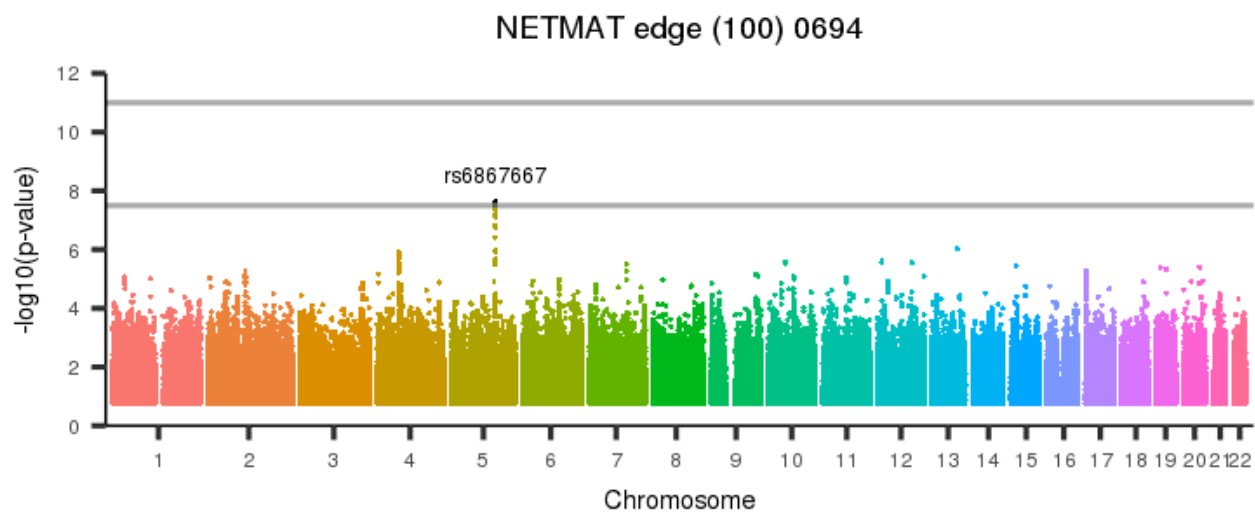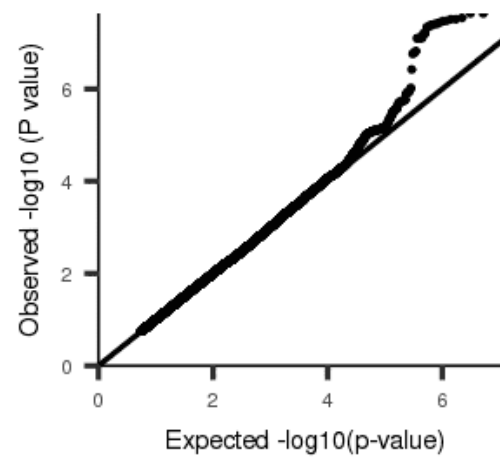

[back to list of plots](#)

Figure 1851: NETMAT edge (100) 0695

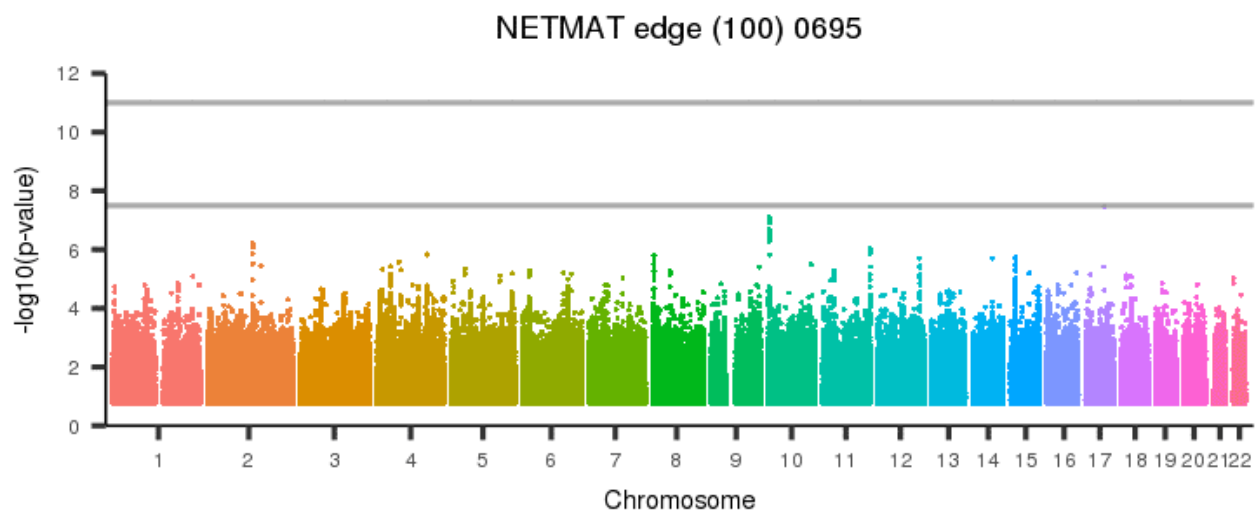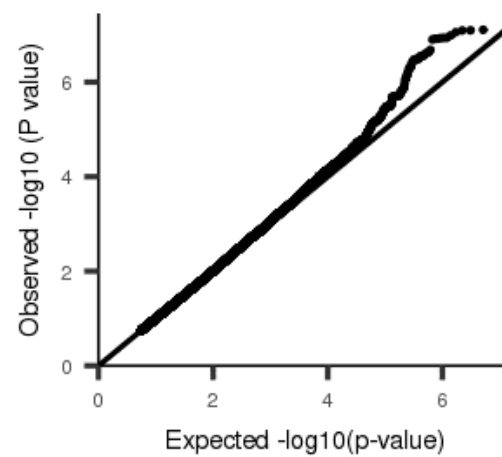

[back to list of plots](#)

Figure 1852: NETMAT edge (100) 0696

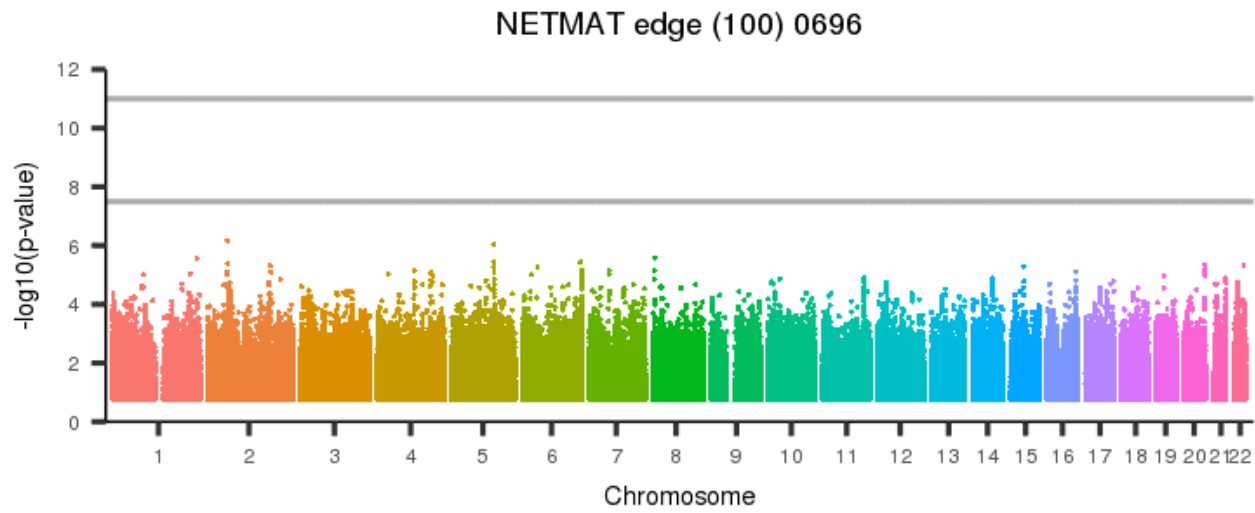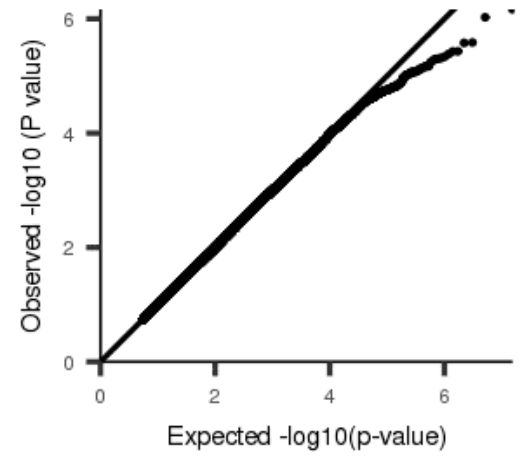

[back to list of plots](#)

Figure 1853: NETMAT edge (100) 0697

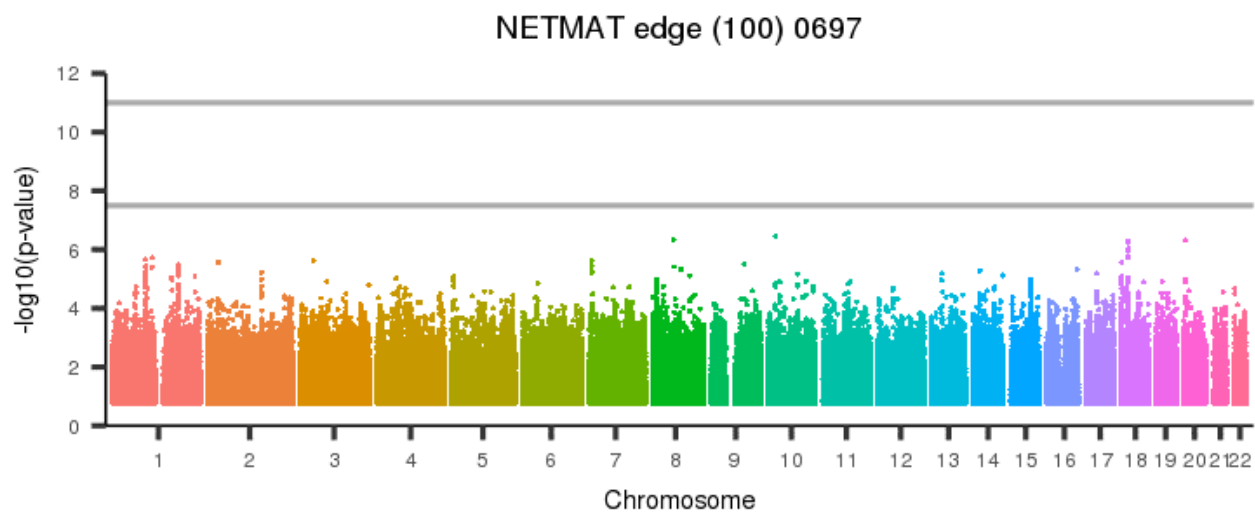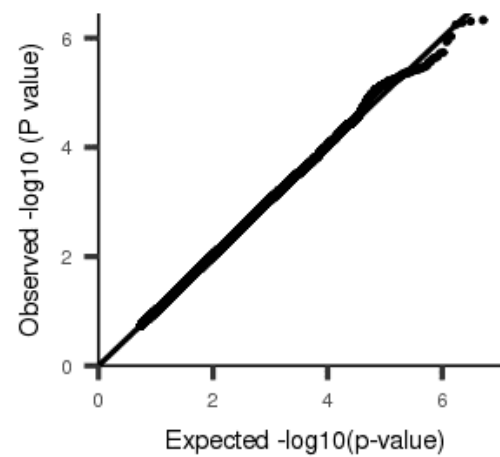

[back to list of plots](#)



Figure 1854: NETMAT edge (100) 0698

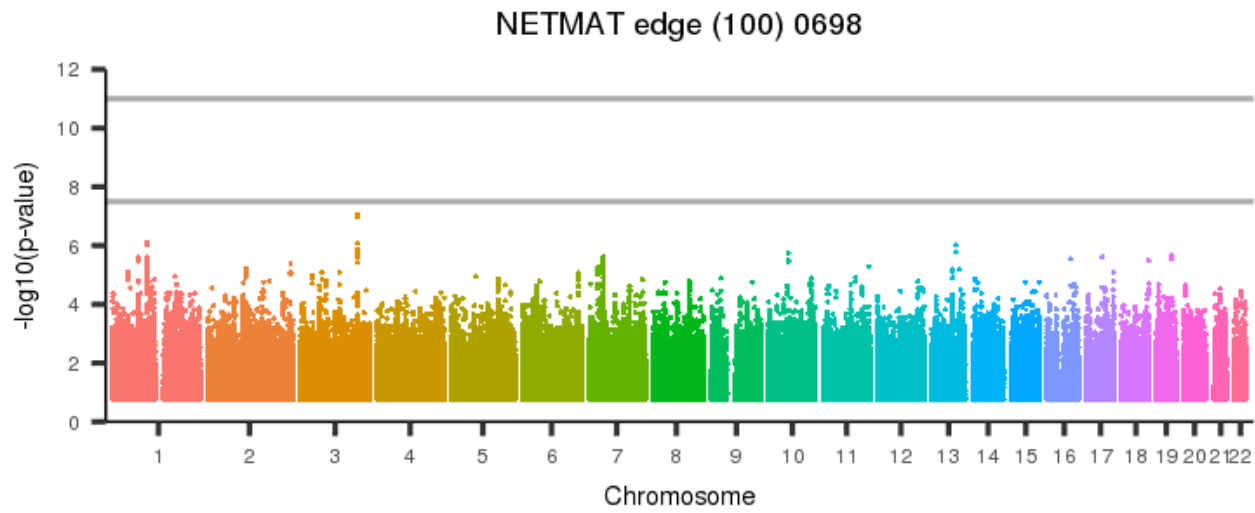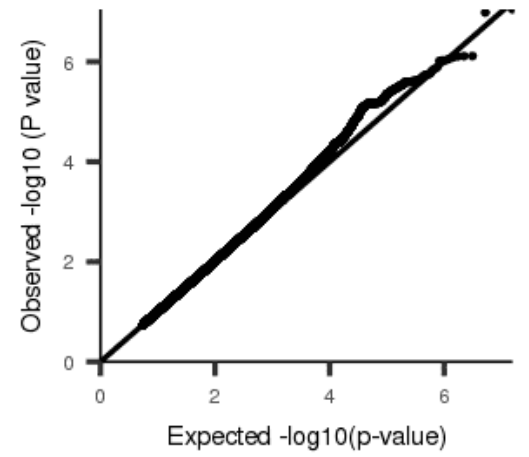

[back to list of plots](#)

Figure 1855: NETMAT edge (100) 0699

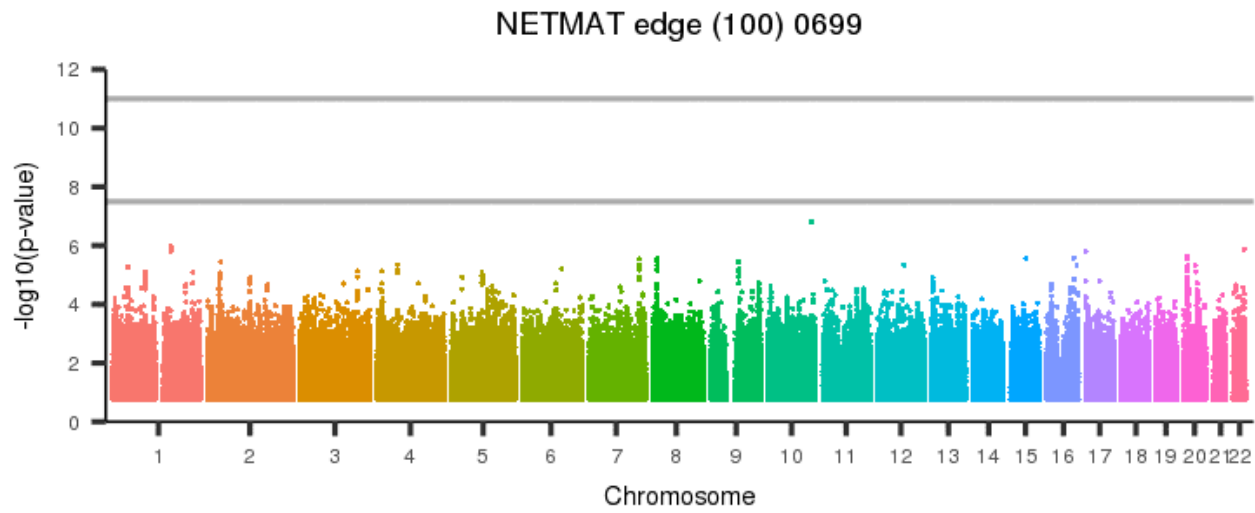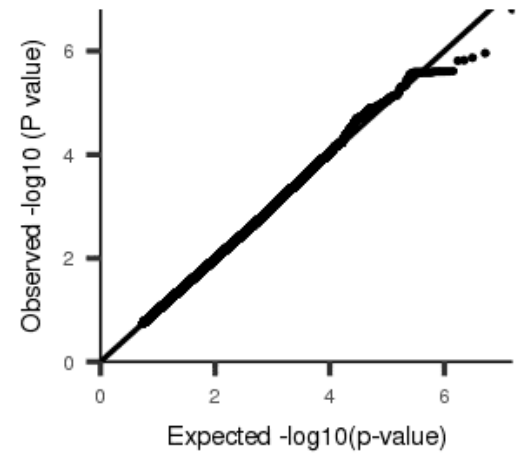

[back to list of plots](#)

Figure 1856: NETMAT edge (100) 0700

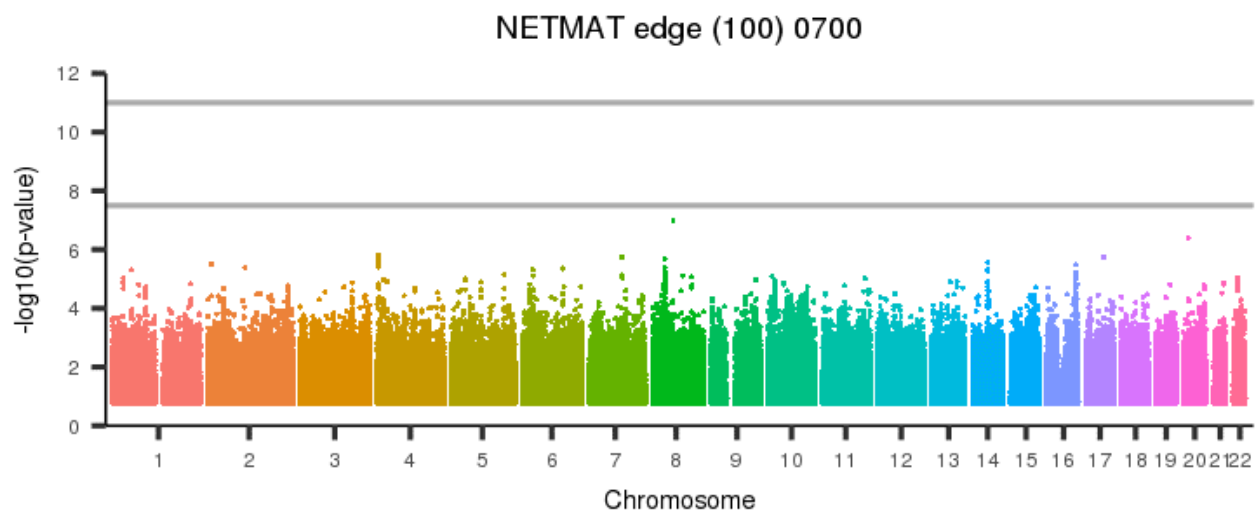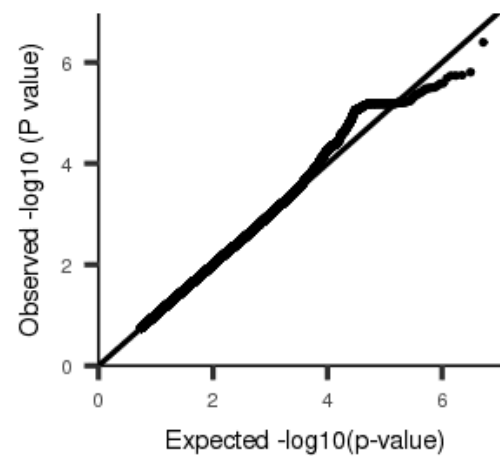

[back to list of plots](#)

Figure 1857: NETMAT edge (100) 0701

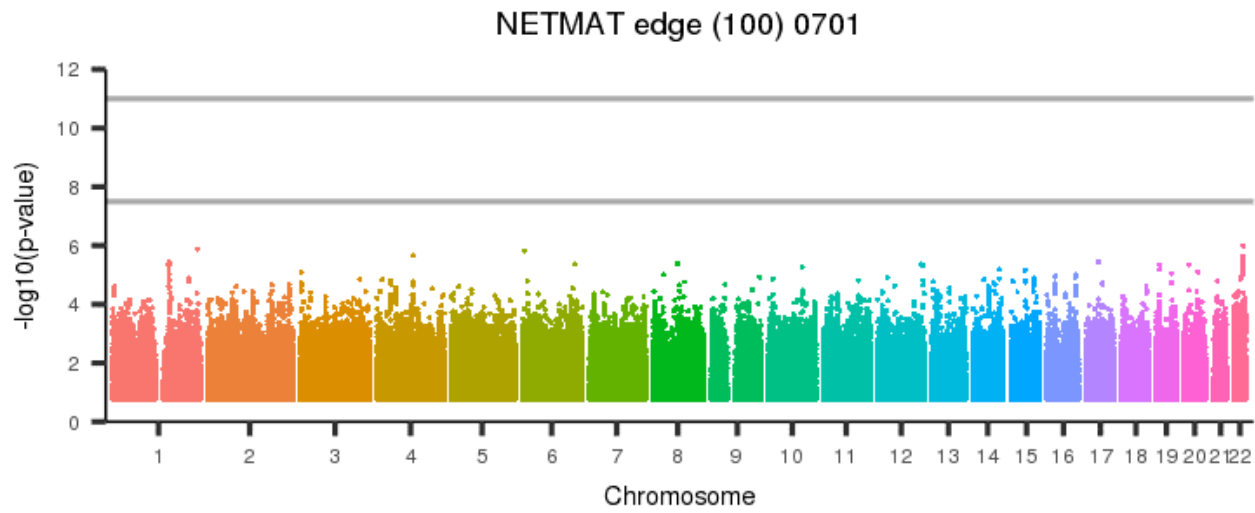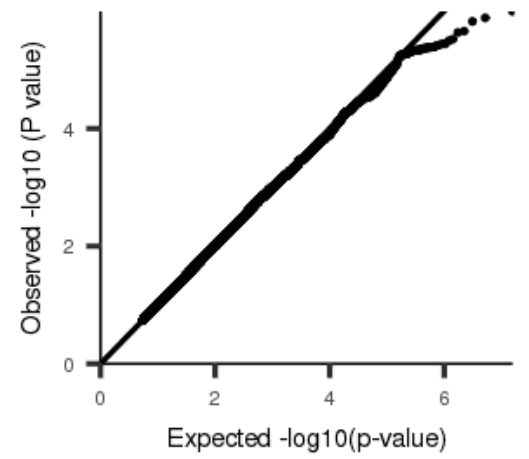

[back to list of plots](#)

Figure 1858: NETMAT edge (100) 0702

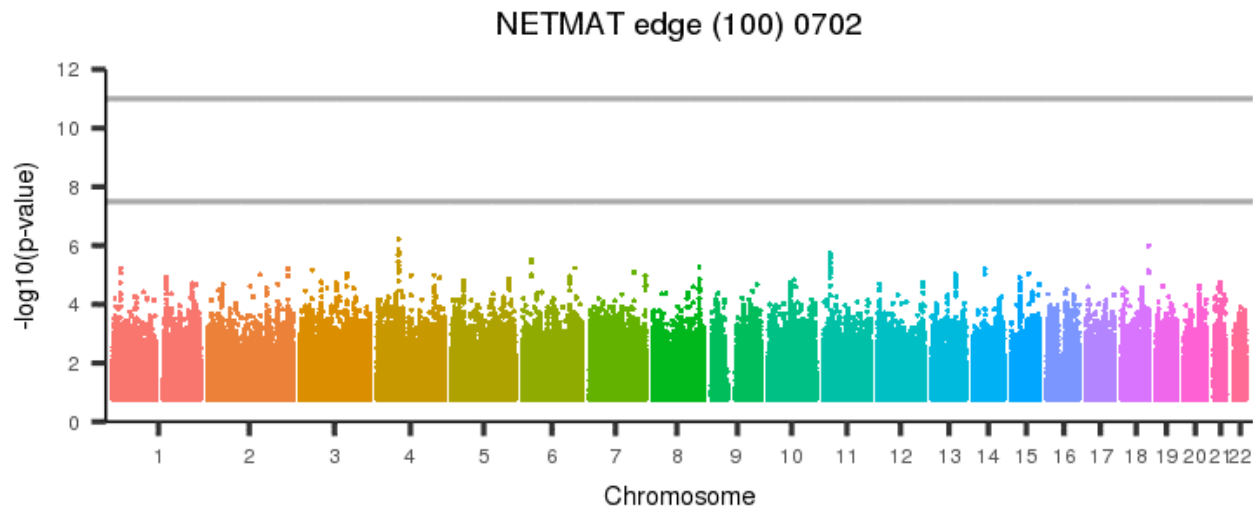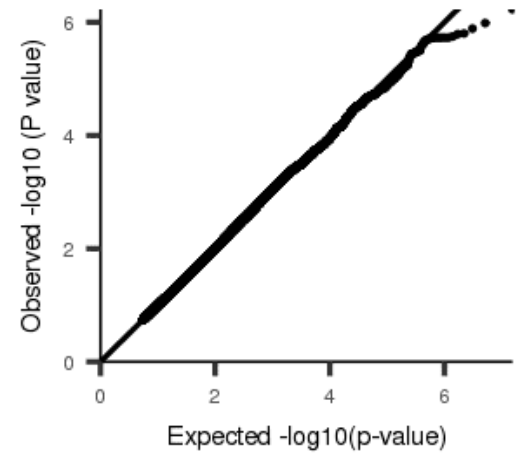

[back to list of plots](#)

Figure 1859: NETMAT edge (100) 0703

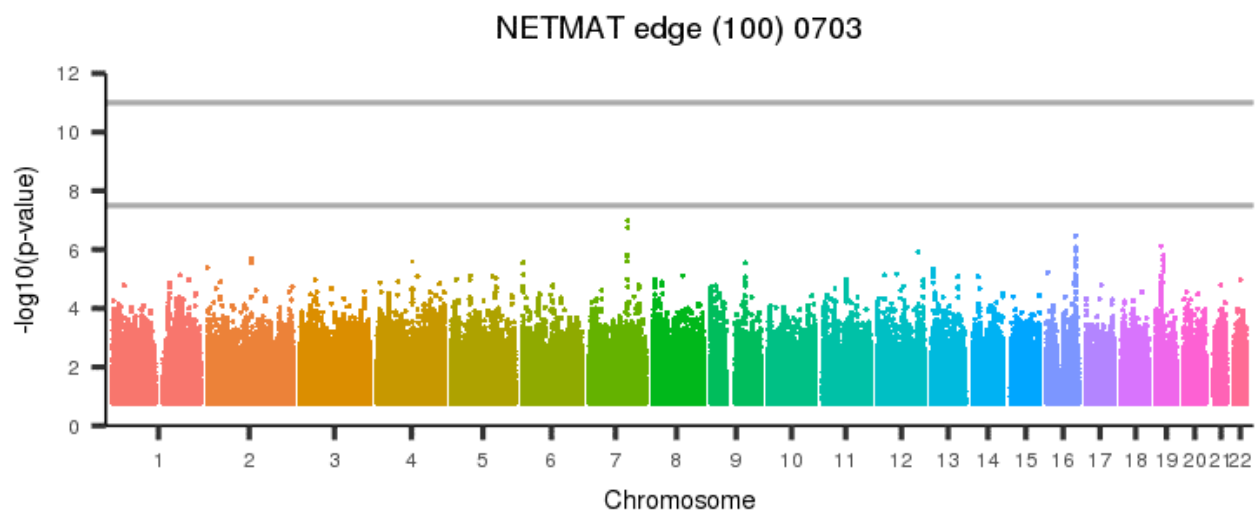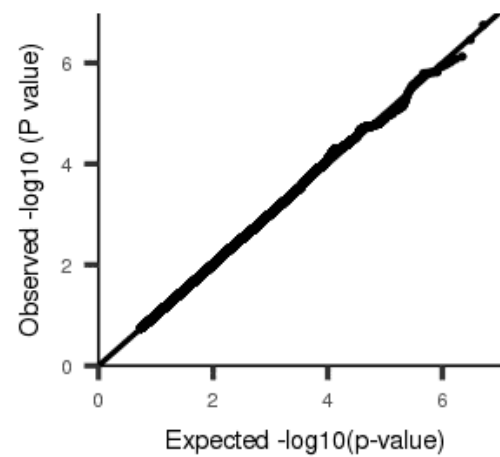

[back to list of plots](#)

Figure 1860: NETMAT edge (100) 0704

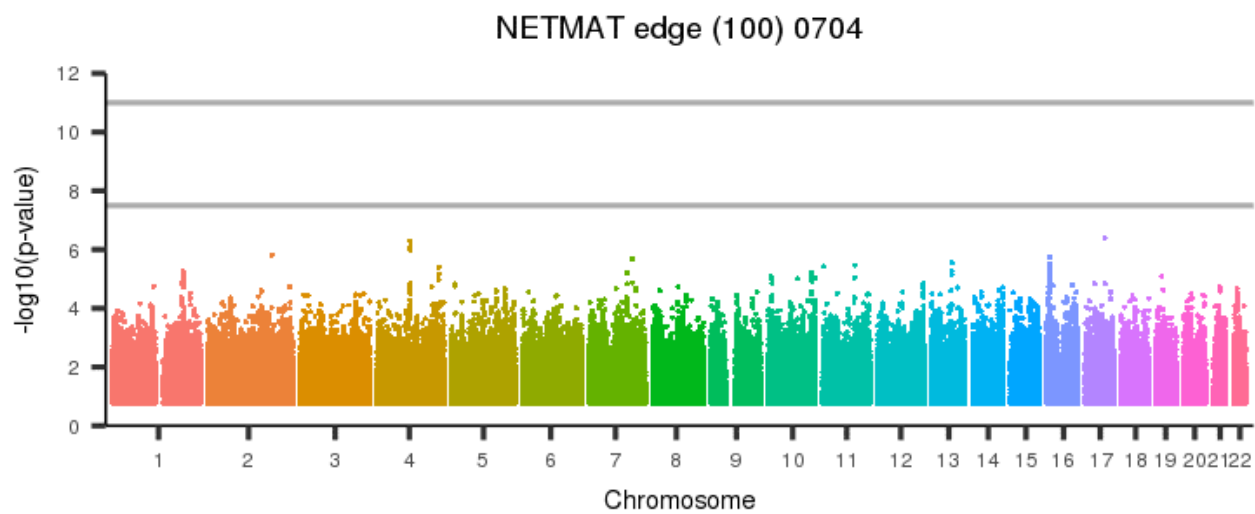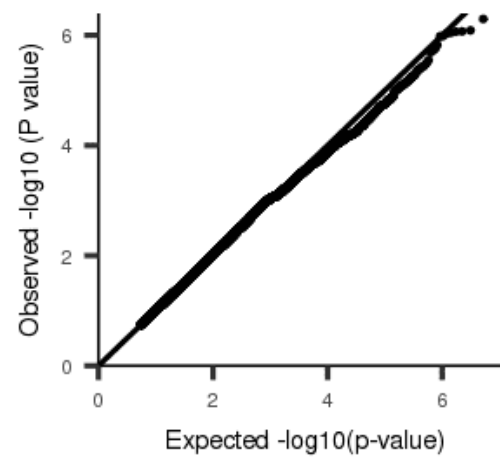

[back to list of plots](#)

Figure 1861: NETMAT edge (100) 0705

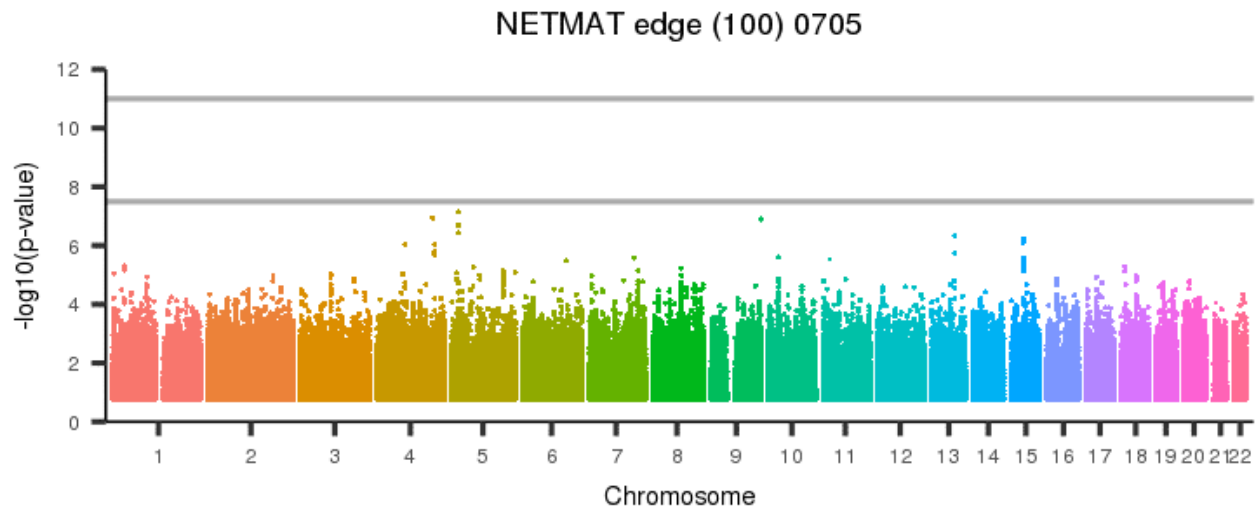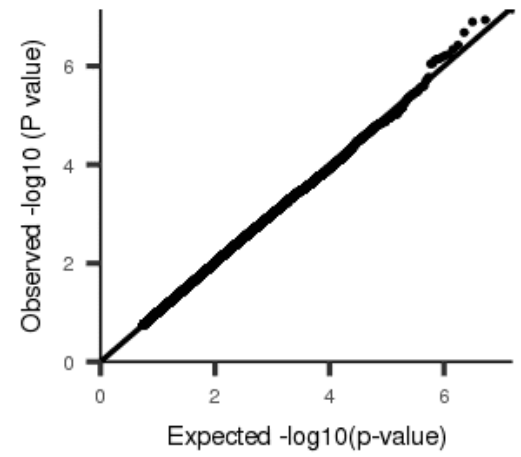

[back to list of plots](#)



Figure 1862: NETMAT edge (100) 0706

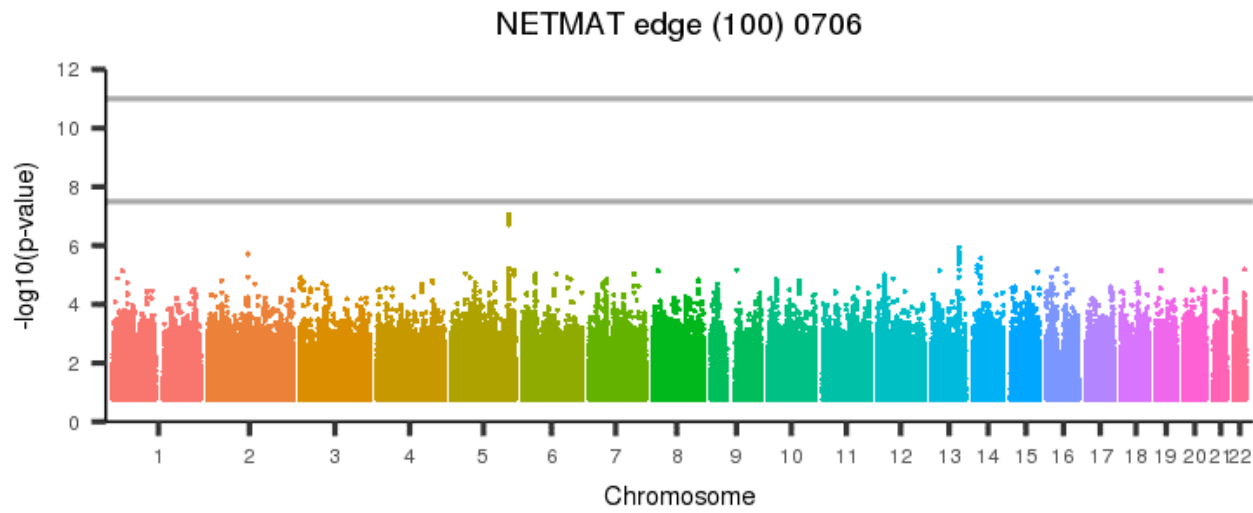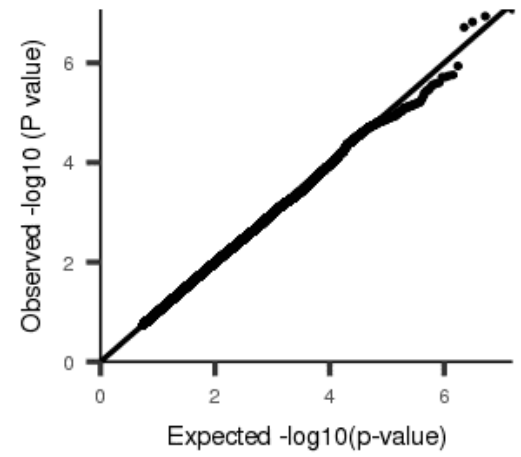

[back to list of plots](#)

Figure 1863: NETMAT edge (100) 0707

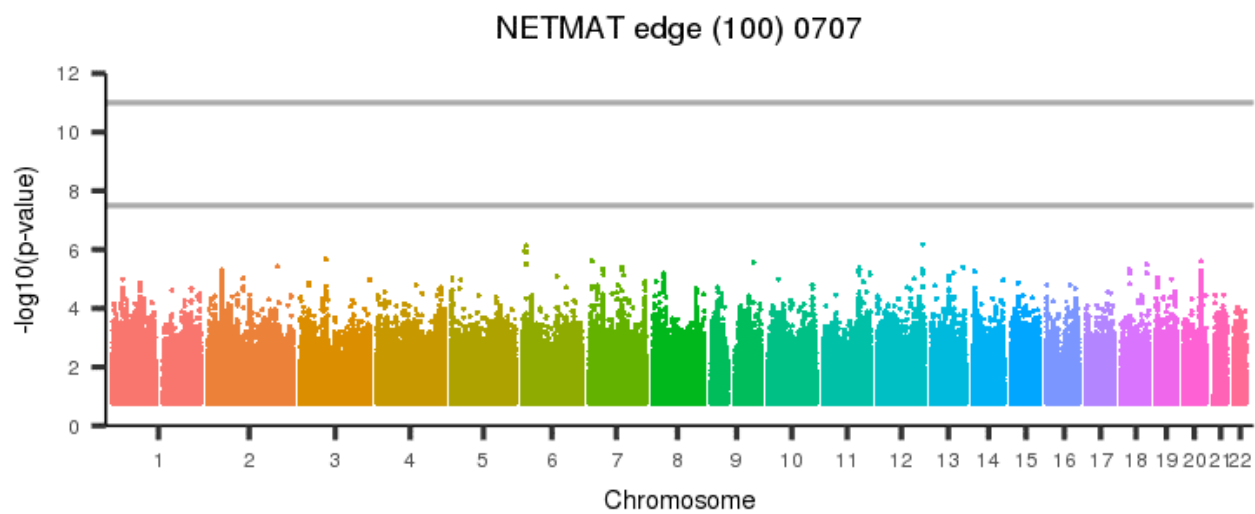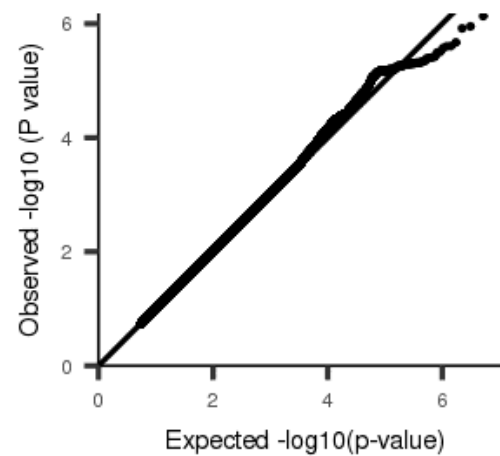

[back to list of plots](#)

Figure 1864: NETMAT edge (100) 0708

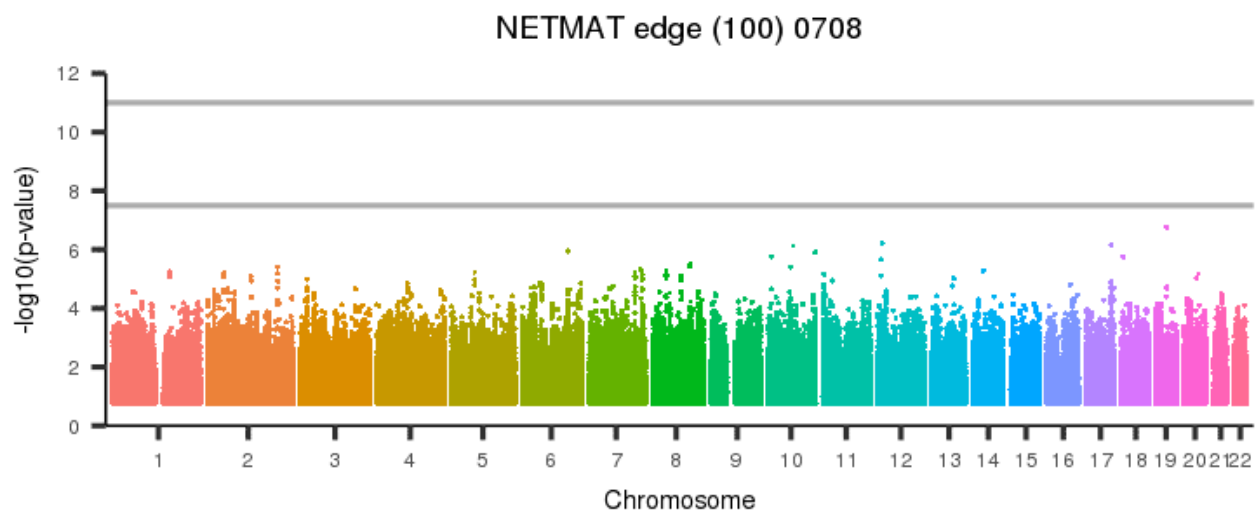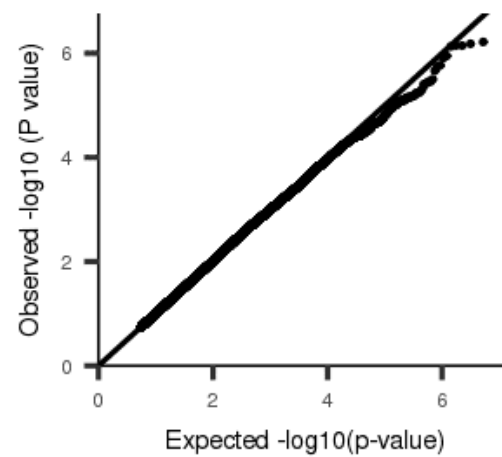

[back to list of plots](#)

Figure 1865: NETMAT edge (100) 0709

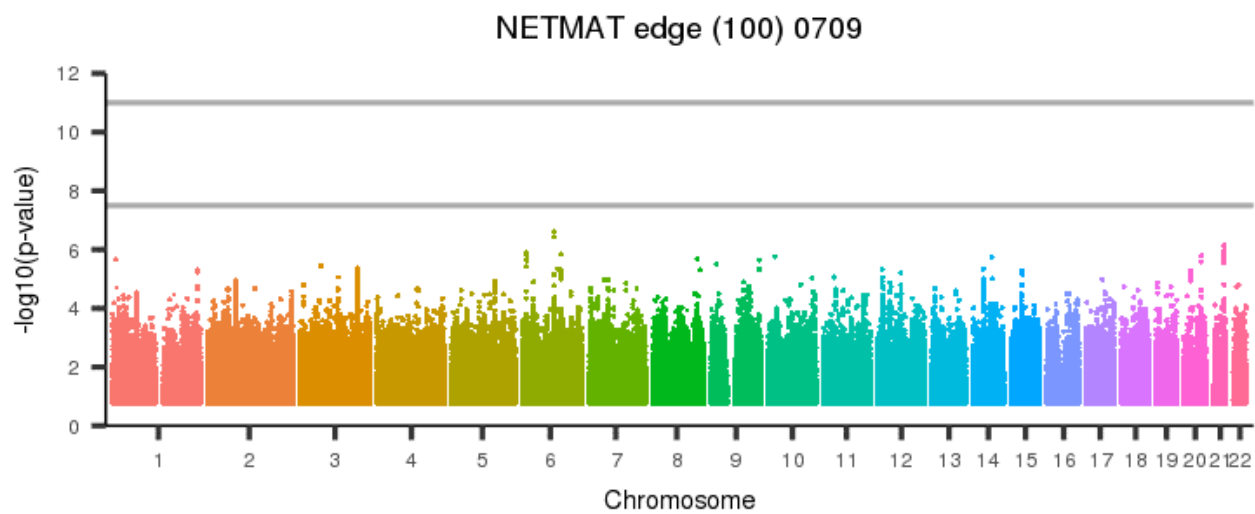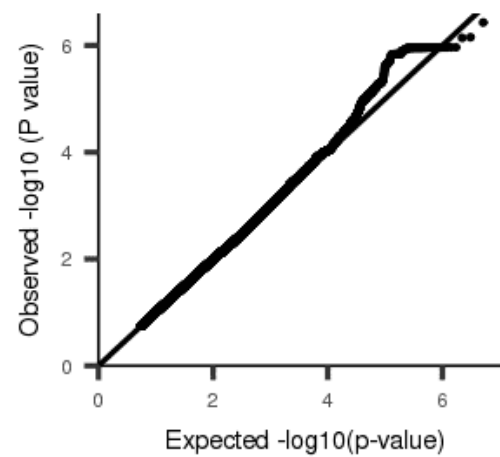

[back to list of plots](#)

Figure 1866: NETMAT edge (100) 0710

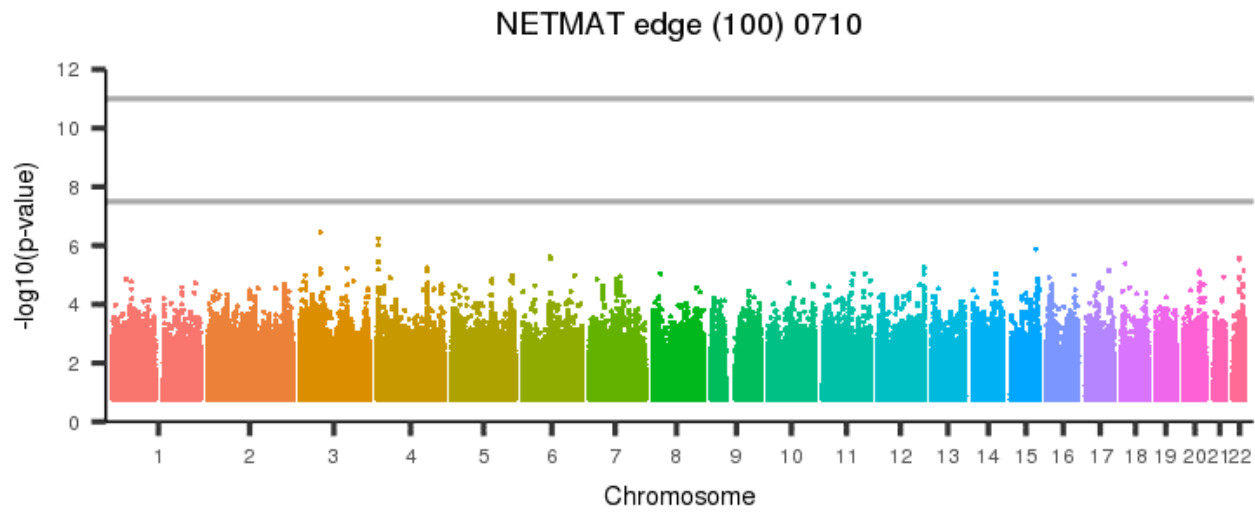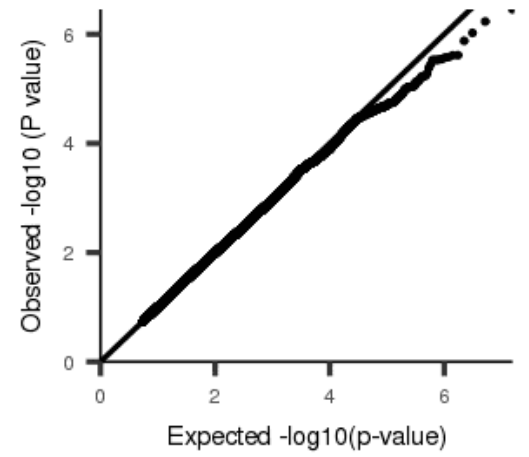

[back to list of plots](#)

Figure 1867: NETMAT edge (100) 0711

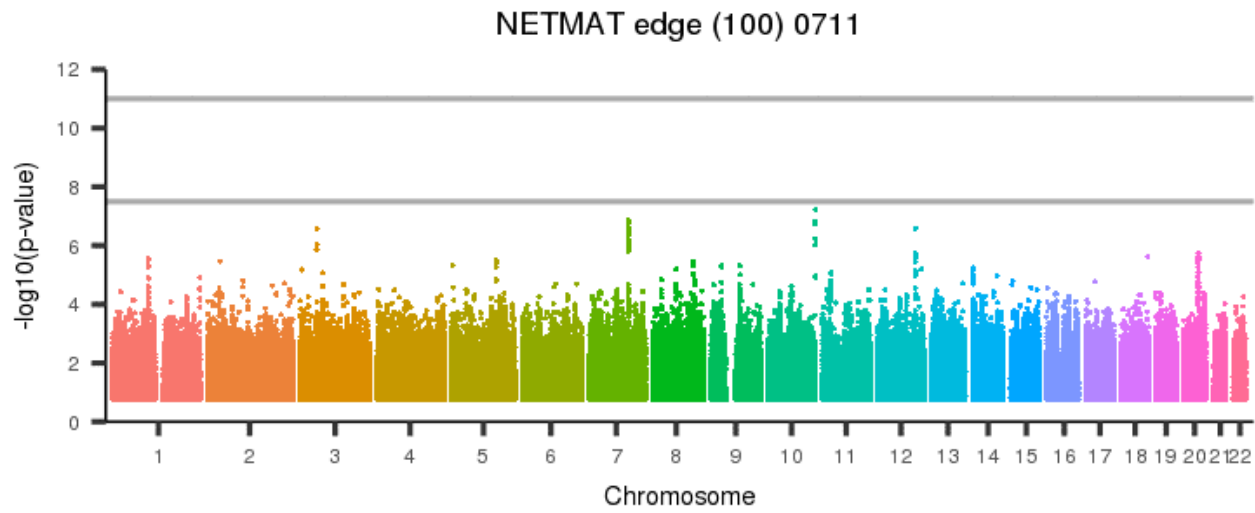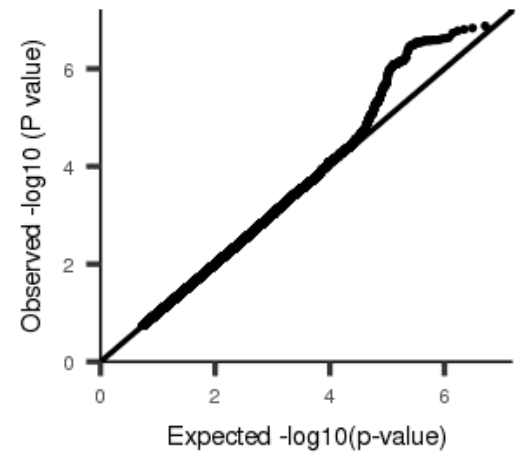

[back to list of plots](#)

Figure 1868: NETMAT edge (100) 0712

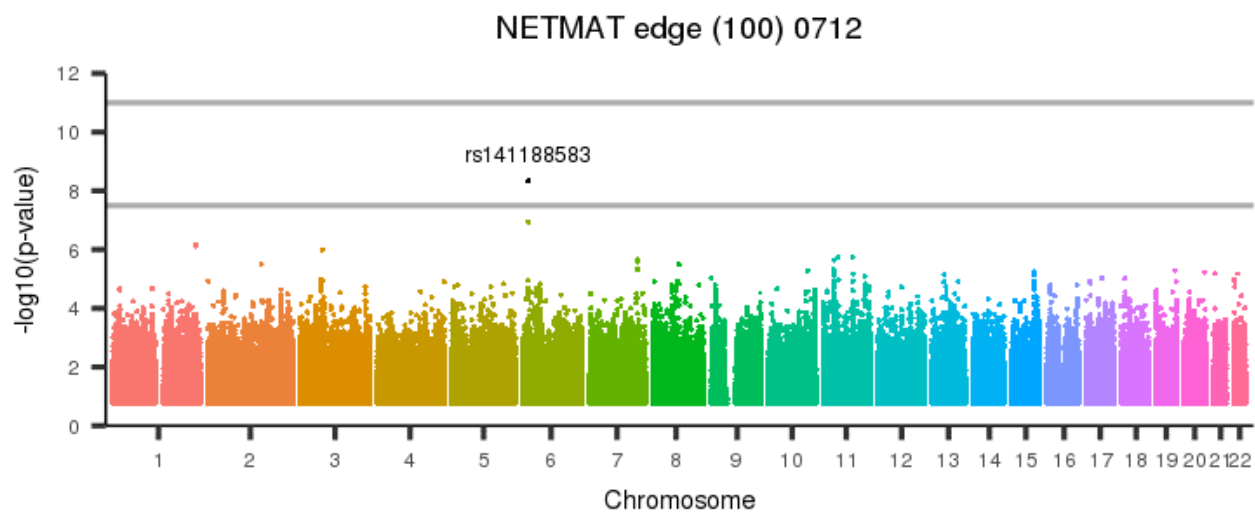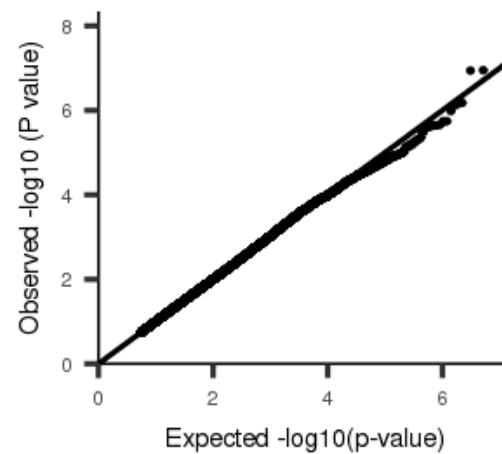

[back to list of plots](#)

Figure 1869: NETMAT edge (100) 0713

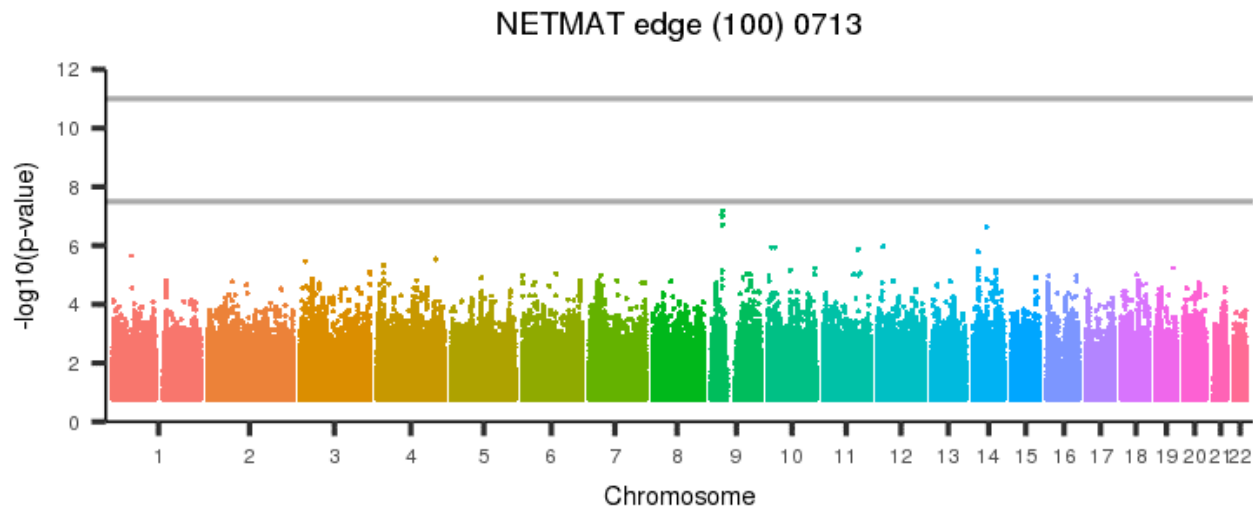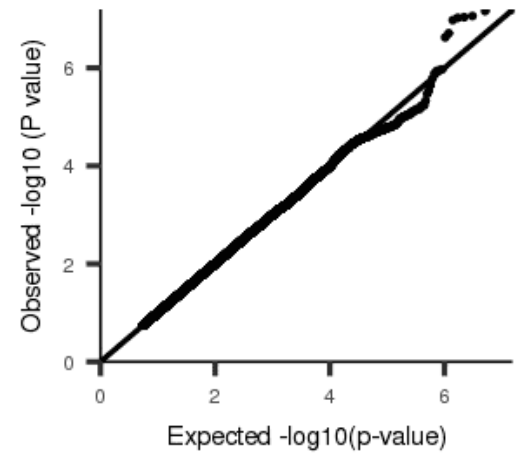

[back to list of plots](#)



Figure 1870: NETMAT edge (100) 0714

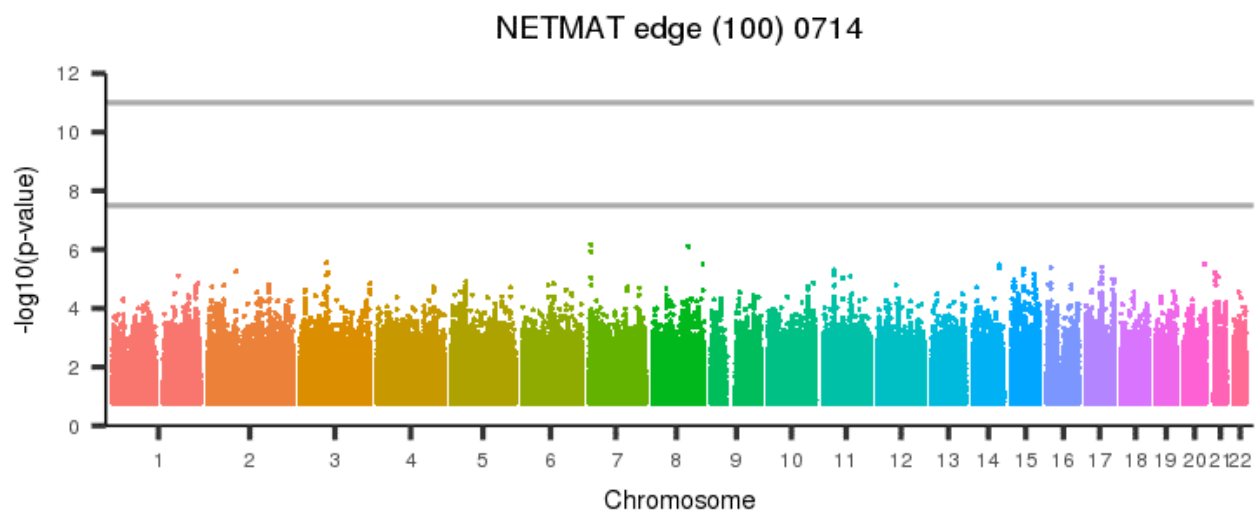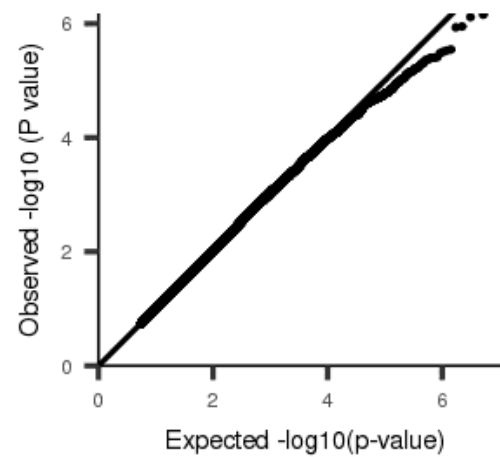

[back to list of plots](#)

Figure 1871: NETMAT edge (100) 0715

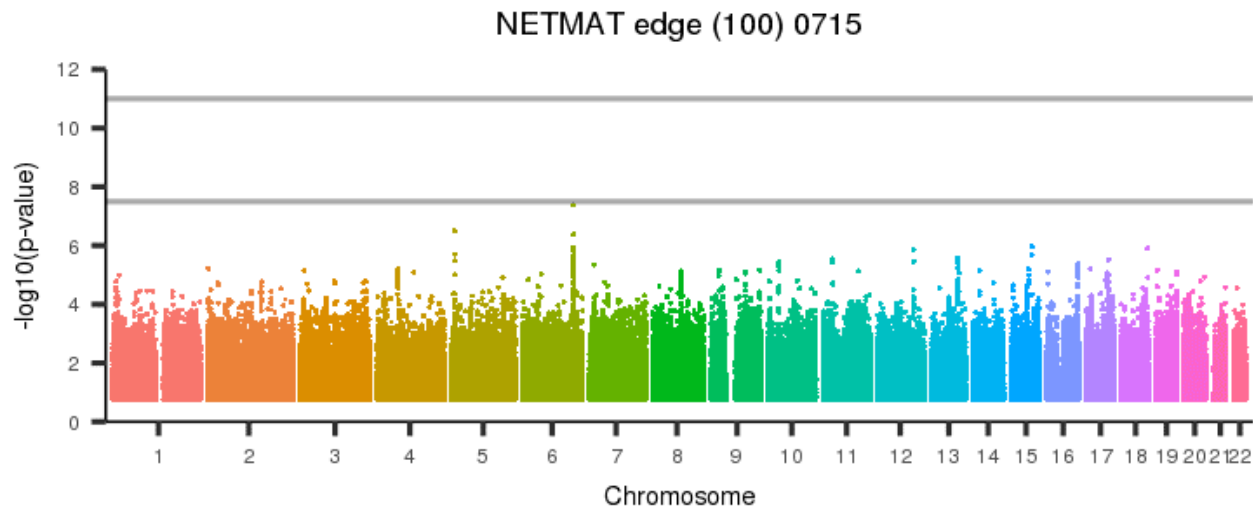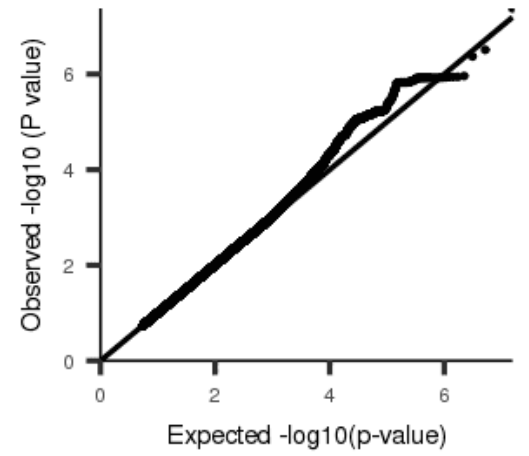

[back to list of plots](#)

Figure 1872: NETMAT edge (100) 0716

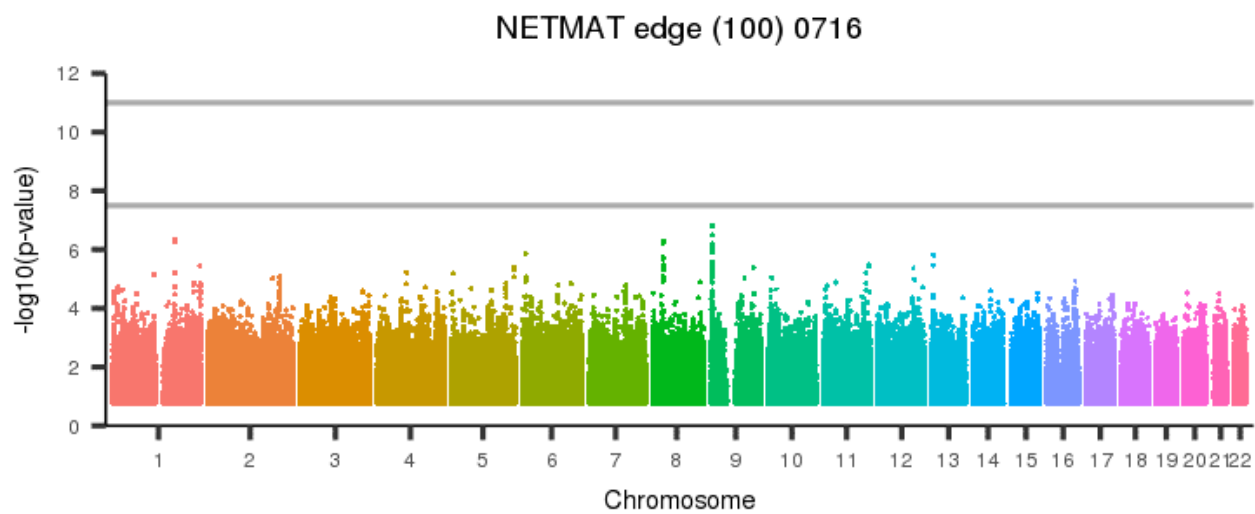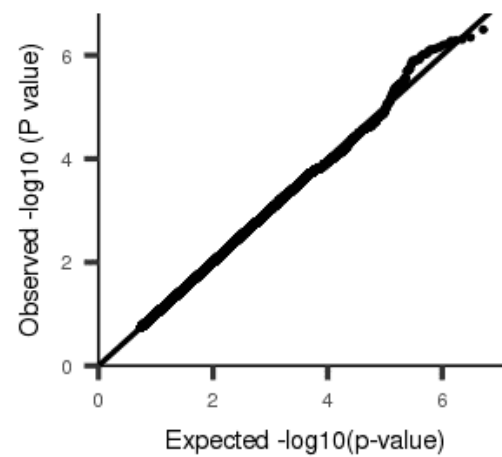

[back to list of plots](#)

Figure 1873: NETMAT edge (100) 0717

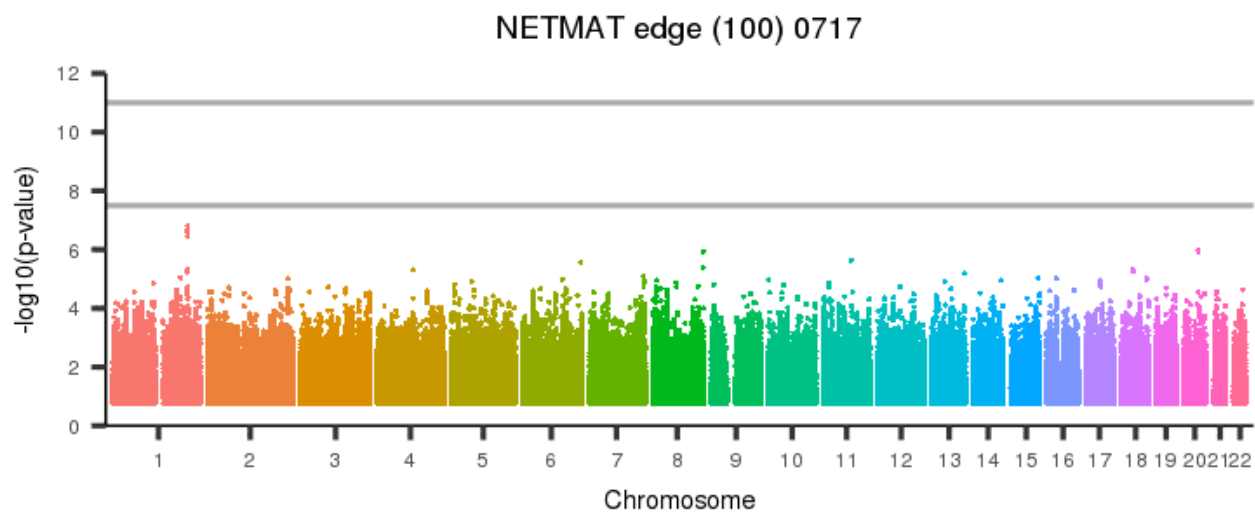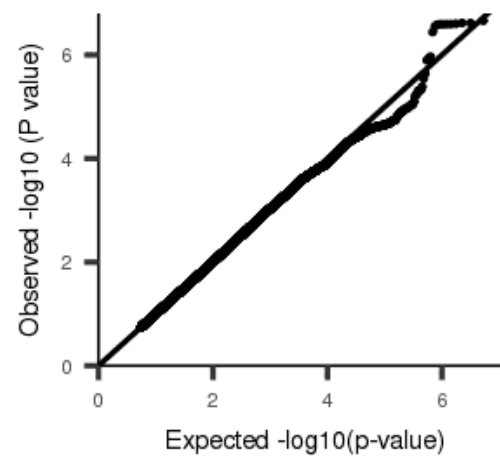

[back to list of plots](#)

Figure 1874: NETMAT edge (100) 0718

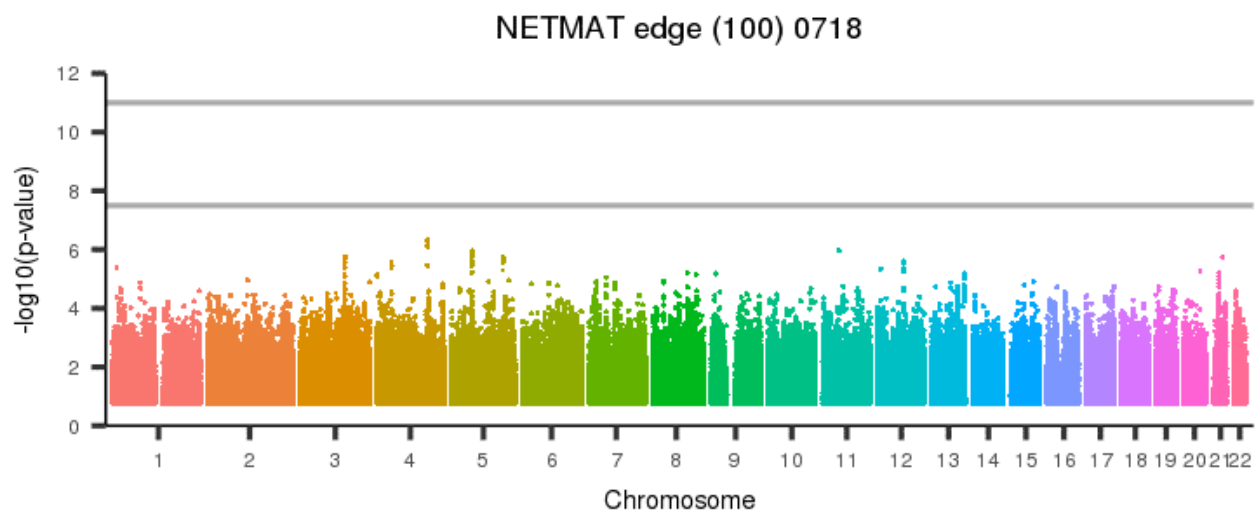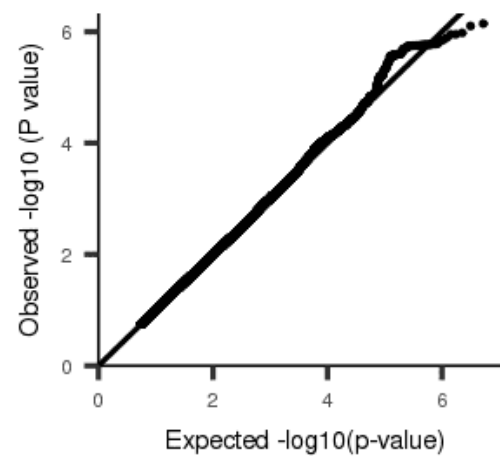

[back to list of plots](#)

Figure 1875: NETMAT edge (100) 0719

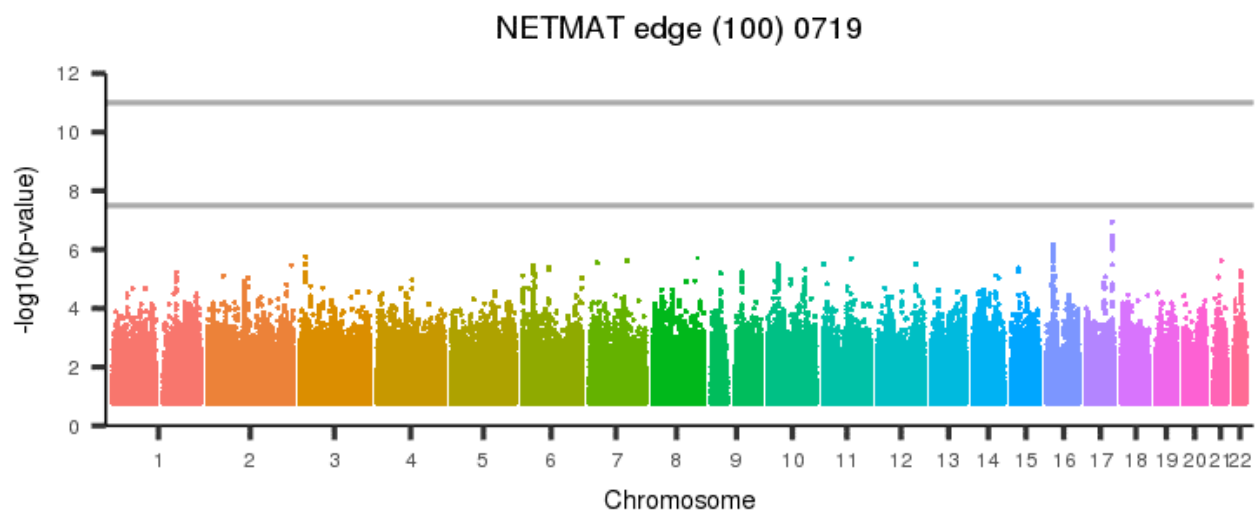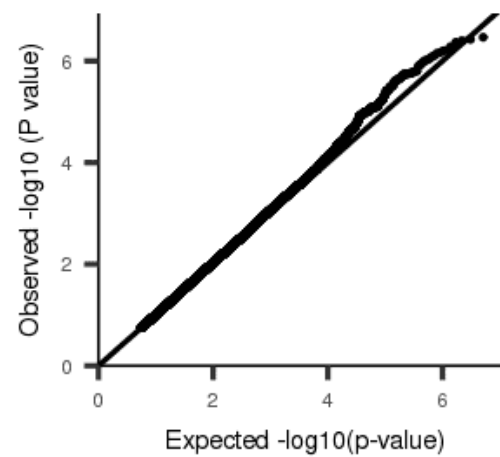

[back to list of plots](#)

Figure 1876: NETMAT edge (100) 0720

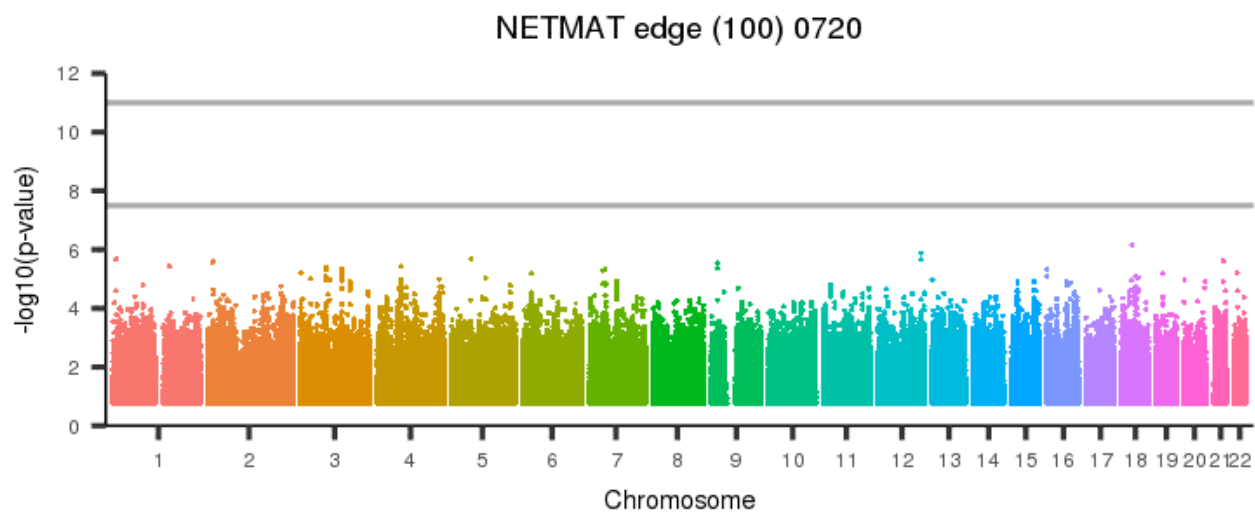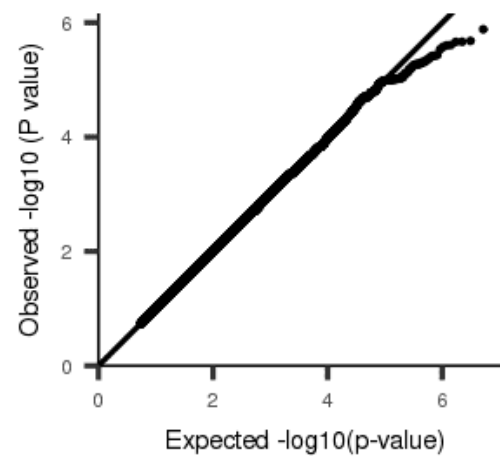

[back to list of plots](#)

Figure 1877: NETMAT edge (100) 0721

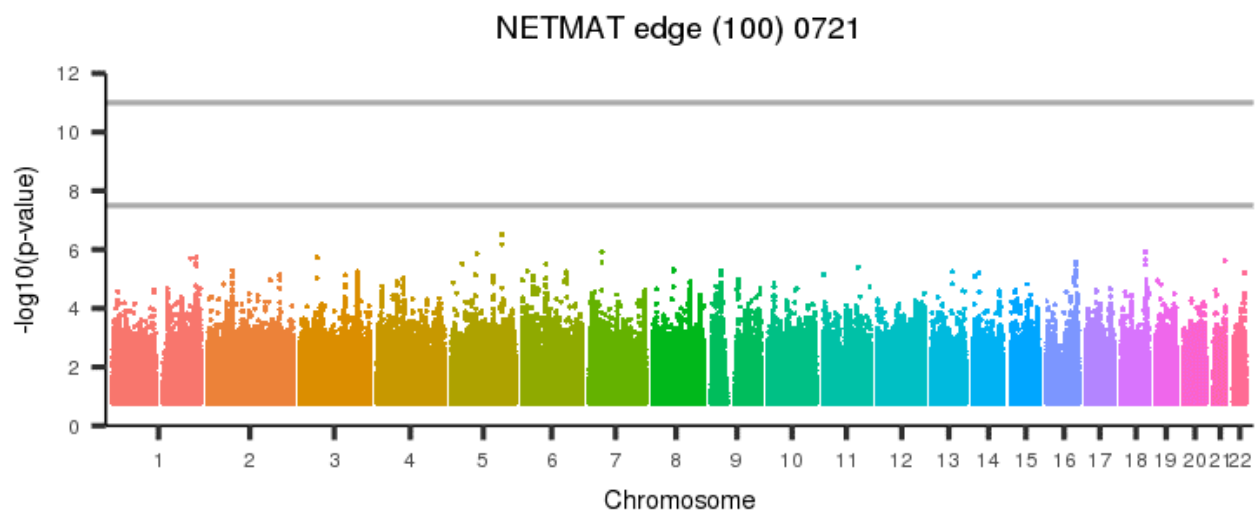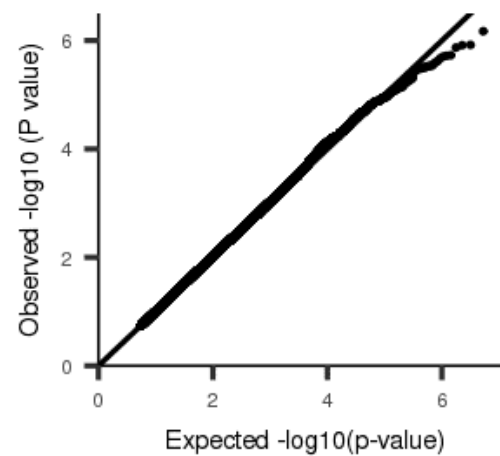

[back to list of plots](#)



Figure 1878: NETMAT edge (100) 0722

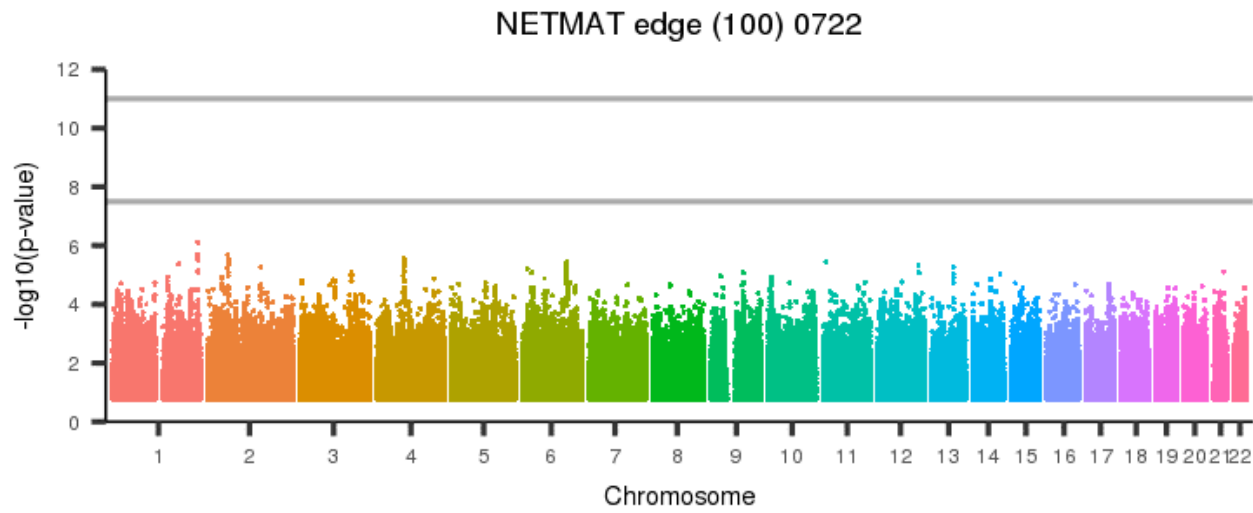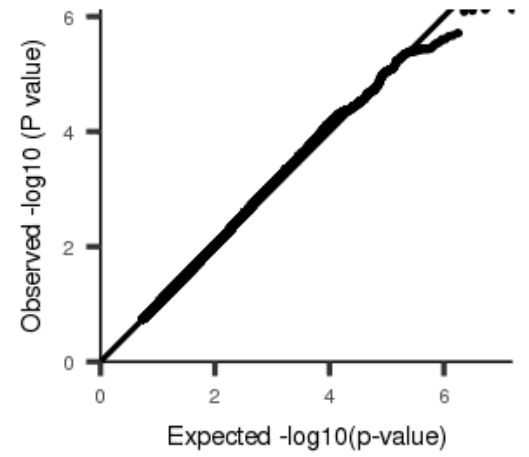

[back to list of plots](#)

Figure 1879: NETMAT edge (100) 0723

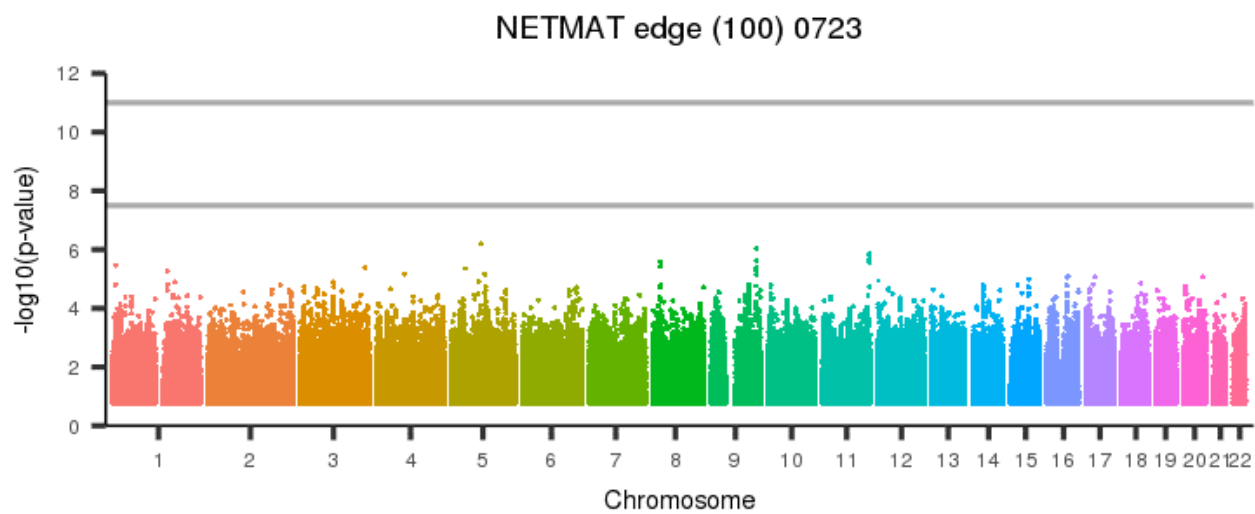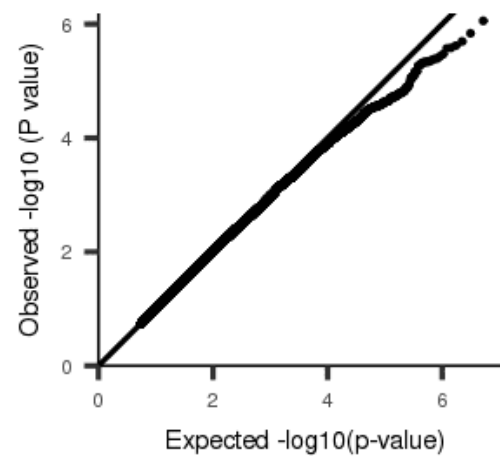

[back to list of plots](#)

Figure 1880: NETMAT edge (100) 0724

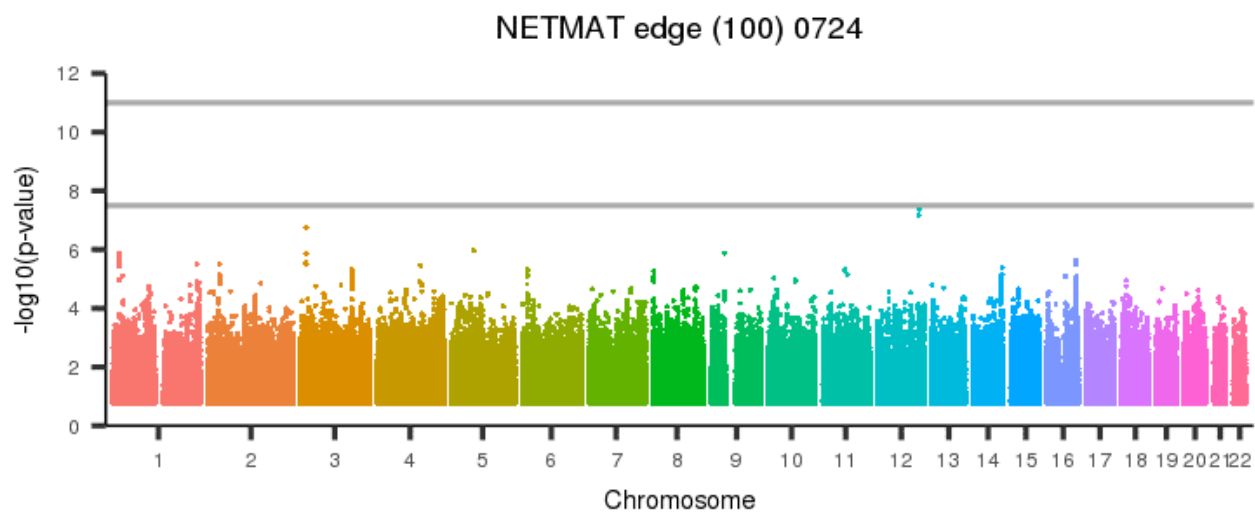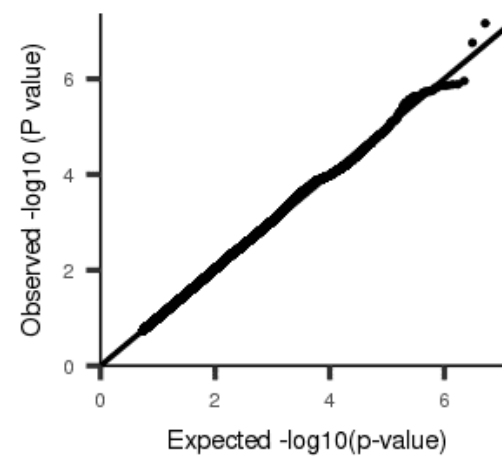

[back to list of plots](#)

Figure 1881: NETMAT edge (100) 0725

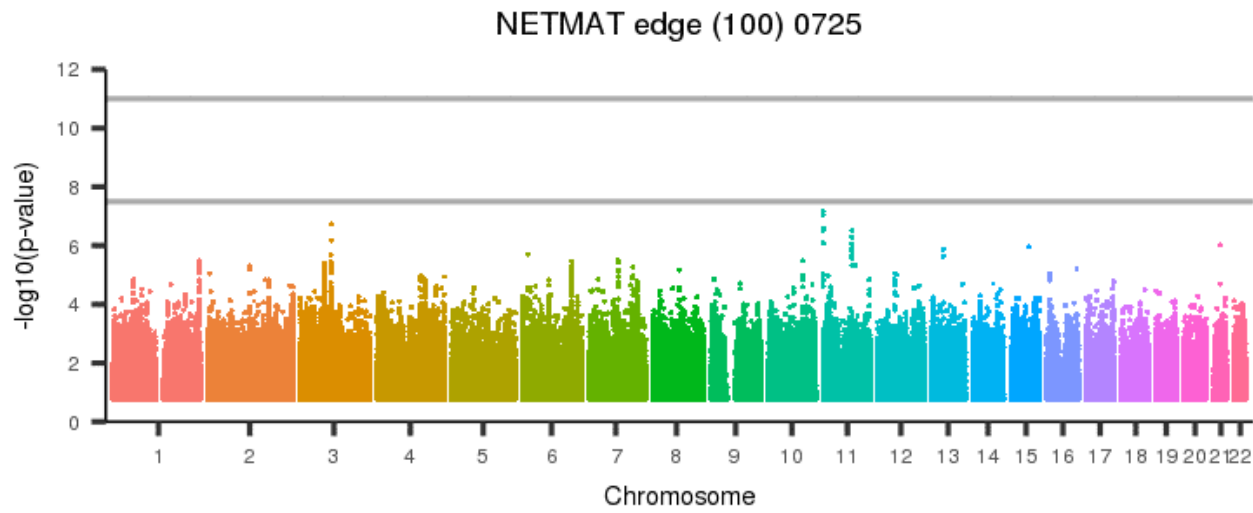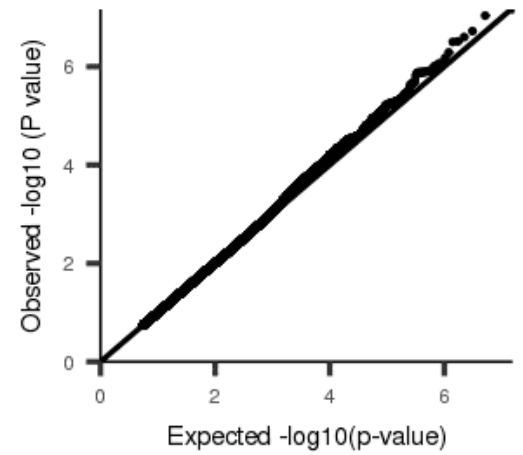

[back to list of plots](#)

Figure 1882: NETMAT edge (100) 0726

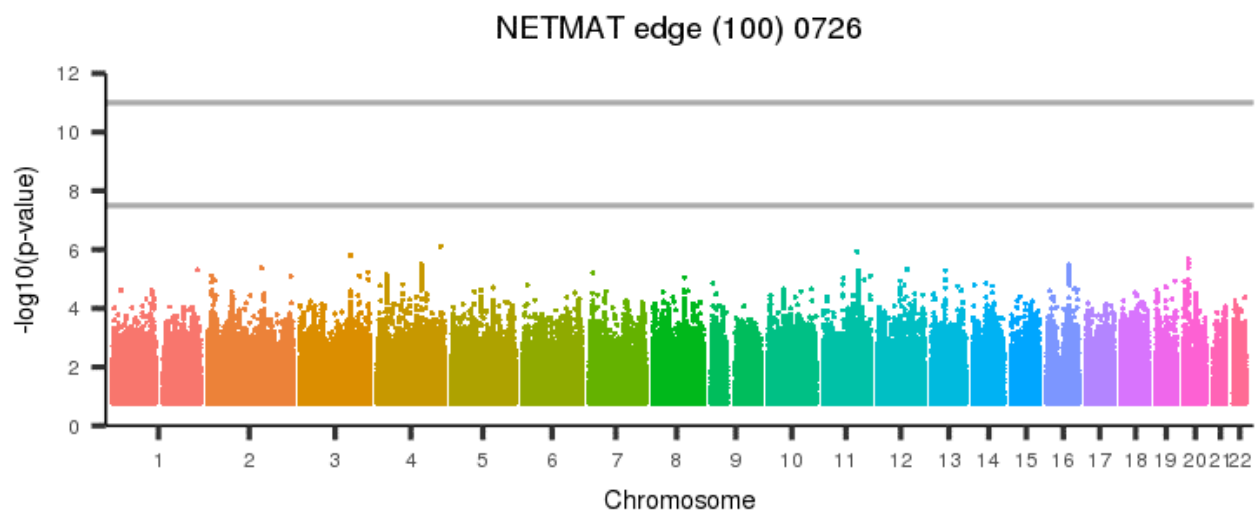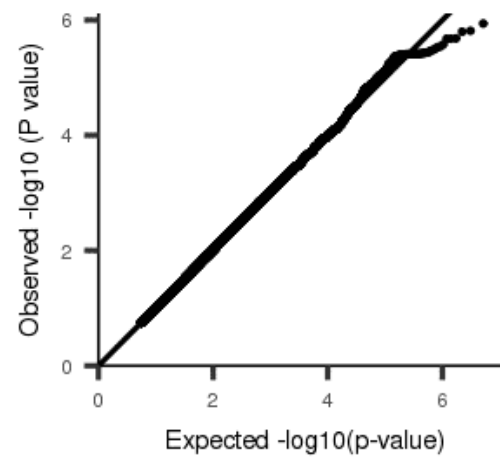

[back to list of plots](#)

Figure 1883: NETMAT edge (100) 0727

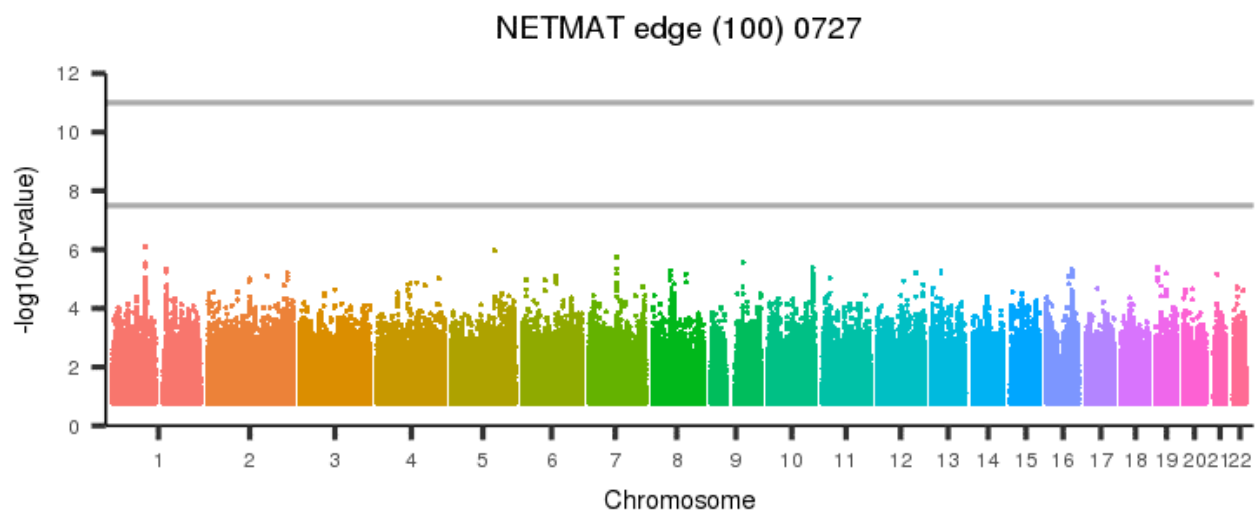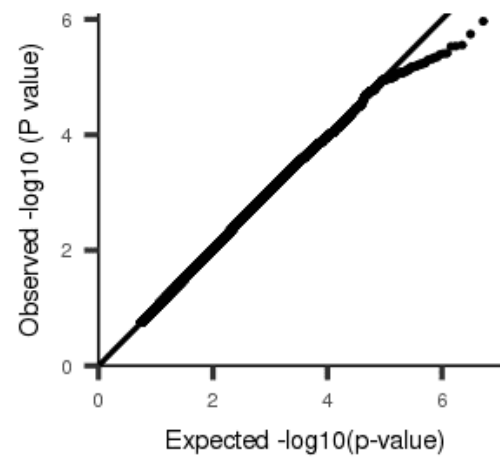

[back to list of plots](#)

Figure 1884: NETMAT edge (100) 0728

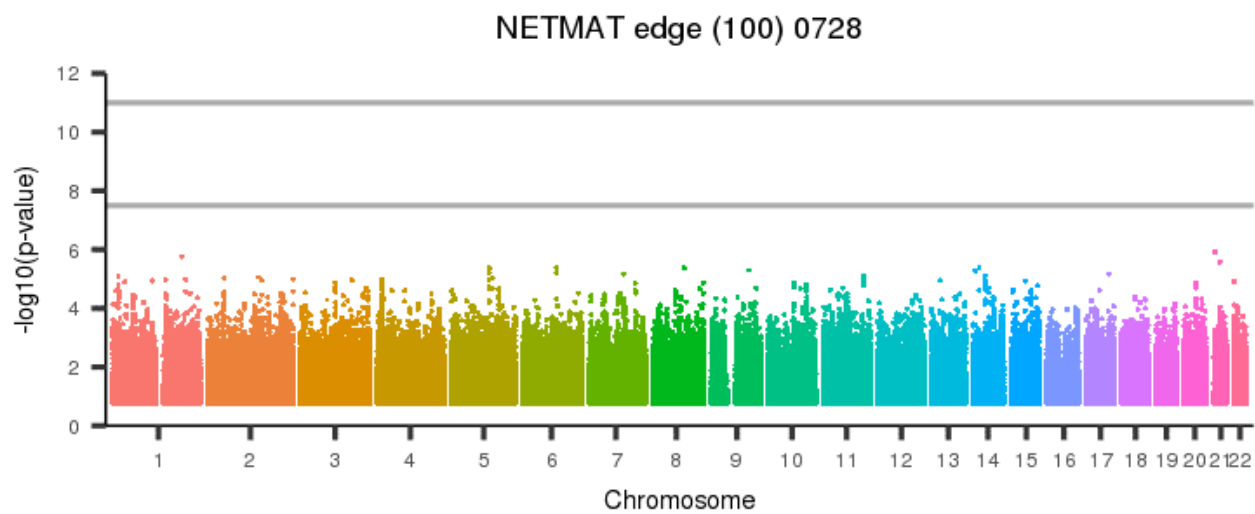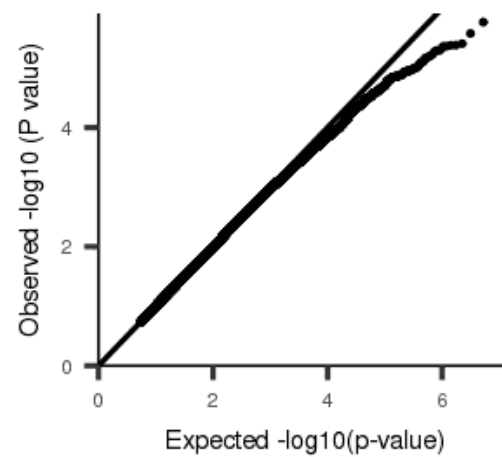

[back to list of plots](#)

Figure 1885: NETMAT edge (100) 0729

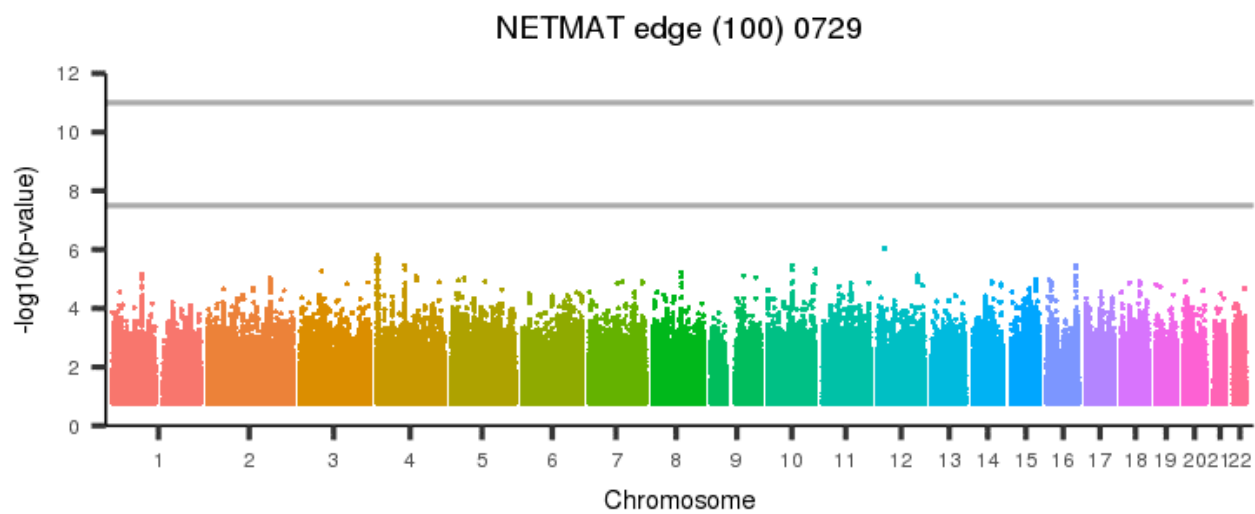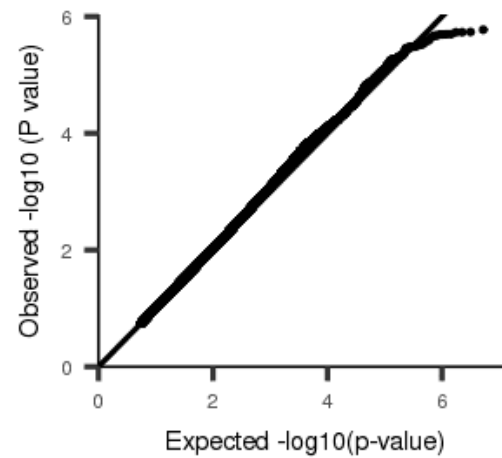

[back to list of plots](#)



Figure 1886: NETMAT edge (100) 0730

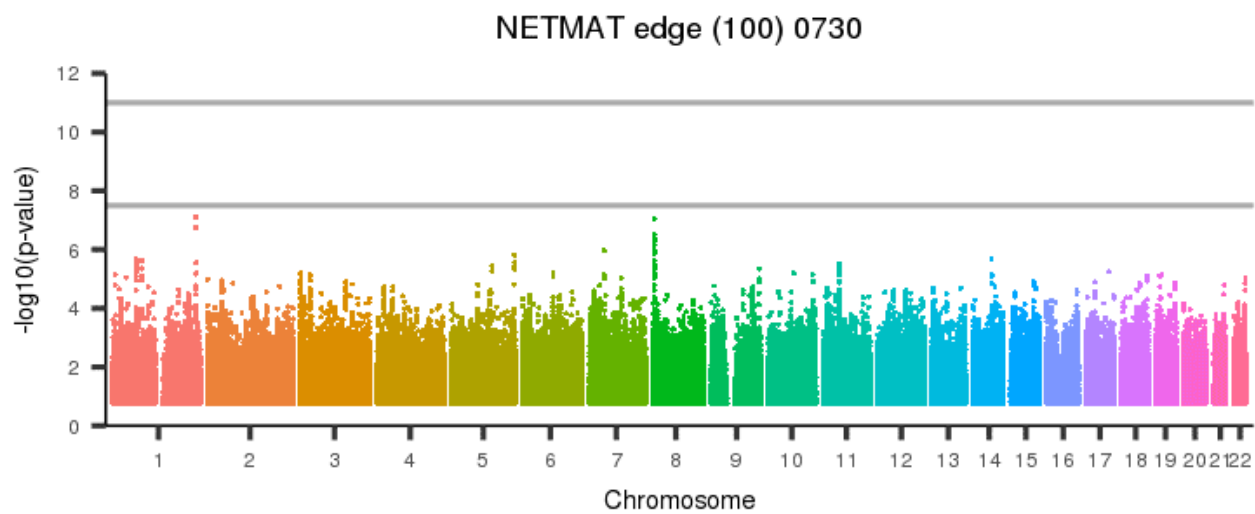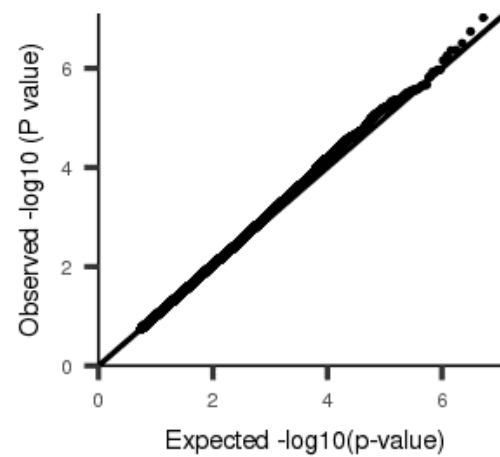

[back to list of plots](#)

Figure 1887: NETMAT edge (100) 0731

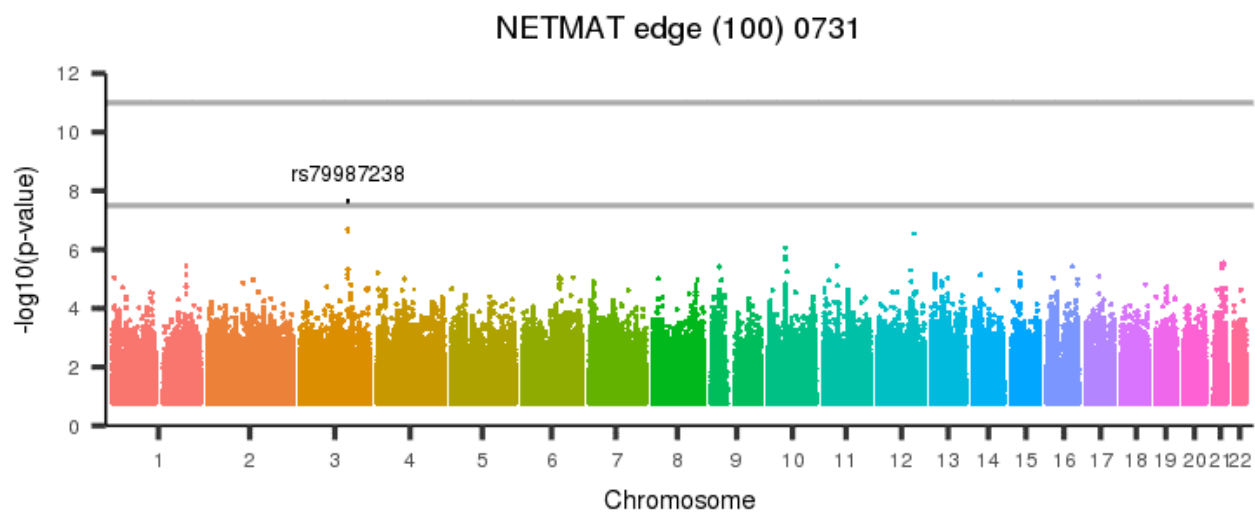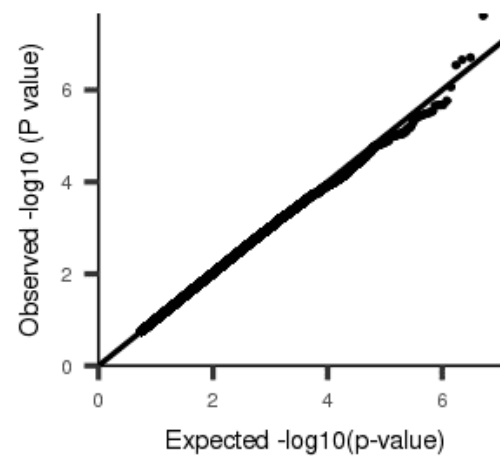

[back to list of plots](#)

Figure 1888: NETMAT edge (100) 0732

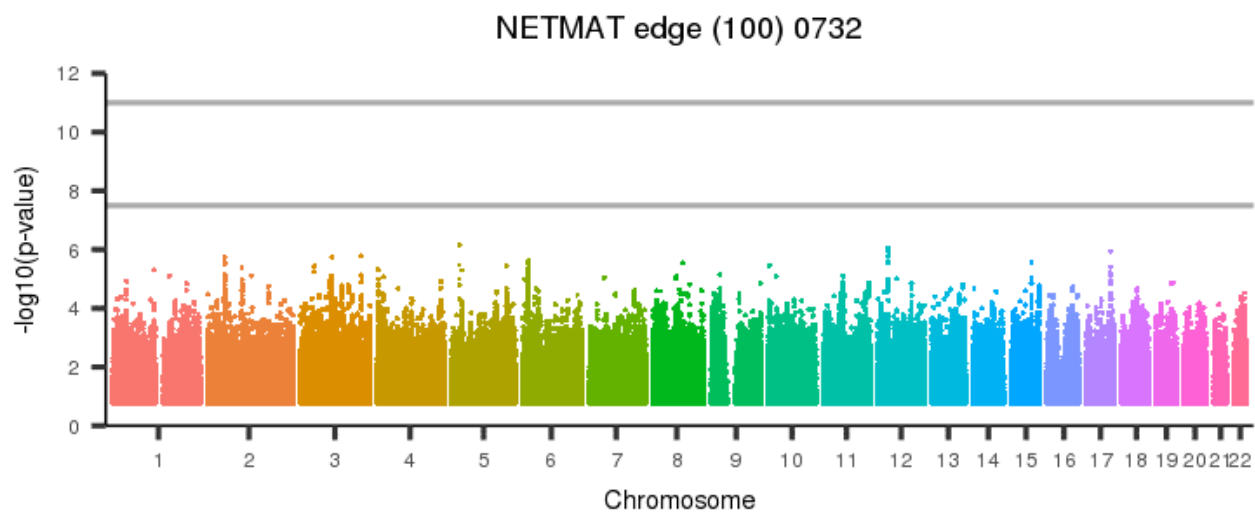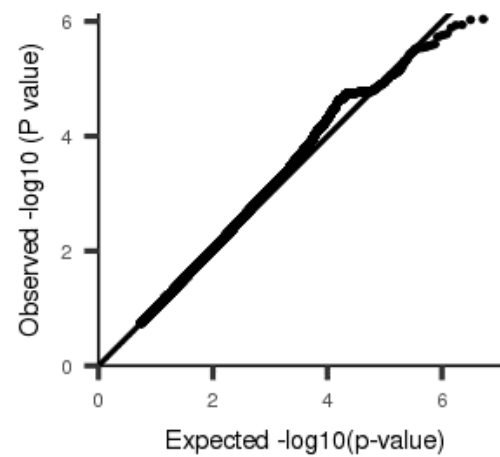

[back to list of plots](#)

Figure 1889: NETMAT edge (100) 0733

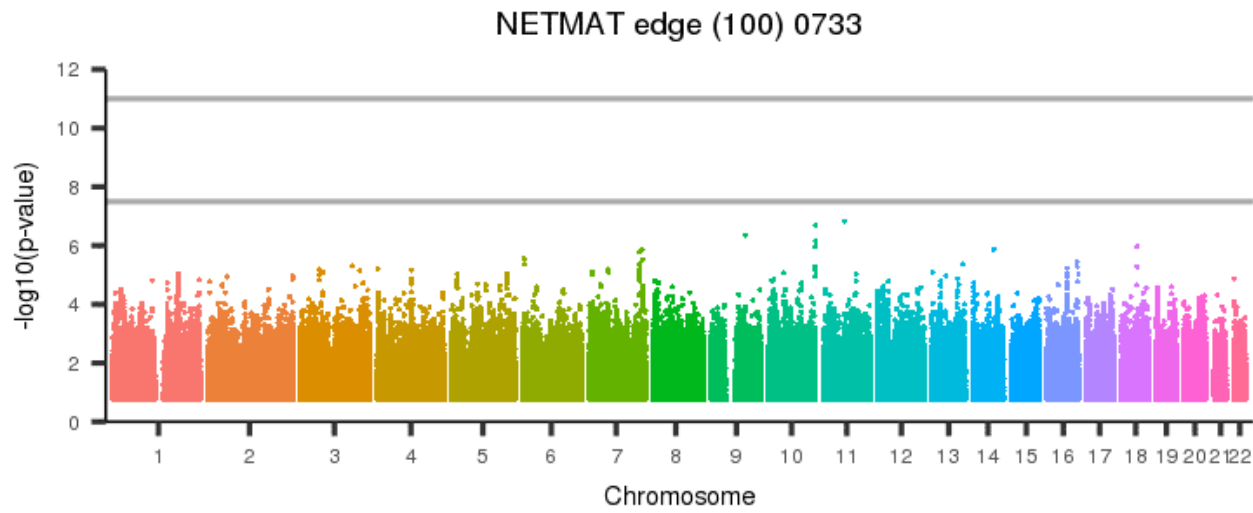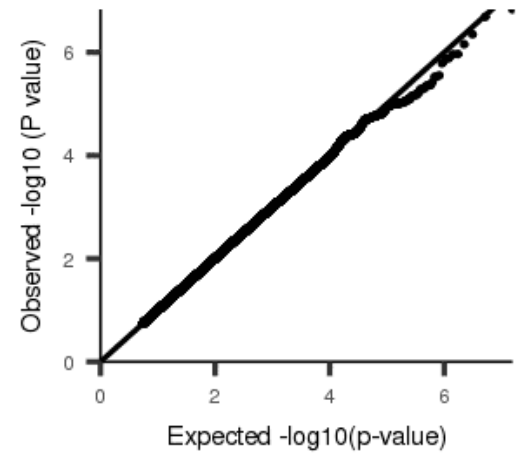

[back to list of plots](#)

Figure 1890: NETMAT edge (100) 0734

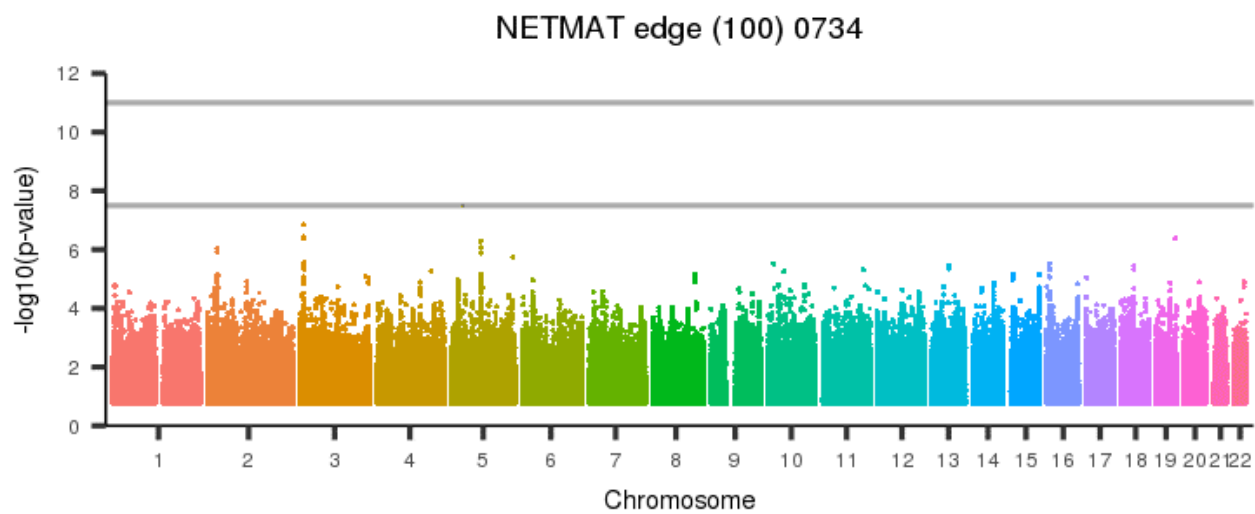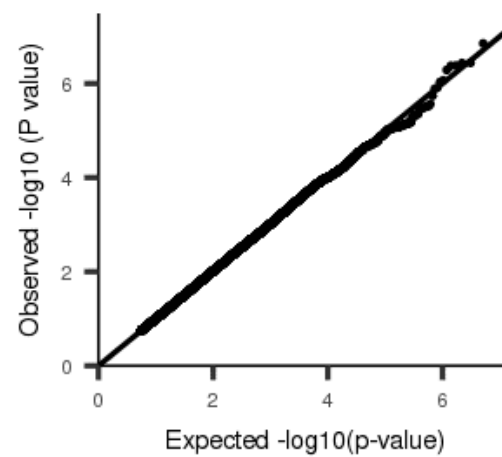

[back to list of plots](#)

Figure 1891: NETMAT edge (100) 0735

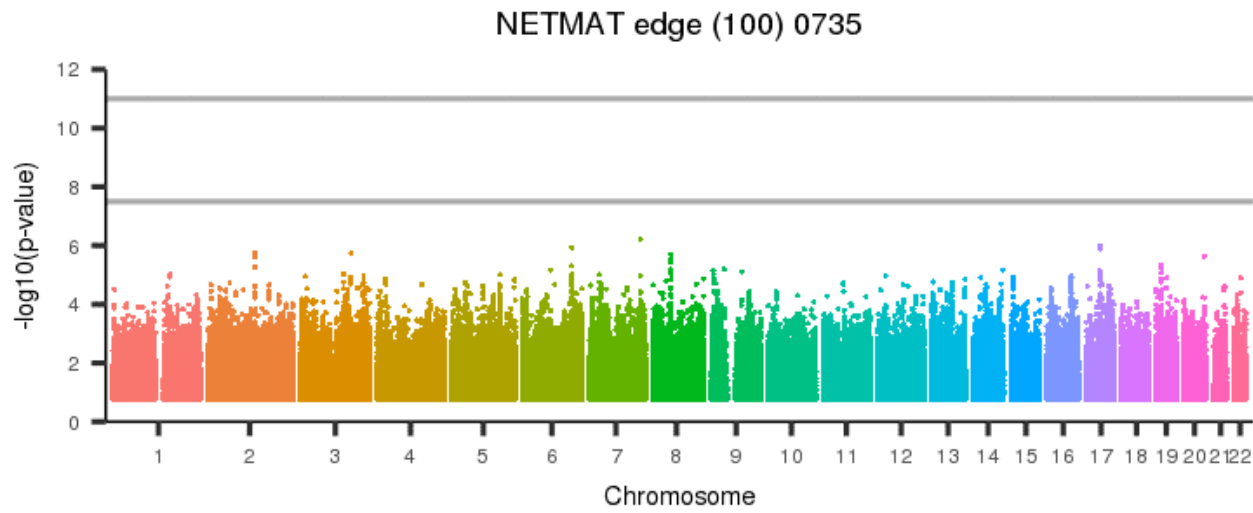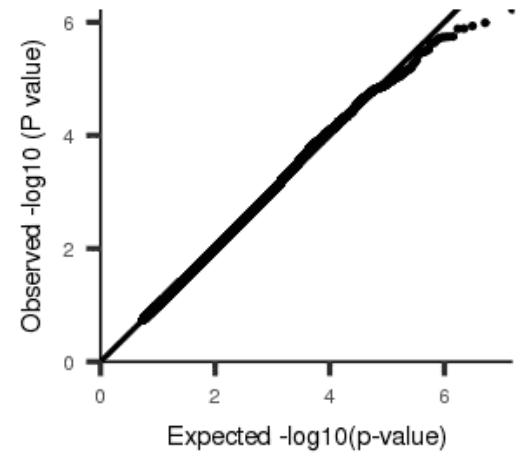

[back to list of plots](#)

Figure 1892: NETMAT edge (100) 0736

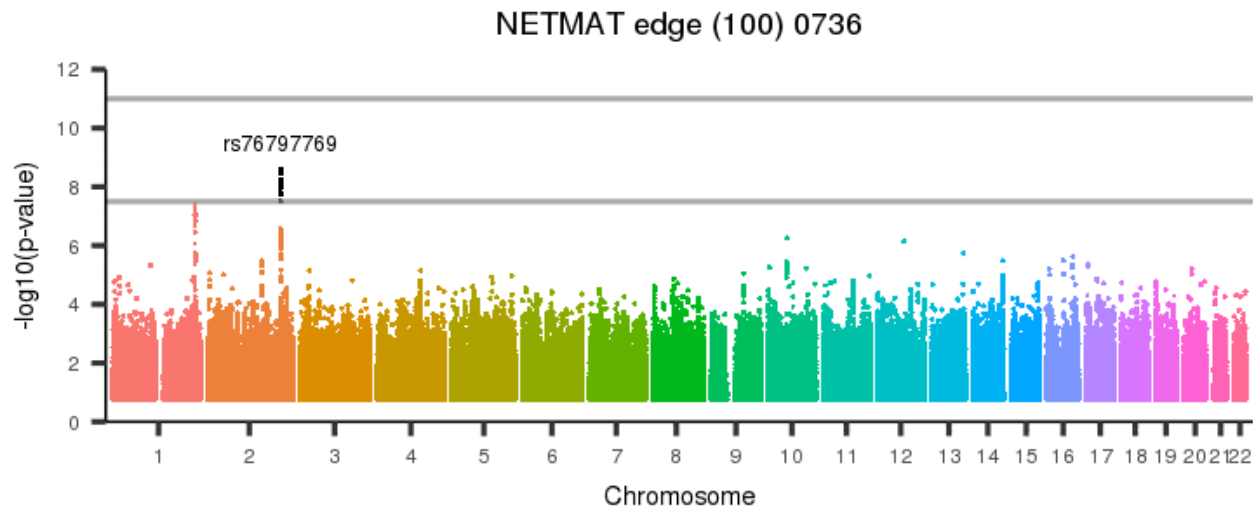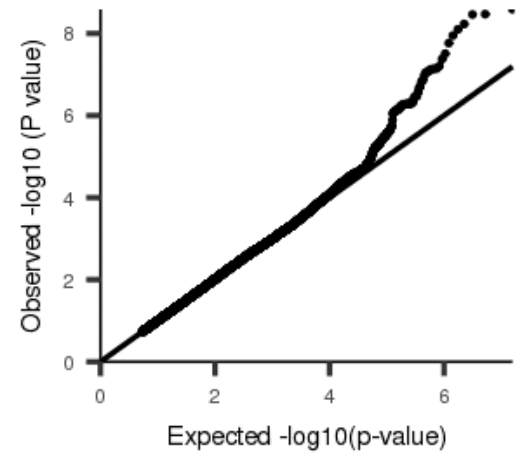

[back to list of plots](#)

Figure 1893: NETMAT edge (100) 0737

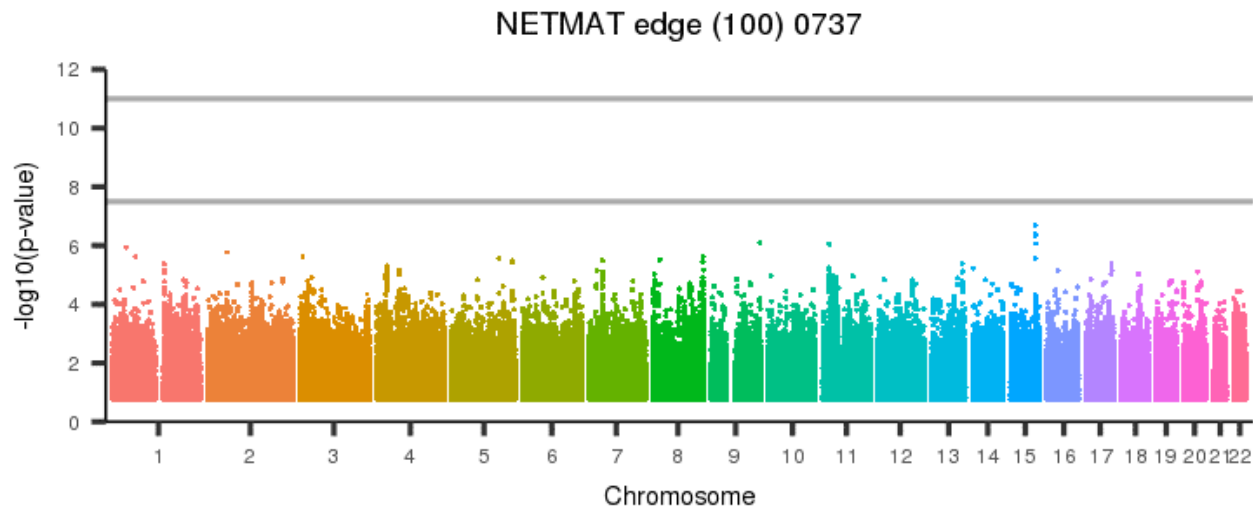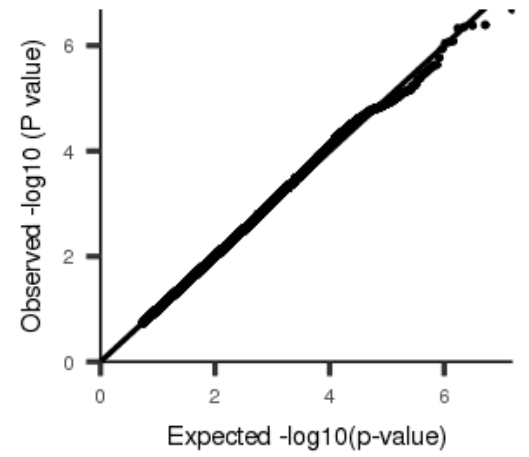

[back to list of plots](#)



Figure 1894: NETMAT edge (100) 0738

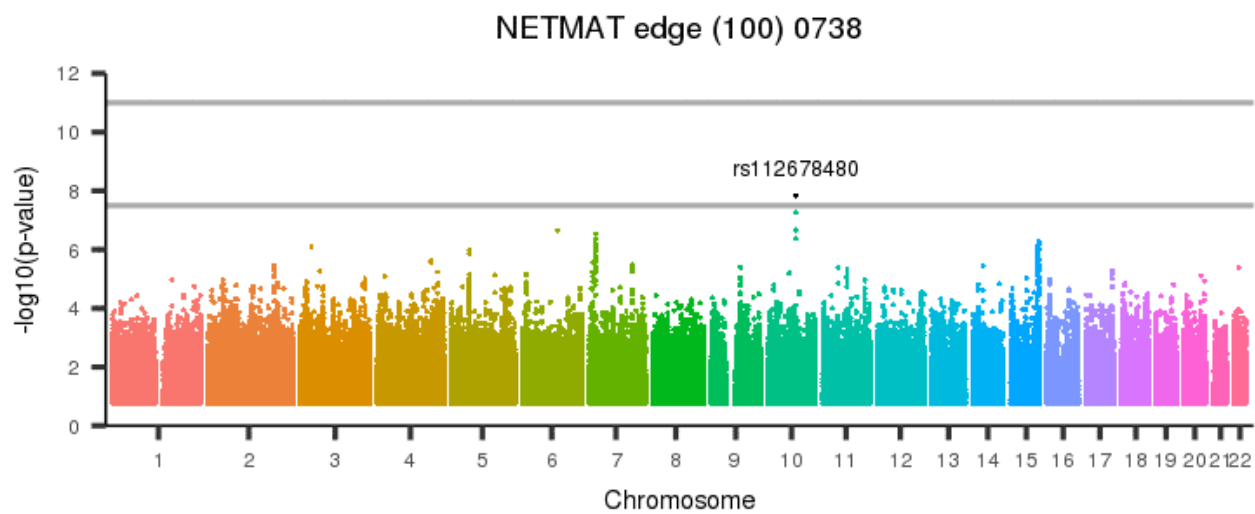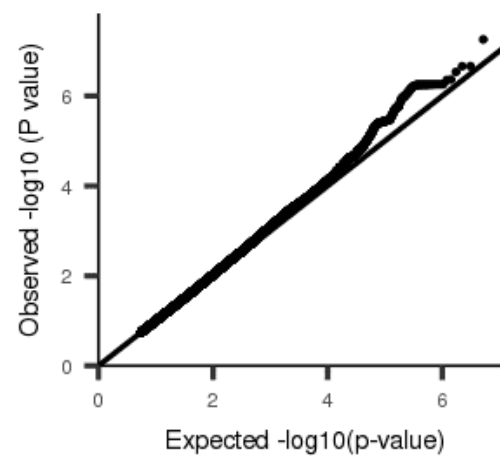

[back to list of plots](#)

Figure 1895: NETMAT edge (100) 0739

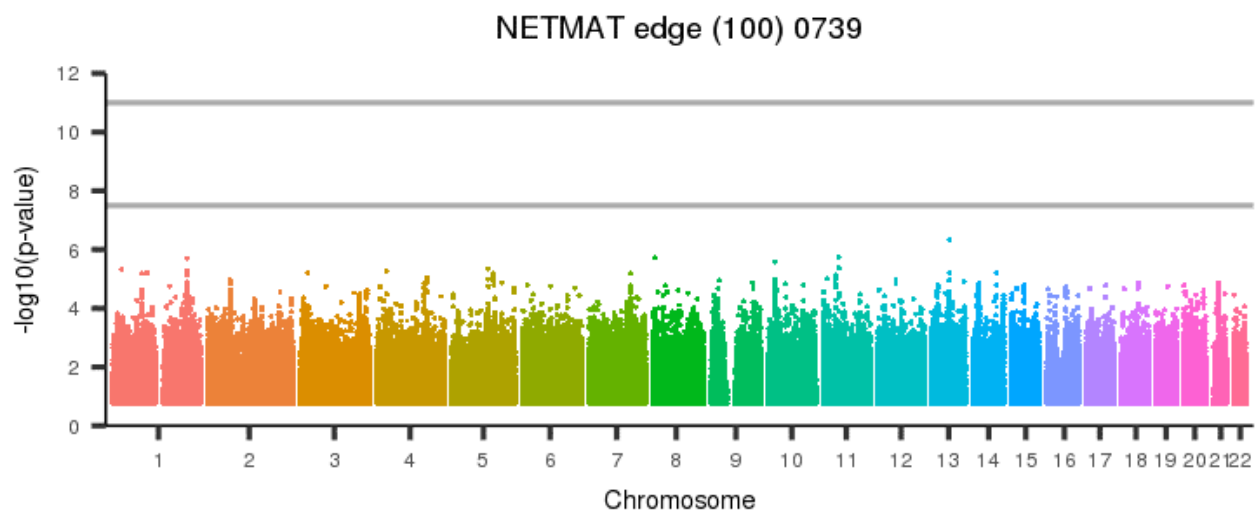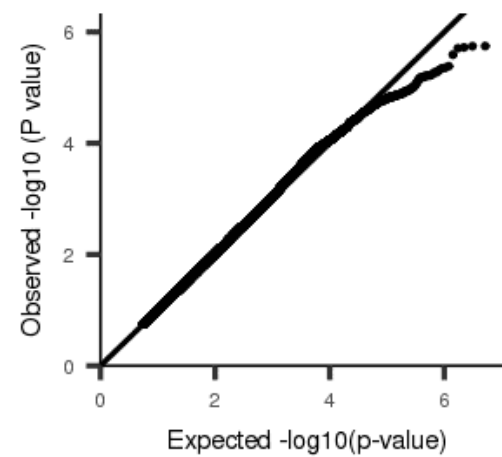

[back to list of plots](#)

Figure 1896: NETMAT edge (100) 0740

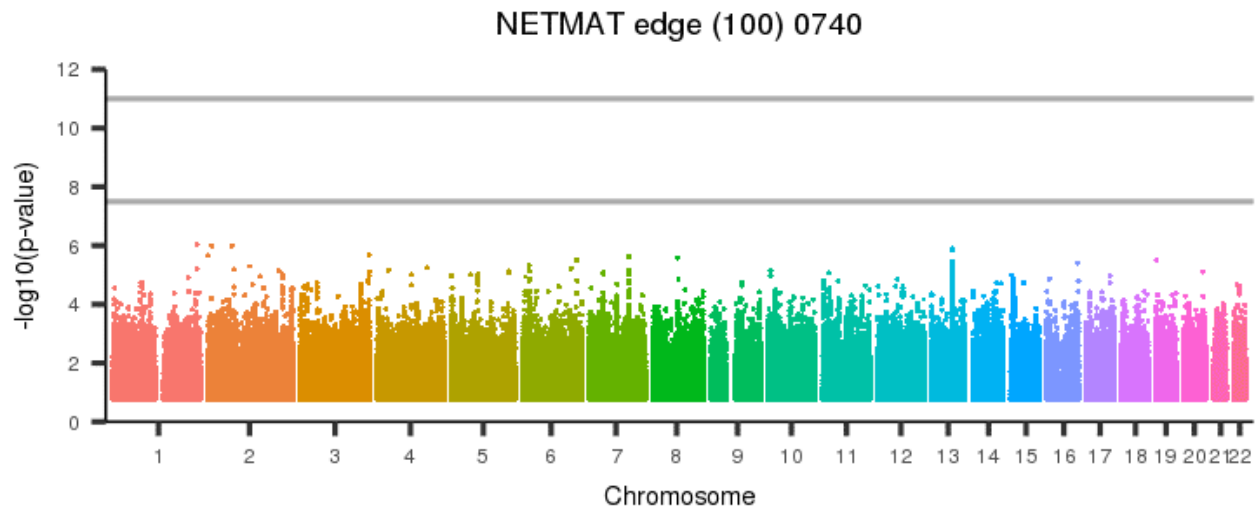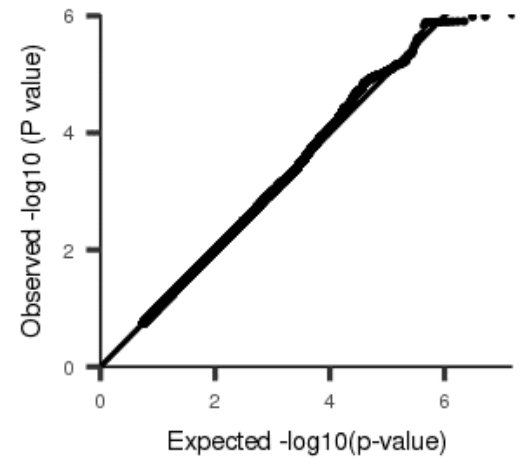

[back to list of plots](#)

Figure 1897: NETMAT edge (100) 0741

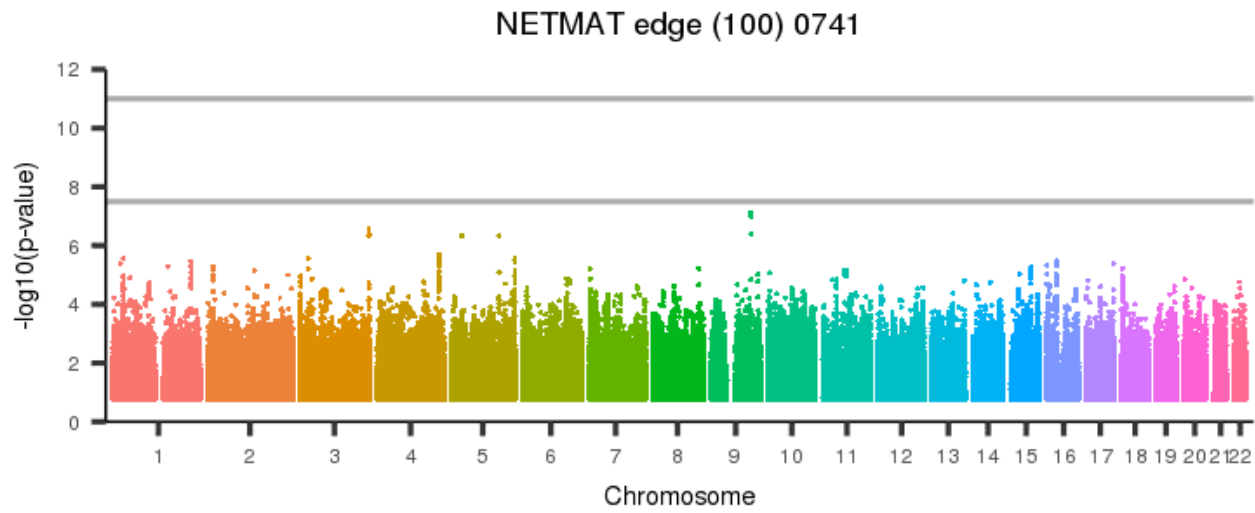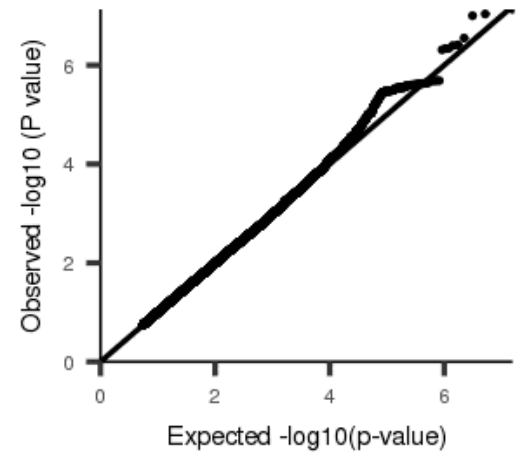

[back to list of plots](#)

Figure 1898: NETMAT edge (100) 0742

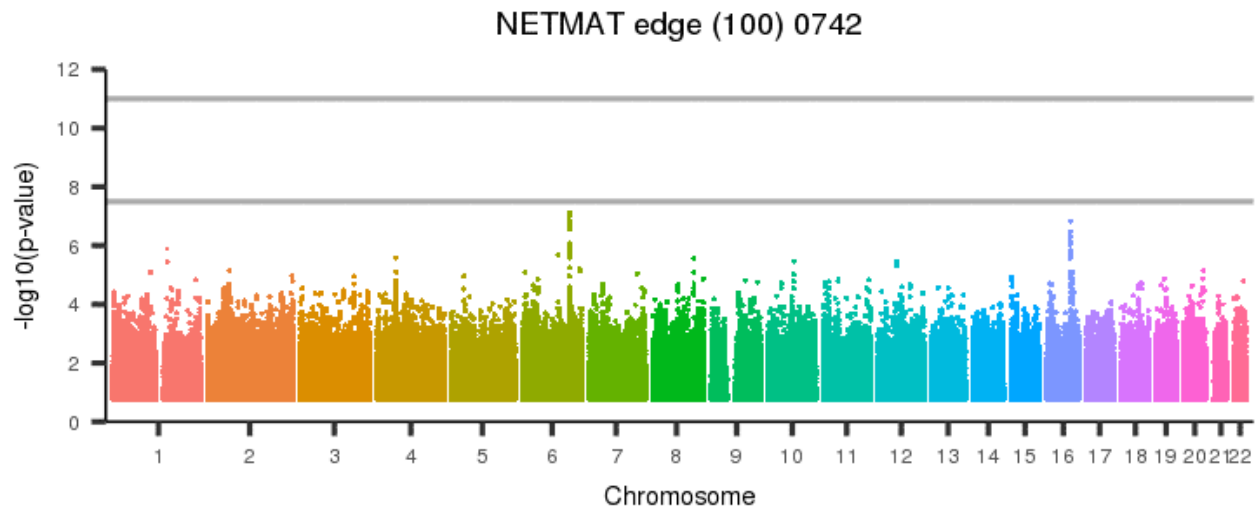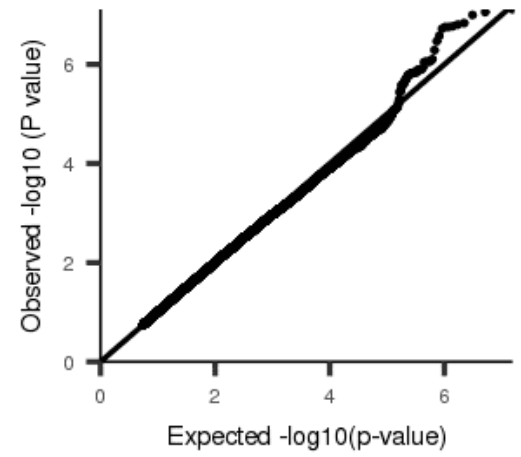

[back to list of plots](#)

Figure 1899: NETMAT edge (100) 0743

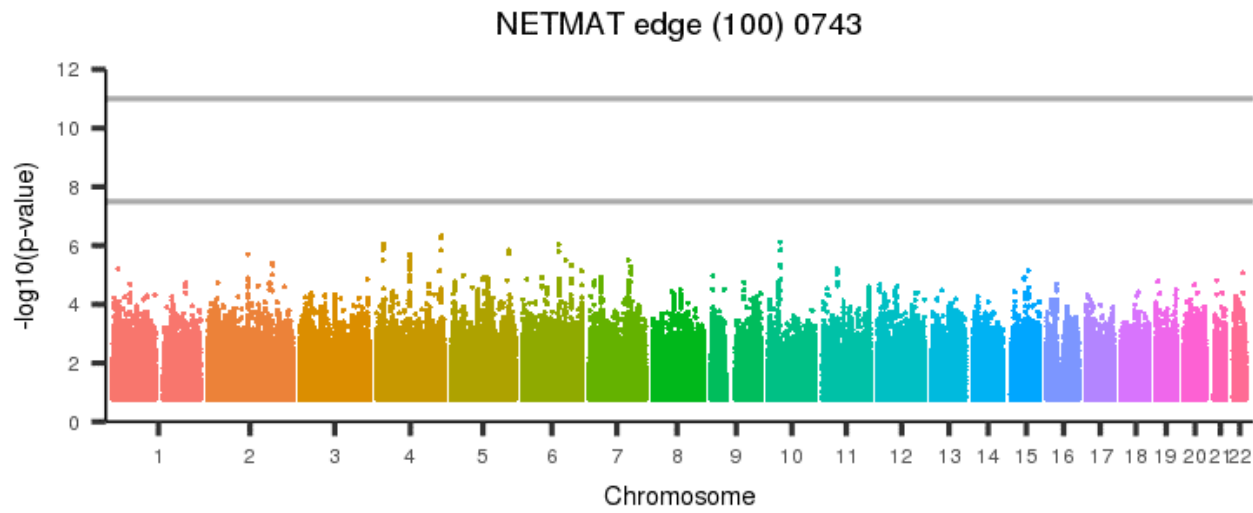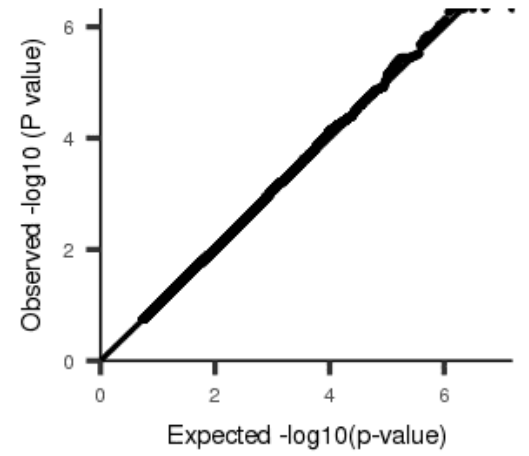

[back to list of plots](#)

Figure 1900: NETMAT edge (100) 0744

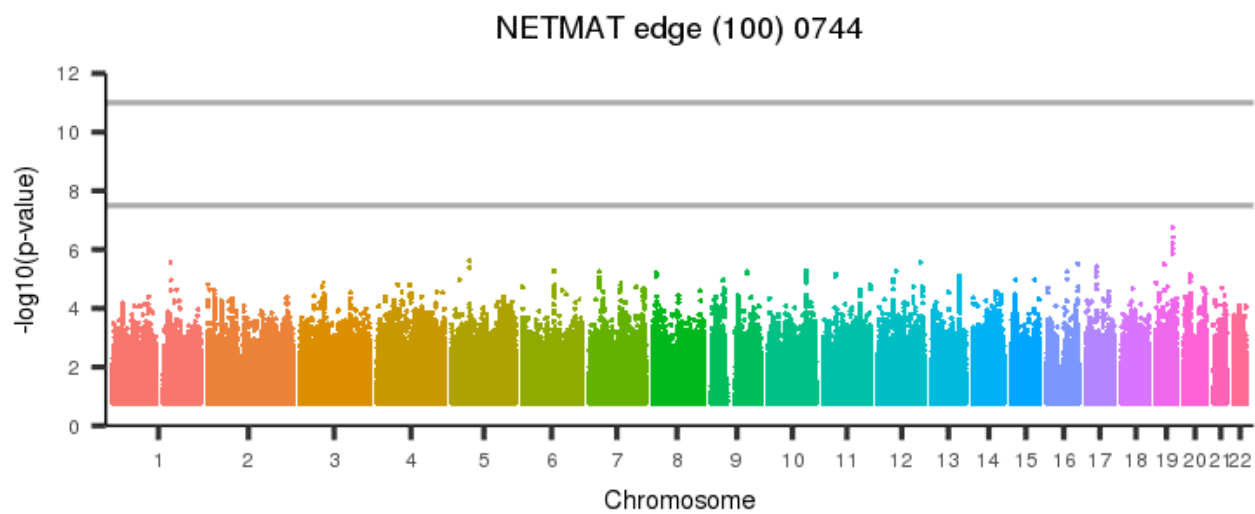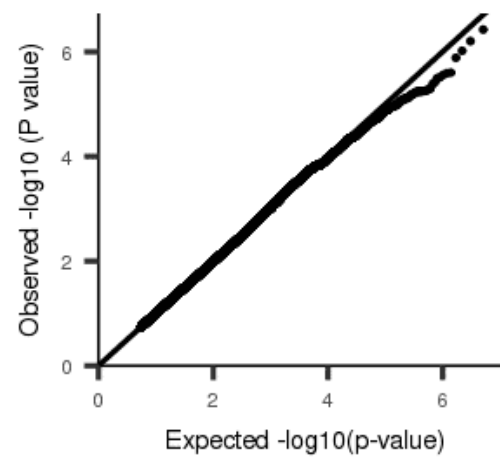

[back to list of plots](#)

Figure 1901: NETMAT edge (100) 0745

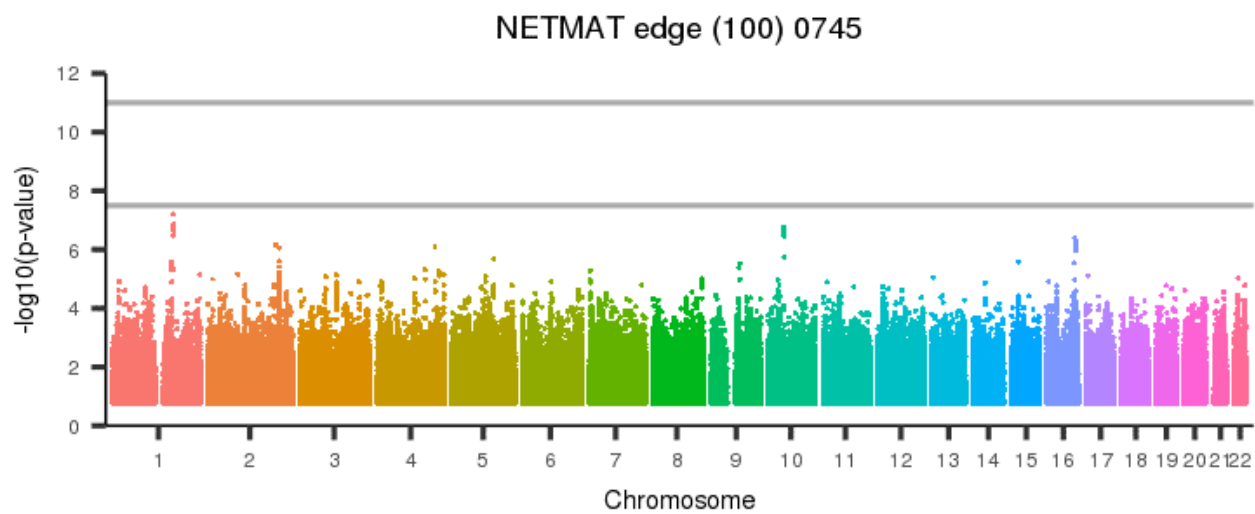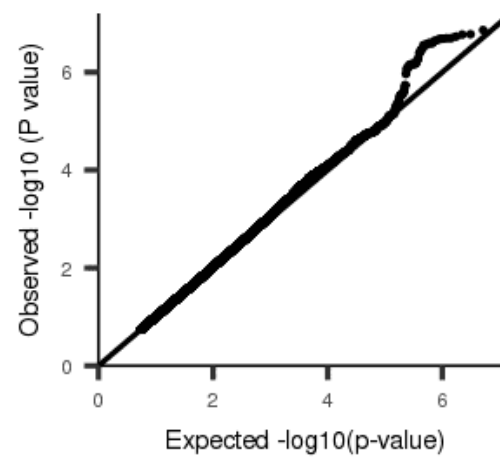

[back to list of plots](#)



Figure 1902: NETMAT edge (100) 0746

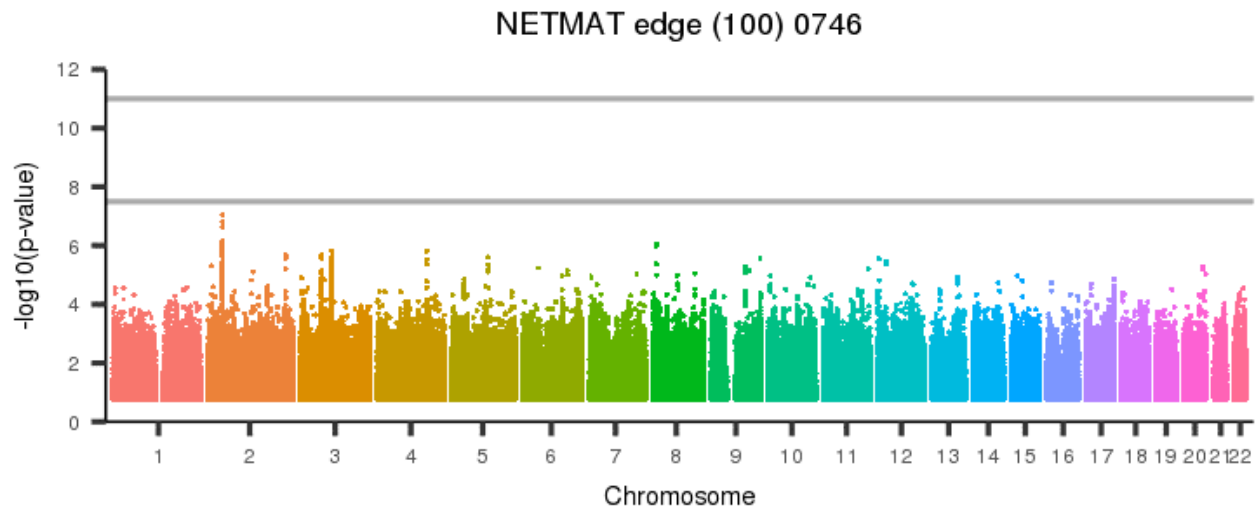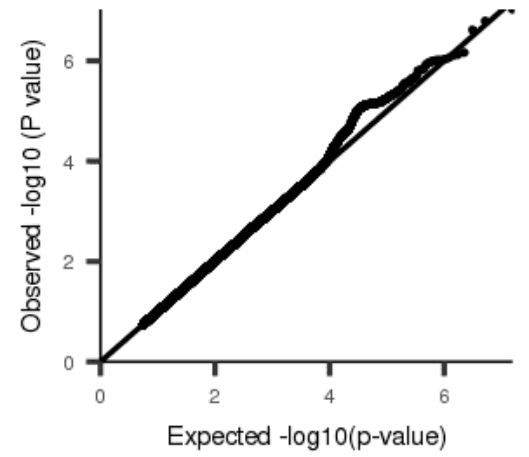

[back to list of plots](#)

Figure 1903: NETMAT edge (100) 0747

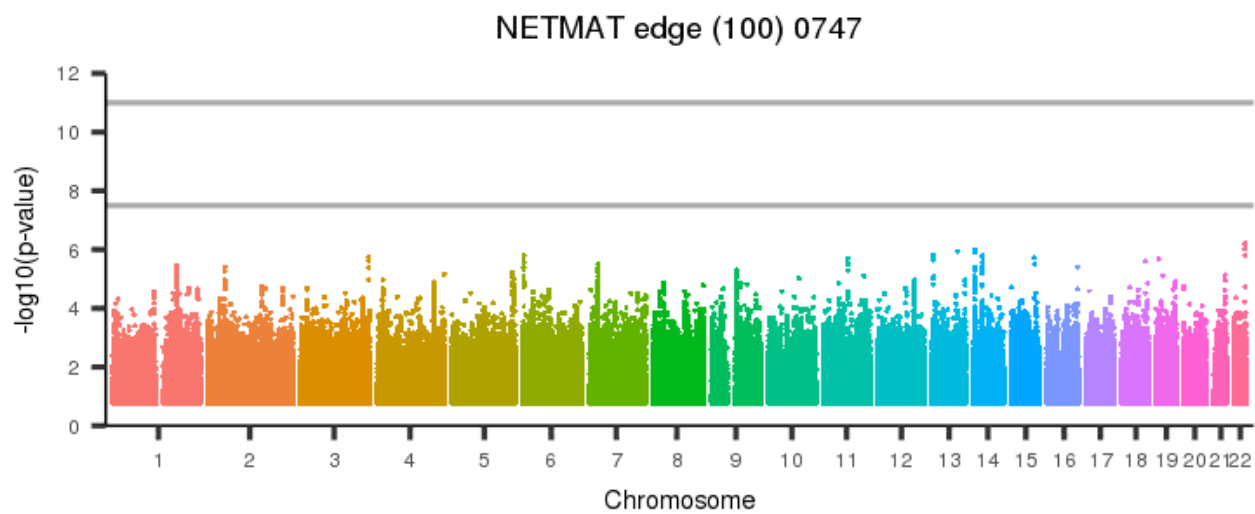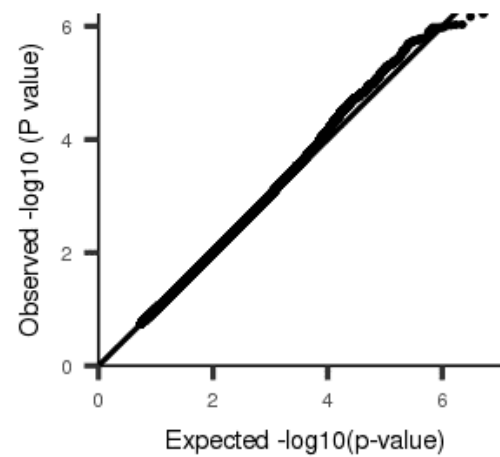

[back to list of plots](#)

Figure 1904: NETMAT edge (100) 0748

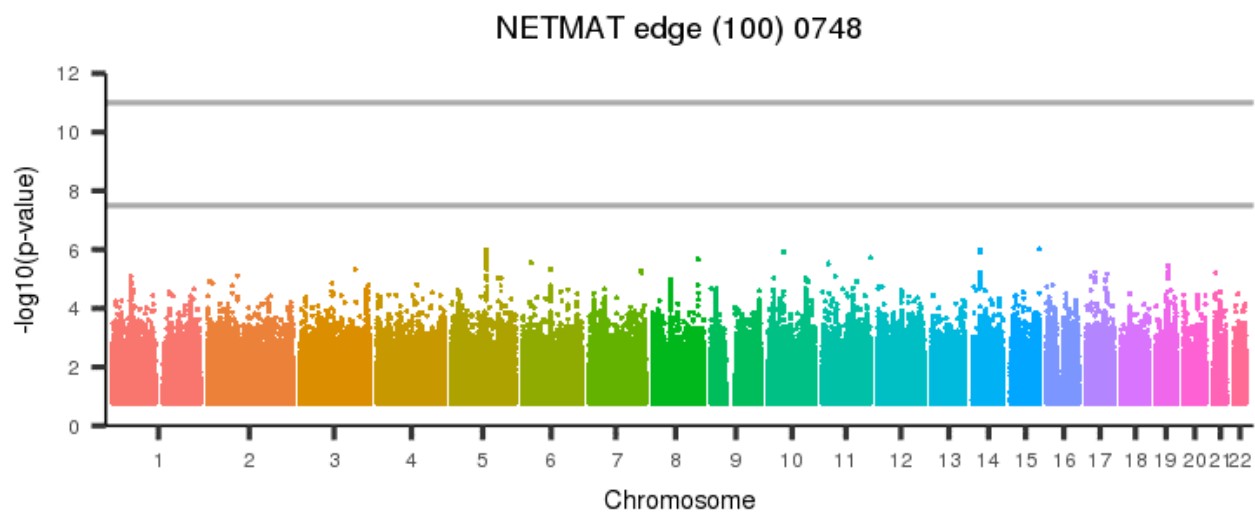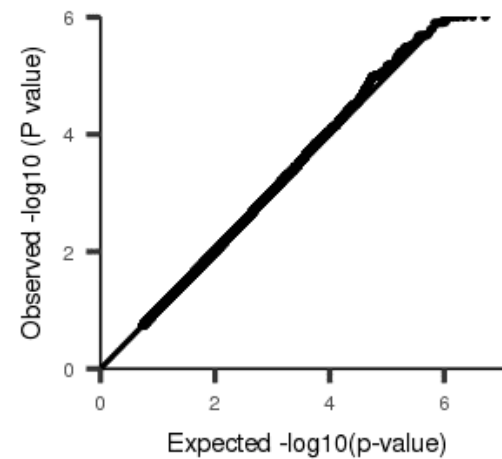

[back to list of plots](#)

Figure 1905: NETMAT edge (100) 0749

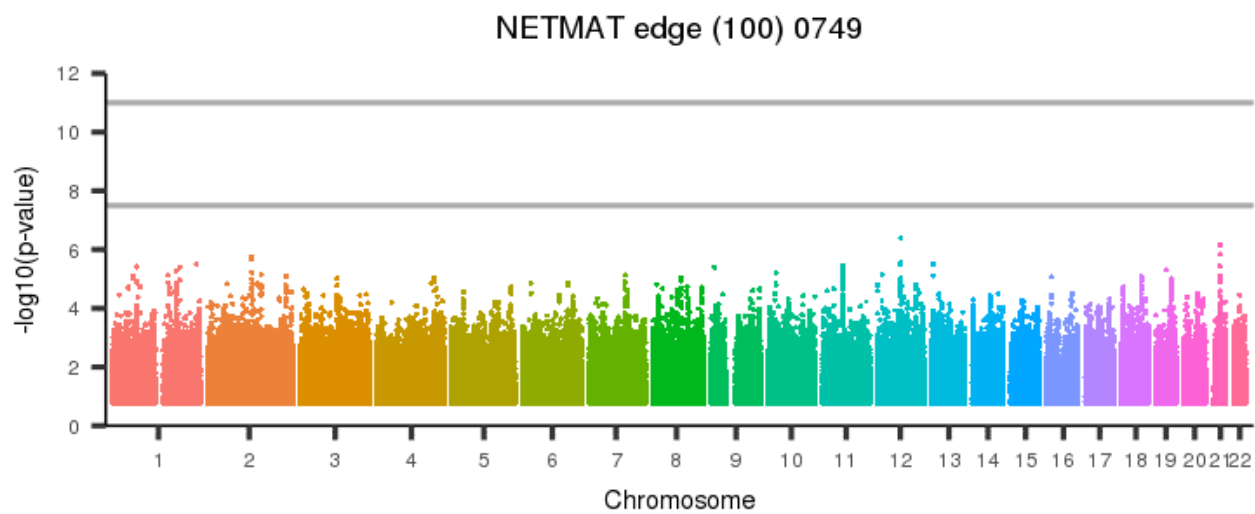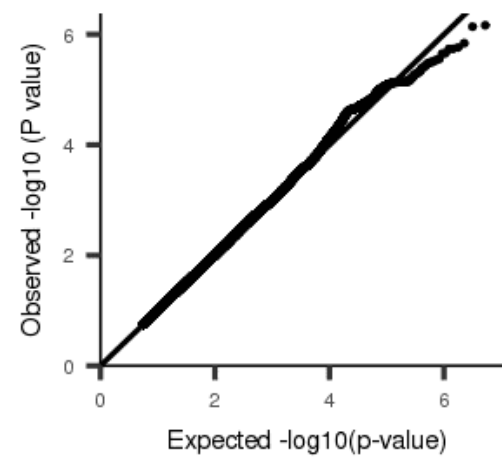

[back to list of plots](#)

Figure 1906: NETMAT edge (100) 0750

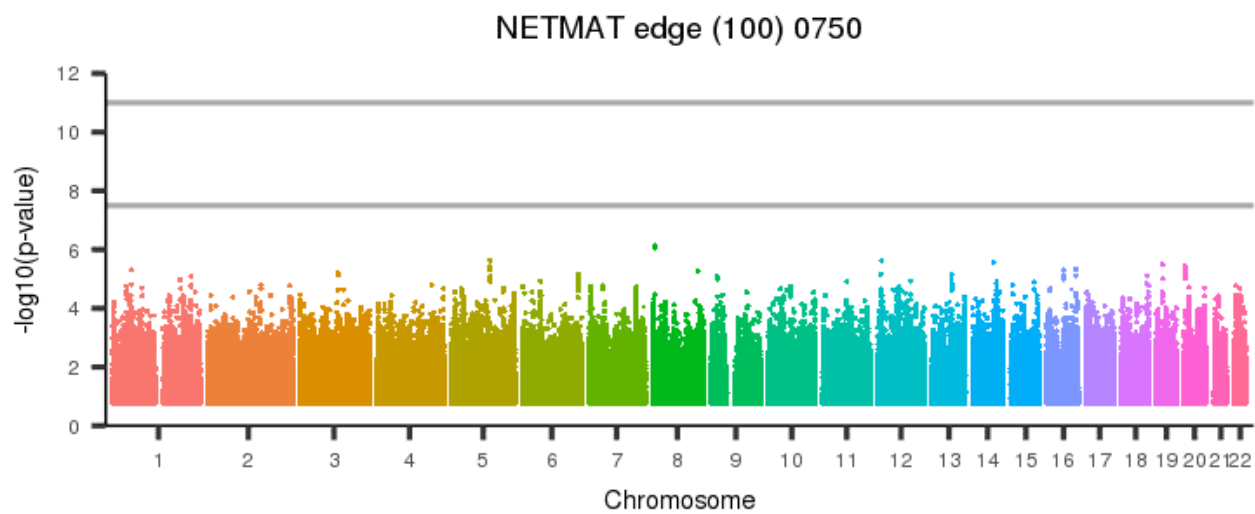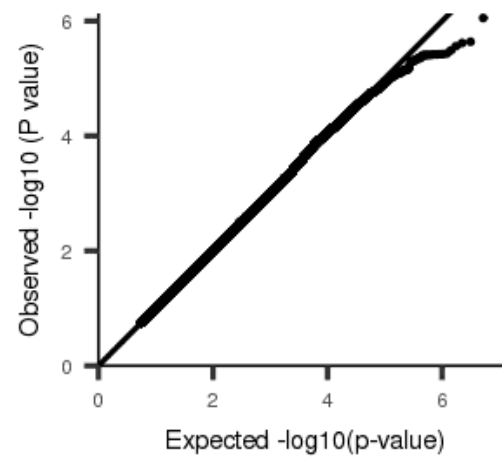

[back to list of plots](#)

Figure 1907: NETMAT edge (100) 0751

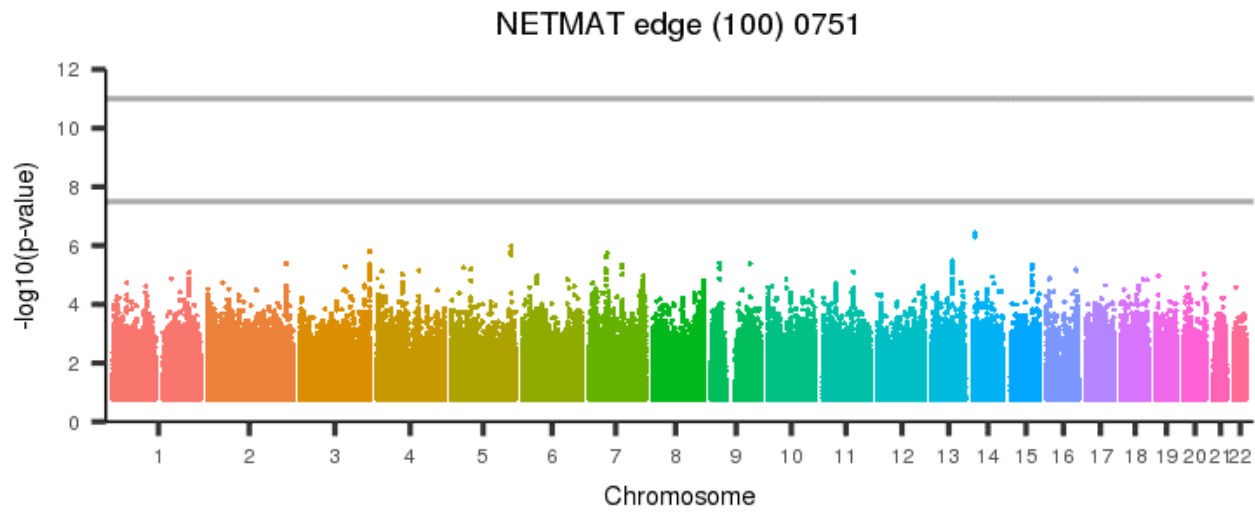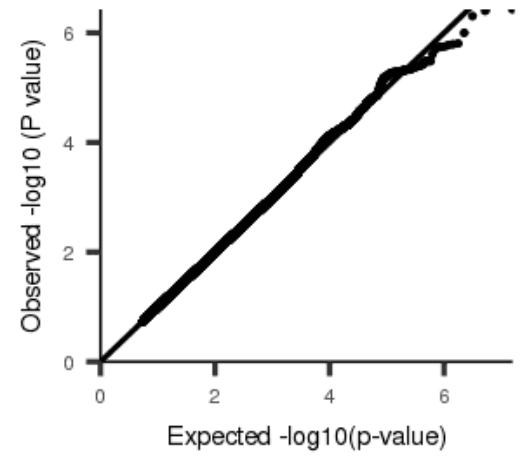

[back to list of plots](#)

Figure 1908: NETMAT edge (100) 0752

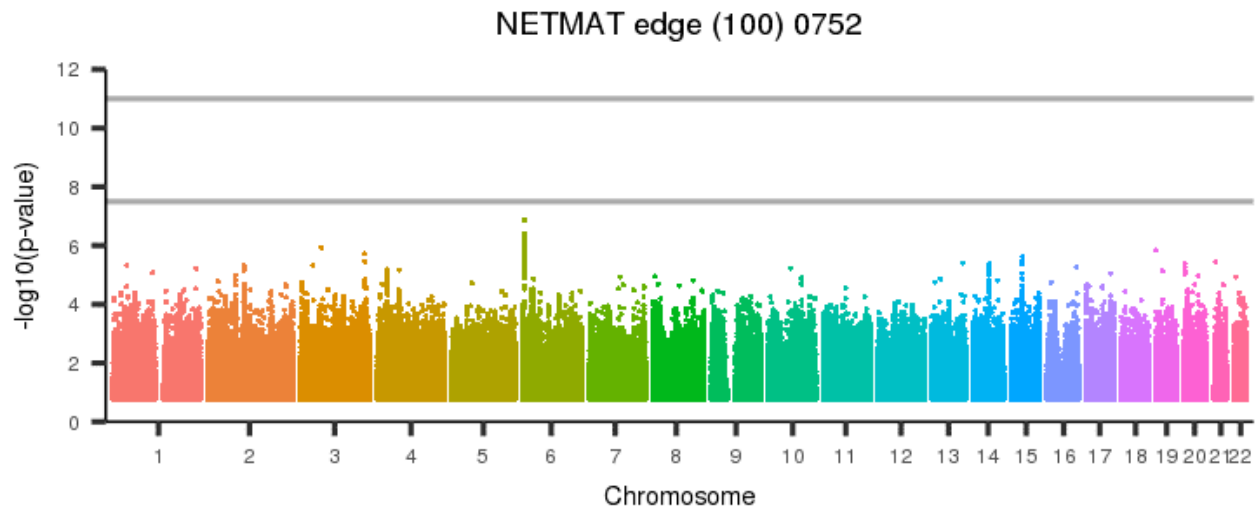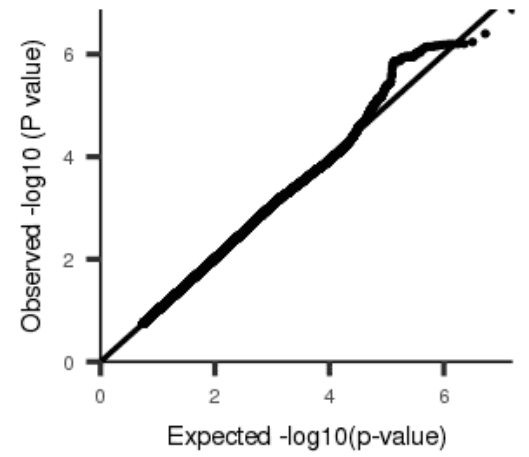

[back to list of plots](#)

Figure 1909: NETMAT edge (100) 0753

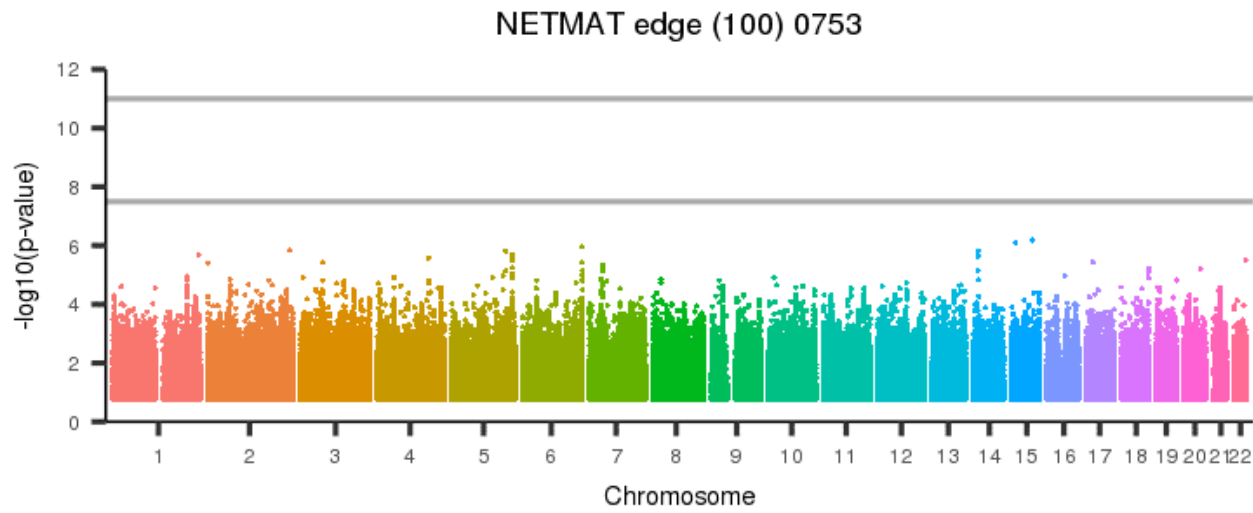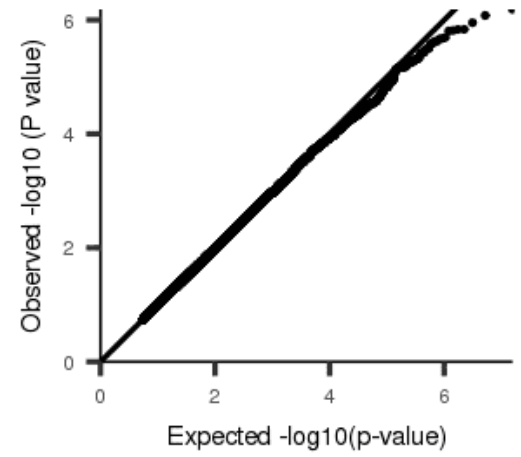

[back to list of plots](#)



Figure 1910: NETMAT edge (100) 0754

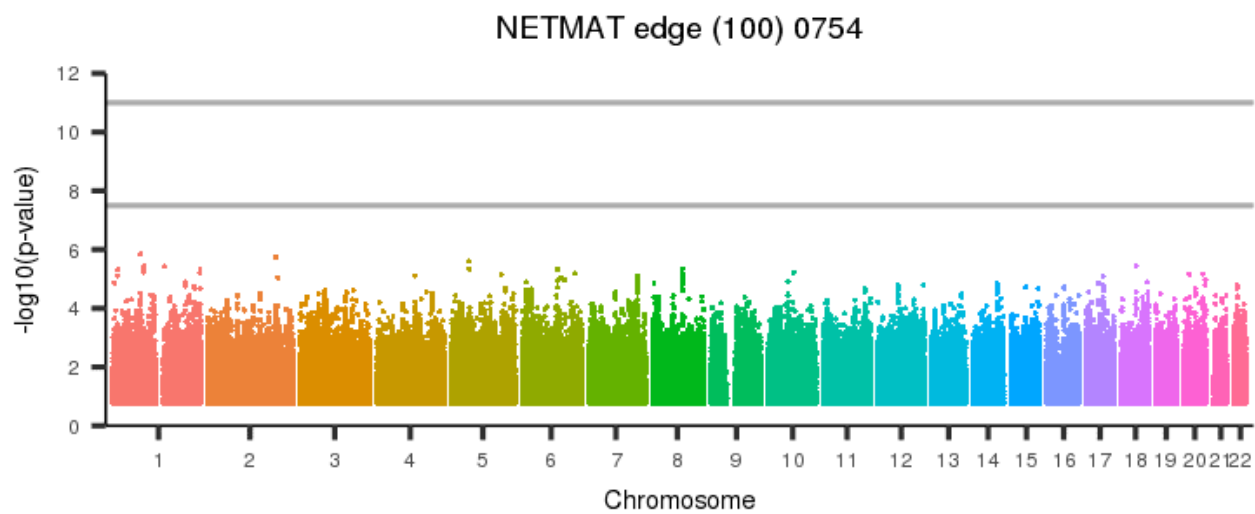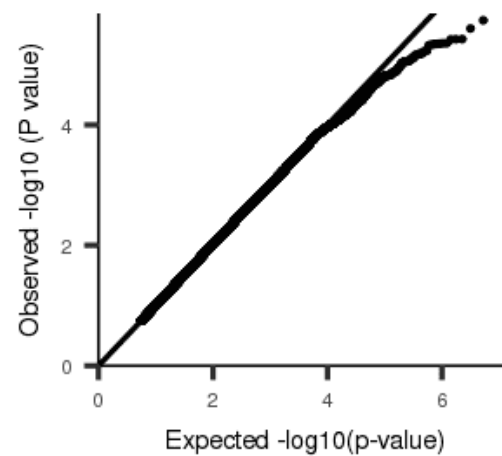

[back to list of plots](#)

Figure 1911: NETMAT edge (100) 0755

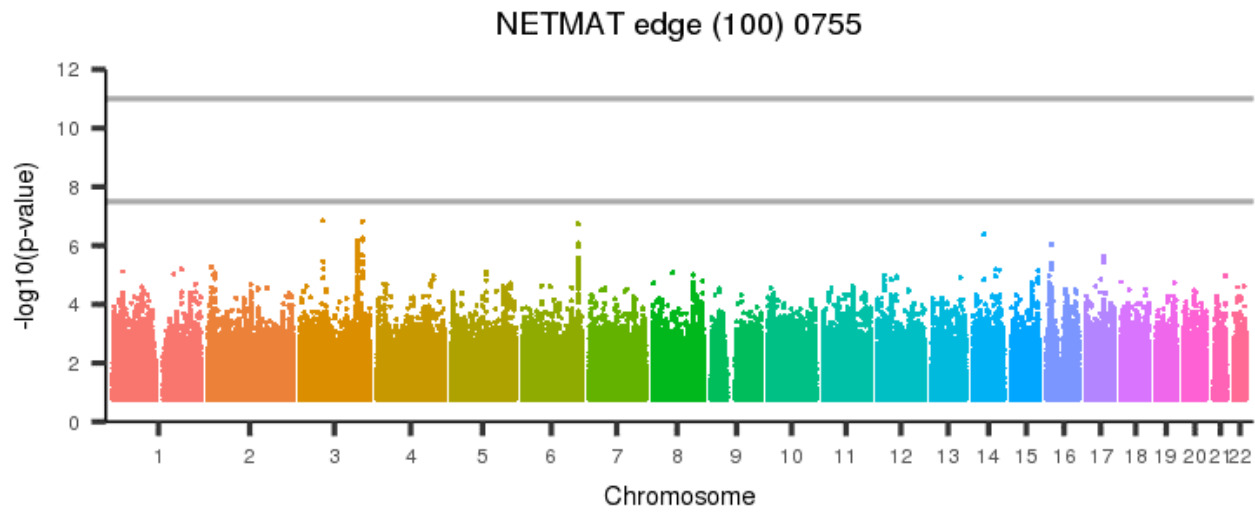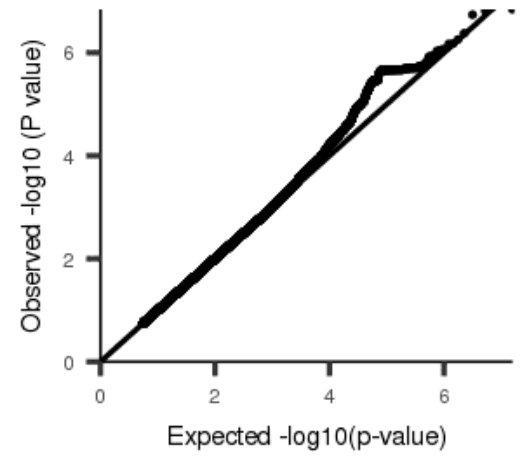

[back to list of plots](#)

Figure 1912: NETMAT edge (100) 0756

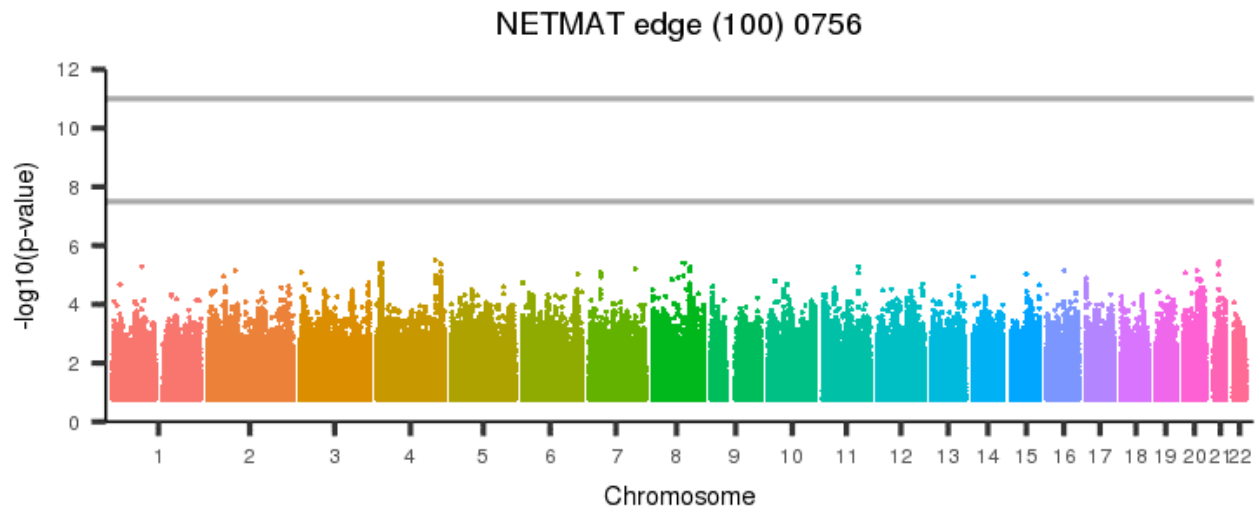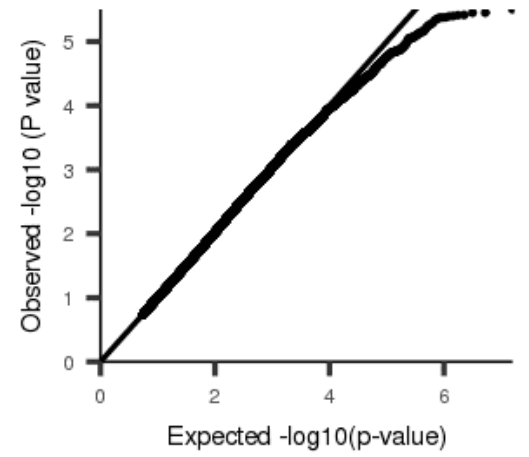

[back to list of plots](#)

Figure 1913: NETMAT edge (100) 0757

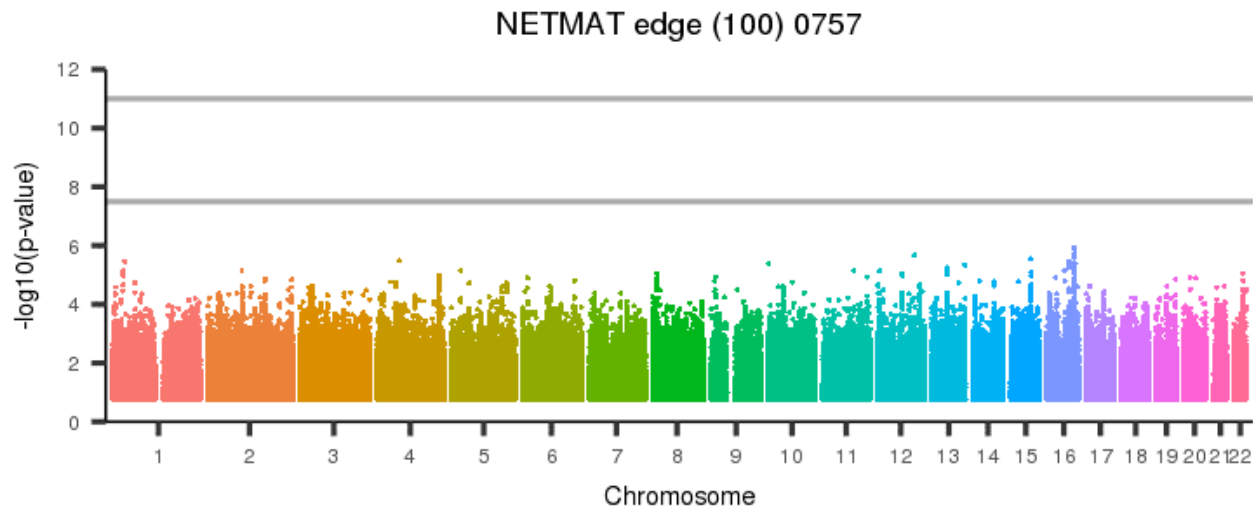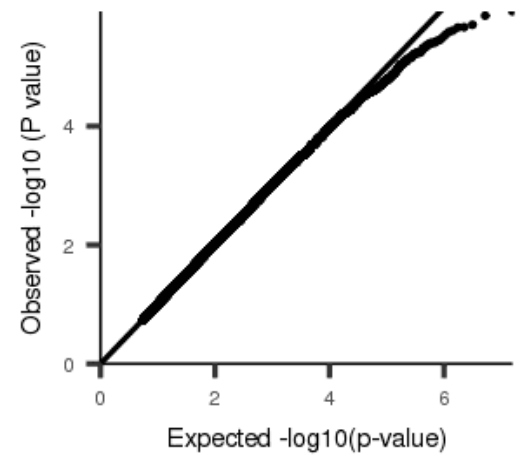

[back to list of plots](#)

Figure 1914: NETMAT edge (100) 0758

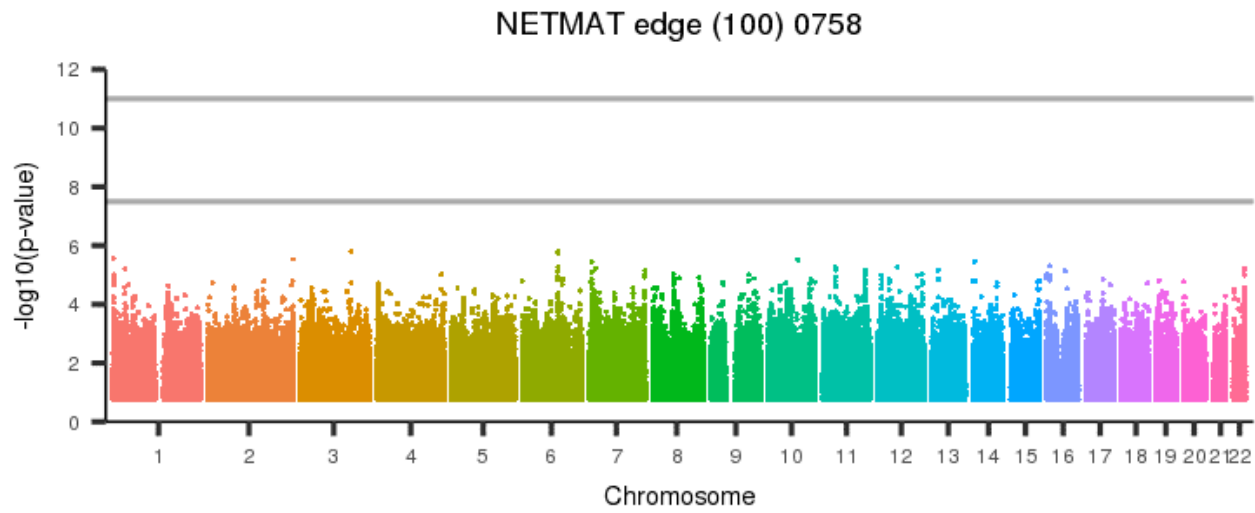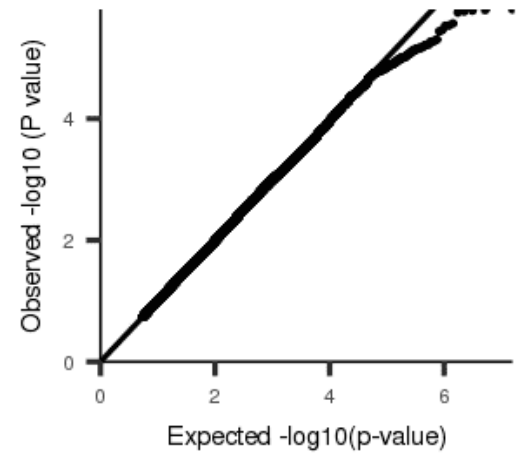

[back to list of plots](#)

Figure 1915: NETMAT edge (100) 0759

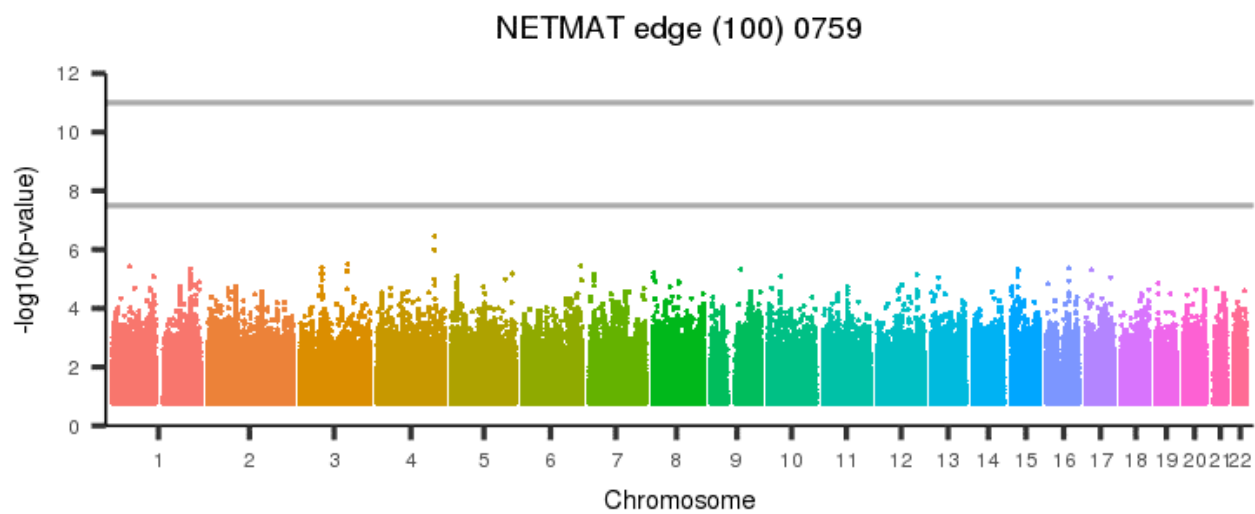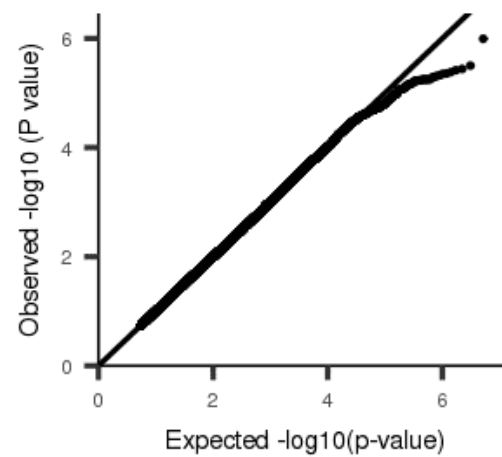

[back to list of plots](#)

Figure 1916: NETMAT edge (100) 0760

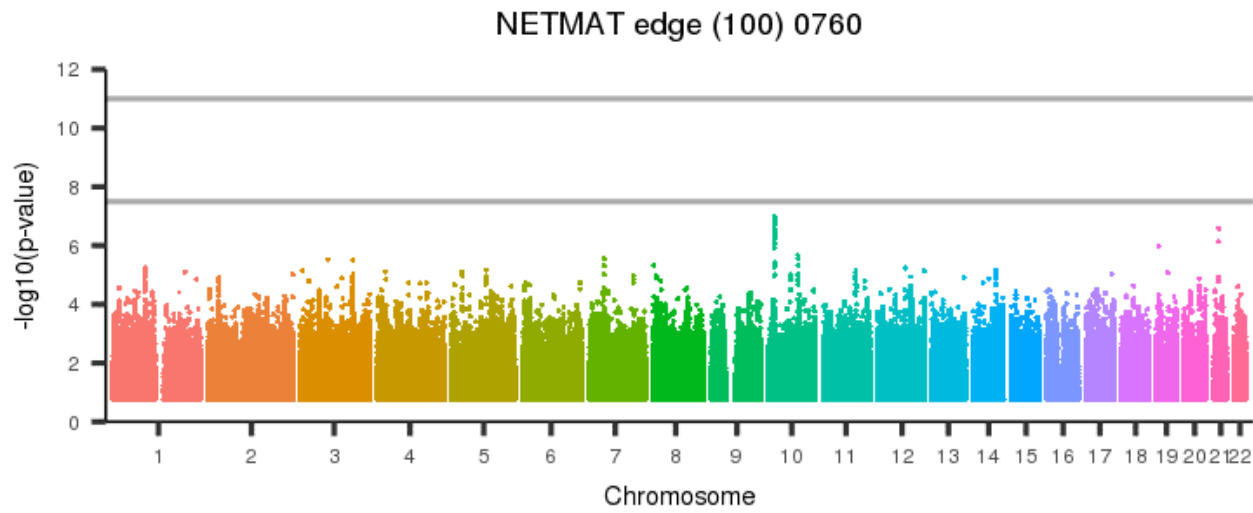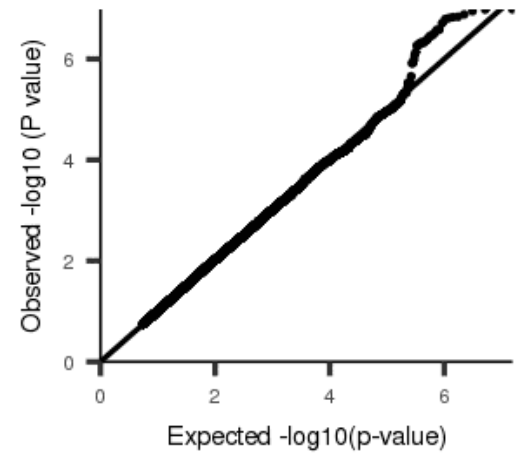

[back to list of plots](#)

Figure 1917: NETMAT edge (100) 0761

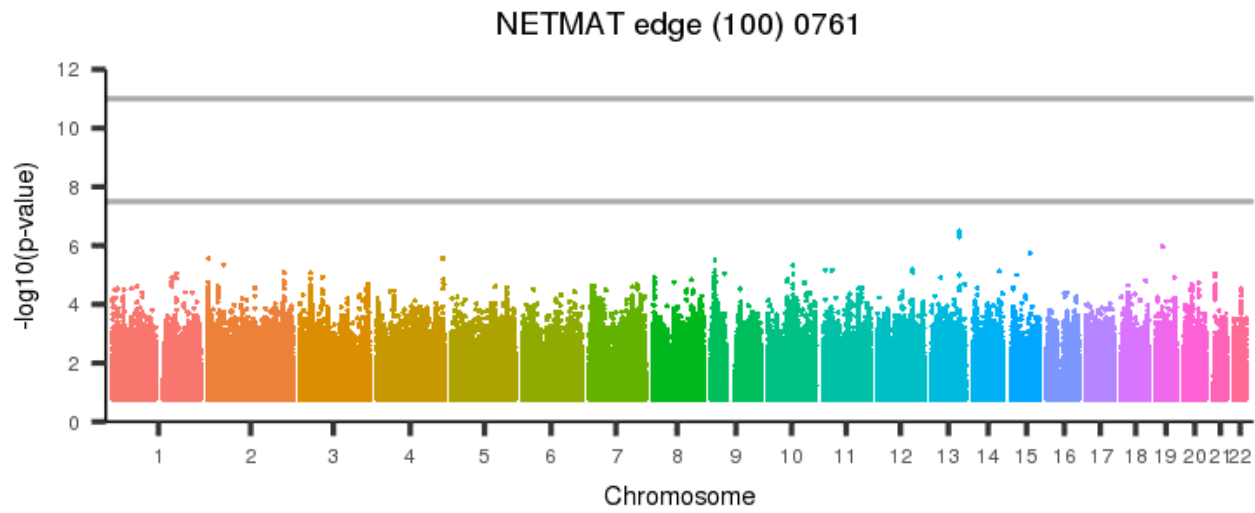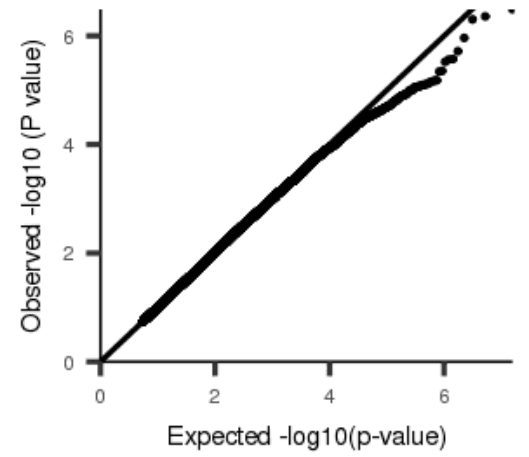

[back to list of plots](#)



Figure 1918: NETMAT edge (100) 0762

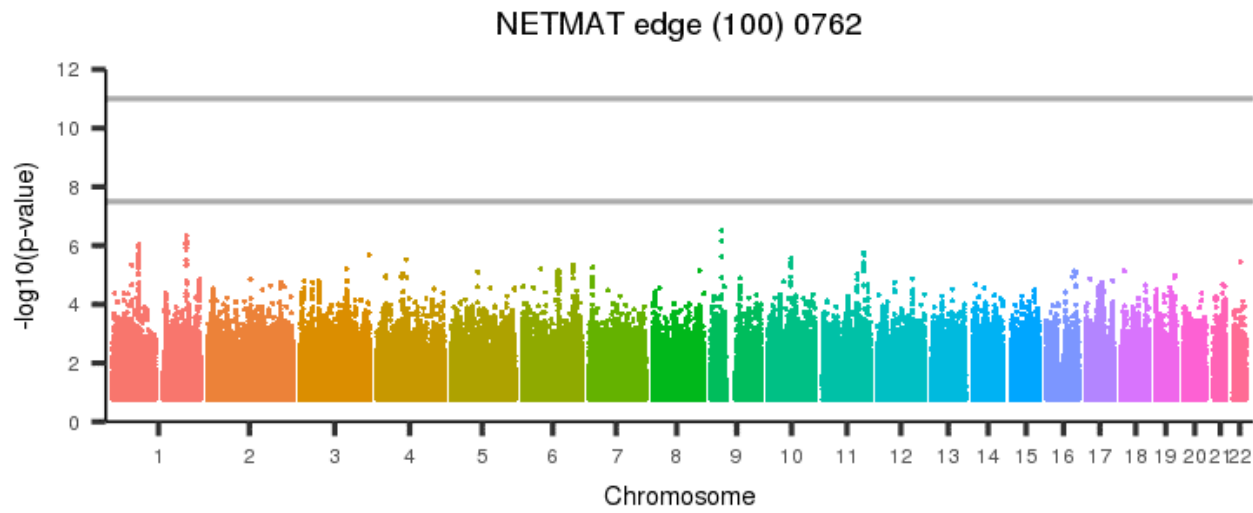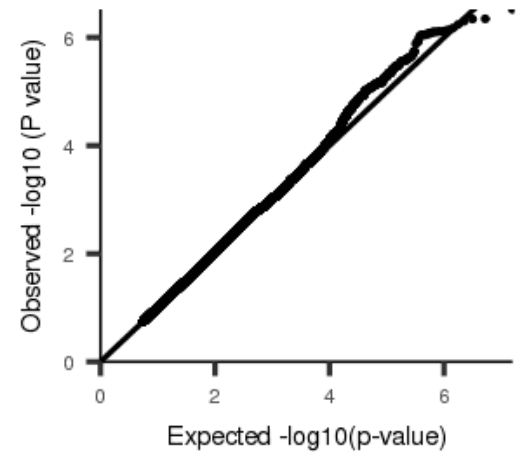

[back to list of plots](#)

Figure 1919: NETMAT edge (100) 0763

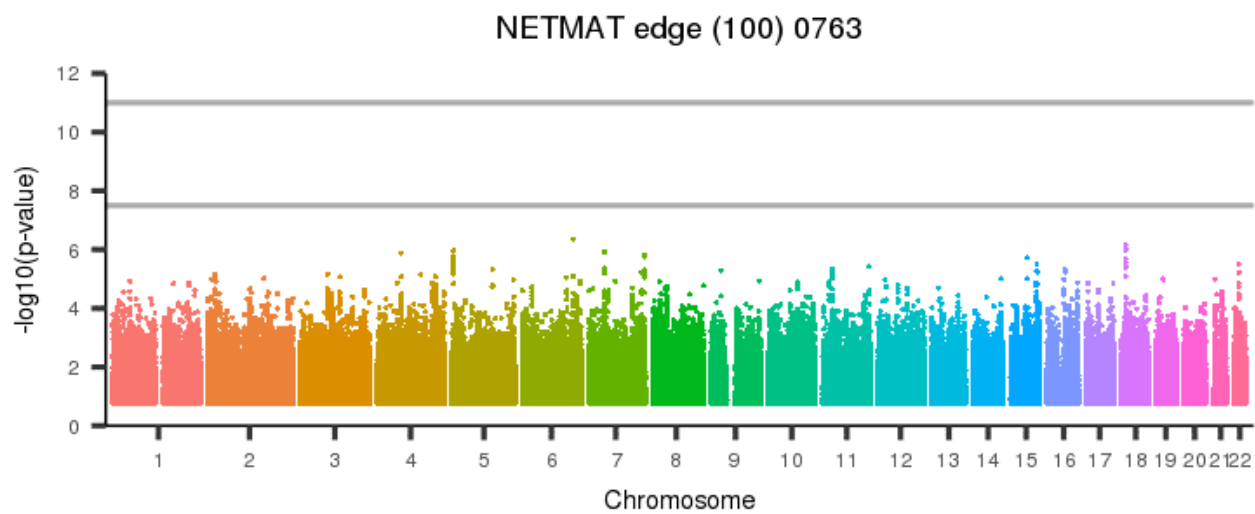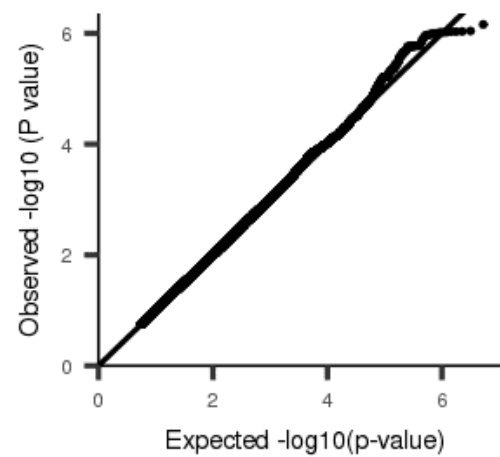

[back to list of plots](#)

Figure 1920: NETMAT edge (100) 0764

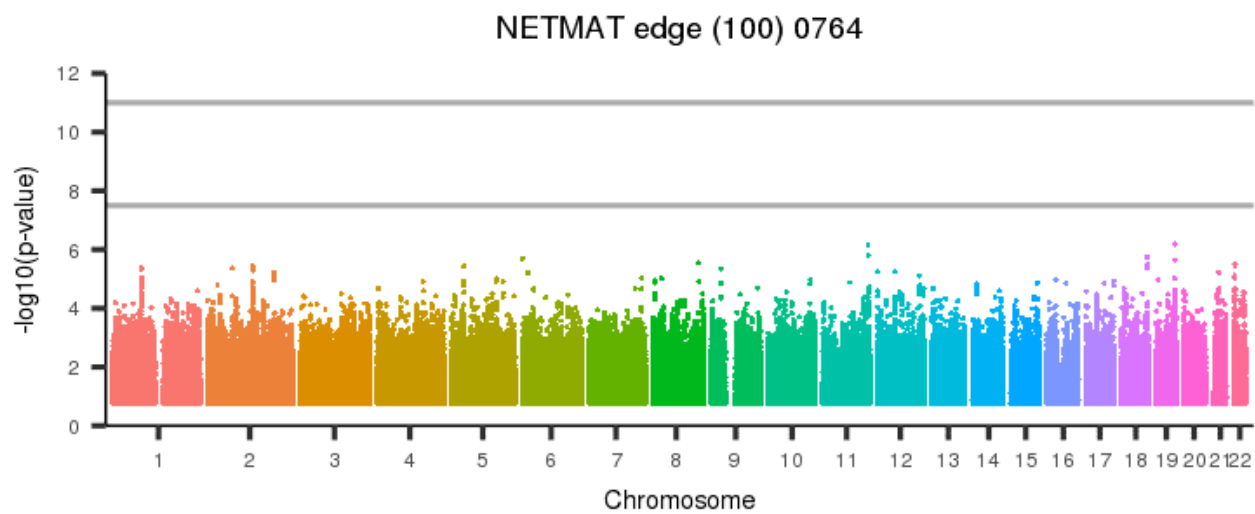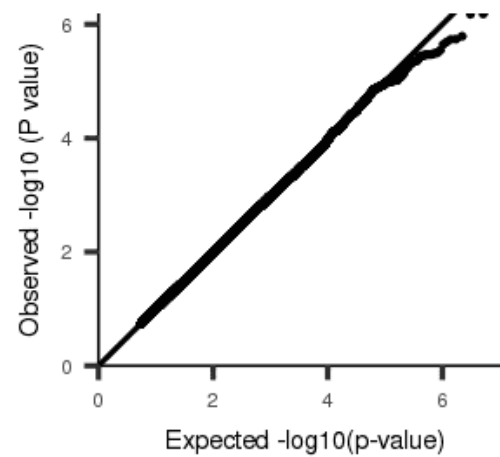

[back to list of plots](#)

Figure 1921: NETMAT edge (100) 0765

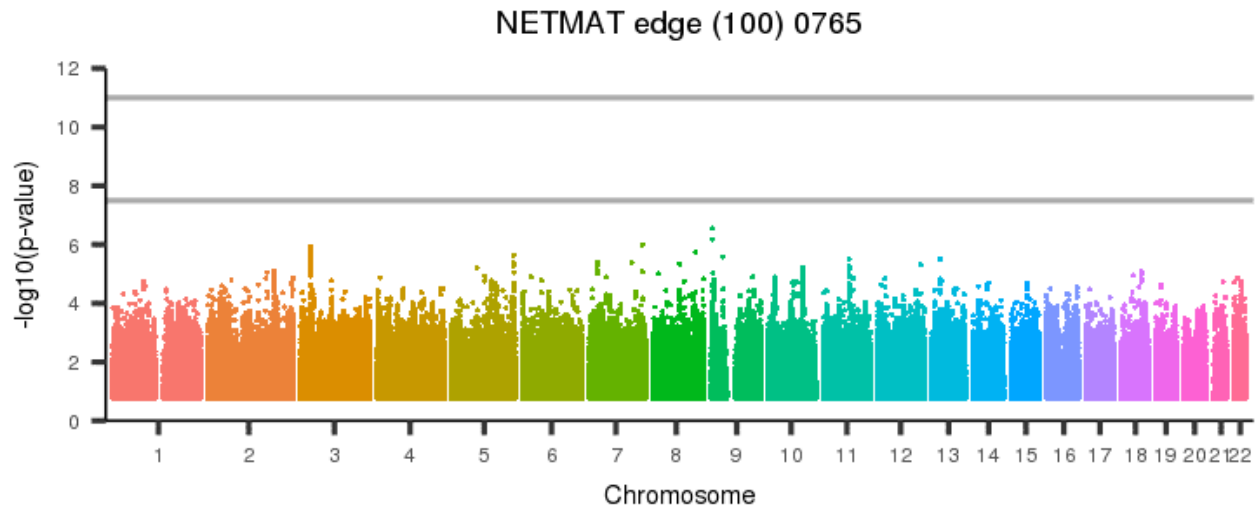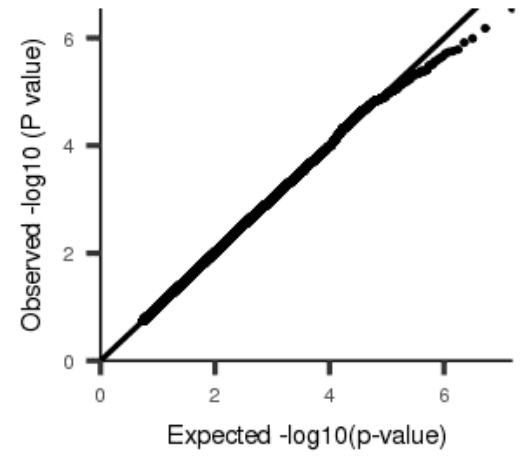

[back to list of plots](#)

Figure 1922: NETMAT edge (100) 0766

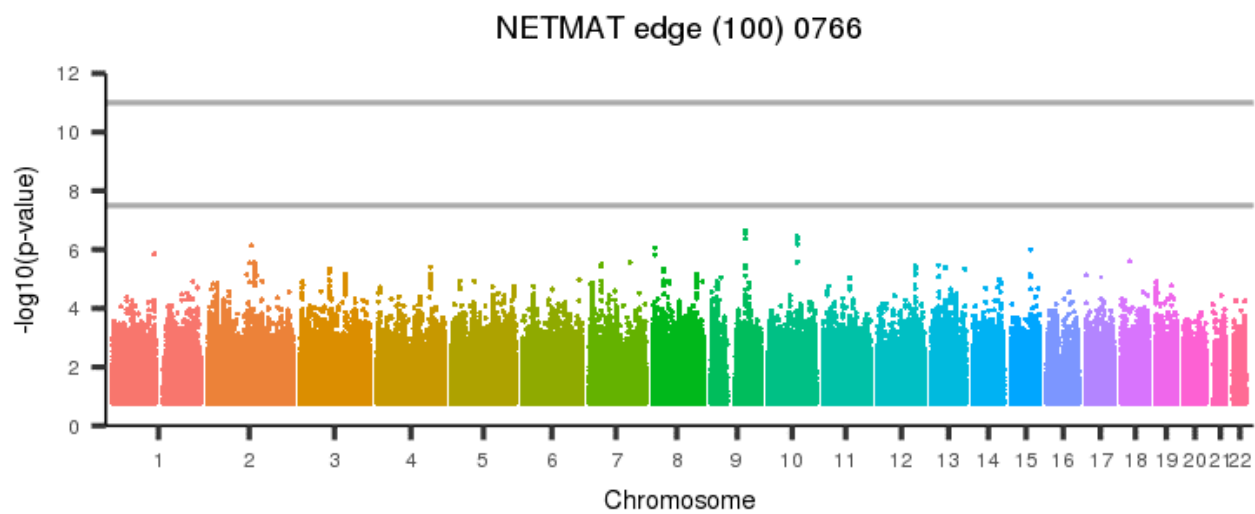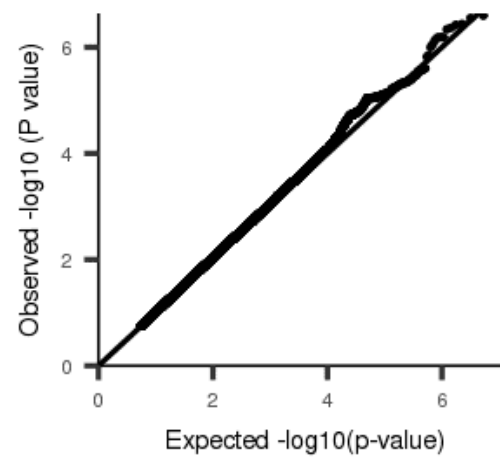

[back to list of plots](#)

Figure 1923: NETMAT edge (100) 0767

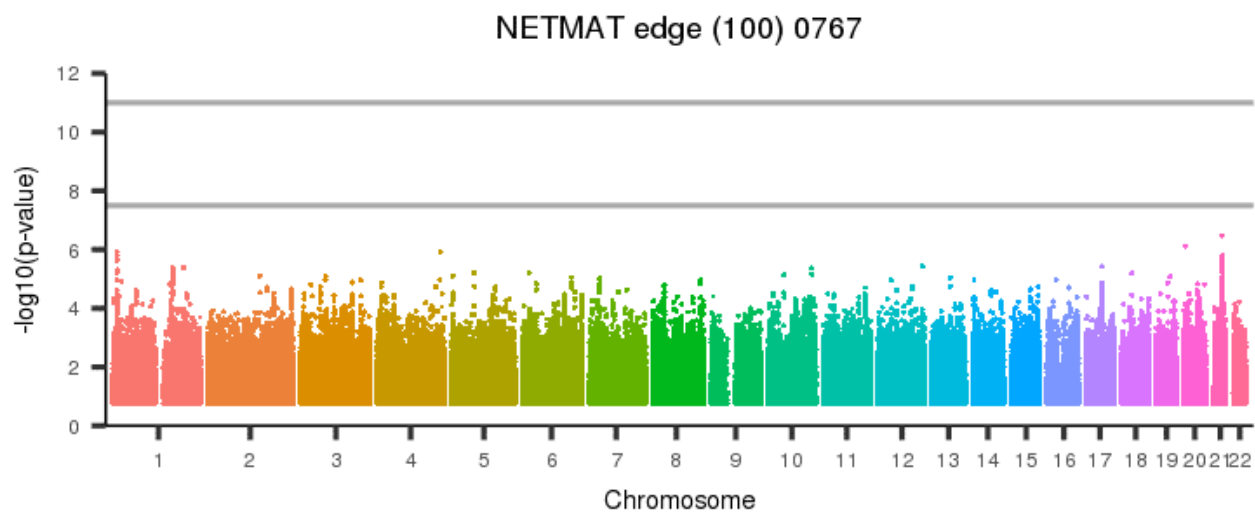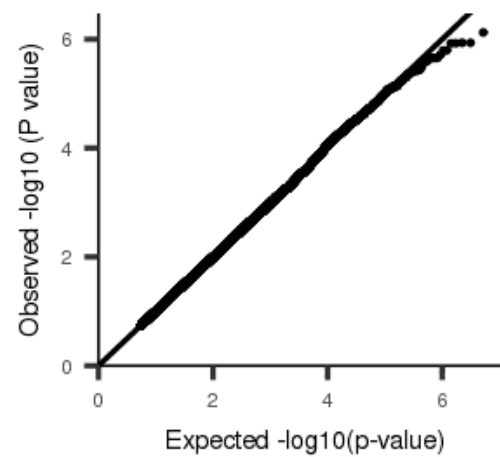

[back to list of plots](#)

Figure 1924: NETMAT edge (100) 0768

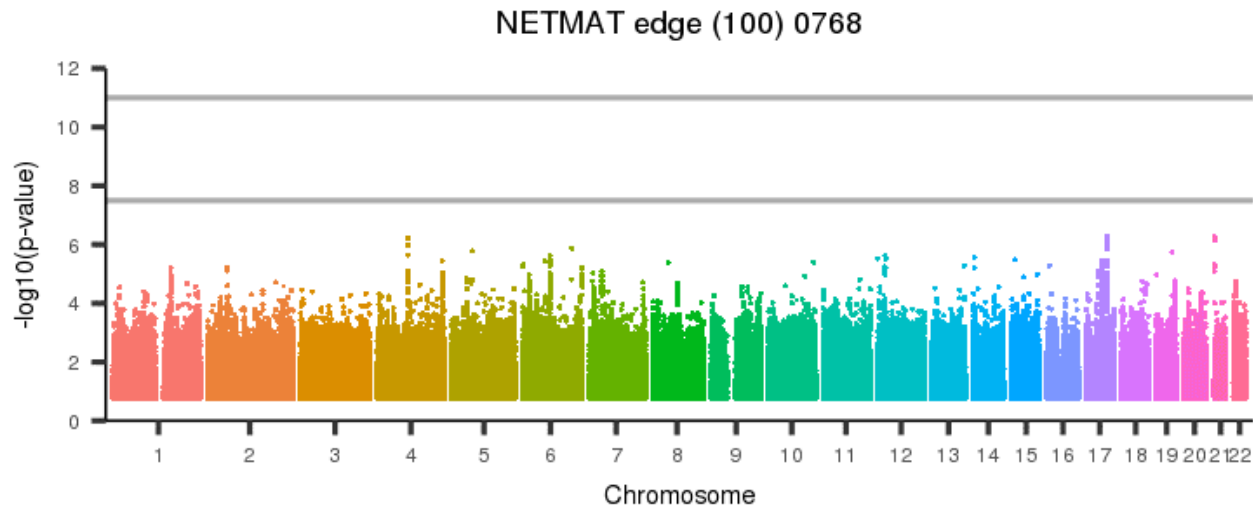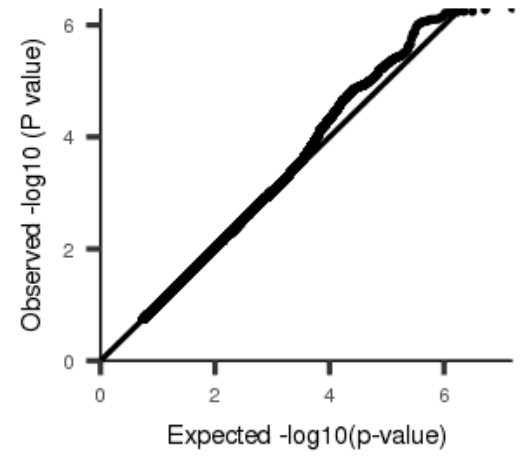

[back to list of plots](#)

Figure 1925: NETMAT edge (100) 0769

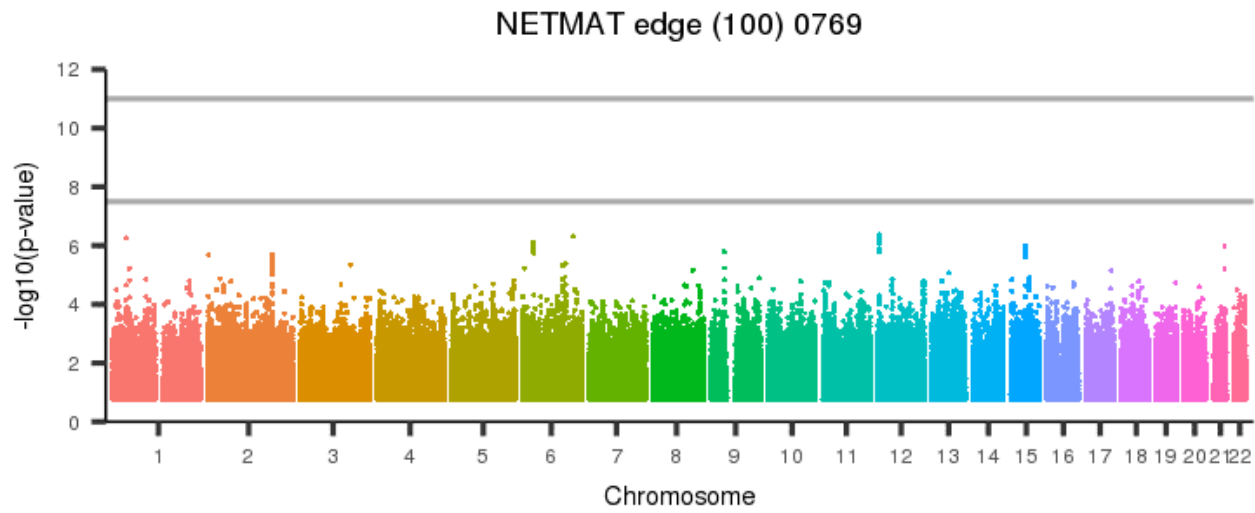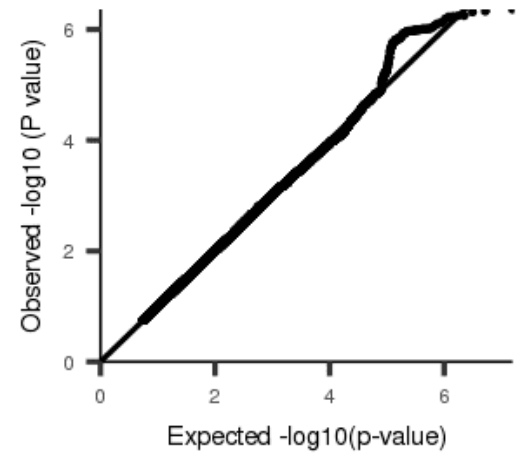

[back to list of plots](#)



Figure 1926: NETMAT edge (100) 0770

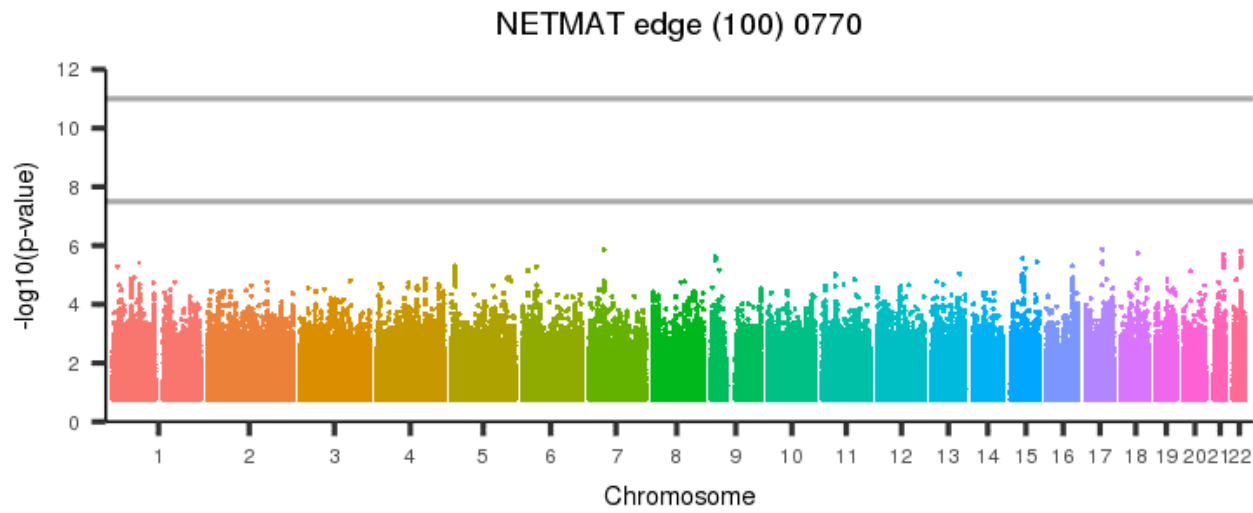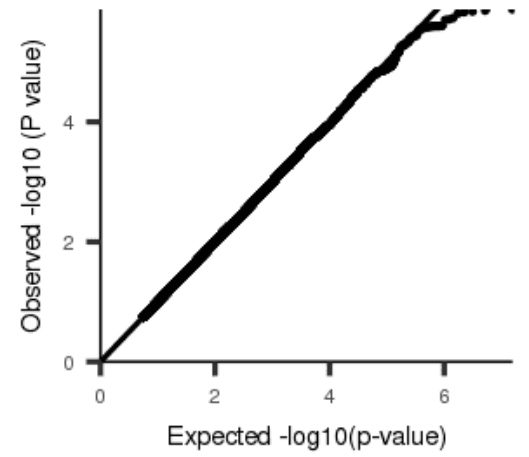

[back to list of plots](#)

Figure 1927: NETMAT edge (100) 0771

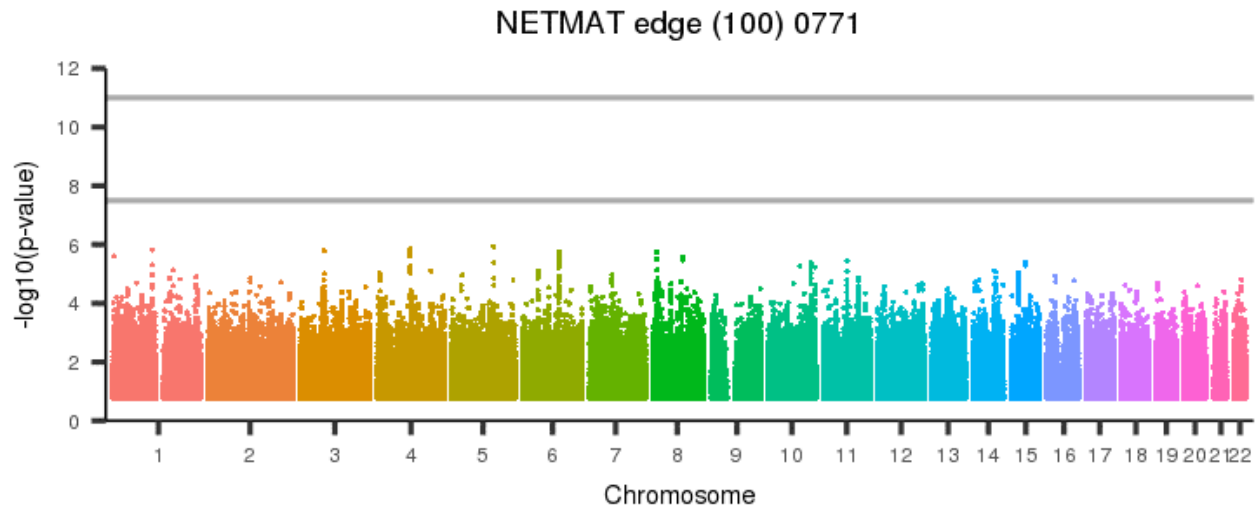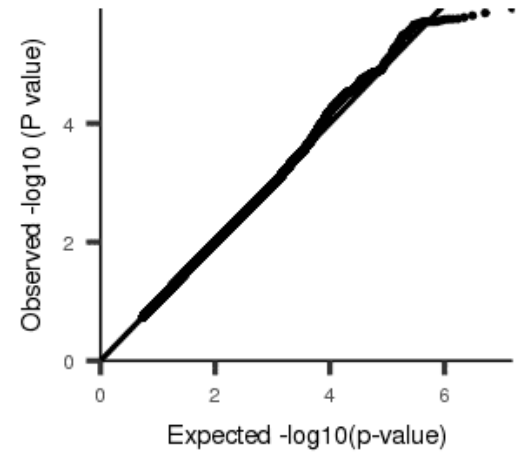

[back to list of plots](#)

Figure 1928: NETMAT edge (100) 0772

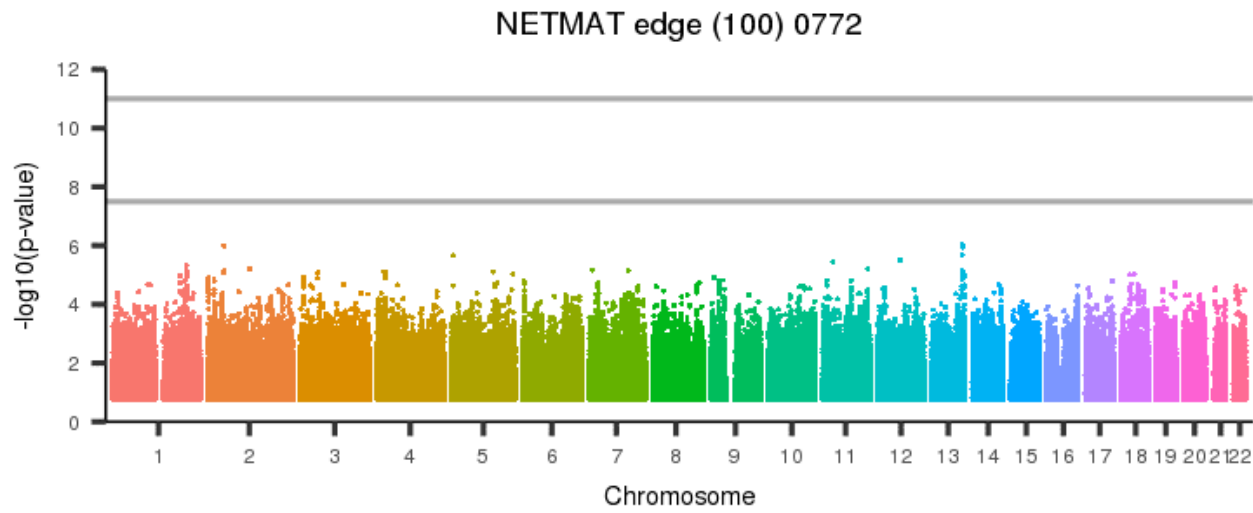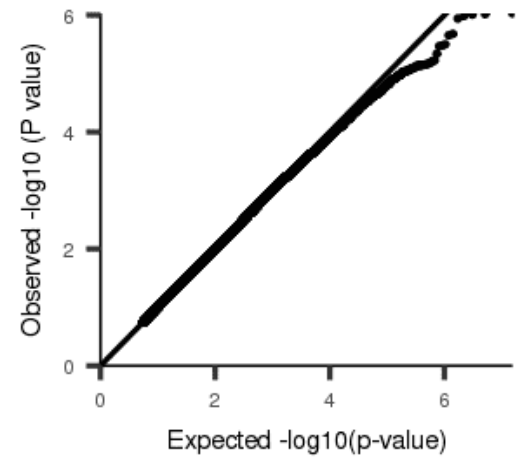

[back to list of plots](#)

Figure 1929: NETMAT edge (100) 0773

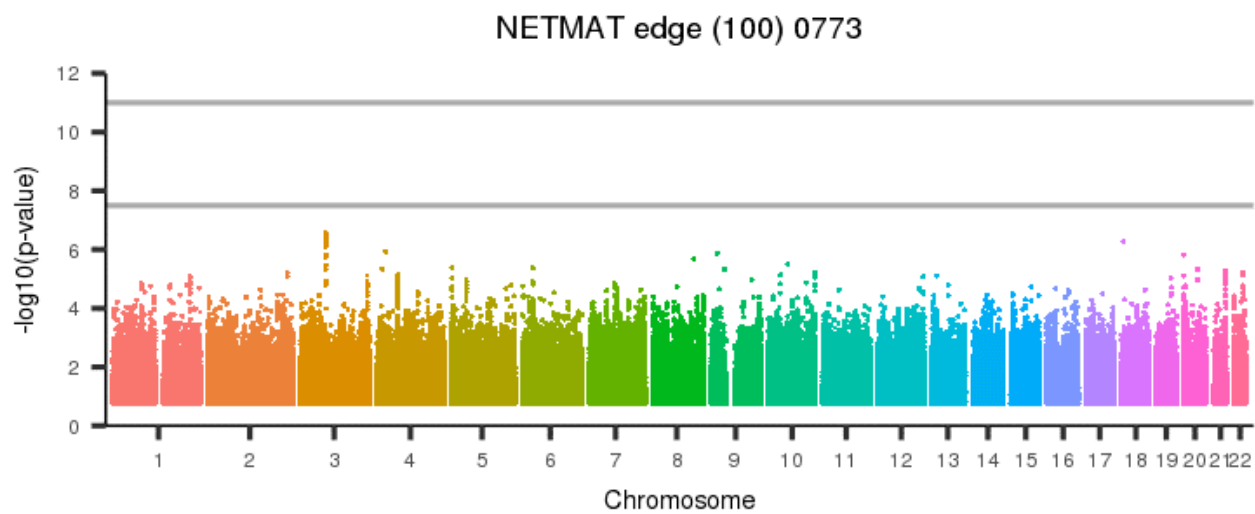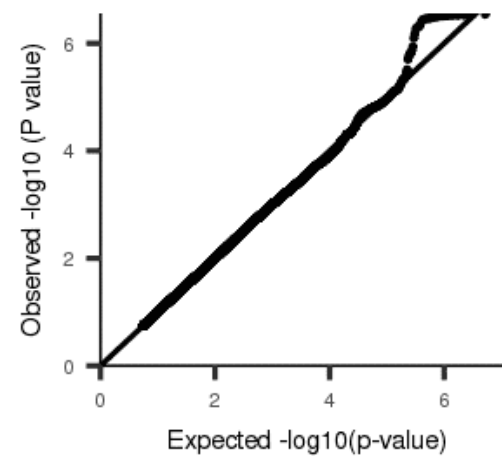

[back to list of plots](#)

Figure 1930: NETMAT edge (100) 0774

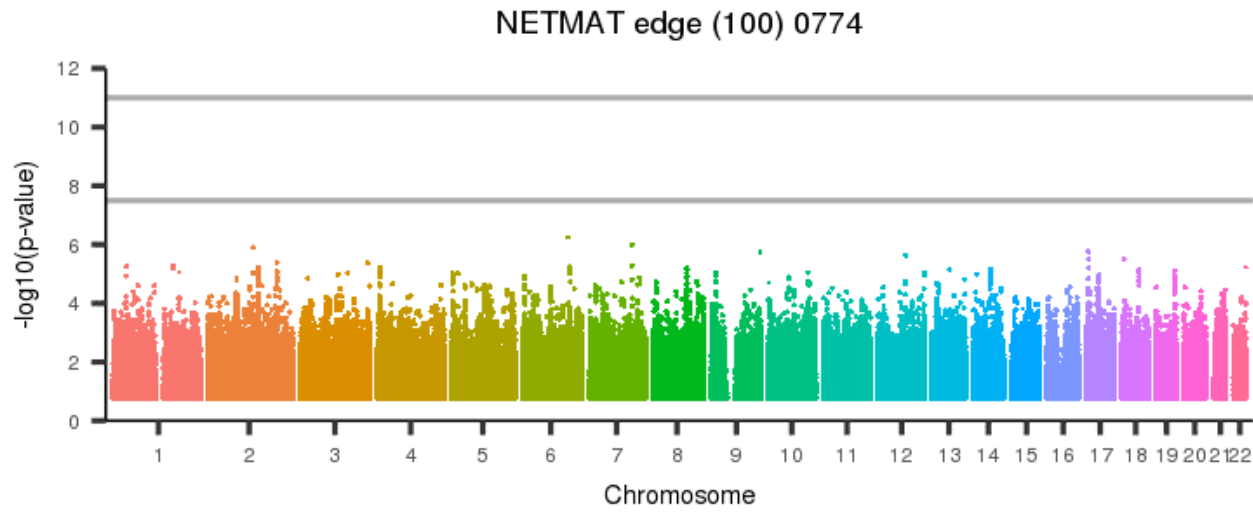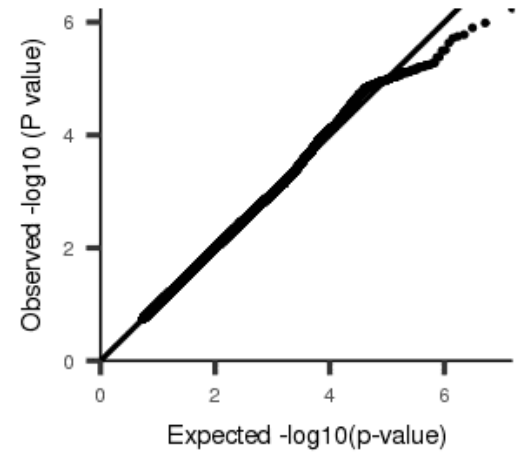

[back to list of plots](#)

Figure 1931: NETMAT edge (100) 0775

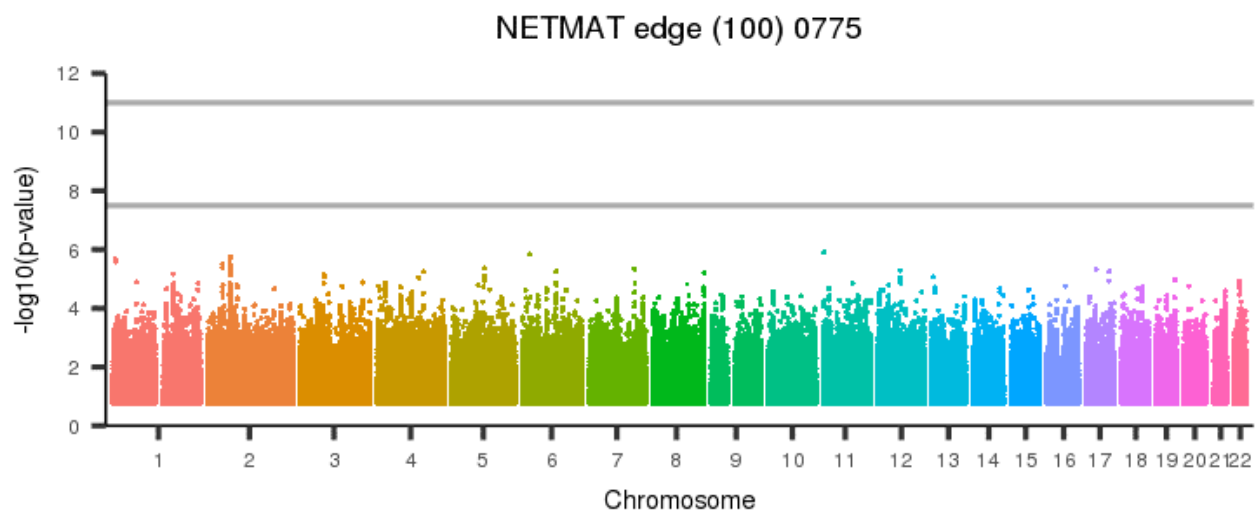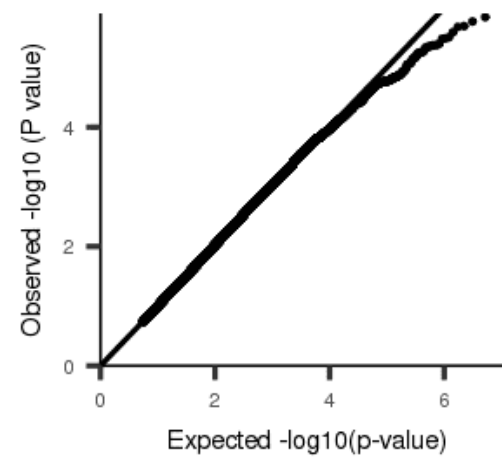

[back to list of plots](#)

Figure 1932: NETMAT edge (100) 0776

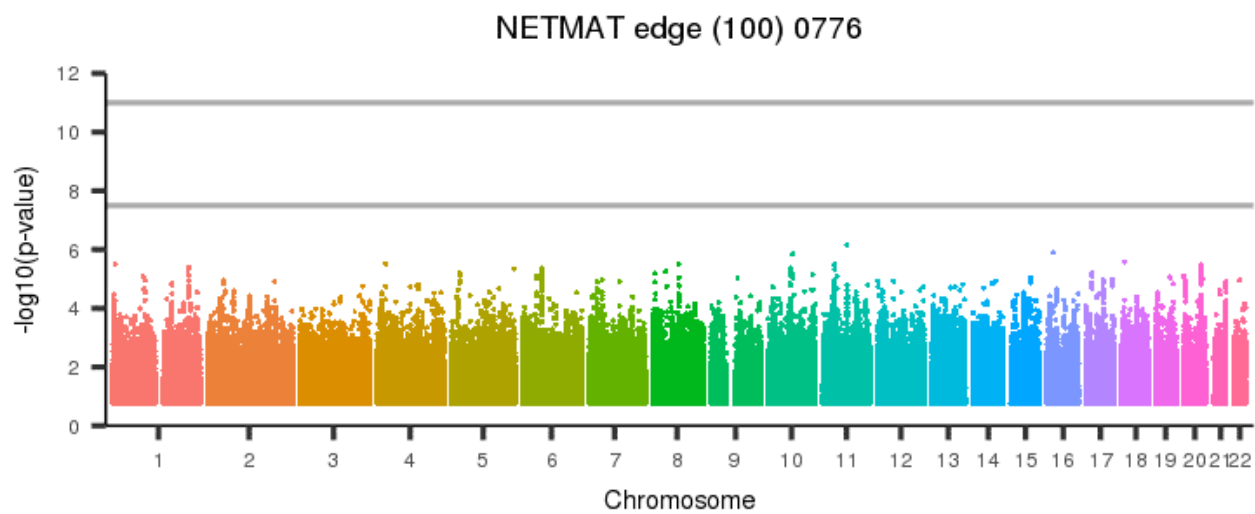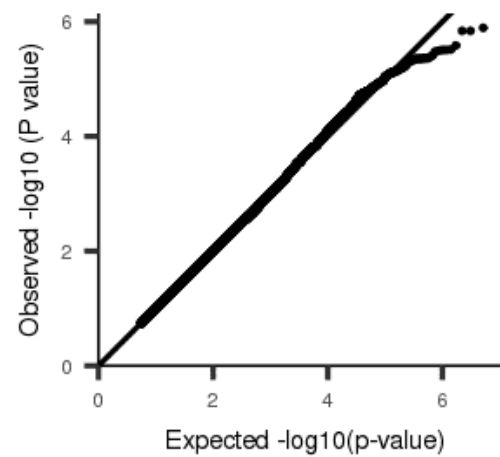

[back to list of plots](#)

Figure 1933: NETMAT edge (100) 0777

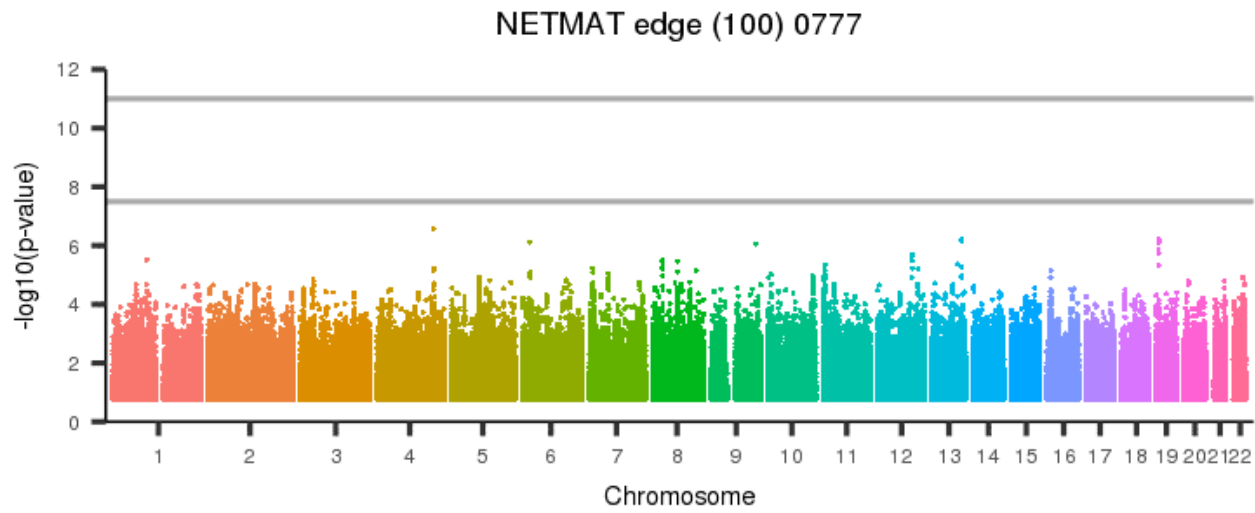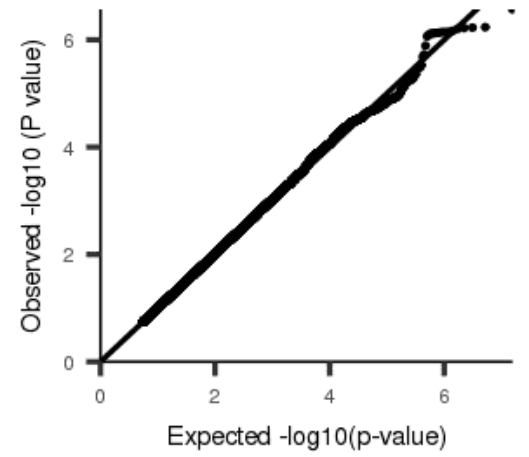

[back to list of plots](#)



Figure 1934: NETMAT edge (100) 0778

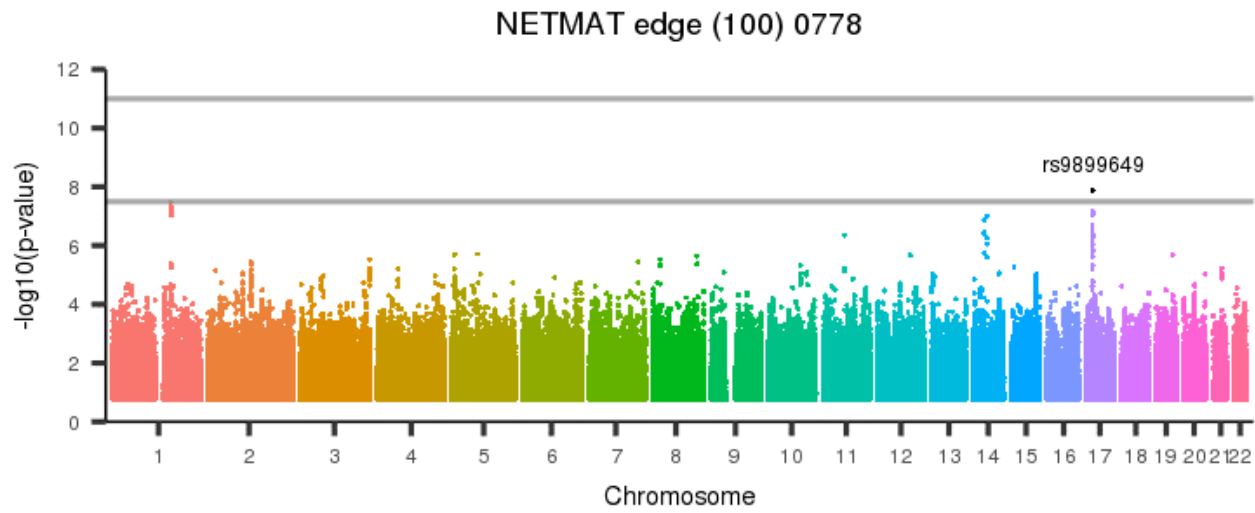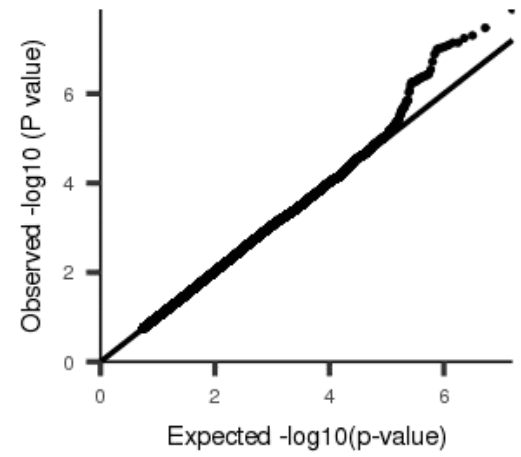

[back to list of plots](#)

Figure 1935: NETMAT edge (100) 0779

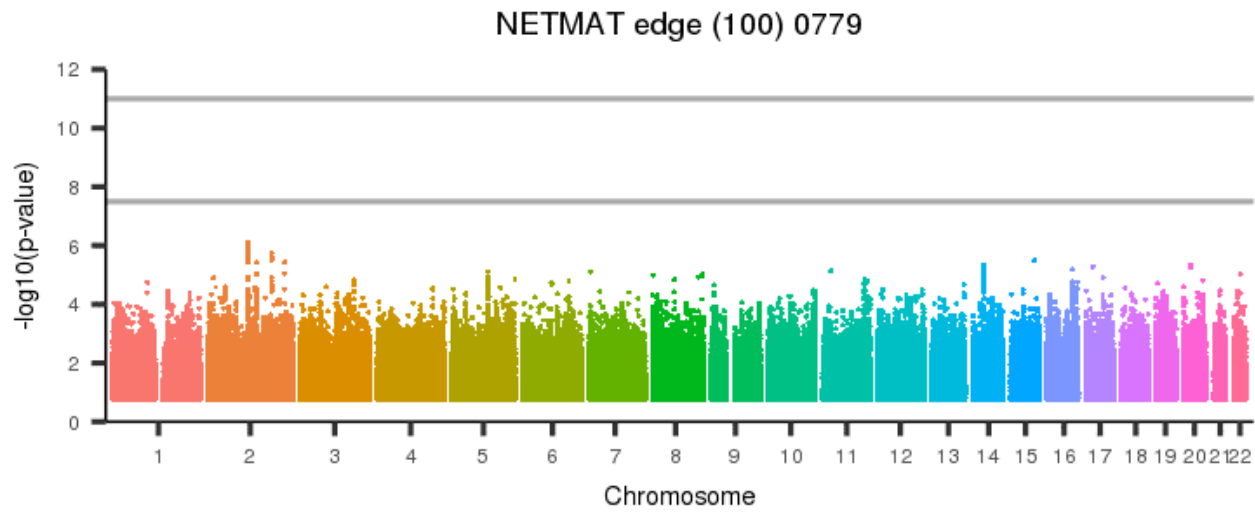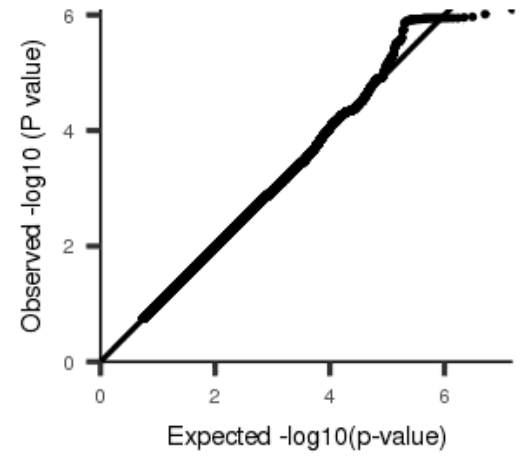

[back to list of plots](#)

Figure 1936: NETMAT edge (100) 0780

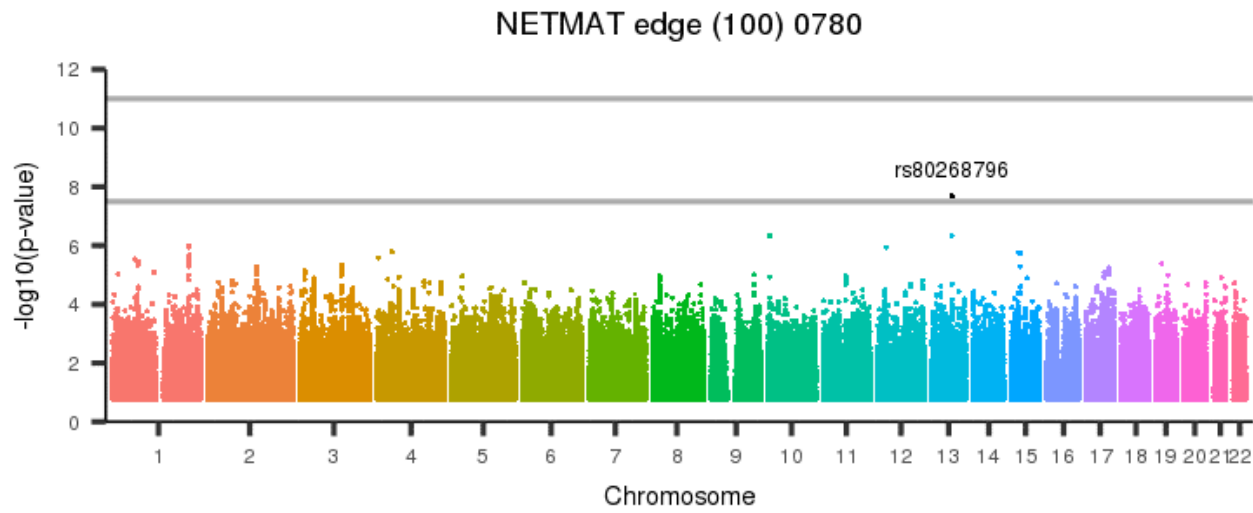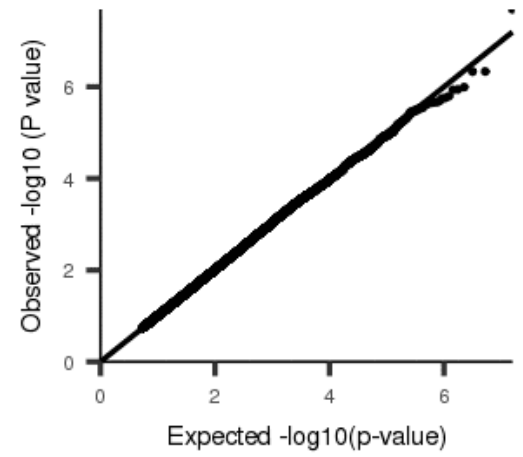

[back to list of plots](#)

Figure 1937: NETMAT edge (100) 0781

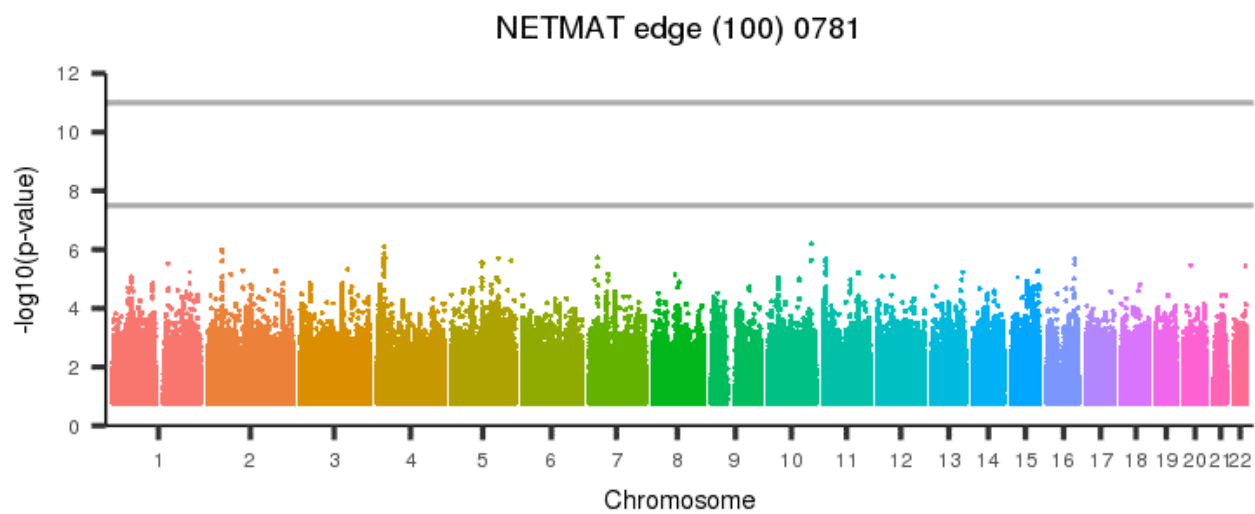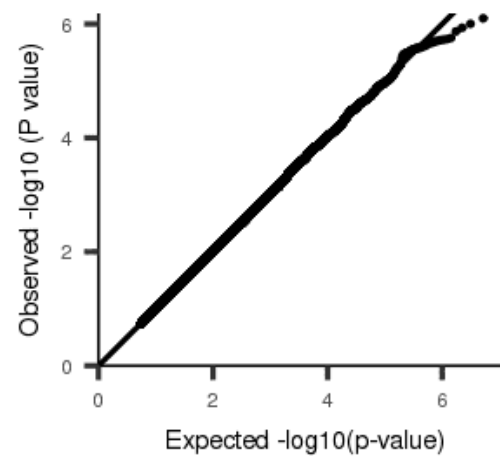

[back to list of plots](#)

Figure 1938: NETMAT edge (100) 0782

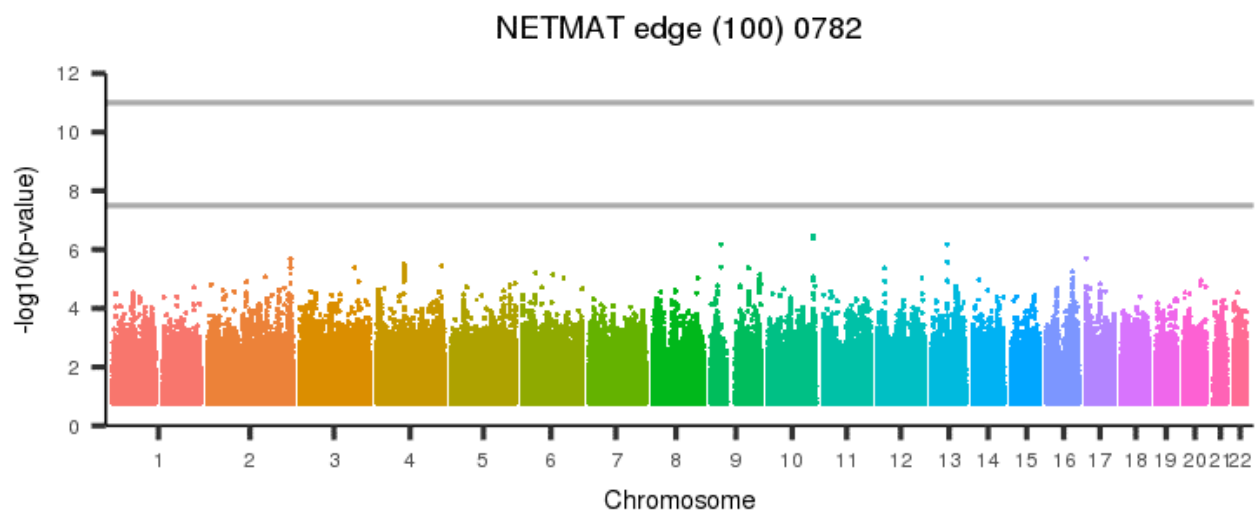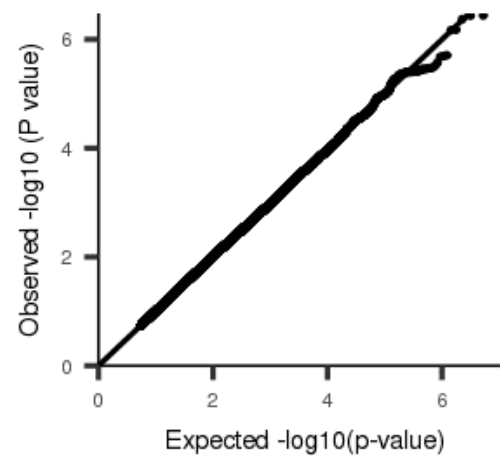

[back to list of plots](#)

Figure 1939: NETMAT edge (100) 0783

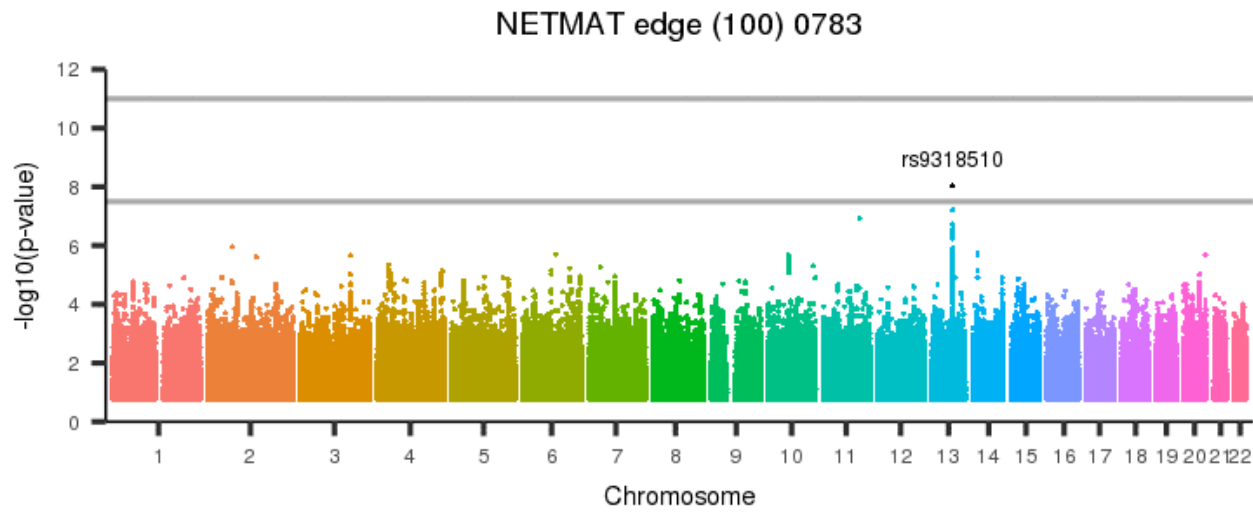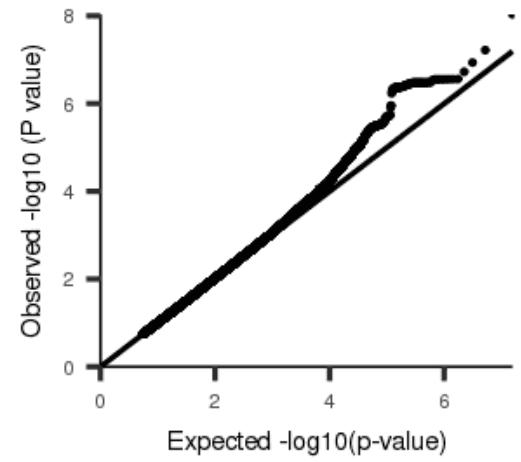

[back to list of plots](#)

Figure 1940: NETMAT edge (100) 0784

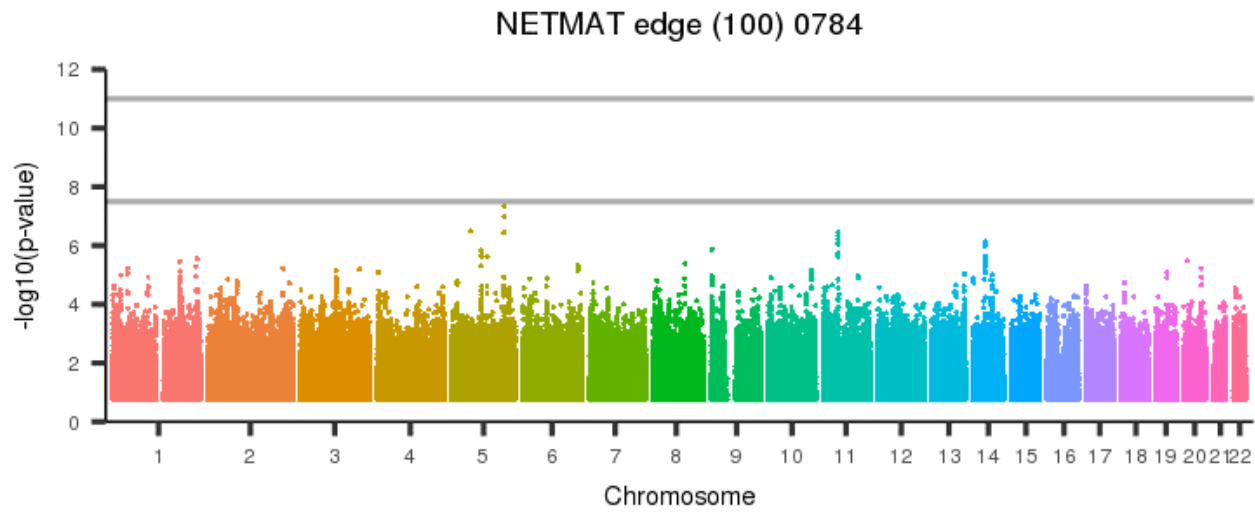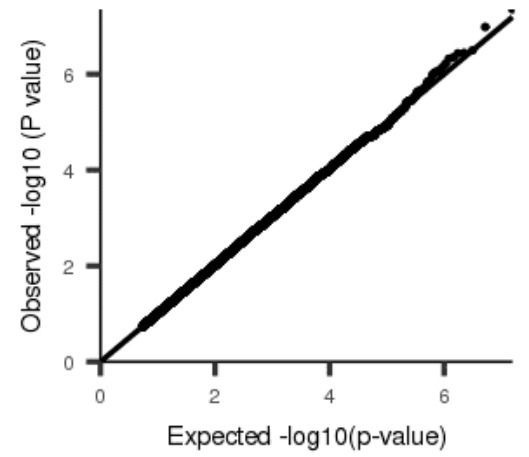

[back to list of plots](#)

Figure 1941: NETMAT edge (100) 0785

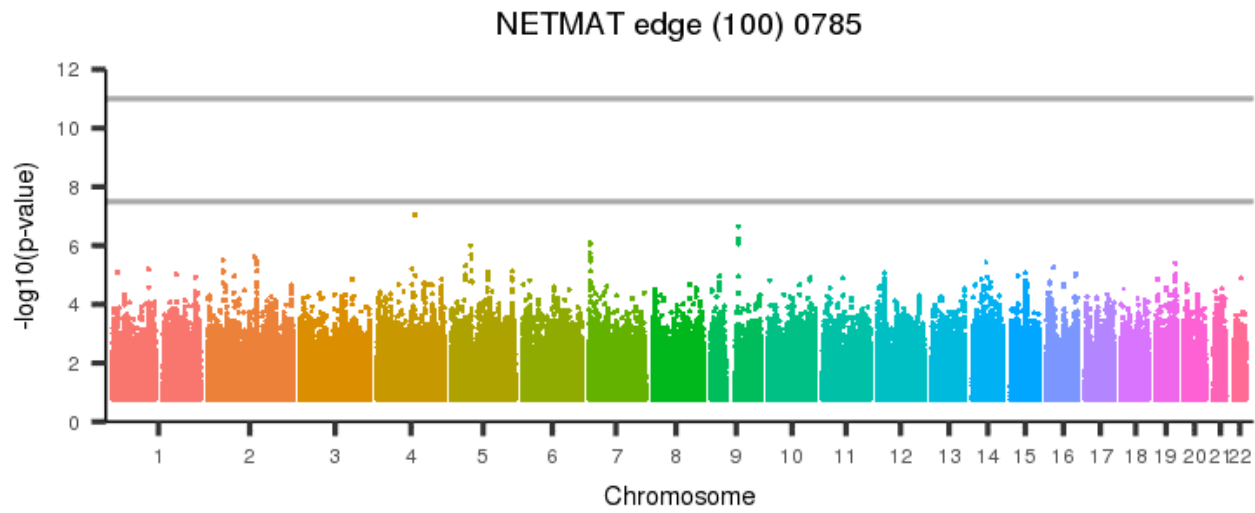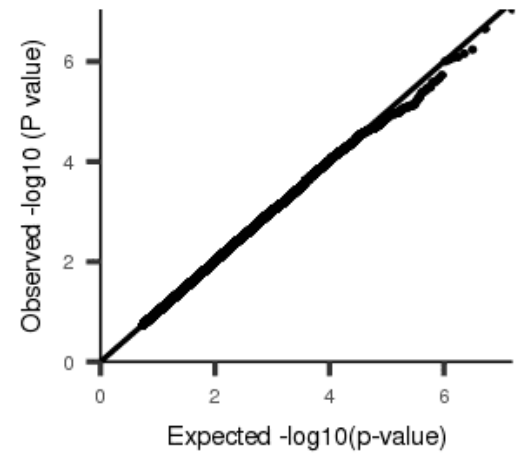

[back to list of plots](#)



Figure 1942: NETMAT edge (100) 0786

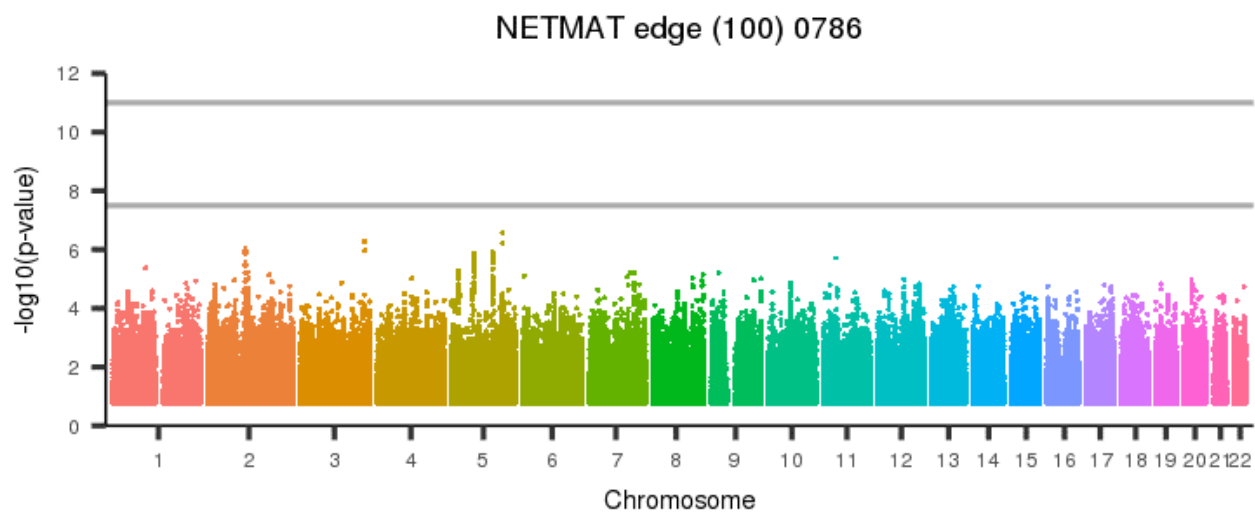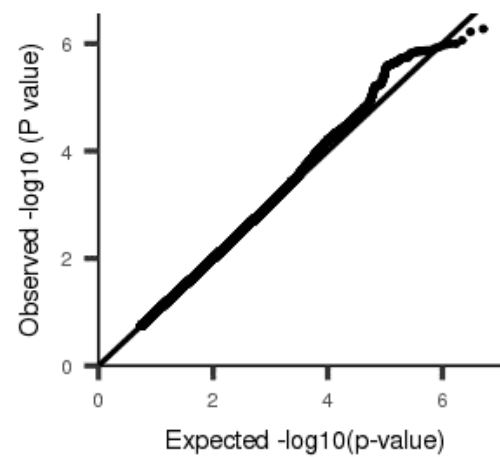

[back to list of plots](#)

Figure 1943: NETMAT edge (100) 0787

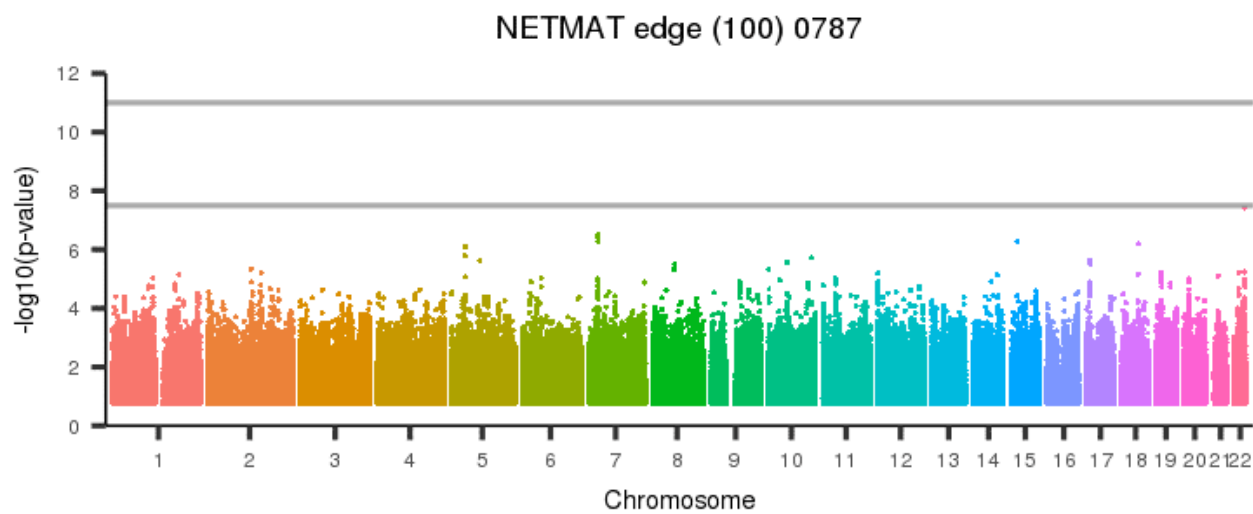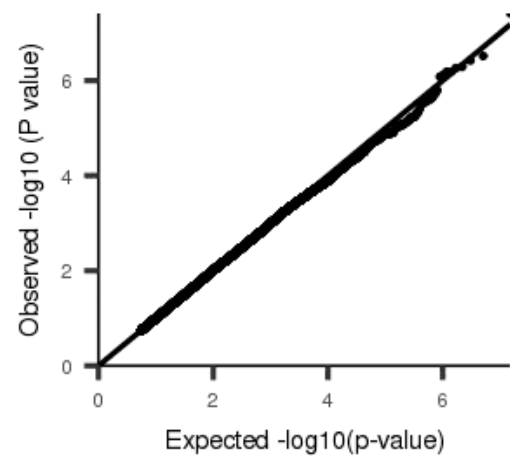

[back to list of plots](#)

Figure 1944: NETMAT edge (100) 0788

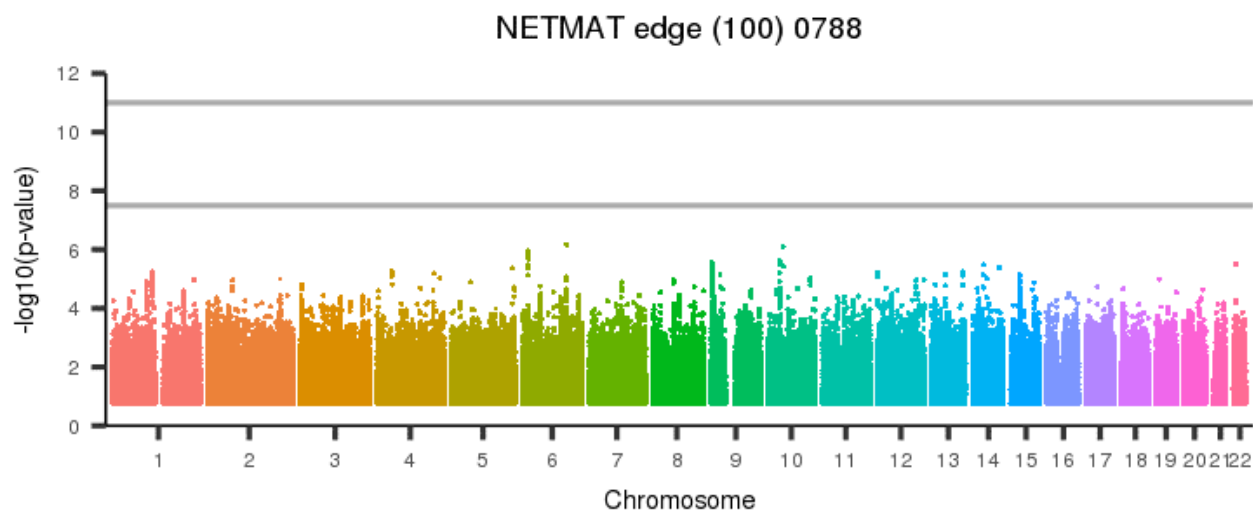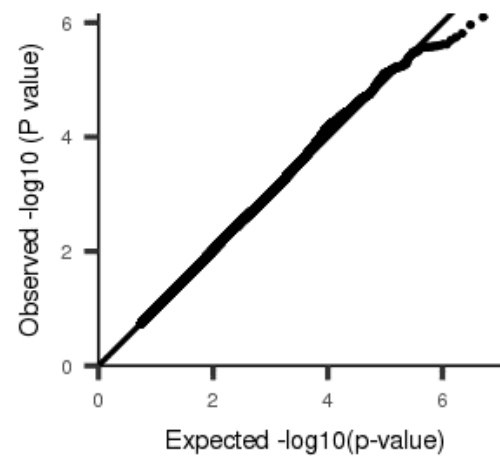

[back to list of plots](#)

Figure 1945: NETMAT edge (100) 0789

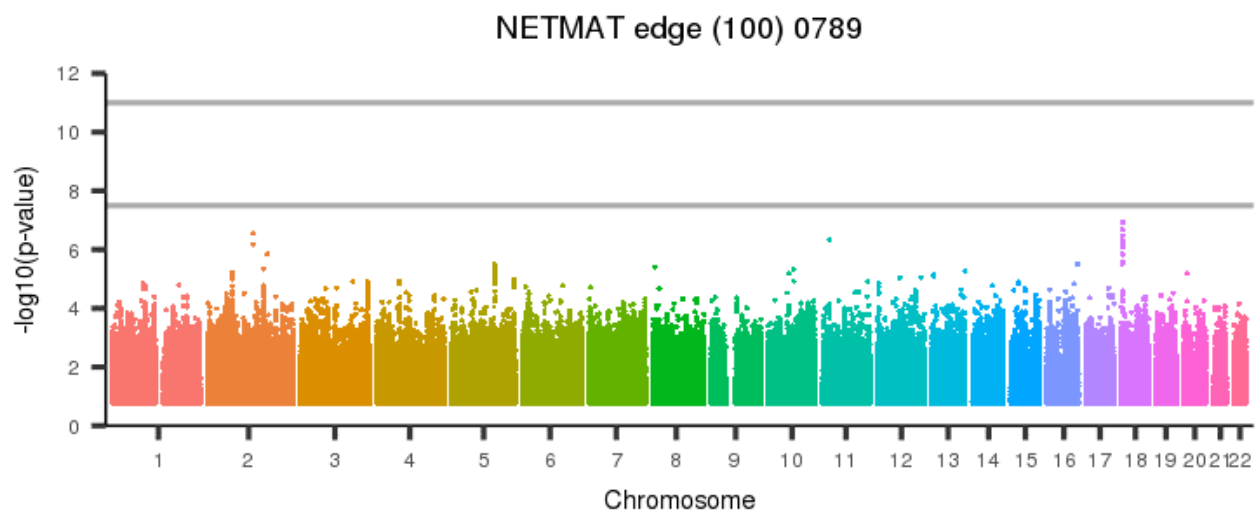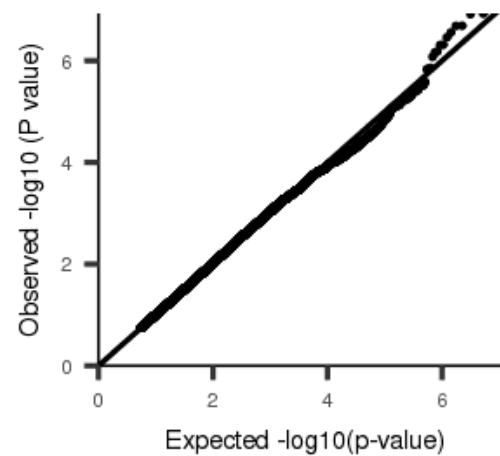

[back to list of plots](#)

Figure 1946: NETMAT edge (100) 0790

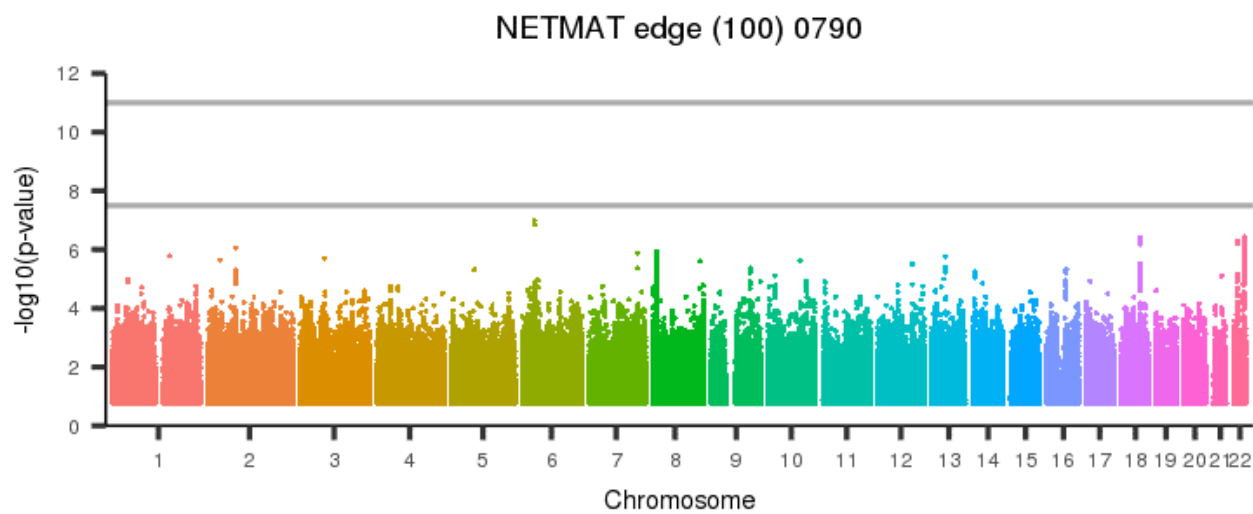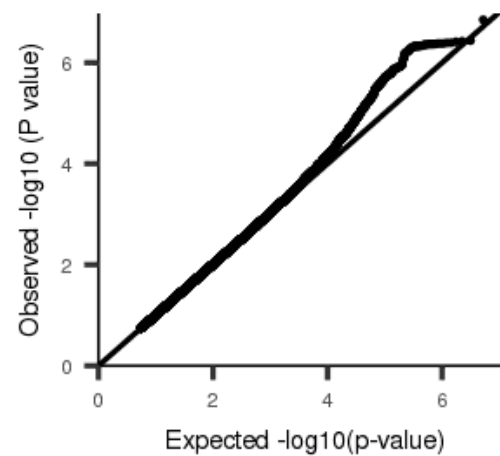

[back to list of plots](#)

Figure 1947: NETMAT edge (100) 0791

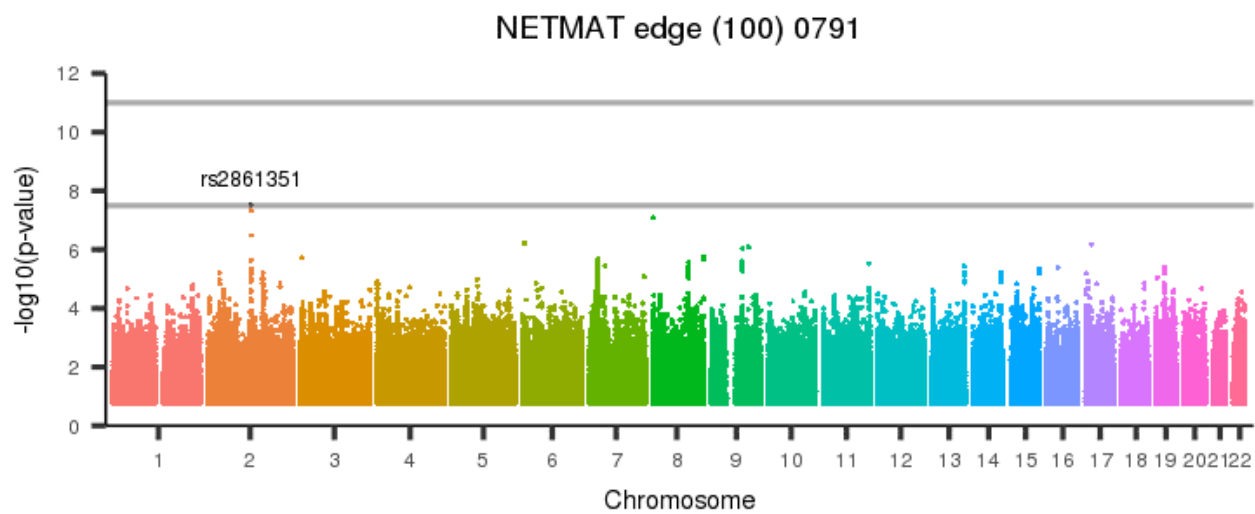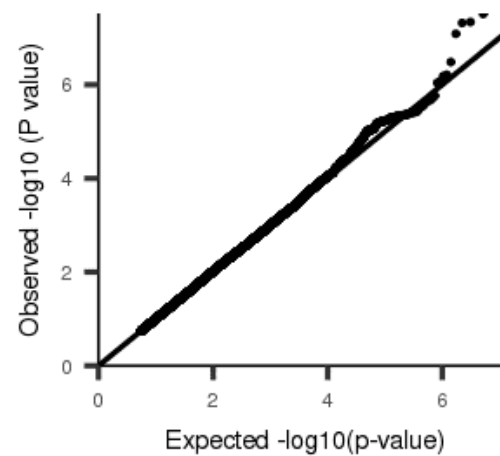

[back to list of plots](#)

Figure 1948: NETMAT edge (100) 0792

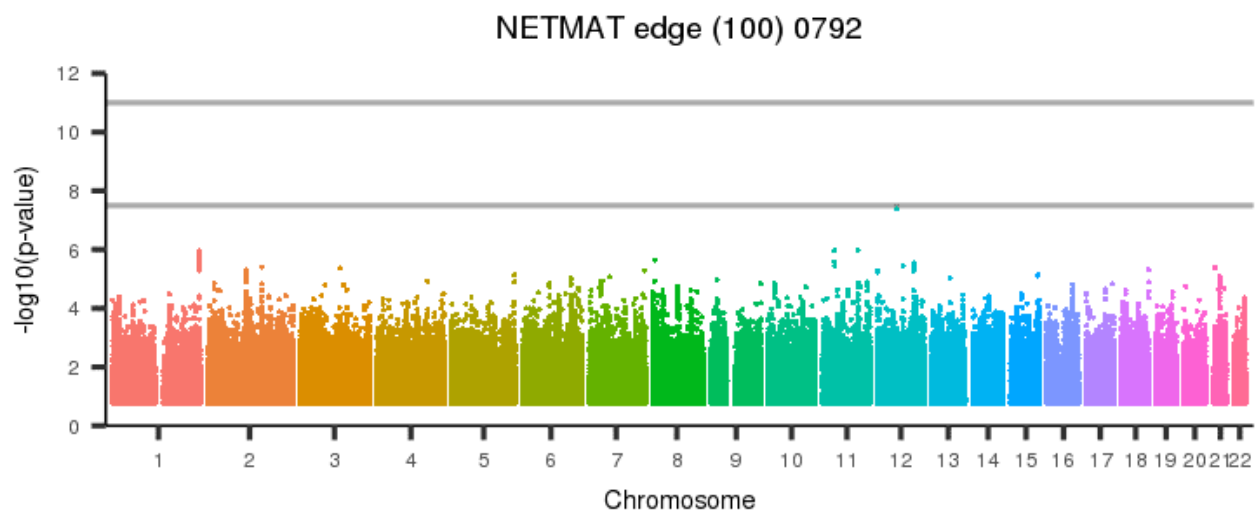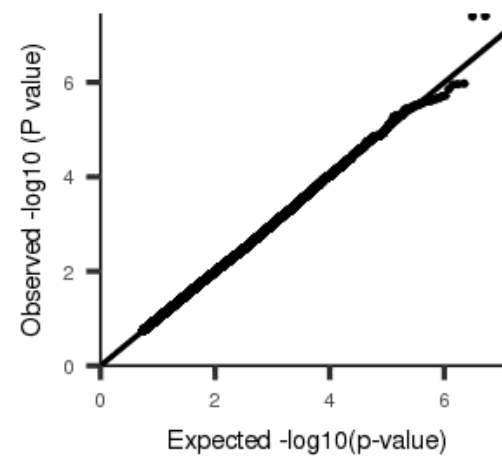

[back to list of plots](#)

Figure 1949: NETMAT edge (100) 0793

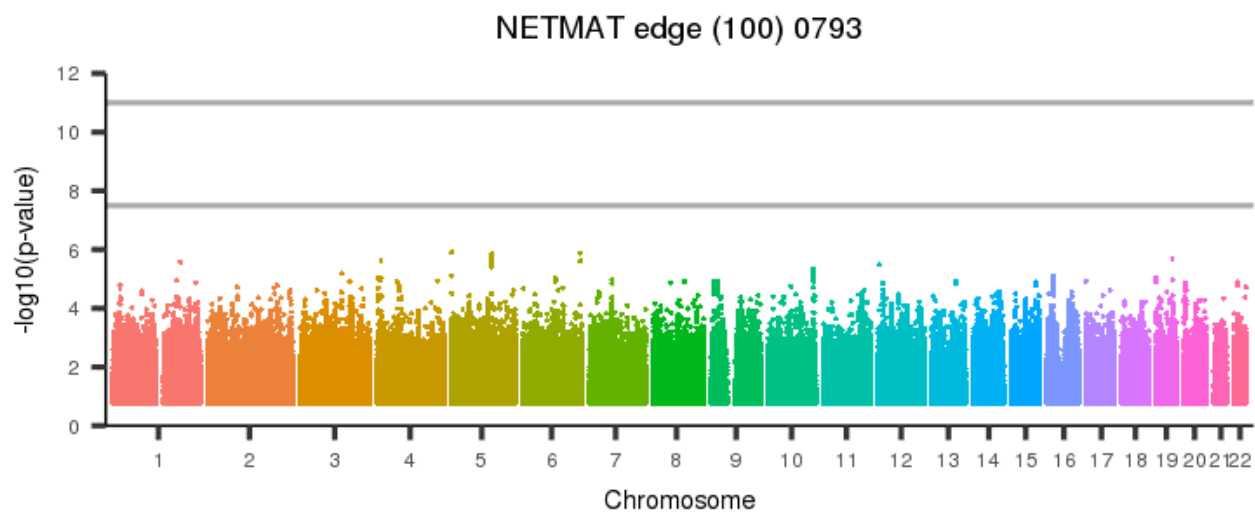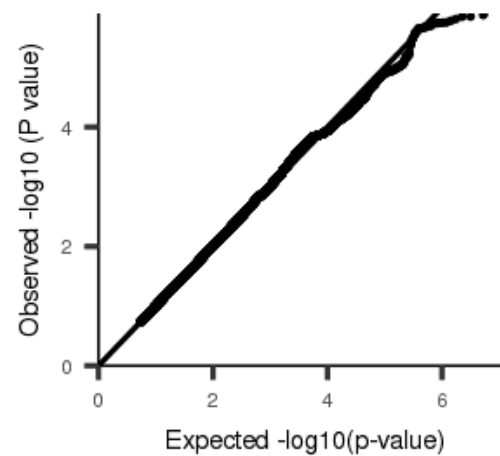

[back to list of plots](#)



Figure 1950: NETMAT edge (100) 0794

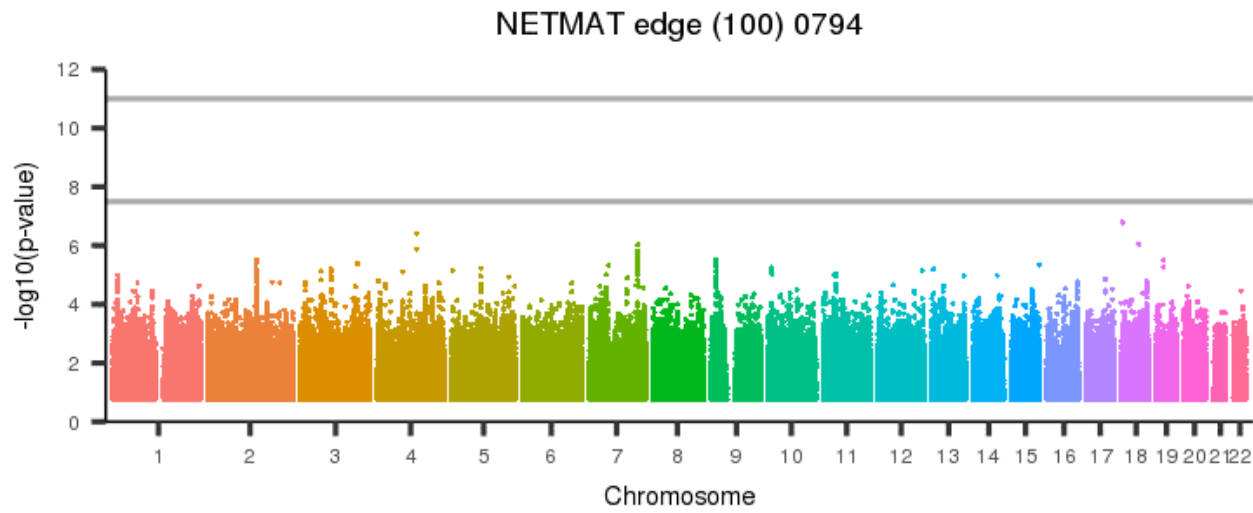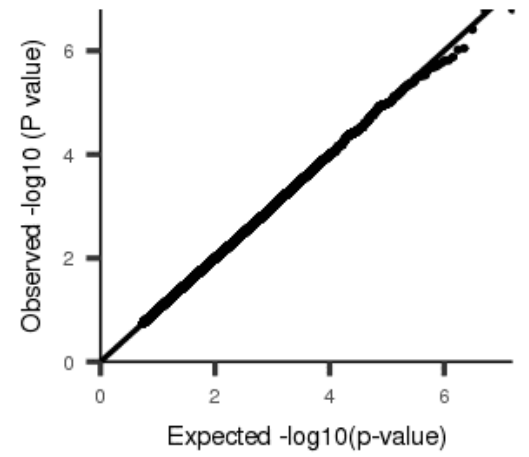

[back to list of plots](#)

Figure 1951: NETMAT edge (100) 0795

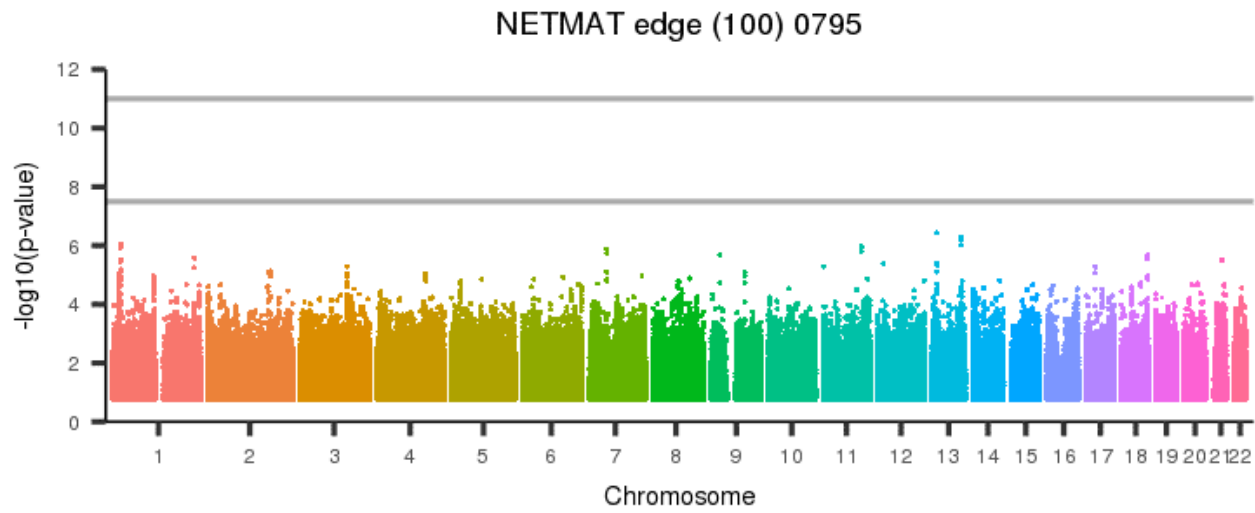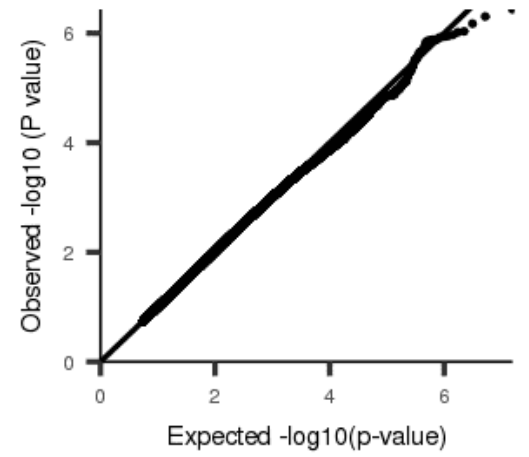

[back to list of plots](#)

Figure 1952: NETMAT edge (100) 0796

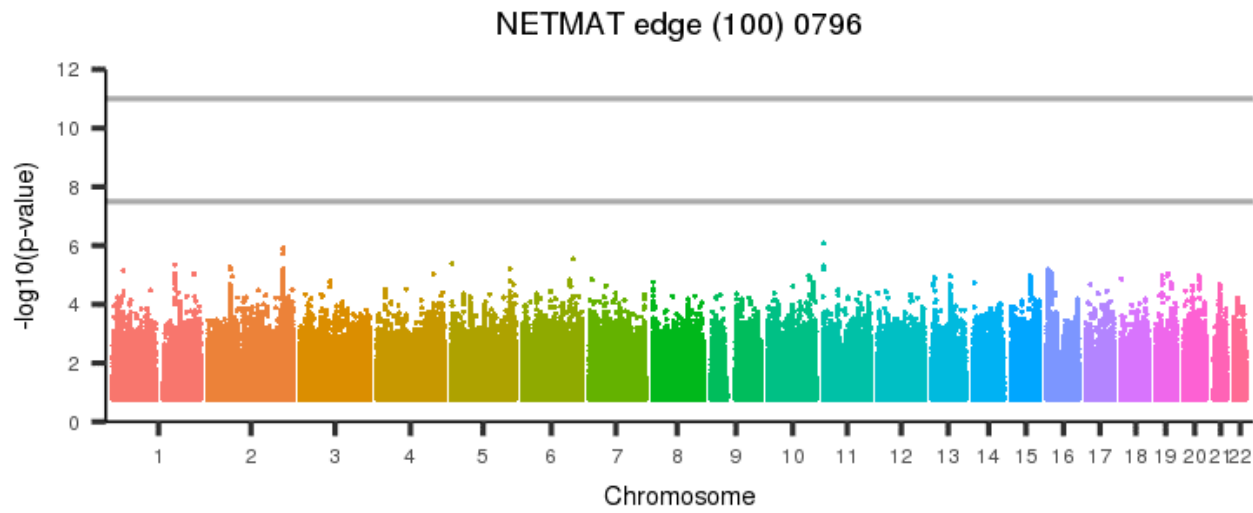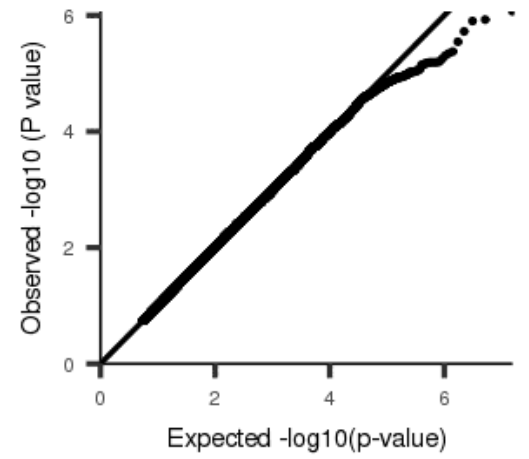

[back to list of plots](#)

Figure 1953: NETMAT edge (100) 0797

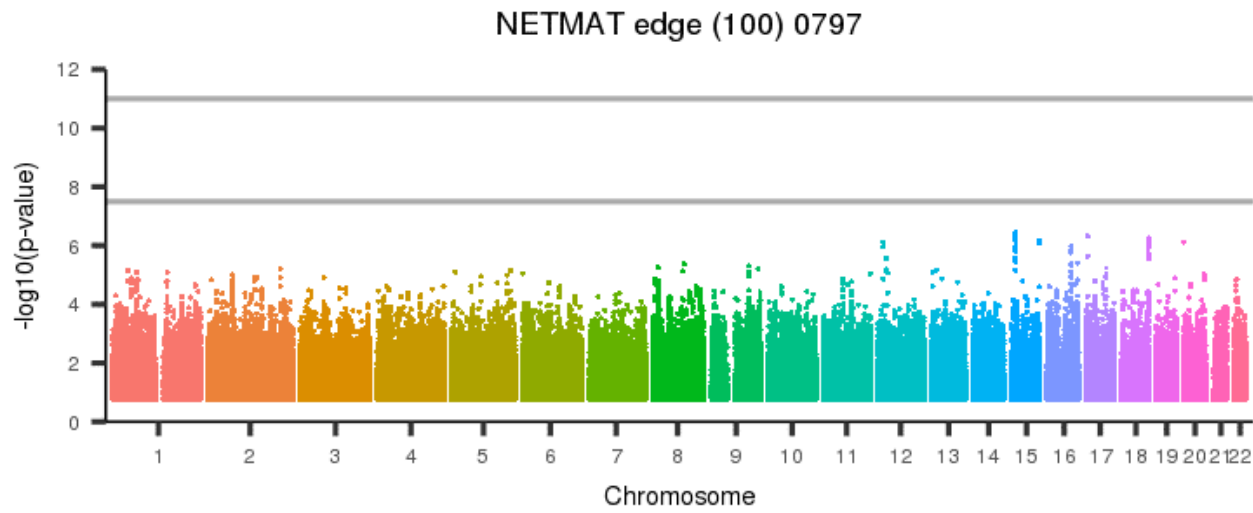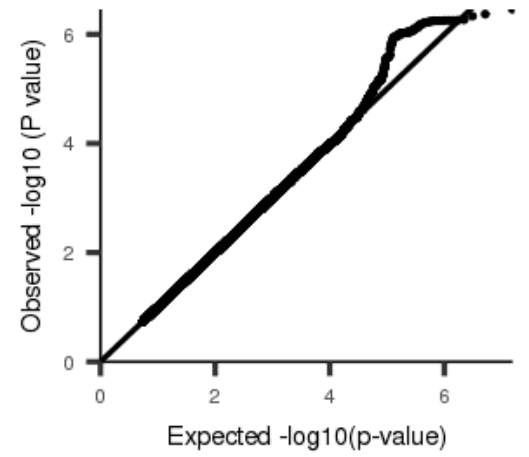

[back to list of plots](#)

Figure 1954: NETMAT edge (100) 0798

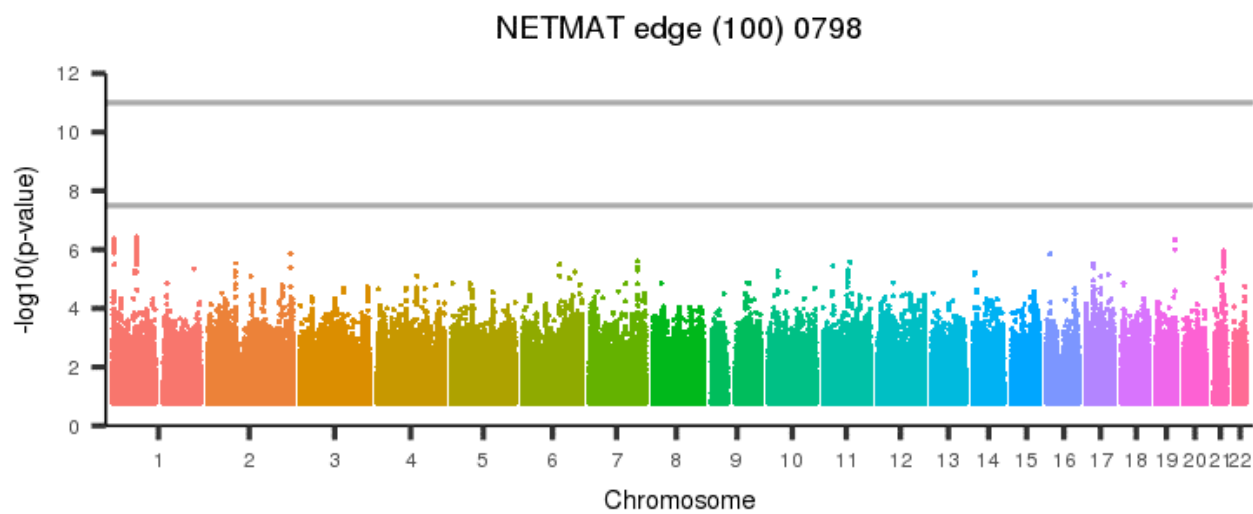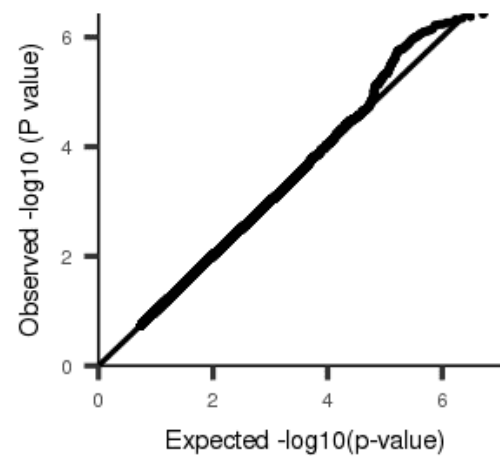

[back to list of plots](#)

Figure 1955: NETMAT edge (100) 0799

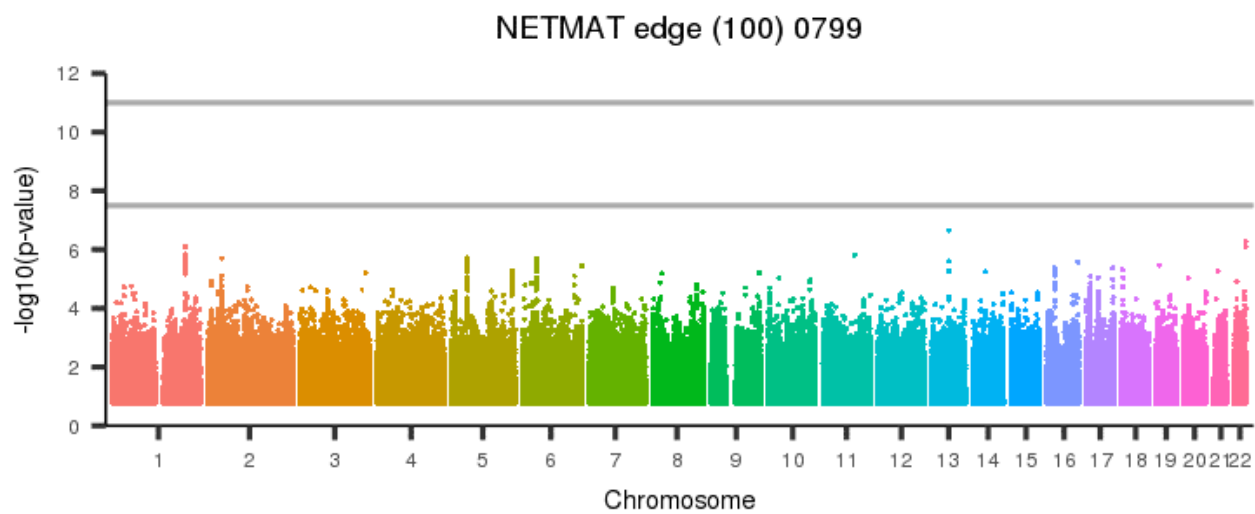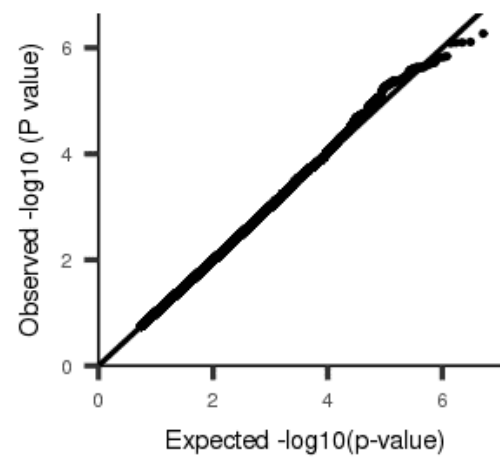

[back to list of plots](#)

Figure 1956: NETMAT edge (100) 0800

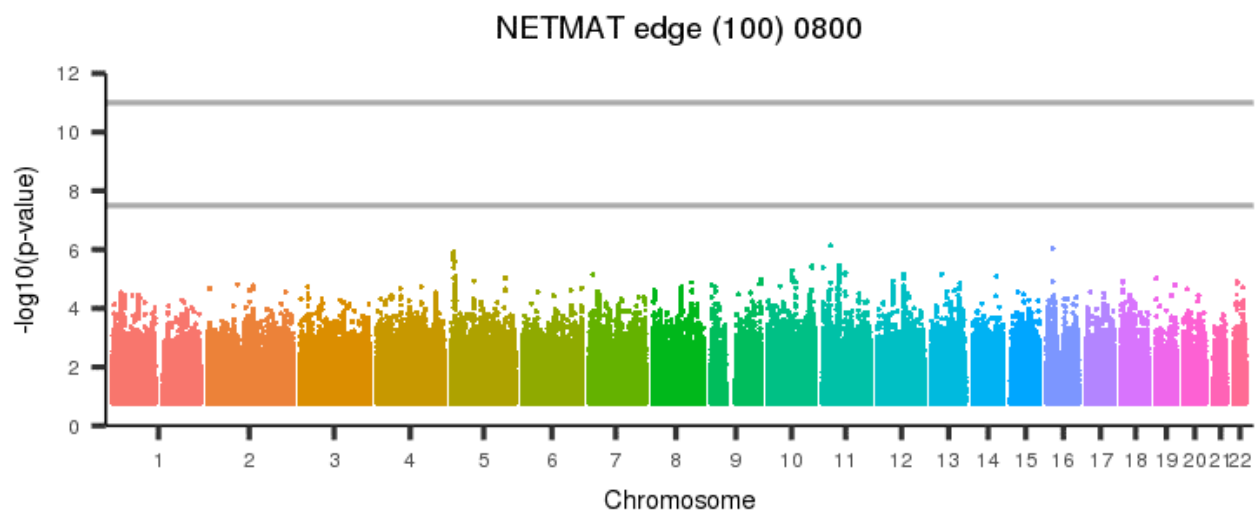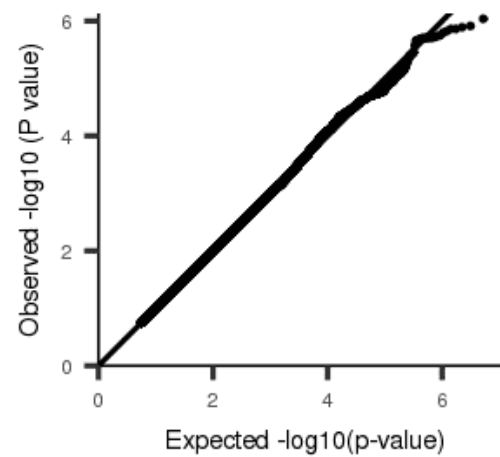

[back to list of plots](#)

Figure 1957: NETMAT edge (100) 0801

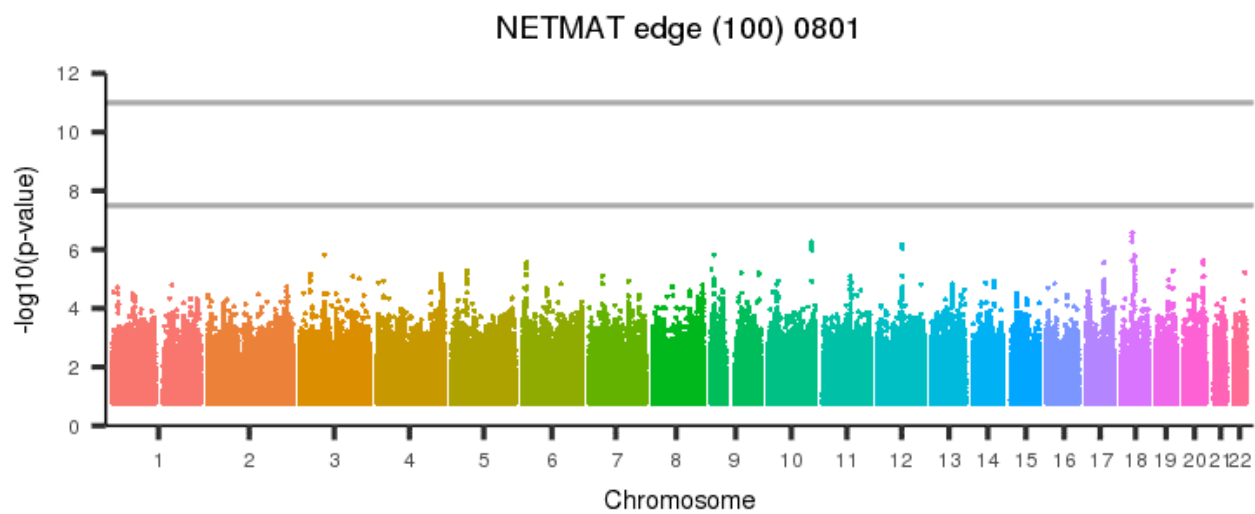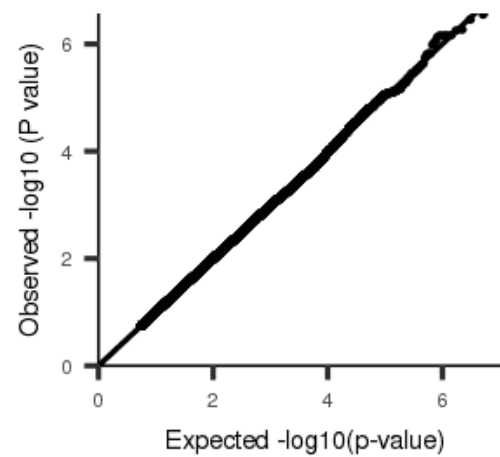

[back to list of plots](#)



Figure 1958: NETMAT edge (100) 0802

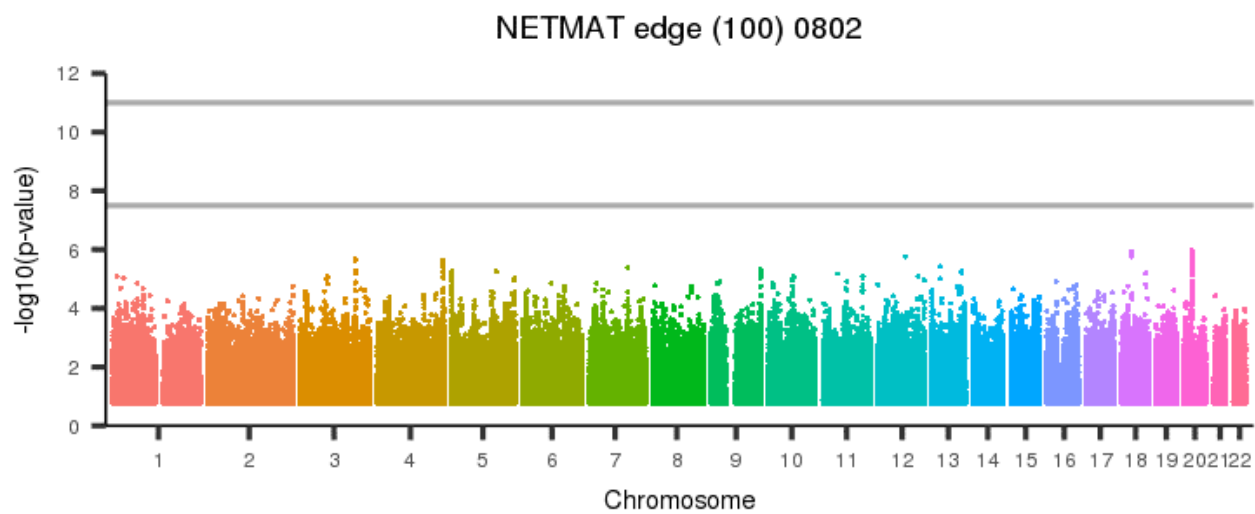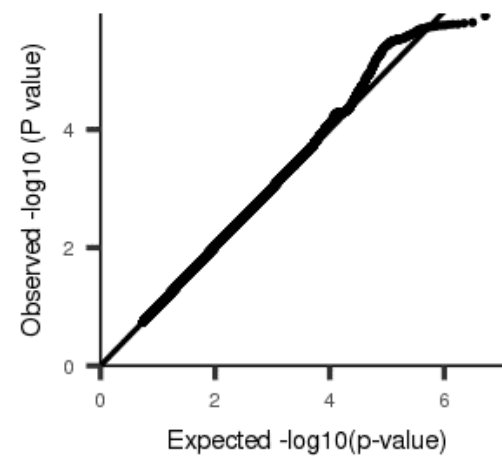

[back to list of plots](#)

Figure 1959: NETMAT edge (100) 0803

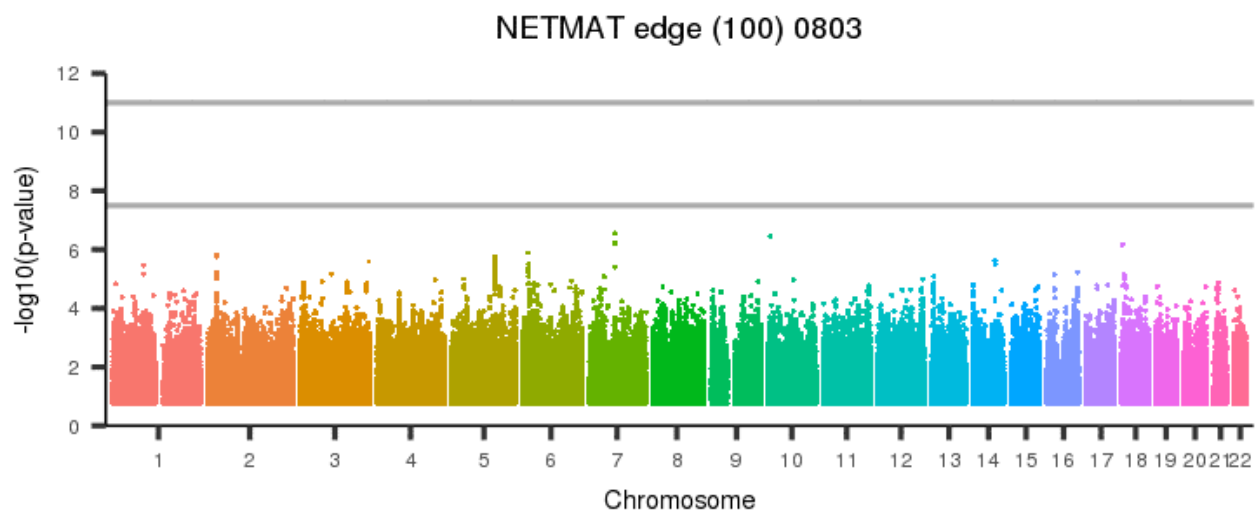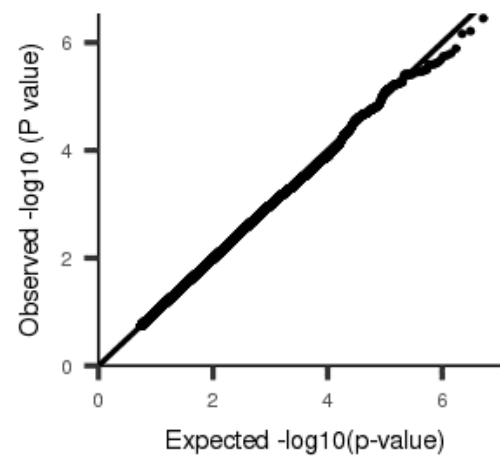

[back to list of plots](#)

Figure 1960: NETMAT edge (100) 0804

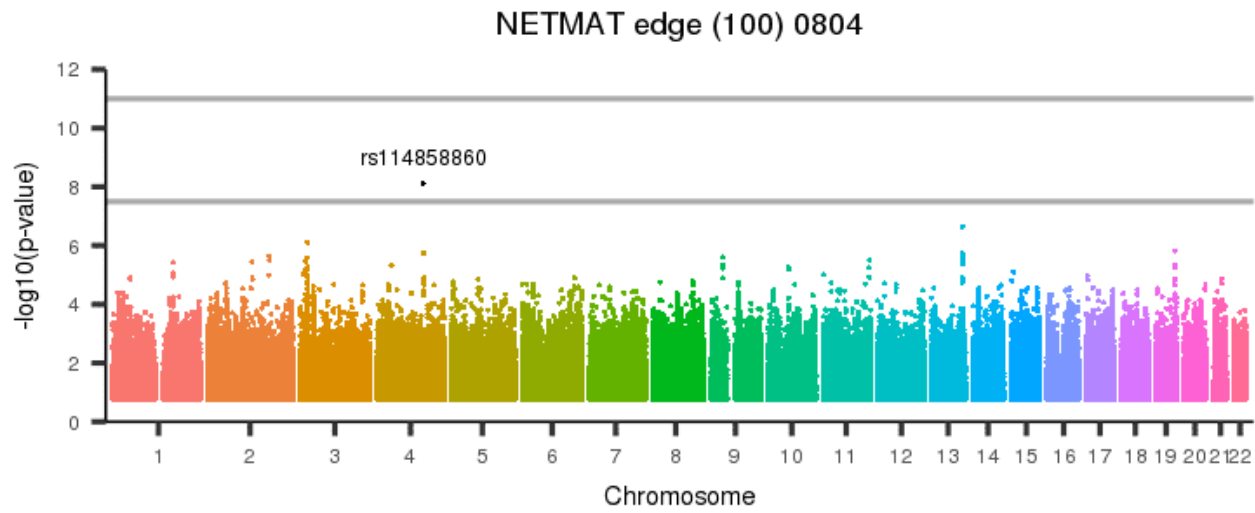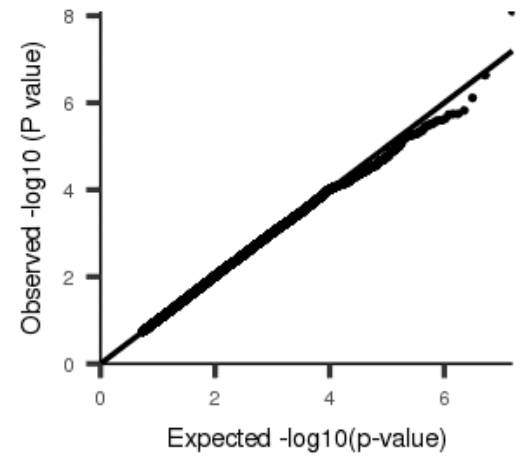

[back to list of plots](#)

Figure 1961: NETMAT edge (100) 0805

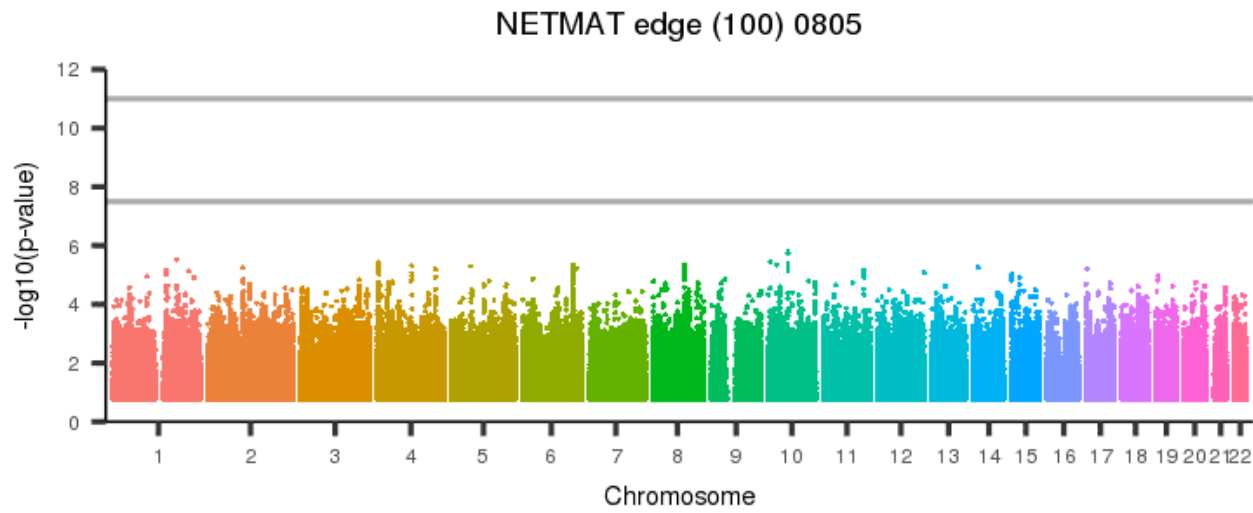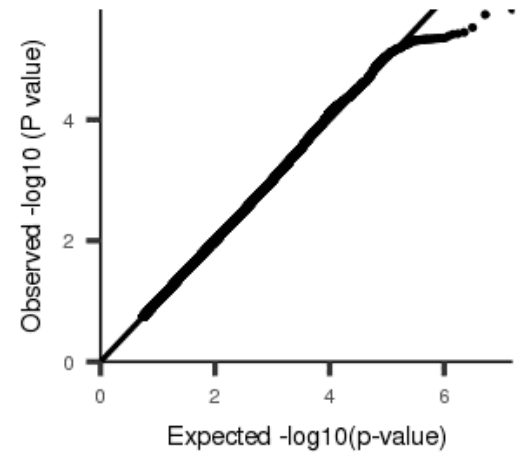

[back to list of plots](#)

Figure 1962: NETMAT edge (100) 0806

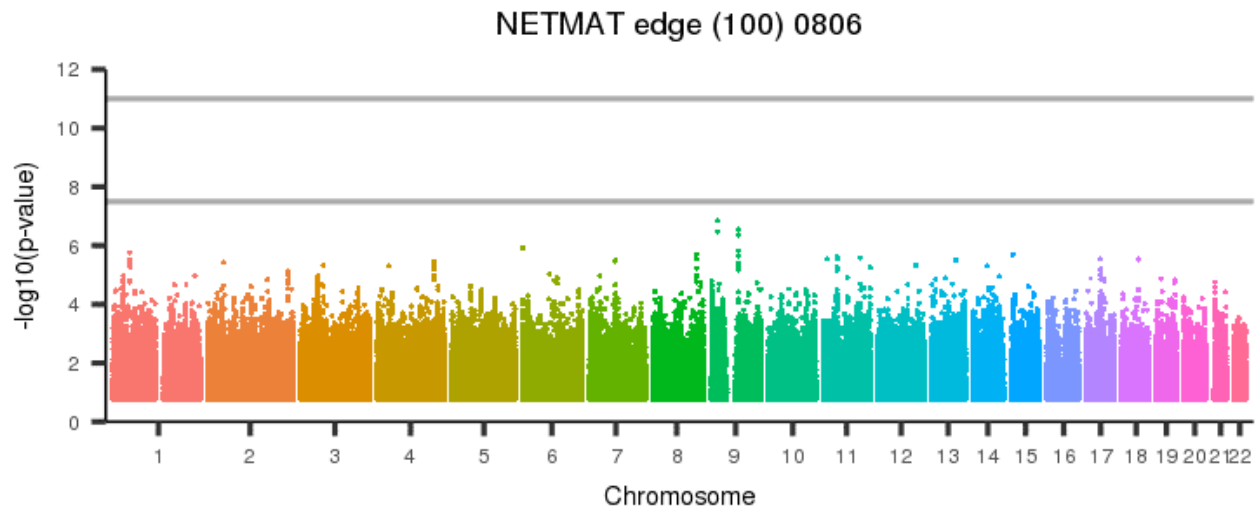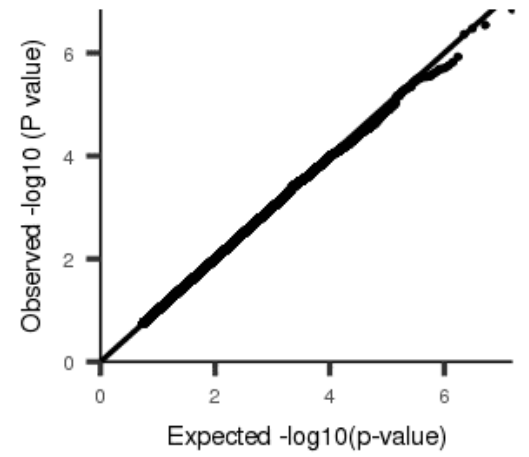

[back to list of plots](#)

Figure 1963: NETMAT edge (100) 0807

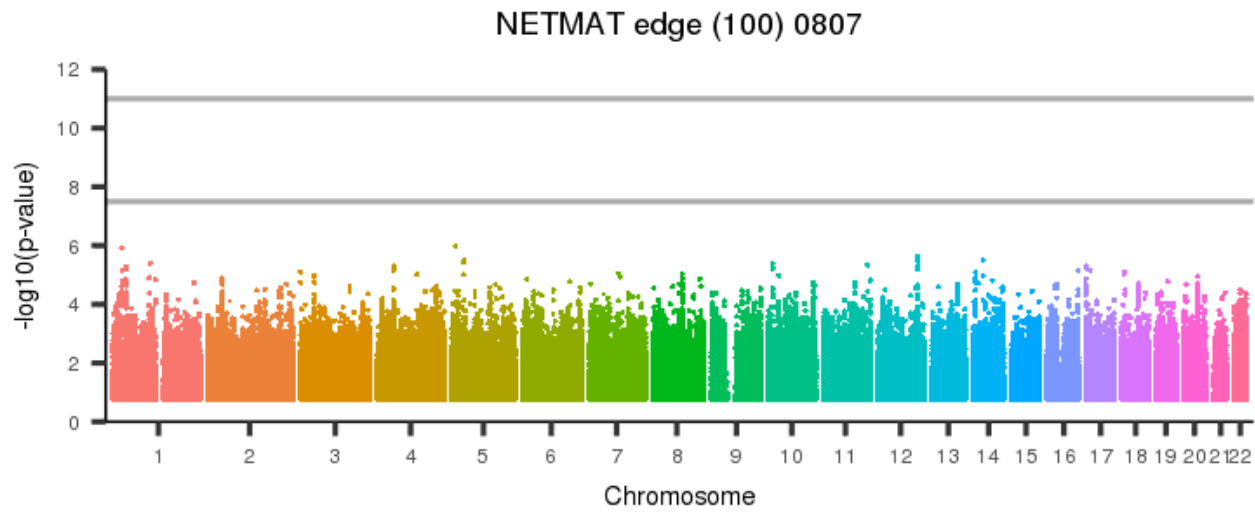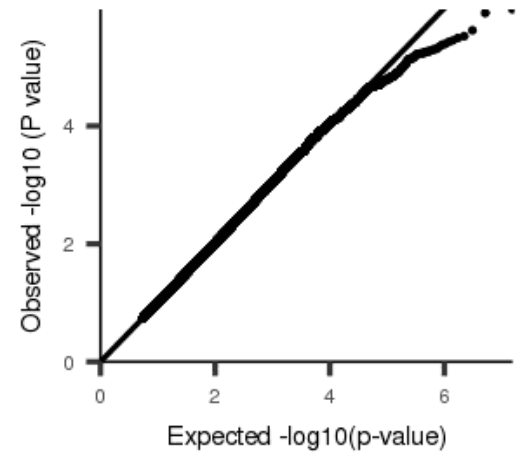

[back to list of plots](#)

Figure 1964: NETMAT edge (100) 0808

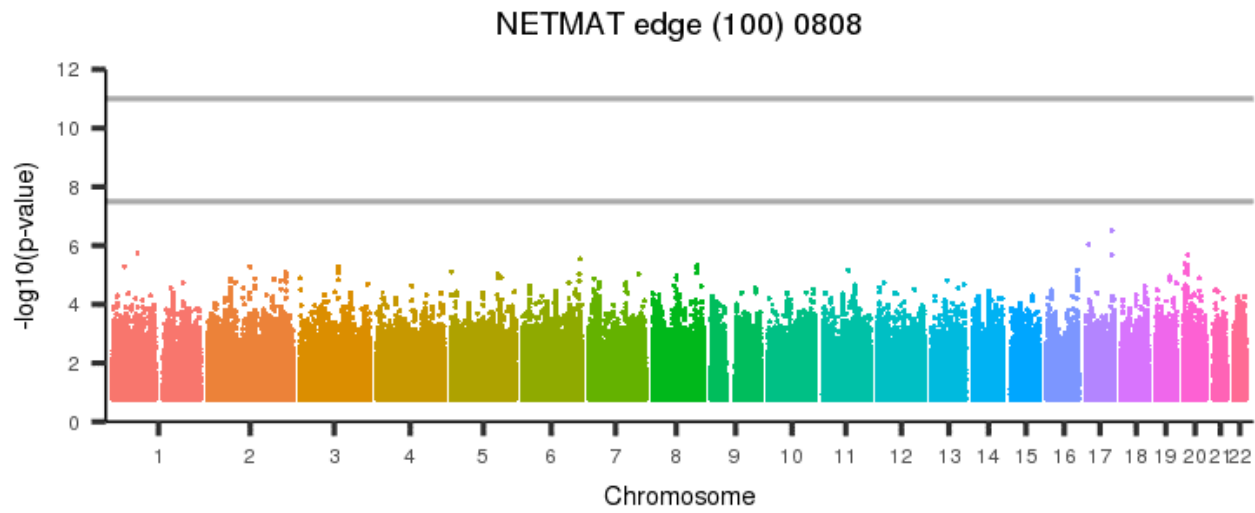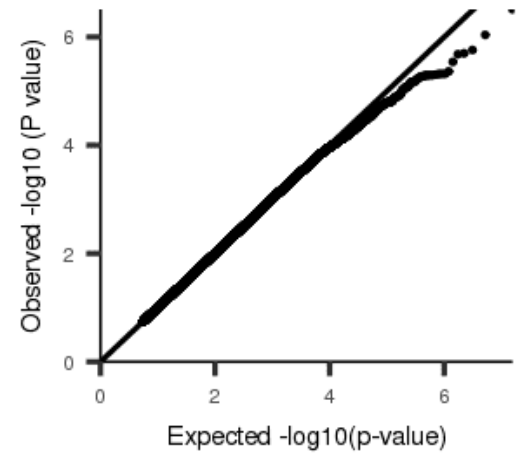

[back to list of plots](#)

Figure 1965: NETMAT edge (100) 0809

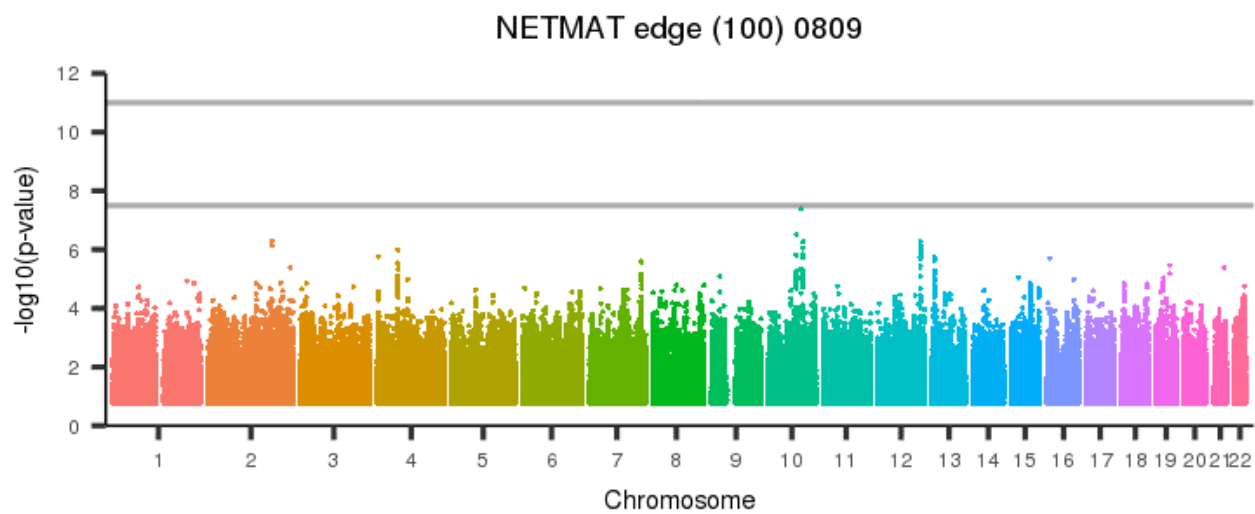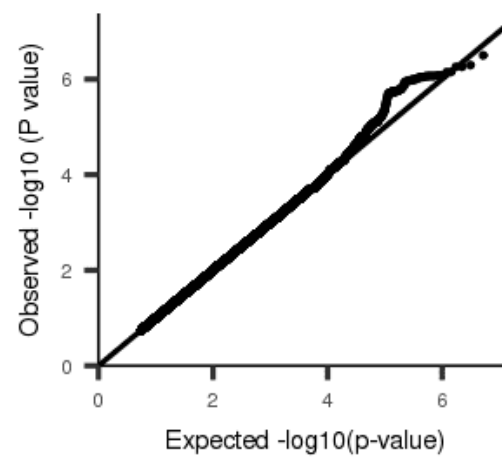

[back to list of plots](#)



Figure 1966: NETMAT edge (100) 0810

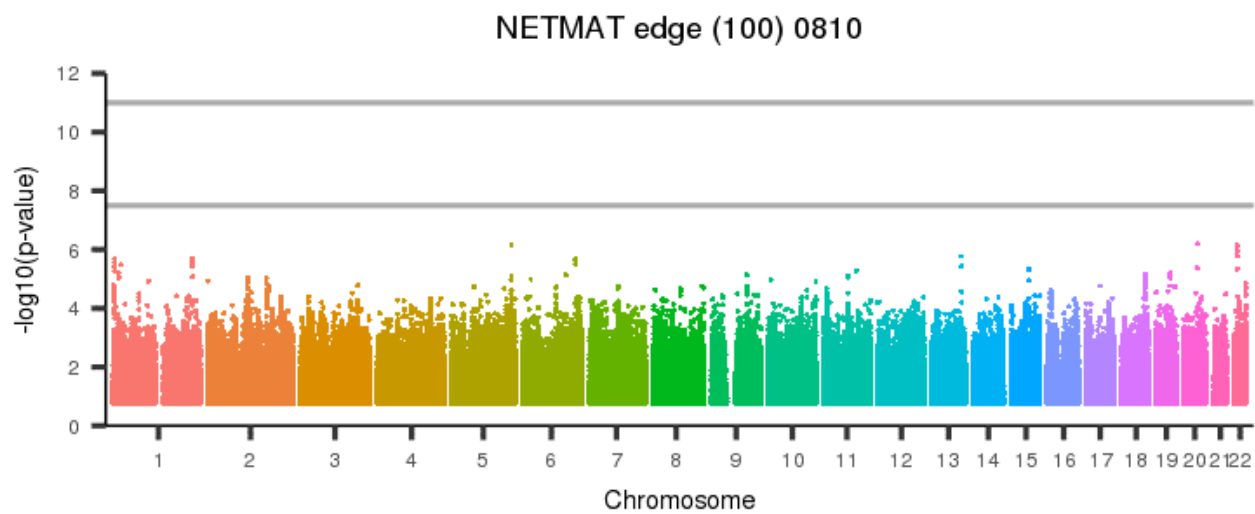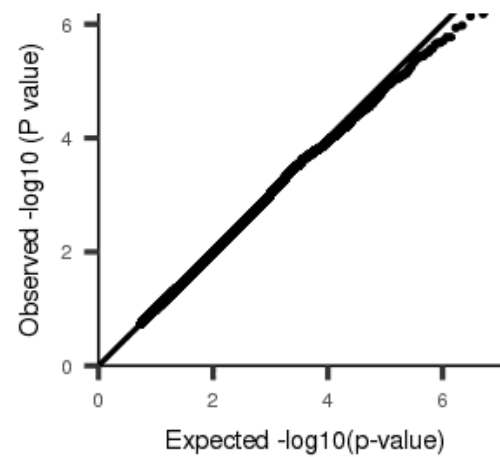

[back to list of plots](#)

Figure 1967: NETMAT edge (100) 0811

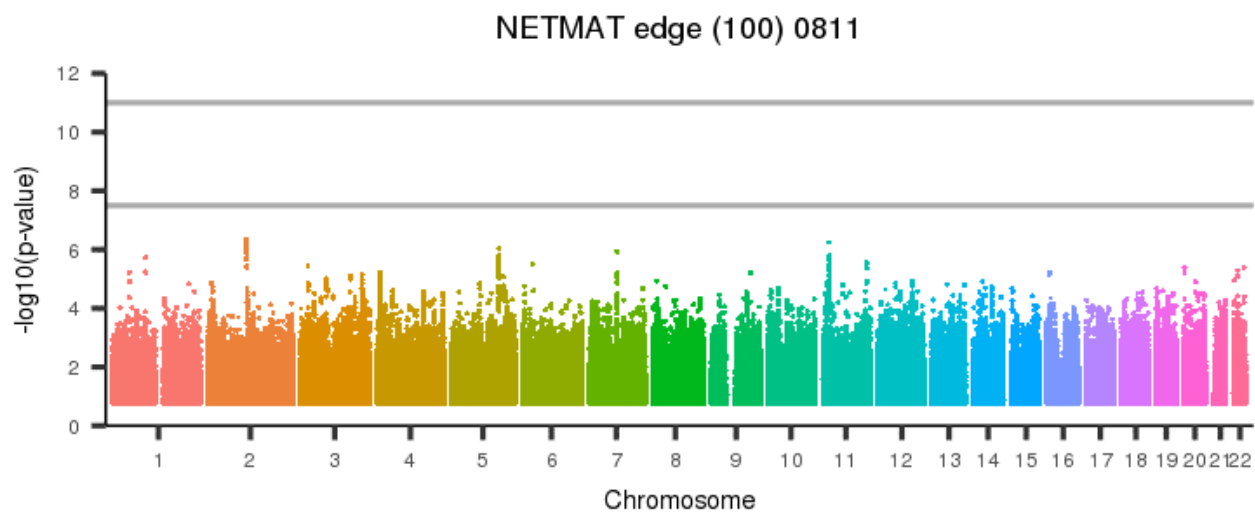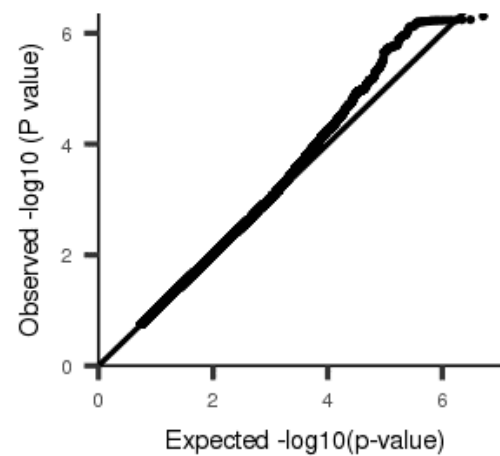

[back to list of plots](#)

Figure 1968: NETMAT edge (100) 0812

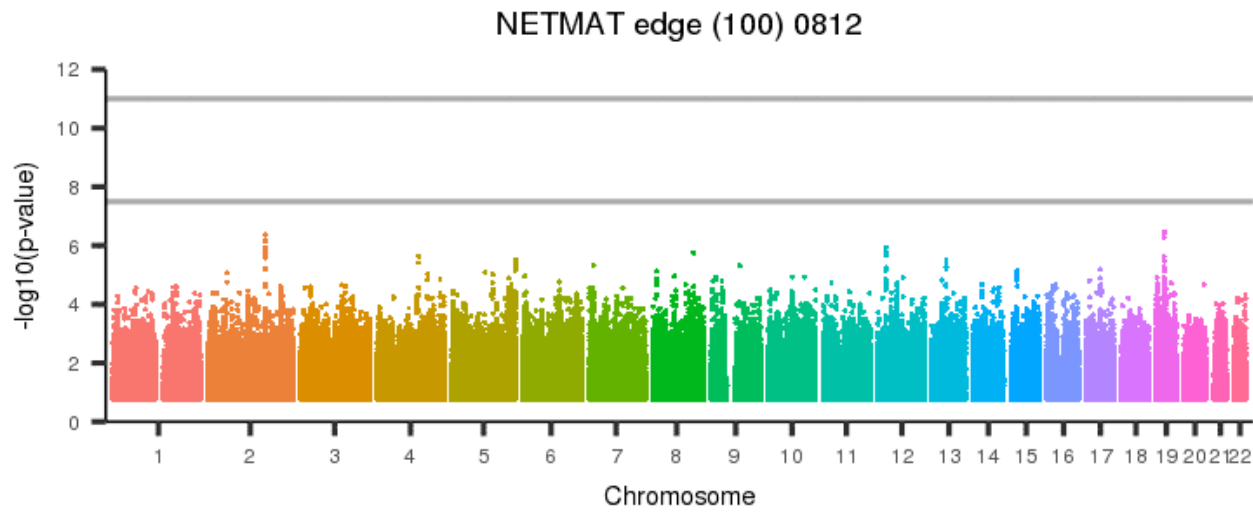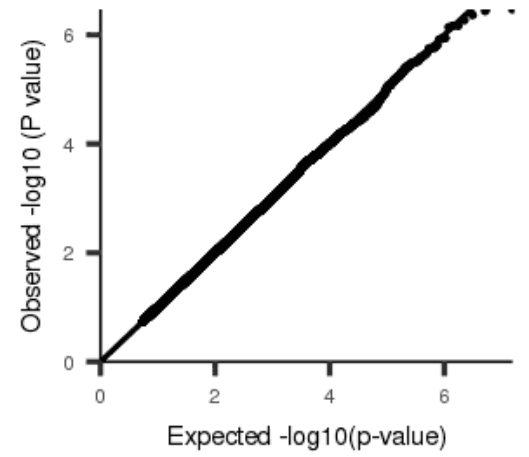

[back to list of plots](#)

Figure 1969: NETMAT edge (100) 0813

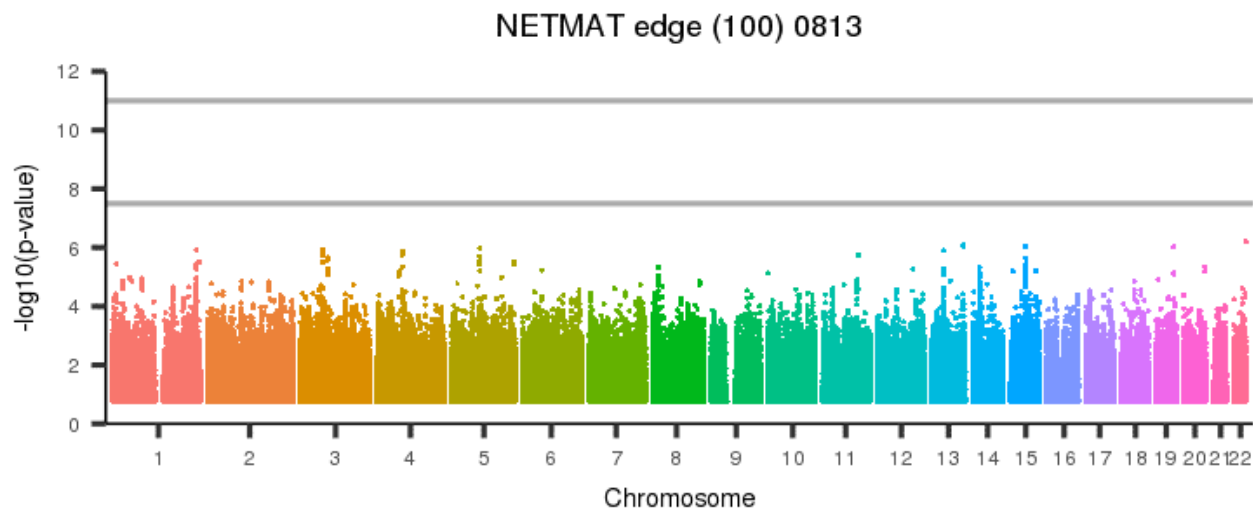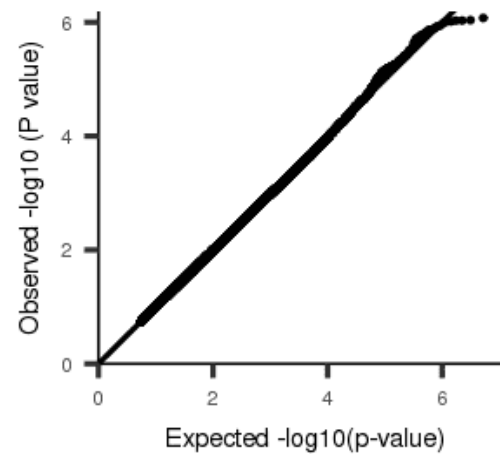

[back to list of plots](#)

Figure 1970: NETMAT edge (100) 0814

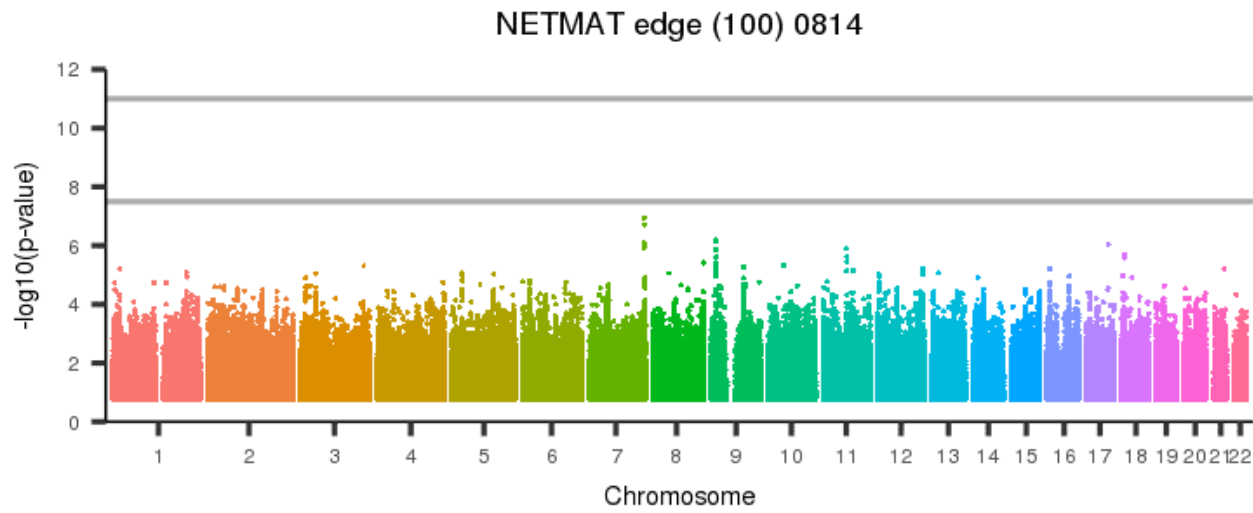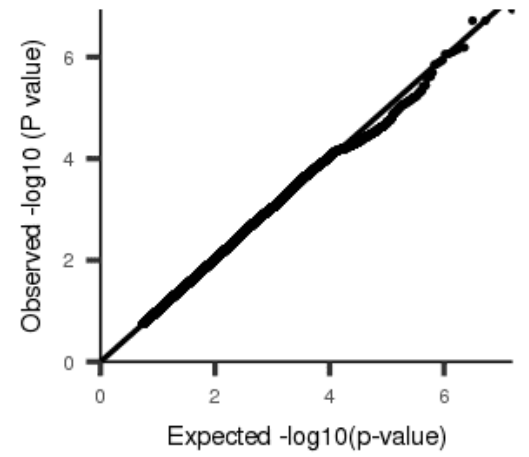

[back to list of plots](#)

Figure 1971: NETMAT edge (100) 0815

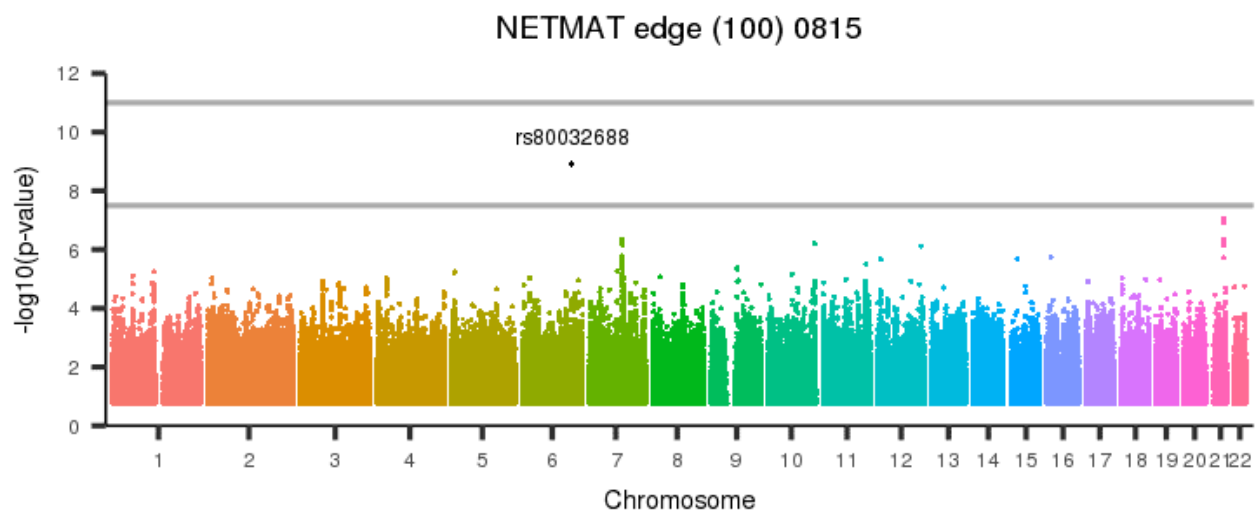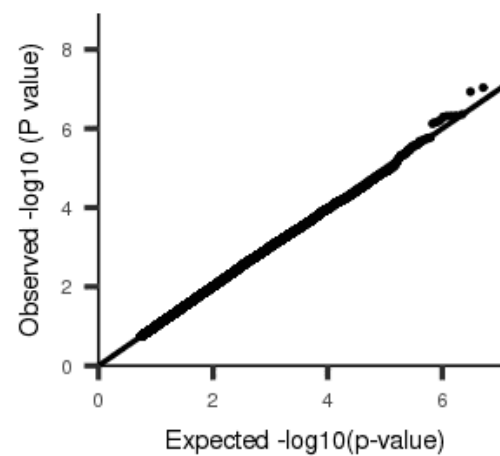

[back to list of plots](#)

Figure 1972: NETMAT edge (100) 0816

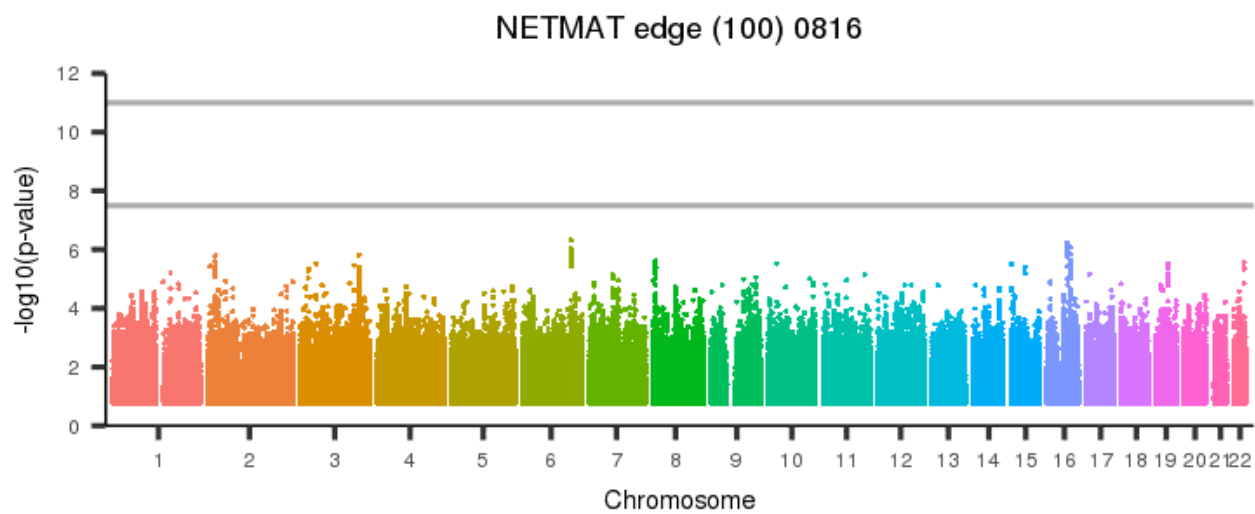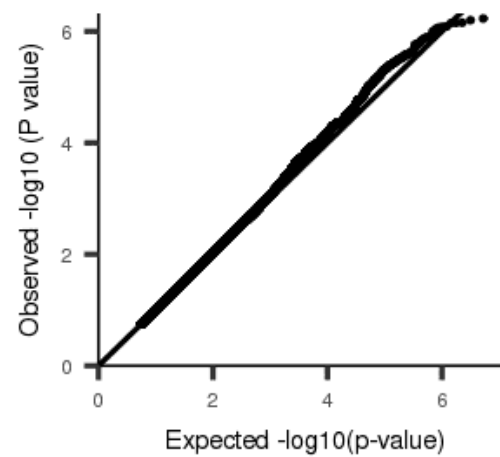

[back to list of plots](#)

Figure 1973: NETMAT edge (100) 0817

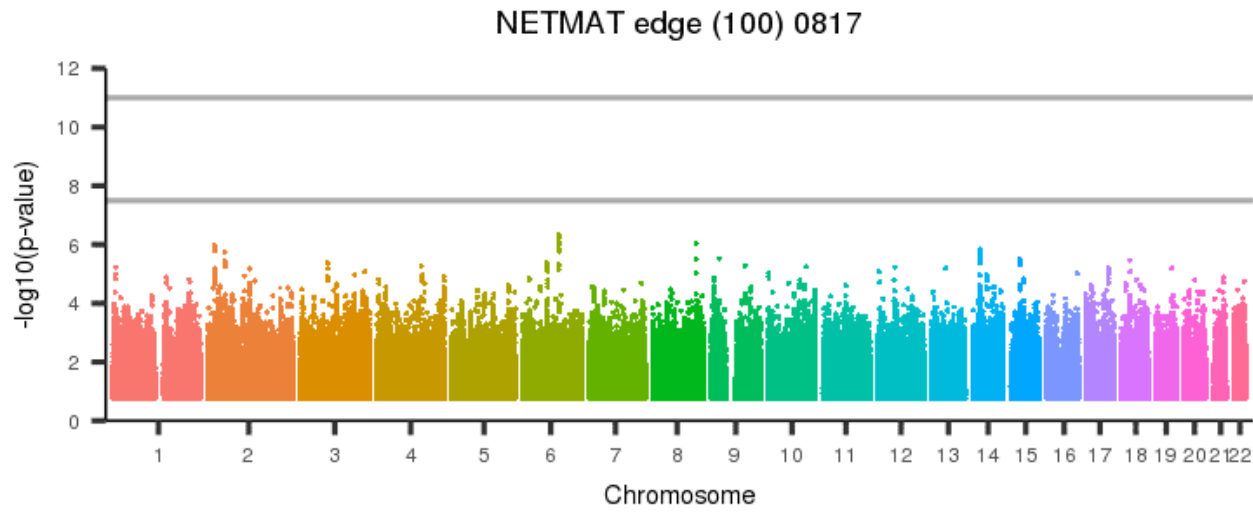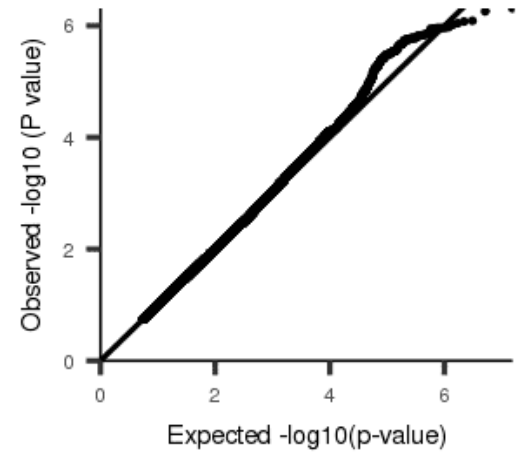

[back to list of plots](#)



Figure 1974: NETMAT edge (100) 0818

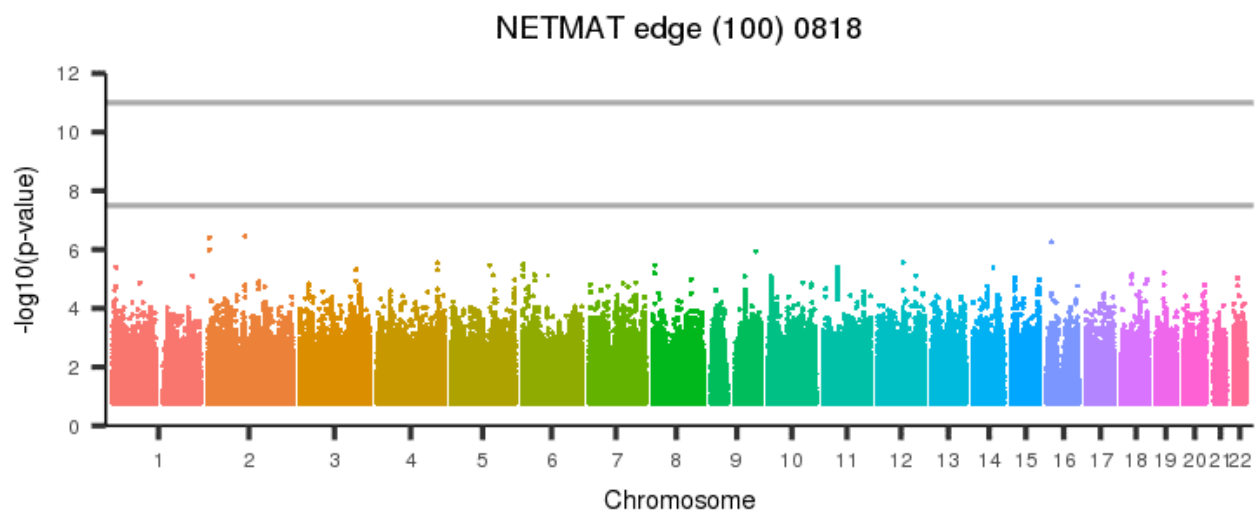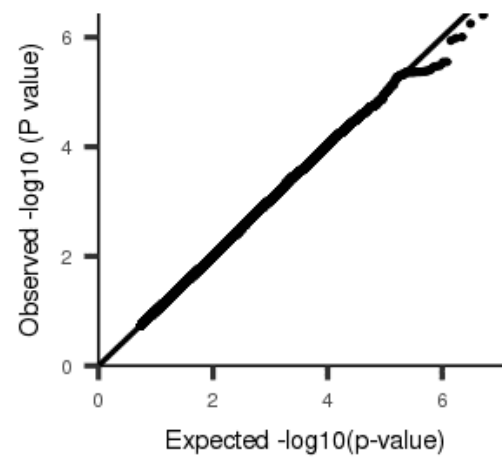

[back to list of plots](#)

Figure 1975: NETMAT edge (100) 0819

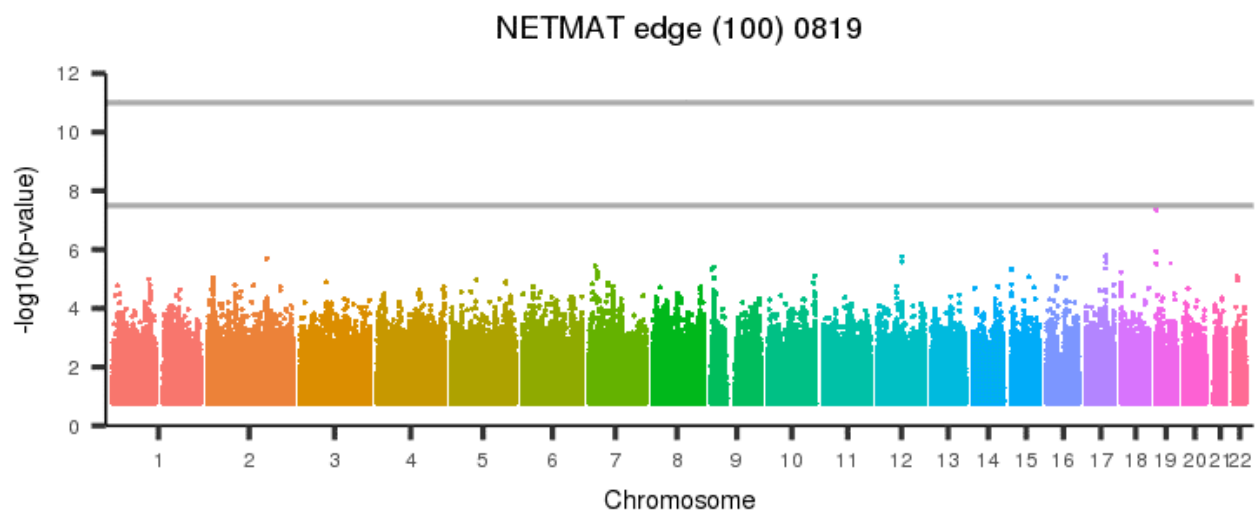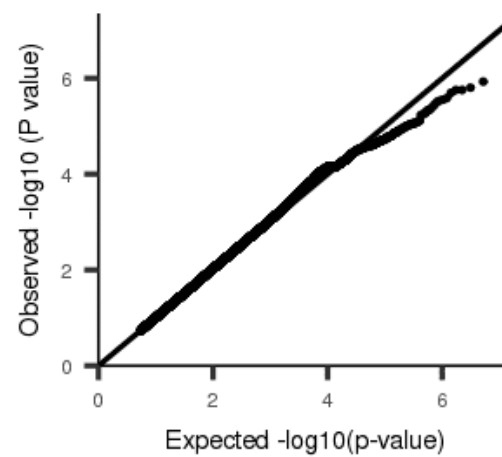

[back to list of plots](#)

Figure 1976: NETMAT edge (100) 0820

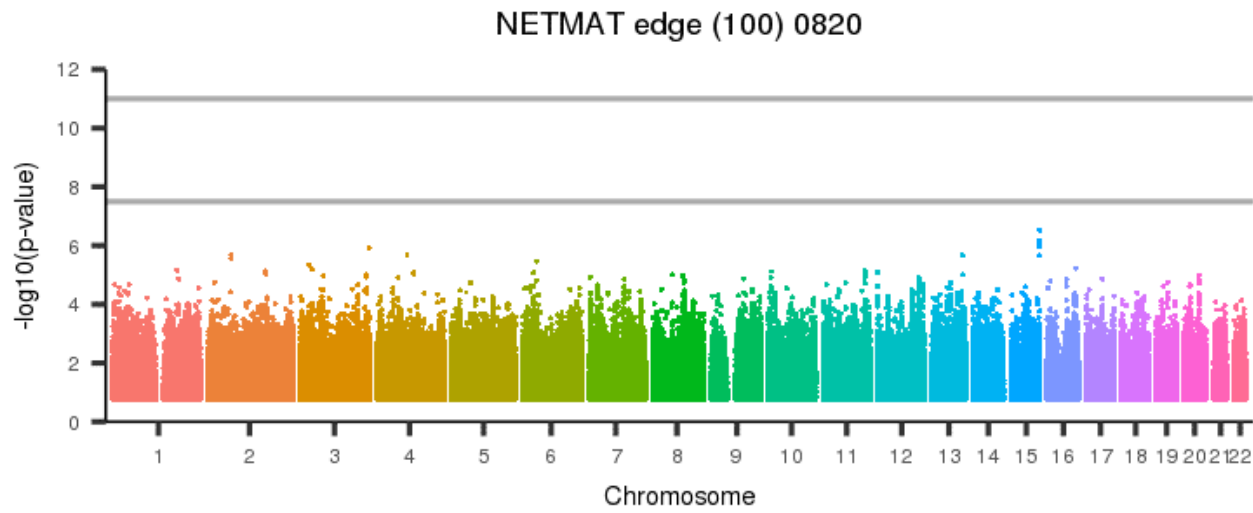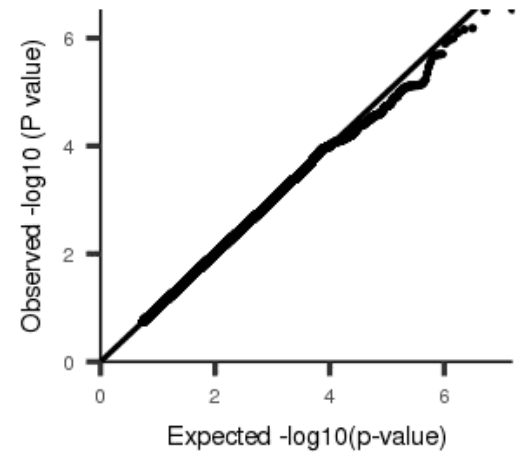

[back to list of plots](#)

Figure 1977: NETMAT edge (100) 0821

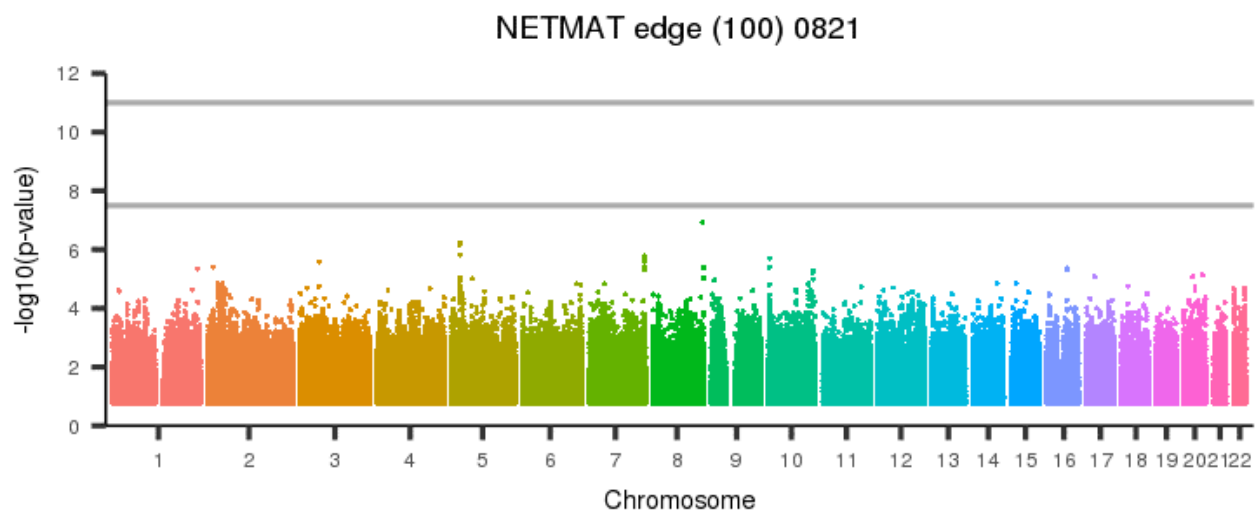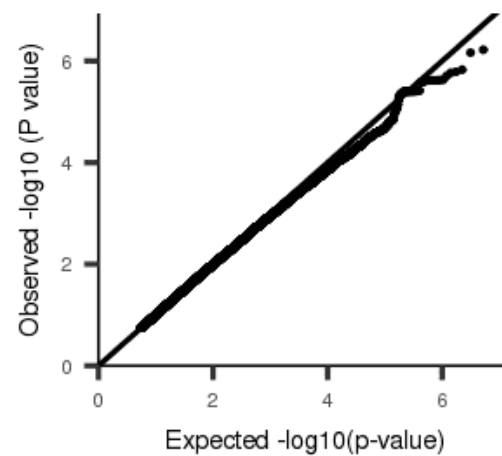

[back to list of plots](#)

Figure 1978: NETMAT edge (100) 0822

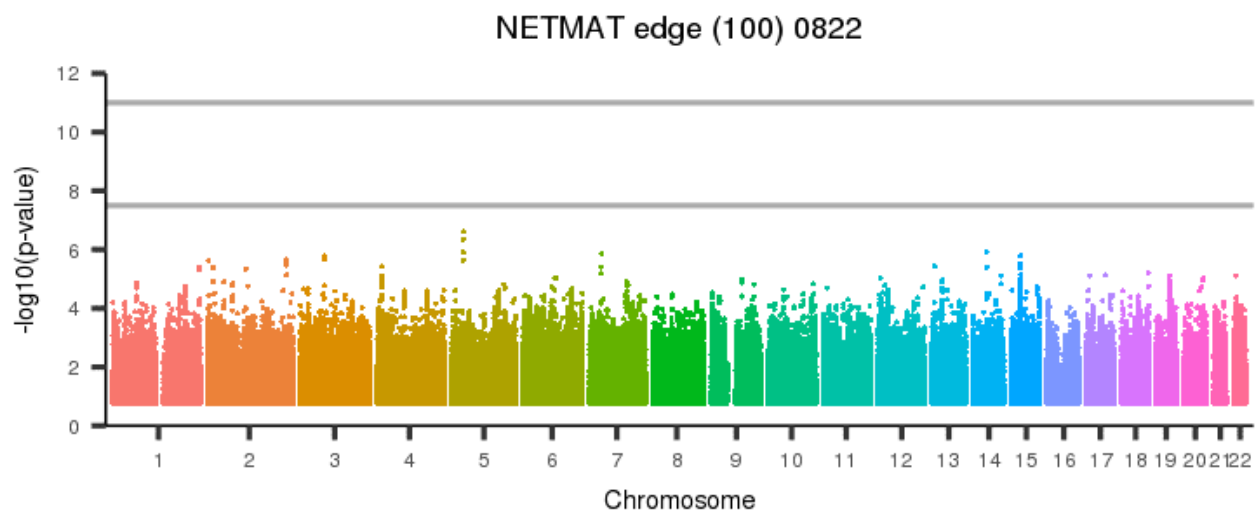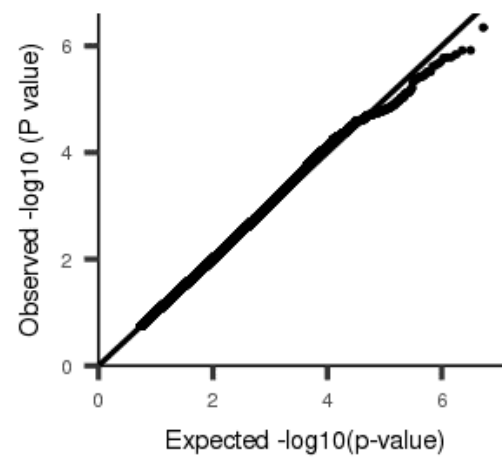

[back to list of plots](#)

Figure 1979: NETMAT edge (100) 0823

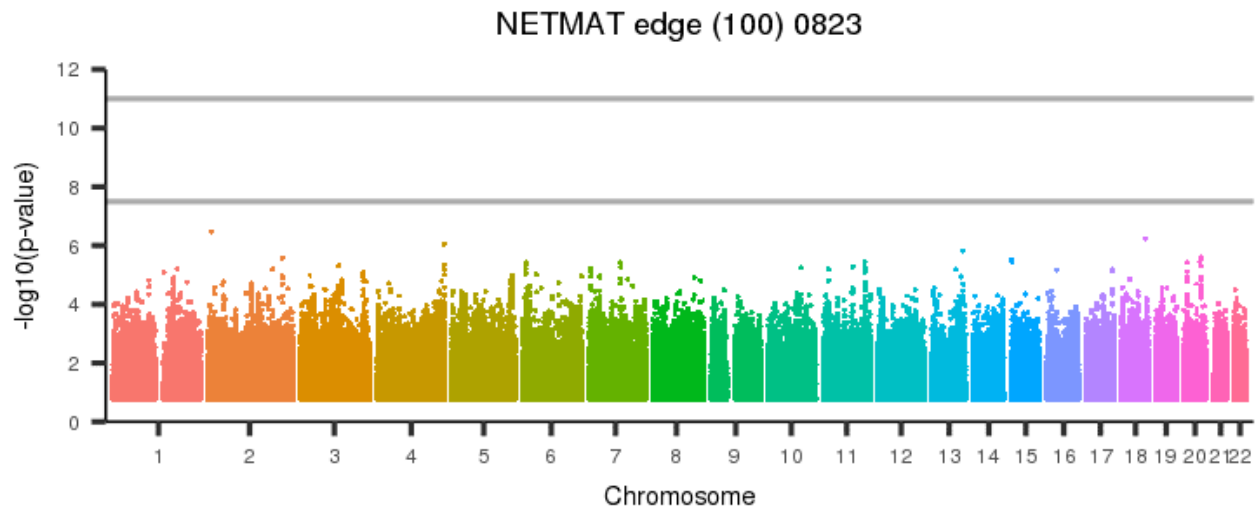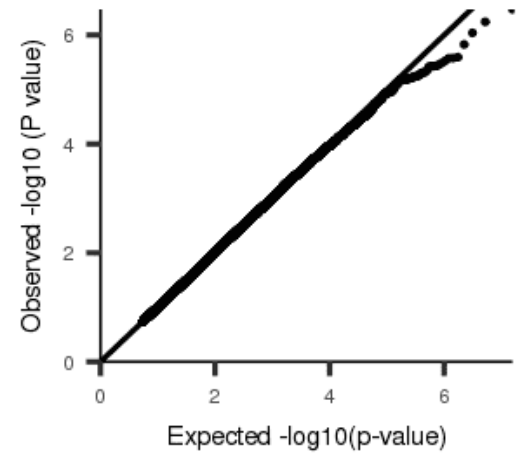

[back to list of plots](#)

Figure 1980: NETMAT edge (100) 0824

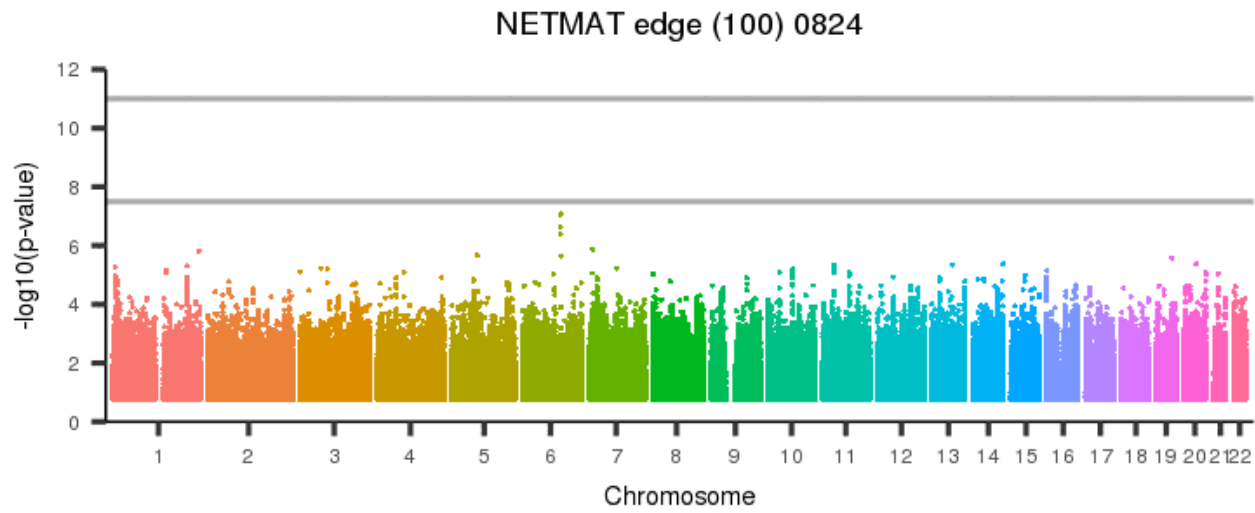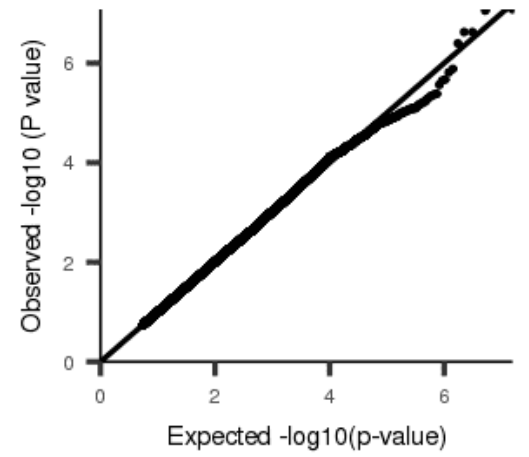

[back to list of plots](#)

Figure 1981: NETMAT edge (100) 0825

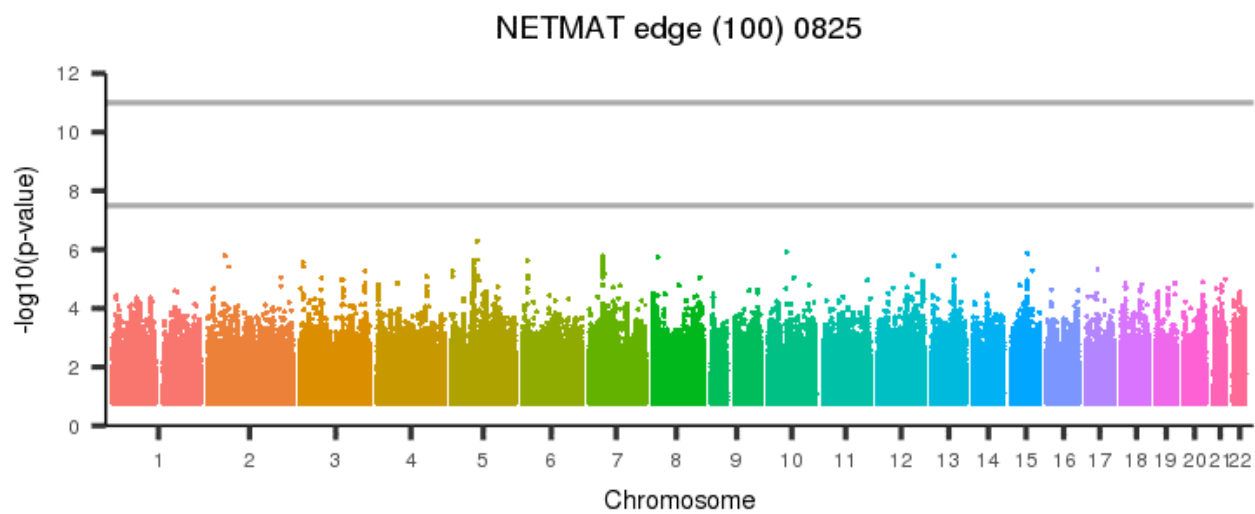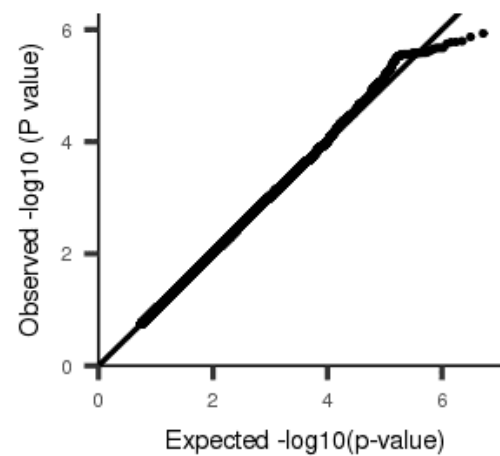

[back to list of plots](#)



Figure 1982: NETMAT edge (100) 0826

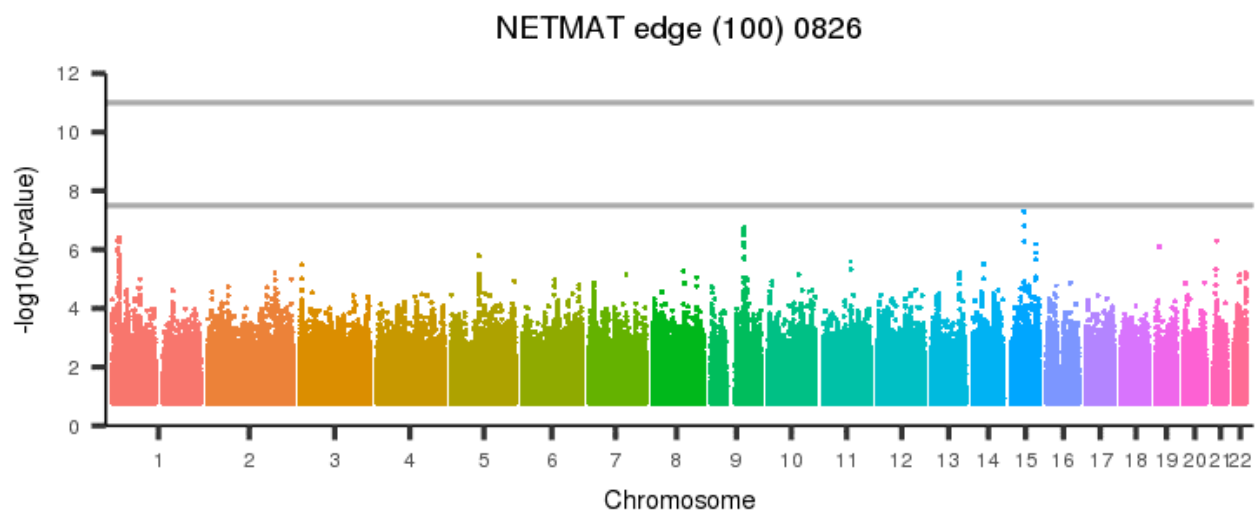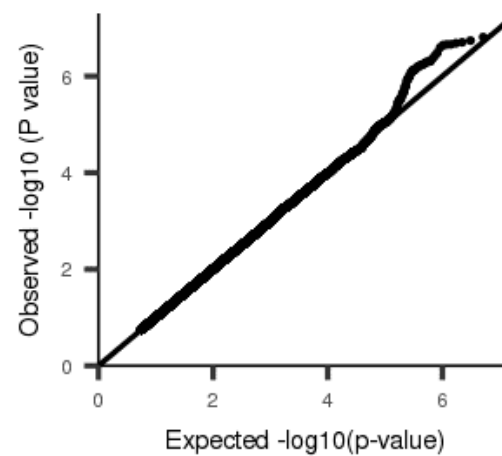

[back to list of plots](#)

Figure 1983: NETMAT edge (100) 0827

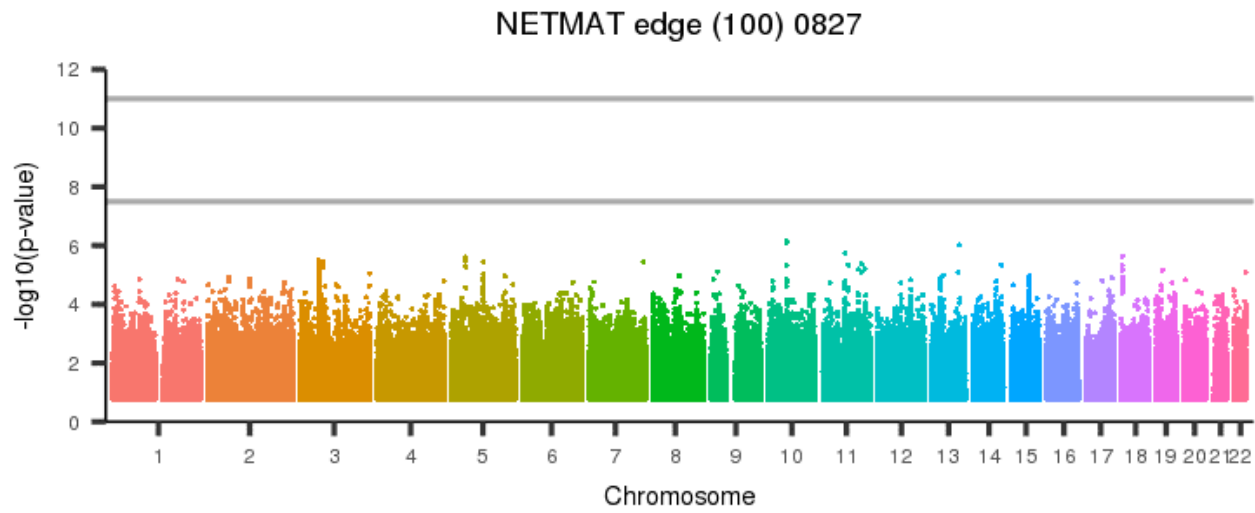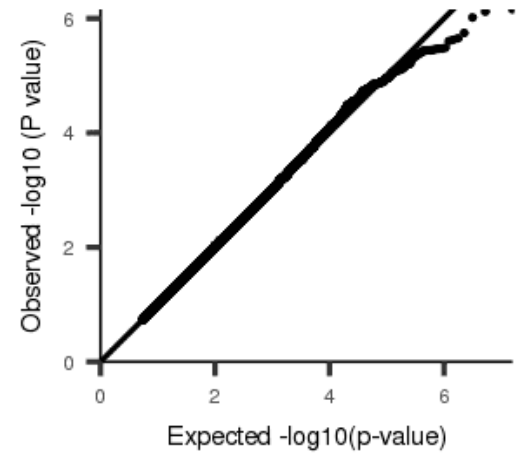

[back to list of plots](#)

Figure 1984: NETMAT edge (100) 0828

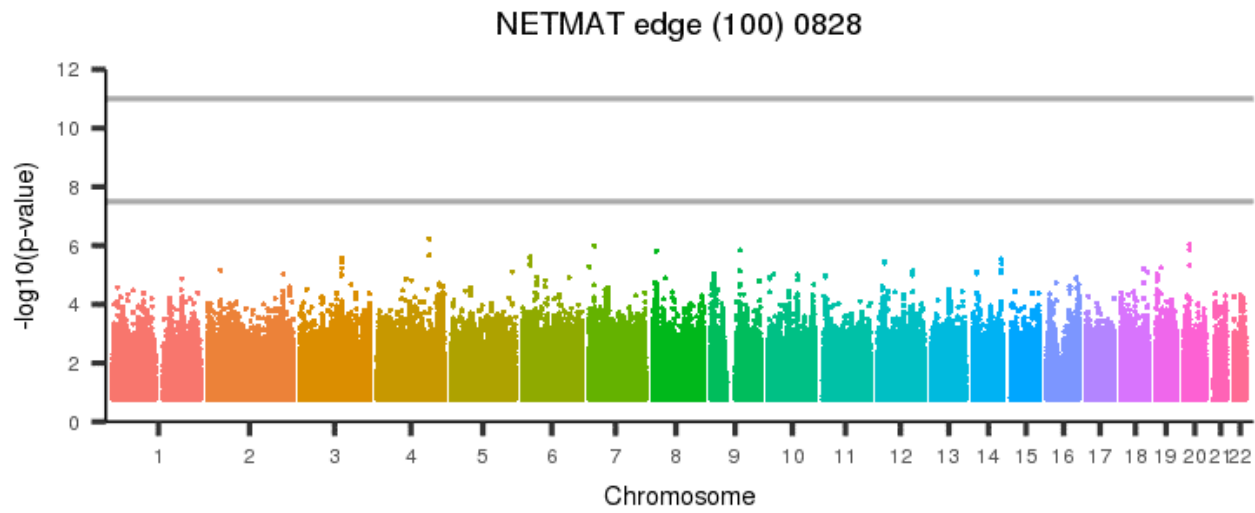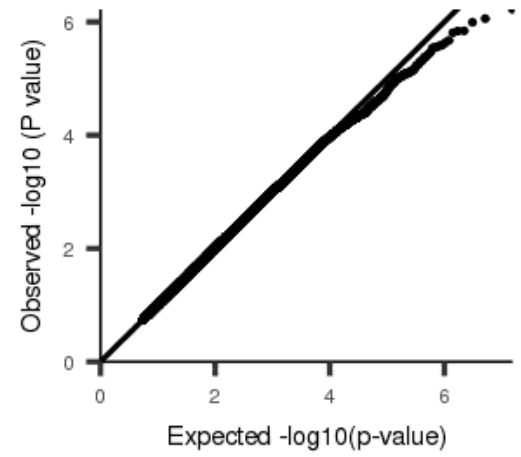

[back to list of plots](#)

Figure 1985: NETMAT edge (100) 0829

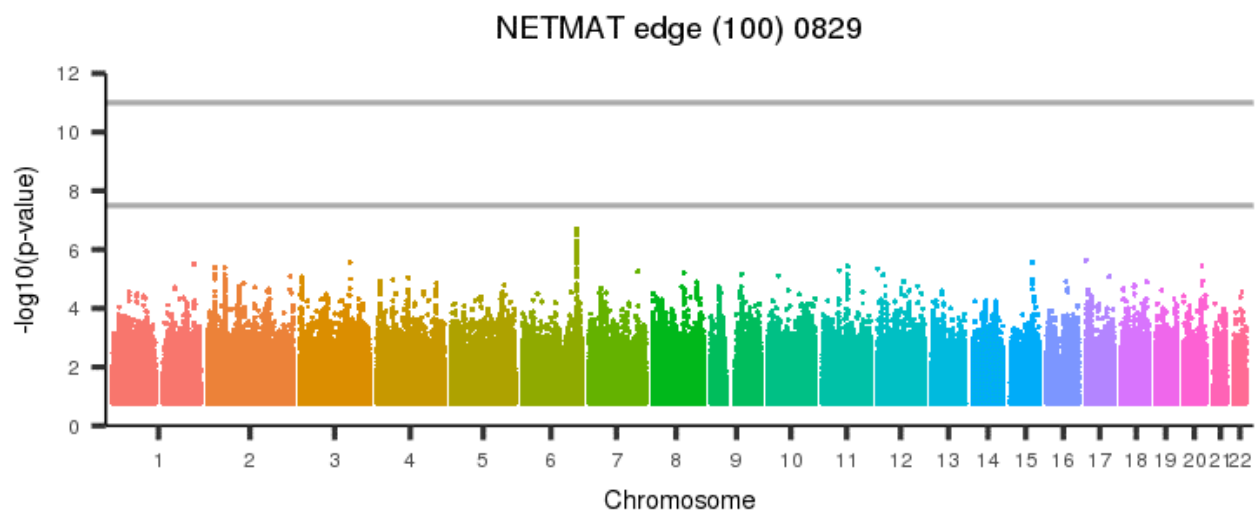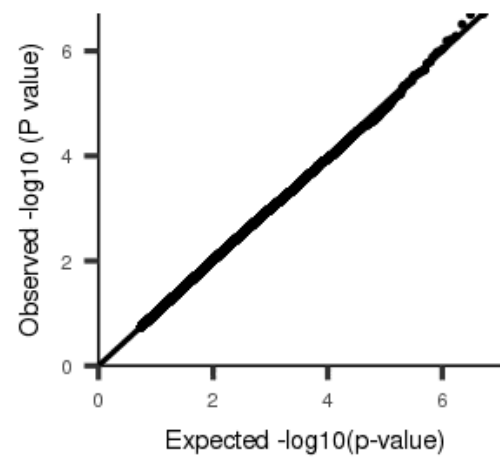

[back to list of plots](#)

Figure 1986: NETMAT edge (100) 0830

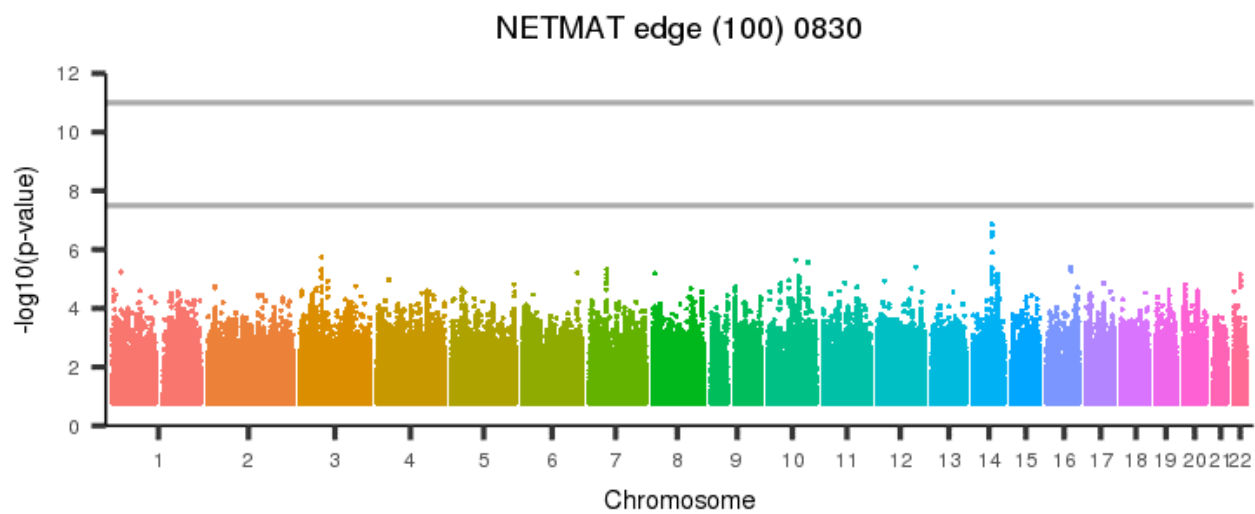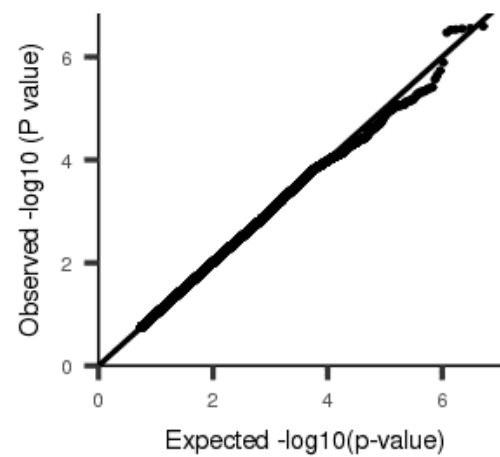

[back to list of plots](#)

Figure 1987: NETMAT edge (100) 0831

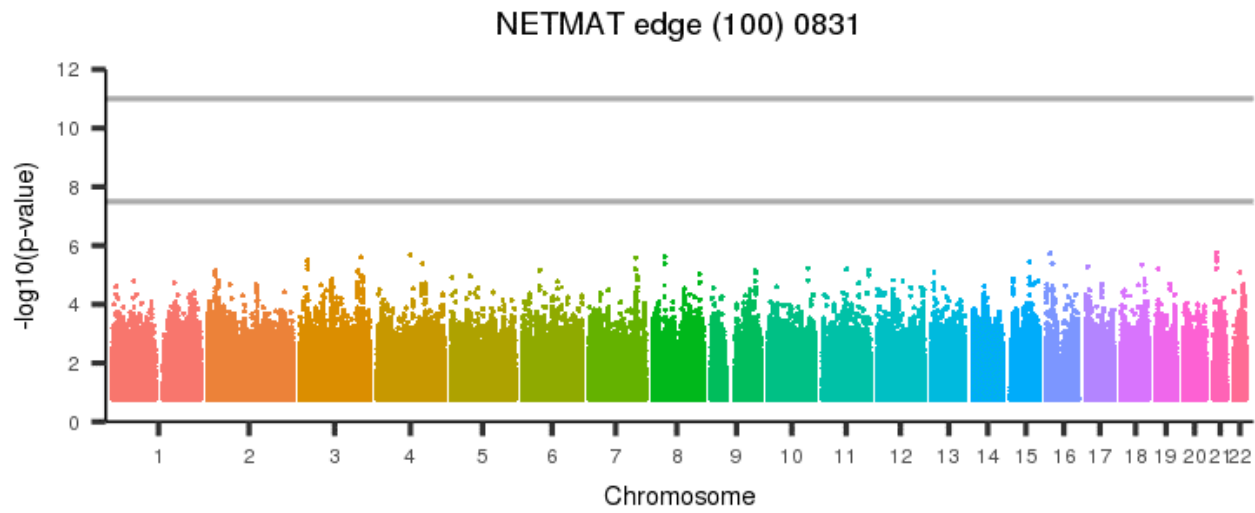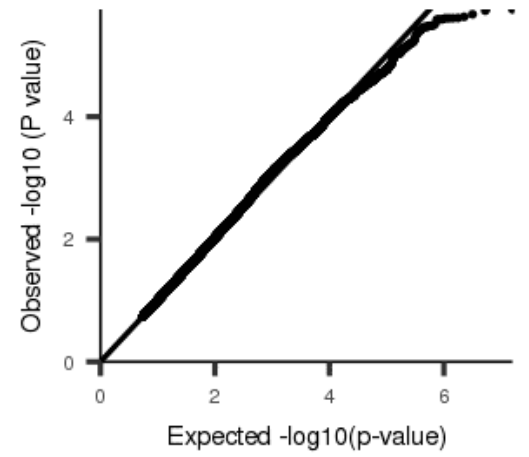

[back to list of plots](#)

Figure 1988: NETMAT edge (100) 0832

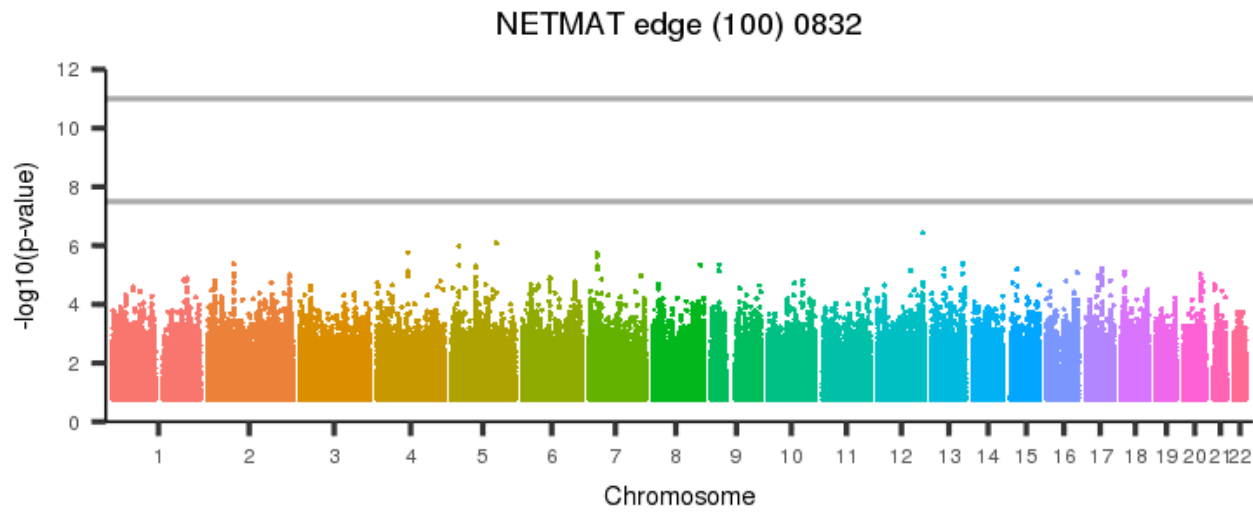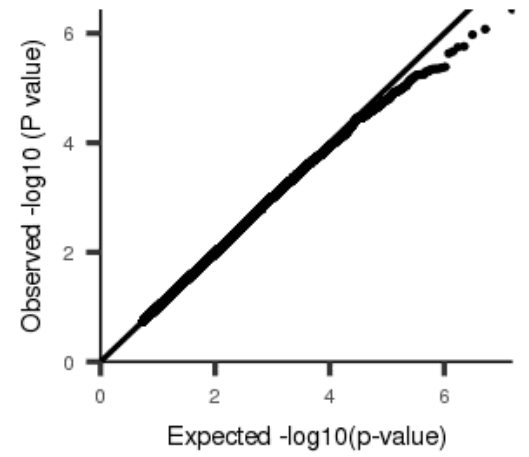

[back to list of plots](#)

Figure 1989: NETMAT edge (100) 0833

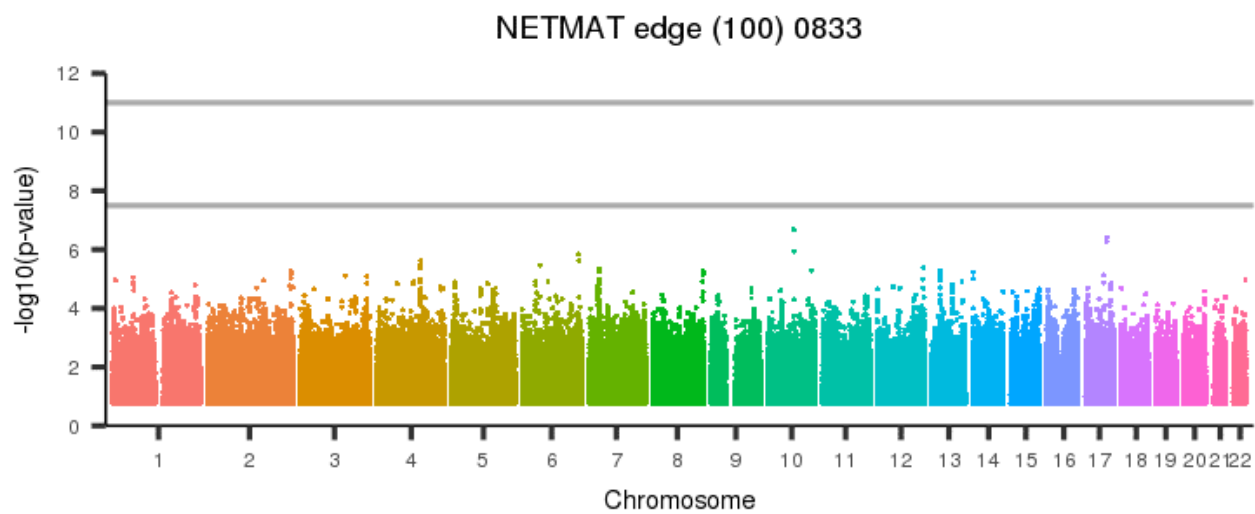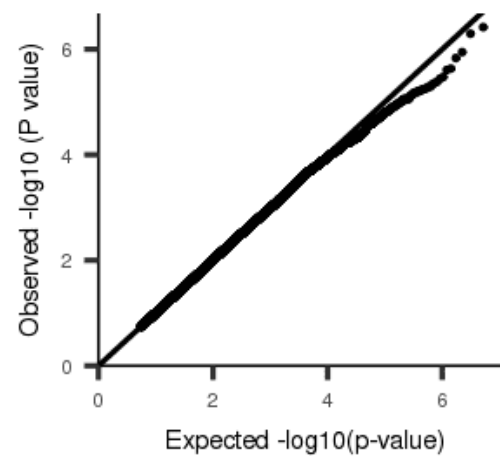

[back to list of plots](#)



Figure 1990: NETMAT edge (100) 0834

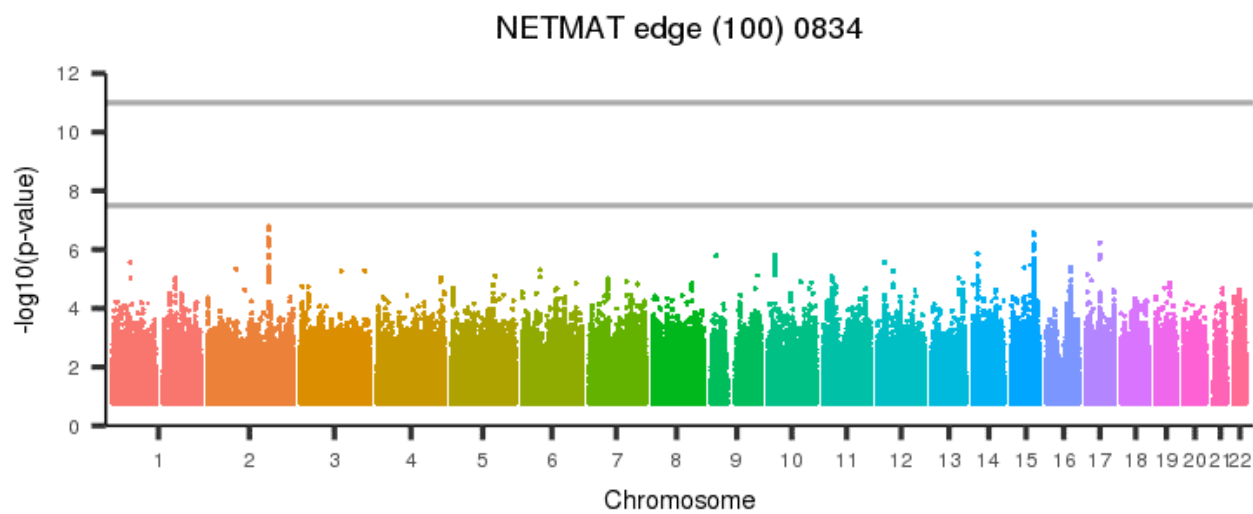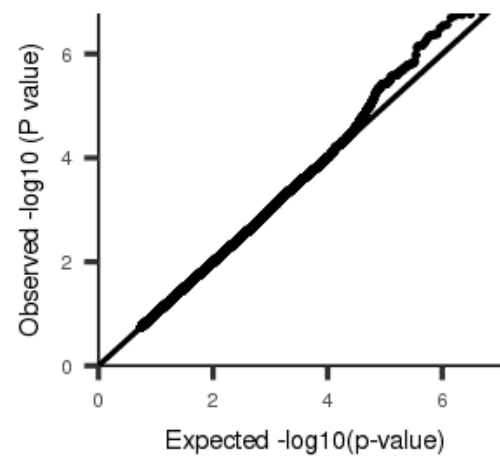

[back to list of plots](#)

Figure 1991: NETMAT edge (100) 0835

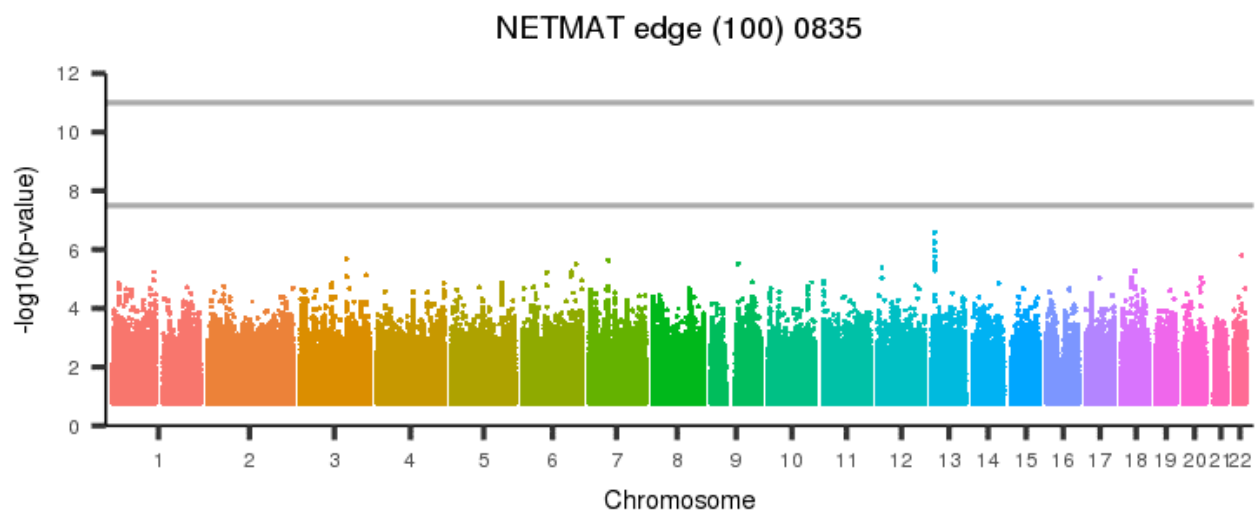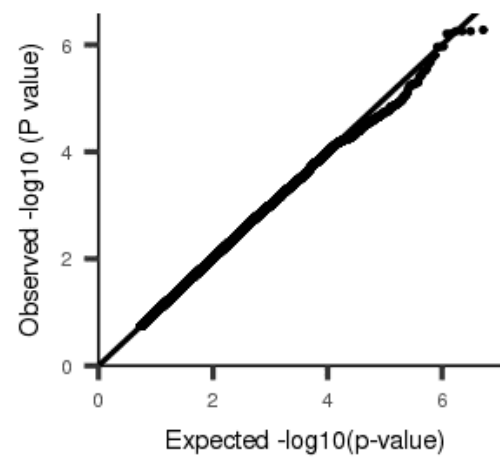

[back to list of plots](#)

Figure 1992: NETMAT edge (100) 0836

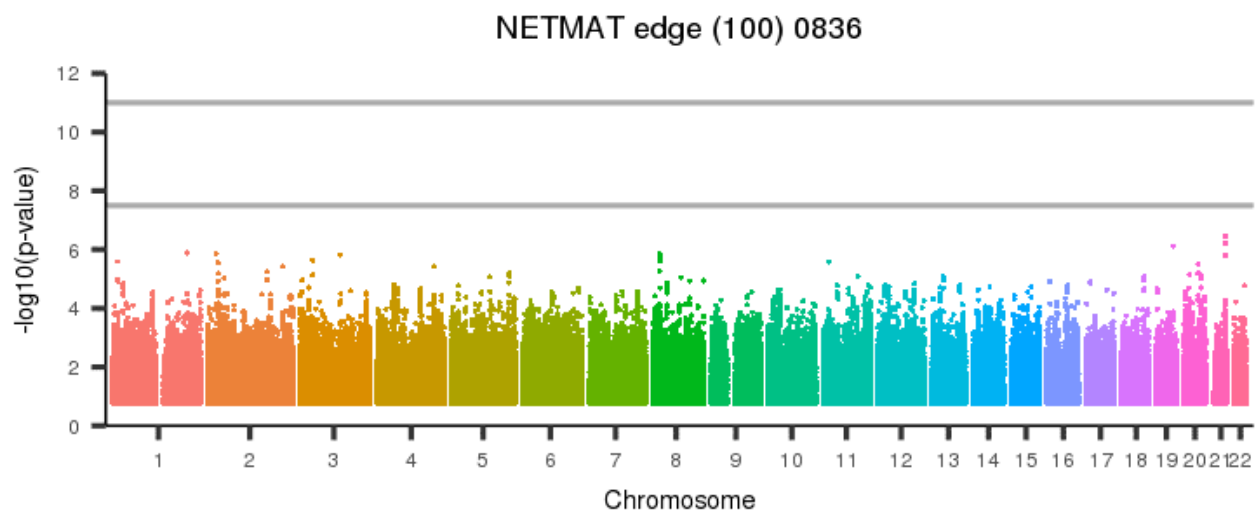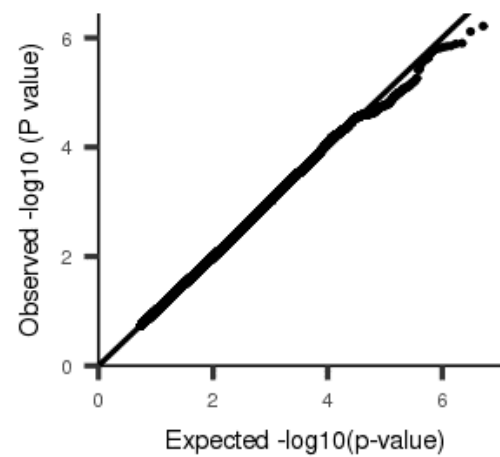

[back to list of plots](#)

Figure 1993: NETMAT edge (100) 0837

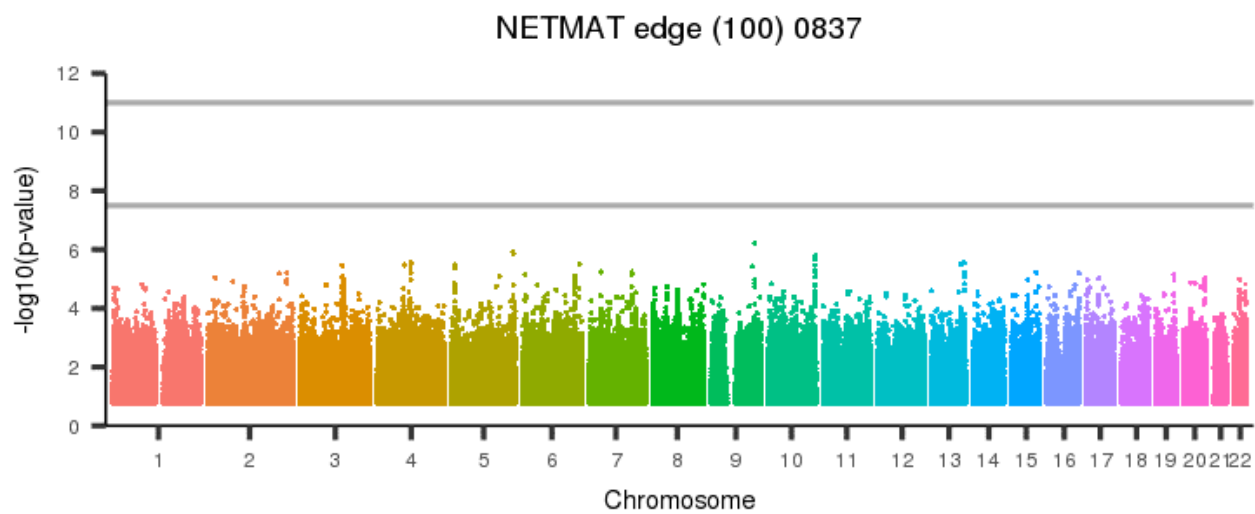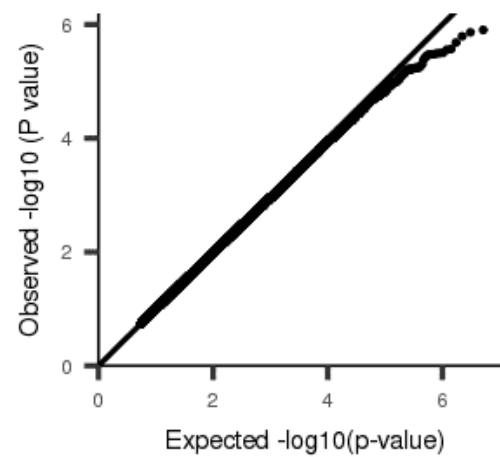

[back to list of plots](#)

Figure 1994: NETMAT edge (100) 0838

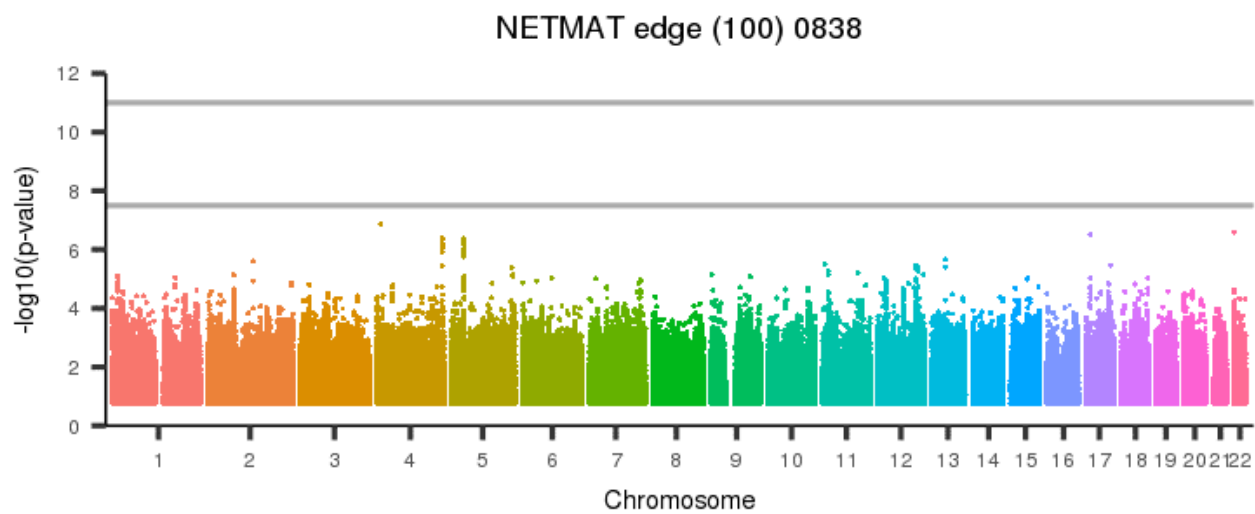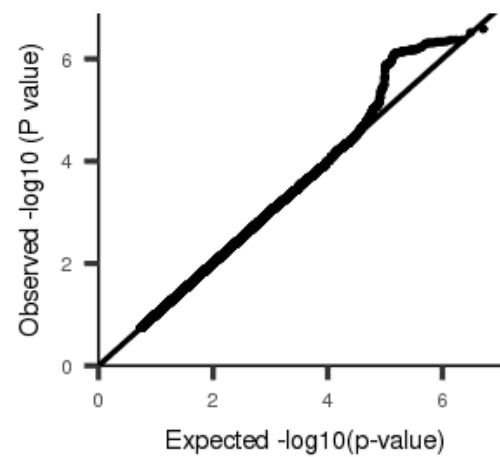

[back to list of plots](#)

Figure 1995: NETMAT edge (100) 0839

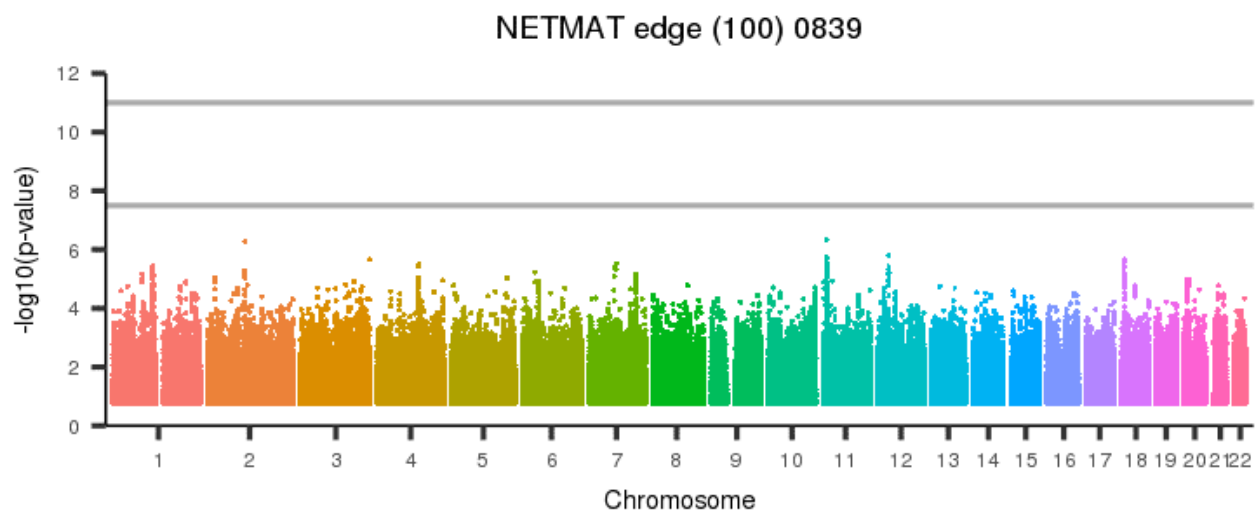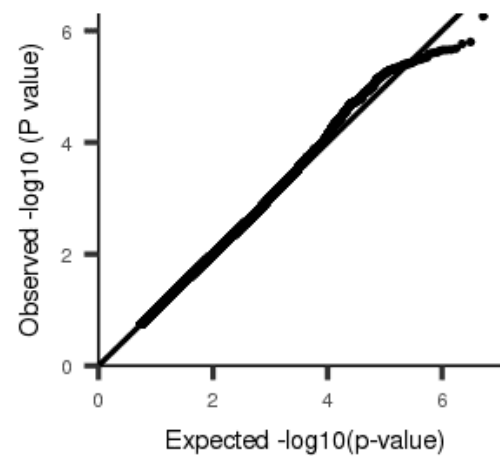

[back to list of plots](#)

Figure 1996: NETMAT edge (100) 0840

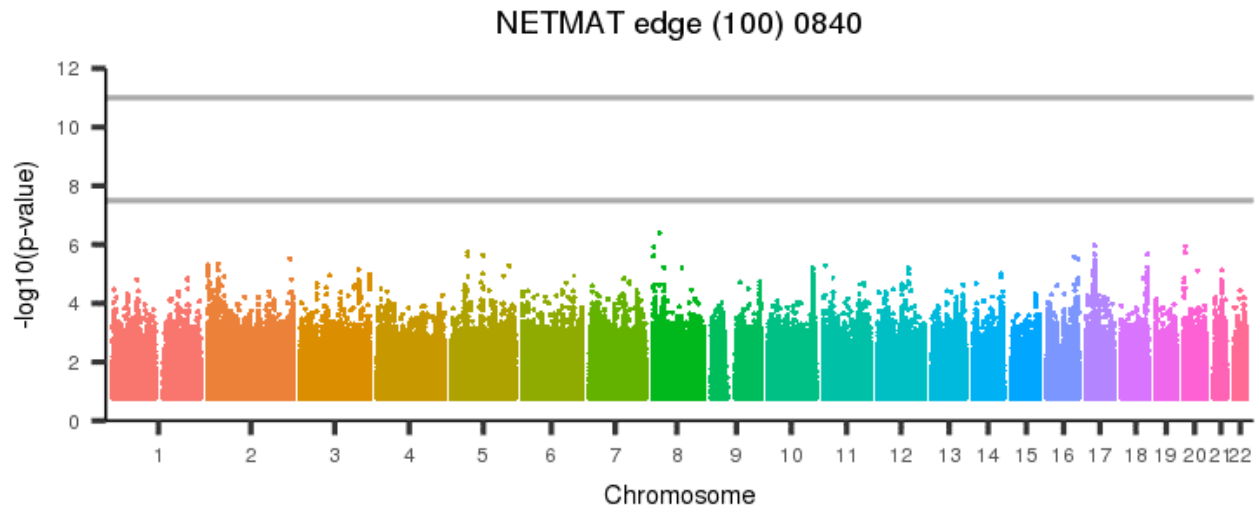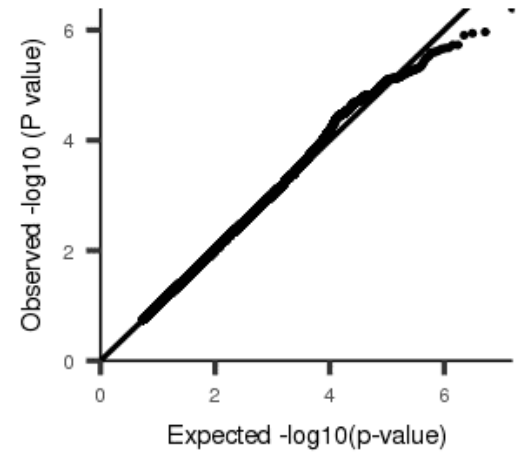

[back to list of plots](#)

Figure 1997: NETMAT edge (100) 0841

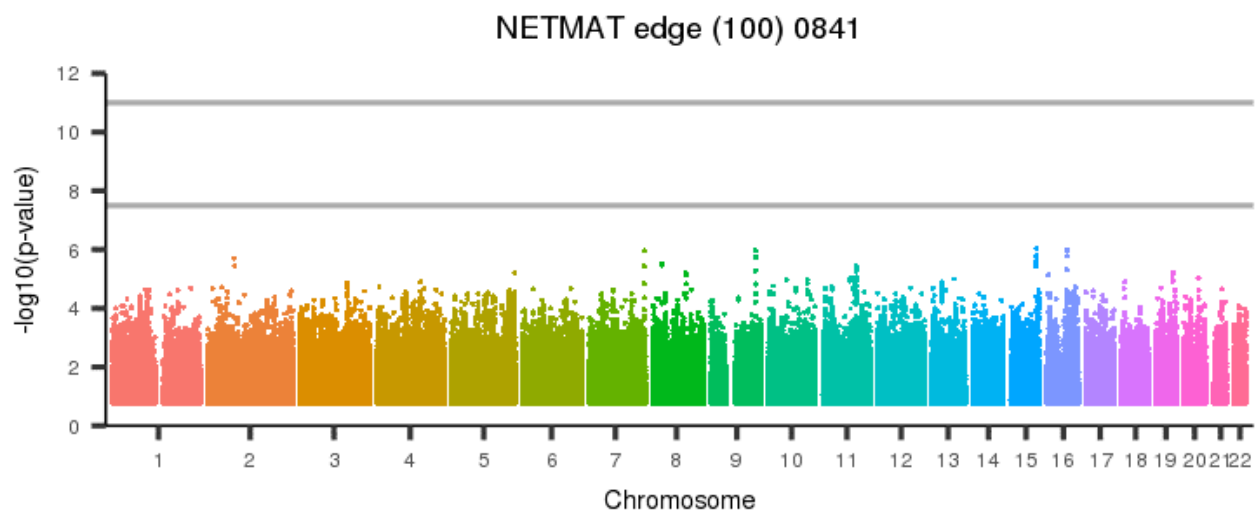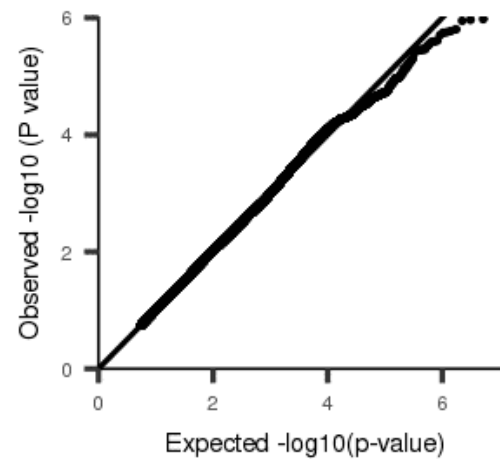

[back to list of plots](#)



Figure 1998: NETMAT edge (100) 0842

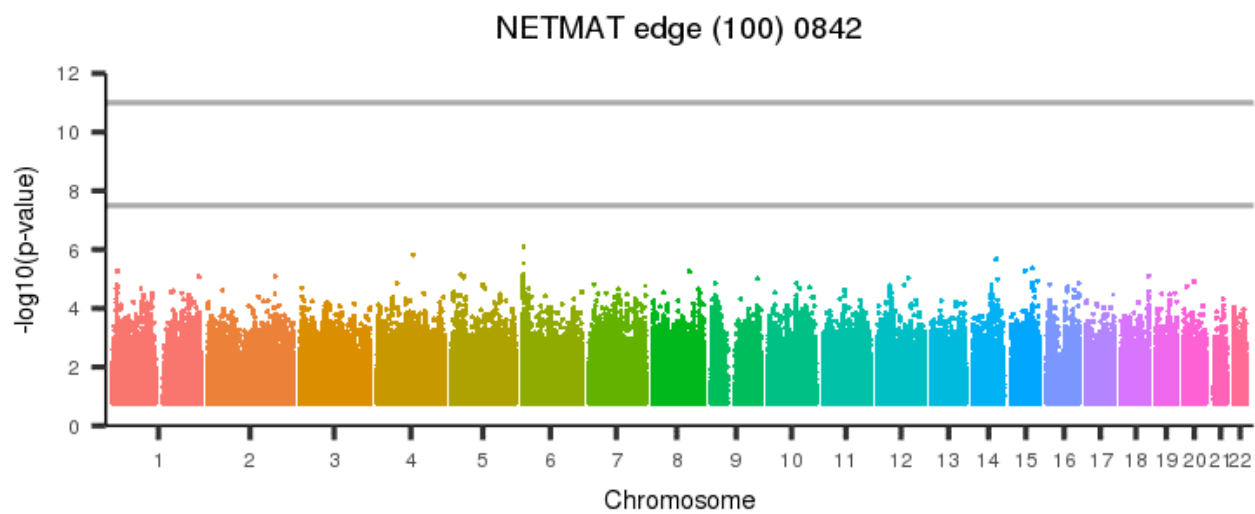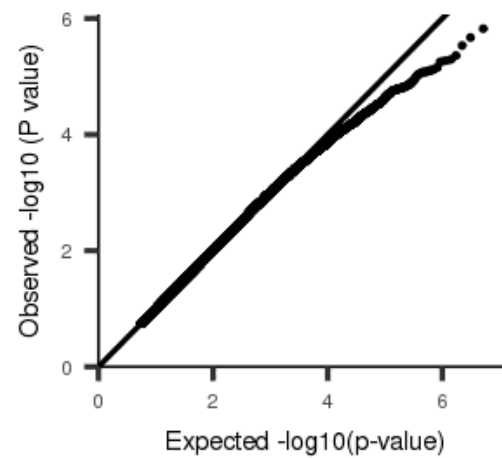

[back to list of plots](#)

Figure 1999: NETMAT edge (100) 0843

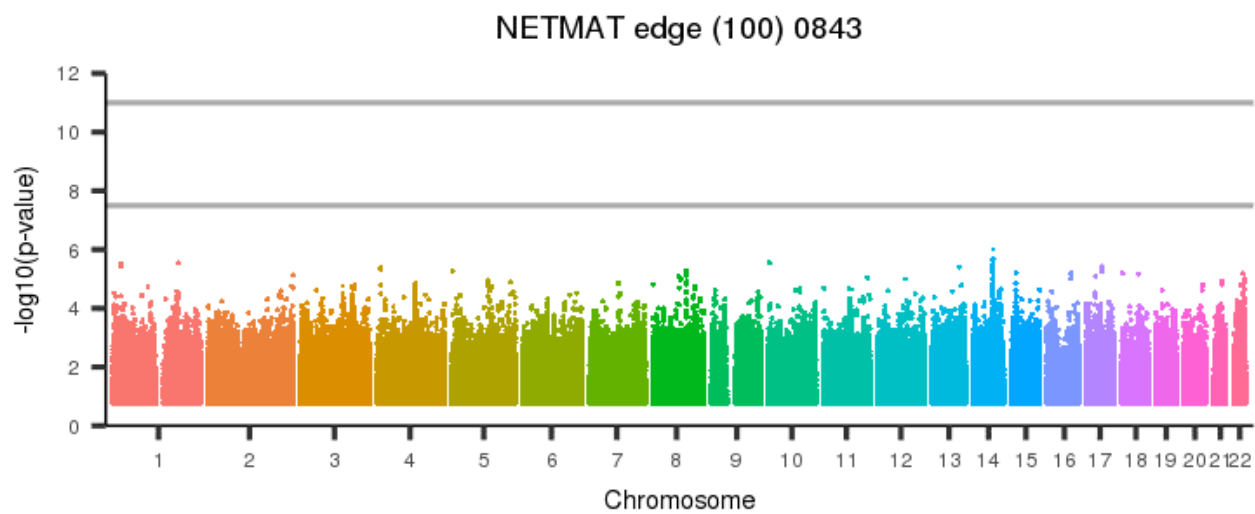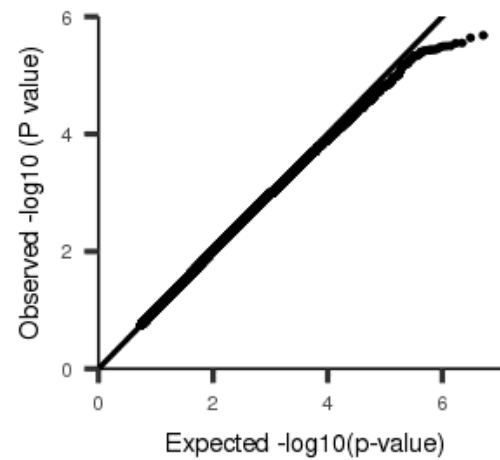

[back to list of plots](#)

Figure 2000: NETMAT edge (100) 0844

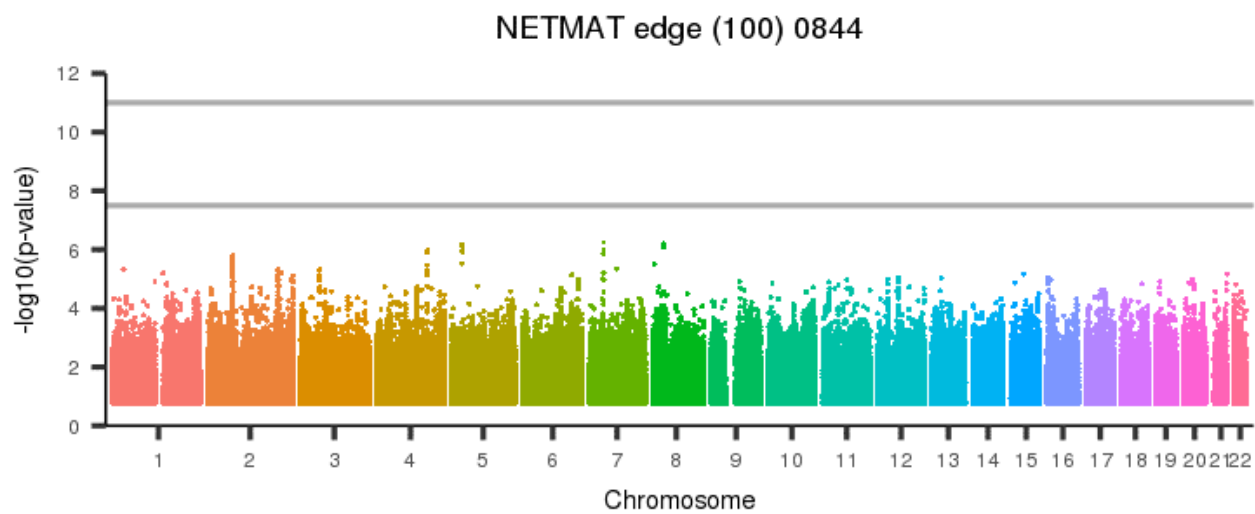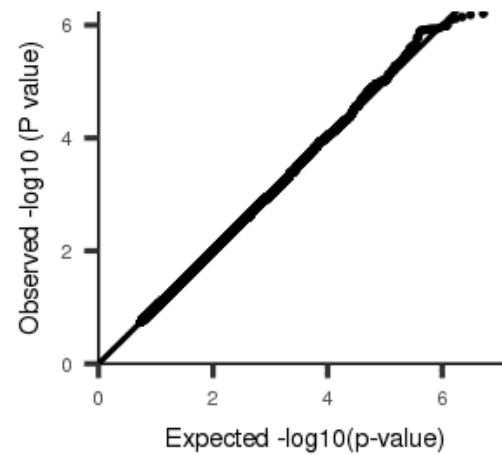

[back to list of plots](#)

Figure 2001: NETMAT edge (100) 0845

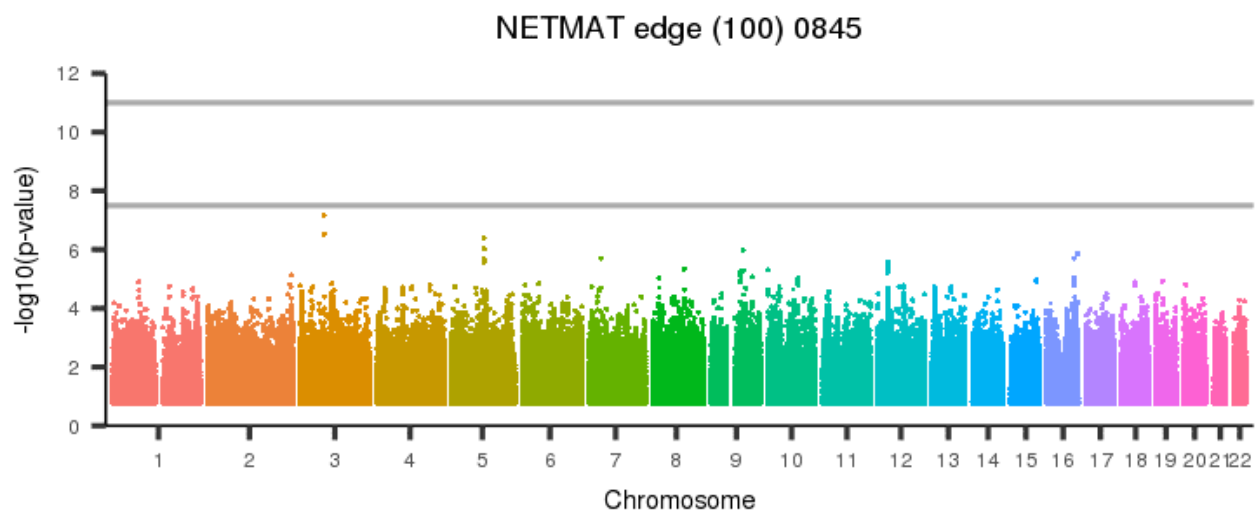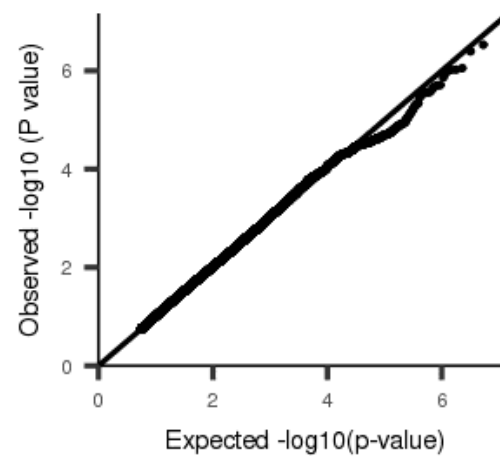

[back to list of plots](#)

Figure 2002: NETMAT edge (100) 0846

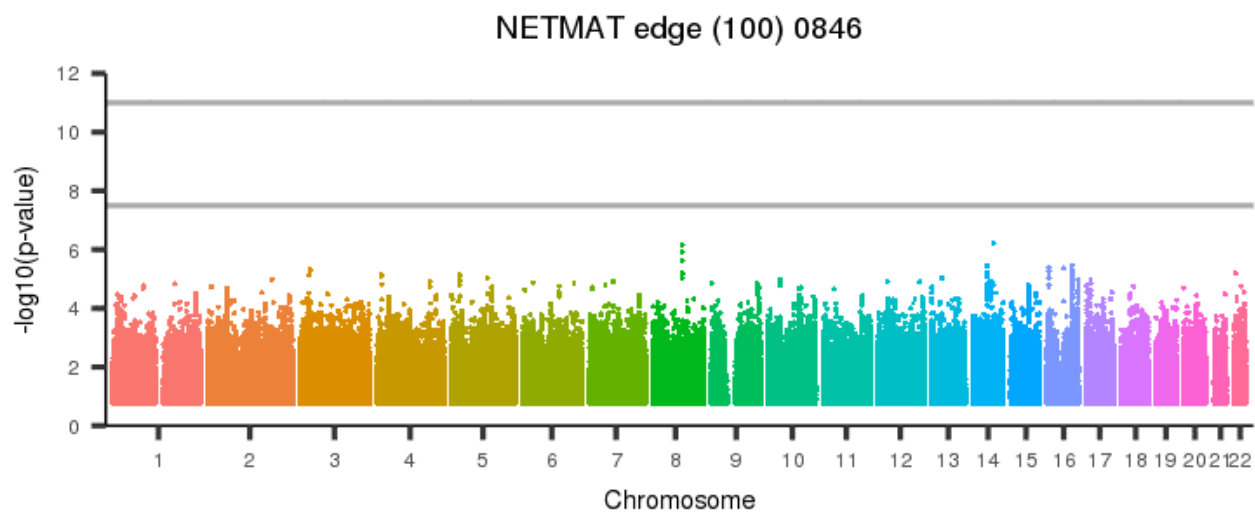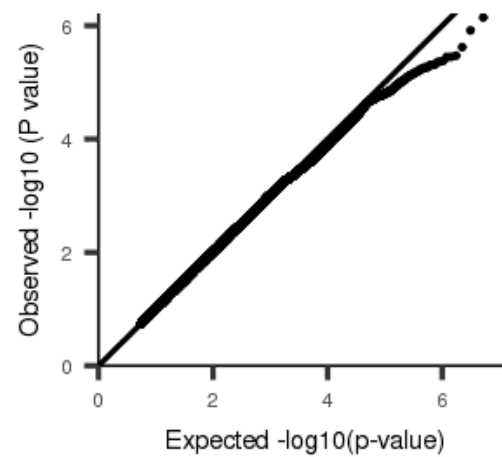

[back to list of plots](#)

Figure 2003: NETMAT edge (100) 0847

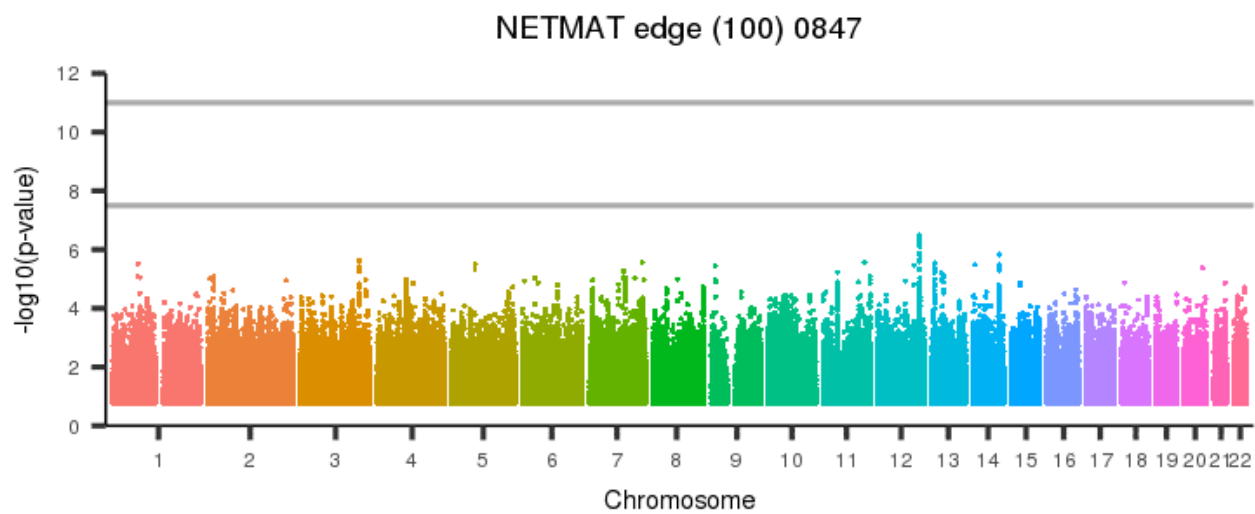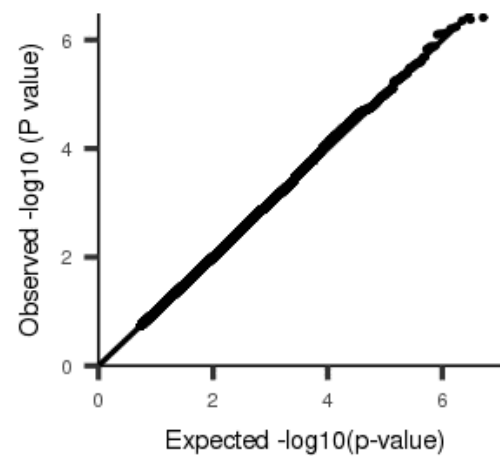

[back to list of plots](#)

Figure 2004: NETMAT edge (100) 0848

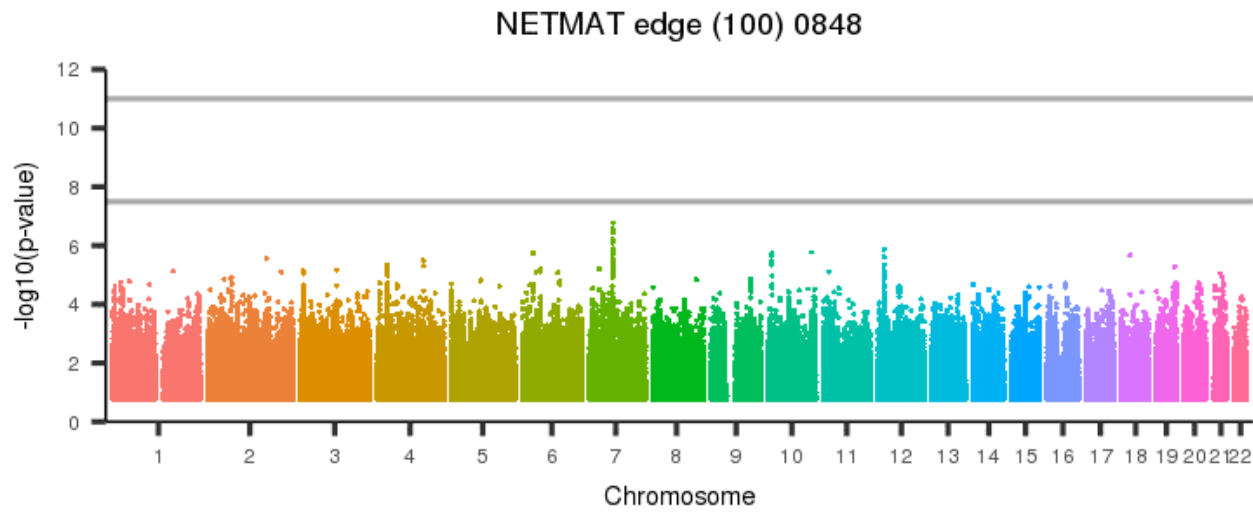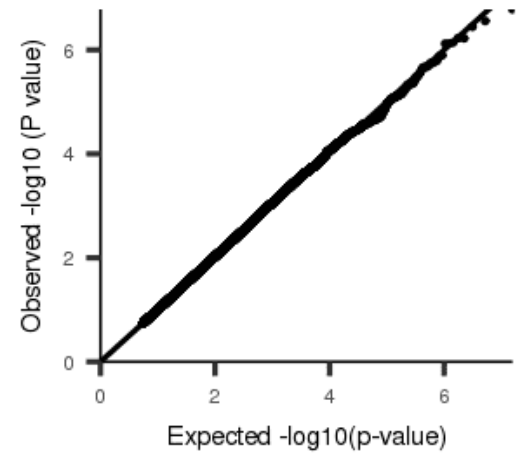

[back to list of plots](#)

Figure 2005: NETMAT edge (100) 0849

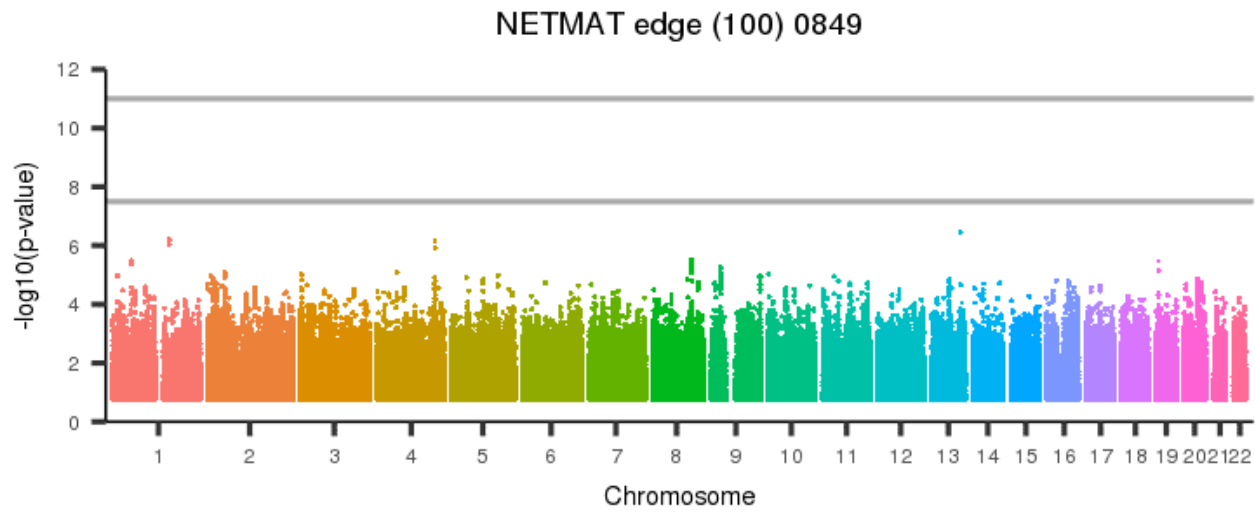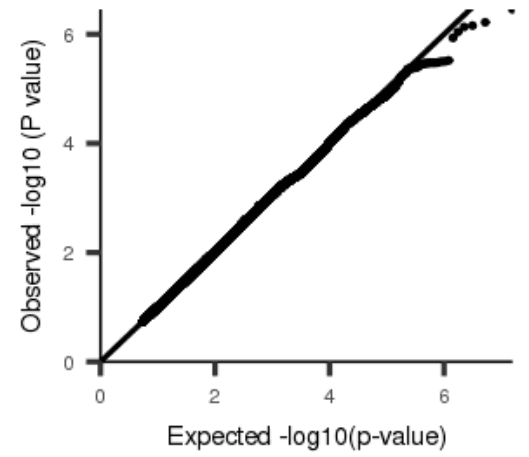

[back to list of plots](#)



Figure 2006: NETMAT edge (100) 0850

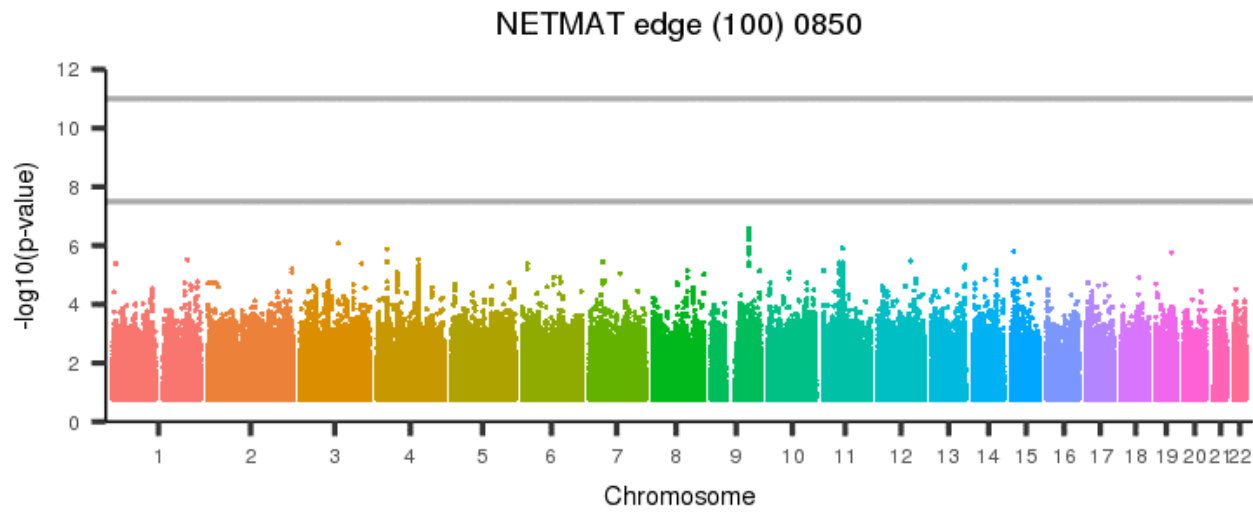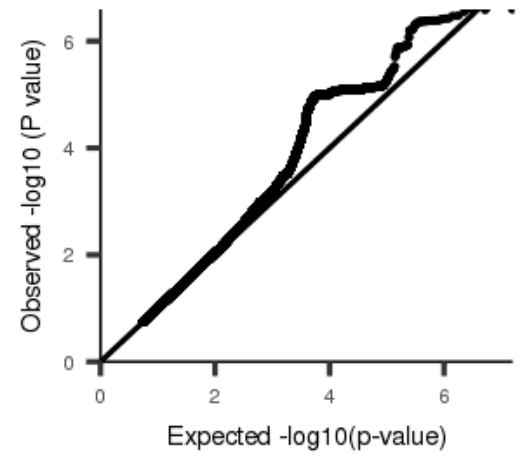

[back to list of plots](#)

Figure 2007: NETMAT edge (100) 0851

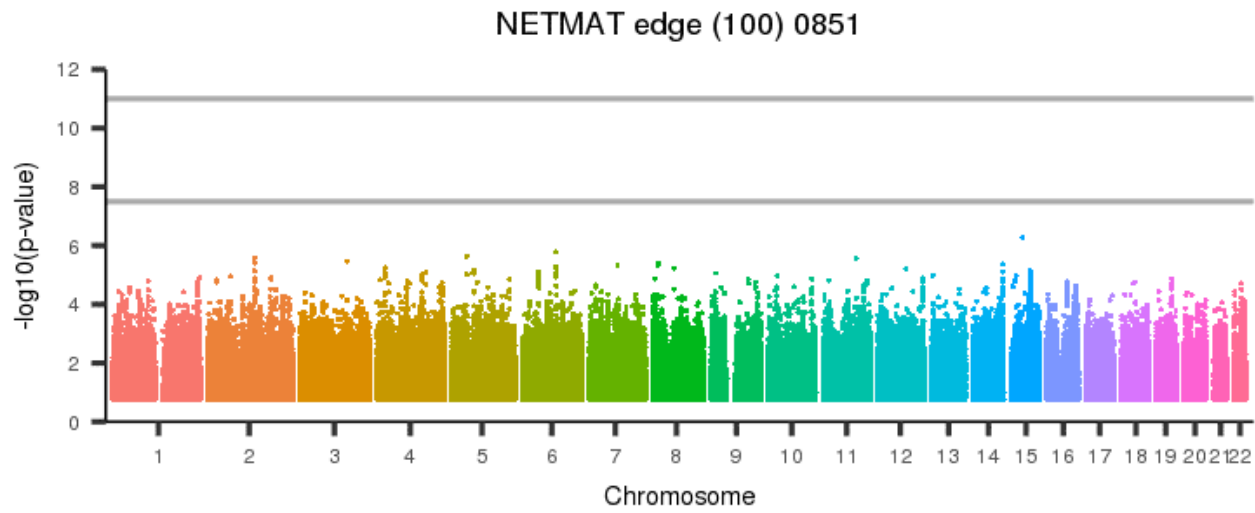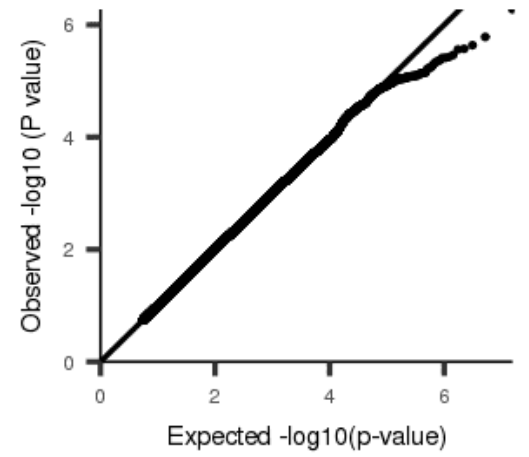

[back to list of plots](#)

Figure 2008: NETMAT edge (100) 0852

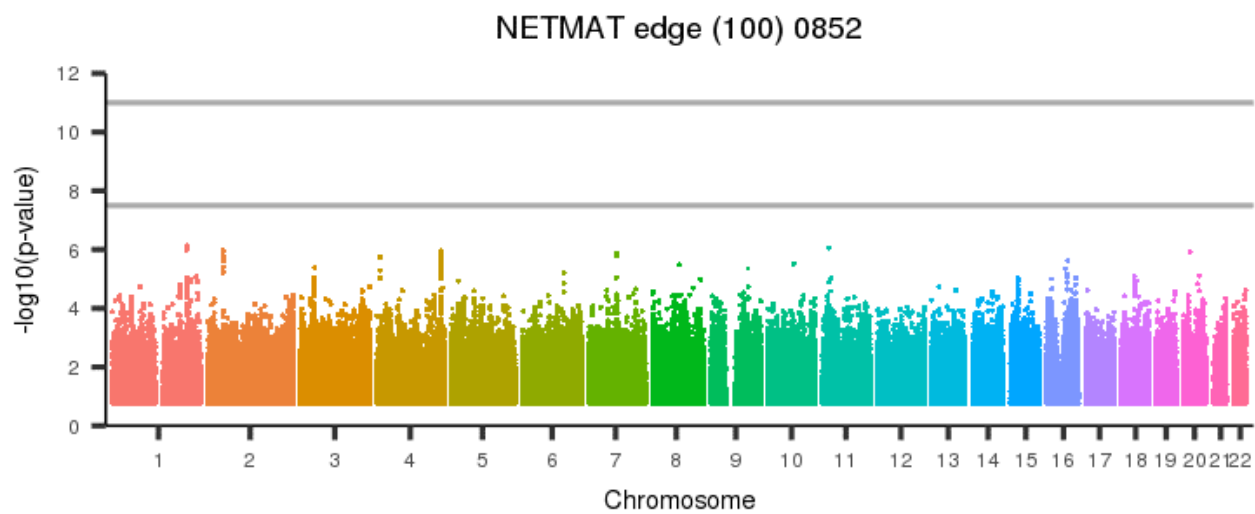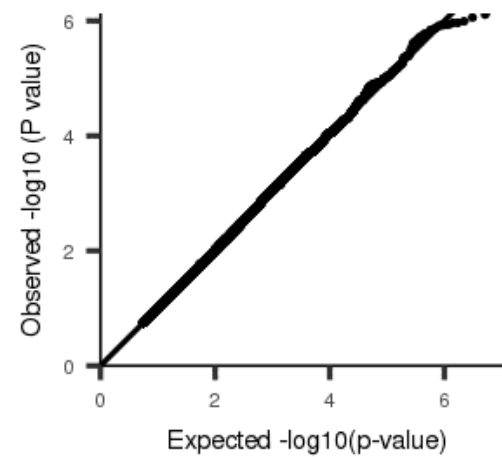

[back to list of plots](#)

Figure 2009: NETMAT edge (100) 0853

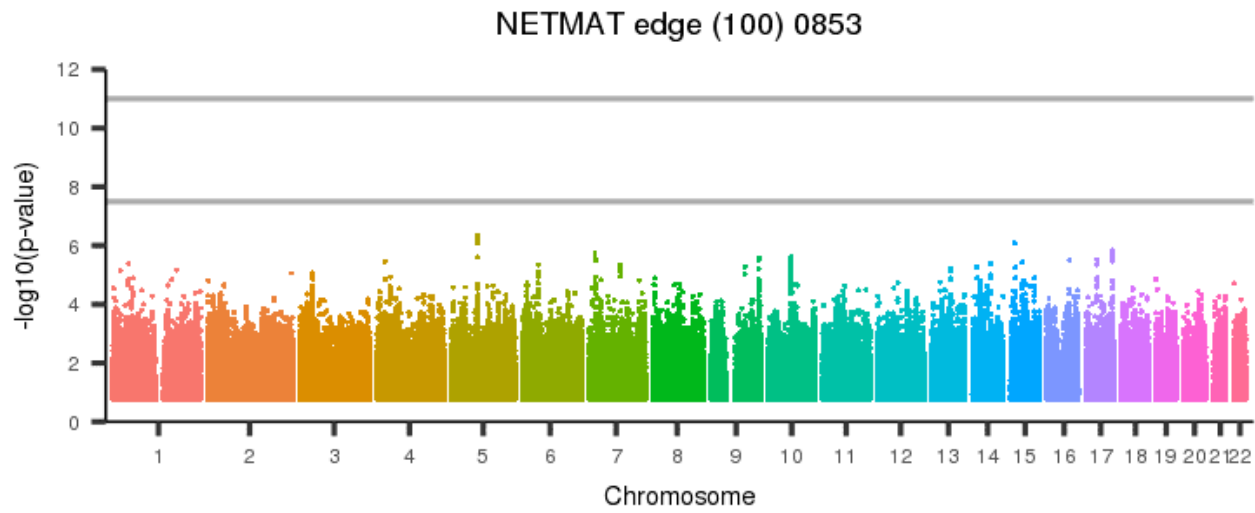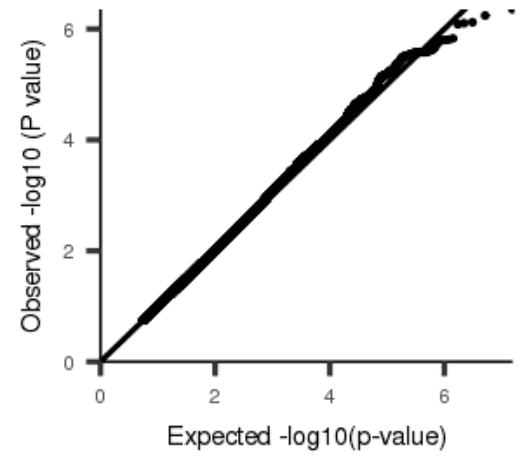

[back to list of plots](#)

Figure 2010: NETMAT edge (100) 0854

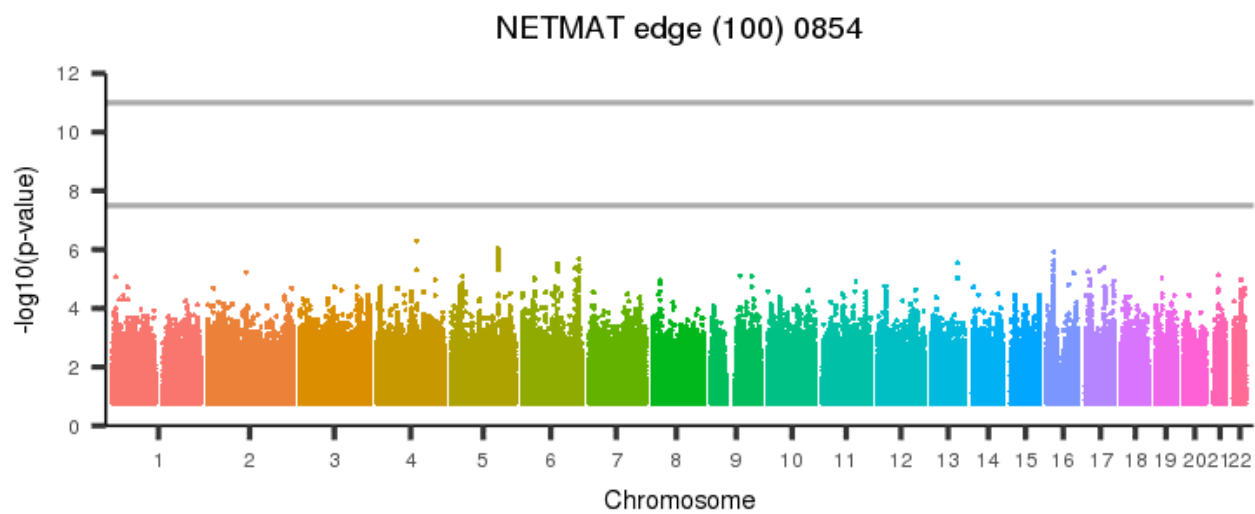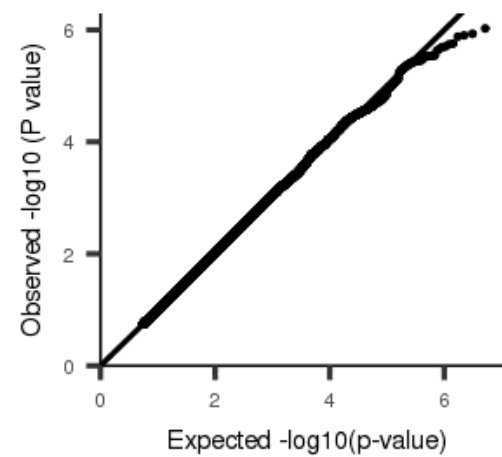

[back to list of plots](#)

Figure 2011: NETMAT edge (100) 0855

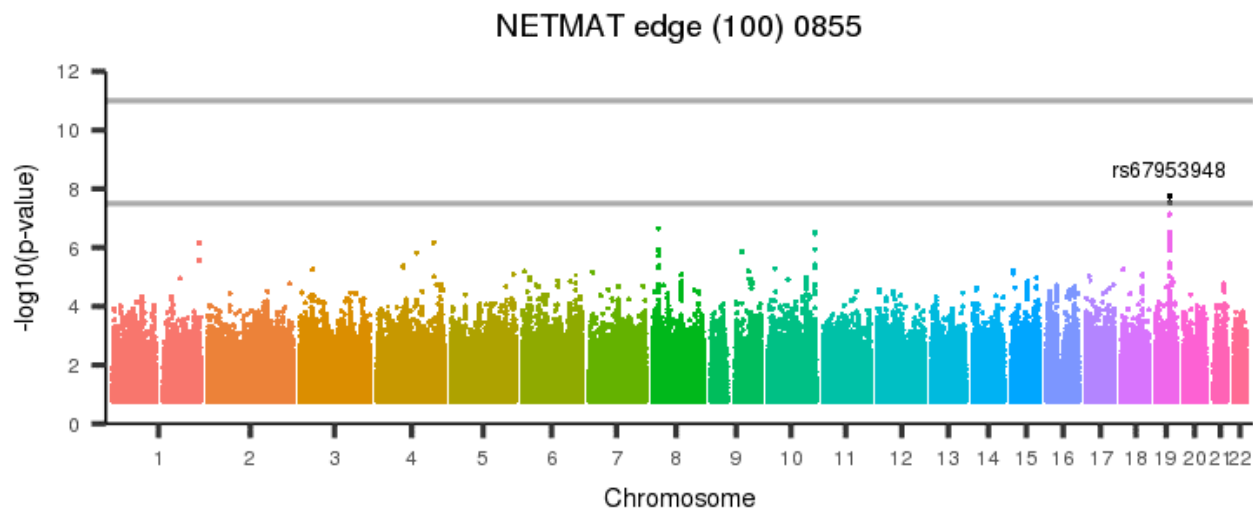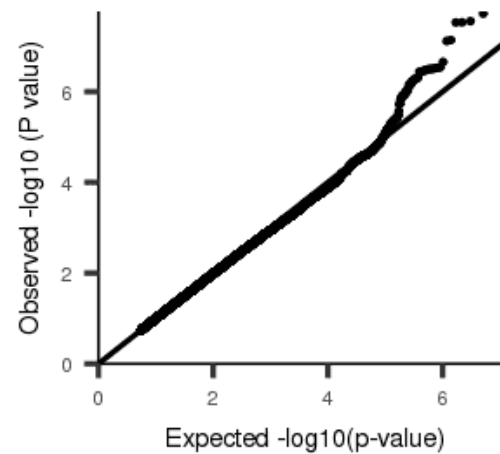

[back to list of plots](#)

Figure 2012: NETMAT edge (100) 0856

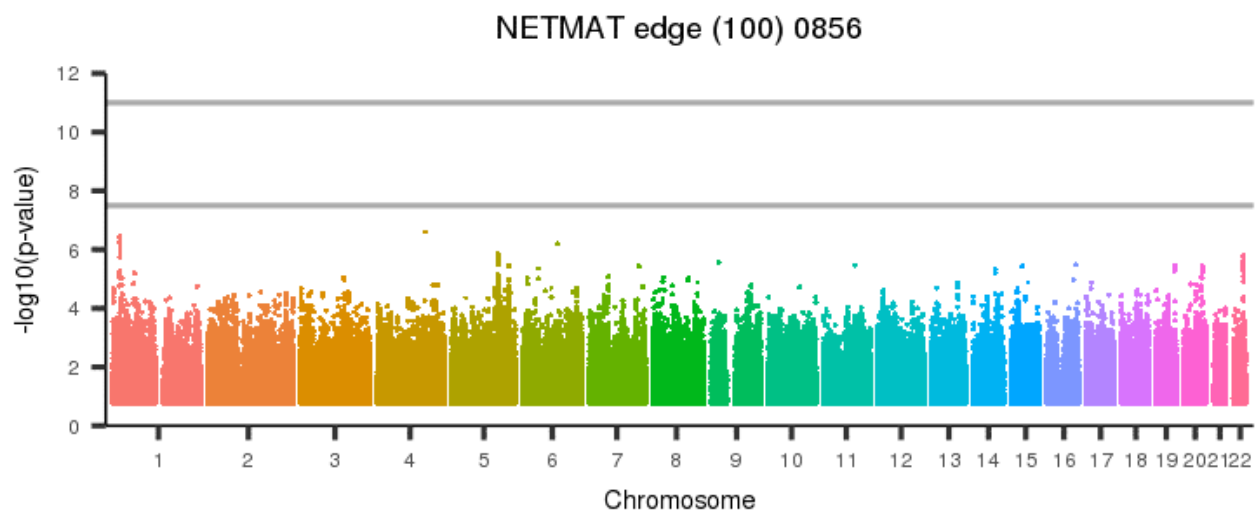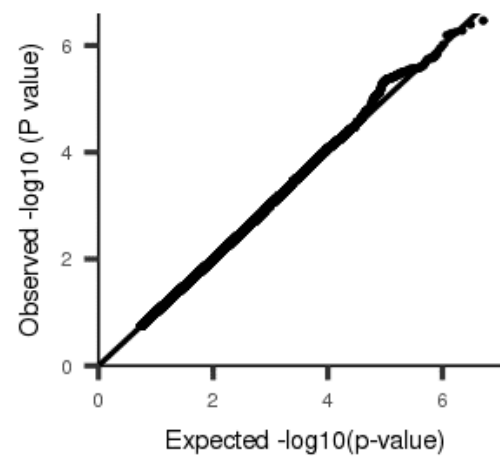

[back to list of plots](#)

Figure 2013: NETMAT edge (100) 0857

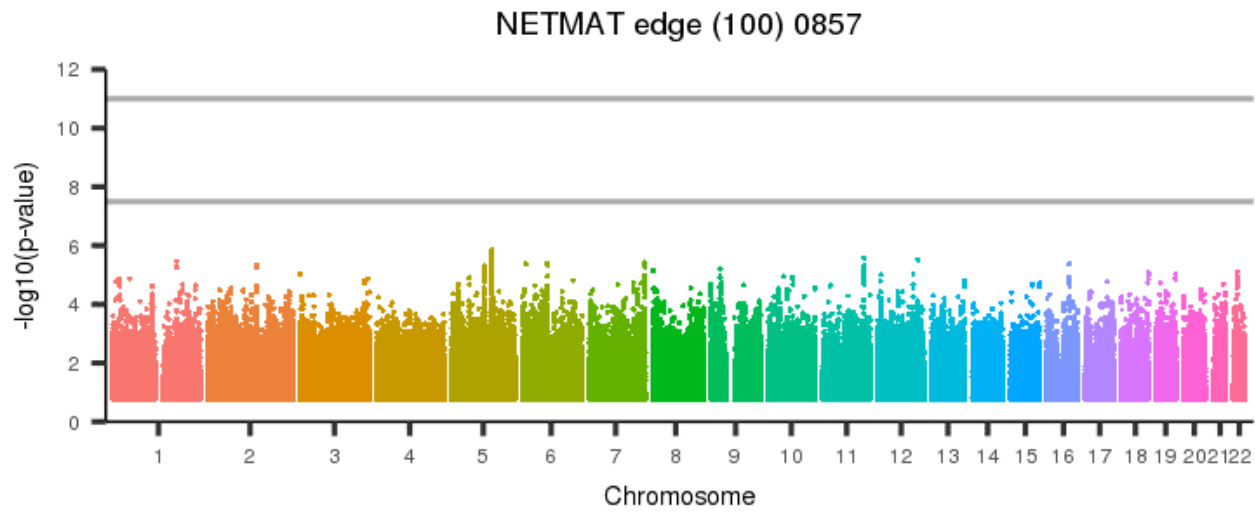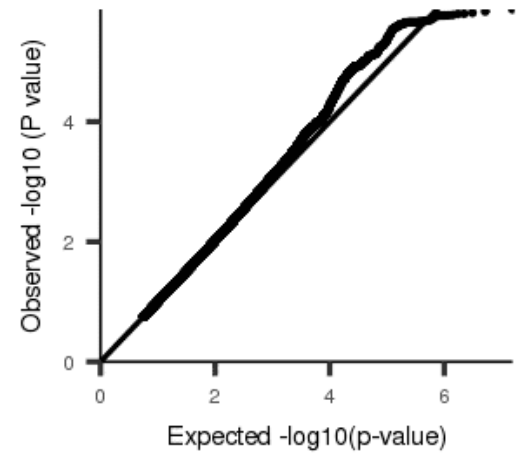

[back to list of plots](#)



Figure 2014: NETMAT edge (100) 0858

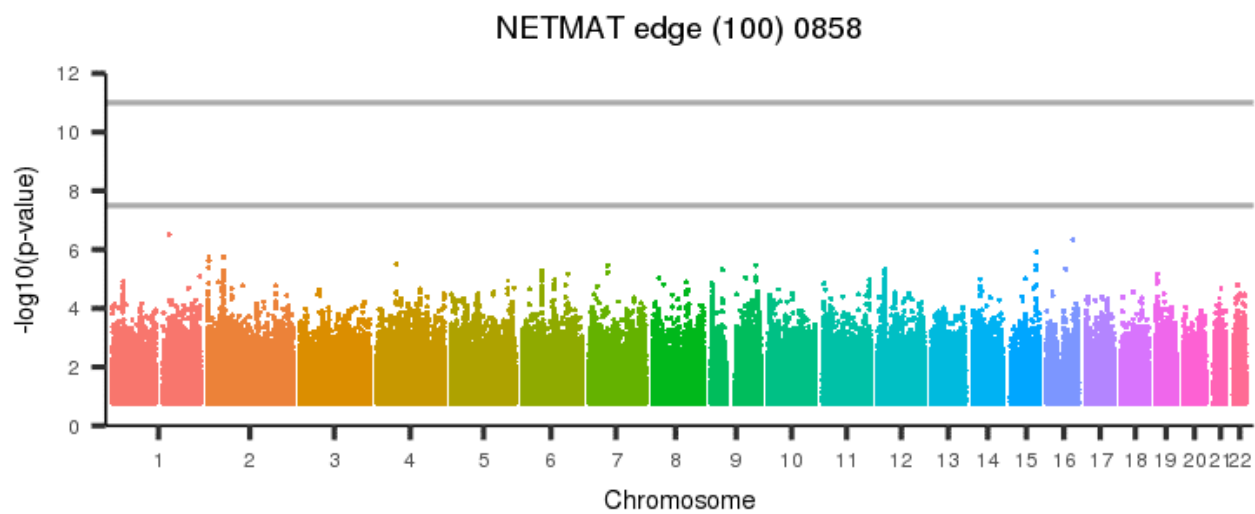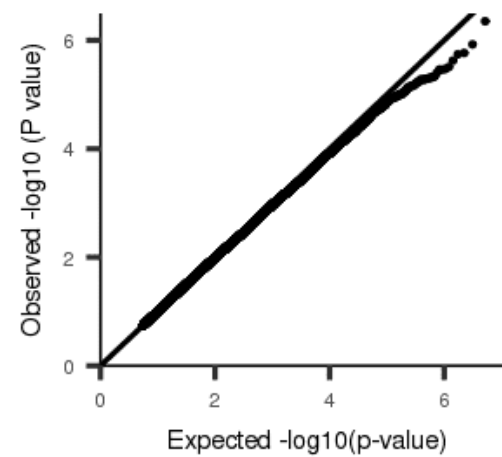

[back to list of plots](#)

Figure 2015: NETMAT edge (100) 0859

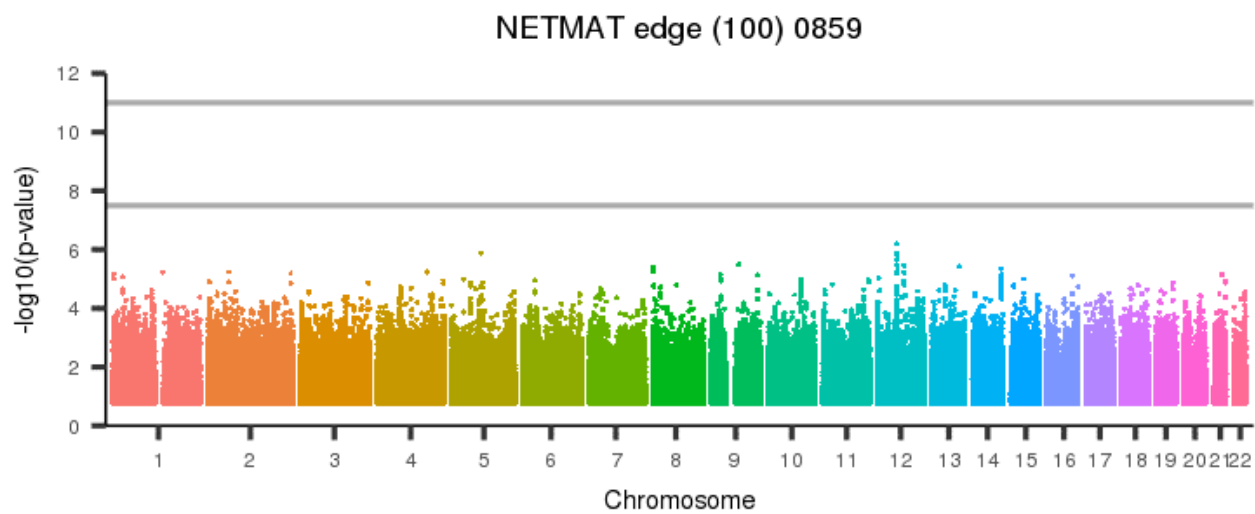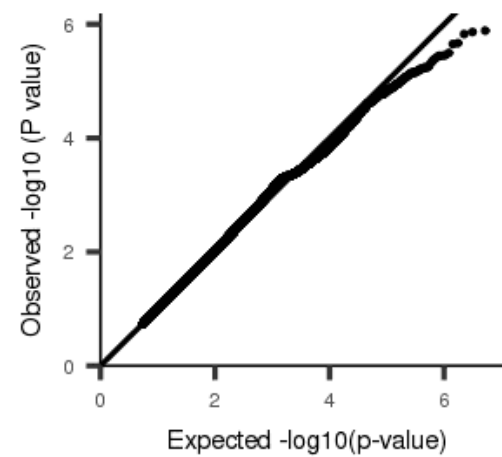

[back to list of plots](#)

Figure 2016: NETMAT edge (100) 0860

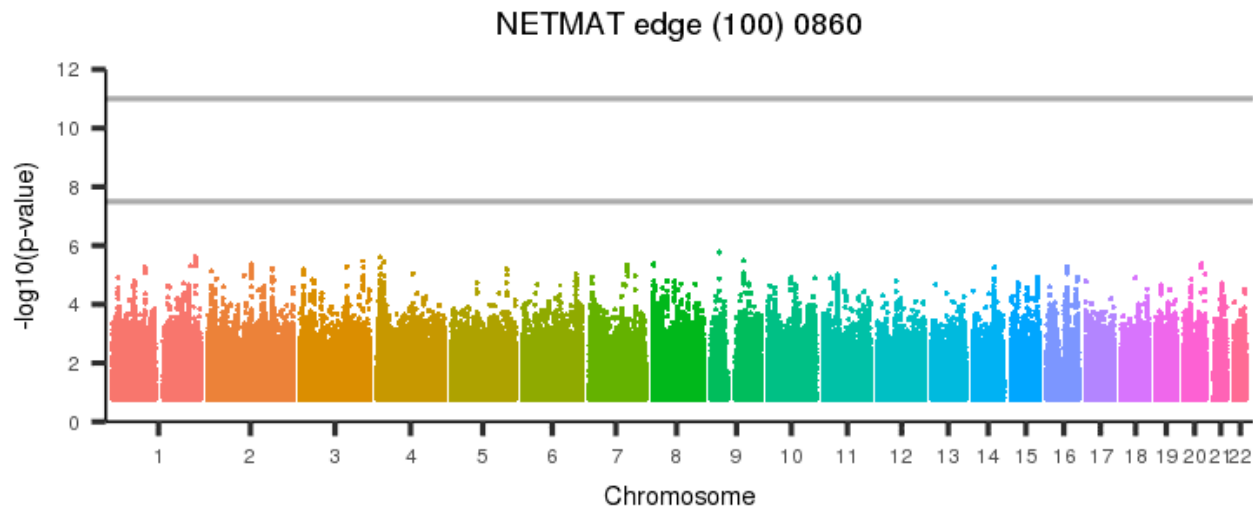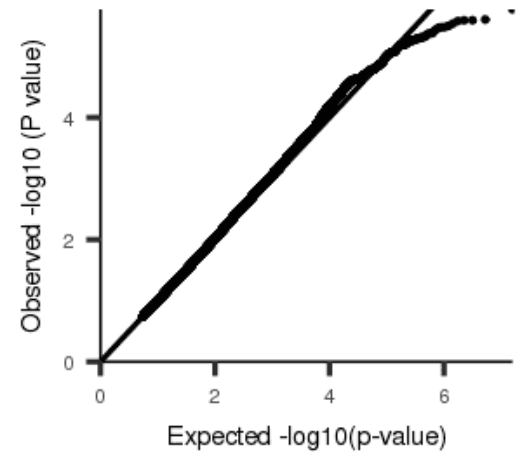

[back to list of plots](#)

Figure 2017: NETMAT edge (100) 0861

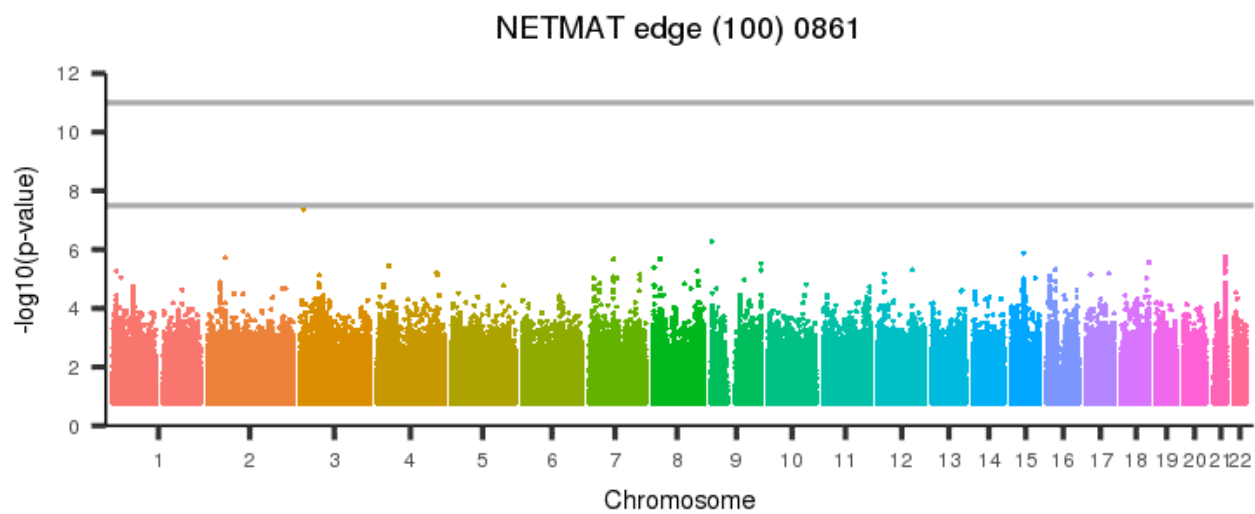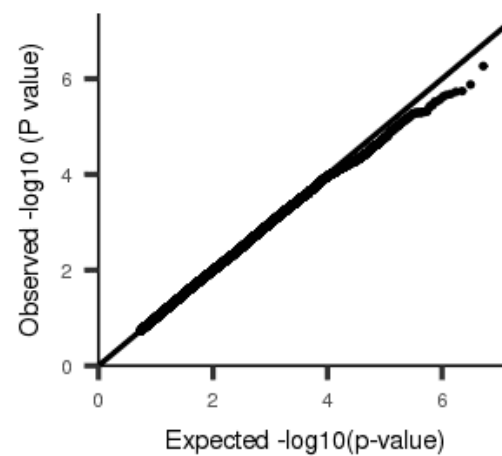

[back to list of plots](#)

Figure 2018: NETMAT edge (100) 0862

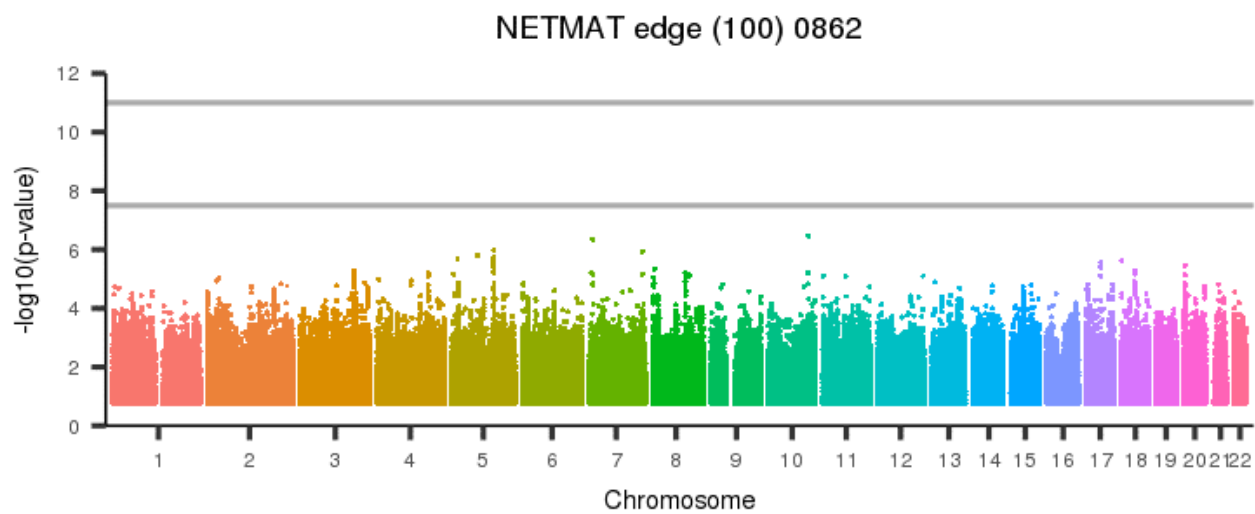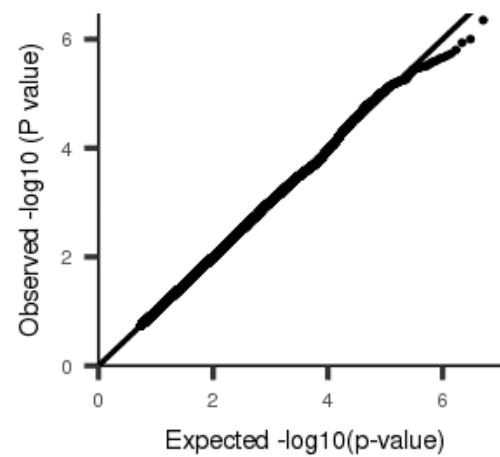

[back to list of plots](#)

Figure 2019: NETMAT edge (100) 0863

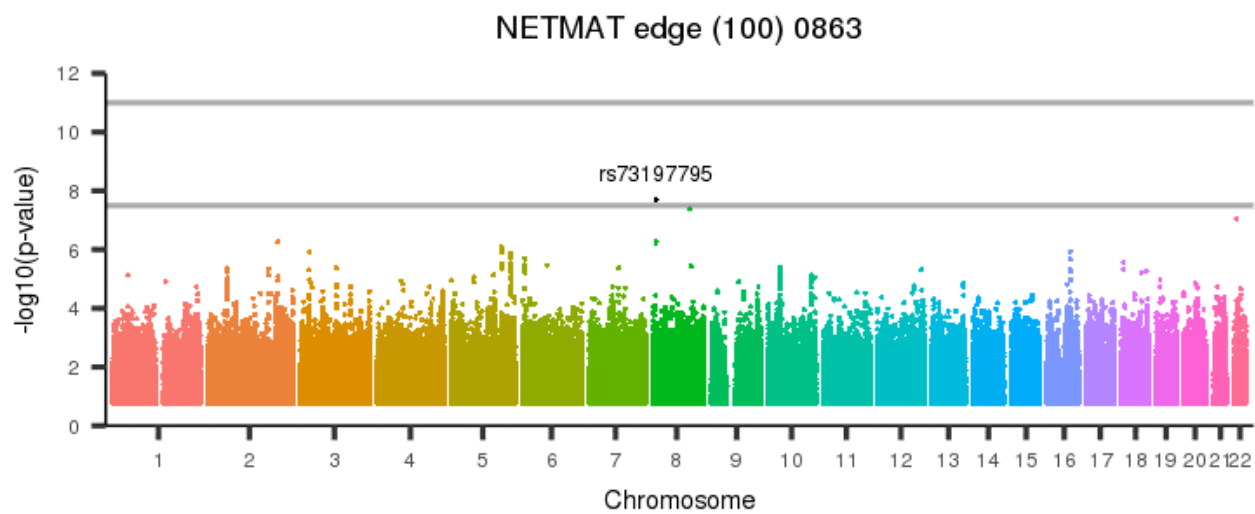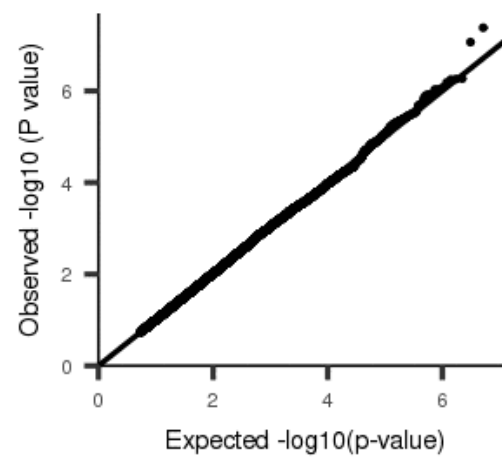

[back to list of plots](#)

Figure 2020: NETMAT edge (100) 0864

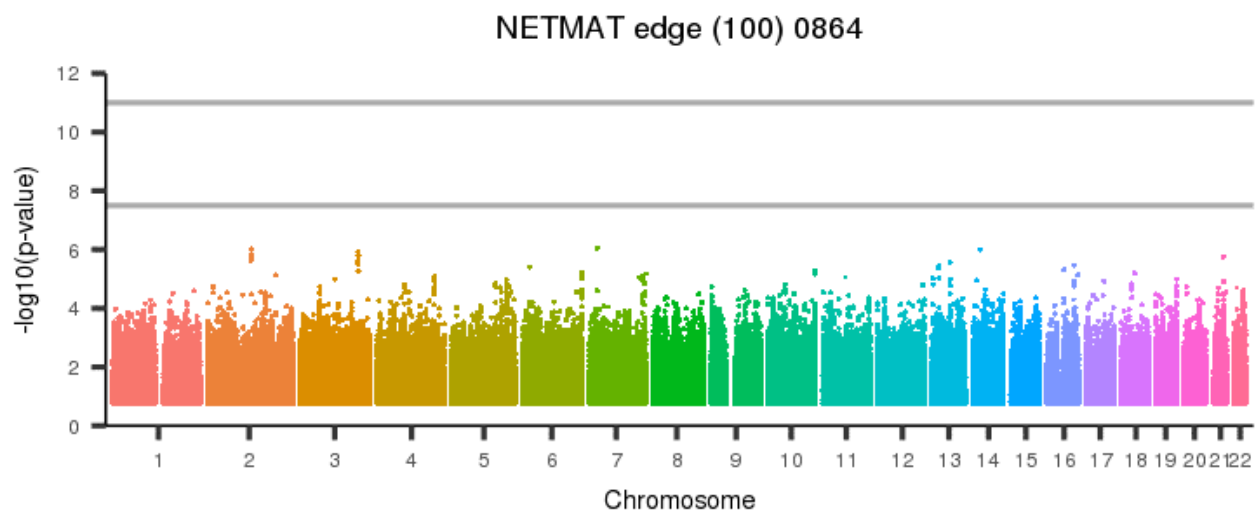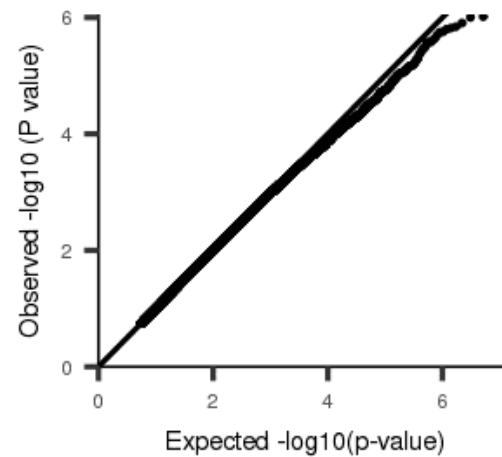

[back to list of plots](#)

Figure 2021: NETMAT edge (100) 0865

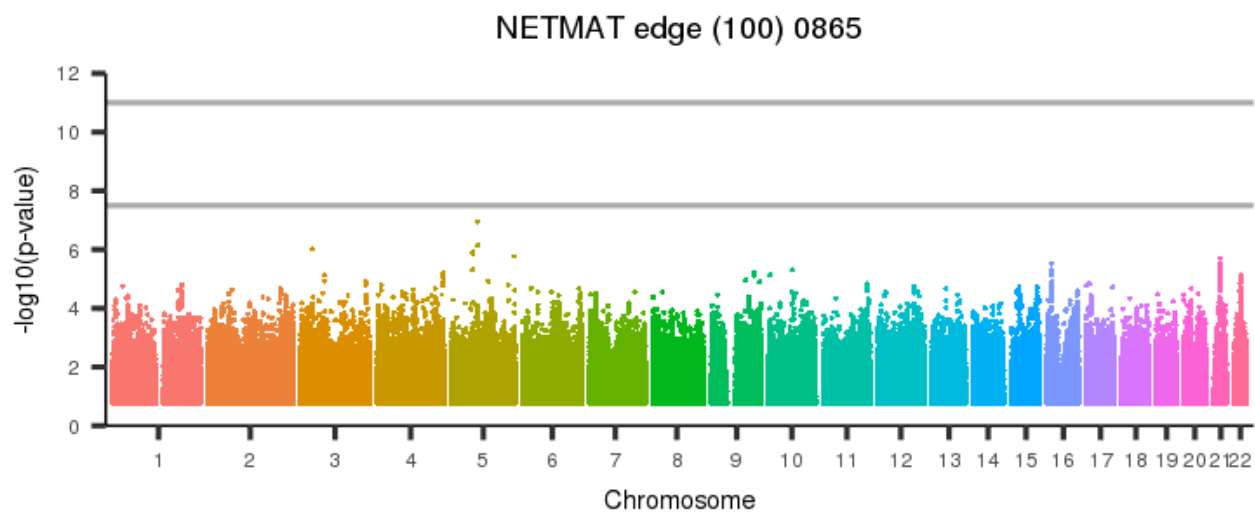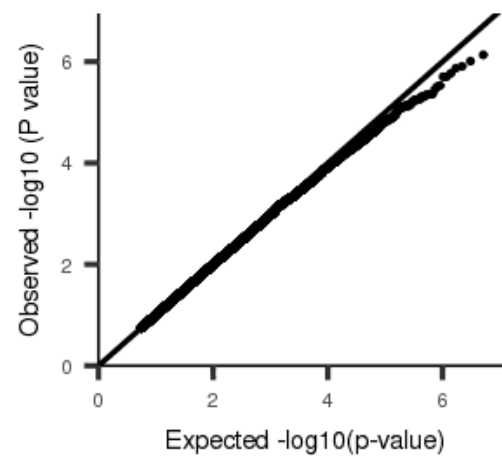

[back to list of plots](#)



Figure 2022: NETMAT edge (100) 0866

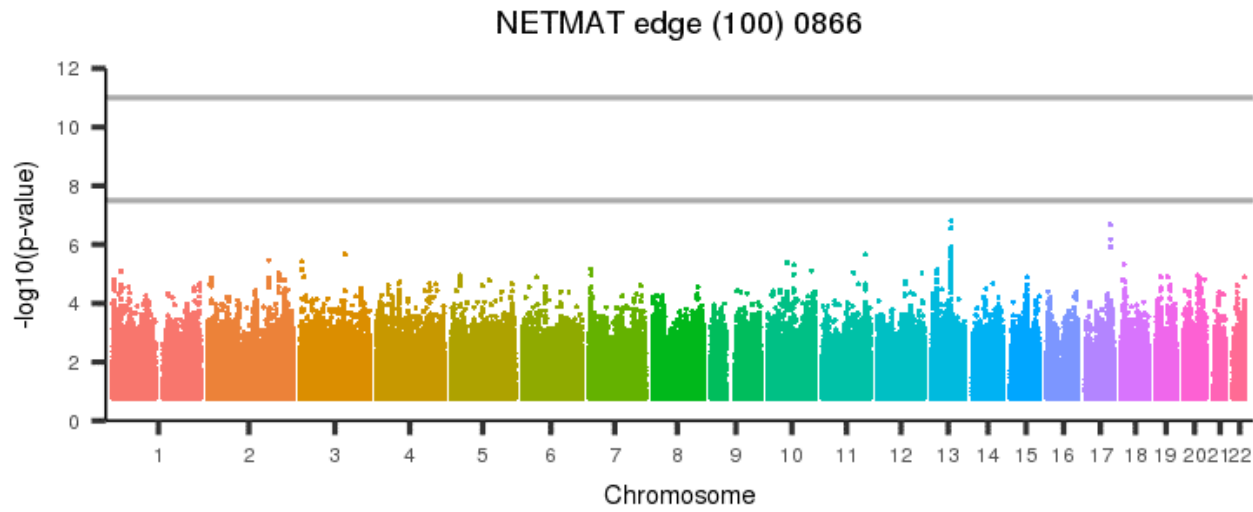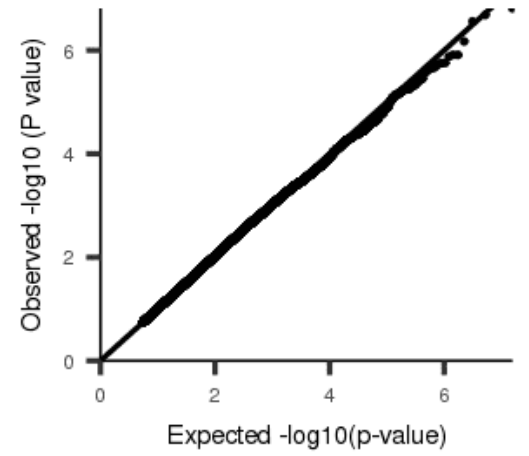

[back to list of plots](#)

Figure 2023: NETMAT edge (100) 0867

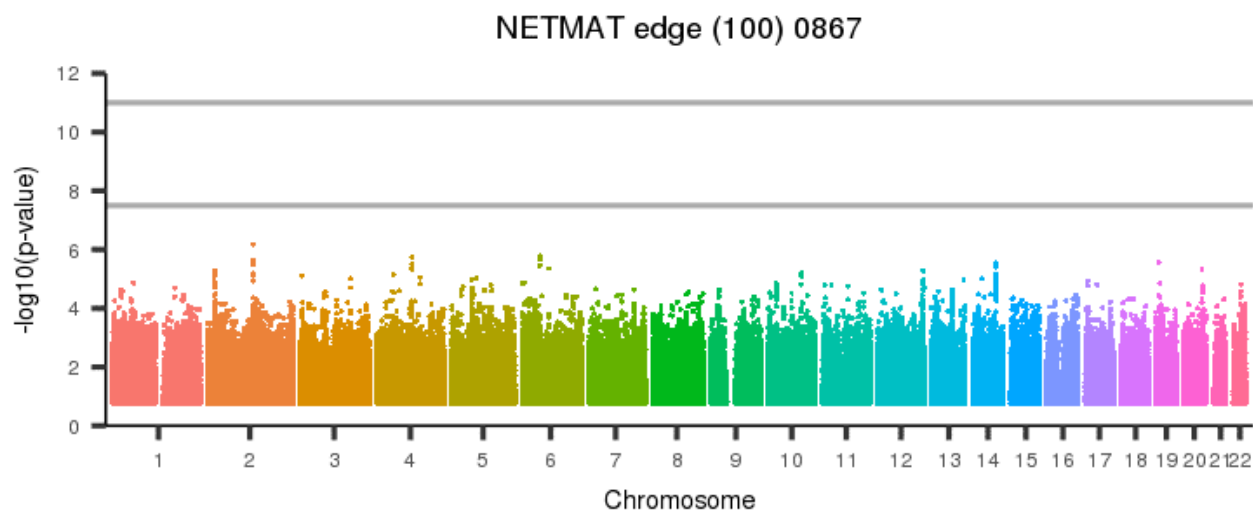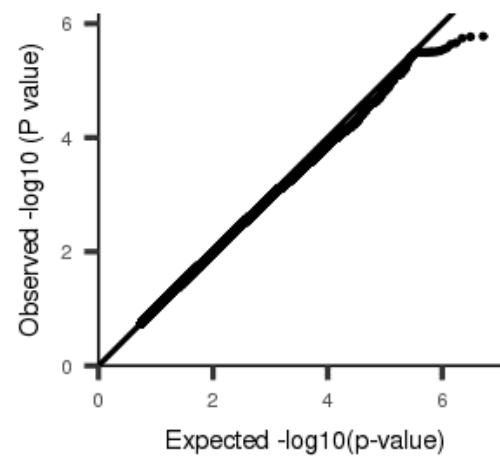

[back to list of plots](#)

Figure 2024: NETMAT edge (100) 0868

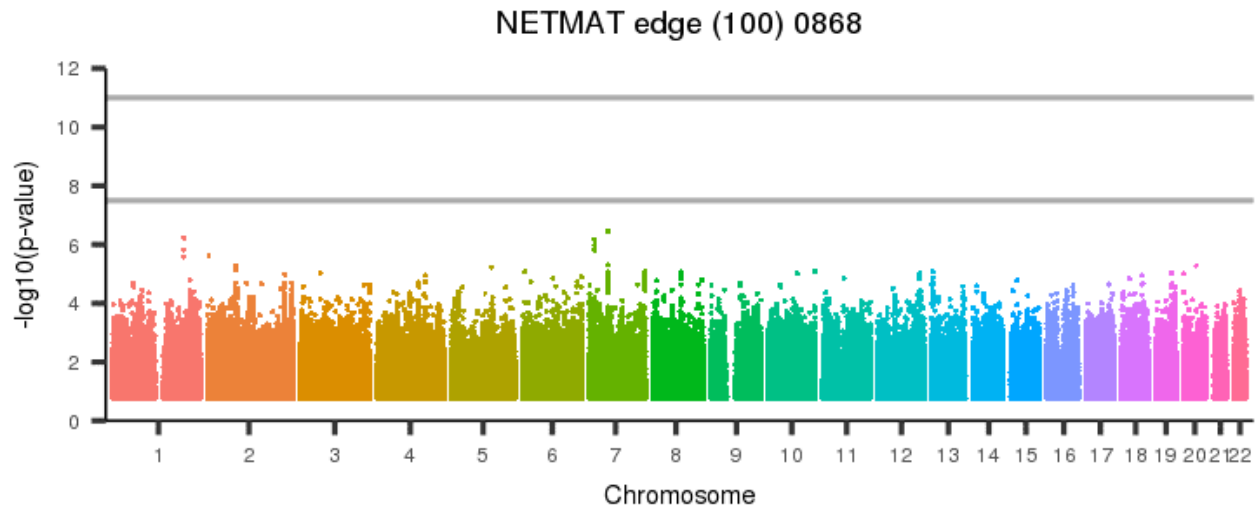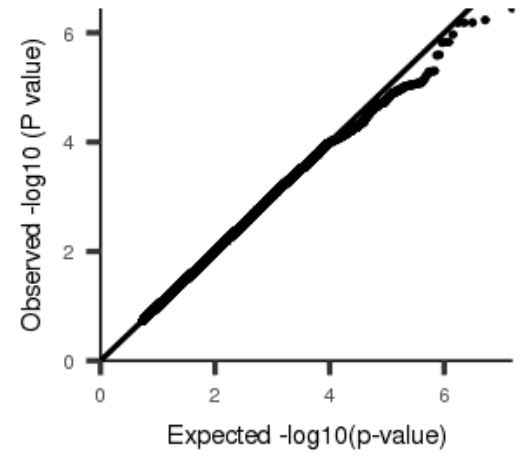

[back to list of plots](#)

Figure 2025: NETMAT edge (100) 0869

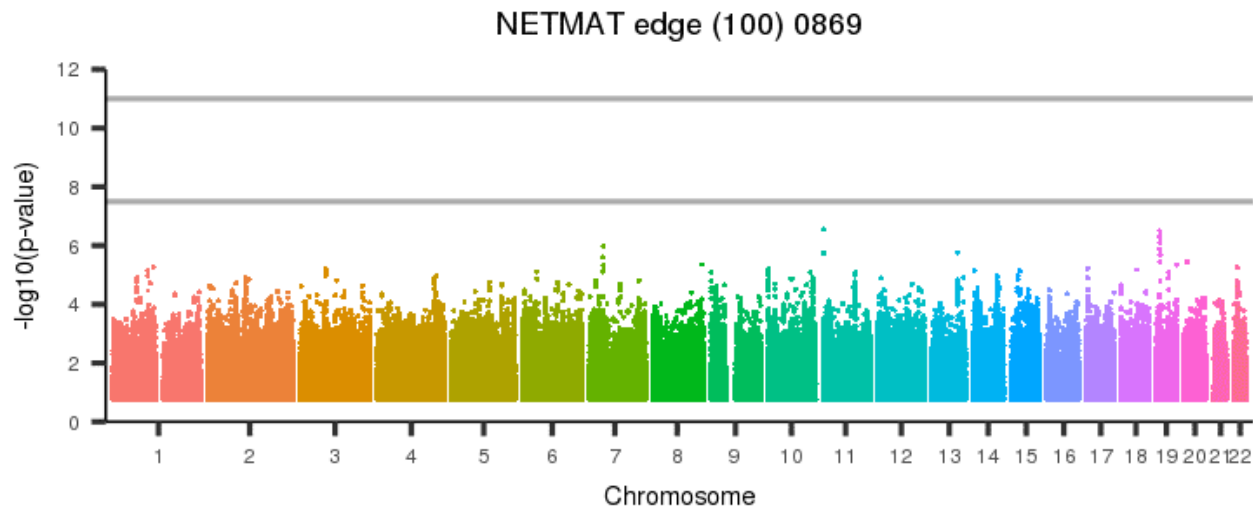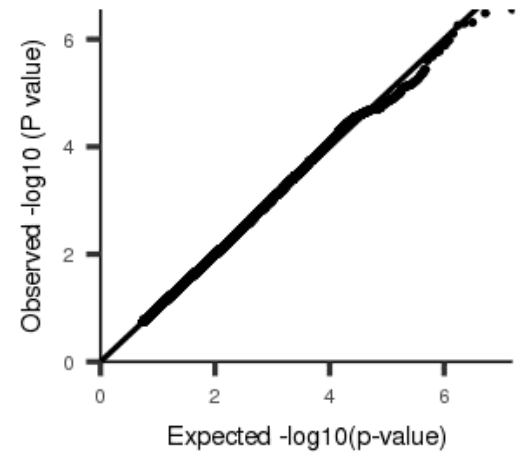

[back to list of plots](#)

Figure 2026: NETMAT edge (100) 0870

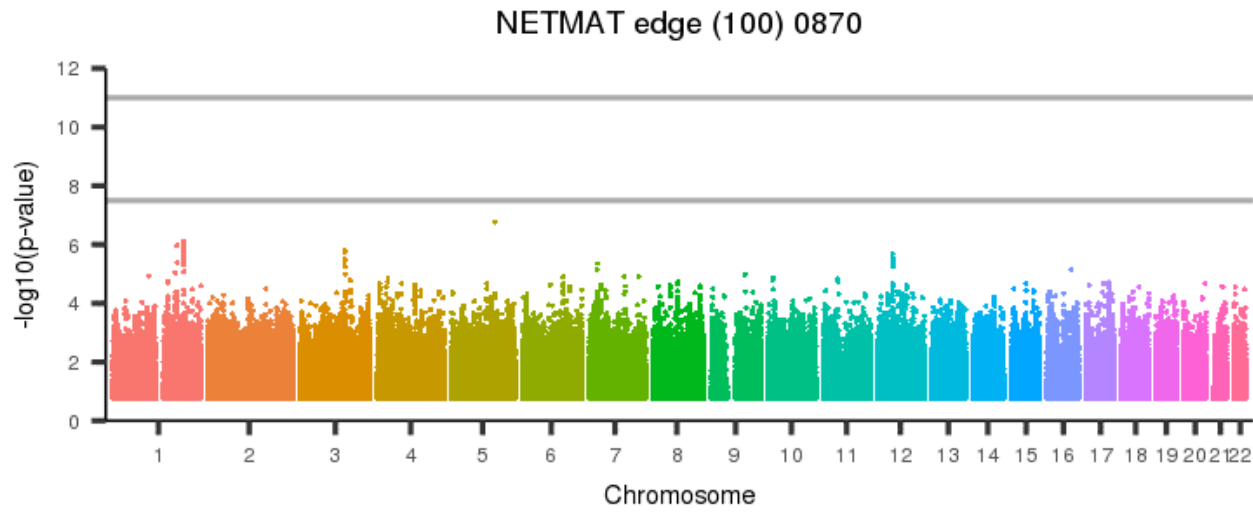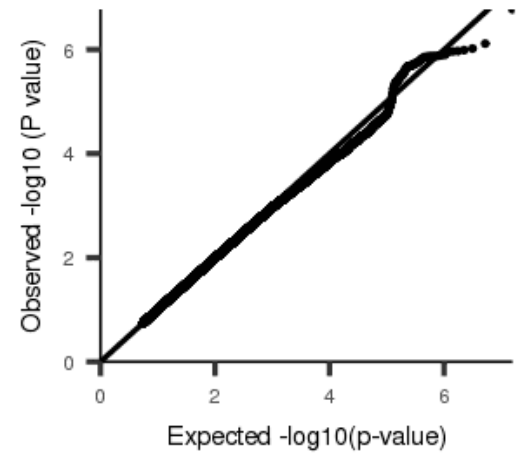

[back to list of plots](#)

Figure 2027: NETMAT edge (100) 0871

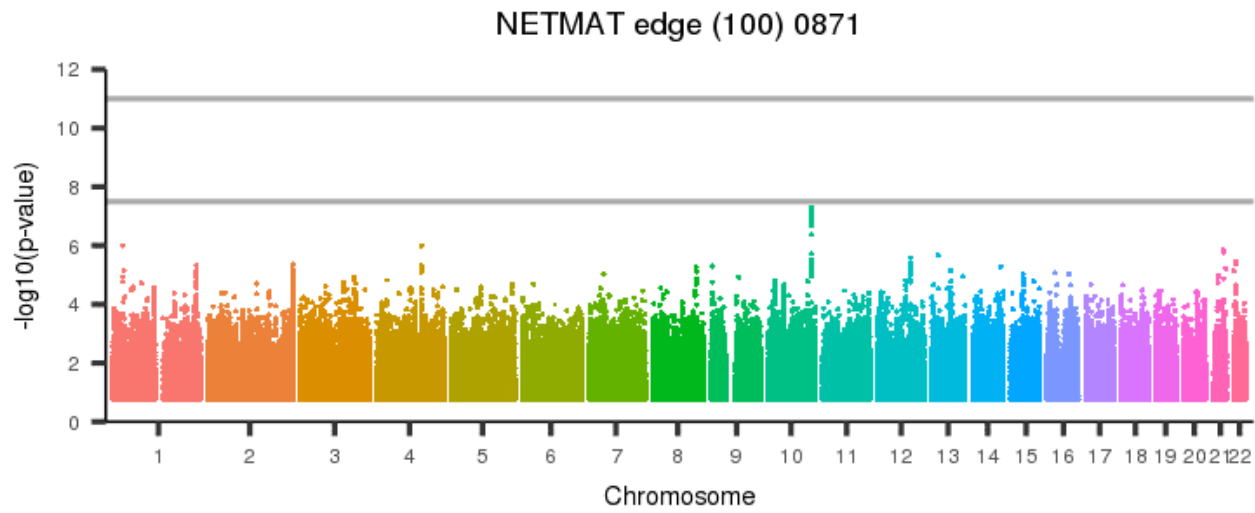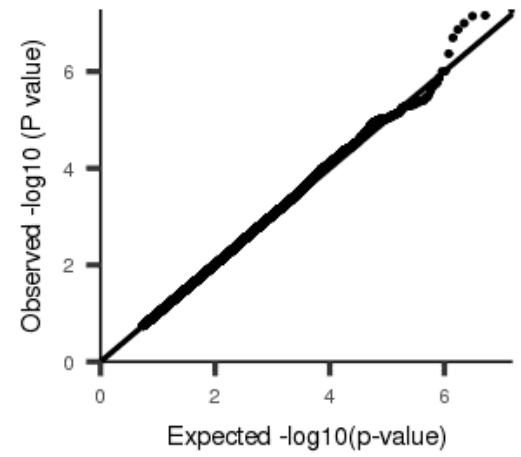

[back to list of plots](#)

Figure 2028: NETMAT edge (100) 0872

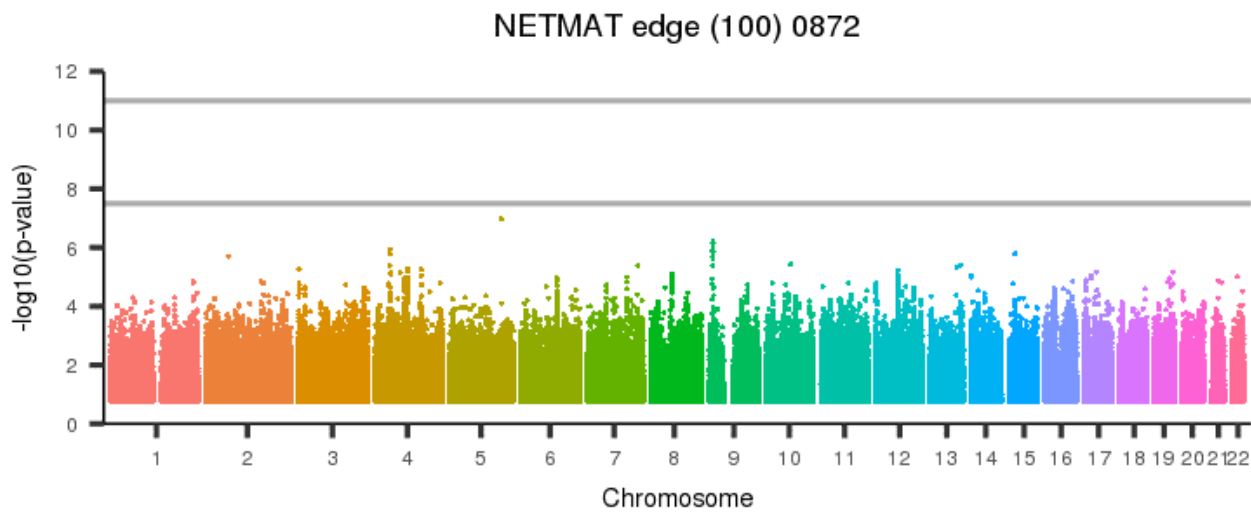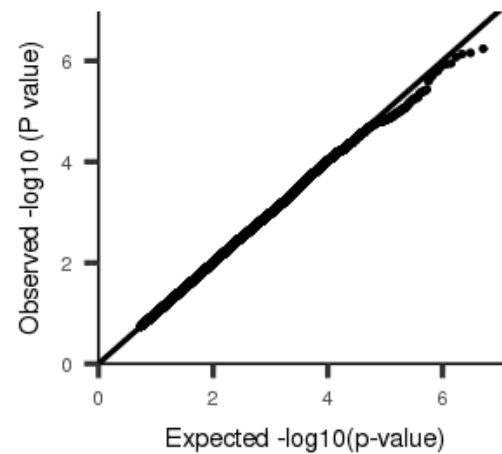

[back to list of plots](#)

Figure 2029: NETMAT edge (100) 0873

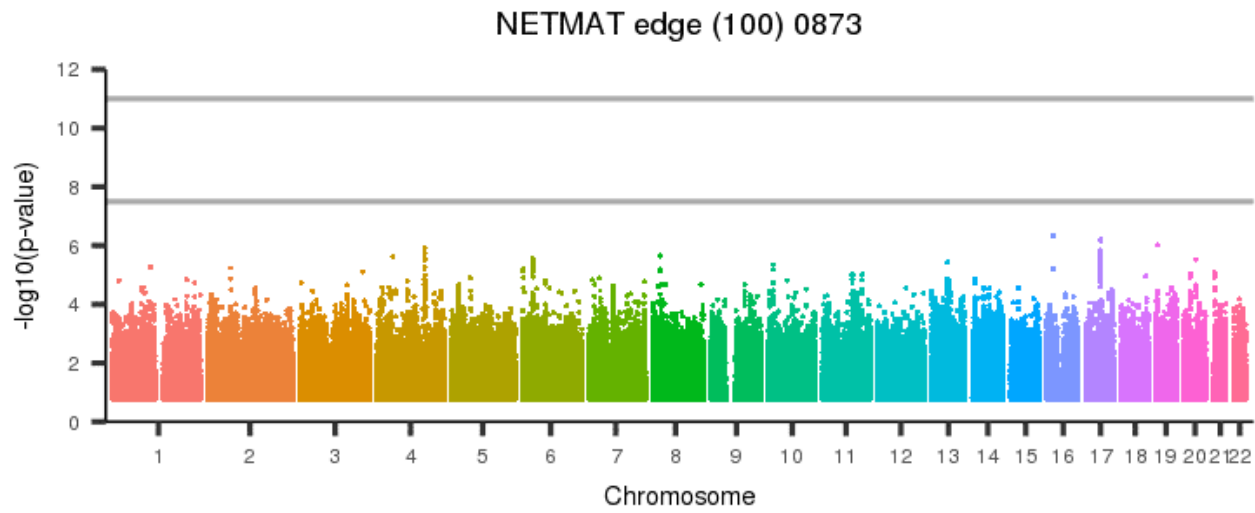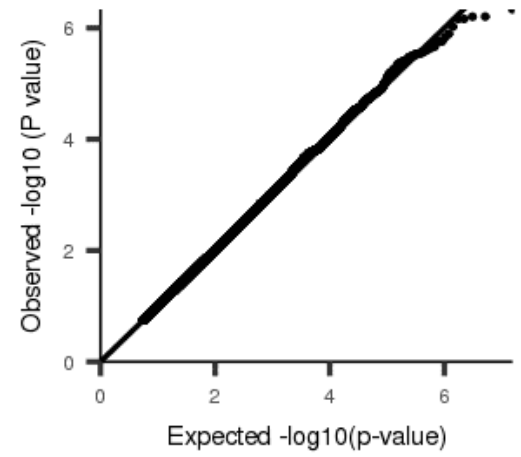

[back to list of plots](#)



Figure 2030: NETMAT edge (100) 0874

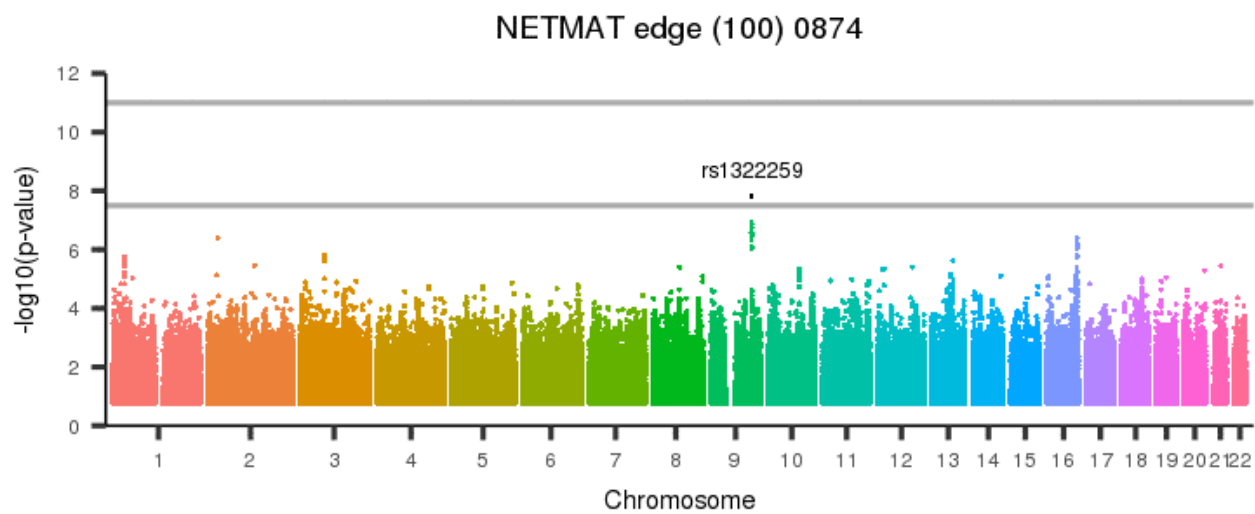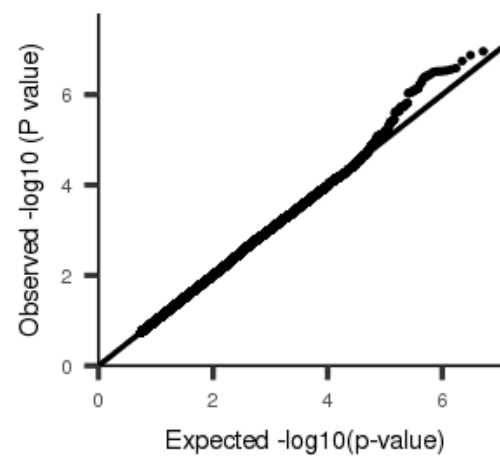

[back to list of plots](#)

Figure 2031: NETMAT edge (100) 0875

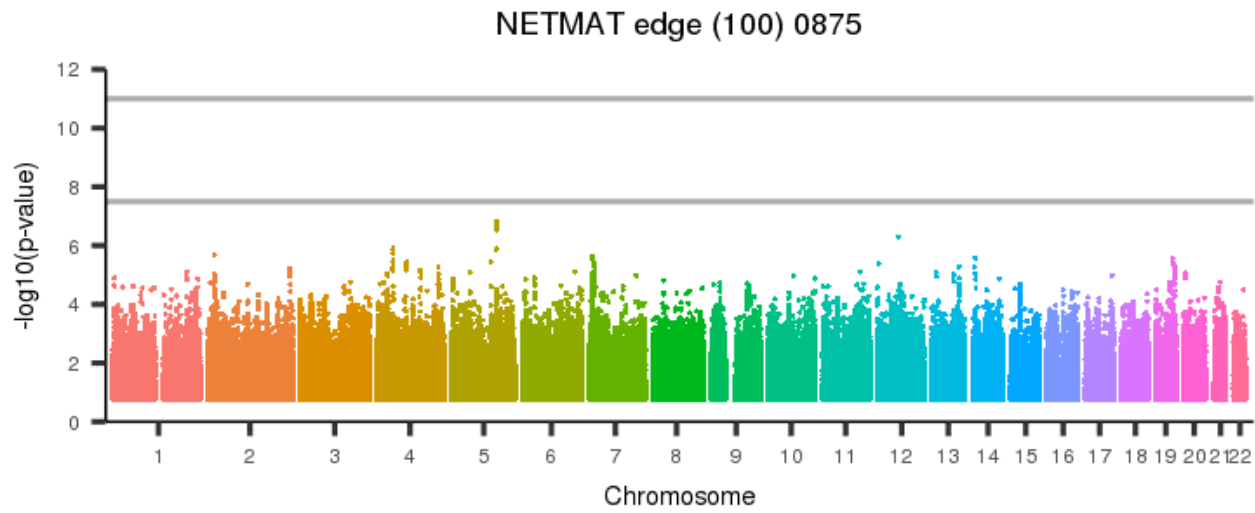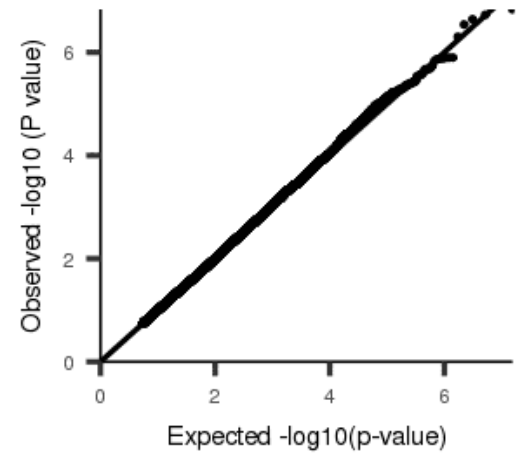

[back to list of plots](#)

Figure 2032: NETMAT edge (100) 0876

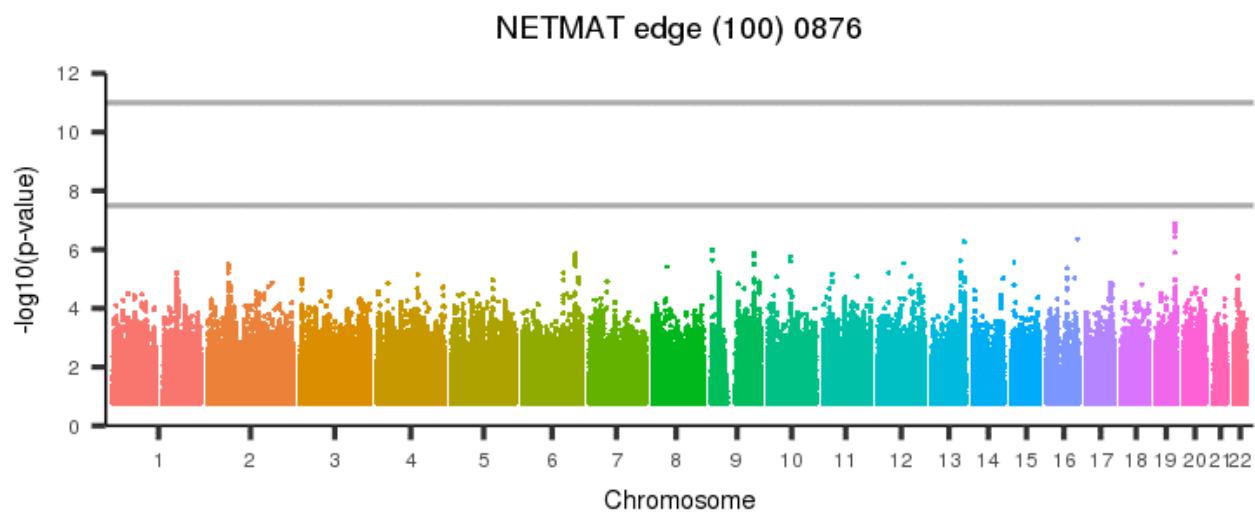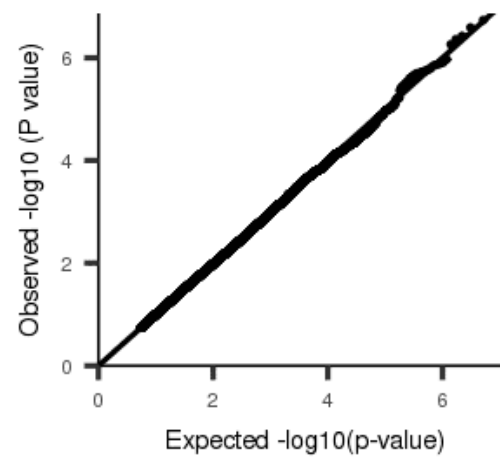

[back to list of plots](#)

Figure 2033: NETMAT edge (100) 0877

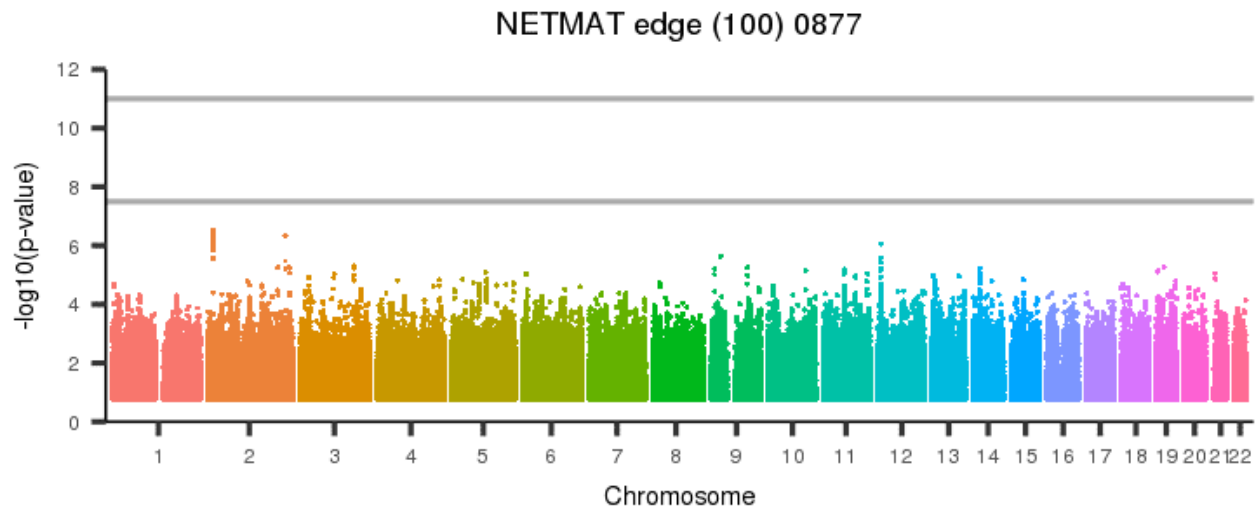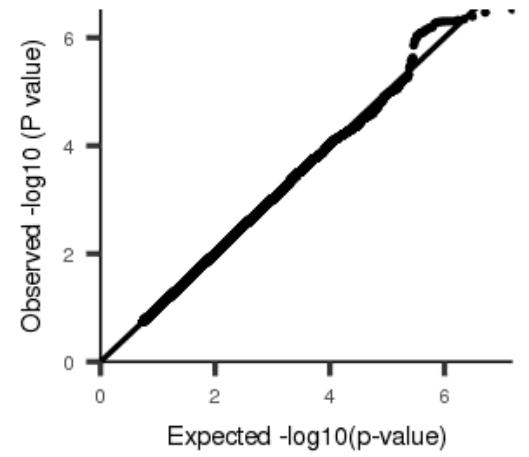

[back to list of plots](#)

Figure 2034: NETMAT edge (100) 0878

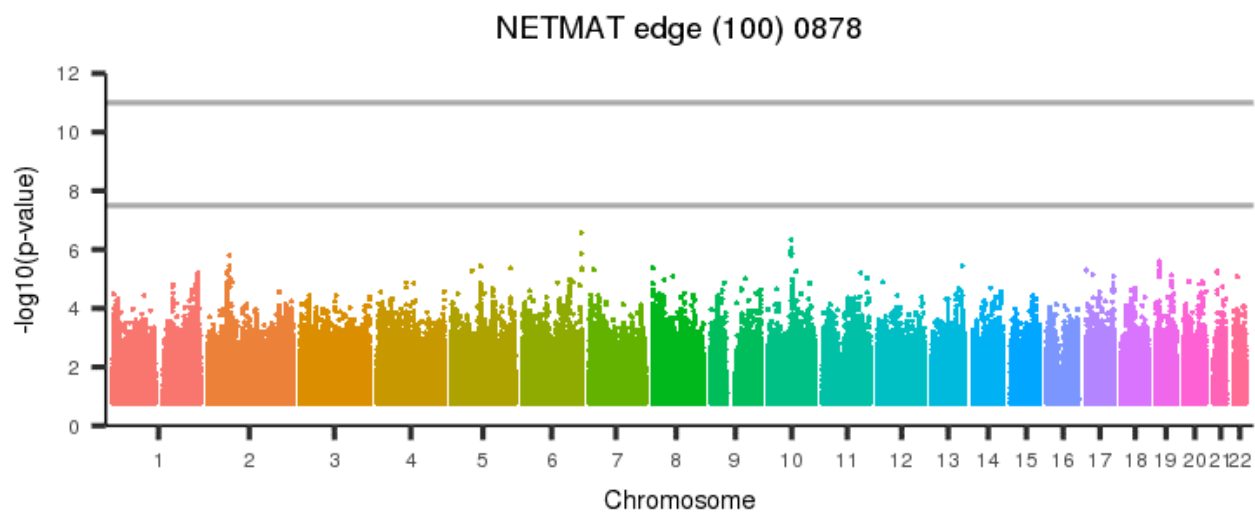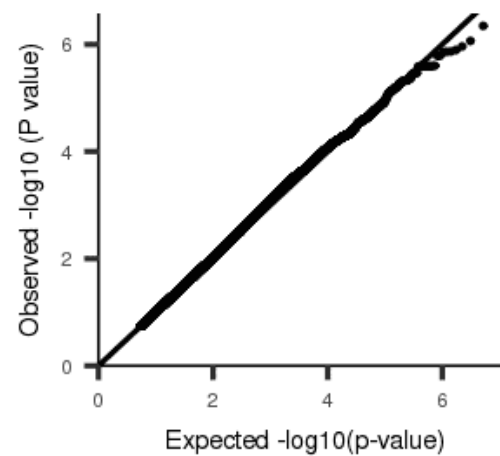

[back to list of plots](#)

Figure 2035: NETMAT edge (100) 0879

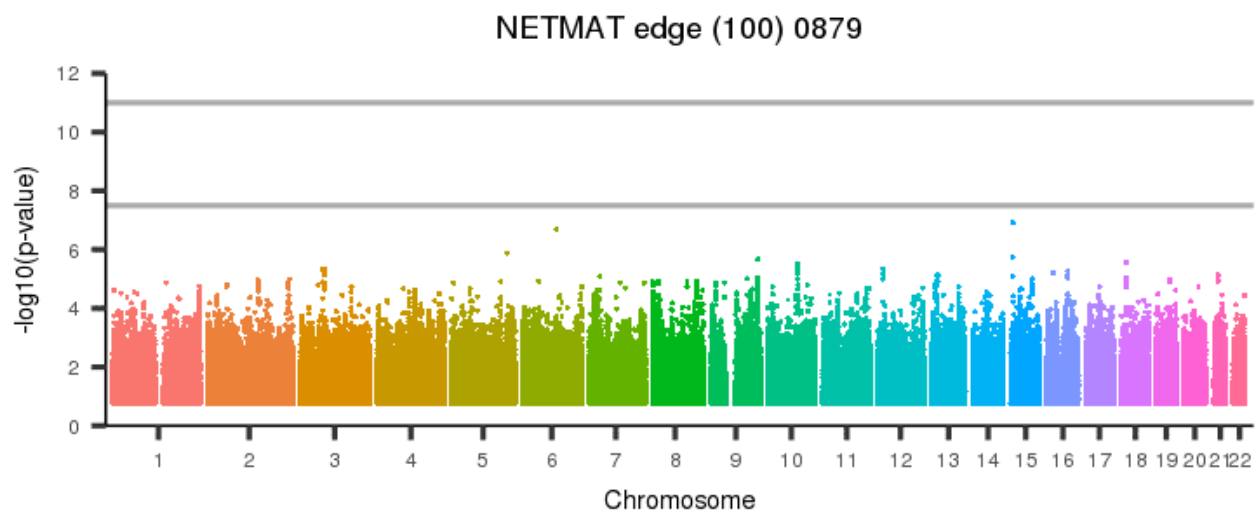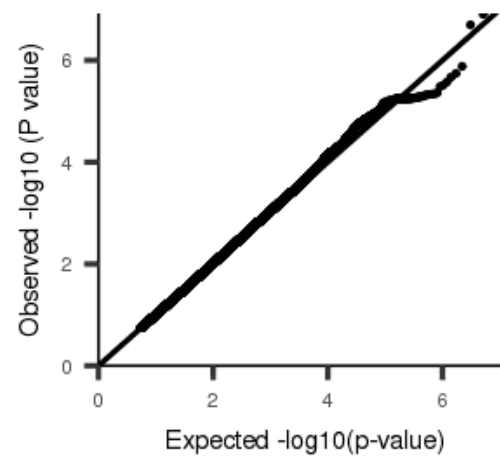

[back to list of plots](#)

Figure 2036: NETMAT edge (100) 0880

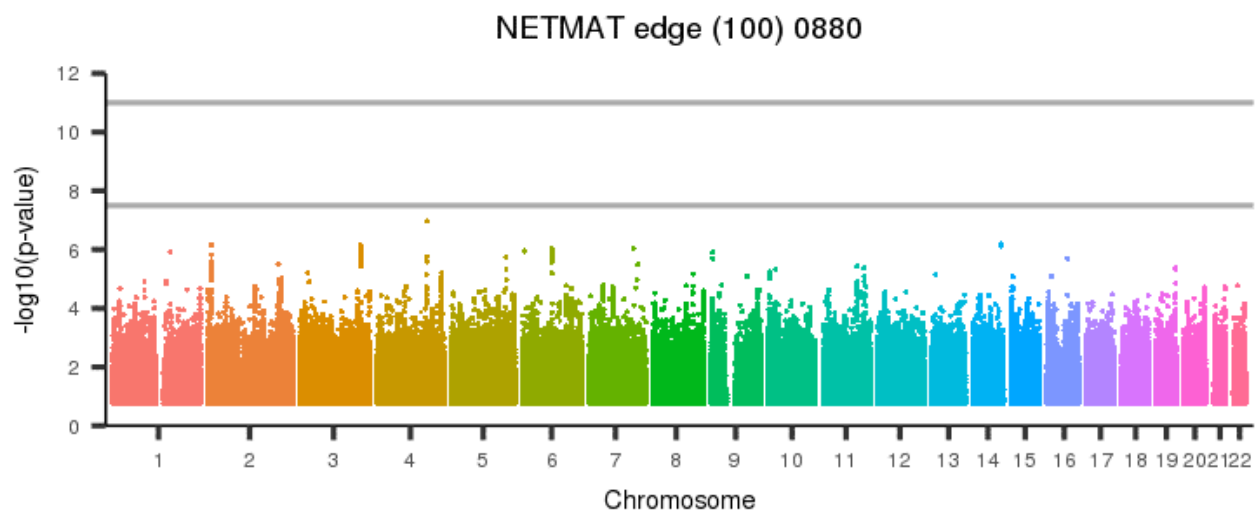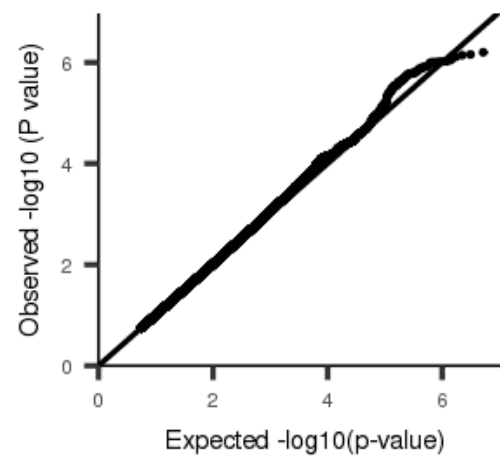

[back to list of plots](#)

Figure 2037: NETMAT edge (100) 0881

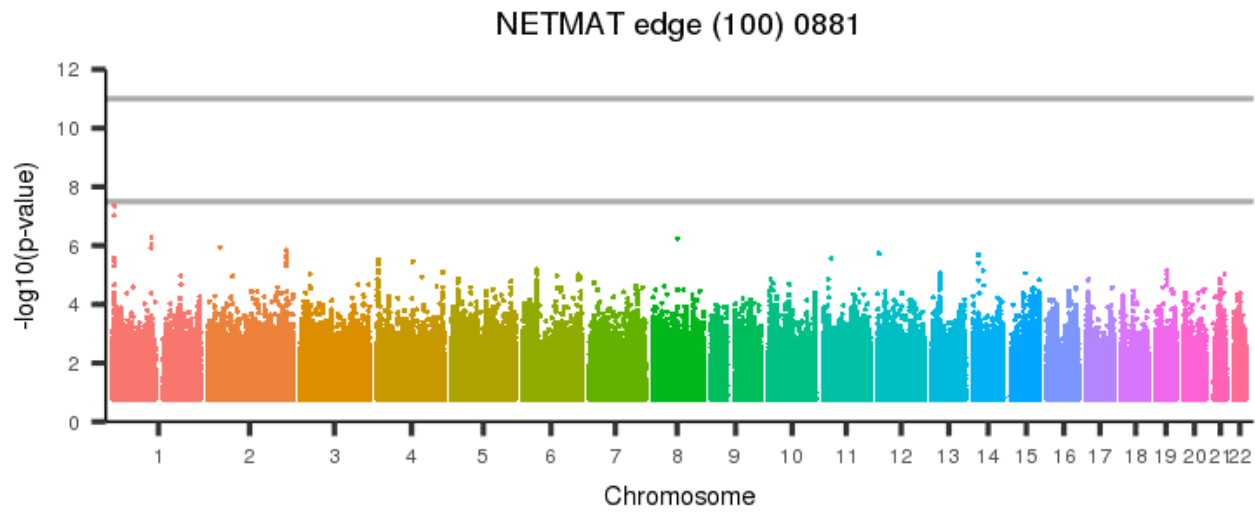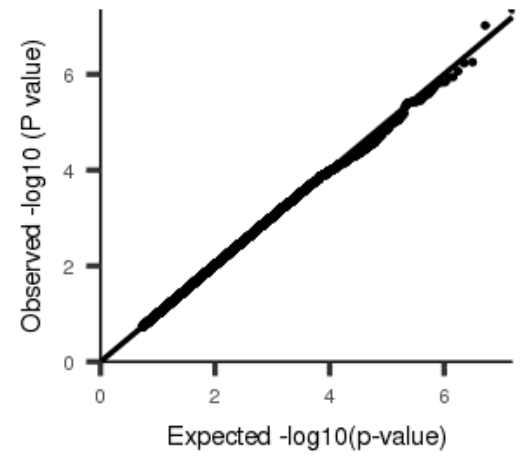

[back to list of plots](#)



Figure 2038: NETMAT edge (100) 0882

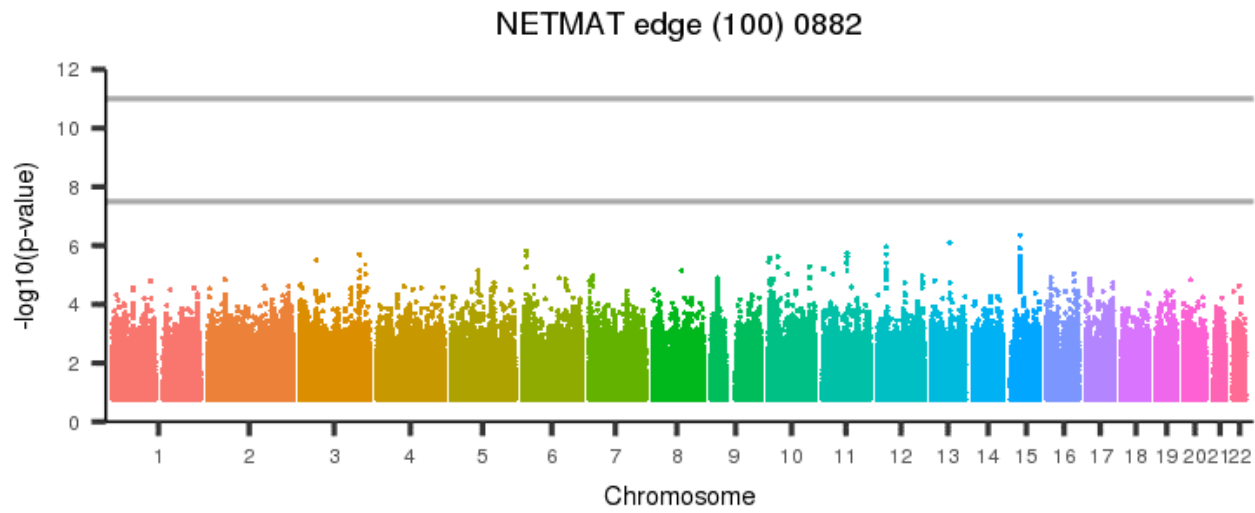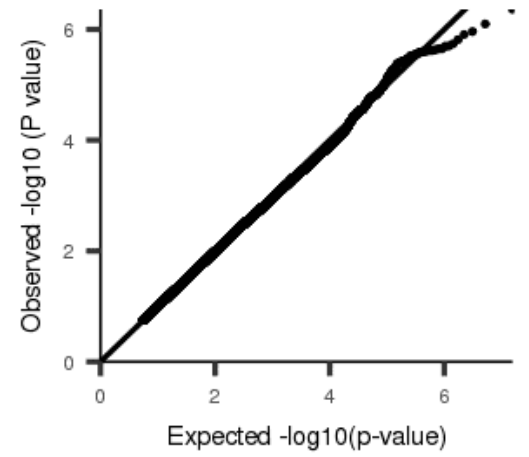

[back to list of plots](#)

Figure 2039: NETMAT edge (100) 0883

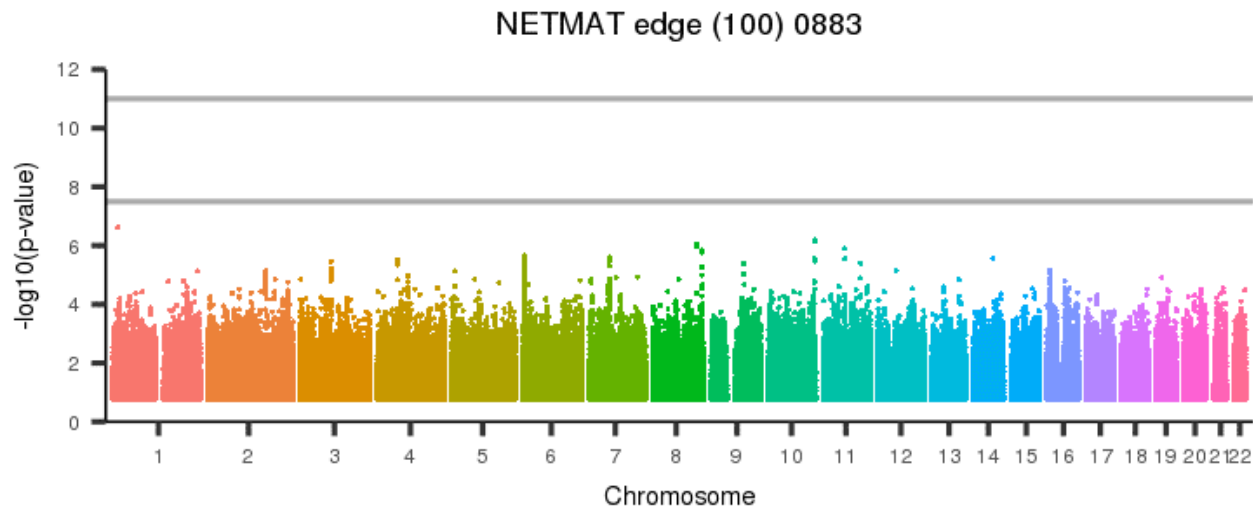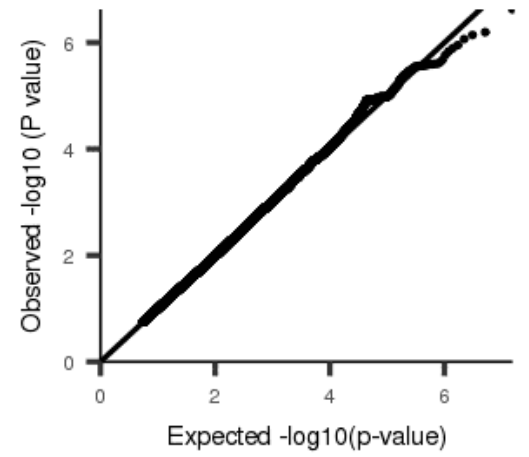

[back to list of plots](#)

Figure 2040: NETMAT edge (100) 0884

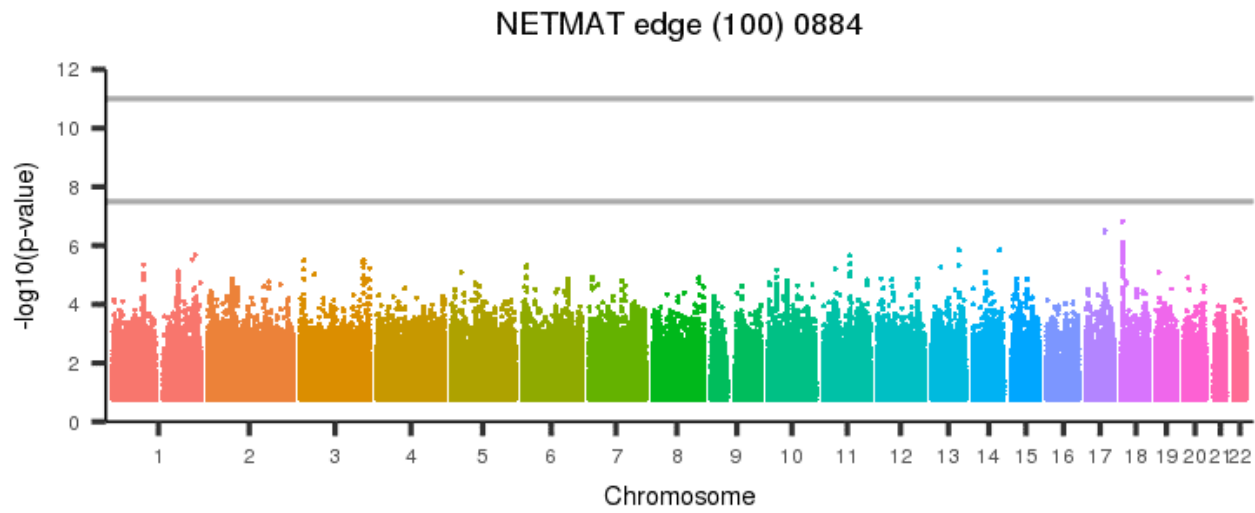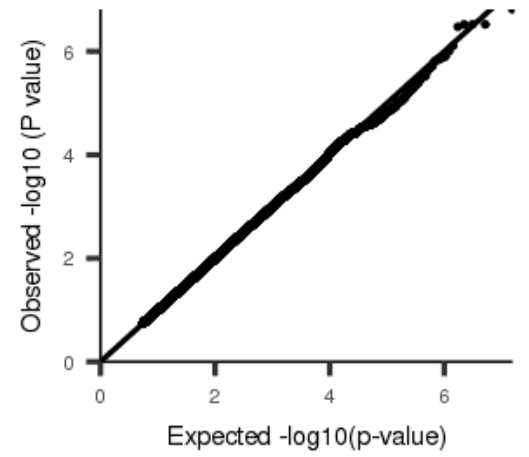

[back to list of plots](#)

Figure 2041: NETMAT edge (100) 0885

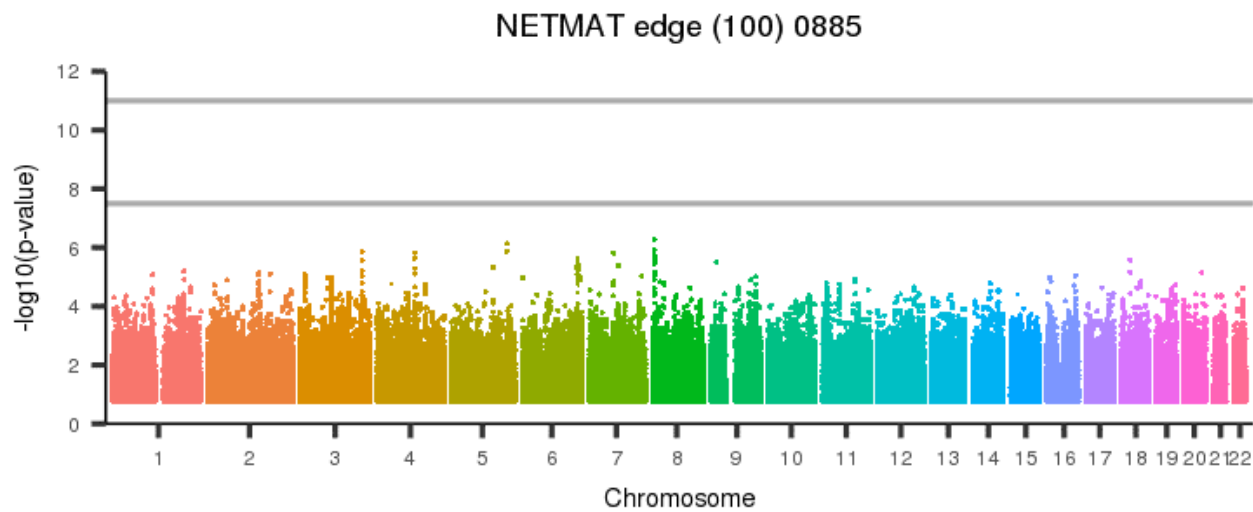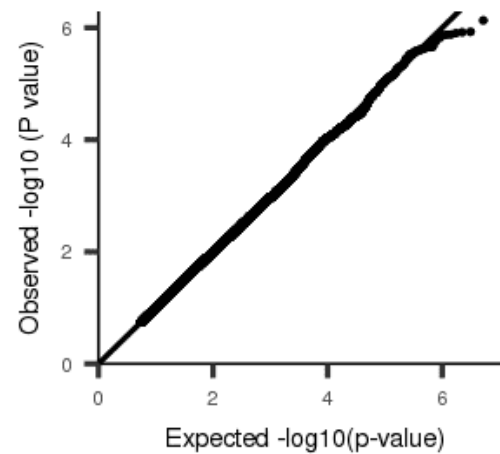

[back to list of plots](#)

Figure 2042: NETMAT edge (100) 0886

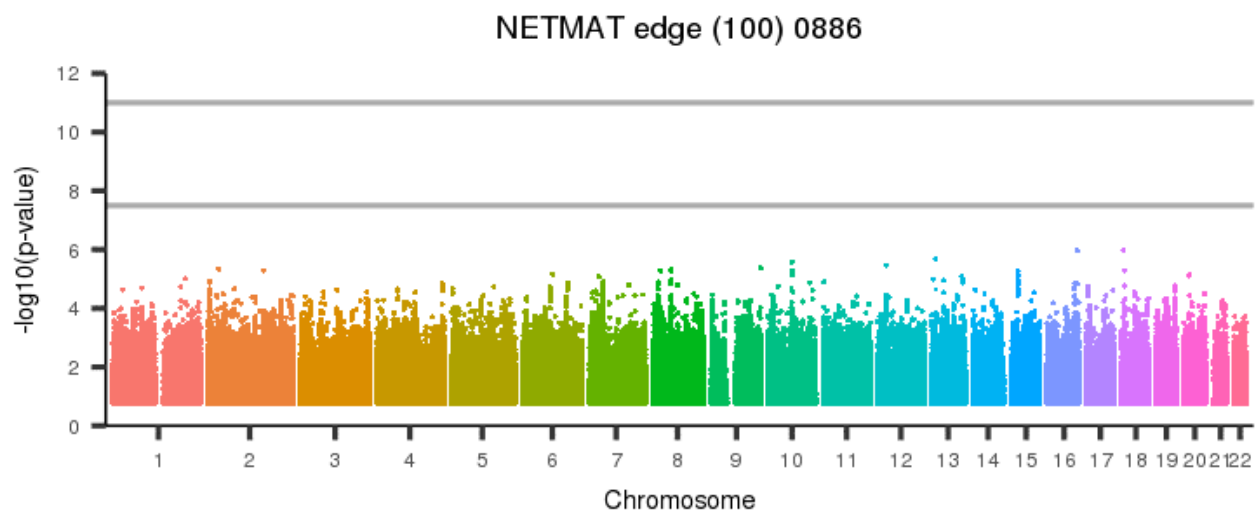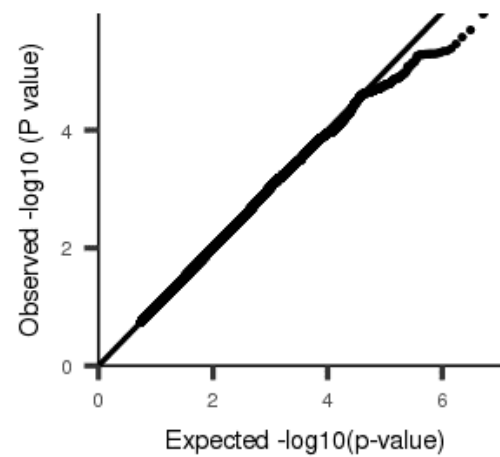

[back to list of plots](#)

Figure 2043: NETMAT edge (100) 0887

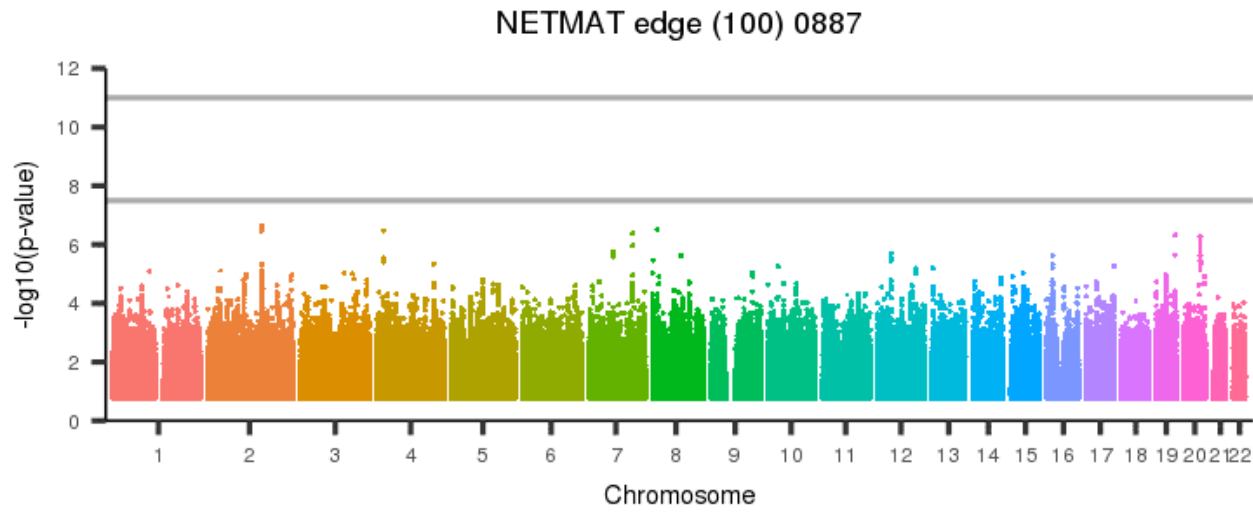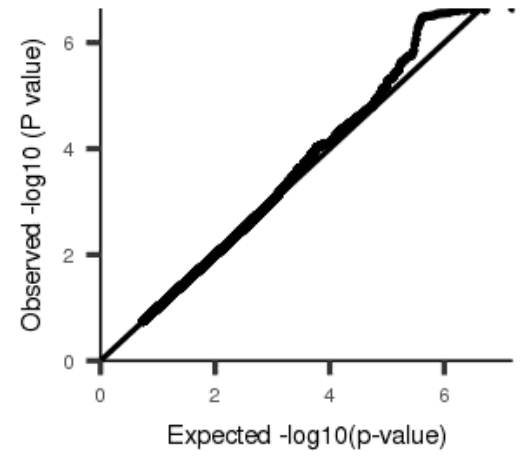

[back to list of plots](#)

Figure 2044: NETMAT edge (100) 0888

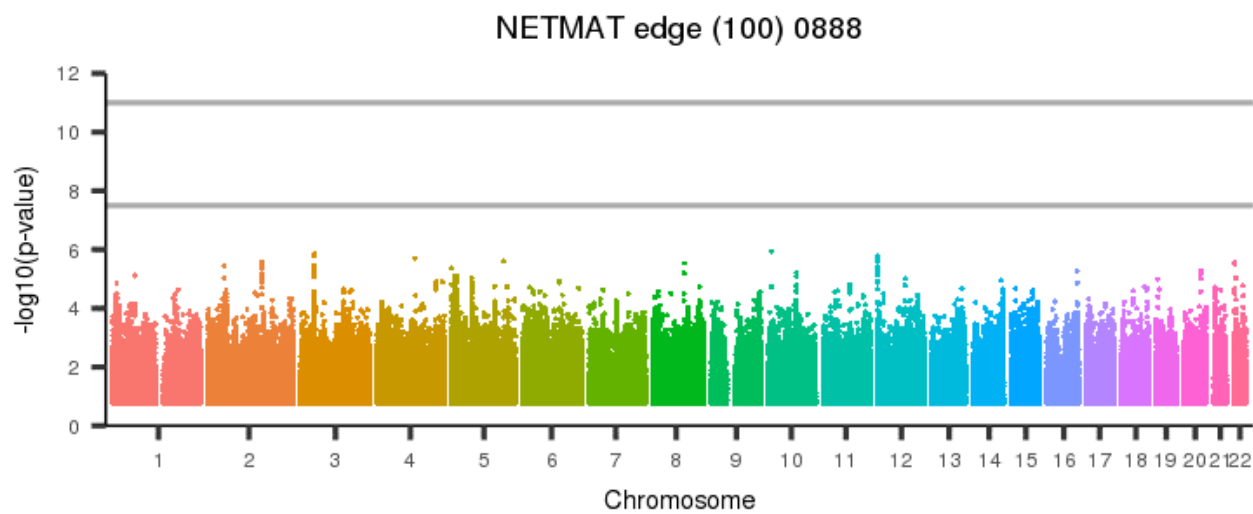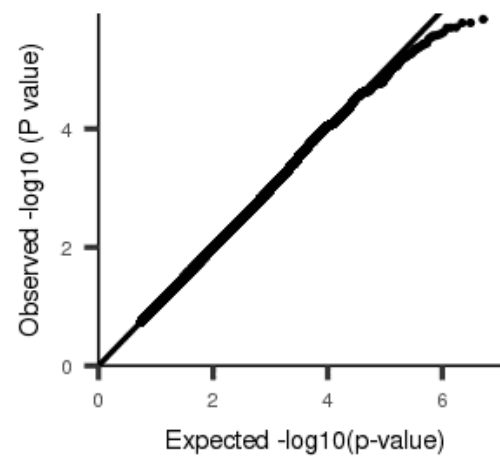

[back to list of plots](#)

Figure 2045: NETMAT edge (100) 0889

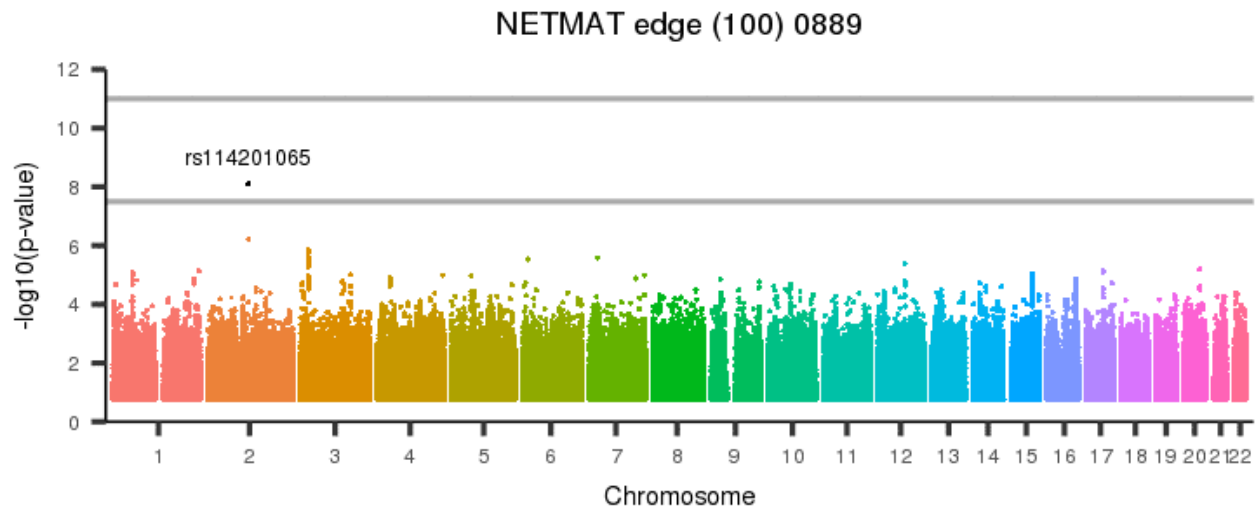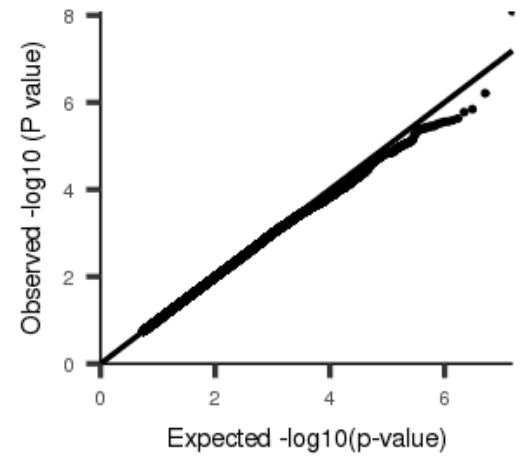

[back to list of plots](#)



Figure 2046: NETMAT edge (100) 0890

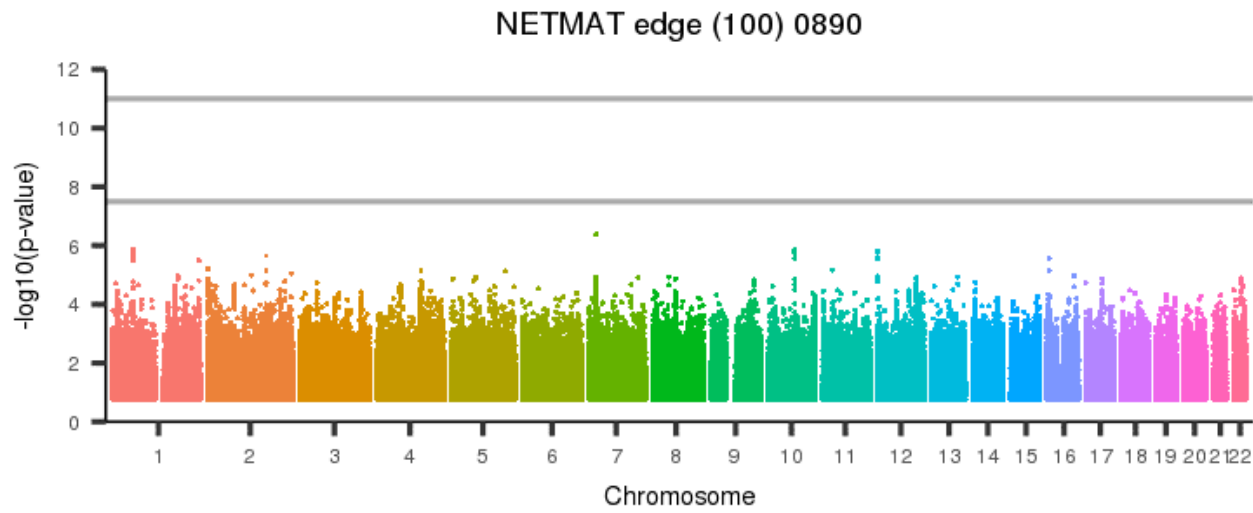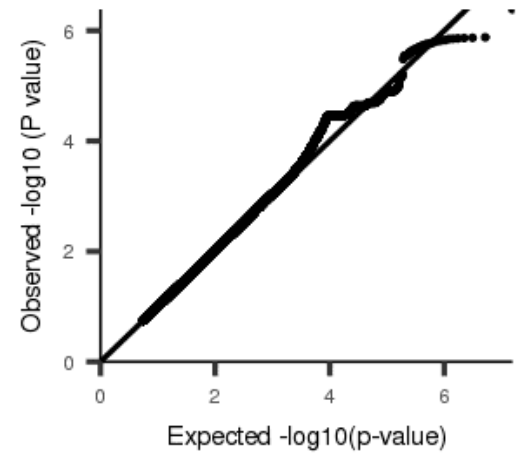

[back to list of plots](#)

Figure 2047: NETMAT edge (100) 0891

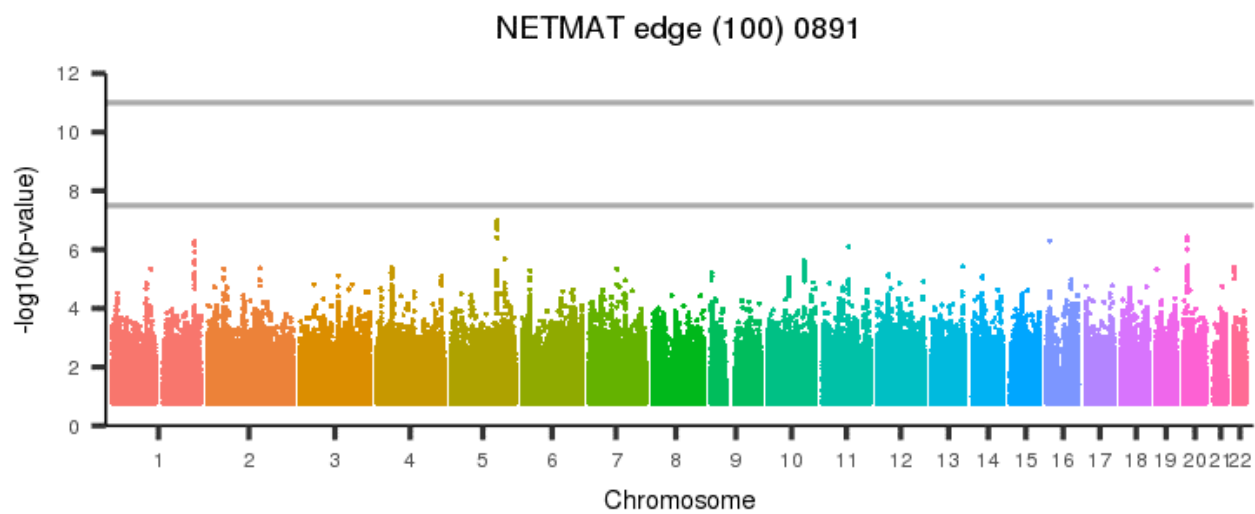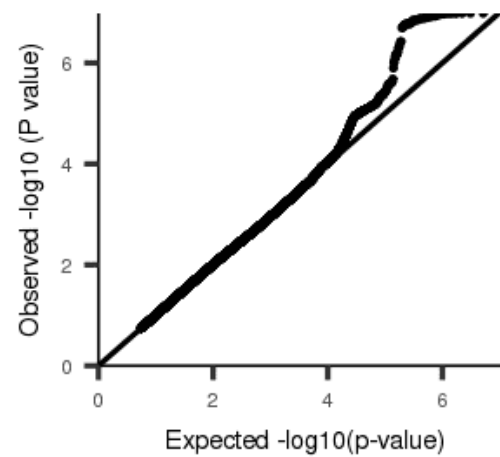

[back to list of plots](#)

Figure 2048: NETMAT edge (100) 0892

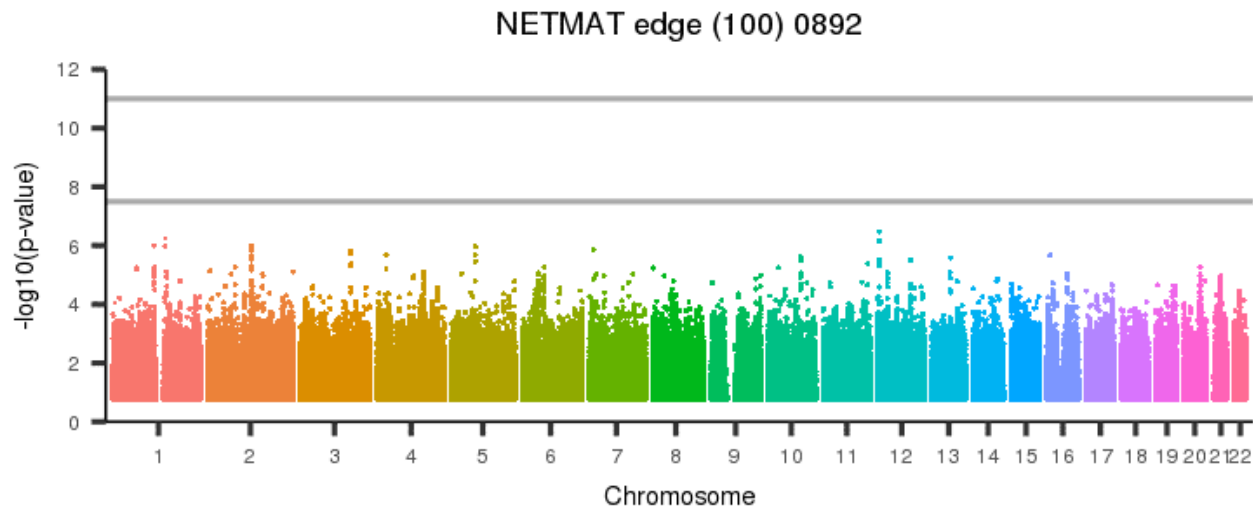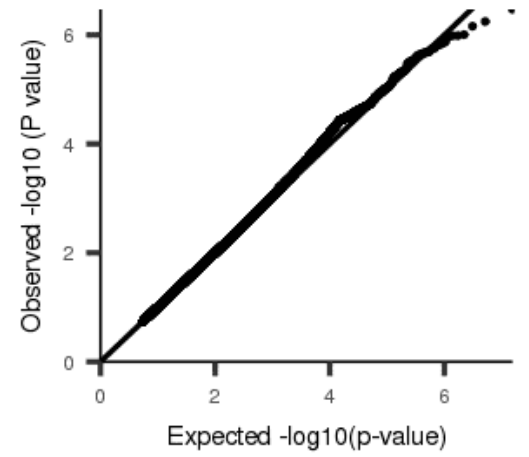

[back to list of plots](#)

Figure 2049: NETMAT edge (100) 0893

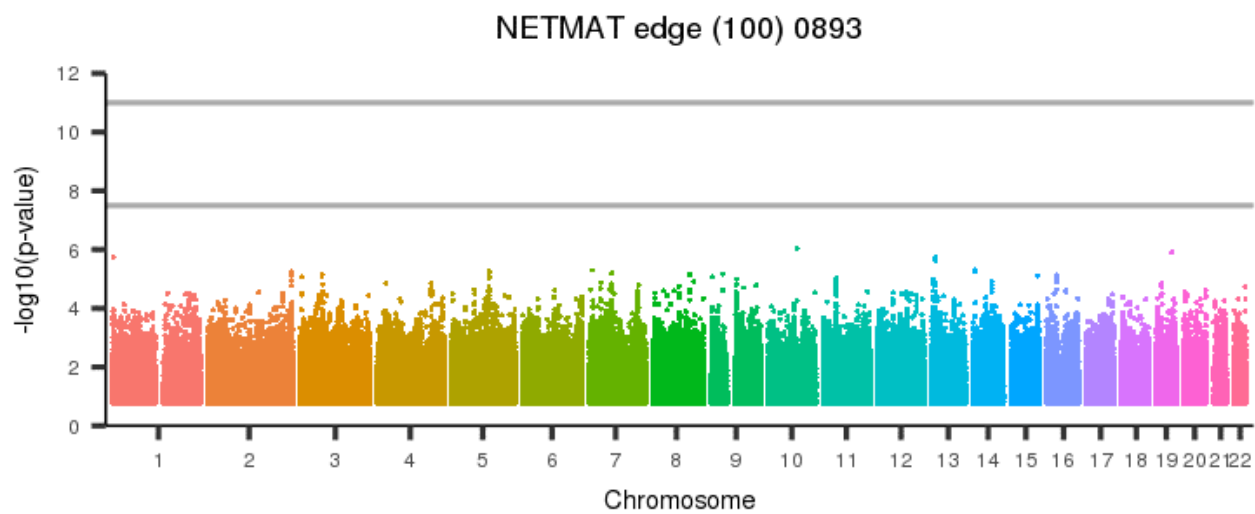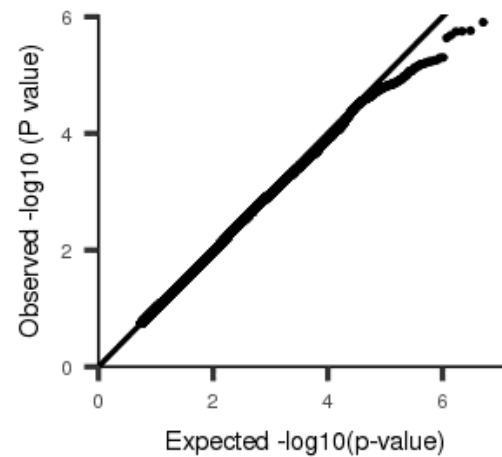

[back to list of plots](#)

Figure 2050: NETMAT edge (100) 0894

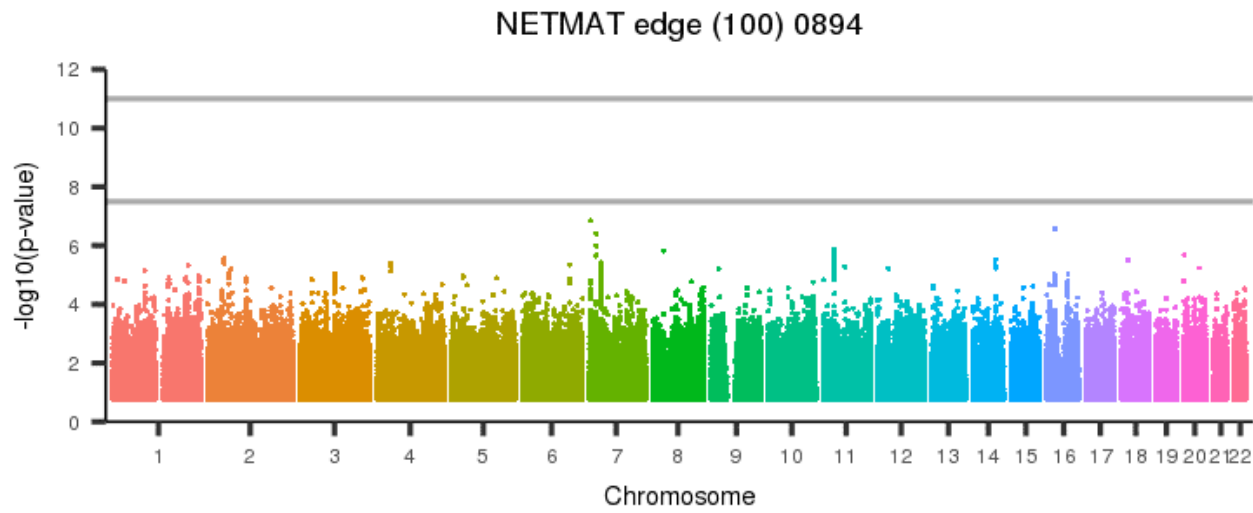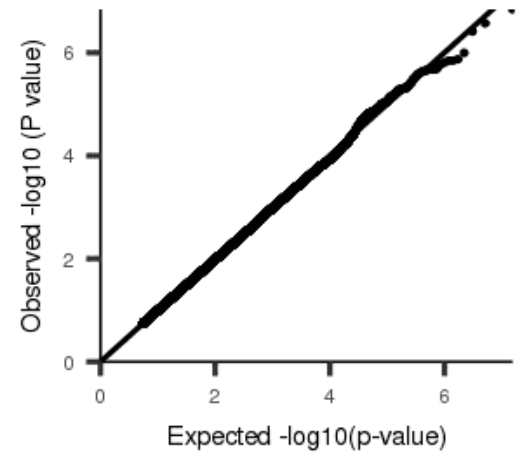

[back to list of plots](#)

Figure 2051: NETMAT edge (100) 0895

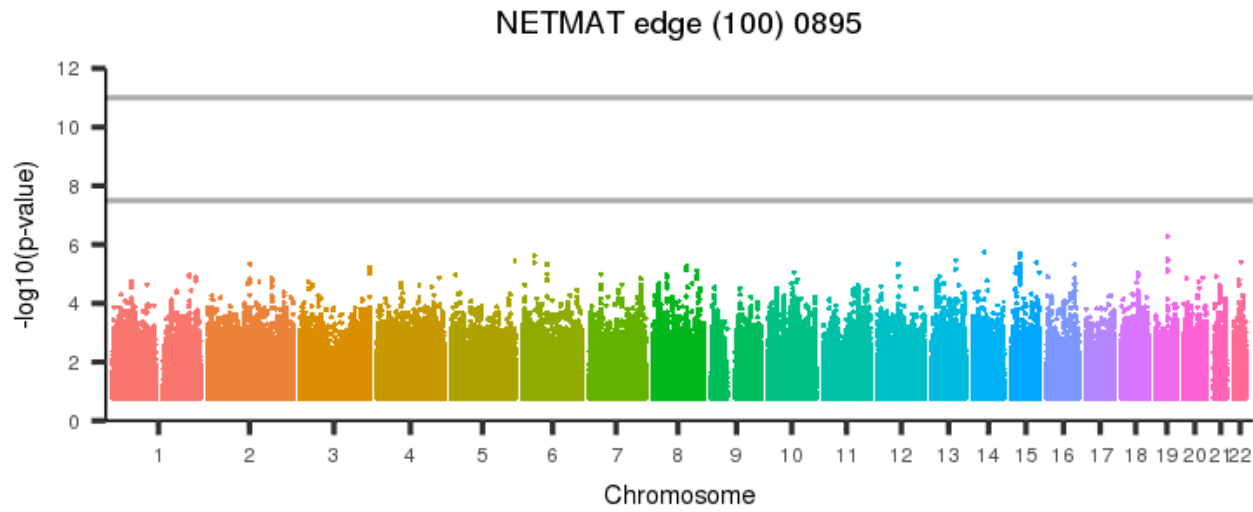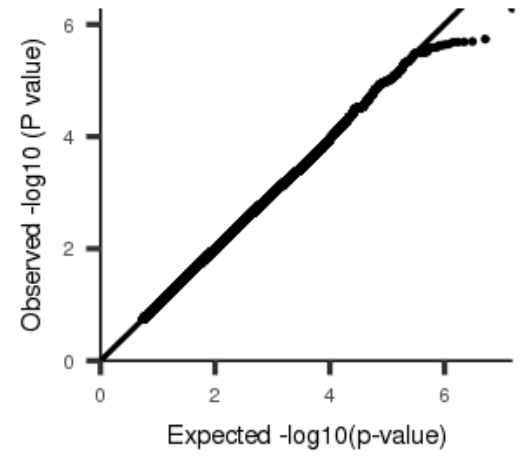

[back to list of plots](#)

Figure 2052: NETMAT edge (100) 0896

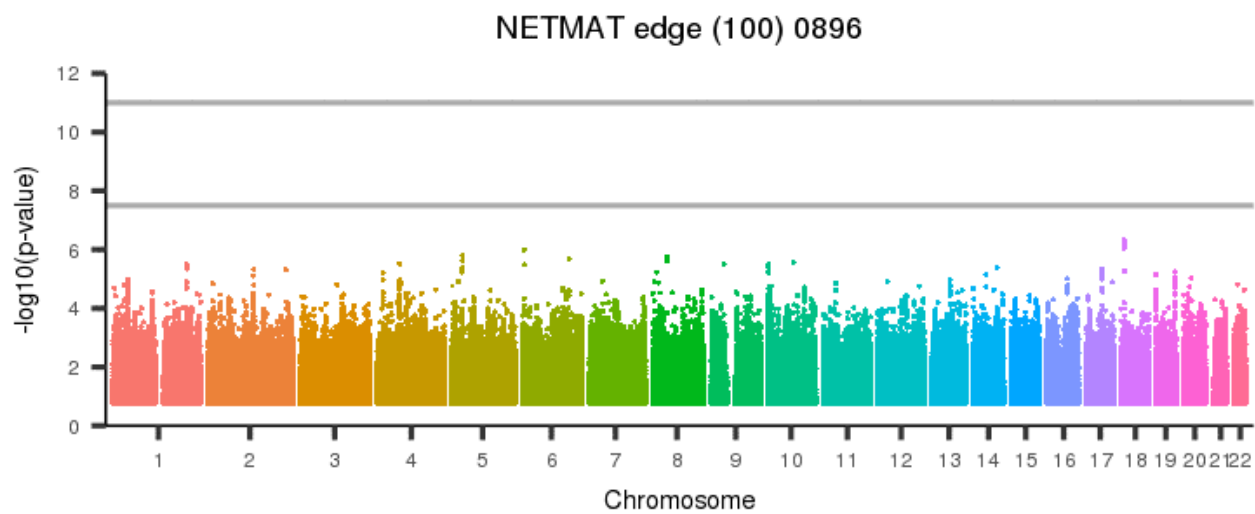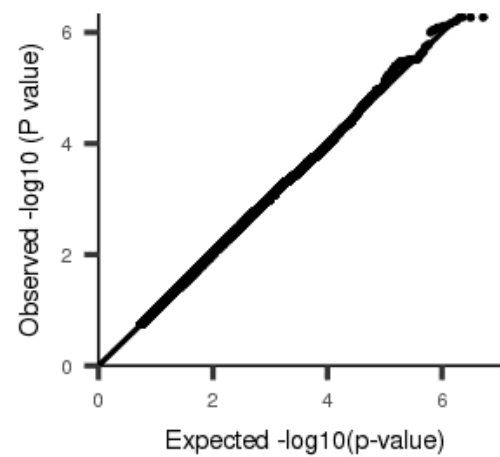

[back to list of plots](#)

Figure 2053: NETMAT edge (100) 0897

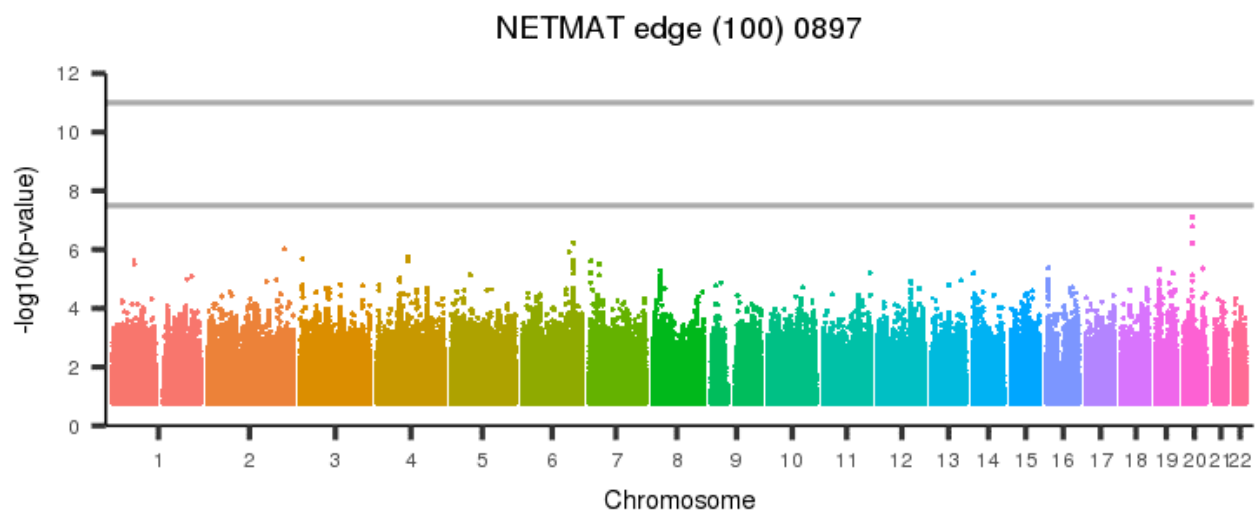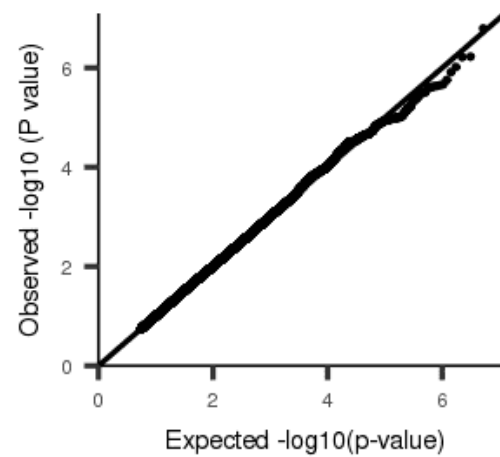

[back to list of plots](#)



Figure 2054: NETMAT edge (100) 0898

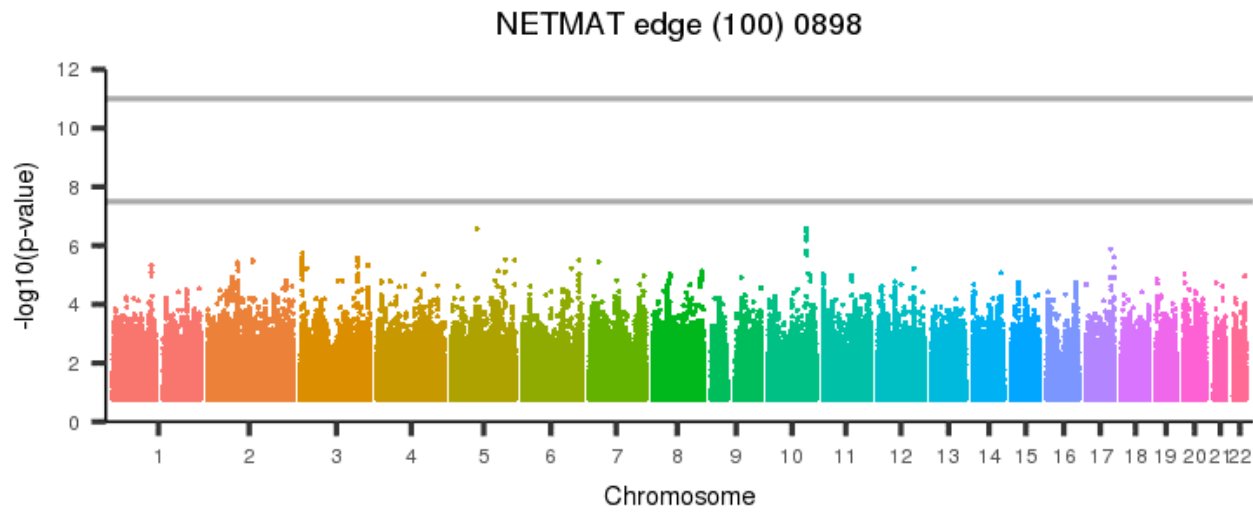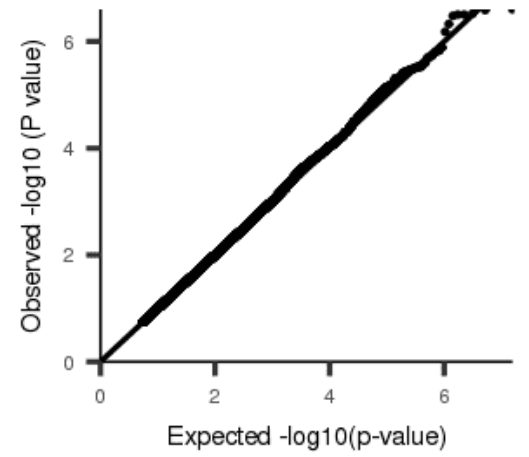

[back to list of plots](#)

Figure 2055: NETMAT edge (100) 0899

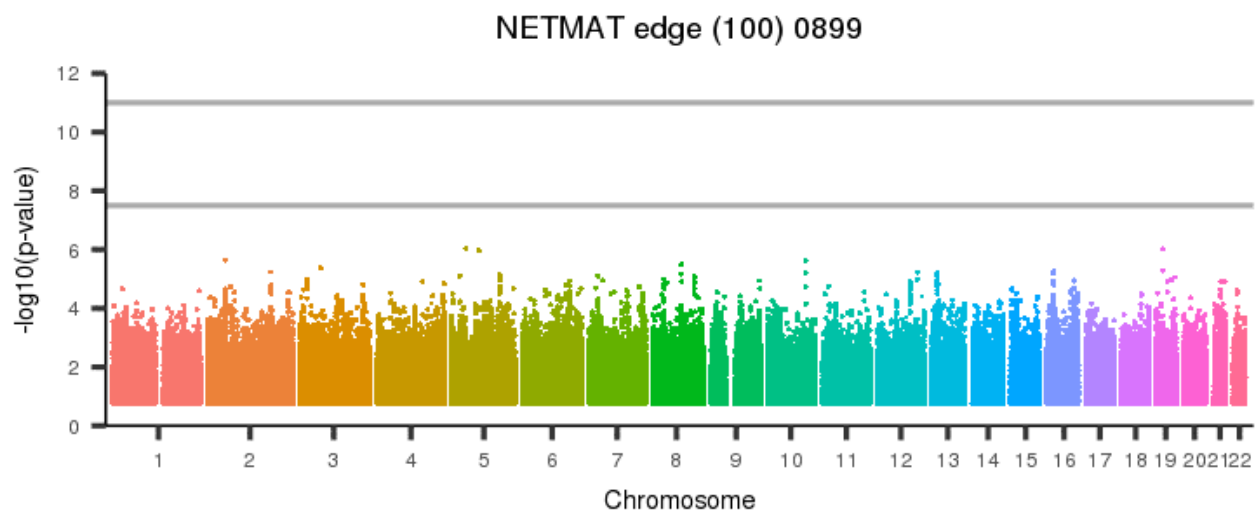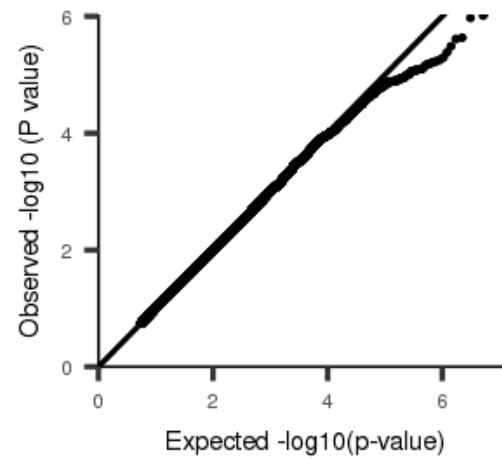

[back to list of plots](#)

Figure 2056: NETMAT edge (100) 0900

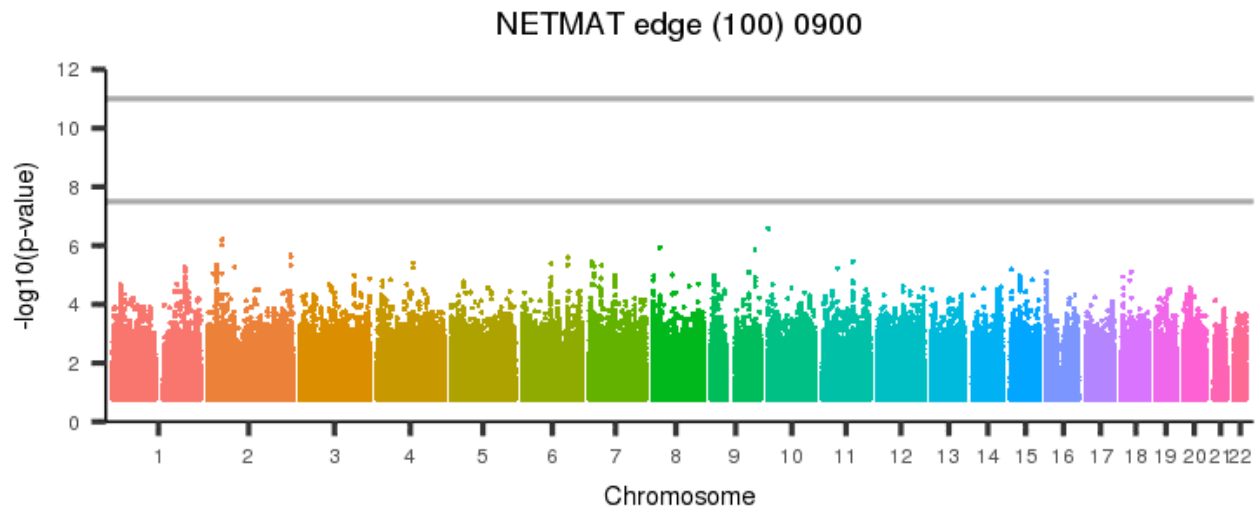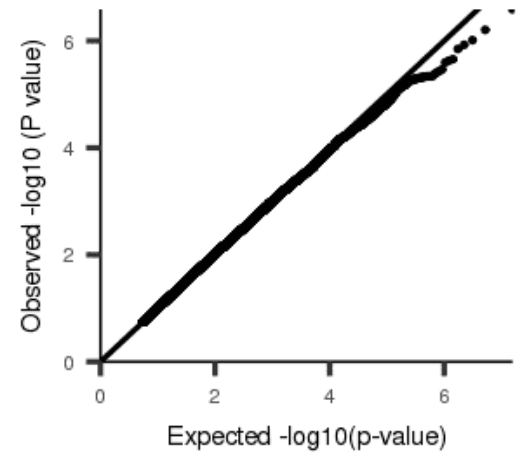

[back to list of plots](#)

Figure 2057: NETMAT edge (100) 0901

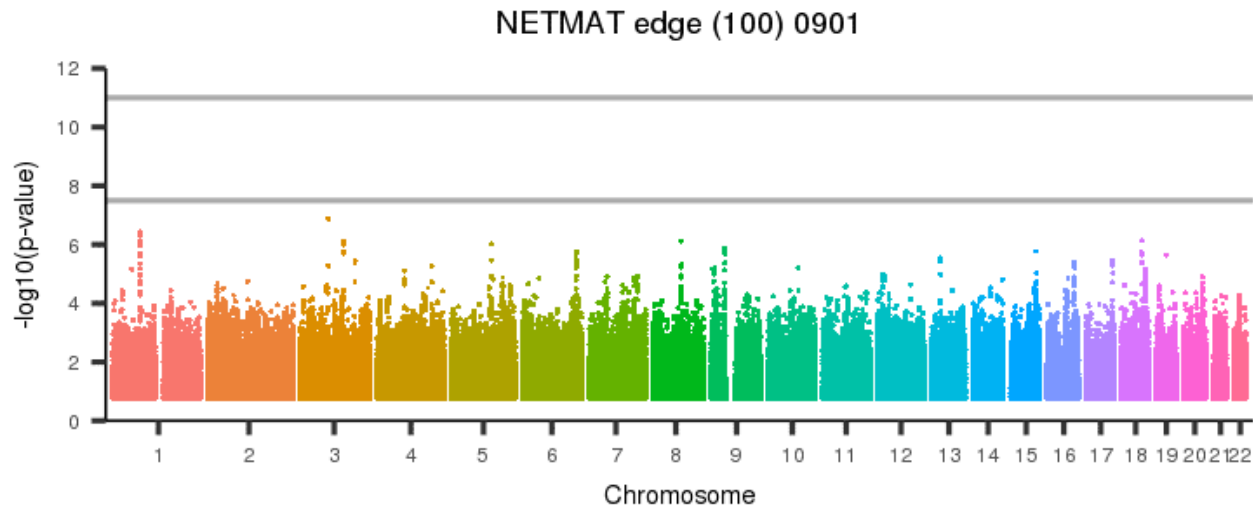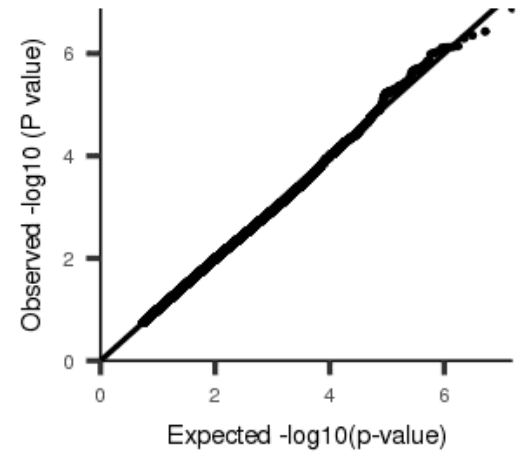

[back to list of plots](#)

Figure 2058: NETMAT edge (100) 0902

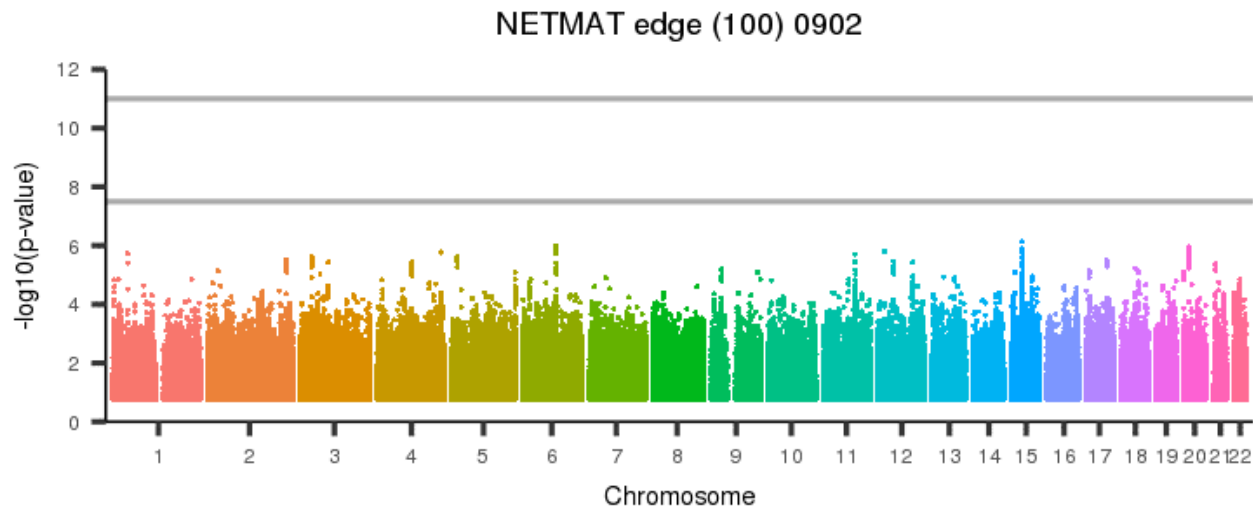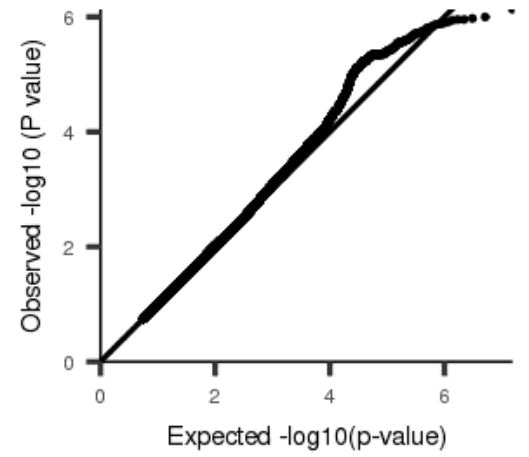

[back to list of plots](#)

Figure 2059: NETMAT edge (100) 0903

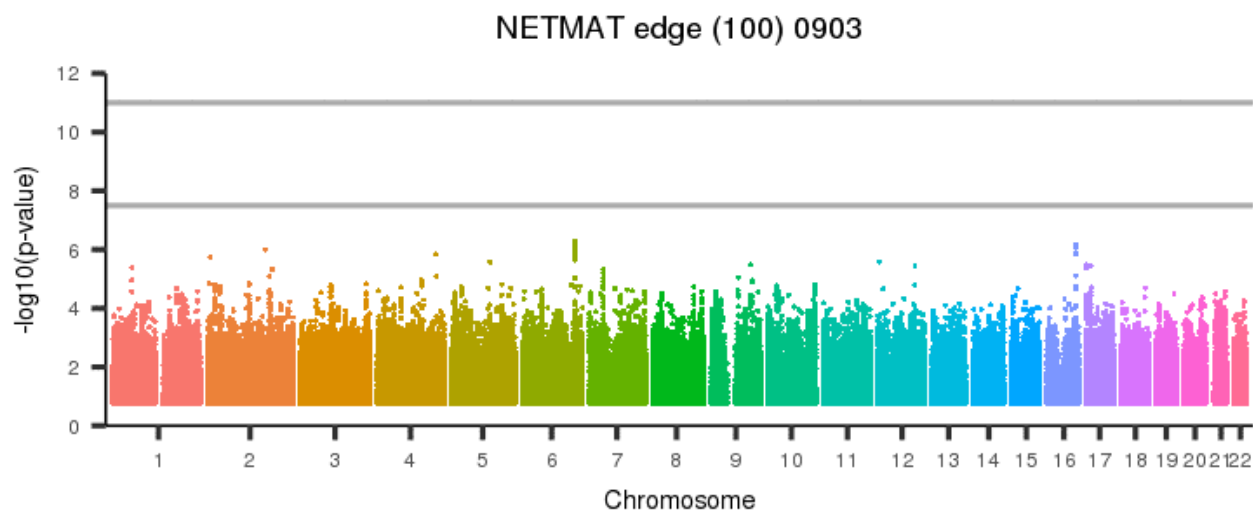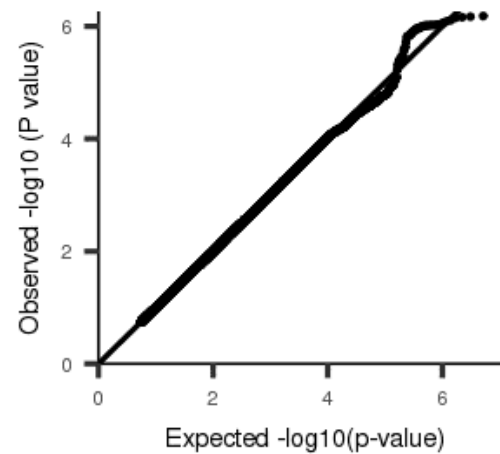

[back to list of plots](#)

Figure 2060: NETMAT edge (100) 0904

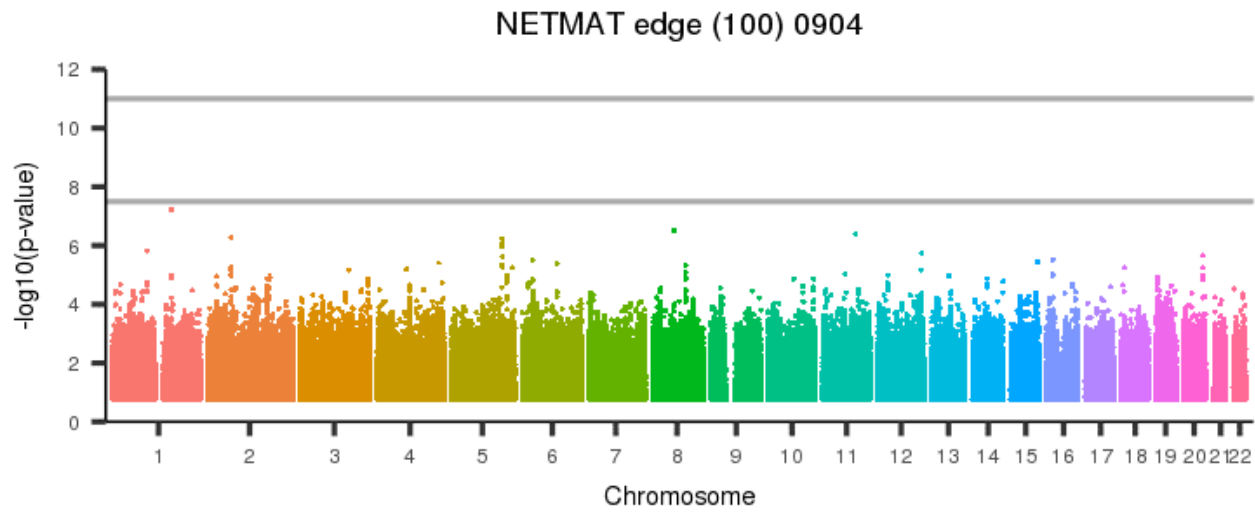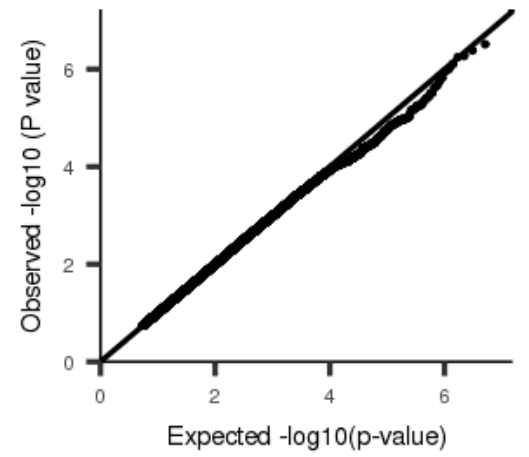

[back to list of plots](#)

Figure 2061: NETMAT edge (100) 0905

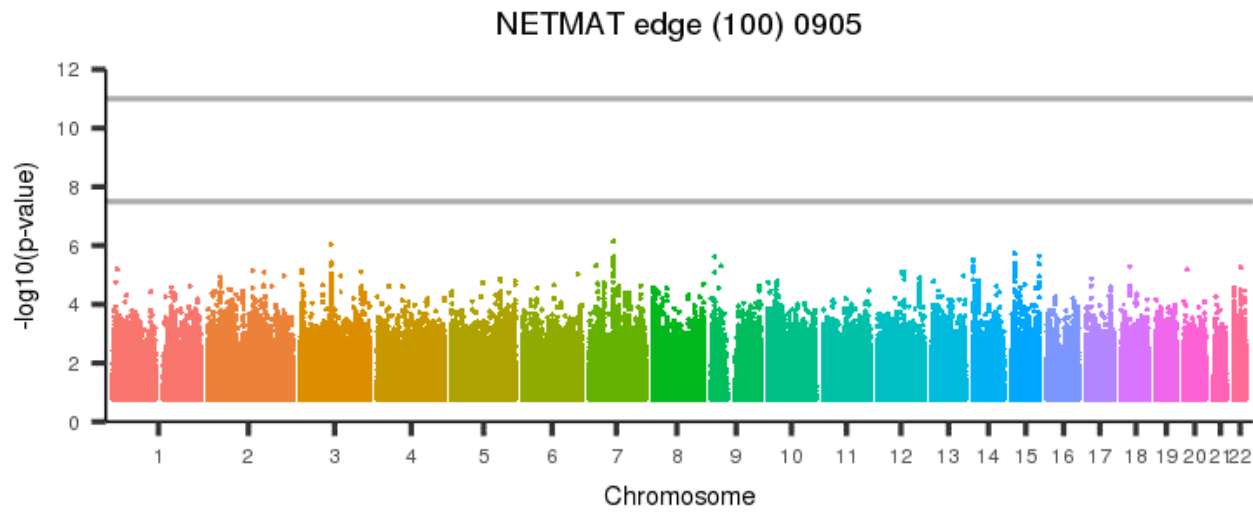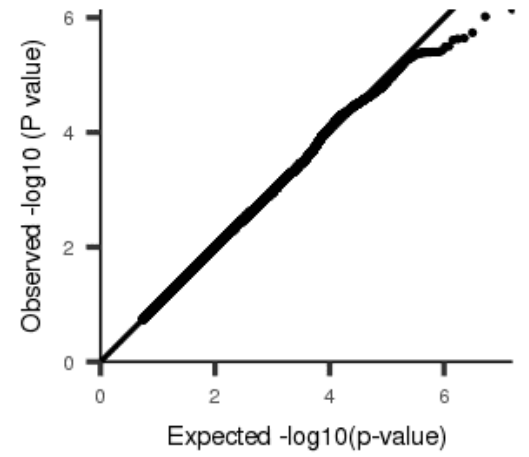

[back to list of plots](#)



Figure 2062: NETMAT edge (100) 0906

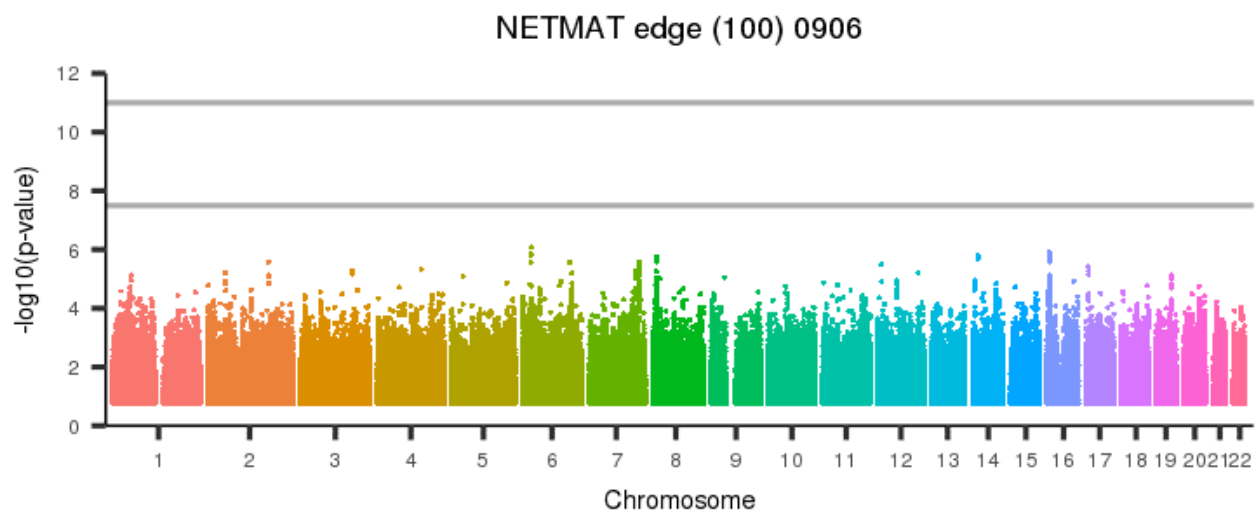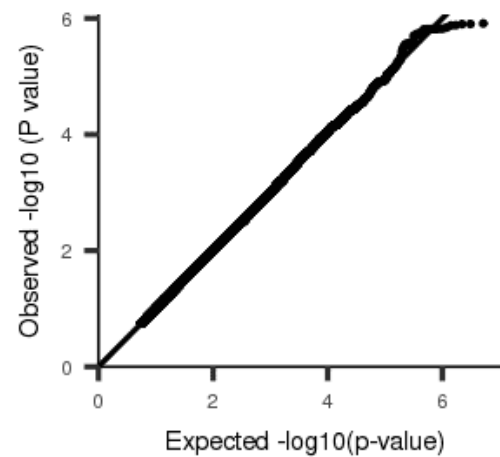

[back to list of plots](#)

Figure 2063: NETMAT edge (100) 0907

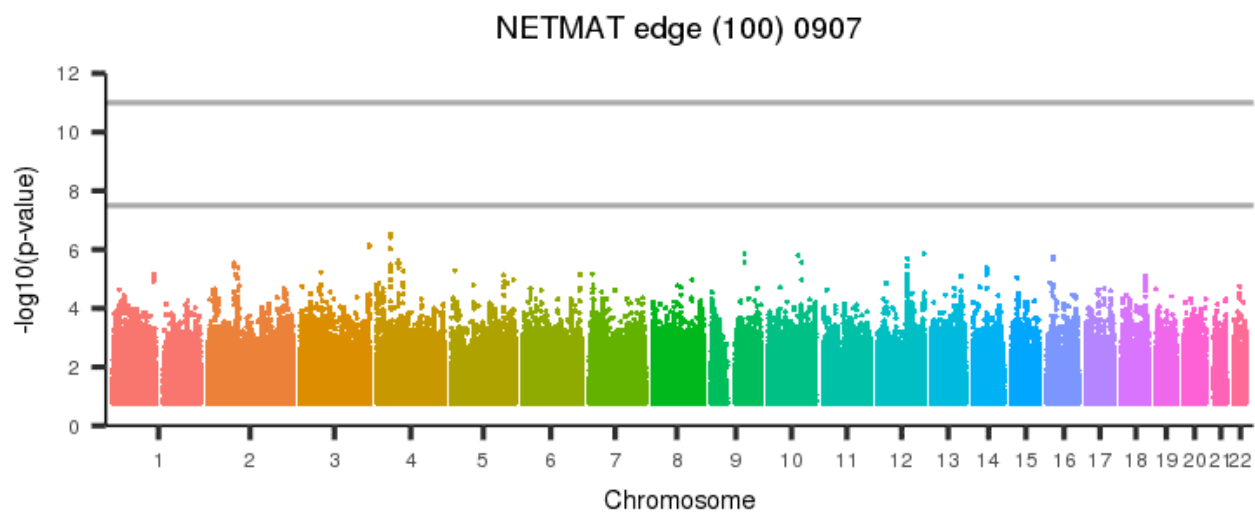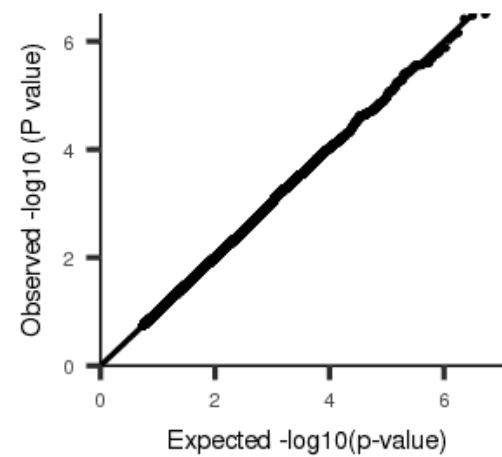

[back to list of plots](#)

Figure 2064: NETMAT edge (100) 0908

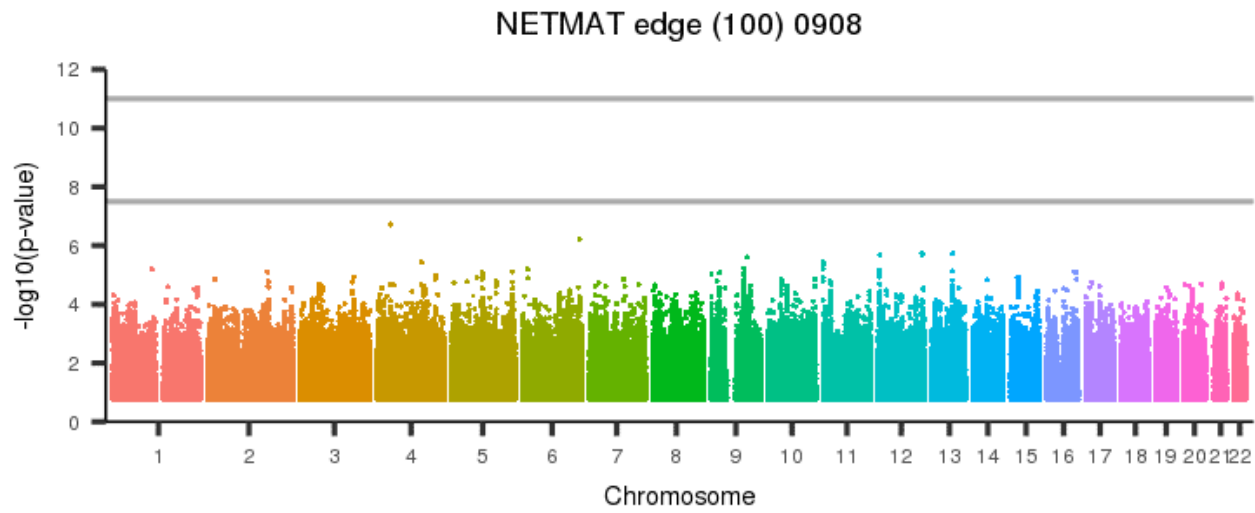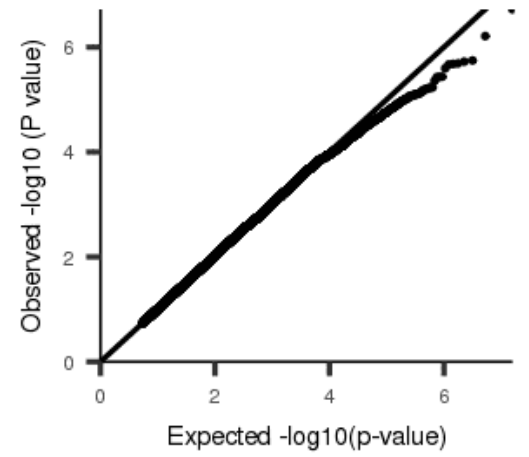

[back to list of plots](#)

Figure 2065: NETMAT edge (100) 0909

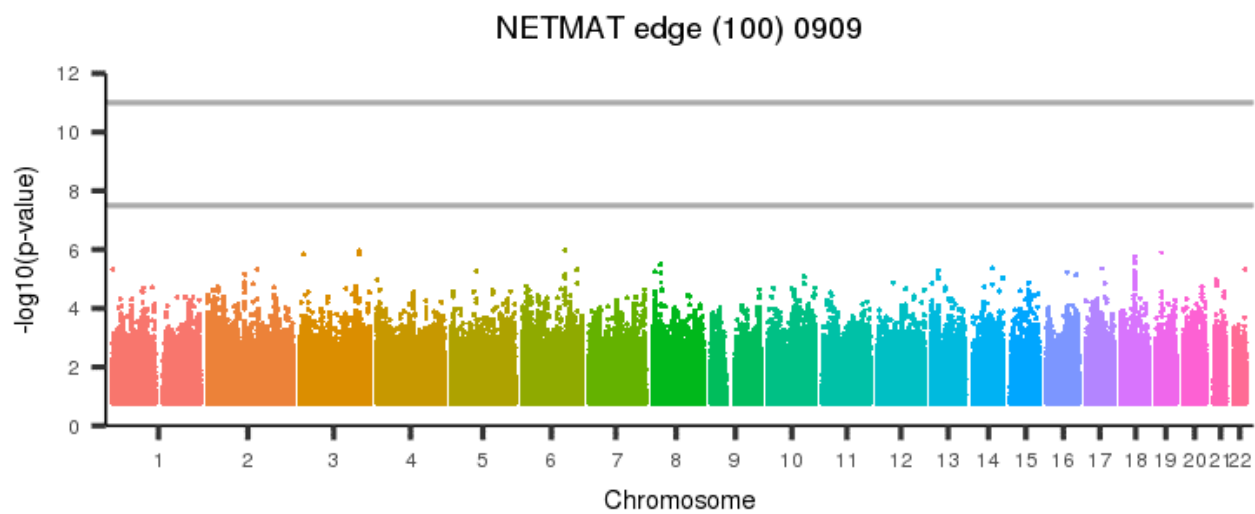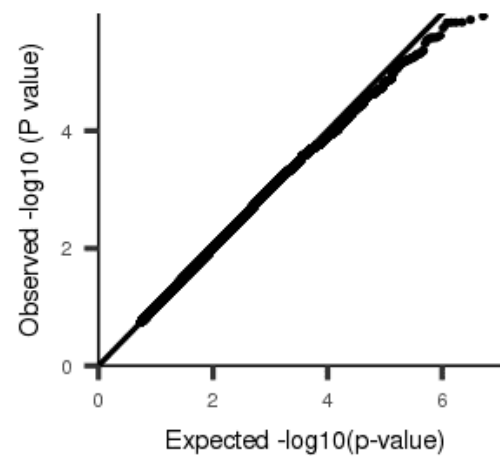

[back to list of plots](#)

Figure 2066: NETMAT edge (100) 0910

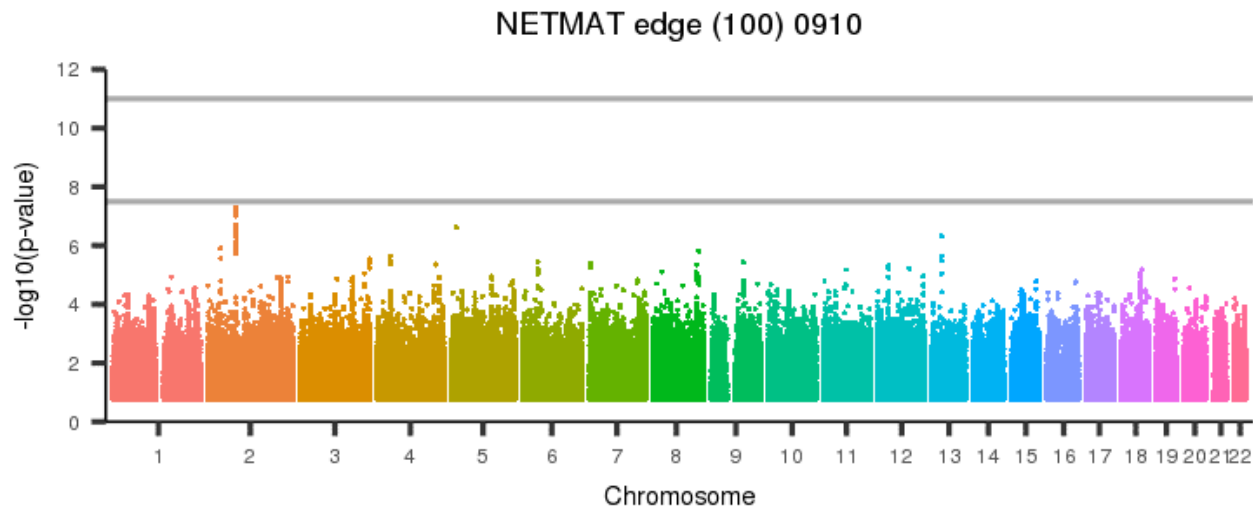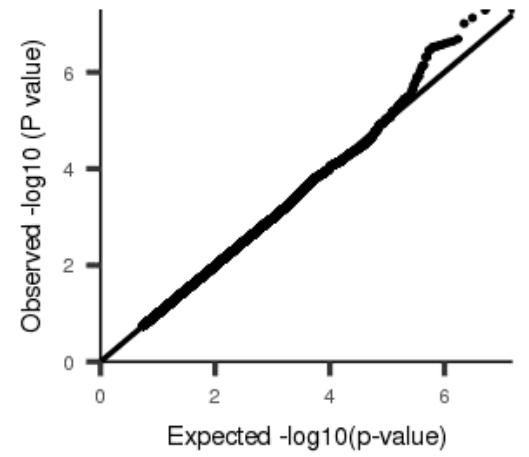

[back to list of plots](#)

Figure 2067: NETMAT edge (100) 0911

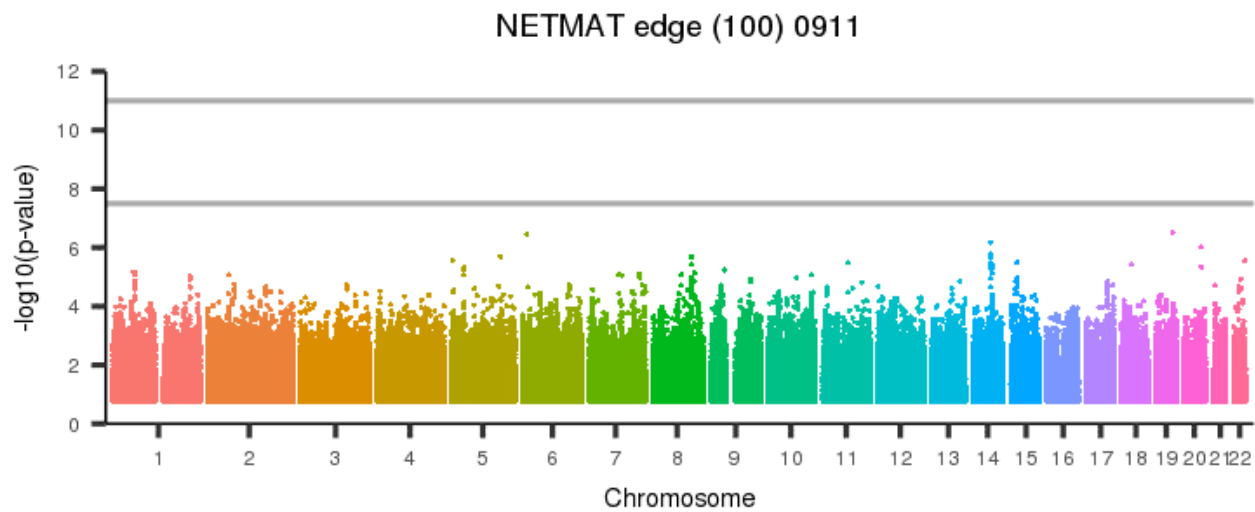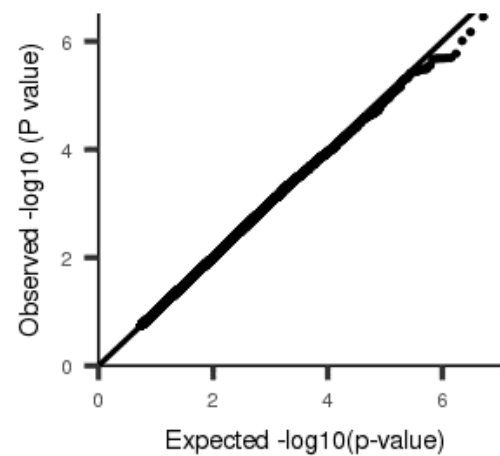

[back to list of plots](#)

Figure 2068: NETMAT edge (100) 0912

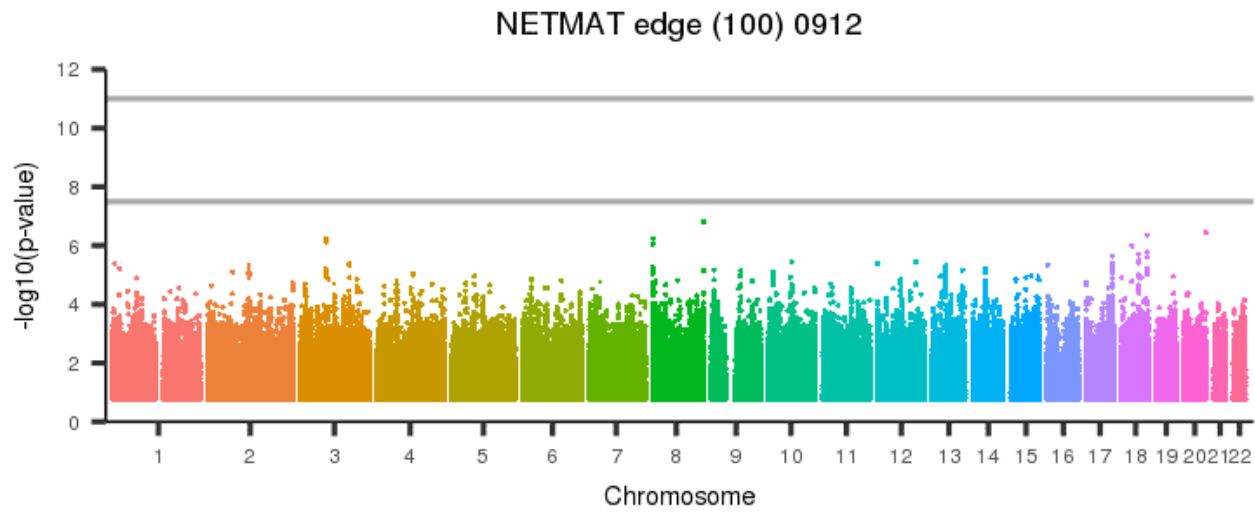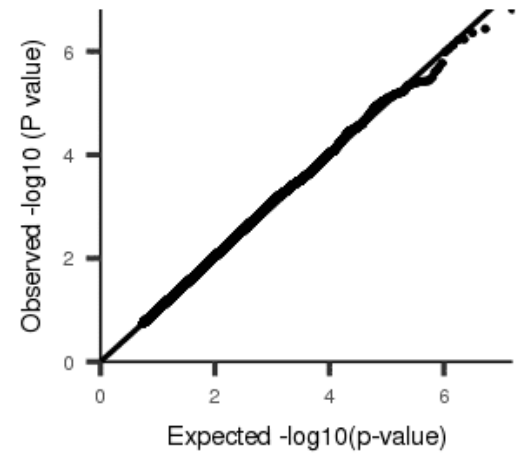

[back to list of plots](#)

Figure 2069: NETMAT edge (100) 0913

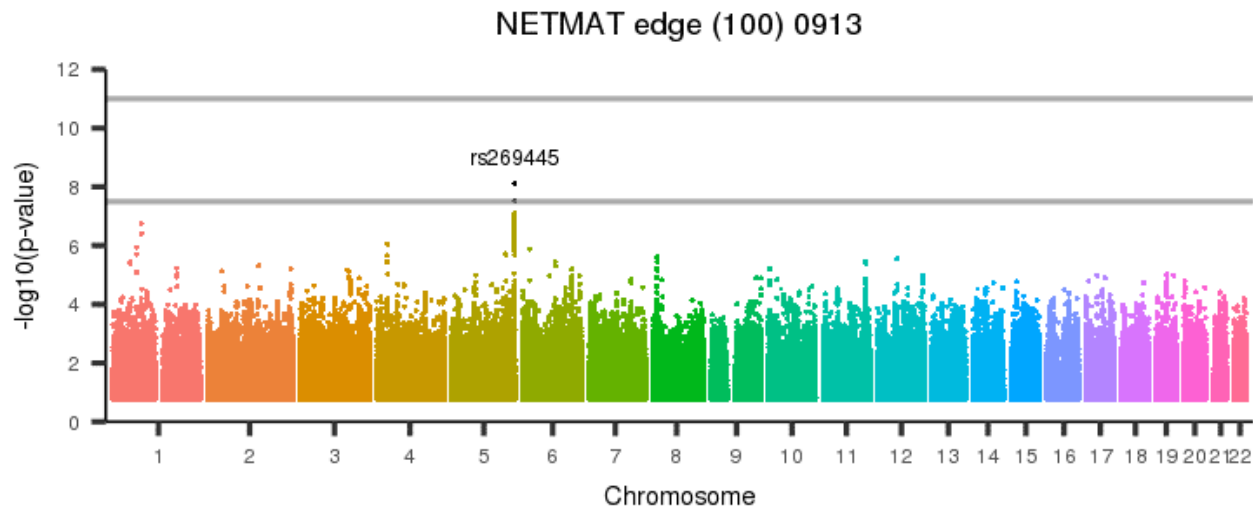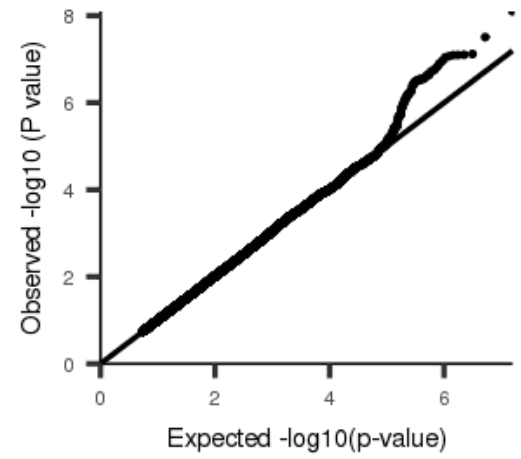

[back to list of plots](#)



Figure 2070: NETMAT edge (100) 0914

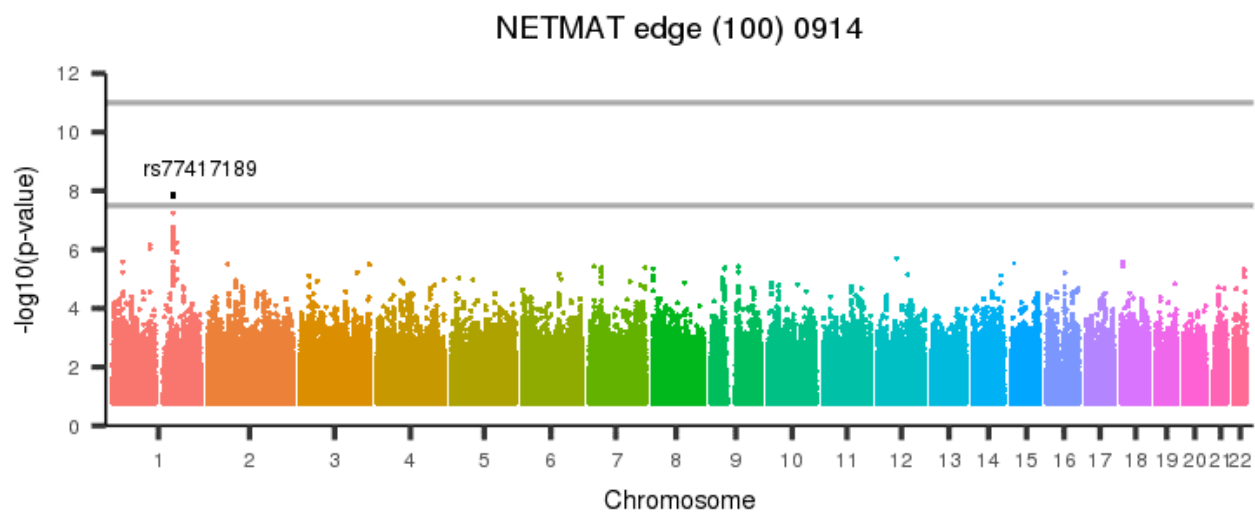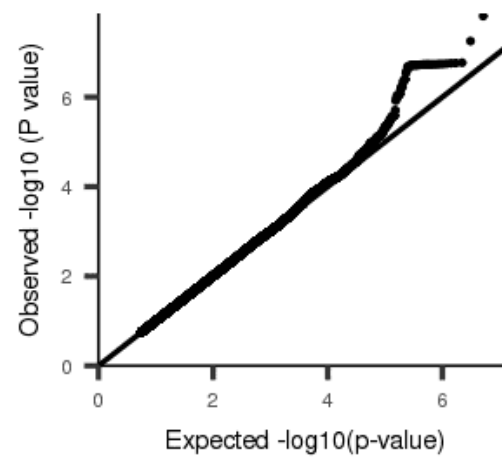

[back to list of plots](#)

Figure 2071: NETMAT edge (100) 0915

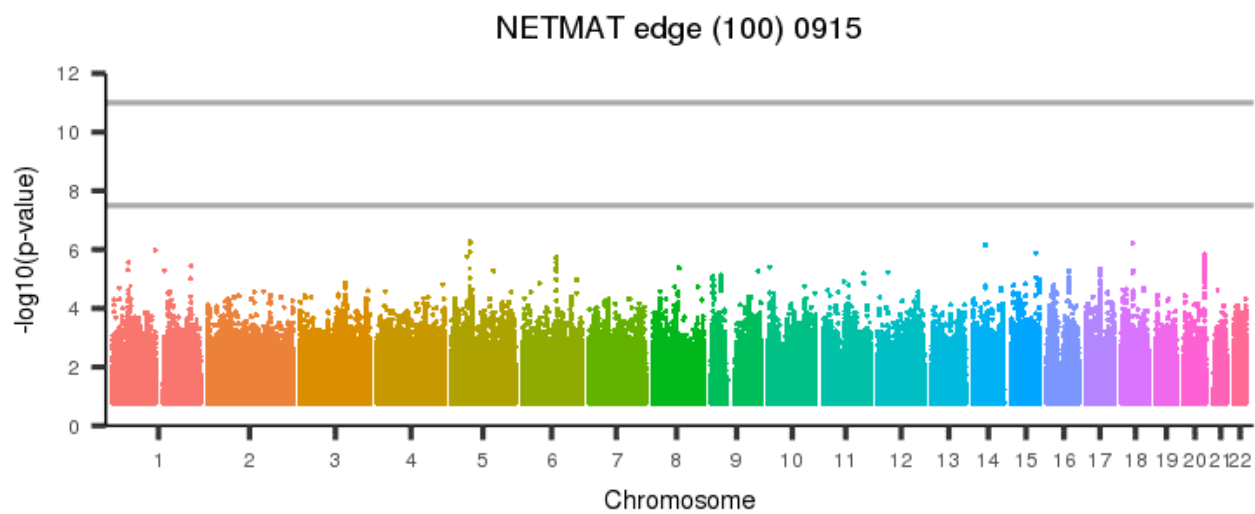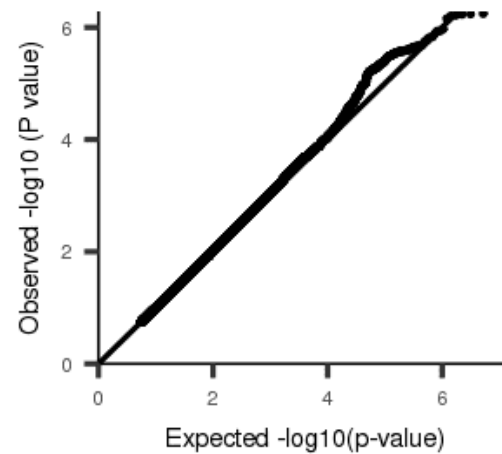

[back to list of plots](#)

Figure 2072: NETMAT edge (100) 0916

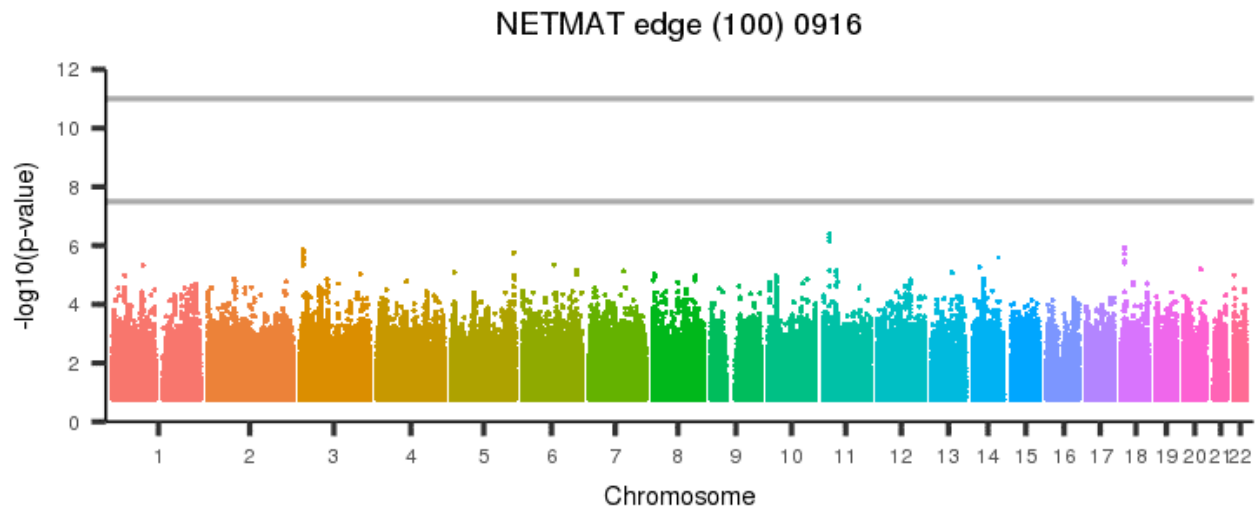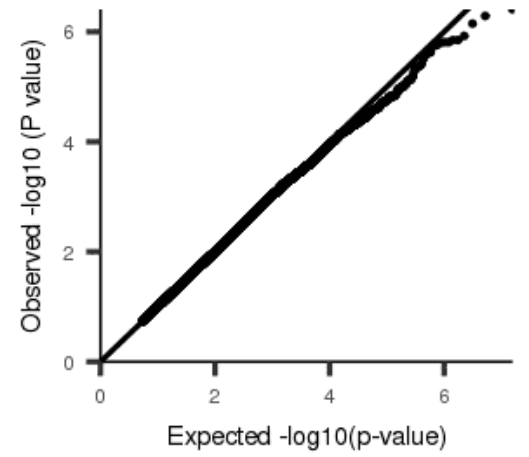

[back to list of plots](#)

Figure 2073: NETMAT edge (100) 0917

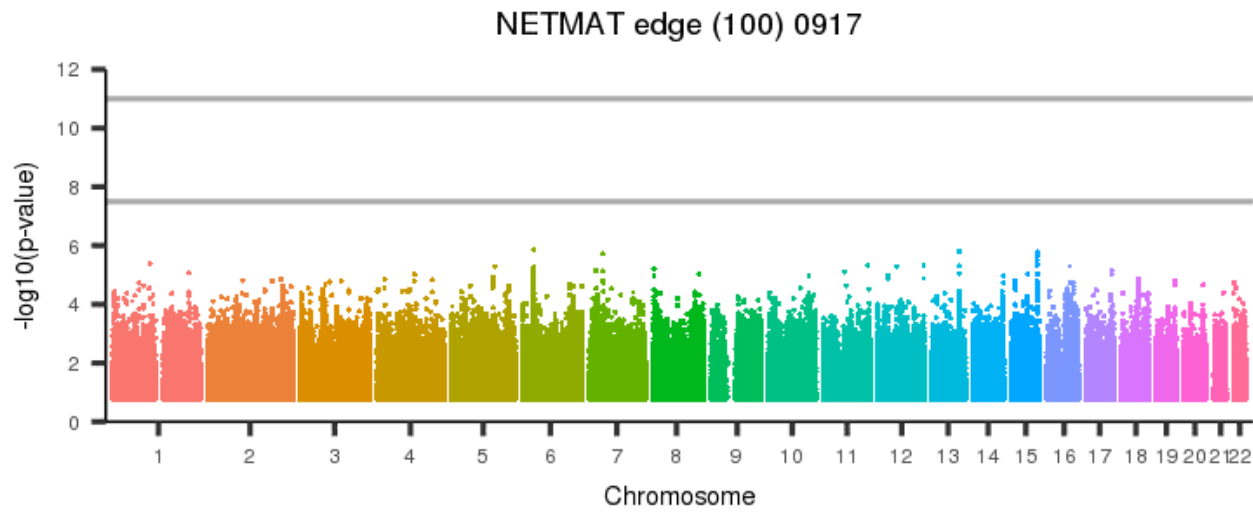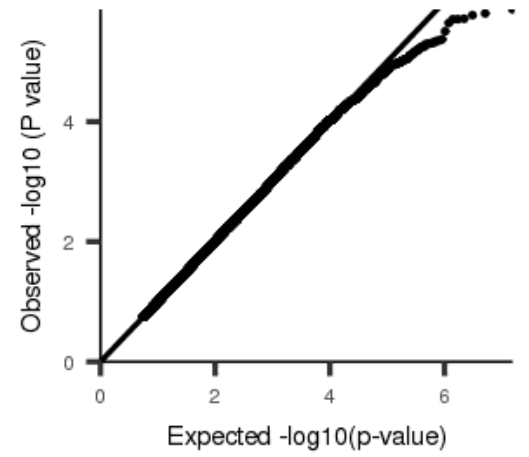

[back to list of plots](#)

Figure 2074: NETMAT edge (100) 0918

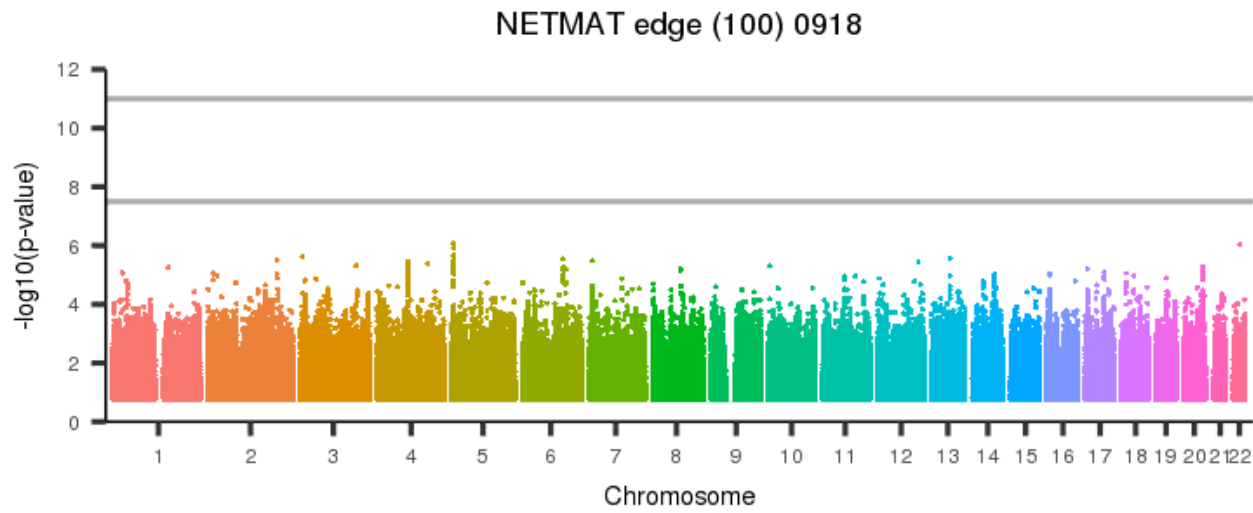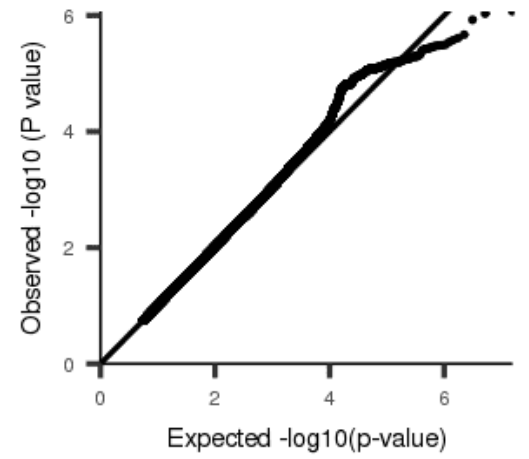

[back to list of plots](#)

Figure 2075: NETMAT edge (100) 0919

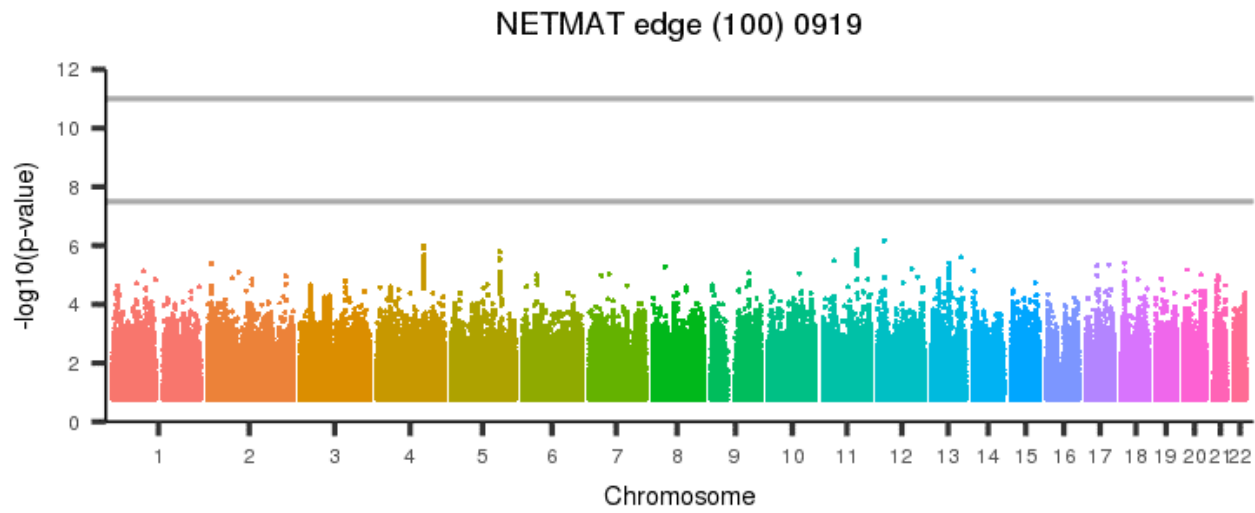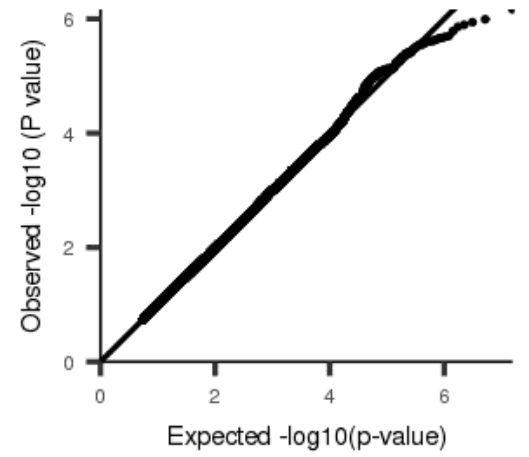

[back to list of plots](#)

Figure 2076: NETMAT edge (100) 0920

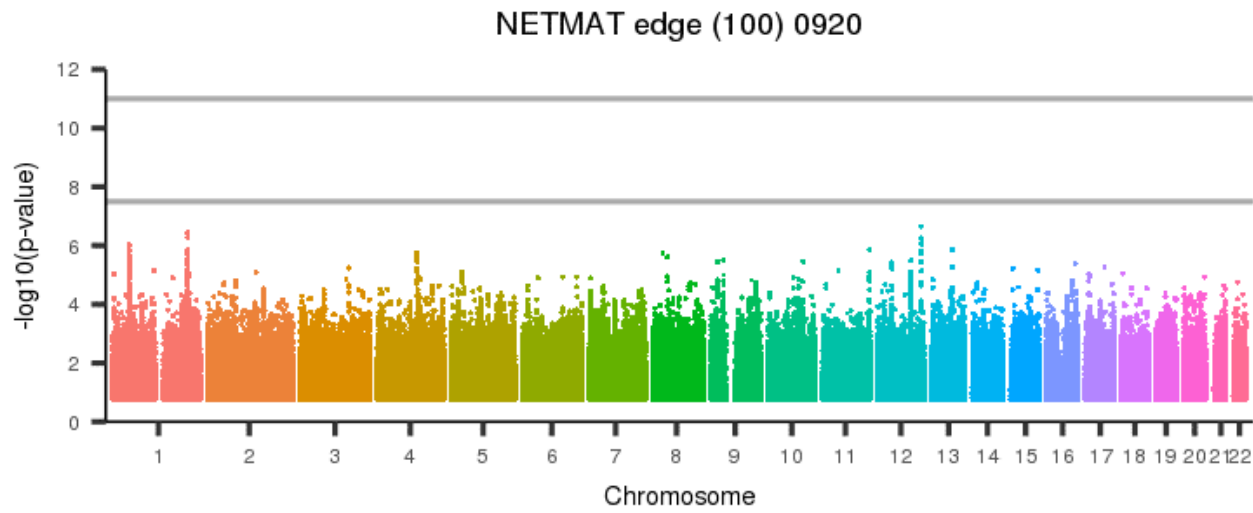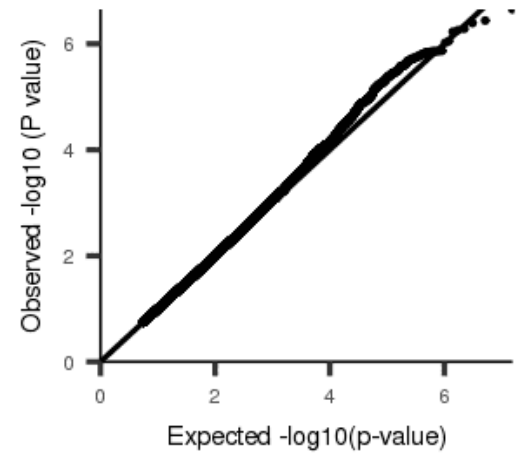

[back to list of plots](#)

Figure 2077: NETMAT edge (100) 0921

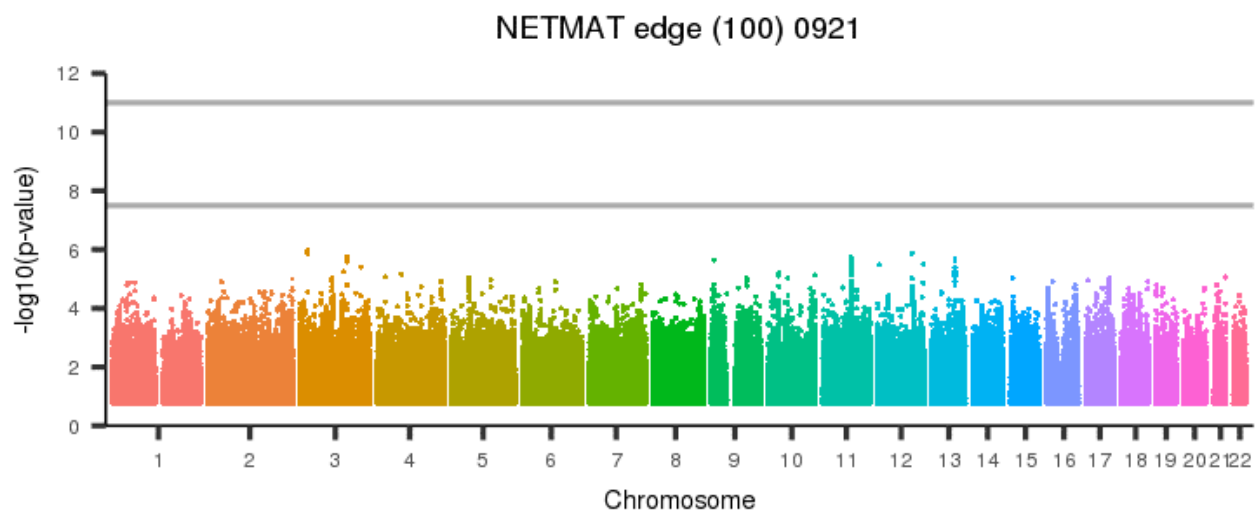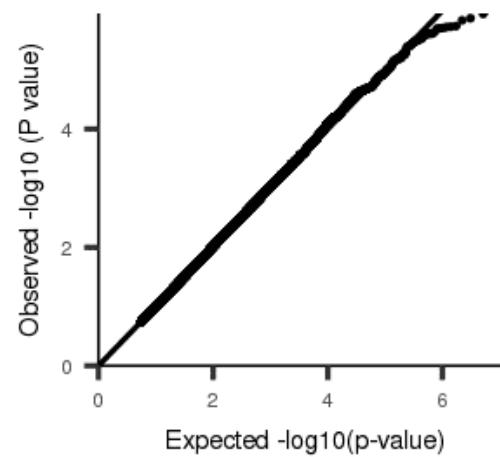

[back to list of plots](#)



Figure 2078: NETMAT edge (100) 0922

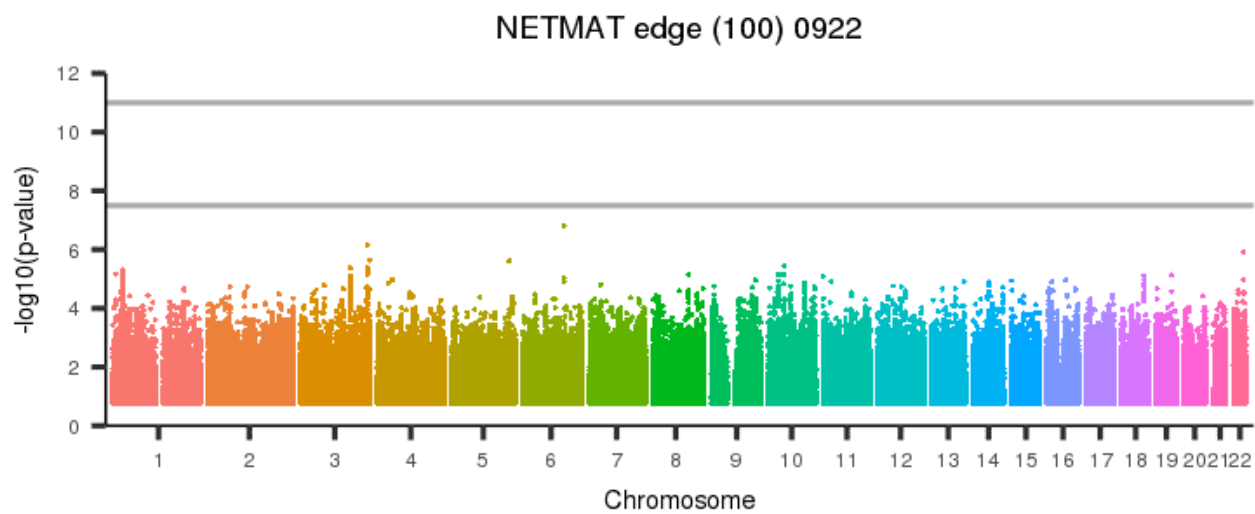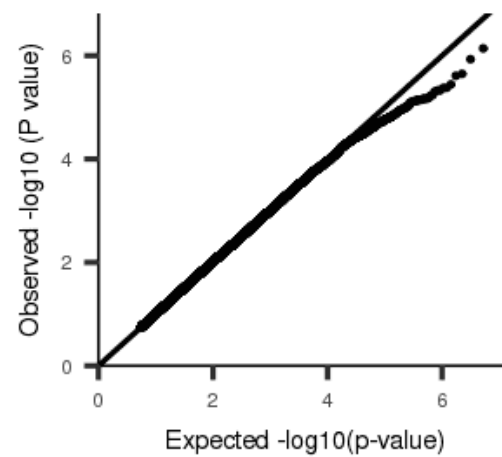

[back to list of plots](#)

Figure 2079: NETMAT edge (100) 0923

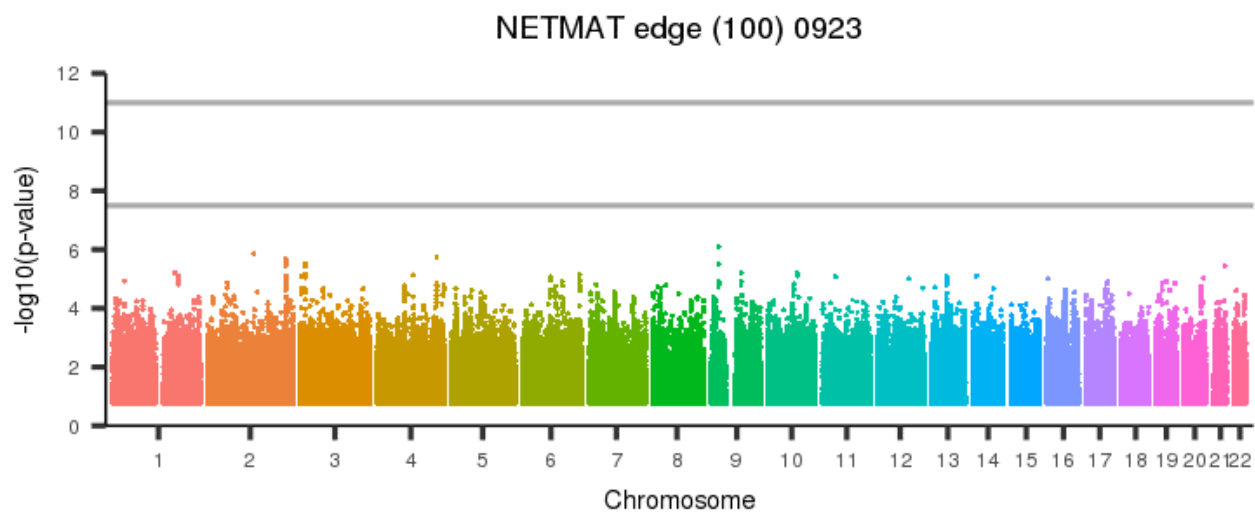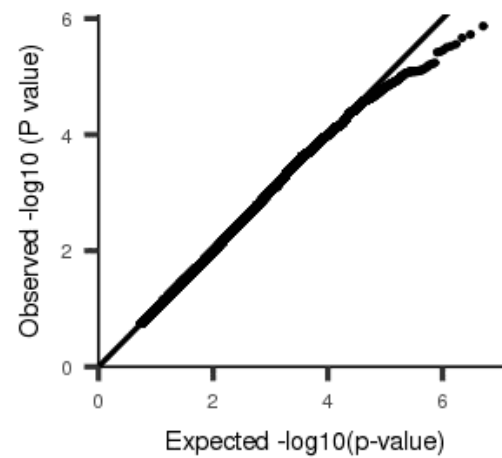

[back to list of plots](#)

Figure 2080: NETMAT edge (100) 0924

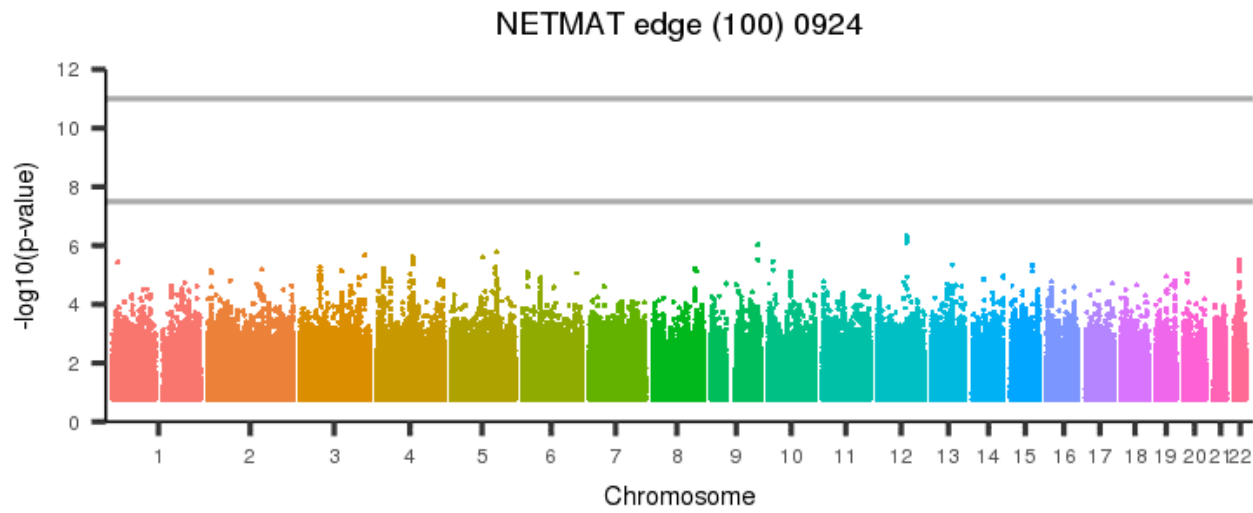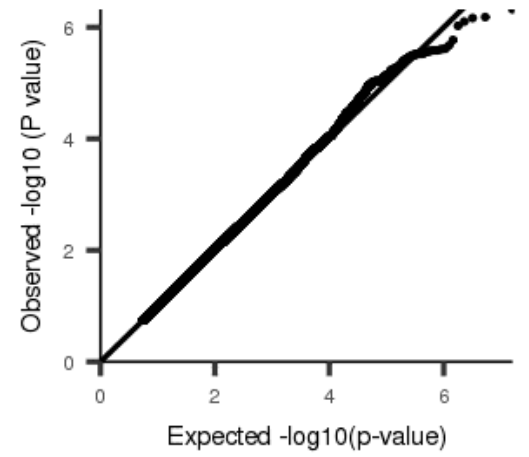

[back to list of plots](#)

Figure 2081: NETMAT edge (100) 0925

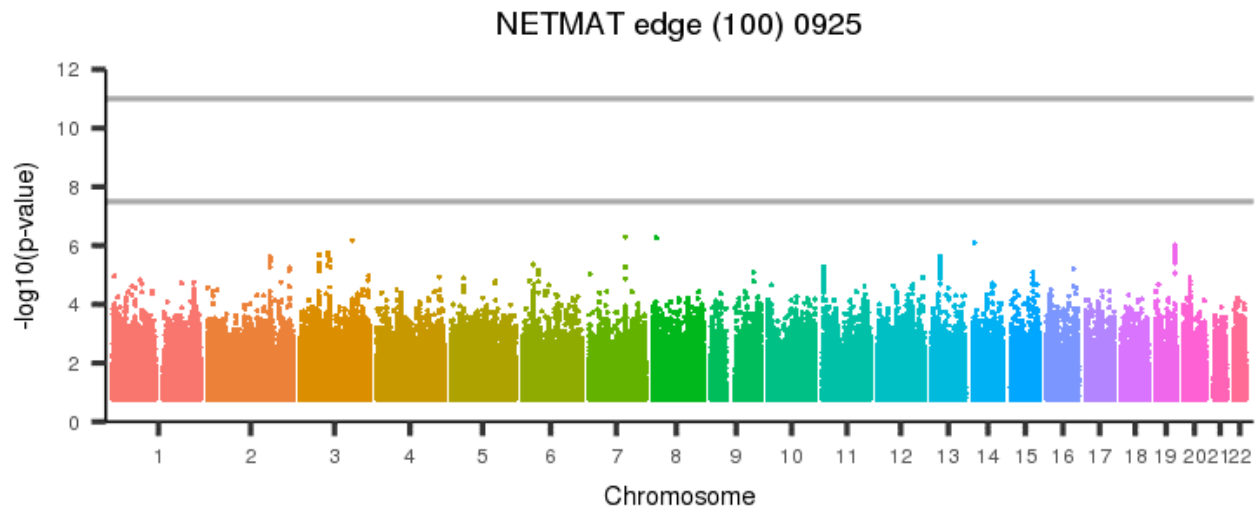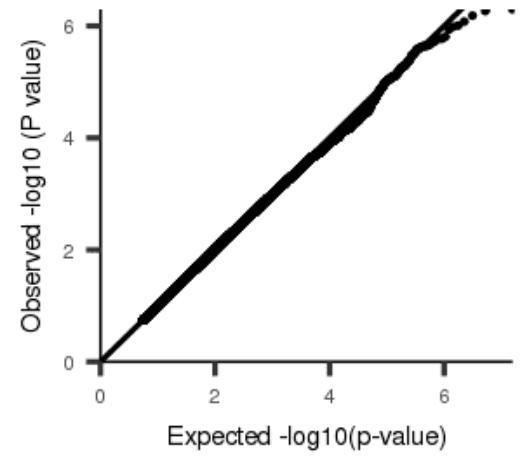

[back to list of plots](#)

Figure 2082: NETMAT edge (100) 0926

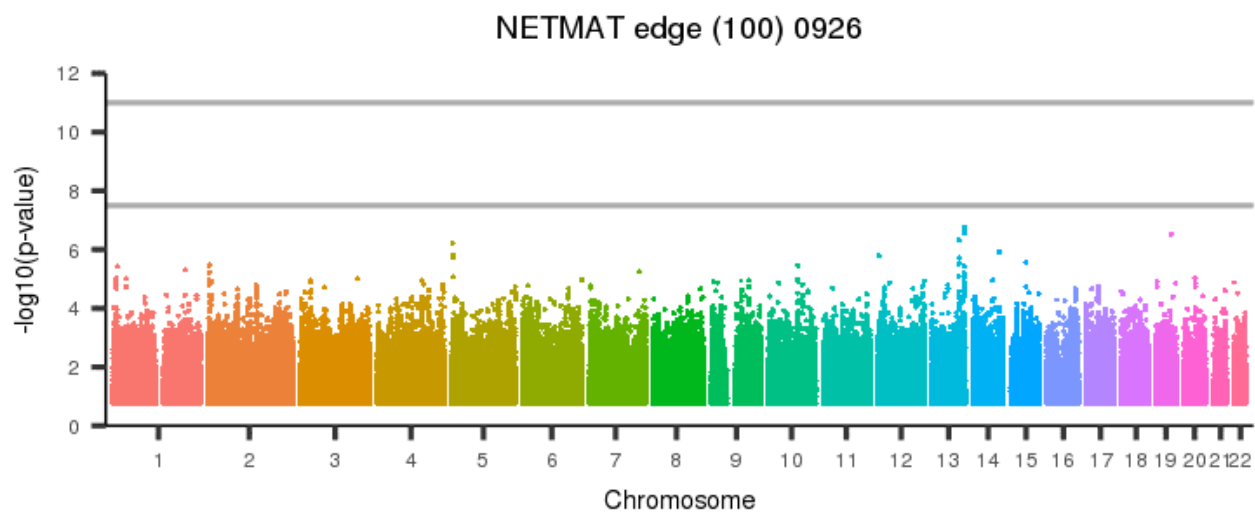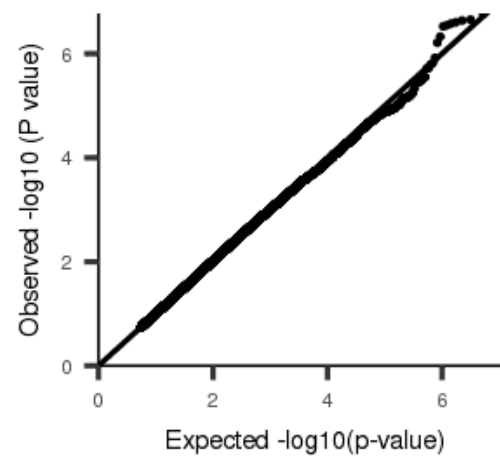

[back to list of plots](#)

Figure 2083: NETMAT edge (100) 0927

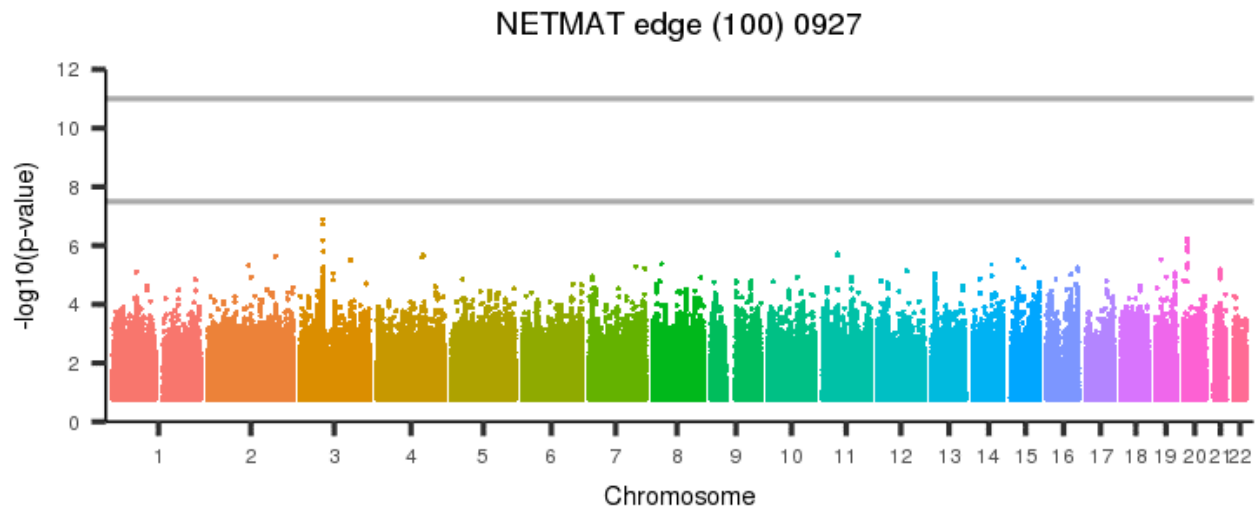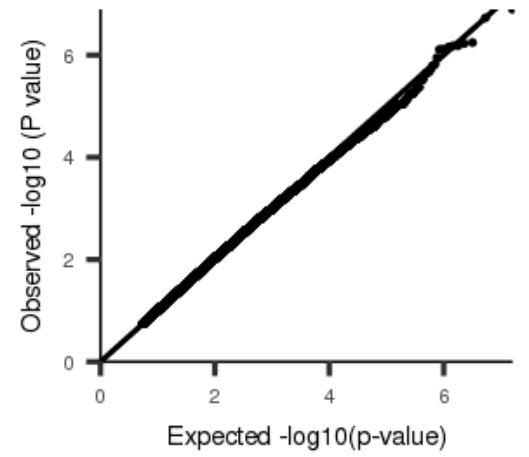

[back to list of plots](#)

Figure 2084: NETMAT edge (100) 0928

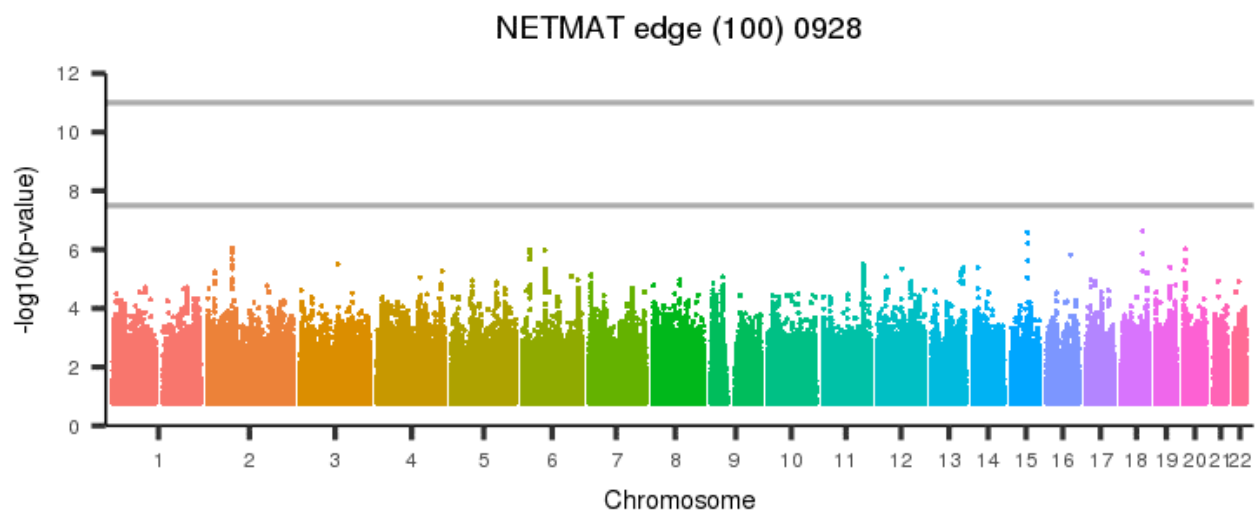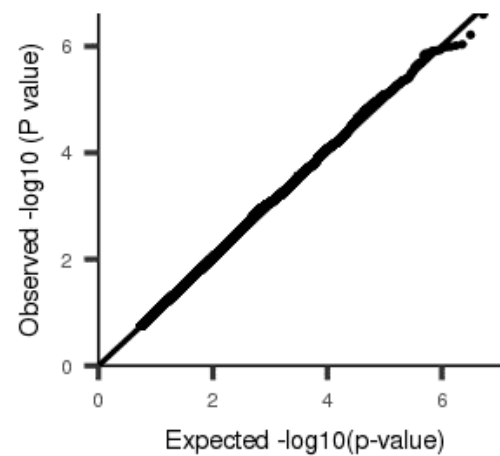

[back to list of plots](#)

Figure 2085: NETMAT edge (100) 0929

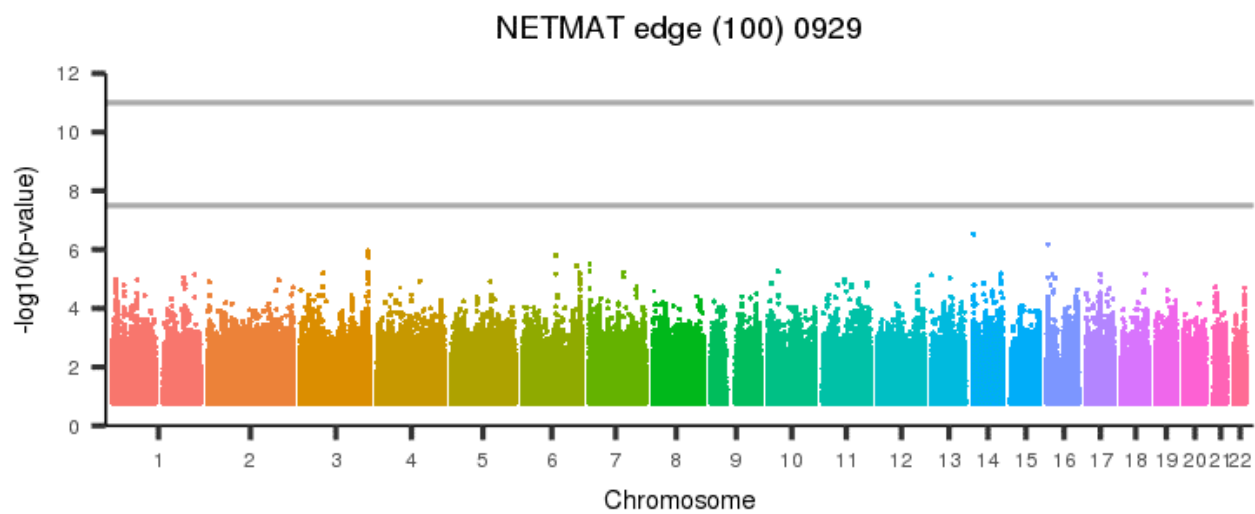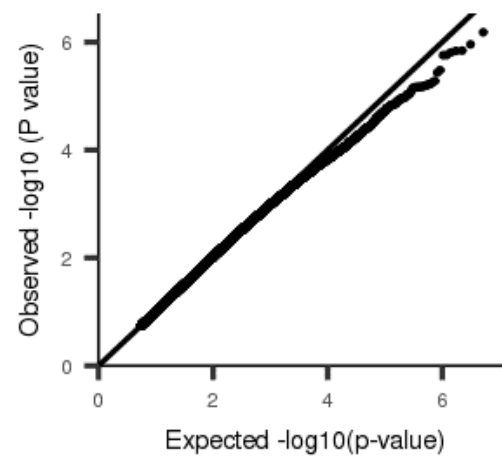

[back to list of plots](#)



Figure 2086: NETMAT edge (100) 0930

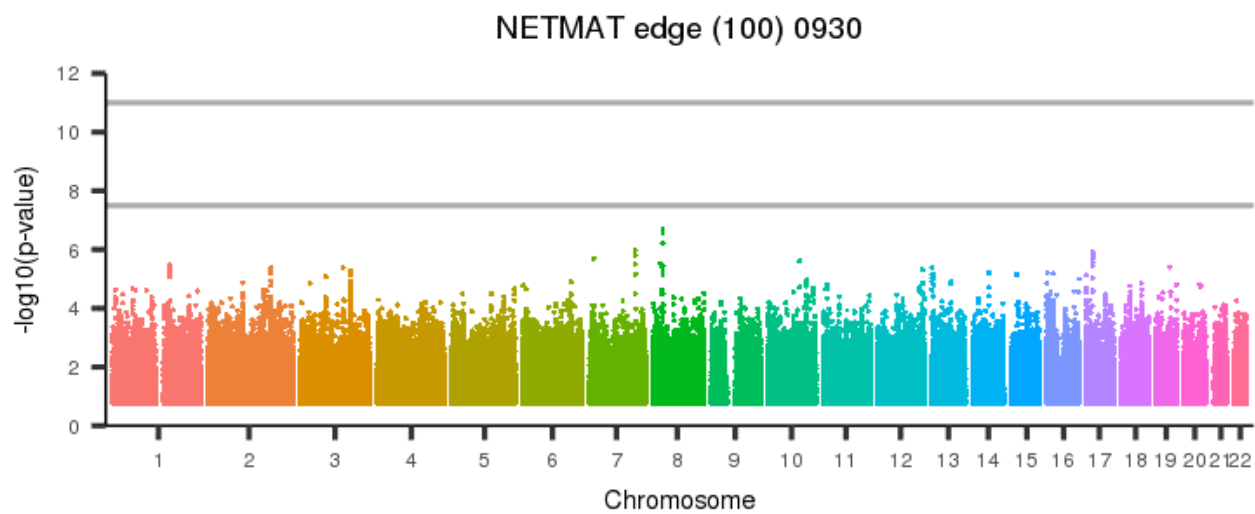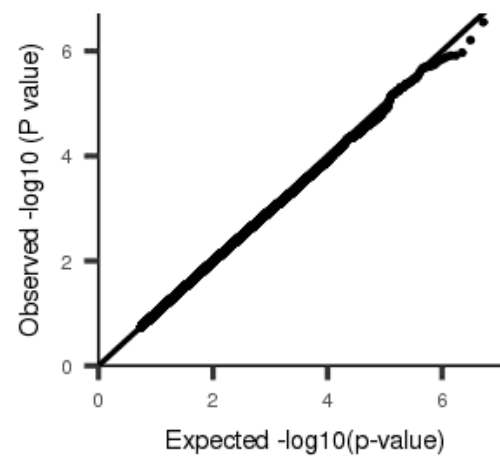

[back to list of plots](#)

Figure 2087: NETMAT edge (100) 0931

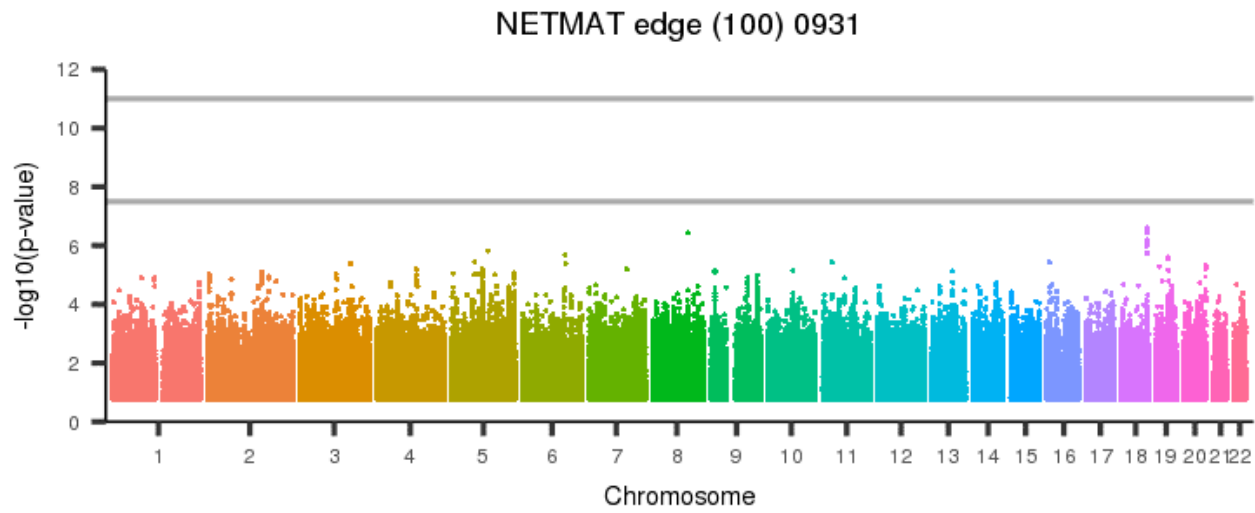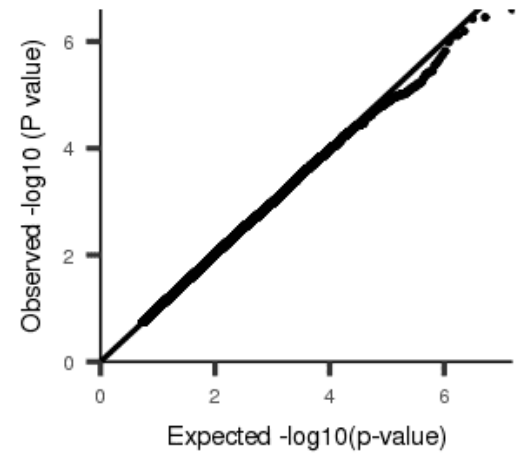

[back to list of plots](#)

Figure 2088: NETMAT edge (100) 0932

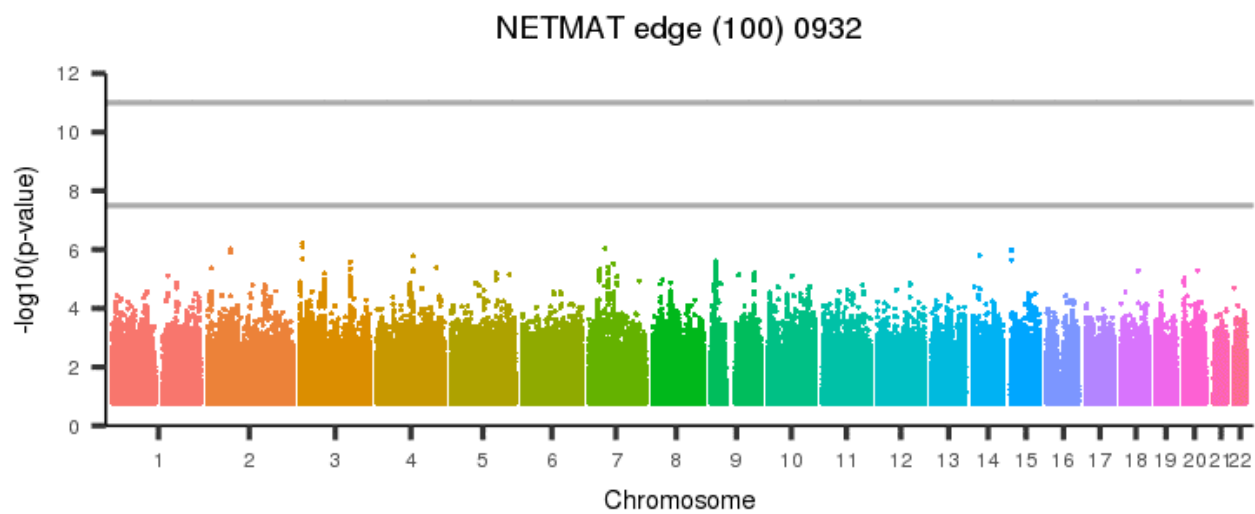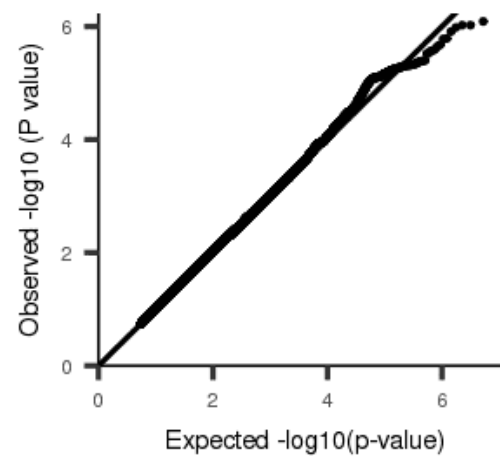

[back to list of plots](#)

Figure 2089: NETMAT edge (100) 0933

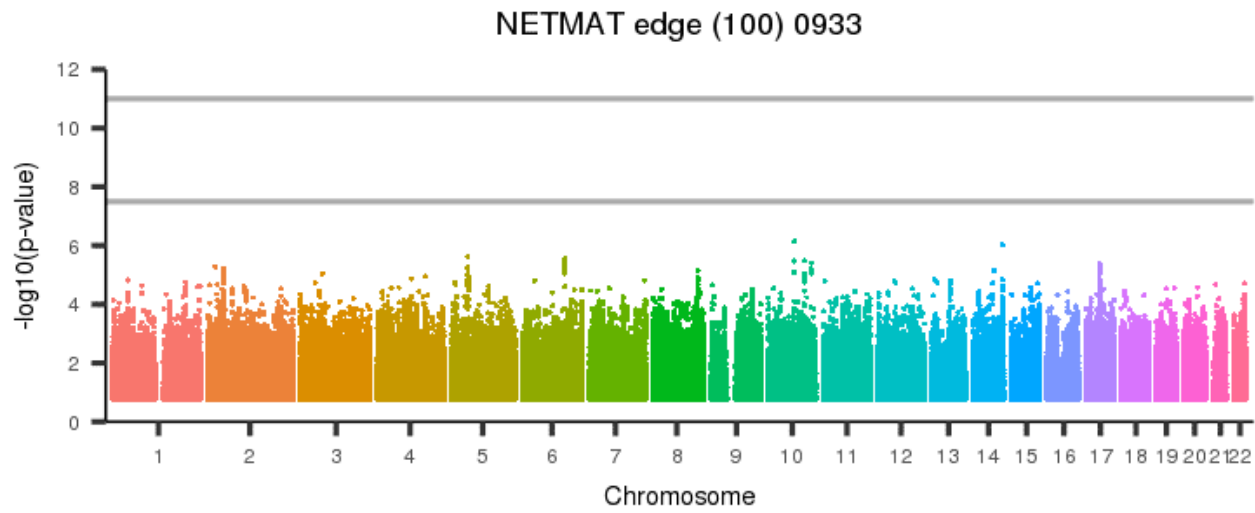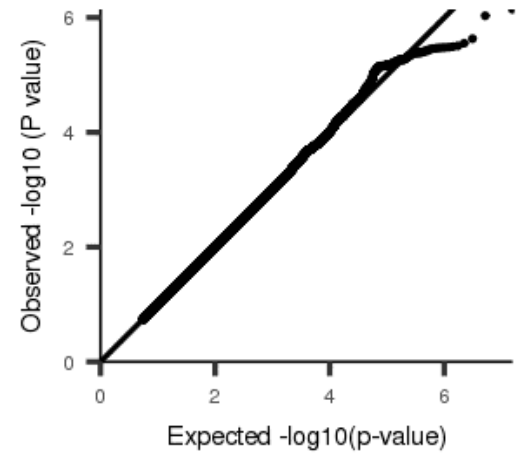

[back to list of plots](#)

Figure 2090: NETMAT edge (100) 0934

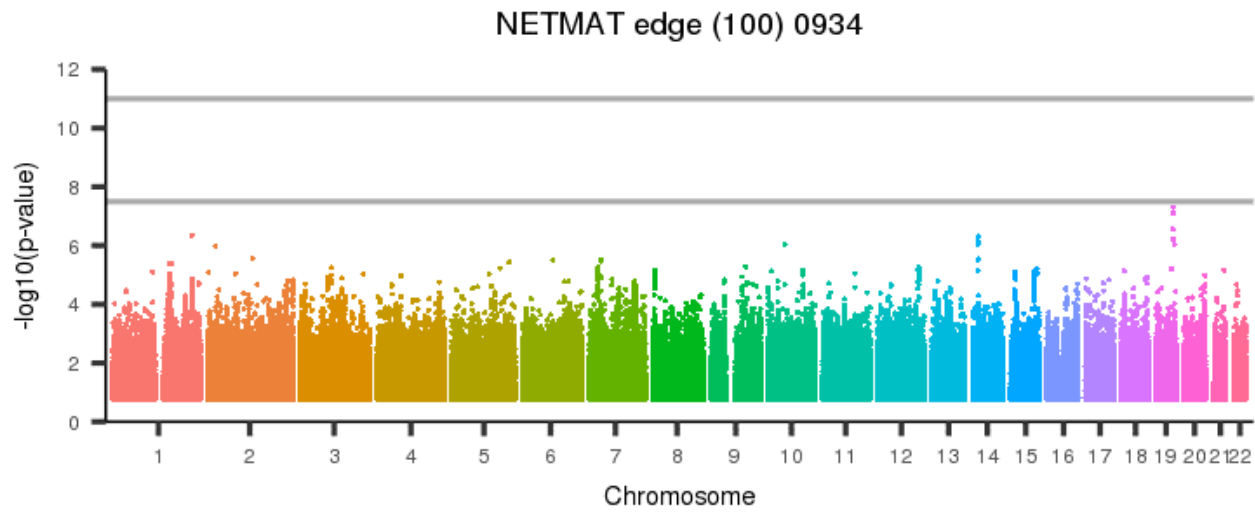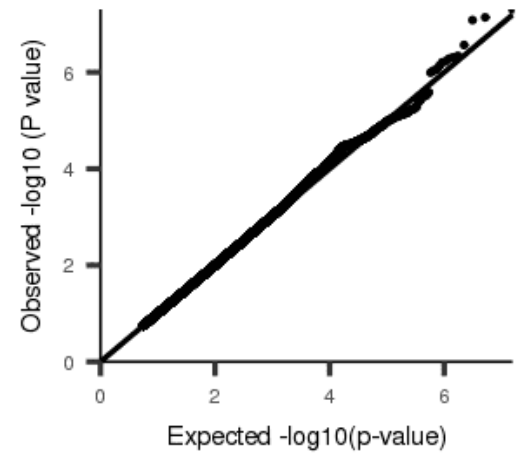

[back to list of plots](#)

Figure 2091: NETMAT edge (100) 0935

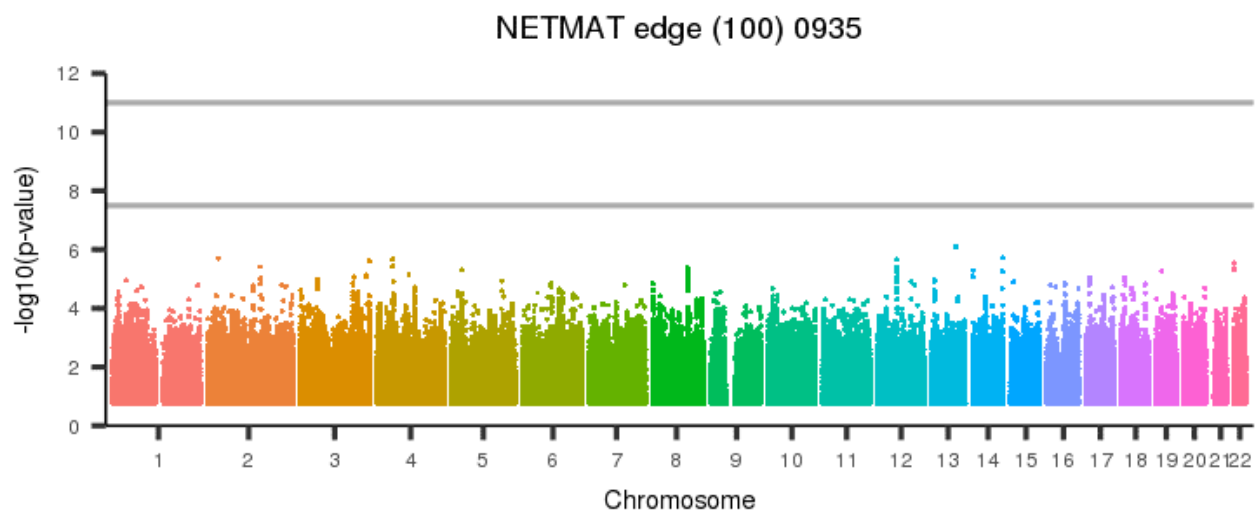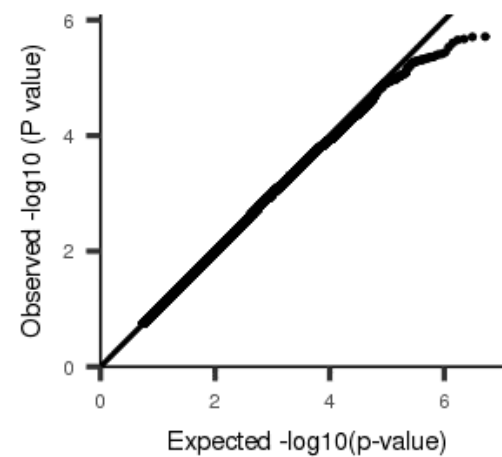

[back to list of plots](#)

Figure 2092: NETMAT edge (100) 0936

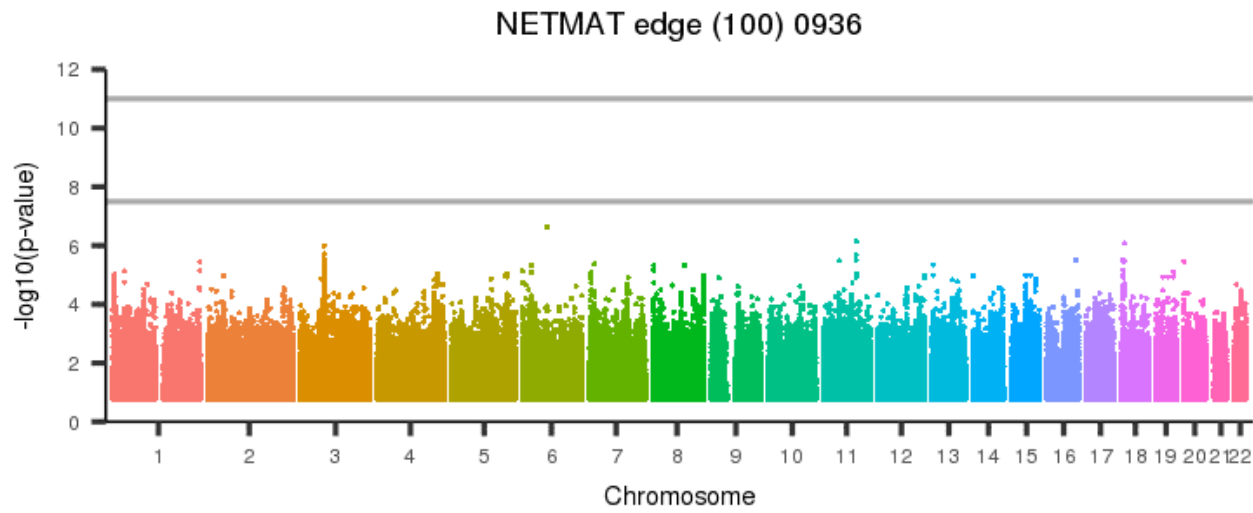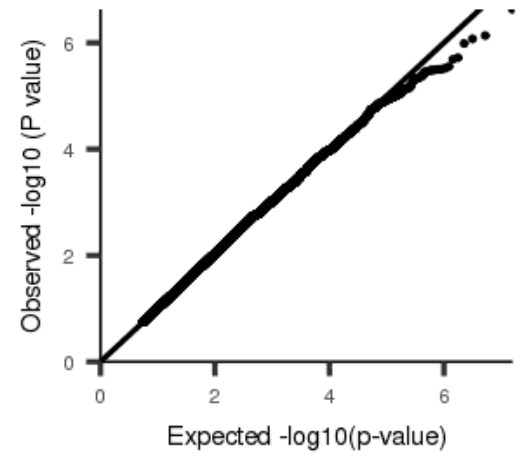

[back to list of plots](#)

Figure 2093: NETMAT edge (100) 0937

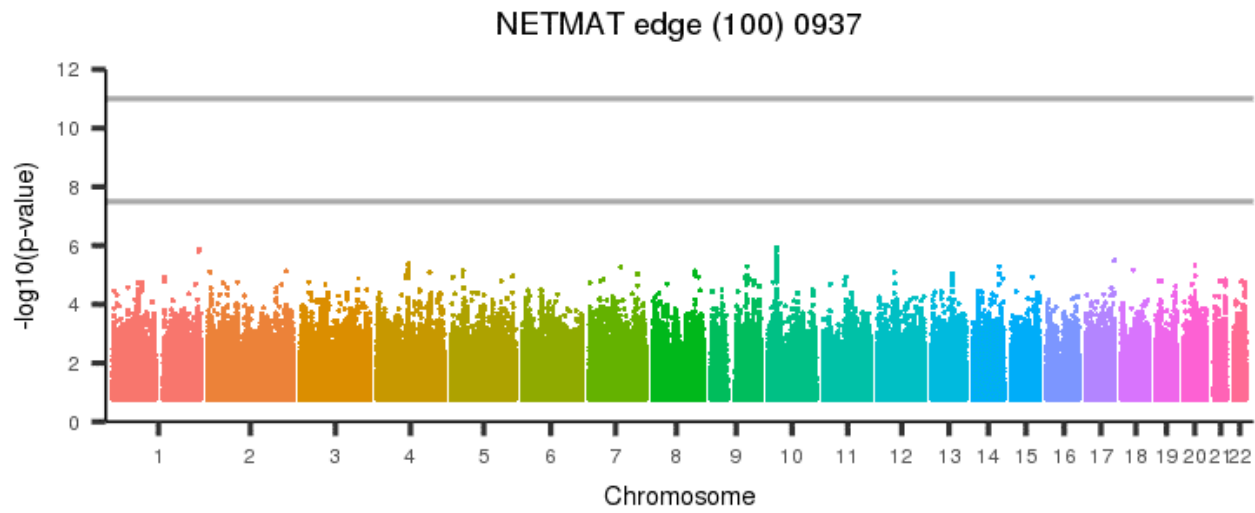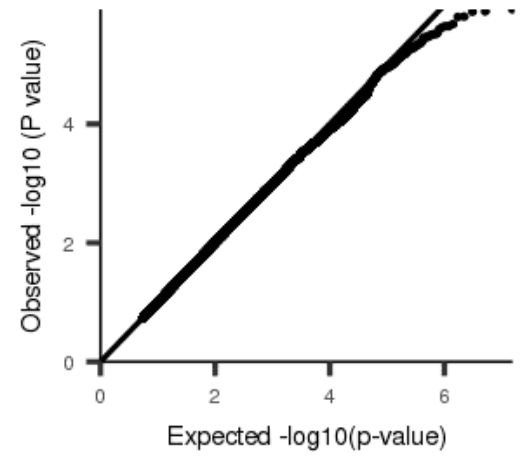

[back to list of plots](#)



Figure 2094: NETMAT edge (100) 0938

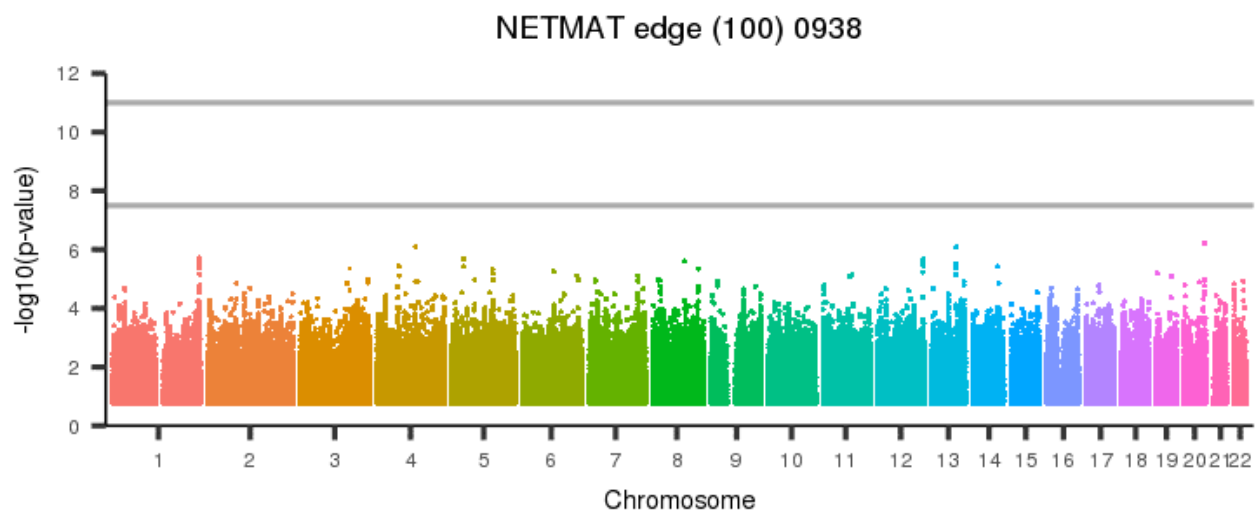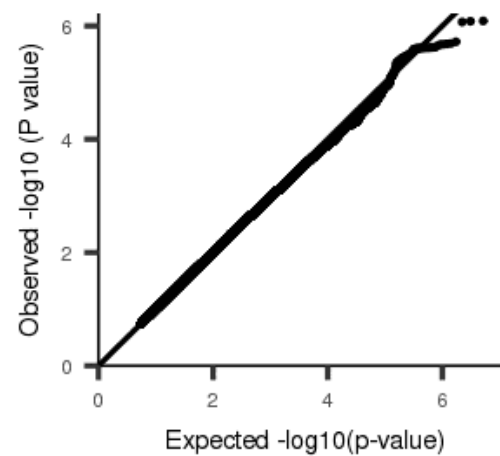

[back to list of plots](#)

Figure 2095: NETMAT edge (100) 0939

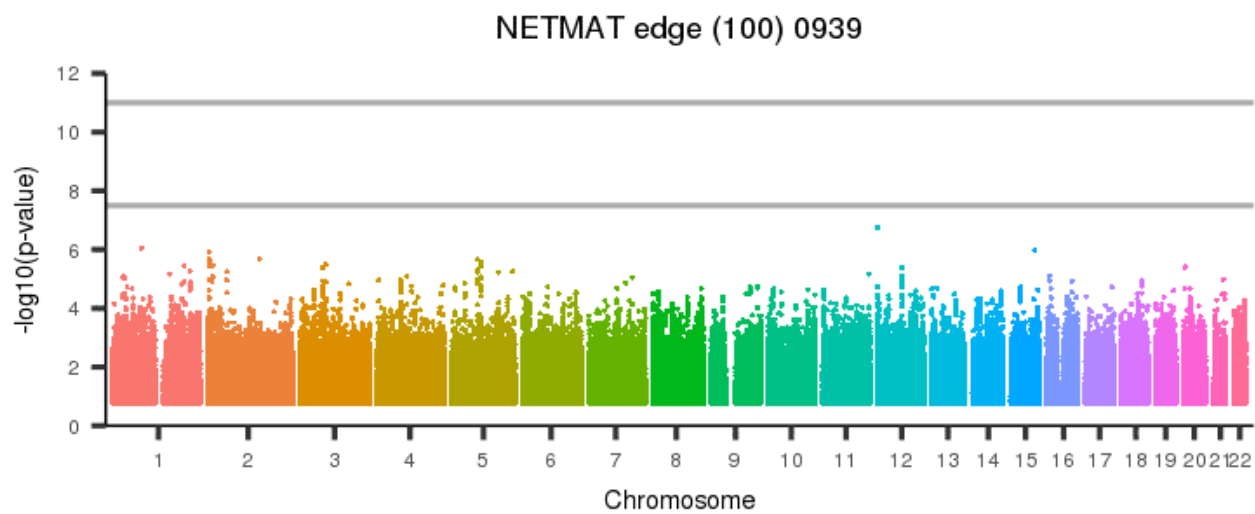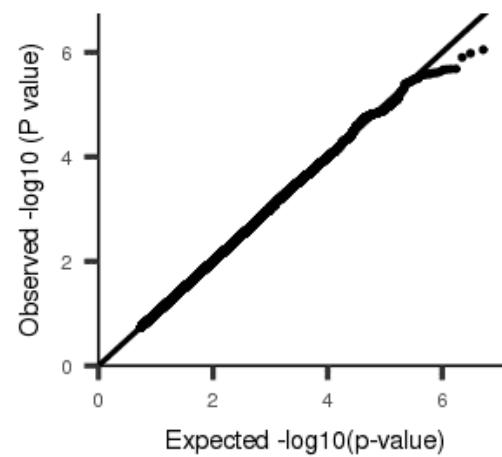

[back to list of plots](#)

Figure 2096: NETMAT edge (100) 0940

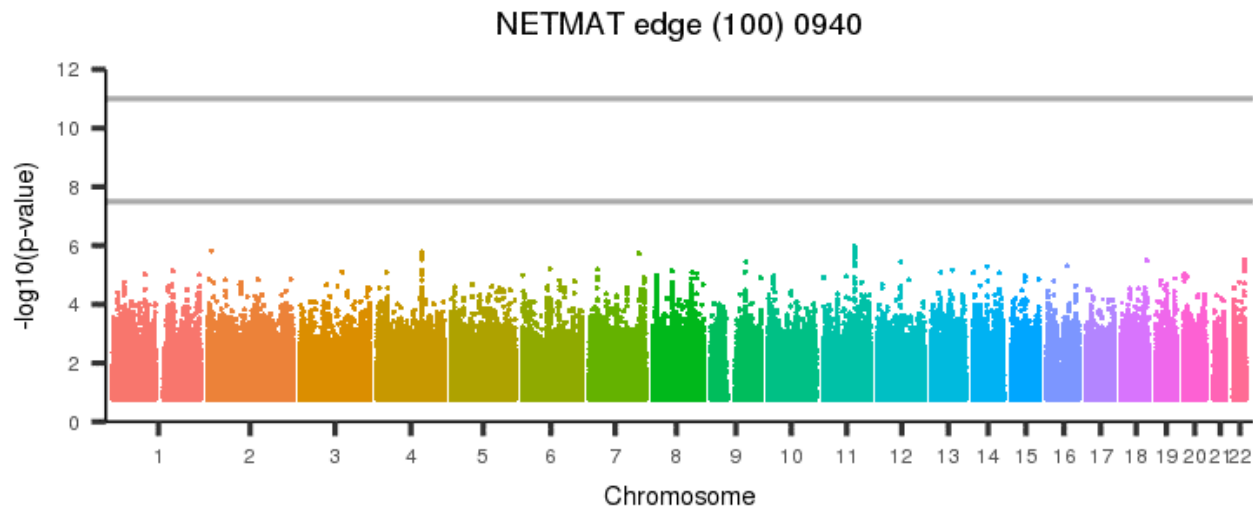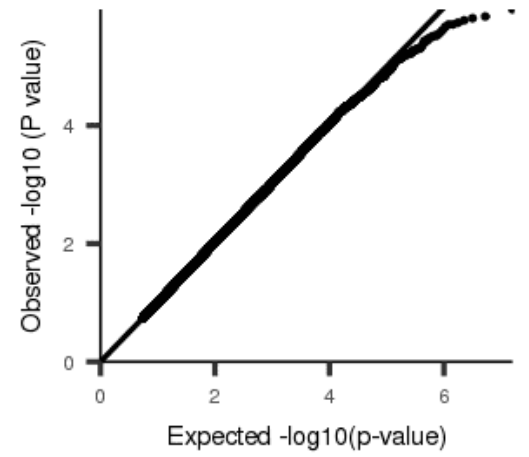

[back to list of plots](#)

Figure 2097: NETMAT edge (100) 0941

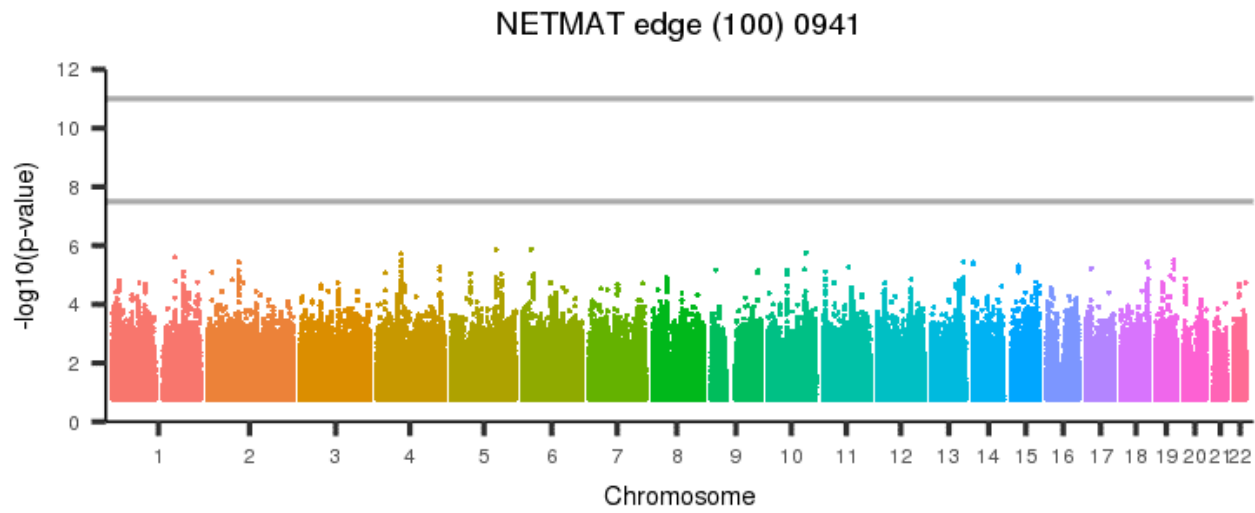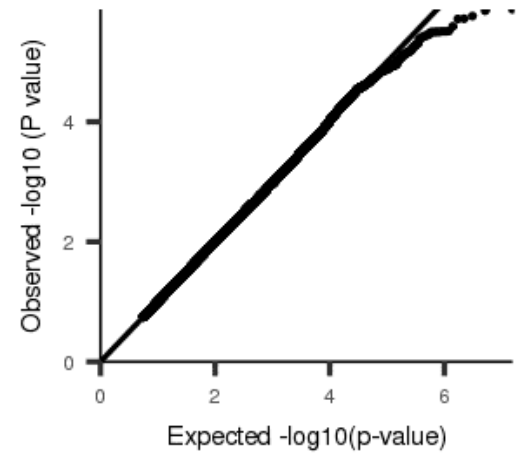

[back to list of plots](#)

Figure 2098: NETMAT edge (100) 0942

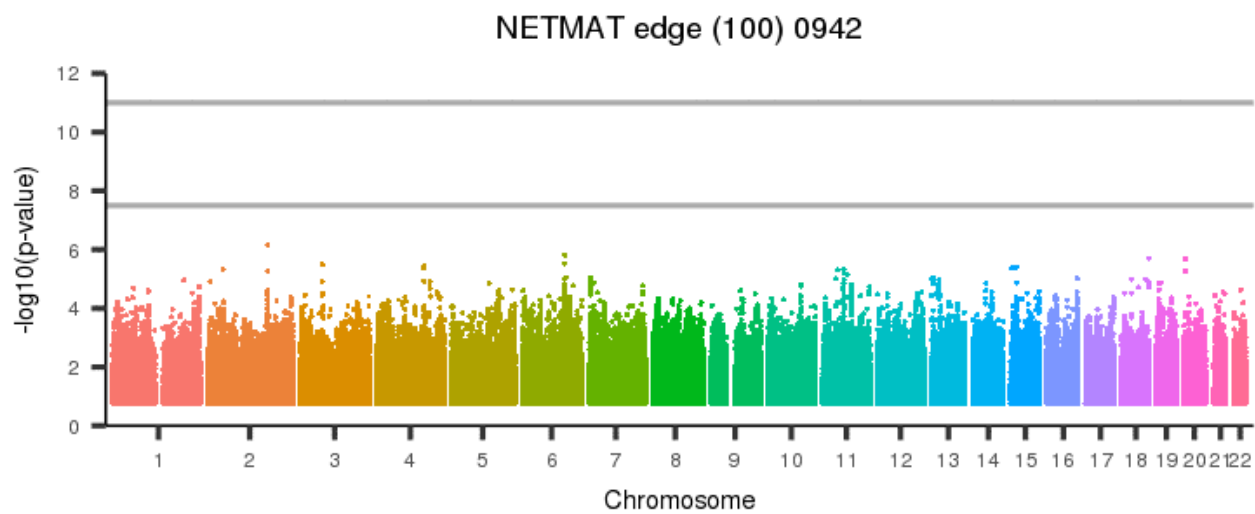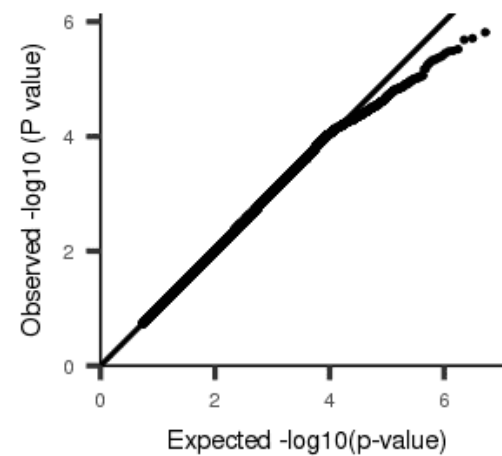

[back to list of plots](#)

Figure 2099: NETMAT edge (100) 0943

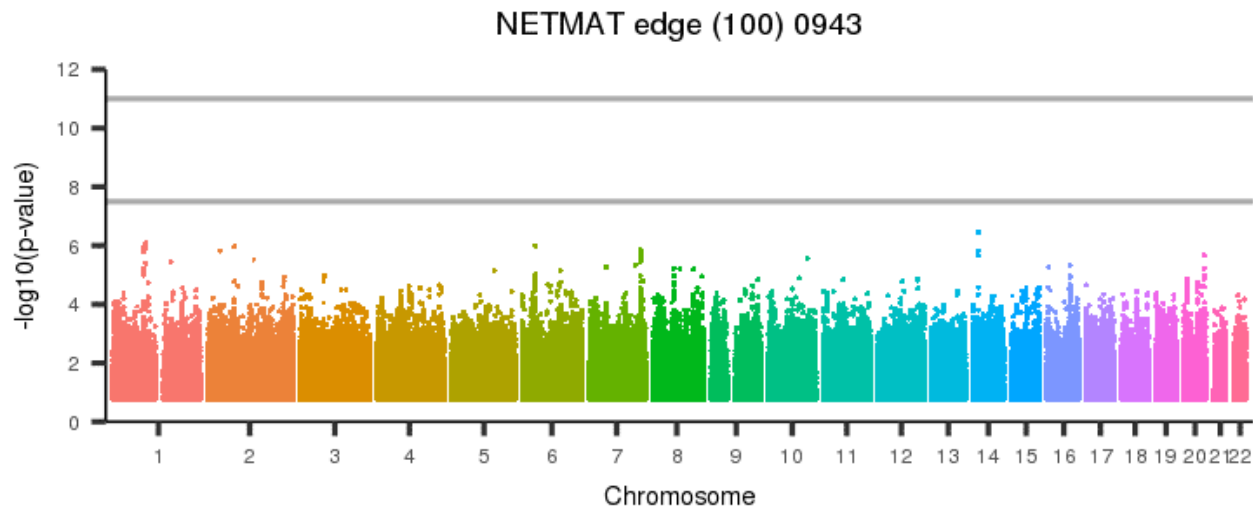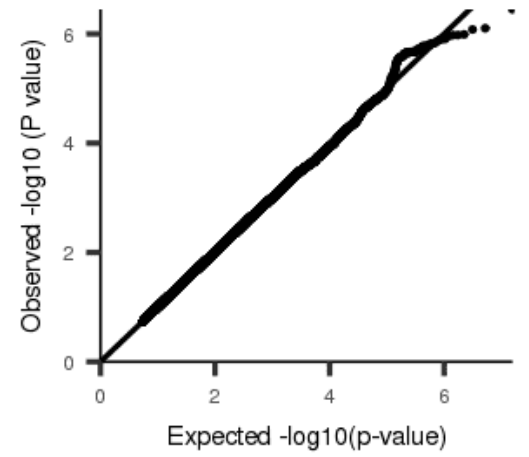

[back to list of plots](#)

Figure 2100: NETMAT edge (100) 0944

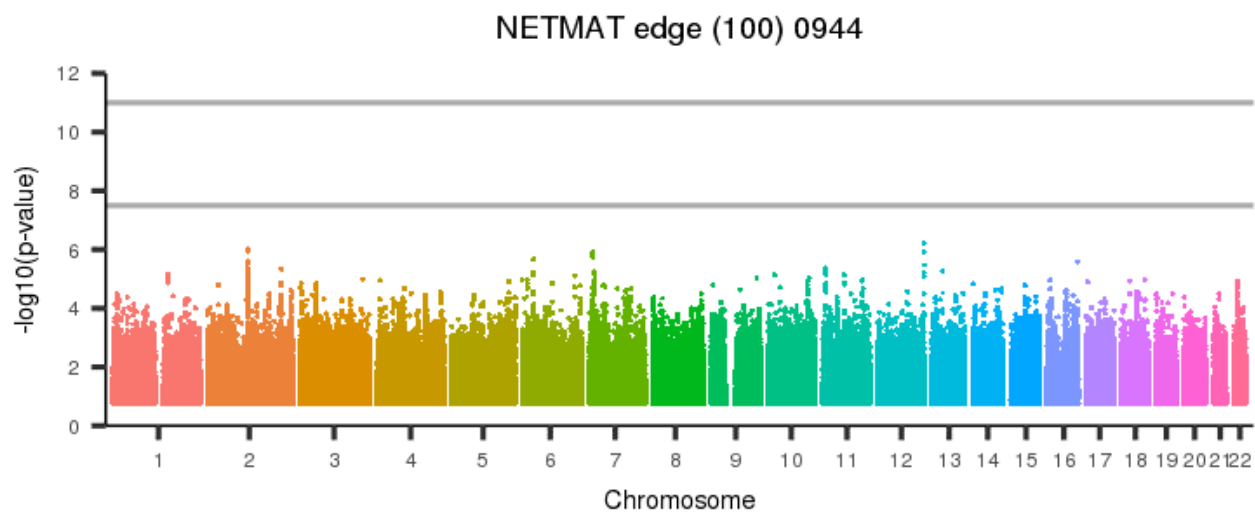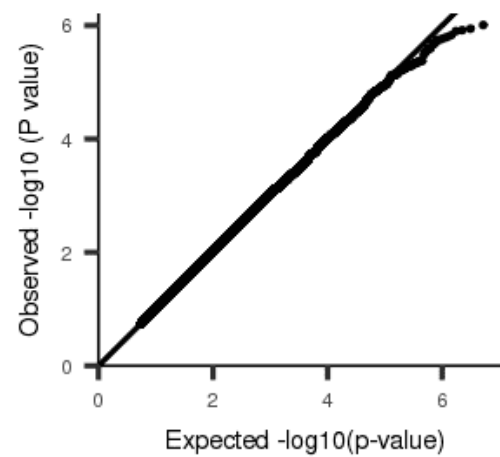

[back to list of plots](#)

Figure 2101: NETMAT edge (100) 0945

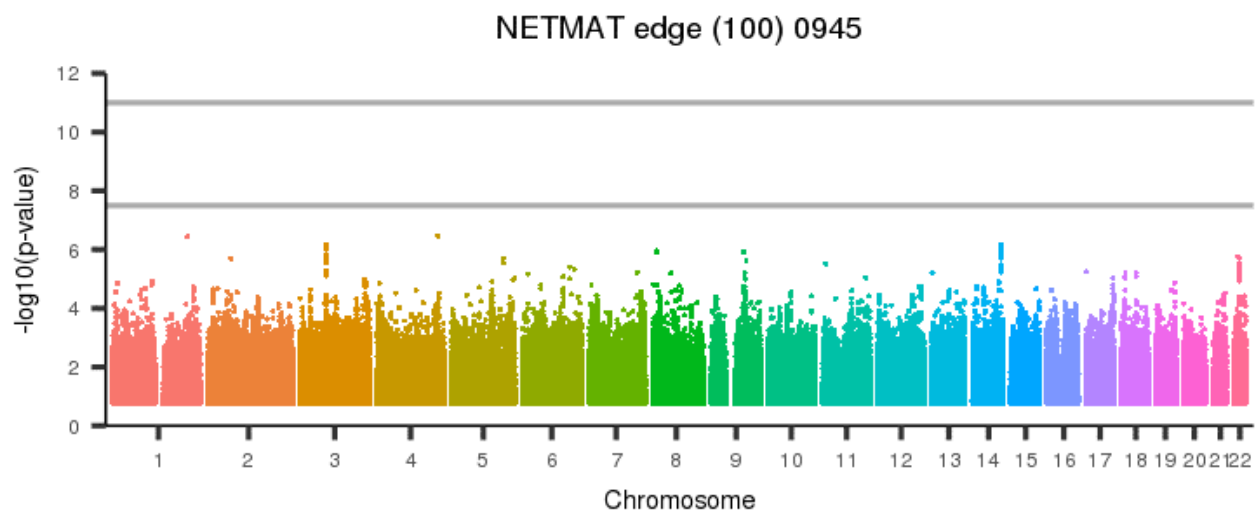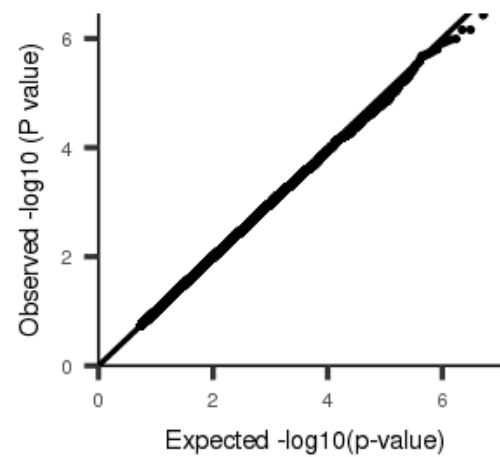

[back to list of plots](#)



Figure 2102: NETMAT edge (100) 0946

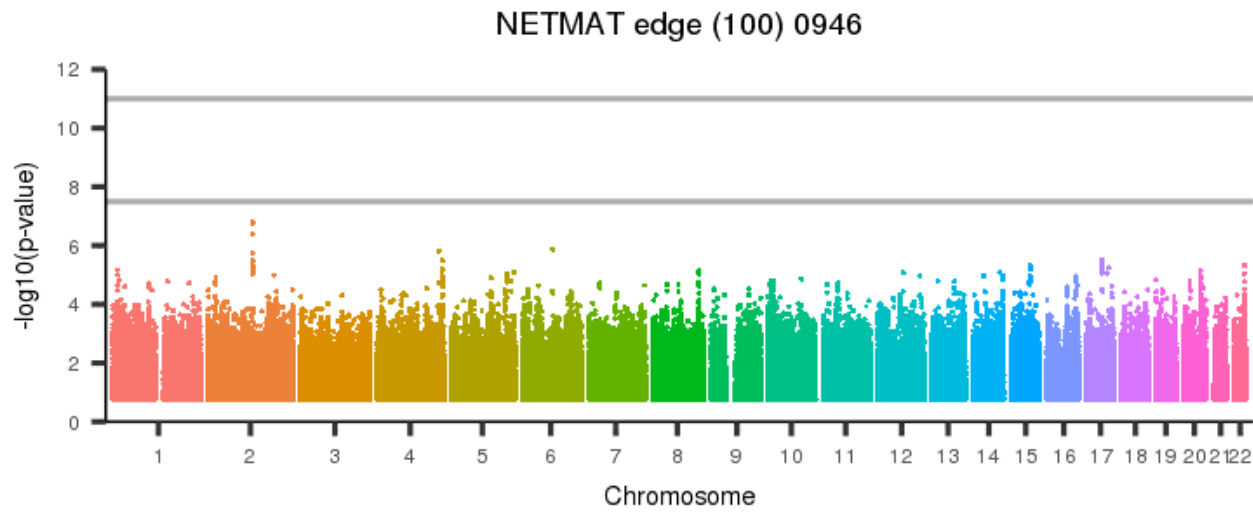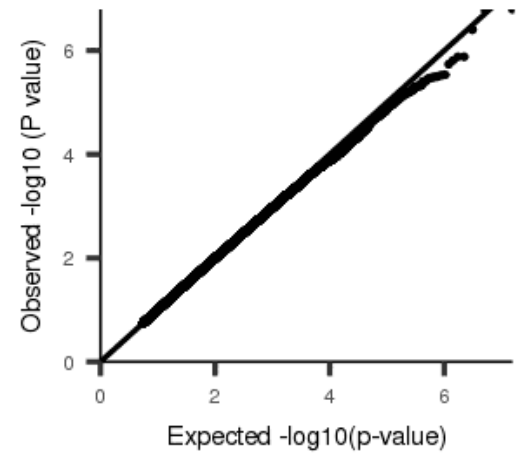

[back to list of plots](#)

Figure 2103: NETMAT edge (100) 0947

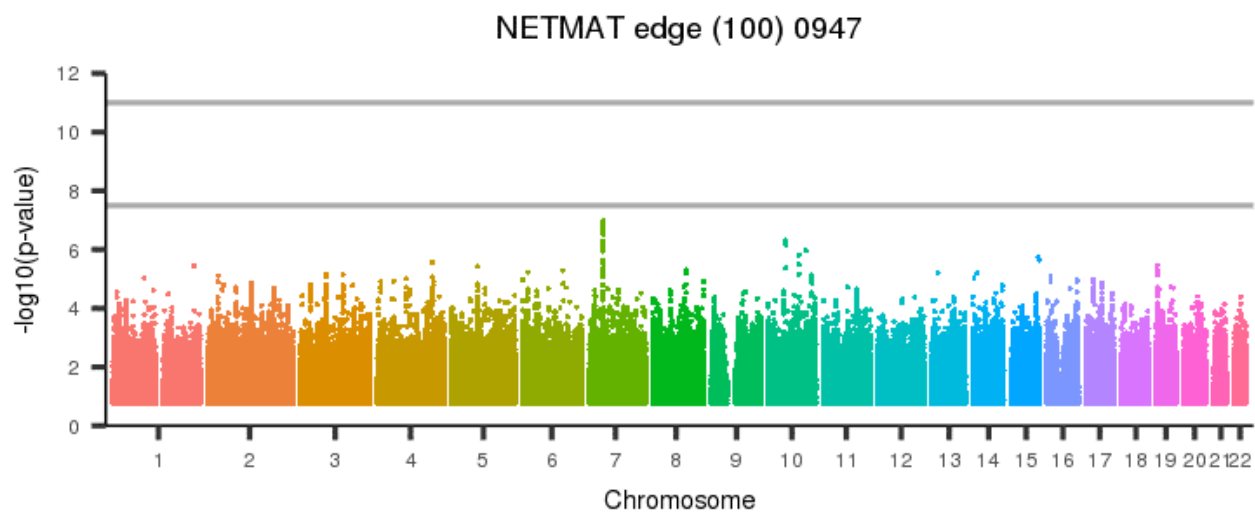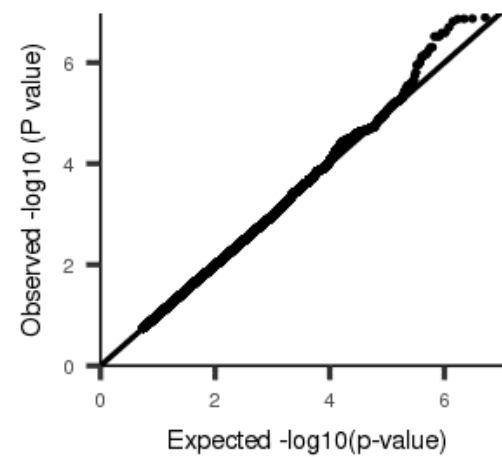

[back to list of plots](#)

Figure 2104: NETMAT edge (100) 0948

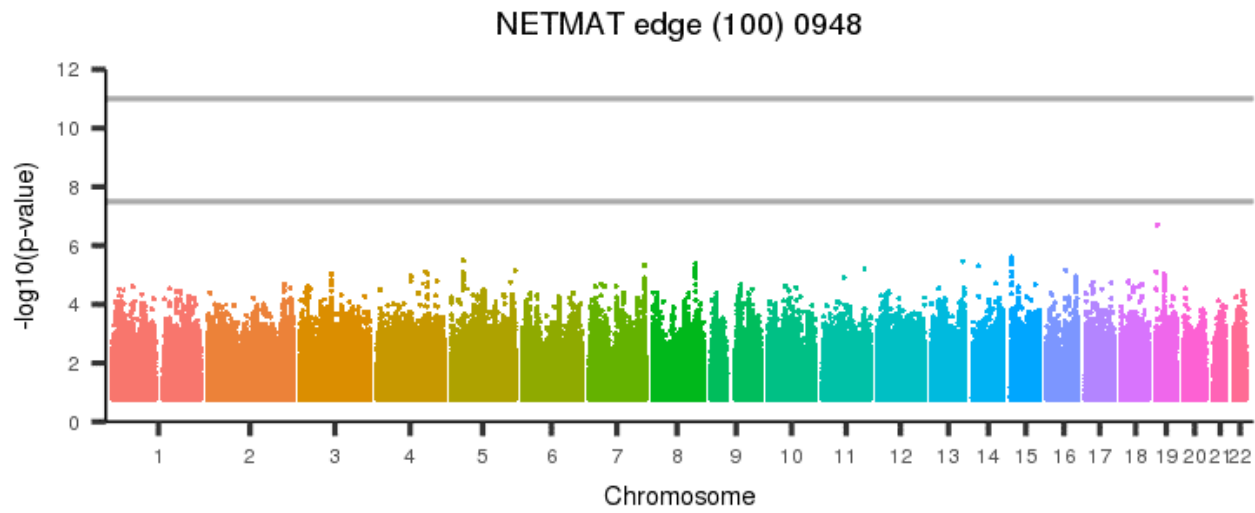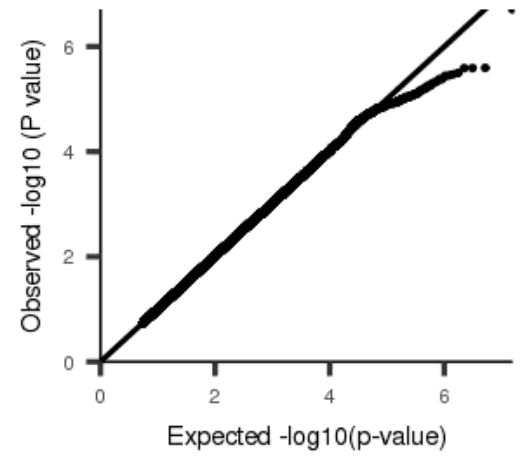

[back to list of plots](#)

Figure 2105: NETMAT edge (100) 0949

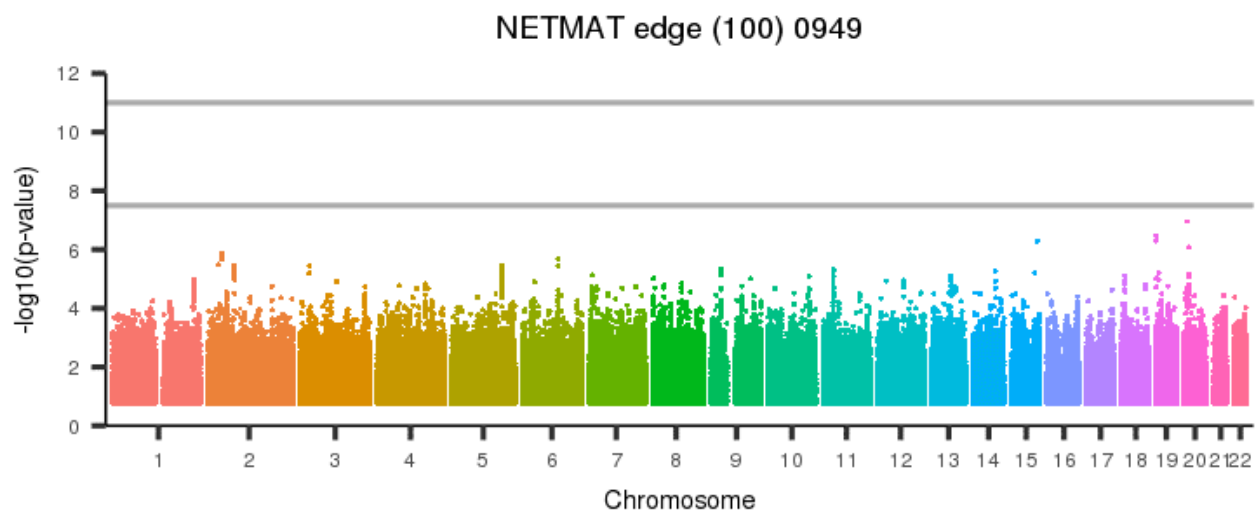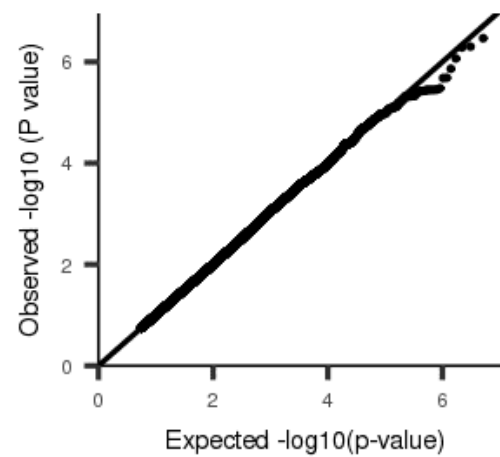

[back to list of plots](#)

Figure 2106: NETMAT edge (100) 0950

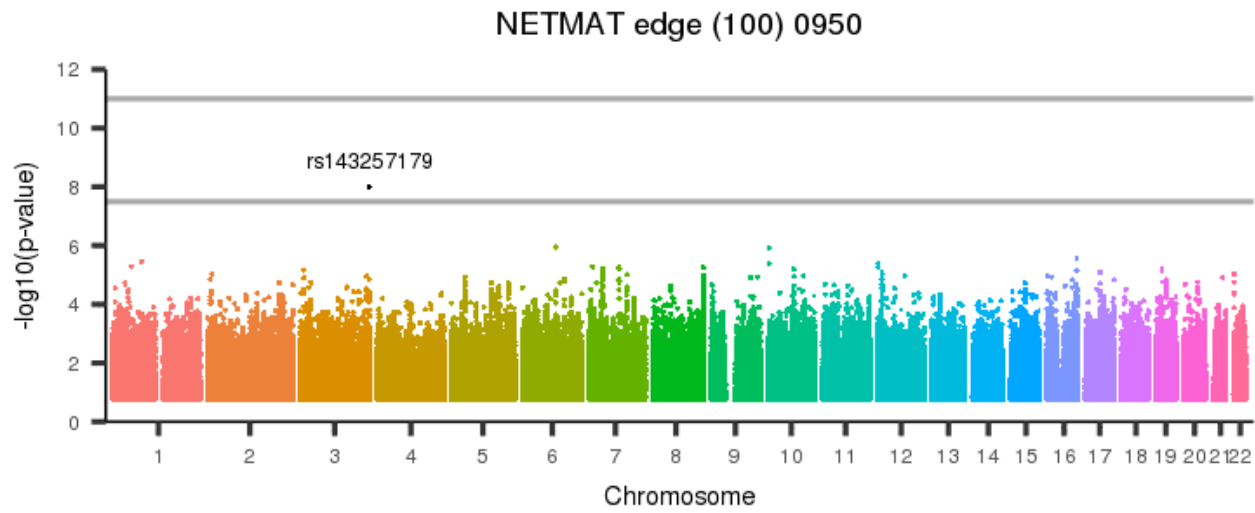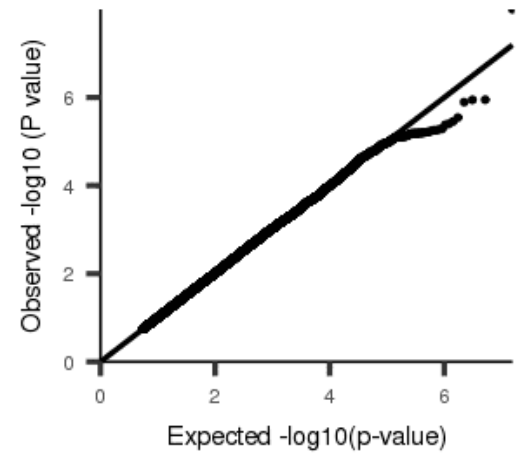

[back to list of plots](#)

Figure 2107: NETMAT edge (100) 0951

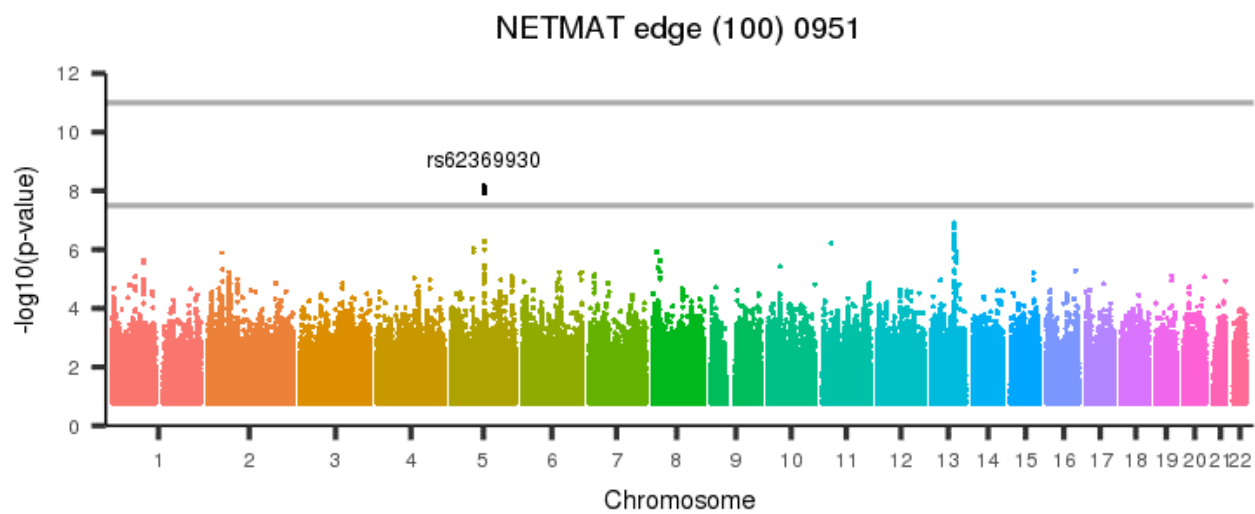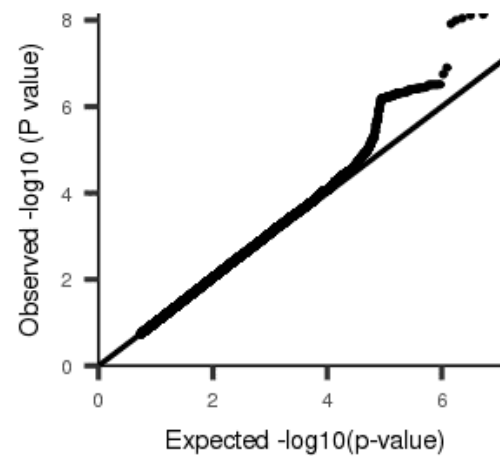

[back to list of plots](#)

Figure 2108: NETMAT edge (100) 0952

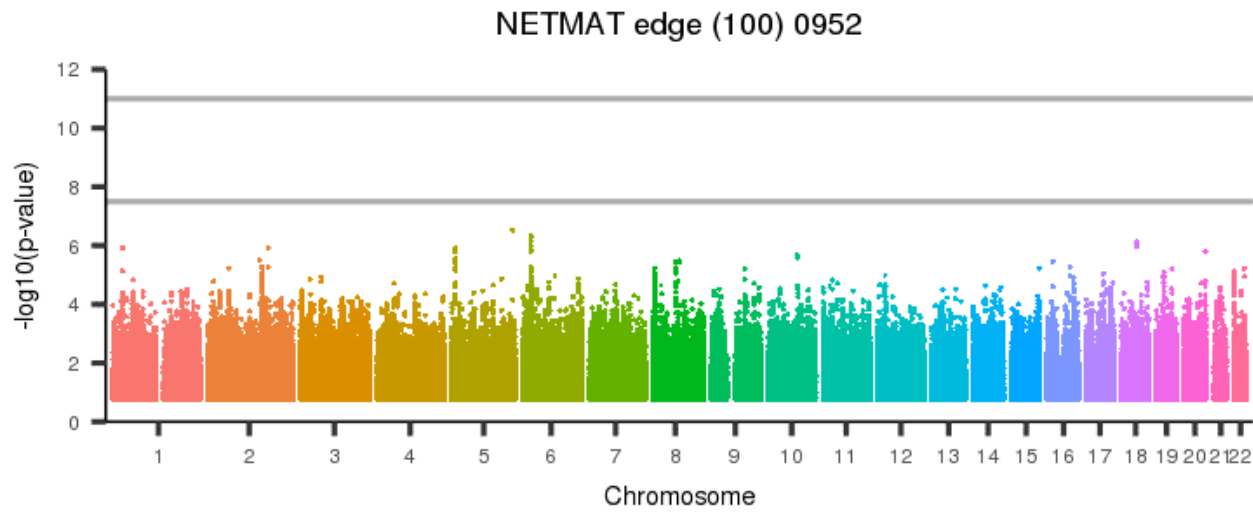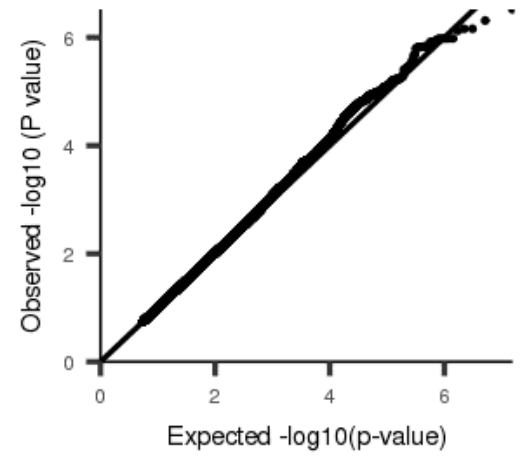

[back to list of plots](#)

Figure 2109: NETMAT edge (100) 0953

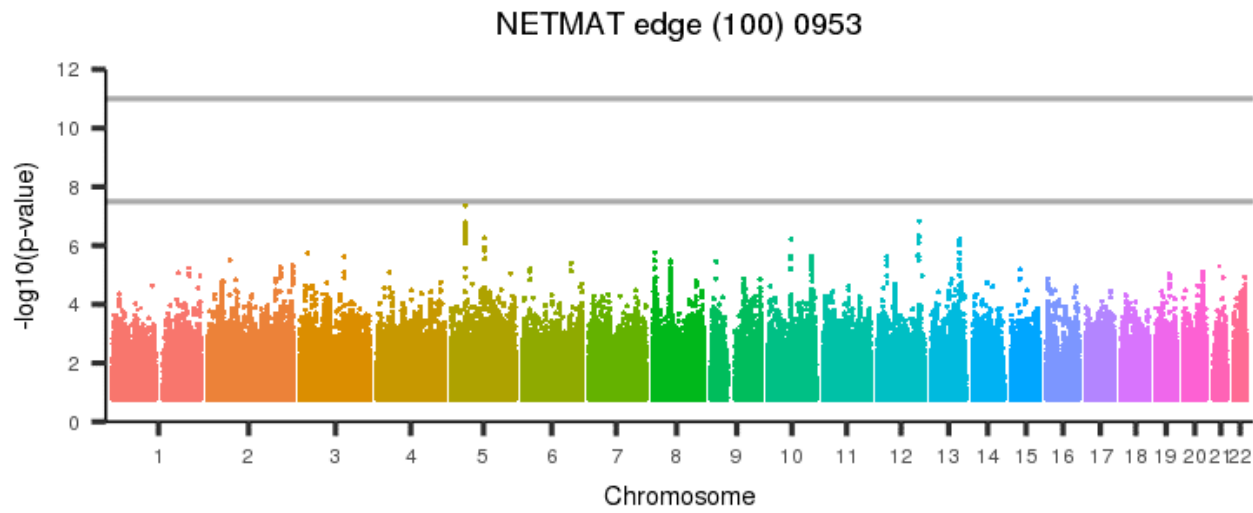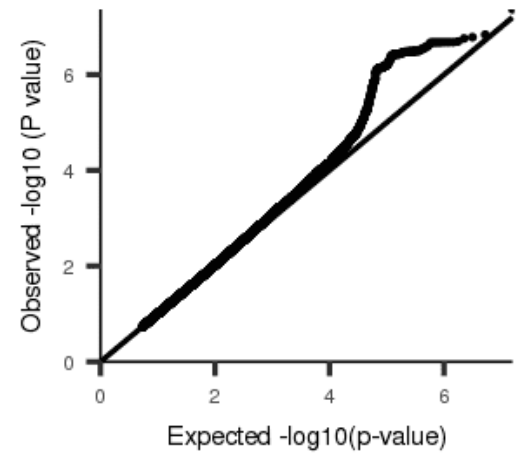

[back to list of plots](#)



Figure 2110: NETMAT edge (100) 0954

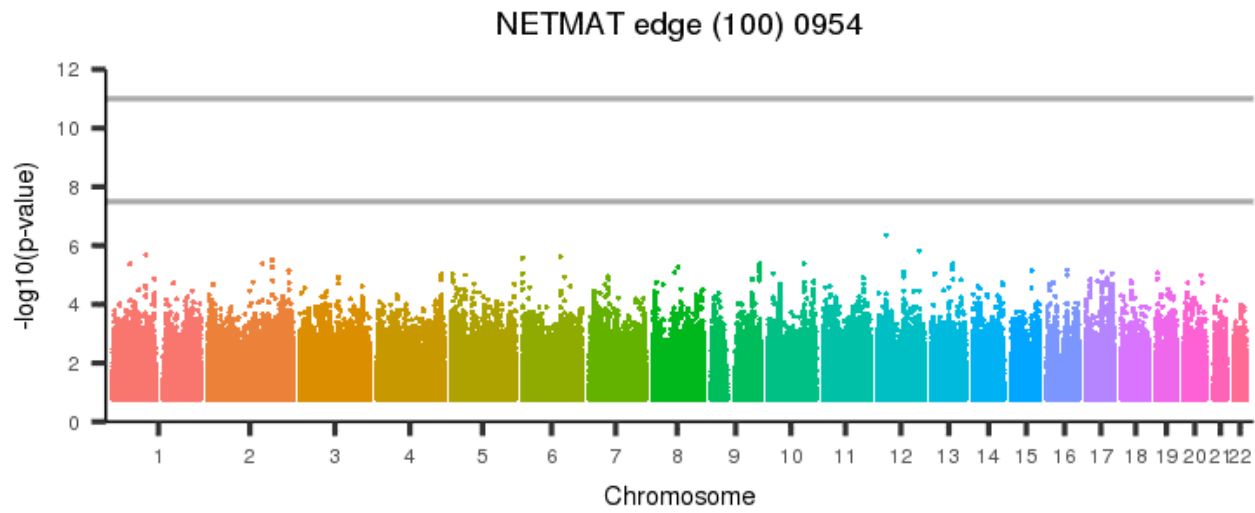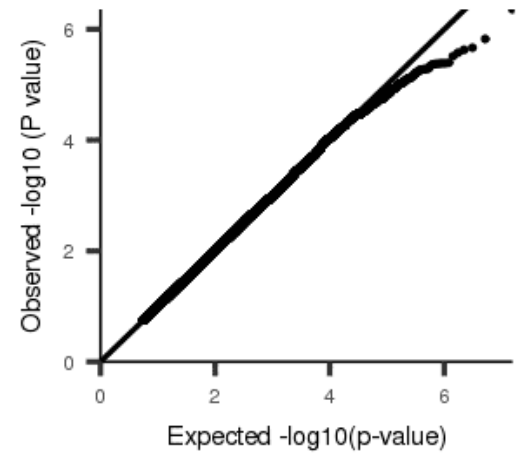

[back to list of plots](#)

Figure 2111: NETMAT edge (100) 0955

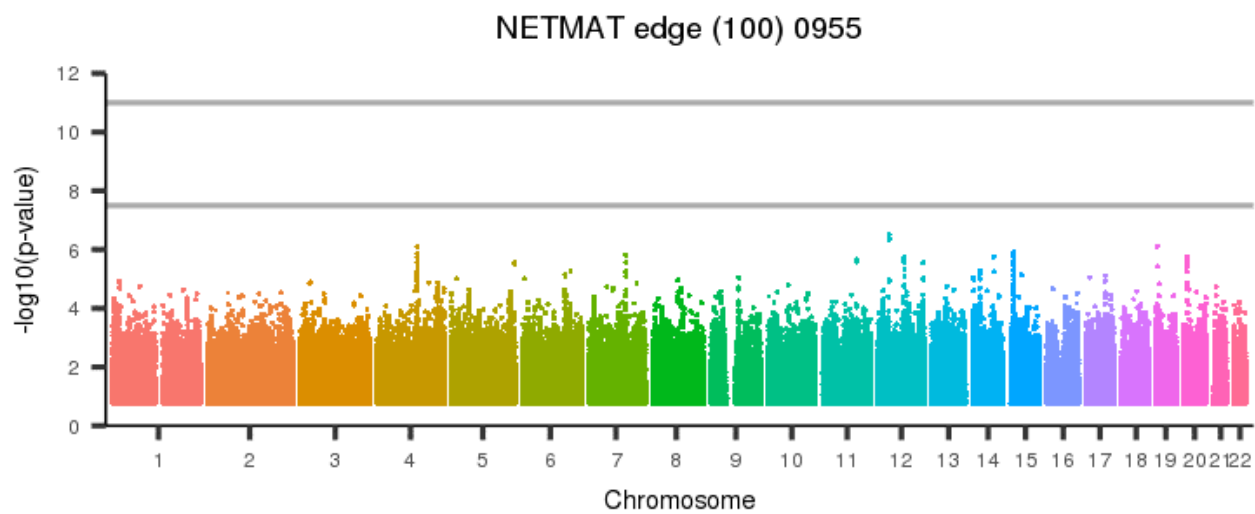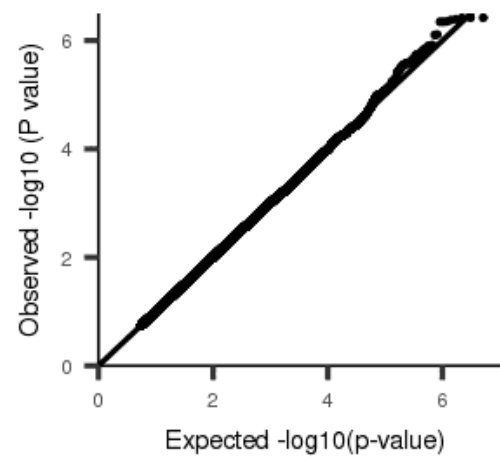

[back to list of plots](#)

Figure 2112: NETMAT edge (100) 0956

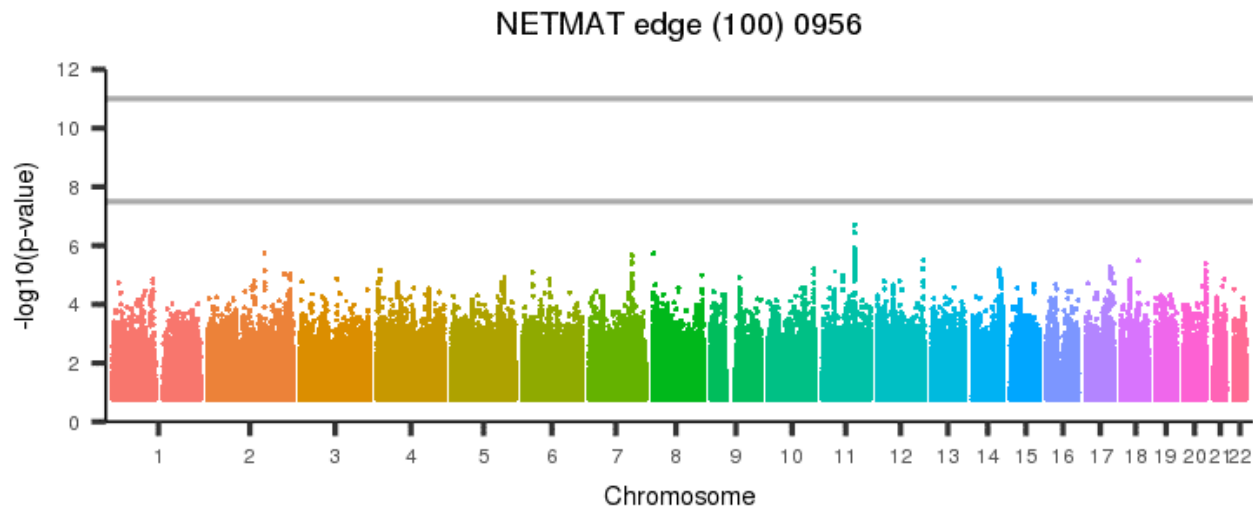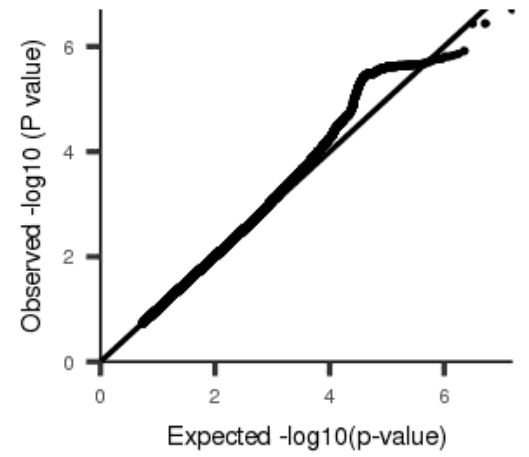

[back to list of plots](#)

Figure 2113: NETMAT edge (100) 0957

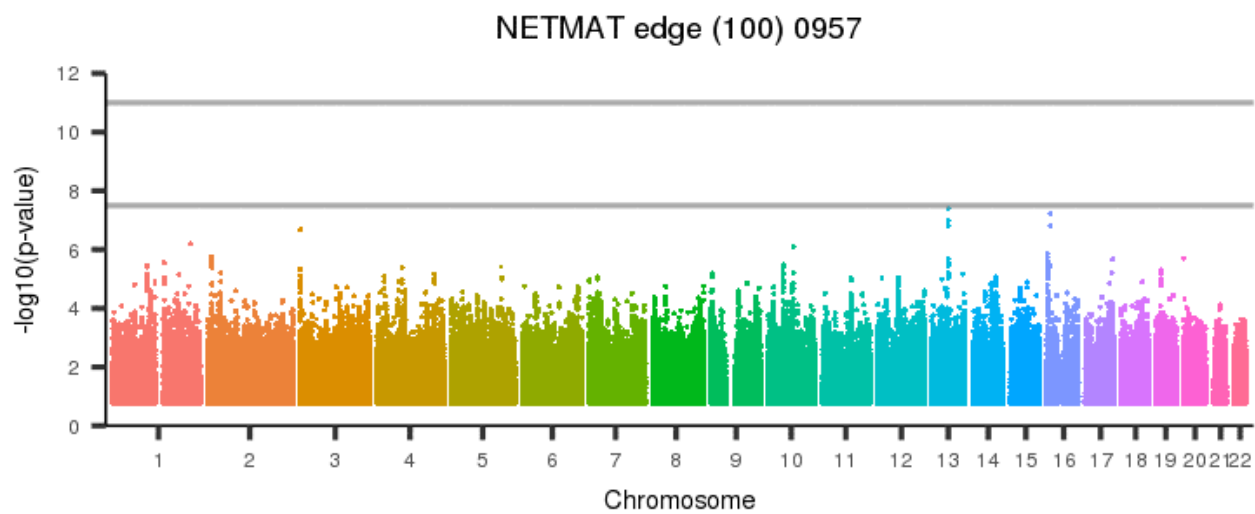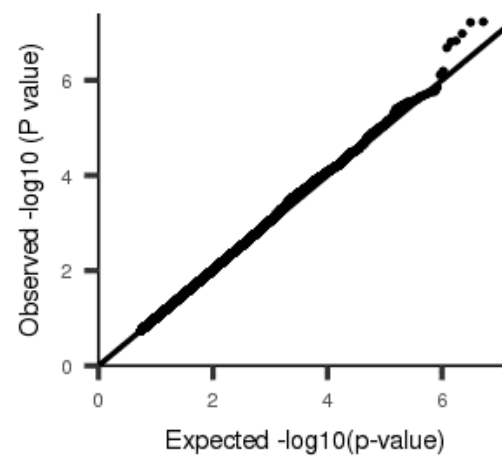

[back to list of plots](#)

Figure 2114: NETMAT edge (100) 0958

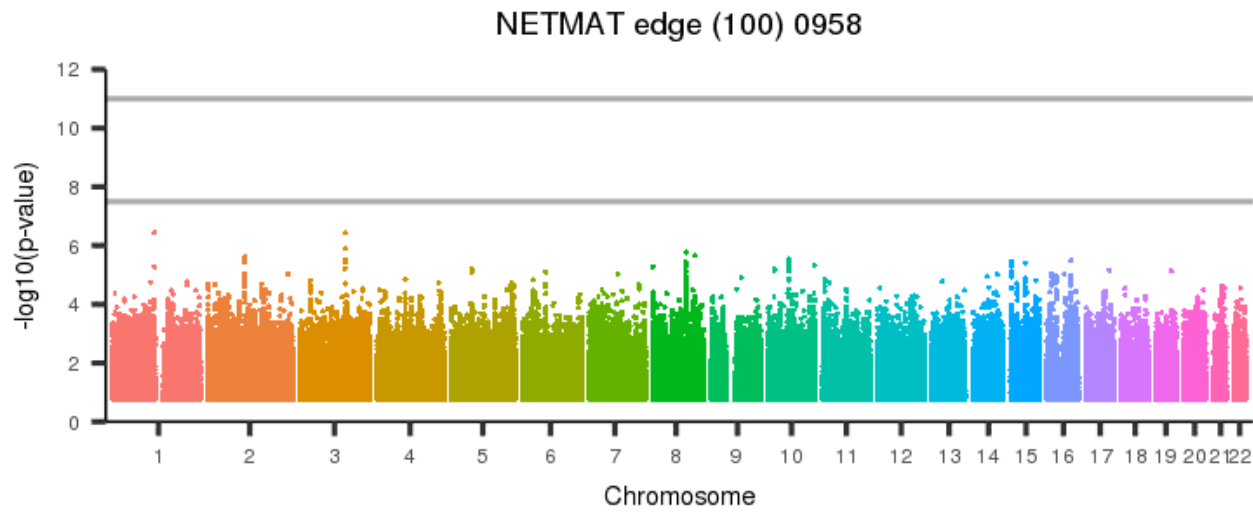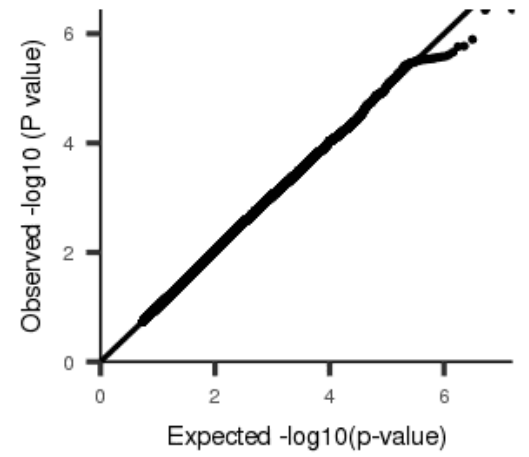

[back to list of plots](#)

Figure 2115: NETMAT edge (100) 0959

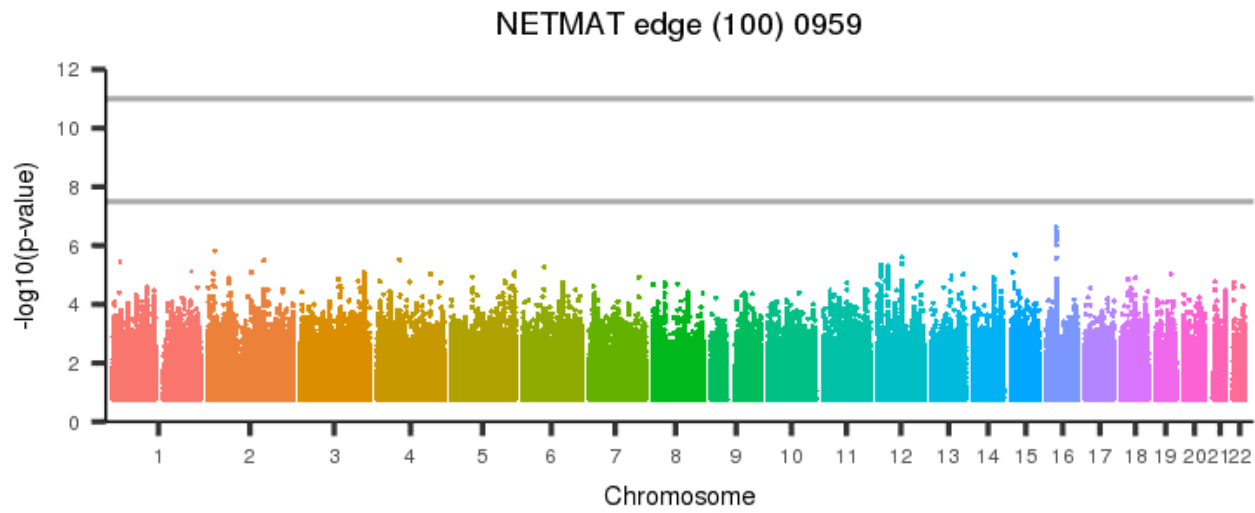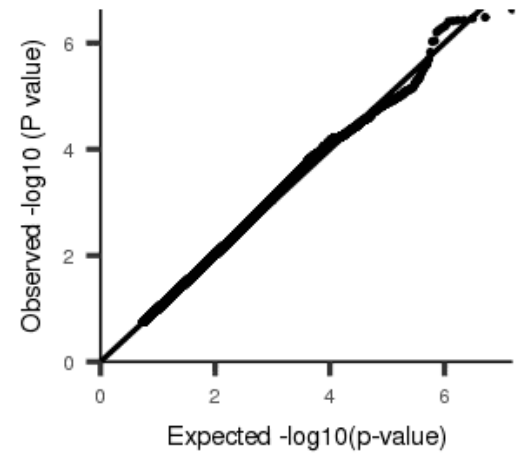

[back to list of plots](#)

Figure 2116: NETMAT edge (100) 0960

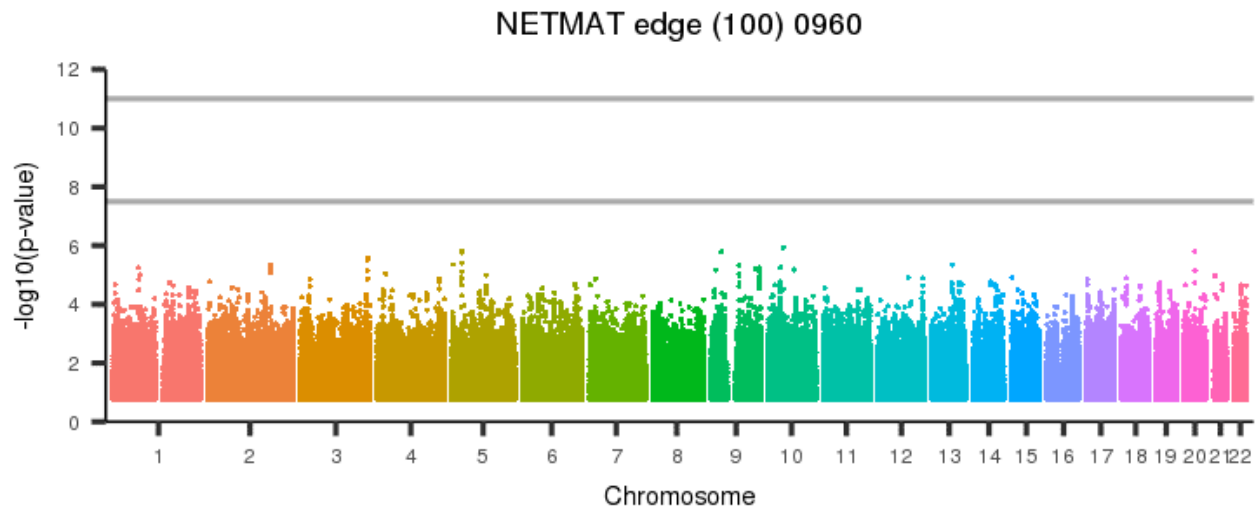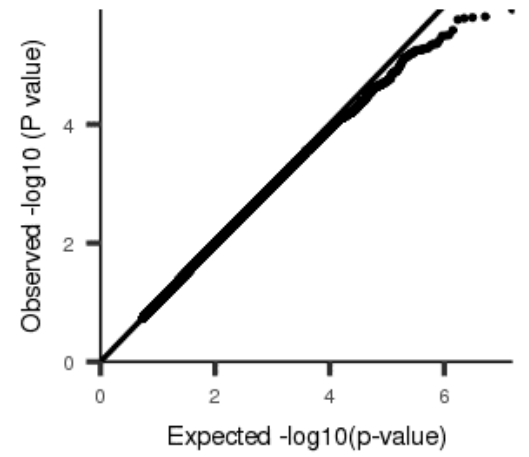

[back to list of plots](#)

Figure 2117: NETMAT edge (100) 0961

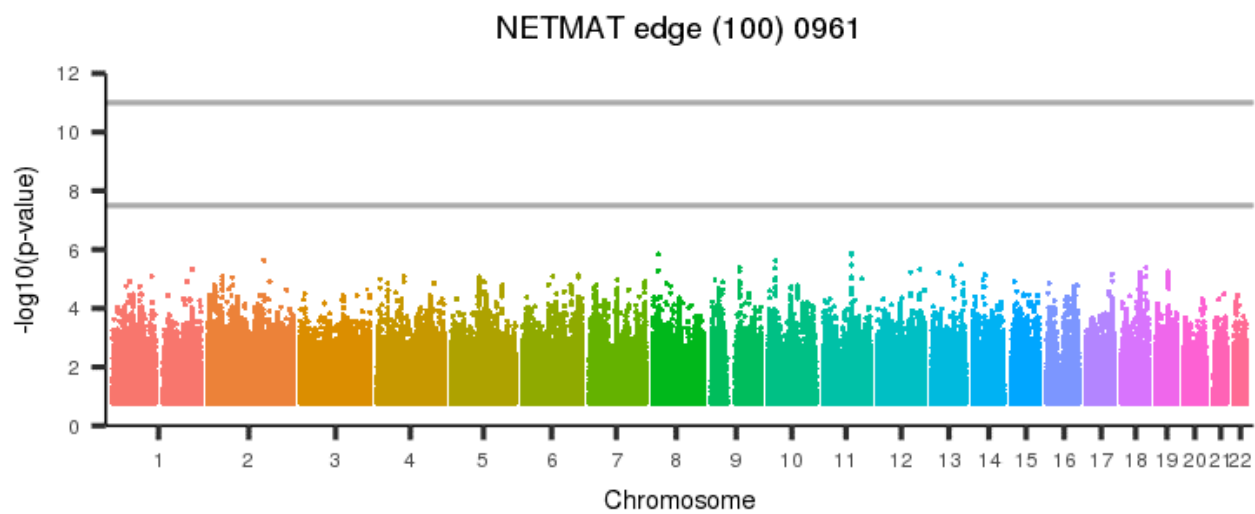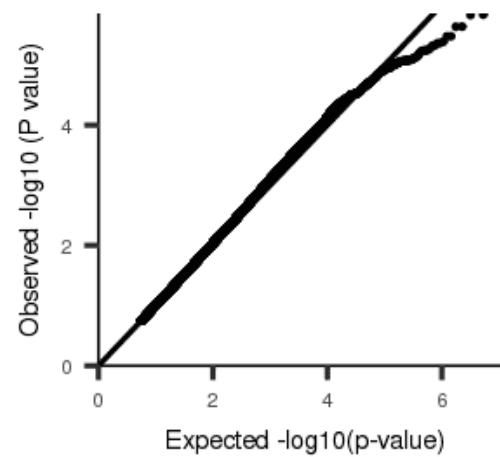

[back to list of plots](#)



Figure 2118: NETMAT edge (100) 0962

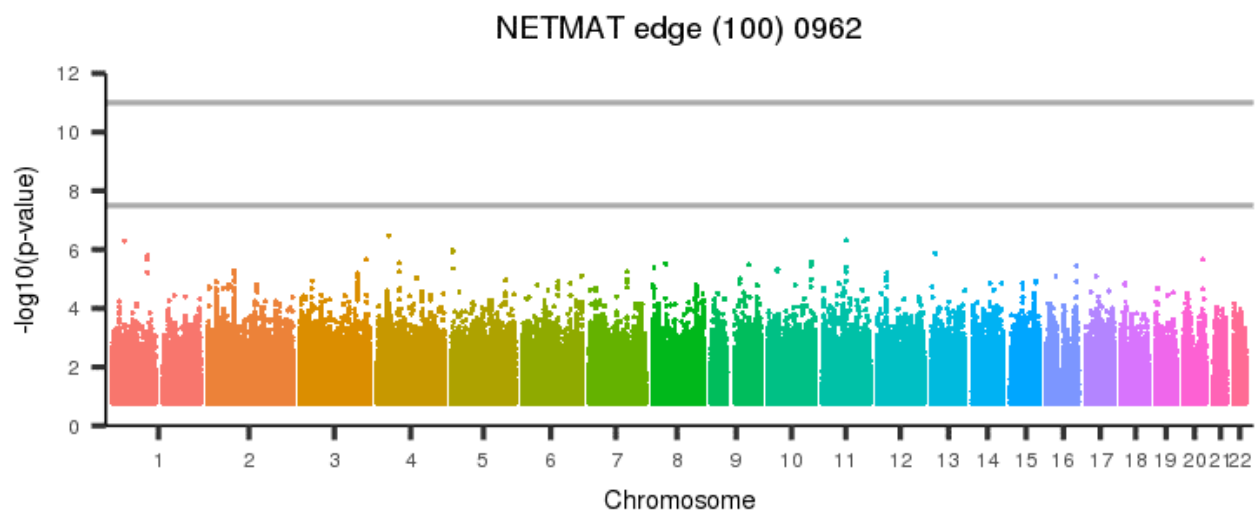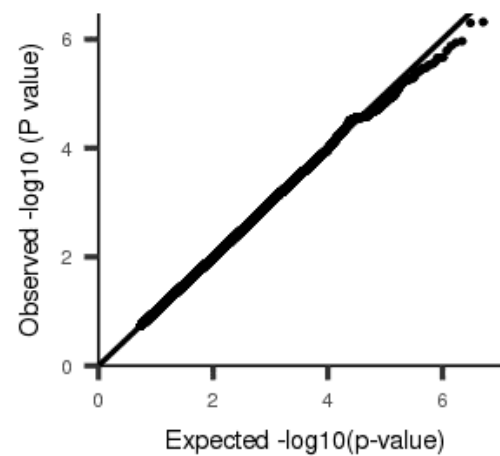

[back to list of plots](#)

Figure 2119: NETMAT edge (100) 0963

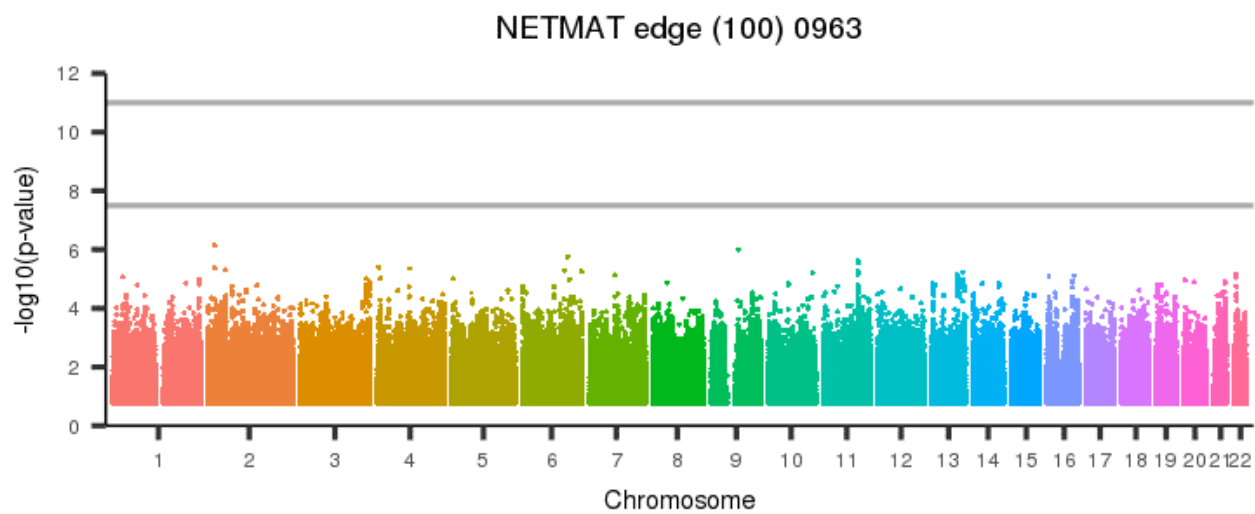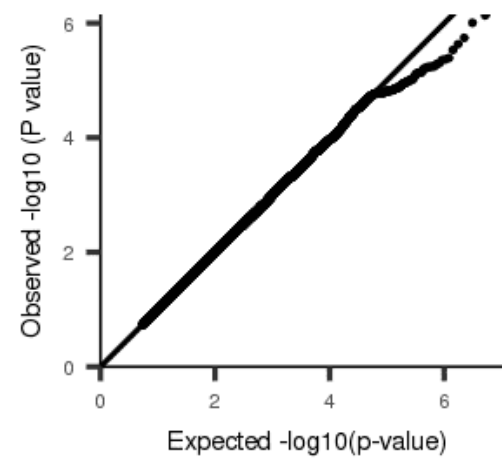

[back to list of plots](#)

Figure 2120: NETMAT edge (100) 0964

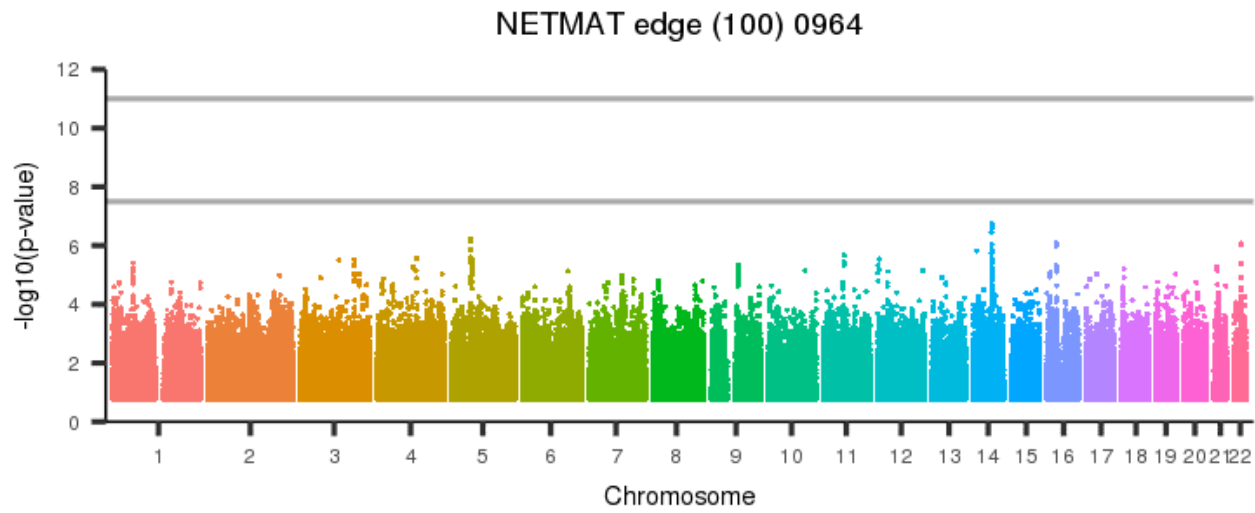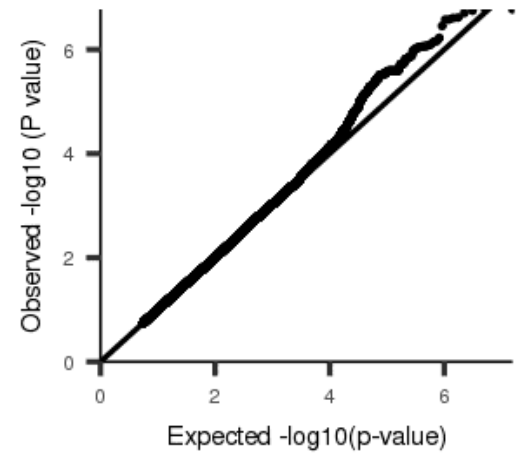

[back to list of plots](#)

Figure 2121: NETMAT edge (100) 0965

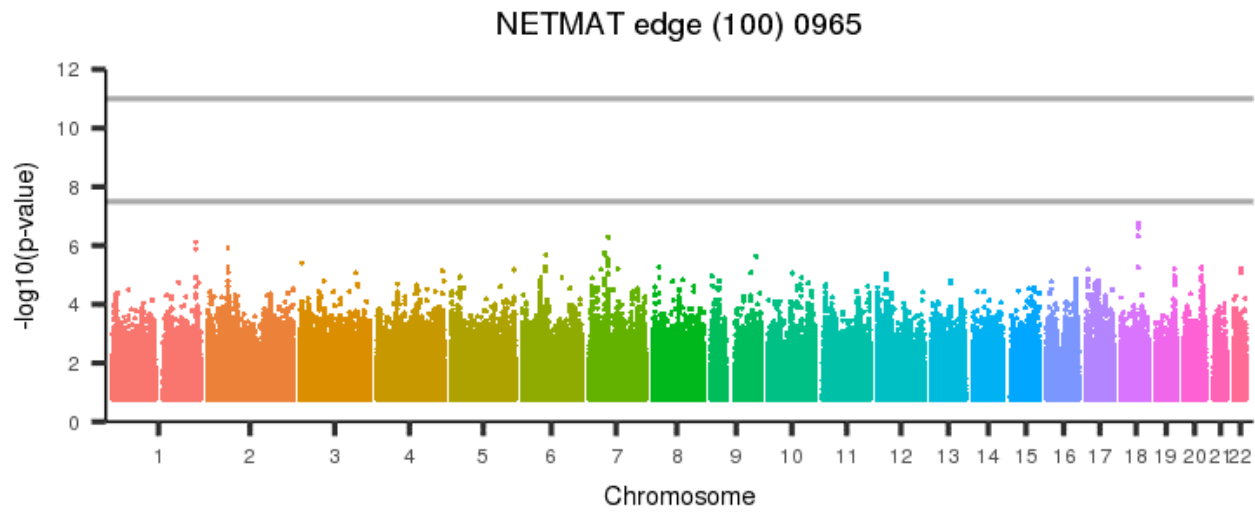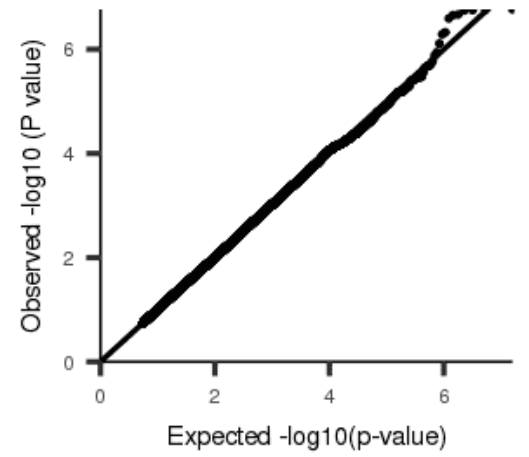

[back to list of plots](#)

Figure 2122: NETMAT edge (100) 0966

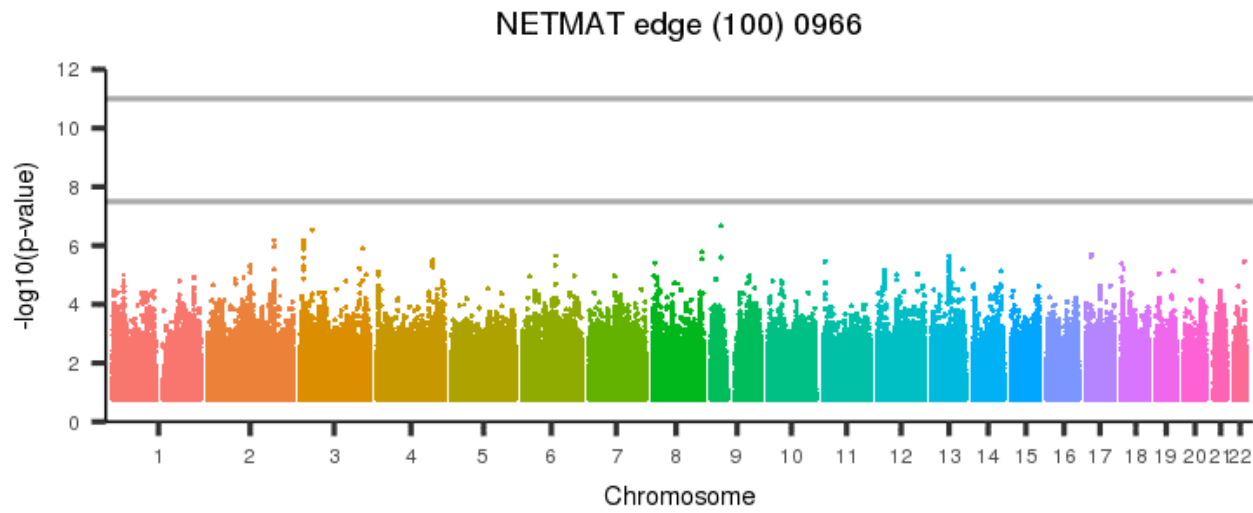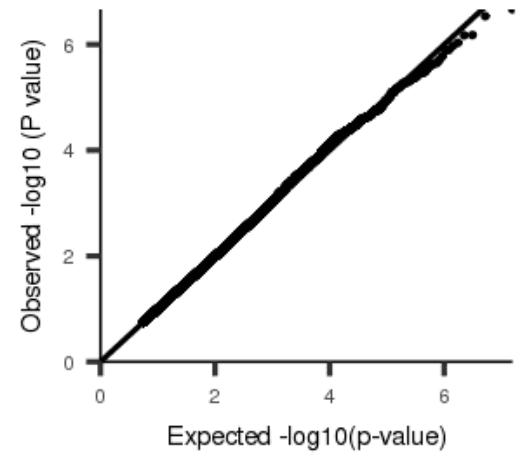

[back to list of plots](#)

Figure 2123: NETMAT edge (100) 0967

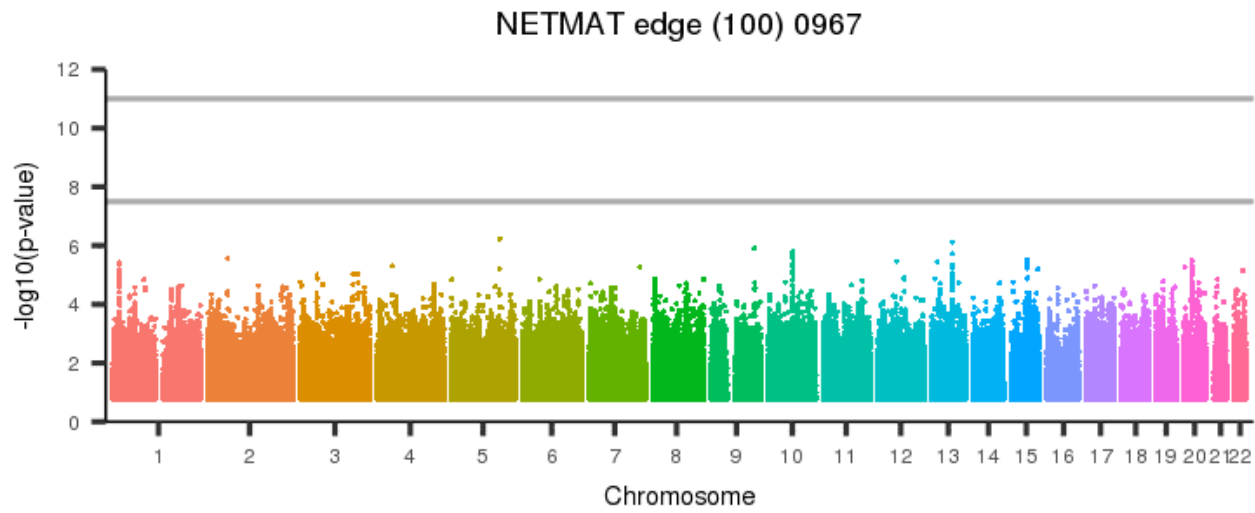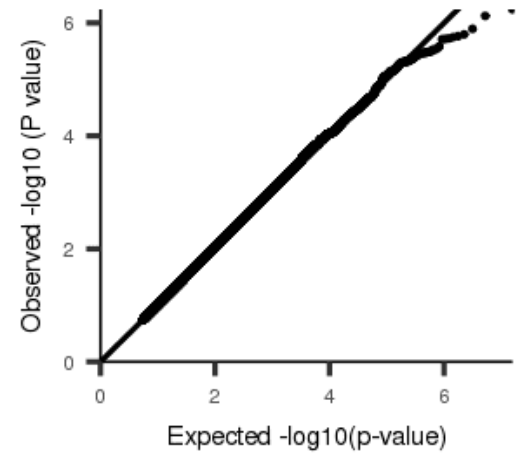

[back to list of plots](#)

Figure 2124: NETMAT edge (100) 0968

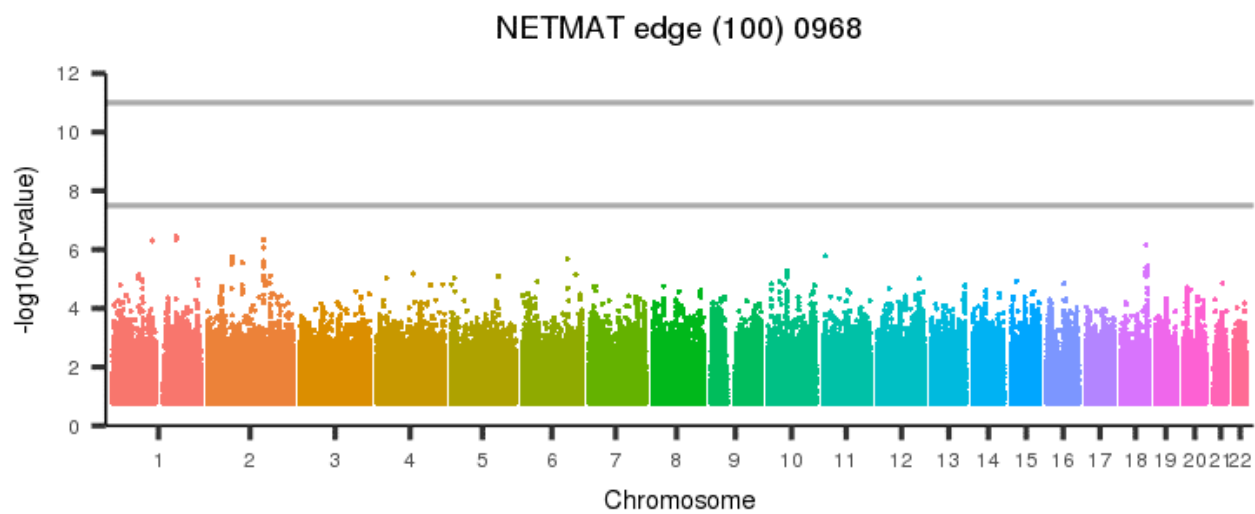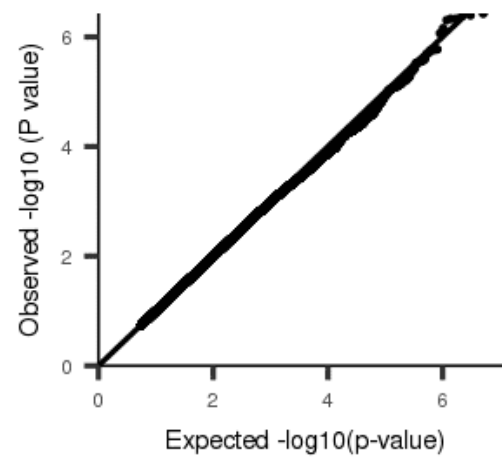

[back to list of plots](#)

Figure 2125: NETMAT edge (100) 0969

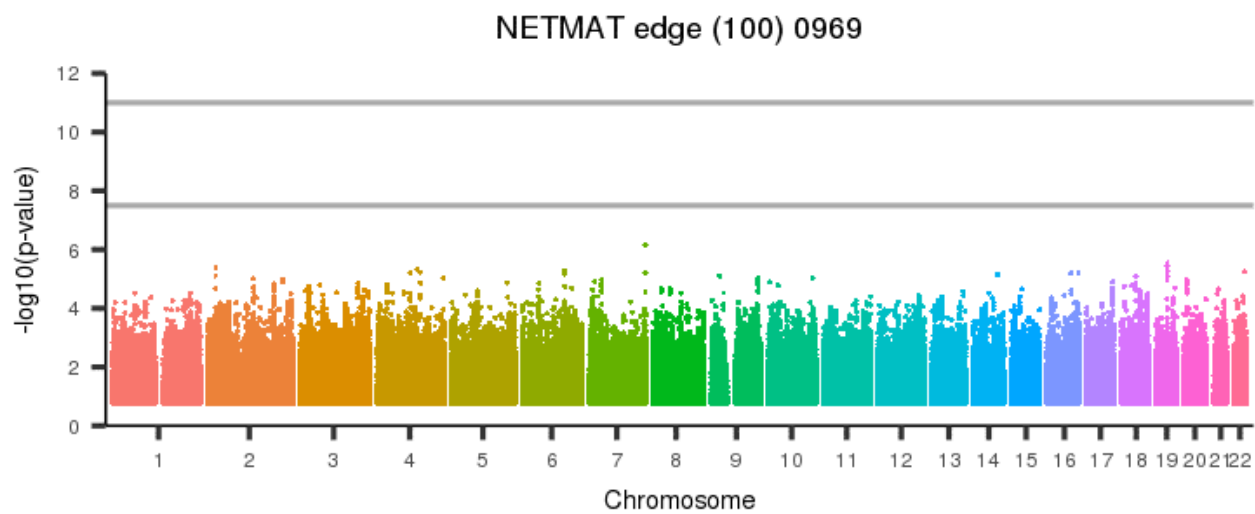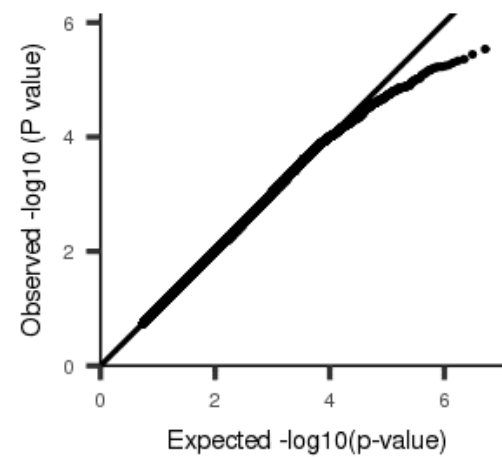

[back to list of plots](#)



Figure 2126: NETMAT edge (100) 0970

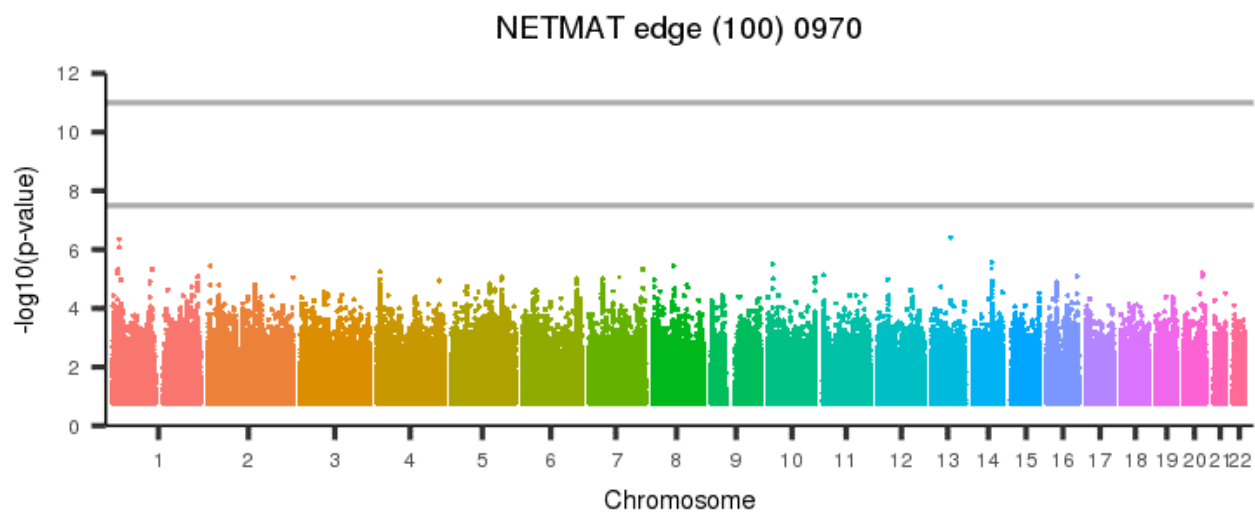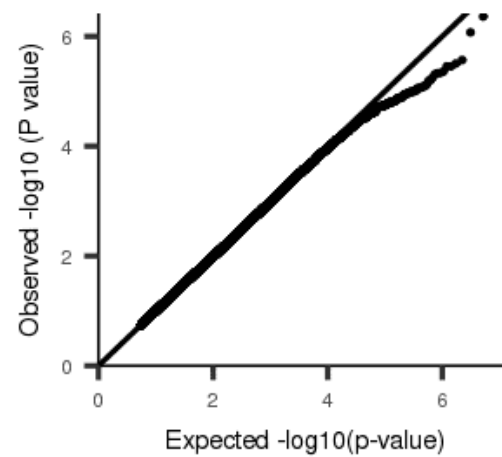

[back to list of plots](#)

Figure 2127: NETMAT edge (100) 0971

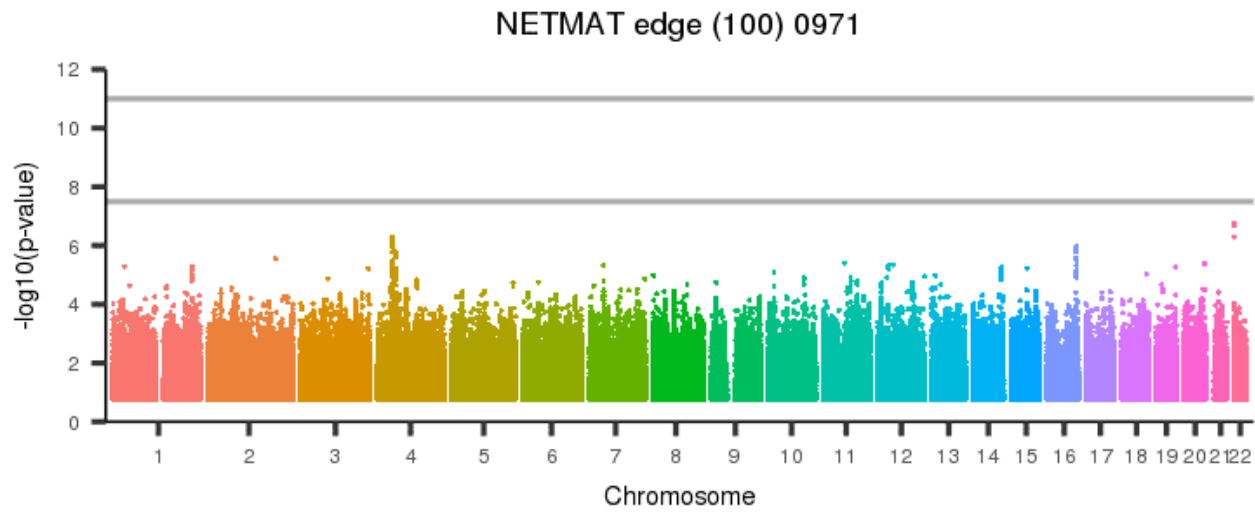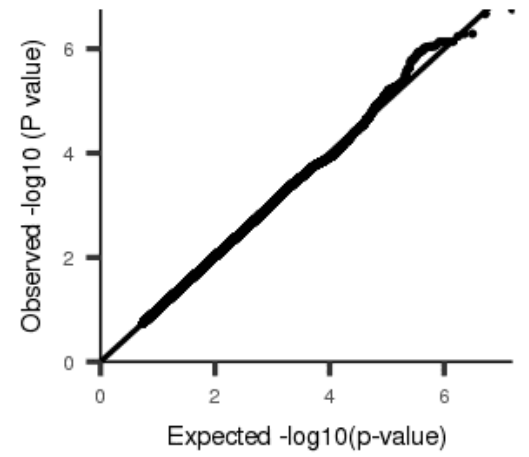

[back to list of plots](#)

Figure 2128: NETMAT edge (100) 0972

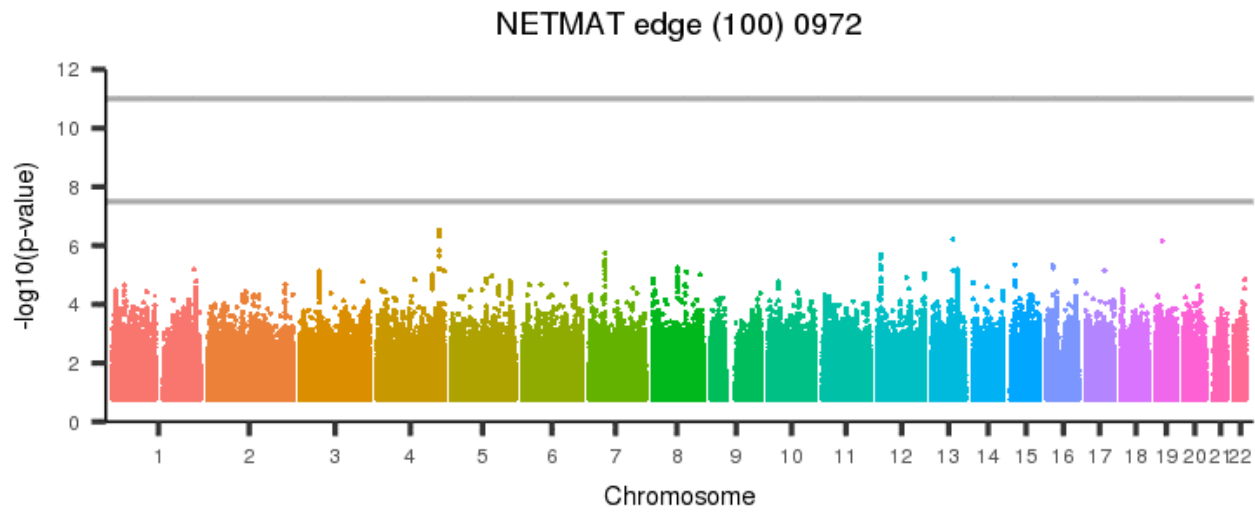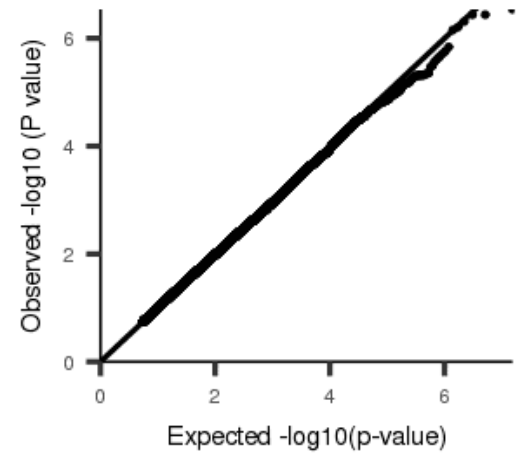

[back to list of plots](#)

Figure 2129: NETMAT edge (100) 0973

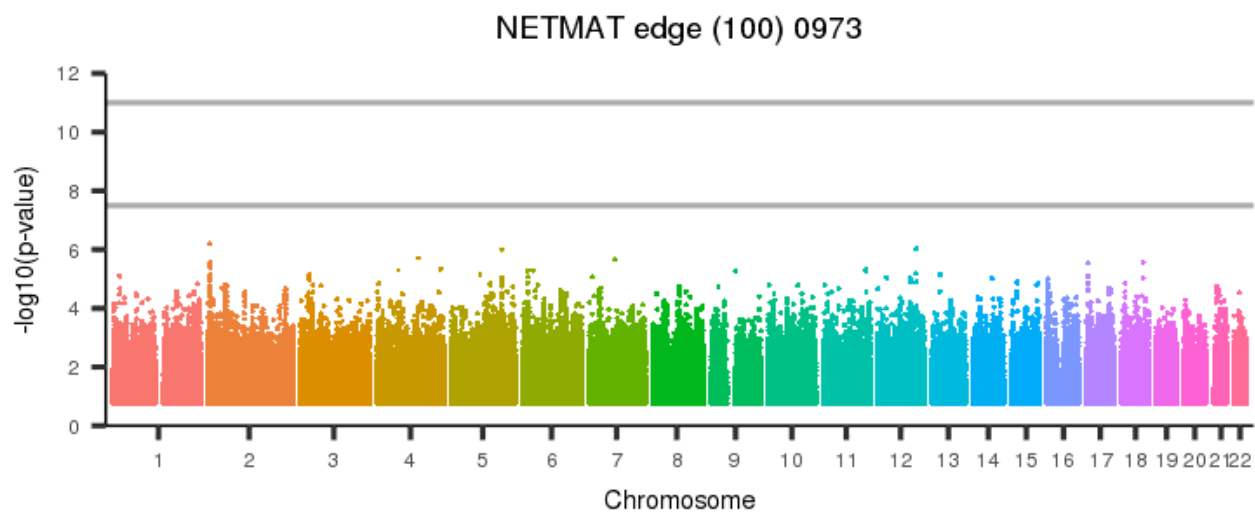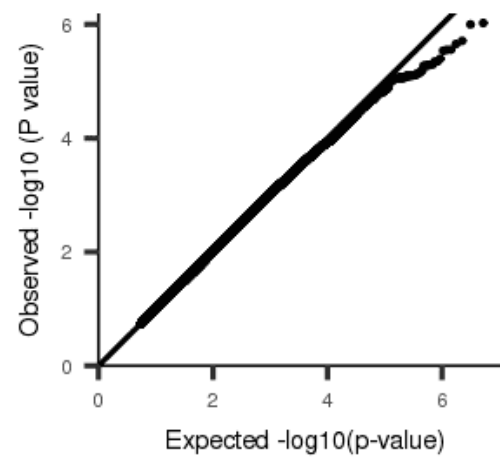

[back to list of plots](#)

Figure 2130: NETMAT edge (100) 0974

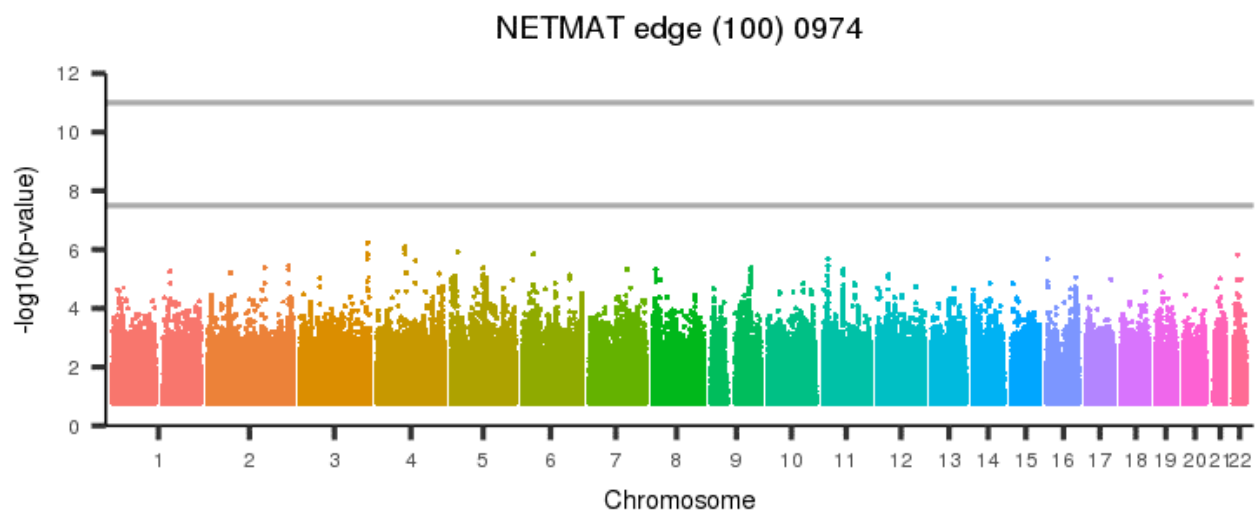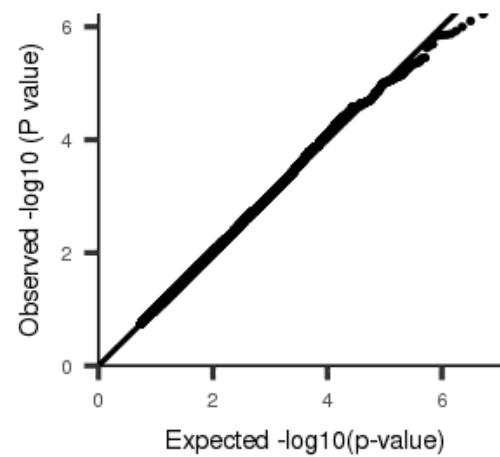

[back to list of plots](#)

Figure 2131: NETMAT edge (100) 0975

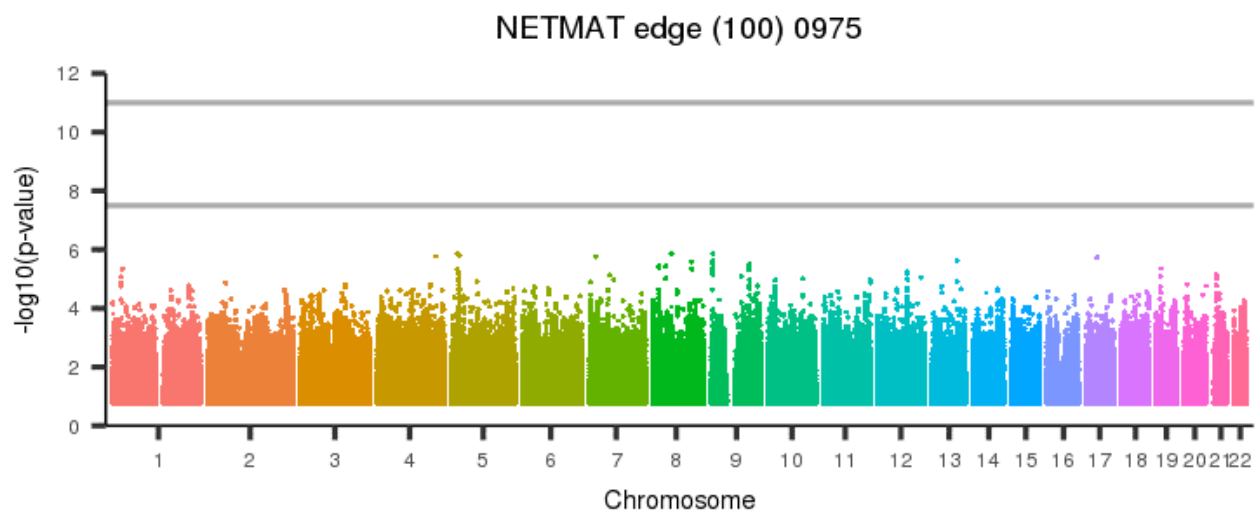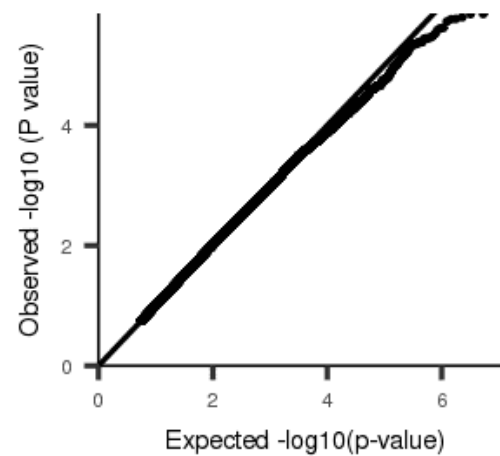

[back to list of plots](#)

Figure 2132: NETMAT edge (100) 0976

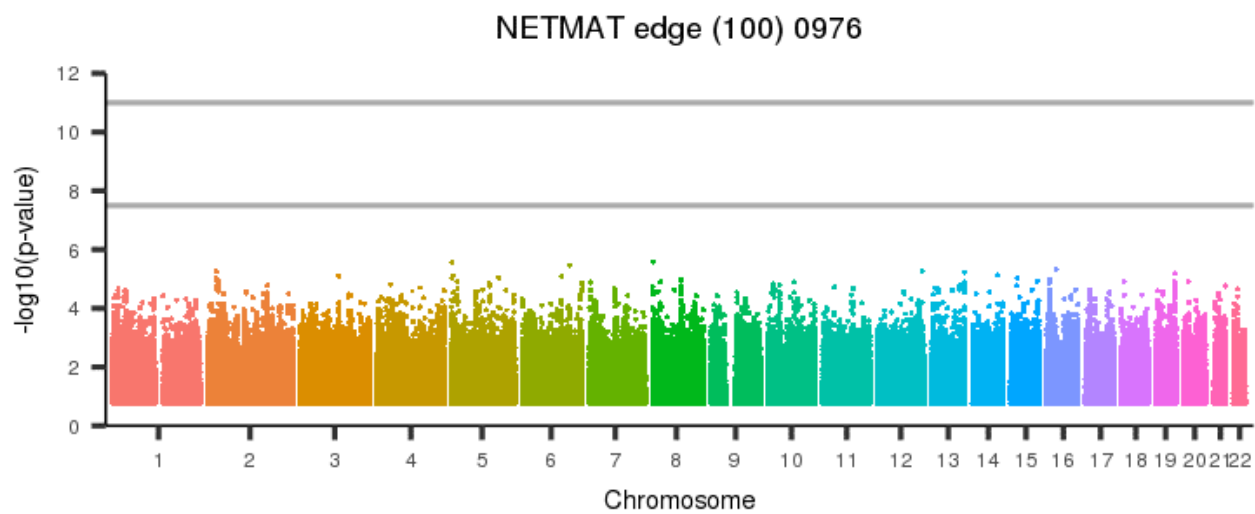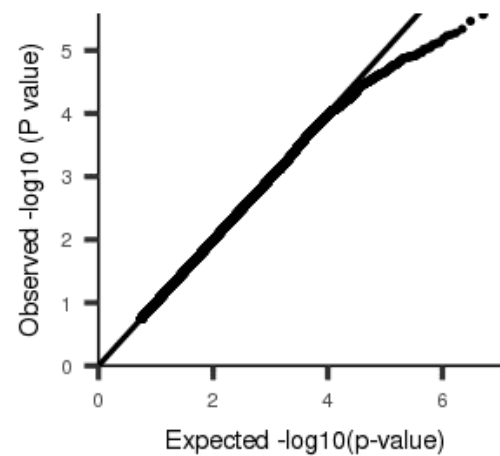

[back to list of plots](#)

Figure 2133: NETMAT edge (100) 0977

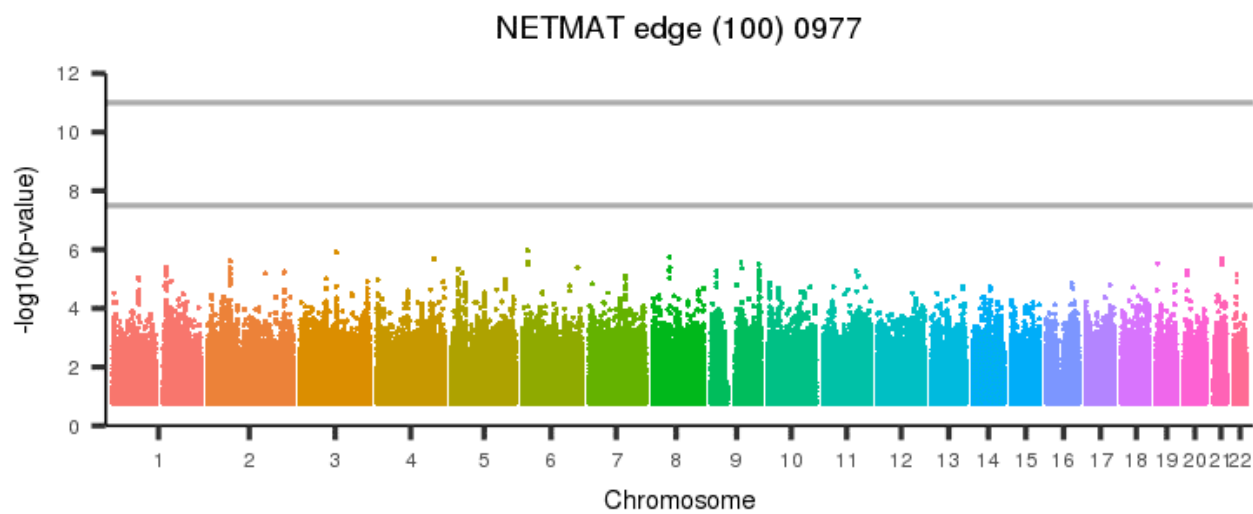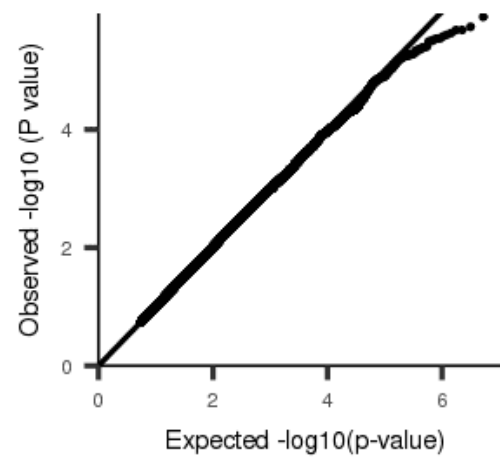

[back to list of plots](#)



Figure 2134: NETMAT edge (100) 0978

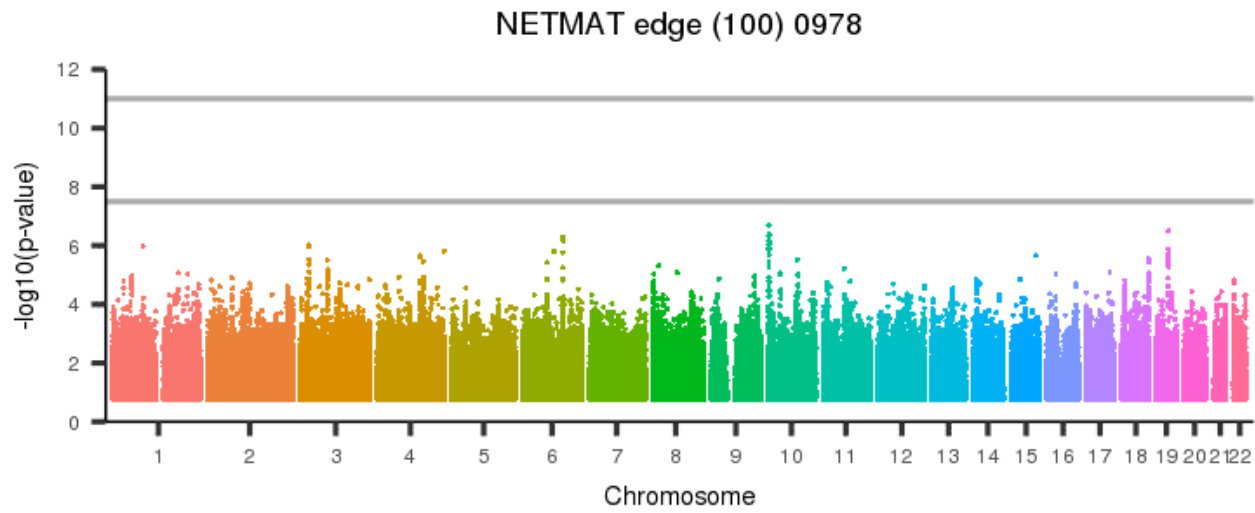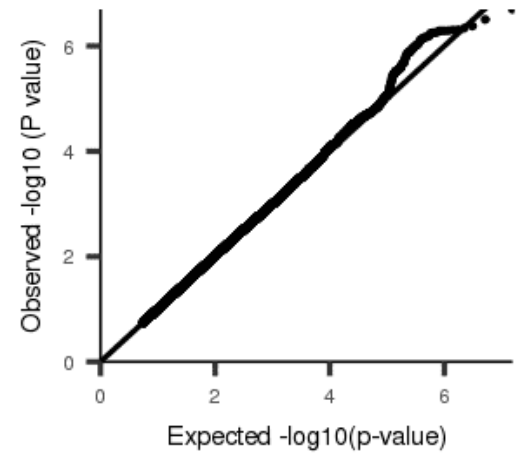

[back to list of plots](#)

Figure 2135: NETMAT edge (100) 0979

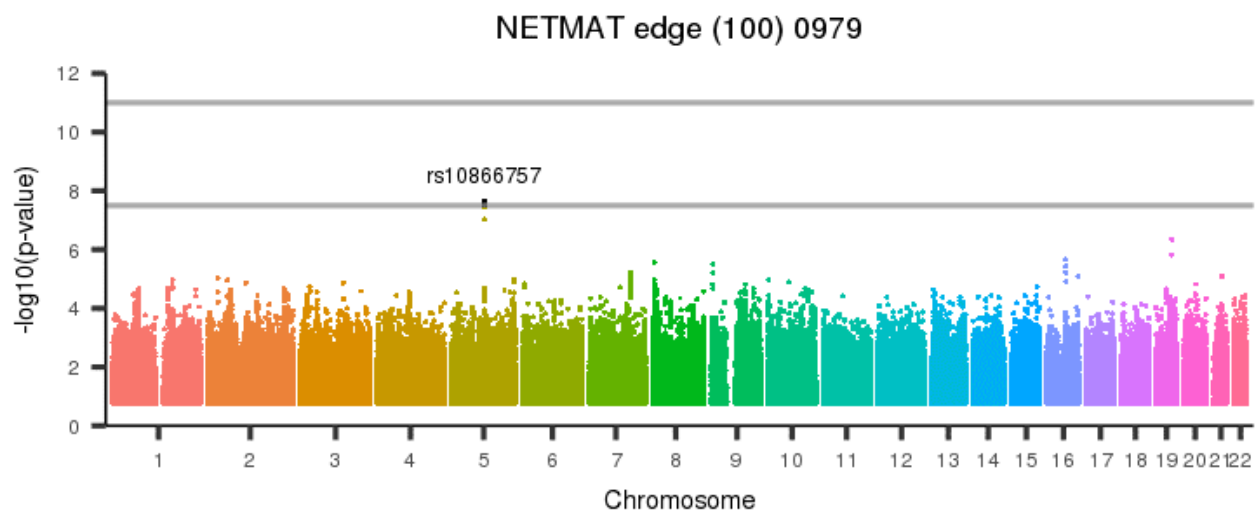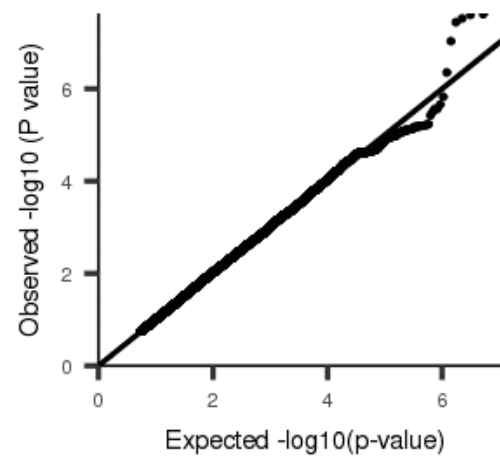

[back to list of plots](#)

Figure 2136: NETMAT edge (100) 0980

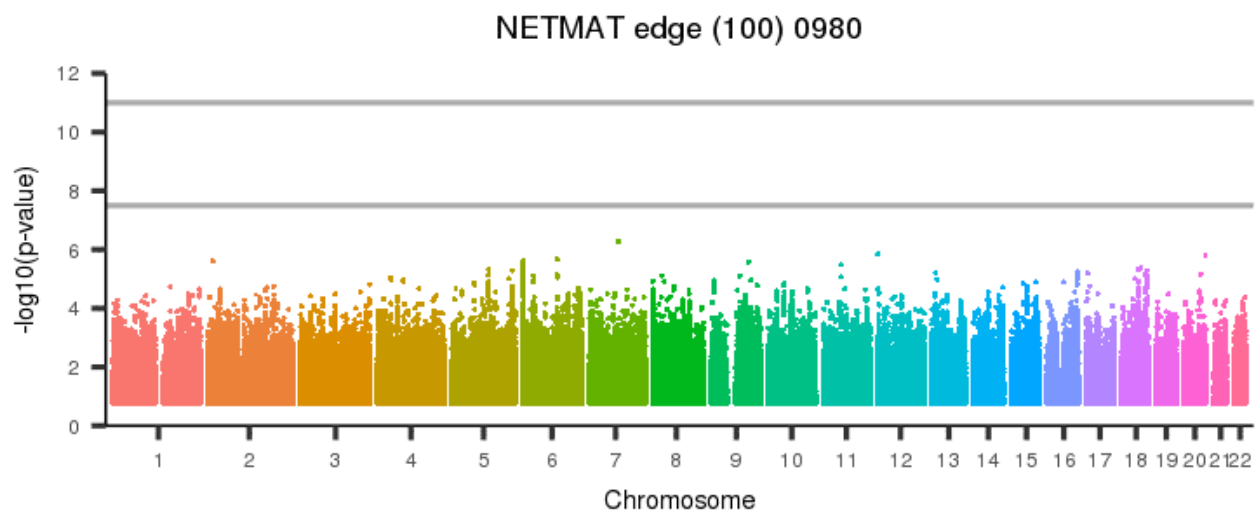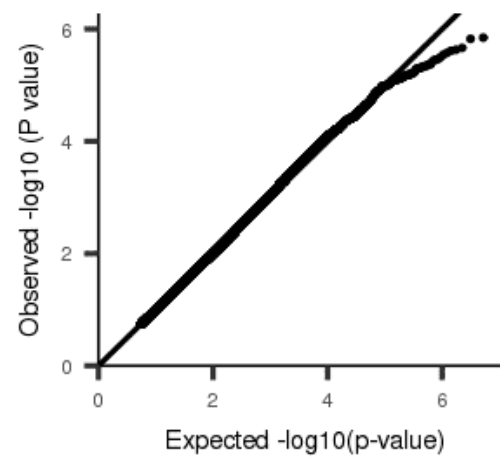

[back to list of plots](#)

Figure 2137: NETMAT edge (100) 0981

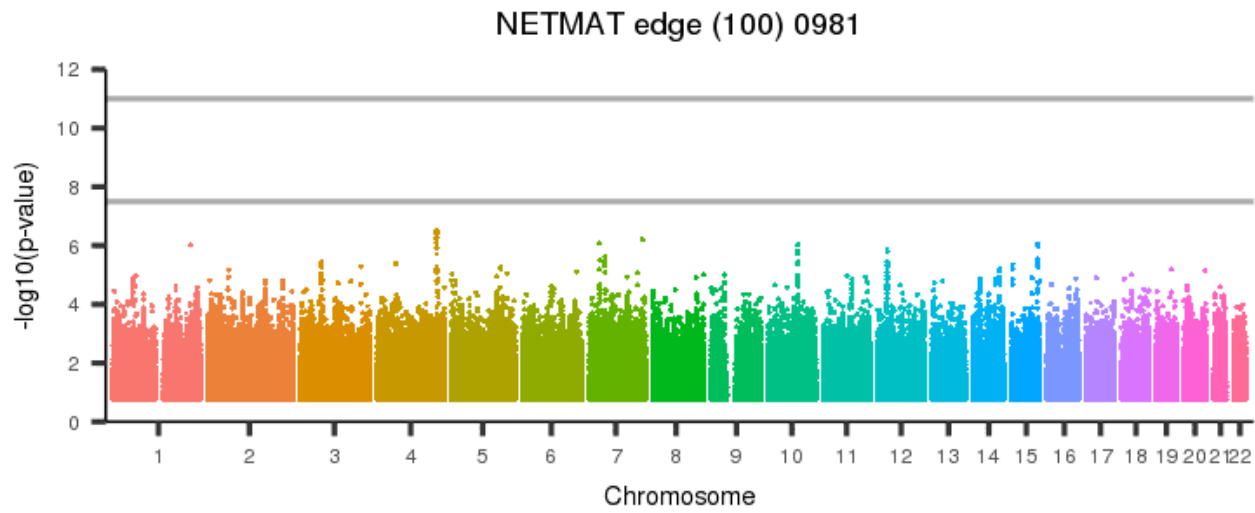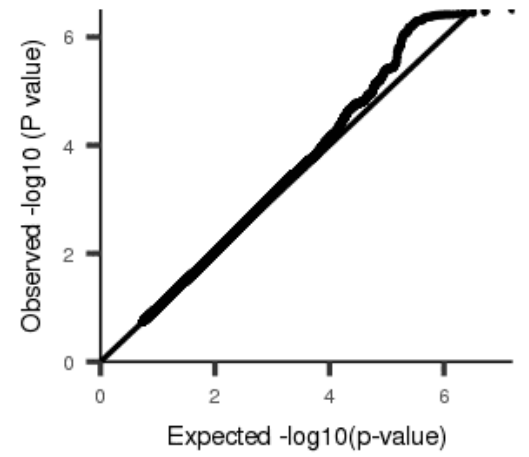

[back to list of plots](#)

Figure 2138: NETMAT edge (100) 0982

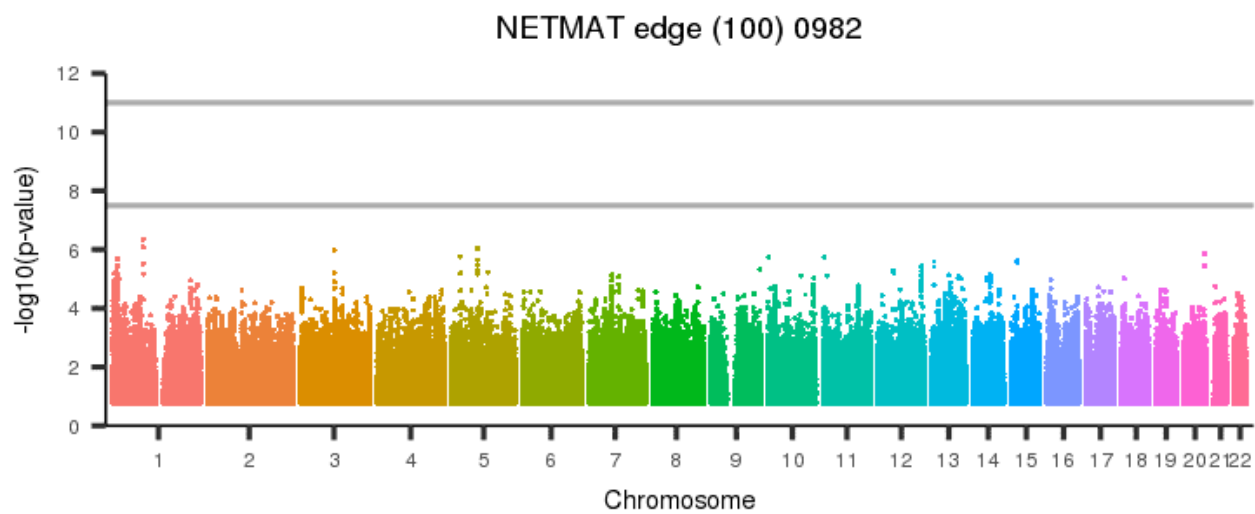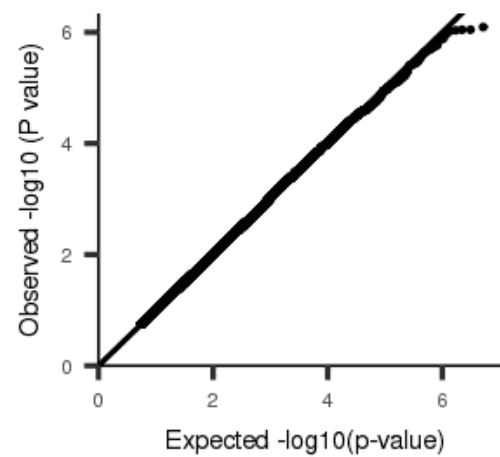

[back to list of plots](#)

Figure 2139: NETMAT edge (100) 0983

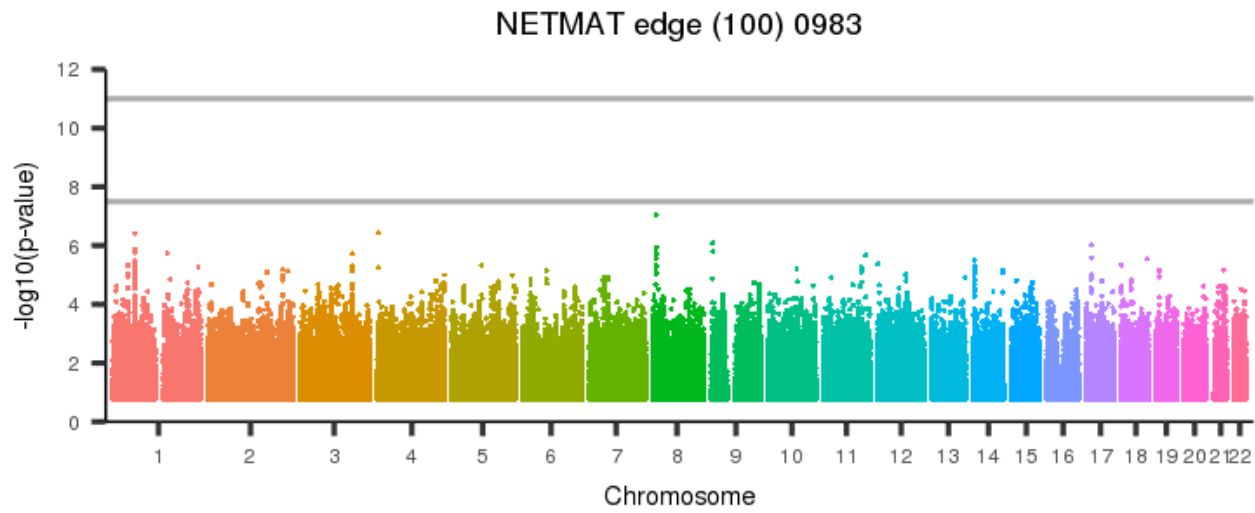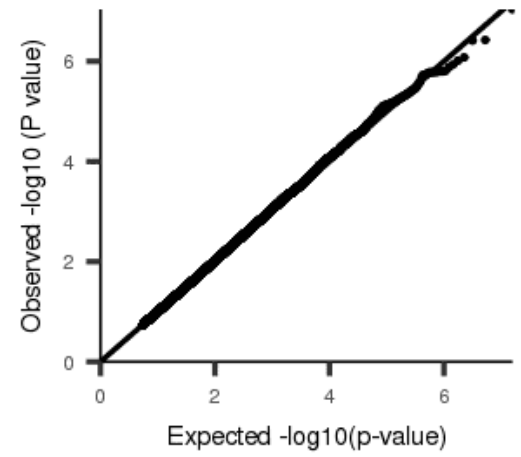

[back to list of plots](#)

Figure 2140: NETMAT edge (100) 0984

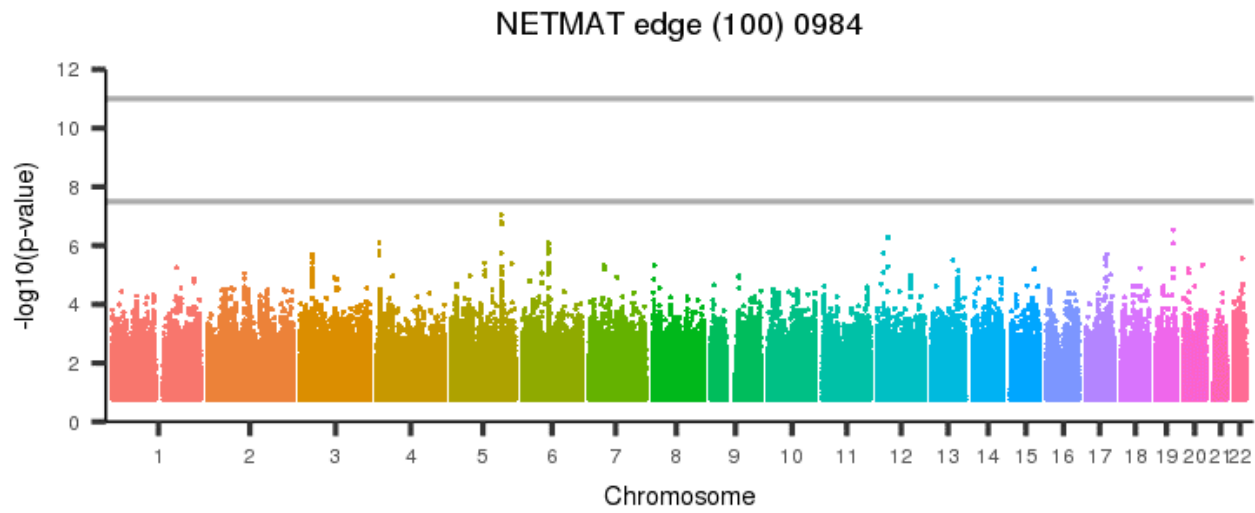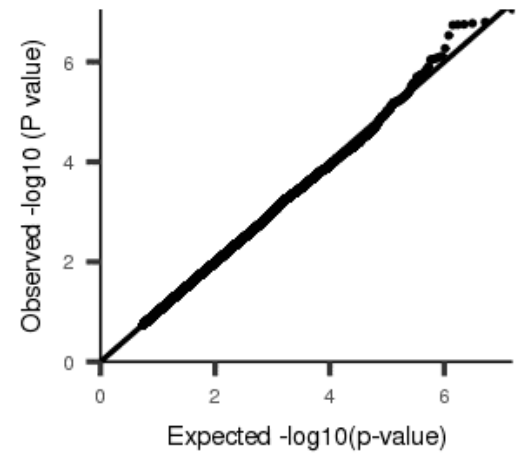

[back to list of plots](#)

Figure 2141: NETMAT edge (100) 0985

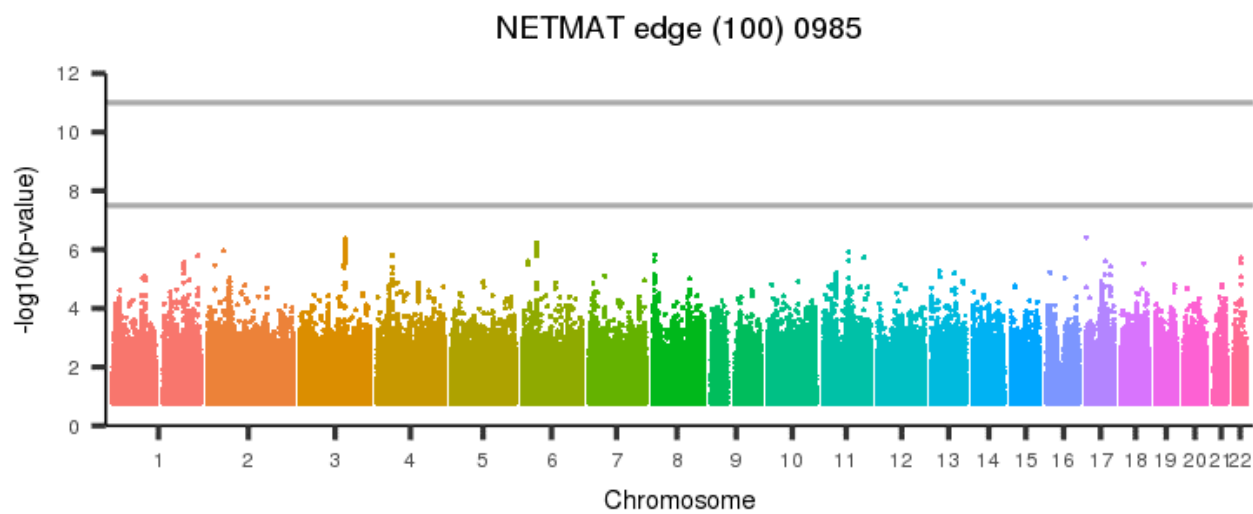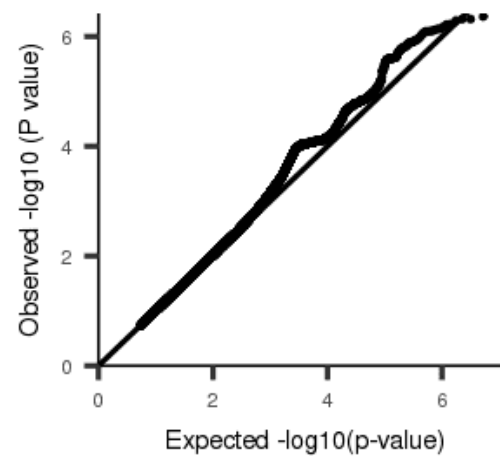

[back to list of plots](#)



Figure 2142: NETMAT edge (100) 0986

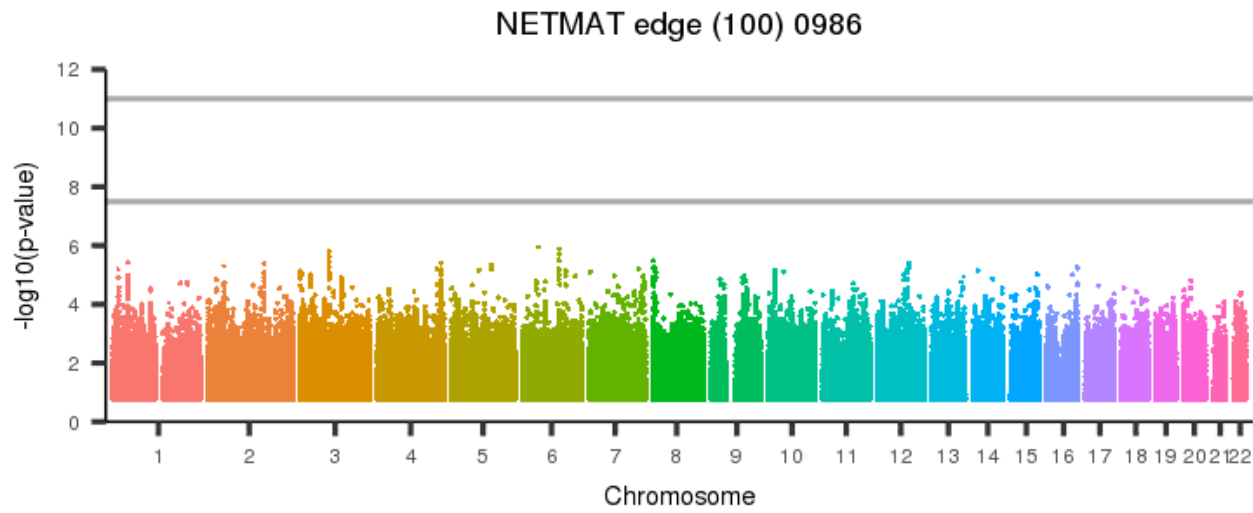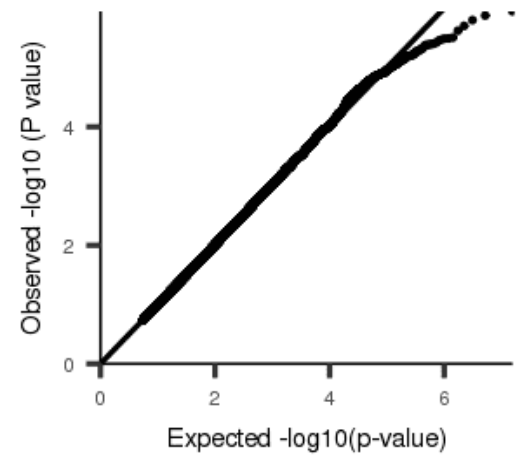

[back to list of plots](#)

Figure 2143: NETMAT edge (100) 0987

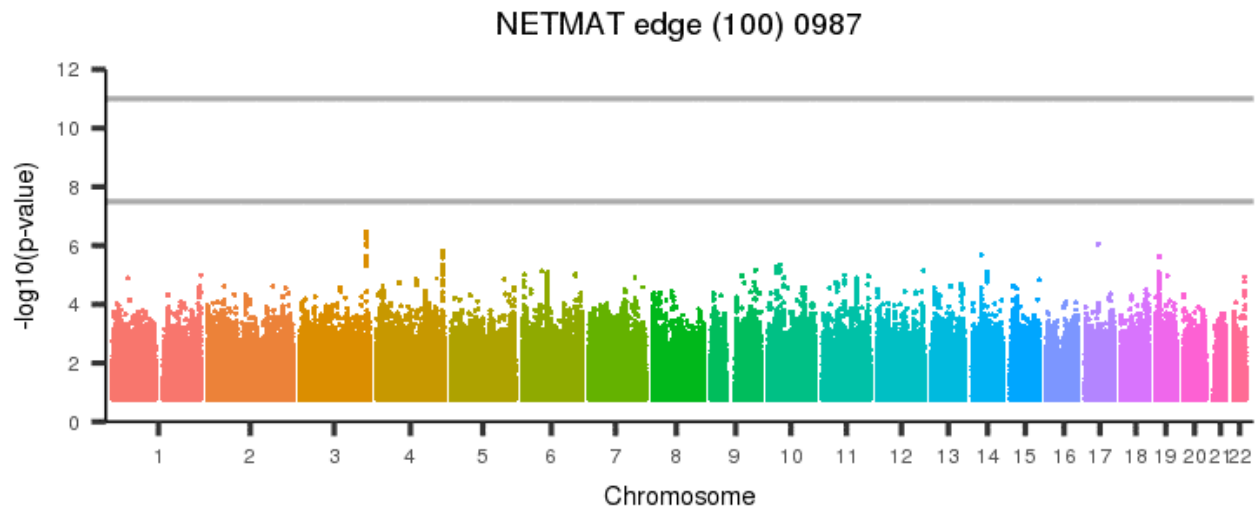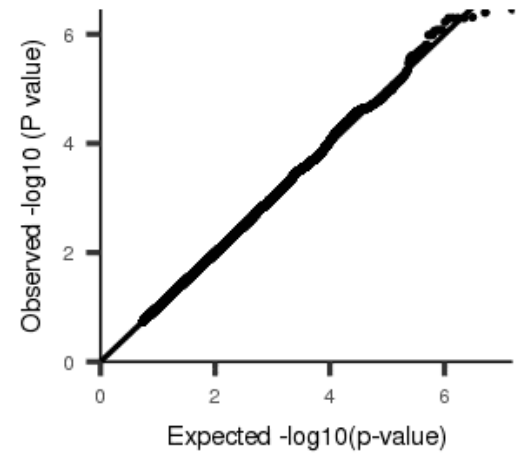

[back to list of plots](#)

Figure 2144: NETMAT edge (100) 0988

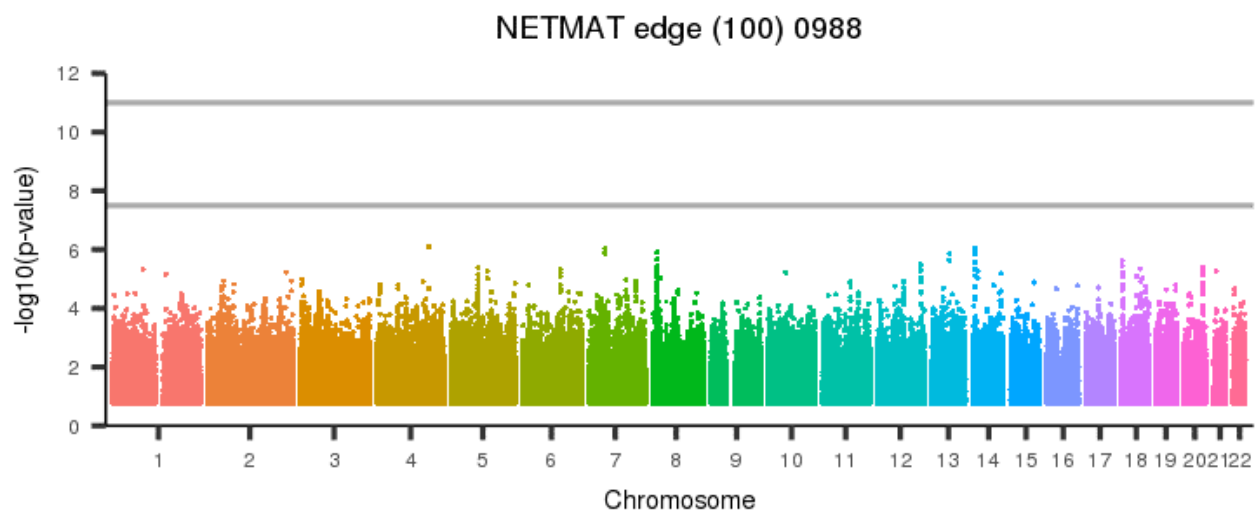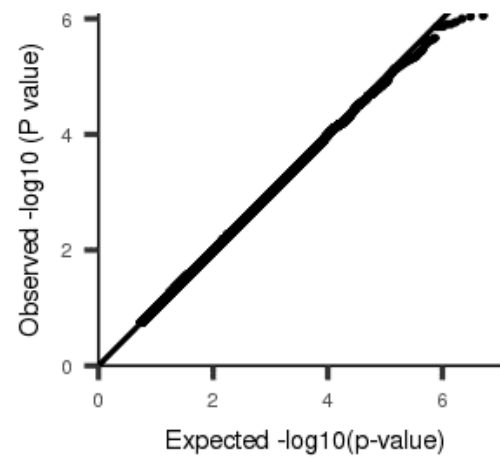

[back to list of plots](#)

Figure 2145: NETMAT edge (100) 0989

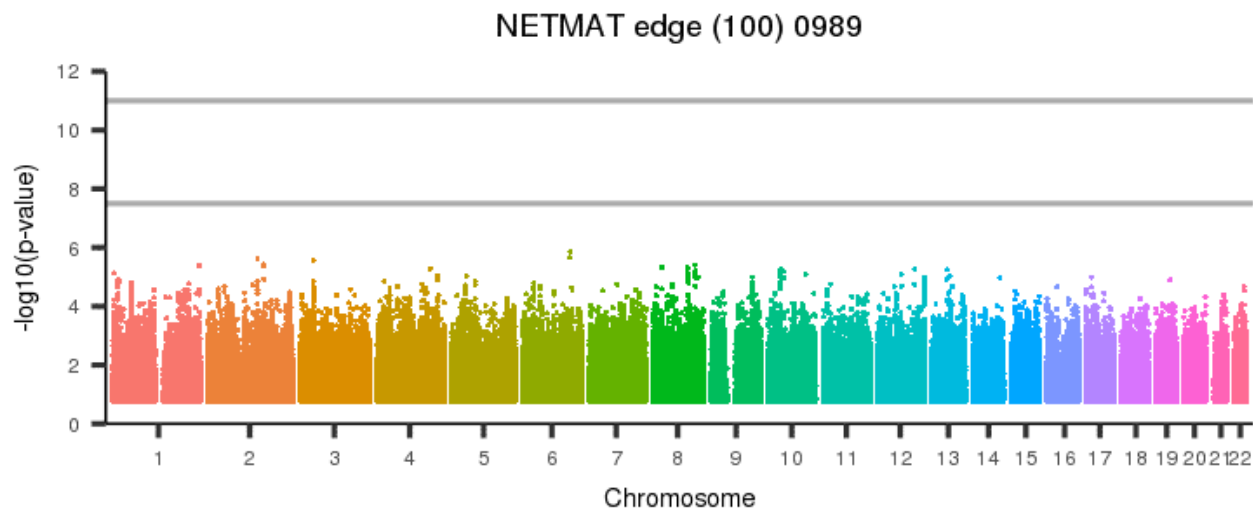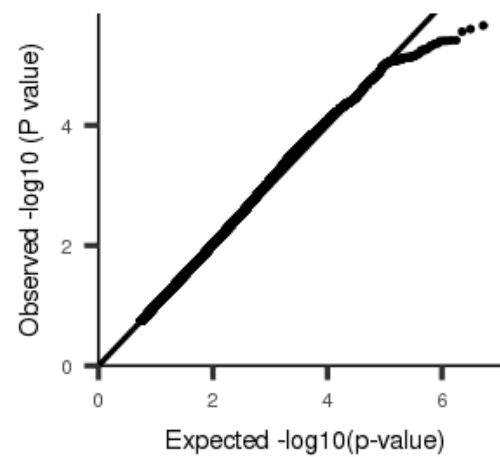

[back to list of plots](#)

Figure 2146: NETMAT edge (100) 0990

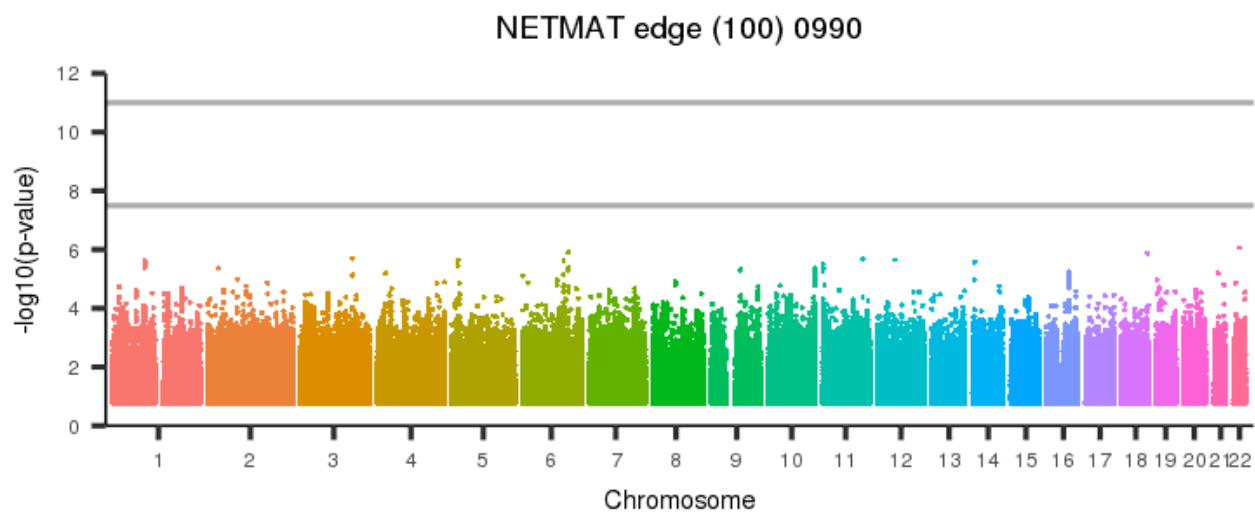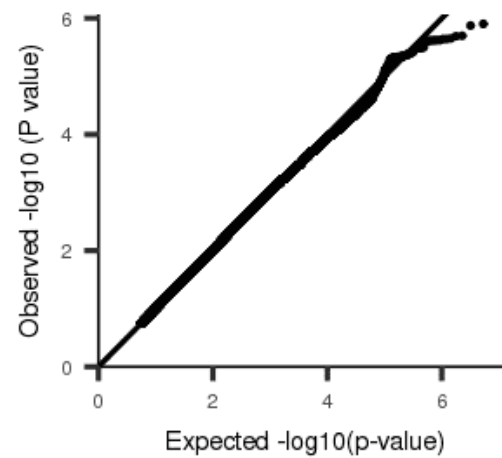

[back to list of plots](#)

Figure 2147: NETMAT edge (100) 0991

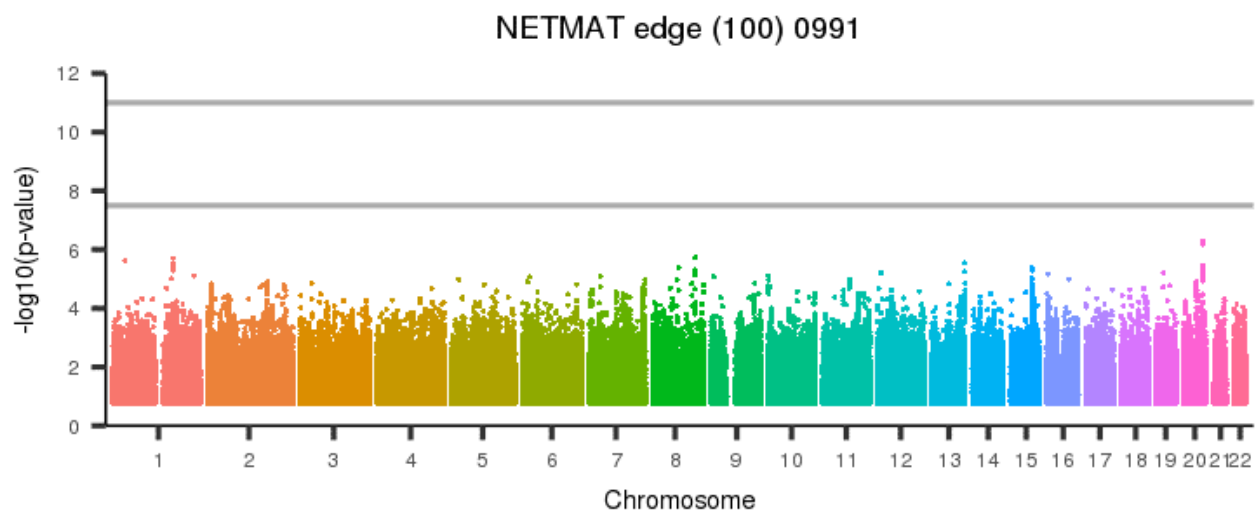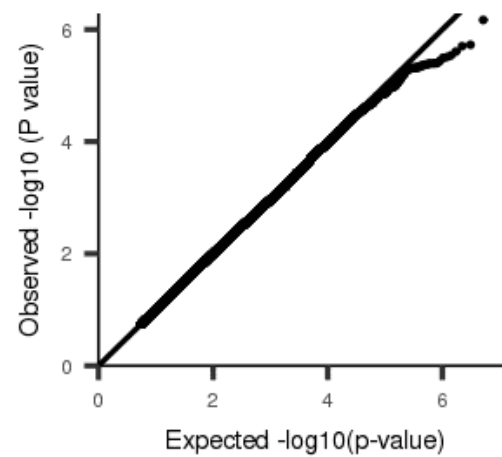

[back to list of plots](#)

Figure 2148: NETMAT edge (100) 0992

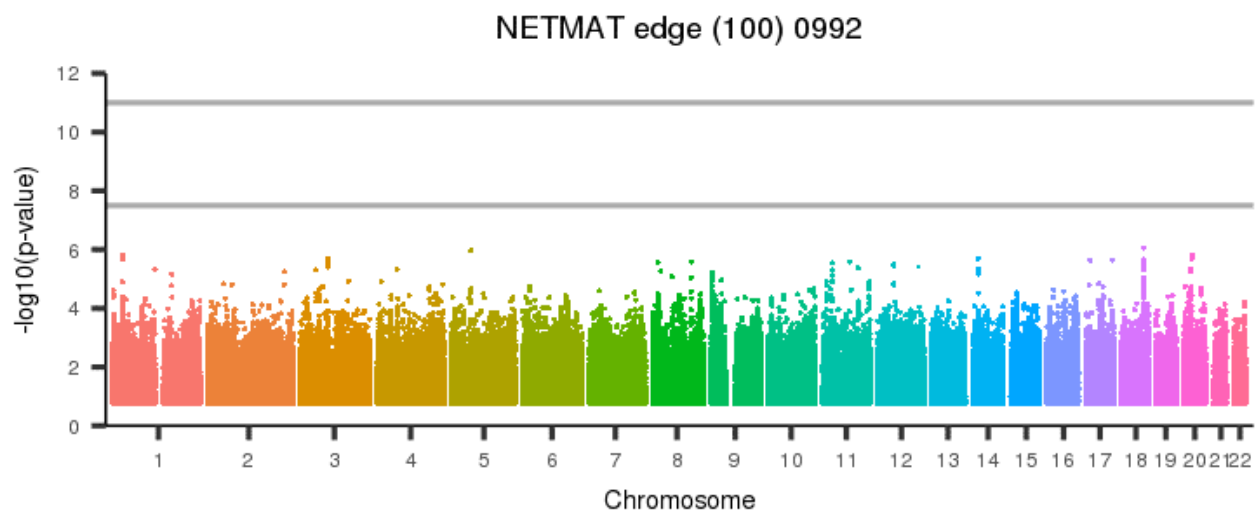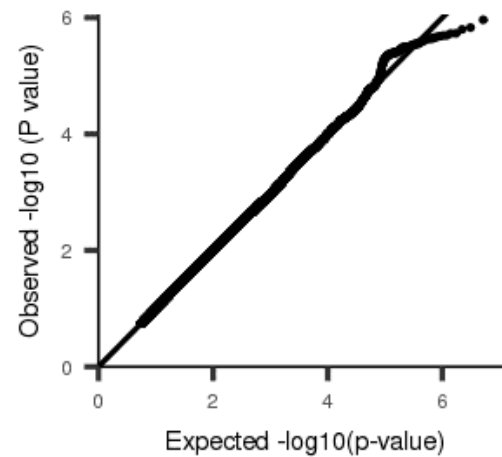

[back to list of plots](#)

Figure 2149: NETMAT edge (100) 0993

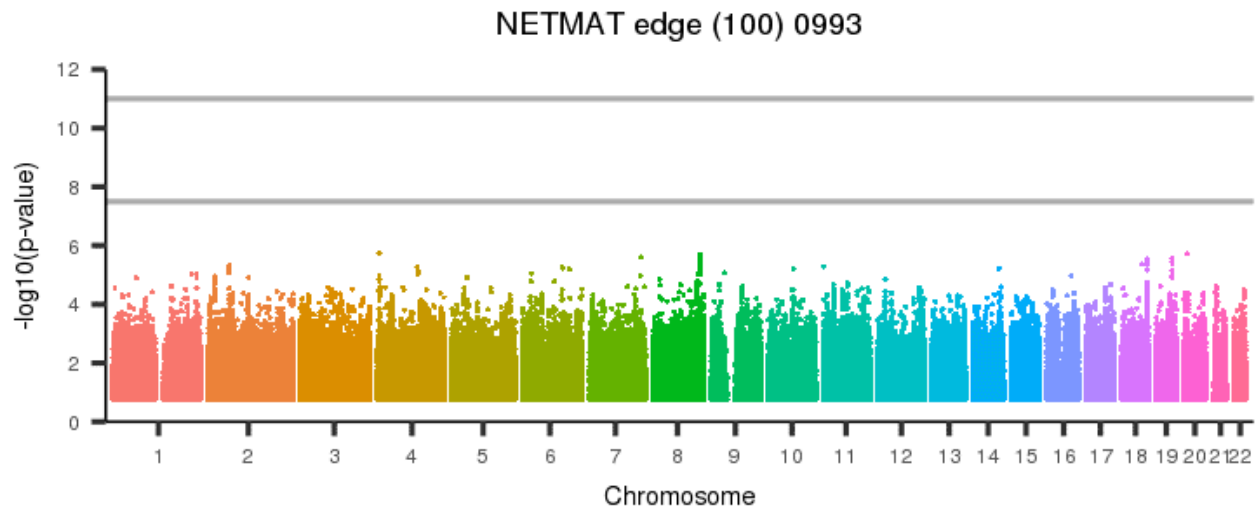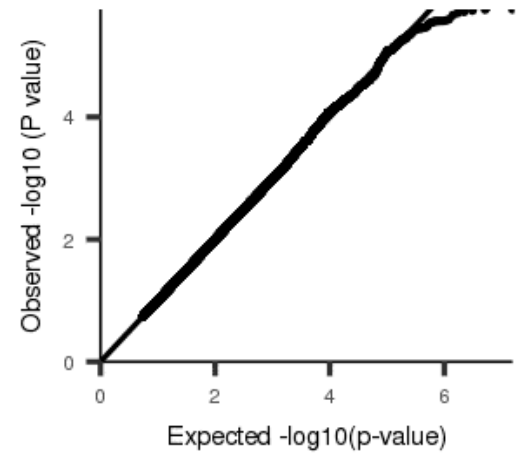

[back to list of plots](#)



Figure 2150: NETMAT edge (100) 0994

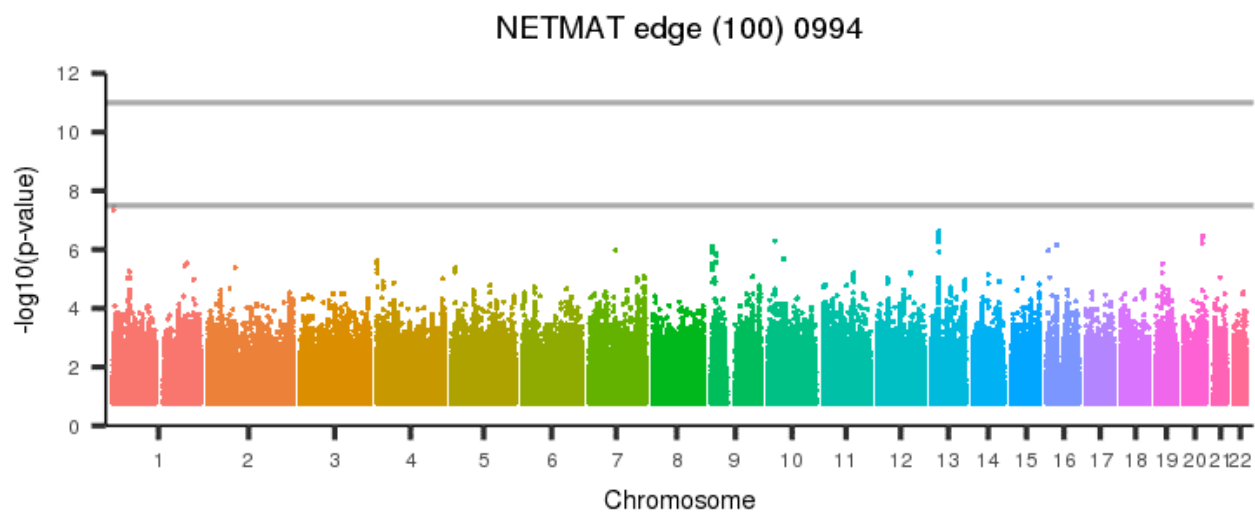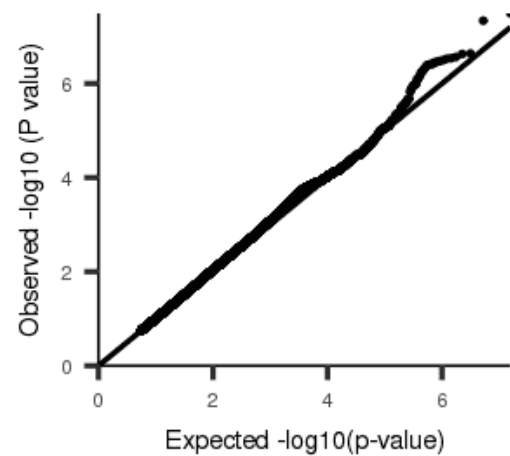

[back to list of plots](#)

Figure 2151: NETMAT edge (100) 0995

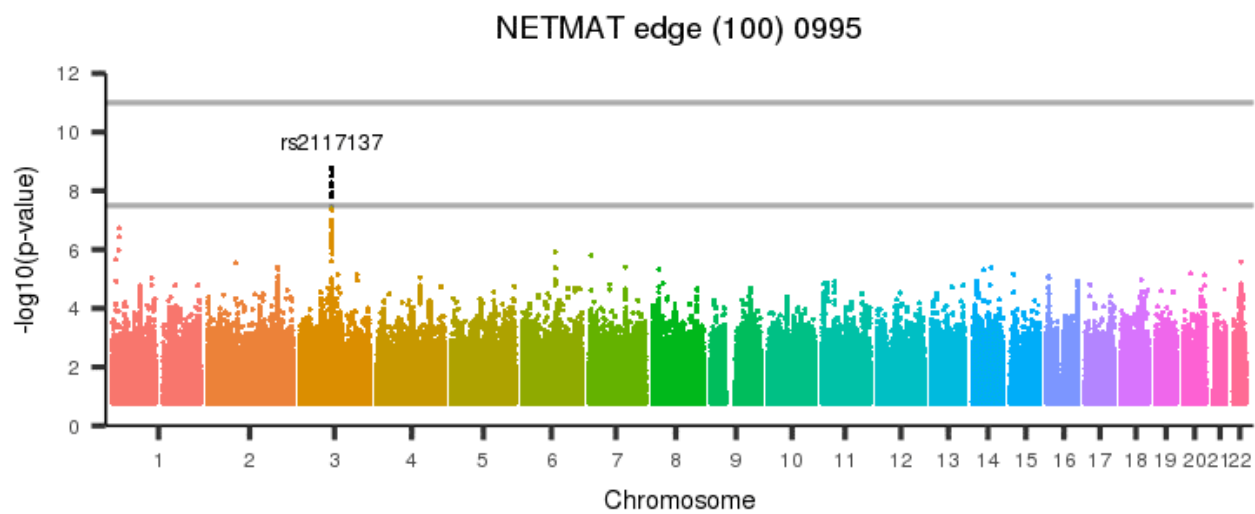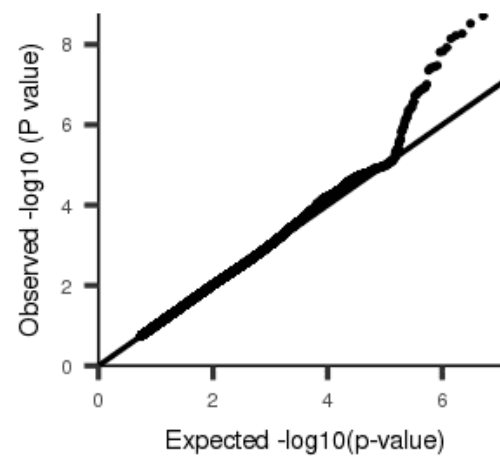

[back to list of plots](#)

Figure 2152: NETMAT edge (100) 0996

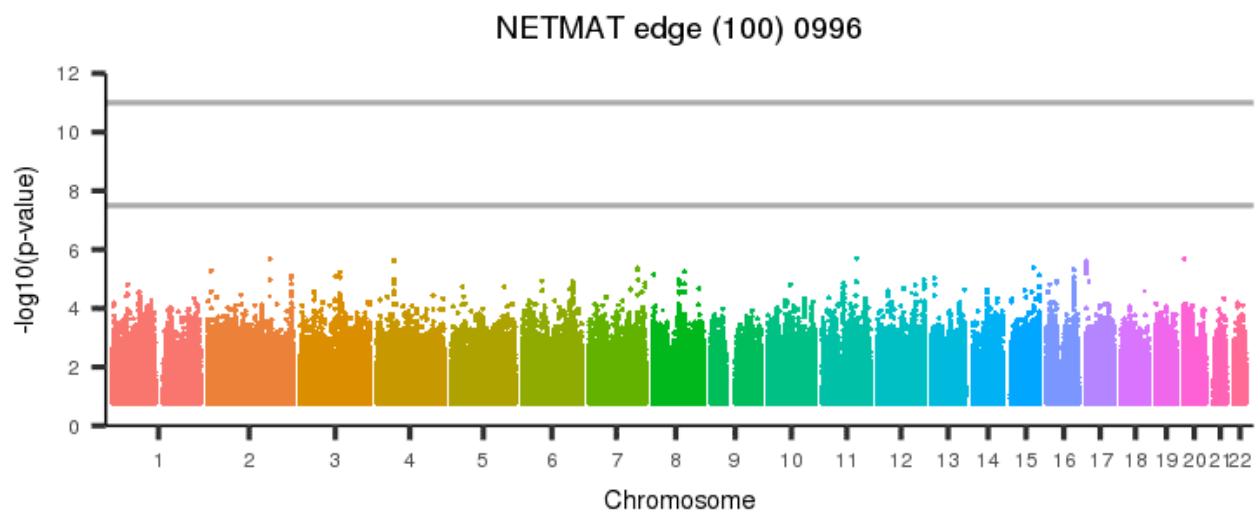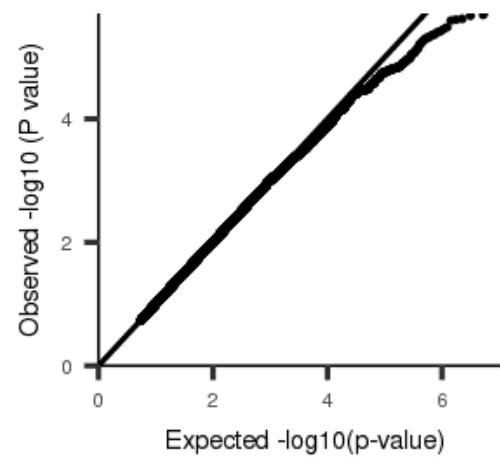

[back to list of plots](#)

Figure 2153: NETMAT edge (100) 0997

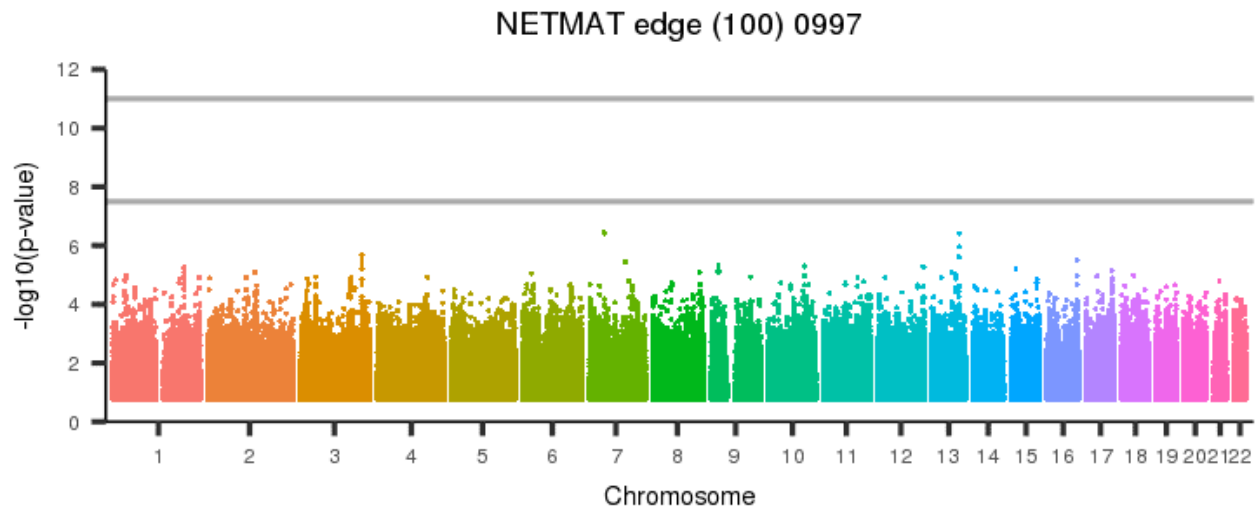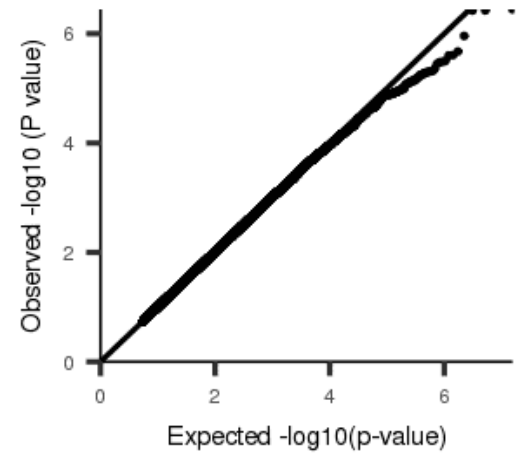

[back to list of plots](#)

Figure 2154: NETMAT edge (100) 0998

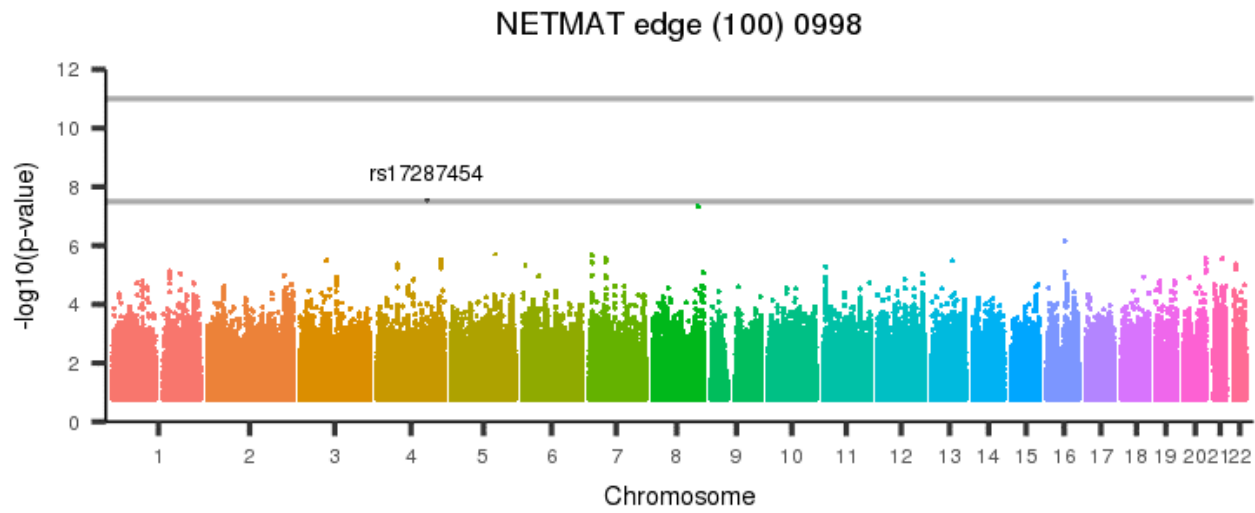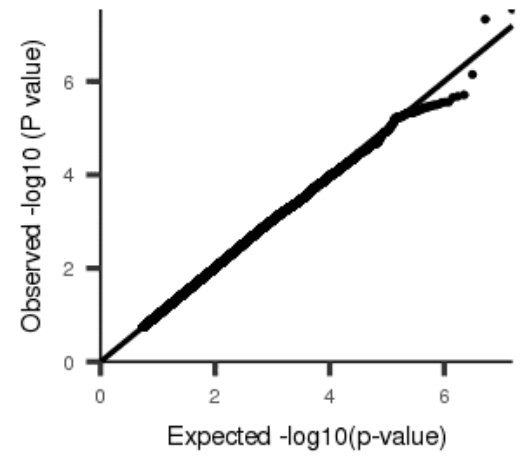

[back to list of plots](#)

Figure 2155: NETMAT edge (100) 0999

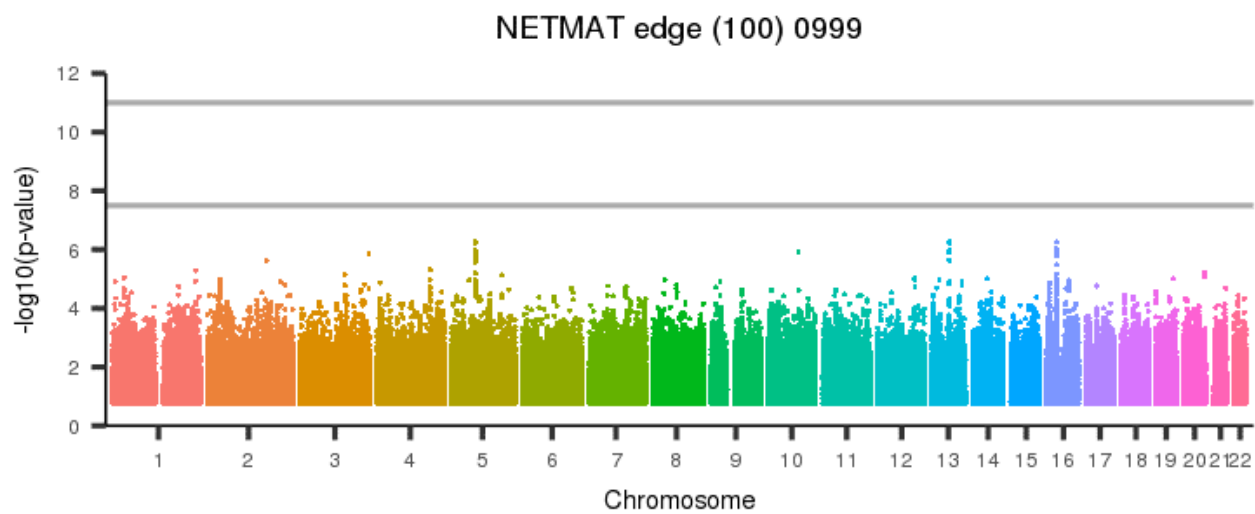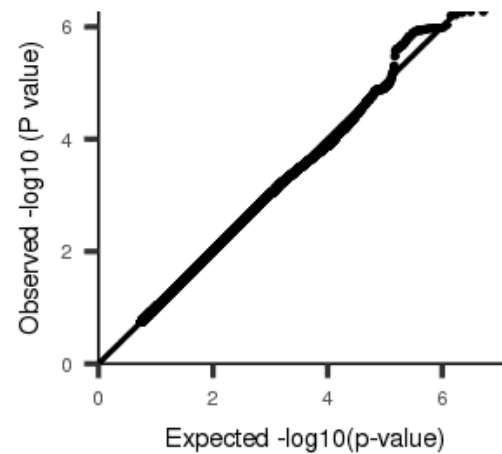

[back to list of plots](#)

Figure 2156: NETMAT edge (100) 1000

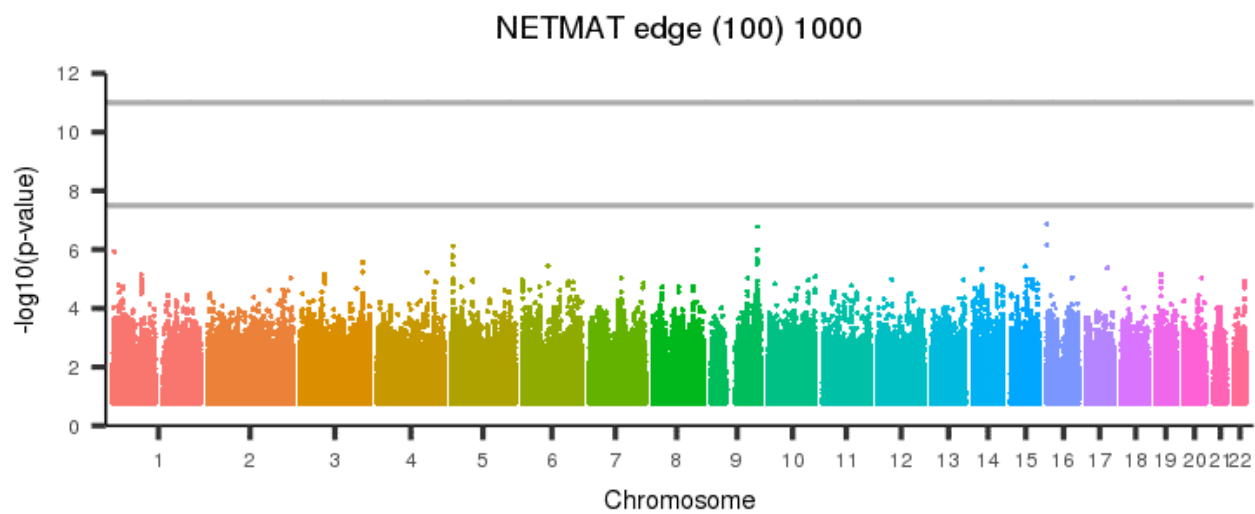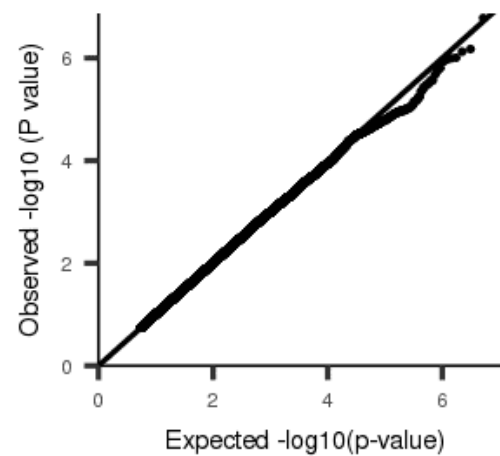

[back to list of plots](#)

Figure 2157: NETMAT edge (100) 1001

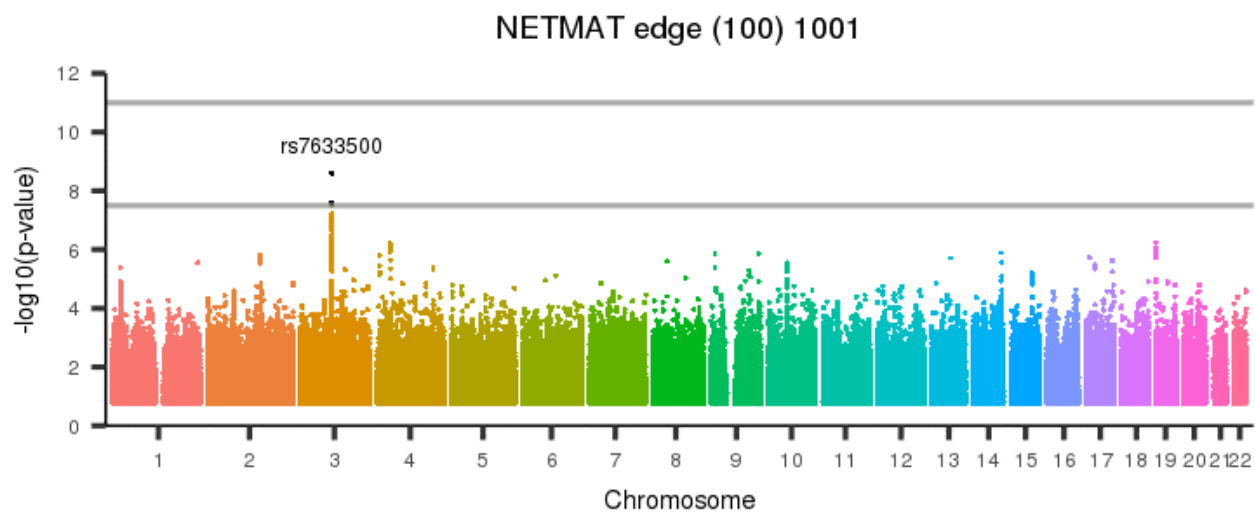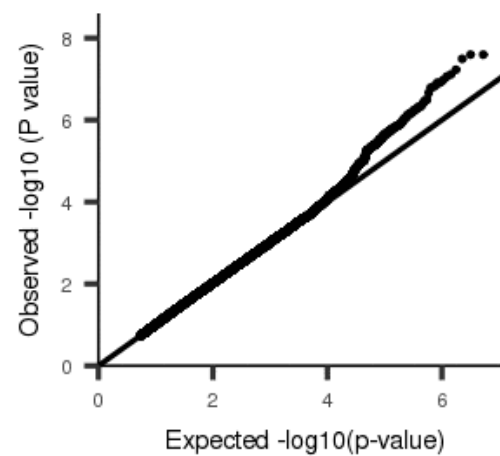

[back to list of plots](#)



Figure 2158: NETMAT edge (100) 1002

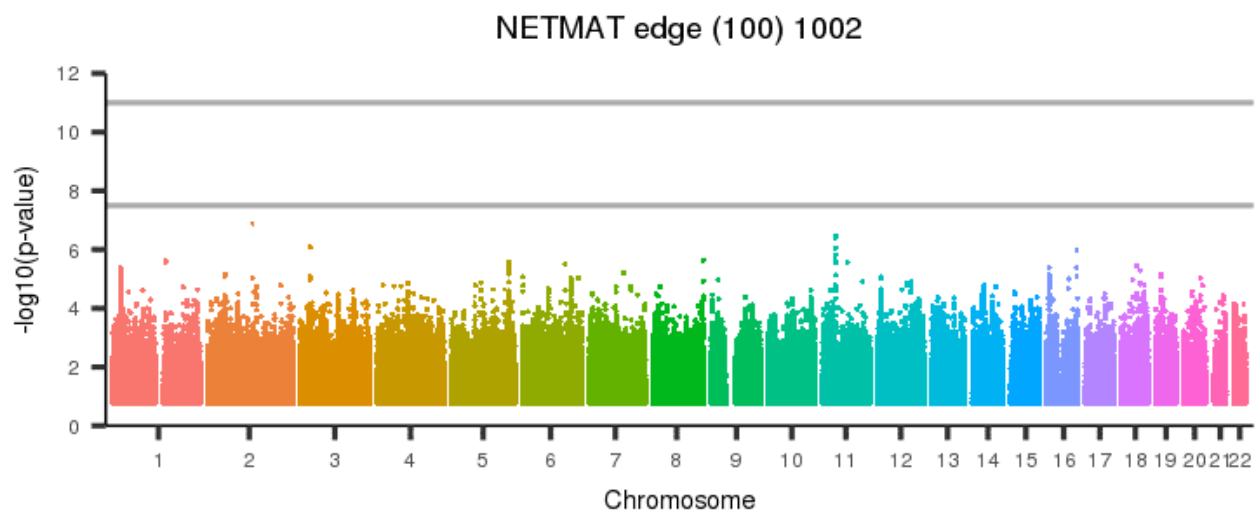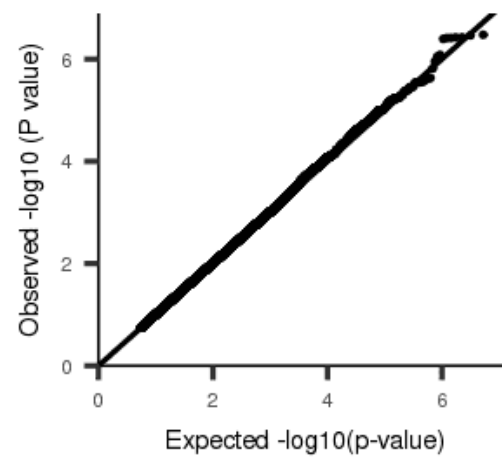

[back to list of plots](#)

Figure 2159: NETMAT edge (100) 1003

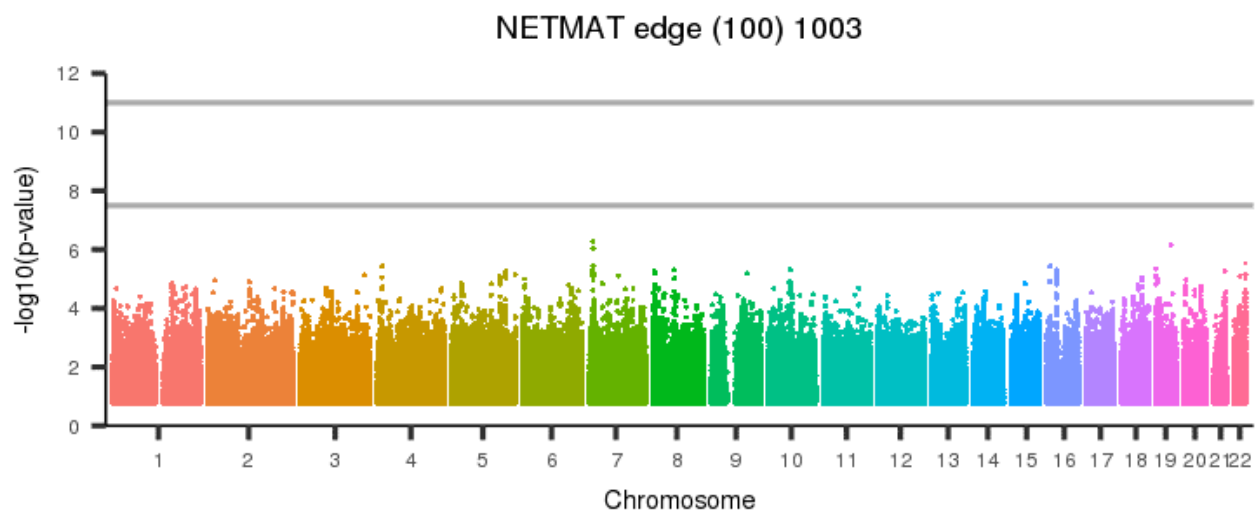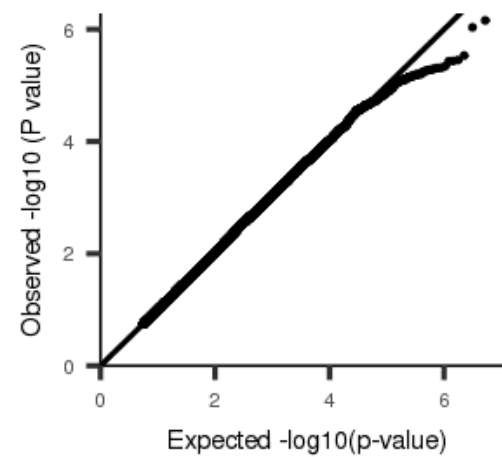

[back to list of plots](#)

Figure 2160: NETMAT edge (100) 1004

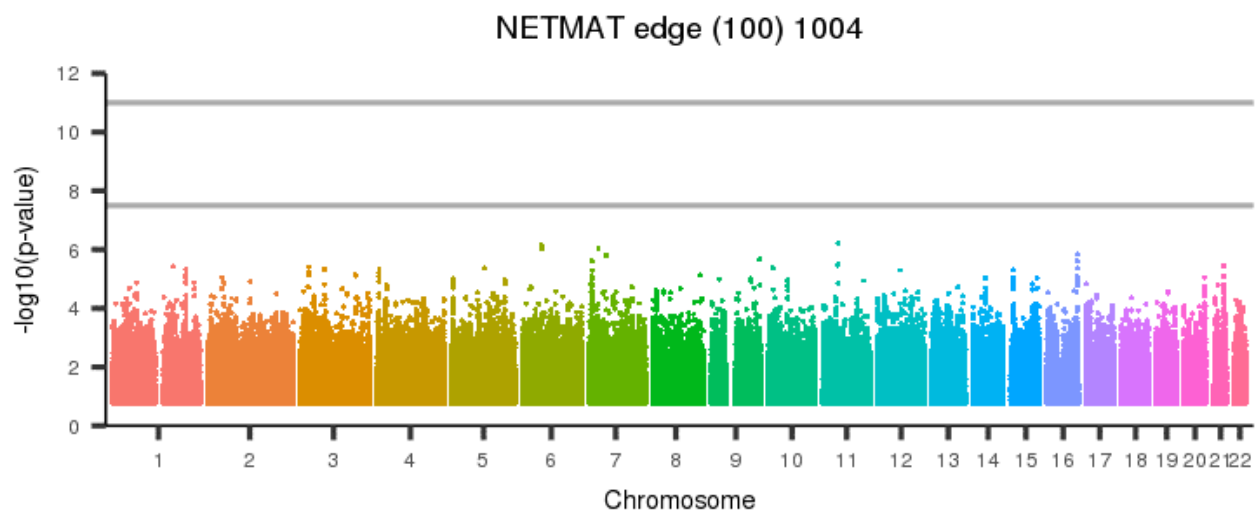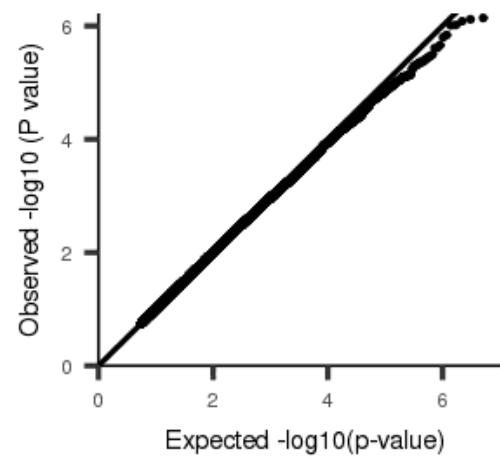

[back to list of plots](#)

Figure 2161: NETMAT edge (100) 1005

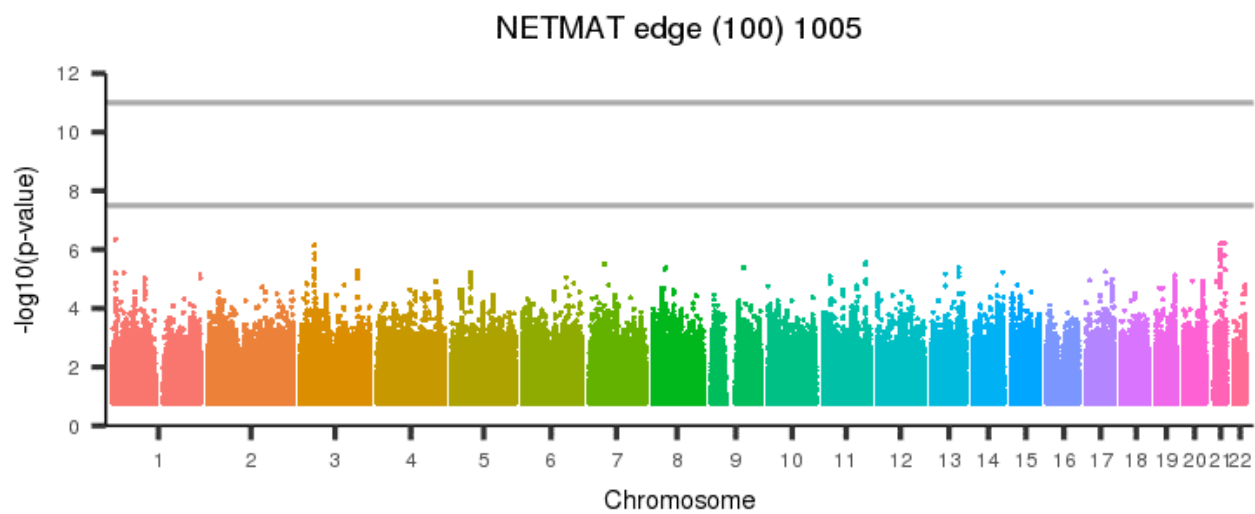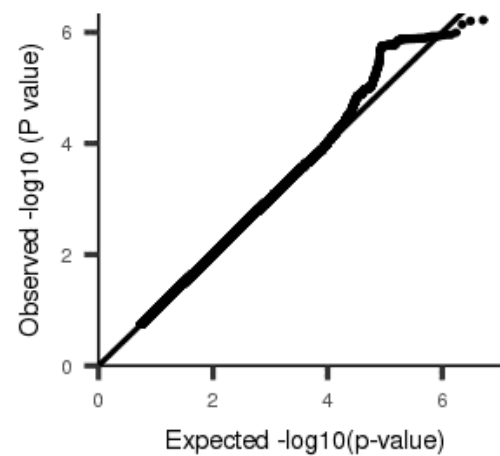

[back to list of plots](#)

Figure 2162: NETMAT edge (100) 1006

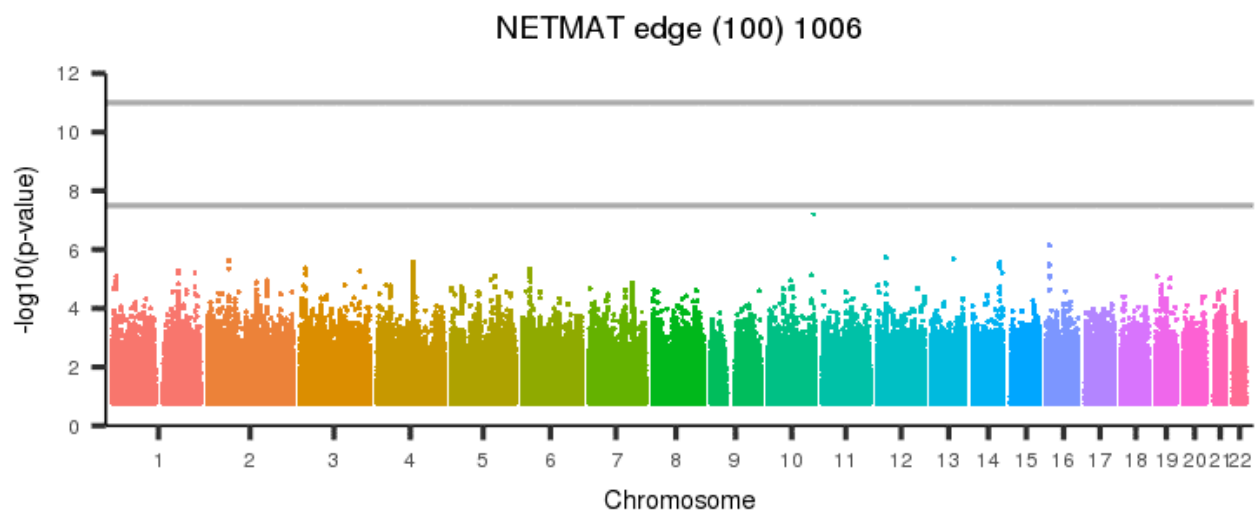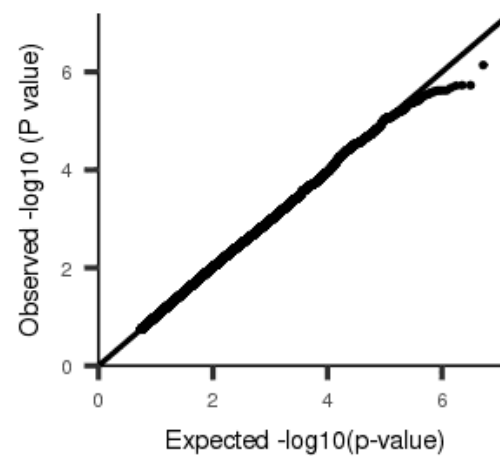

[back to list of plots](#)

Figure 2163: NETMAT edge (100) 1007

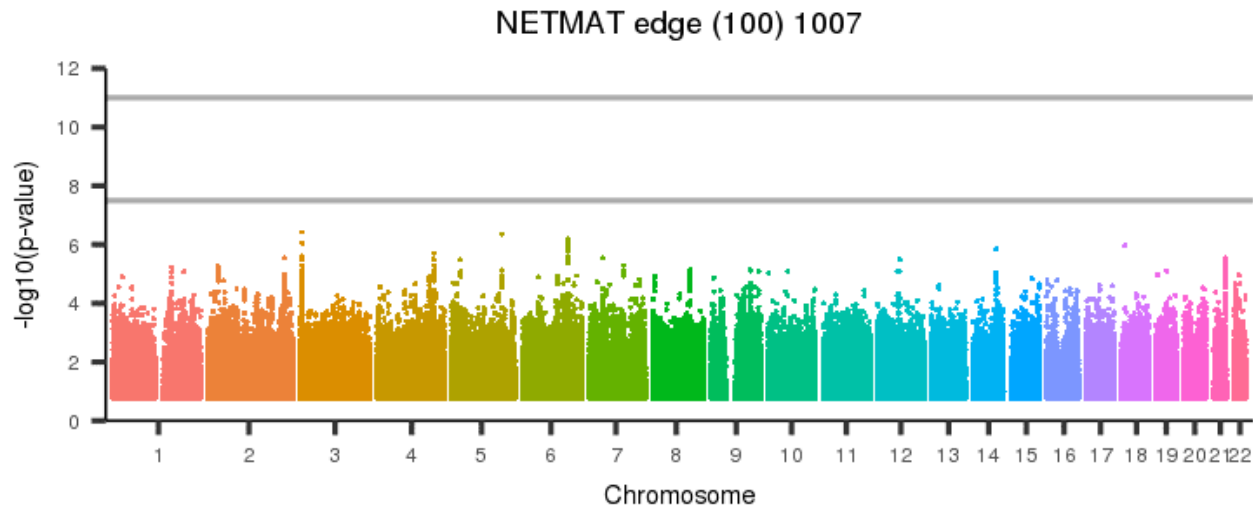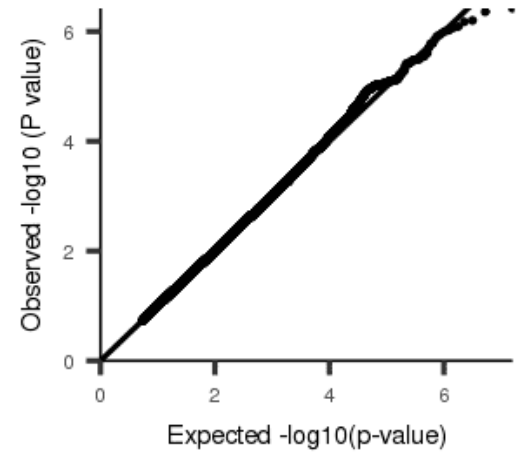

[back to list of plots](#)

Figure 2164: NETMAT edge (100) 1008

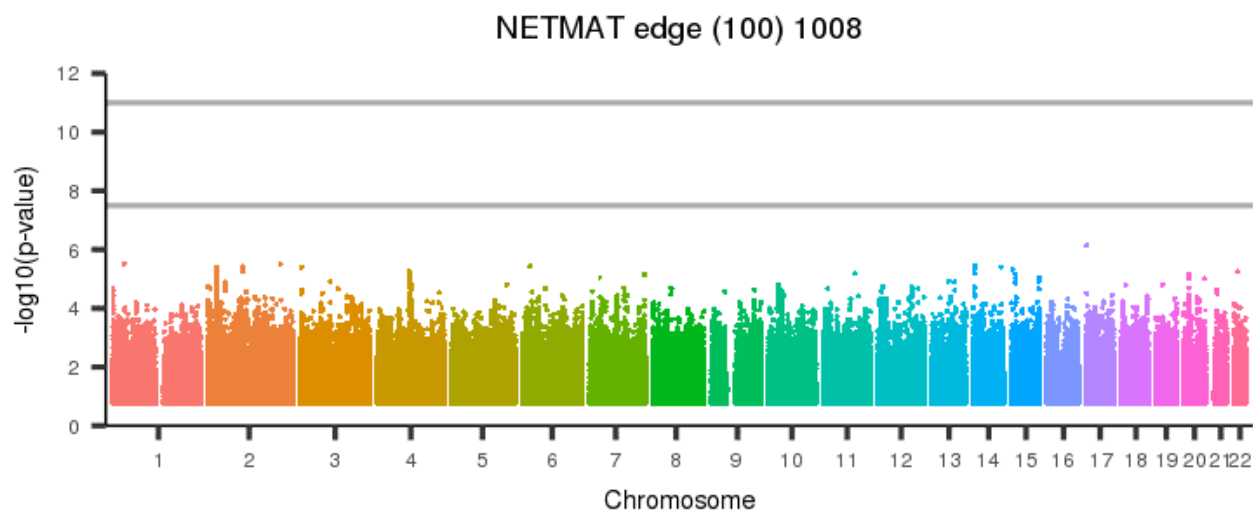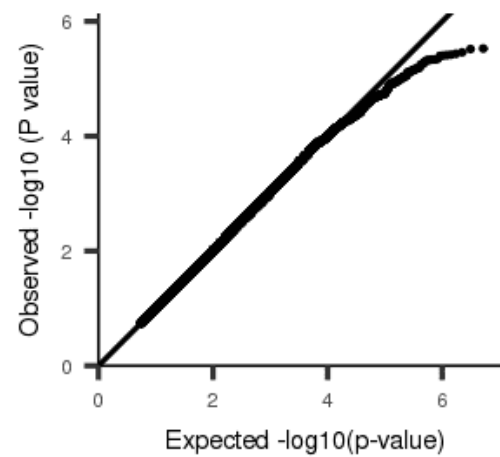

[back to list of plots](#)

Figure 2165: NETMAT edge (100) 1009

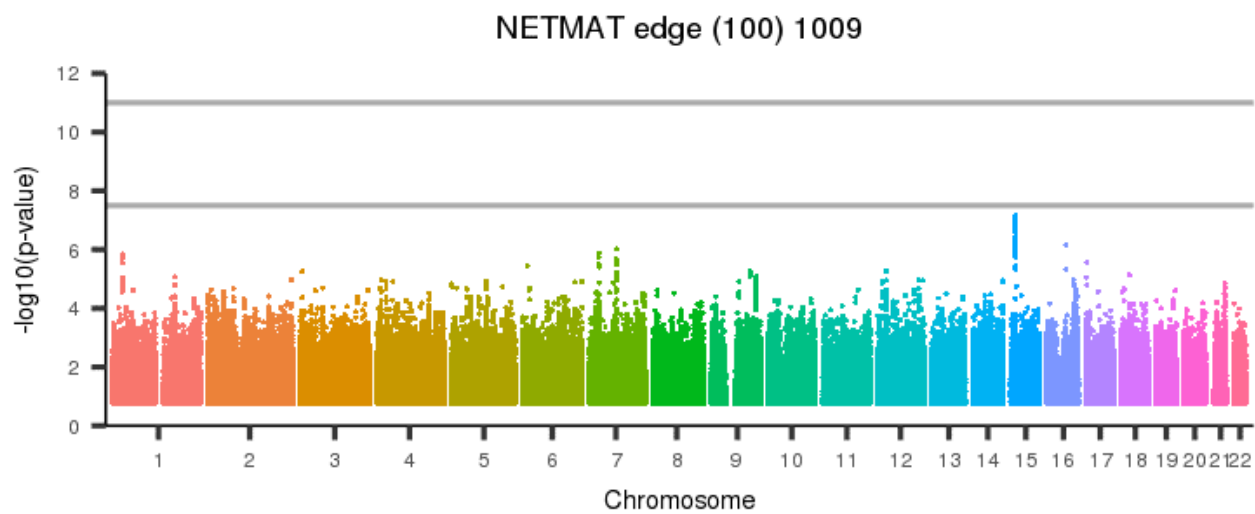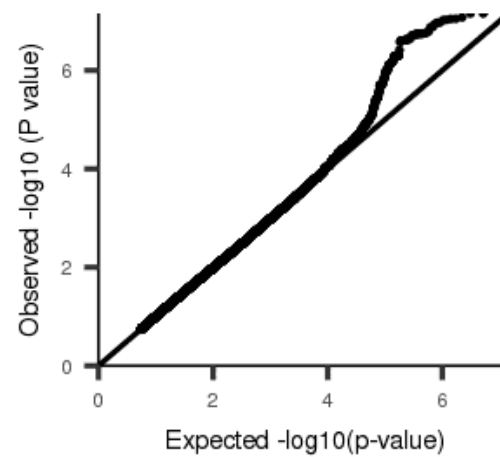

[back to list of plots](#)



Figure 2166: NETMAT edge (100) 1010

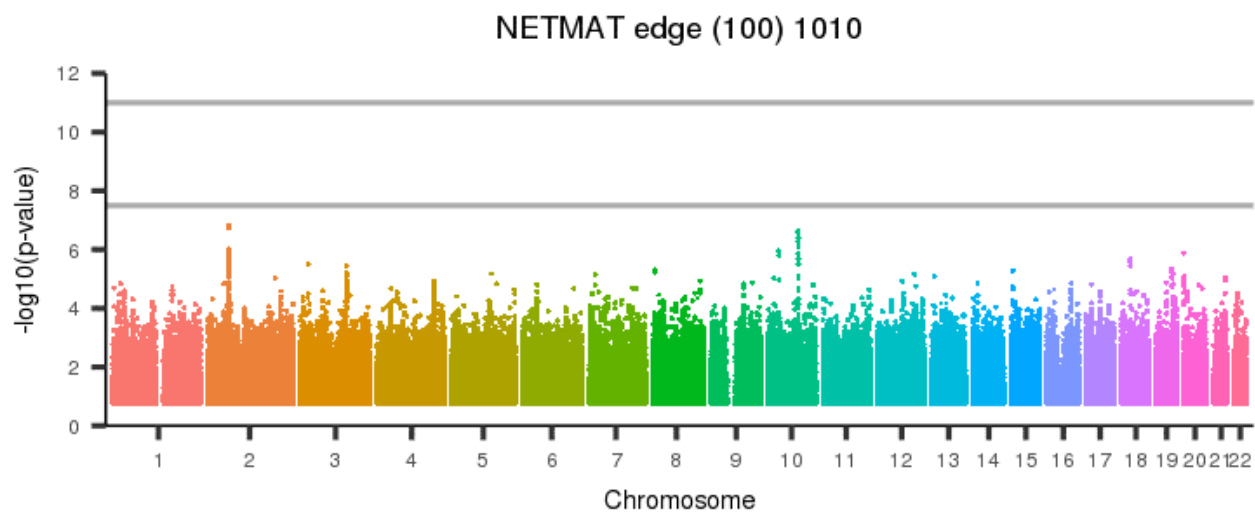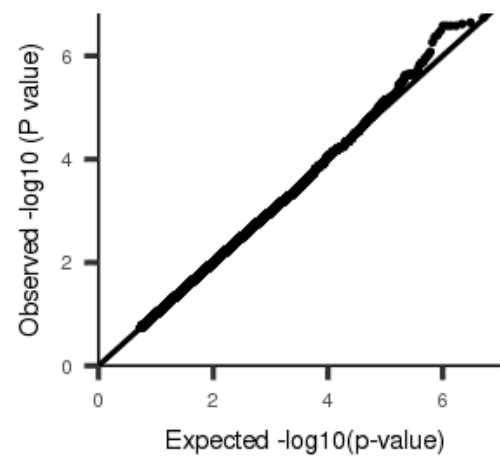

[back to list of plots](#)

Figure 2167: NETMAT edge (100) 1011

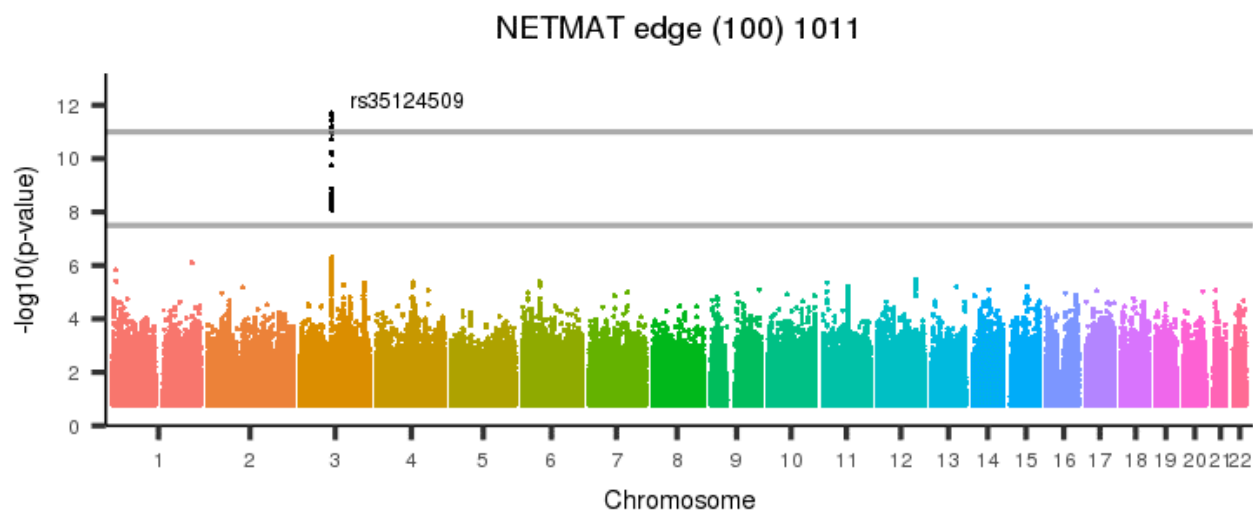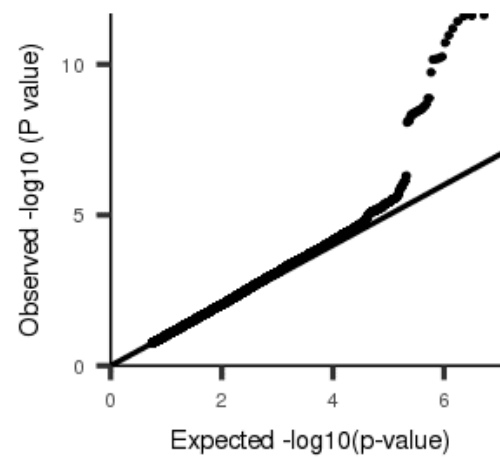

[back to list of plots](#)

Figure 2168: NETMAT edge (100) 1012

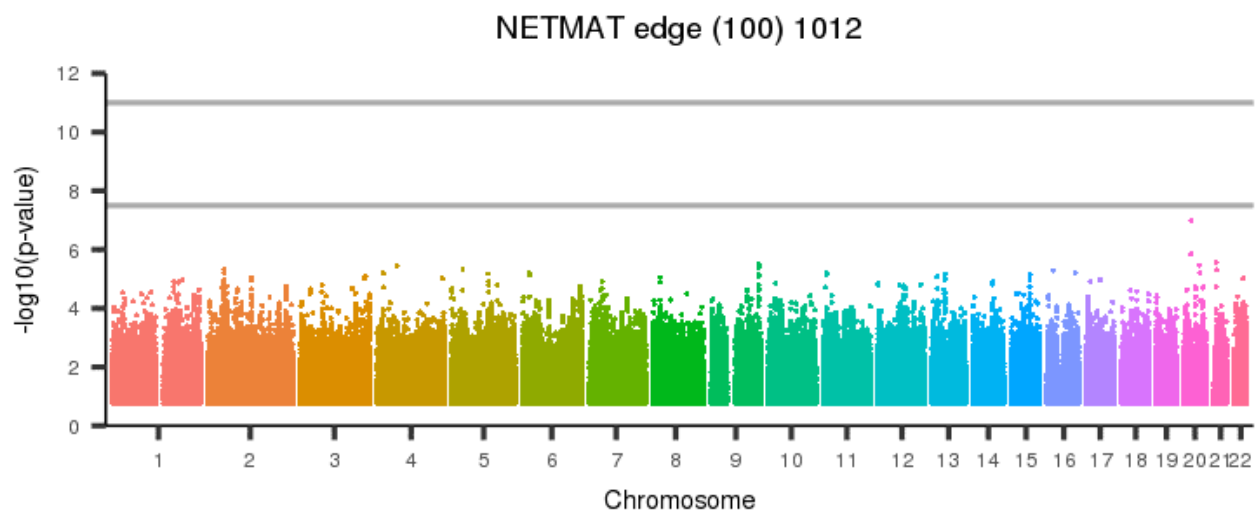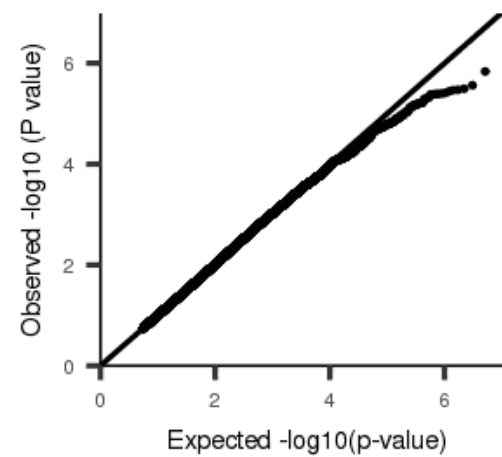

[back to list of plots](#)

Figure 2169: NETMAT edge (100) 1013

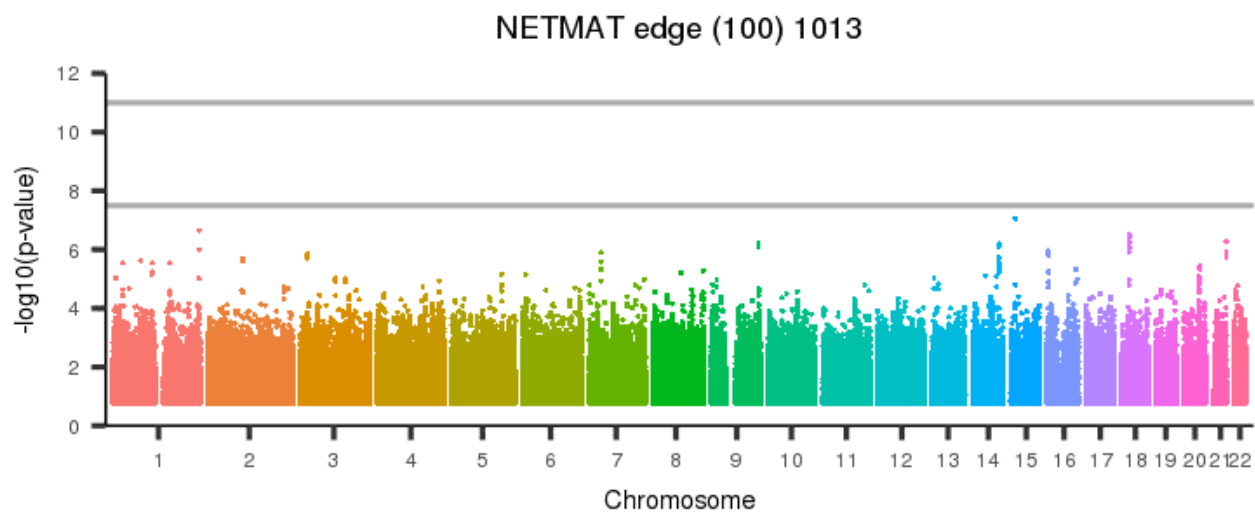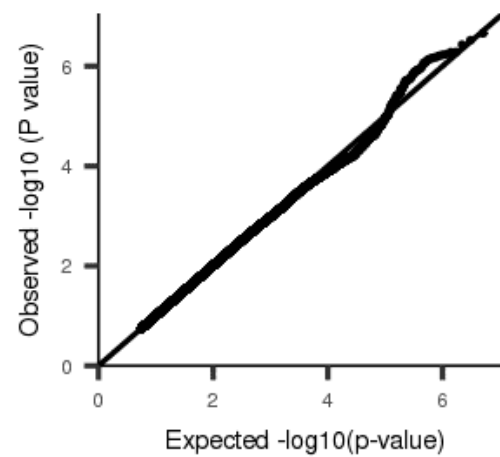

[back to list of plots](#)

Figure 2170: NETMAT edge (100) 1014

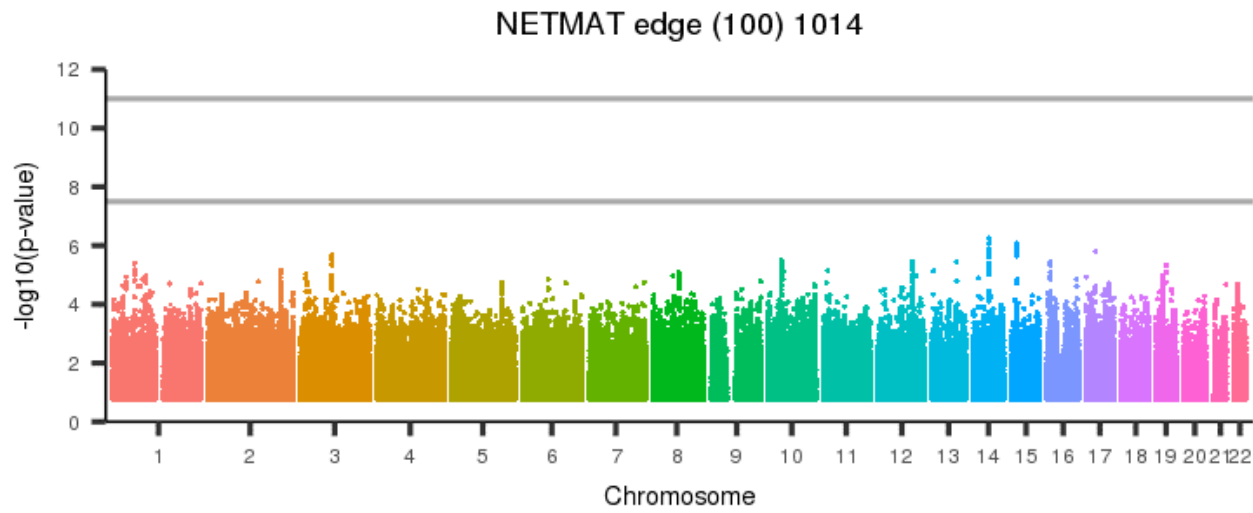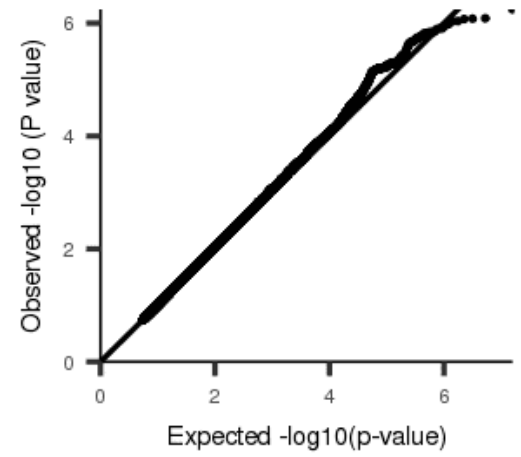

[back to list of plots](#)

Figure 2171: NETMAT edge (100) 1015

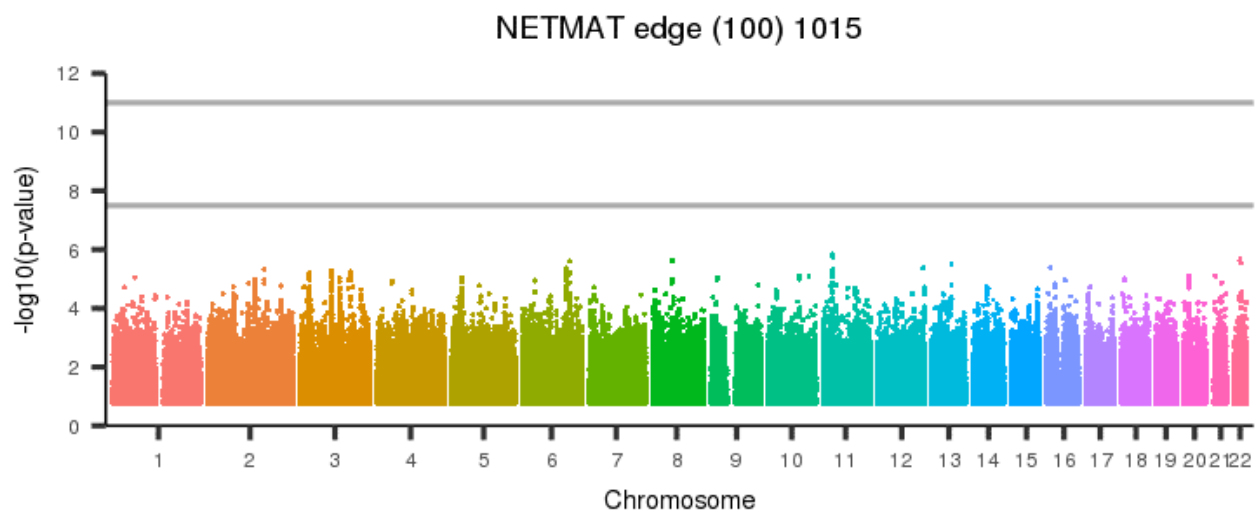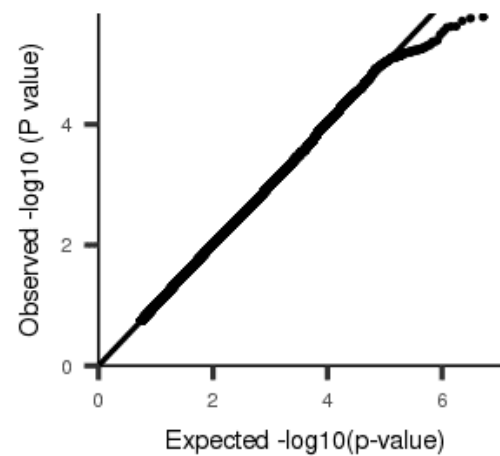

[back to list of plots](#)

Figure 2172: NETMAT edge (100) 1016

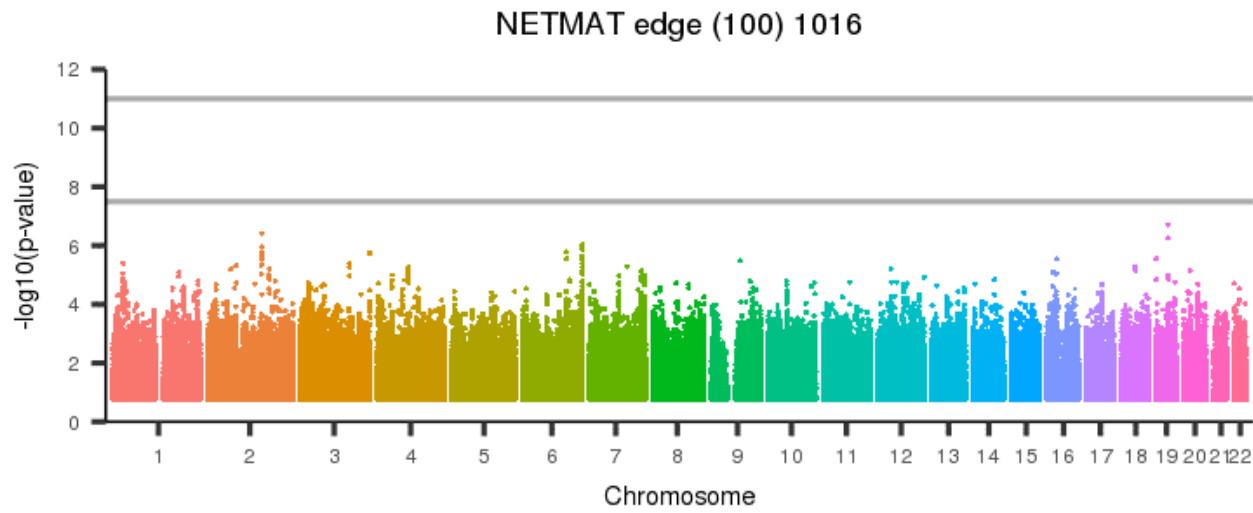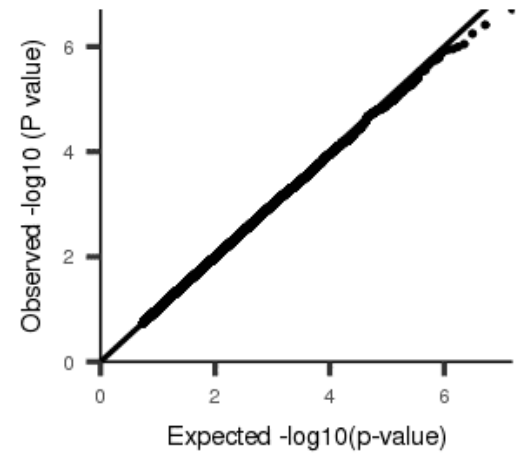

[back to list of plots](#)

Figure 2173: NETMAT edge (100) 1017

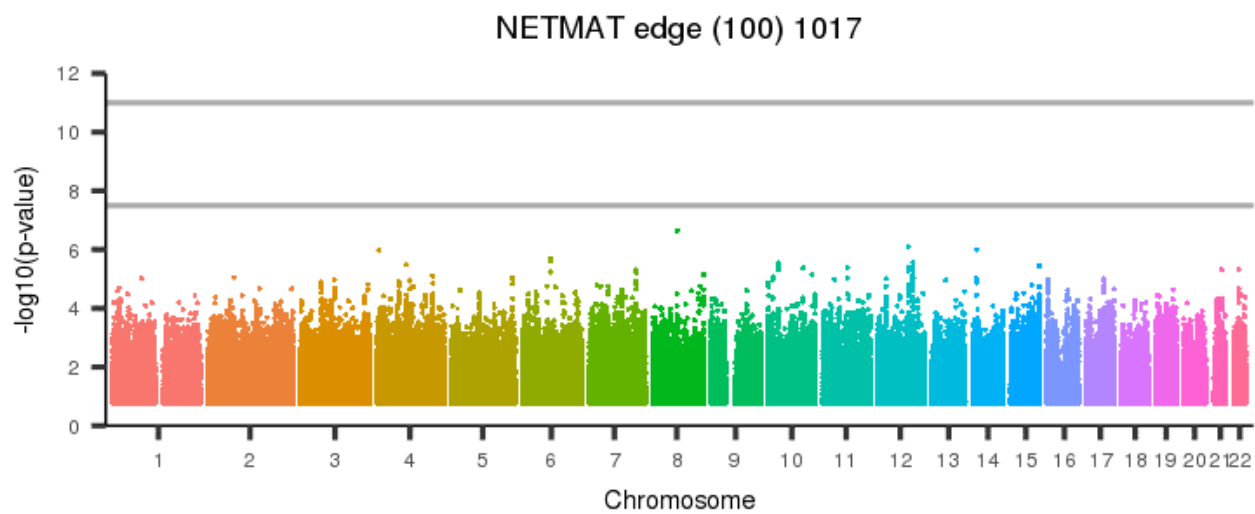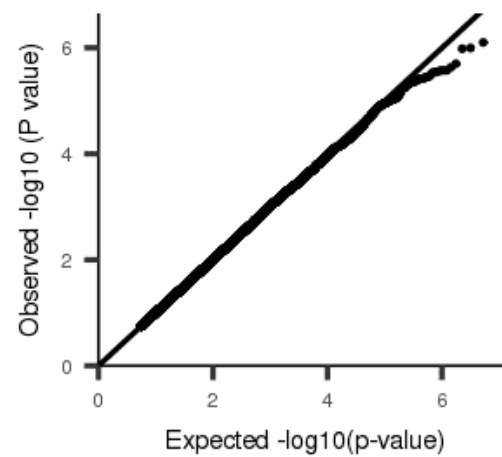

[back to list of plots](#)



Figure 2174: NETMAT edge (100) 1018

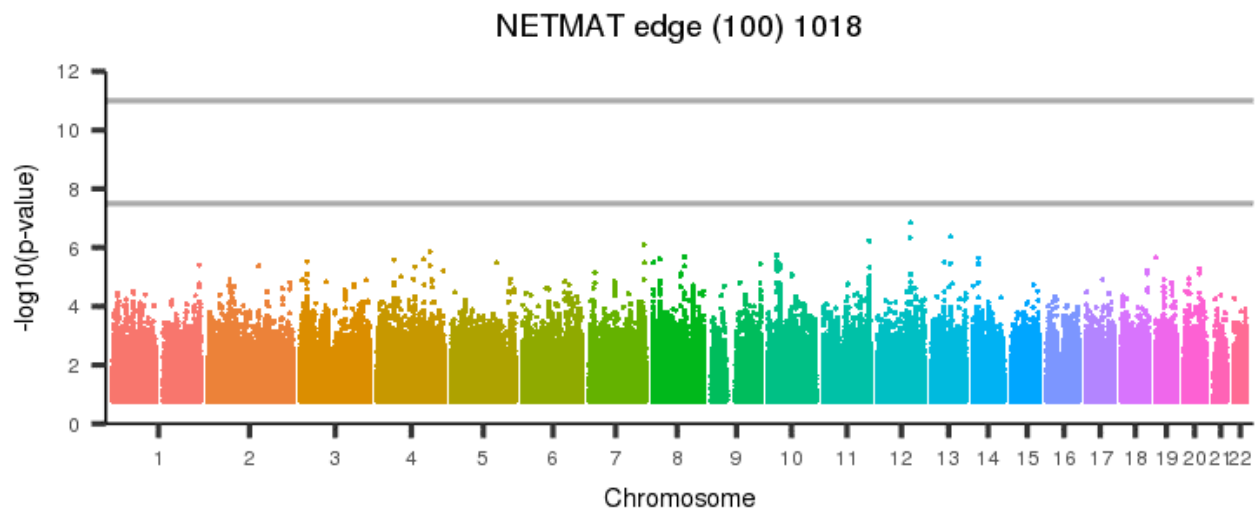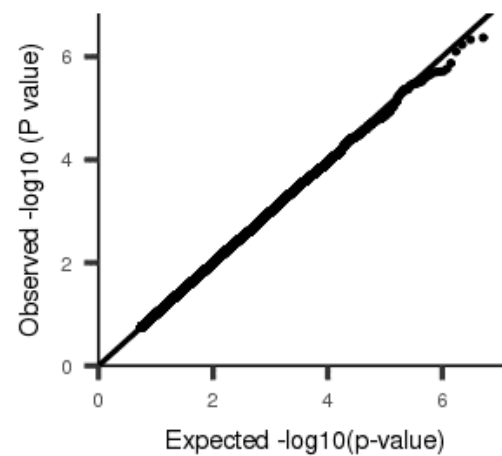

[back to list of plots](#)

Figure 2175: NETMAT edge (100) 1019

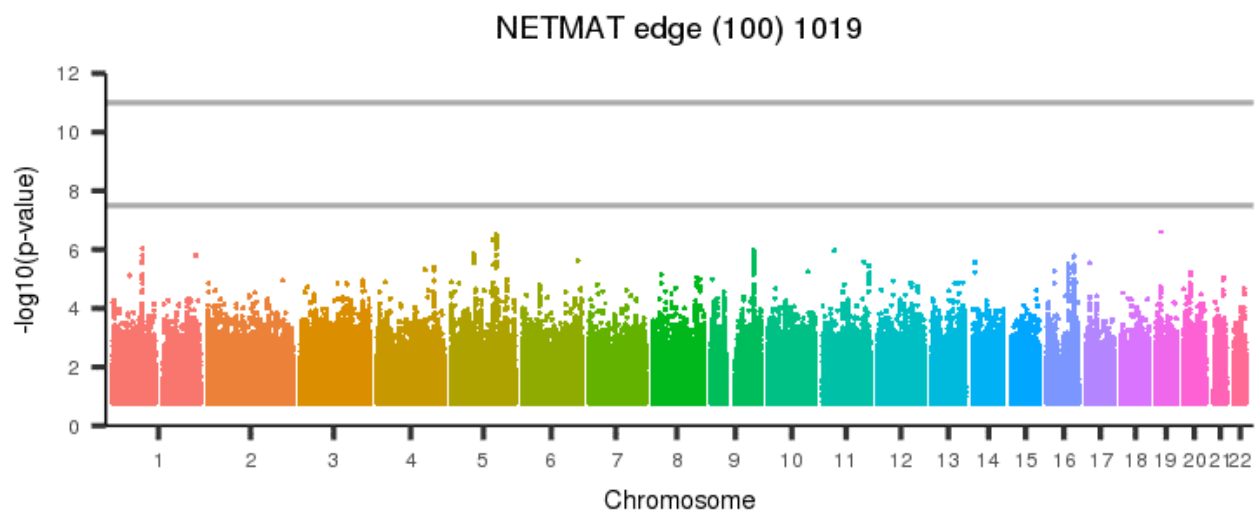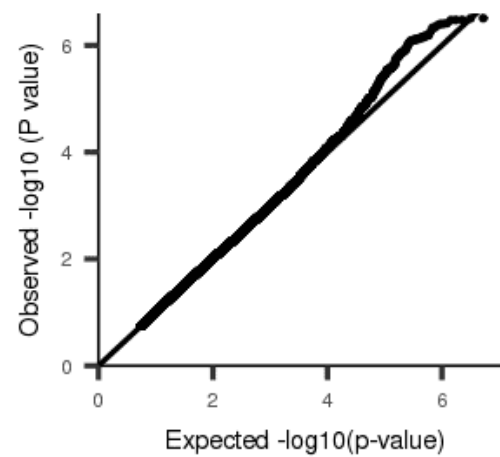

[back to list of plots](#)

Figure 2176: NETMAT edge (100) 1020

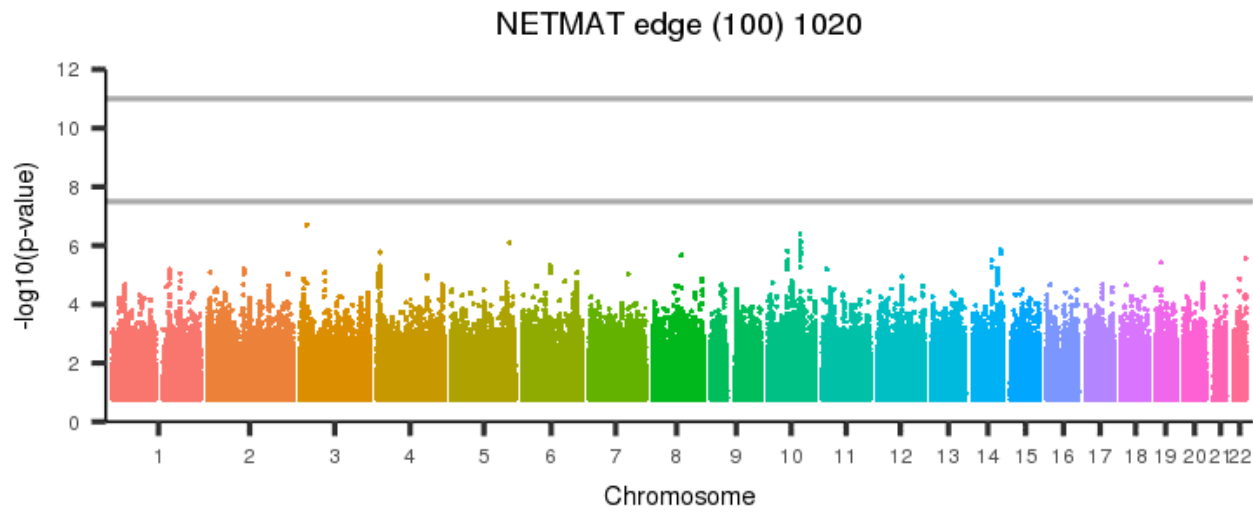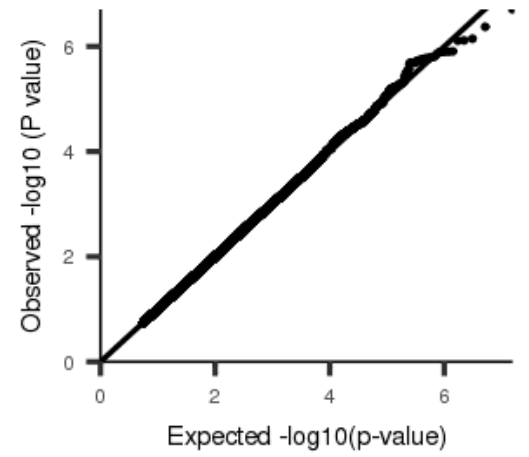

[back to list of plots](#)

Figure 2177: NETMAT edge (100) 1021

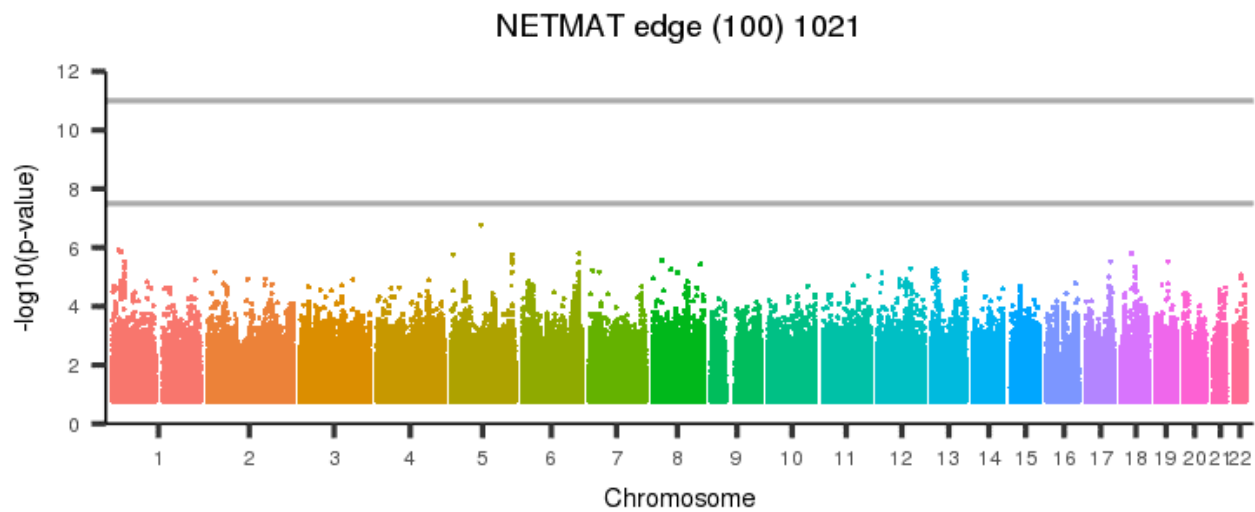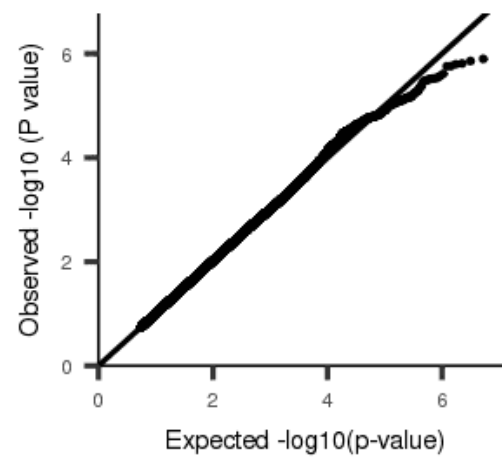

[back to list of plots](#)

Figure 2178: NETMAT edge (100) 1022

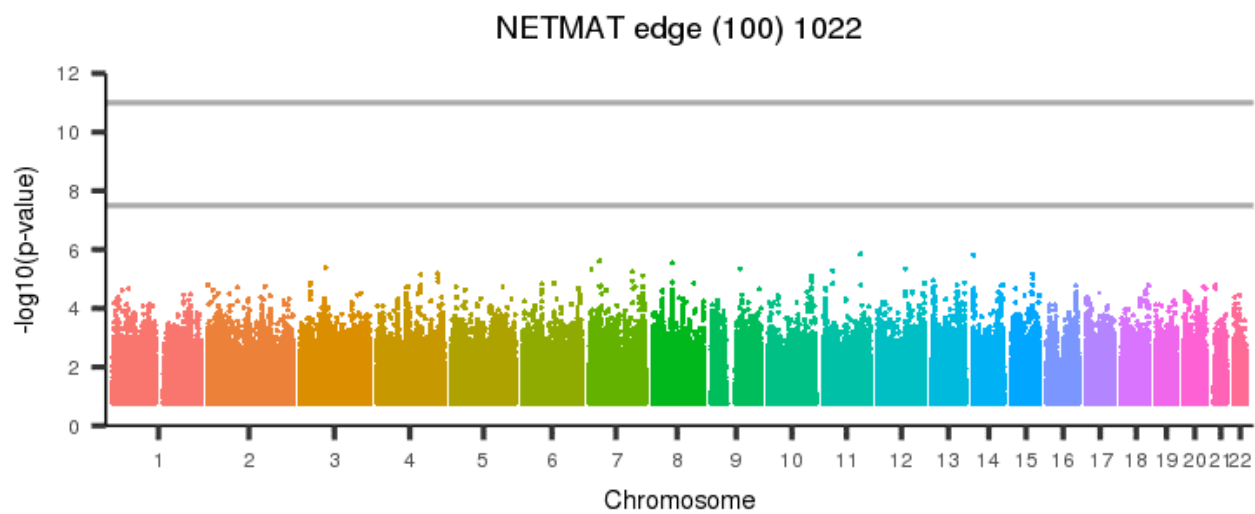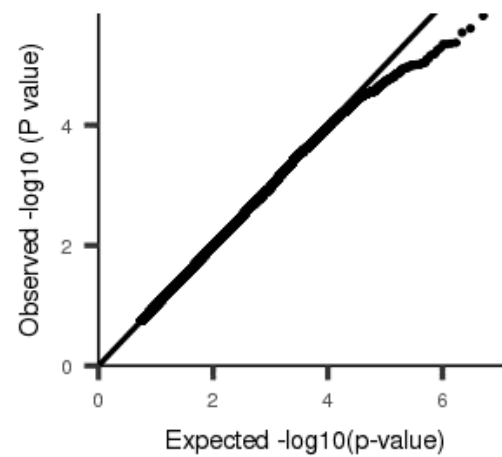

[back to list of plots](#)

Figure 2179: NETMAT edge (100) 1023

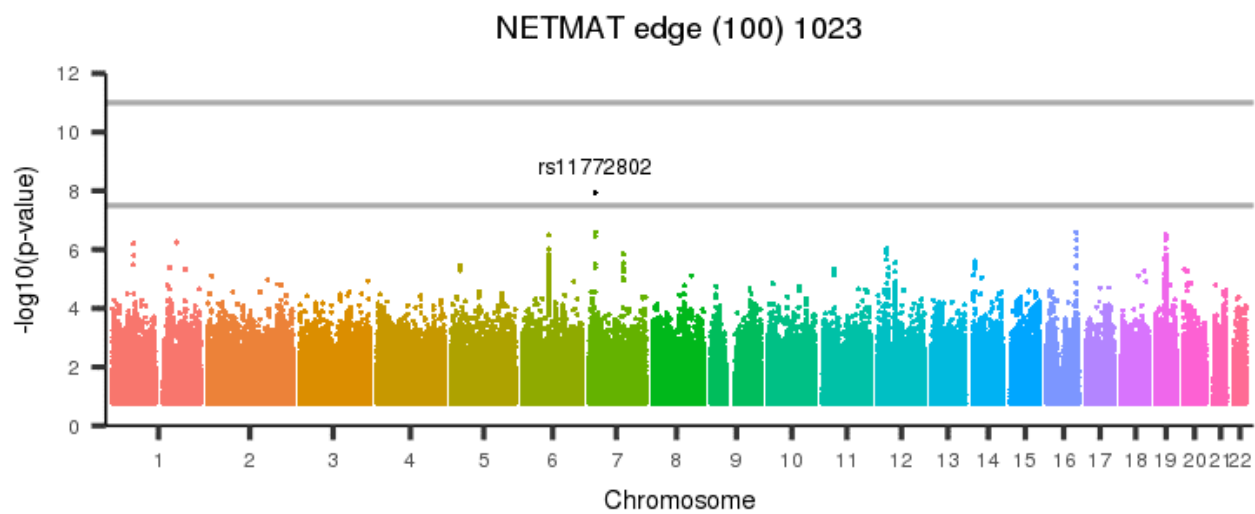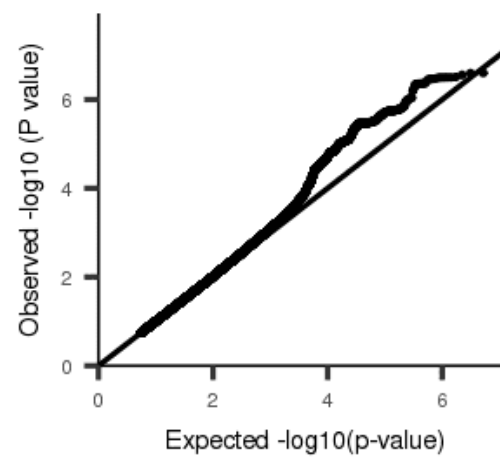

[back to list of plots](#)

Figure 2180: NETMAT edge (100) 1024

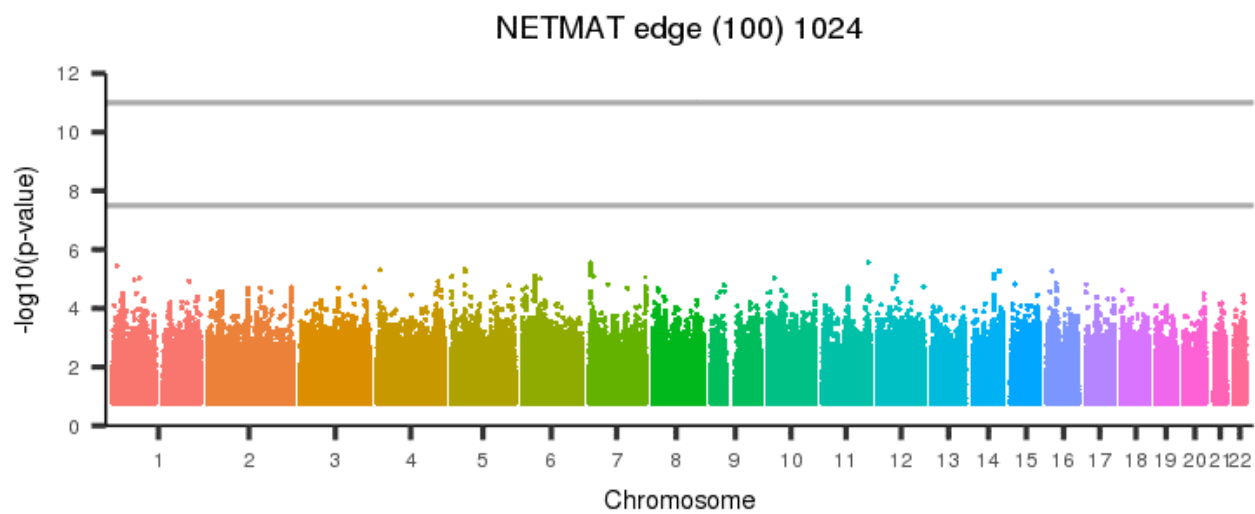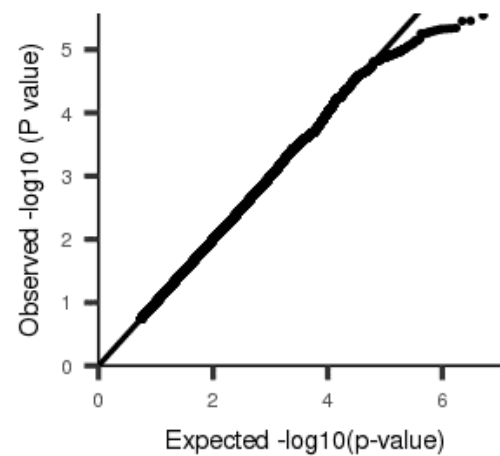

[back to list of plots](#)

Figure 2181: NETMAT edge (100) 1025

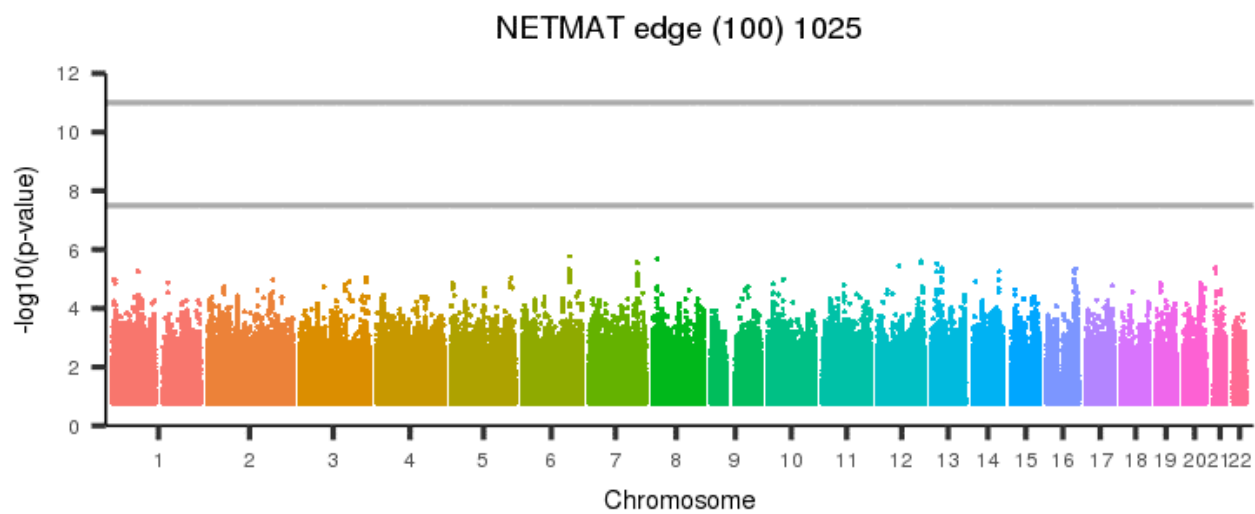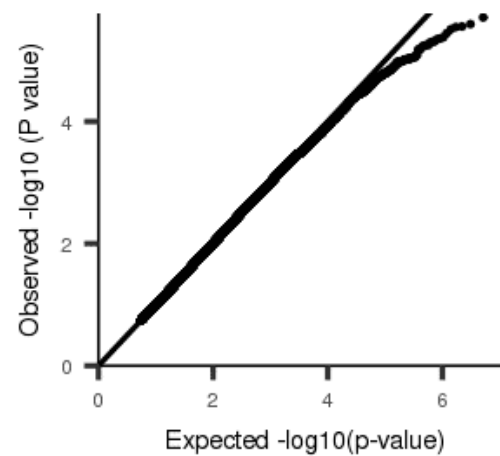

[back to list of plots](#)



Figure 2182: NETMAT edge (100) 1026

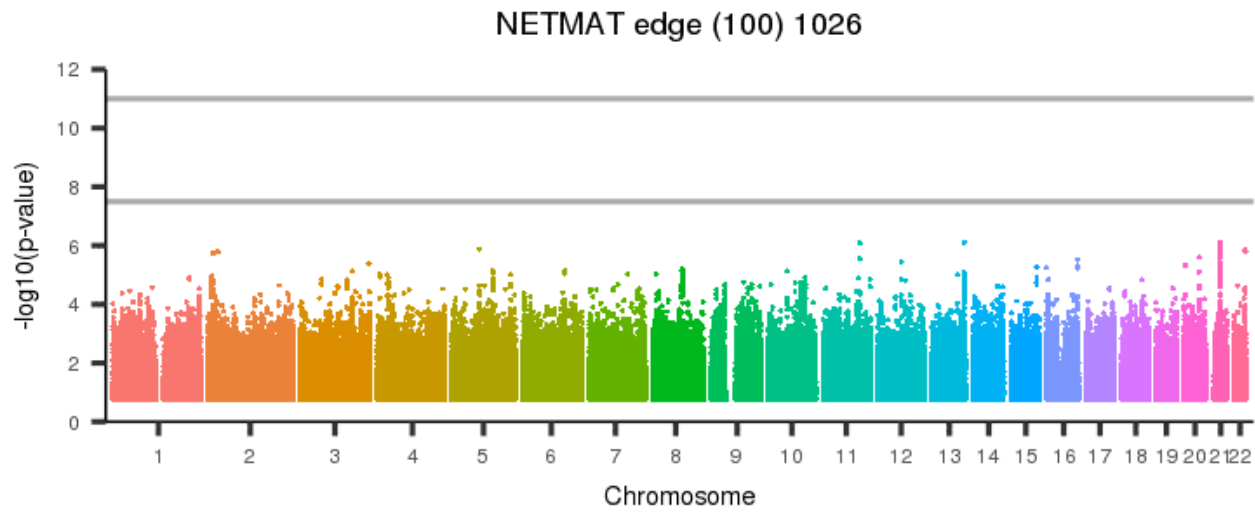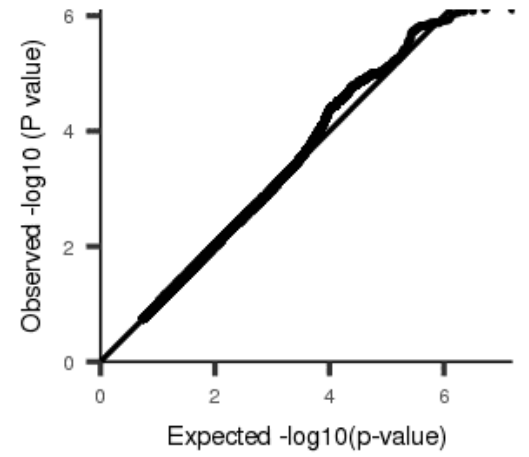

[back to list of plots](#)

Figure 2183: NETMAT edge (100) 1027

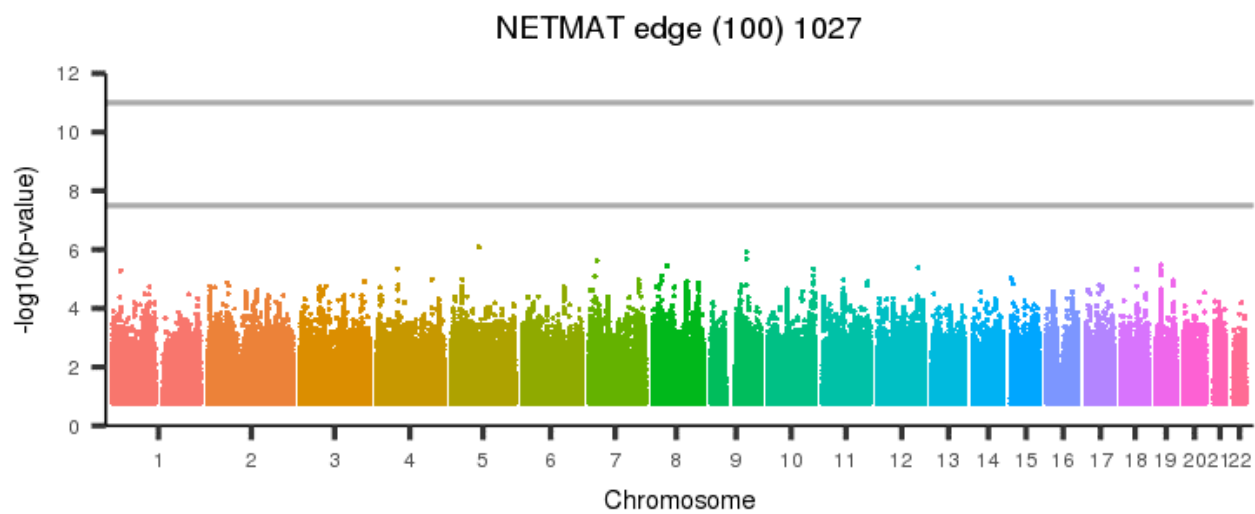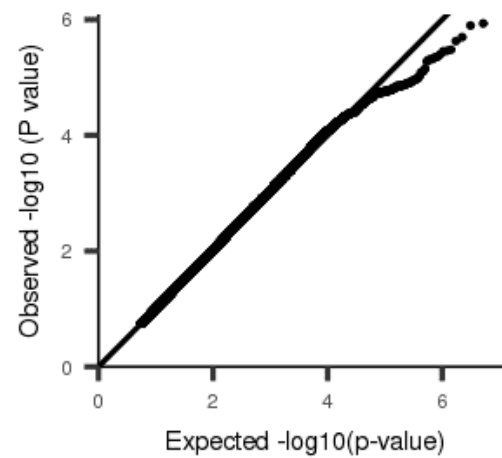

[back to list of plots](#)

Figure 2184: NETMAT edge (100) 1028

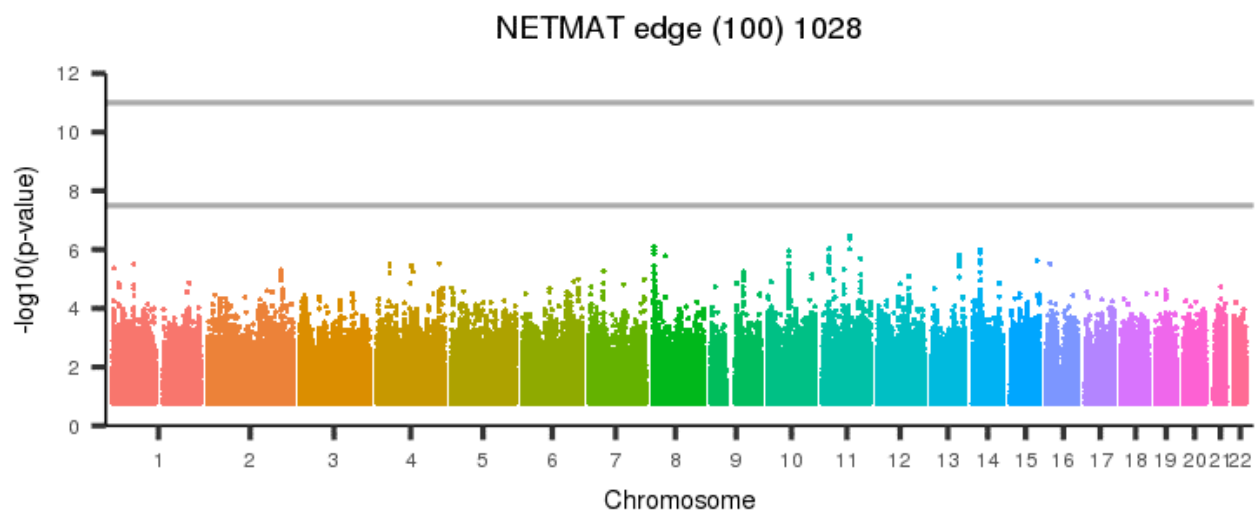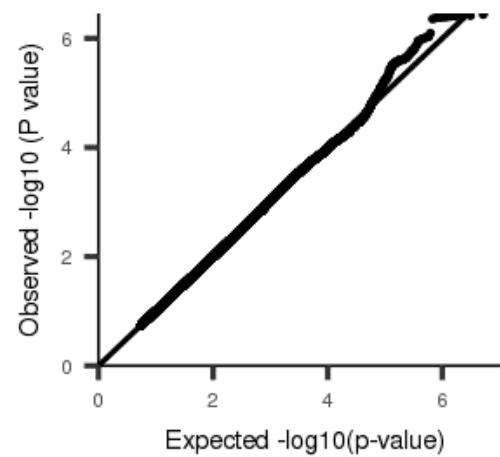

[back to list of plots](#)

Figure 2185: NETMAT edge (100) 1029

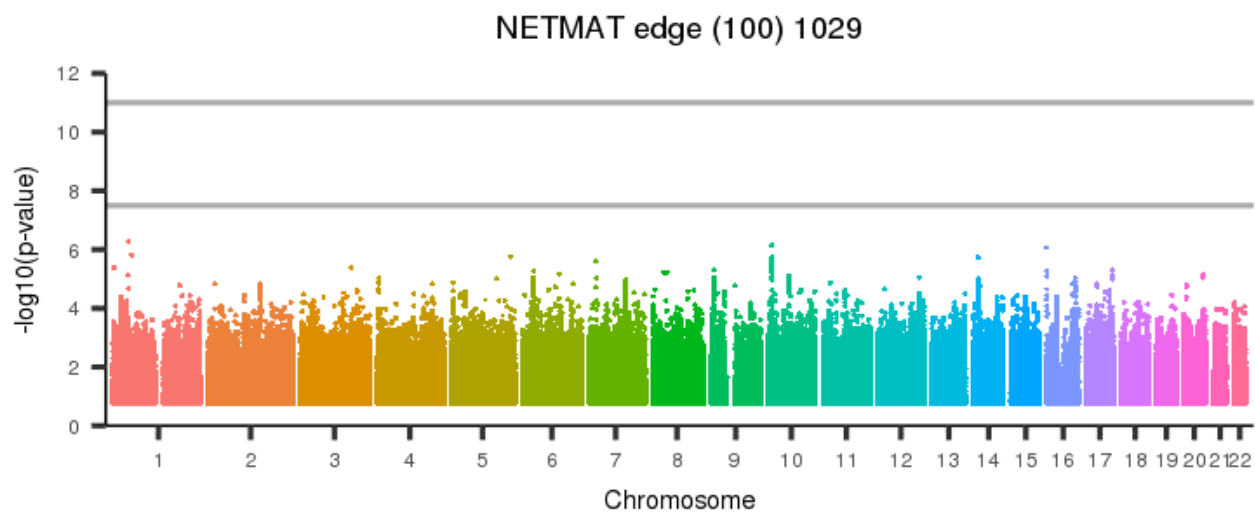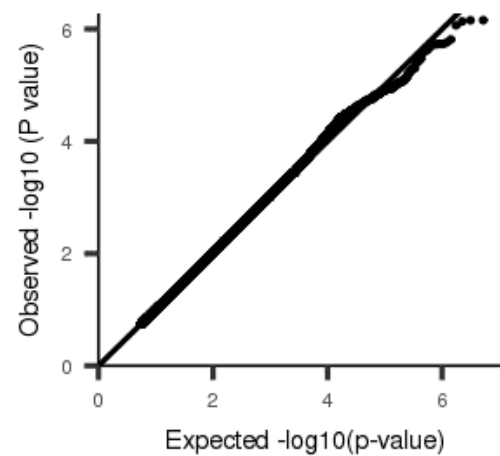

[back to list of plots](#)

Figure 2186: NETMAT edge (100) 1030

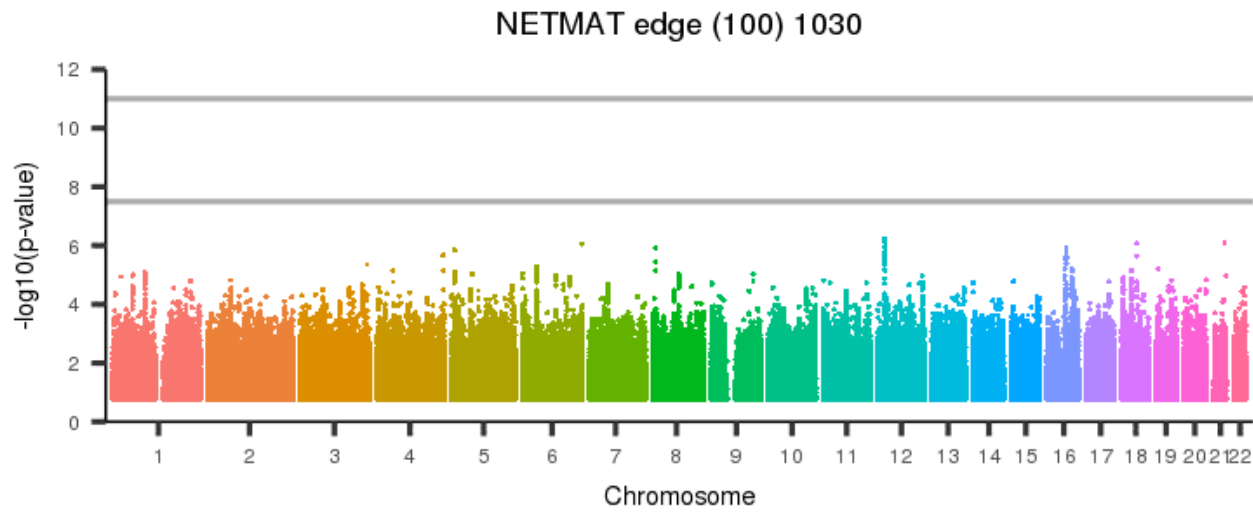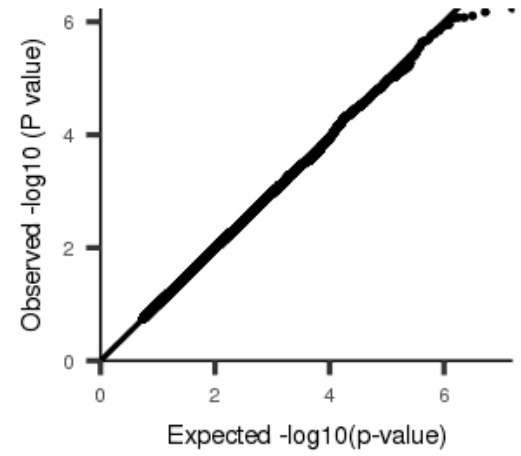

[back to list of plots](#)

Figure 2187: NETMAT edge (100) 1031

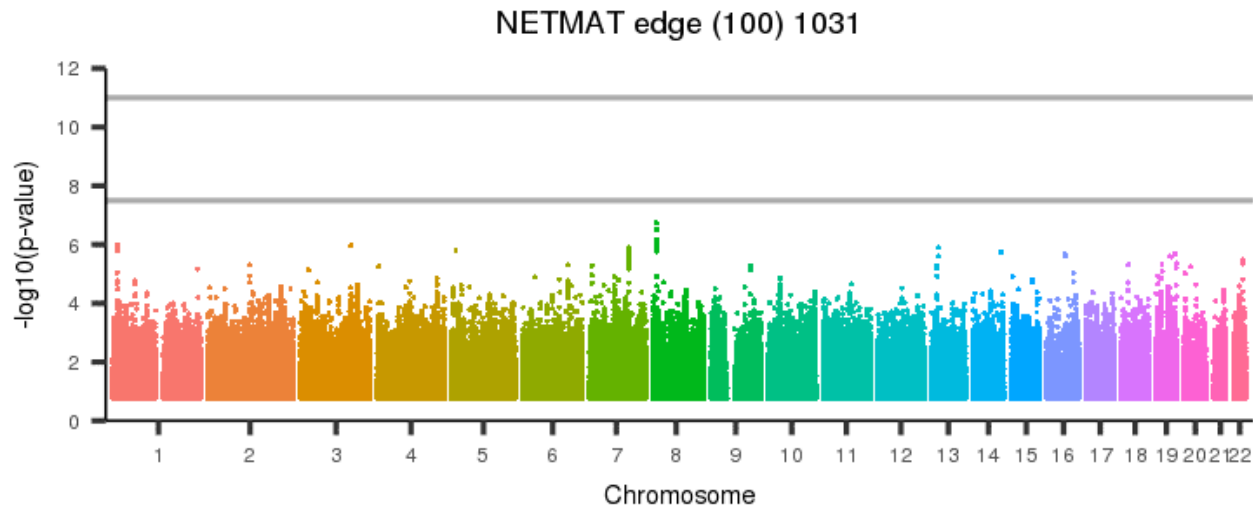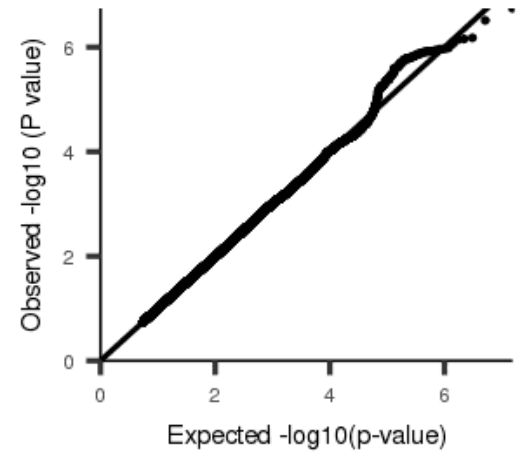

[back to list of plots](#)

Figure 2188: NETMAT edge (100) 1032

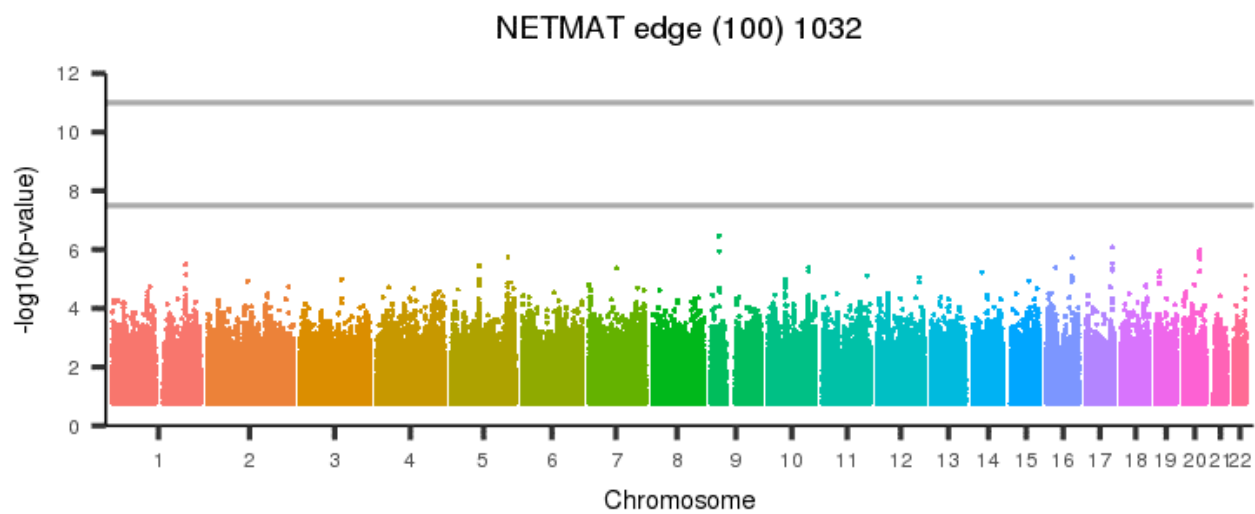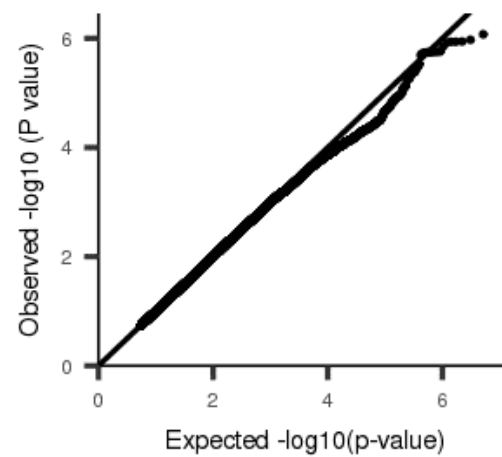

[back to list of plots](#)

Figure 2189: NETMAT edge (100) 1033

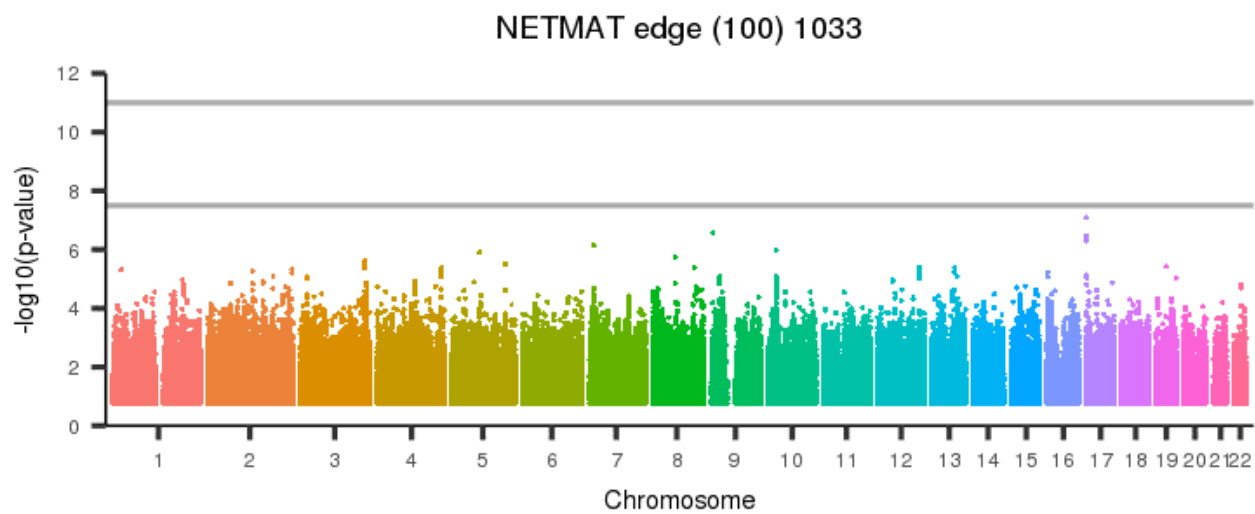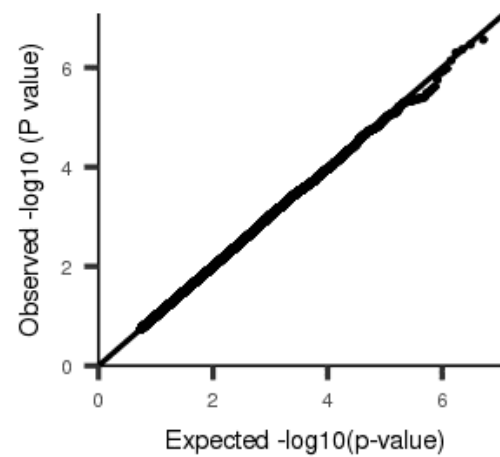

[back to list of plots](#)



Figure 2190: NETMAT edge (100) 1034

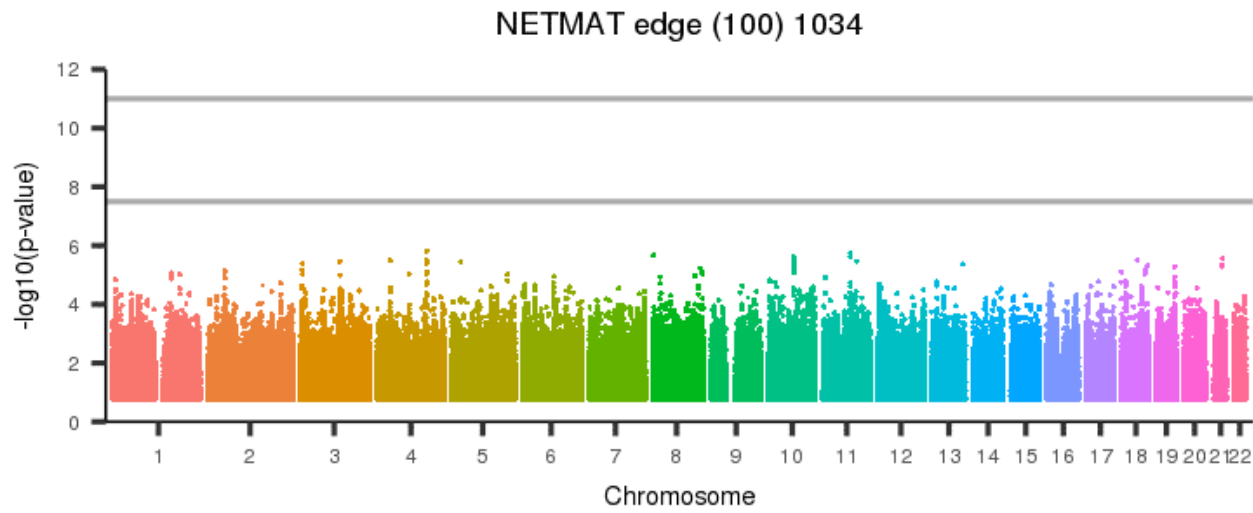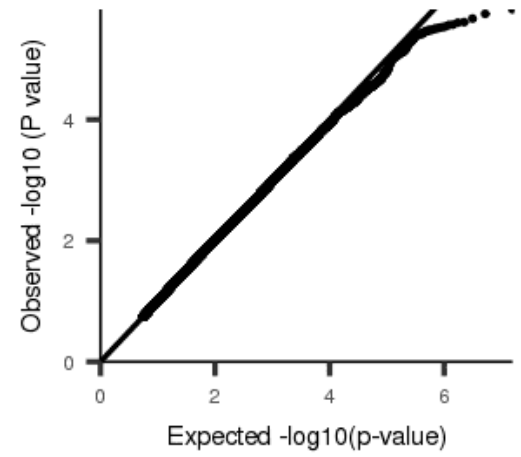

[back to list of plots](#)

Figure 2191: NETMAT edge (100) 1035

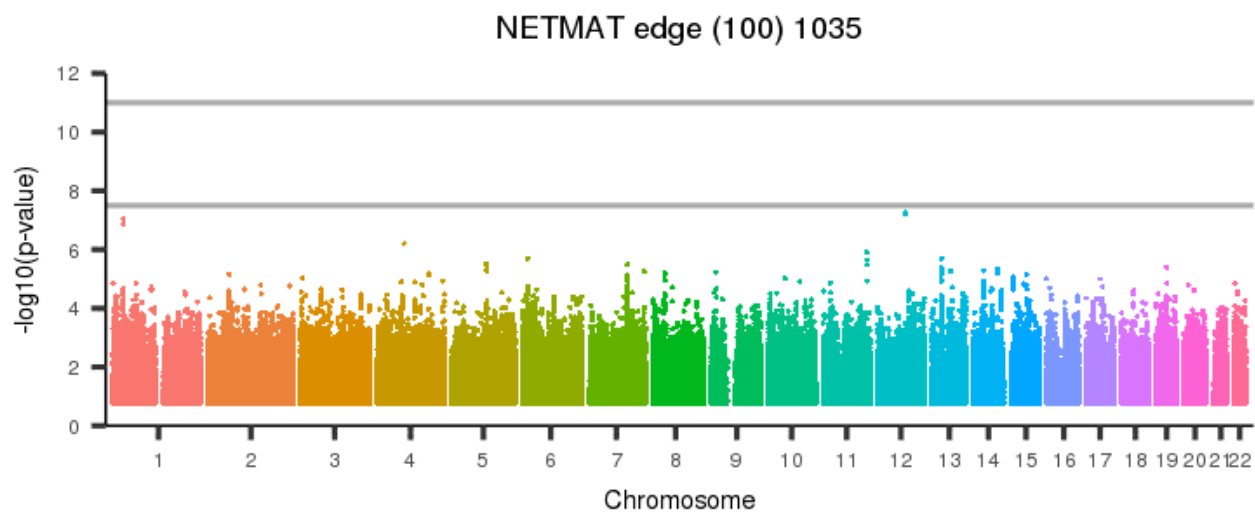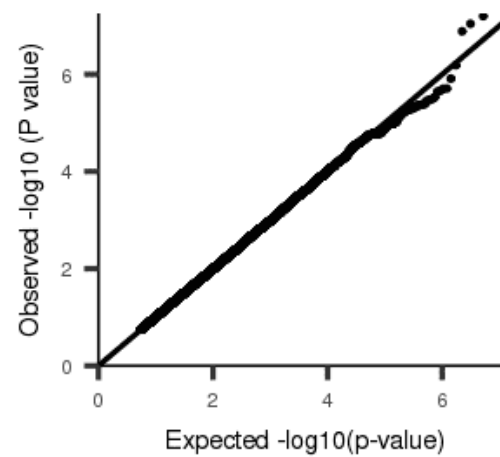

[back to list of plots](#)

Figure 2192: NETMAT edge (100) 1036

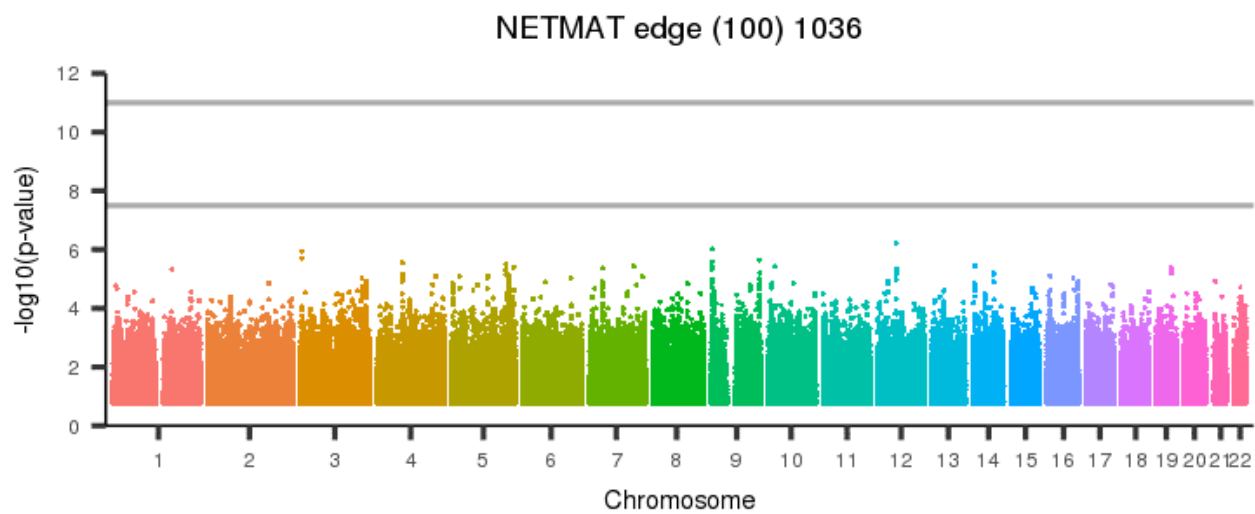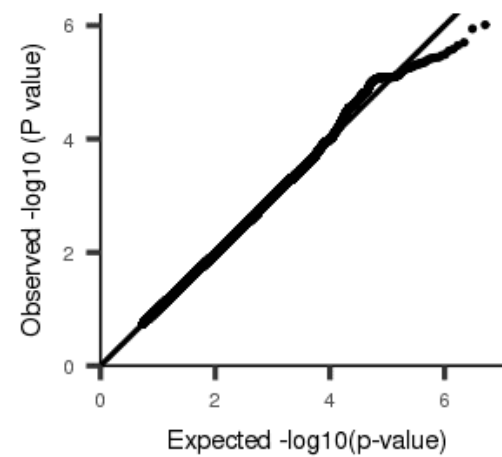

[back to list of plots](#)

Figure 2193: NETMAT edge (100) 1037

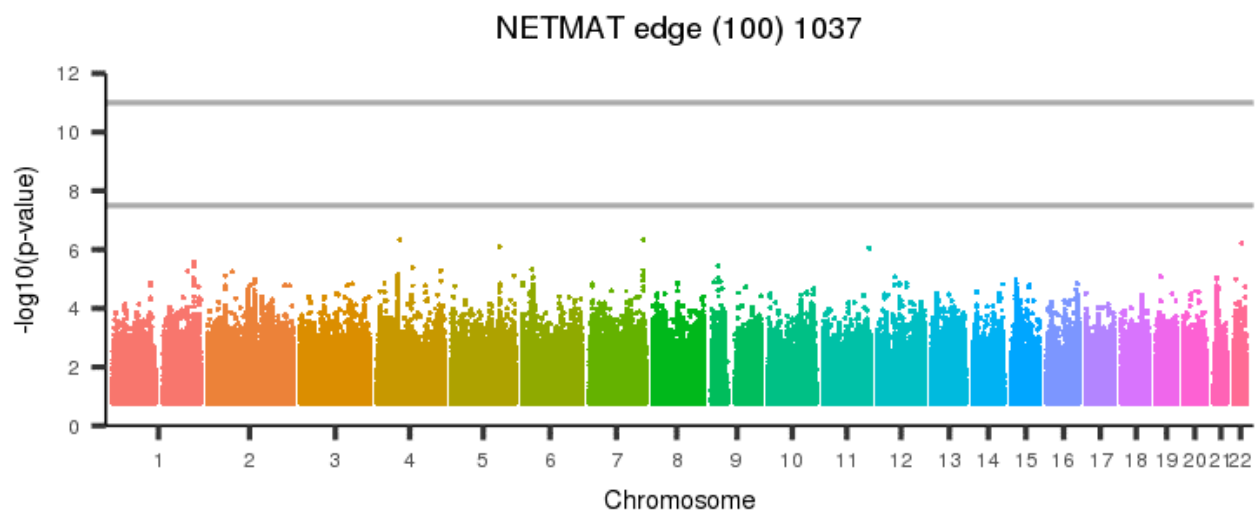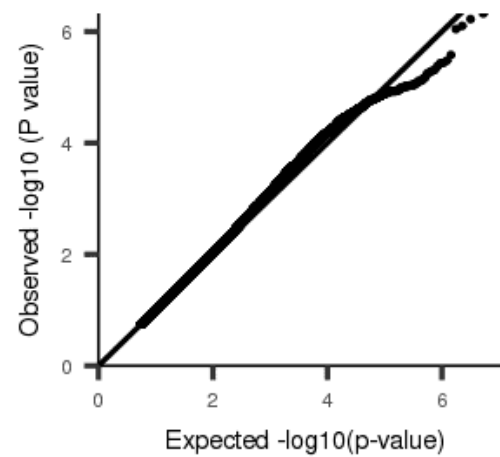

[back to list of plots](#)

Figure 2194: NETMAT edge (100) 1038

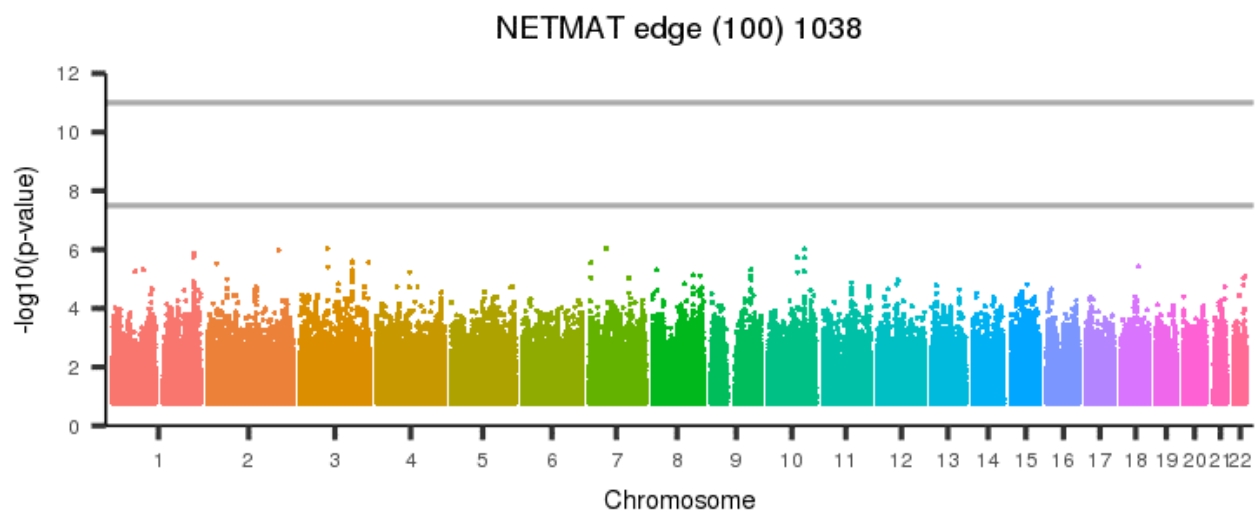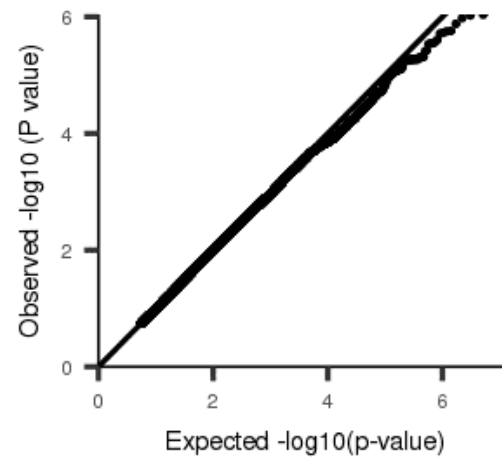

[back to list of plots](#)

Figure 2195: NETMAT edge (100) 1039

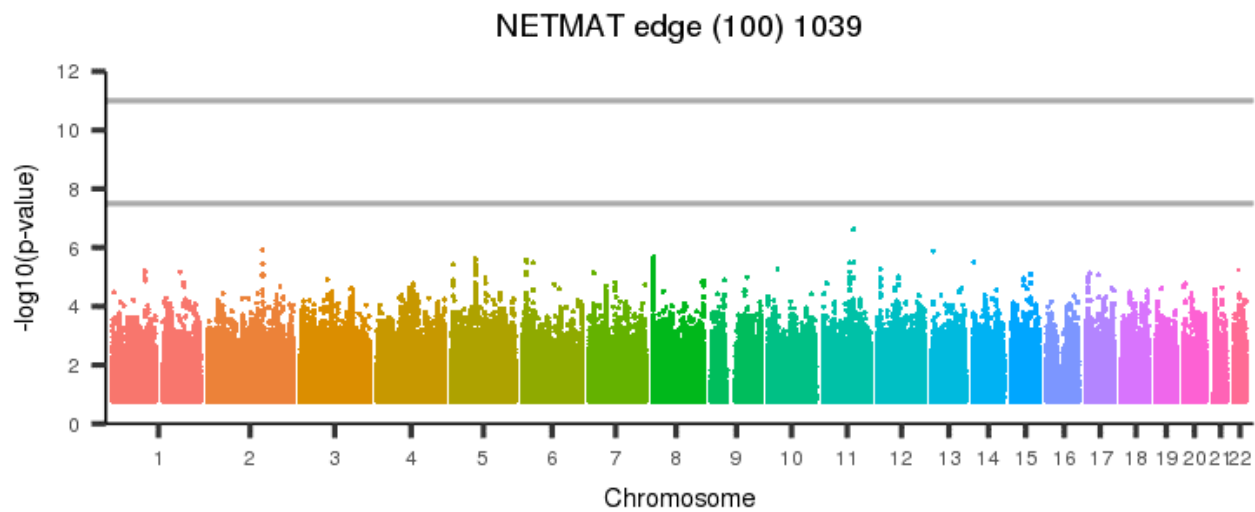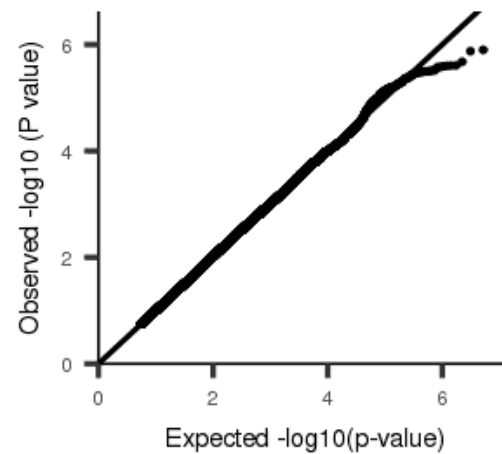

[back to list of plots](#)

Figure 2196: NETMAT edge (100) 1040

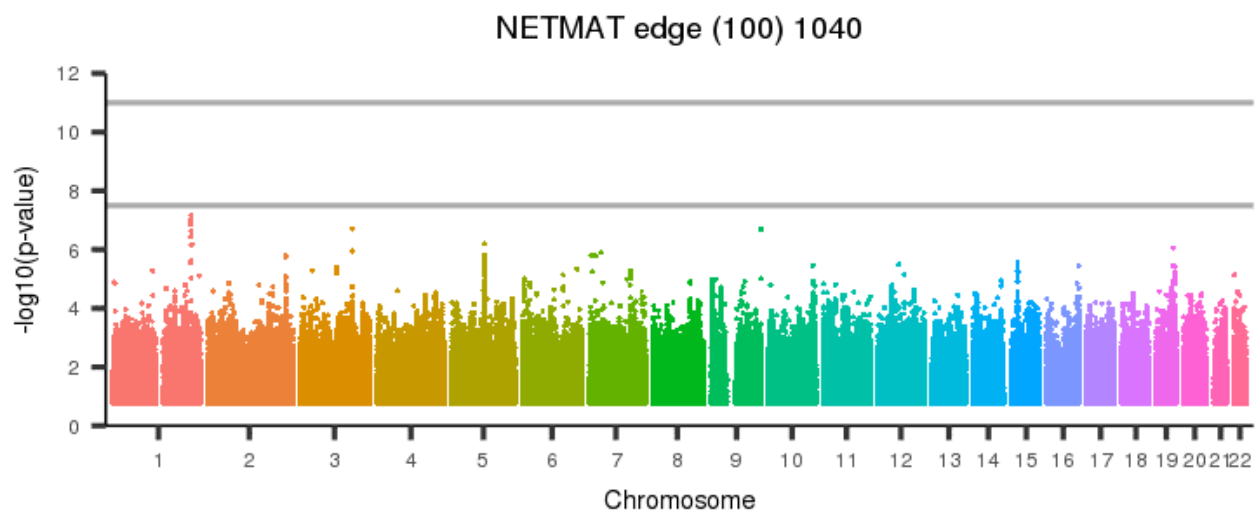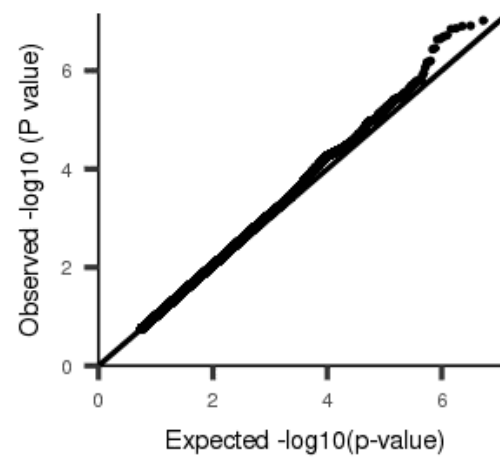

[back to list of plots](#)

Figure 2197: NETMAT edge (100) 1041

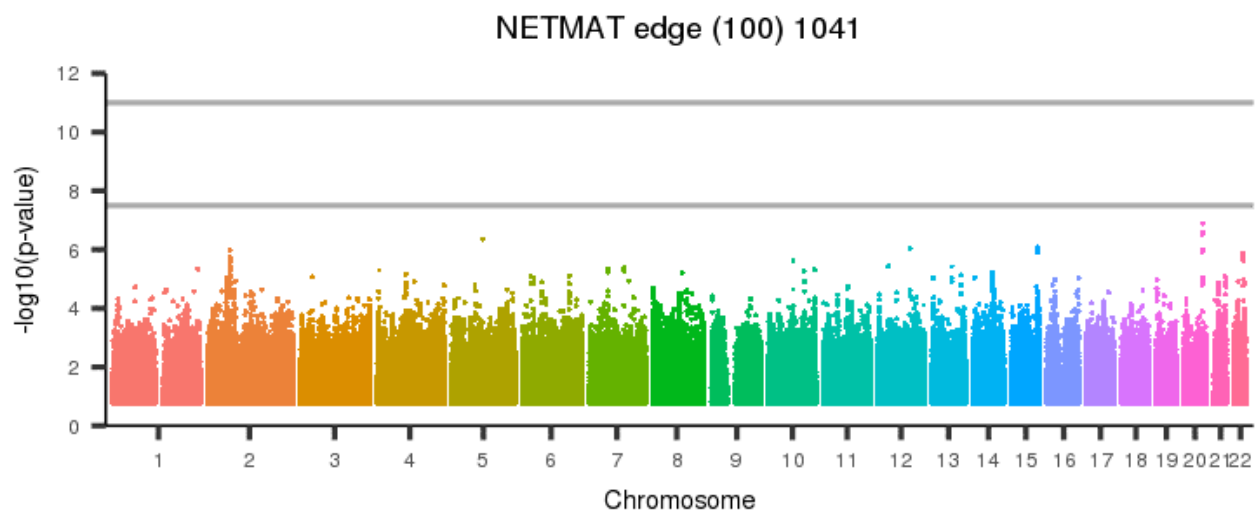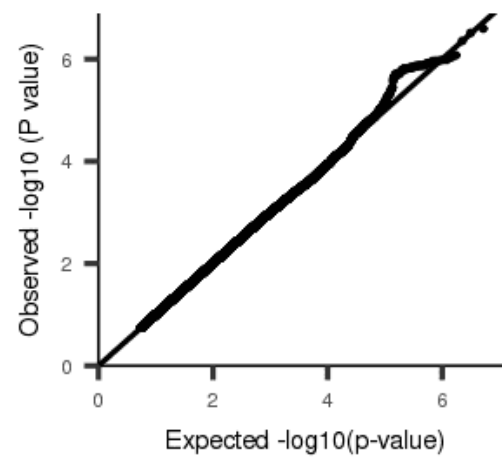

[back to list of plots](#)



Figure 2198: NETMAT edge (100) 1042

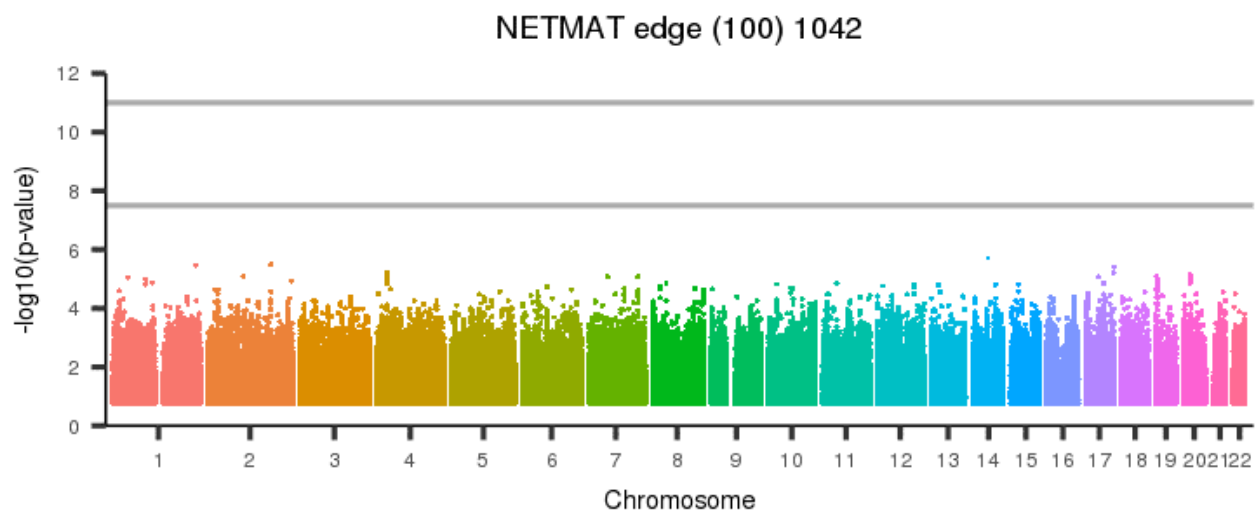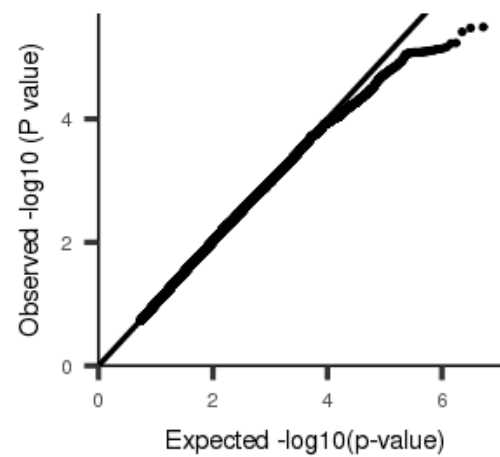

[back to list of plots](#)

Figure 2199: NETMAT edge (100) 1043

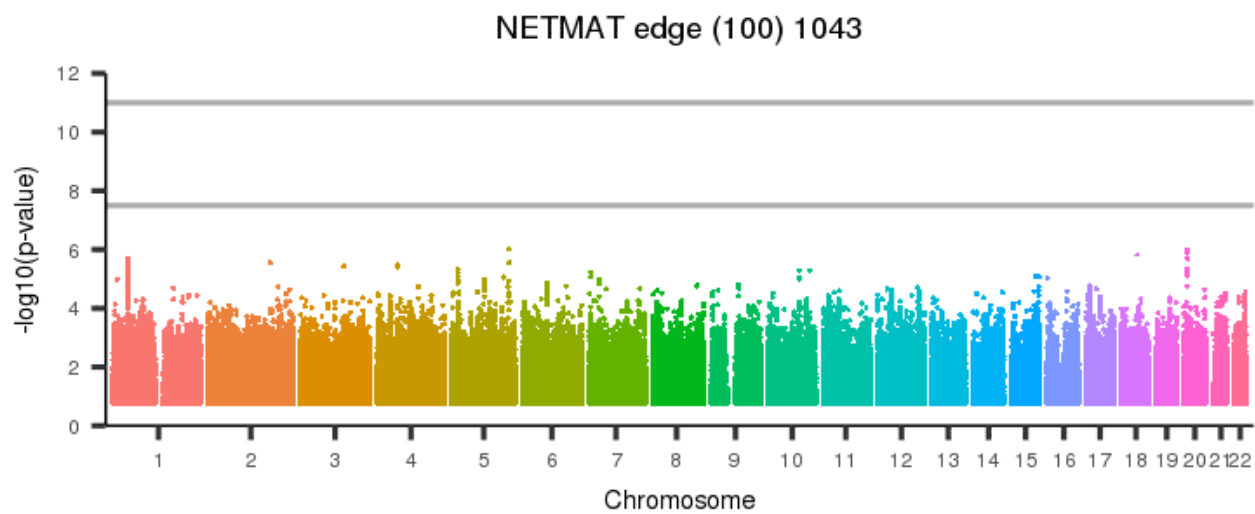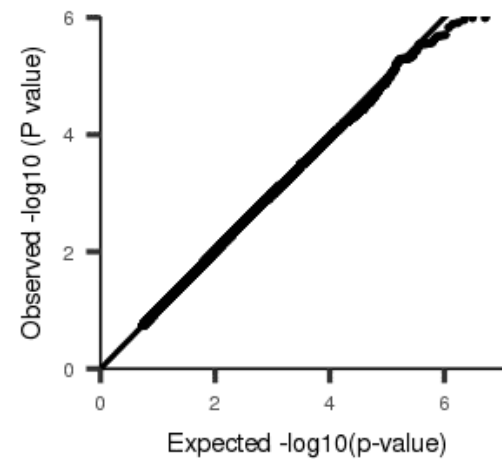

[back to list of plots](#)

Figure 2200: NETMAT edge (100) 1044

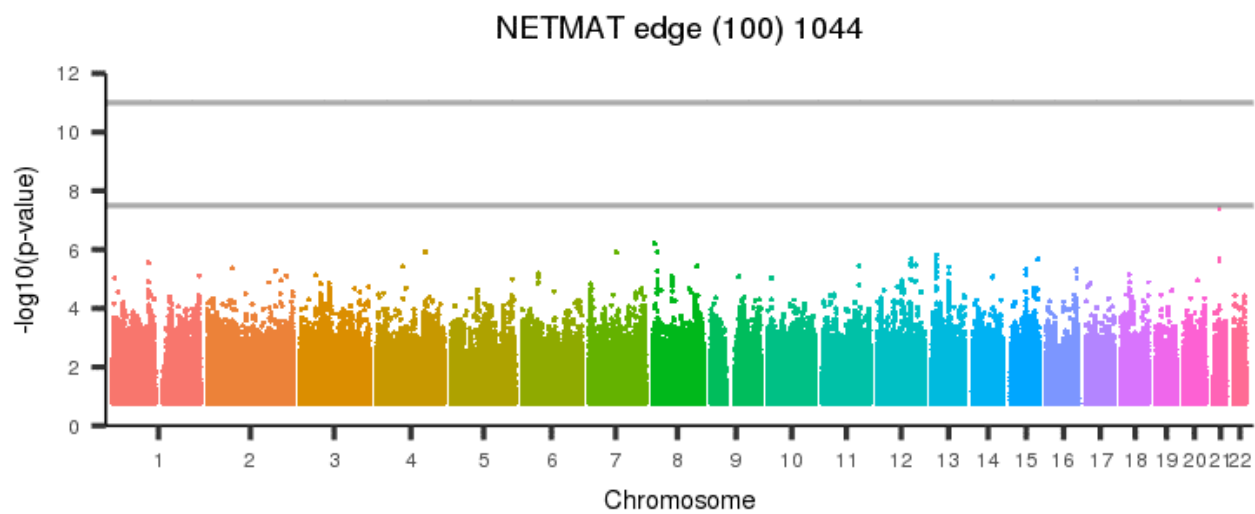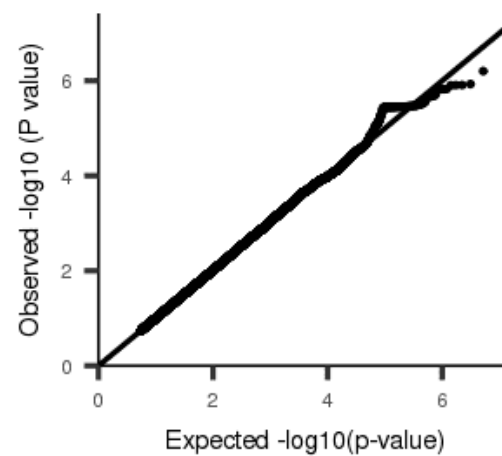

[back to list of plots](#)

Figure 2201: NETMAT edge (100) 1045

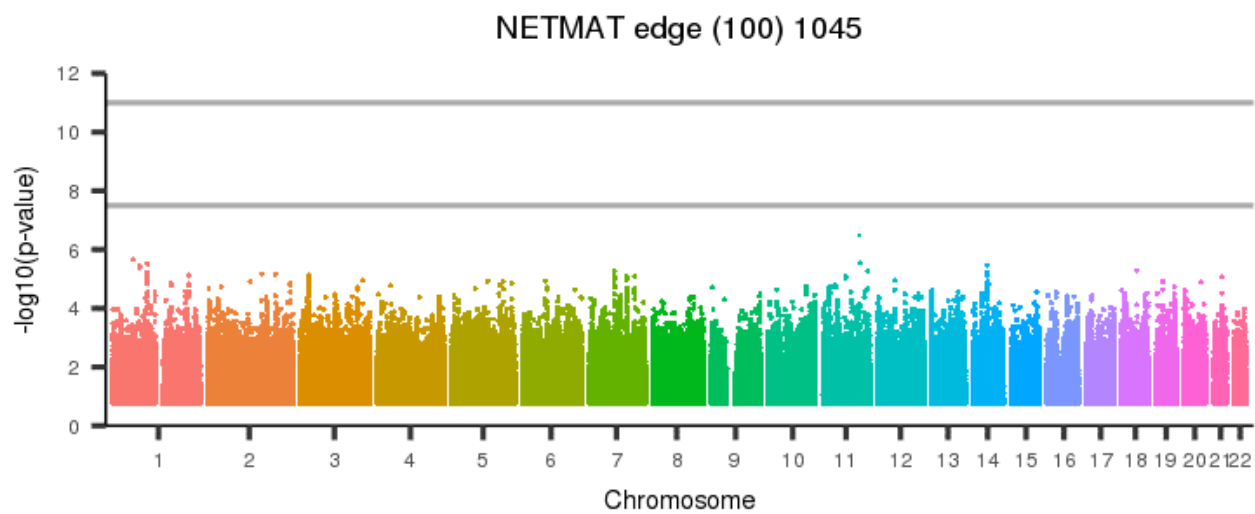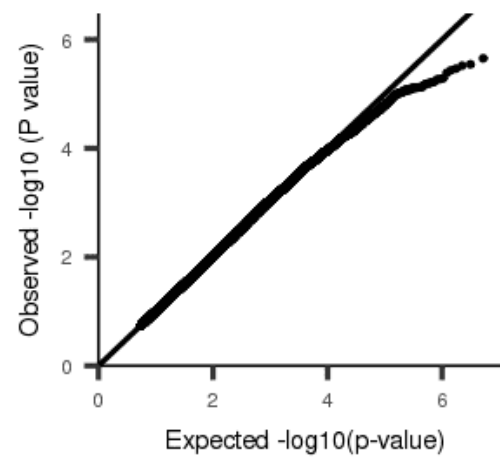

[back to list of plots](#)

Figure 2202: NETMAT edge (100) 1046

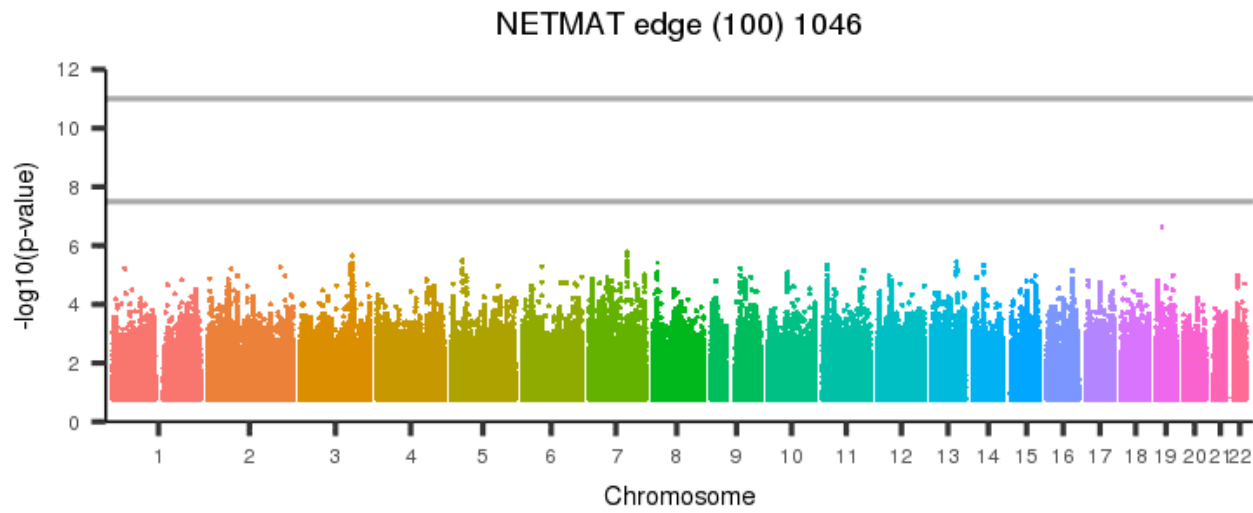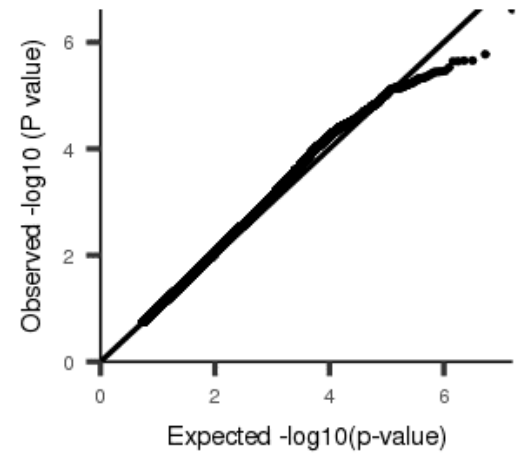

[back to list of plots](#)

Figure 2203: NETMAT edge (100) 1047

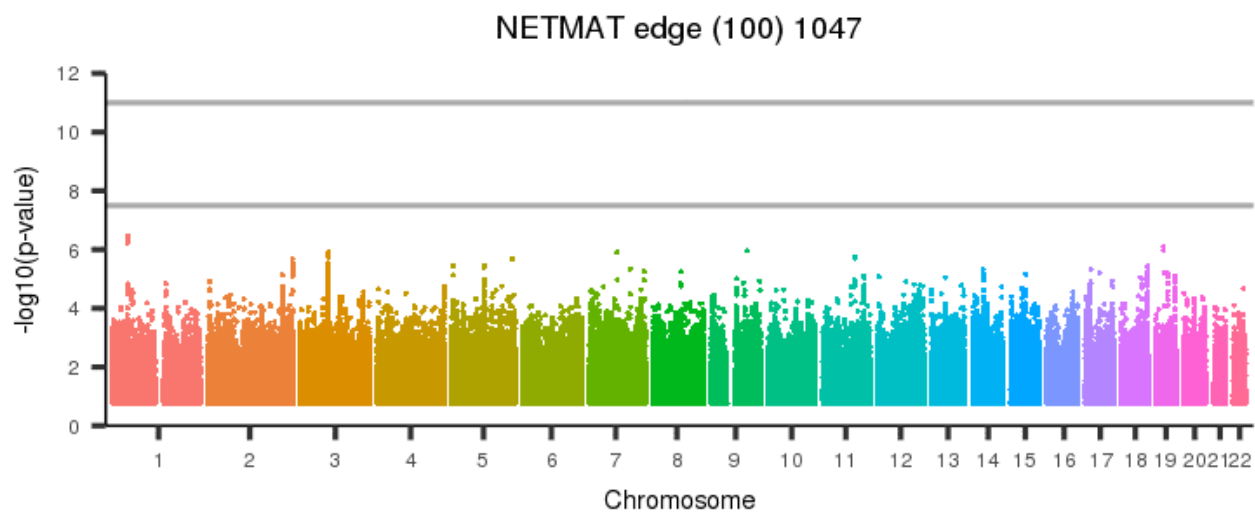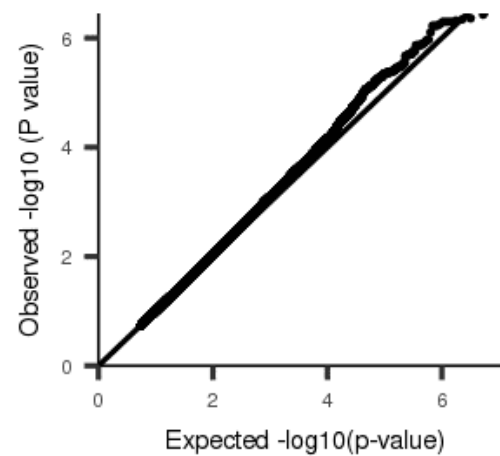

[back to list of plots](#)

Figure 2204: NETMAT edge (100) 1048

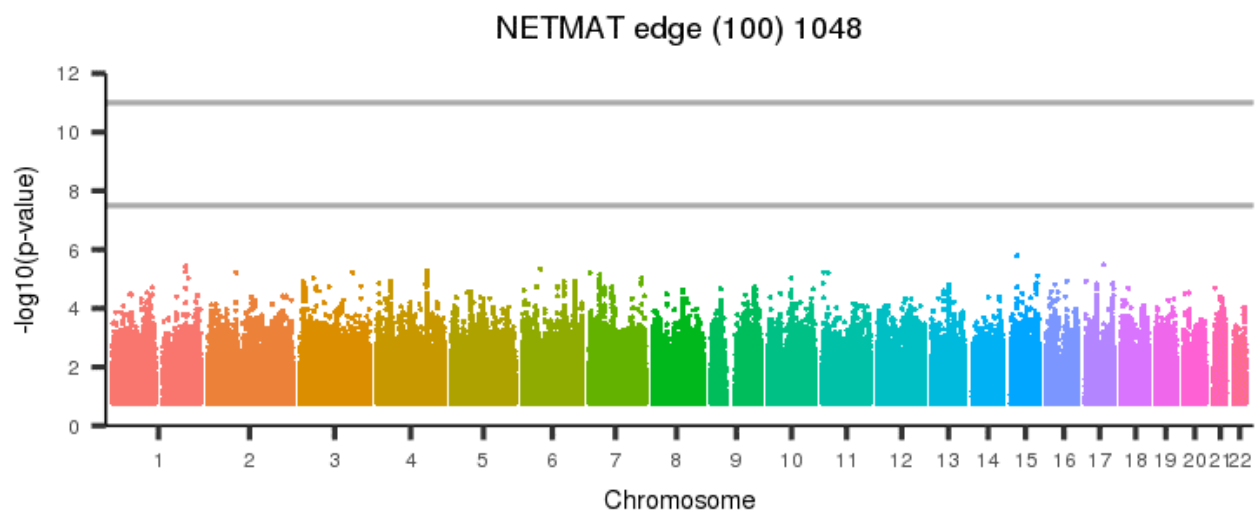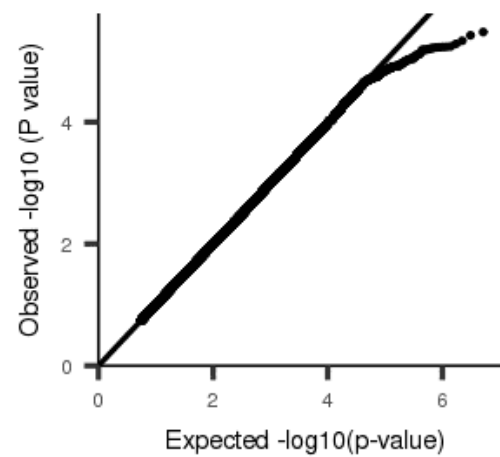

[back to list of plots](#)

Figure 2205: NETMAT edge (100) 1049

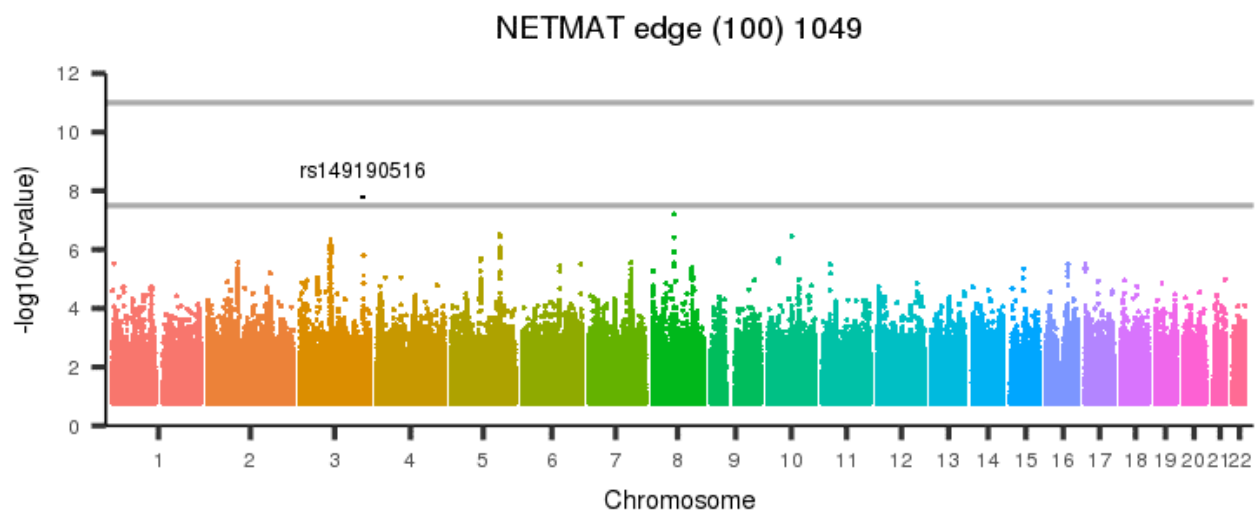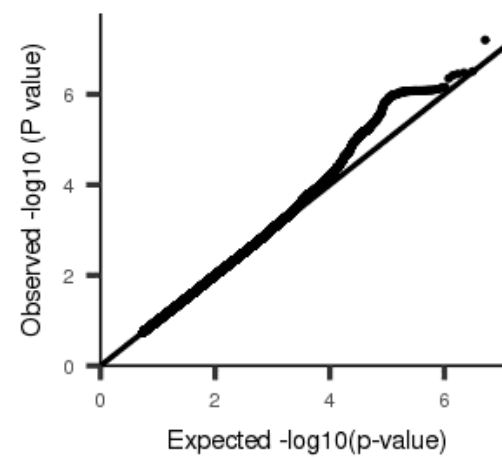

[back to list of plots](#)



Figure 2206: NETMAT edge (100) 1050

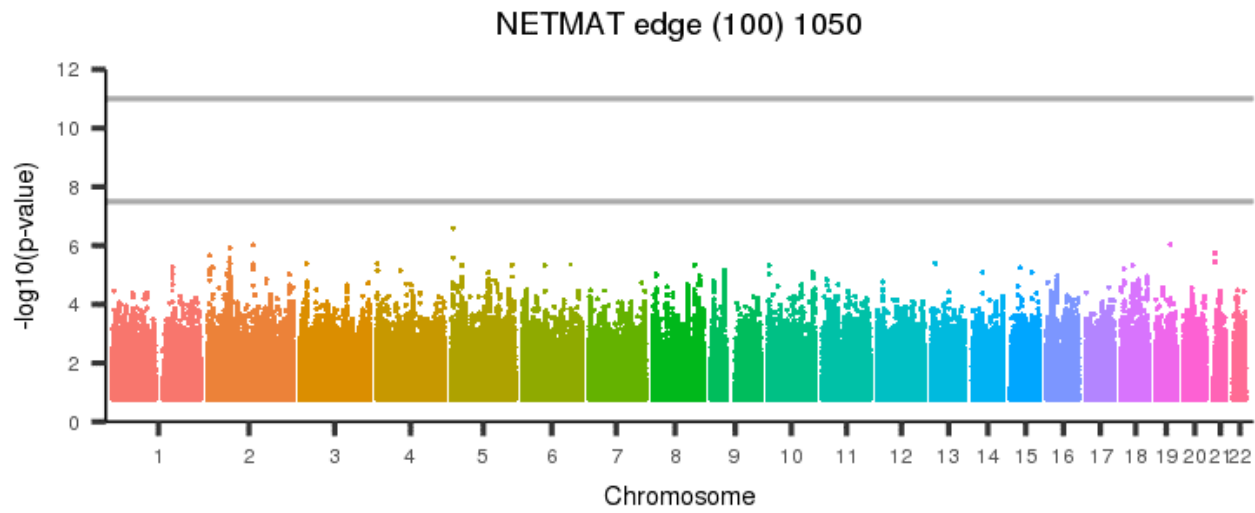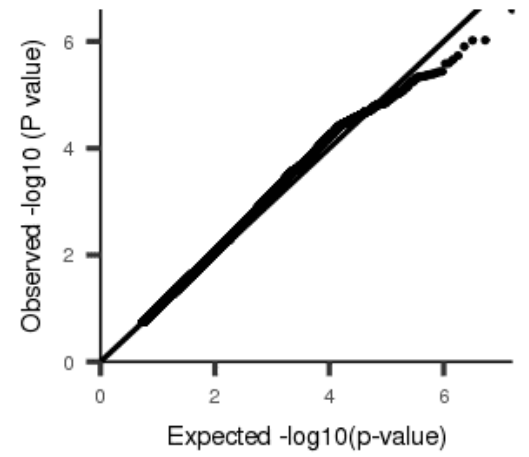

[back to list of plots](#)

Figure 2207: NETMAT edge (100) 1051

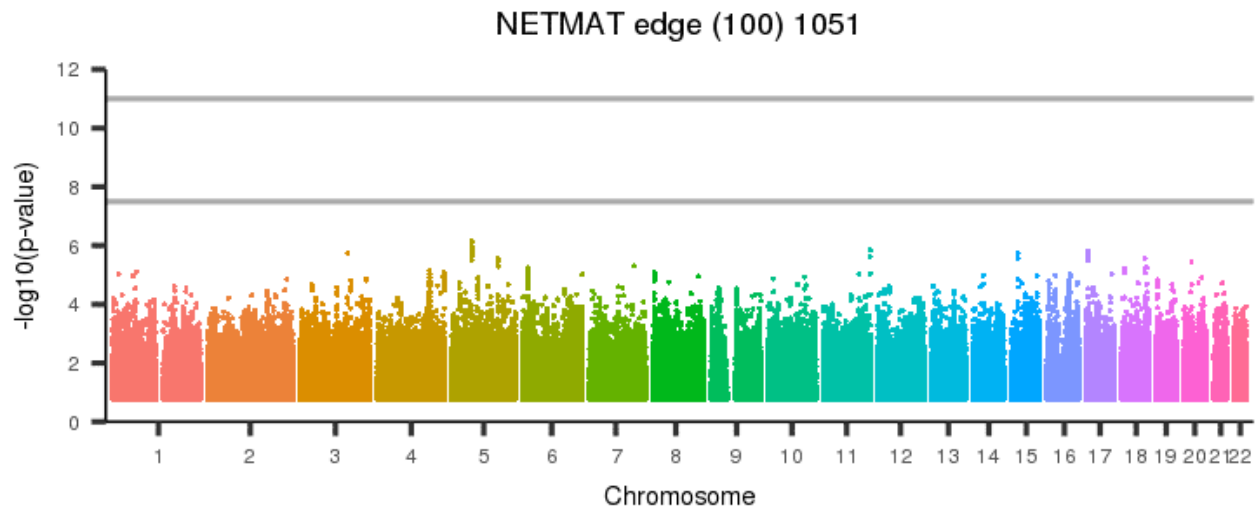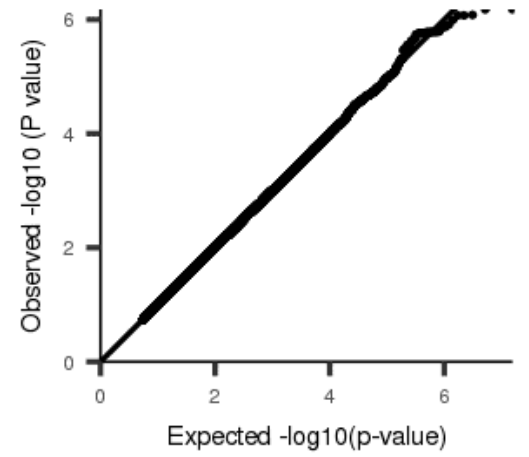

[back to list of plots](#)

Figure 2208: NETMAT edge (100) 1052

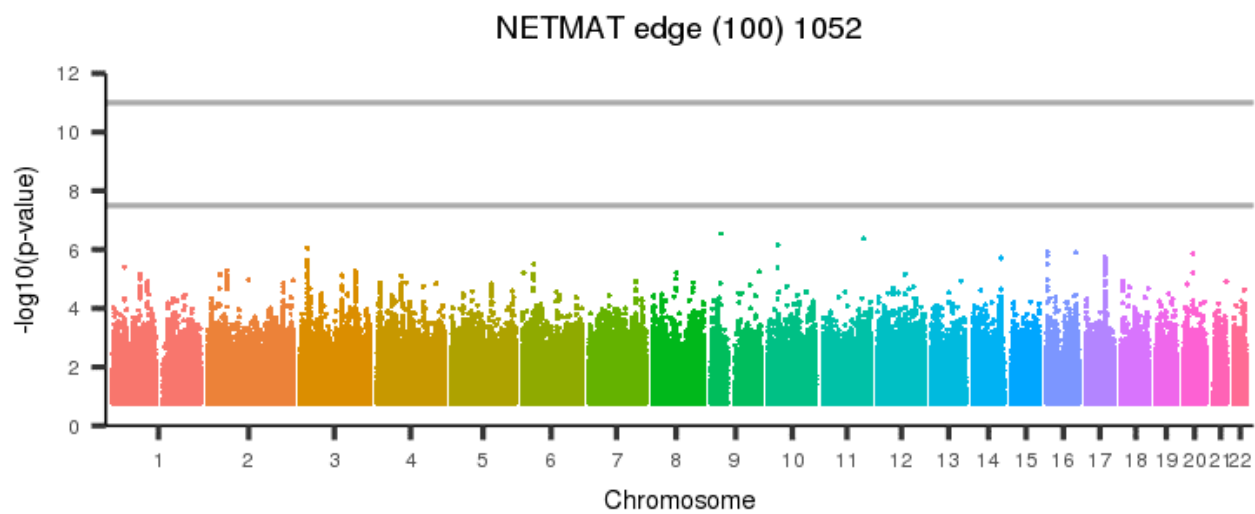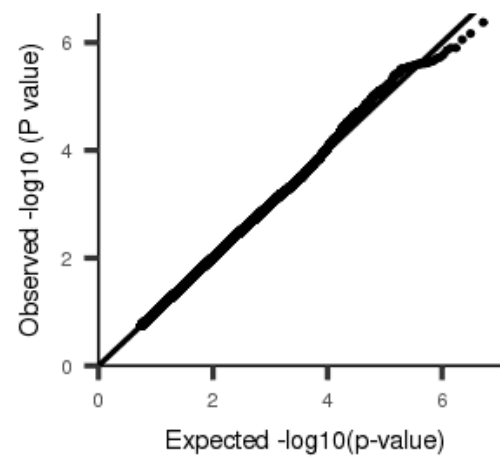

[back to list of plots](#)

Figure 2209: NETMAT edge (100) 1053

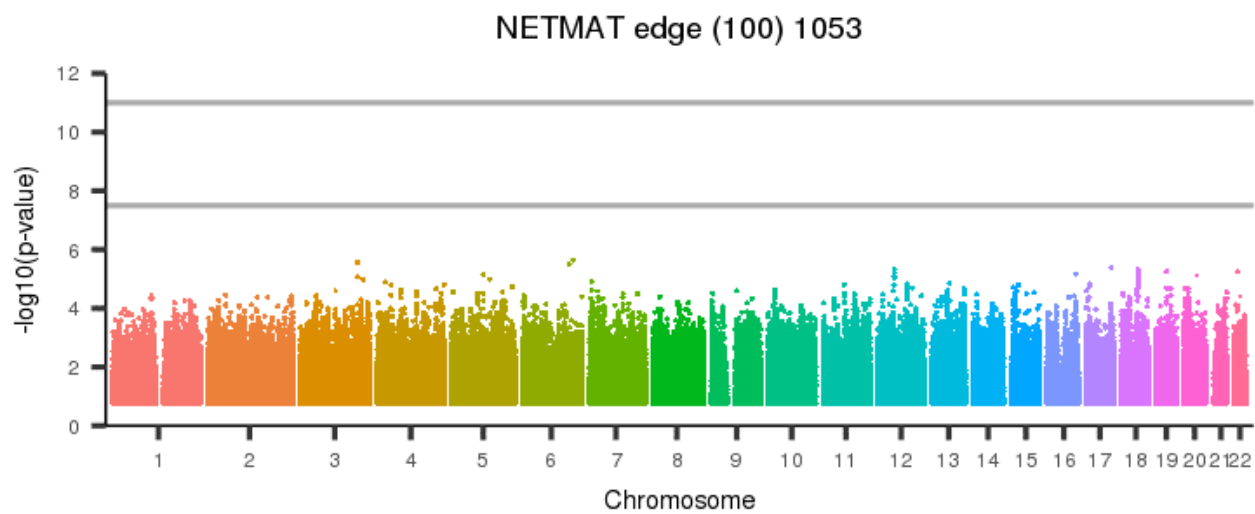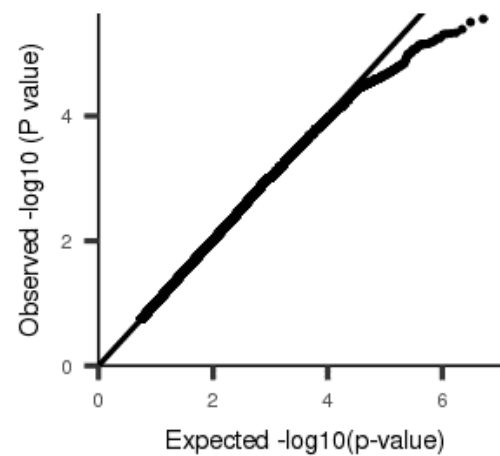

[back to list of plots](#)

Figure 2210: NETMAT edge (100) 1054

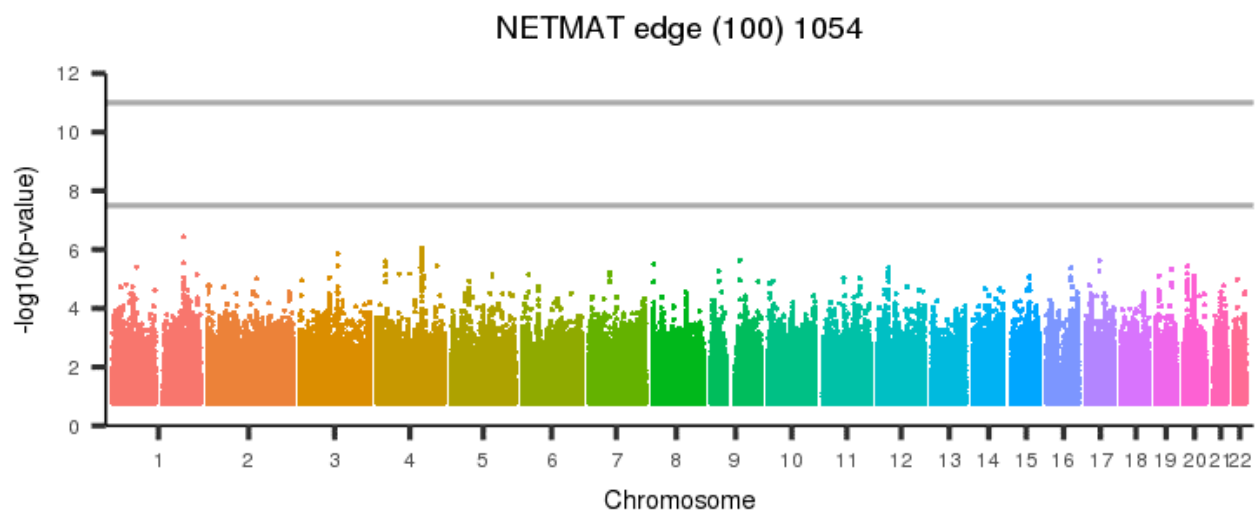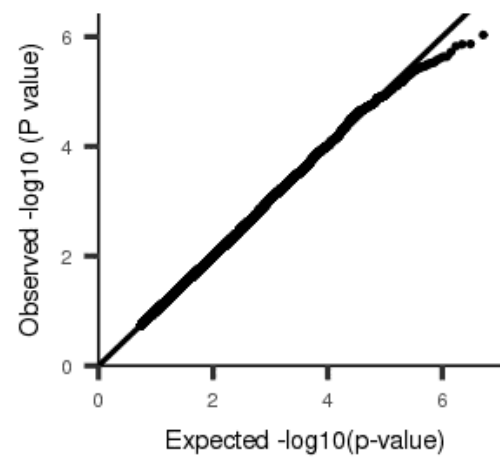

[back to list of plots](#)

Figure 2211: NETMAT edge (100) 1055

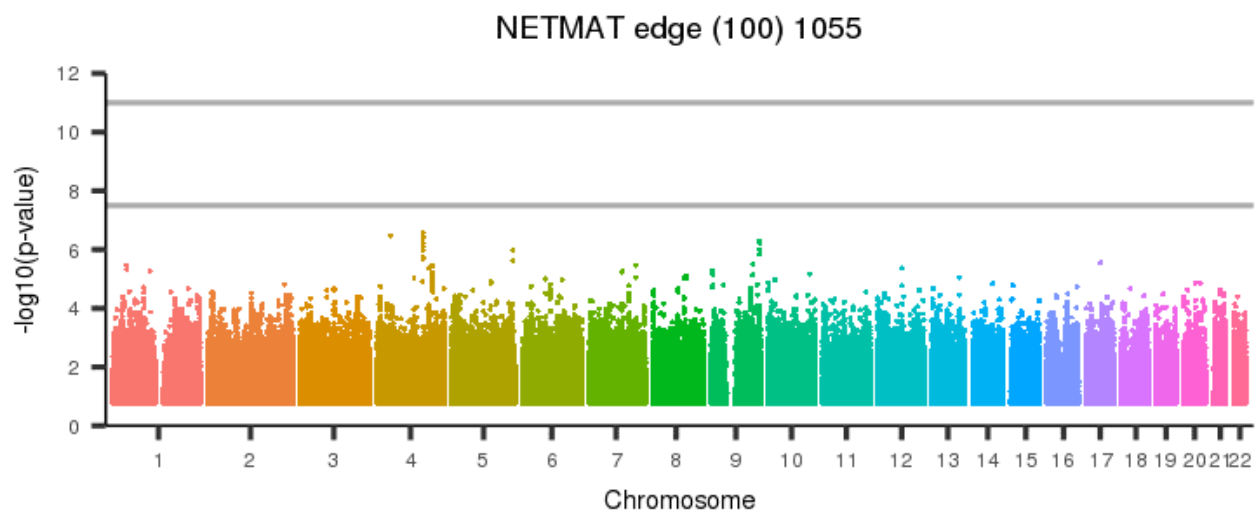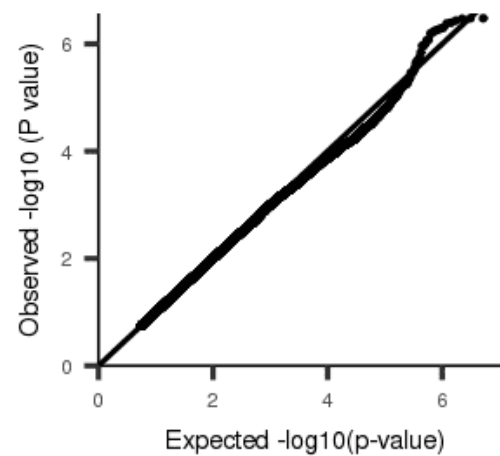

[back to list of plots](#)

Figure 2212: NETMAT edge (100) 1056

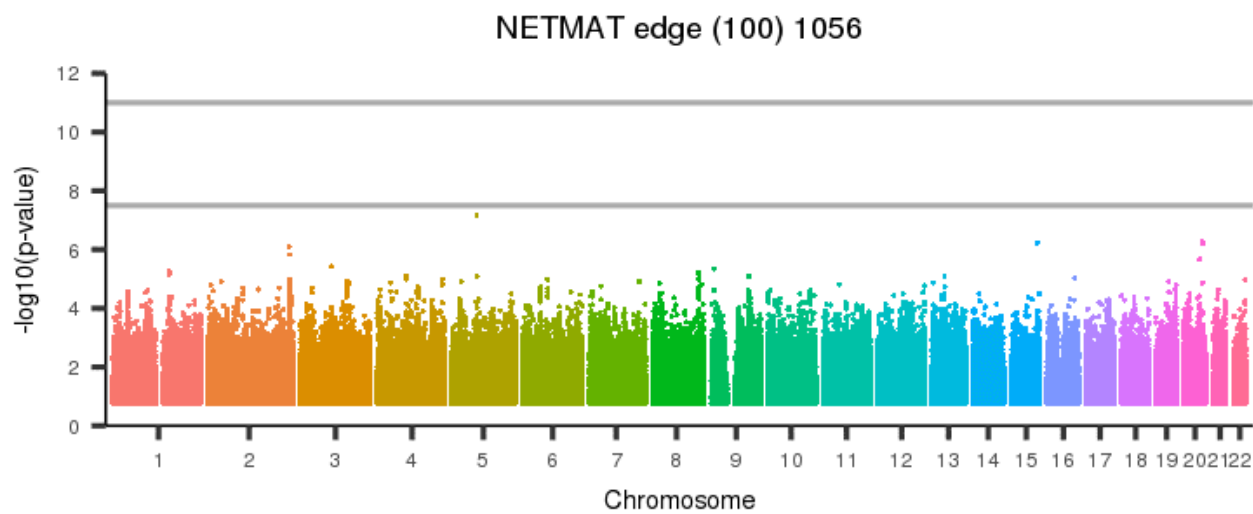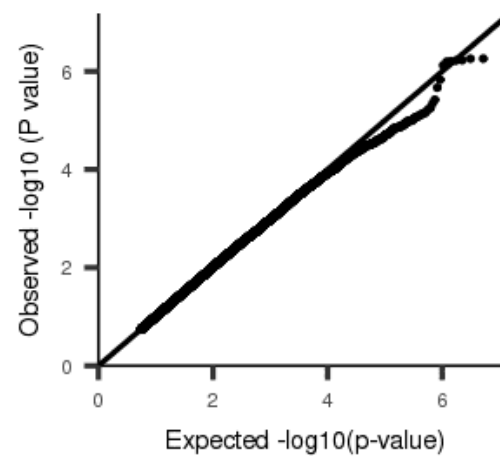

[back to list of plots](#)

Figure 2213: NETMAT edge (100) 1057

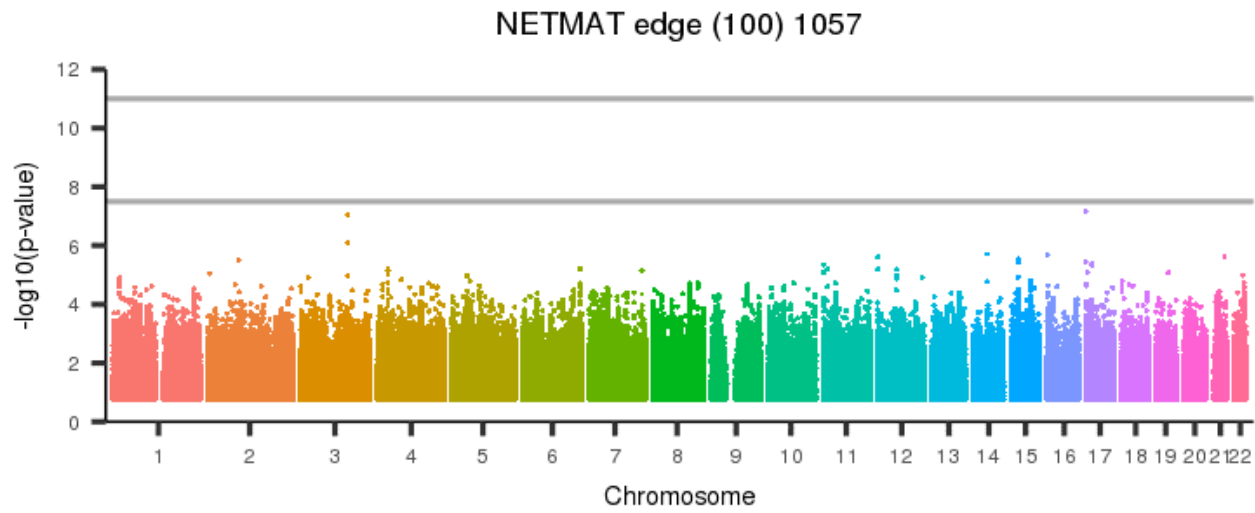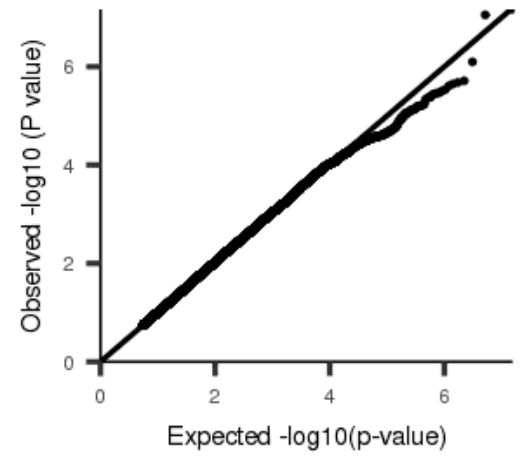

[back to list of plots](#)



Figure 2214: NETMAT edge (100) 1058

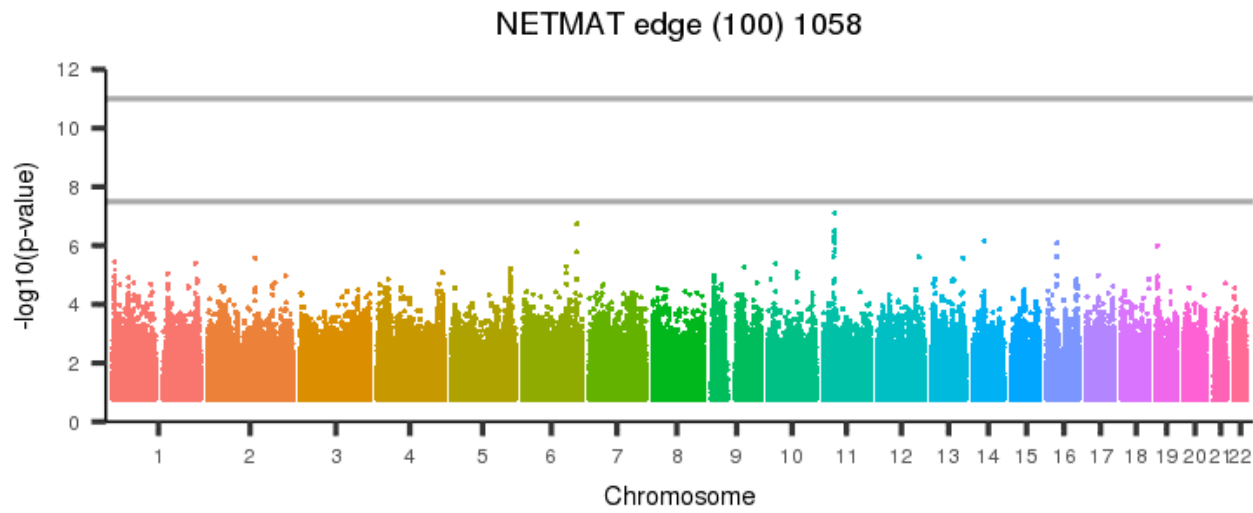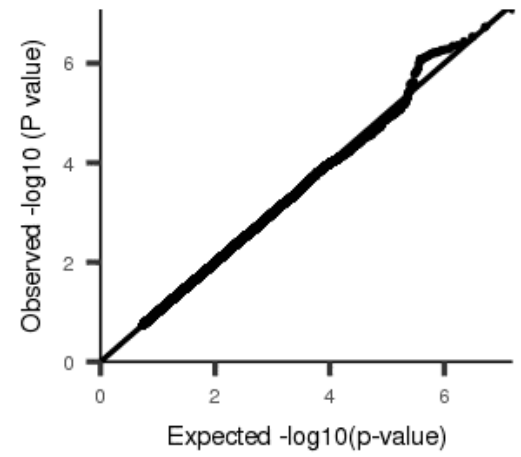

[back to list of plots](#)

Figure 2215: NETMAT edge (100) 1059

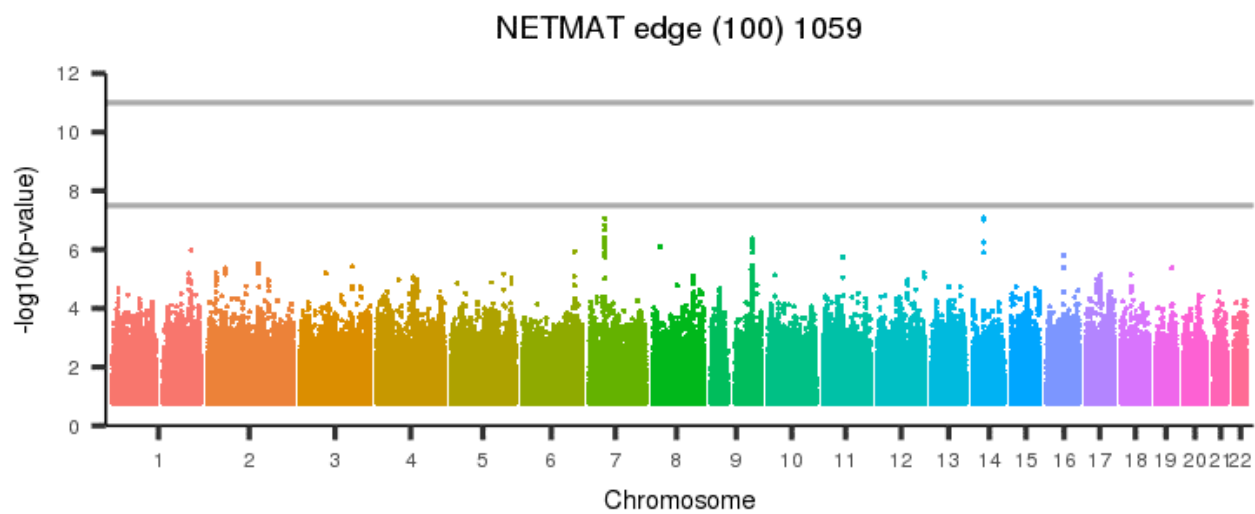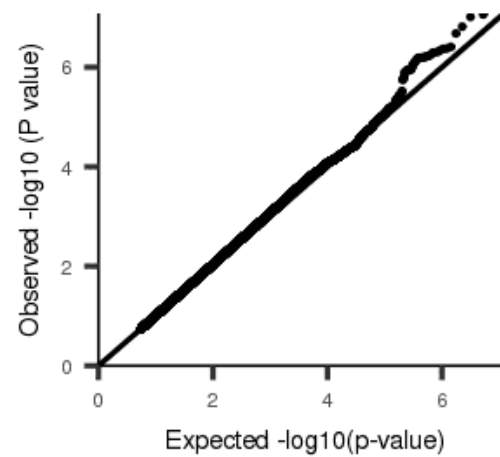

[back to list of plots](#)

Figure 2216: NETMAT edge (100) 1060

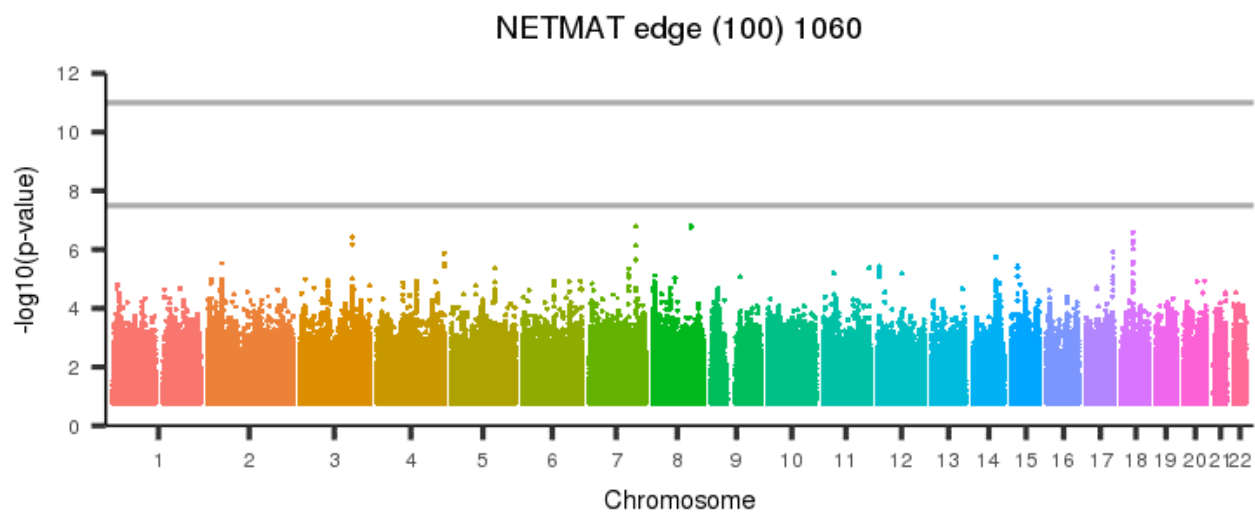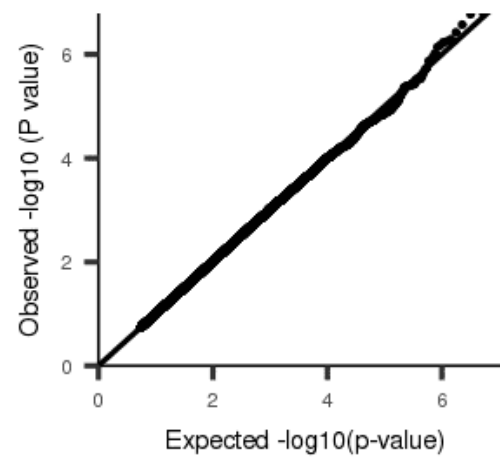

[back to list of plots](#)

Figure 2217: NETMAT edge (100) 1061

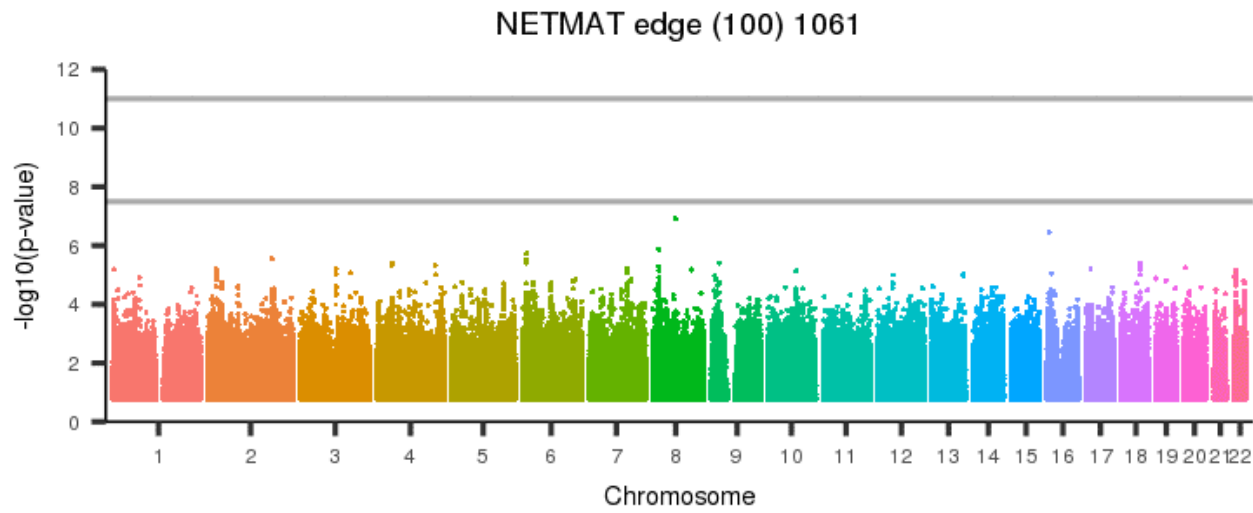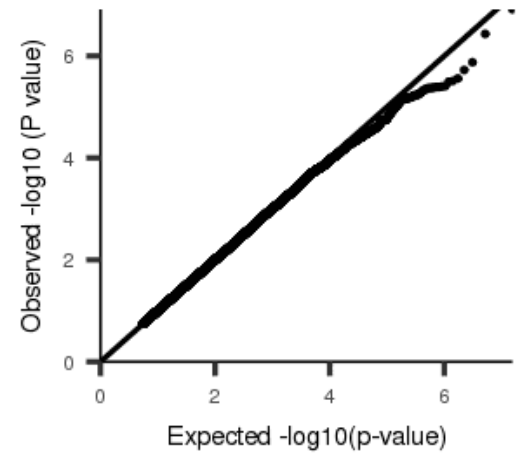

[back to list of plots](#)

Figure 2218: NETMAT edge (100) 1062

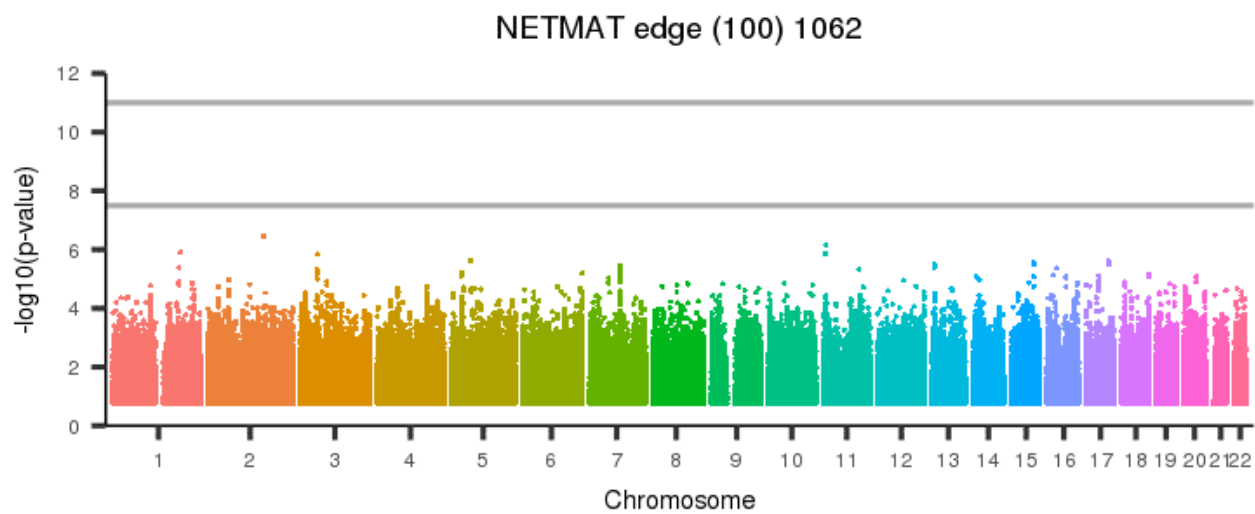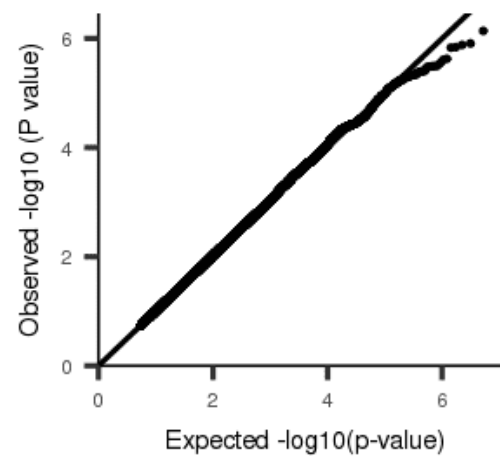

[back to list of plots](#)

Figure 2219: NETMAT edge (100) 1063

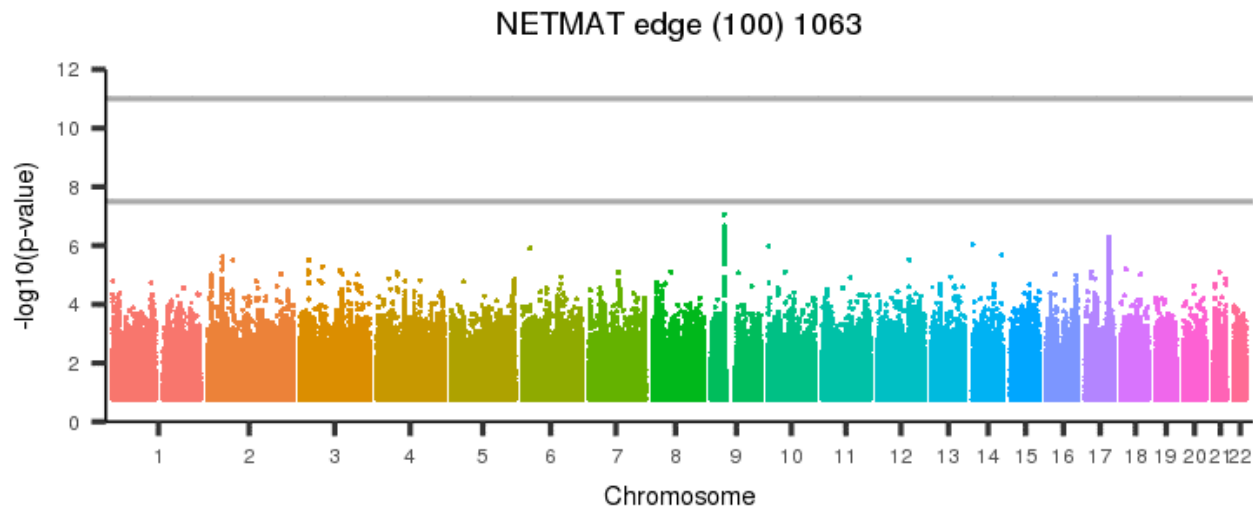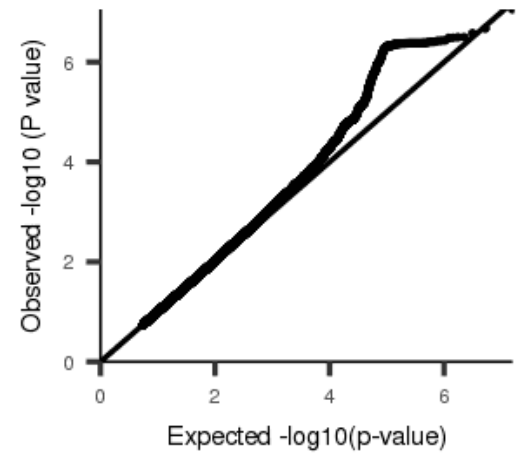

[back to list of plots](#)

Figure 2220: NETMAT edge (100) 1064

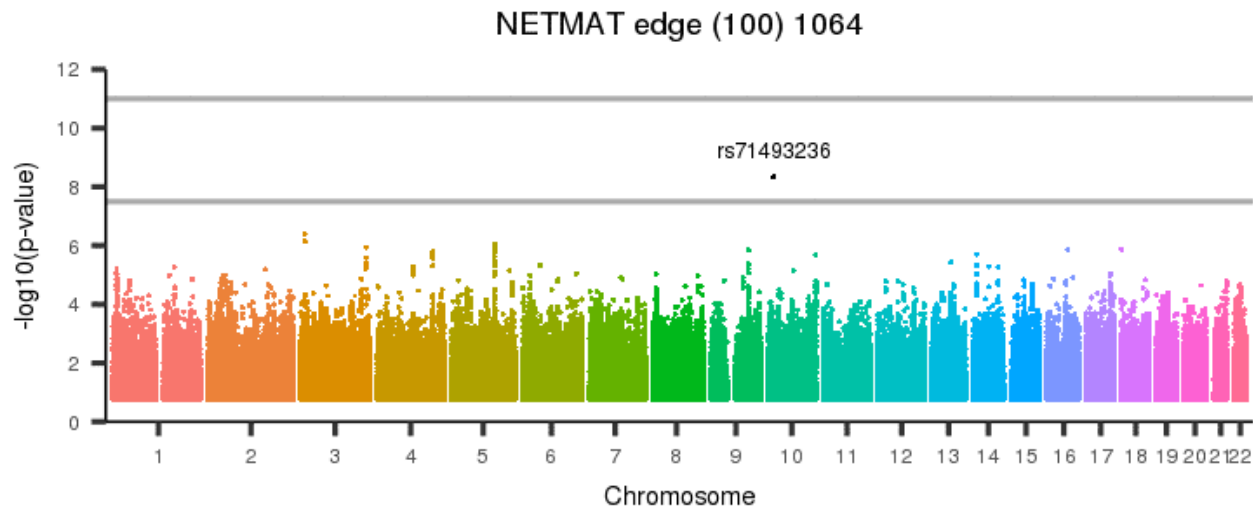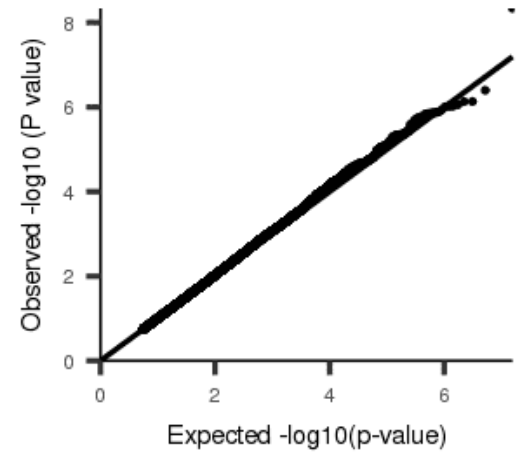

[back to list of plots](#)

Figure 2221: NETMAT edge (100) 1065

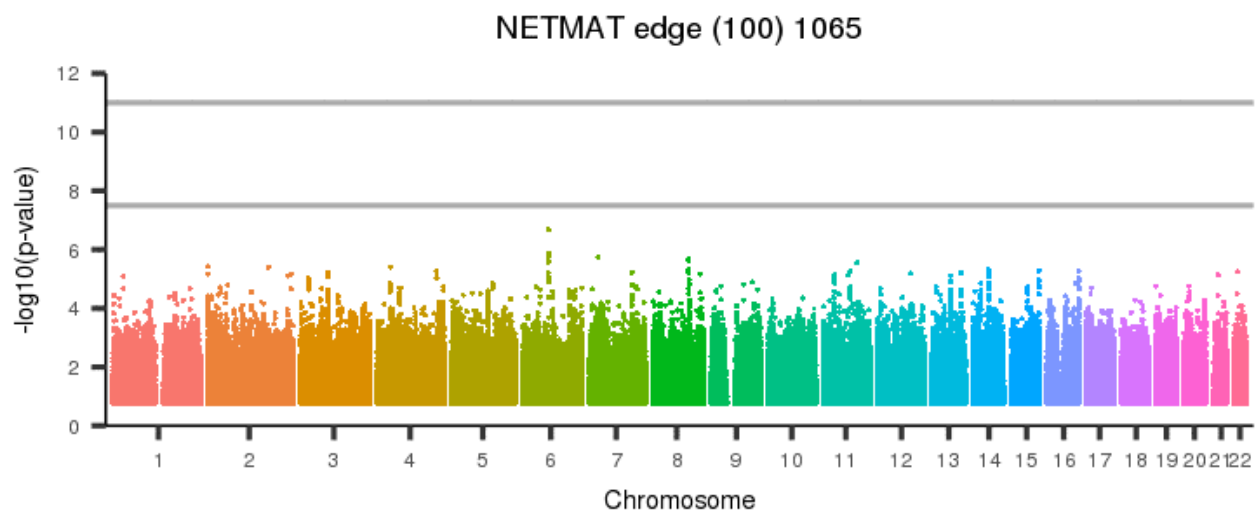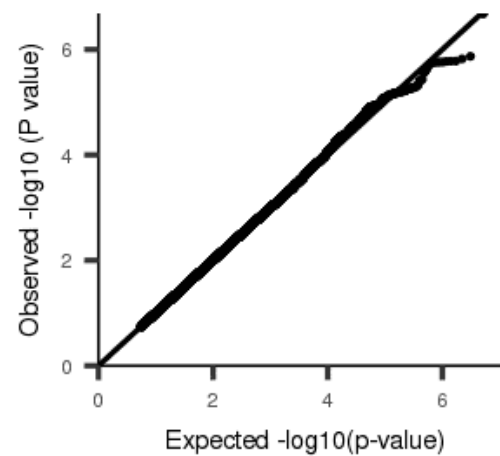

[back to list of plots](#)



Figure 2222: NETMAT edge (100) 1066

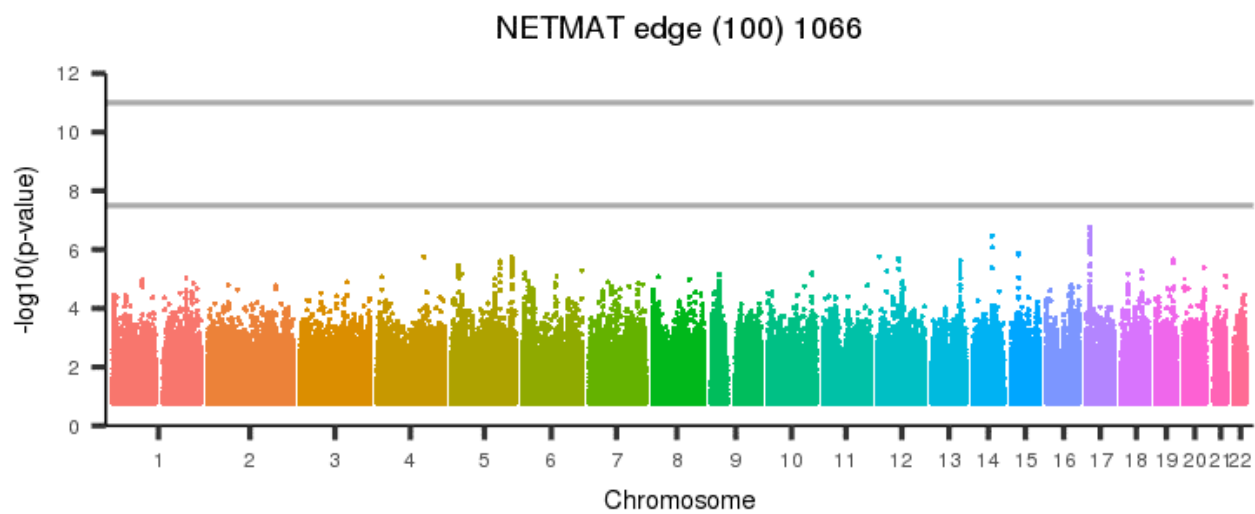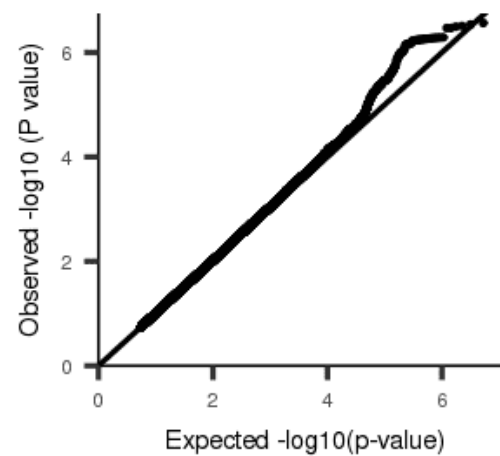

[back to list of plots](#)

Figure 2223: NETMAT edge (100) 1067

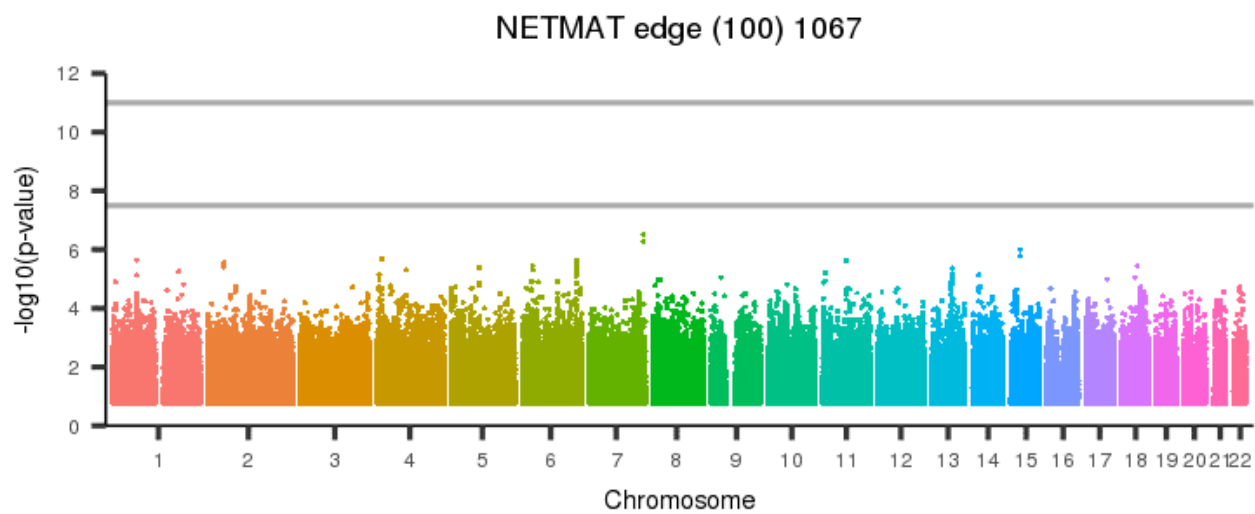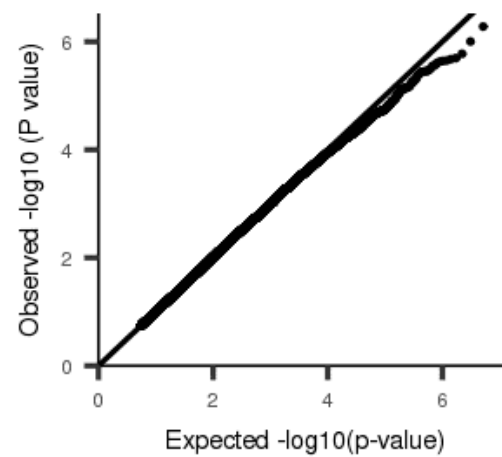

[back to list of plots](#)

Figure 2224: NETMAT edge (100) 1068

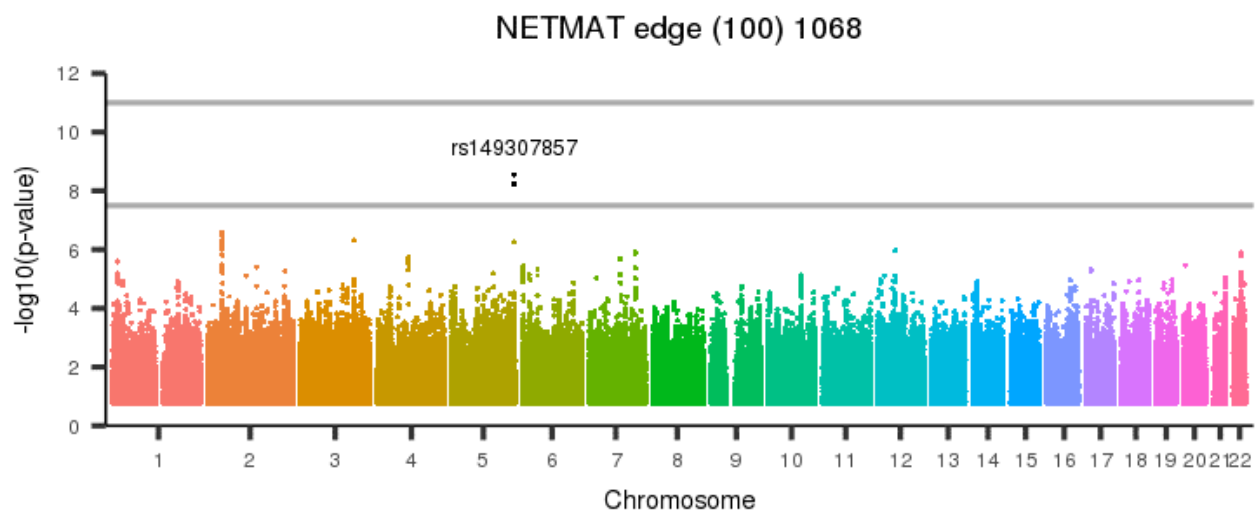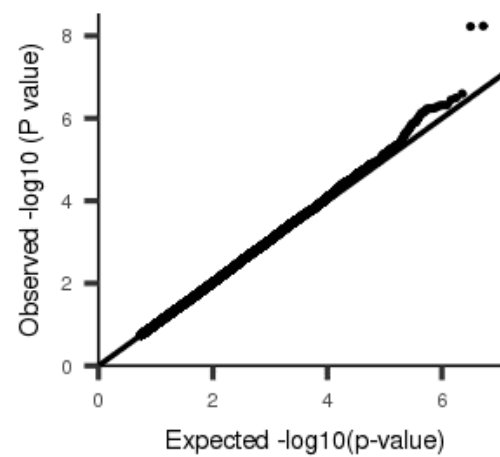

[back to list of plots](#)

Figure 2225: NETMAT edge (100) 1069

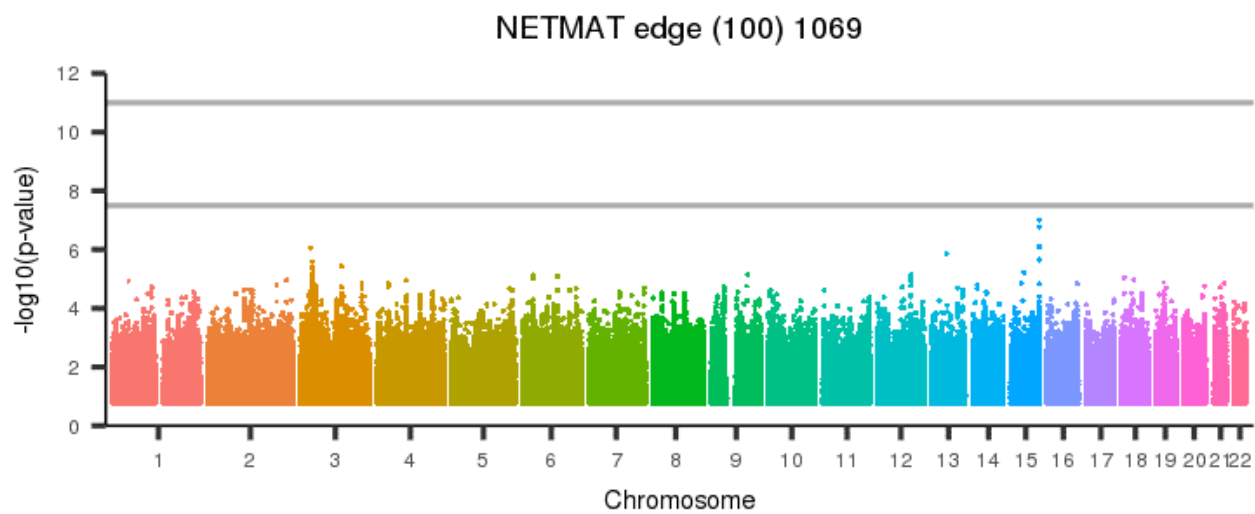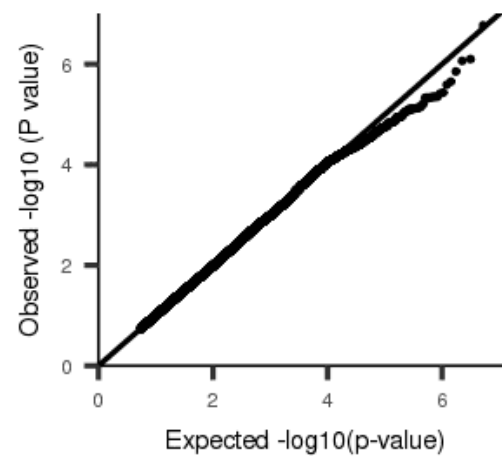

[back to list of plots](#)

Figure 2226: NETMAT edge (100) 1070

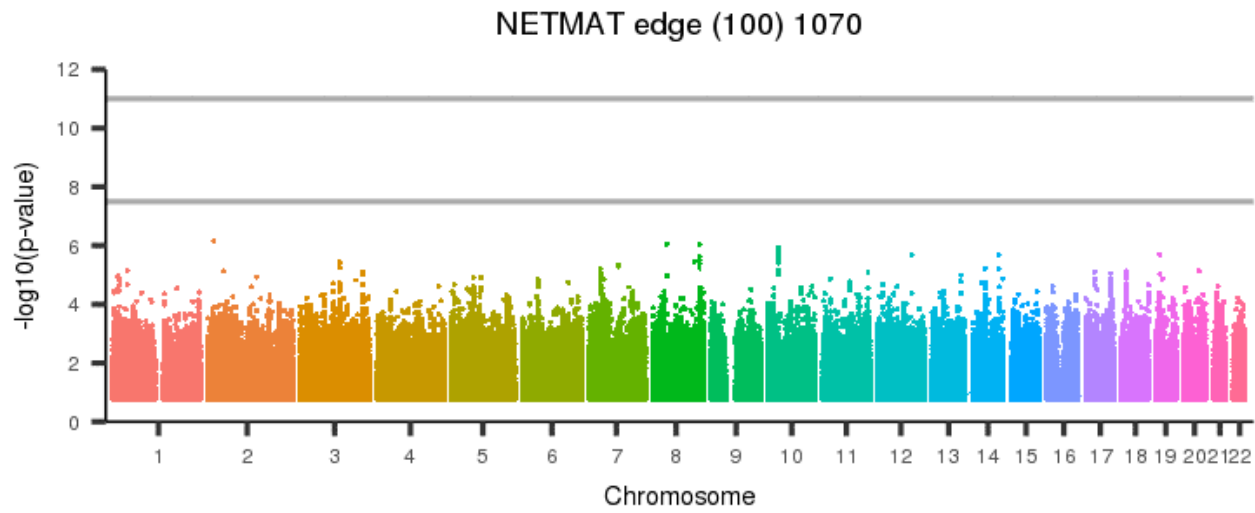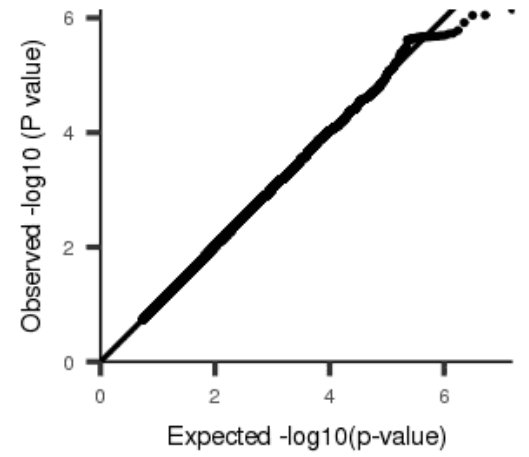

[back to list of plots](#)

Figure 2227: NETMAT edge (100) 1071

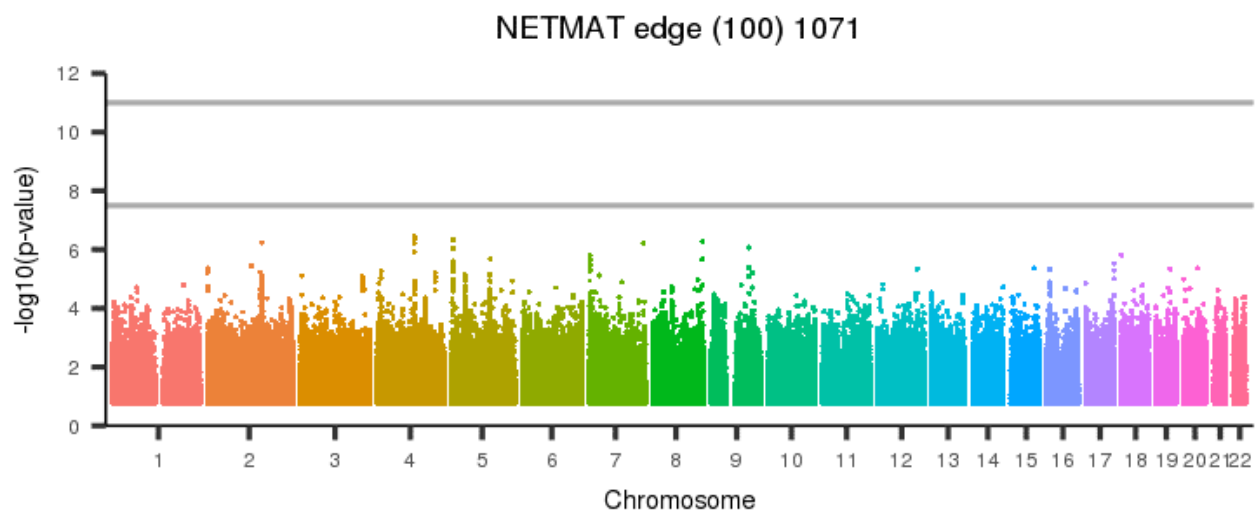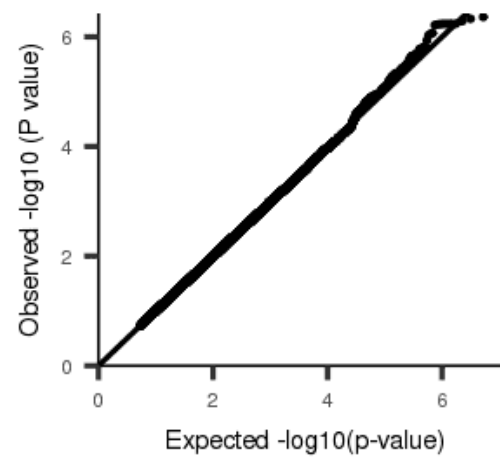

[back to list of plots](#)

Figure 2228: NETMAT edge (100) 1072

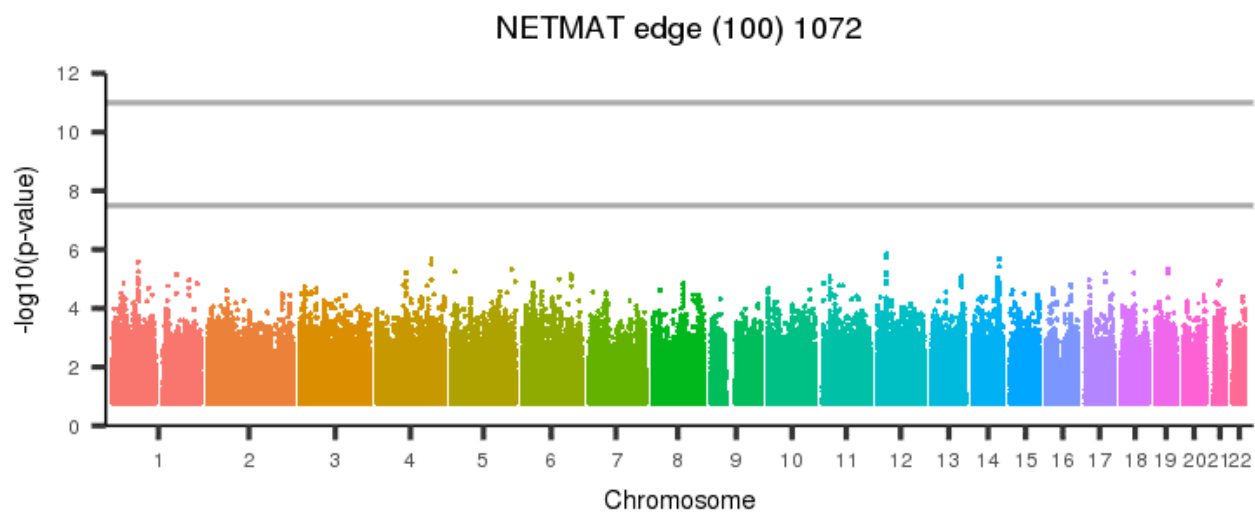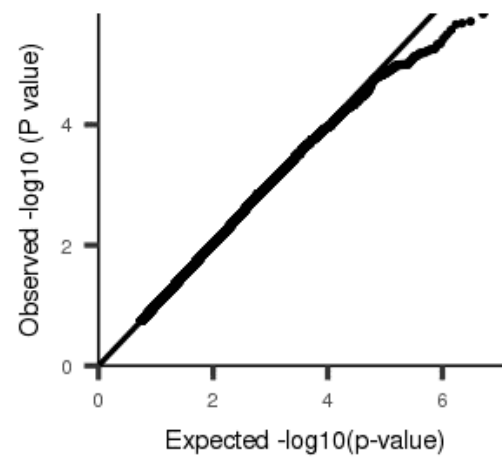

[back to list of plots](#)

Figure 2229: NETMAT edge (100) 1073

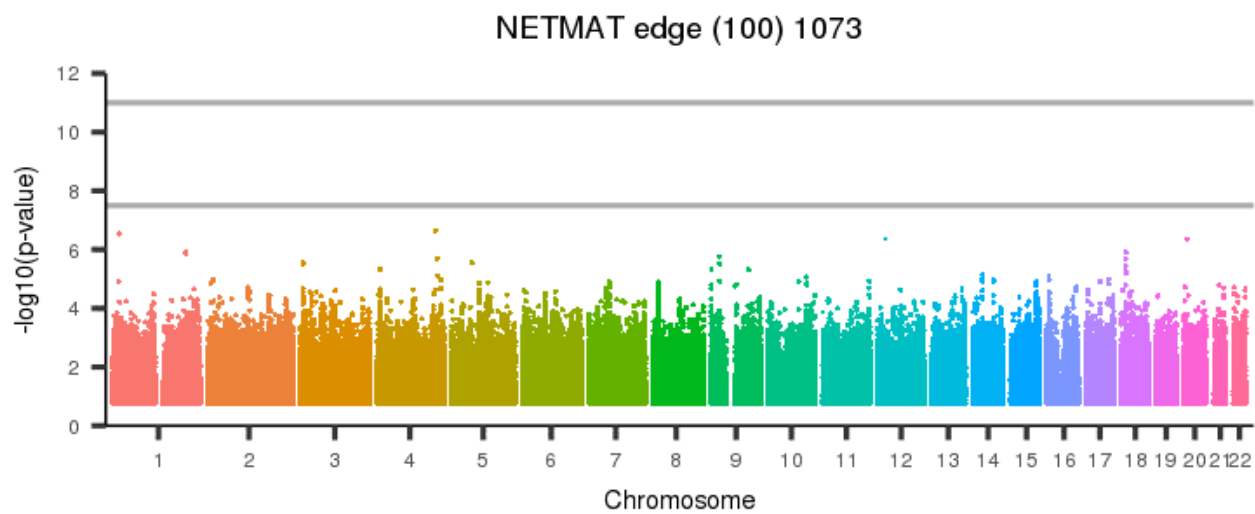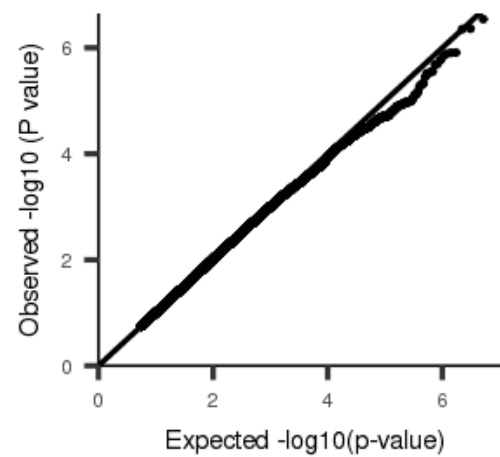

[back to list of plots](#)



Figure 2230: NETMAT edge (100) 1074

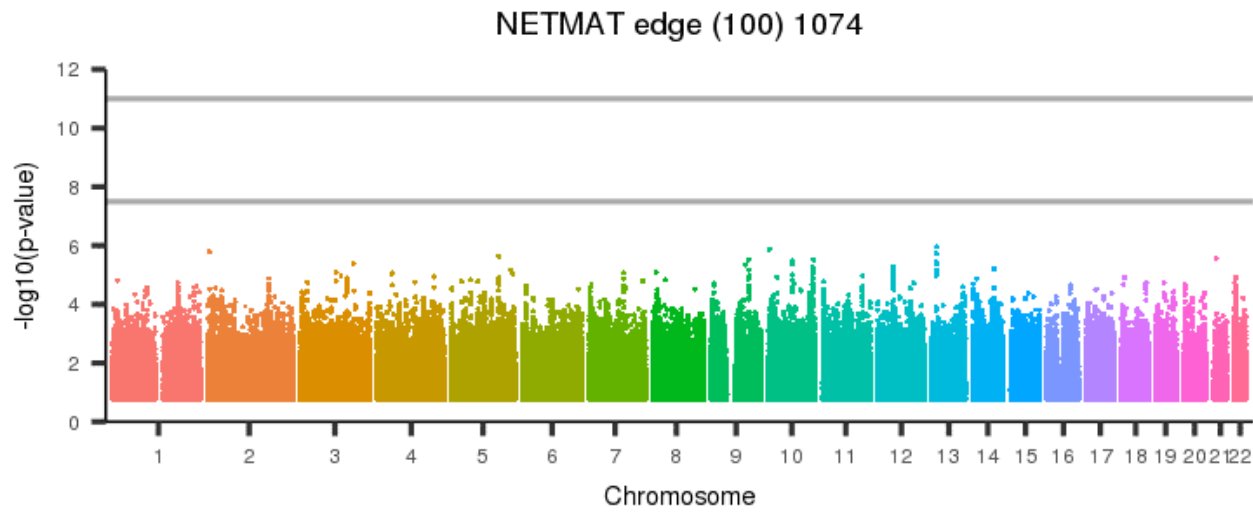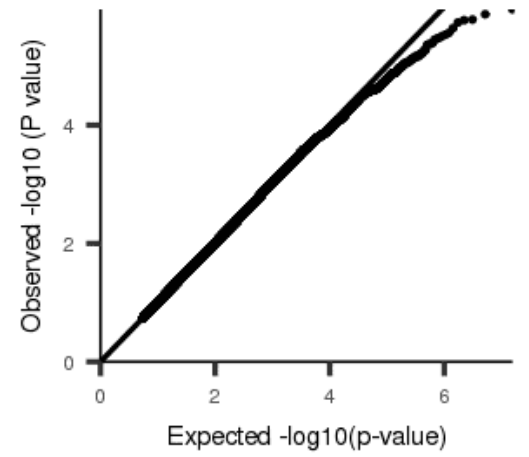

[back to list of plots](#)

Figure 2231: NETMAT edge (100) 1075

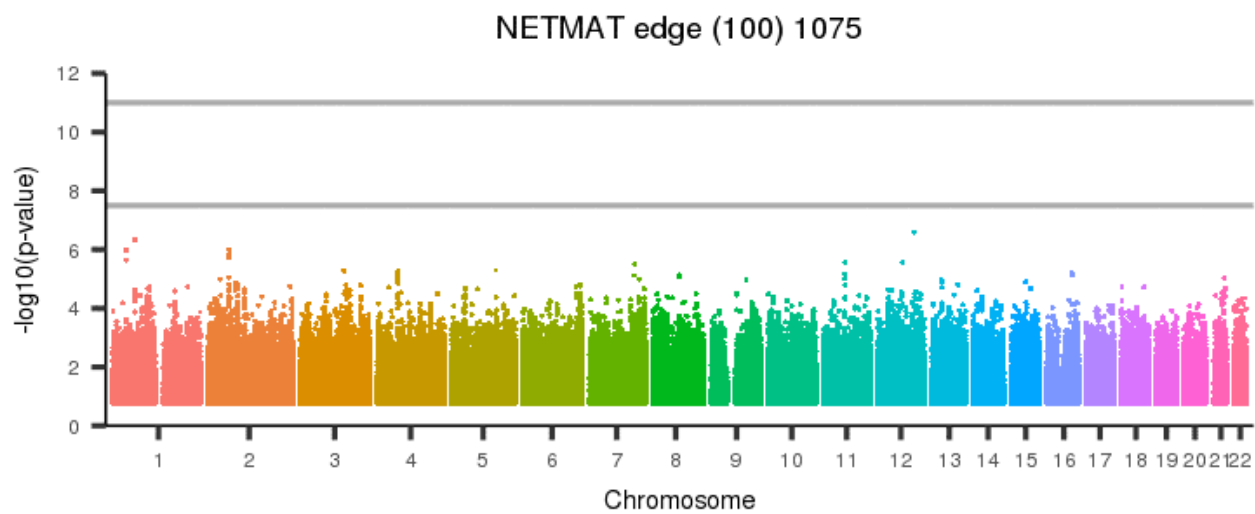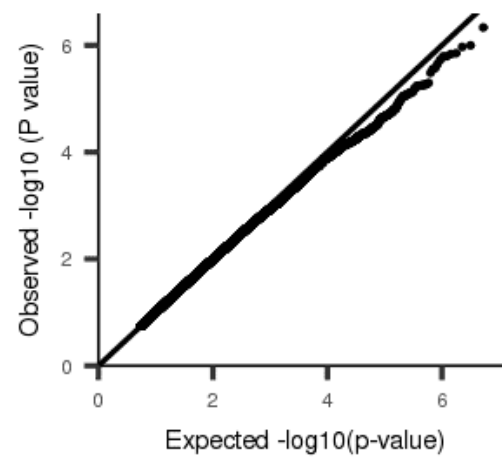

[back to list of plots](#)

Figure 2232: NETMAT edge (100) 1076

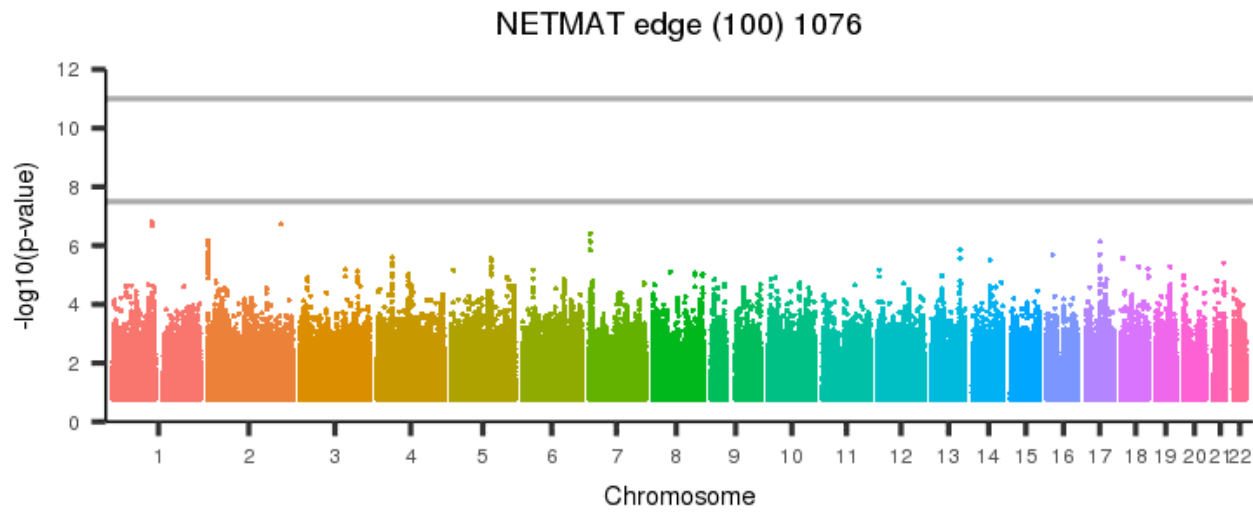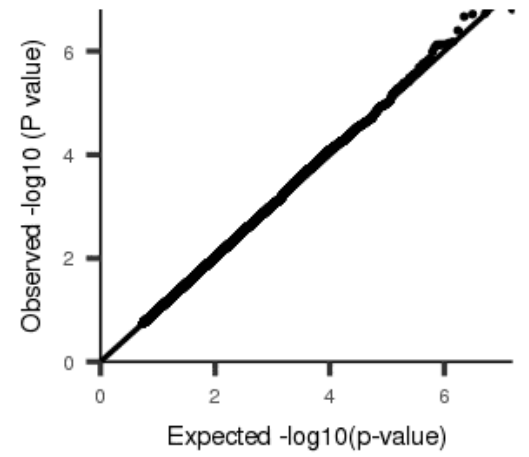

[back to list of plots](#)

Figure 2233: NETMAT edge (100) 1077

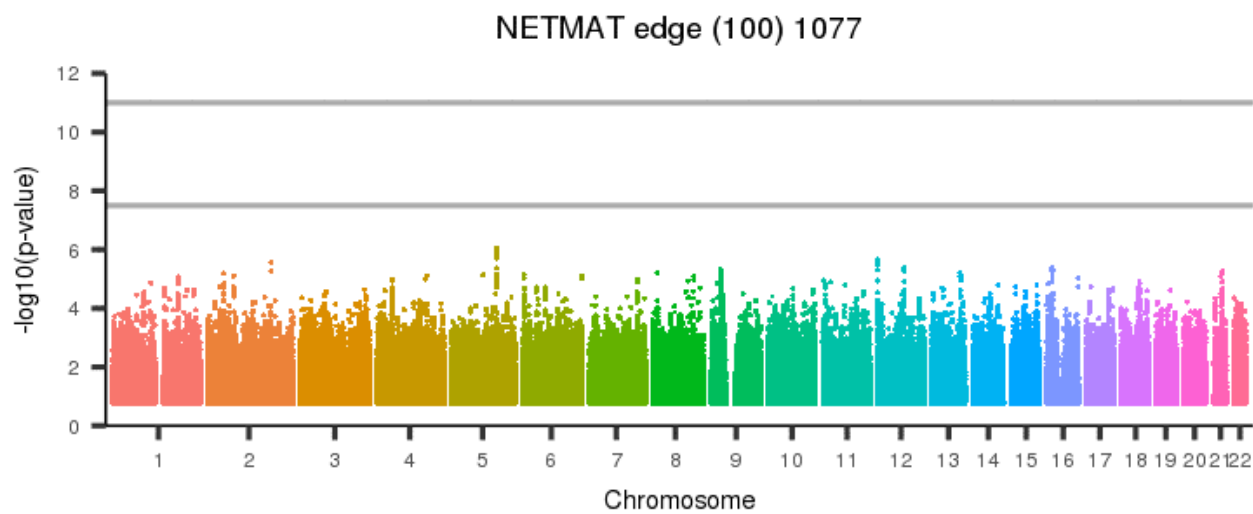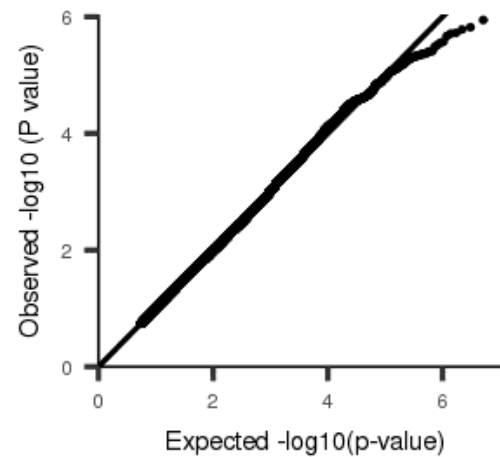

[back to list of plots](#)

Figure 2234: NETMAT edge (100) 1078

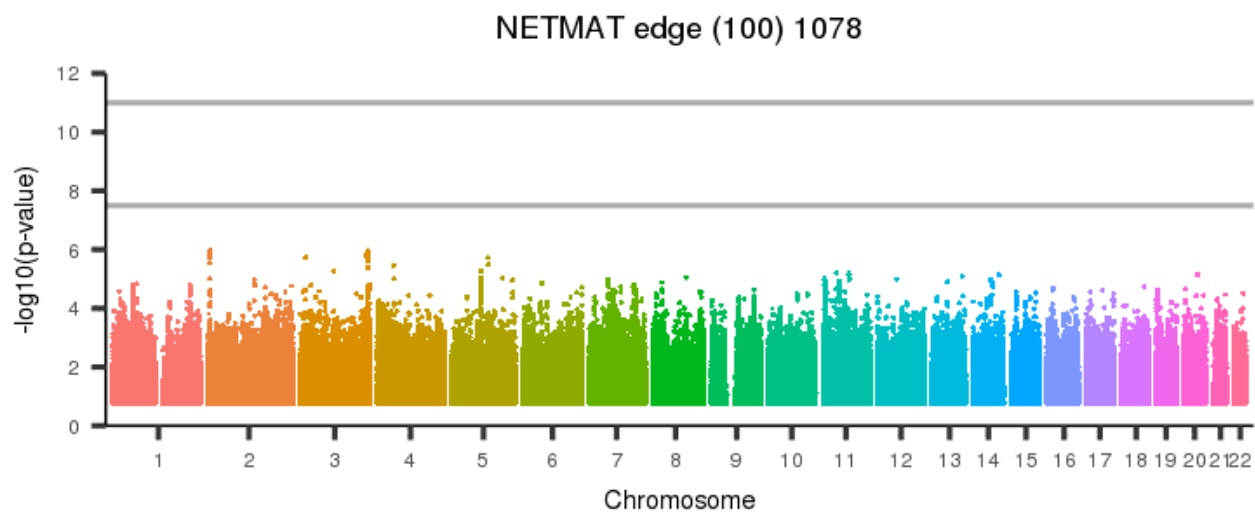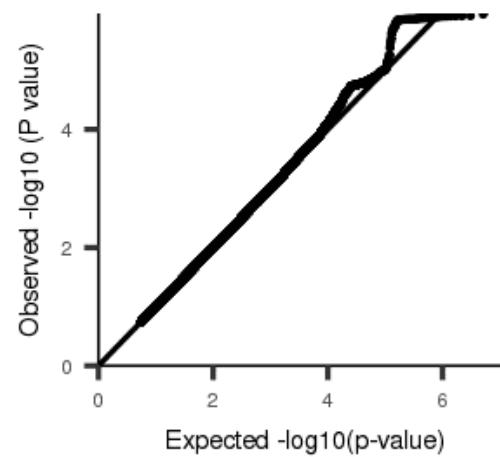

[back to list of plots](#)

Figure 2235: NETMAT edge (100) 1079

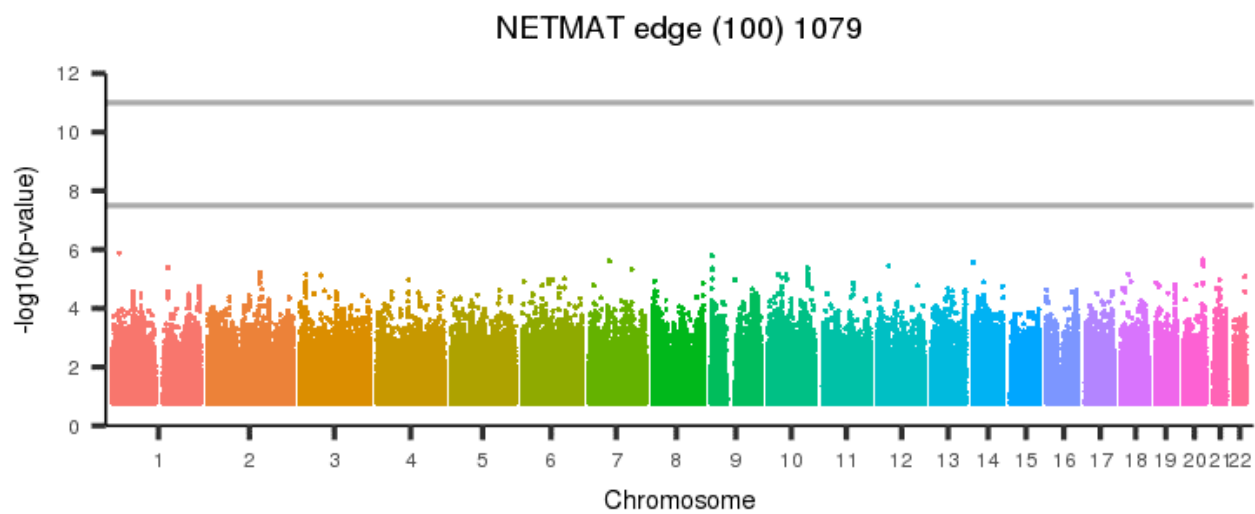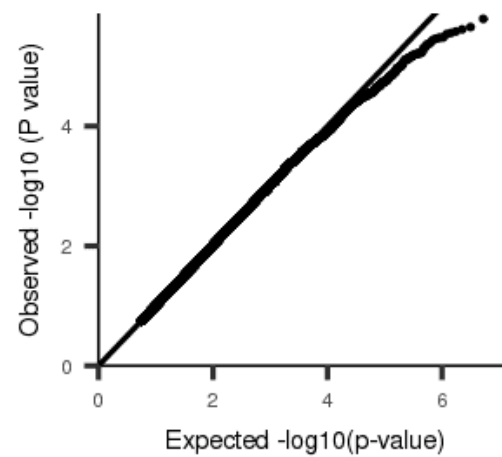

[back to list of plots](#)

Figure 2236: NETMAT edge (100) 1080

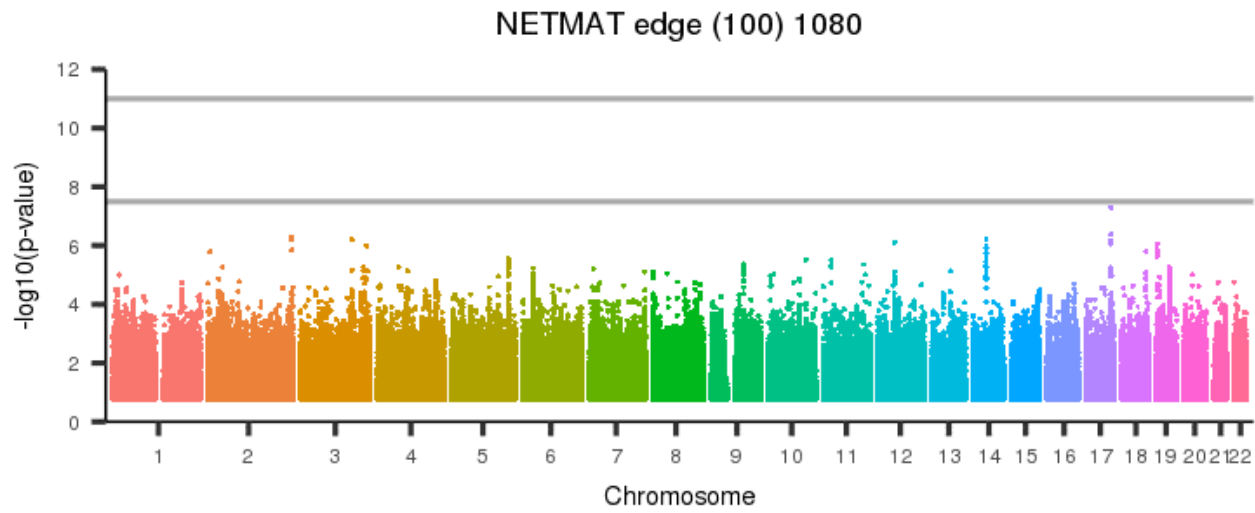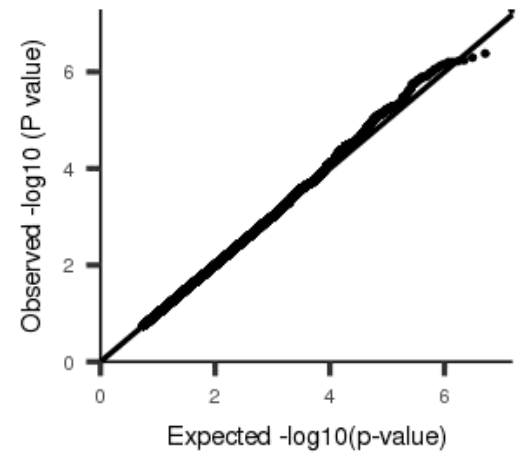

[back to list of plots](#)

Figure 2237: NETMAT edge (100) 1081

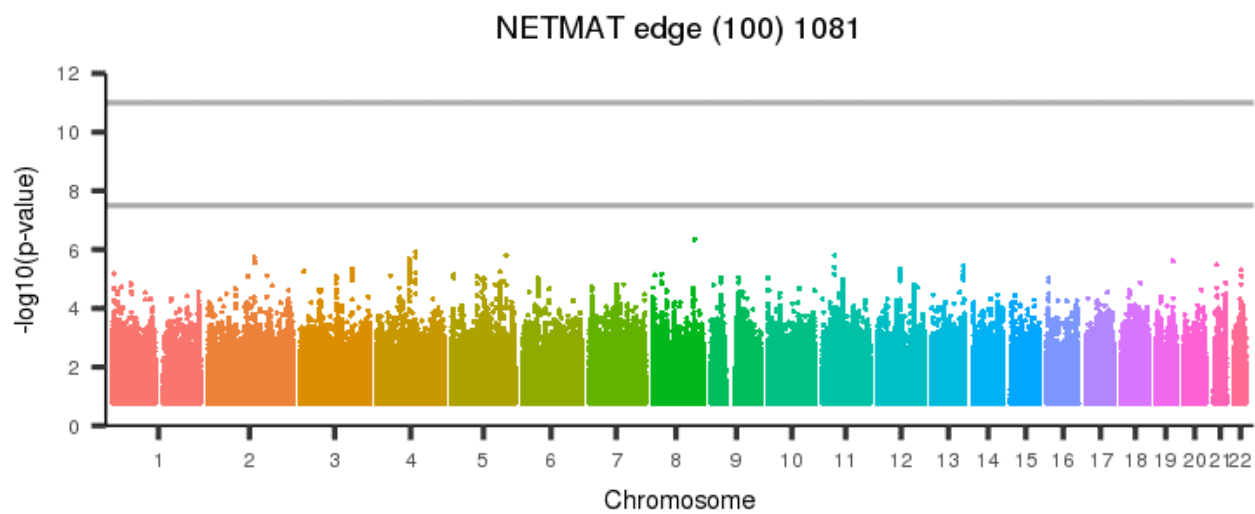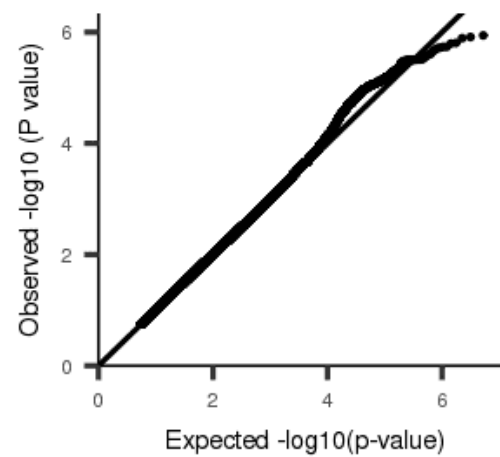

[back to list of plots](#)



Figure 2238: NETMAT edge (100) 1082

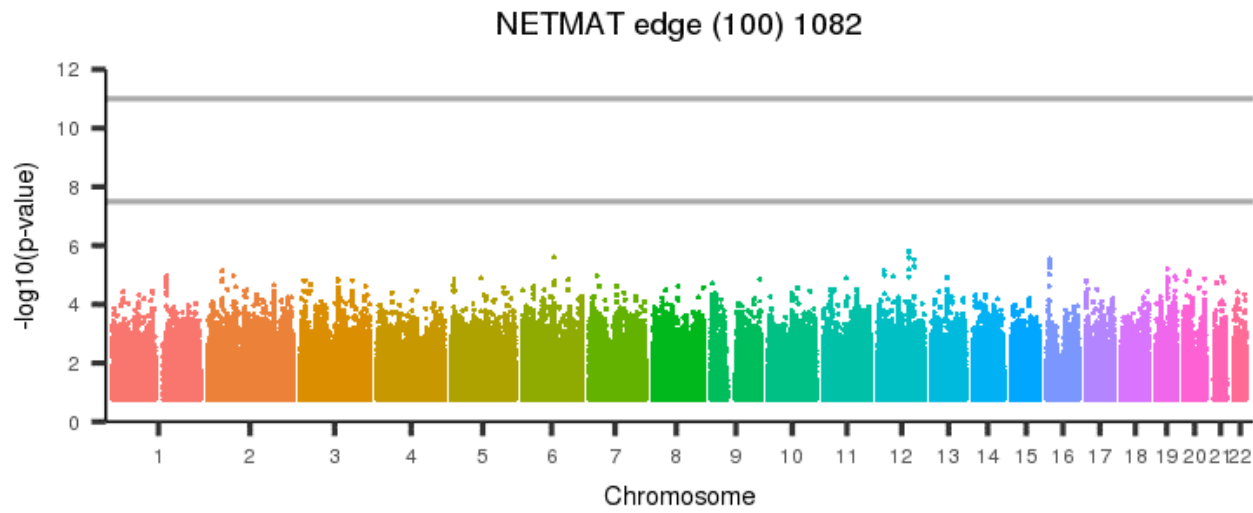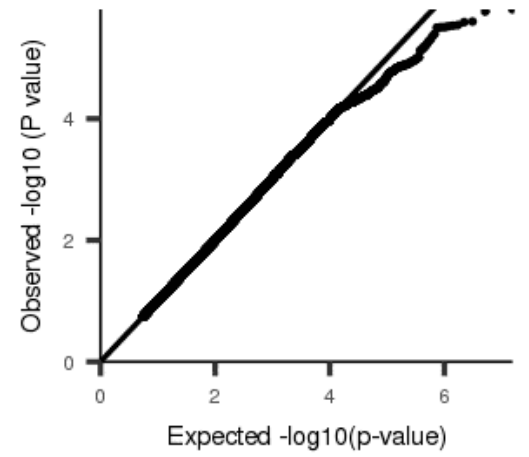

[back to list of plots](#)

Figure 2239: NETMAT edge (100) 1083

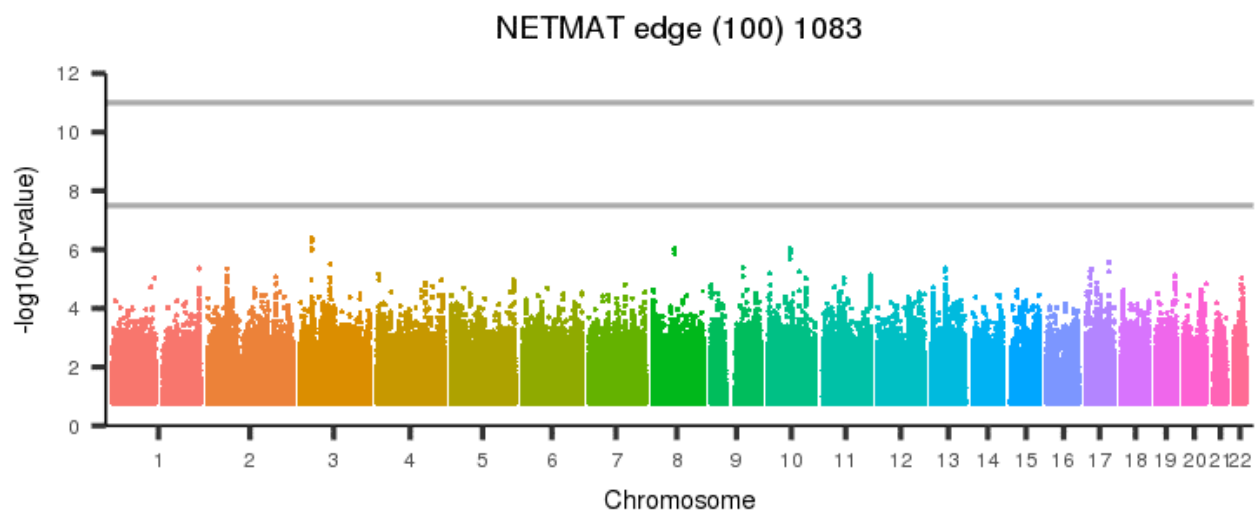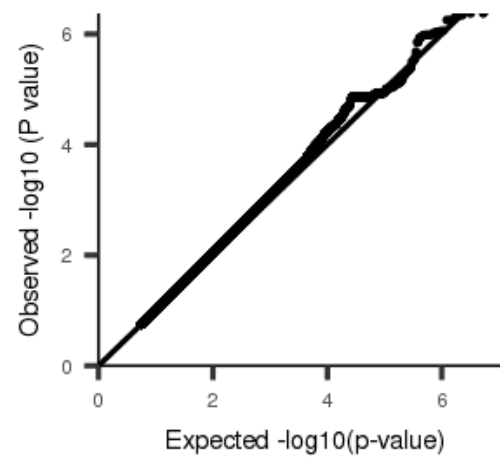

[back to list of plots](#)

Figure 2240: NETMAT edge (100) 1084

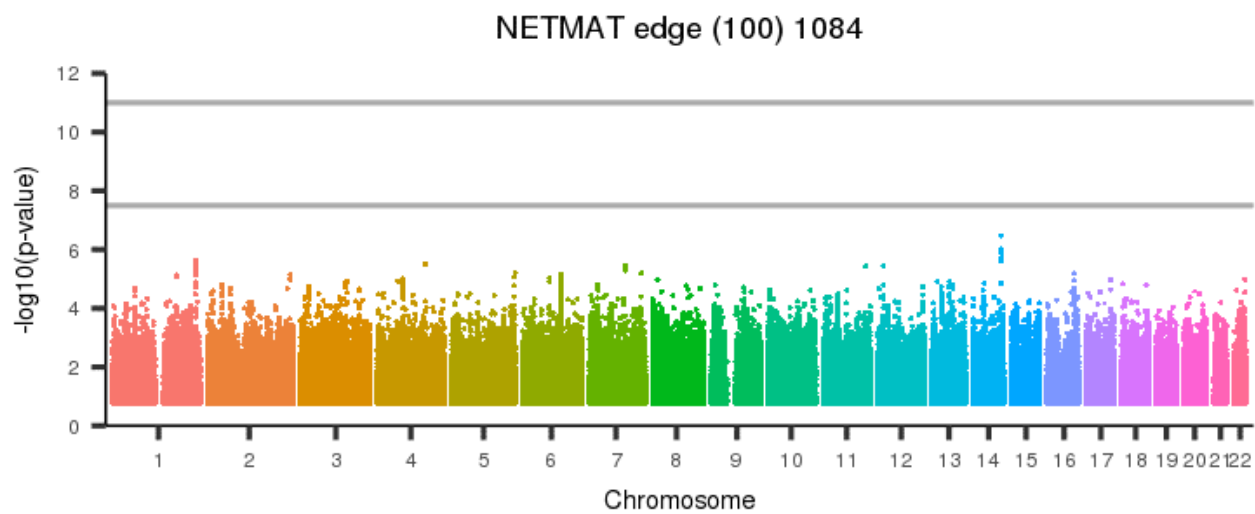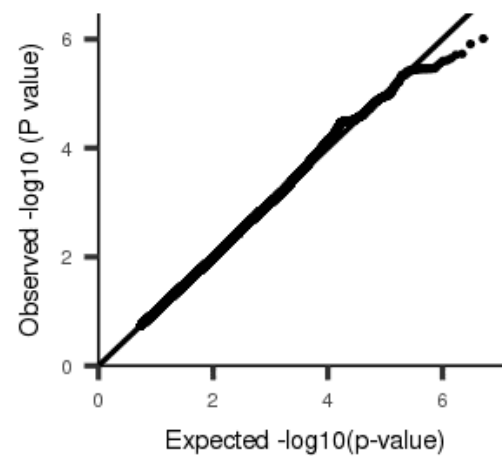

[back to list of plots](#)

Figure 2241: NETMAT edge (100) 1085

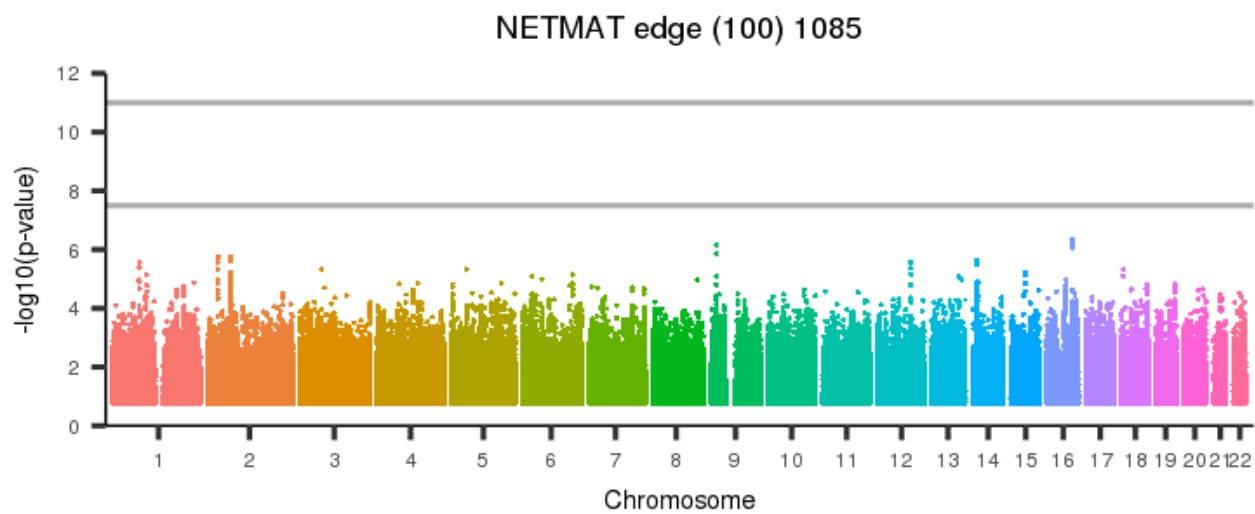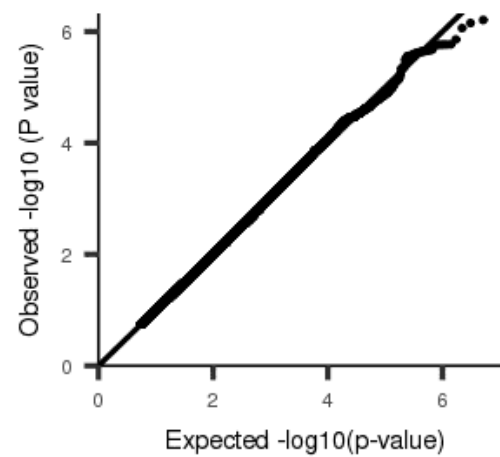

[back to list of plots](#)

Figure 2242: NETMAT edge (100) 1086

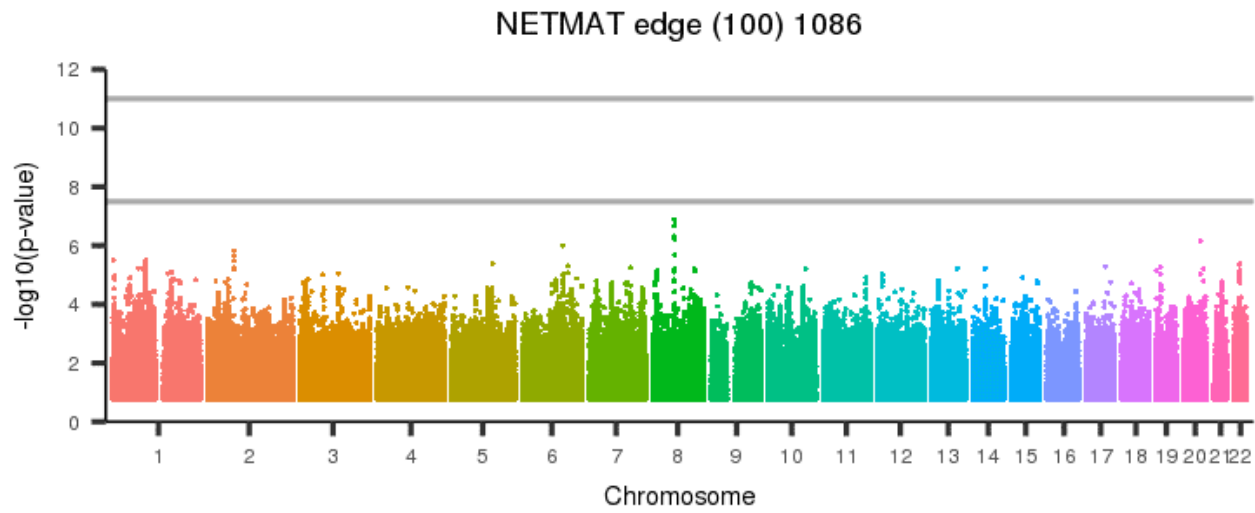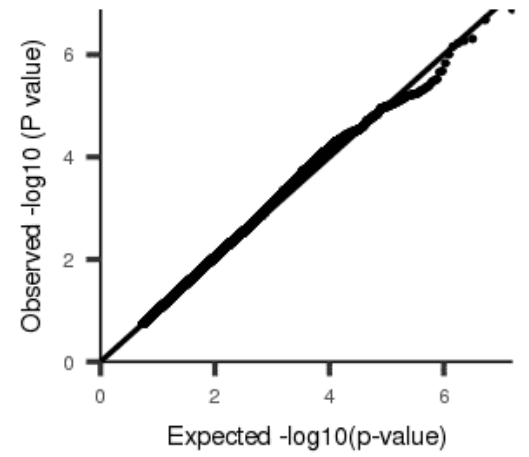

[back to list of plots](#)

Figure 2243: NETMAT edge (100) 1087

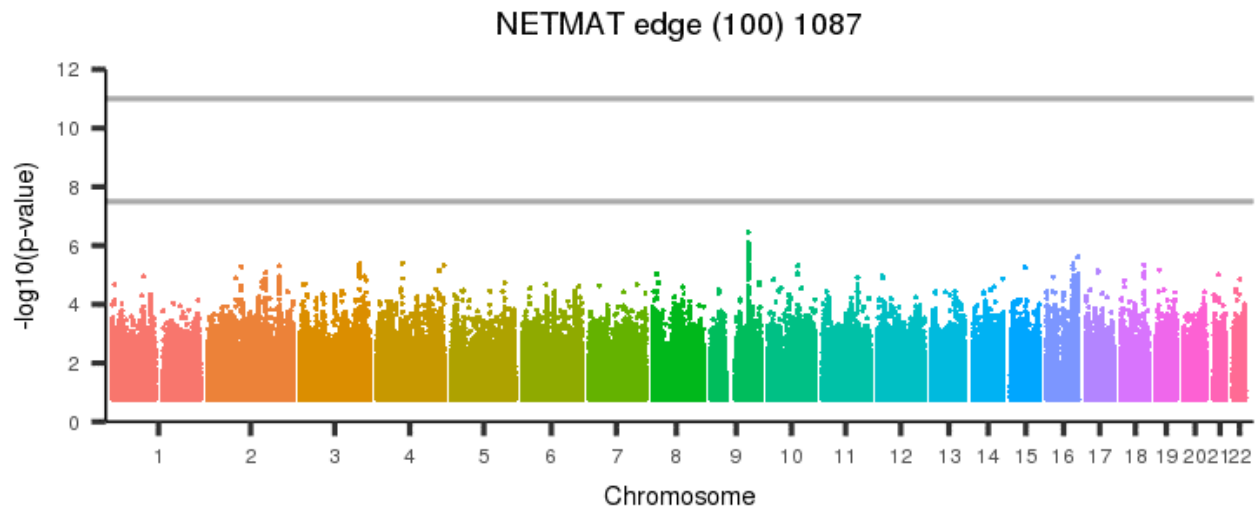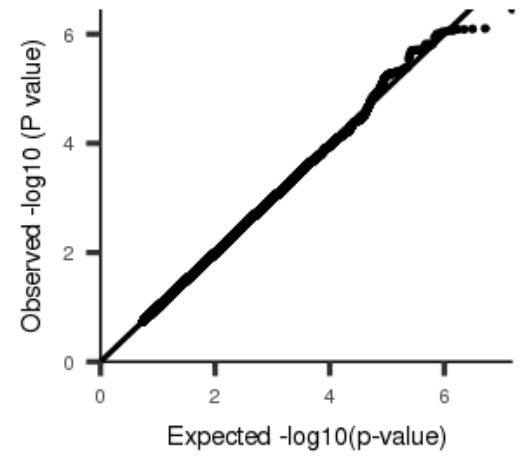

[back to list of plots](#)

Figure 2244: NETMAT edge (100) 1088

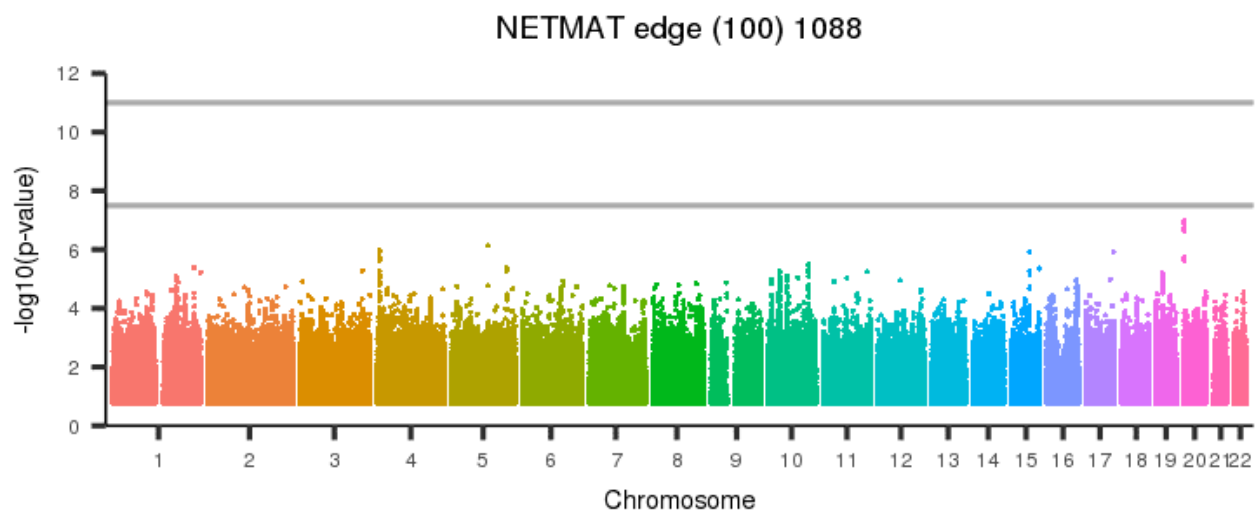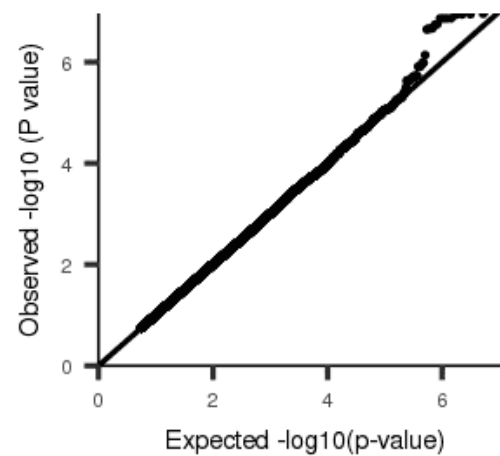

[back to list of plots](#)

Figure 2245: NETMAT edge (100) 1089

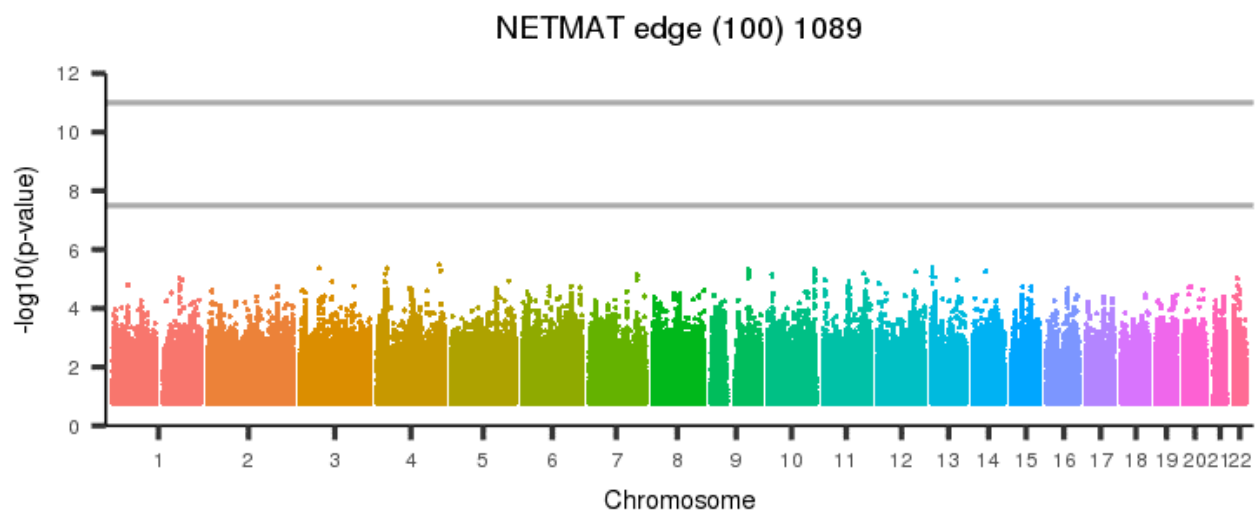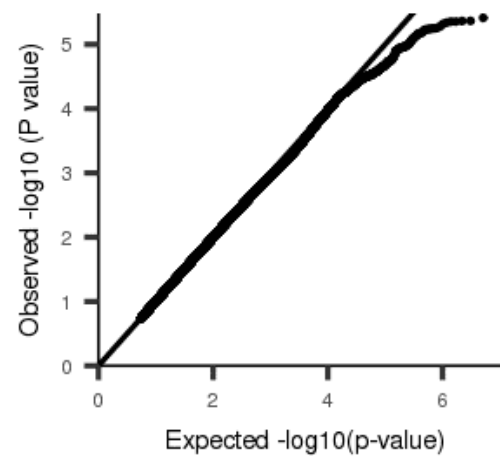

[back to list of plots](#)



Figure 2246: NETMAT edge (100) 1090

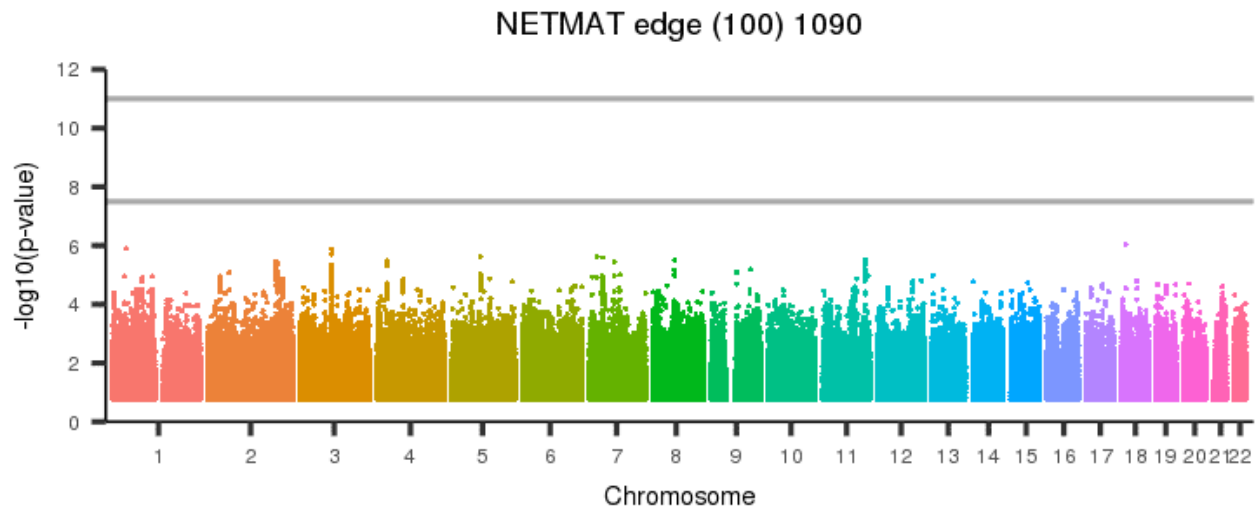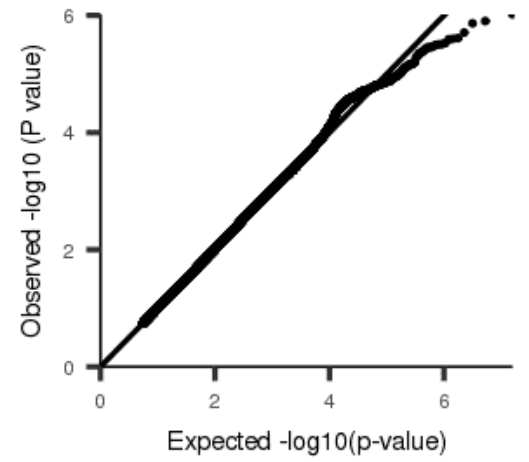

[back to list of plots](#)

Figure 2247: NETMAT edge (100) 1091

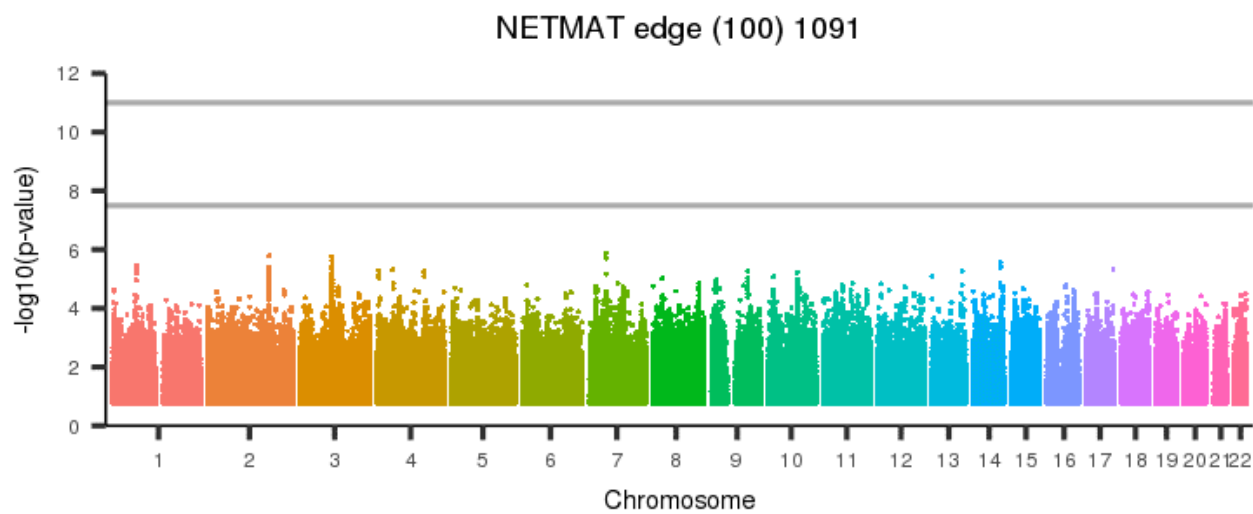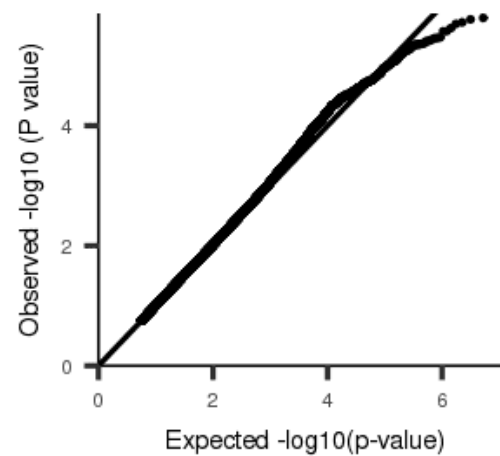

[back to list of plots](#)

Figure 2248: NETMAT edge (100) 1092

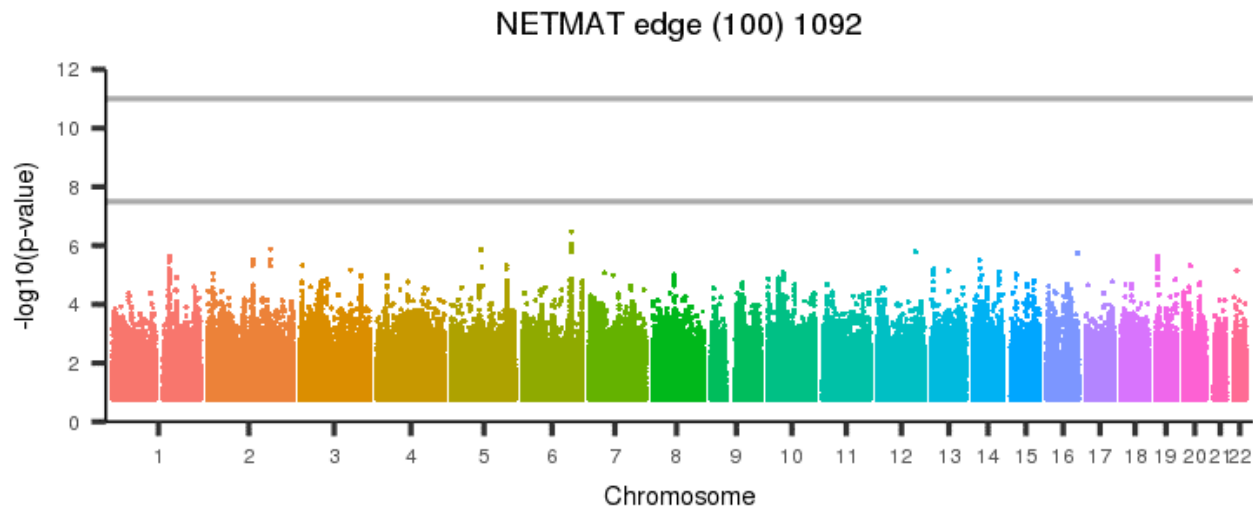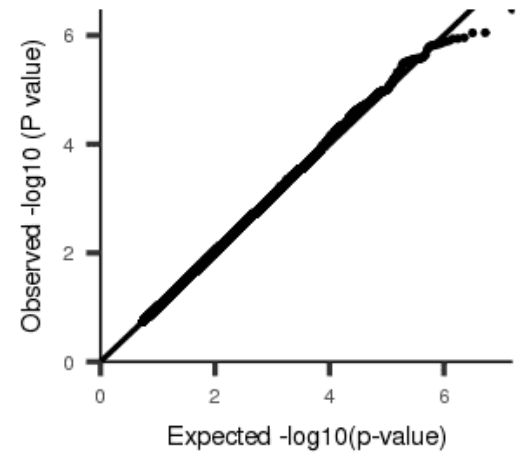

[back to list of plots](#)

Figure 2249: NETMAT edge (100) 1093

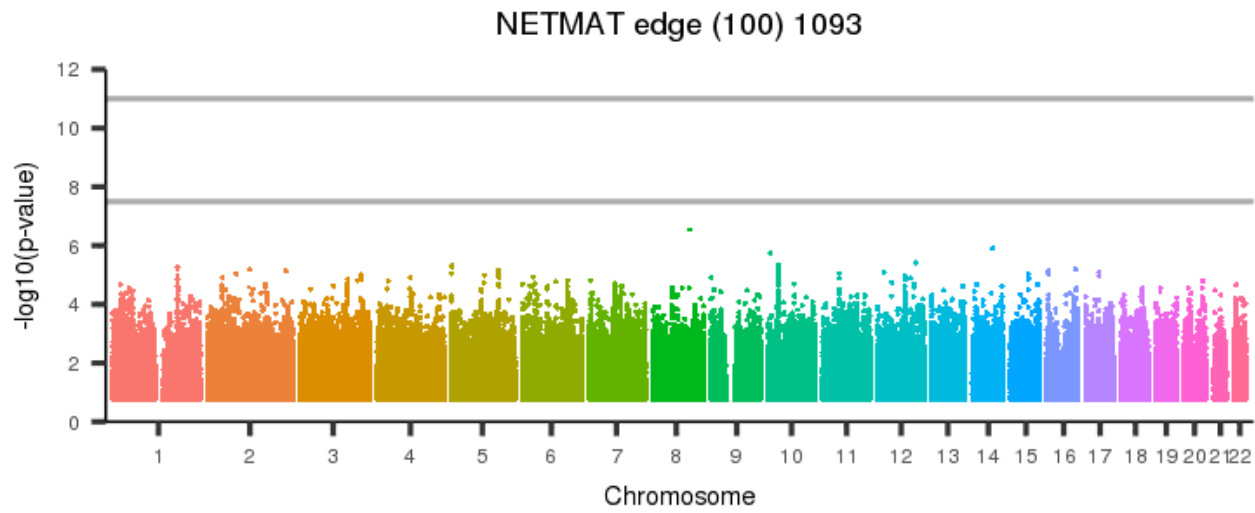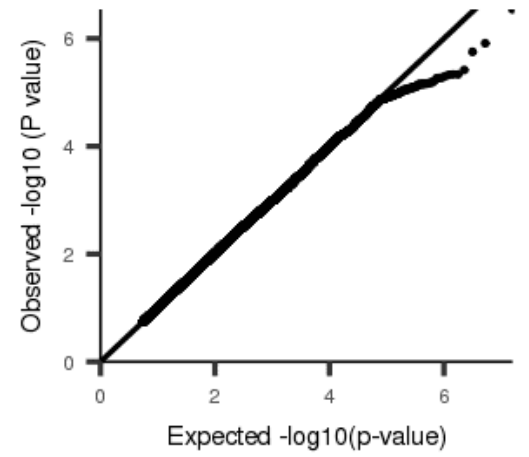

[back to list of plots](#)

Figure 2250: NETMAT edge (100) 1094

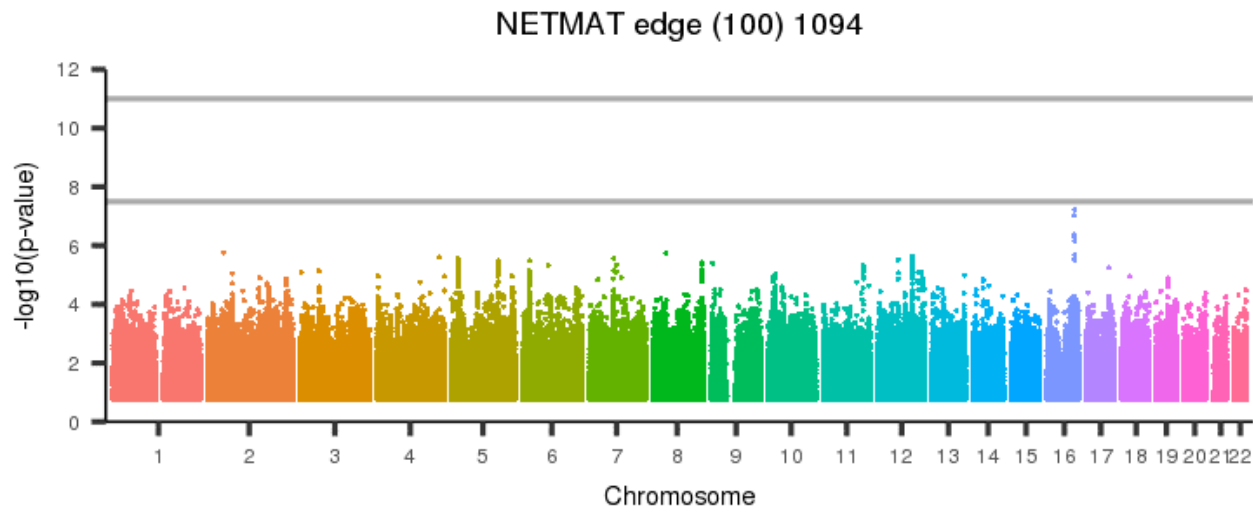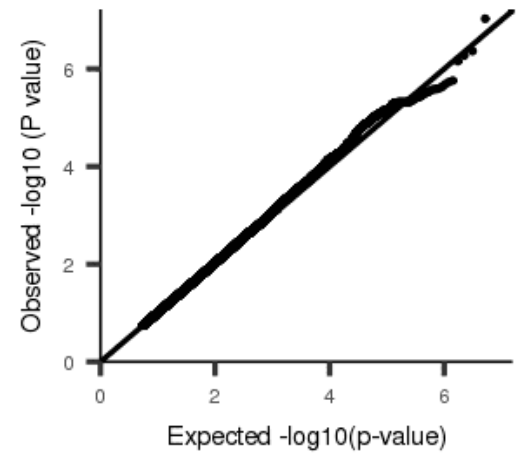

[back to list of plots](#)

Figure 2251: NETMAT edge (100) 1095

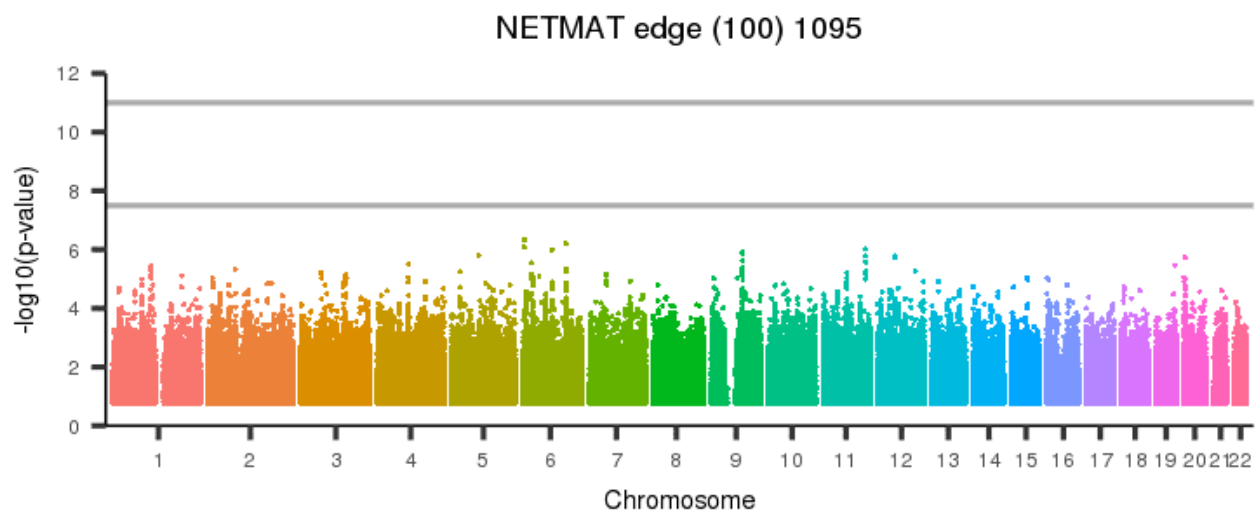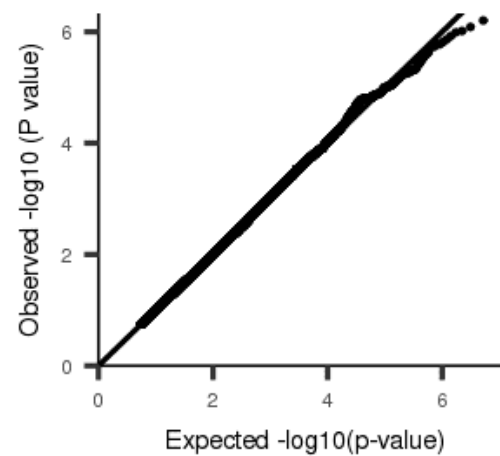

[back to list of plots](#)

Figure 2252: NETMAT edge (100) 1096

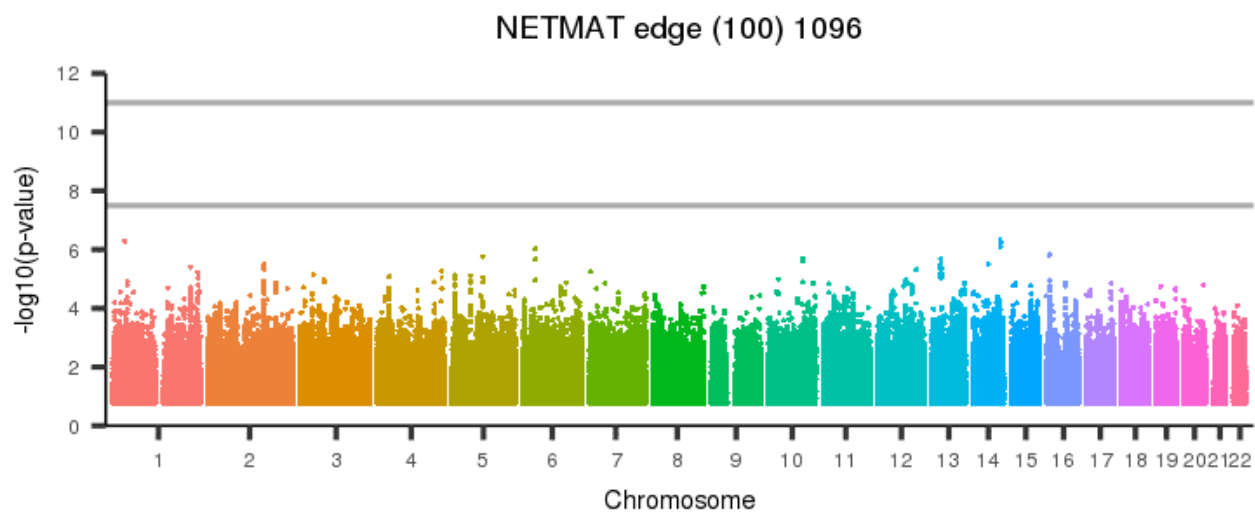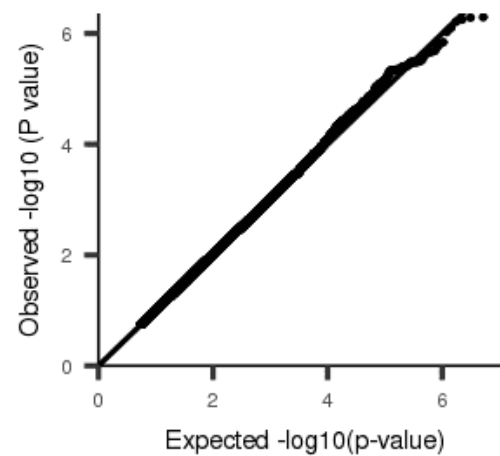

[back to list of plots](#)

Figure 2253: NETMAT edge (100) 1097

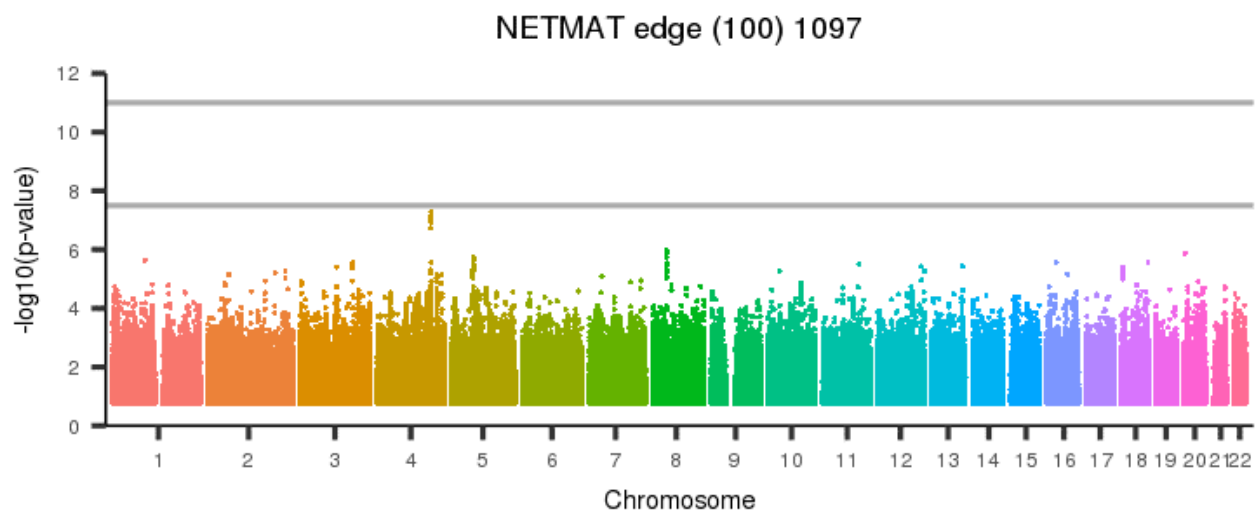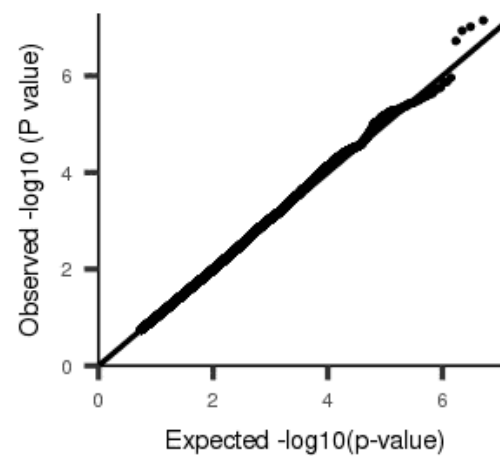

[back to list of plots](#)



Figure 2254: NETMAT edge (100) 1098

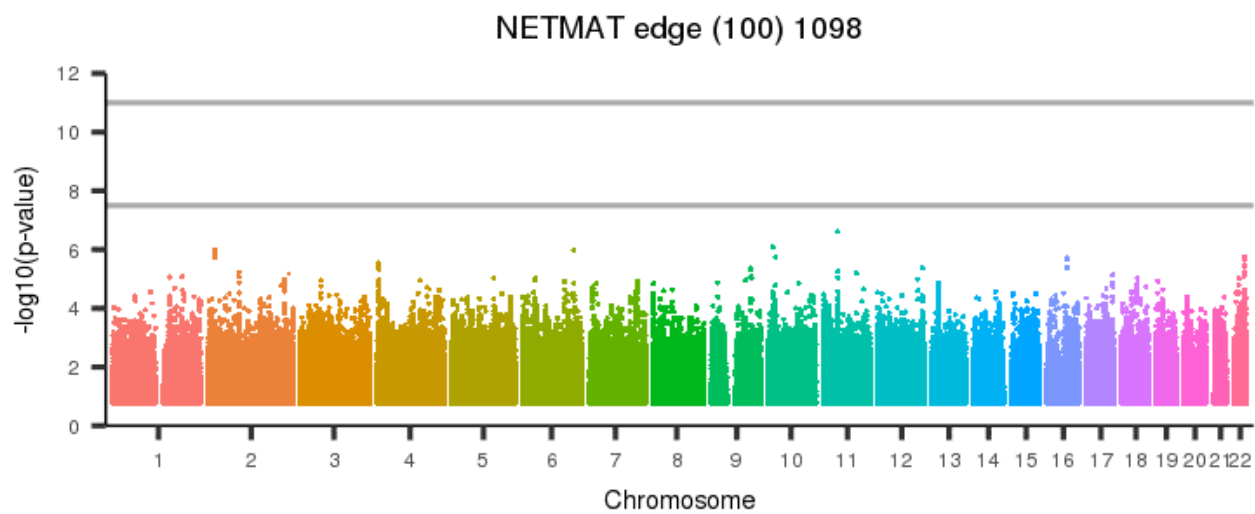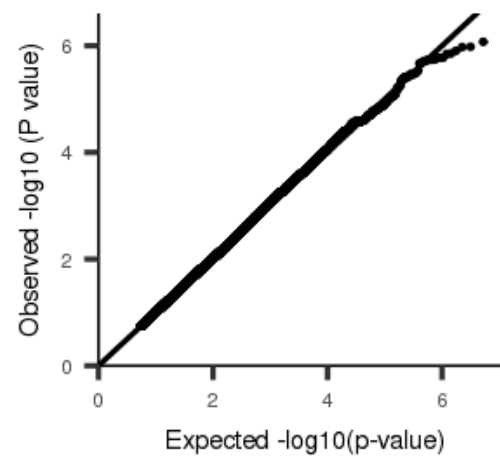

[back to list of plots](#)

Figure 2255: NETMAT edge (100) 1099

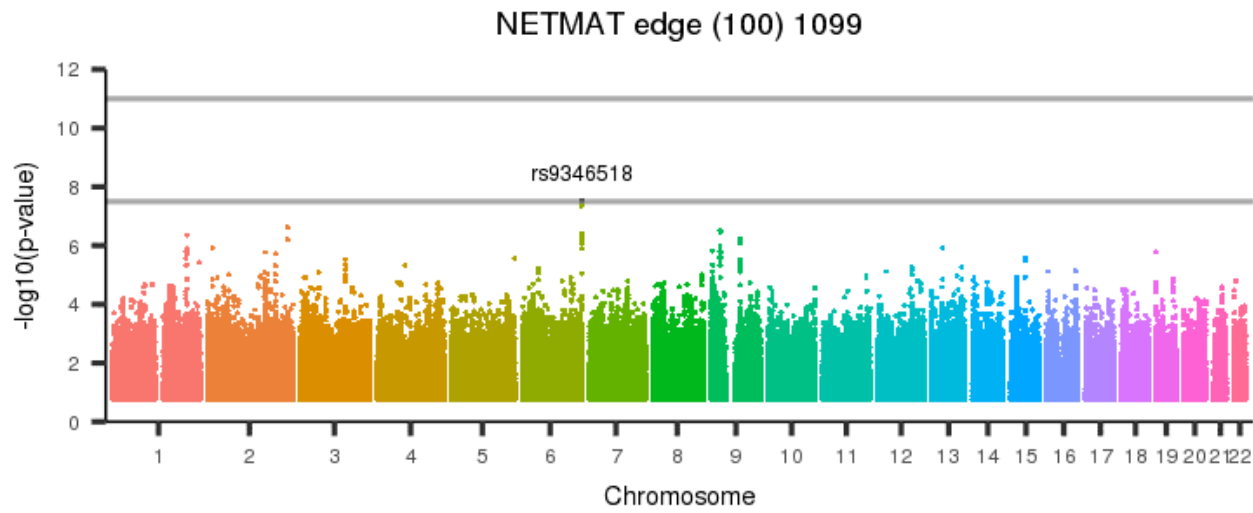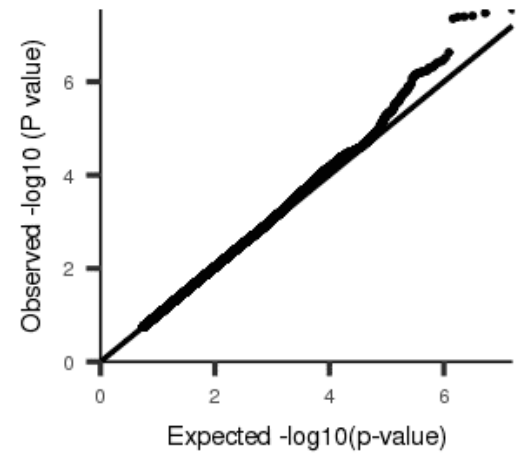

[back to list of plots](#)

Figure 2256: NETMAT edge (100) 1100

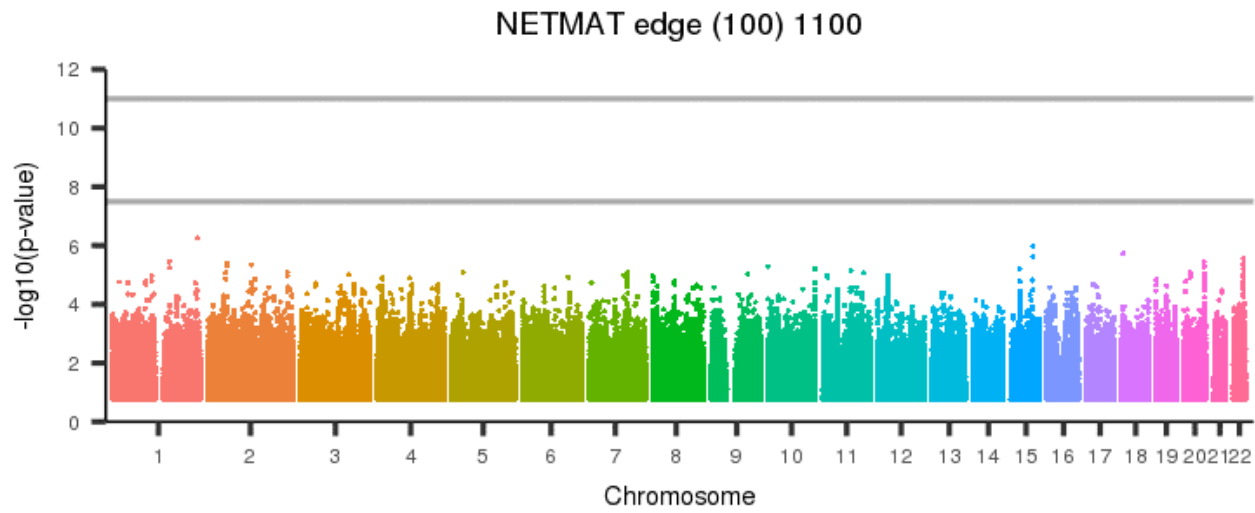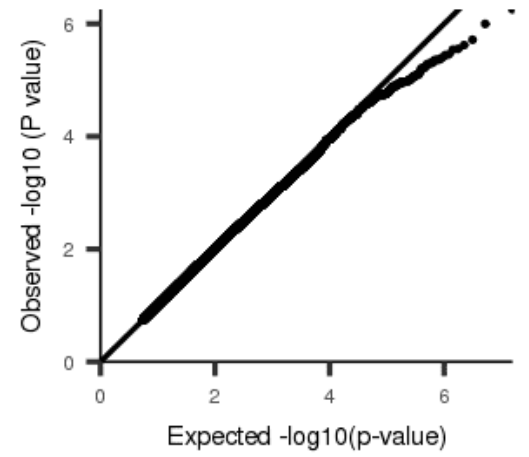

[back to list of plots](#)

Figure 2257: NETMAT edge (100) 1101

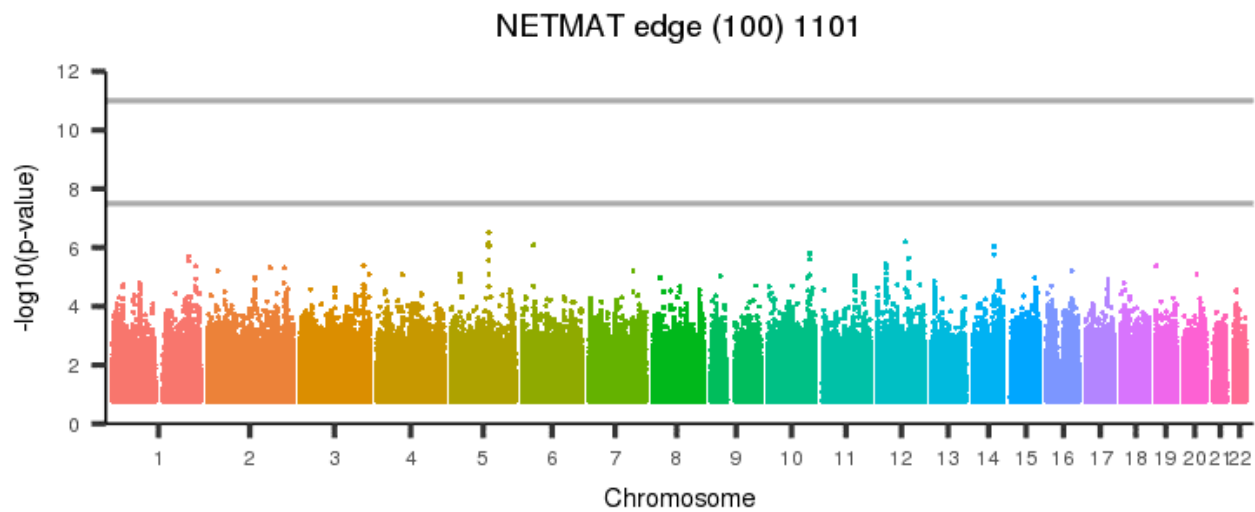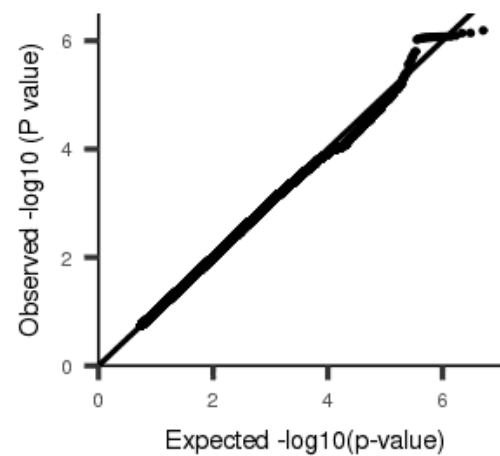

[back to list of plots](#)

Figure 2258: NETMAT edge (100) 1102

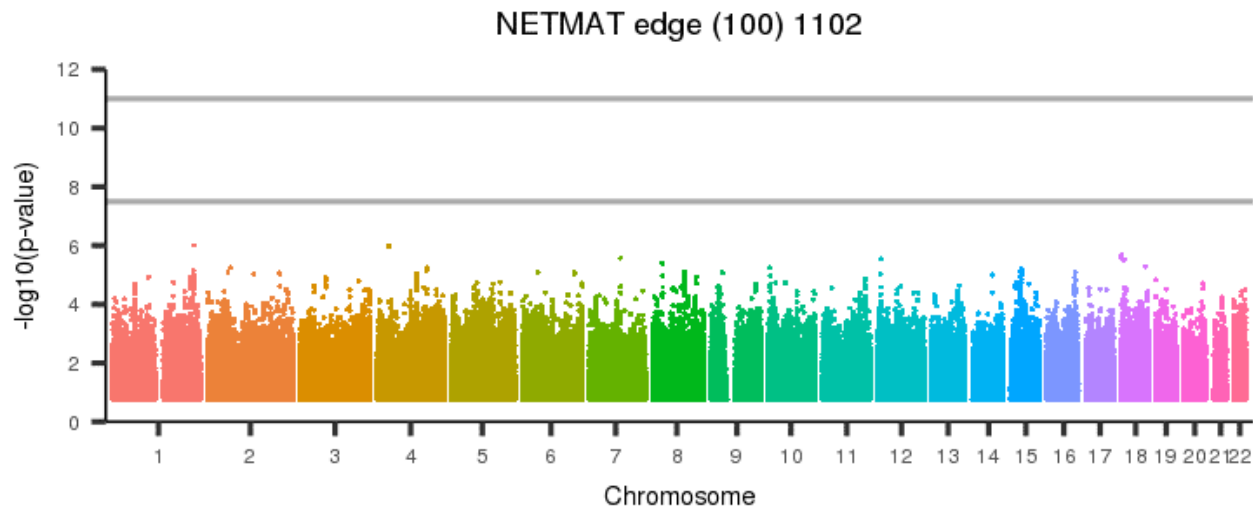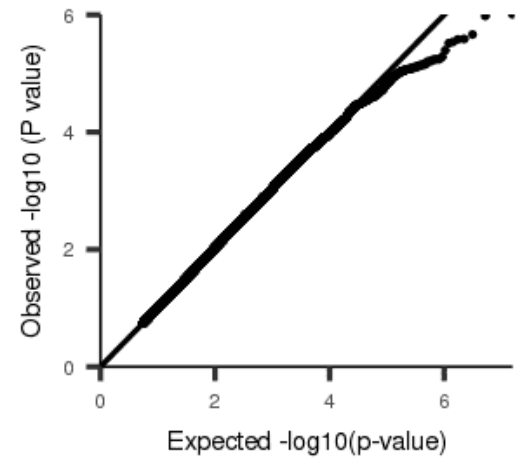

[back to list of plots](#)

Figure 2259: NETMAT edge (100) 1103

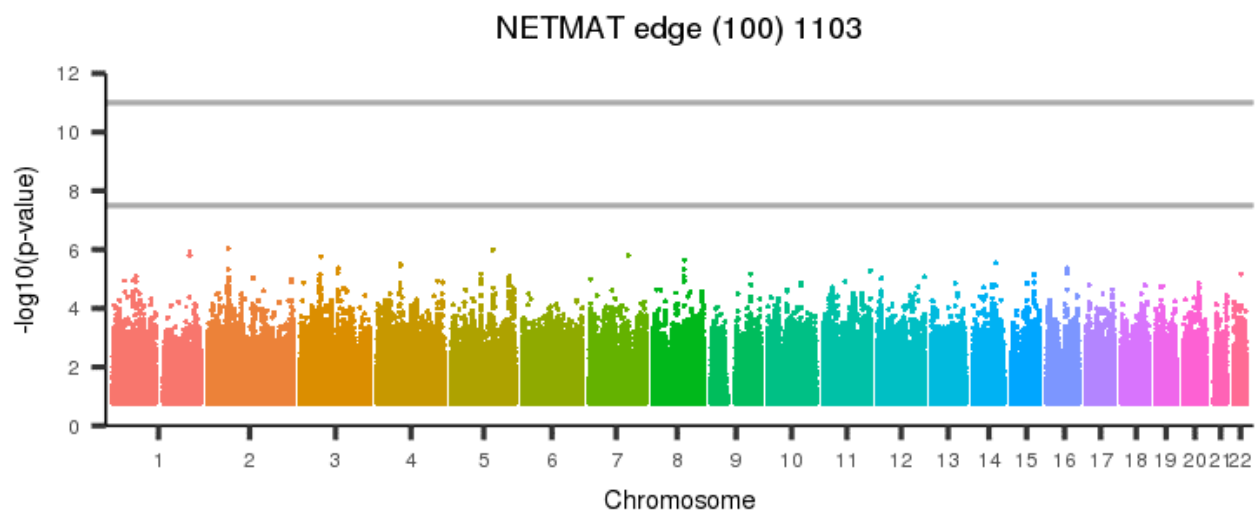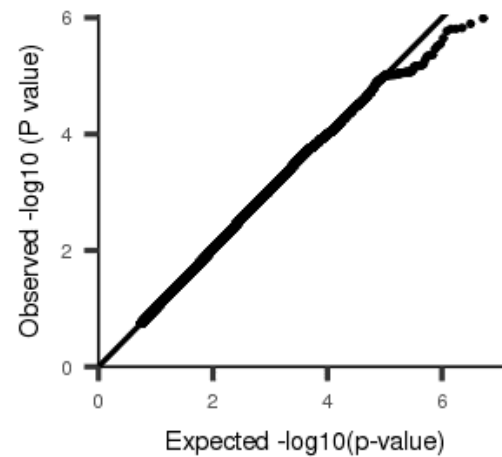

[back to list of plots](#)

Figure 2260: NETMAT edge (100) 1104

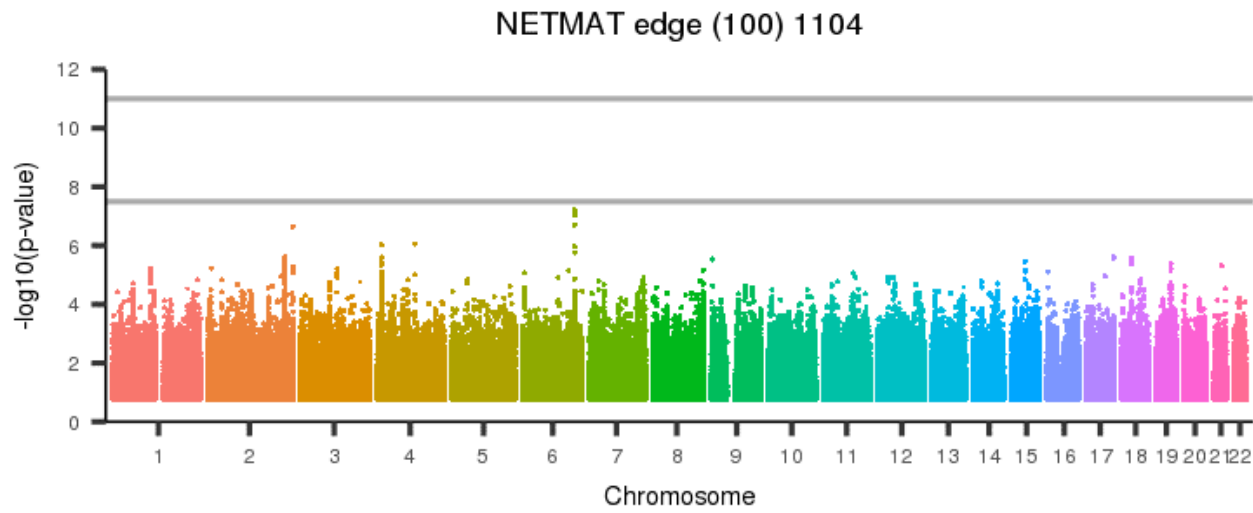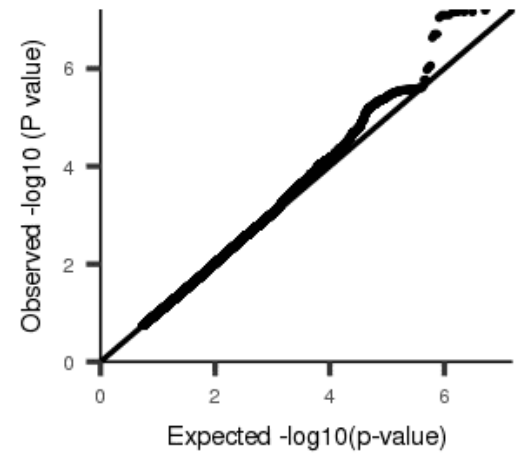

[back to list of plots](#)

Figure 2261: NETMAT edge (100) 1105

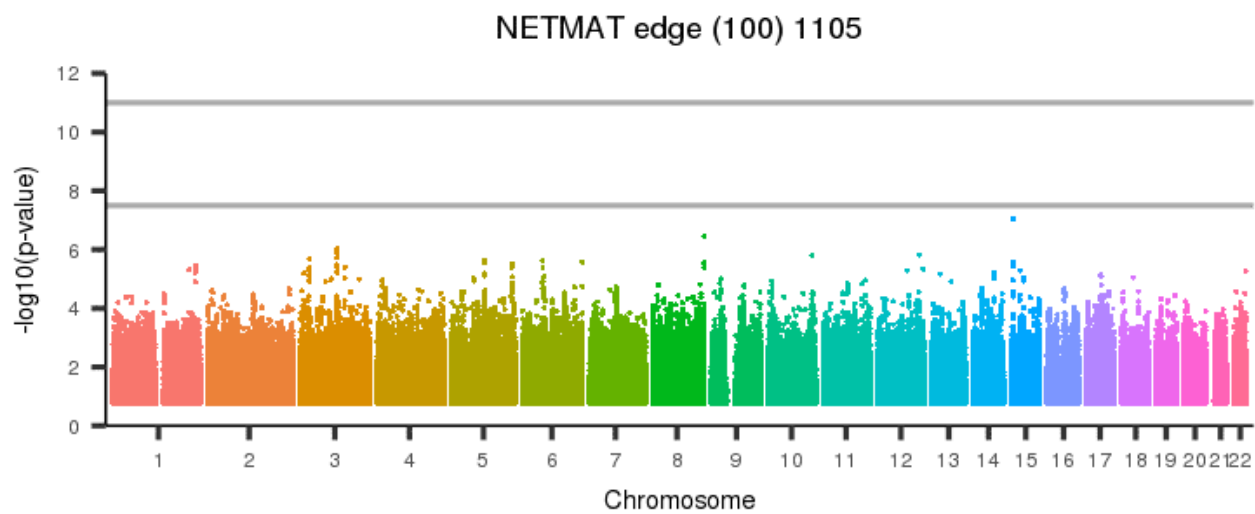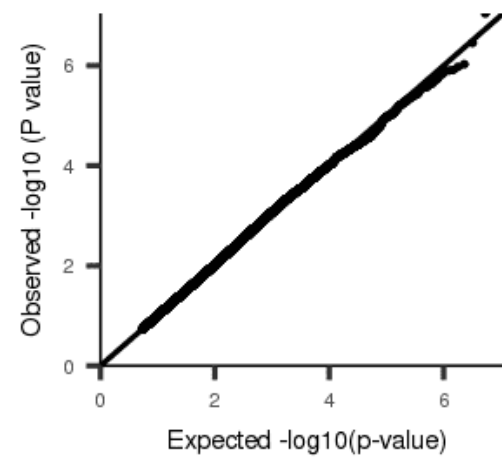

[back to list of plots](#)



Figure 2262: NETMAT edge (100) 1106

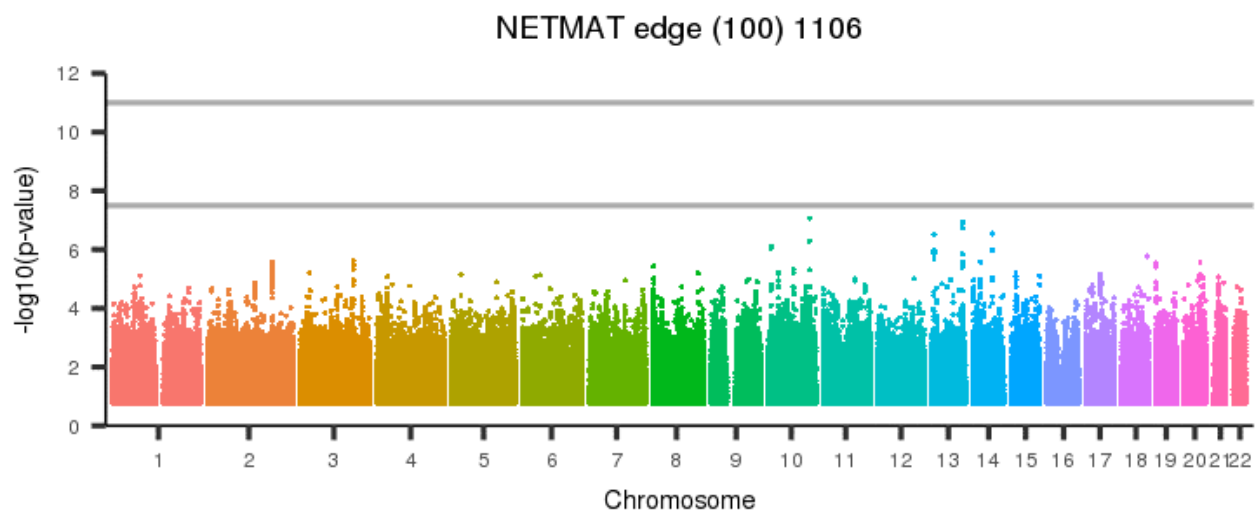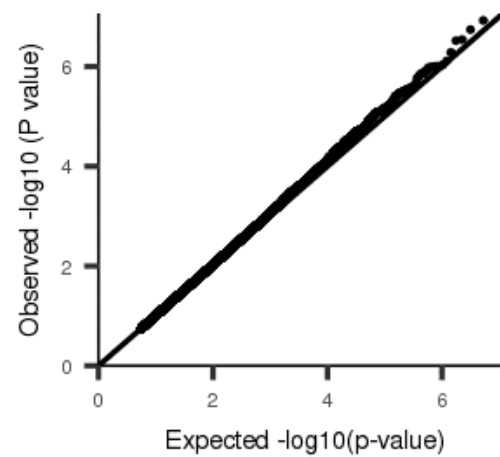

[back to list of plots](#)

Figure 2263: NETMAT edge (100) 1107

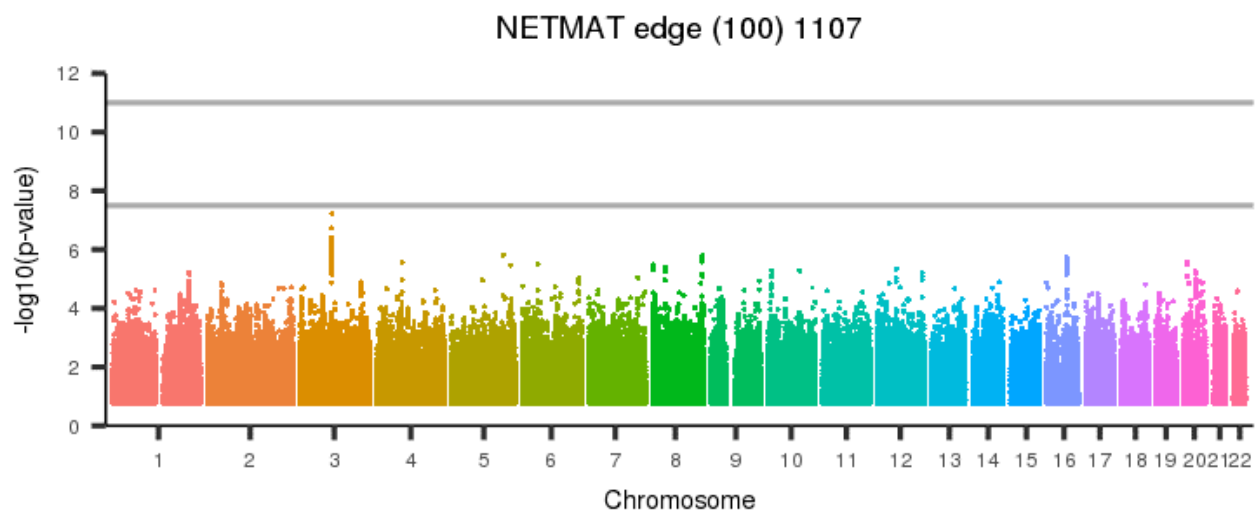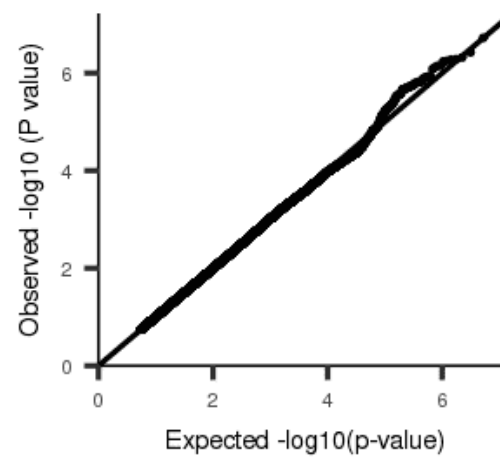

[back to list of plots](#)

Figure 2264: NETMAT edge (100) 1108

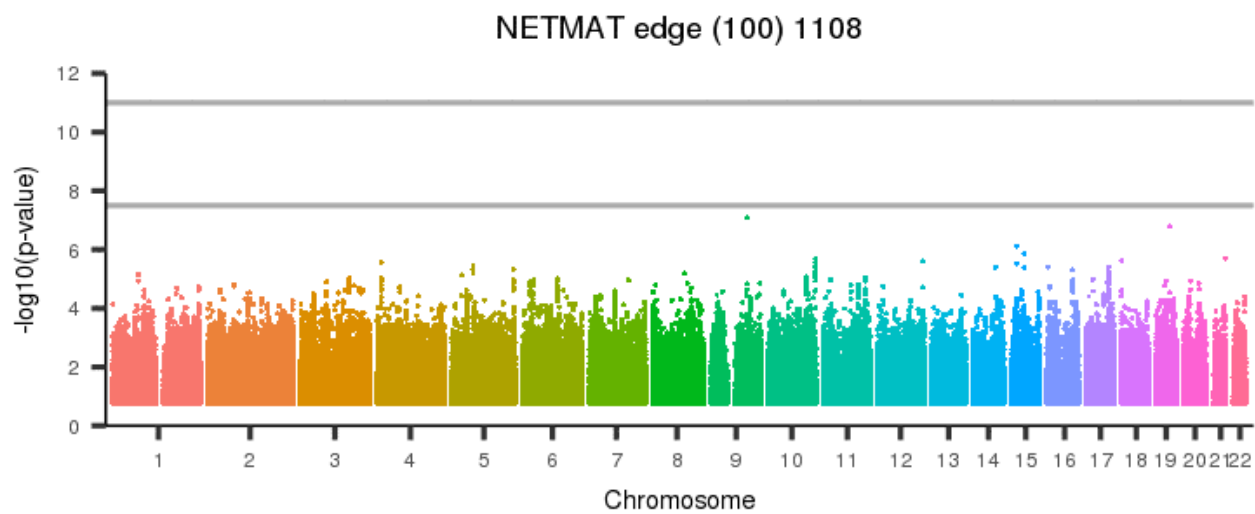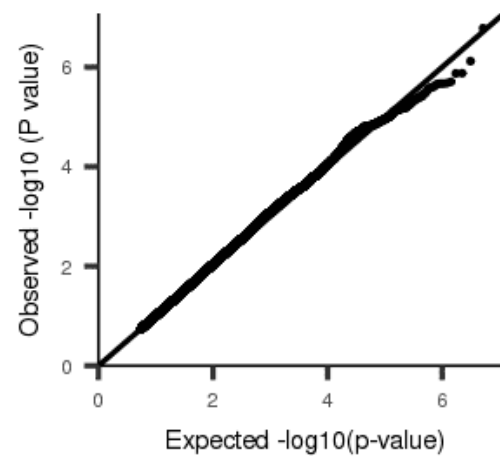

[back to list of plots](#)

Figure 2265: NETMAT edge (100) 1109

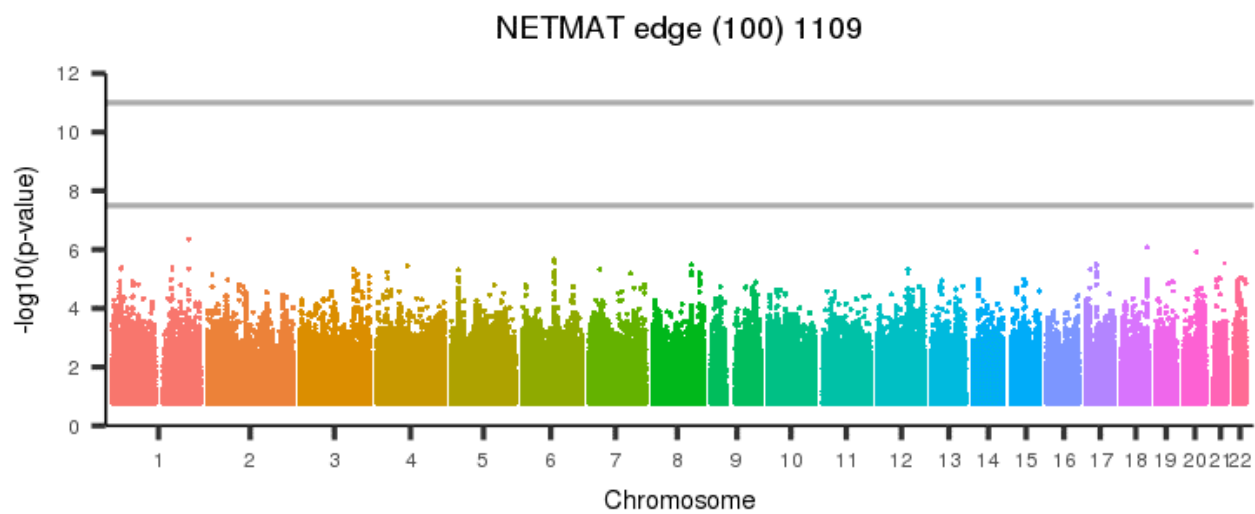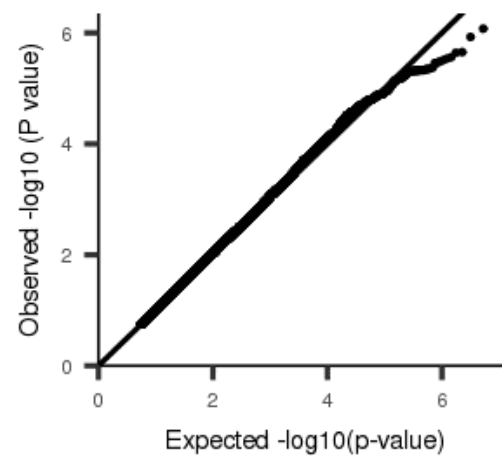

[back to list of plots](#)

Figure 2266: NETMAT edge (100) 1110

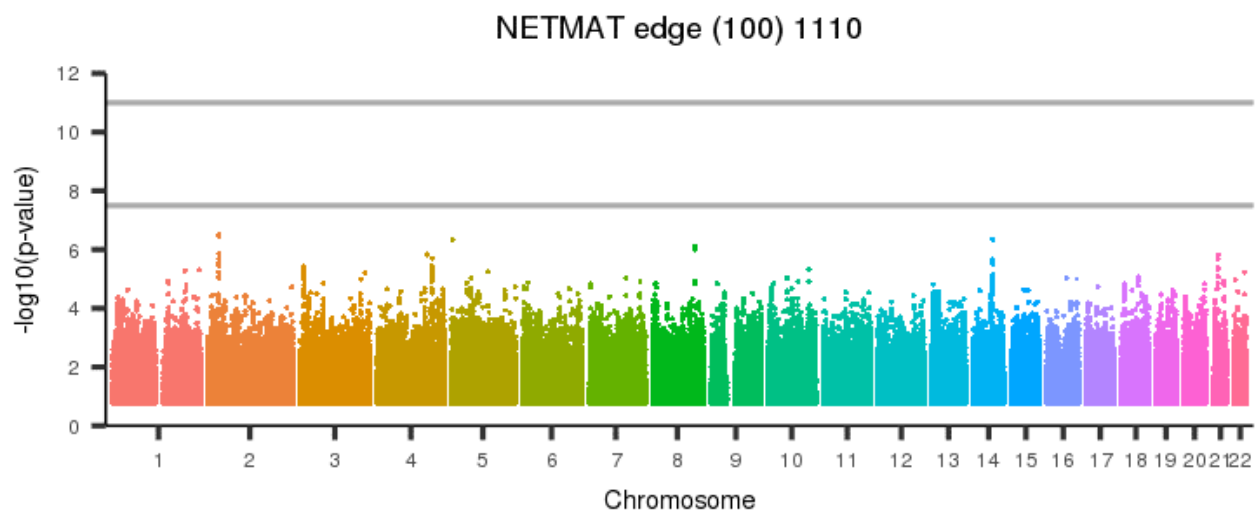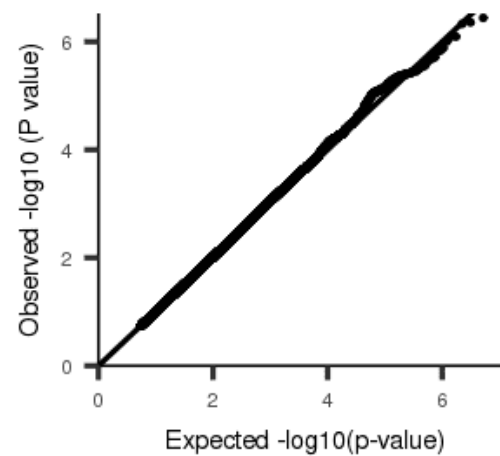

[back to list of plots](#)

Figure 2267: NETMAT edge (100) 1111

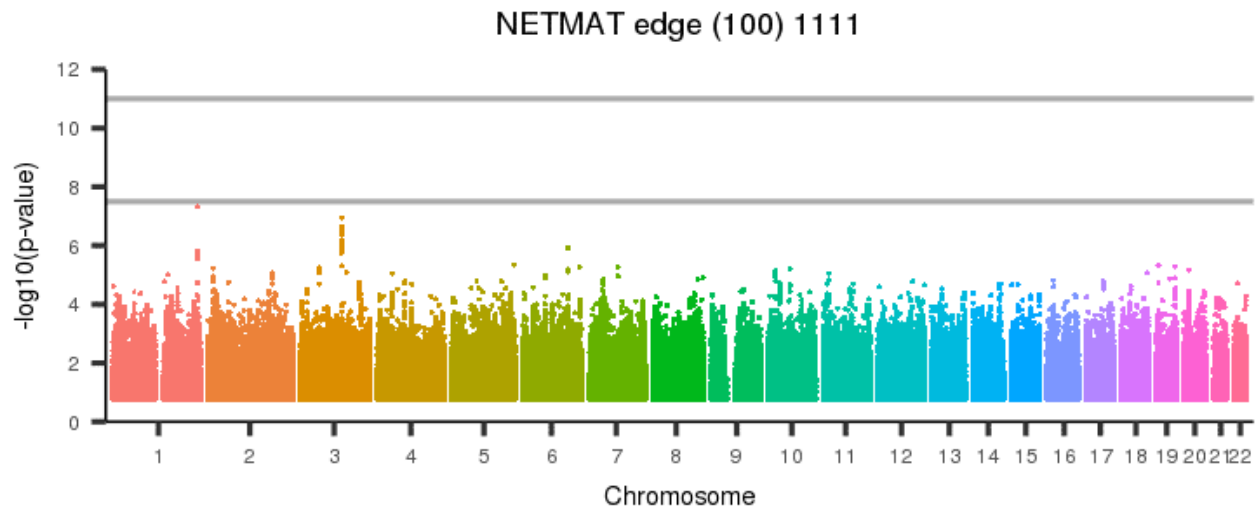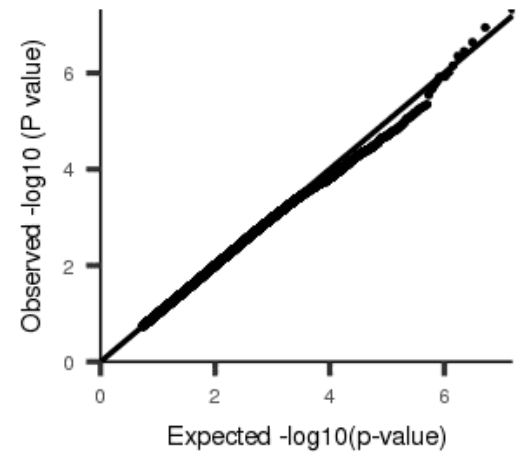

[back to list of plots](#)

Figure 2268: NETMAT edge (100) 1112

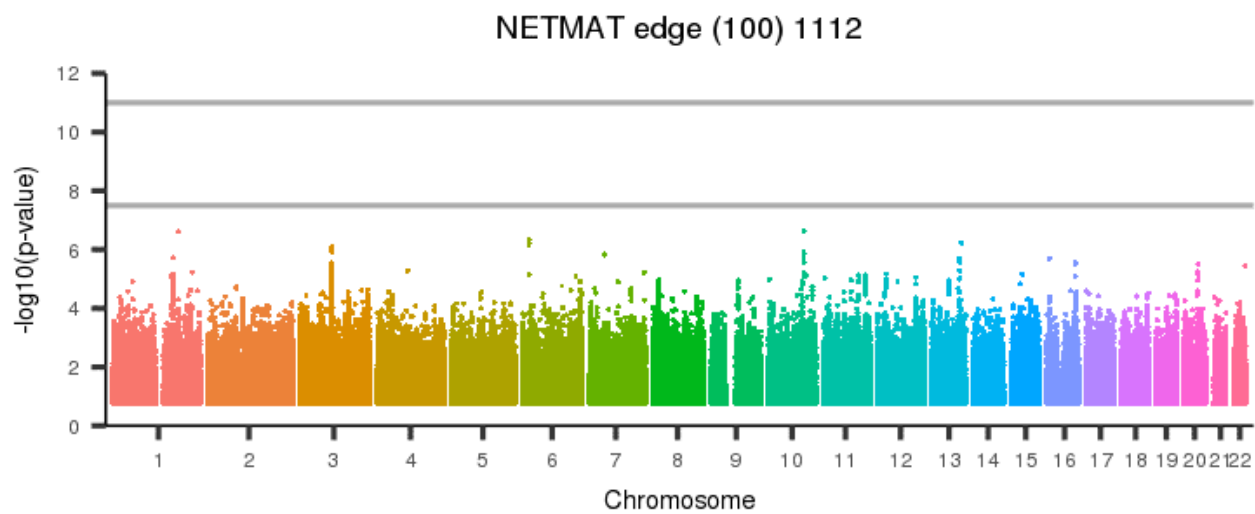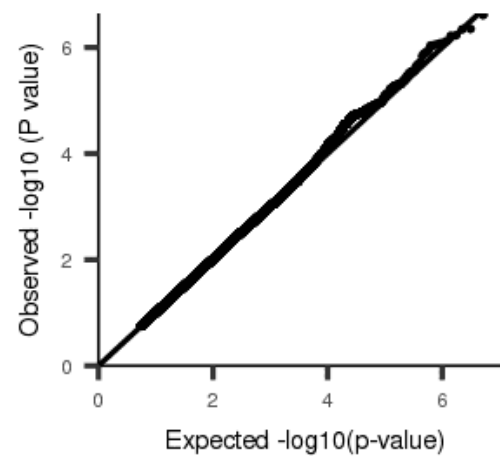

[back to list of plots](#)

Figure 2269: NETMAT edge (100) 1113

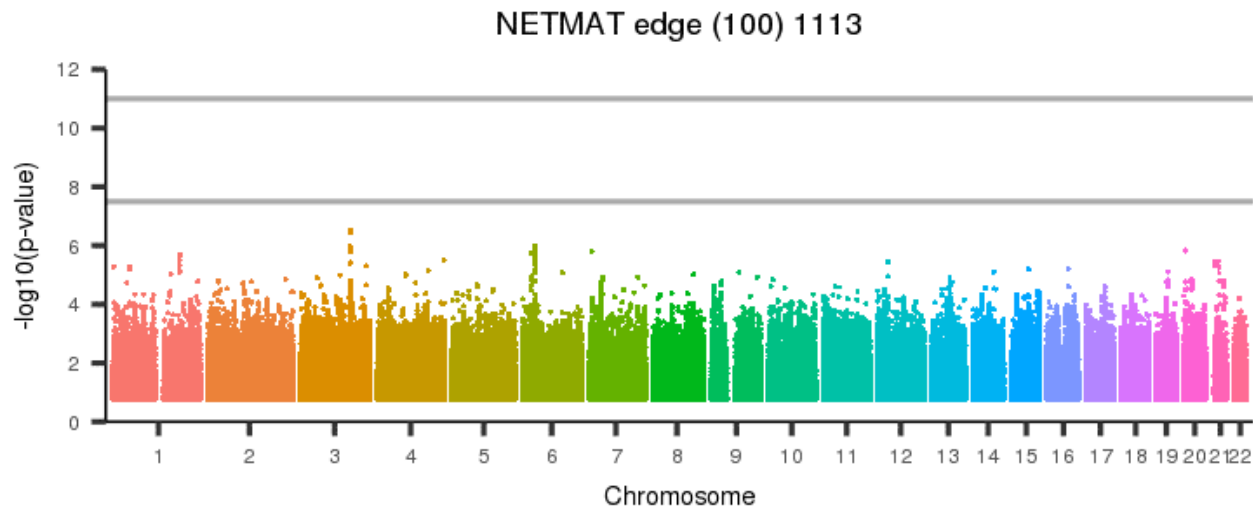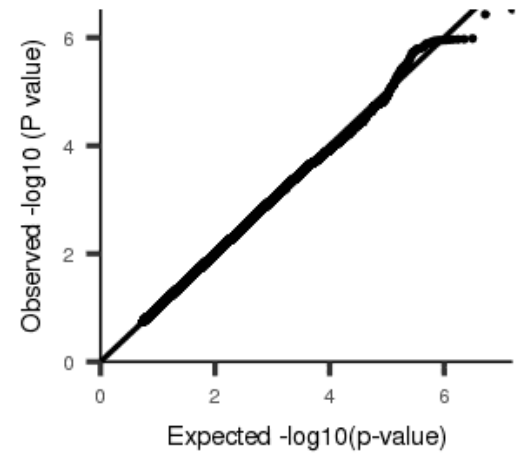

[back to list of plots](#)



Figure 2270: NETMAT edge (100) 1114

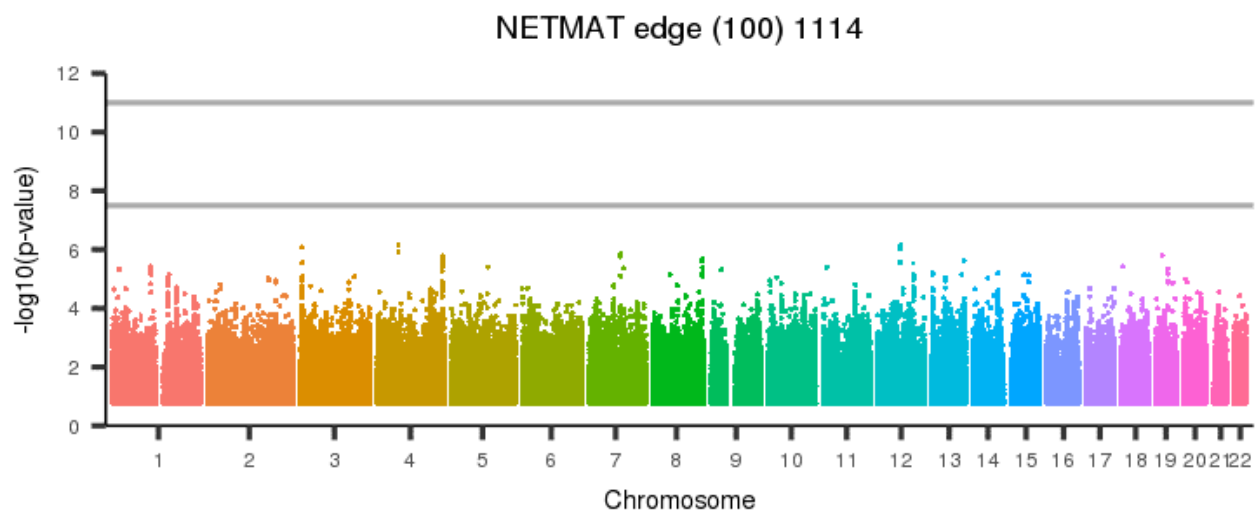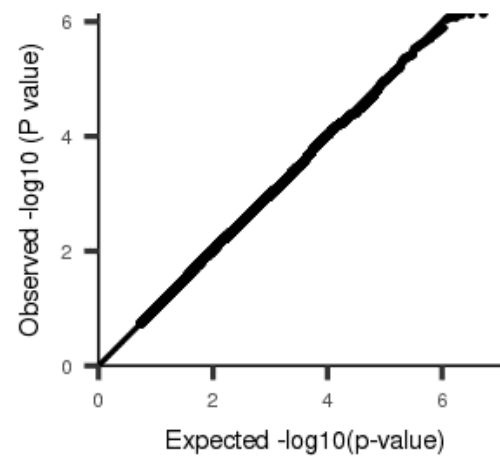

[back to list of plots](#)

Figure 2271: NETMAT edge (100) 1115

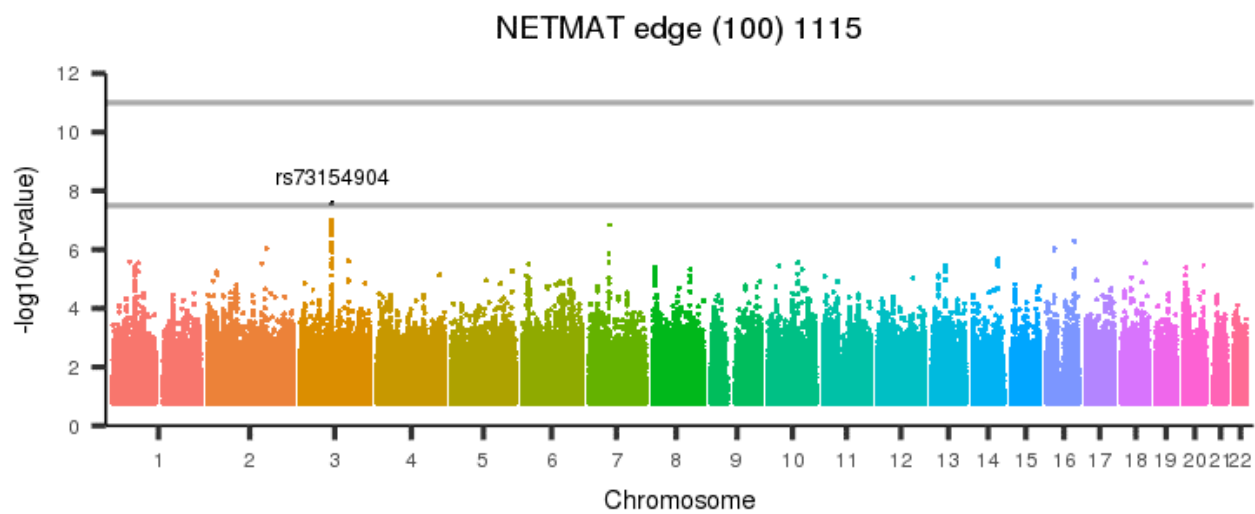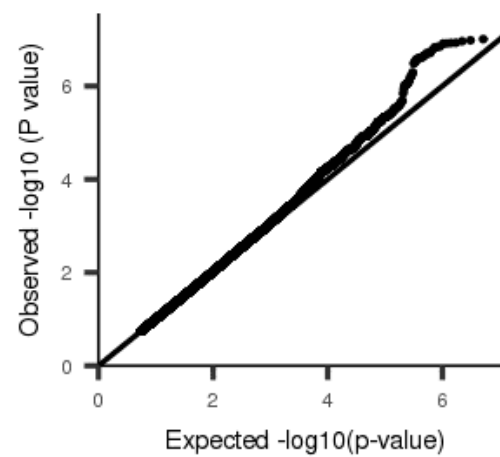

[back to list of plots](#)

Figure 2272: NETMAT edge (100) 1116

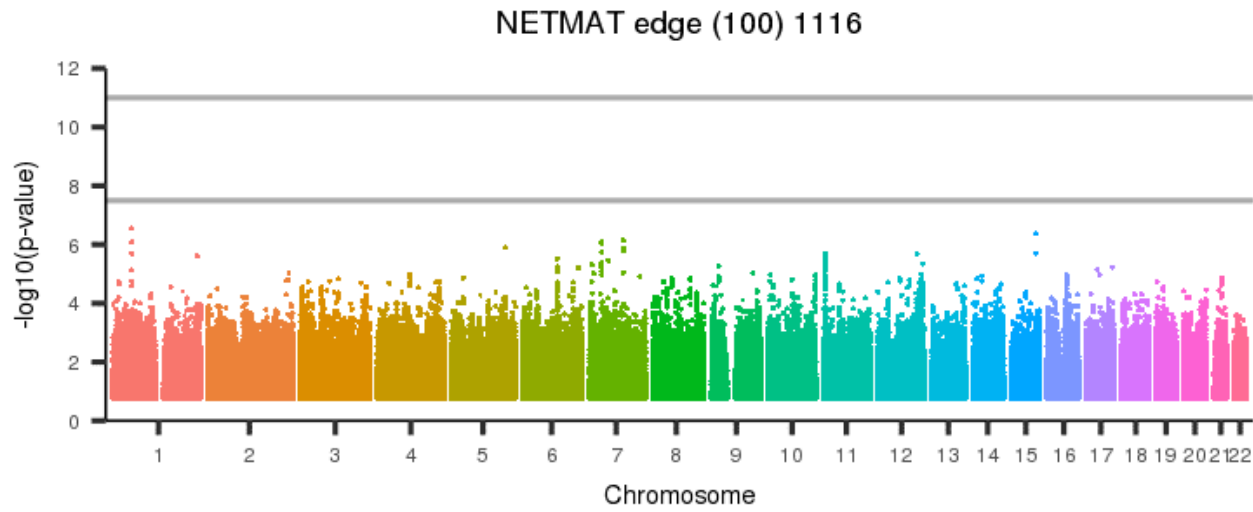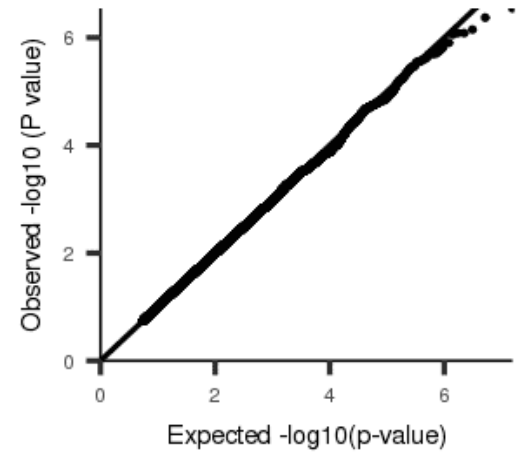

[back to list of plots](#)

Figure 2273: NETMAT edge (100) 1117

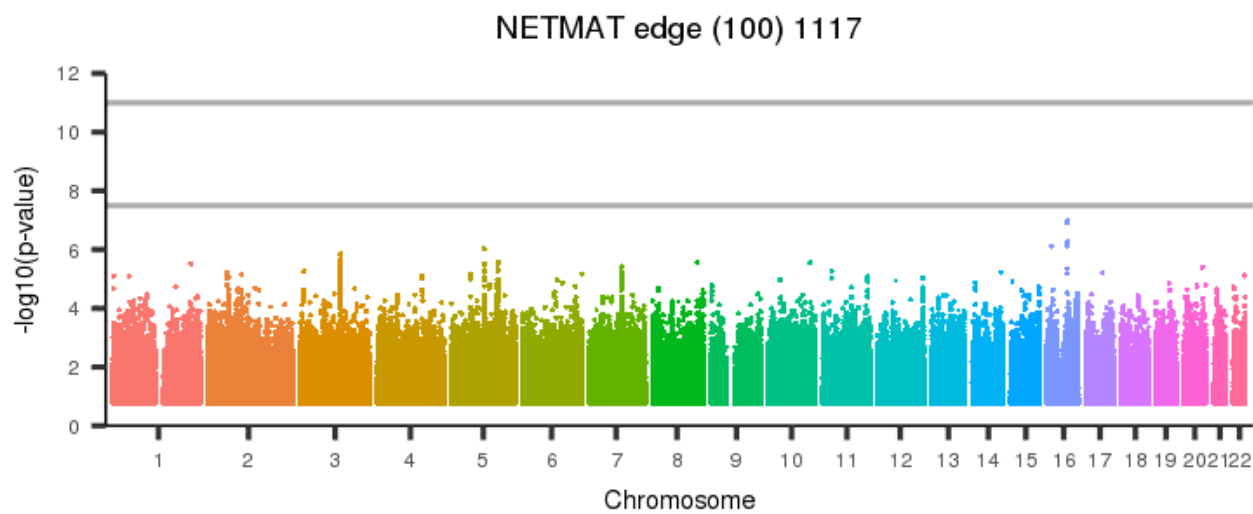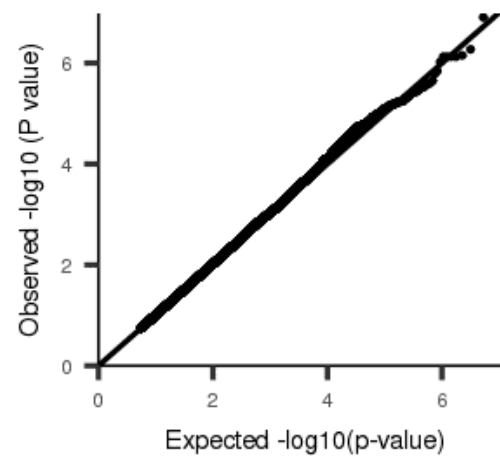

[back to list of plots](#)

Figure 2274: NETMAT edge (100) 1118

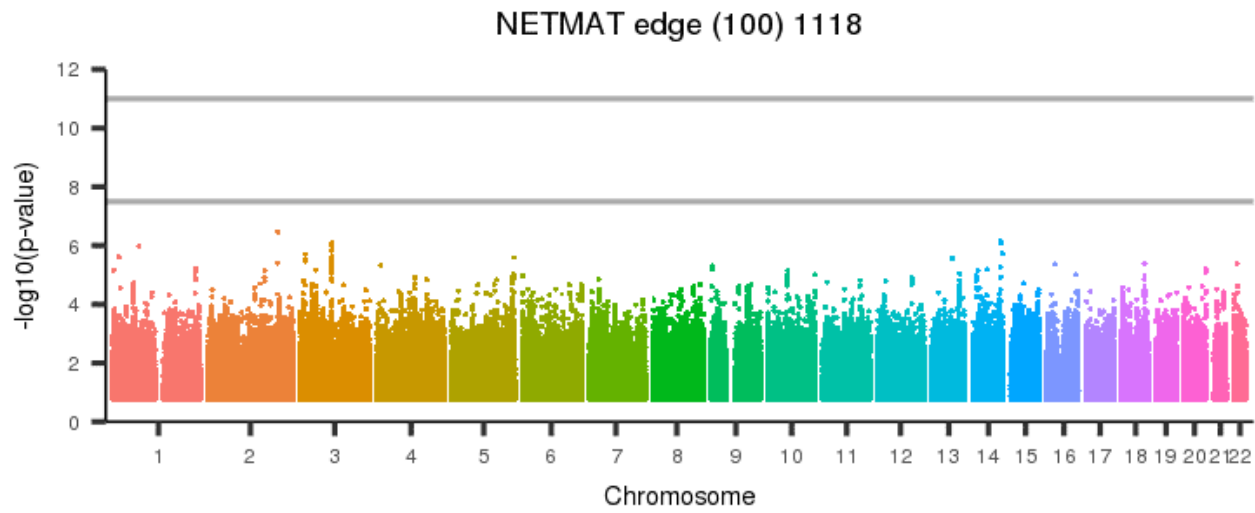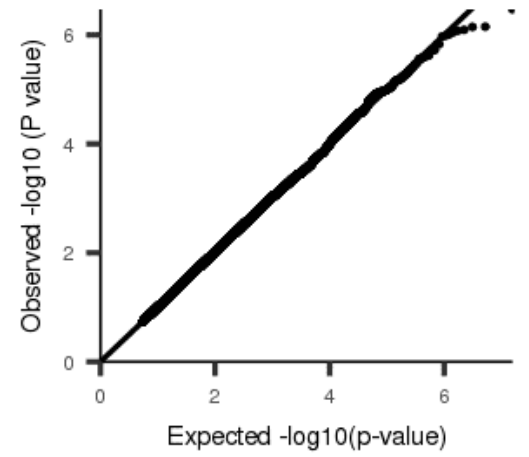

[back to list of plots](#)

Figure 2275: NETMAT edge (100) 1119

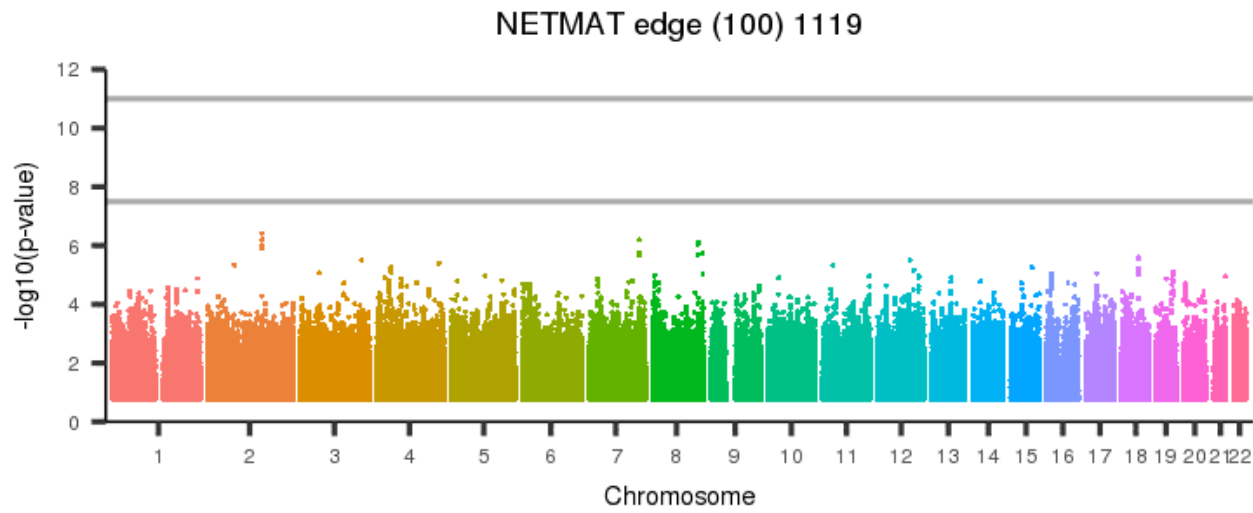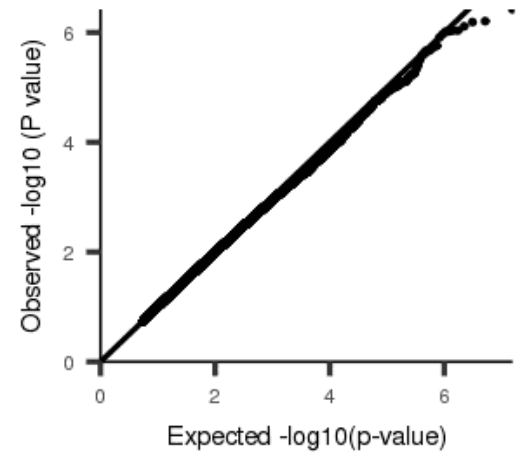

[back to list of plots](#)

Figure 2276: NETMAT edge (100) 1120

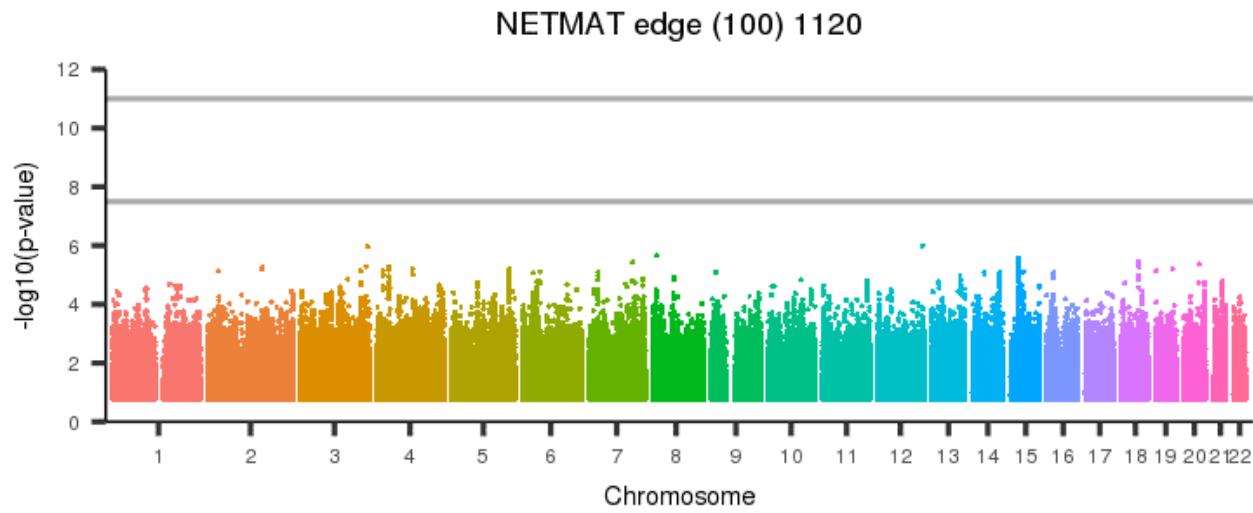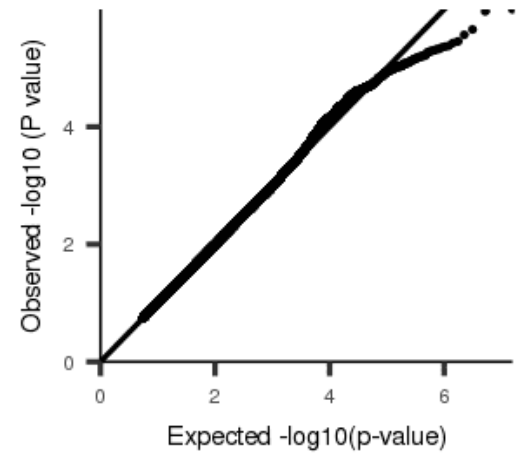

[back to list of plots](#)

Figure 2277: NETMAT edge (100) 1121

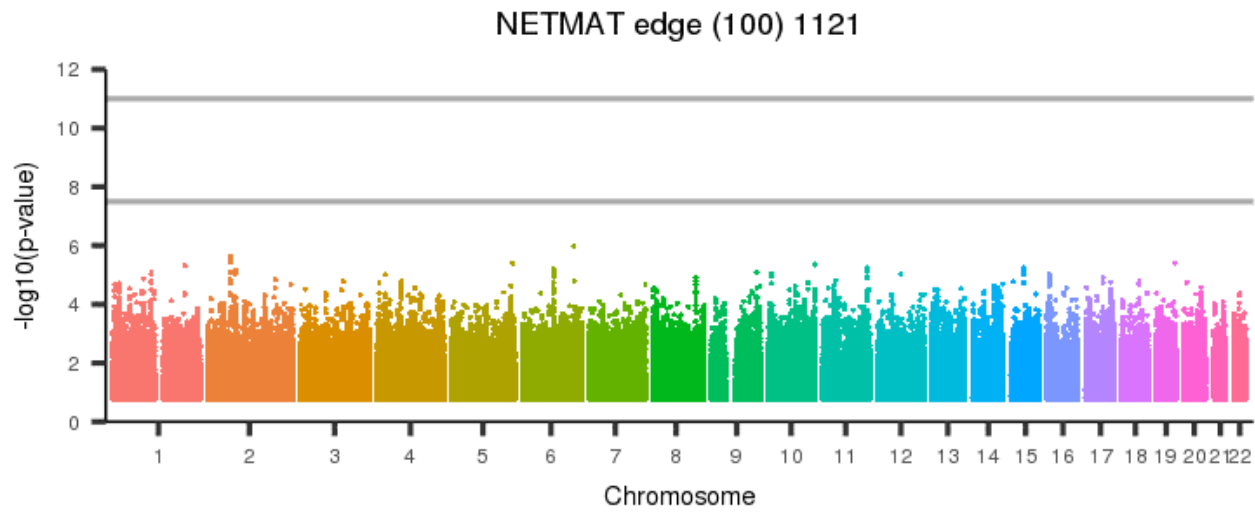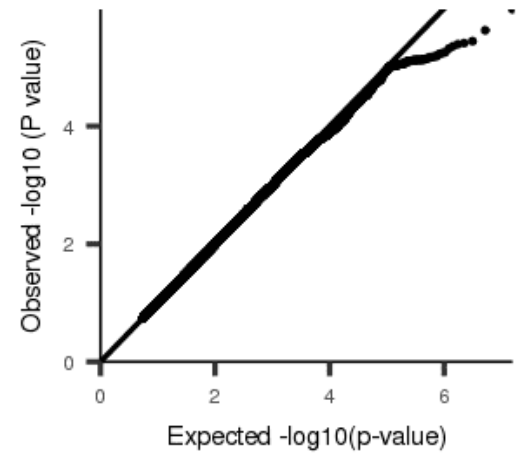

[back to list of plots](#)



Figure 2278: NETMAT edge (100) 1122

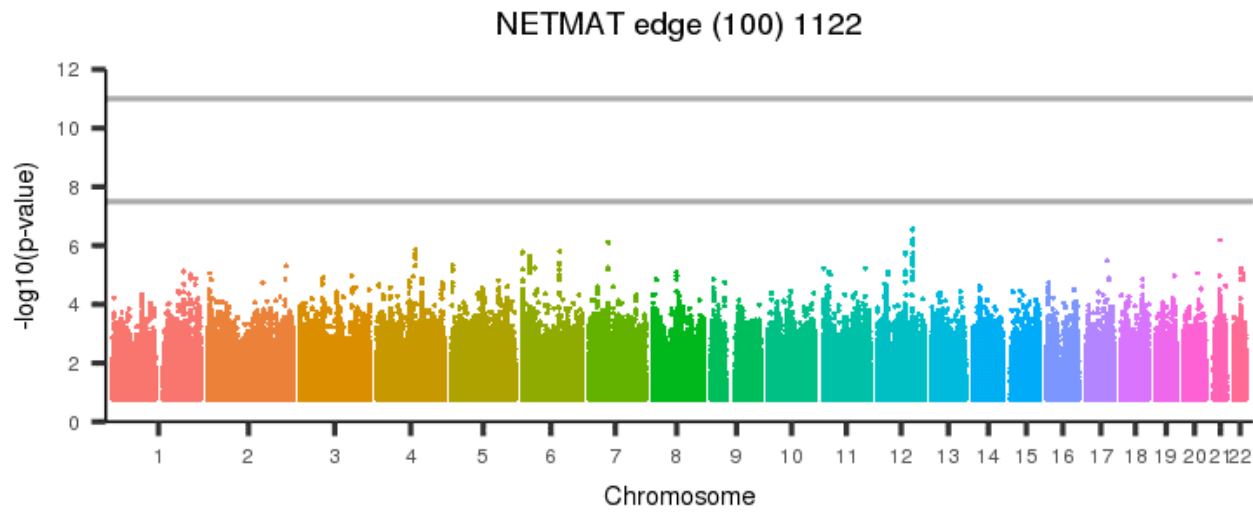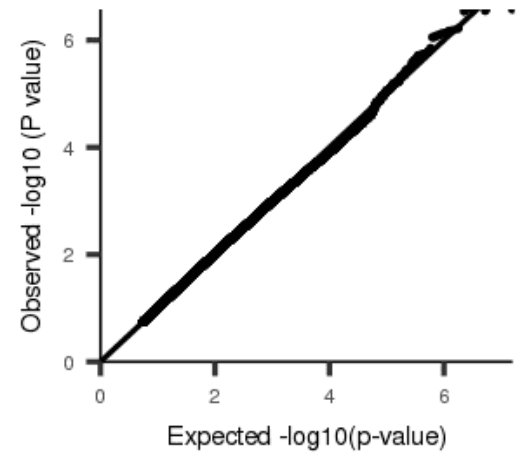

[back to list of plots](#)

Figure 2279: NETMAT edge (100) 1123

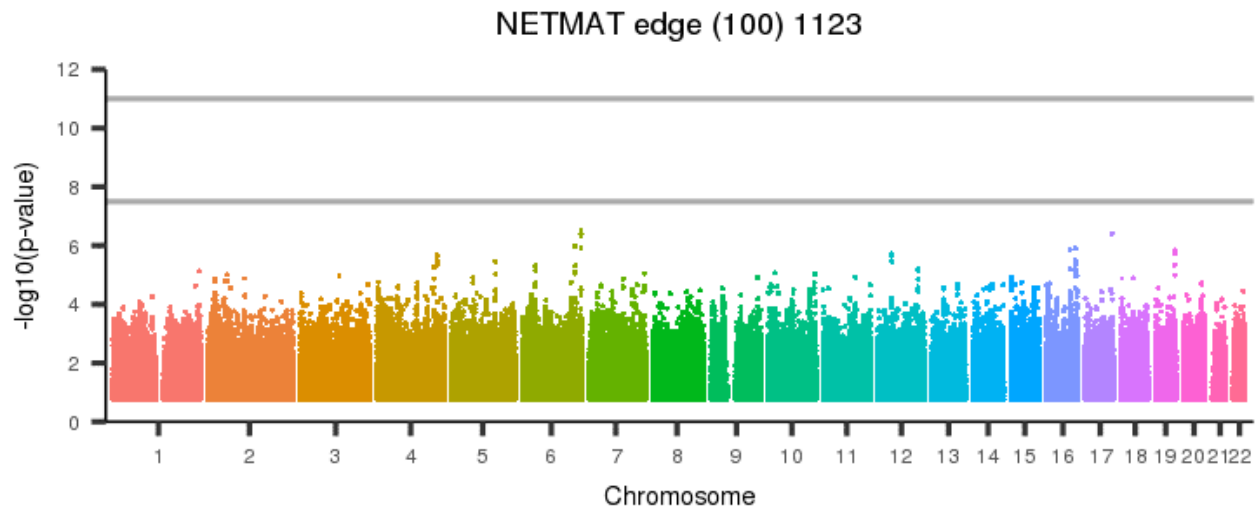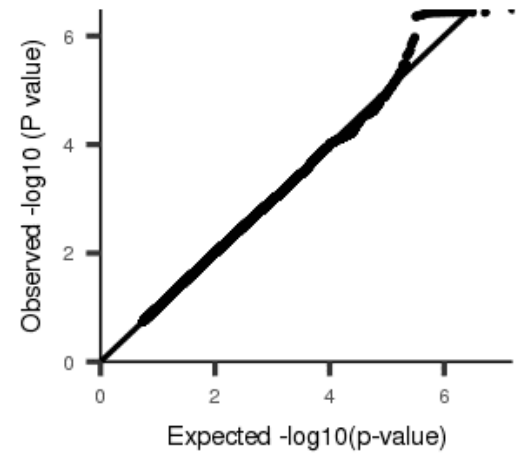

[back to list of plots](#)

Figure 2280: NETMAT edge (100) 1124

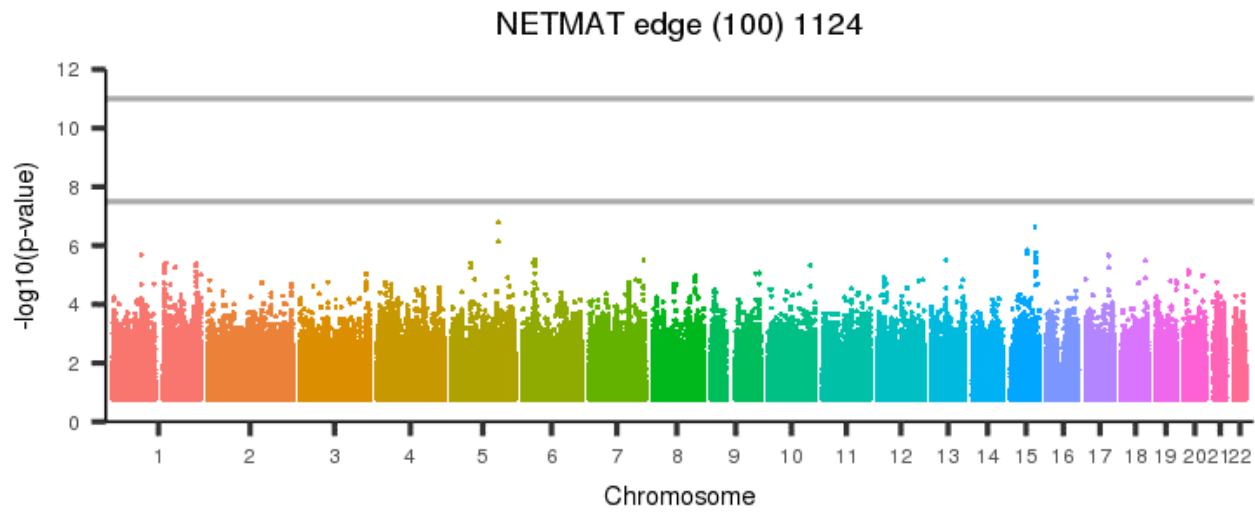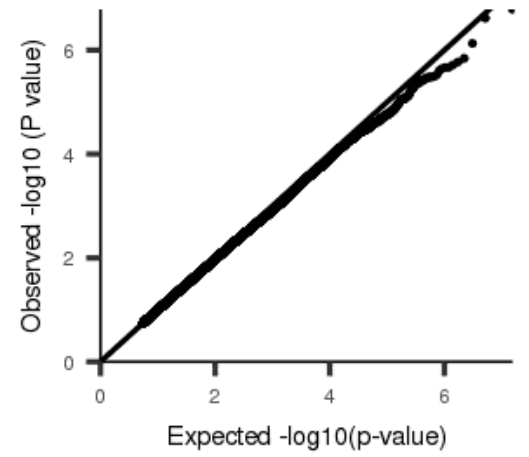

[back to list of plots](#)

Figure 2281: NETMAT edge (100) 1125

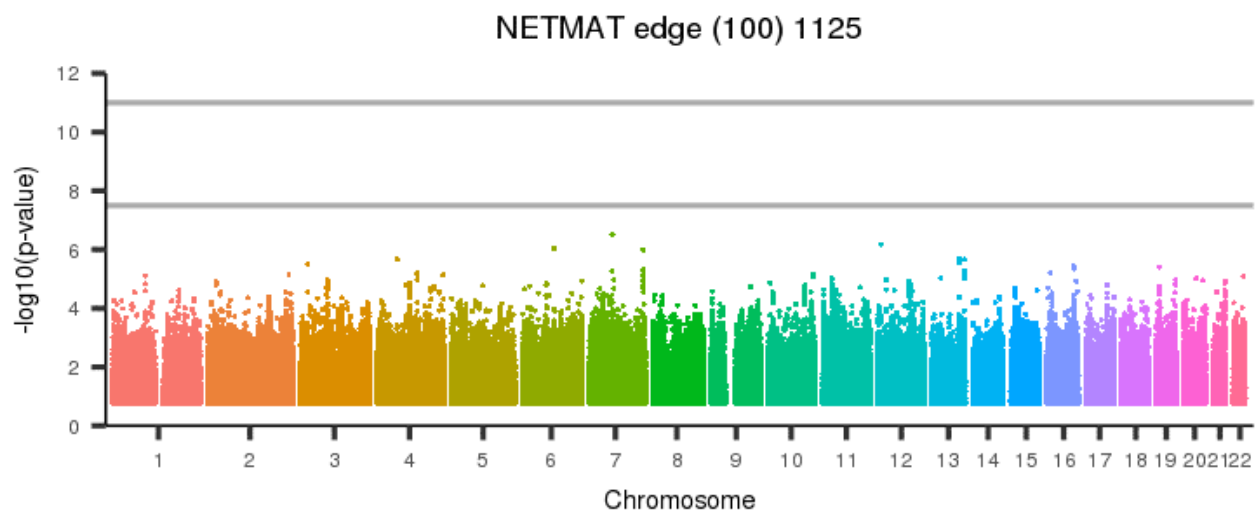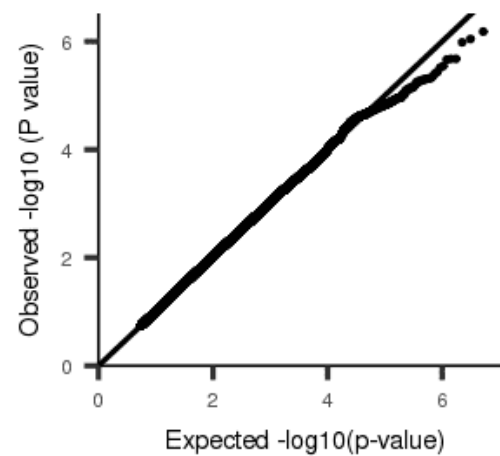

[back to list of plots](#)

Figure 2282: NETMAT edge (100) 1126

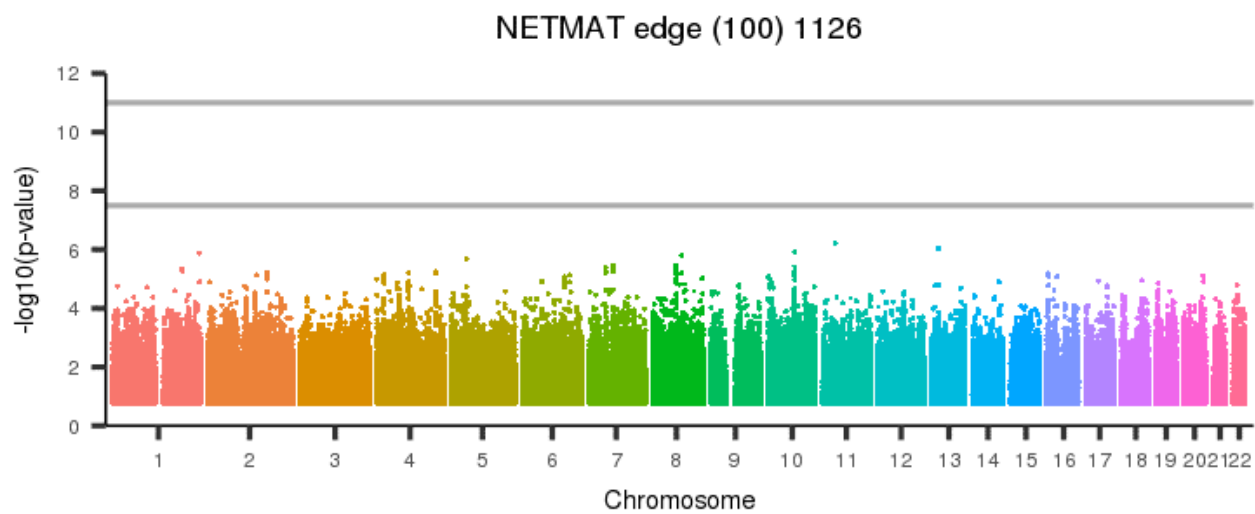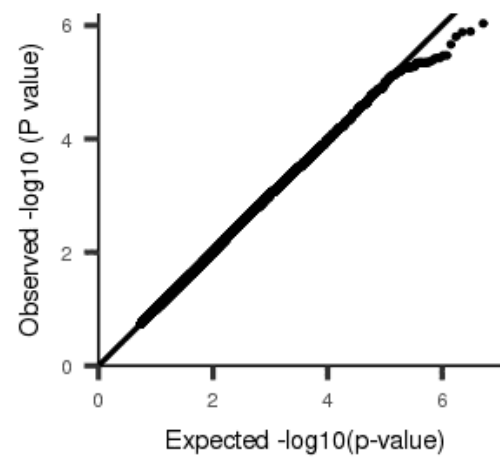

[back to list of plots](#)

Figure 2283: NETMAT edge (100) 1127

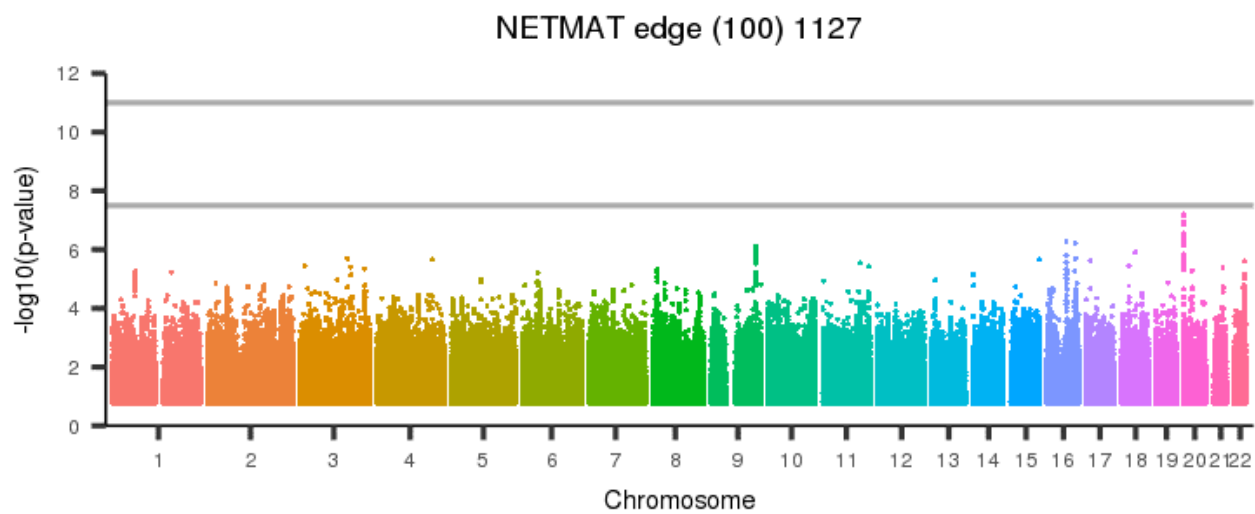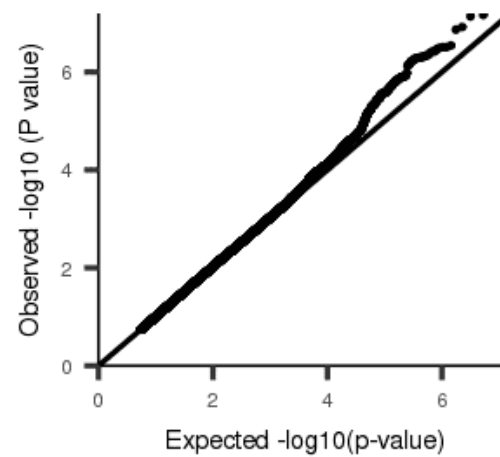

[back to list of plots](#)

Figure 2284: NETMAT edge (100) 1128

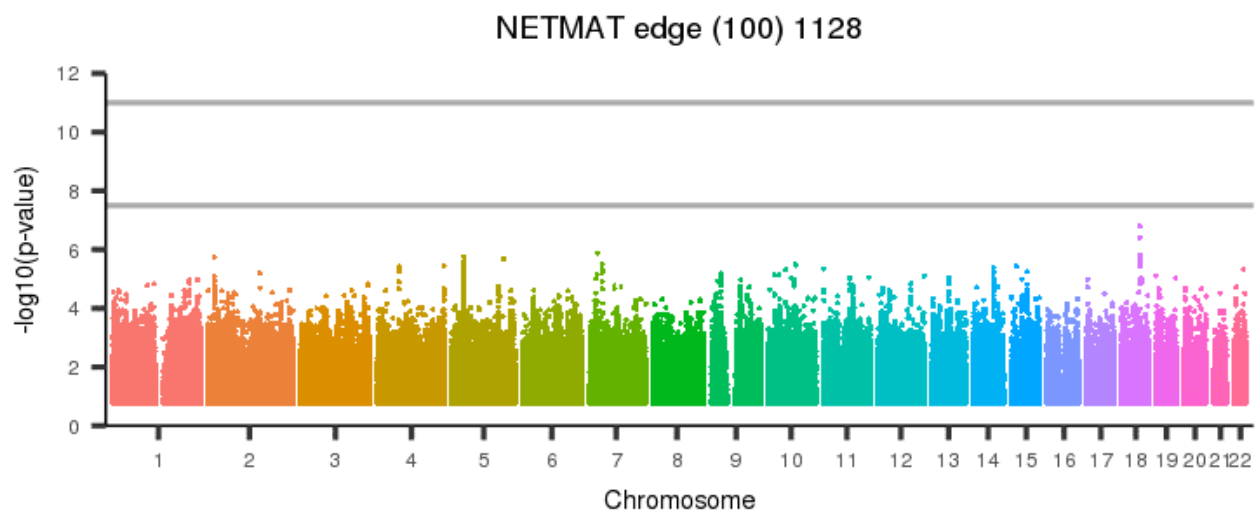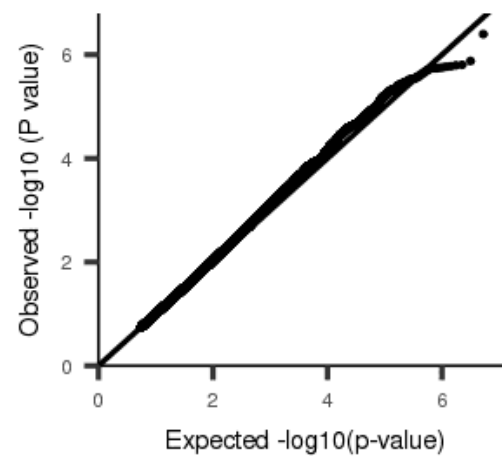

[back to list of plots](#)

Figure 2285: NETMAT edge (100) 1129

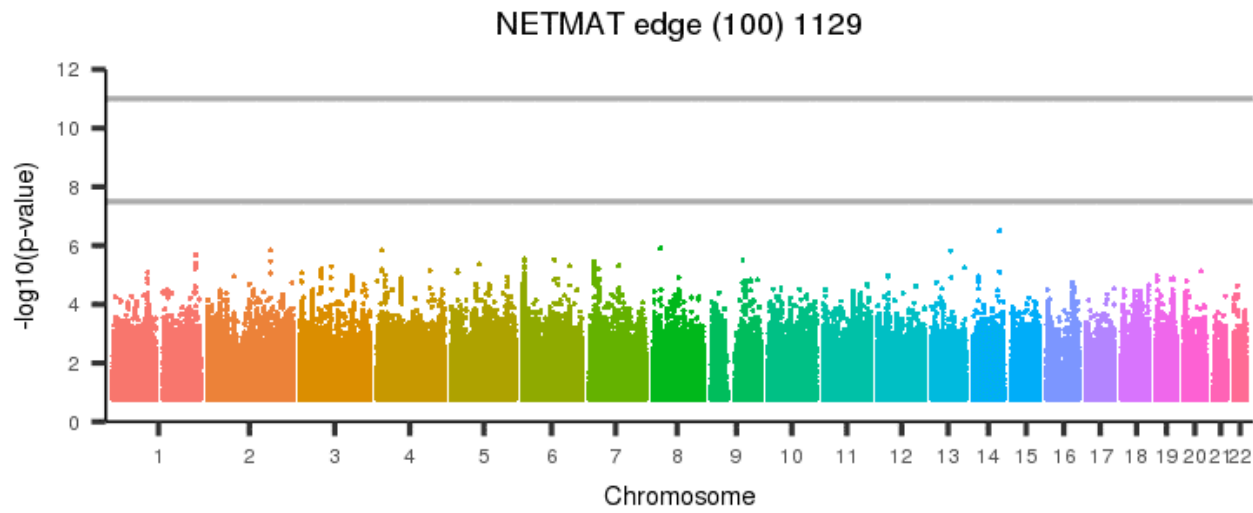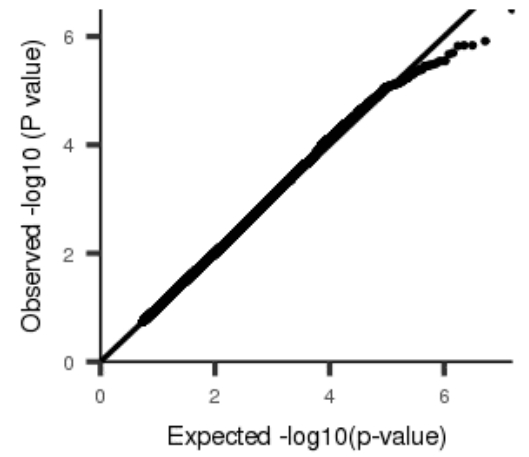

[back to list of plots](#)



Figure 2286: NETMAT edge (100) 1130

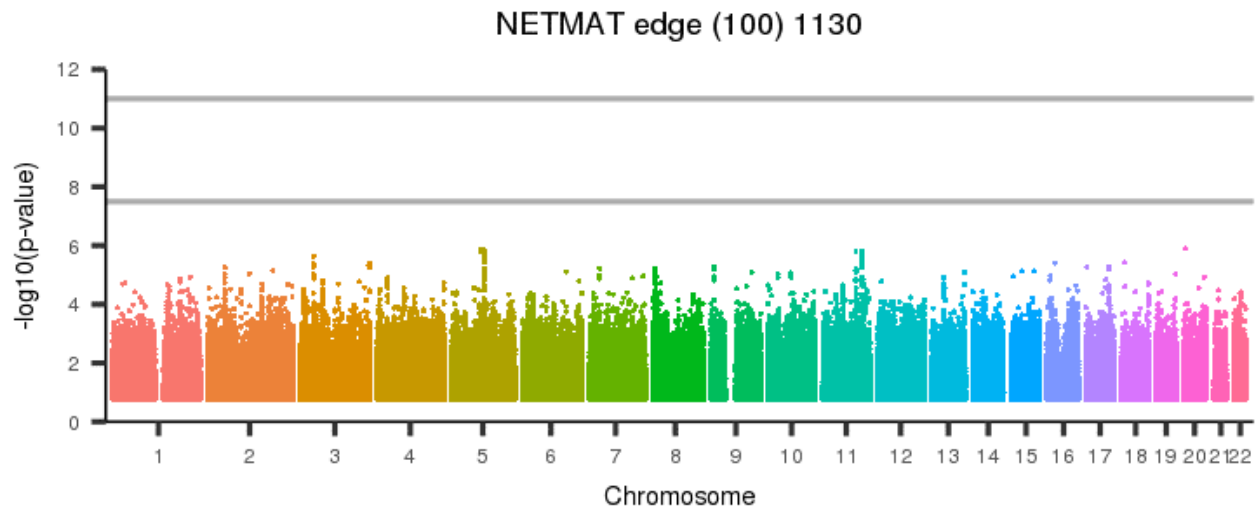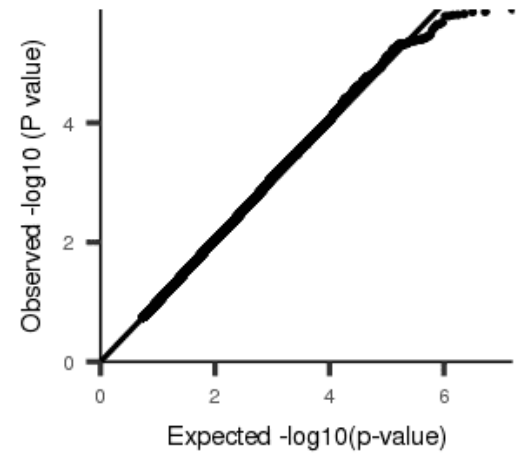

[back to list of plots](#)

Figure 2287: NETMAT edge (100) 1131

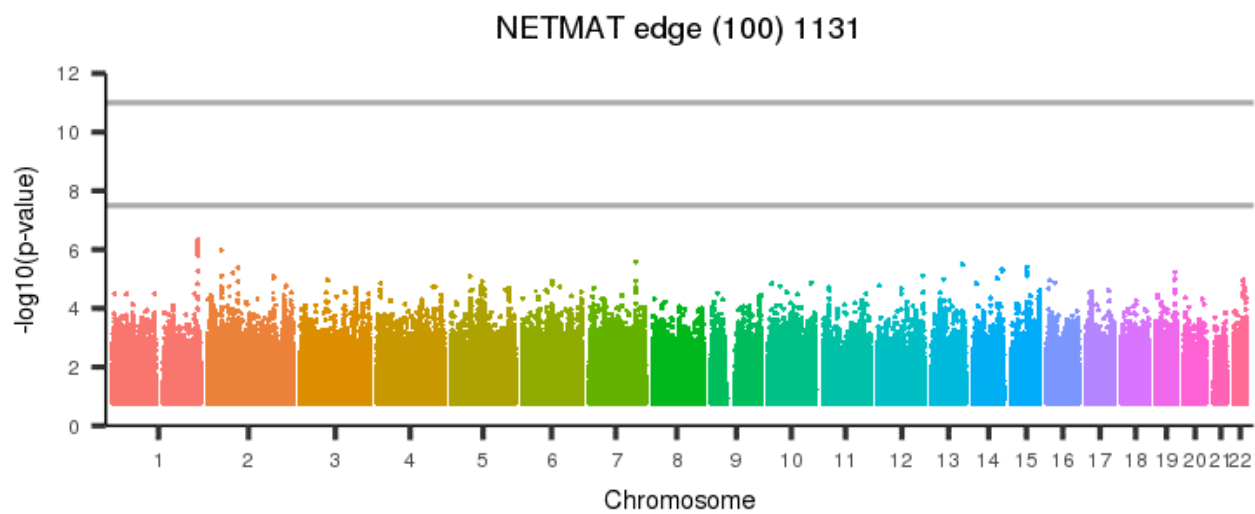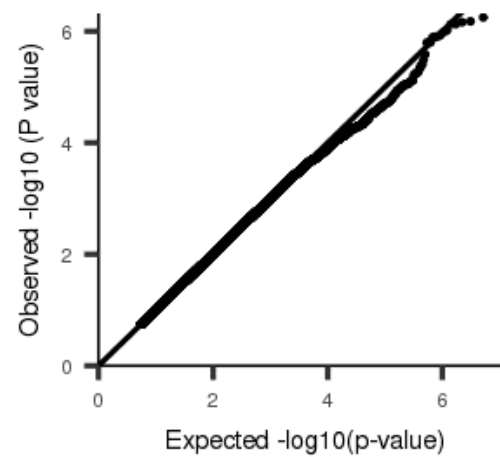

[back to list of plots](#)

Figure 2288: NETMAT edge (100) 1132

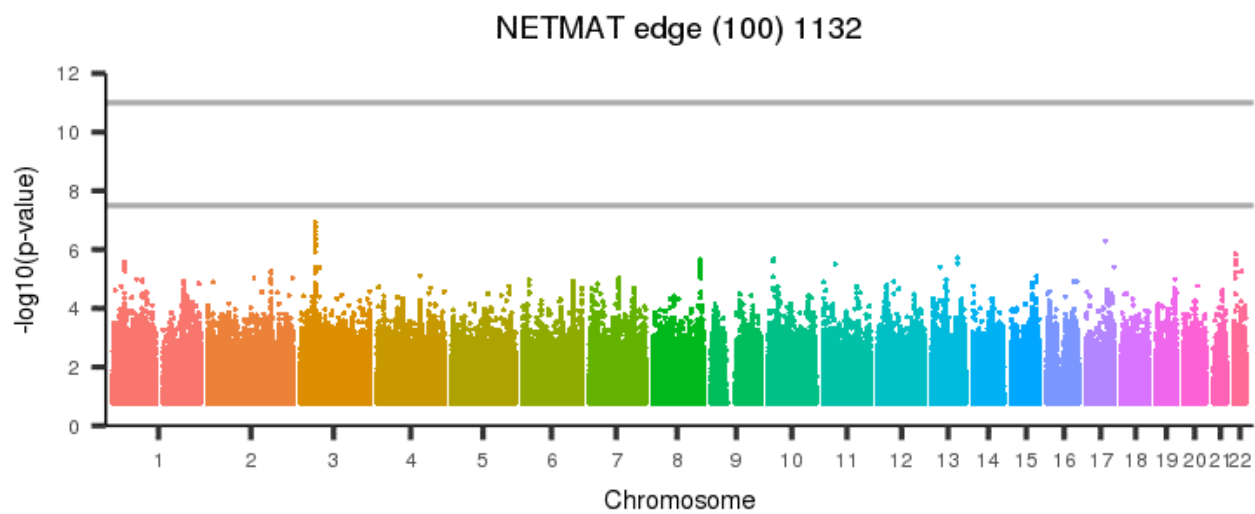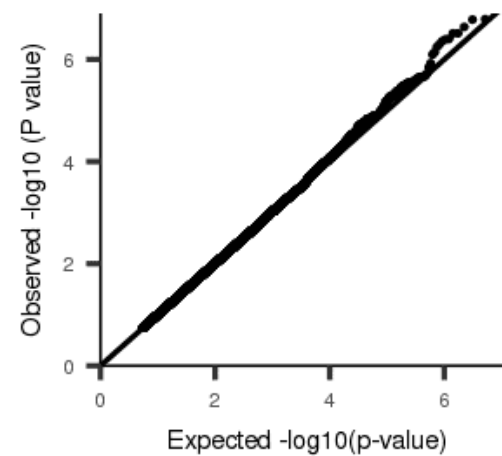

[back to list of plots](#)

Figure 2289: NETMAT edge (100) 1133

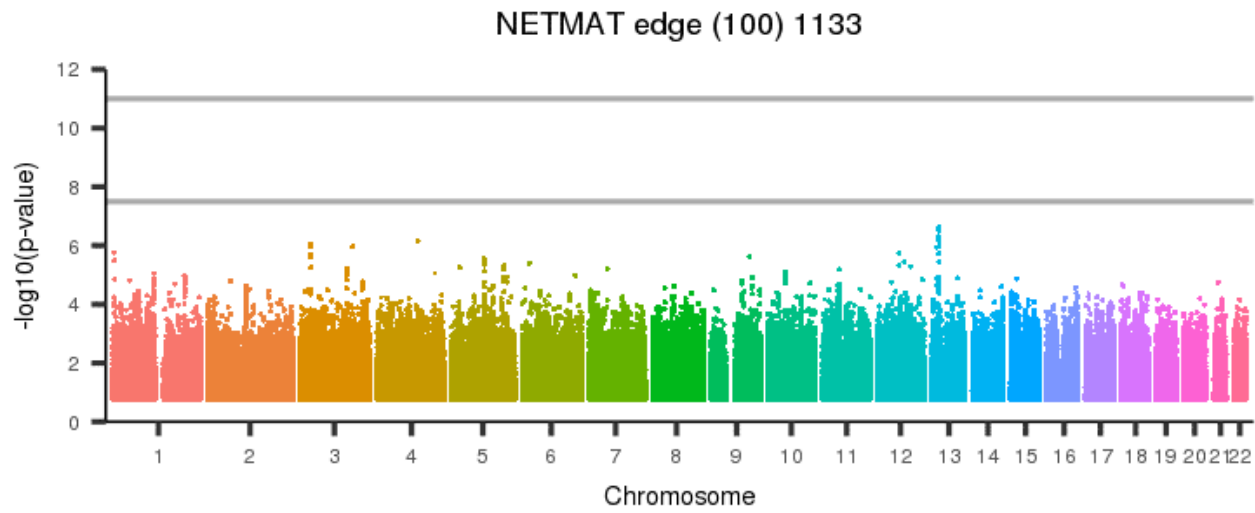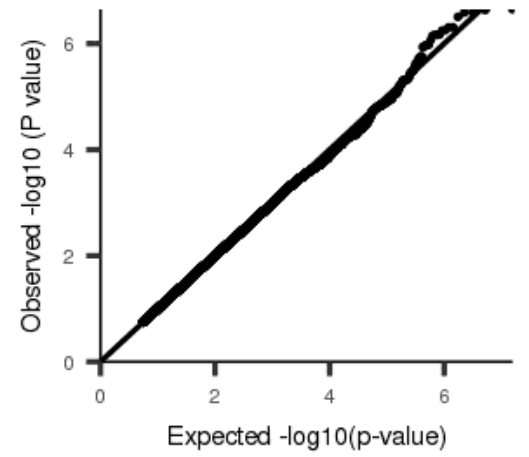

[back to list of plots](#)

Figure 2290: NETMAT edge (100) 1134

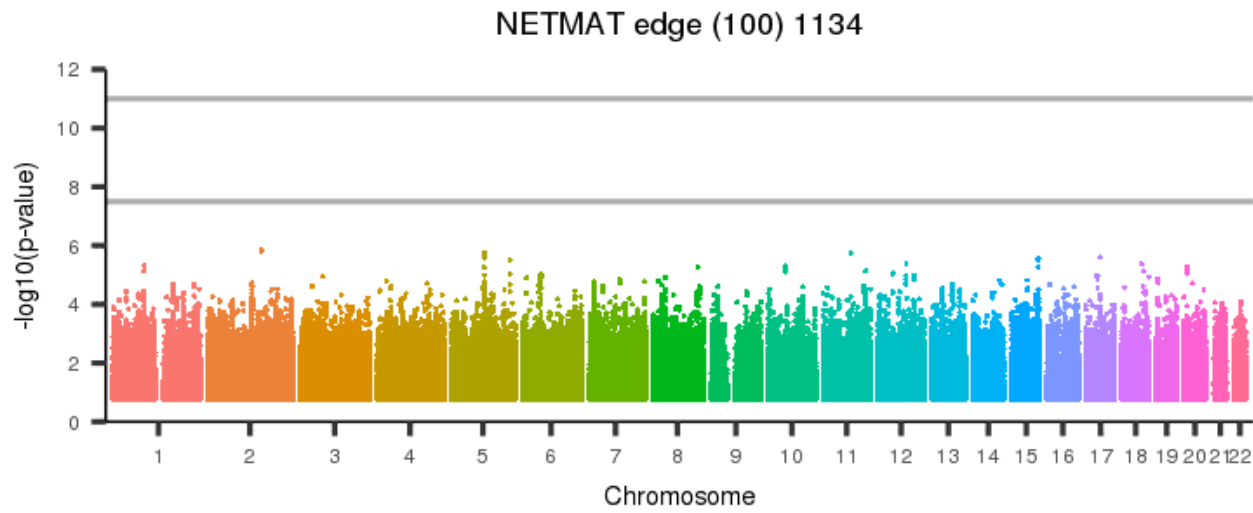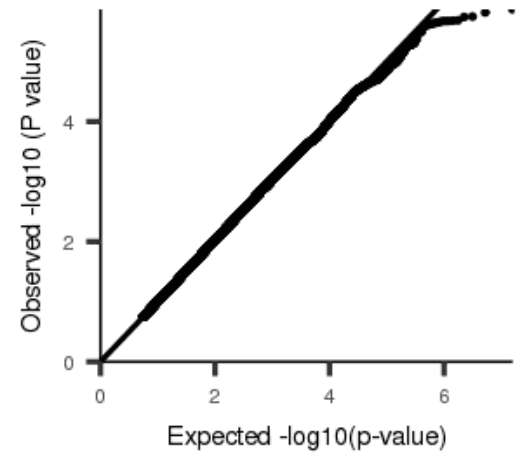

[back to list of plots](#)

Figure 2291: NETMAT edge (100) 1135

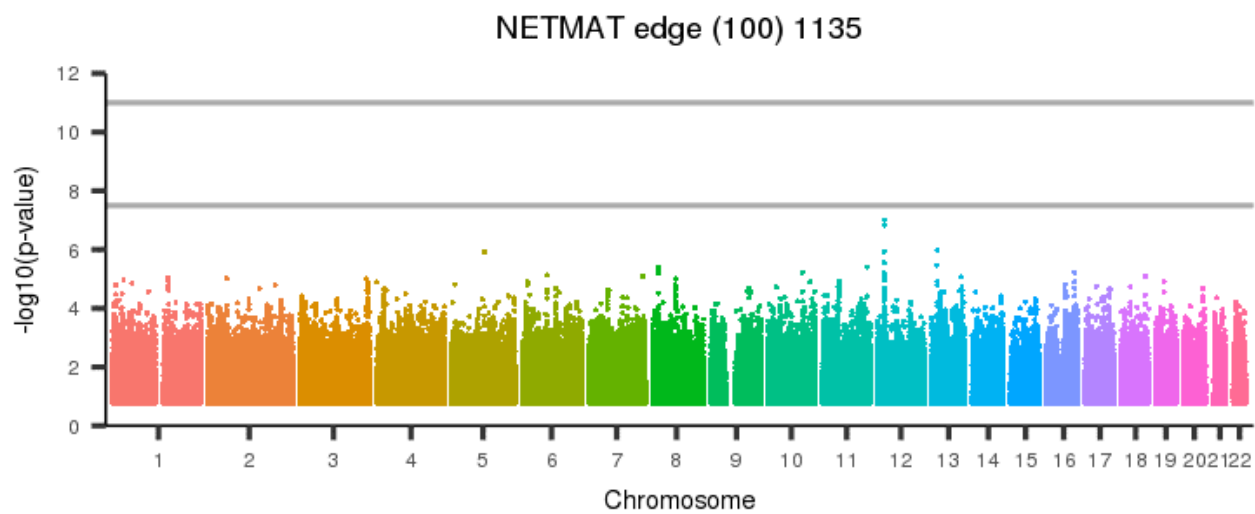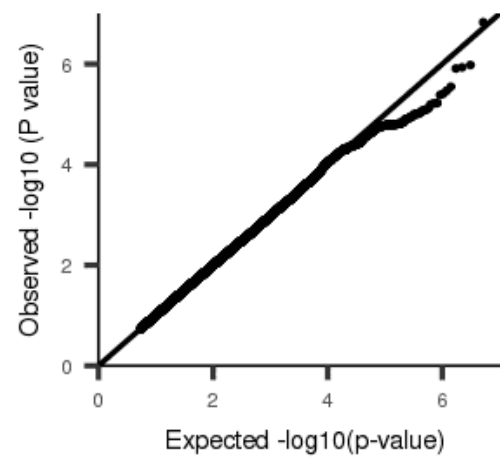

[back to list of plots](#)

Figure 2292: NETMAT edge (100) 1136

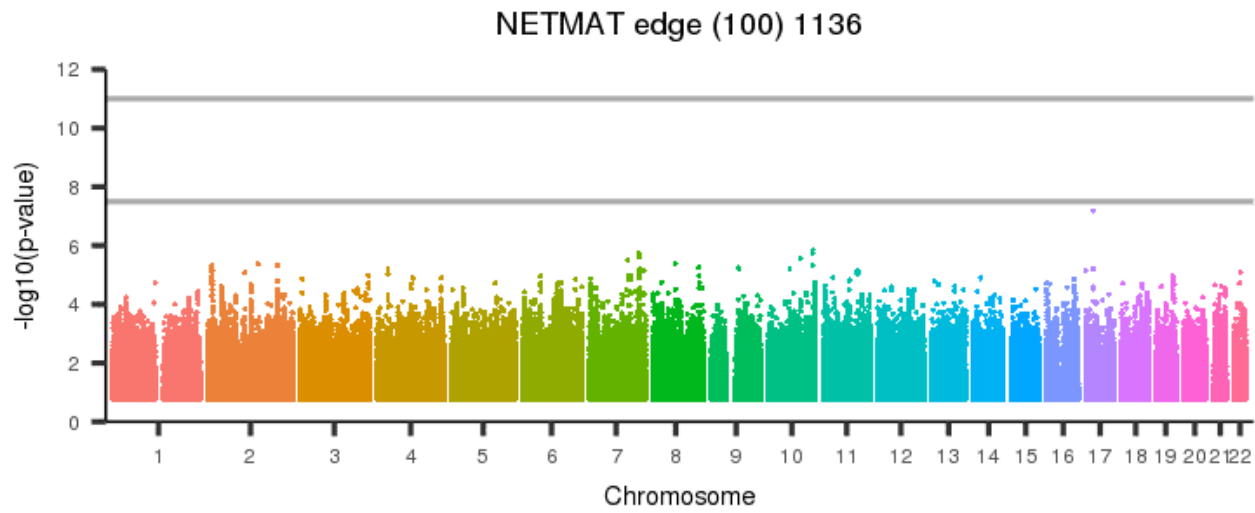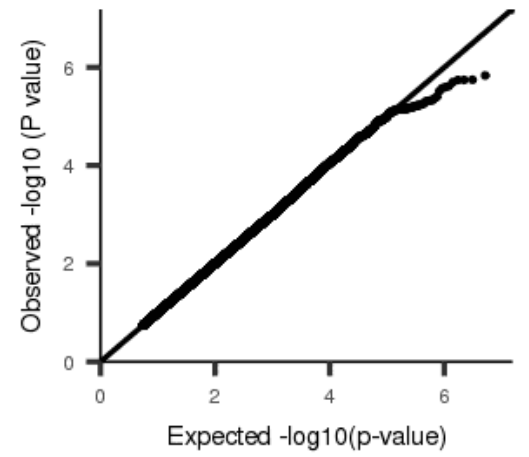

[back to list of plots](#)

Figure 2293: NETMAT edge (100) 1137

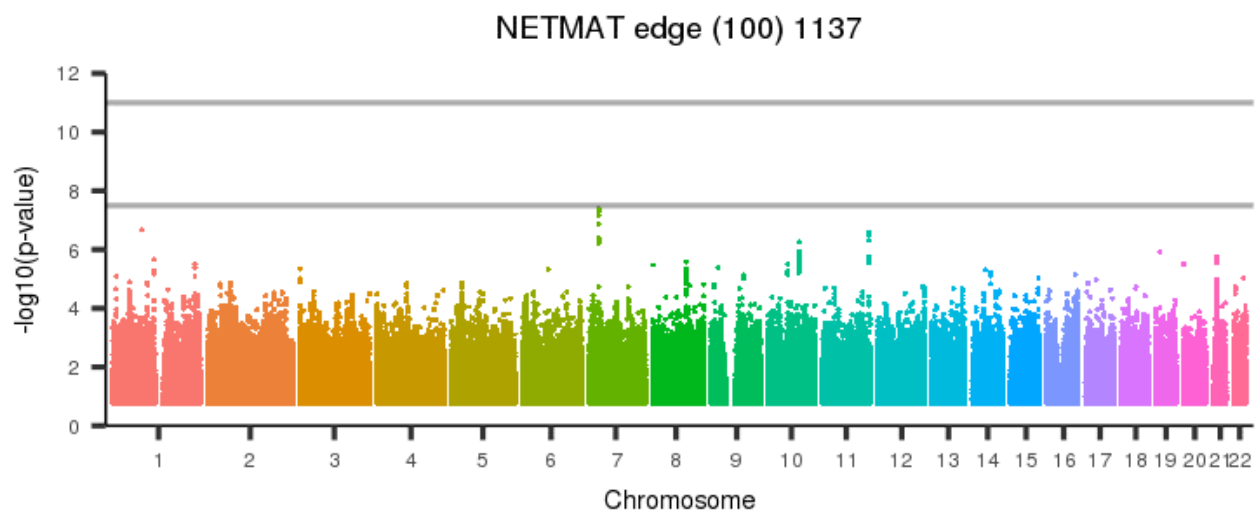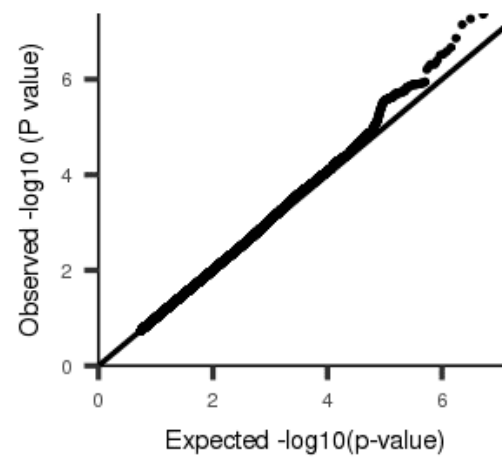

[back to list of plots](#)



Figure 2294: NETMAT edge (100) 1138

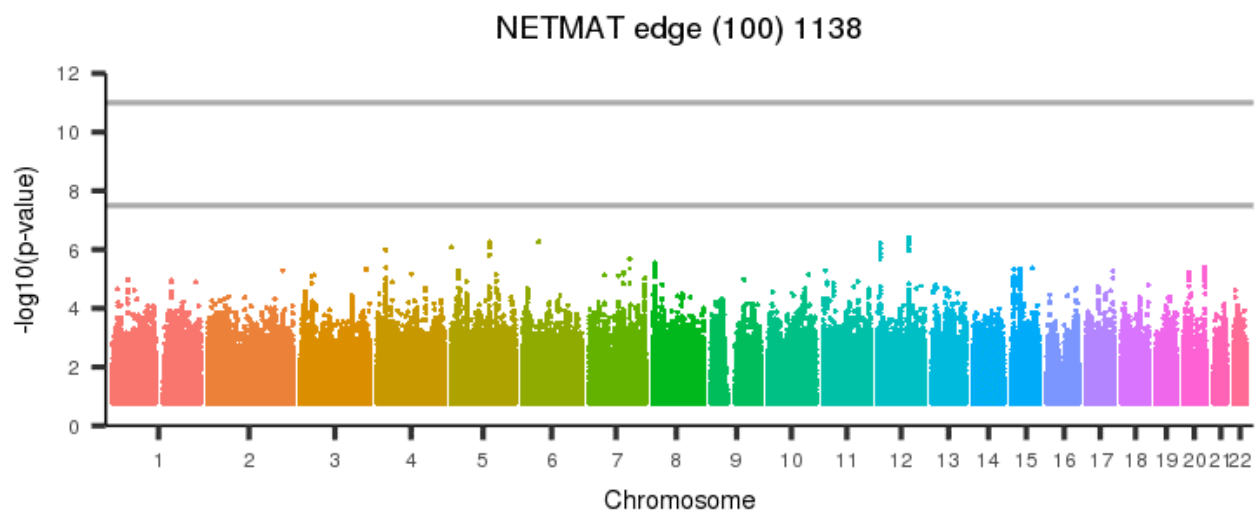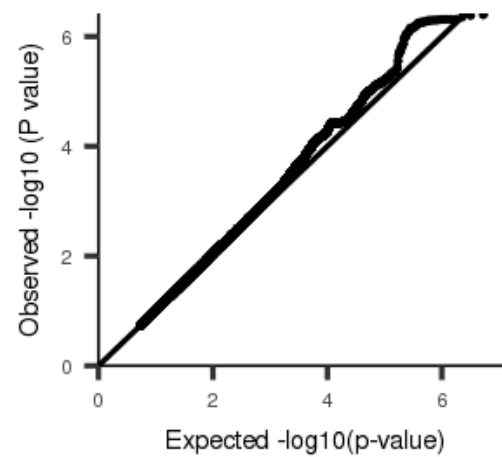

[back to list of plots](#)

Figure 2295: NETMAT edge (100) 1139

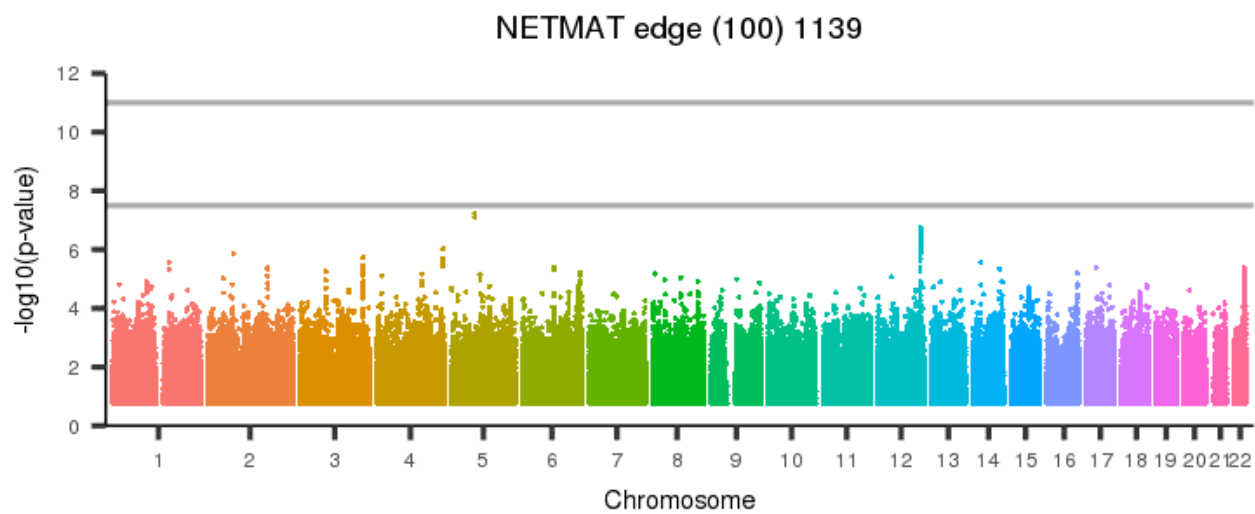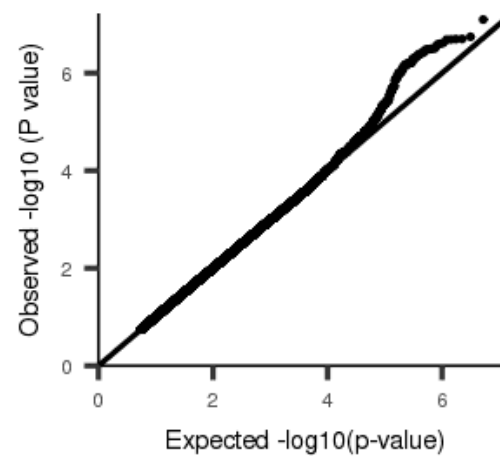

[back to list of plots](#)

Figure 2296: NETMAT edge (100) 1140

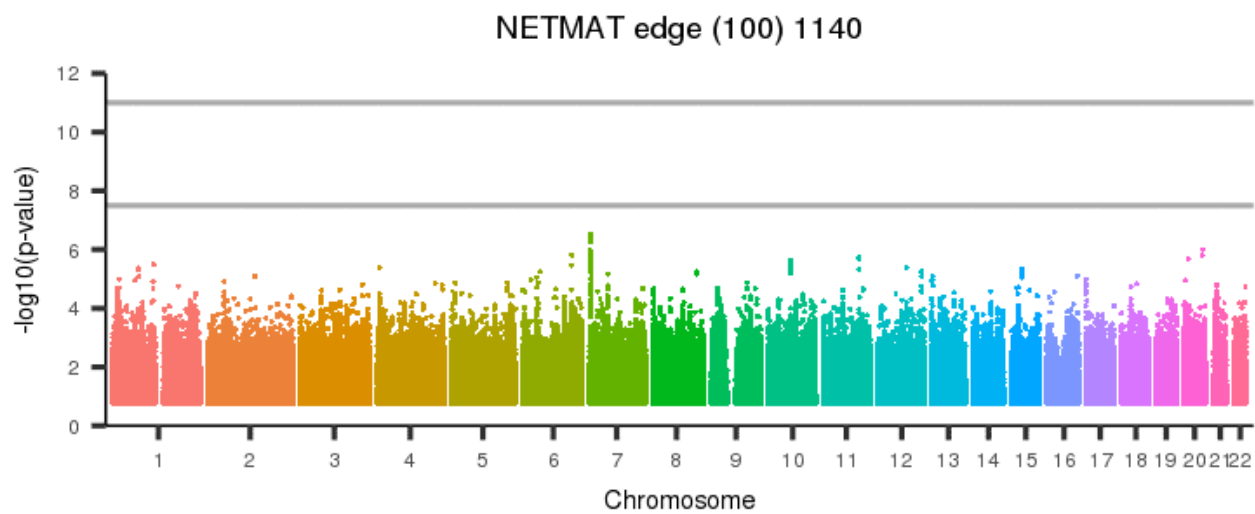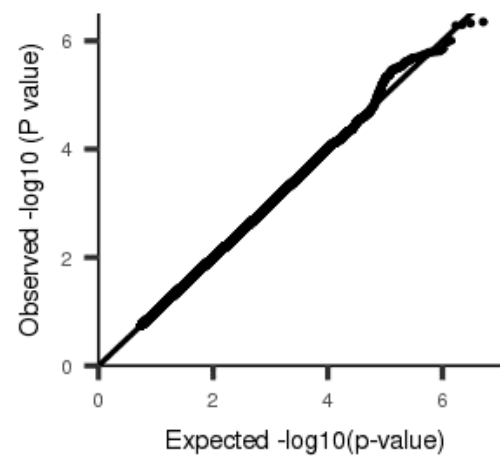

[back to list of plots](#)

Figure 2297: NETMAT edge (100) 1141

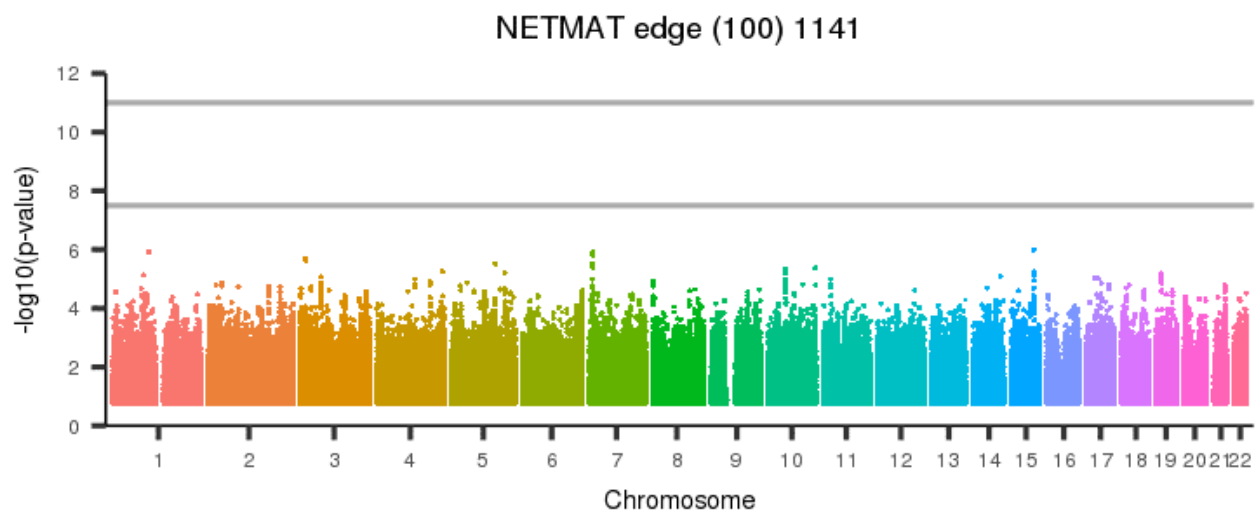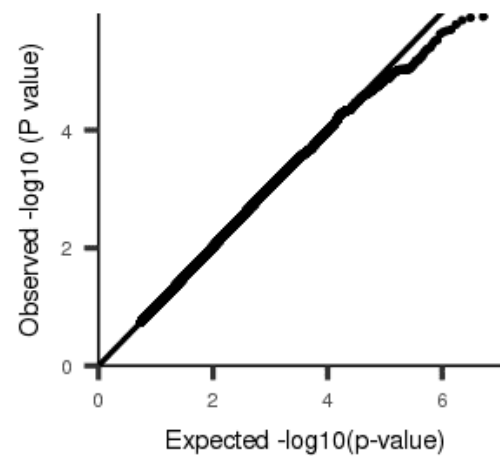

[back to list of plots](#)

Figure 2298: NETMAT edge (100) 1142

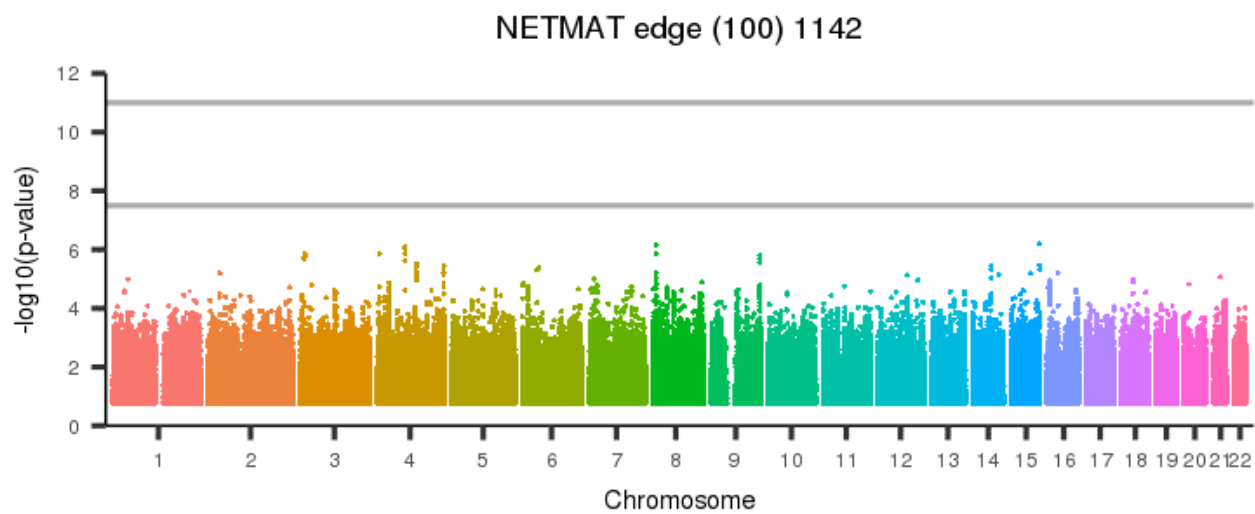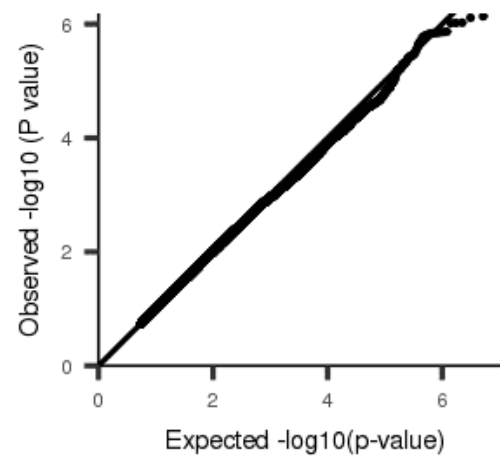

[back to list of plots](#)

Figure 2299: NETMAT edge (100) 1143

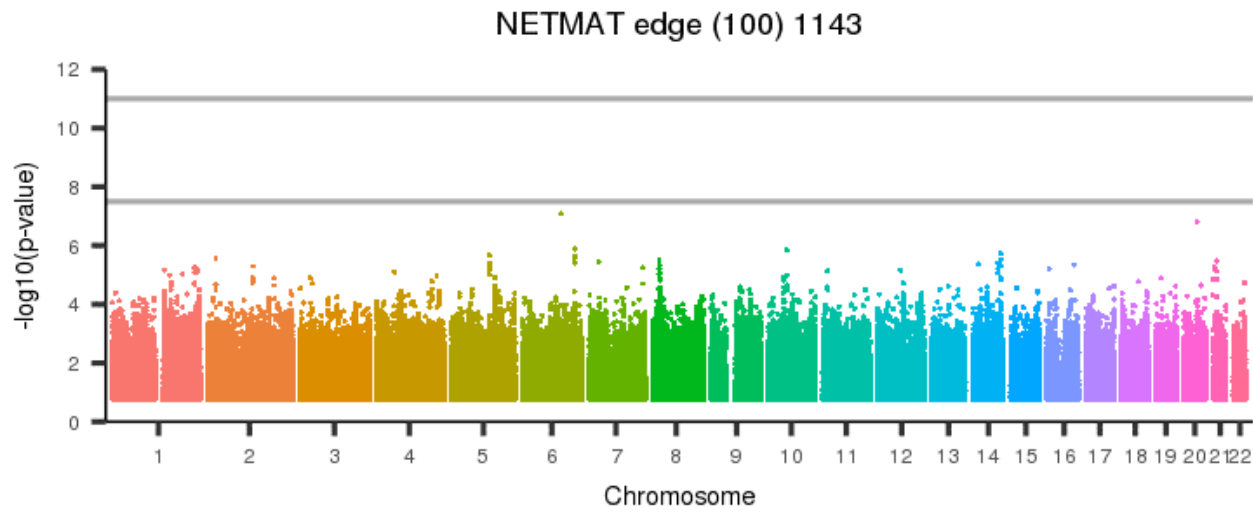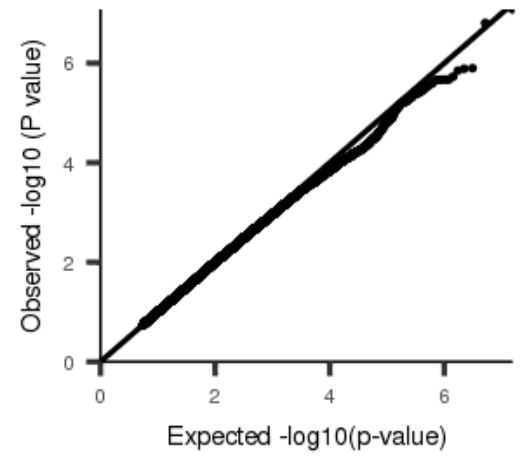

[back to list of plots](#)

Figure 2300: NETMAT edge (100) 1144

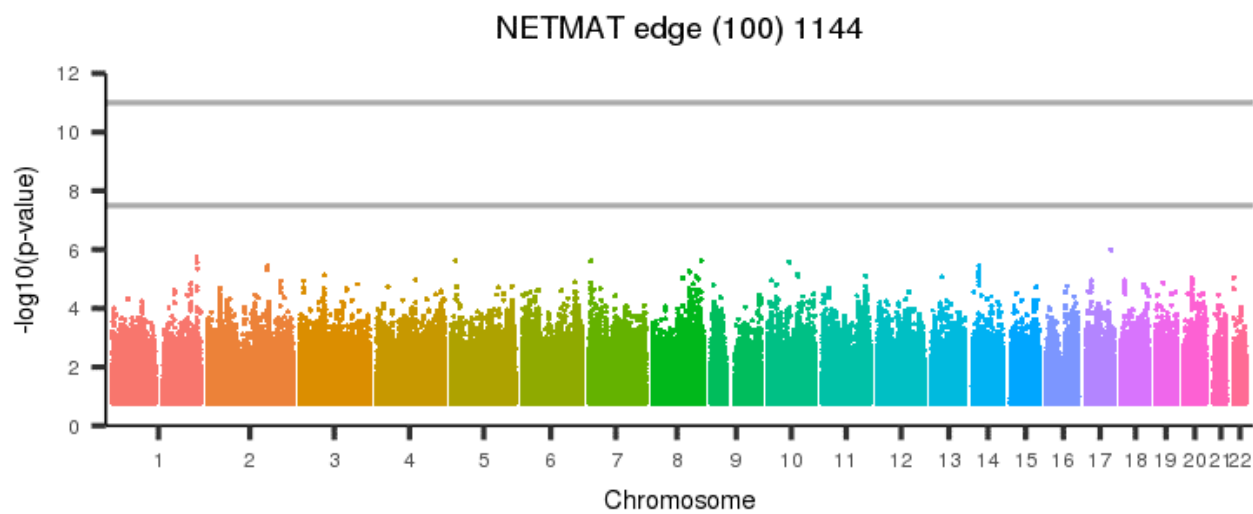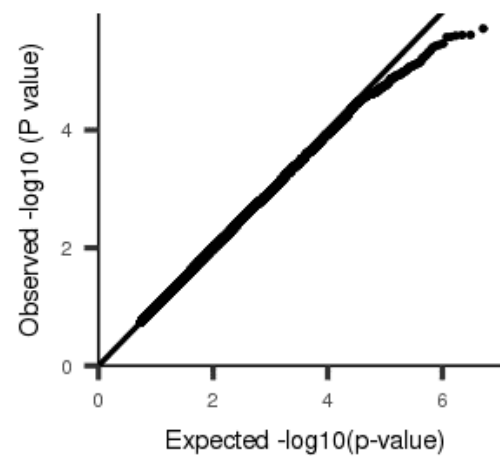

[back to list of plots](#)

Figure 2301: NETMAT edge (100) 1145

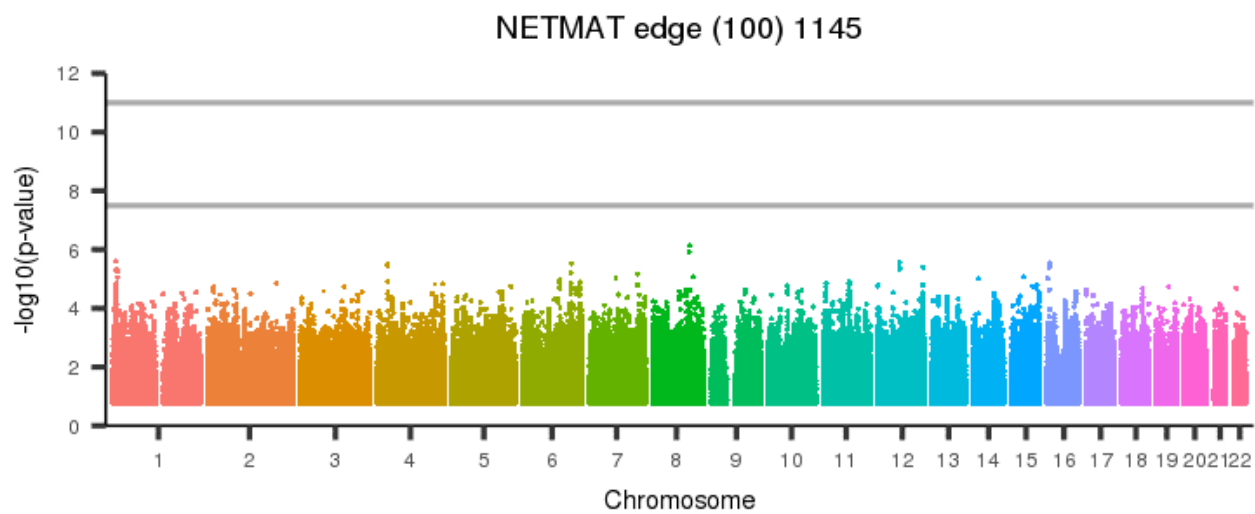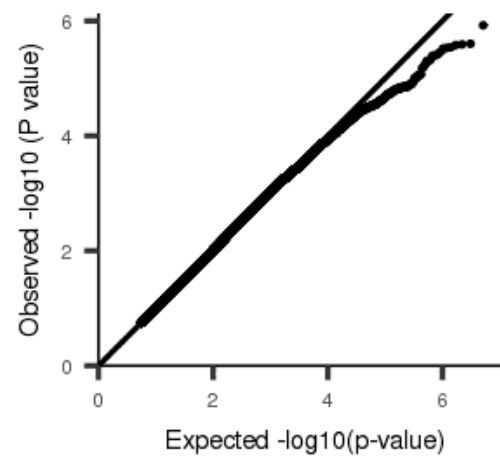

[back to list of plots](#)



Figure 2302: NETMAT edge (100) 1146

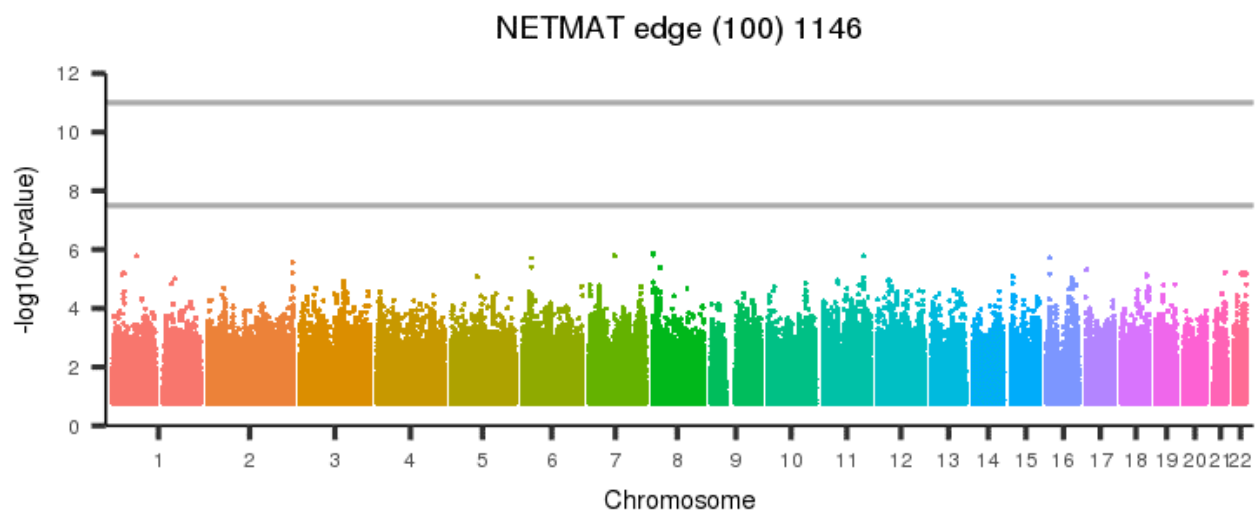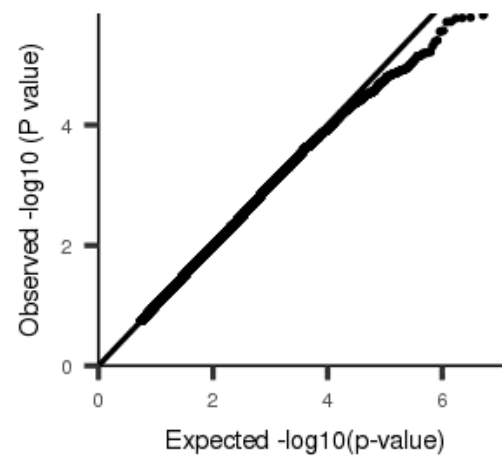

[back to list of plots](#)

Figure 2303: NETMAT edge (100) 1147

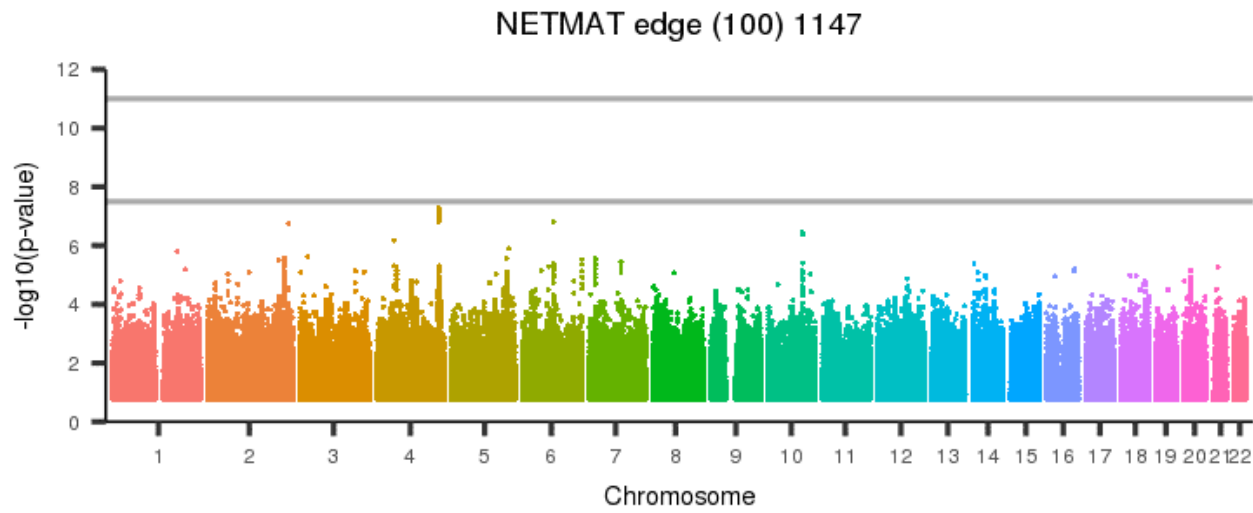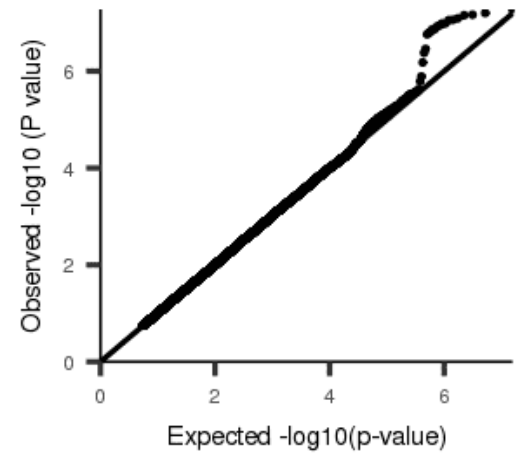

[back to list of plots](#)

Figure 2304: NETMAT edge (100) 1148

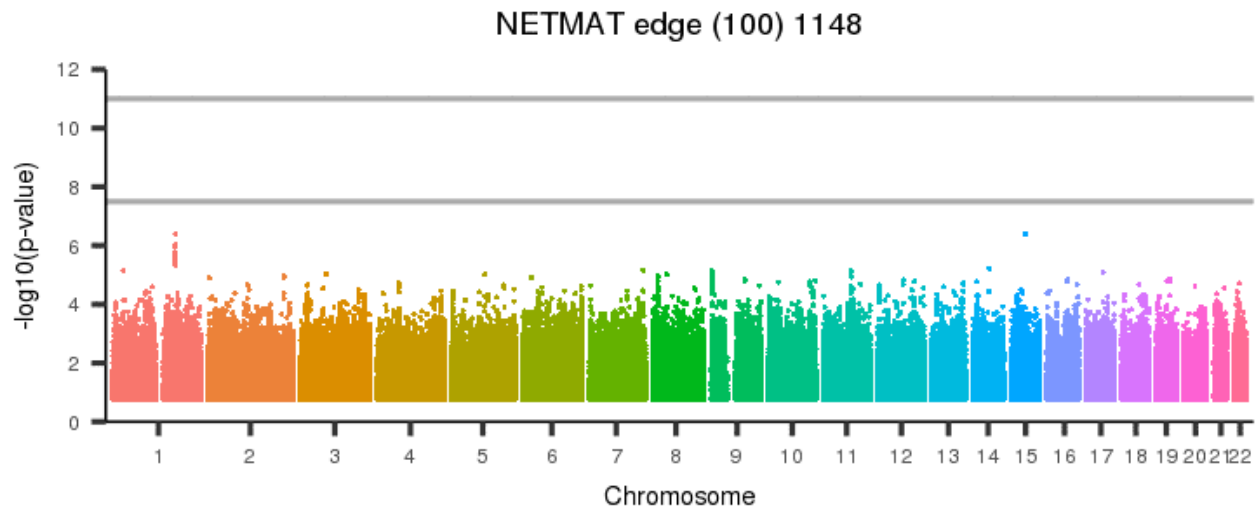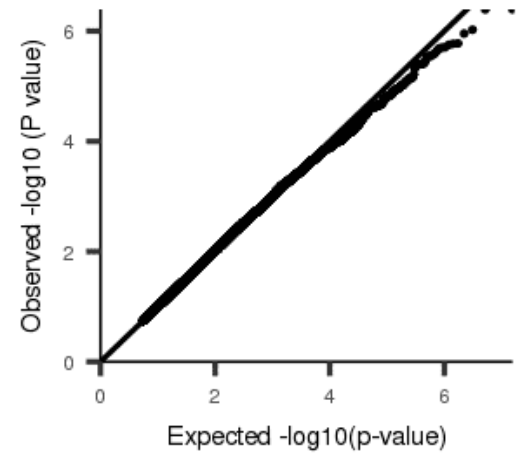

[back to list of plots](#)

Figure 2305: NETMAT edge (100) 1149

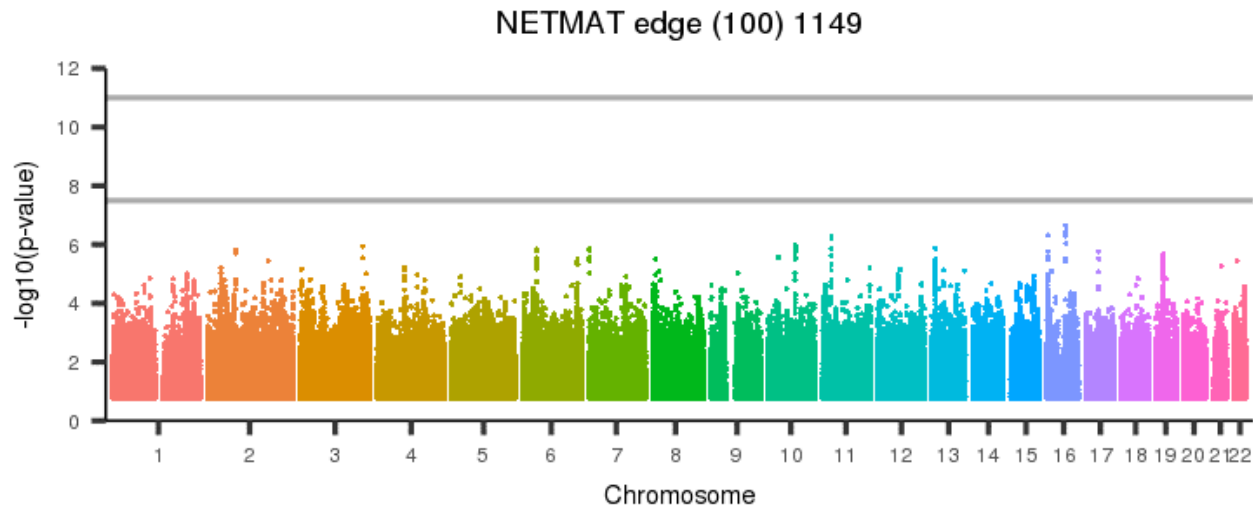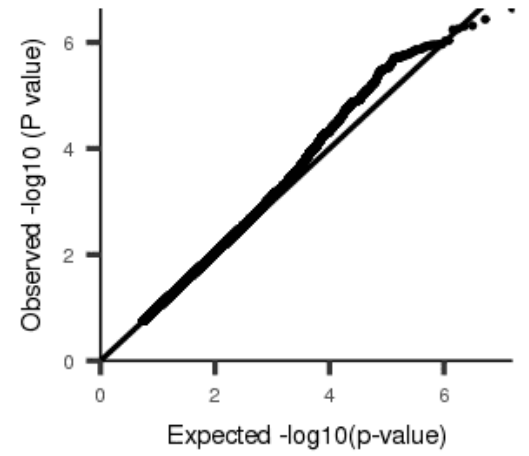

[back to list of plots](#)

Figure 2306: NETMAT edge (100) 1150

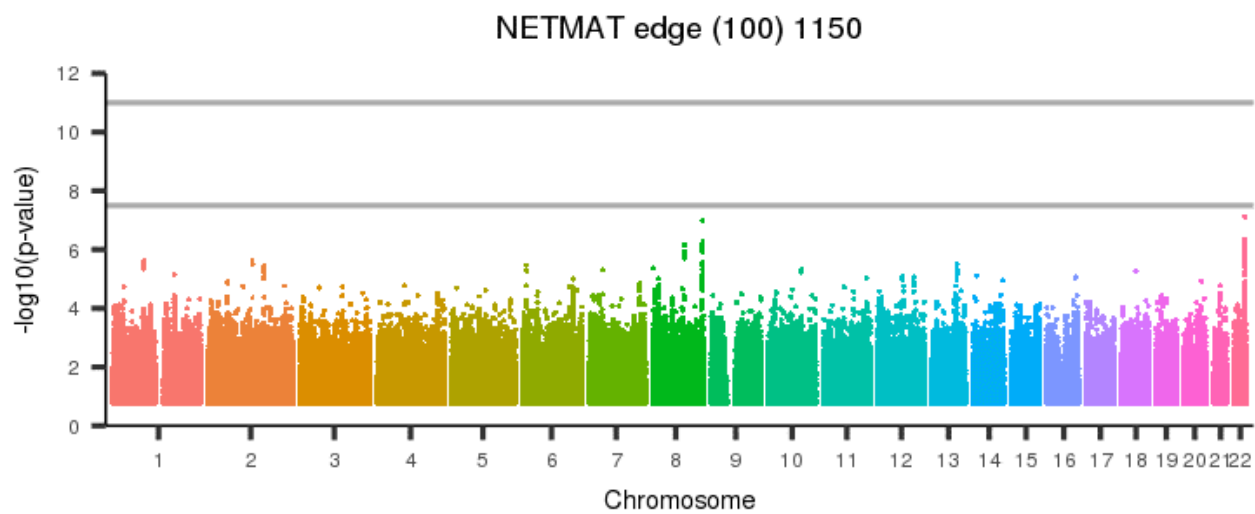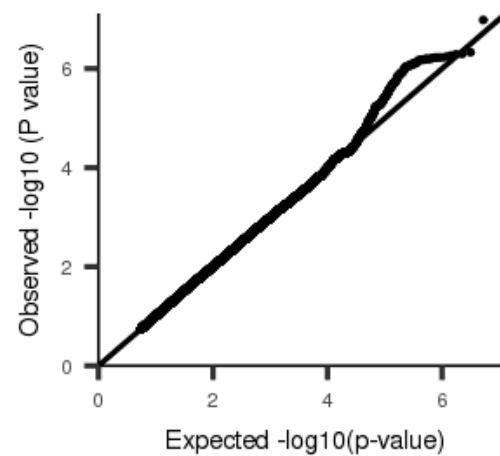

[back to list of plots](#)

Figure 2307: NETMAT edge (100) 1151

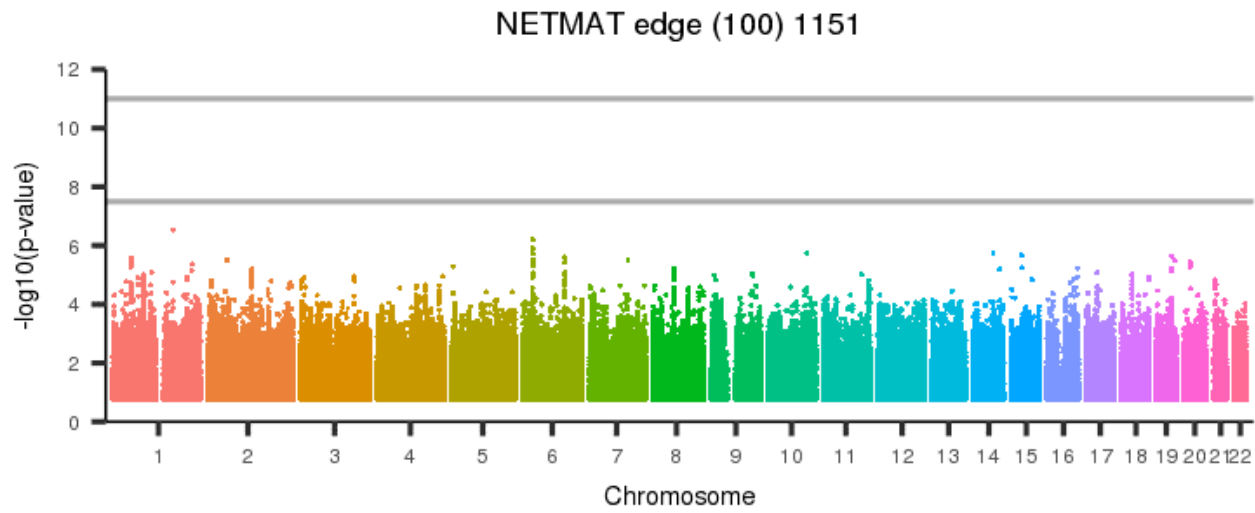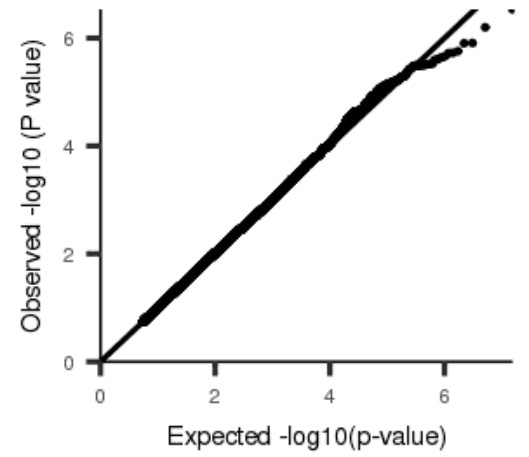

[back to list of plots](#)

Figure 2308: NETMAT edge (100) 1152

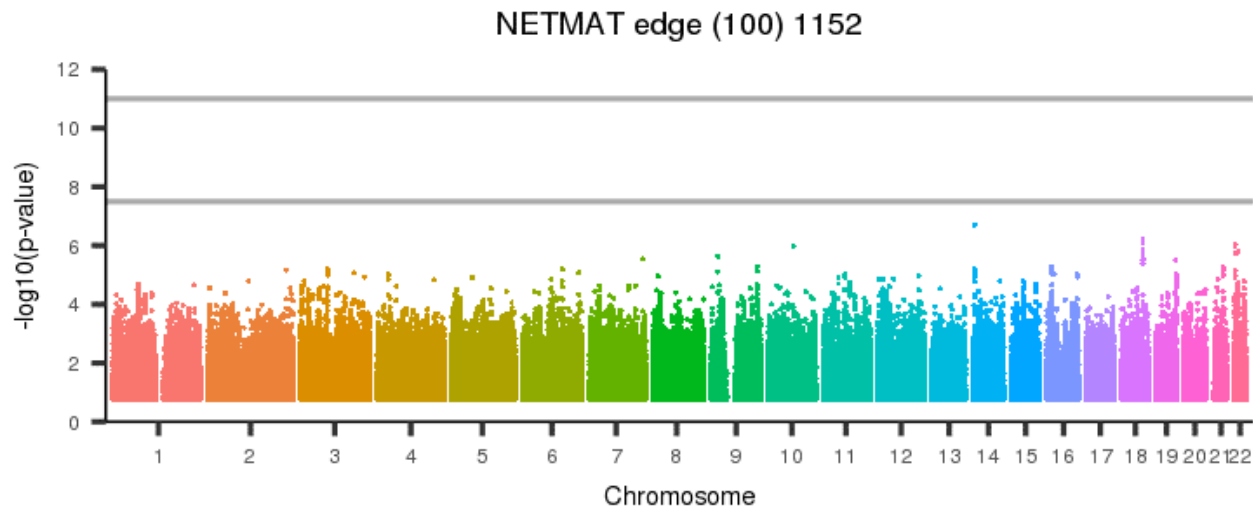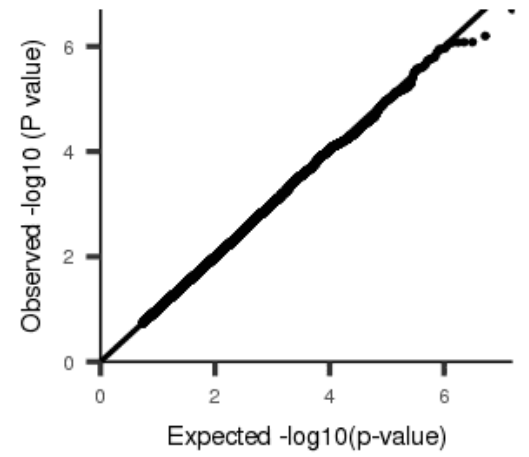

[back to list of plots](#)

Figure 2309: NETMAT edge (100) 1153

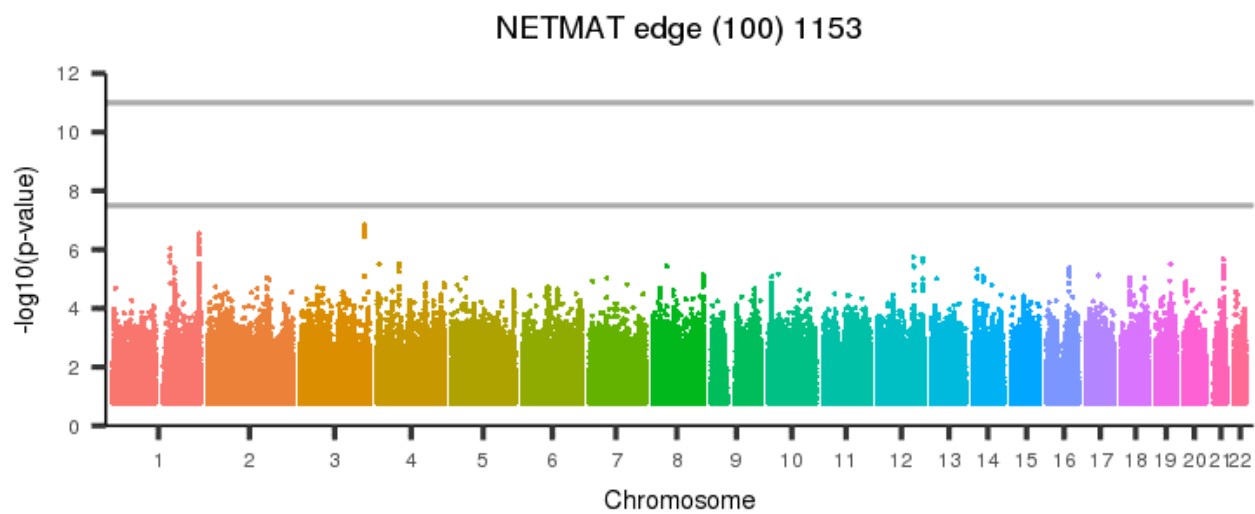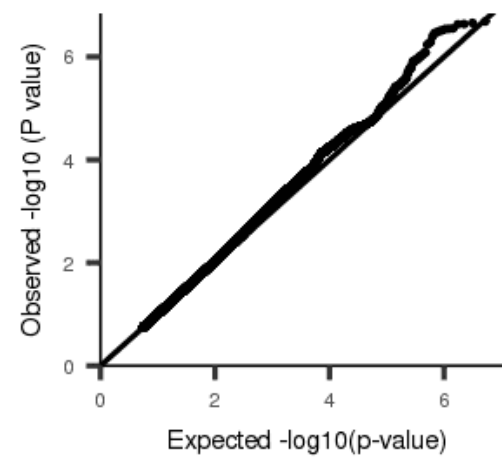

[back to list of plots](#)



Figure 2310: NETMAT edge (100) 1154

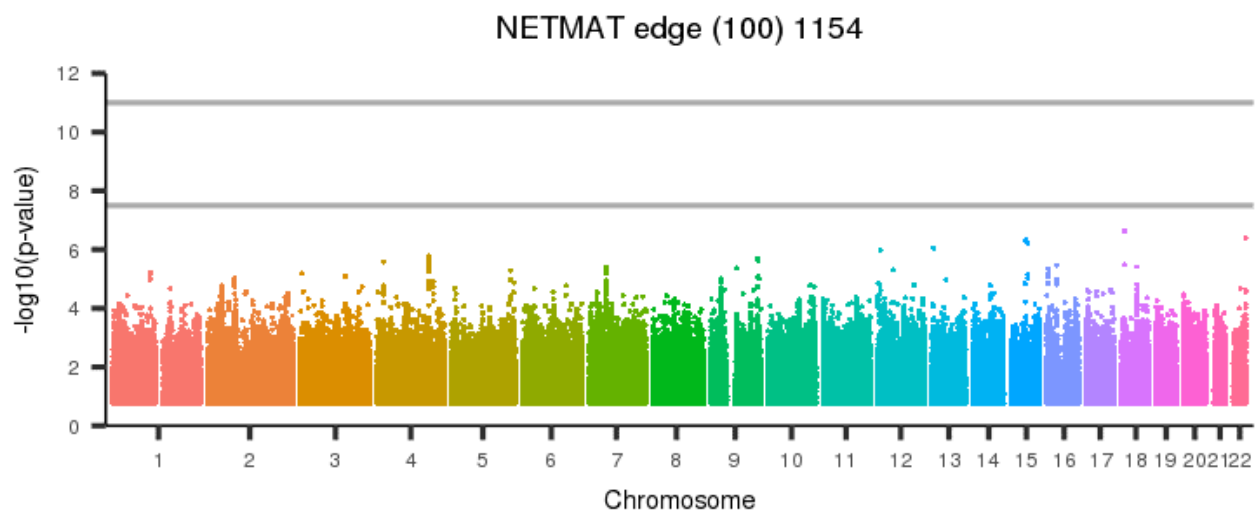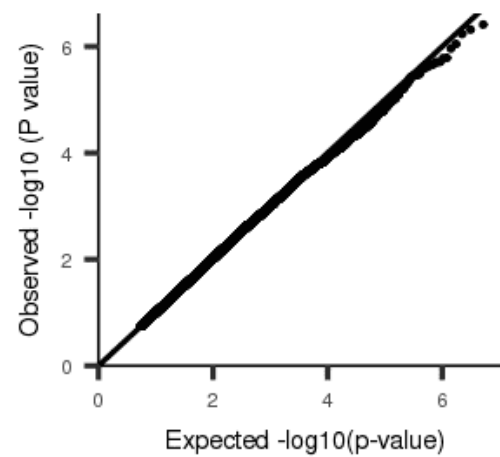

[back to list of plots](#)

Figure 2311: NETMAT edge (100) 1155

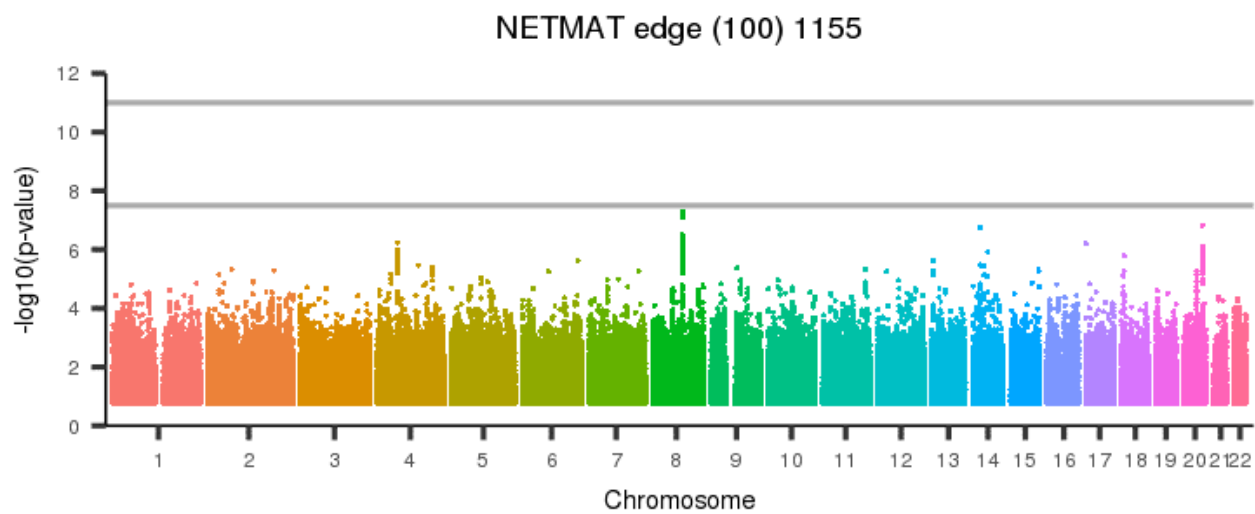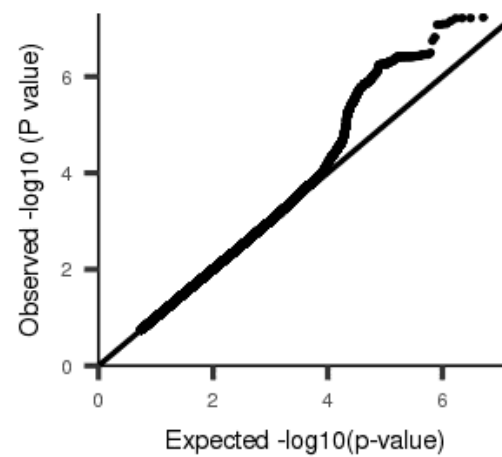

[back to list of plots](#)

Figure 2312: NETMAT edge (100) 1156

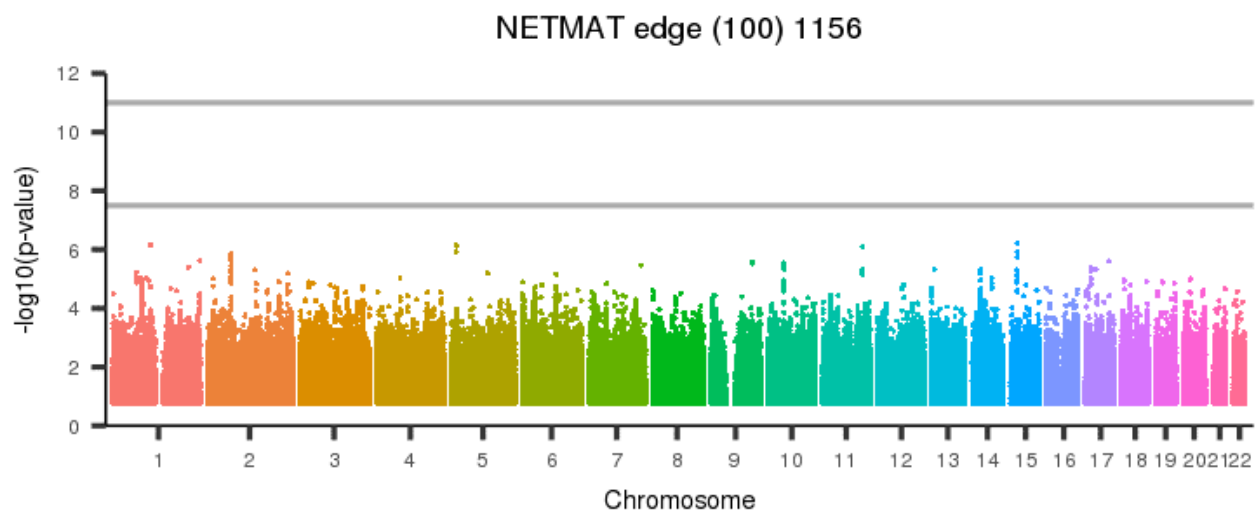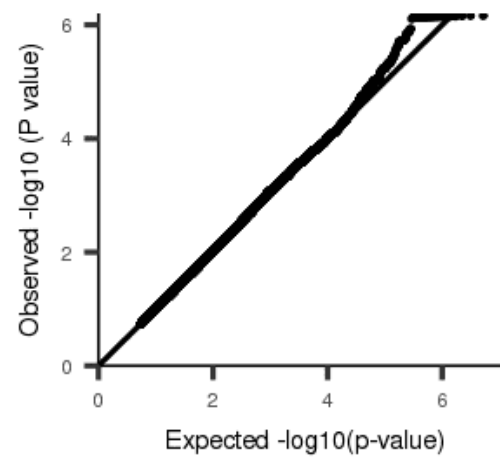

[back to list of plots](#)

Figure 2313: NETMAT edge (100) 1157

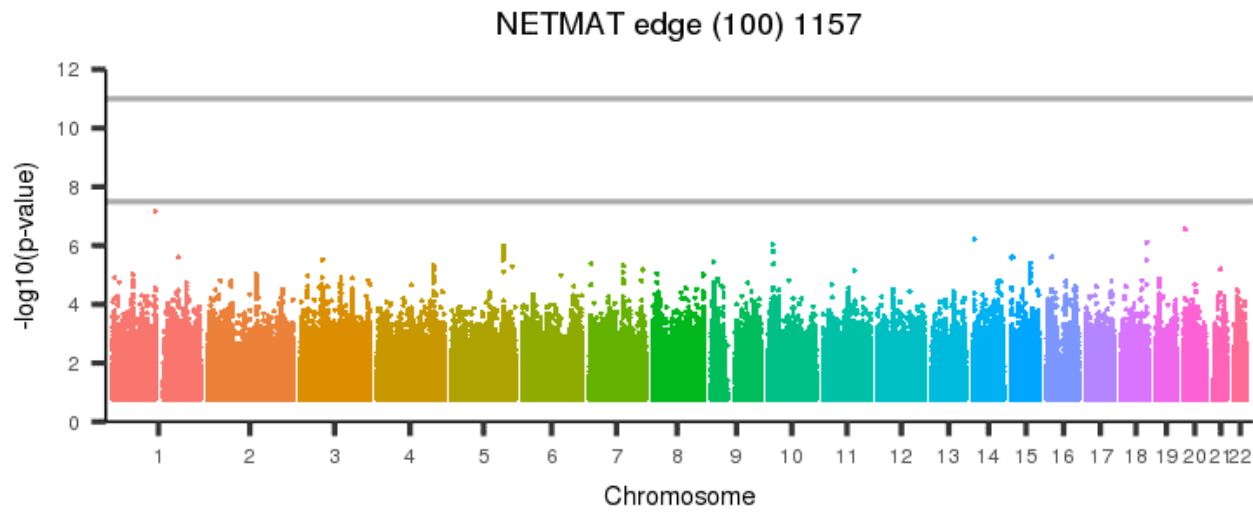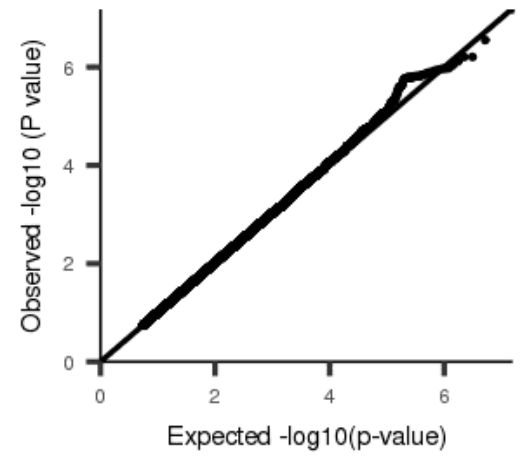

[back to list of plots](#)

Figure 2314: NETMAT edge (100) 1158

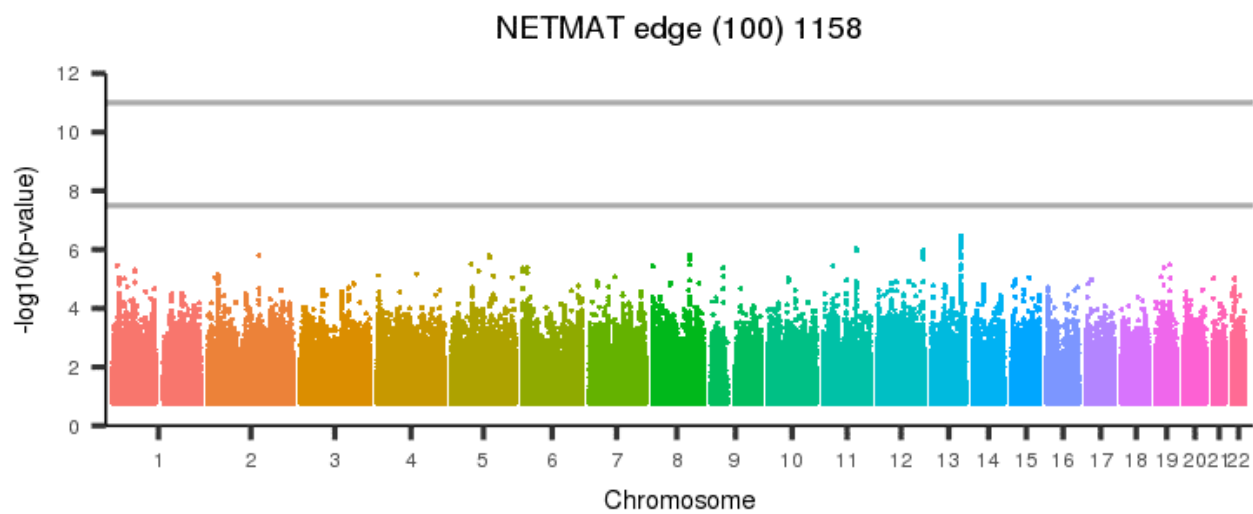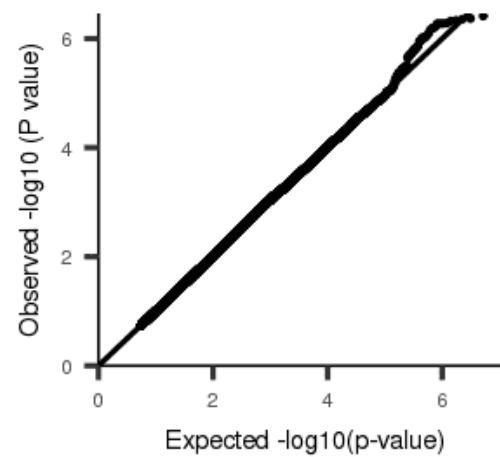

[back to list of plots](#)

Figure 2315: NETMAT edge (100) 1159

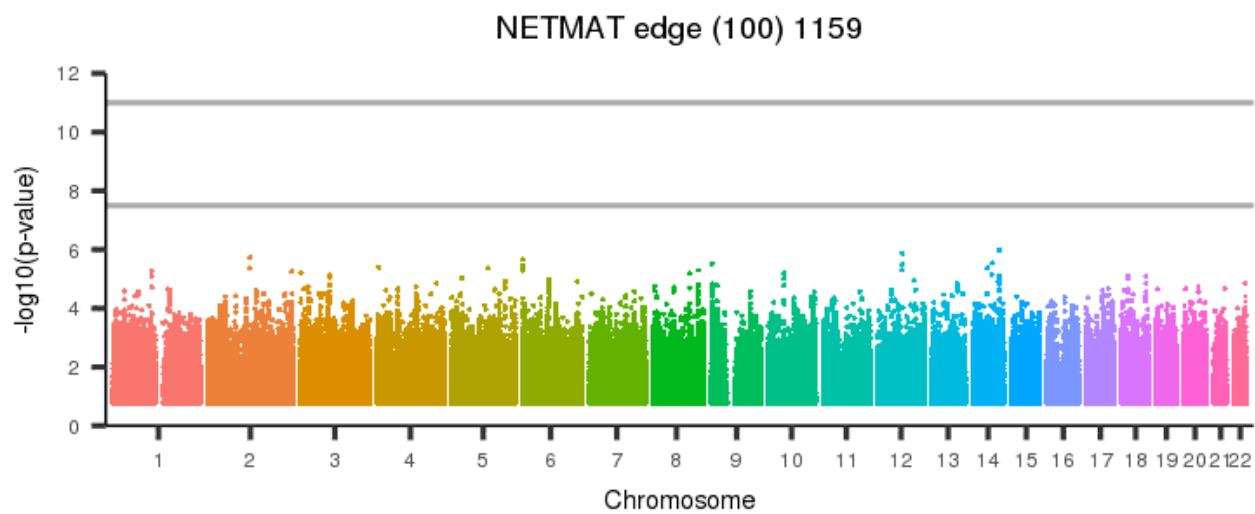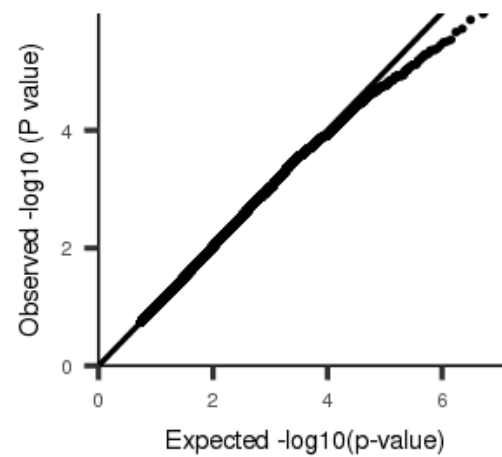

[back to list of plots](#)

Figure 2316: NETMAT edge (100) 1160

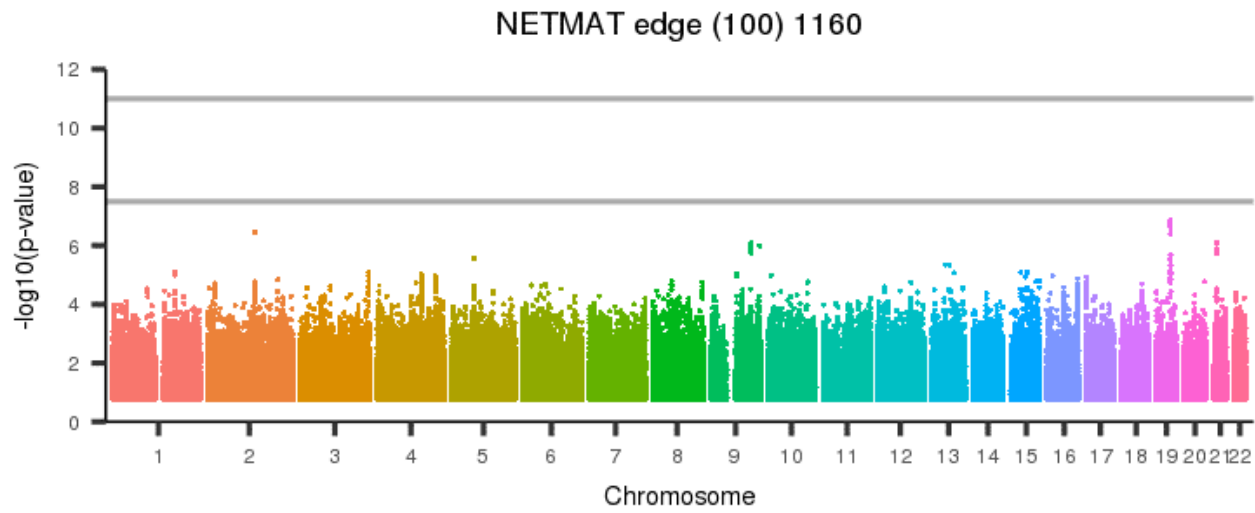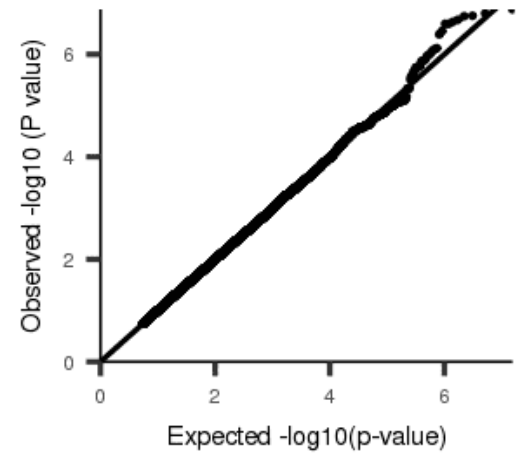

[back to list of plots](#)

Figure 2317: NETMAT edge (100) 1161

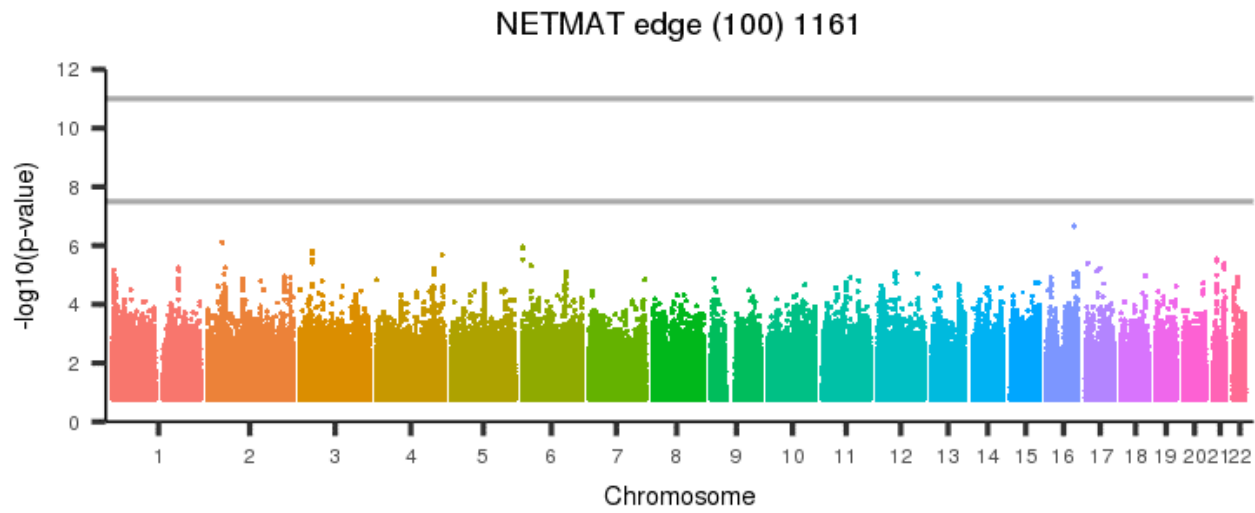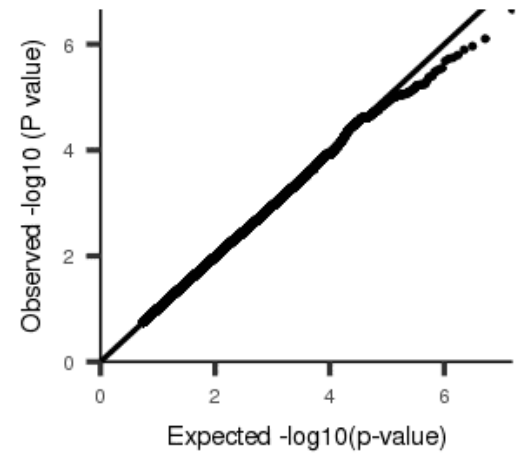

[back to list of plots](#)



Figure 2318: NETMAT edge (100) 1162

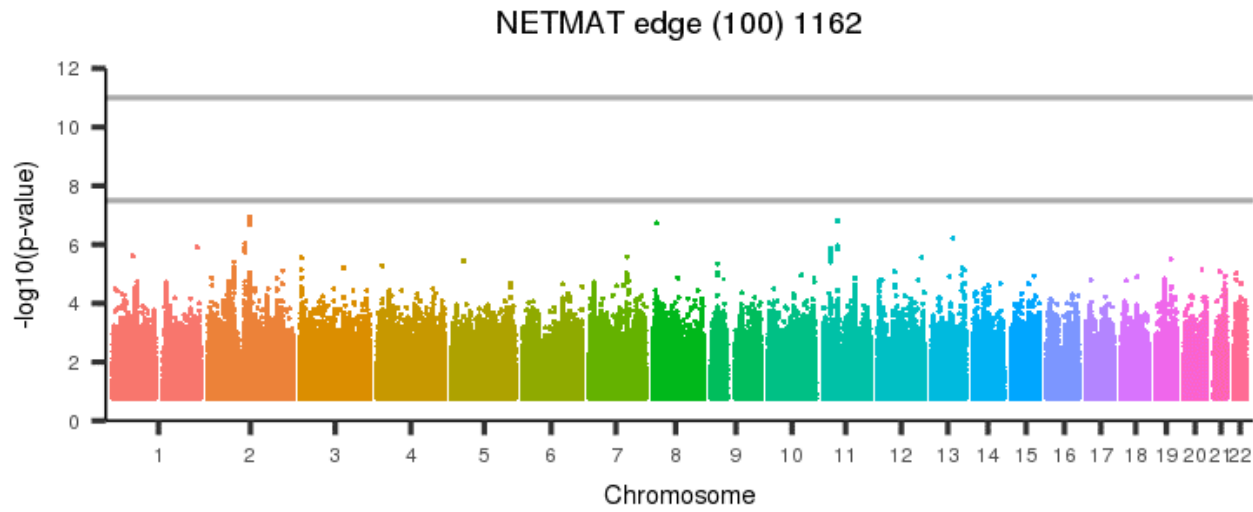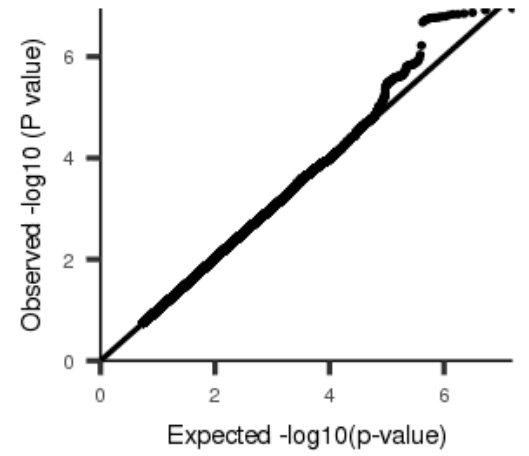

[back to list of plots](#)

Figure 2319: NETMAT edge (100) 1163

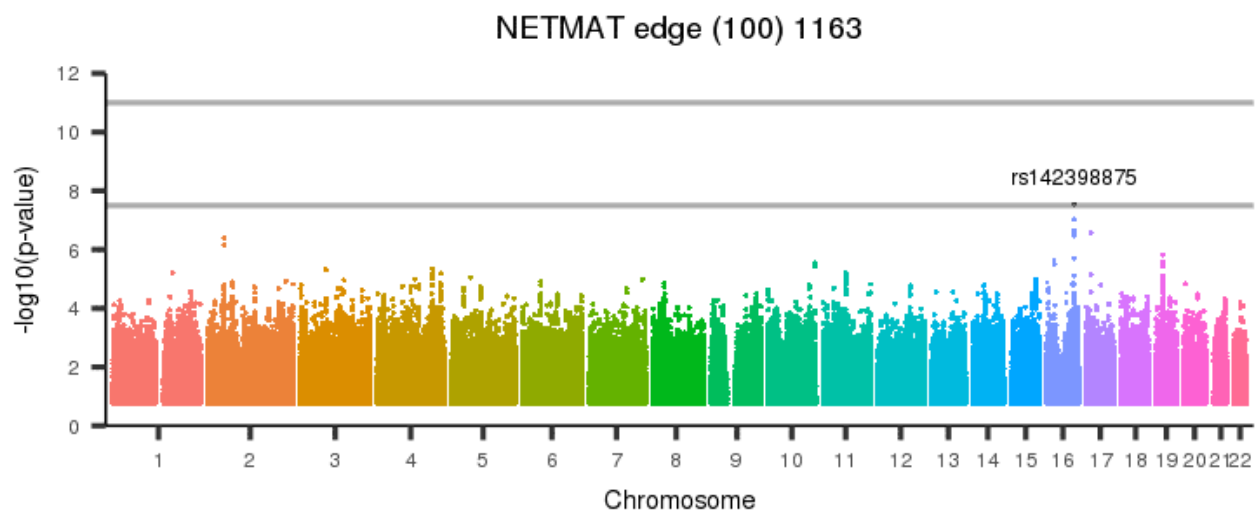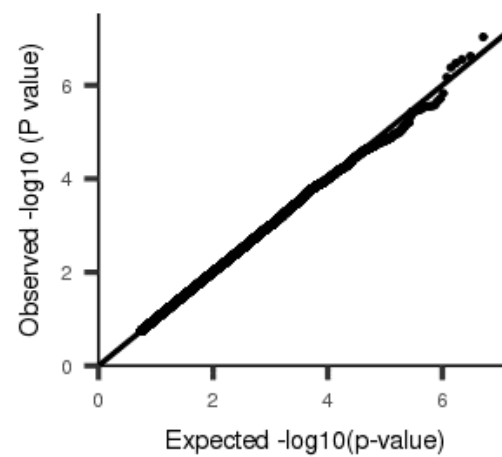

[back to list of plots](#)

Figure 2320: NETMAT edge (100) 1164

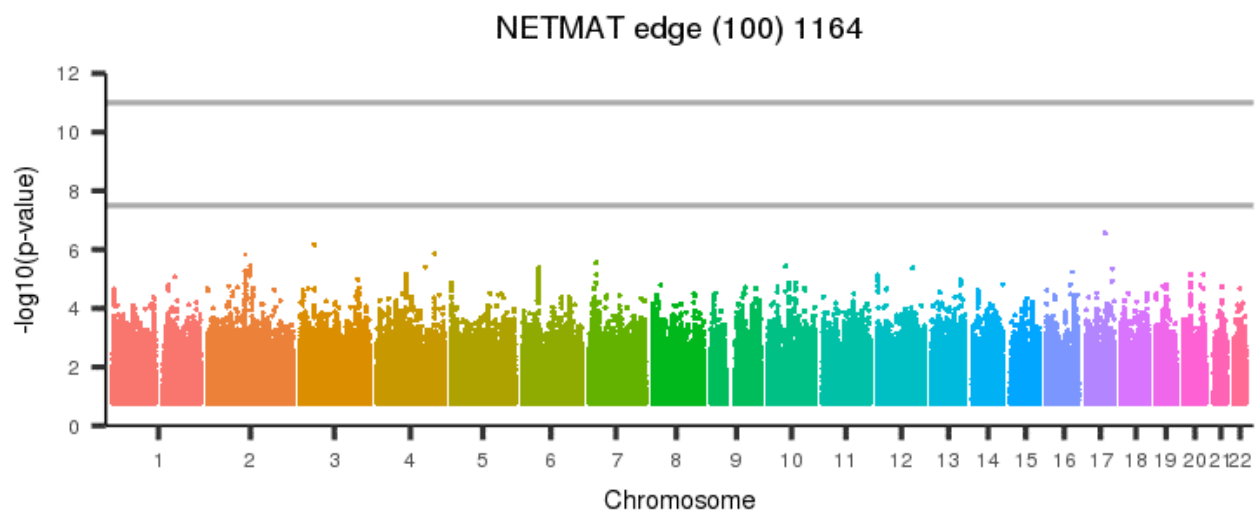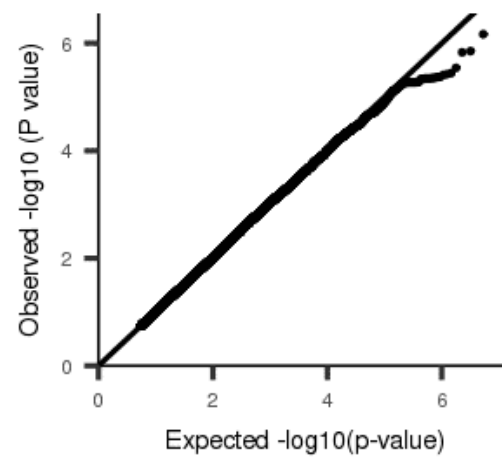

[back to list of plots](#)

Figure 2321: NETMAT edge (100) 1165

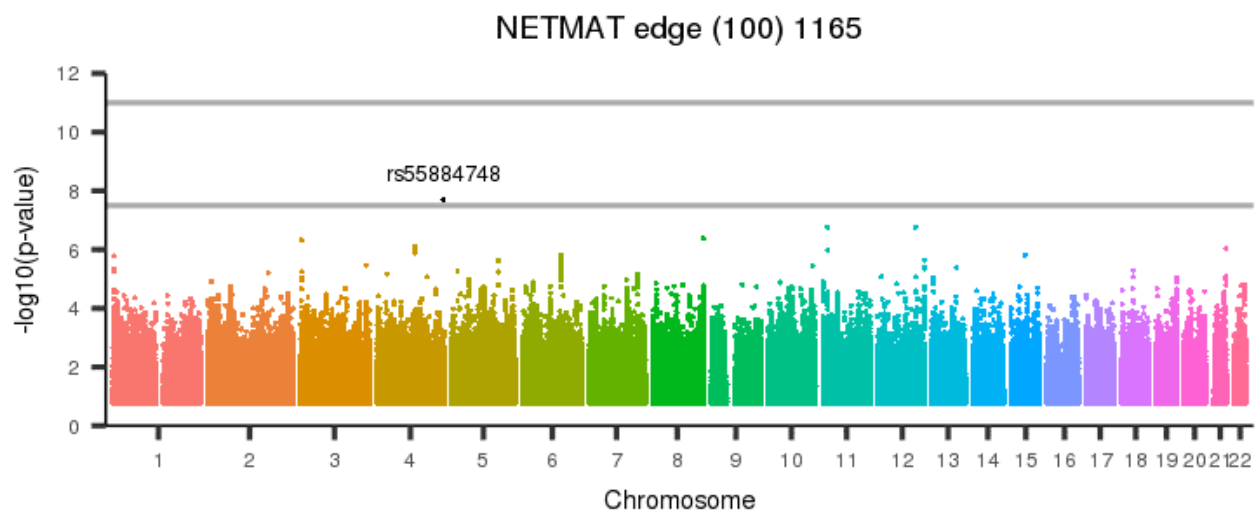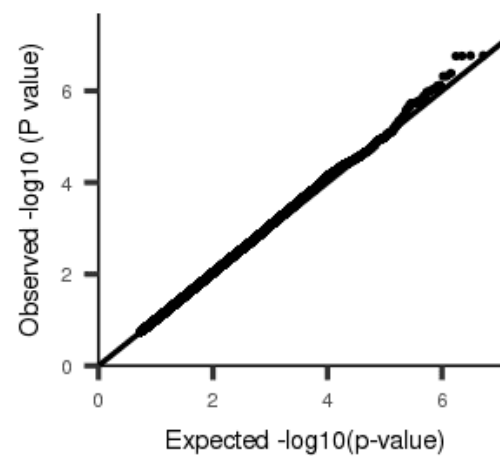

[back to list of plots](#)

Figure 2322: NETMAT edge (100) 1166

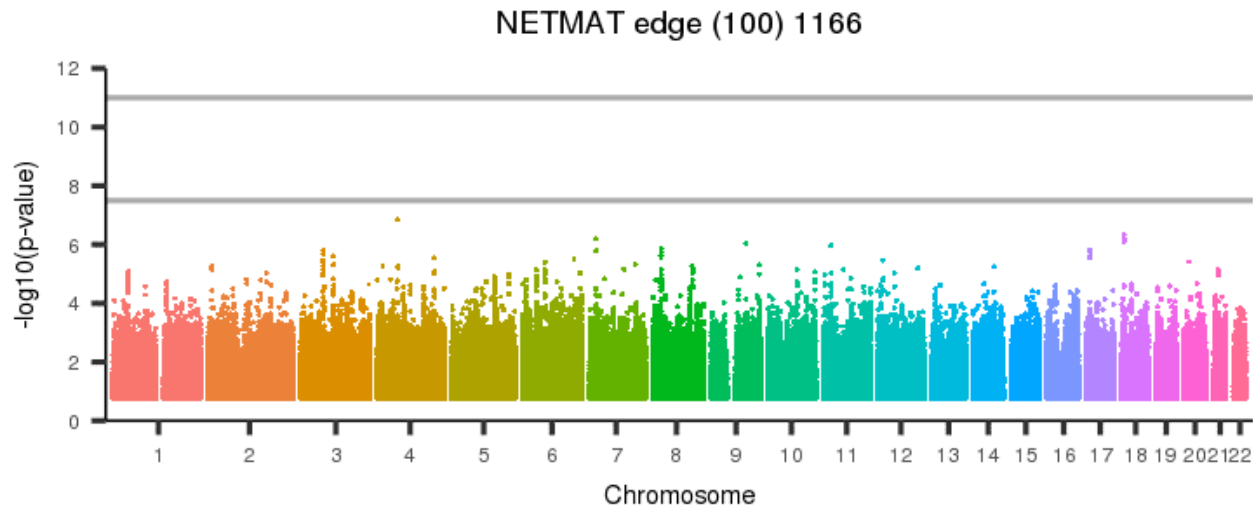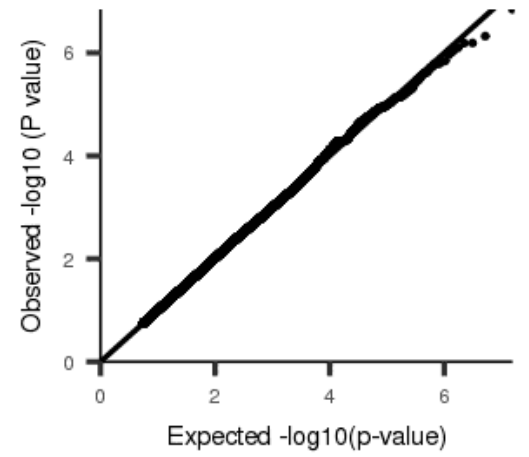

[back to list of plots](#)

Figure 2323: NETMAT edge (100) 1167

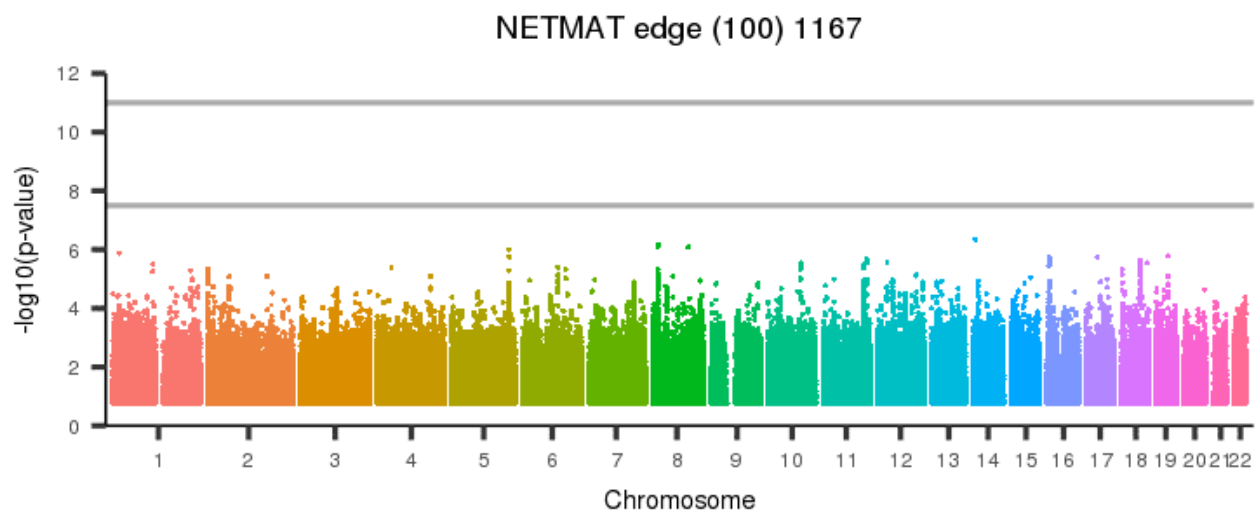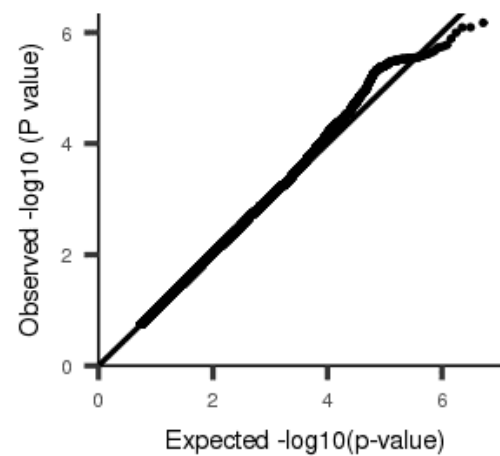

[back to list of plots](#)

Figure 2324: NETMAT edge (100) 1168

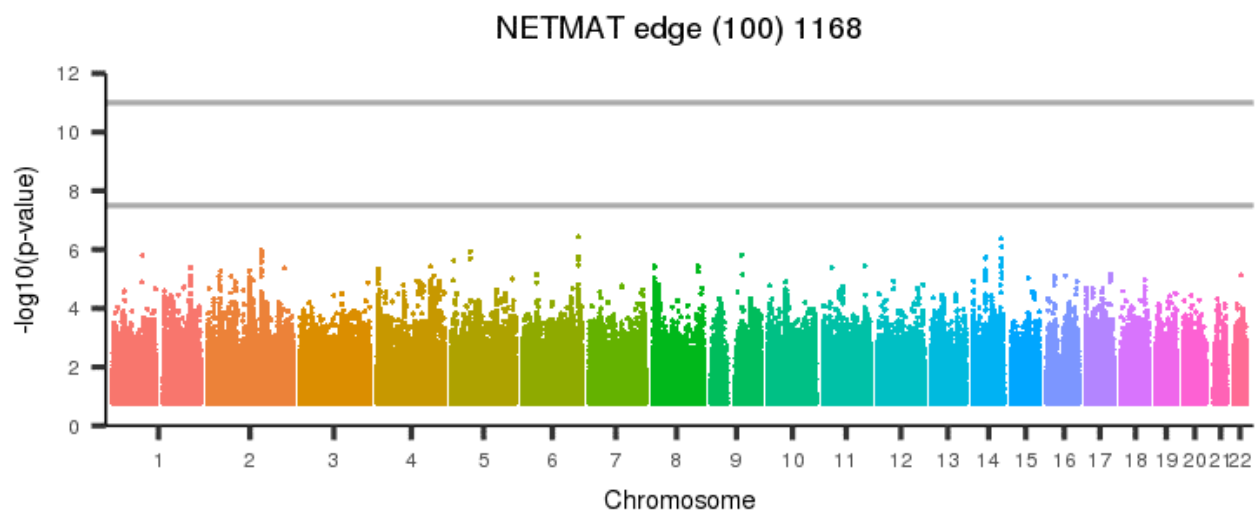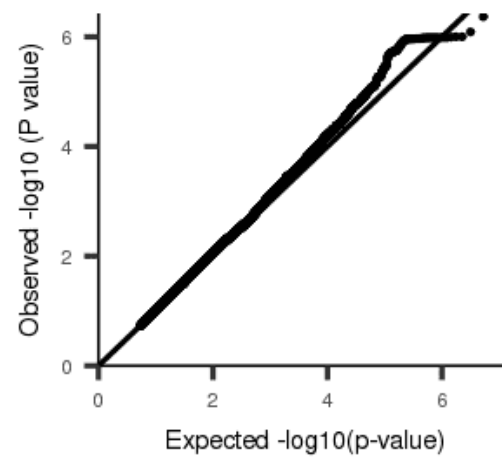

[back to list of plots](#)

Figure 2325: NETMAT edge (100) 1169

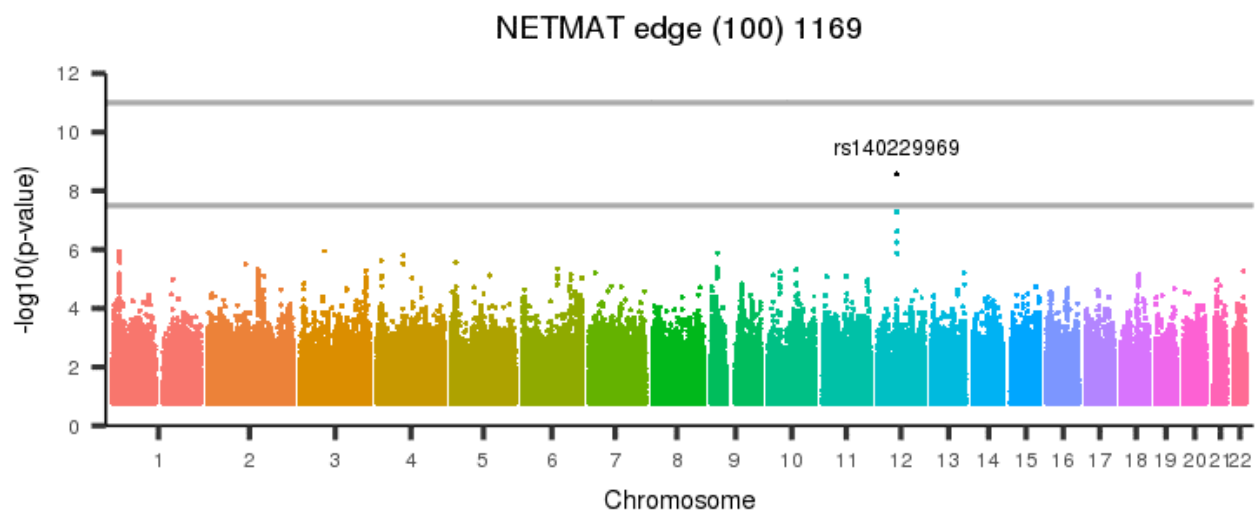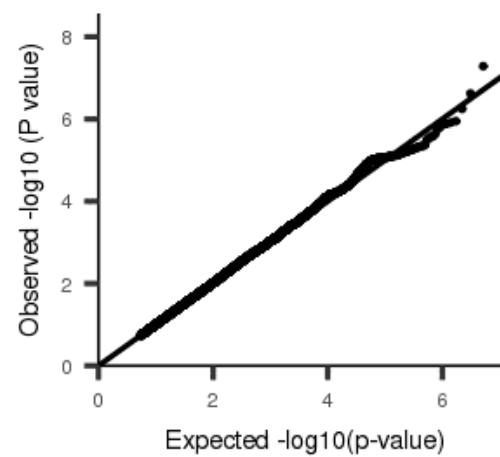

[back to list of plots](#)



Figure 2326: NETMAT edge (100) 1170

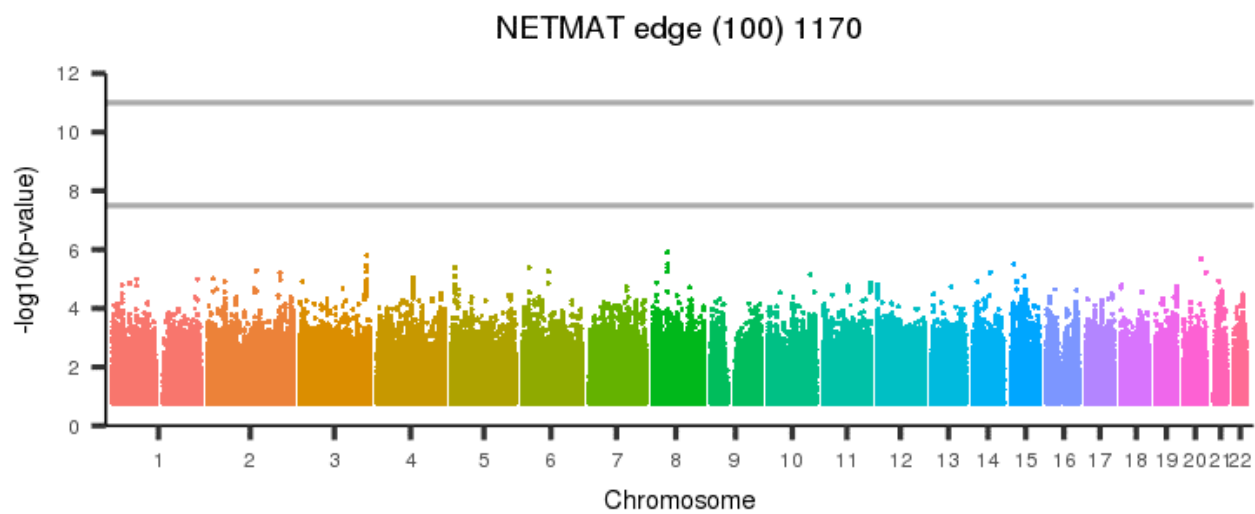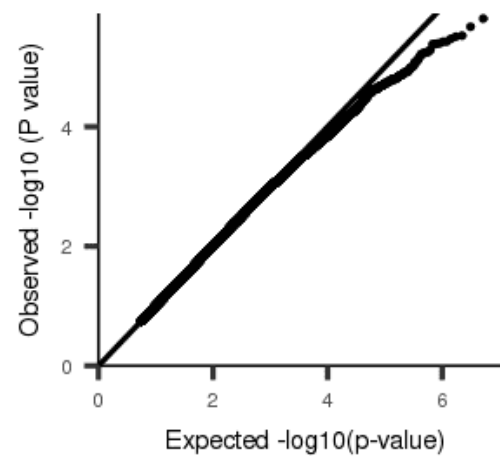

[back to list of plots](#)

Figure 2327: NETMAT edge (100) 1171

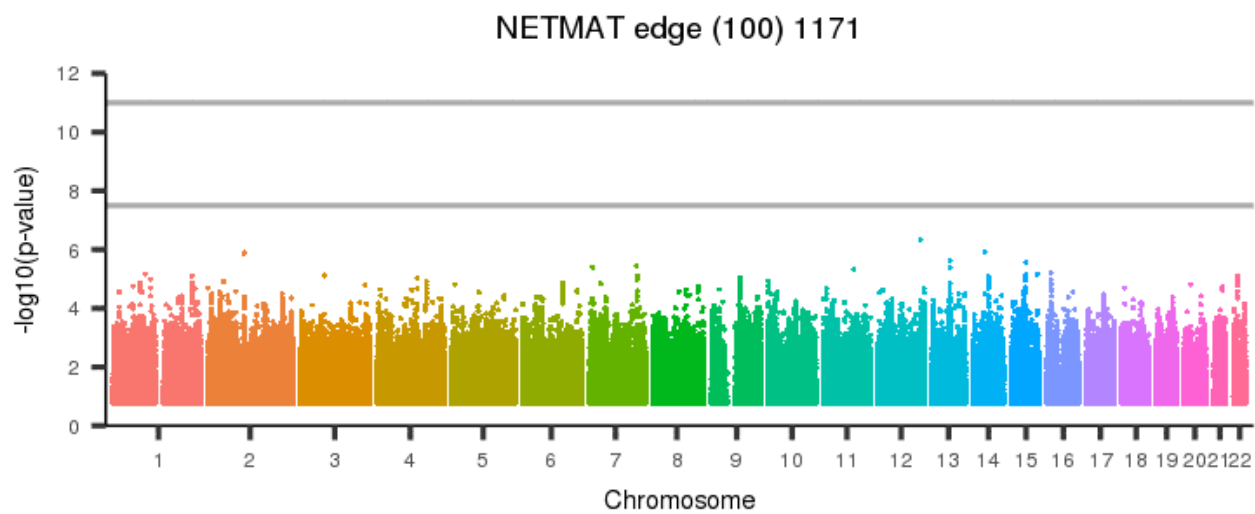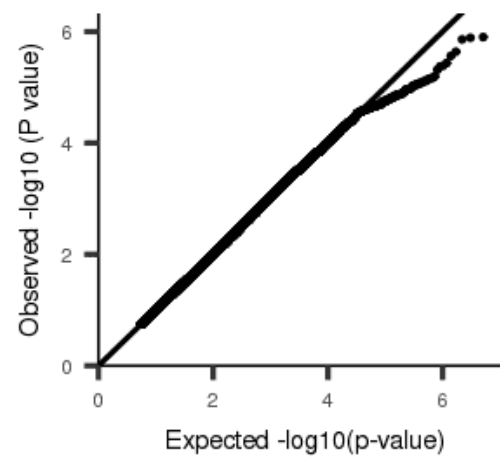

[back to list of plots](#)

Figure 2328: NETMAT edge (100) 1172

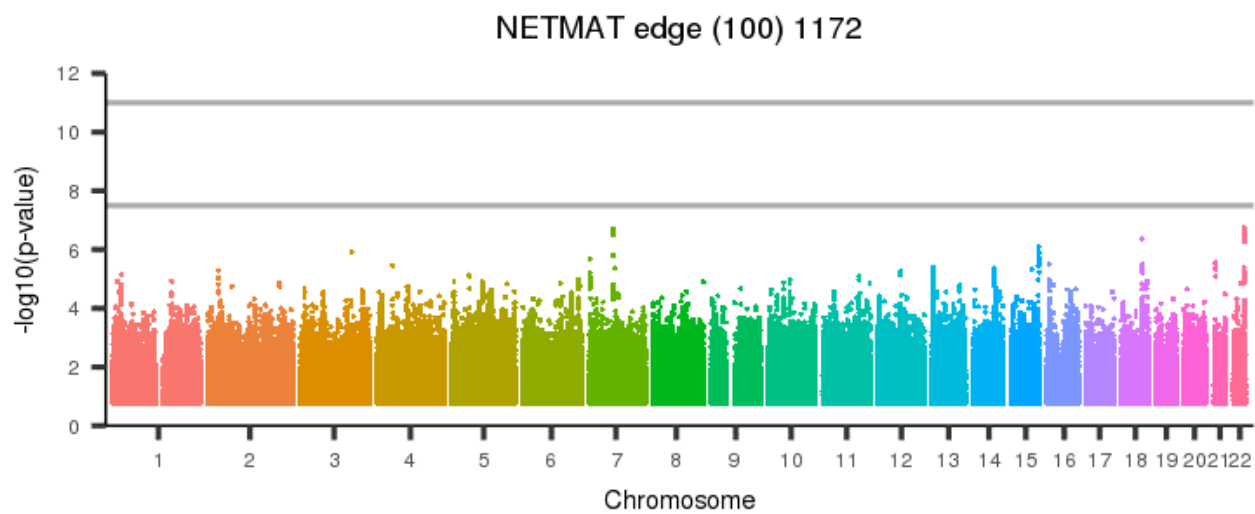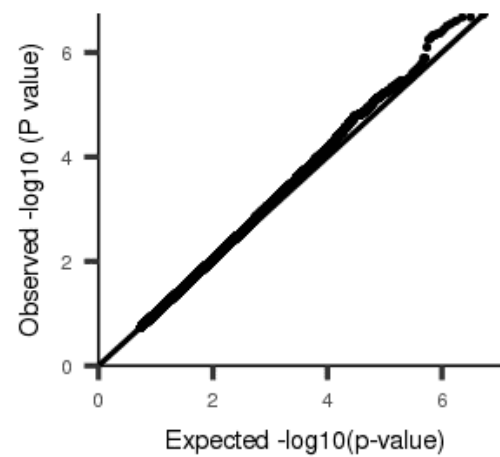

[back to list of plots](#)

Figure 2329: NETMAT edge (100) 1173

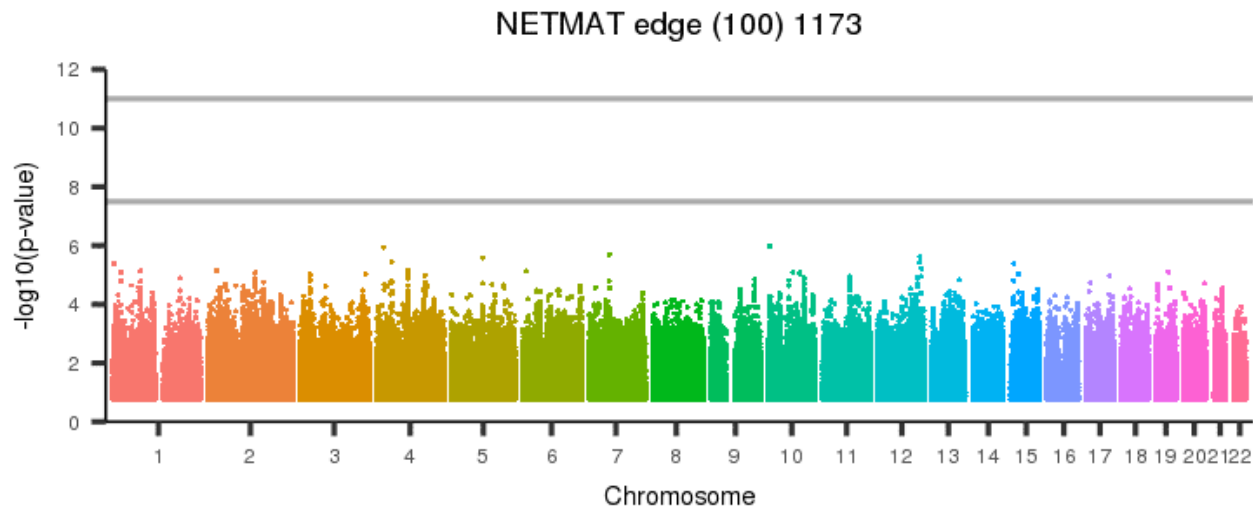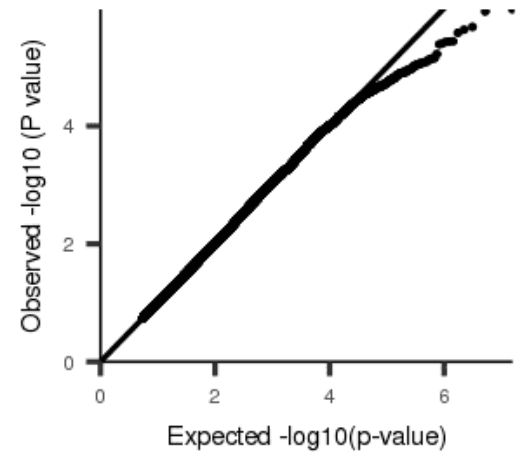

[back to list of plots](#)

Figure 2330: NETMAT edge (100) 1174

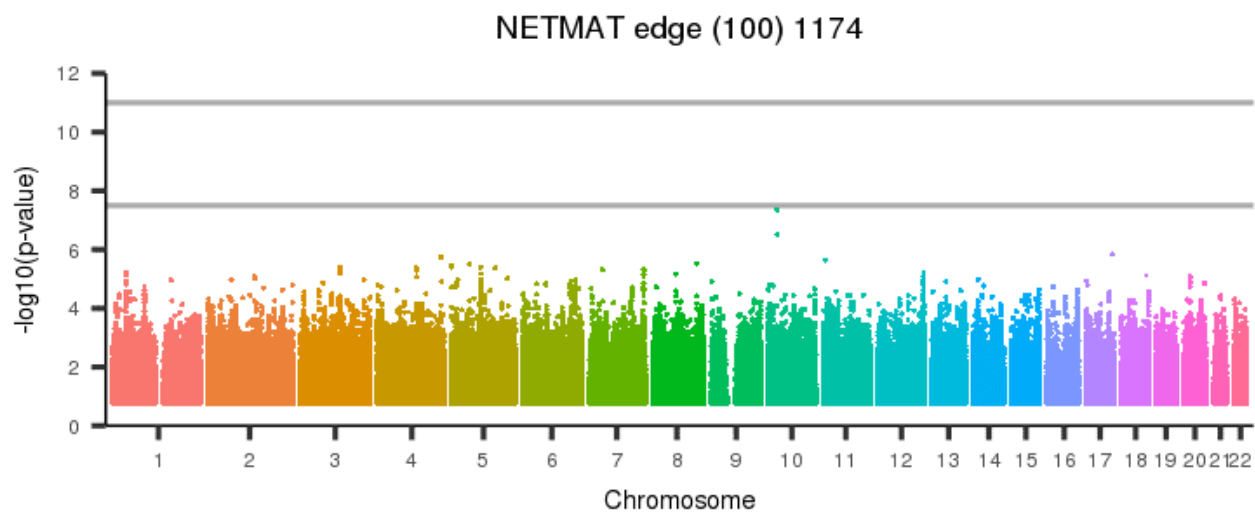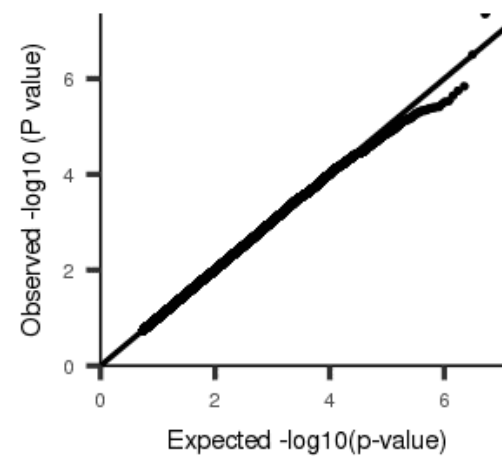

[back to list of plots](#)

Figure 2331: NETMAT edge (100) 1175

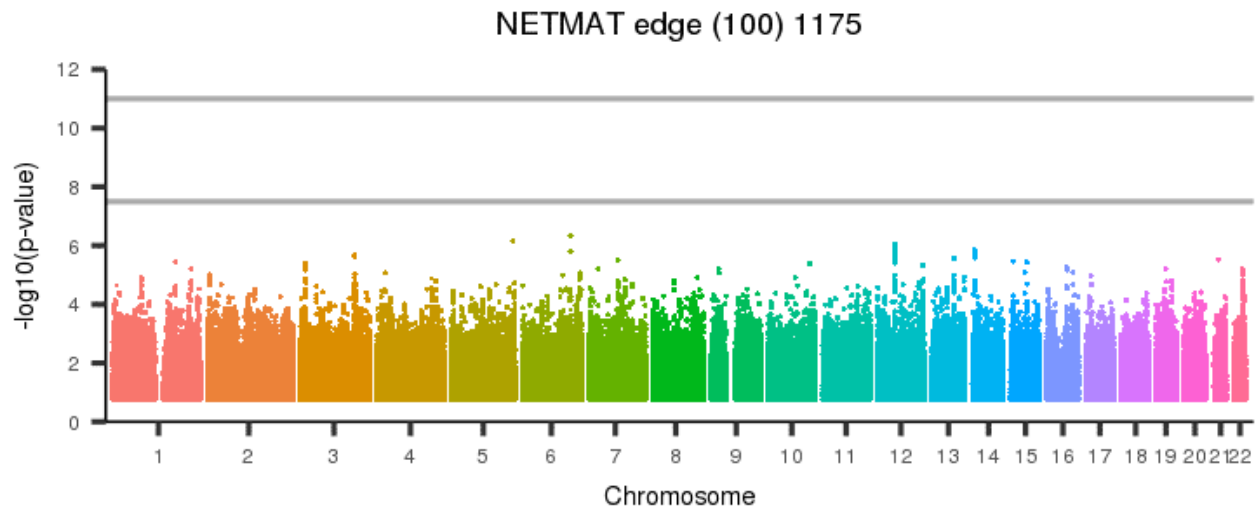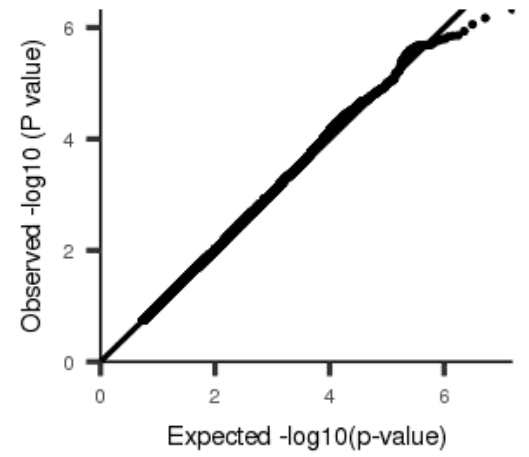

[back to list of plots](#)

Figure 2332: NETMAT edge (100) 1176

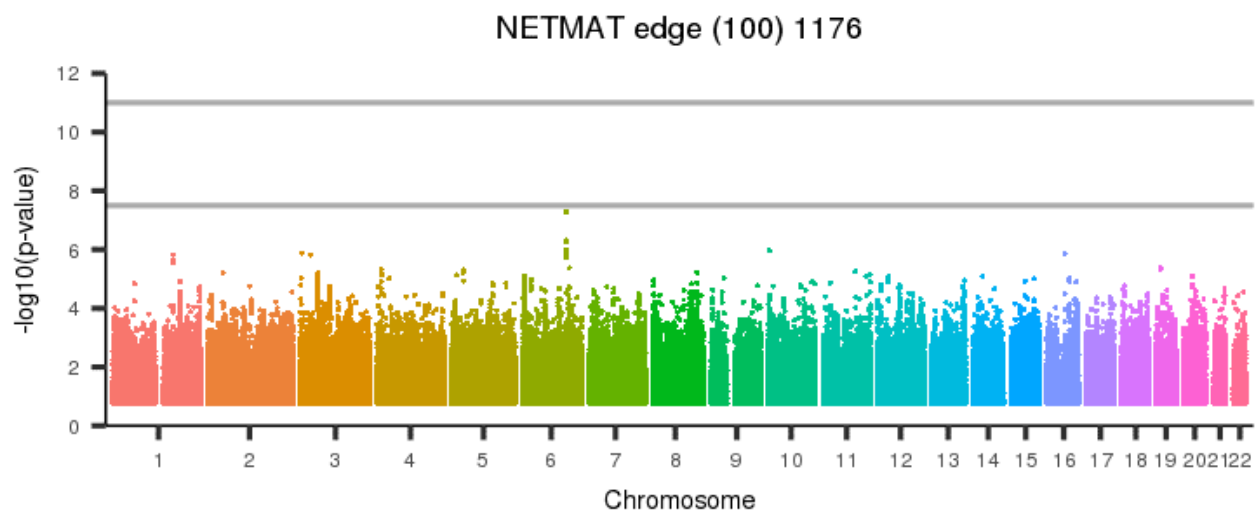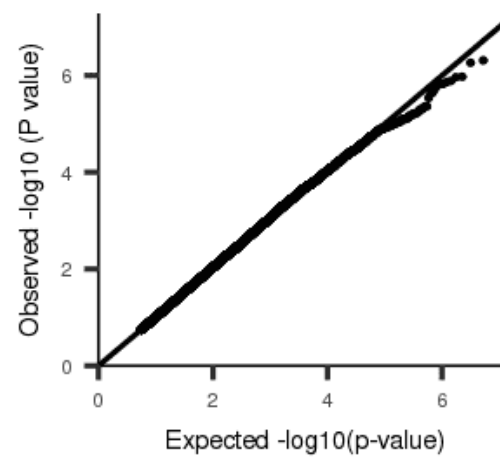

[back to list of plots](#)

Figure 2333: NETMAT edge (100) 1177

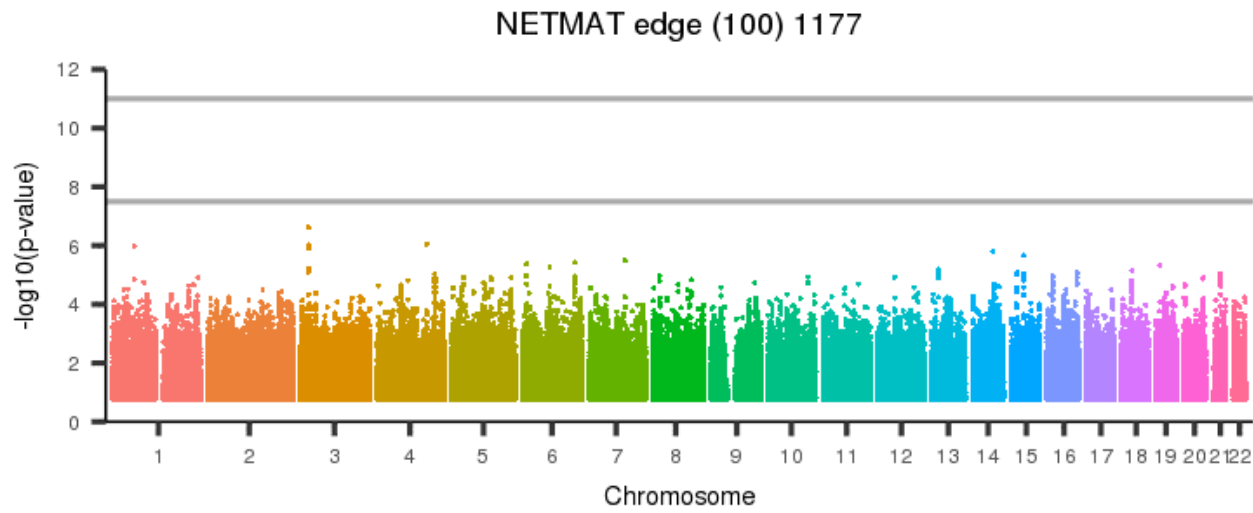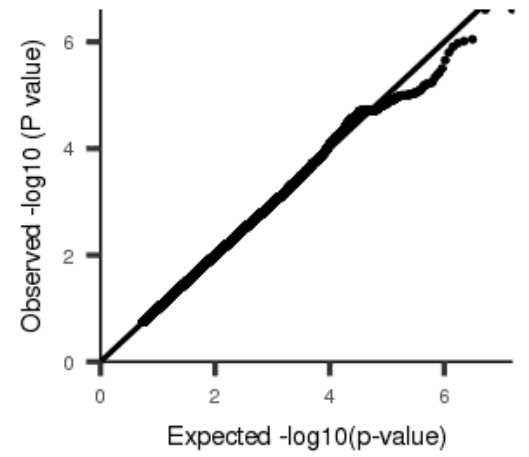

[back to list of plots](#)



Figure 2334: NETMAT edge (100) 1178

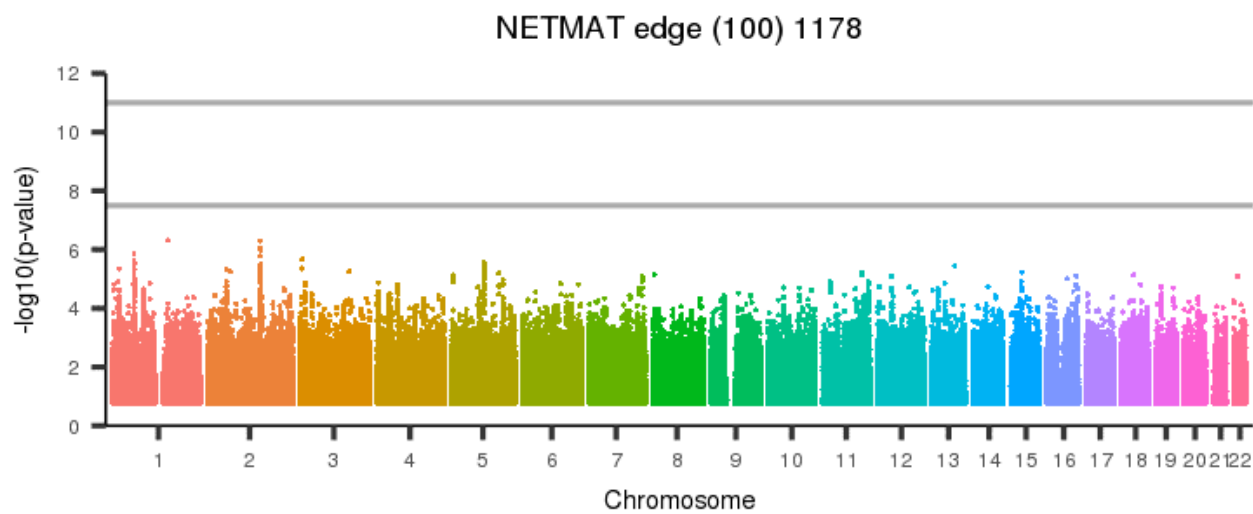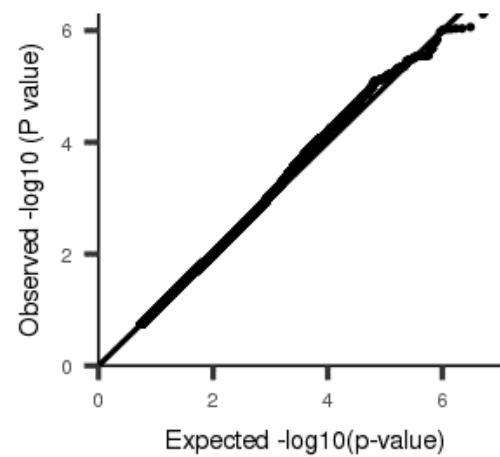

[back to list of plots](#)

Figure 2335: NETMAT edge (100) 1179

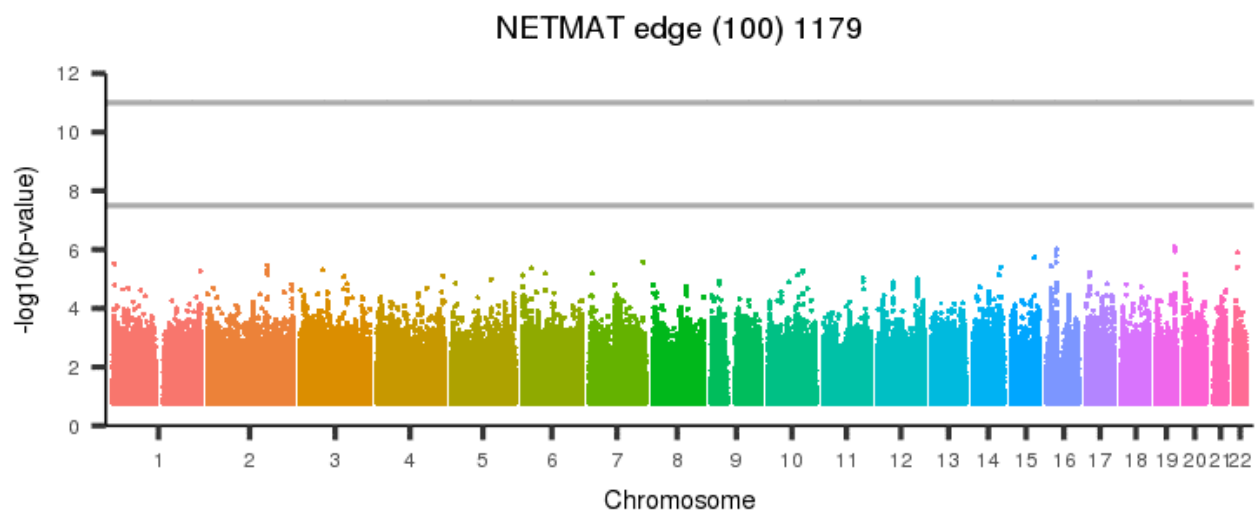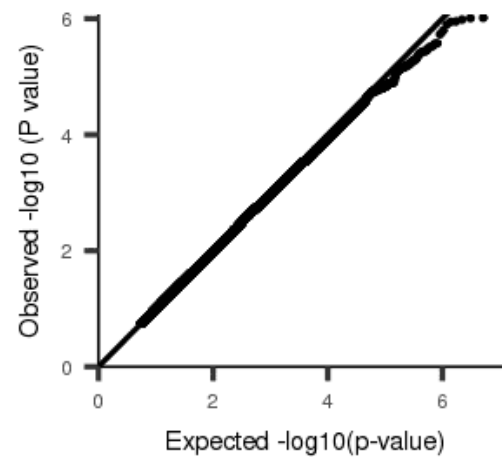

[back to list of plots](#)

Figure 2336: NETMAT edge (100) 1180

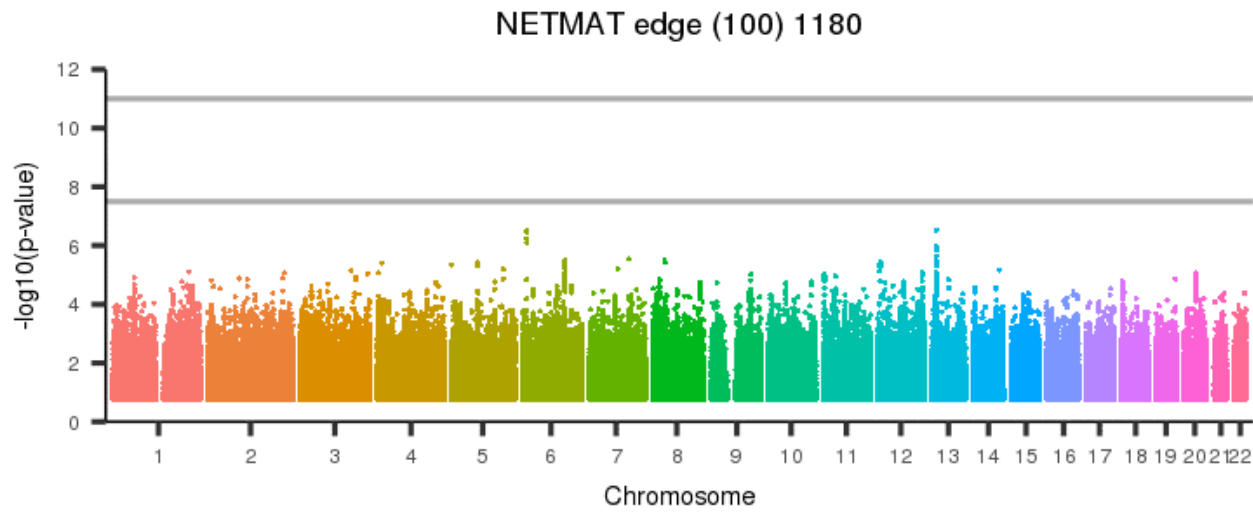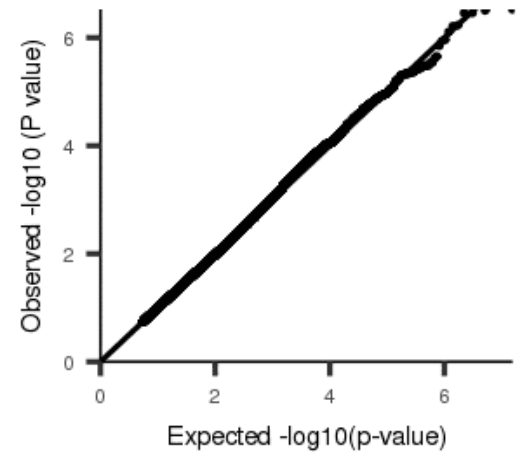

[back to list of plots](#)

Figure 2337: NETMAT edge (100) 1181

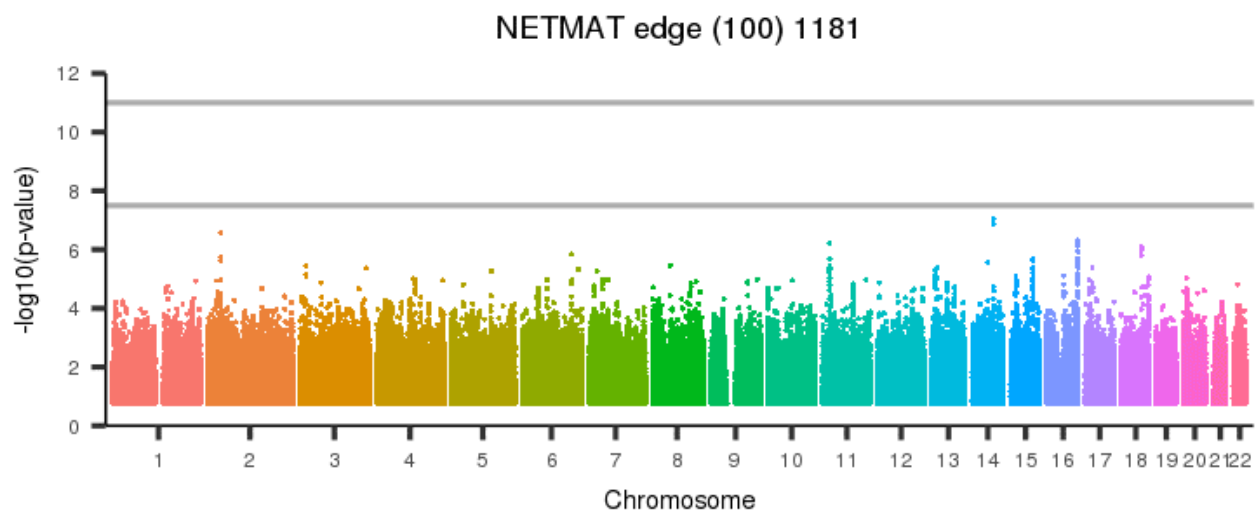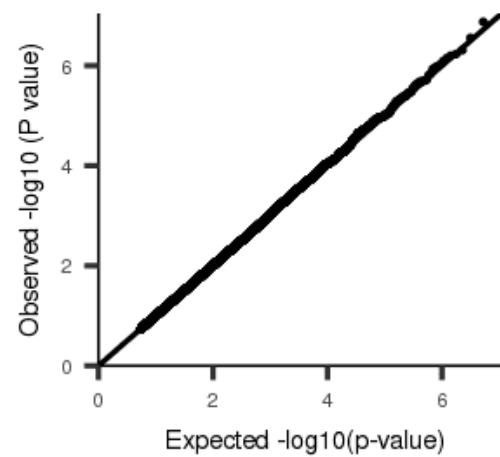

[back to list of plots](#)

Figure 2338: NETMAT edge (100) 1182

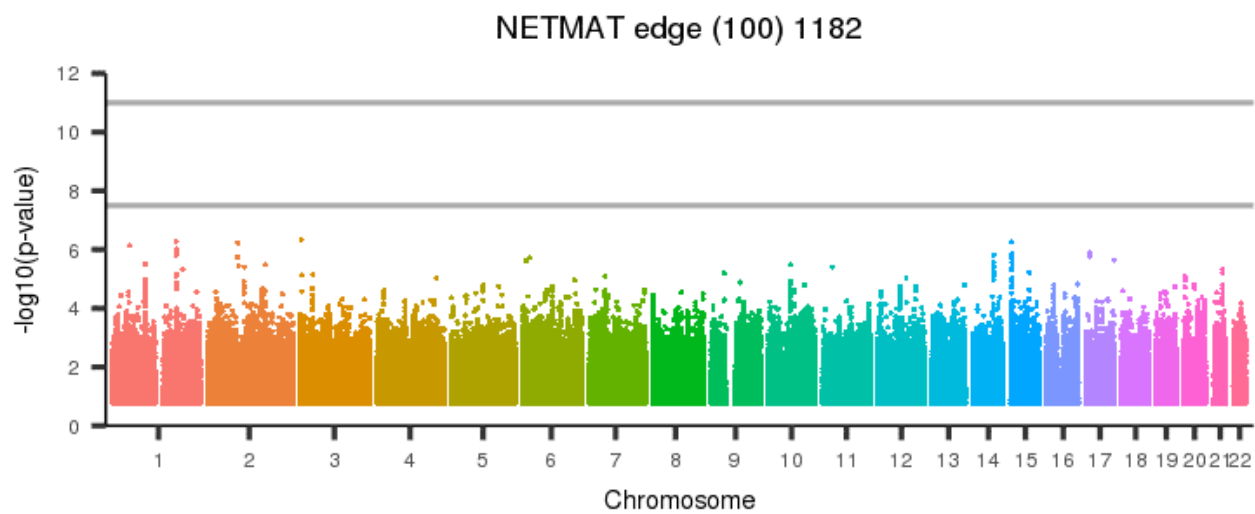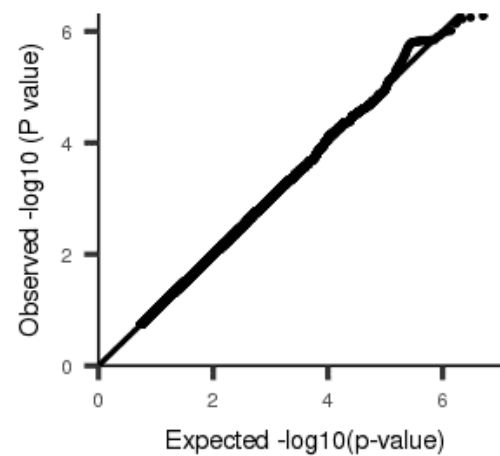

[back to list of plots](#)

Figure 2339: NETMAT edge (100) 1183

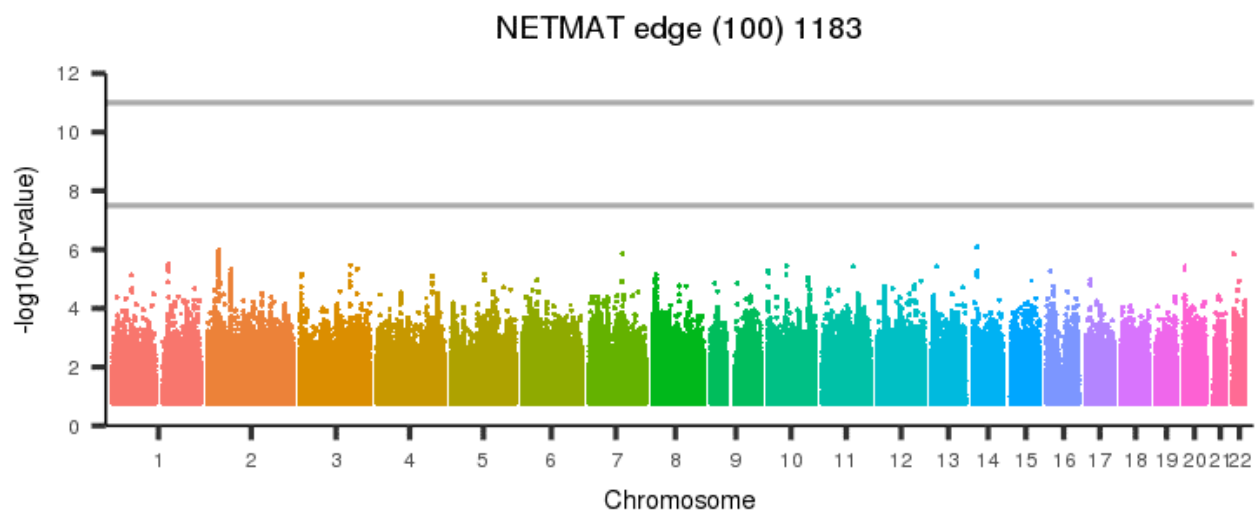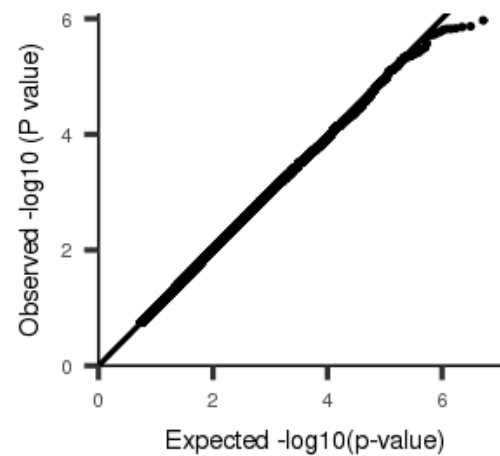

[back to list of plots](#)

Figure 2340: NETMAT edge (100) 1184

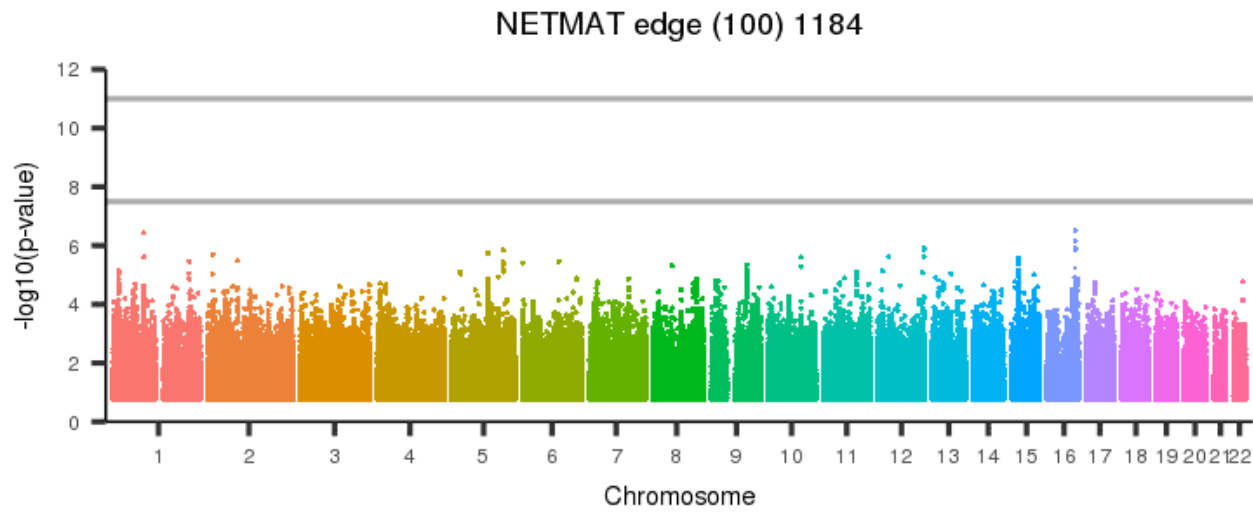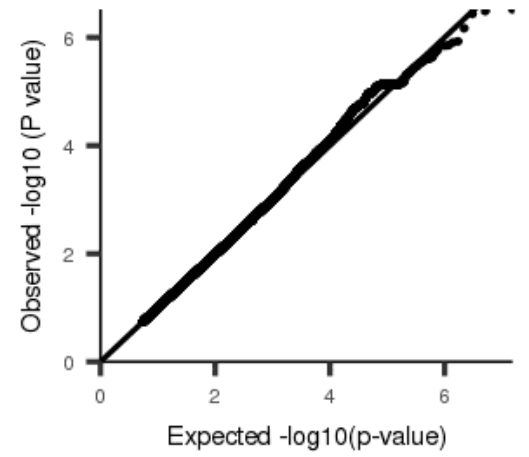

[back to list of plots](#)

Figure 2341: NETMAT edge (100) 1185

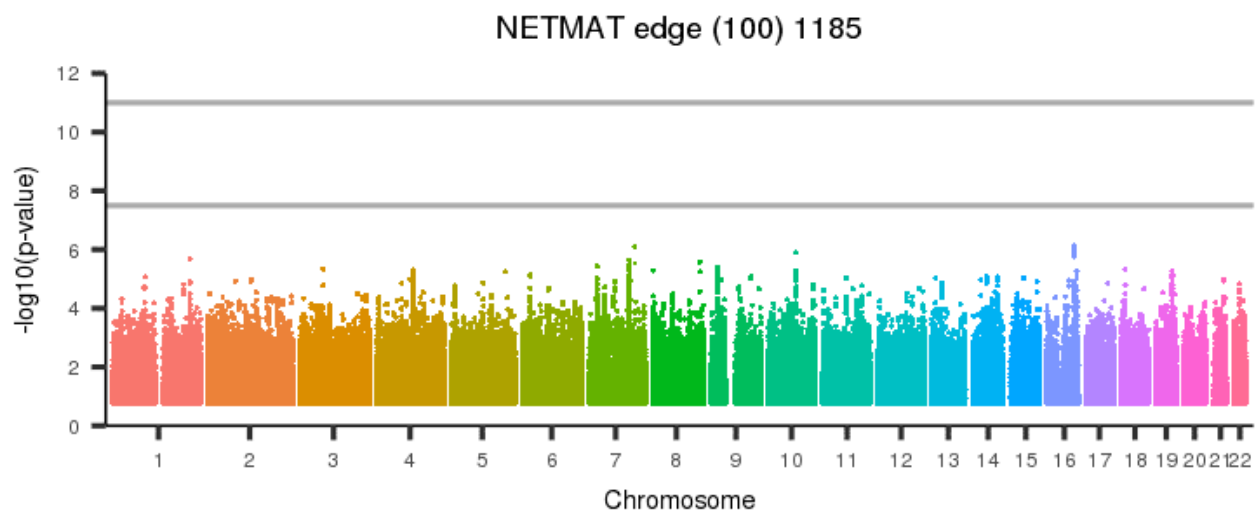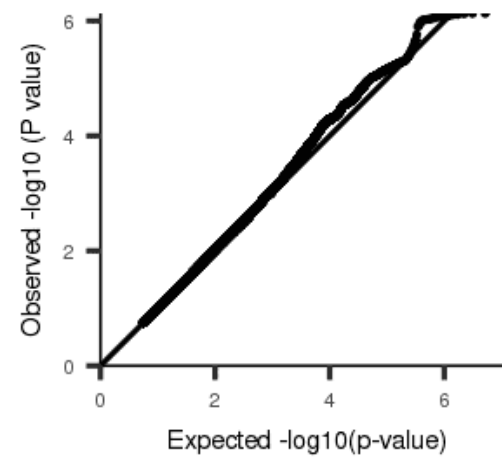

[back to list of plots](#)



Figure 2342: NETMAT edge (100) 1186

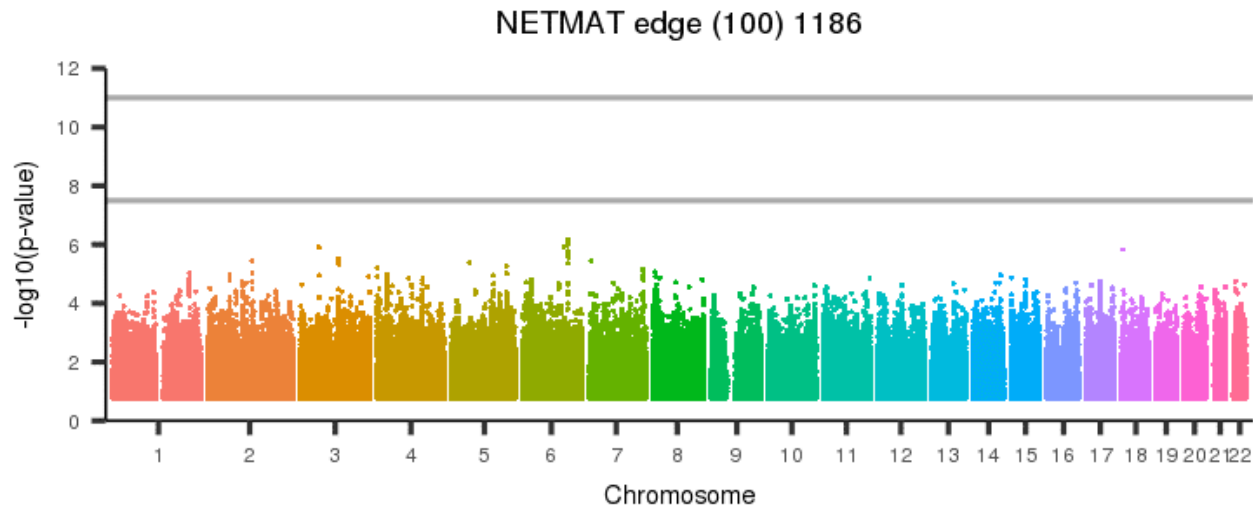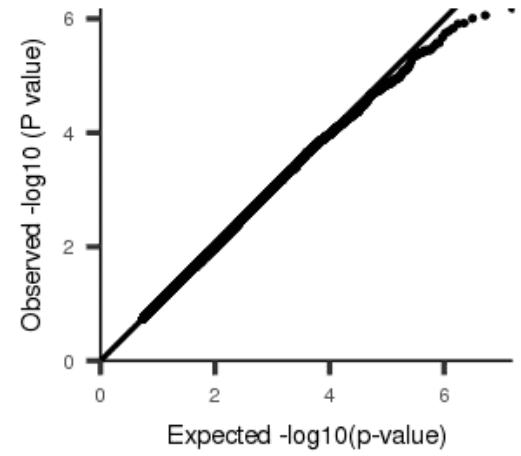

[back to list of plots](#)

Figure 2343: NETMAT edge (100) 1187

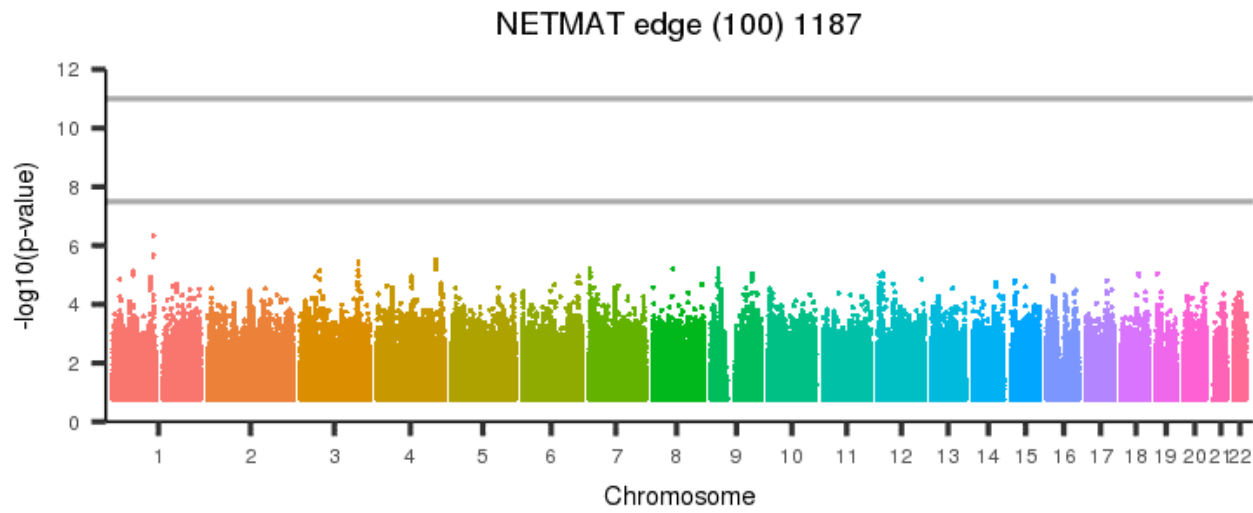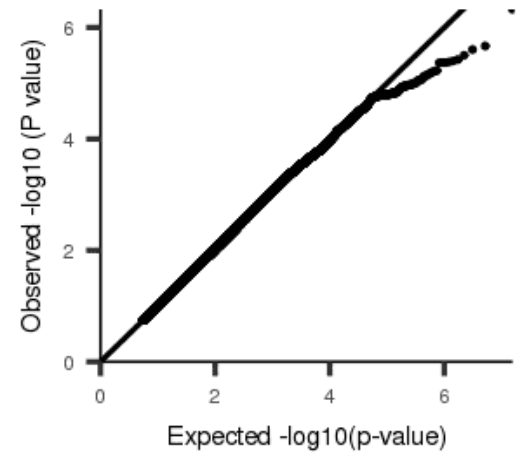

[back to list of plots](#)

Figure 2344: NETMAT edge (100) 1188

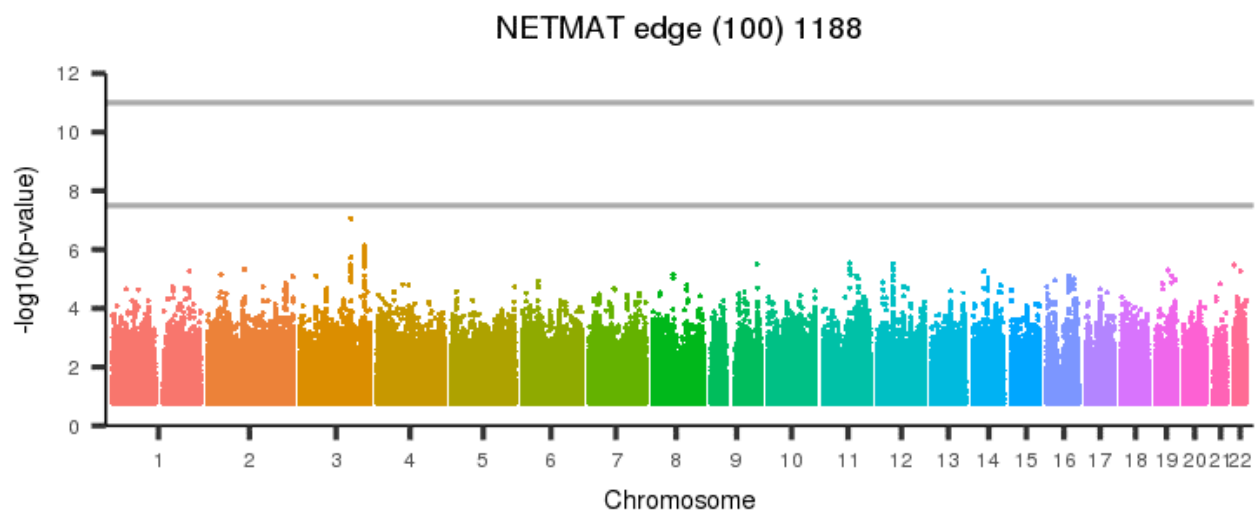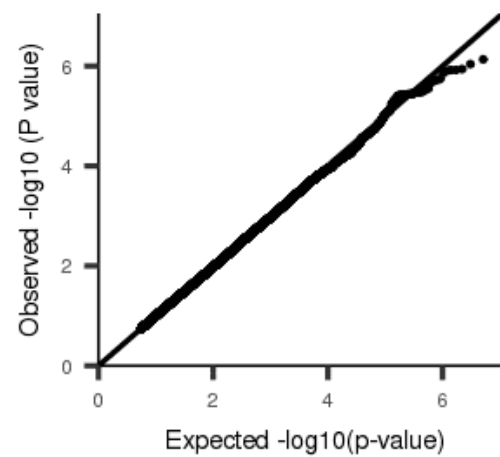

[back to list of plots](#)

Figure 2345: NETMAT edge (100) 1189

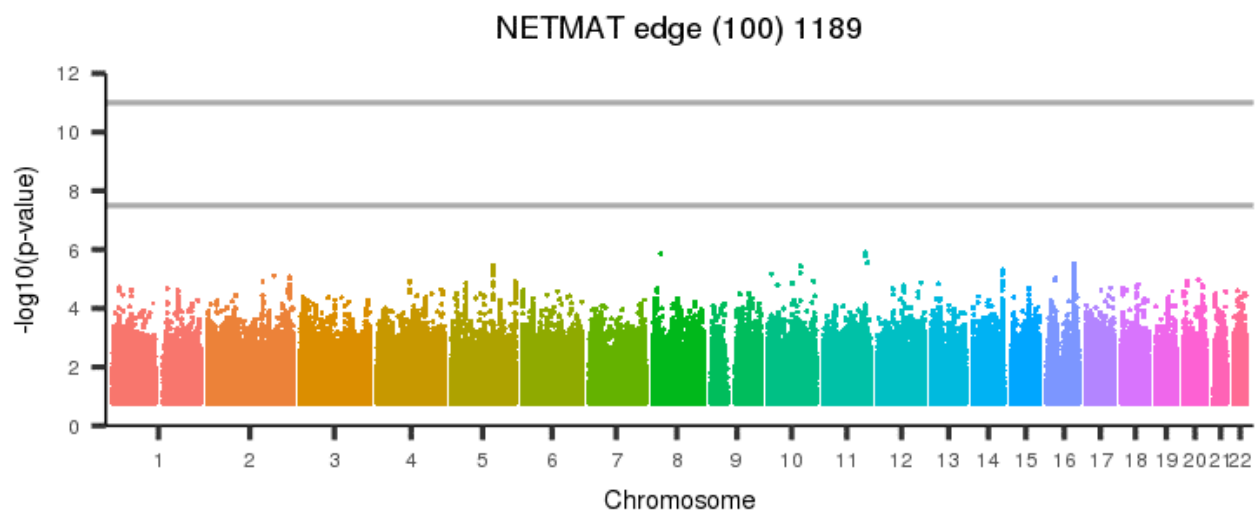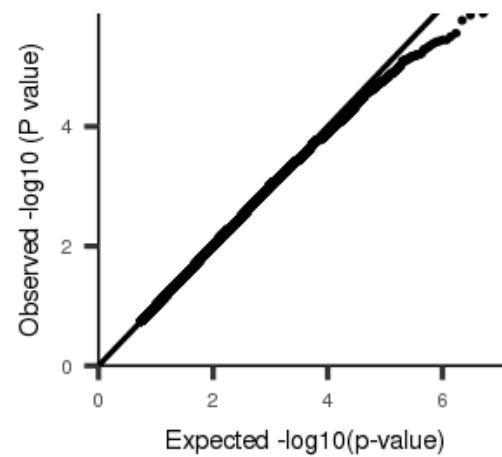

[back to list of plots](#)

Figure 2346: NETMAT edge (100) 1190

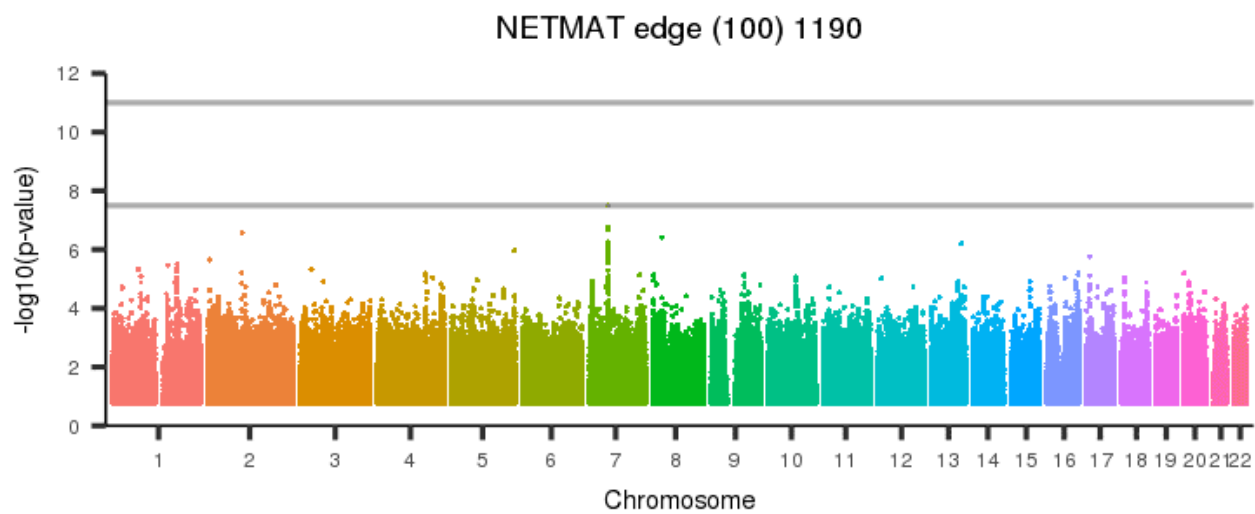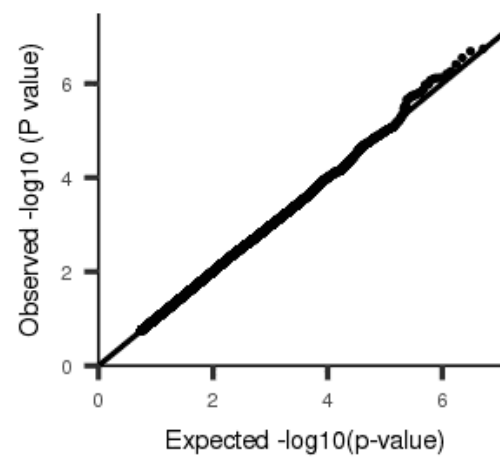

[back to list of plots](#)

Figure 2347: NETMAT edge (100) 1191

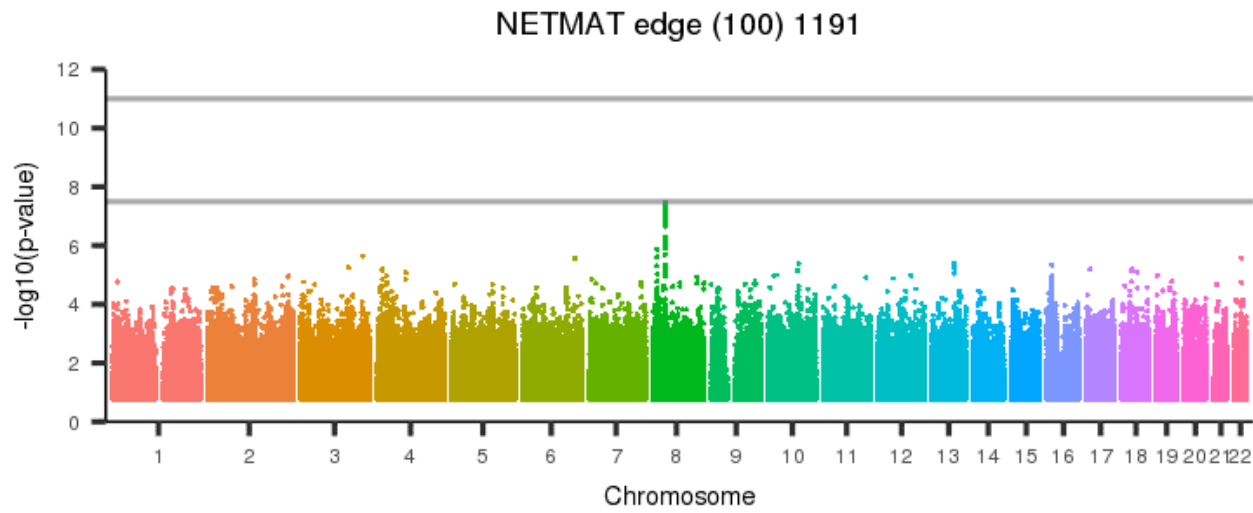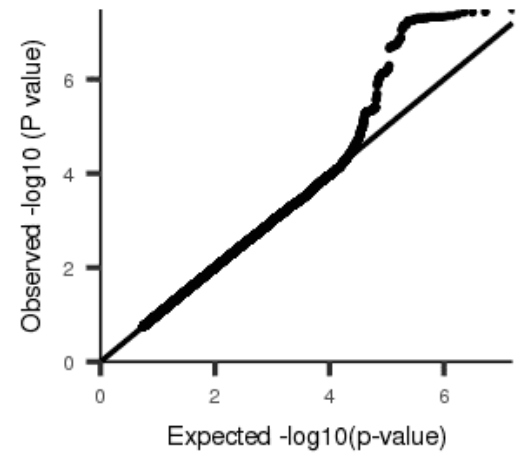

[back to list of plots](#)

Figure 2348: NETMAT edge (100) 1192

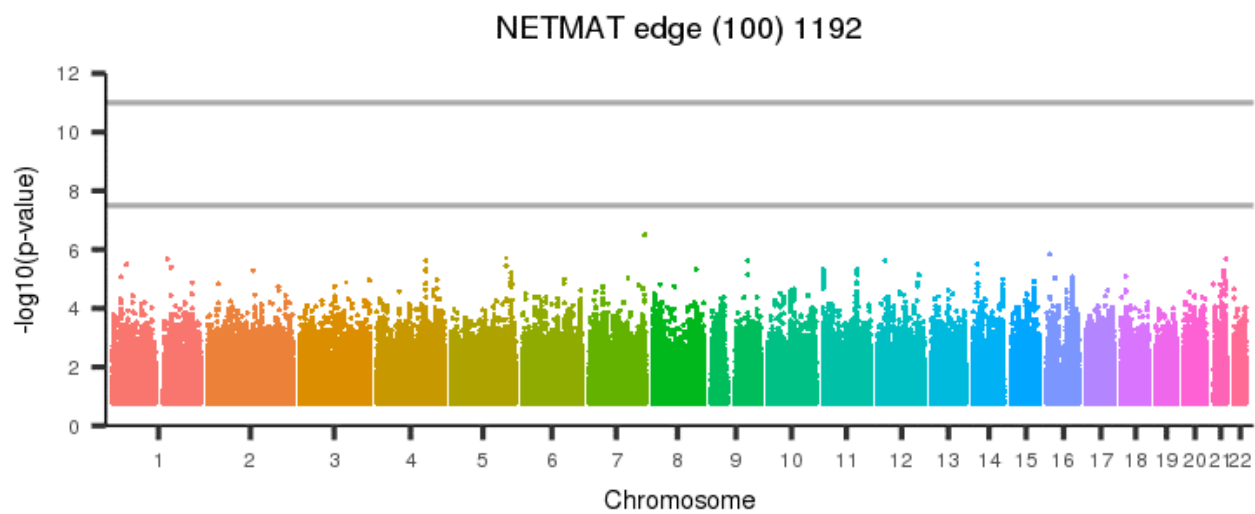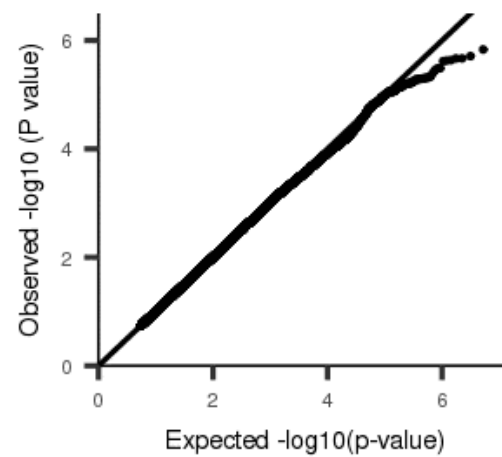

[back to list of plots](#)

Figure 2349: NETMAT edge (100) 1193

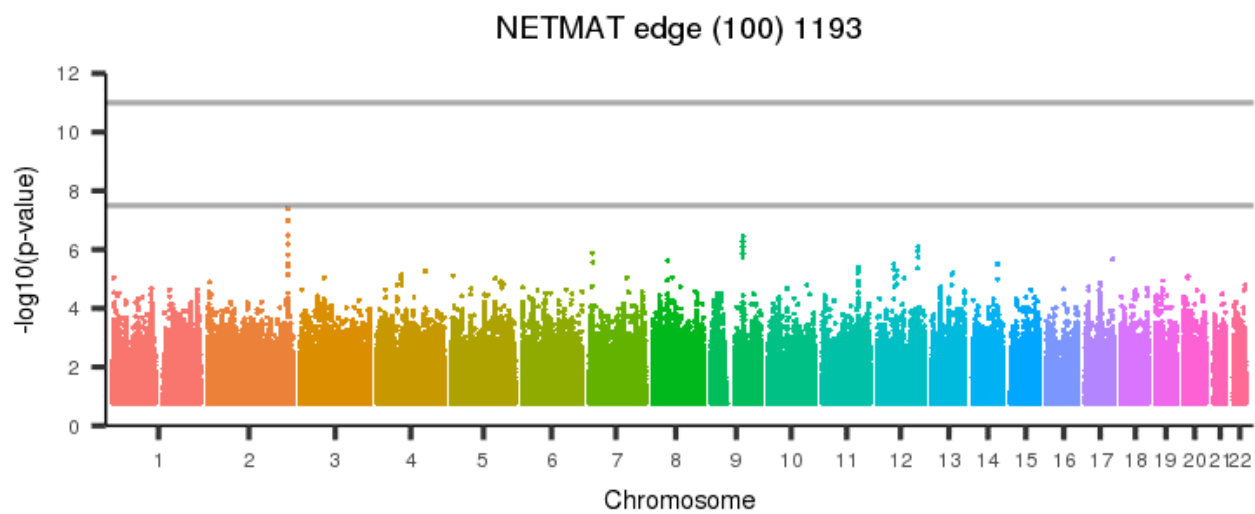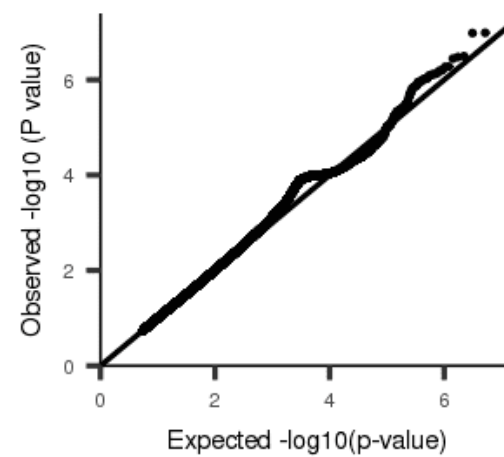

[back to list of plots](#)



Figure 2350: NETMAT edge (100) 1194

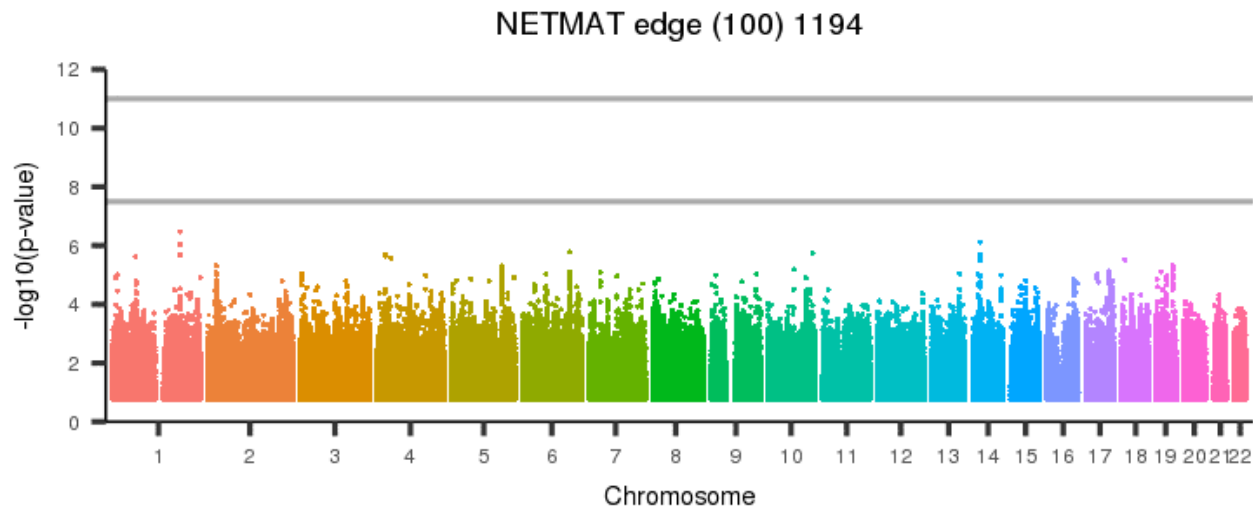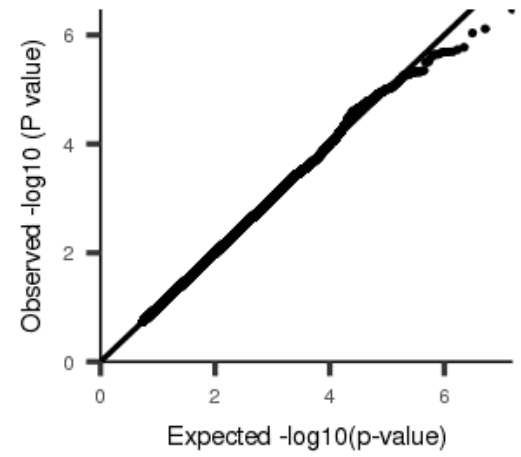

[back to list of plots](#)

Figure 2351: NETMAT edge (100) 1195

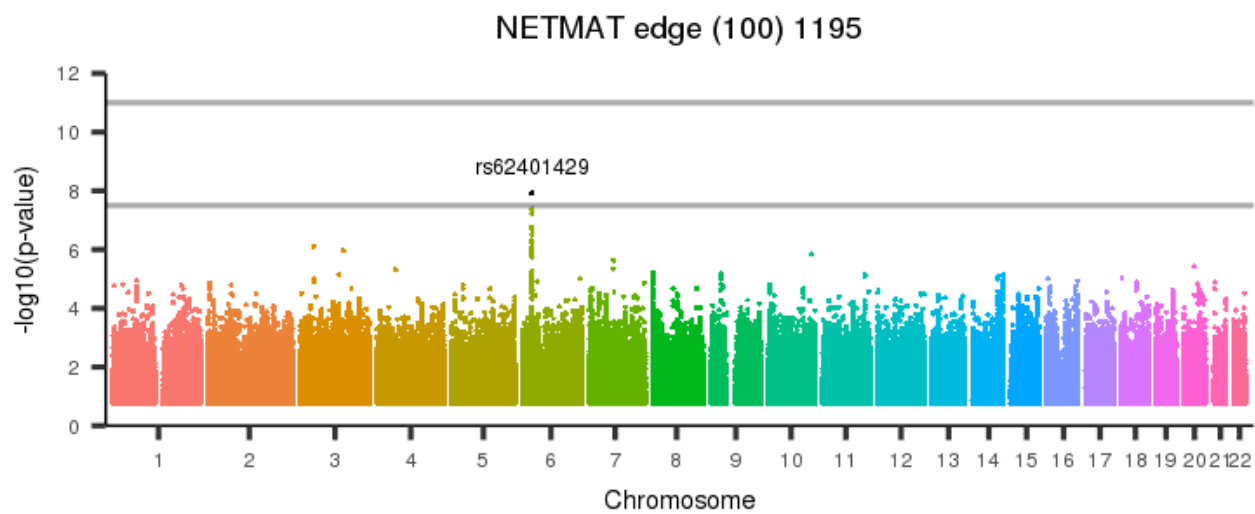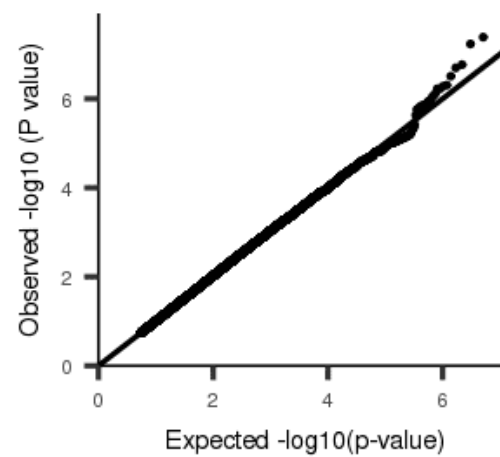

[back to list of plots](#)

Figure 2352: NETMAT edge (100) 1196

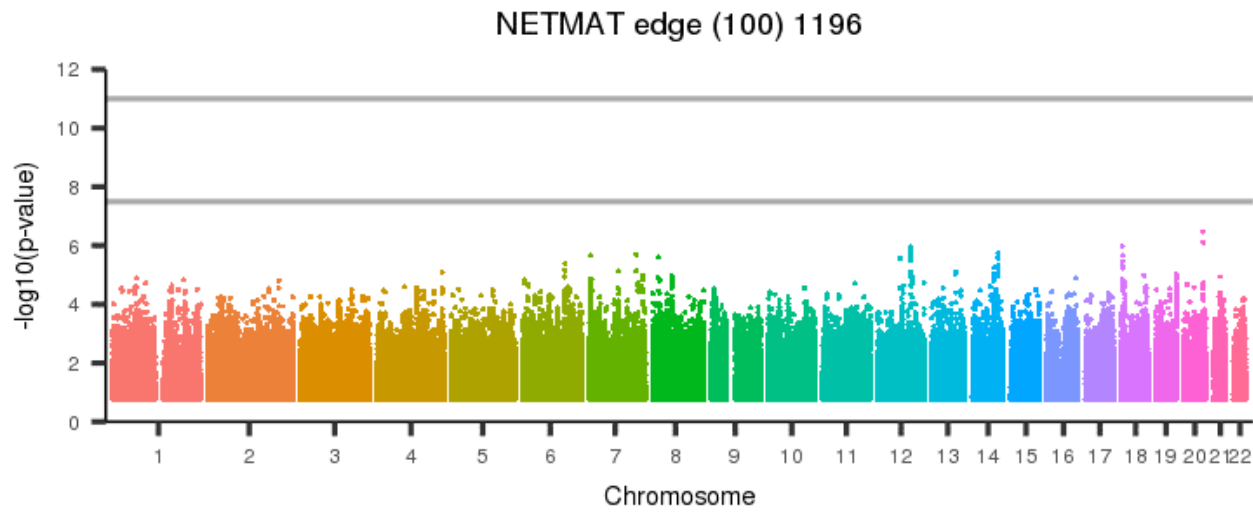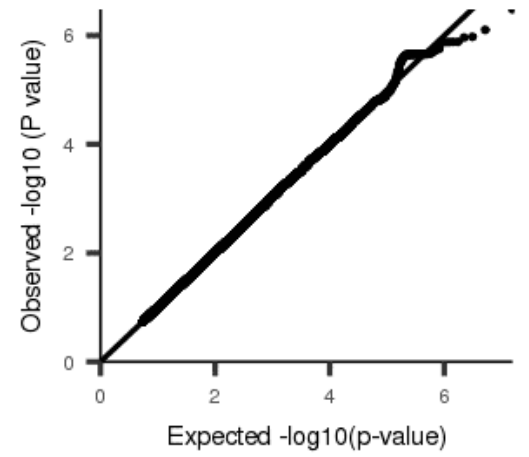

[back to list of plots](#)

Figure 2353: NETMAT edge (100) 1197

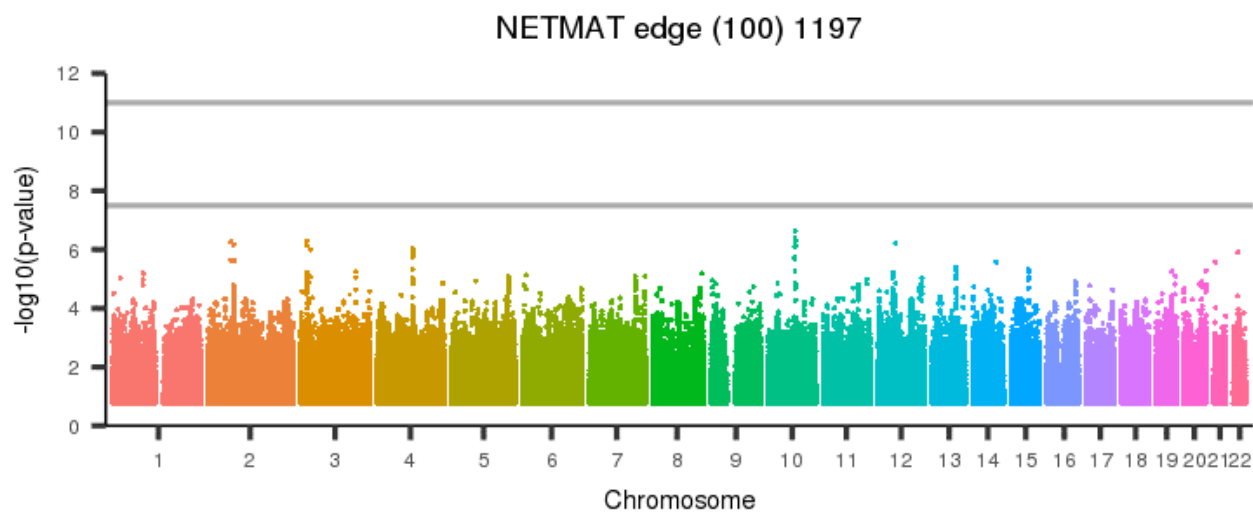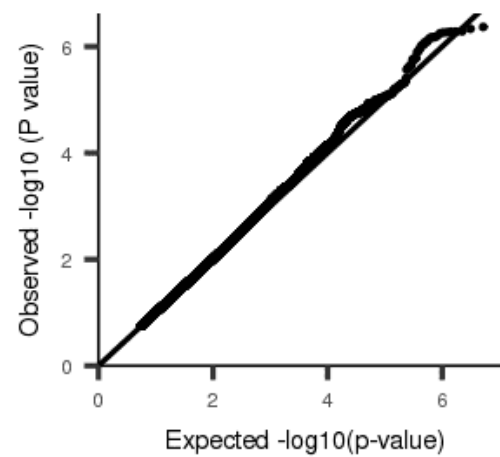

[back to list of plots](#)

Figure 2354: NETMAT edge (100) 1198

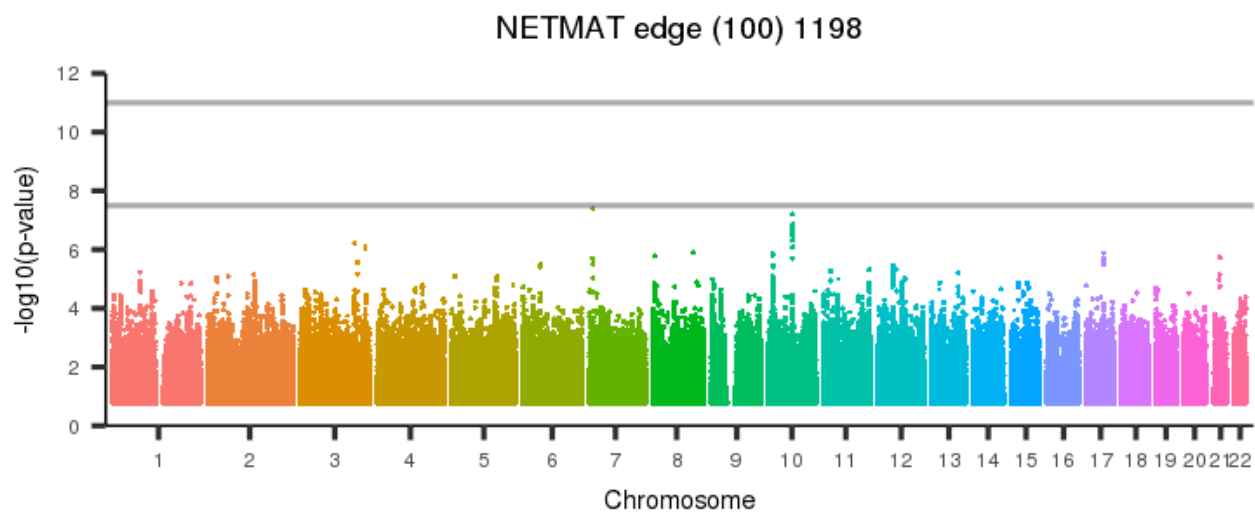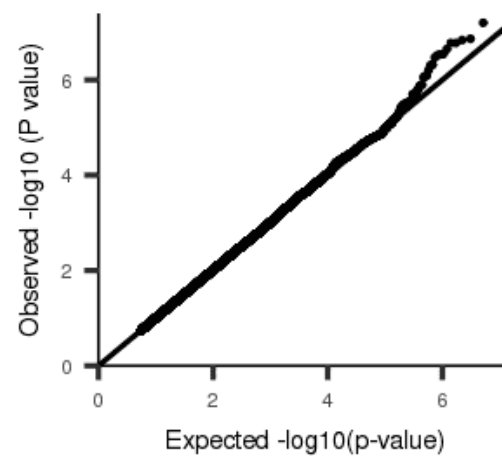

[back to list of plots](#)

Figure 2355: NETMAT edge (100) 1199

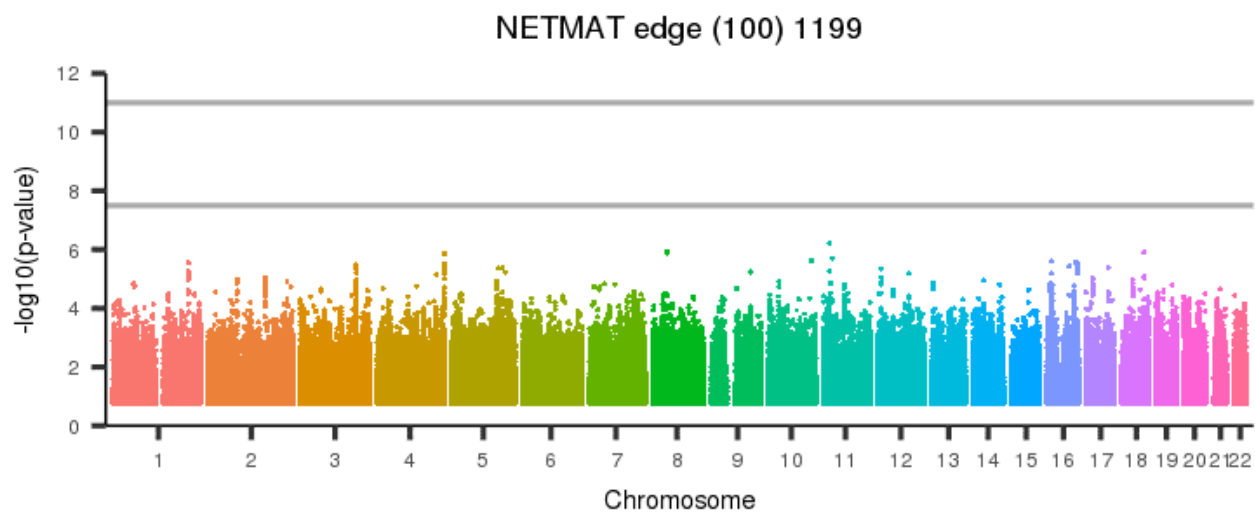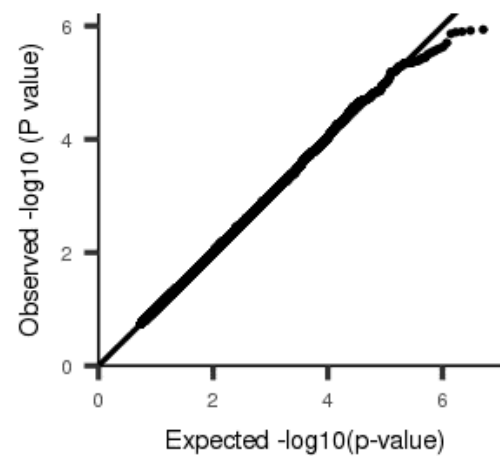

[back to list of plots](#)

Figure 2356: NETMAT edge (100) 1200

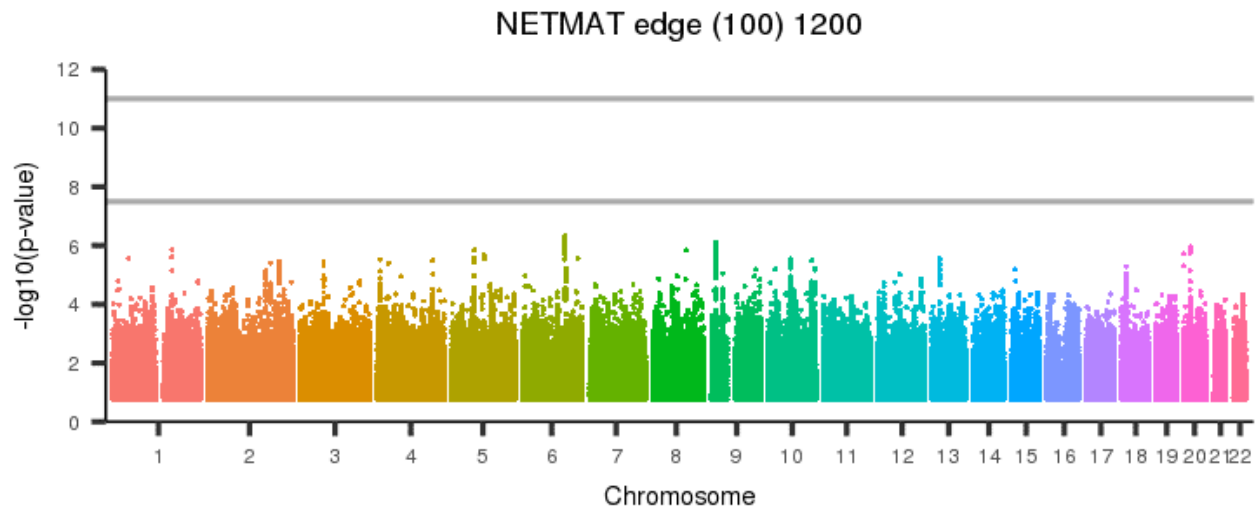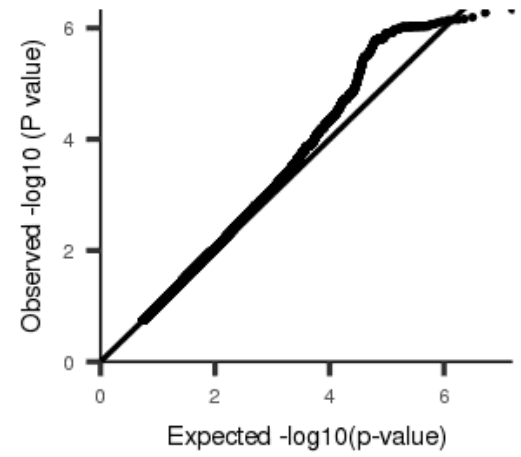

[back to list of plots](#)

Figure 2357: NETMAT edge (100) 1201

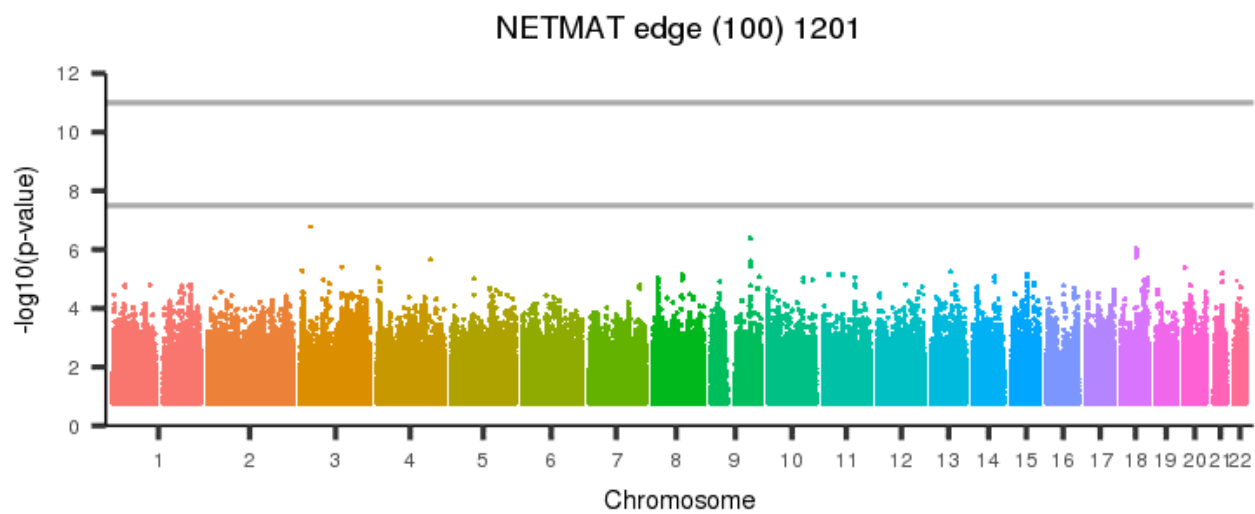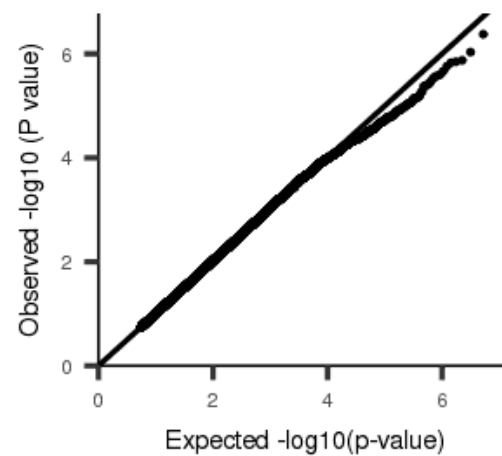

[back to list of plots](#)



Figure 2358: NETMAT edge (100) 1202

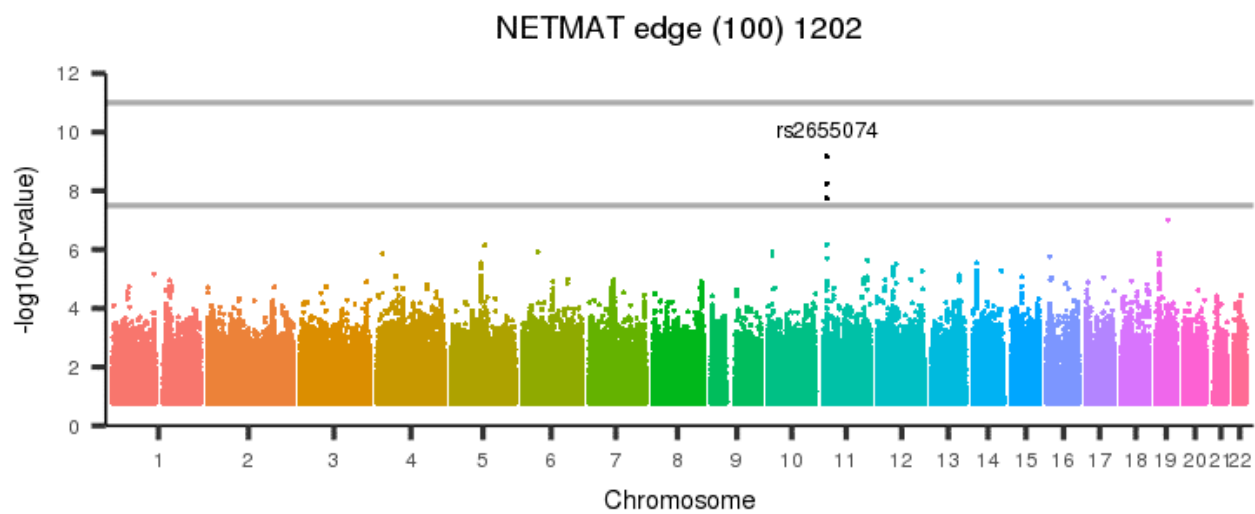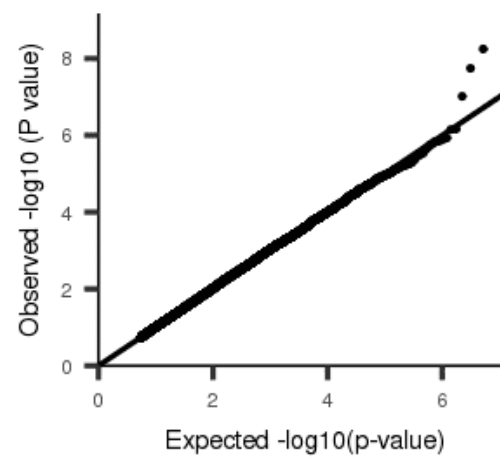

[back to list of plots](#)

Figure 2359: NETMAT edge (100) 1203

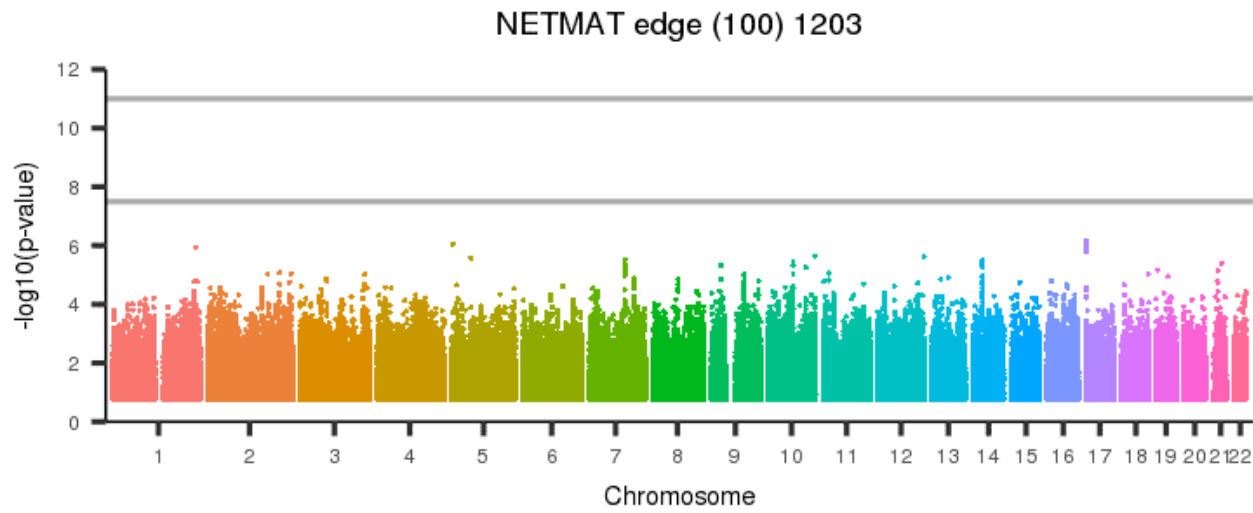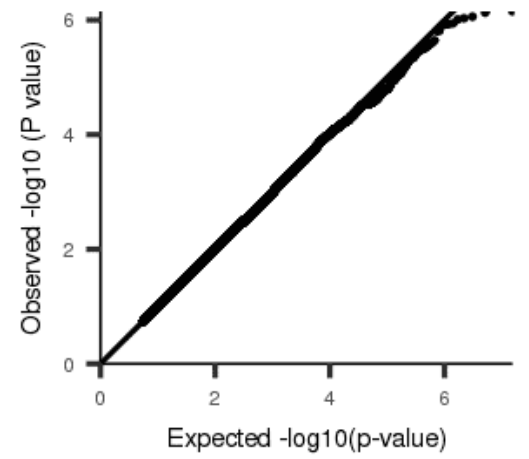

[back to list of plots](#)

Figure 2360: NETMAT edge (100) 1204

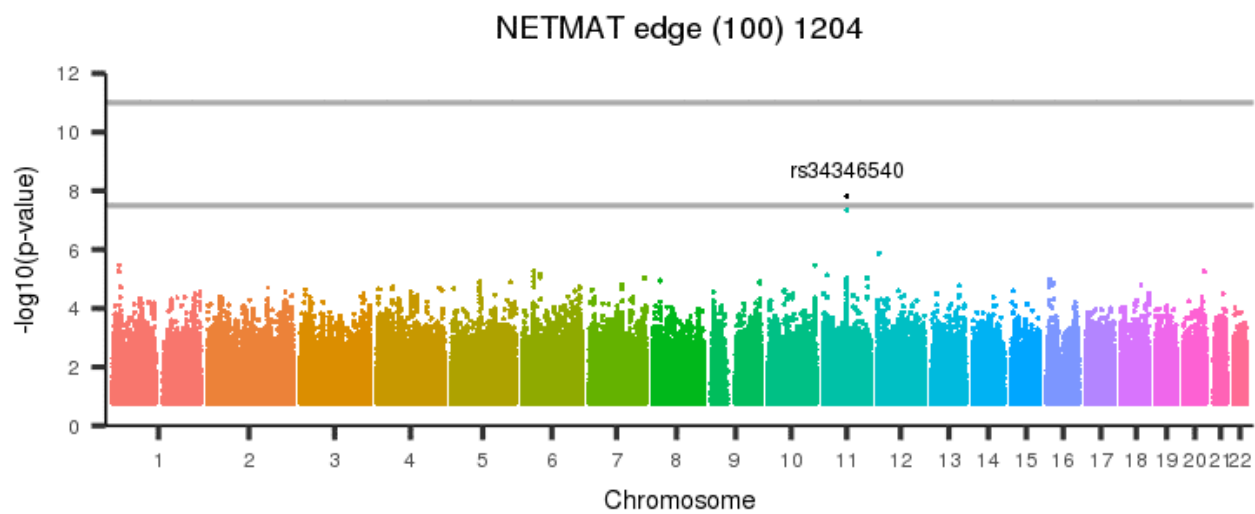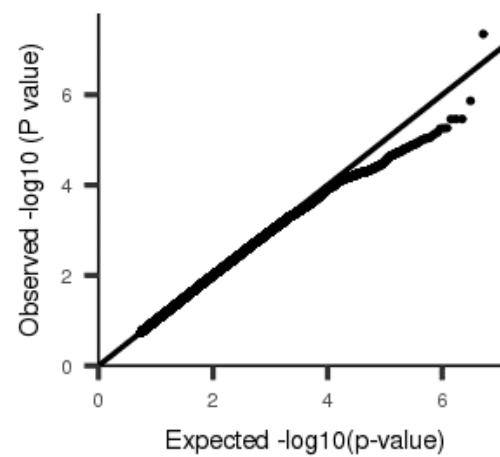

[back to list of plots](#)

Figure 2361: NETMAT edge (100) 1205

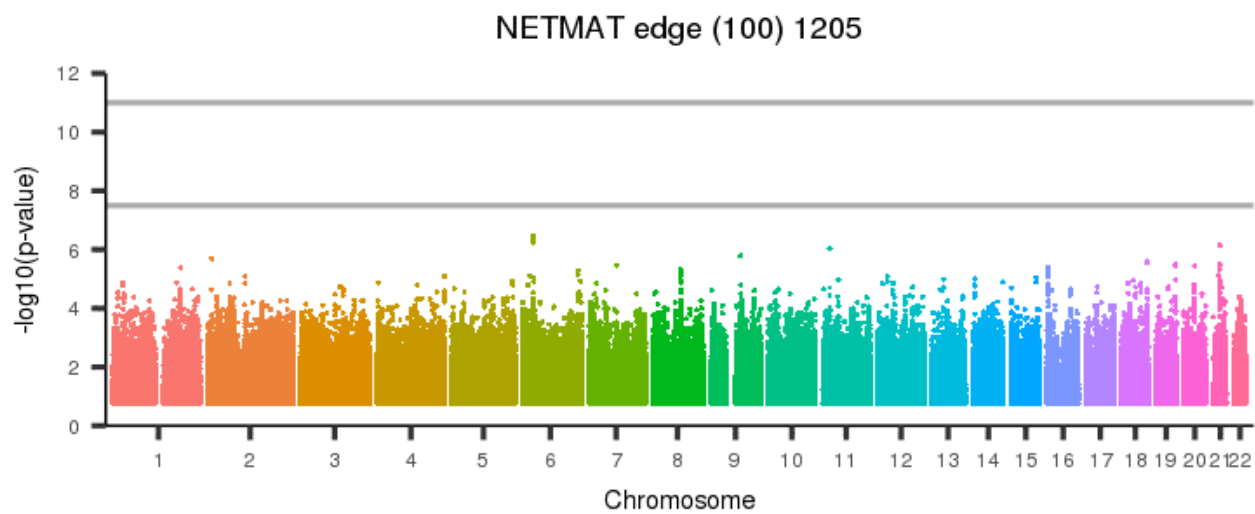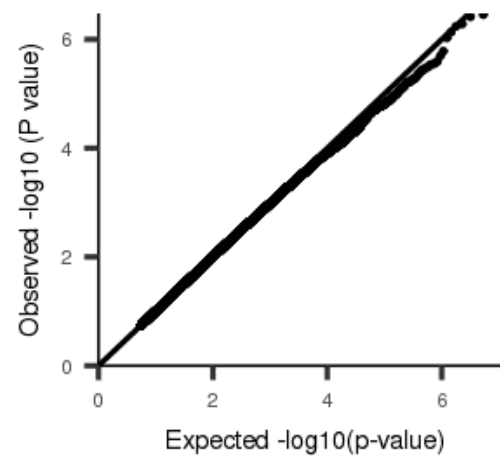

[back to list of plots](#)

Figure 2362: NETMAT edge (100) 1206

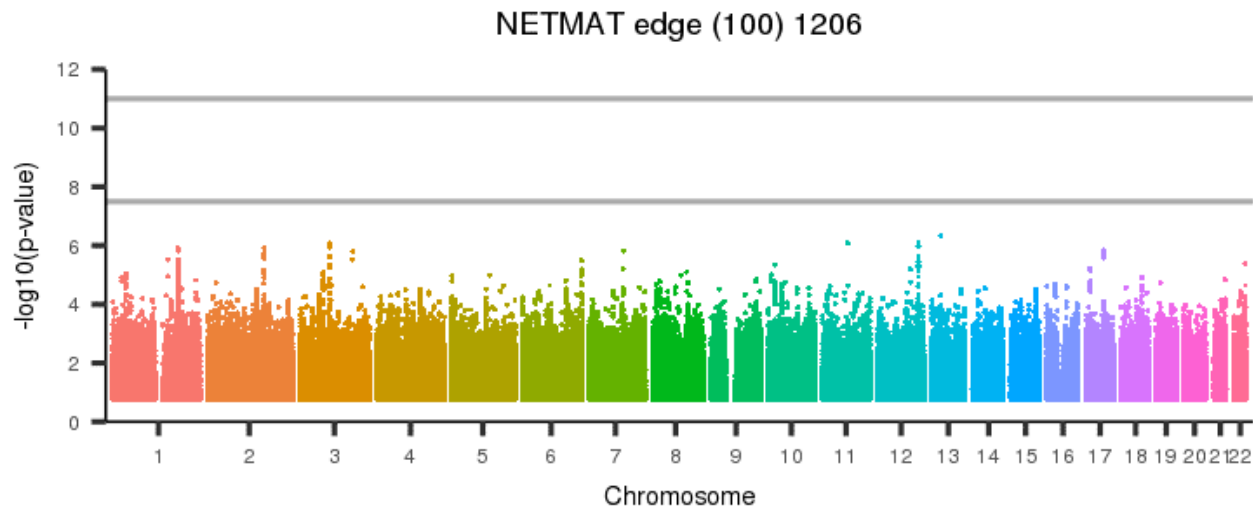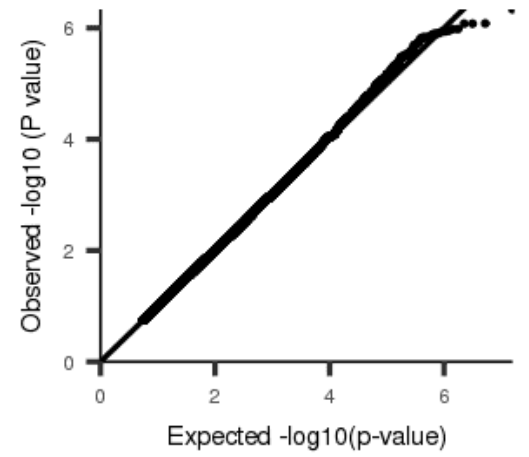

[back to list of plots](#)

Figure 2363: NETMAT edge (100) 1207

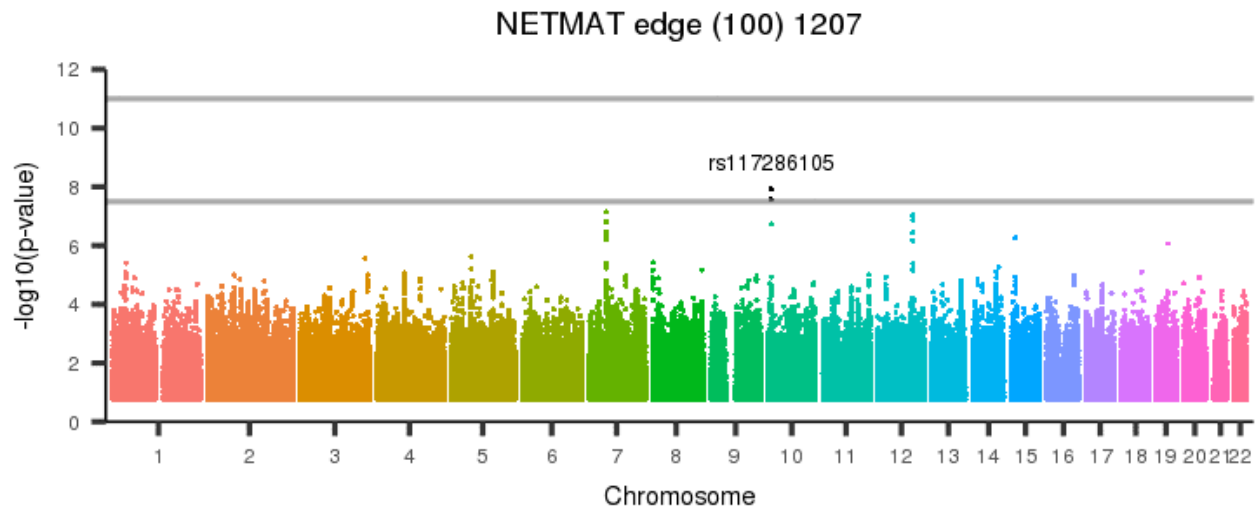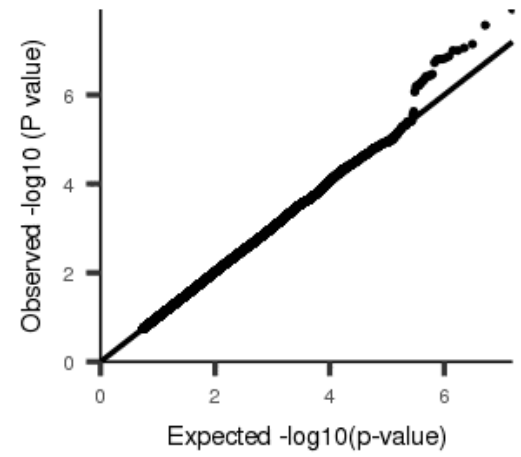

[back to list of plots](#)

Figure 2364: NETMAT edge (100) 1208

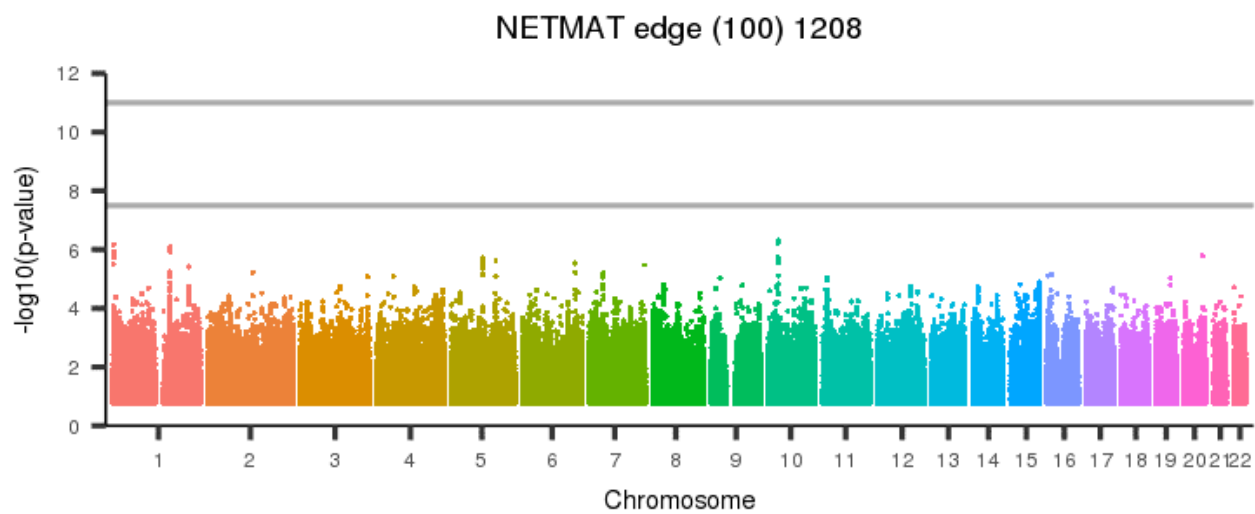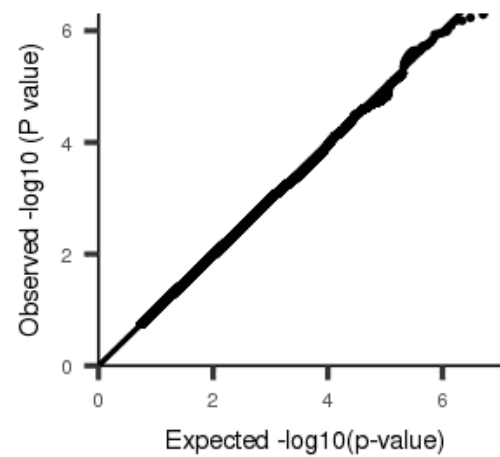

[back to list of plots](#)

Figure 2365: NETMAT edge (100) 1209

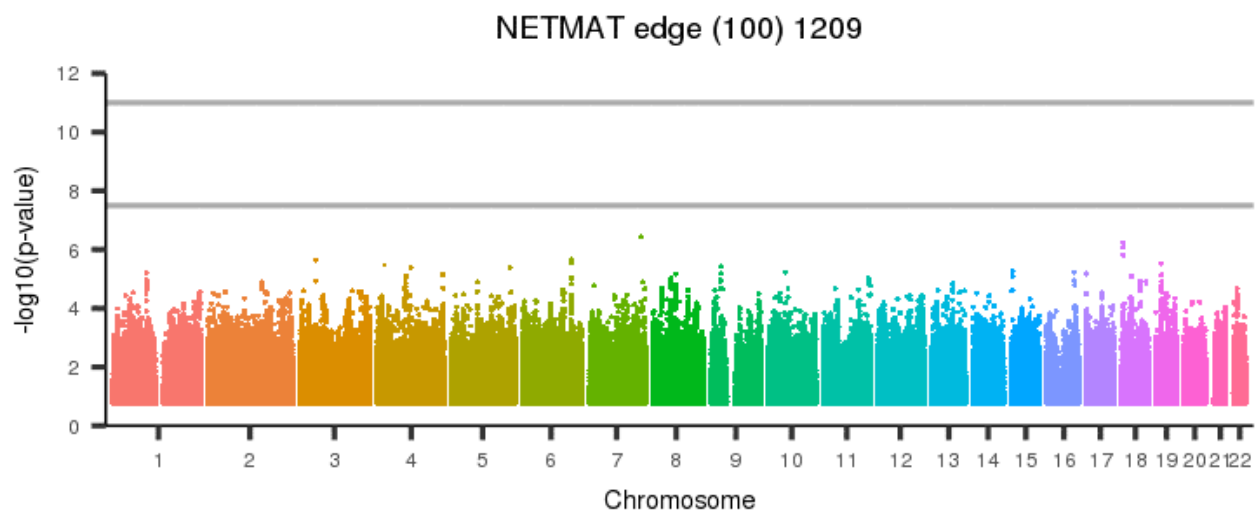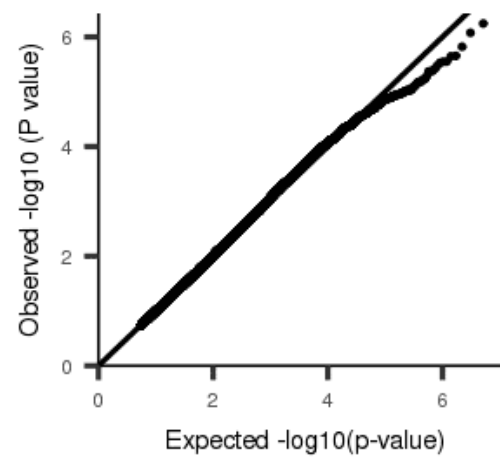

[back to list of plots](#)



Figure 2366: NETMAT edge (100) 1210

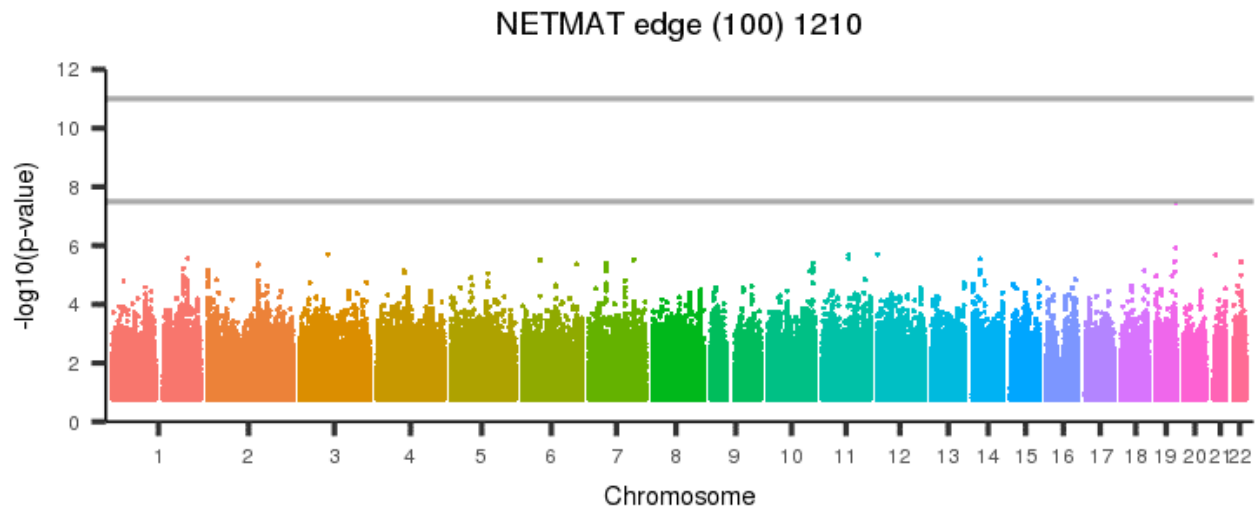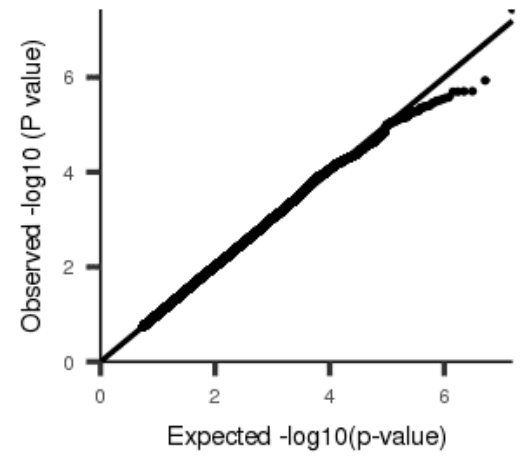

[back to list of plots](#)

Figure 2367: NETMAT edge (100) 1211

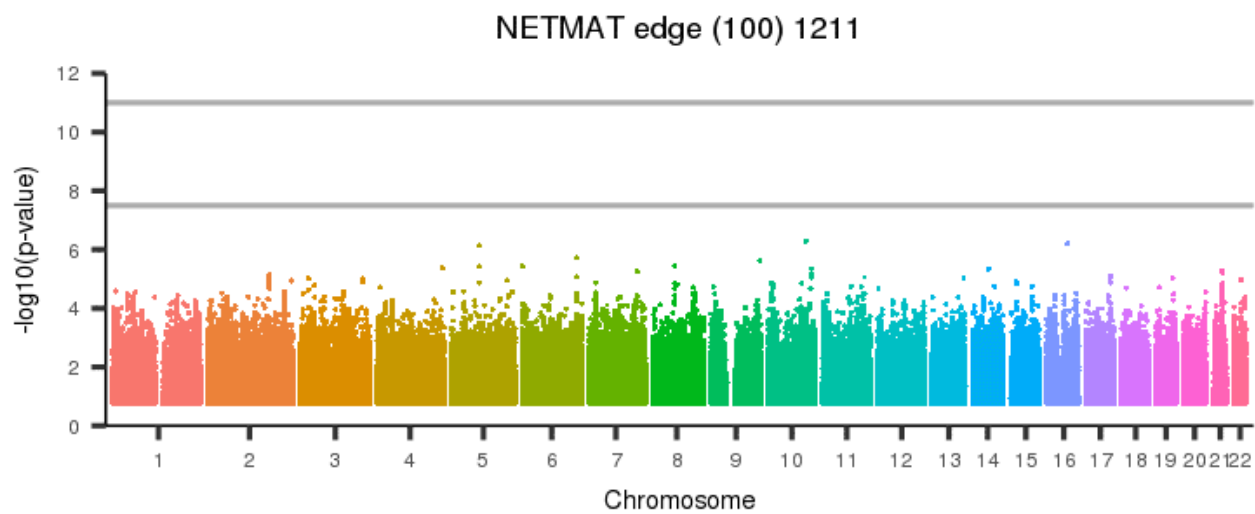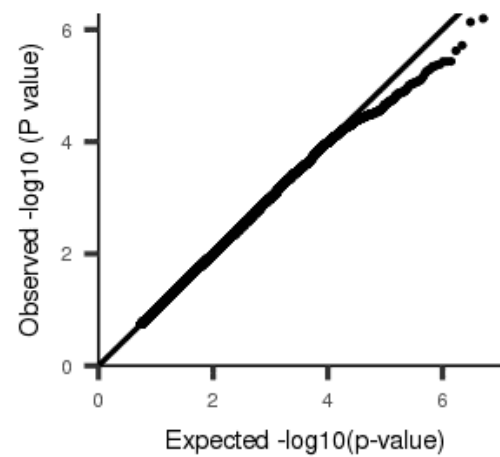

[back to list of plots](#)

Figure 2368: NETMAT edge (100) 1212

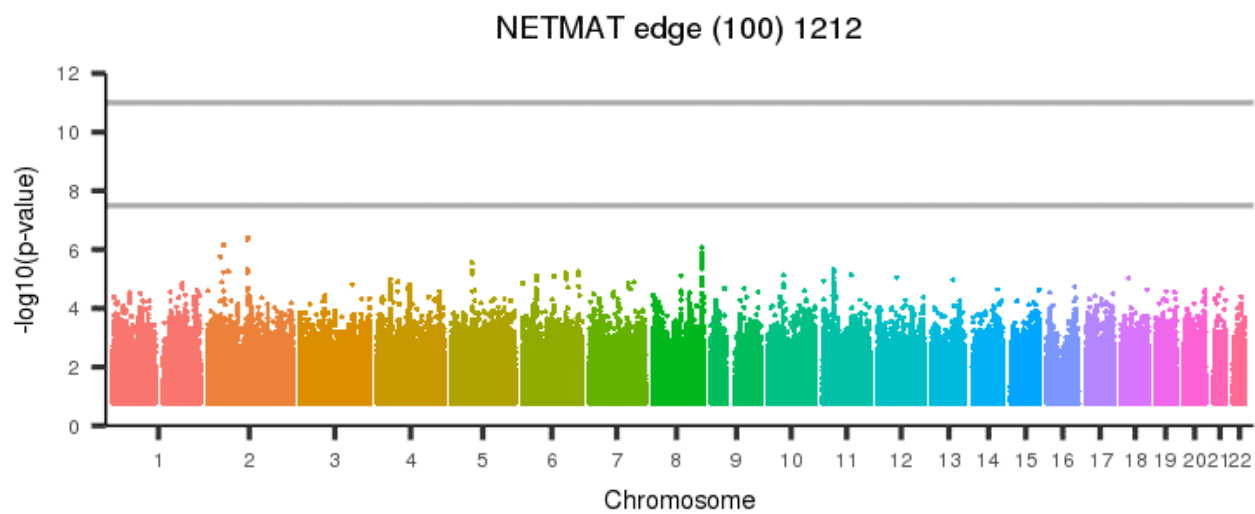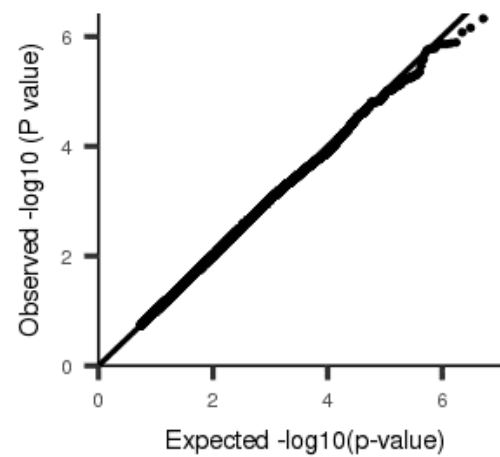

[back to list of plots](#)

Figure 2369: NETMAT edge (100) 1213

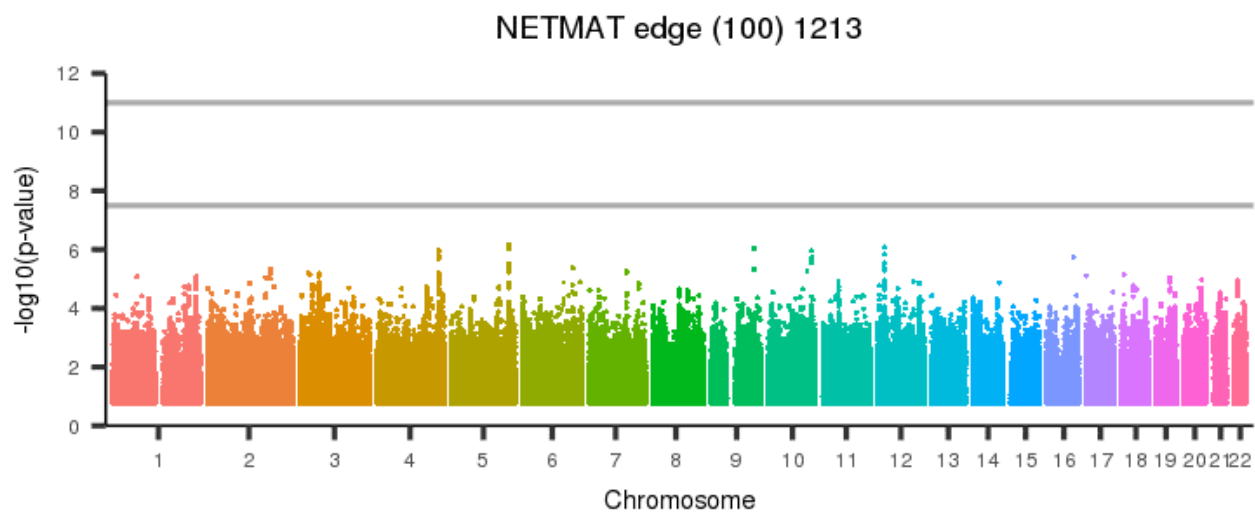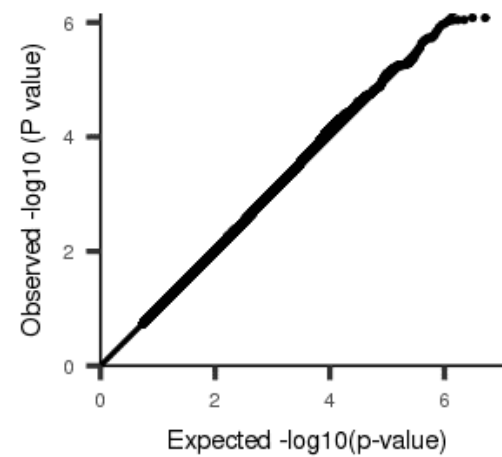

[back to list of plots](#)

Figure 2370: NETMAT edge (100) 1214

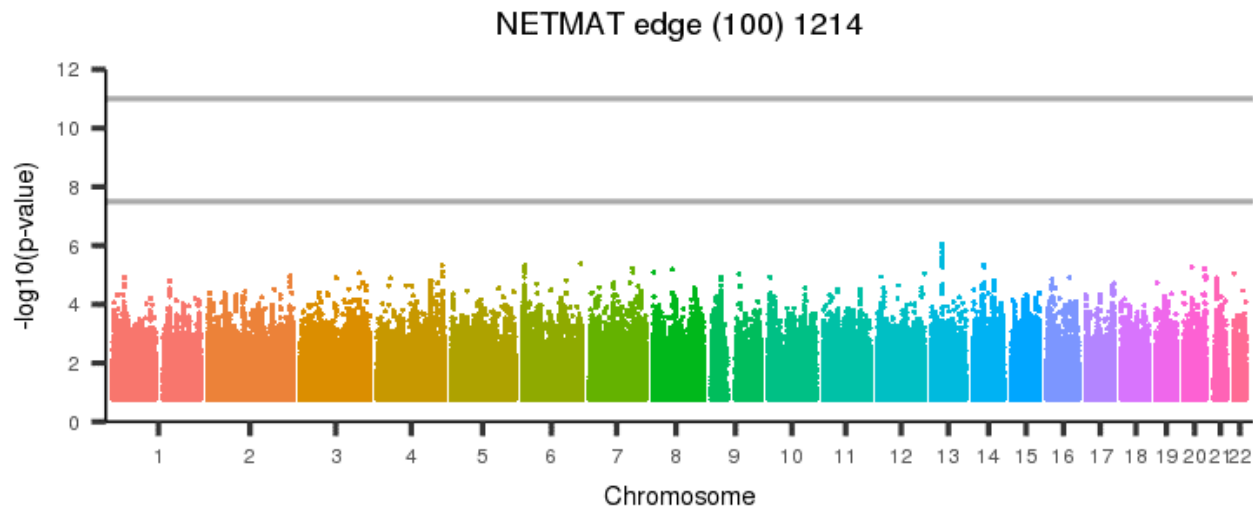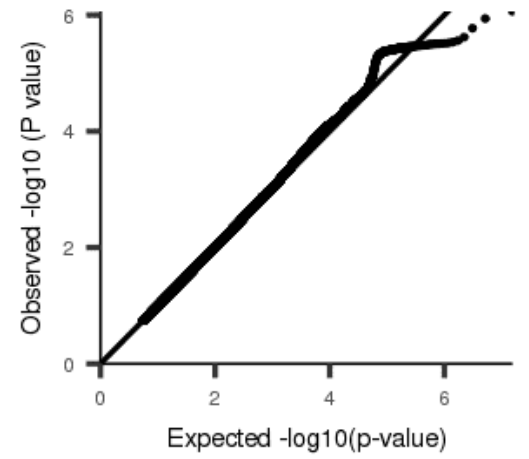

[back to list of plots](#)

Figure 2371: NETMAT edge (100) 1215

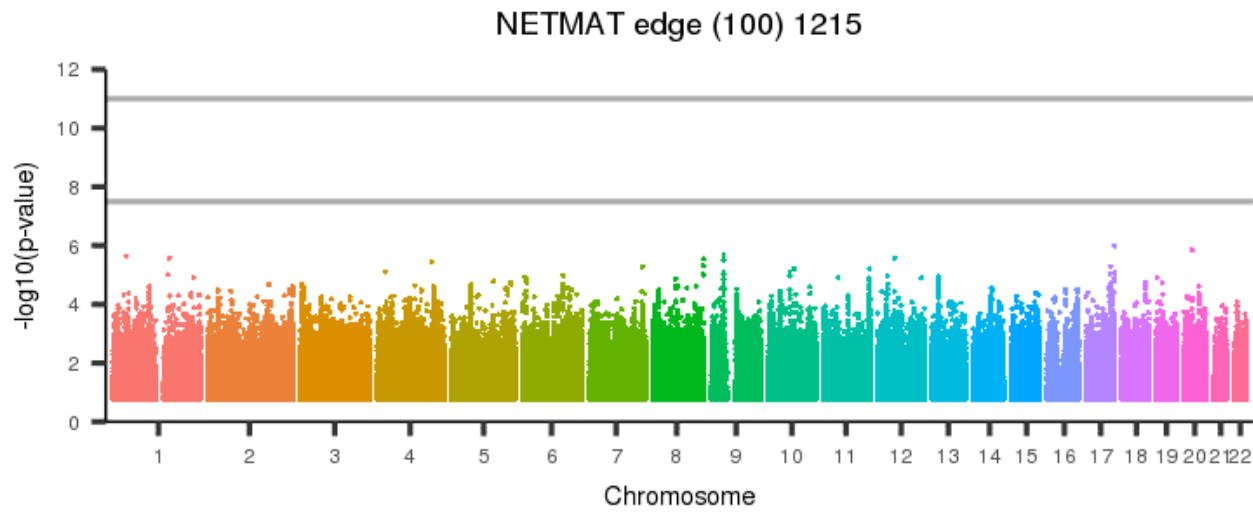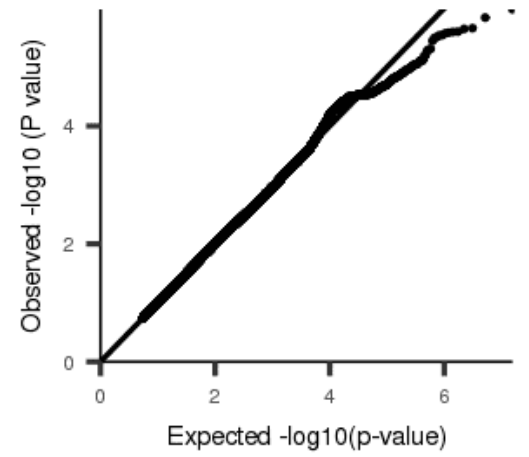

[back to list of plots](#)

Figure 2372: NETMAT edge (100) 1216

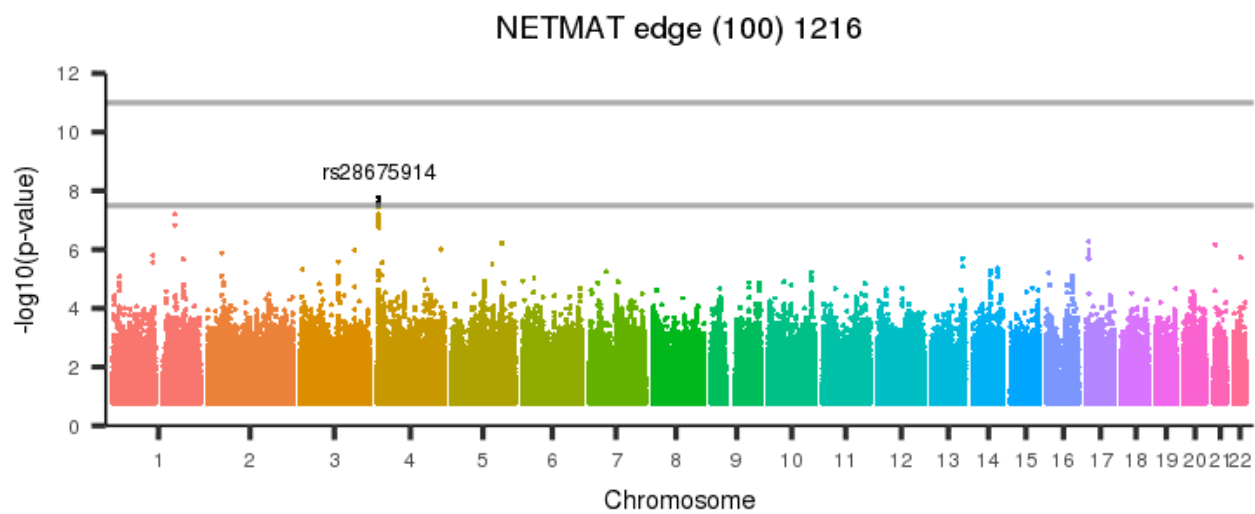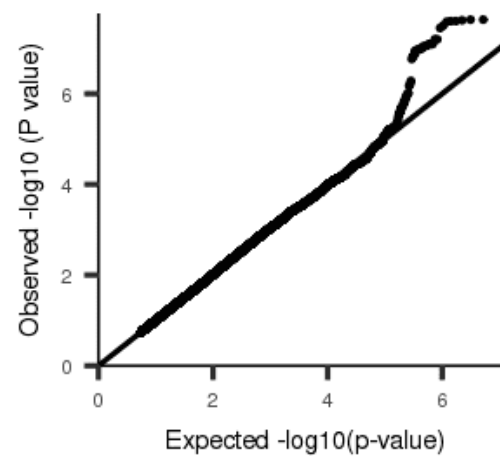

[back to list of plots](#)

Figure 2373: NETMAT edge (100) 1217

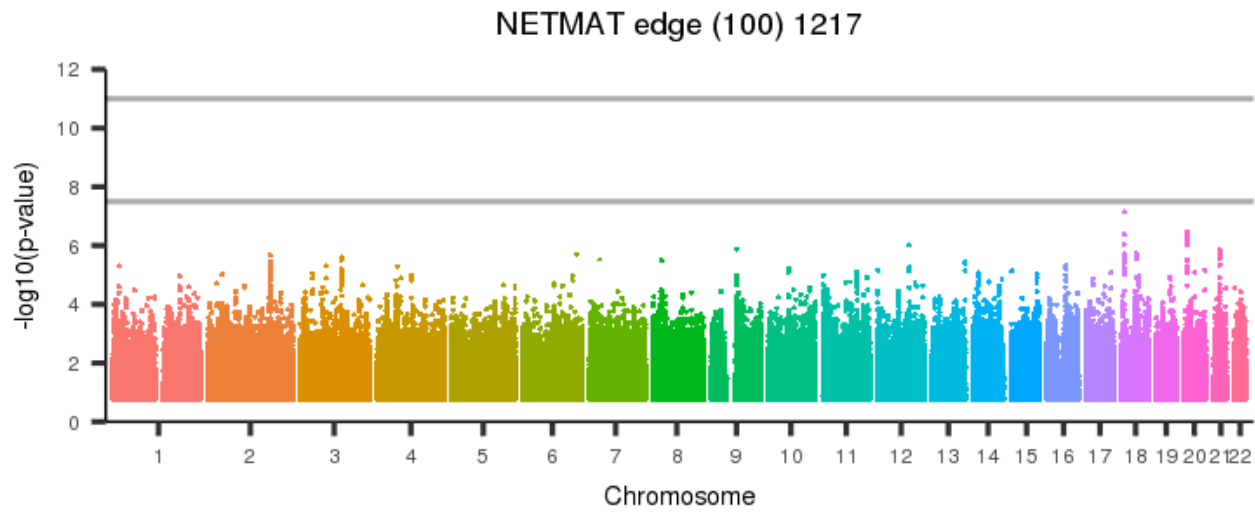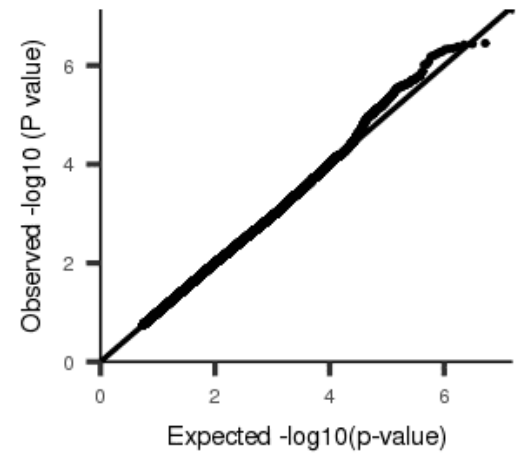

[back to list of plots](#)



Figure 2374: NETMAT edge (100) 1218

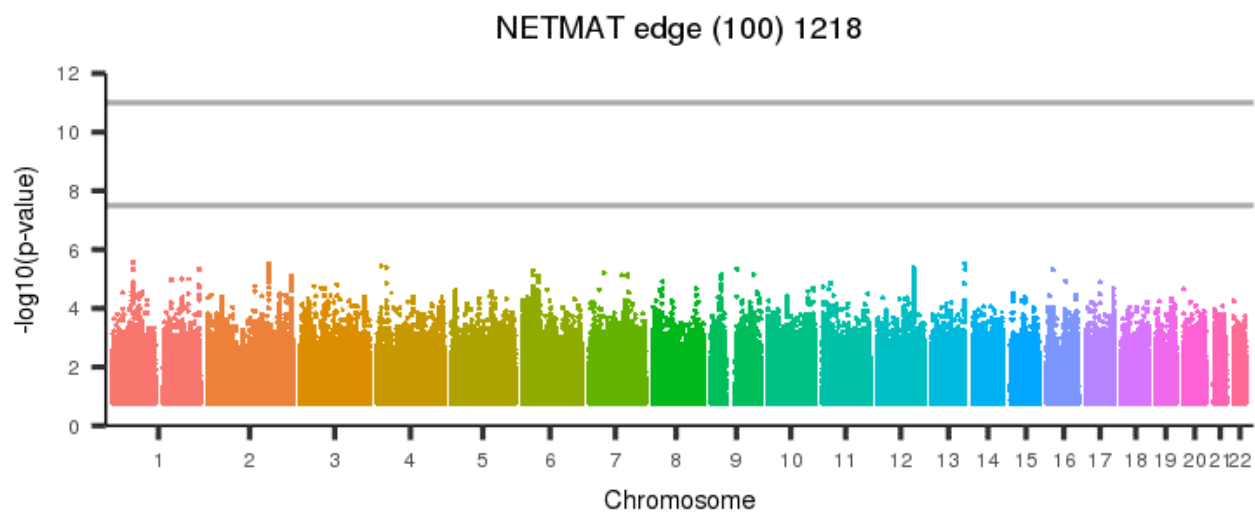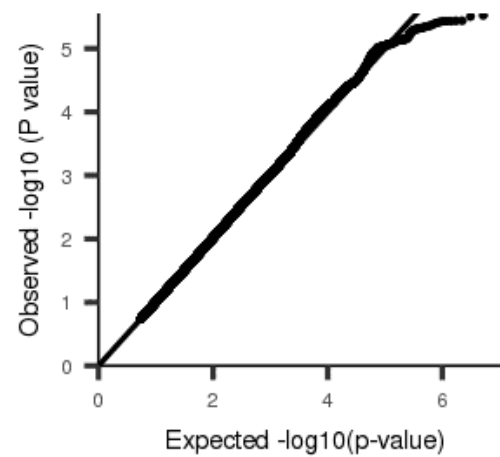

[back to list of plots](#)

Figure 2375: NETMAT edge (100) 1219

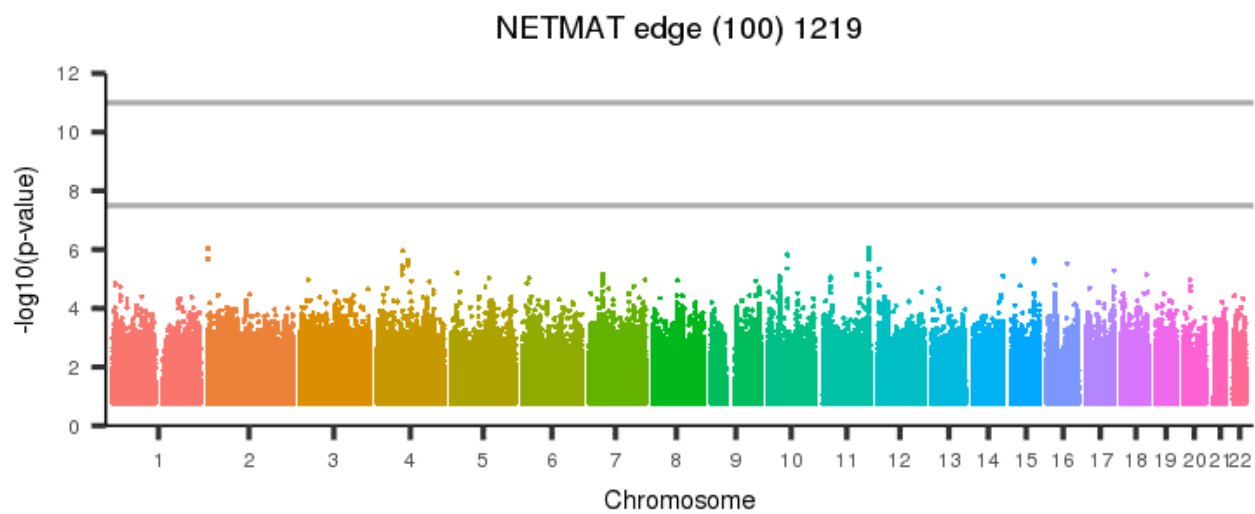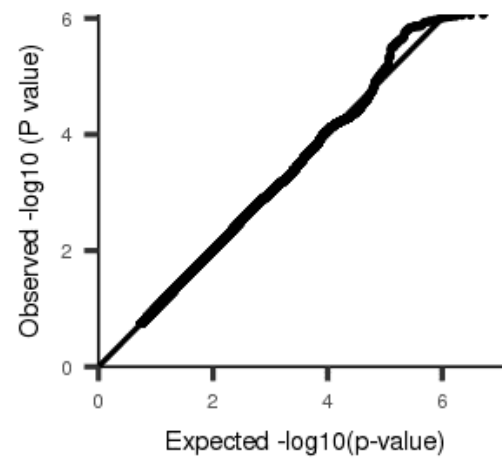

[back to list of plots](#)

Figure 2376: NETMAT edge (100) 1220

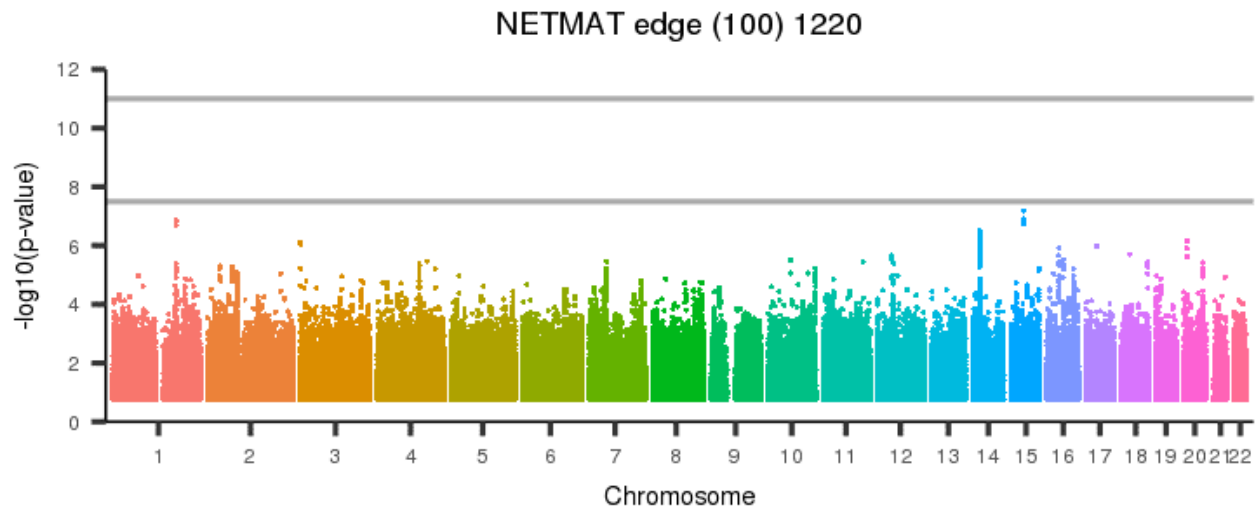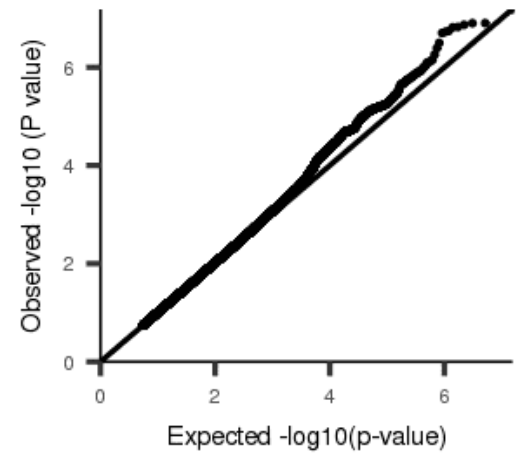

[back to list of plots](#)

Figure 2377: NETMAT edge (100) 1221

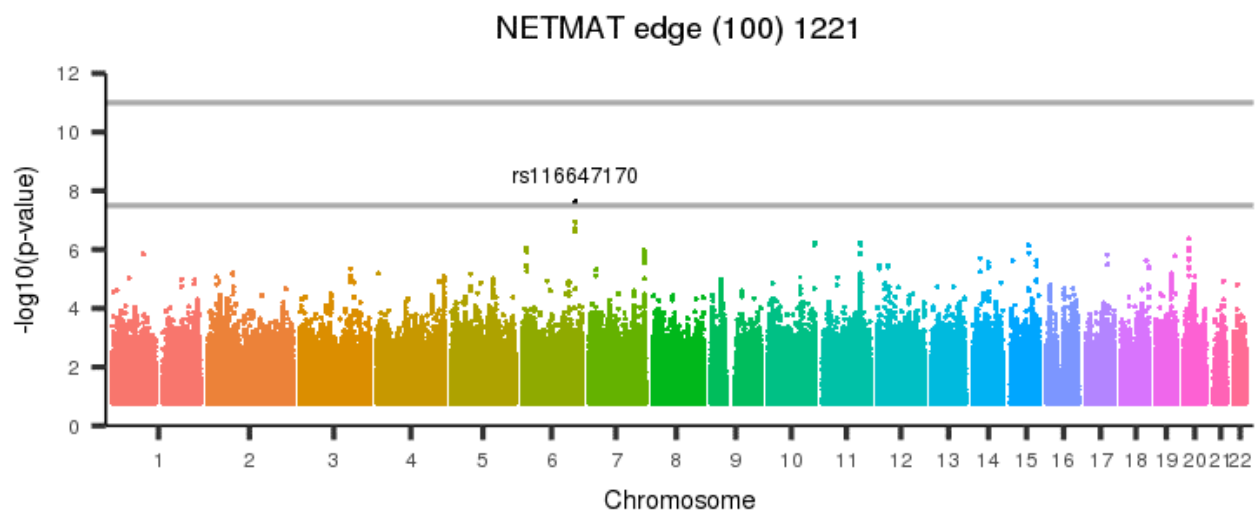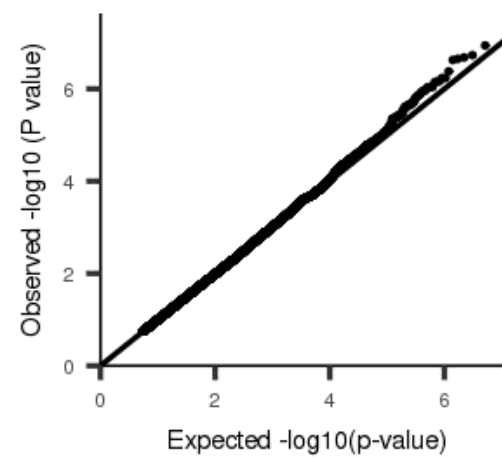

[back to list of plots](#)

Figure 2378: NETMAT edge (100) 1222

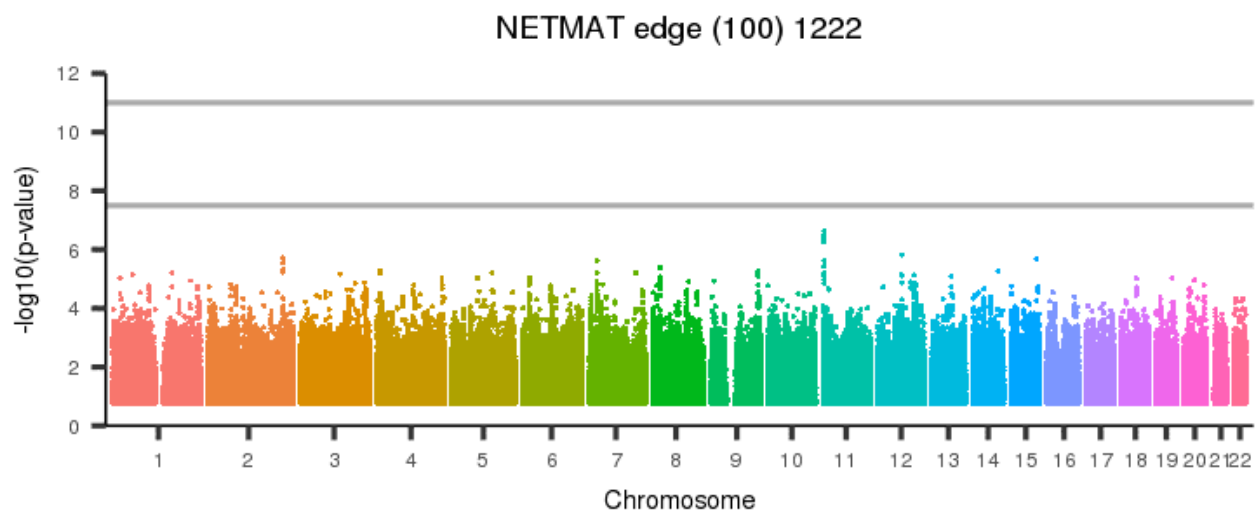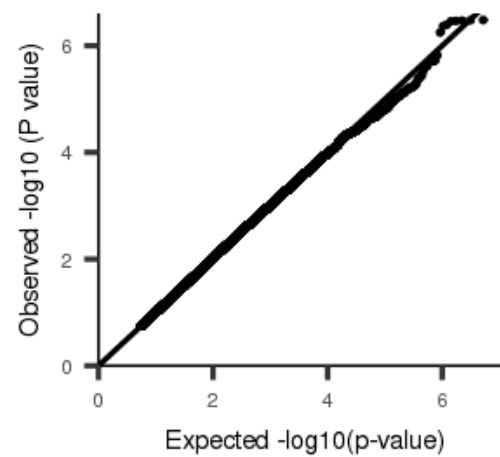

[back to list of plots](#)

Figure 2379: NETMAT edge (100) 1223

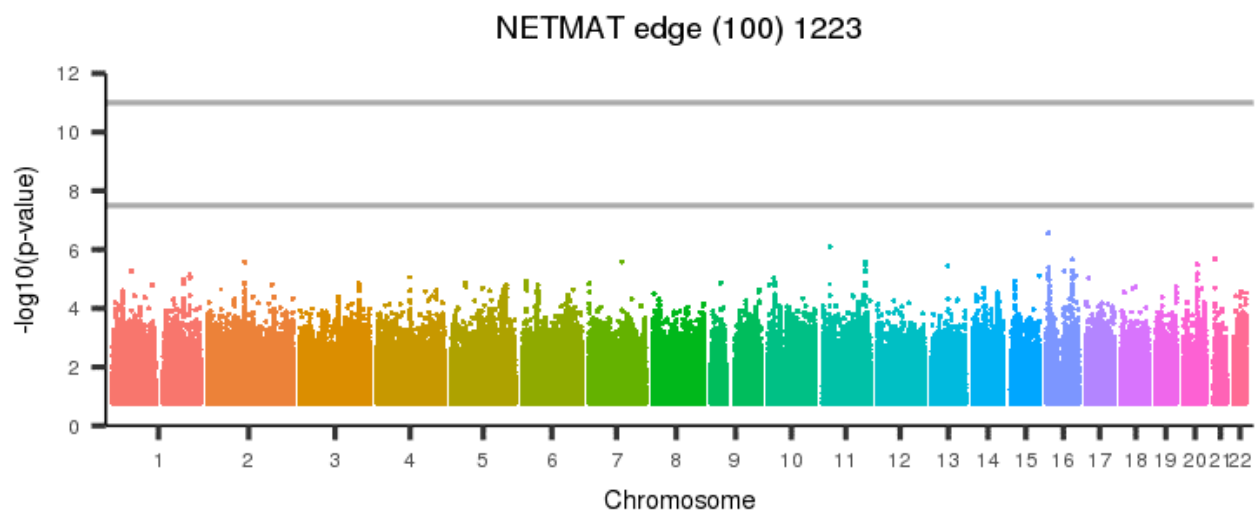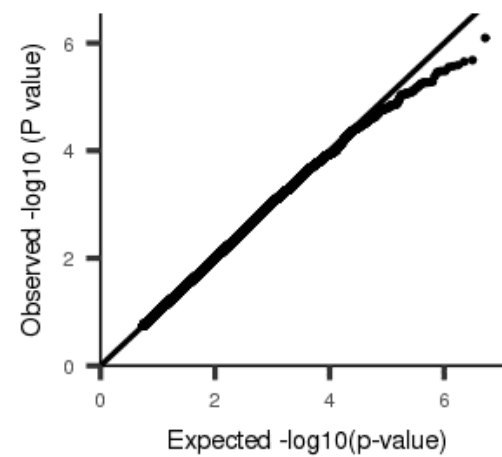

[back to list of plots](#)

Figure 2380: NETMAT edge (100) 1224

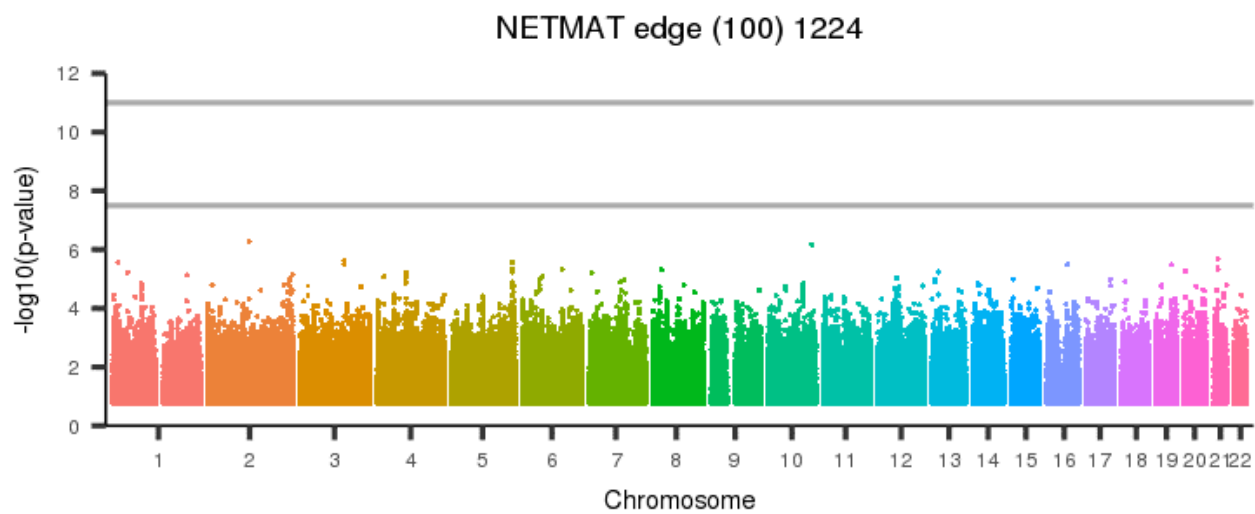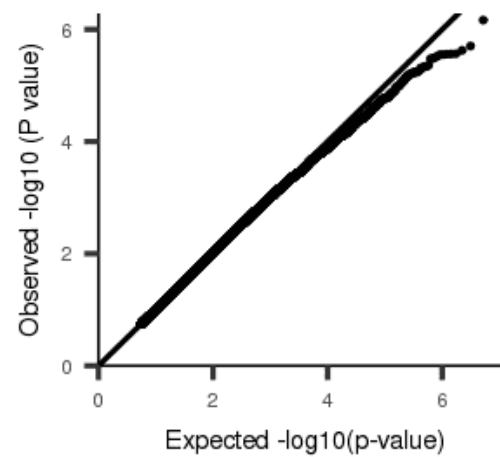

[back to list of plots](#)

Figure 2381: NETMAT edge (100) 1225

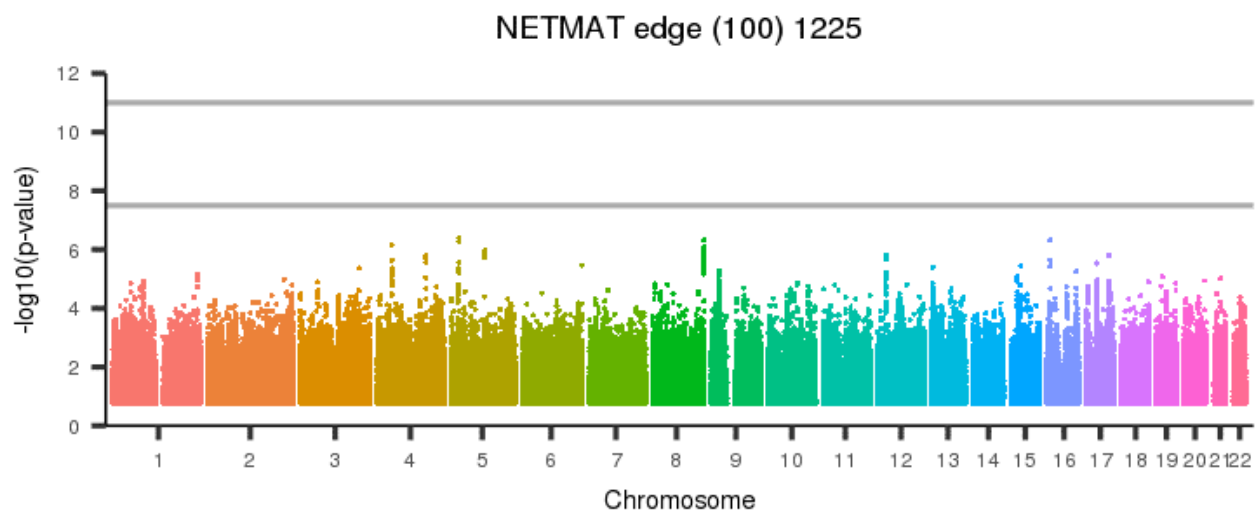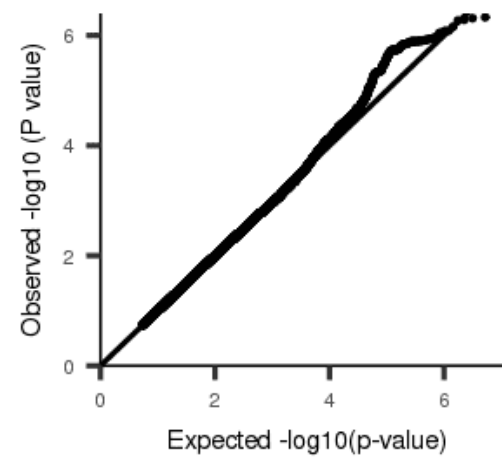

[back to list of plots](#)



Figure 2382: NETMAT edge (100) 1226

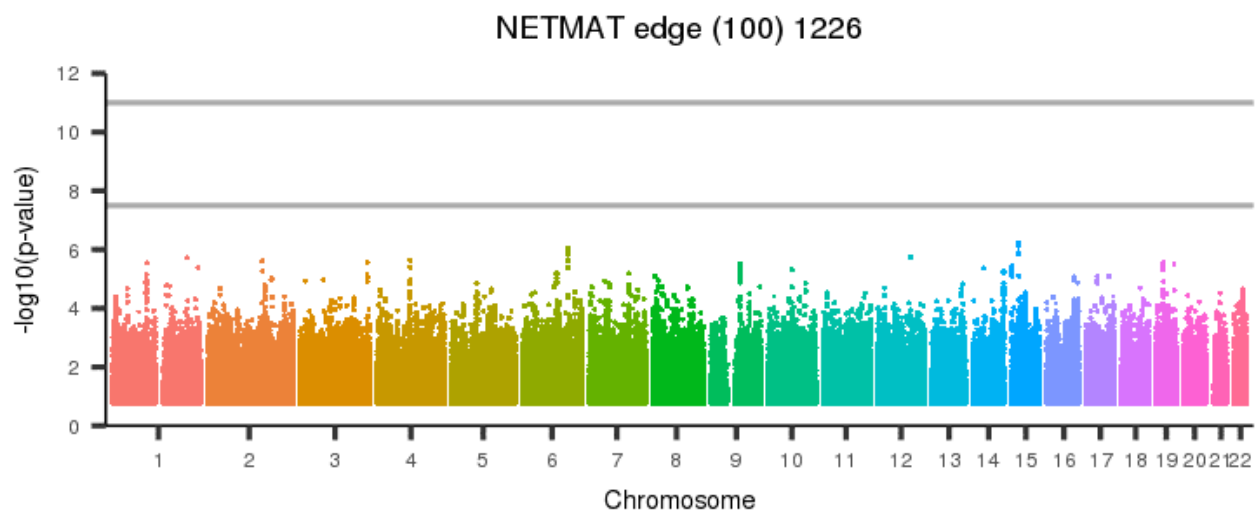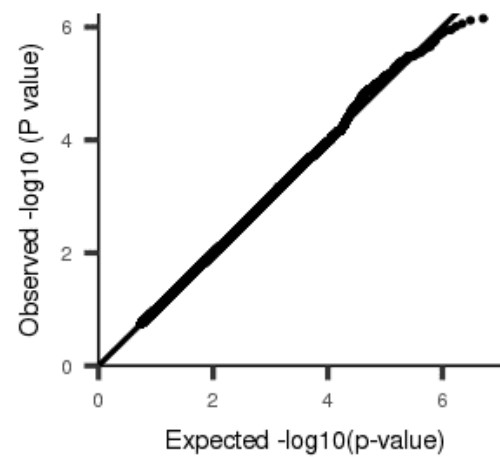

[back to list of plots](#)

Figure 2383: NETMAT edge (100) 1227

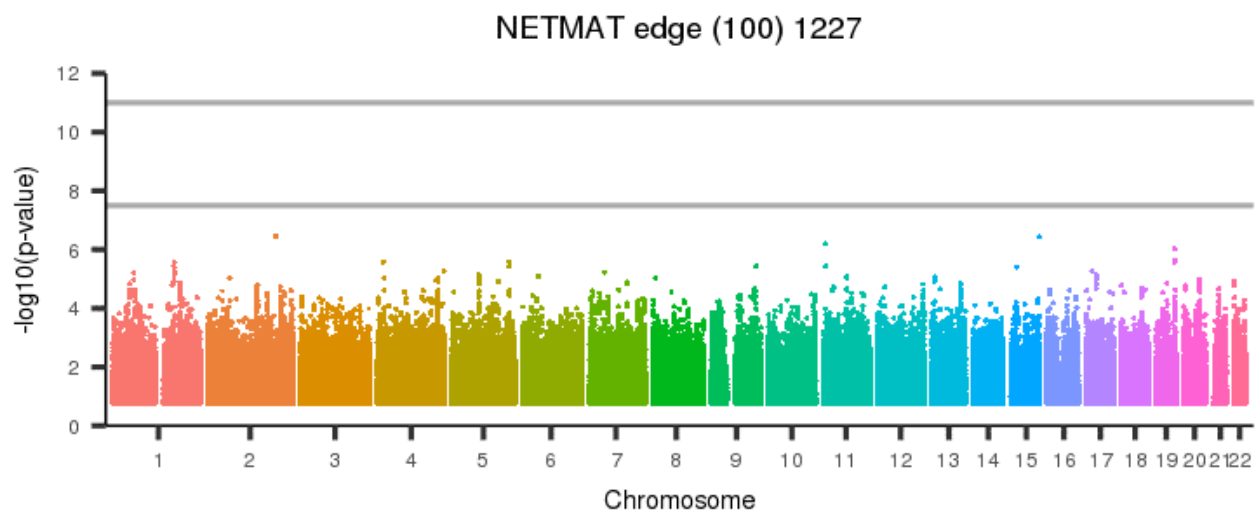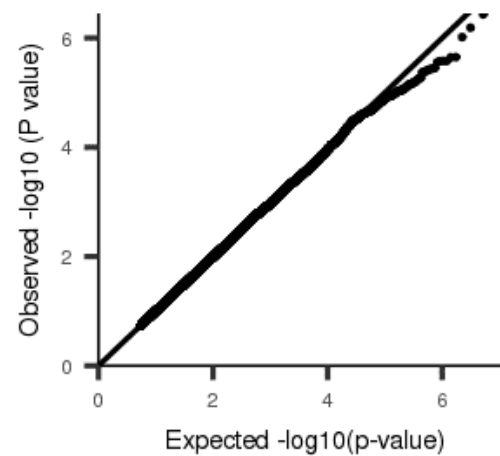

[back to list of plots](#)

Figure 2384: NETMAT edge (100) 1228

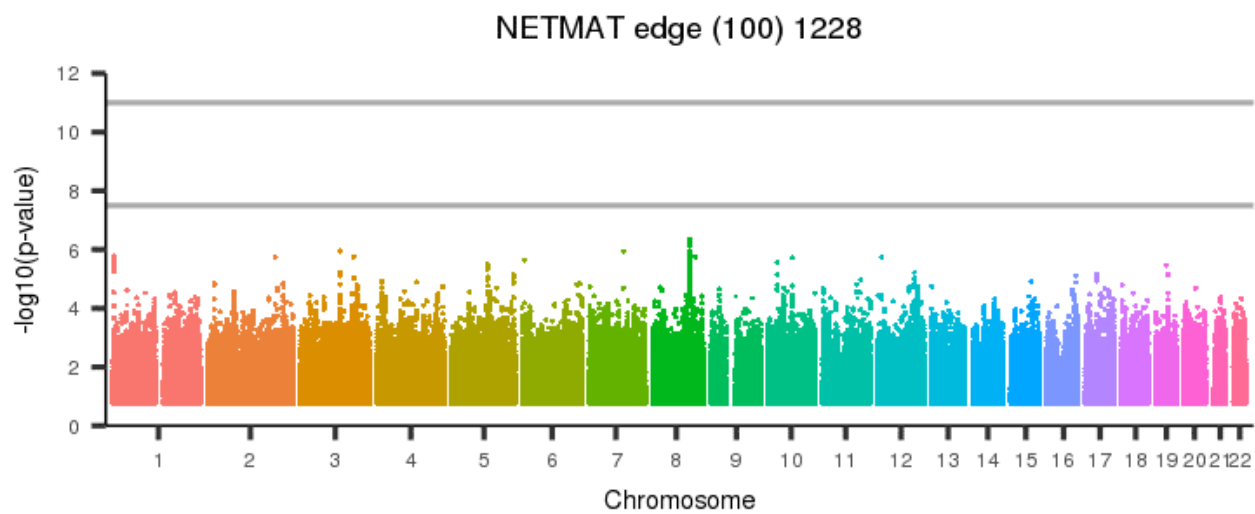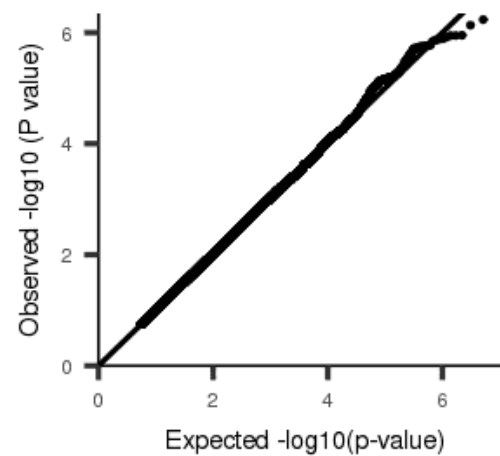

[back to list of plots](#)

Figure 2385: NETMAT edge (100) 1229

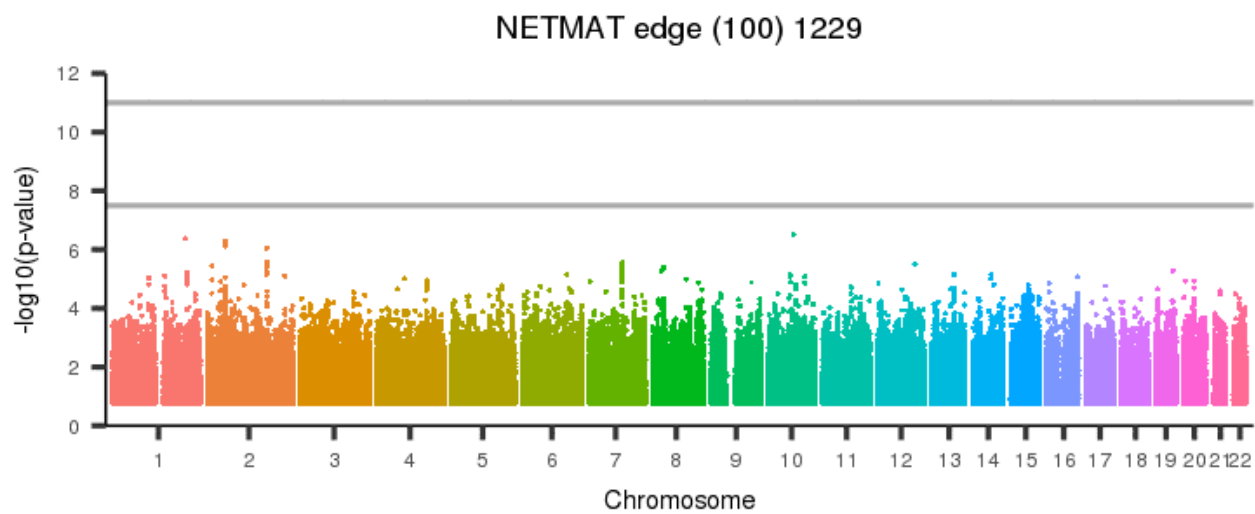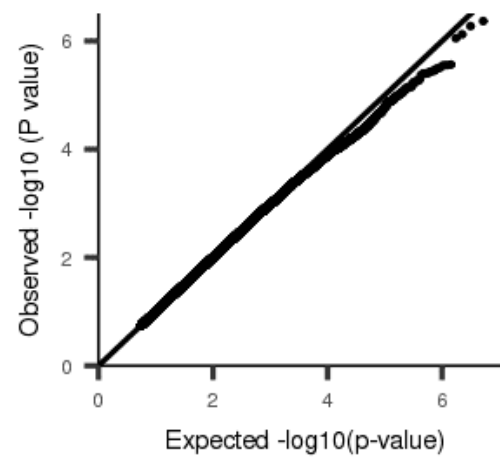

[back to list of plots](#)

Figure 2386: NETMAT edge (100) 1230

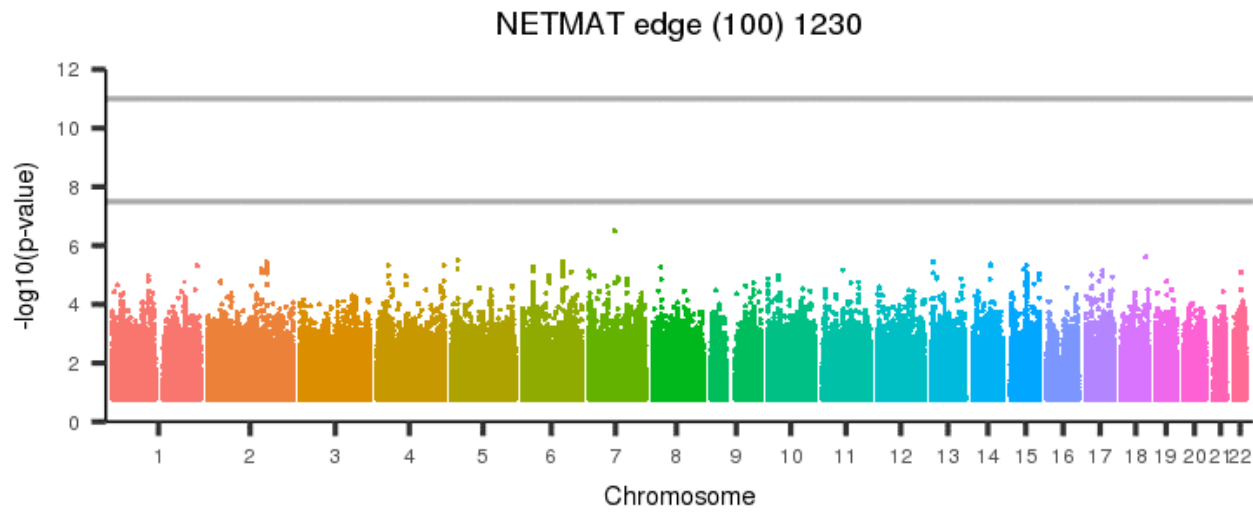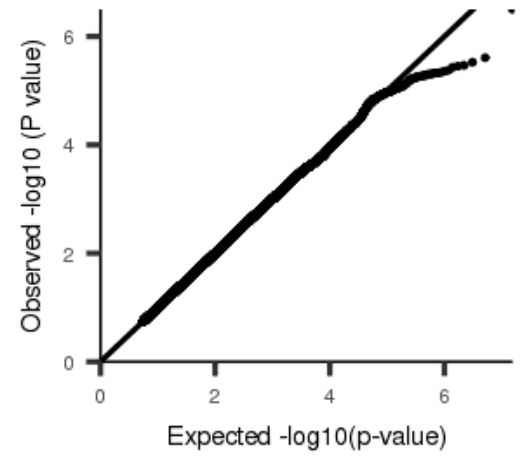

[back to list of plots](#)

Figure 2387: NETMAT edge (100) 1231

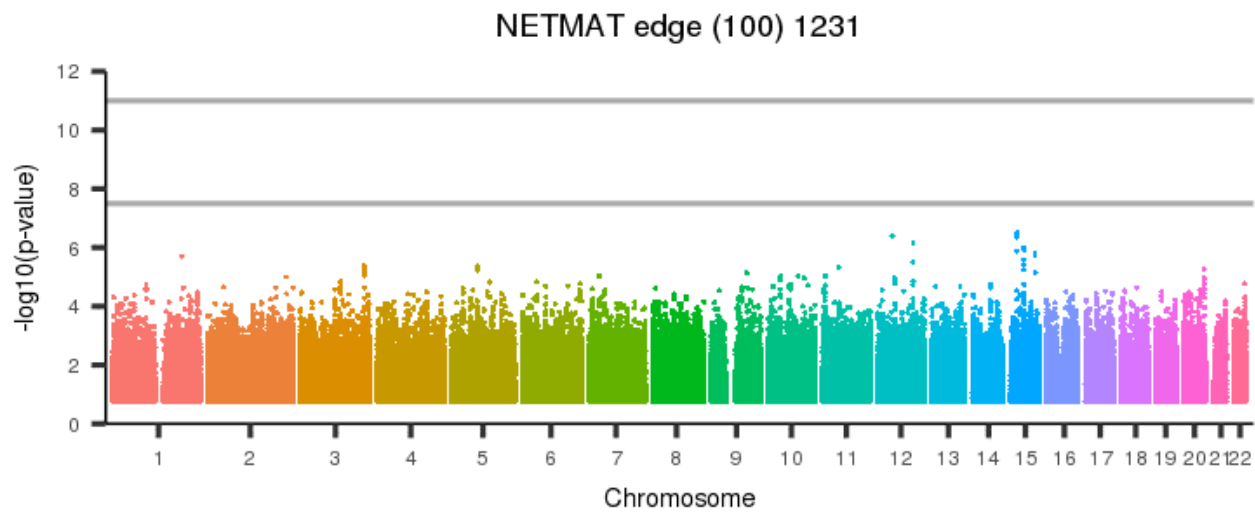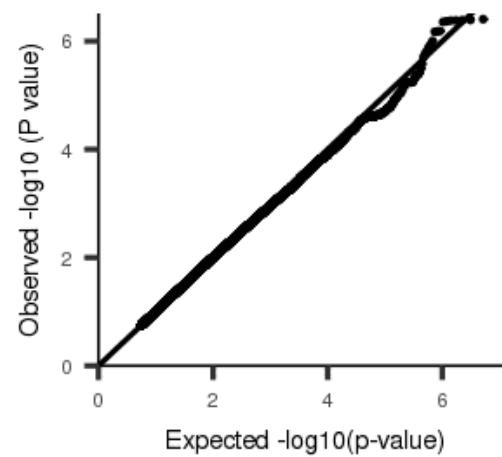

[back to list of plots](#)

Figure 2388: NETMAT edge (100) 1232

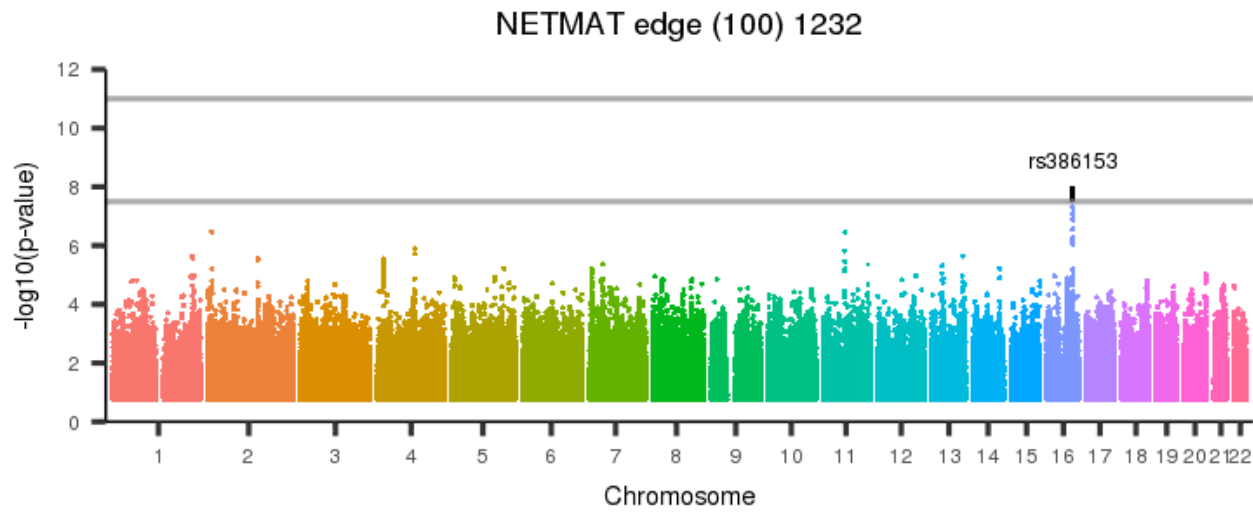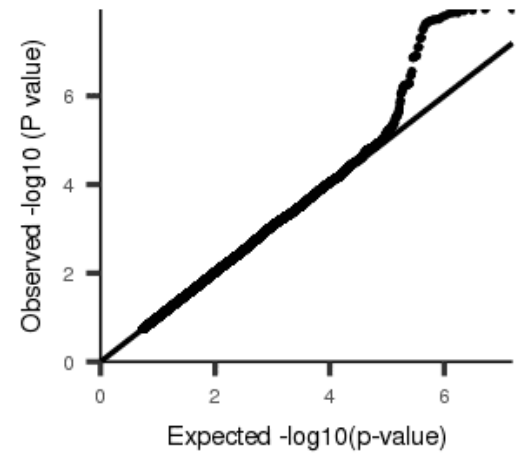

[back to list of plots](#)

Figure 2389: NETMAT edge (100) 1233

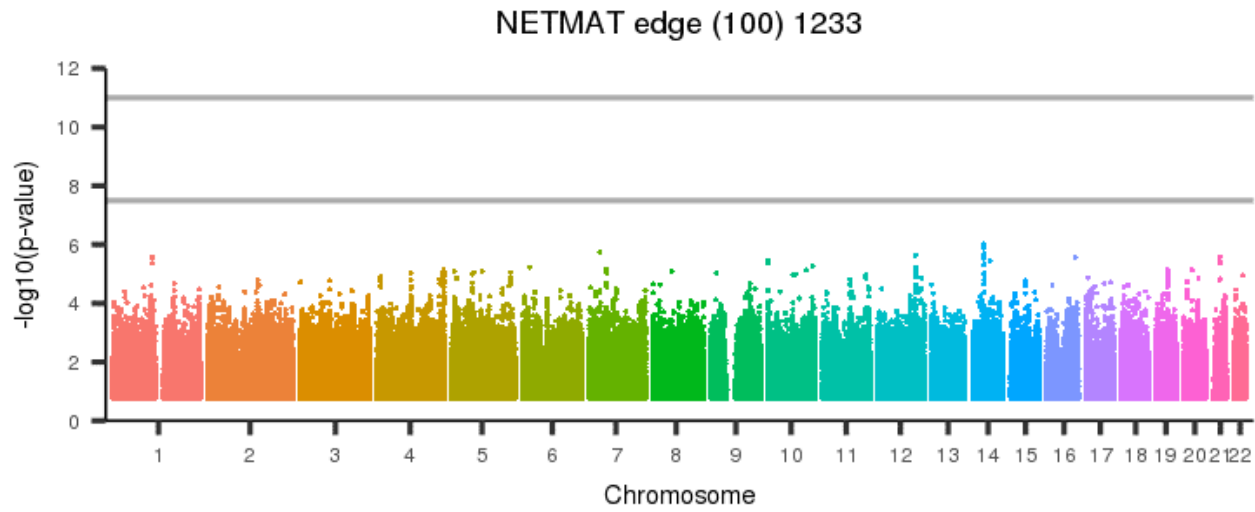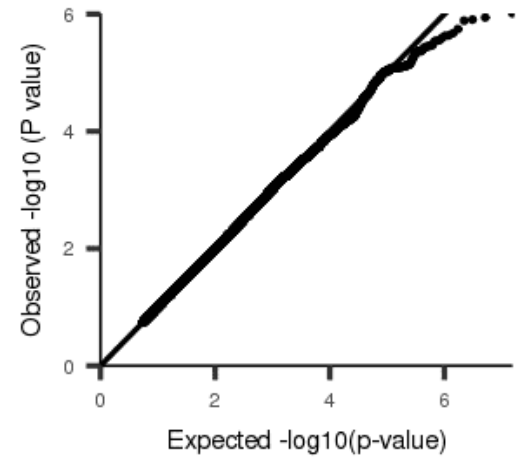

[back to list of plots](#)



Figure 2390: NETMAT edge (100) 1234

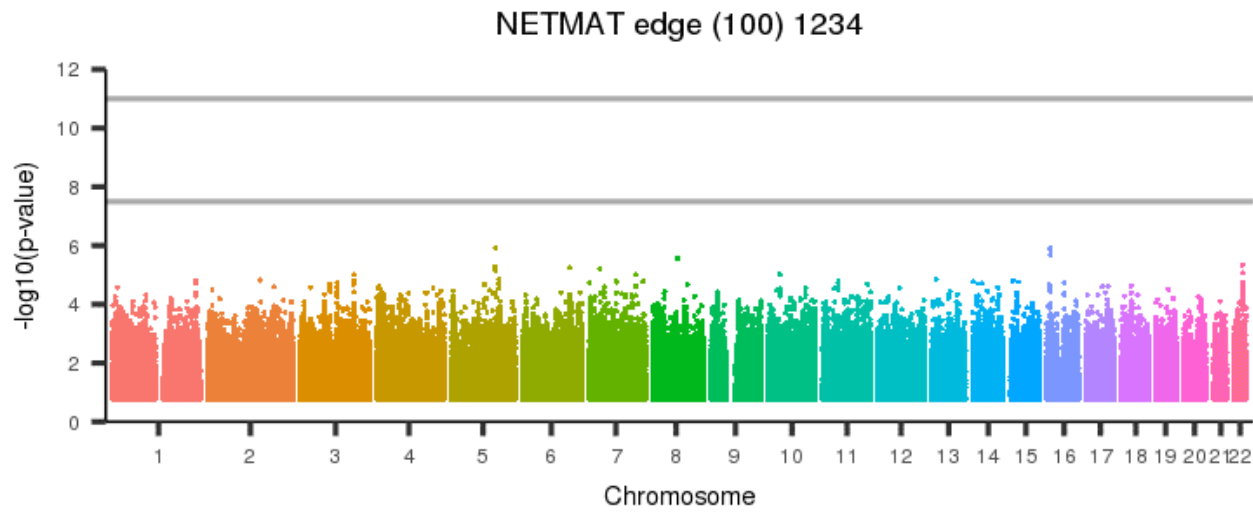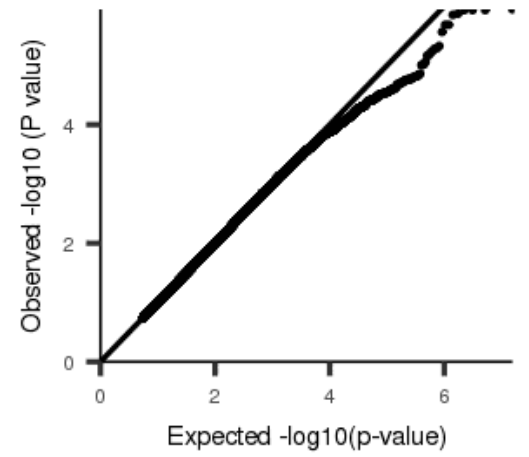

[back to list of plots](#)

Figure 2391: NETMAT edge (100) 1235

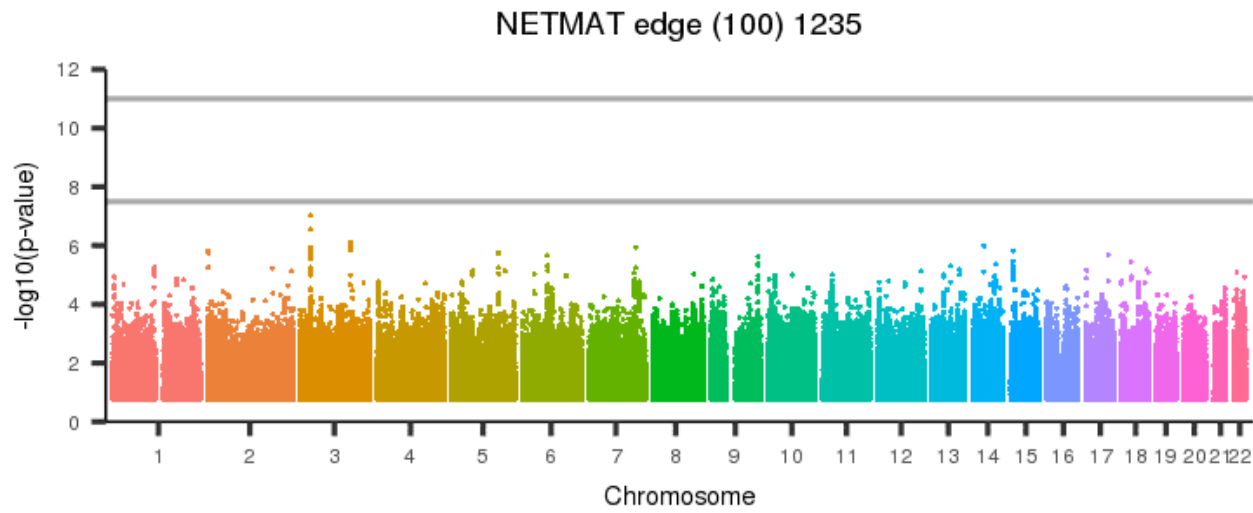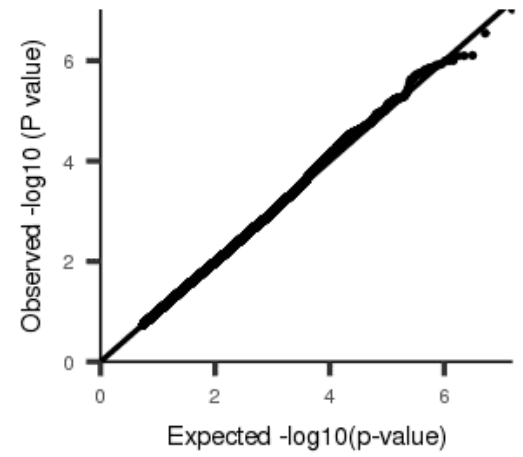

[back to list of plots](#)

Figure 2392: NETMAT edge (100) 1236

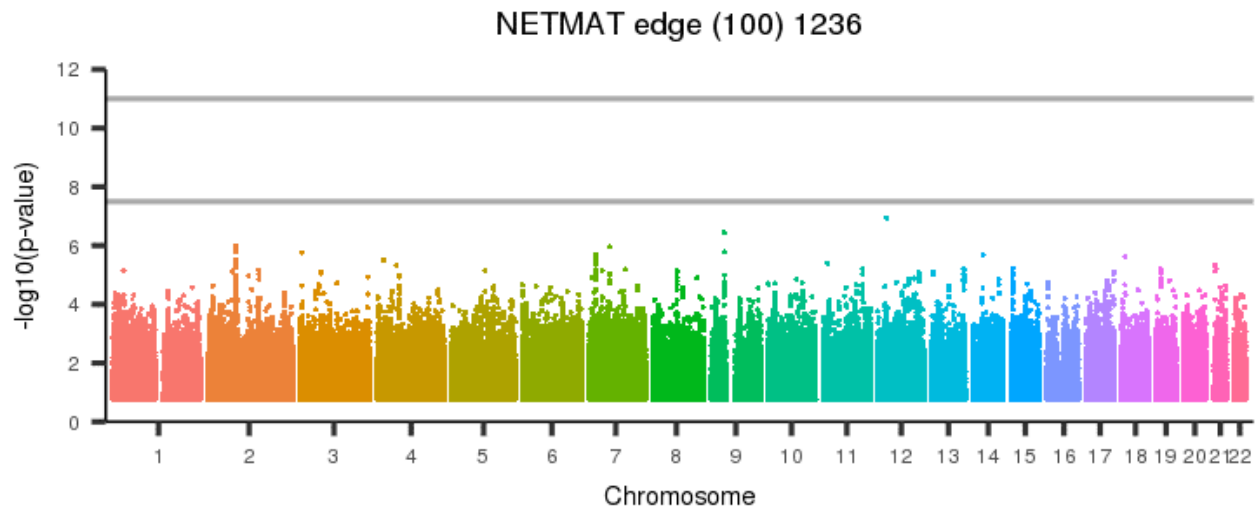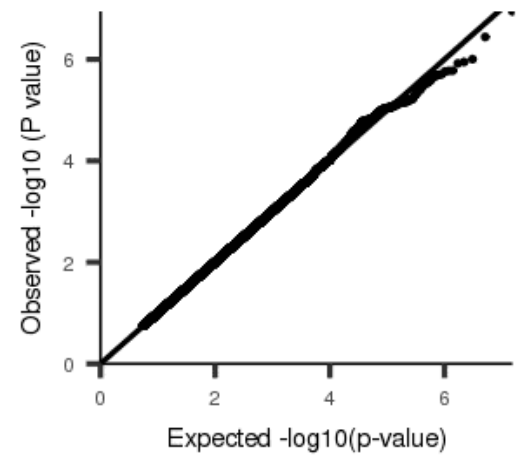

[back to list of plots](#)

Figure 2393: NETMAT edge (100) 1237

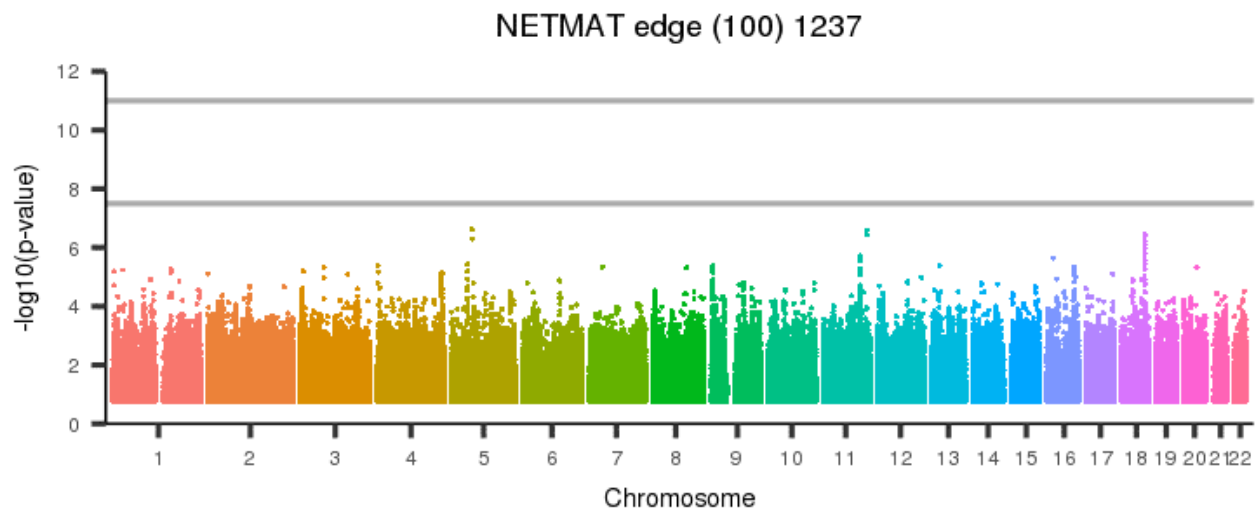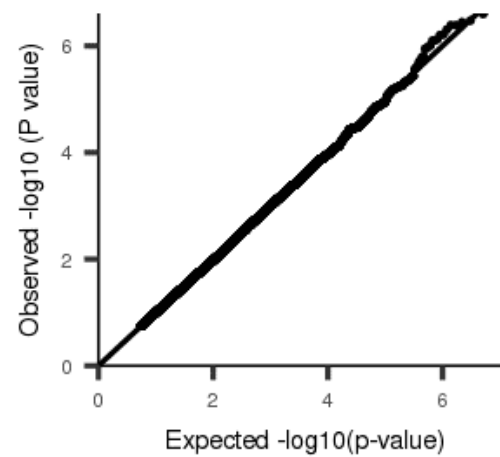

[back to list of plots](#)

Figure 2394: NETMAT edge (100) 1238

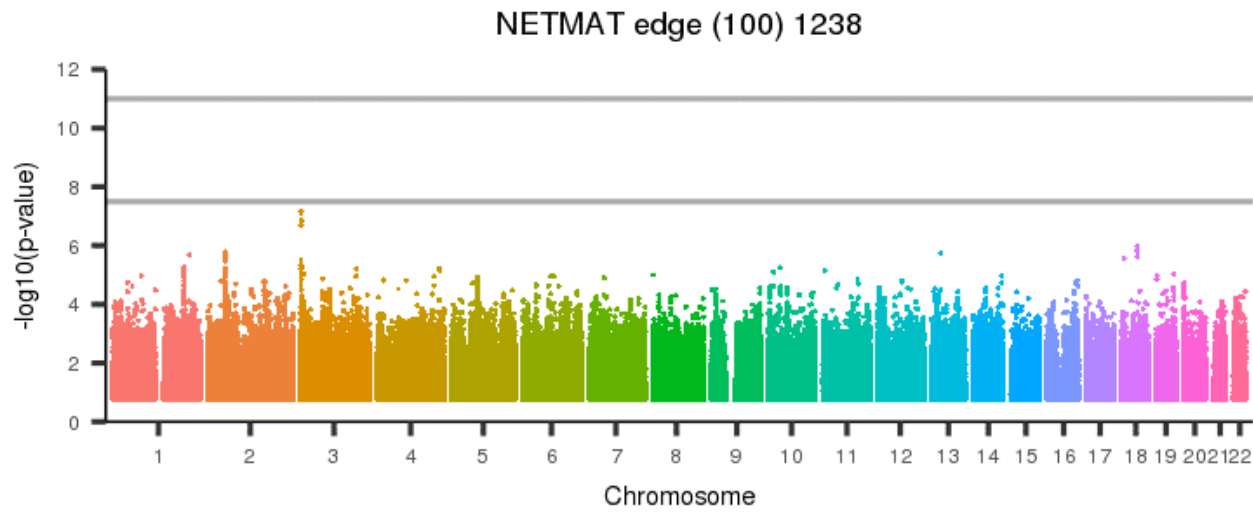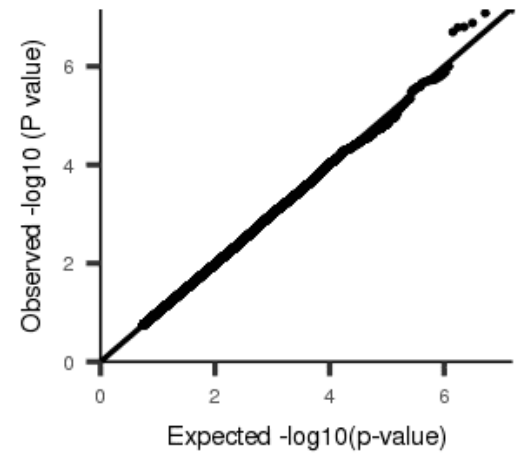

[back to list of plots](#)

Figure 2395: NETMAT edge (100) 1239

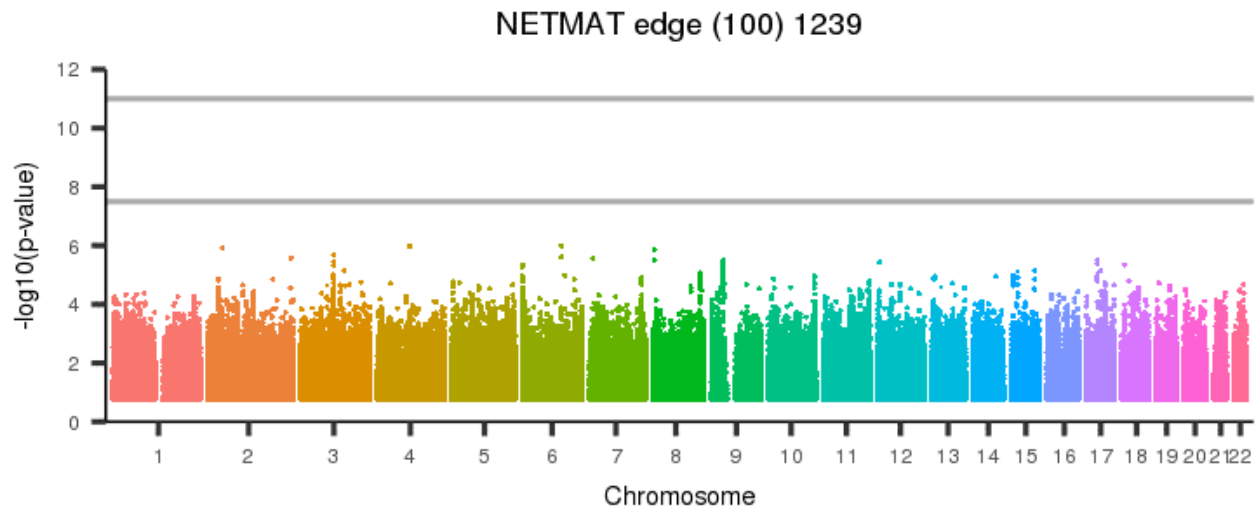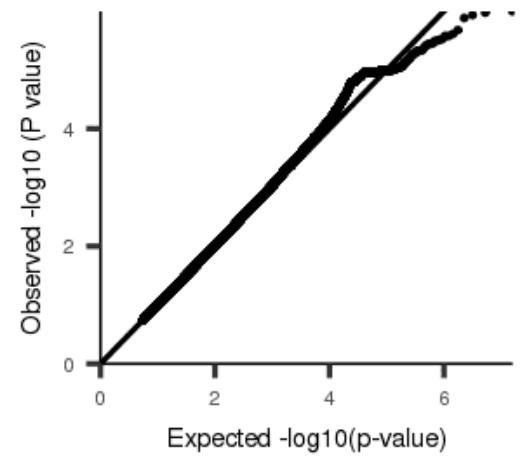

[back to list of plots](#)

Figure 2396: NETMAT edge (100) 1240

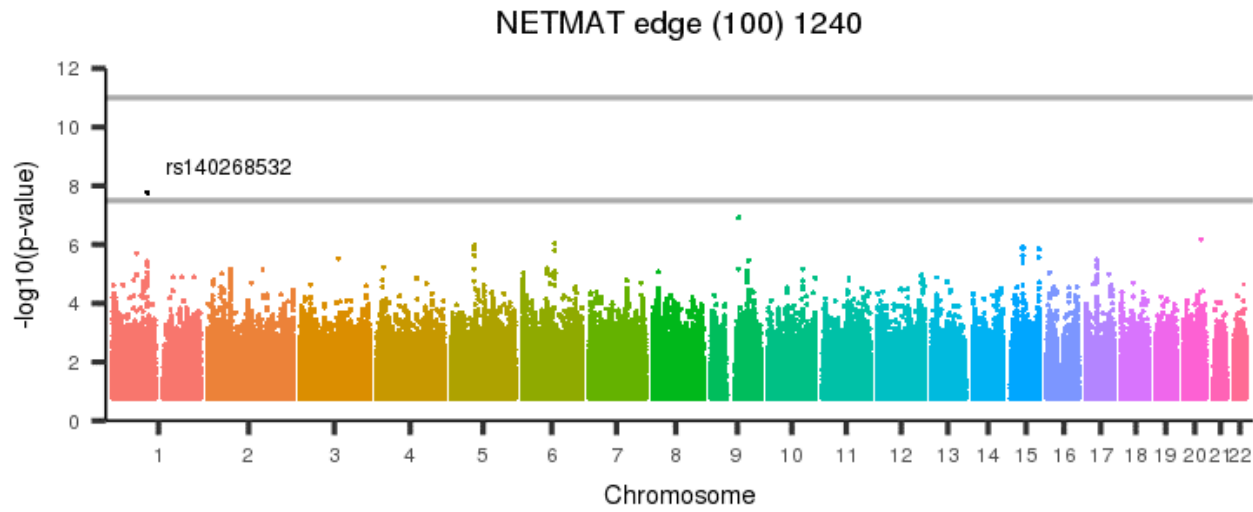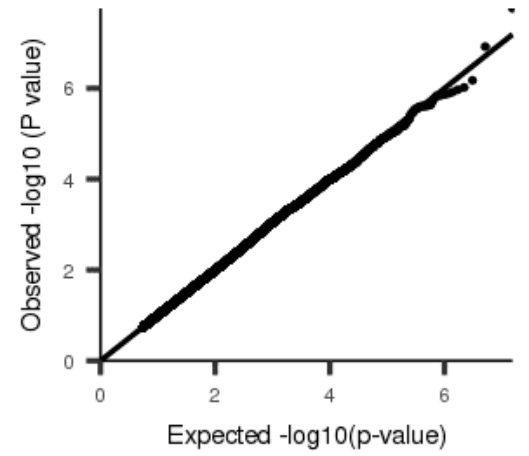

[back to list of plots](#)

Figure 2397: NETMAT edge (100) 1241

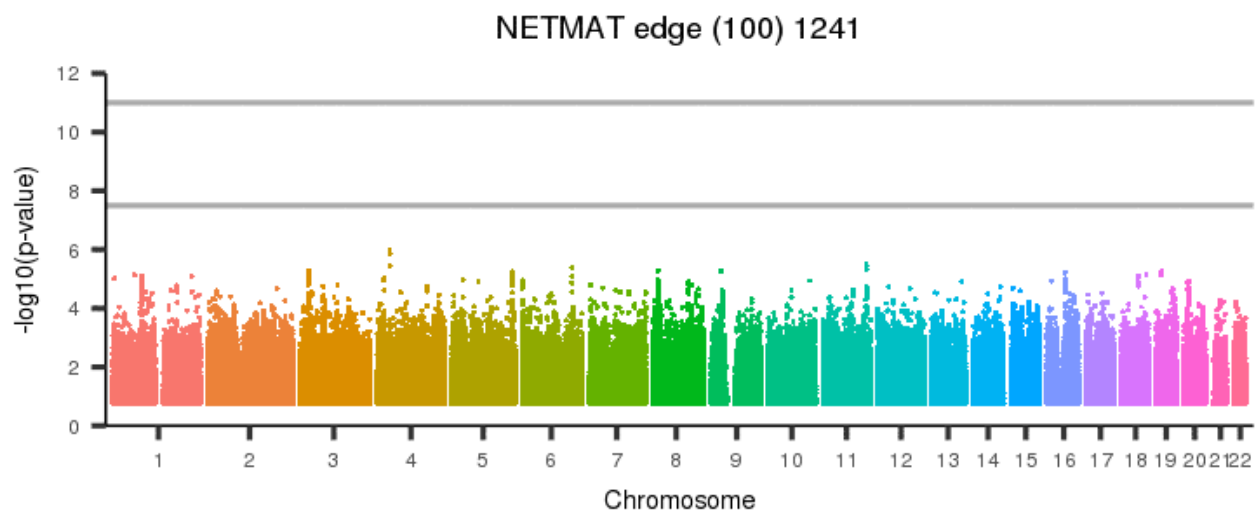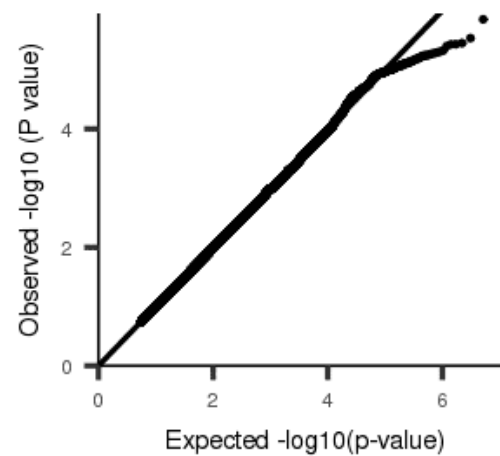

[back to list of plots](#)



Figure 2398: NETMAT edge (100) 1242

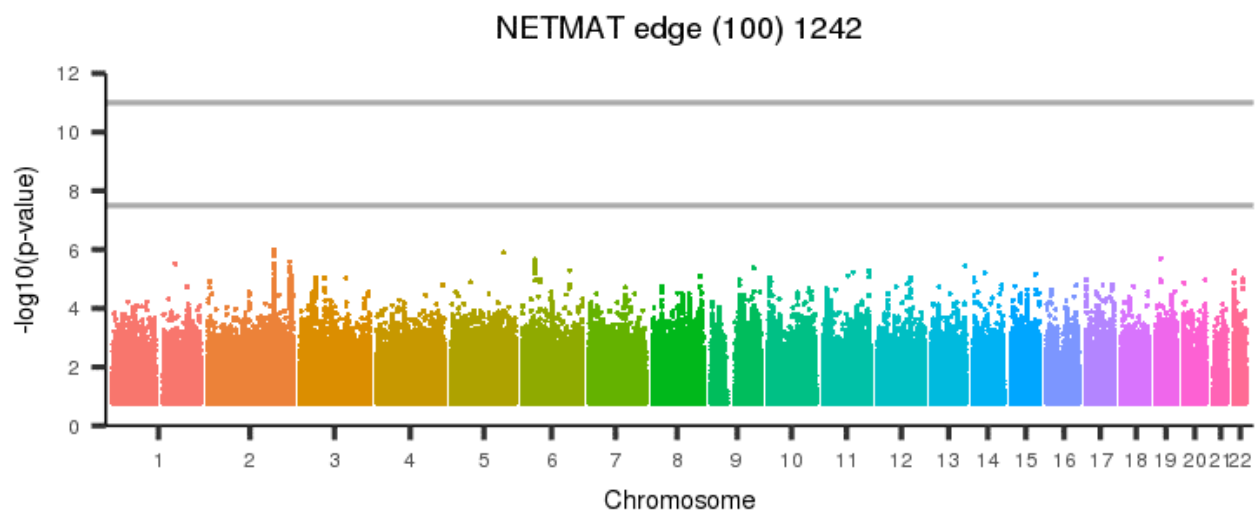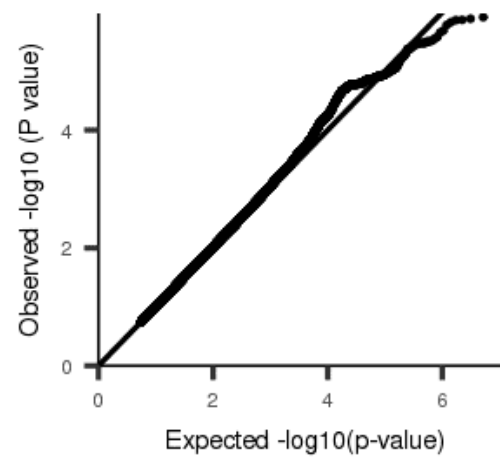

[back to list of plots](#)

Figure 2399: NETMAT edge (100) 1243

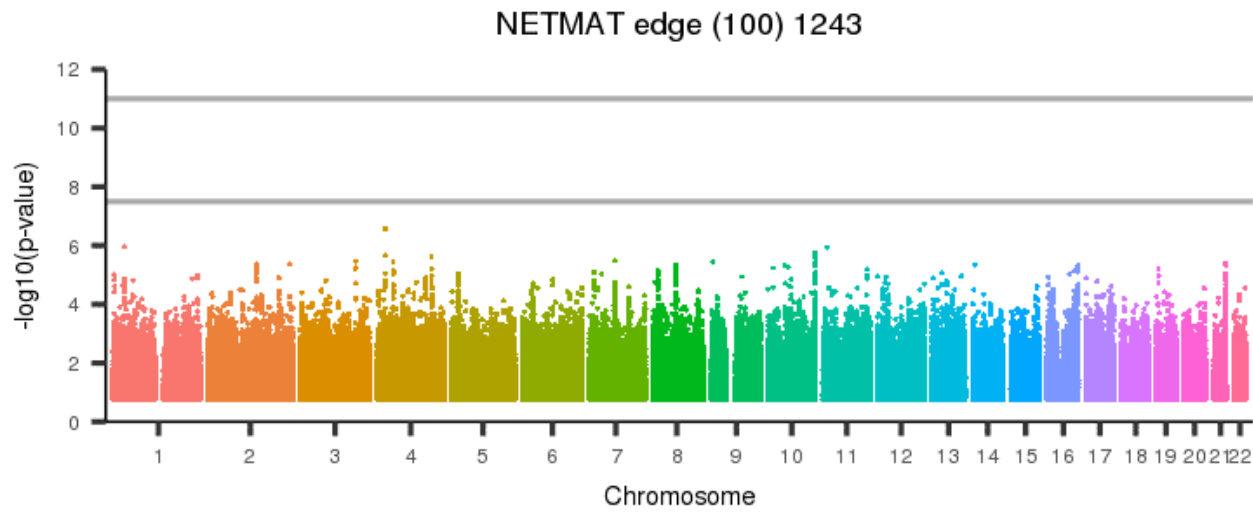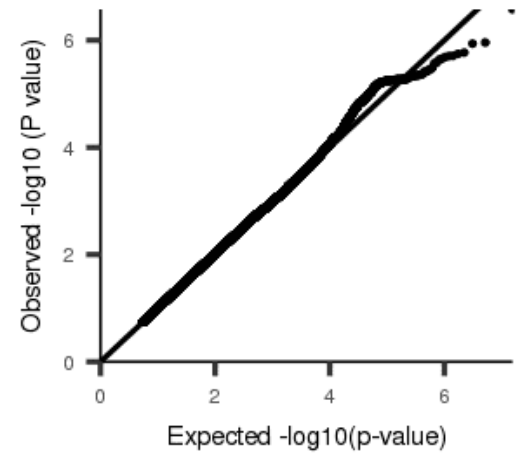

[back to list of plots](#)

Figure 2400: NETMAT edge (100) 1244

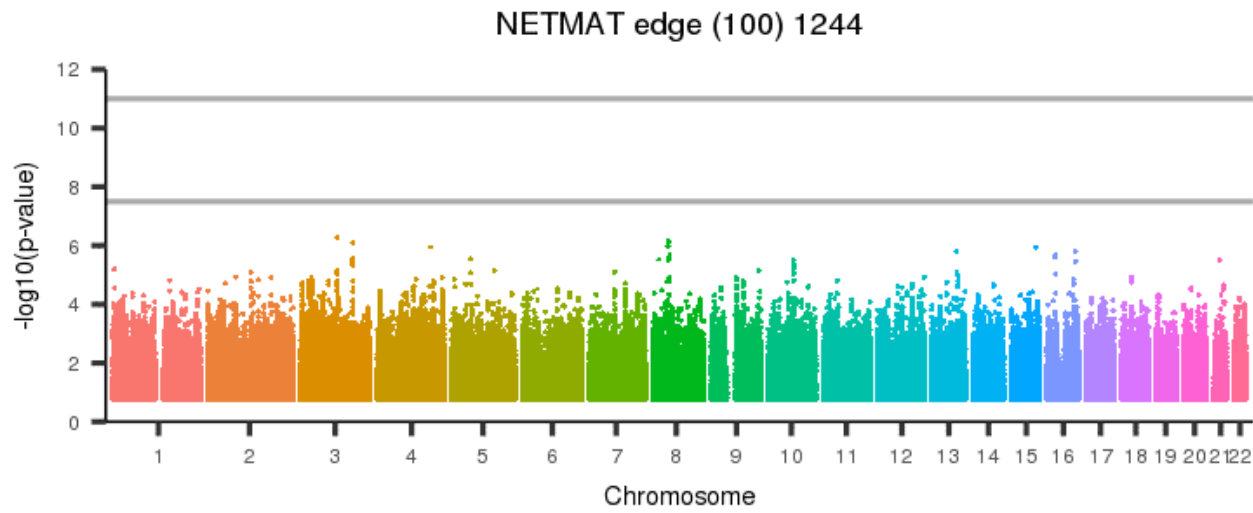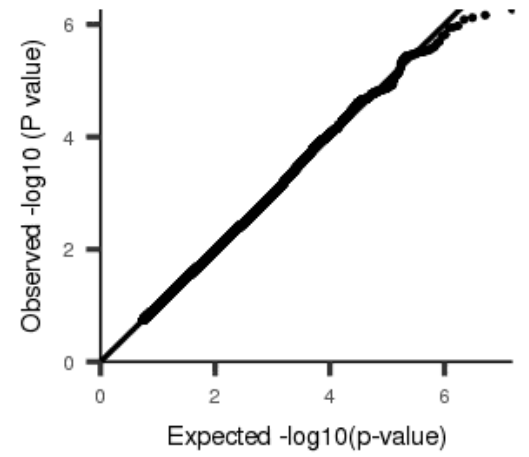

[back to list of plots](#)

Figure 2401: NETMAT edge (100) 1245

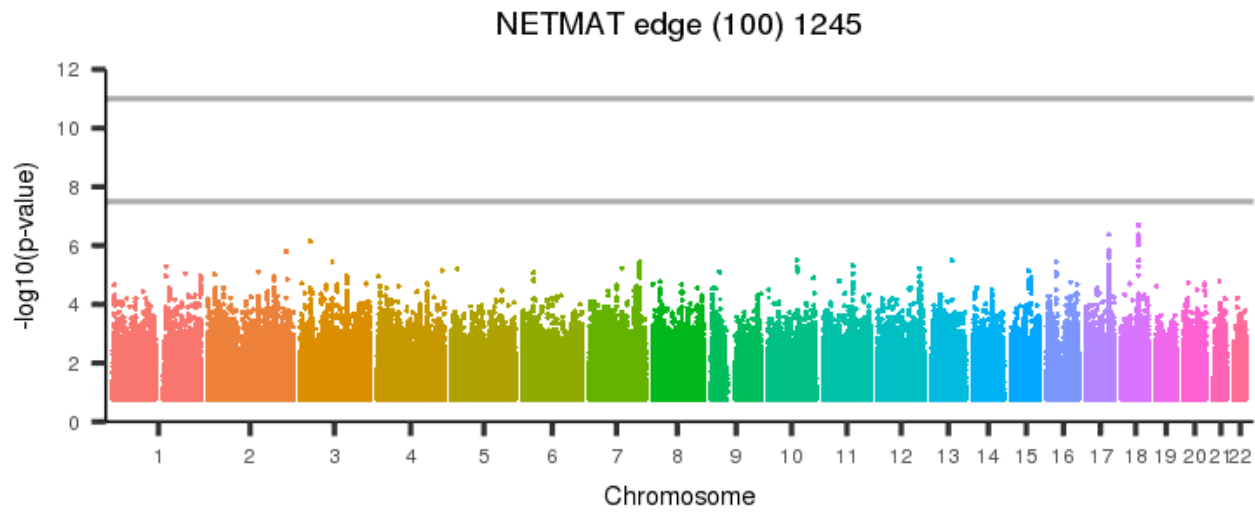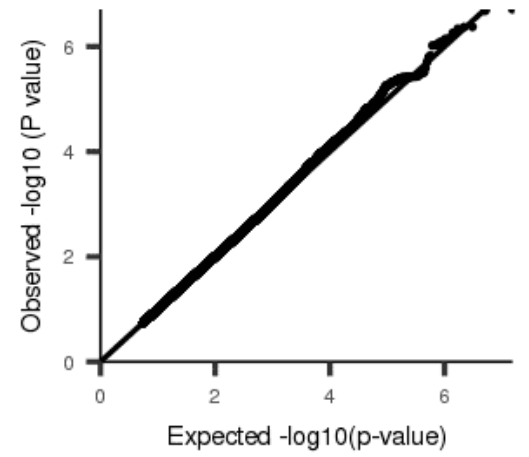

[back to list of plots](#)

Figure 2402: NETMAT edge (100) 1246

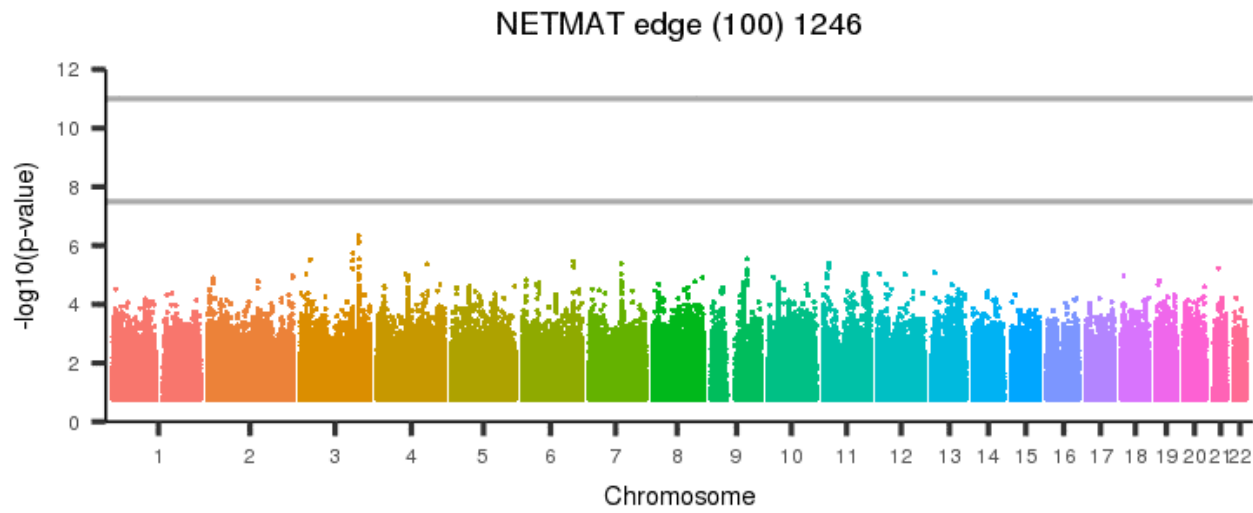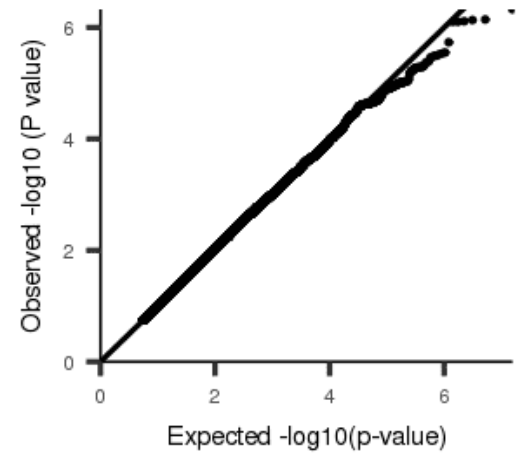

[back to list of plots](#)

Figure 2403: NETMAT edge (100) 1247

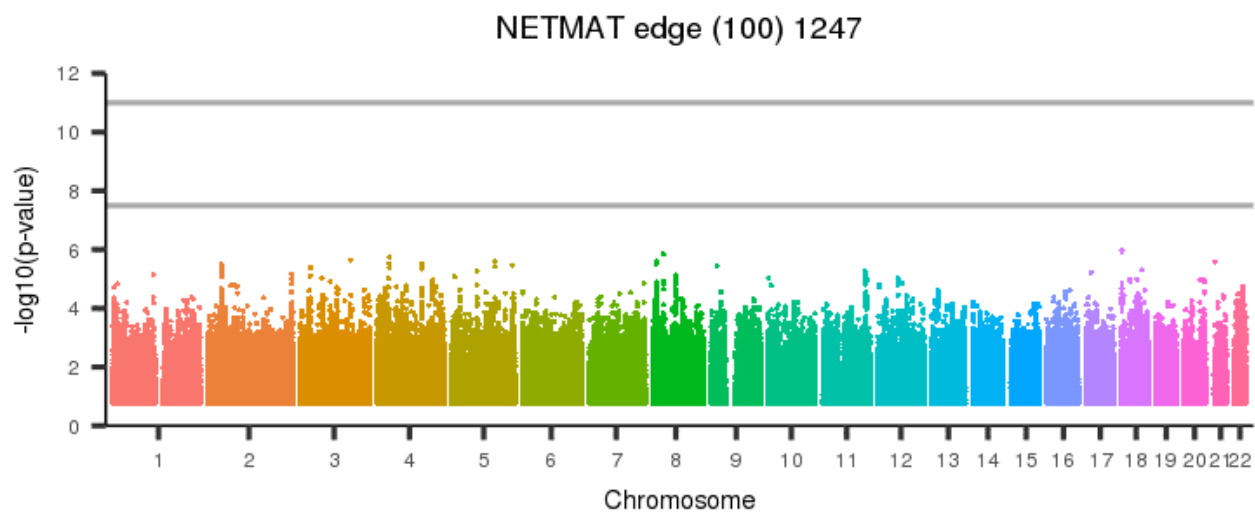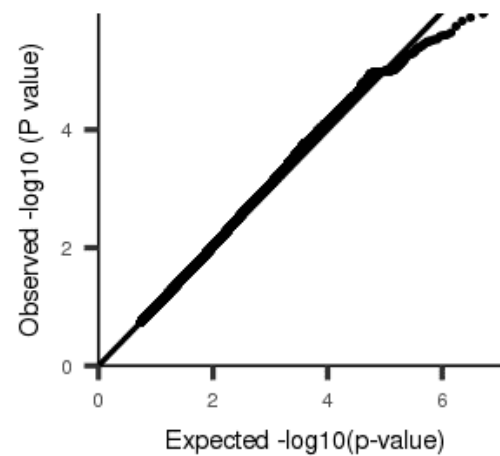

[back to list of plots](#)

Figure 2404: NETMAT edge (100) 1248

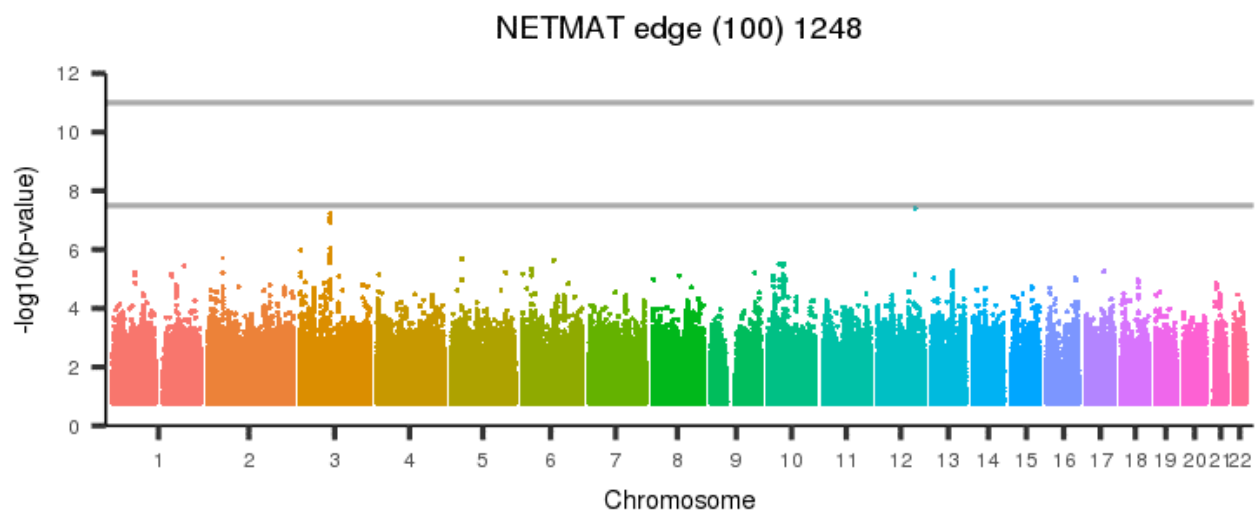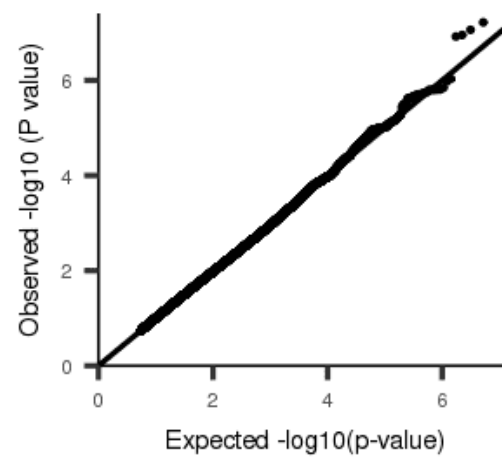

[back to list of plots](#)

Figure 2405: NETMAT edge (100) 1249

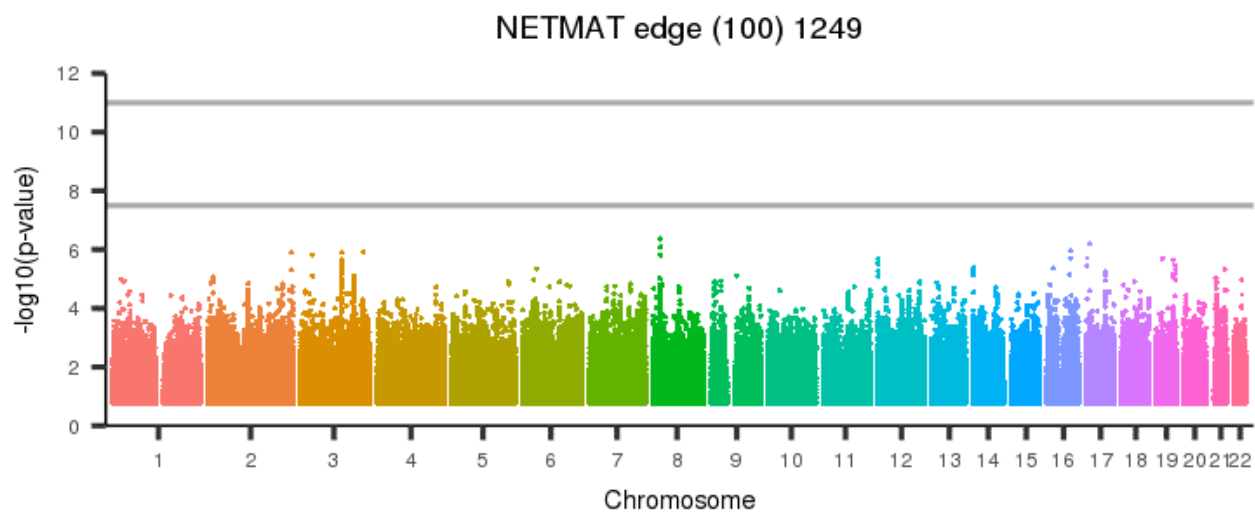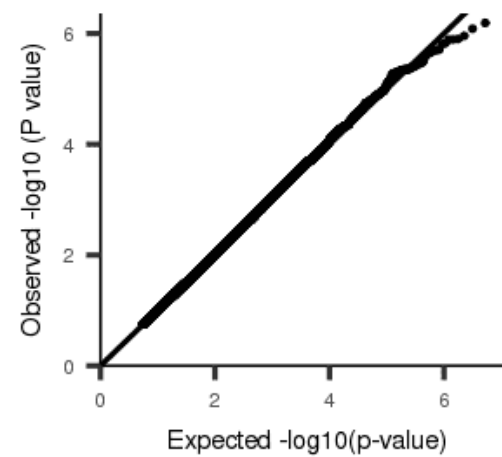

[back to list of plots](#)



Figure 2406: NETMAT edge (100) 1250

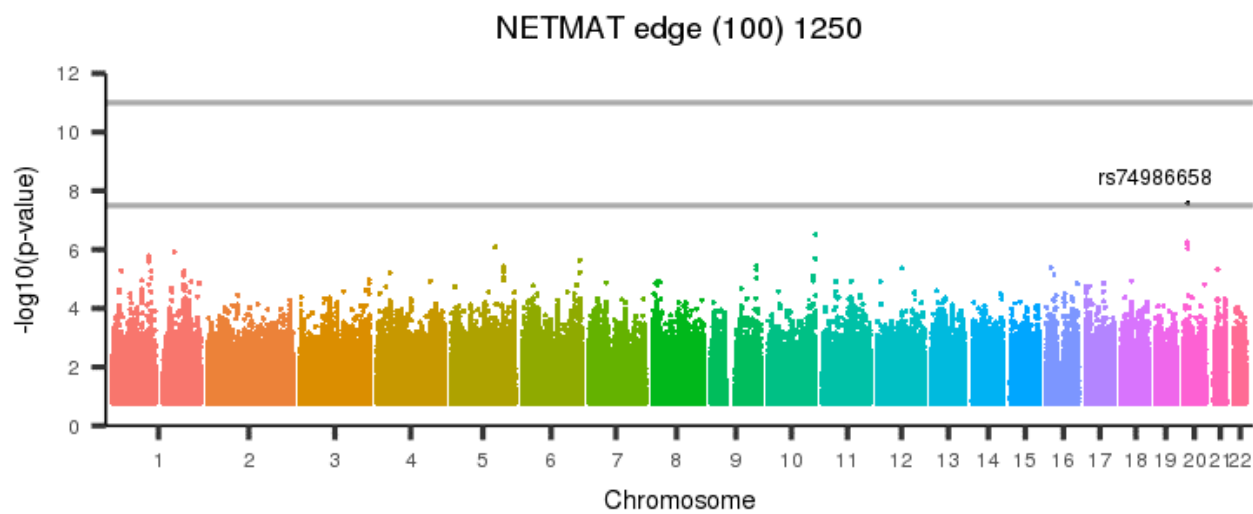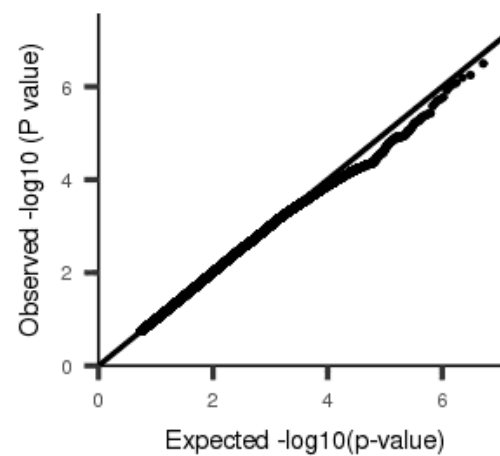

[back to list of plots](#)

Figure 2407: NETMAT edge (100) 1251

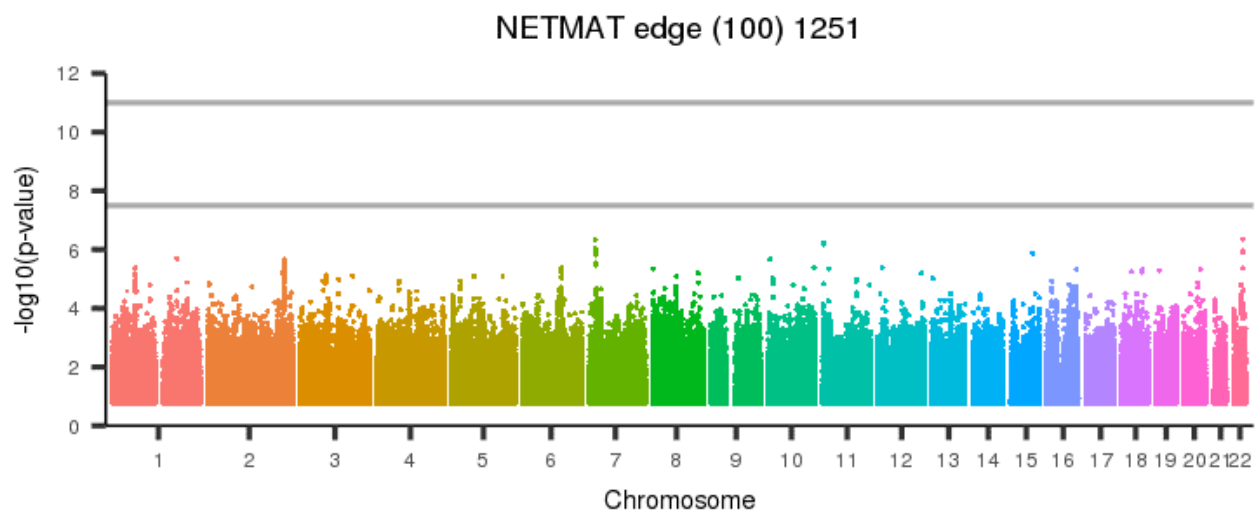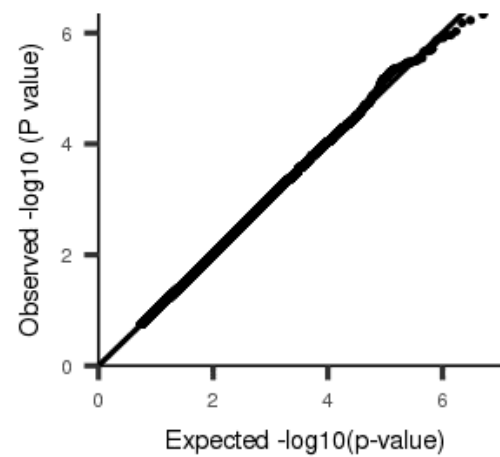

[back to list of plots](#)

Figure 2408: NETMAT edge (100) 1252

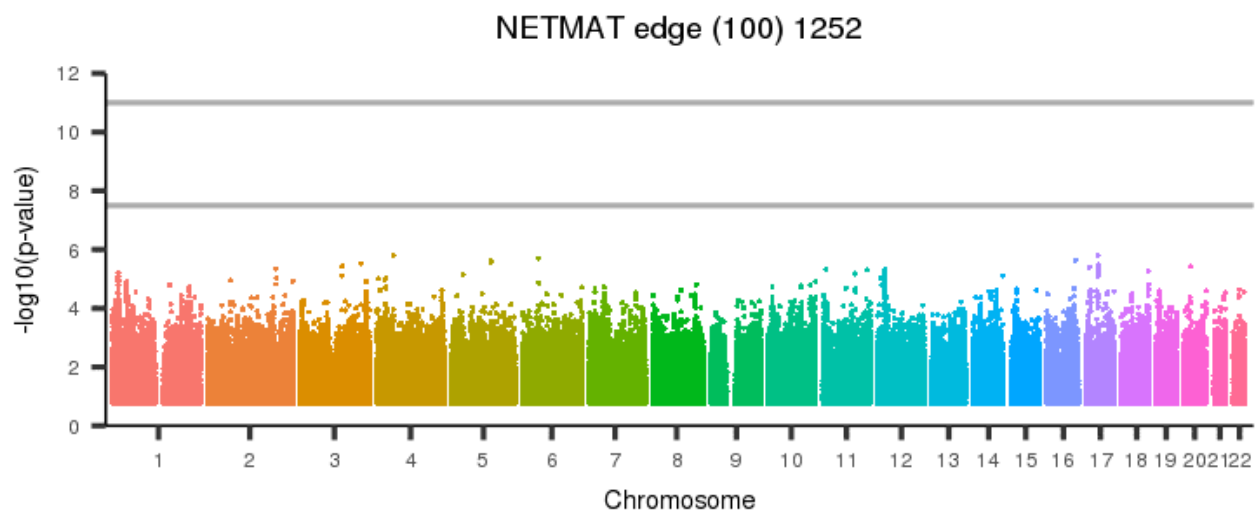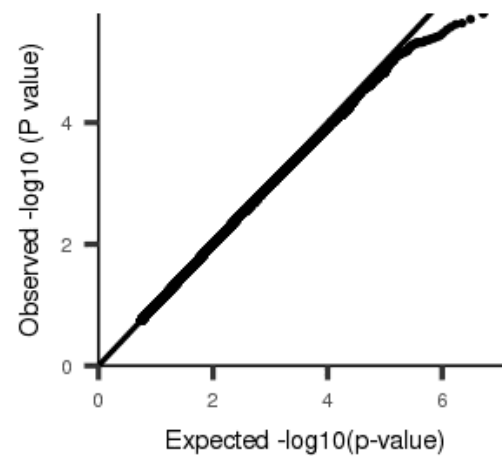

[back to list of plots](#)

Figure 2409: NETMAT edge (100) 1253

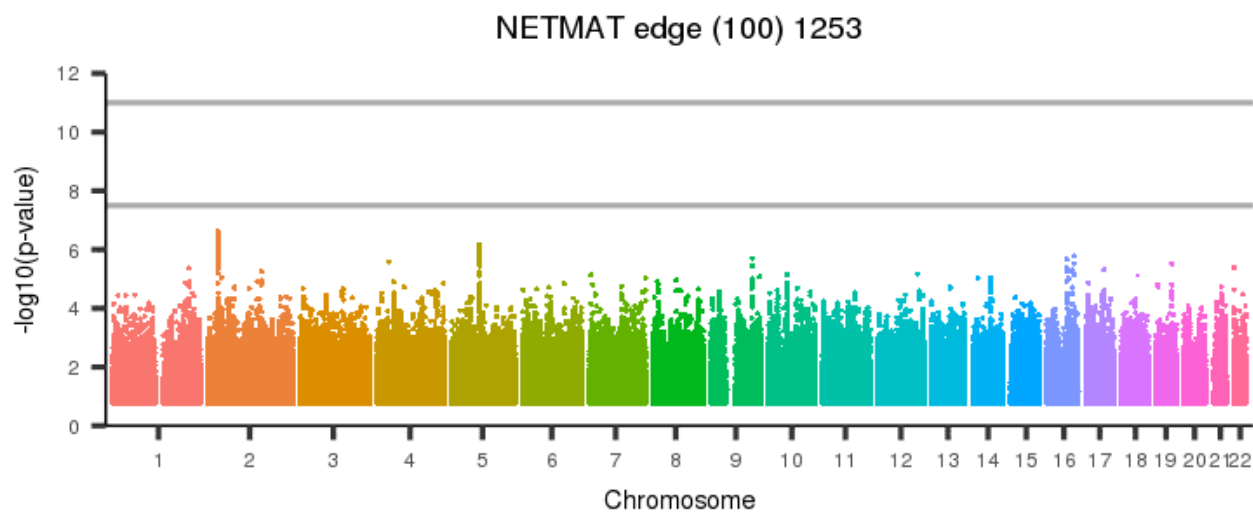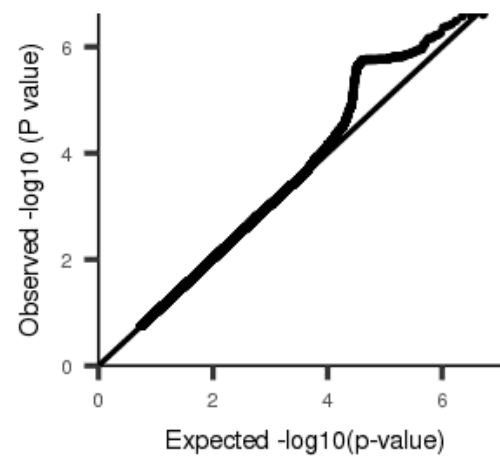

[back to list of plots](#)

Figure 2410: NETMAT edge (100) 1254

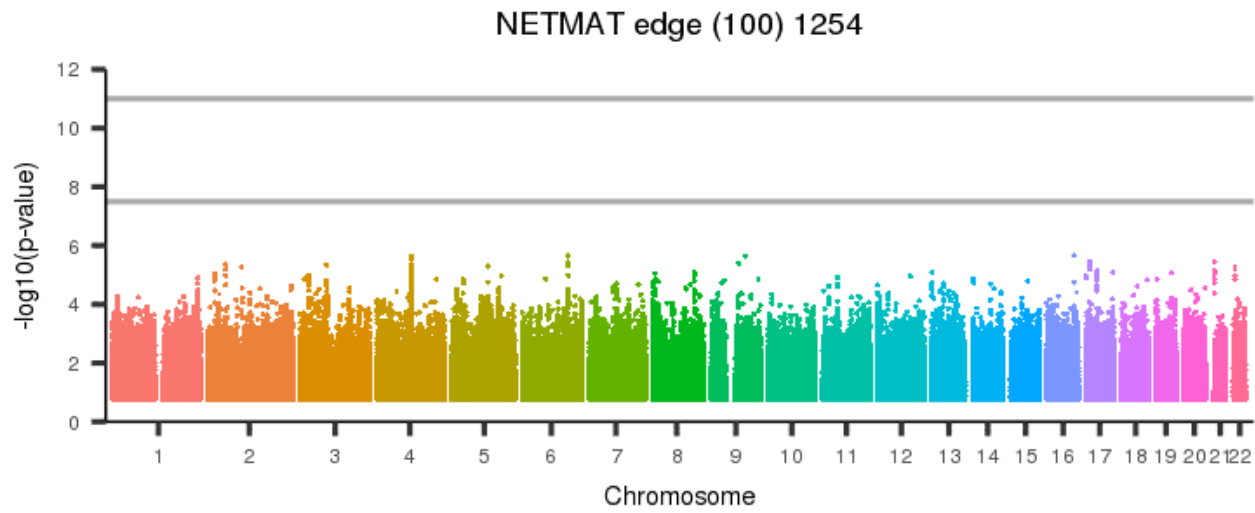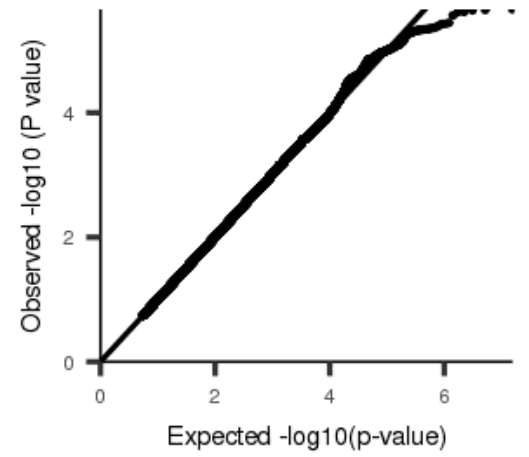

[back to list of plots](#)

Figure 2411: NETMAT edge (100) 1255

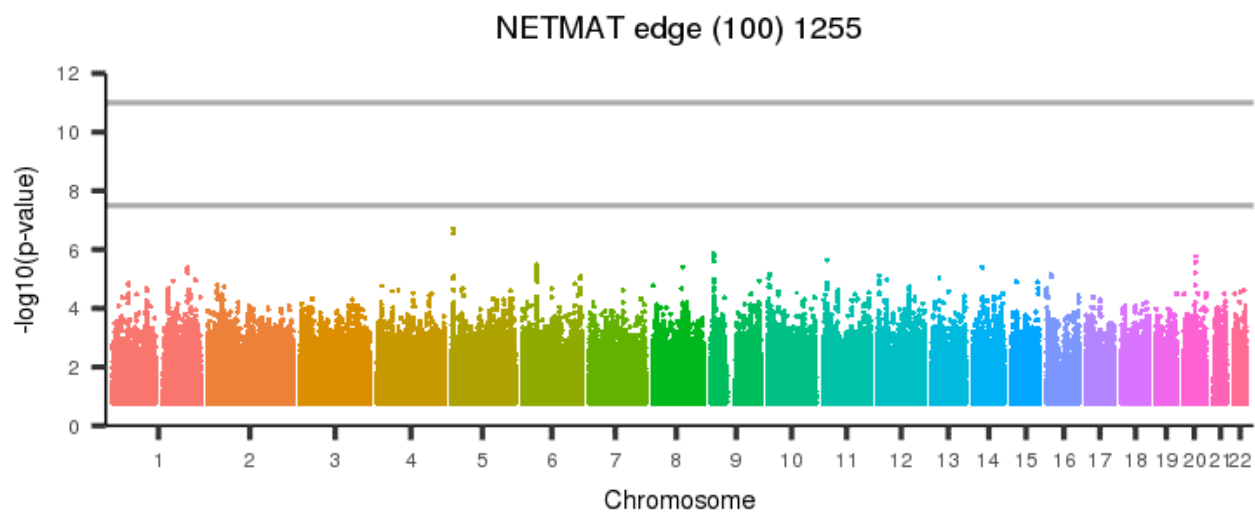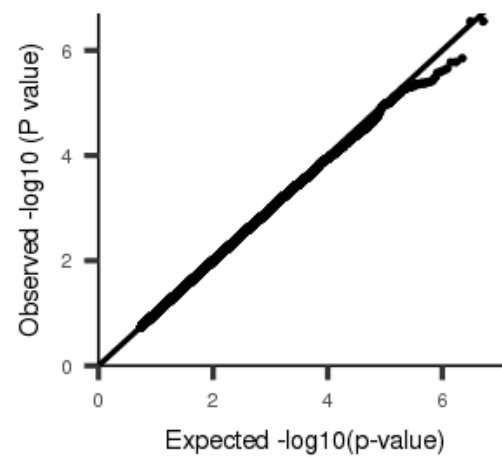

[back to list of plots](#)

Figure 2412: NETMAT edge (100) 1256

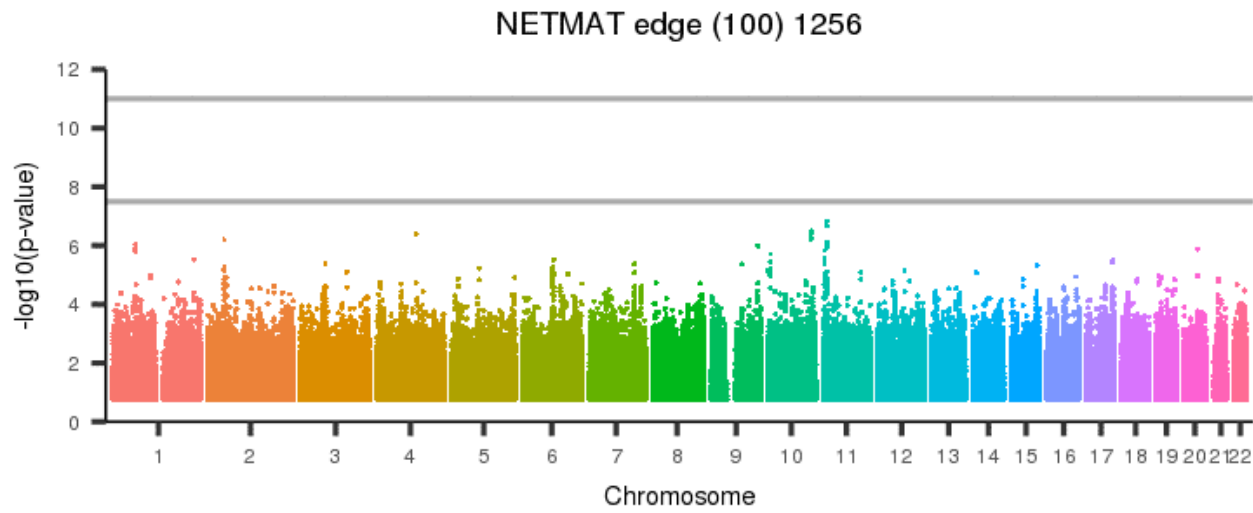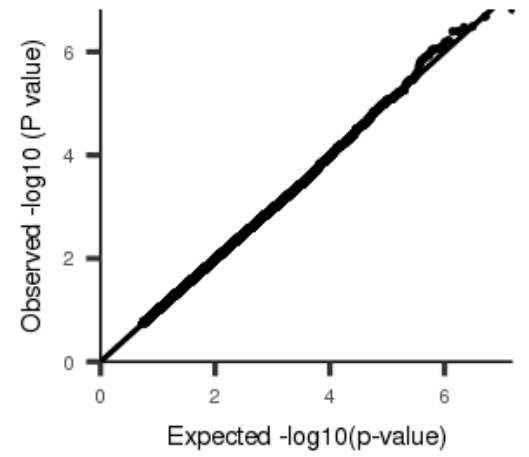

[back to list of plots](#)

Figure 2413: NETMAT edge (100) 1257

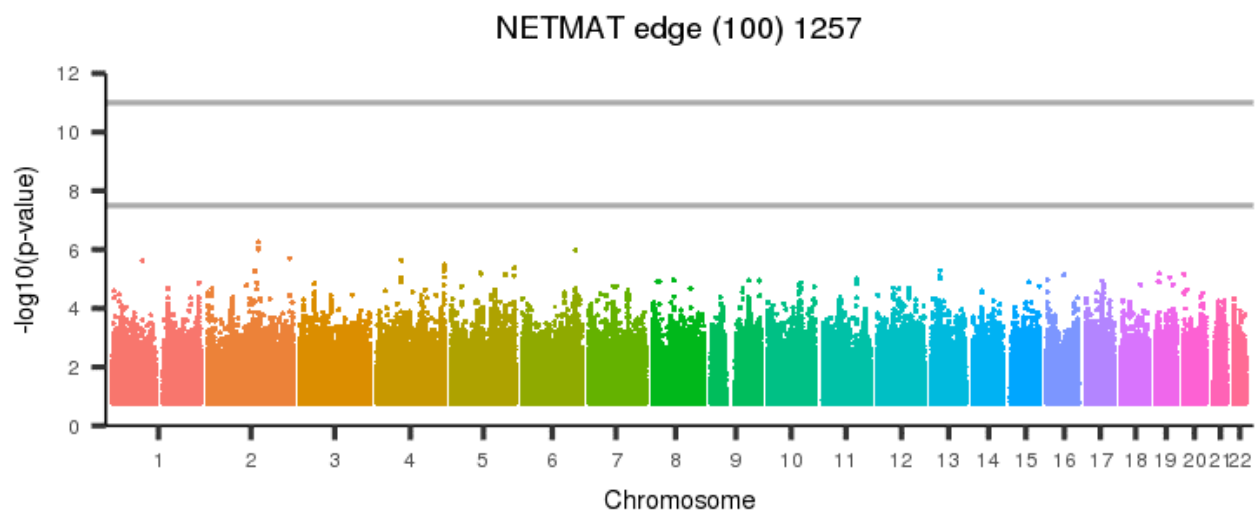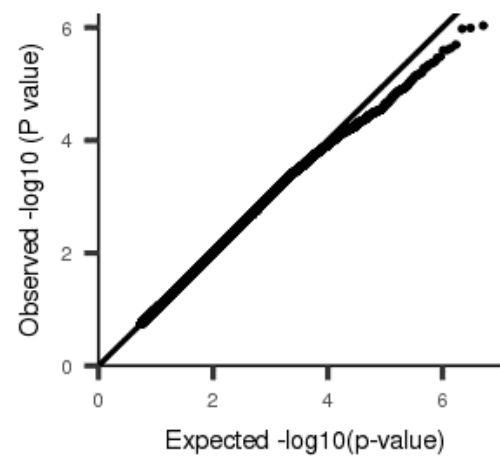

[back to list of plots](#)



Figure 2414: NETMAT edge (100) 1258

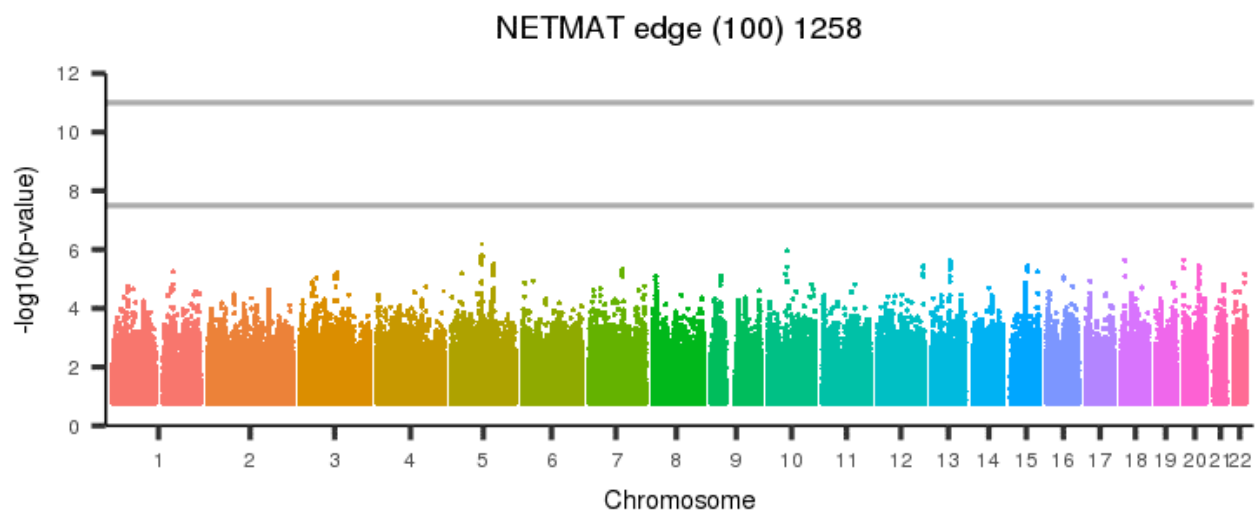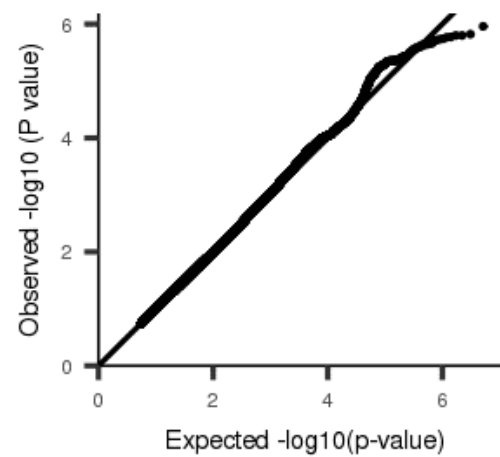

[back to list of plots](#)

Figure 2415: NETMAT edge (100) 1259

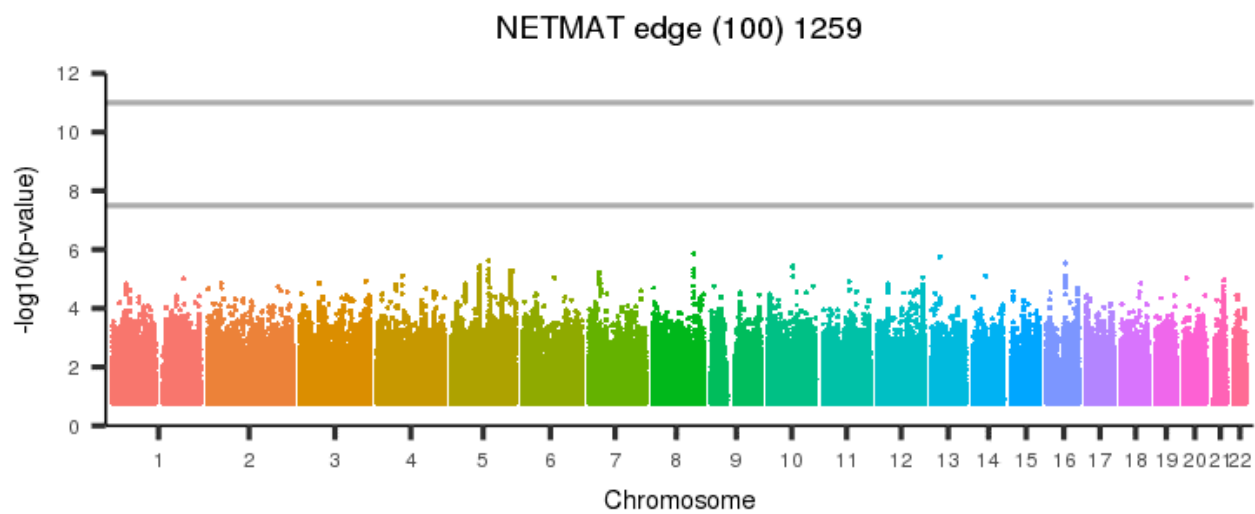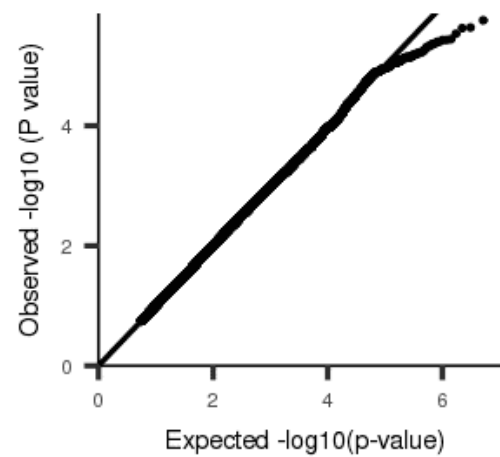

[back to list of plots](#)

Figure 2416: NETMAT edge (100) 1260

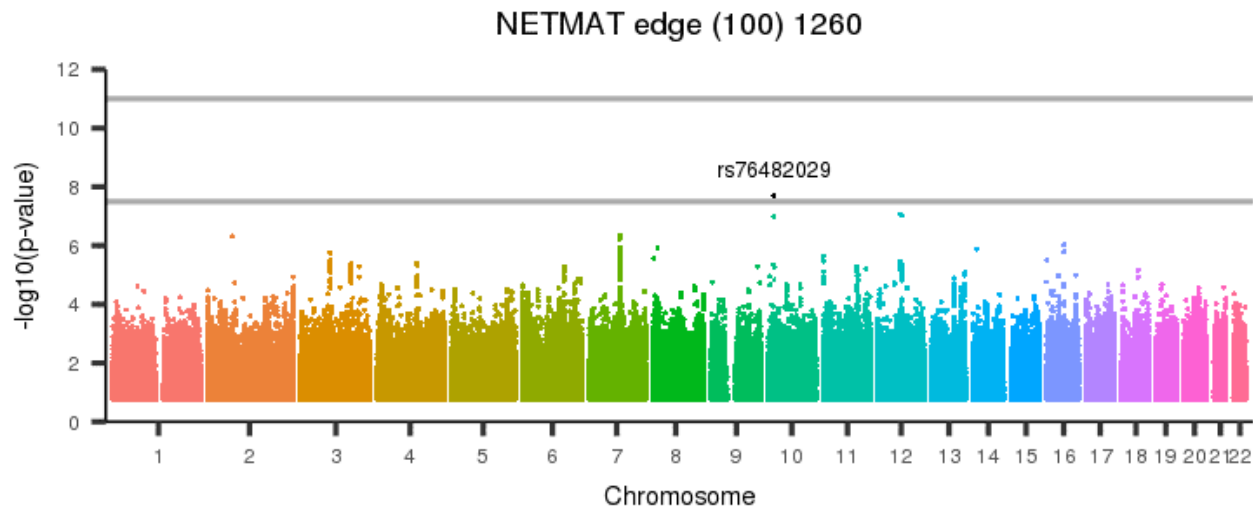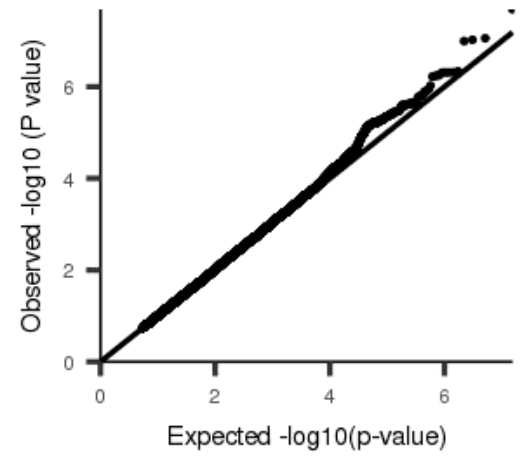

[back to list of plots](#)

Figure 2417: NETMAT edge (100) 1261

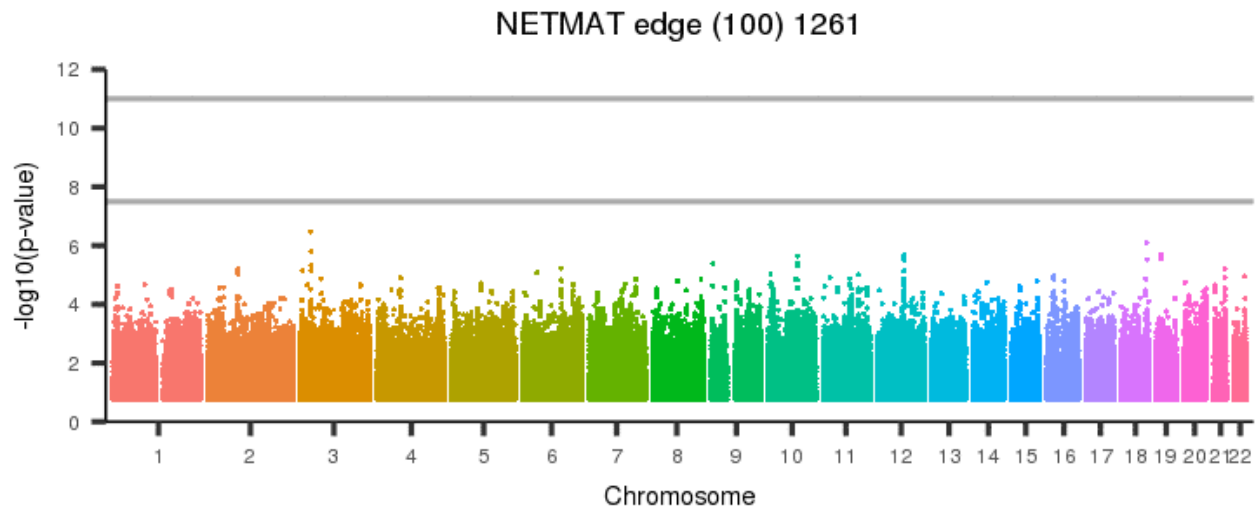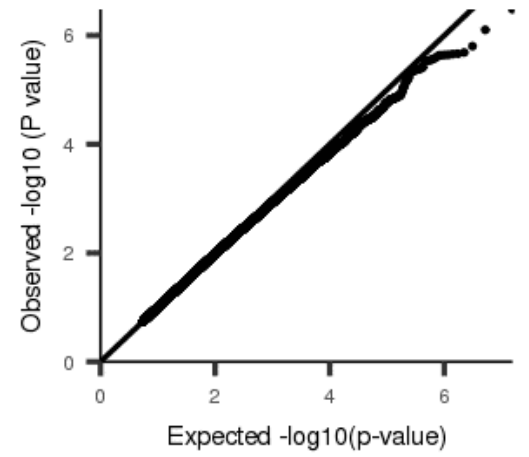

[back to list of plots](#)

Figure 2418: NETMAT edge (100) 1262

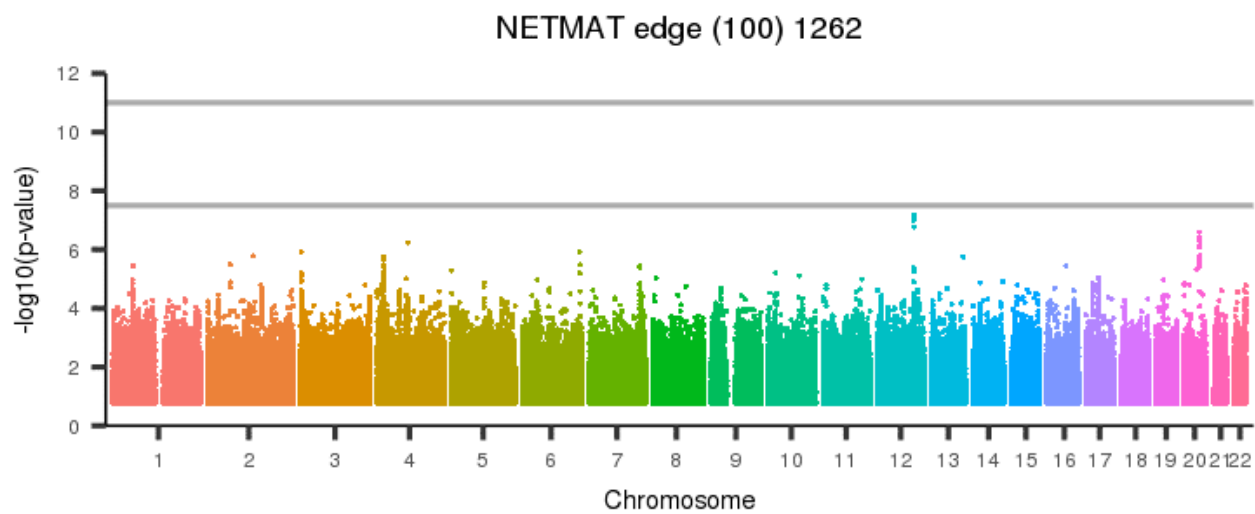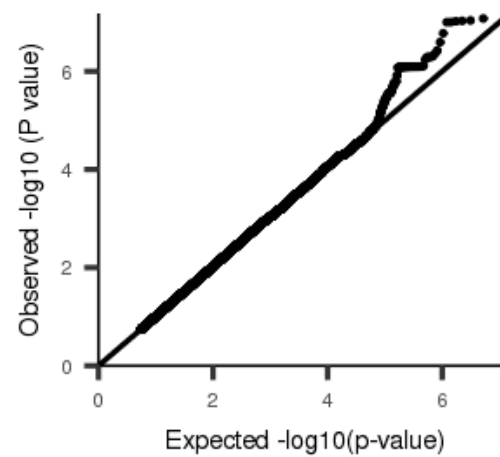

[back to list of plots](#)

Figure 2419: NETMAT edge (100) 1263

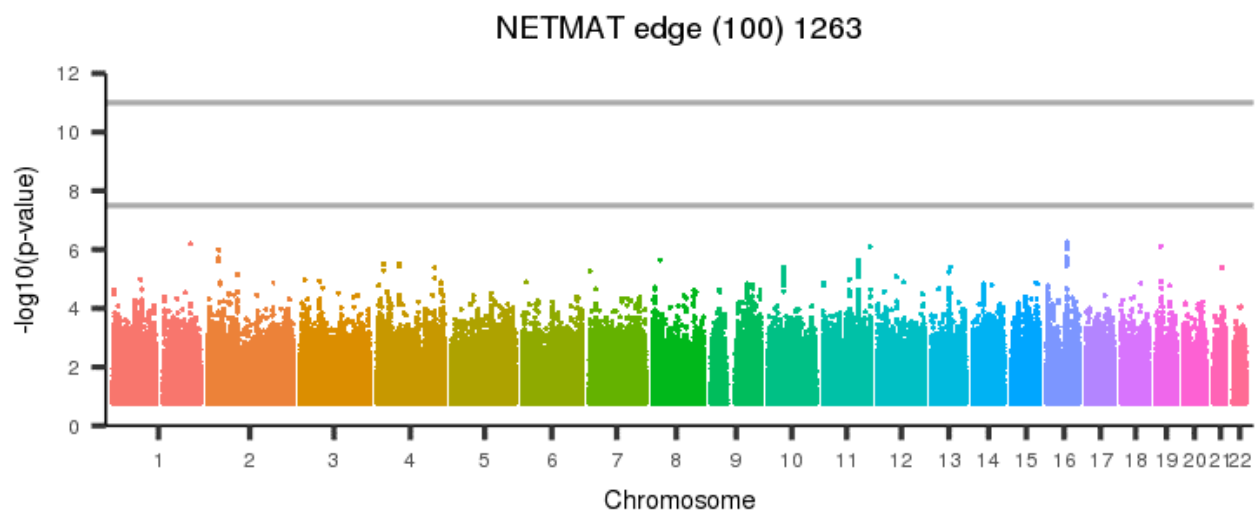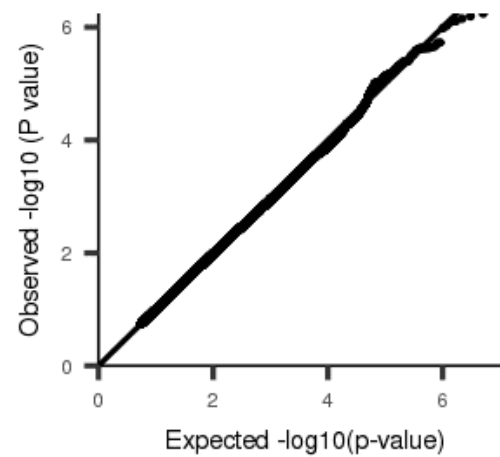

[back to list of plots](#)

Figure 2420: NETMAT edge (100) 1264

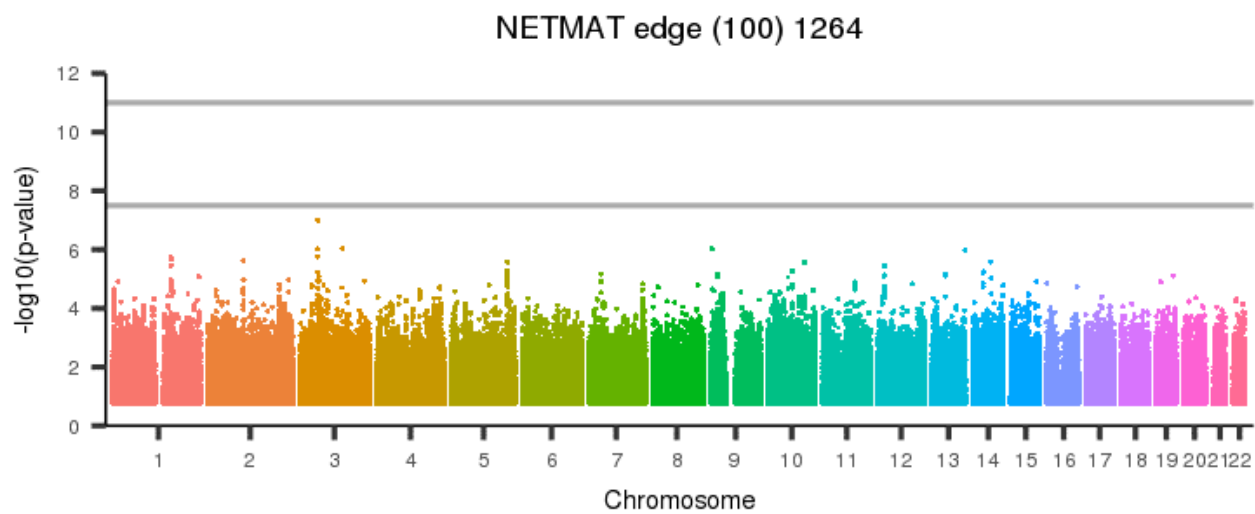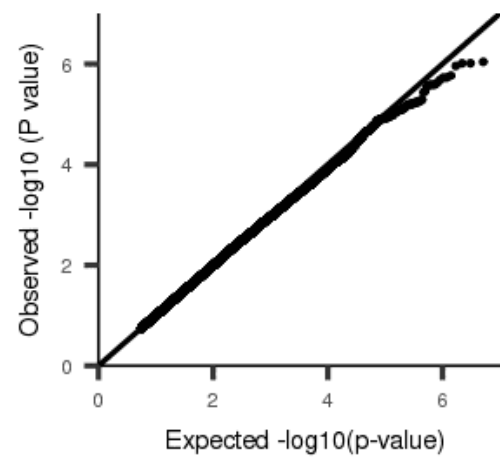

[back to list of plots](#)

Figure 2421: NETMAT edge (100) 1265

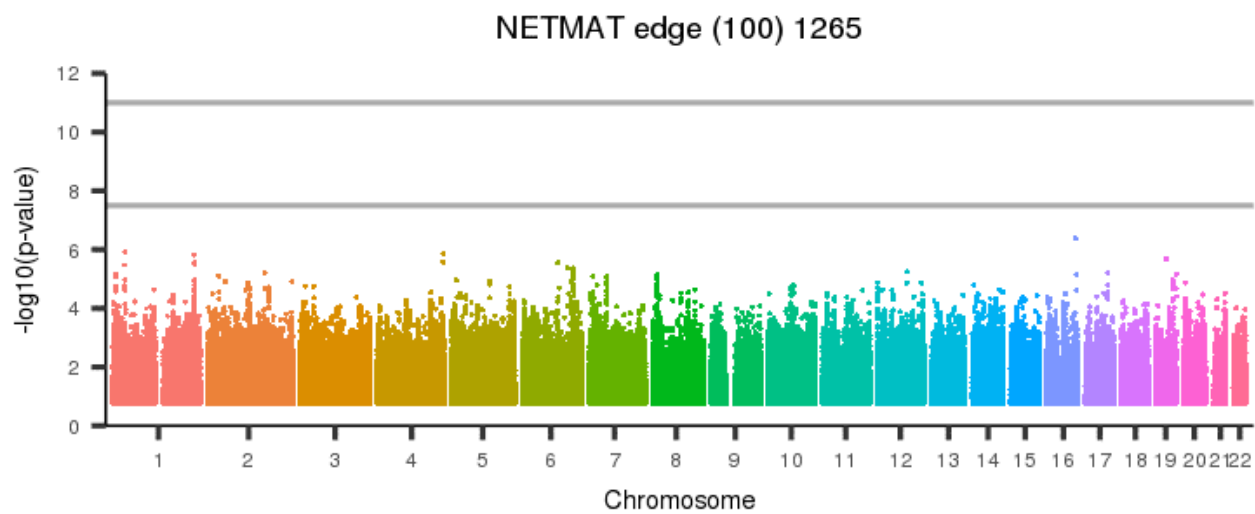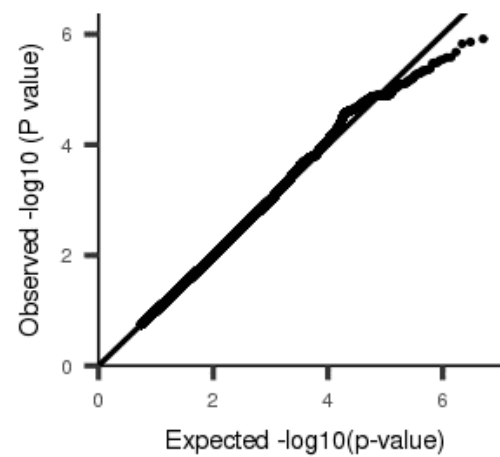

[back to list of plots](#)



Figure 2422: NETMAT edge (100) 1266

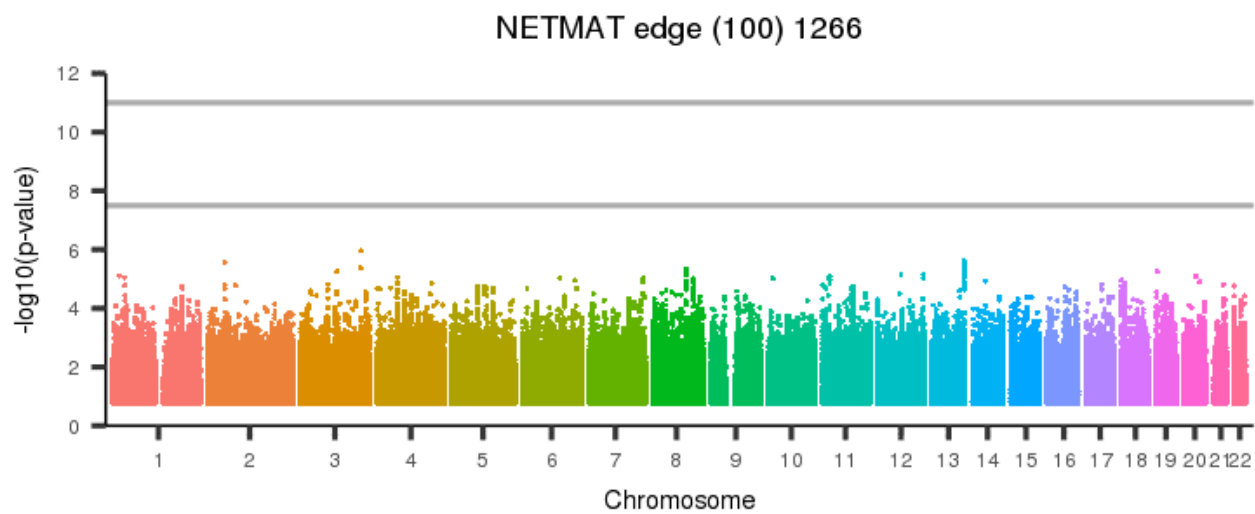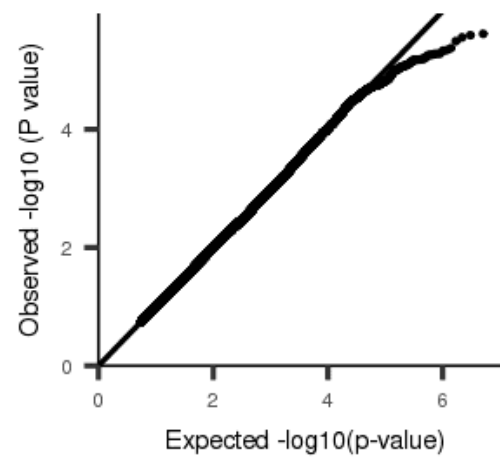

[back to list of plots](#)

Figure 2423: NETMAT edge (100) 1267

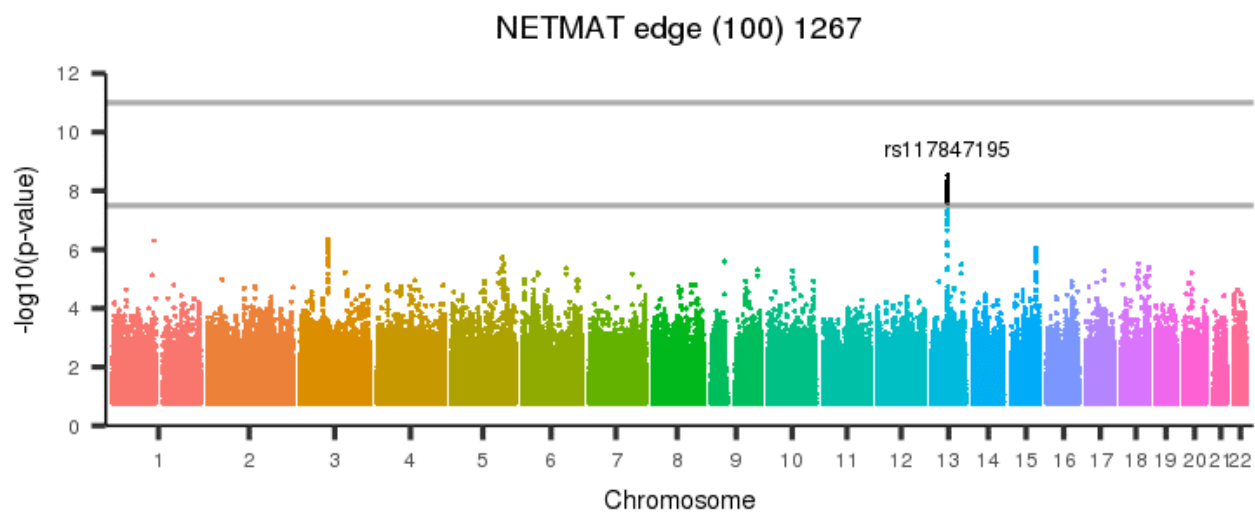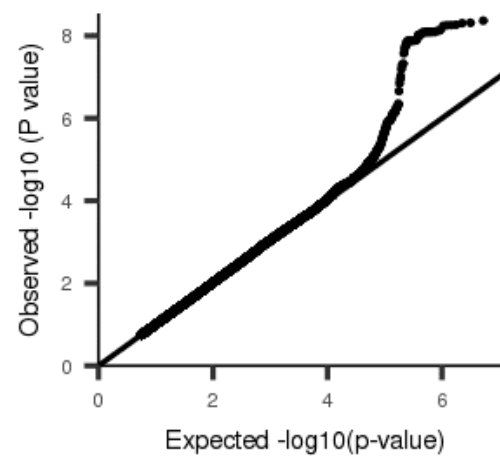

[back to list of plots](#)

Figure 2424: NETMAT edge (100) 1268

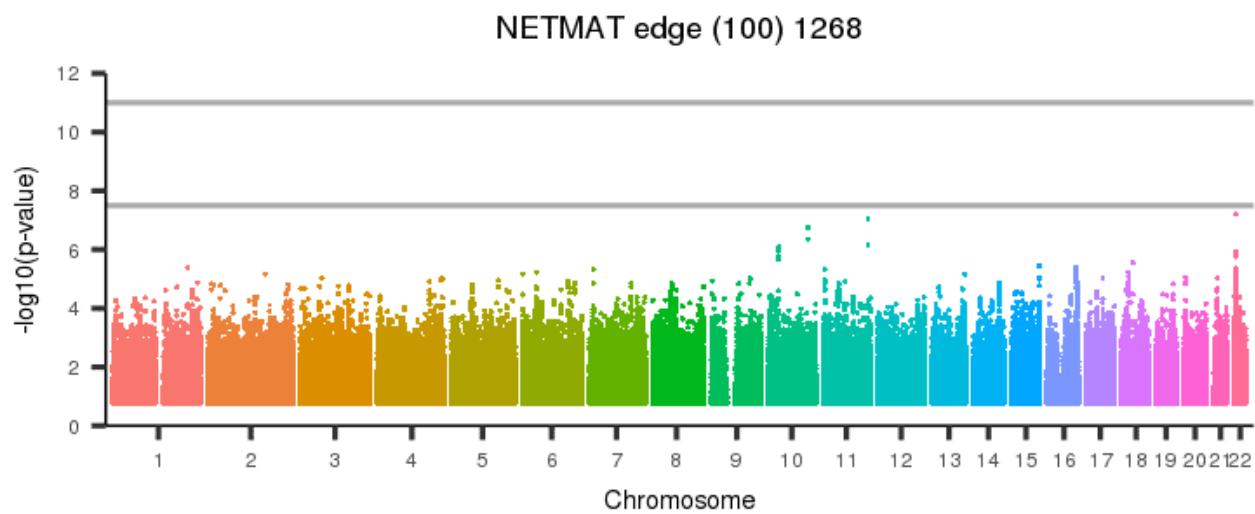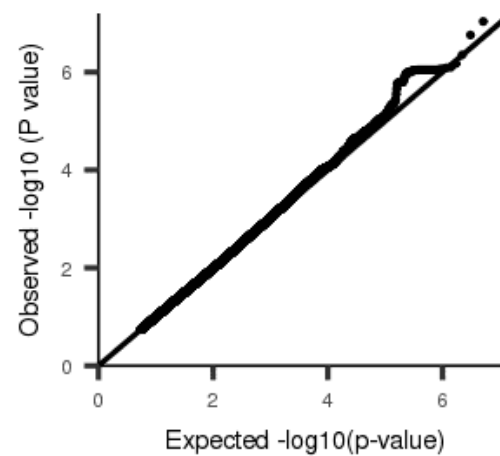

[back to list of plots](#)

Figure 2425: NETMAT edge (100) 1269

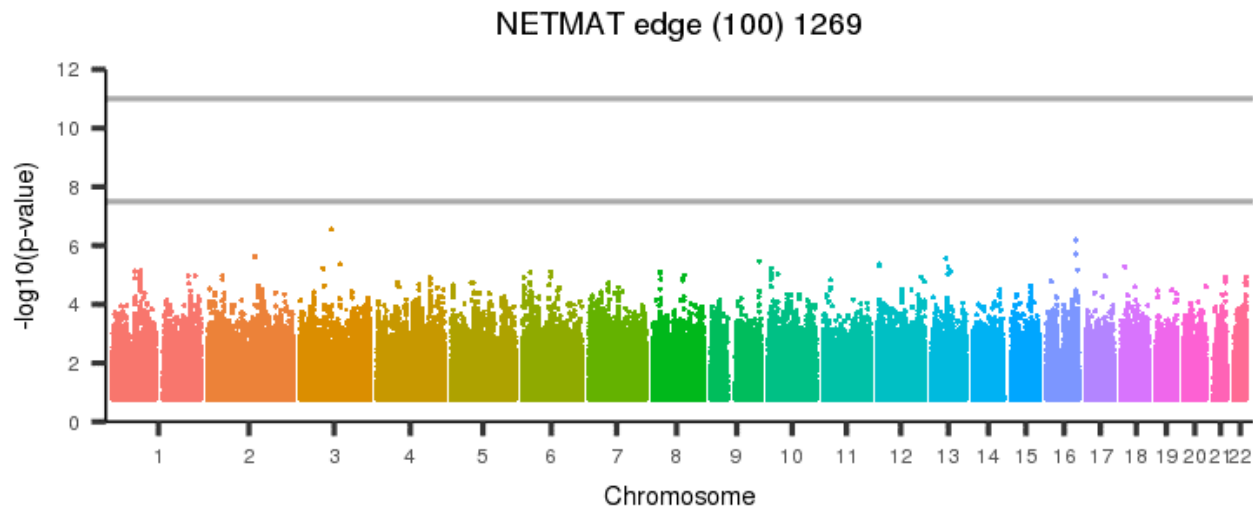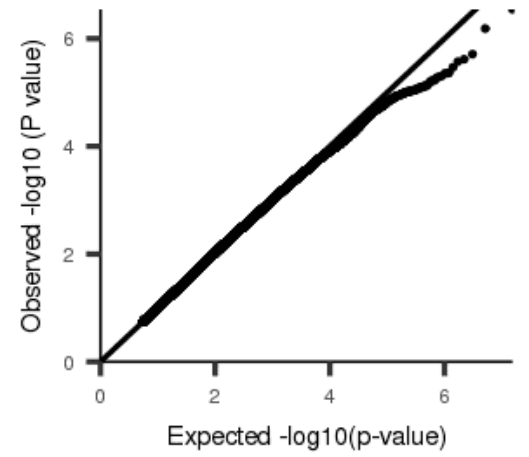

[back to list of plots](#)

Figure 2426: NETMAT edge (100) 1270

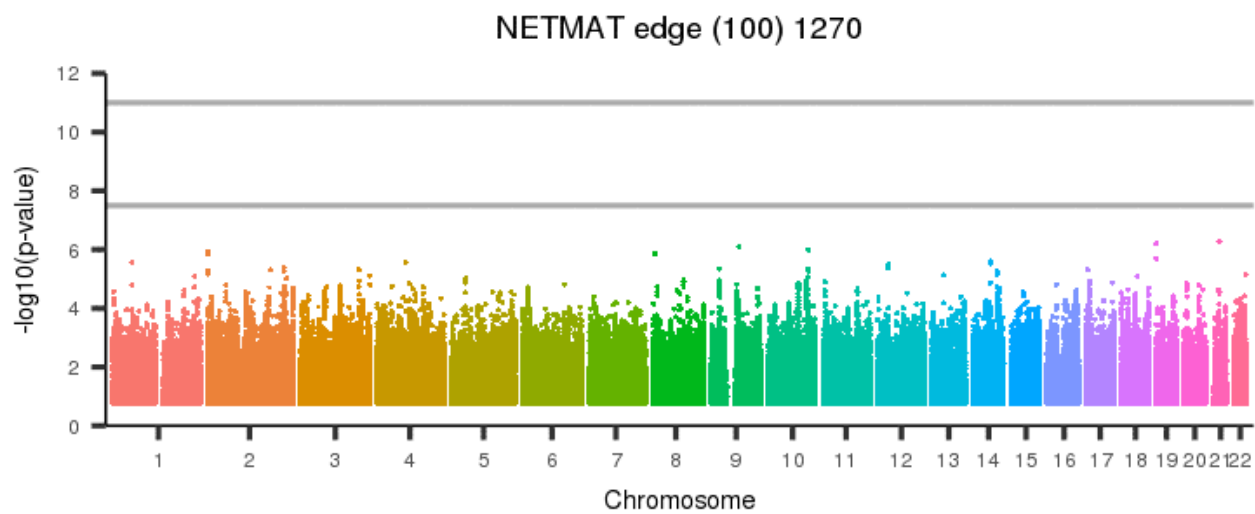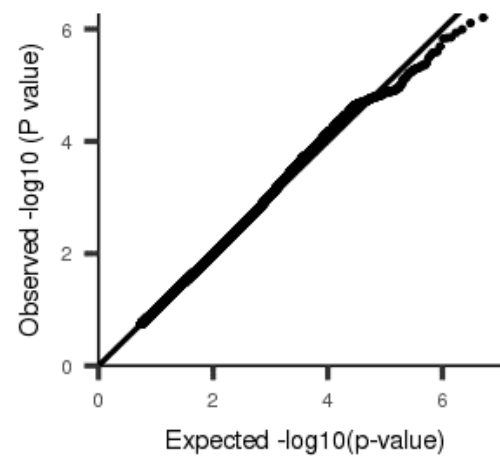

[back to list of plots](#)

Figure 2427: NETMAT edge (100) 1271

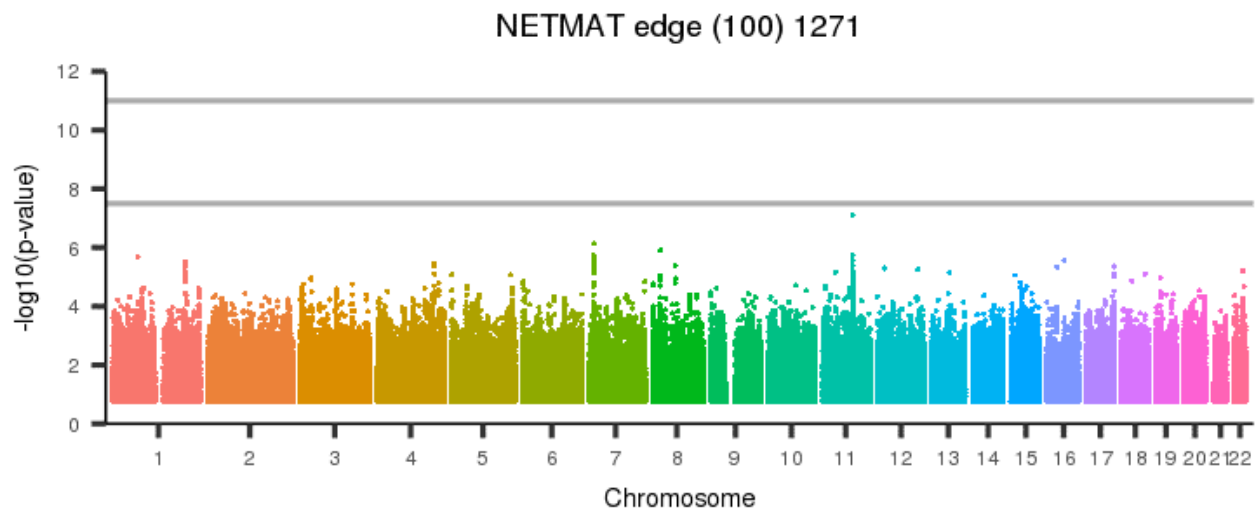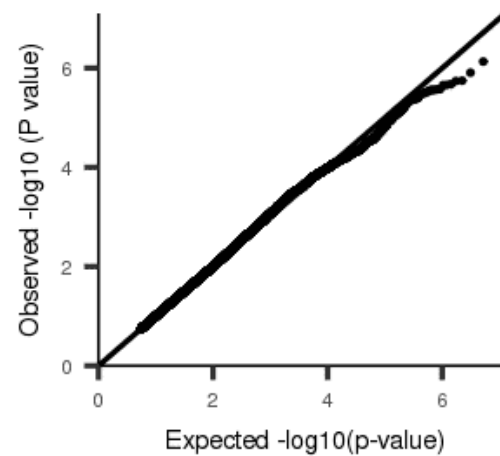

[back to list of plots](#)

Figure 2428: NETMAT edge (100) 1272

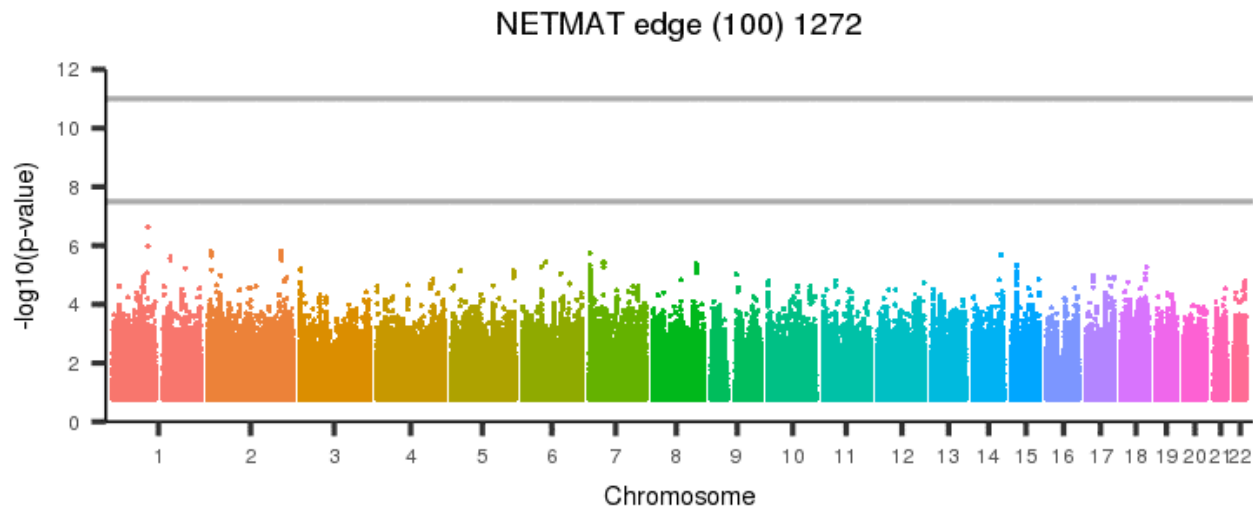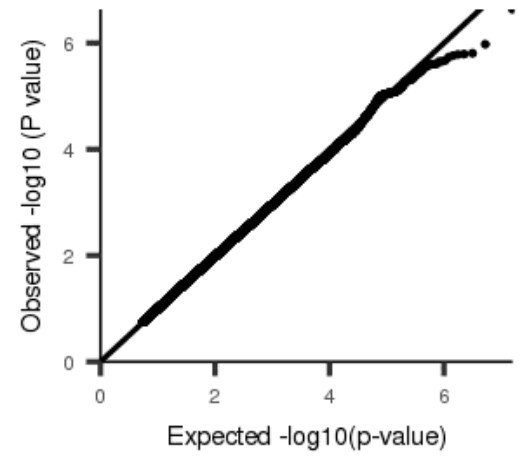

[back to list of plots](#)

Figure 2429: NETMAT edge (100) 1273

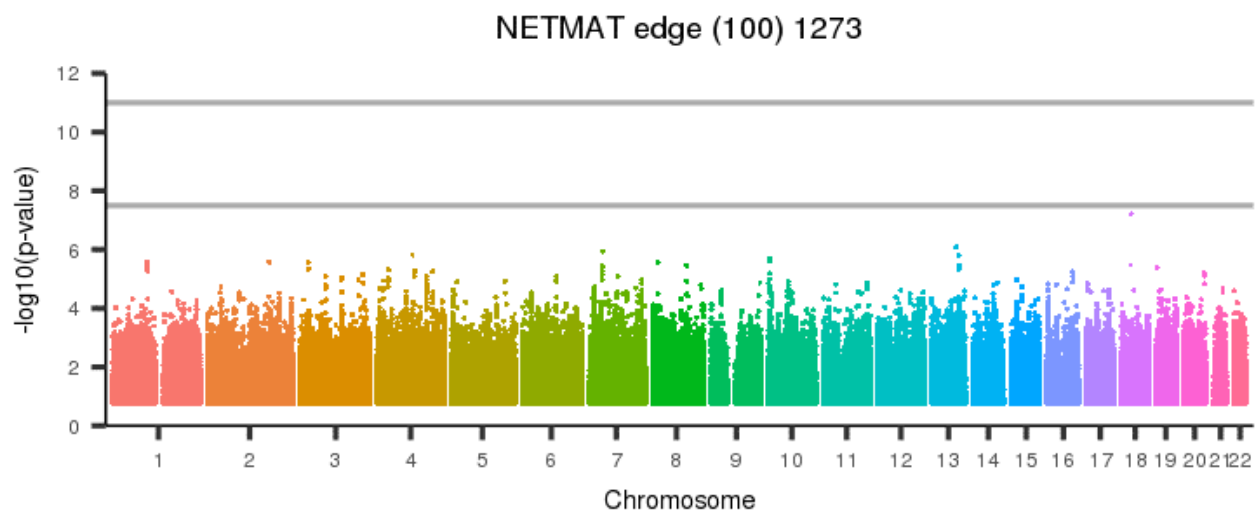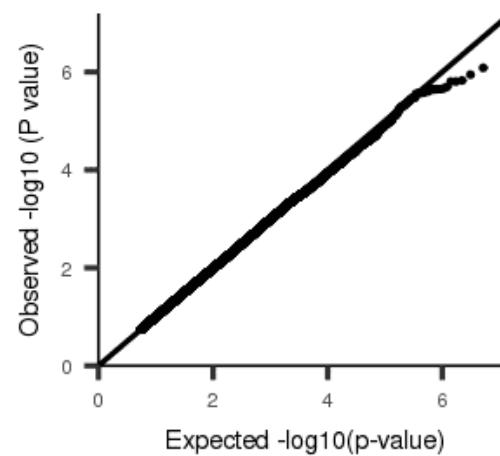

[back to list of plots](#)



Figure 2430: NETMAT edge (100) 1274

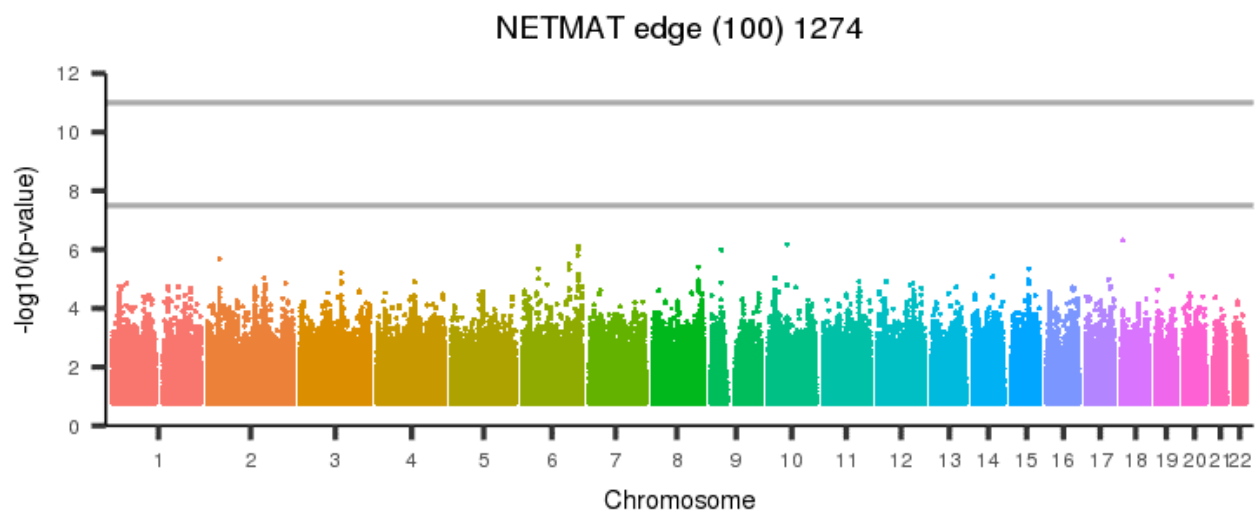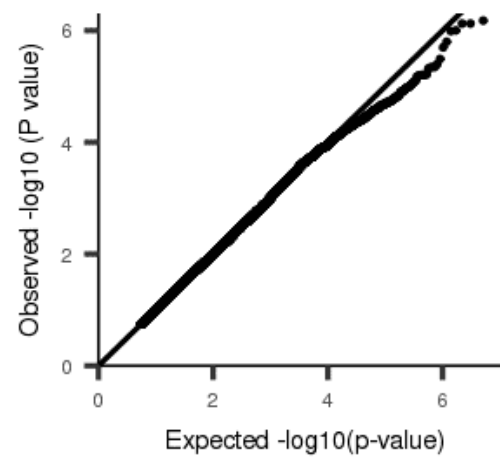

[back to list of plots](#)

Figure 2431: NETMAT edge (100) 1275

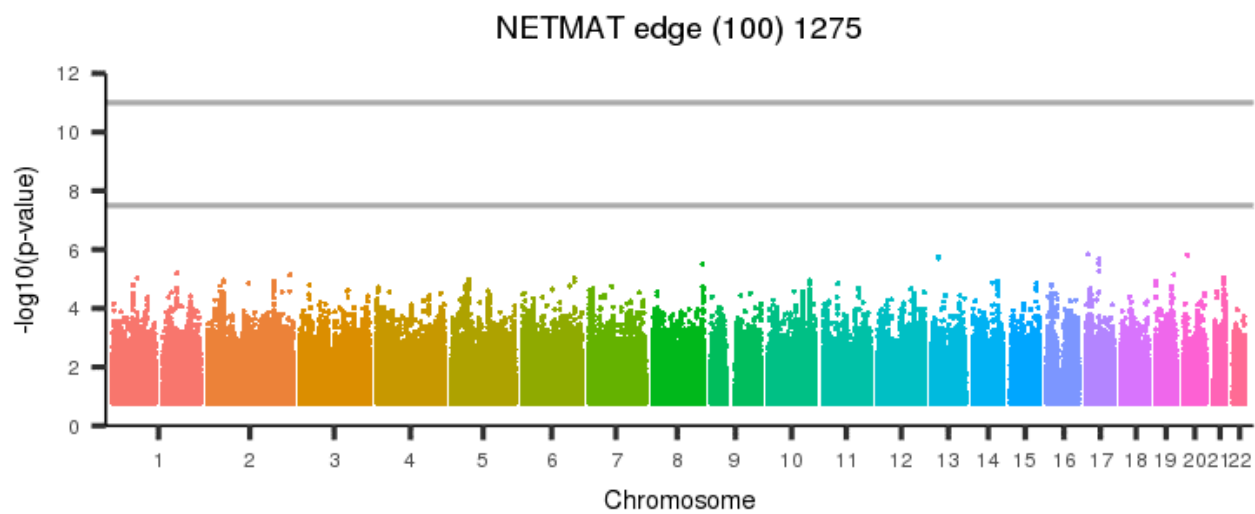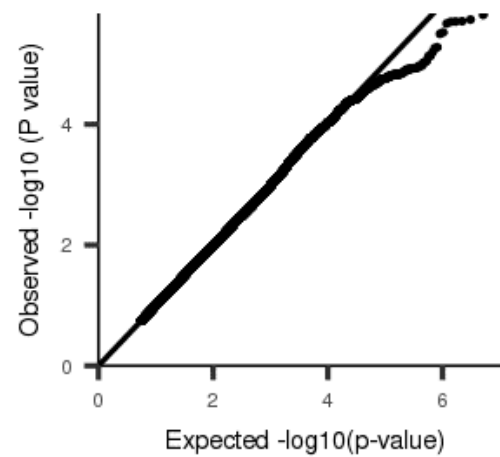

[back to list of plots](#)

Figure 2432: NETMAT edge (100) 1276

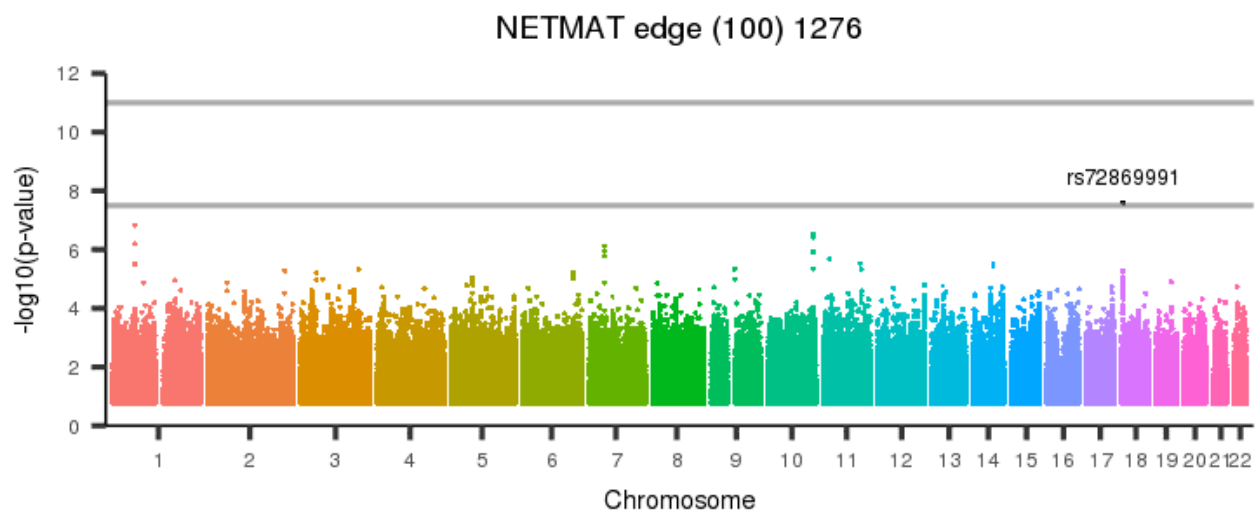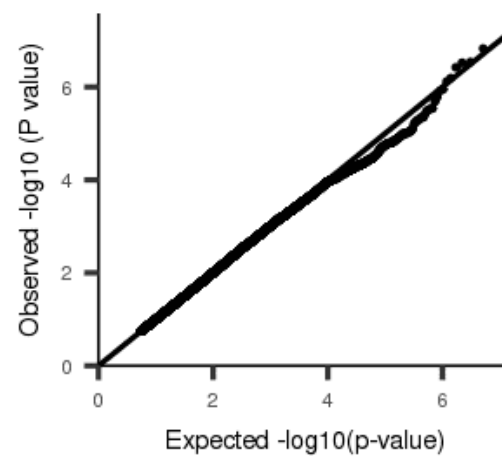

[back to list of plots](#)

Figure 2433: NETMAT edge (100) 1277

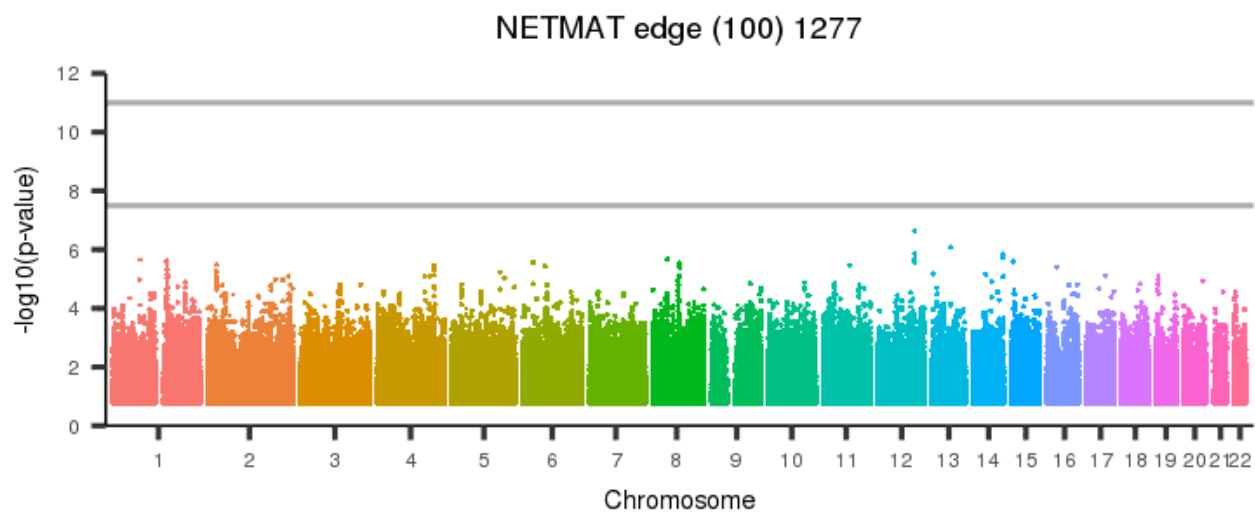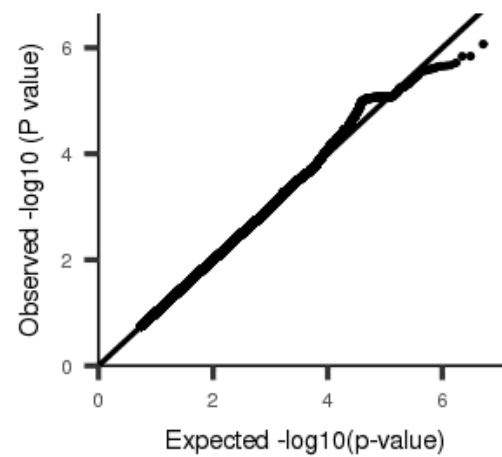

[back to list of plots](#)

Figure 2434: NETMAT edge (100) 1278

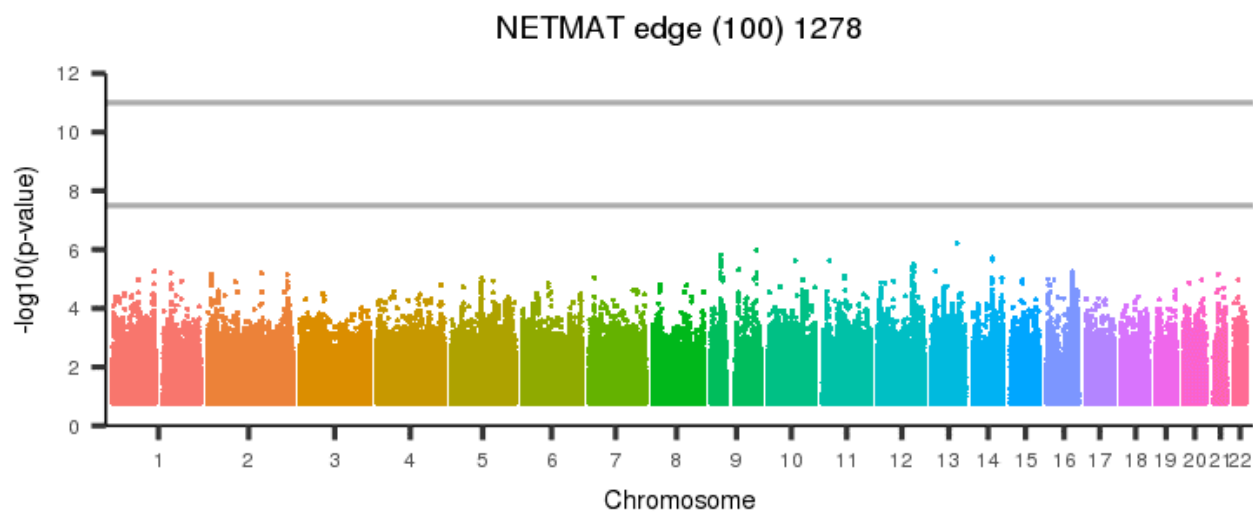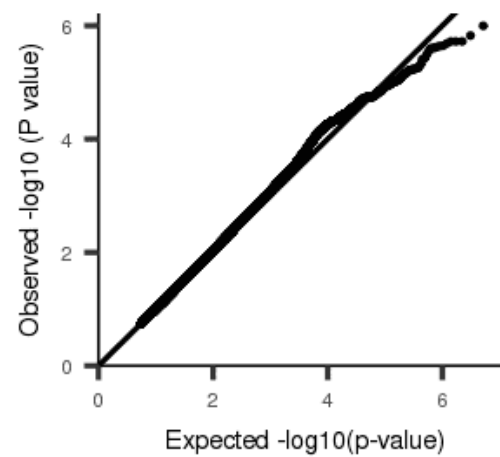

[back to list of plots](#)

Figure 2435: NETMAT edge (100) 1279

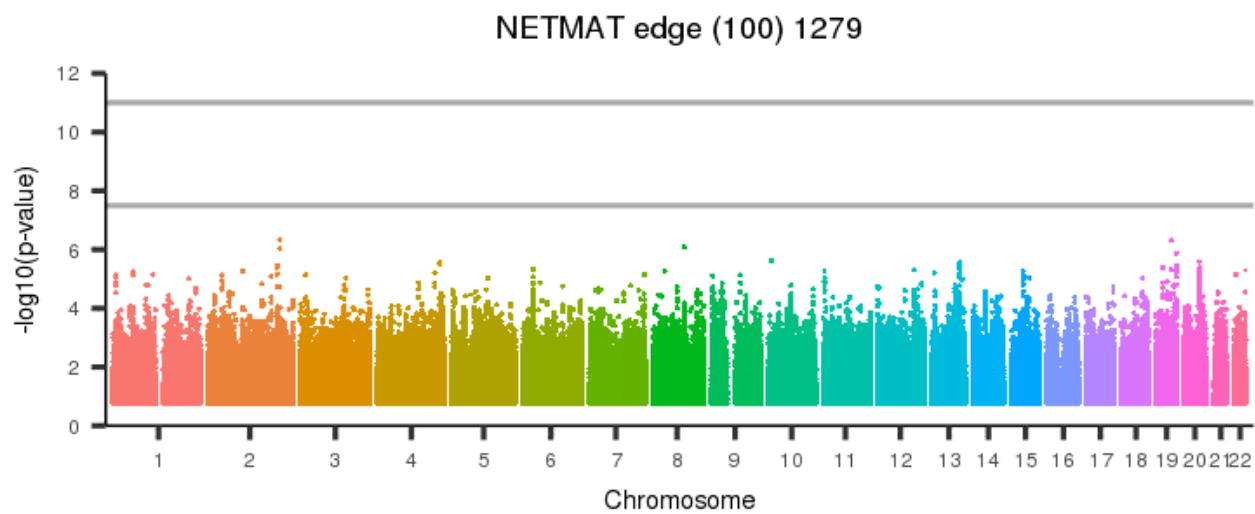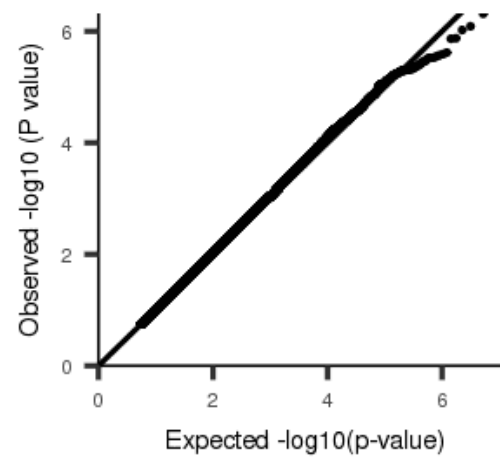

[back to list of plots](#)

Figure 2436: NETMAT edge (100) 1280

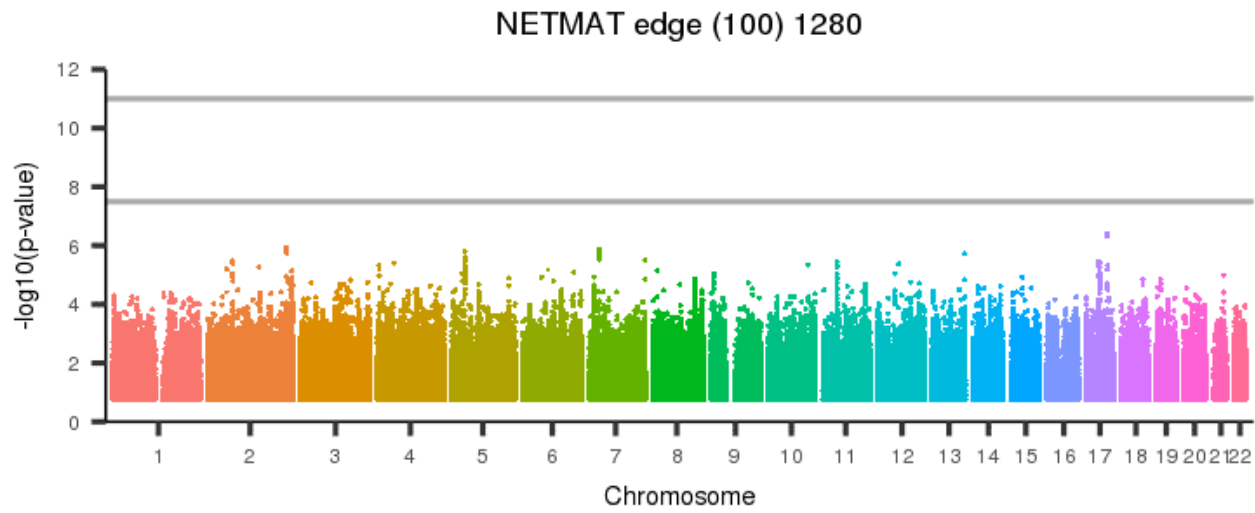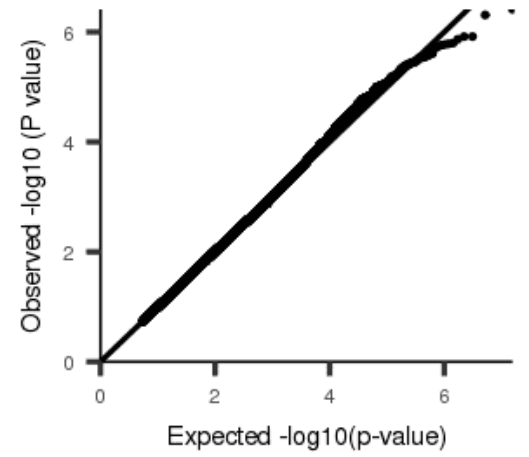

[back to list of plots](#)

Figure 2437: NETMAT edge (100) 1281

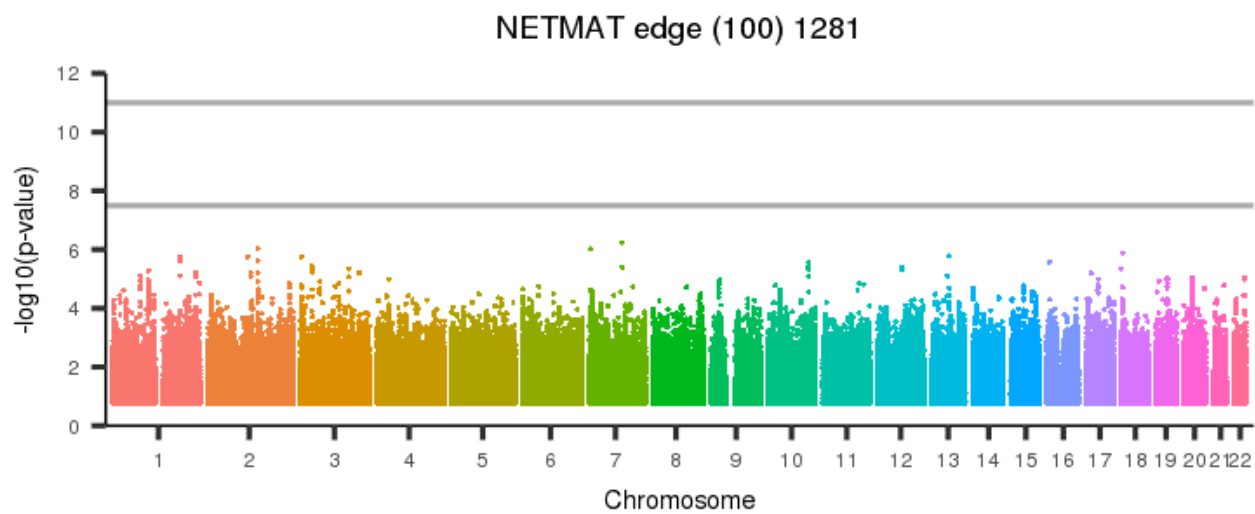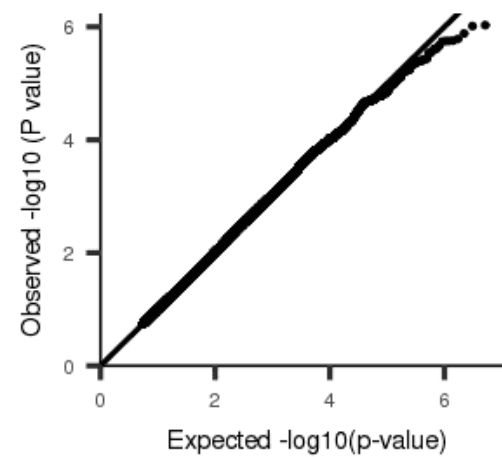

[back to list of plots](#)



Figure 2438: NETMAT edge (100) 1282

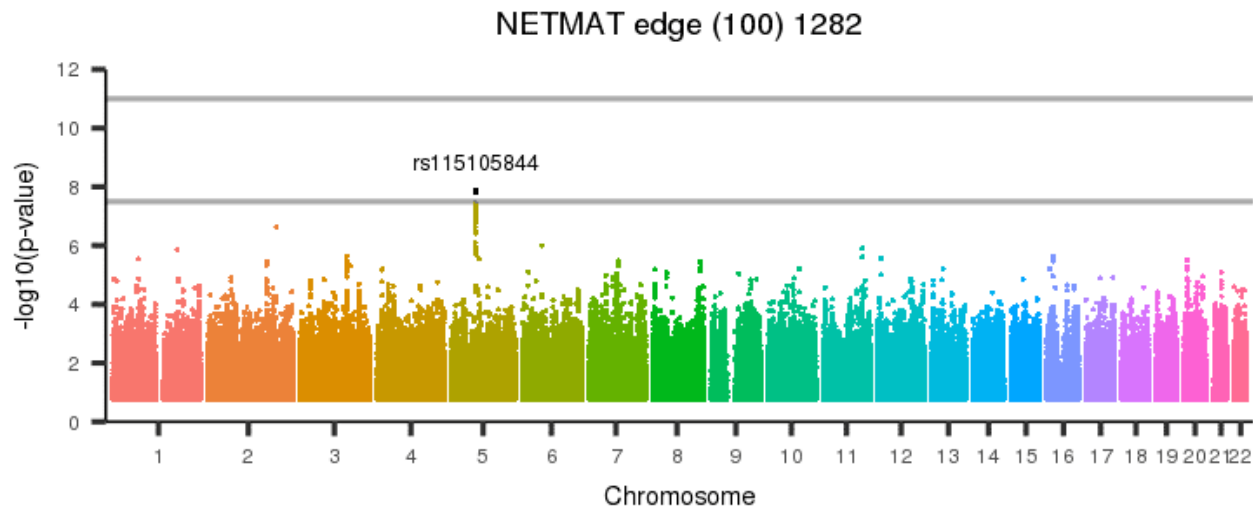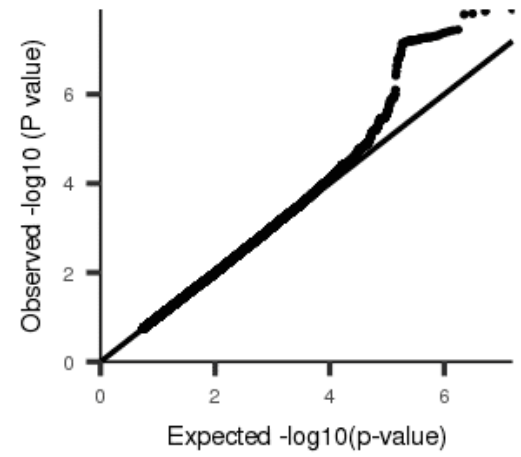

[back to list of plots](#)

Figure 2439: NETMAT edge (100) 1283

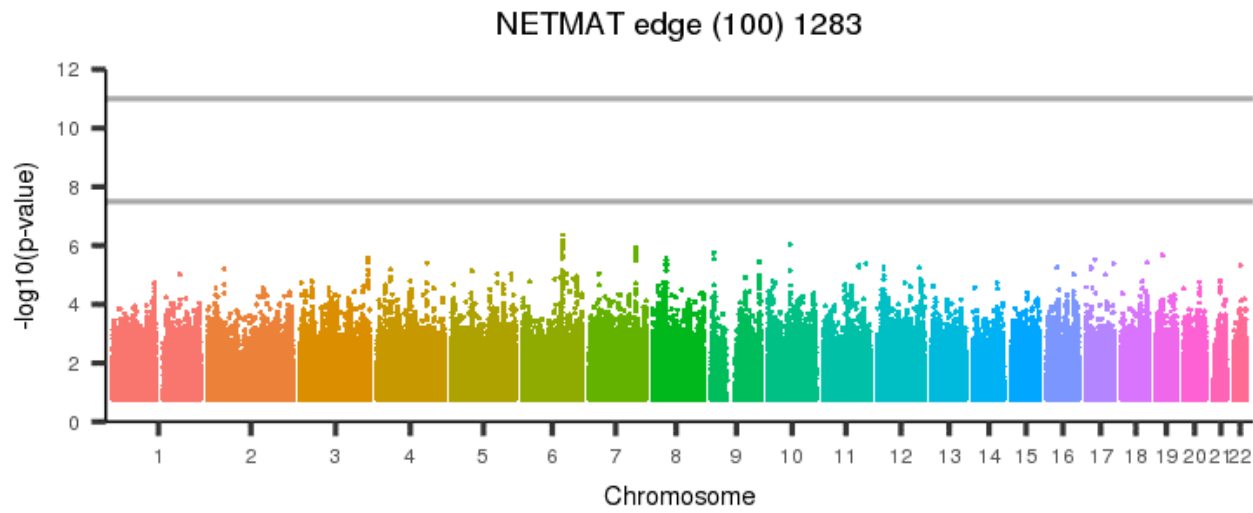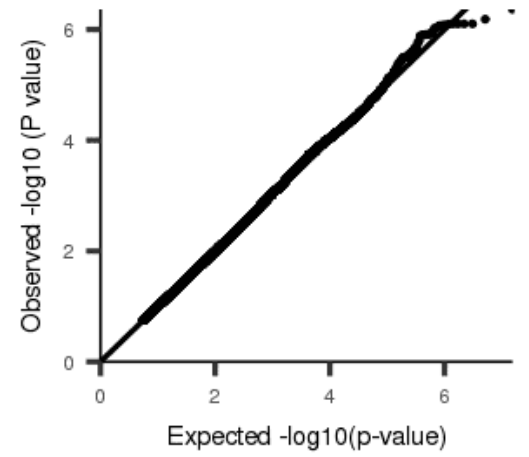

[back to list of plots](#)

Figure 2440: NETMAT edge (100) 1284

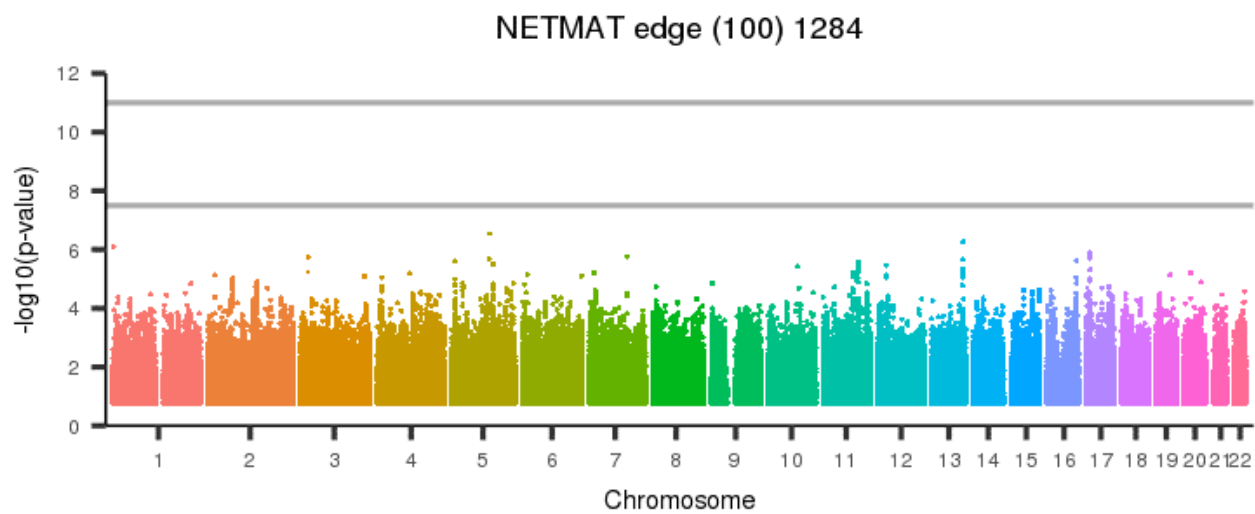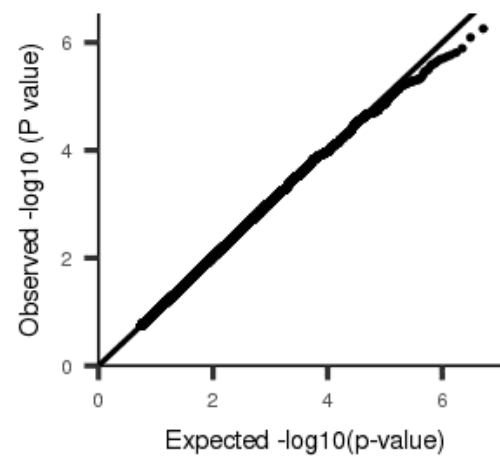

[back to list of plots](#)

Figure 2441: NETMAT edge (100) 1285

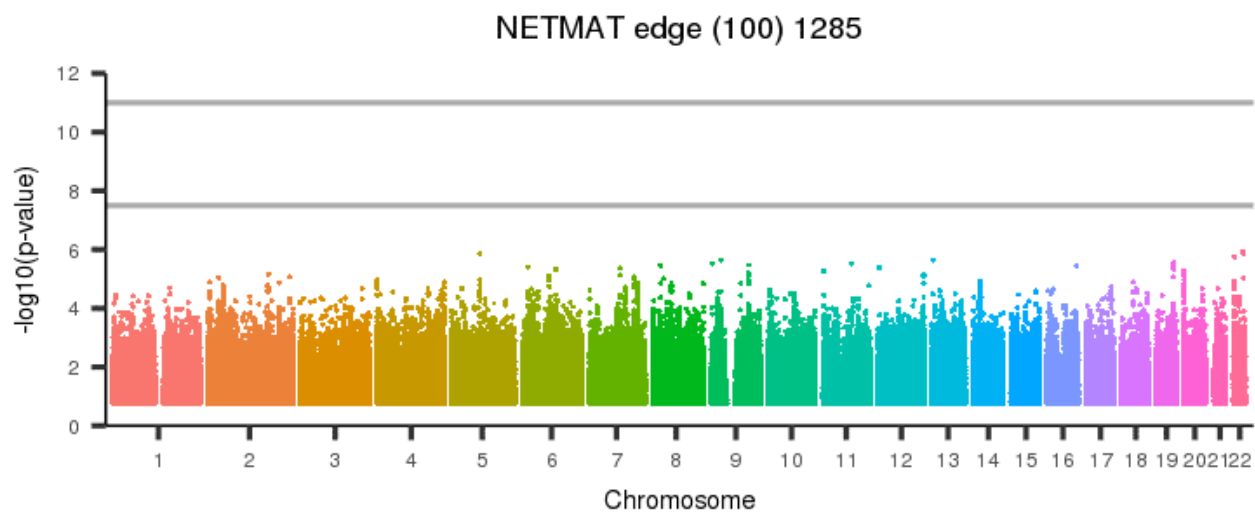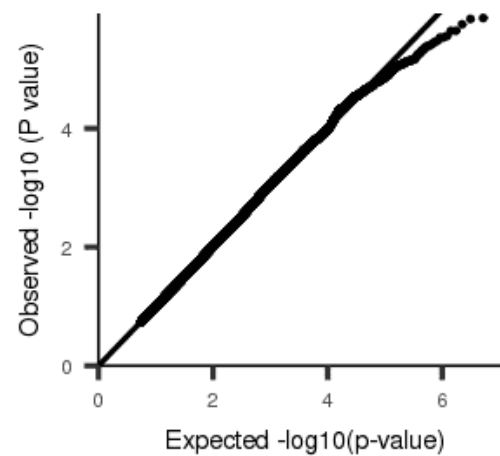

[back to list of plots](#)

Figure 2442: NETMAT edge (100) 1286

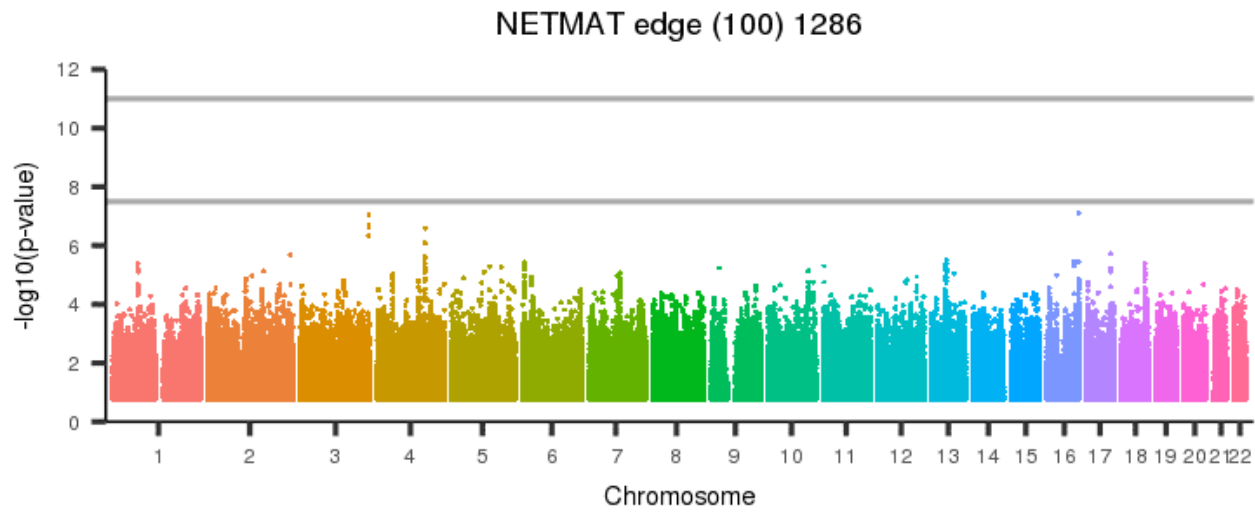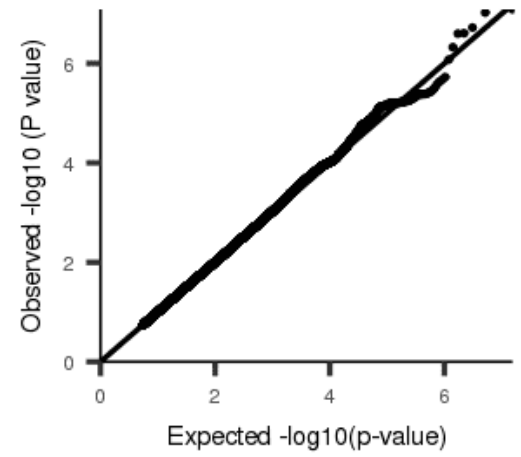

[back to list of plots](#)

Figure 2443: NETMAT edge (100) 1287

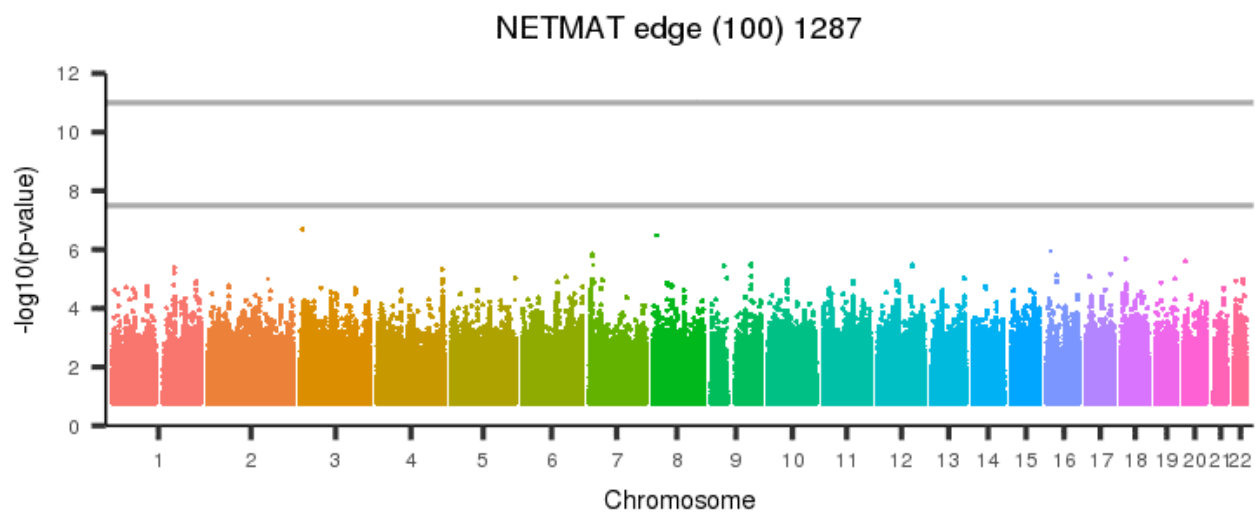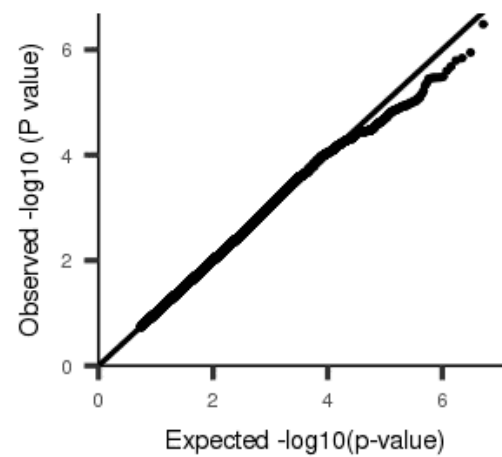

[back to list of plots](#)

Figure 2444: NETMAT edge (100) 1288

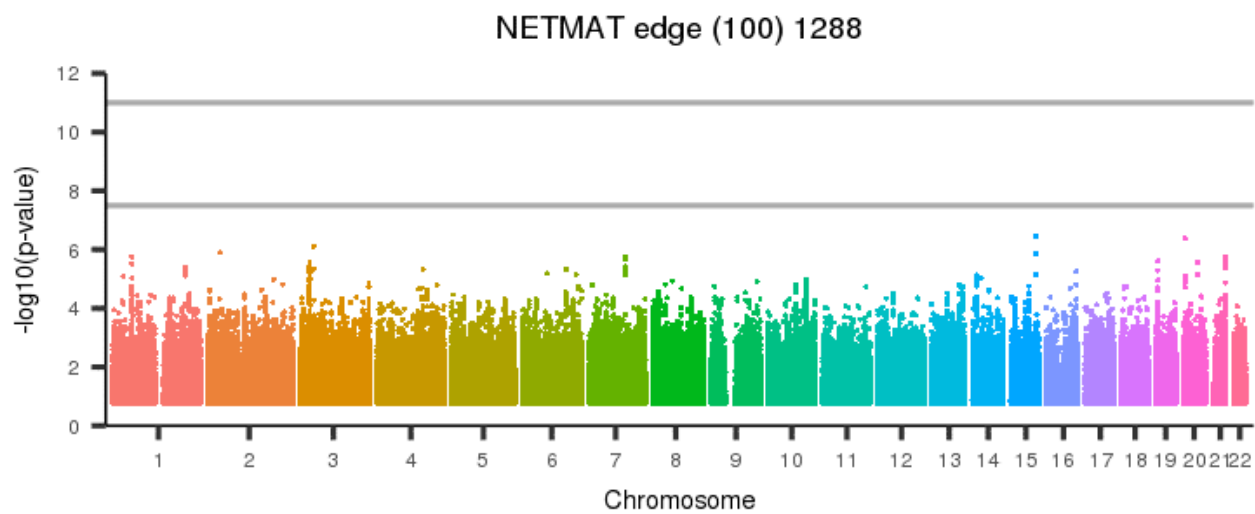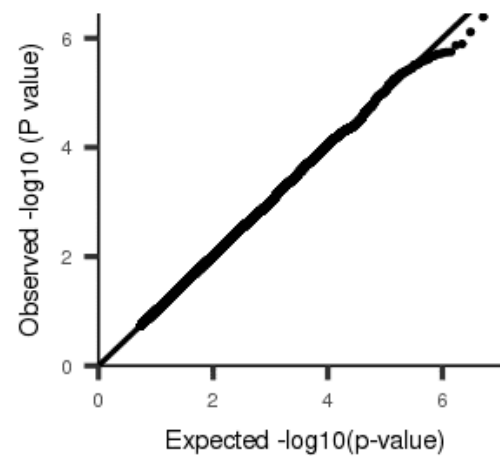

[back to list of plots](#)

Figure 2445: NETMAT edge (100) 1289

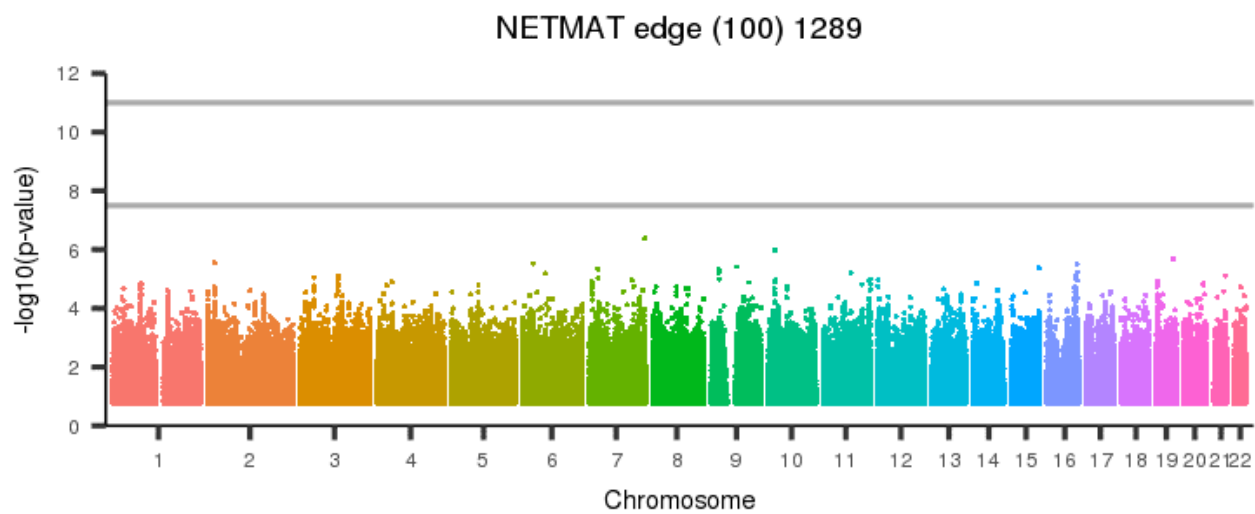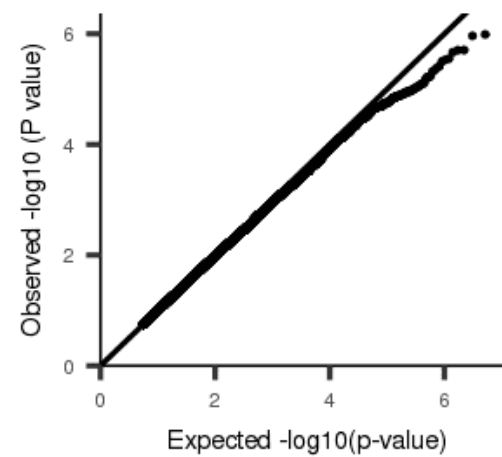

[back to list of plots](#)



Figure 2446: NETMAT edge (100) 1290

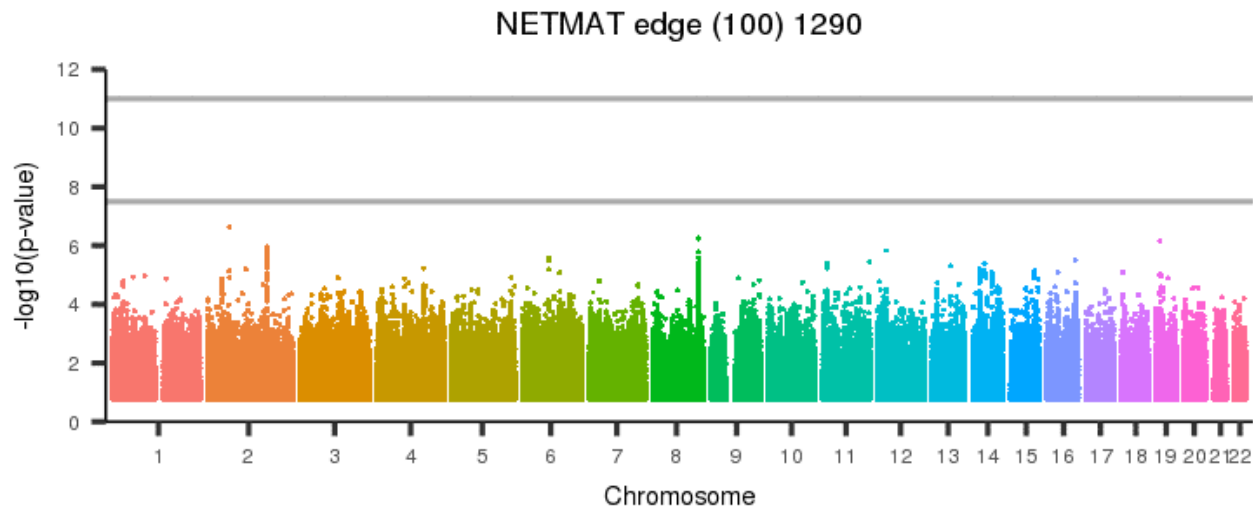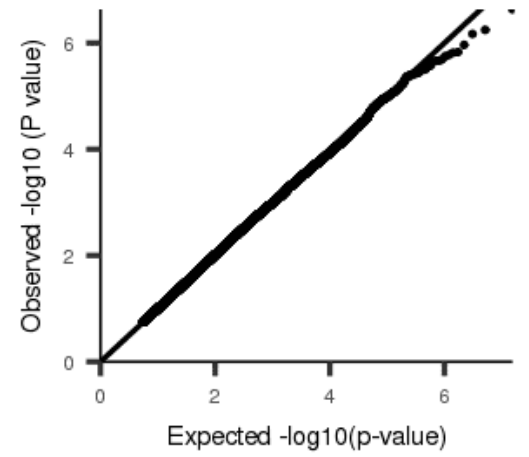

[back to list of plots](#)

Figure 2447: NETMAT edge (100) 1291

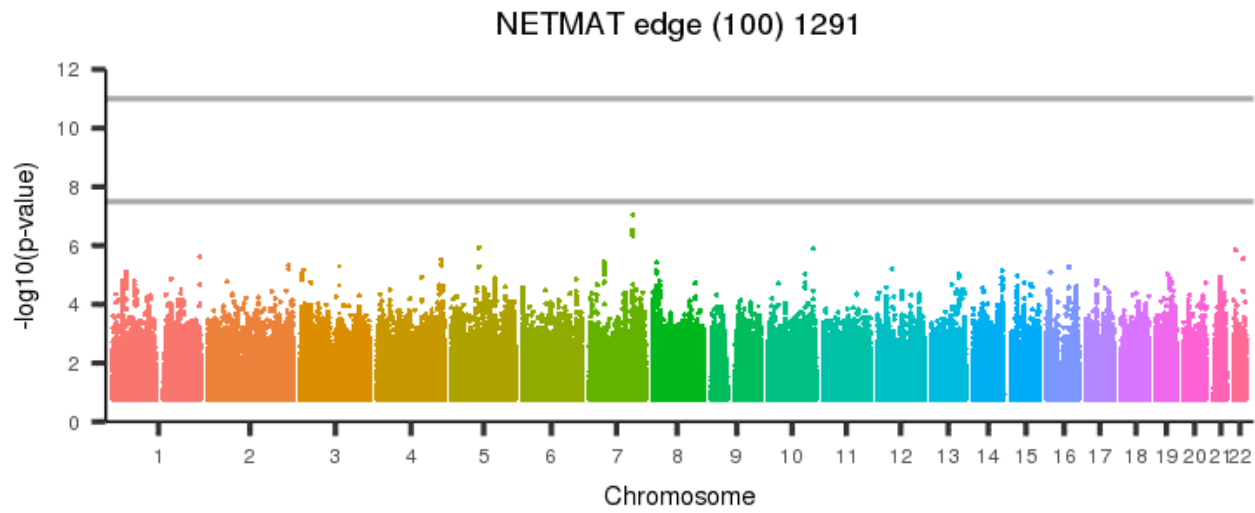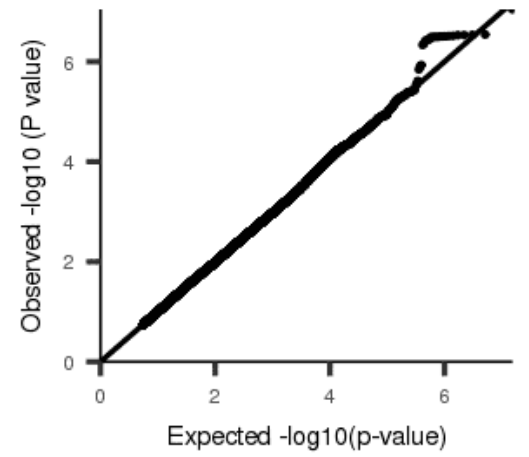

[back to list of plots](#)

Figure 2448: NETMAT edge (100) 1292

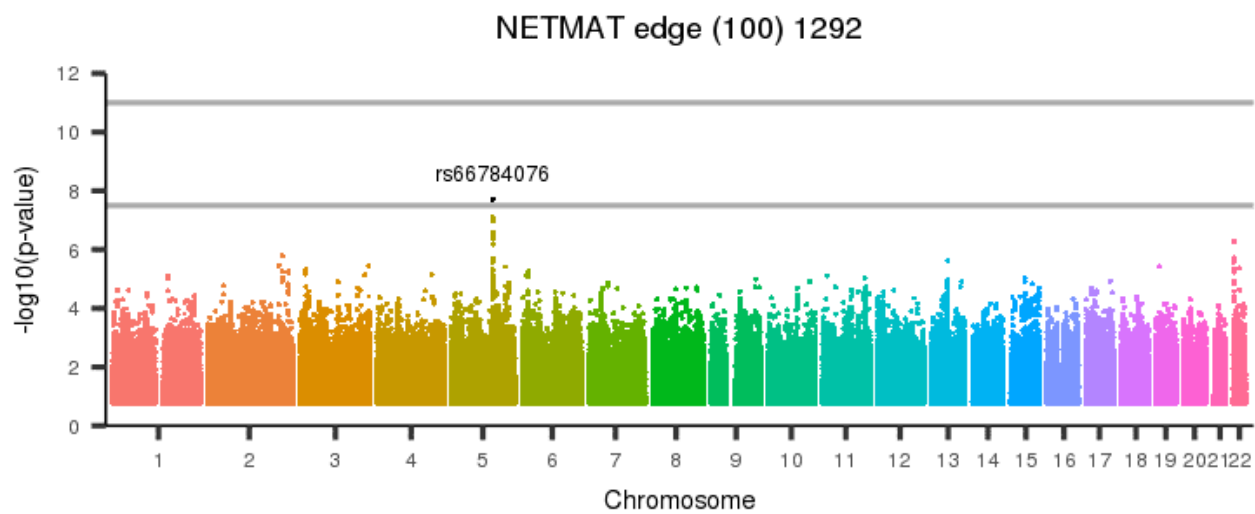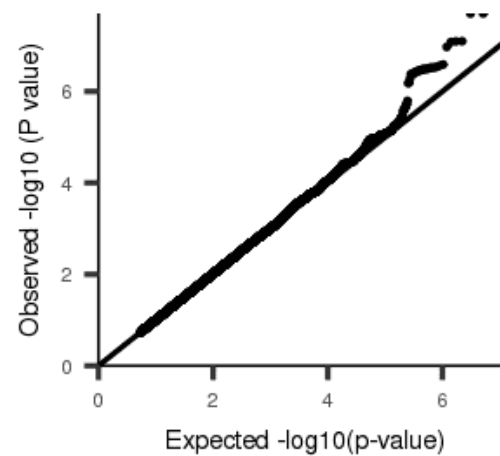

[back to list of plots](#)

Figure 2449: NETMAT edge (100) 1293

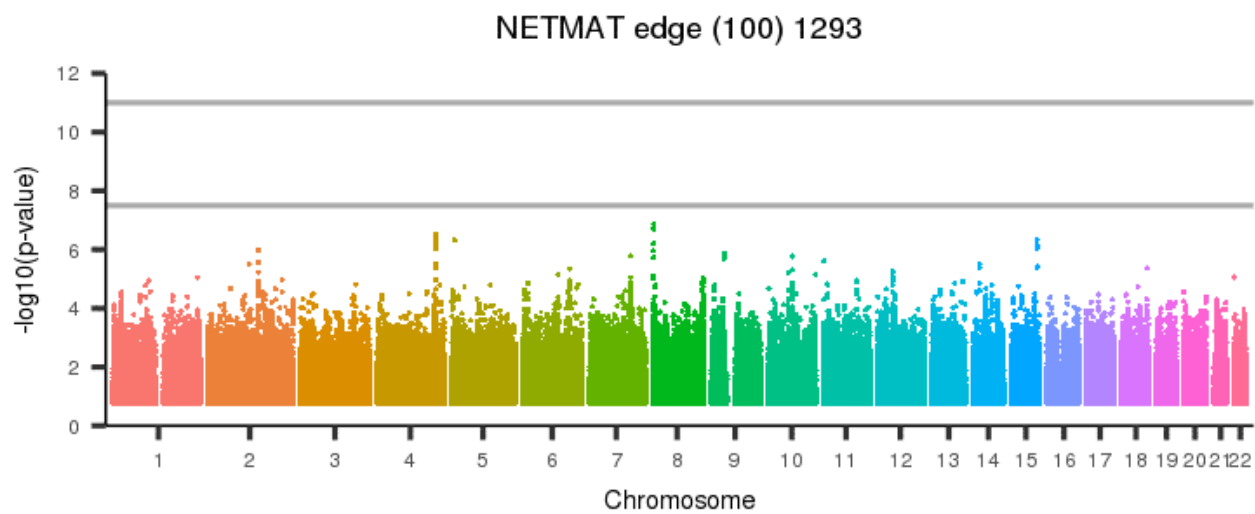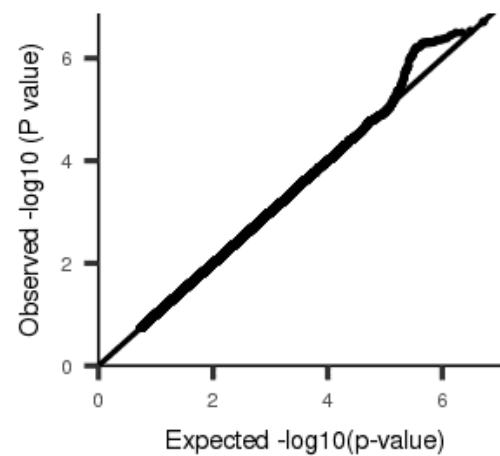

[back to list of plots](#)

Figure 2450: NETMAT edge (100) 1294

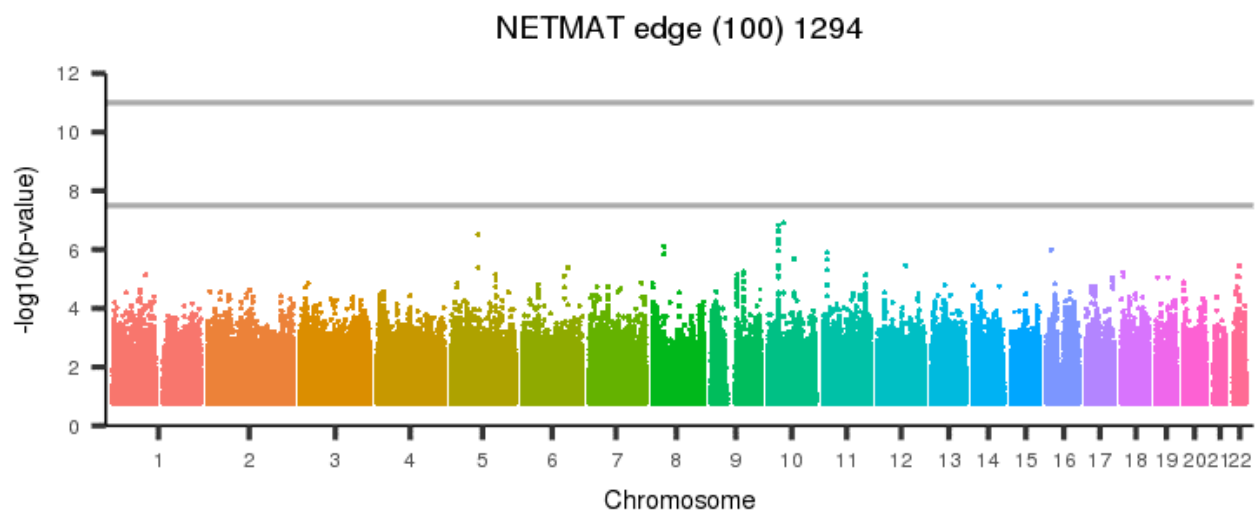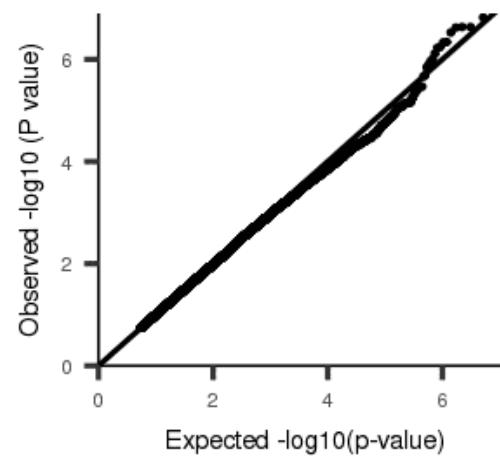

[back to list of plots](#)

Figure 2451: NETMAT edge (100) 1295

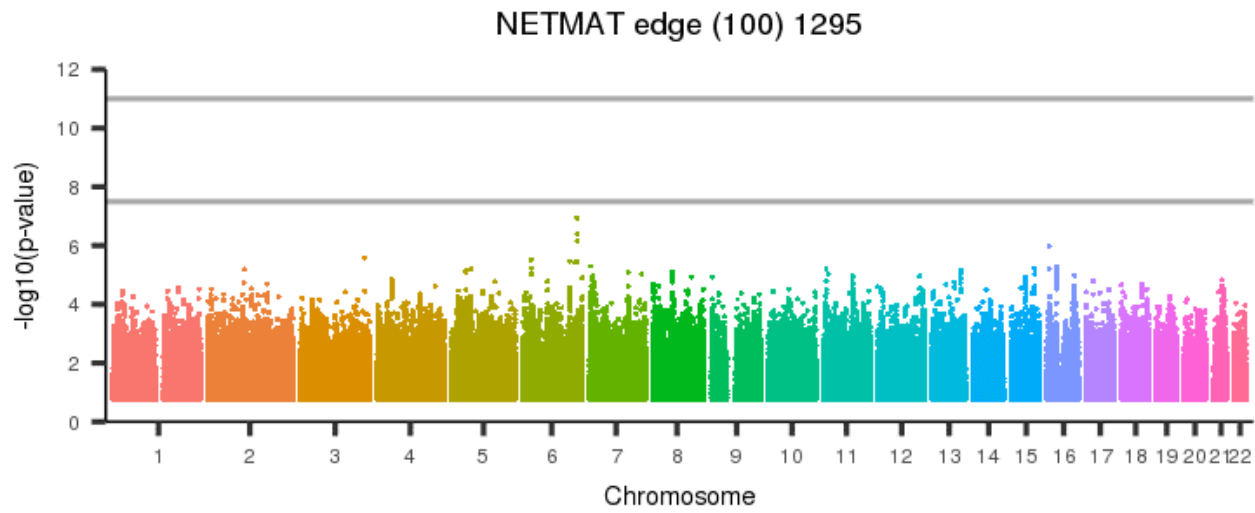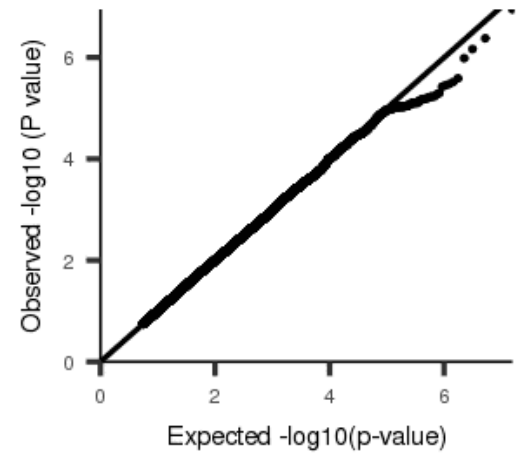

[back to list of plots](#)

Figure 2452: NETMAT edge (100) 1296

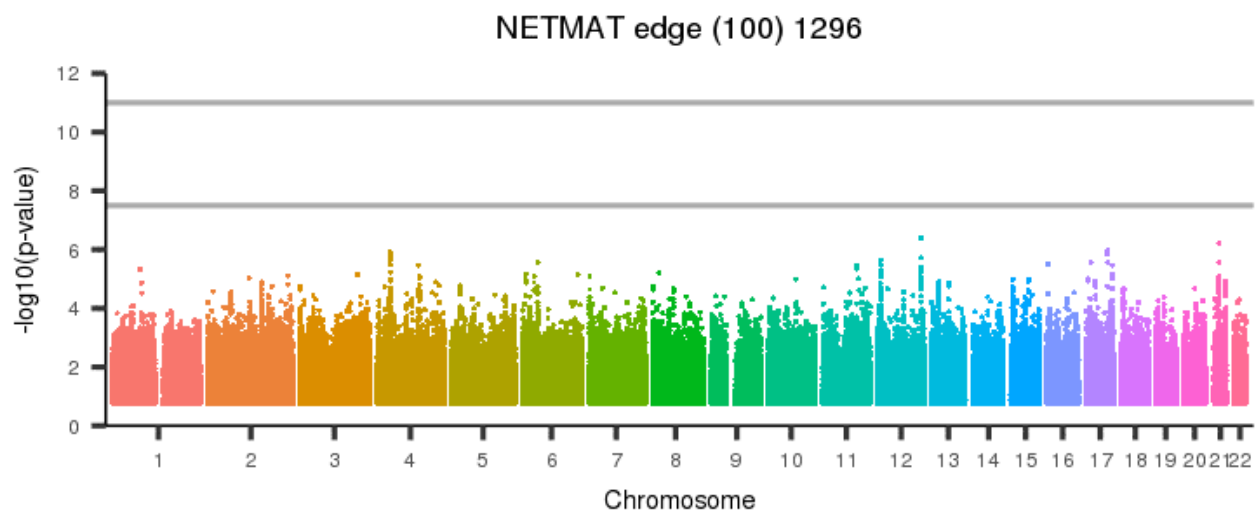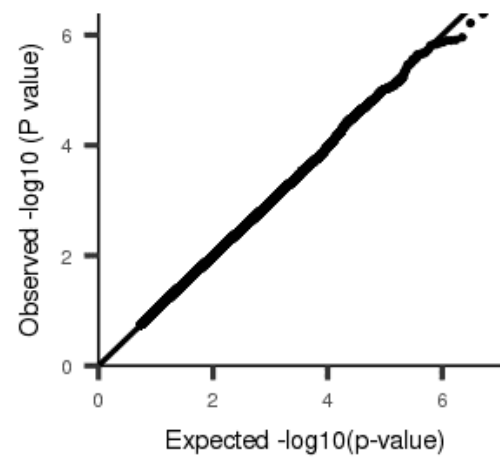

[back to list of plots](#)

Figure 2453: NETMAT edge (100) 1297

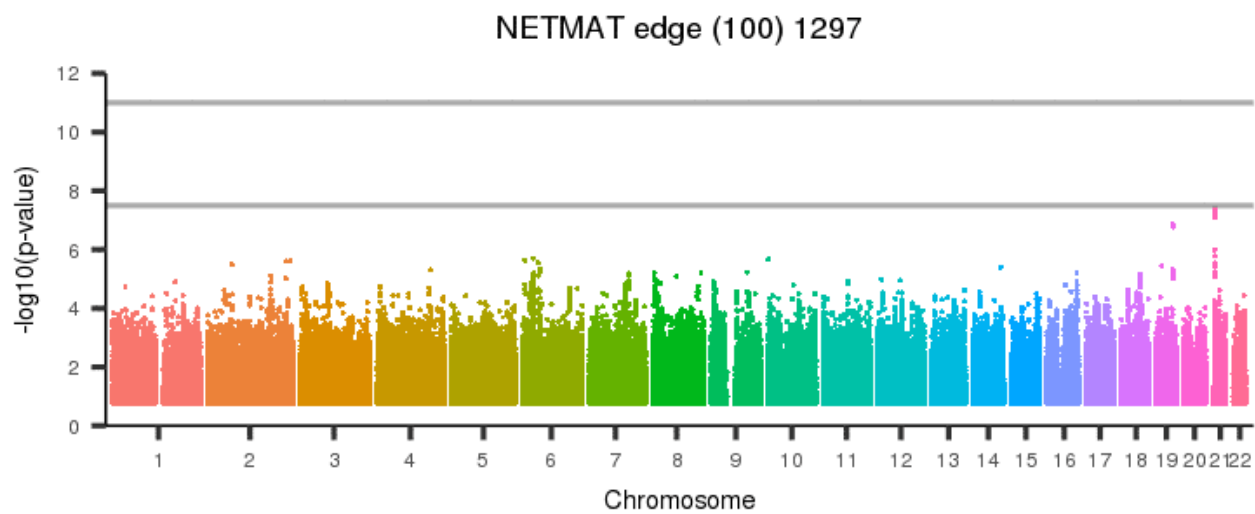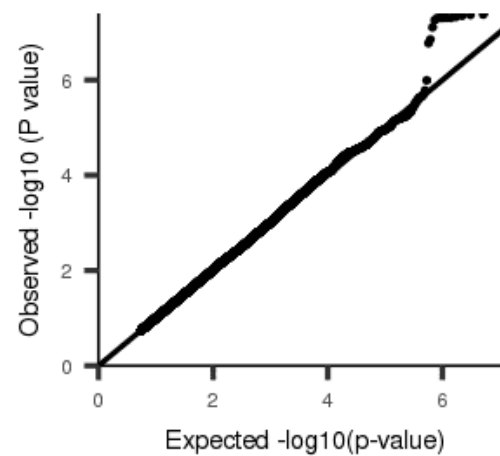

[back to list of plots](#)



Figure 2454: NETMAT edge (100) 1298

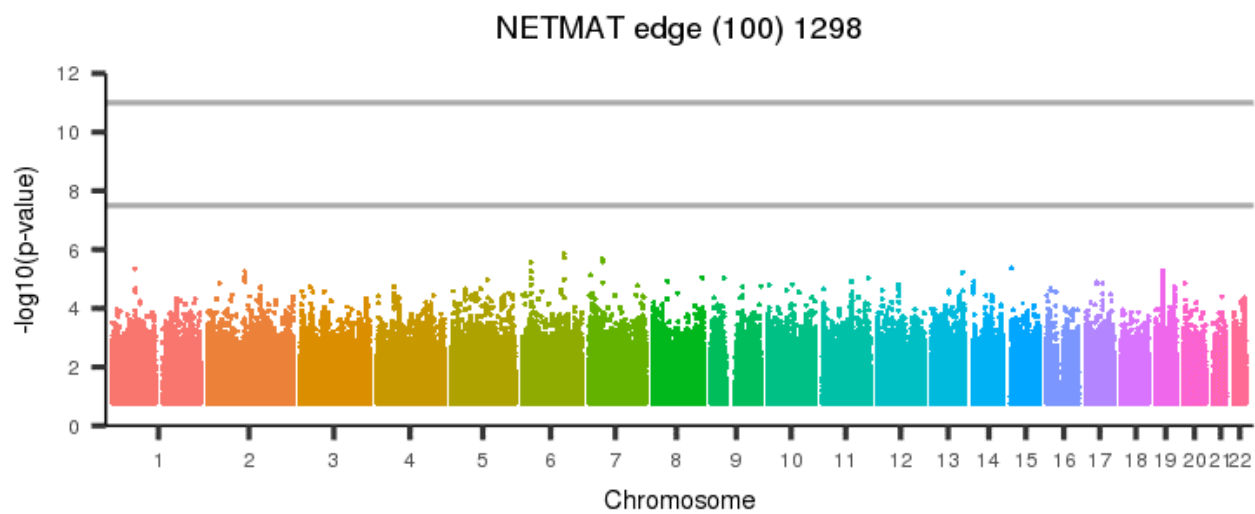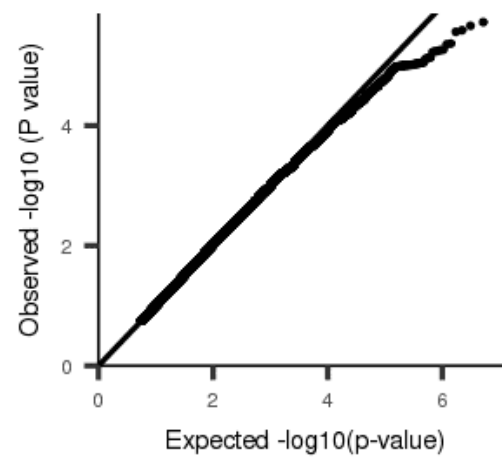

[back to list of plots](#)

Figure 2455: NETMAT edge (100) 1299

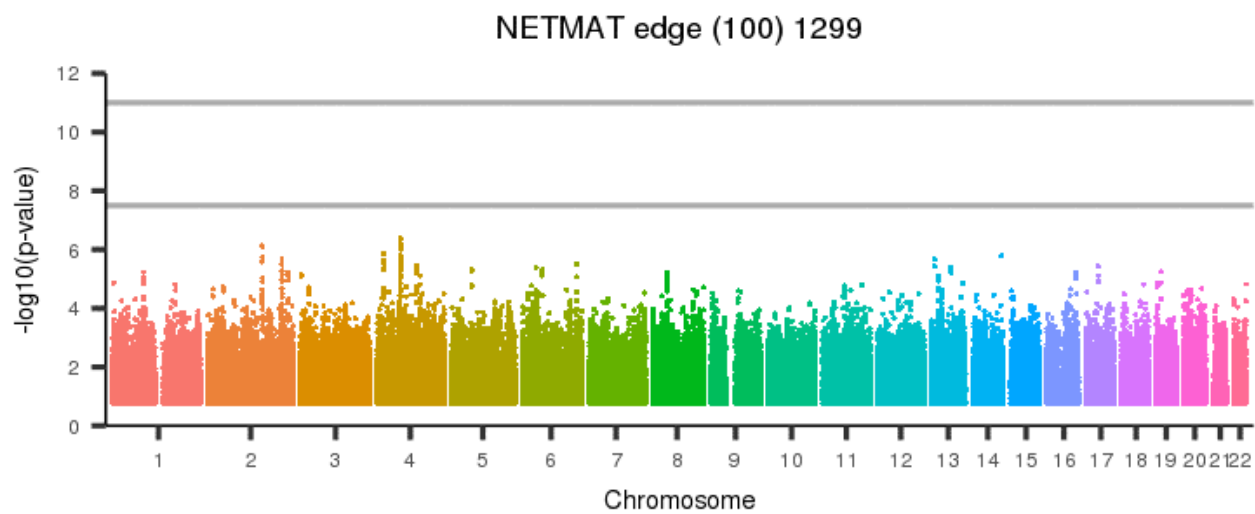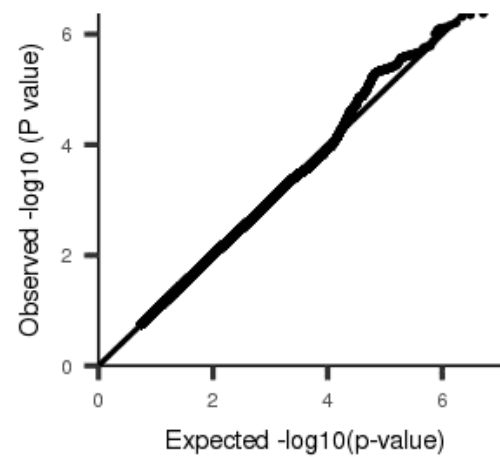

[back to list of plots](#)

Figure 2456: NETMAT edge (100) 1300

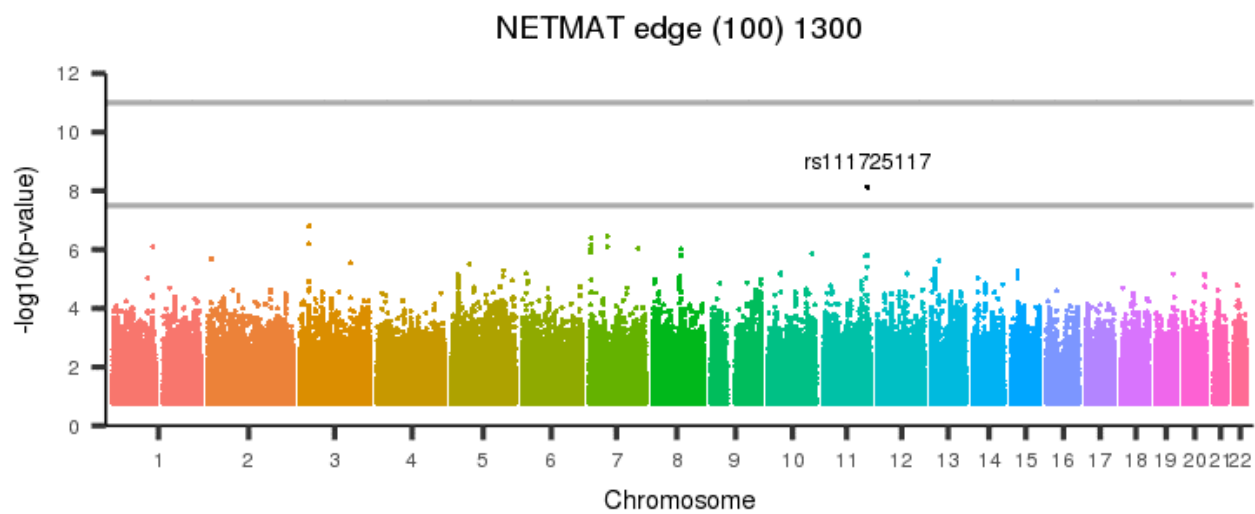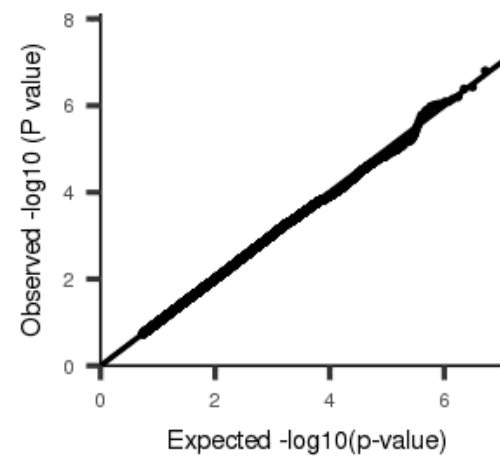

[back to list of plots](#)

Figure 2457: NETMAT edge (100) 1301

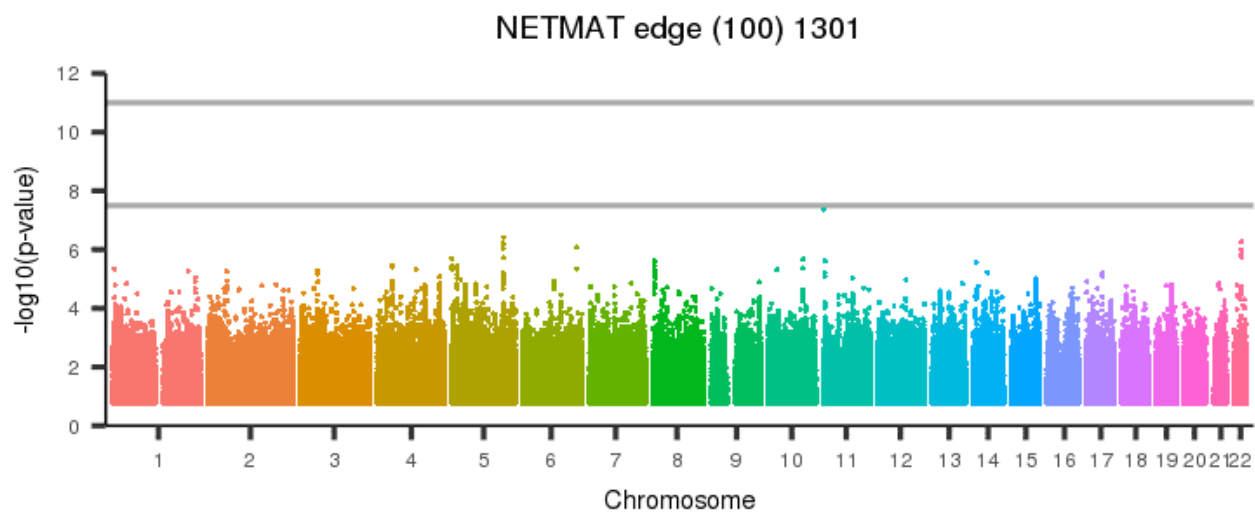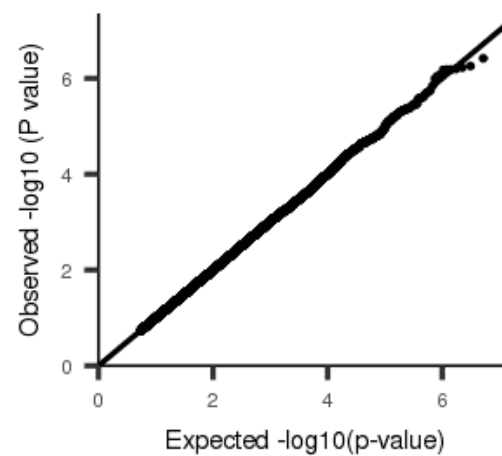

[back to list of plots](#)

Figure 2458: NETMAT edge (100) 1302

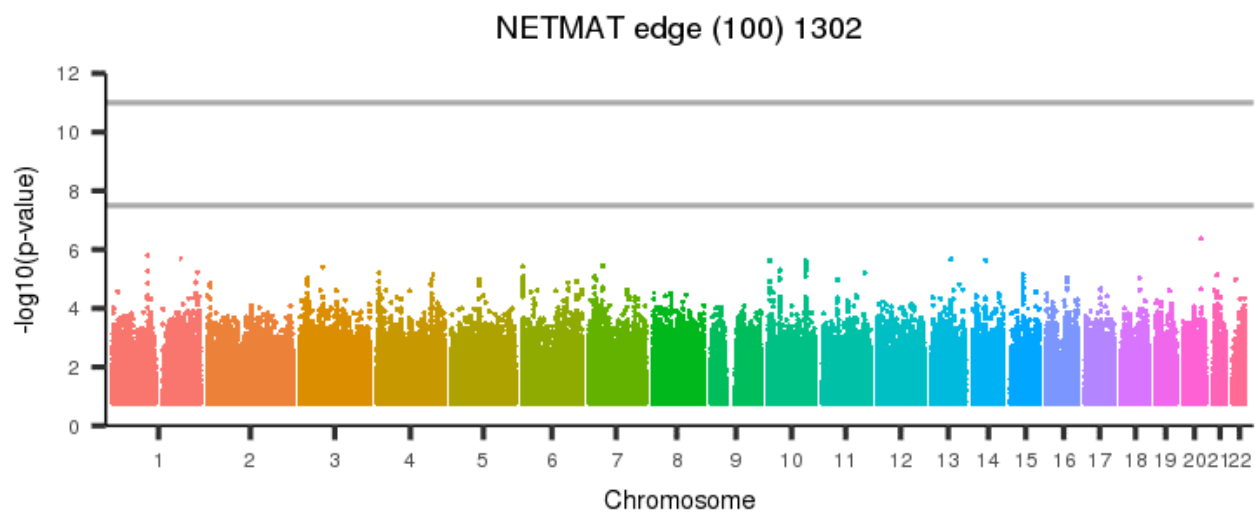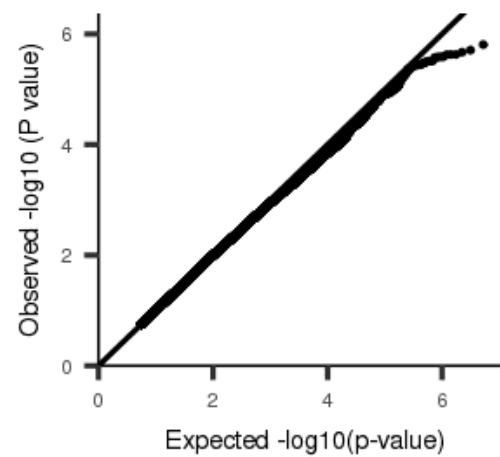

[back to list of plots](#)

Figure 2459: NETMAT edge (100) 1303

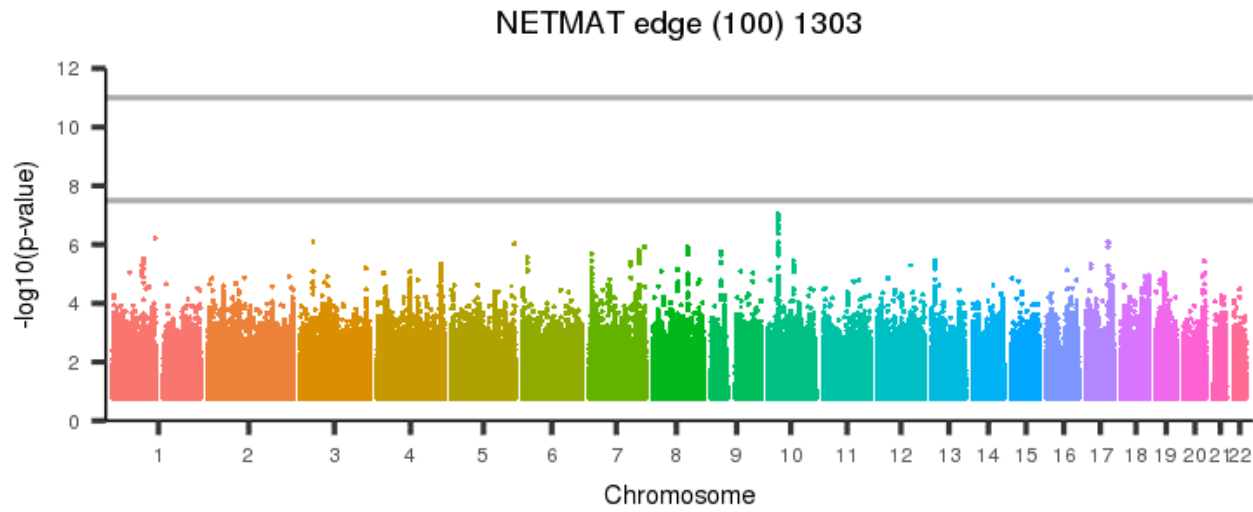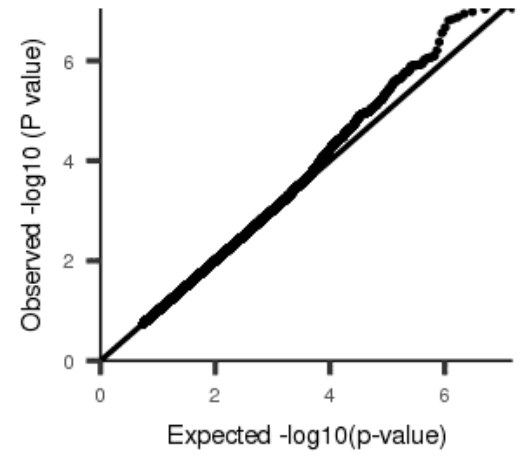

[back to list of plots](#)

Figure 2460: NETMAT edge (100) 1304

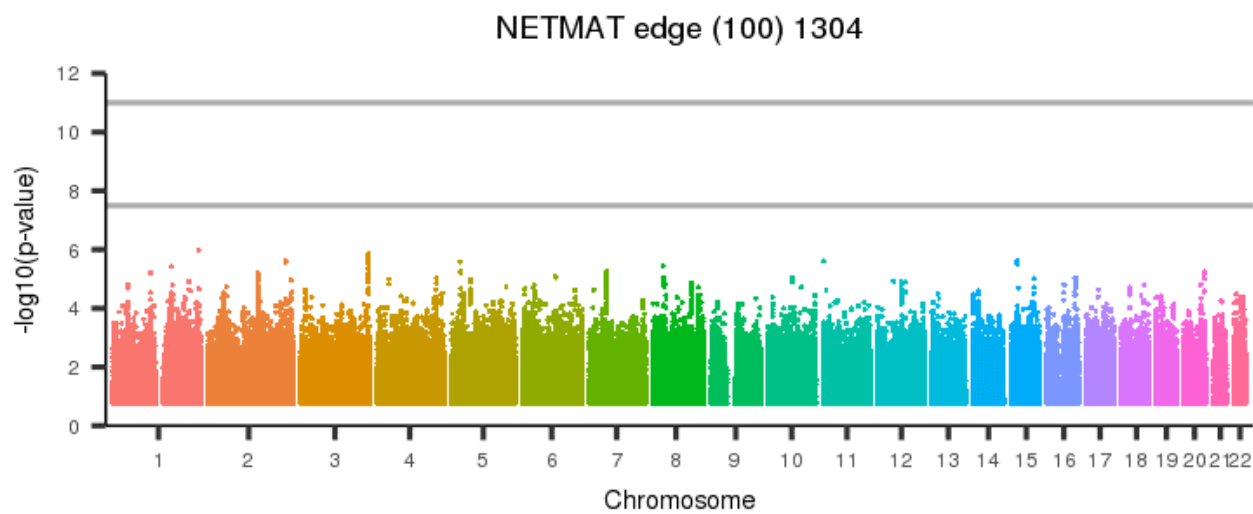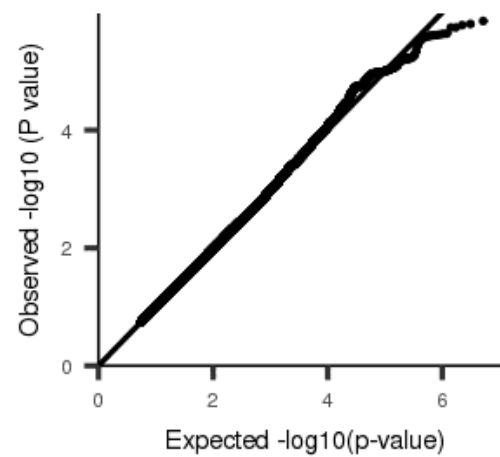

[back to list of plots](#)

Figure 2461: NETMAT edge (100) 1305

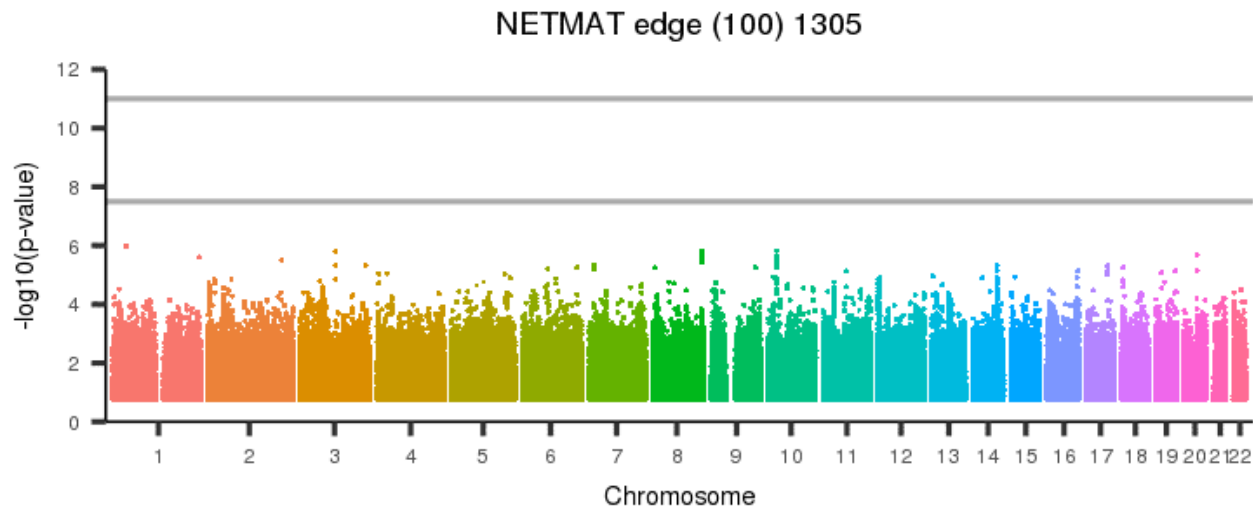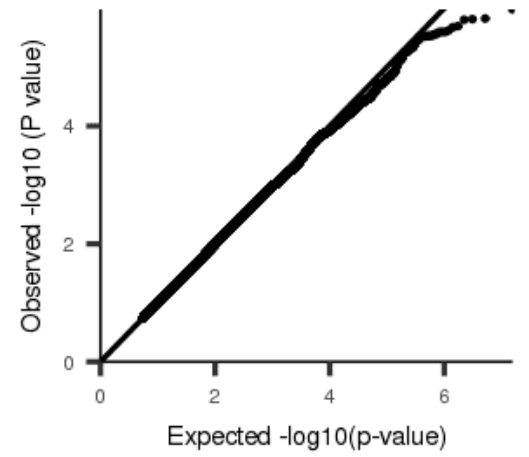

[back to list of plots](#)



Figure 2462: NETMAT edge (100) 1306

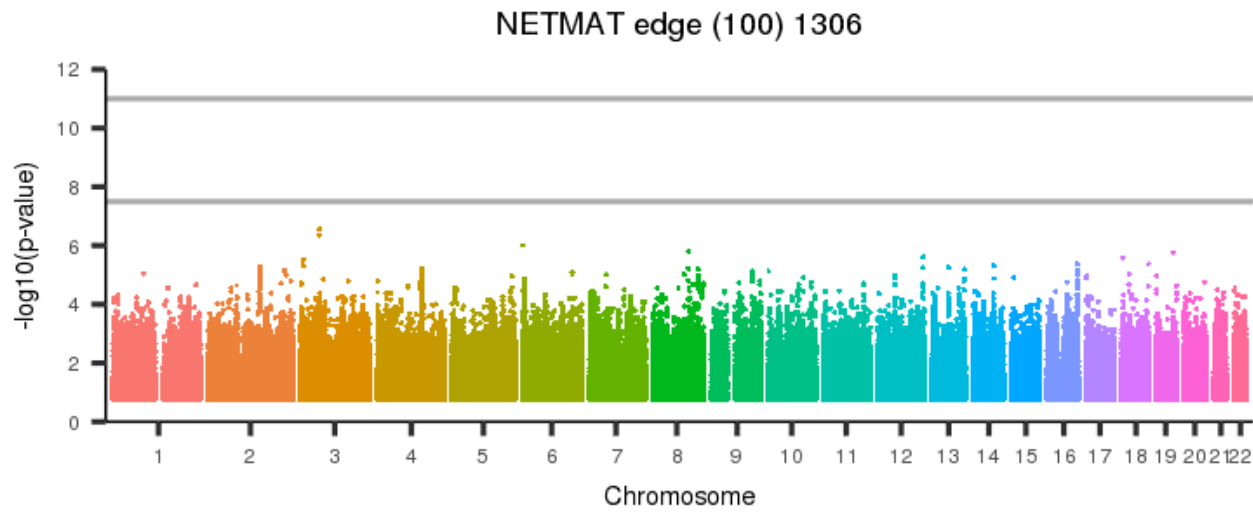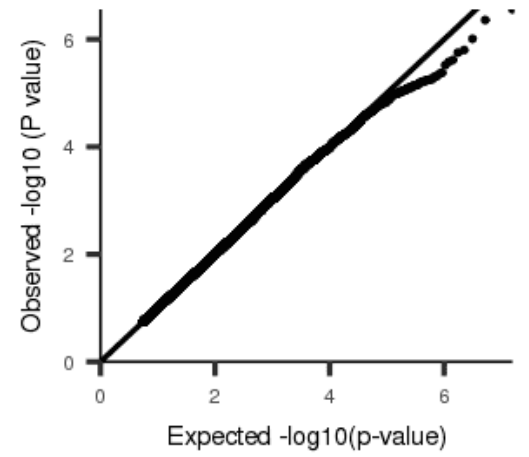

[back to list of plots](#)

Figure 2463: NETMAT edge (100) 1307

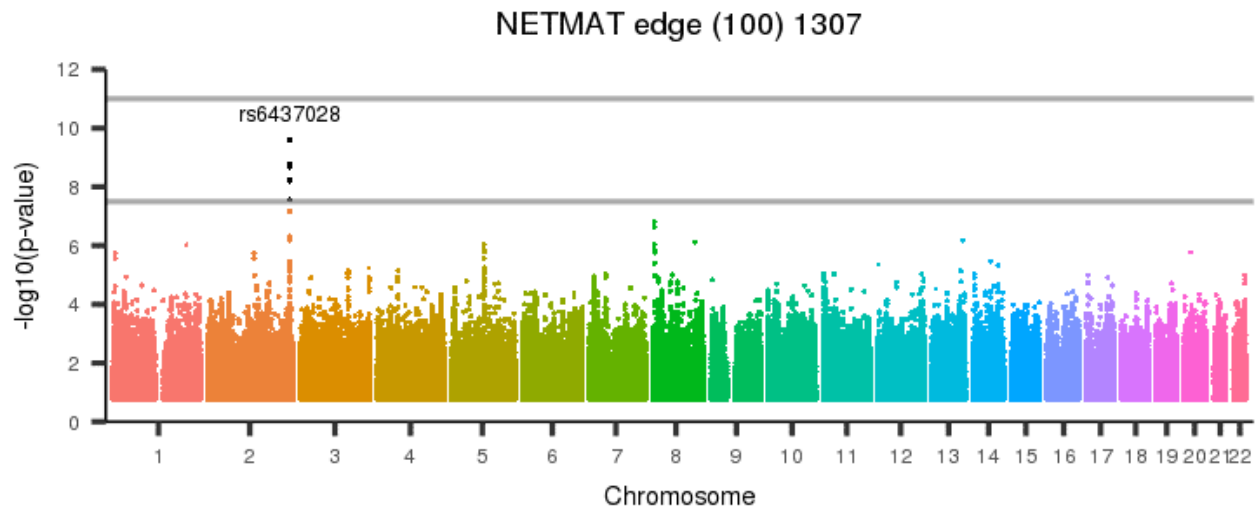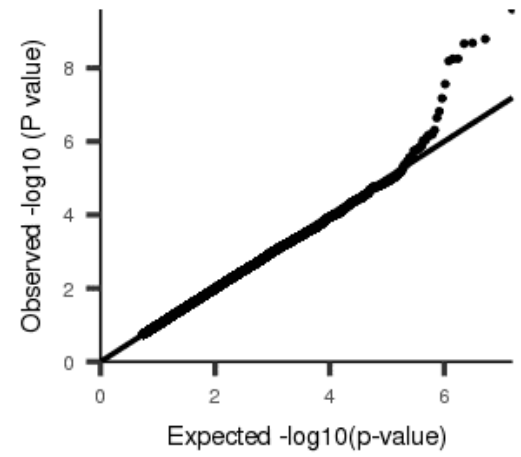

[back to list of plots](#)

Figure 2464: NETMAT edge (100) 1308

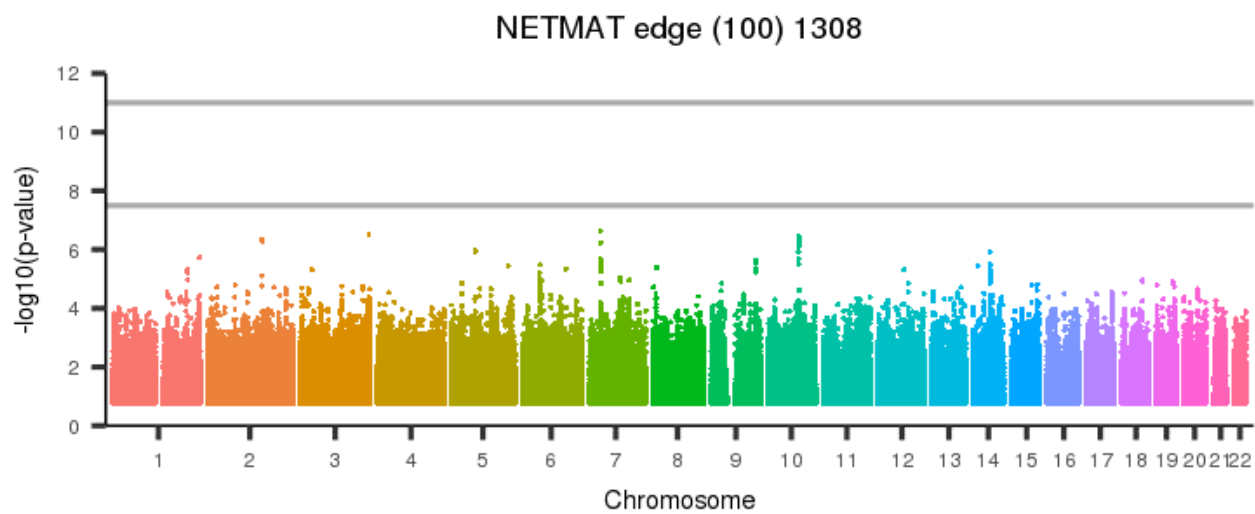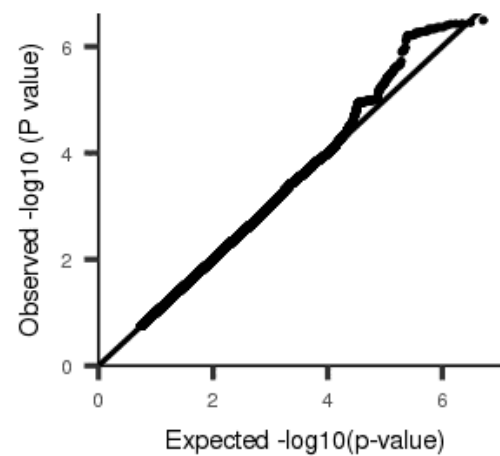

[back to list of plots](#)

Figure 2465: NETMAT edge (100) 1309

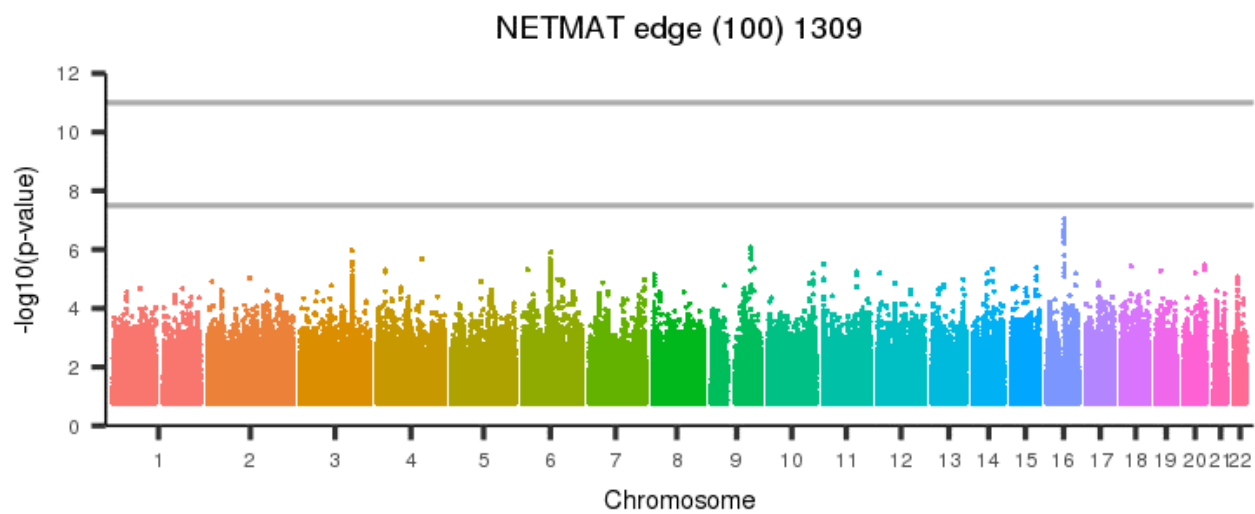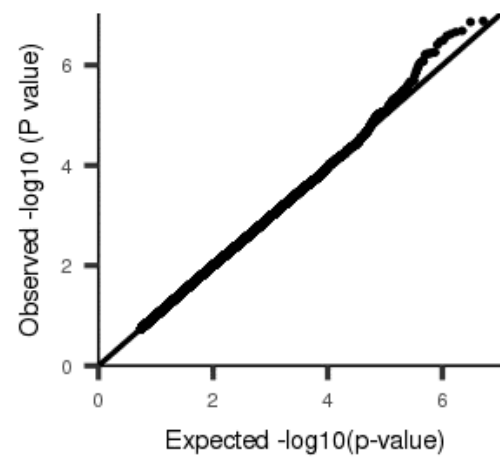

[back to list of plots](#)

Figure 2466: NETMAT edge (100) 1310

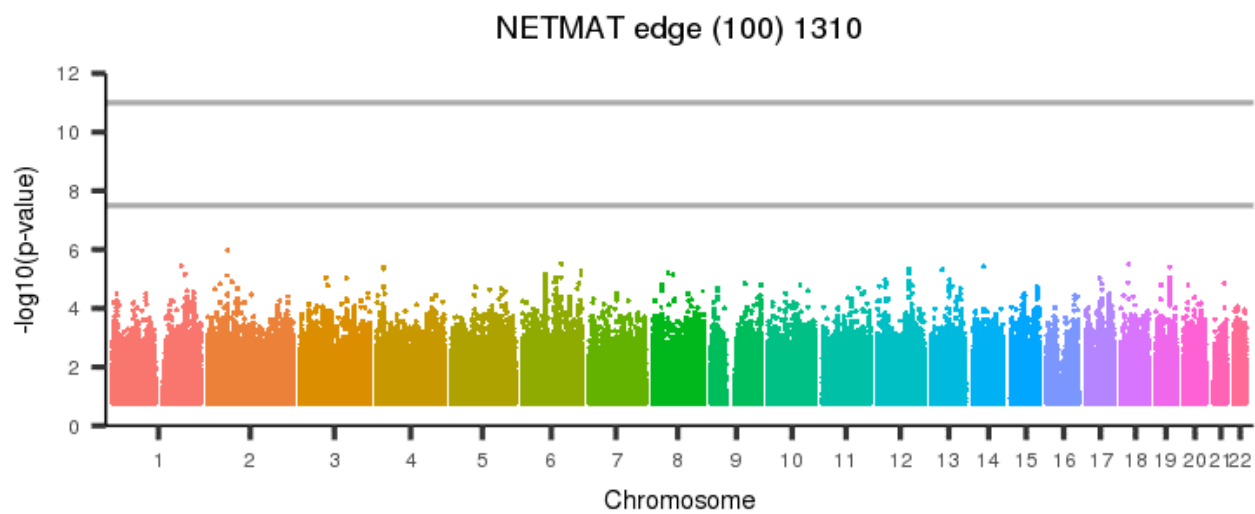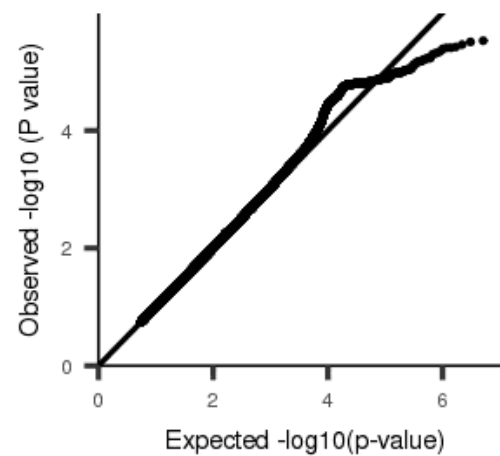

[back to list of plots](#)

Figure 2467: NETMAT edge (100) 1311

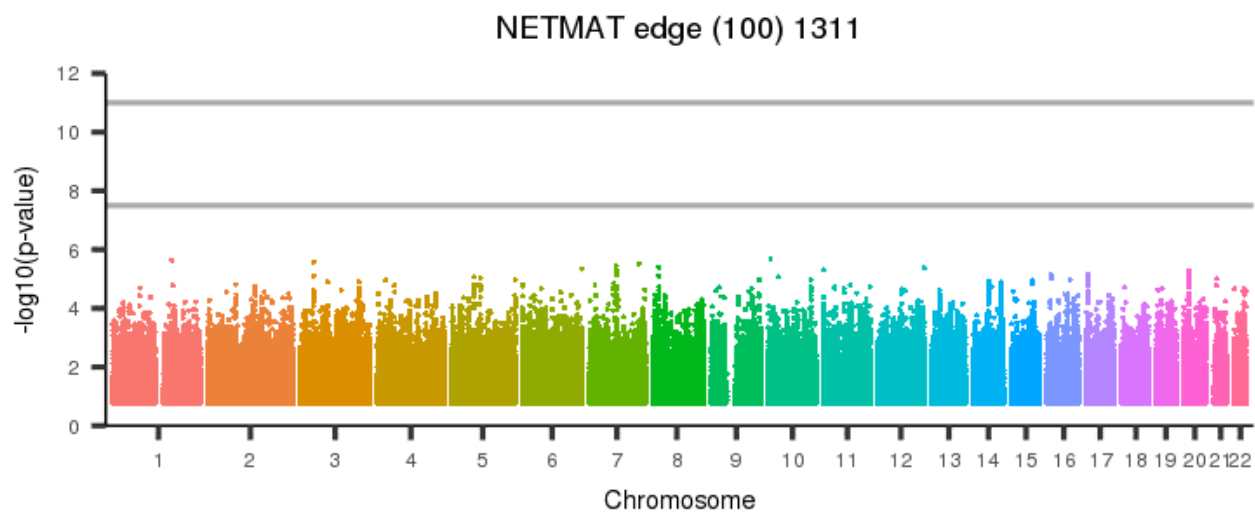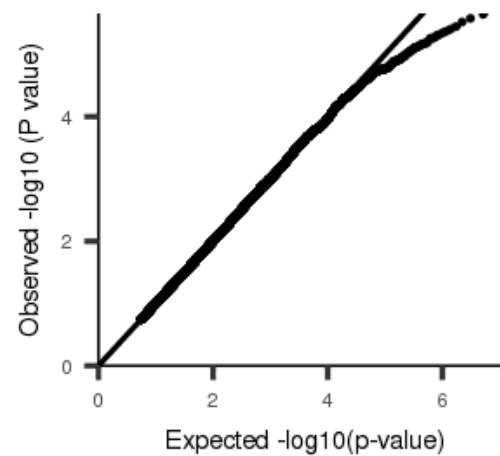

[back to list of plots](#)

Figure 2468: NETMAT edge (100) 1312

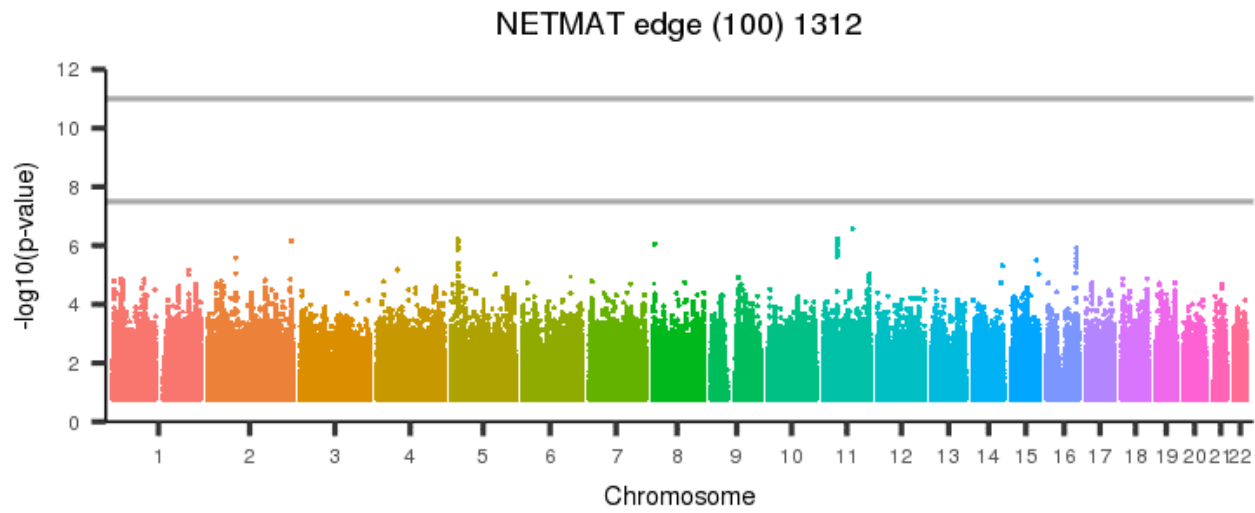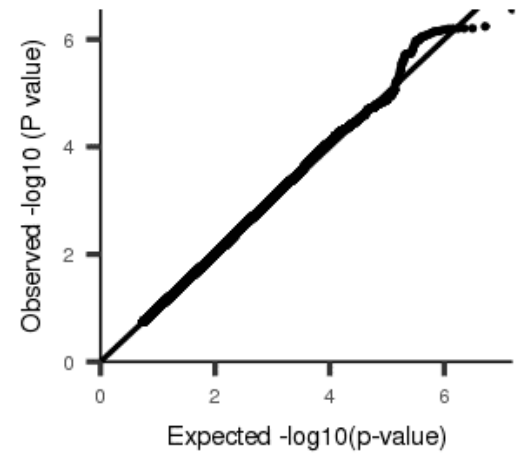

[back to list of plots](#)

Figure 2469: NETMAT edge (100) 1313

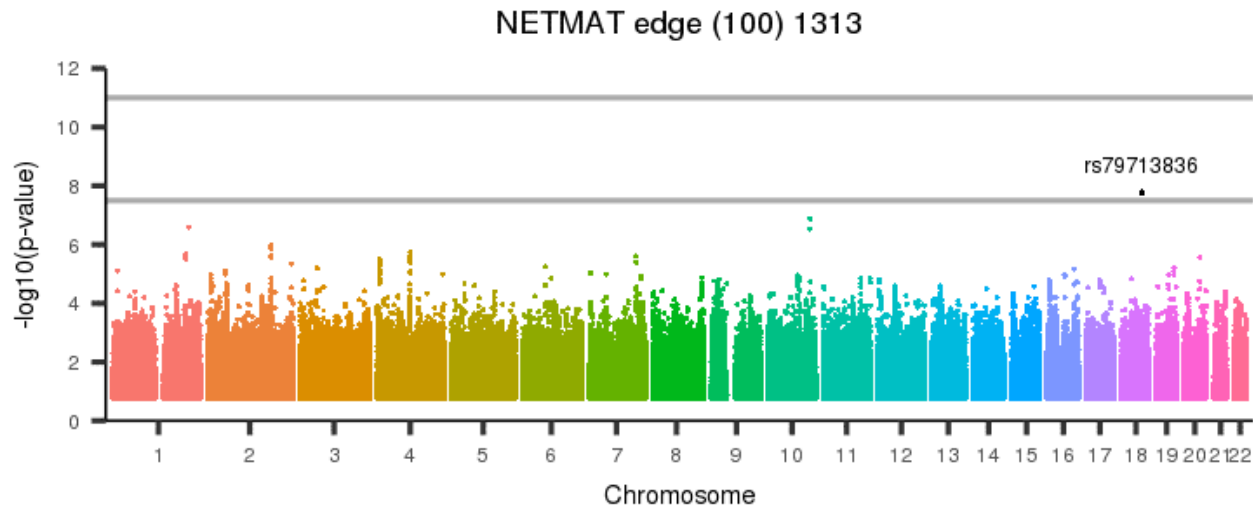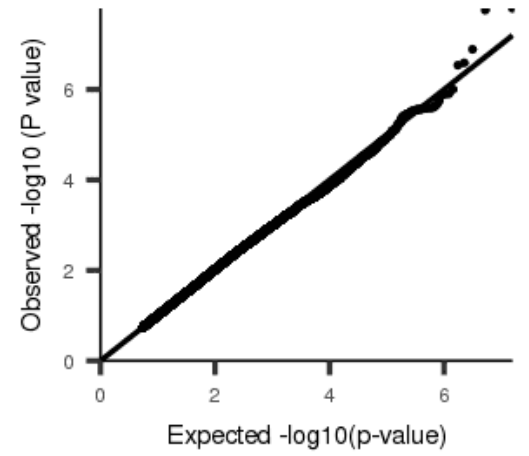

[back to list of plots](#)



Figure 2470: NETMAT edge (100) 1314

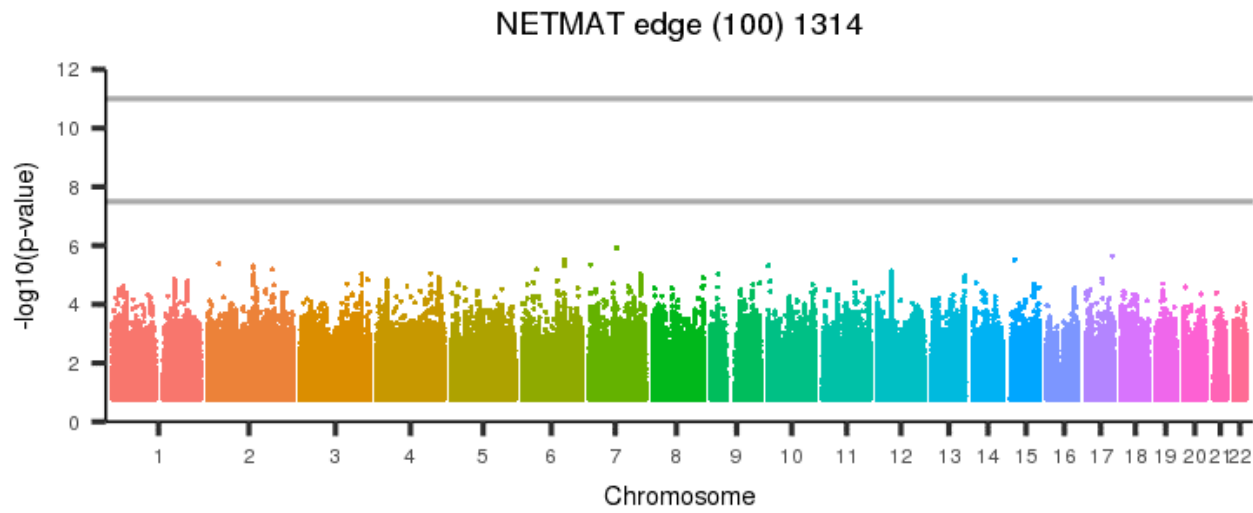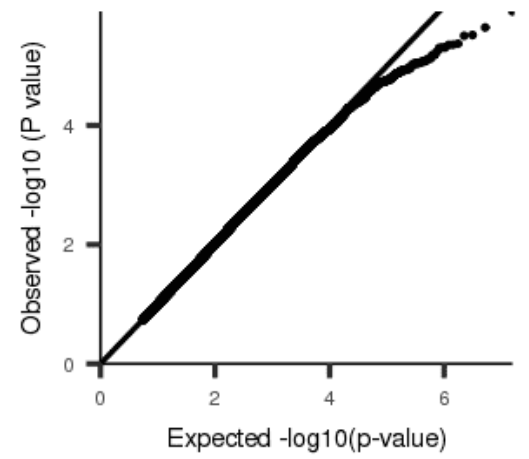

[back to list of plots](#)

Figure 2471: NETMAT edge (100) 1315

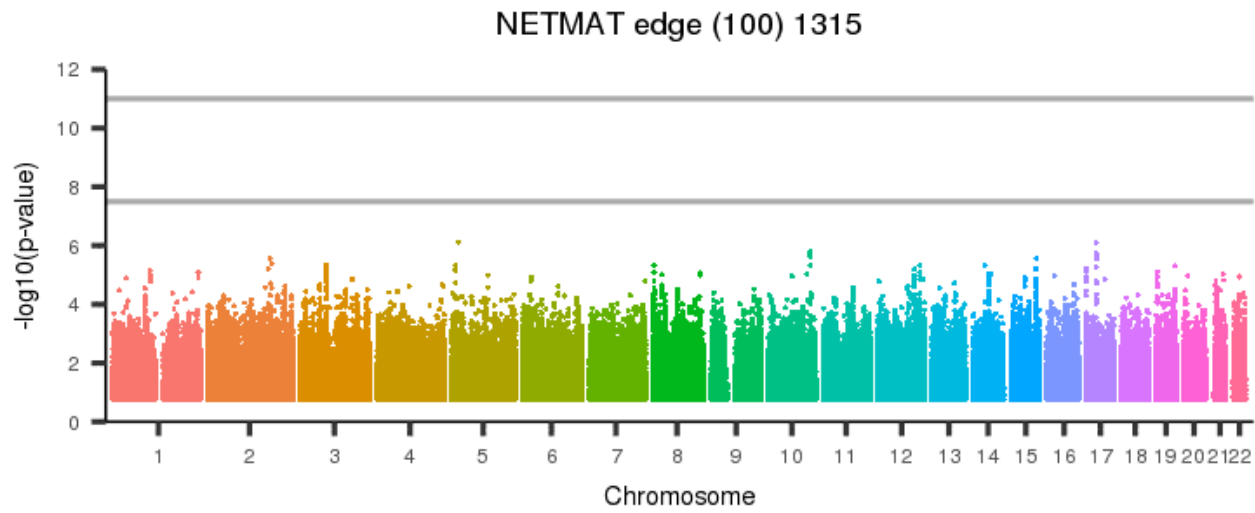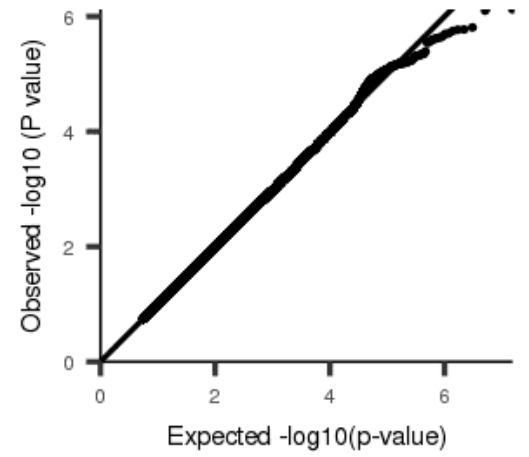

[back to list of plots](#)

Figure 2472: NETMAT edge (100) 1316

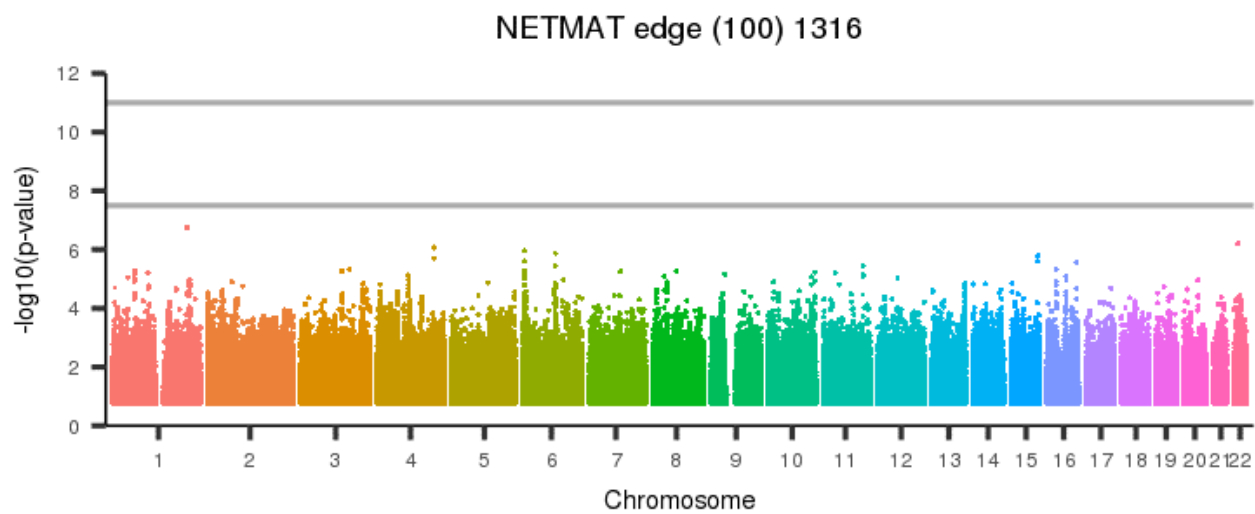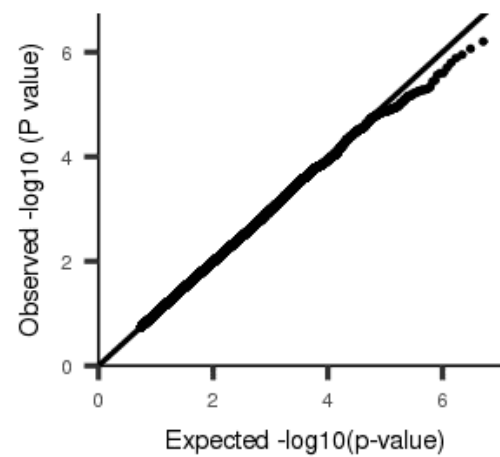

[back to list of plots](#)

Figure 2473: NETMAT edge (100) 1317

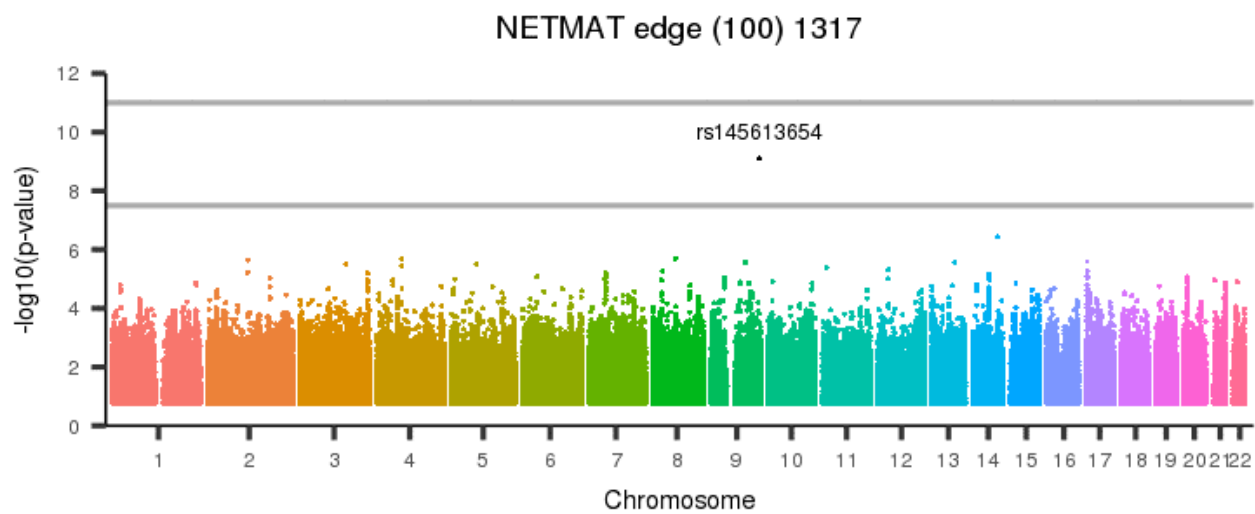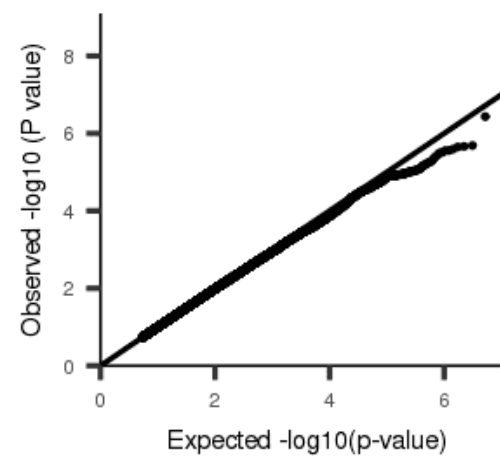

[back to list of plots](#)

Figure 2474: NETMAT edge (100) 1318

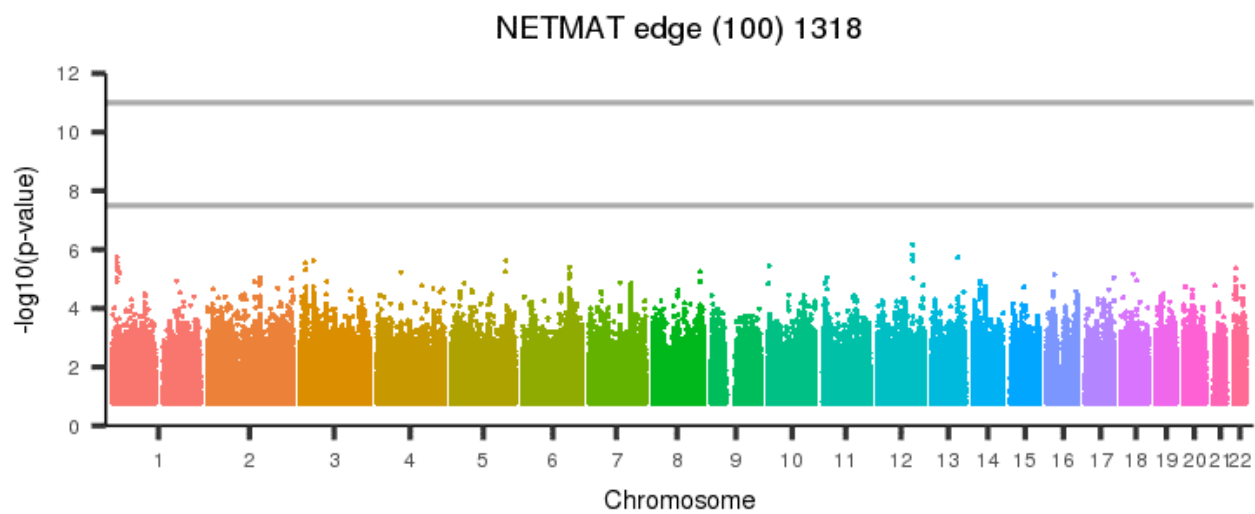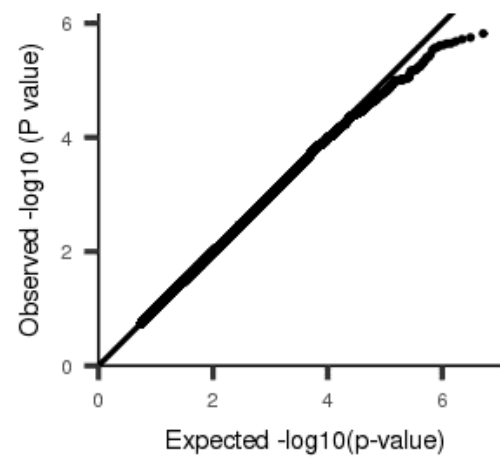

[back to list of plots](#)

Figure 2475: NETMAT edge (100) 1319

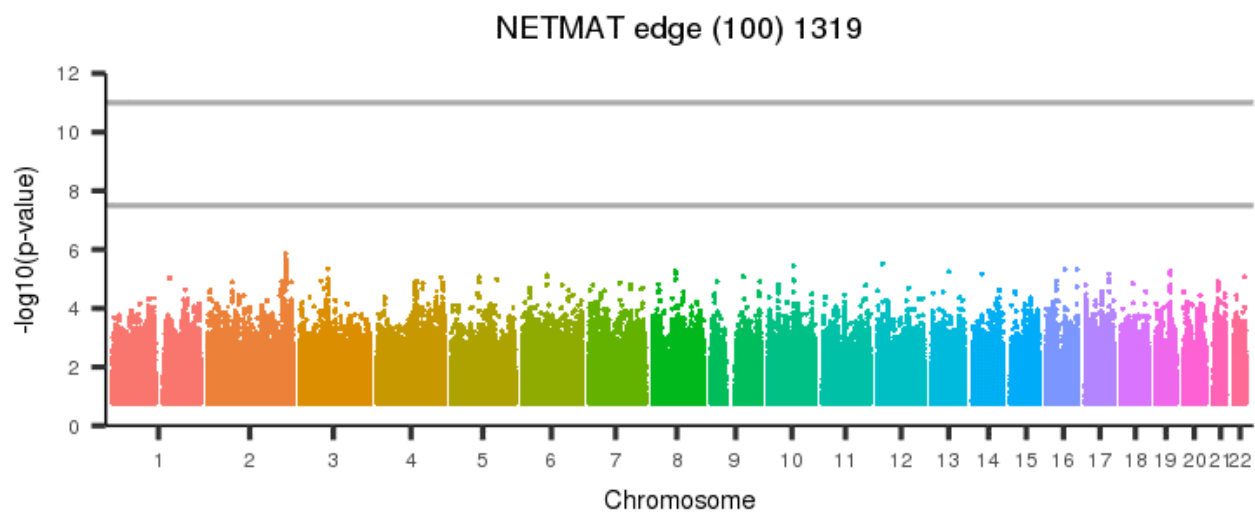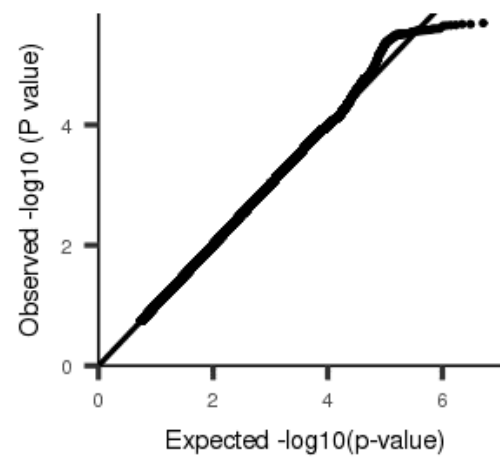

[back to list of plots](#)

Figure 2476: NETMAT edge (100) 1320

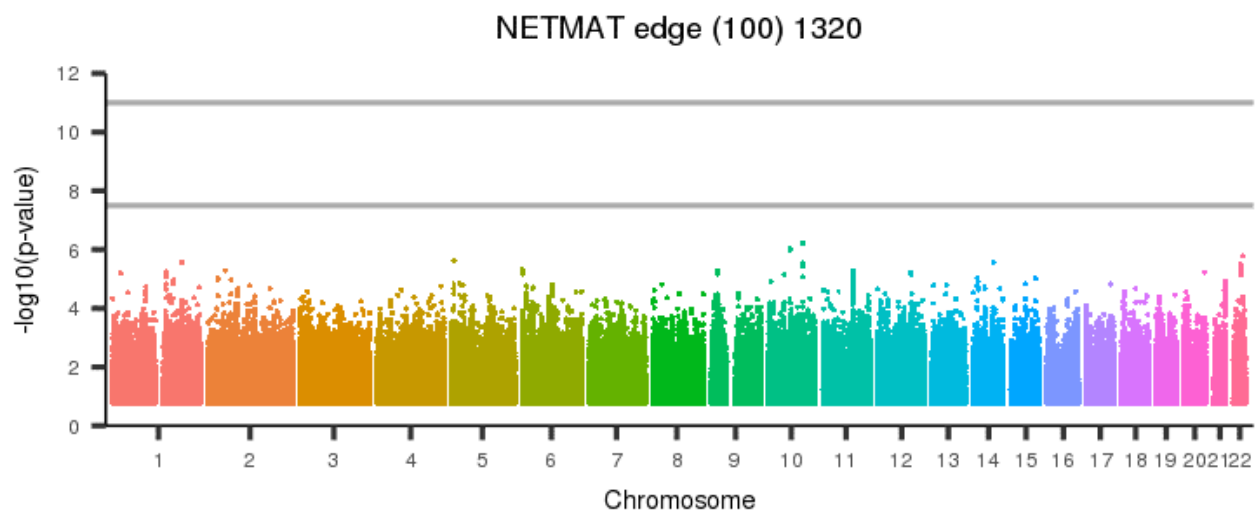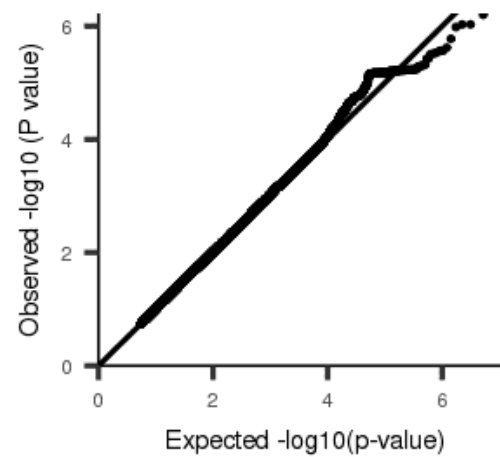

[back to list of plots](#)

Figure 2477: NETMAT edge (100) 1321

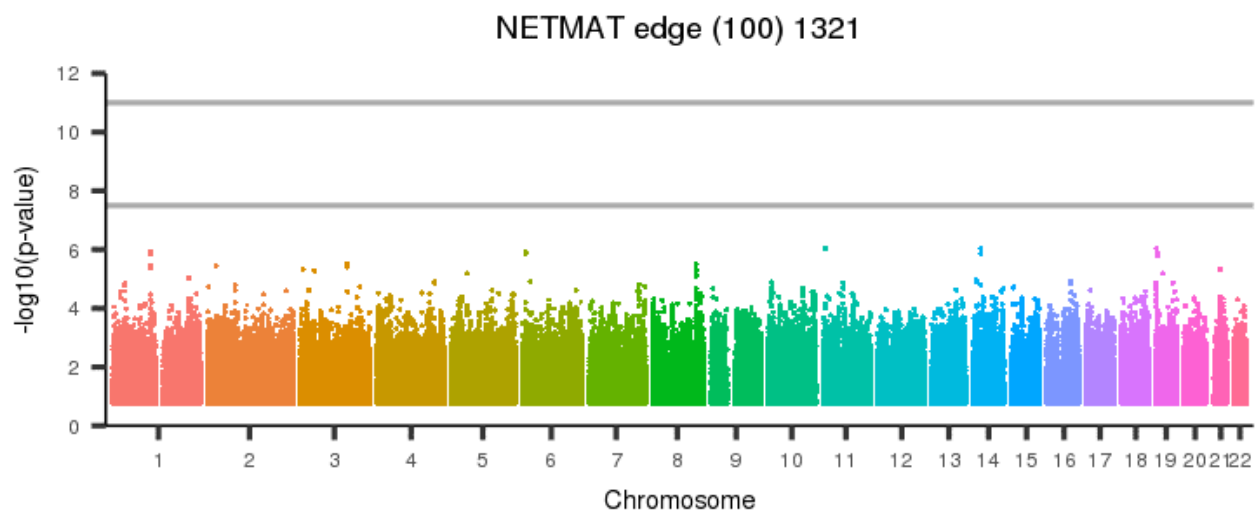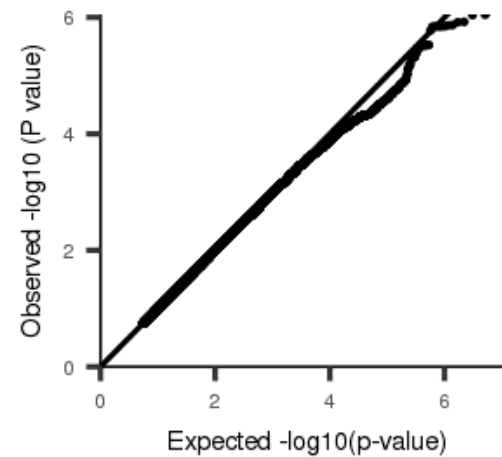

[back to list of plots](#)



Figure 2478: NETMAT edge (100) 1322

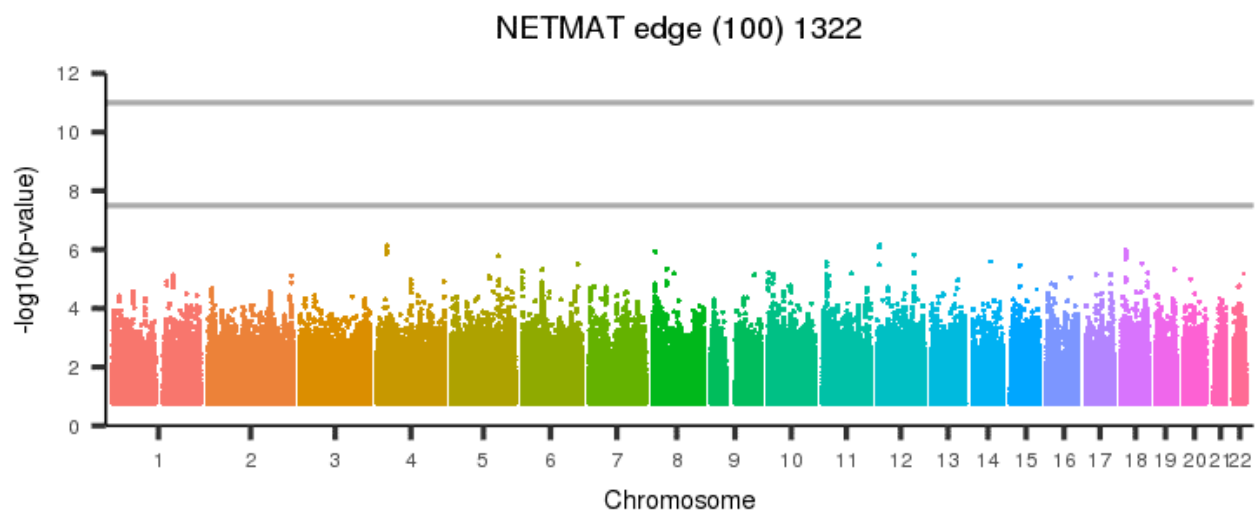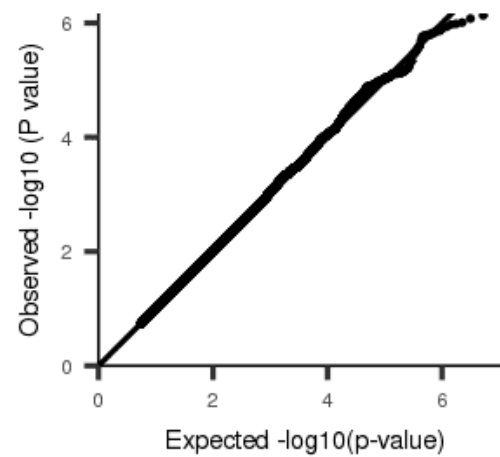

[back to list of plots](#)

Figure 2479: NETMAT edge (100) 1323

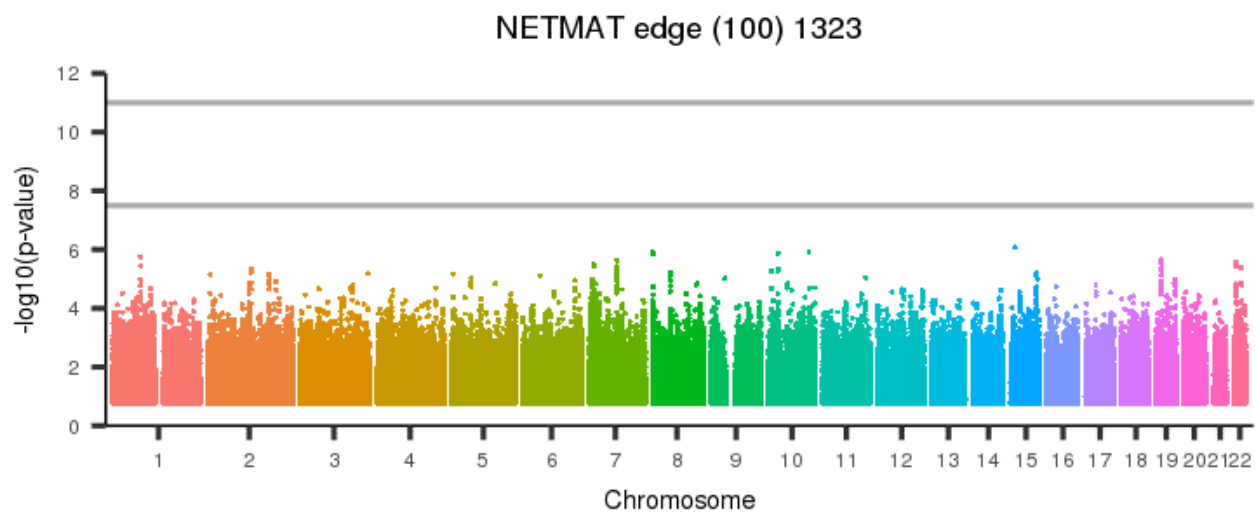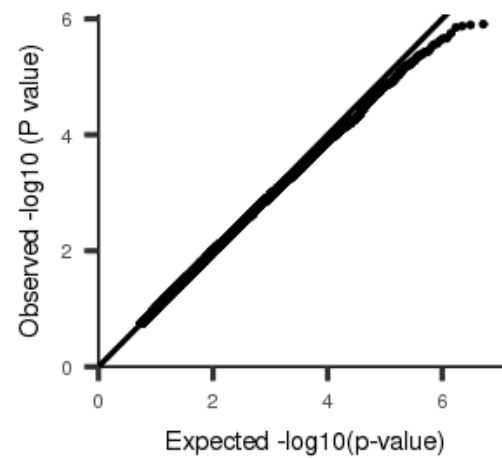

[back to list of plots](#)

Figure 2480: NETMAT edge (100) 1324

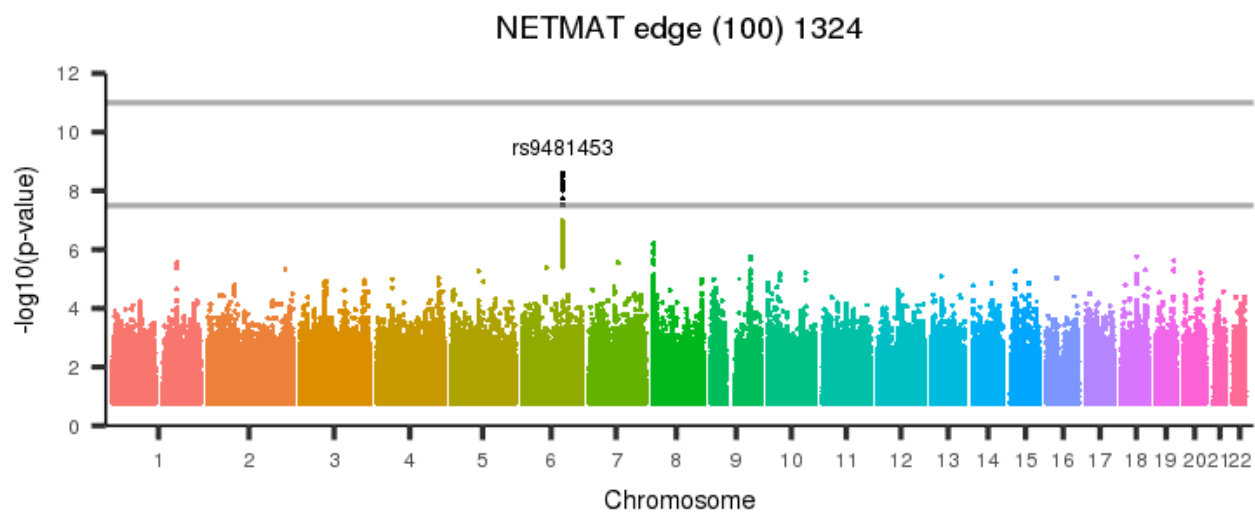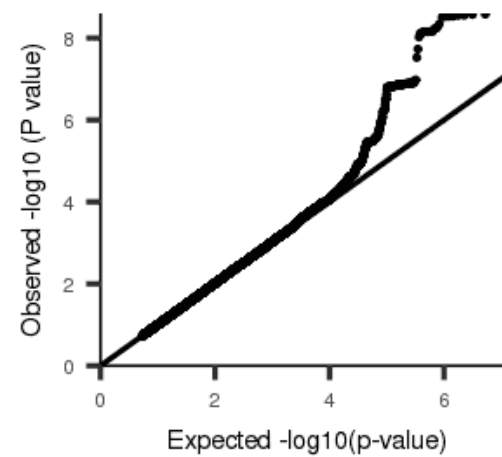

[back to list of plots](#)

Figure 2481: NETMAT edge (100) 1325

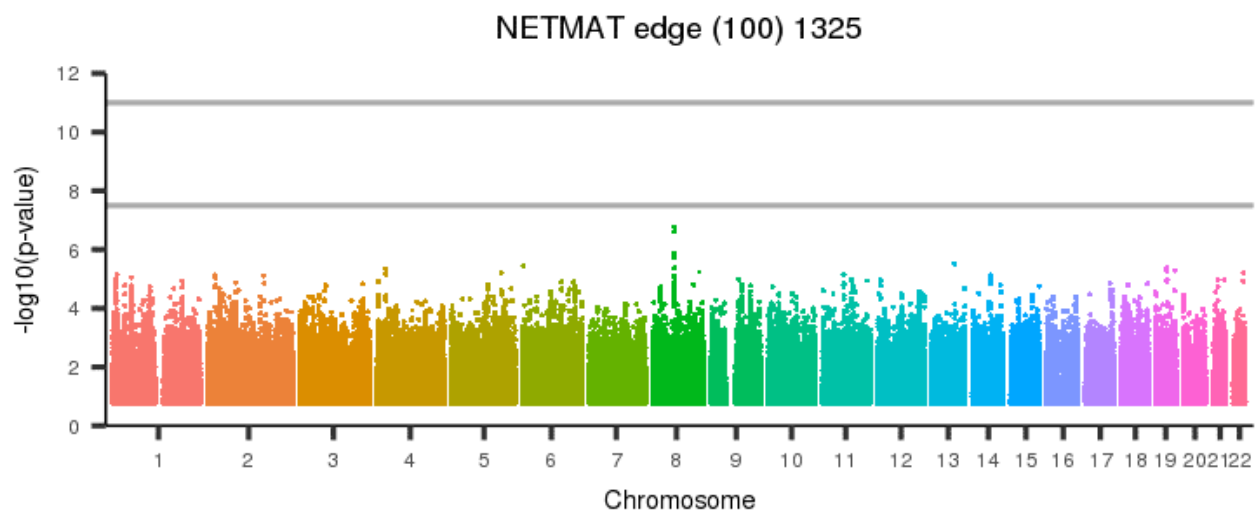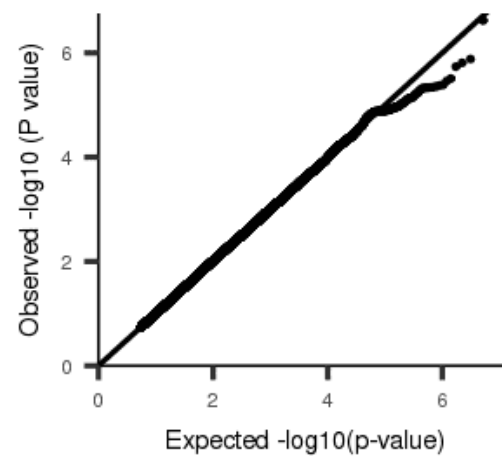

[back to list of plots](#)

Figure 2482: NETMAT edge (100) 1326

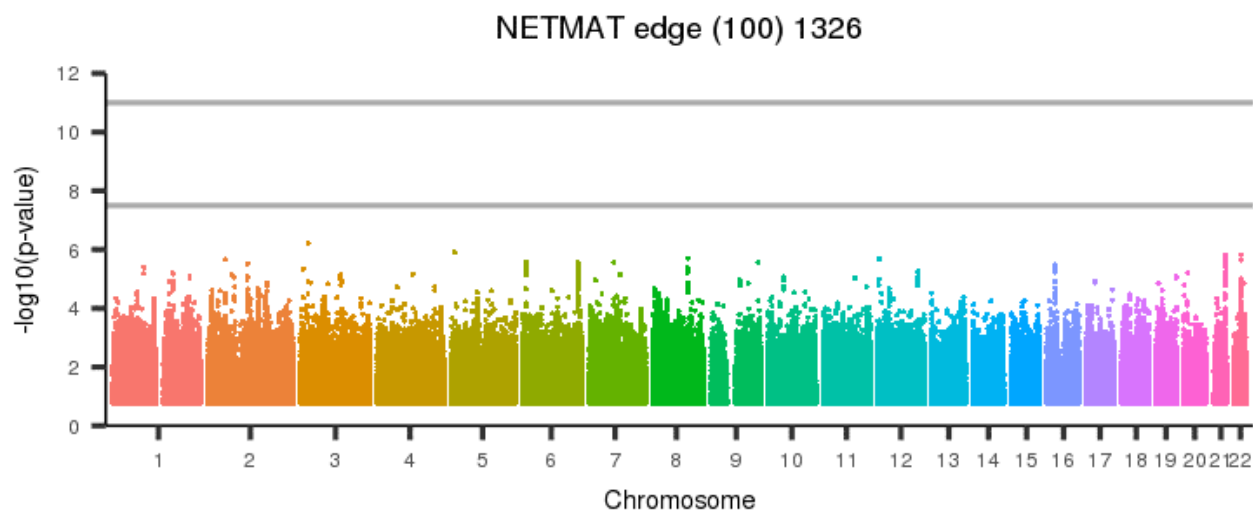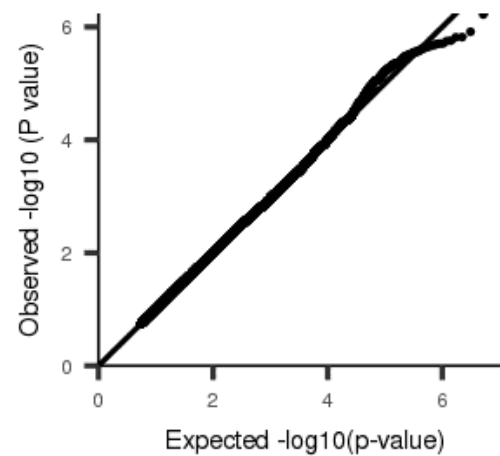

[back to list of plots](#)

Figure 2483: NETMAT edge (100) 1327

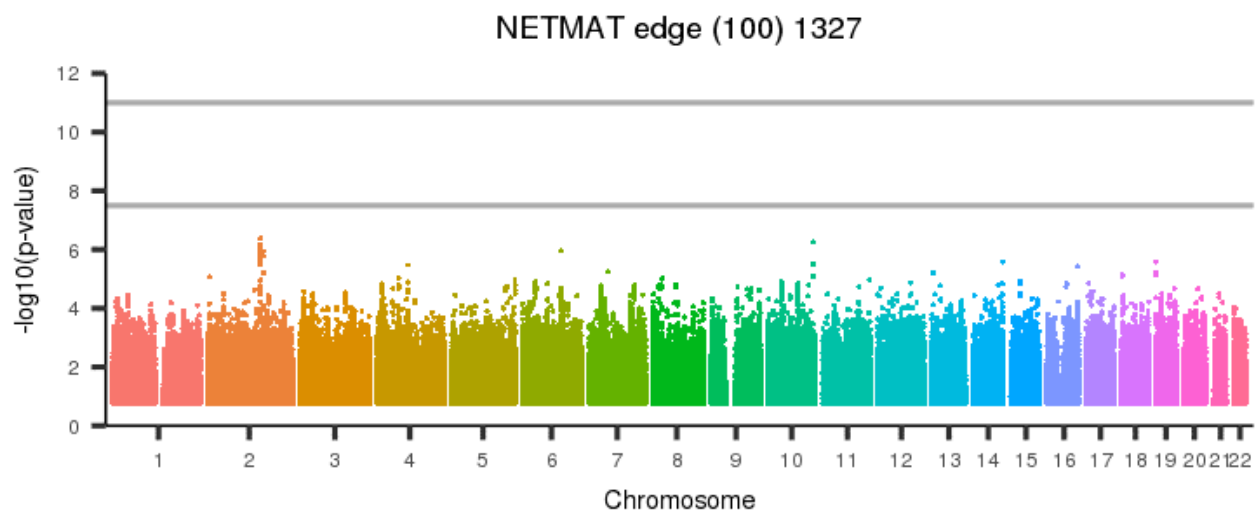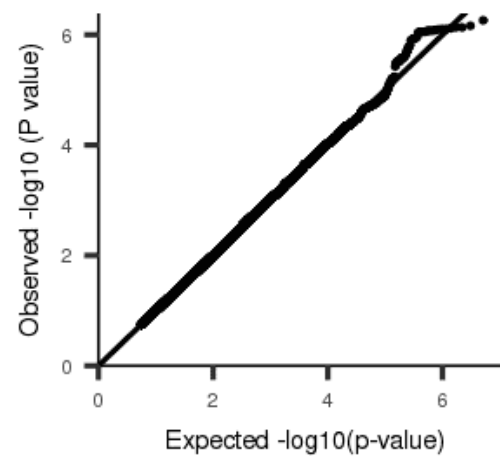

[back to list of plots](#)

Figure 2484: NETMAT edge (100) 1328

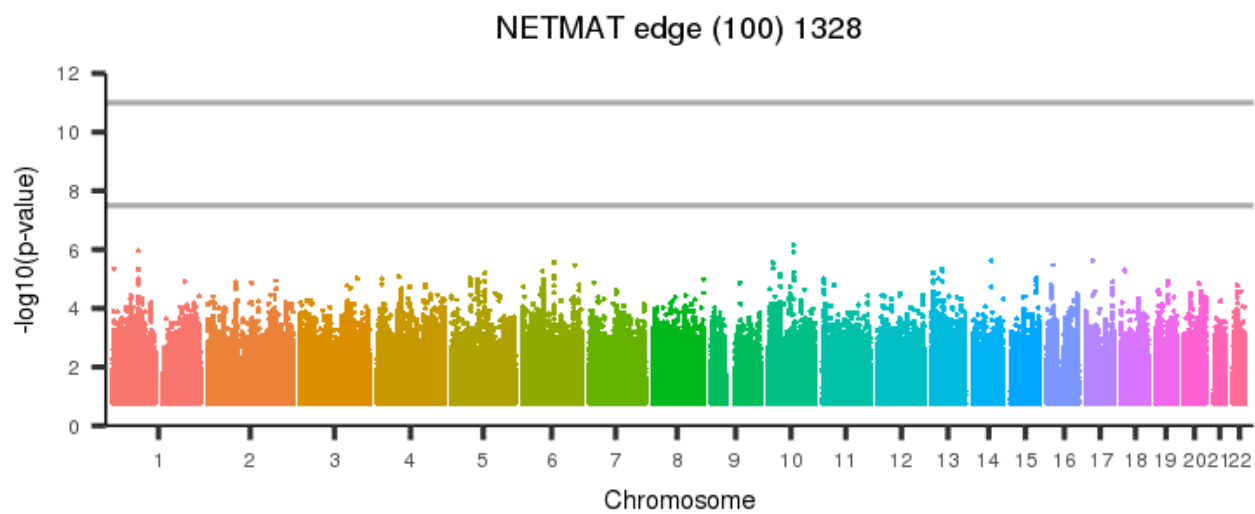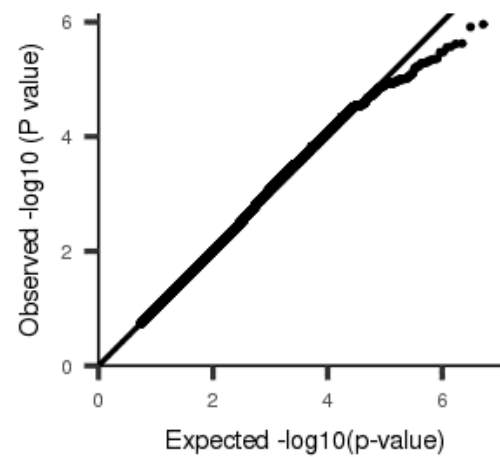

[back to list of plots](#)

Figure 2485: NETMAT edge (100) 1329

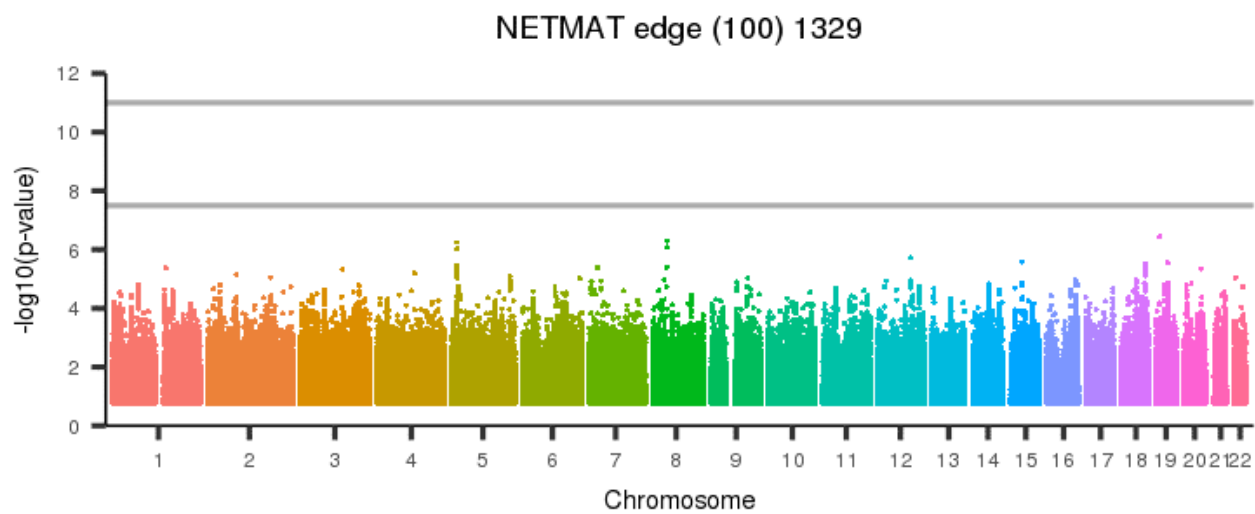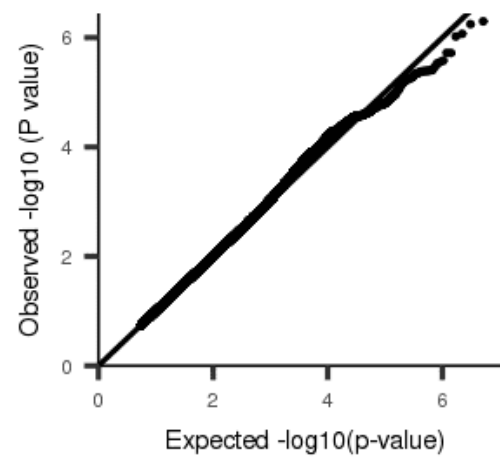

[back to list of plots](#)



Figure 2486: NETMAT edge (100) 1330

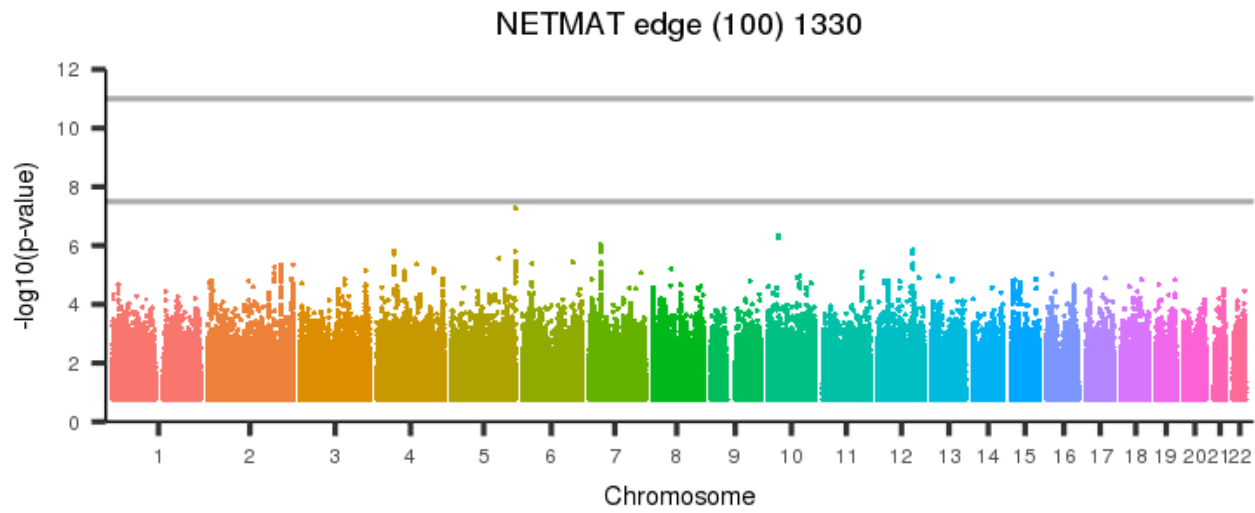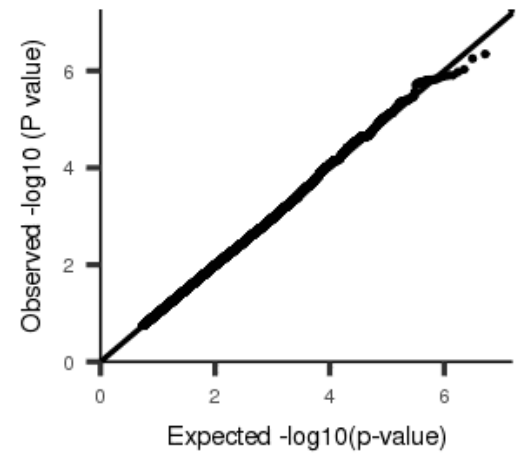

[back to list of plots](#)

Figure 2487: NETMAT edge (100) 1331

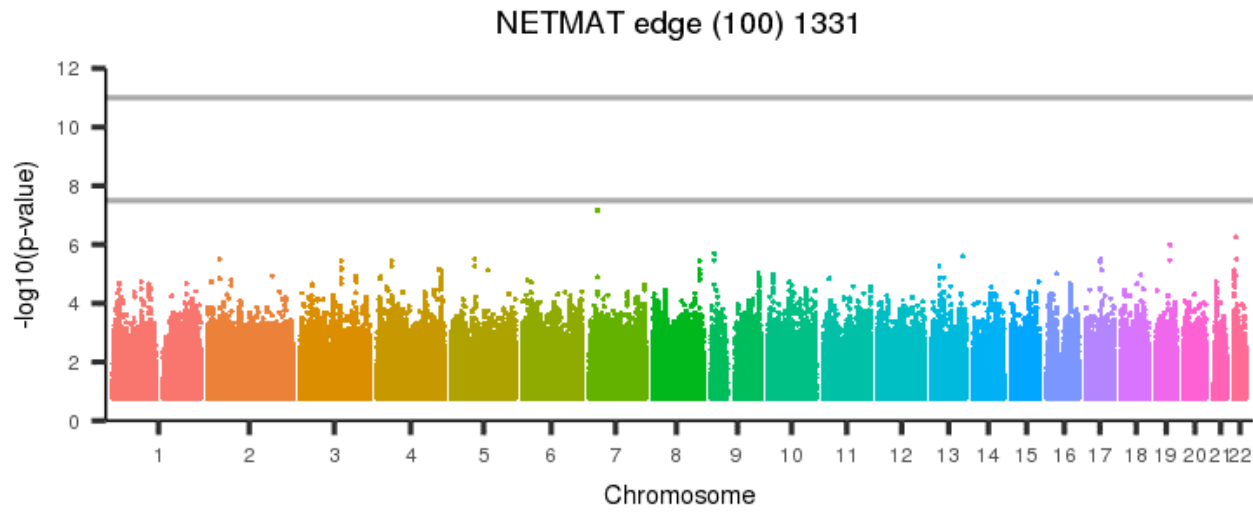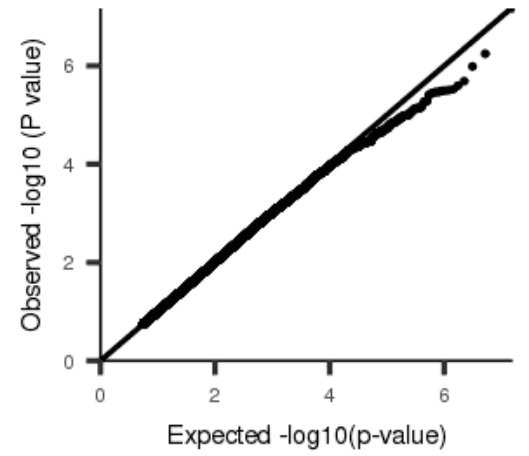

[back to list of plots](#)

Figure 2488: NETMAT edge (100) 1332

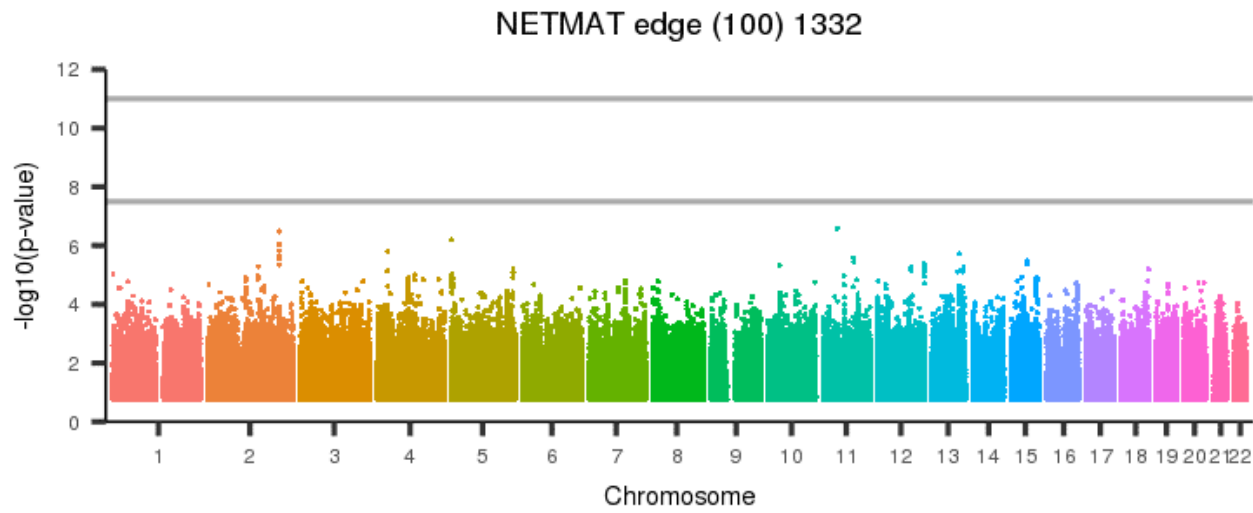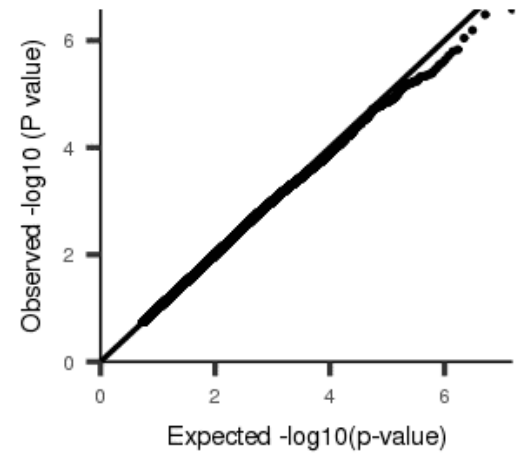

[back to list of plots](#)

Figure 2489: NETMAT edge (100) 1333

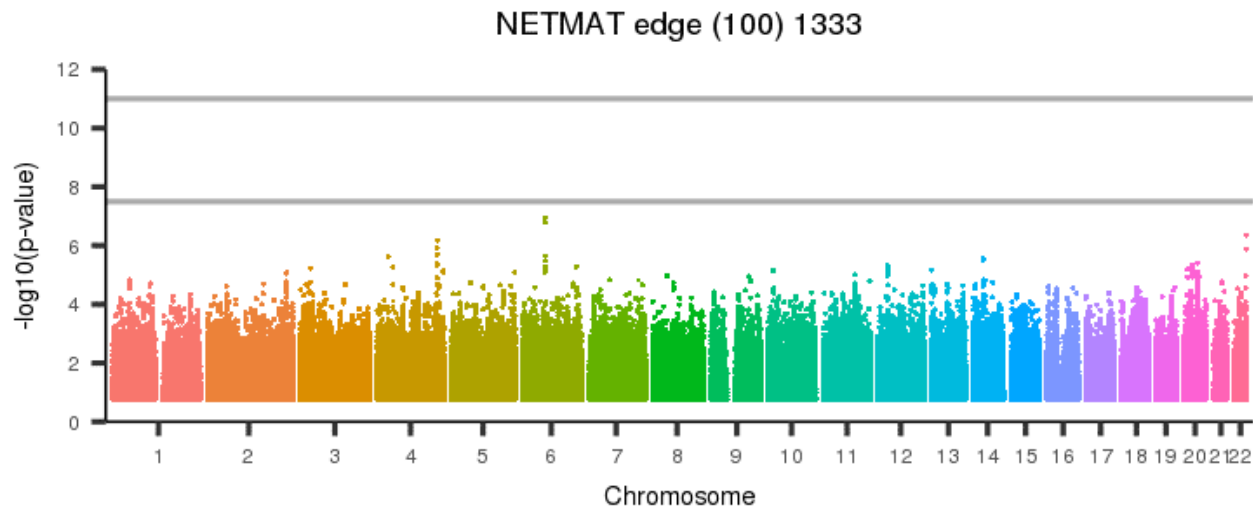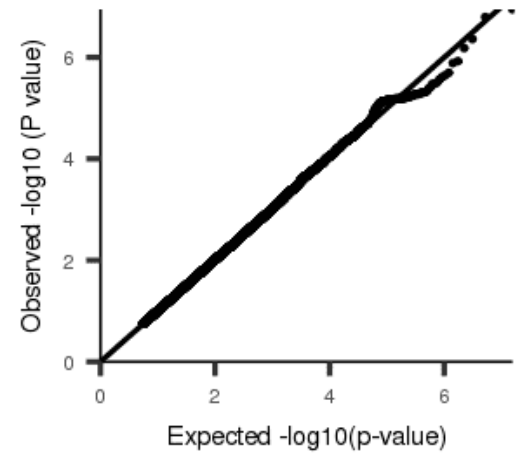

[back to list of plots](#)

Figure 2490: NETMAT edge (100) 1334

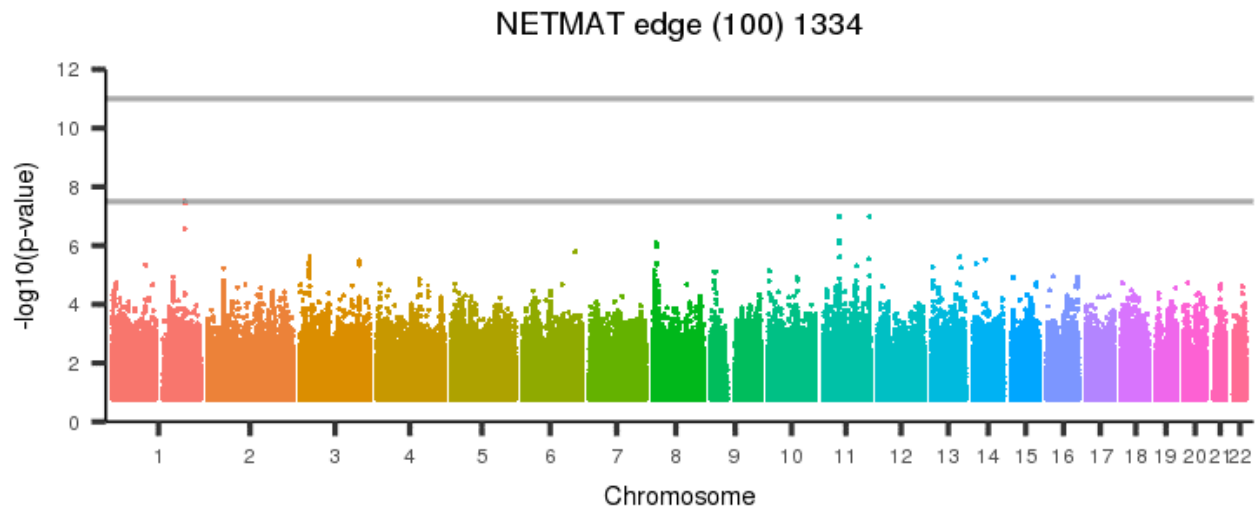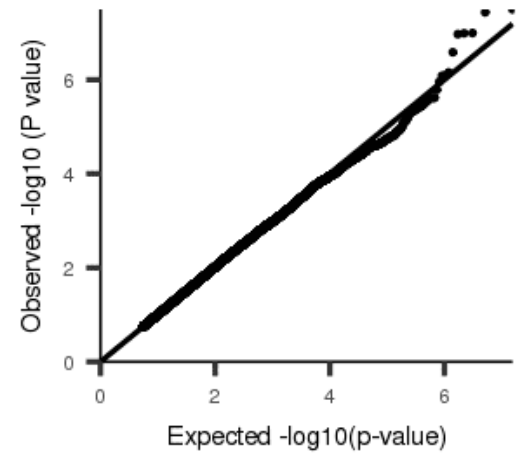

[back to list of plots](#)

Figure 2491: NETMAT edge (100) 1335

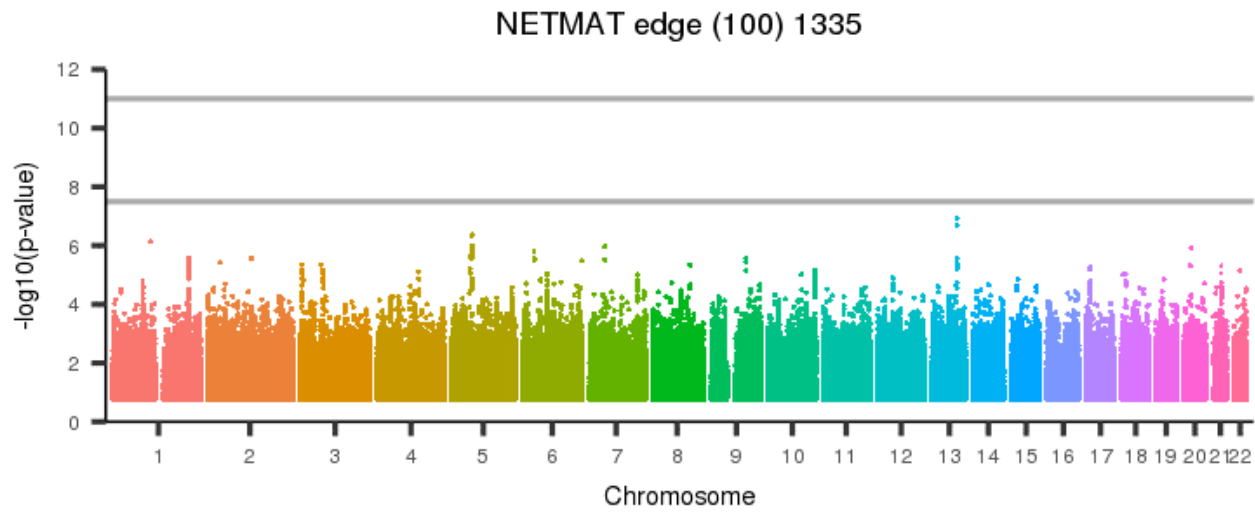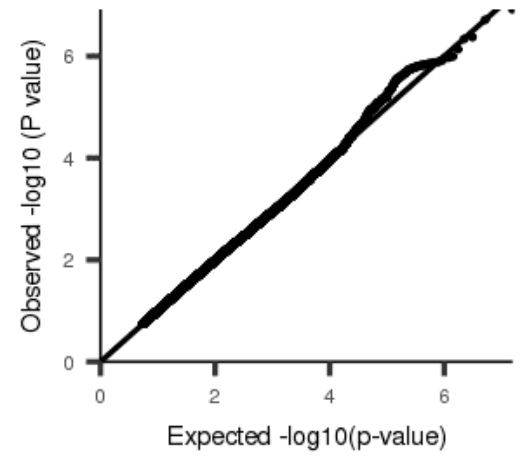

[back to list of plots](#)

Figure 2492: NETMAT edge (100) 1336

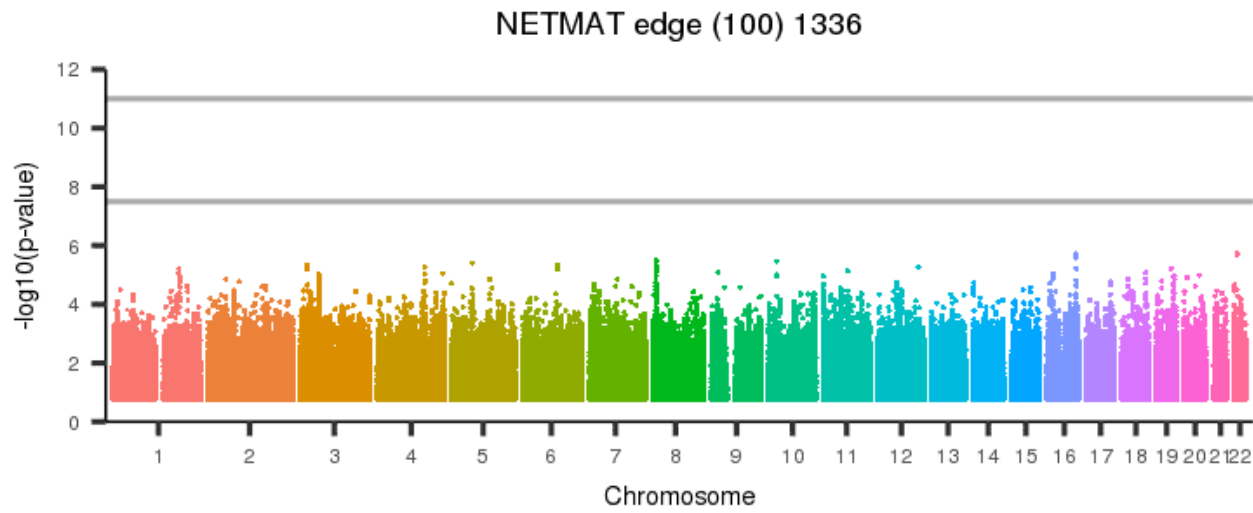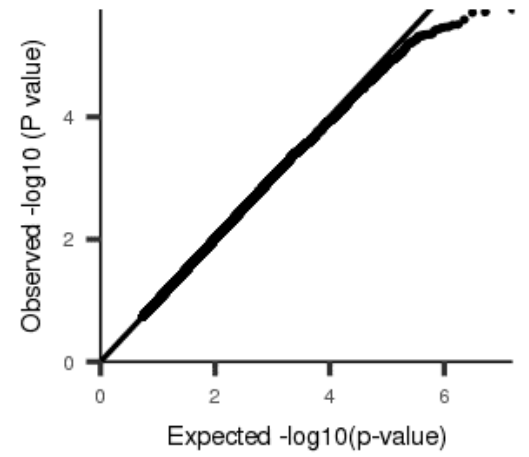

[back to list of plots](#)

Figure 2493: NETMAT edge (100) 1337

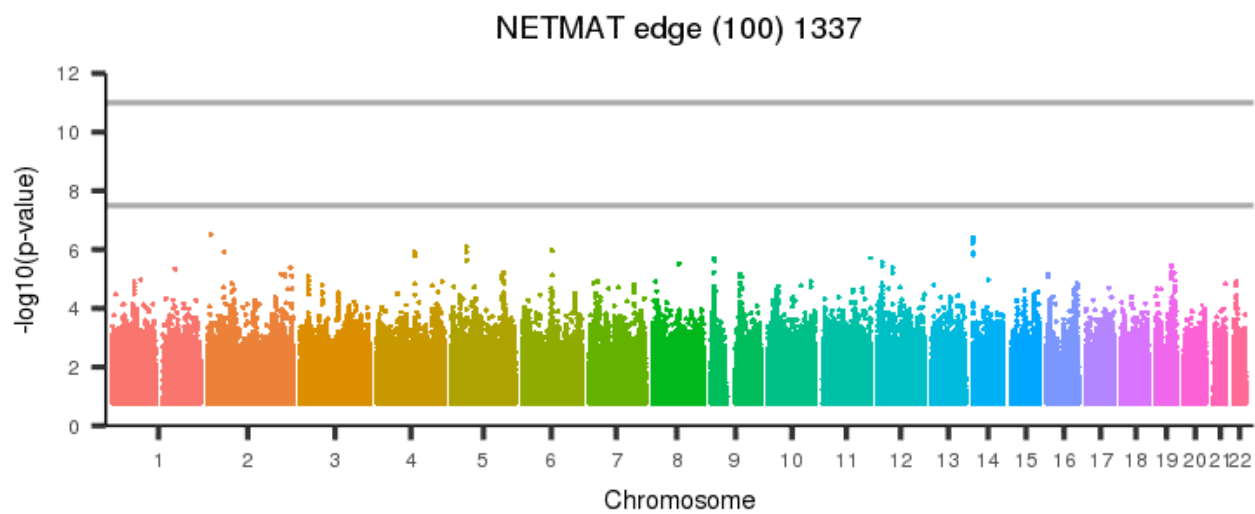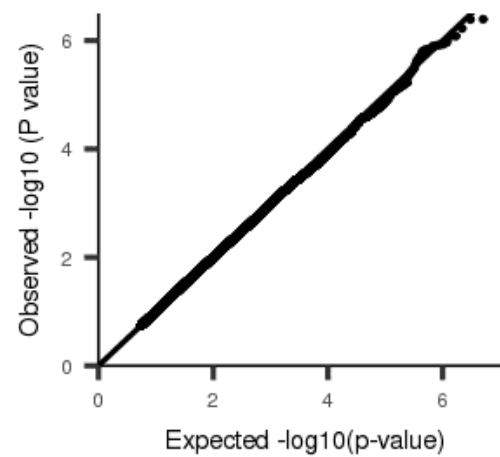

[back to list of plots](#)



Figure 2494: NETMAT edge (100) 1338

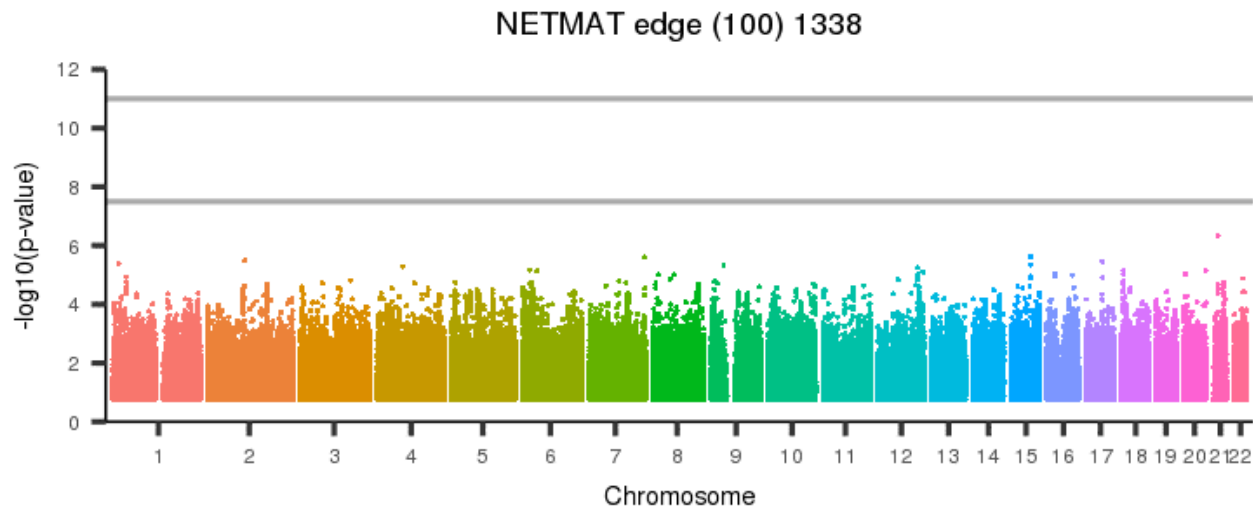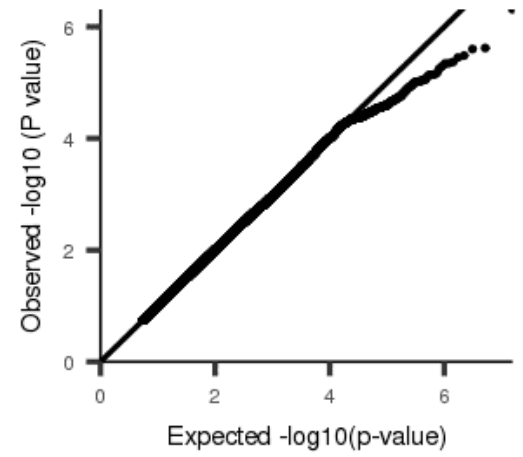

[back to list of plots](#)

Figure 2495: NETMAT edge (100) 1339

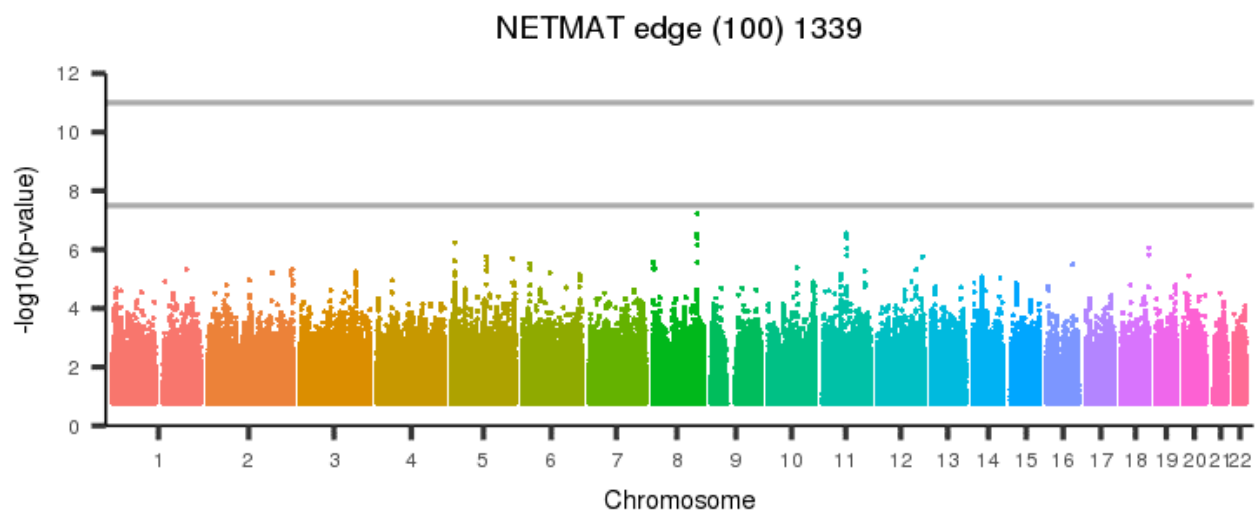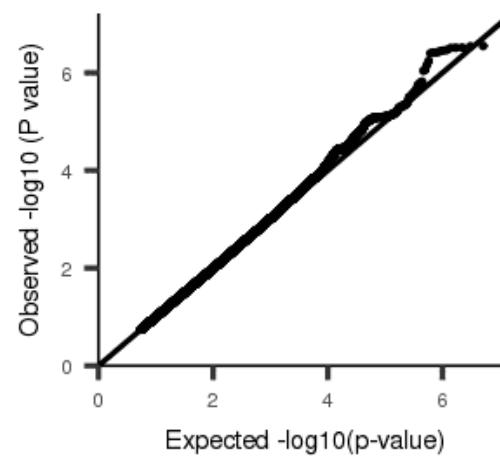

[back to list of plots](#)

Figure 2496: NETMAT edge (100) 1340

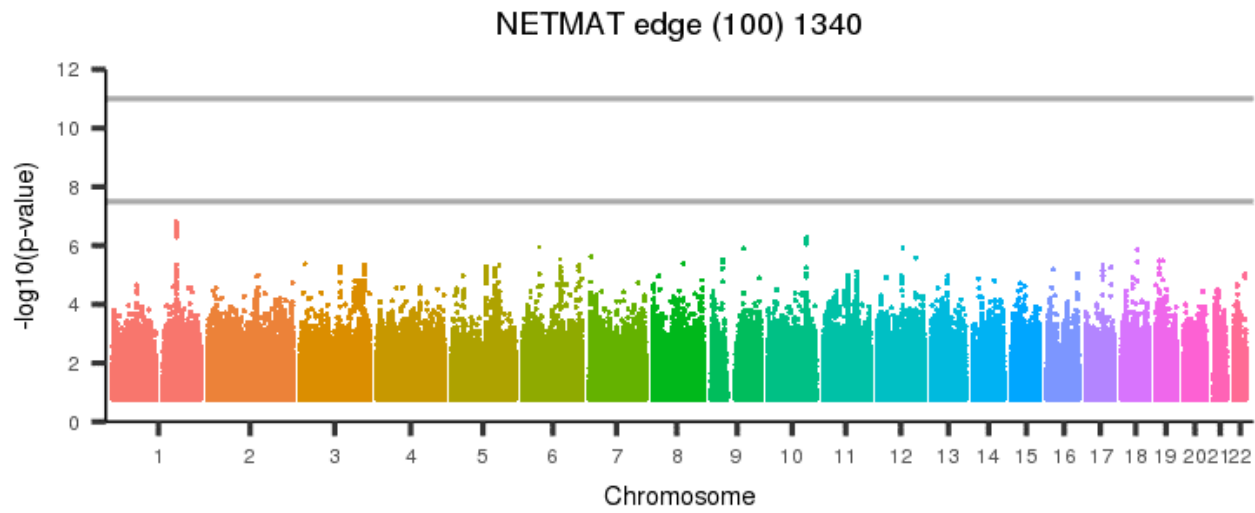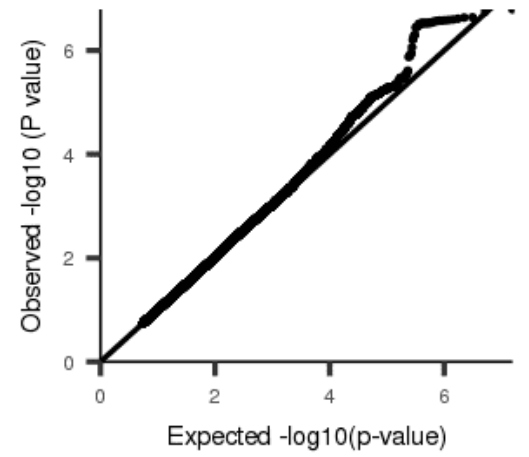

[back to list of plots](#)

Figure 2497: NETMAT edge (100) 1341

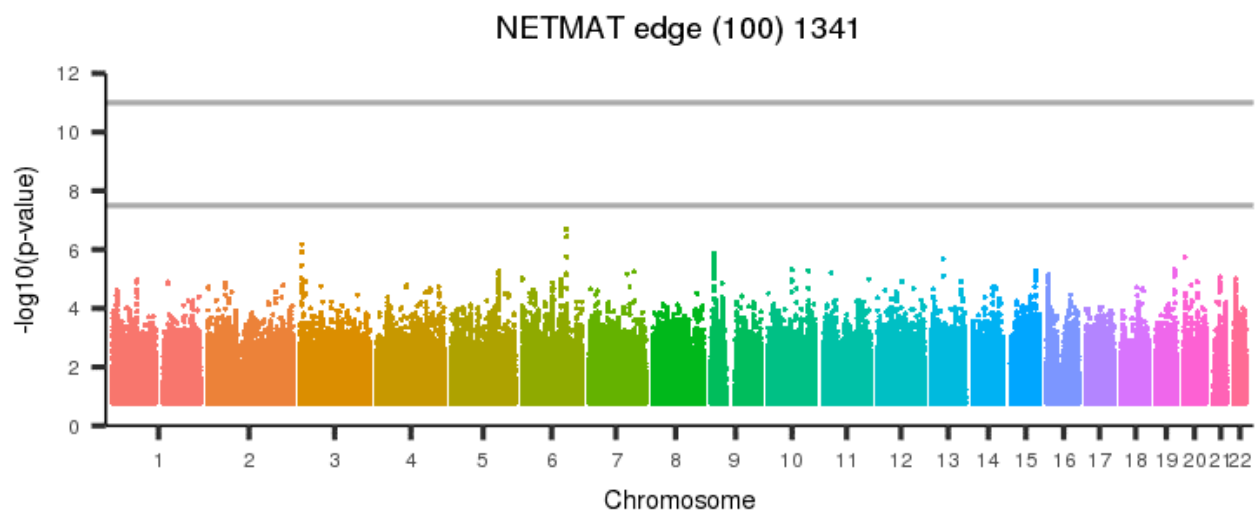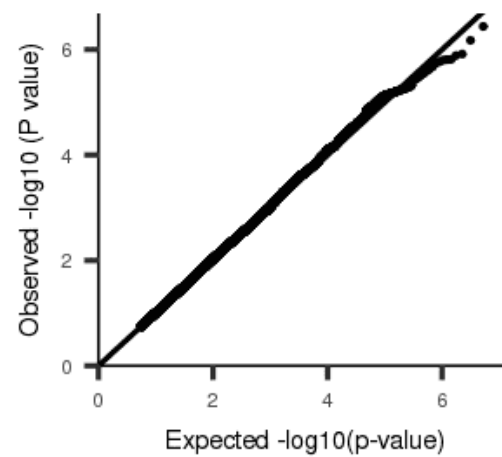

[back to list of plots](#)

Figure 2498: NETMAT edge (100) 1342

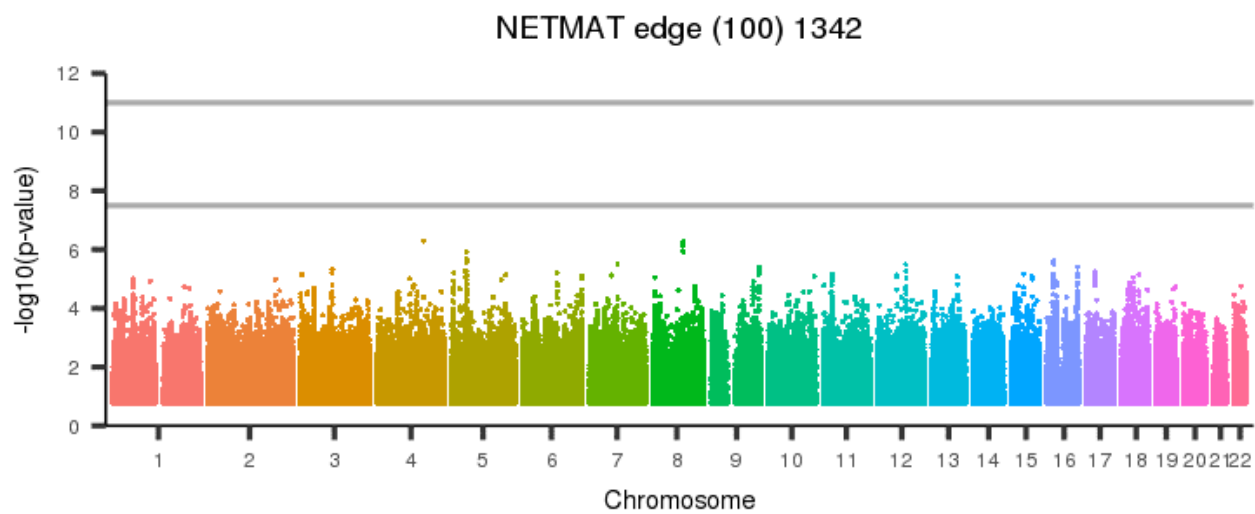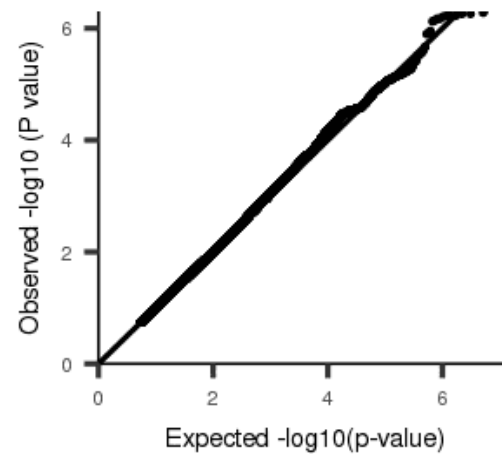

[back to list of plots](#)

Figure 2499: NETMAT edge (100) 1343

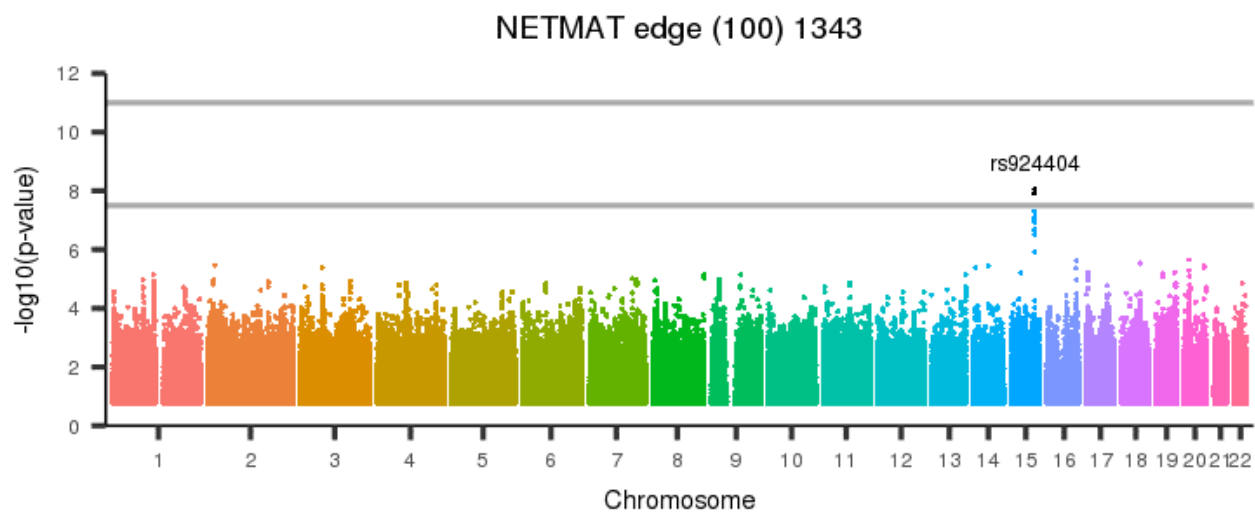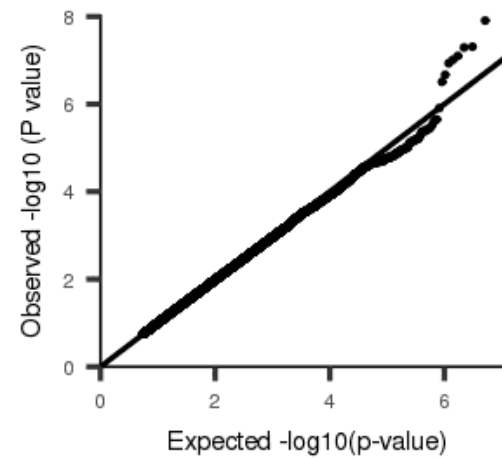

[back to list of plots](#)

Figure 2500: NETMAT edge (100) 1344

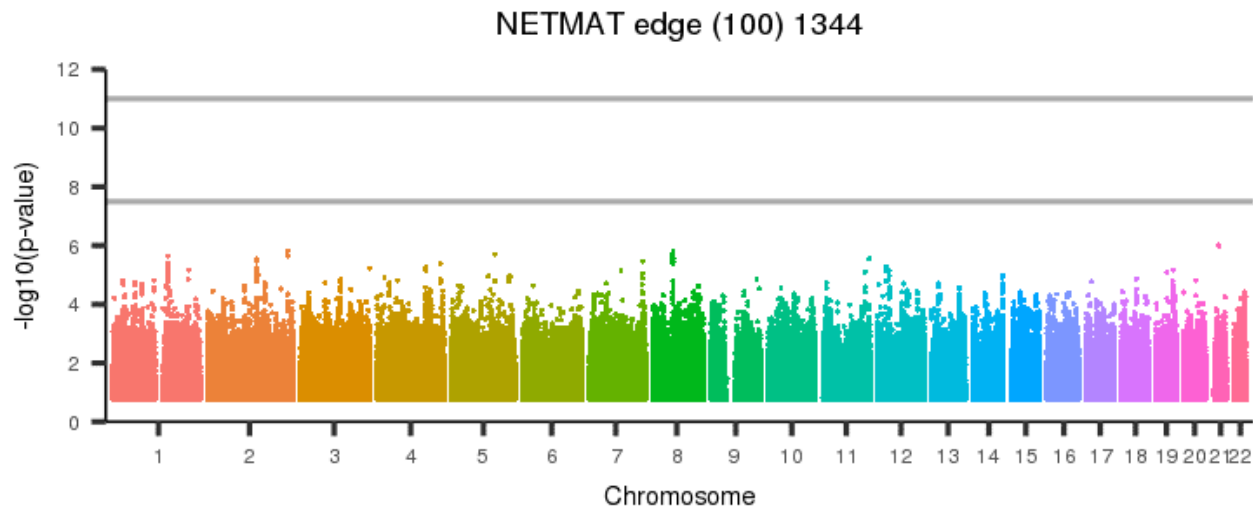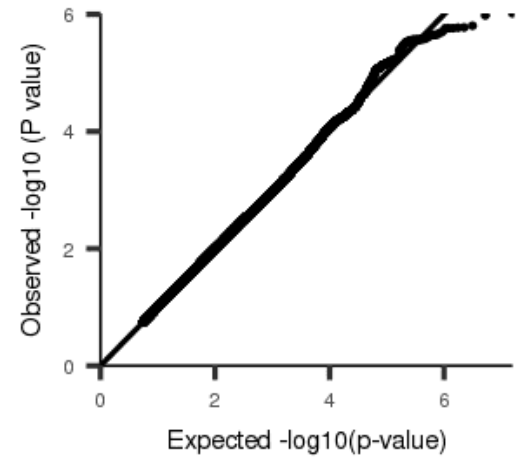

[back to list of plots](#)

Figure 2501: NETMAT edge (100) 1345

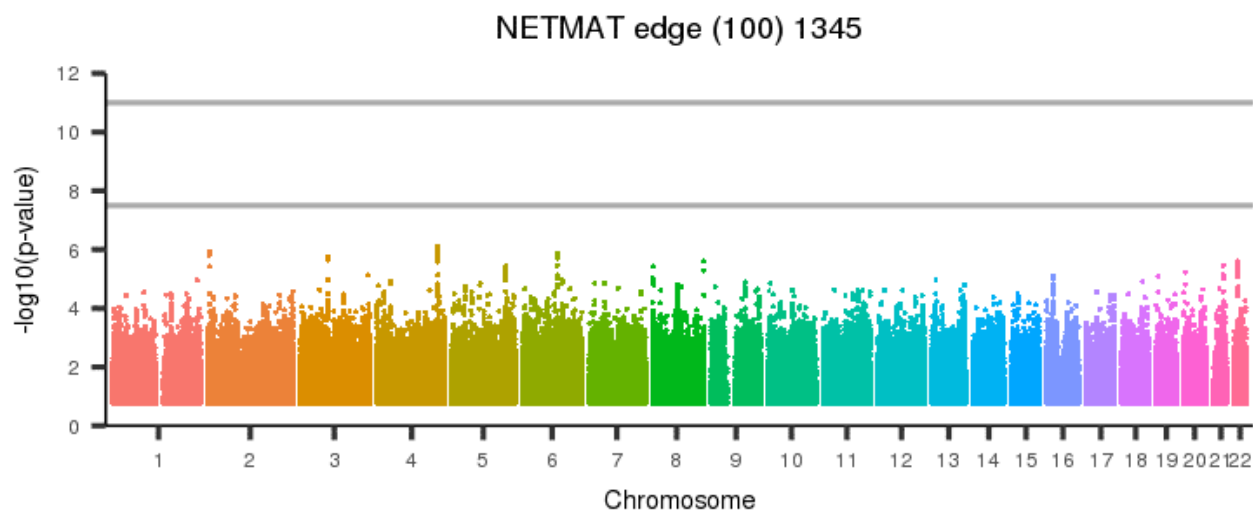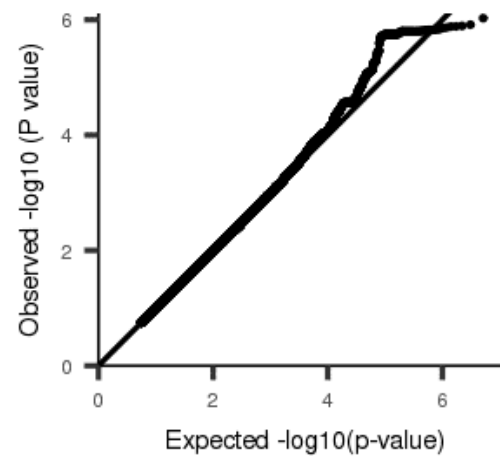

[back to list of plots](#)



Figure 2502: NETMAT edge (100) 1346

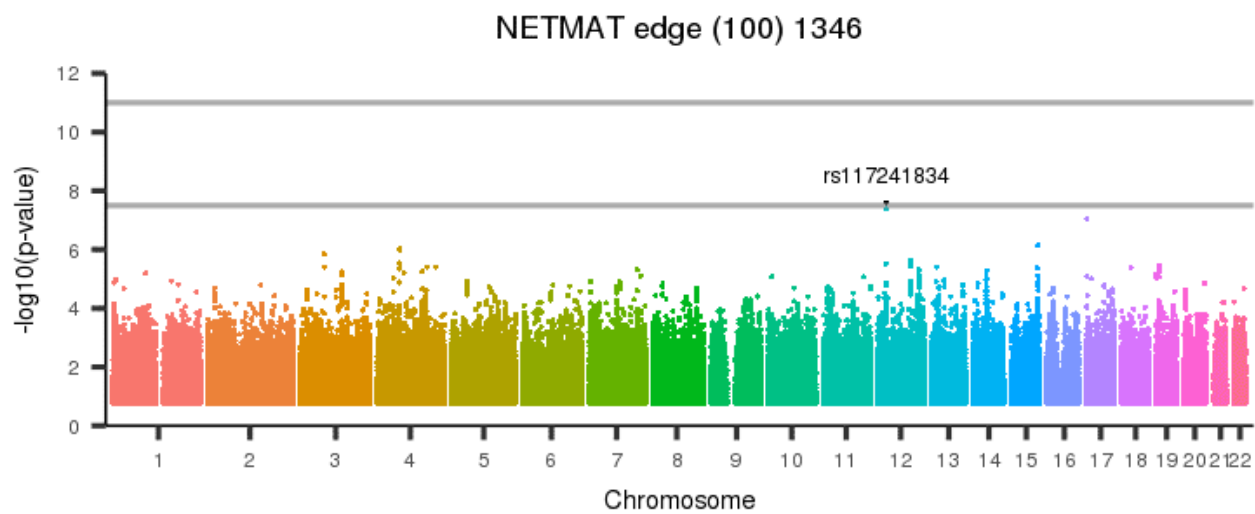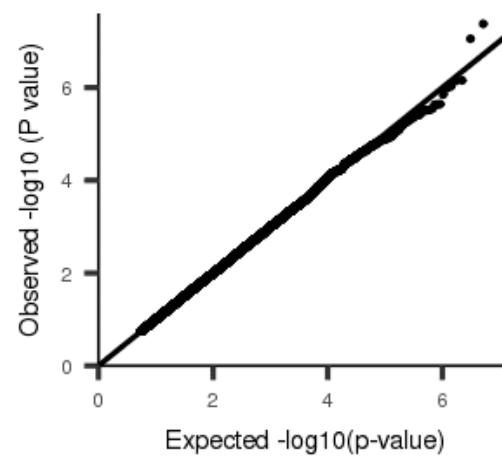

[back to list of plots](#)

Figure 2503: NETMAT edge (100) 1347

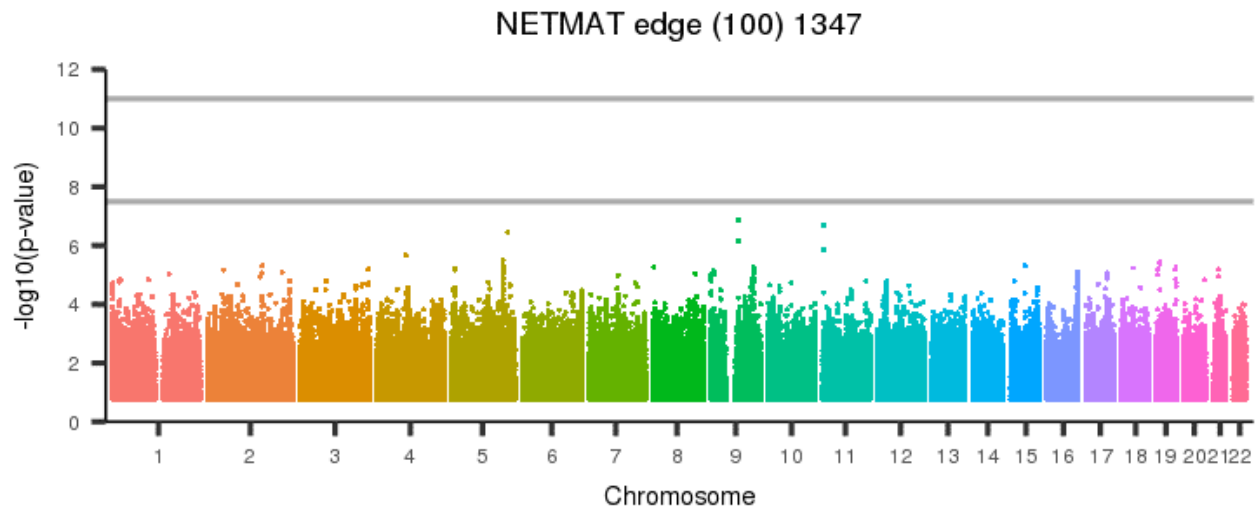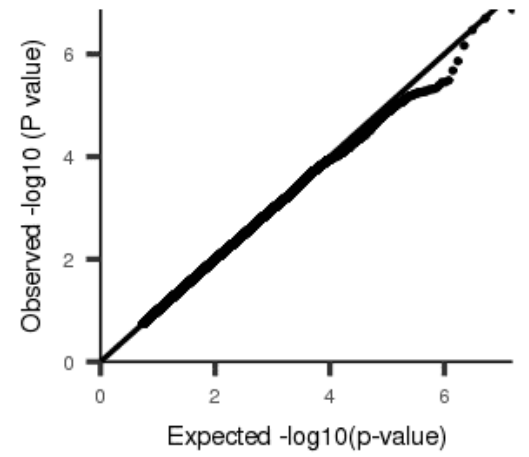

[back to list of plots](#)

Figure 2504: NETMAT edge (100) 1348

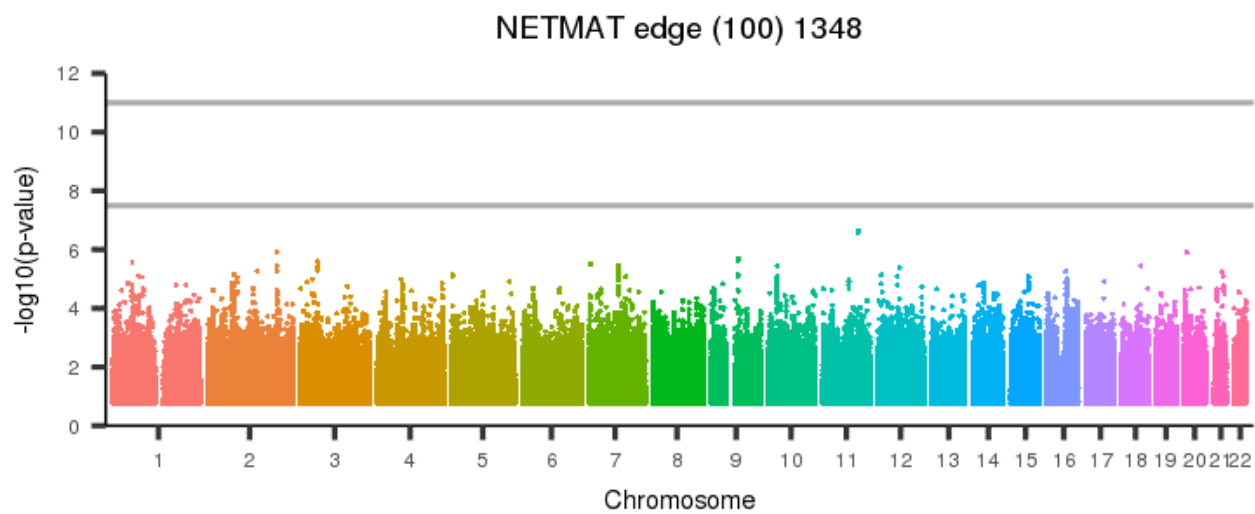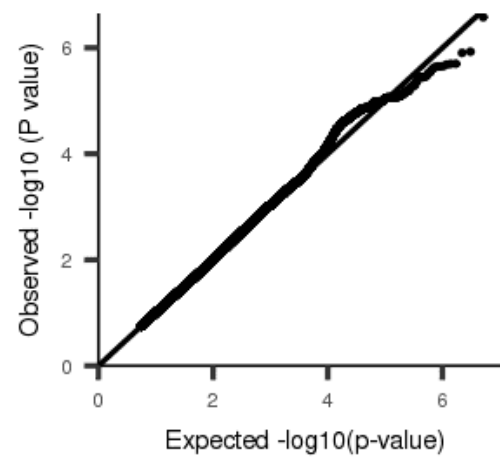

[back to list of plots](#)

Figure 2505: NETMAT edge (100) 1349

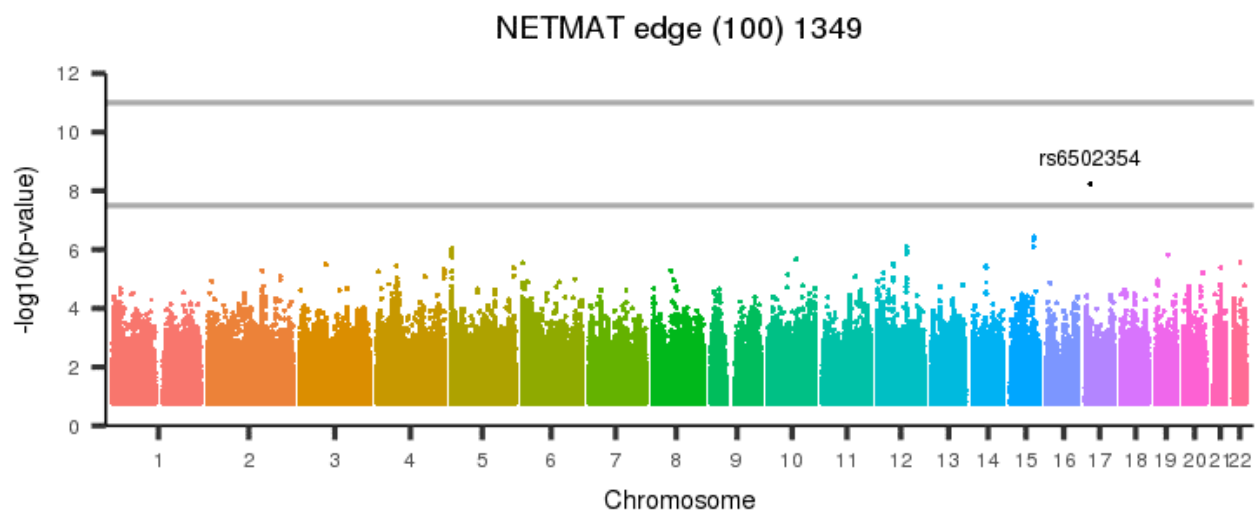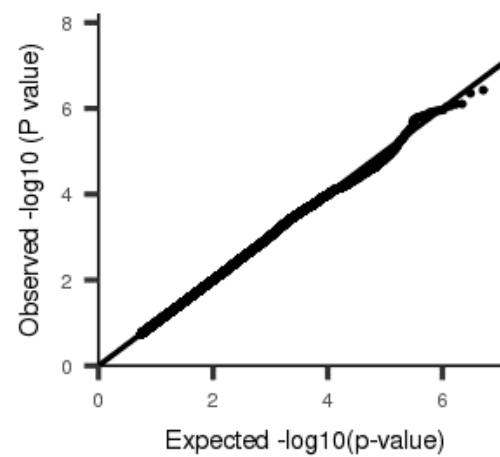

[back to list of plots](#)

Figure 2506: NETMAT edge (100) 1350

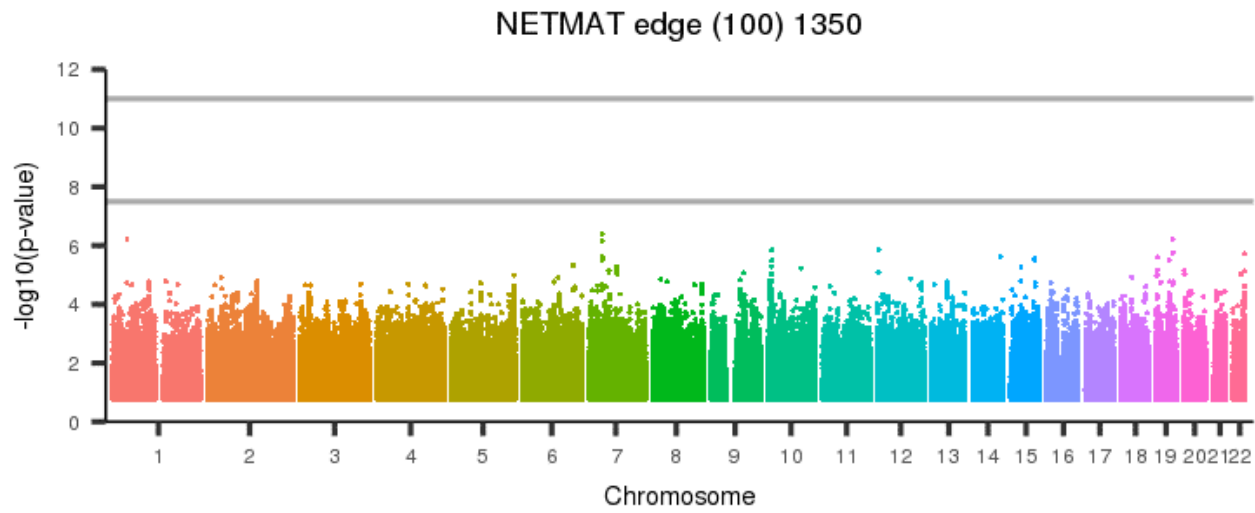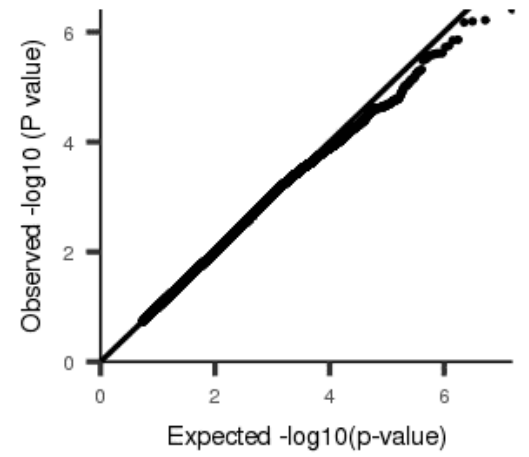

[back to list of plots](#)

Figure 2507: NETMAT edge (100) 1351

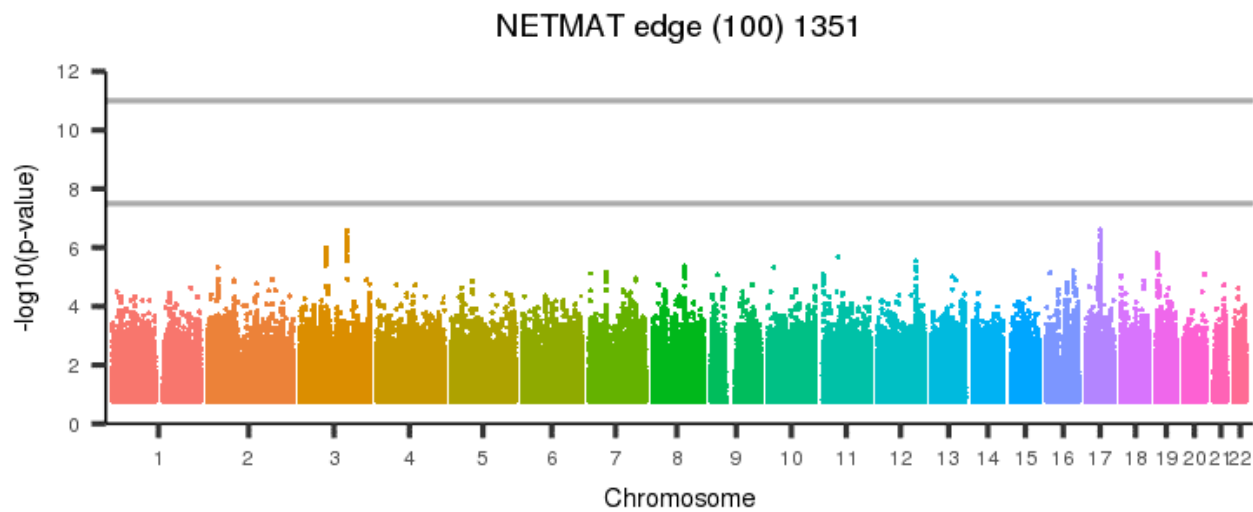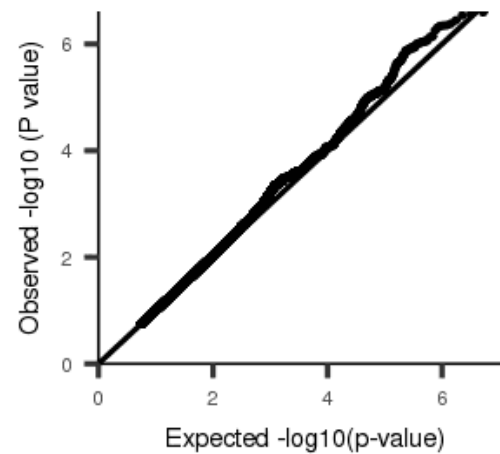

[back to list of plots](#)

Figure 2508: NETMAT edge (100) 1352

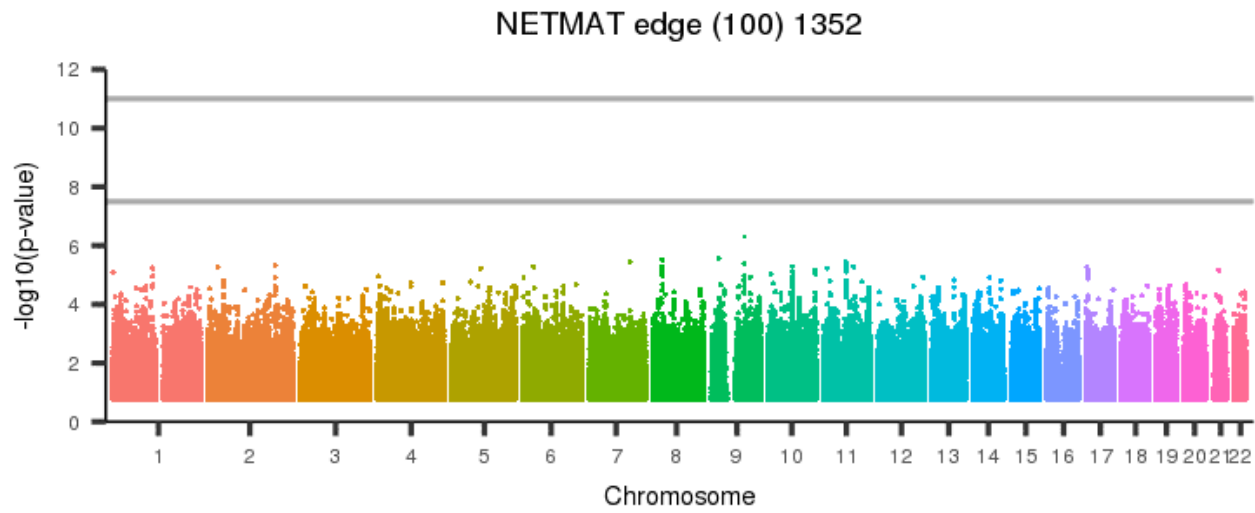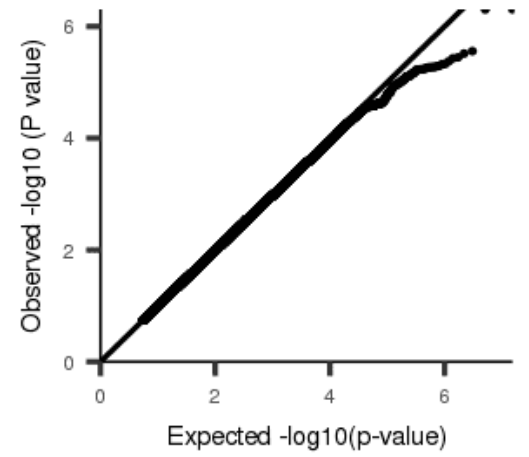

[back to list of plots](#)

Figure 2509: NETMAT edge (100) 1353

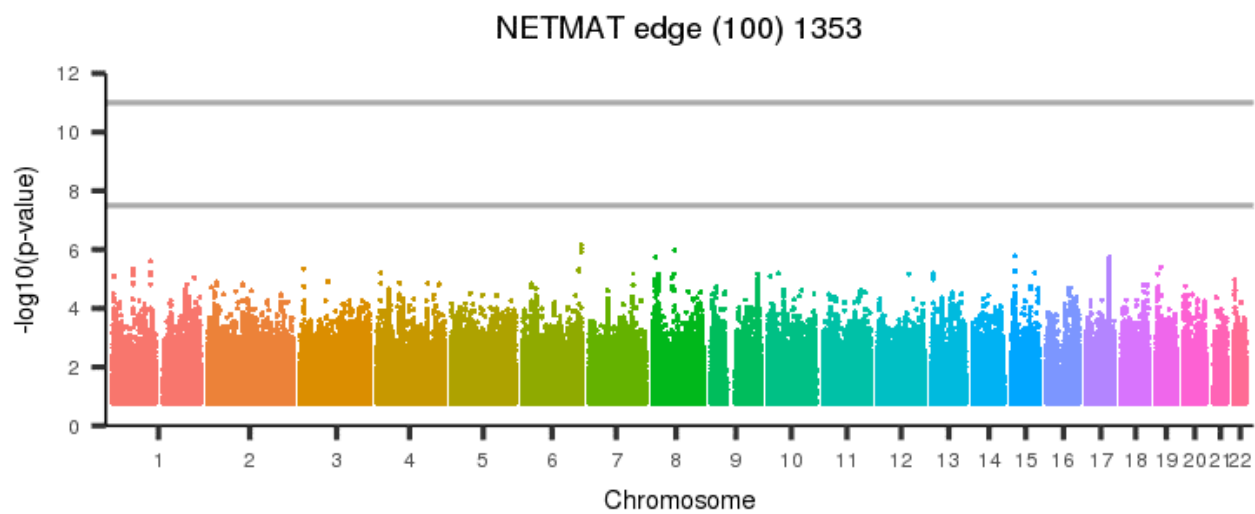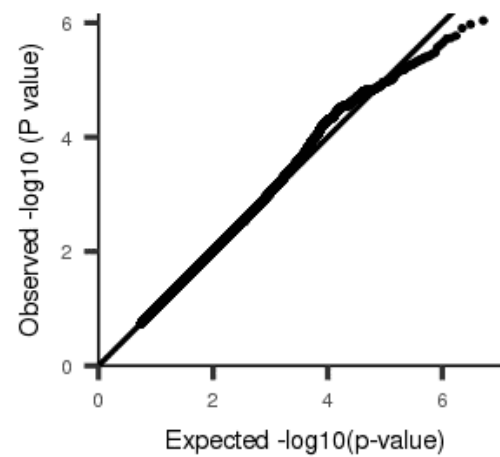

[back to list of plots](#)



Figure 2510: NETMAT edge (100) 1354

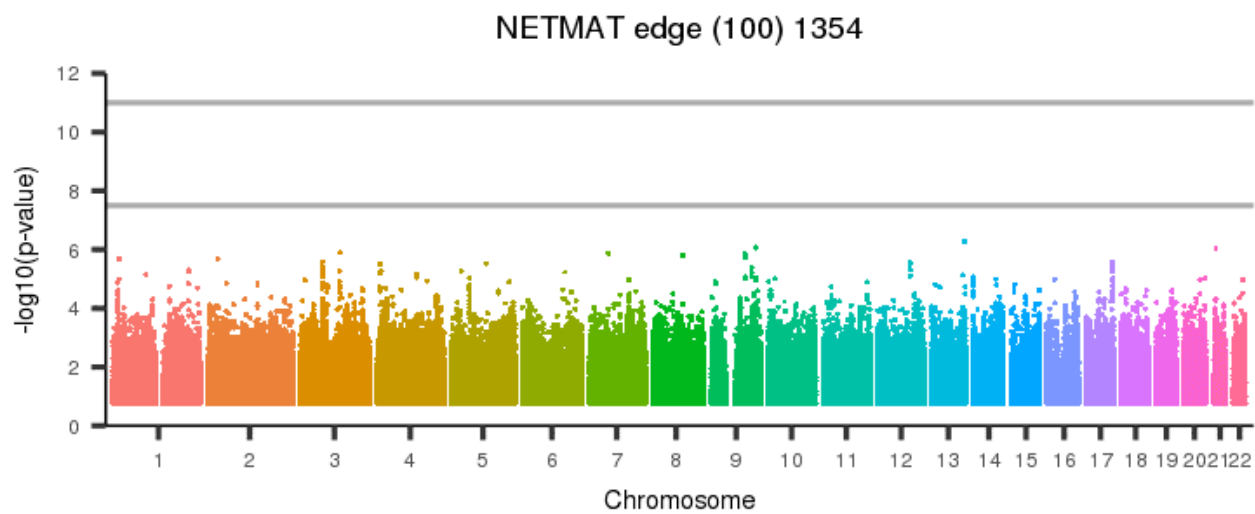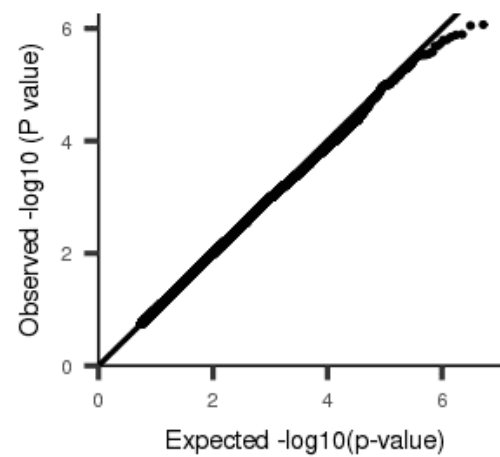

[back to list of plots](#)

Figure 2511: NETMAT edge (100) 1355

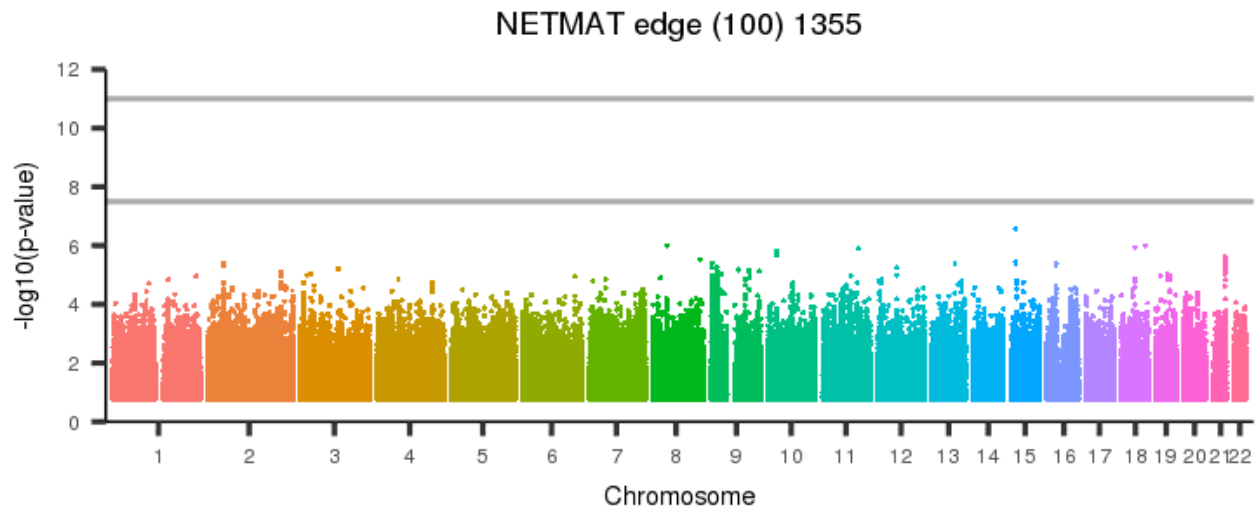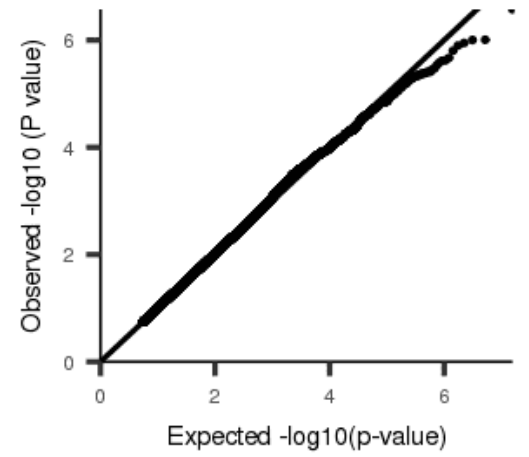

[back to list of plots](#)

Figure 2512: NETMAT edge (100) 1356

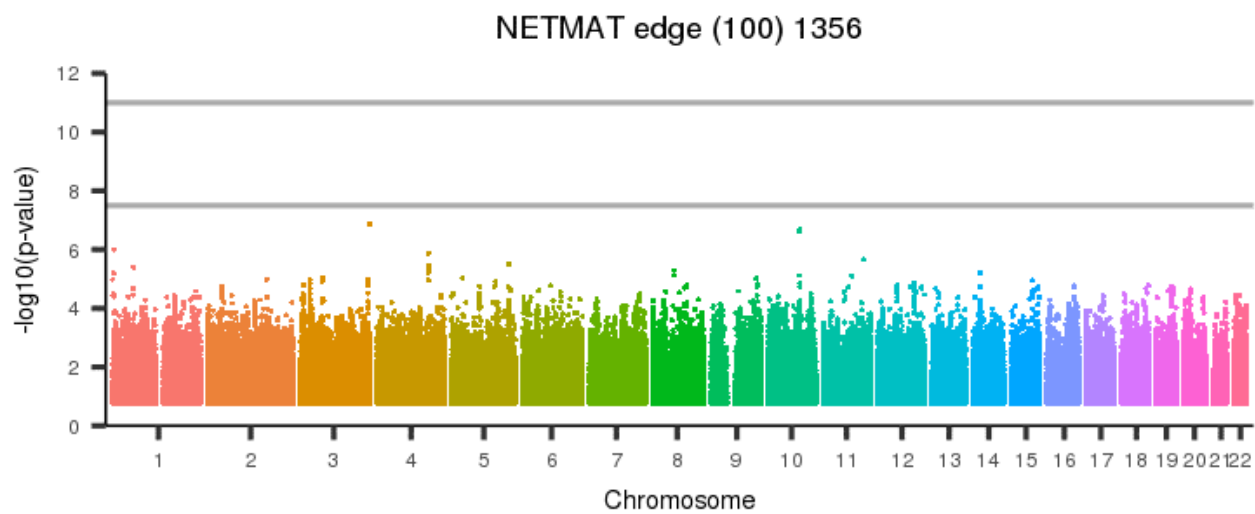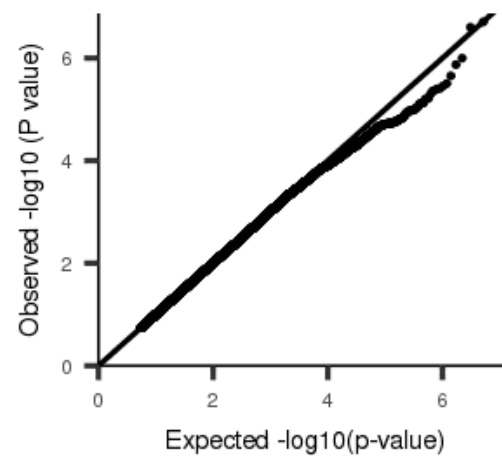

[back to list of plots](#)

Figure 2513: NETMAT edge (100) 1357

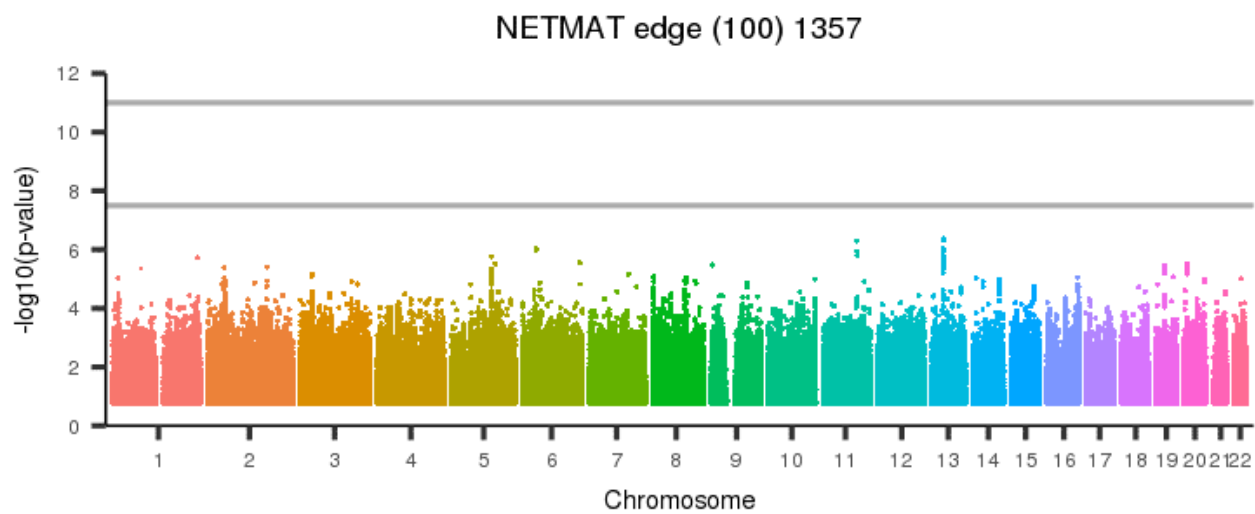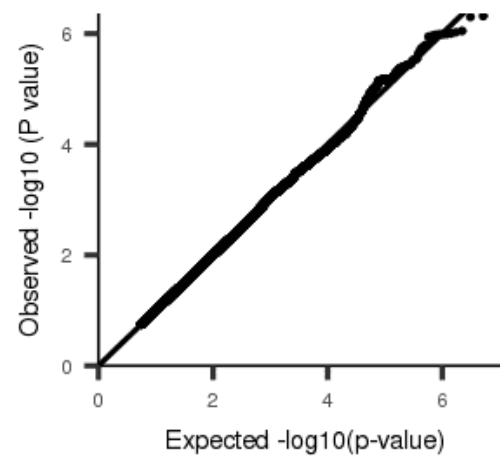

[back to list of plots](#)

Figure 2514: NETMAT edge (100) 1358

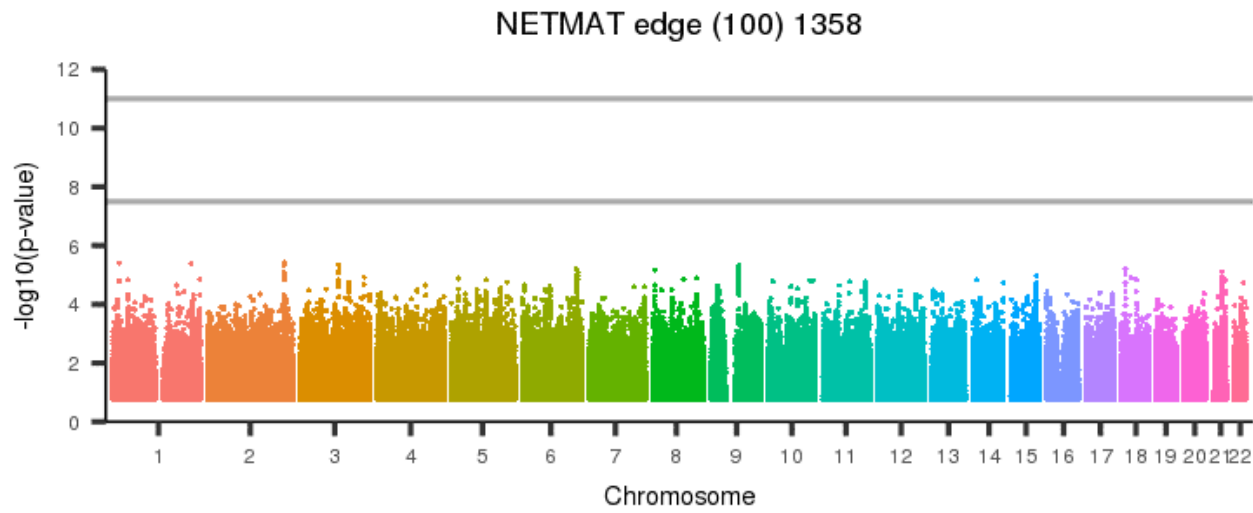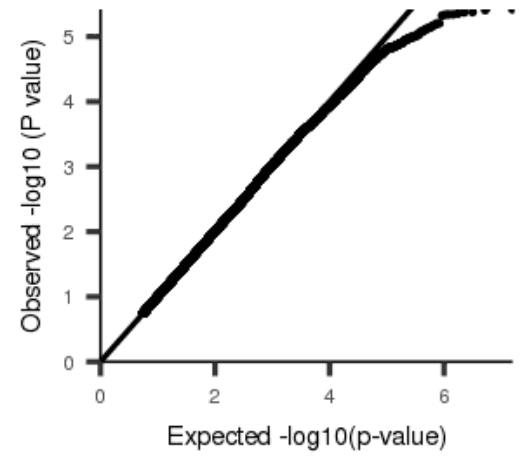

[back to list of plots](#)

Figure 2515: NETMAT edge (100) 1359

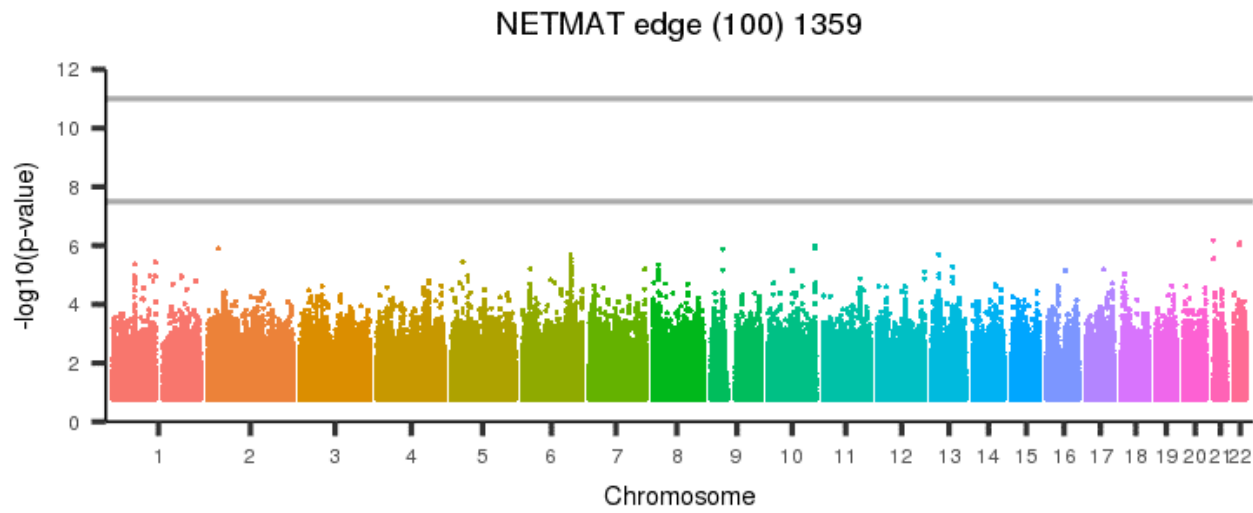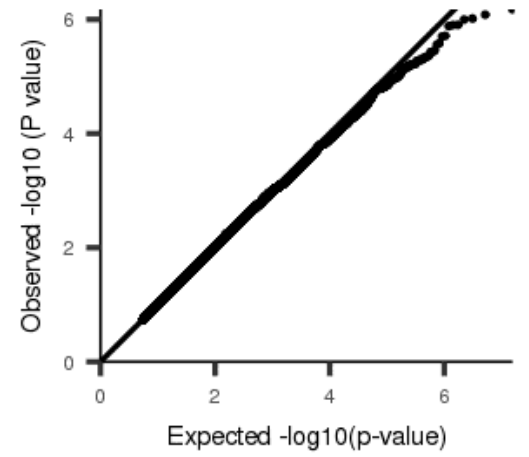

[back to list of plots](#)

Figure 2516: NETMAT edge (100) 1360

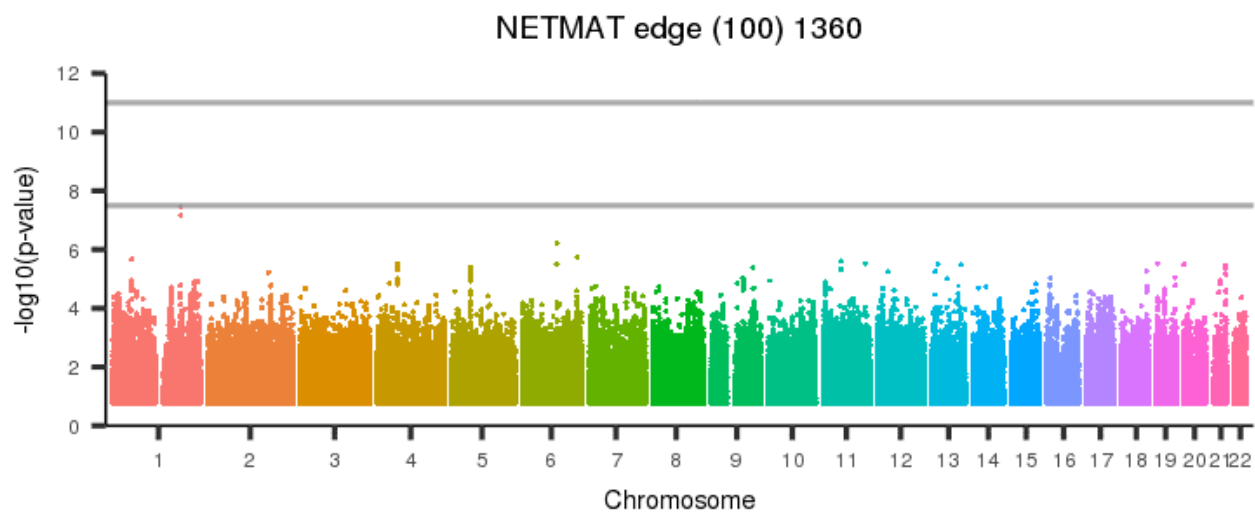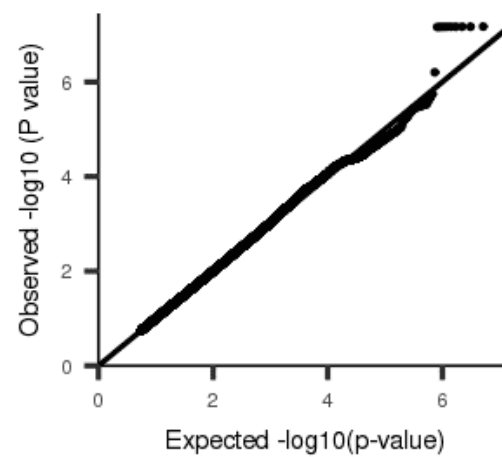

[back to list of plots](#)

Figure 2517: NETMAT edge (100) 1361

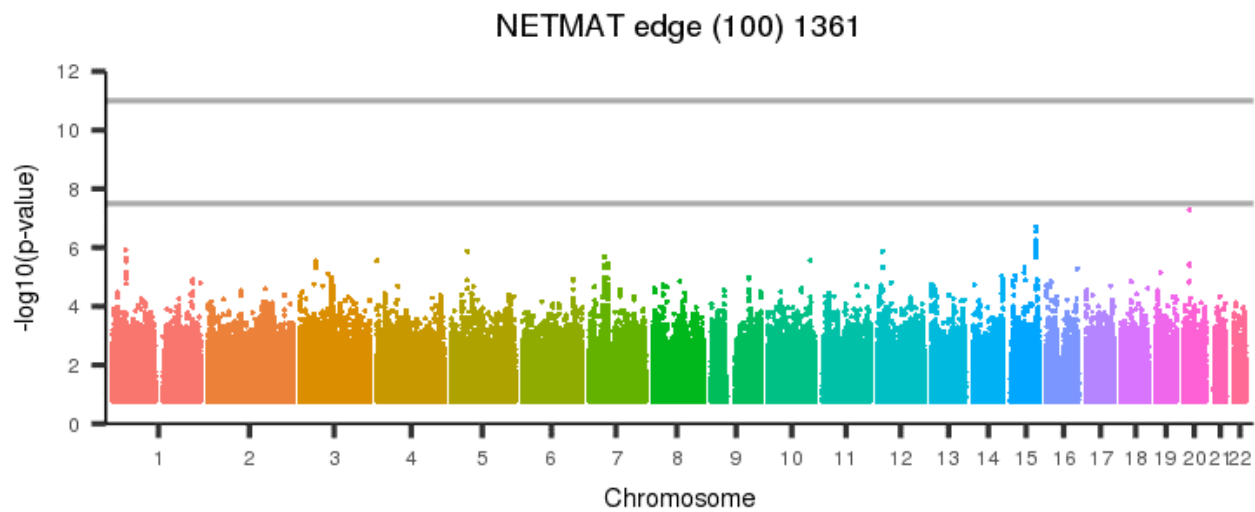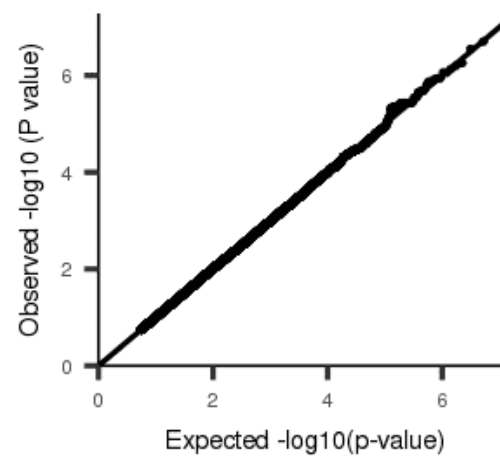

[back to list of plots](#)



Figure 2518: NETMAT edge (100) 1362

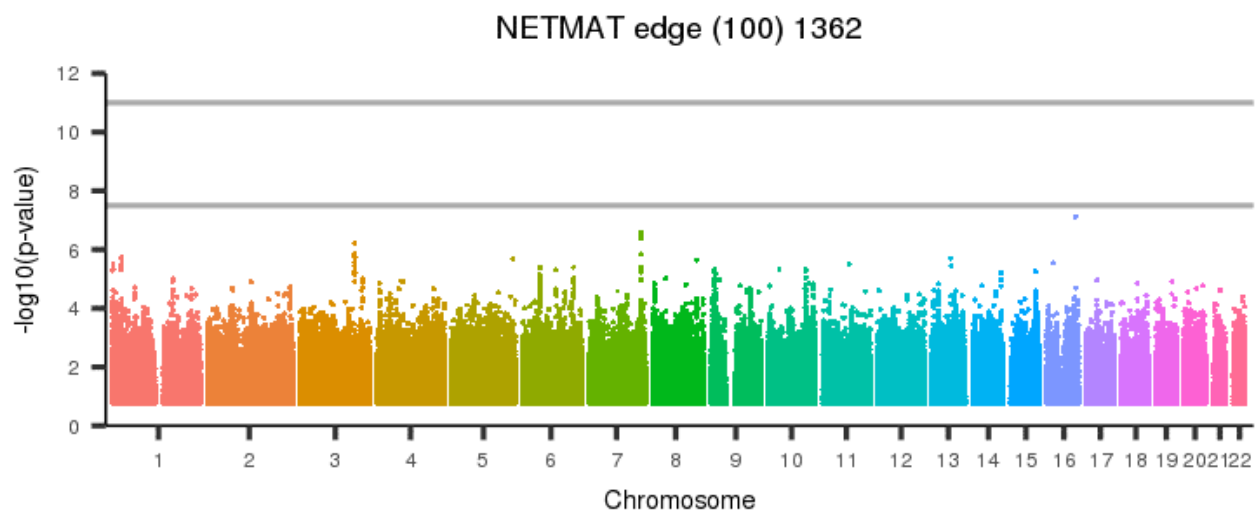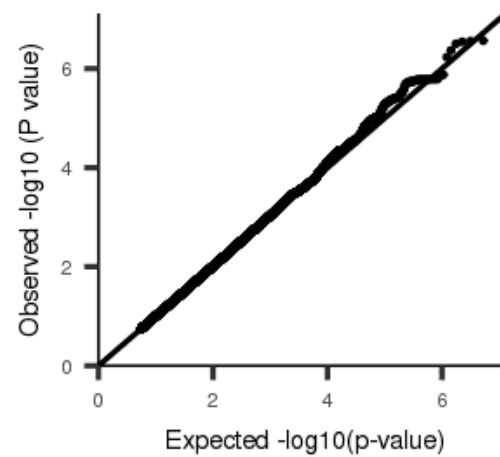

[back to list of plots](#)

Figure 2519: NETMAT edge (100) 1363

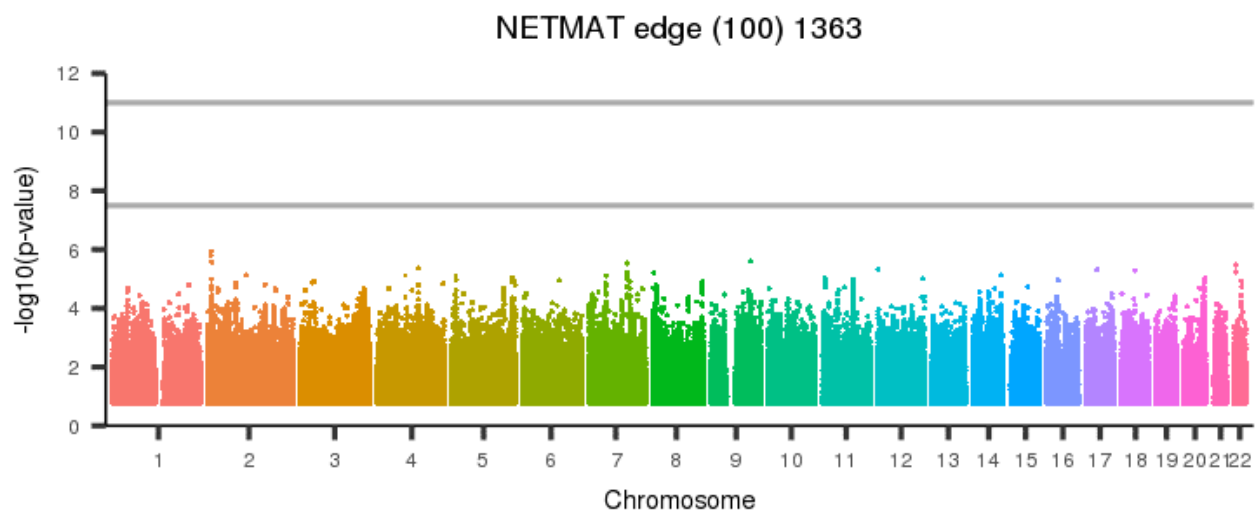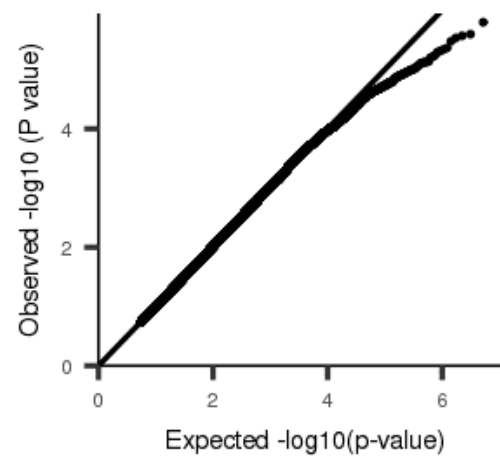

[back to list of plots](#)

Figure 2520: NETMAT edge (100) 1364

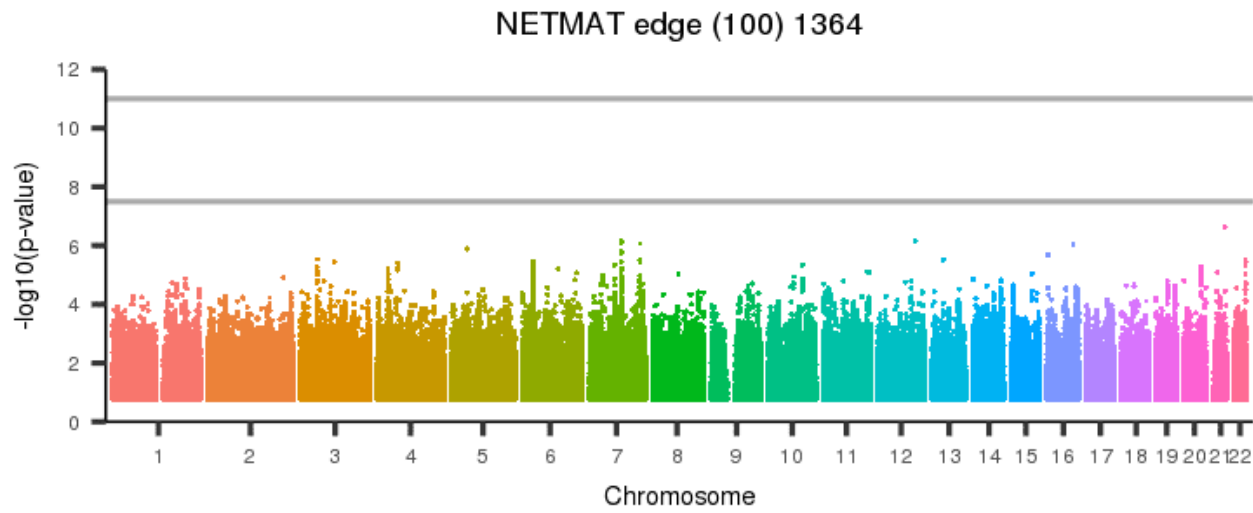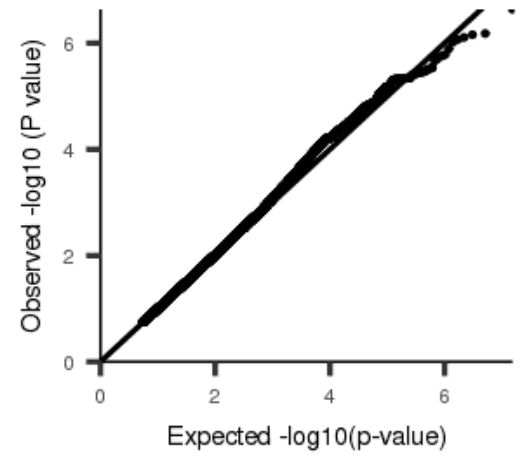

[back to list of plots](#)

Figure 2521: NETMAT edge (100) 1365

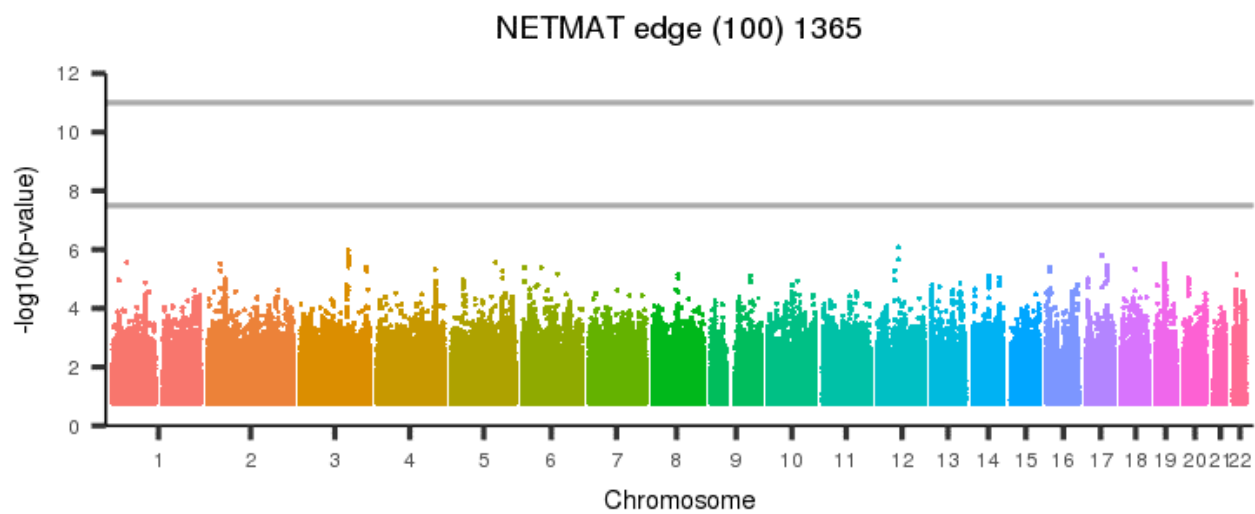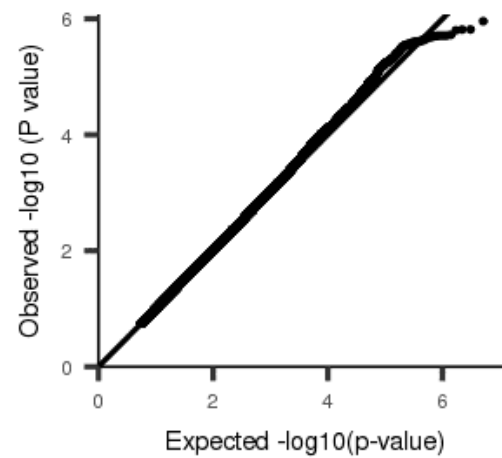

[back to list of plots](#)

Figure 2522: NETMAT edge (100) 1366

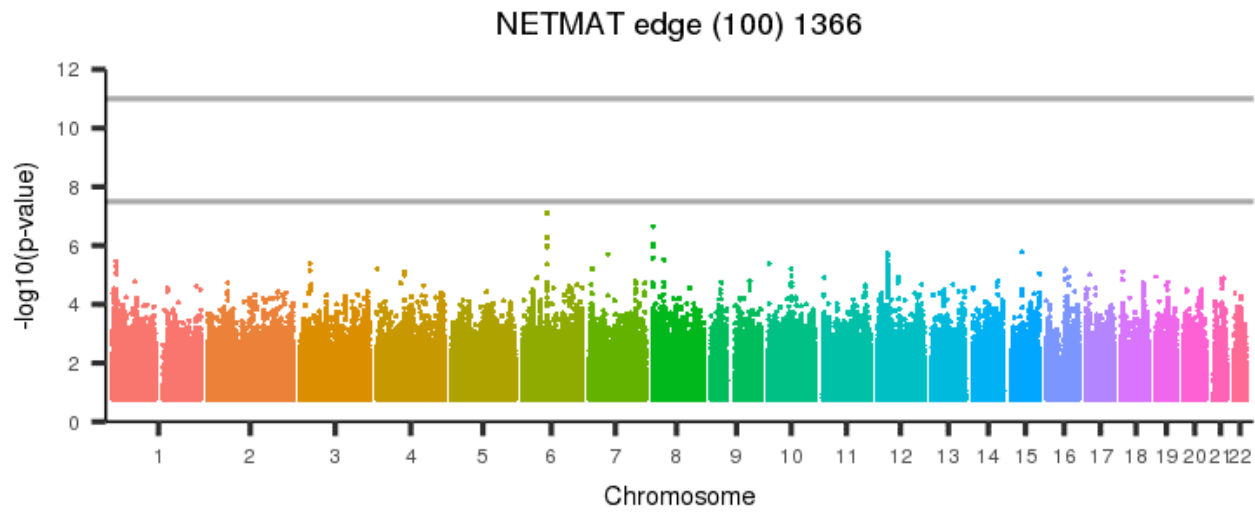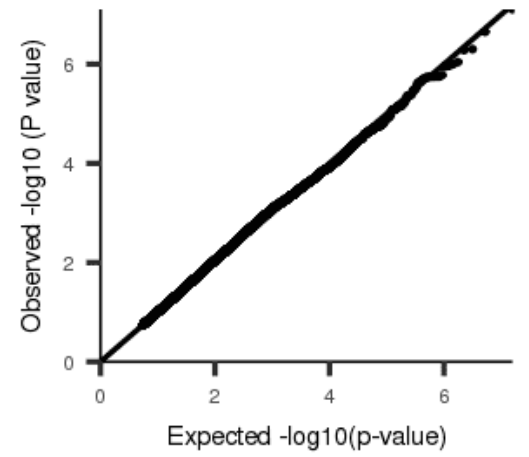

[back to list of plots](#)

Figure 2523: NETMAT edge (100) 1367

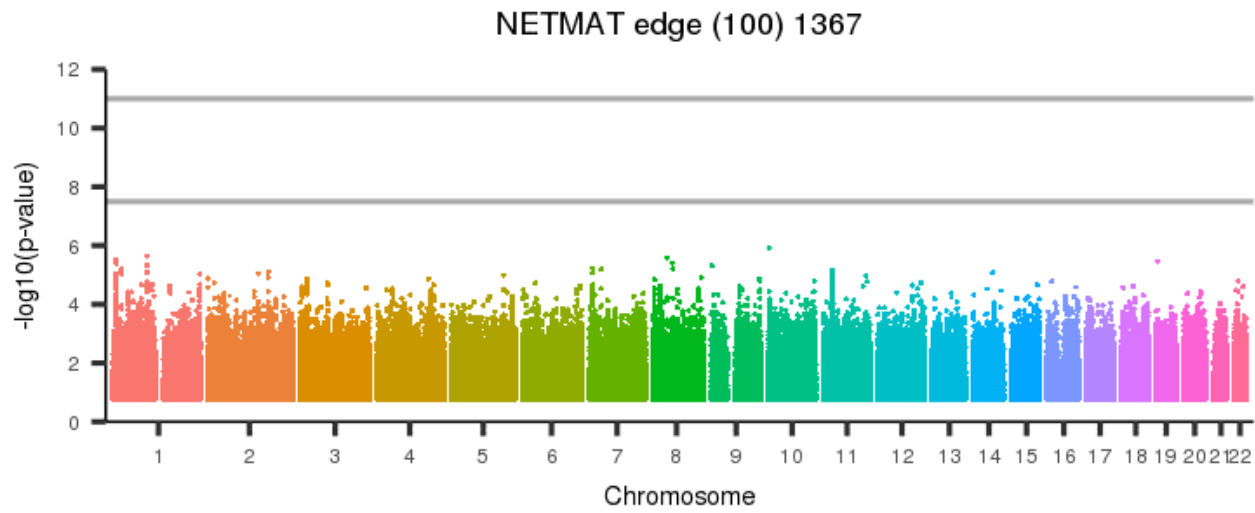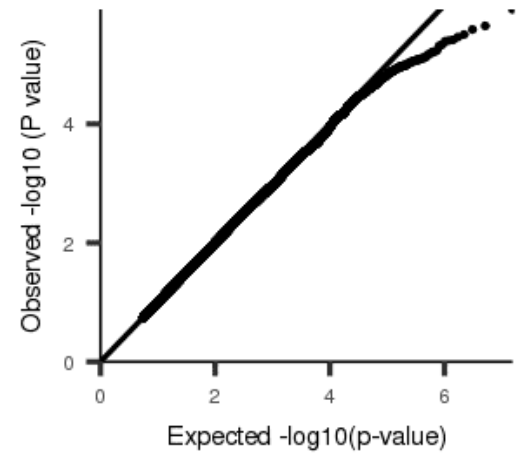

[back to list of plots](#)

Figure 2524: NETMAT edge (100) 1368

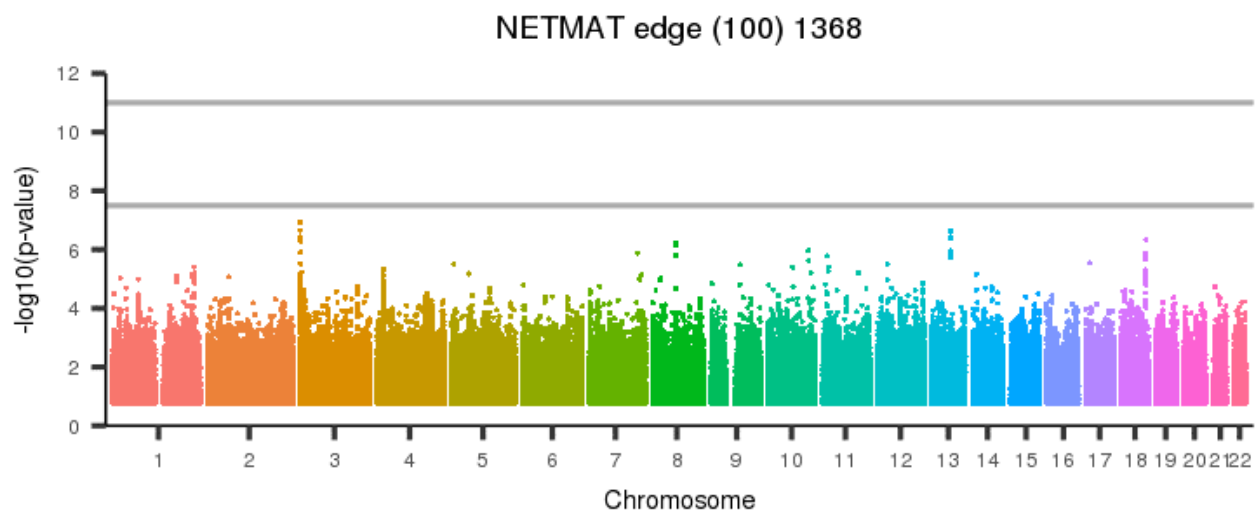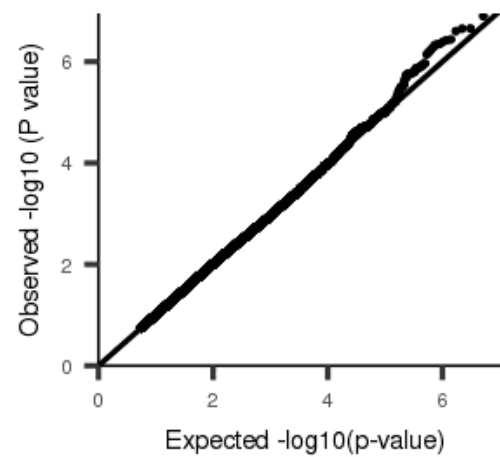

[back to list of plots](#)

Figure 2525: NETMAT edge (100) 1369

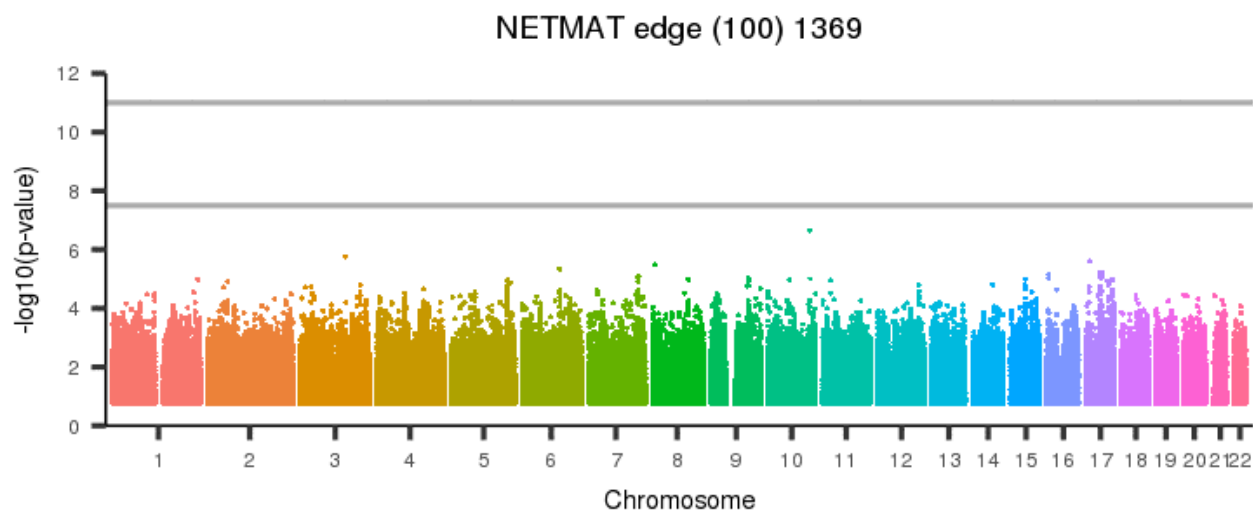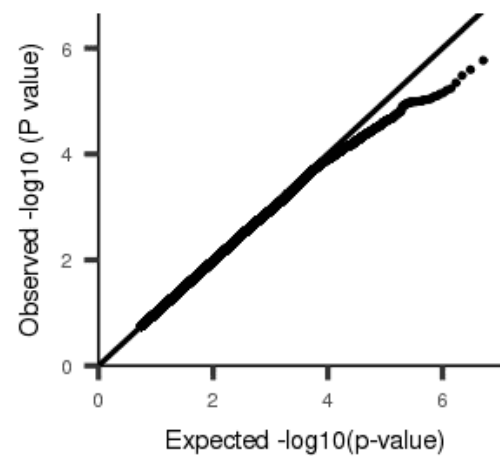

[back to list of plots](#)



Figure 2526: NETMAT edge (100) 1370

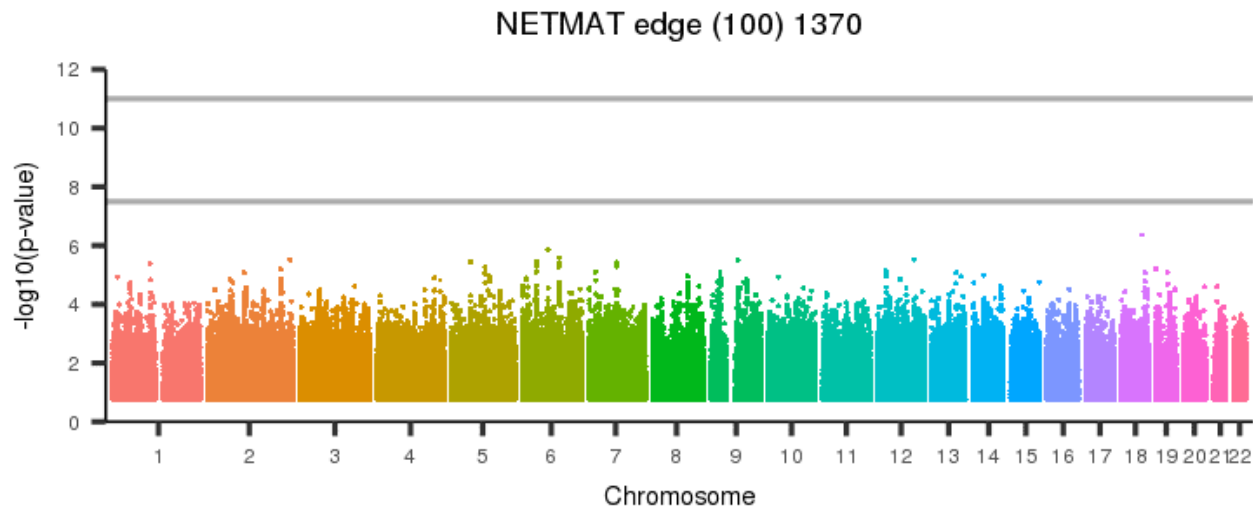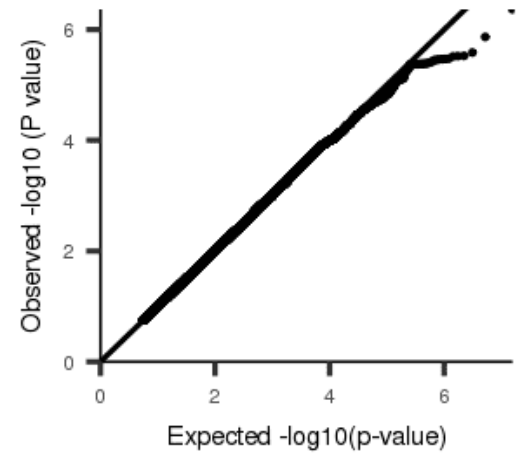

[back to list of plots](#)

Figure 2527: NETMAT edge (100) 1371

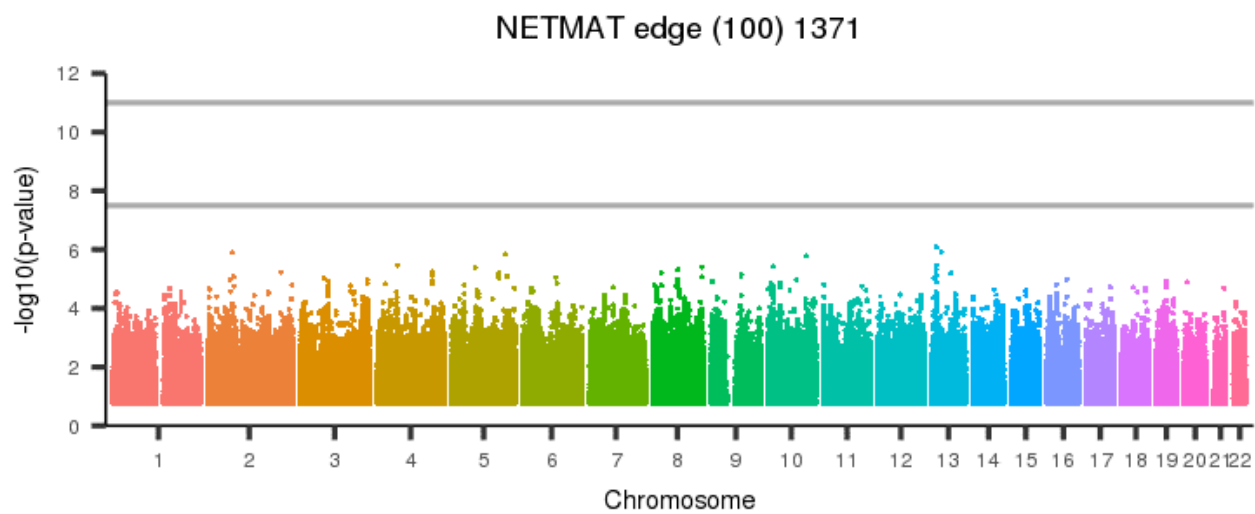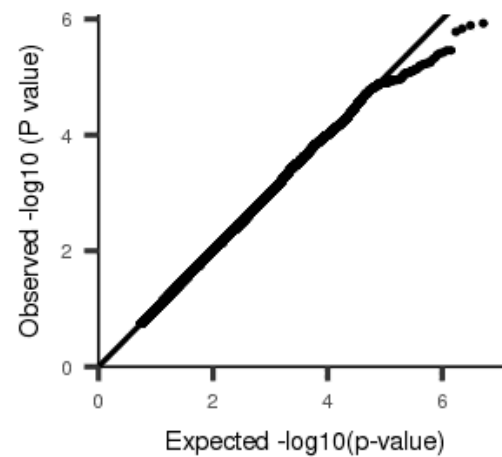

[back to list of plots](#)

Figure 2528: NETMAT edge (100) 1372

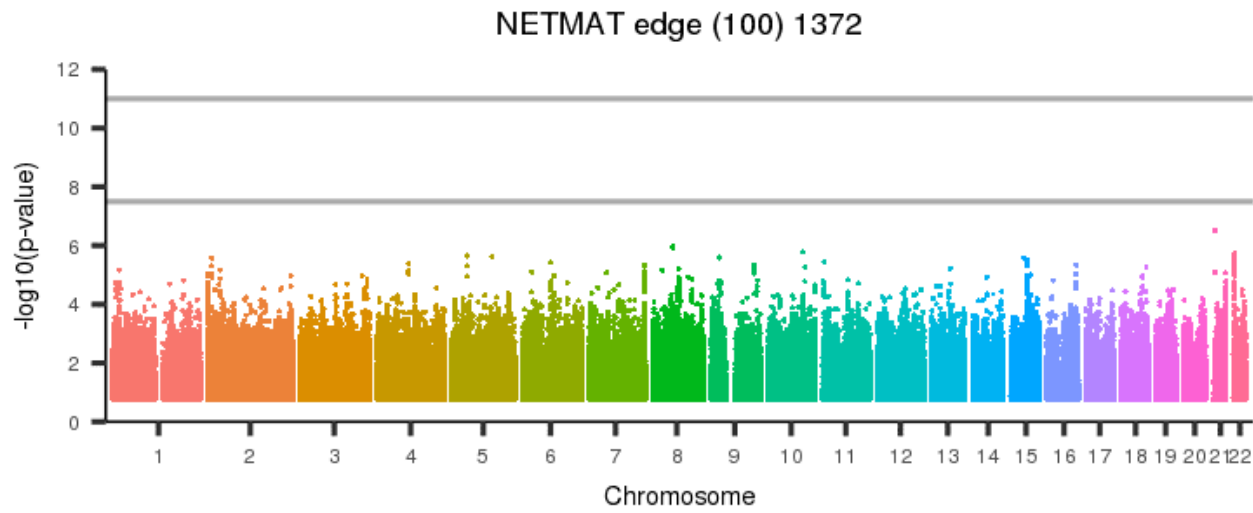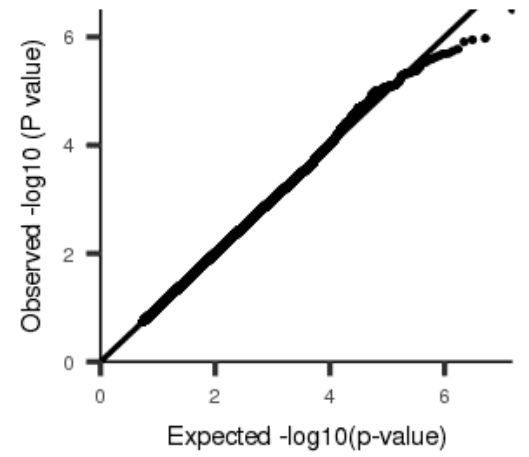

[back to list of plots](#)

Figure 2529: NETMAT edge (100) 1373

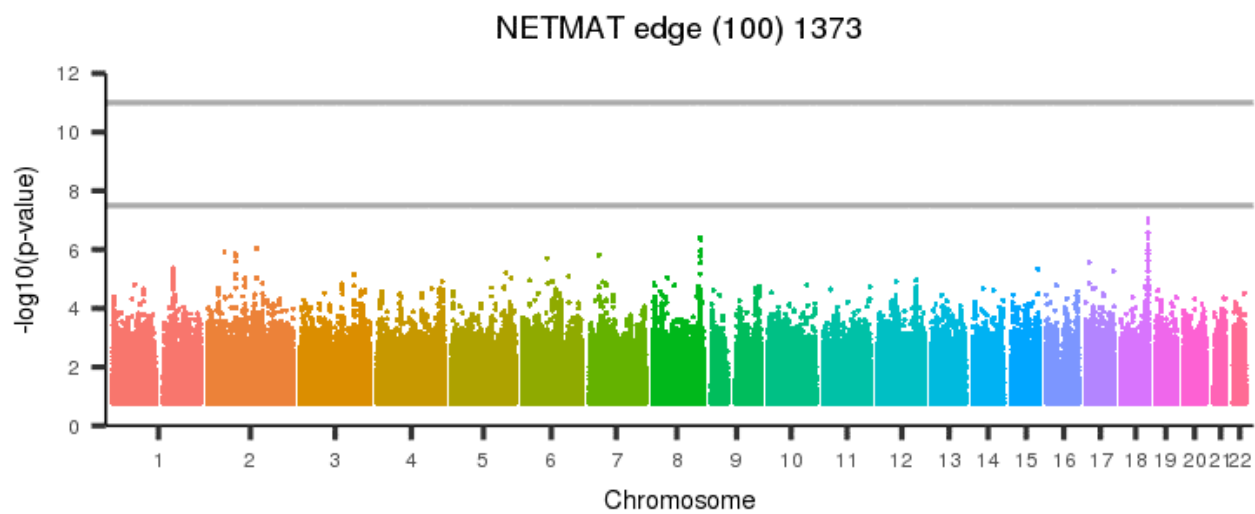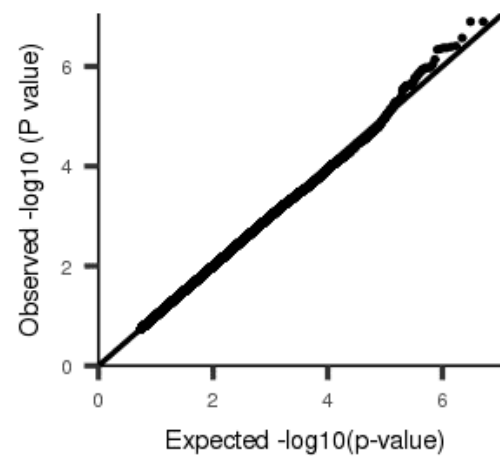

[back to list of plots](#)

Figure 2530: NETMAT edge (100) 1374

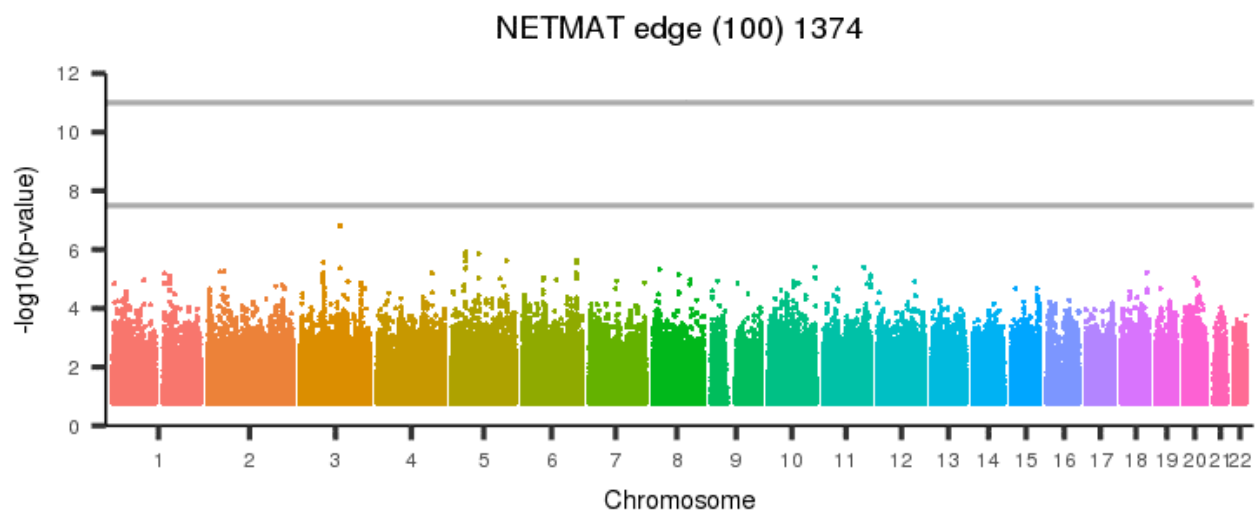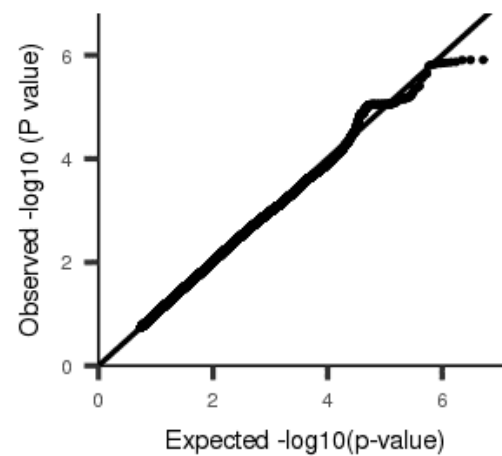

[back to list of plots](#)

Figure 2531: NETMAT edge (100) 1375

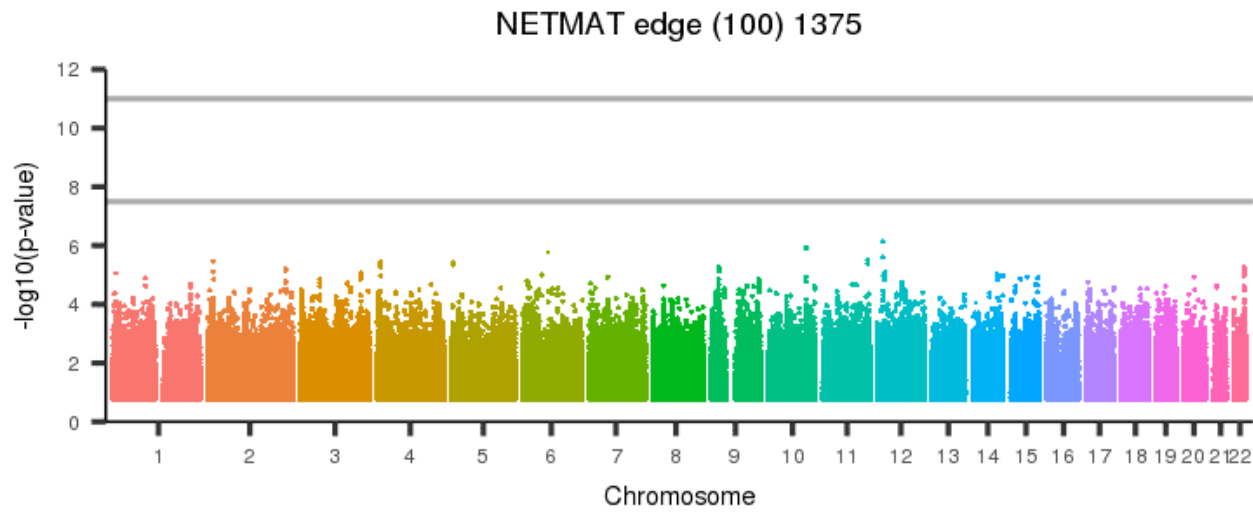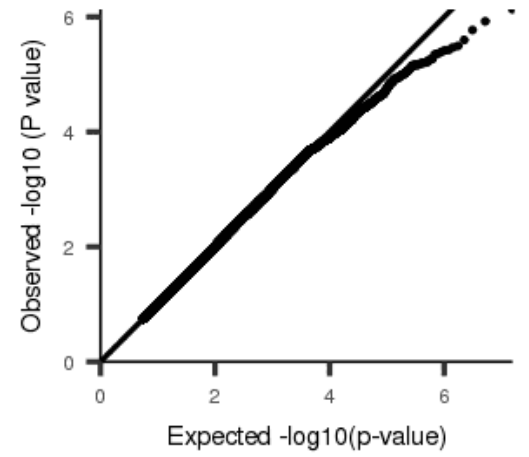

[back to list of plots](#)

Figure 2532: NETMAT edge (100) 1376

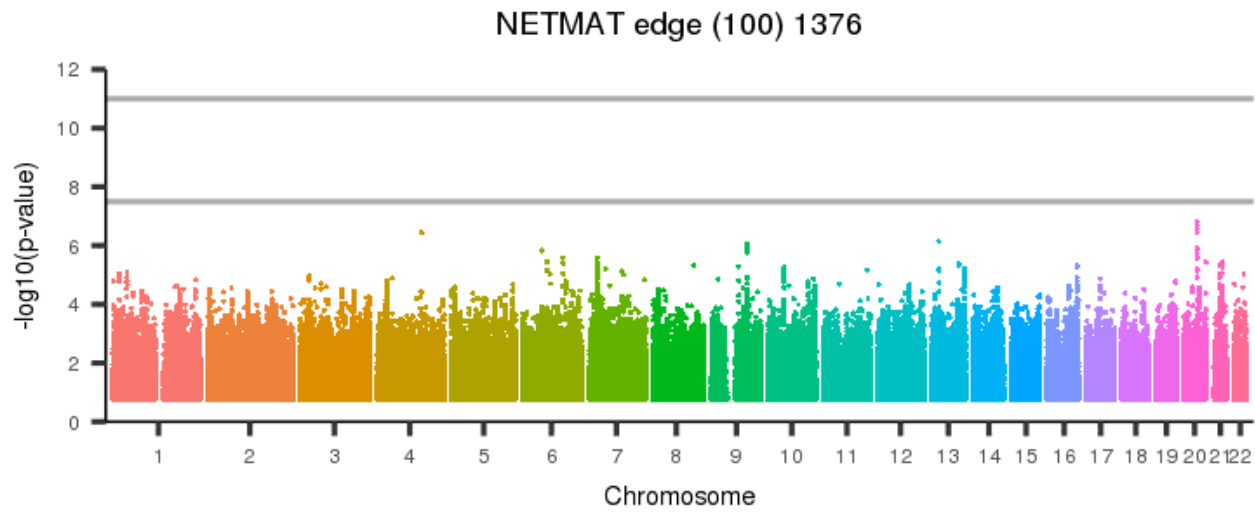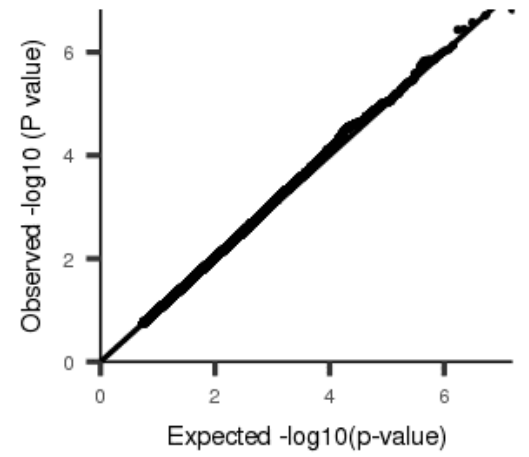

[back to list of plots](#)

Figure 2533: NETMAT edge (100) 1377

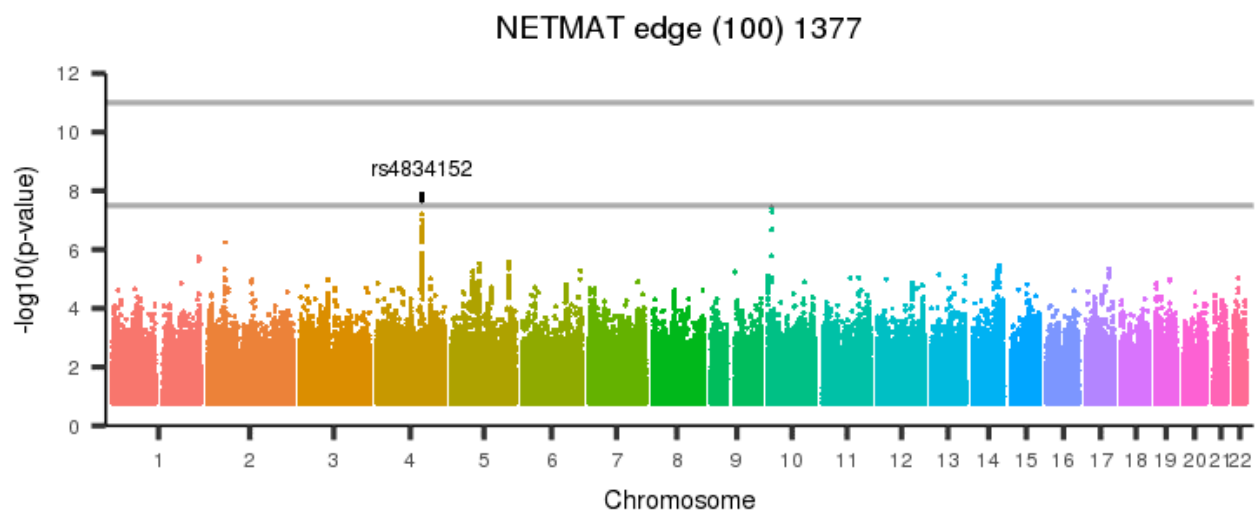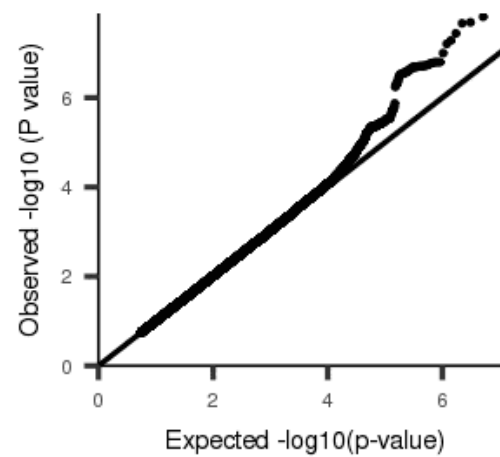

[back to list of plots](#)



Figure 2534: NETMAT edge (100) 1378

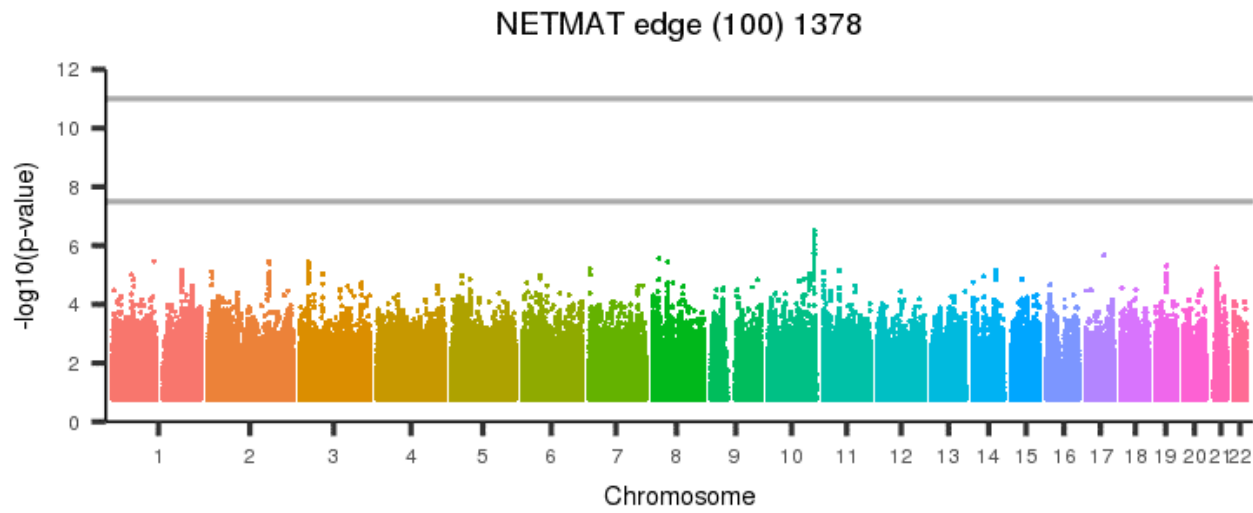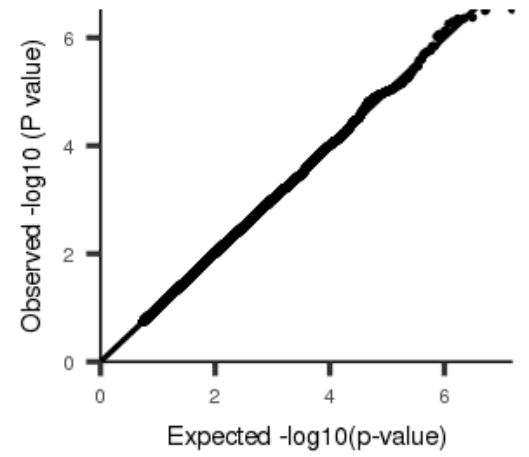

[back to list of plots](#)

Figure 2535: NETMAT edge (100) 1379

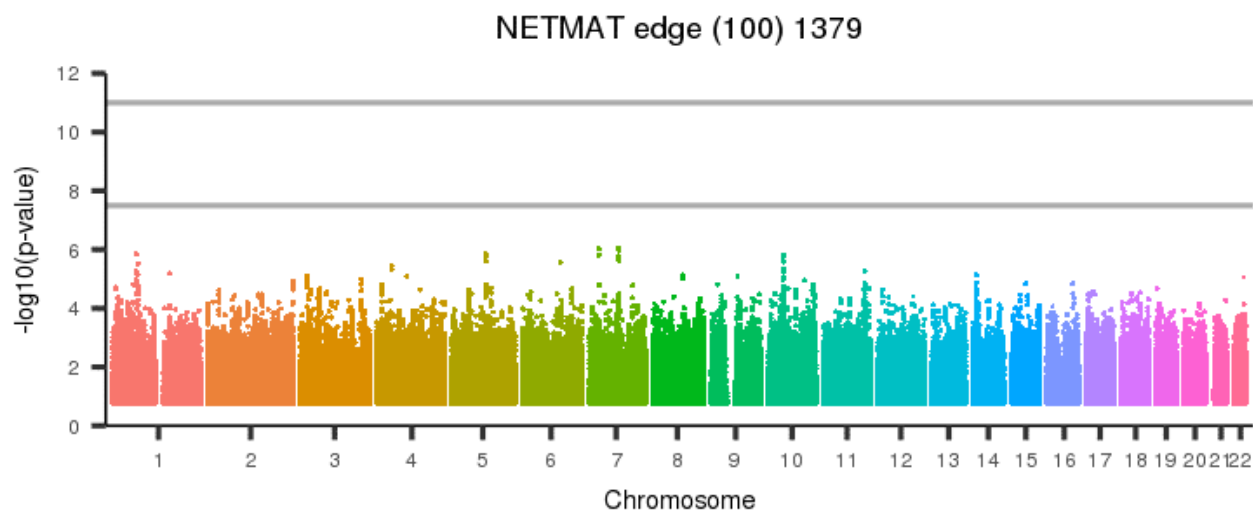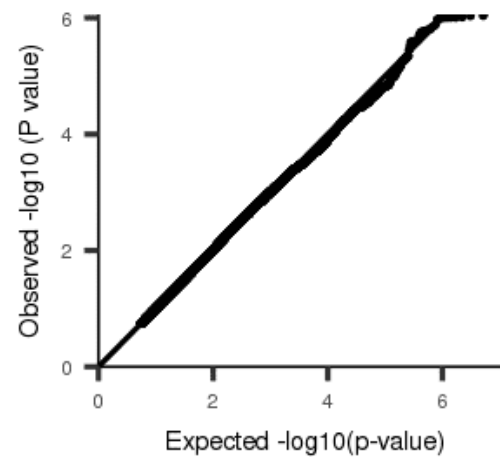

[back to list of plots](#)

Figure 2536: NETMAT edge (100) 1380

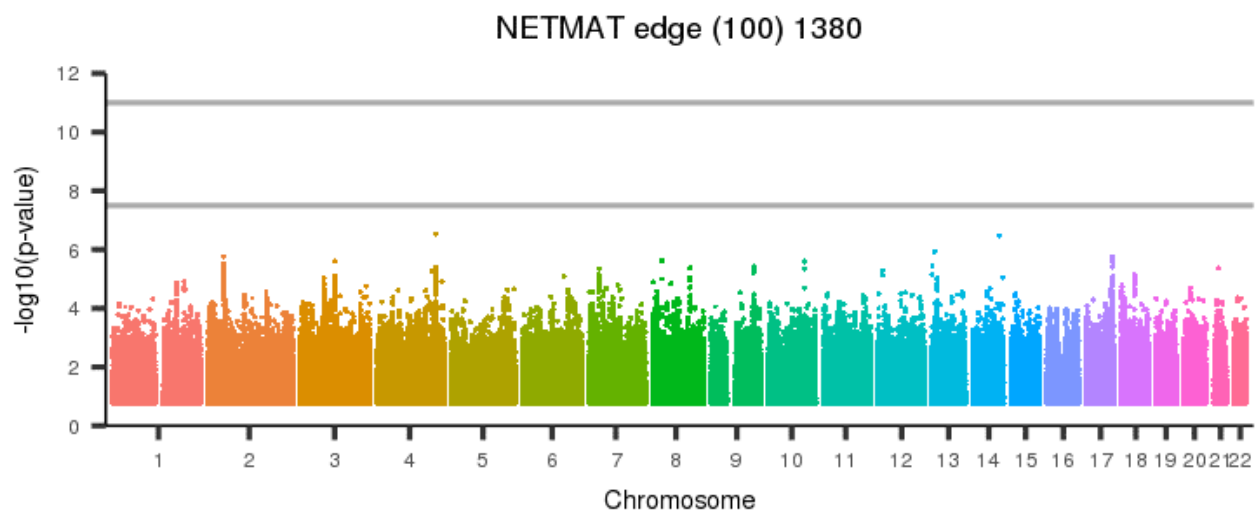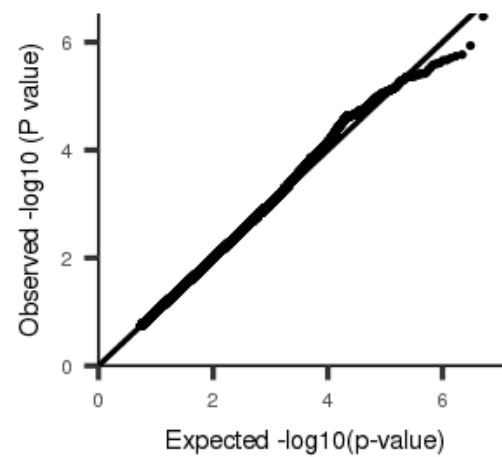

[back to list of plots](#)

Figure 2537: NETMAT edge (100) 1381

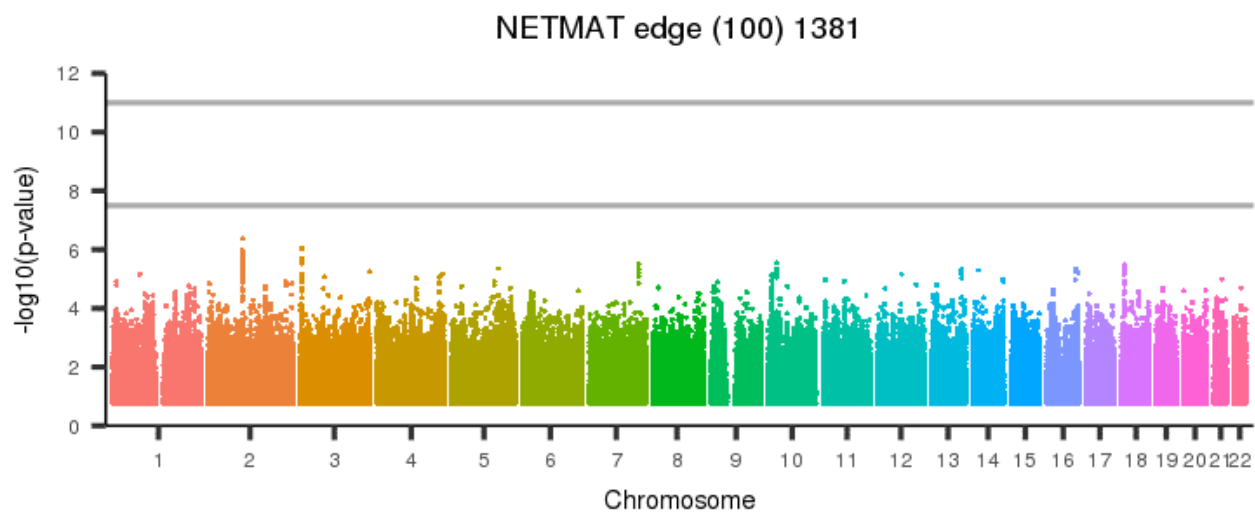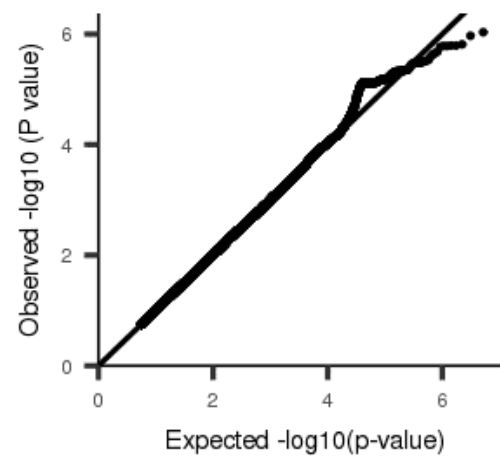

[back to list of plots](#)

Figure 2538: NETMAT edge (100) 1382

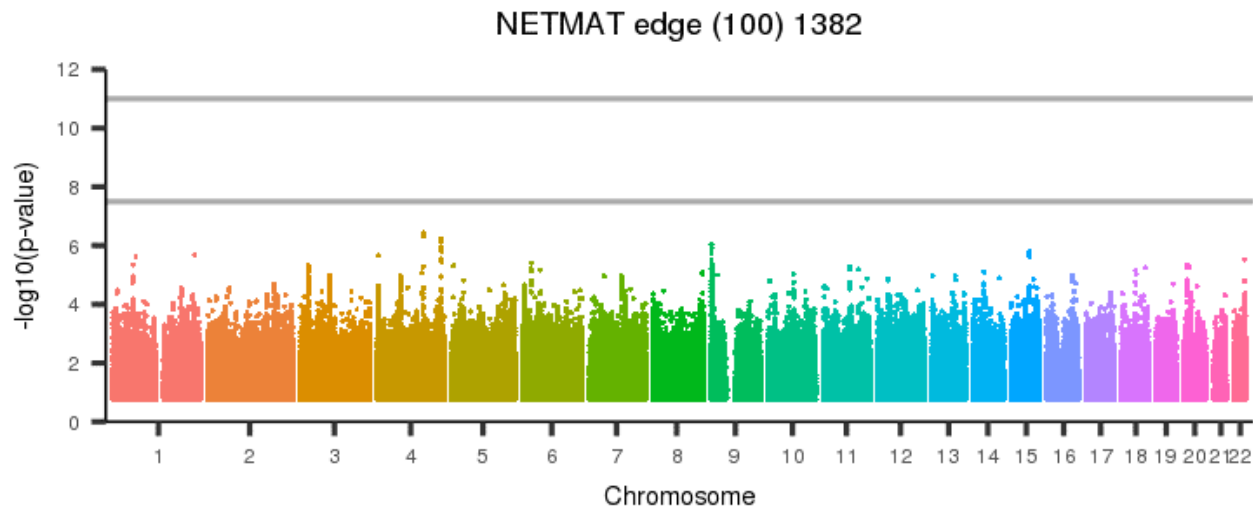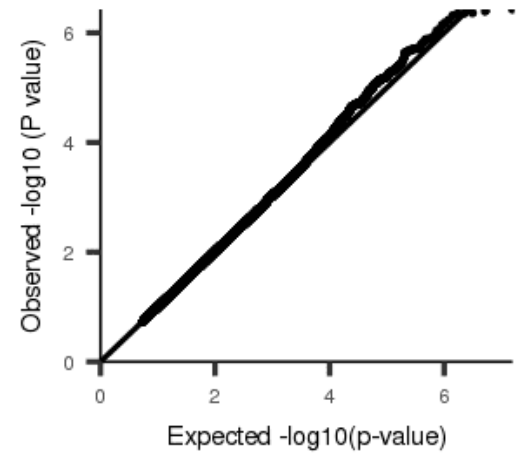

[back to list of plots](#)

Figure 2539: NETMAT edge (100) 1383

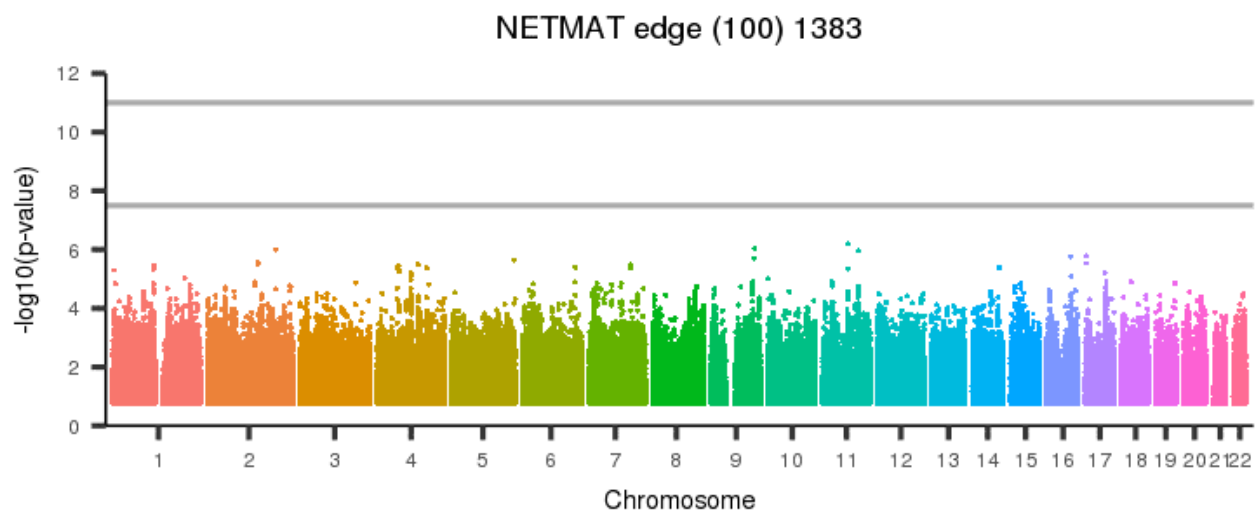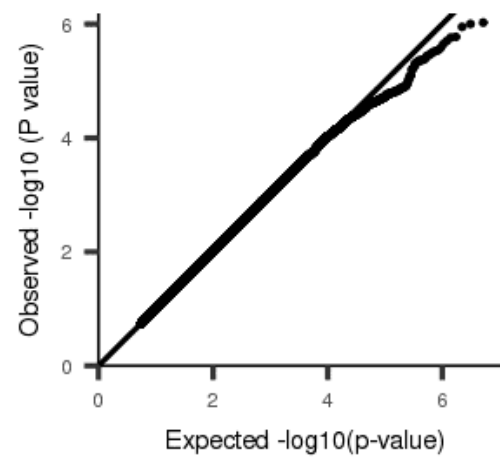

[back to list of plots](#)

Figure 2540: NETMAT edge (100) 1384

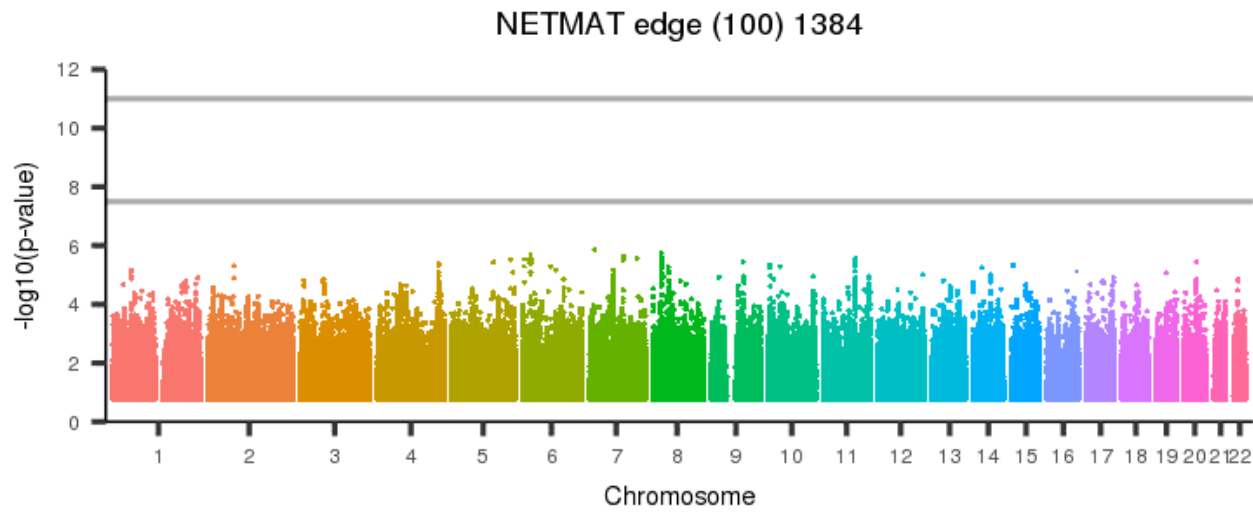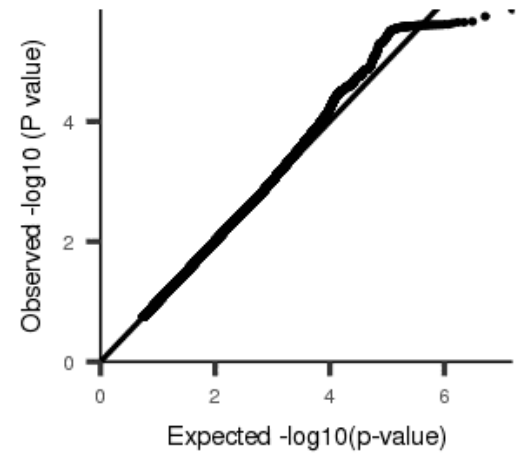

[back to list of plots](#)

Figure 2541: NETMAT edge (100) 1385

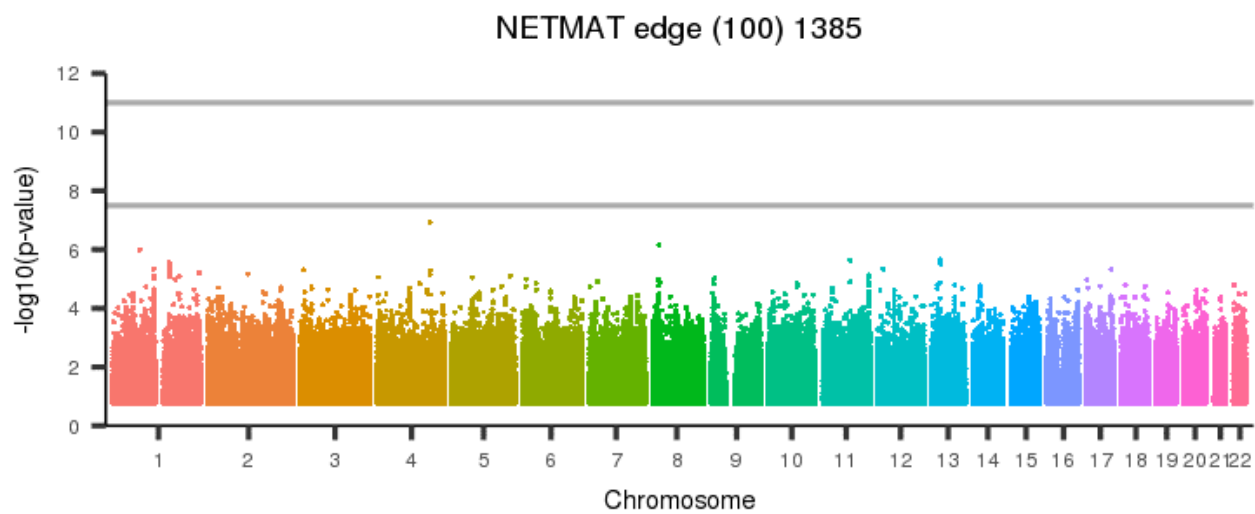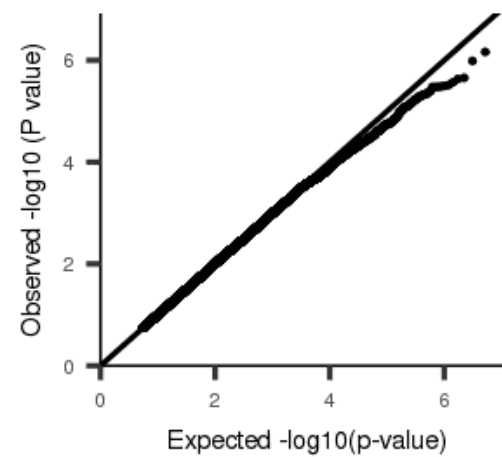

[back to list of plots](#)



Figure 2542: NETMAT edge (100) 1386

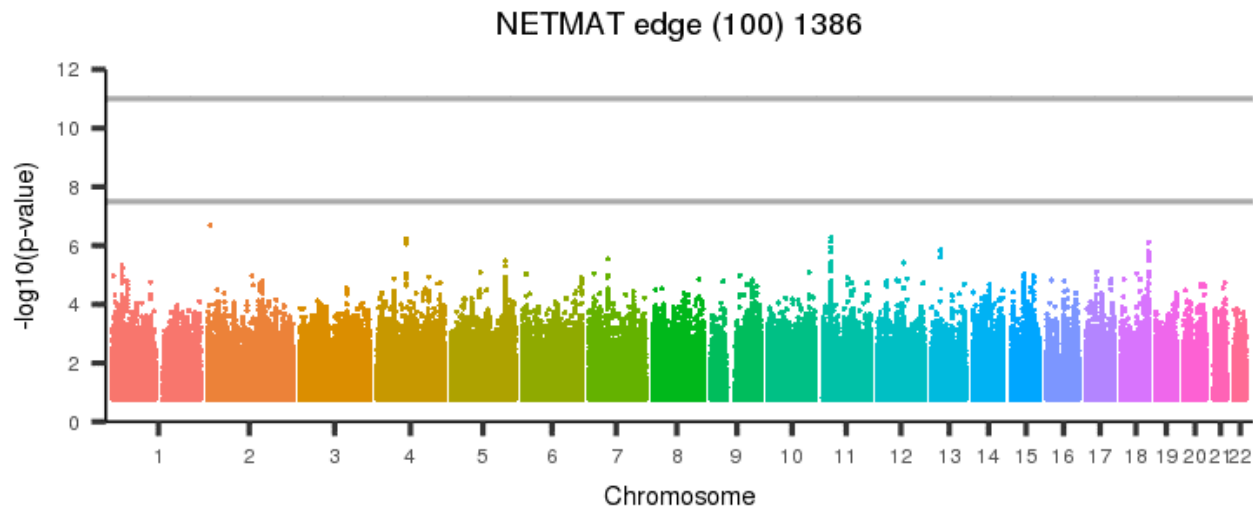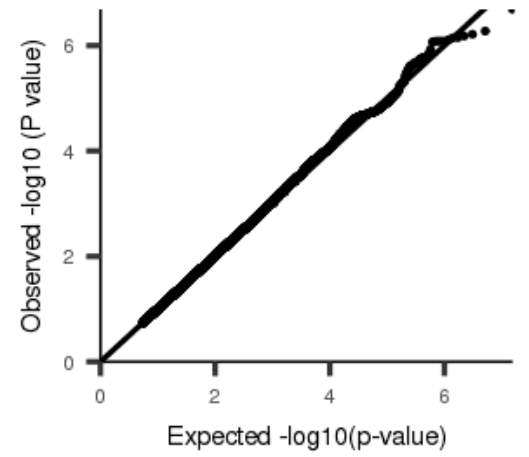

[back to list of plots](#)

Figure 2543: NETMAT edge (100) 1387

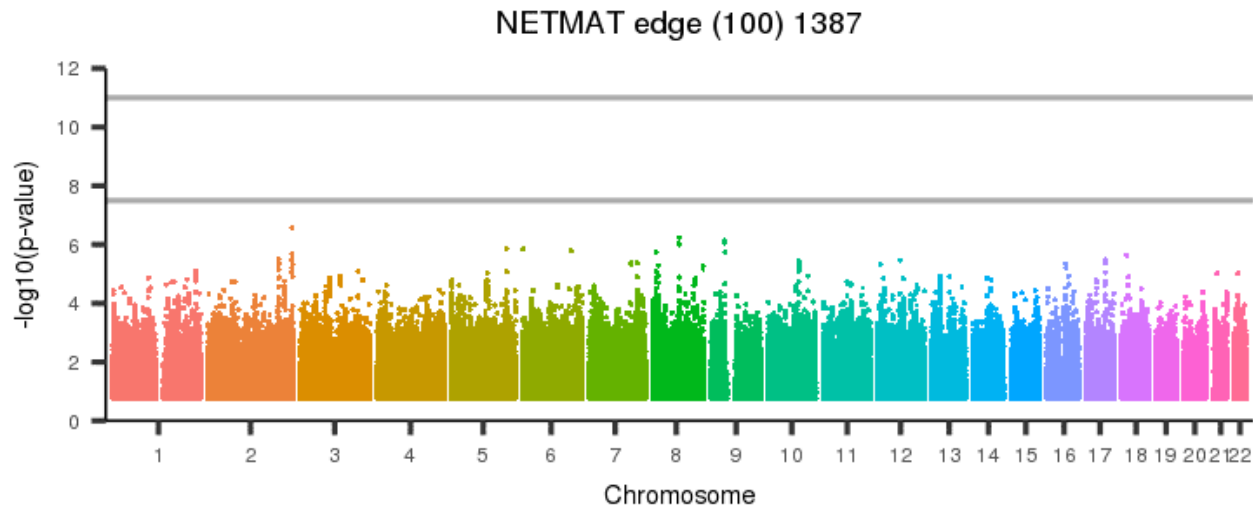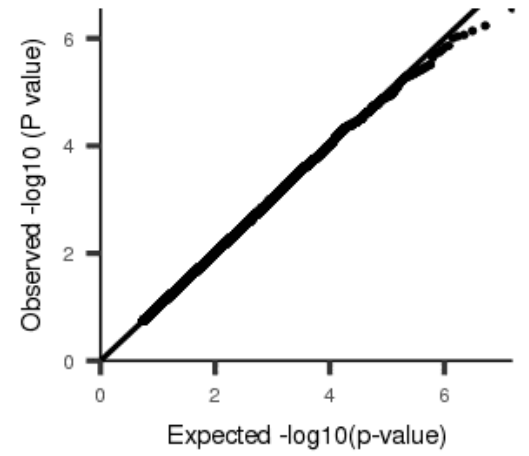

[back to list of plots](#)

Figure 2544: NETMAT edge (100) 1388

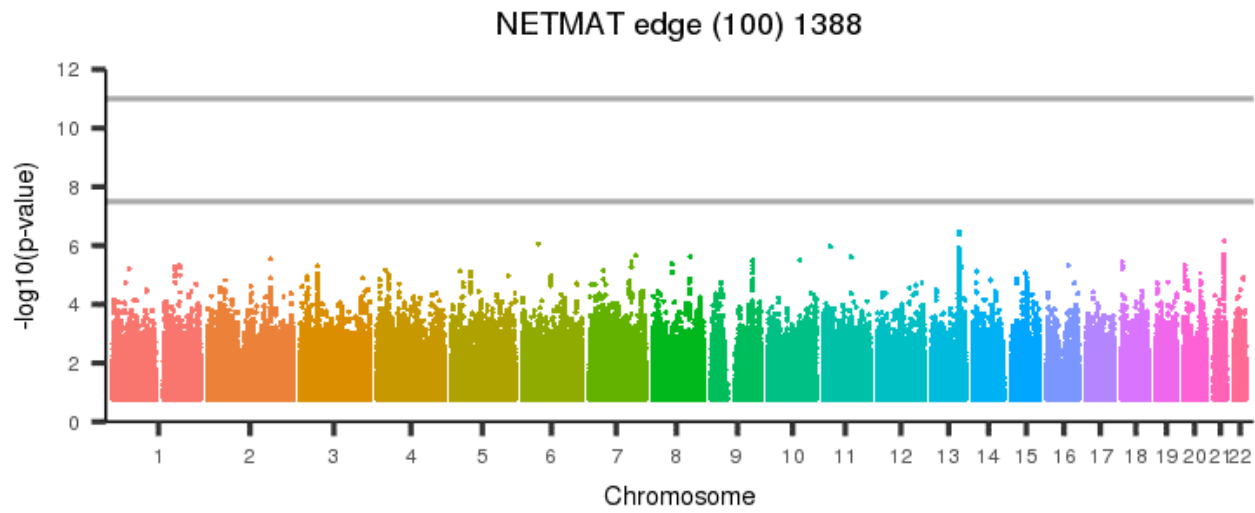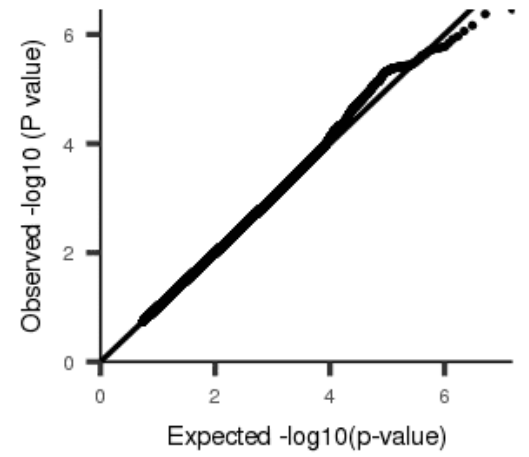

[back to list of plots](#)

Figure 2545: NETMAT edge (100) 1389

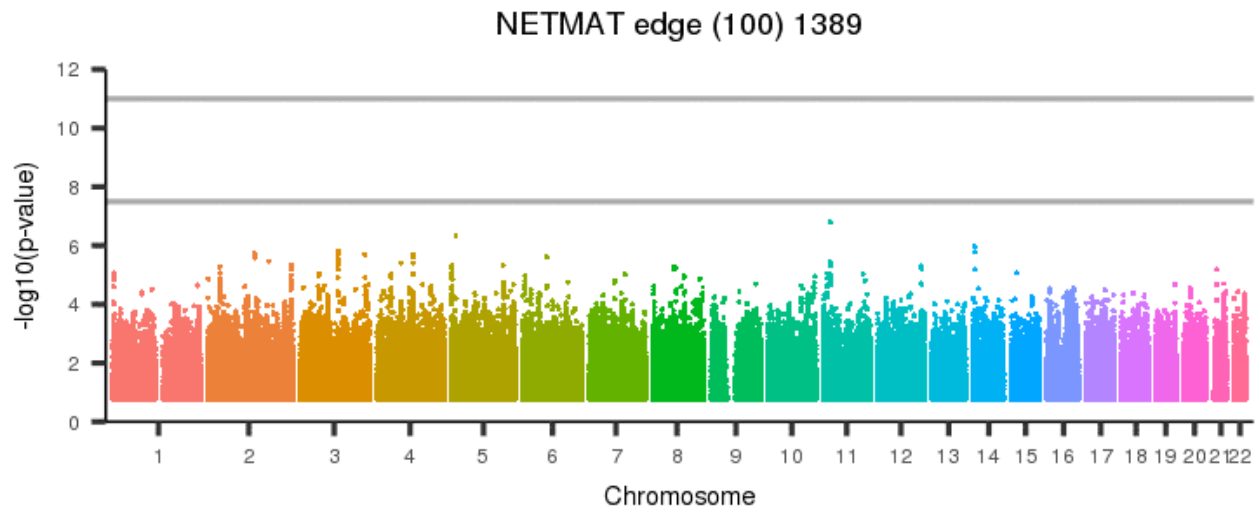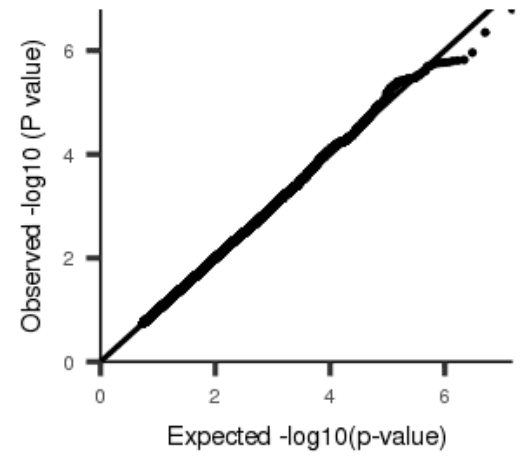

[back to list of plots](#)

Figure 2546: NETMAT edge (100) 1390

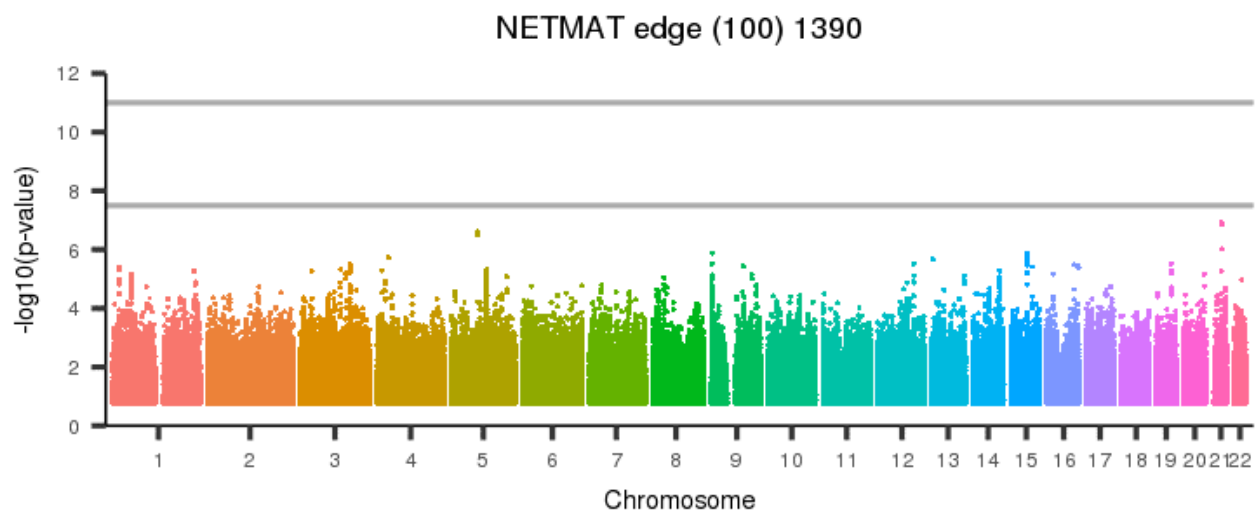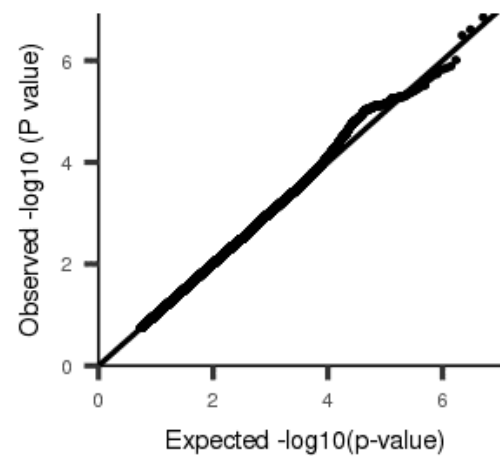

[back to list of plots](#)

Figure 2547: NETMAT edge (100) 1391

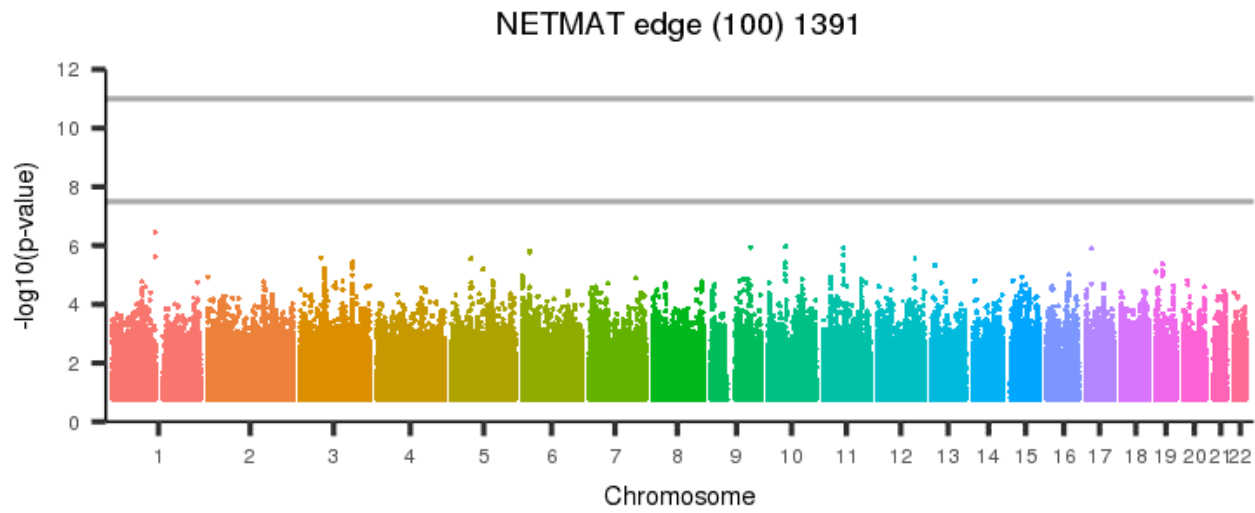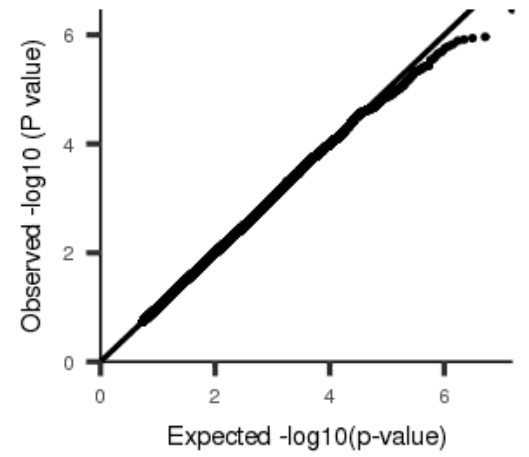

[back to list of plots](#)

Figure 2548: NETMAT edge (100) 1392

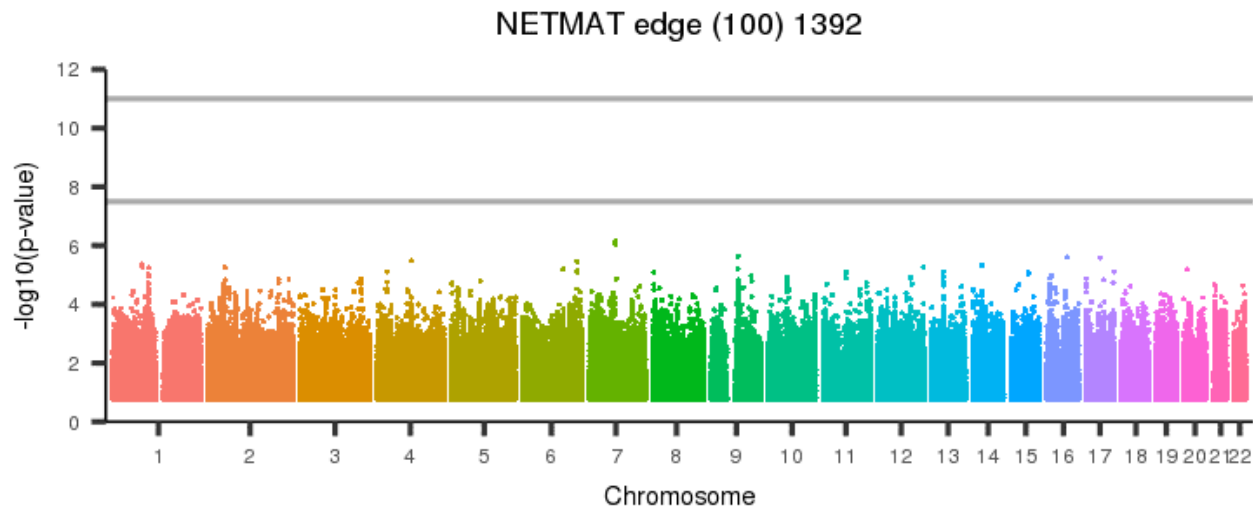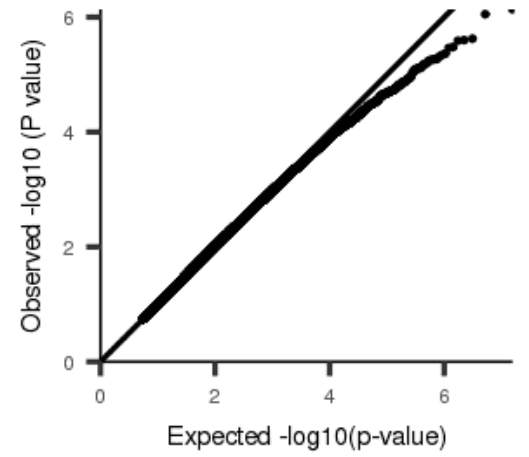

[back to list of plots](#)

Figure 2549: NETMAT edge (100) 1393

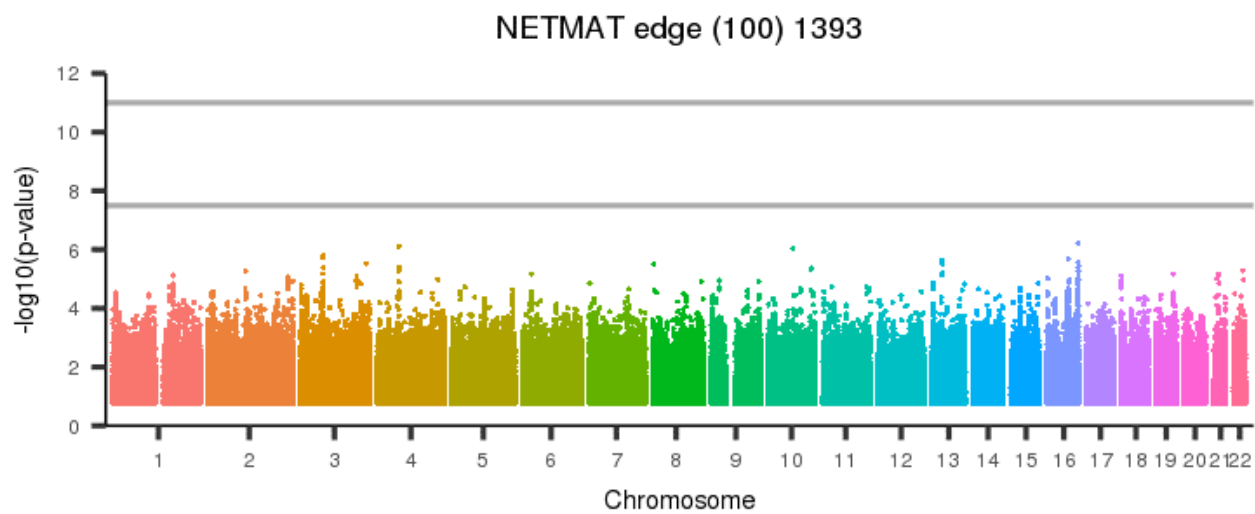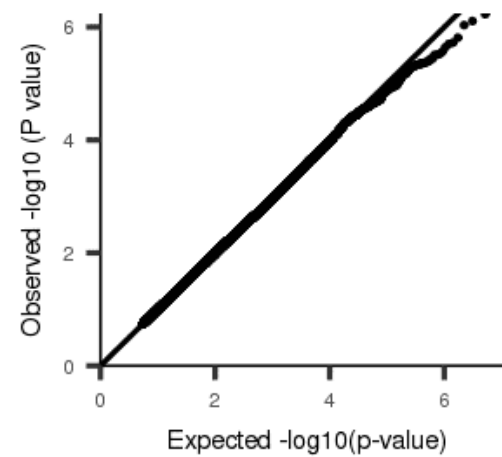

[back to list of plots](#)



Figure 2550: NETMAT edge (100) 1394

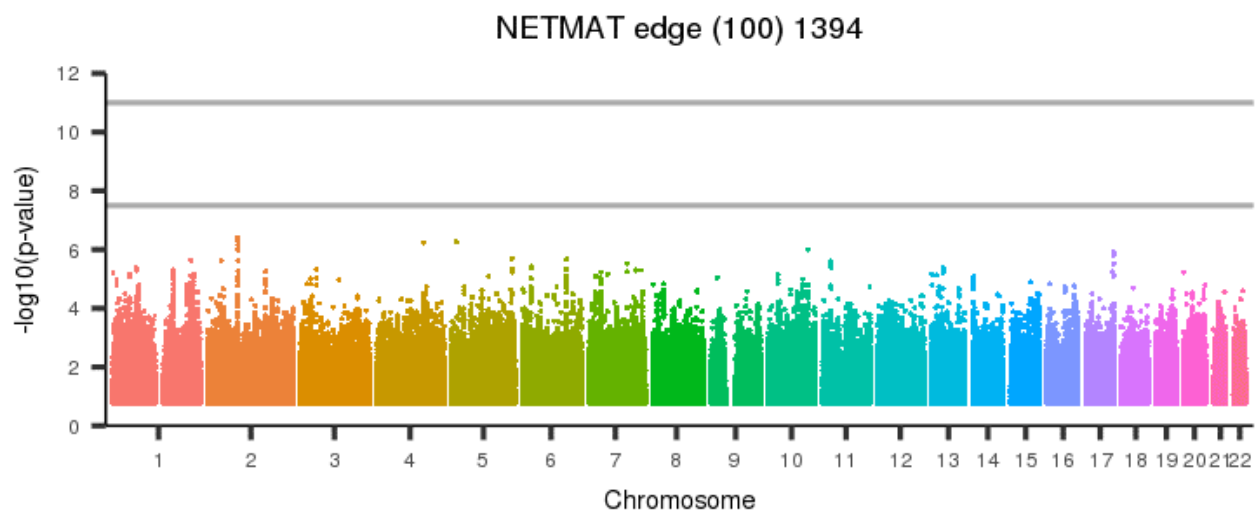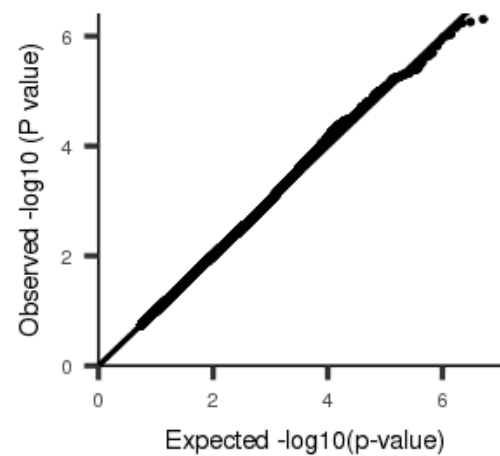

[back to list of plots](#)

Figure 2551: NETMAT edge (100) 1395

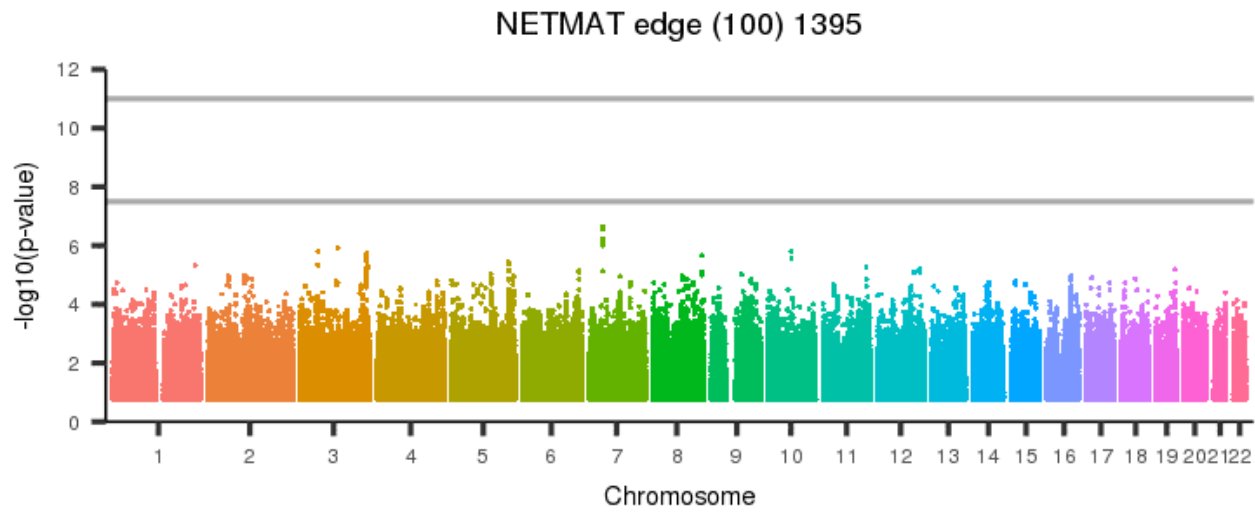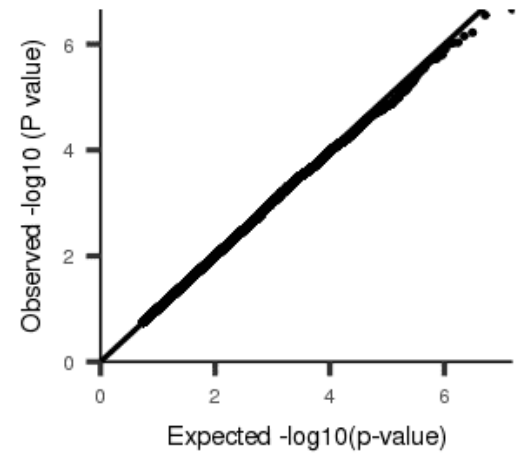

[back to list of plots](#)

Figure 2552: NETMAT edge (100) 1396

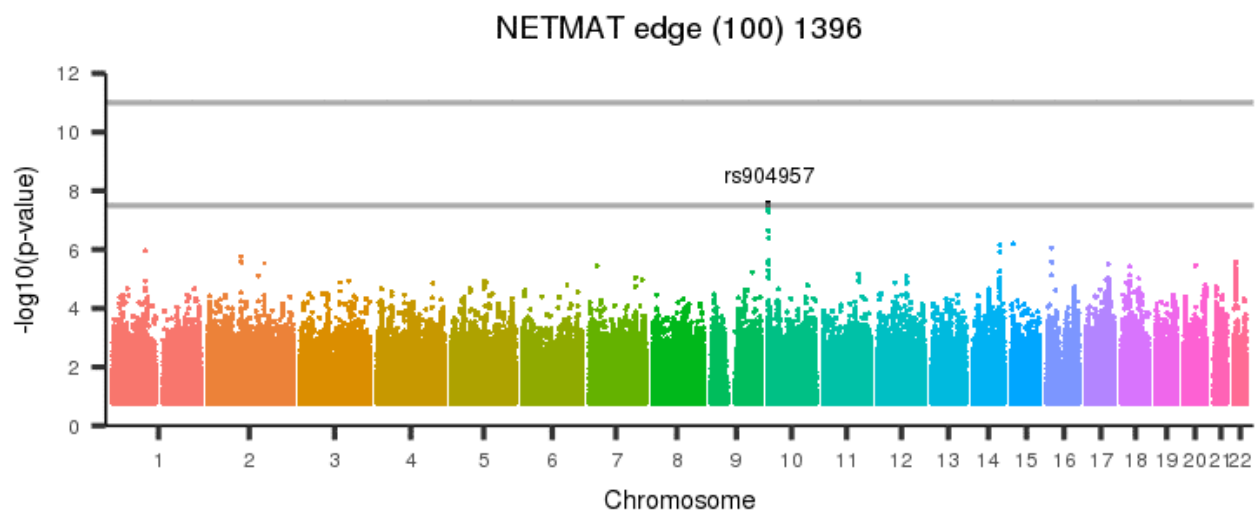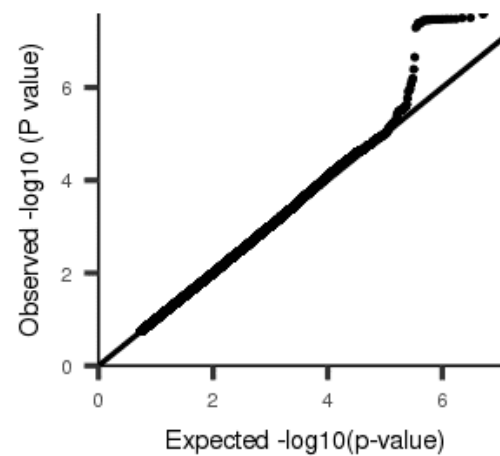

[back to list of plots](#)

Figure 2553: NETMAT edge (100) 1397

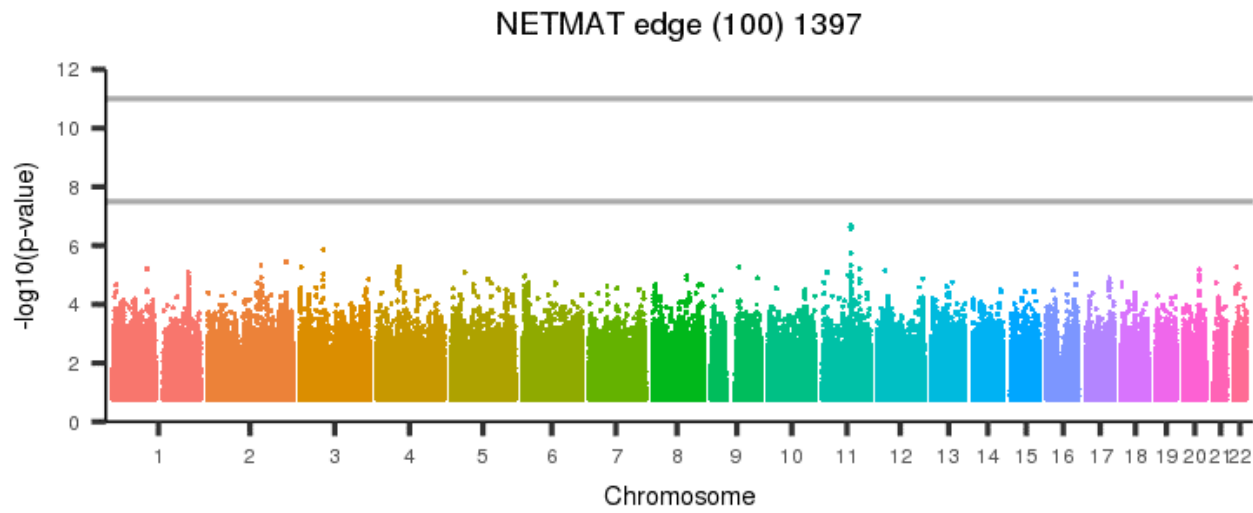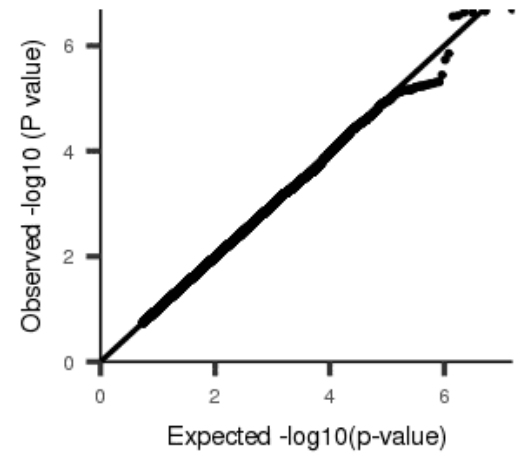

[back to list of plots](#)

Figure 2554: NETMAT edge (100) 1398

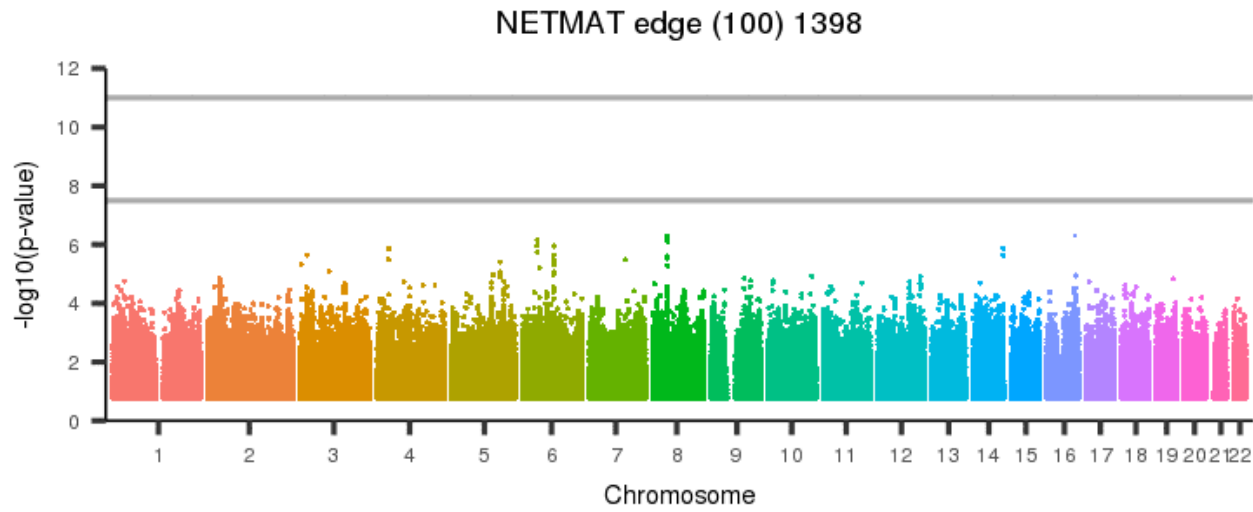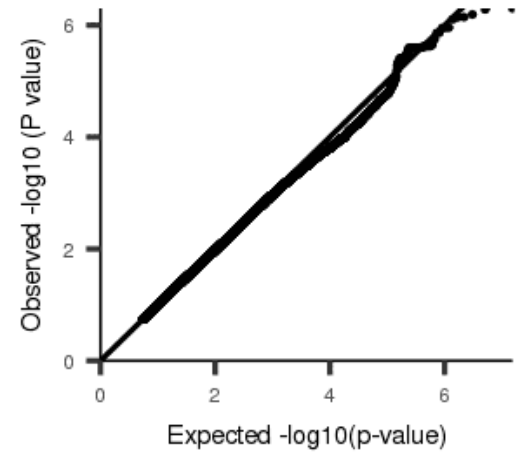

[back to list of plots](#)

Figure 2555: NETMAT edge (100) 1399

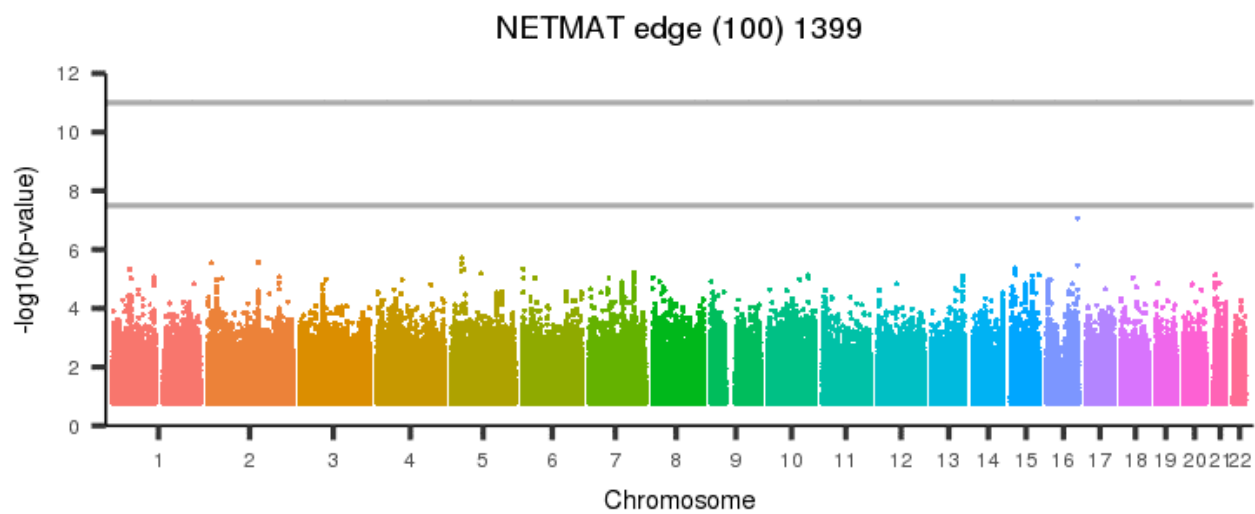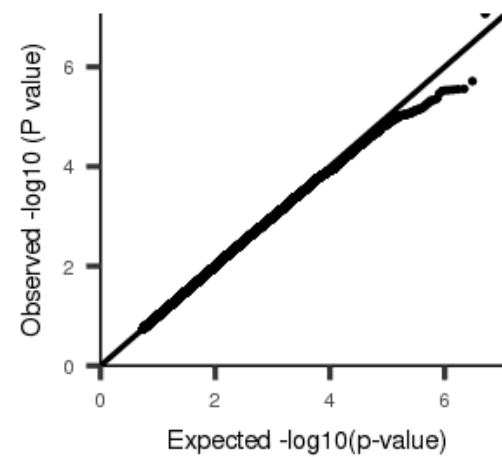

[back to list of plots](#)

Figure 2556: NETMAT edge (100) 1400

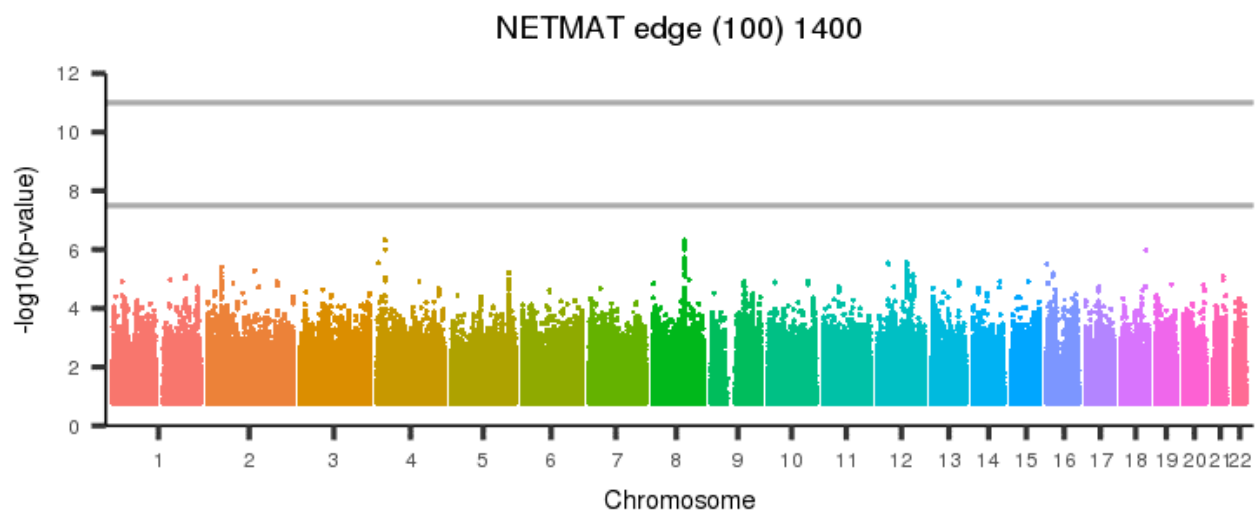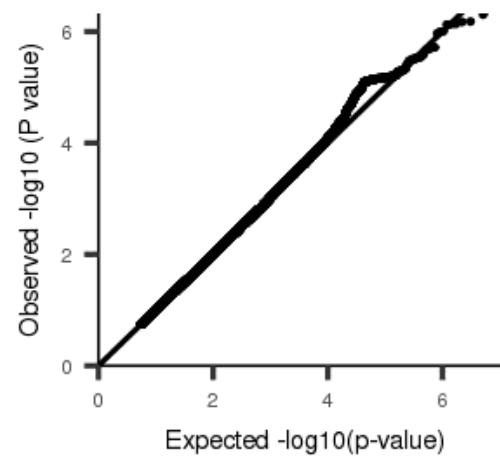

[back to list of plots](#)

Figure 2557: NETMAT edge (100) 1401

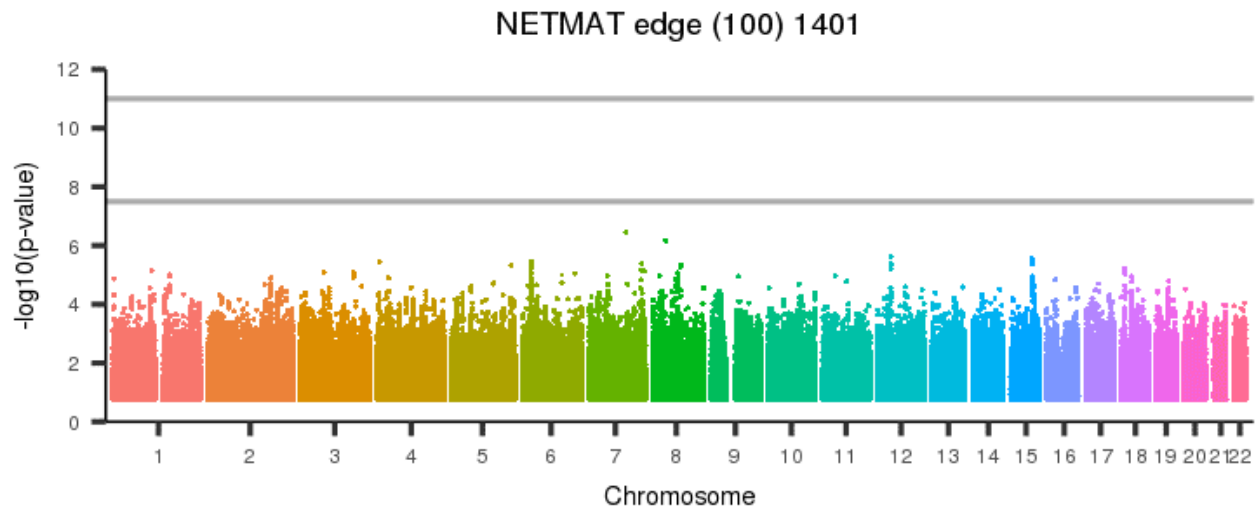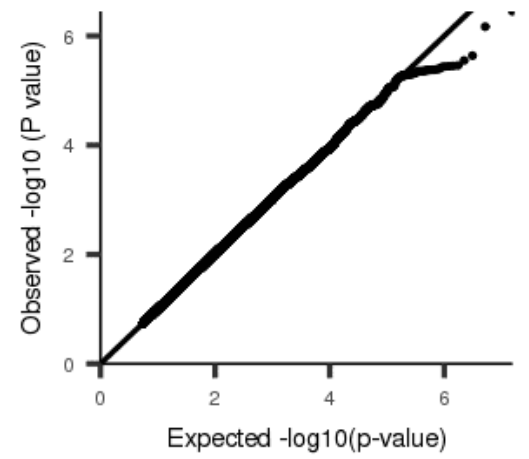

[back to list of plots](#)



Figure 2558: NETMAT edge (100) 1402

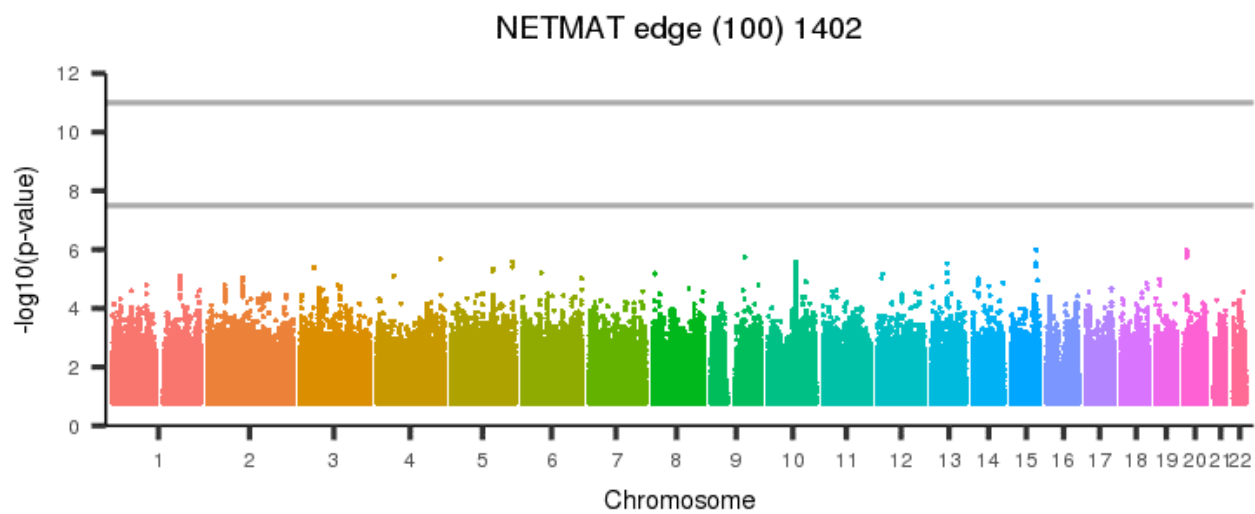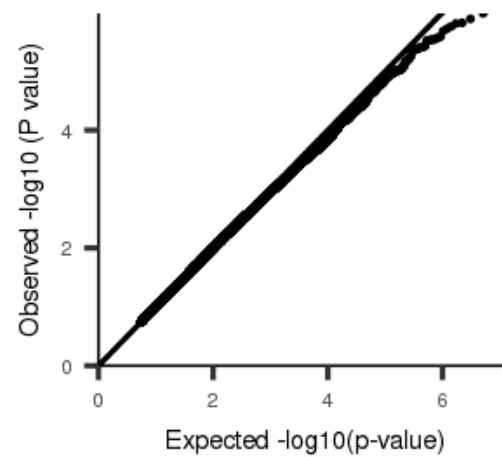

[back to list of plots](#)

Figure 2559: NETMAT edge (100) 1403

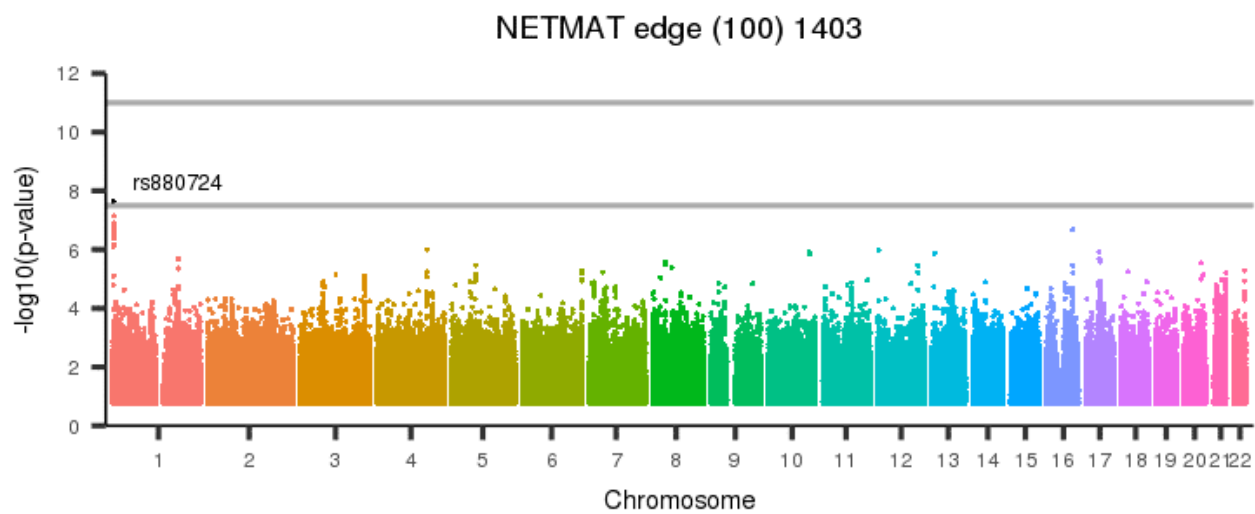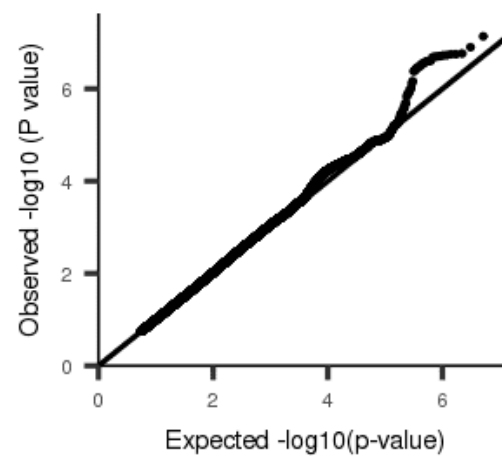

[back to list of plots](#)

Figure 2560: NETMAT edge (100) 1404

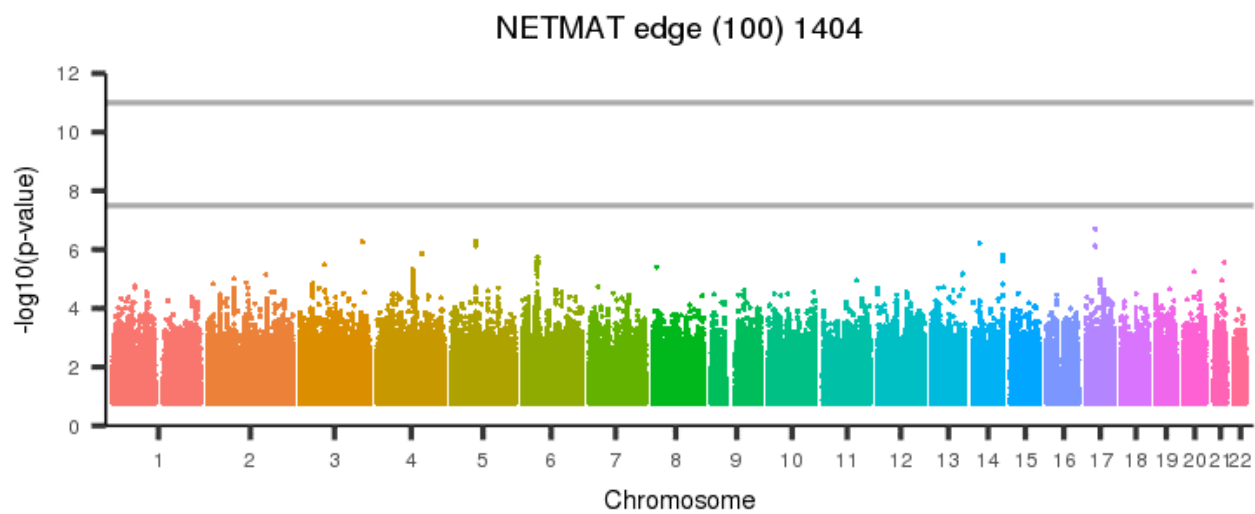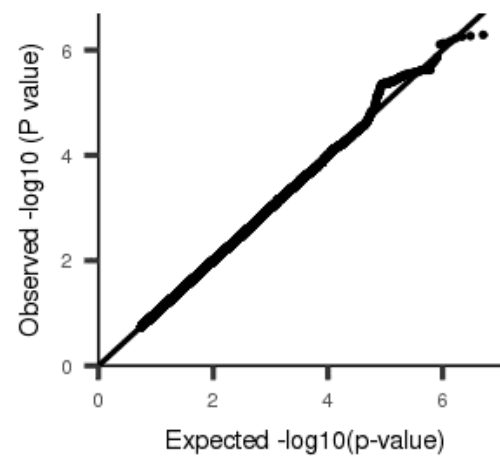

[back to list of plots](#)

Figure 2561: NETMAT edge (100) 1405

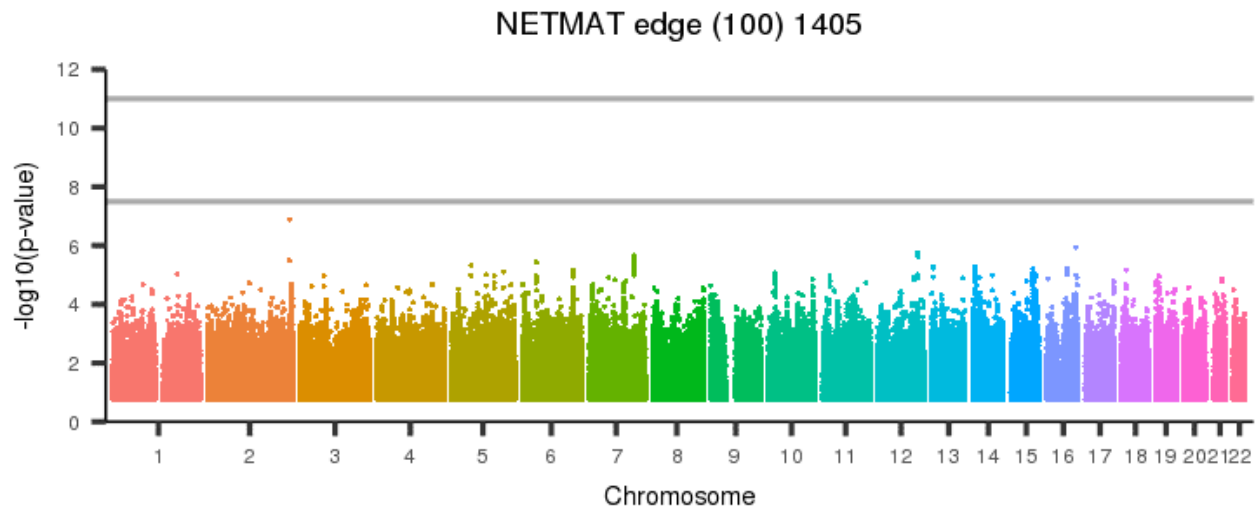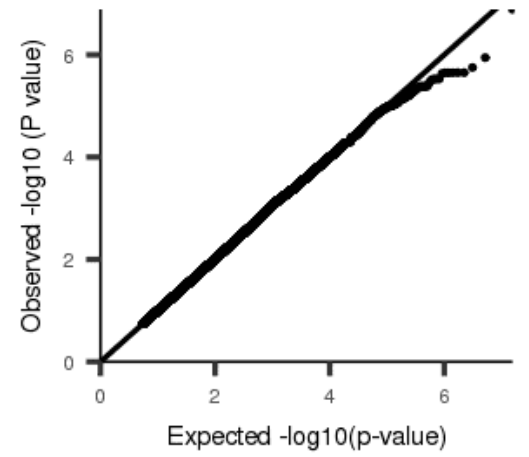

[back to list of plots](#)

Figure 2562: NETMAT edge (100) 1406

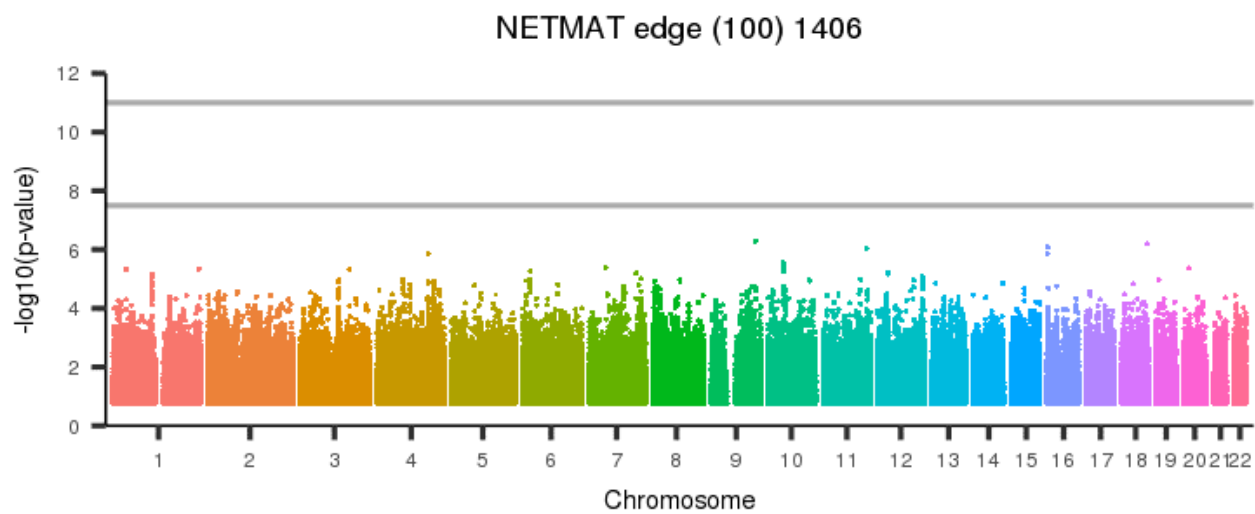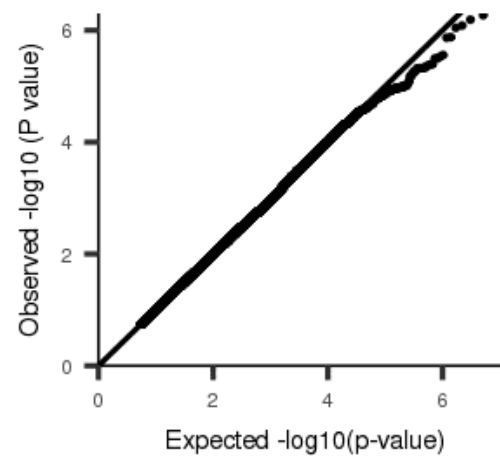

[back to list of plots](#)

Figure 2563: NETMAT edge (100) 1407

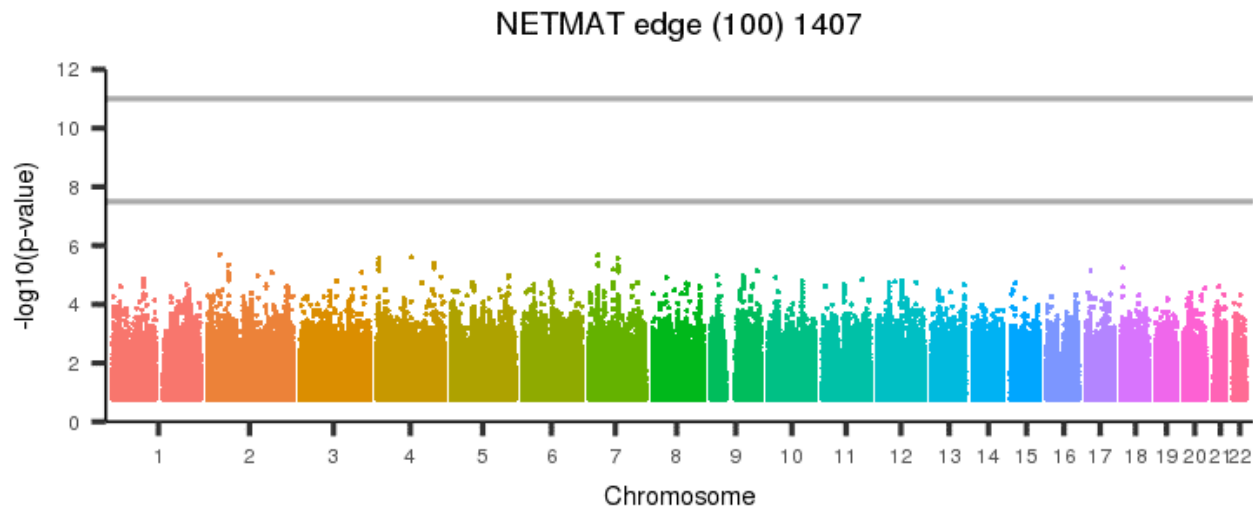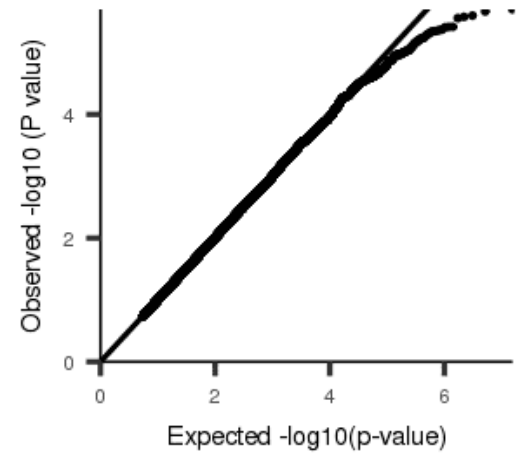

[back to list of plots](#)

Figure 2564: NETMAT edge (100) 1408

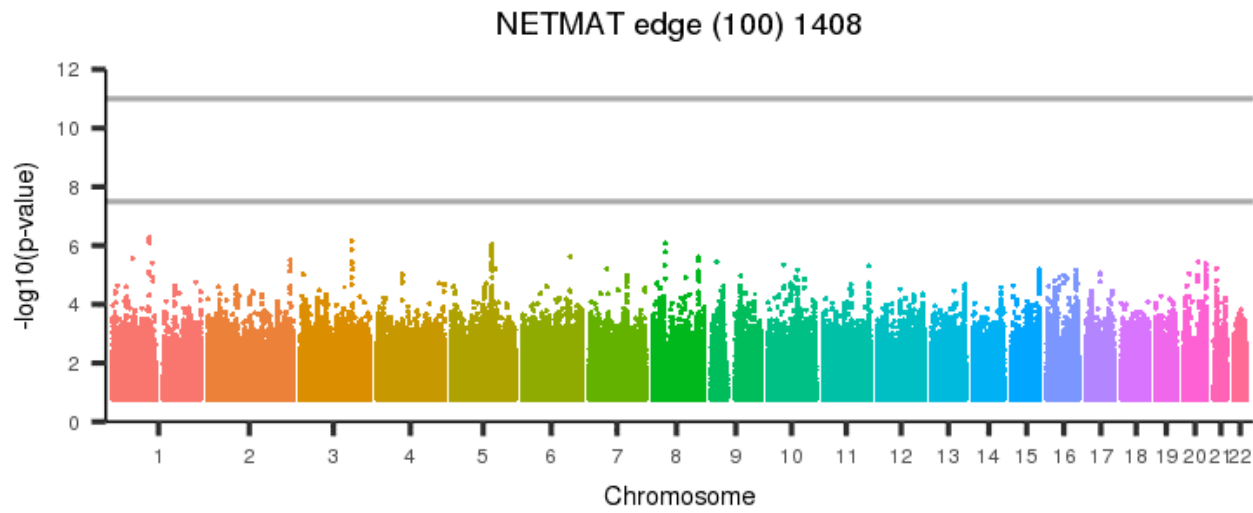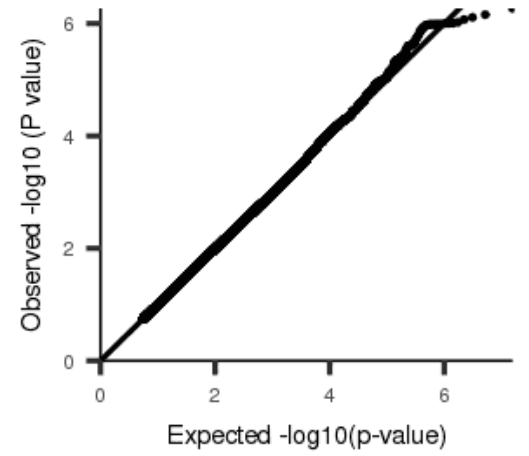

[back to list of plots](#)

Figure 2565: NETMAT edge (100) 1409

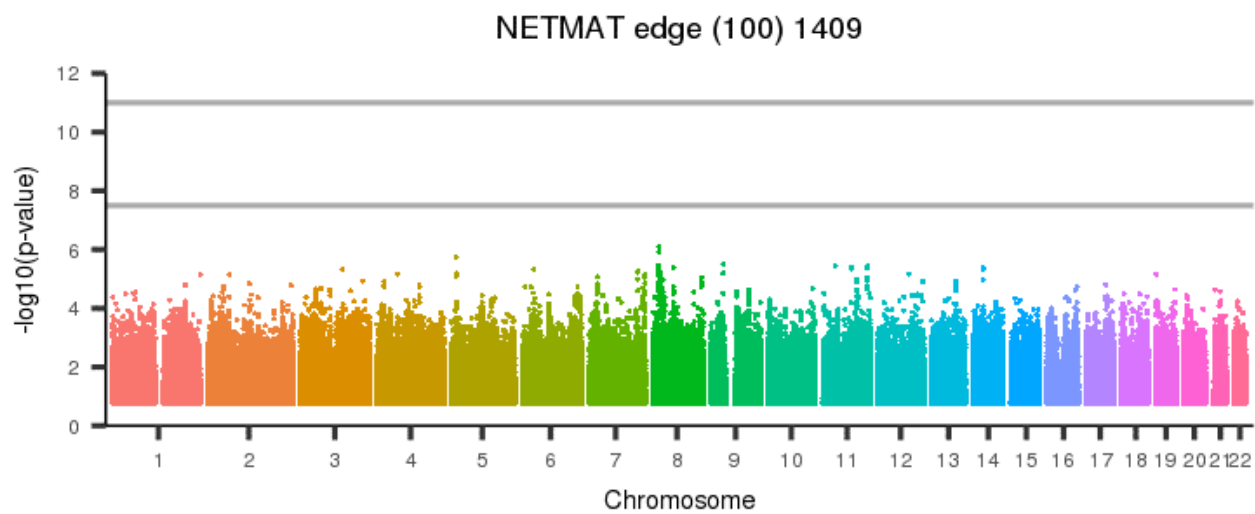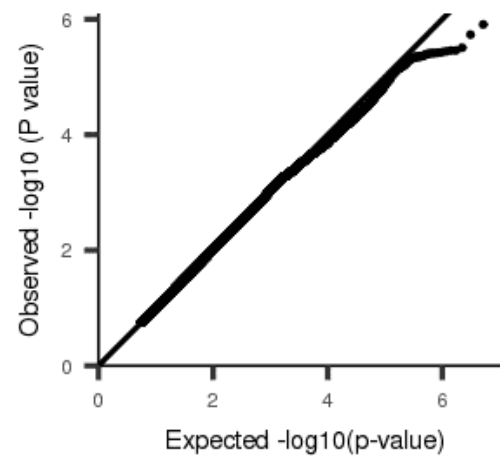

[back to list of plots](#)



Figure 2566: NETMAT edge (100) 1410

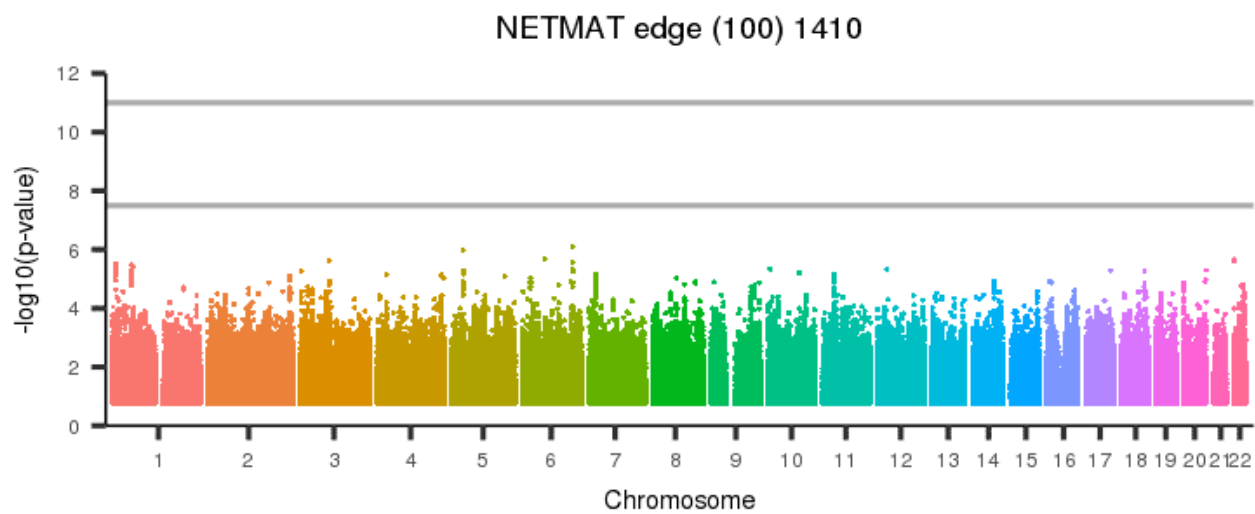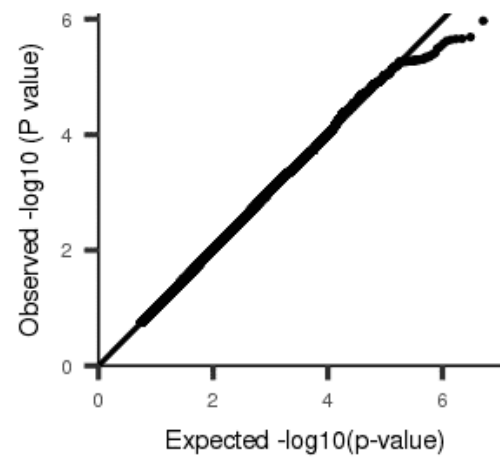

[back to list of plots](#)

Figure 2567: NETMAT edge (100) 1411

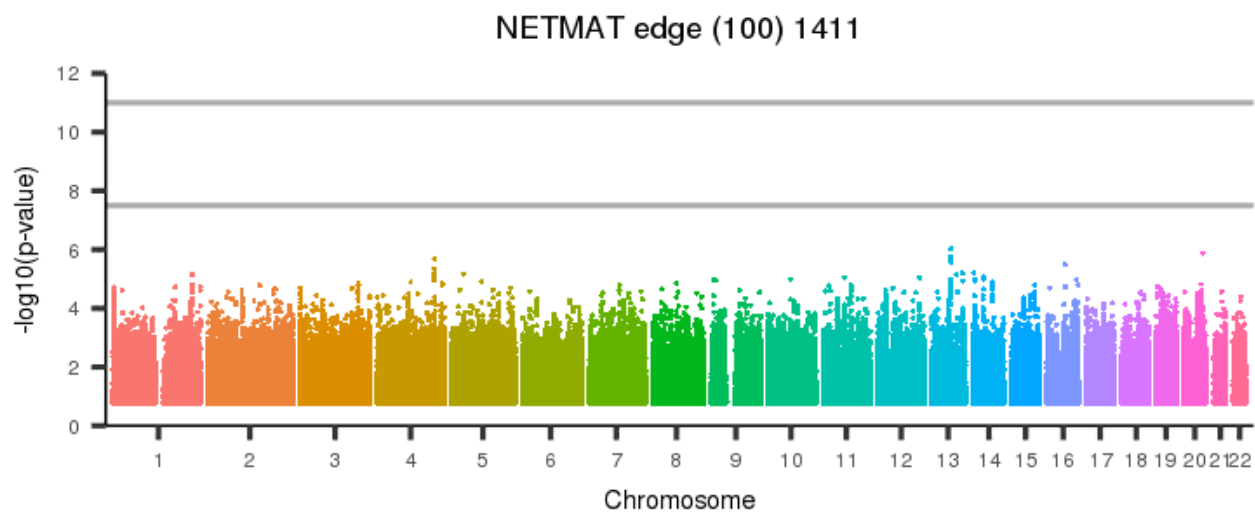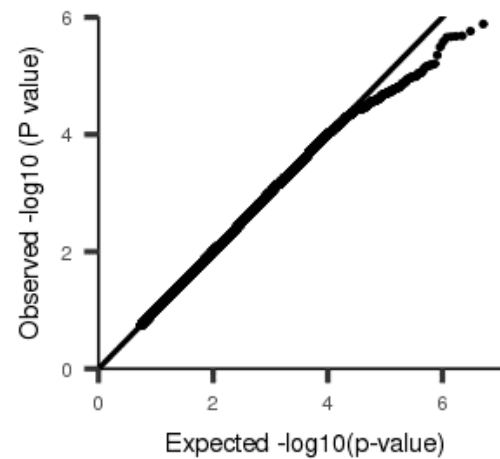

[back to list of plots](#)

Figure 2568: NETMAT edge (100) 1412

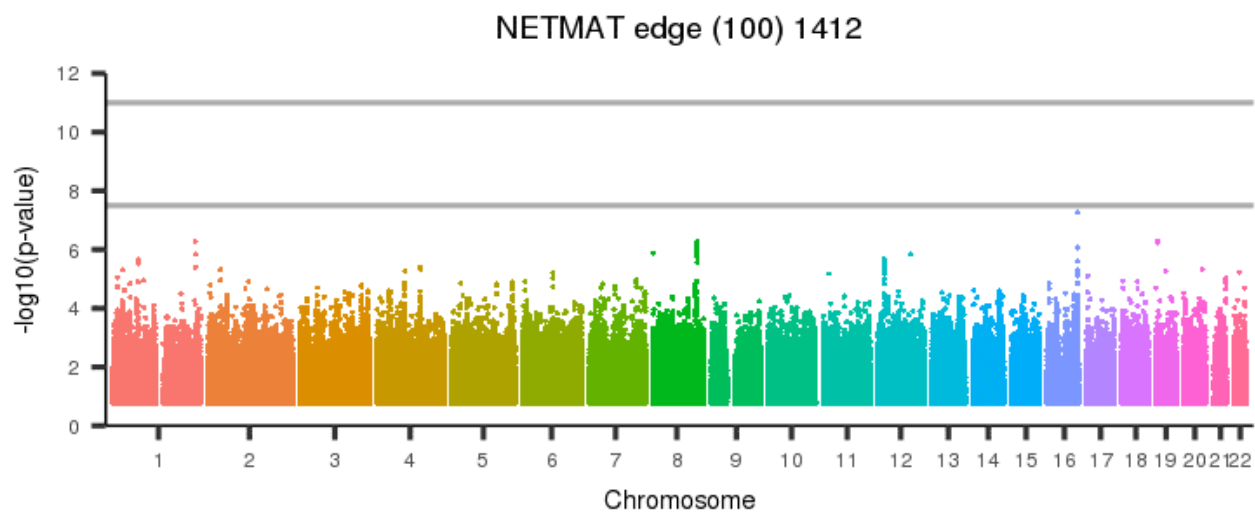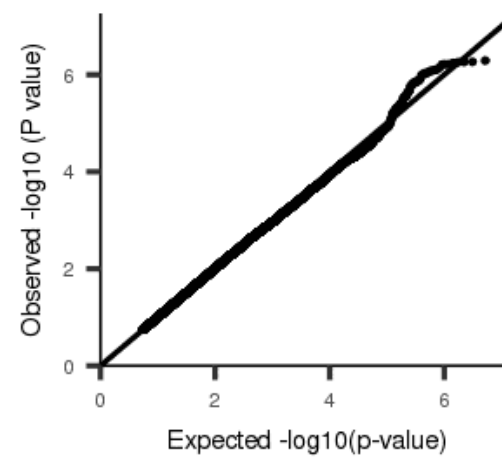

[back to list of plots](#)

Figure 2569: NETMAT edge (100) 1413

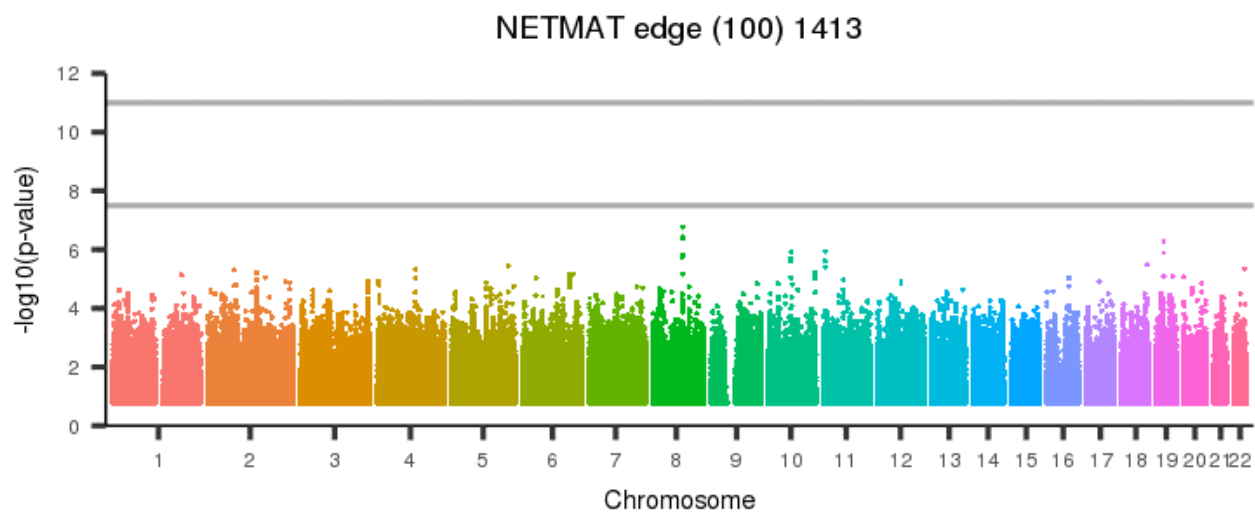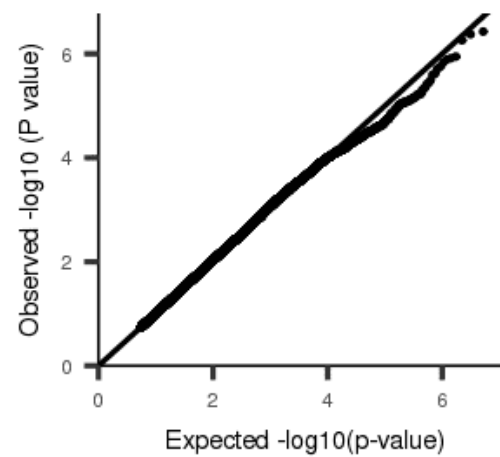

[back to list of plots](#)

Figure 2570: NETMAT edge (100) 1414

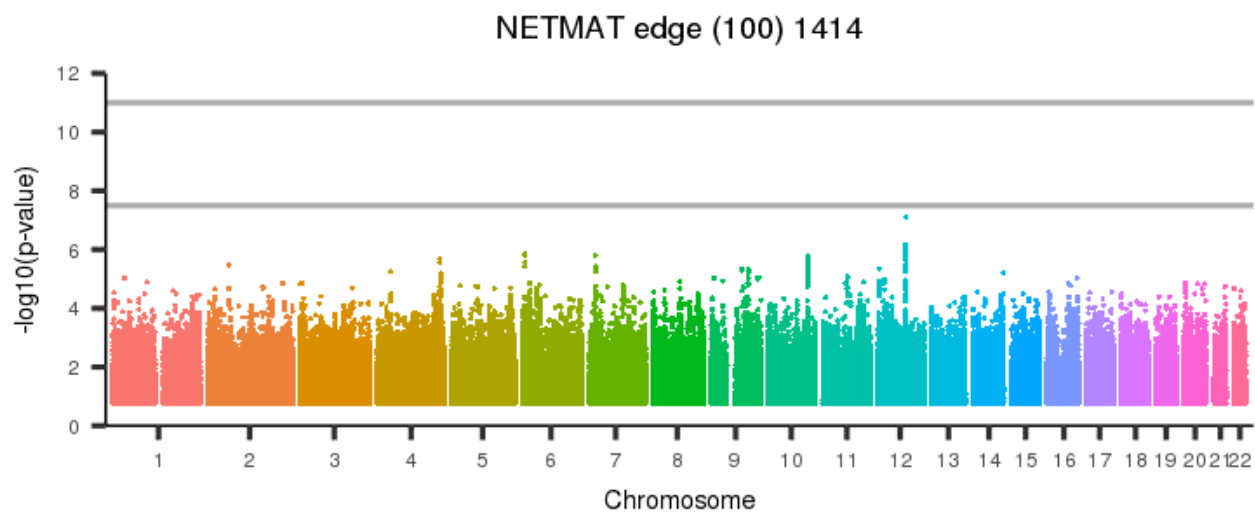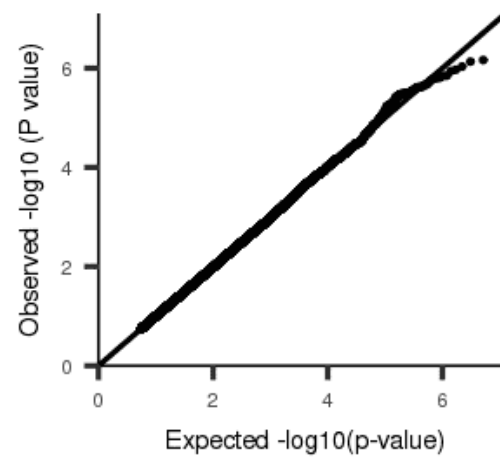

[back to list of plots](#)

Figure 2571: NETMAT edge (100) 1415

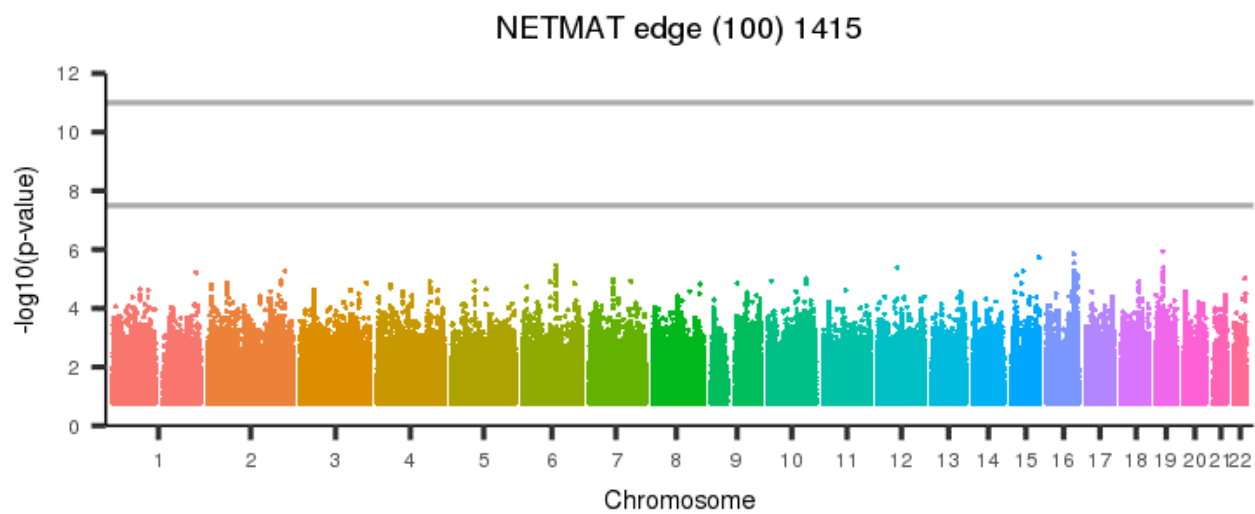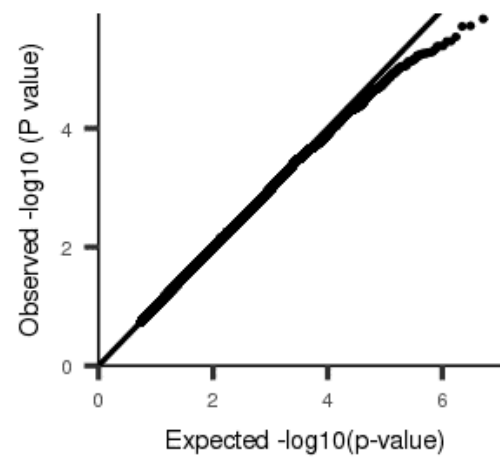

[back to list of plots](#)

Figure 2572: NETMAT edge (100) 1416

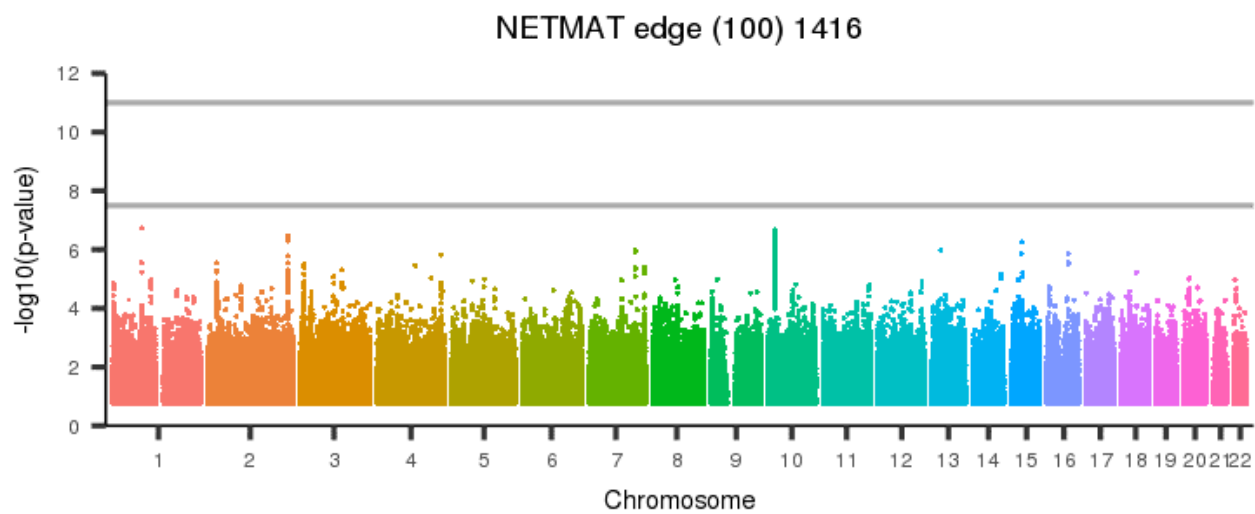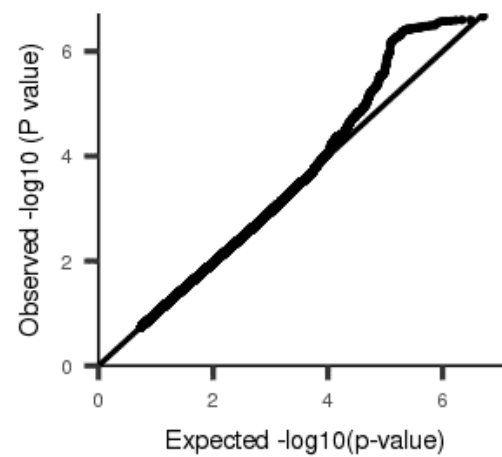

[back to list of plots](#)

Figure 2573: NETMAT edge (100) 1417

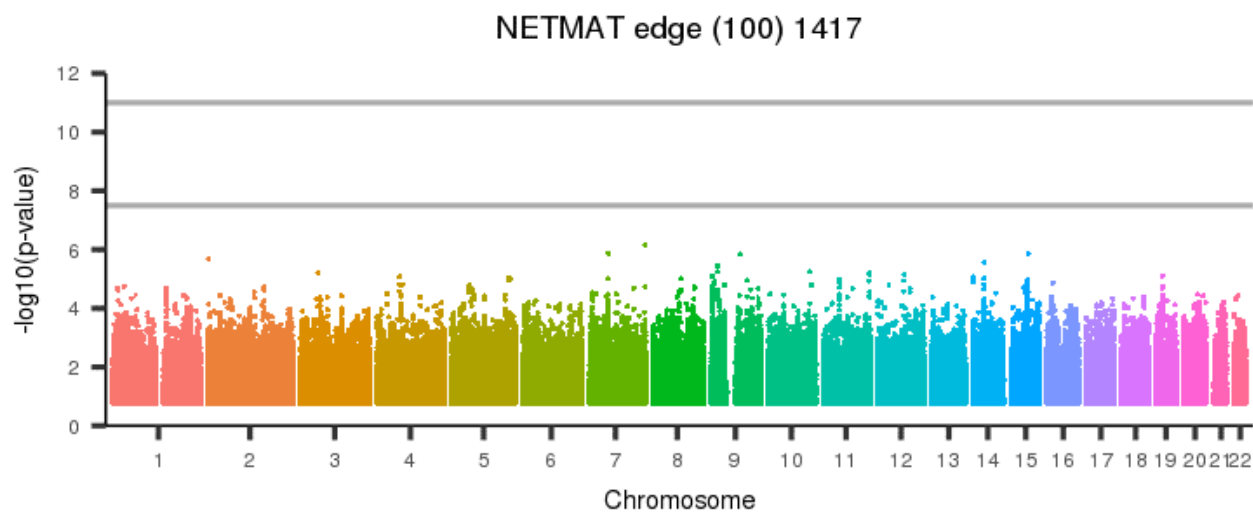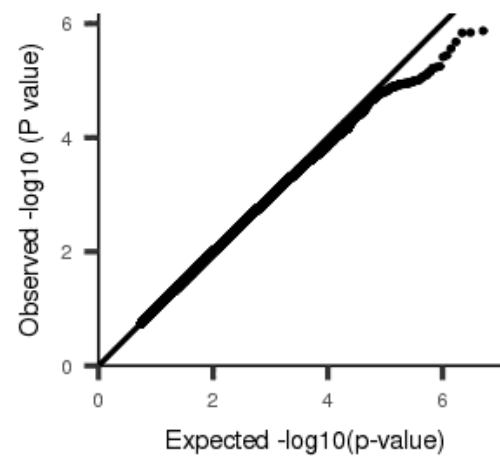

[back to list of plots](#)



Figure 2574: NETMAT edge (100) 1418

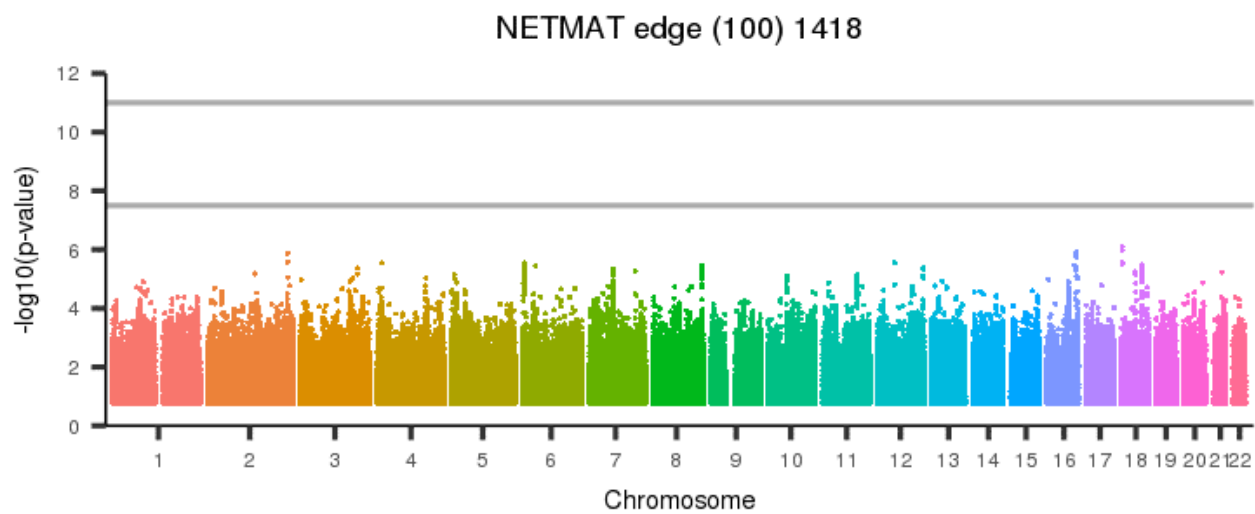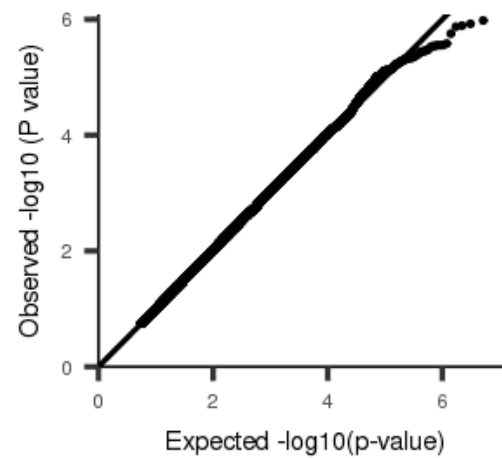

[back to list of plots](#)

Figure 2575: NETMAT edge (100) 1419

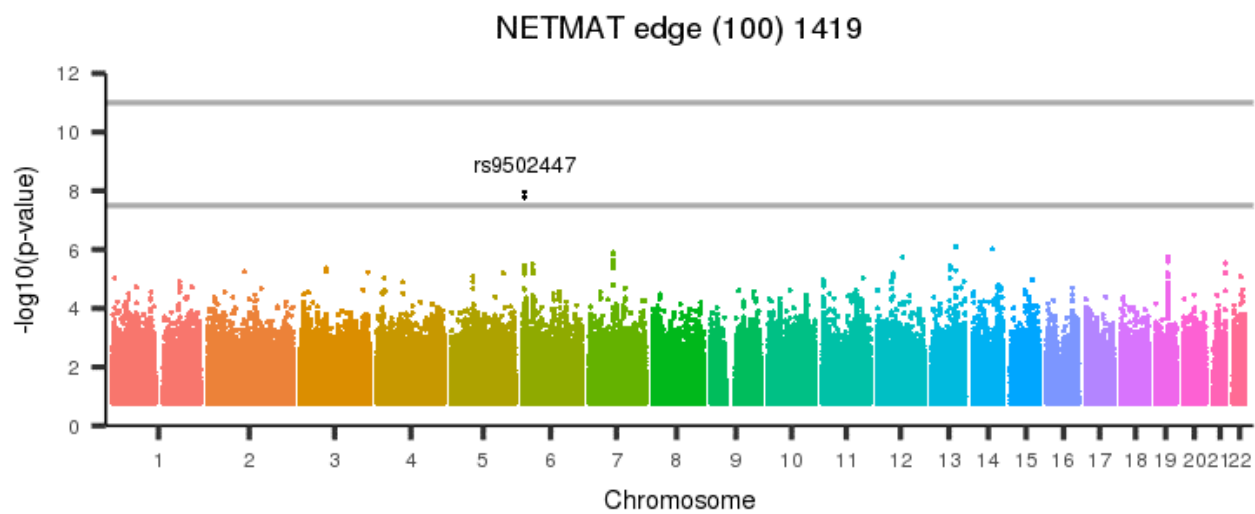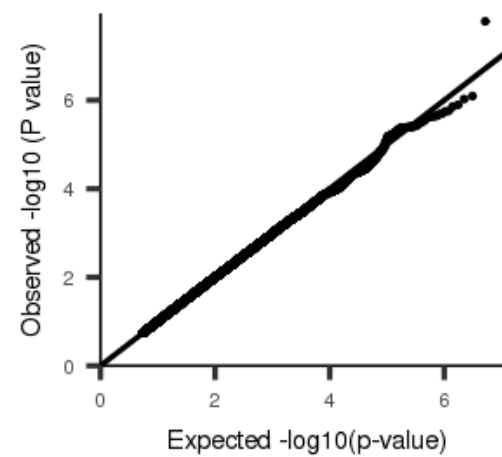

[back to list of plots](#)

Figure 2576: NETMAT edge (100) 1420

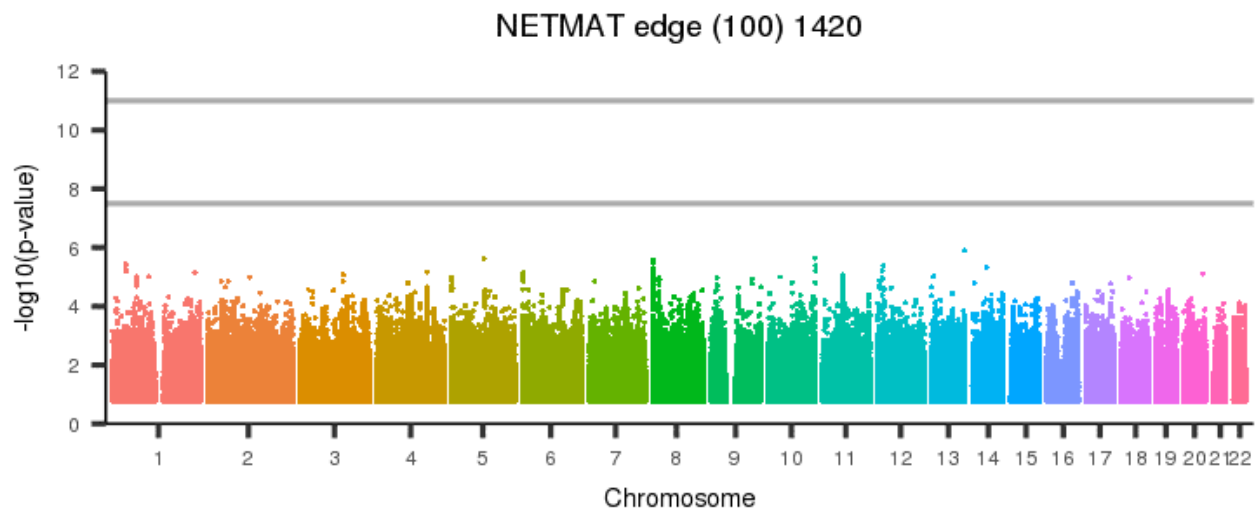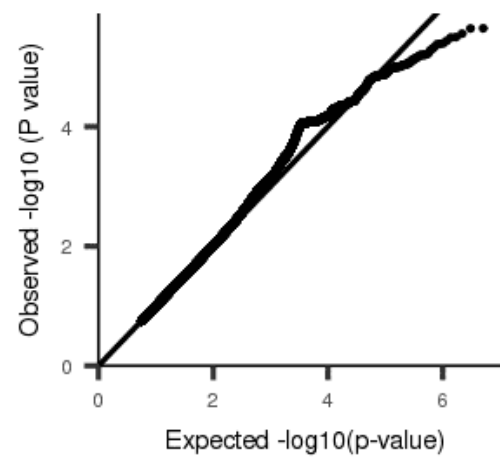

[back to list of plots](#)

Figure 2577: NETMAT edge (100) 1421

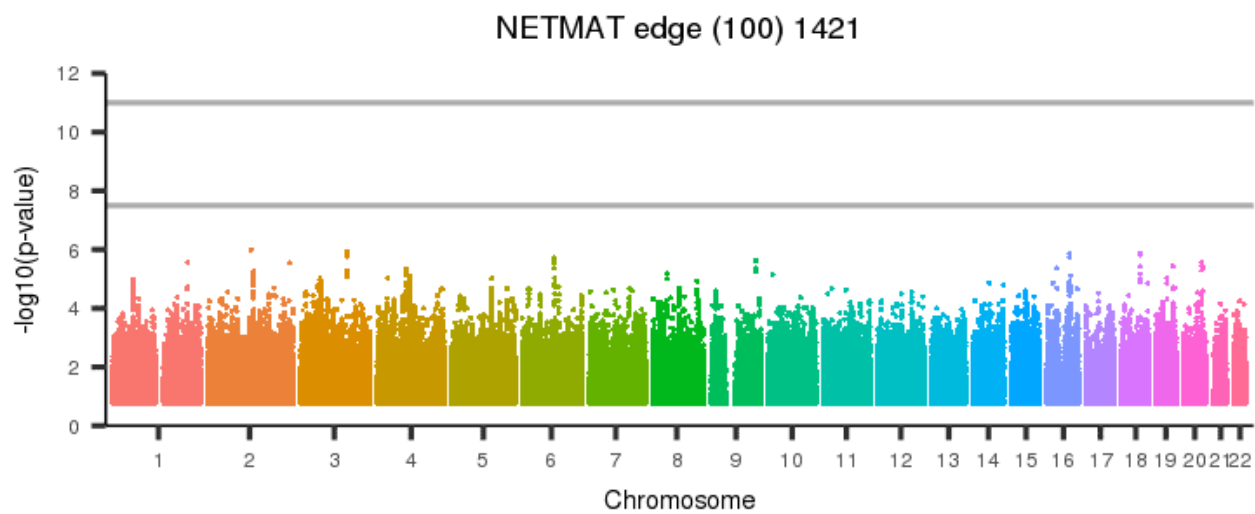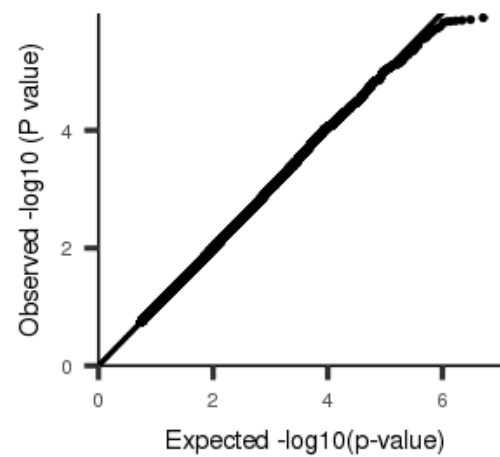

[back to list of plots](#)

Figure 2578: NETMAT edge (100) 1422

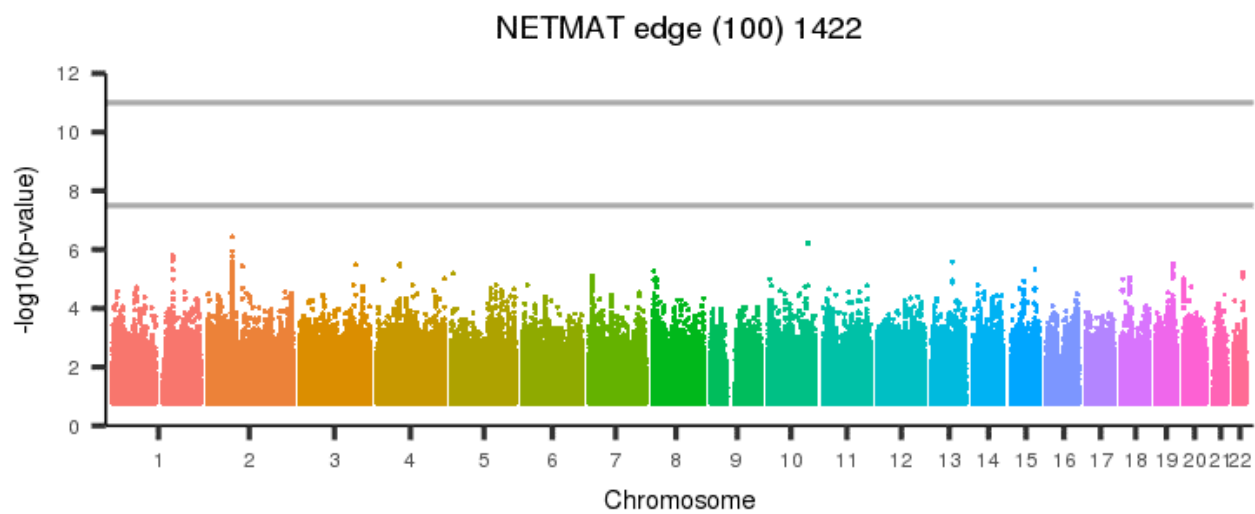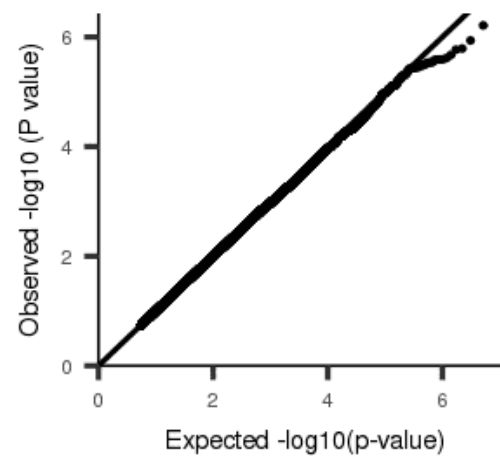

[back to list of plots](#)

Figure 2579: NETMAT edge (100) 1423

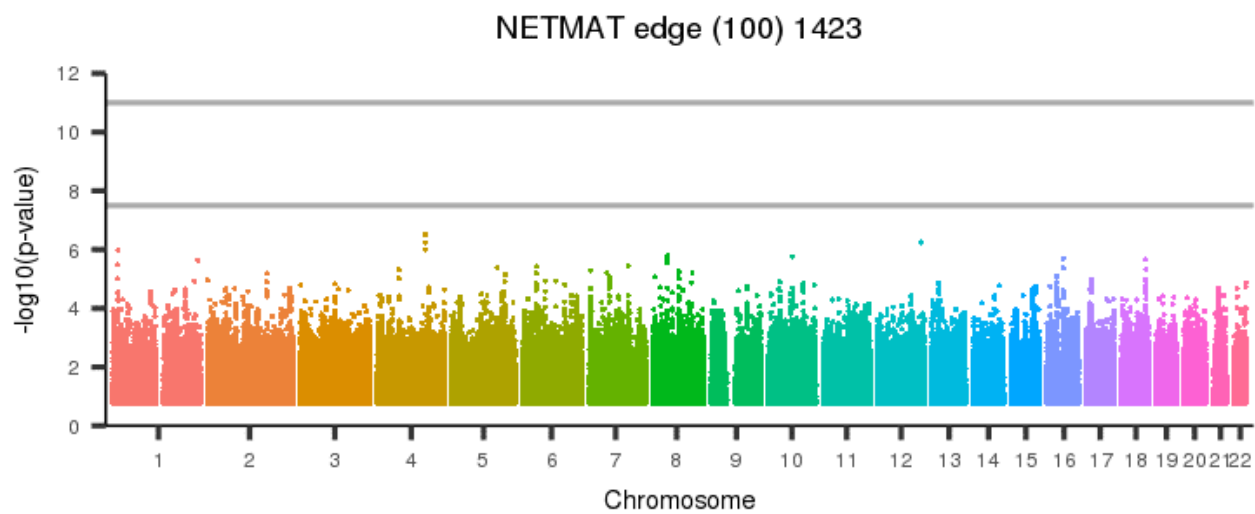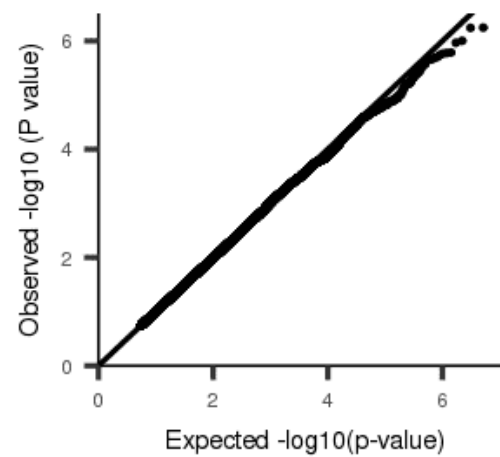

[back to list of plots](#)

Figure 2580: NETMAT edge (100) 1424

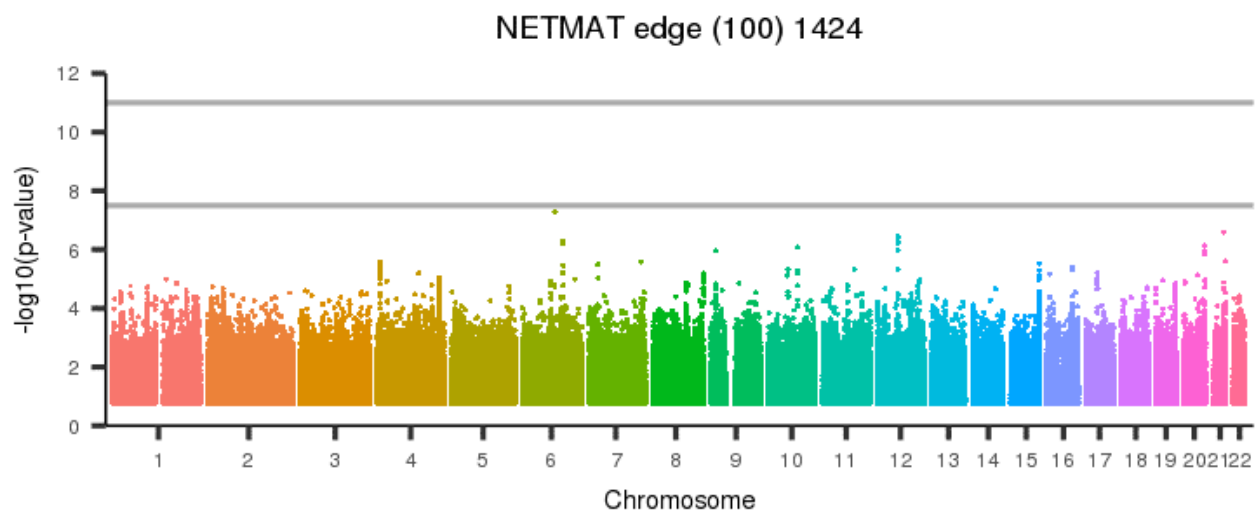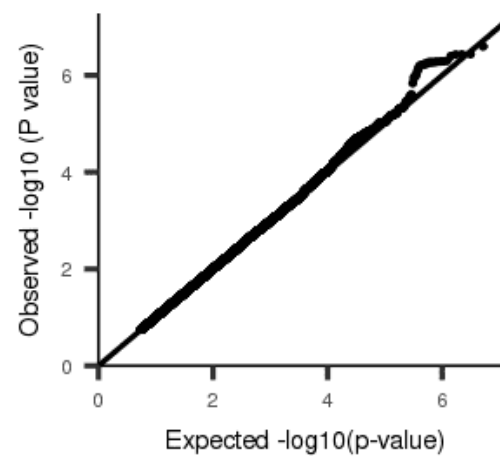

[back to list of plots](#)

Figure 2581: NETMAT edge (100) 1425

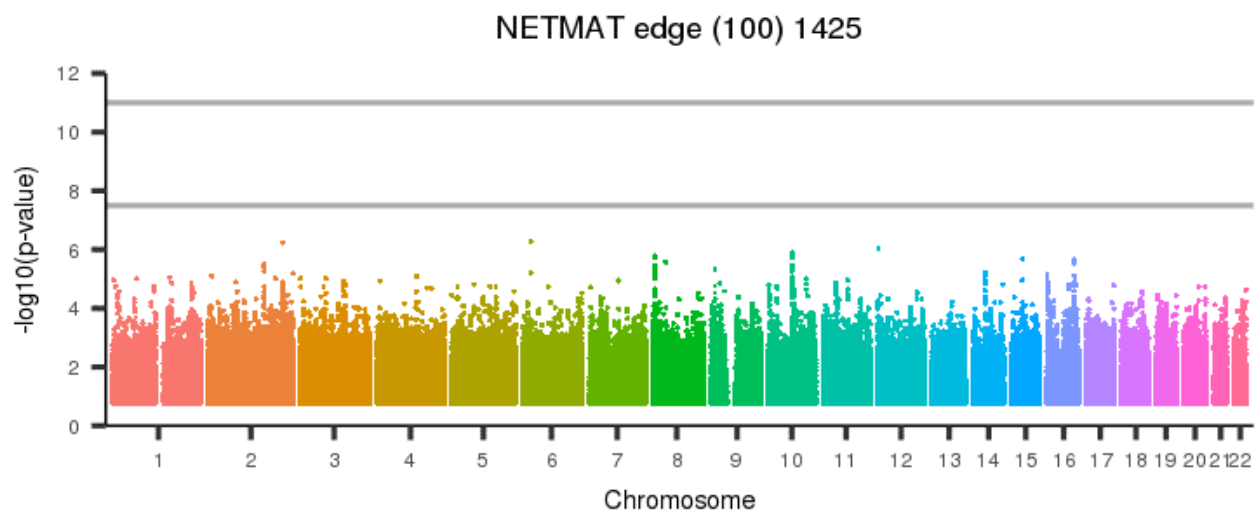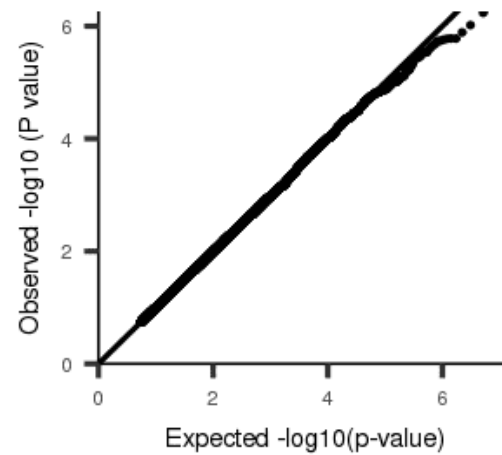

[back to list of plots](#)



Figure 2582: NETMAT edge (100) 1426

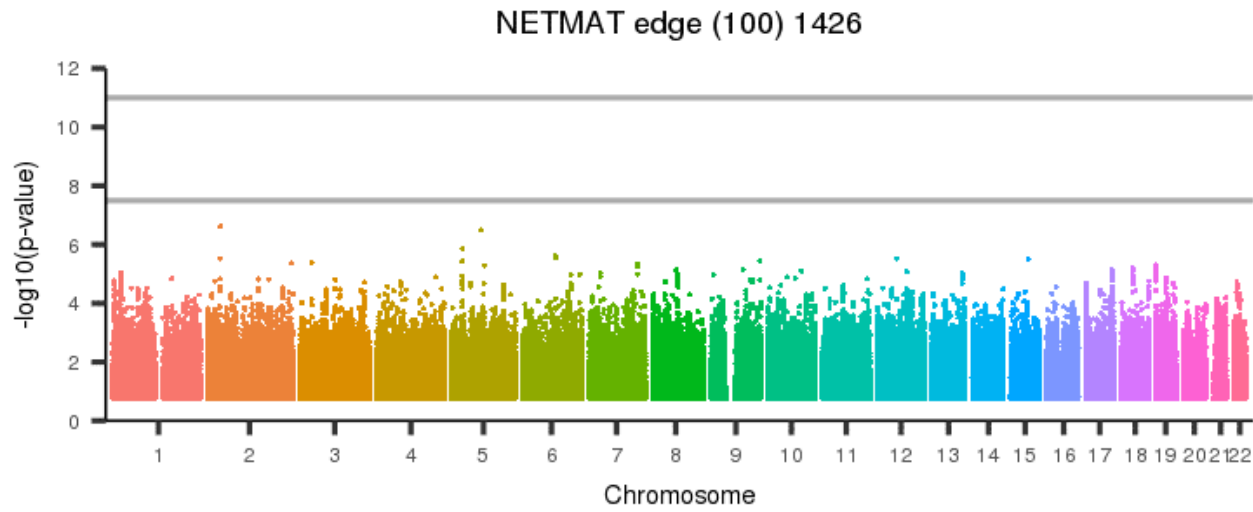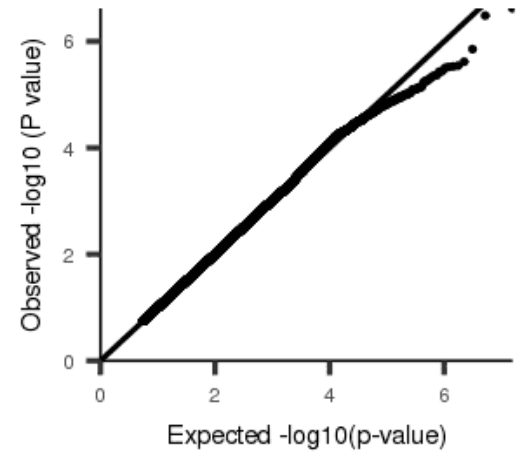

[back to list of plots](#)

Figure 2583: NETMAT edge (100) 1427

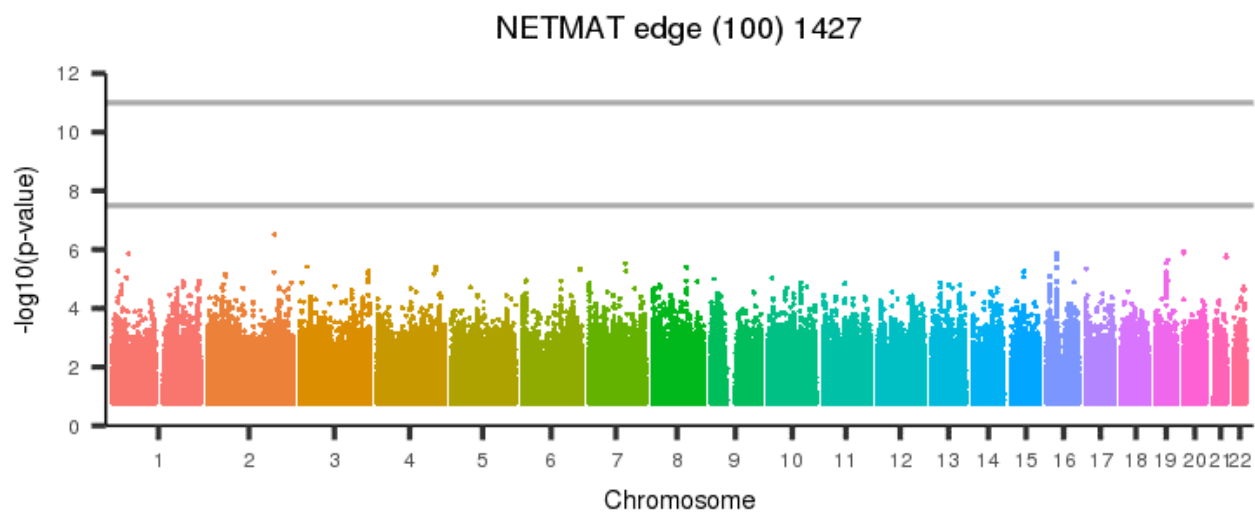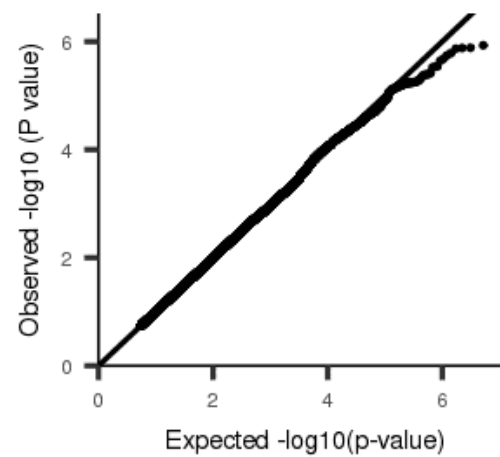

[back to list of plots](#)

Figure 2584: NETMAT edge (100) 1428

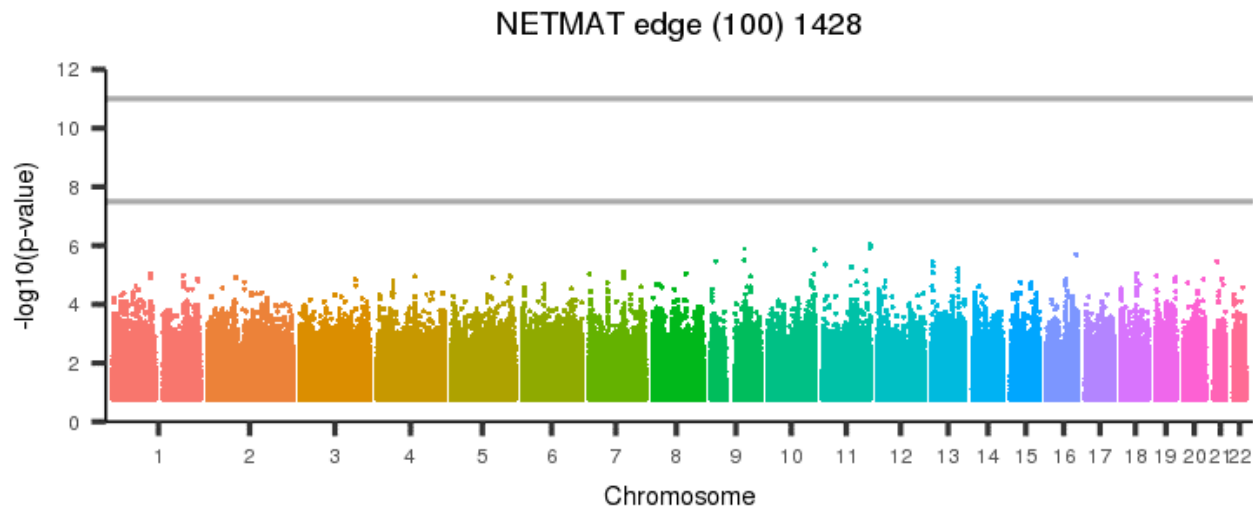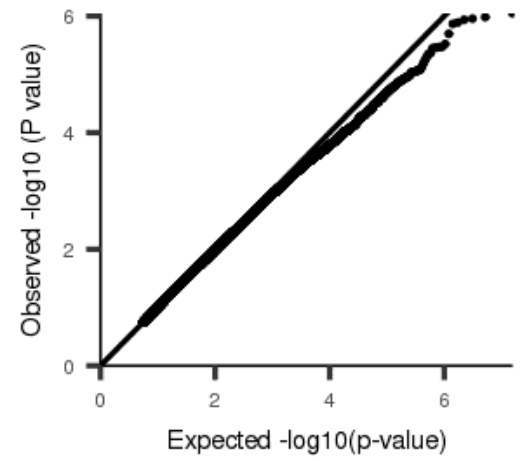

[back to list of plots](#)

Figure 2585: NETMAT edge (100) 1429

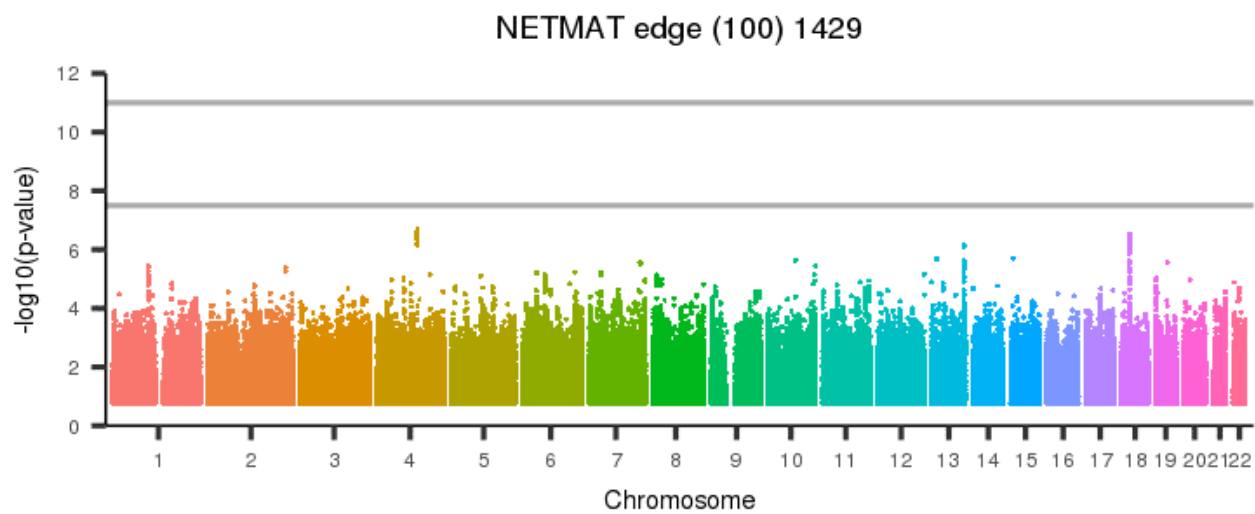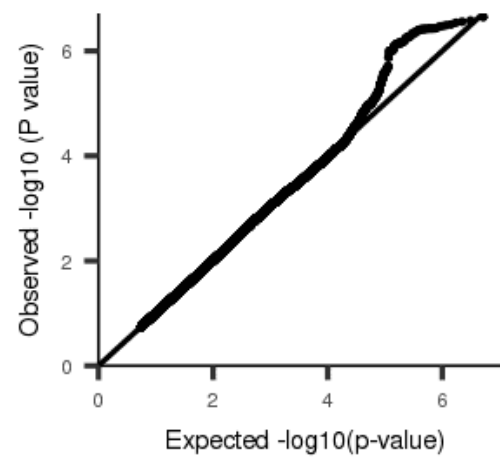

[back to list of plots](#)

Figure 2586: NETMAT edge (100) 1430

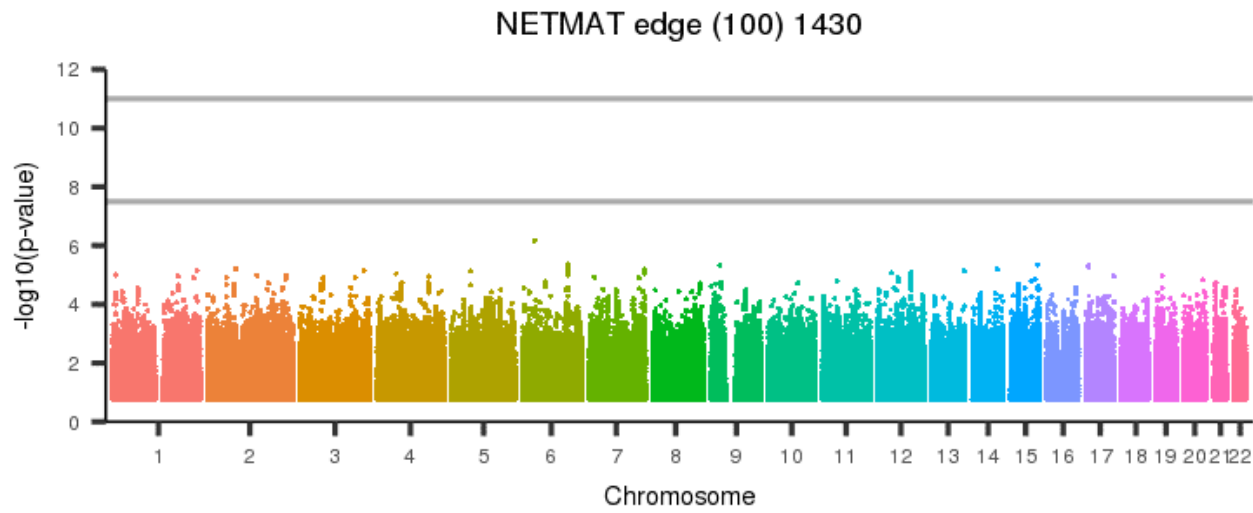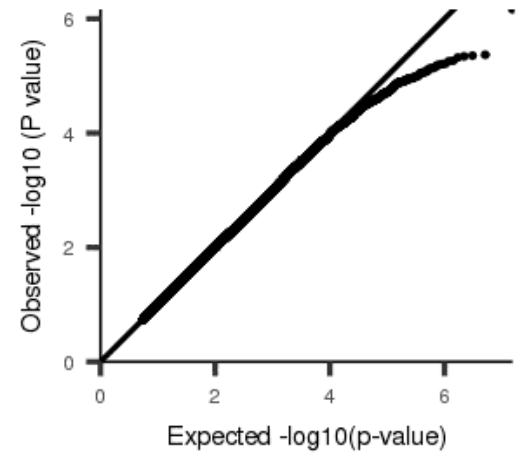

[back to list of plots](#)

Figure 2587: NETMAT edge (100) 1431

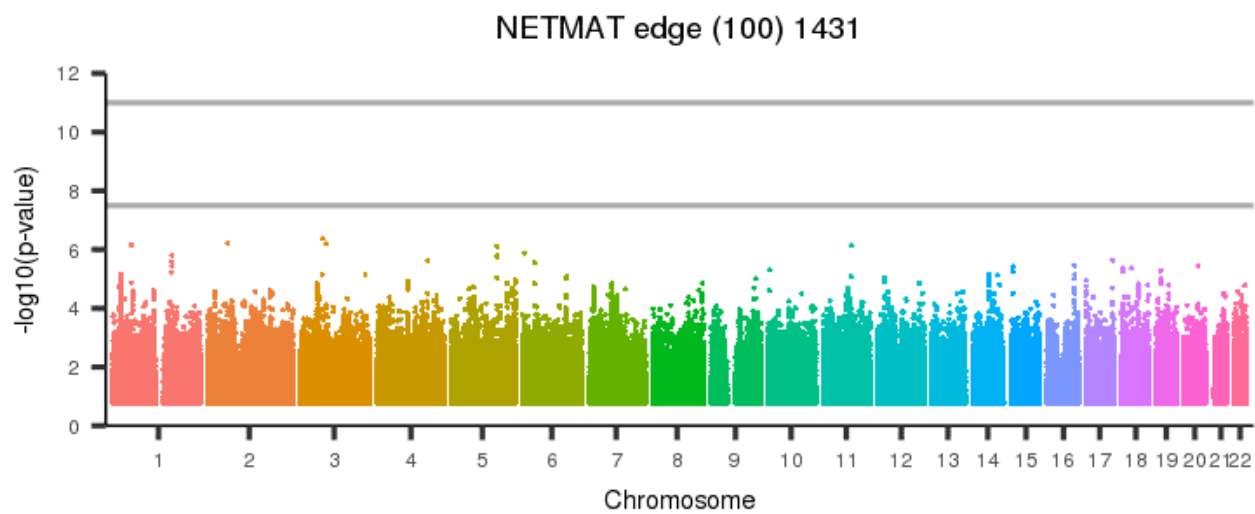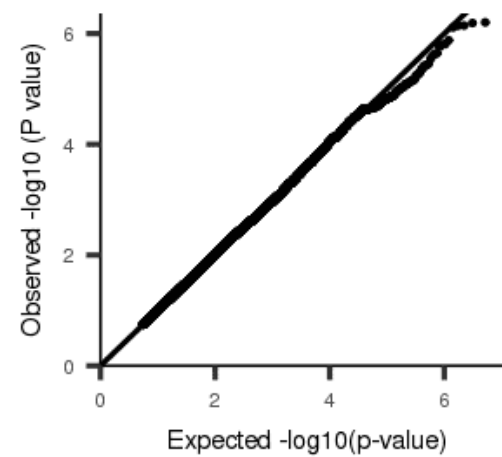

[back to list of plots](#)

Figure 2588: NETMAT edge (100) 1432

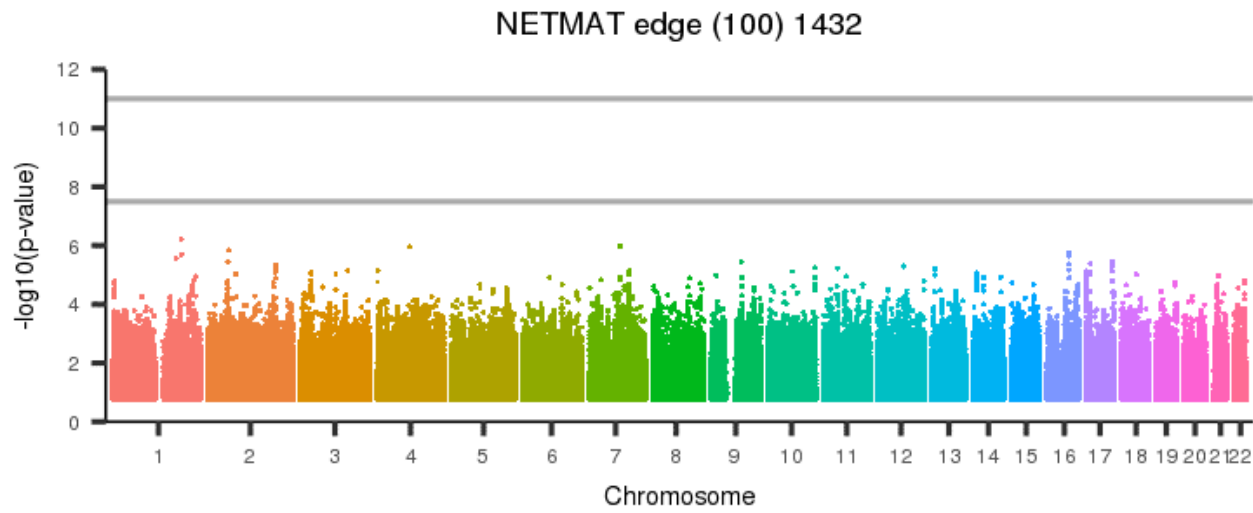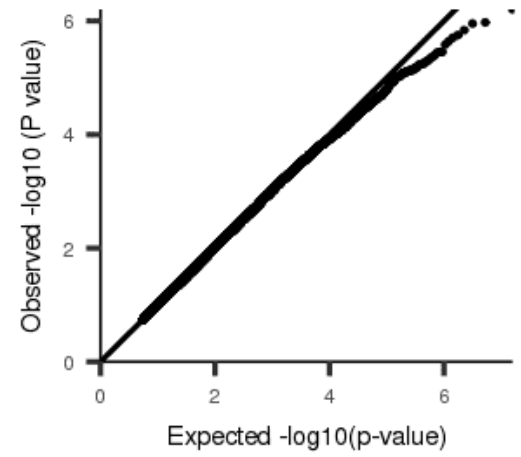

[back to list of plots](#)

Figure 2589: NETMAT edge (100) 1433

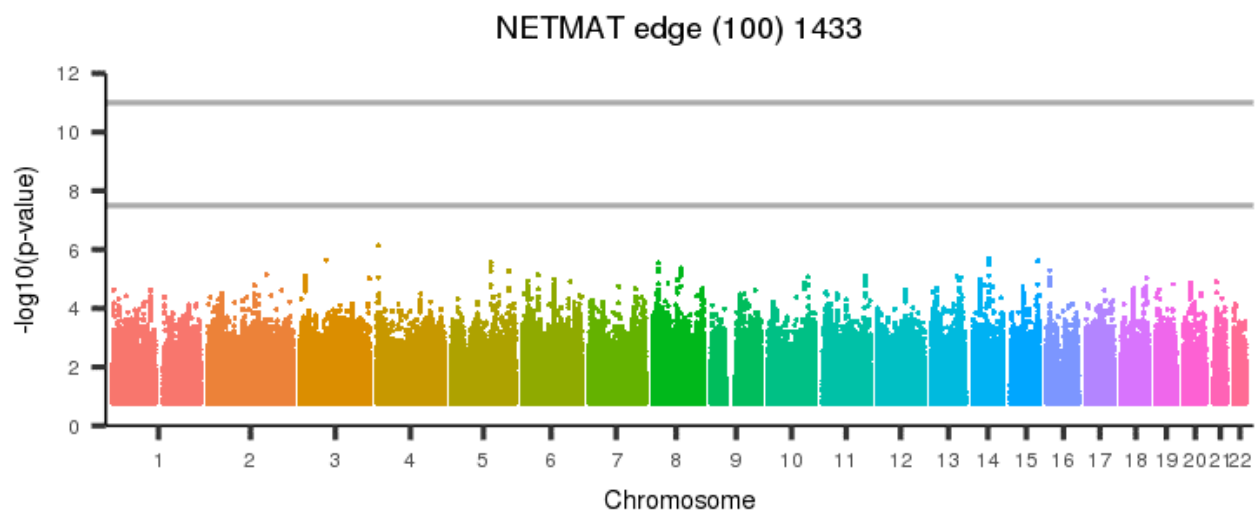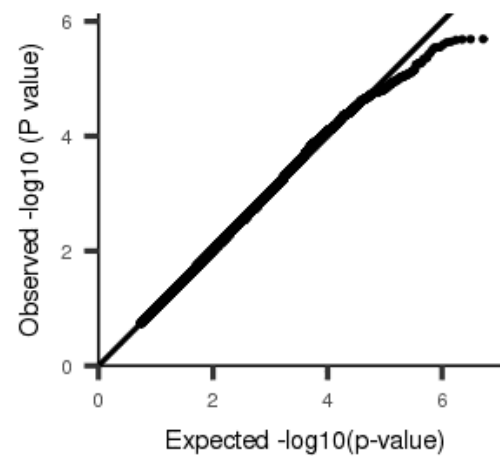

[back to list of plots](#)



Figure 2590: NETMAT edge (100) 1434

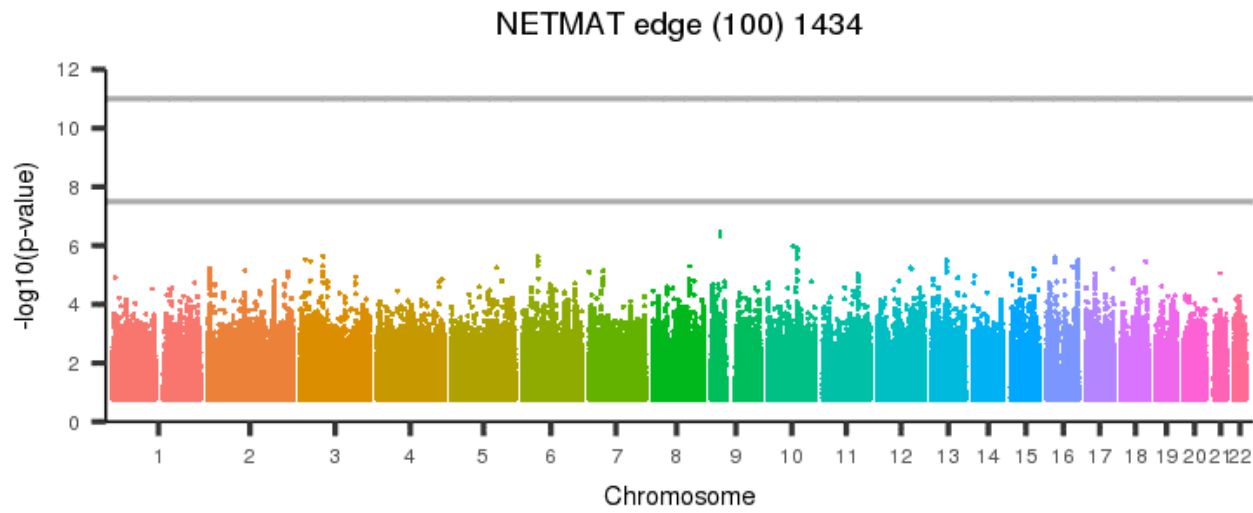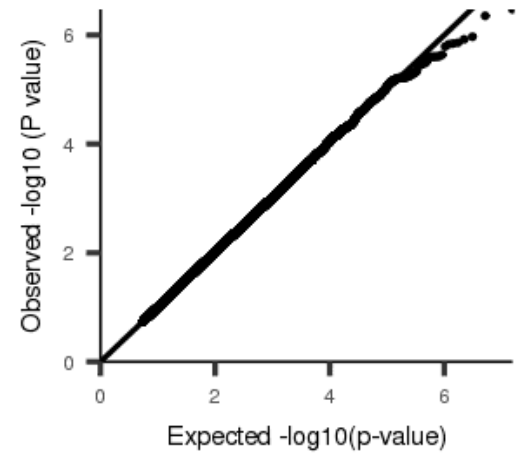

[back to list of plots](#)

Figure 2591: NETMAT edge (100) 1435

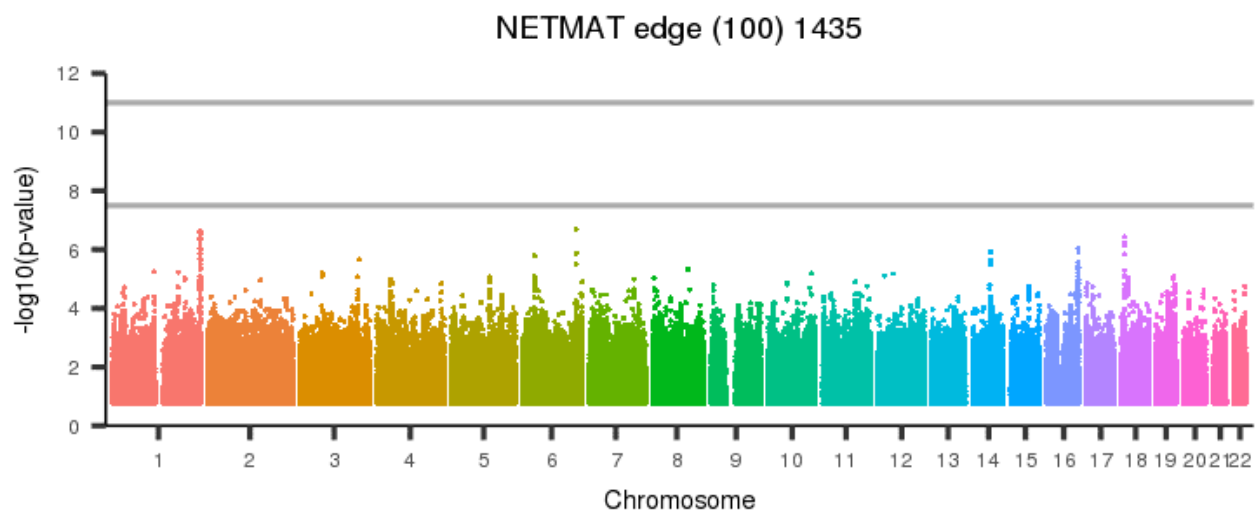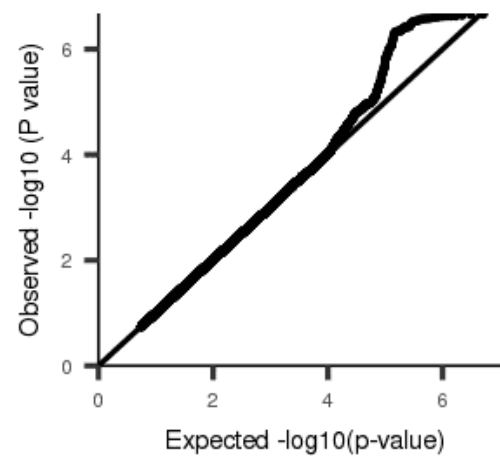

[back to list of plots](#)

Figure 2592: NETMAT edge (100) 1436

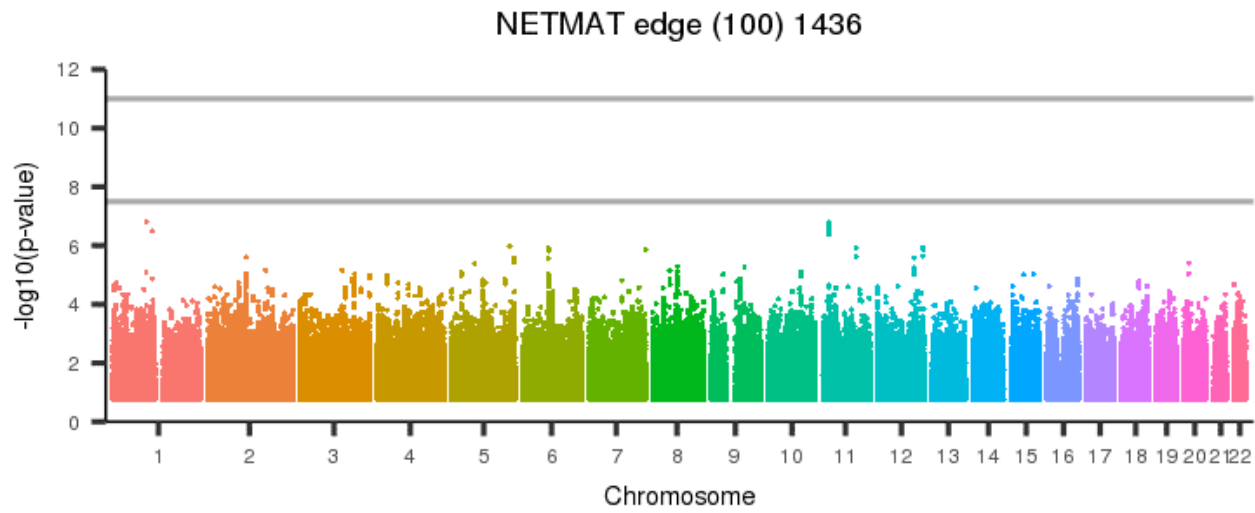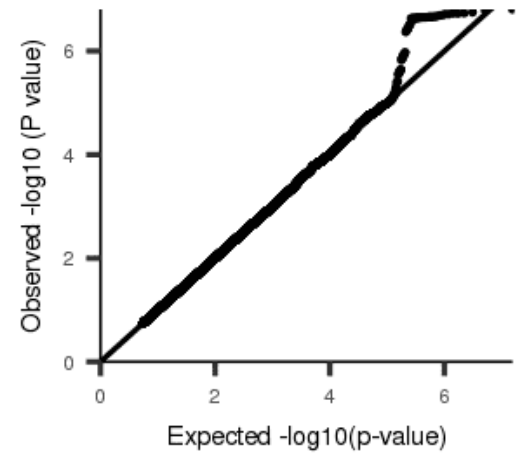

[back to list of plots](#)

Figure 2593: NETMAT edge (100) 1437

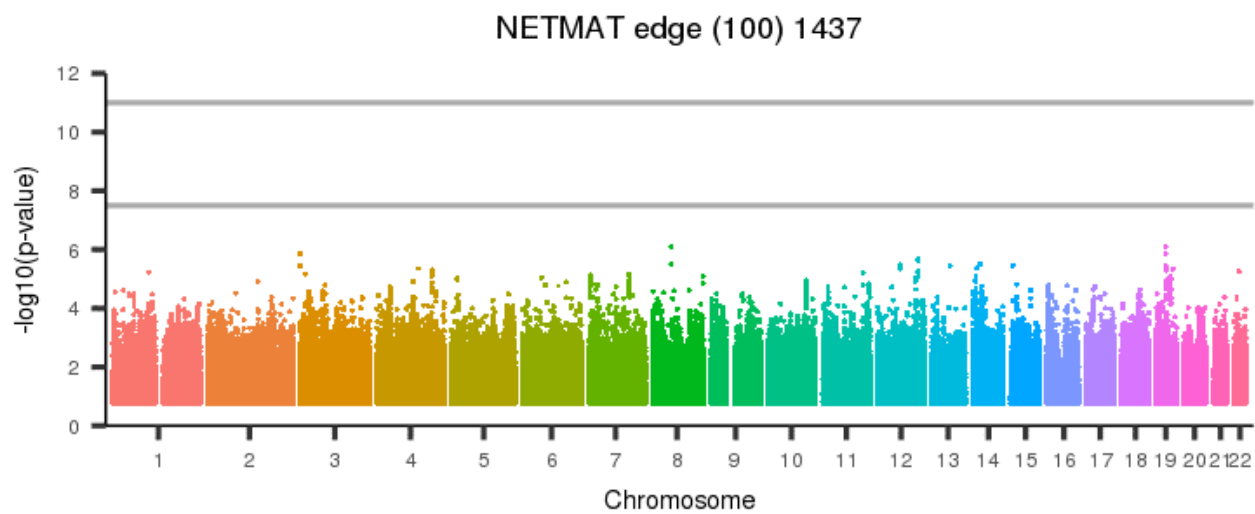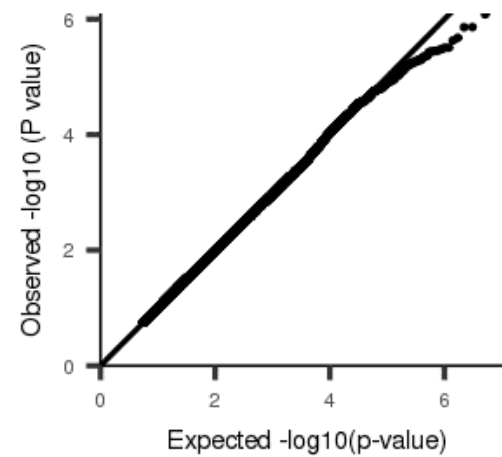

[back to list of plots](#)

Figure 2594: NETMAT edge (100) 1438

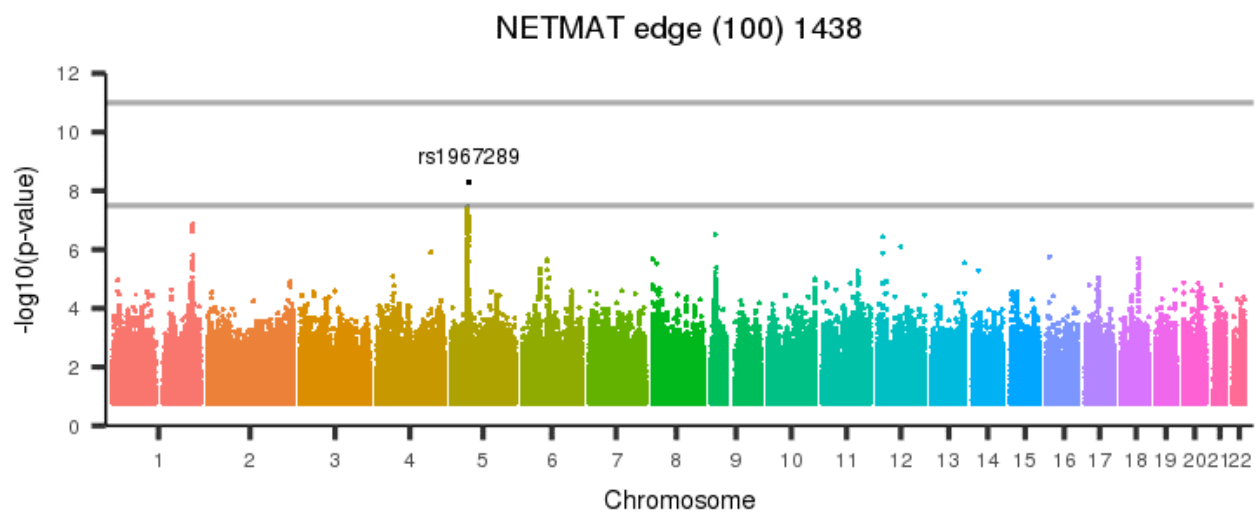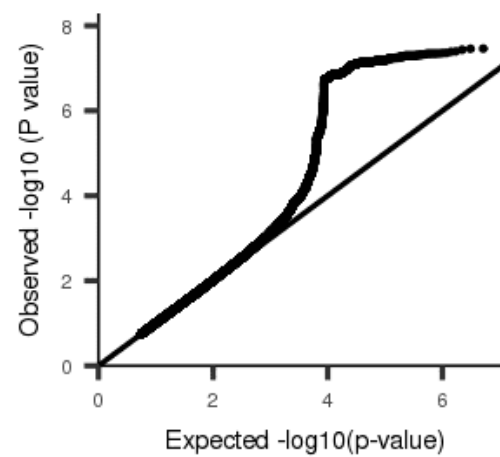

[back to list of plots](#)

Figure 2595: NETMAT edge (100) 1439

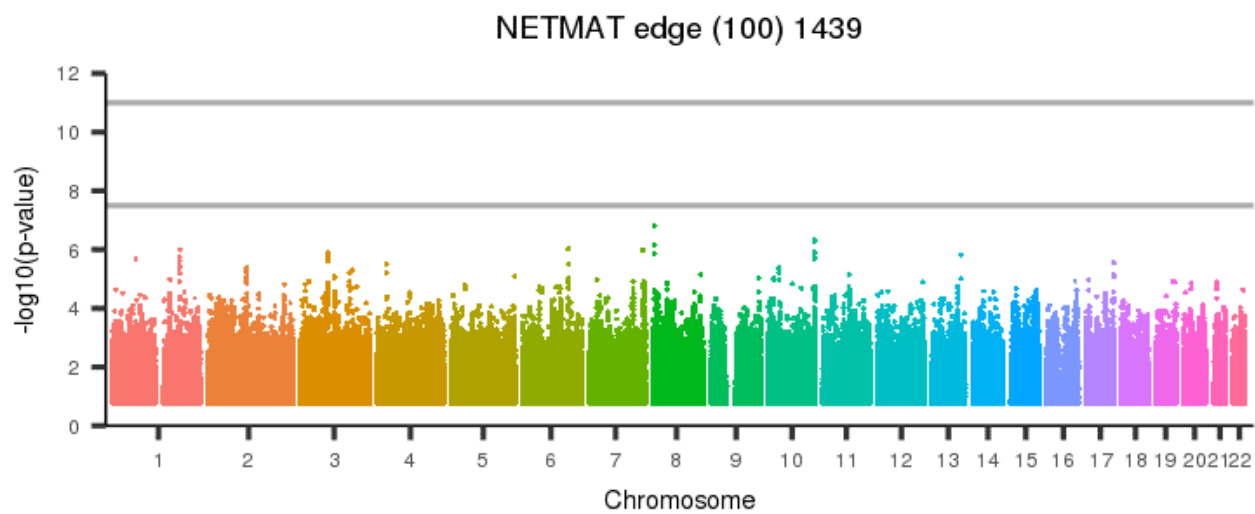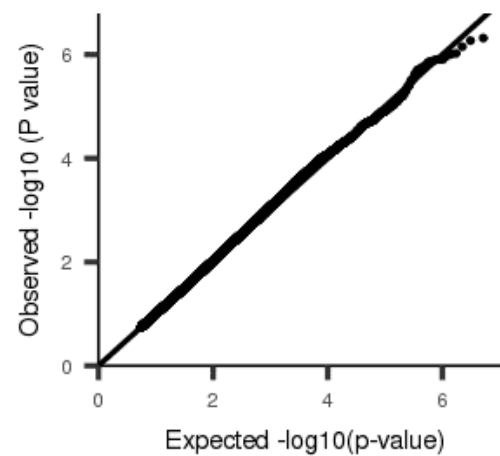

[back to list of plots](#)

Figure 2596: NETMAT edge (100) 1440

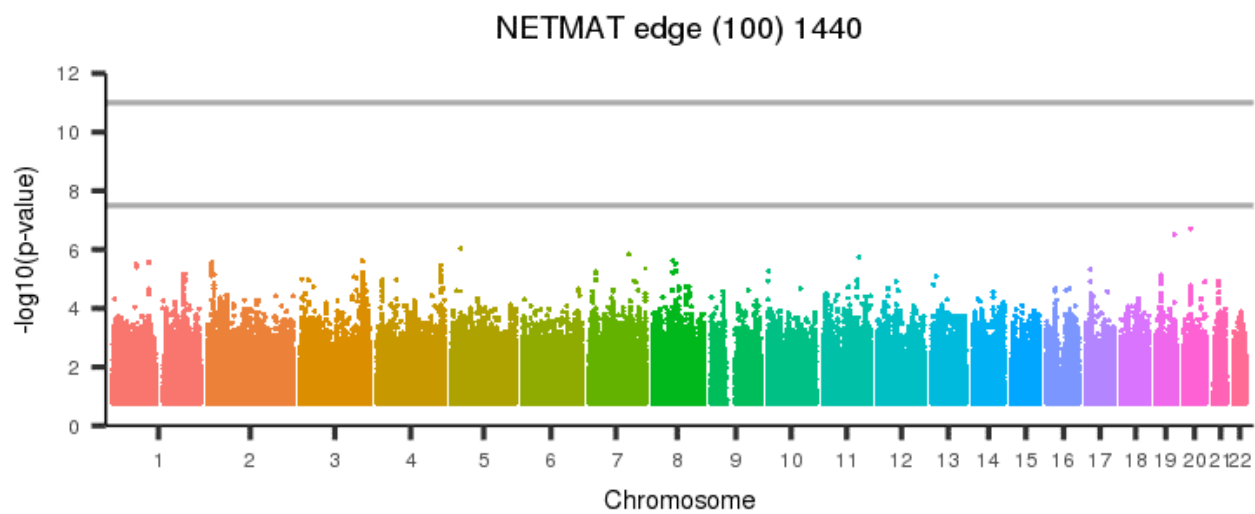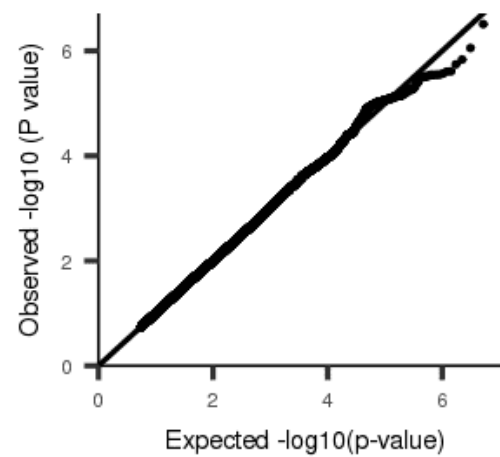

[back to list of plots](#)

Figure 2597: NETMAT edge (100) 1441

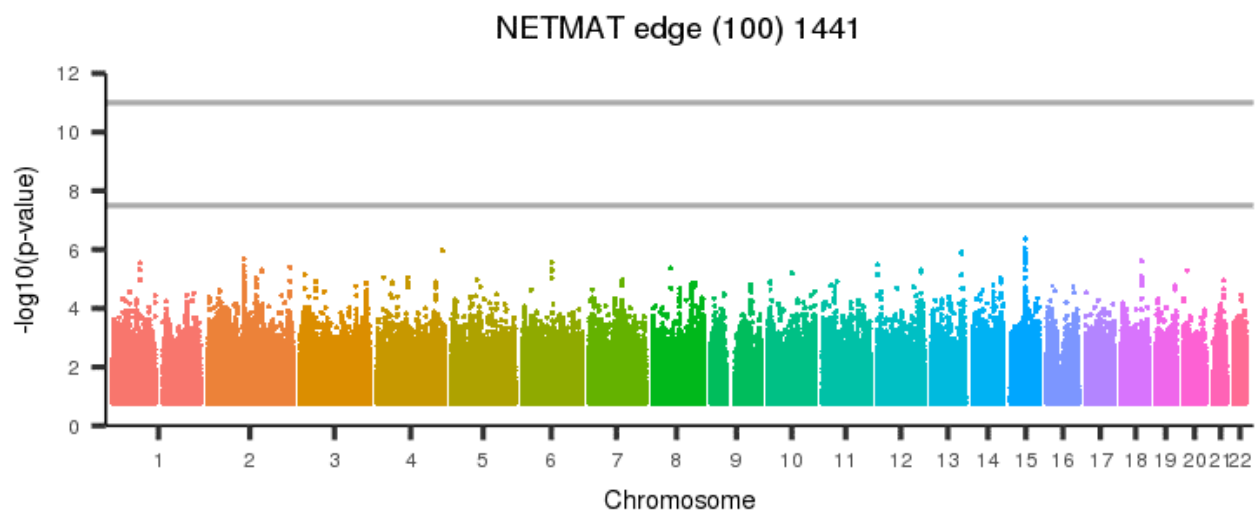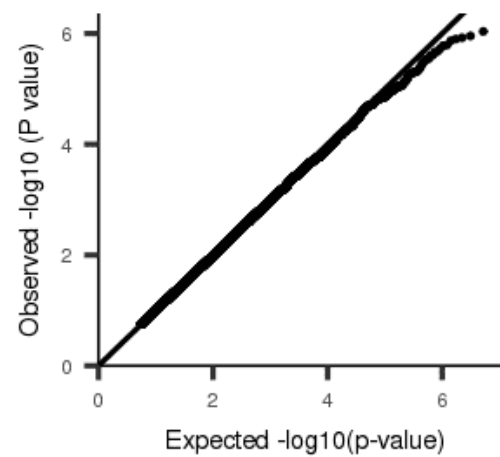

[back to list of plots](#)



Figure 2598: NETMAT edge (100) 1442

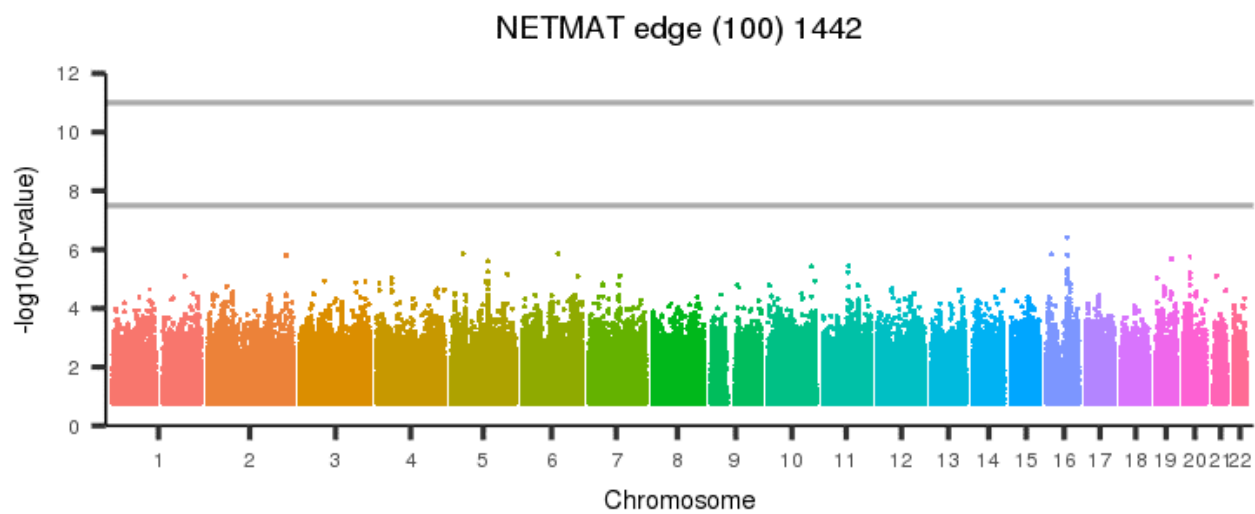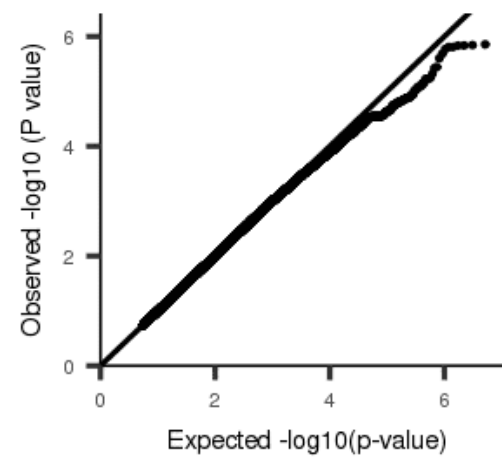

[back to list of plots](#)

Figure 2599: NETMAT edge (100) 1443

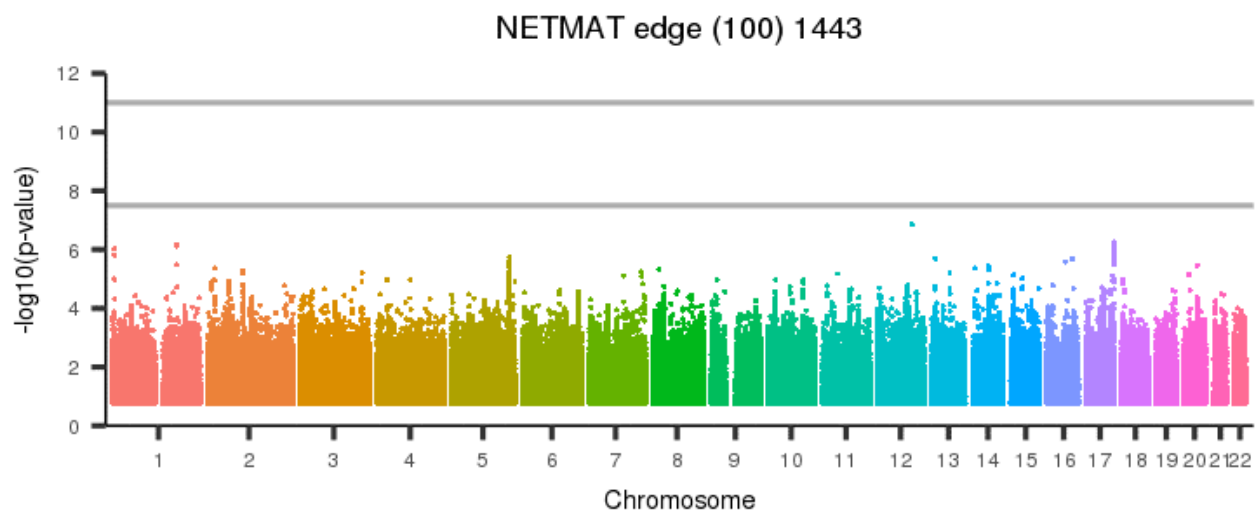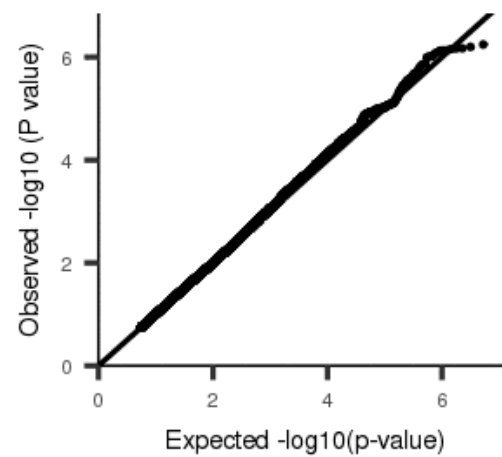

[back to list of plots](#)

Figure 2600: NETMAT edge (100) 1444

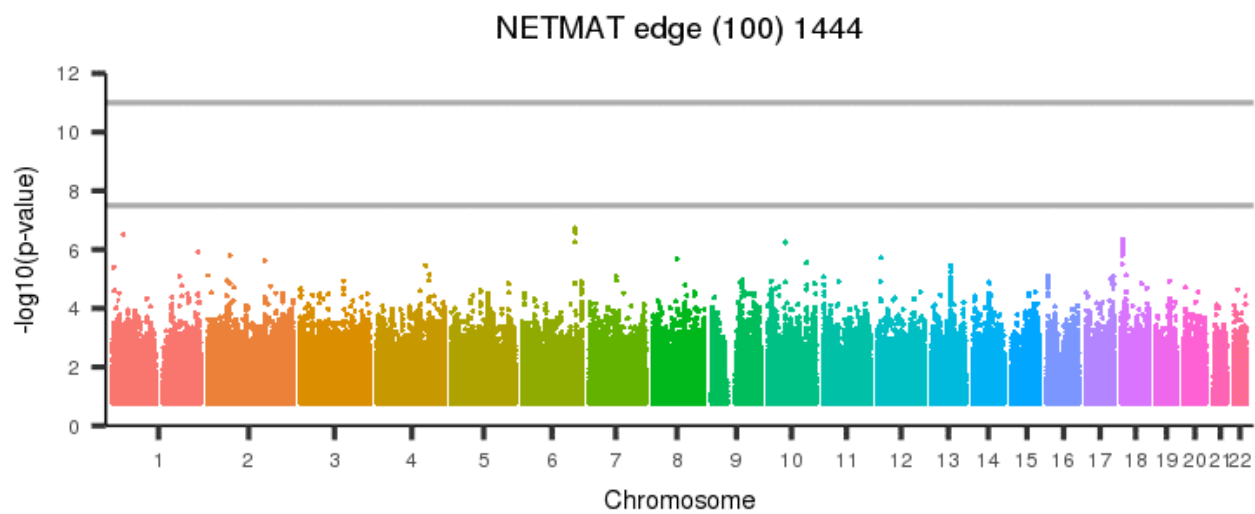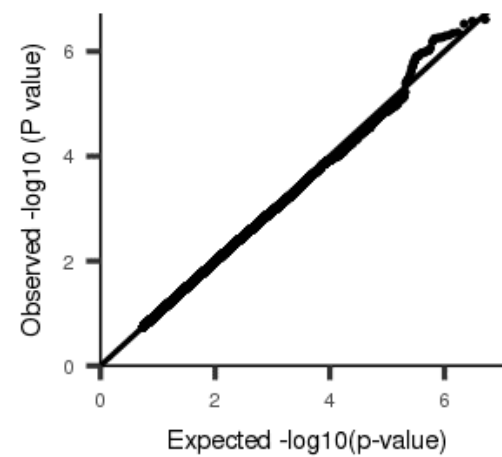

[back to list of plots](#)

Figure 2601: NETMAT edge (100) 1445

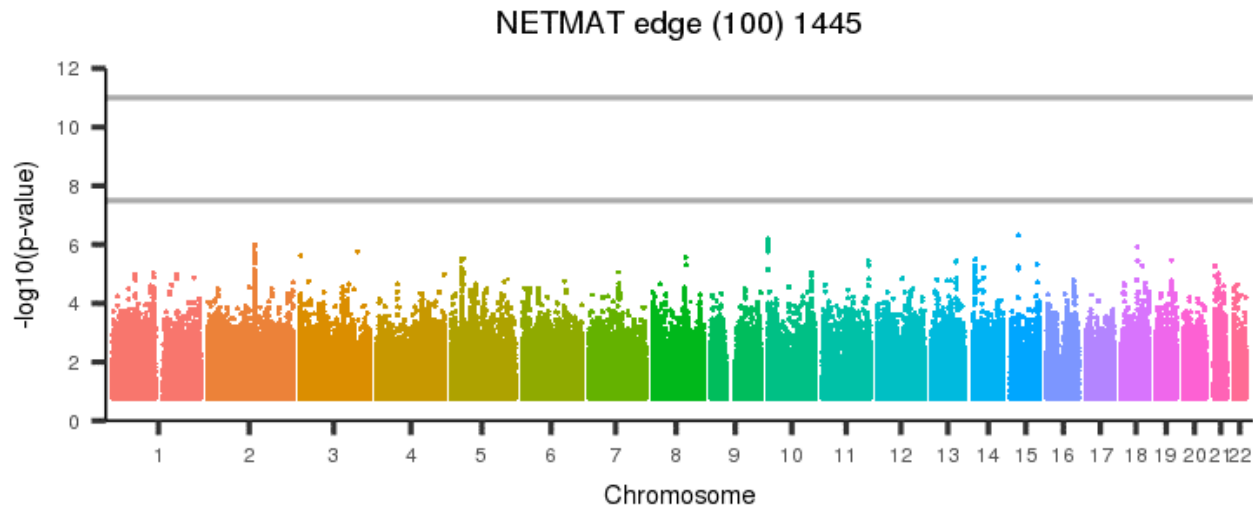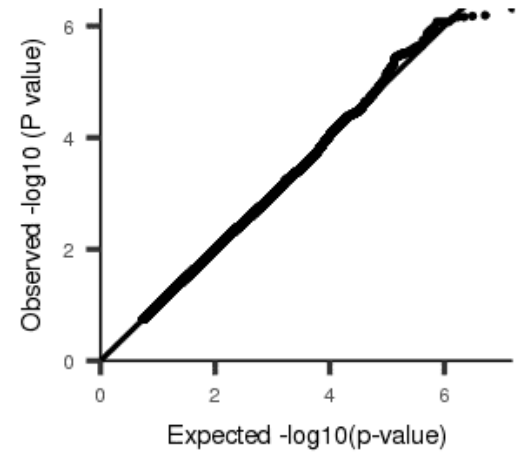

[back to list of plots](#)

Figure 2602: NETMAT edge (100) 1446

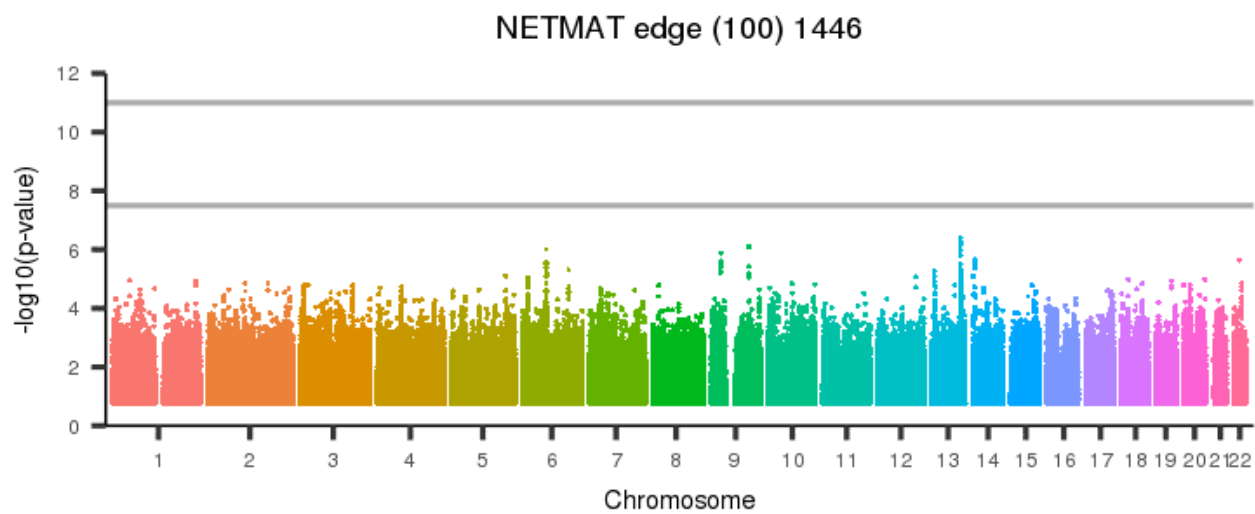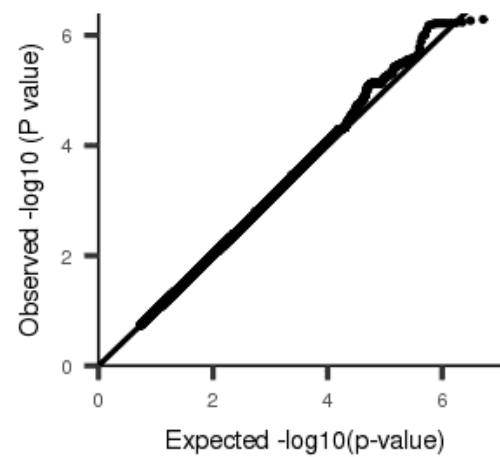

[back to list of plots](#)

Figure 2603: NETMAT edge (100) 1447

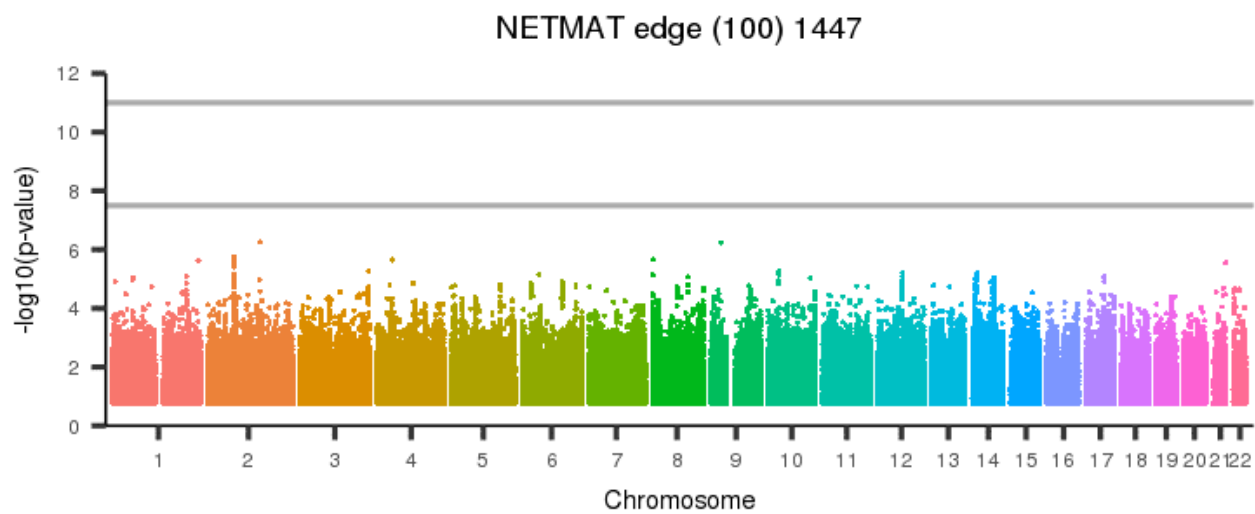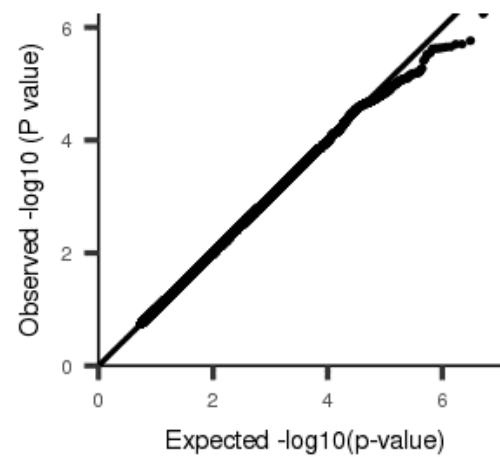

[back to list of plots](#)

Figure 2604: NETMAT edge (100) 1448

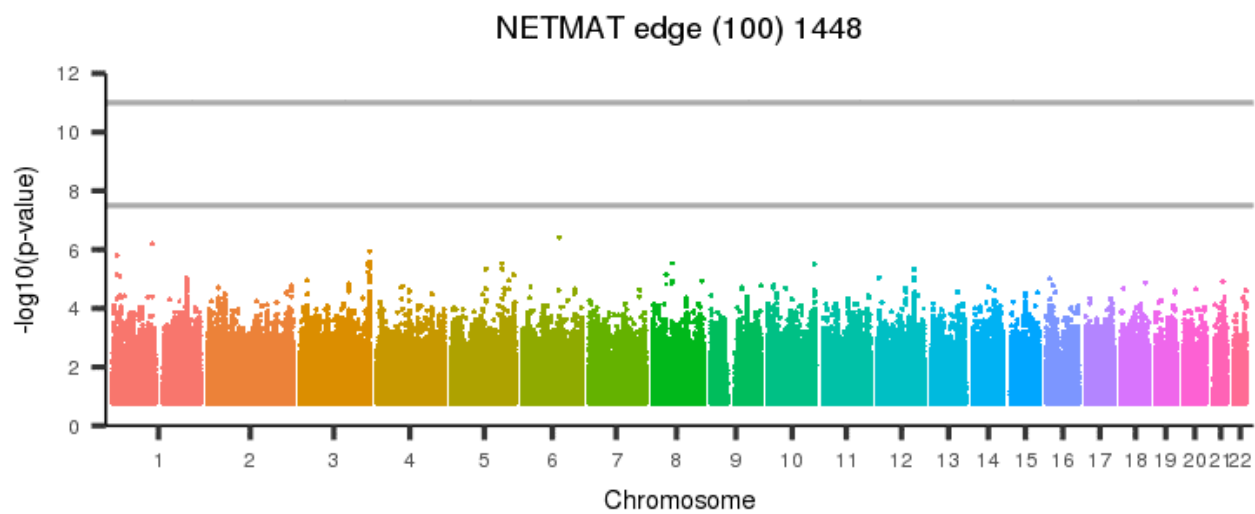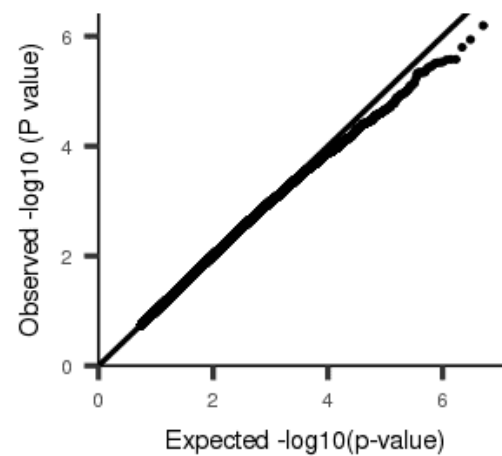

[back to list of plots](#)

Figure 2605: NETMAT edge (100) 1449

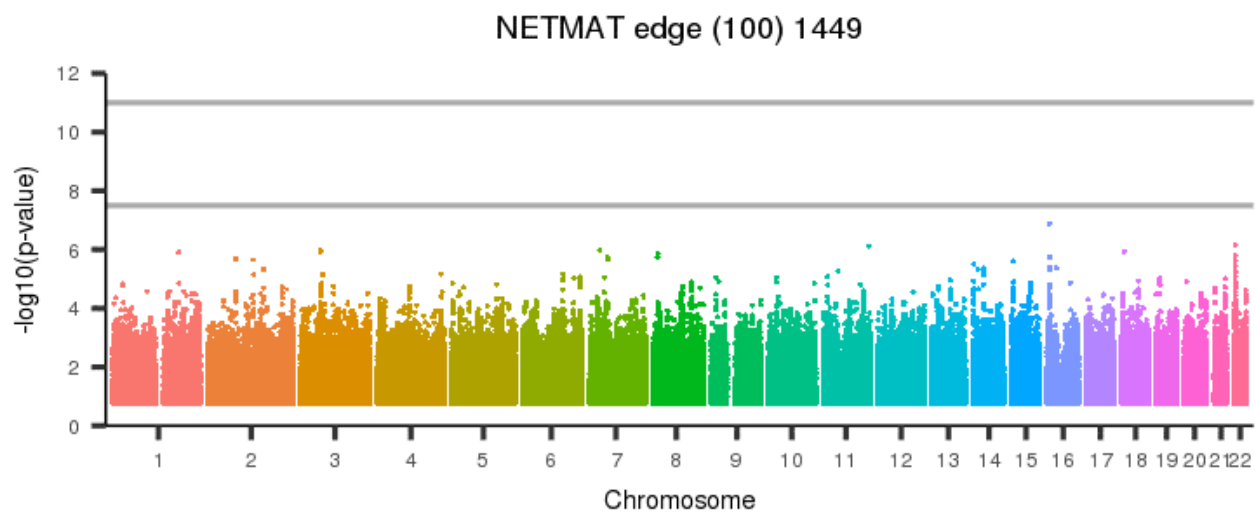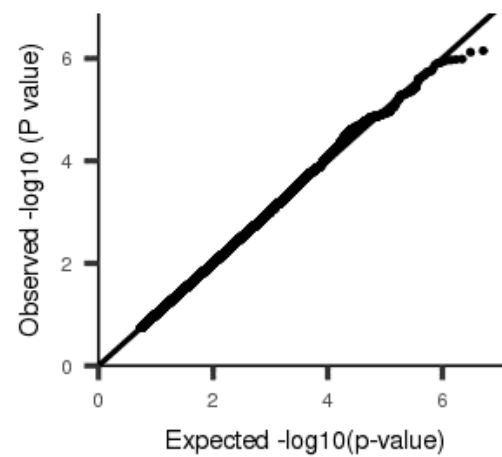

[back to list of plots](#)



Figure 2606: NETMAT edge (100) 1450

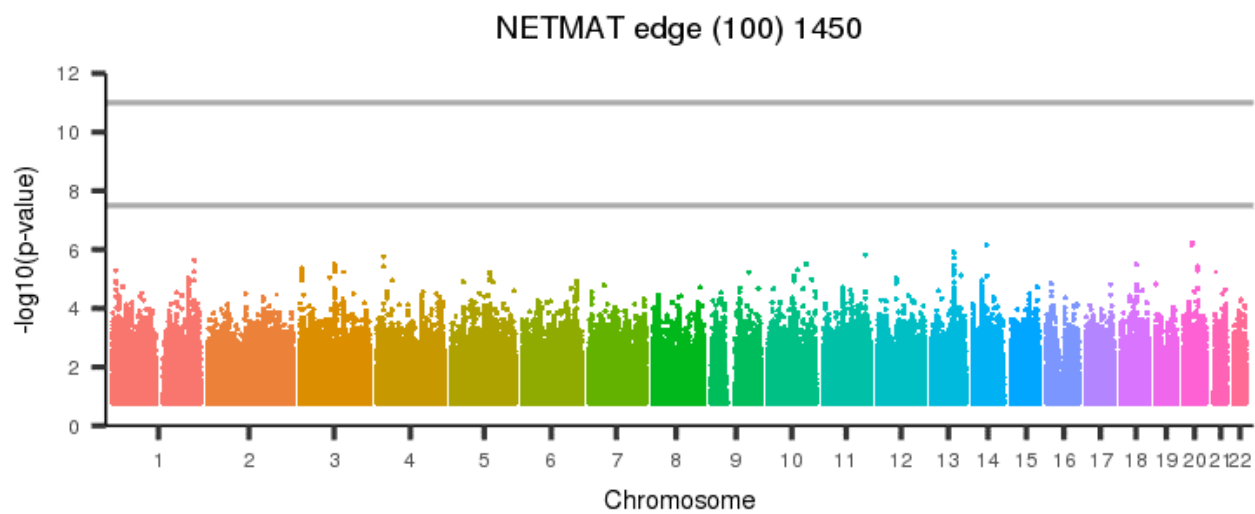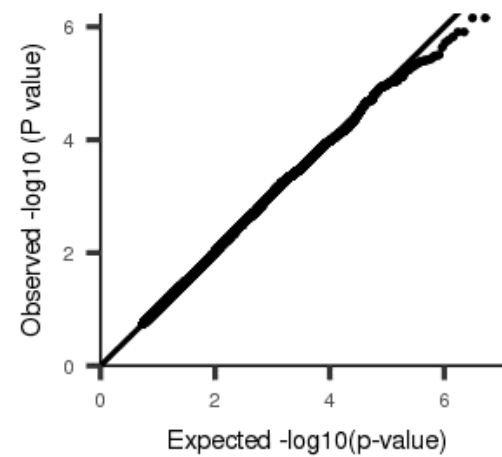

[back to list of plots](#)

Figure 2607: NETMAT edge (100) 1451

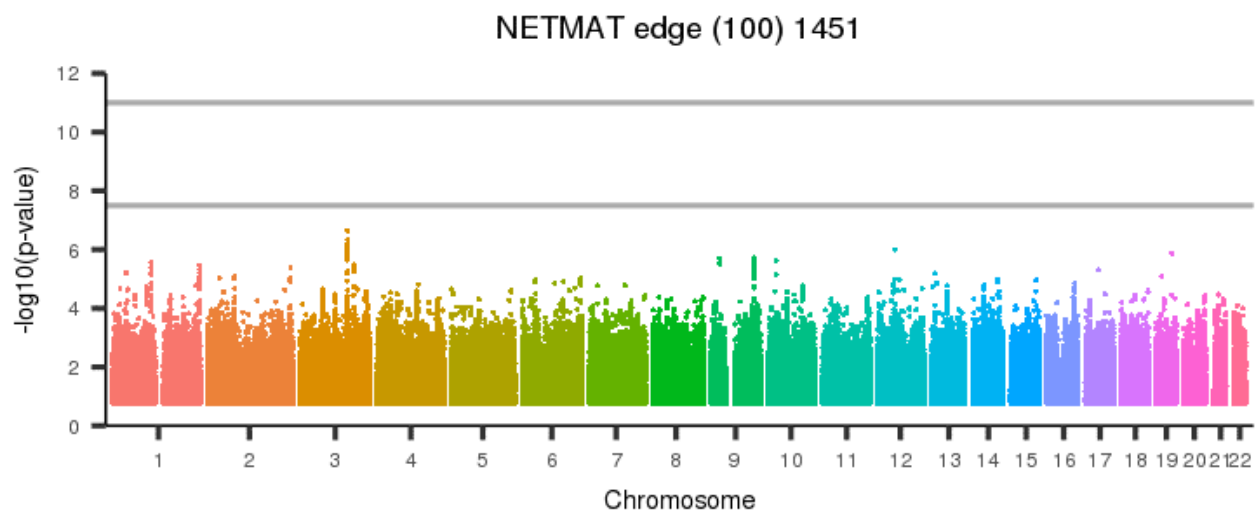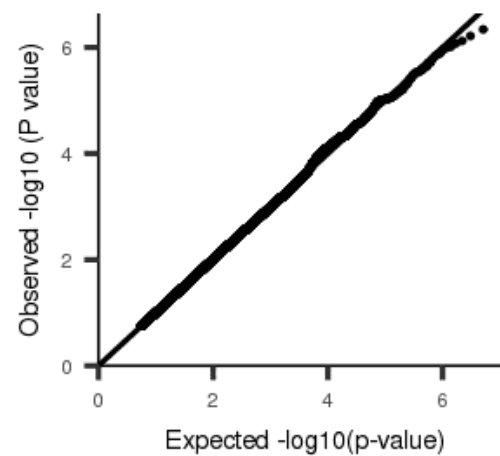

[back to list of plots](#)

Figure 2608: NETMAT edge (100) 1452

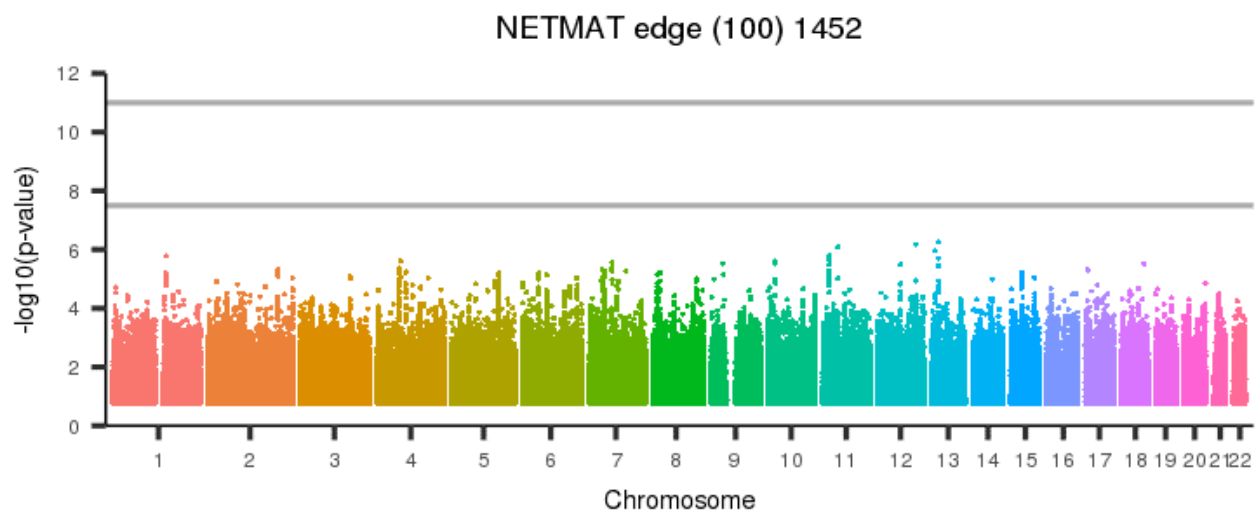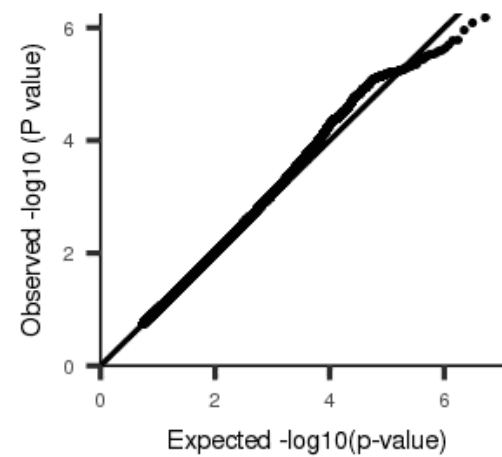

[back to list of plots](#)

Figure 2609: NETMAT edge (100) 1453

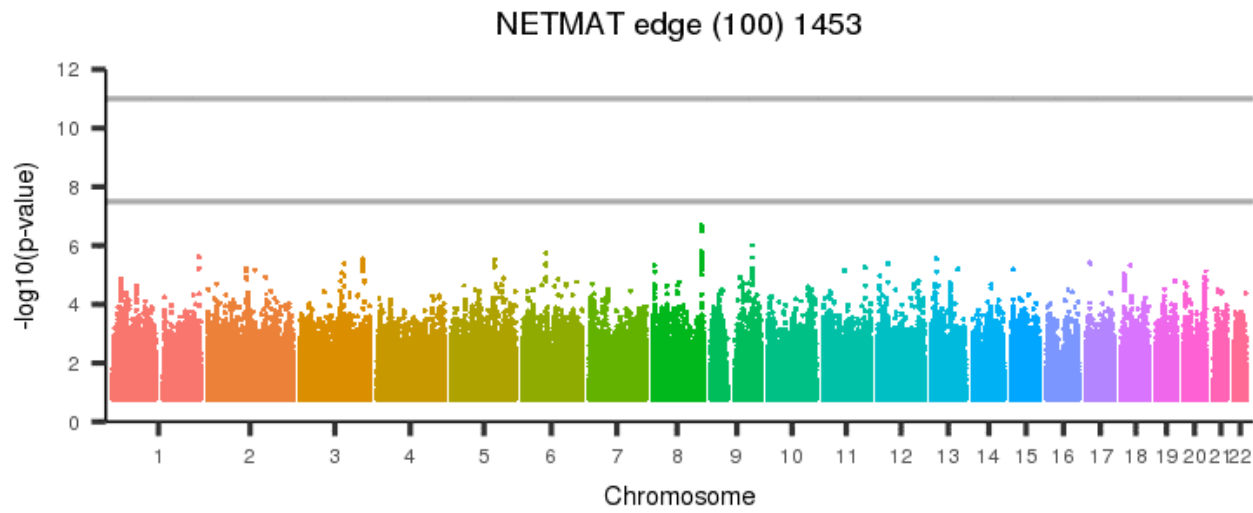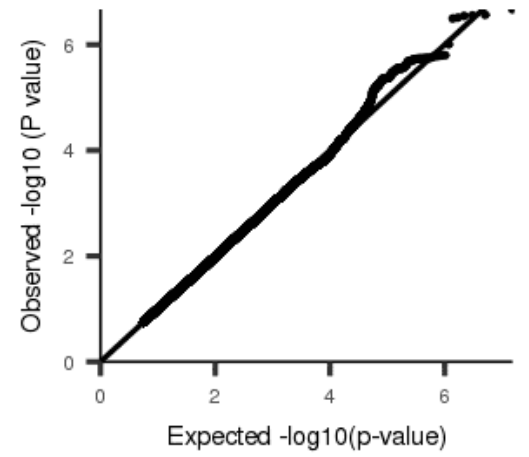

[back to list of plots](#)

Figure 2610: NETMAT edge (100) 1454

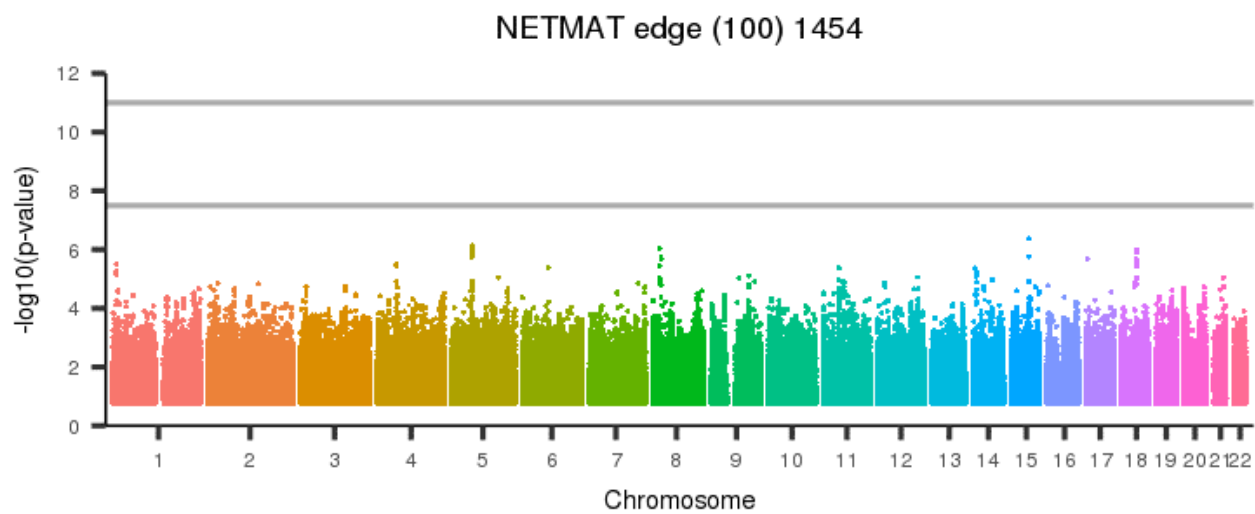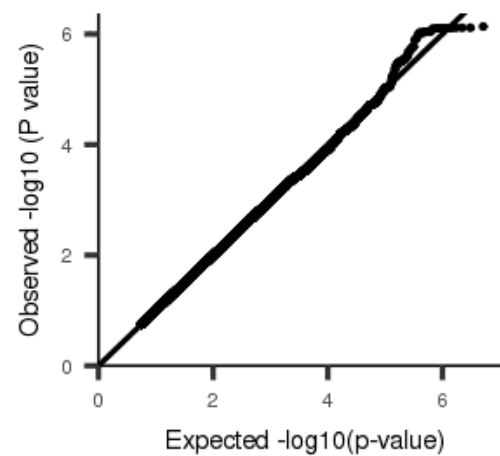

[back to list of plots](#)

Figure 2611: NETMAT edge (100) 1455

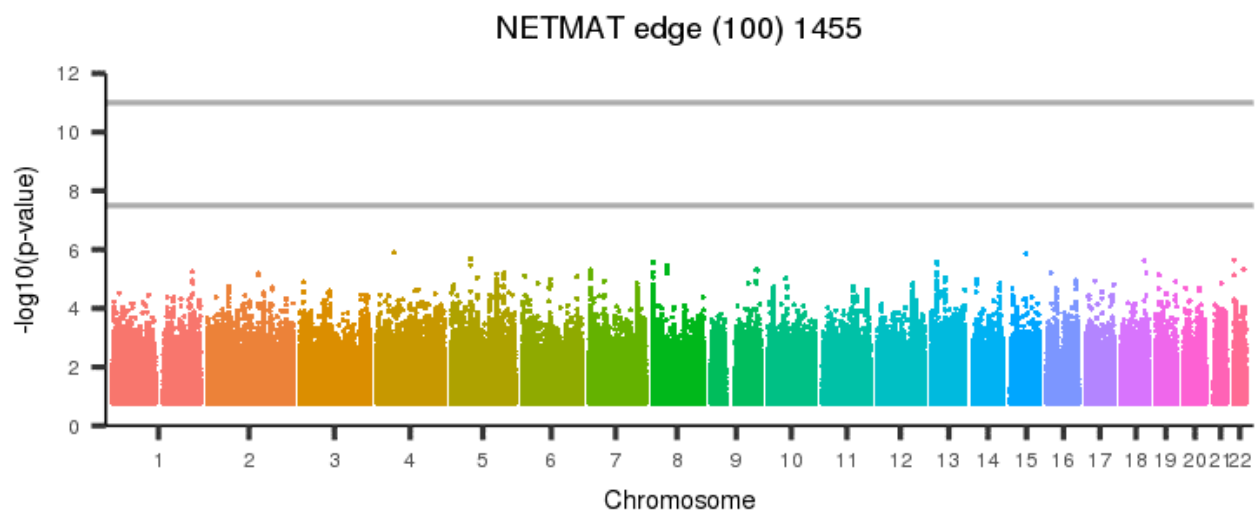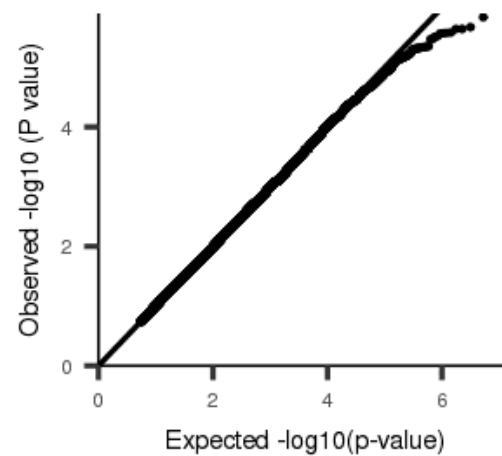

[back to list of plots](#)

Figure 2612: NETMAT edge (100) 1456

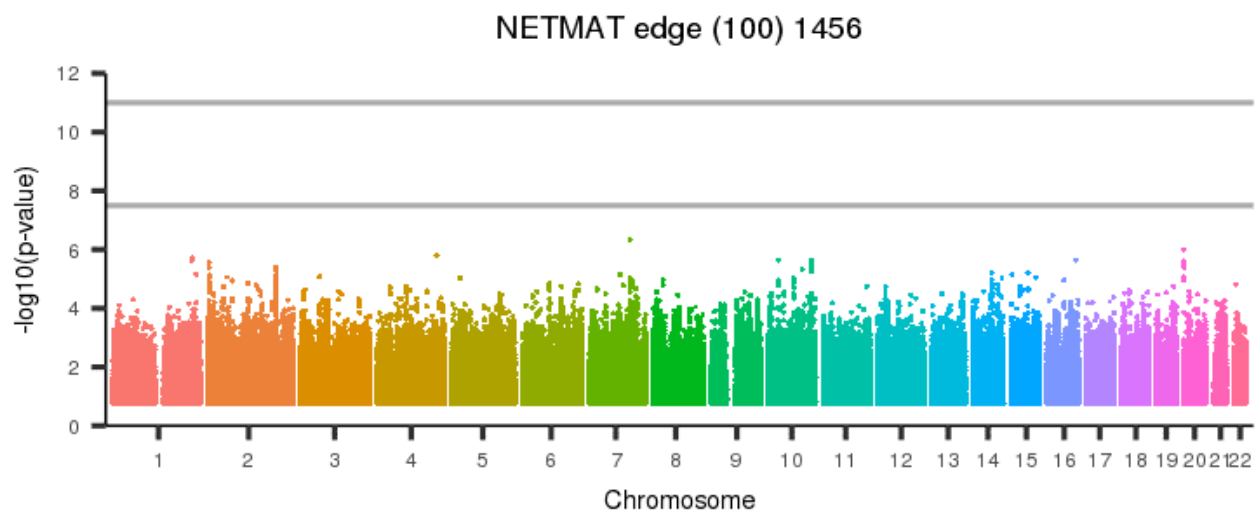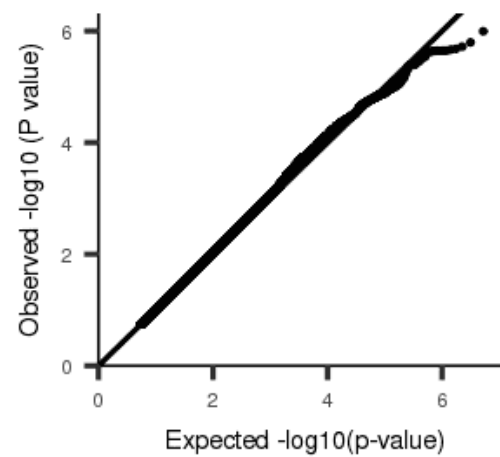

[back to list of plots](#)

Figure 2613: NETMAT edge (100) 1457

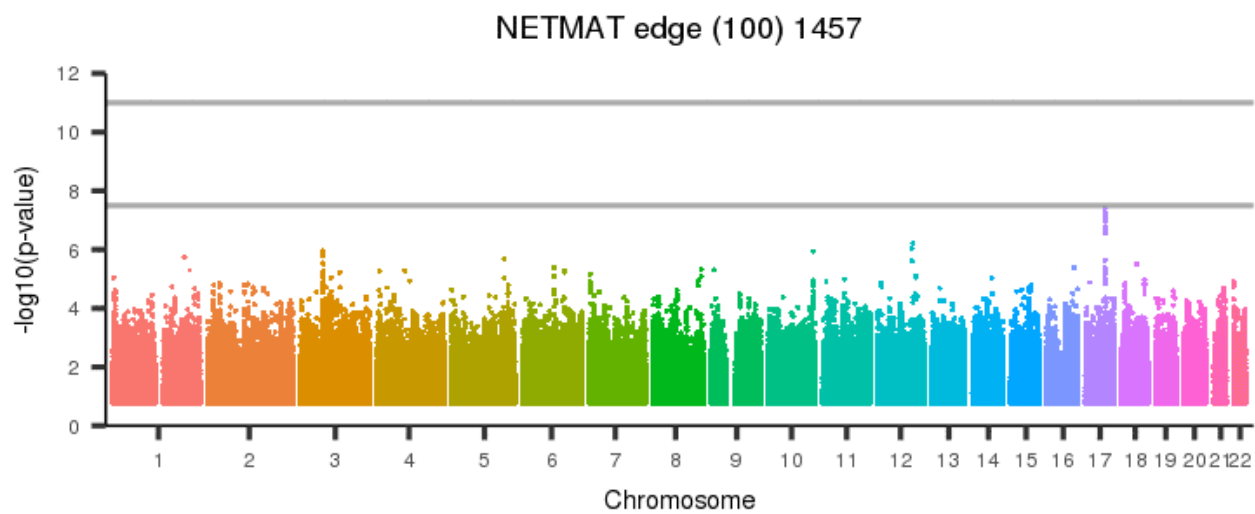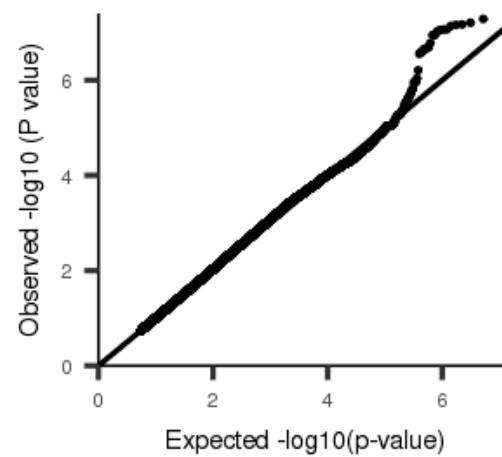

[back to list of plots](#)



Figure 2614: NETMAT edge (100) 1458

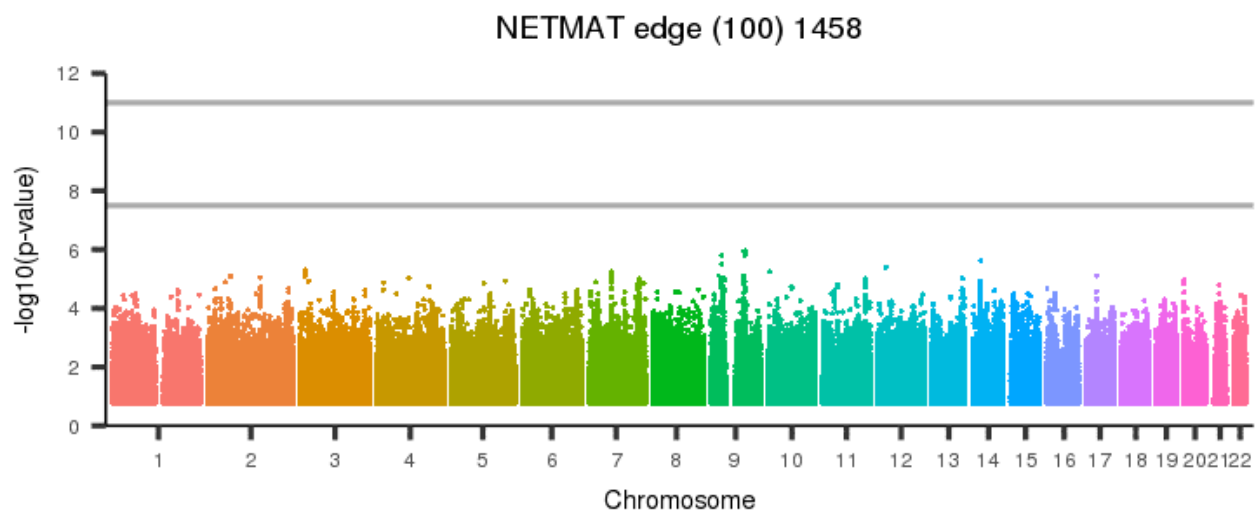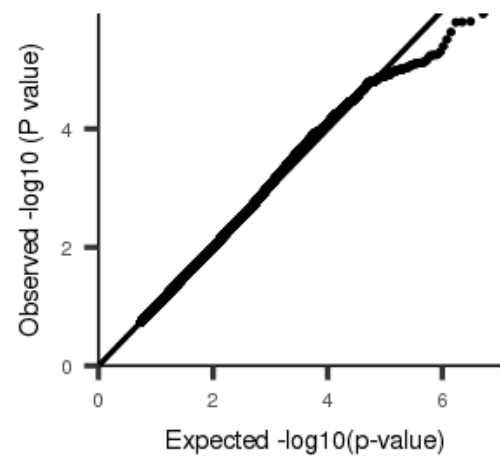

[back to list of plots](#)

Figure 2615: NETMAT edge (100) 1459

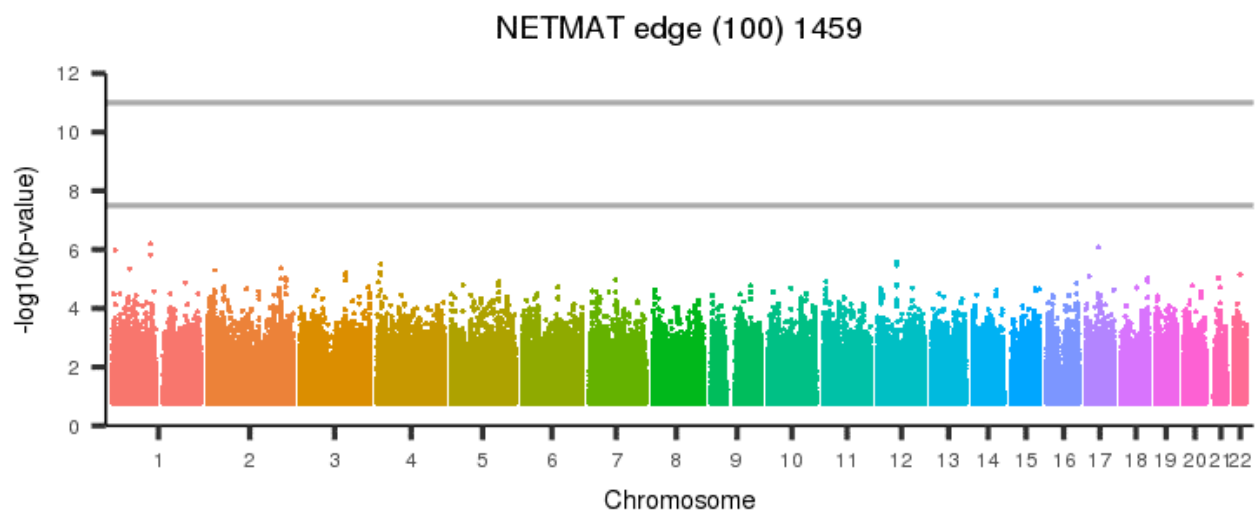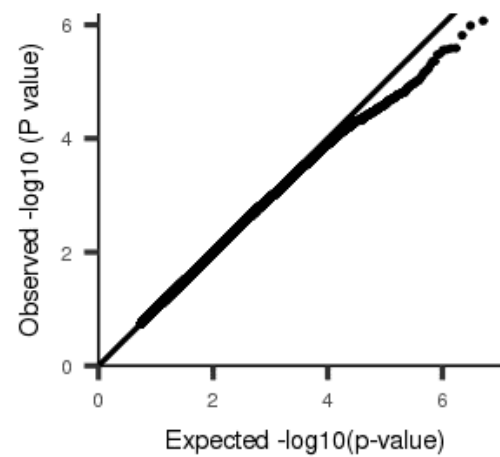

[back to list of plots](#)

Figure 2616: NETMAT edge (100) 1460

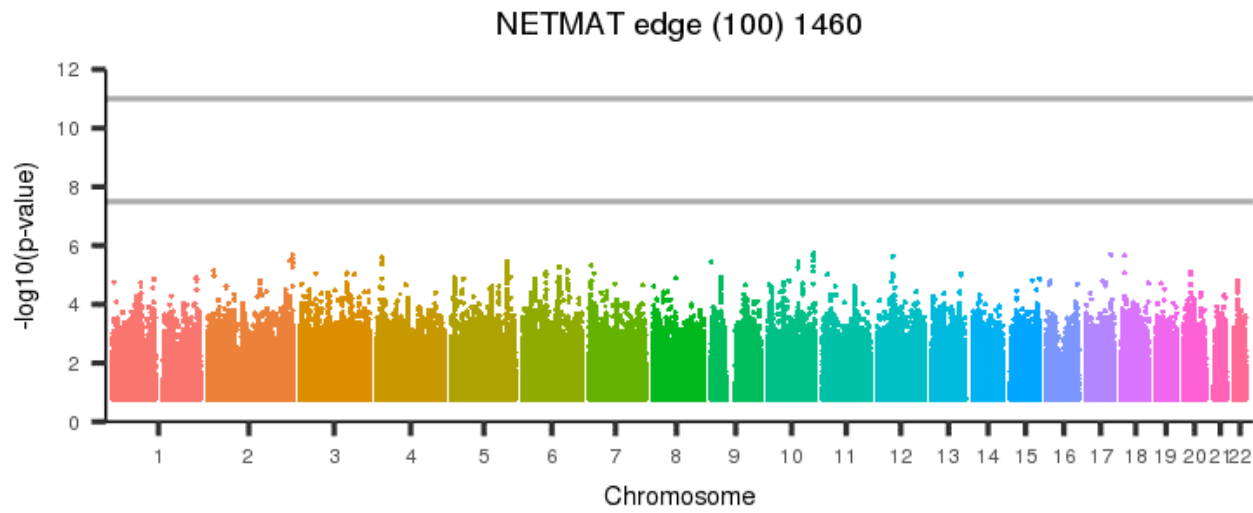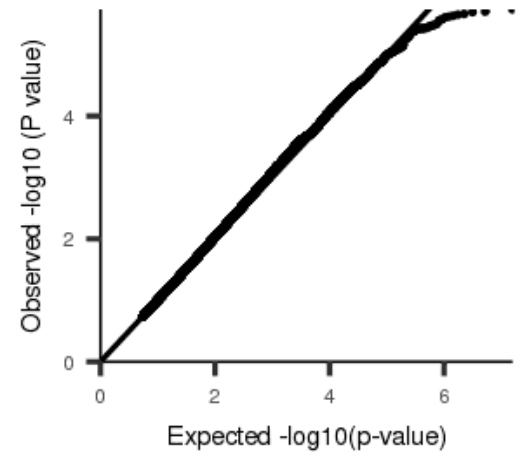

[back to list of plots](#)

Figure 2617: NETMAT edge (100) 1461

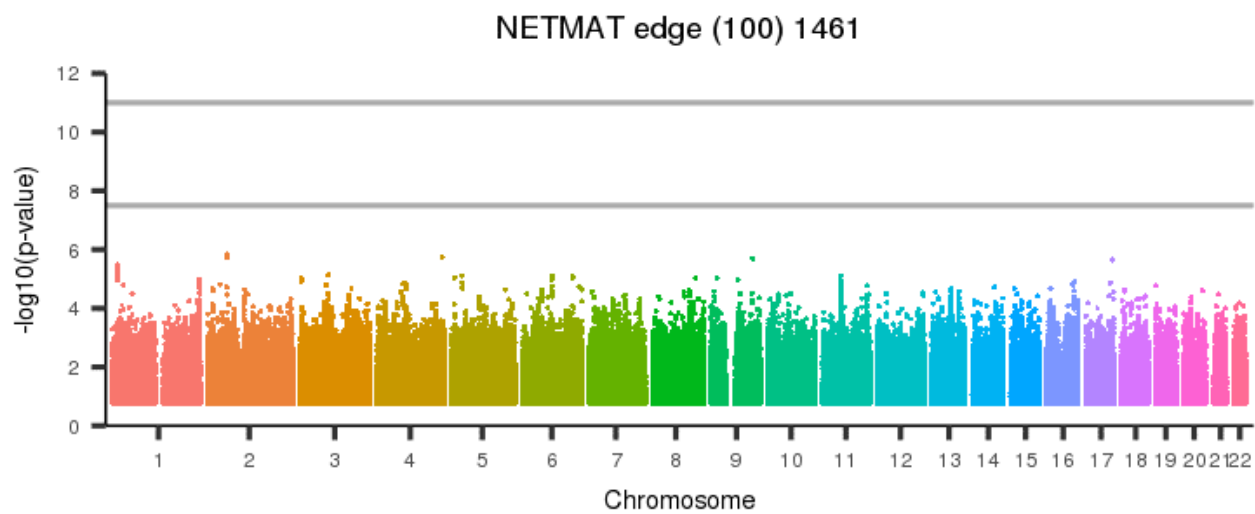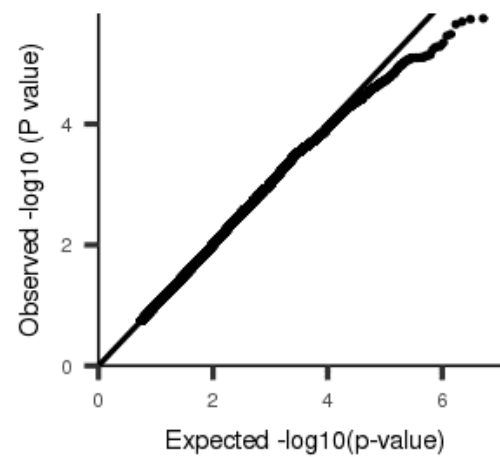

[back to list of plots](#)

Figure 2618: NETMAT edge (100) 1462

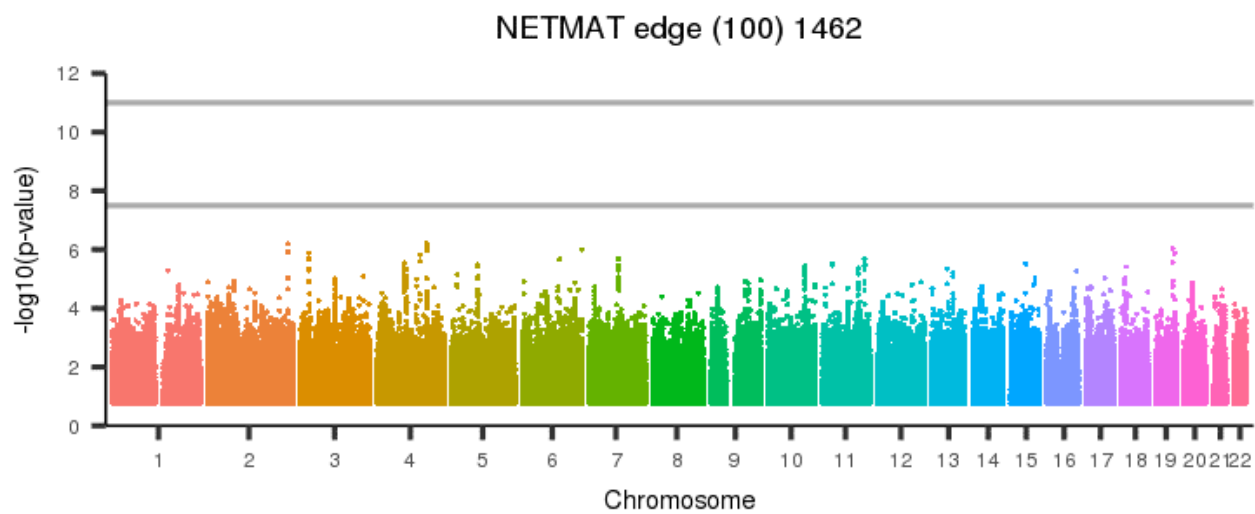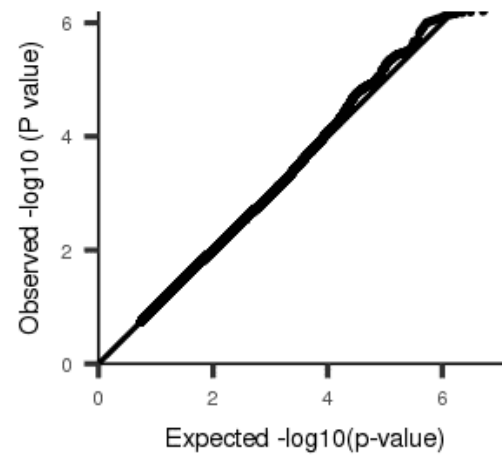

[back to list of plots](#)

Figure 2619: NETMAT edge (100) 1463

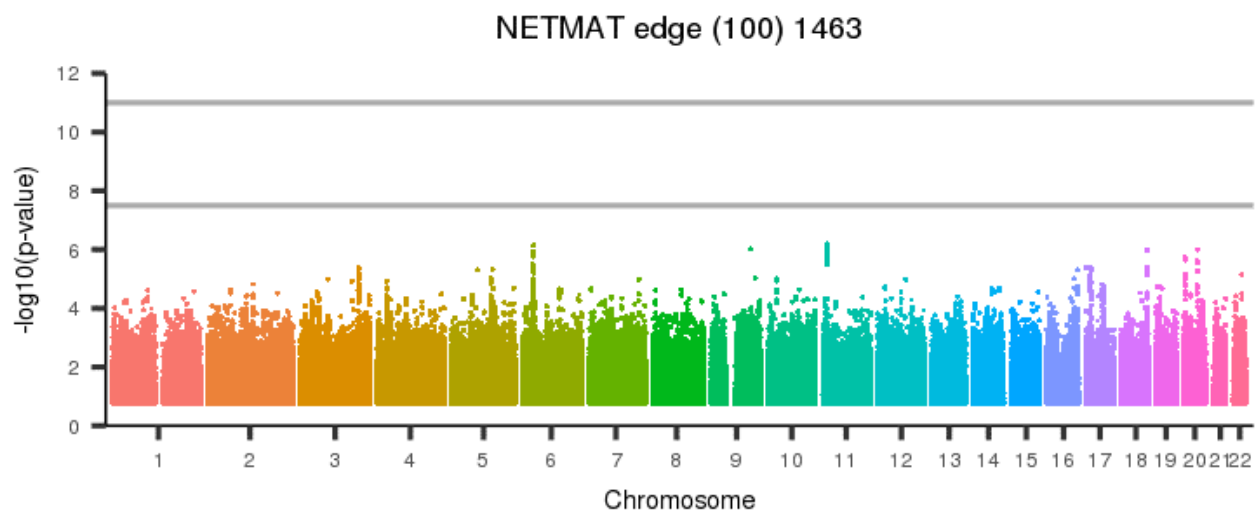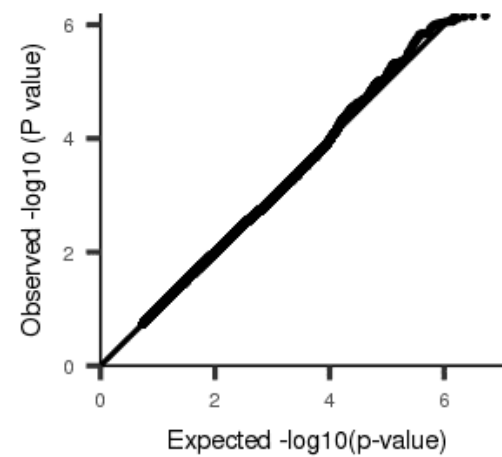

[back to list of plots](#)

Figure 2620: NETMAT edge (100) 1464

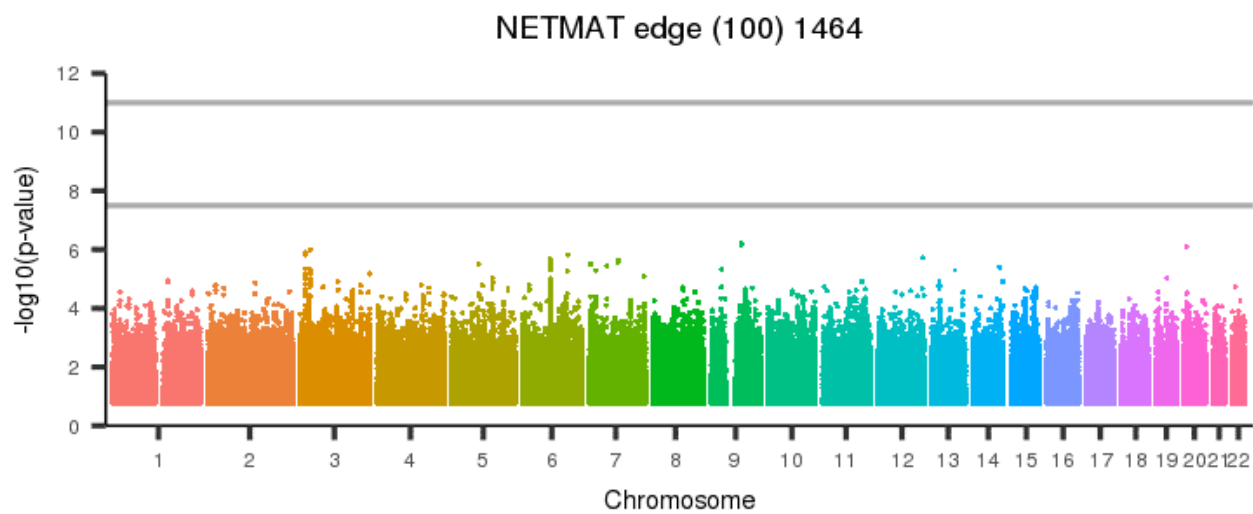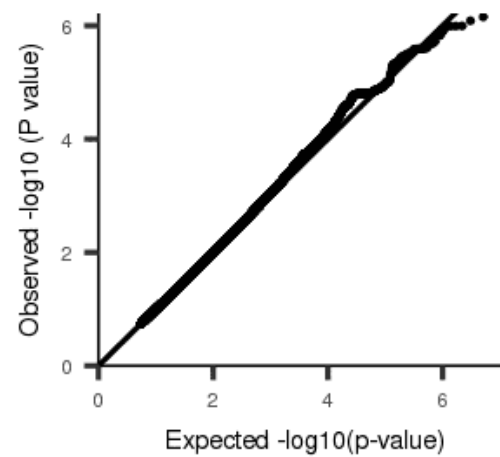

[back to list of plots](#)

Figure 2621: NETMAT edge (100) 1465

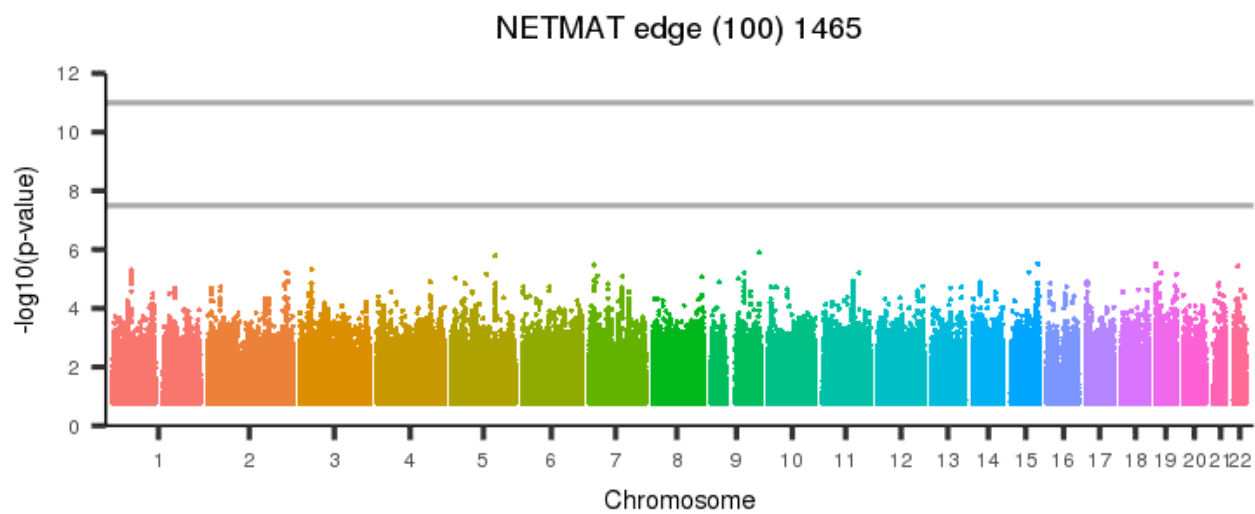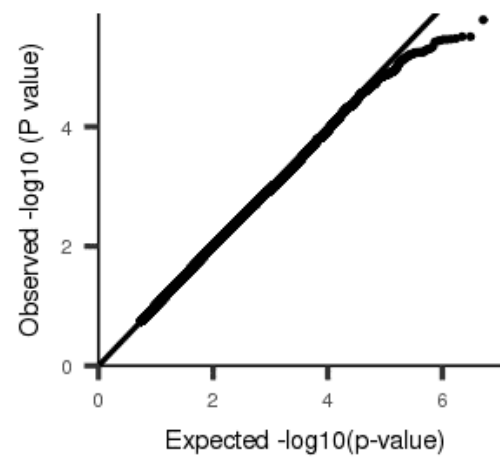

[back to list of plots](#)



Figure 2622: NETMAT edge (100) 1466

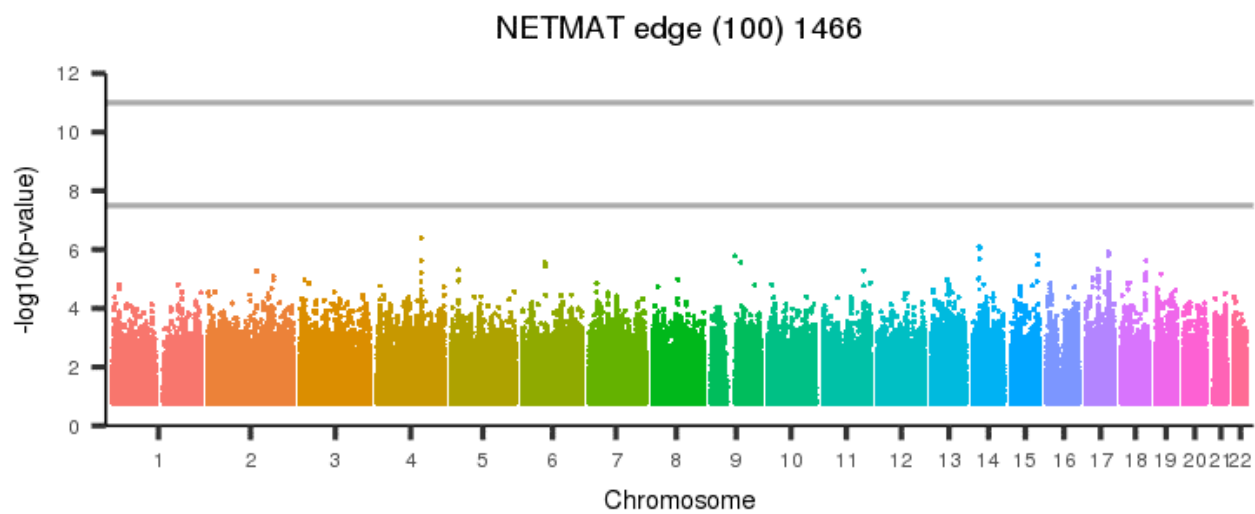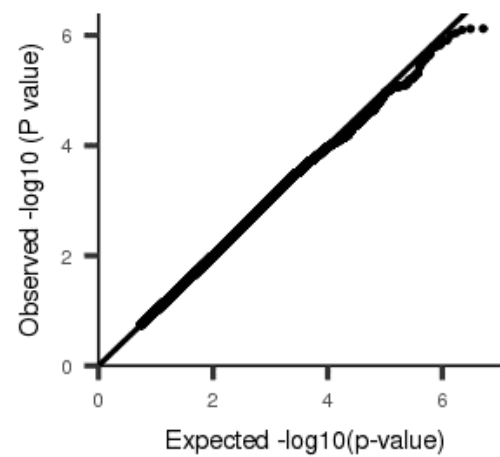

[back to list of plots](#)

Figure 2623: NETMAT edge (100) 1467

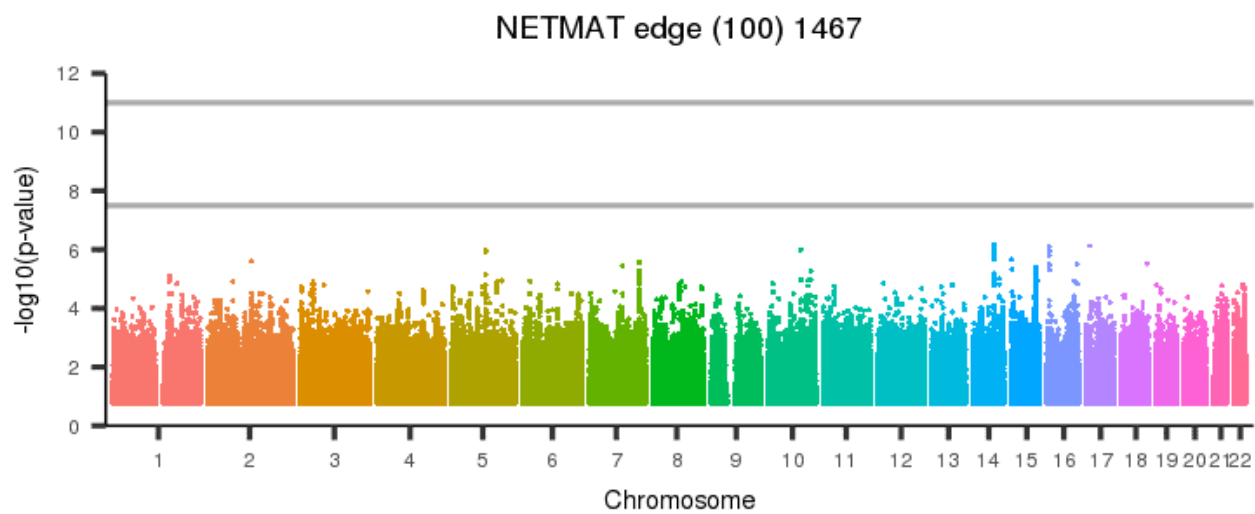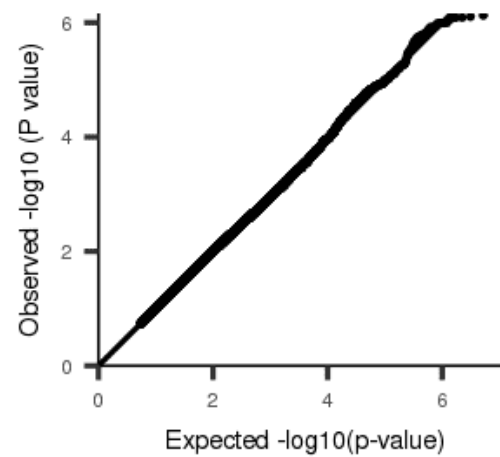

[back to list of plots](#)

Figure 2624: NETMAT edge (100) 1468

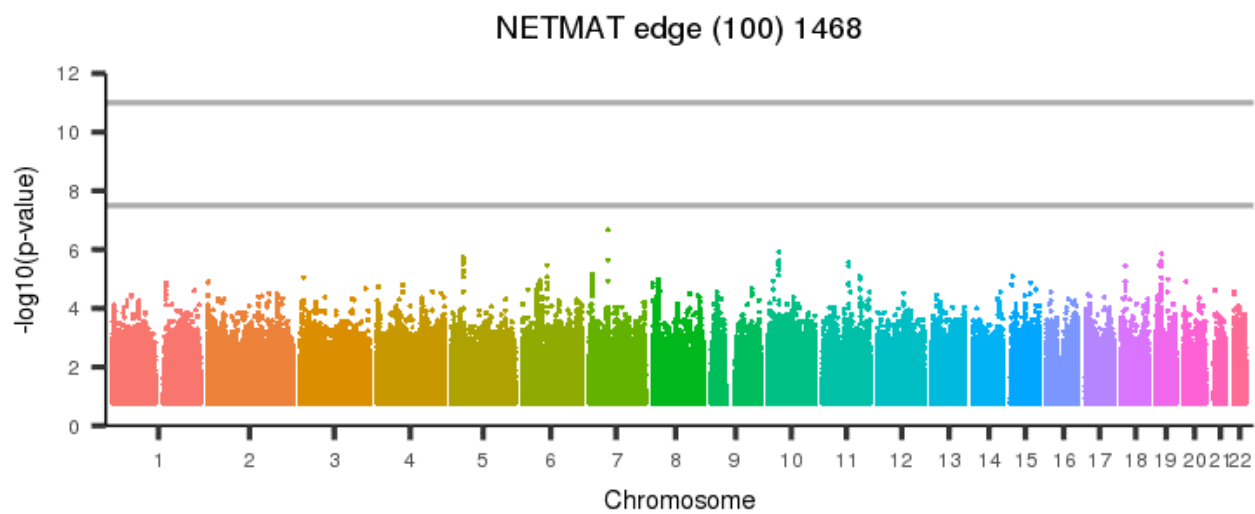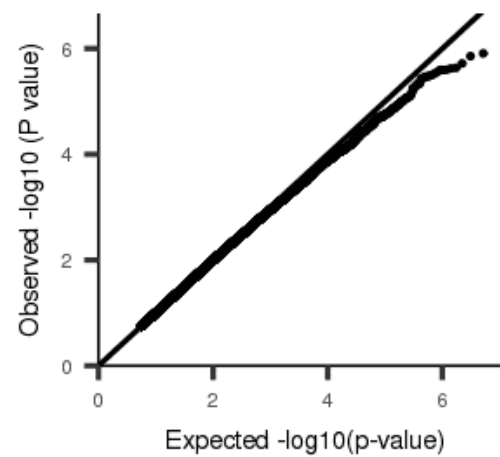

[back to list of plots](#)

Figure 2625: NETMAT edge (100) 1469

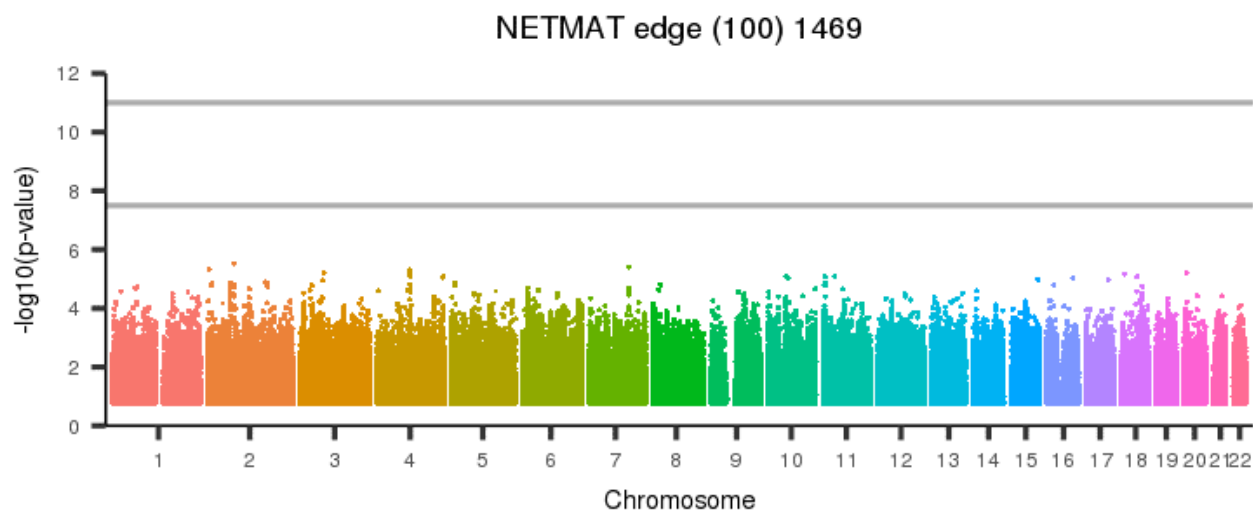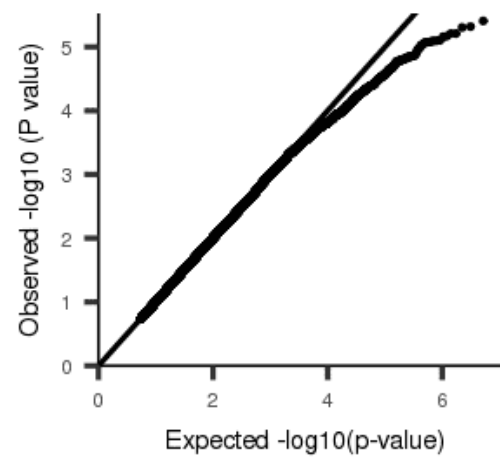

[back to list of plots](#)

Figure 2626: NETMAT edge (100) 1470

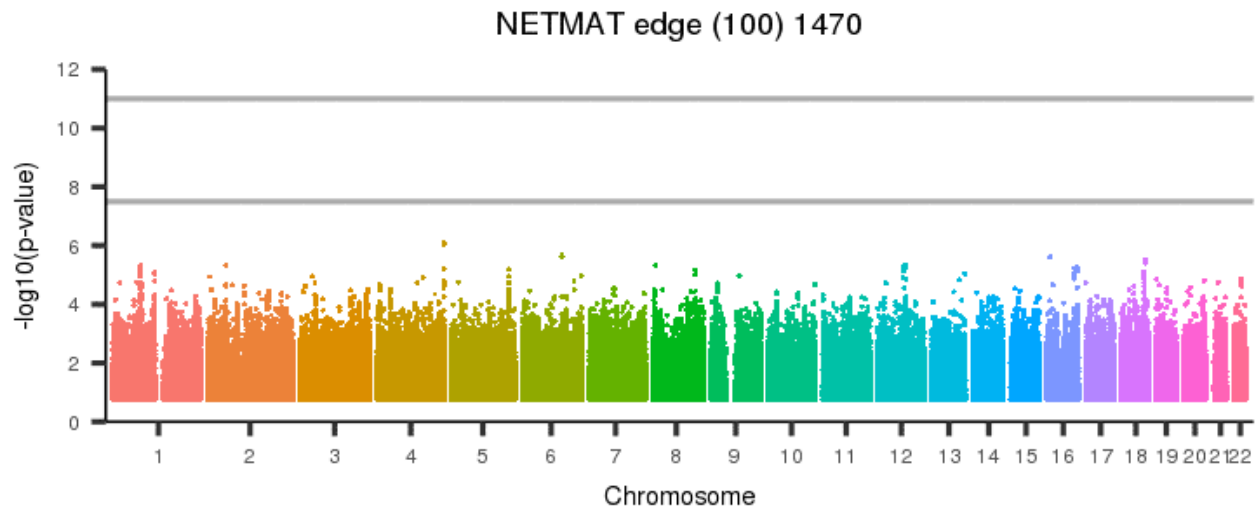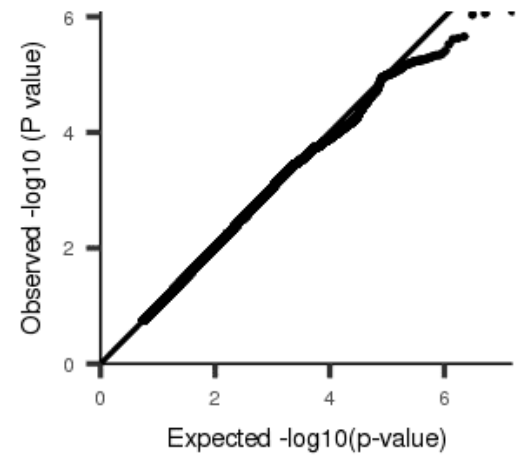

[back to list of plots](#)

Figure 2627: NETMAT edge (100) 1471

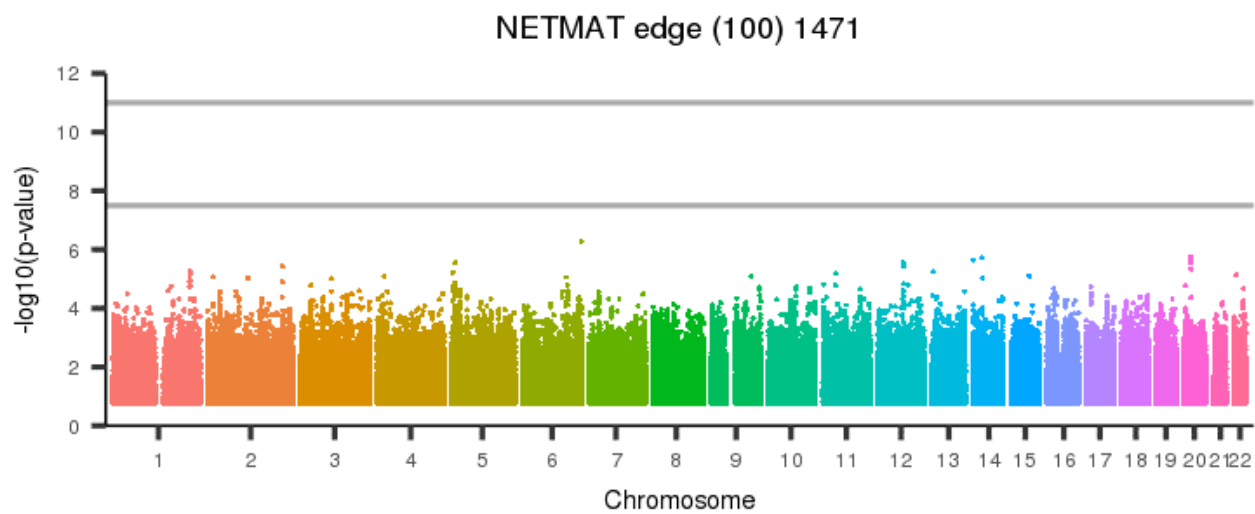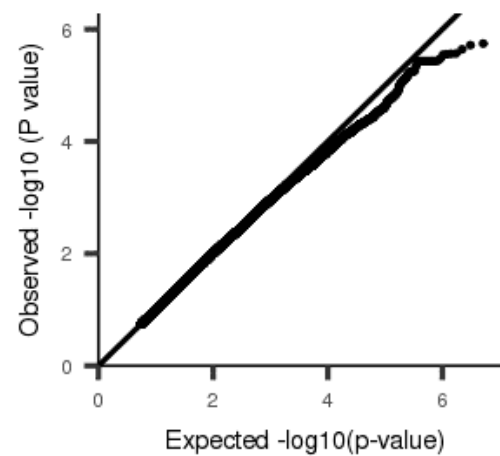

[back to list of plots](#)

Figure 2628: NETMAT edge (100) 1472

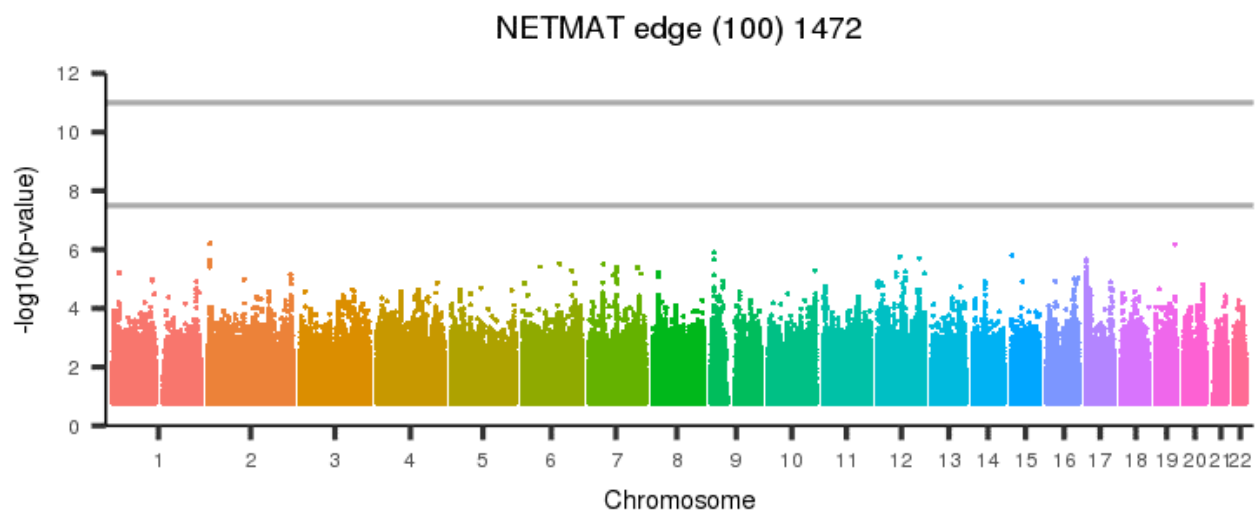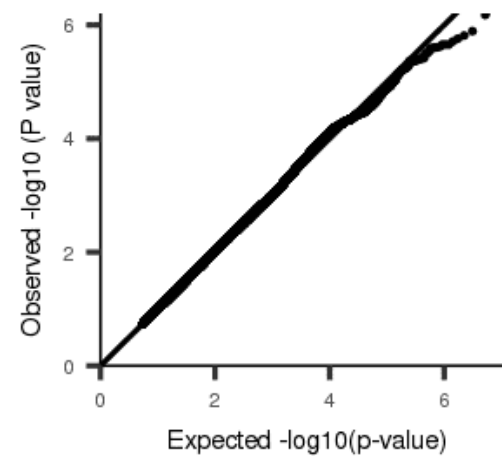

[back to list of plots](#)

Figure 2629: NETMAT edge (100) 1473

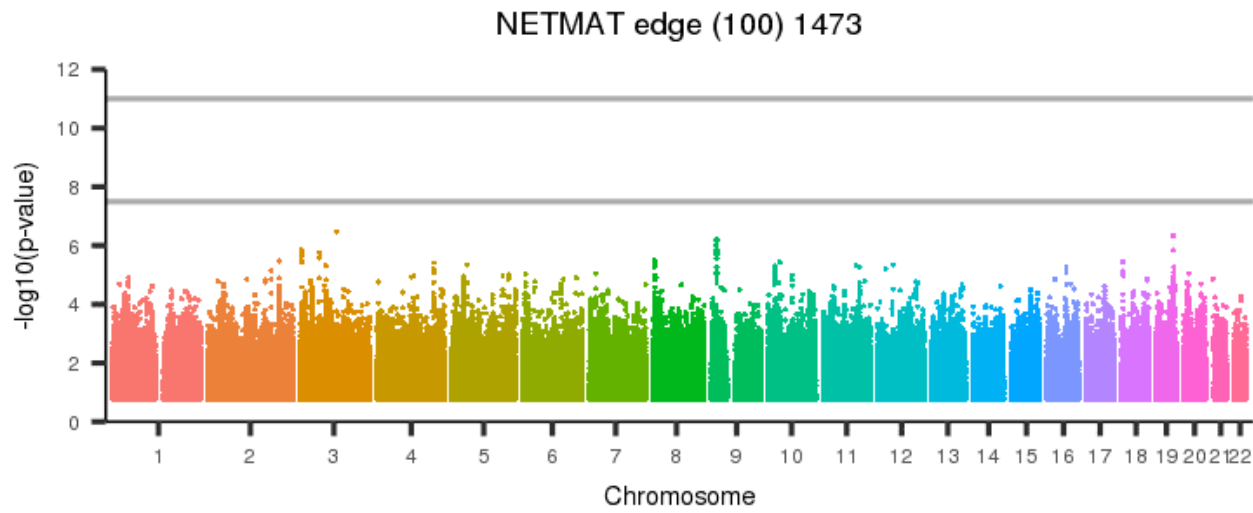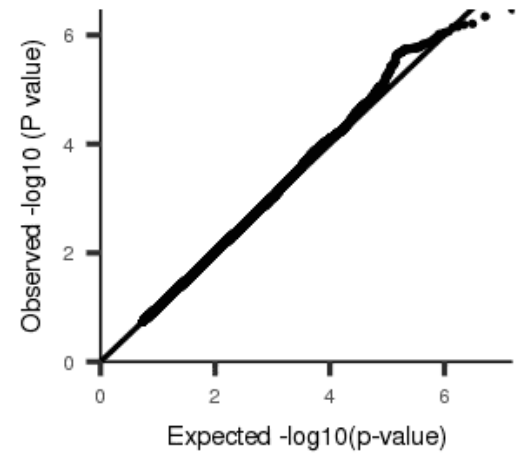

[back to list of plots](#)



Figure 2630: NETMAT edge (100) 1474

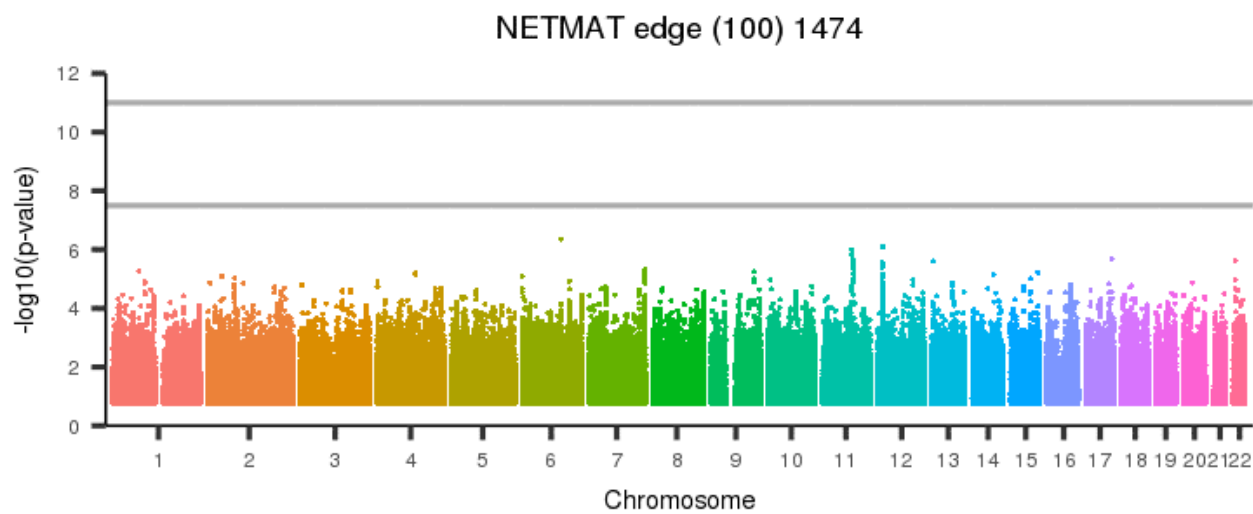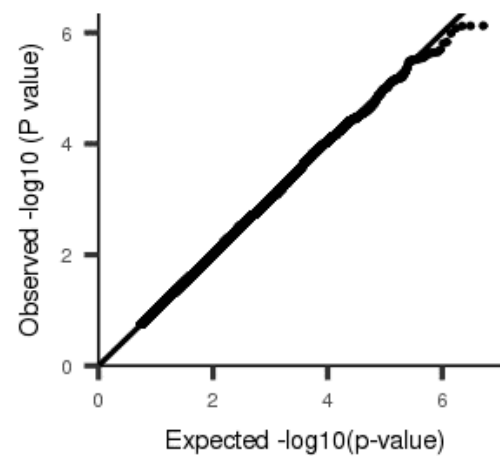

[back to list of plots](#)

Figure 2631: NETMAT edge (100) 1475

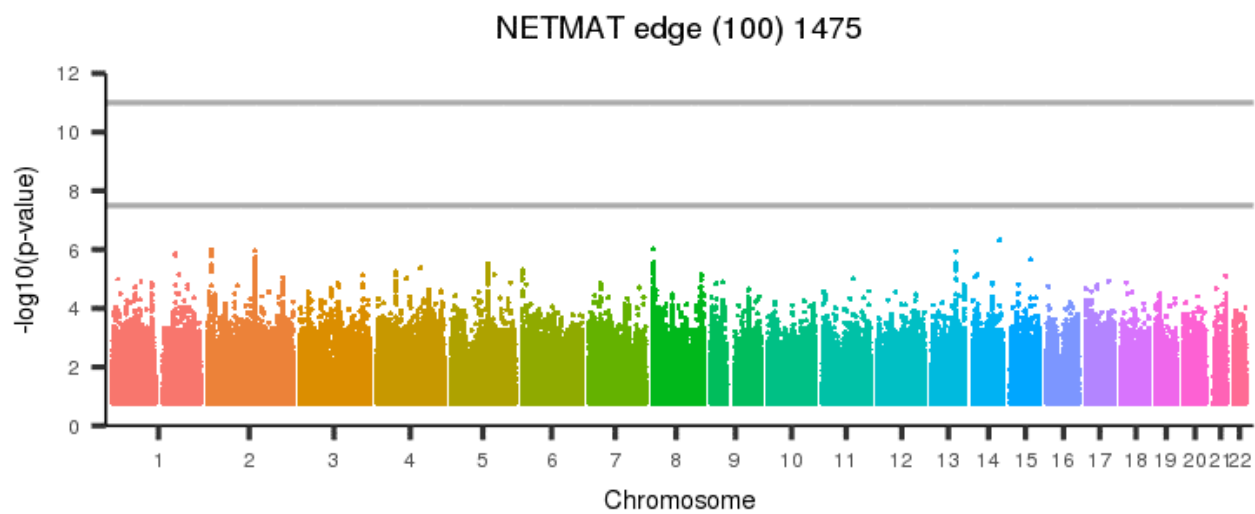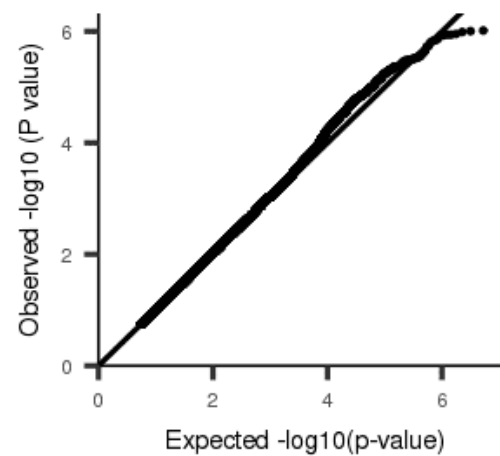

[back to list of plots](#)

Figure 2632: NETMAT edge (100) 1476

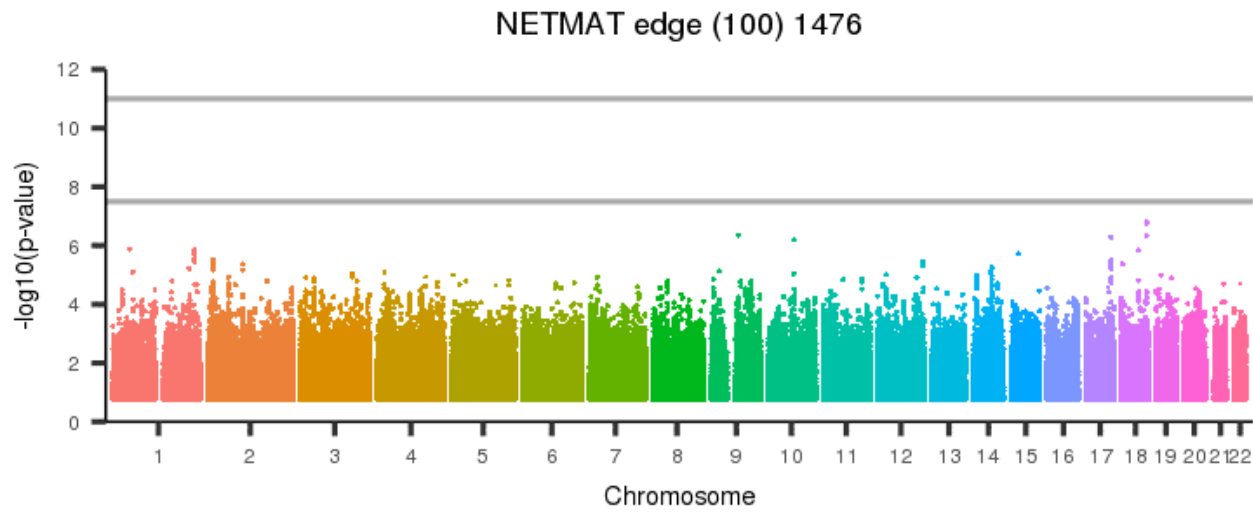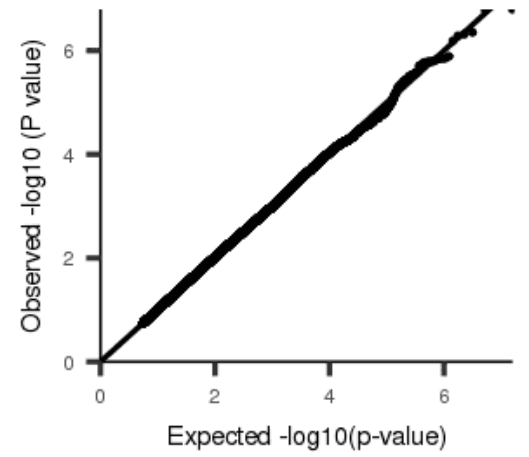

[back to list of plots](#)

Figure 2633: NETMAT edge (100) 1477

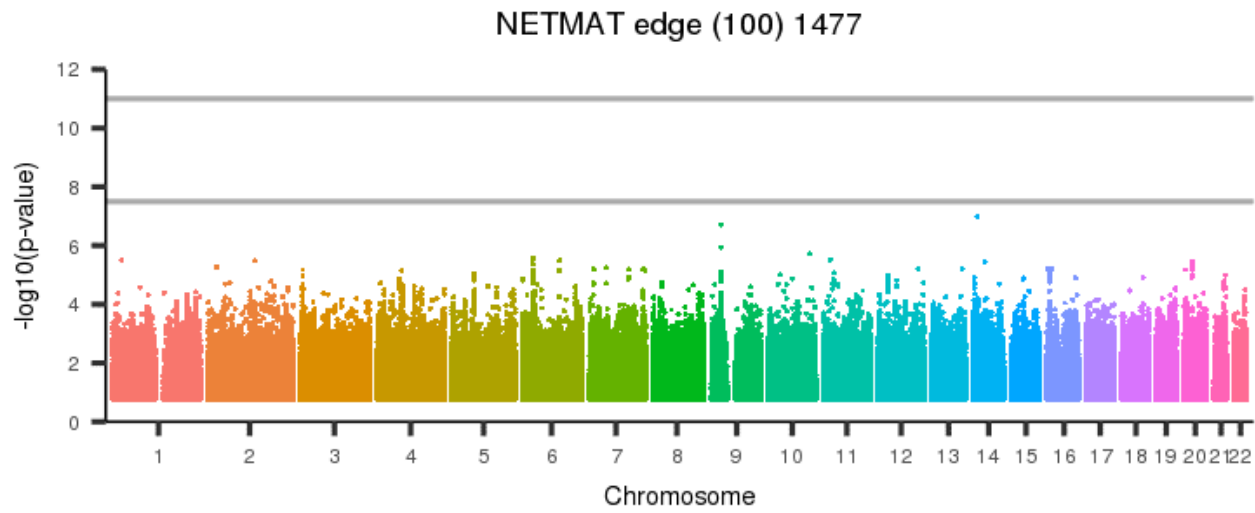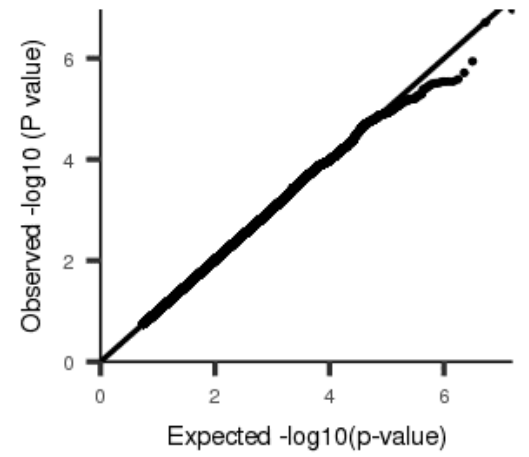

[back to list of plots](#)

Figure 2634: NETMAT edge (100) 1478

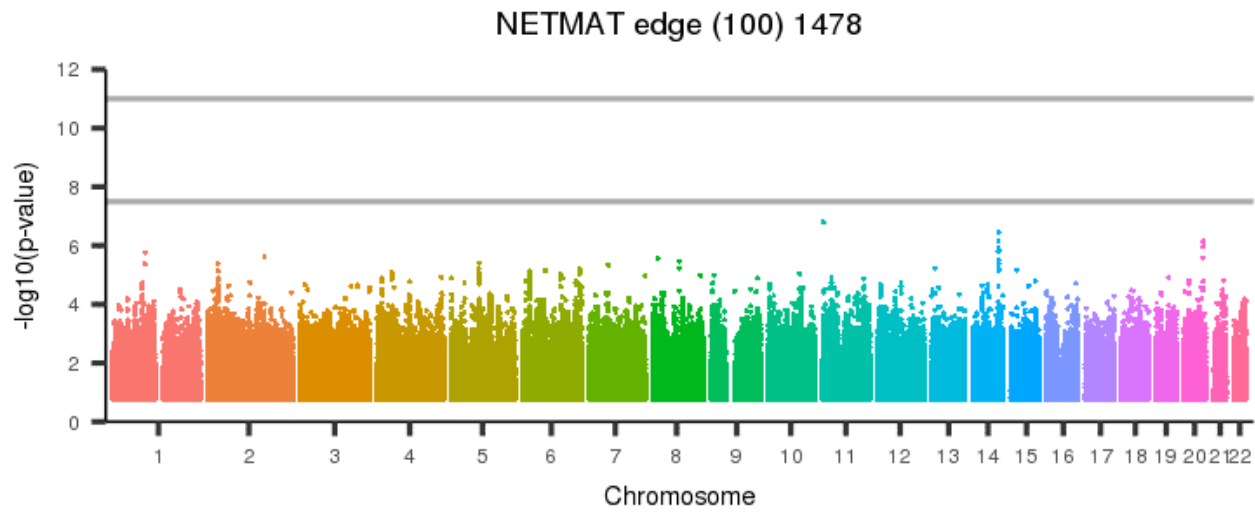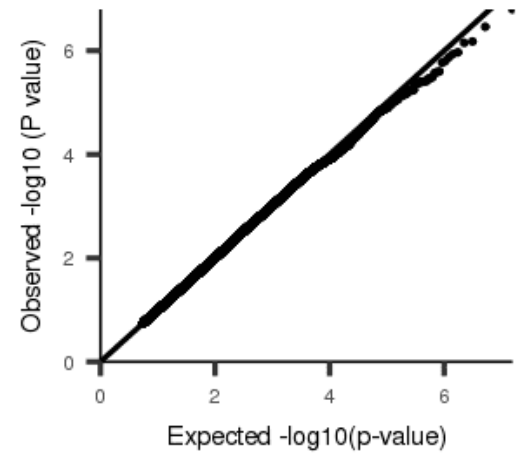

[back to list of plots](#)

Figure 2635: NETMAT edge (100) 1479

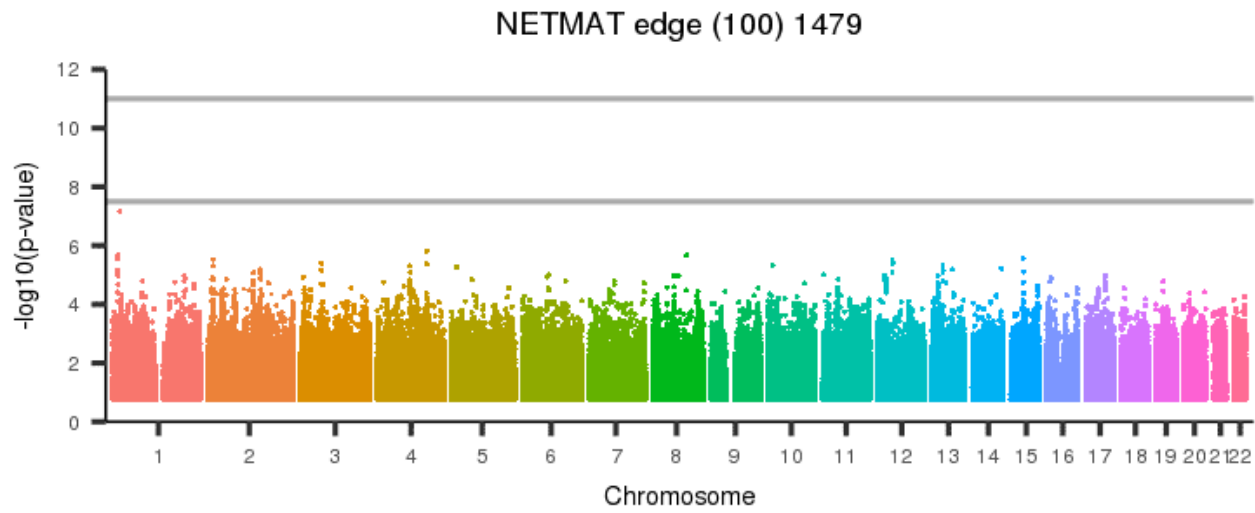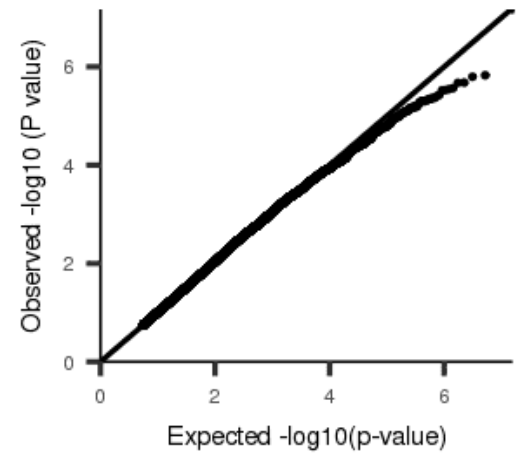

[back to list of plots](#)

Figure 2636: NETMAT edge (100) 1480

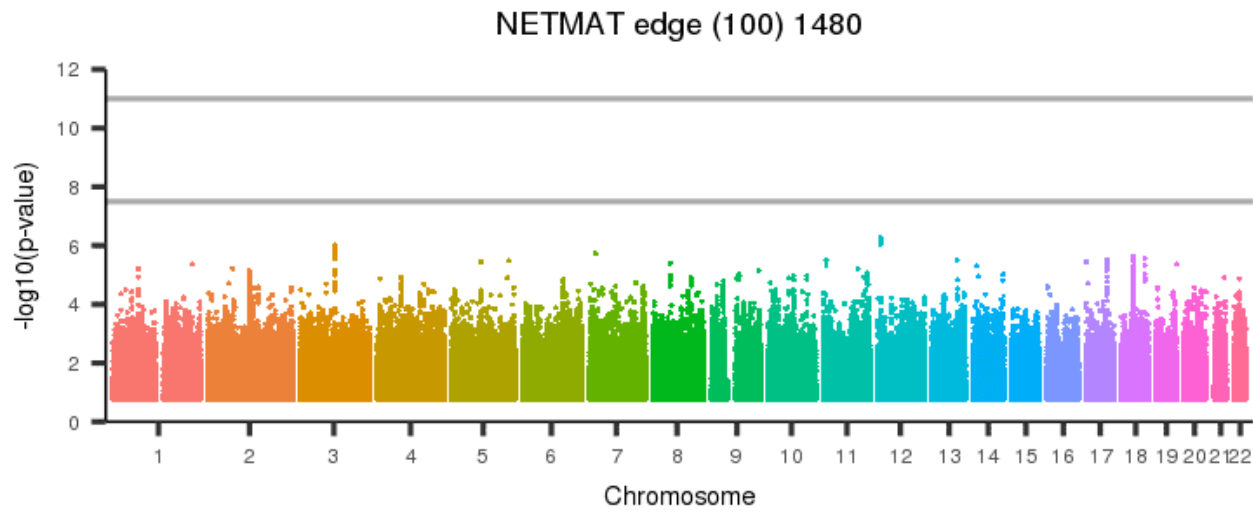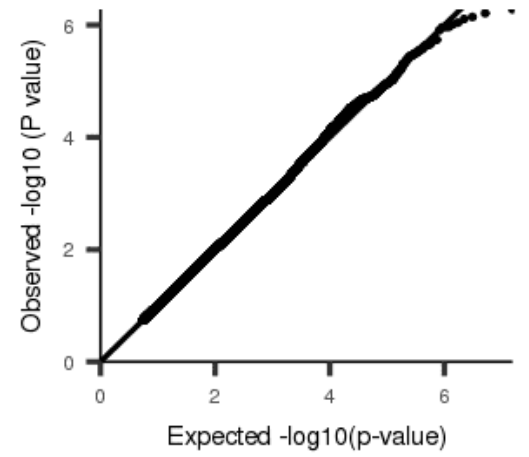

[back to list of plots](#)

Figure 2637: NETMAT edge (100) 1481

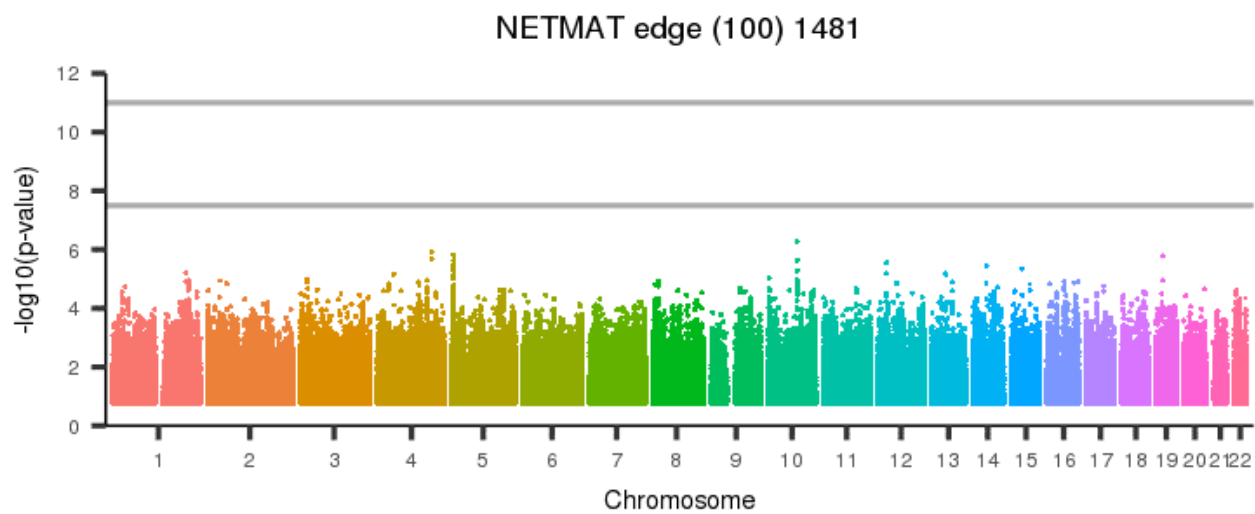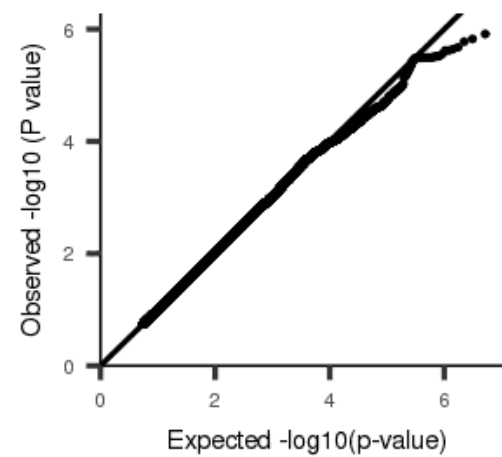

[back to list of plots](#)



Figure 2638: NETMAT edge (100) 1482

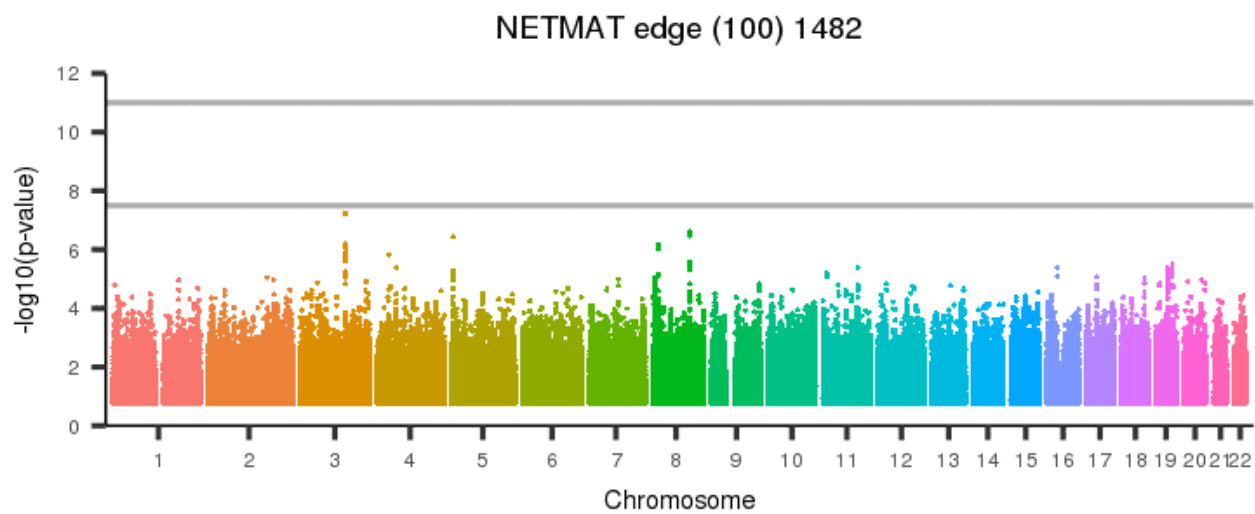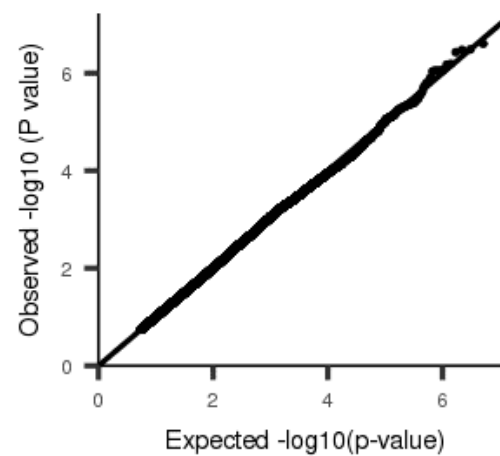

[back to list of plots](#)

Figure 2639: NETMAT edge (100) 1483

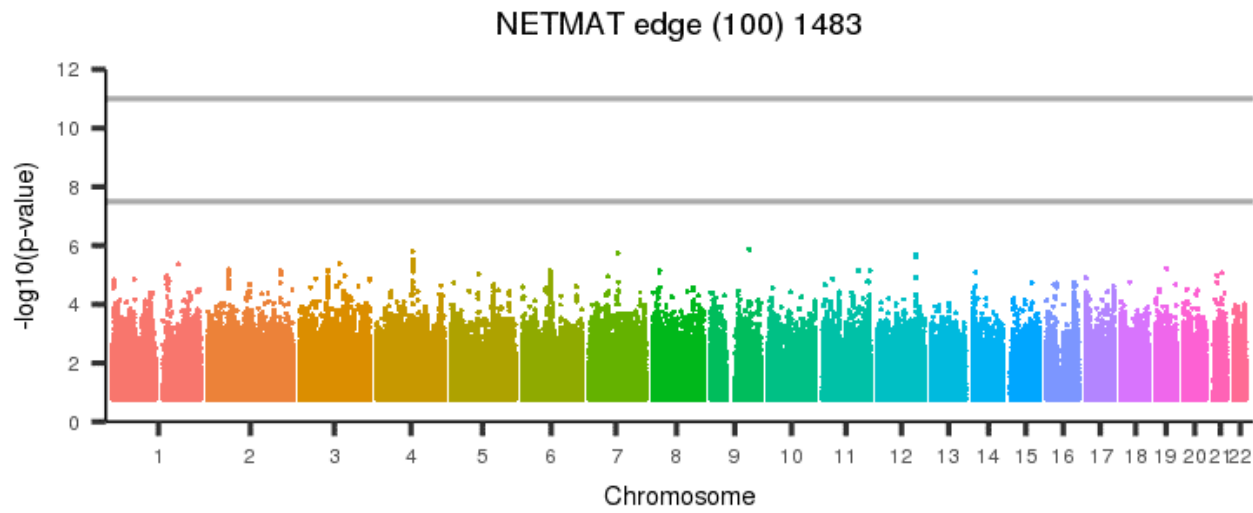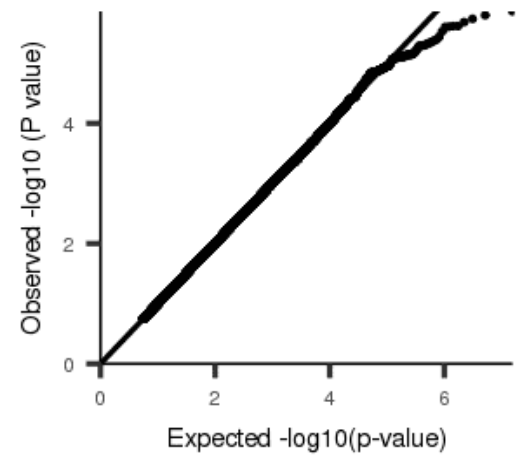

[back to list of plots](#)

Figure 2640: NETMAT edge (100) 1484

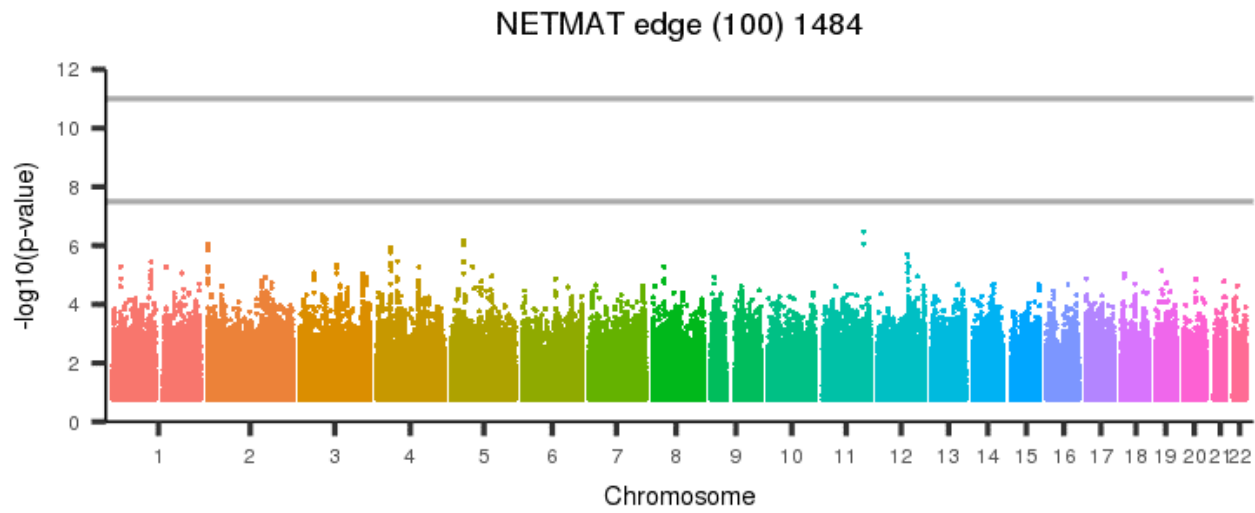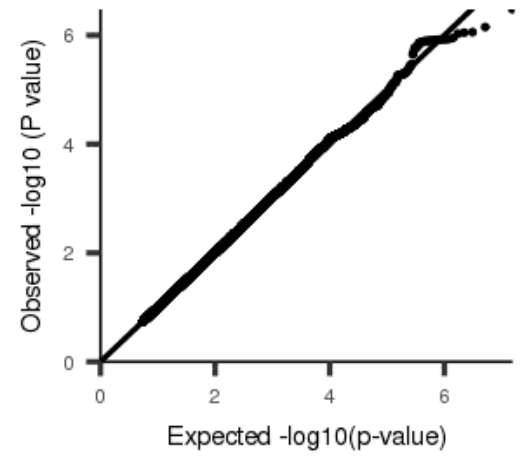

[back to list of plots](#)

Figure 2641: NETMAT edge (100) 1485

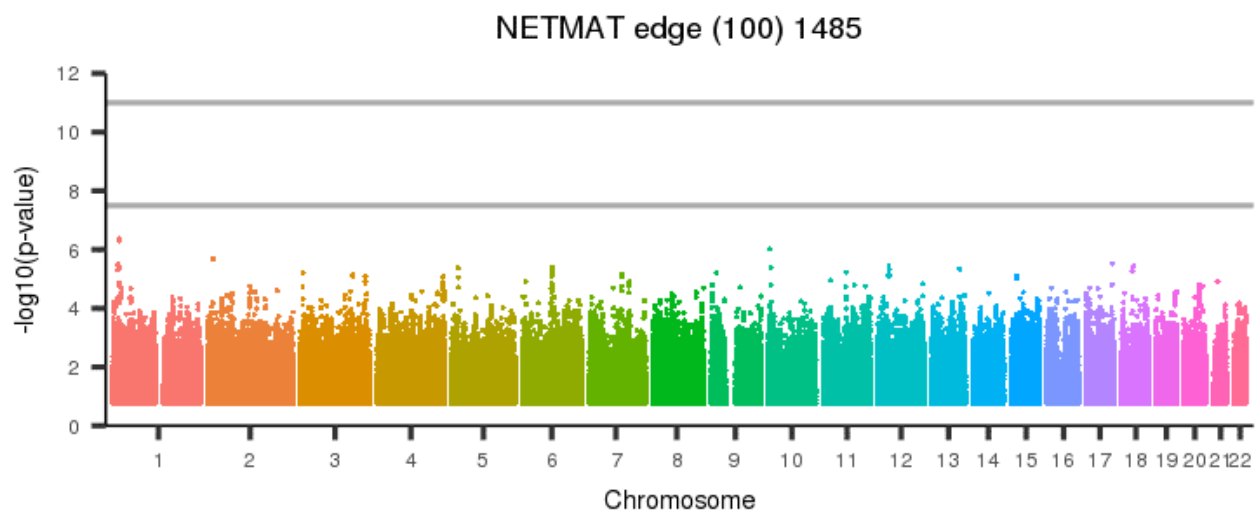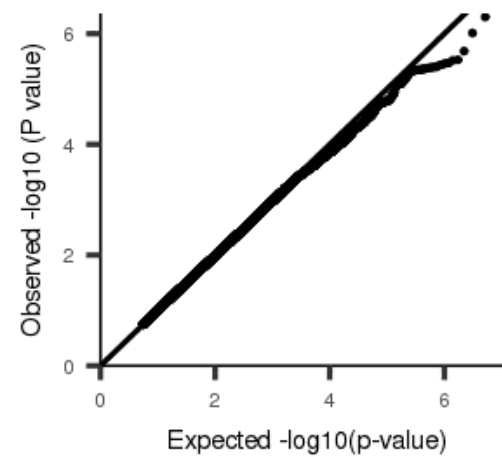

[back to list of plots](#)

Figure 2642: T1 FIRST left plus right thalamus volume

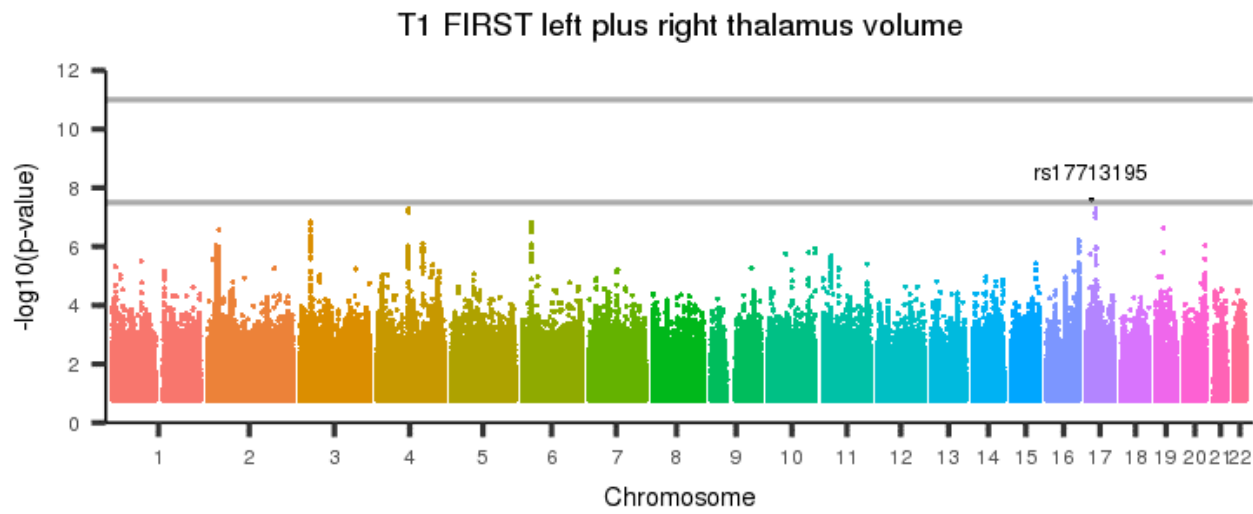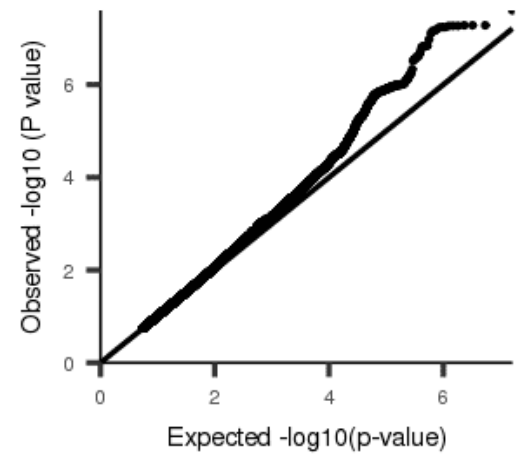

[back to list of plots](#)

Figure 2643: T1 FIRST left plus right caudate volume

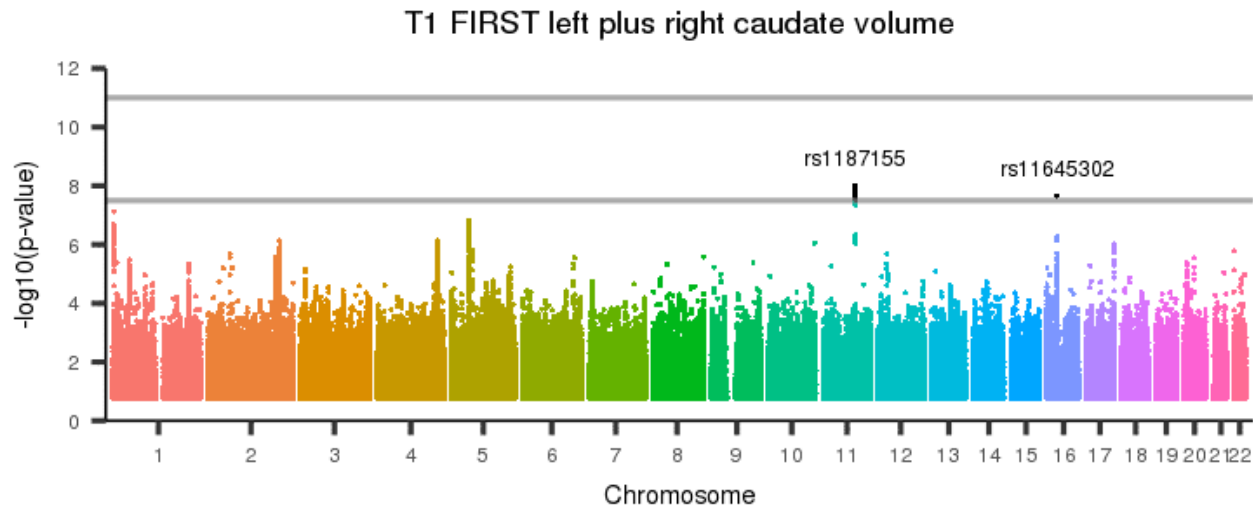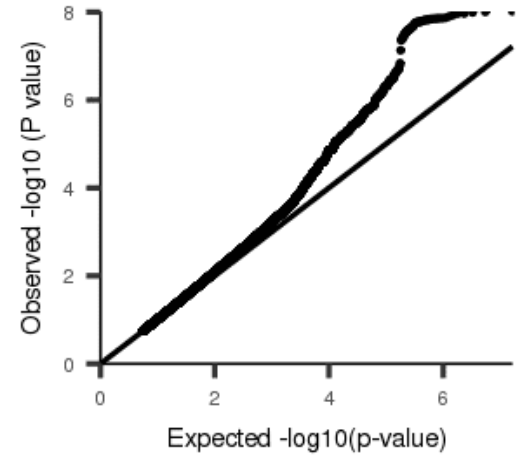

[back to list of plots](#)

Figure 2644: T1 FIRST left plus right putamen volume

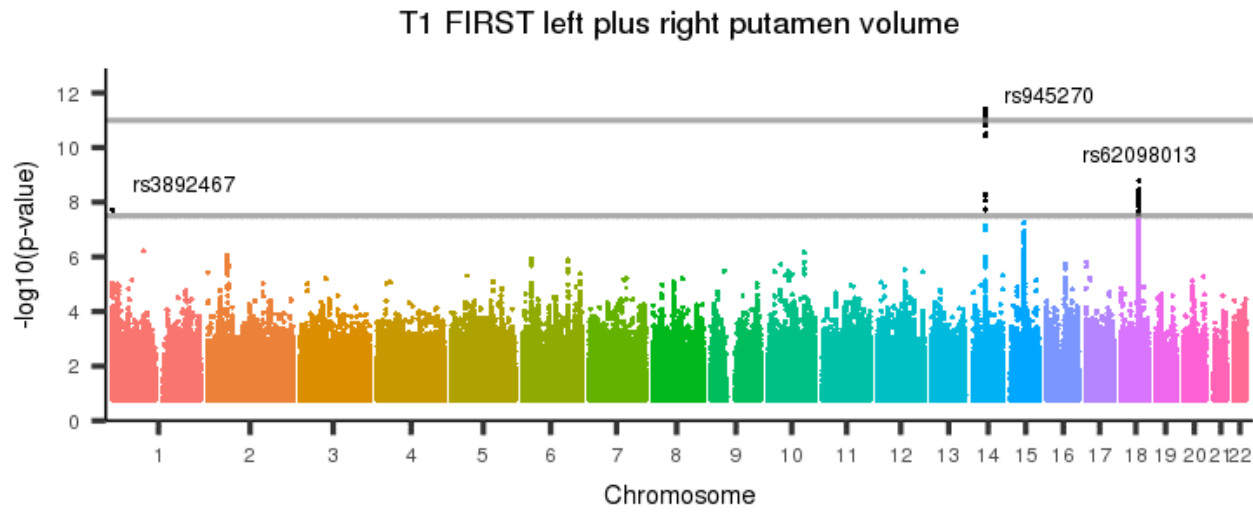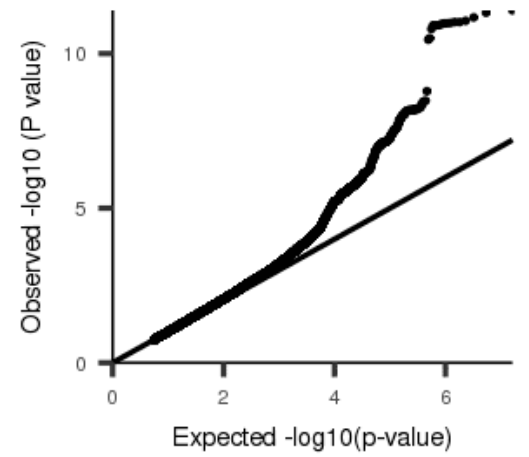

[back to list of plots](#)

Figure 2645: T1 FIRST left plus right pallidum volume

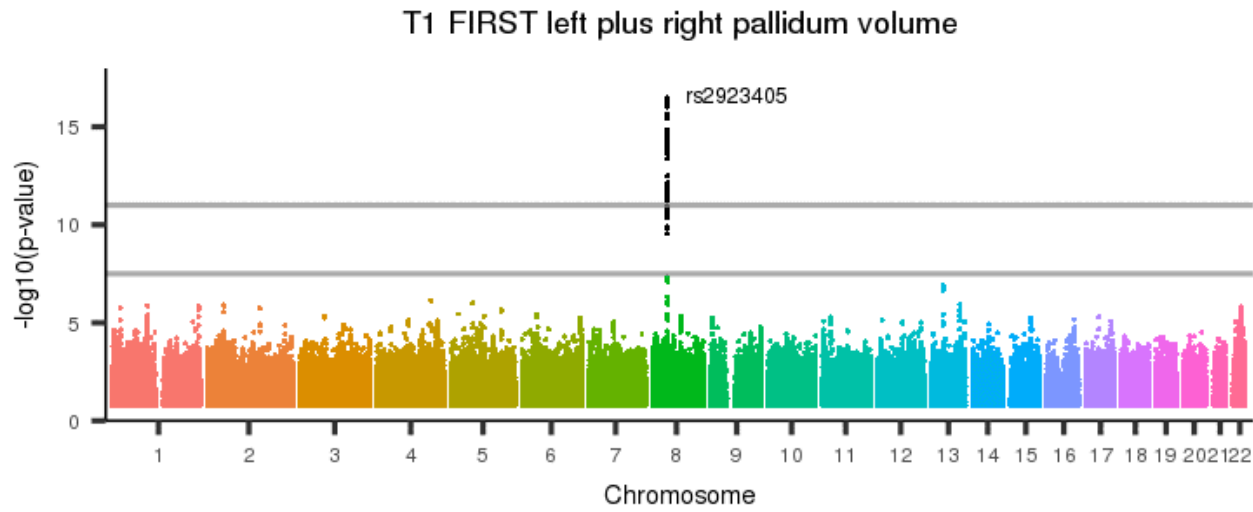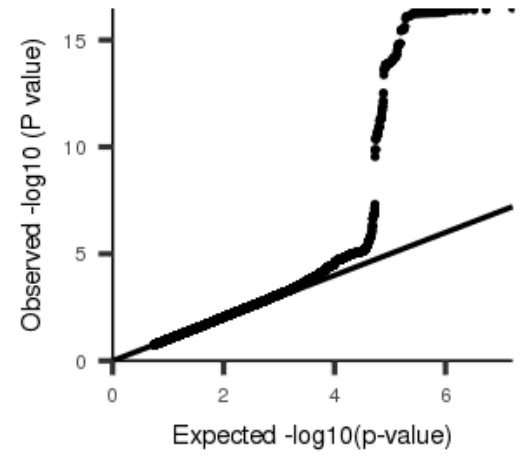

[back to list of plots](#)



Figure 2646: T1 FIRST left plus right hippocampus volume

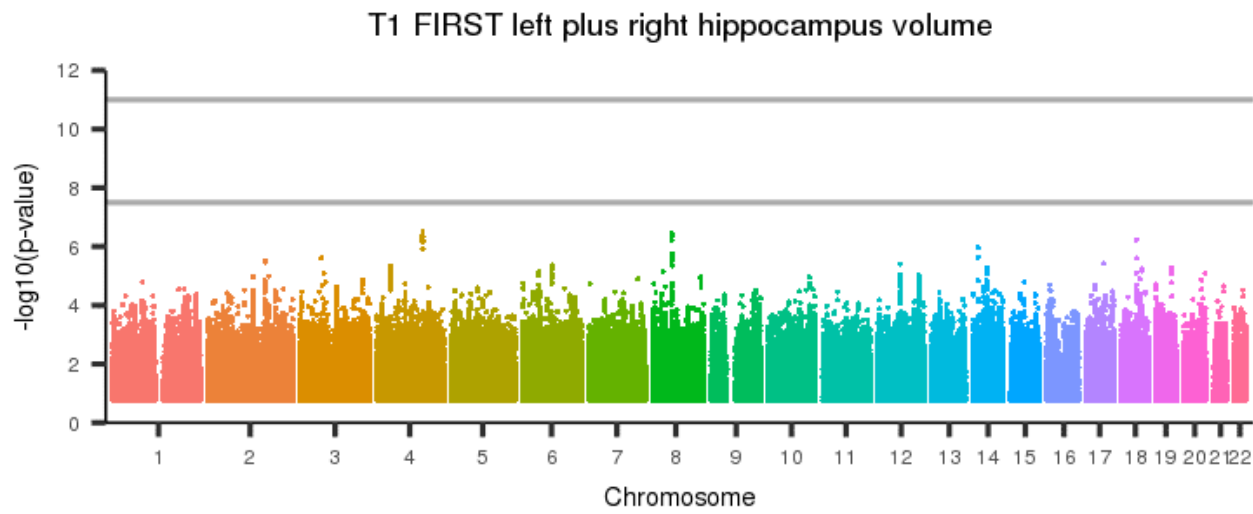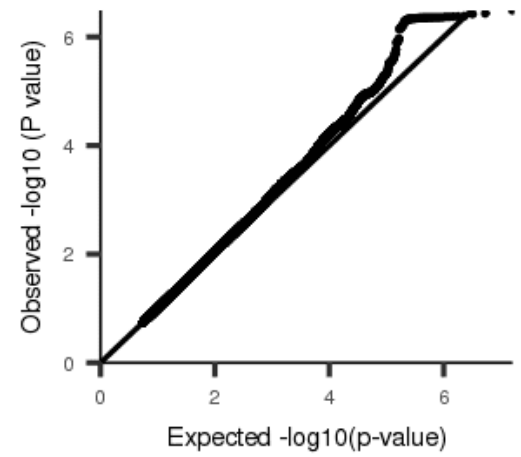

[back to list of plots](#)

Figure 2647: T1 FIRST left plus right amygdala volume

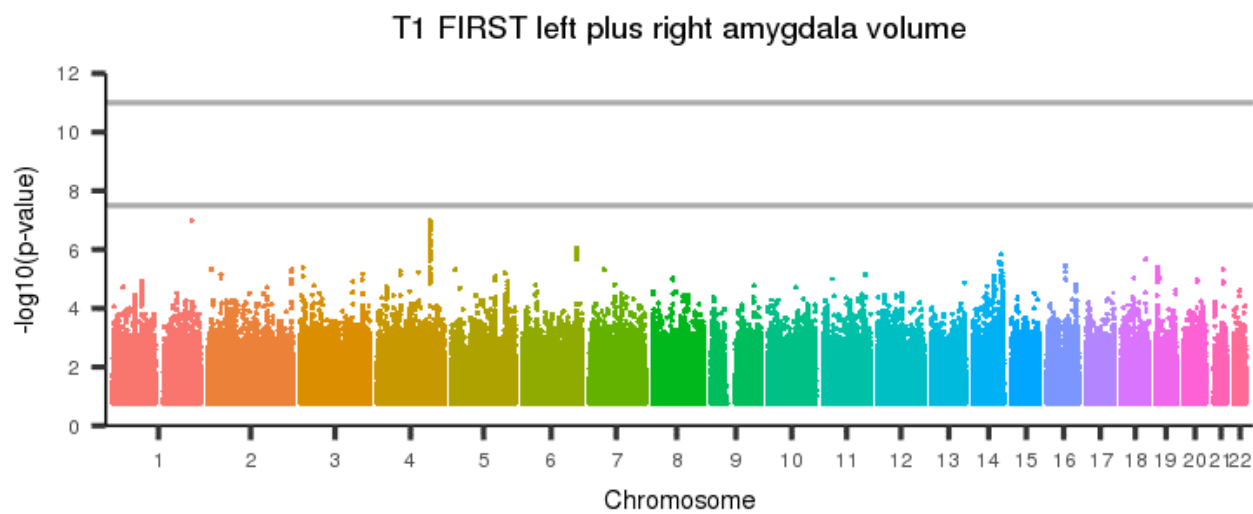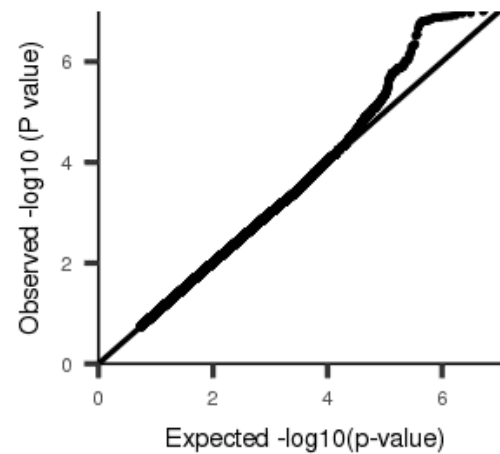

[back to list of plots](#)

Figure 2648: T1 FIRST left plus right accumbens volume

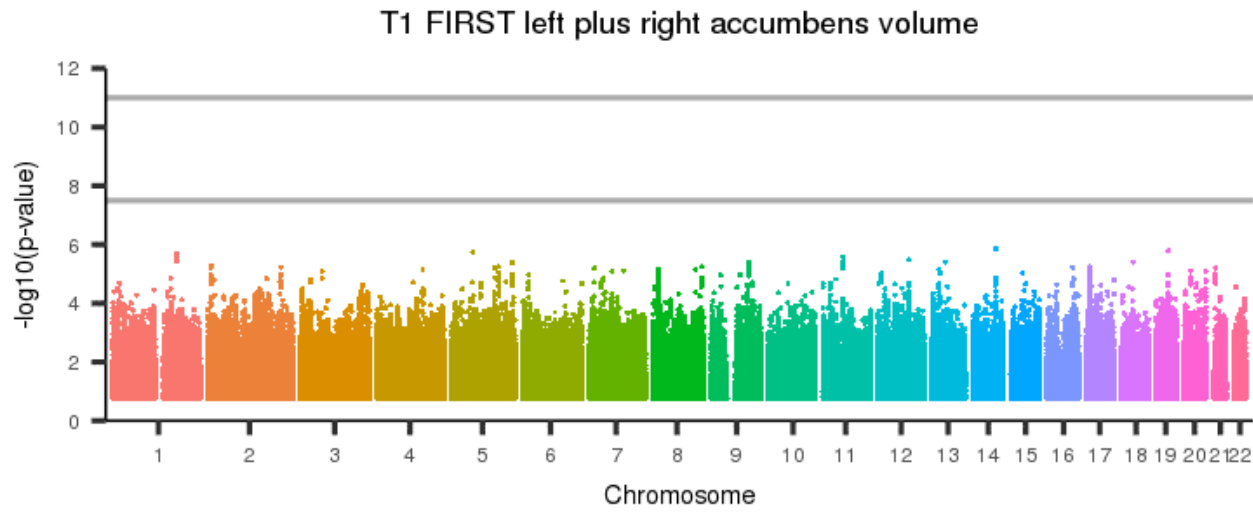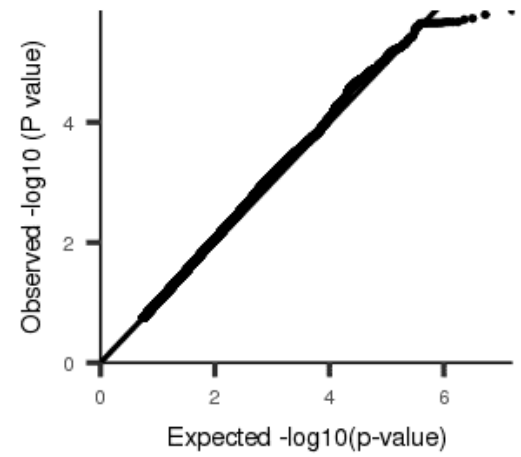

[back to list of plots](#)

Figure 2649: SWI T2star left plus right thalamus

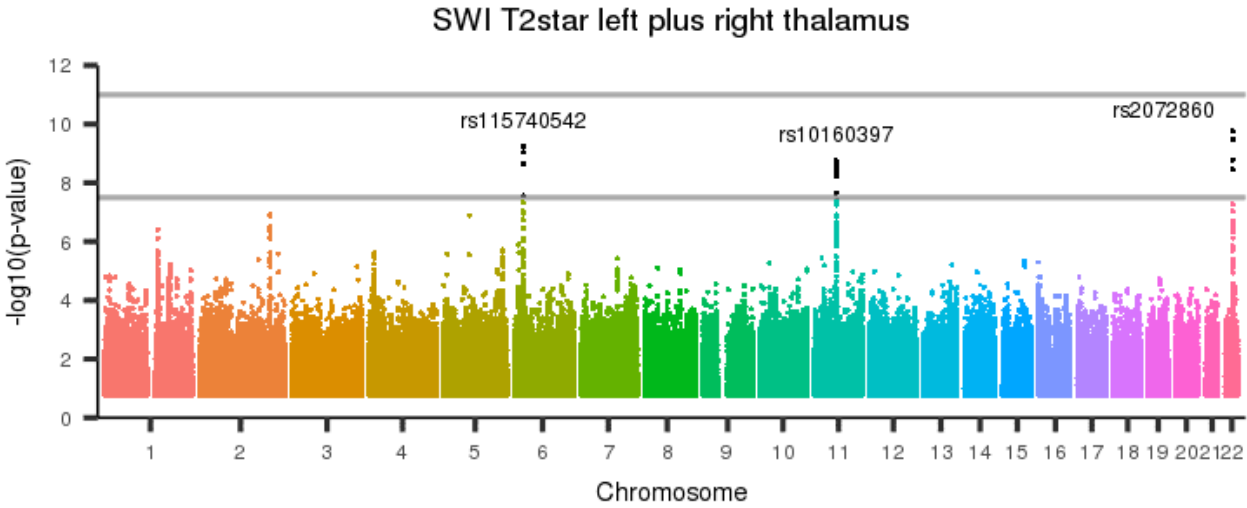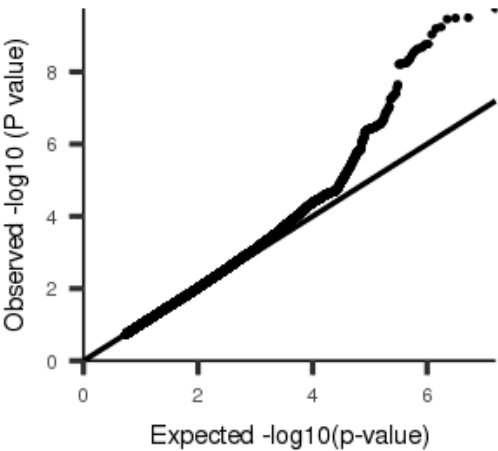

[back to list of plots](#)

Figure 2650: SWI T2star left plus right caudate

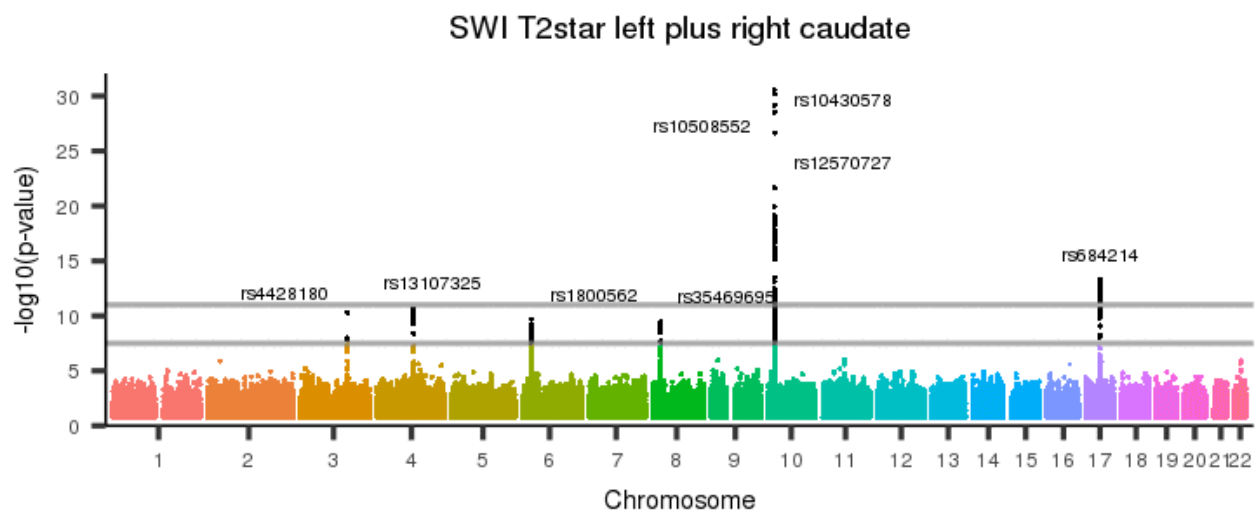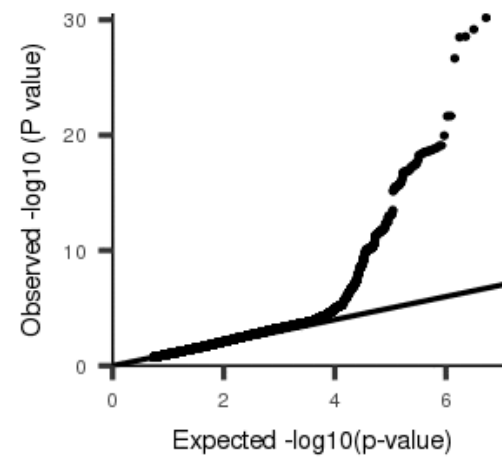

[back to list of plots](#)

Figure 2651: SWI T2star left plus right putamen

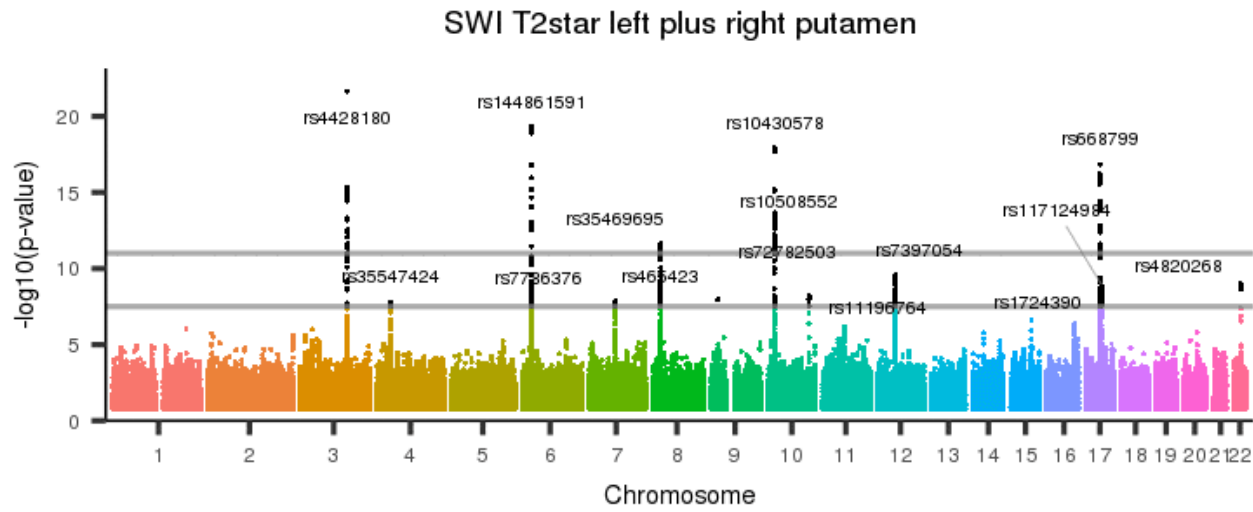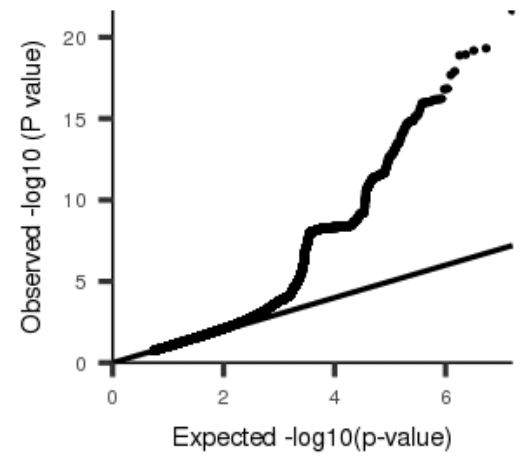

[back to list of plots](#)

Figure 2652: SWI T2star left plus right pallidum

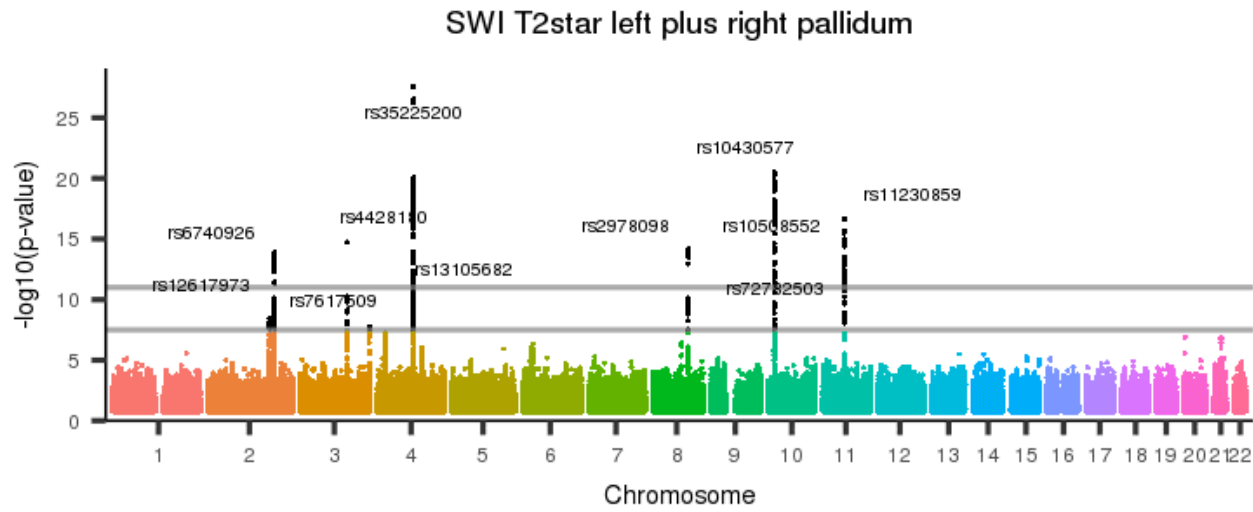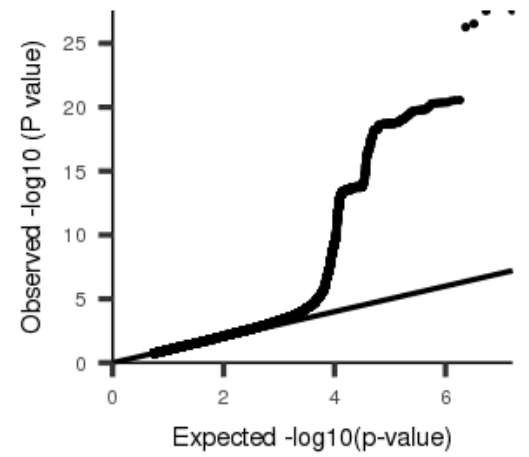

[back to list of plots](#)

Figure 2653: SWI T2star left plus right hippocampus

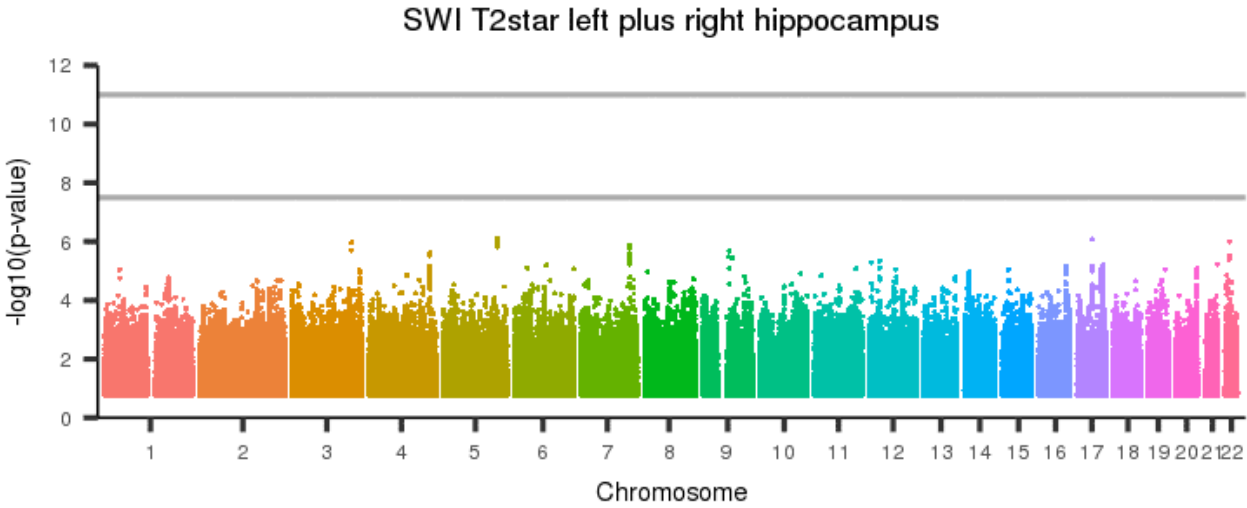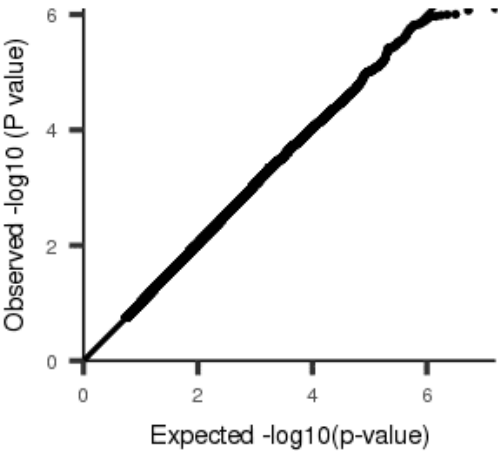

[back to list of plots](#)



Figure 2654: SWI T2star left plus right amygdala

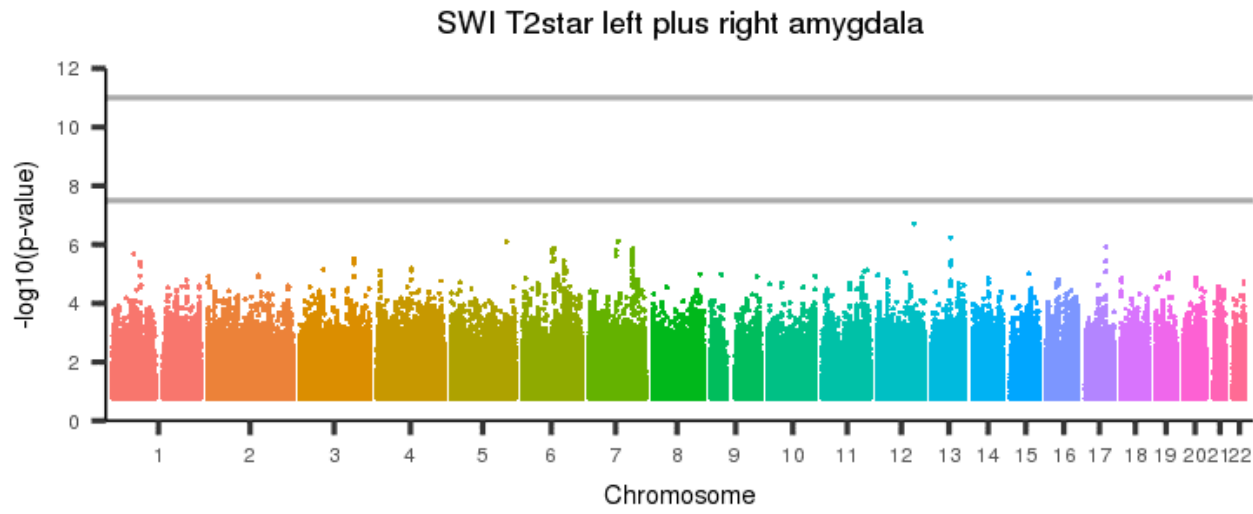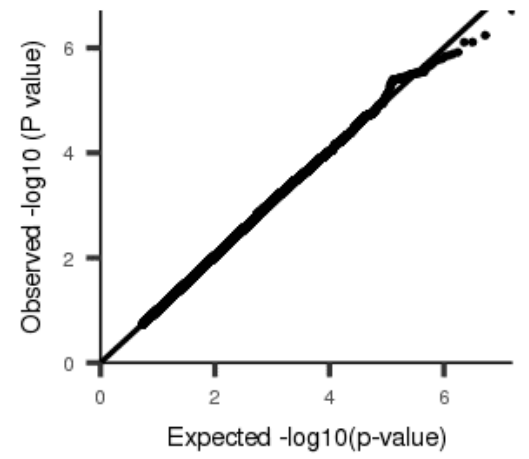

[back to list of plots](#)

Figure 2655: SWI T2star left plus right accumbens

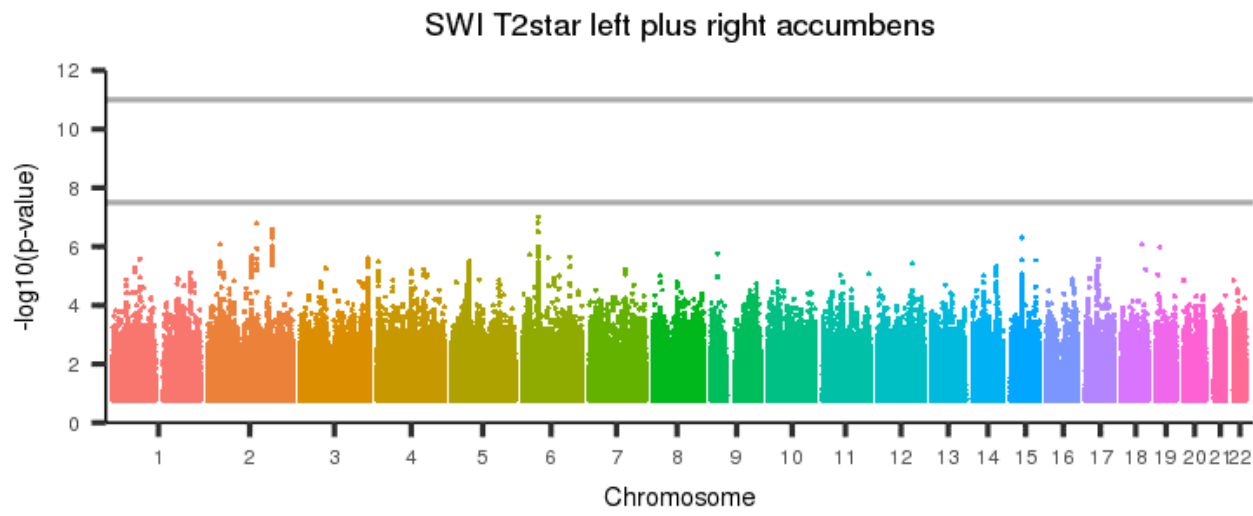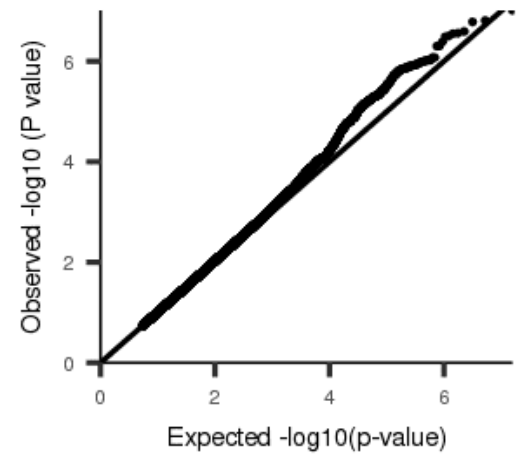

[back to list of plots](#)

Figure 2656: FreeSurfer volume Left-Lateral-Ventricle

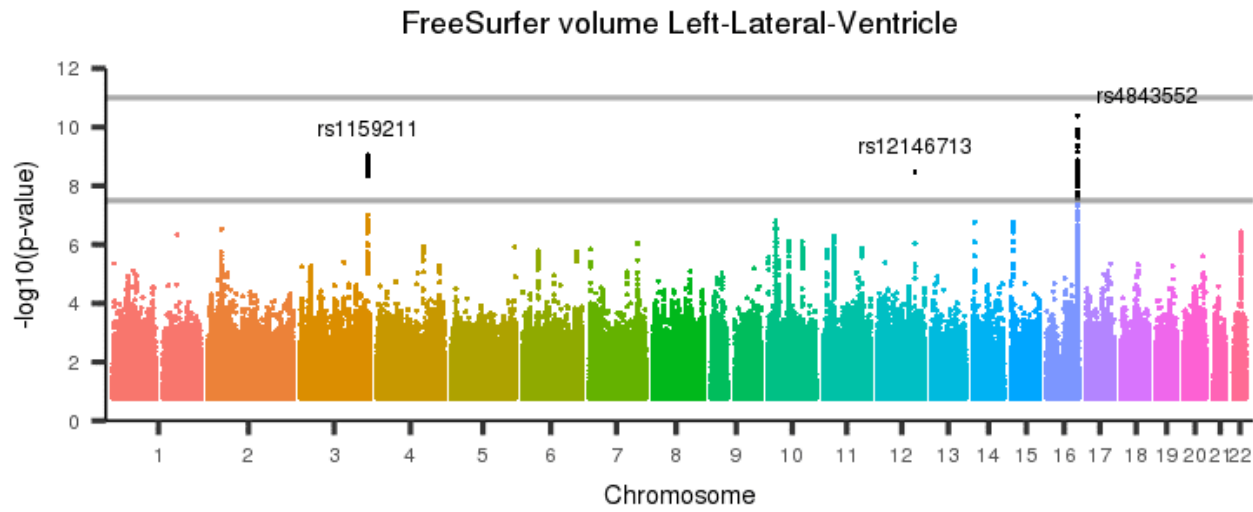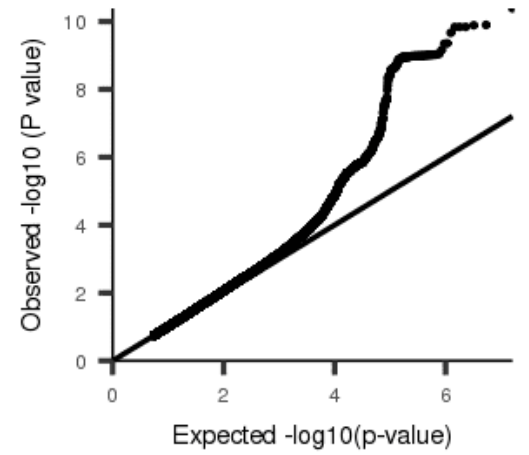

[back to list of plots](#)

Figure 2657: FreeSurfer volume Left-Inf-Lat-Vent

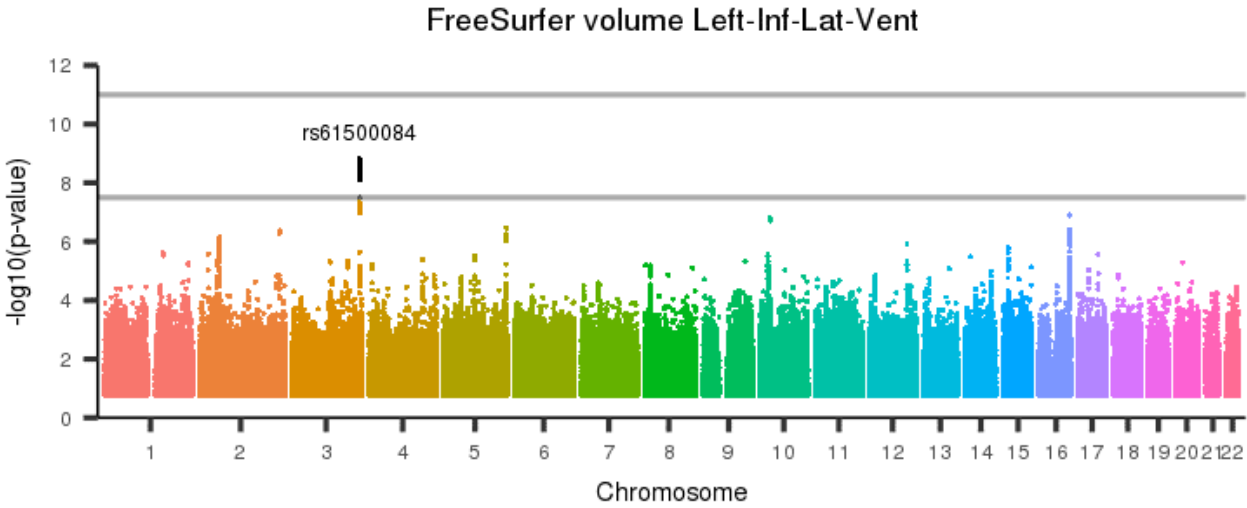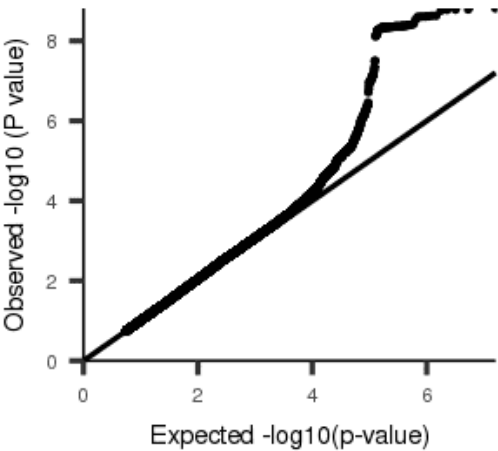

[back to list of plots](#)

Figure 2658: FreeSurfer volume Left-Cerebellum-White-Matter

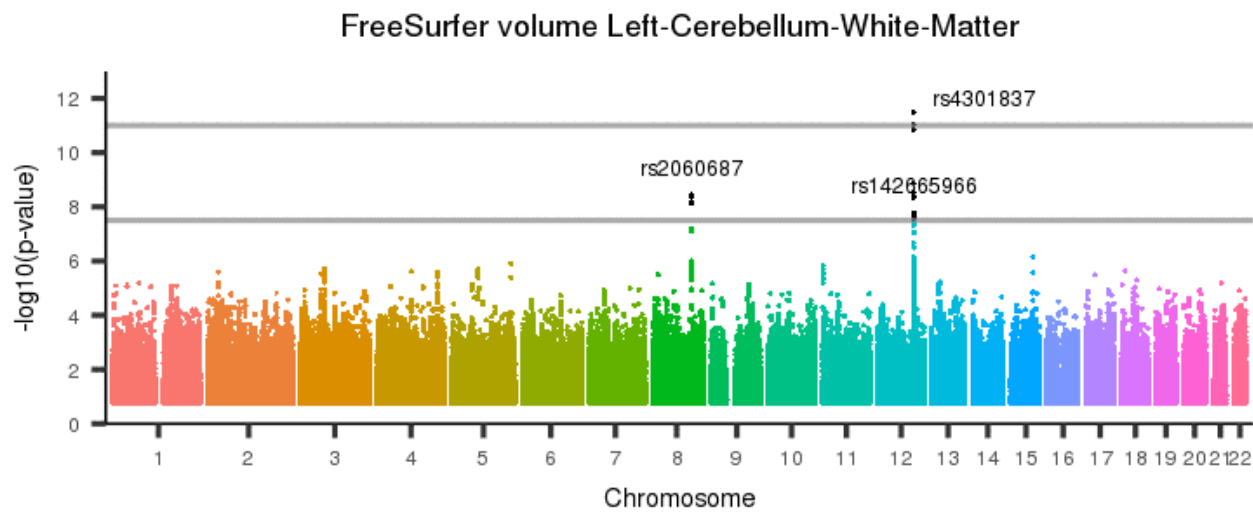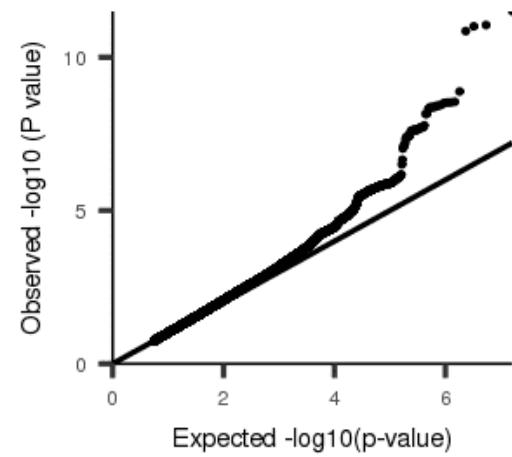

[back to list of plots](#)

Figure 2659: FreeSurfer volume Left-Cerebellum-Cortex

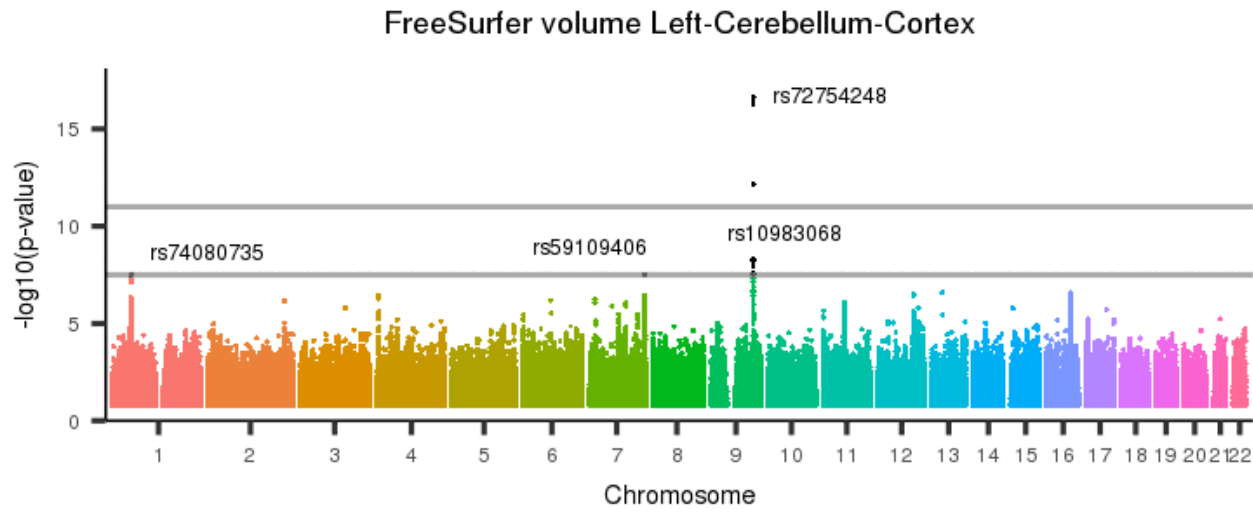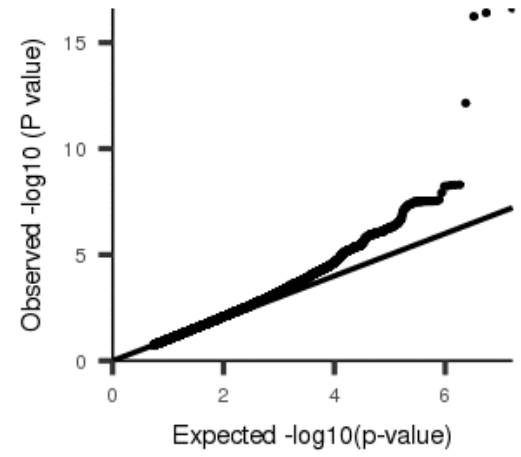

[back to list of plots](#)

Figure 2660: FreeSurfer volume Left-Thalamus-Propor

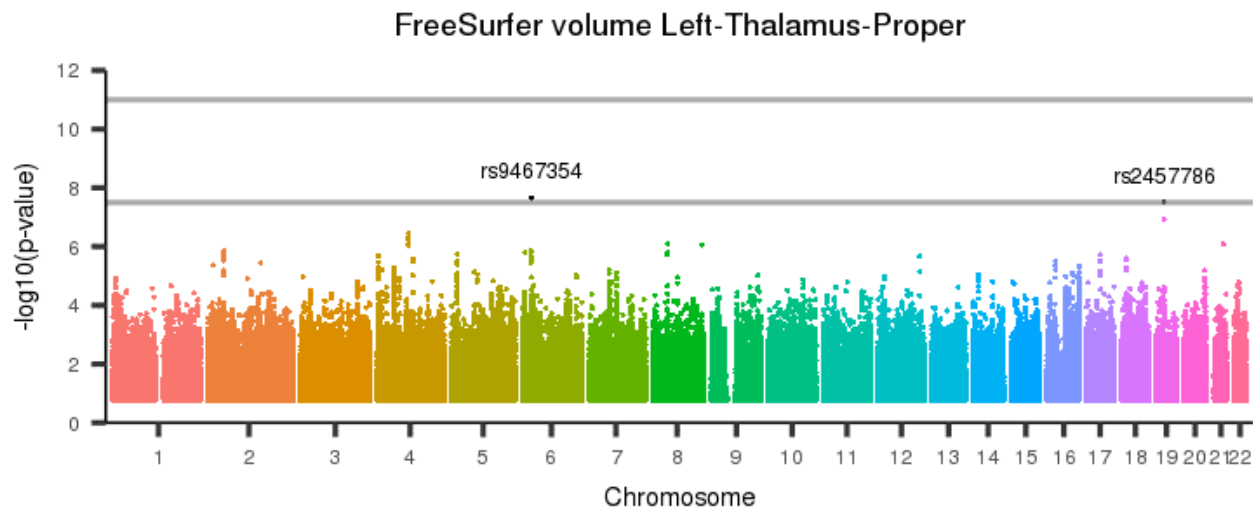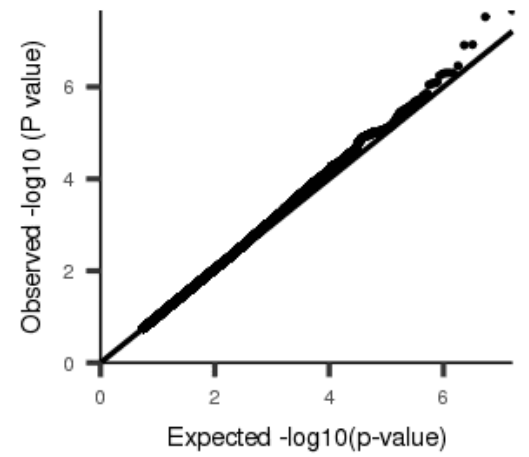

[back to list of plots](#)

Figure 2661: FreeSurfer volume Left-Caudate

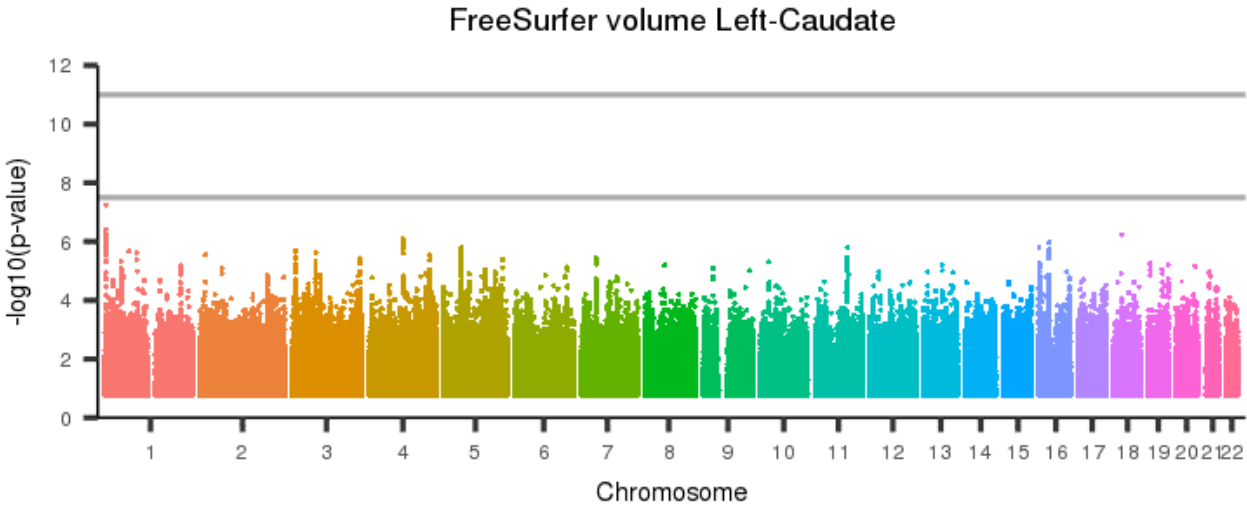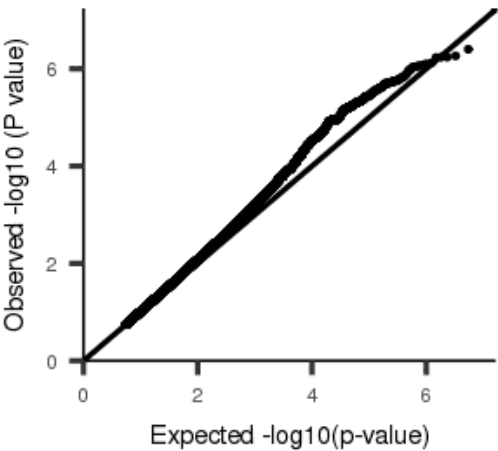

[back to list of plots](#)



Figure 2662: FreeSurfer volume Left-Putamen

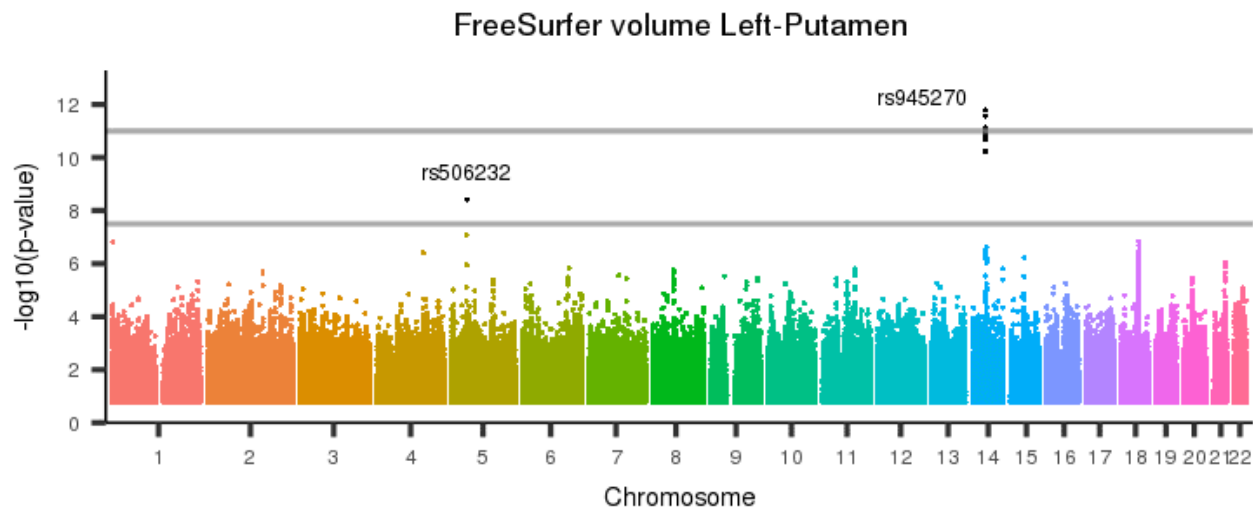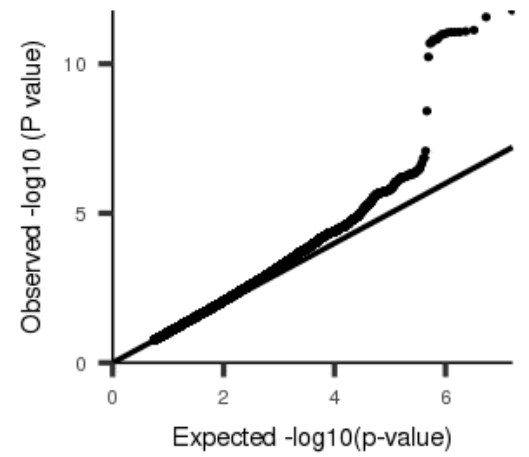

[back to list of plots](#)

Figure 2663: FreeSurfer volume Left-Pallidum

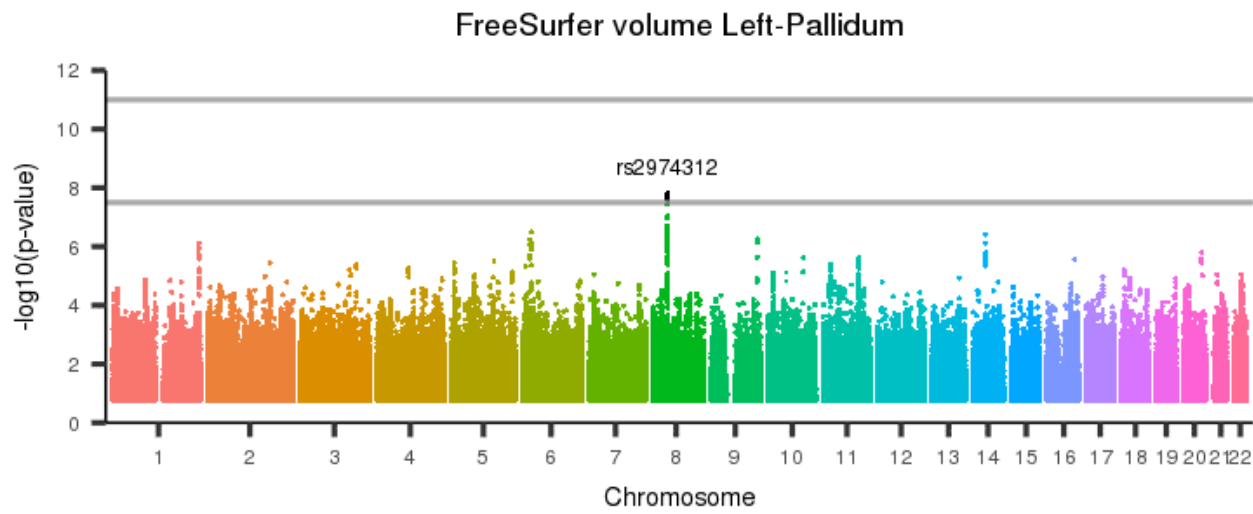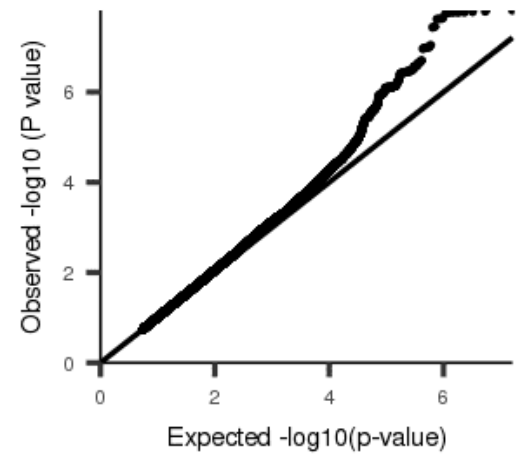

[back to list of plots](#)

Figure 2664: FreeSurfer volume 3rd-Ventricle

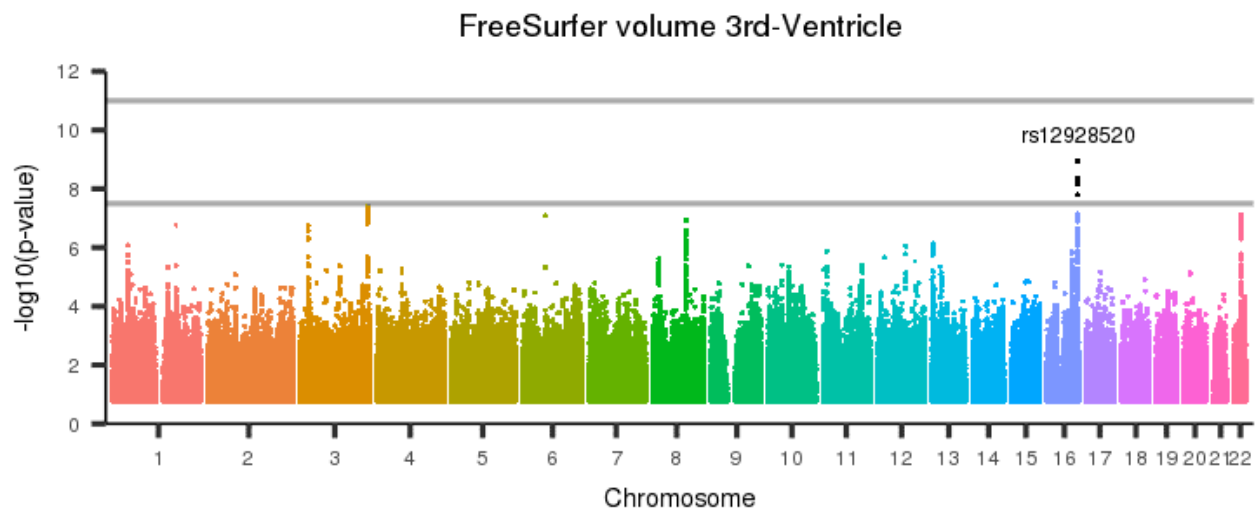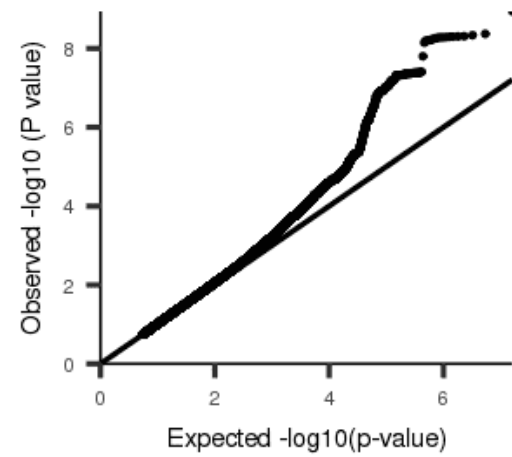

[back to list of plots](#)

Figure 2665: FreeSurfer volume 4th-Ventricle

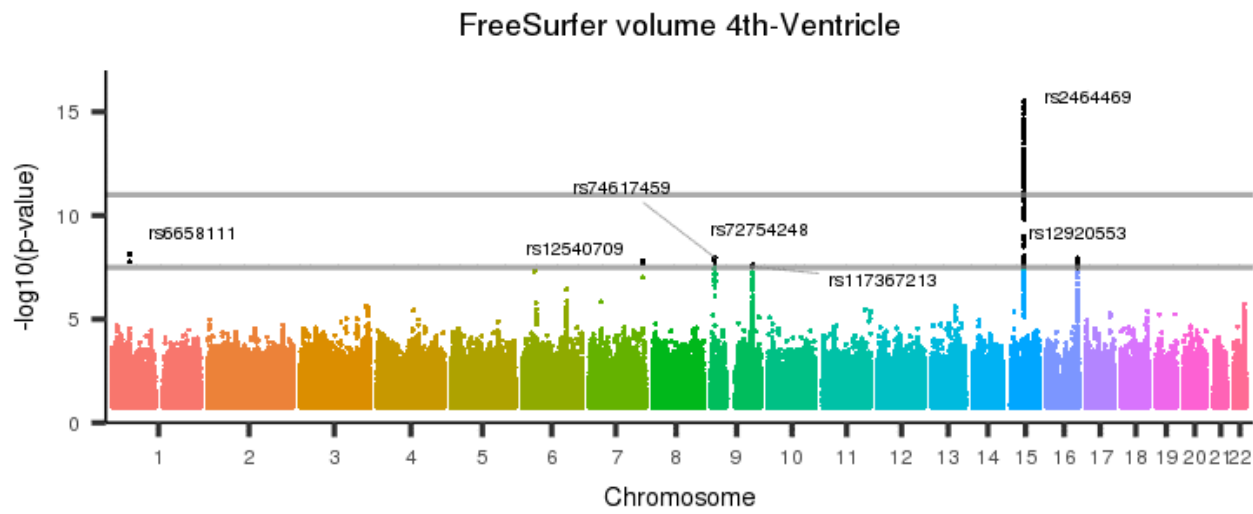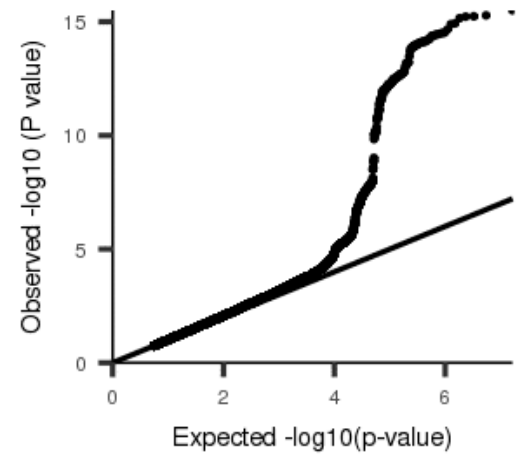

[back to list of plots](#)

Figure 2666: FreeSurfer volume Brain-Stem

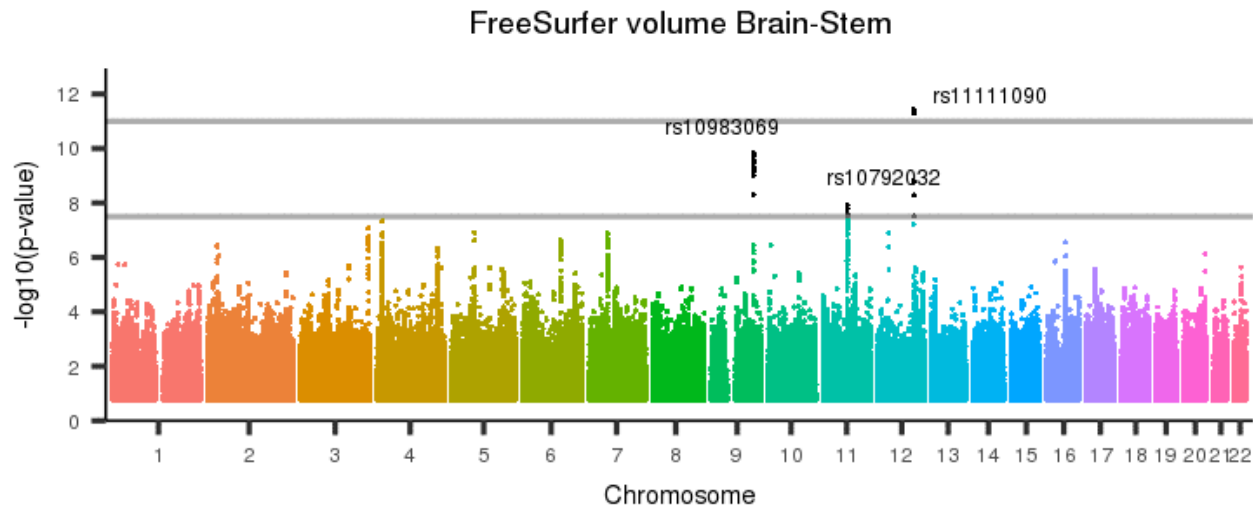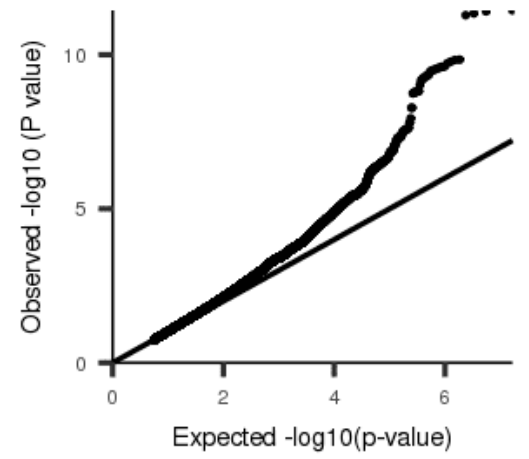

[back to list of plots](#)

Figure 2667: FreeSurfer volume Left-Hippocampus

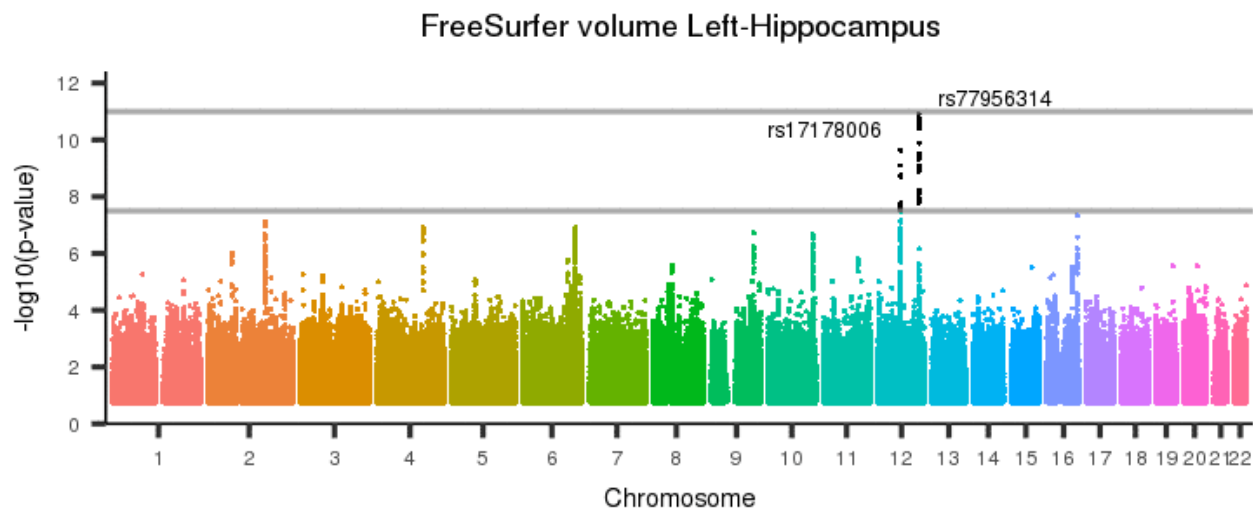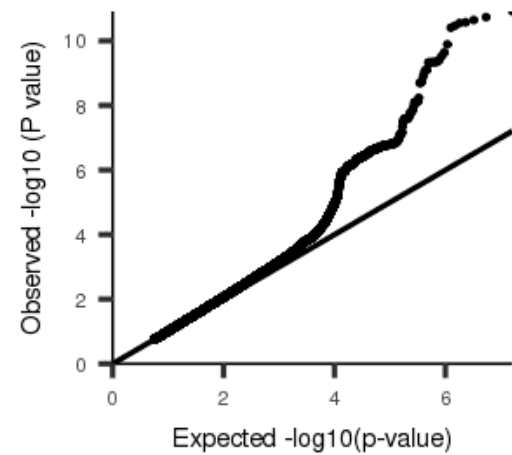

[back to list of plots](#)

Figure 2668: FreeSurfer volume Left-Amygdala

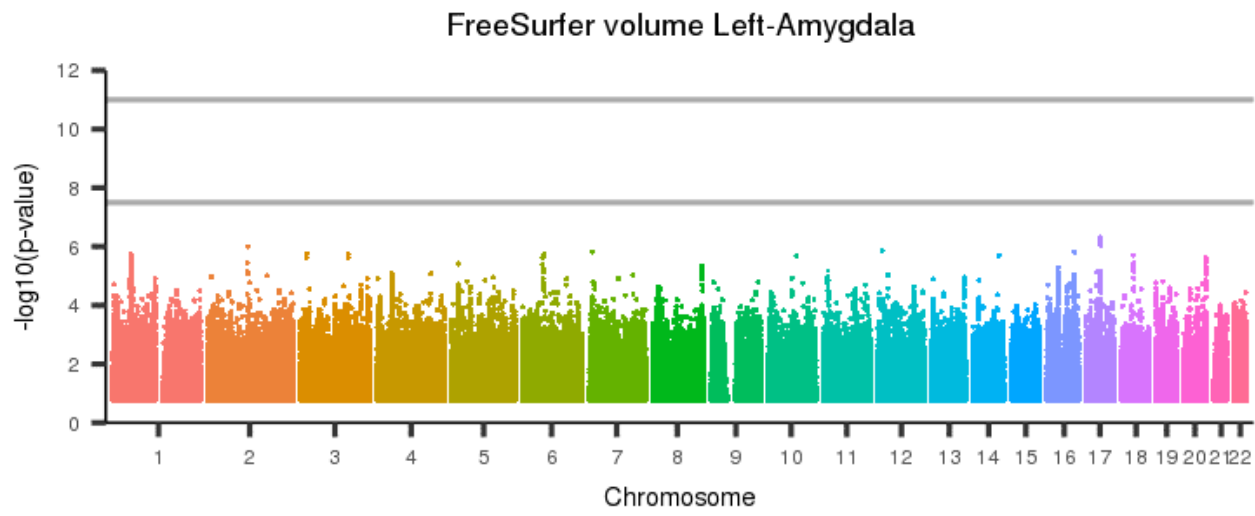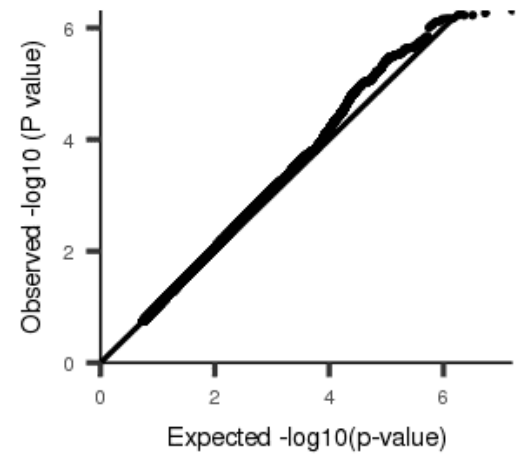

[back to list of plots](#)

Figure 2669: FreeSurfer volume CSF

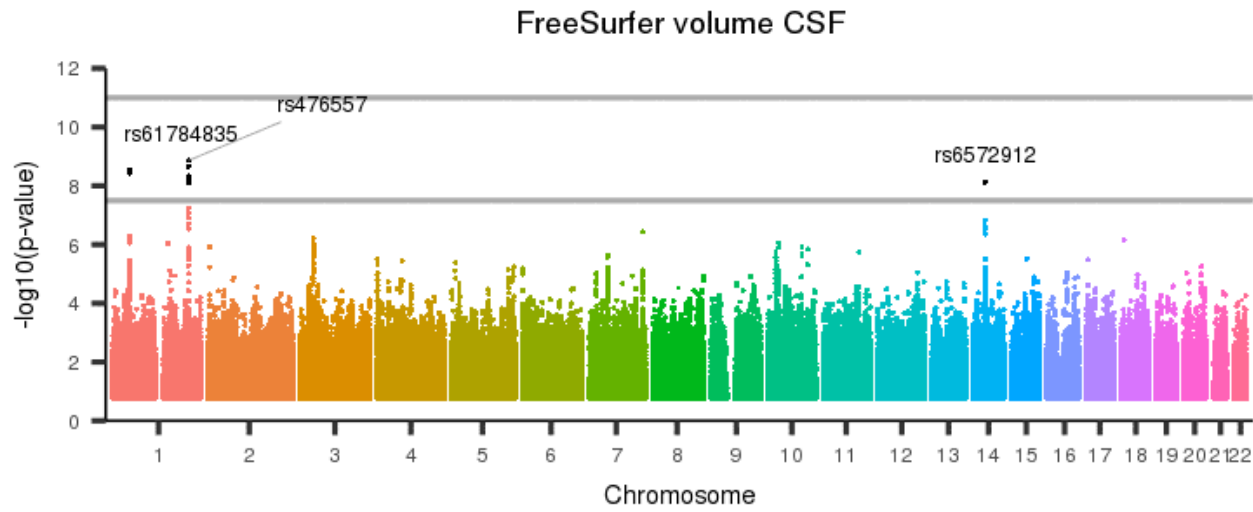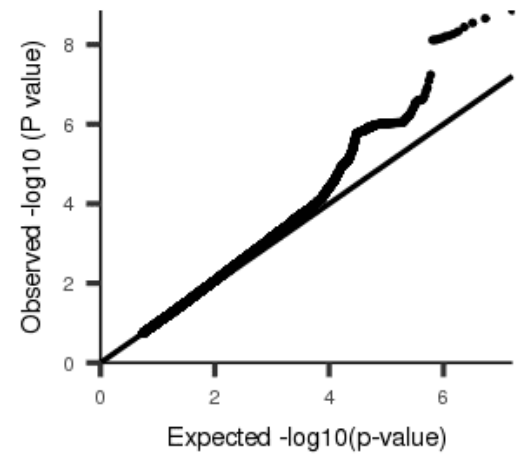

[back to list of plots](#)



Figure 2670: FreeSurfer volume Left-Accumbens-area

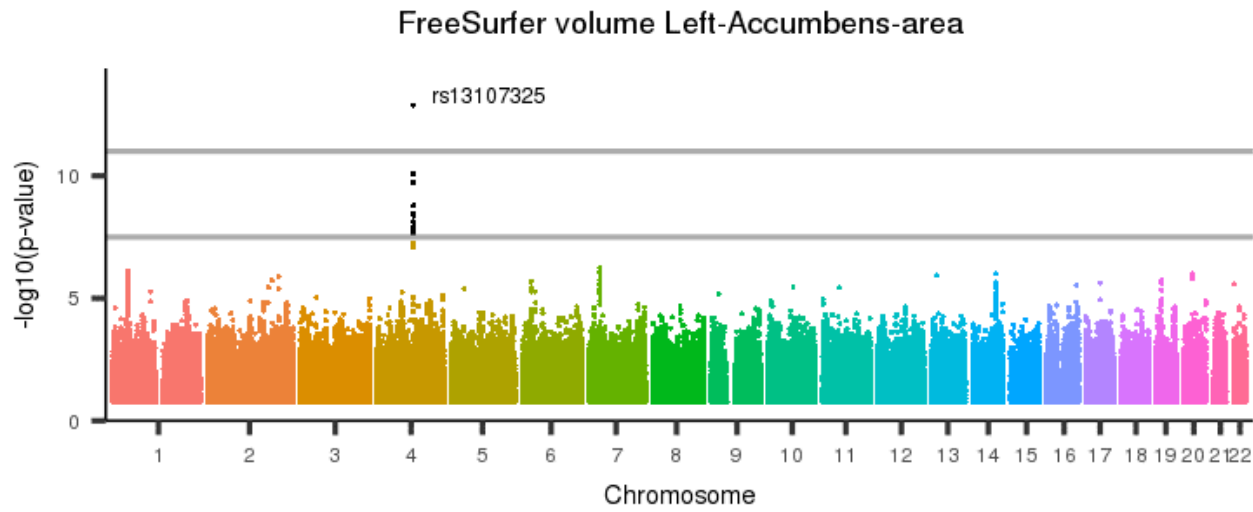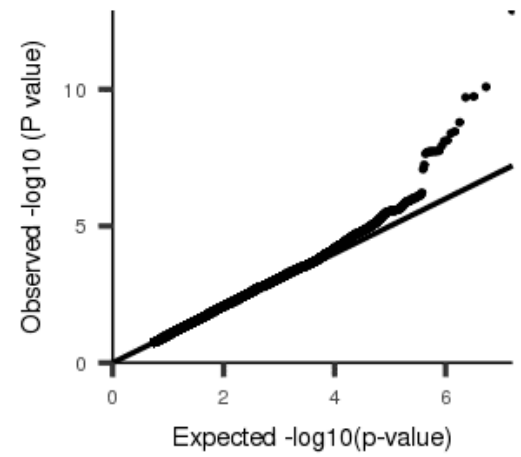

[back to list of plots](#)

Figure 2671: FreeSurfer volume Left-VentralDC

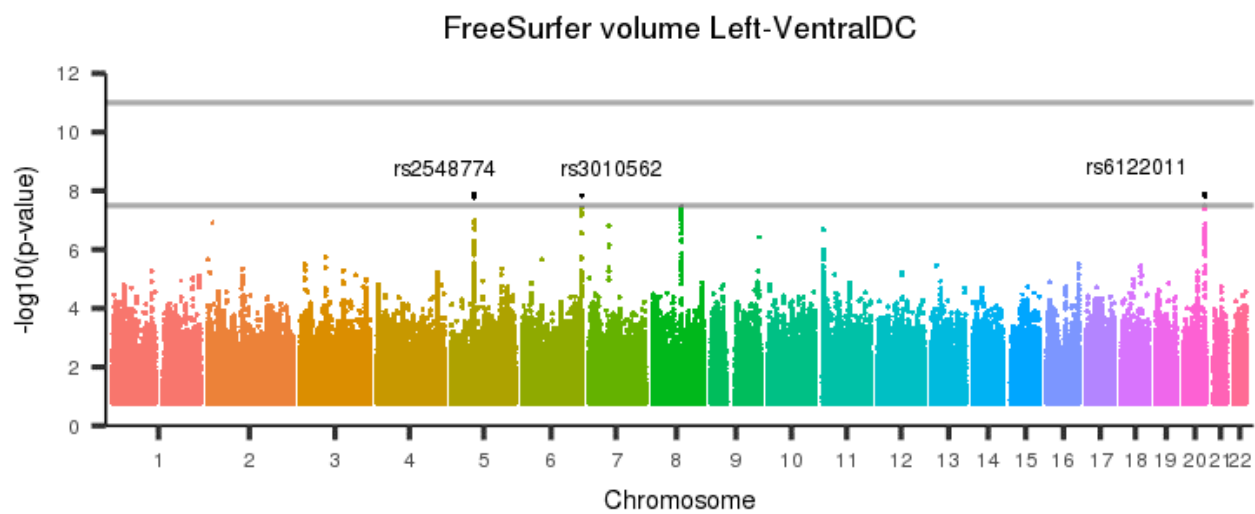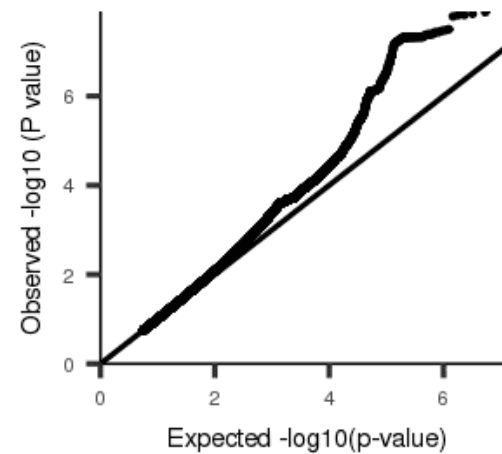

[back to list of plots](#)

Figure 2672: FreeSurfer volume Left-vessel

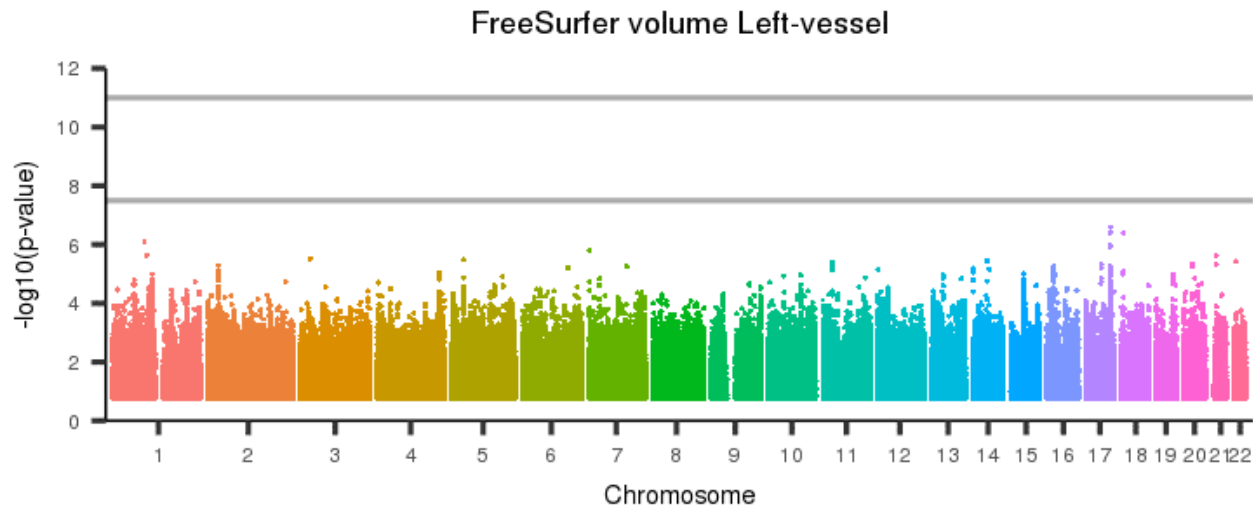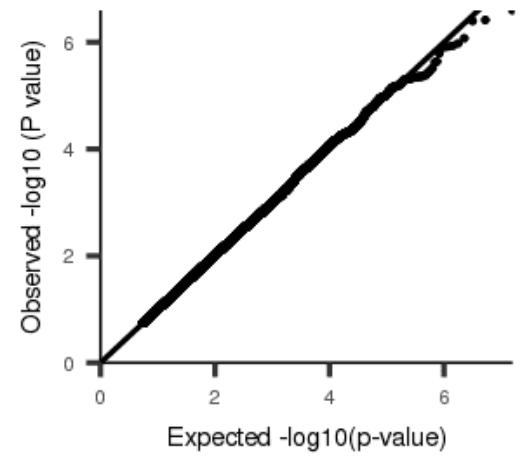

[back to list of plots](#)

Figure 2673: FreeSurfer volume Left-choroid-plexus

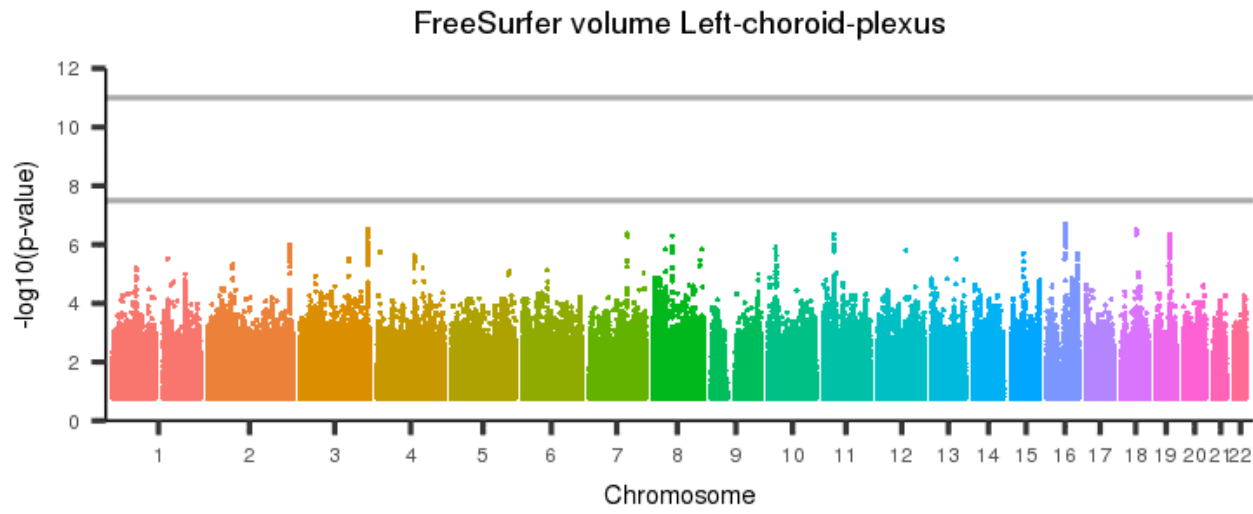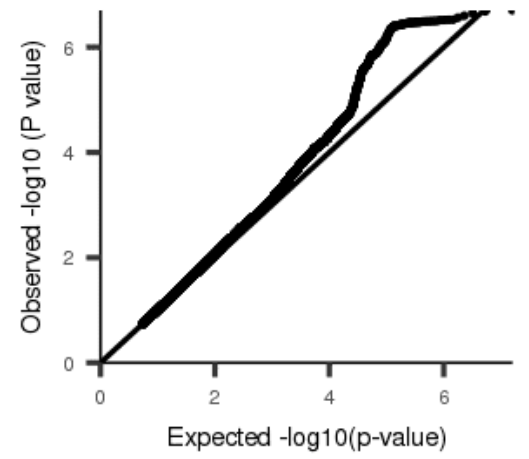

[back to list of plots](#)

Figure 2674: FreeSurfer volume Right-Lateral-Ventricle

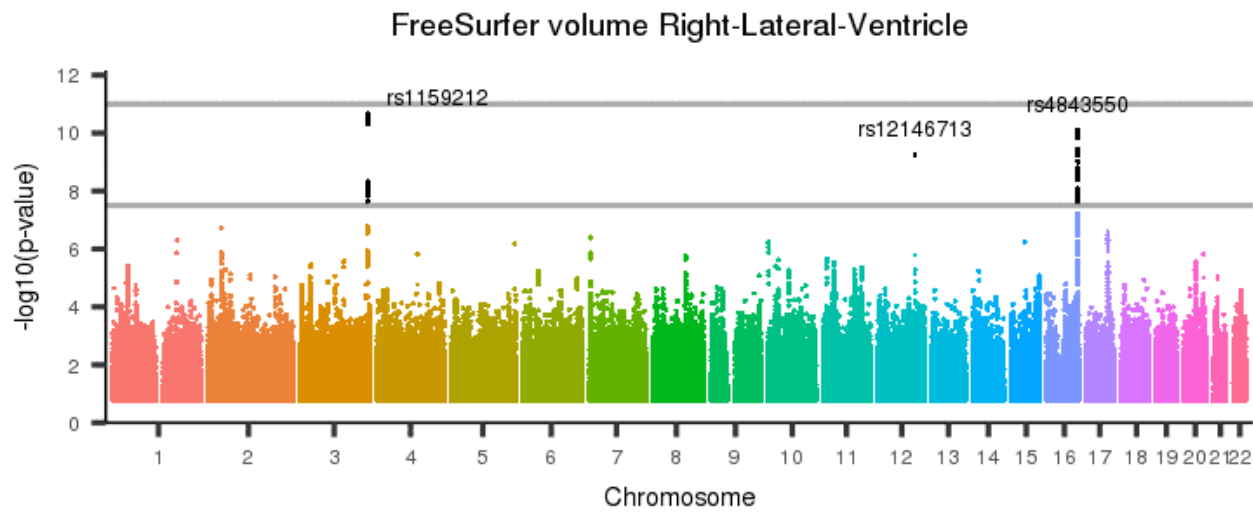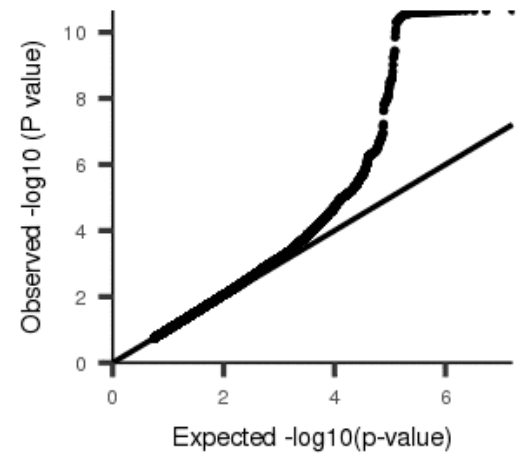

[back to list of plots](#)

Figure 2675: FreeSurfer volume Right-Inf-Lat-Vent

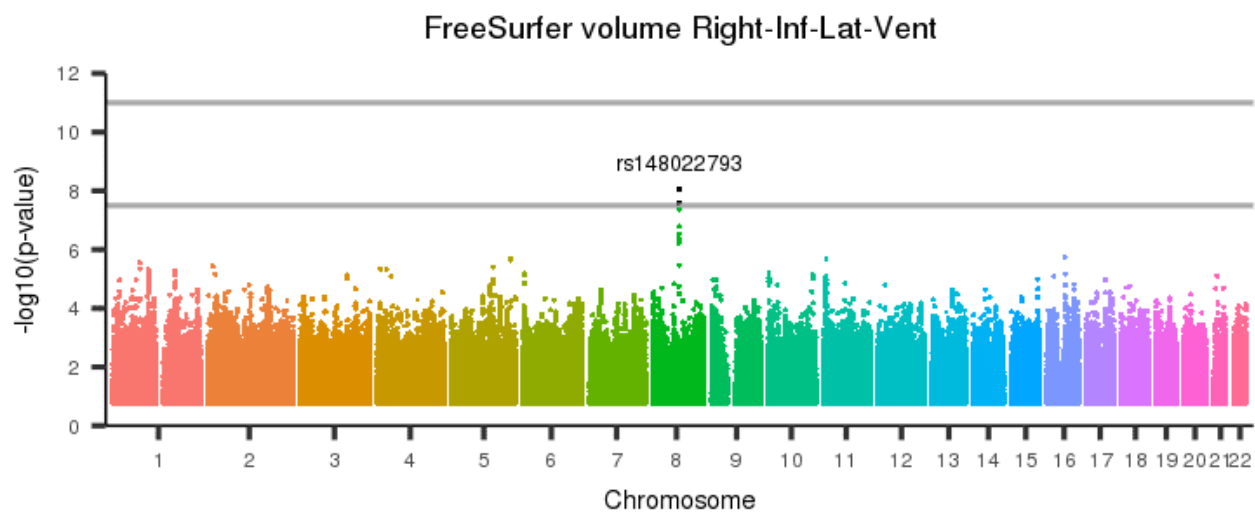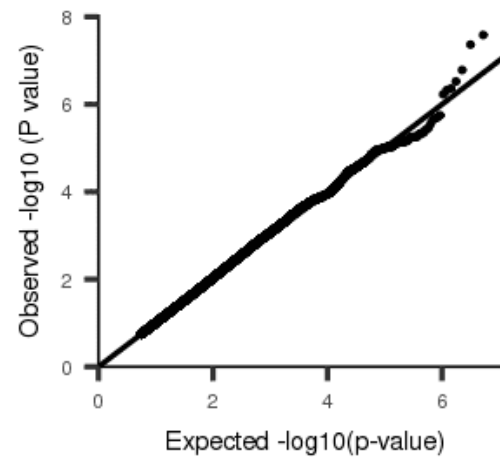

[back to list of plots](#)

Figure 2676: FreeSurfer volume Right-Cerebellum-White-Matter

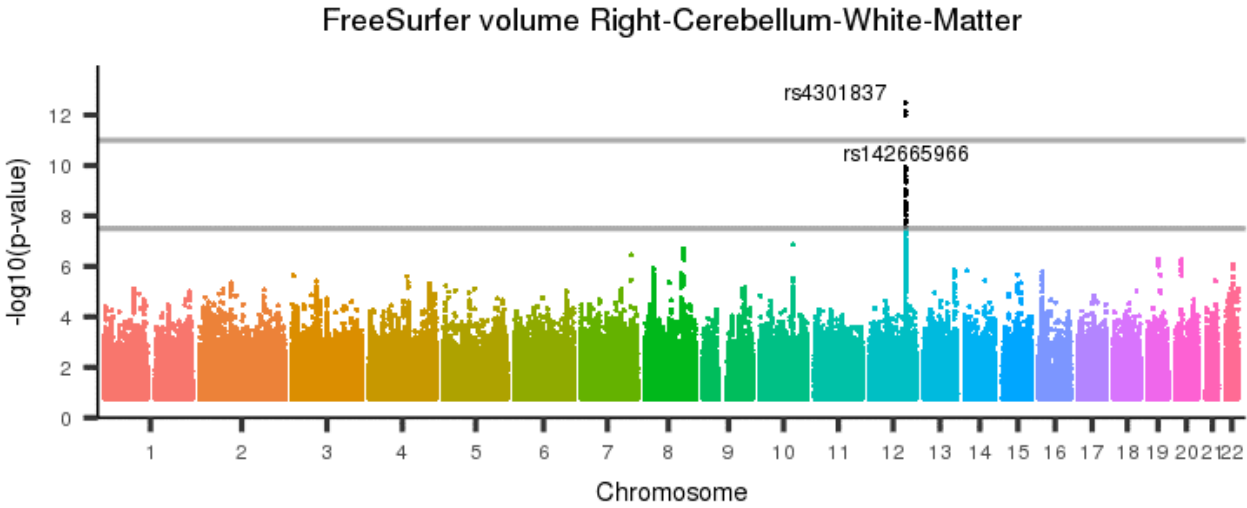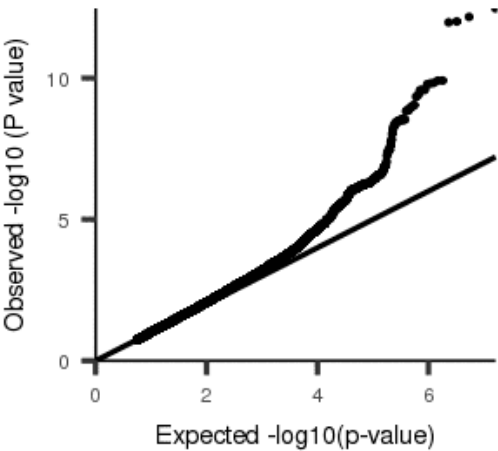

[back to list of plots](#)

Figure 2677: FreeSurfer volume Right-Cerebellum-Cortex

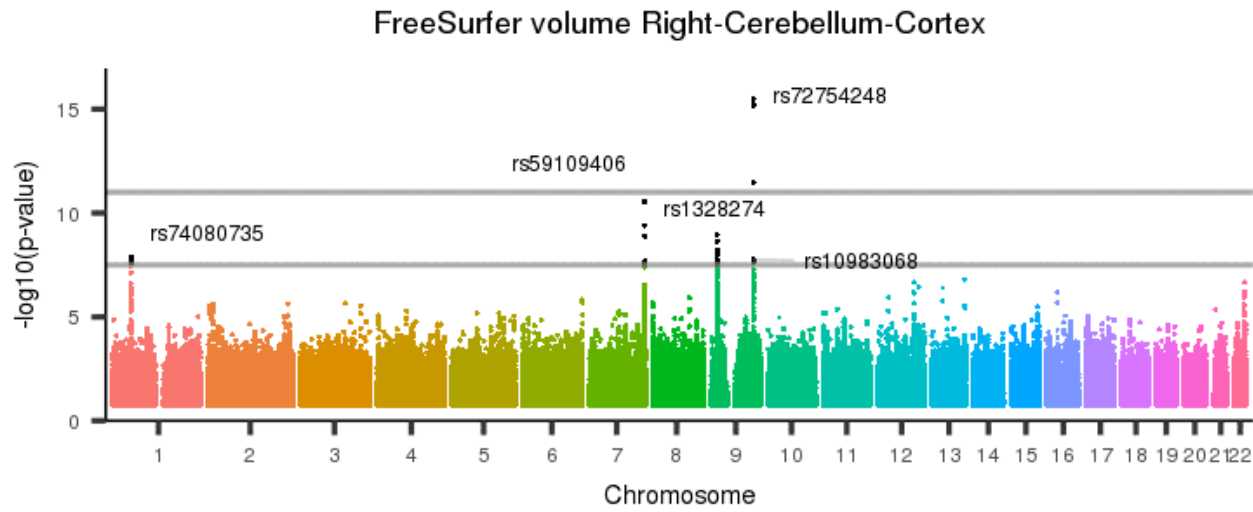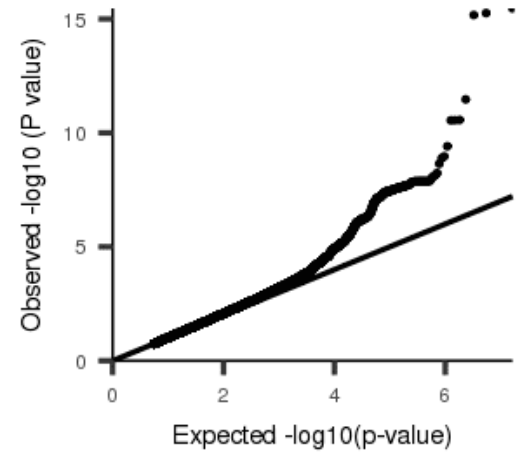

[back to list of plots](#)



Figure 2678: FreeSurfer volume Right-Thalamus-Proper

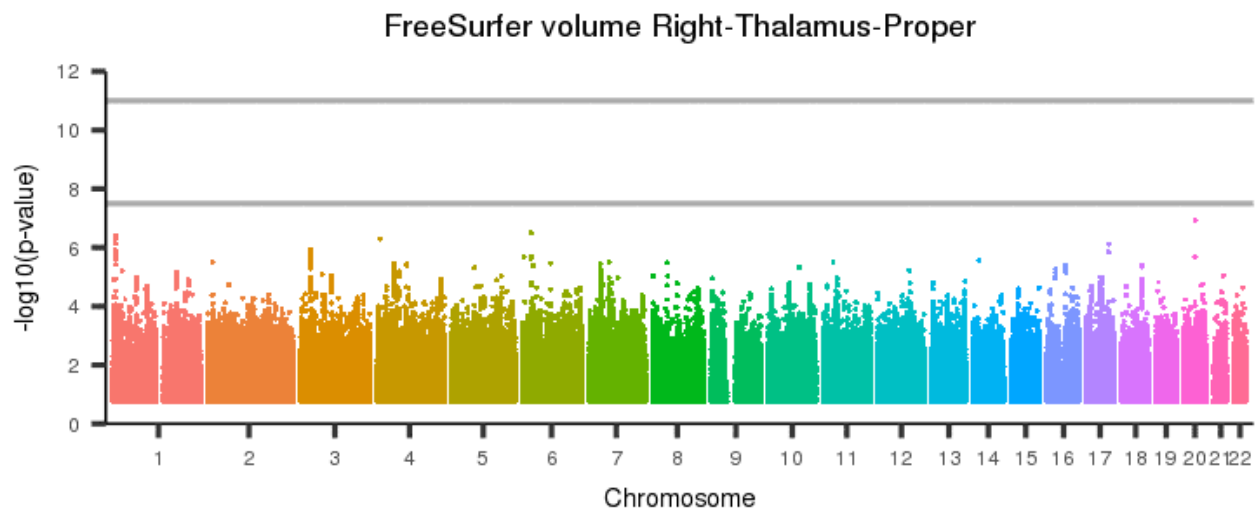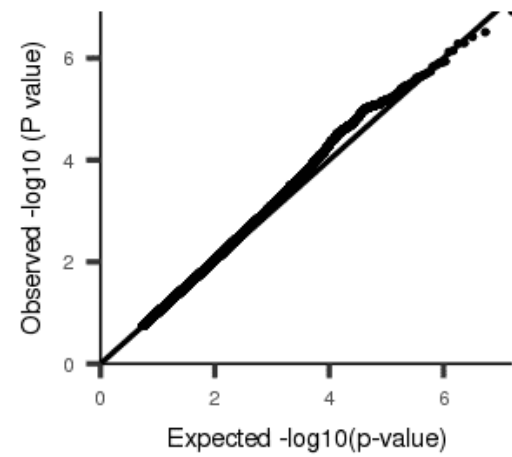

[back to list of plots](#)

Figure 2679: FreeSurfer volume Right-Caudate

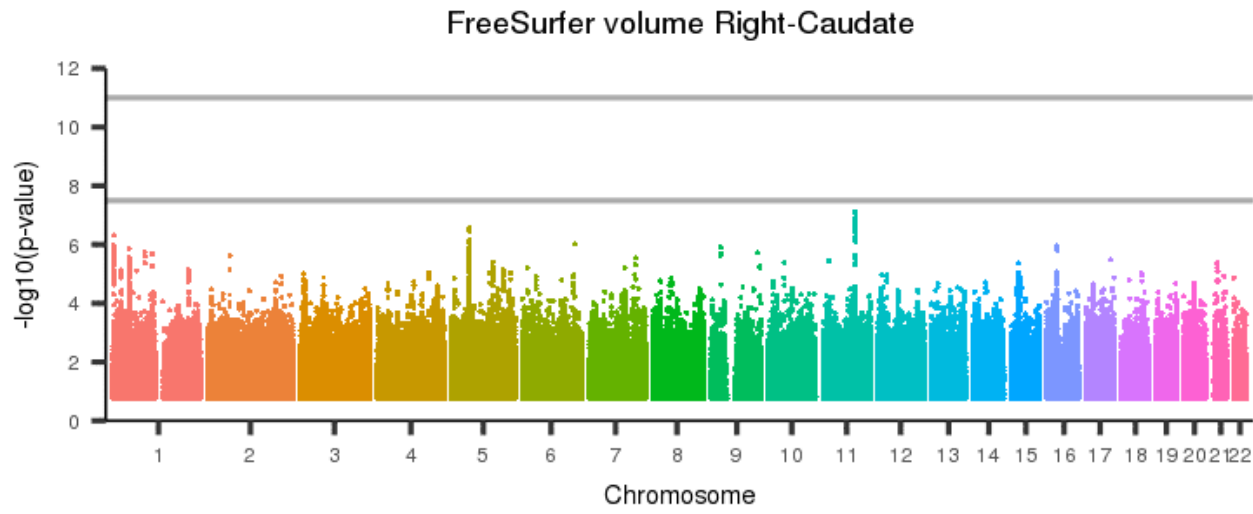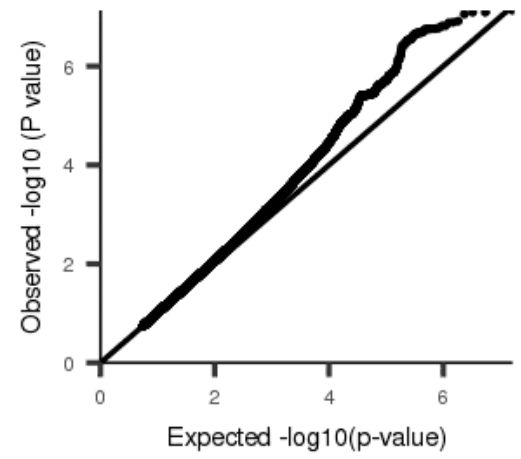

[back to list of plots](#)

Figure 2680: FreeSurfer volume Right-Putamen

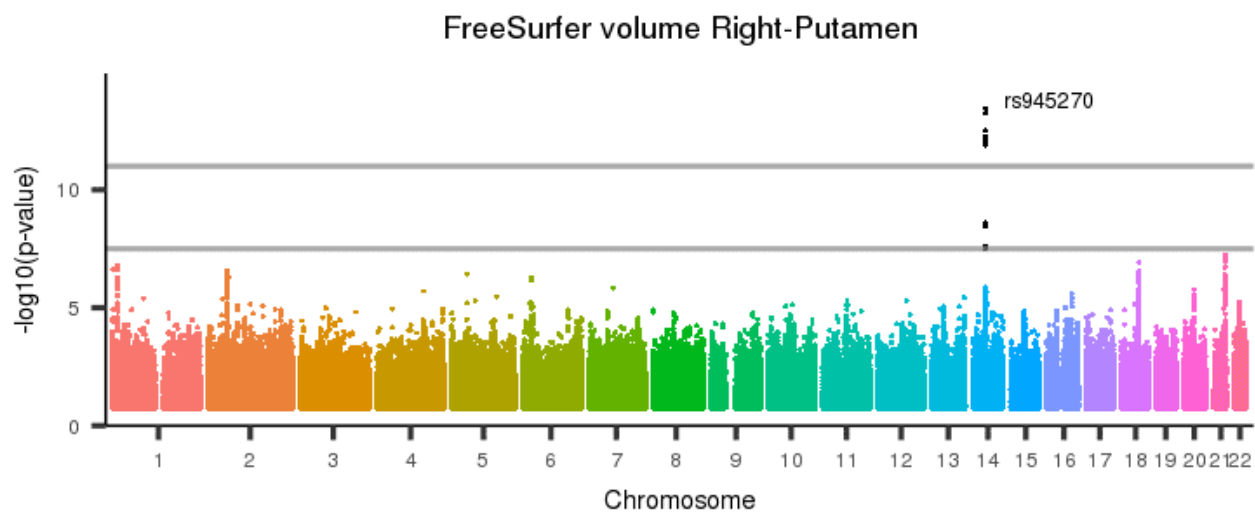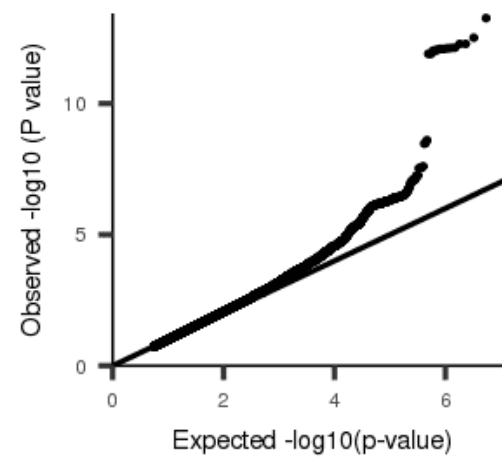

[back to list of plots](#)

Figure 2681: FreeSurfer volume Right-Pallidum

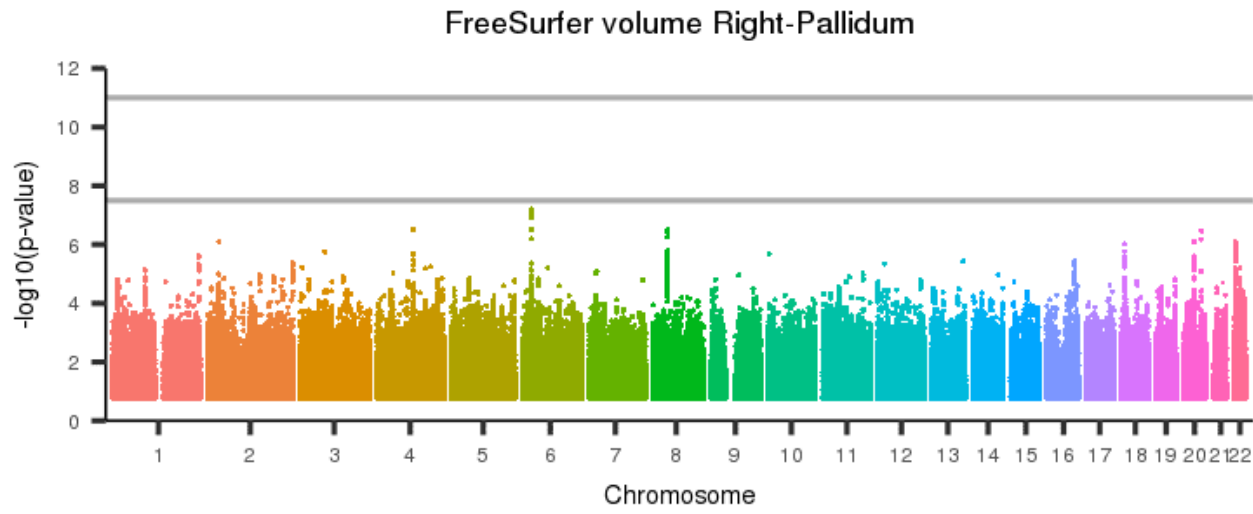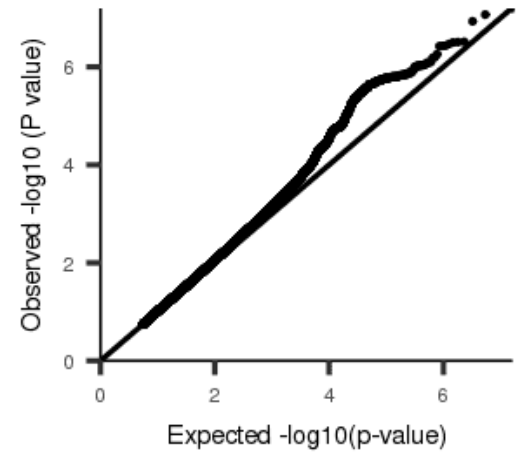

[back to list of plots](#)

Figure 2682: FreeSurfer volume Right-Hippocampus

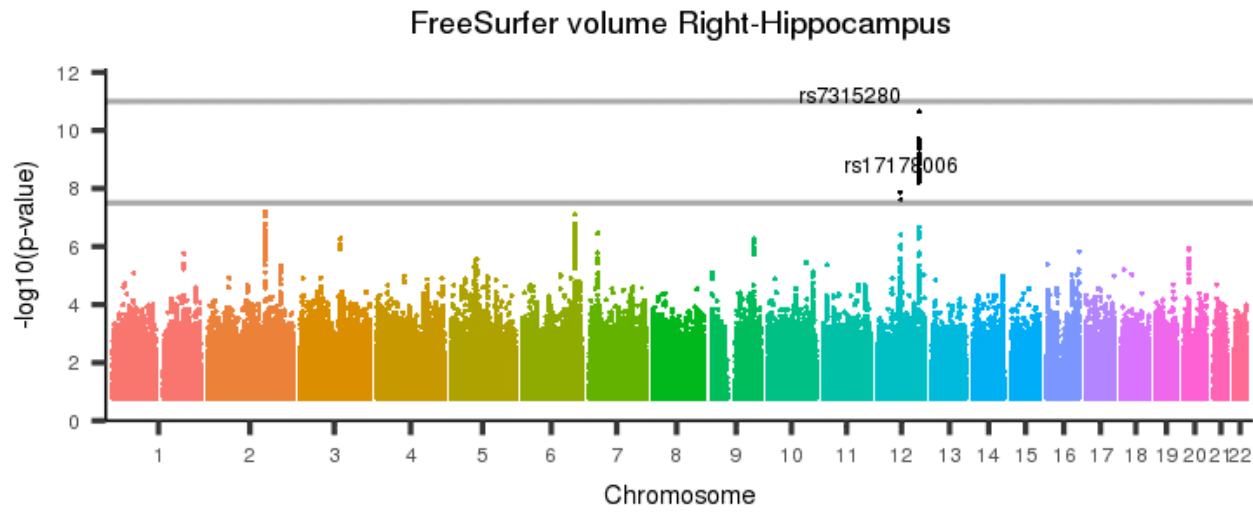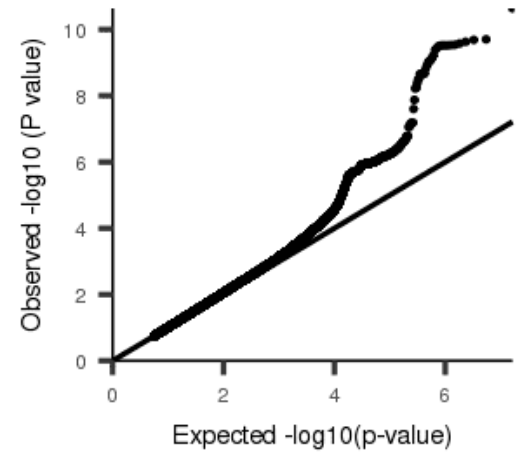

[back to list of plots](#)

Figure 2683: FreeSurfer volume Right-Amygdala

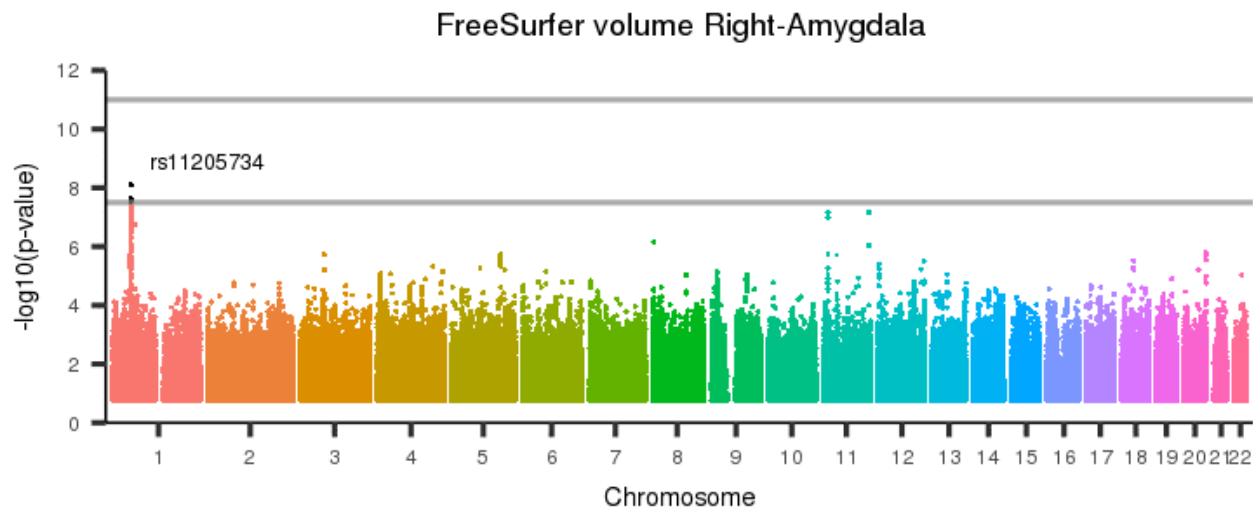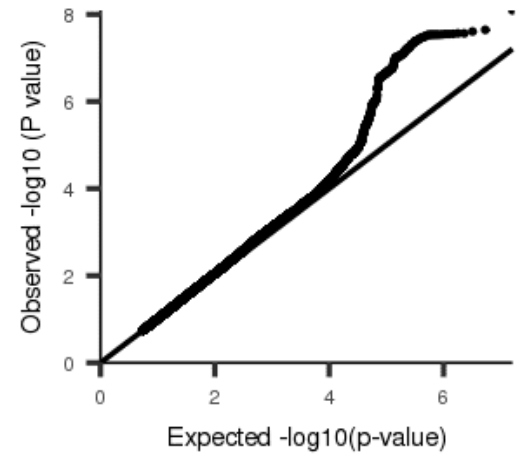

[back to list of plots](#)

Figure 2684: FreeSurfer volume Right-Accumbens-area

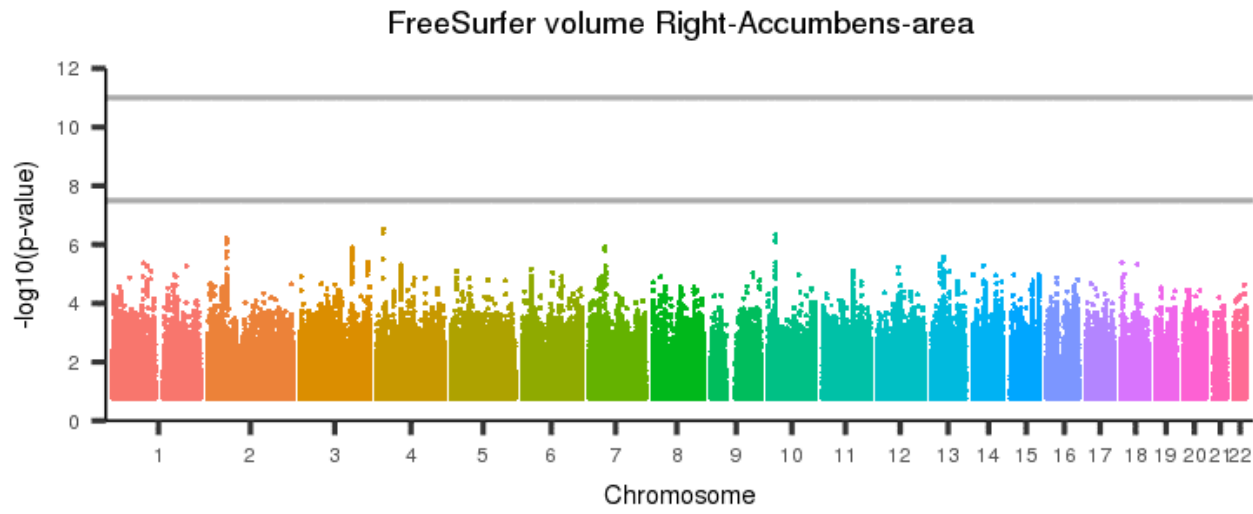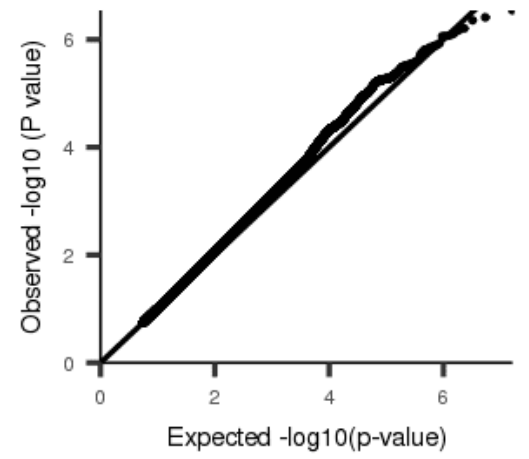

[back to list of plots](#)

Figure 2685: FreeSurfer volume Right-VentralDC

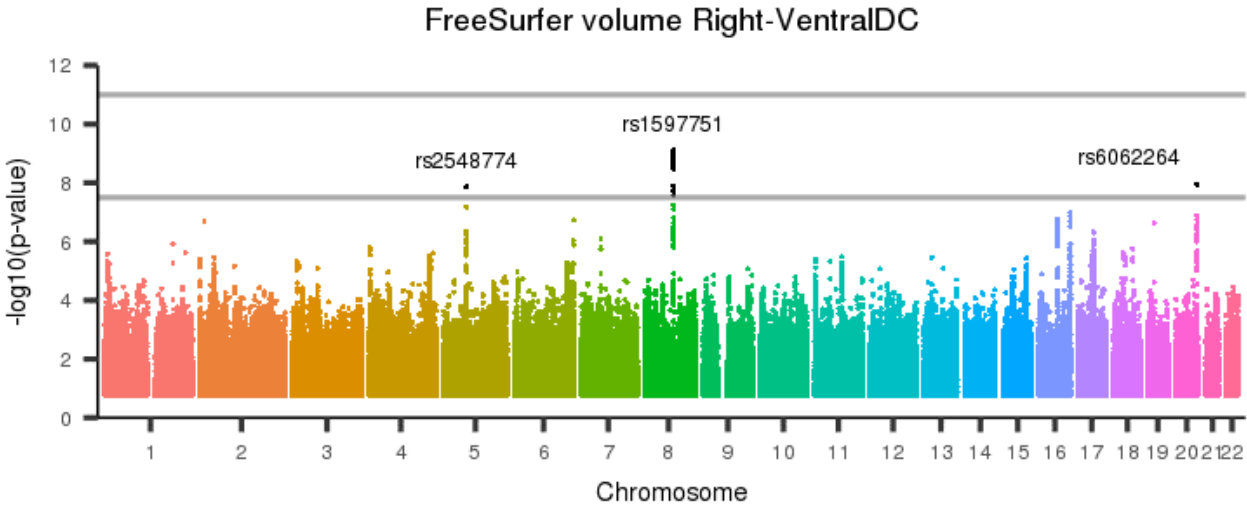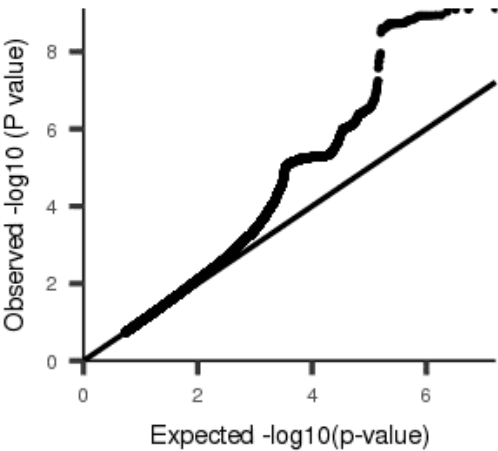

[back to list of plots](#)



Figure 2686: FreeSurfer volume Right-vessel

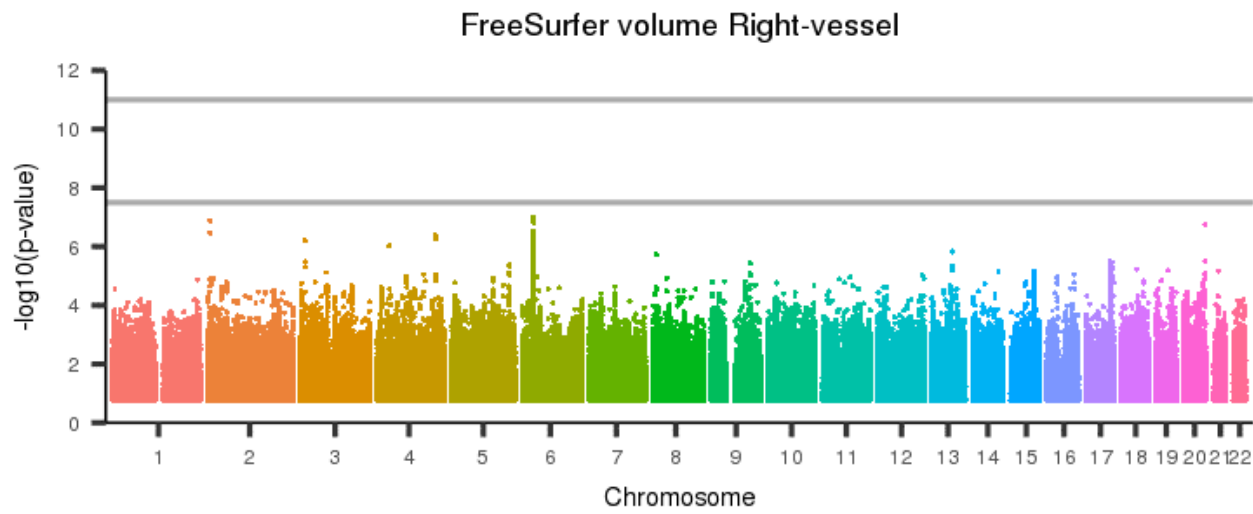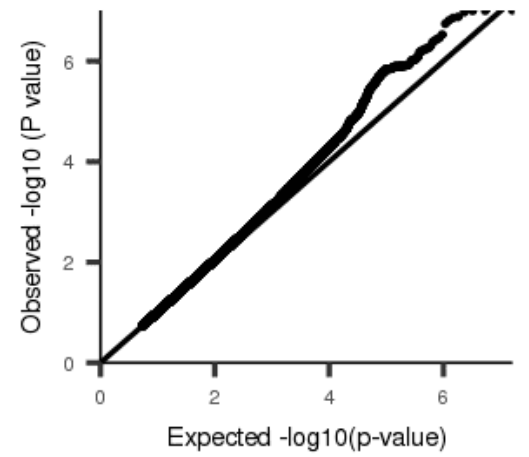

[back to list of plots](#)

Figure 2687: FreeSurfer volume Right-choroid-plexus

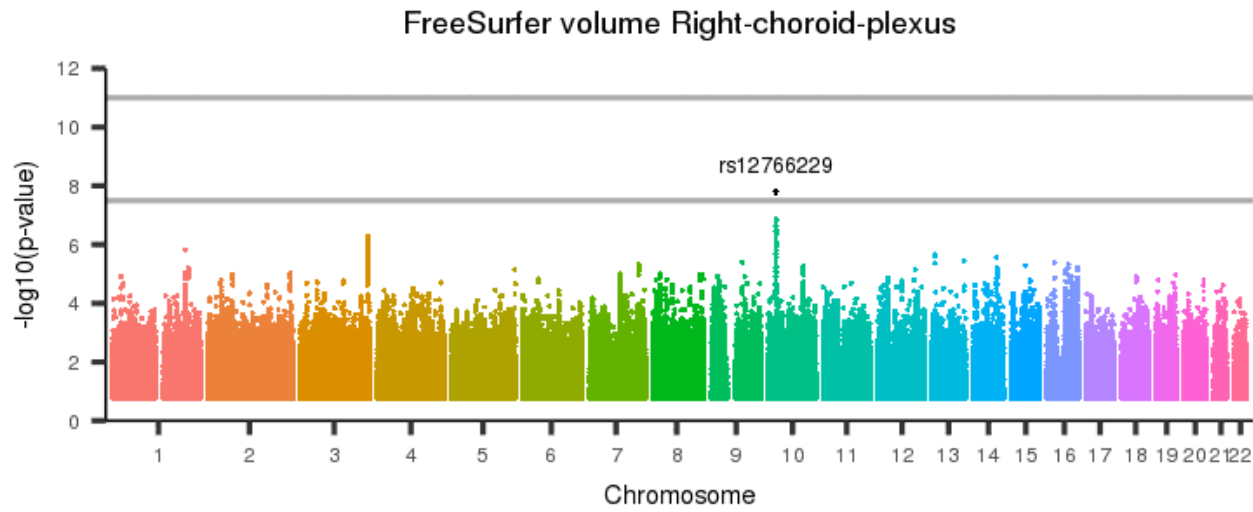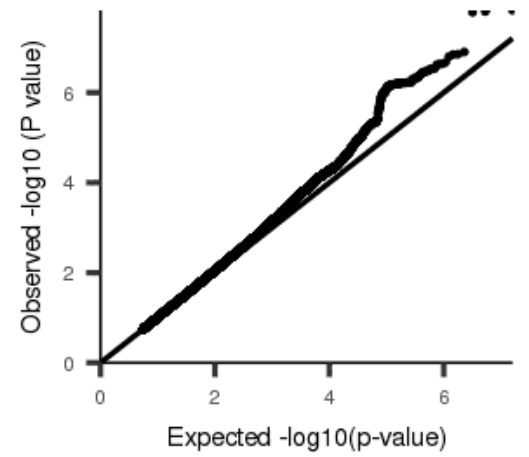

[back to list of plots](#)

Figure 2688: FreeSurfer volume Optic-Chiasm

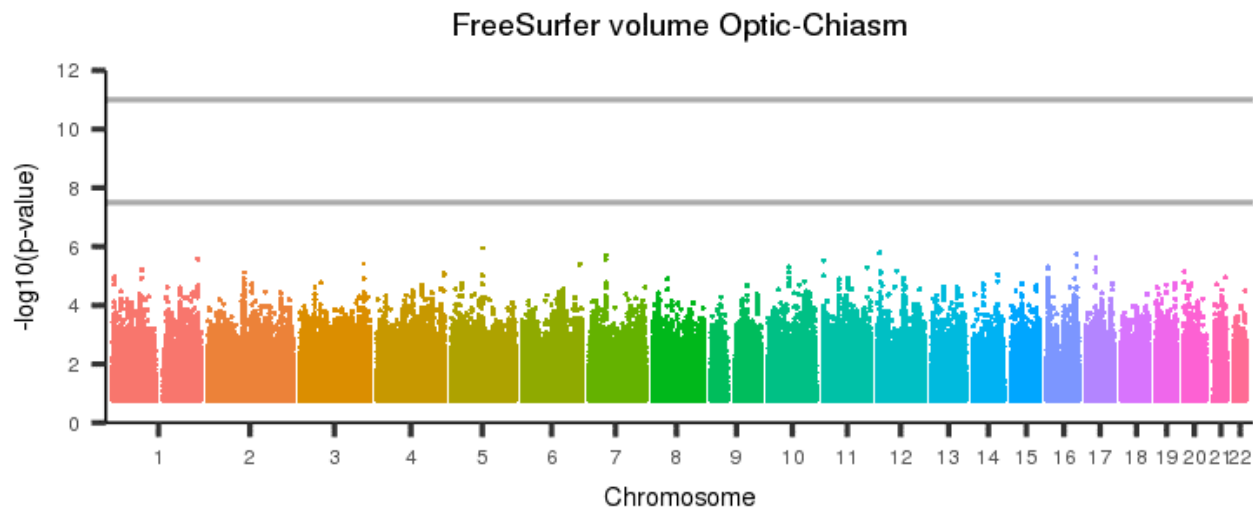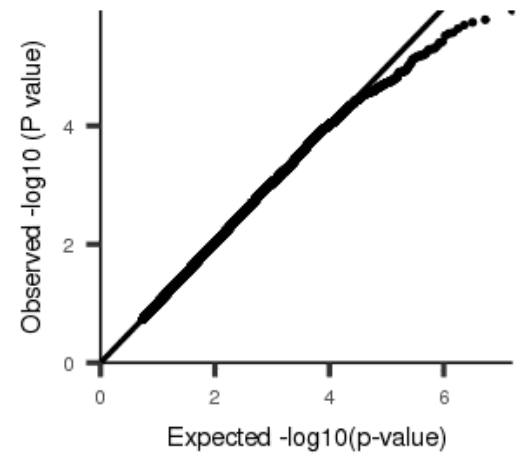

[back to list of plots](#)

Figure 2689: FreeSurfer volume CC Posterior

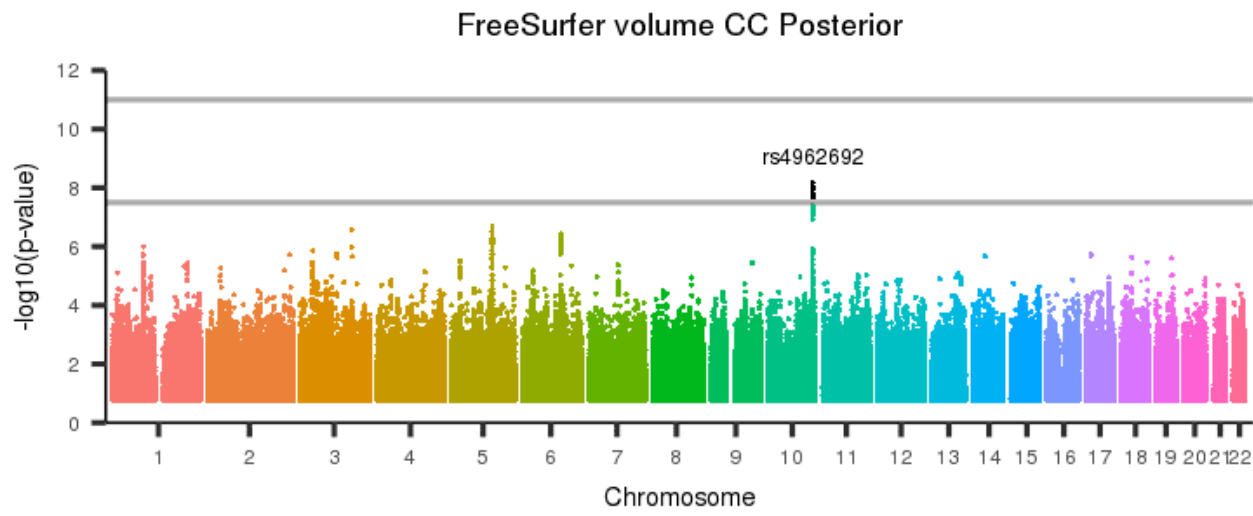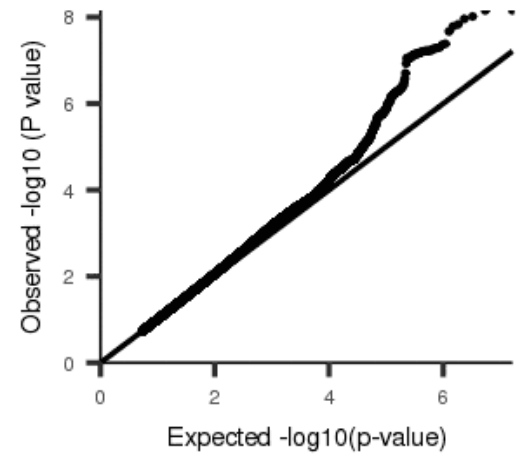

[back to list of plots](#)

Figure 2690: FreeSurfer volume CC Mid Posterior

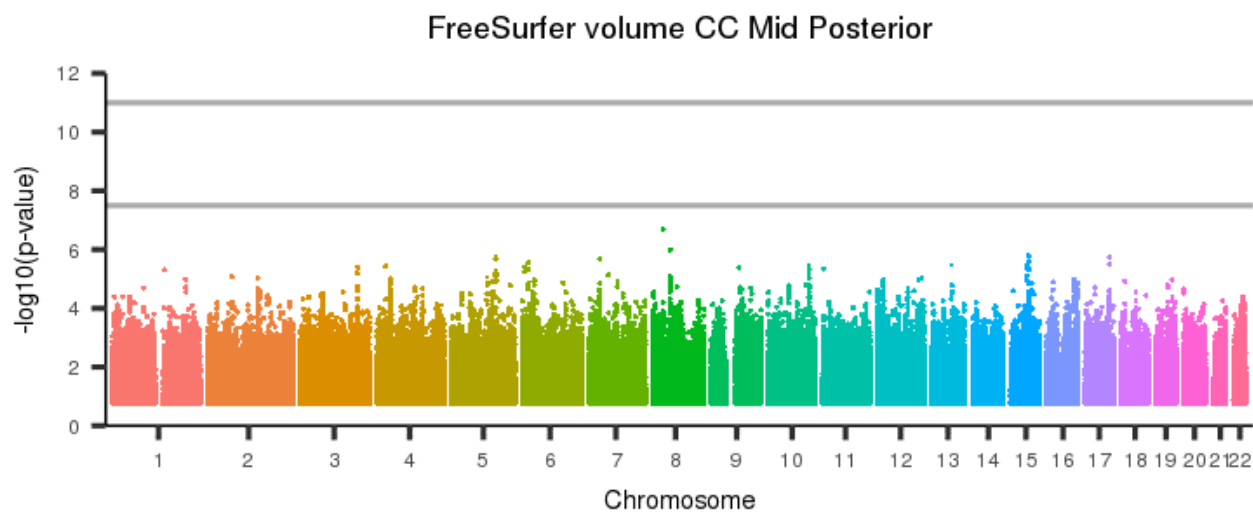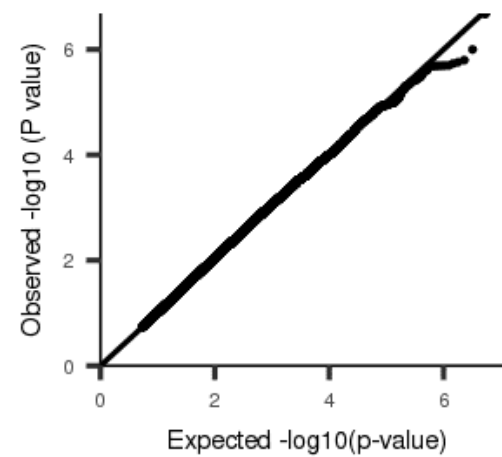

[back to list of plots](#)

Figure 2691: FreeSurfer volume CC Central

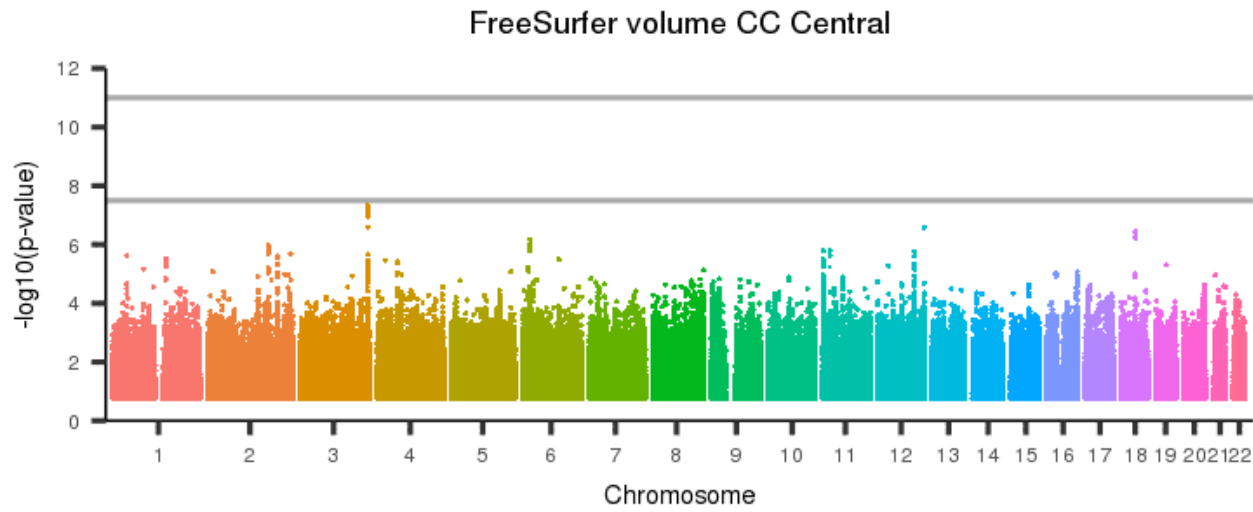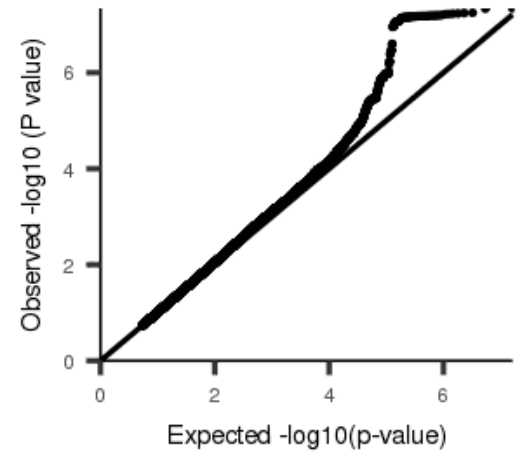

[back to list of plots](#)

Figure 2692: FreeSurfer volume CC Mid Anterior

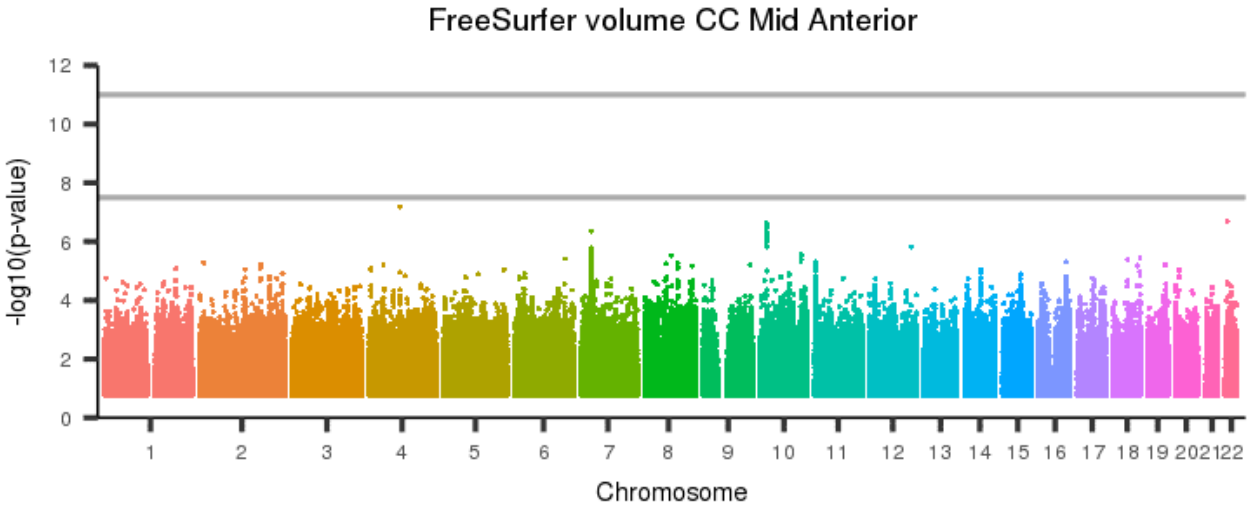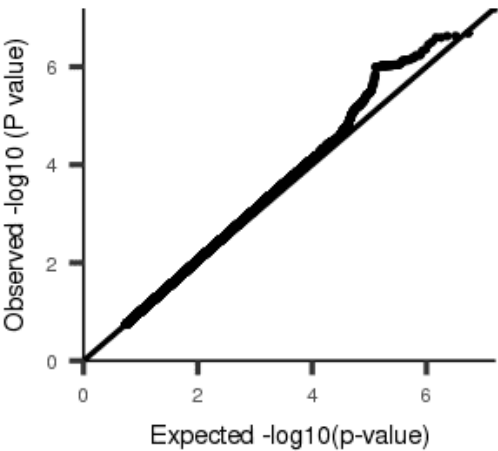

[back to list of plots](#)

Figure 2693: FreeSurfer volume CC Anterior

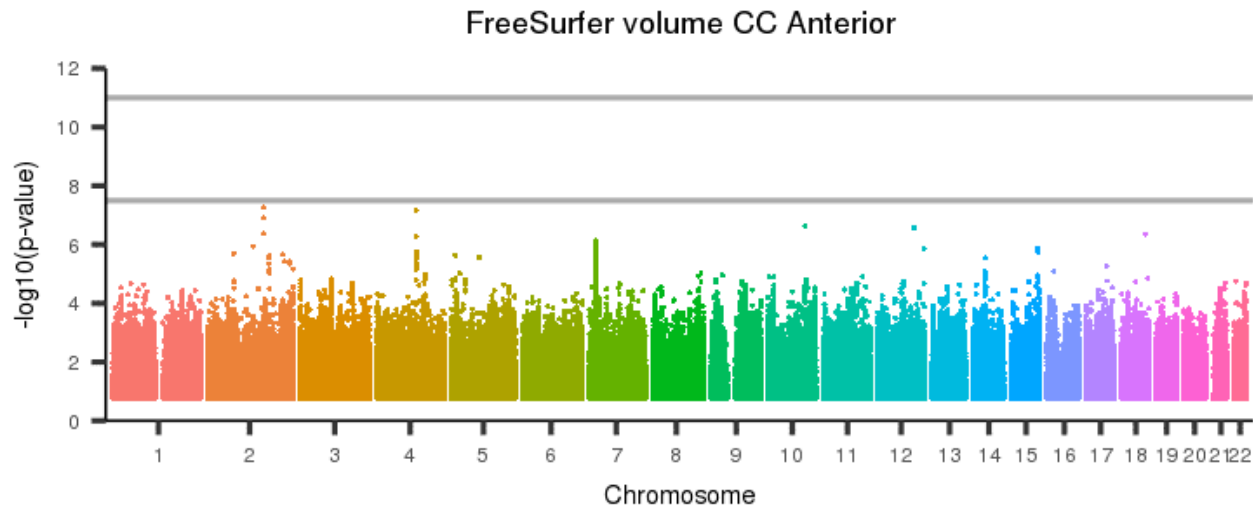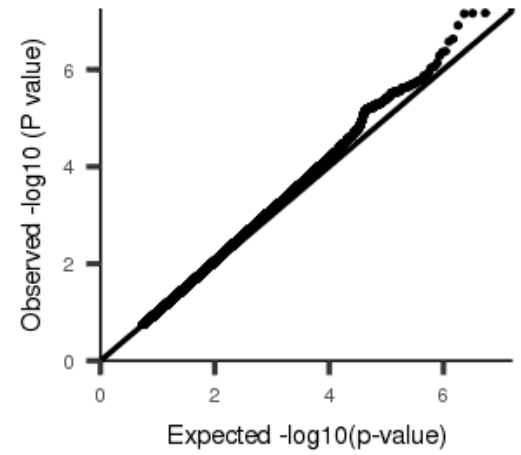

[back to list of plots](#)



Figure 2694: FreeSurfer volume BrainSegVol

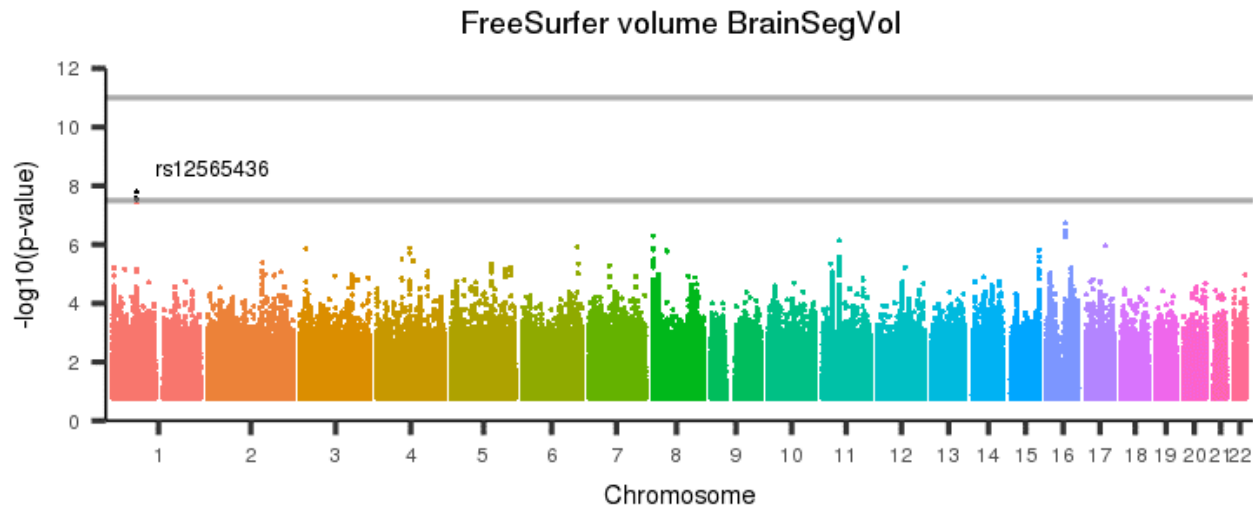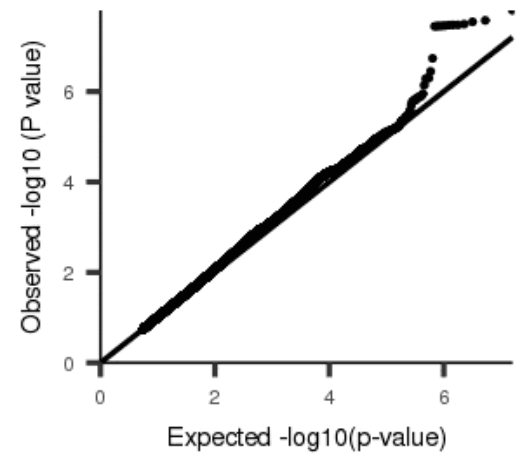

[back to list of plots](#)

Figure 2695: FreeSurfer volume BrainSegVolNotVent

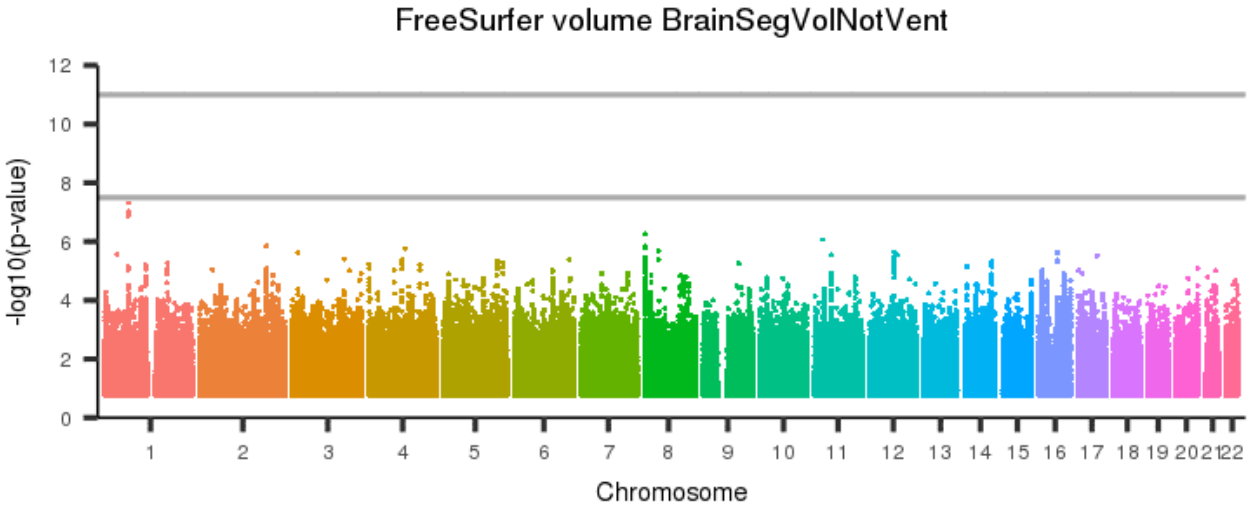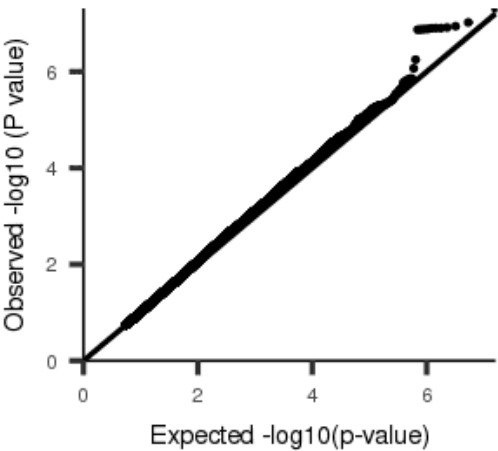

[back to list of plots](#)

Figure 2696: FreeSurfer volume BrainSegVolNotVentSurf

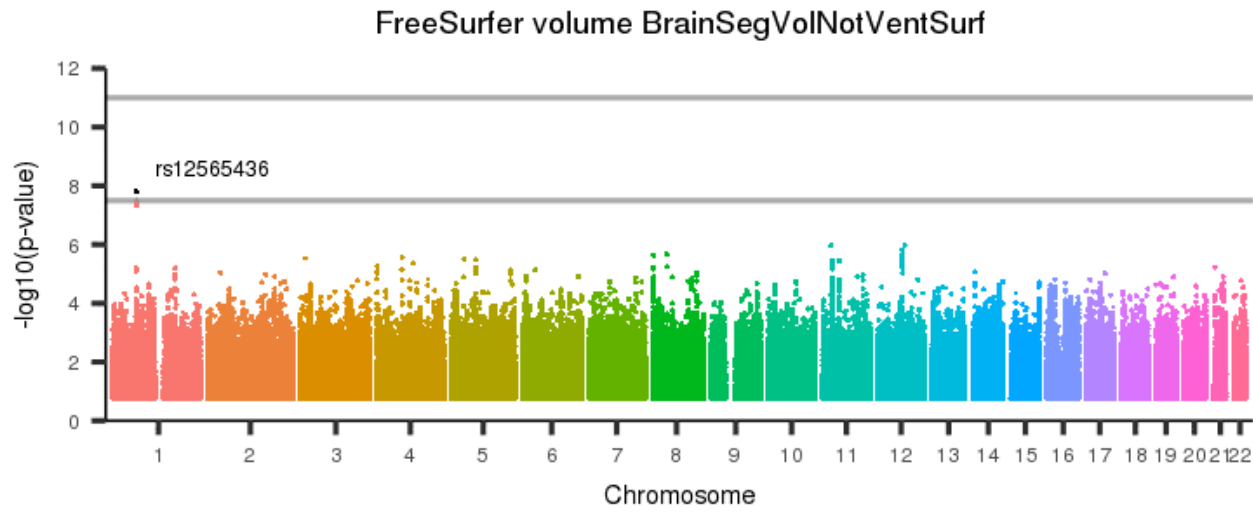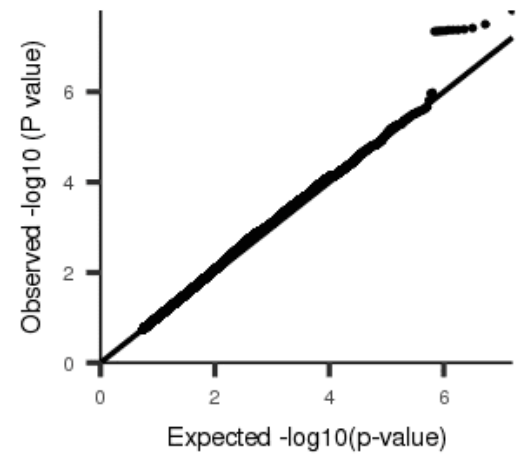

[back to list of plots](#)

Figure 2697: FreeSurfer volume lhCortexVol

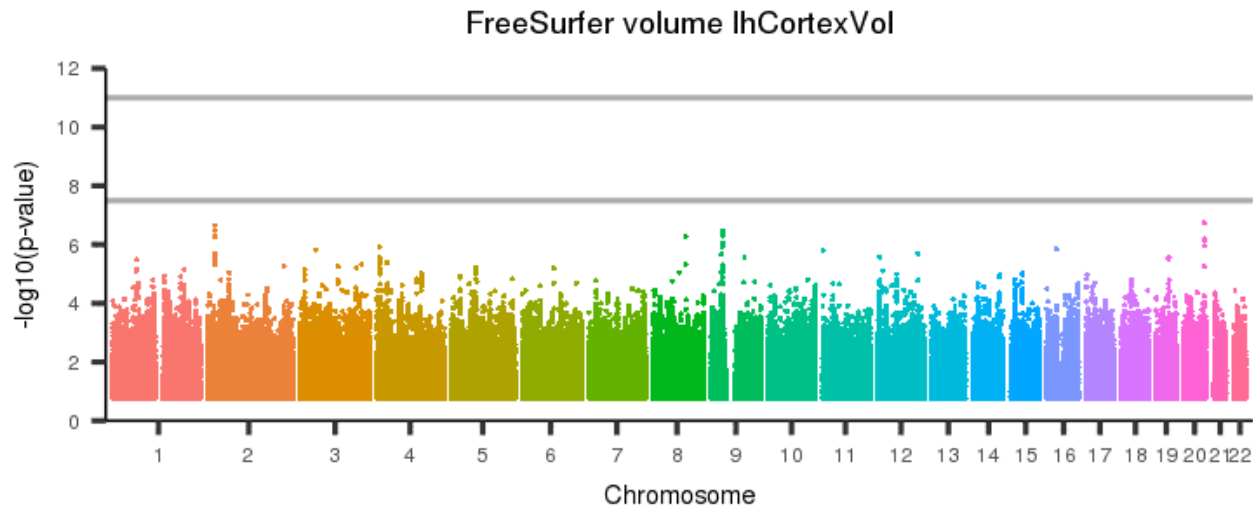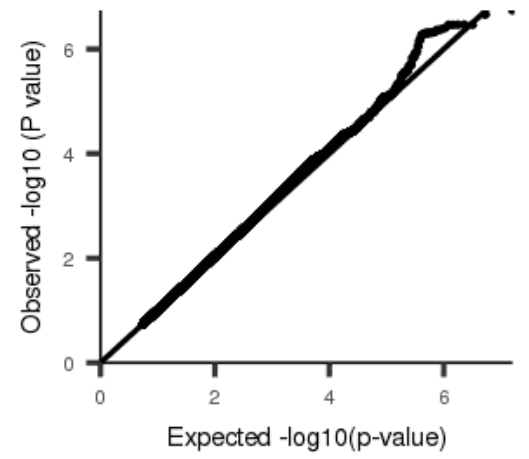

[back to list of plots](#)

Figure 2698: FreeSurfer volume rhCortexVol

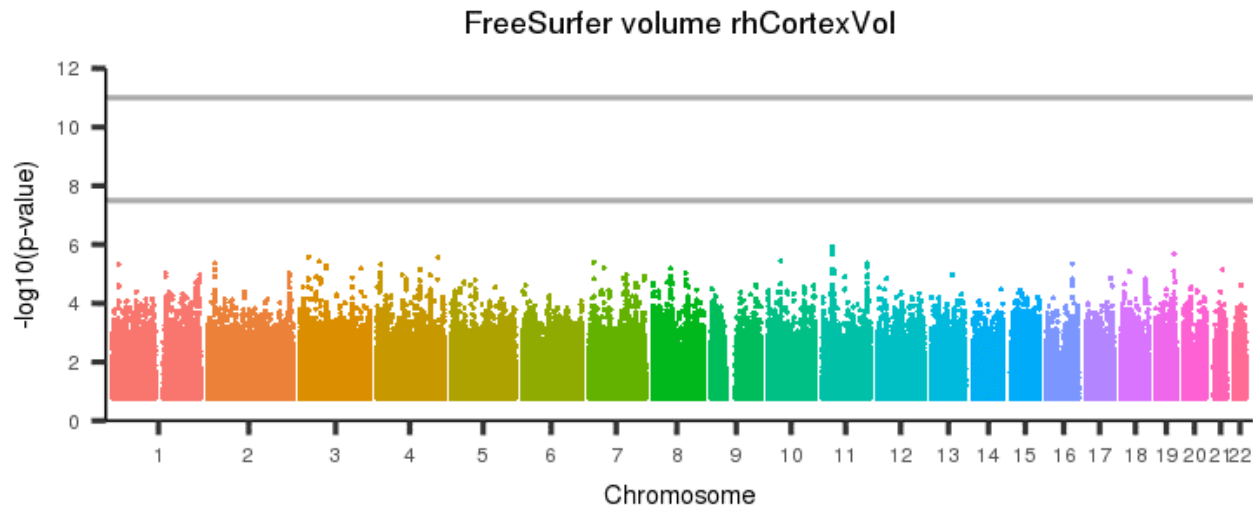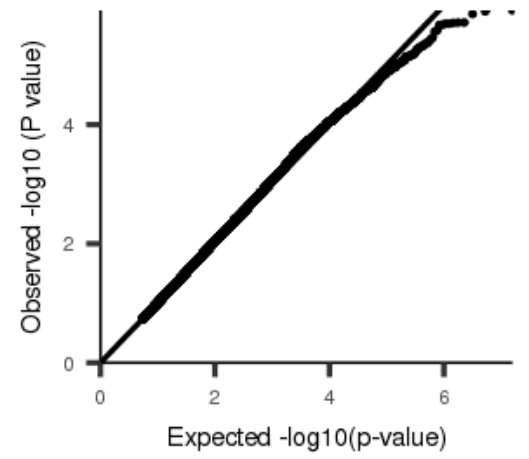

[back to list of plots](#)

Figure 2699: FreeSurfer volume CortexVol

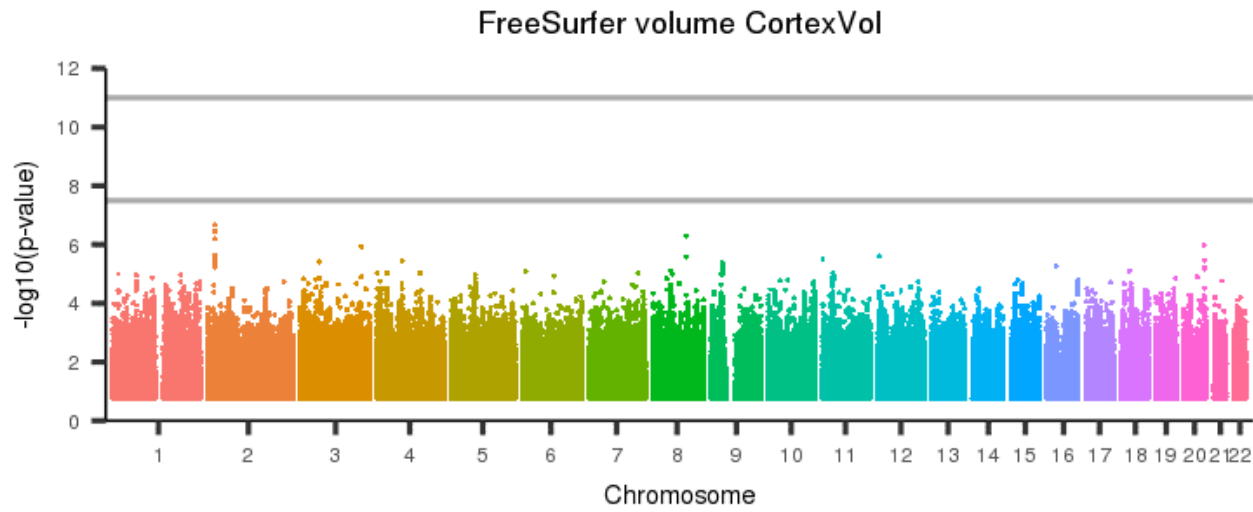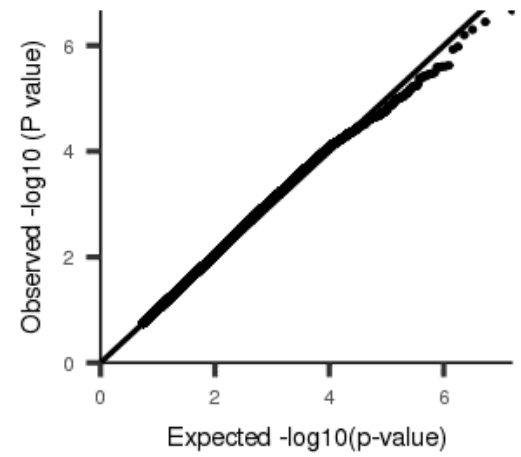

[back to list of plots](#)

Figure 2700: FreeSurfer volume lhCerebralWhiteMatterVol

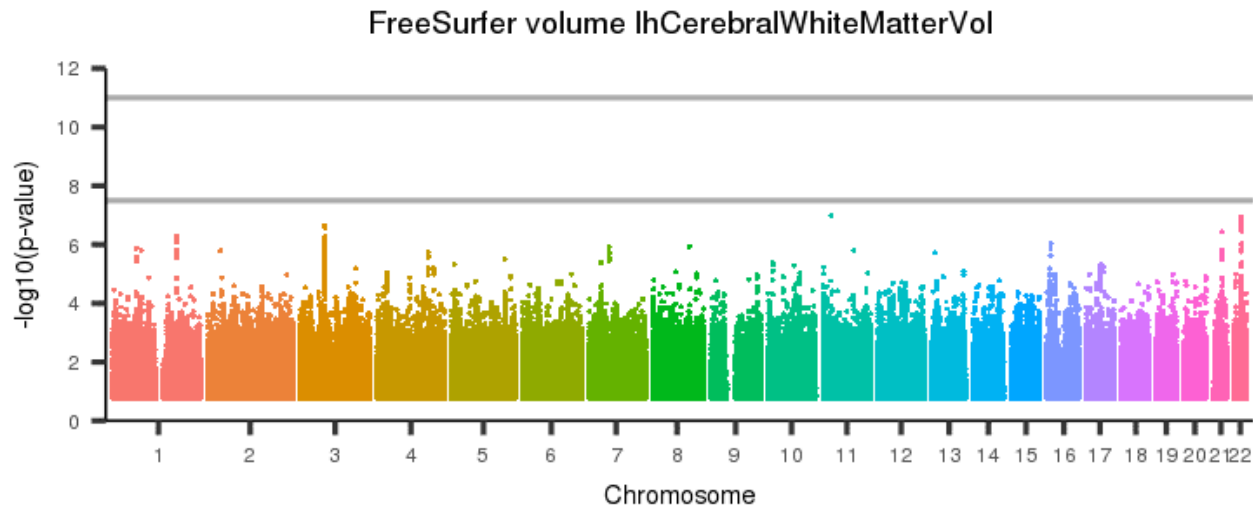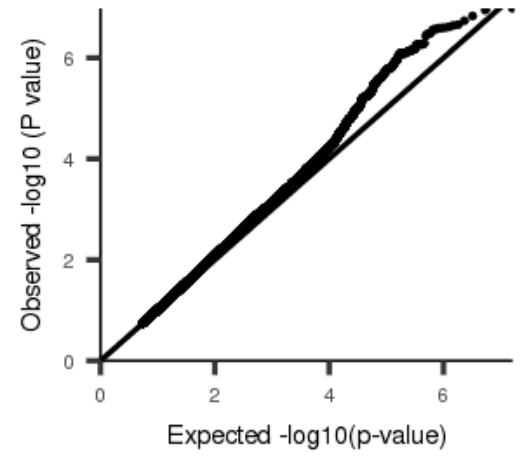

[back to list of plots](#)

Figure 2701: FreeSurfer volume rhCerebralWhiteMatterVol

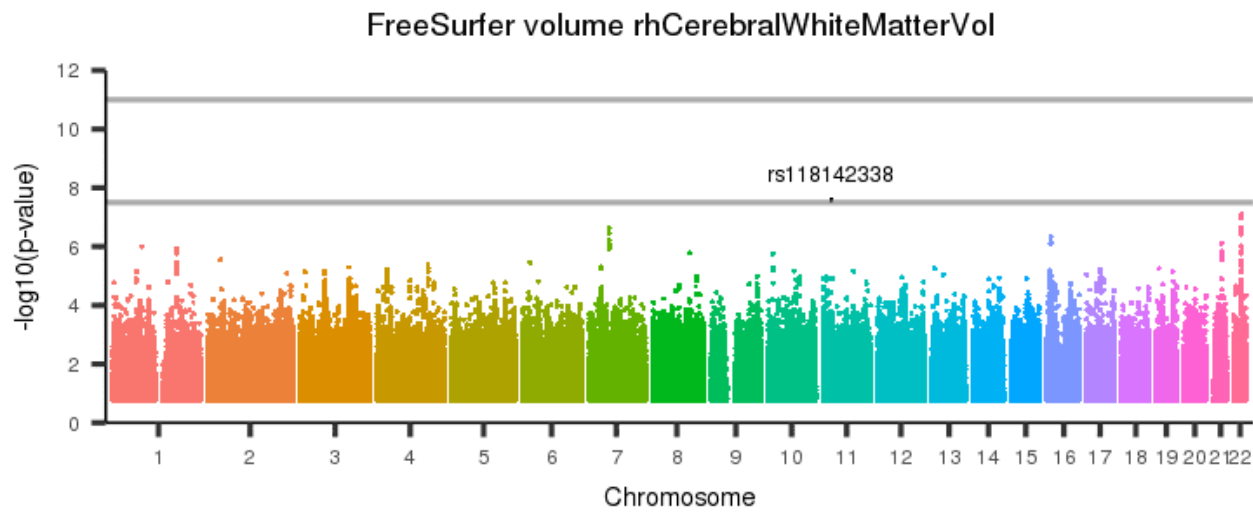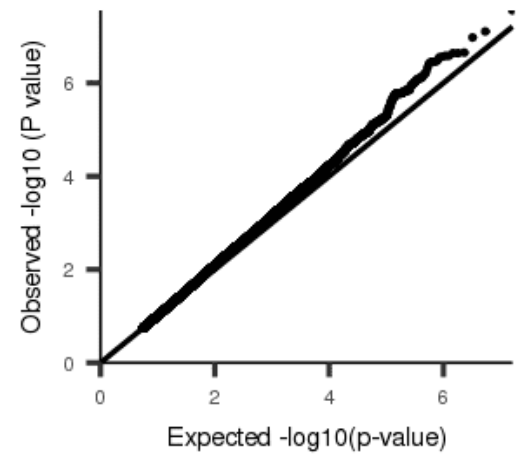

[back to list of plots](#)



Figure 2702: FreeSurfer volume CerebralWhiteMatterVol

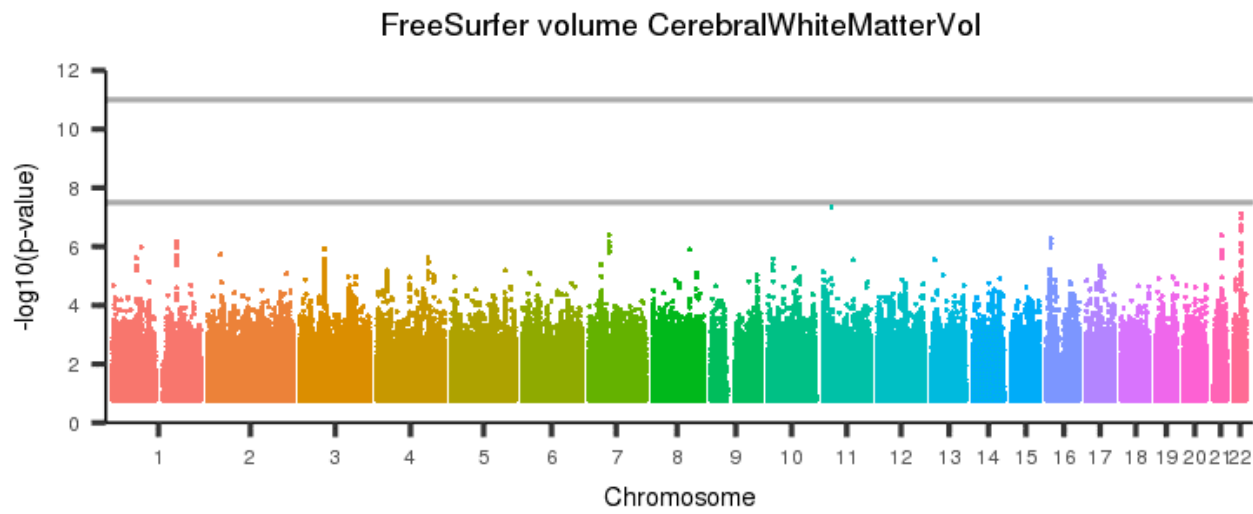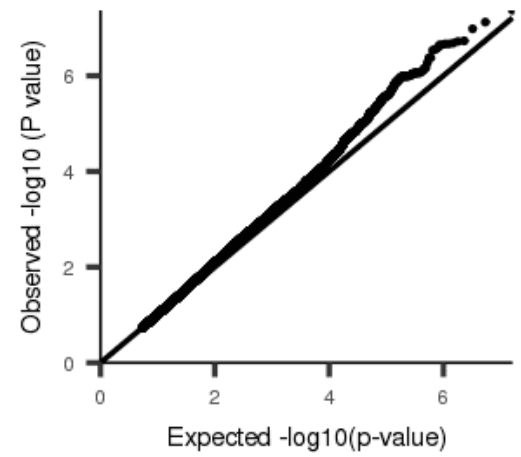

[back to list of plots](#)

Figure 2703: FreeSurfer volume SubCortGrayVol

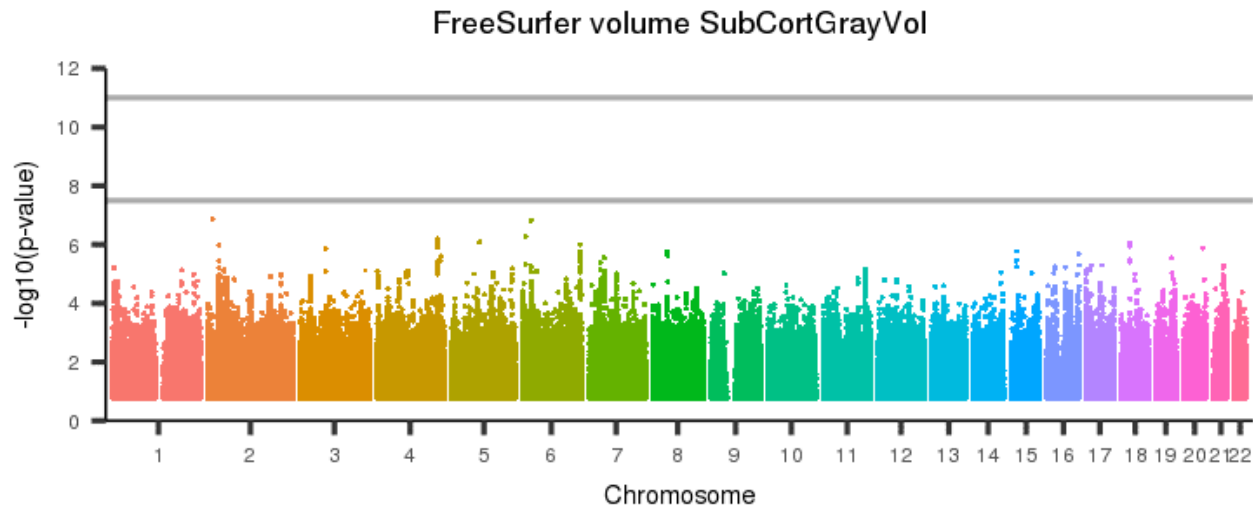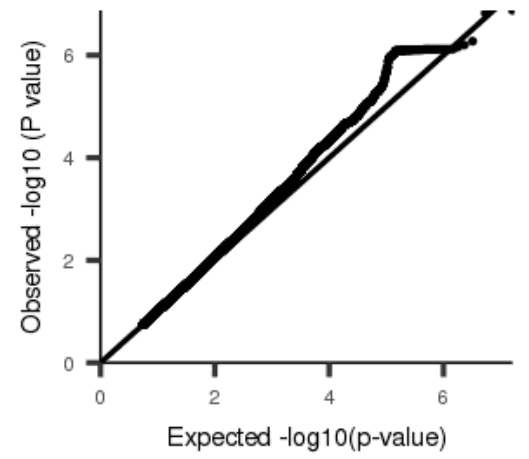

[back to list of plots](#)

Figure 2704: FreeSurfer volume TotalGrayVol

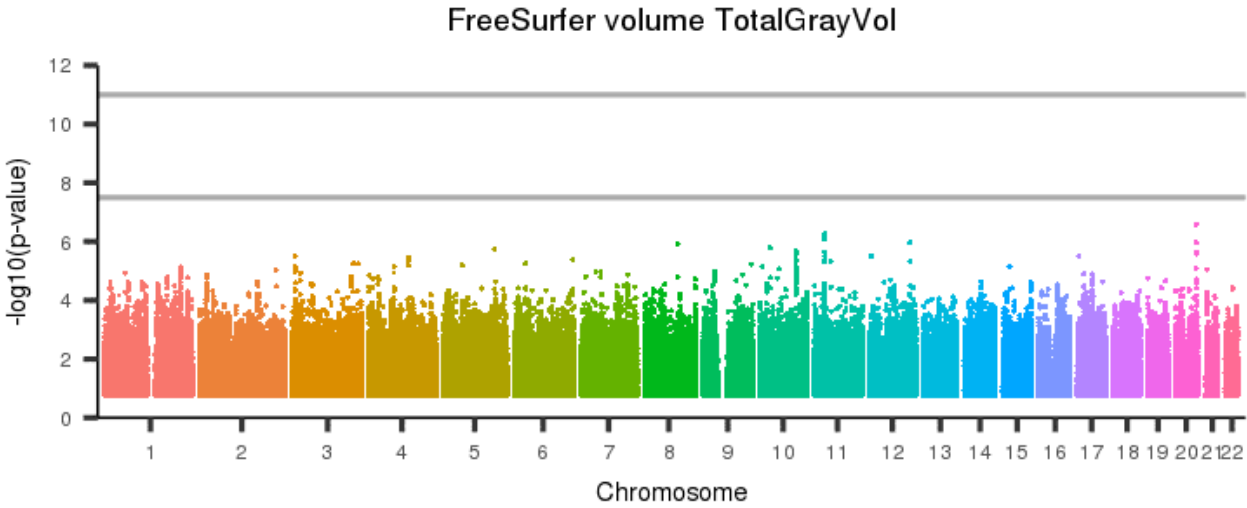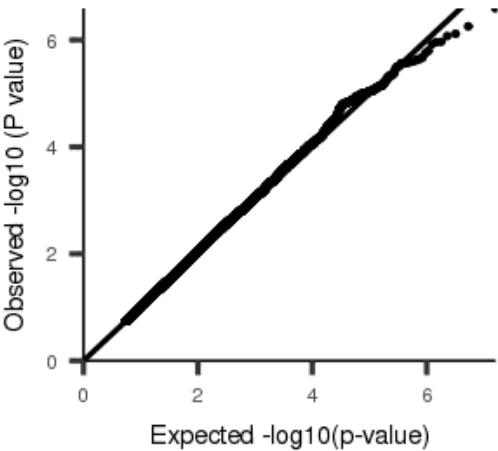

[back to list of plots](#)

Figure 2705: FreeSurfer volume SupraTentorialVol

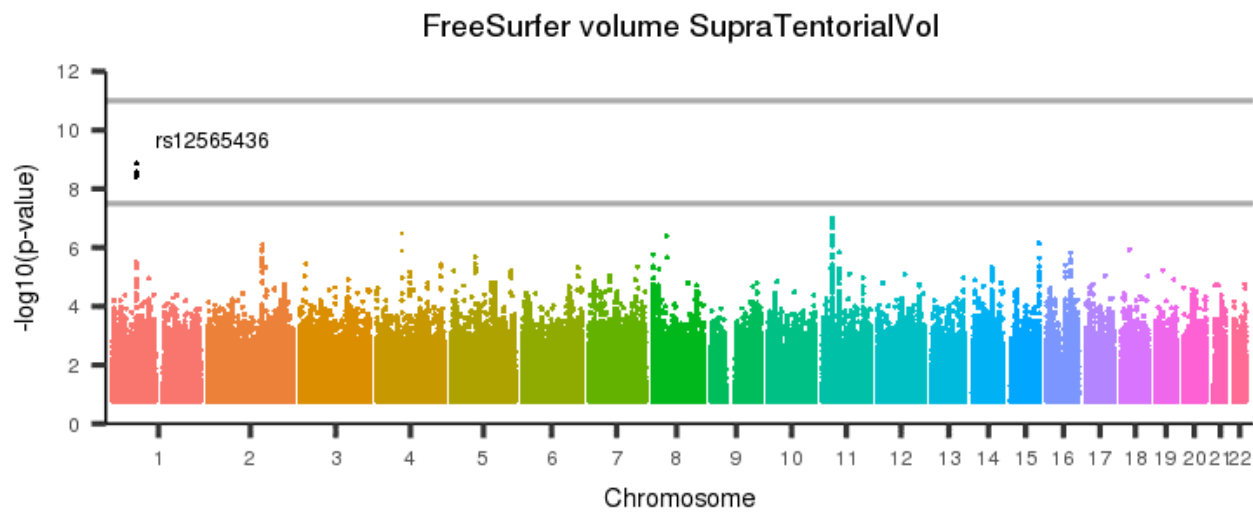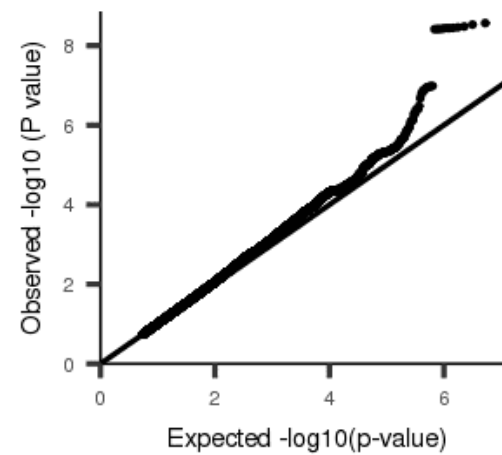

[back to list of plots](#)

Figure 2706: FreeSurfer volume SupraTentorialVolNotVent

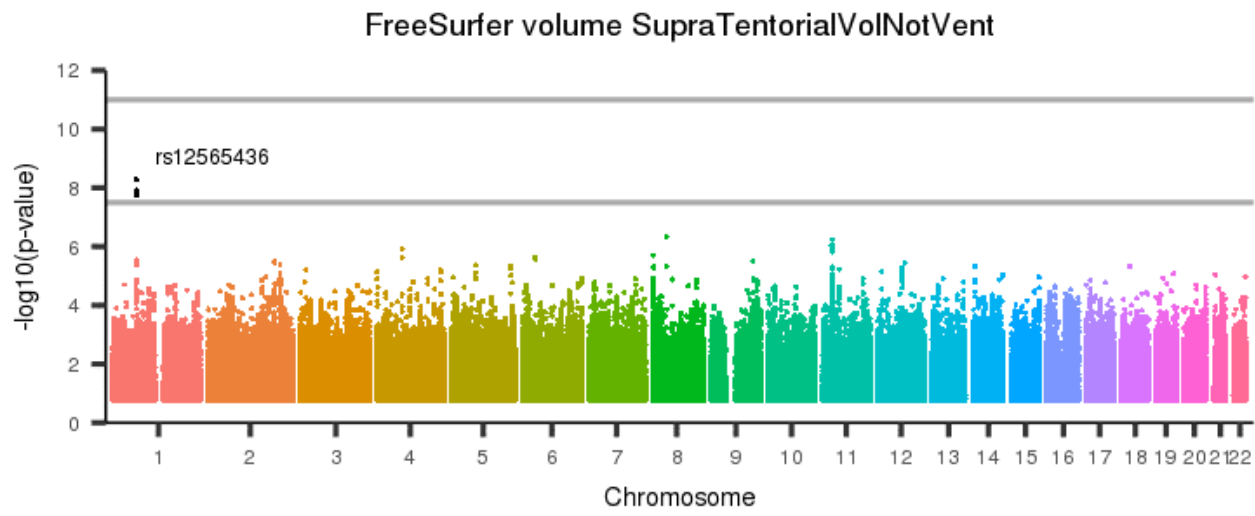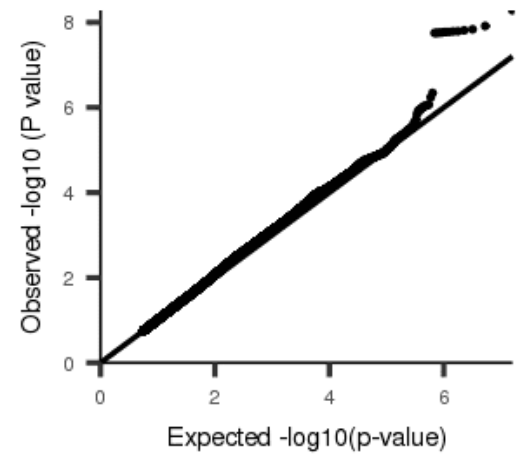

[back to list of plots](#)

Figure 2707: FreeSurfer volume SupraTentorialVolNotVentVox

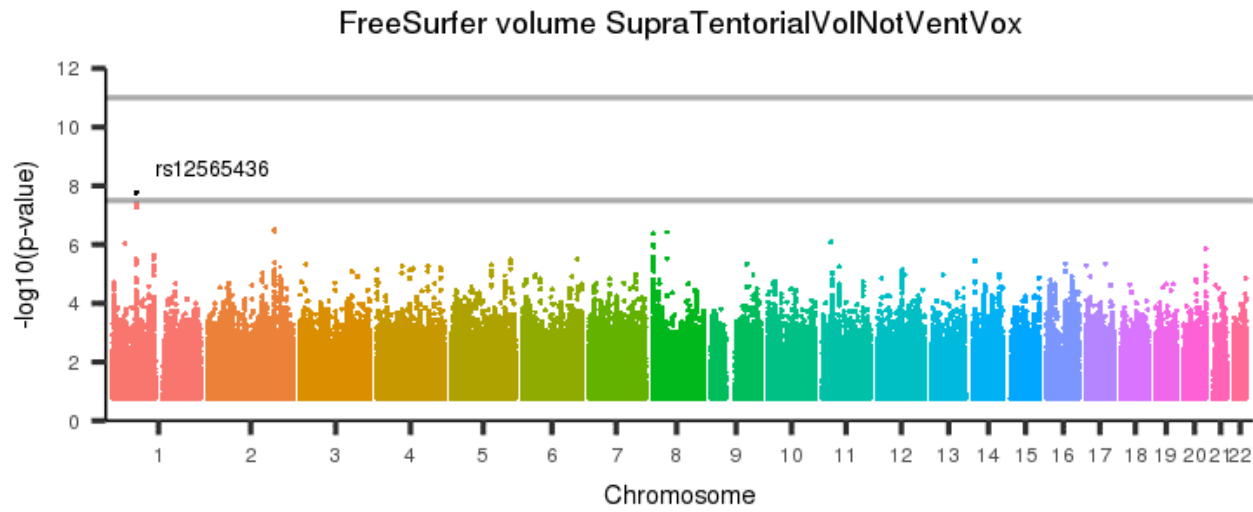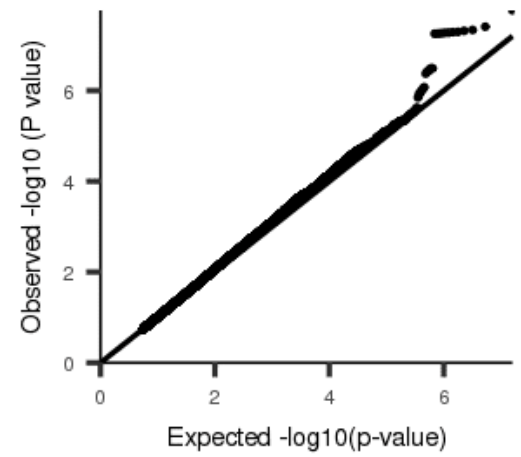

[back to list of plots](#)

Figure 2708: FreeSurfer volume MaskVol

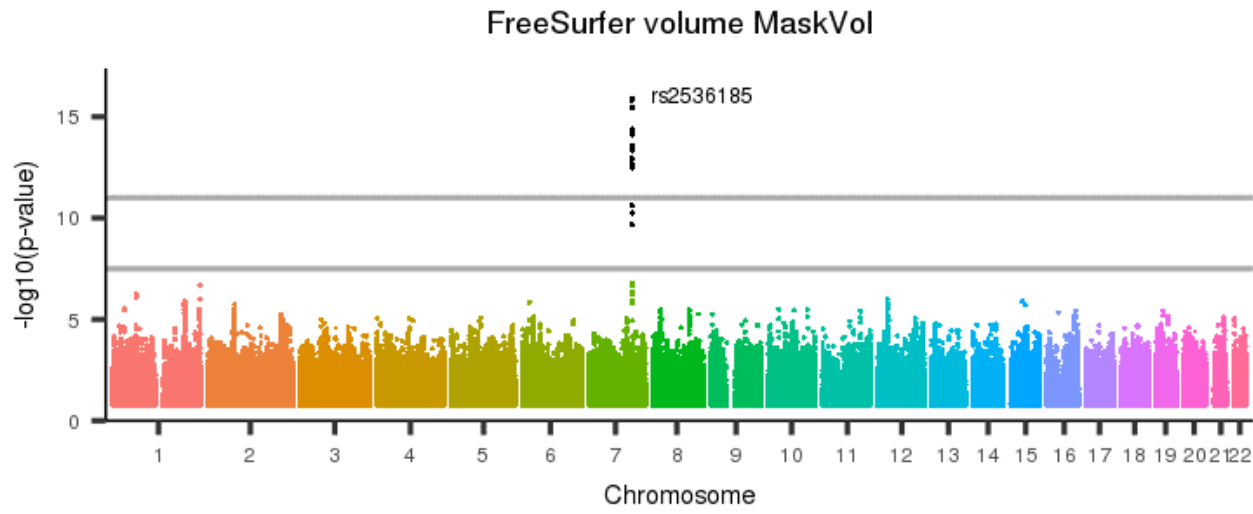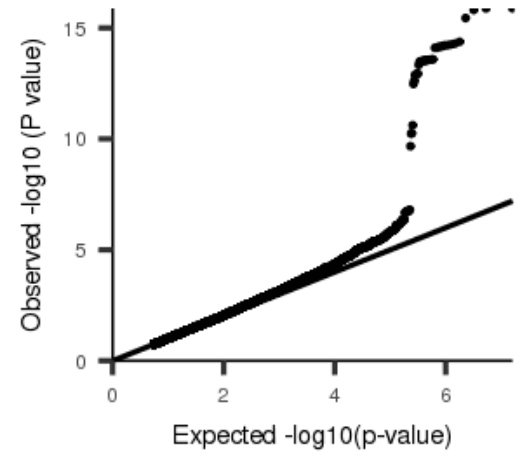

[back to list of plots](#)

Figure 2709: FreeSurfer volume BrainSegVol-to-eTIV

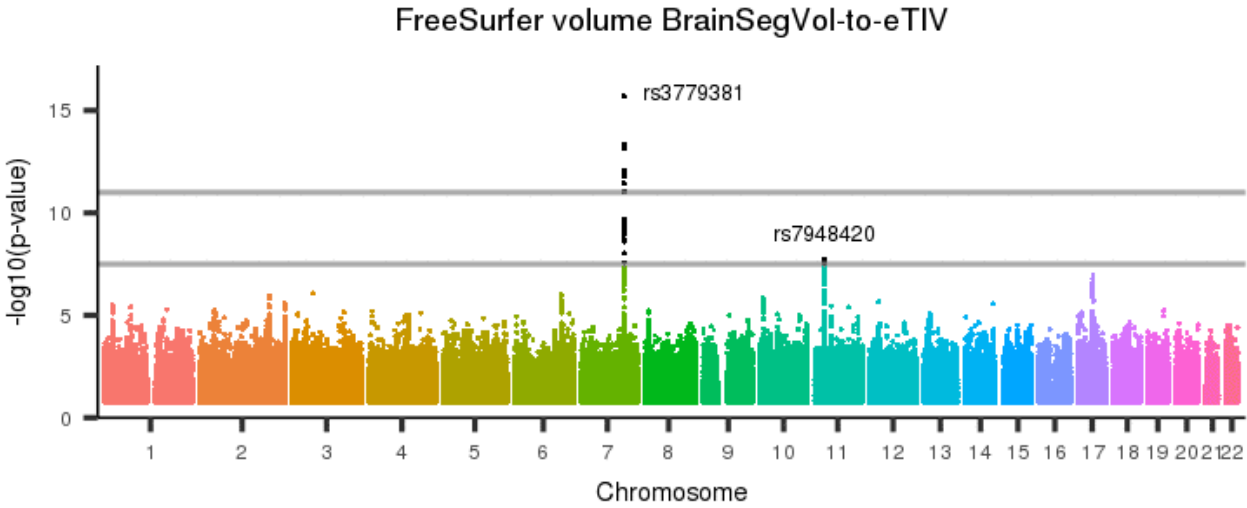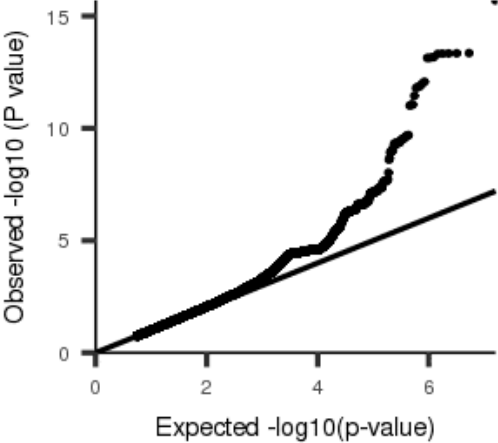

[back to list of plots](#)



Figure 2710: FreeSurfer volume MaskVol-to-eTIV

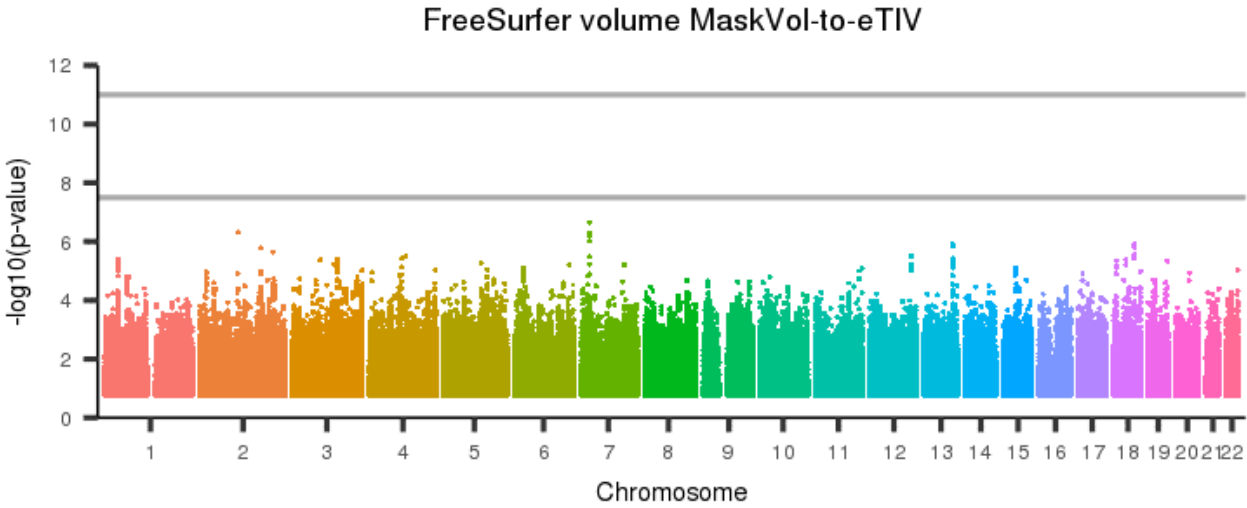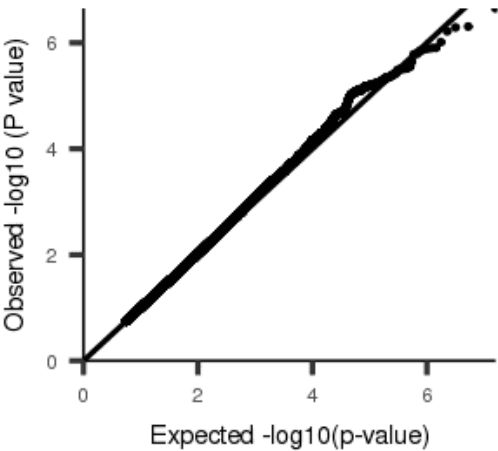

[back to list of plots](#)

Figure 2711: FreeSurfer volume lhSurfaceHoles

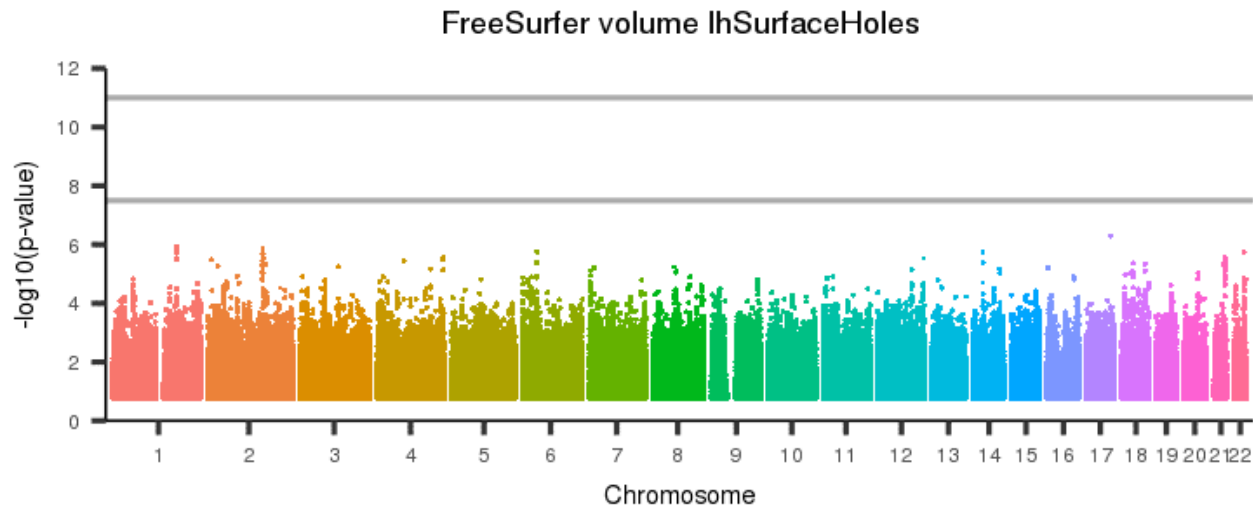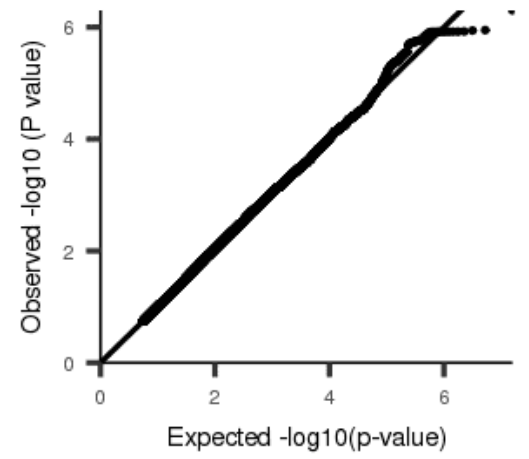

[back to list of plots](#)

Figure 2712: FreeSurfer volume rhSurfaceHoles

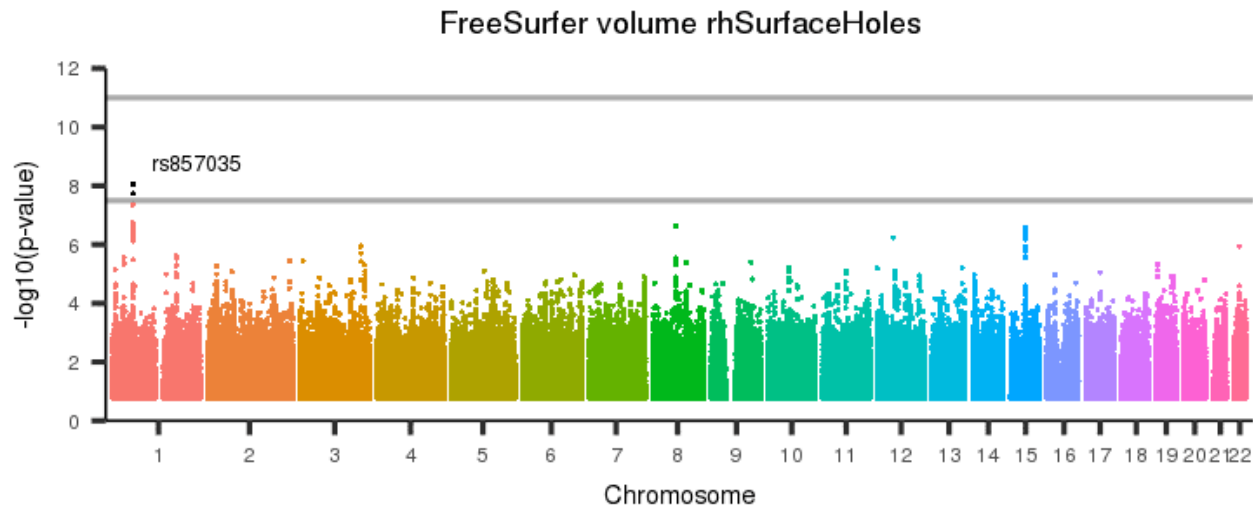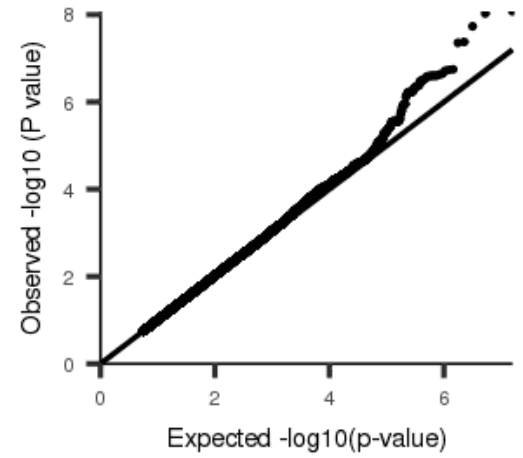

[back to list of plots](#)

Figure 2713: FreeSurfer volume SurfaceHoles

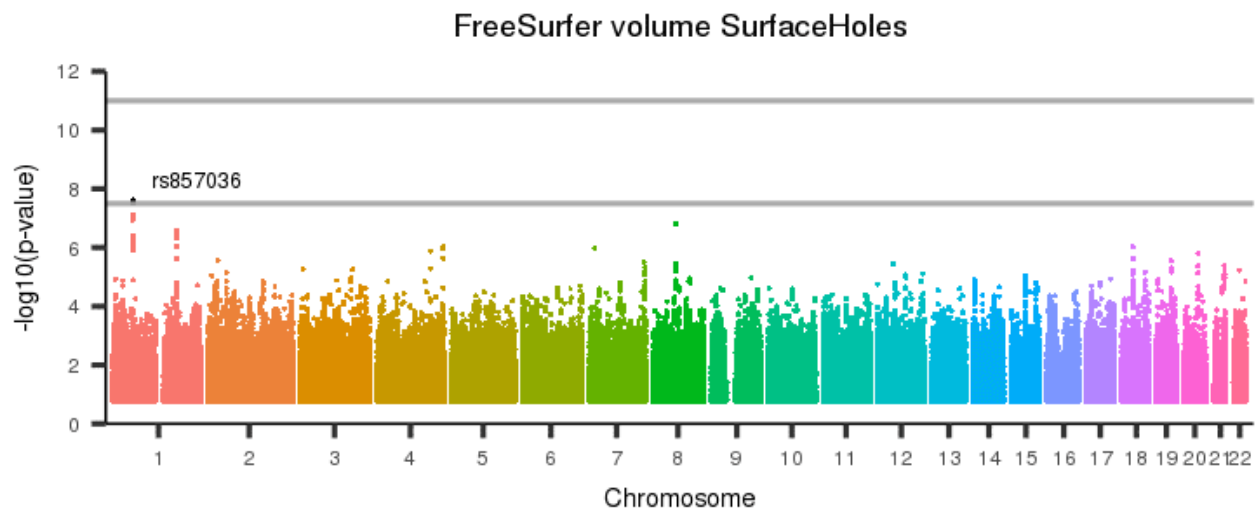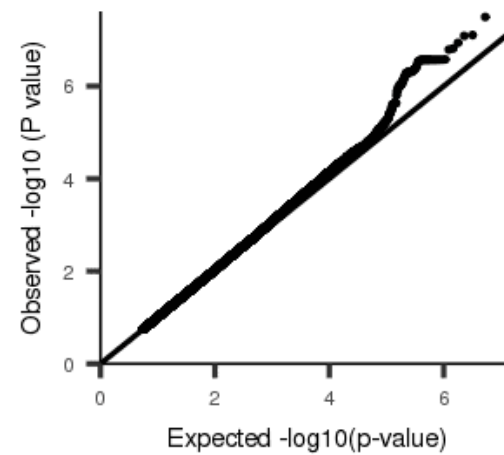

[back to list of plots](#)

Figure 2714: FreeSurfer volume EstimatedTotalIntraCranialVol

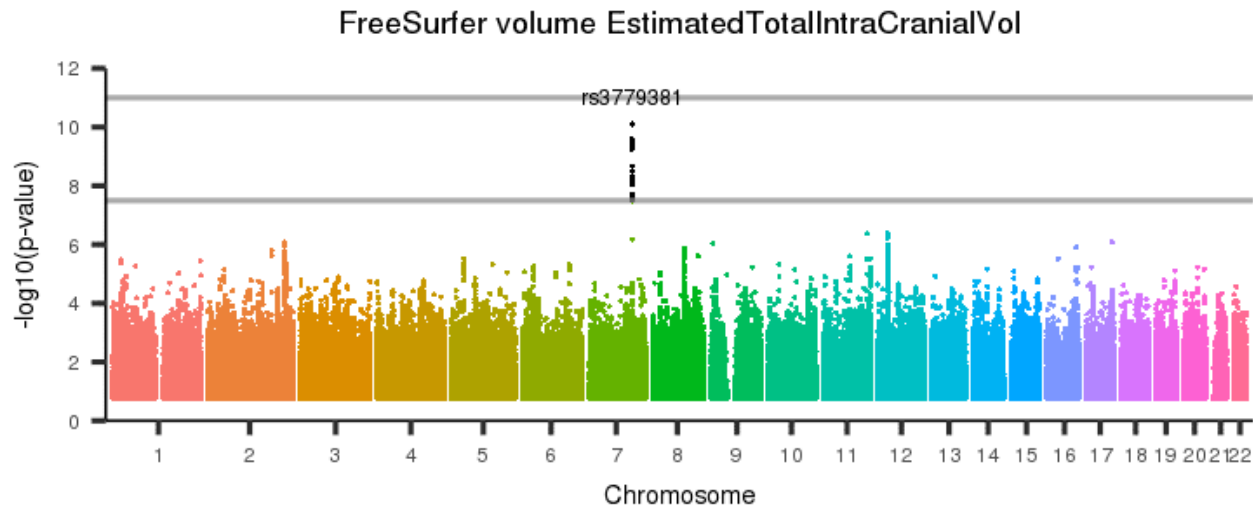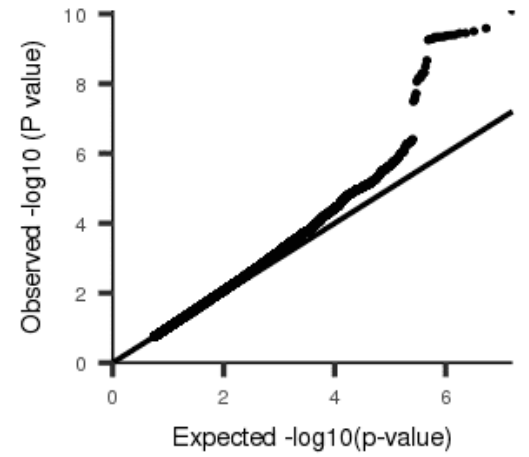

[back to list of plots](#)

Figure 2715: FreeSurfer DKTatlas lh caudalanteriorcingulate area

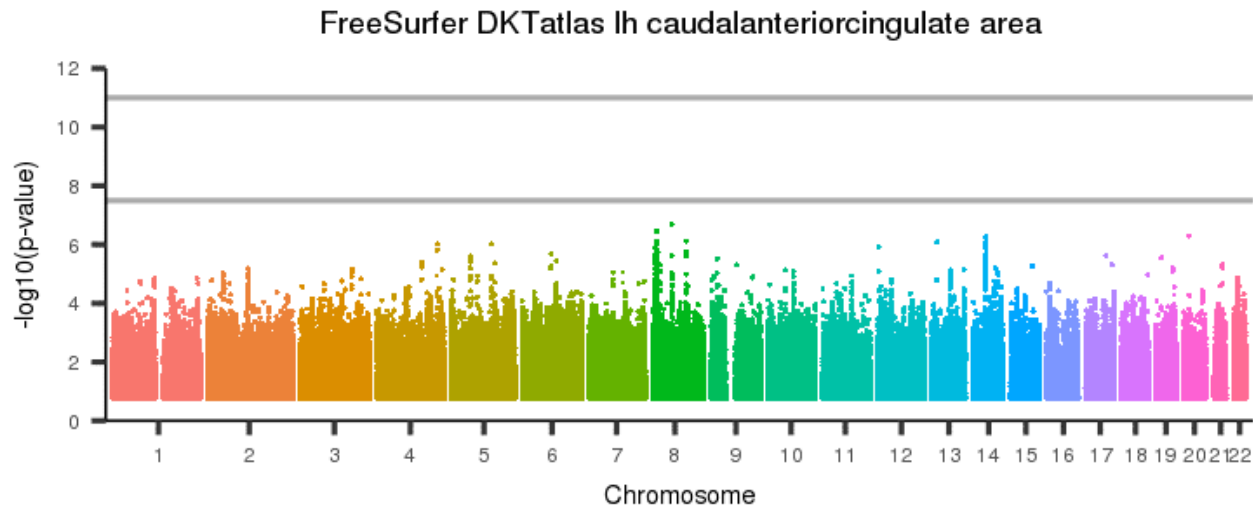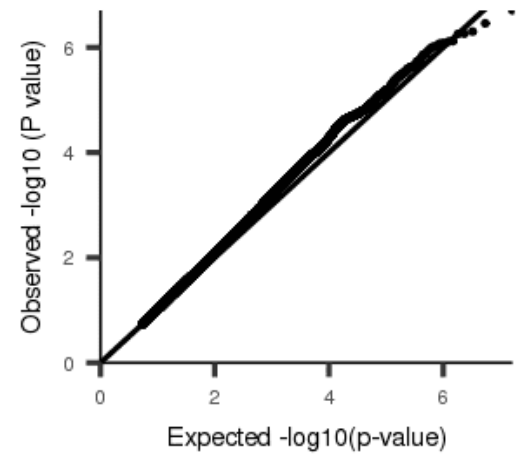

[back to list of plots](#)

Figure 2716: FreeSurfer DKTatlas lh caudalmiddlefrontal area

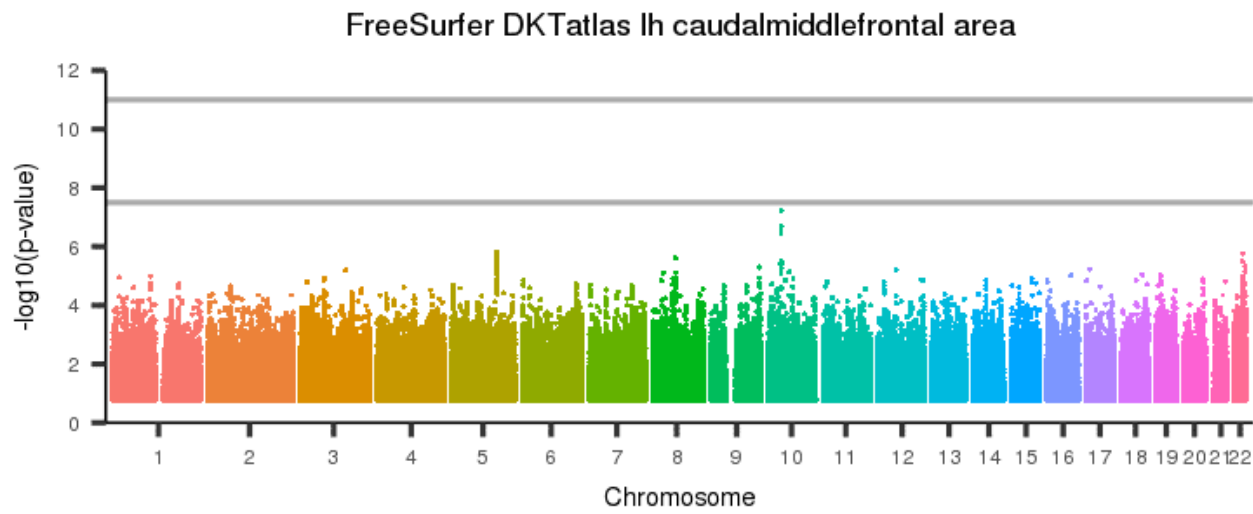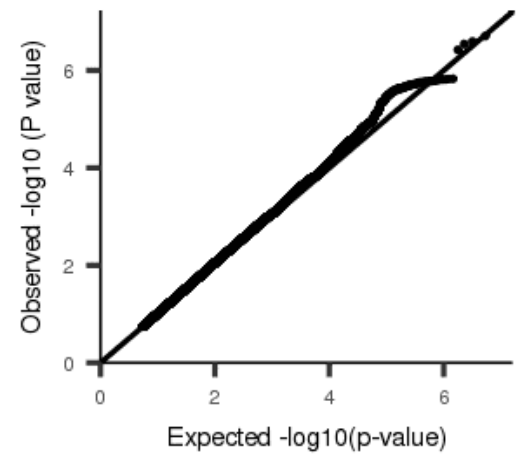

[back to list of plots](#)

Figure 2717: FreeSurfer DKAtlas lh cuneus area

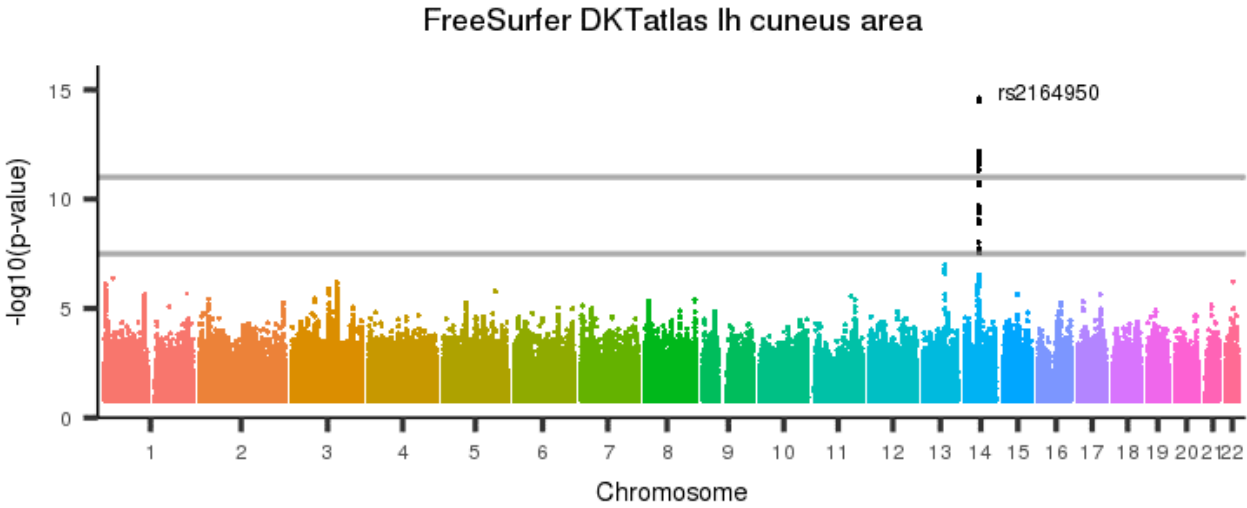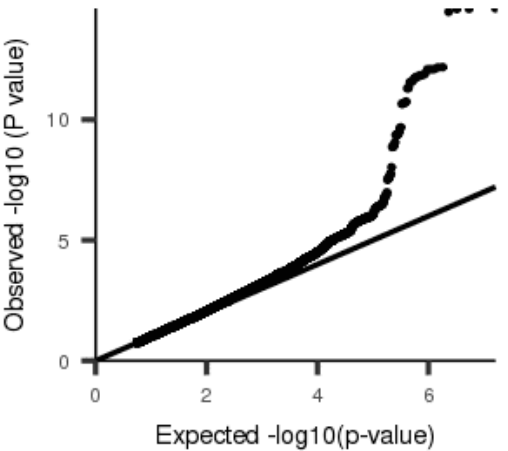

[back to list of plots](#)



Figure 2718: FreeSurfer DKTatlas lh entorhinal area

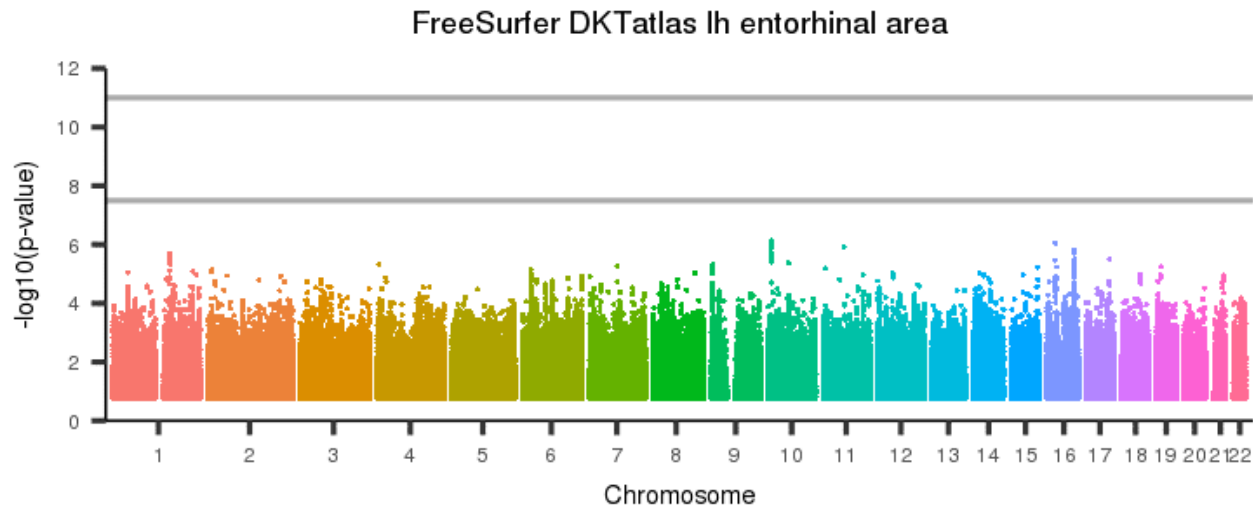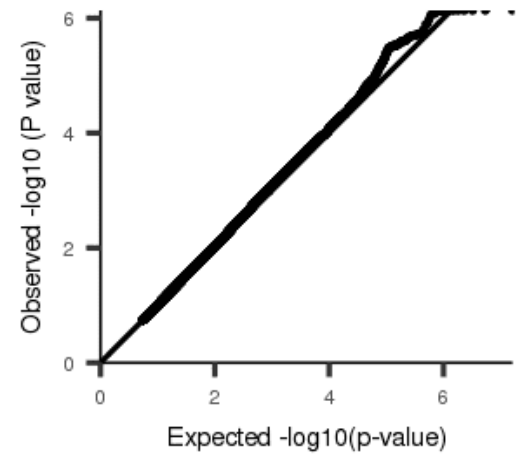

[back to list of plots](#)

Figure 2719: FreeSurfer DKAtlas lh fusiform area

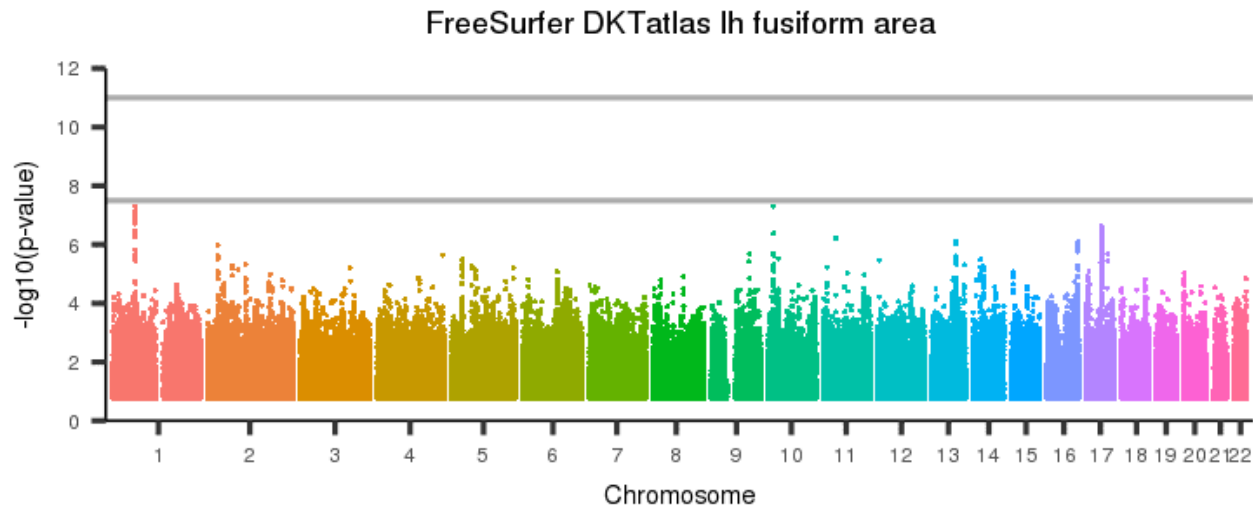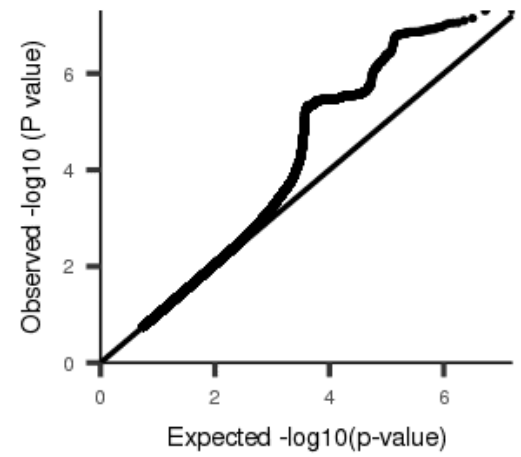

[back to list of plots](#)

Figure 2720: FreeSurfer DKAtlas lh inferiorparietal area

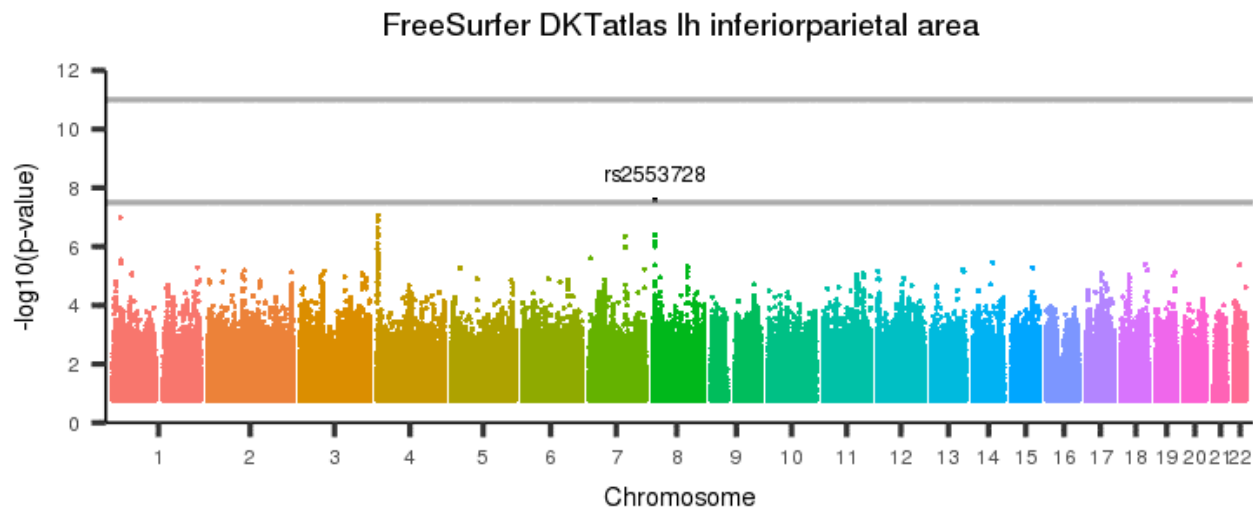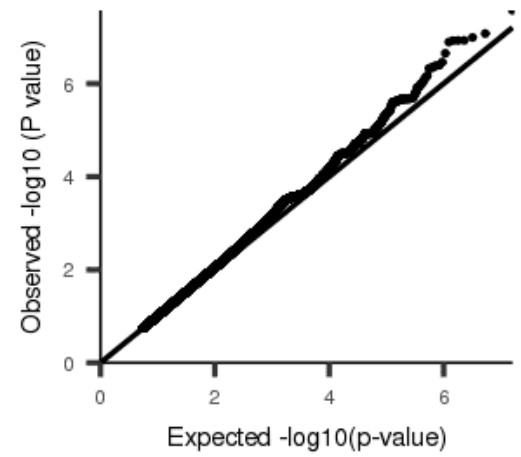

[back to list of plots](#)

Figure 2721: FreeSurfer DKTatlas lh inferiortemporal area

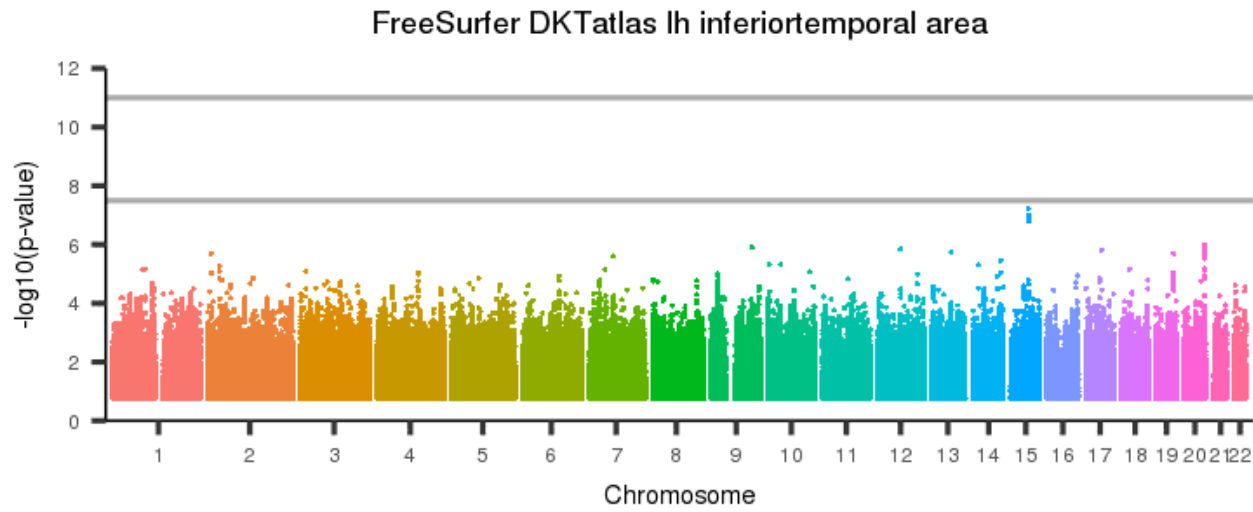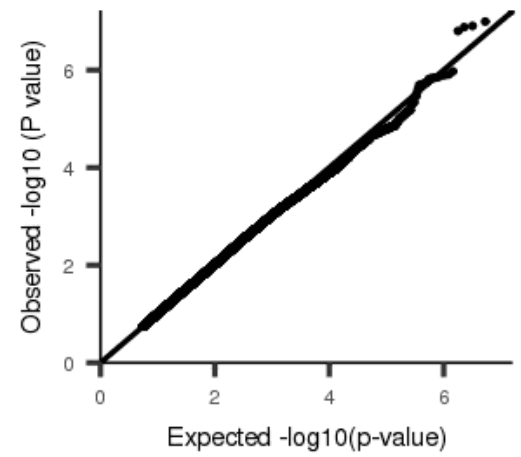

[back to list of plots](#)

Figure 2722: FreeSurfer DKTAtlas lh isthmuscingulate area

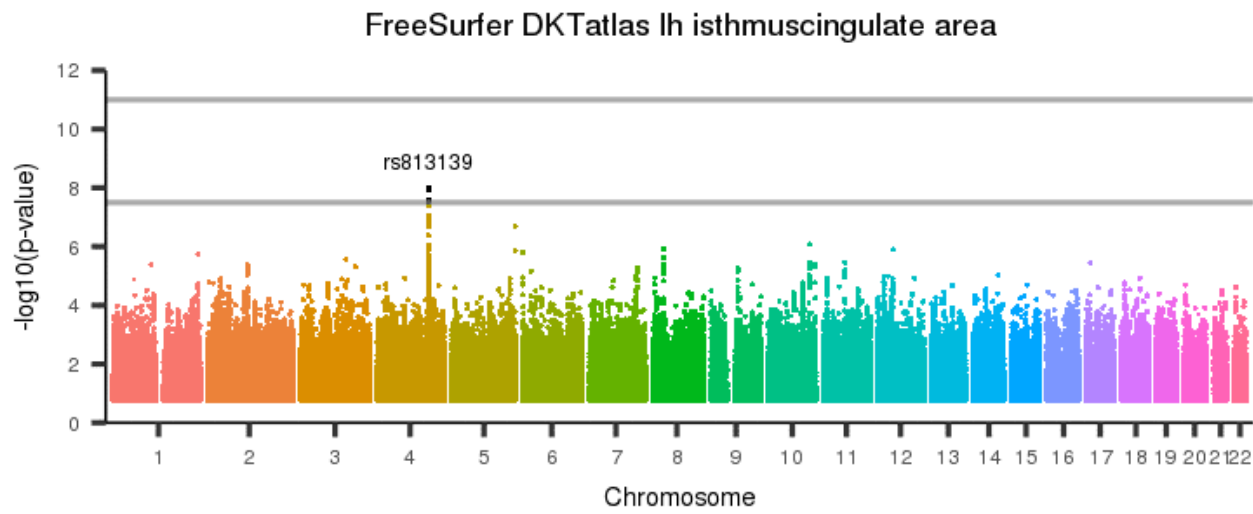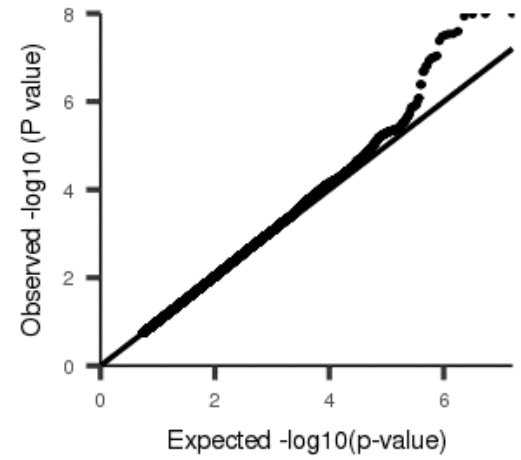

[back to list of plots](#)

Figure 2723: FreeSurfer DKAtlas lh lateraloccipital area

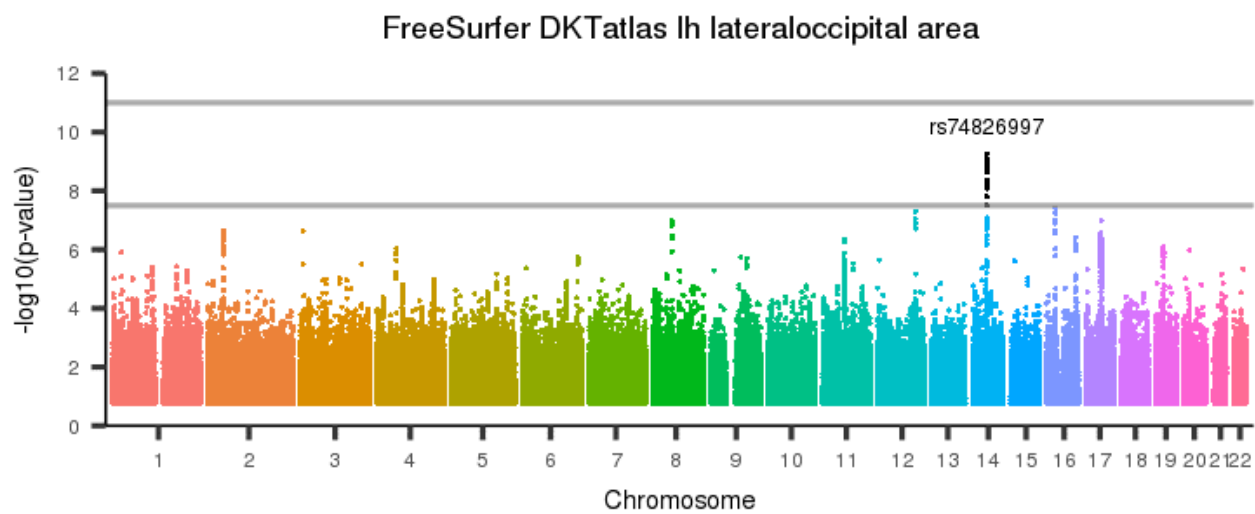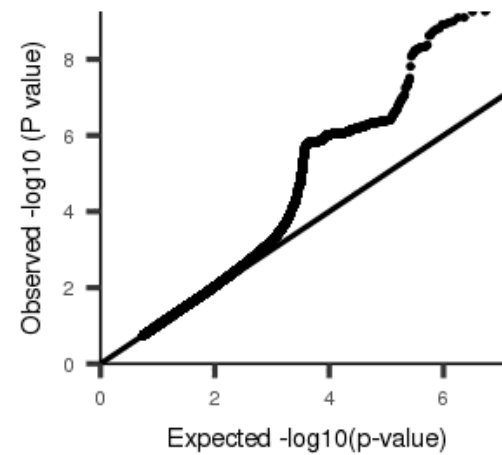

[back to list of plots](#)

Figure 2724: FreeSurfer DKTatlas lh lateralorbitofrontal area

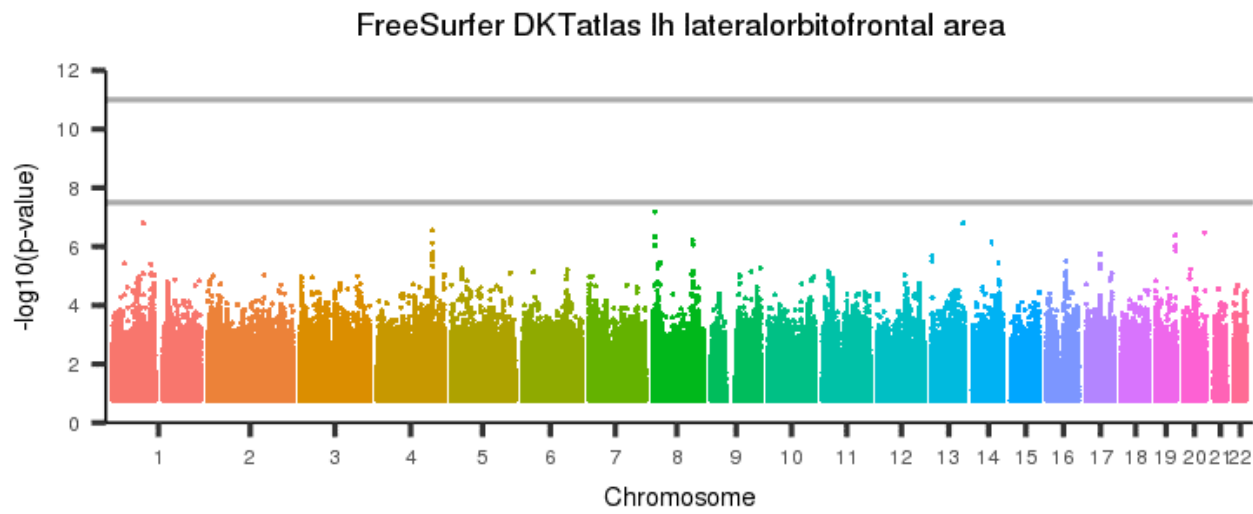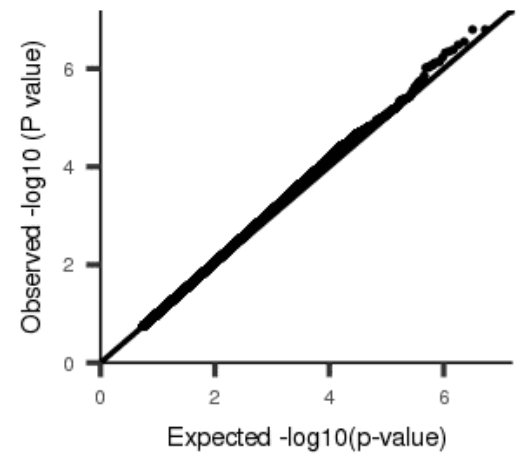

[back to list of plots](#)

Figure 2725: FreeSurfer DKAtlas lh lingual area

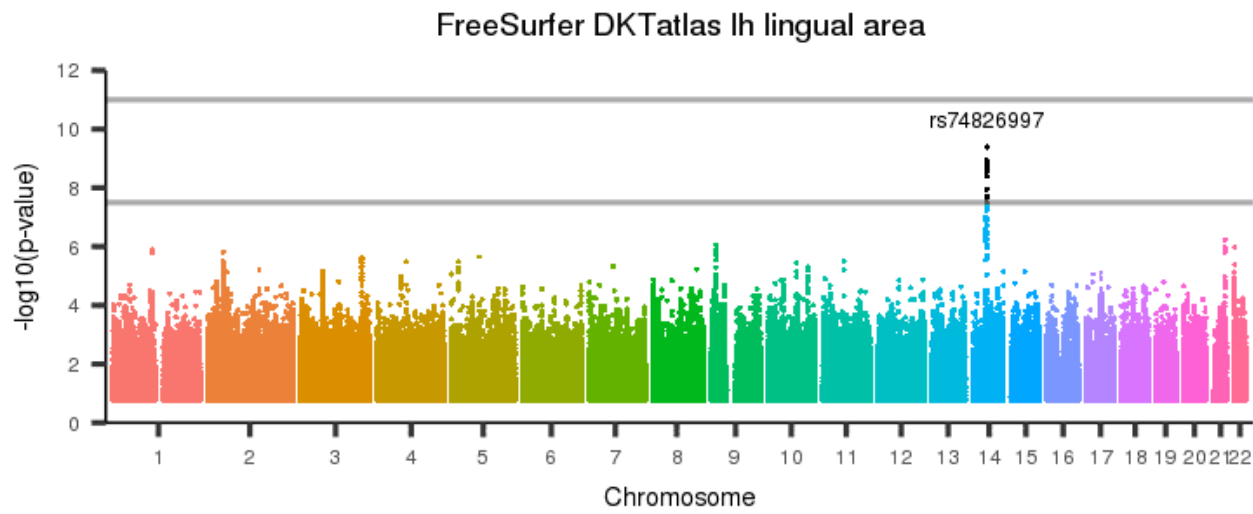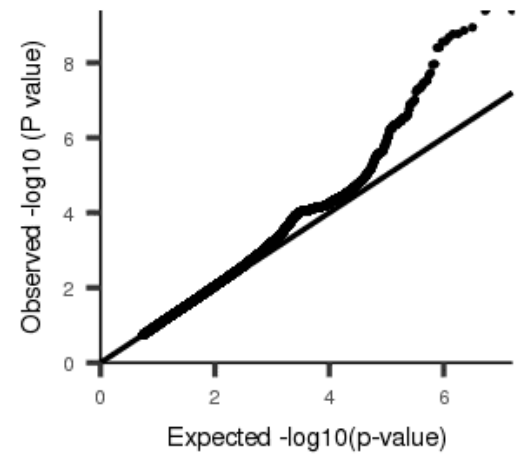

[back to list of plots](#)



Figure 2726: FreeSurfer DKTatlas lh medialorbitofrontal area

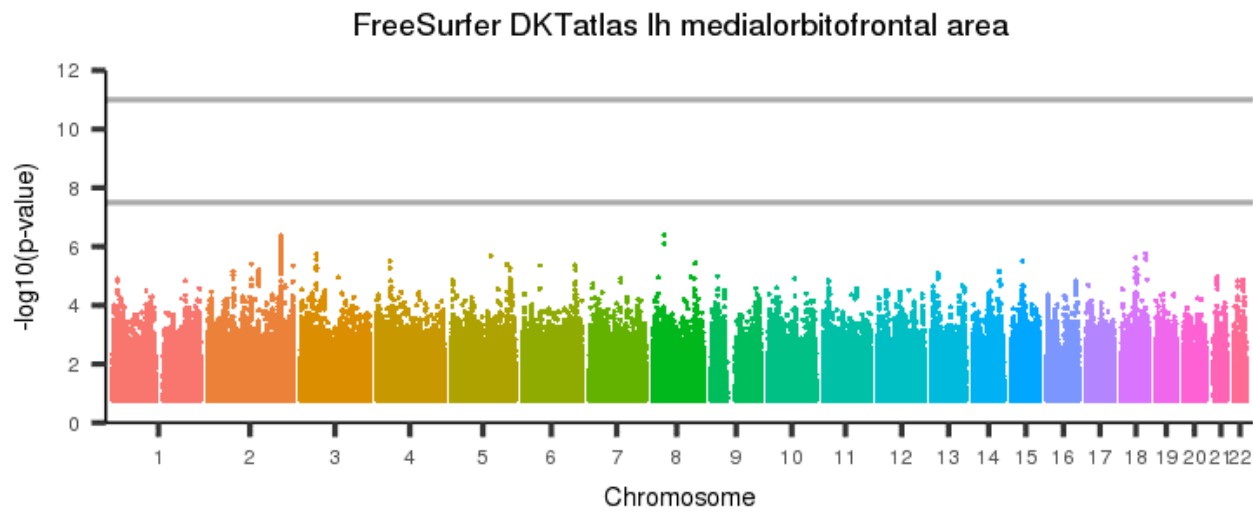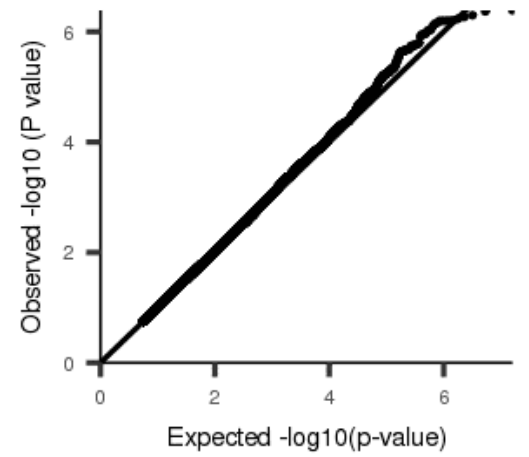

[back to list of plots](#)

Figure 2727: FreeSurfer DKTatlas lh middletemporal area

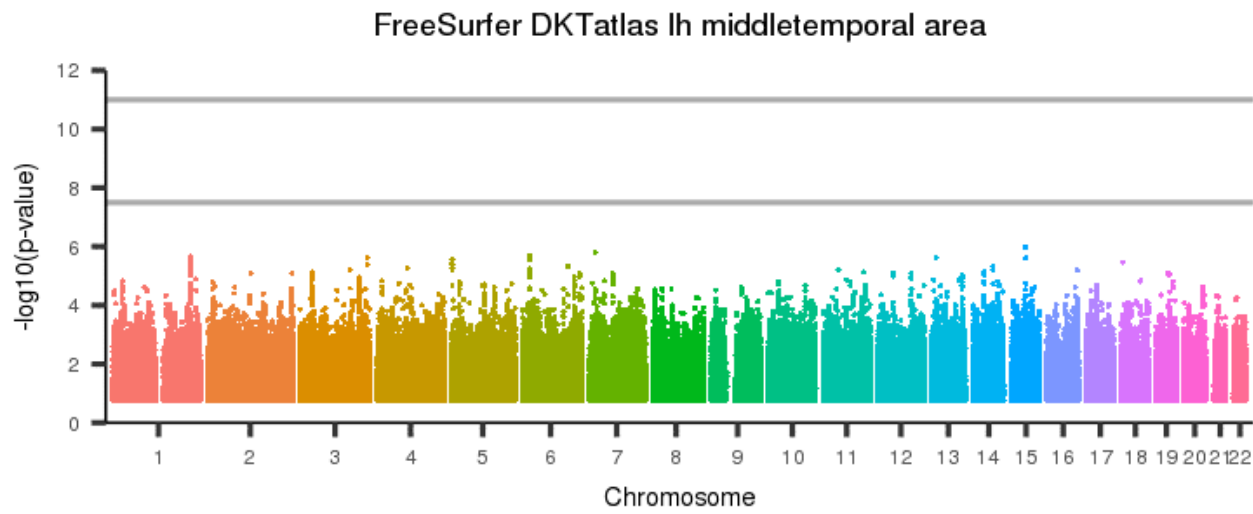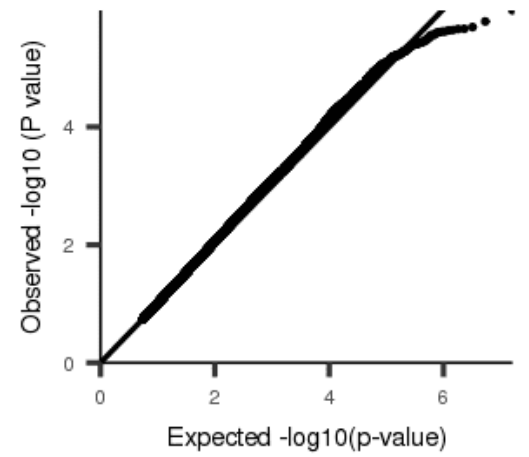

[back to list of plots](#)

Figure 2728: FreeSurfer DKAtlas lh parahippocampal area

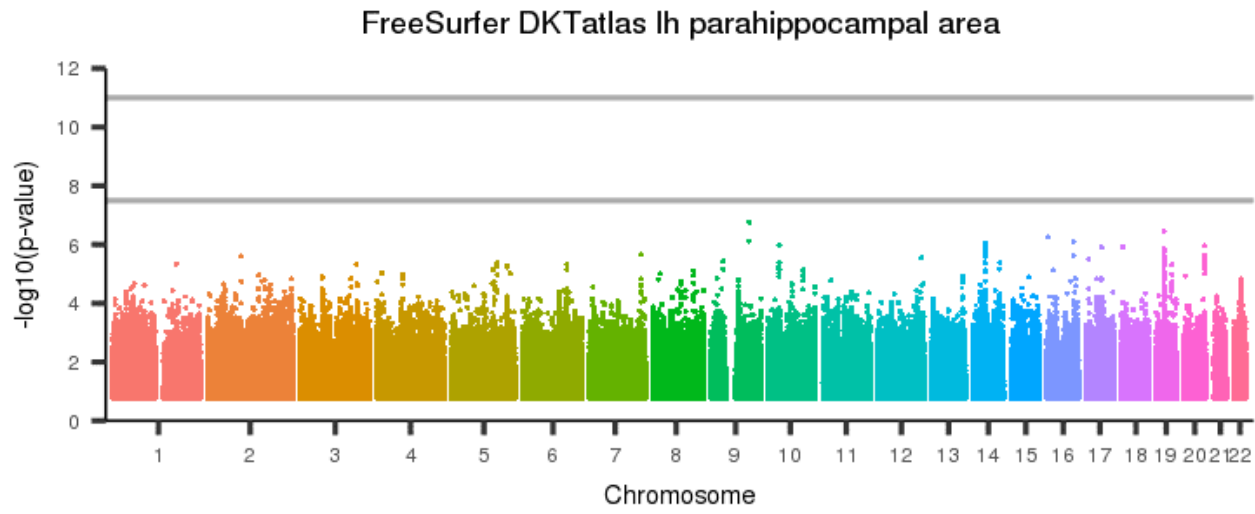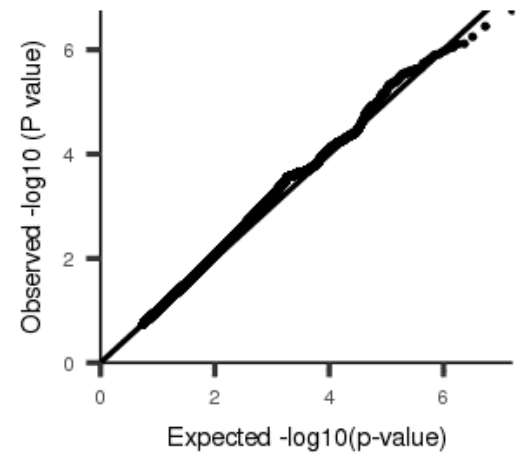

[back to list of plots](#)

Figure 2729: FreeSurfer DKTAtlas lh paracentral area

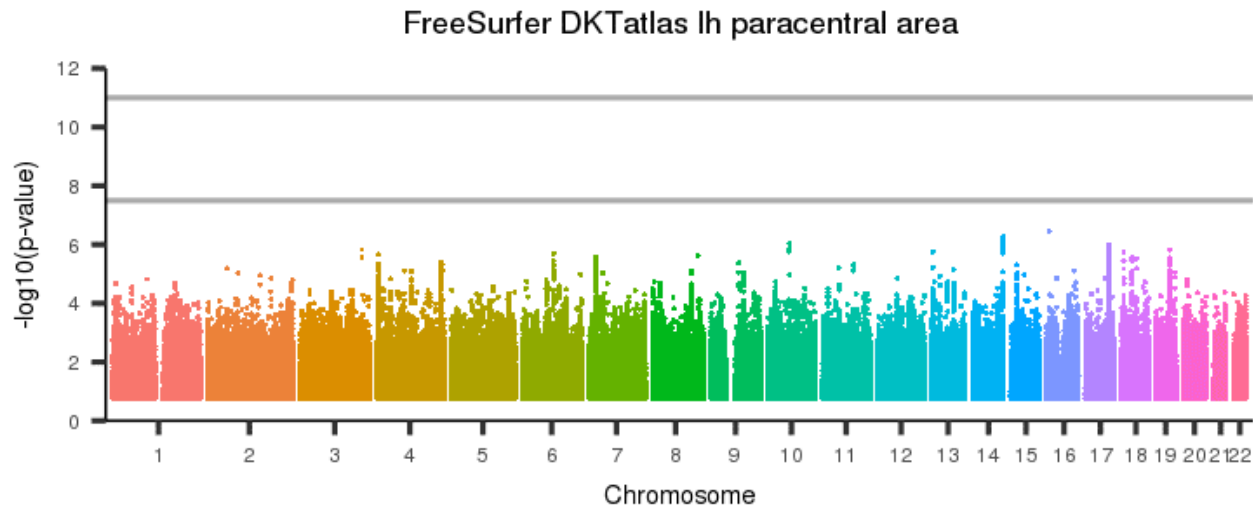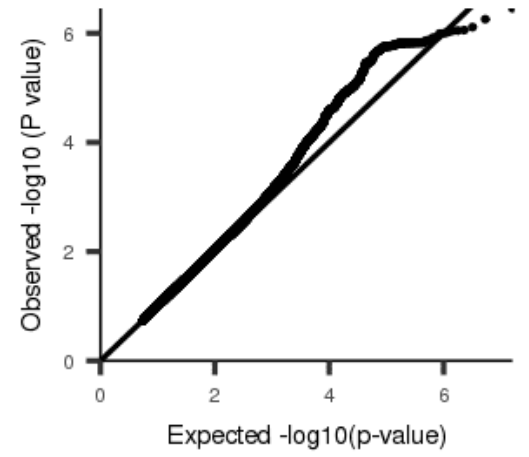

[back to list of plots](#)

Figure 2730: FreeSurfer DKTatlas lh parsopercularis area

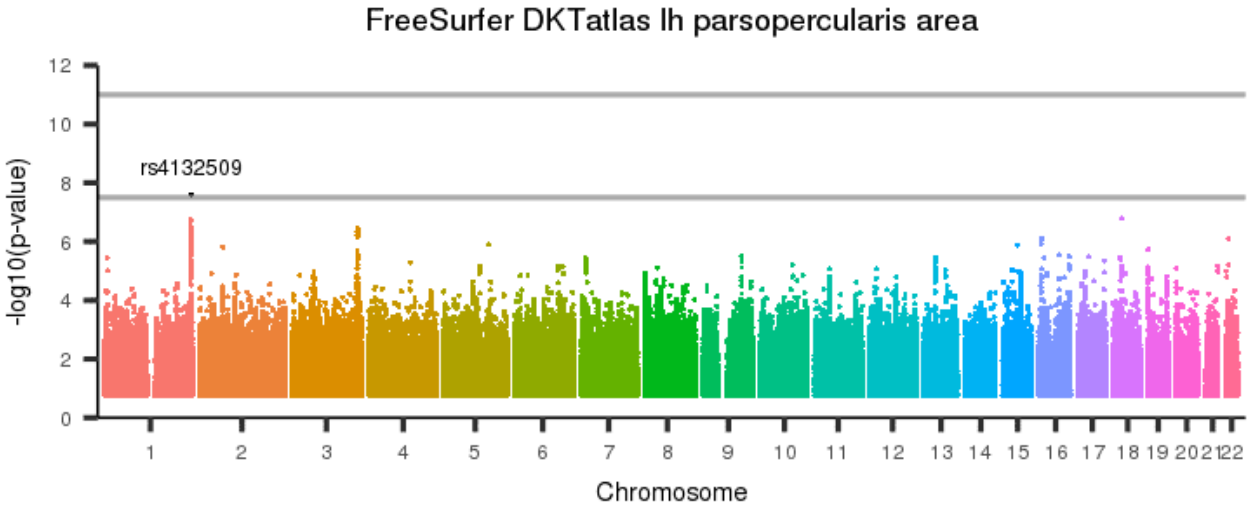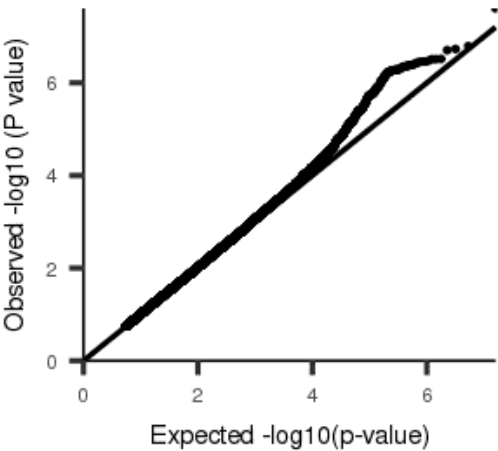

[back to list of plots](#)

Figure 2731: FreeSurfer DKAtlas lh parsorbitalis area

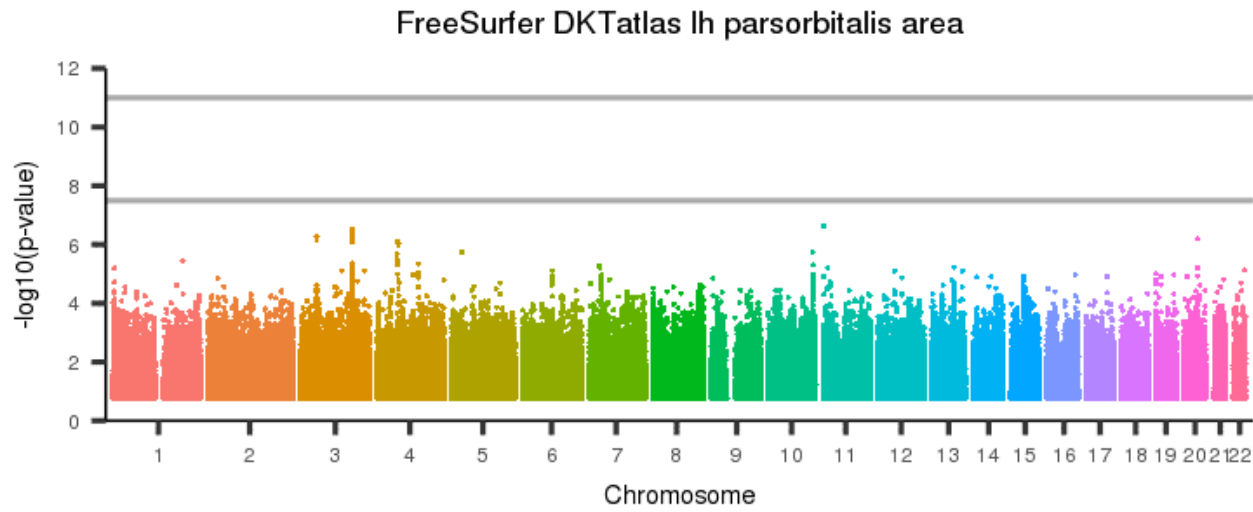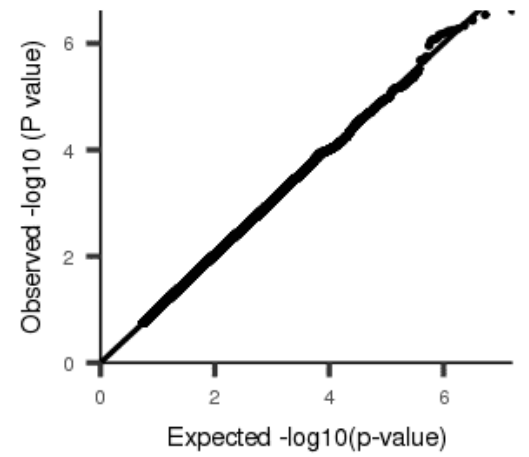

[back to list of plots](#)

Figure 2732: FreeSurfer DKTatlas lh parstriangularis area

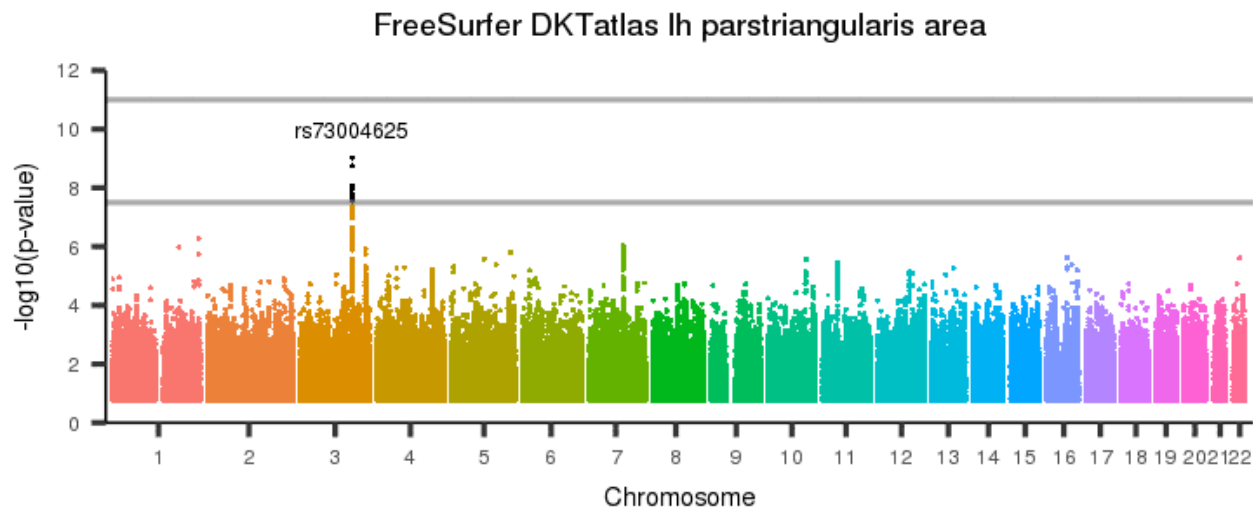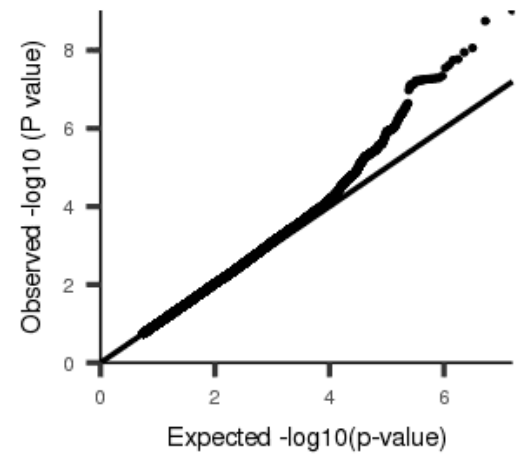

[back to list of plots](#)

Figure 2733: FreeSurfer DKTAtlas lh pericalcarine area

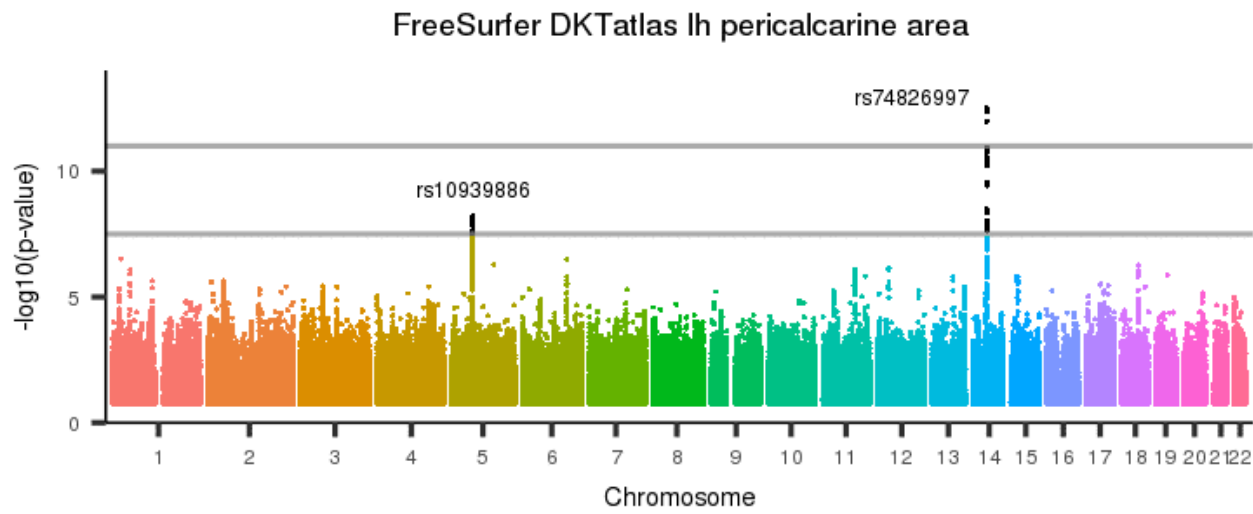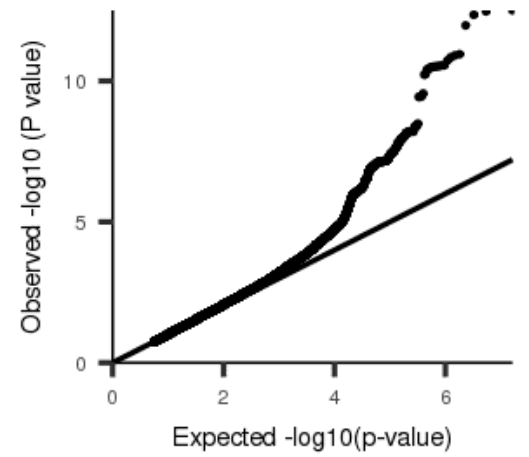

[back to list of plots](#)



Figure 2734: FreeSurfer DKTatlas lh postcentral area

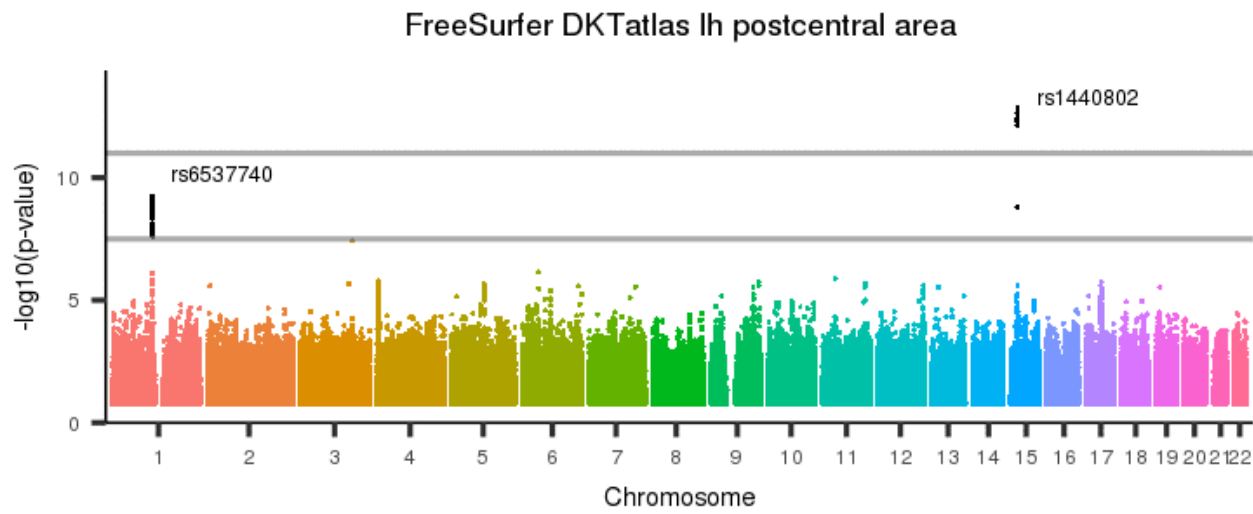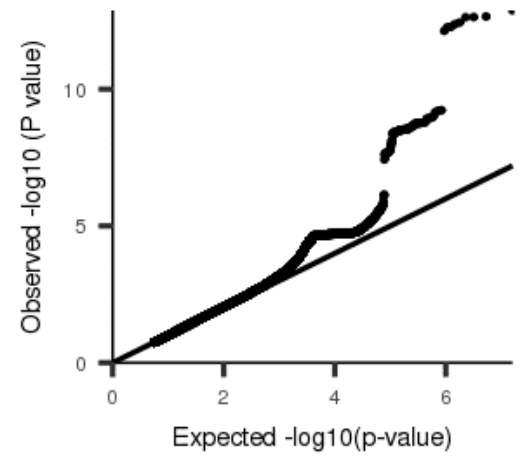

[back to list of plots](#)

Figure 2735: FreeSurfer DKAtlas lh posteriorcingulate area

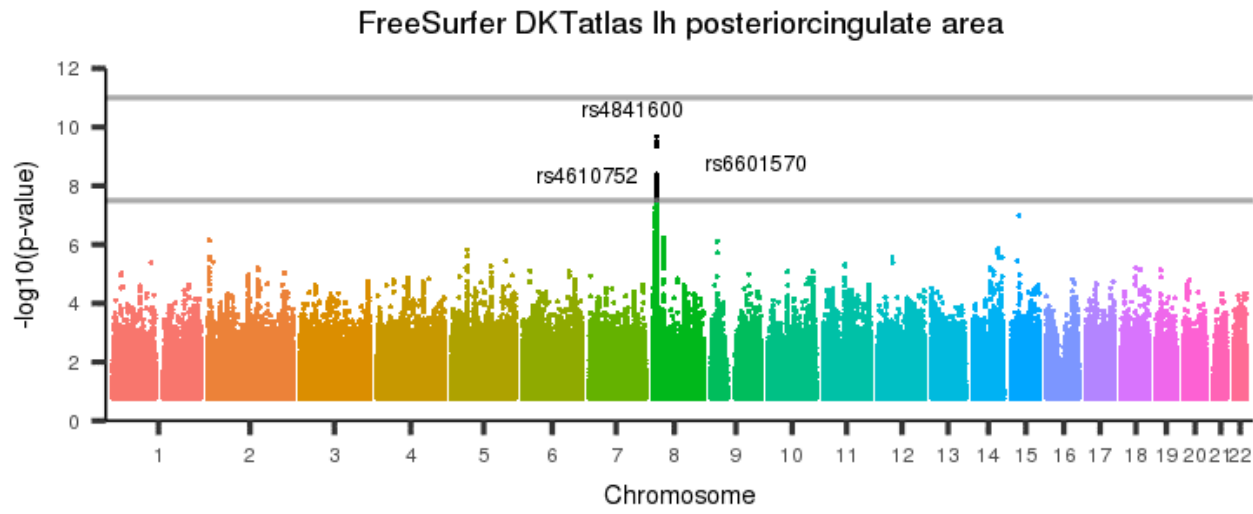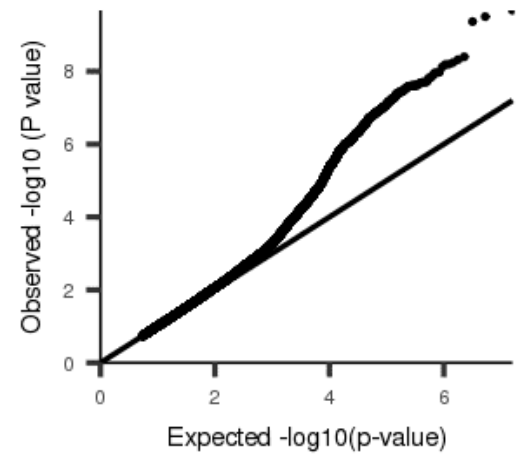

[back to list of plots](#)

Figure 2736: FreeSurfer DKTatlas lh precentral area

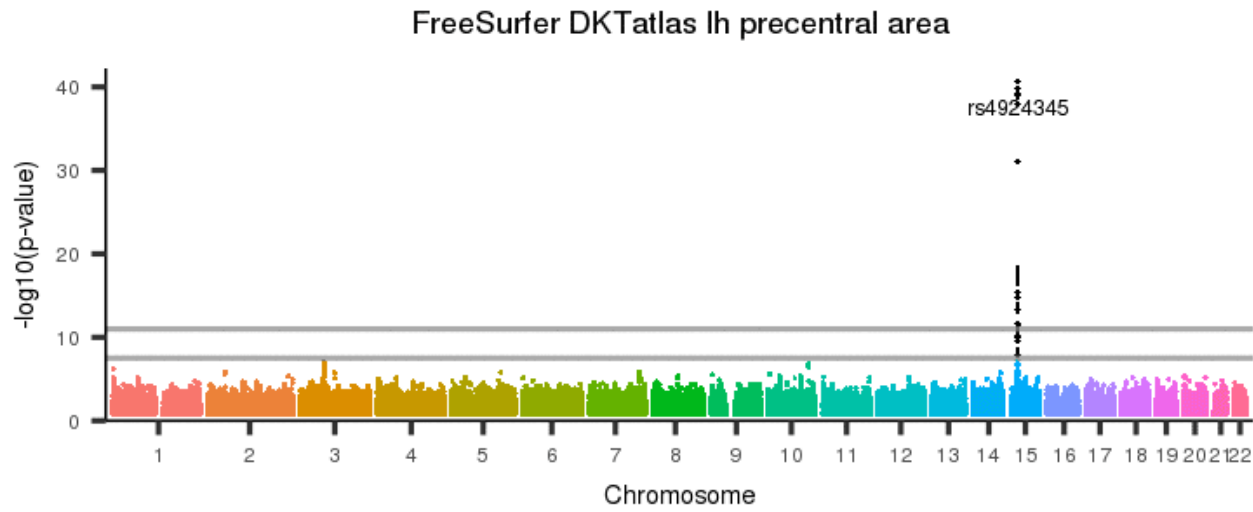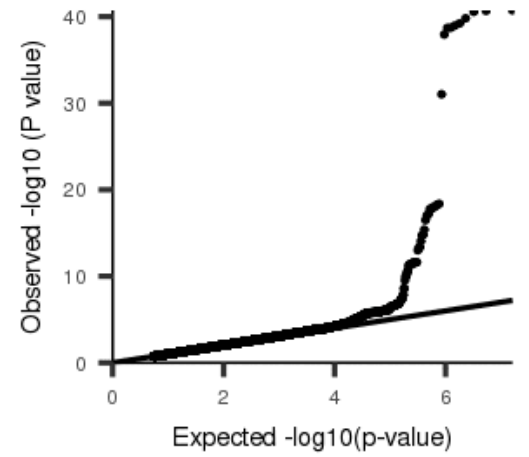

[back to list of plots](#)

Figure 2737: FreeSurfer DKTatlas lh precuneus area

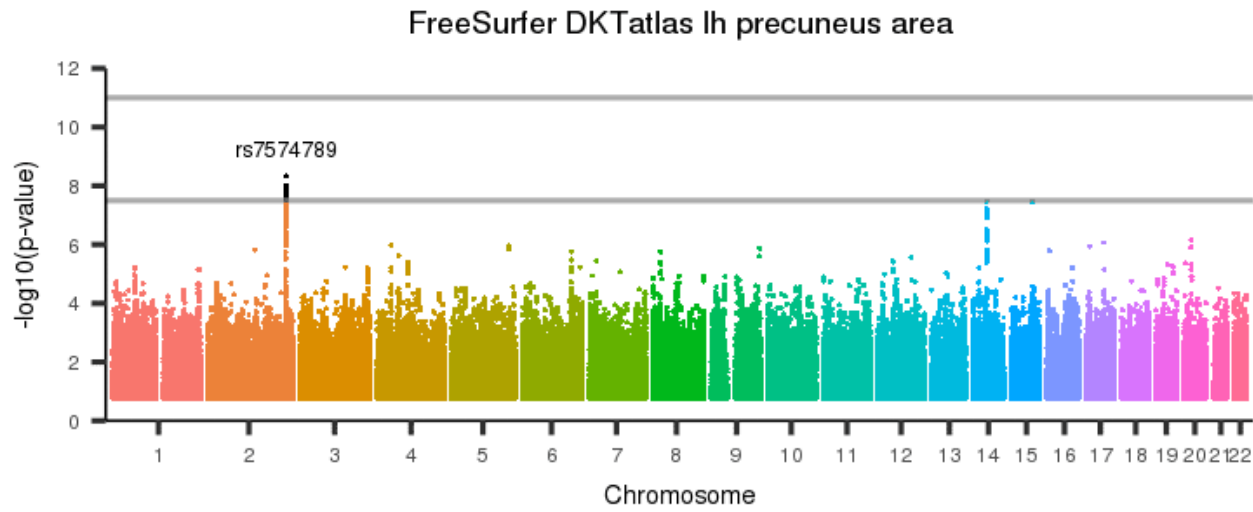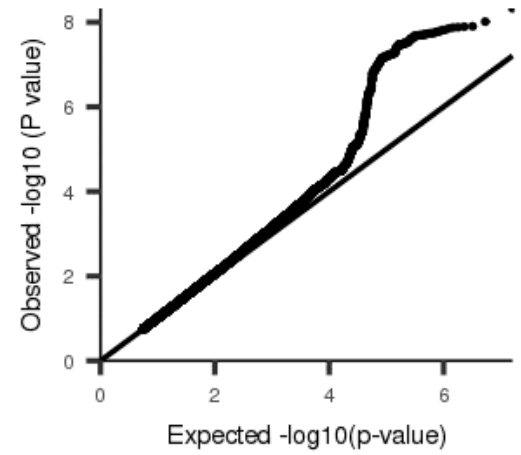

[back to list of plots](#)

Figure 2738: FreeSurfer DKAtlas lh rostral anterior cingulate area

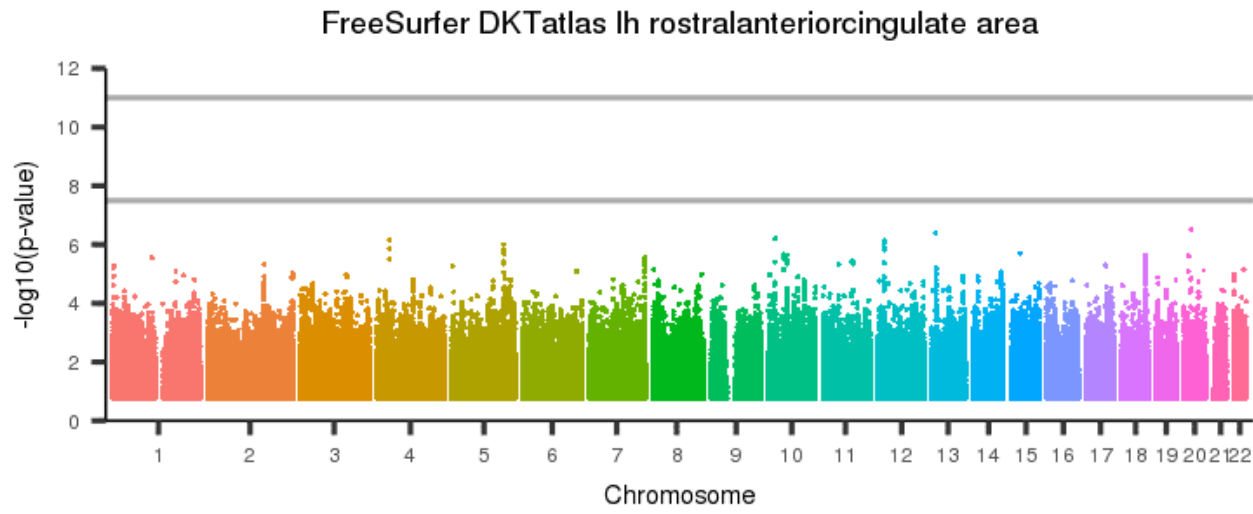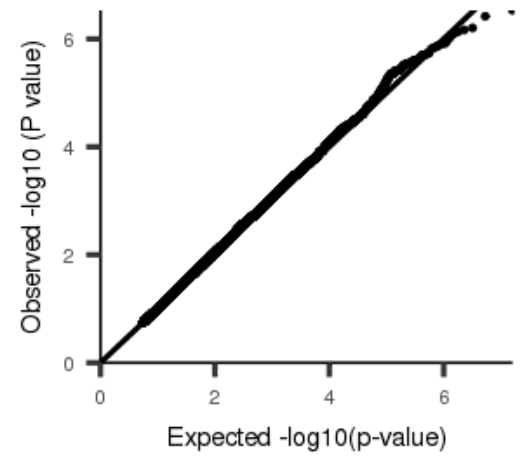

[back to list of plots](#)

Figure 2739: FreeSurfer DKTatlas lh rostralmiddlefrontal area

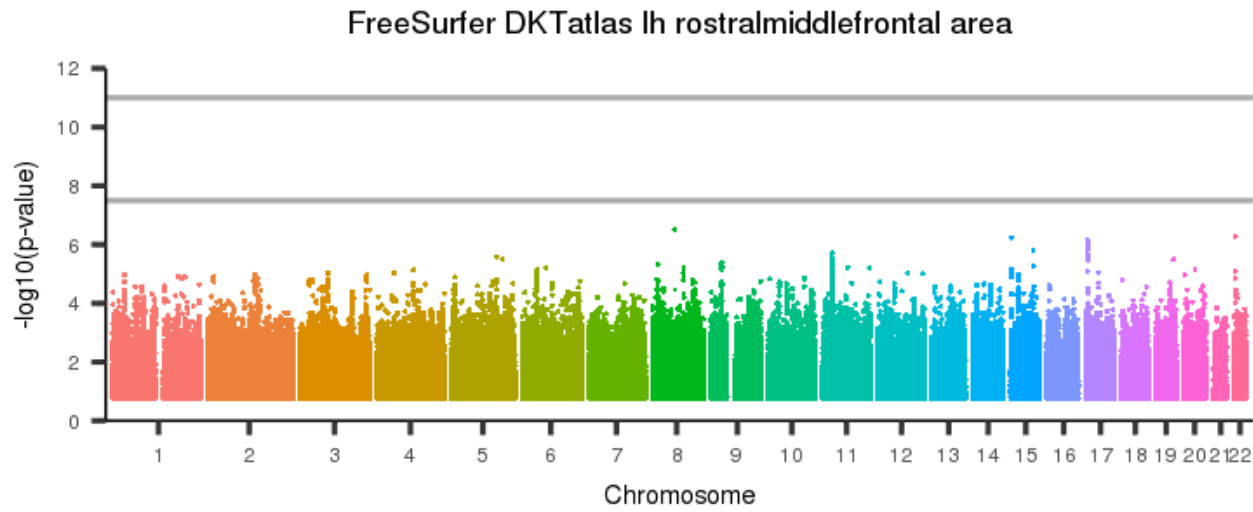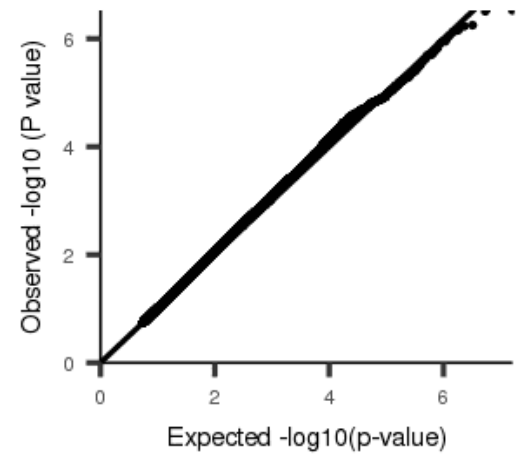

[back to list of plots](#)

Figure 2740: FreeSurfer DKAtlas lh superiorfrontal area

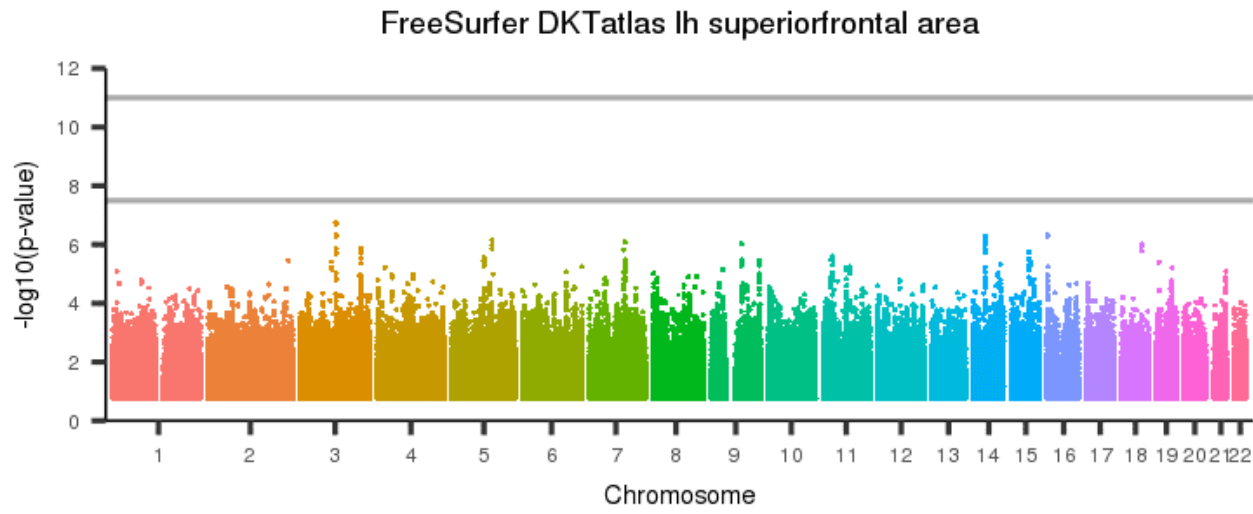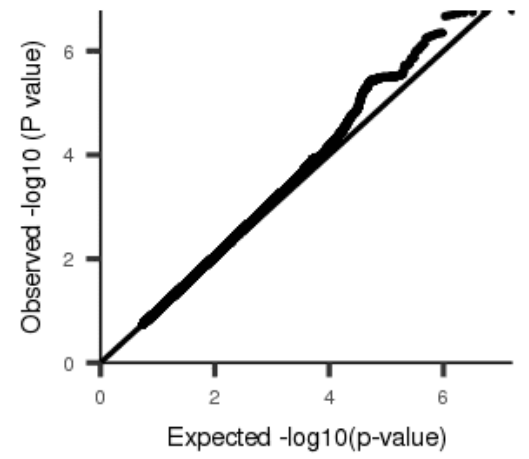

[back to list of plots](#)

Figure 2741: FreeSurfer DKAtlas lh superiorparietal area

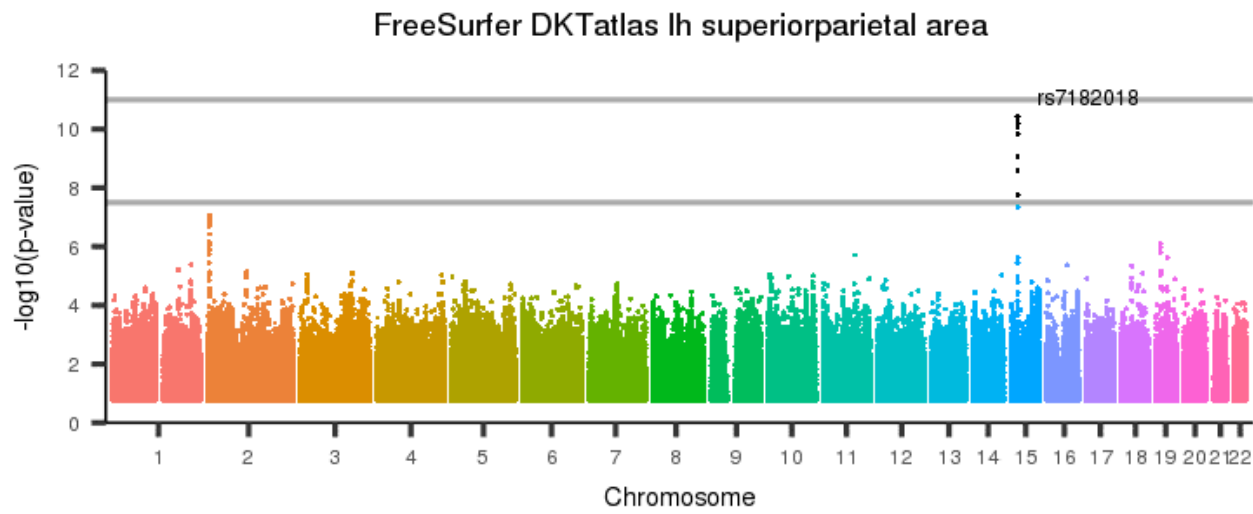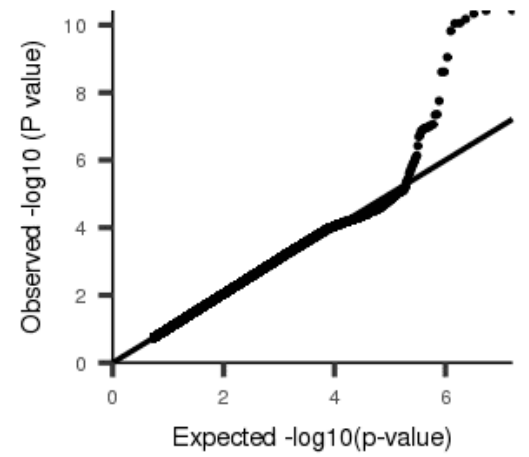

[back to list of plots](#)



Figure 2742: FreeSurfer DKTatlas lh superior temporal area

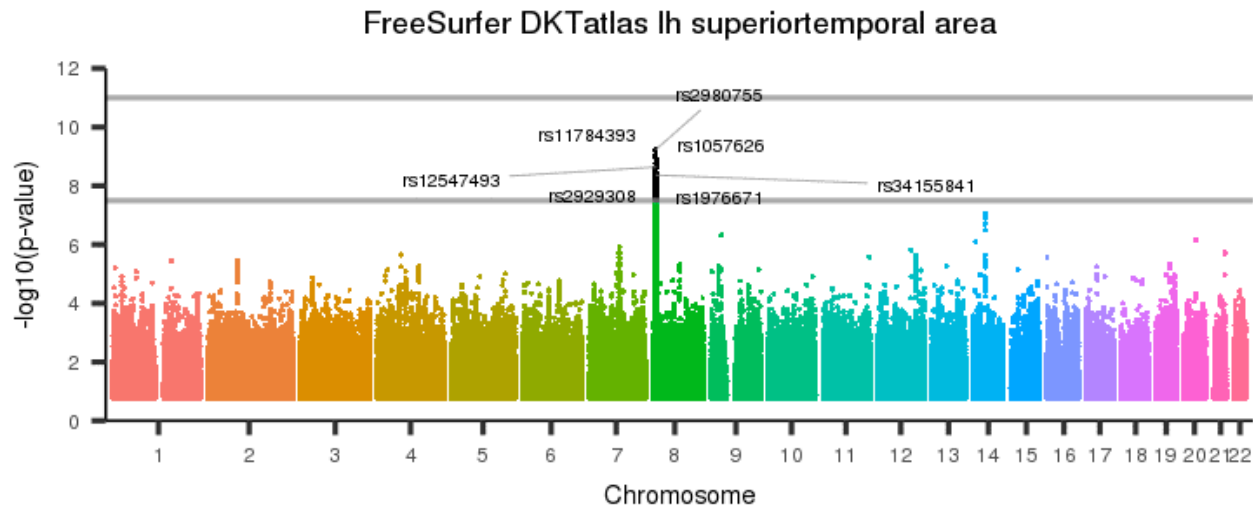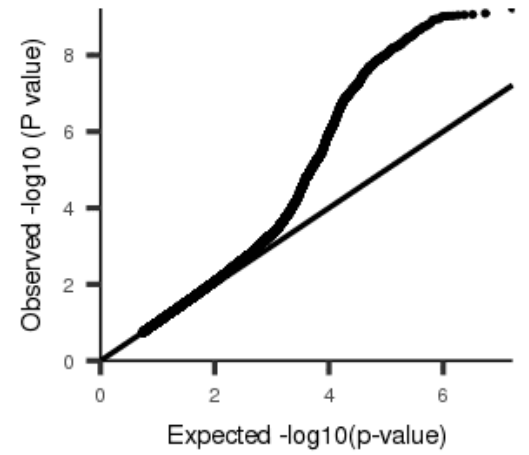

[back to list of plots](#)

Figure 2743: FreeSurfer DKTatlas lh supramarginal area

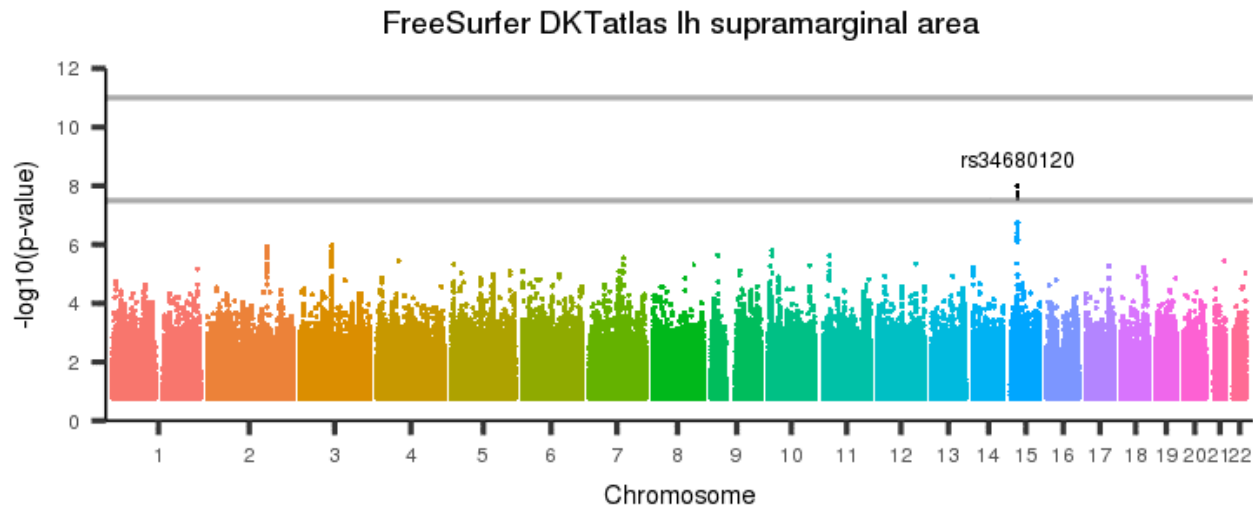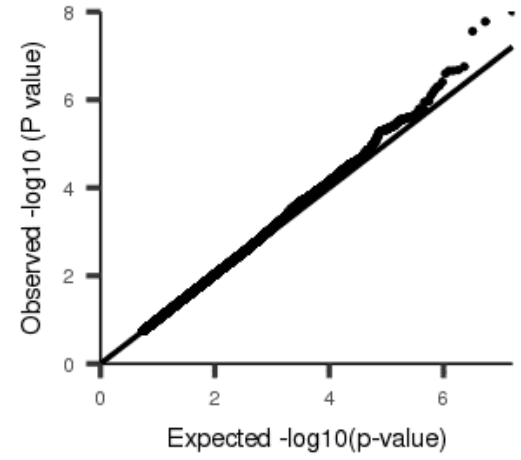

[back to list of plots](#)

Figure 2744: FreeSurfer DKTatlas lh transversetemporal area

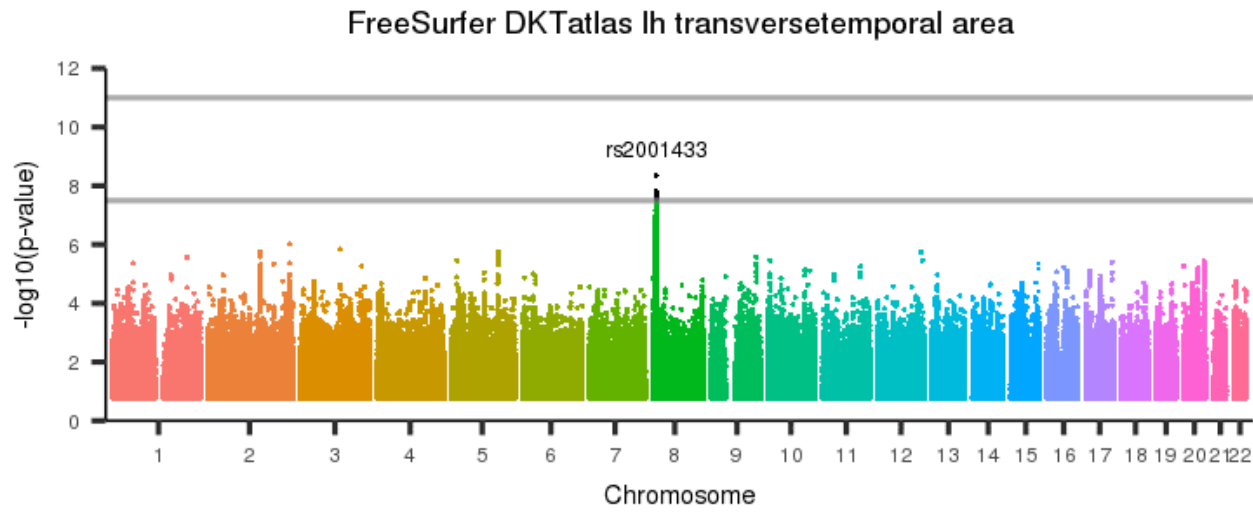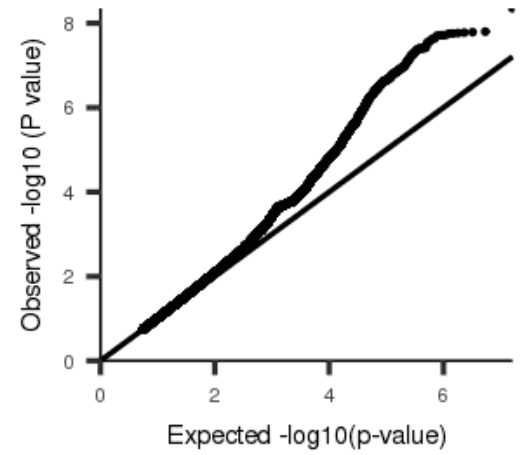

[back to list of plots](#)

Figure 2745: FreeSurfer DKAtlas lh insula area

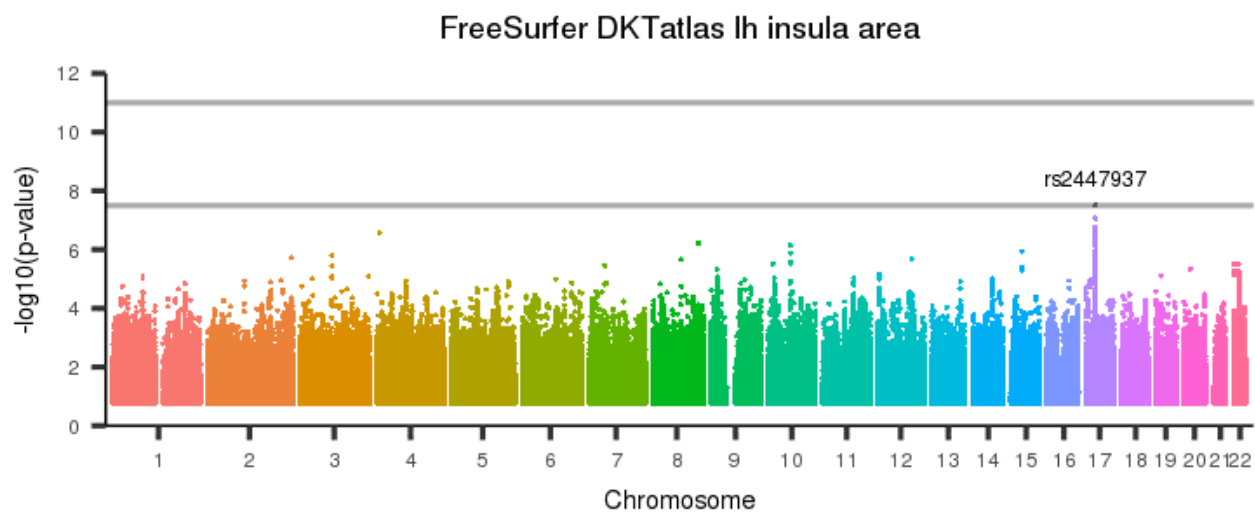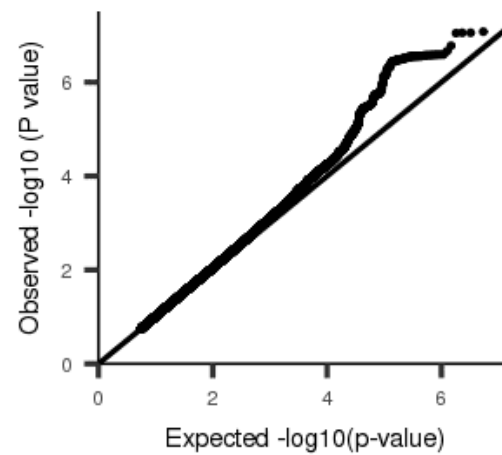

[back to list of plots](#)

Figure 2746: FreeSurfer DKAtlas lh WhiteSurfArea area

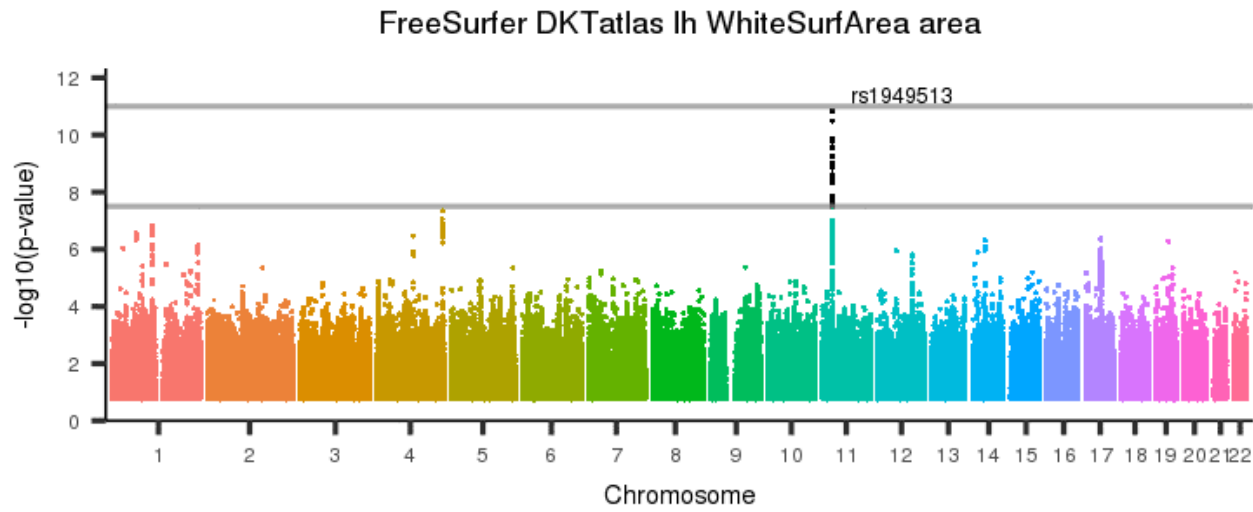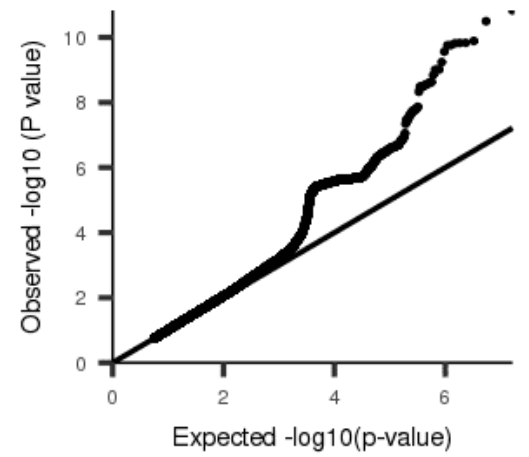

[back to list of plots](#)

Figure 2747: FreeSurfer a2009s lh G and S frontomargin area

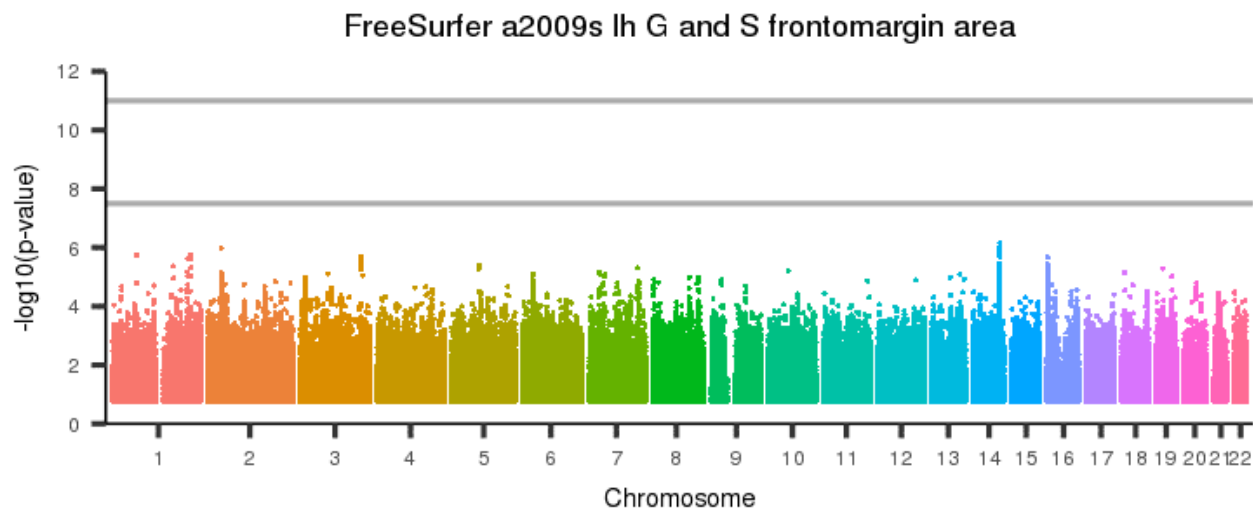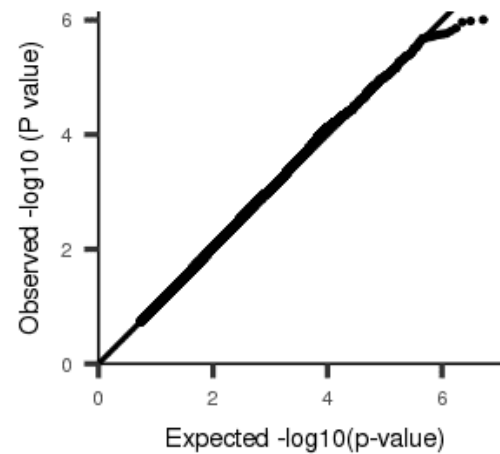

[back to list of plots](#)

Figure 2748: FreeSurfer a2009s lh G and S occipital inf area

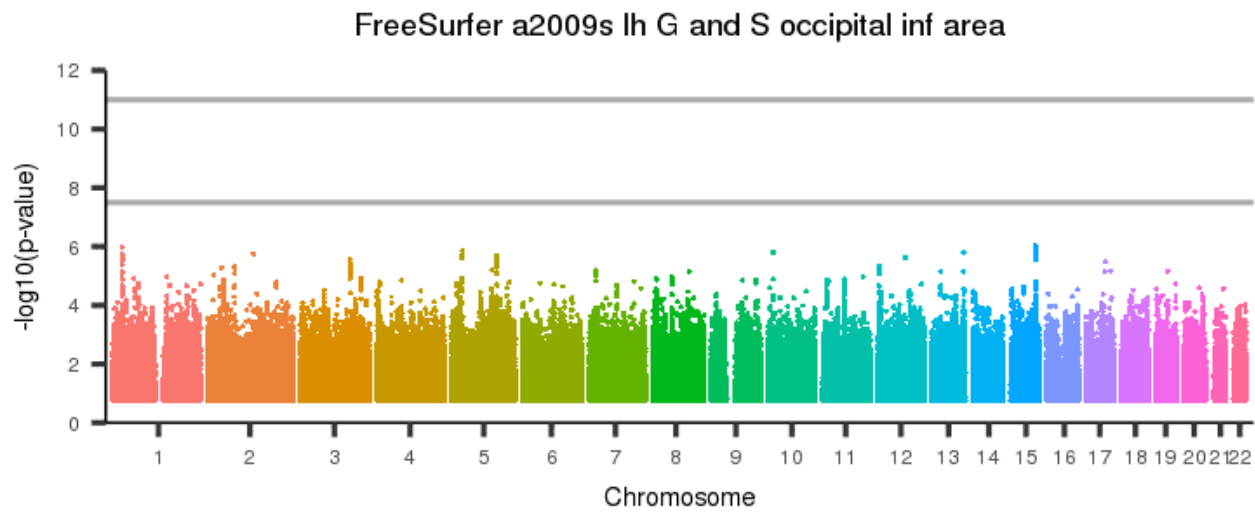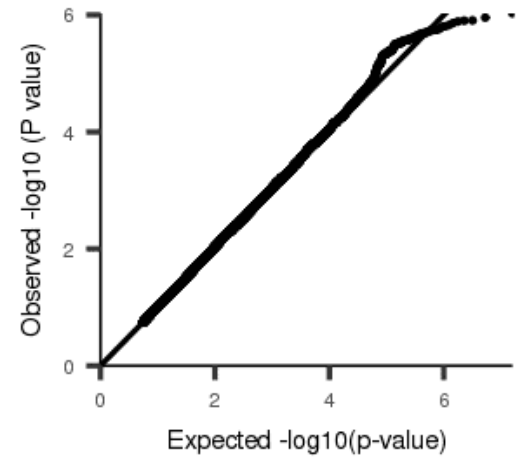

[back to list of plots](#)

Figure 2749: FreeSurfer a2009s lh G and S paracentral area

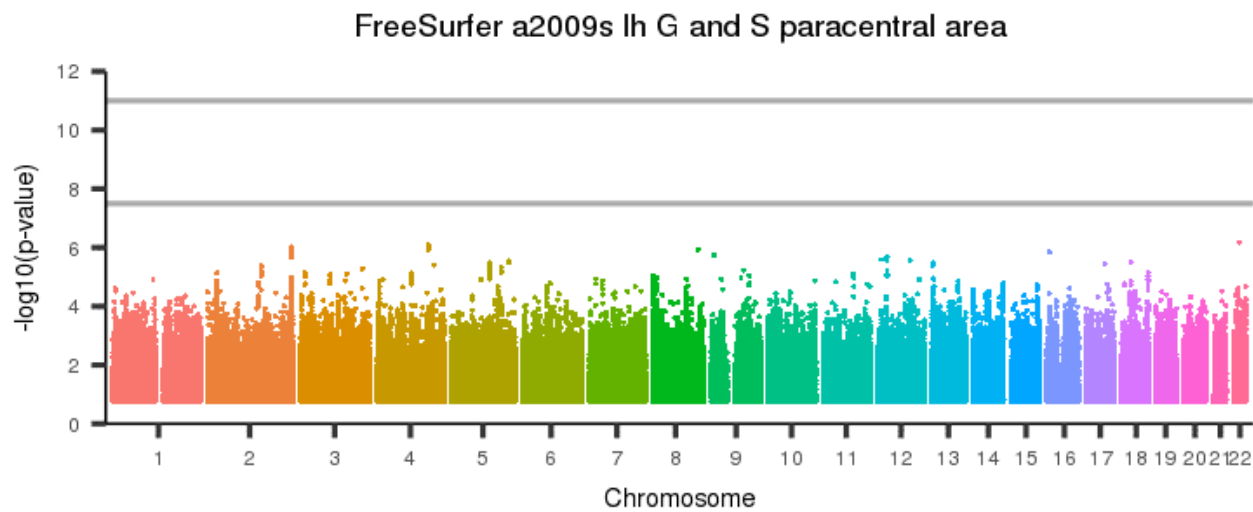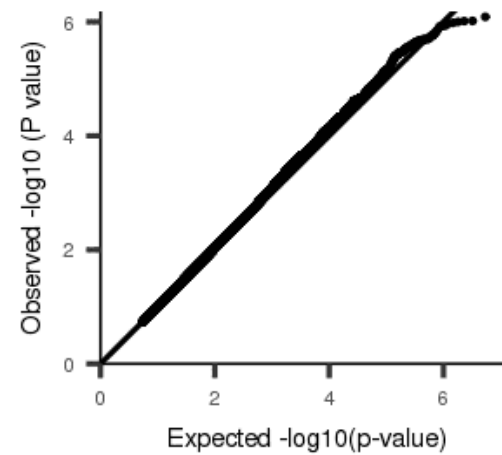

[back to list of plots](#)



Figure 2750: FreeSurfer a2009s lh G and S subcentral area

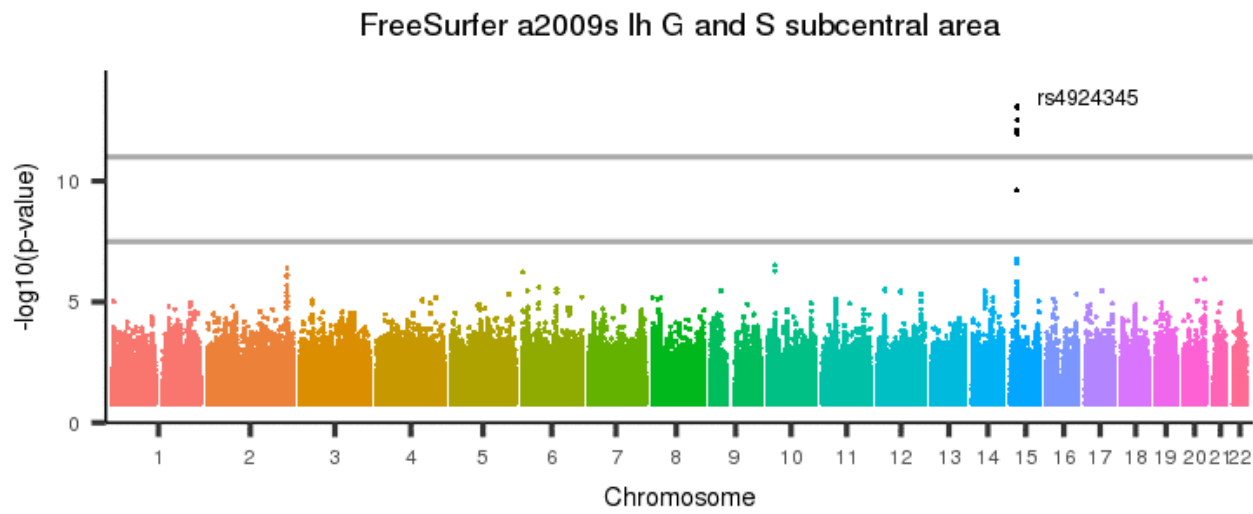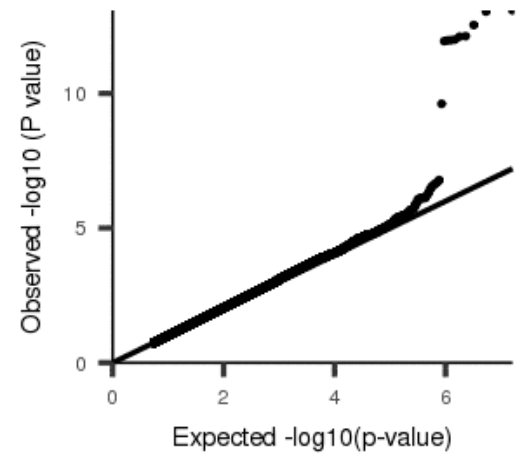

[back to list of plots](#)

Figure 2751: FreeSurfer a2009s lh G and S transv frontopol area

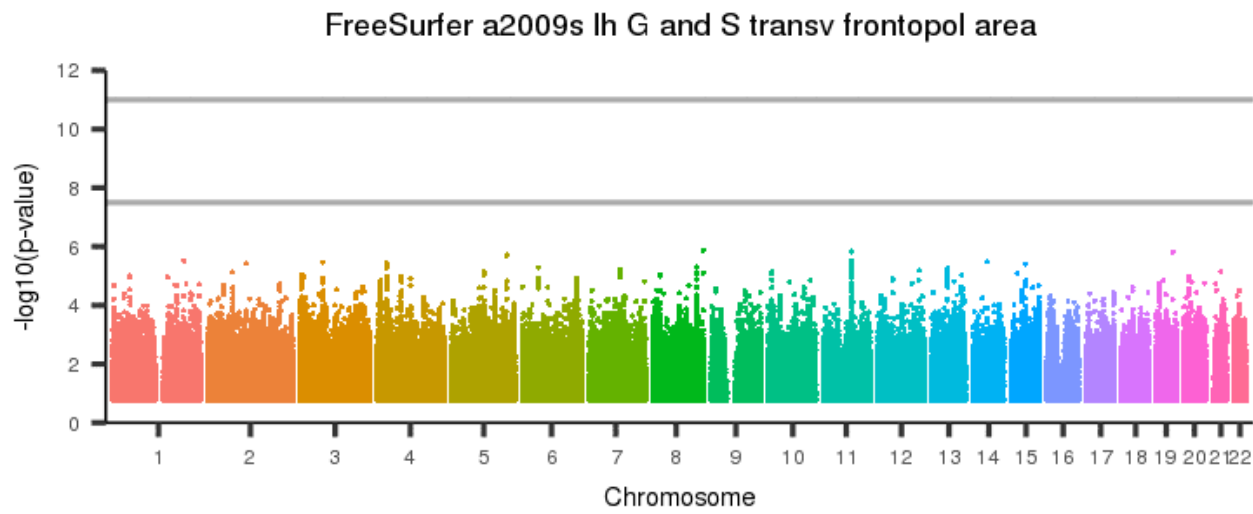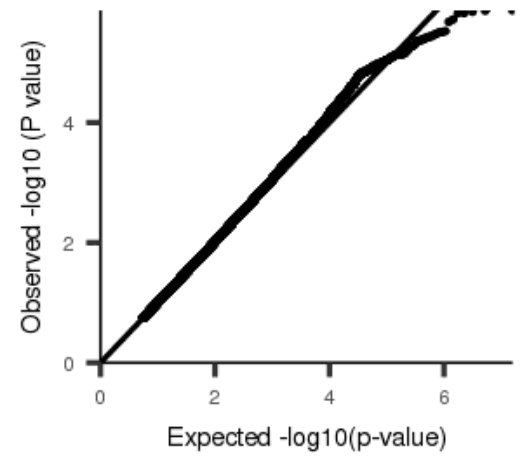

[back to list of plots](#)

Figure 2752: FreeSurfer a2009s lh G and S cingul-Ant area

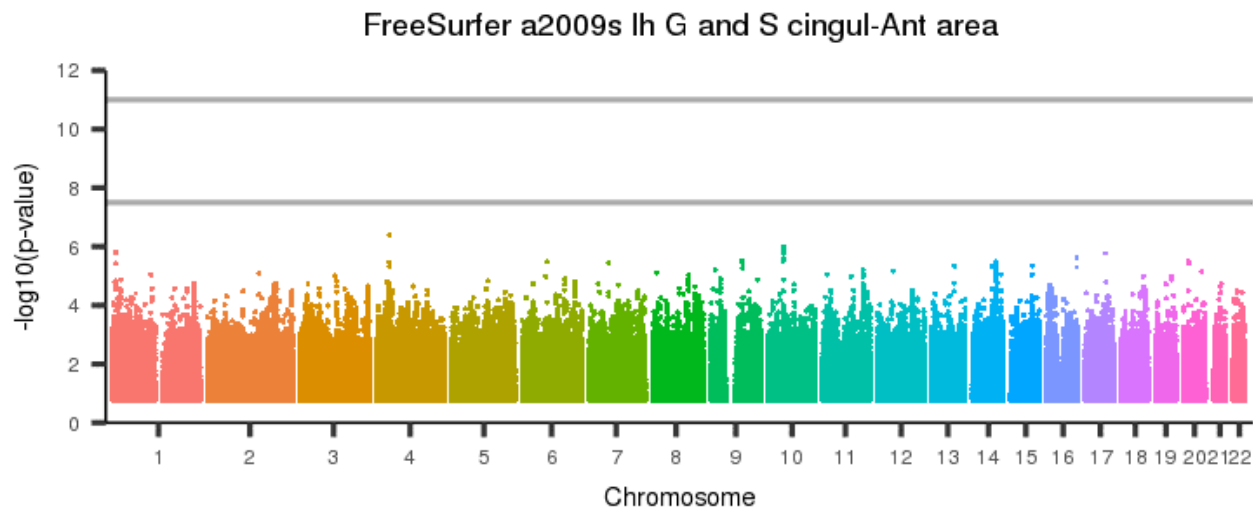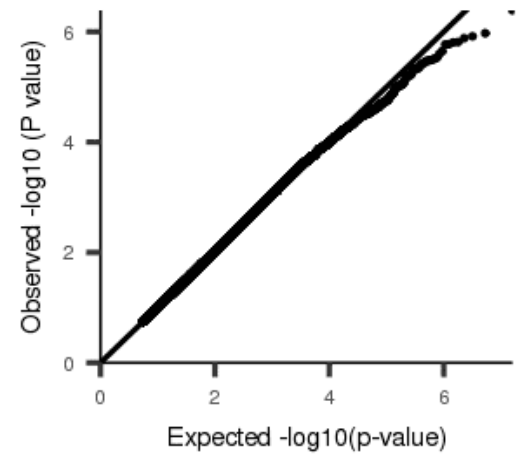

[back to list of plots](#)

Figure 2753: FreeSurfer a2009s lh G and S cingul-Mid-Ant area

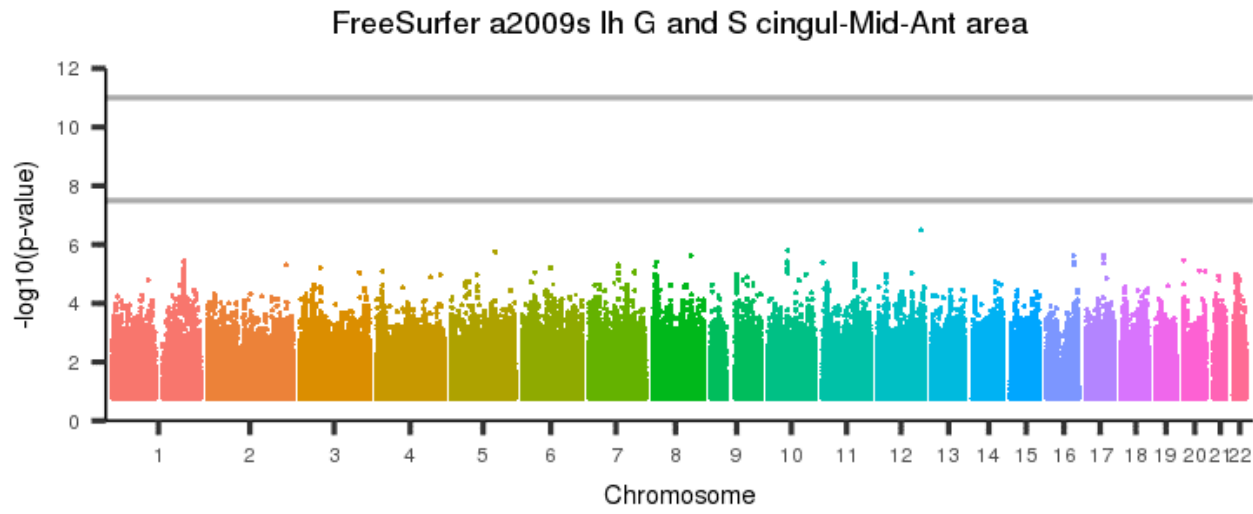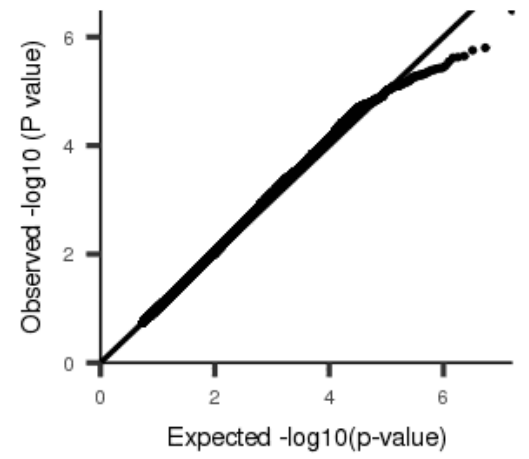

[back to list of plots](#)

Figure 2754: FreeSurfer a2009s lh G and S cingul-Mid-Post area

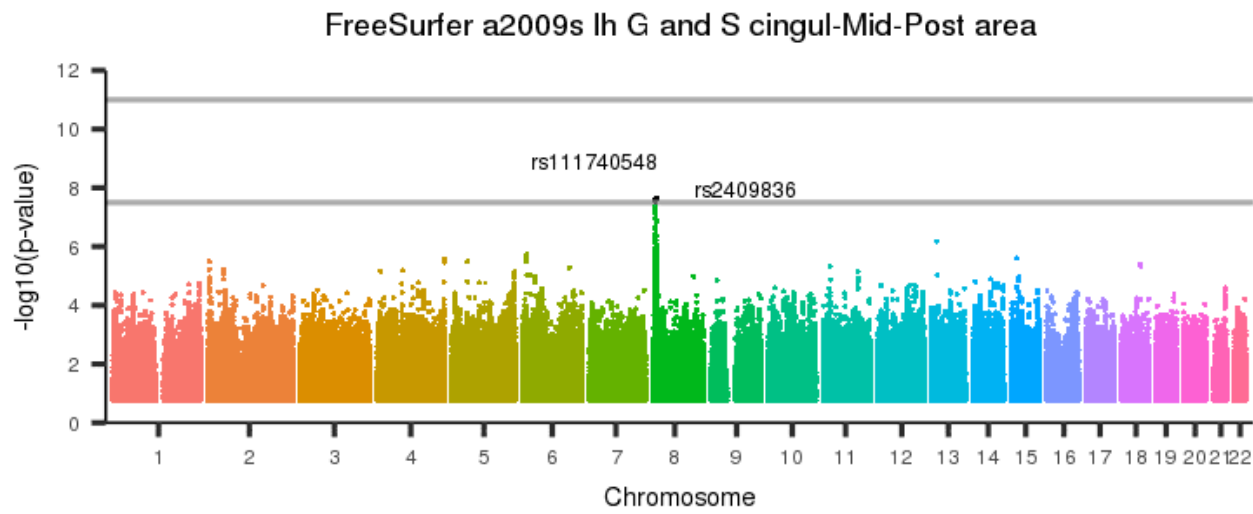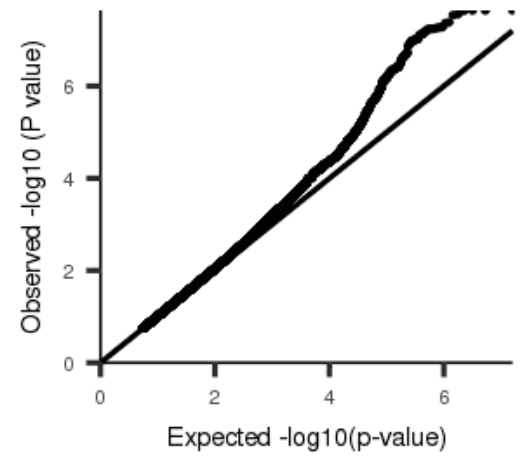

[back to list of plots](#)

Figure 2755: FreeSurfer a2009s lh G cingul-Post-dorsal area

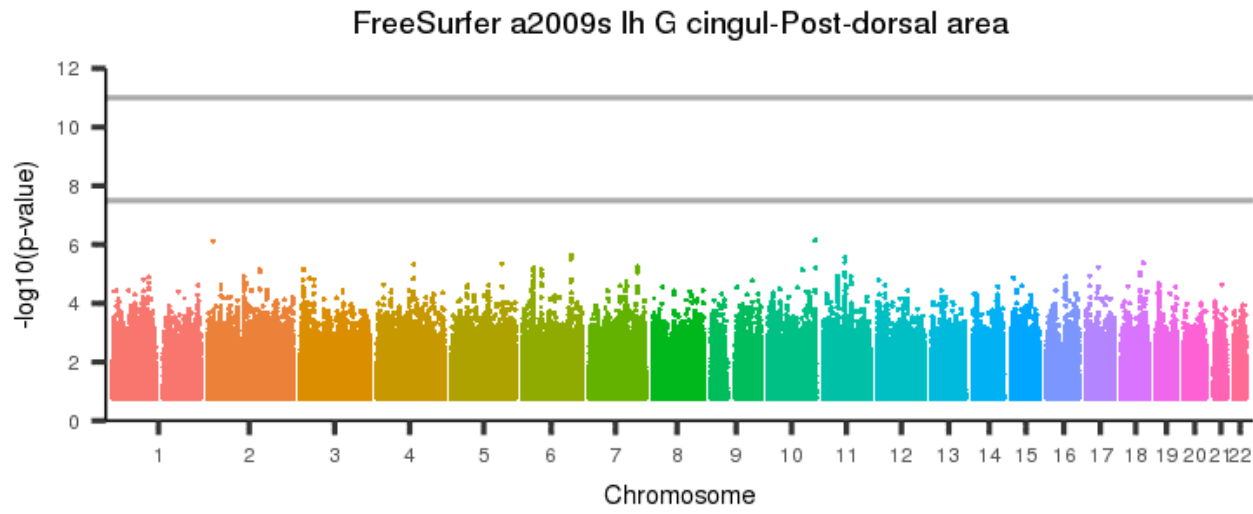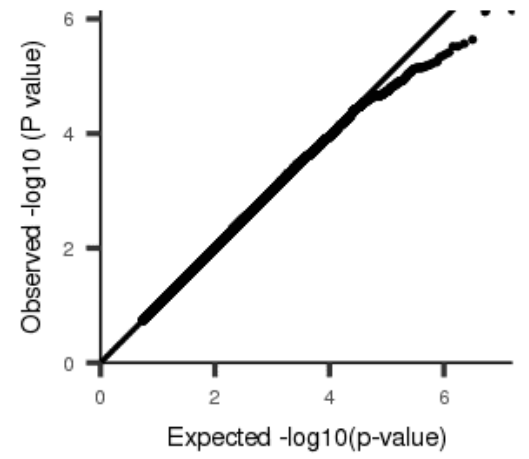

[back to list of plots](#)

Figure 2756: FreeSurfer a2009s lh G cingul-Post-ventral area

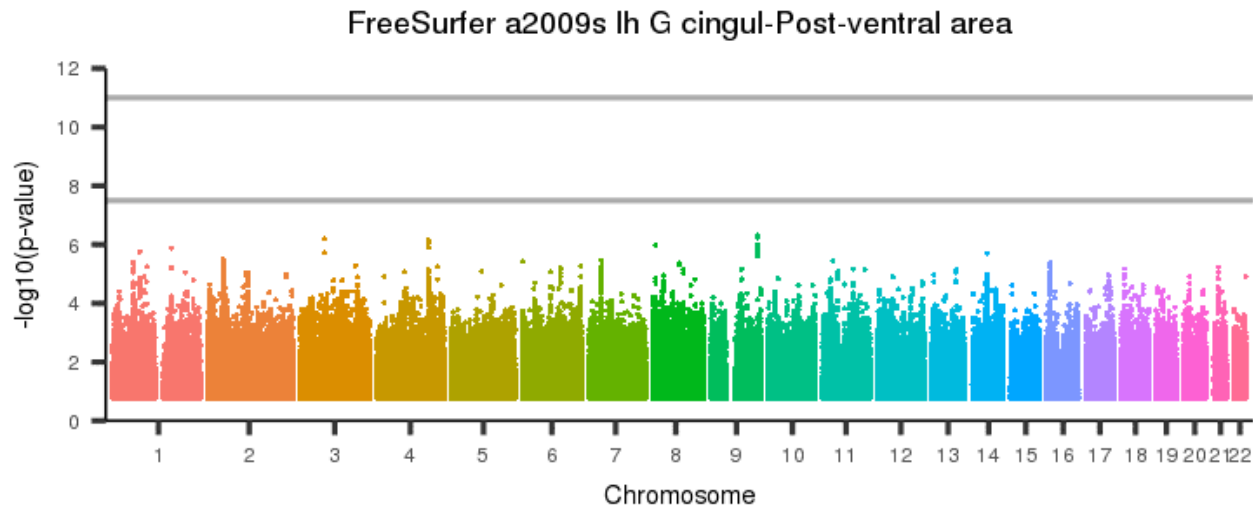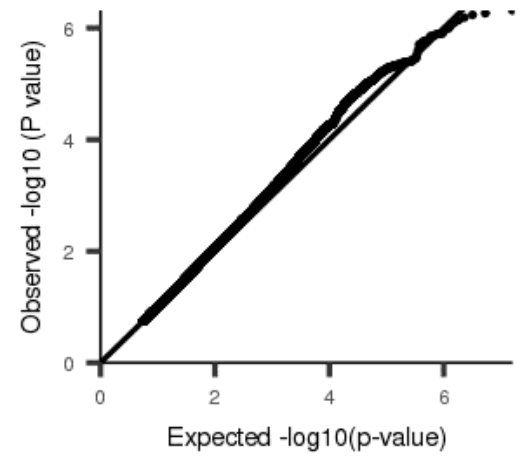

[back to list of plots](#)

Figure 2757: FreeSurfer a2009s lh G cuneus area

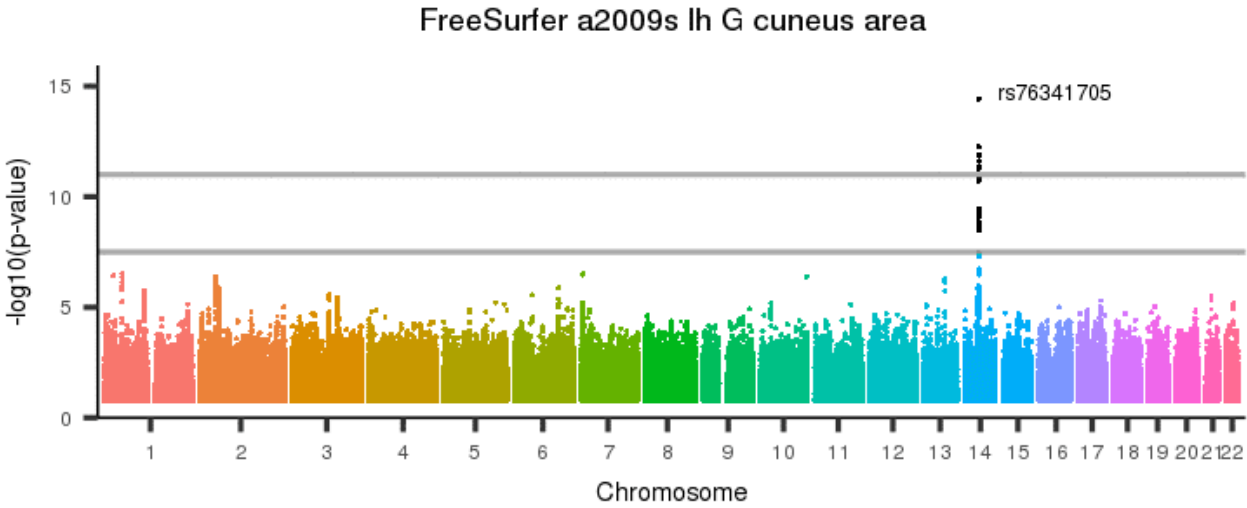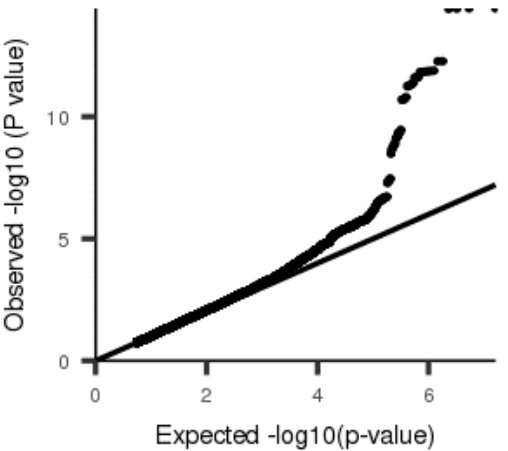

[back to list of plots](#)



Figure 2758: FreeSurfer a2009s lh G front inf-Opercular area

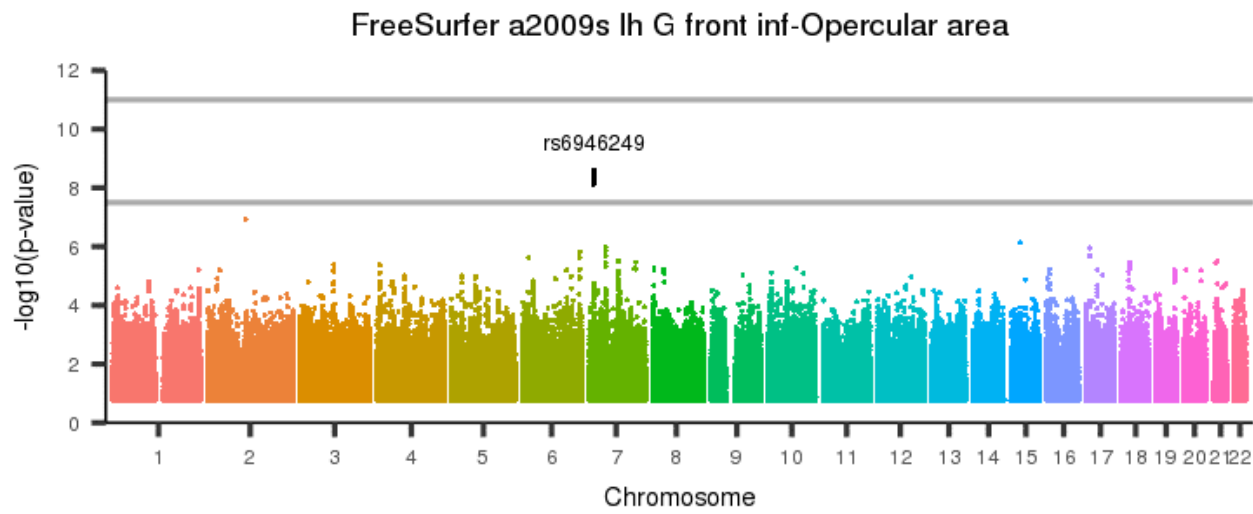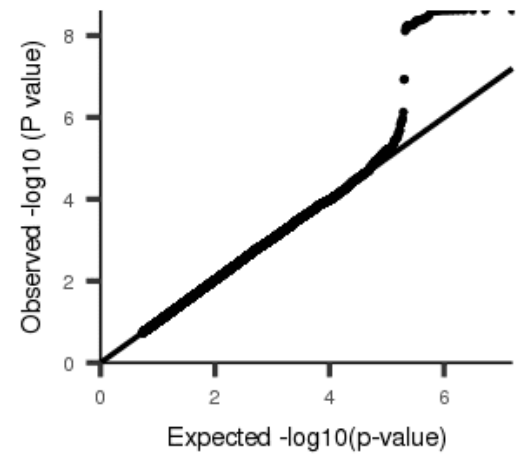

[back to list of plots](#)

Figure 2759: FreeSurfer a2009s lh G front inf-Orbital area

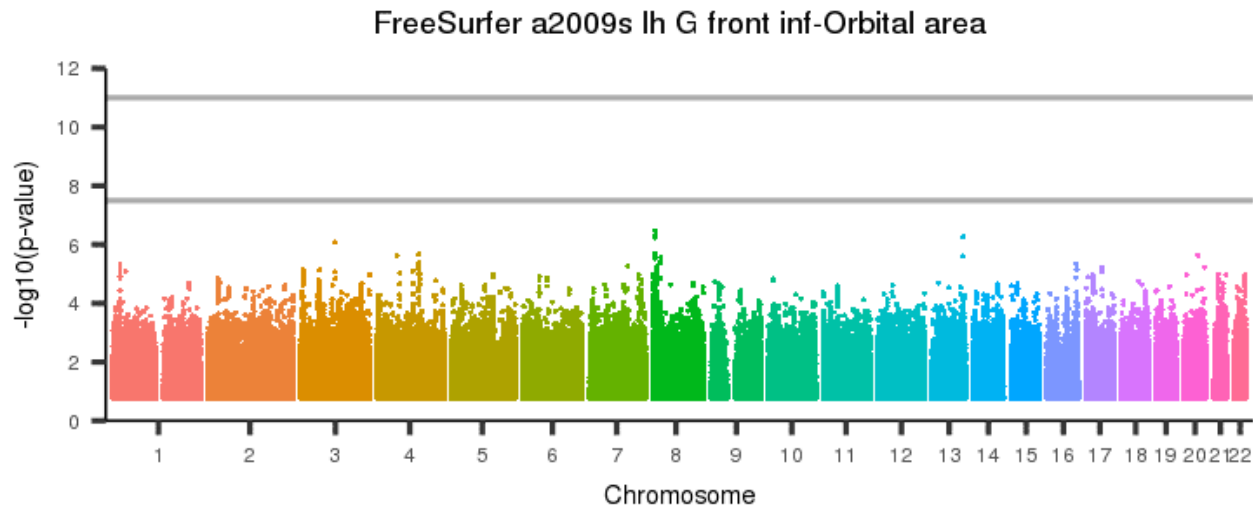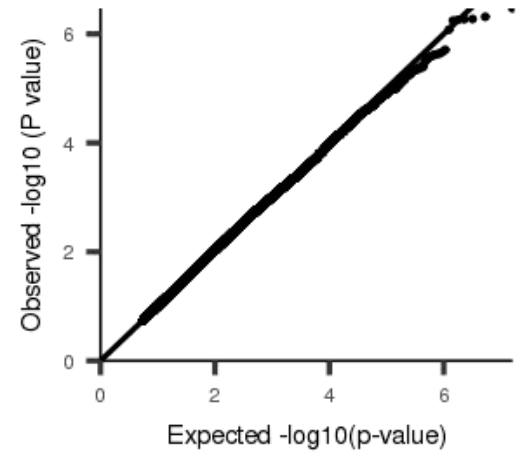

[back to list of plots](#)

Figure 2760: FreeSurfer a2009s lh G front inf-Triangul area

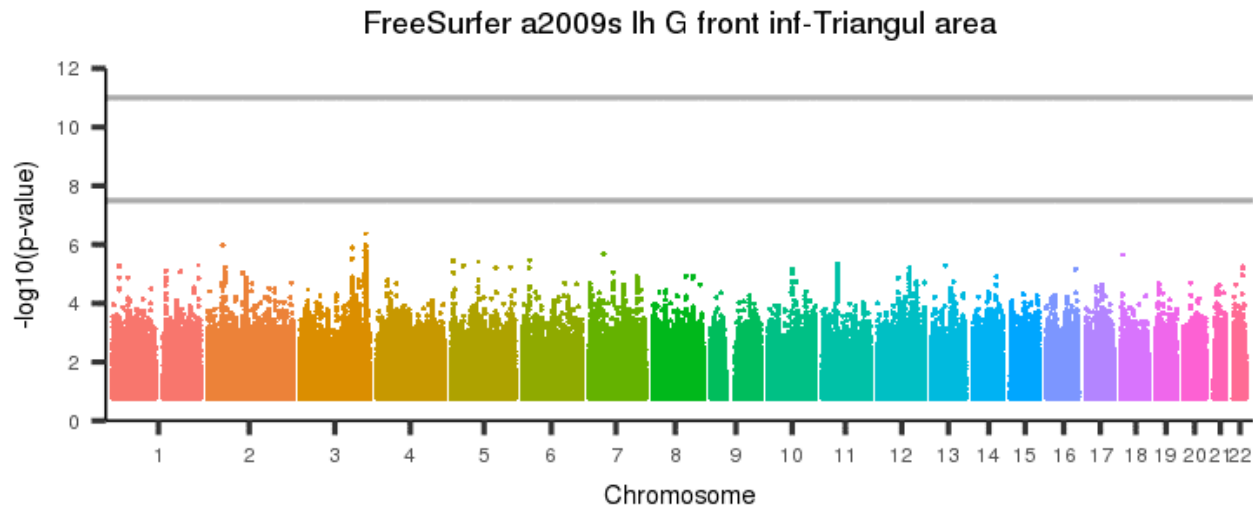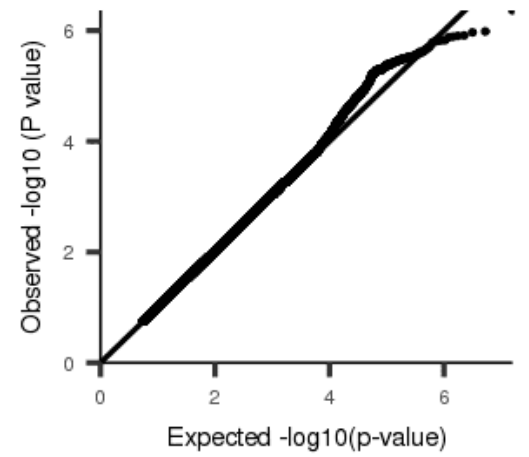

[back to list of plots](#)

Figure 2761: FreeSurfer a2009s lh G front middle area

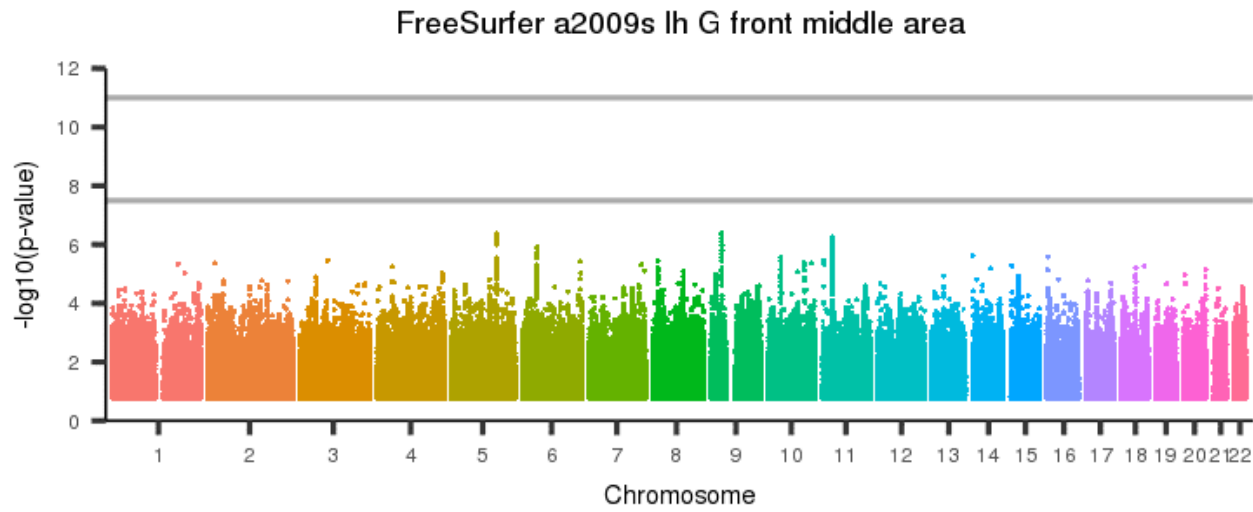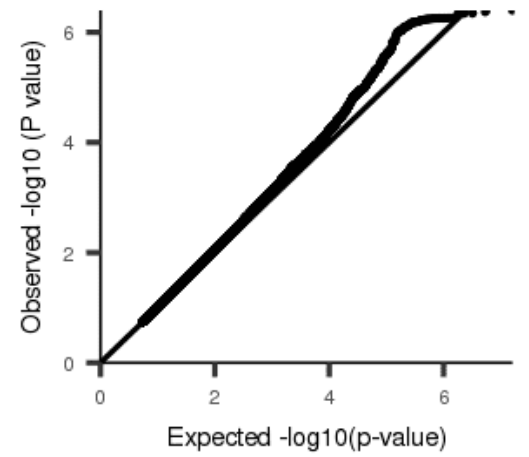

[back to list of plots](#)

Figure 2762: FreeSurfer a2009s lh G front sup area

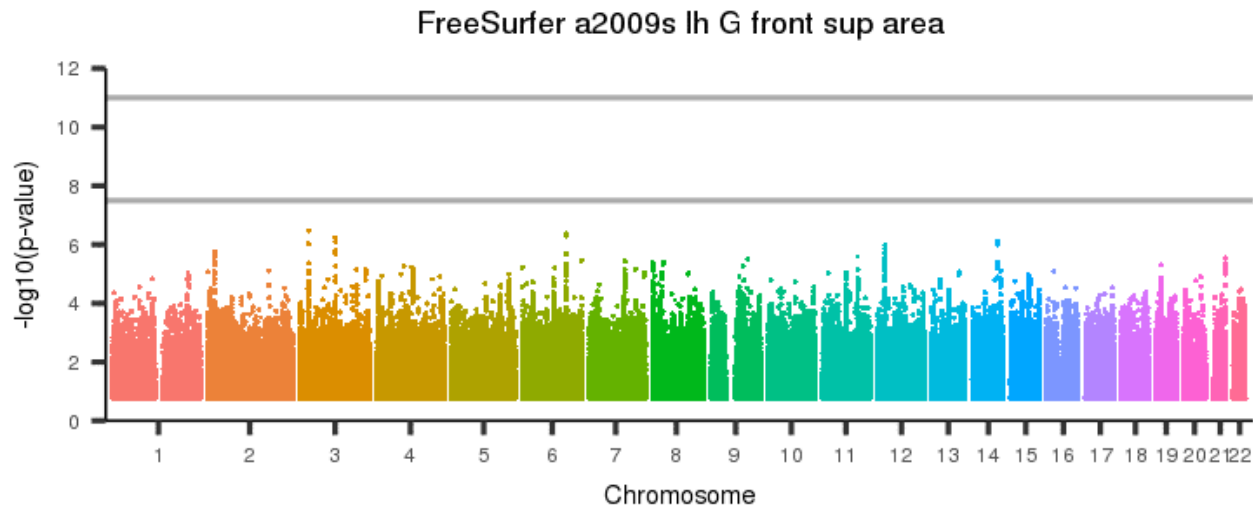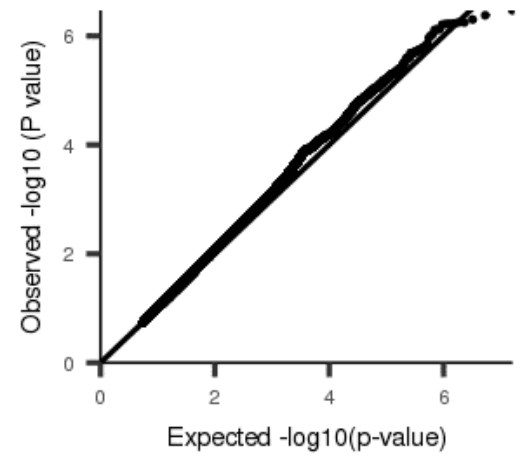

[back to list of plots](#)

Figure 2763: FreeSurfer a2009s lh G Ins lg and S cent ins area

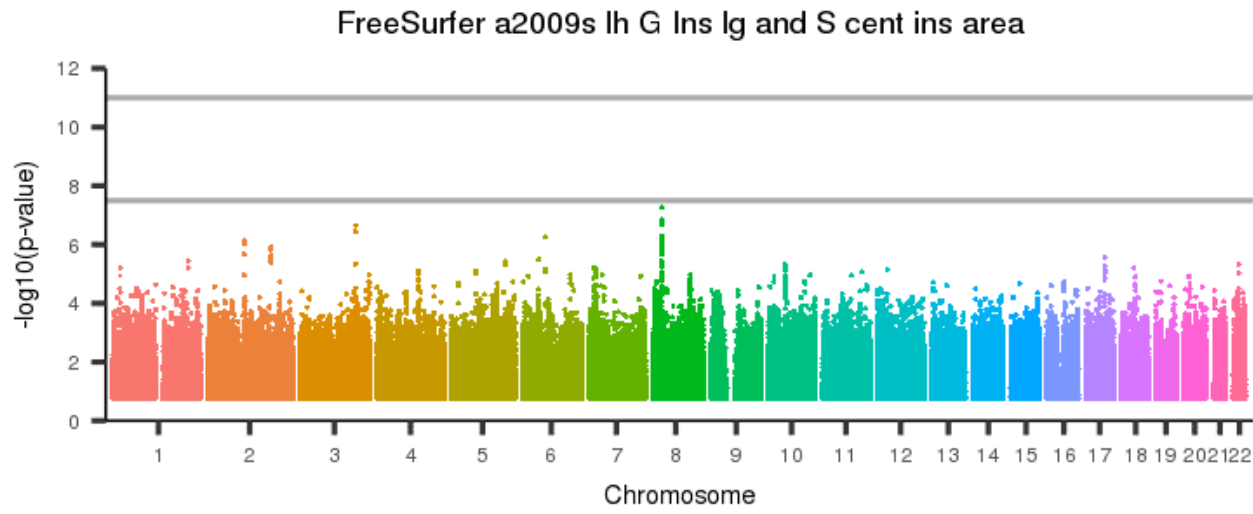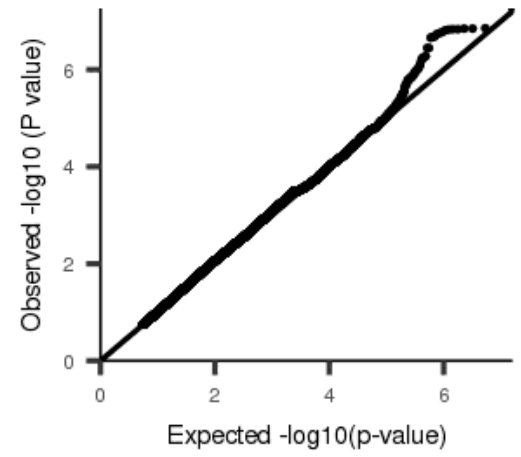

[back to list of plots](#)

Figure 2764: FreeSurfer a2009s lh G insular short area

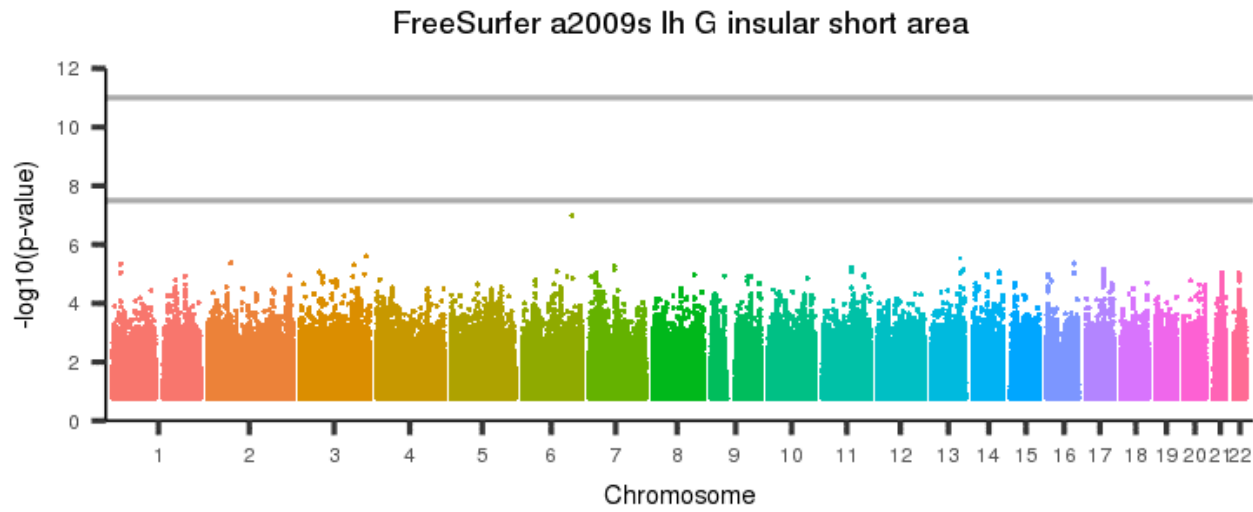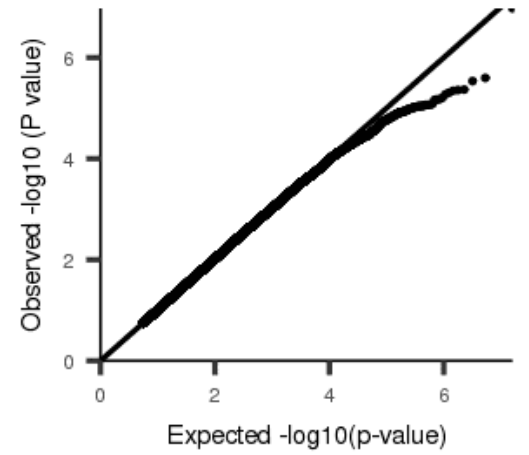

[back to list of plots](#)

Figure 2765: FreeSurfer a2009s lh G occipital middle area

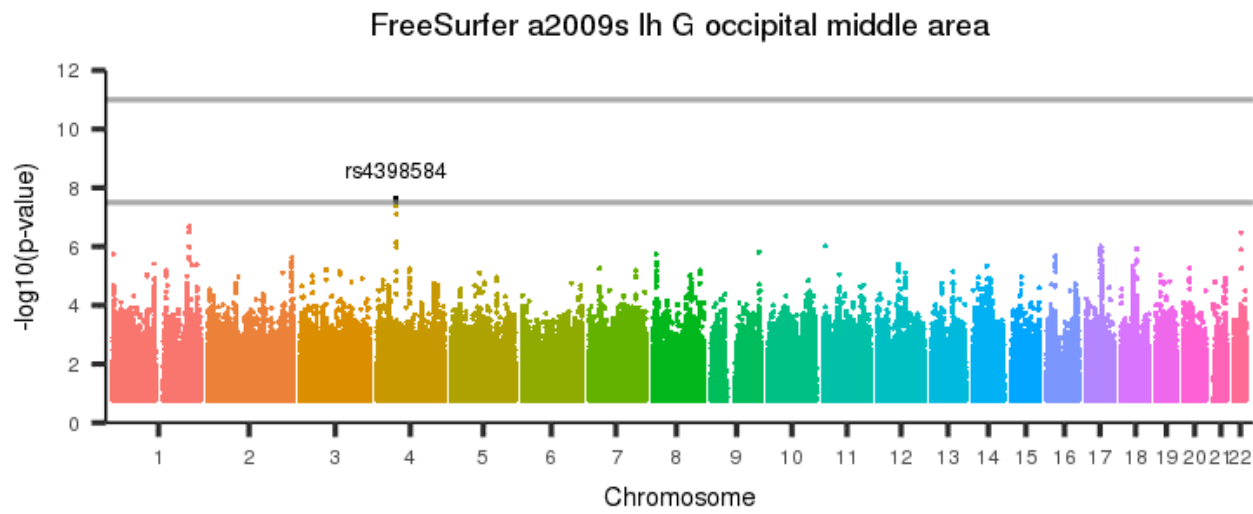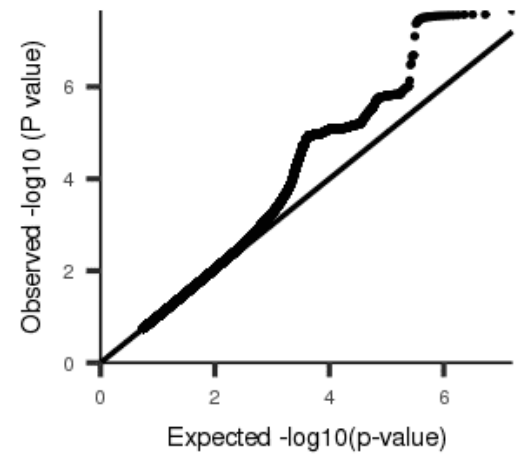

[back to list of plots](#)



Figure 2766: FreeSurfer a2009s lh G occipital sup area

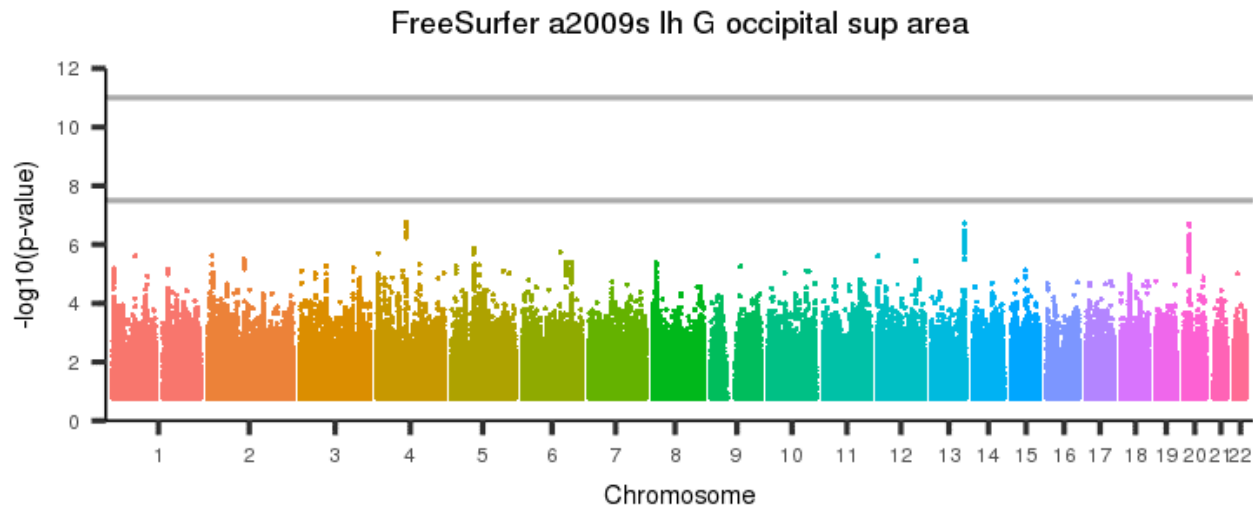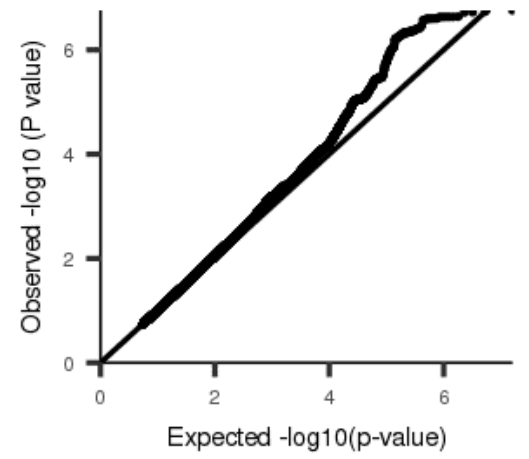

[back to list of plots](#)

Figure 2767: FreeSurfer a2009s lh G oc-temp lat-fusifor area

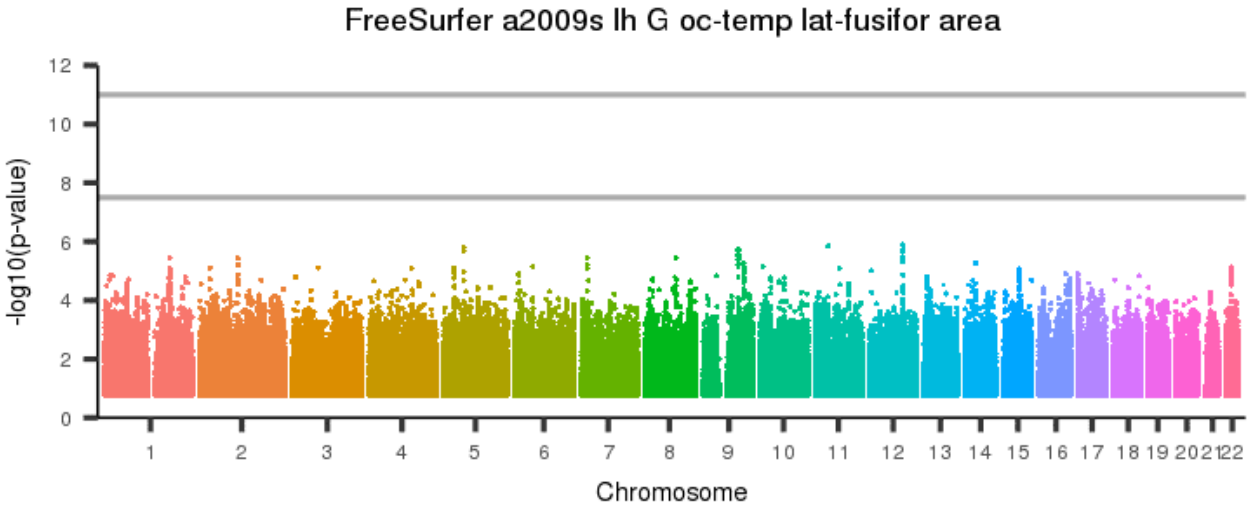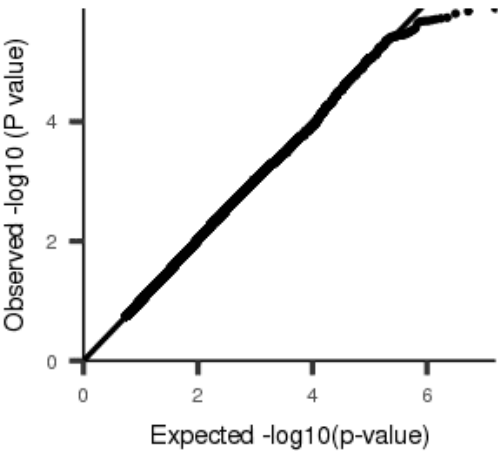

[back to list of plots](#)

Figure 2768: FreeSurfer a2009s lh G oc-temp med-Lingual area

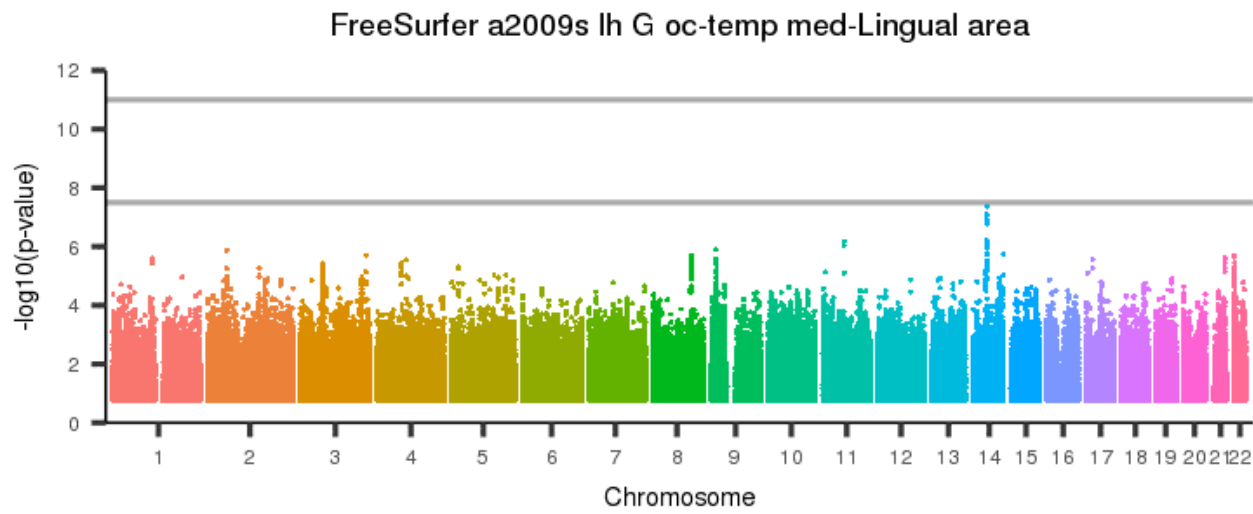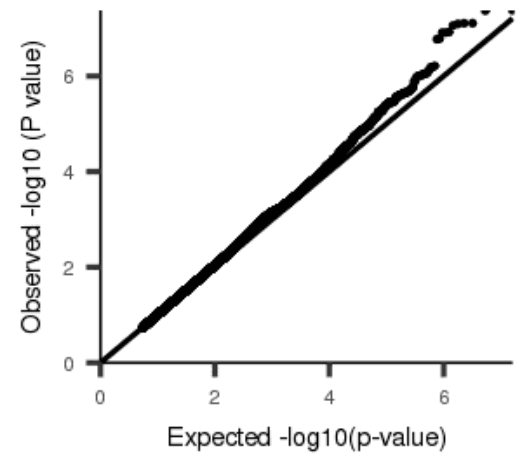

[back to list of plots](#)

Figure 2769: FreeSurfer a2009s lh G oc-temp med-Parahip area

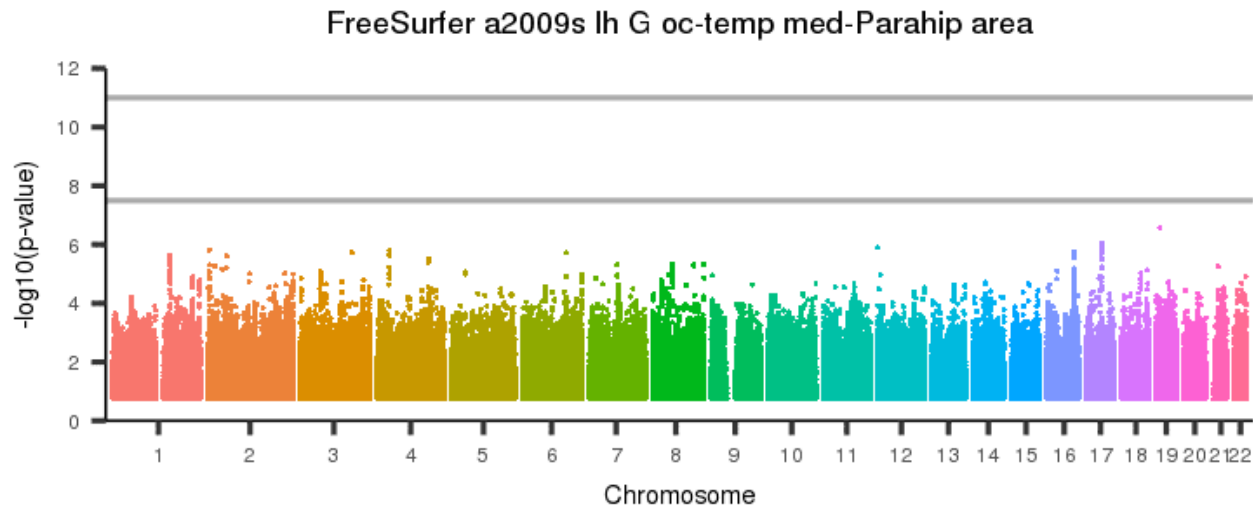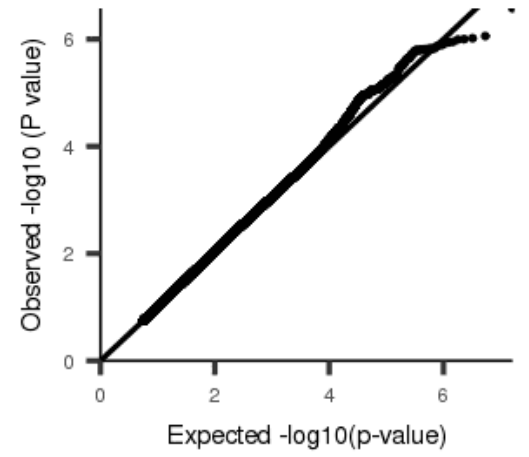

[back to list of plots](#)

Figure 2770: FreeSurfer a2009s lh G orbital area

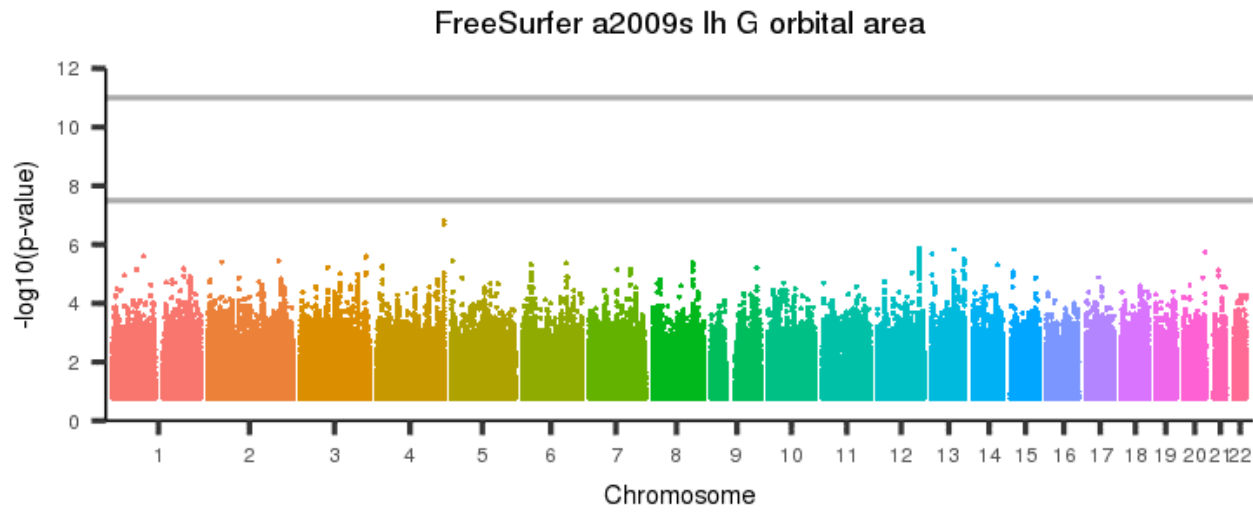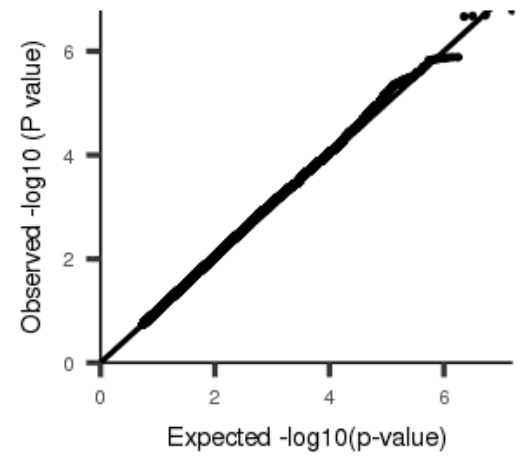

[back to list of plots](#)

Figure 2771: FreeSurfer a2009s lh G pariet inf-Angular area

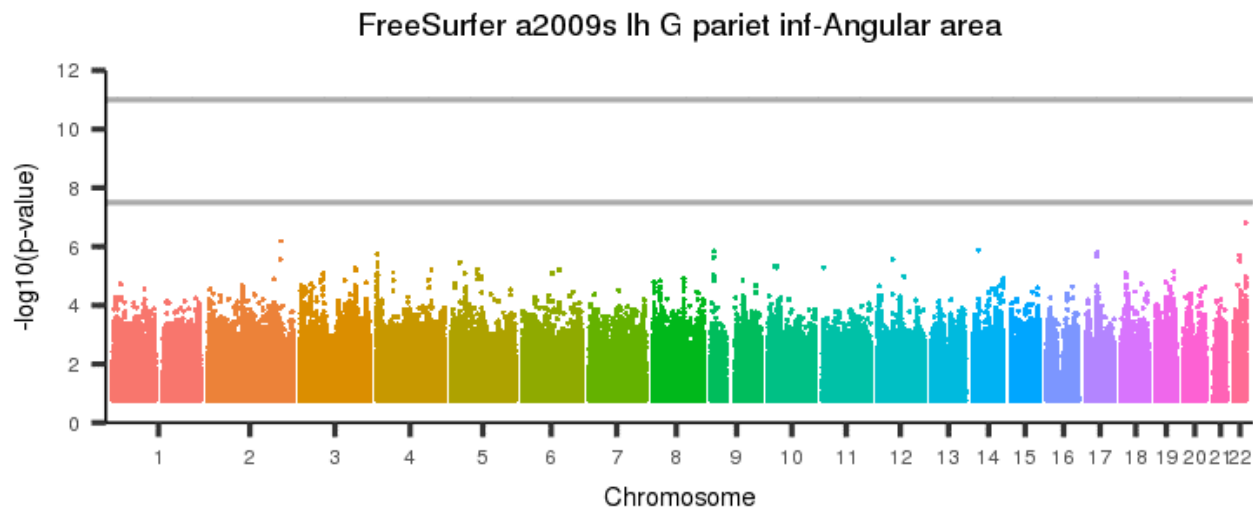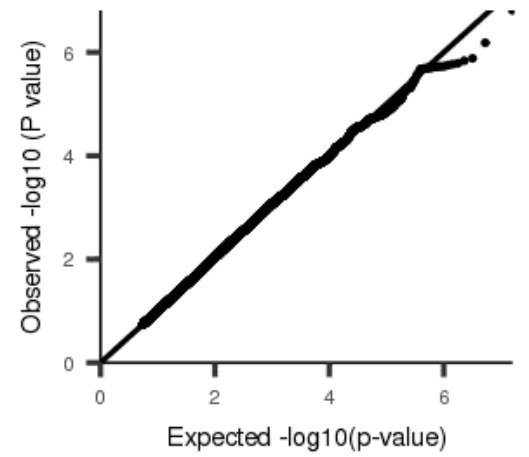

[back to list of plots](#)

Figure 2772: FreeSurfer a2009s lh G pariet inf-Supramar area

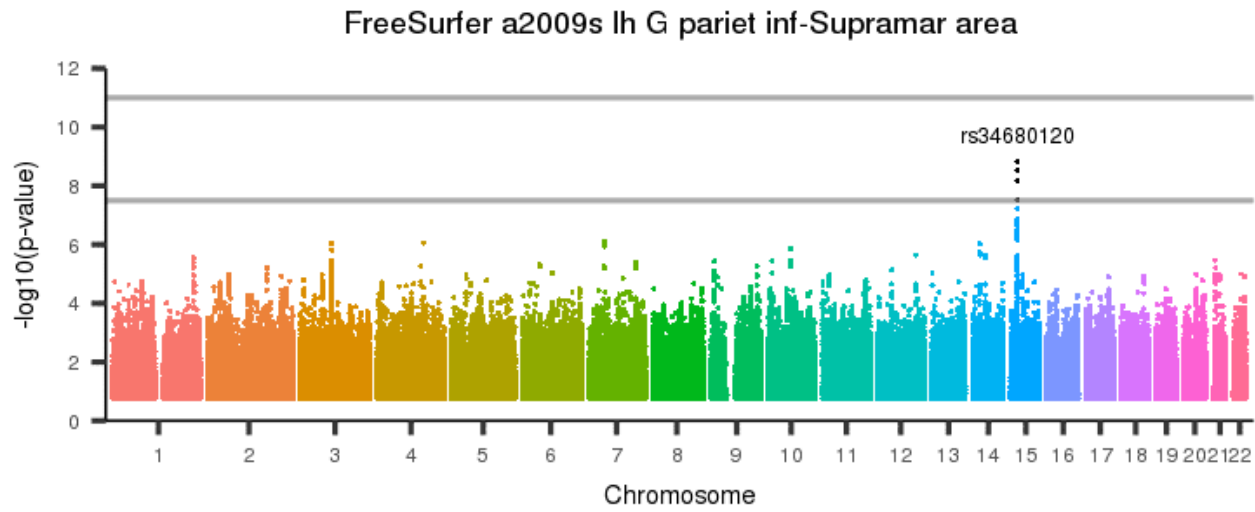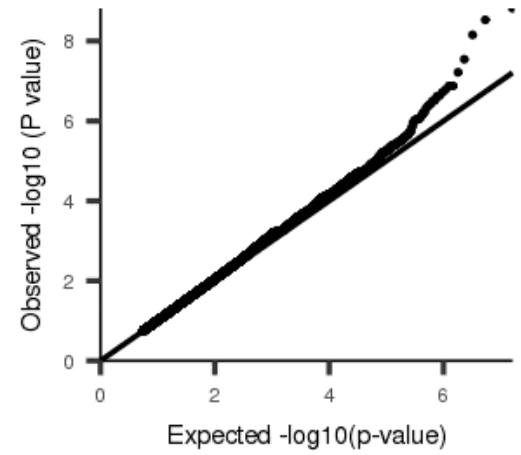

[back to list of plots](#)

Figure 2773: FreeSurfer a2009s lh G parietal sup area

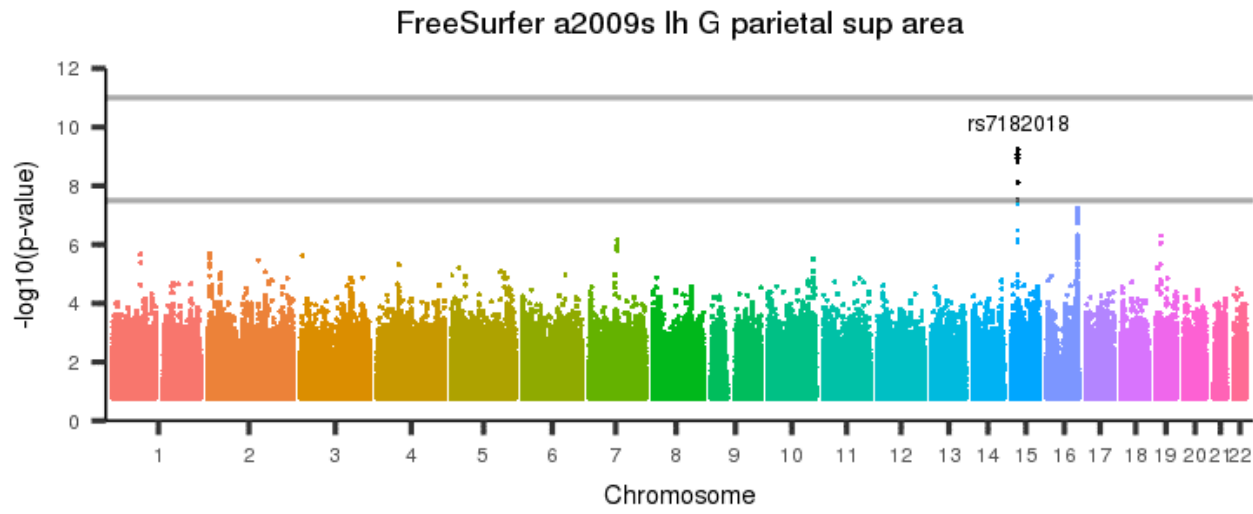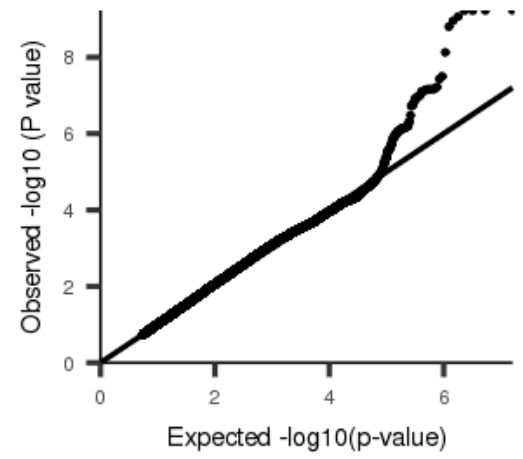

[back to list of plots](#)



Figure 2774: FreeSurfer a2009s lh G postcentral area

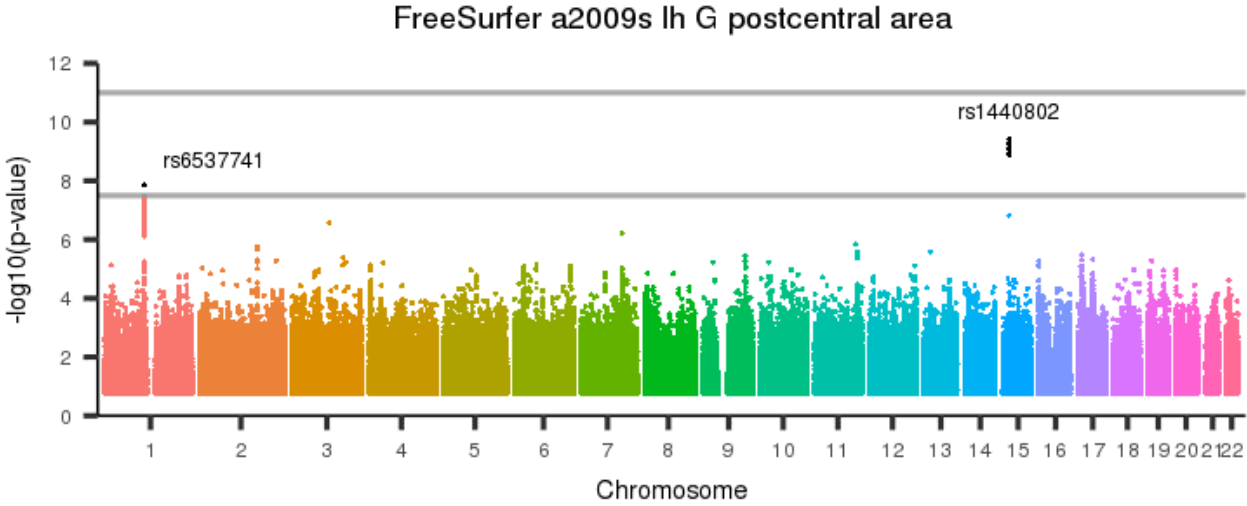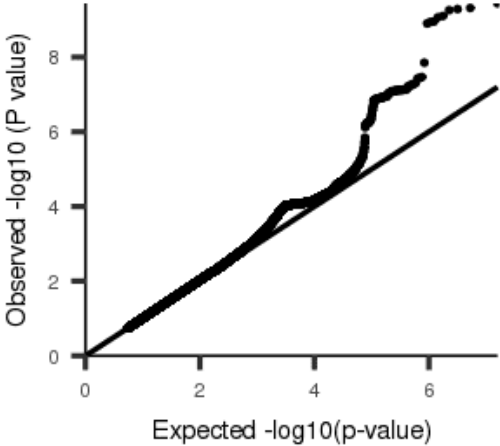

[back to list of plots](#)

Figure 2775: FreeSurfer a2009s lh G precentral area

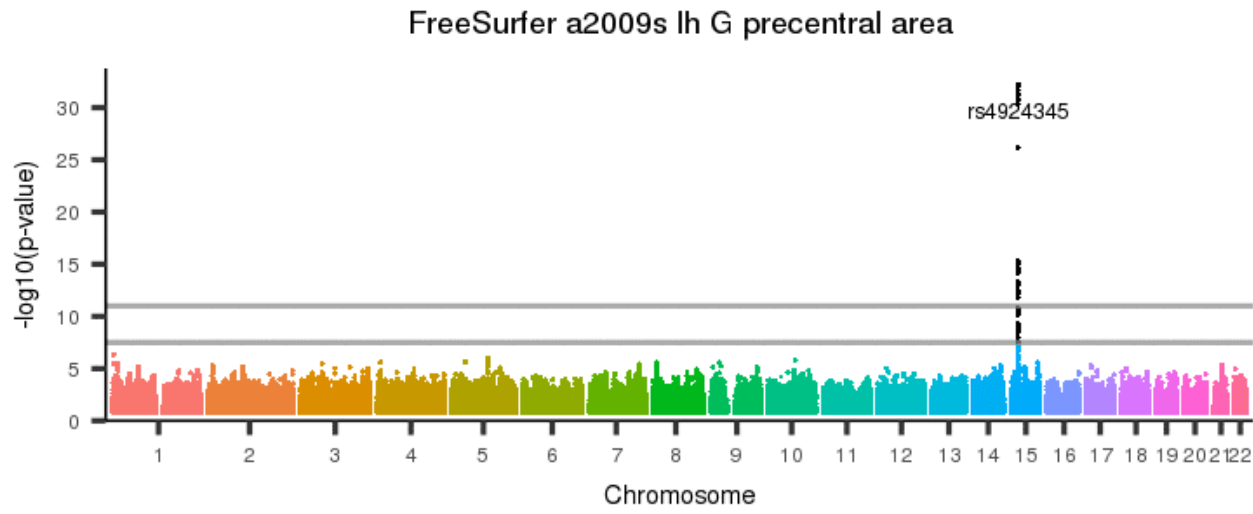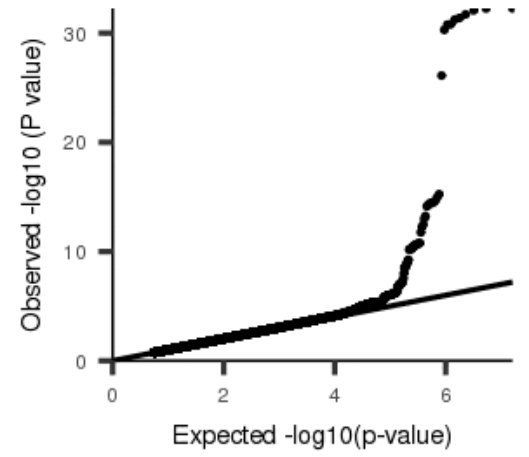

[back to list of plots](#)

Figure 2776: FreeSurfer a2009s lh G precuneus area

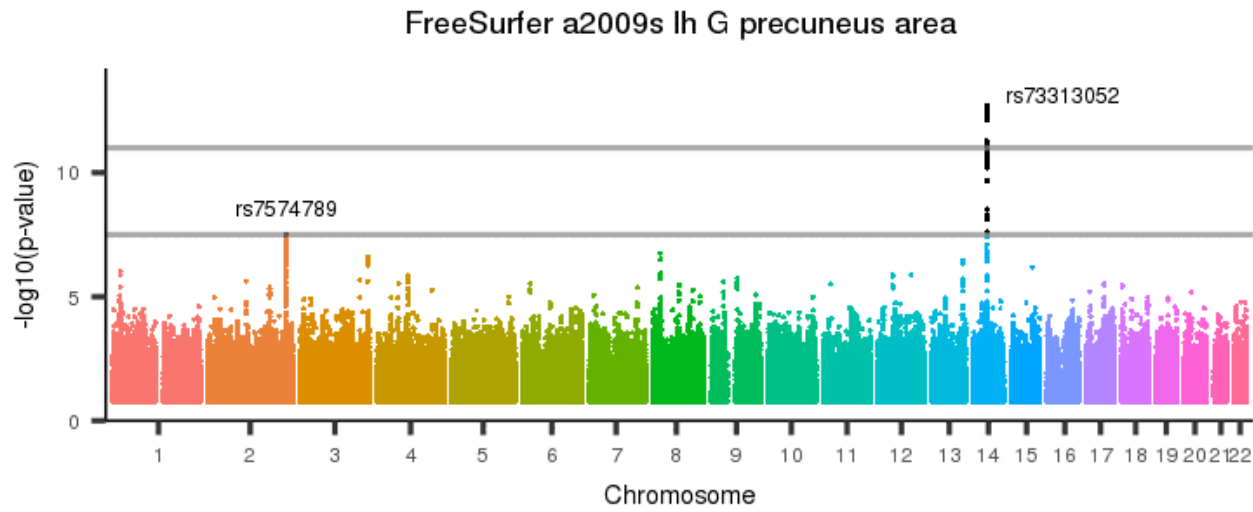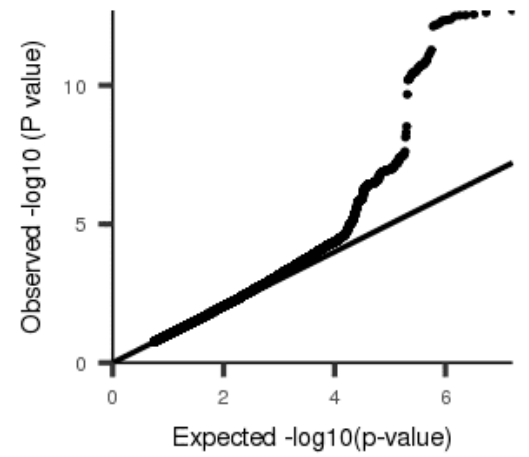

[back to list of plots](#)

Figure 2777: FreeSurfer a2009s lh G rectus area

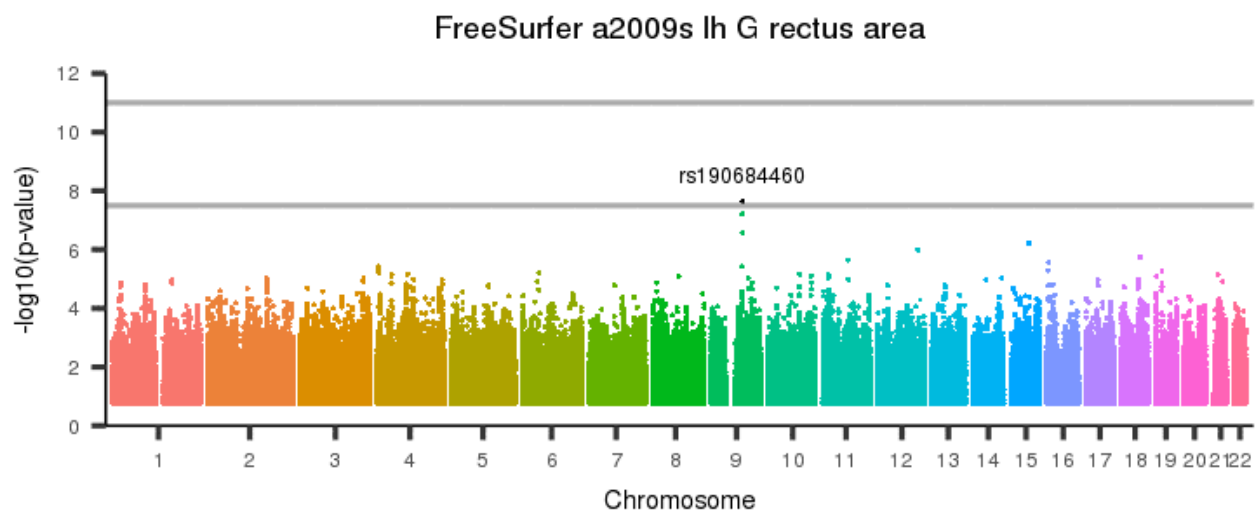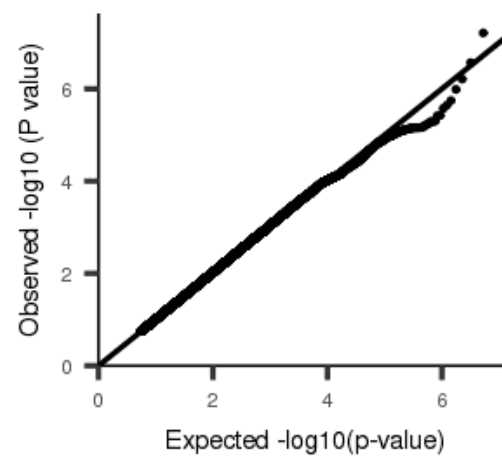

[back to list of plots](#)

Figure 2778: FreeSurfer a2009s lh G subcallosal area

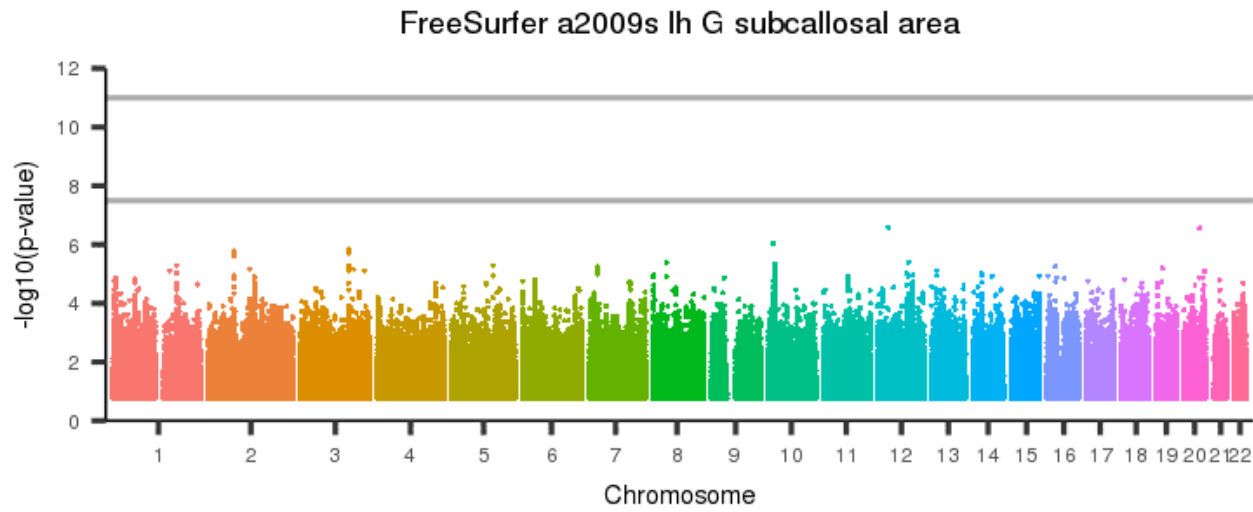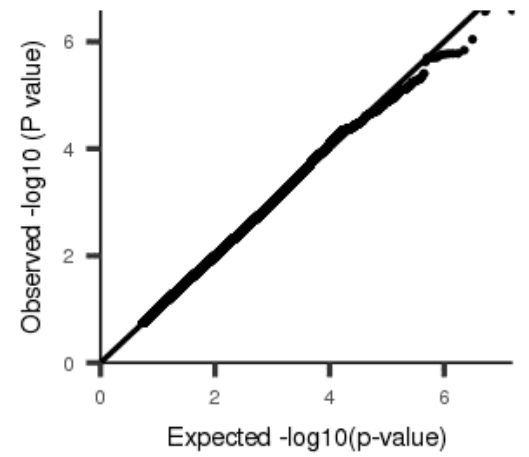

[back to list of plots](#)

Figure 2779: FreeSurfer a2009s lh G temp sup-G T transv area

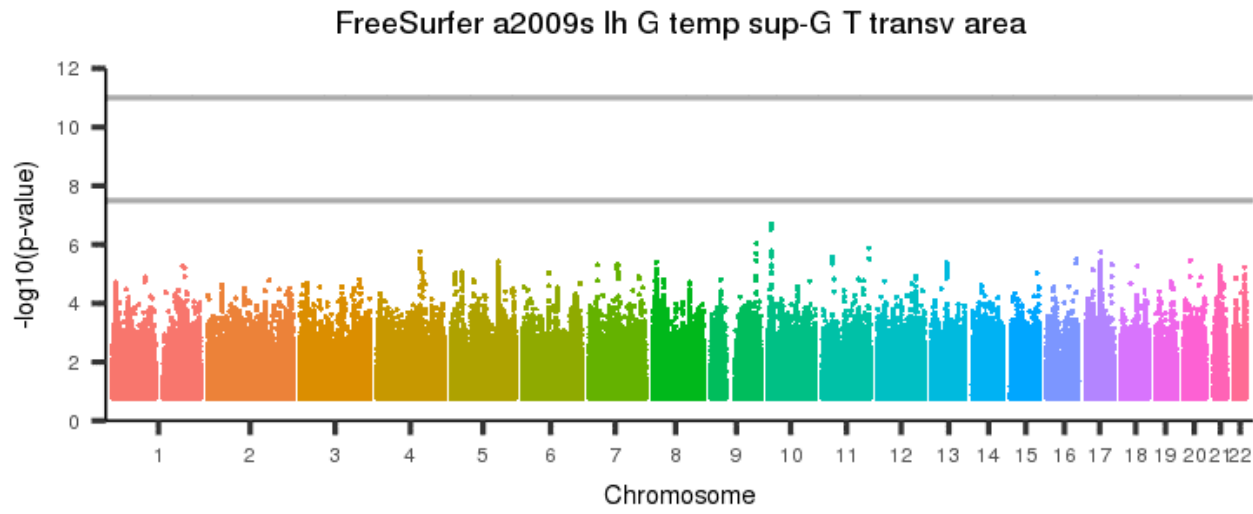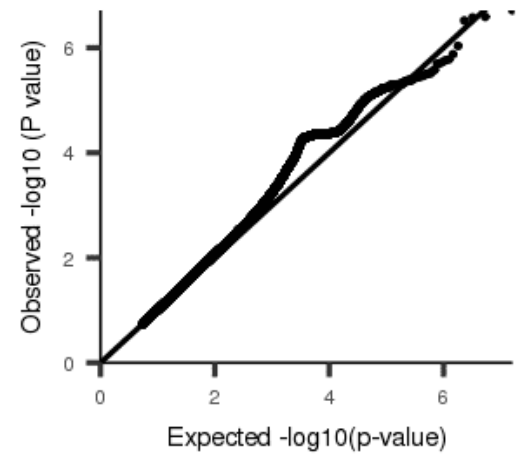

[back to list of plots](#)

Figure 2780: FreeSurfer a2009s lh G temp sup-Lateral area

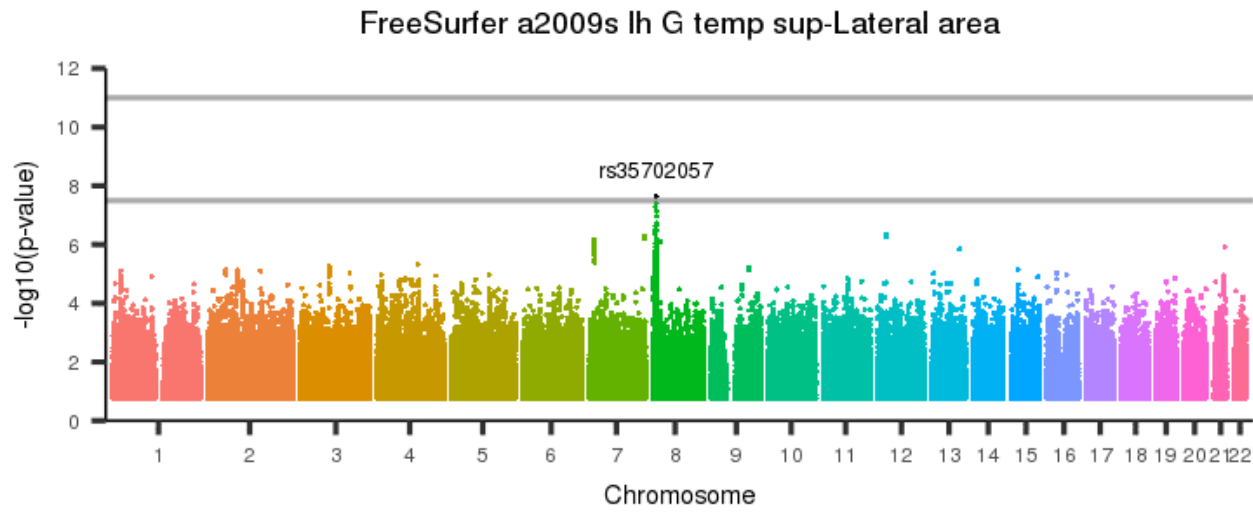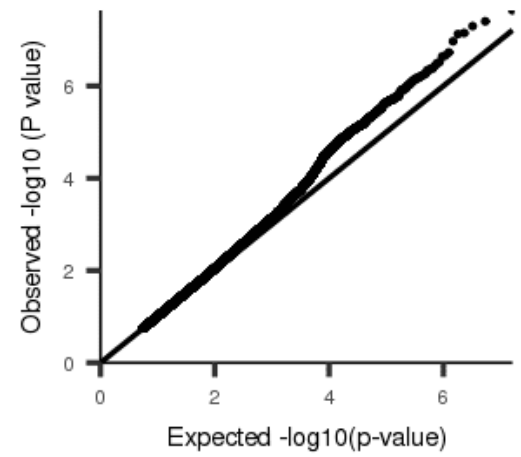

[back to list of plots](#)

Figure 2781: FreeSurfer a2009s lh G temp sup-Plan polar area

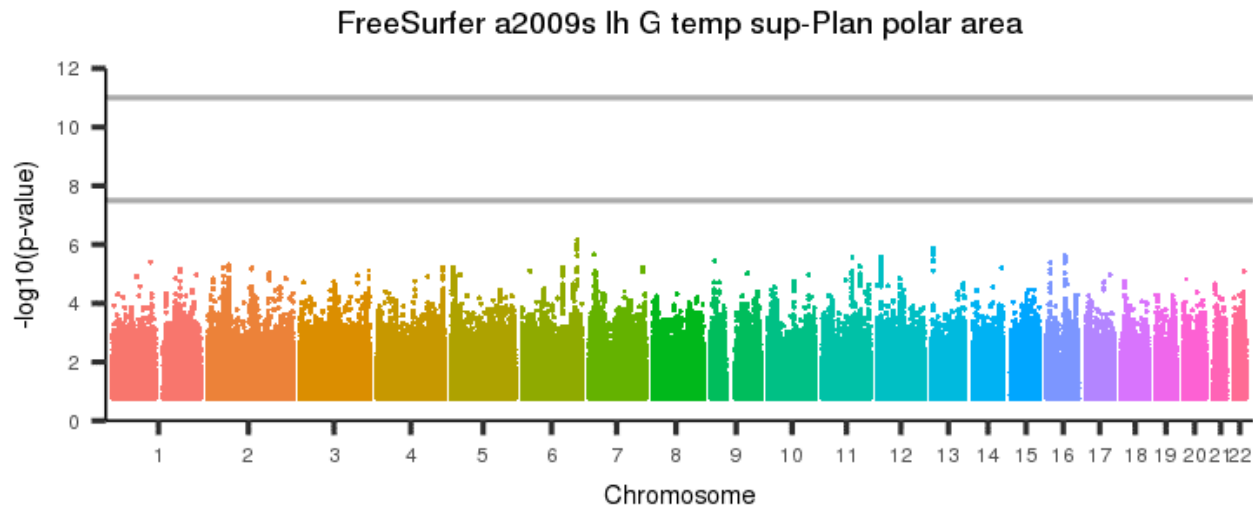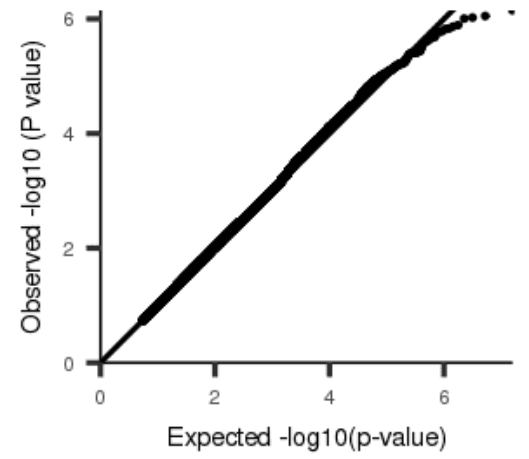

[back to list of plots](#)



Figure 2782: FreeSurfer a2009s lh G temp sup-Plan tempo area

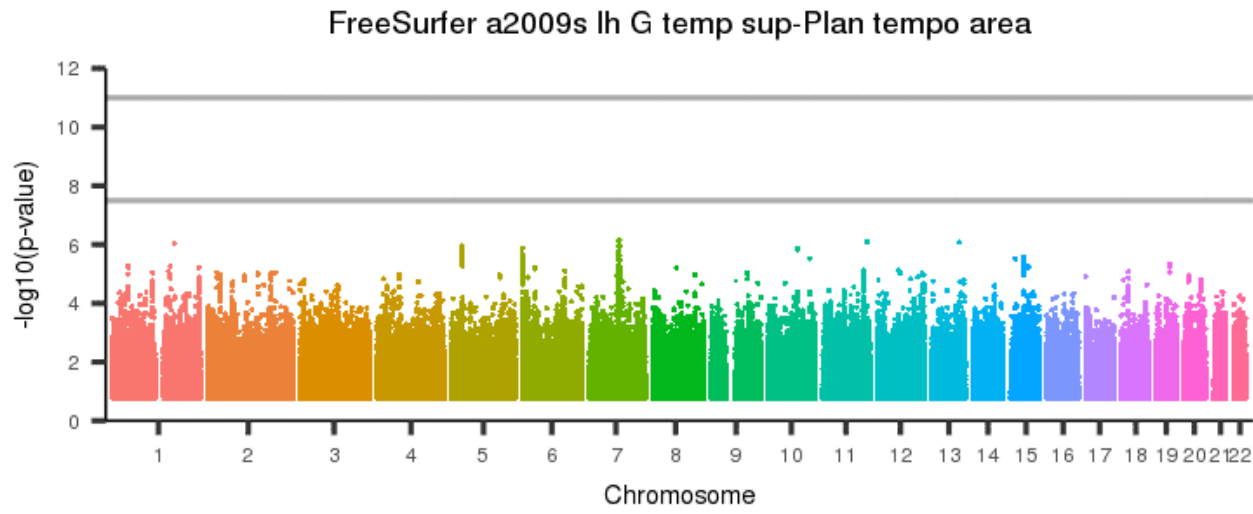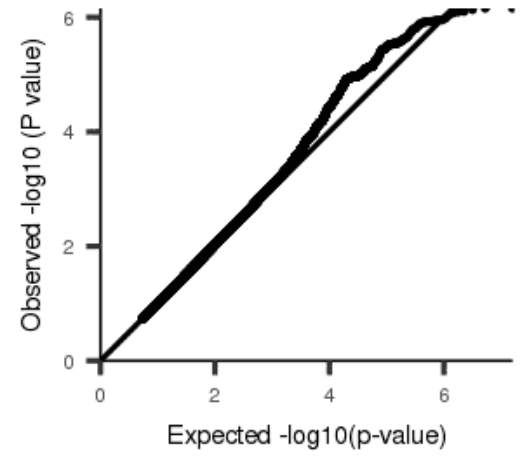

[back to list of plots](#)

Figure 2783: FreeSurfer a2009s lh G temporal inf area

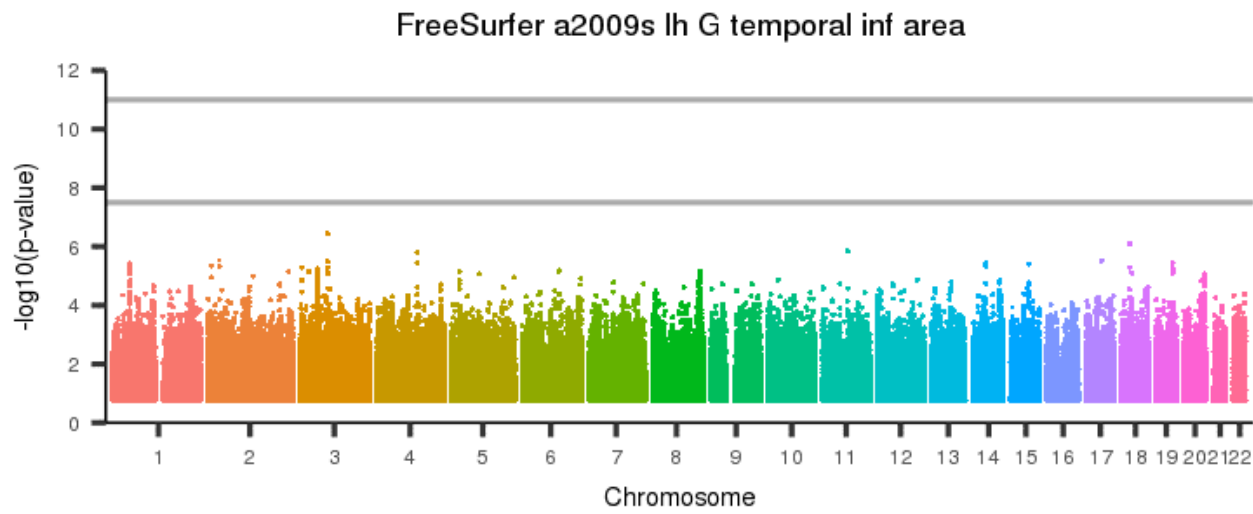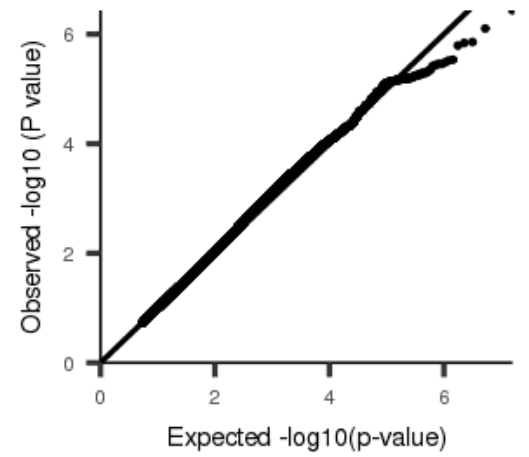

[back to list of plots](#)

Figure 2784: FreeSurfer a2009s lh G temporal middle area

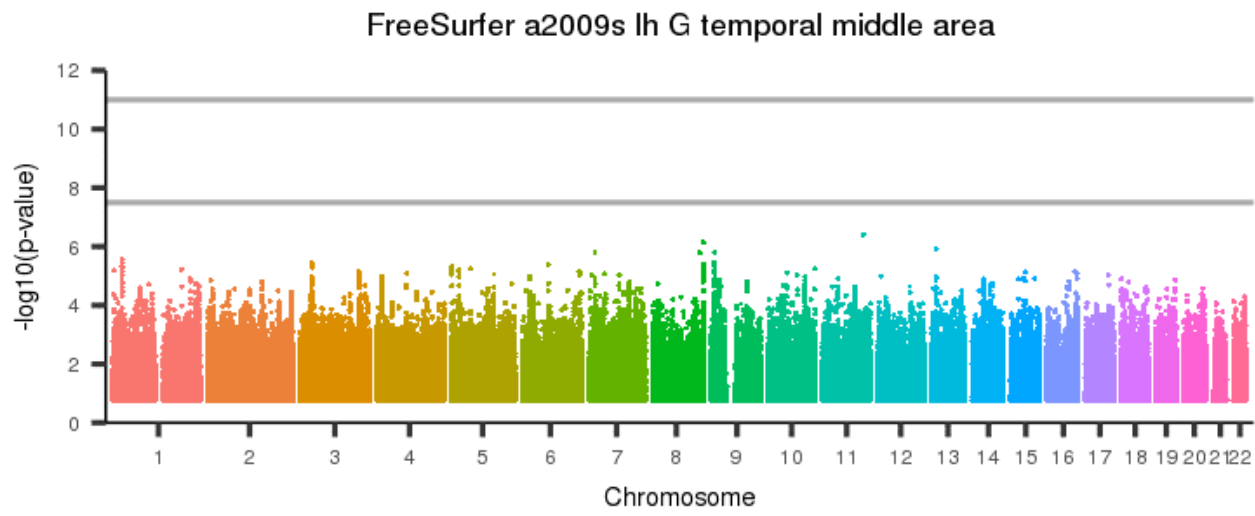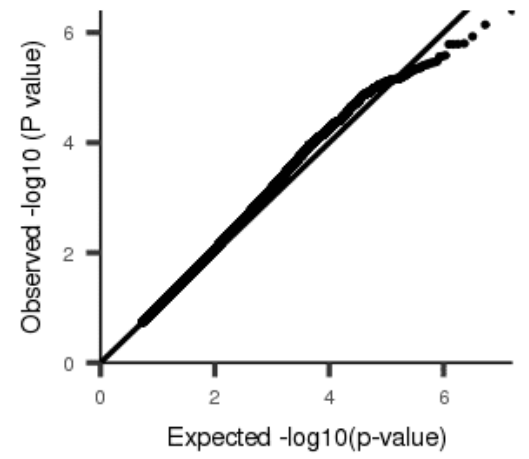

[back to list of plots](#)

Figure 2785: FreeSurfer a2009s lh Lat Fis-ant-Horizont area

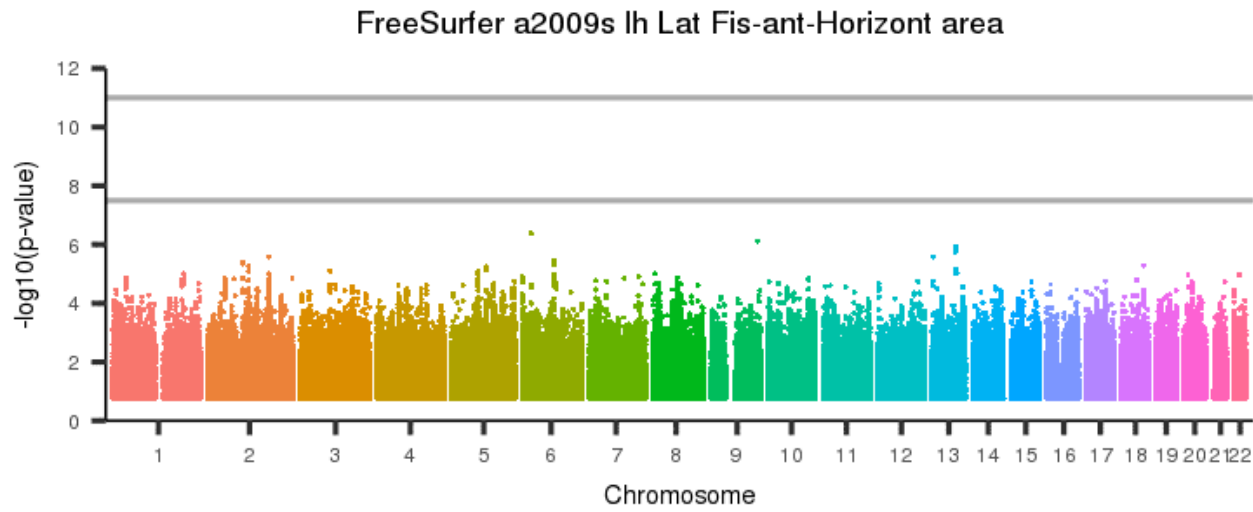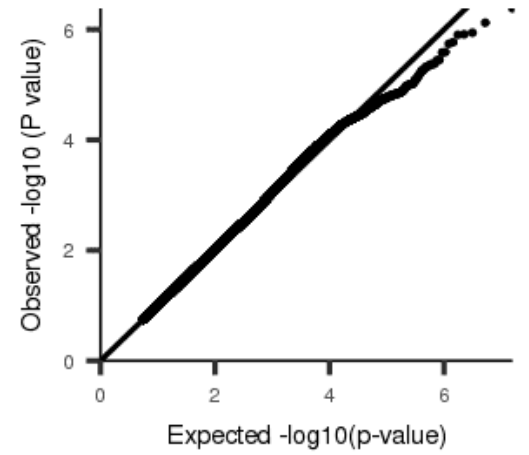

[back to list of plots](#)

Figure 2786: FreeSurfer a2009s lh Lat Fis-ant-Vertical area

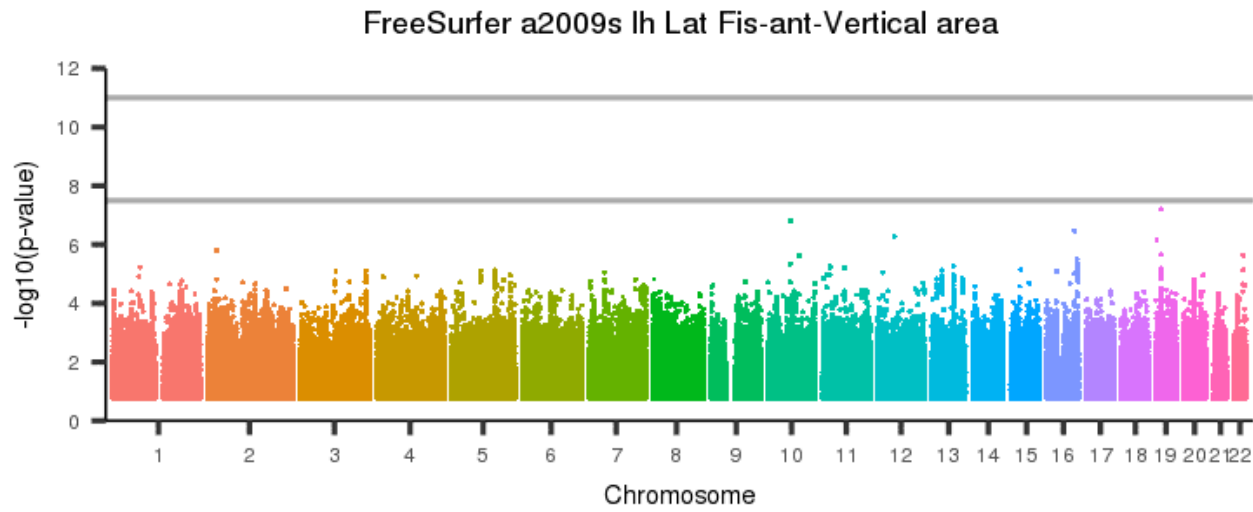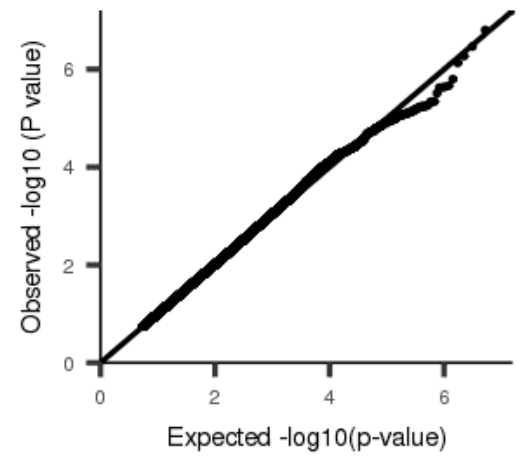

[back to list of plots](#)

Figure 2787: FreeSurfer a2009s lh Lat Fis-post area

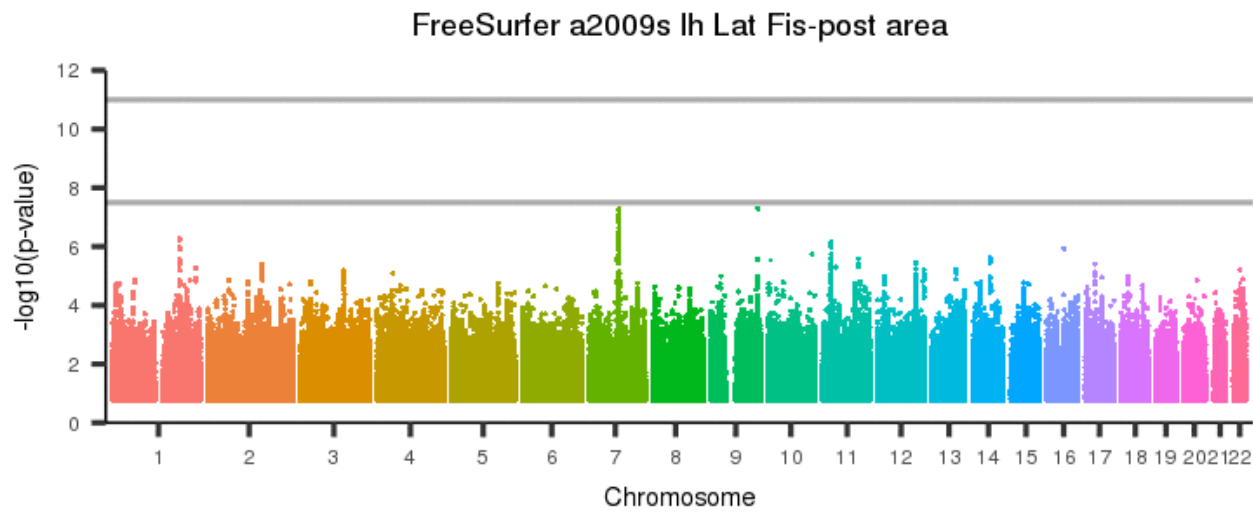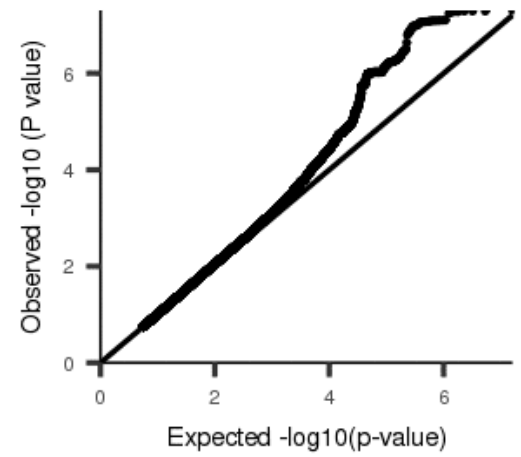

[back to list of plots](#)

Figure 2788: FreeSurfer a2009s lh Pole occipital area

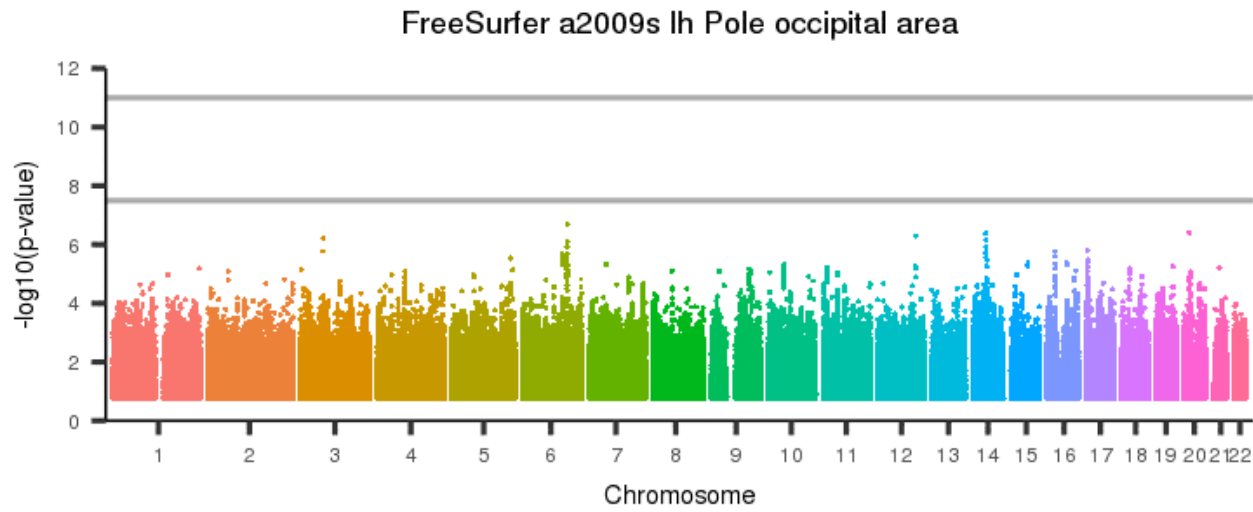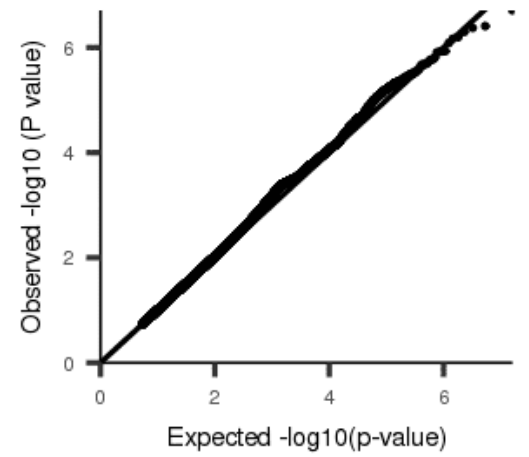

[back to list of plots](#)

Figure 2789: FreeSurfer a2009s lh Pole temporal area

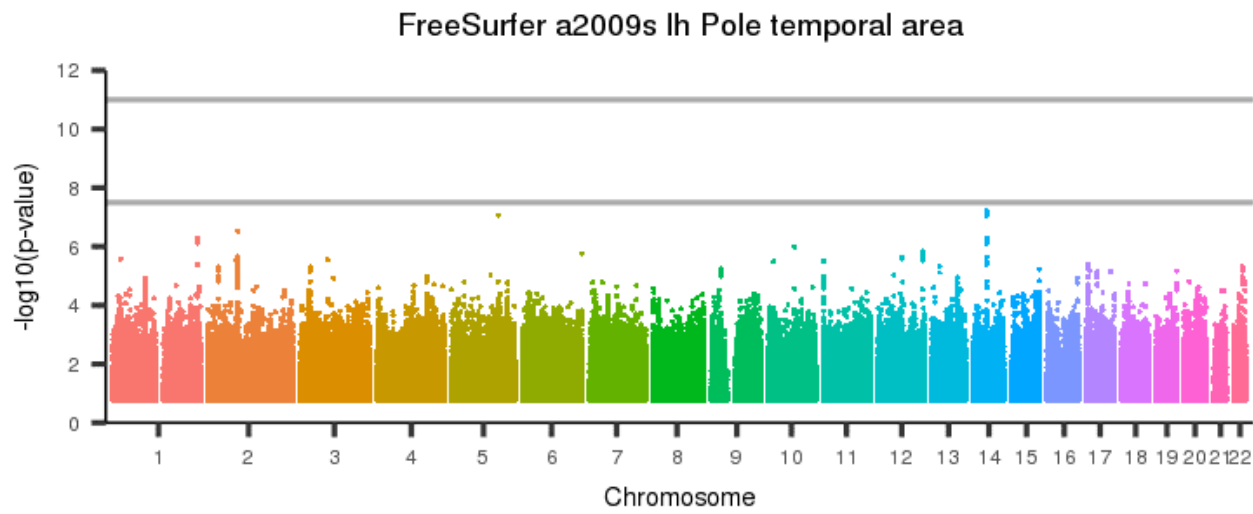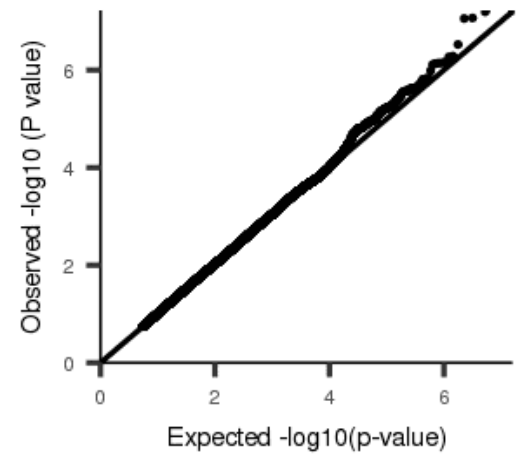

[back to list of plots](#)



Figure 2790: FreeSurfer a2009s lh S calcarine area

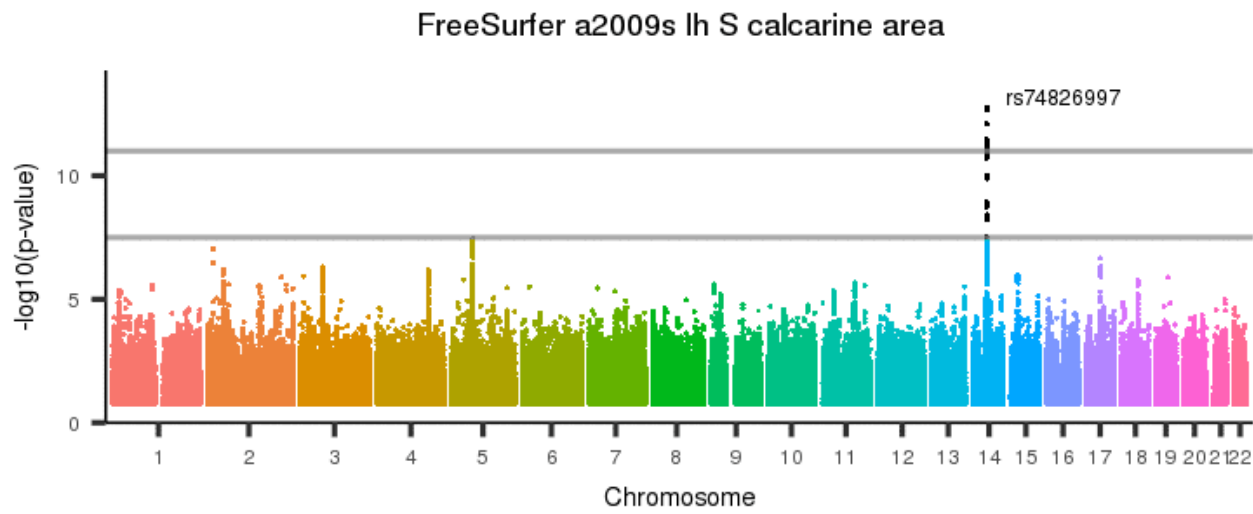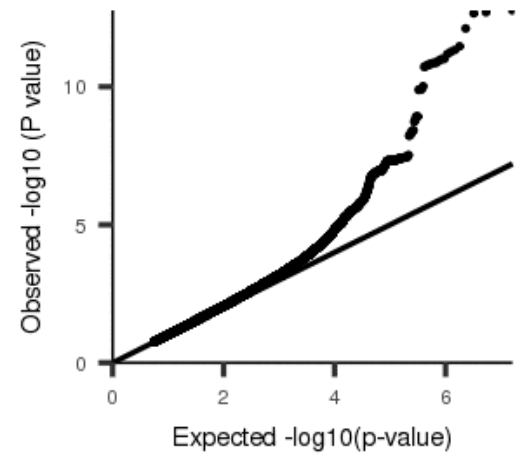

[back to list of plots](#)

Figure 2791: FreeSurfer a2009s lh S central area

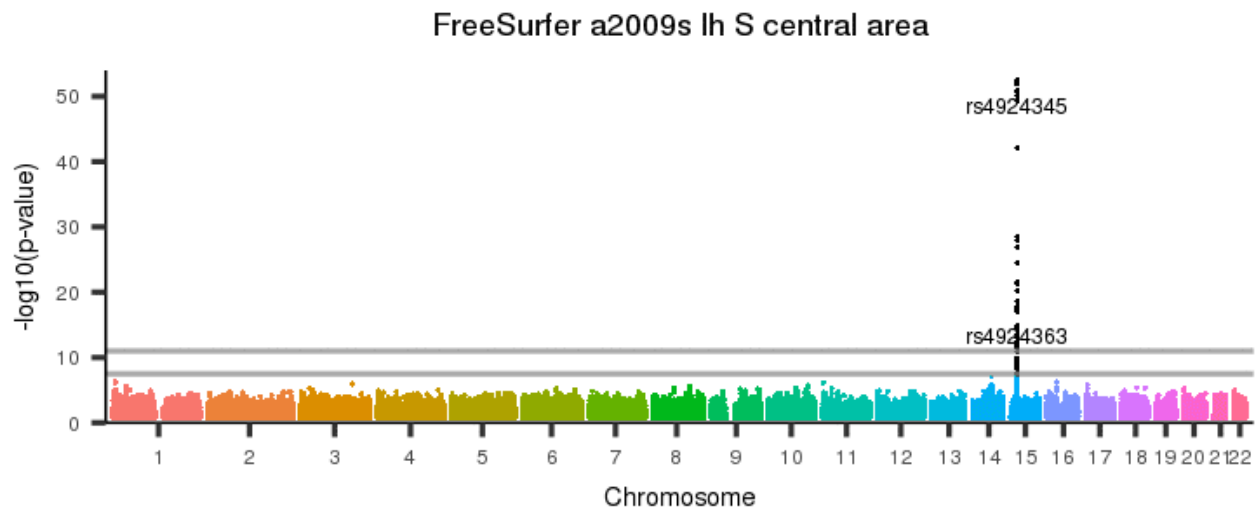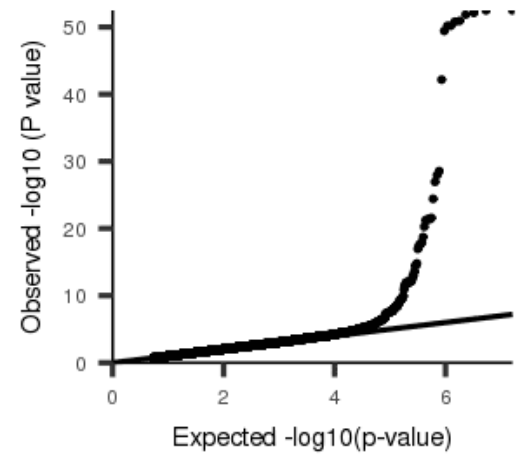

[back to list of plots](#)

Figure 2792: FreeSurfer a2009s lh S cingul-Marginalis area

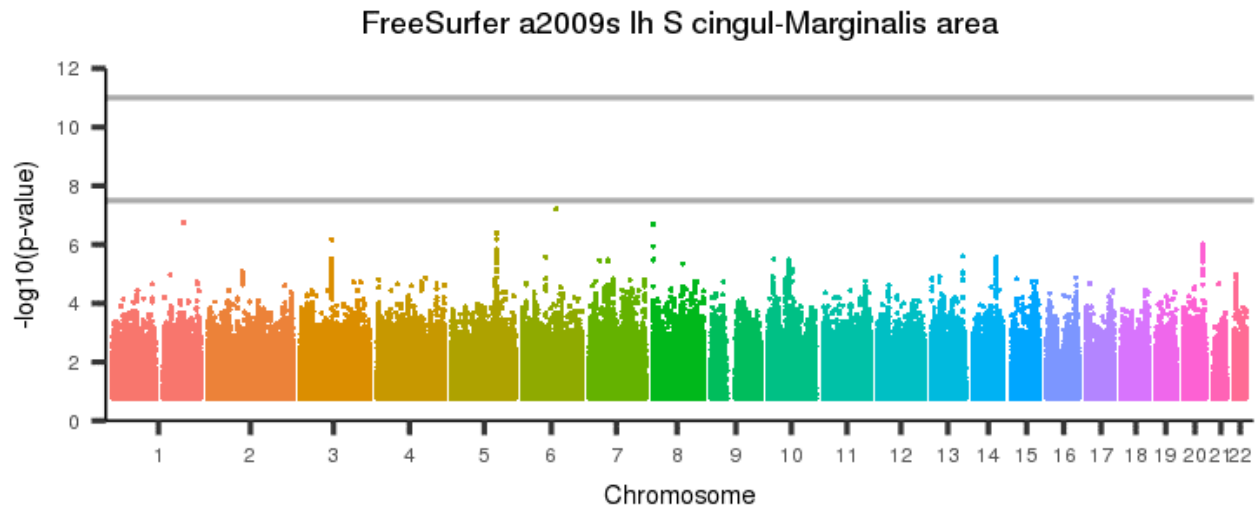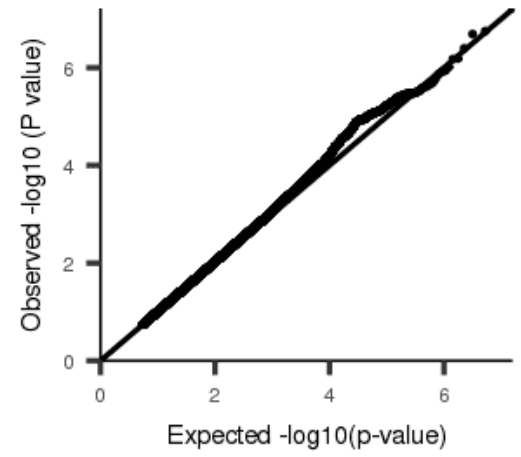

[back to list of plots](#)

Figure 2793: FreeSurfer a2009s lh S circular insula ant area

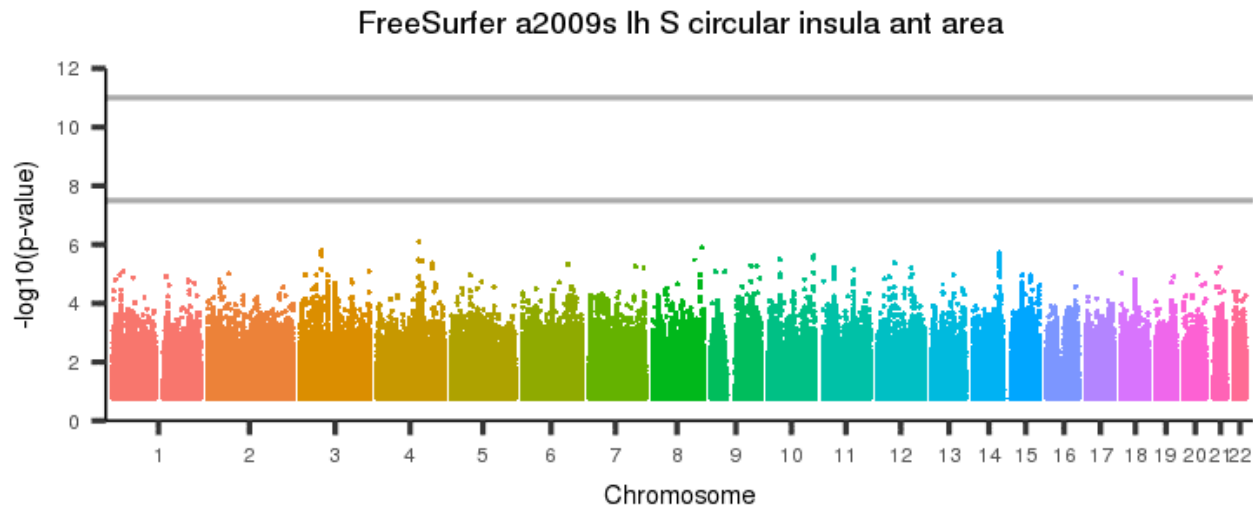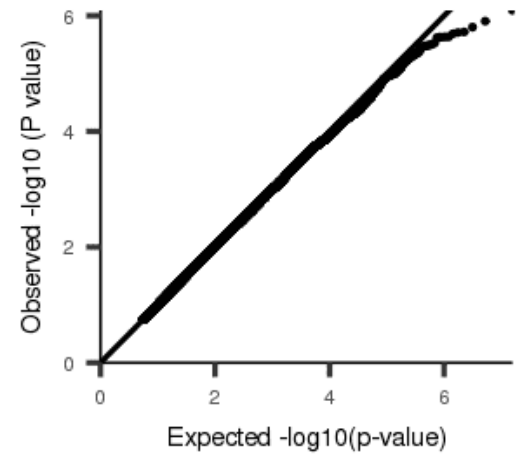

[back to list of plots](#)

Figure 2794: FreeSurfer a2009s lh S circular insula inf area

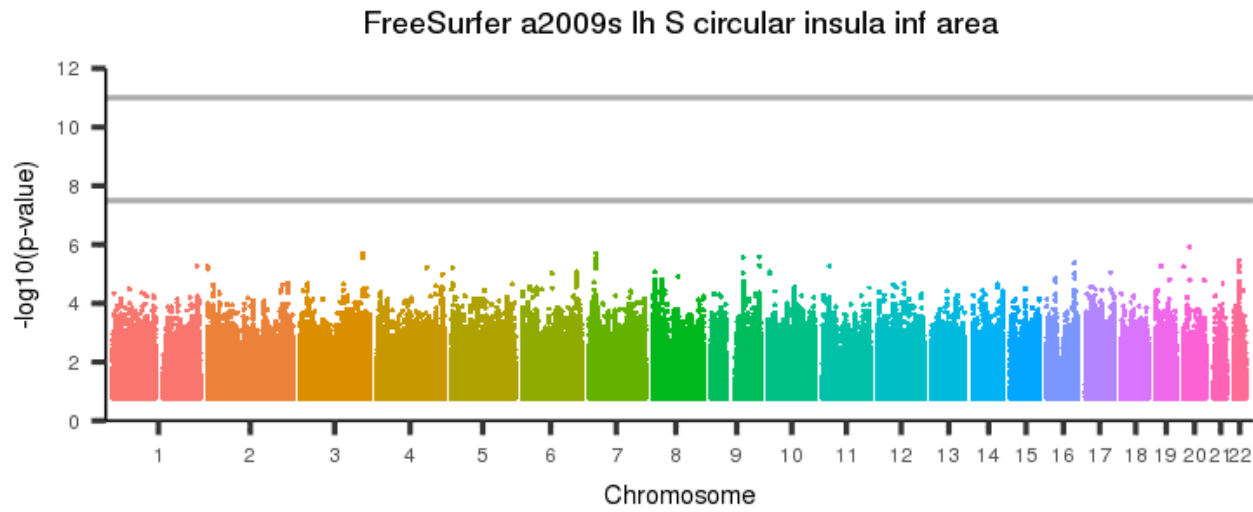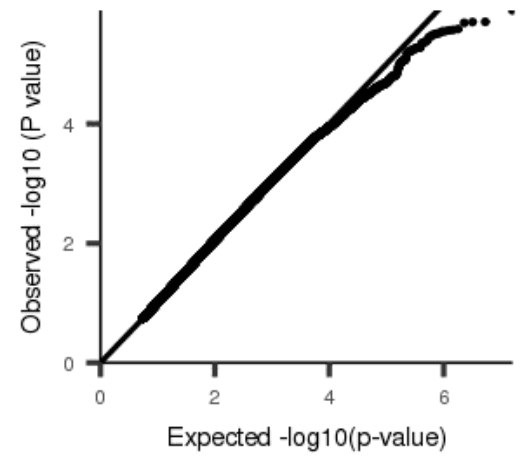

[back to list of plots](#)

Figure 2795: FreeSurfer a2009s lh S circular insula sup area

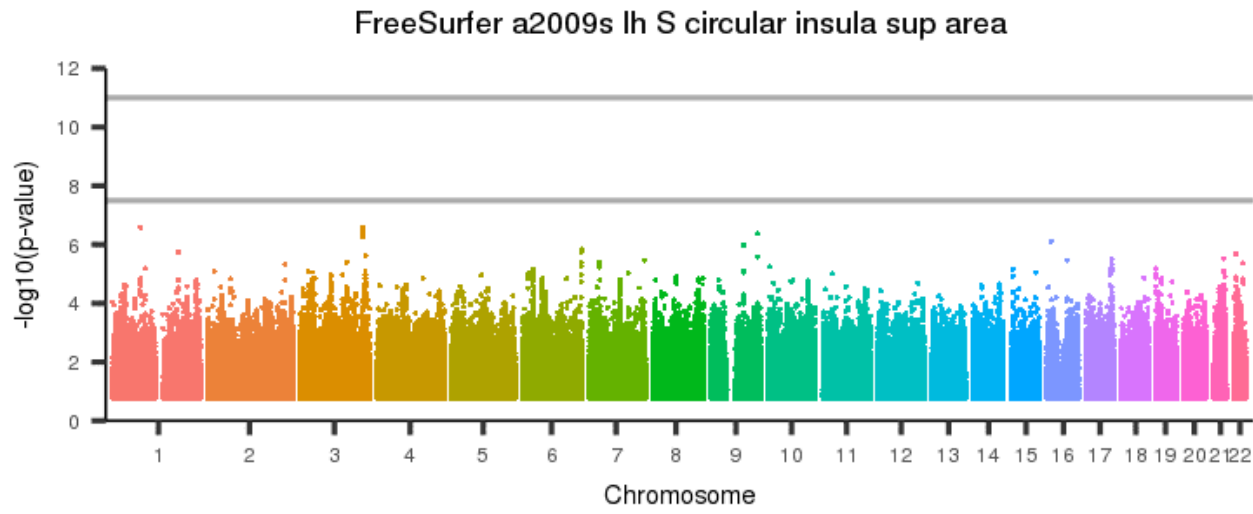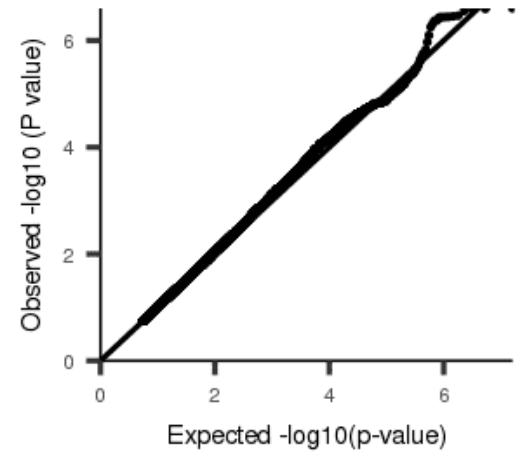

[back to list of plots](#)

Figure 2796: FreeSurfer a2009s lh S collat transv ant area

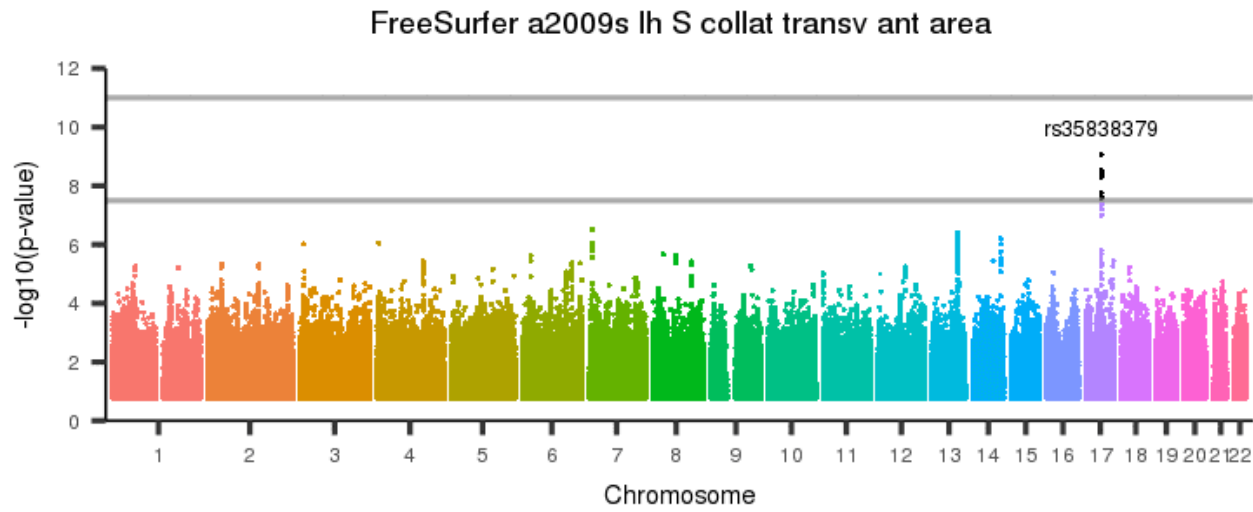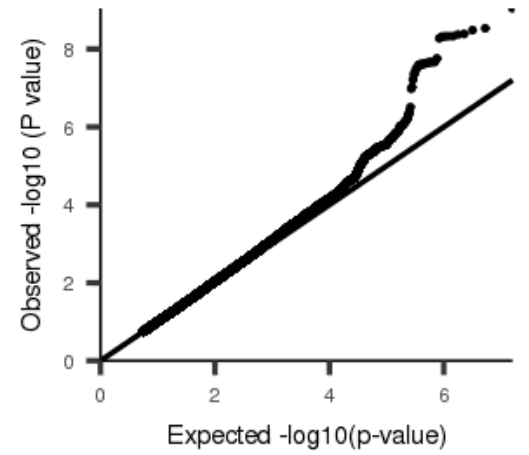

[back to list of plots](#)

Figure 2797: FreeSurfer a2009s lh S collat transv post area

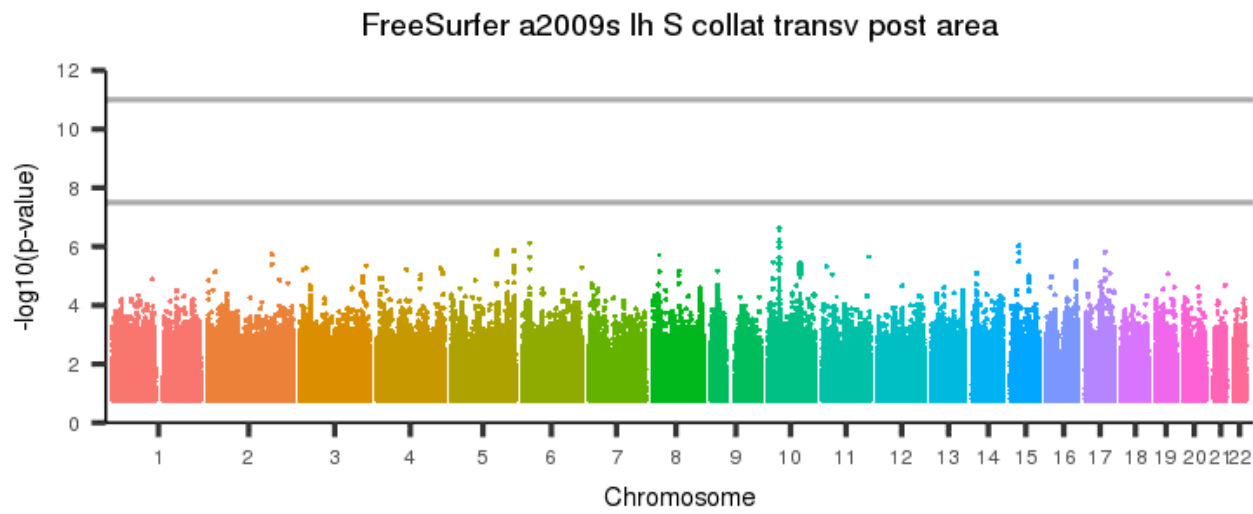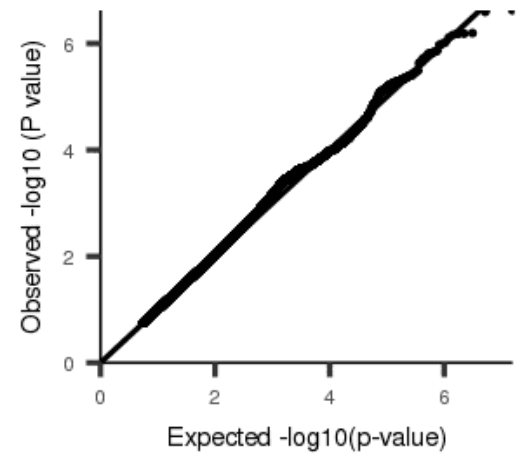

[back to list of plots](#)



Figure 2798: FreeSurfer a2009s lh S front inf area

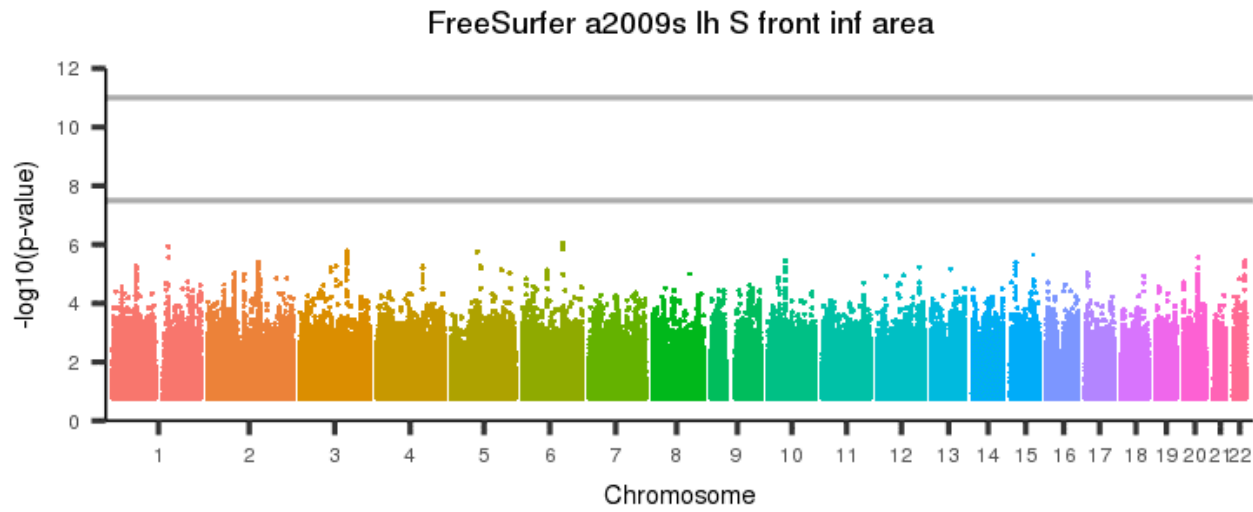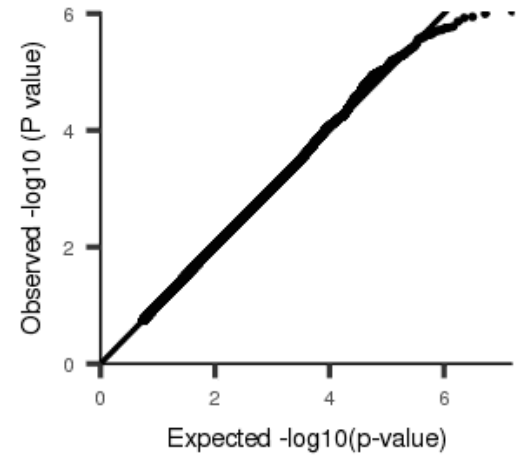

[back to list of plots](#)

Figure 2799: FreeSurfer a2009s lh S front middle area

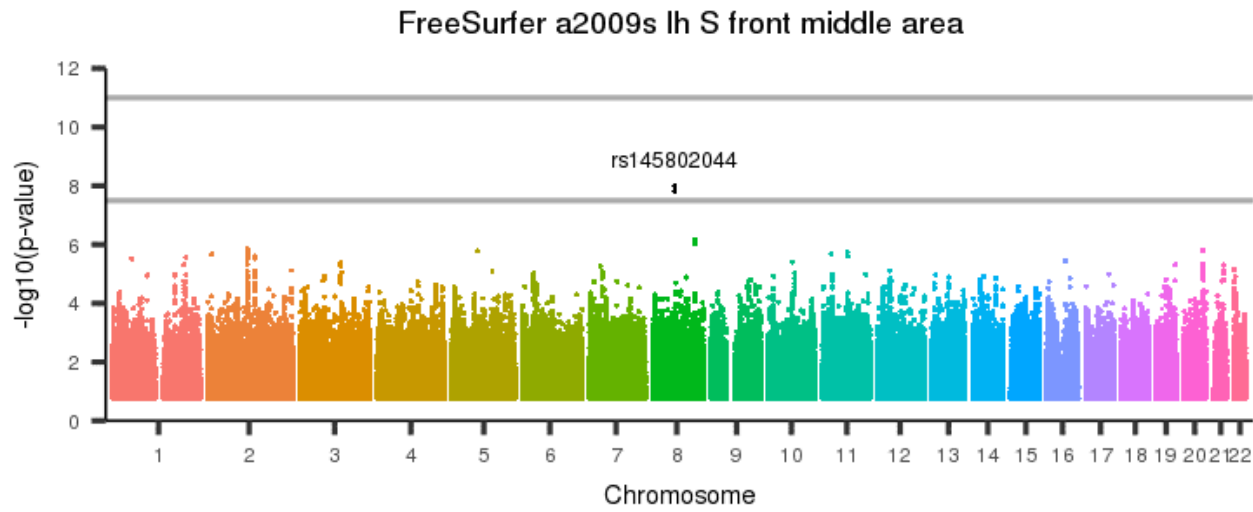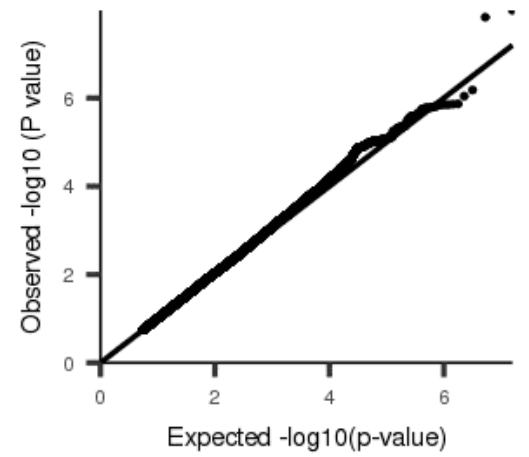

[back to list of plots](#)

Figure 2800: FreeSurfer a2009s lh S front sup area

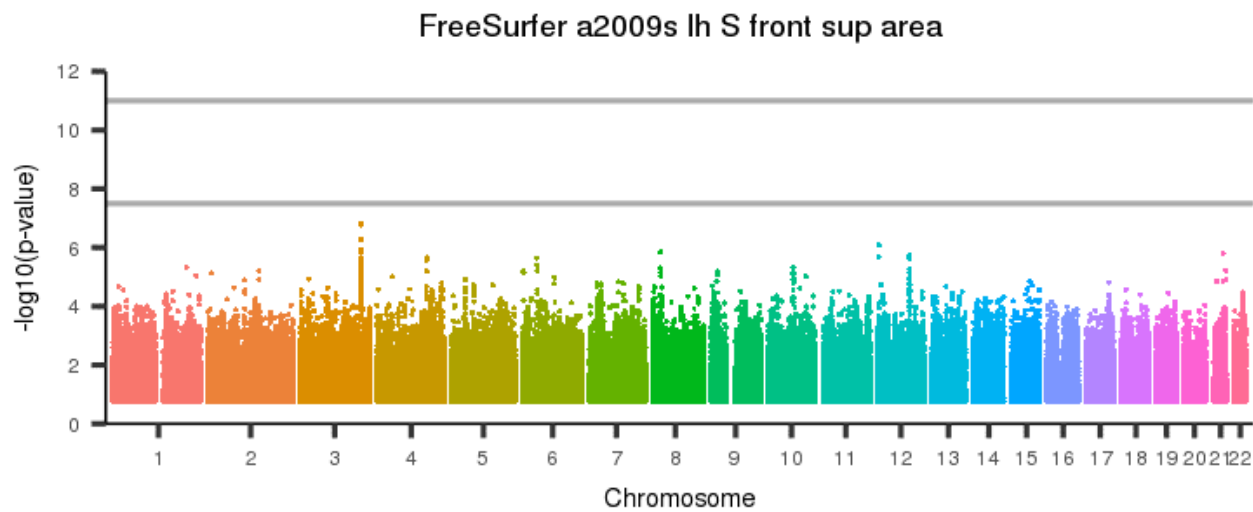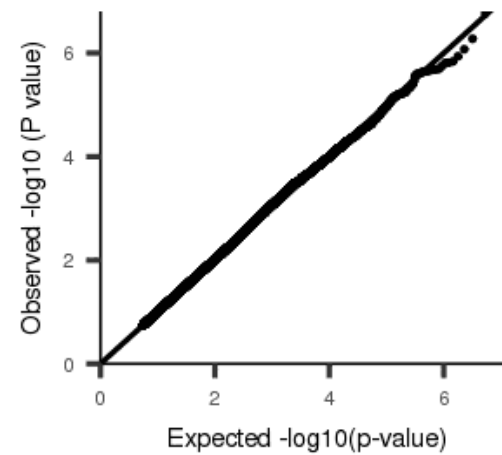

[back to list of plots](#)

Figure 2801: FreeSurfer a2009s lh S interm prim-Jensen area

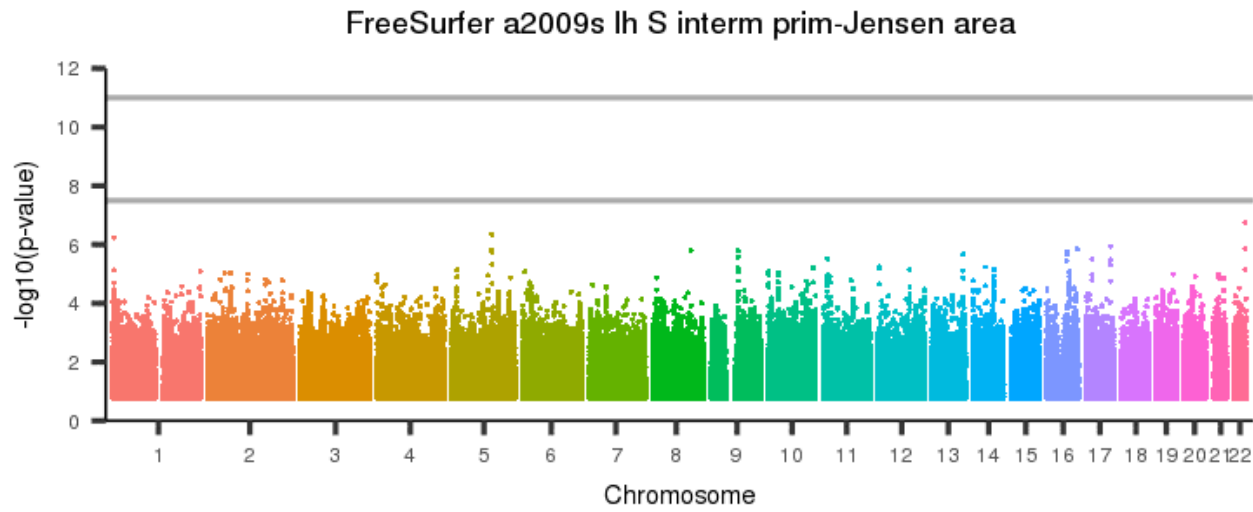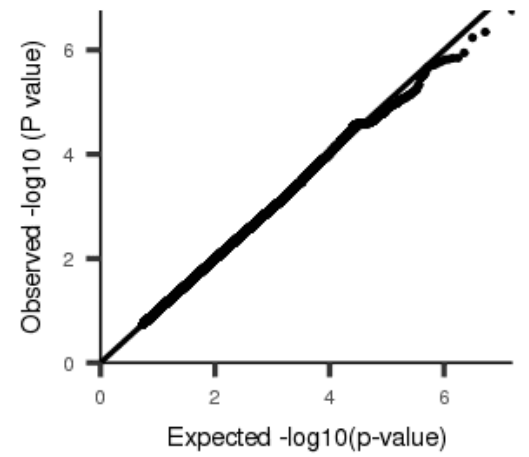

[back to list of plots](#)

Figure 2802: FreeSurfer a2009s lh S intrapariet and P trans area

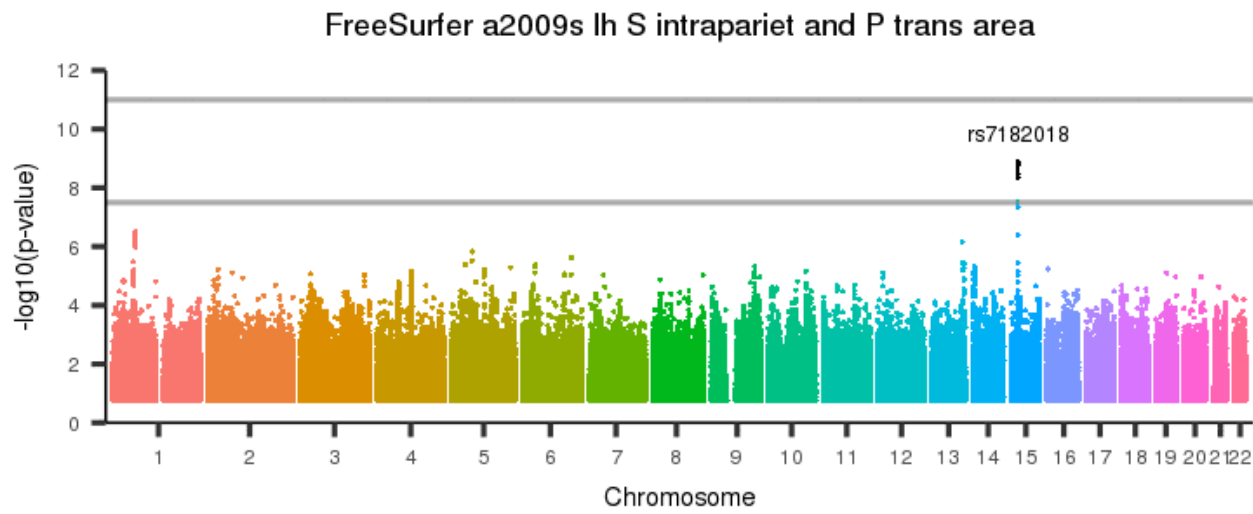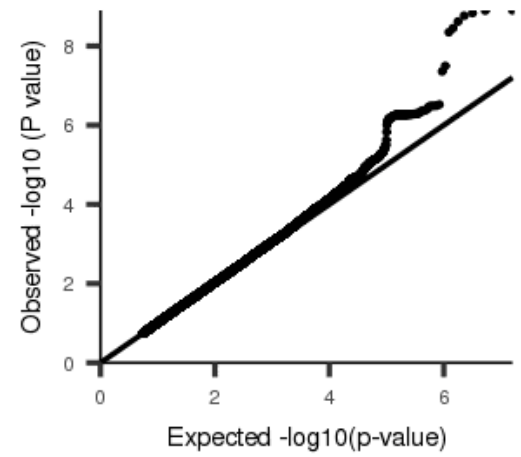

[back to list of plots](#)

Figure 2803: FreeSurfer a2009s lh S oc middle and Lunatus area

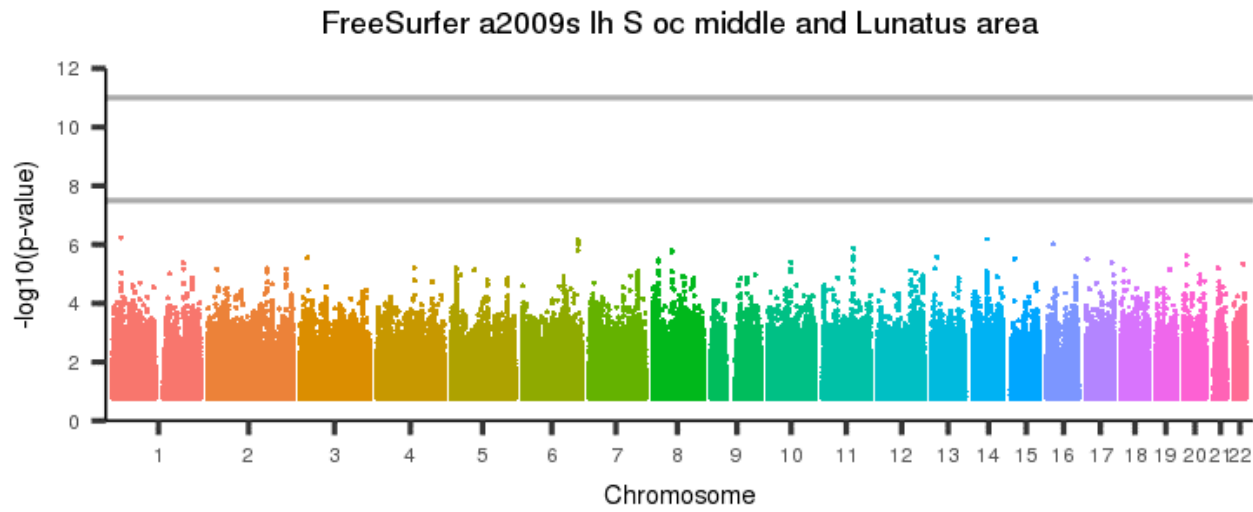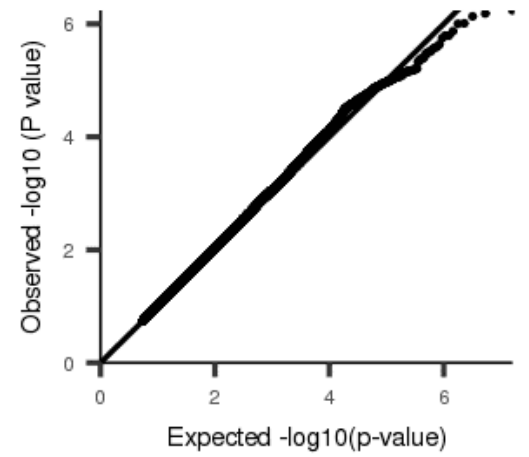

[back to list of plots](#)

Figure 2804: FreeSurfer a2009s lh S oc sup and transversal area

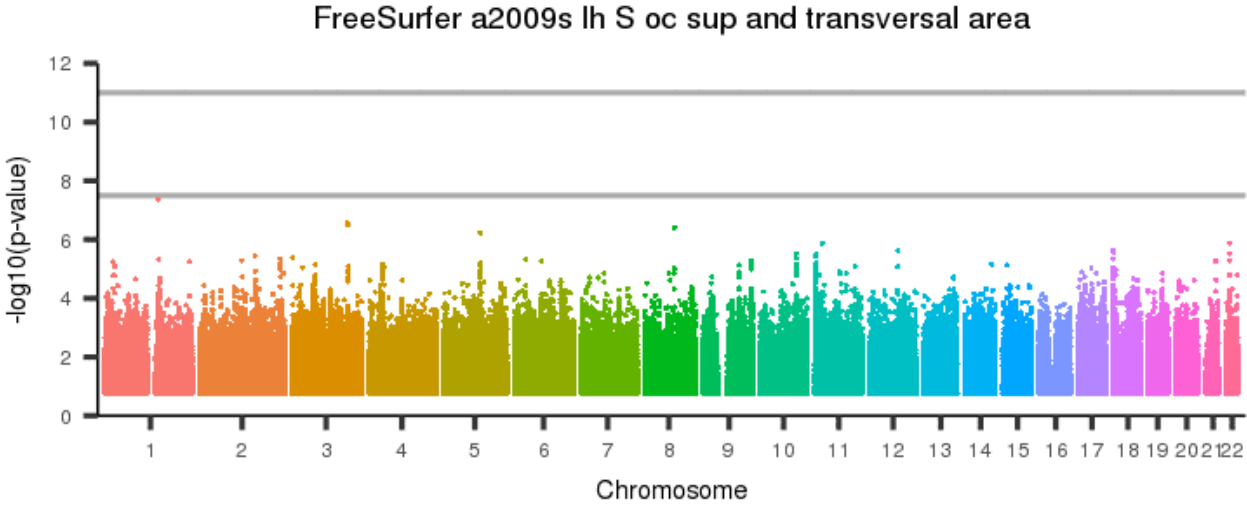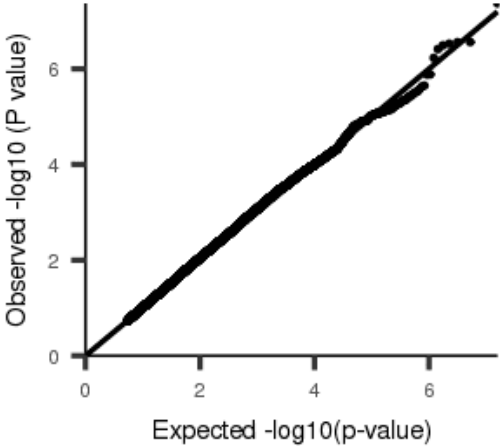

[back to list of plots](#)

Figure 2805: FreeSurfer a2009s lh S occipital ant area

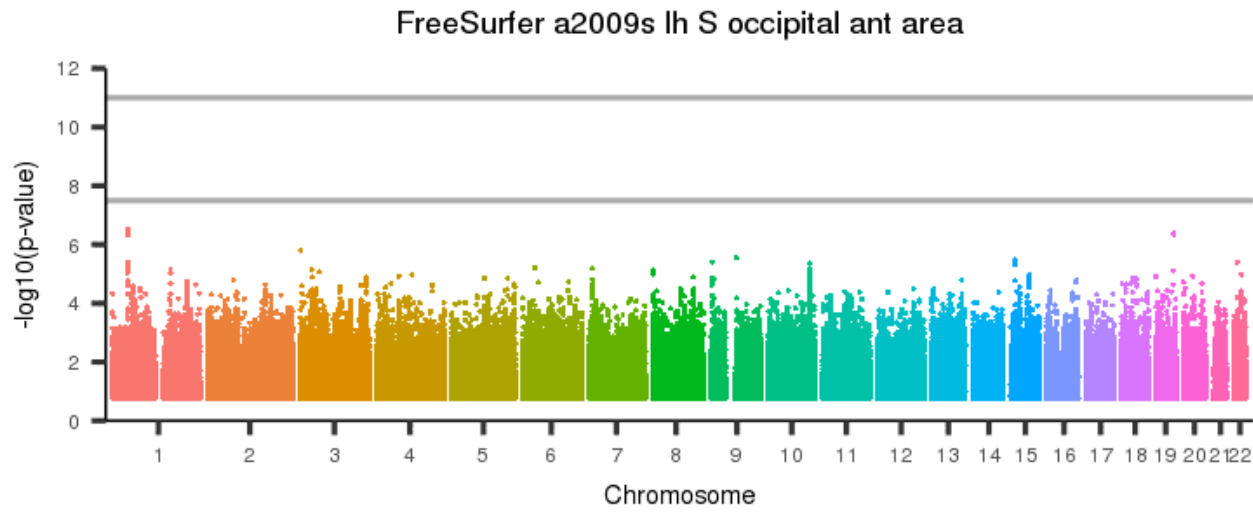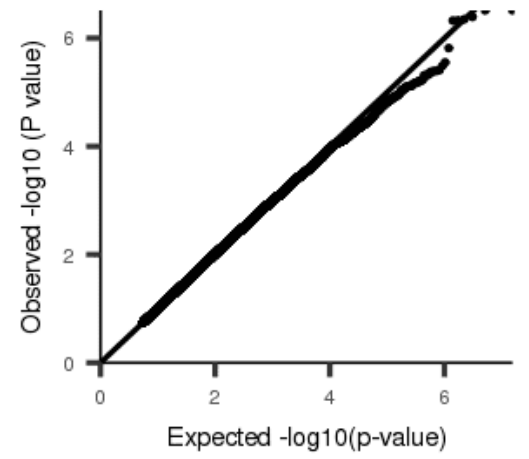

[back to list of plots](#)



Figure 2806: FreeSurfer a2009s lh S oc-temp lat area

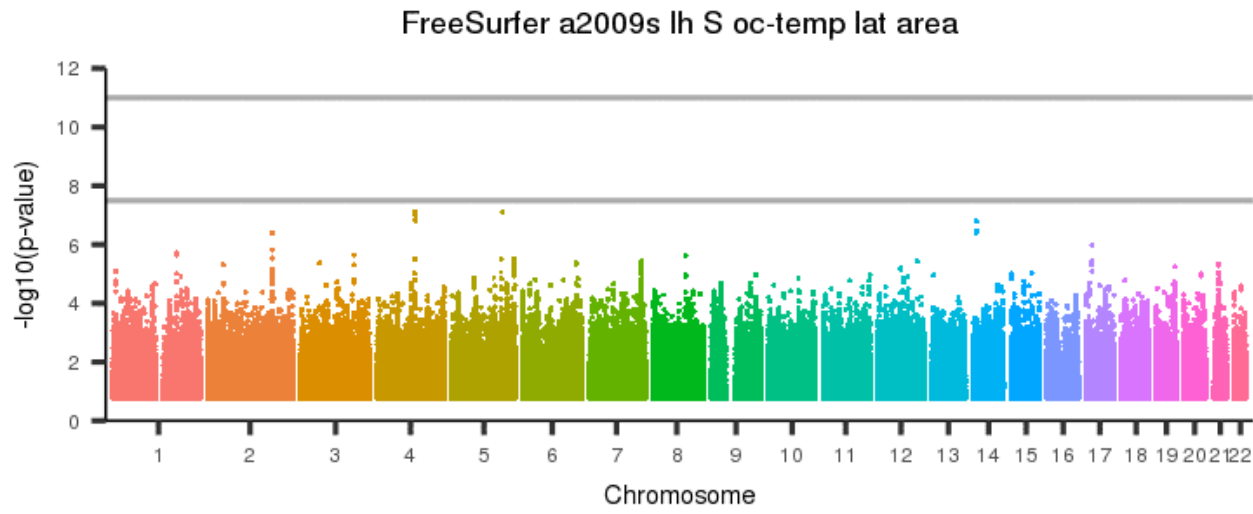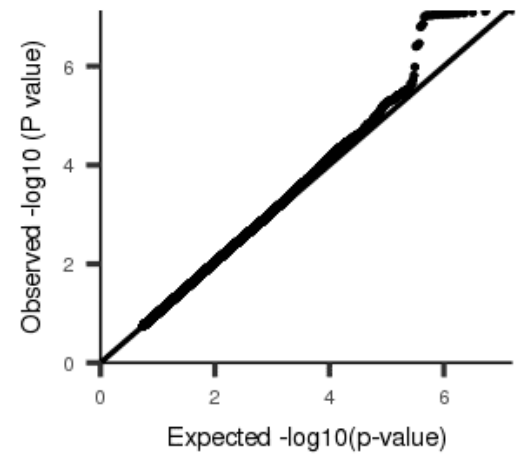

[back to list of plots](#)

Figure 2807: FreeSurfer a2009s lh S oc-temp med and Lingual area

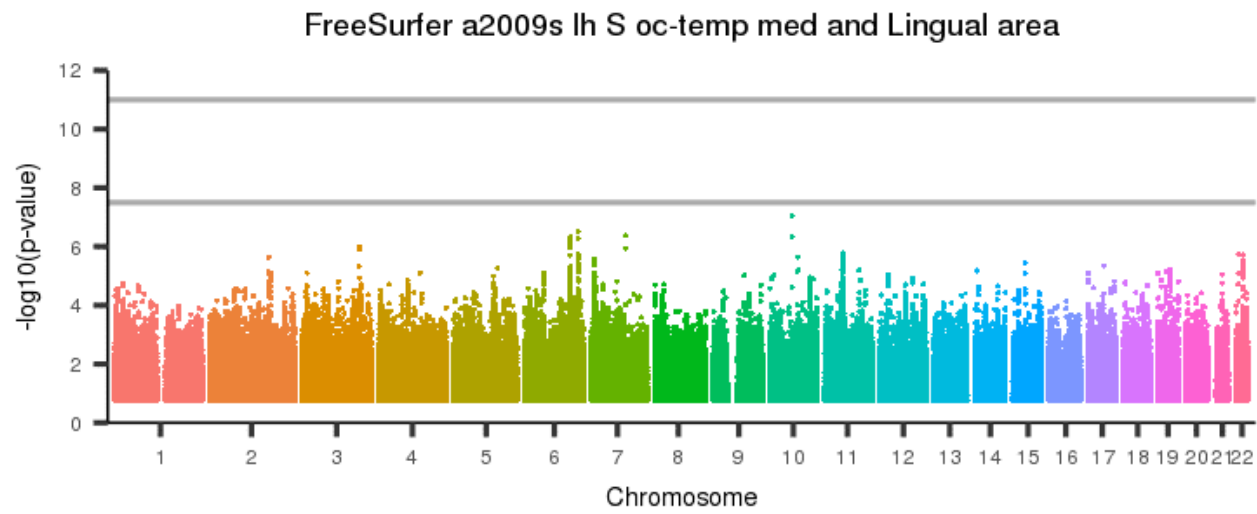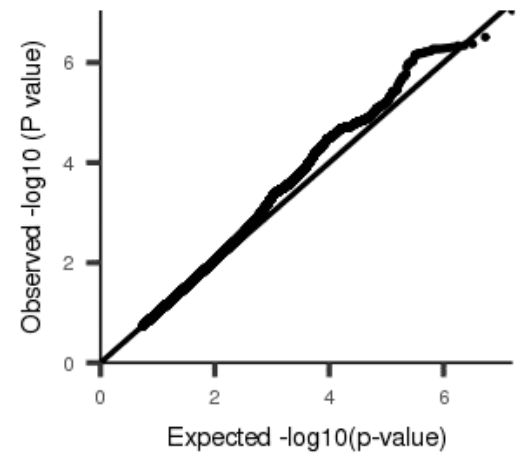

[back to list of plots](#)

Figure 2808: FreeSurfer a2009s lh S orbital lateral area

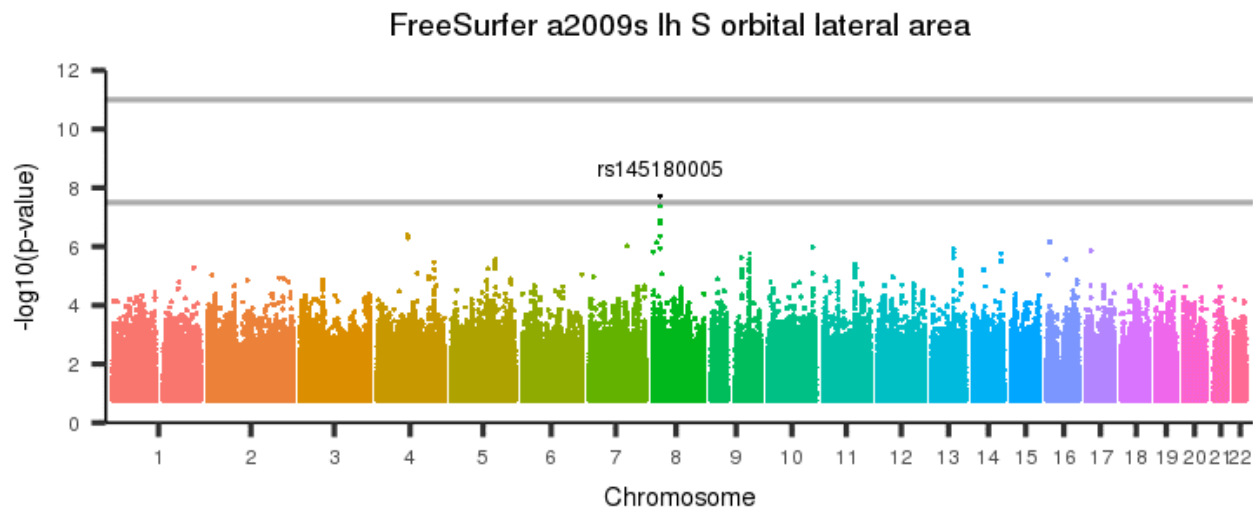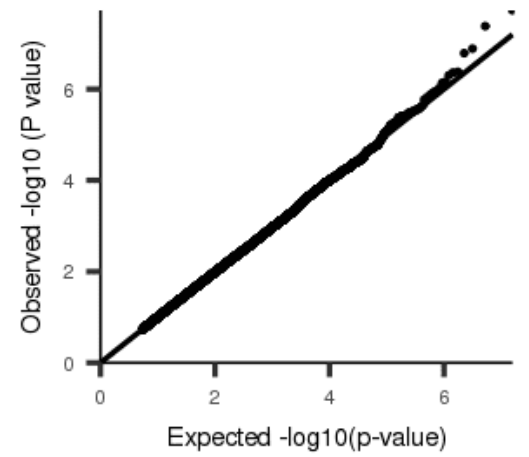

[back to list of plots](#)

Figure 2809: FreeSurfer a2009s lh S orbital med-olfact area

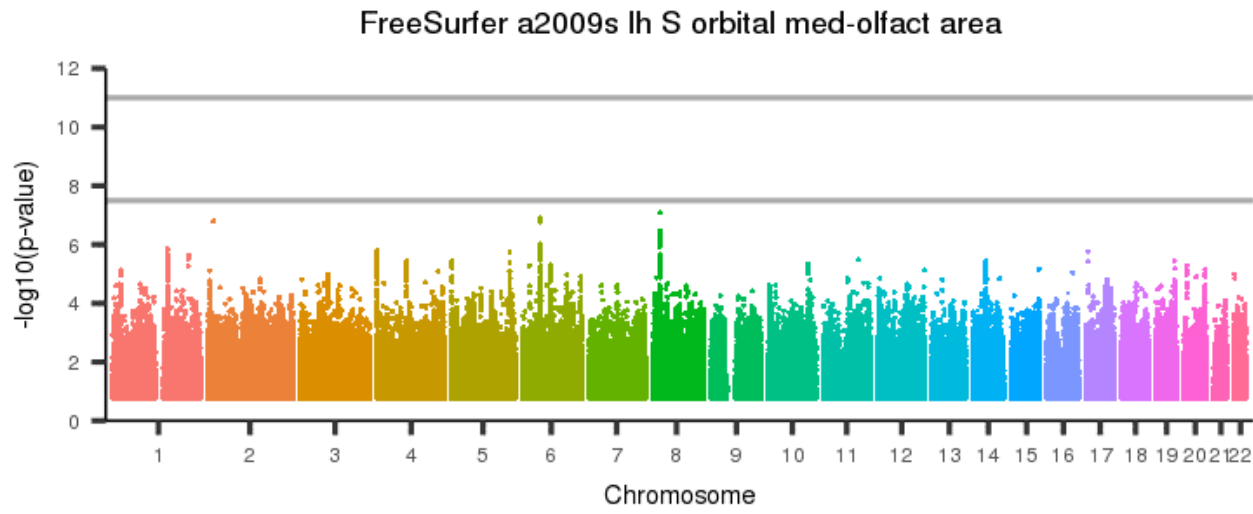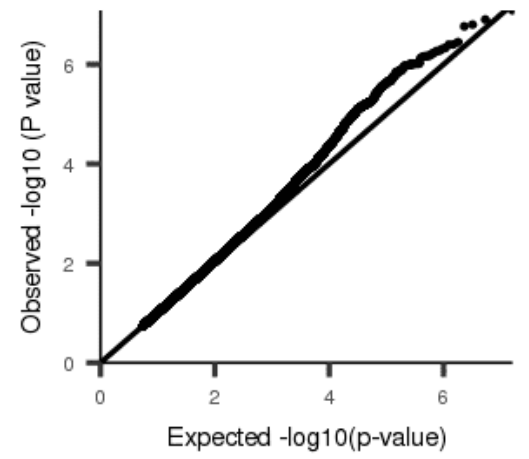

[back to list of plots](#)

Figure 2810: FreeSurfer a2009s lh S orbital-H Shaped area

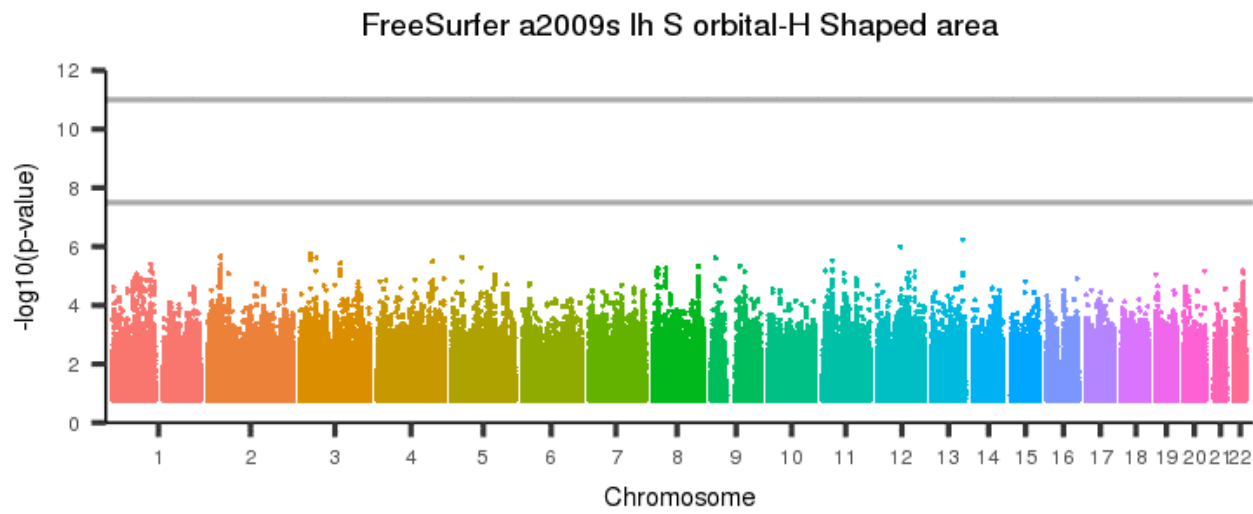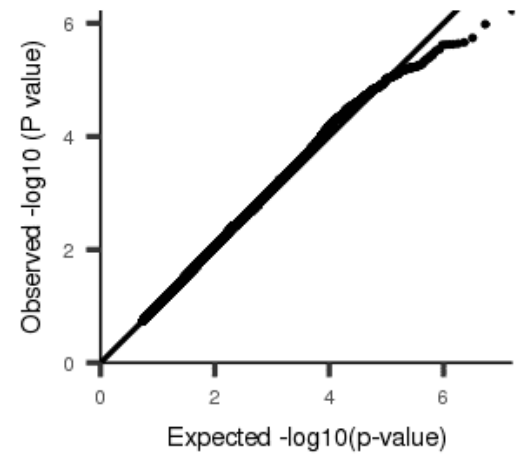

[back to list of plots](#)

Figure 2811: FreeSurfer a2009s lh S parieto occipital area

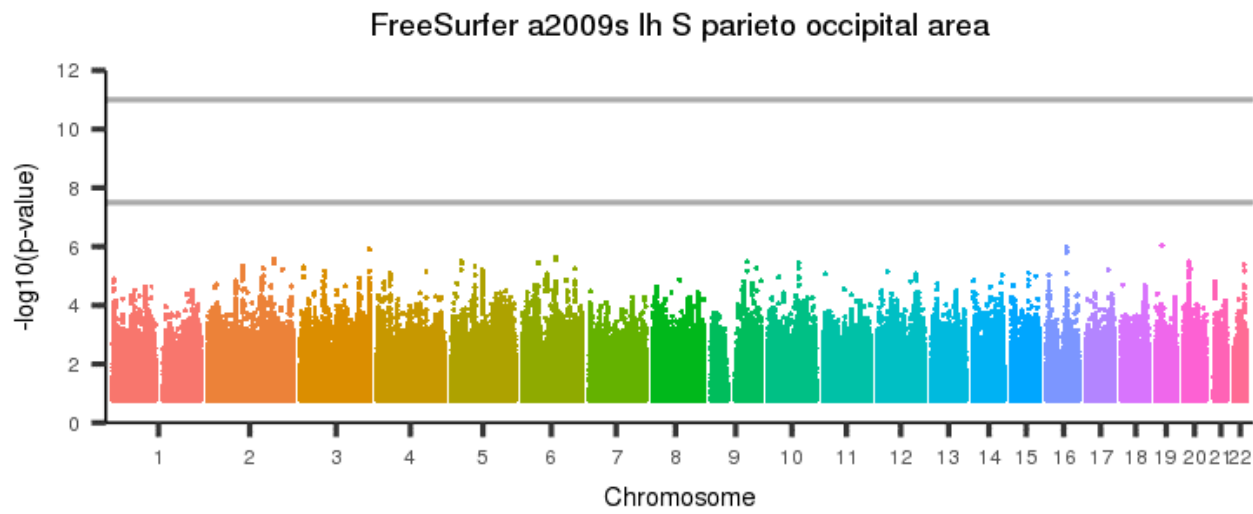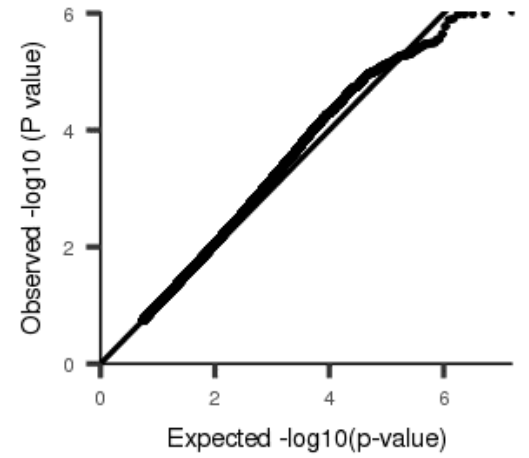

[back to list of plots](#)

Figure 2812: FreeSurfer a2009s lh S pericallosal area

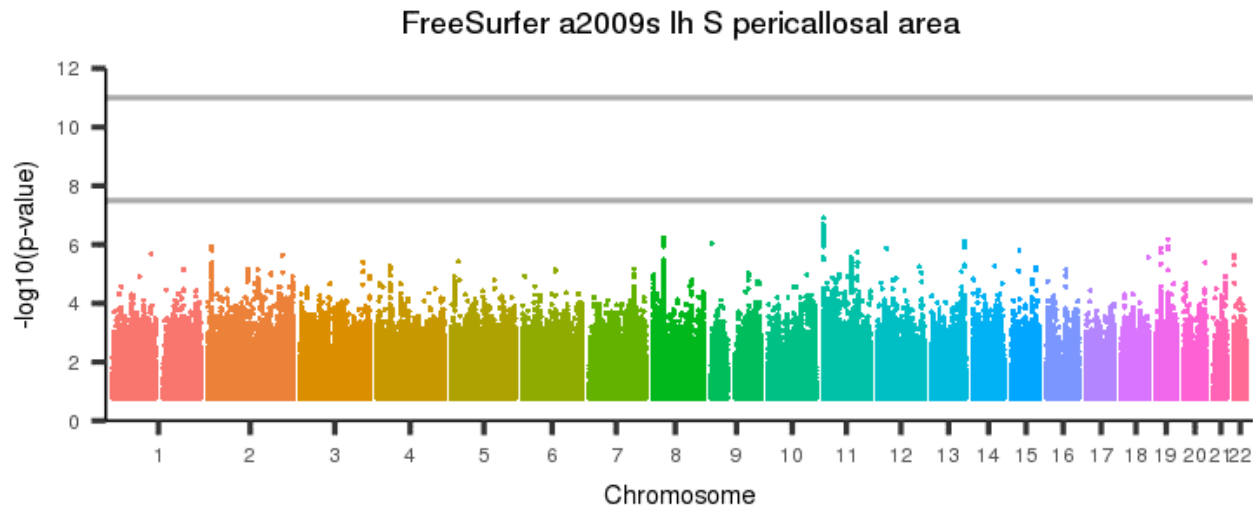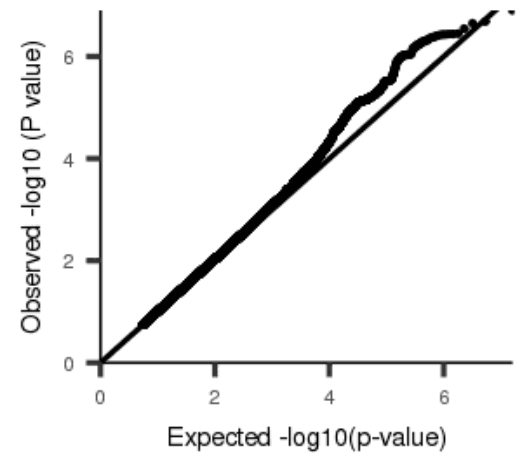

[back to list of plots](#)

Figure 2813: FreeSurfer a2009s lh S postcentral area

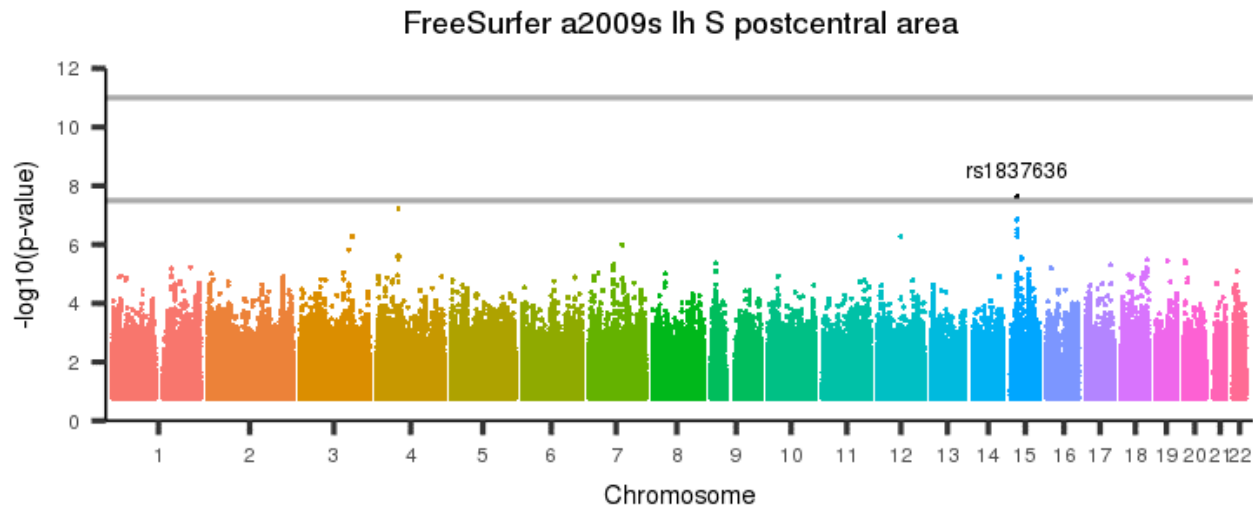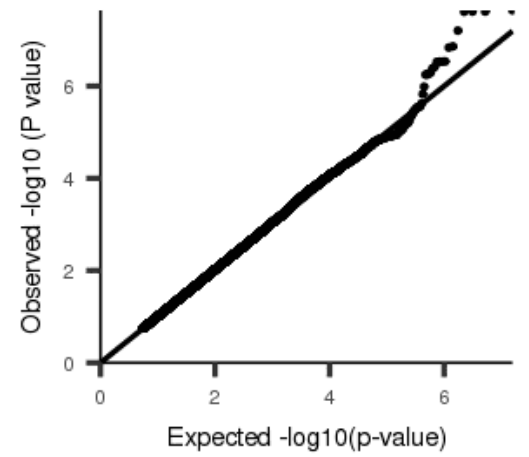

[back to list of plots](#)



Figure 2814: FreeSurfer a2009s lh S precentral-inf-part area

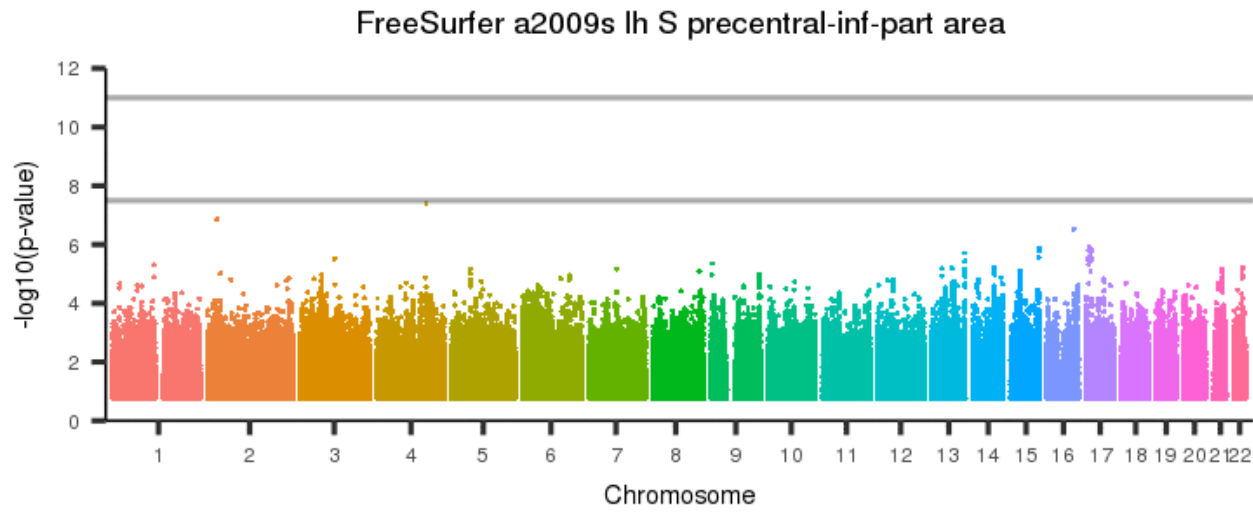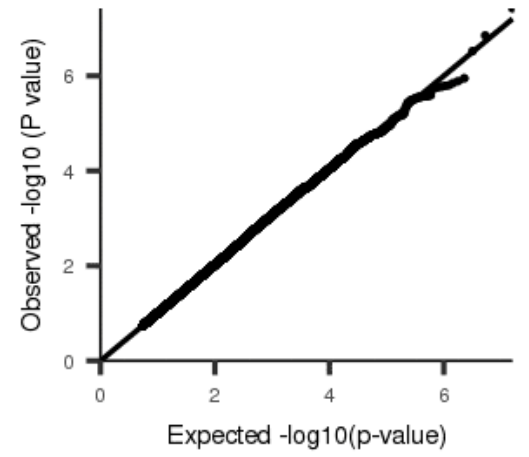

[back to list of plots](#)

Figure 2815: FreeSurfer a2009s lh S precentral-sup-part area

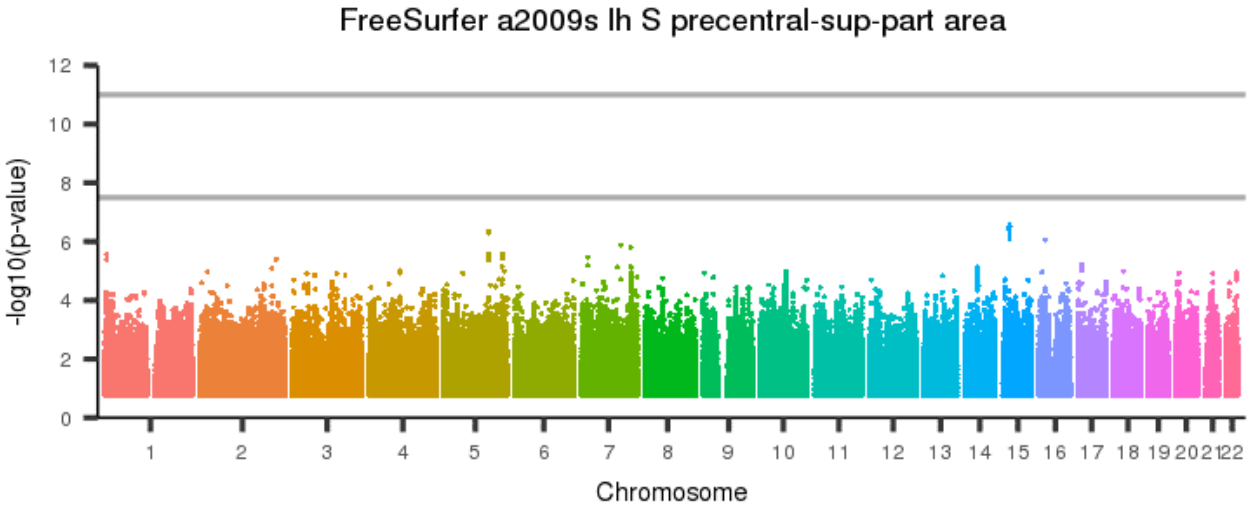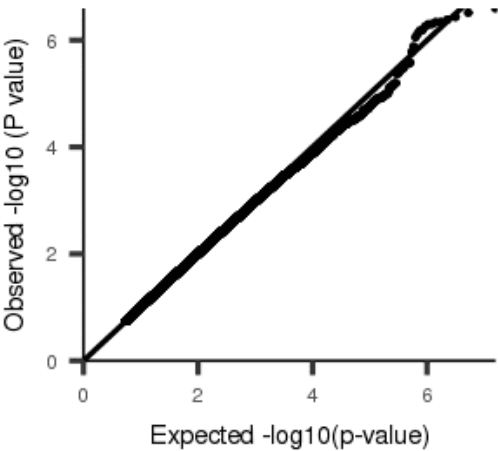

[back to list of plots](#)

Figure 2816: FreeSurfer a2009s lh S suborbital area

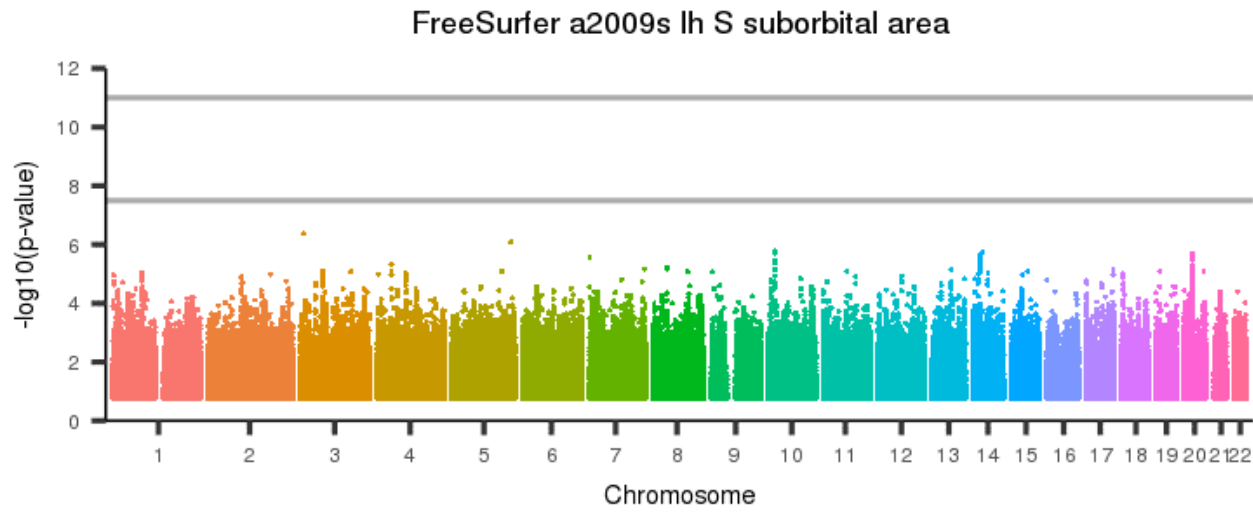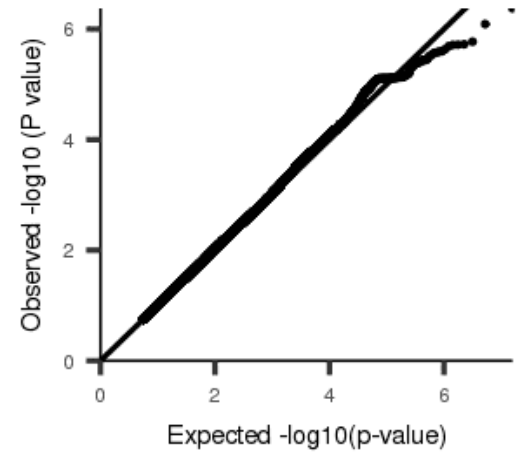

[back to list of plots](#)

Figure 2817: FreeSurfer a2009s lh S subparietal area

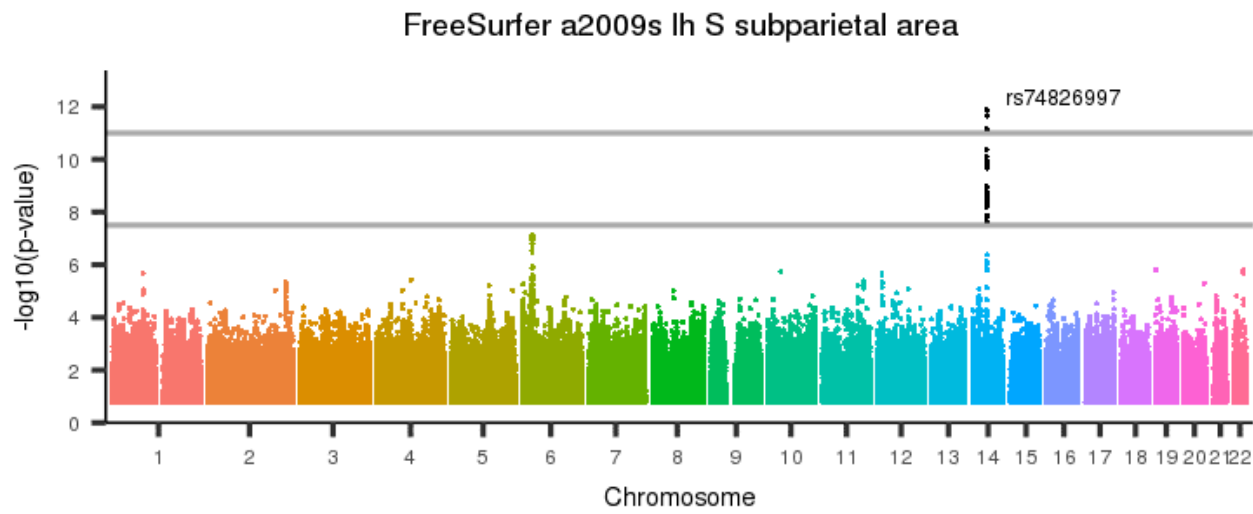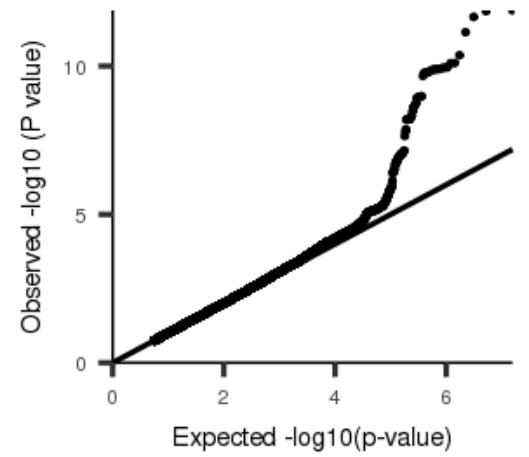

[back to list of plots](#)

Figure 2818: FreeSurfer a2009s lh S temporal inf area

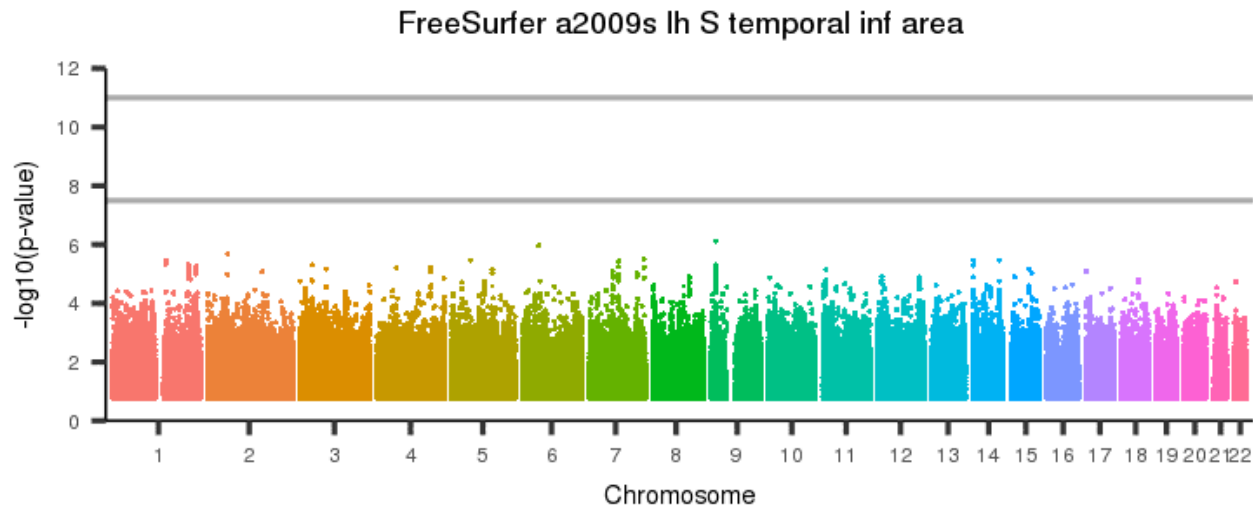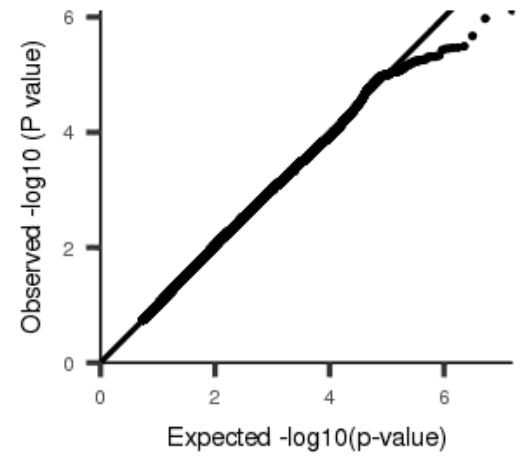

[back to list of plots](#)

Figure 2819: FreeSurfer a2009s lh S temporal sup area

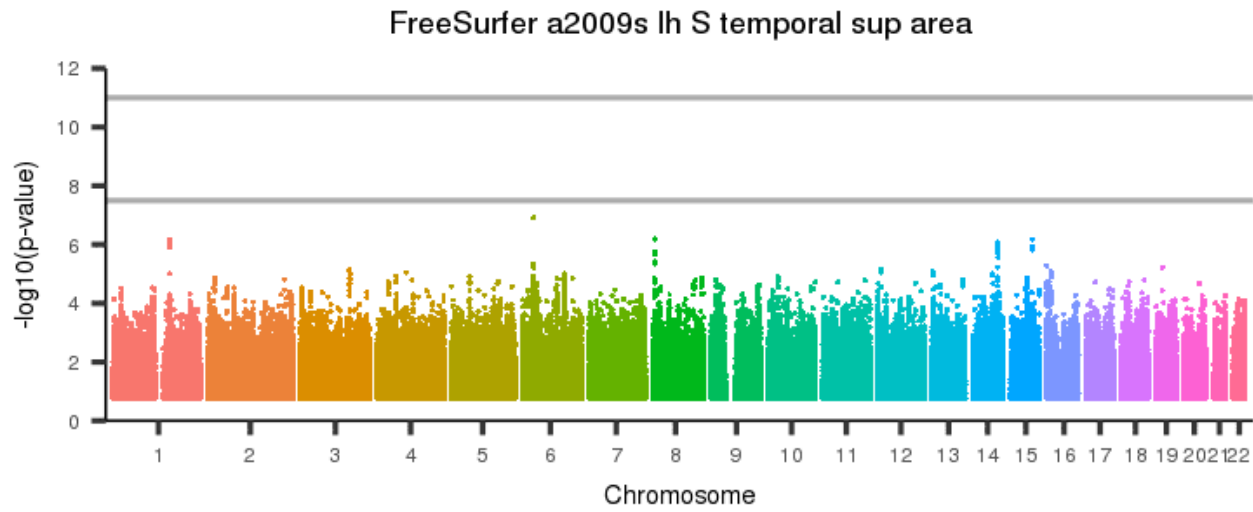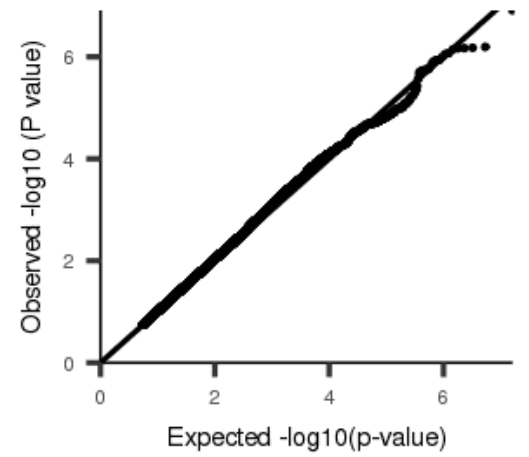

[back to list of plots](#)

Figure 2820: FreeSurfer a2009s lh S temporal transverse area

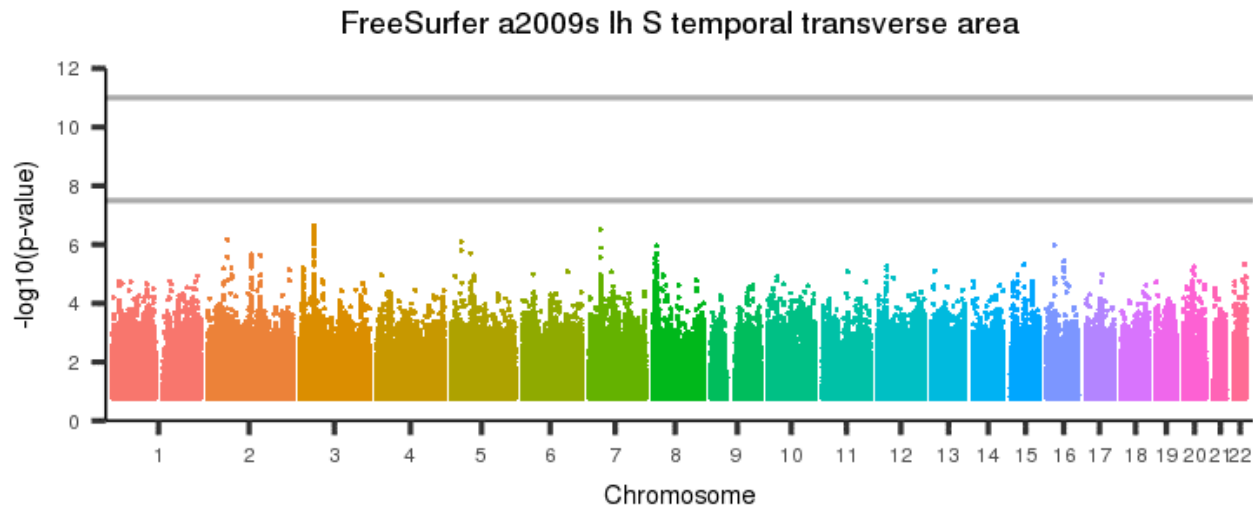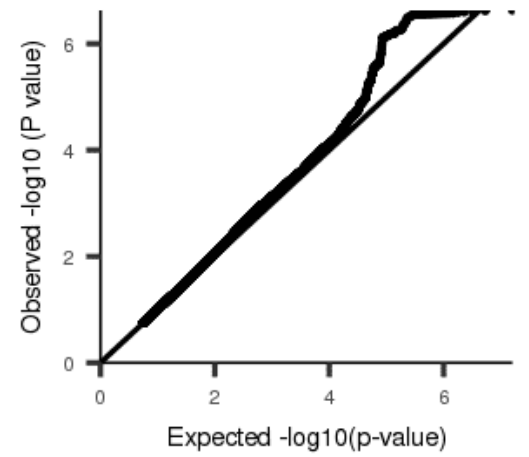

[back to list of plots](#)

Figure 2821: FreeSurfer DKTatlas rh caudalanteriorcingulate area

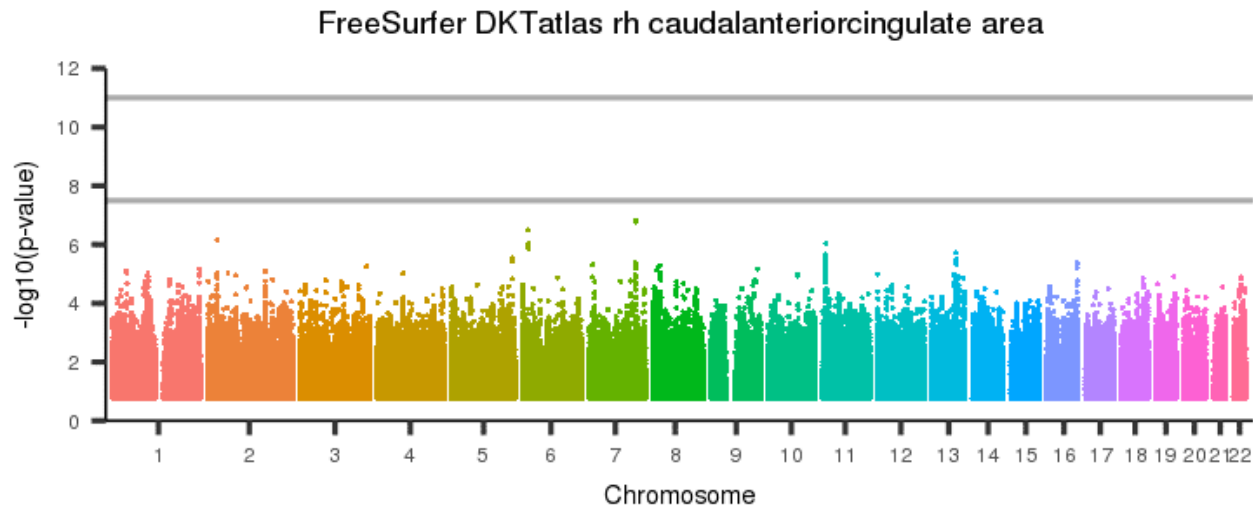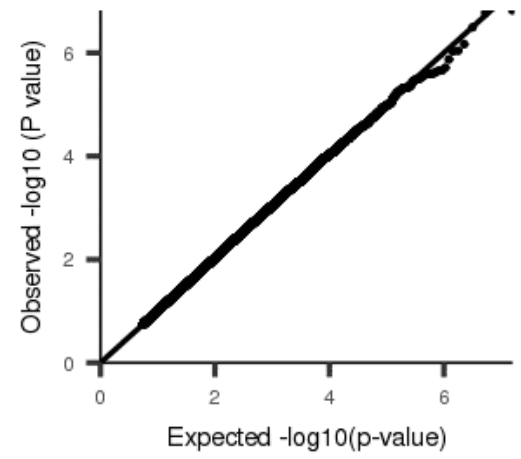

[back to list of plots](#)



Figure 2822: FreeSurfer DKTatlas rh caudalmiddlefrontal area

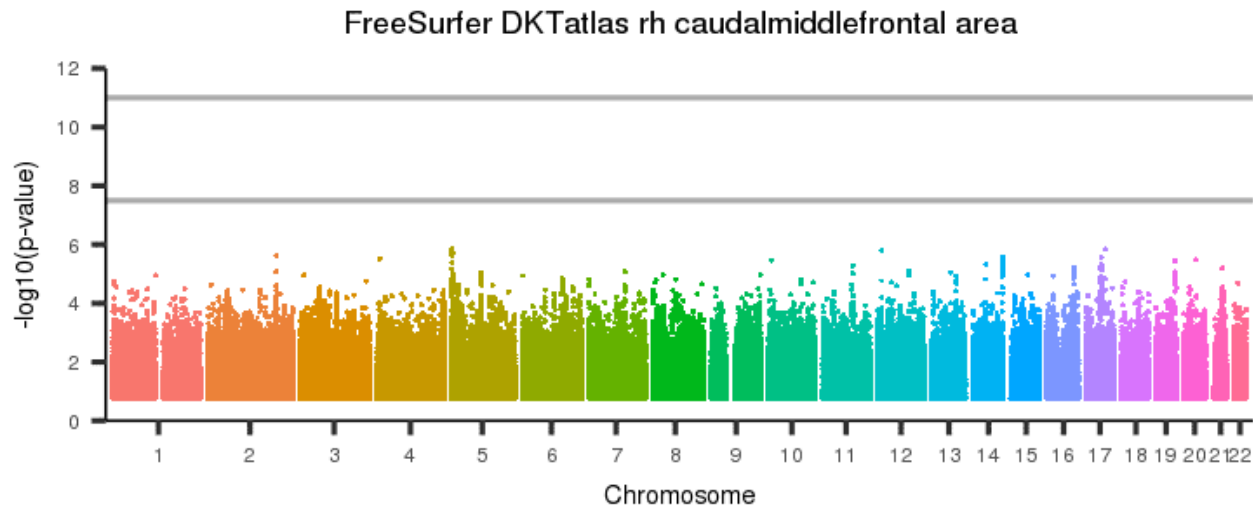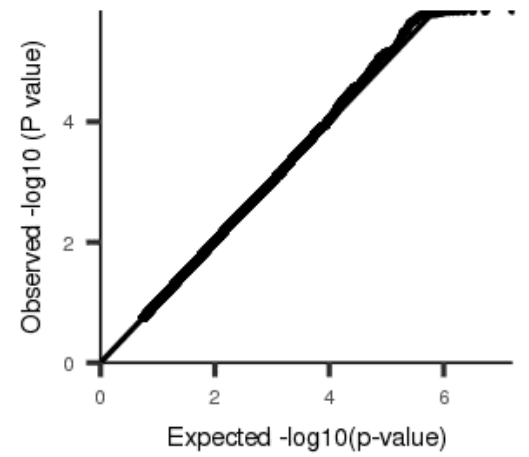

[back to list of plots](#)

Figure 2823: FreeSurfer DKAtlas rh cuneus area

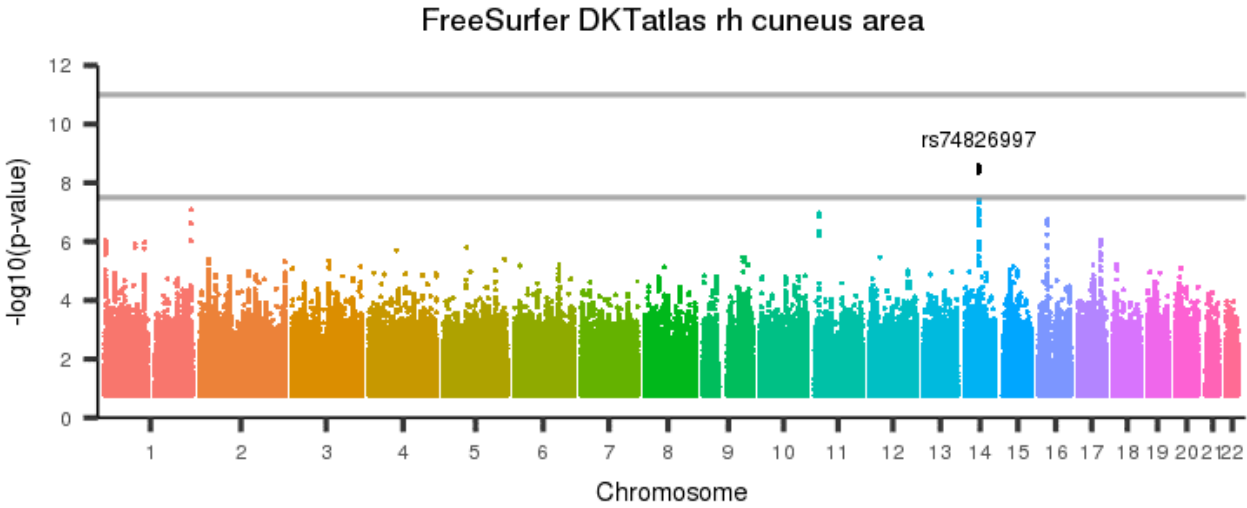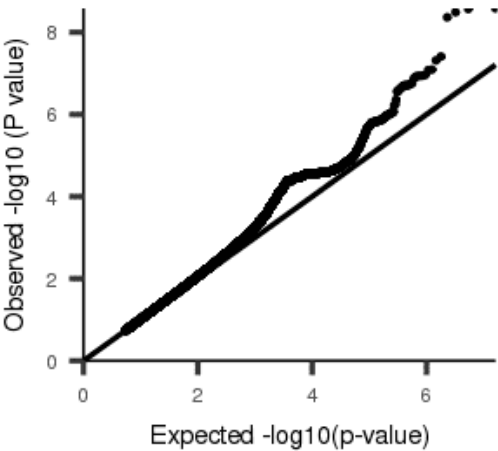

[back to list of plots](#)

Figure 2824: FreeSurfer DKTAtlas rh entorhinal area

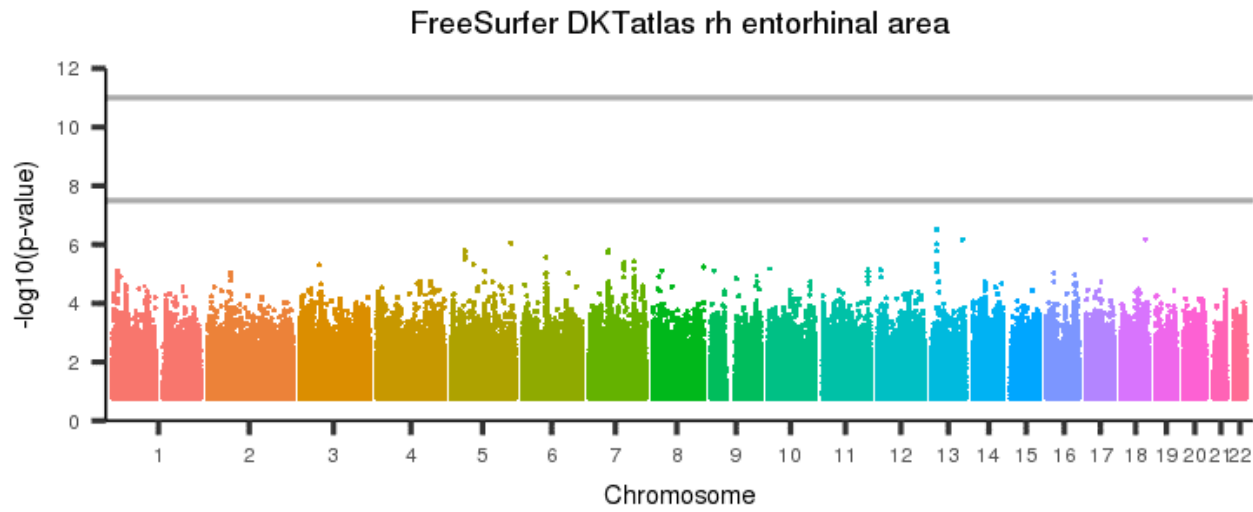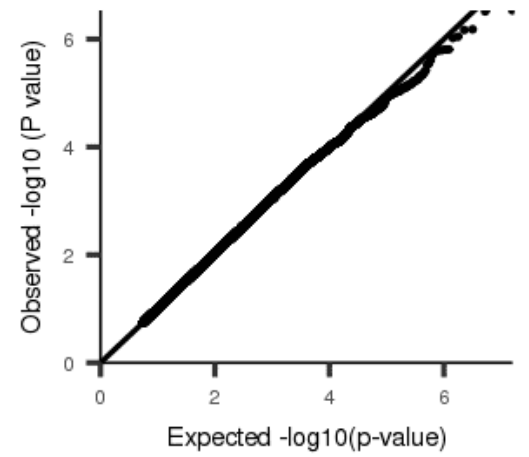

[back to list of plots](#)

Figure 2825: FreeSurfer DKAtlas rh fusiform area

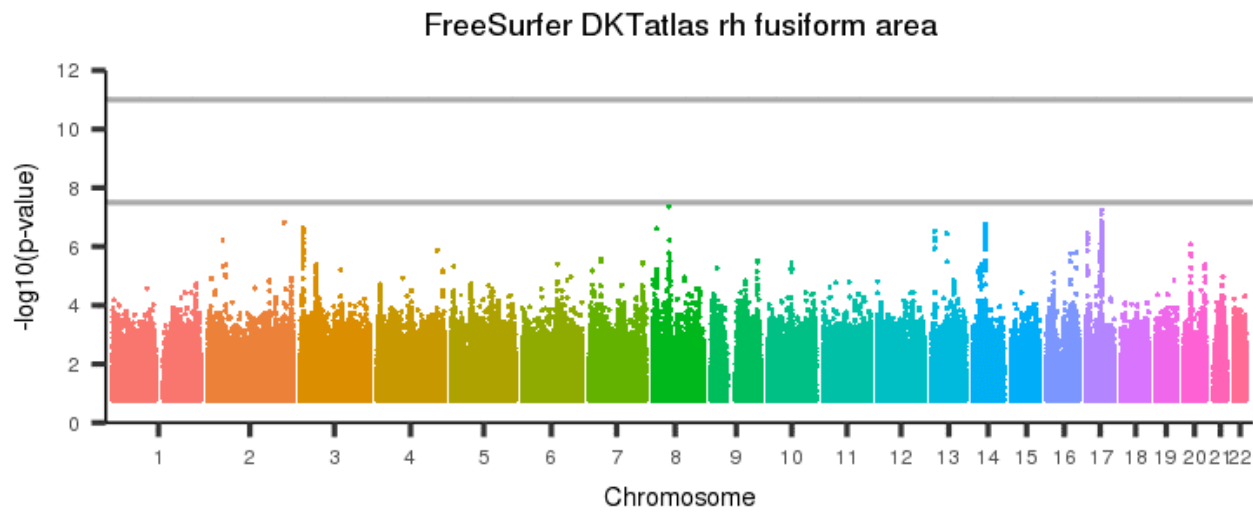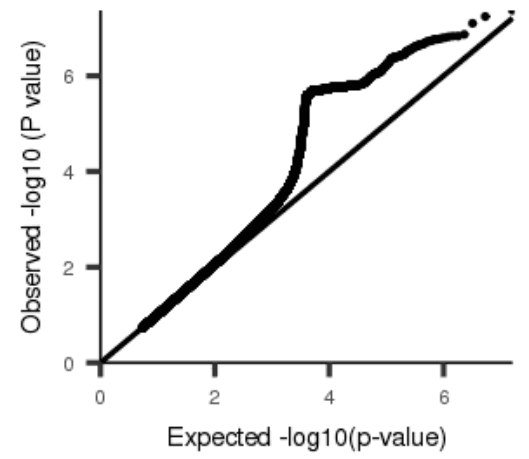

[back to list of plots](#)

Figure 2826: FreeSurfer DKAtlas rh inferiorparietal area

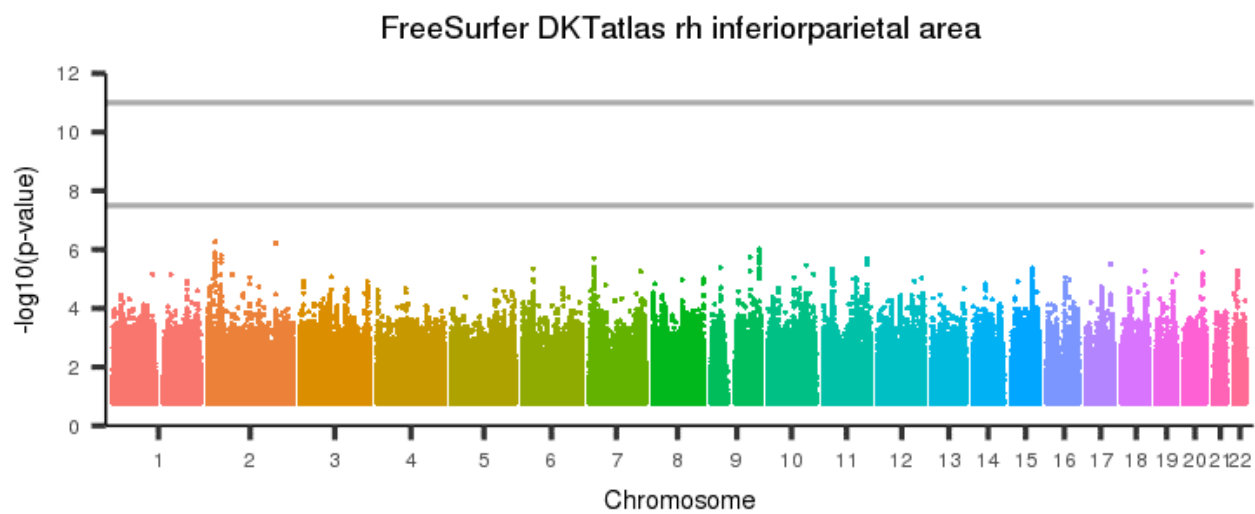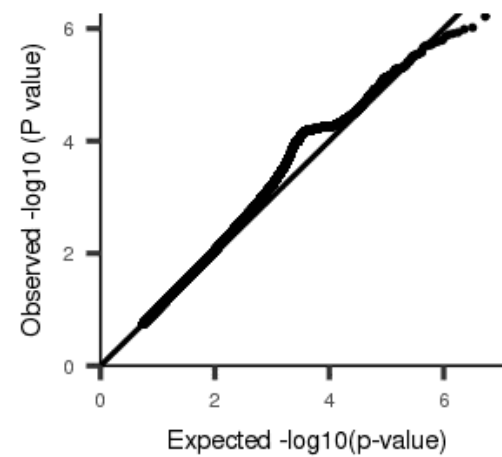

[back to list of plots](#)

Figure 2827: FreeSurfer DKTatlas rh inferiortemporal area

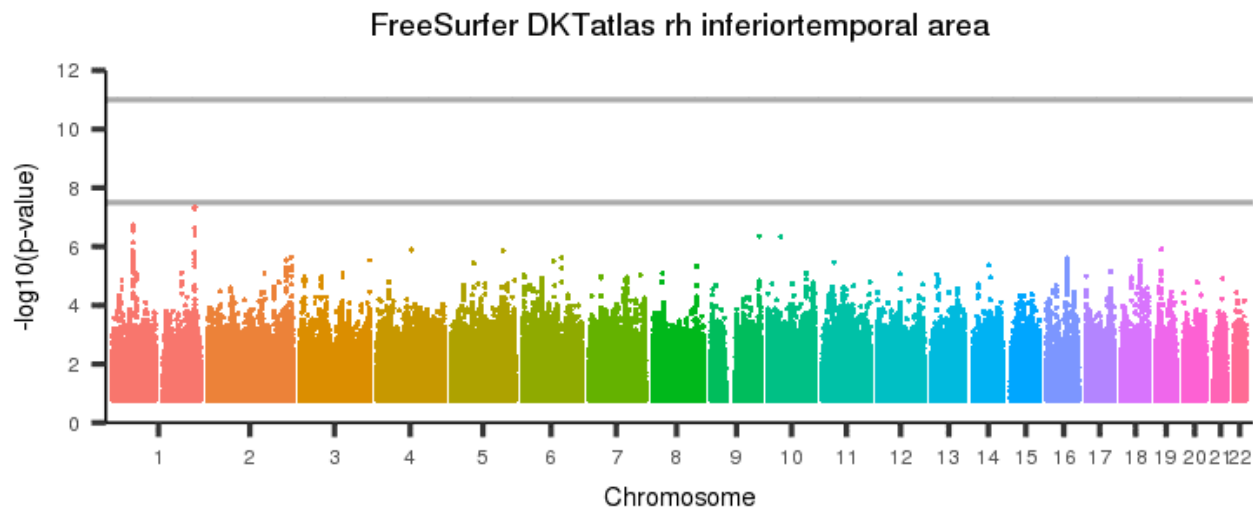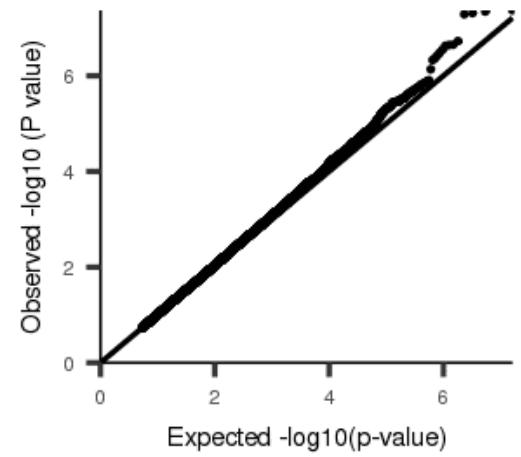

[back to list of plots](#)

Figure 2828: FreeSurfer DKAtlas rh isthmuscingulate area

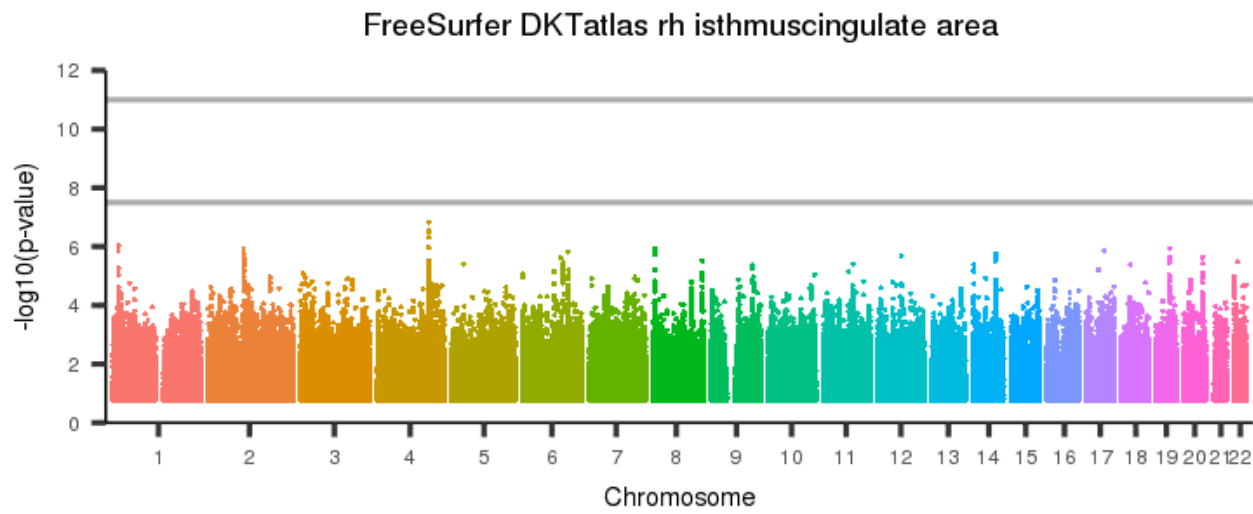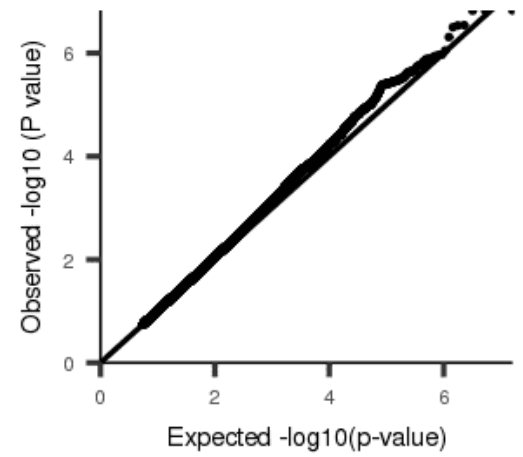

[back to list of plots](#)

Figure 2829: FreeSurfer DKAtlas rh lateraloccipital area

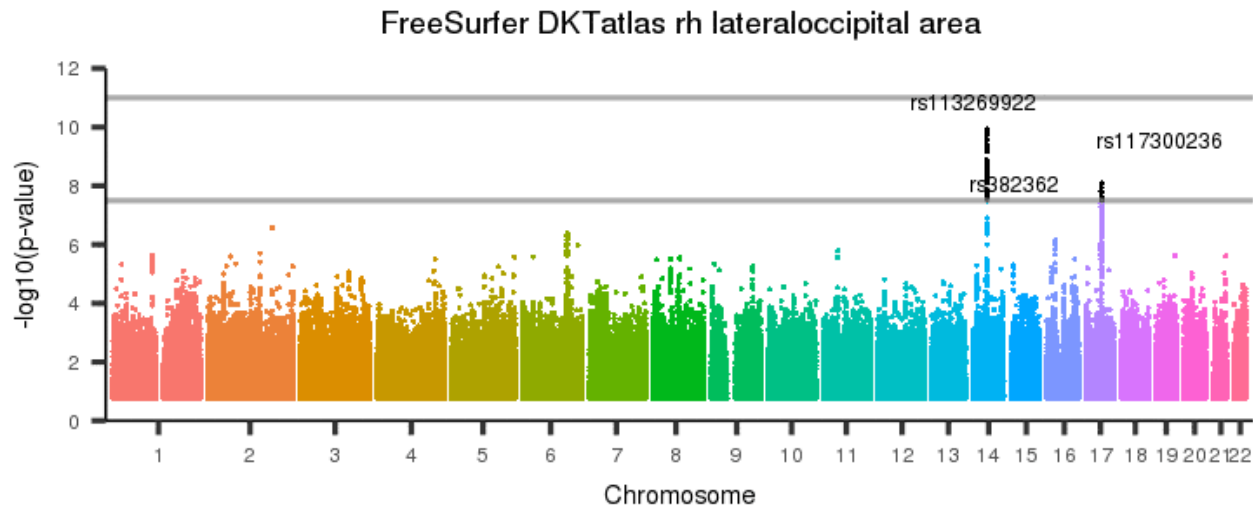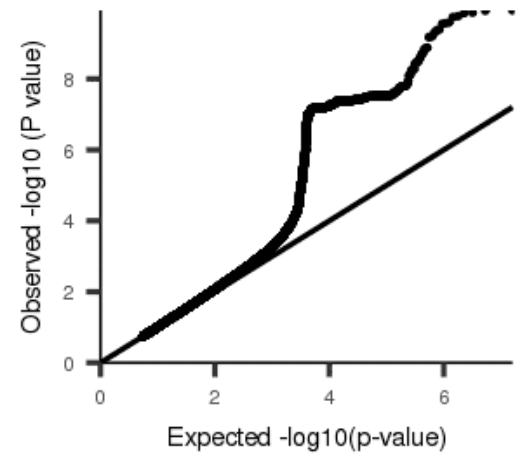

[back to list of plots](#)



Figure 2830: FreeSurfer DKTAtlas rh lateralorbitofrontal area

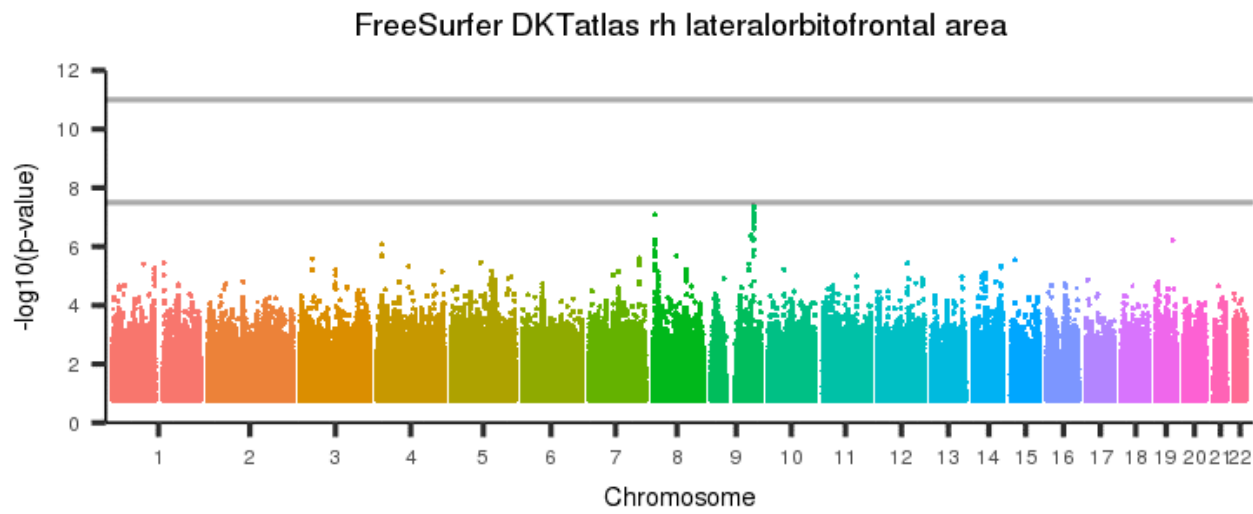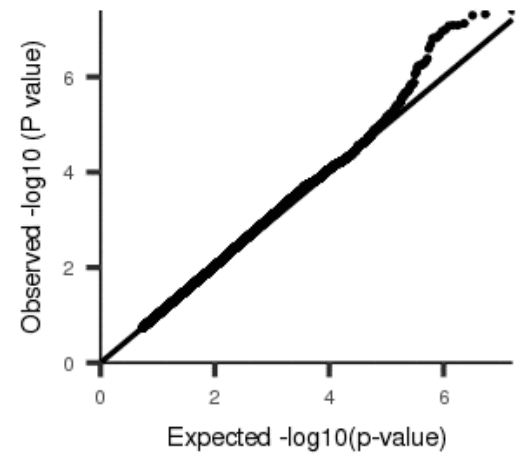

[back to list of plots](#)

Figure 2831: FreeSurfer DKAtlas rh lingual area

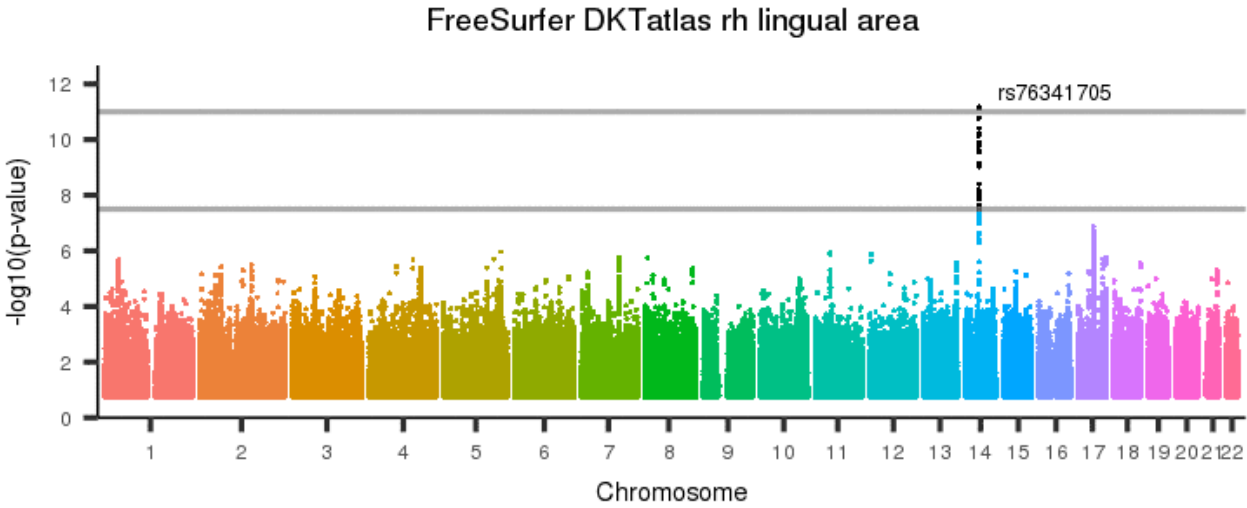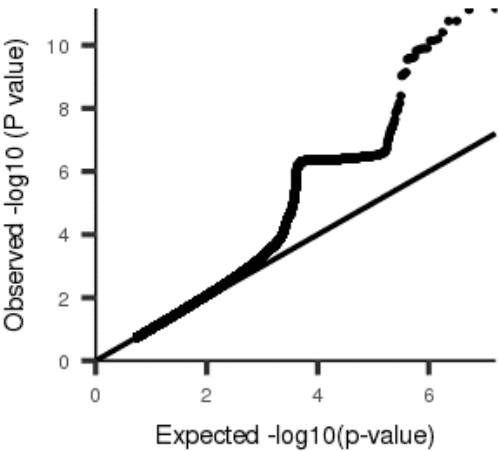

[back to list of plots](#)

Figure 2832: FreeSurfer DKTatlas rh medialorbitofrontal area

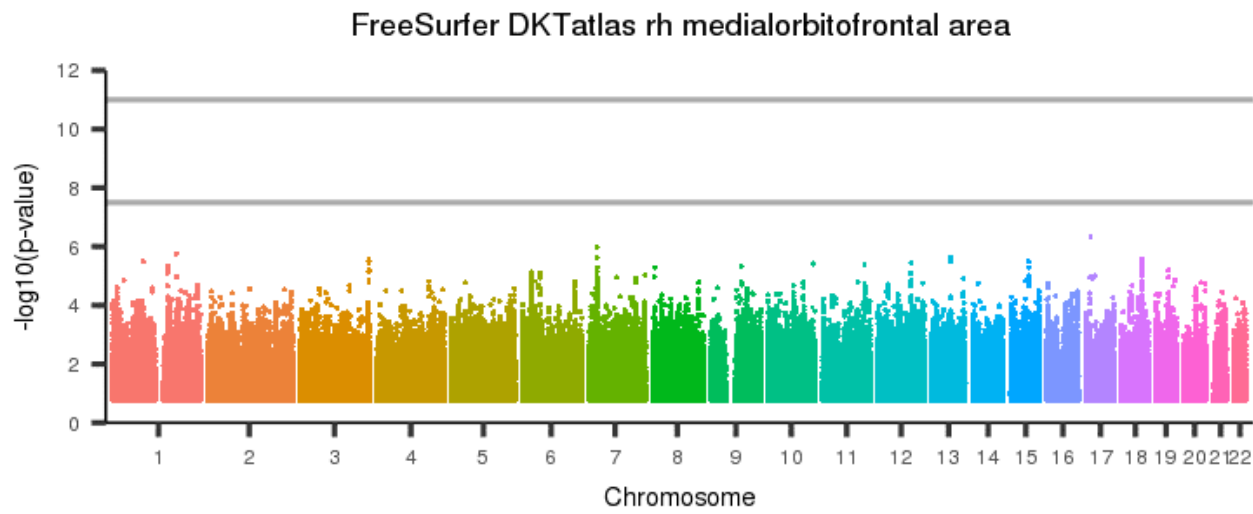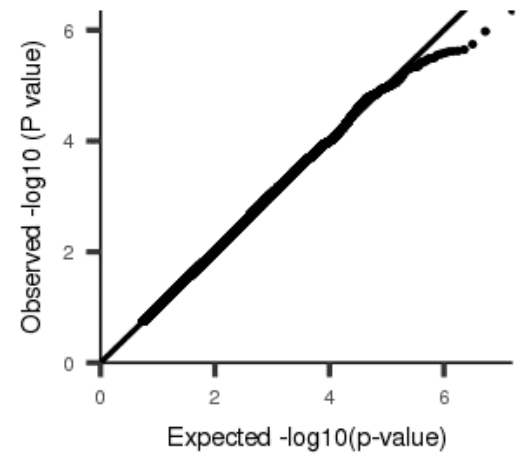

[back to list of plots](#)

Figure 2833: FreeSurfer DKTatlas rh middletemporal area

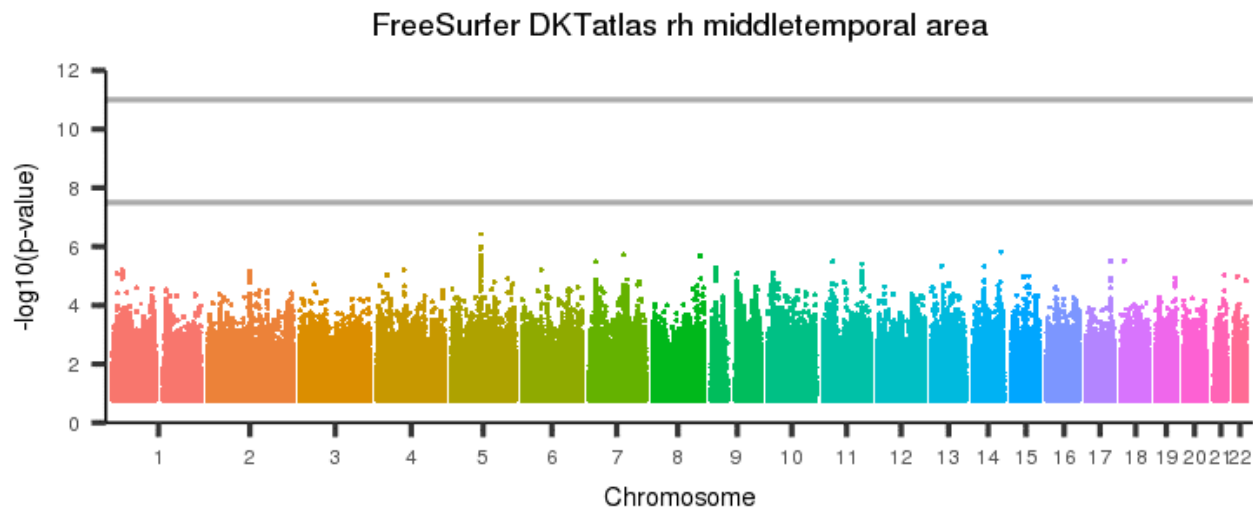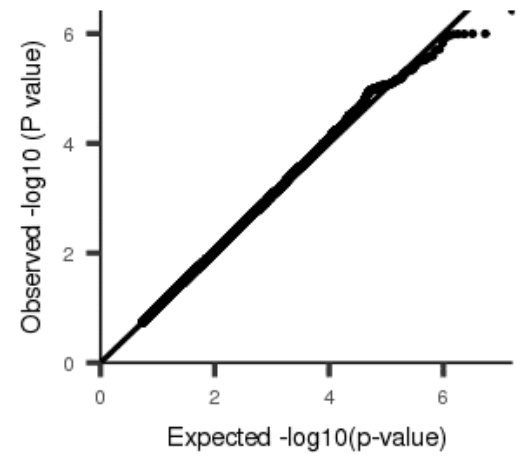

[back to list of plots](#)

Figure 2834: FreeSurfer DKAtlas rh parahippocampal area

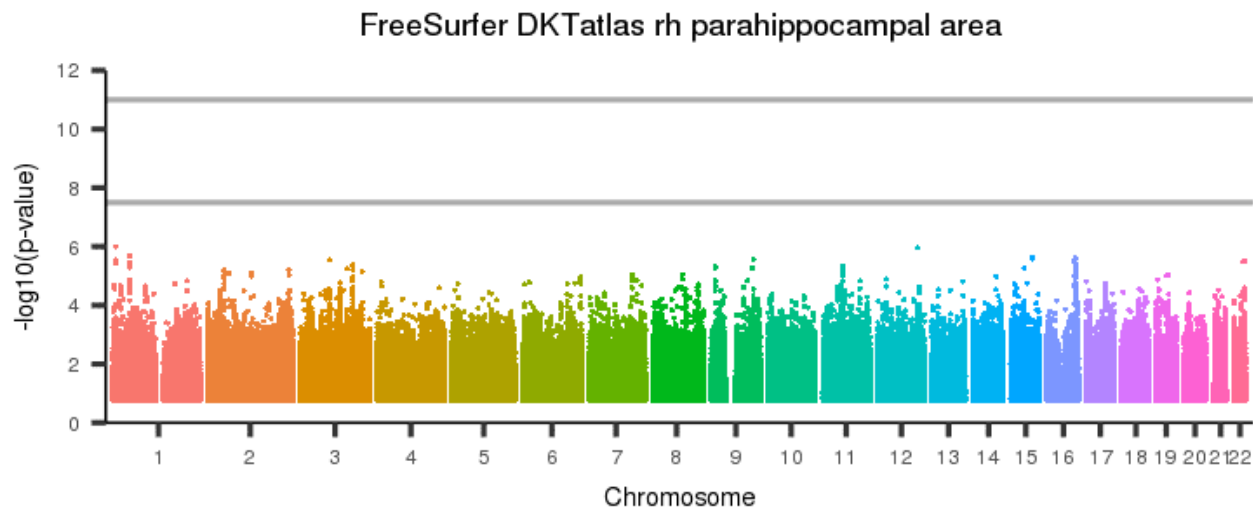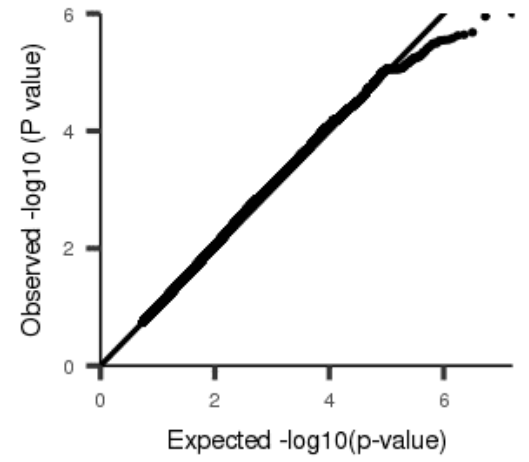

[back to list of plots](#)

Figure 2835: FreeSurfer DKTAtlas rh paracentral area

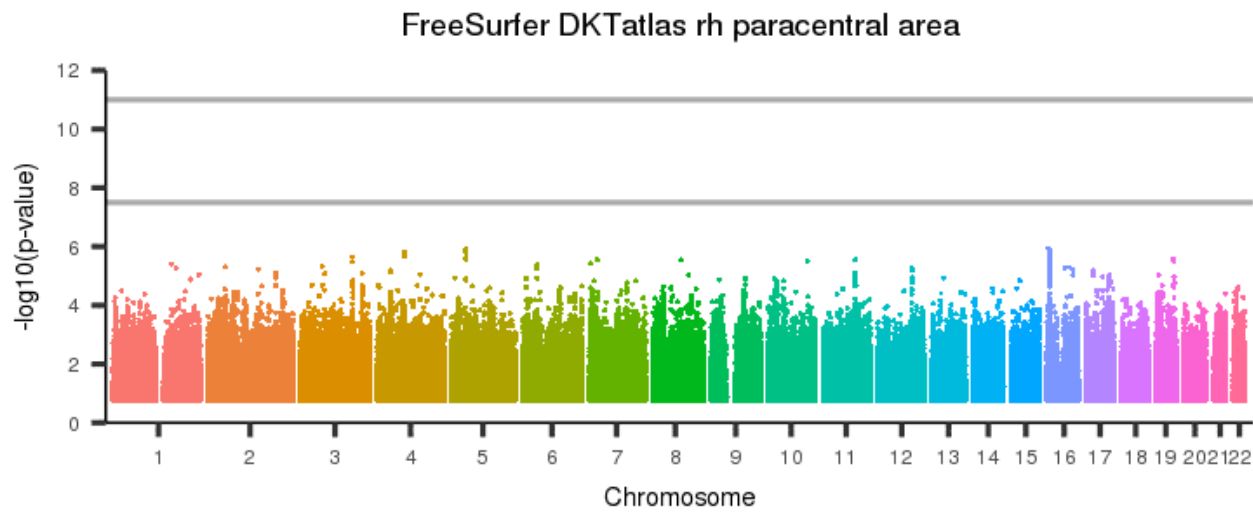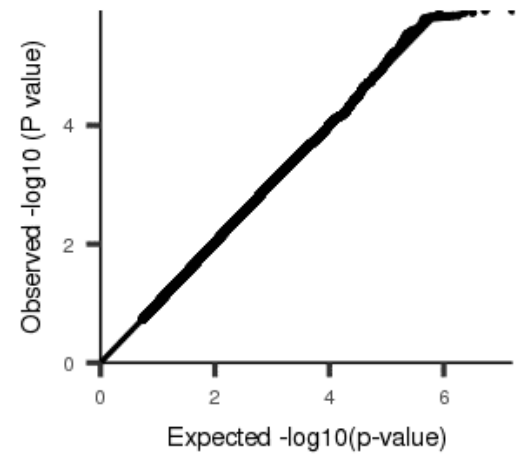

[back to list of plots](#)

Figure 2836: FreeSurfer DKTAtlas rh parsopercularis area

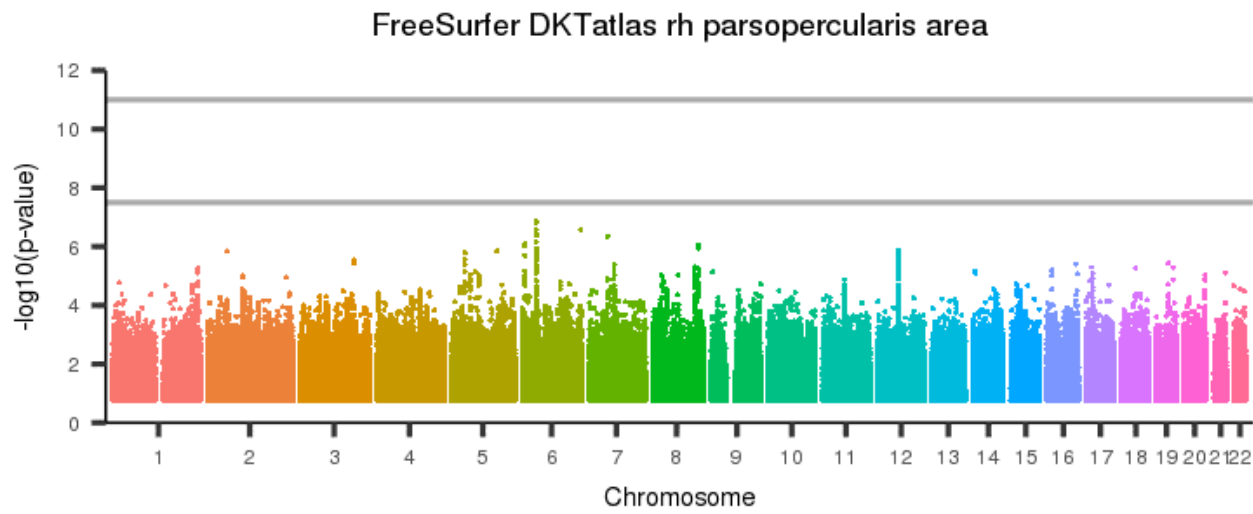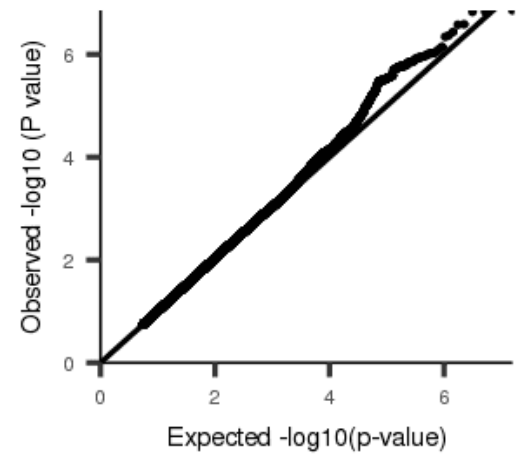

[back to list of plots](#)

Figure 2837: FreeSurfer DKTAtlas rh parsorbitalis area

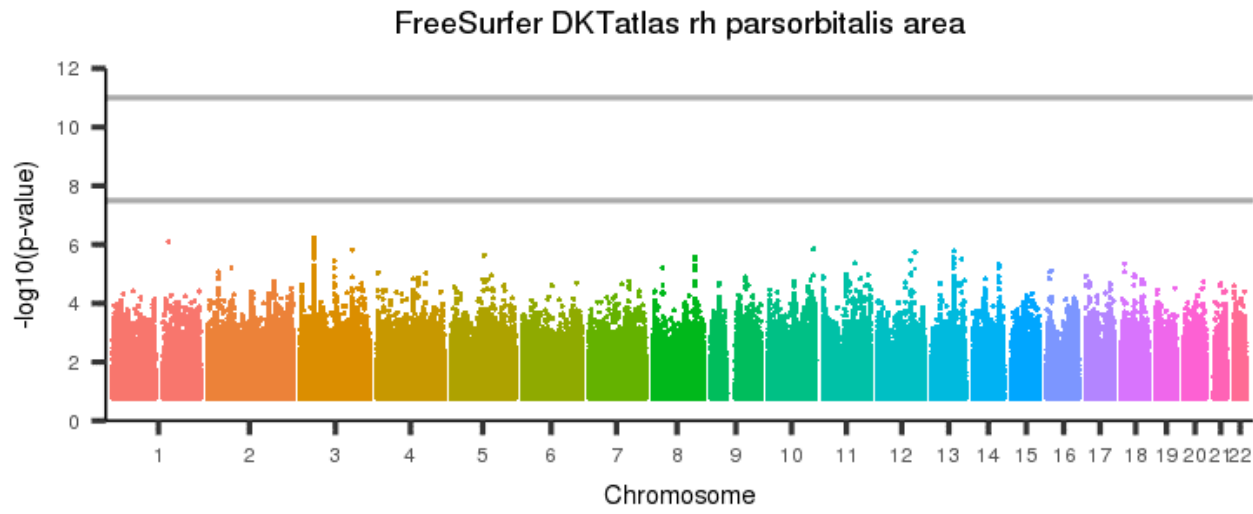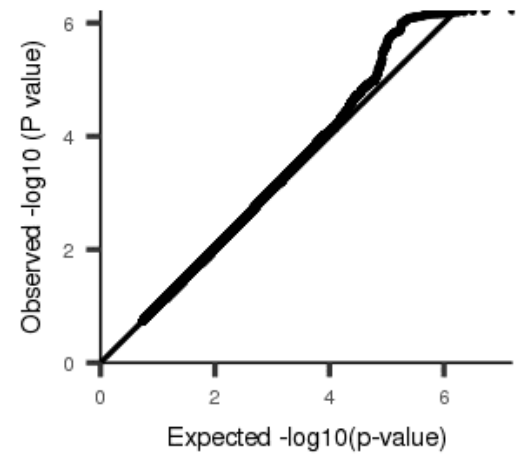

[back to list of plots](#)



Figure 2838: FreeSurfer DKTAtlas rh parstriangularis area

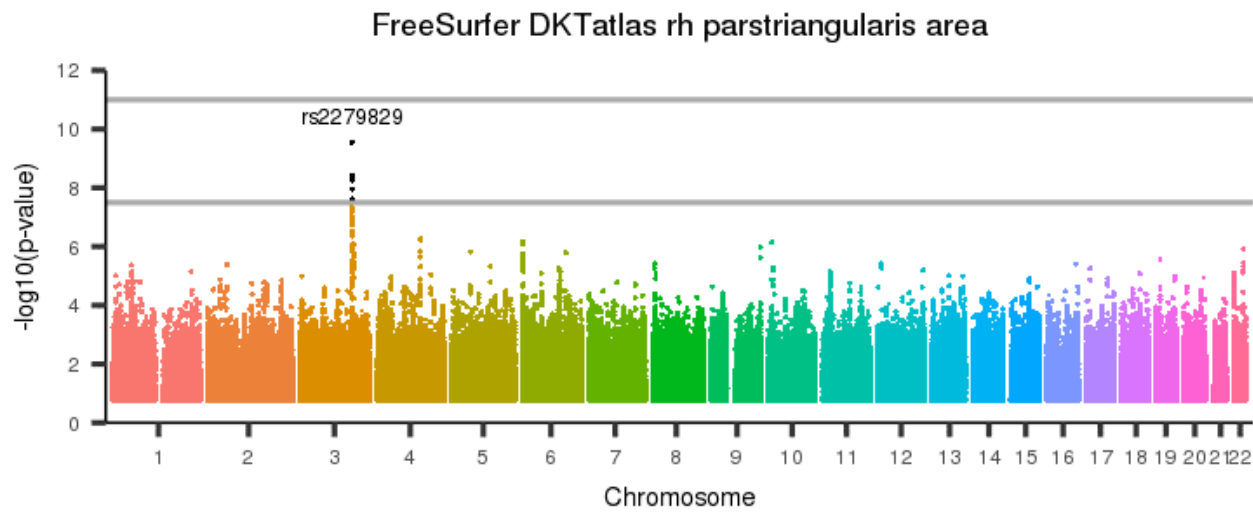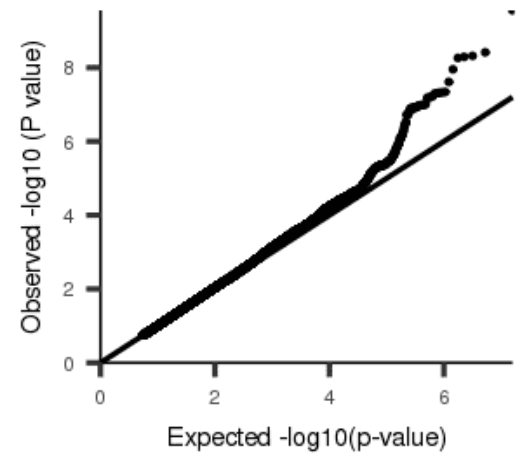

[back to list of plots](#)

Figure 2839: FreeSurfer DKTAtlas rh pericalcarine area

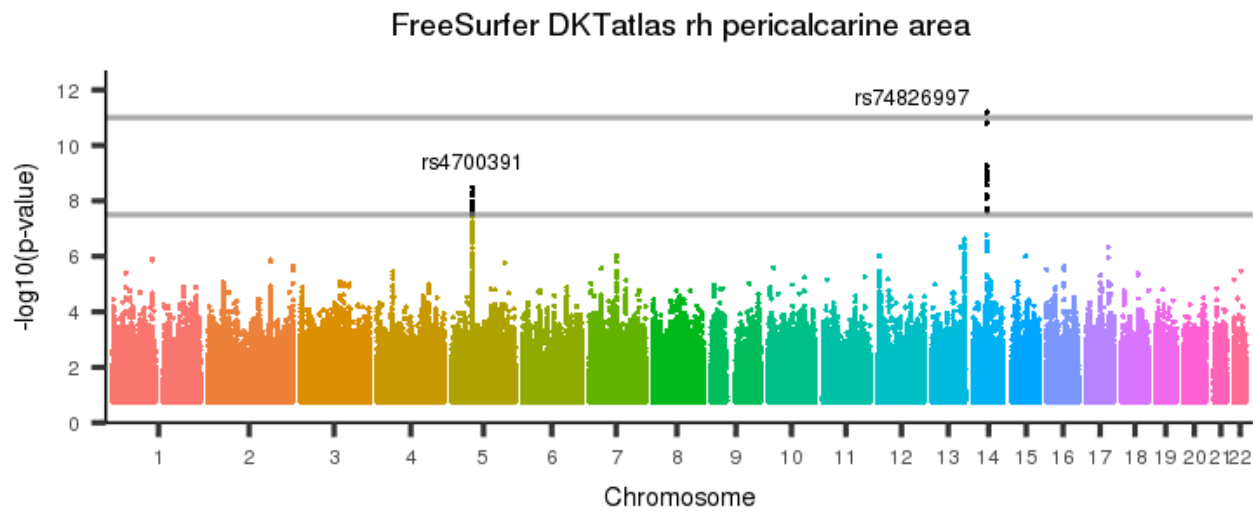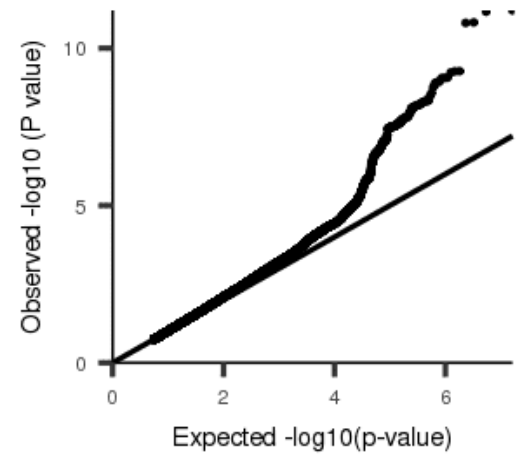

[back to list of plots](#)

Figure 2840: FreeSurfer DKTatlas rh postcentral area

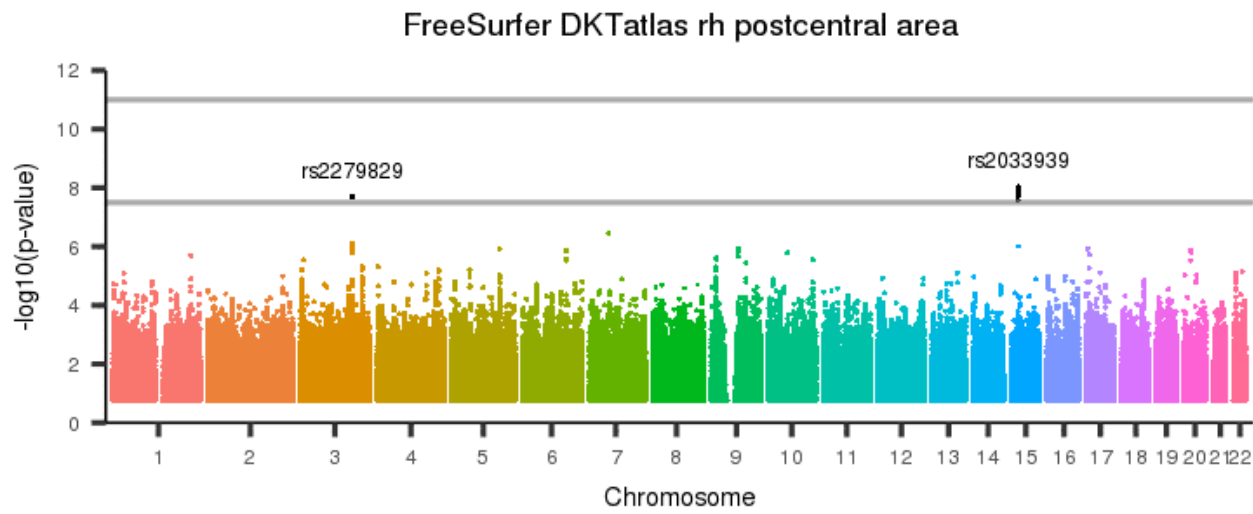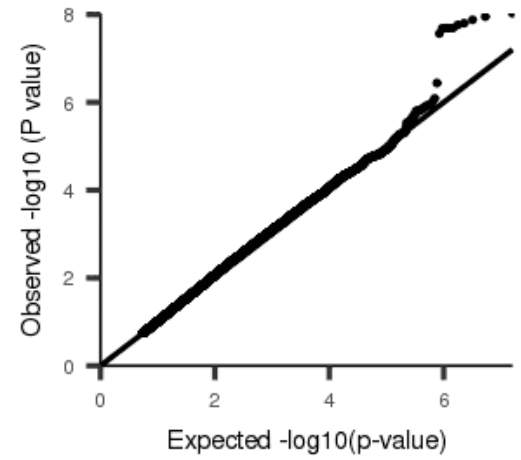

[back to list of plots](#)

Figure 2841: FreeSurfer DKAtlas rh posteriorcingulate area

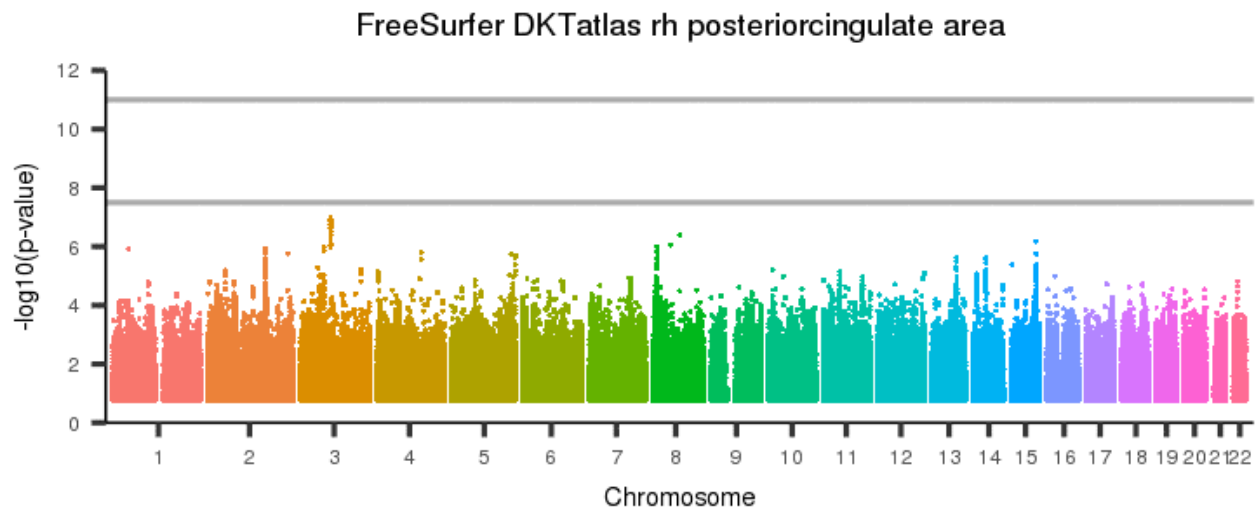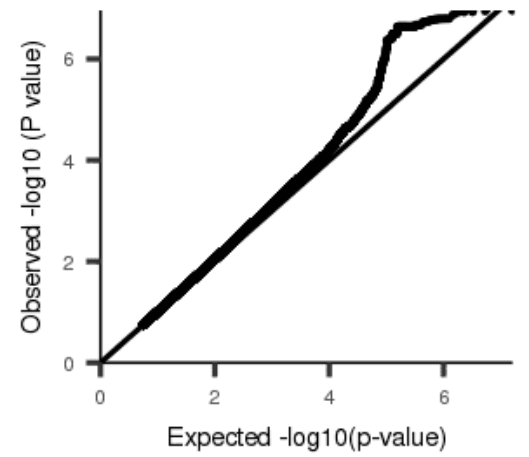

[back to list of plots](#)

Figure 2842: FreeSurfer DKTatlas rh precentral area

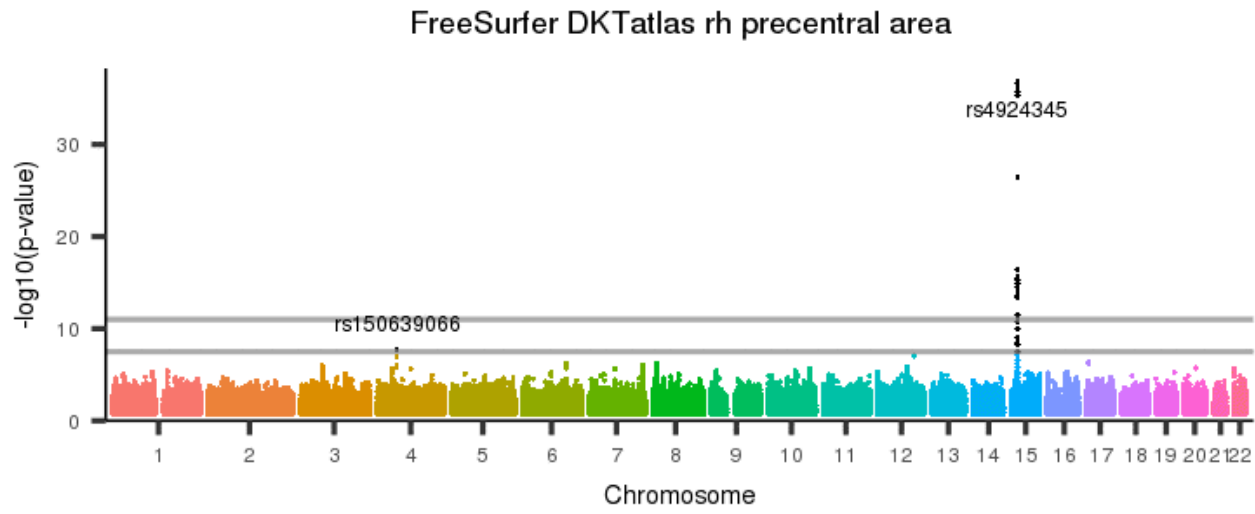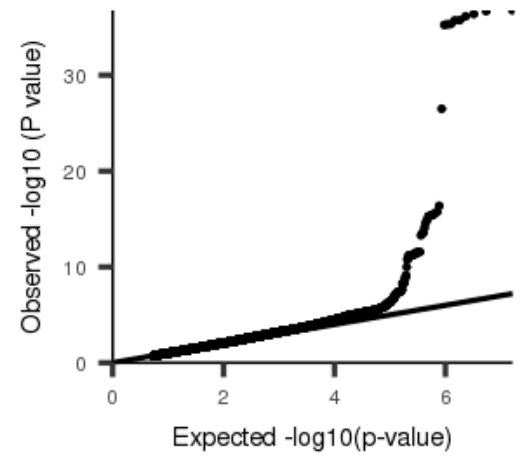

[back to list of plots](#)

Figure 2843: FreeSurfer DKTatlas rh precuneus area

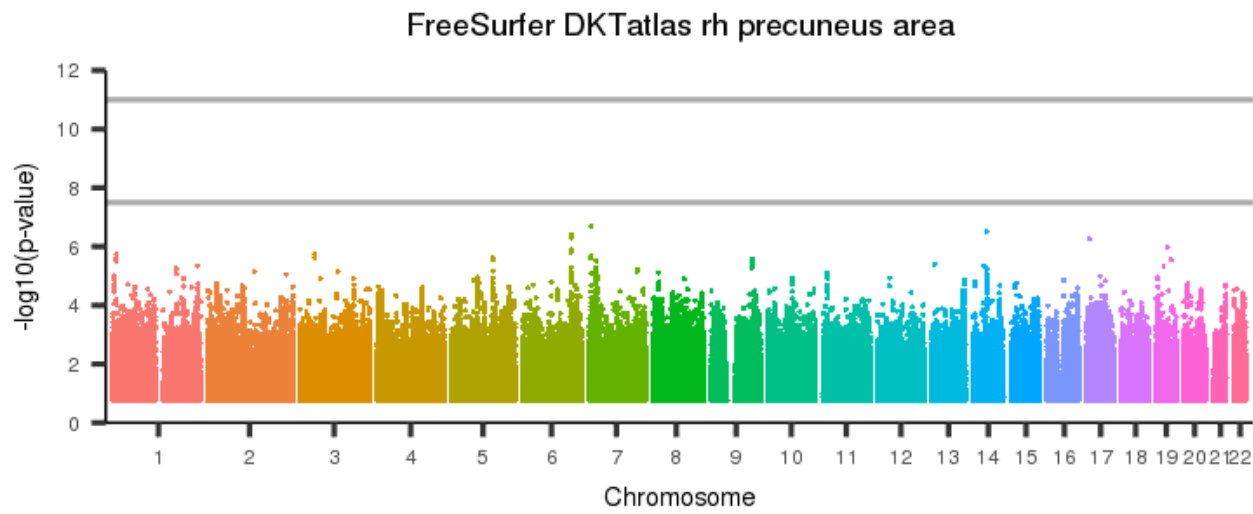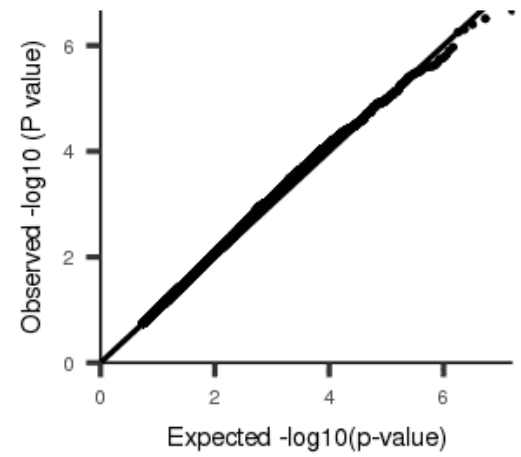

[back to list of plots](#)

Figure 2844: FreeSurfer DKTatlas rh rostralanteriorcingulate area

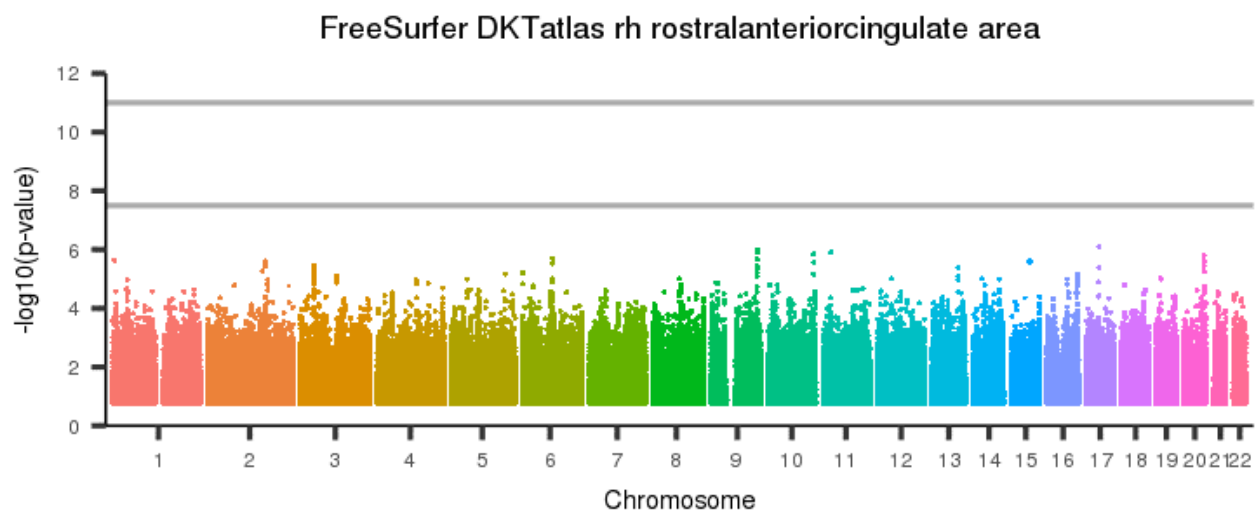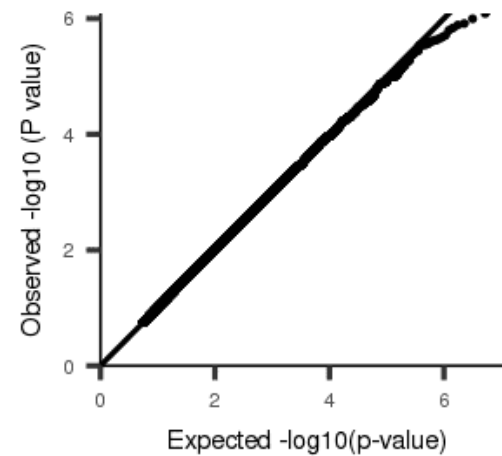

[back to list of plots](#)

Figure 2845: FreeSurfer DKAtlas rh rostralmiddlefrontal area

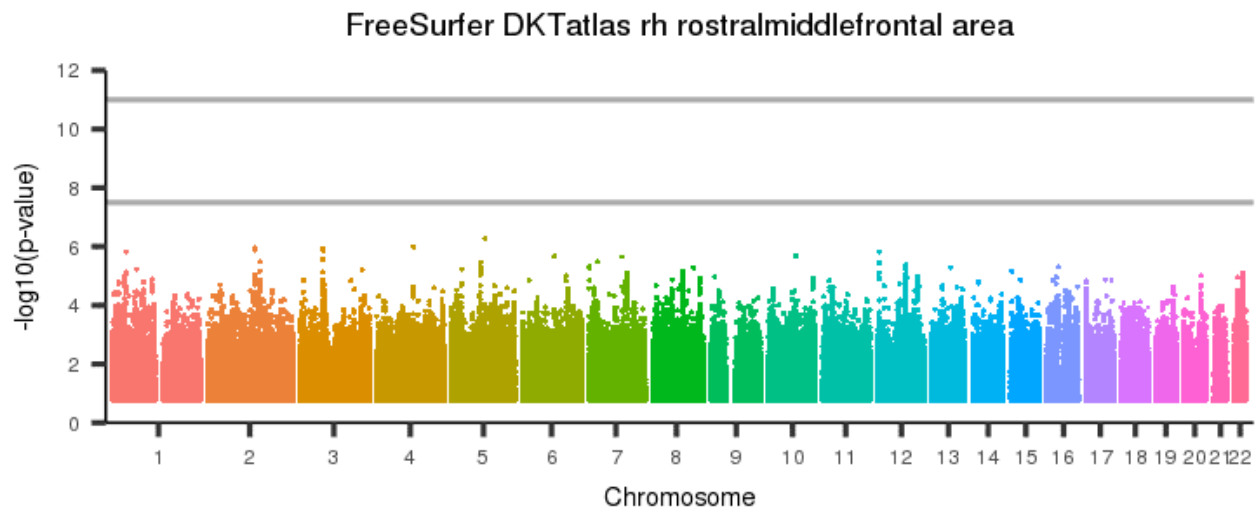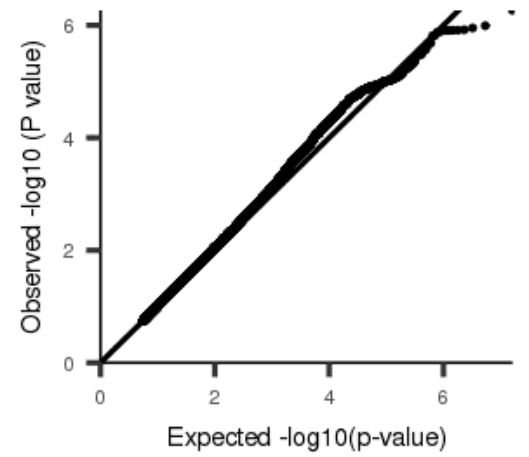

[back to list of plots](#)



Figure 2846: FreeSurfer DKTatlas rh superiorfrontal area

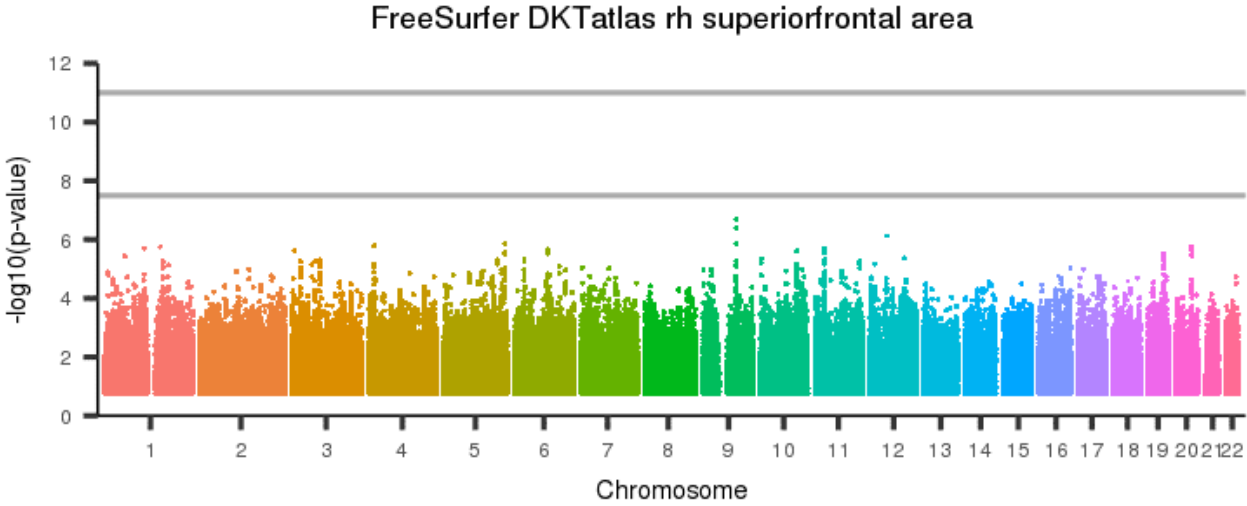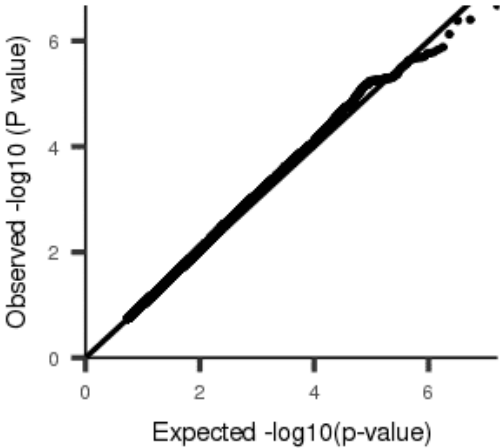

[back to list of plots](#)

Figure 2847: FreeSurfer DKTatlas rh superiorparietal area

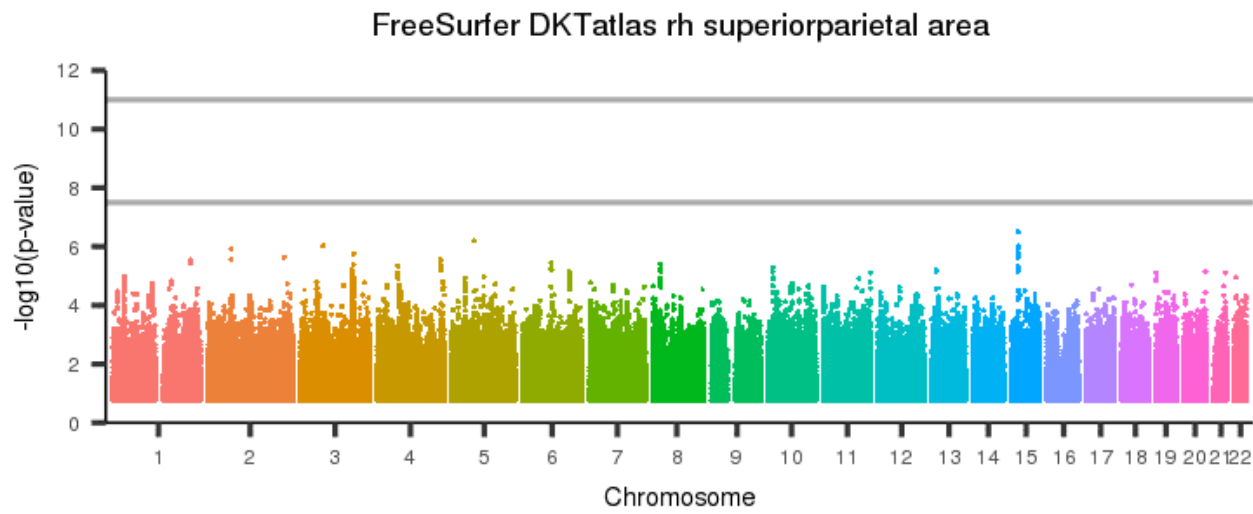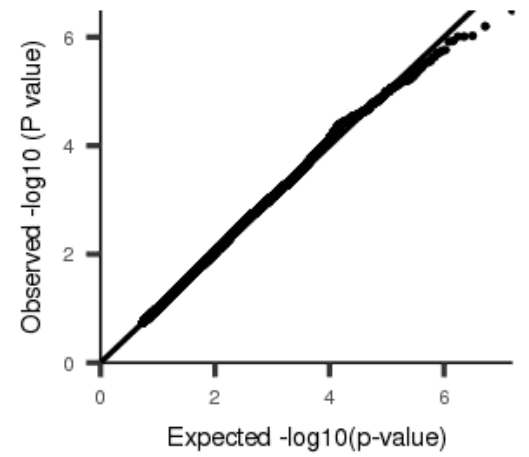

[back to list of plots](#)

Figure 2848: FreeSurfer DKAtlas rh superior temporal area

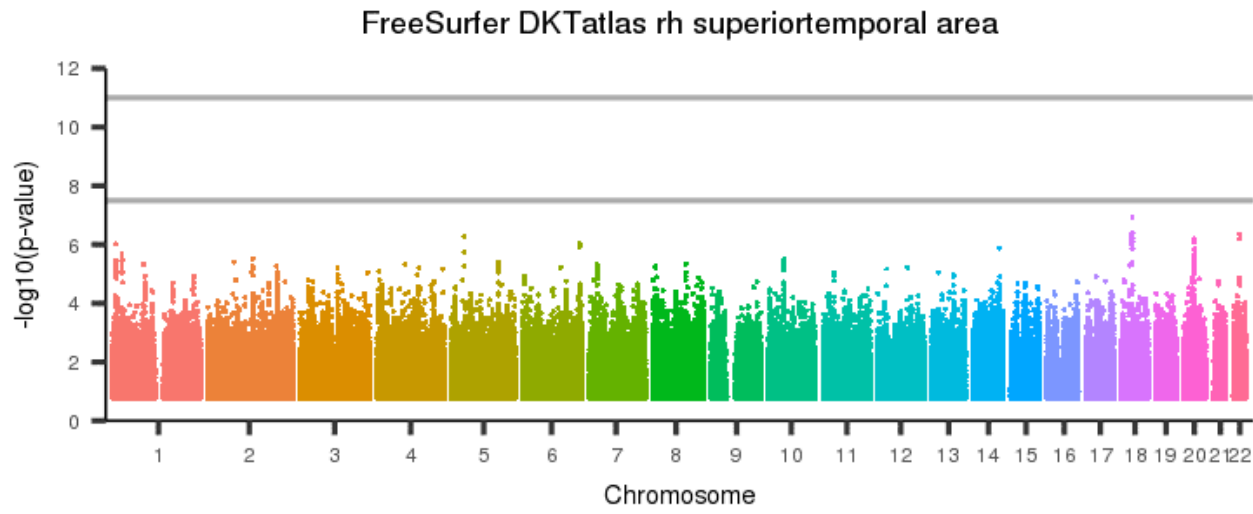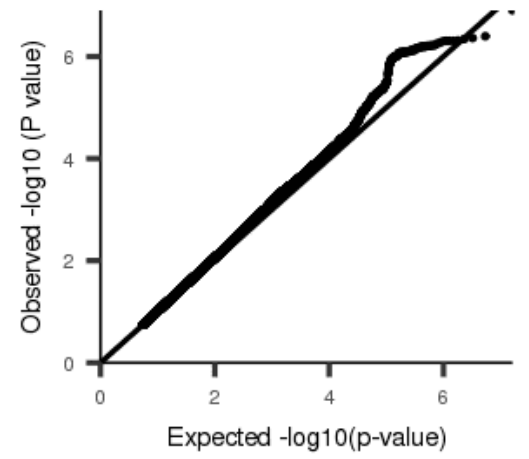

[back to list of plots](#)

Figure 2849: FreeSurfer DKTatlas rh supramarginal area

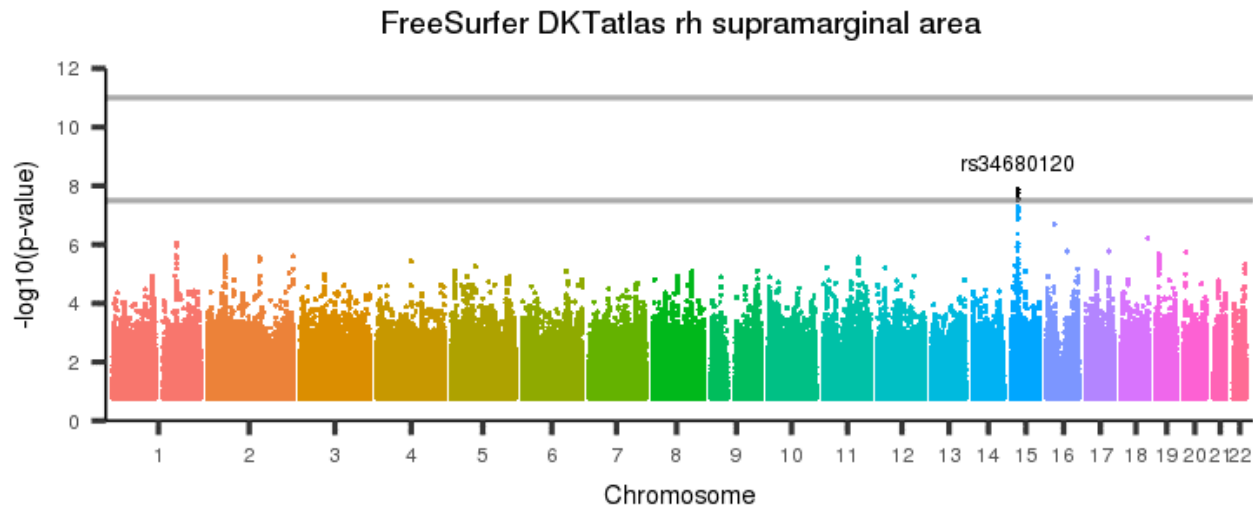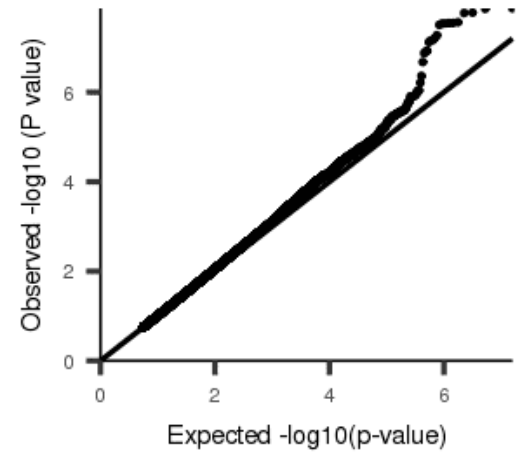

[back to list of plots](#)

Figure 2850: FreeSurfer DKTatlas rh transversetemporal area

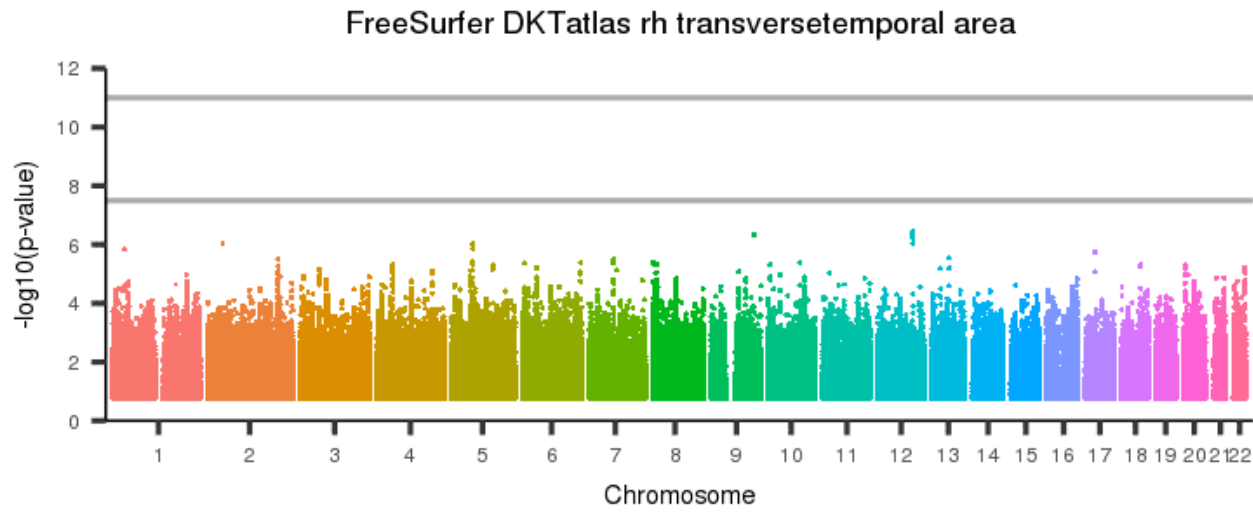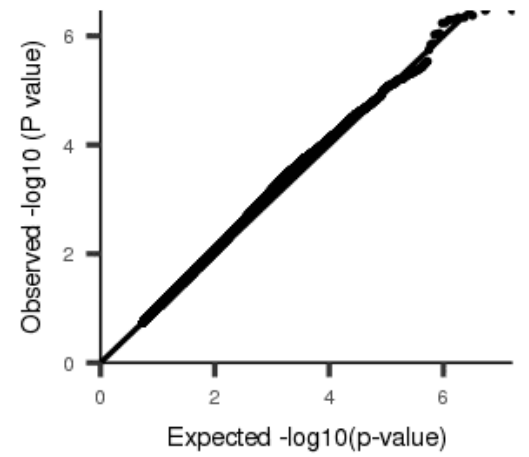

[back to list of plots](#)

Figure 2851: FreeSurfer DKTatlas rh insula area

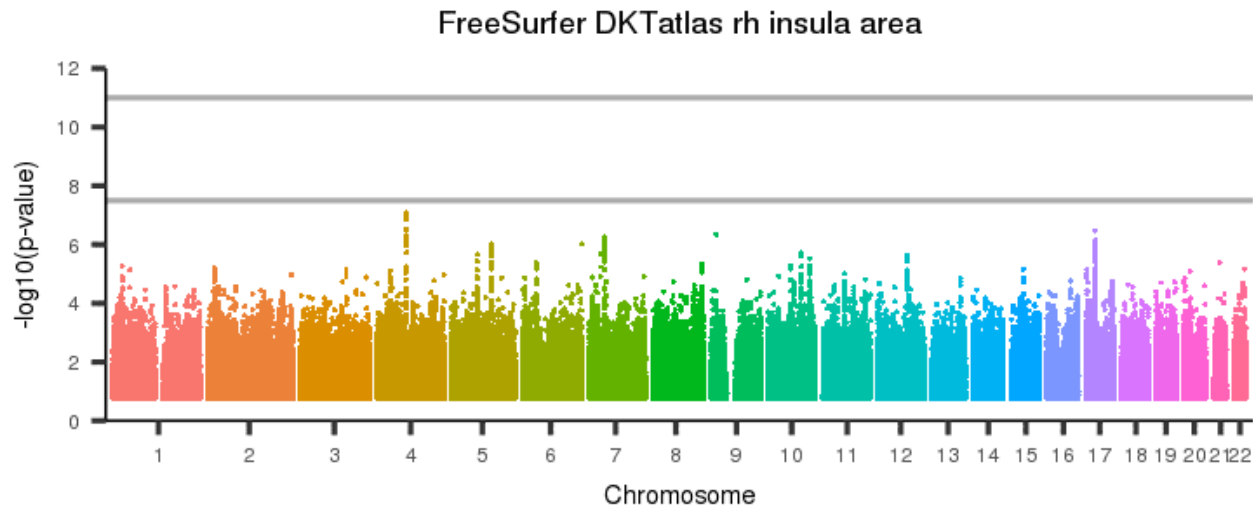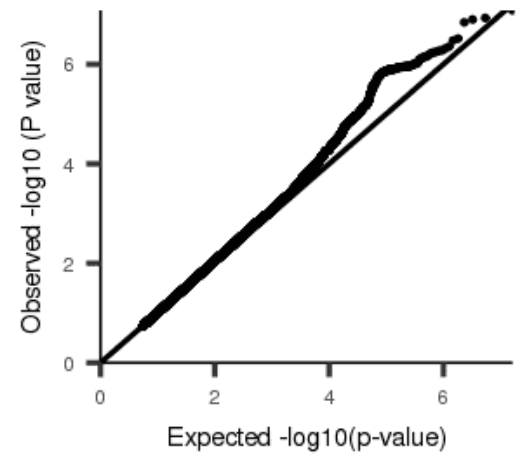

[back to list of plots](#)

Figure 2852: FreeSurfer DKTAtlas rh WhiteSurfArea area

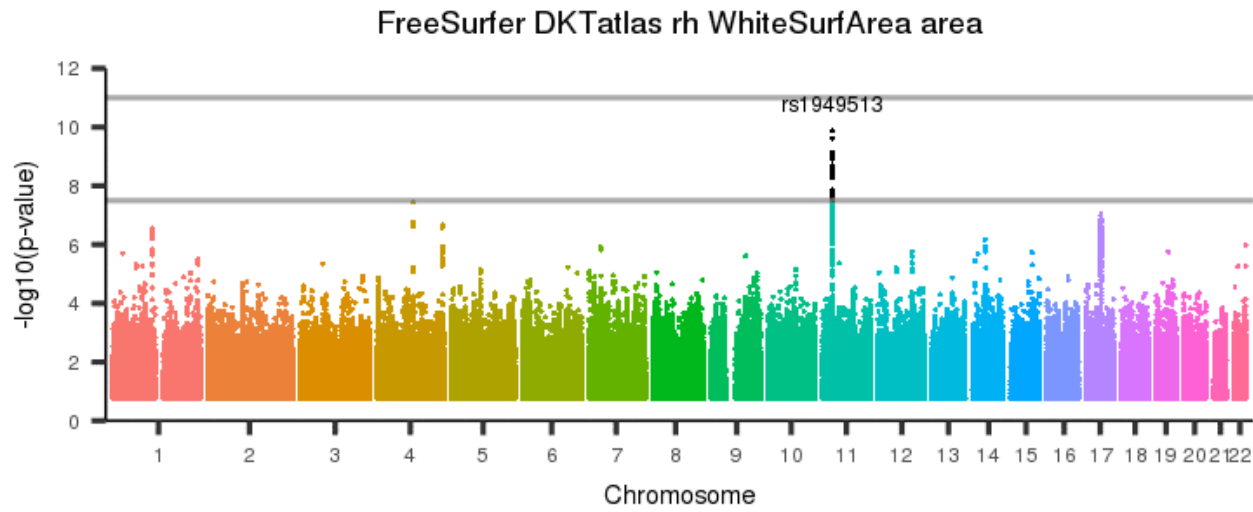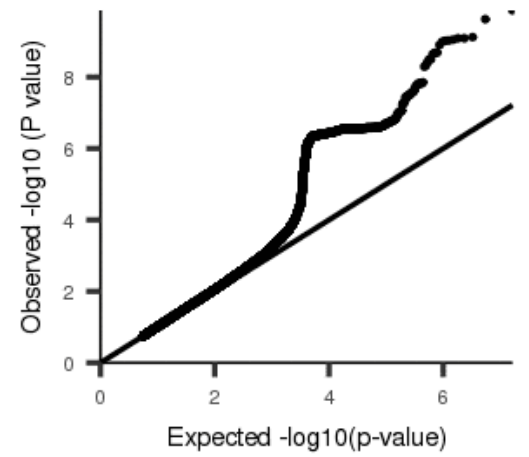

[back to list of plots](#)

Figure 2853: FreeSurfer a2009s rh G and S frontomargin area

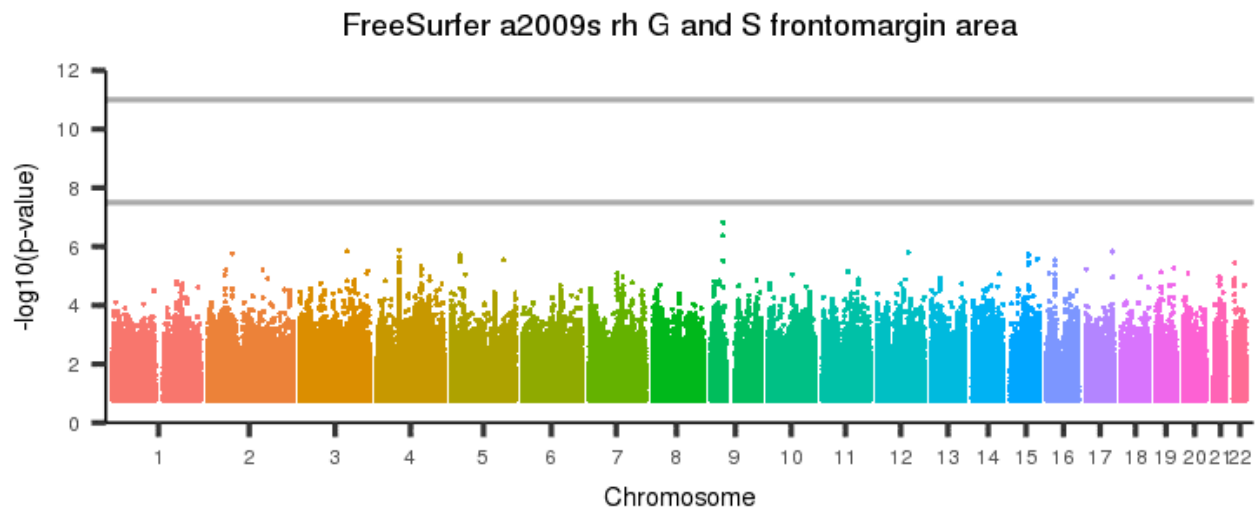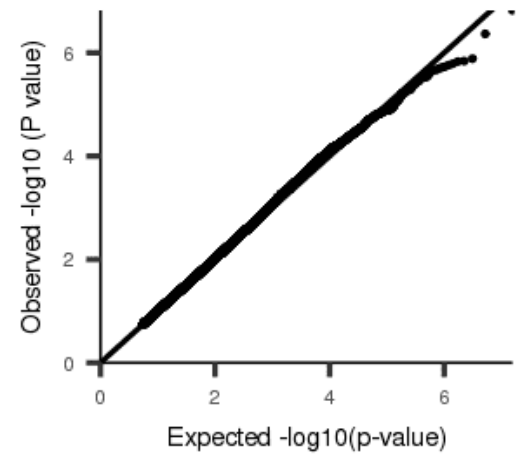

[back to list of plots](#)



Figure 2854: FreeSurfer a2009s rh G and S occipital inf area

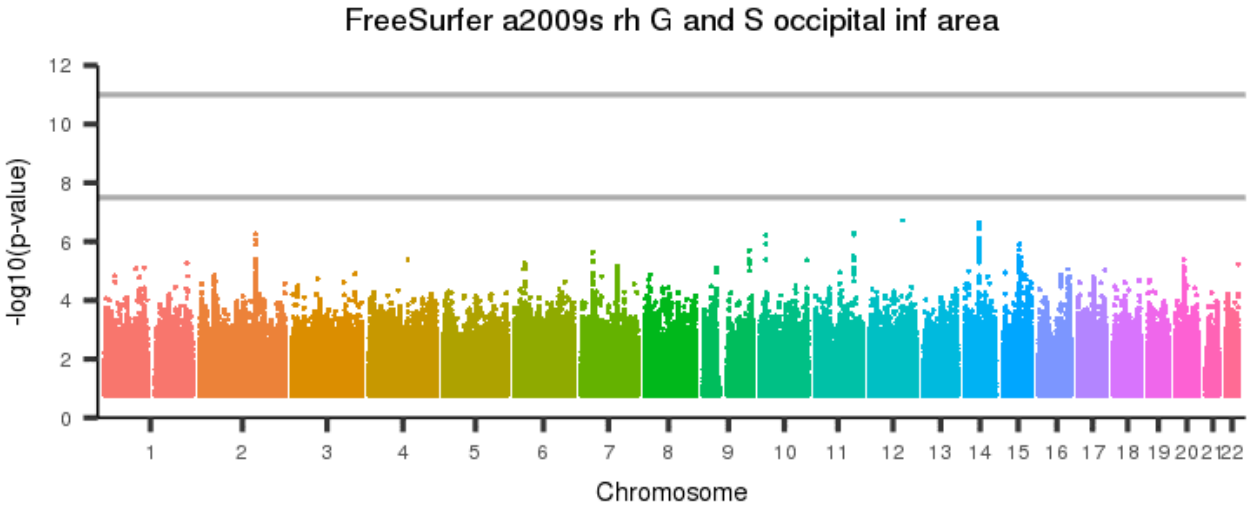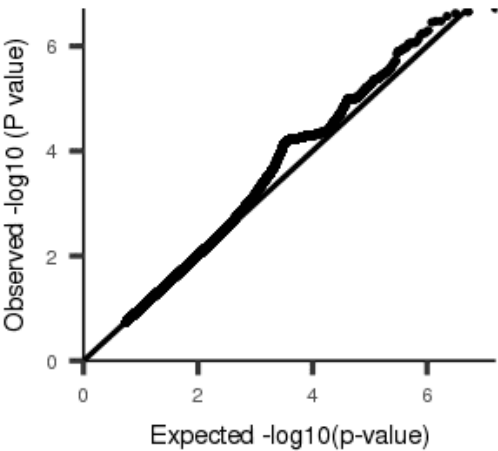

[back to list of plots](#)

Figure 2855: FreeSurfer a2009s rh G and S paracentral area

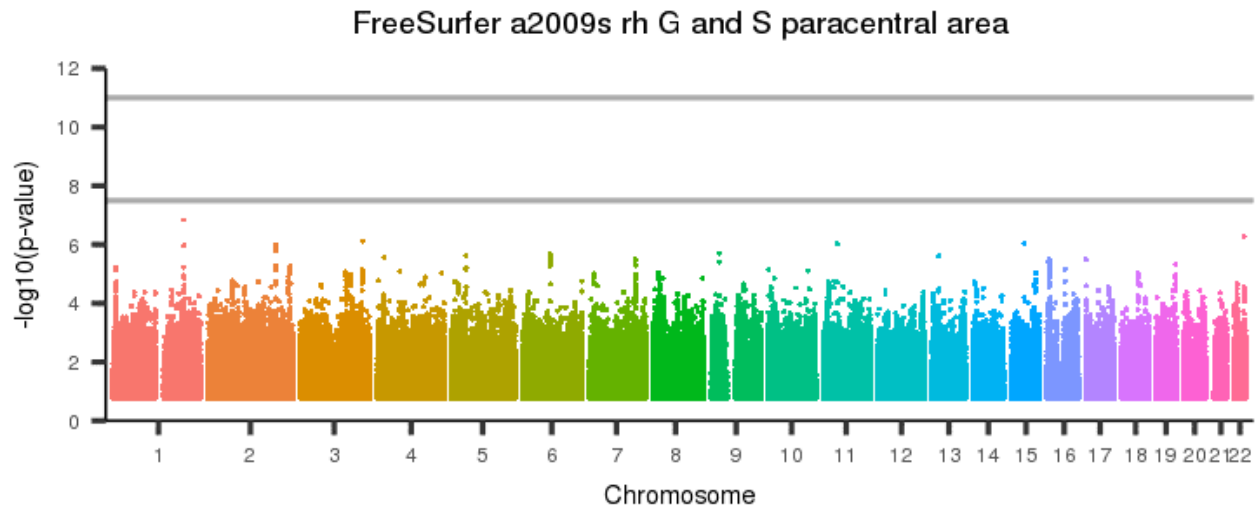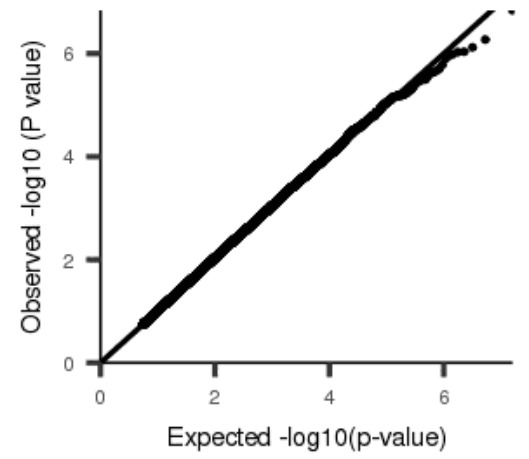

[back to list of plots](#)

Figure 2856: FreeSurfer a2009s rh G and S subcentral area

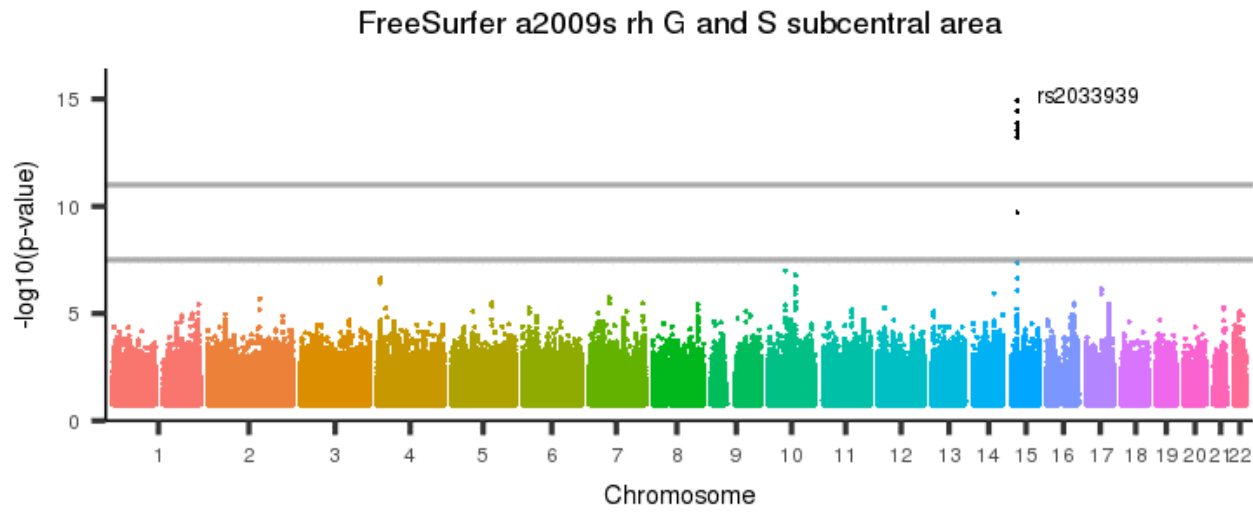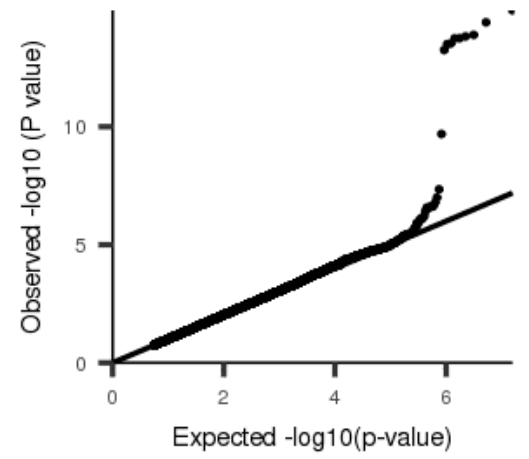

[back to list of plots](#)

Figure 2857: FreeSurfer a2009s rh G and S transv frontopol area

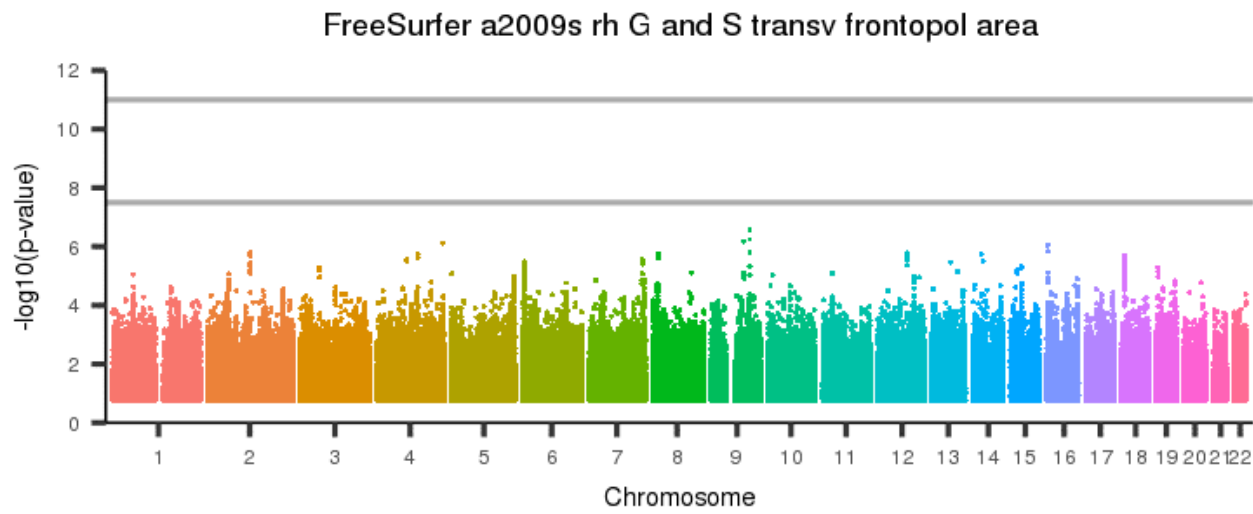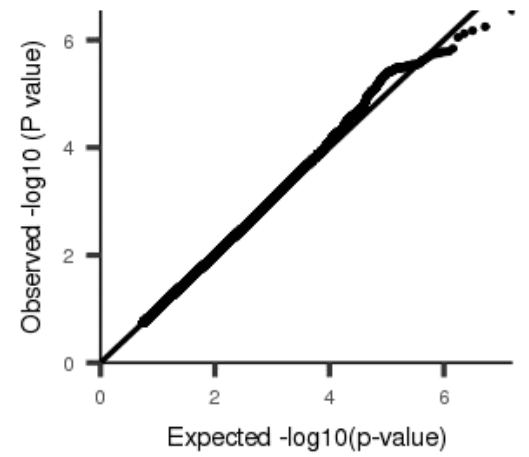

[back to list of plots](#)

Figure 2858: FreeSurfer a2009s rh G and S cingul-Ant area

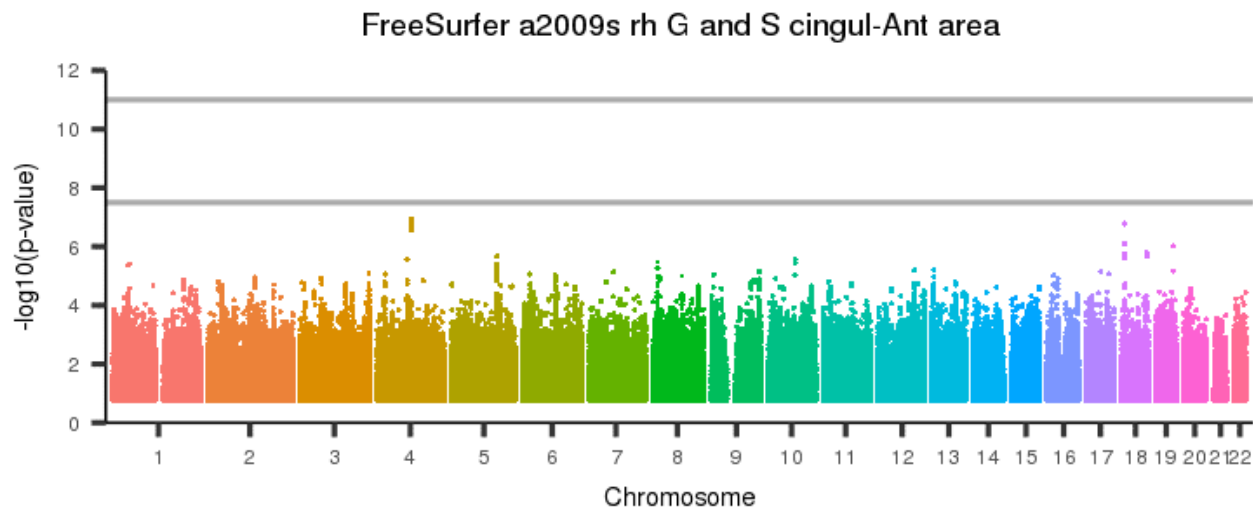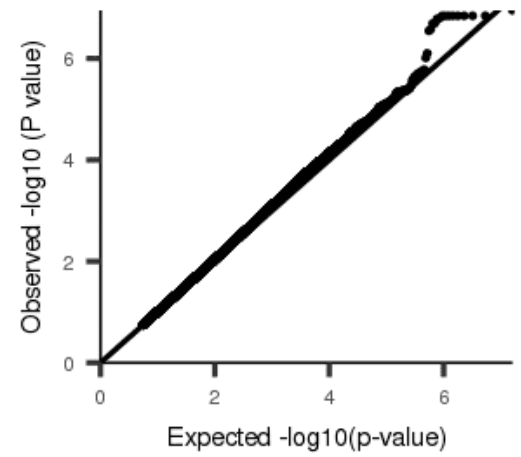

[back to list of plots](#)

Figure 2859: FreeSurfer a2009s rh G and S cingul-Mid-Ant area

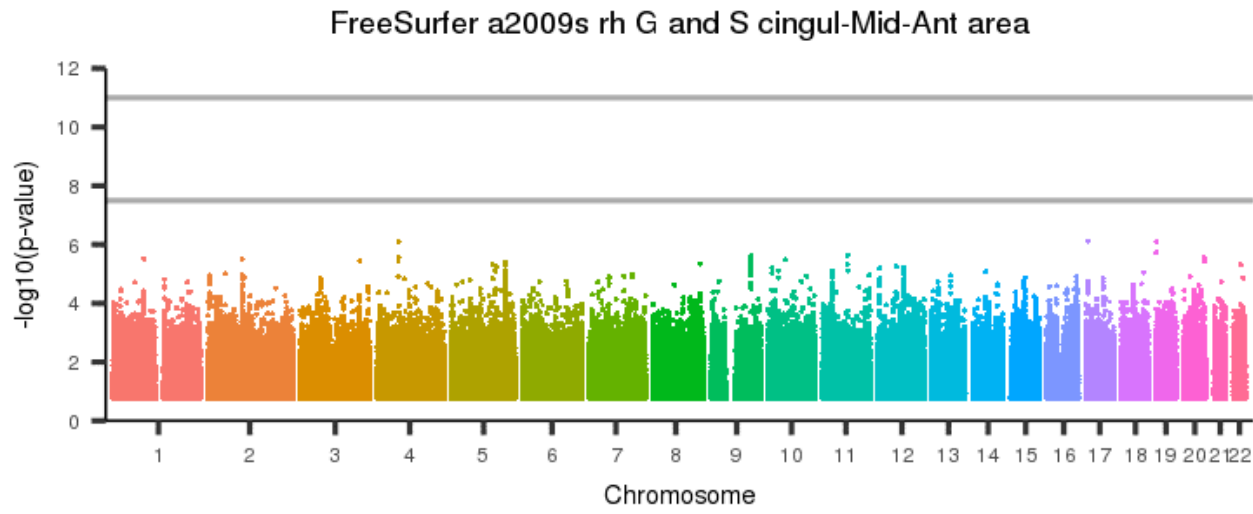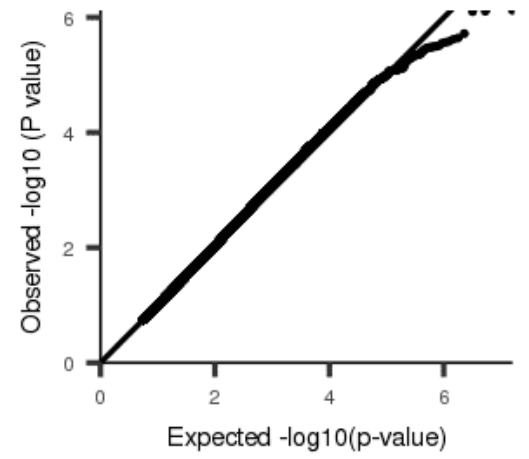

[back to list of plots](#)

Figure 2860: FreeSurfer a2009s rh G and S cingul-Mid-Post area

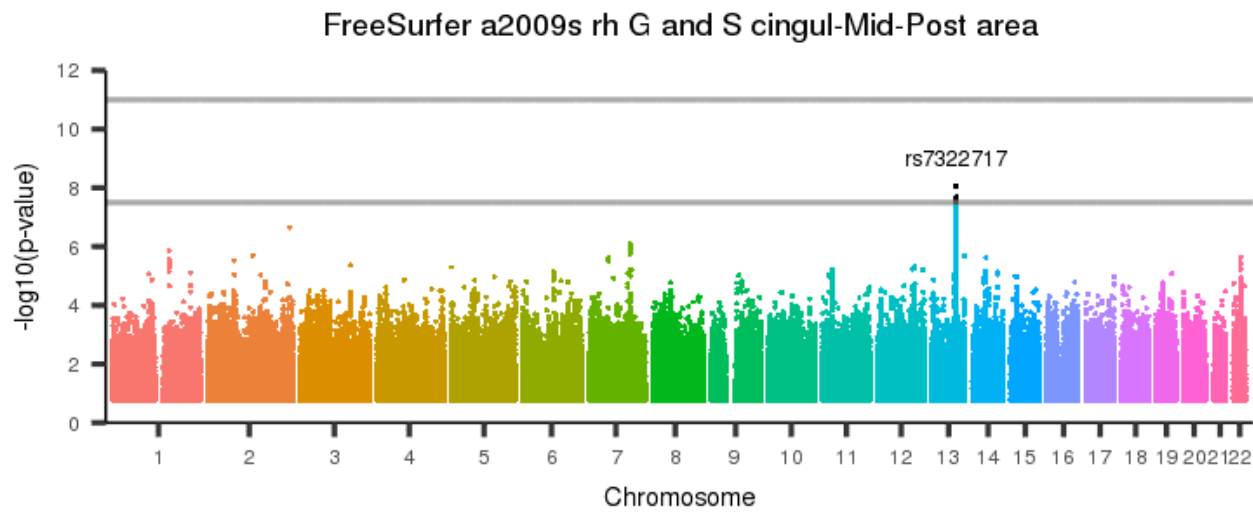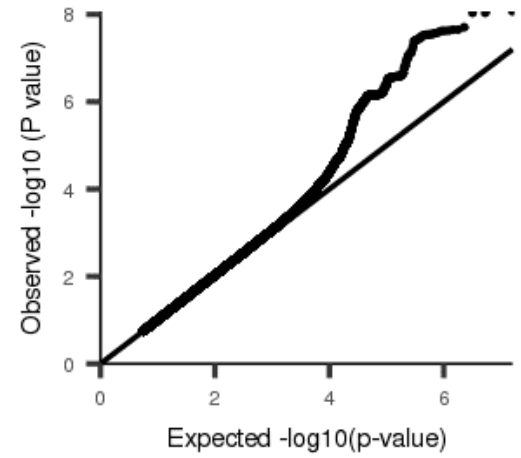

[back to list of plots](#)

Figure 2861: FreeSurfer a2009s rh G cingul-Post-dorsal area

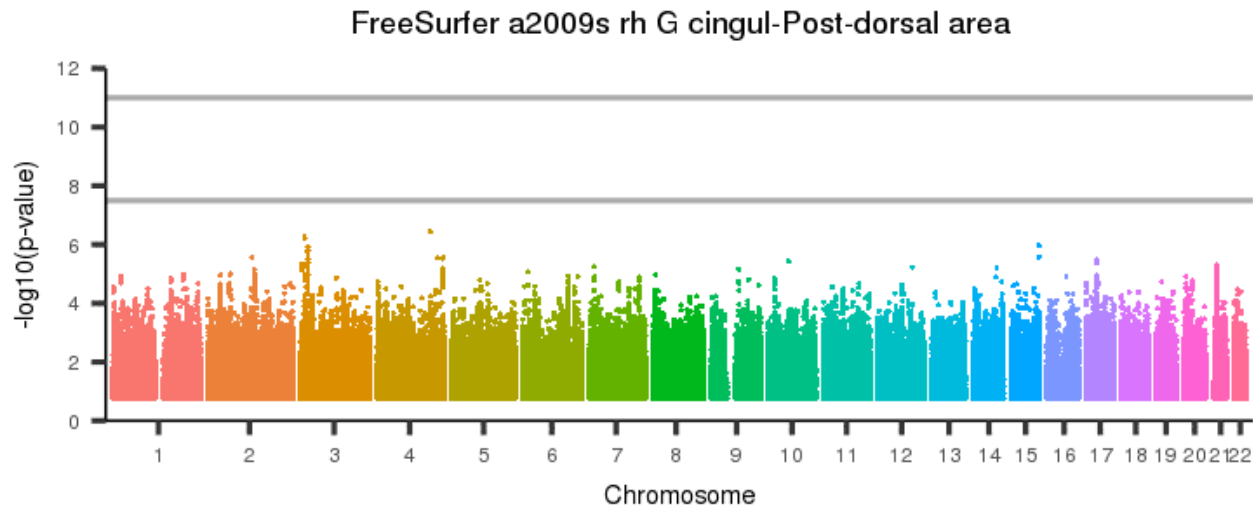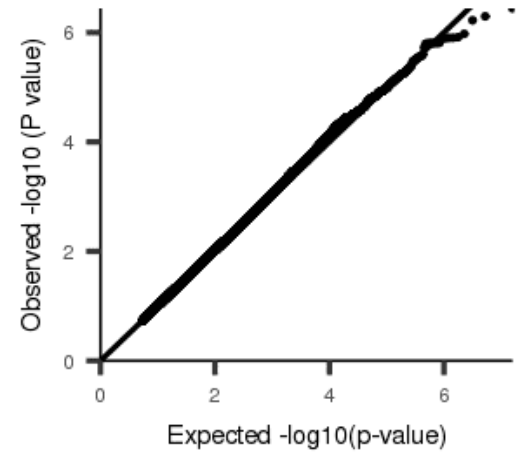

[back to list of plots](#)



Figure 2862: FreeSurfer a2009s rh G cingul-Post-ventral area

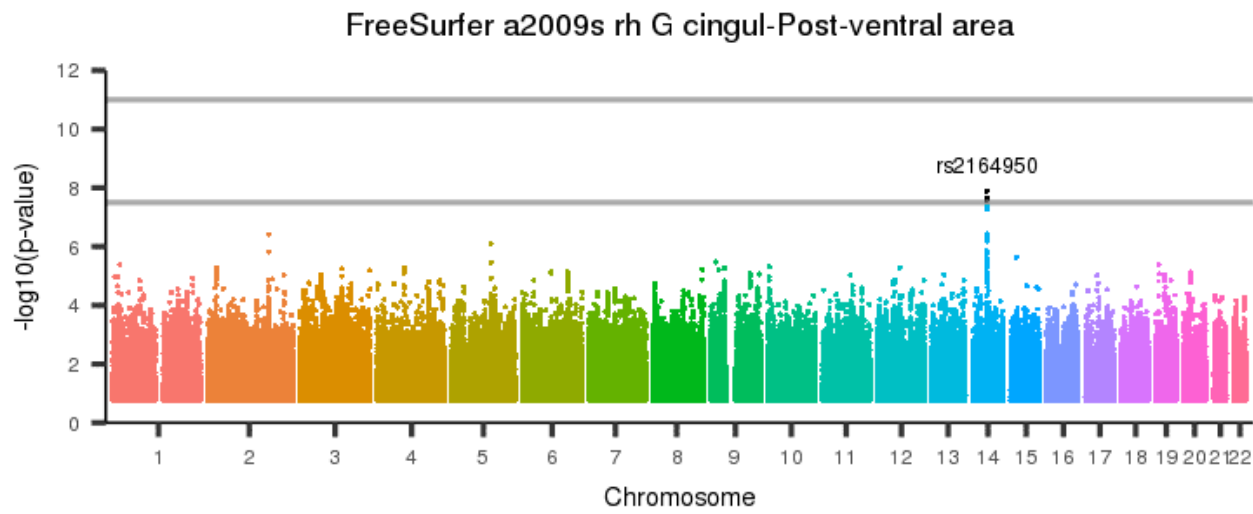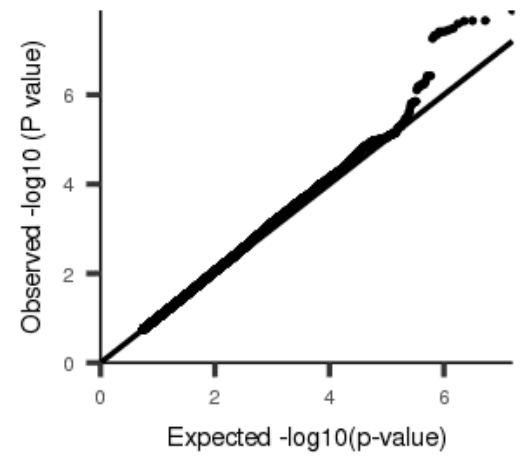

[back to list of plots](#)

Figure 2863: FreeSurfer a2009s rh G cuneus area

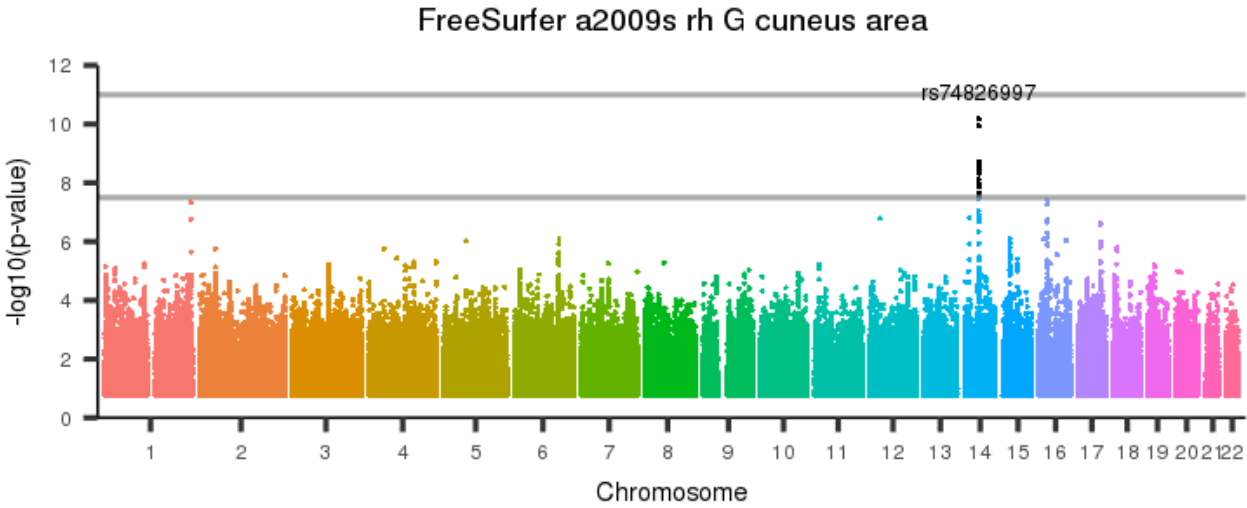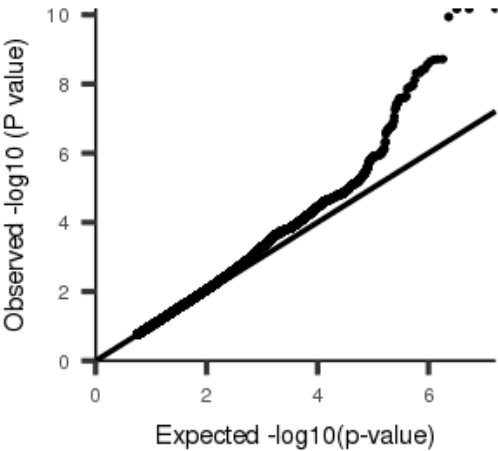

[back to list of plots](#)

Figure 2864: FreeSurfer a2009s rh G front inf-Opercular area

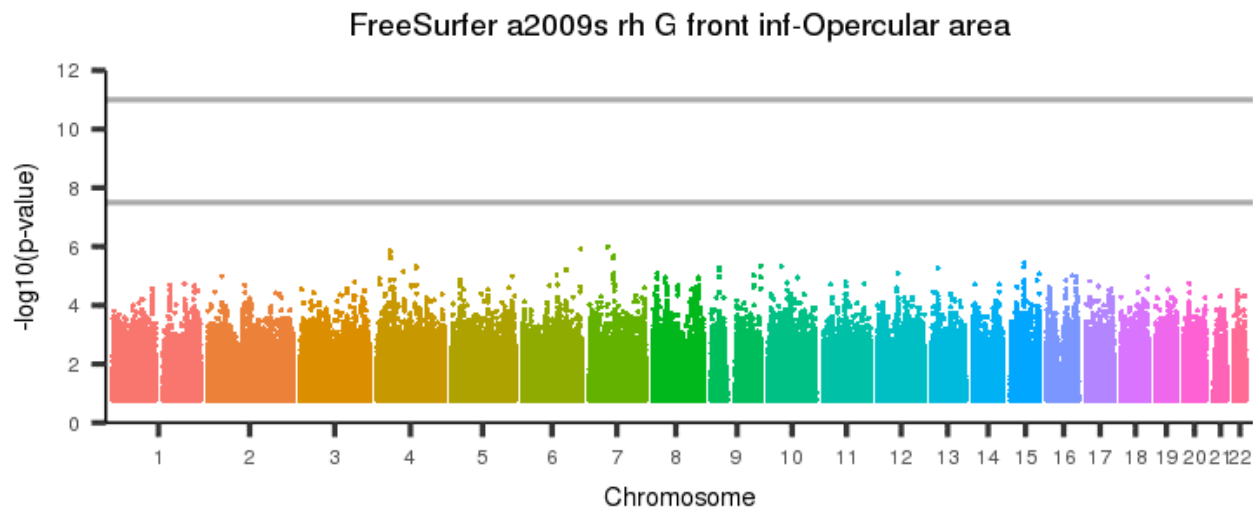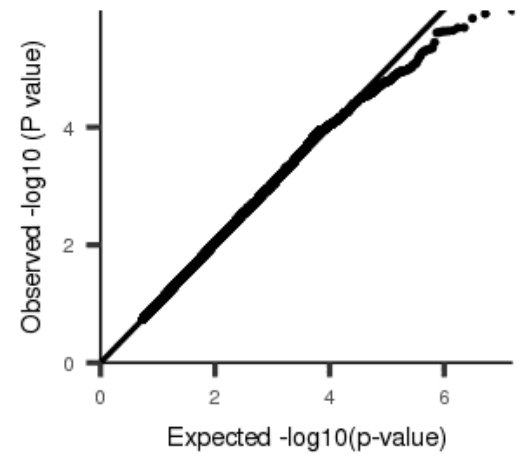

[back to list of plots](#)

Figure 2865: FreeSurfer a2009s rh G front inf-Orbital area

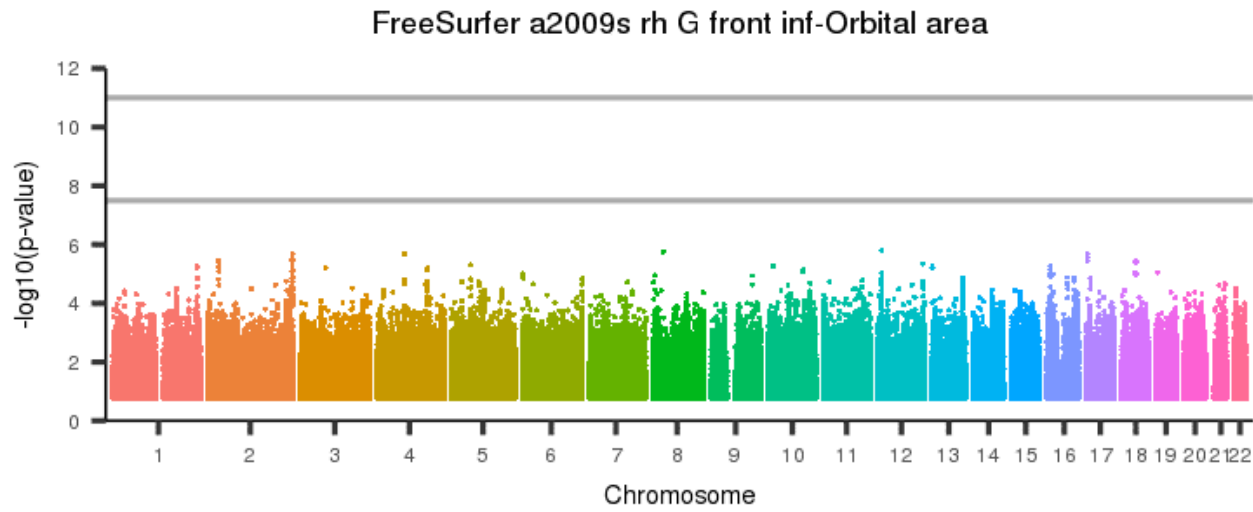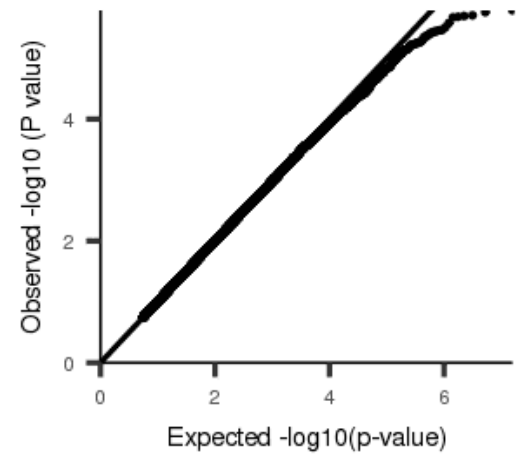

[back to list of plots](#)

Figure 2866: FreeSurfer a2009s rh G front inf-Triangul area

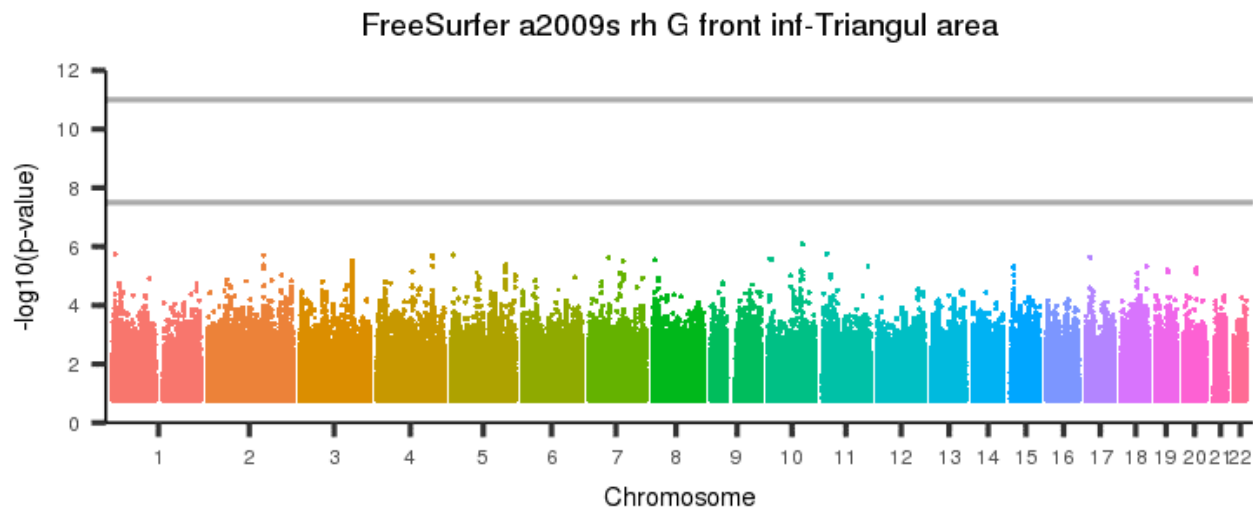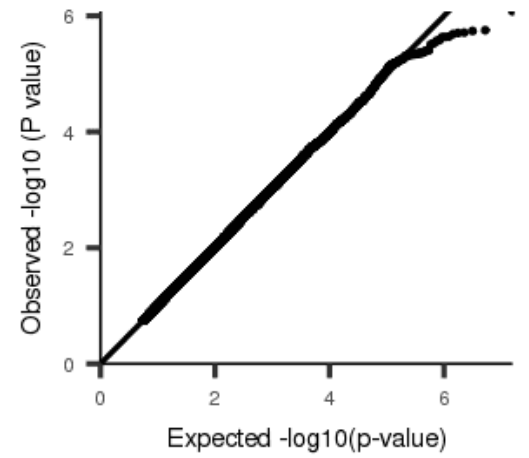

[back to list of plots](#)

Figure 2867: FreeSurfer a2009s rh G front middle area

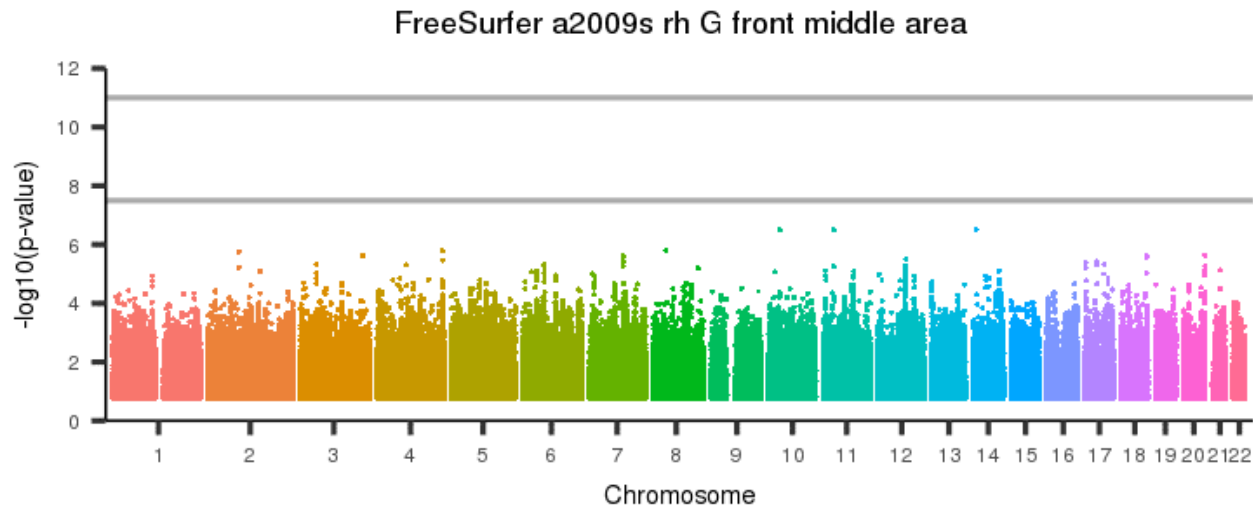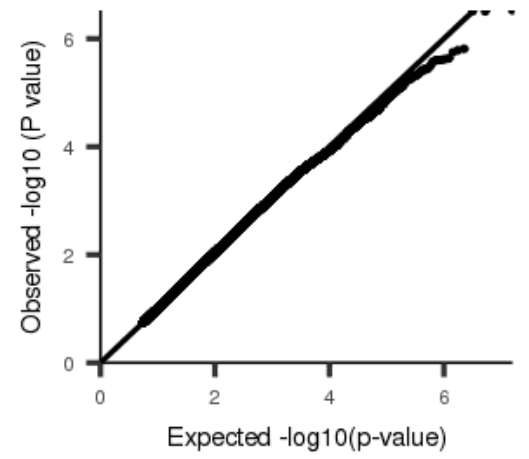

[back to list of plots](#)

Figure 2868: FreeSurfer a2009s rh G front sup area

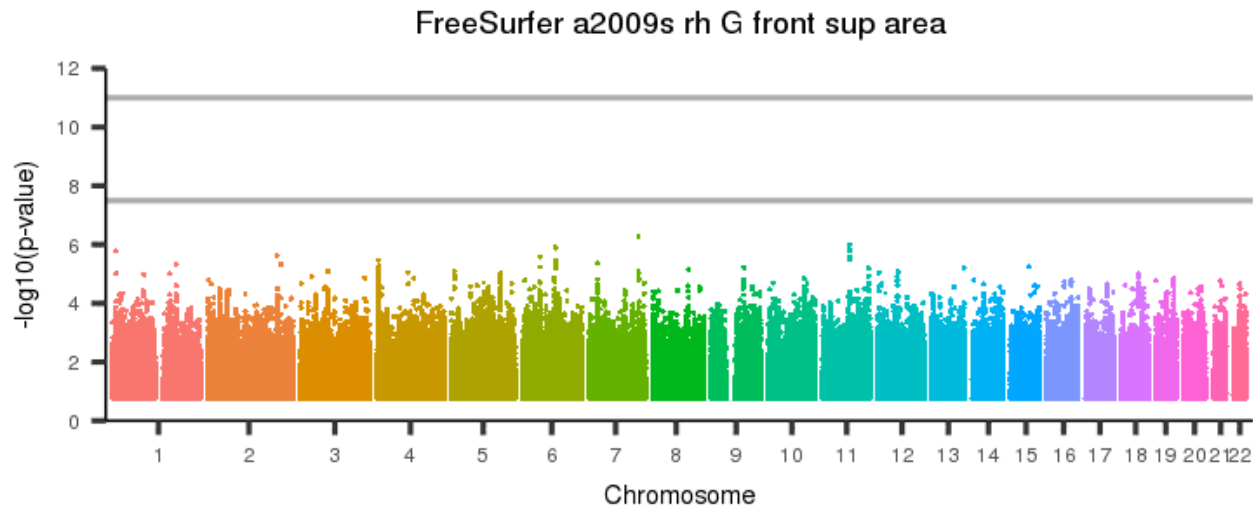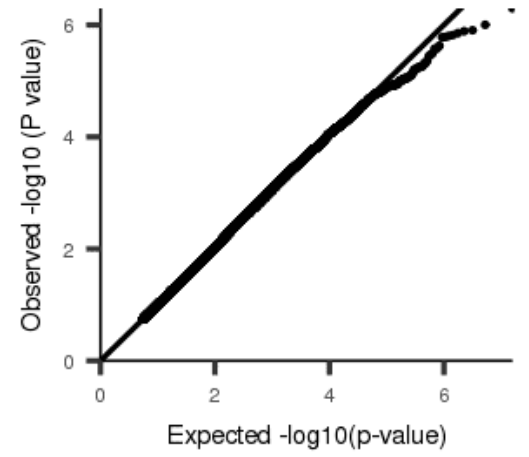

[back to list of plots](#)

Figure 2869: FreeSurfer a2009s rh G Ins lg and S cent ins area

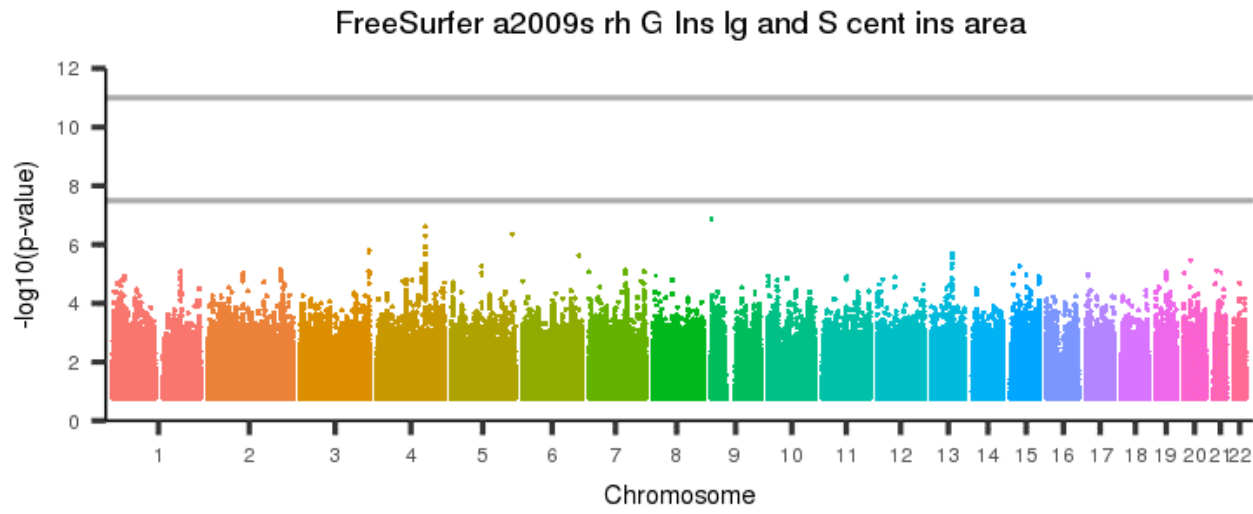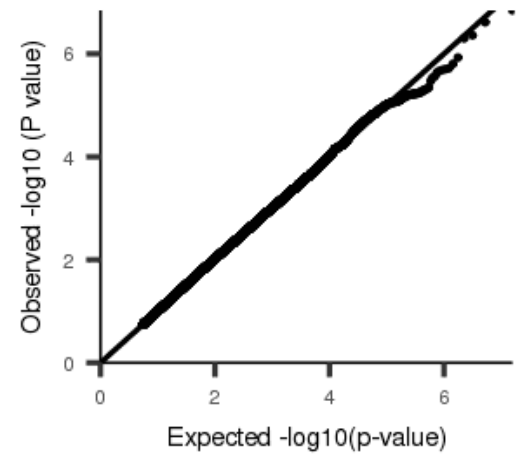

[back to list of plots](#)



Figure 2870: FreeSurfer a2009s rh G insular short area

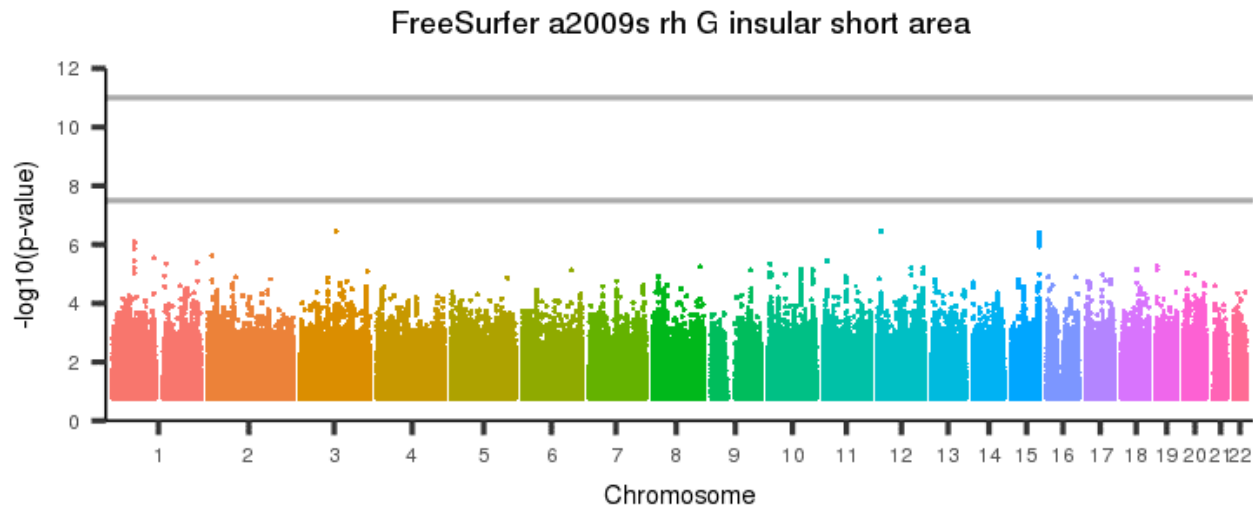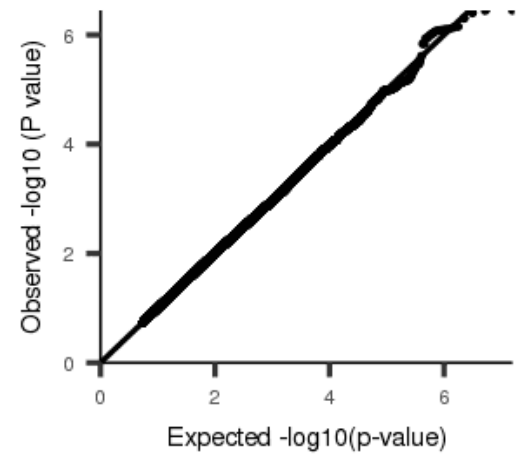

[back to list of plots](#)

Figure 2871: FreeSurfer a2009s rh G occipital middle area

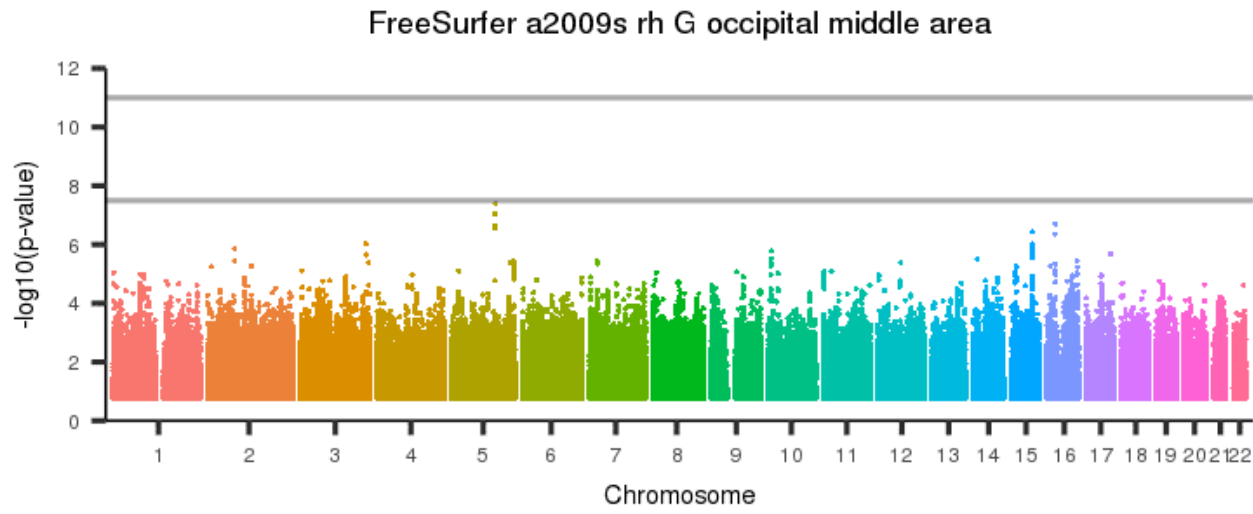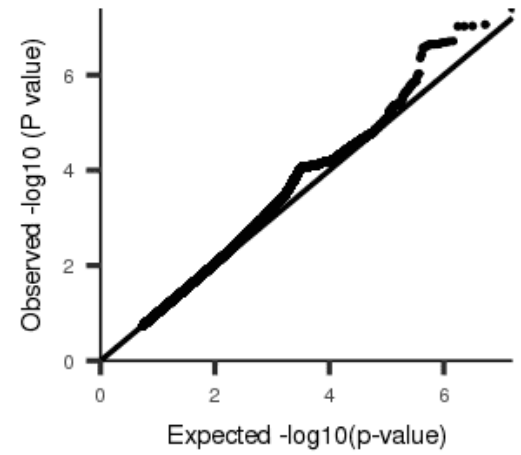

[back to list of plots](#)

Figure 2872: FreeSurfer a2009s rh G occipital sup area

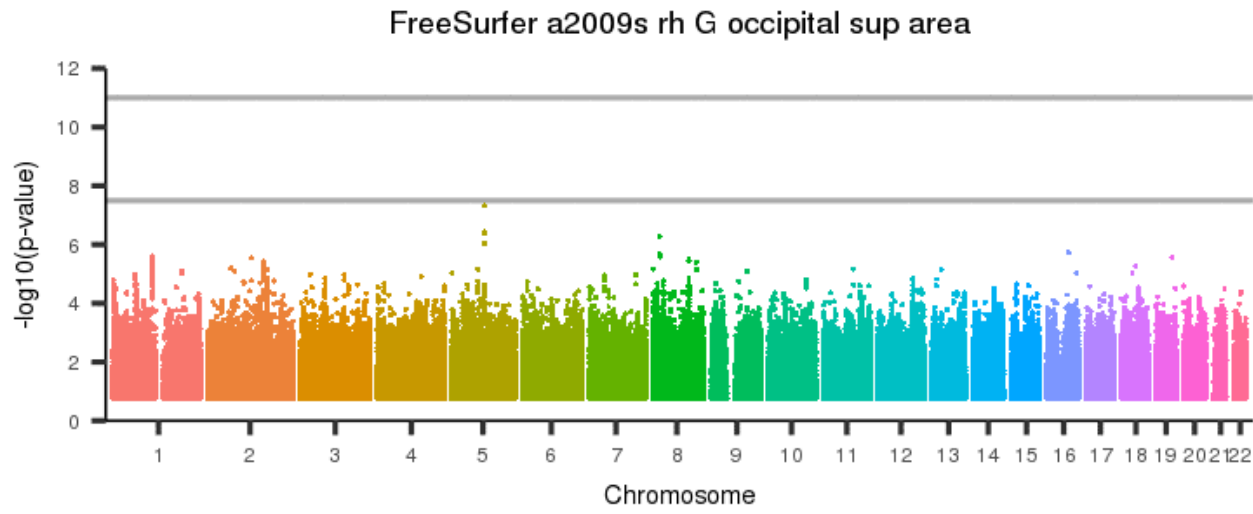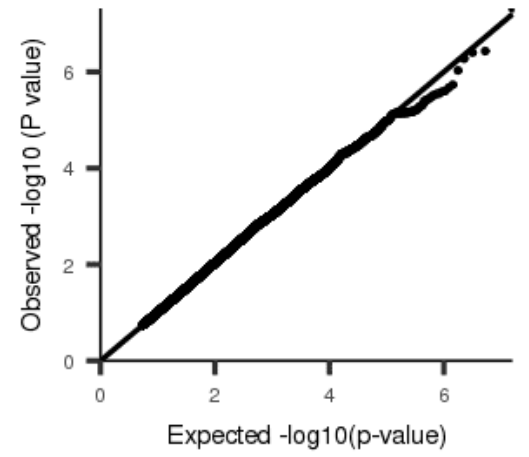

[back to list of plots](#)

Figure 2873: FreeSurfer a2009s rh G oc-temp lat-fusifor area

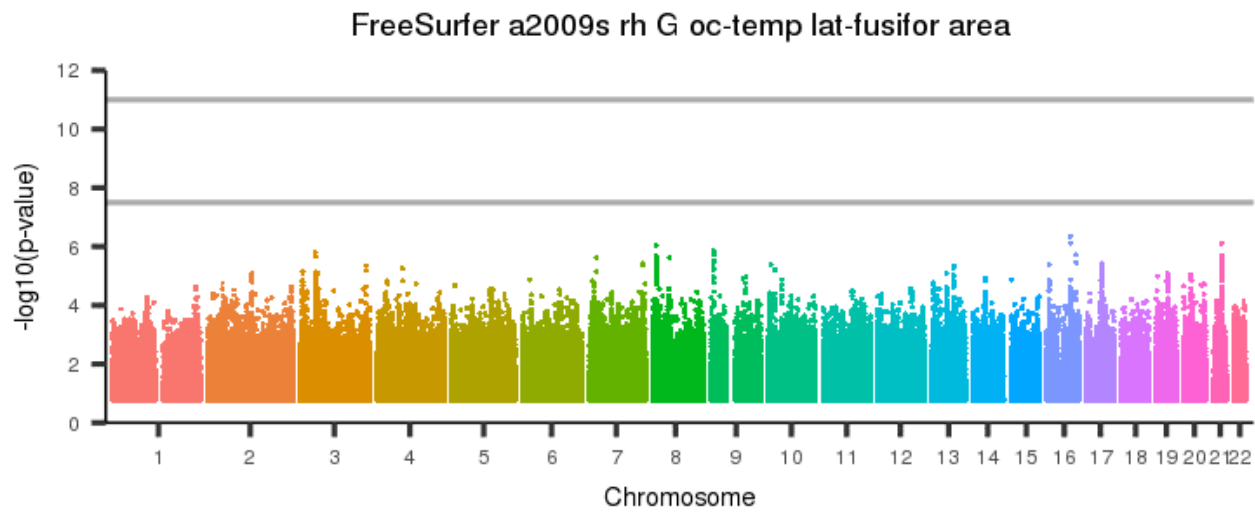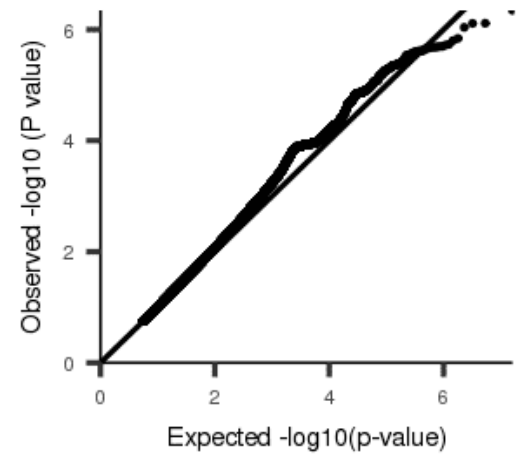

[back to list of plots](#)

Figure 2874: FreeSurfer a2009s rh G oc-temp med-Lingual area

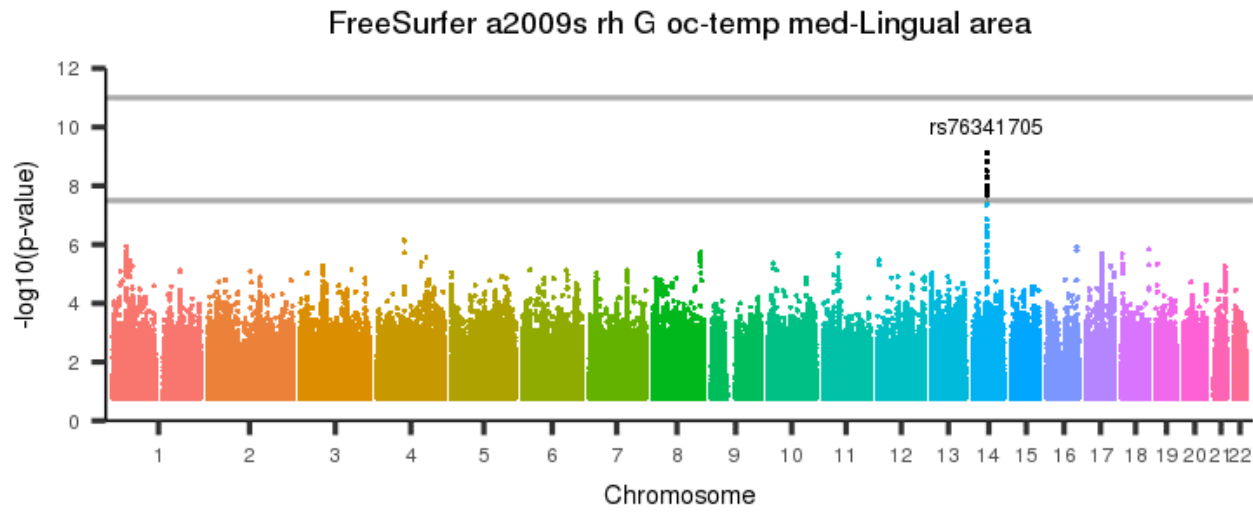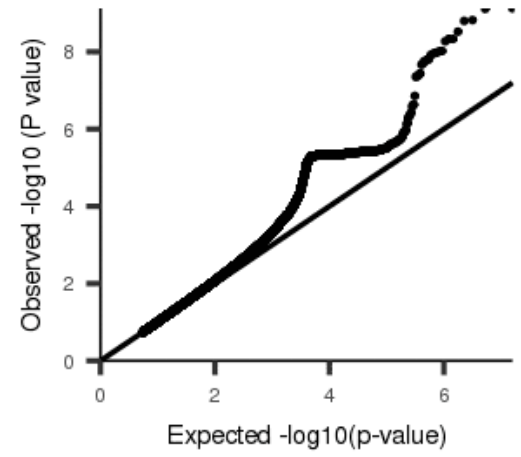

[back to list of plots](#)

Figure 2875: FreeSurfer a2009s rh G oc-temp med-Parahip area

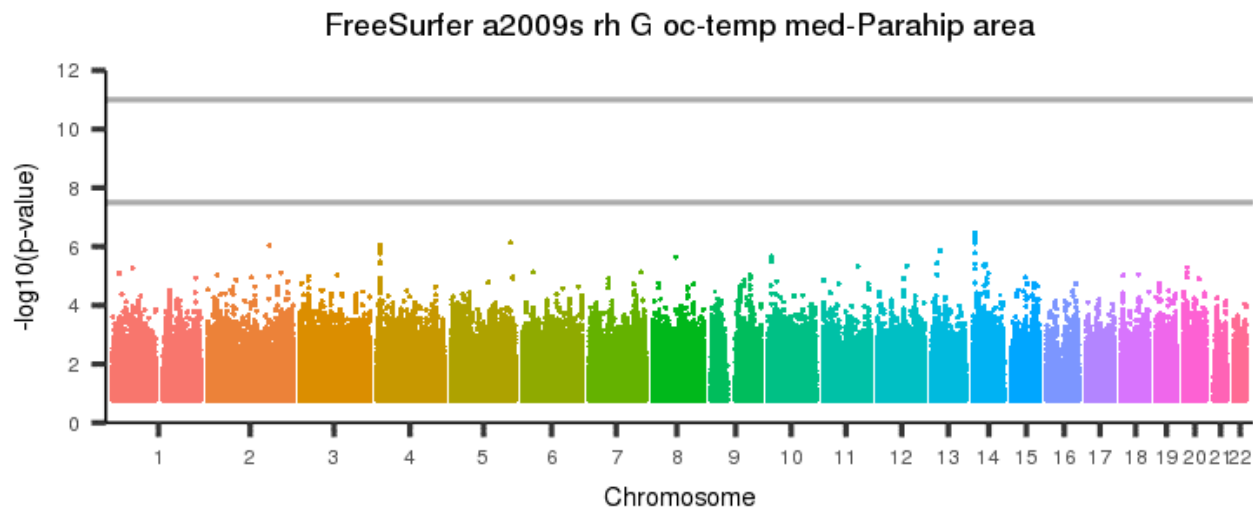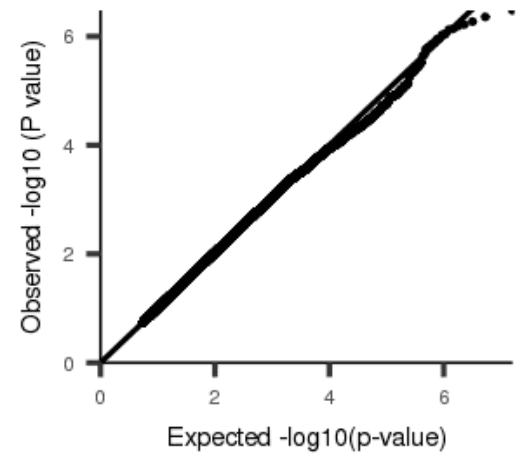

[back to list of plots](#)

Figure 2876: FreeSurfer a2009s rh G orbital area

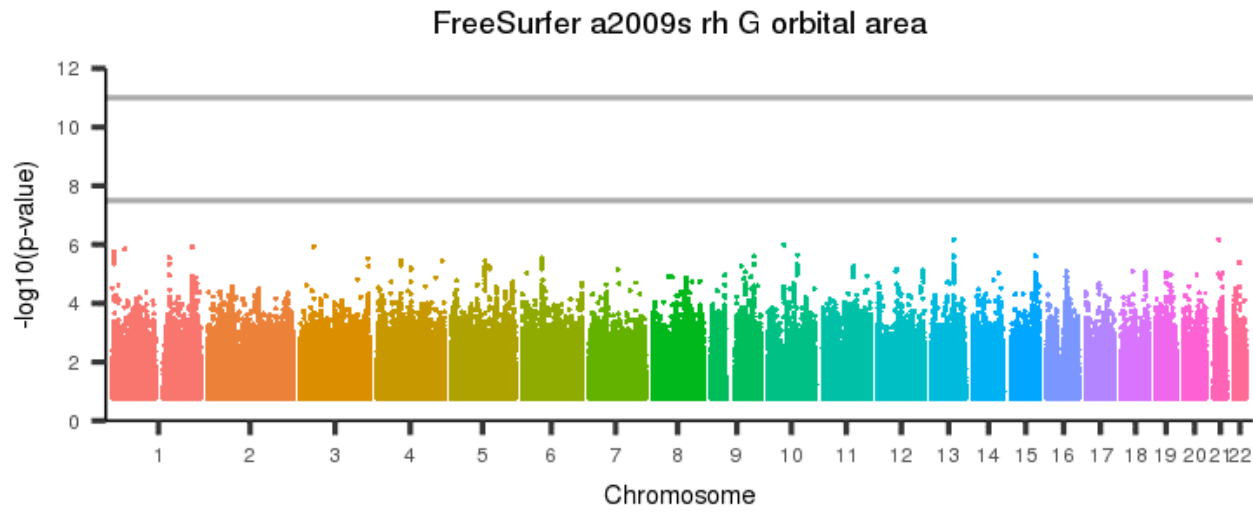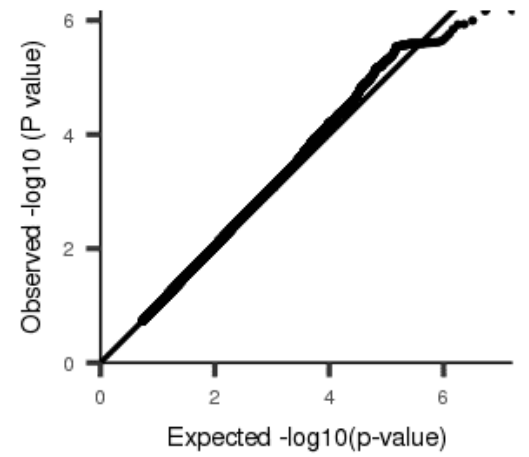

[back to list of plots](#)

Figure 2877: FreeSurfer a2009s rh G pariet inf-Angular area

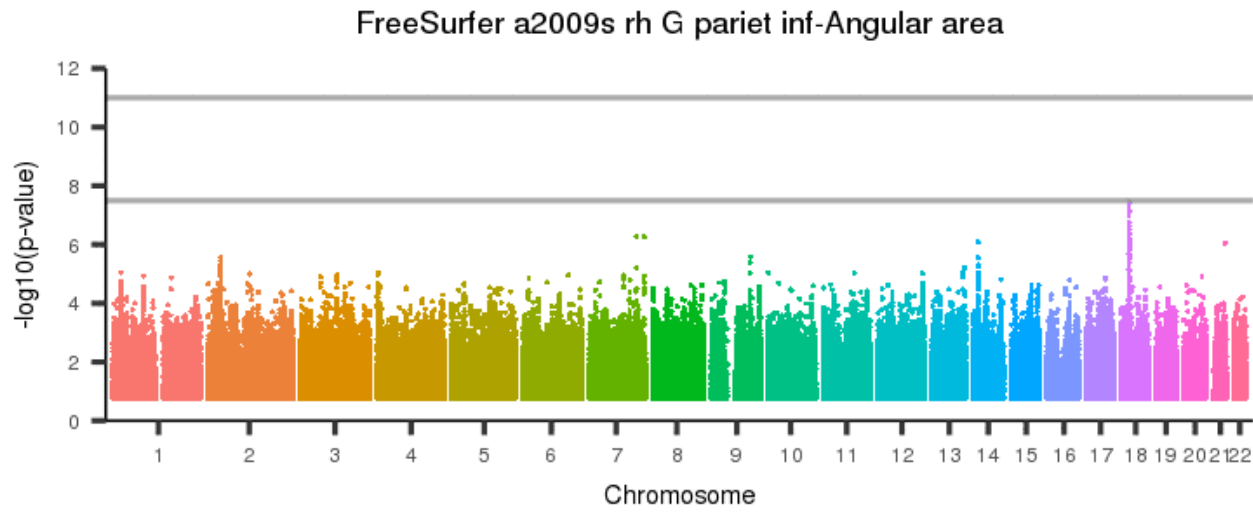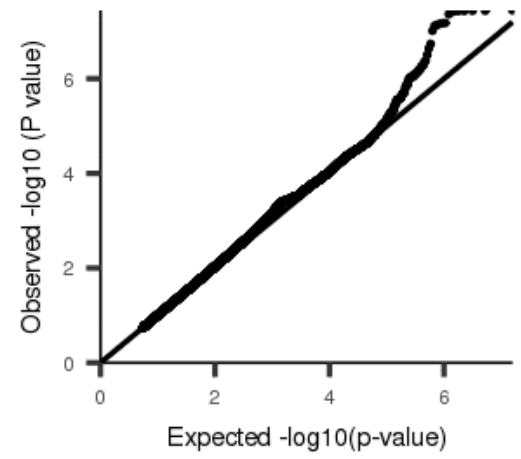

[back to list of plots](#)



Figure 2878: FreeSurfer a2009s rh G pariet inf-Supramar area

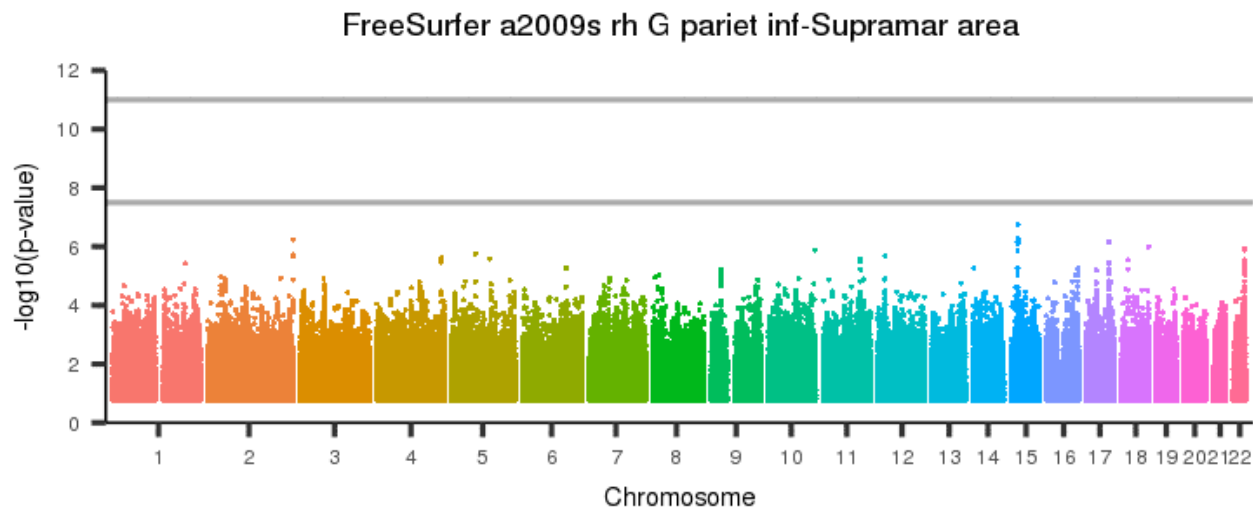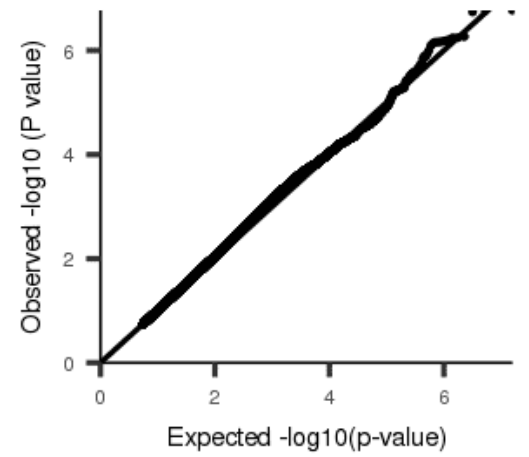

[back to list of plots](#)

Figure 2879: FreeSurfer a2009s rh G parietal sup area

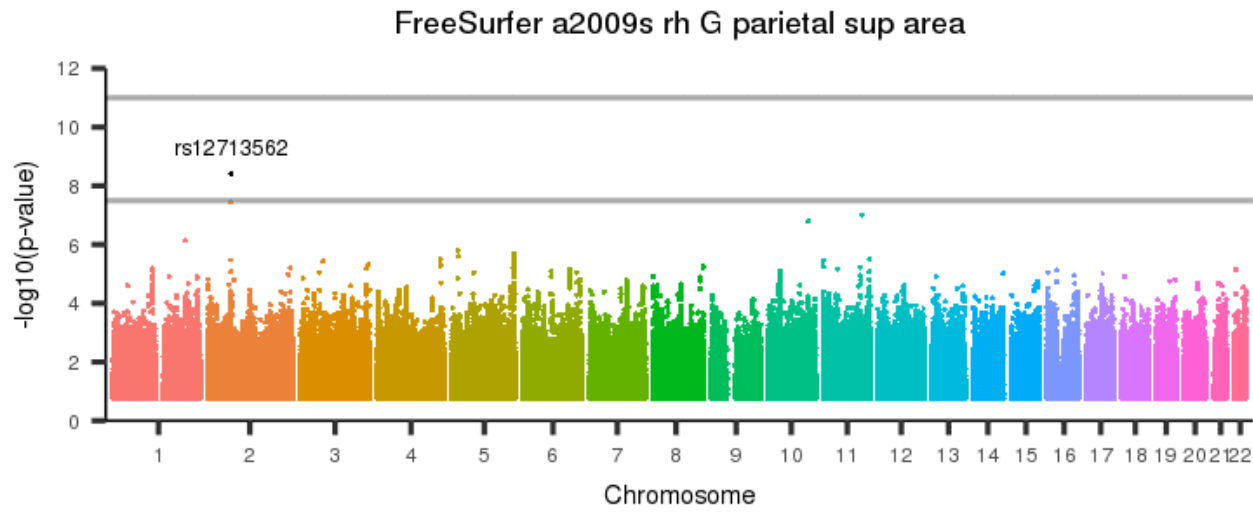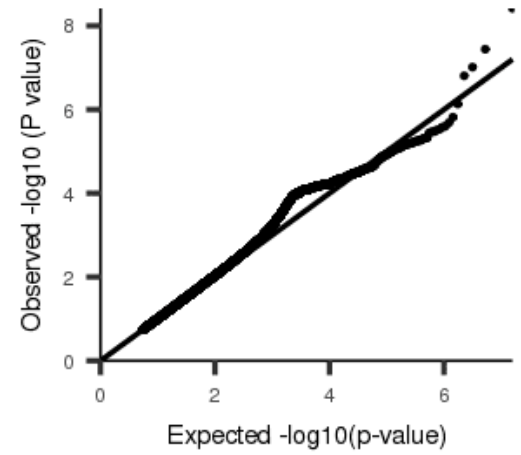

[back to list of plots](#)

Figure 2880: FreeSurfer a2009s rh G postcentral area

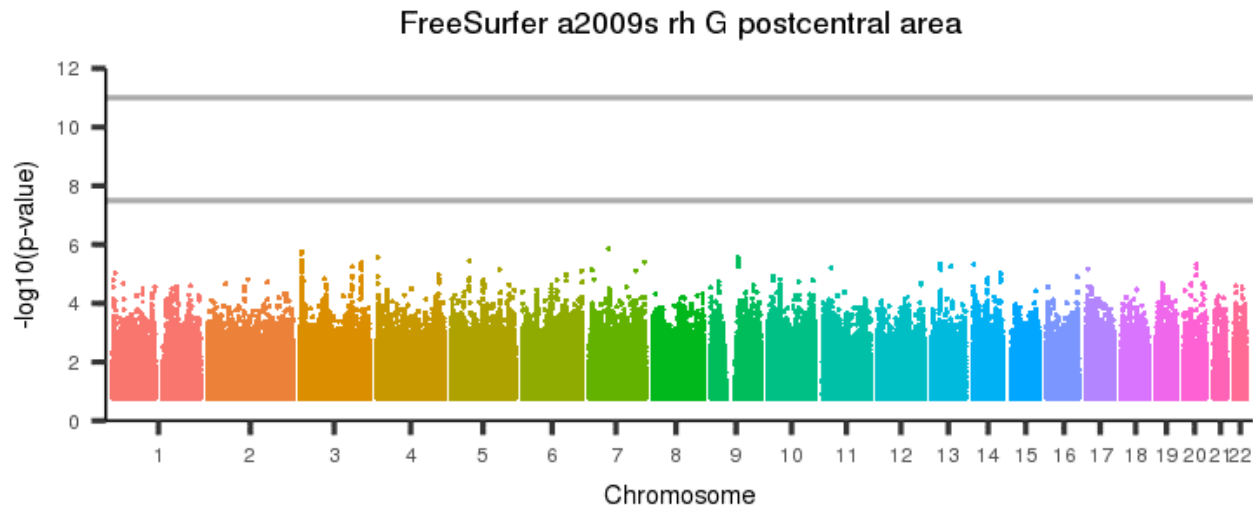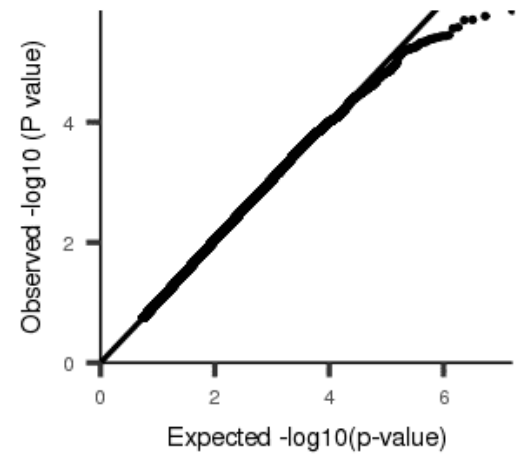

[back to list of plots](#)

Figure 2881: FreeSurfer a2009s rh G precentral area

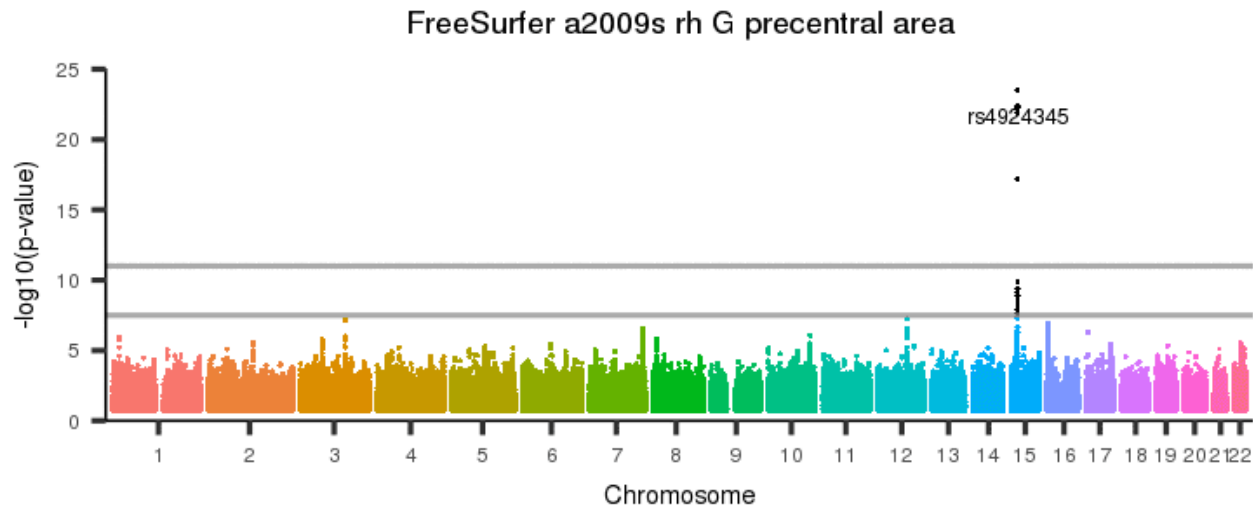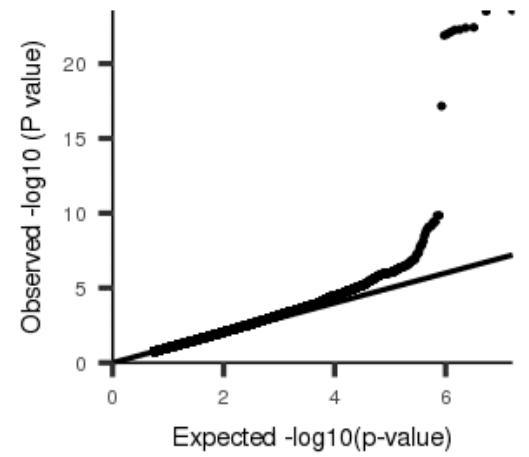

[back to list of plots](#)

Figure 2882: FreeSurfer a2009s rh G precuneus area

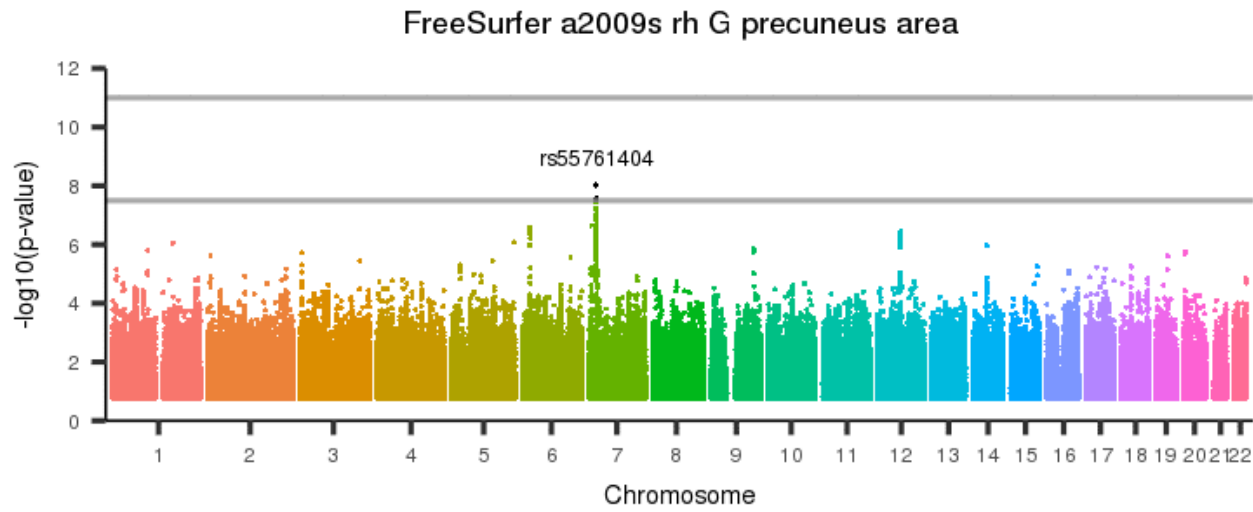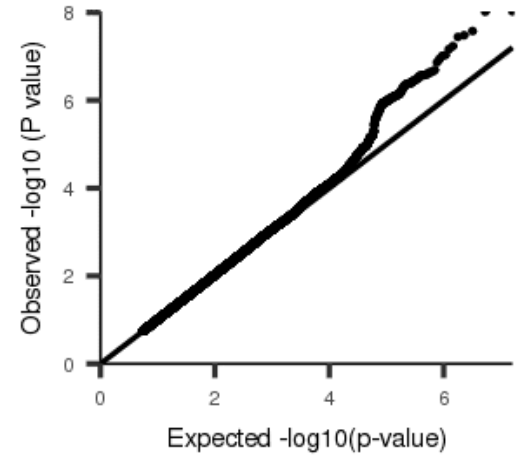

[back to list of plots](#)

Figure 2883: FreeSurfer a2009s rh G rectus area

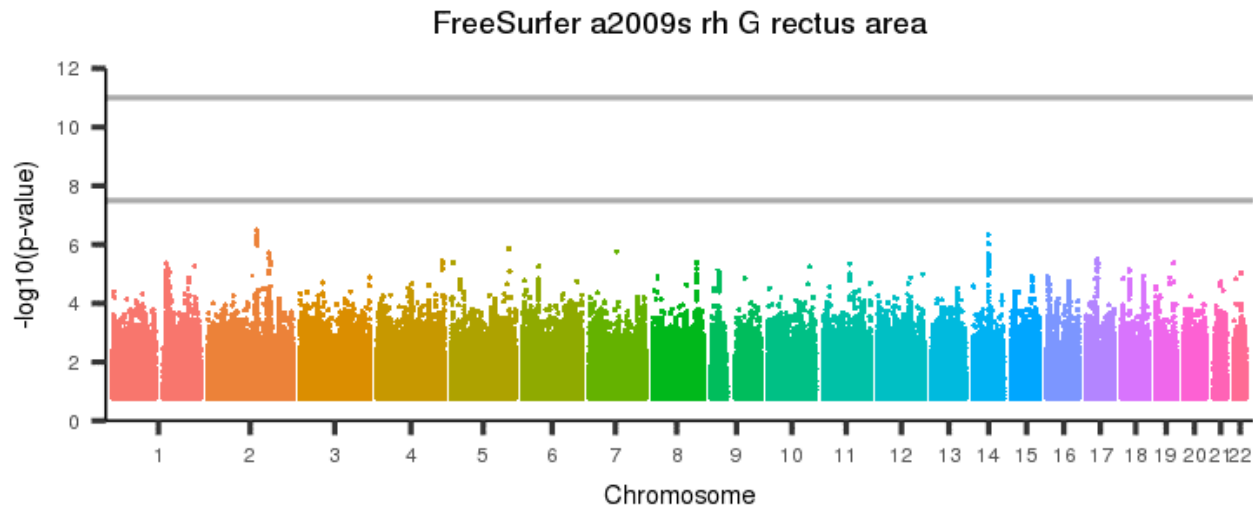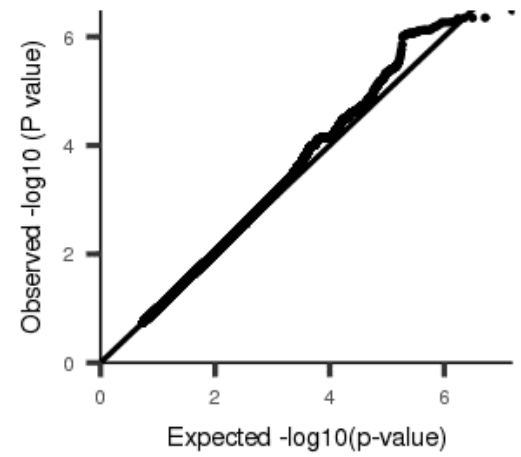

[back to list of plots](#)

Figure 2884: FreeSurfer a2009s rh G subcallosal area

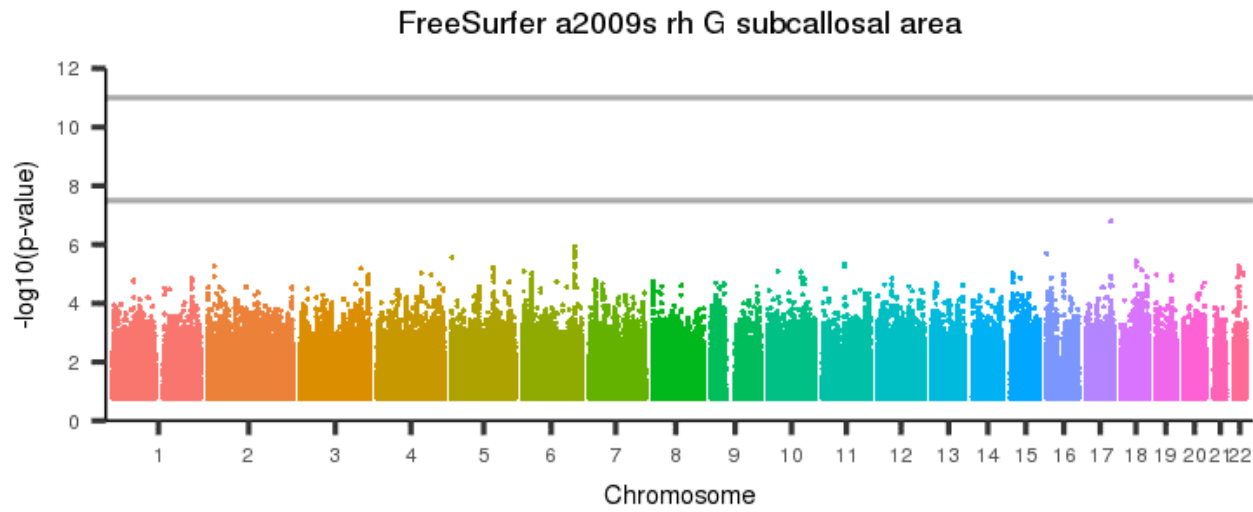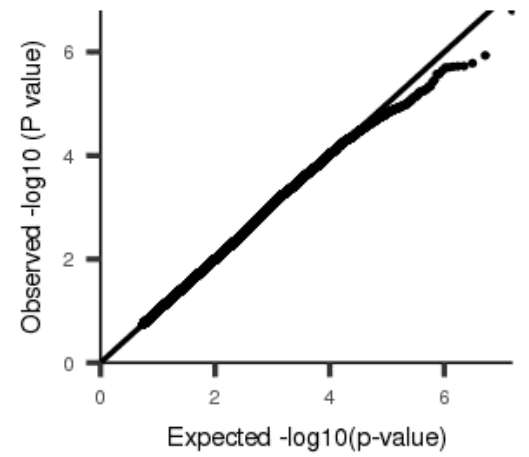

[back to list of plots](#)

Figure 2885: FreeSurfer a2009s rh G temp sup-G T transv area

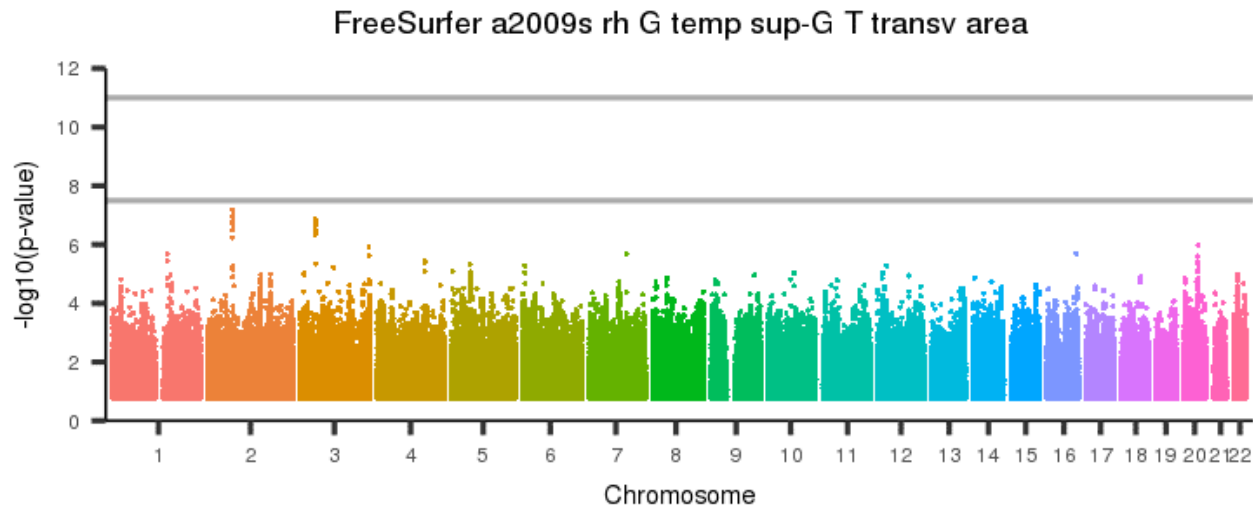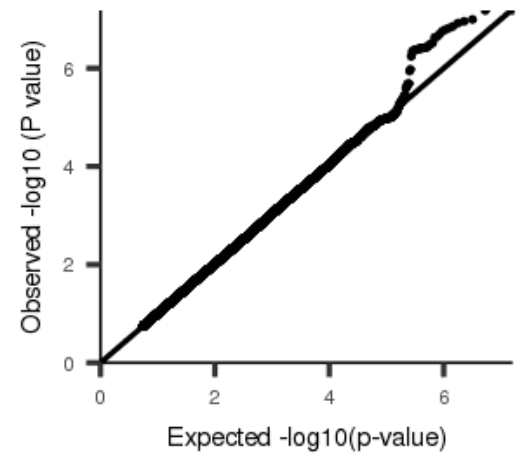

[back to list of plots](#)



Figure 2886: FreeSurfer a2009s rh G temp sup-Lateral area

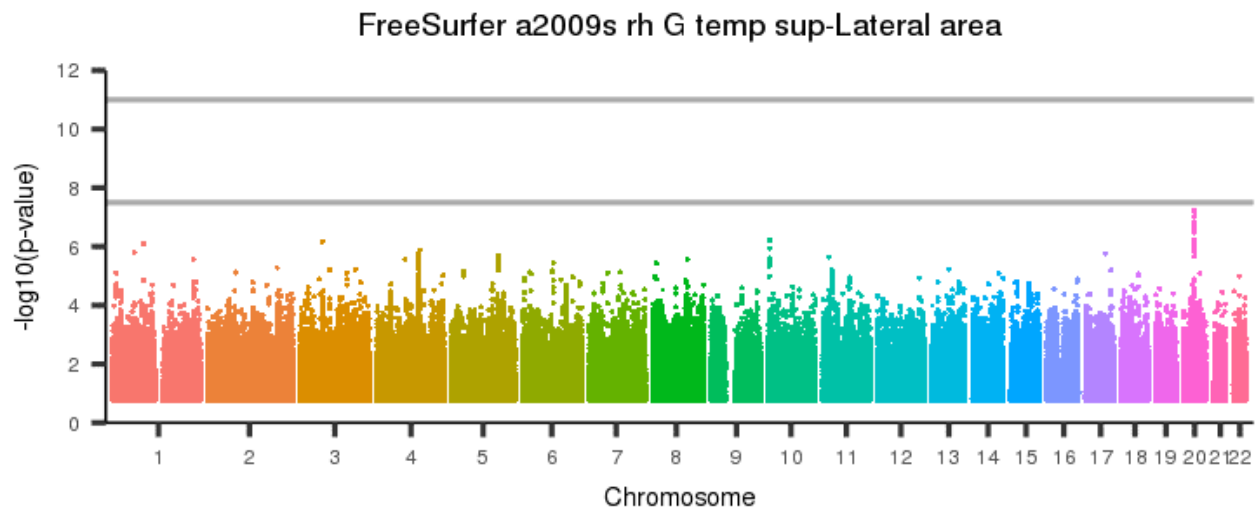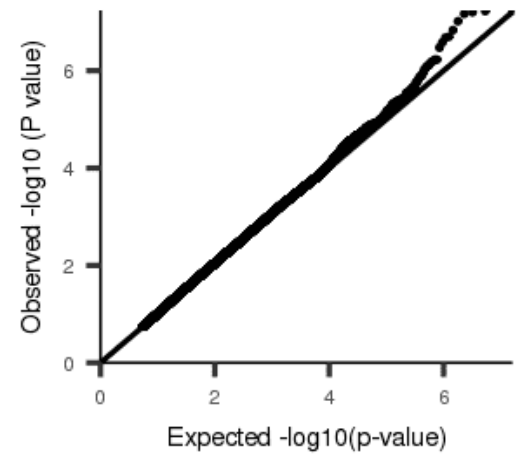

[back to list of plots](#)

Figure 2887: FreeSurfer a2009s rh G temp sup-Plan polar area

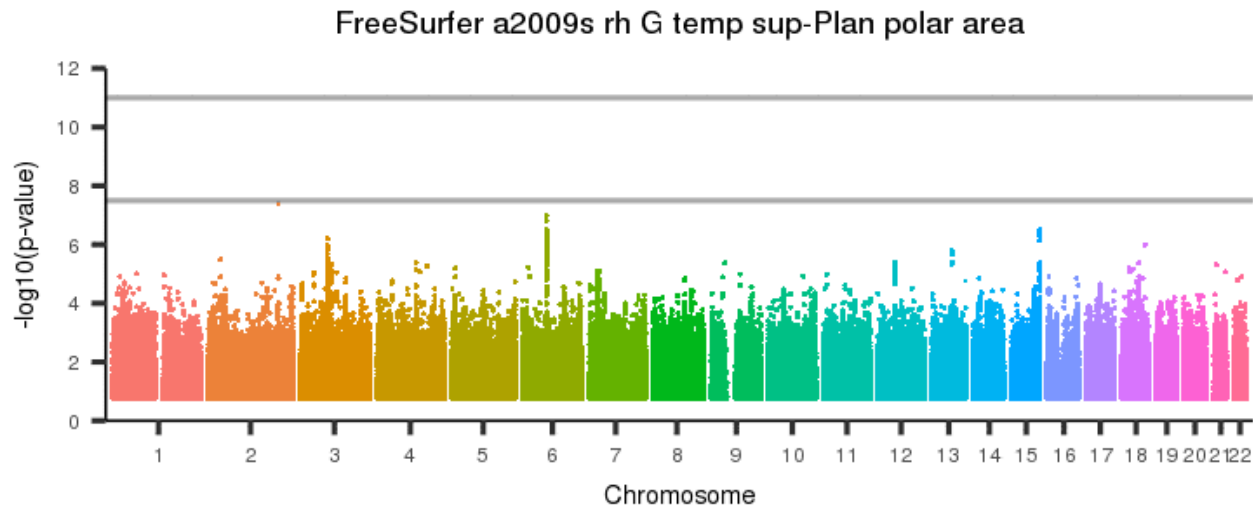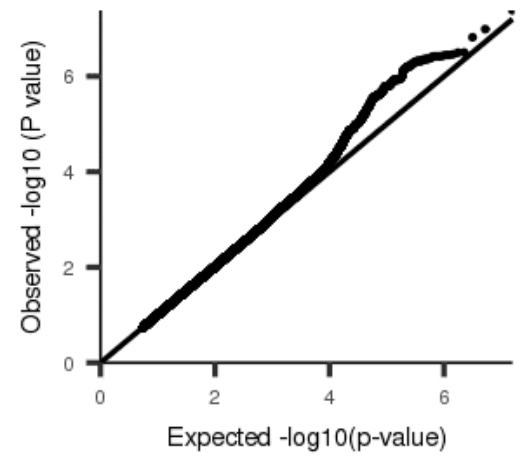

[back to list of plots](#)

Figure 2888: FreeSurfer a2009s rh G temp sup-Plan tempo area

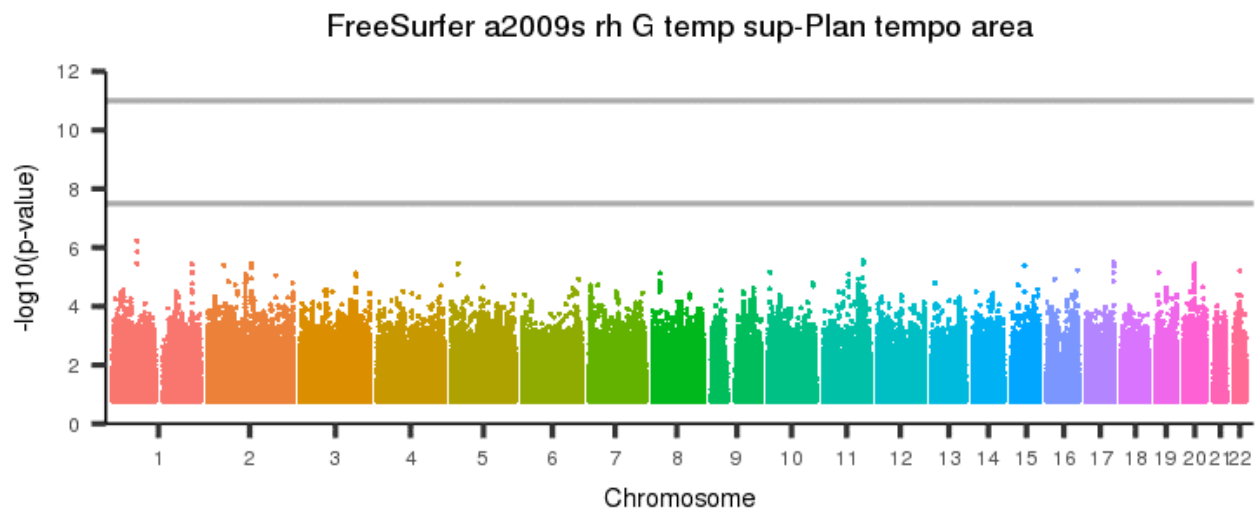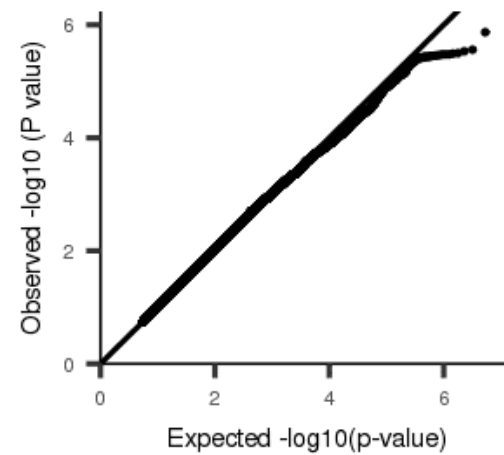

[back to list of plots](#)

Figure 2889: FreeSurfer a2009s rh G temporal inf area

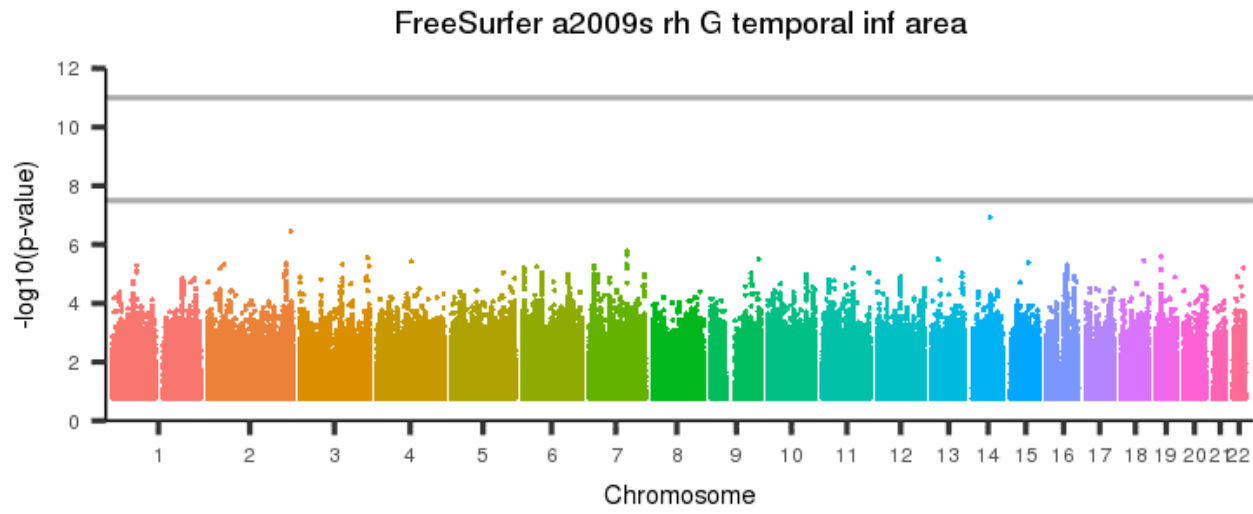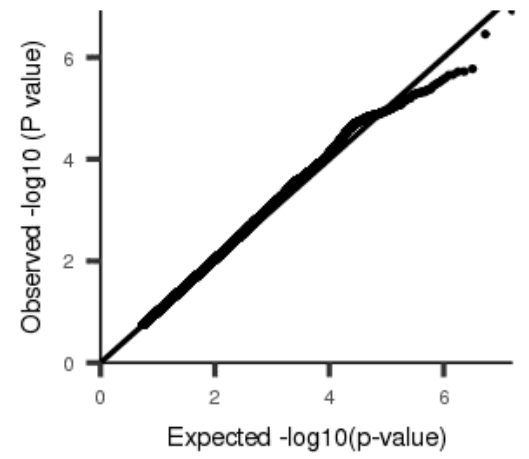

[back to list of plots](#)

Figure 2890: FreeSurfer a2009s rh G temporal middle area

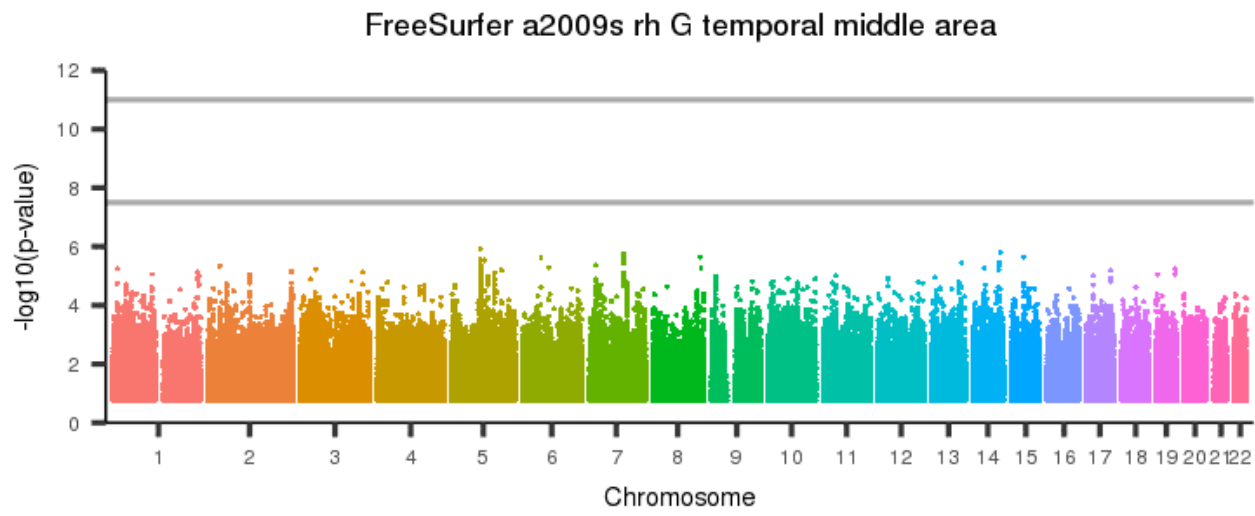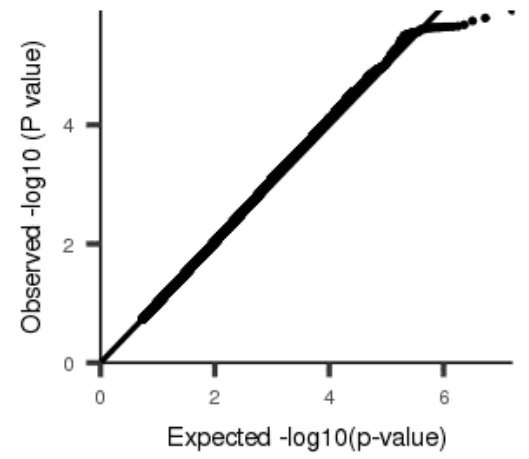

[back to list of plots](#)

Figure 2891: FreeSurfer a2009s rh Lat Fis-ant-Horizont area

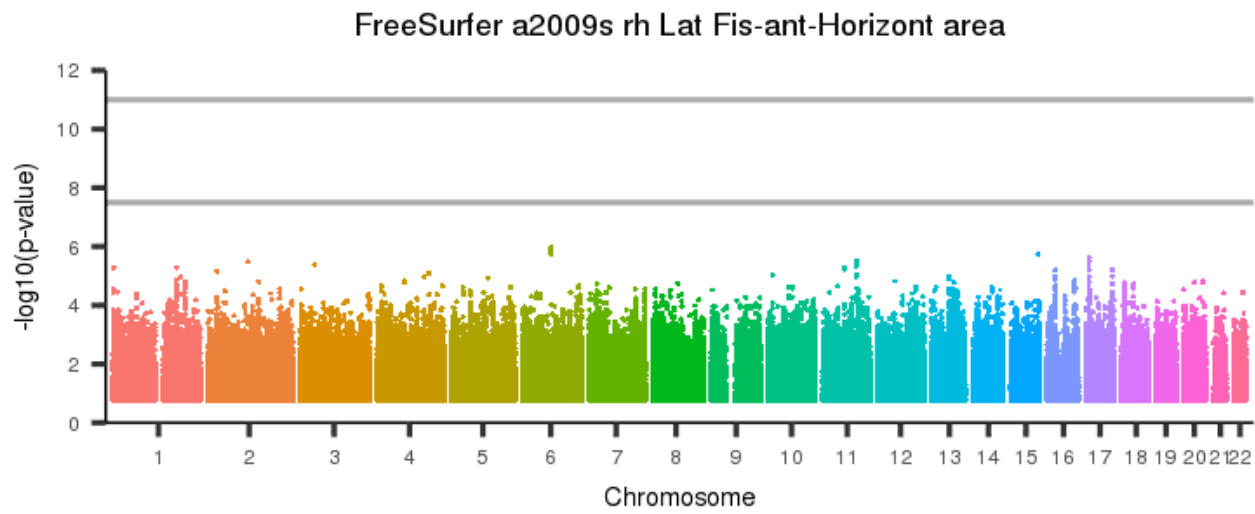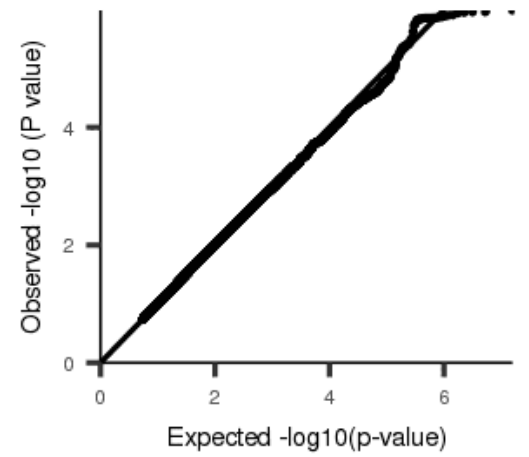

[back to list of plots](#)

Figure 2892: FreeSurfer a2009s rh Lat Fis-ant-Vertical area

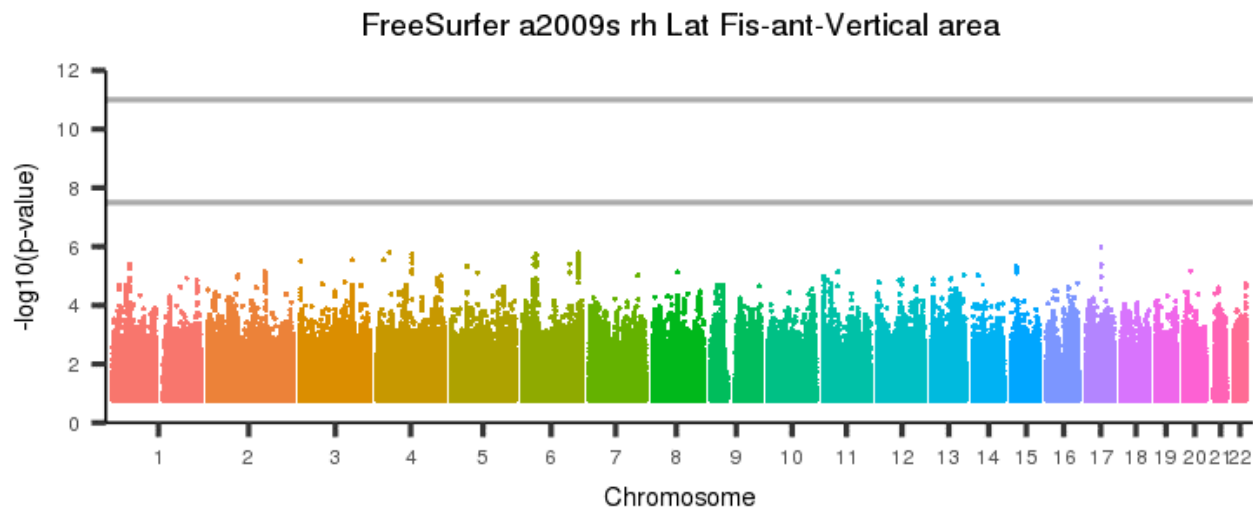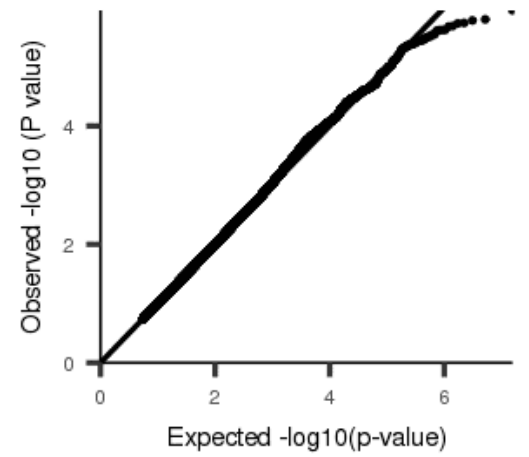

[back to list of plots](#)

Figure 2893: FreeSurfer a2009s rh Lat Fis-post area

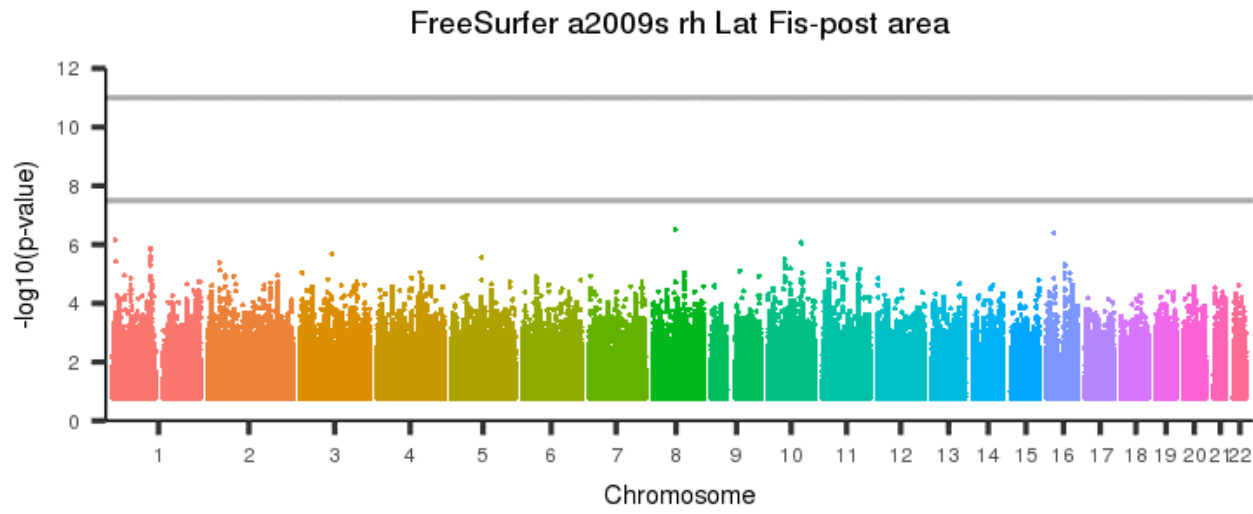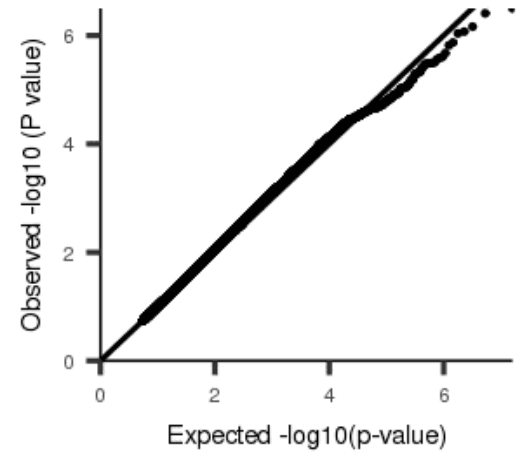

[back to list of plots](#)



Figure 2894: FreeSurfer a2009s rh Pole occipital area

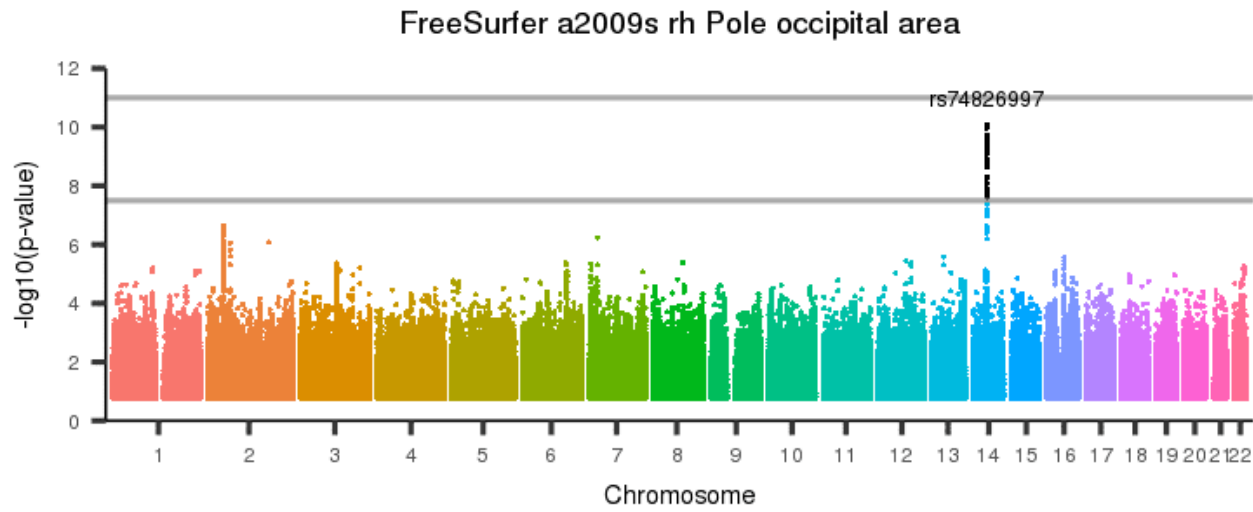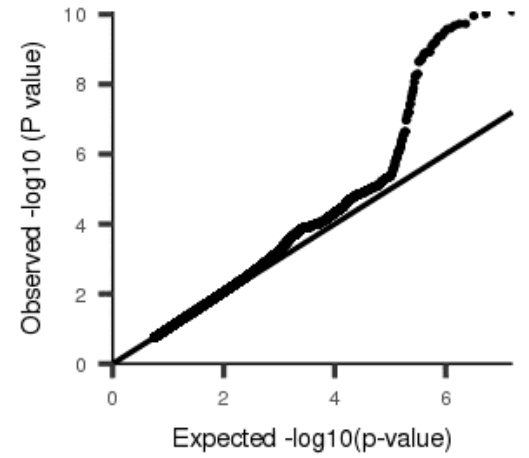

[back to list of plots](#)

Figure 2895: FreeSurfer a2009s rh Pole temporal area

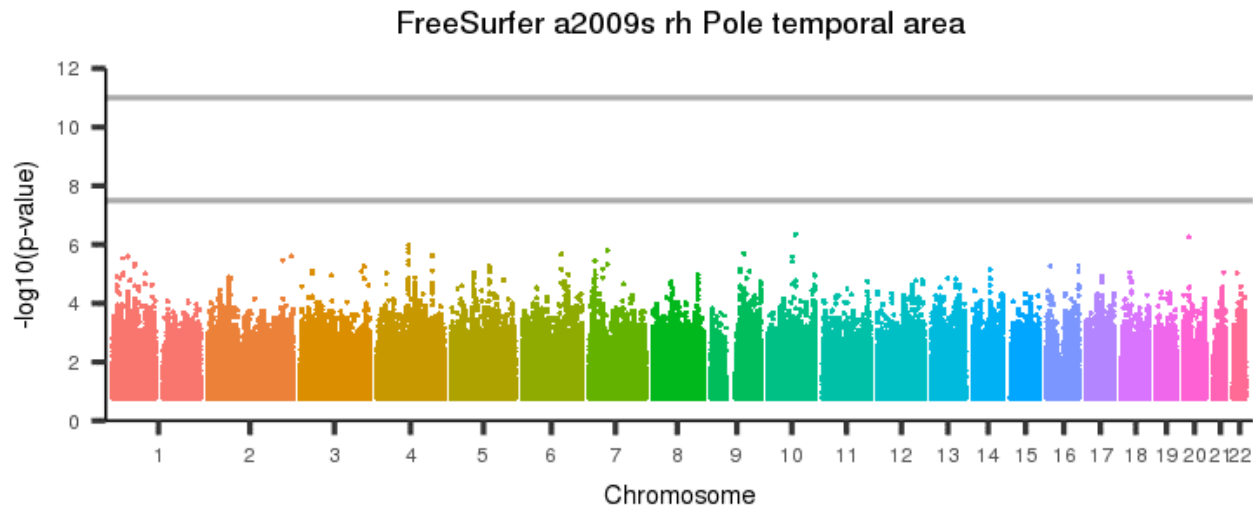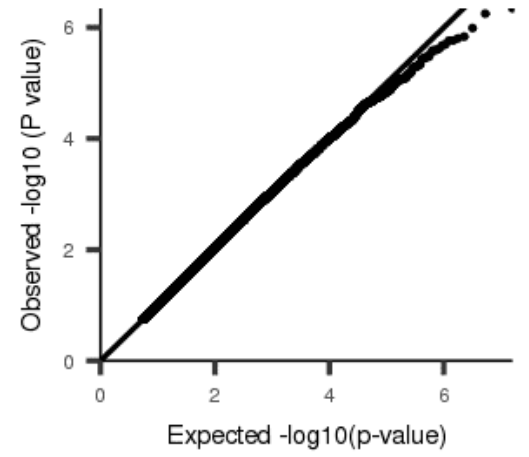

[back to list of plots](#)

Figure 2896: FreeSurfer a2009s rh S calcarine area

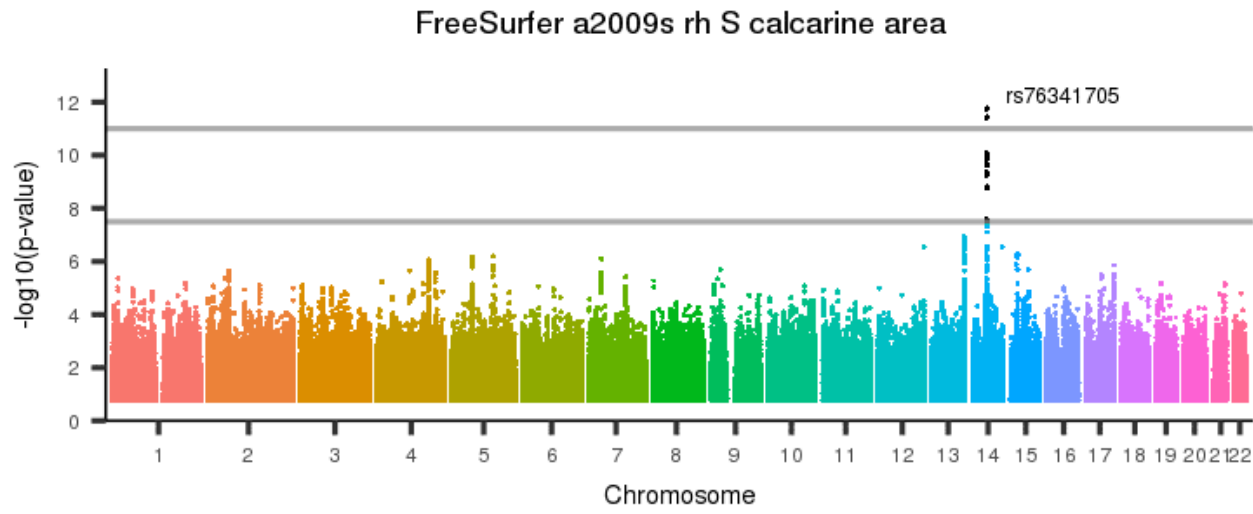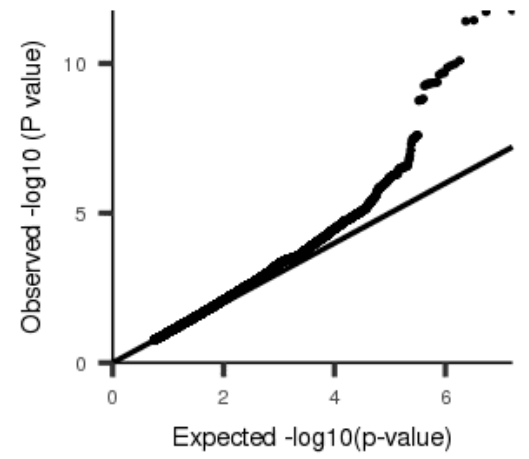

[back to list of plots](#)

Figure 2897: FreeSurfer a2009s rh S central area

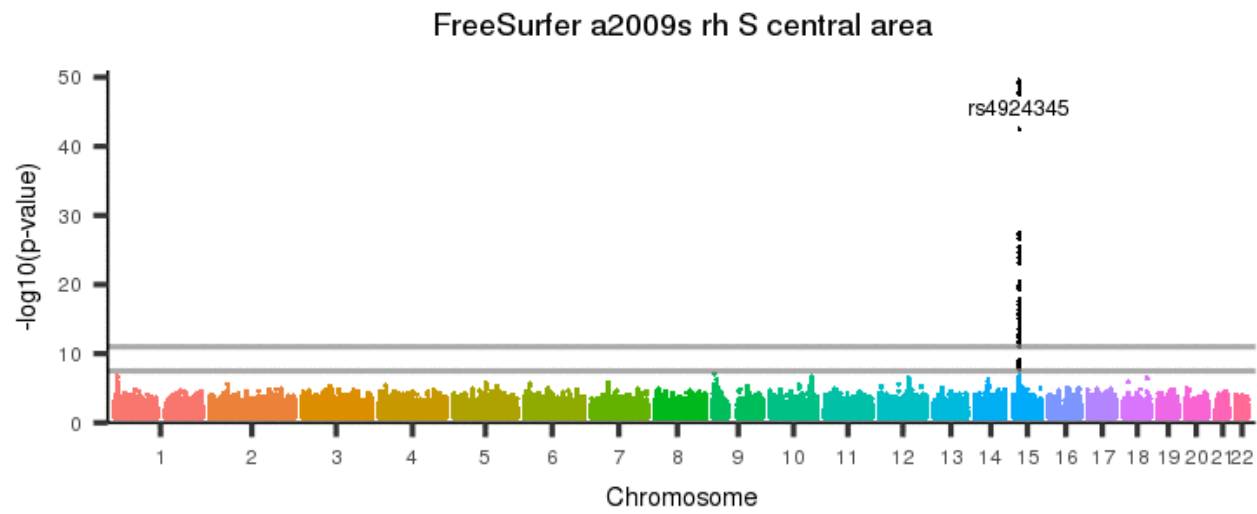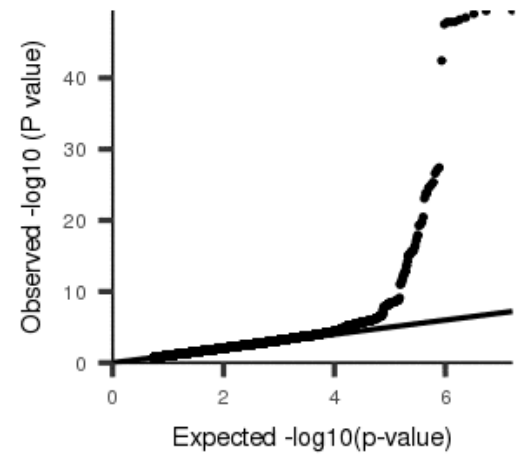

[back to list of plots](#)

Figure 2898: FreeSurfer a2009s rh S cingul-Marginalis area

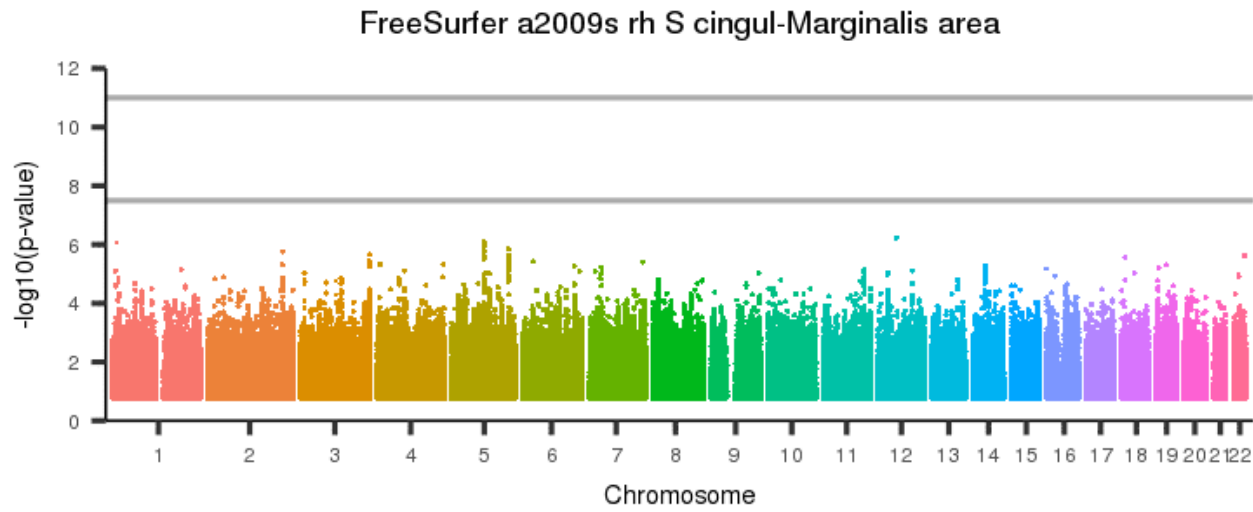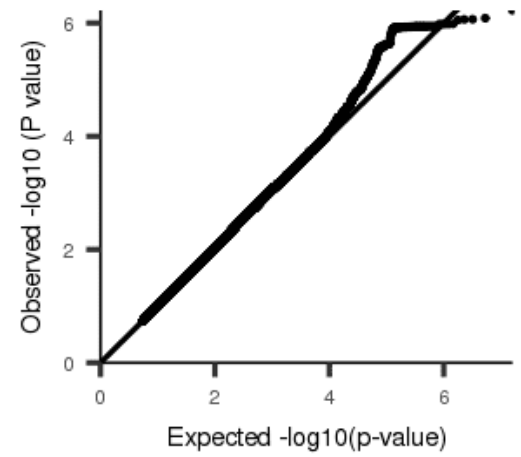

[back to list of plots](#)

Figure 2899: FreeSurfer a2009s rh S circular insula ant area

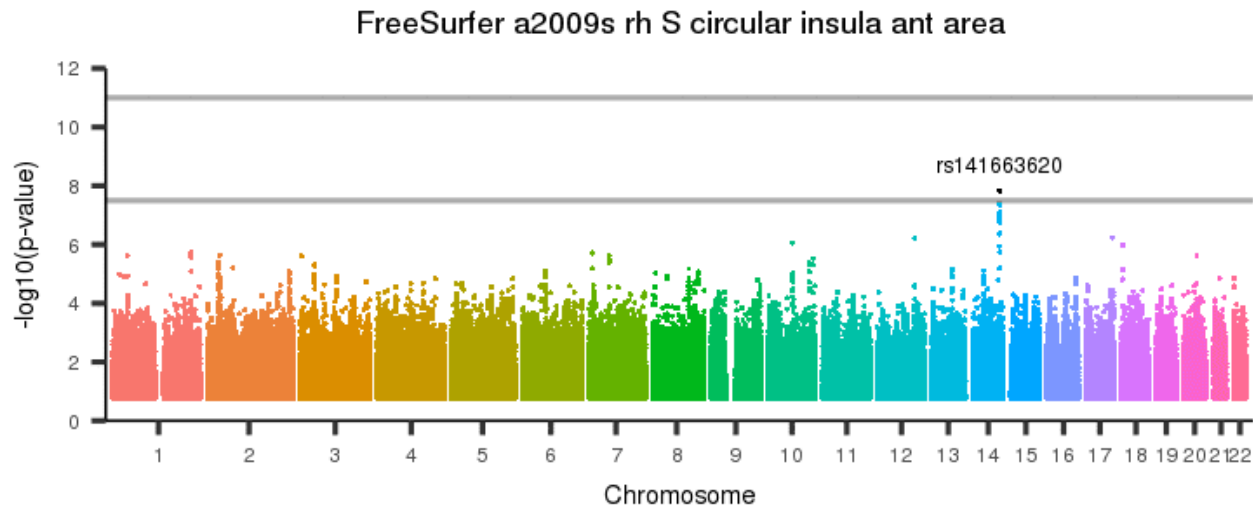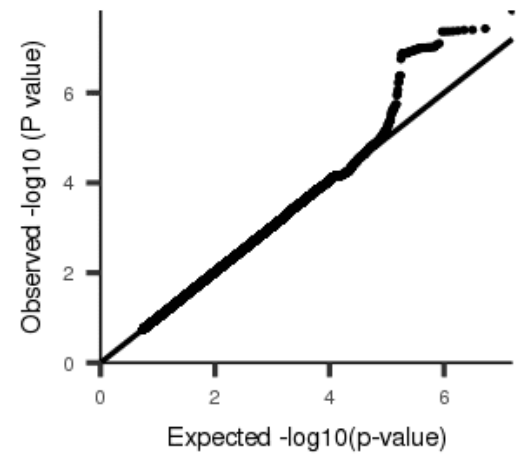

[back to list of plots](#)

Figure 2900: FreeSurfer a2009s rh S circular insula inf area

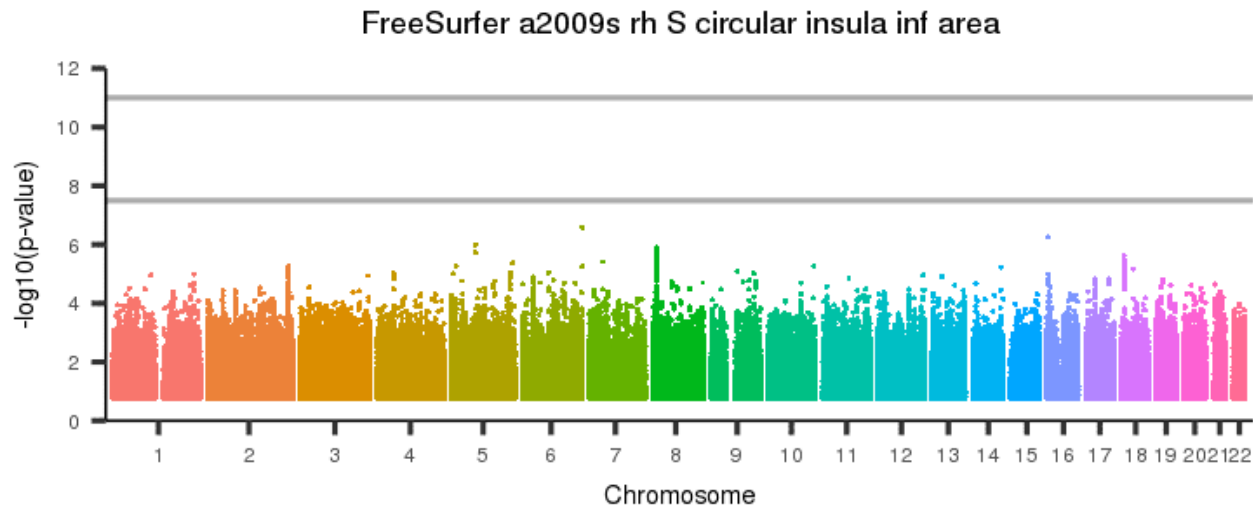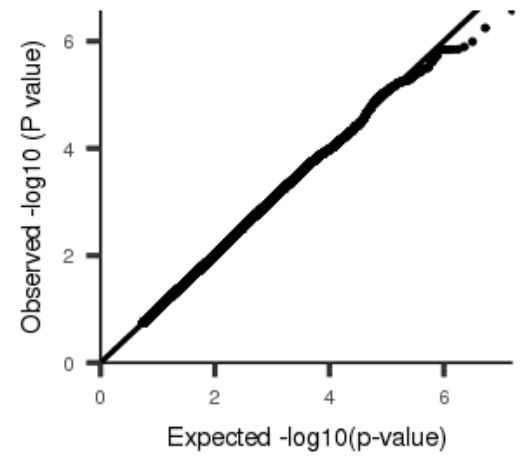

[back to list of plots](#)

Figure 2901: FreeSurfer a2009s rh S circular insula sup area

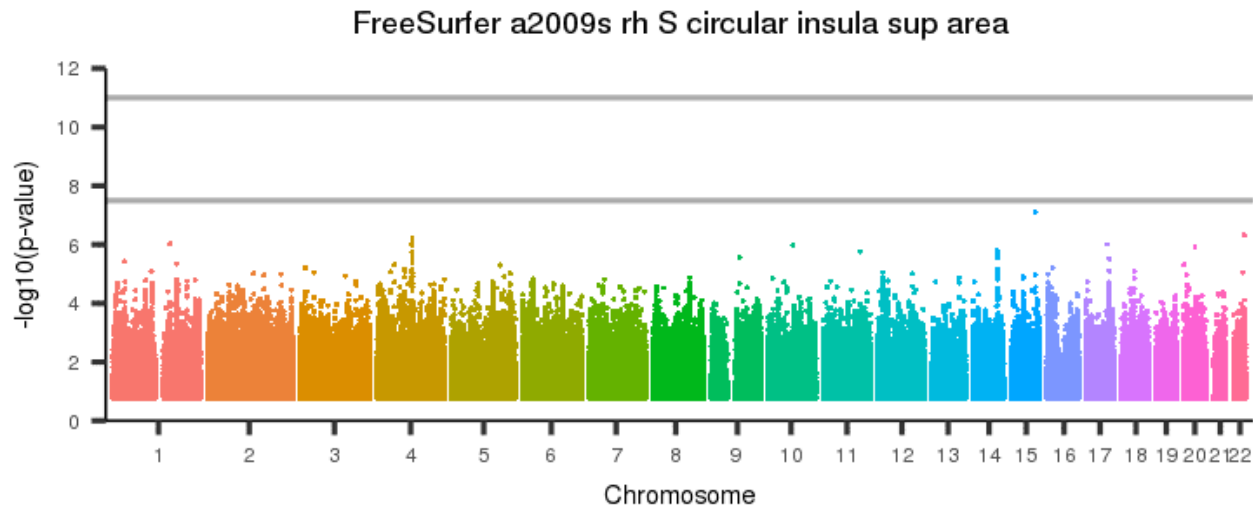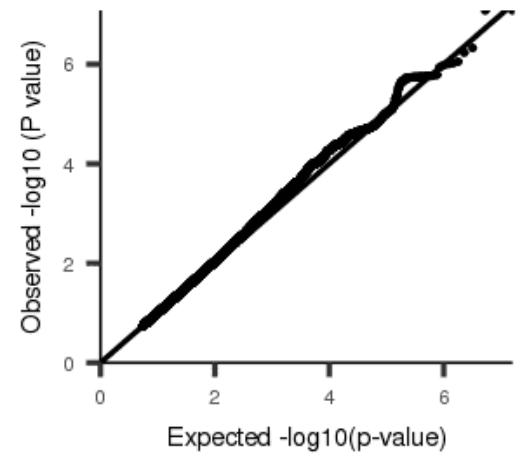

[back to list of plots](#)



Figure 2902: FreeSurfer a2009s rh S collat transv ant area

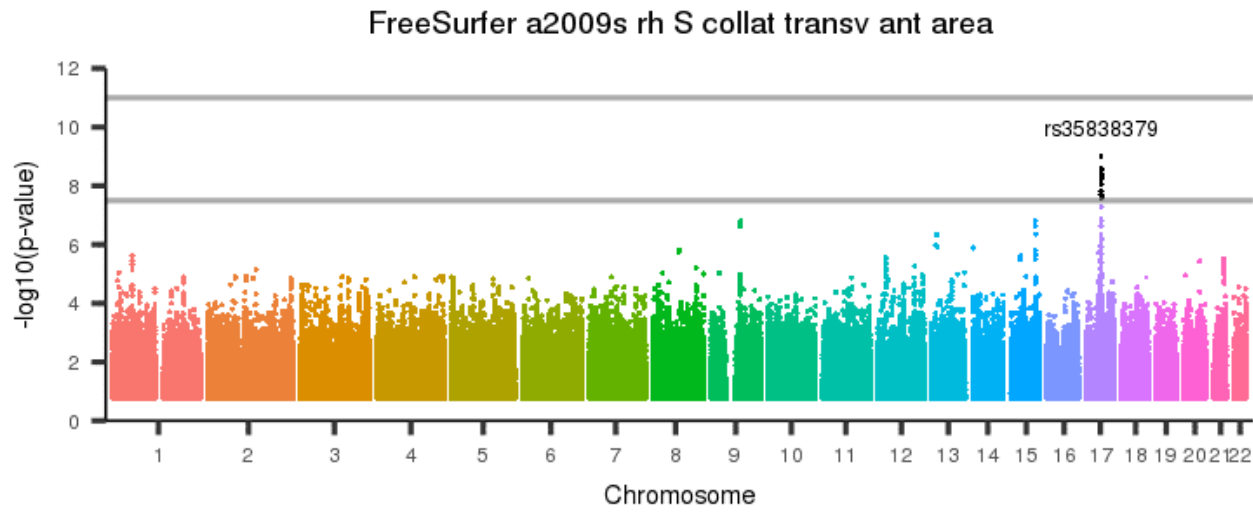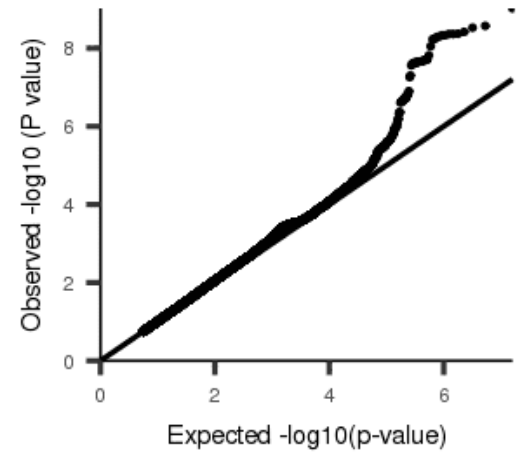

[back to list of plots](#)

Figure 2903: FreeSurfer a2009s rh S collat transv post area

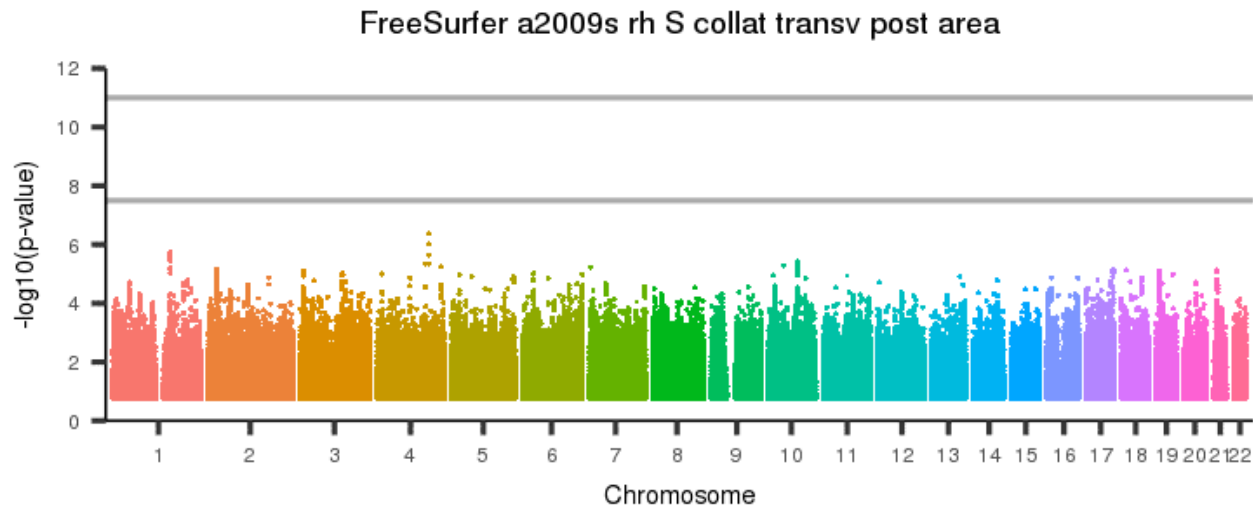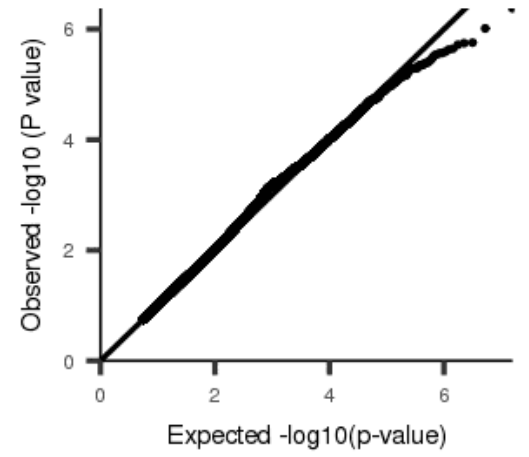

[back to list of plots](#)

Figure 2904: FreeSurfer a2009s rh S front inf area

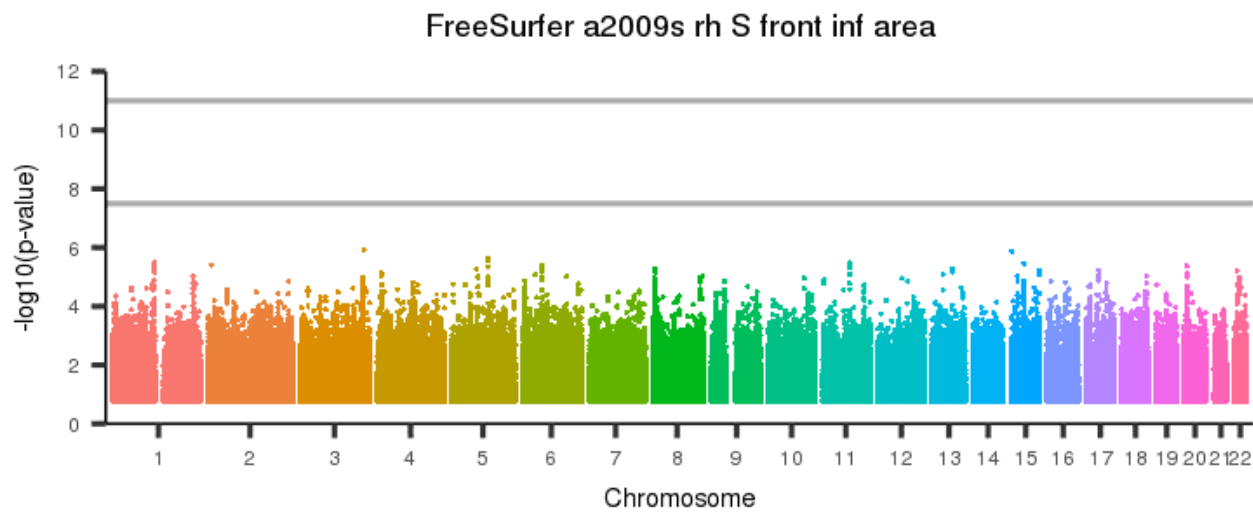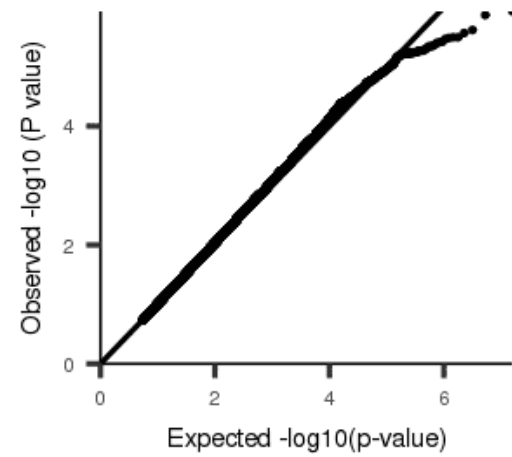

[back to list of plots](#)

Figure 2905: FreeSurfer a2009s rh S front middle area

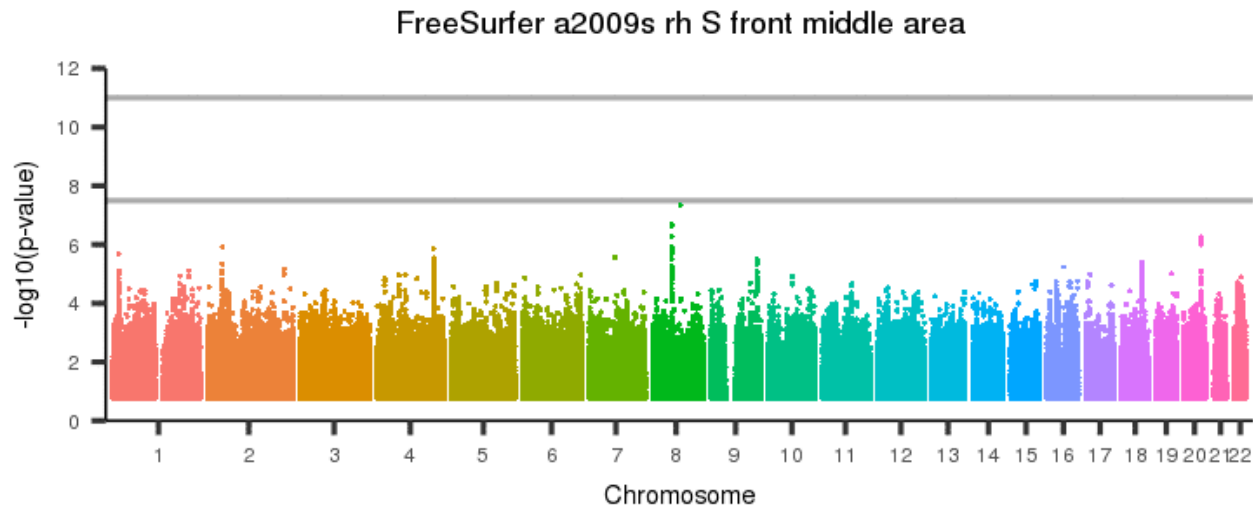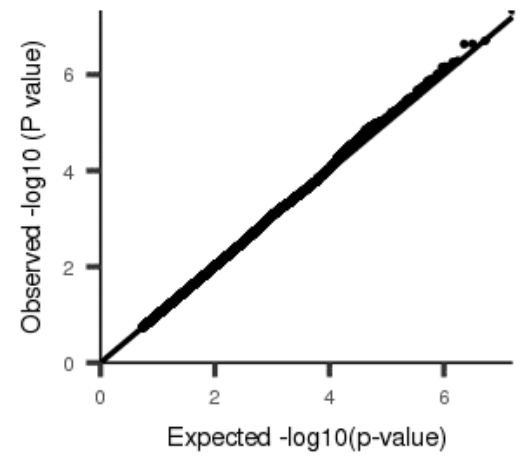

[back to list of plots](#)

Figure 2906: FreeSurfer a2009s rh S front sup area

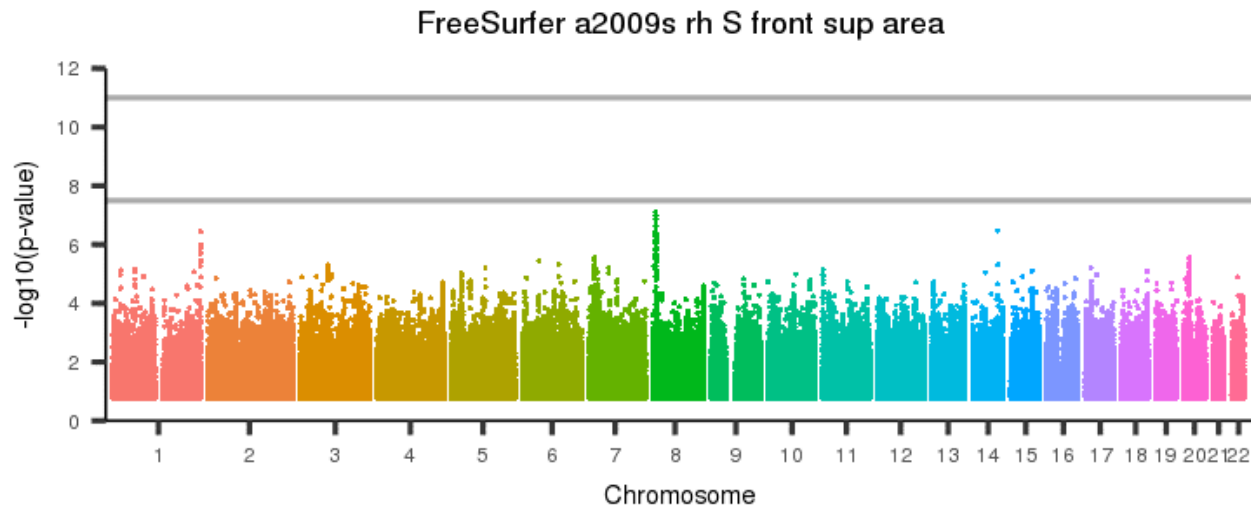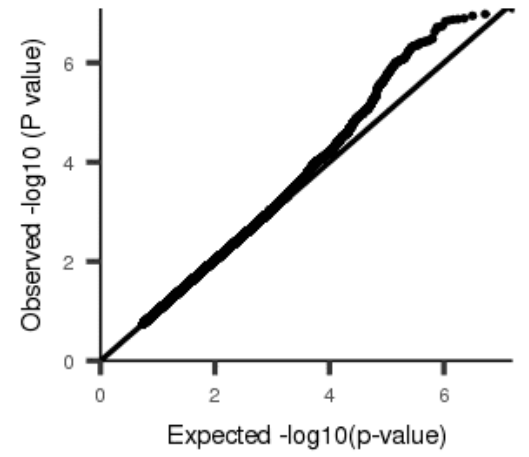

[back to list of plots](#)

Figure 2907: FreeSurfer a2009s rh S interm prim-Jensen area

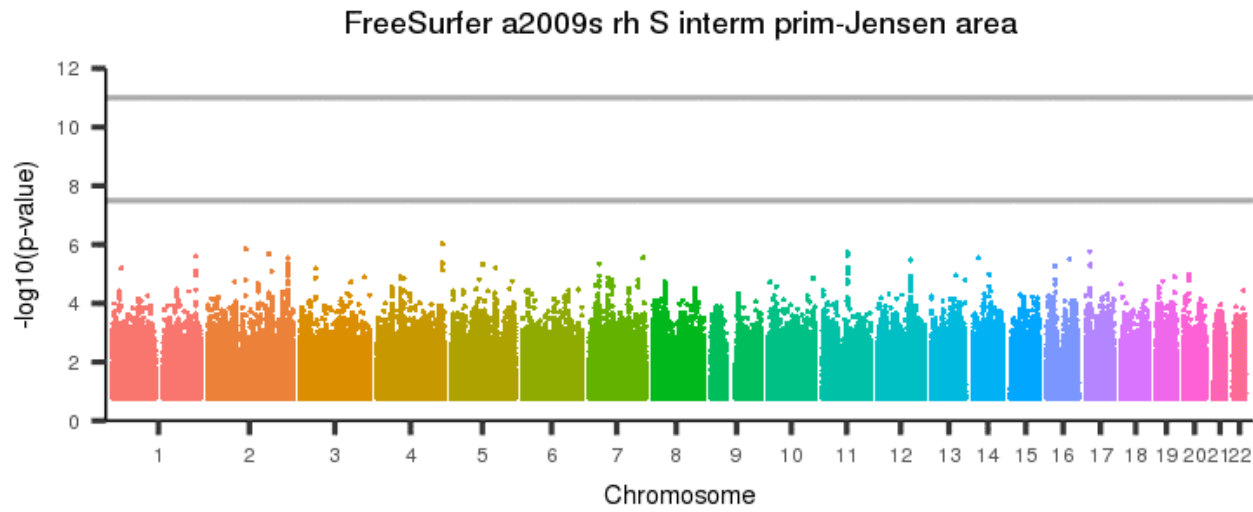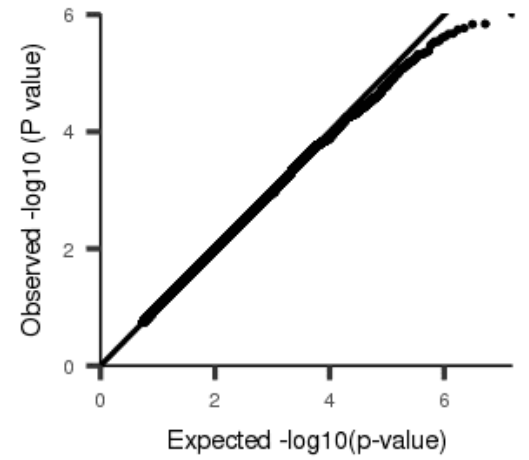

[back to list of plots](#)

Figure 2908: FreeSurfer a2009s rh S intrapariet and P trans area

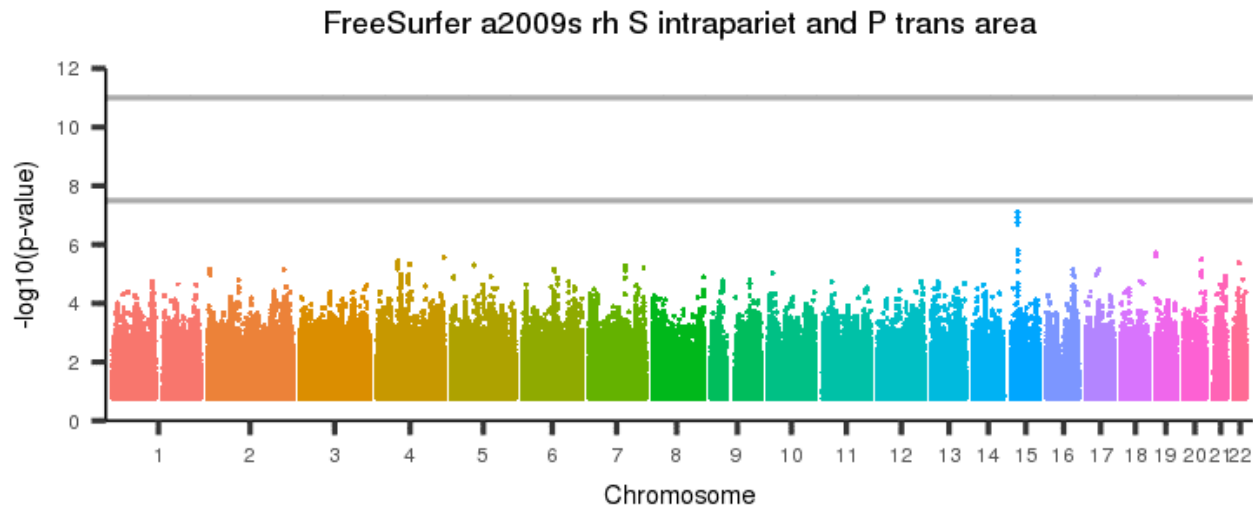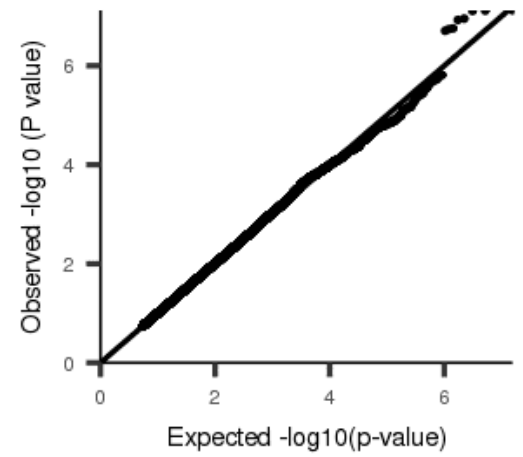

[back to list of plots](#)

Figure 2909: FreeSurfer a2009s rh S oc middle and Lunatus area

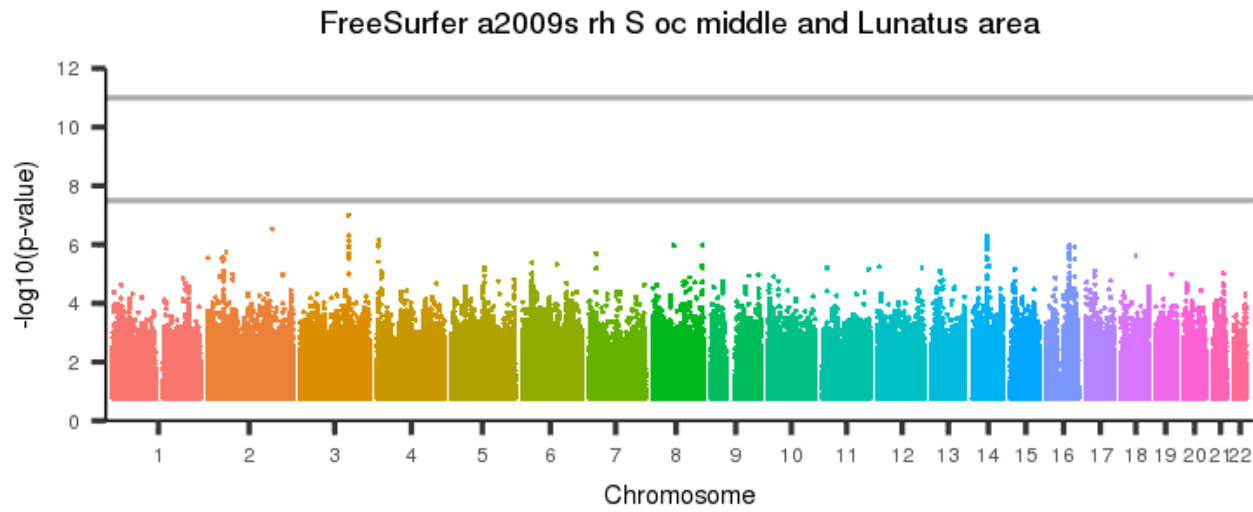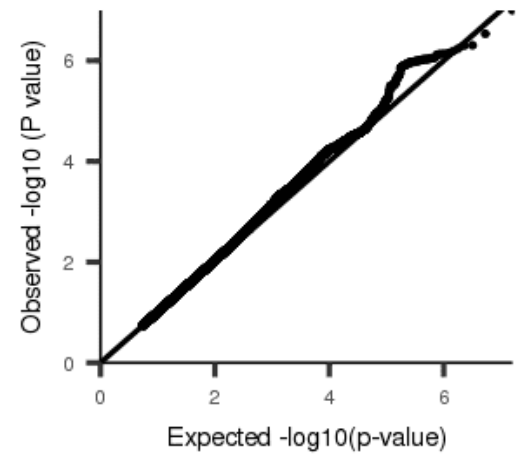

[back to list of plots](#)



Figure 2910: FreeSurfer a2009s rh S oc sup and transversal area

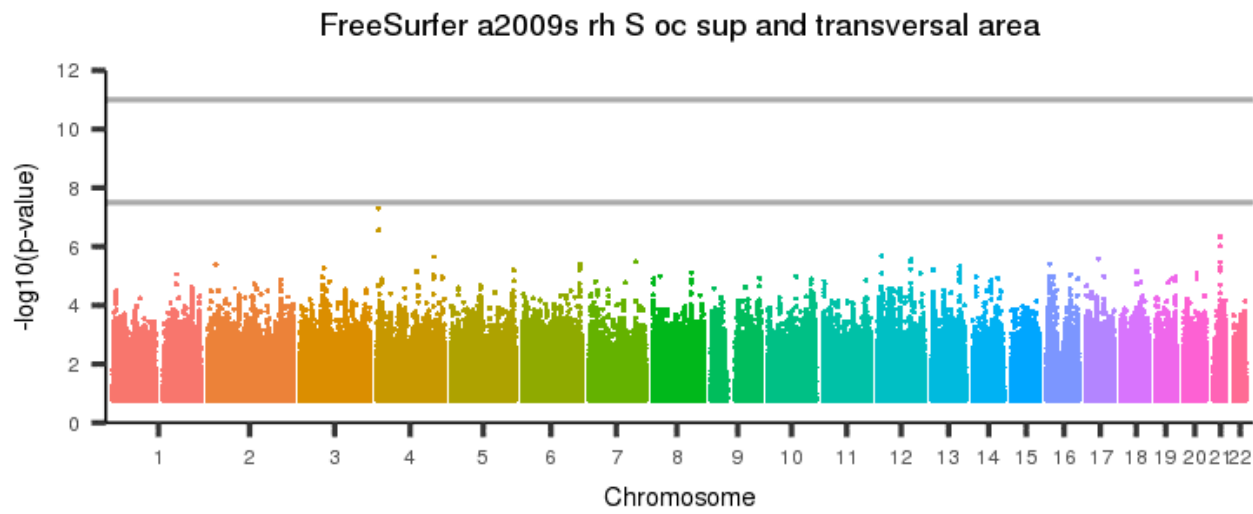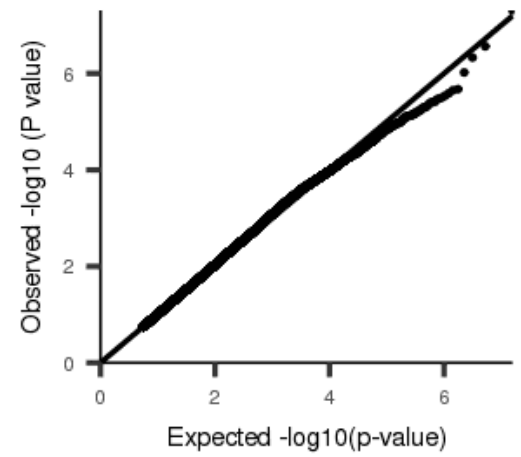

[back to list of plots](#)

Figure 2911: FreeSurfer a2009s rh S occipital ant area

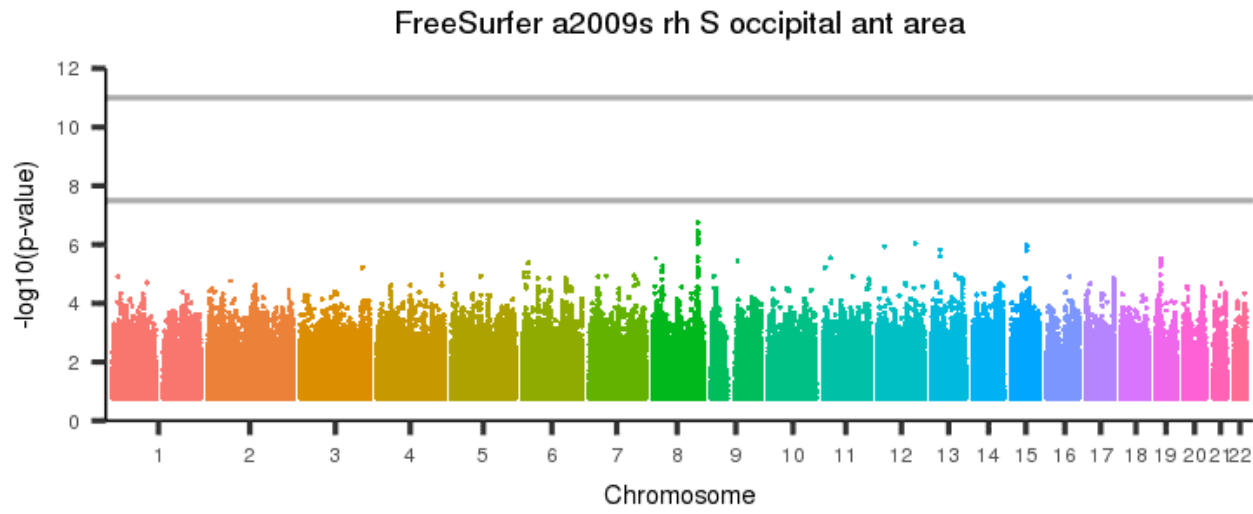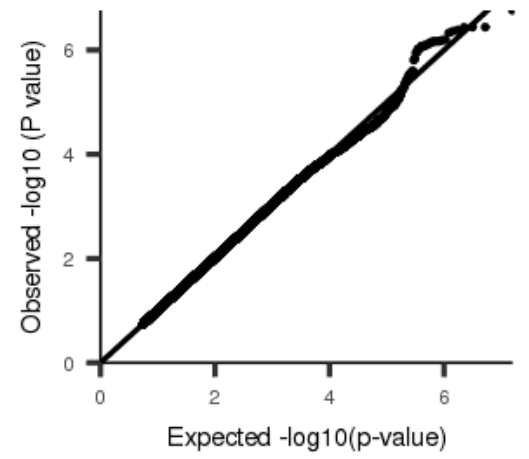

[back to list of plots](#)

Figure 2912: FreeSurfer a2009s rh S oc-temp lat area

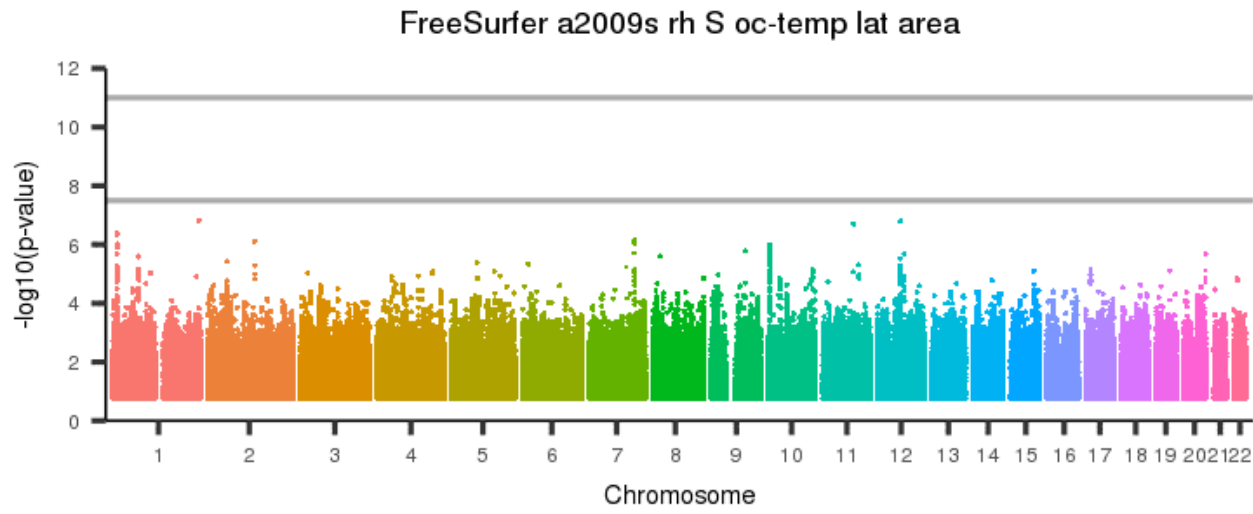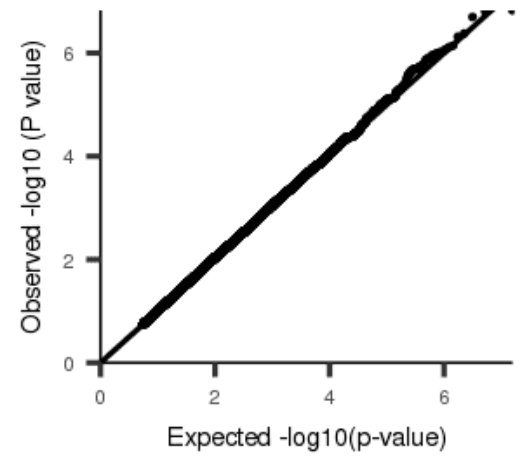

[back to list of plots](#)

Figure 2913: FreeSurfer a2009s rh S oc-temp med and Lingual area

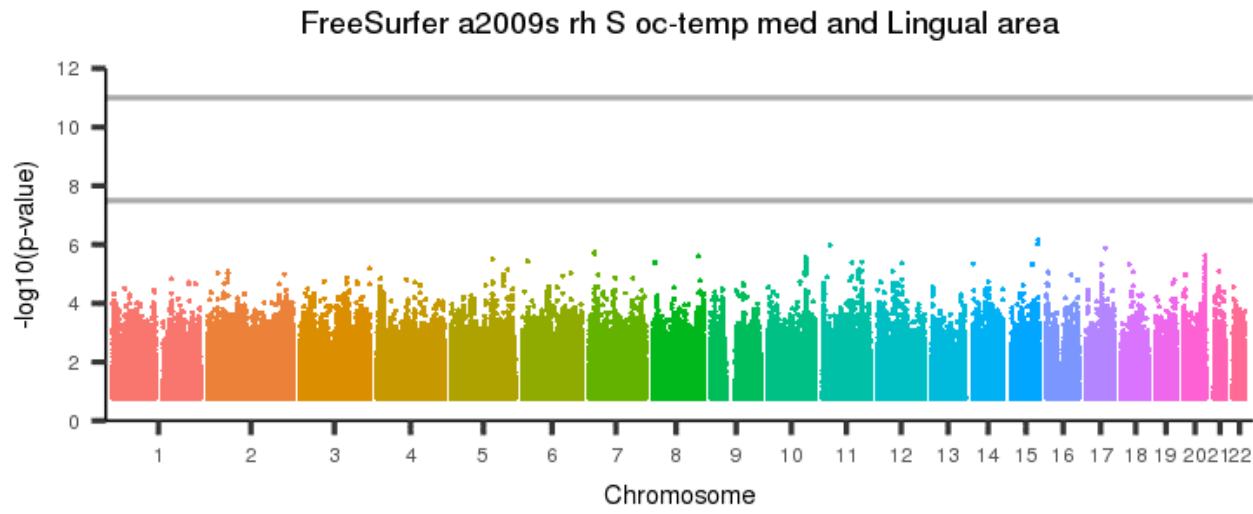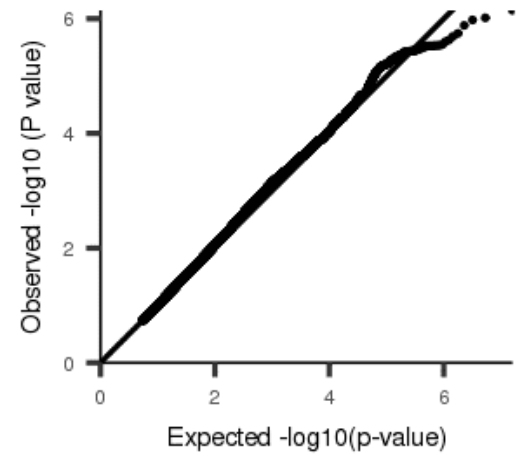

[back to list of plots](#)

Figure 2914: FreeSurfer a2009s rh S orbital lateral area

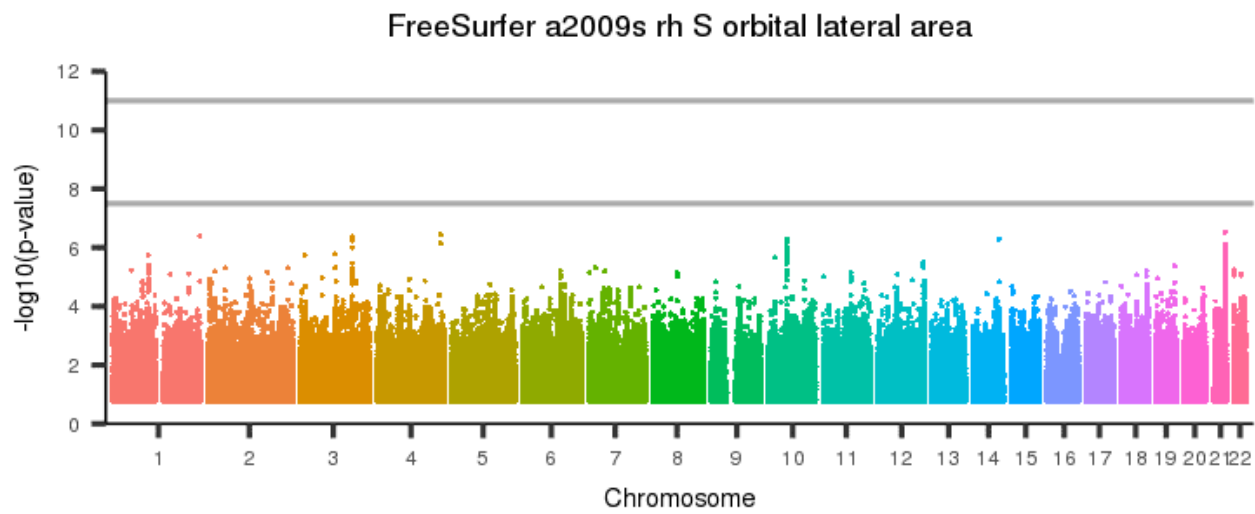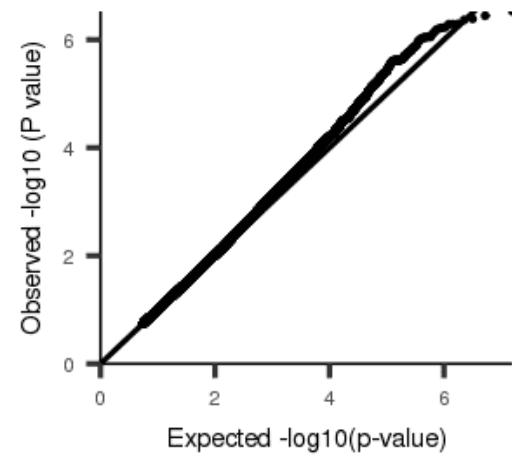

[back to list of plots](#)

Figure 2915: FreeSurfer a2009s rh S orbital med-olfact area

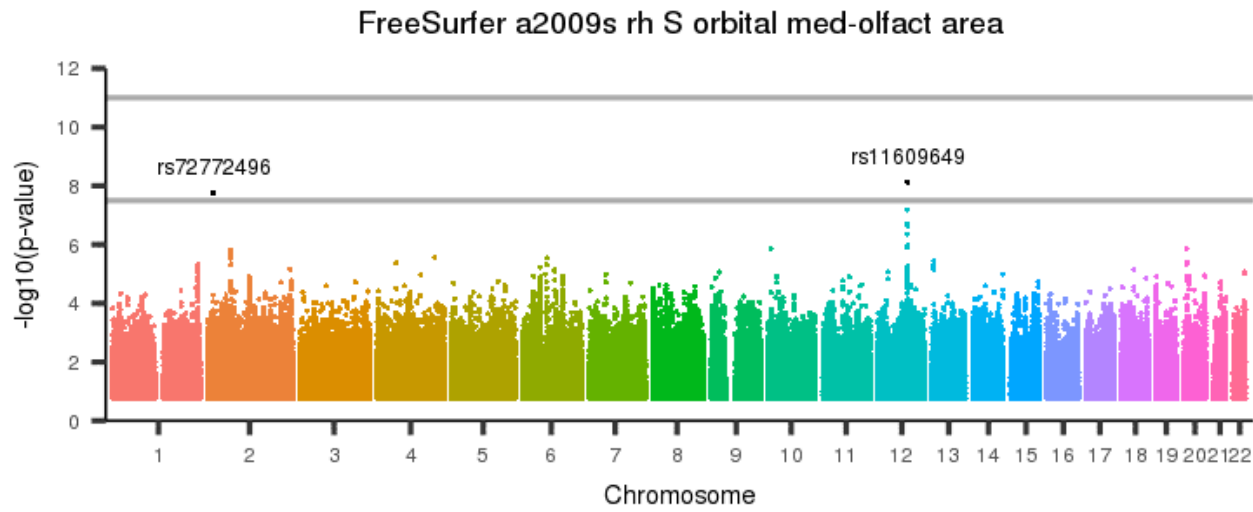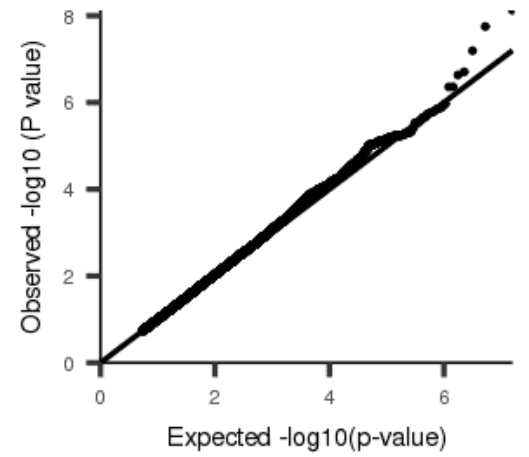

[back to list of plots](#)

Figure 2916: FreeSurfer a2009s rh S orbital-H Shaped area

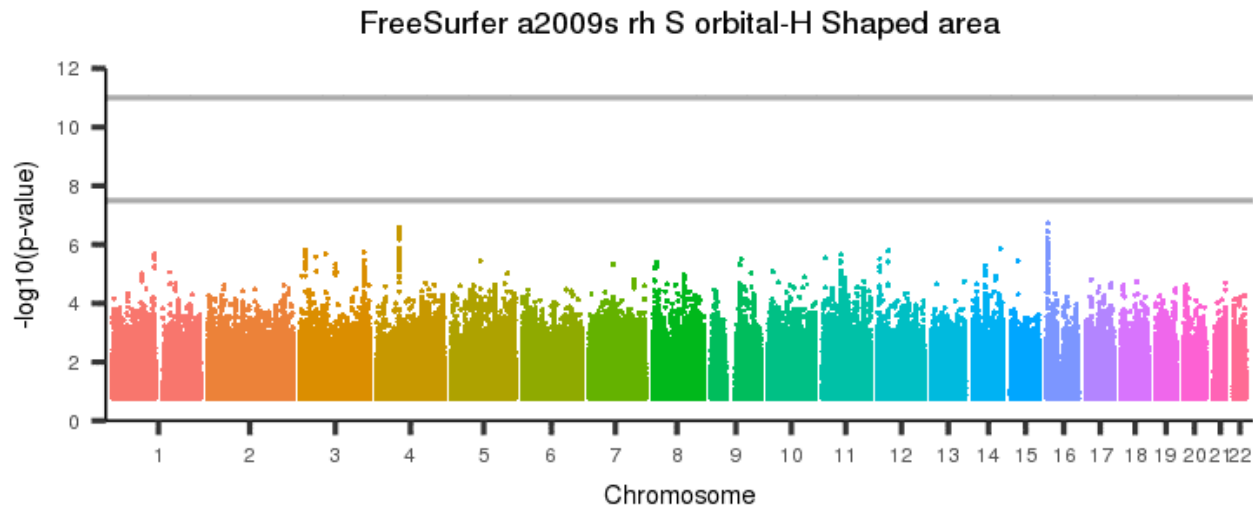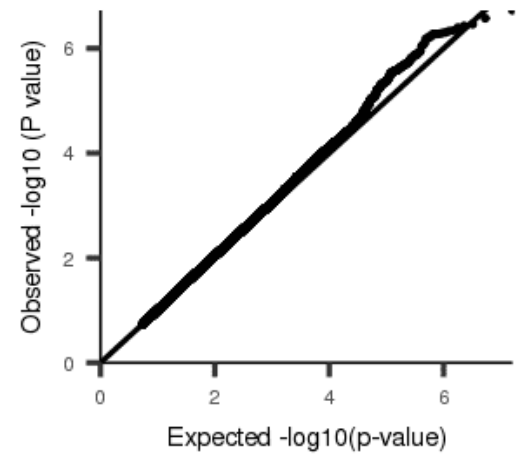

[back to list of plots](#)

Figure 2917: FreeSurfer a2009s rh S parieto occipital area

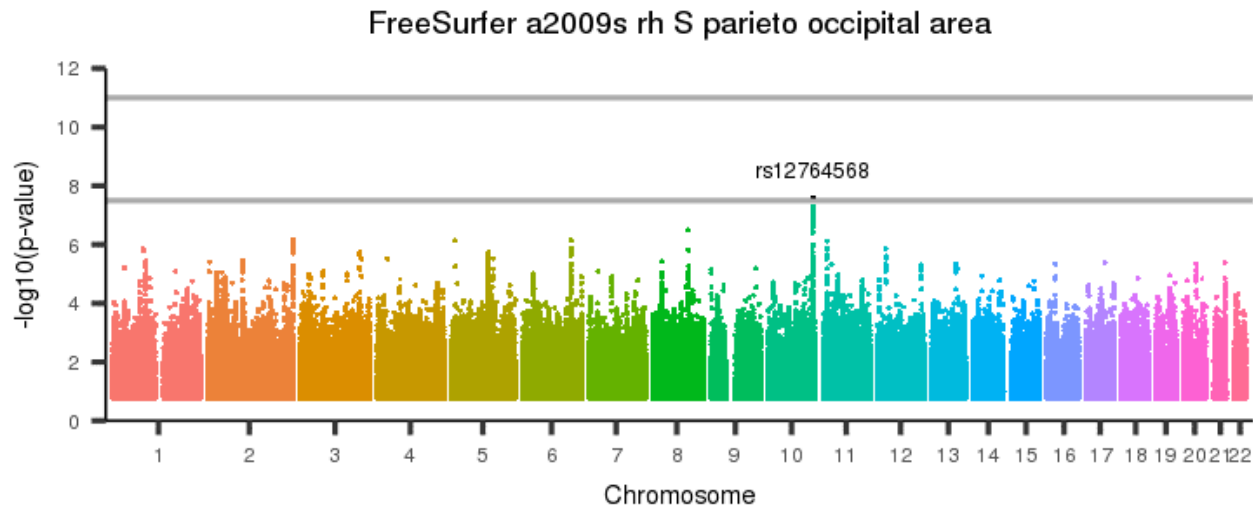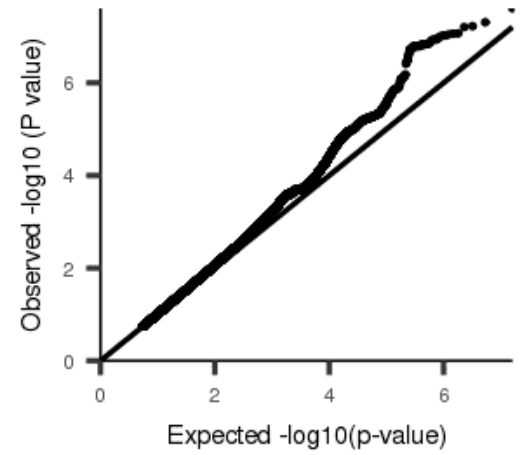

[back to list of plots](#)



Figure 2918: FreeSurfer a2009s rh S pericallosal area

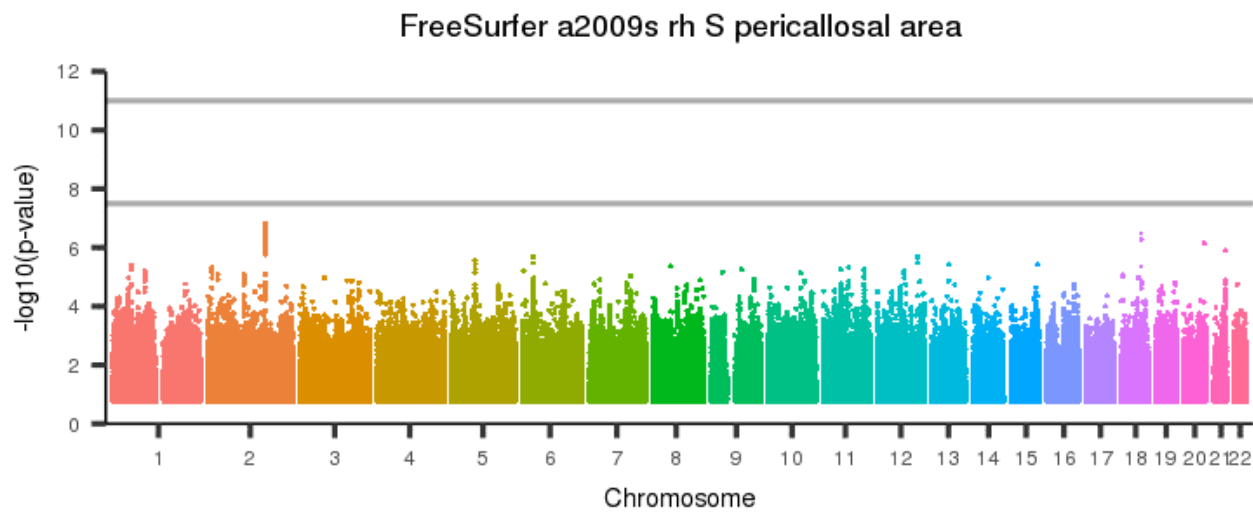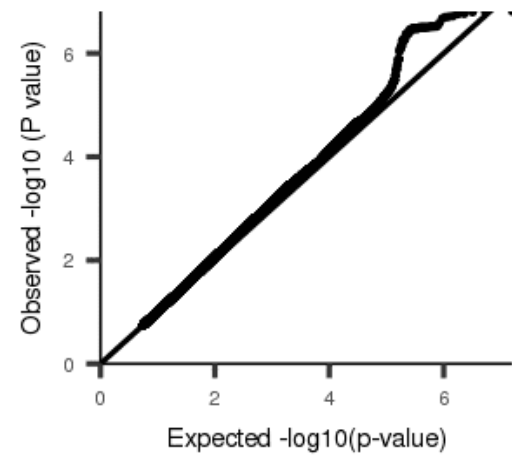

[back to list of plots](#)

Figure 2919: FreeSurfer a2009s rh S postcentral area

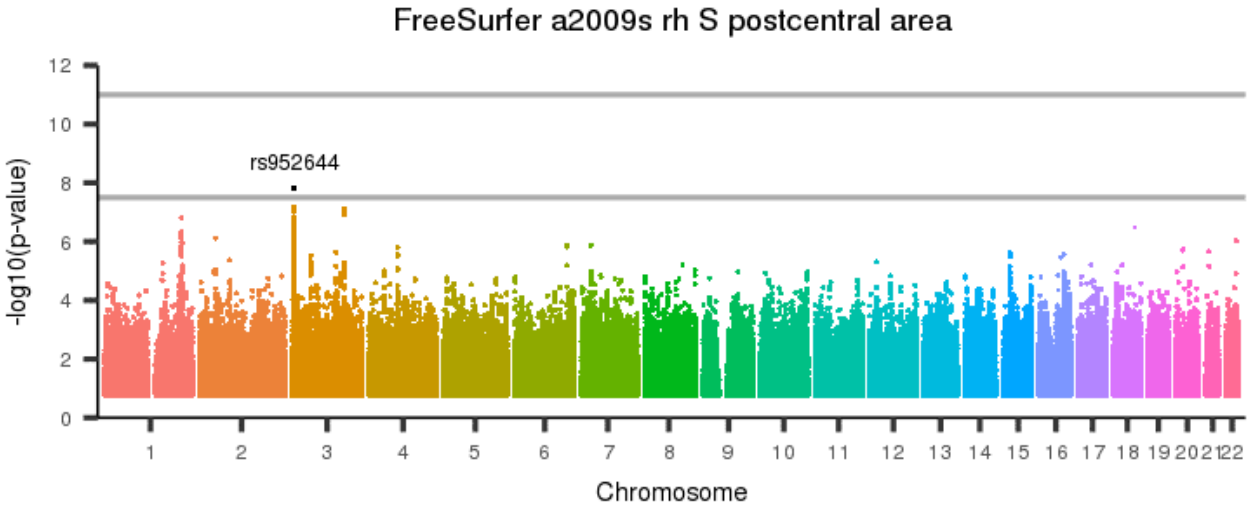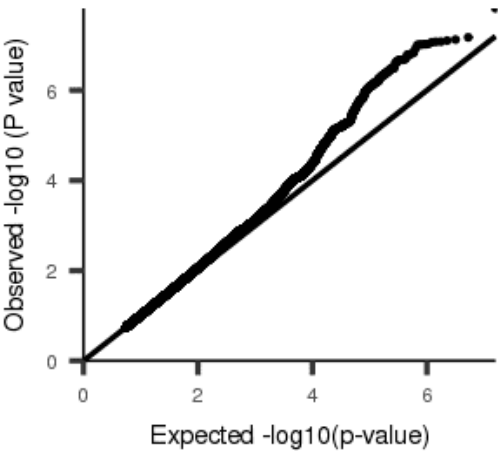

[back to list of plots](#)

Figure 2920: FreeSurfer a2009s rh S precentral-inf-part area

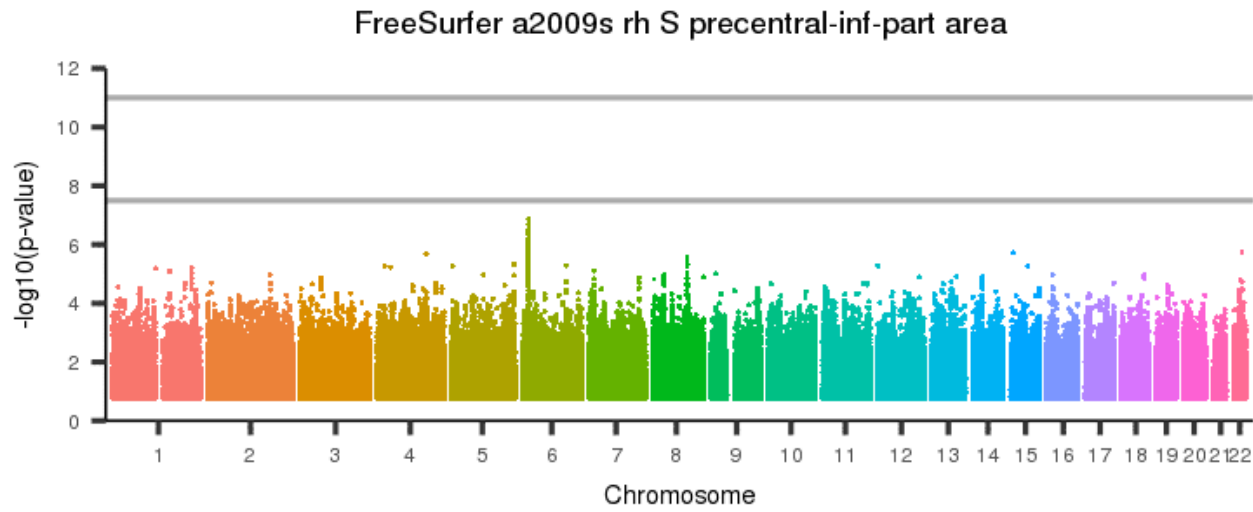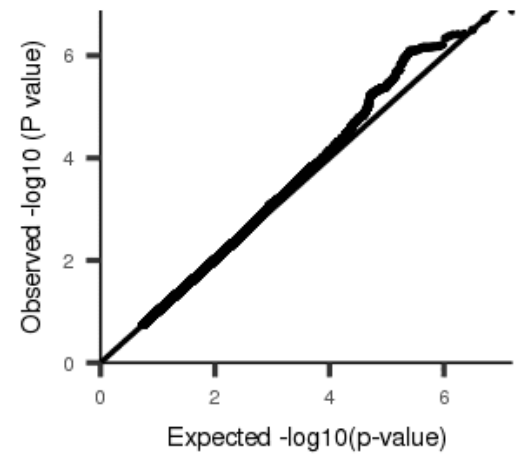

[back to list of plots](#)

Figure 2921: FreeSurfer a2009s rh S precentral-sup-part area

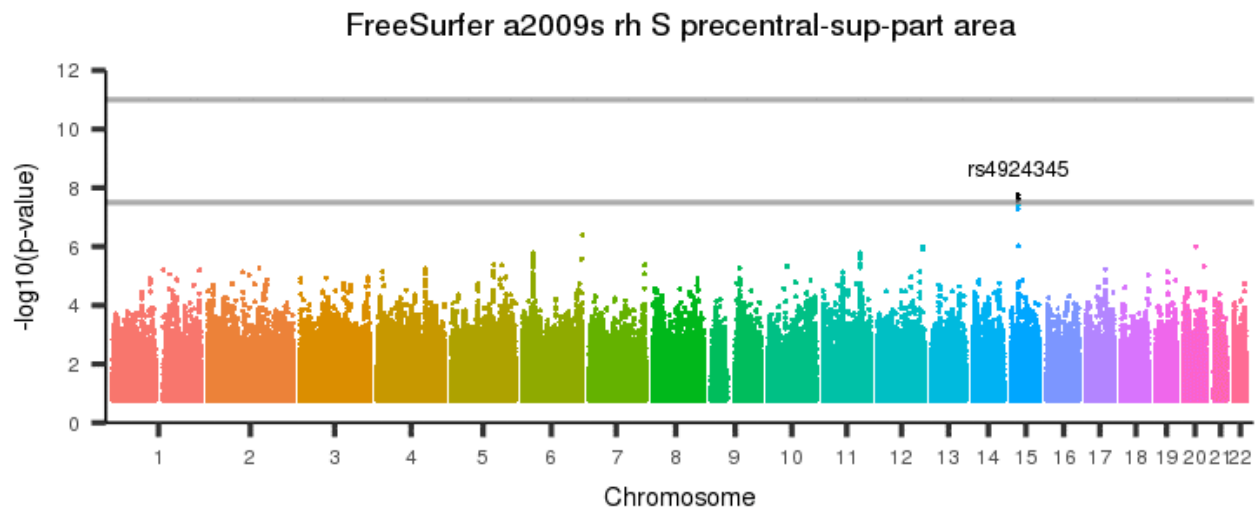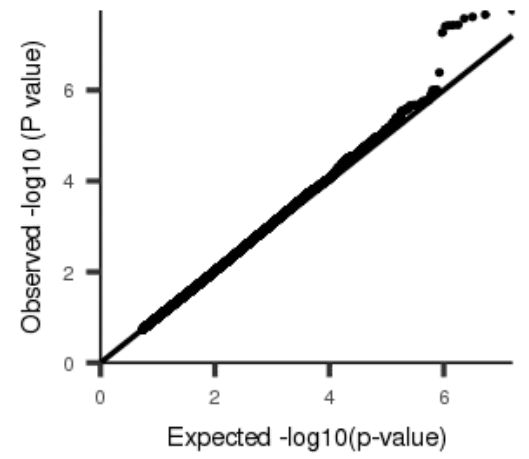

[back to list of plots](#)

Figure 2922: FreeSurfer a2009s rh S suborbital area

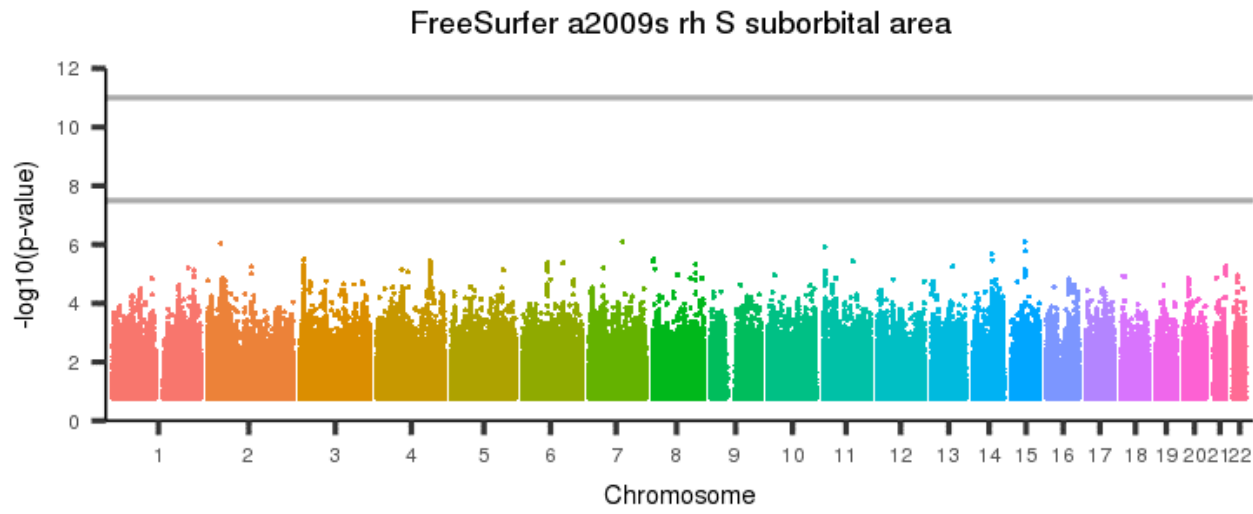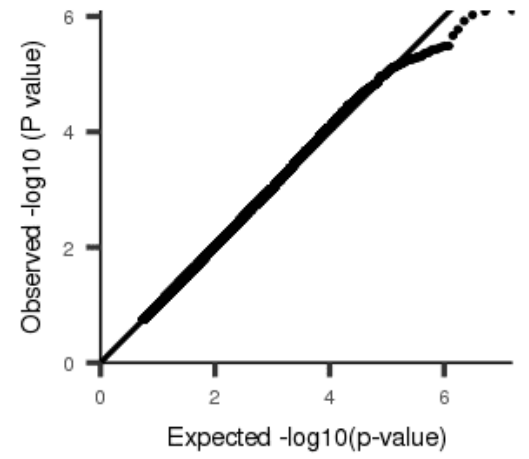

[back to list of plots](#)

Figure 2923: FreeSurfer a2009s rh S subparietal area

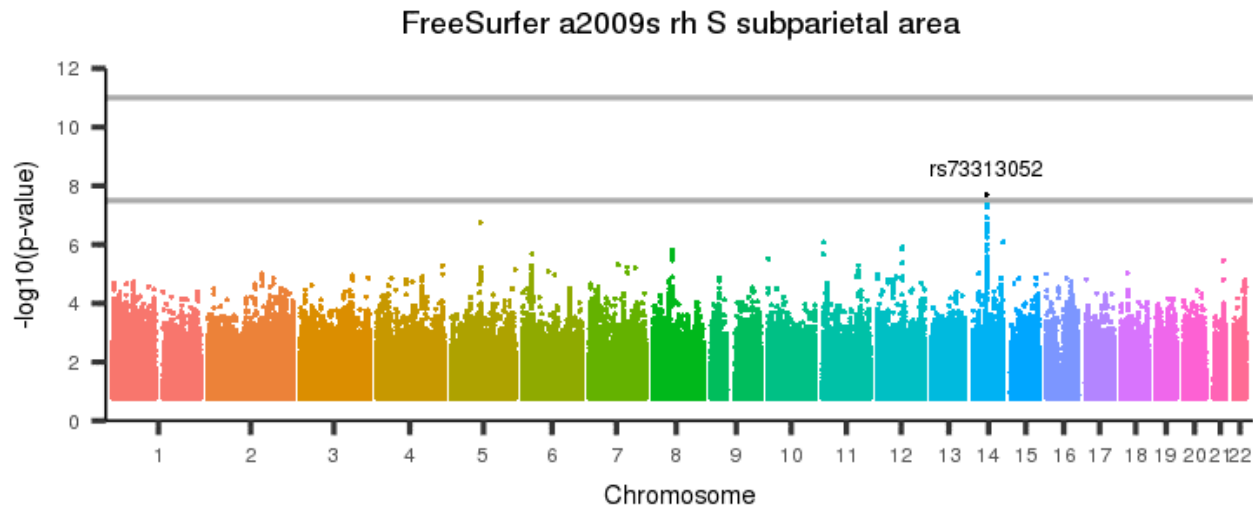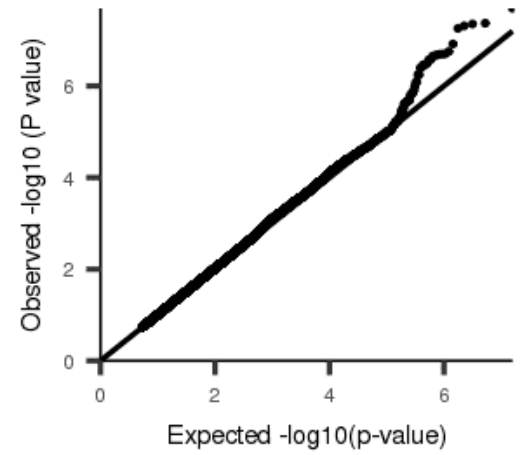

[back to list of plots](#)

Figure 2924: FreeSurfer a2009s rh S temporal inf area

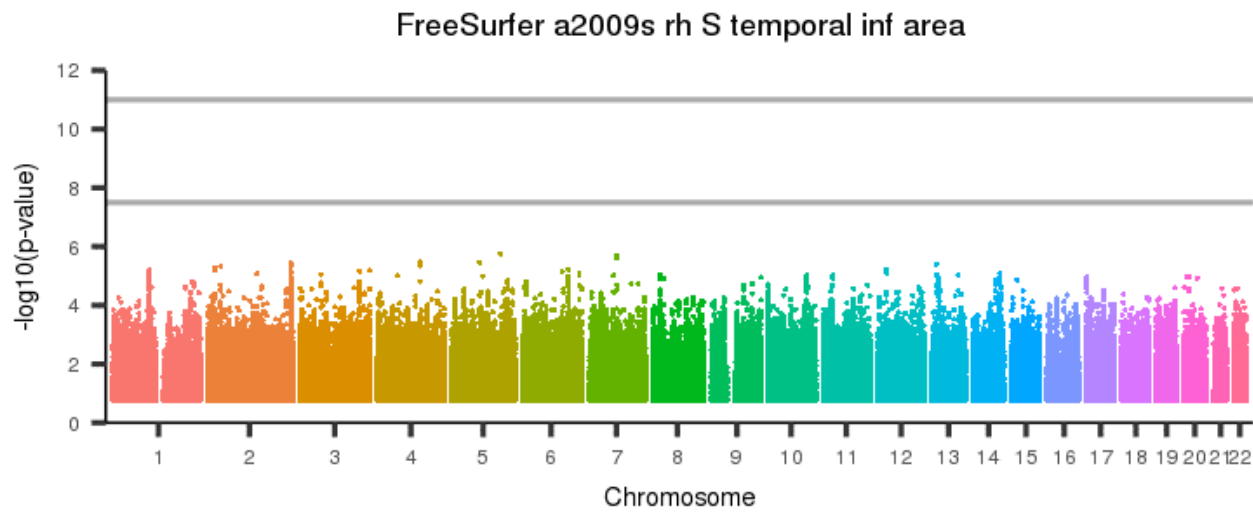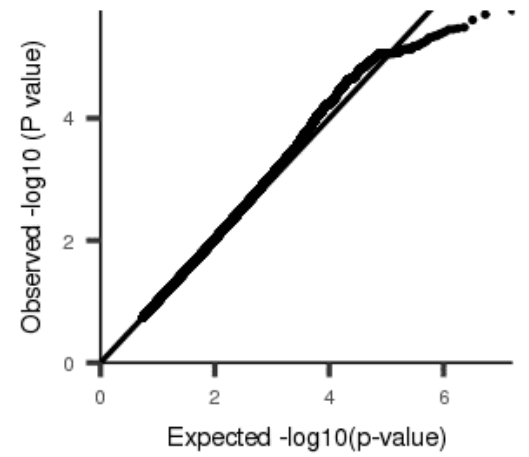

[back to list of plots](#)

Figure 2925: FreeSurfer a2009s rh S temporal sup area

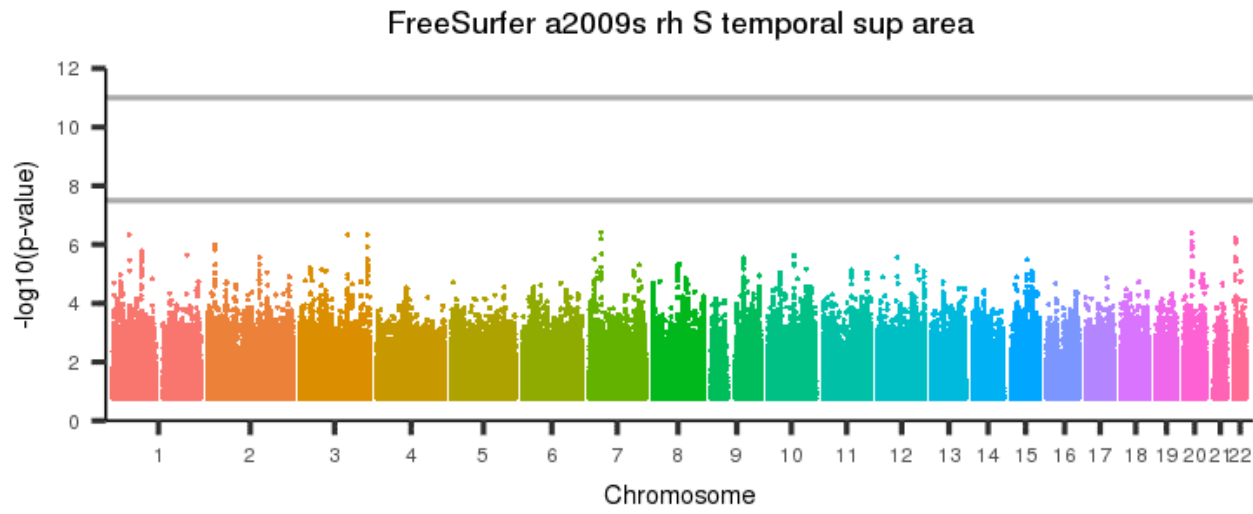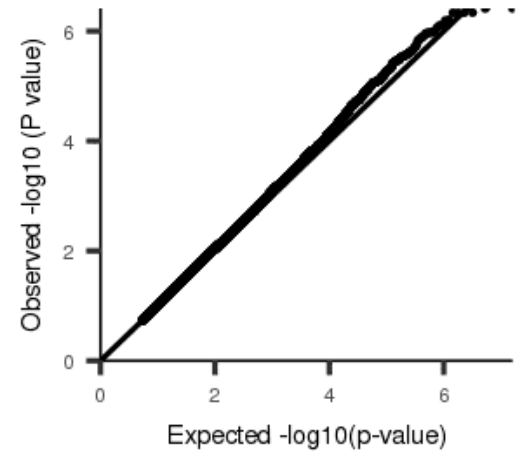

[back to list of plots](#)



Figure 2926: FreeSurfer a2009s rh S temporal transverse area

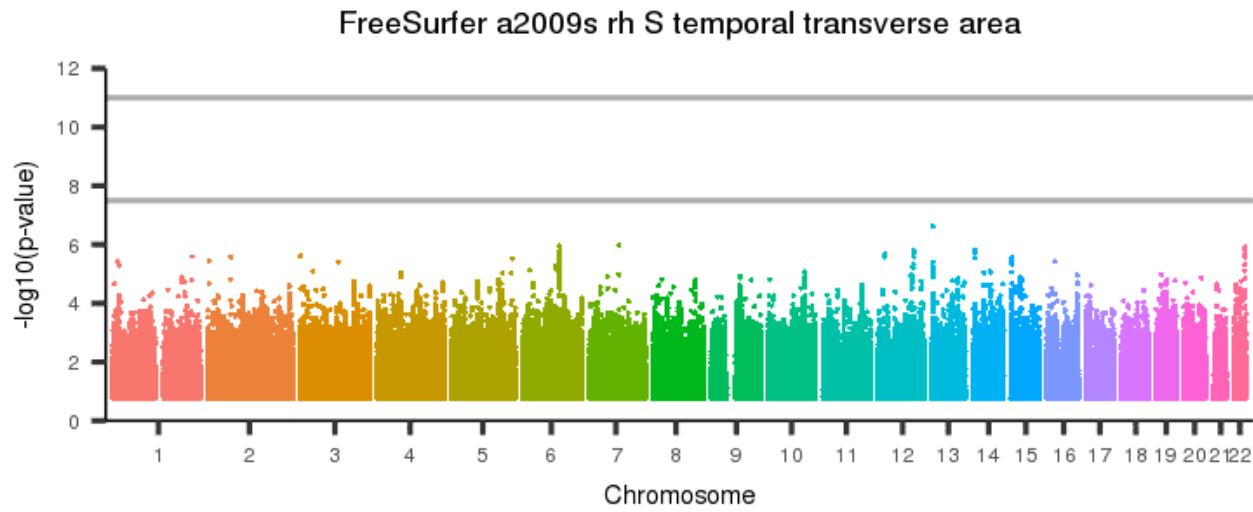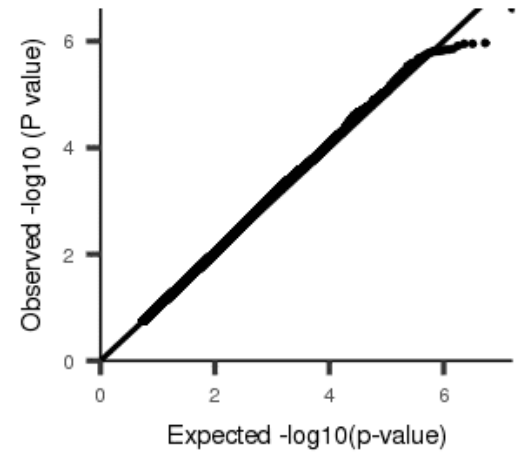

[back to list of plots](#)

Figure 2927: FreeSurfer DKTAtlas lh caudalanteriorcingulate thickness

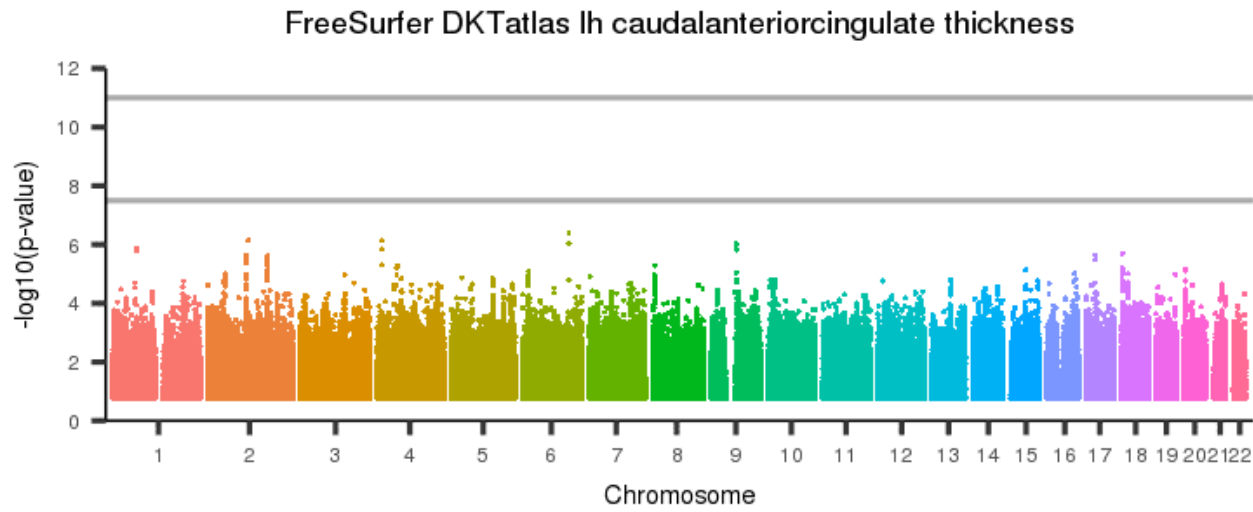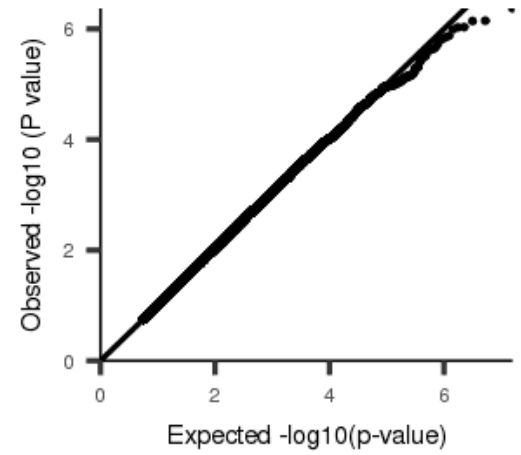

[back to list of plots](#)

Figure 2928: FreeSurfer DKTatlas lh caudalmiddlefrontal thickness

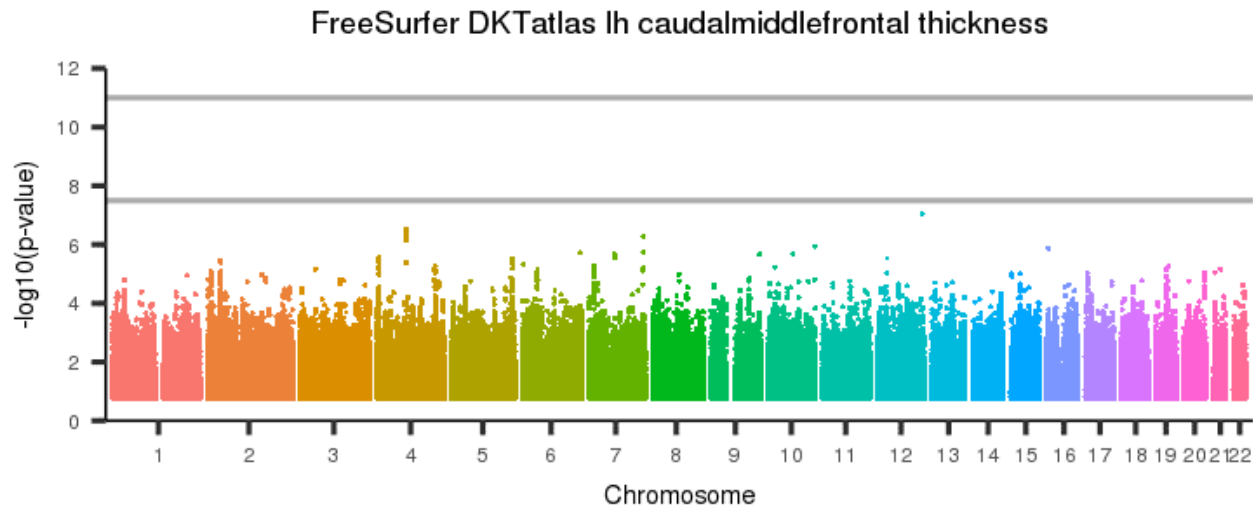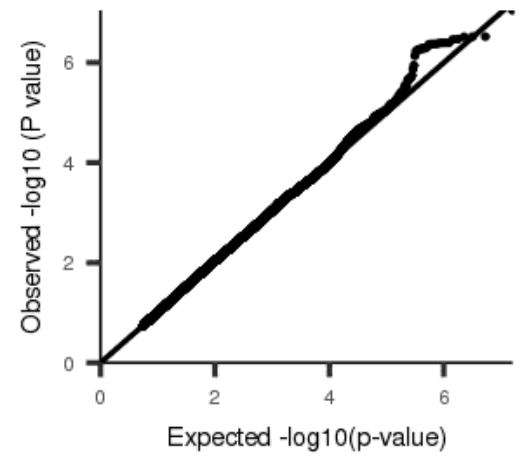

[back to list of plots](#)

Figure 2929: FreeSurfer DKTAtlas lh cuneus thickness

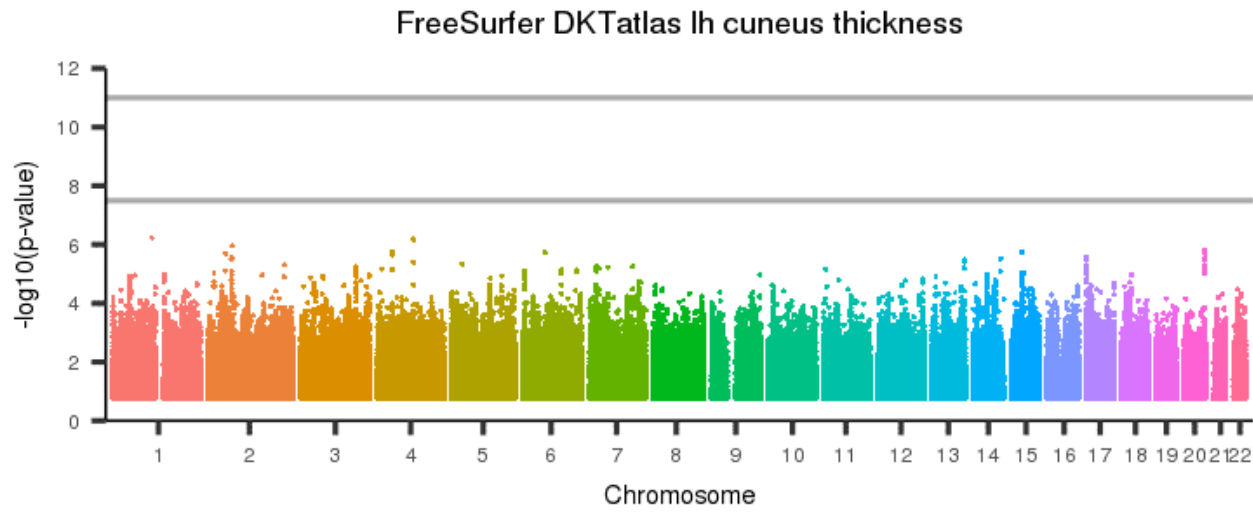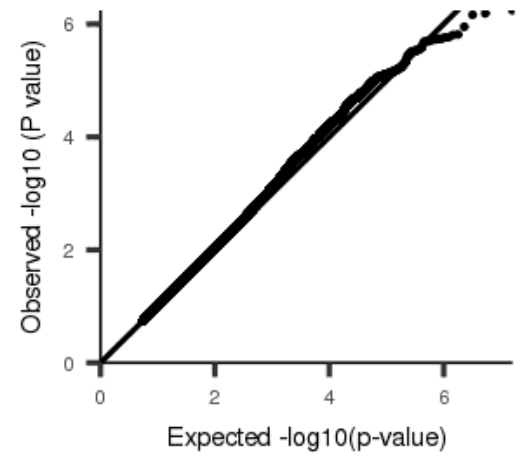

[back to list of plots](#)

Figure 2930: FreeSurfer DKAtlas lh entorhinal thickness

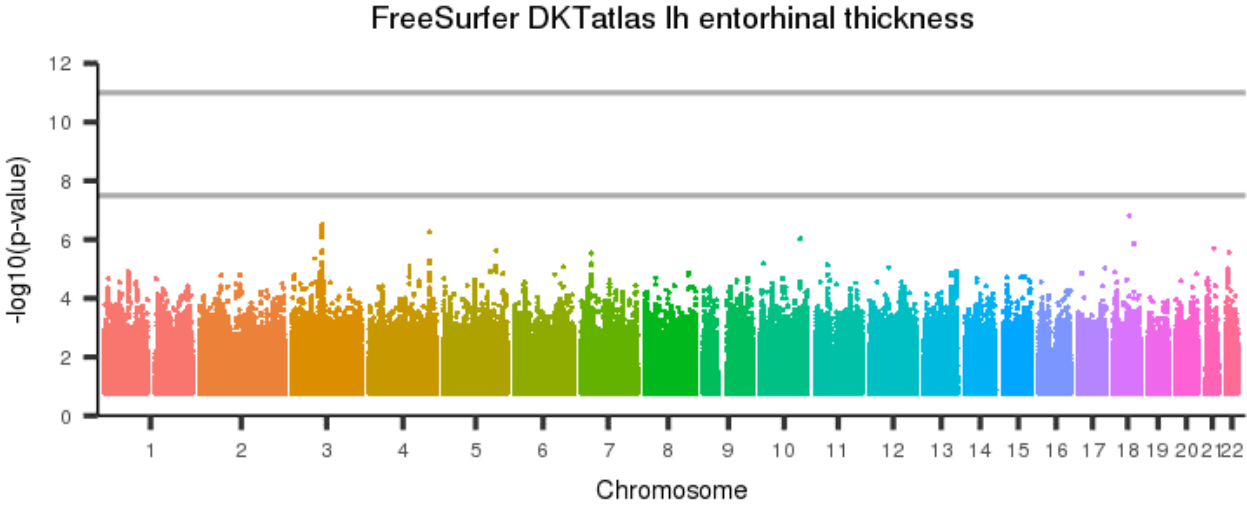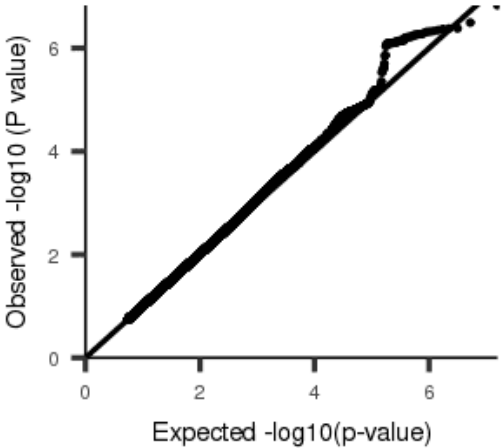

[back to list of plots](#)

Figure 2931: FreeSurfer DKTatlas lh fusiform thickness

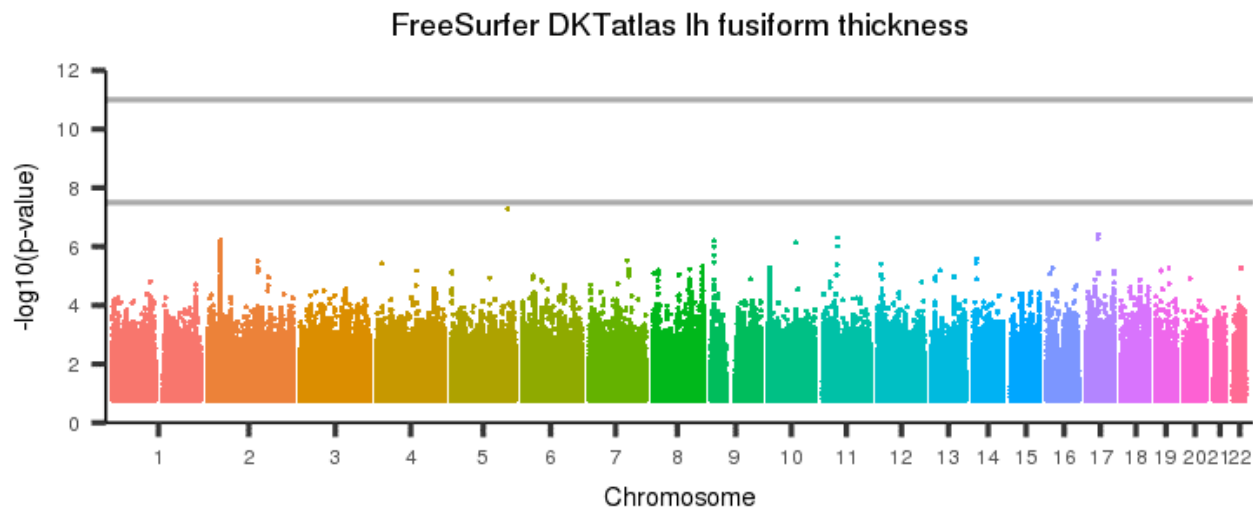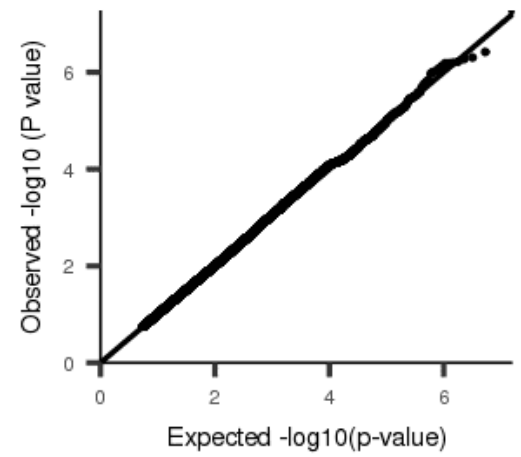

[back to list of plots](#)

Figure 2932: FreeSurfer DKTatlas lh inferiorparietal thickness

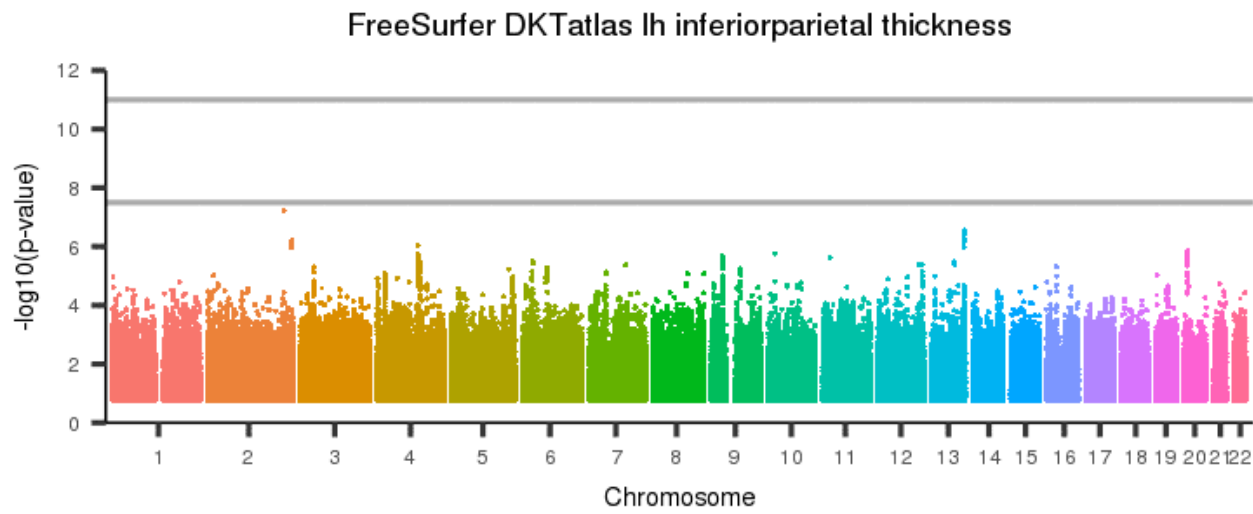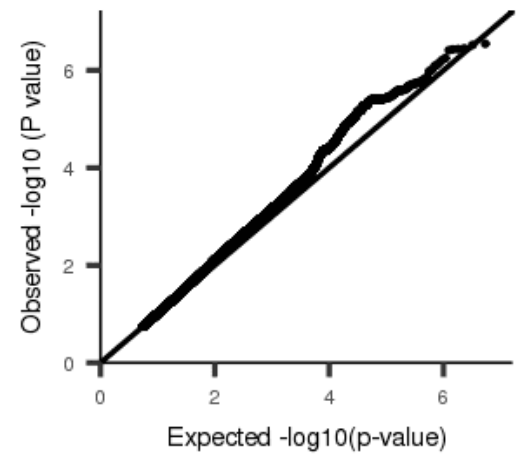

[back to list of plots](#)

Figure 2933: FreeSurfer DKAtlas lh inferior temporal thickness

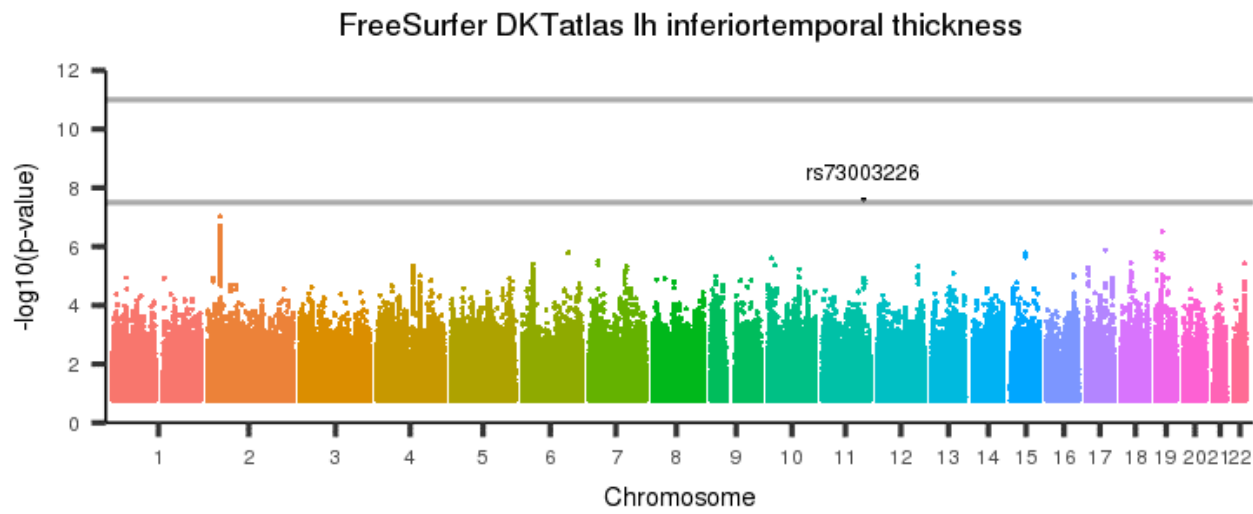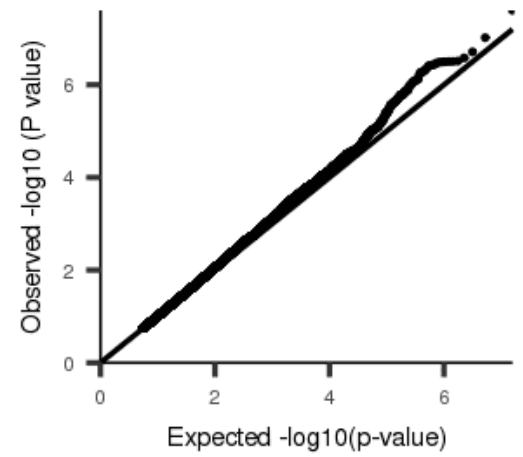

[back to list of plots](#)



Figure 2934: FreeSurfer DKTatlas lh isthmuscingulate thickness

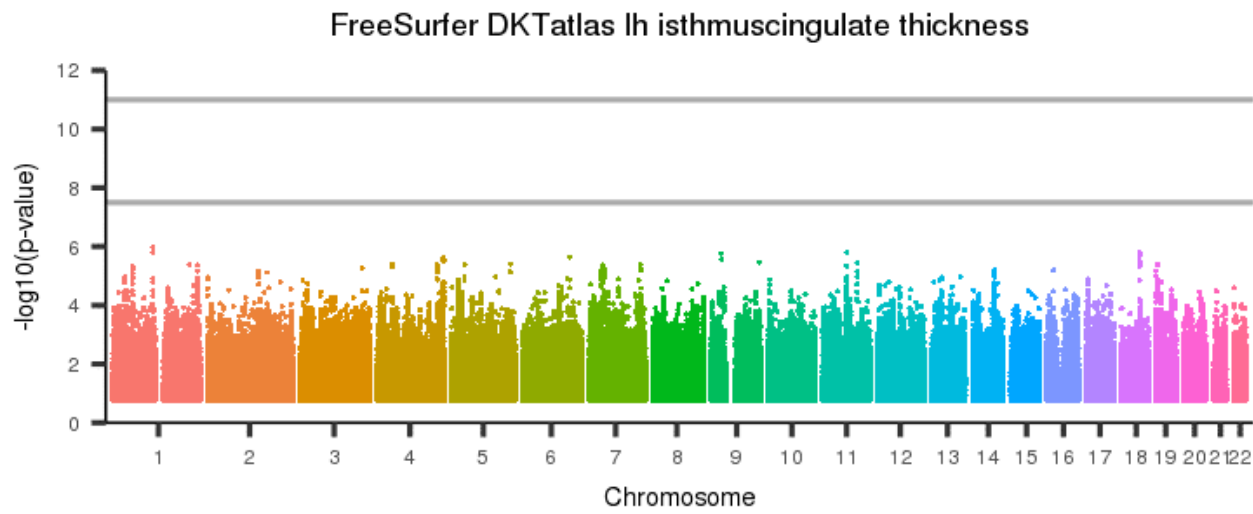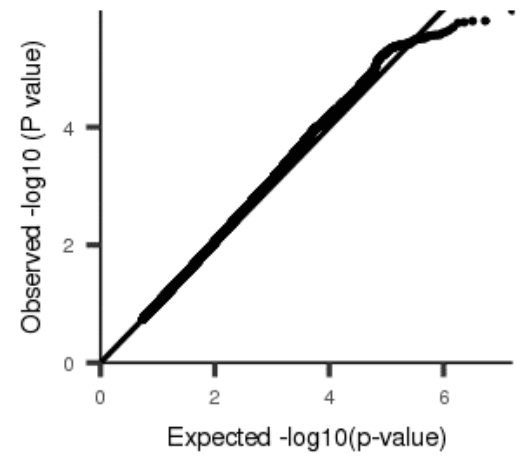

[back to list of plots](#)

Figure 2935: FreeSurfer DKTatlas lh lateraloccipital thickness

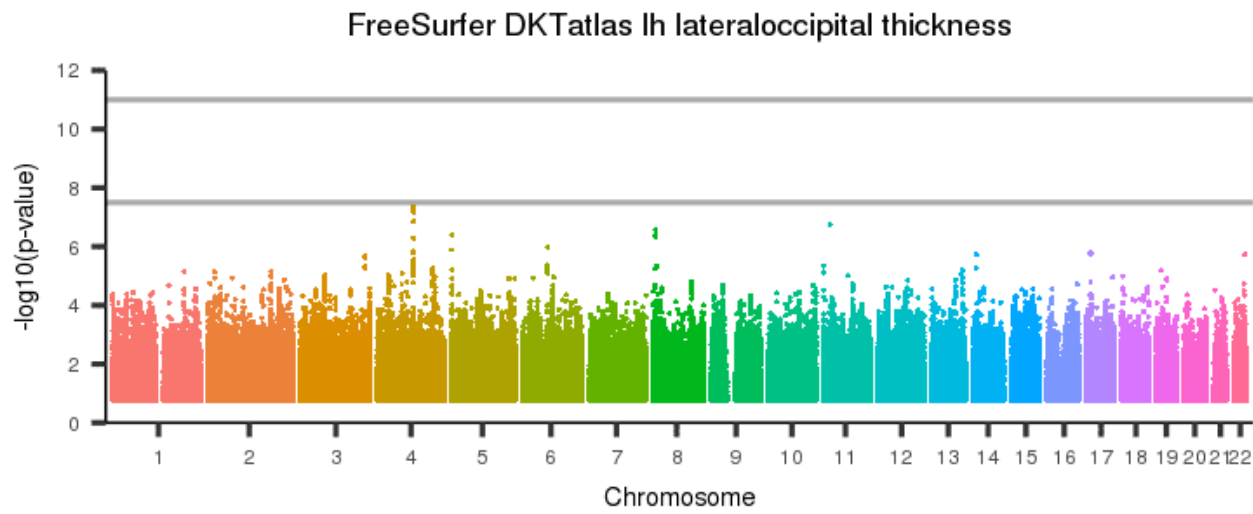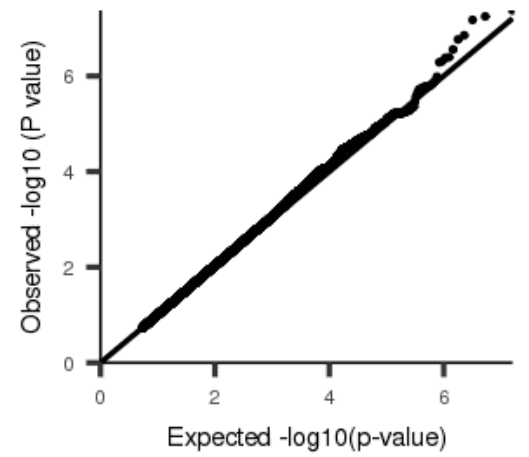

[back to list of plots](#)

Figure 2936: FreeSurfer DKAtlas lh lateralorbitofrontal thickness

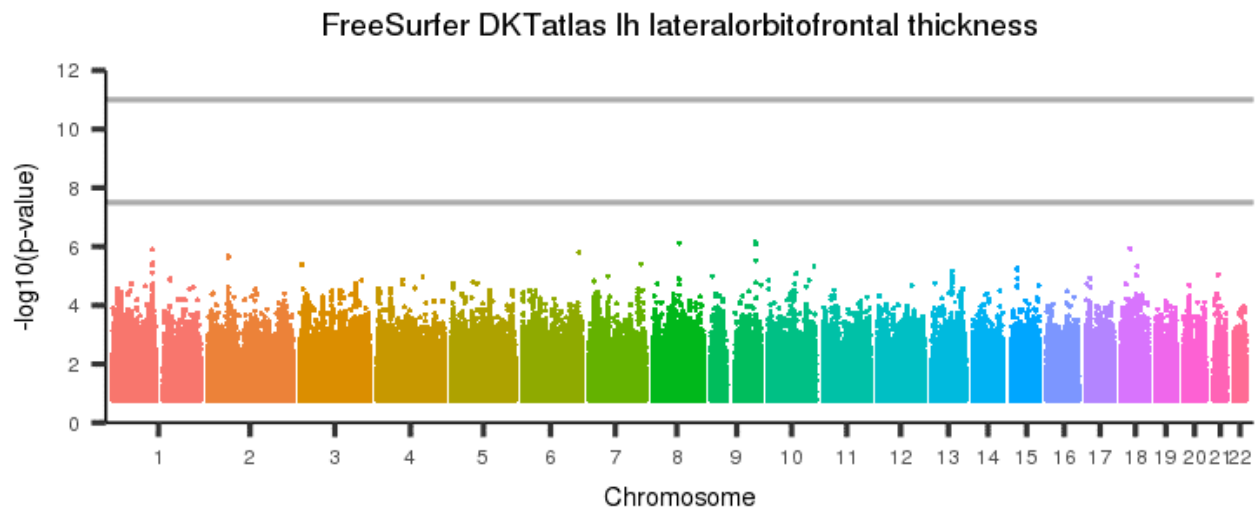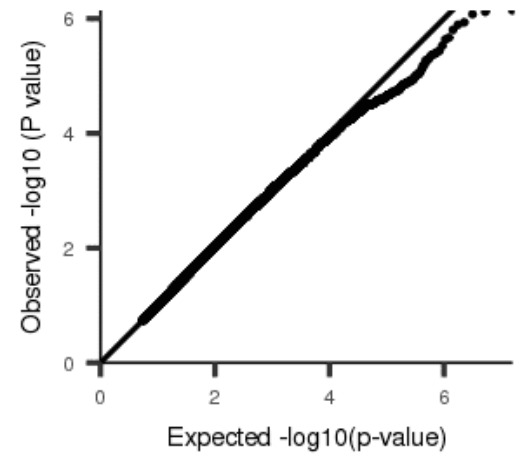

[back to list of plots](#)

Figure 2937: FreeSurfer DKTAtlas lh lingual thickness

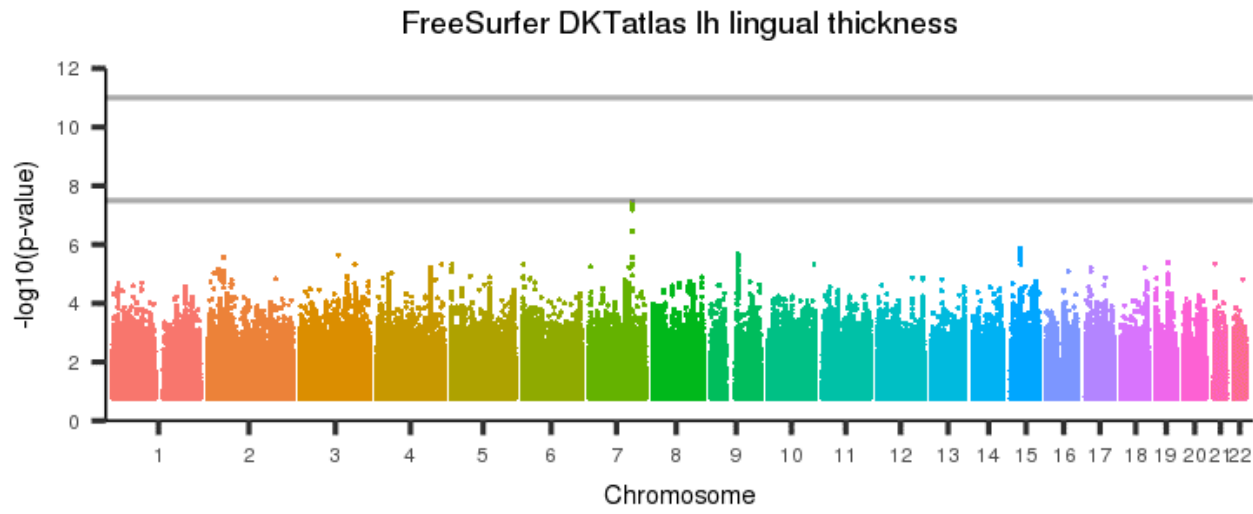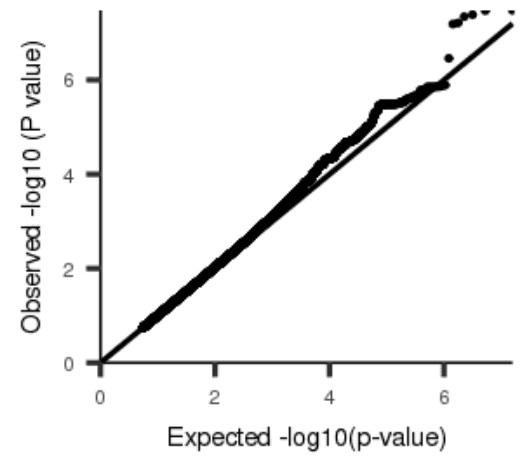

[back to list of plots](#)

Figure 2938: FreeSurfer DKTatlas lh medialorbitofrontal thickness

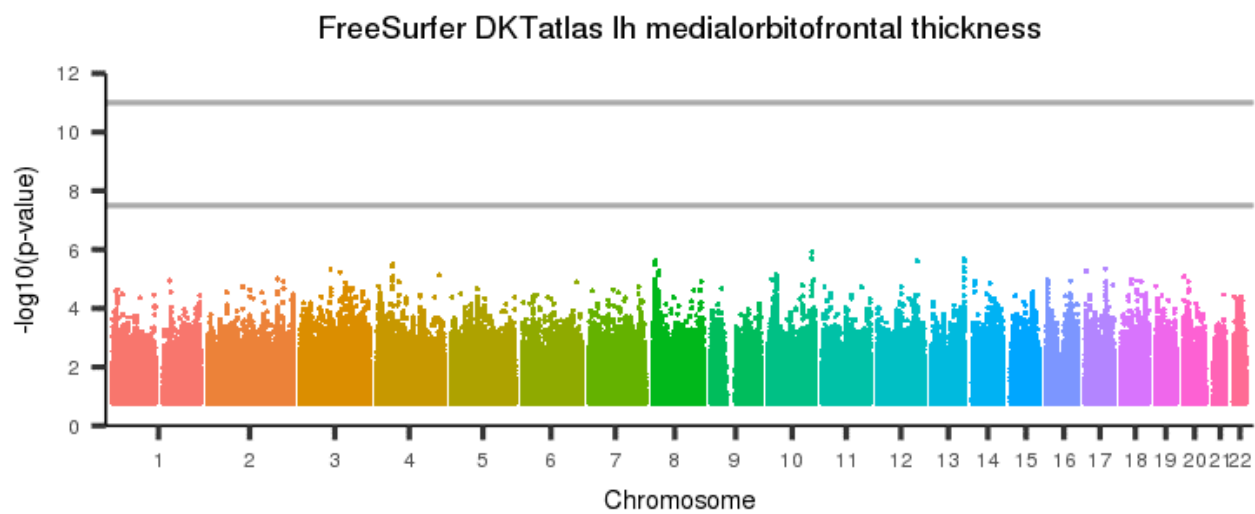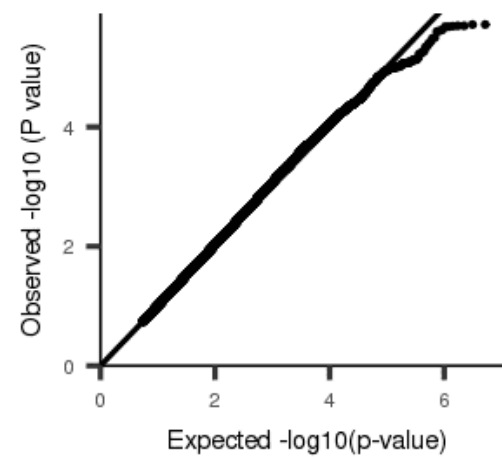

[back to list of plots](#)

Figure 2939: FreeSurfer DKTatlas lh middletemporal thickness

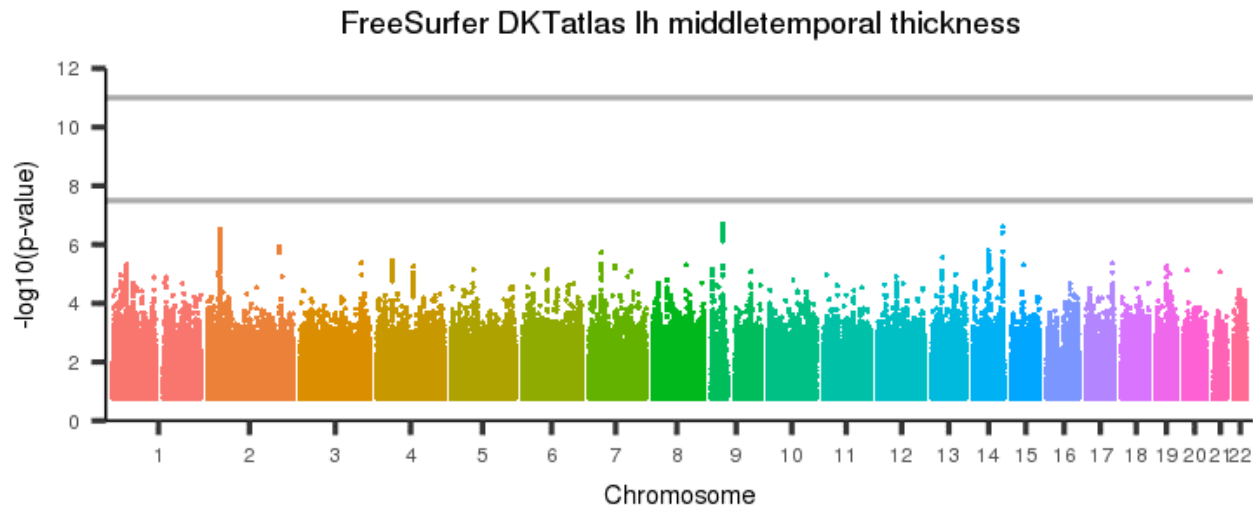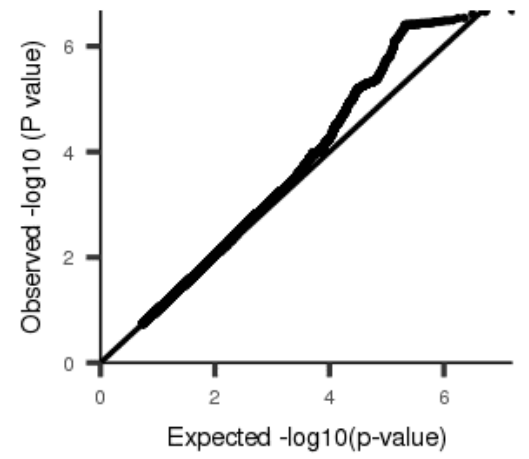

[back to list of plots](#)

Figure 2940: FreeSurfer DKTatlas lh parahippocampal thickness

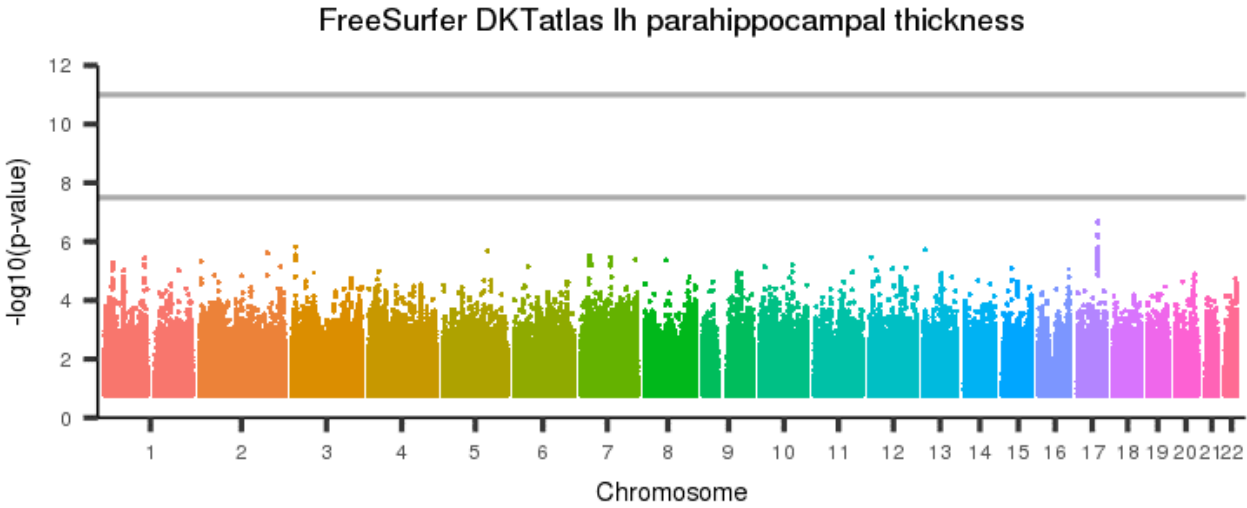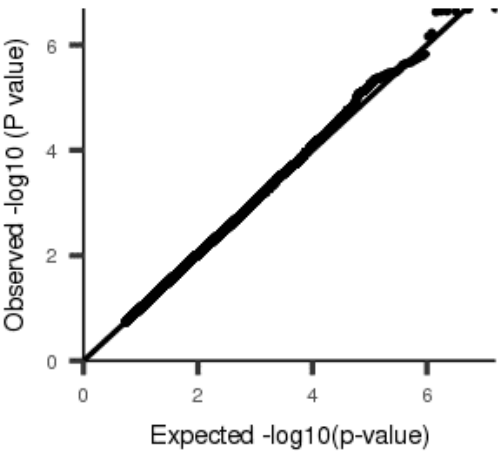

[back to list of plots](#)

Figure 2941: FreeSurfer DKTatlas lh paracentral thickness

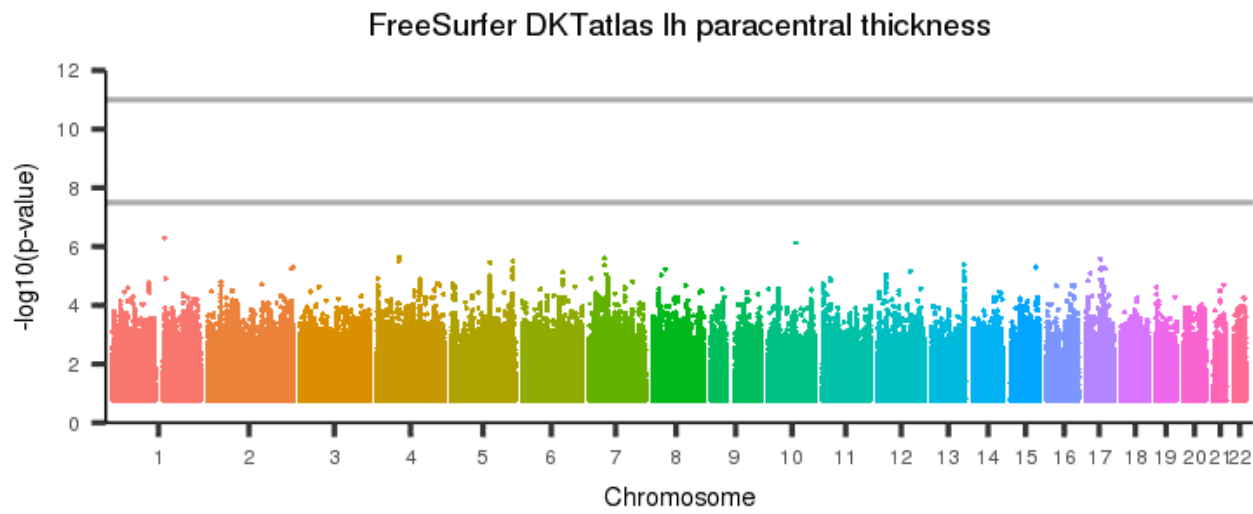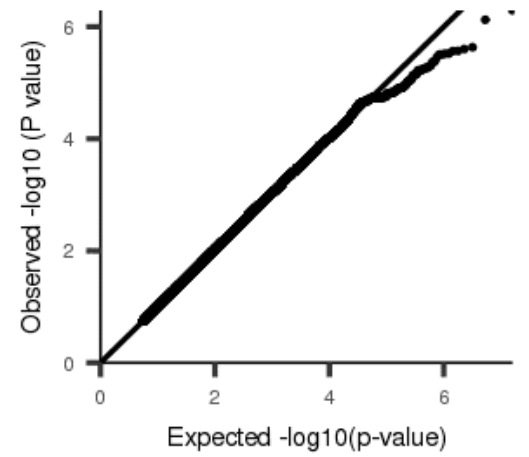

[back to list of plots](#)



Figure 2942: FreeSurfer DKAtlas lh parsopercularis thickness

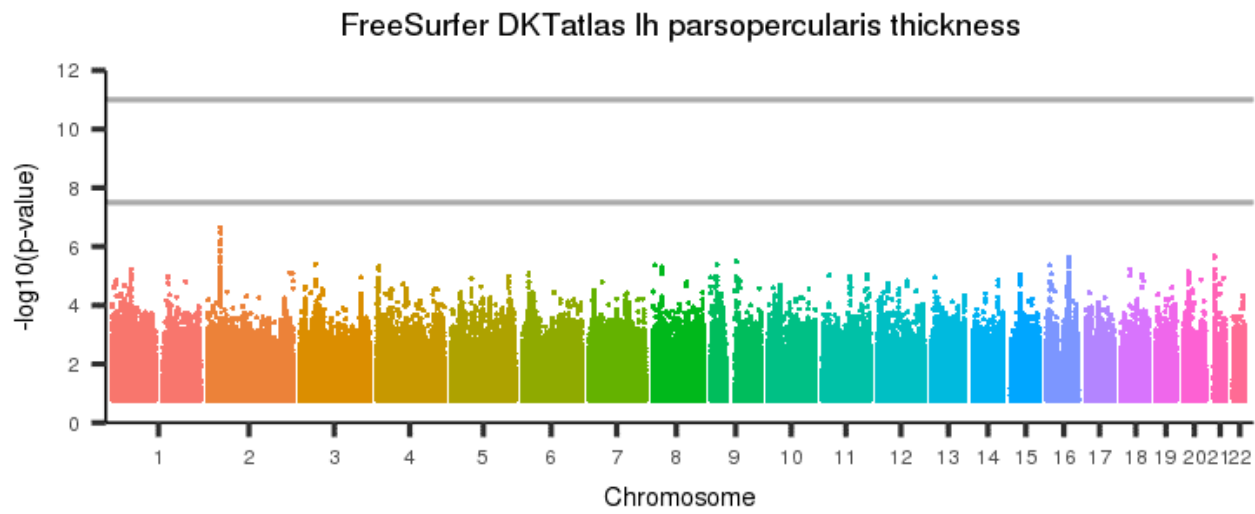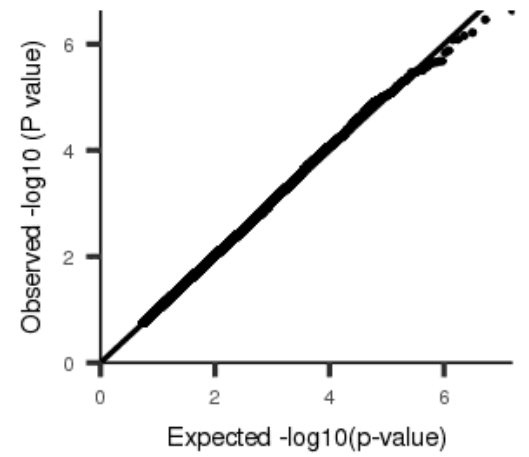

[back to list of plots](#)

Figure 2943: FreeSurfer DKTatlas lh parsorbitalis thickness

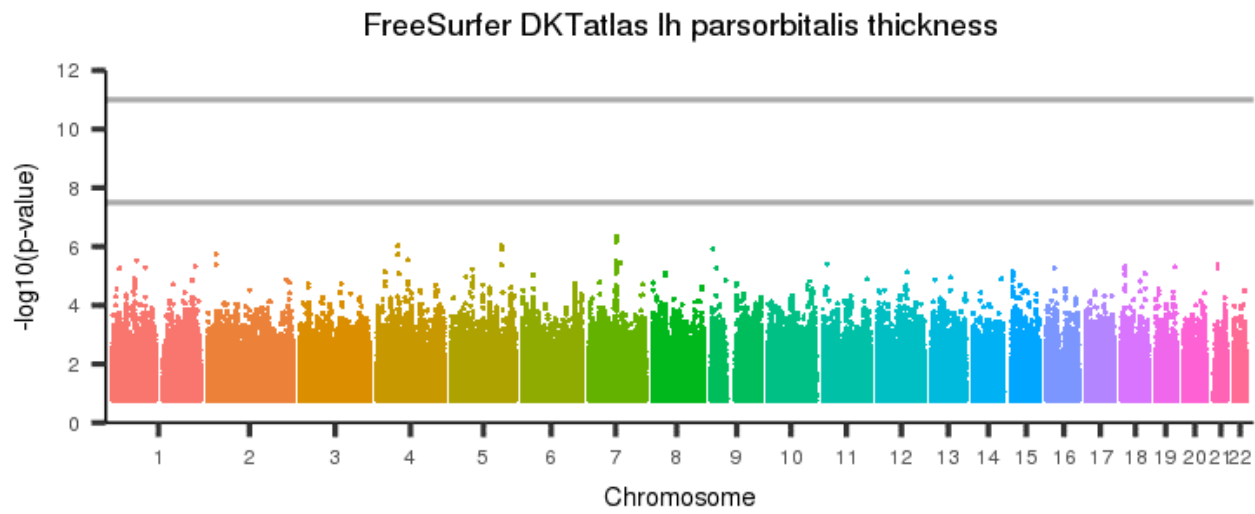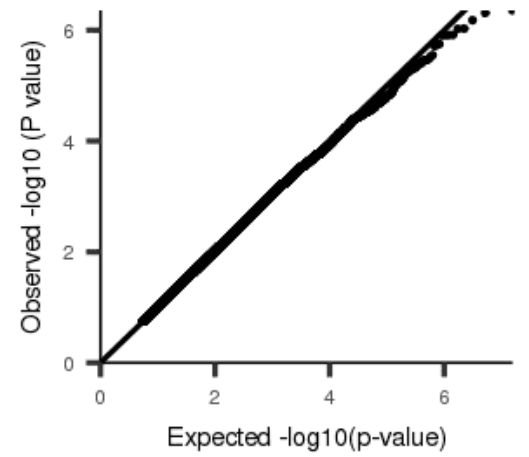

[back to list of plots](#)

Figure 2944: FreeSurfer DKAtlas lh parstriangularis thickness

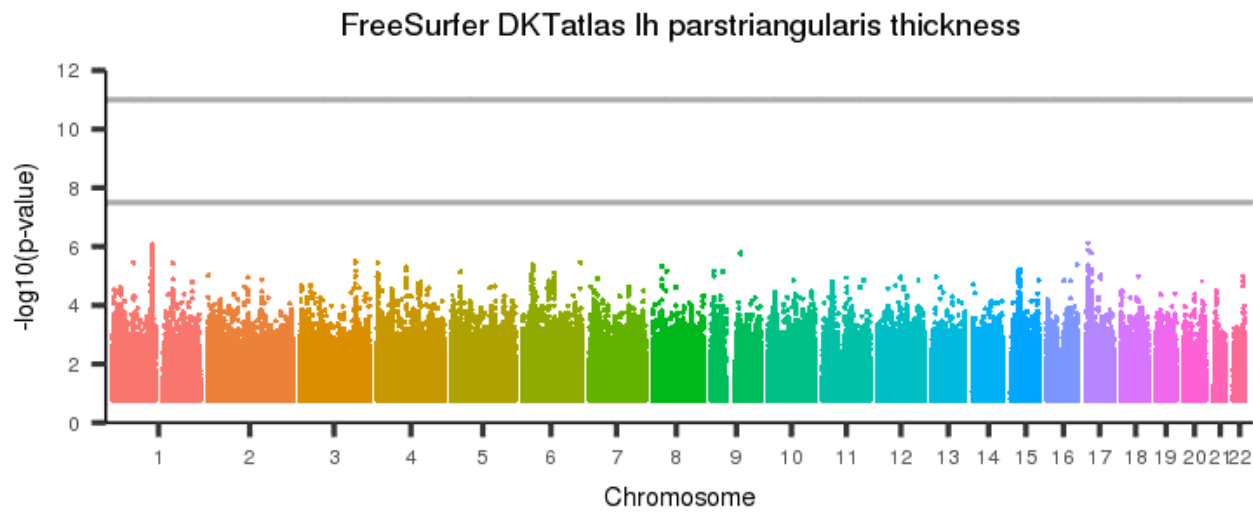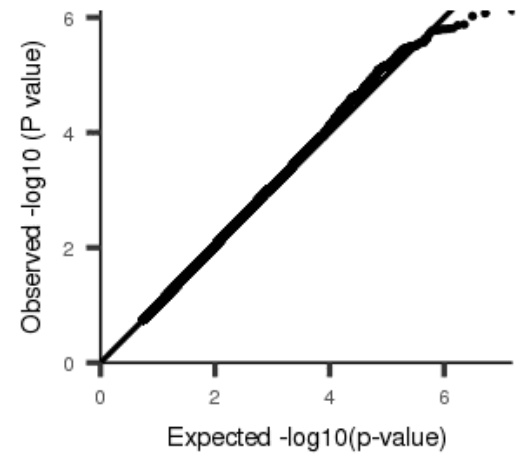

[back to list of plots](#)

Figure 2945: FreeSurfer DKTatlas lh pericalcarine thickness

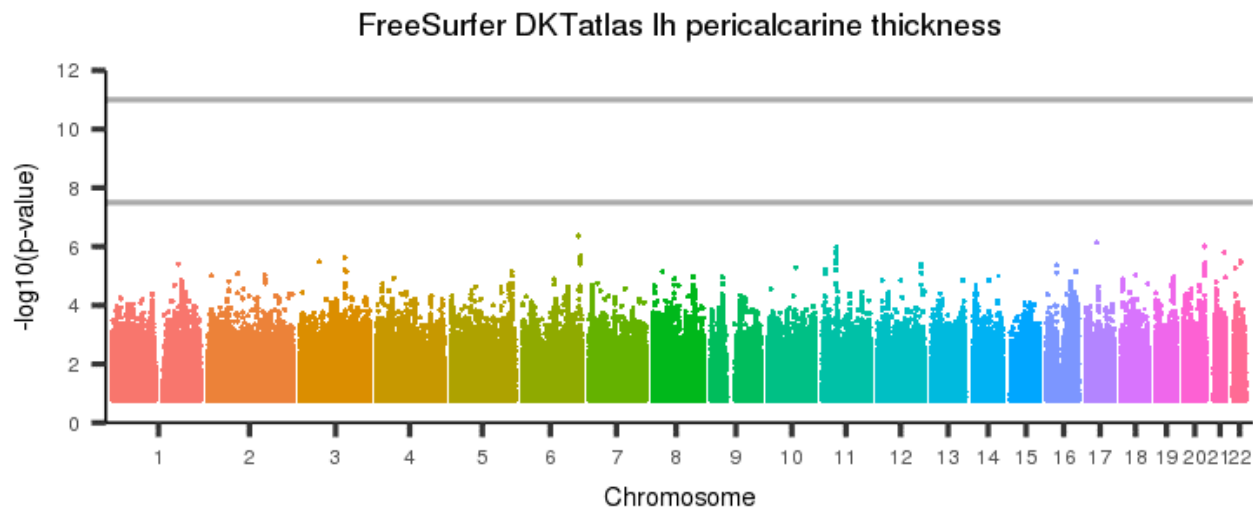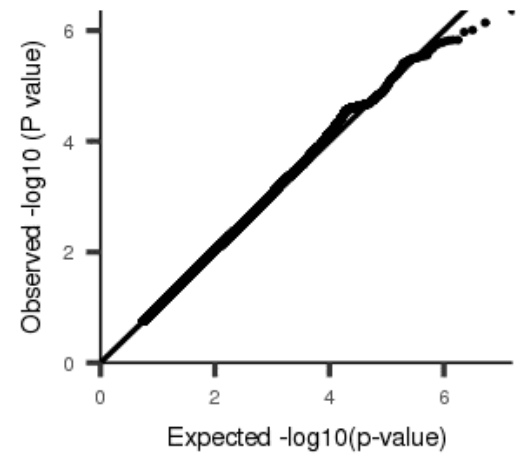

[back to list of plots](#)

Figure 2946: FreeSurfer DKTatlas lh postcentral thickness

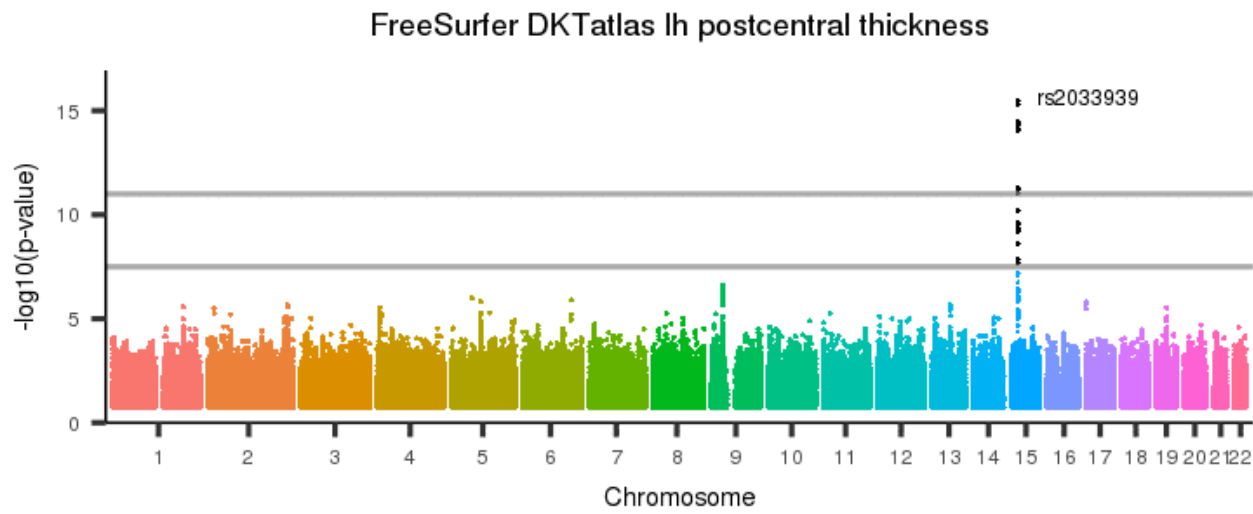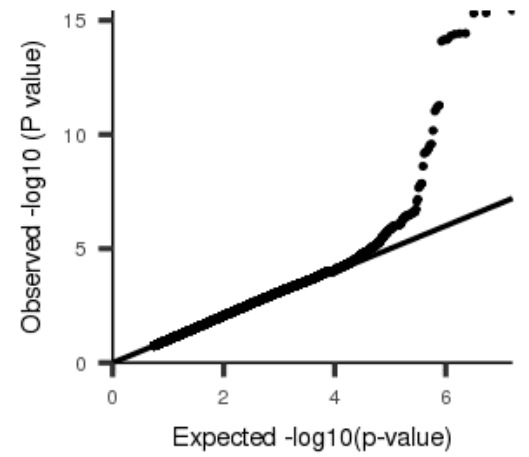

[back to list of plots](#)

Figure 2947: FreeSurfer DKAtlas lh posteriorcingulate thickness

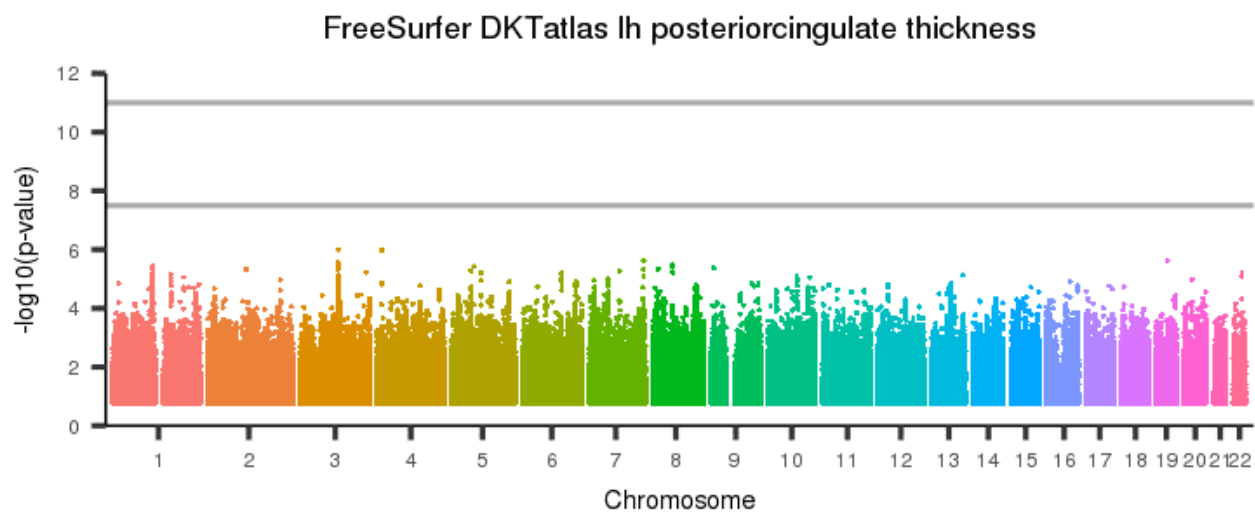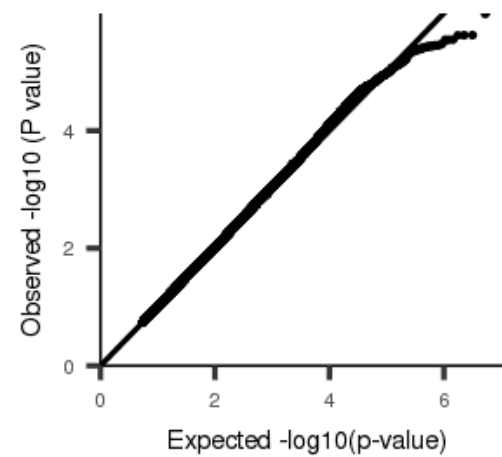

[back to list of plots](#)

Figure 2948: FreeSurfer DKTatlas lh precentral thickness

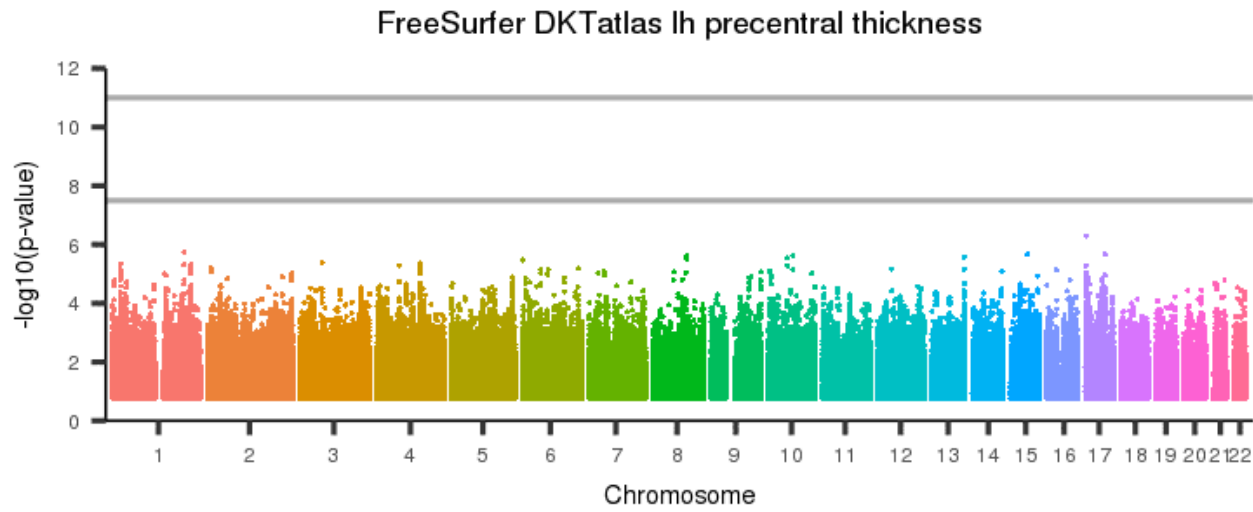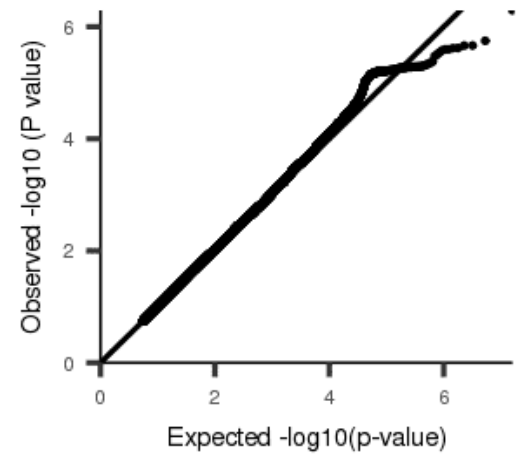

[back to list of plots](#)

Figure 2949: FreeSurfer DKAtlas lh precuneus thickness

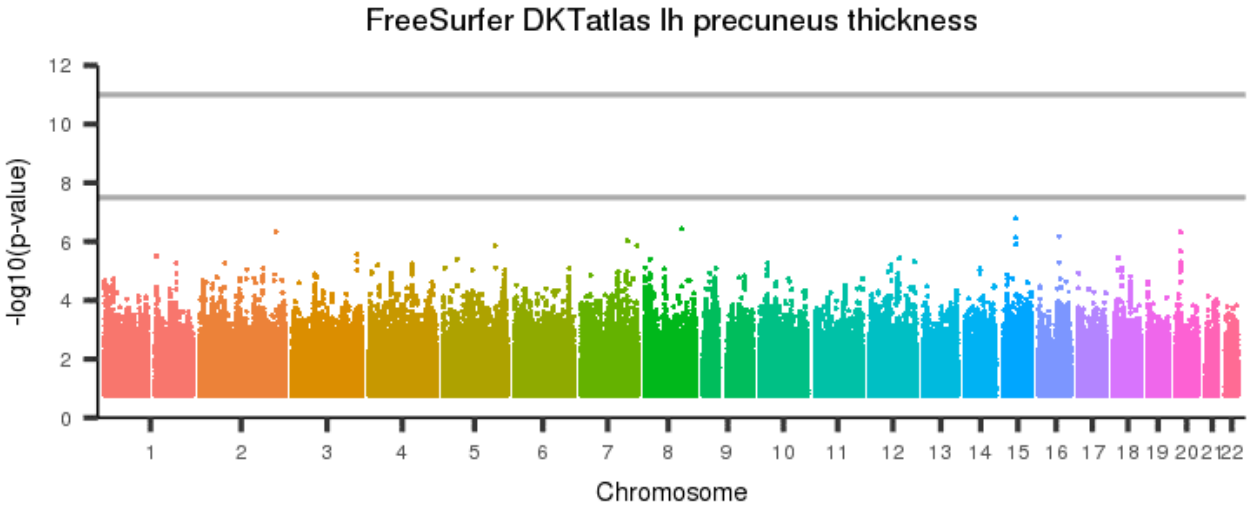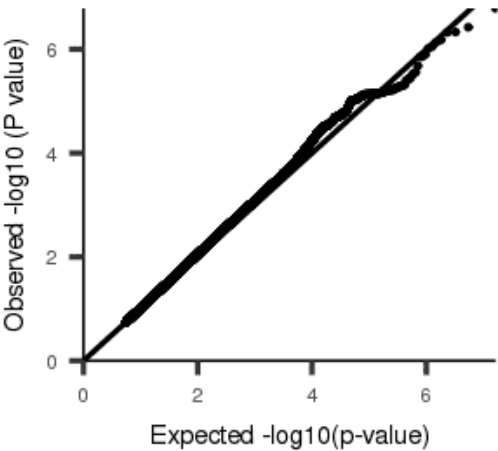

[back to list of plots](#)



Figure 2950: FreeSurfer DKTAtlas lh rostralanteriorcingulate thickness

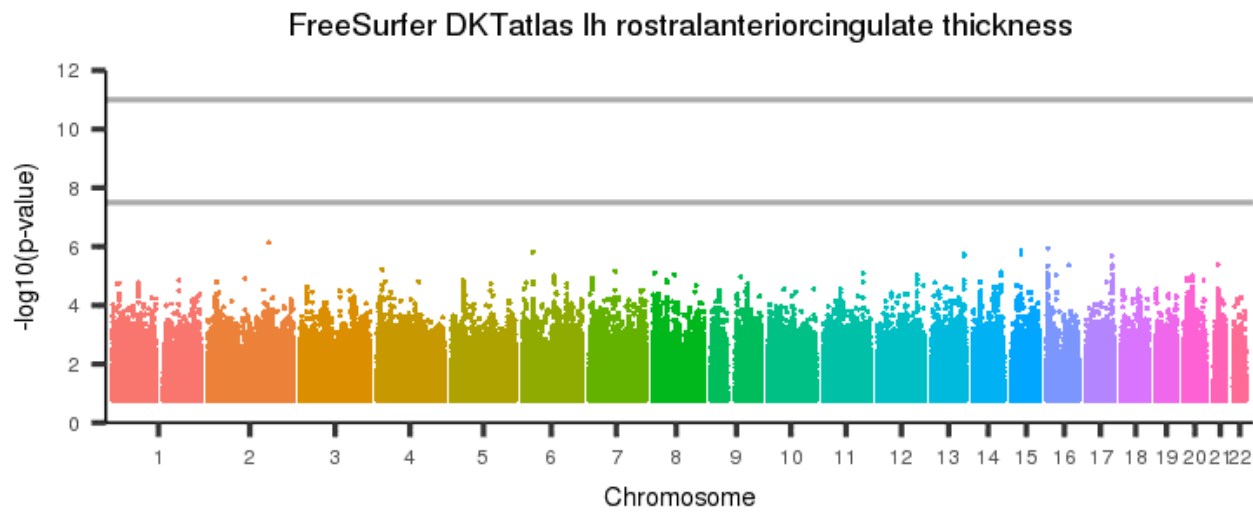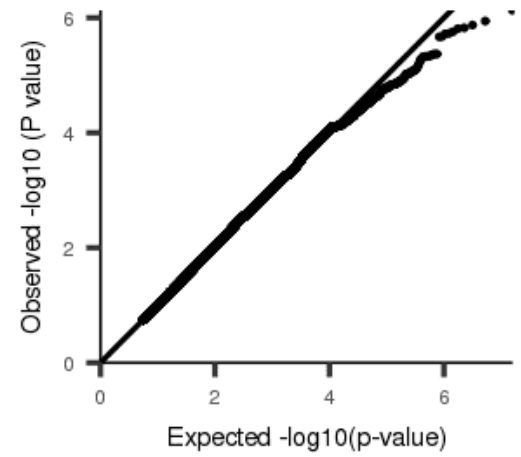

[back to list of plots](#)

Figure 2951: FreeSurfer DKTAtlas lh rostralmiddlefrontal thickness

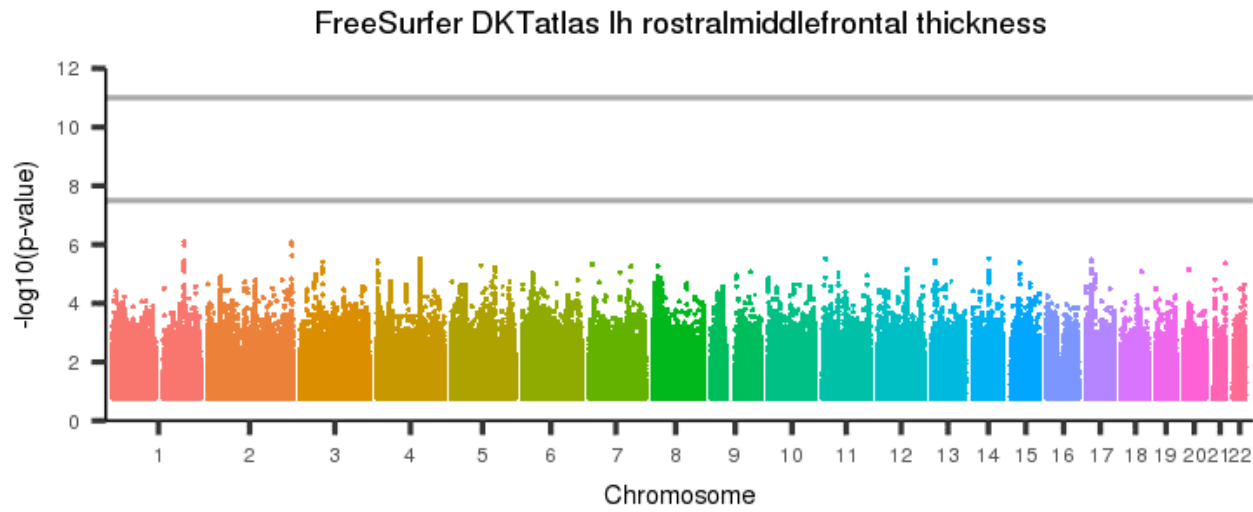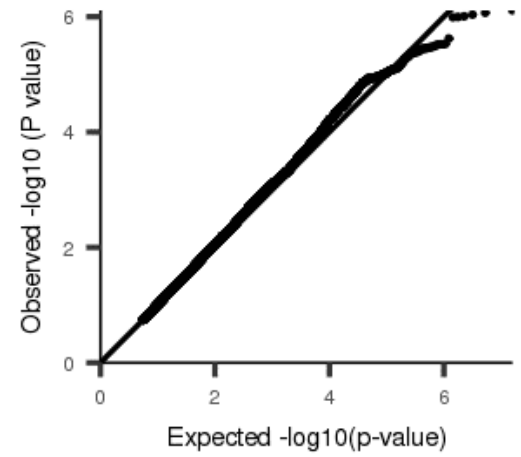

[back to list of plots](#)

Figure 2952: FreeSurfer DKTatlas lh superiorfrontal thickness

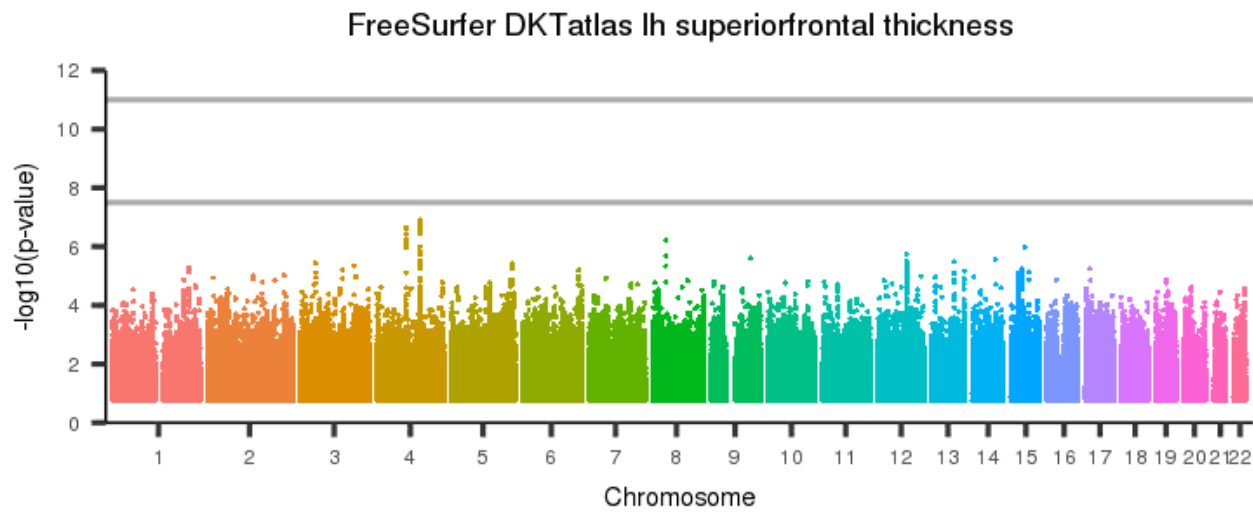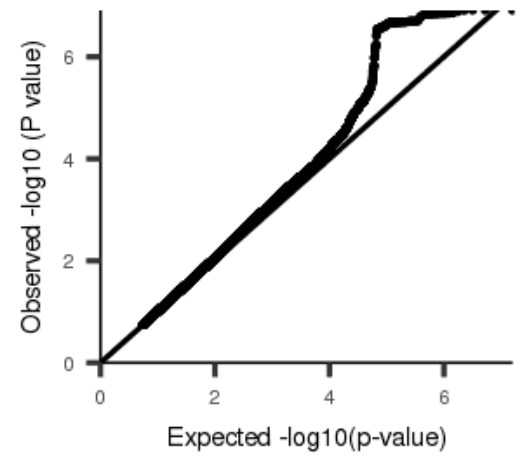

[back to list of plots](#)

Figure 2953: FreeSurfer DKAtlas lh superiorparietal thickness

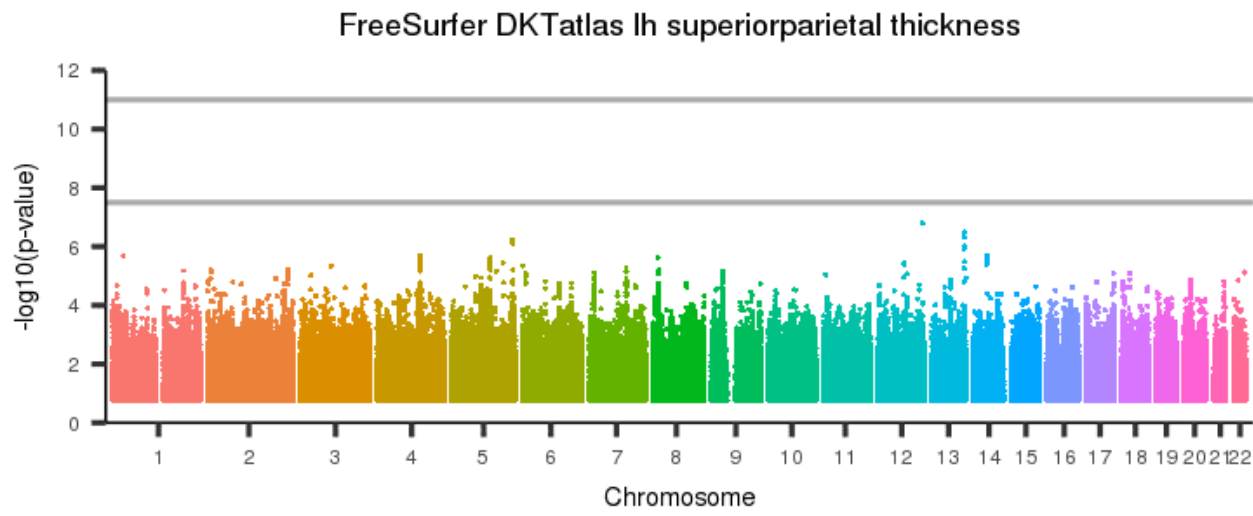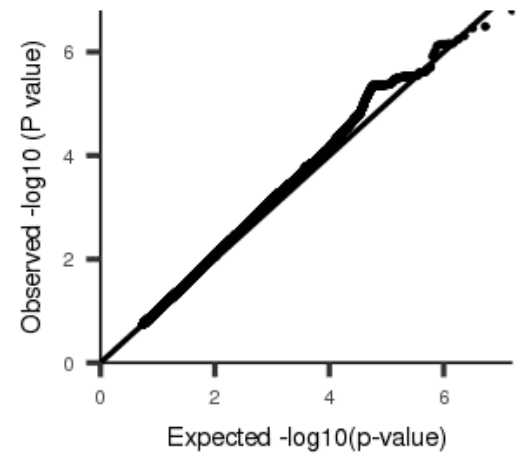

[back to list of plots](#)

Figure 2954: FreeSurfer DKTAtlas lh superior temporal thickness

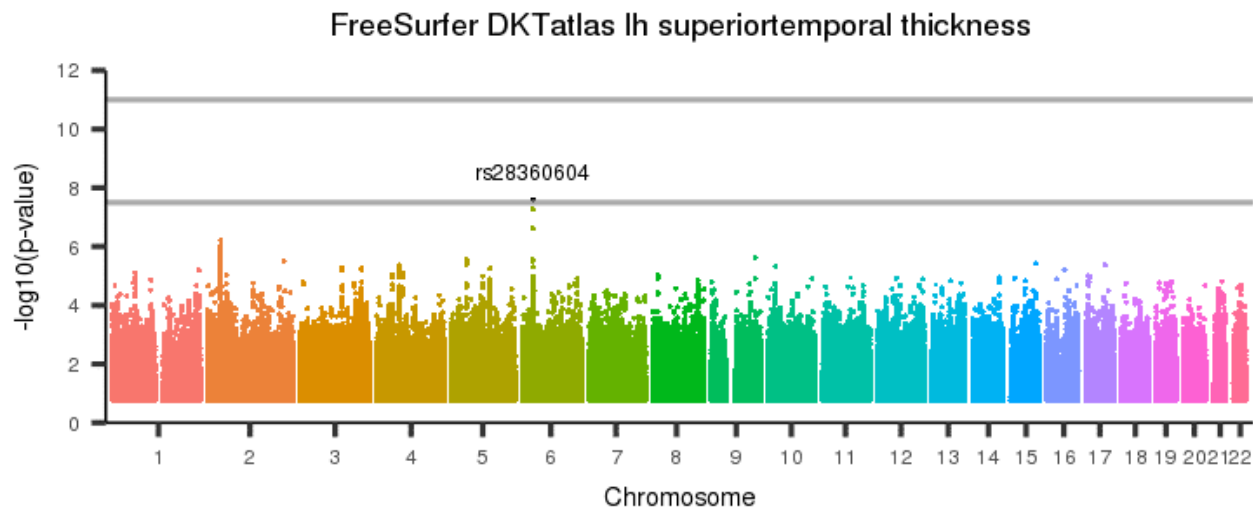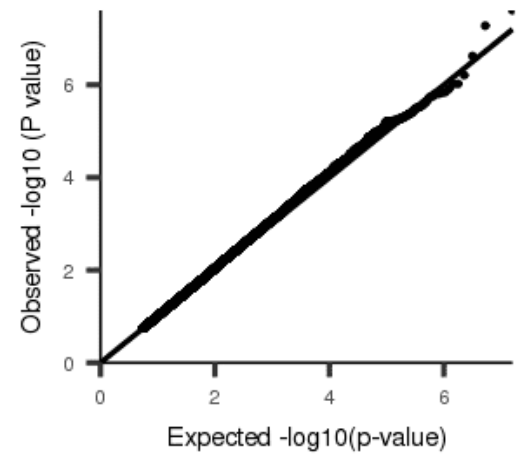

[back to list of plots](#)

Figure 2955: FreeSurfer DKTatlas lh supramarginal thickness

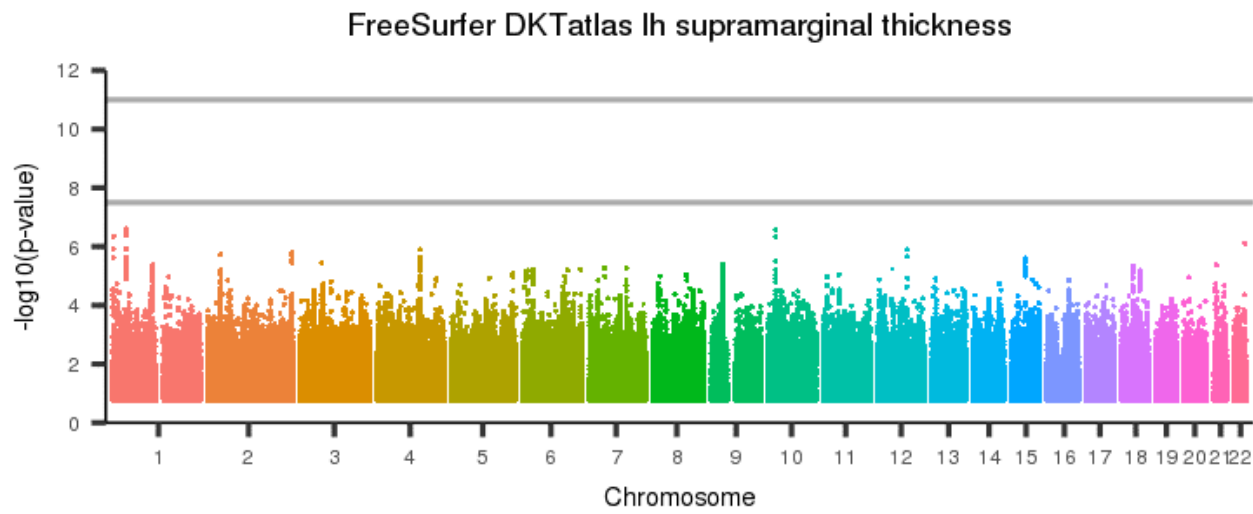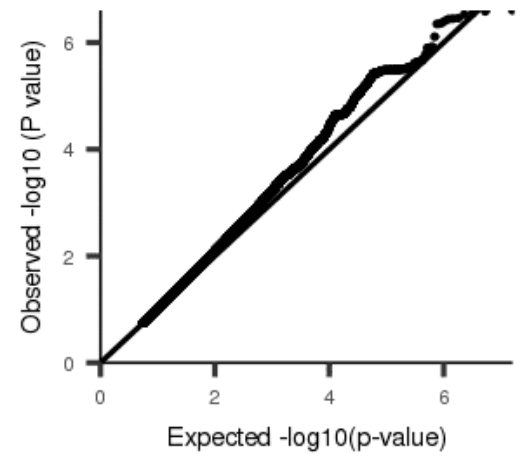

[back to list of plots](#)

Figure 2956: FreeSurfer DKTatlas lh transversetemporal thickness

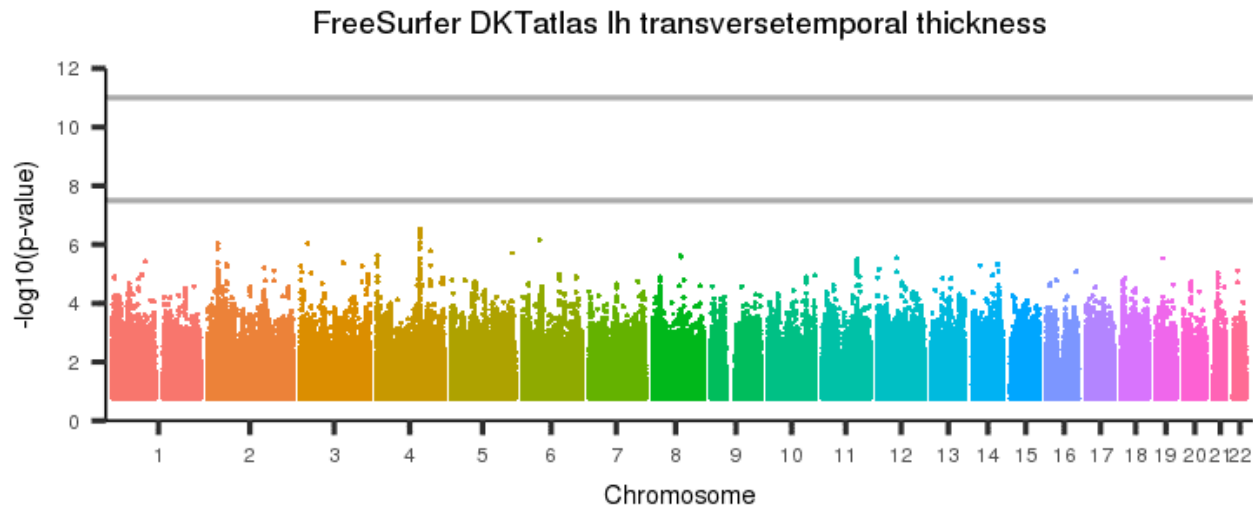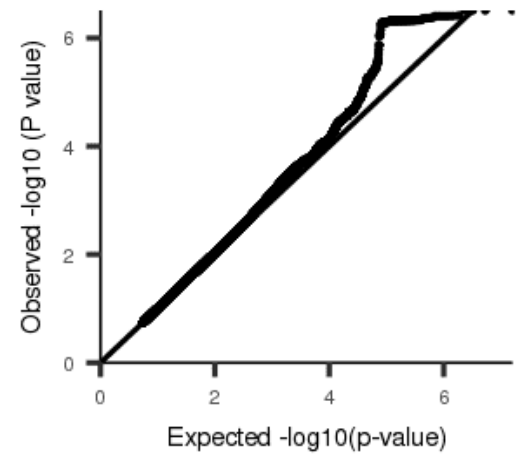

[back to list of plots](#)

Figure 2957: FreeSurfer DKTatlas lh insula thickness

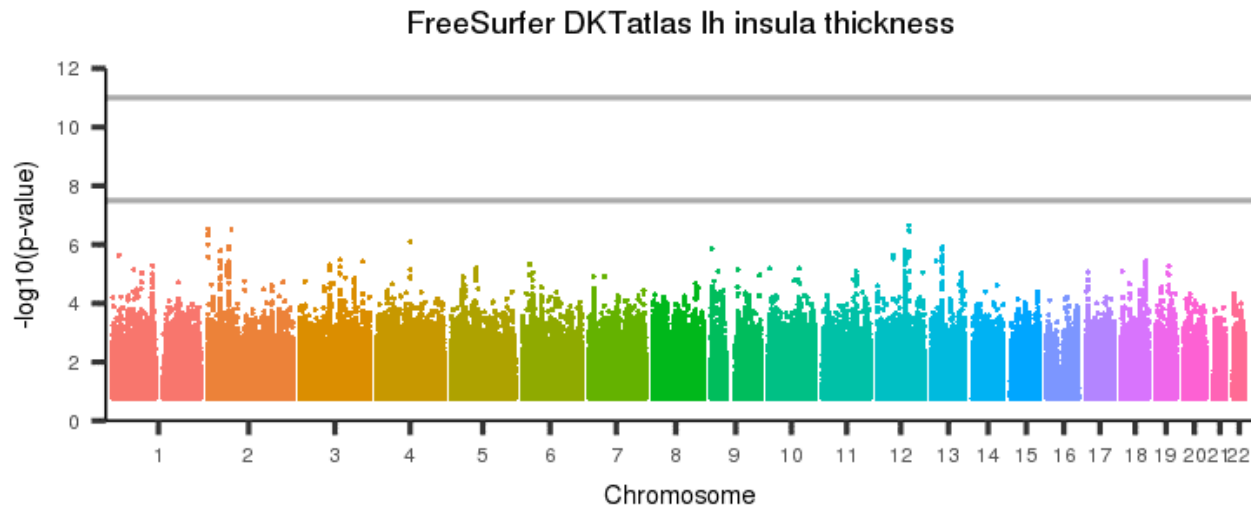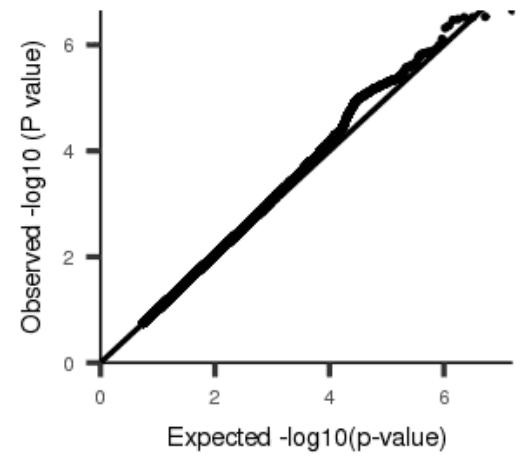

[back to list of plots](#)



Figure 2958: FreeSurfer DKAtlas lh MeanThickness thickness

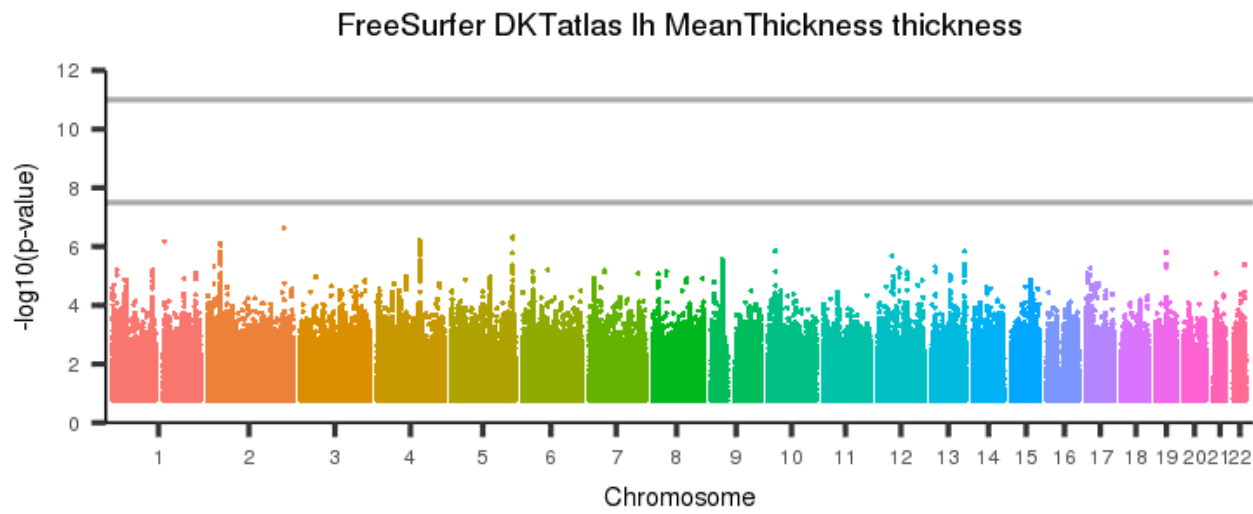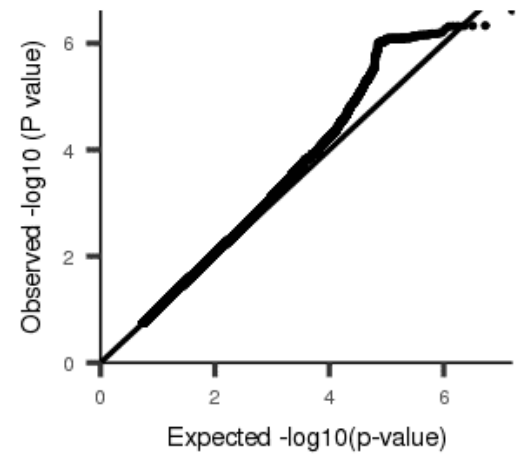

[back to list of plots](#)

Figure 2959: FreeSurfer a2009s lh G and S frontomargin thickness

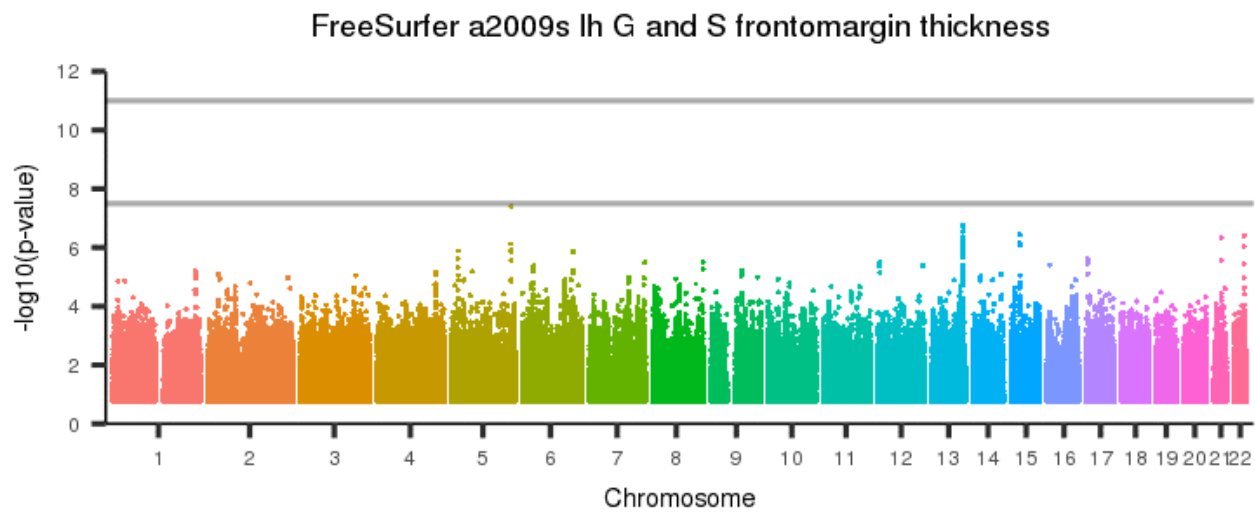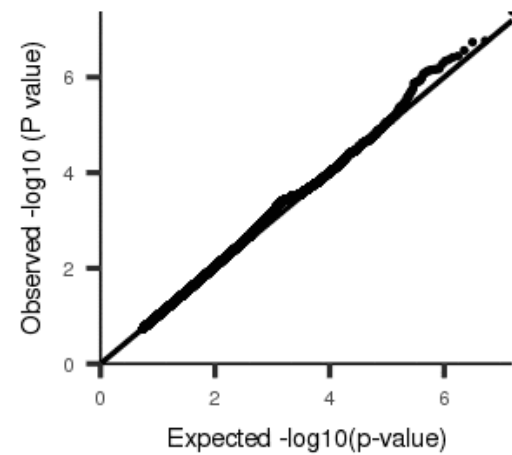

[back to list of plots](#)

Figure 2960: FreeSurfer a2009s lh G and S occipital inf thickness

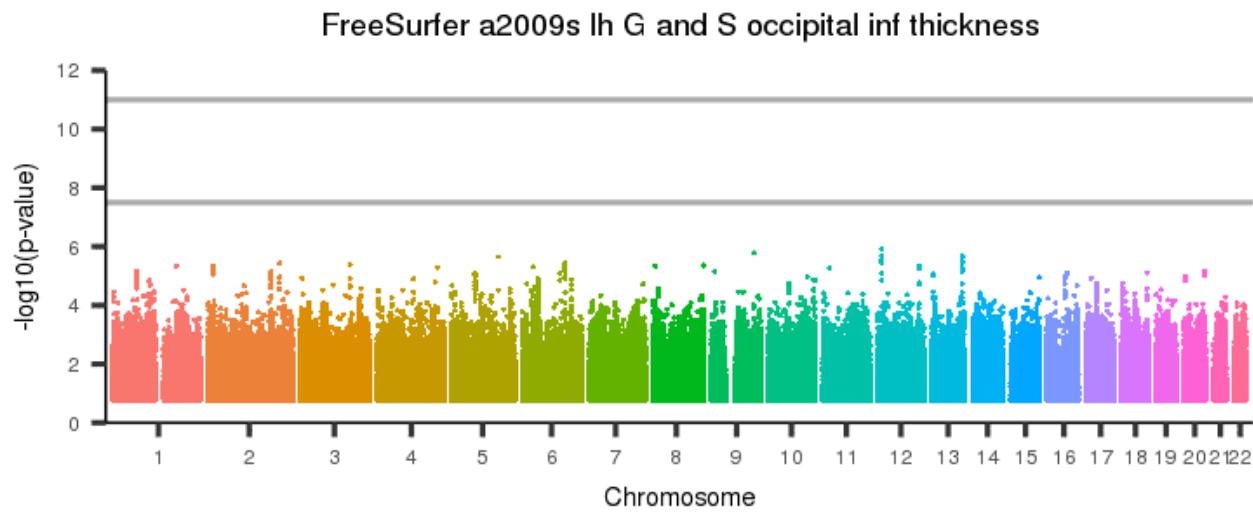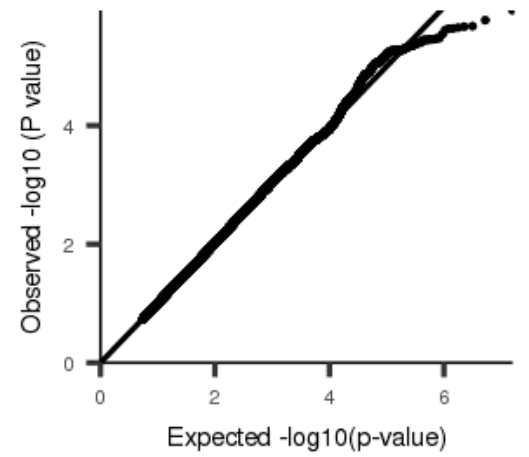

[back to list of plots](#)

Figure 2961: FreeSurfer a2009s lh G and S paracentral thickness

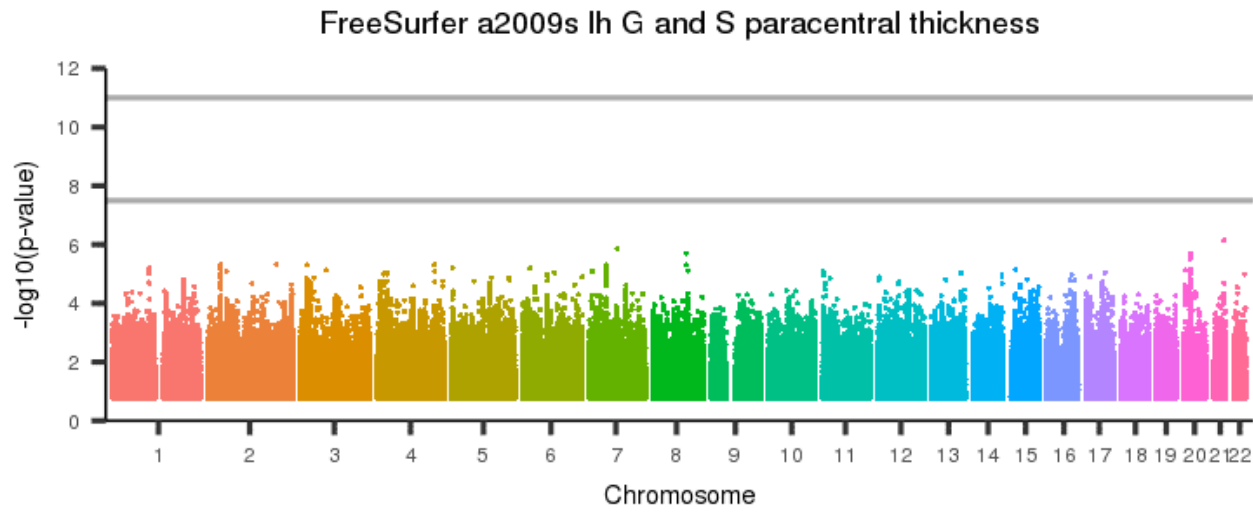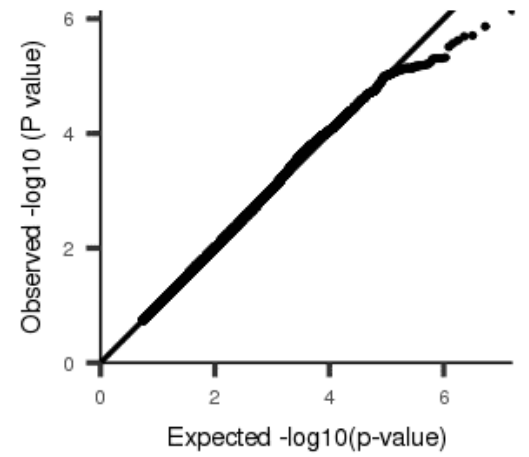

[back to list of plots](#)

Figure 2962: FreeSurfer a2009s lh G and S subcentral thickness

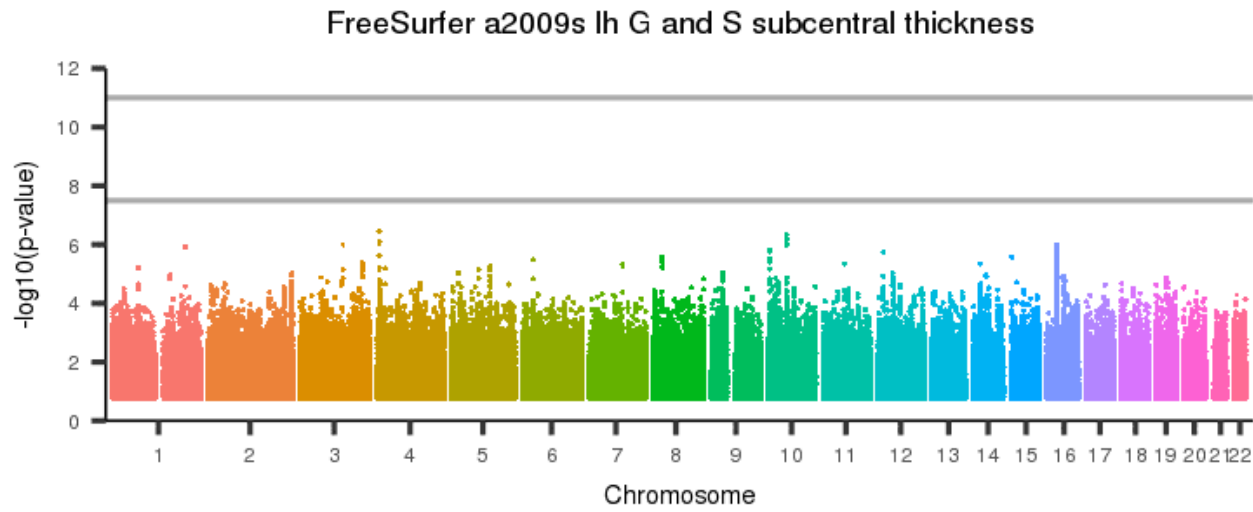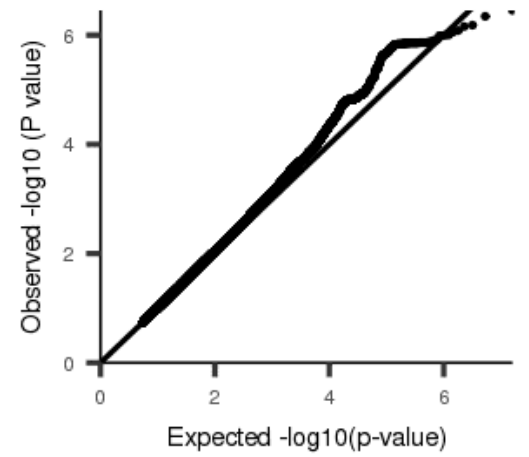

[back to list of plots](#)

Figure 2963: FreeSurfer a2009s lh G and S transv frontopol thickness

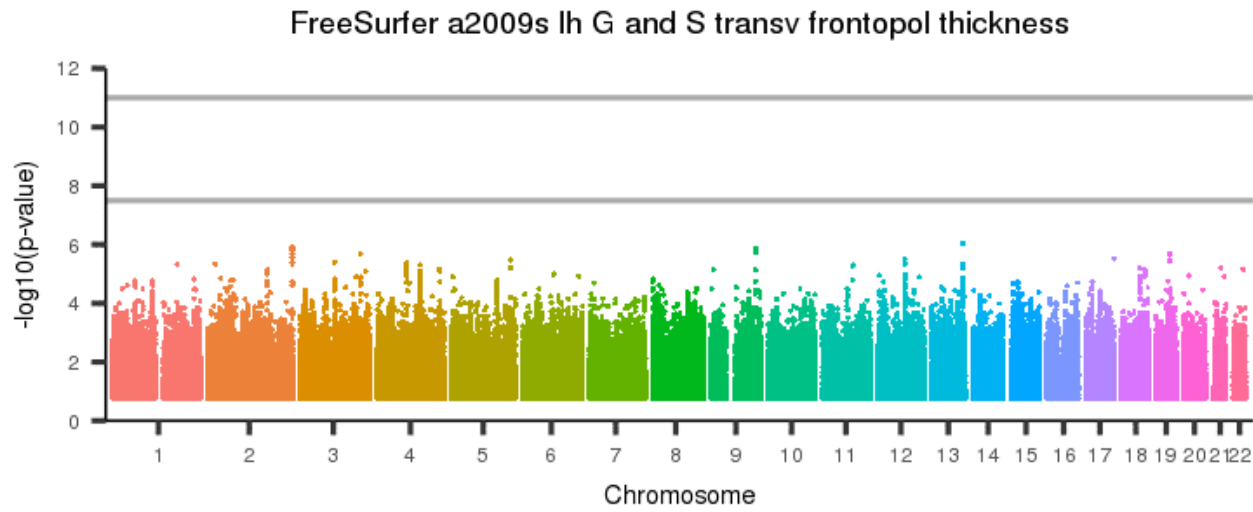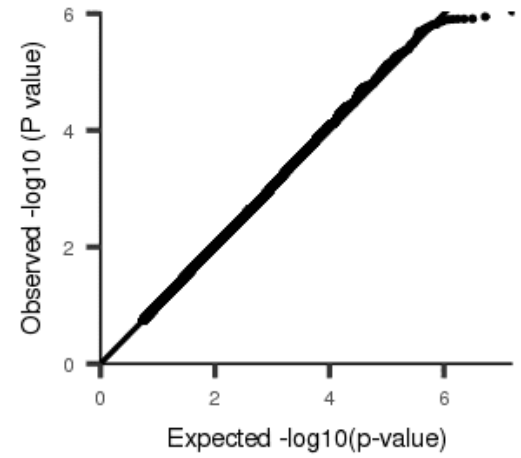

[back to list of plots](#)

Figure 2964: FreeSurfer a2009s lh G and S cingul-Ant thickness

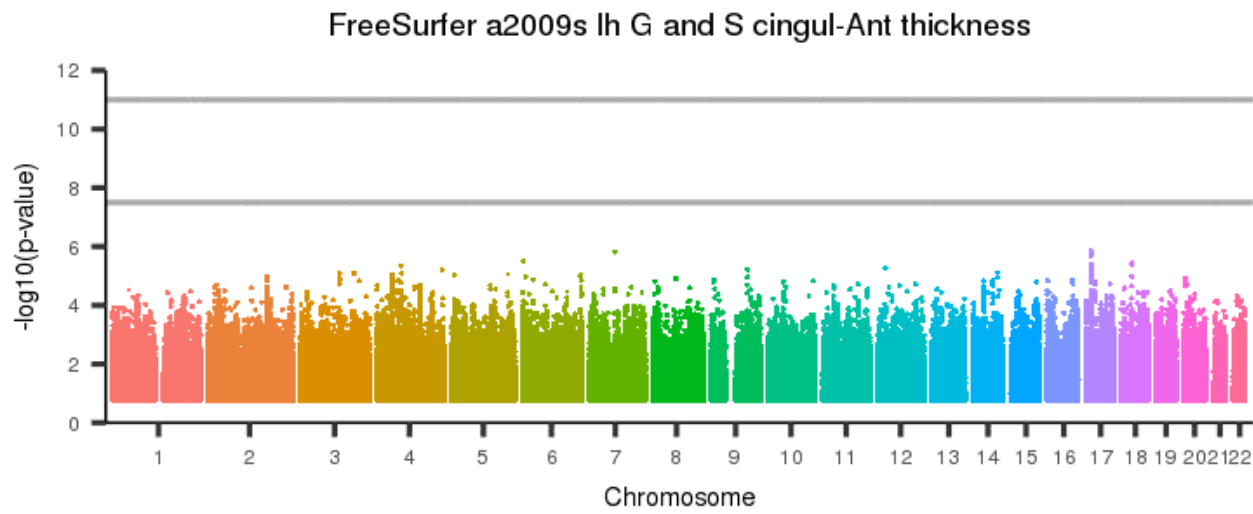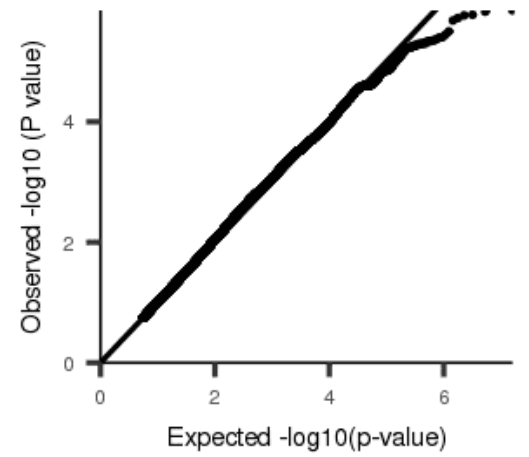

[back to list of plots](#)

Figure 2965: FreeSurfer a2009s lh G and S cingul-Mid-Ant thickness

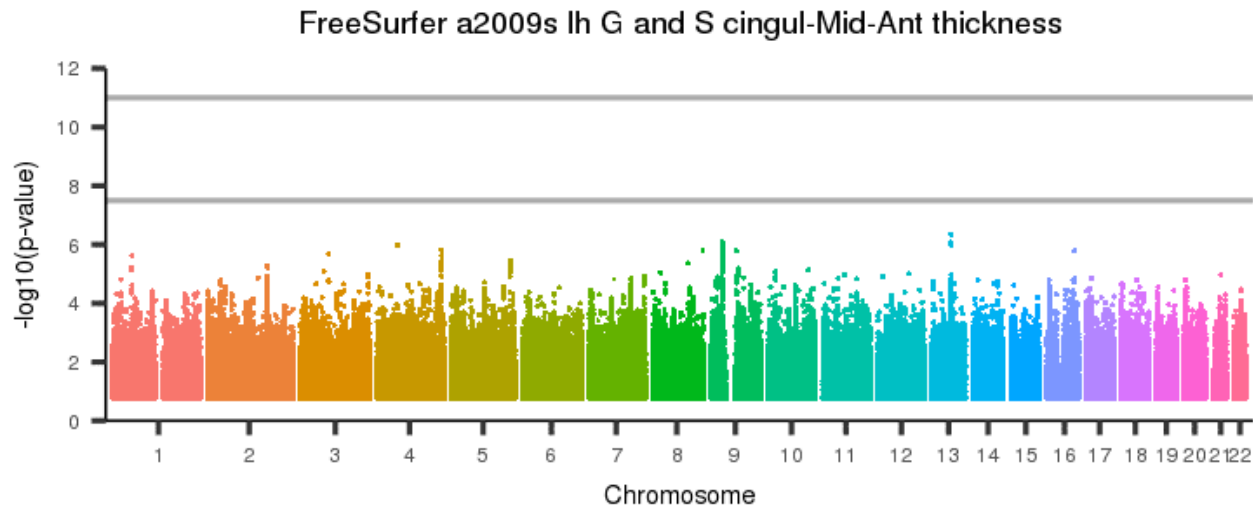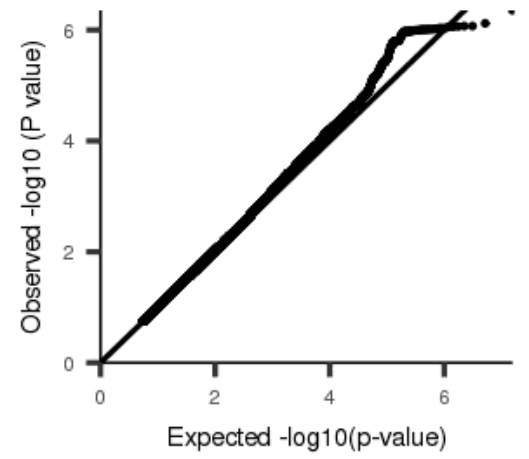

[back to list of plots](#)



Figure 2966: FreeSurfer a2009s lh G and S cingul-Mid-Post thickness

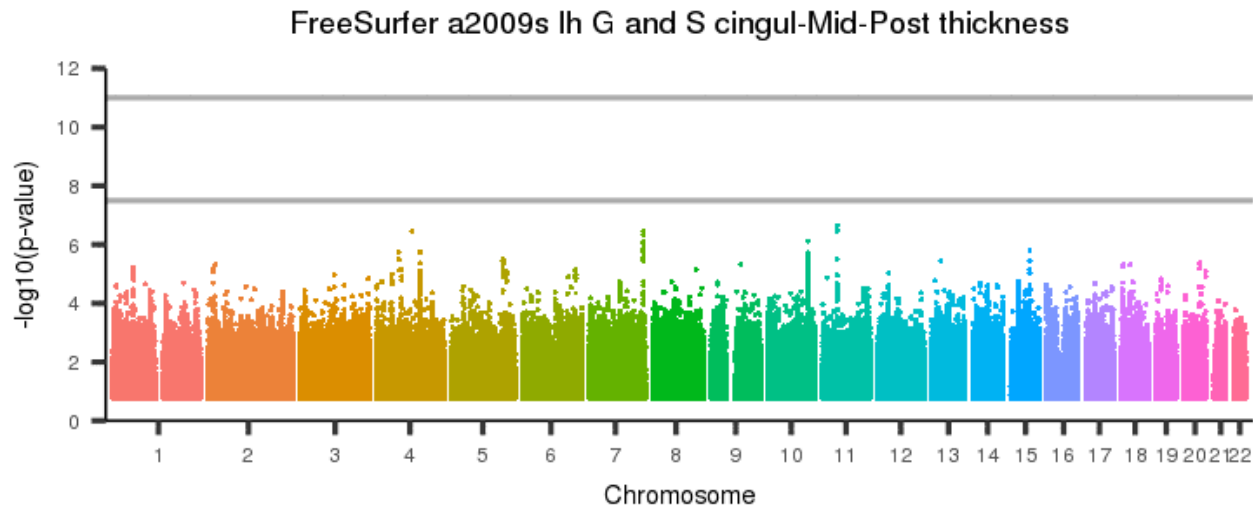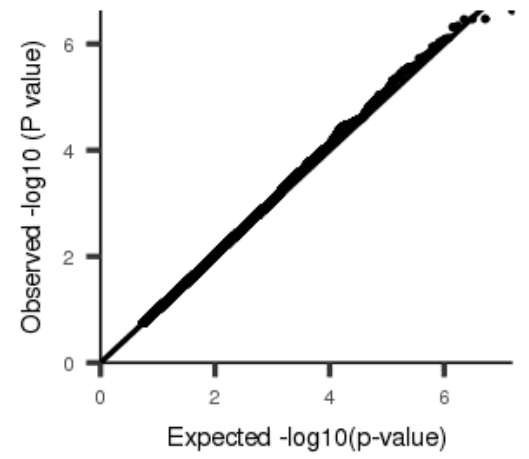

[back to list of plots](#)

Figure 2967: FreeSurfer a2009s lh G cingul-Post-dorsal thickness

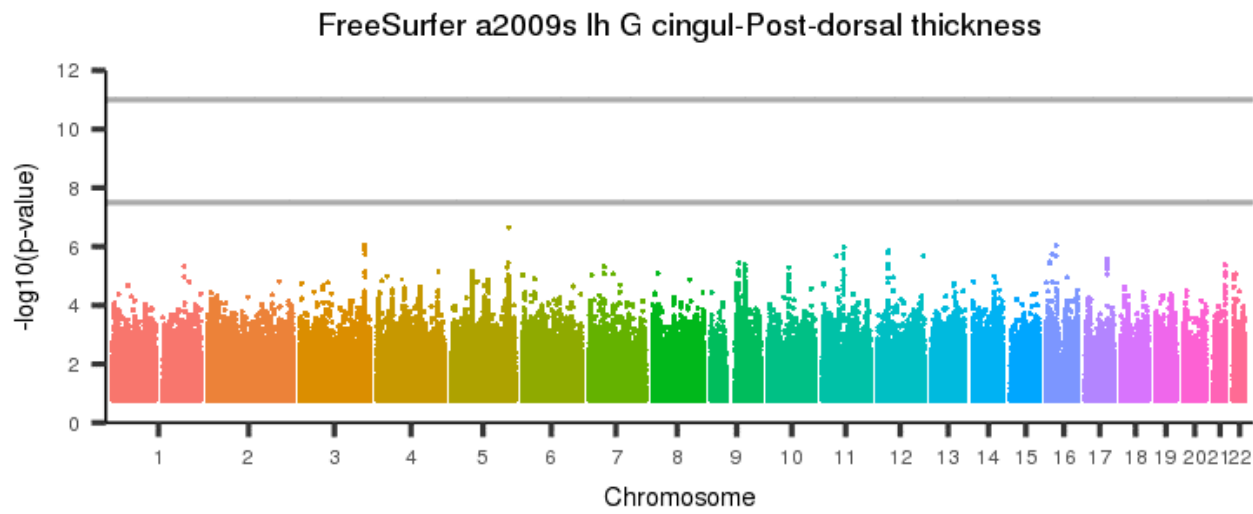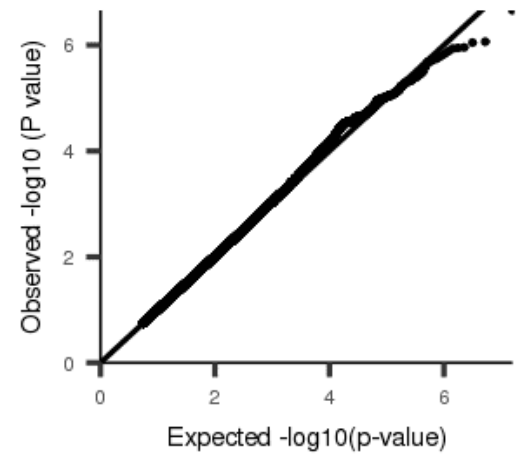

[back to list of plots](#)

Figure 2968: FreeSurfer a2009s lh G cingul-Post-ventral thickness

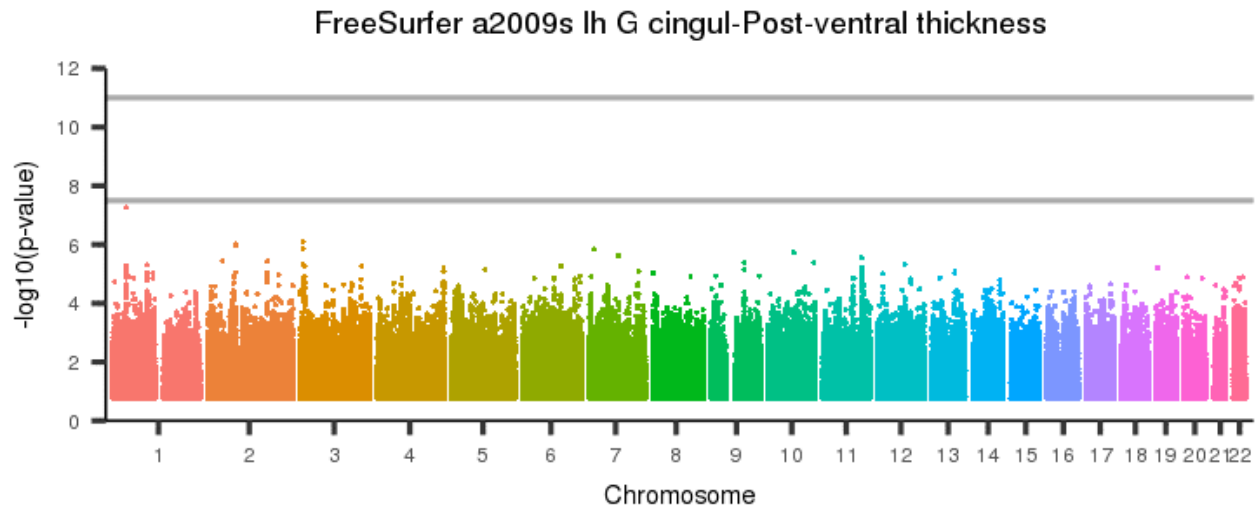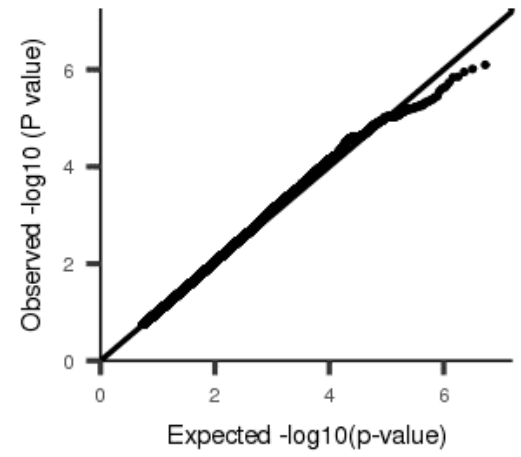

[back to list of plots](#)

Figure 2969: FreeSurfer a2009s lh G cuneus thickness

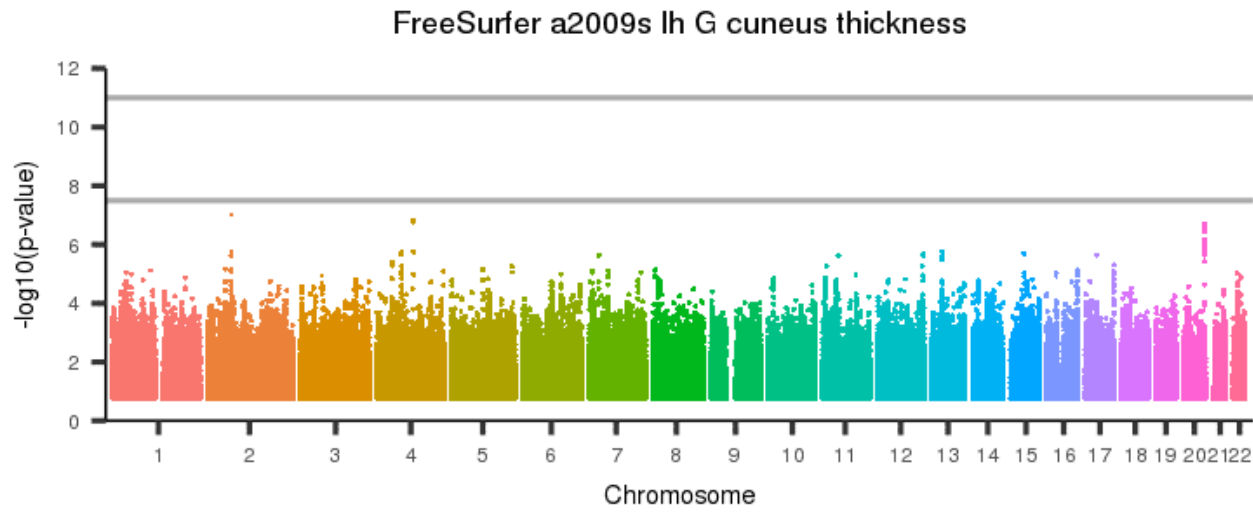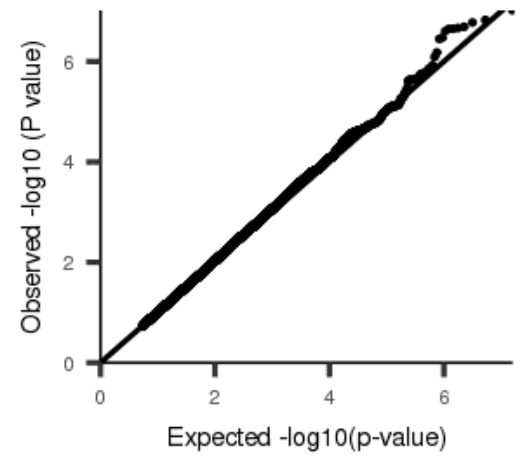

[back to list of plots](#)

Figure 2970: FreeSurfer a2009s lh G front inf-Opercular thickness

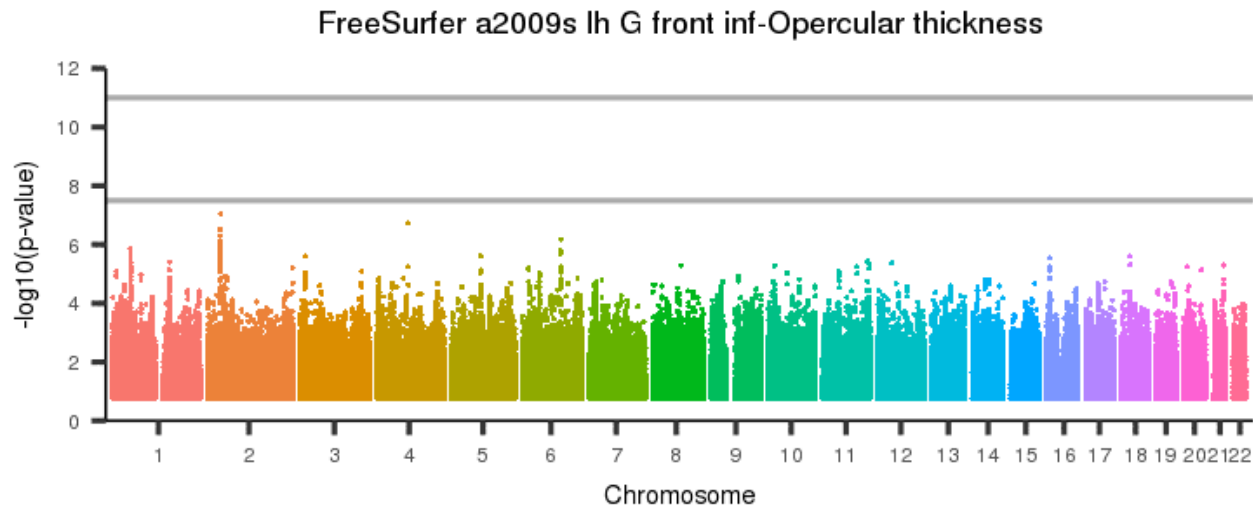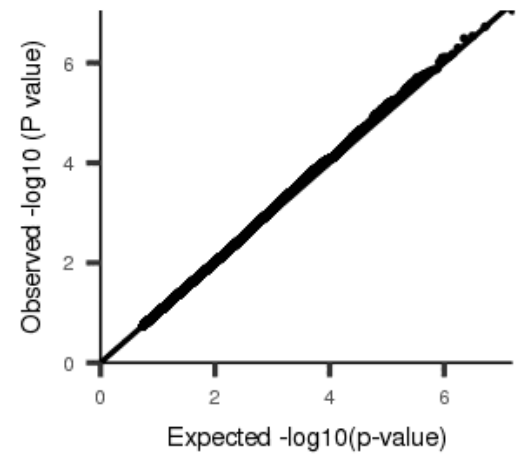

[back to list of plots](#)

Figure 2971: FreeSurfer a2009s lh G front inf-Orbital thickness

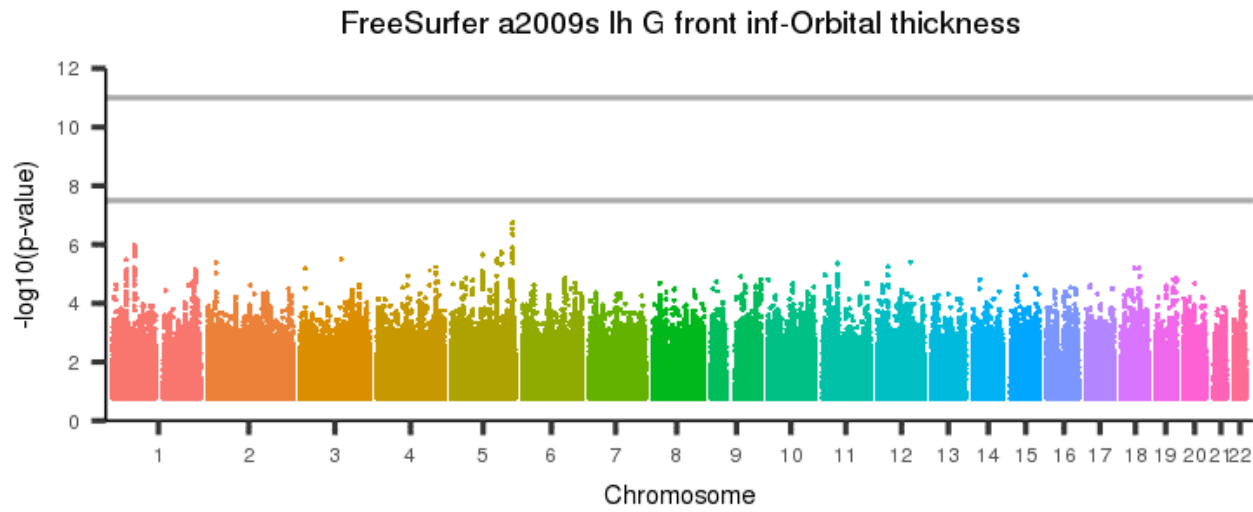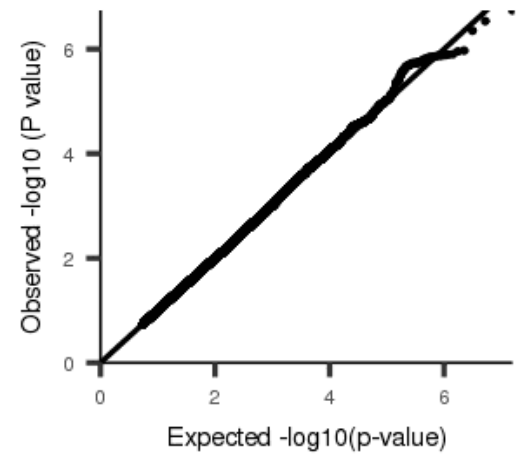

[back to list of plots](#)

Figure 2972: FreeSurfer a2009s lh G front inf-Triangul thickness

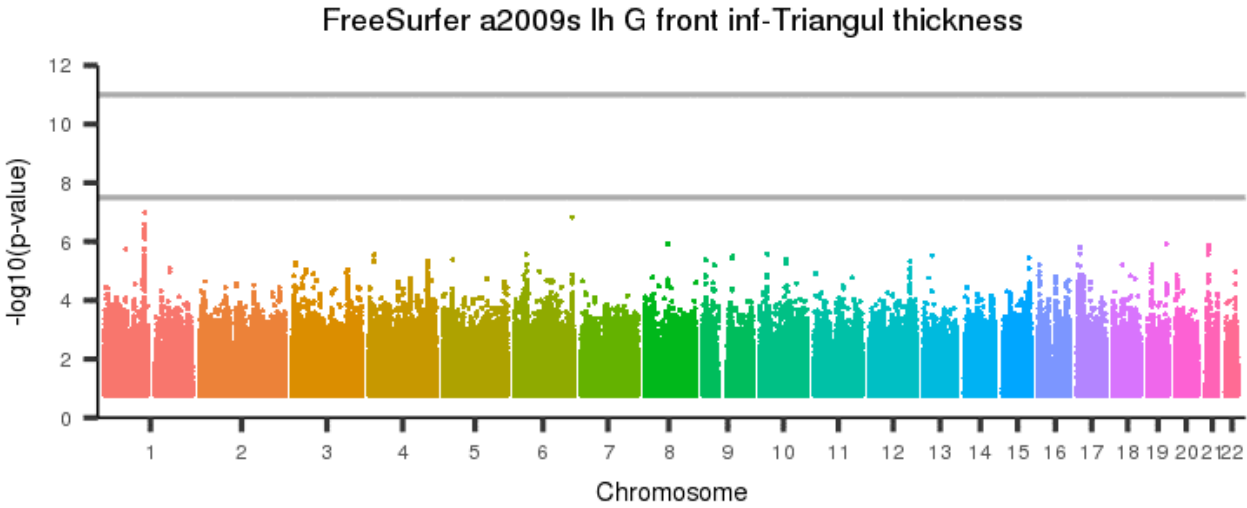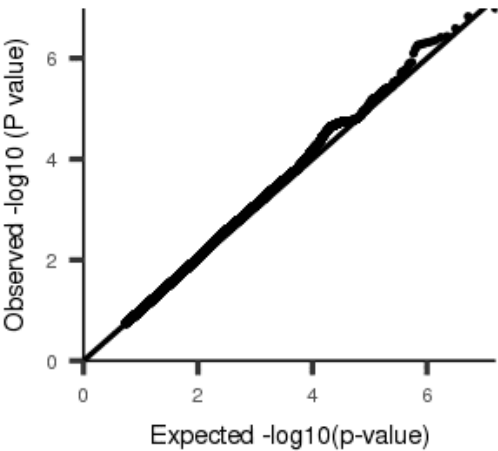

[back to list of plots](#)

Figure 2973: FreeSurfer a2009s lh G front middle thickness

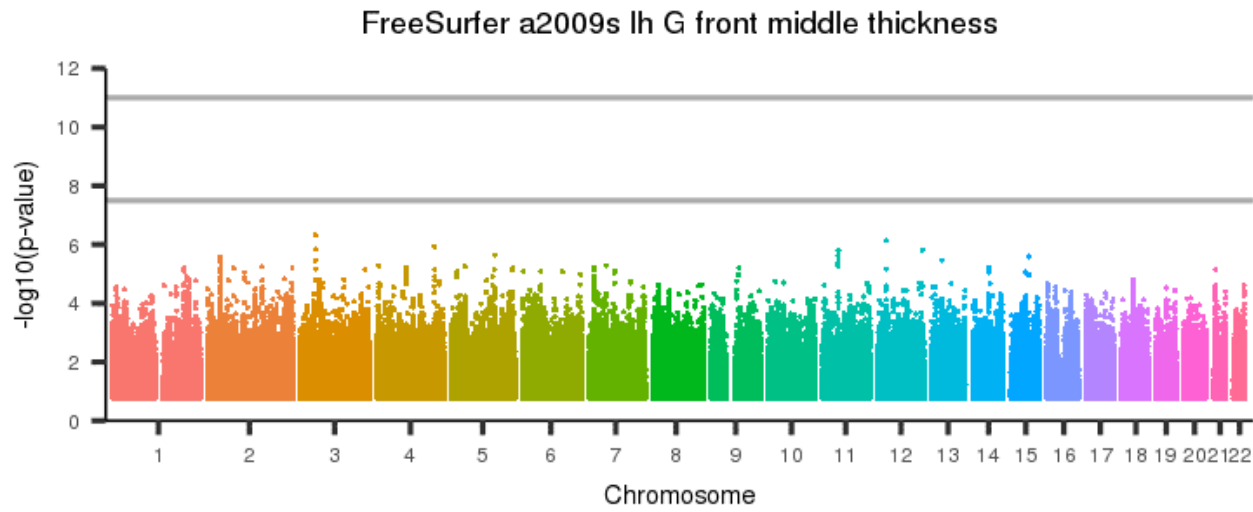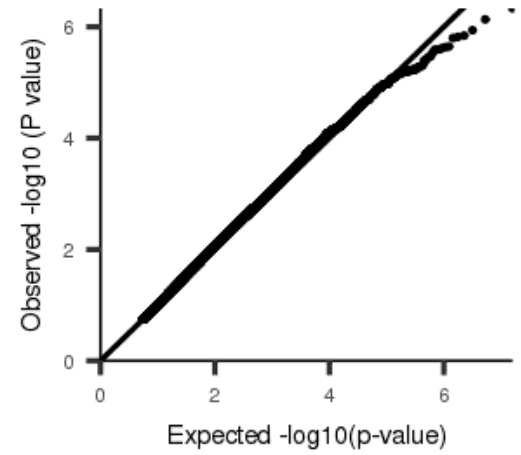

[back to list of plots](#)



Figure 2974: FreeSurfer a2009s lh G front sup thickness

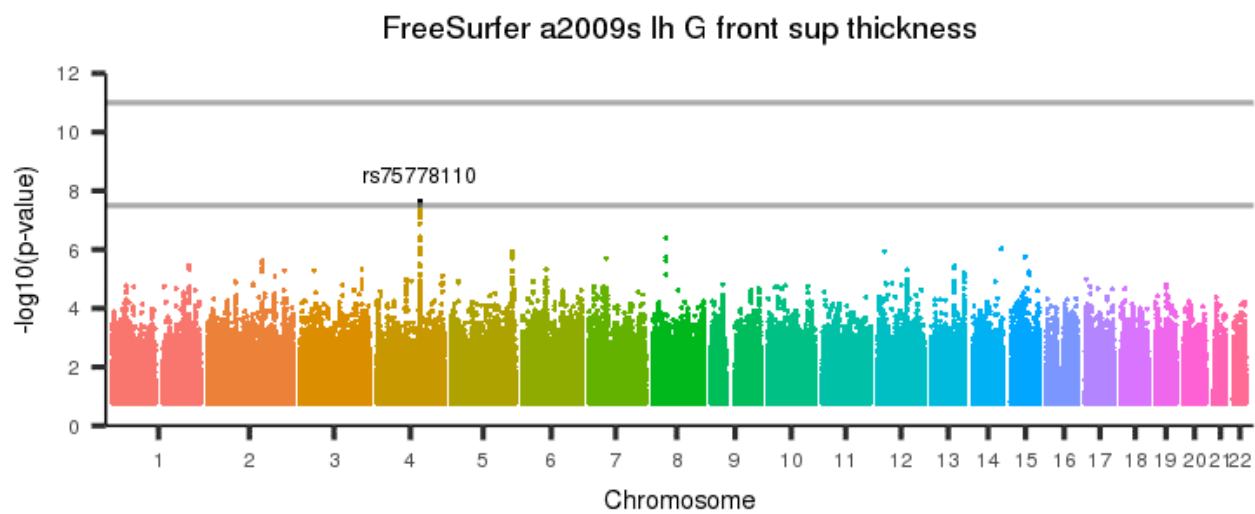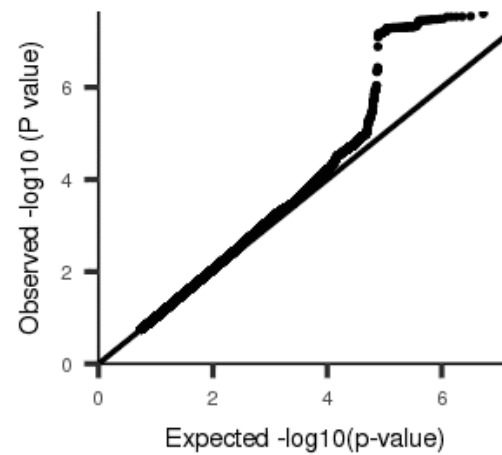

[back to list of plots](#)

Figure 2975: FreeSurfer a2009s lh G Ins lg and S cent ins thickness

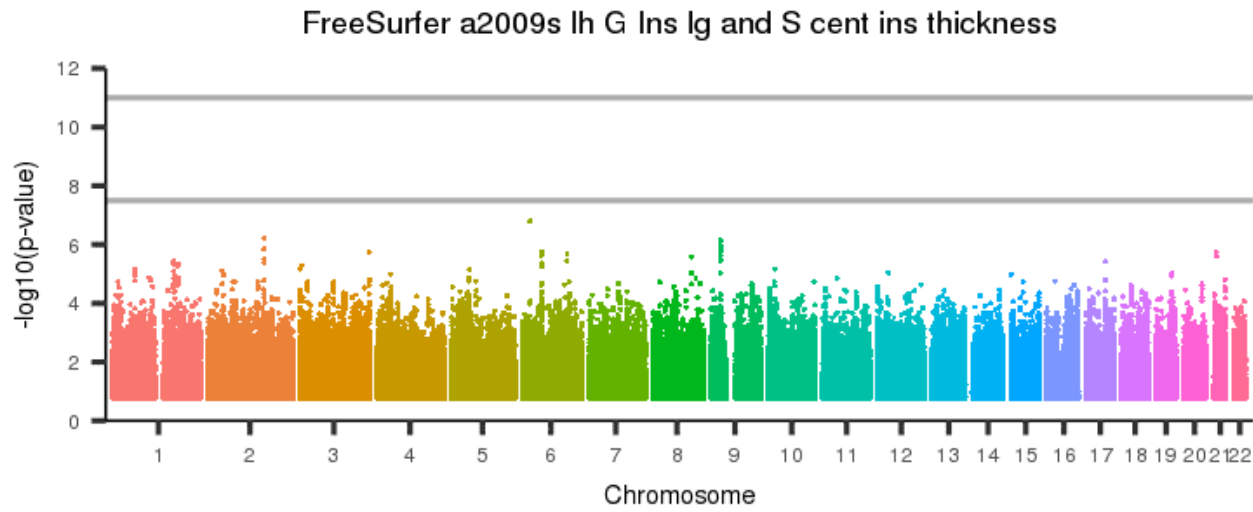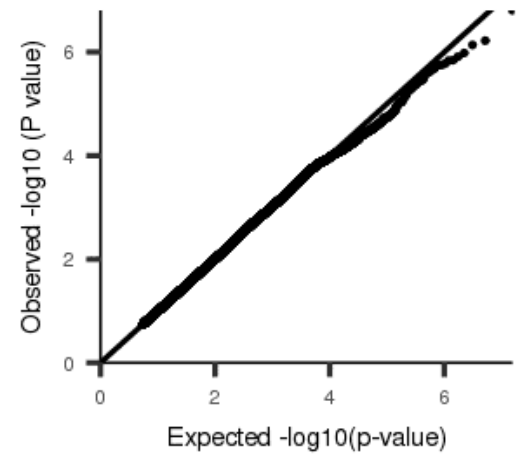

[back to list of plots](#)

Figure 2976: FreeSurfer a2009s lh G insular short thickness

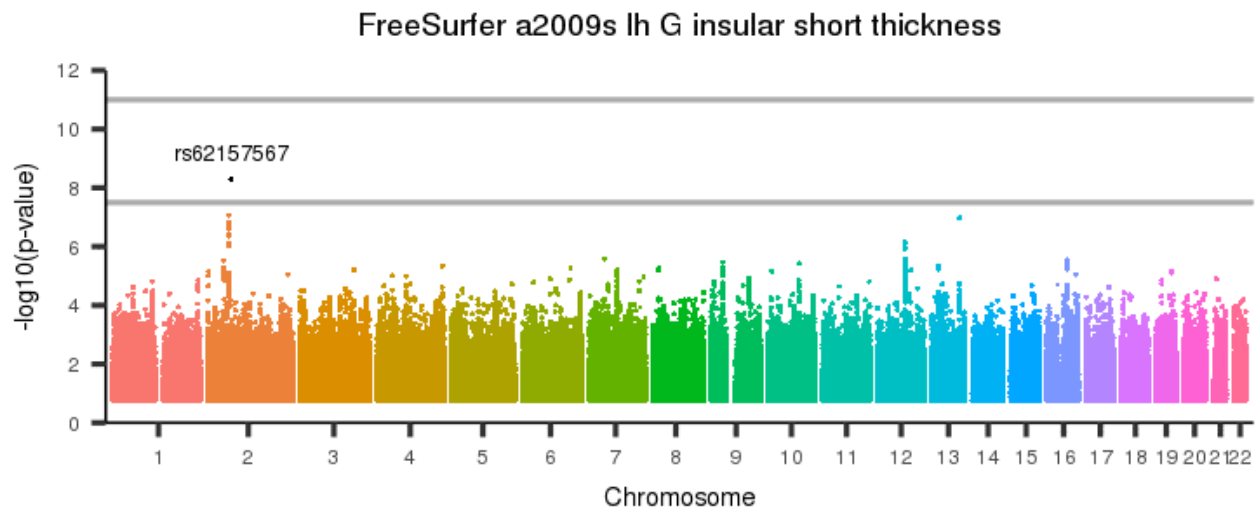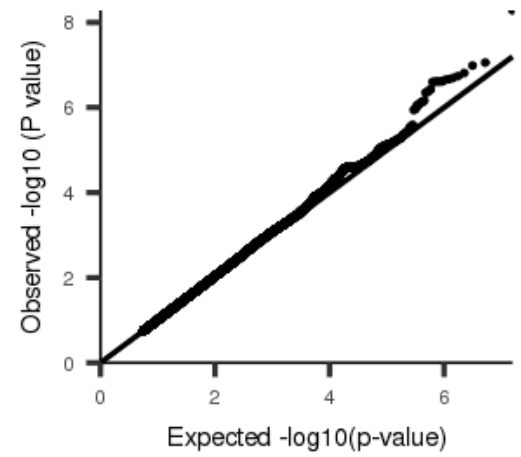

[back to list of plots](#)

Figure 2977: FreeSurfer a2009s lh G occipital middle thickness

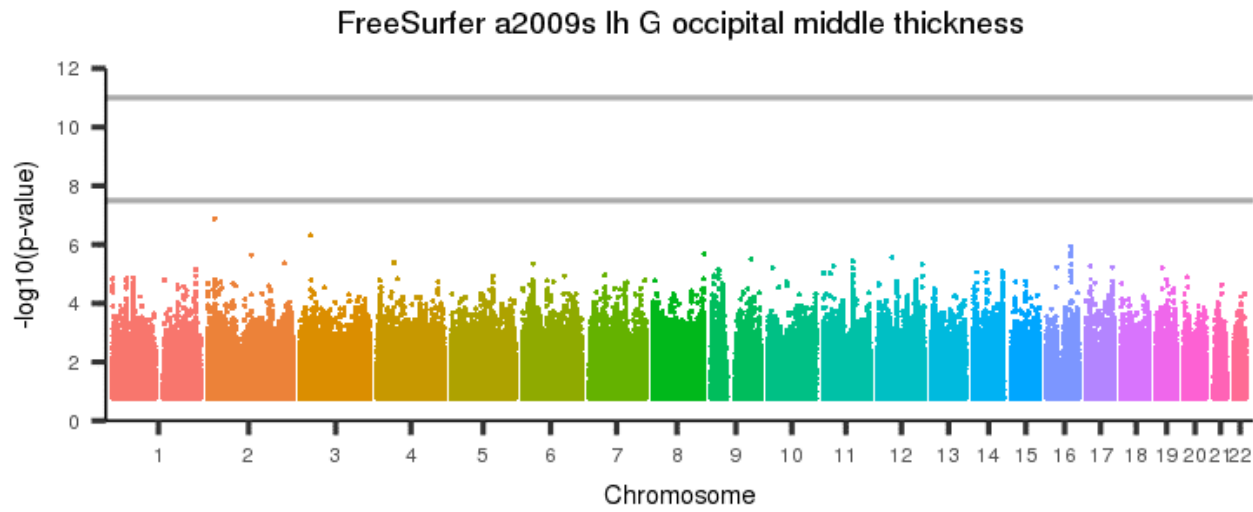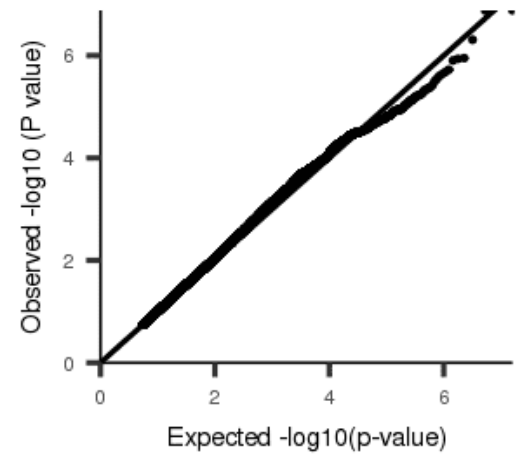

[back to list of plots](#)

Figure 2978: FreeSurfer a2009s lh G occipital sup thickness

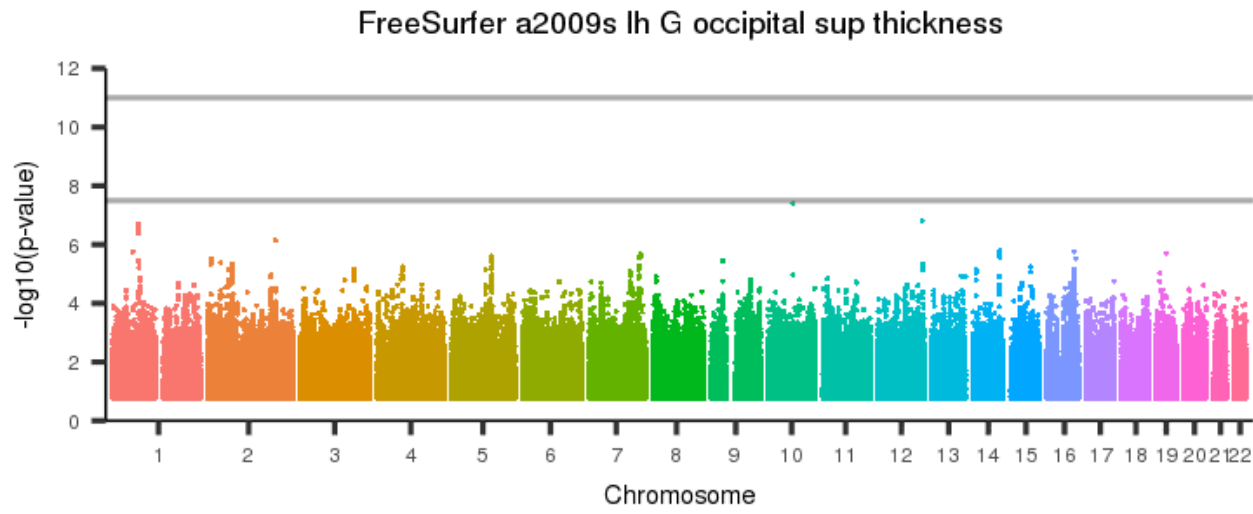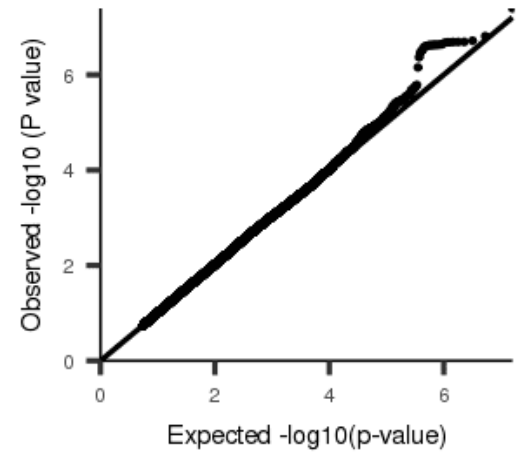

[back to list of plots](#)

Figure 2979: FreeSurfer a2009s lh G oc-temp lat-fusifor thickness

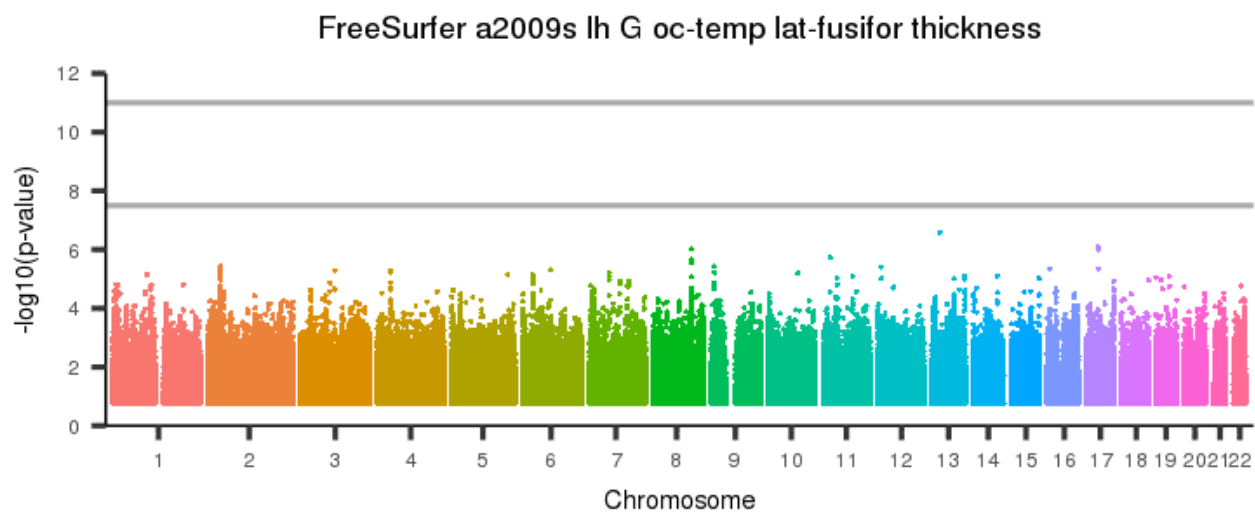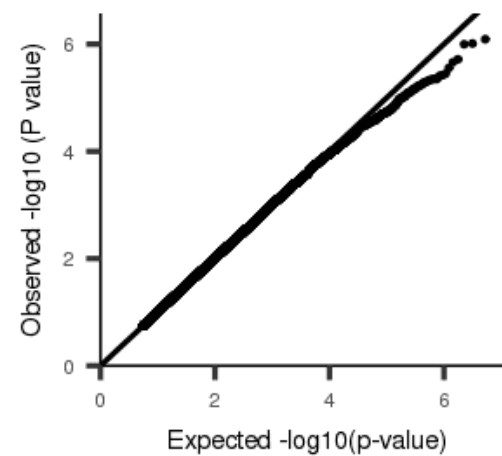

[back to list of plots](#)

Figure 2980: FreeSurfer a2009s lh G oc-temp med-Lingual thickness

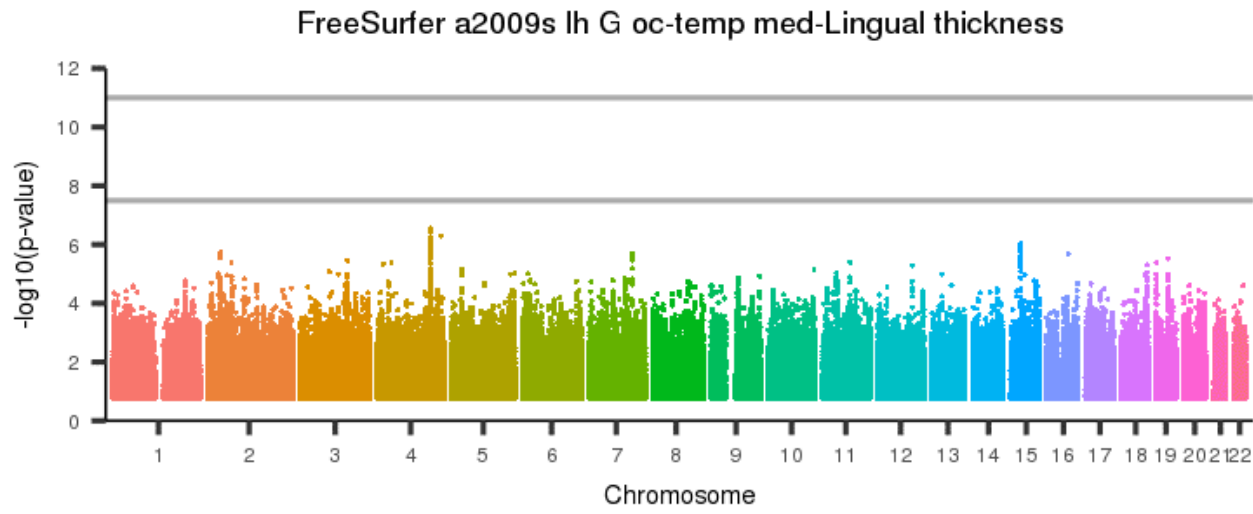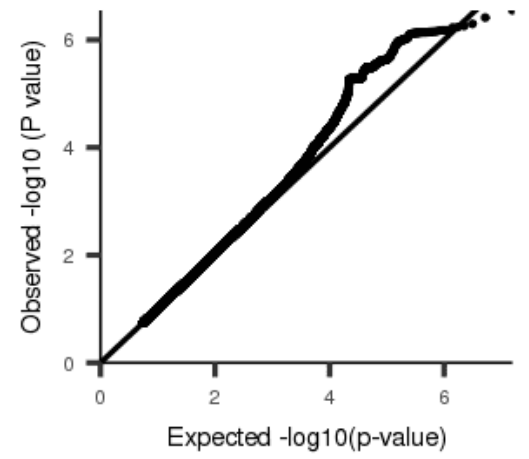

[back to list of plots](#)

Figure 2981: FreeSurfer a2009s lh G oc-temp med-Parahip thickness

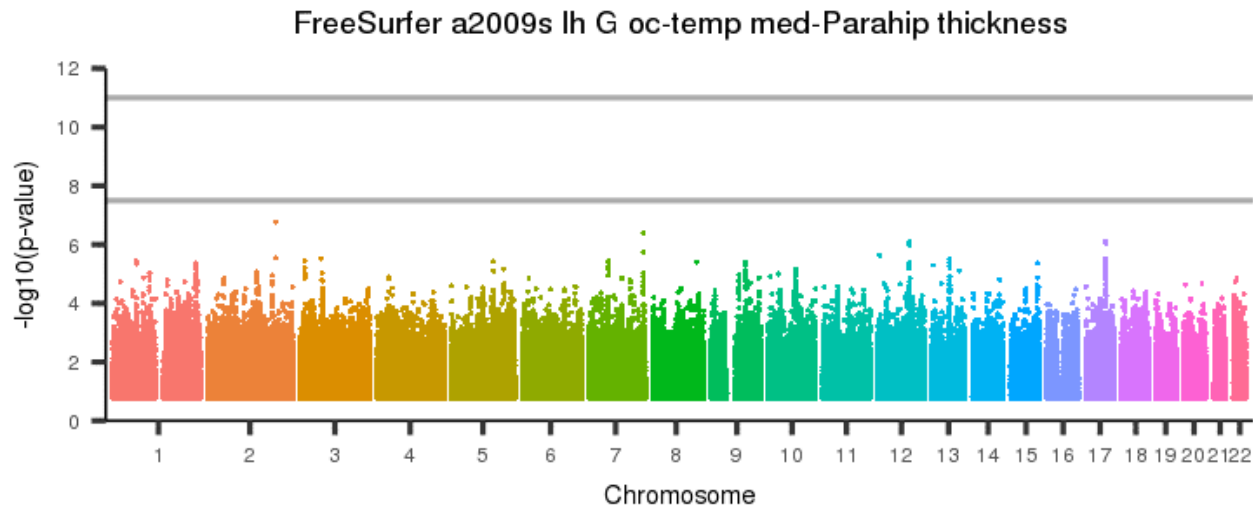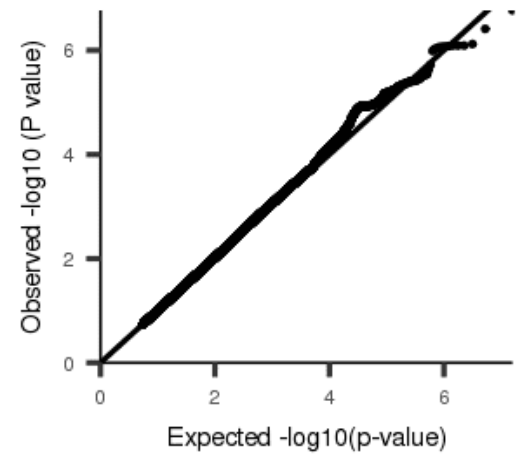

[back to list of plots](#)



Figure 2982: FreeSurfer a2009s lh G orbital thickness

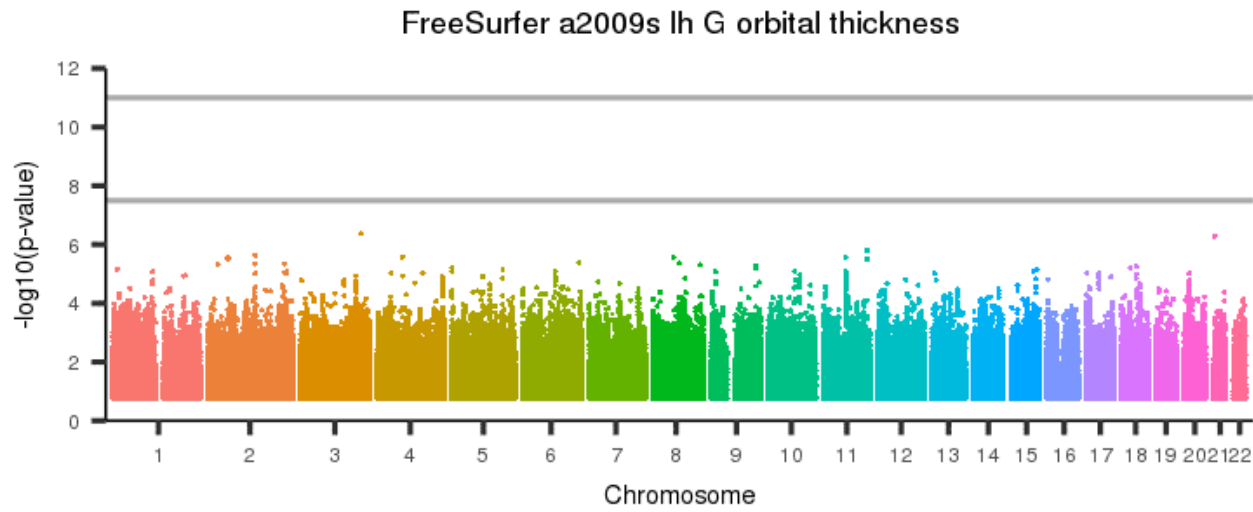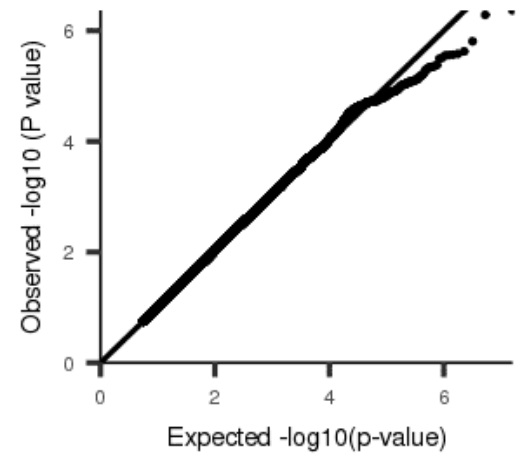

[back to list of plots](#)

Figure 2983: FreeSurfer a2009s lh G pariet inf-Angular thickness

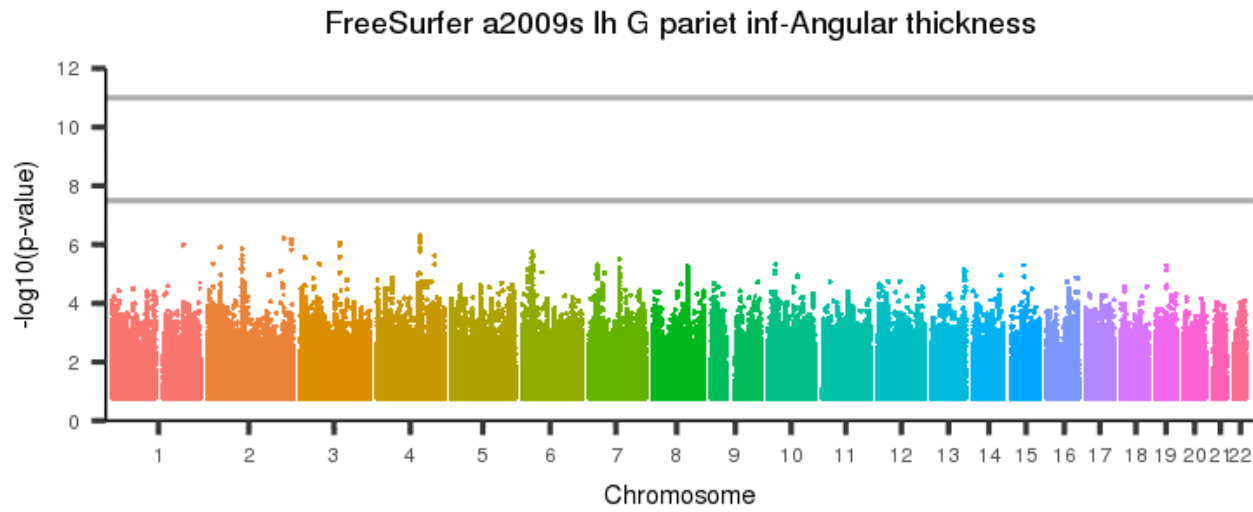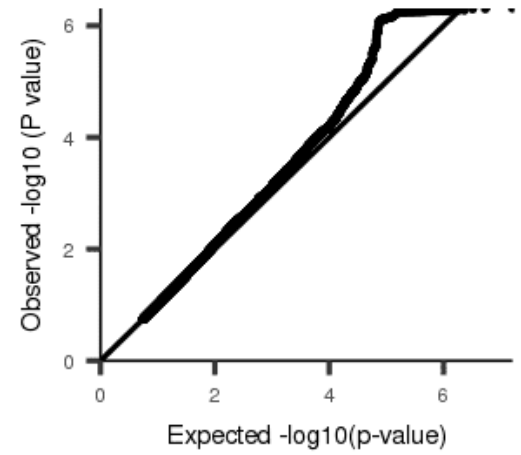

[back to list of plots](#)

Figure 2984: FreeSurfer a2009s lh G pariet inf-Supramar thickness

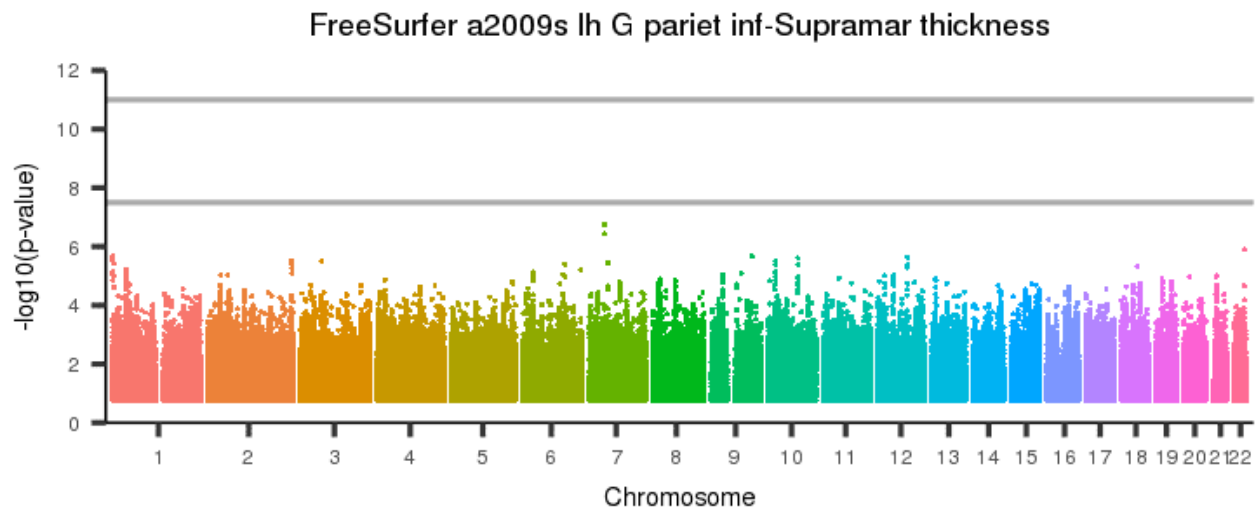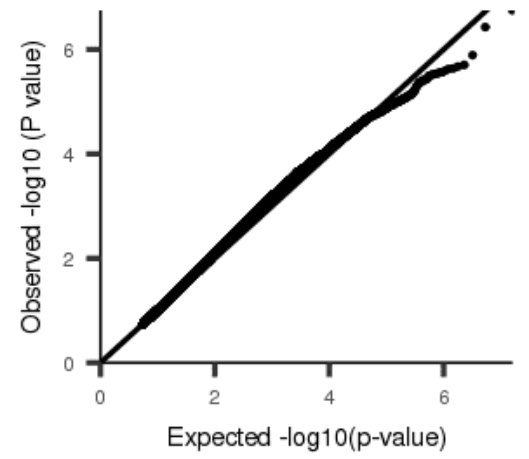

[back to list of plots](#)

Figure 2985: FreeSurfer a2009s lh G parietal sup thickness

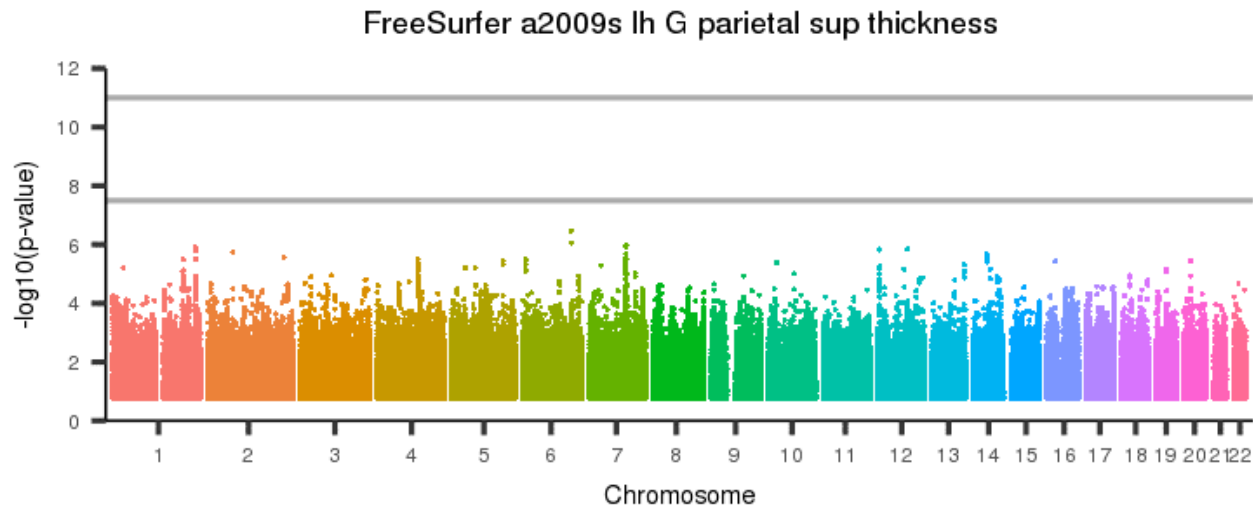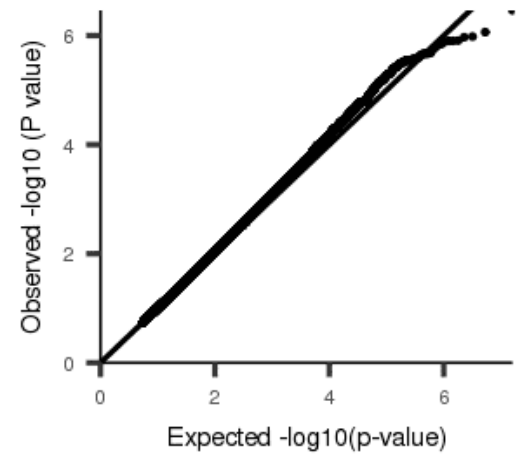

[back to list of plots](#)

Figure 2986: FreeSurfer a2009s lh G postcentral thickness

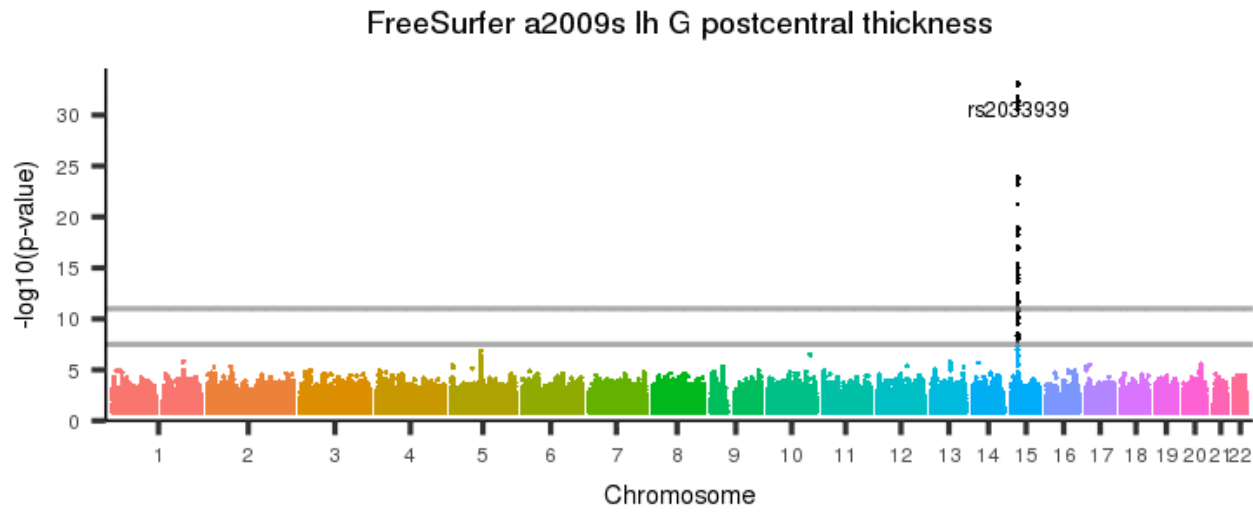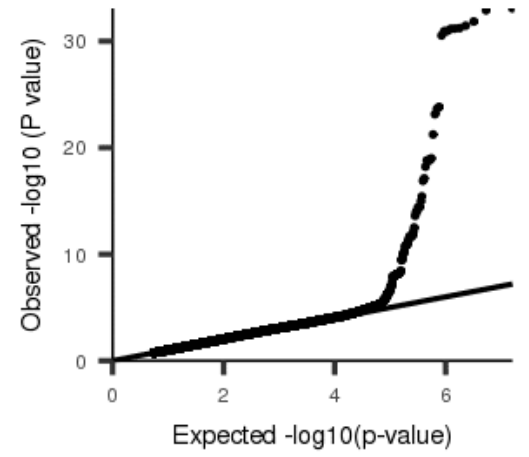

[back to list of plots](#)

Figure 2987: FreeSurfer a2009s lh G precentral thickness

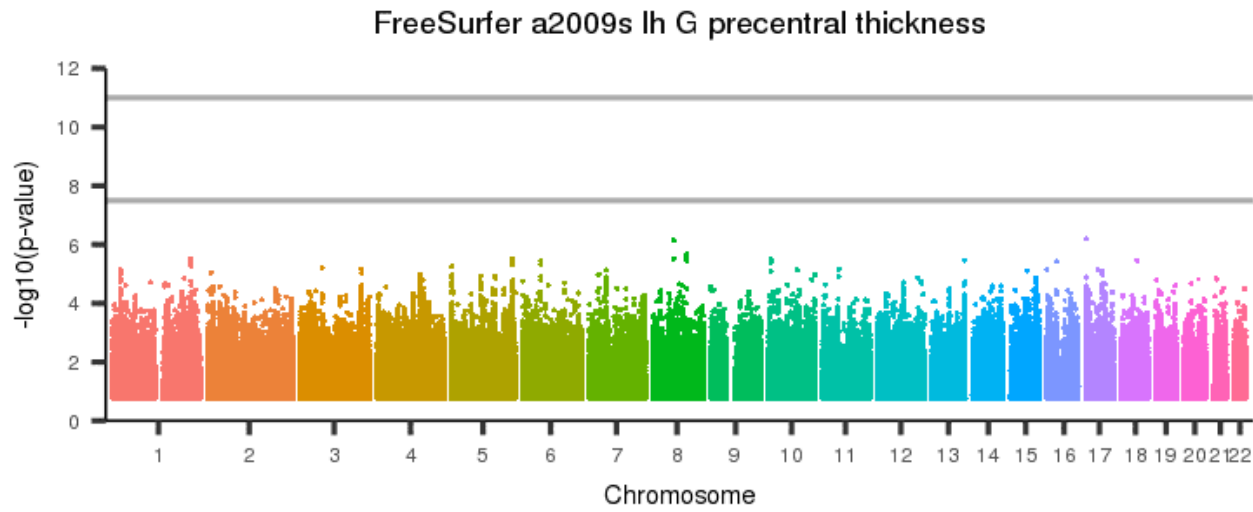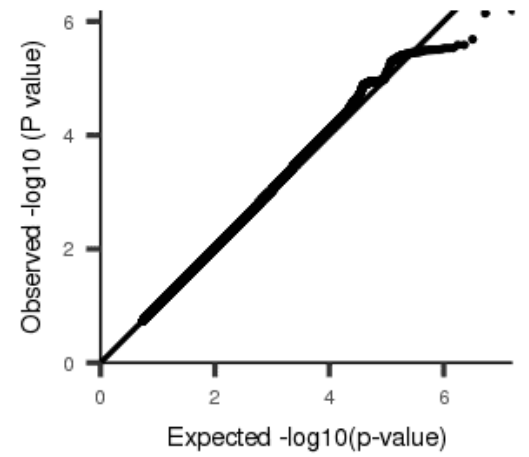

[back to list of plots](#)

Figure 2988: FreeSurfer a2009s lh G precuneus thickness

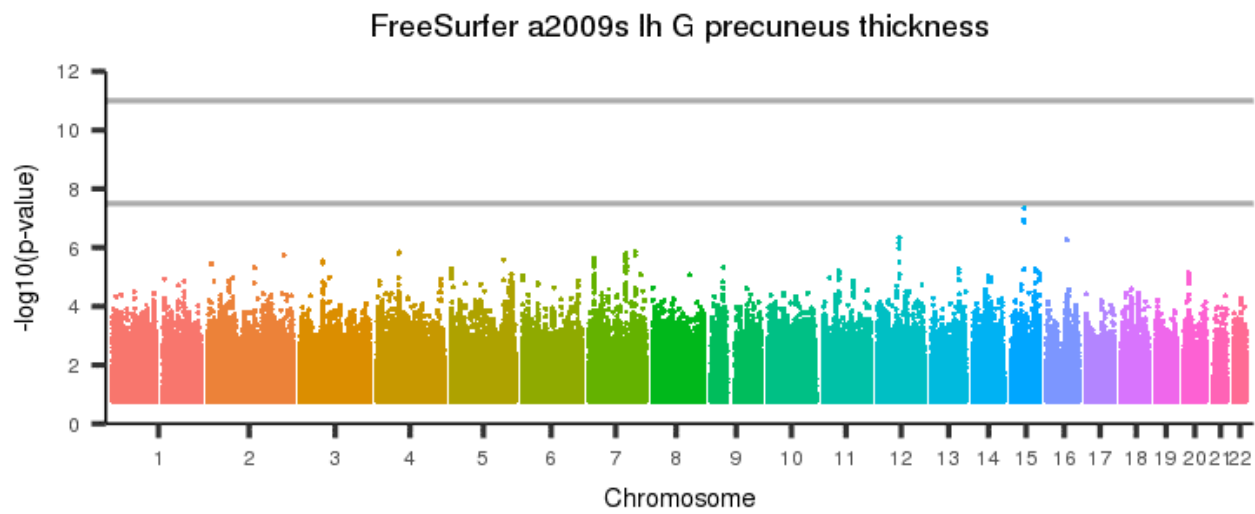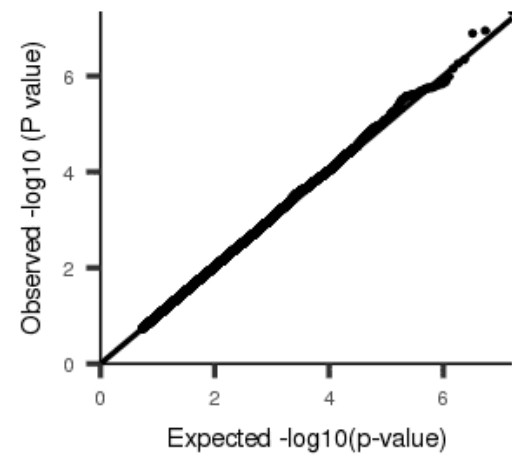

[back to list of plots](#)

Figure 2989: FreeSurfer a2009s lh G rectus thickness

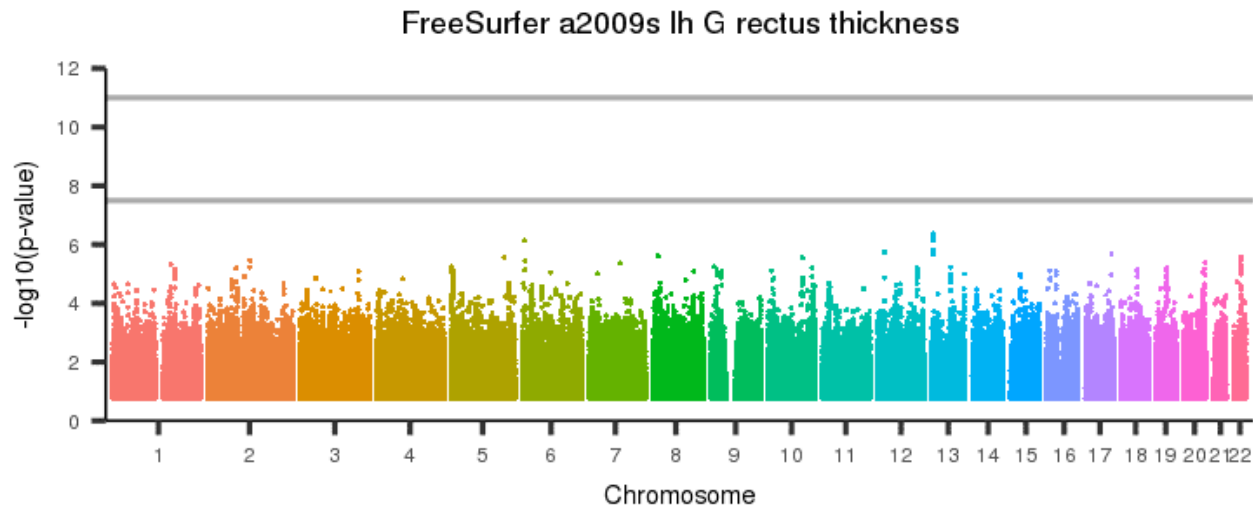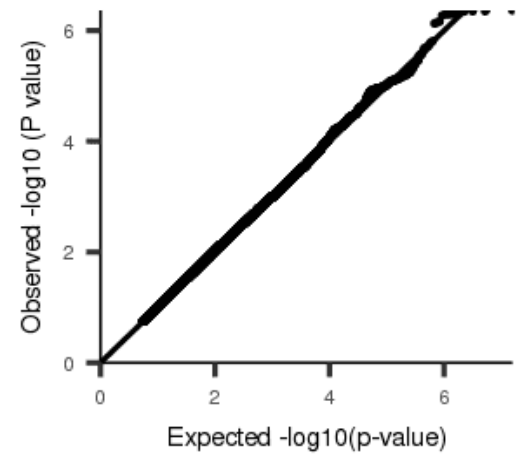

[back to list of plots](#)



Figure 2990: FreeSurfer a2009s lh G subcallosal thickness

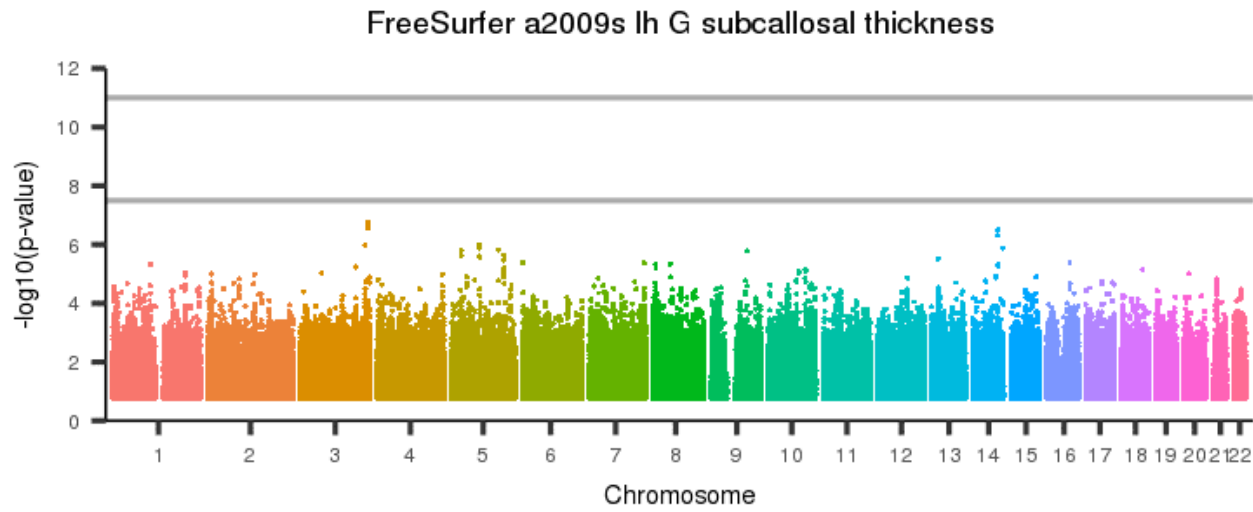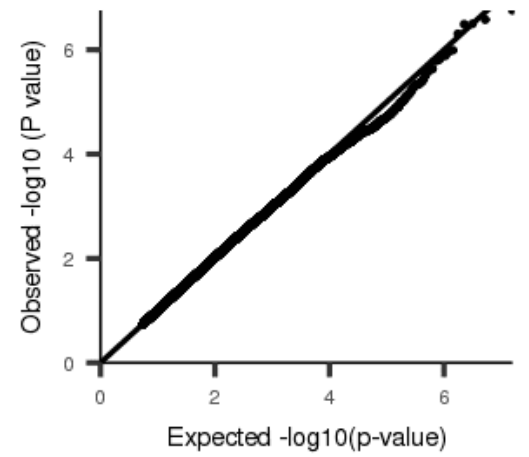

[back to list of plots](#)

Figure 2991: FreeSurfer a2009s lh G temp sup-G T transv thickness

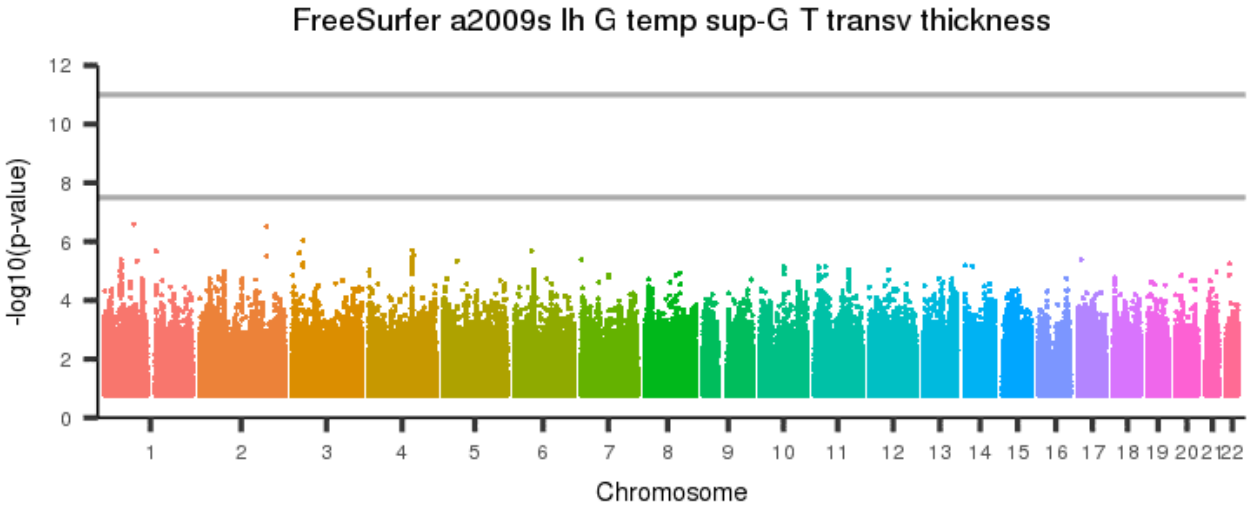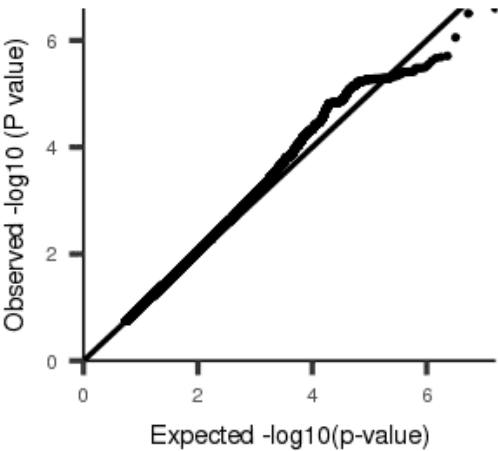

[back to list of plots](#)

Figure 2992: FreeSurfer a2009s lh G temp sup-Lateral thickness

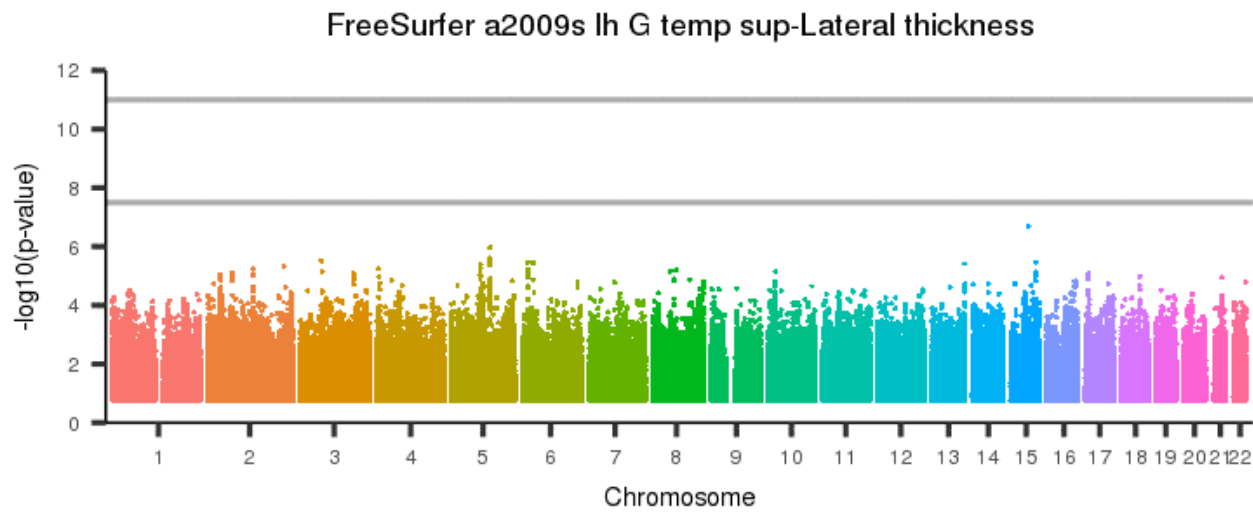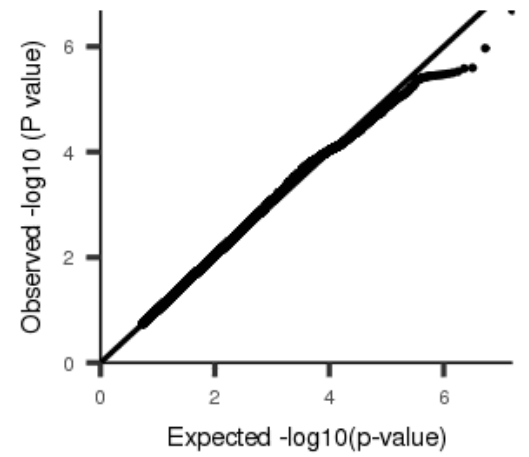

[back to list of plots](#)

Figure 2993: FreeSurfer a2009s lh G temp sup-Plan polar thickness

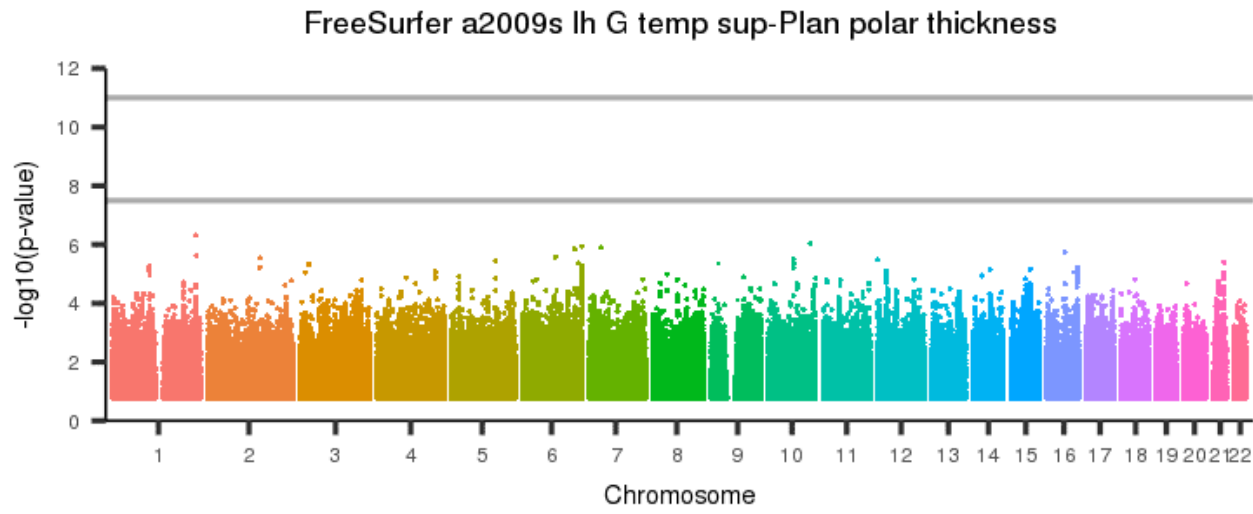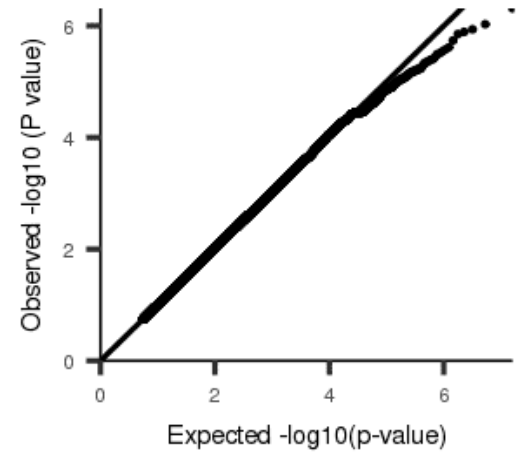

[back to list of plots](#)

Figure 2994: FreeSurfer a2009s lh G temp sup-Plan tempo thickness

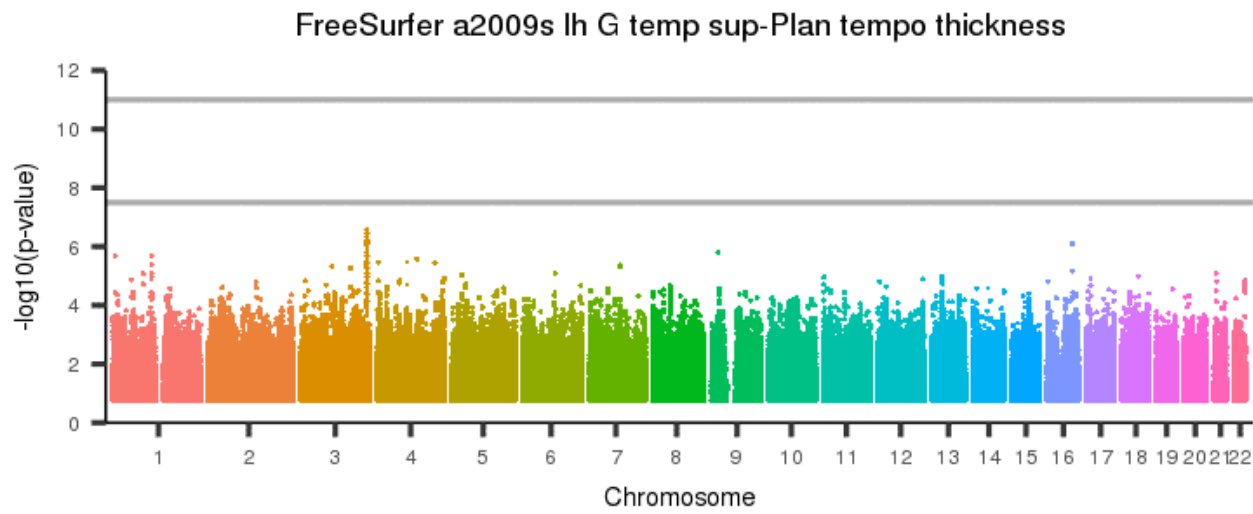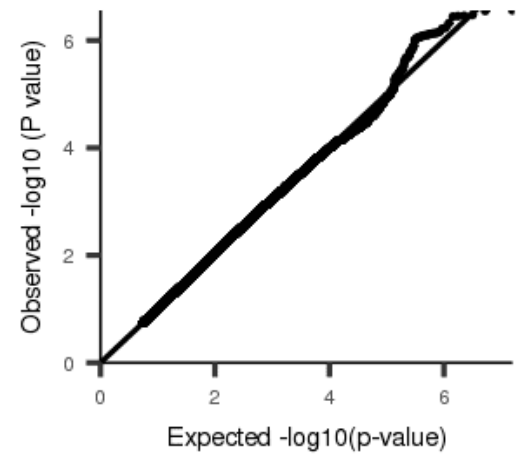

[back to list of plots](#)

Figure 2995: FreeSurfer a2009s lh G temporal inf thickness

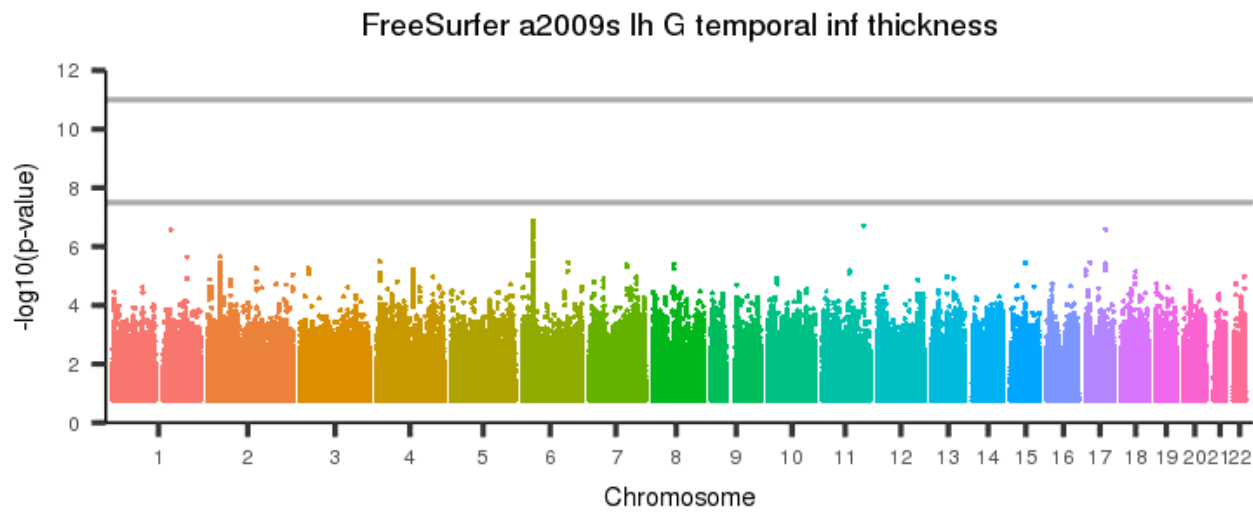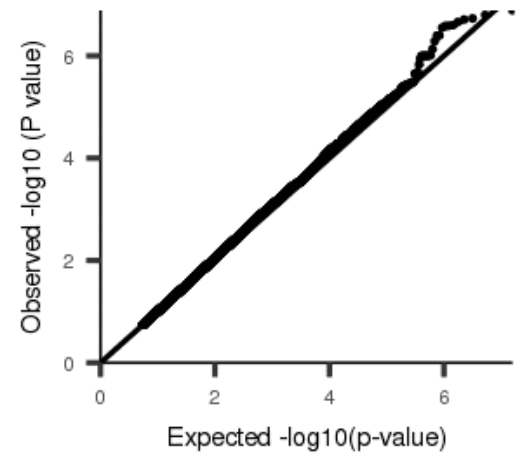

[back to list of plots](#)

Figure 2996: FreeSurfer a2009s lh G temporal middle thickness

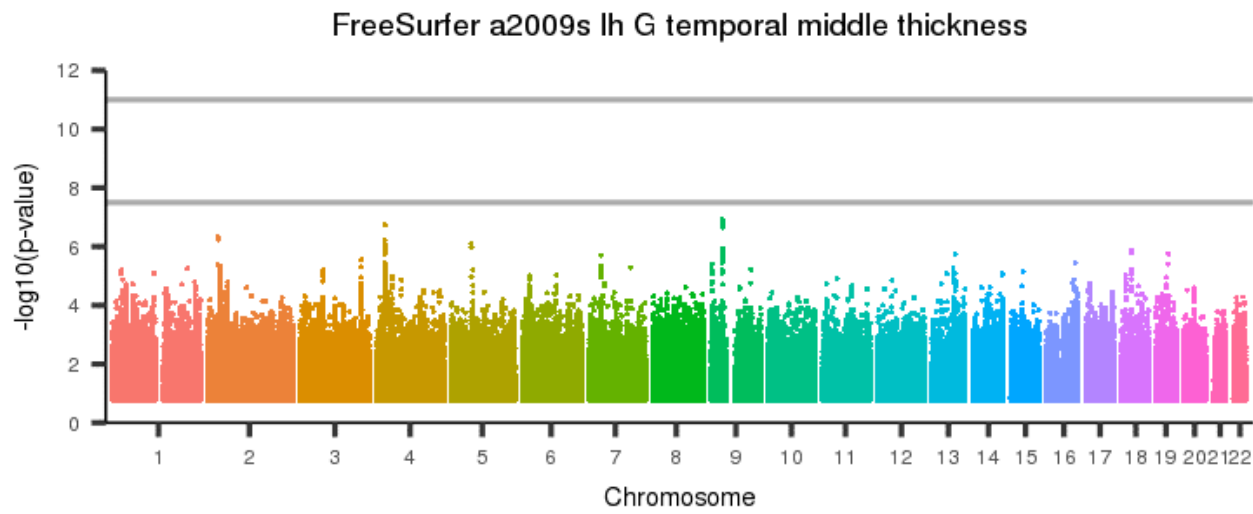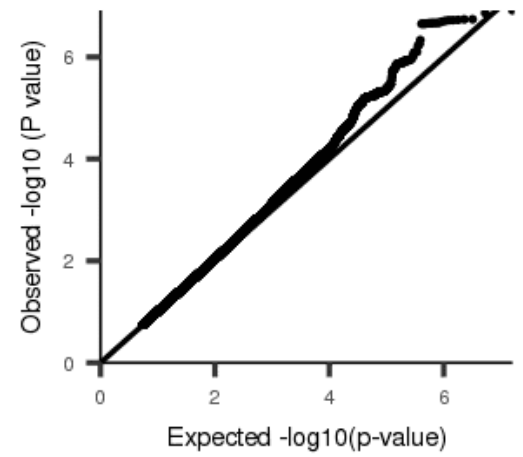

[back to list of plots](#)

Figure 2997: FreeSurfer a2009s lh Lat Fis-ant-Horizont thickness

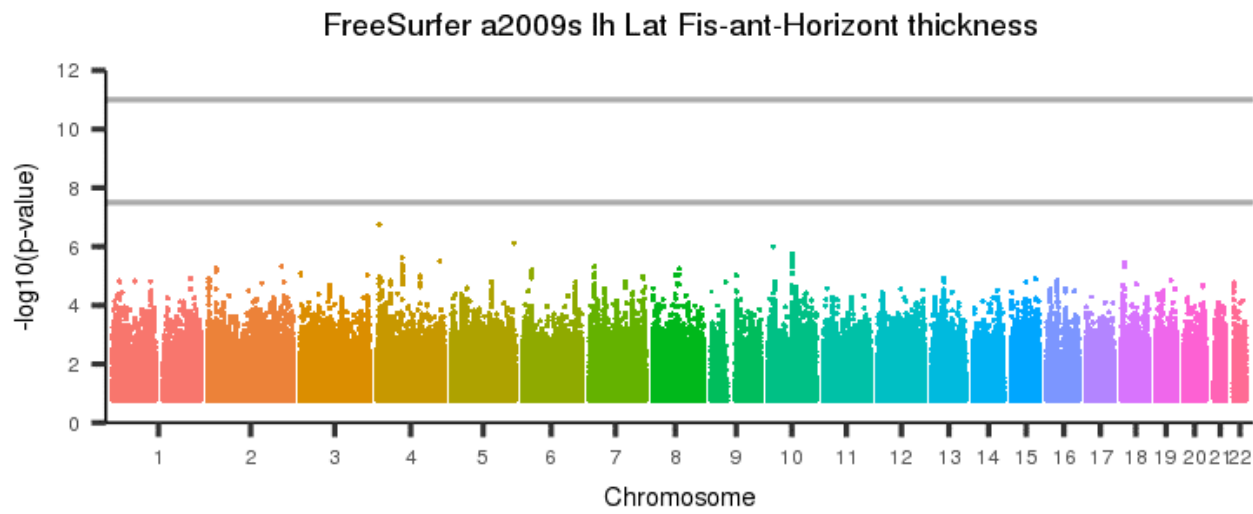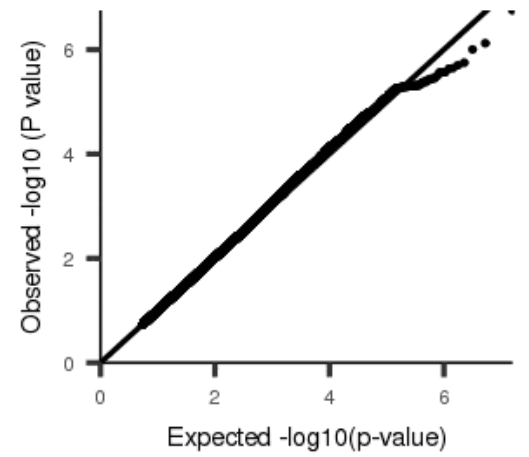

[back to list of plots](#)



Figure 2998: FreeSurfer a2009s lh Lat Fis-ant-Vertical thickness

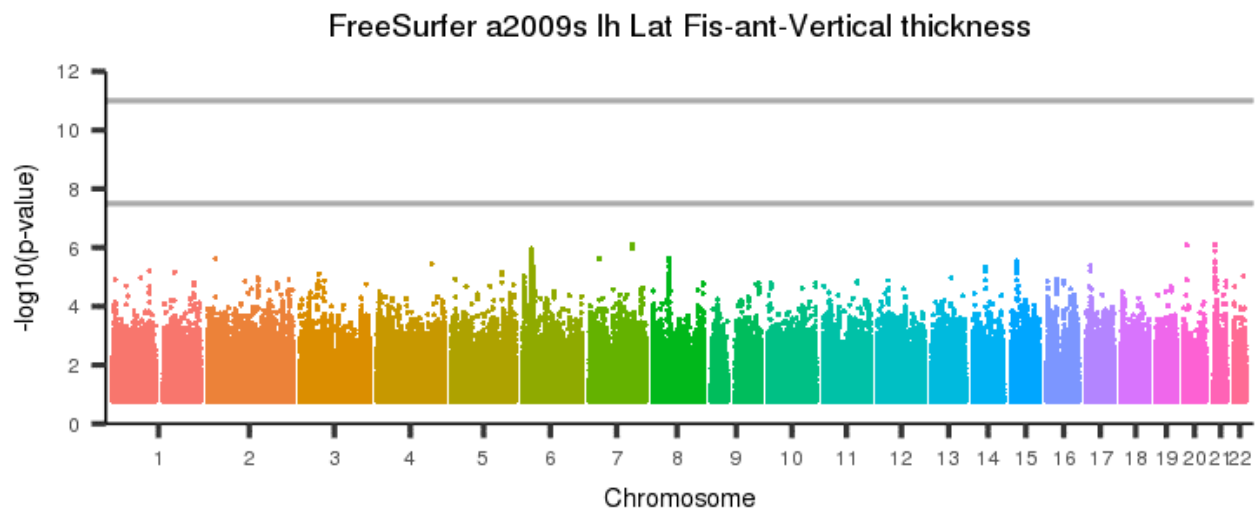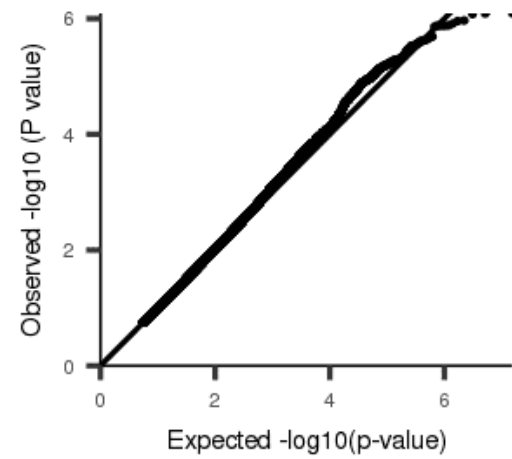

[back to list of plots](#)

Figure 2999: FreeSurfer a2009s lh Lat Fis-post thickness

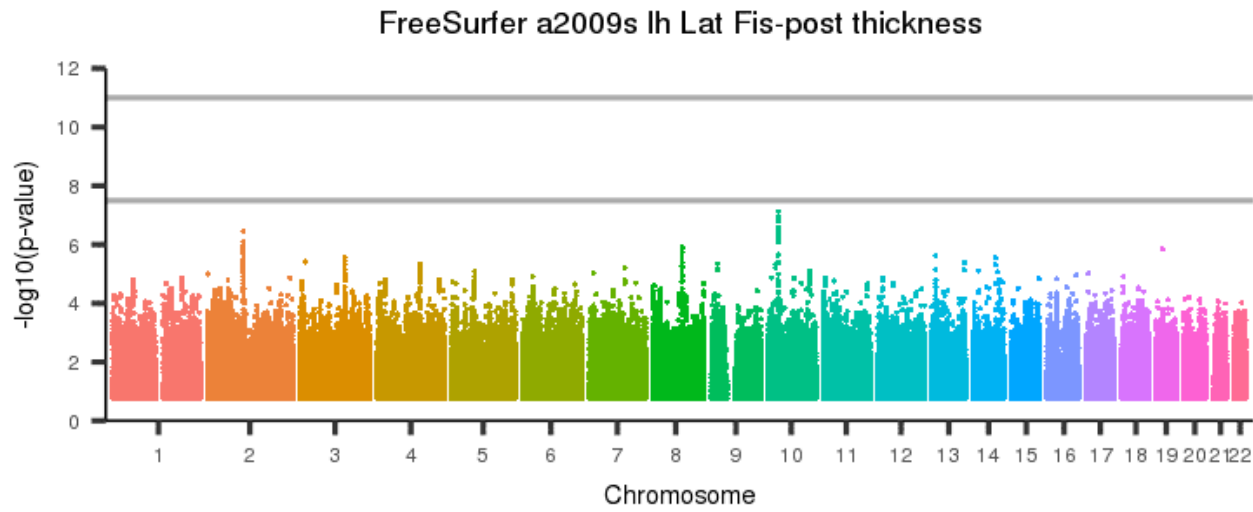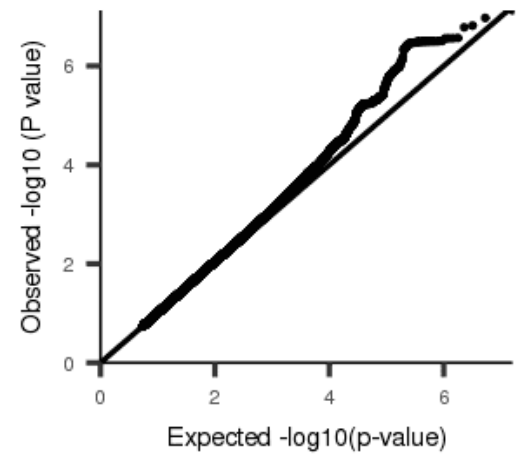

[back to list of plots](#)

Figure 3000: FreeSurfer a2009s lh Pole occipital thickness

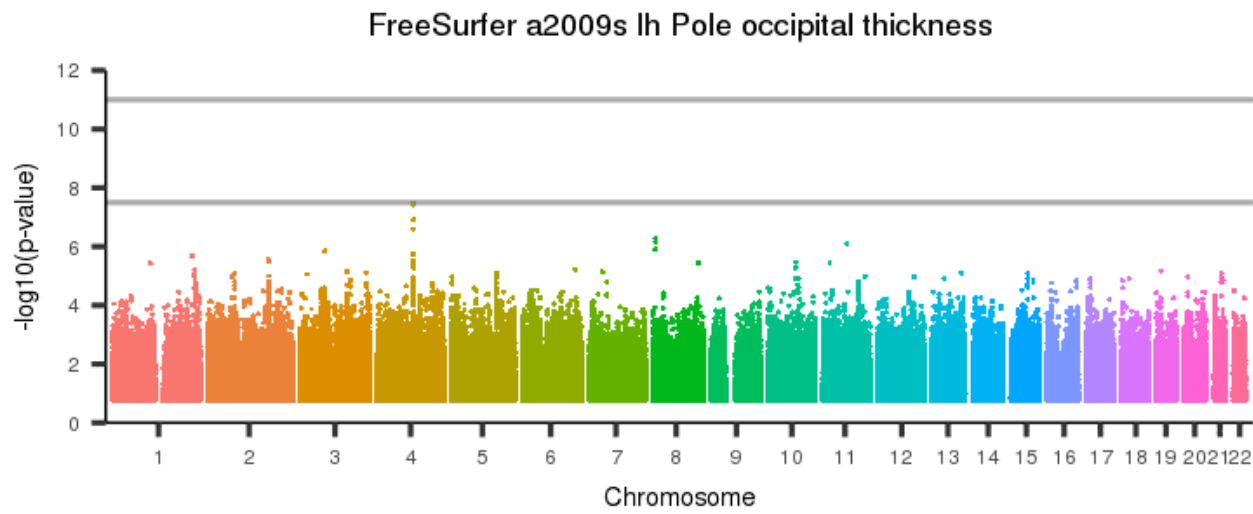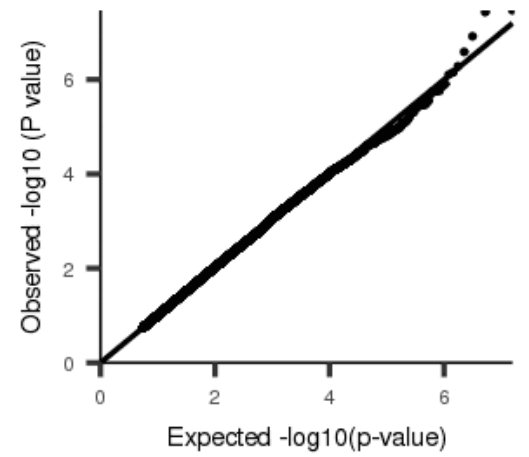

[back to list of plots](#)

Figure 3001: FreeSurfer a2009s lh Pole temporal thickness

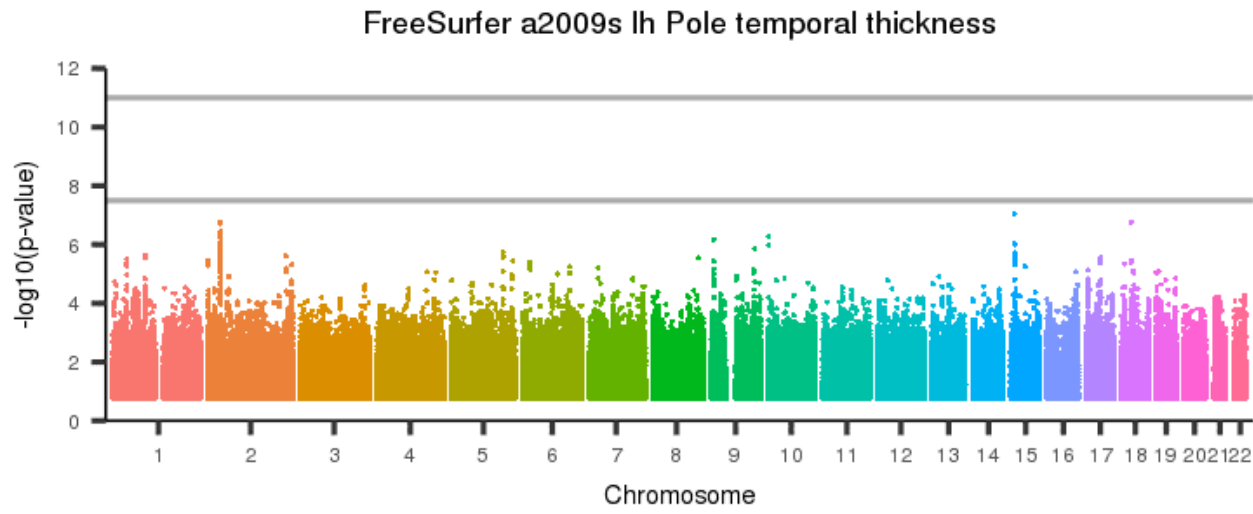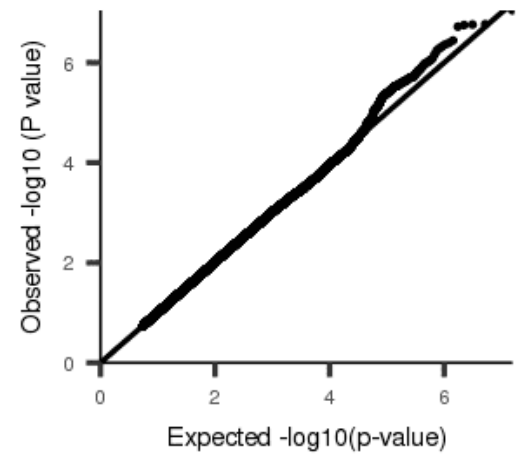

[back to list of plots](#)

Figure 3002: FreeSurfer a2009s lh S calcarine thickness

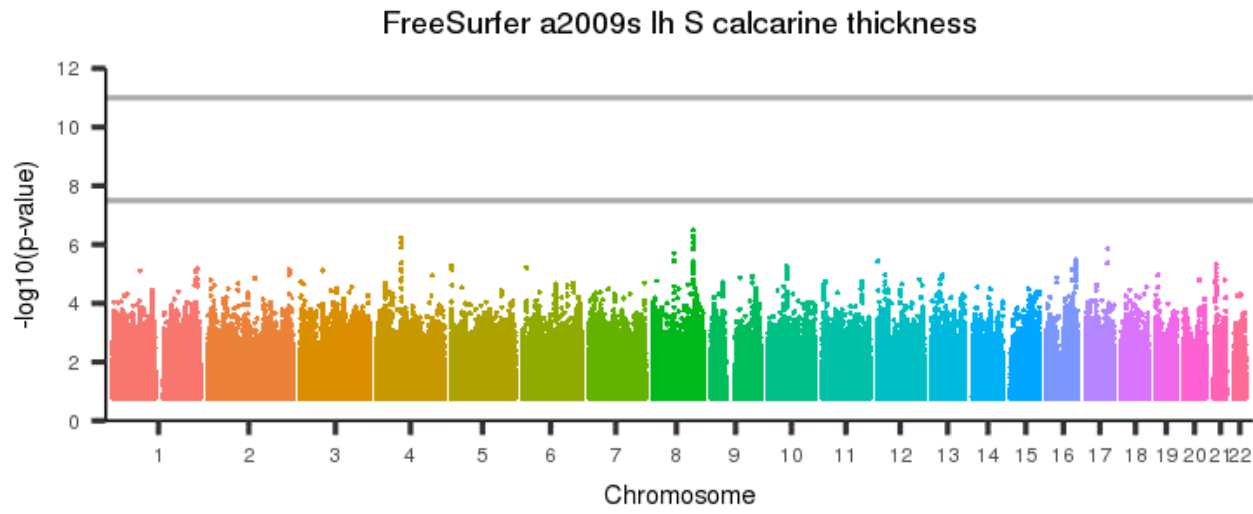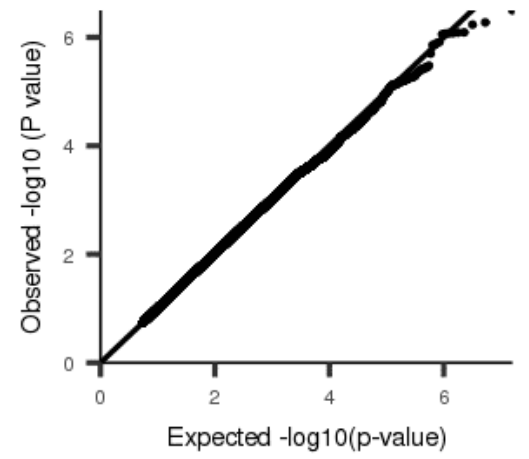

[back to list of plots](#)

Figure 3003: FreeSurfer a2009s lh S central thickness

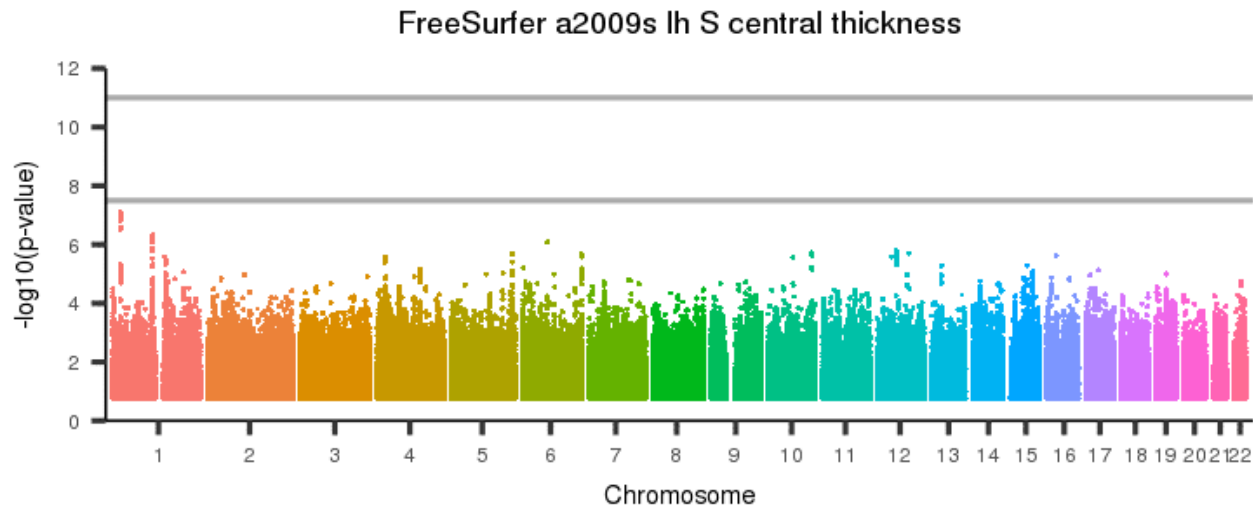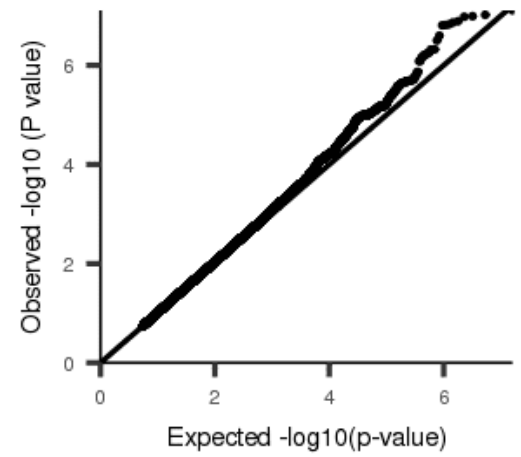

[back to list of plots](#)

Figure 3004: FreeSurfer a2009s lh S cingul-Marginalis thickness

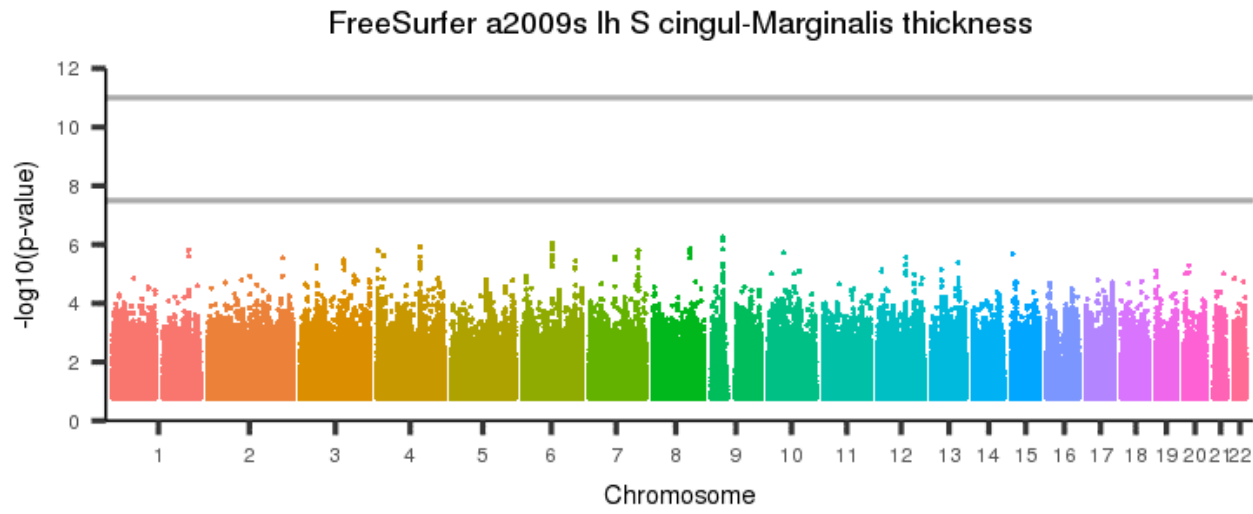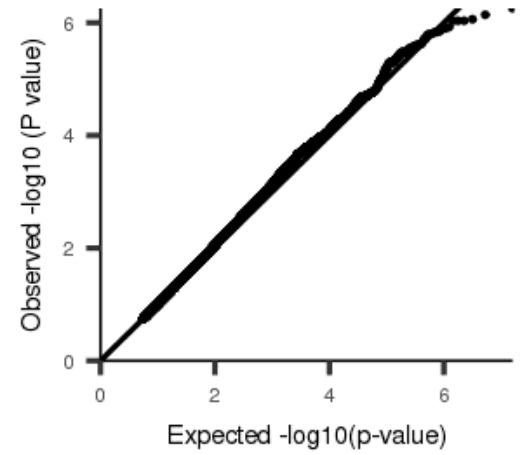

[back to list of plots](#)

Figure 3005: FreeSurfer a2009s lh S circular insula ant thickness

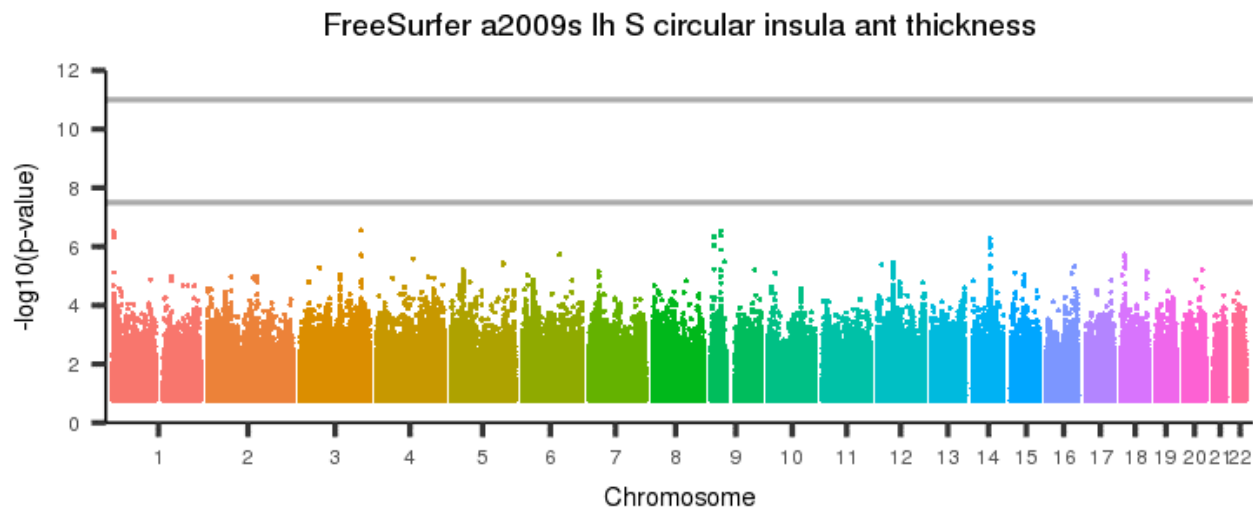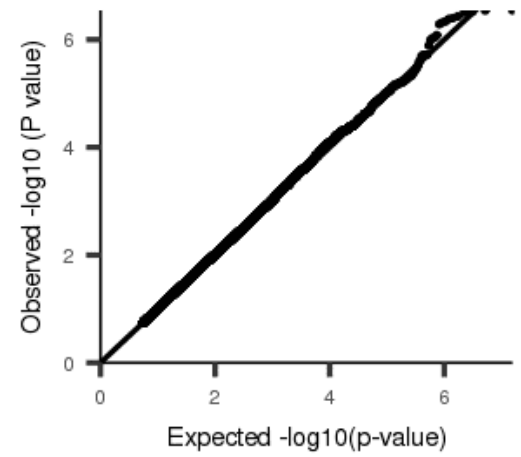

[back to list of plots](#)



Figure 3006: FreeSurfer a2009s lh S circular insula inf thickness

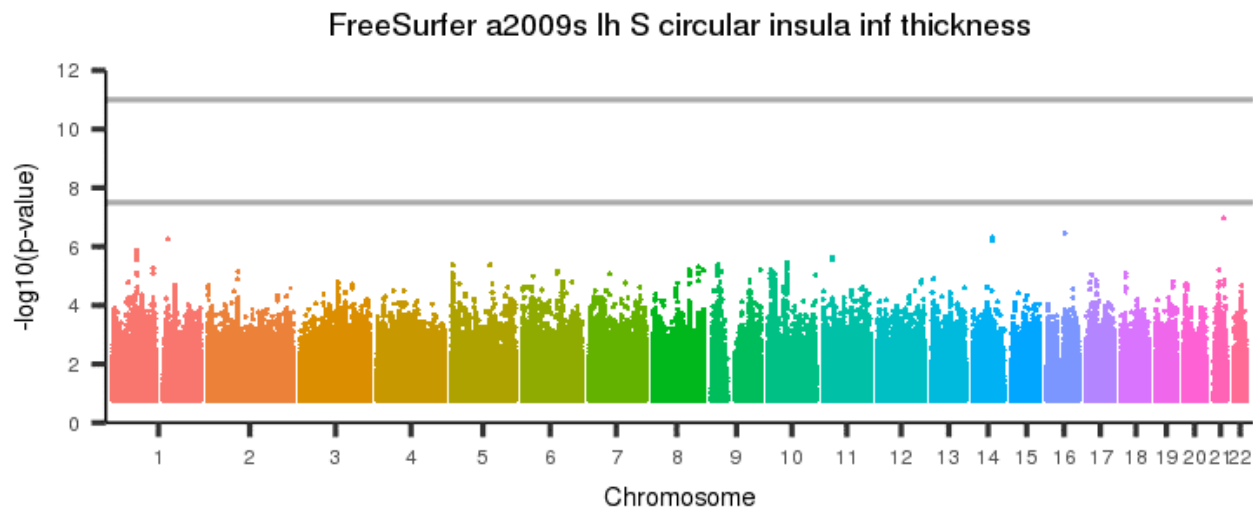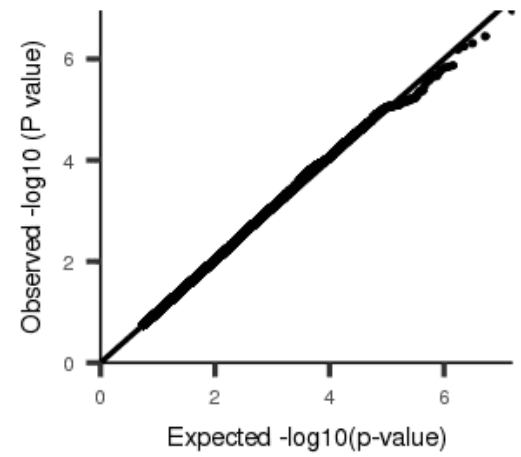

[back to list of plots](#)

Figure 3007: FreeSurfer a2009s lh S circular insula sup thickness

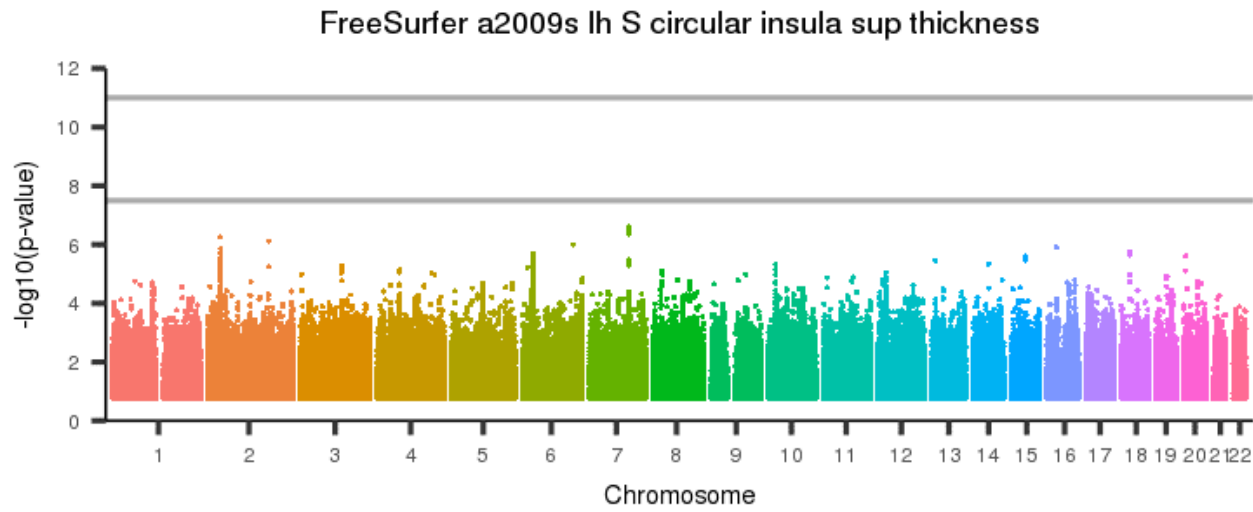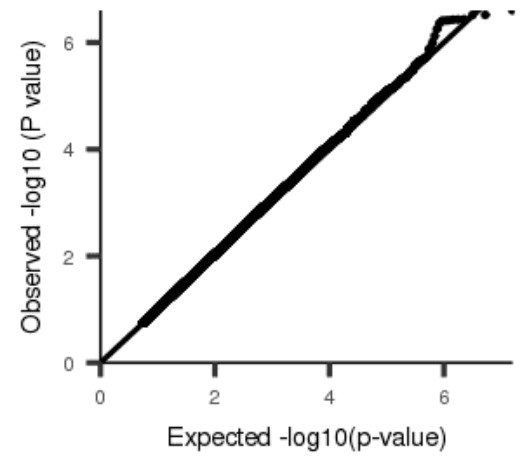

[back to list of plots](#)

Figure 3008: FreeSurfer a2009s lh S collat transv ant thickness

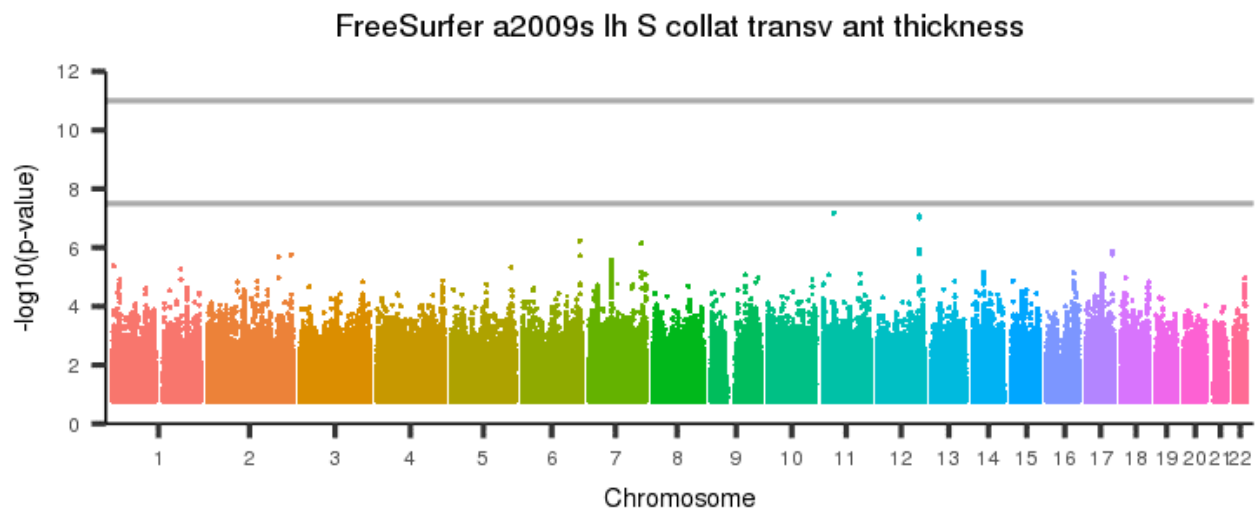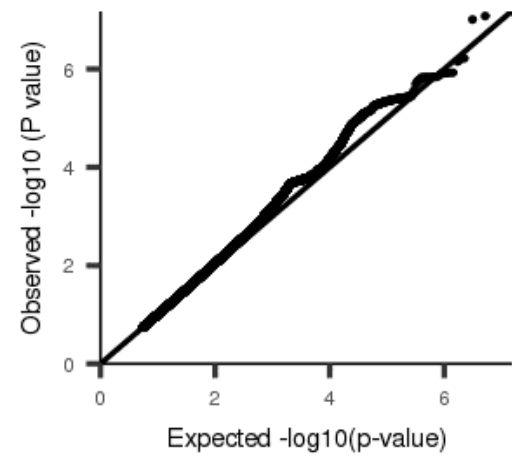

[back to list of plots](#)

Figure 3009: FreeSurfer a2009s lh S collat transv post thickness

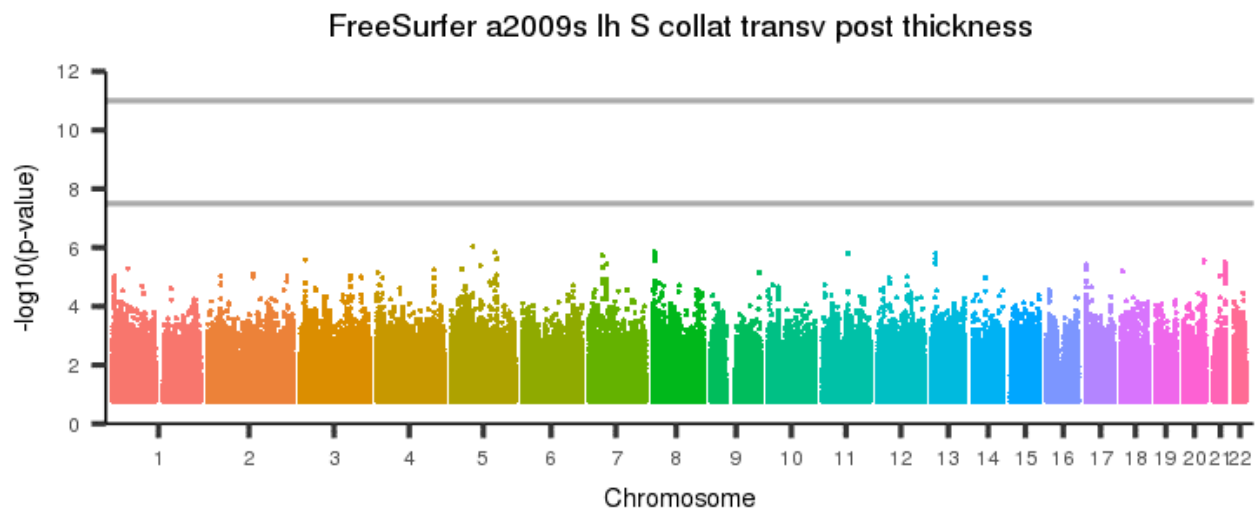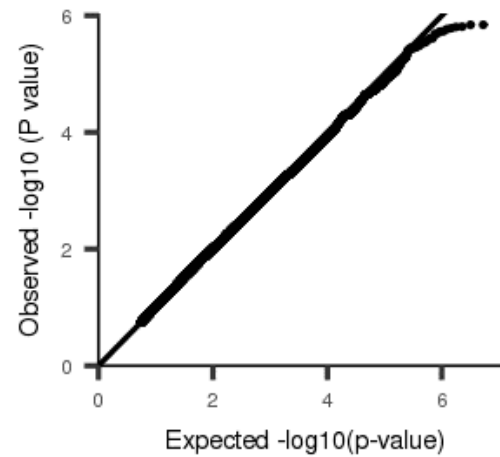

[back to list of plots](#)

Figure 3010: FreeSurfer a2009s lh S front inf thickness

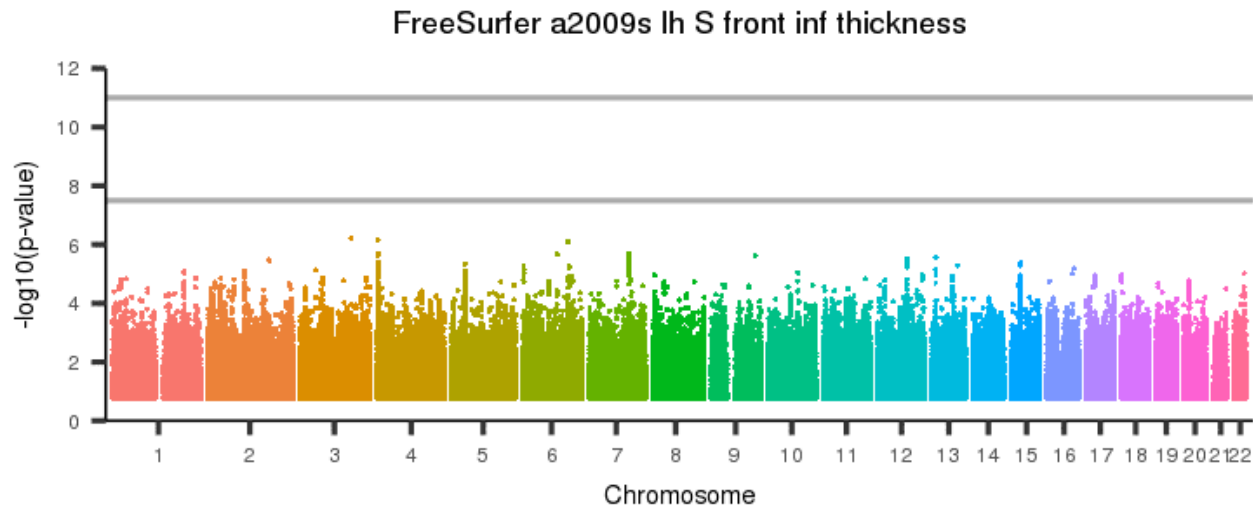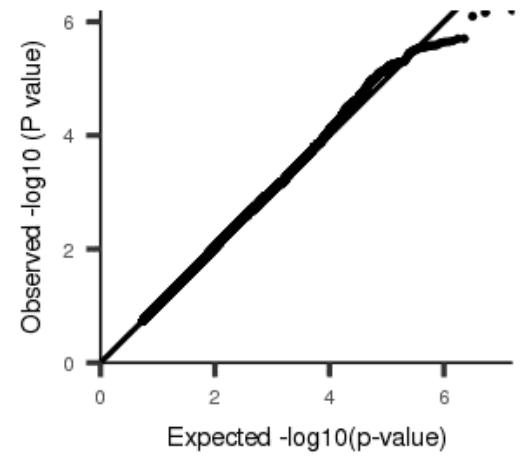

[back to list of plots](#)

Figure 3011: FreeSurfer a2009s lh S front middle thickness

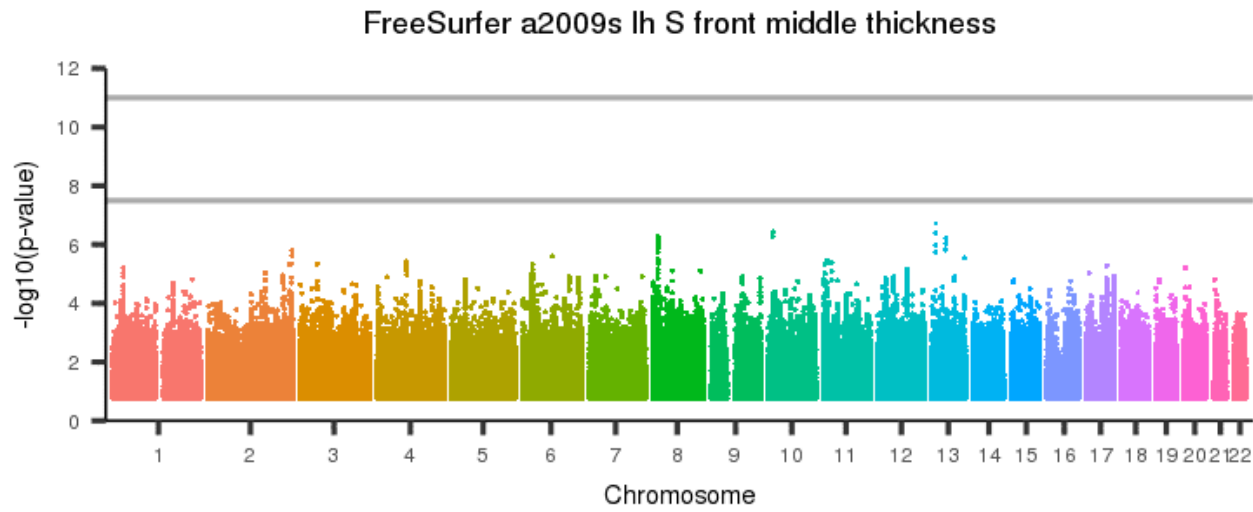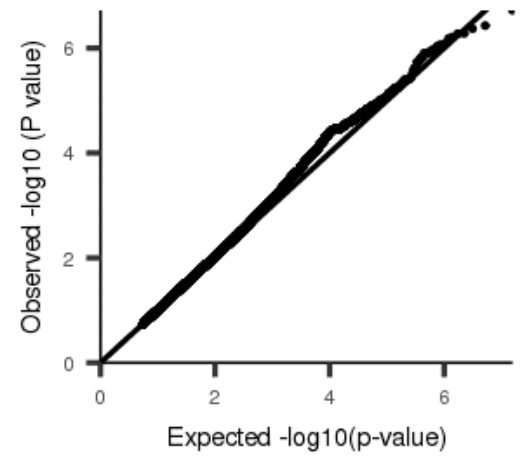

[back to list of plots](#)

Figure 3012: FreeSurfer a2009s lh S front sup thickness

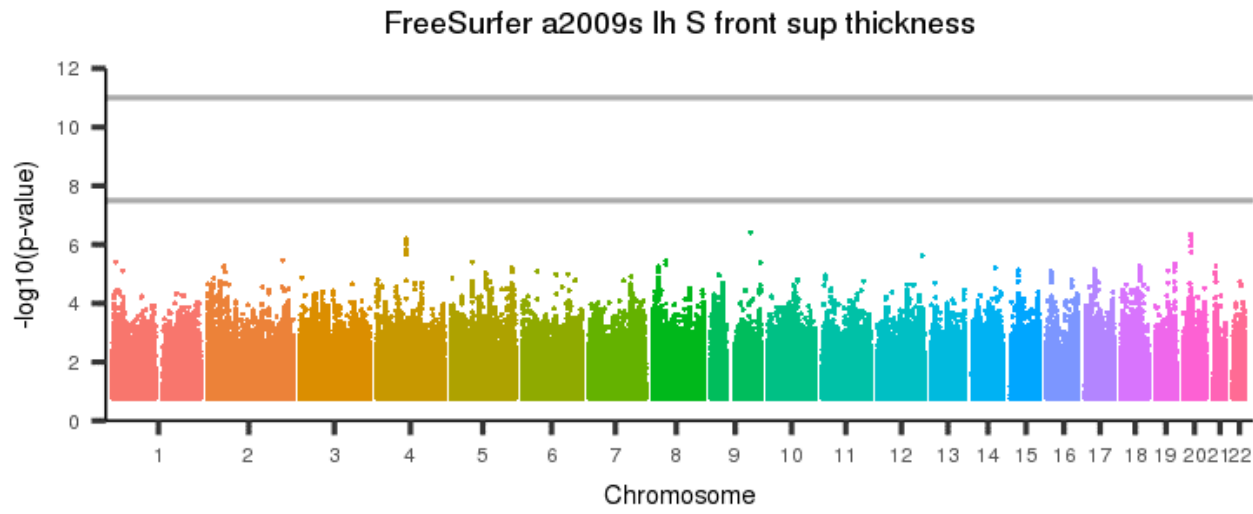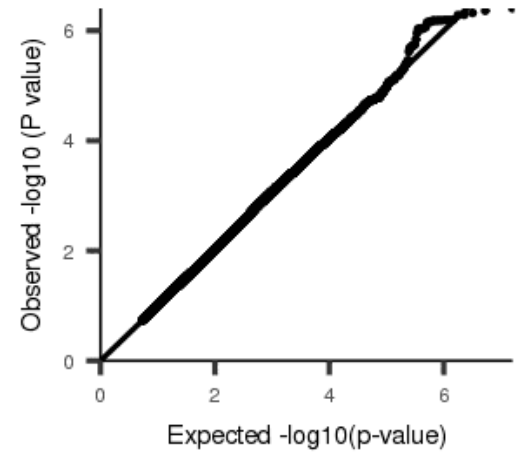

[back to list of plots](#)

Figure 3013: FreeSurfer a2009s lh S interm prim-Jensen thickness

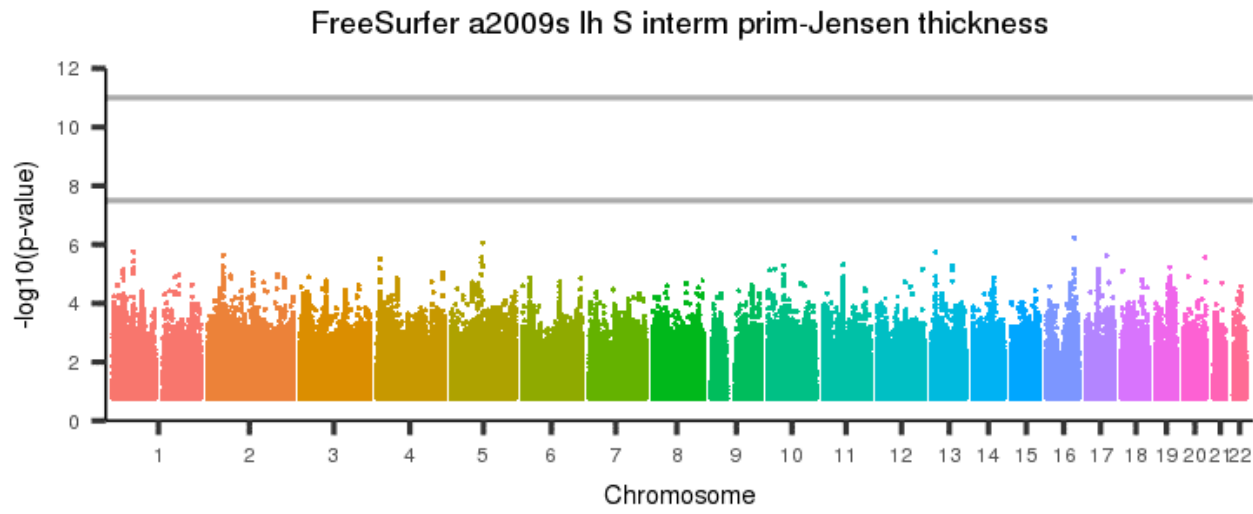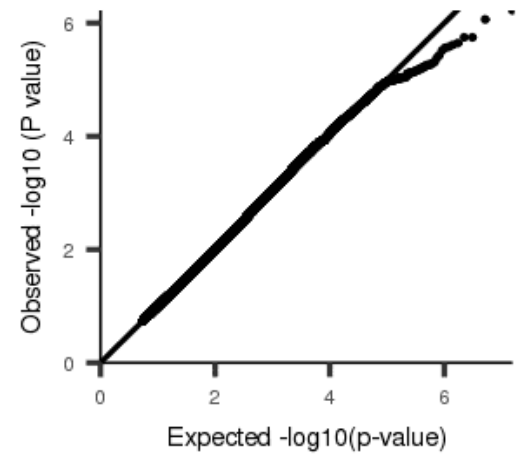

[back to list of plots](#)



Figure 3014: FreeSurfer a2009s lh S intrapariet and P trans thickness

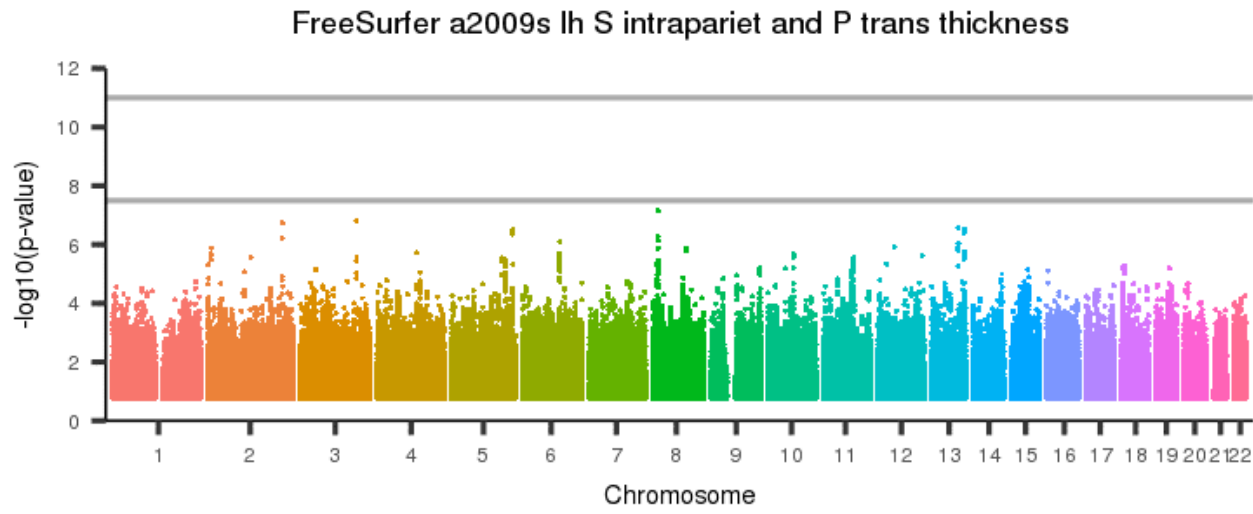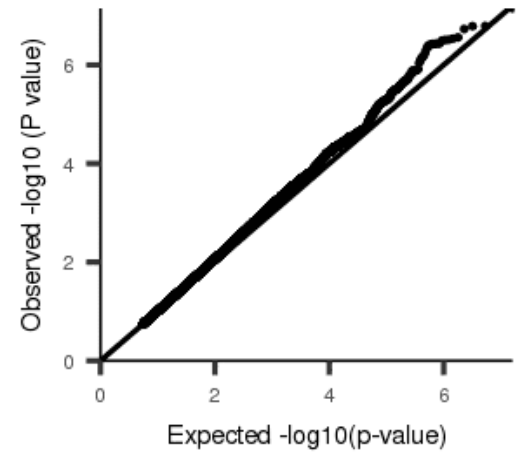

[back to list of plots](#)

Figure 3015: FreeSurfer a2009s lh S oc middle and Lunatus thickness

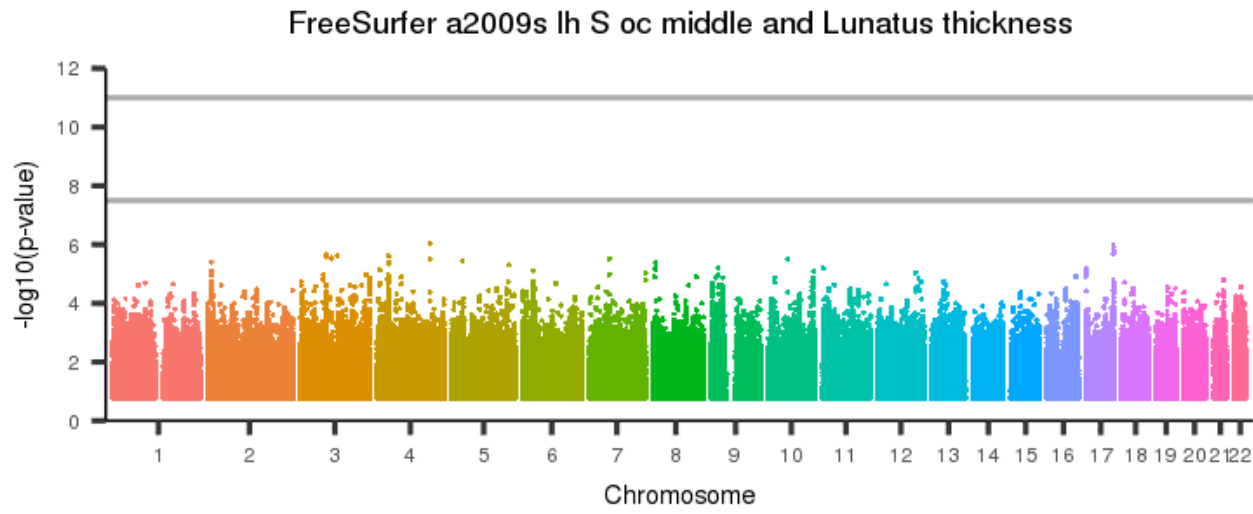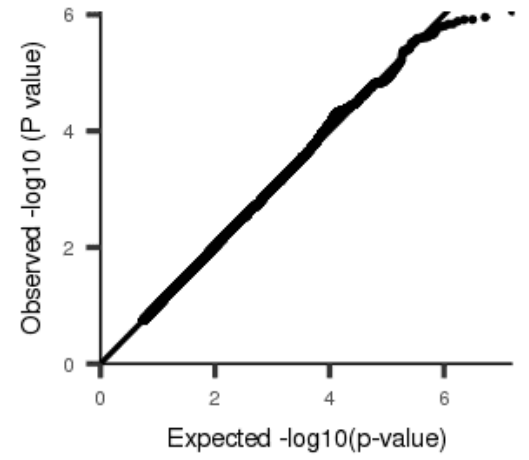

[back to list of plots](#)

Figure 3016: FreeSurfer a2009s lh S oc sup and transversal thickness

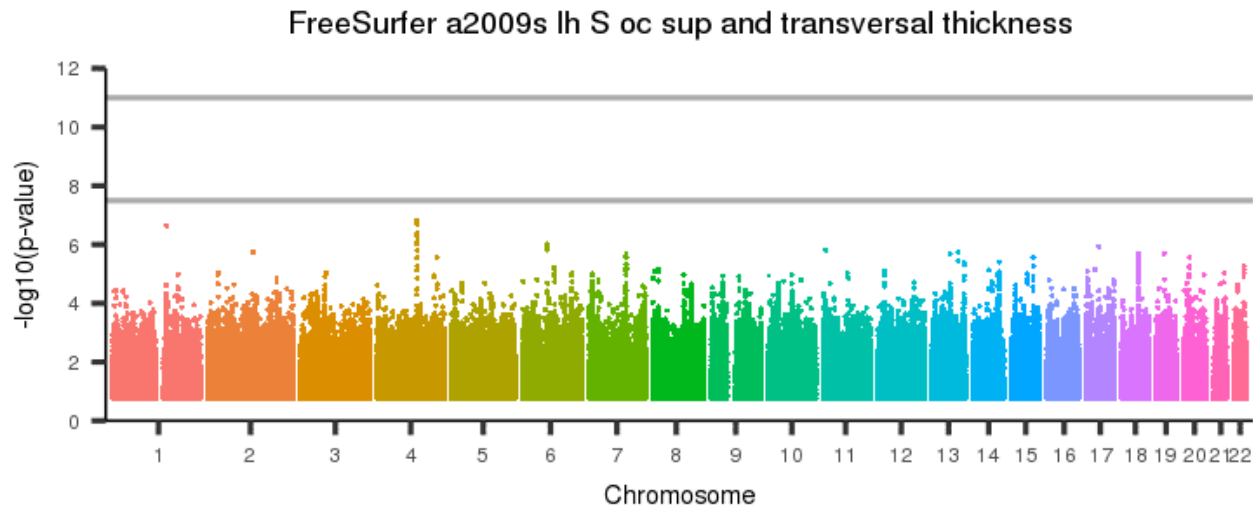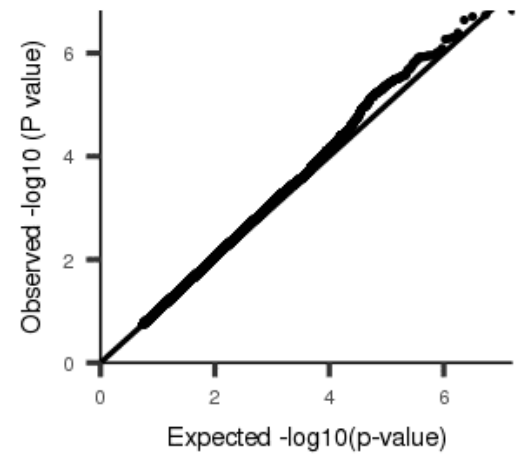

[back to list of plots](#)

Figure 3017: FreeSurfer a2009s lh S occipital ant thickness

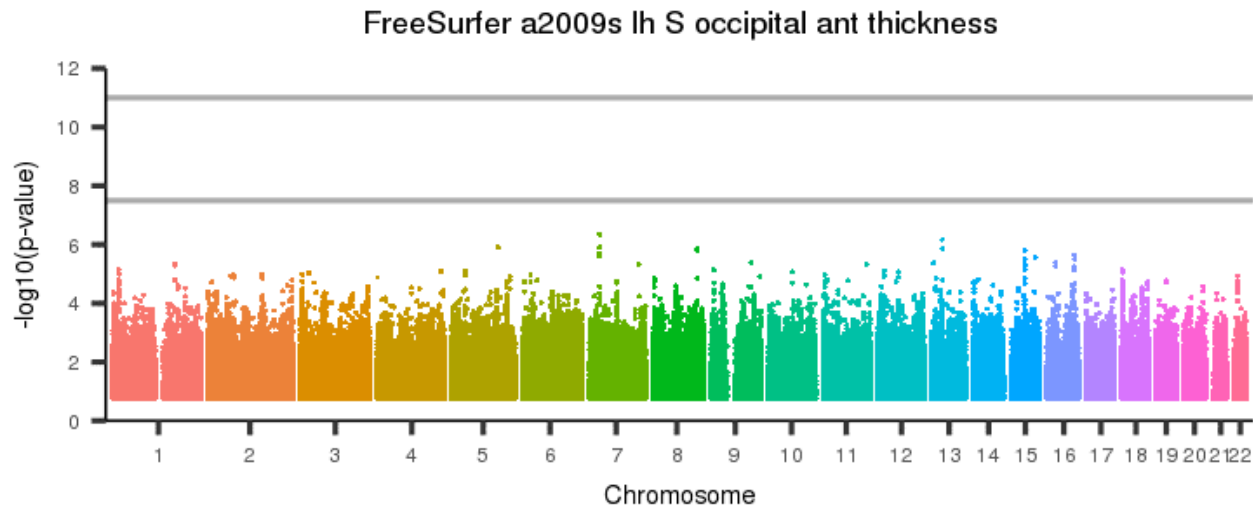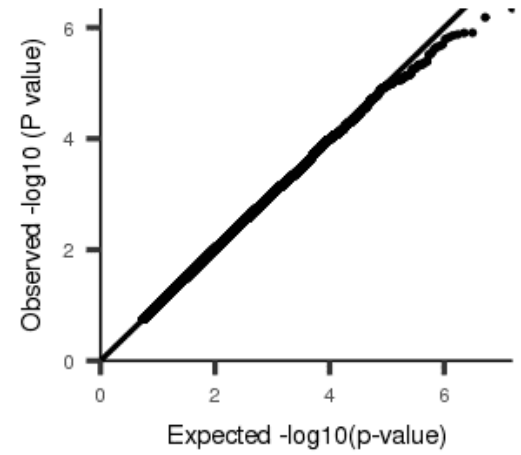

[back to list of plots](#)

Figure 3018: FreeSurfer a2009s lh S oc-temp lat thickness

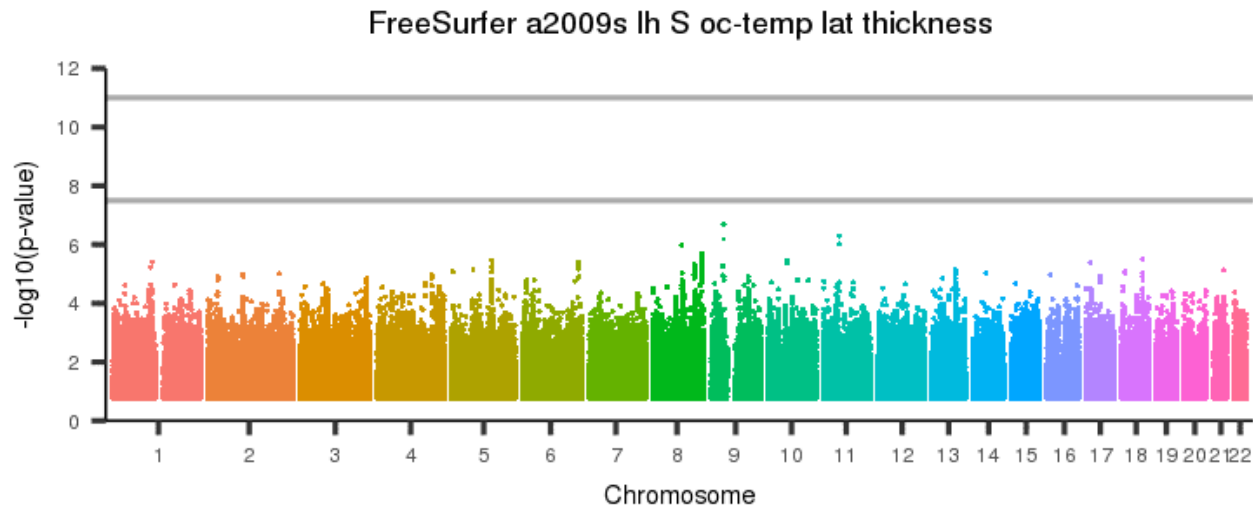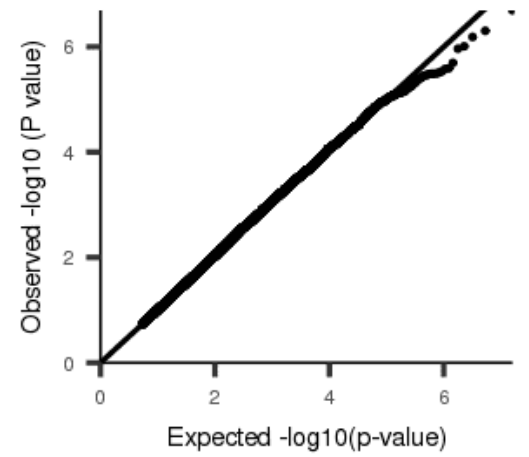

[back to list of plots](#)

Figure 3019: FreeSurfer a2009s lh S oc-temp med and Lingual thickness

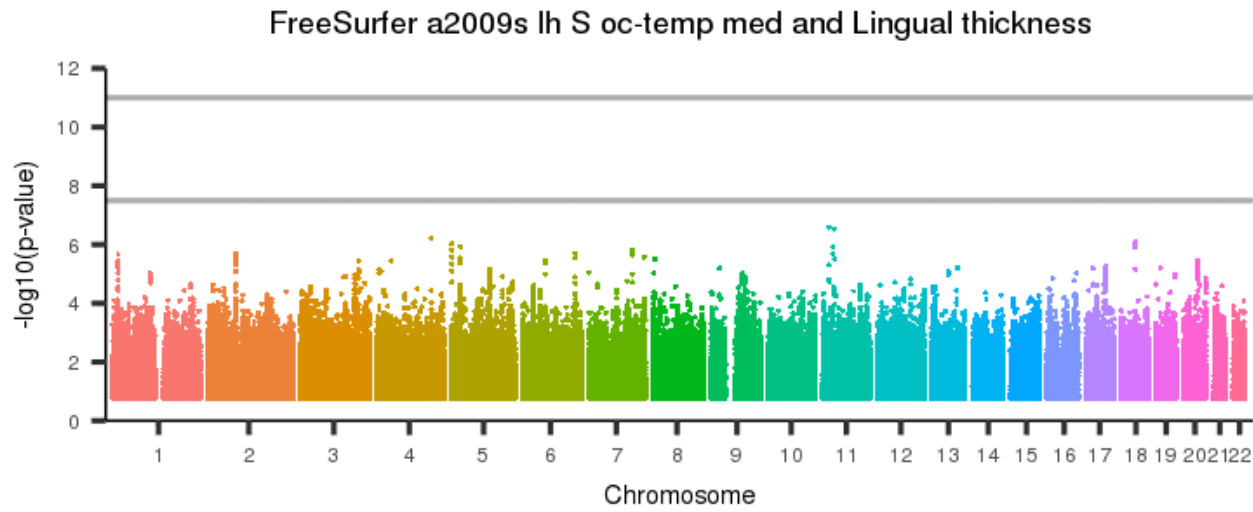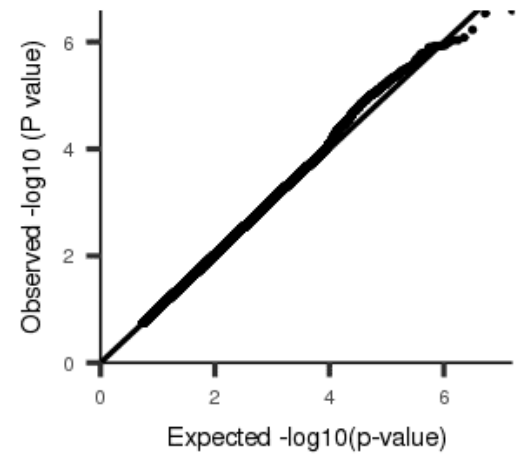

[back to list of plots](#)

Figure 3020: FreeSurfer a2009s lh S orbital lateral thickness

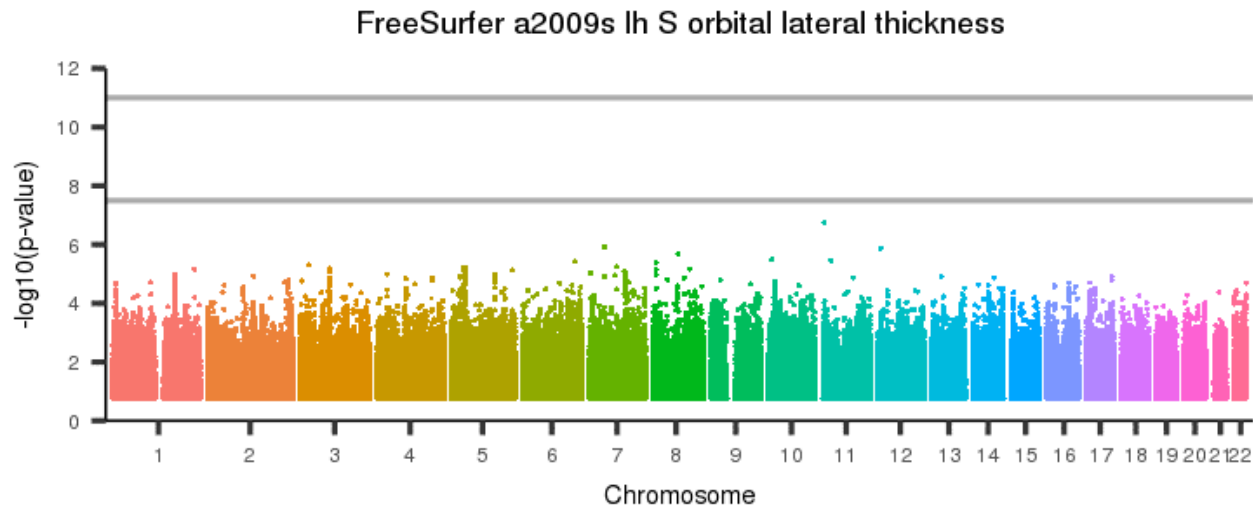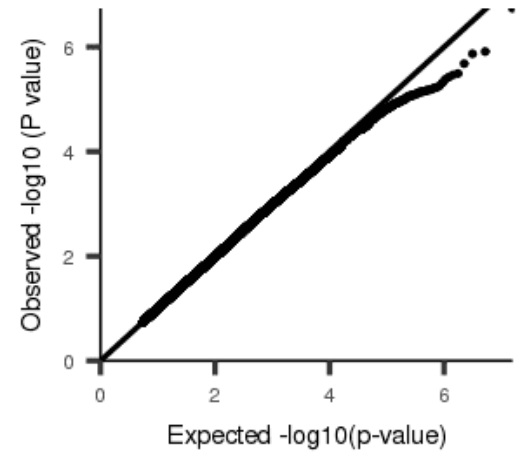

[back to list of plots](#)

Figure 3021: FreeSurfer a2009s lh S orbital med-olfact thickness

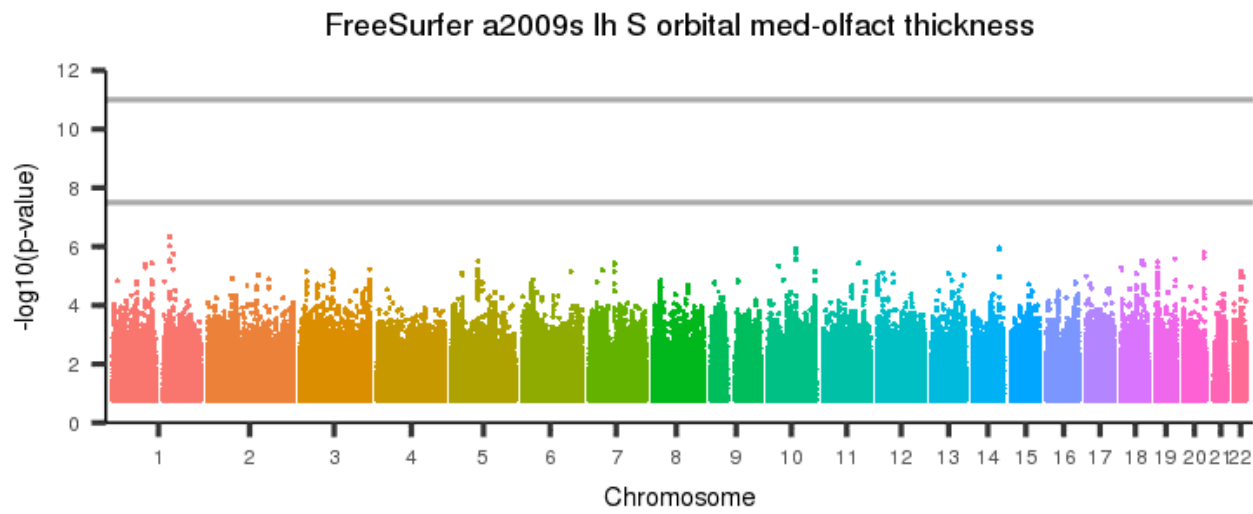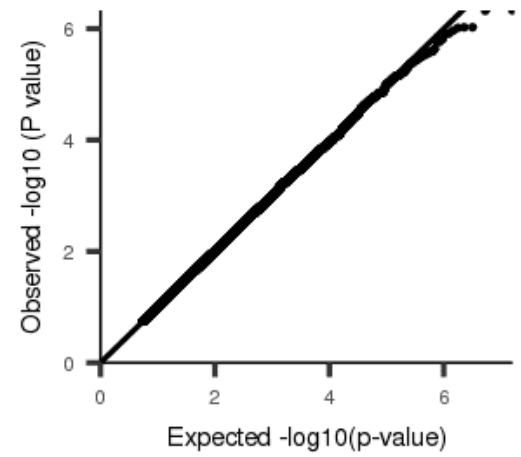

[back to list of plots](#)



Figure 3022: FreeSurfer a2009s lh S orbital-H Shaped thickness

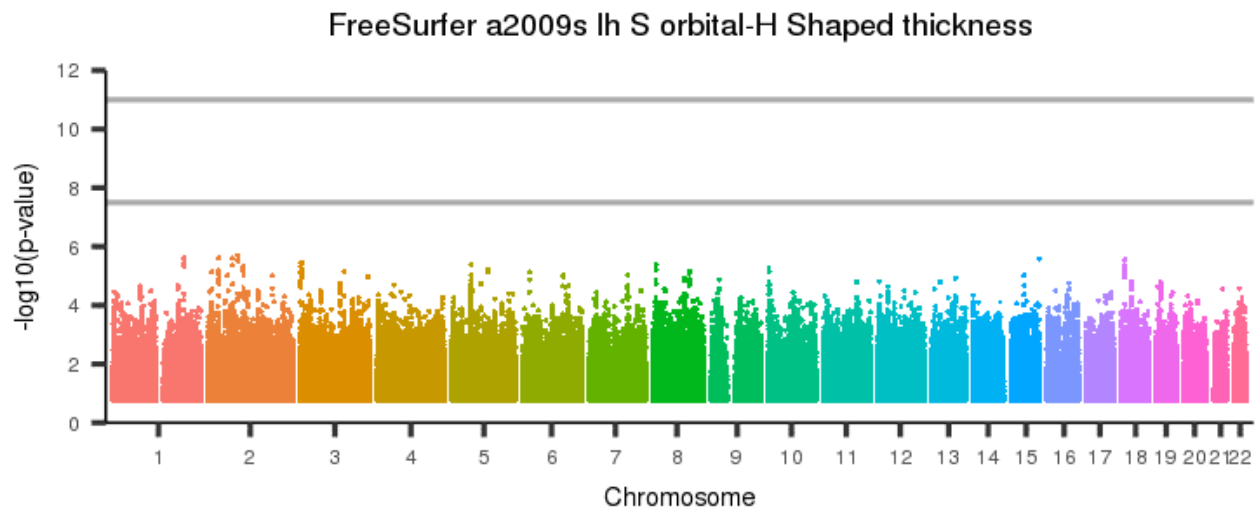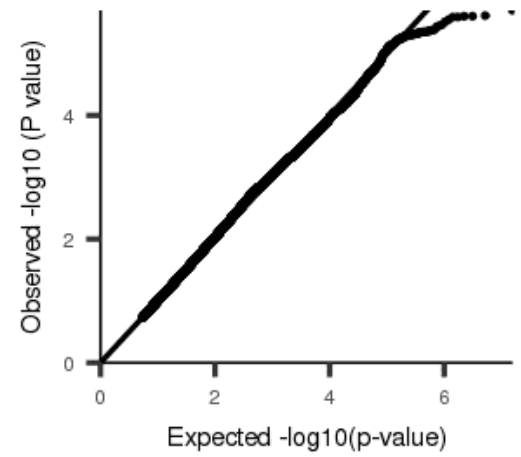

[back to list of plots](#)

Figure 3023: FreeSurfer a2009s lh S parieto occipital thickness

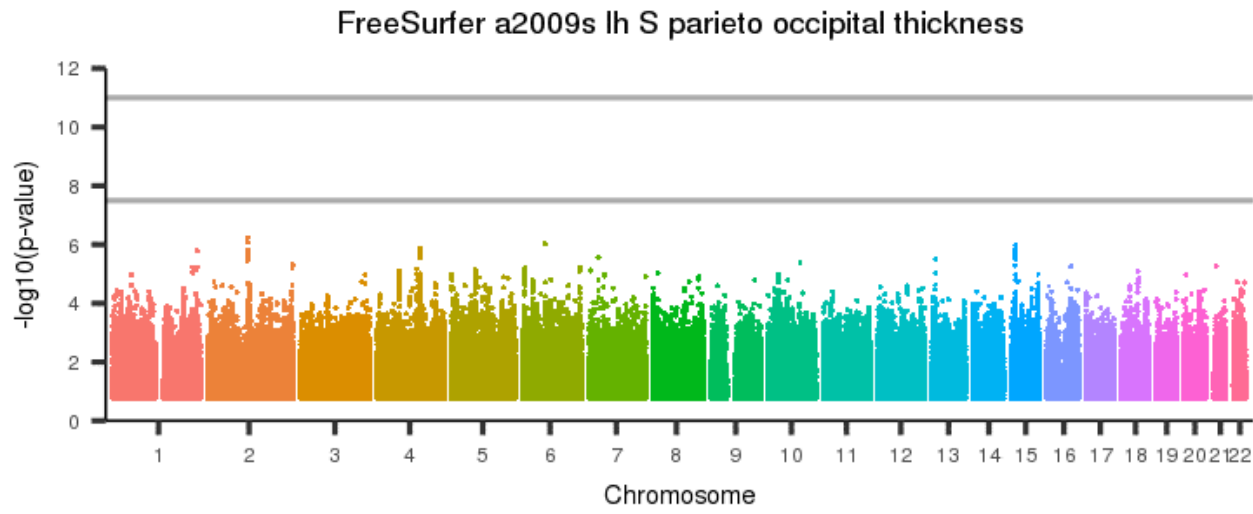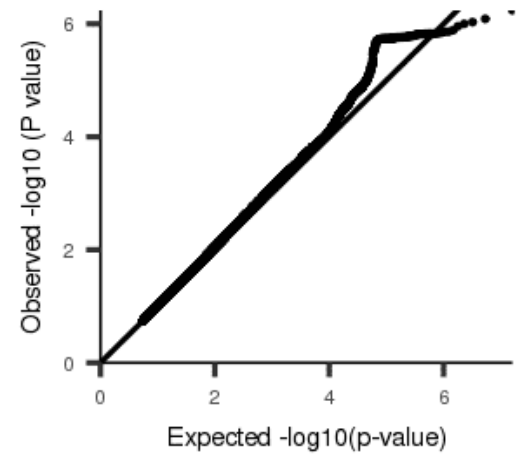

[back to list of plots](#)

Figure 3024: FreeSurfer a2009s lh S pericallosal thickness

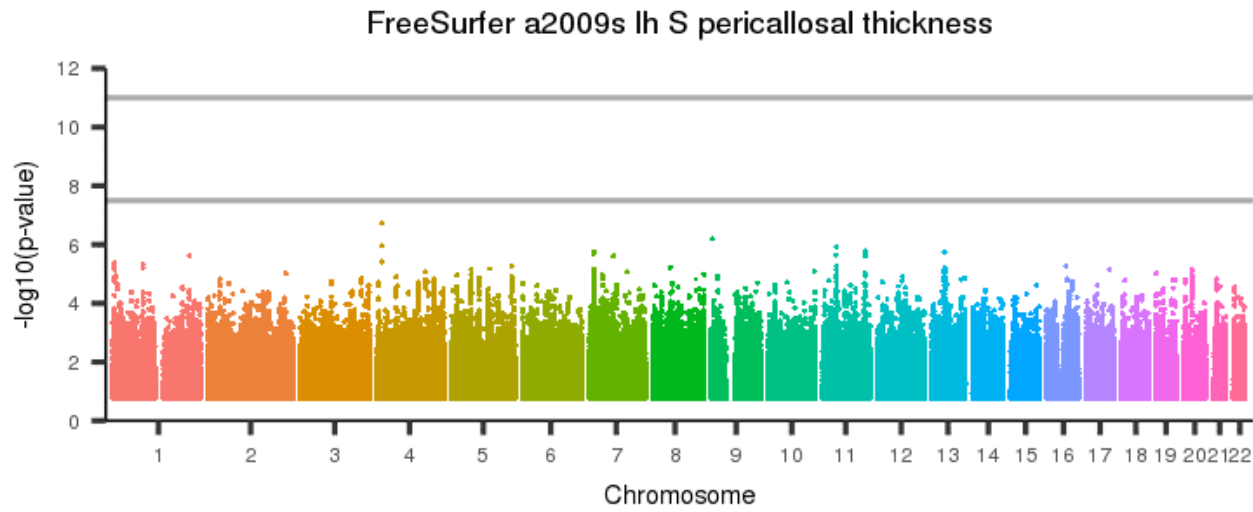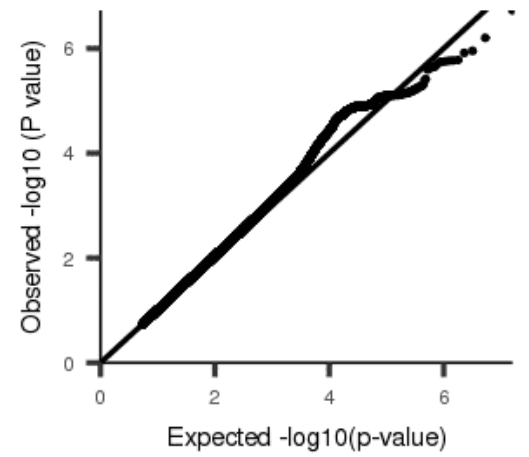

[back to list of plots](#)

Figure 3025: FreeSurfer a2009s lh S postcentral thickness

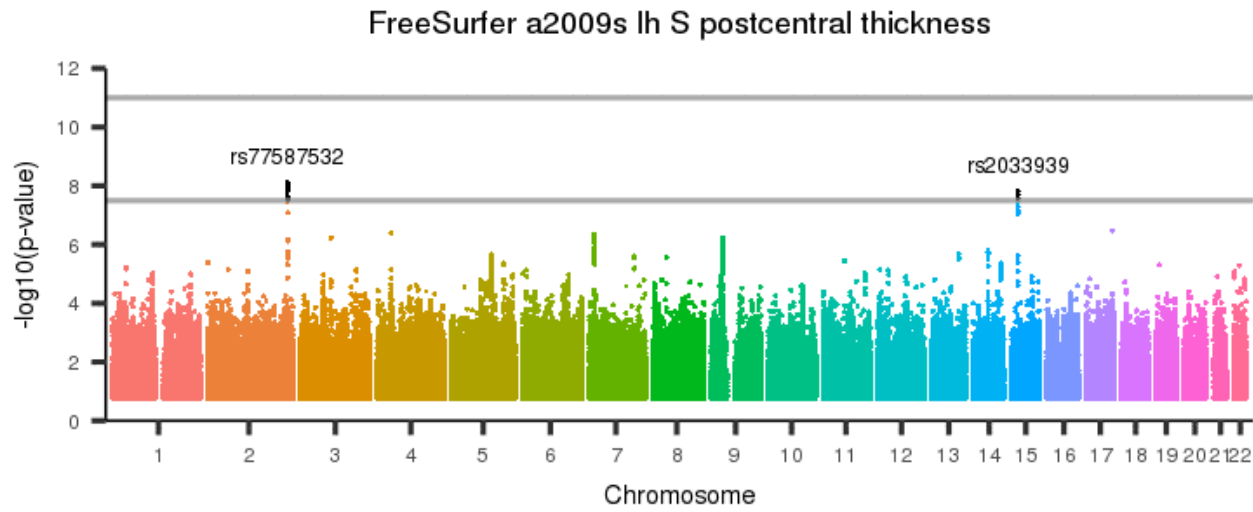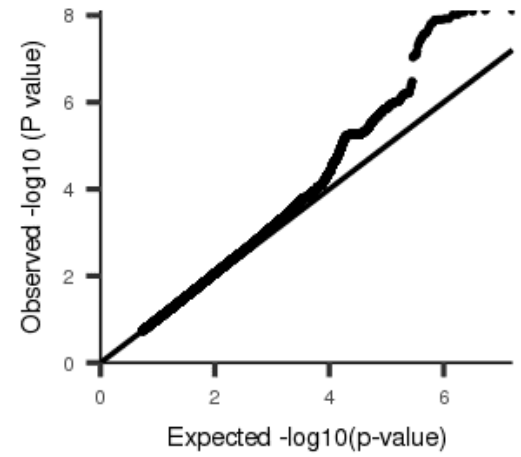

[back to list of plots](#)

Figure 3026: FreeSurfer a2009s lh S precentral-inf-part thickness

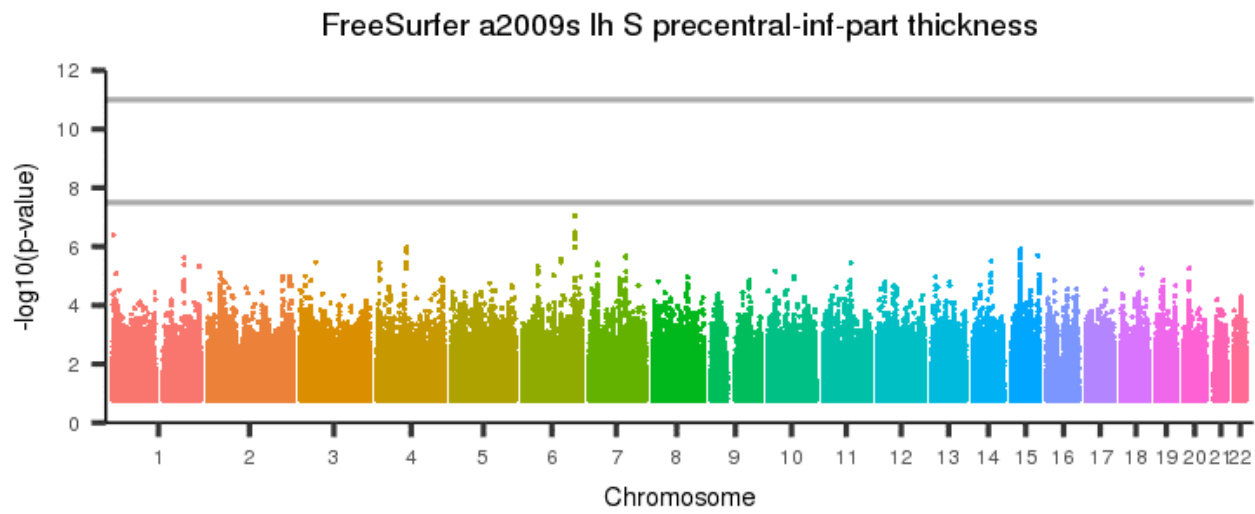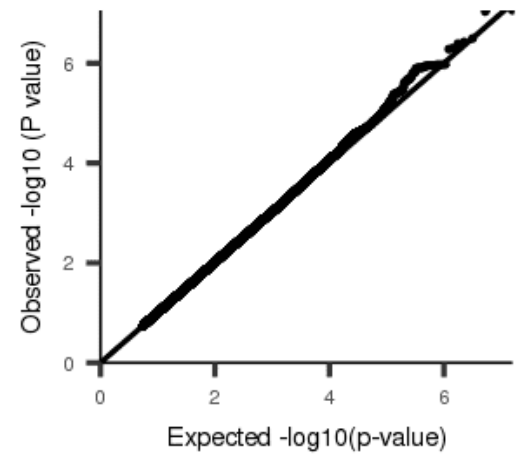

[back to list of plots](#)

Figure 3027: FreeSurfer a2009s lh S precentral-sup-part thickness

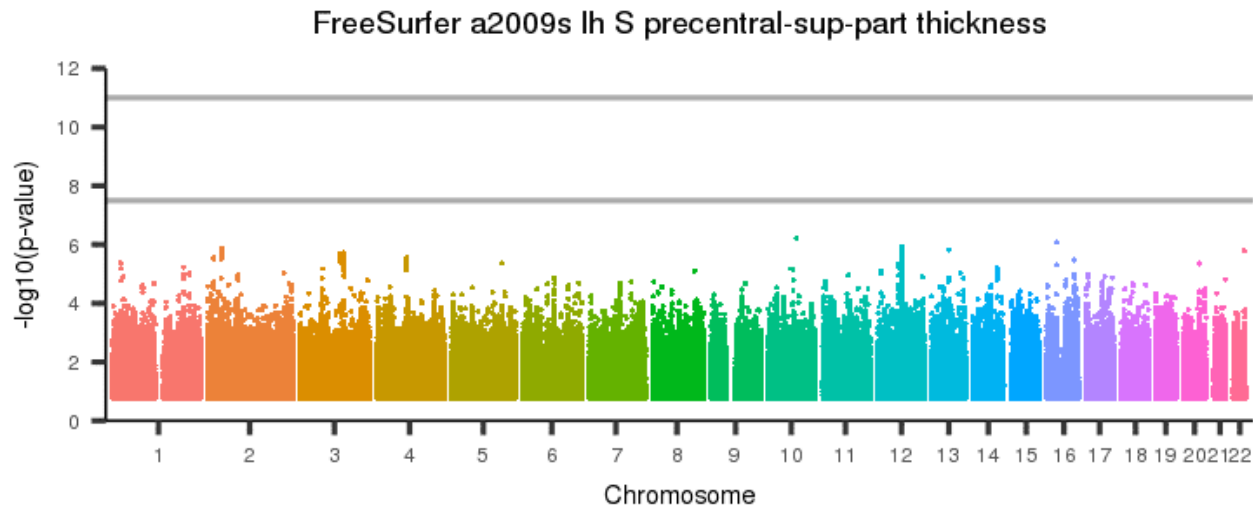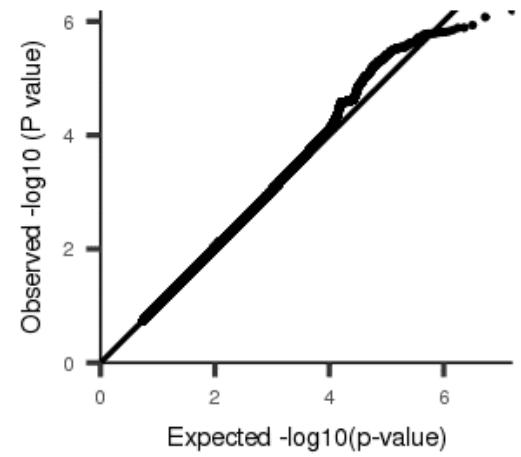

[back to list of plots](#)

Figure 3028: FreeSurfer a2009s lh S suborbital thickness

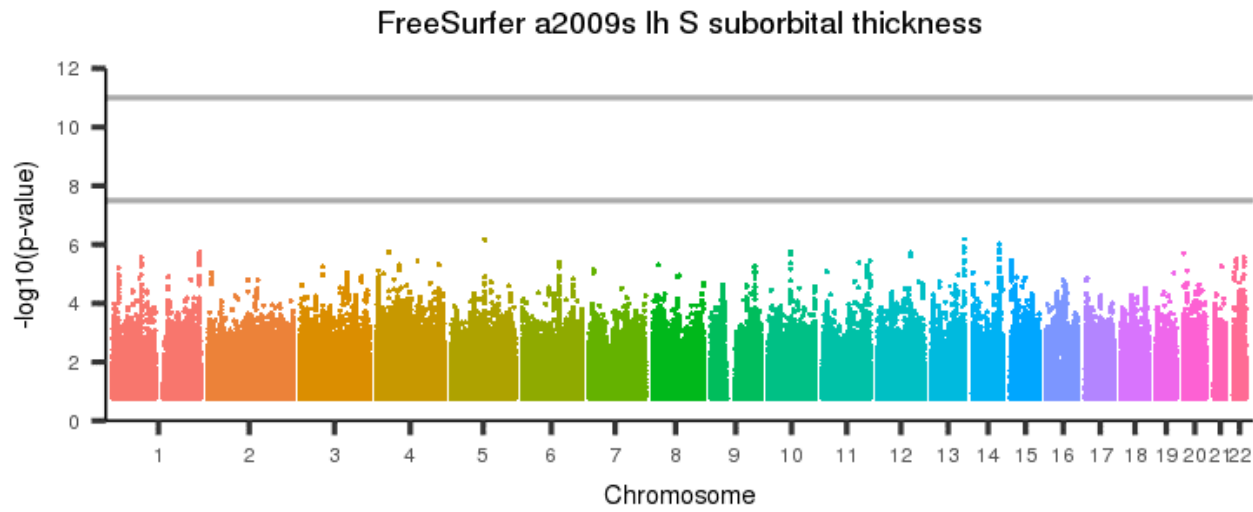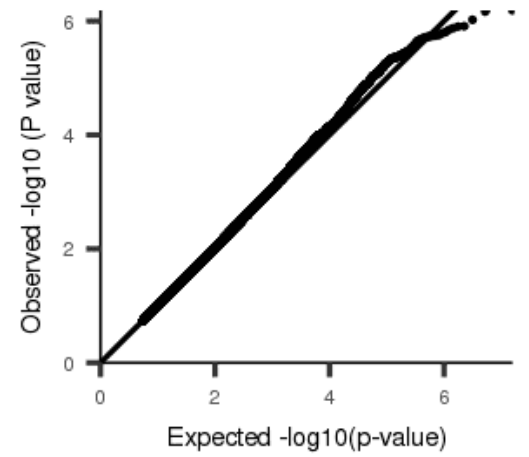

[back to list of plots](#)

Figure 3029: FreeSurfer a2009s lh S subparietal thickness

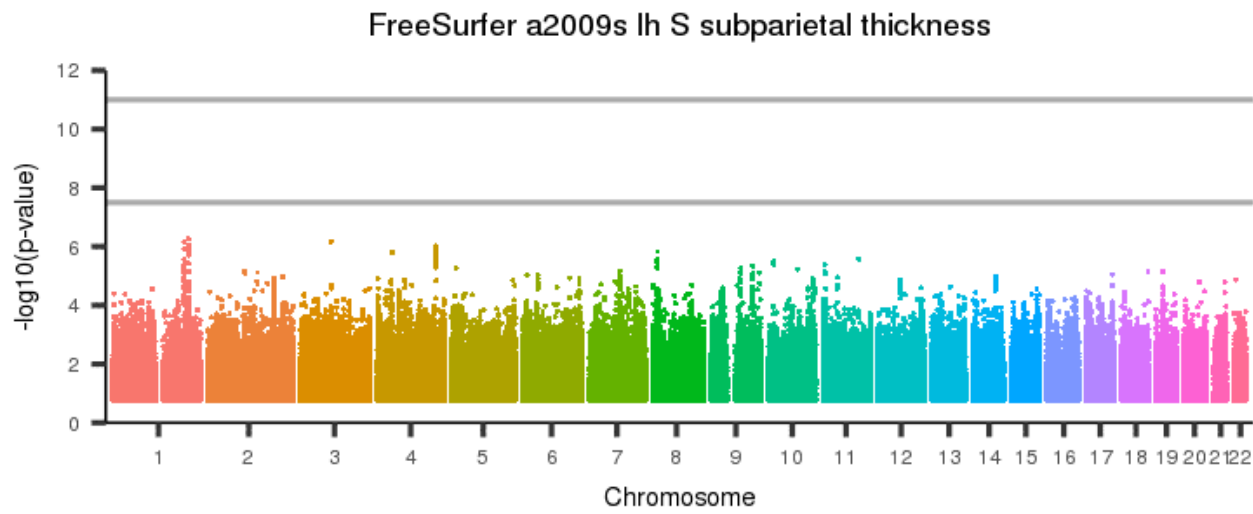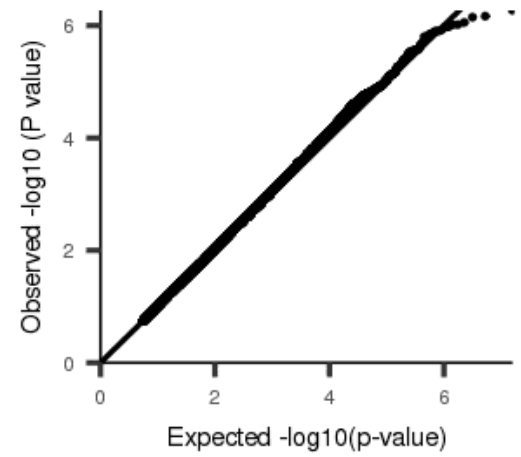

[back to list of plots](#)



Figure 3030: FreeSurfer a2009s lh S temporal inf thickness

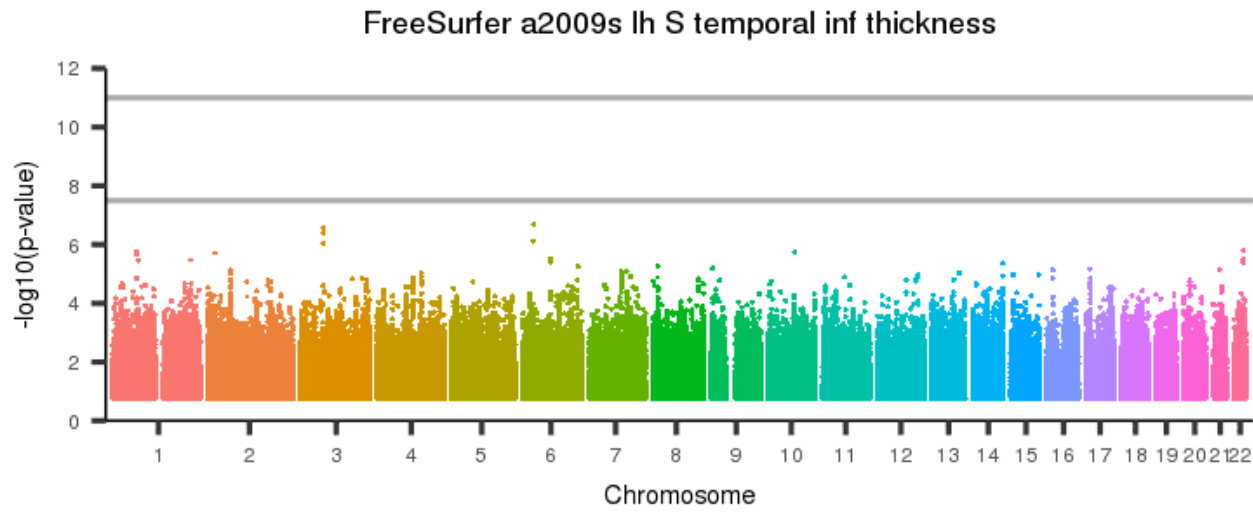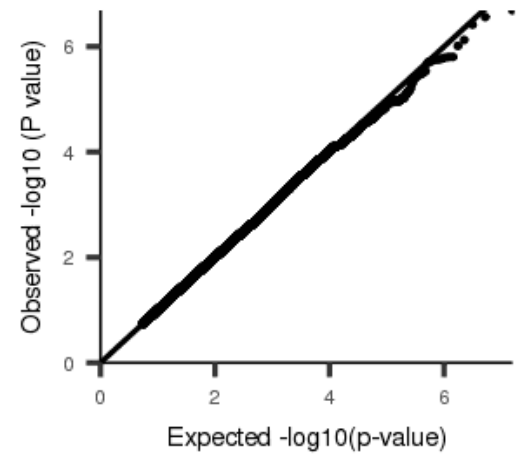

[back to list of plots](#)

Figure 3031: FreeSurfer a2009s lh S temporal sup thickness

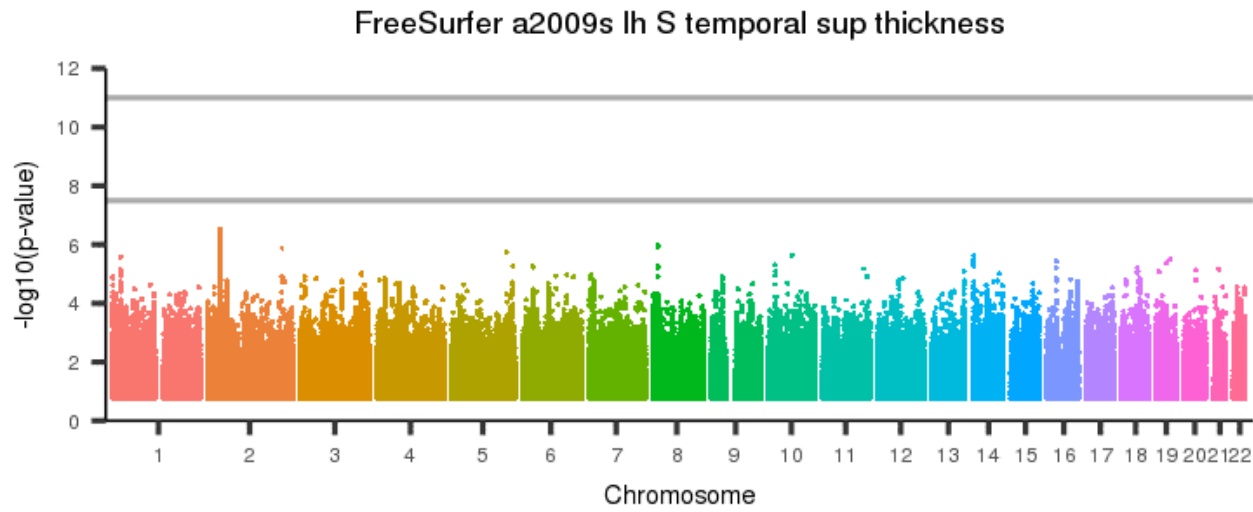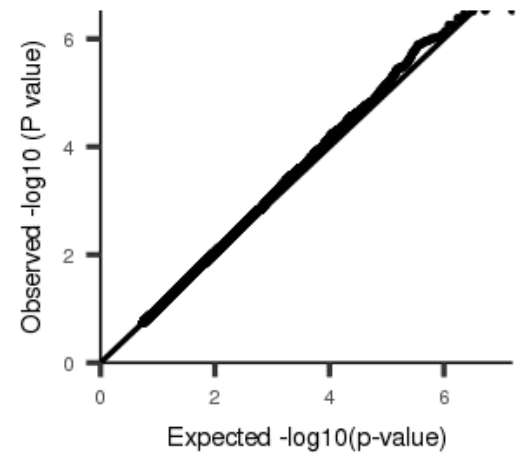

[back to list of plots](#)

Figure 3032: FreeSurfer a2009s lh S temporal transverse thickness

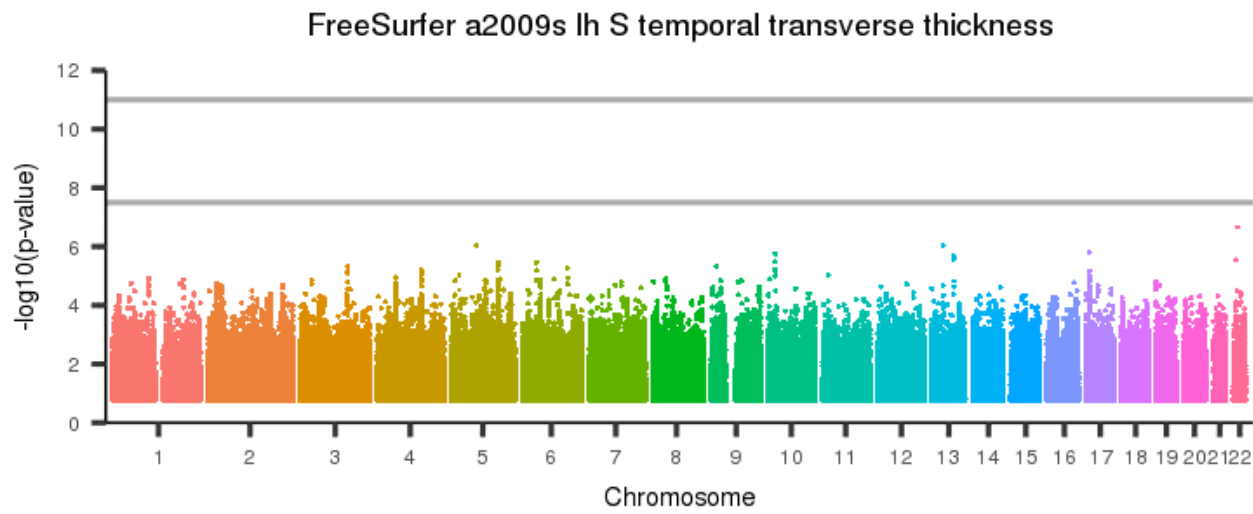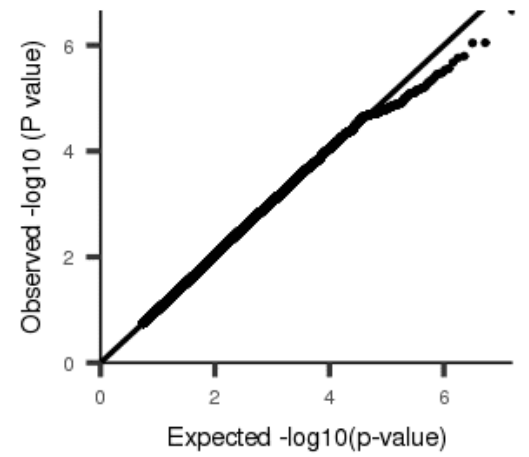

[back to list of plots](#)

Figure 3033: FreeSurfer DKTatlas rh caudalanteriorcingulate thickness

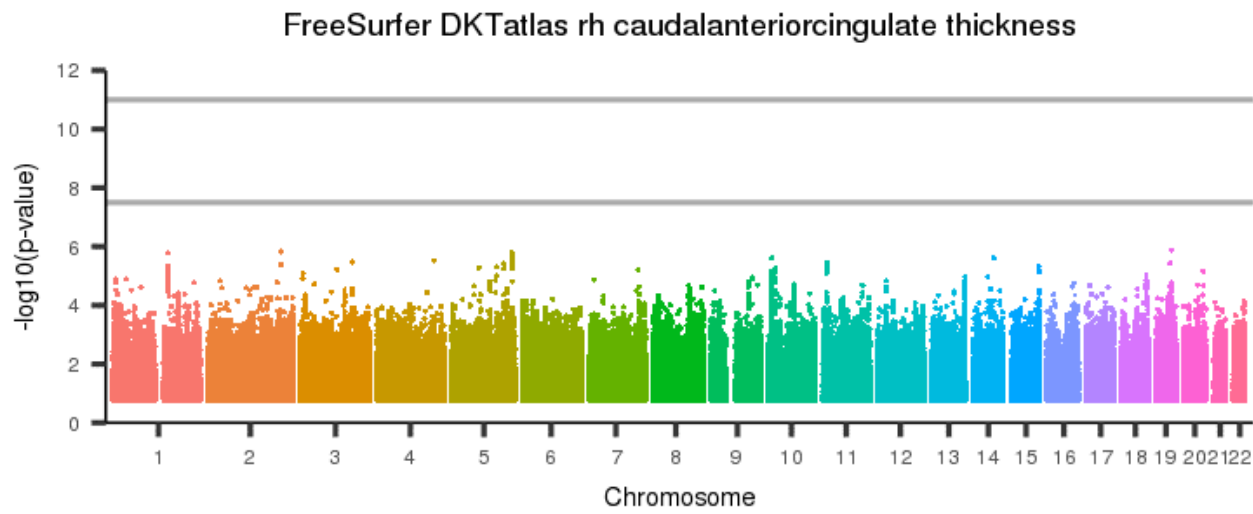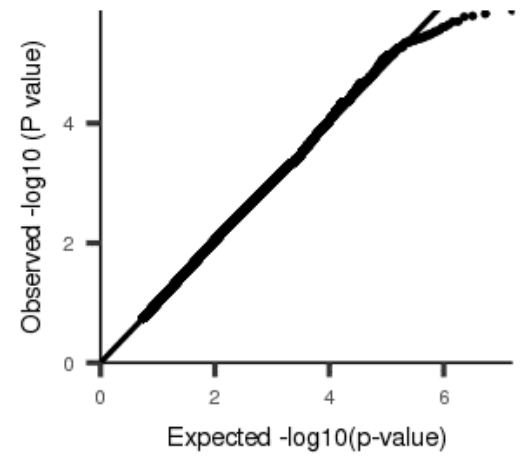

[back to list of plots](#)

Figure 3034: FreeSurfer DKTatlas rh caudalmiddlefrontal thickness

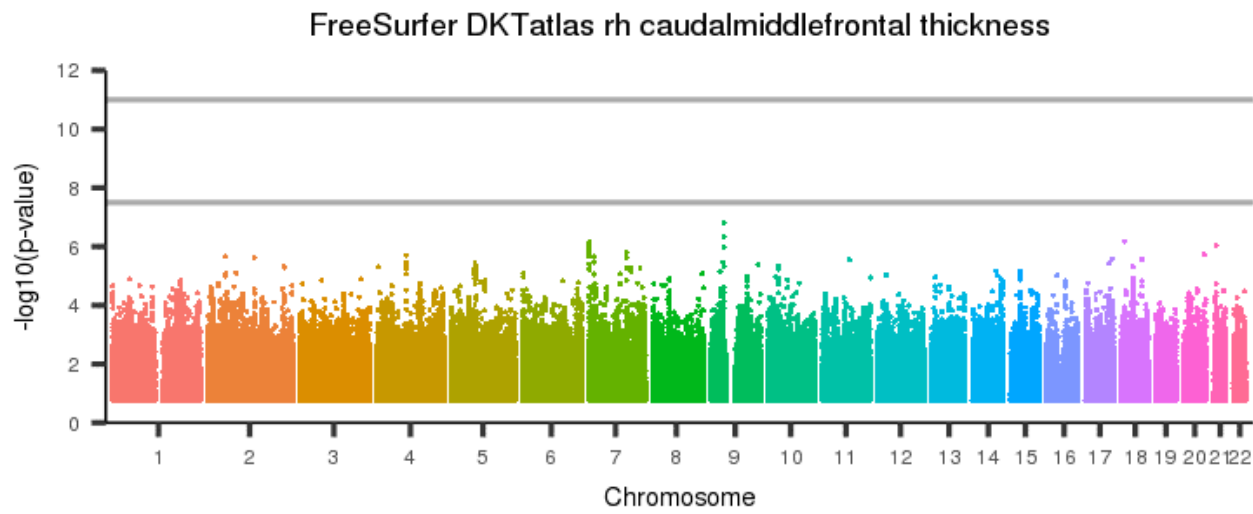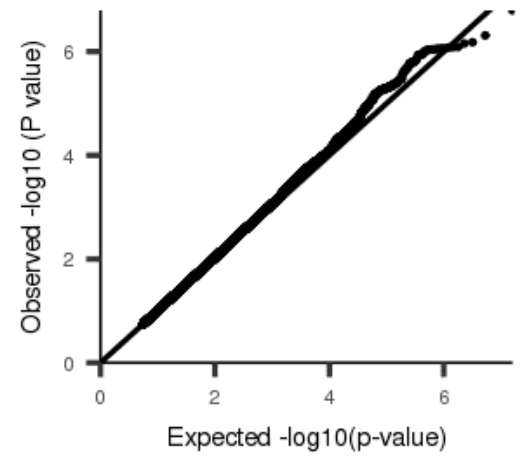

[back to list of plots](#)

Figure 3035: FreeSurfer DKAtlas rh cuneus thickness

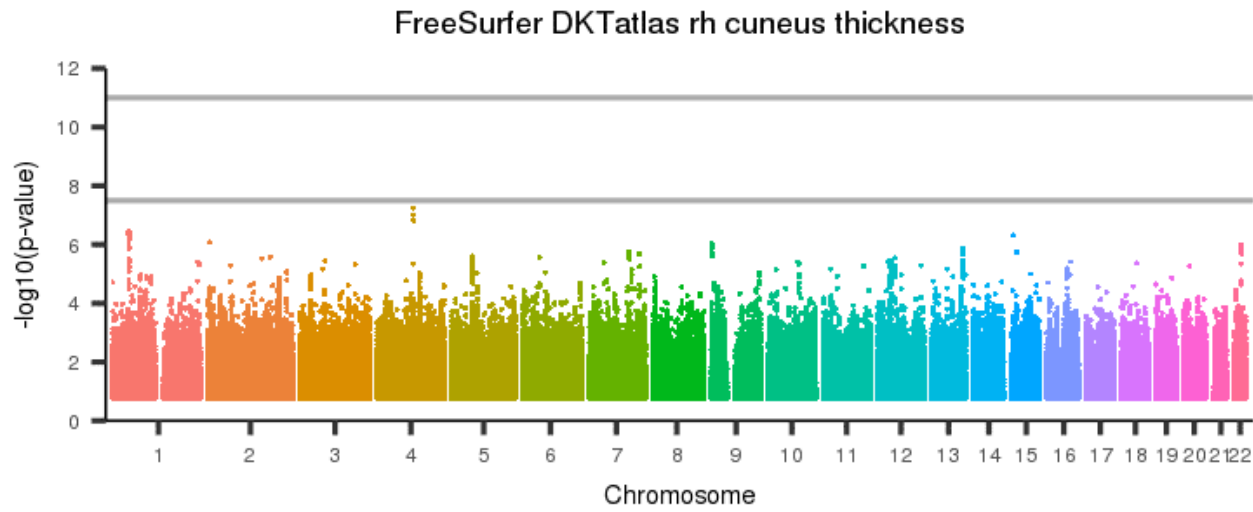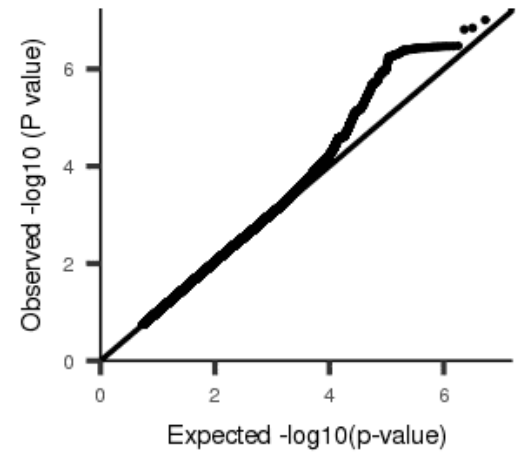

[back to list of plots](#)

Figure 3036: FreeSurfer DKTAtlas rh entorhinal thickness

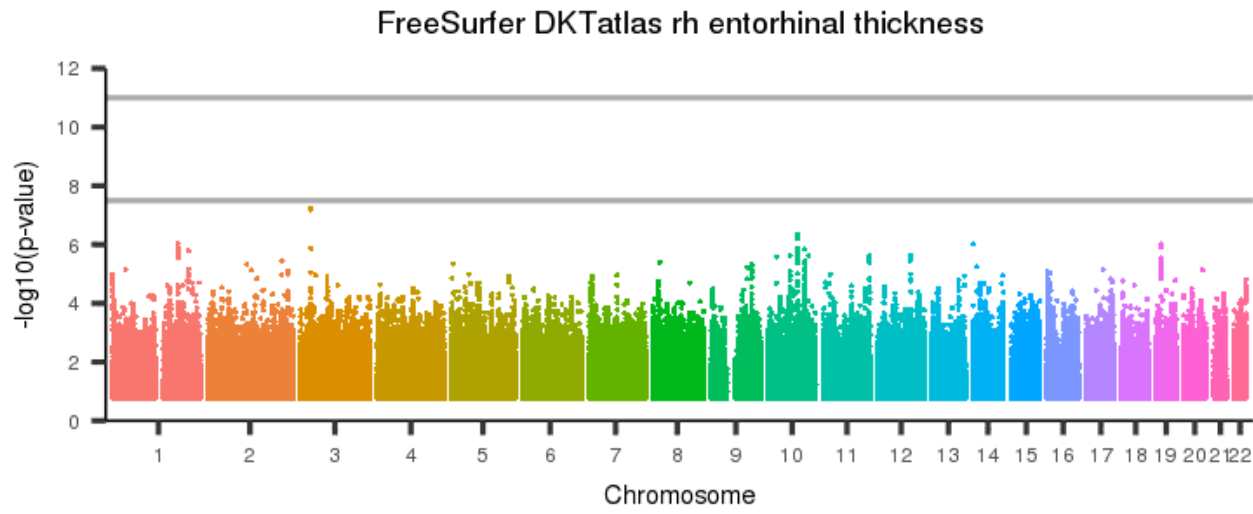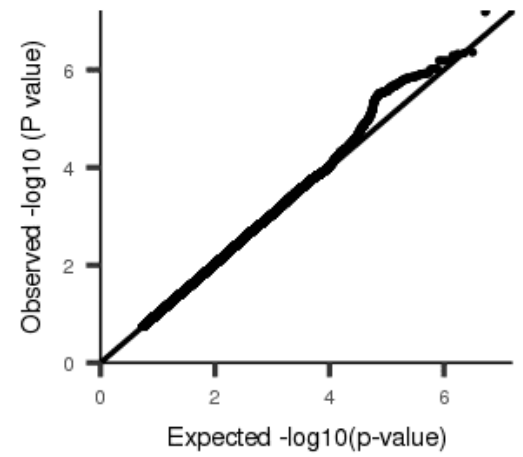

[back to list of plots](#)

Figure 3037: FreeSurfer DKTatlas rh fusiform thickness

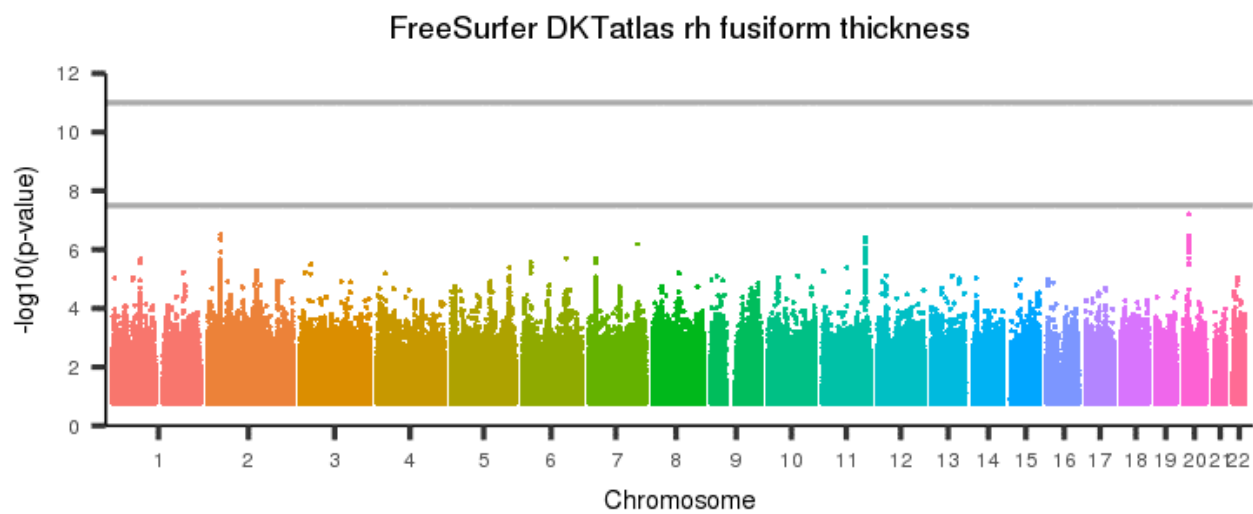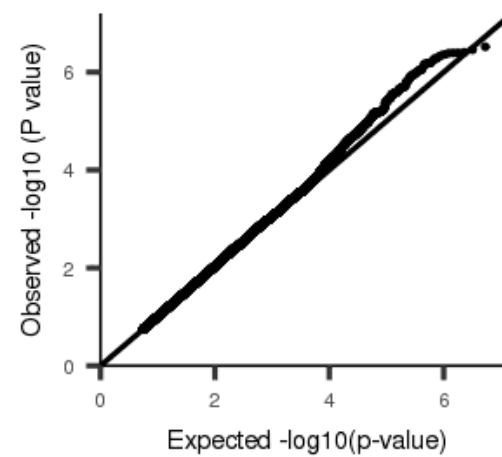

[back to list of plots](#)



Figure 3038: FreeSurfer DKTAtlas rh inferiorparietal thickness

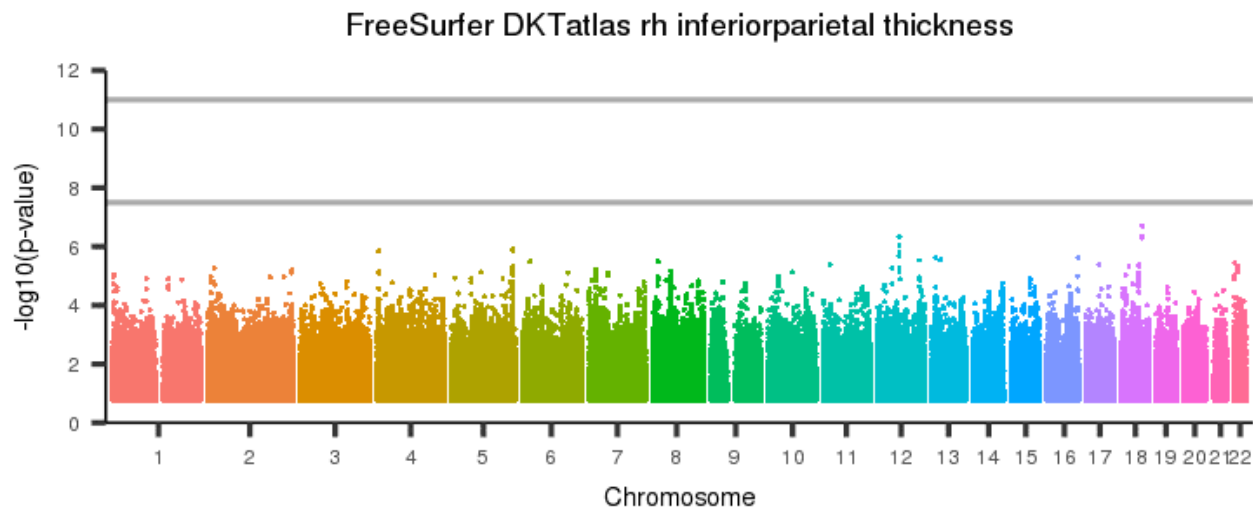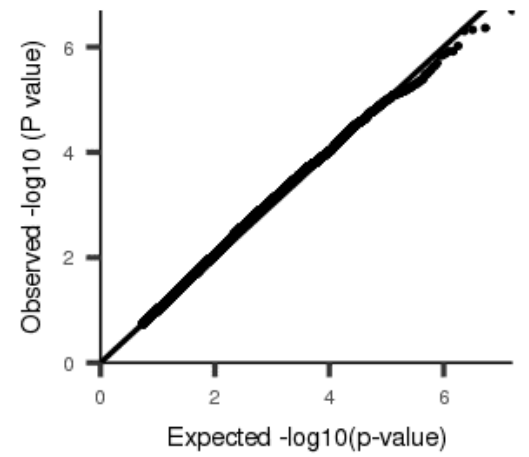

[back to list of plots](#)

Figure 3039: FreeSurfer DKAtlas rh inferior temporal thickness

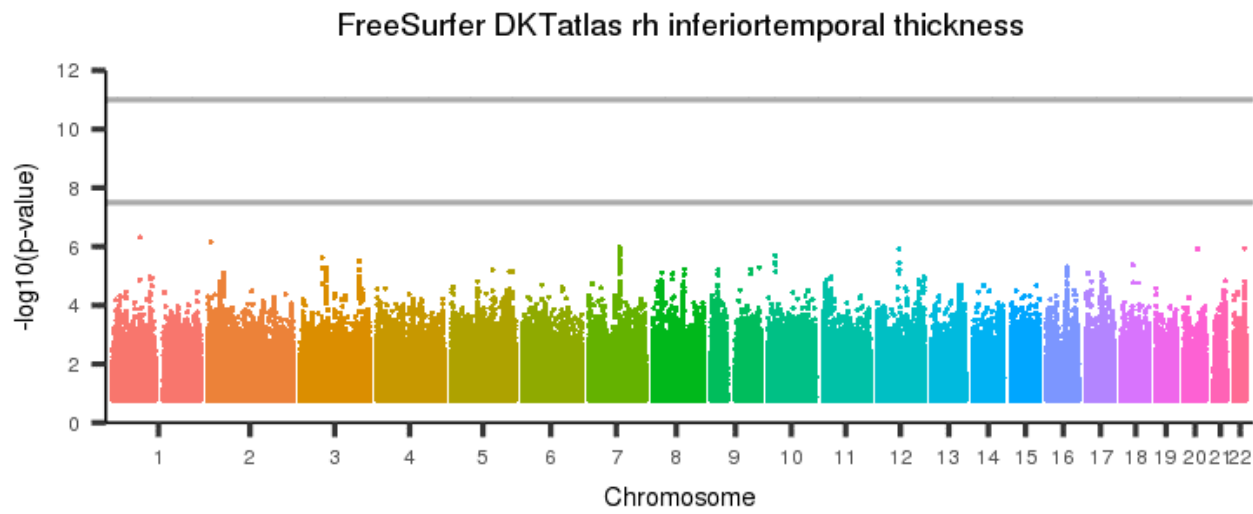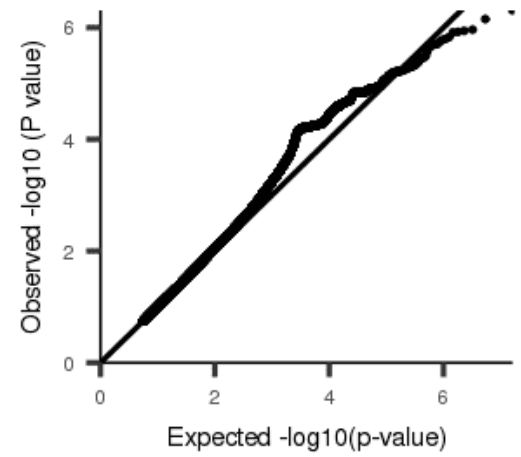

[back to list of plots](#)

Figure 3040: FreeSurfer DKTatlas rh isthmuscingulate thickness

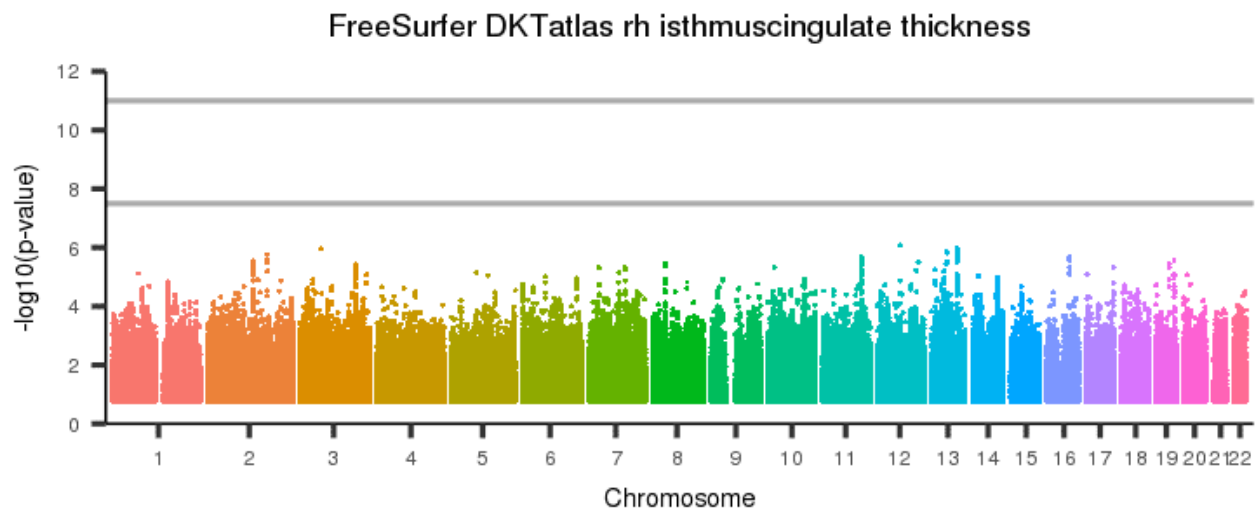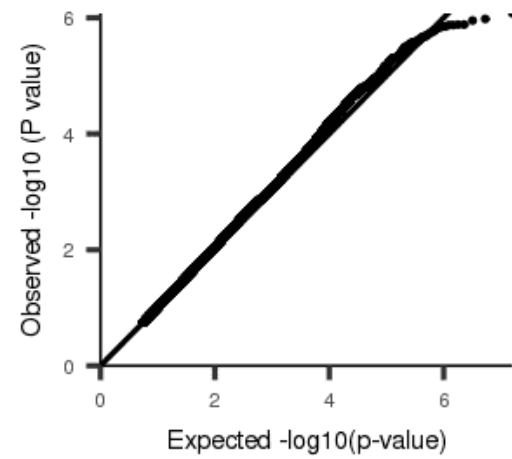

[back to list of plots](#)

Figure 3041: FreeSurfer DKTAtlas rh lateraloccipital thickness

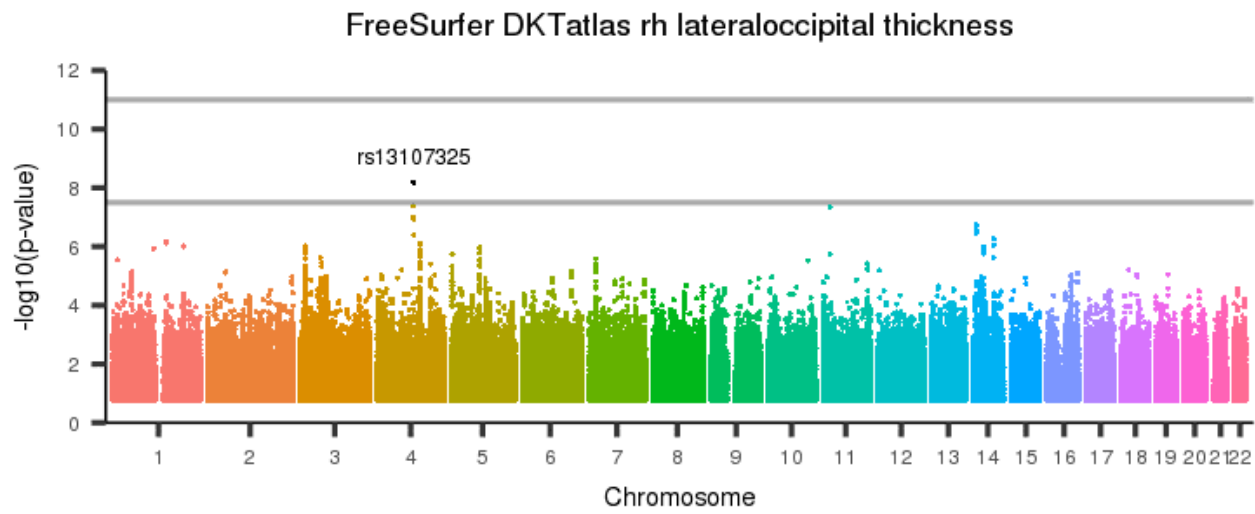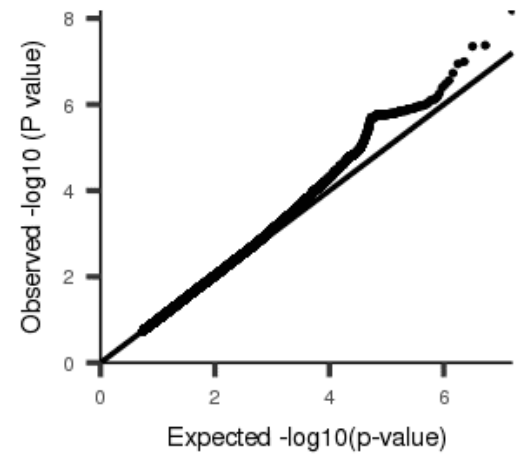

[back to list of plots](#)

Figure 3042: FreeSurfer DKTAtlas rh lateralorbitofrontal thickness

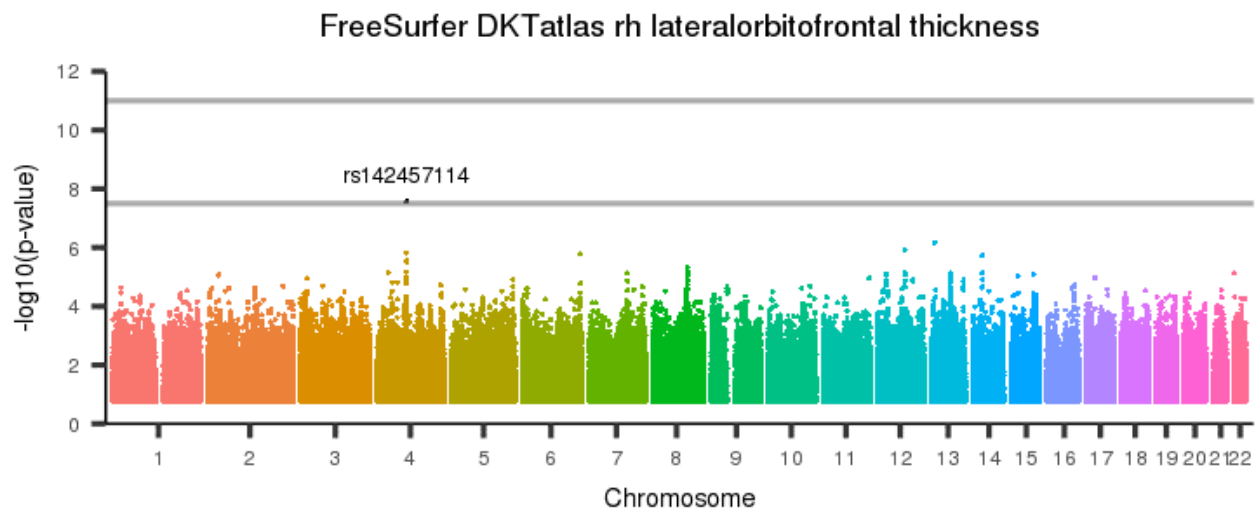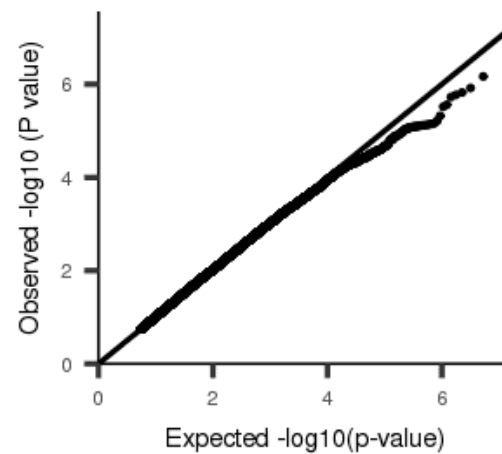

[back to list of plots](#)

Figure 3043: FreeSurfer DKTAtlas rh lingual thickness

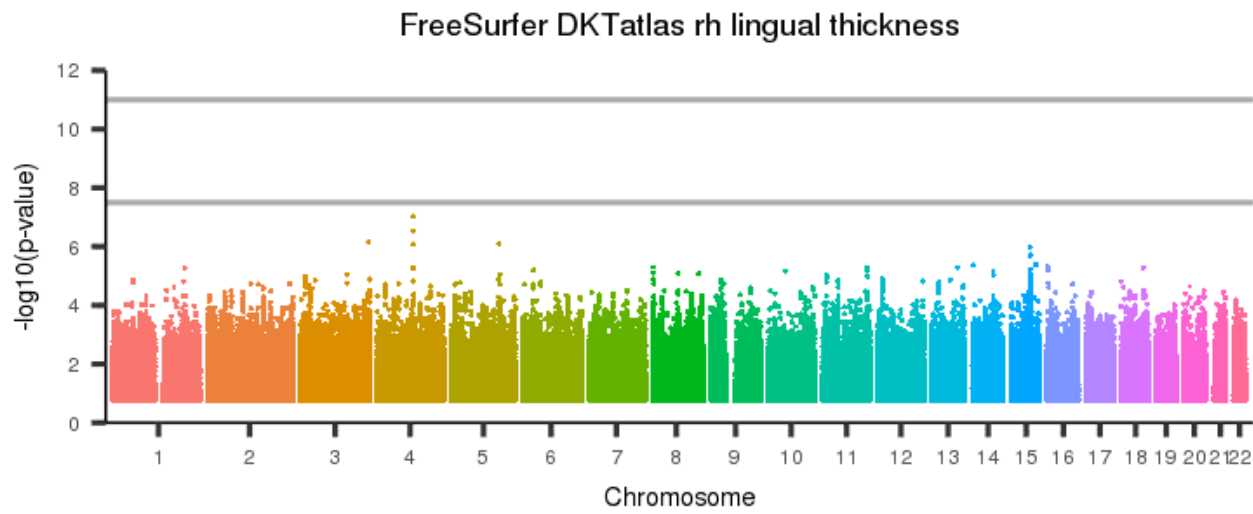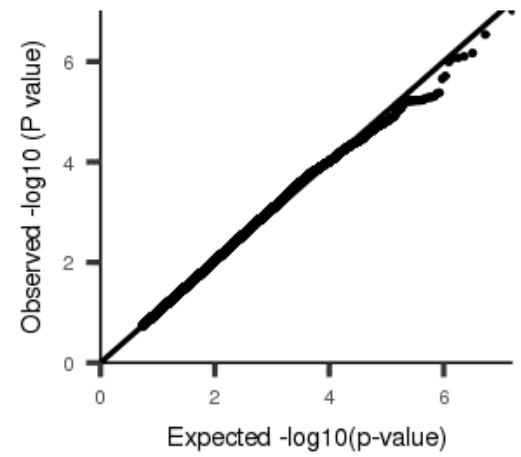

[back to list of plots](#)

Figure 3044: FreeSurfer DKTatlas rh medialorbitofrontal thickness

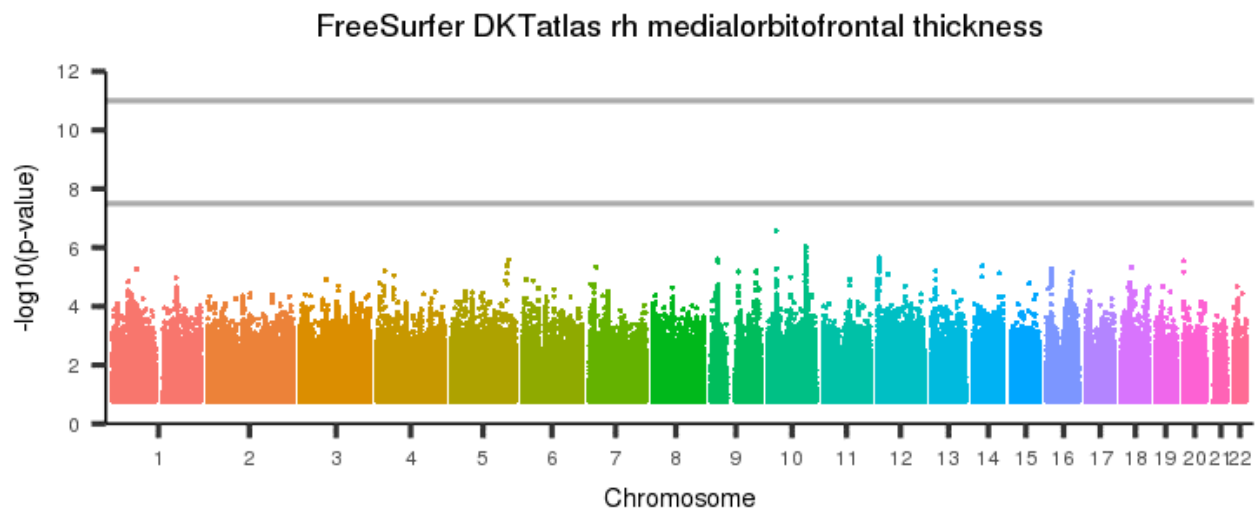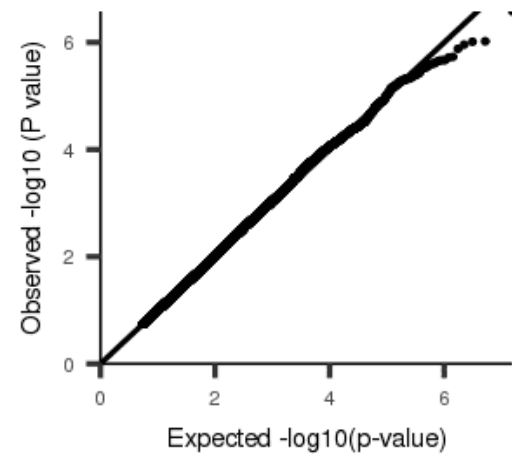

[back to list of plots](#)

Figure 3045: FreeSurfer DKAtlas rh middletemporal thickness

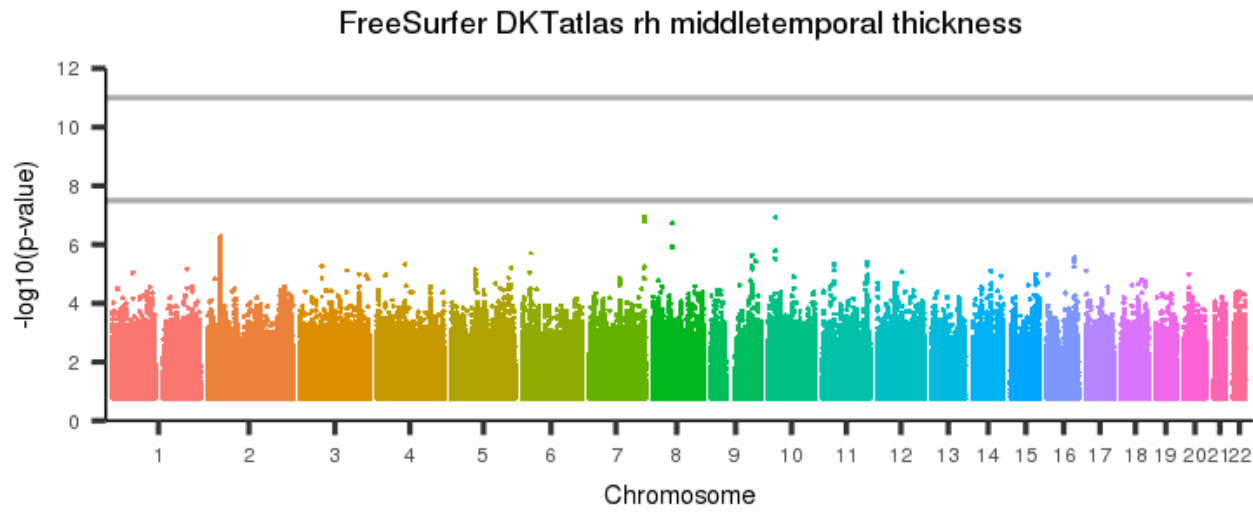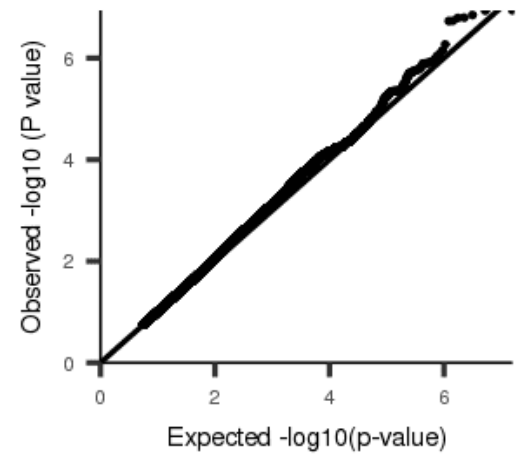

[back to list of plots](#)



Figure 3046: FreeSurfer DKTAtlas rh parahippocampal thickness

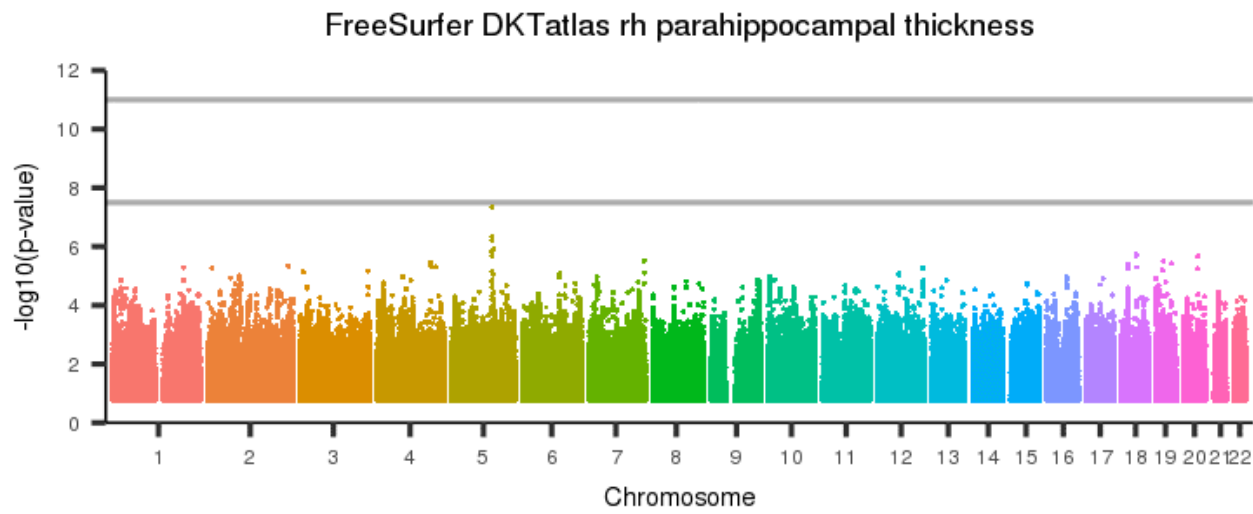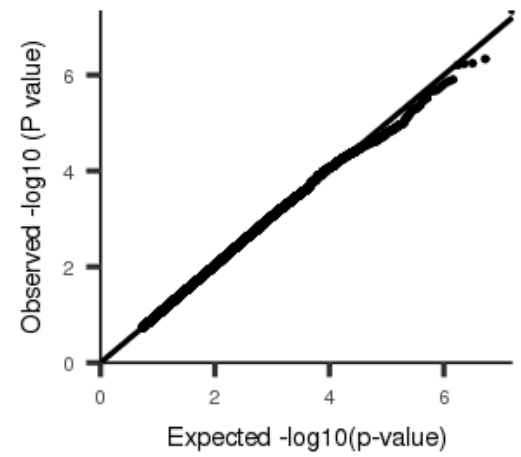

[back to list of plots](#)

Figure 3047: FreeSurfer DKTAtlas rh paracentral thickness

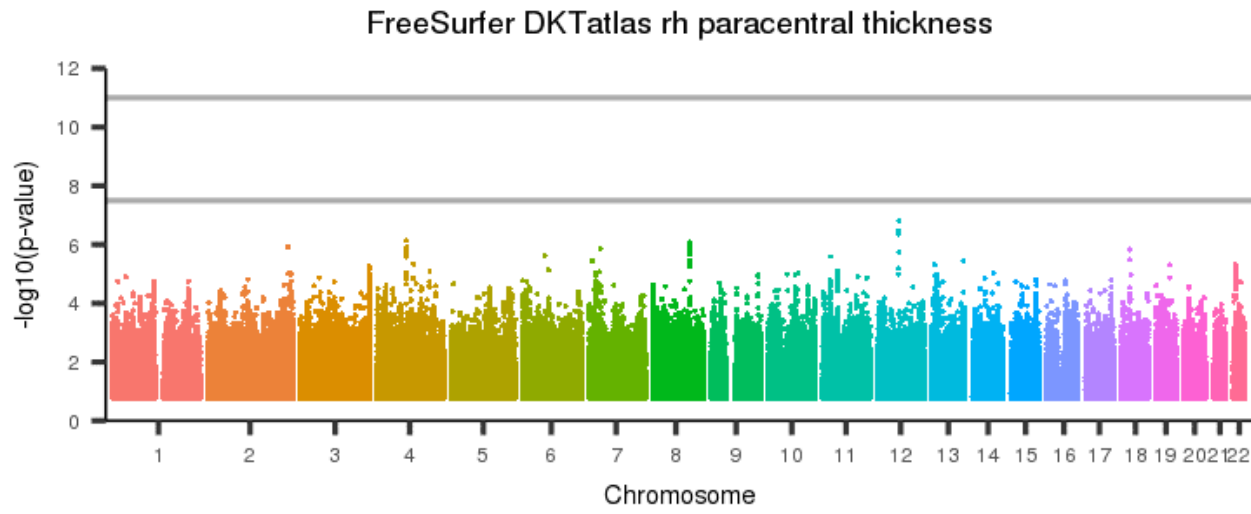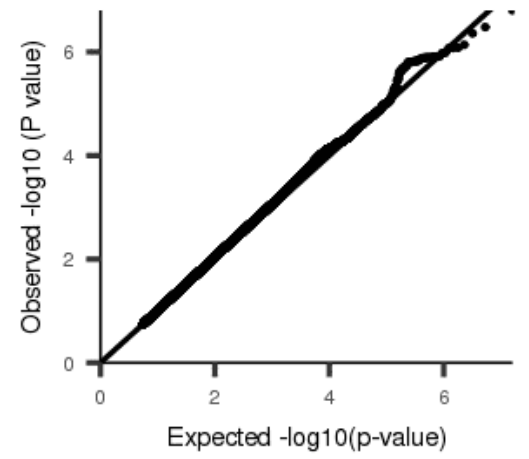

[back to list of plots](#)

Figure 3048: FreeSurfer DKTatlas rh parsopercularis thickness

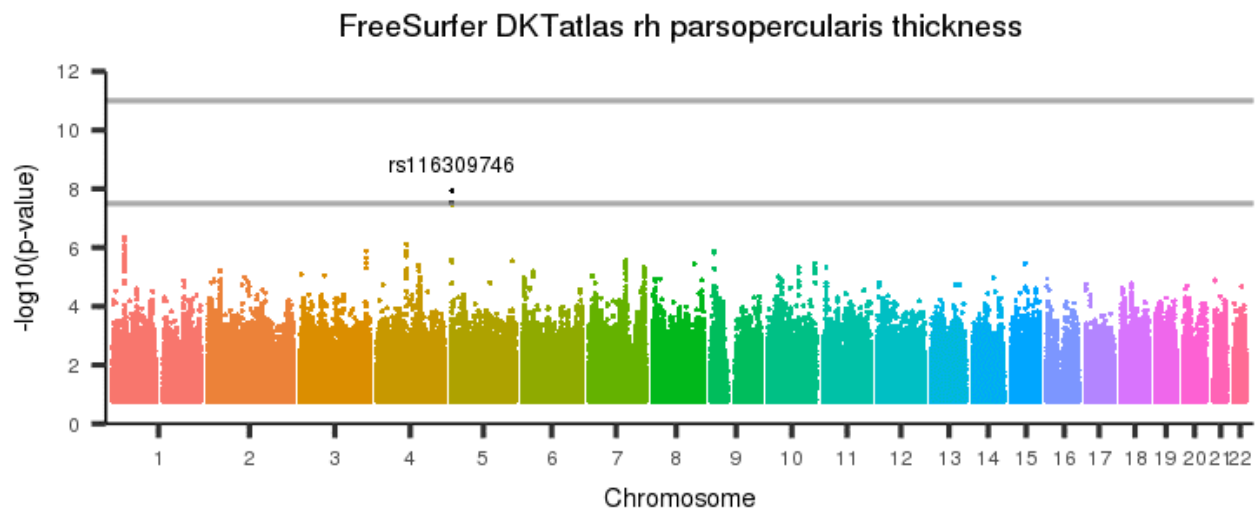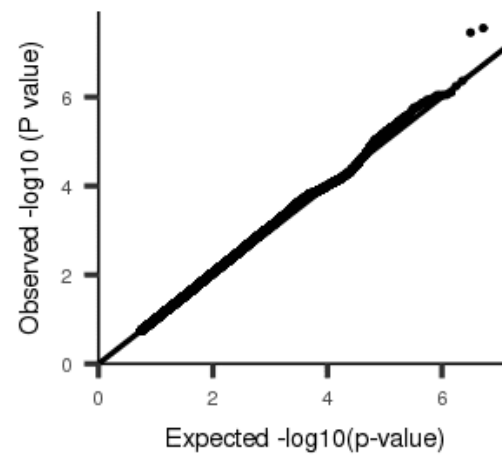

[back to list of plots](#)

Figure 3049: FreeSurfer DKTAtlas rh parsorbitalis thickness

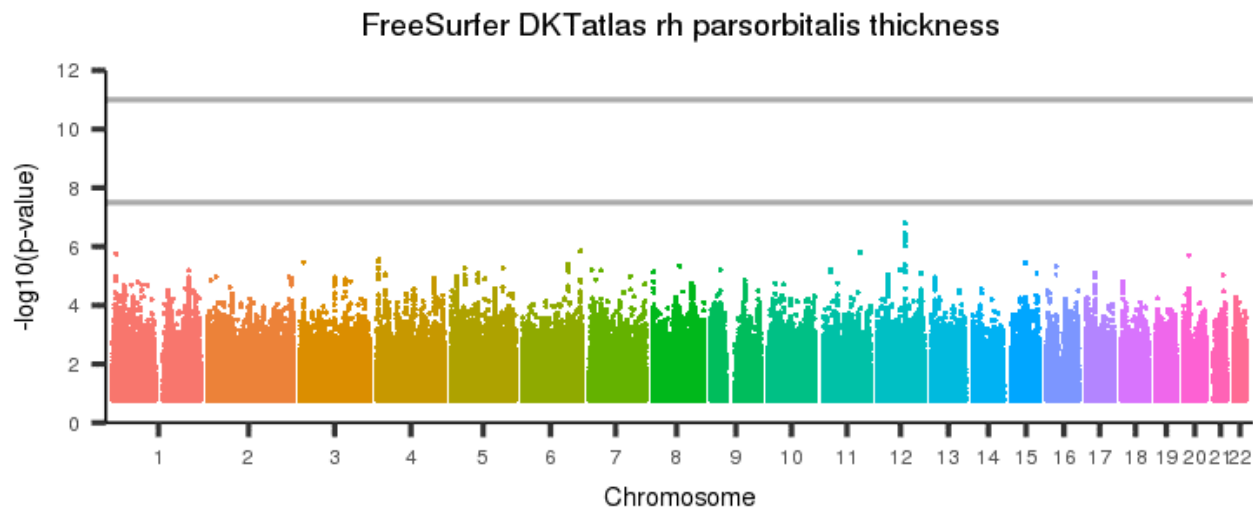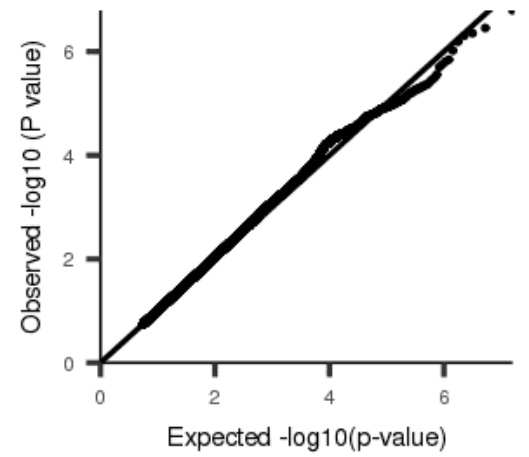

[back to list of plots](#)

Figure 3050: FreeSurfer DKTatlas rh parstriangularis thickness

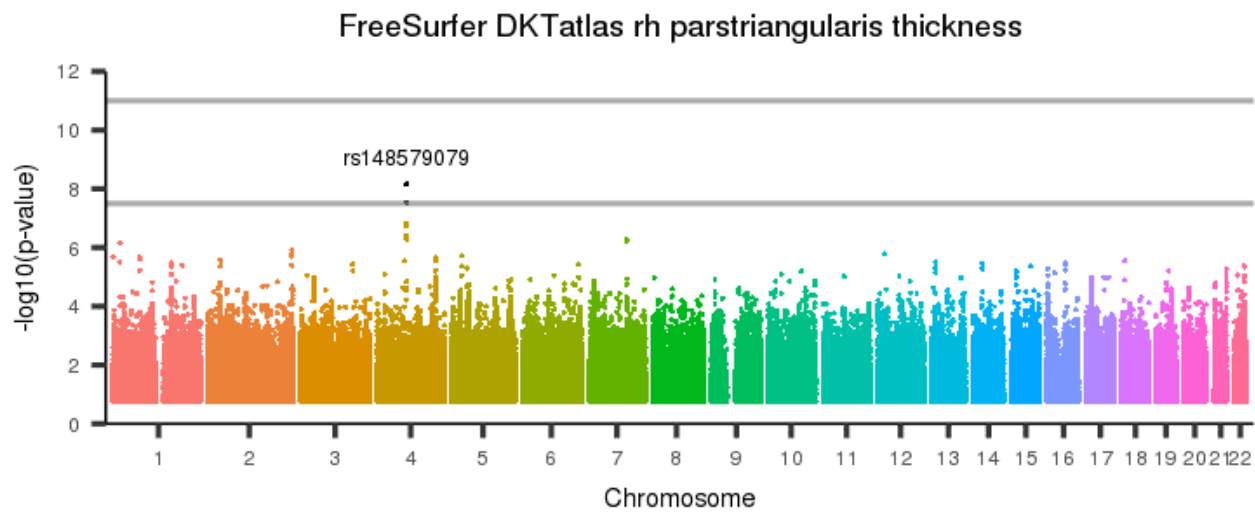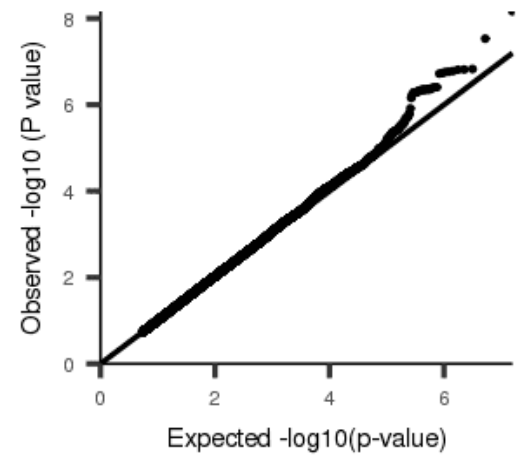

[back to list of plots](#)

Figure 3051: FreeSurfer DKTAtlas rh pericalcarine thickness

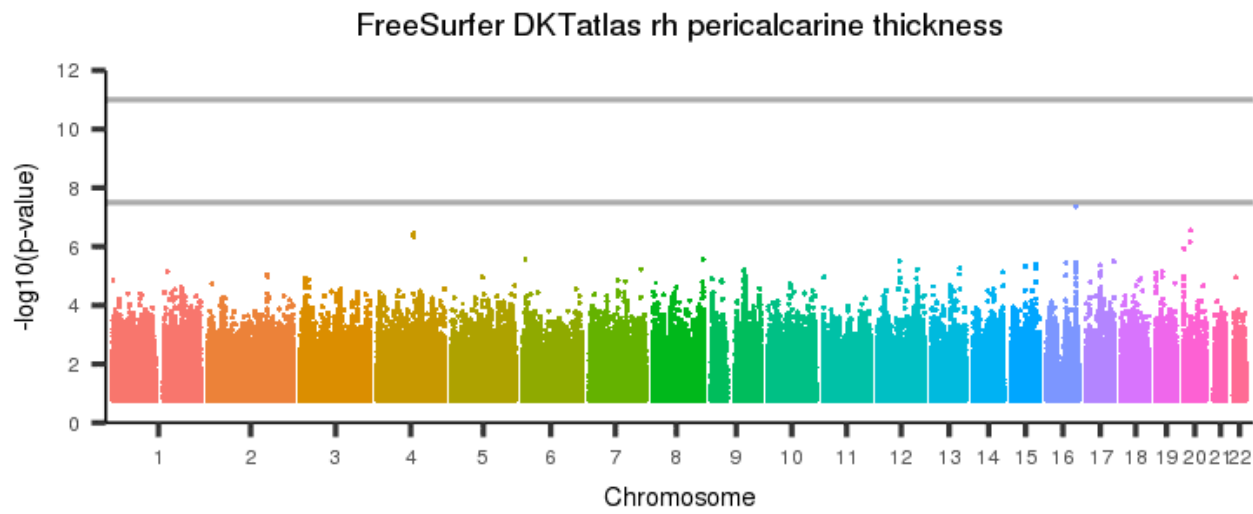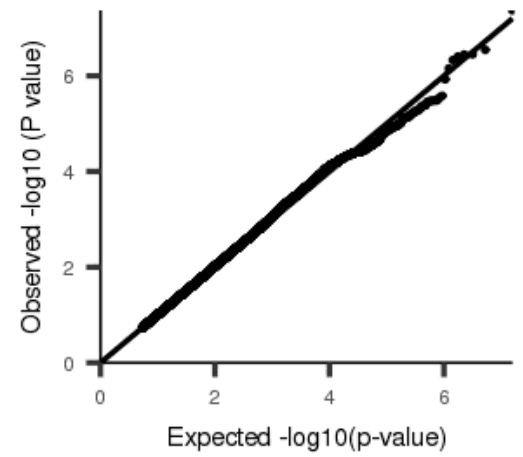

[back to list of plots](#)

Figure 3052: FreeSurfer DKTatlas rh postcentral thickness

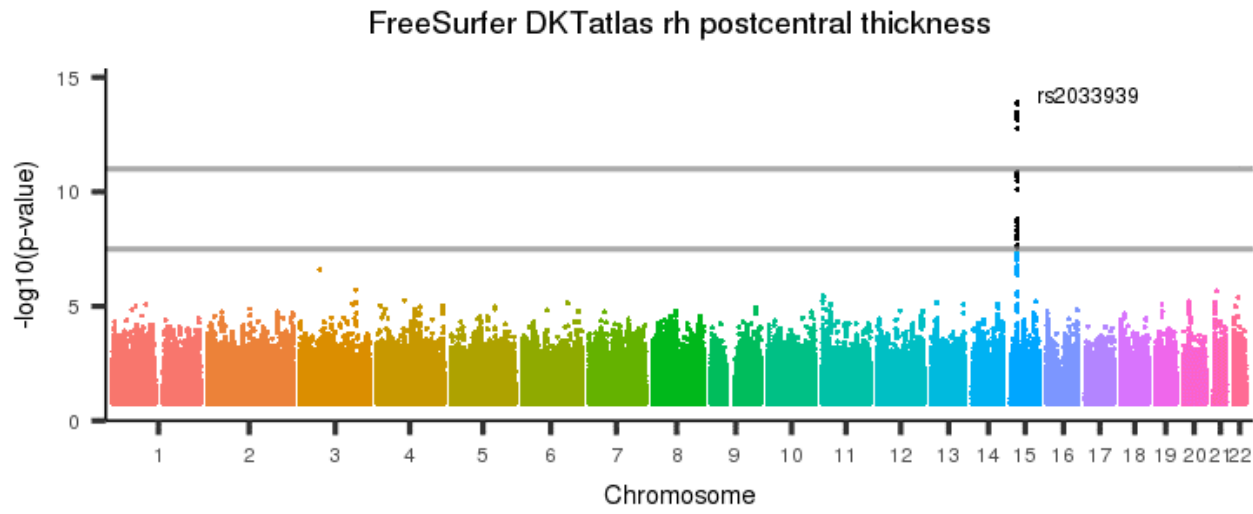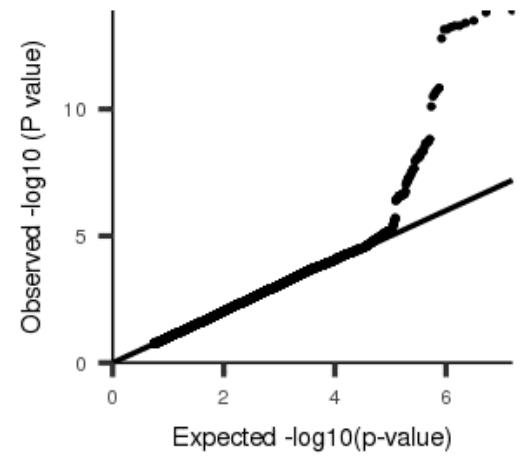

[back to list of plots](#)

Figure 3053: FreeSurfer DKAtlas rh posteriorcingulate thickness

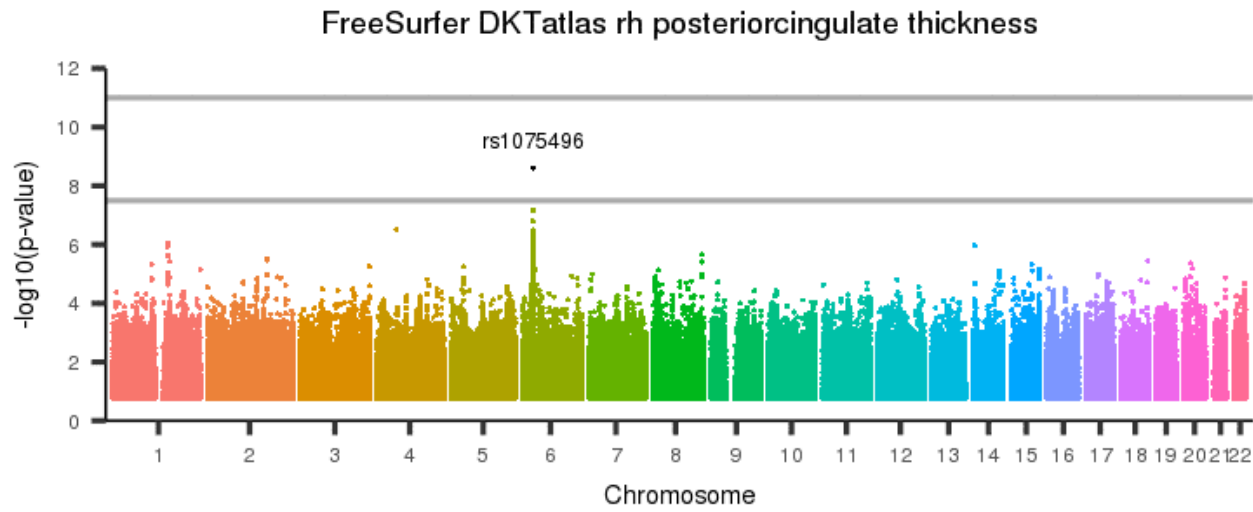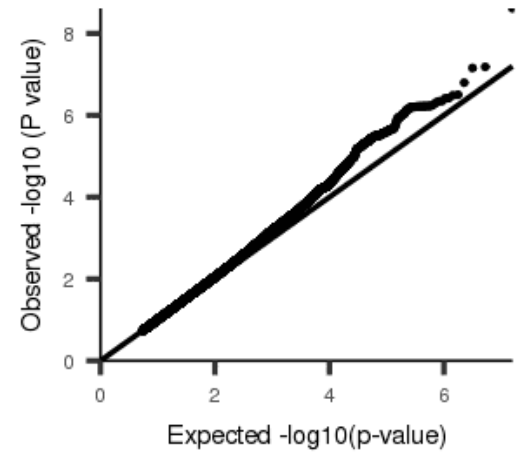

[back to list of plots](#)



Figure 3054: FreeSurfer DKTAtlas rh precentral thickness

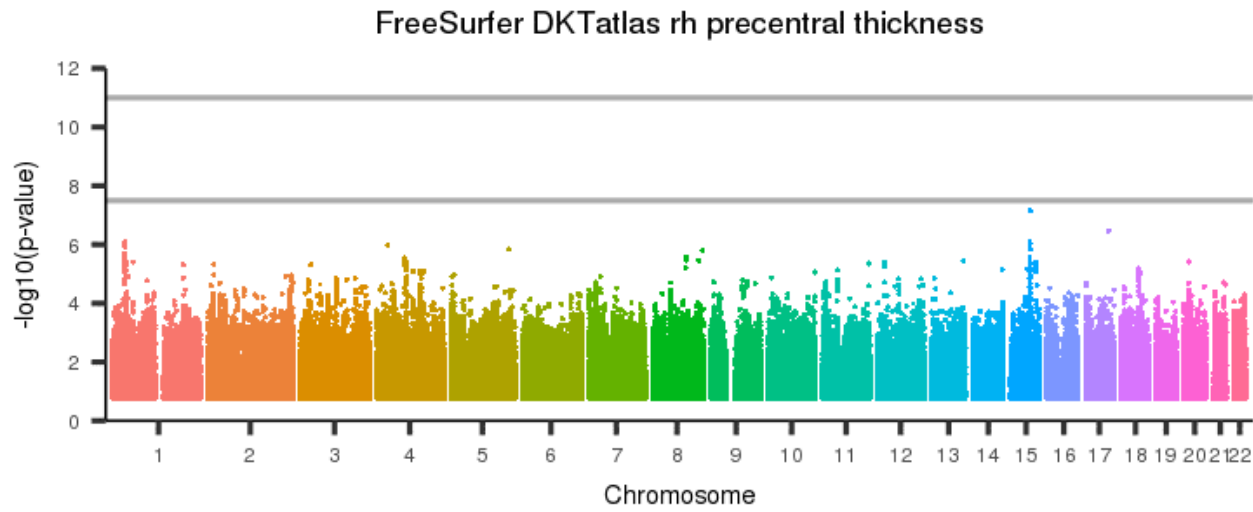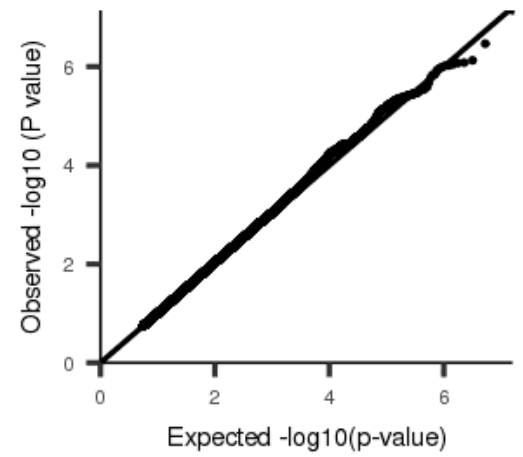

[back to list of plots](#)

Figure 3055: FreeSurfer DKAtlas rh precuneus thickness

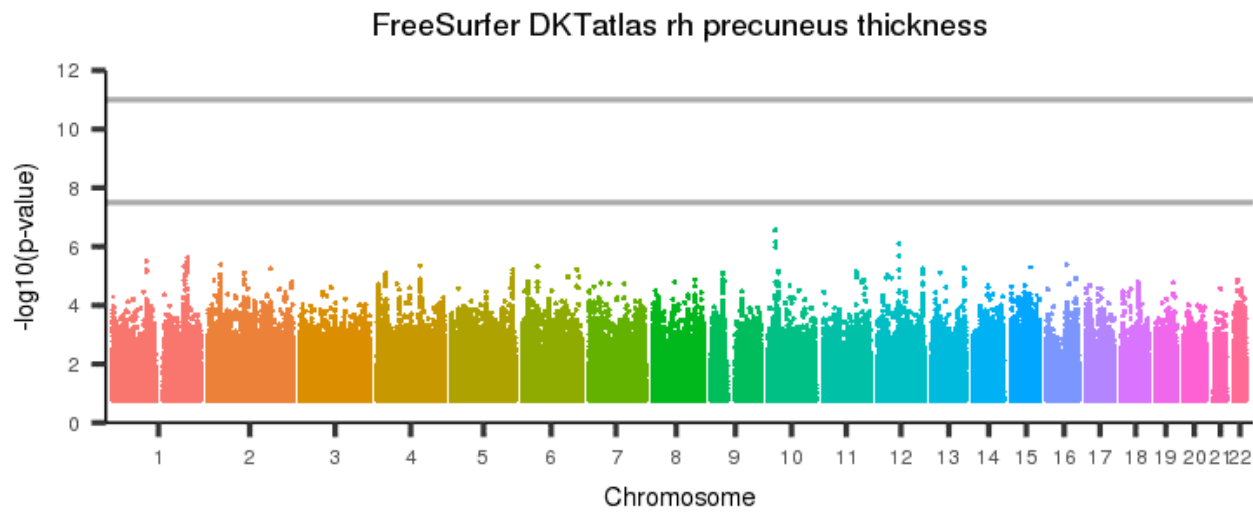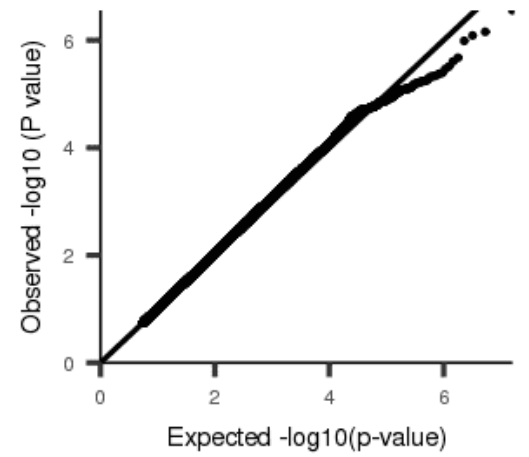

[back to list of plots](#)

Figure 3056: FreeSurfer DKTatlas rh rostralanteriorcingulate thickness

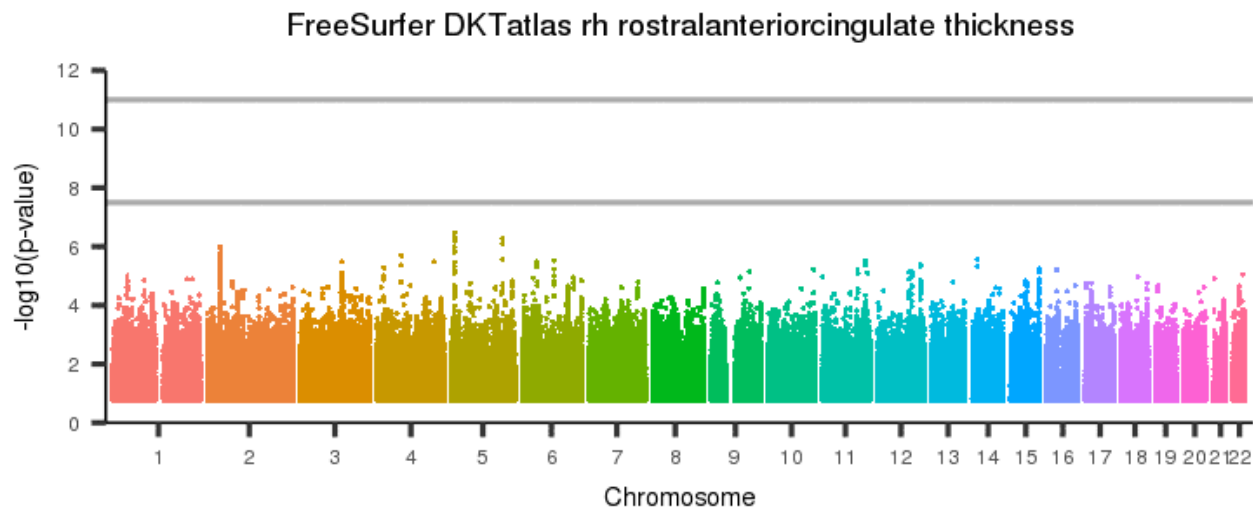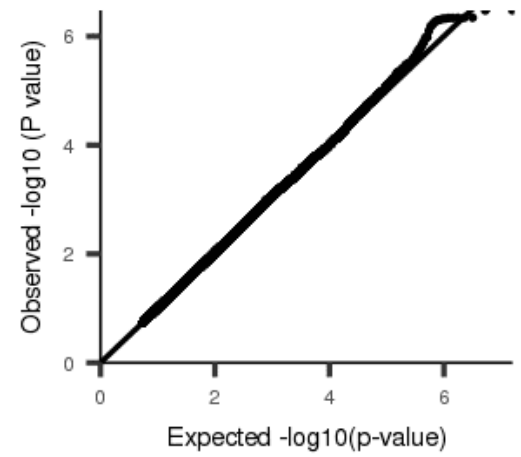

[back to list of plots](#)

Figure 3057: FreeSurfer DKTAtlas rh rostralmiddlefrontal thickness

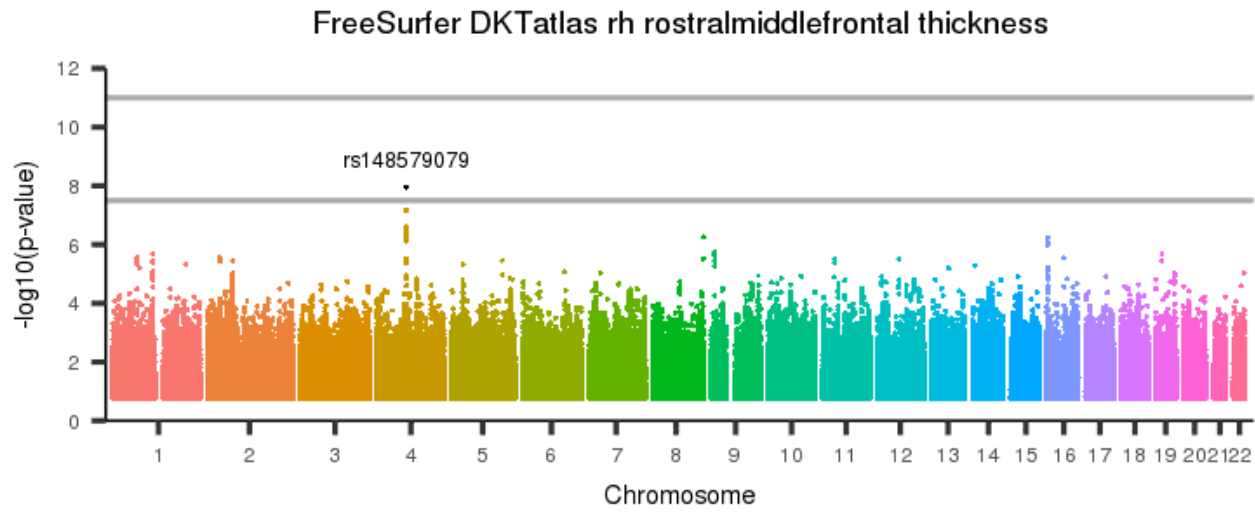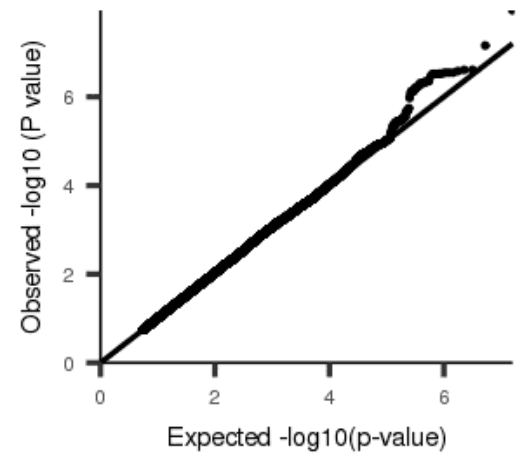

[back to list of plots](#)

Figure 3058: FreeSurfer DKTAtlas rh superiorfrontal thickness

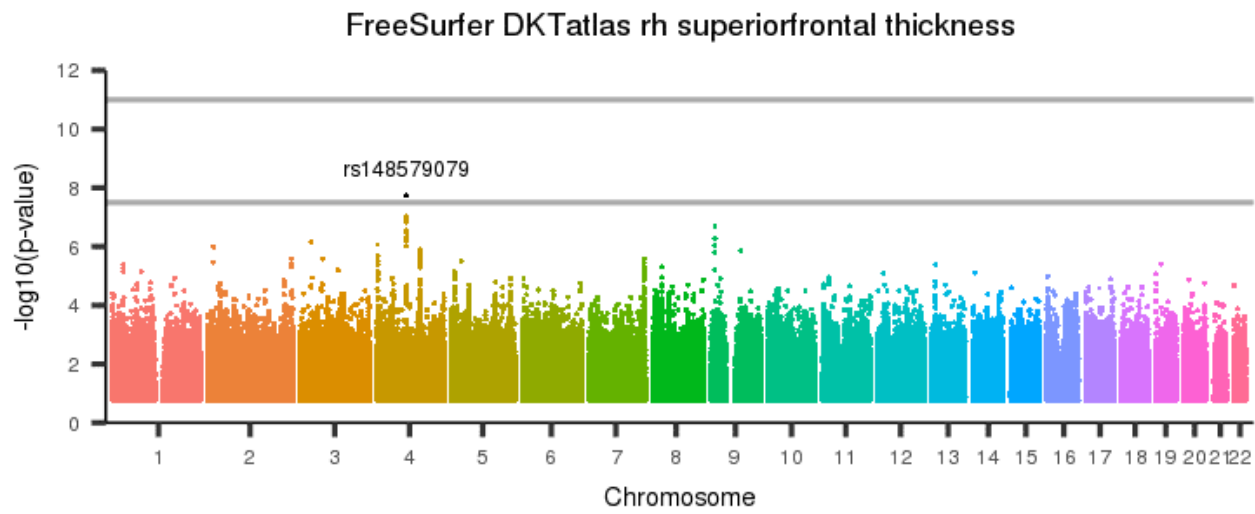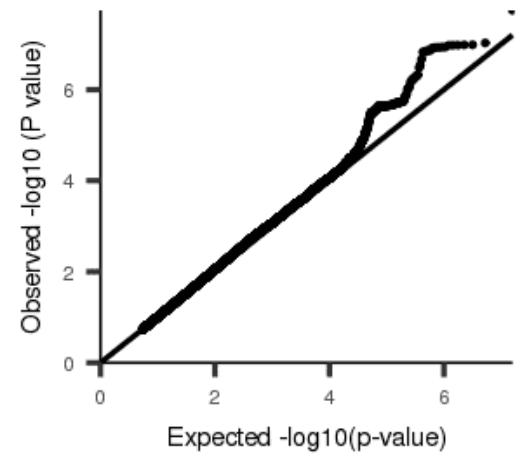

[back to list of plots](#)

Figure 3059: FreeSurfer DKAtlas rh superiorparietal thickness

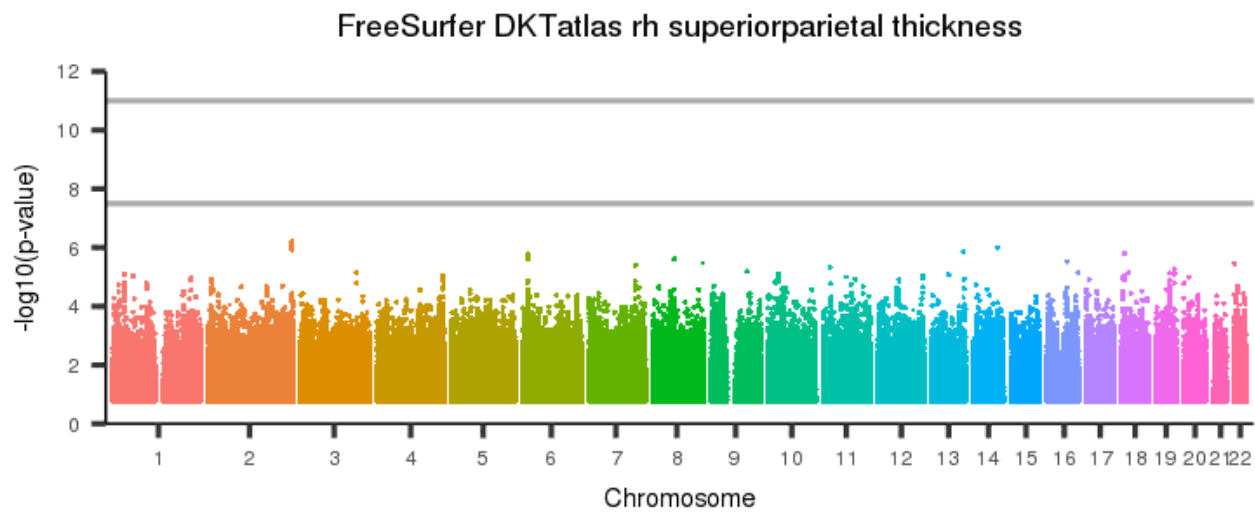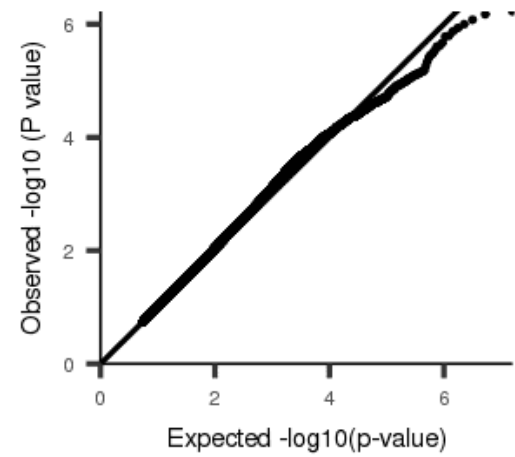

[back to list of plots](#)

Figure 3060: FreeSurfer DKTatlas rh superiortemporal thickness

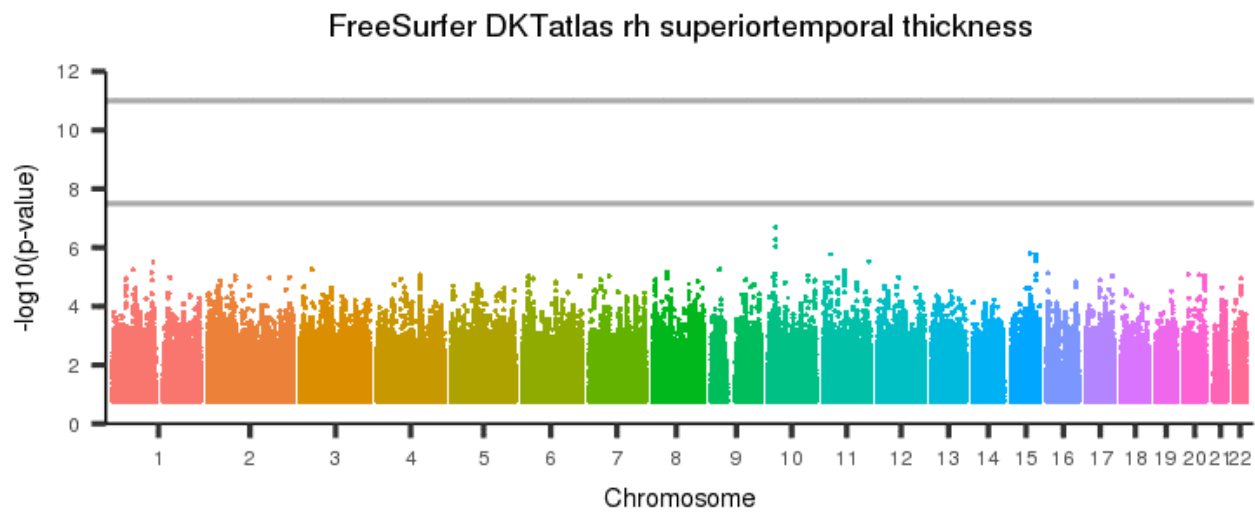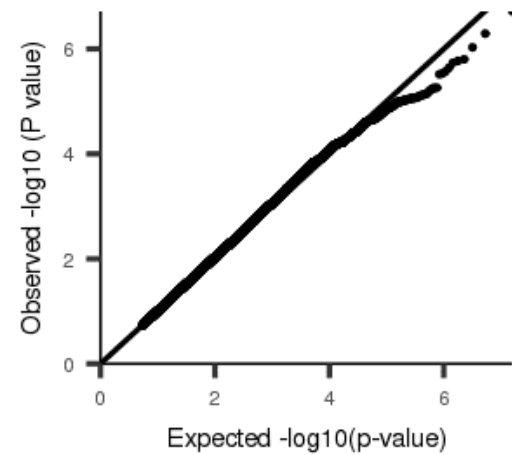

[back to list of plots](#)

Figure 3061: FreeSurfer DKTatlas rh supramarginal thickness

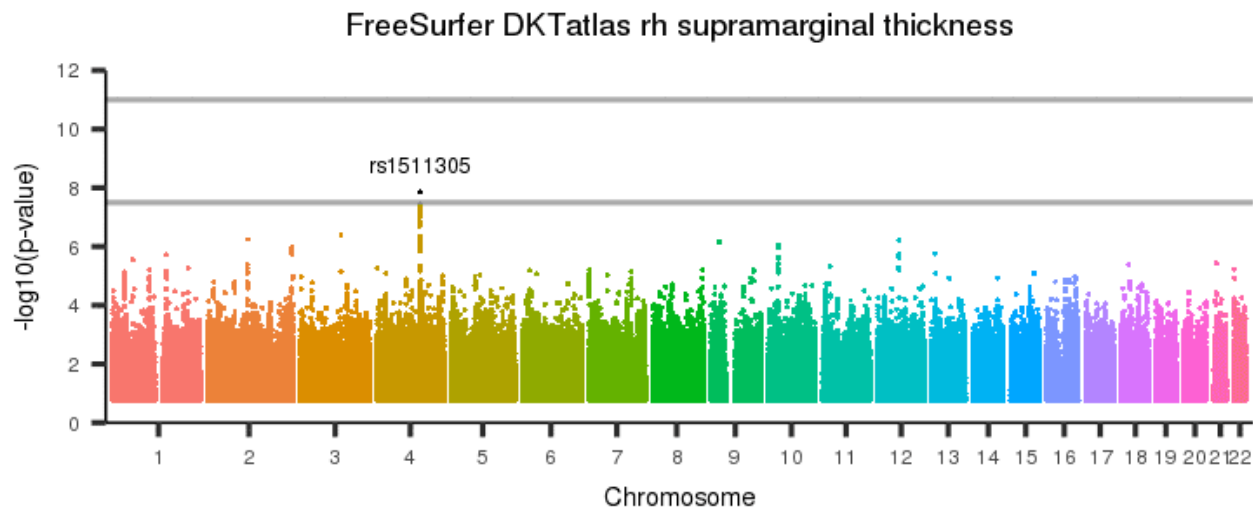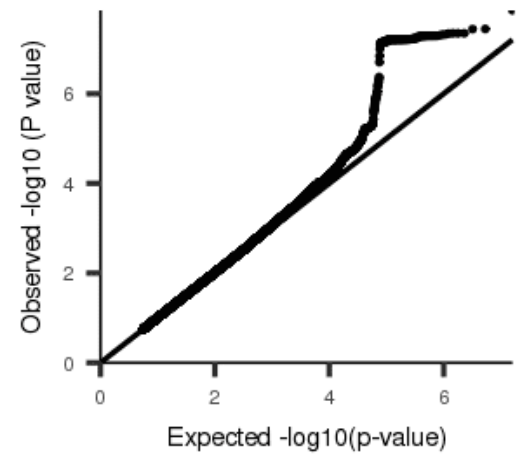

[back to list of plots](#)



Figure 3062: FreeSurfer DKTatlas rh transversetemporal thickness

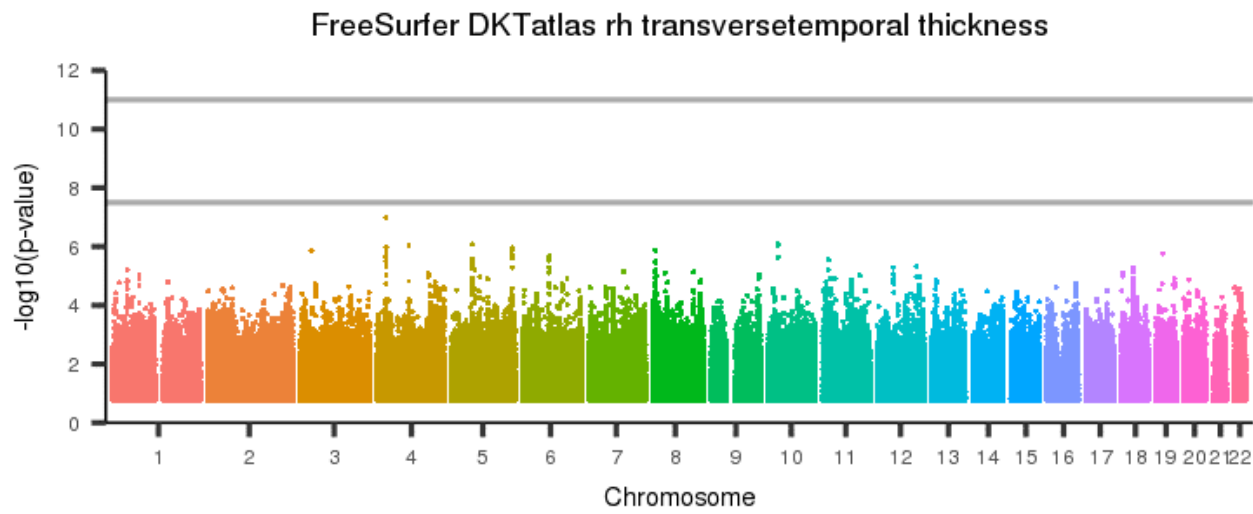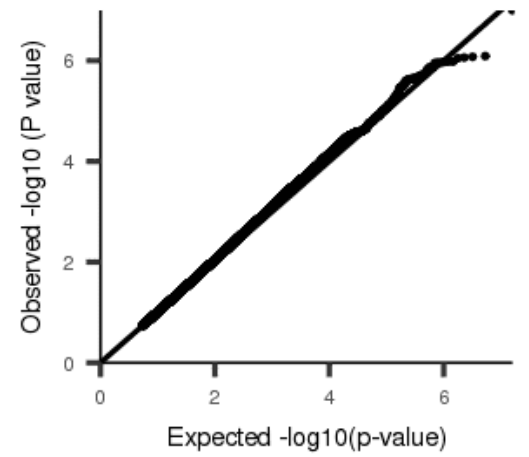

[back to list of plots](#)

Figure 3063: FreeSurfer DKTatlas rh insula thickness

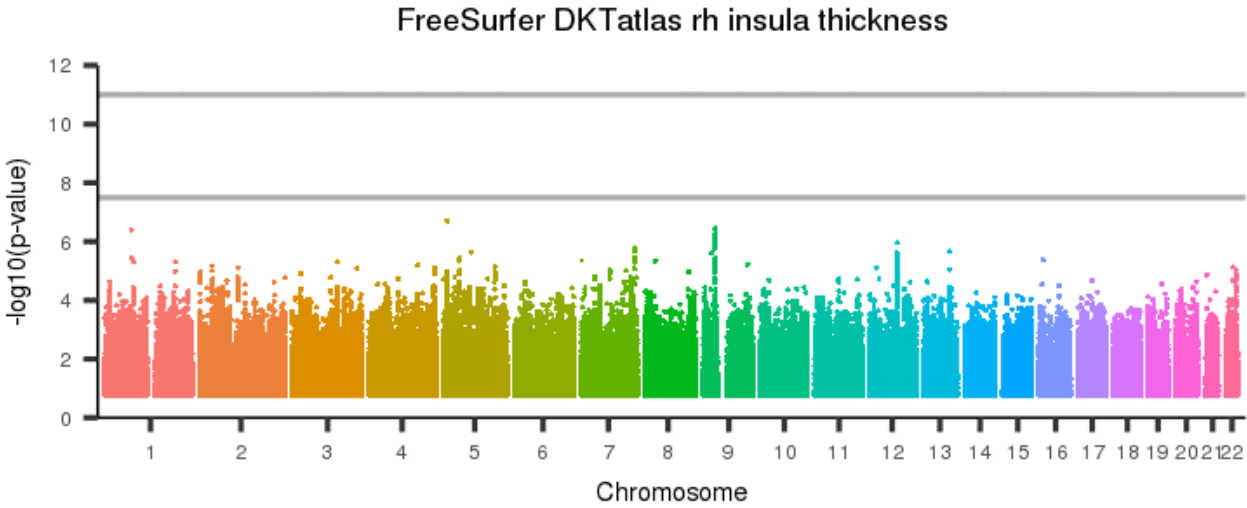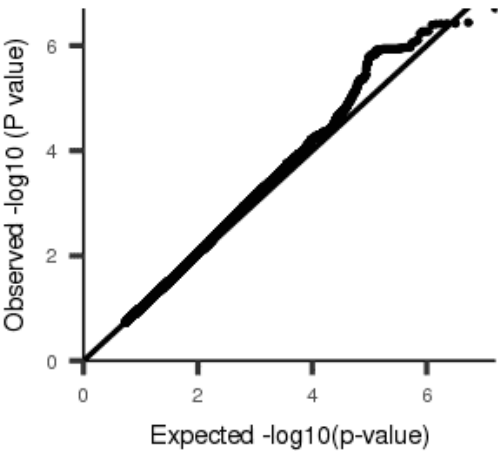

[back to list of plots](#)

Figure 3064: FreeSurfer DKTAtlas rh MeanThickness thickness

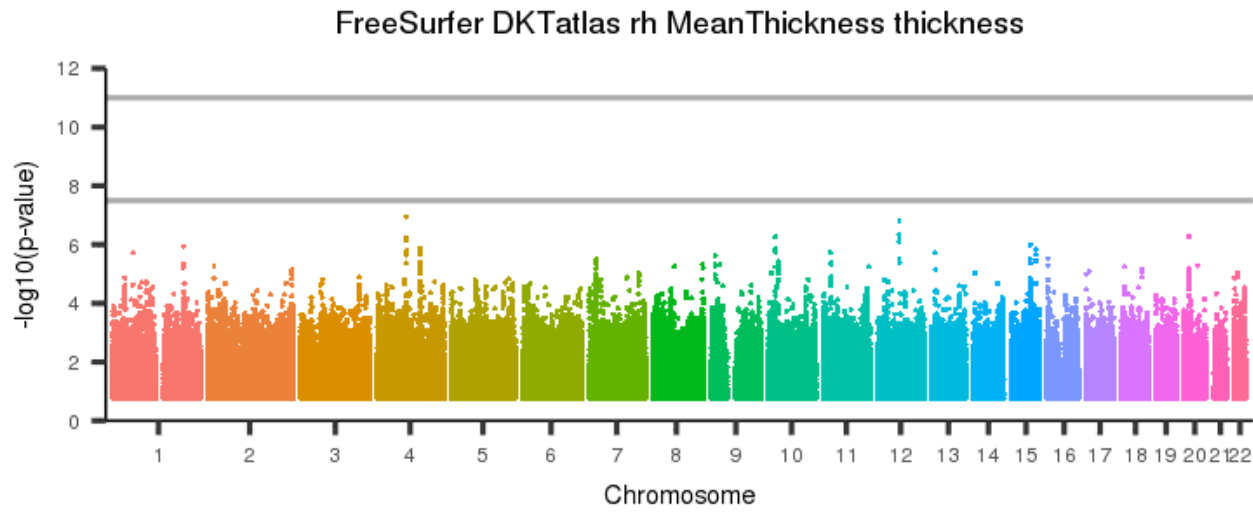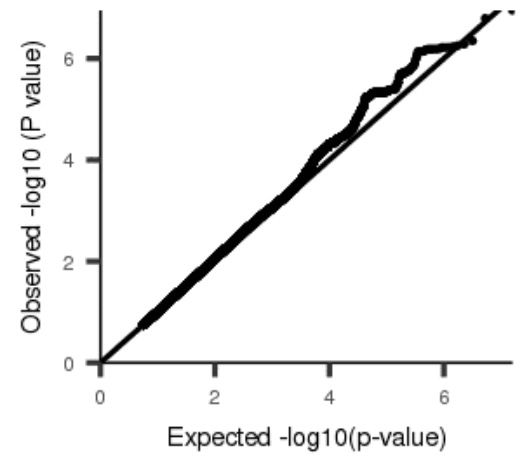

[back to list of plots](#)

Figure 3065: FreeSurfer a2009s rh G and S frontomargin thickness

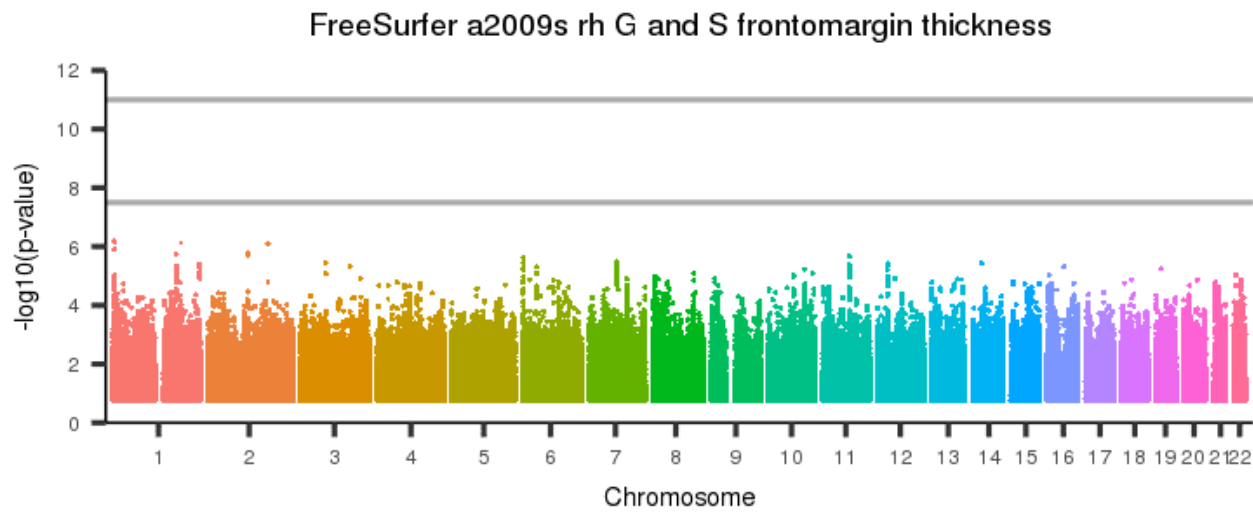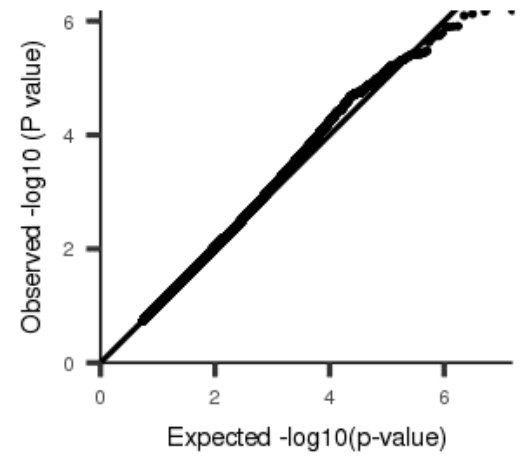

[back to list of plots](#)

Figure 3066: FreeSurfer a2009s rh G and S occipital inf thickness

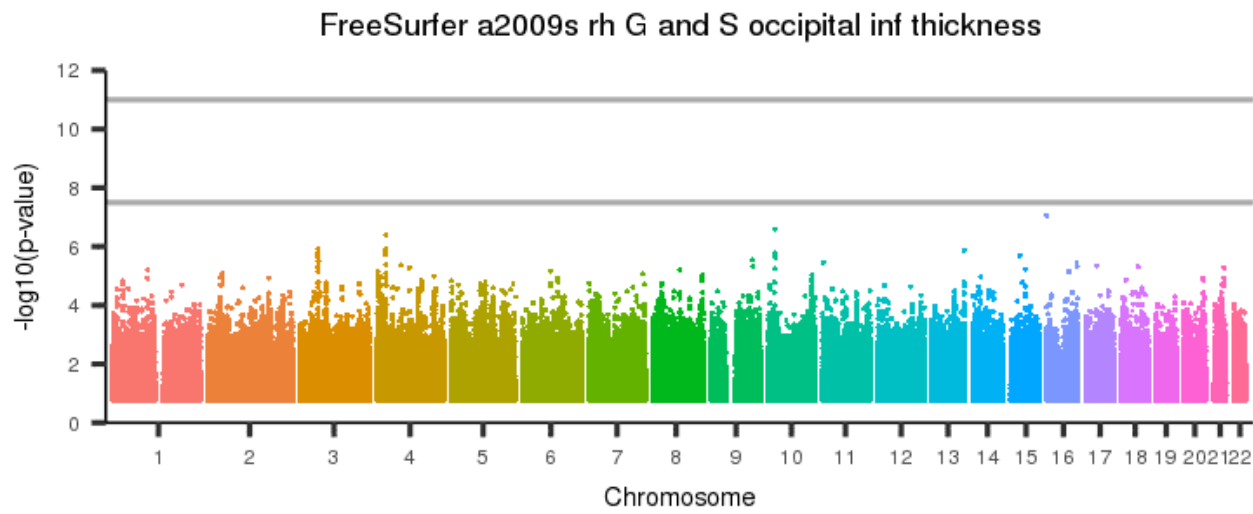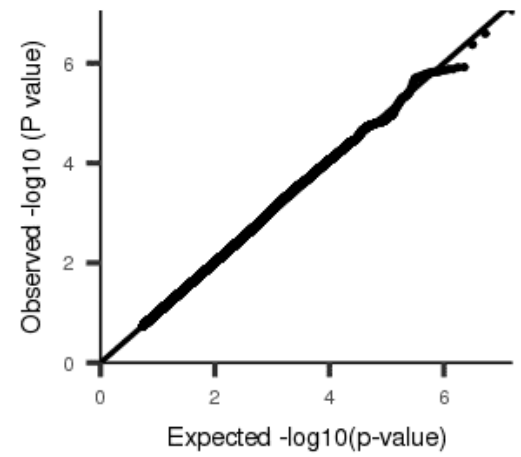

[back to list of plots](#)

Figure 3067: FreeSurfer a2009s rh G and S paracentral thickness

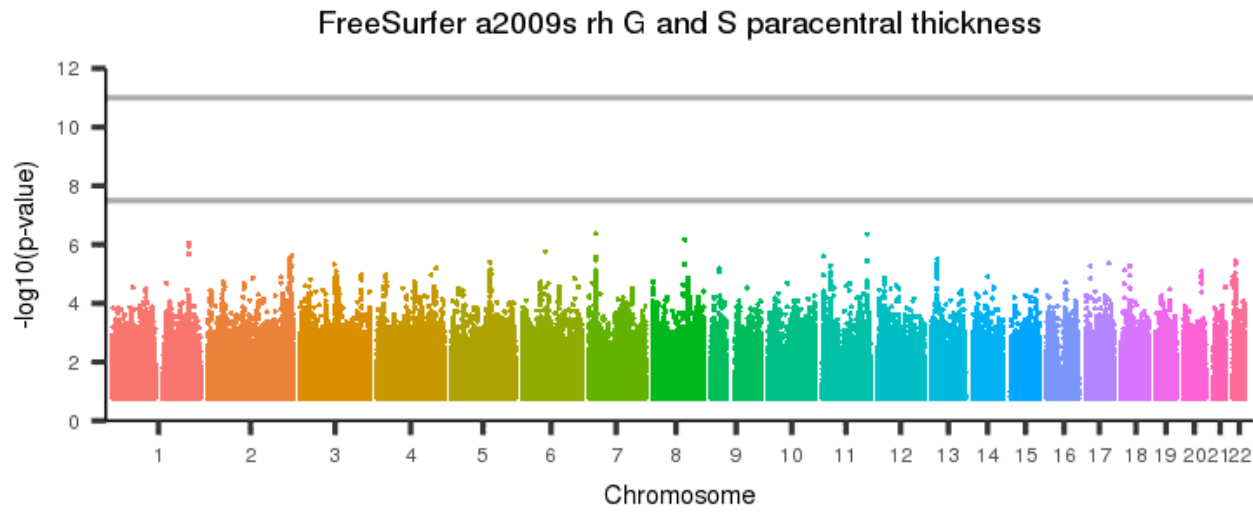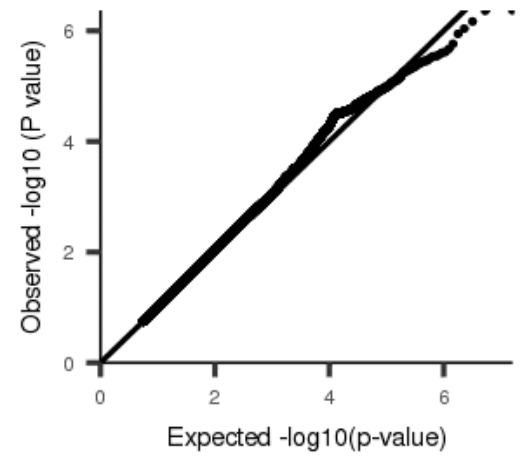

[back to list of plots](#)

Figure 3068: FreeSurfer a2009s rh G and S subcentral thickness

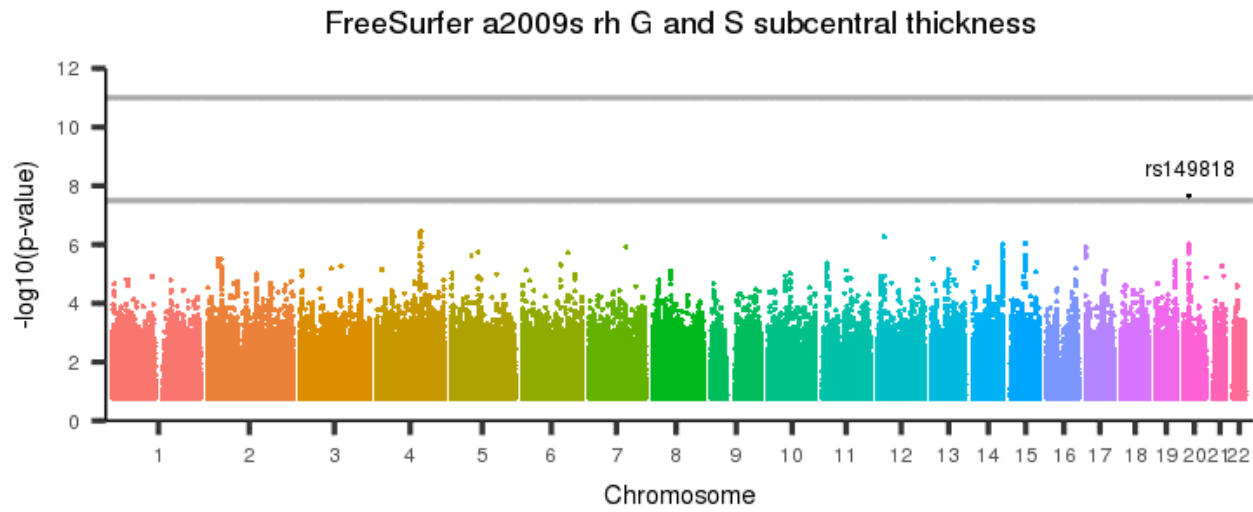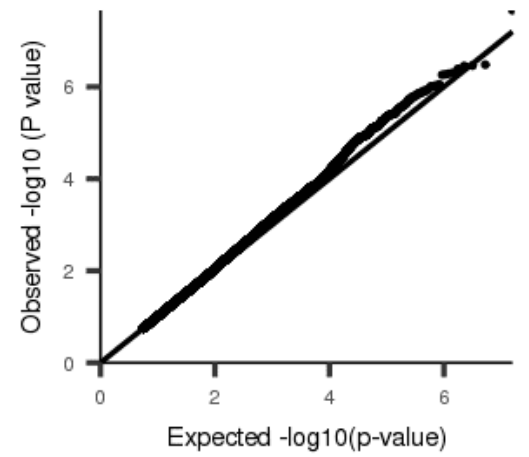

[back to list of plots](#)

Figure 3069: FreeSurfer a2009s rh G and S transv frontopol thickness

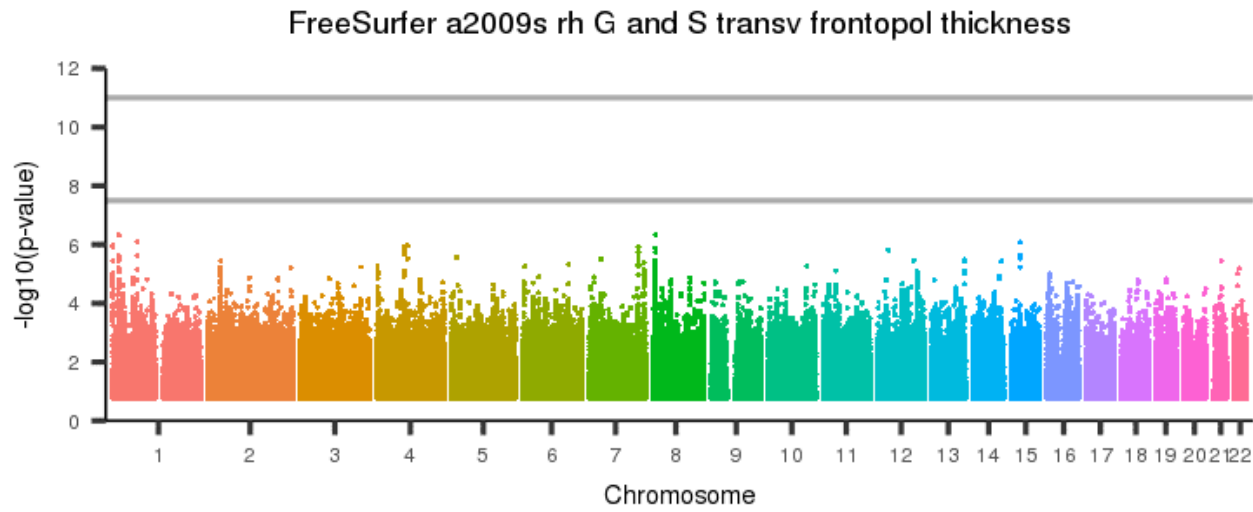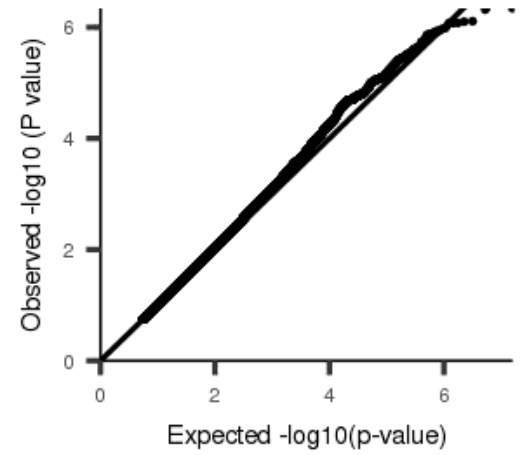

[back to list of plots](#)



Figure 3070: FreeSurfer a2009s rh G and S cingul-Ant thickness

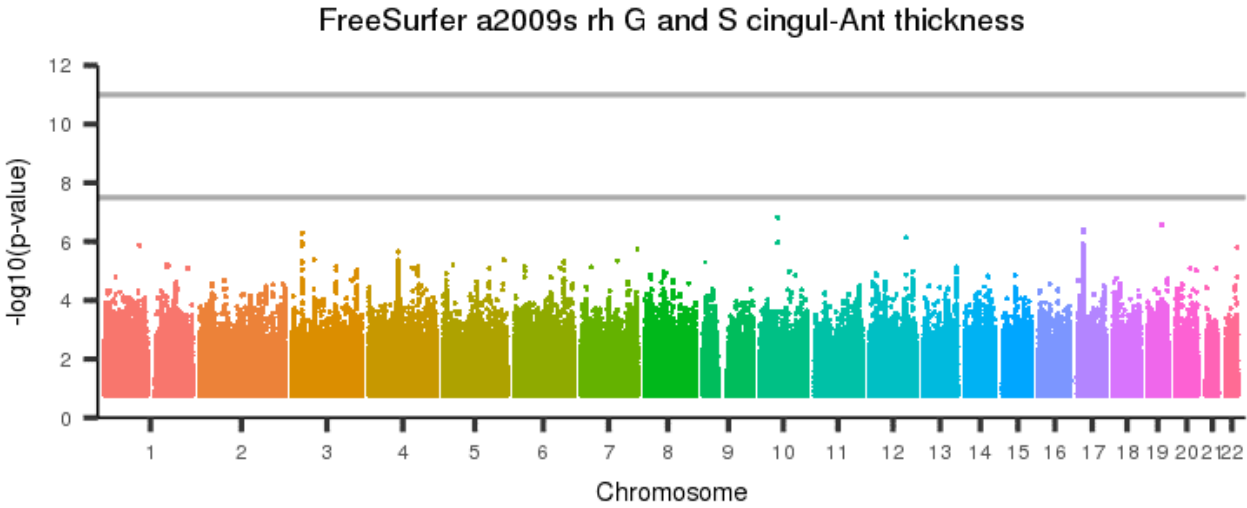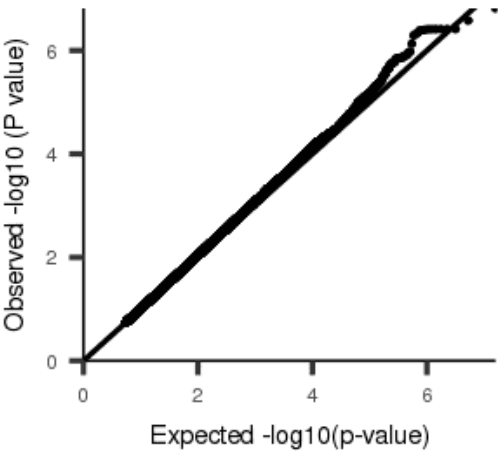

[back to list of plots](#)

Figure 3071: FreeSurfer a2009s rh G and S cingul-Mid-Ant thickness

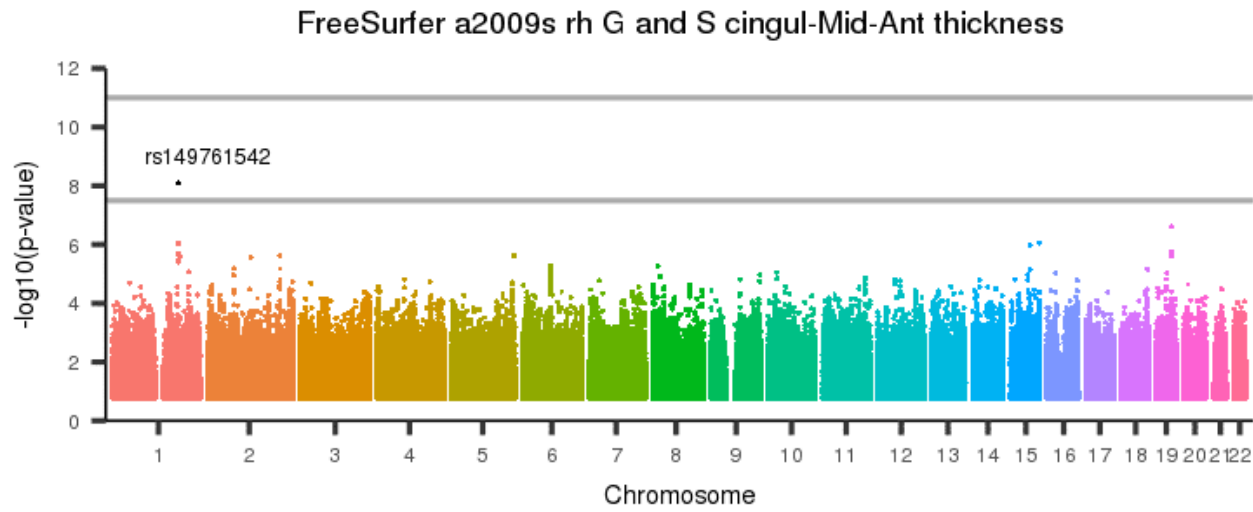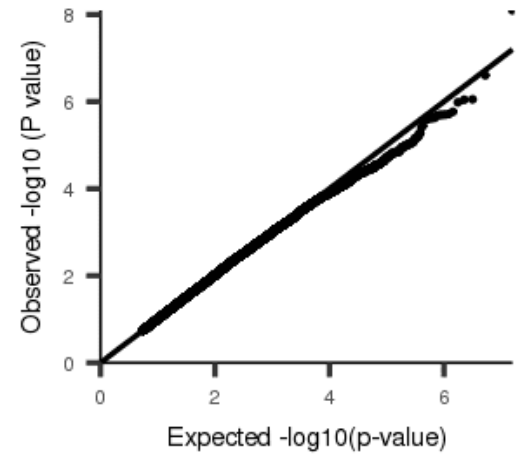

[back to list of plots](#)

Figure 3072: FreeSurfer a2009s rh G and S cingul-Mid-Post thickness

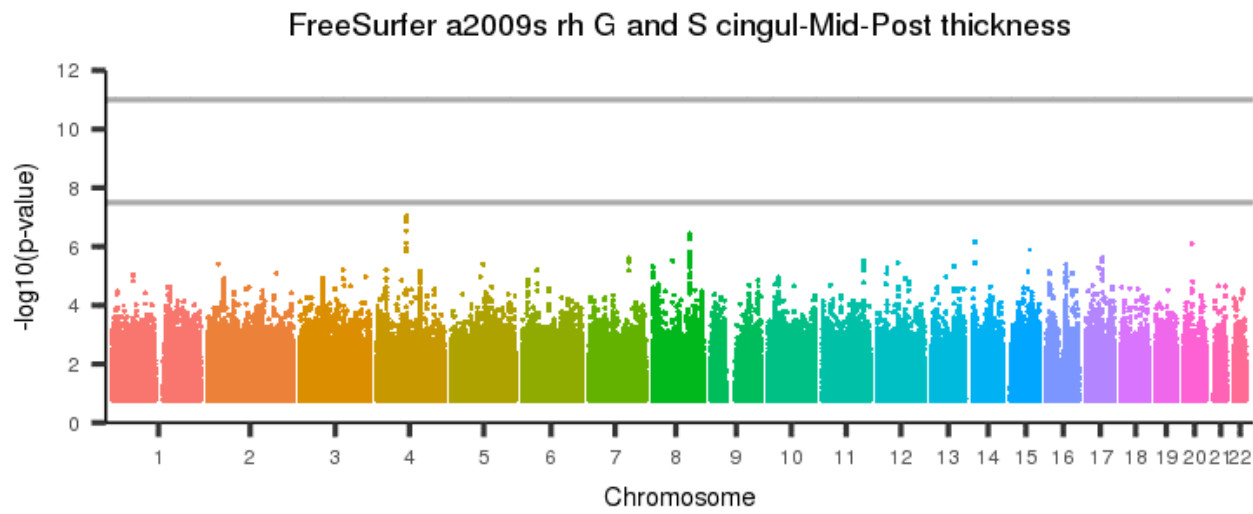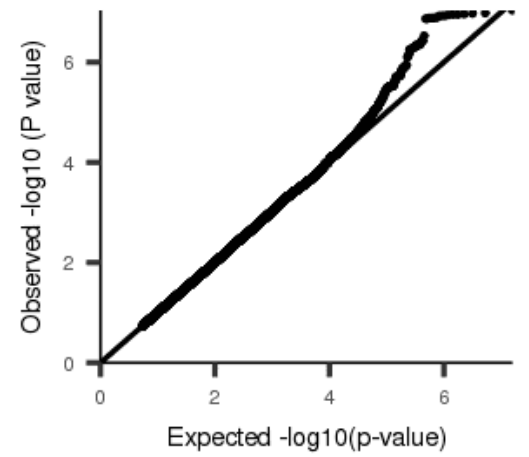

[back to list of plots](#)

Figure 3073: FreeSurfer a2009s rh G cingul-Post-dorsal thickness

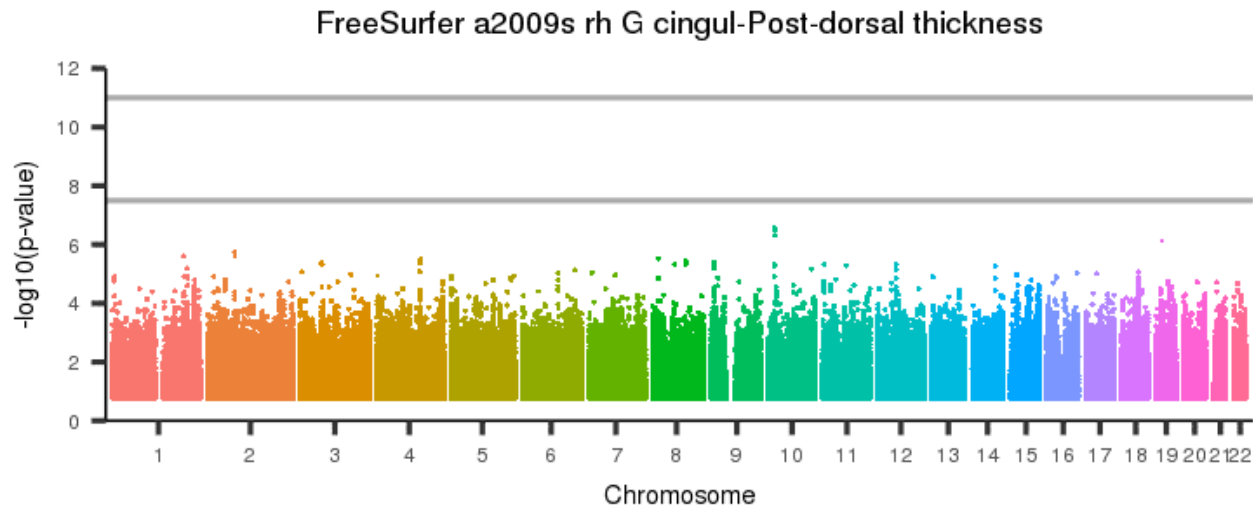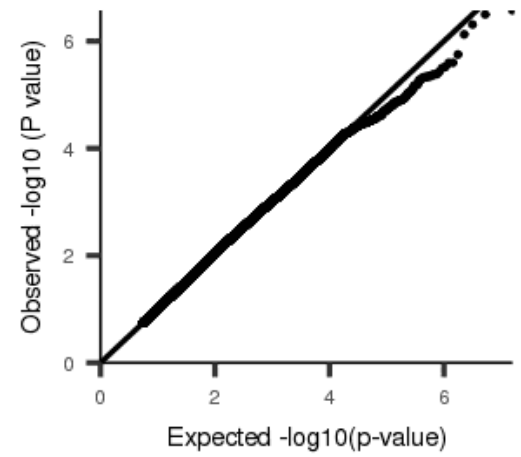

[back to list of plots](#)

Figure 3074: FreeSurfer a2009s rh G cingul-Post-ventral thickness

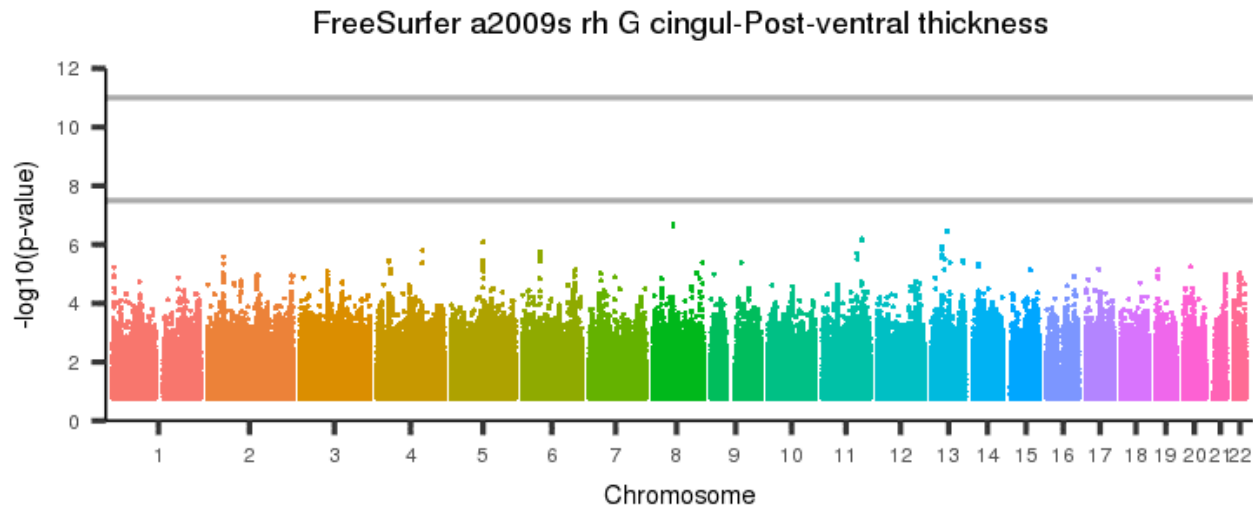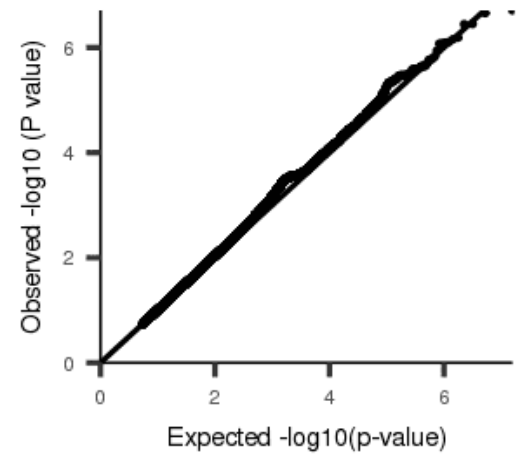

[back to list of plots](#)

Figure 3075: FreeSurfer a2009s rh G cuneus thickness

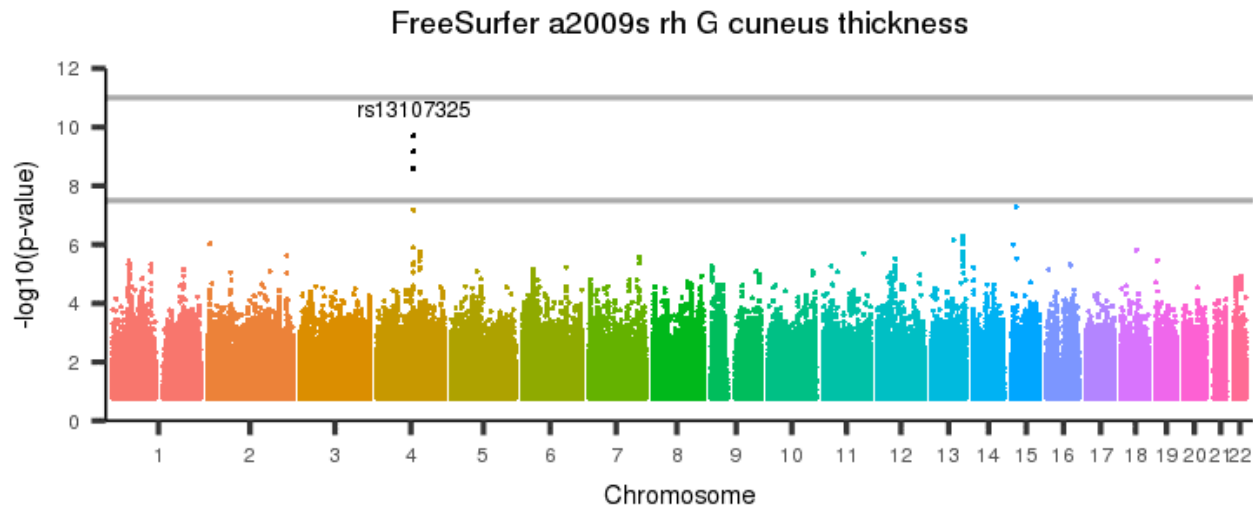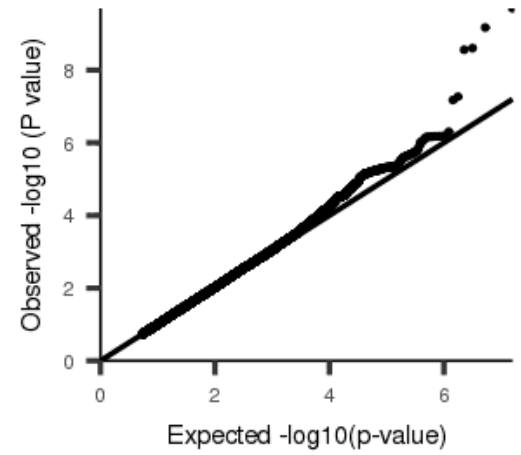

[back to list of plots](#)

Figure 3076: FreeSurfer a2009s rh G front inf-Opercular thickness

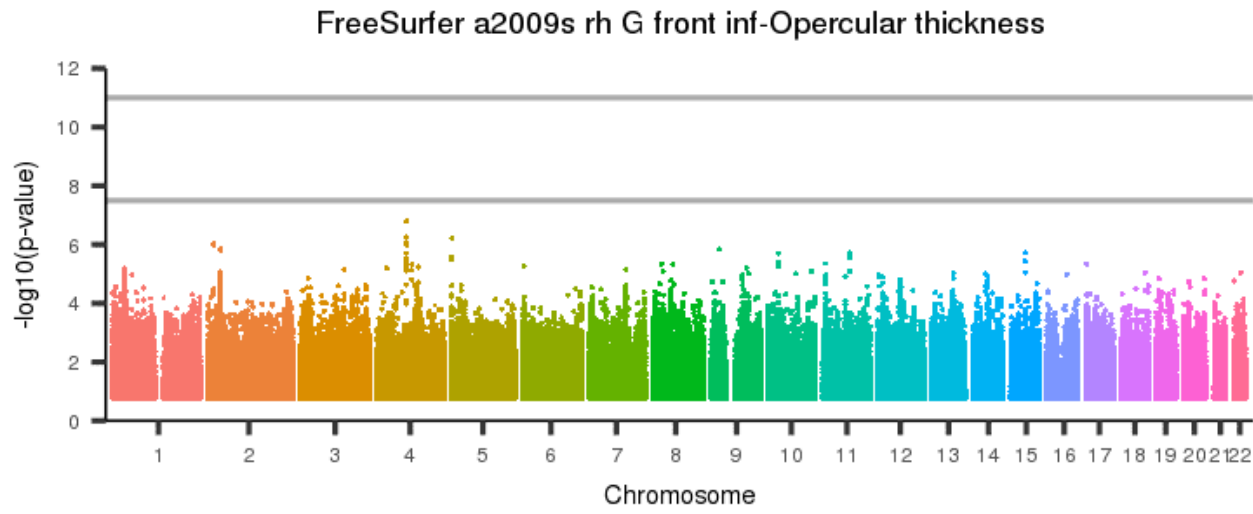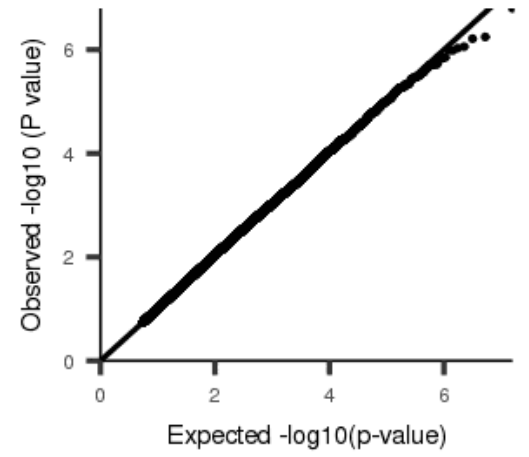

[back to list of plots](#)

Figure 3077: FreeSurfer a2009s rh G front inf-Orbital thickness

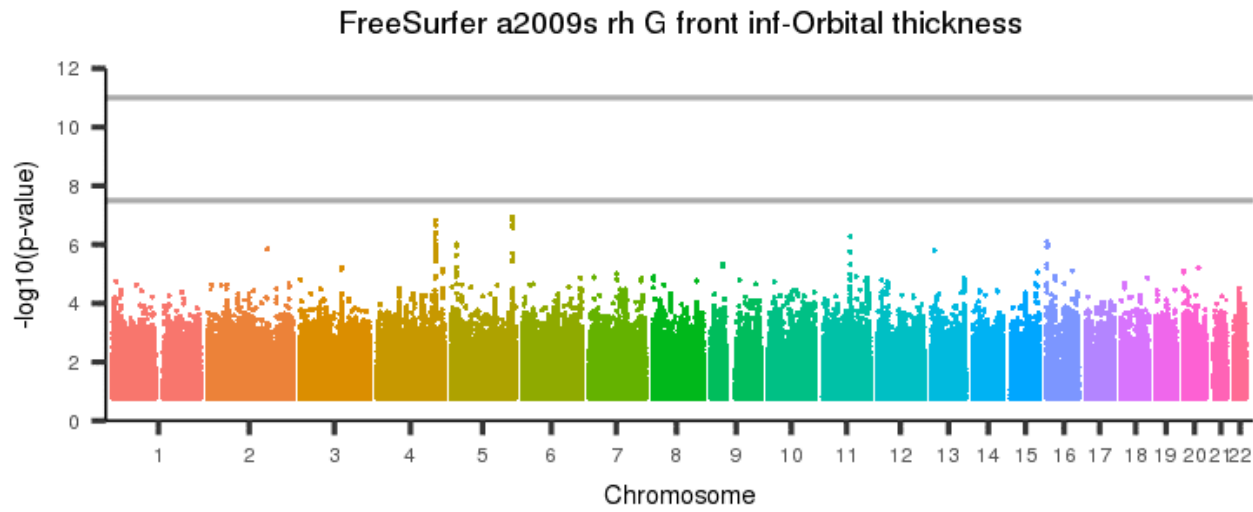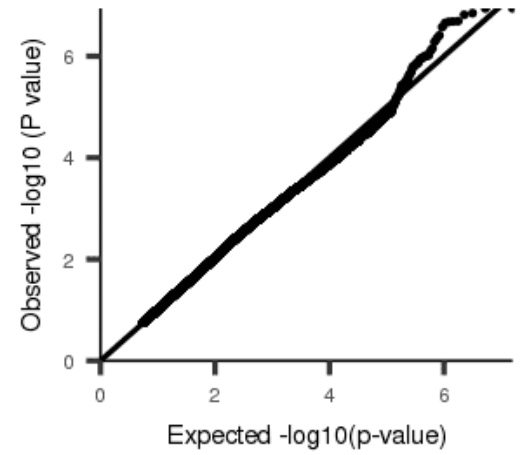

[back to list of plots](#)



Figure 3078: FreeSurfer a2009s rh G front inf-Triangul thickness

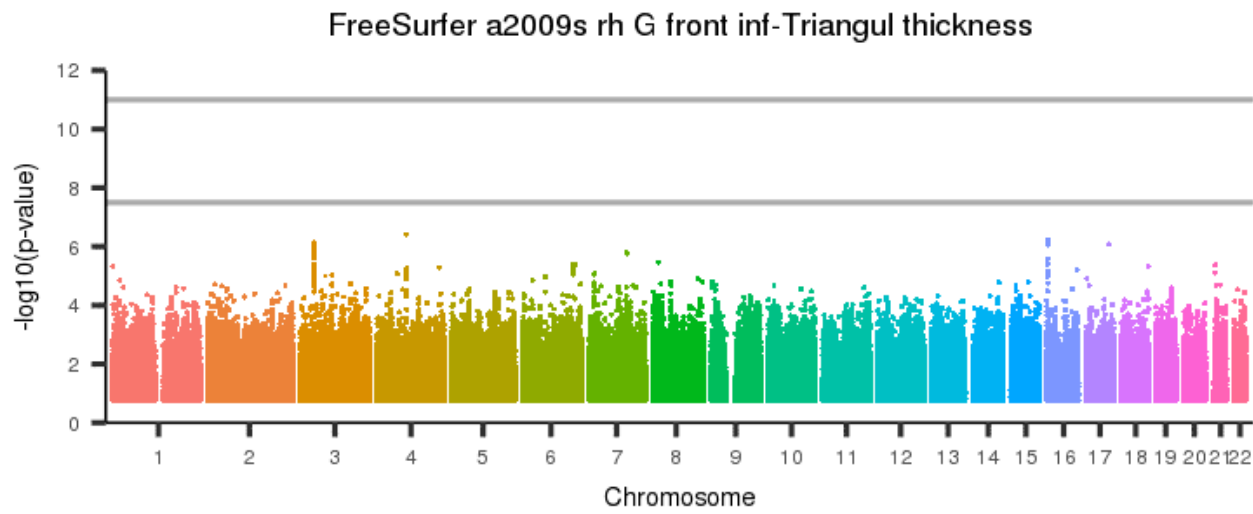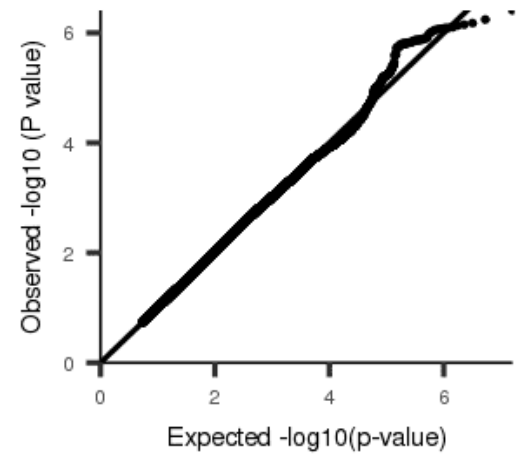

[back to list of plots](#)

Figure 3079: FreeSurfer a2009s rh G front middle thickness

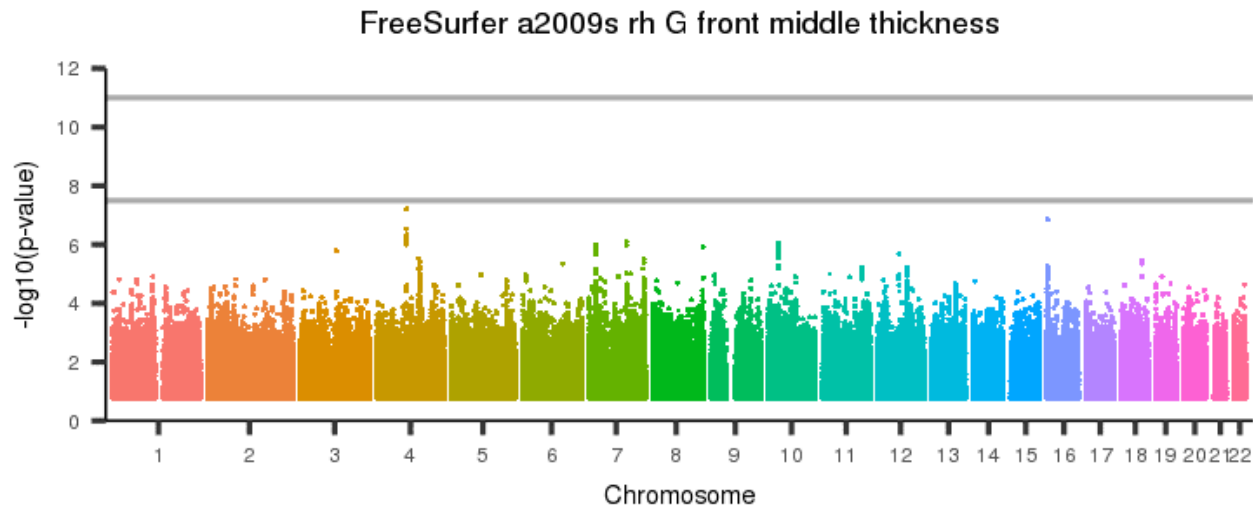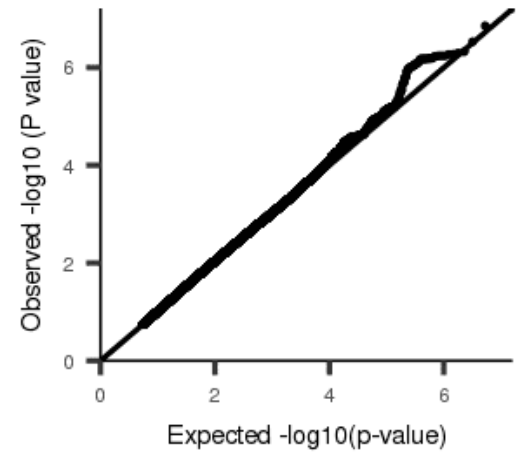

[back to list of plots](#)

Figure 3080: FreeSurfer a2009s rh G front sup thickness

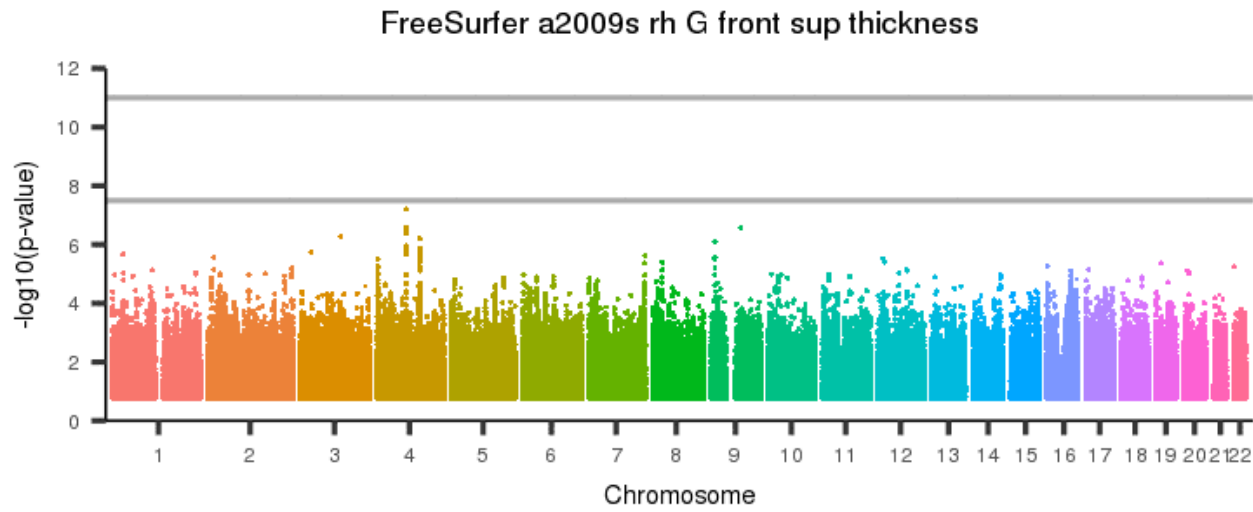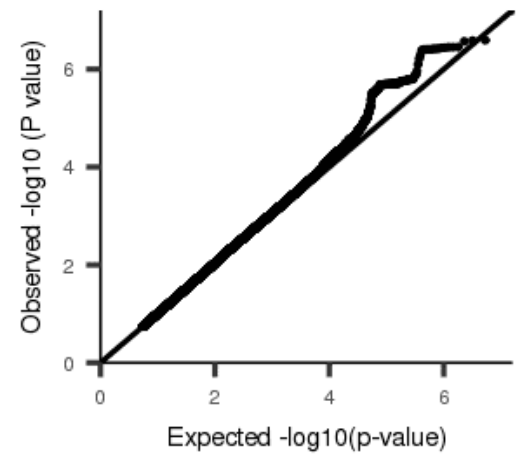

[back to list of plots](#)

Figure 3081: FreeSurfer a2009s rh G Ins lg and S cent ins thickness

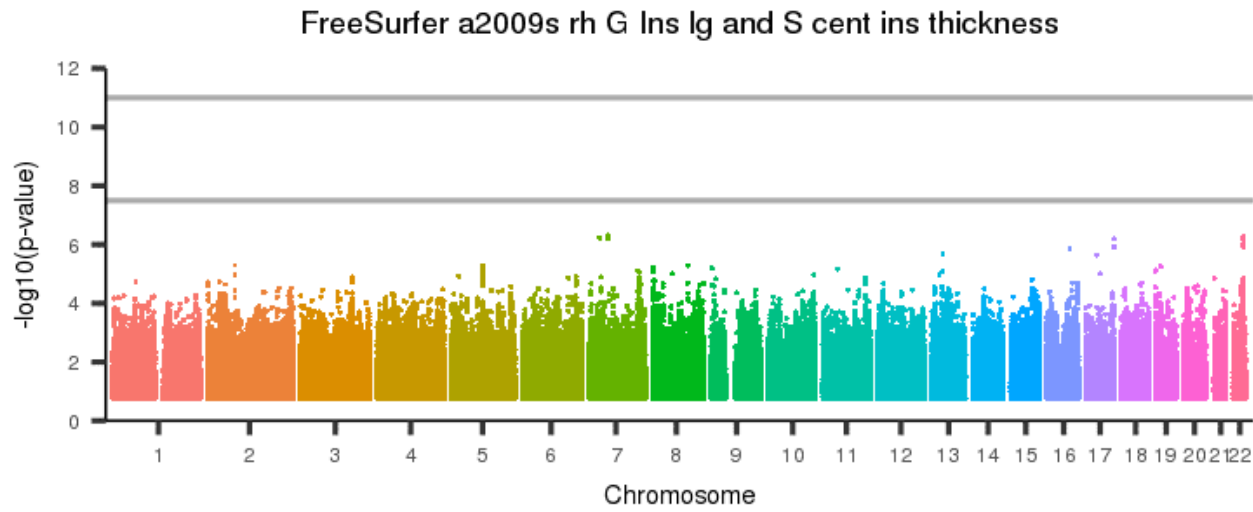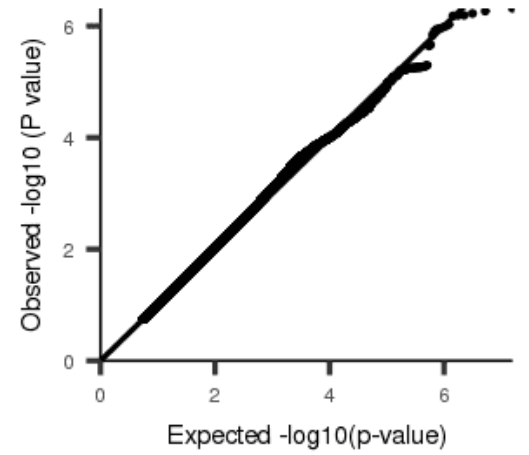

[back to list of plots](#)

Figure 3082: FreeSurfer a2009s rh G insular short thickness

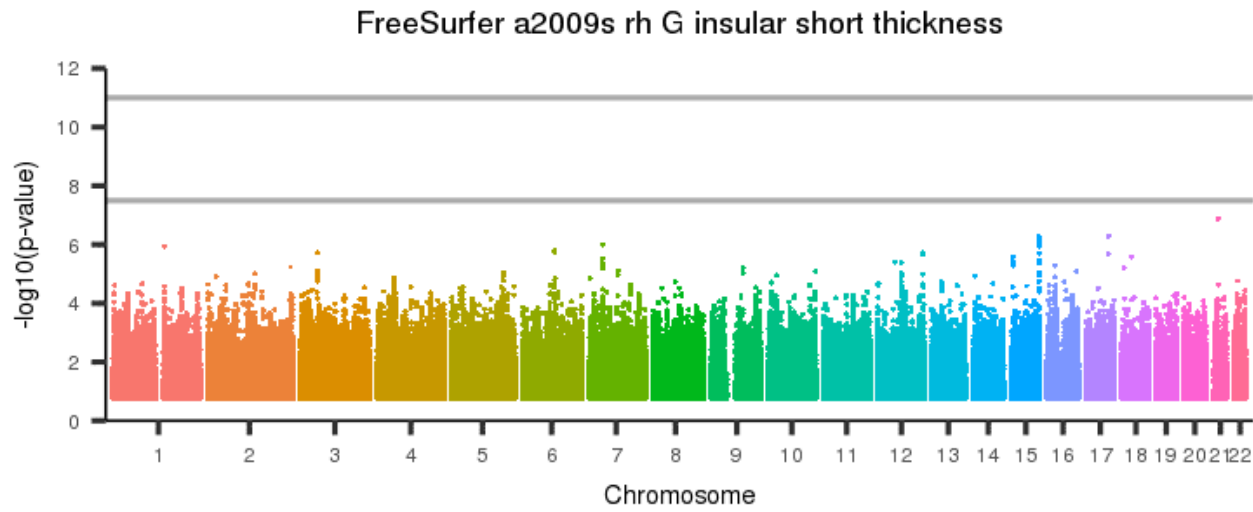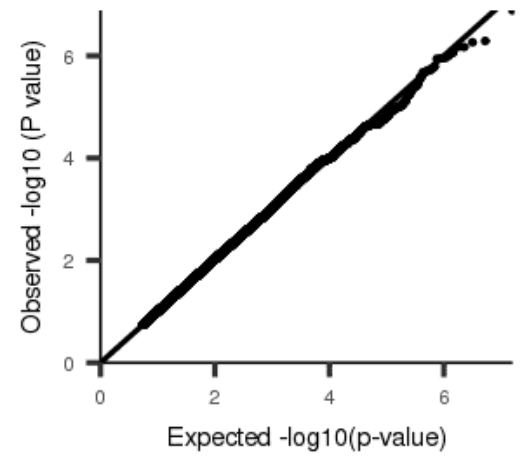

[back to list of plots](#)

Figure 3083: FreeSurfer a2009s rh G occipital middle thickness

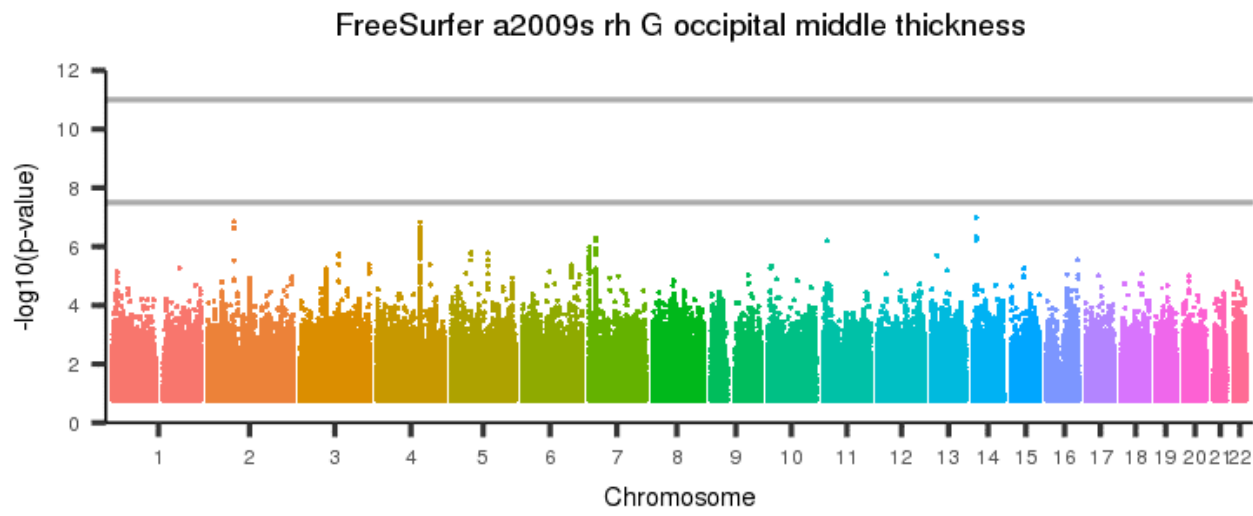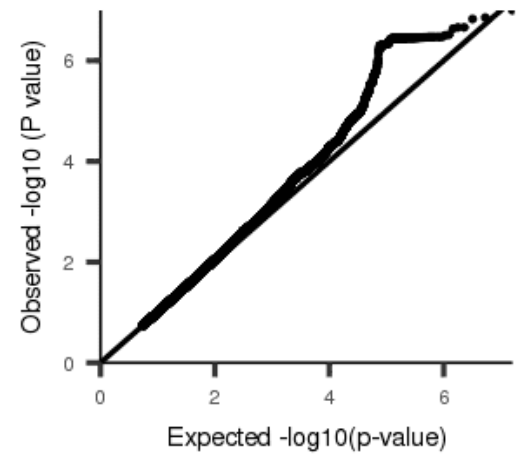

[back to list of plots](#)

Figure 3084: FreeSurfer a2009s rh G occipital sup thickness

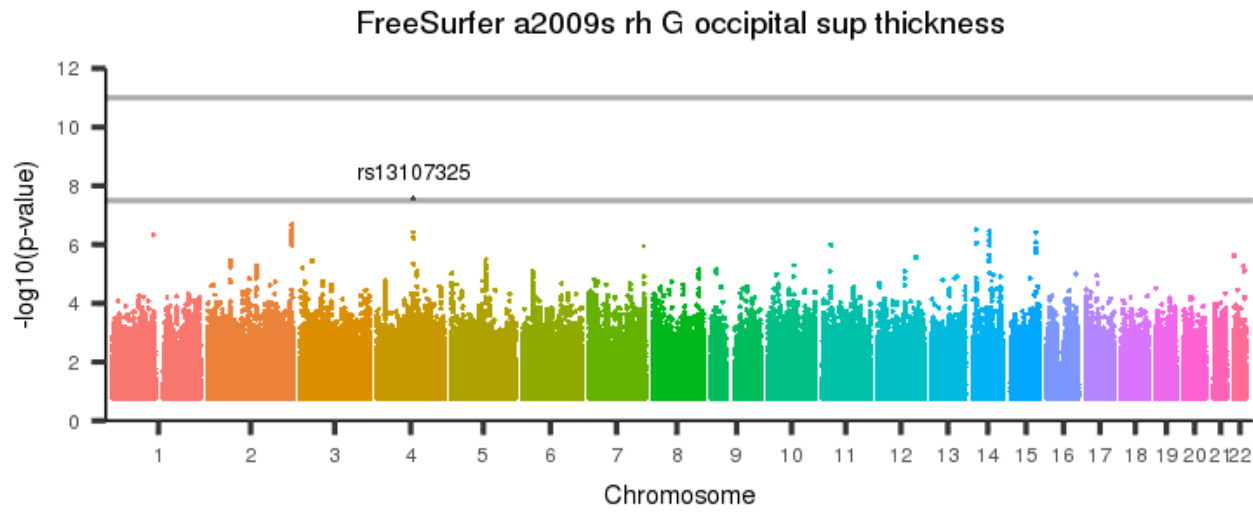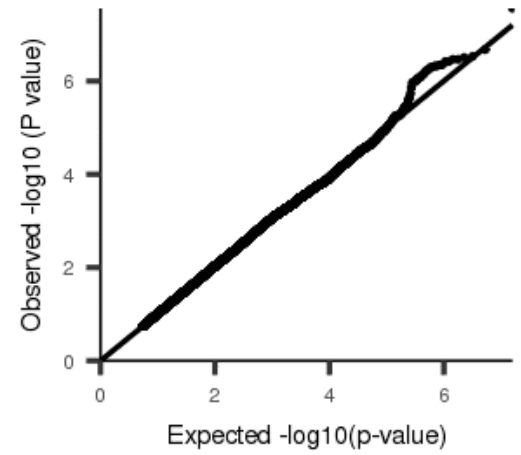

[back to list of plots](#)

Figure 3085: FreeSurfer a2009s rh G oc-temp lat-fusifor thickness

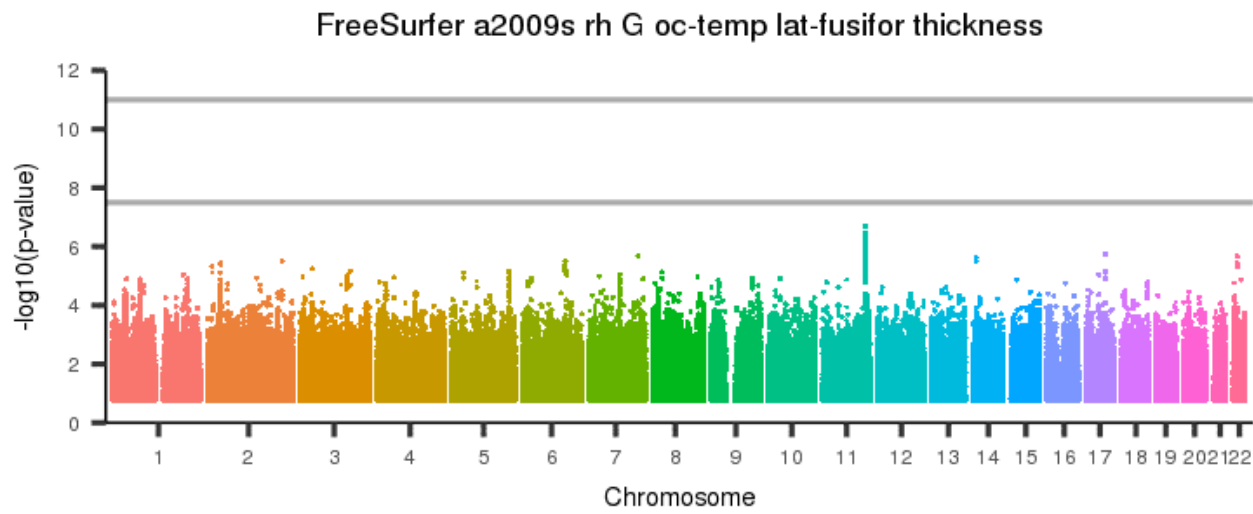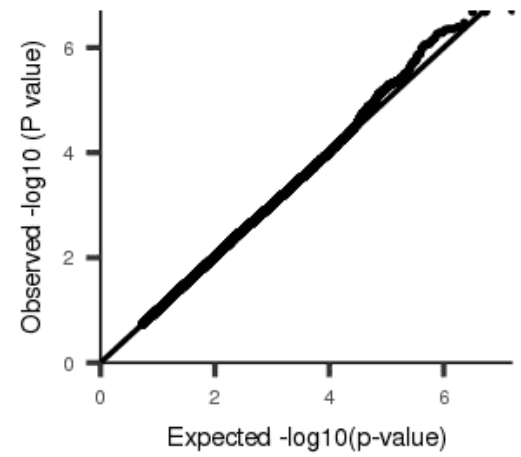

[back to list of plots](#)



Figure 3086: FreeSurfer a2009s rh G oc-temp med-Lingual thickness

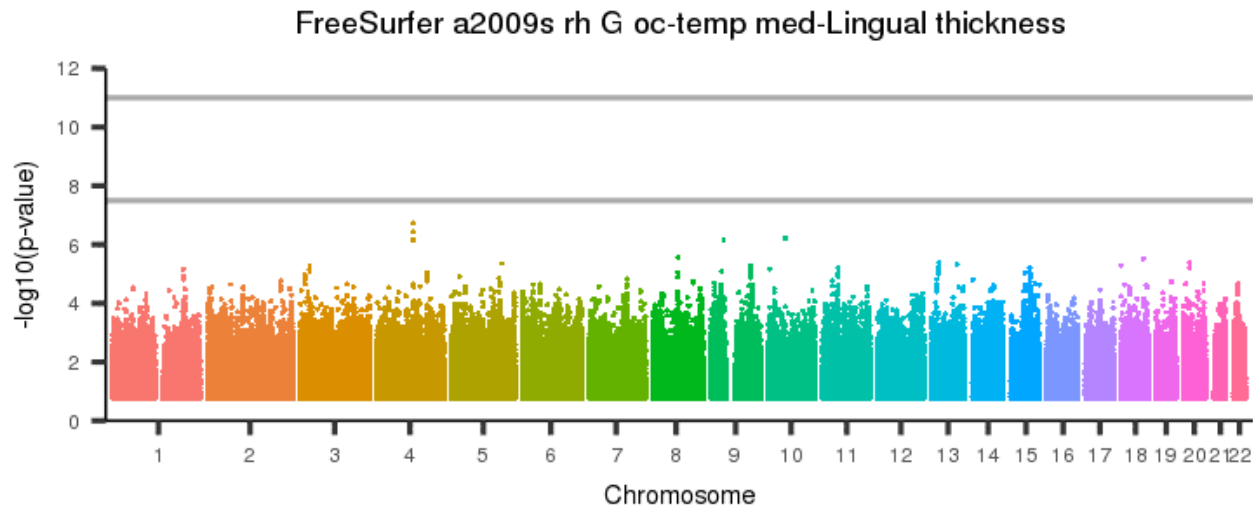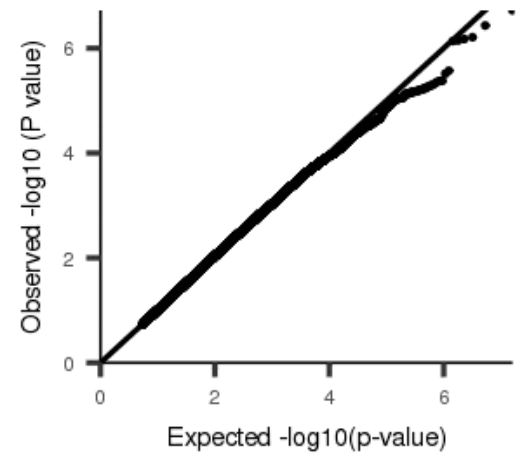

[back to list of plots](#)

Figure 3087: FreeSurfer a2009s rh G oc-temp med-Parahip thickness

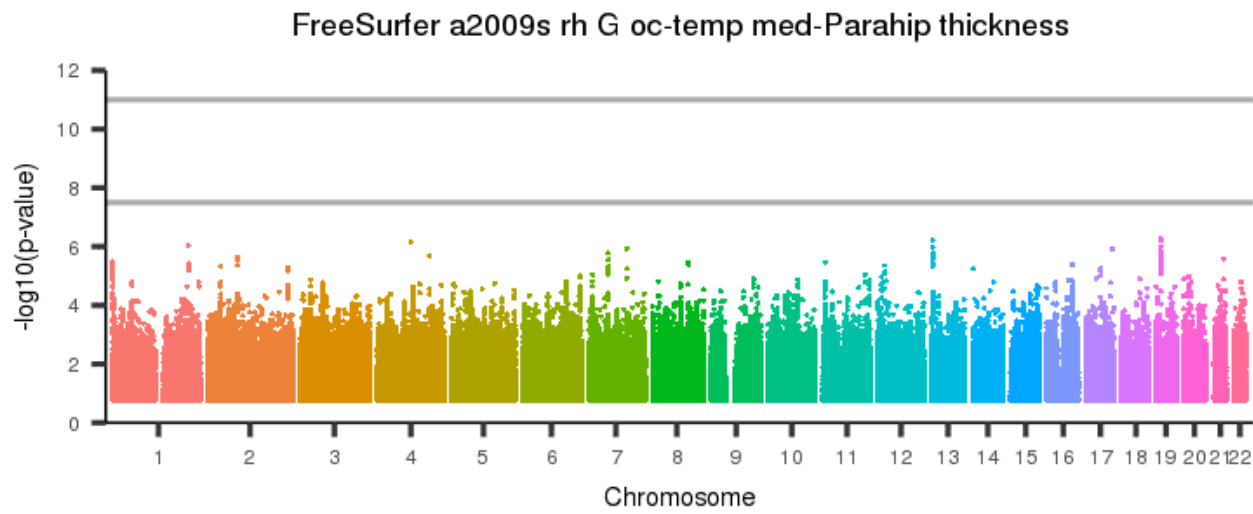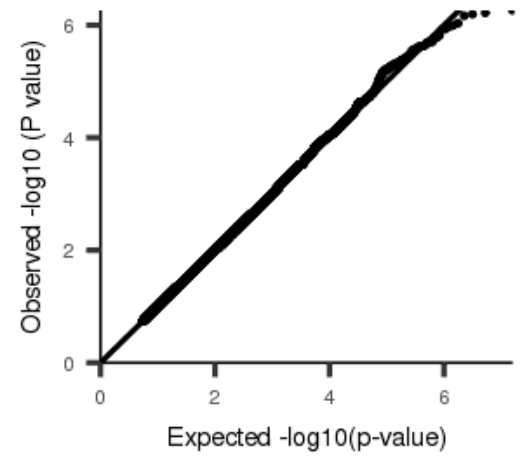

[back to list of plots](#)

Figure 3088: FreeSurfer a2009s rh G orbital thickness

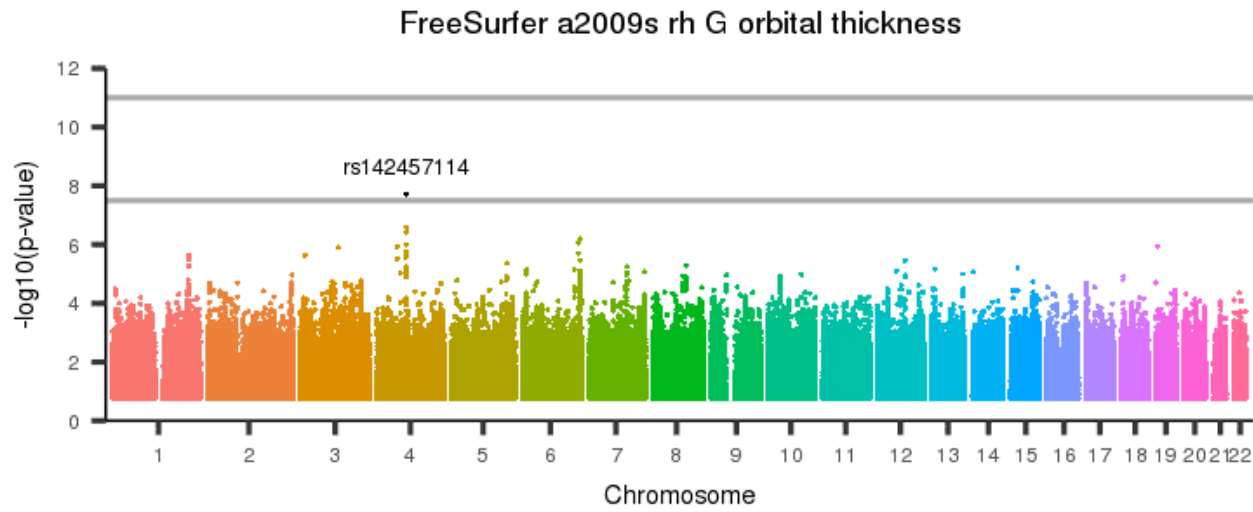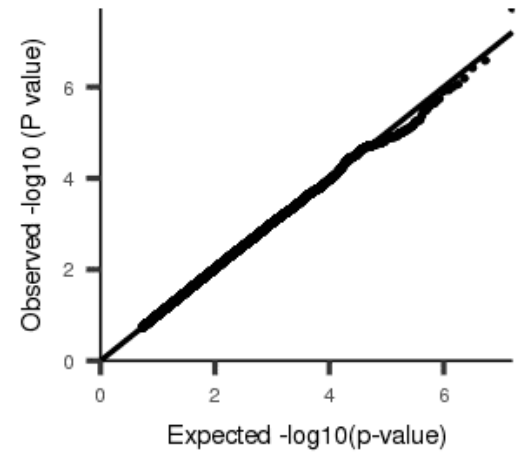

[back to list of plots](#)

Figure 3089: FreeSurfer a2009s rh G pariet inf-Angular thickness

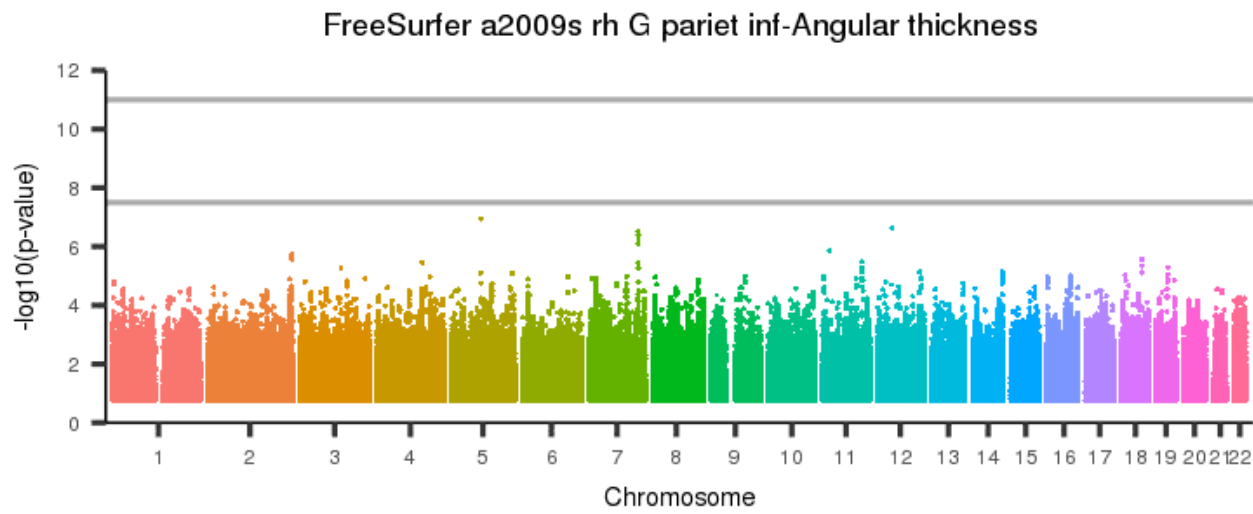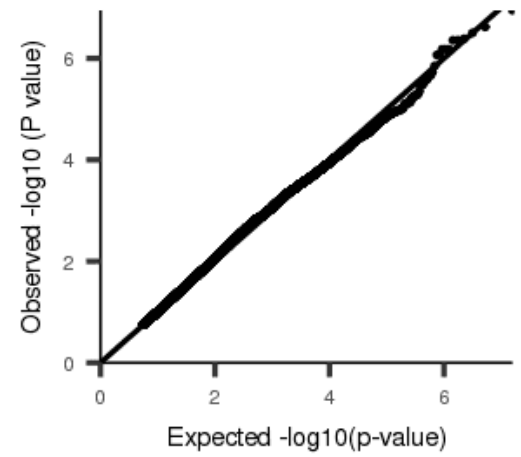

[back to list of plots](#)

Figure 3090: FreeSurfer a2009s rh G pariet inf-Supramar thickness

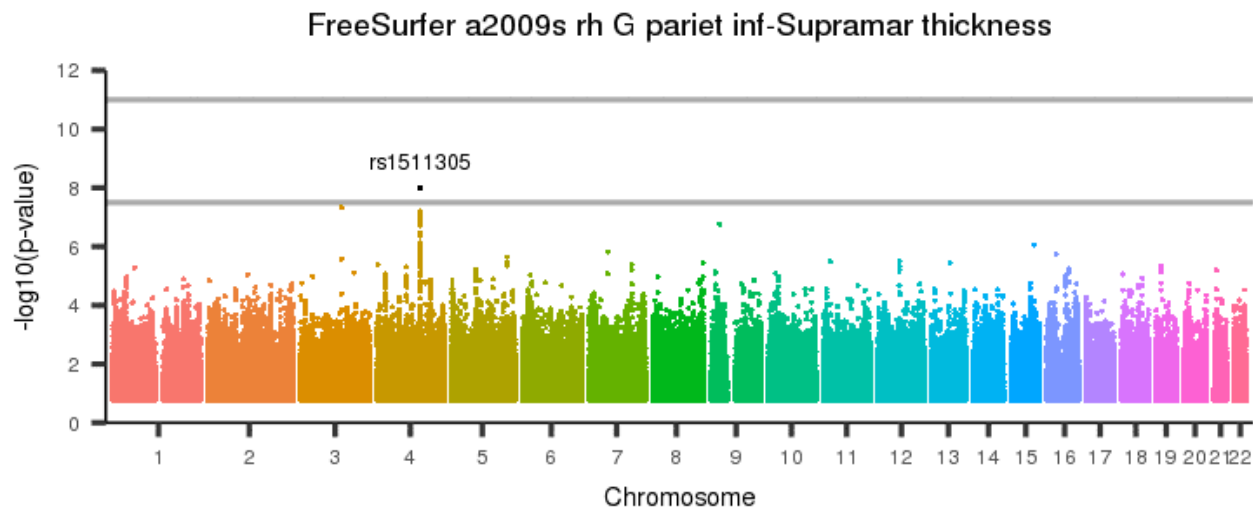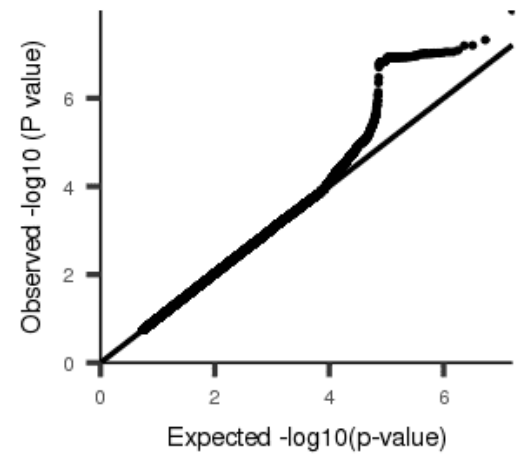

[back to list of plots](#)

Figure 3091: FreeSurfer a2009s rh G parietal sup thickness

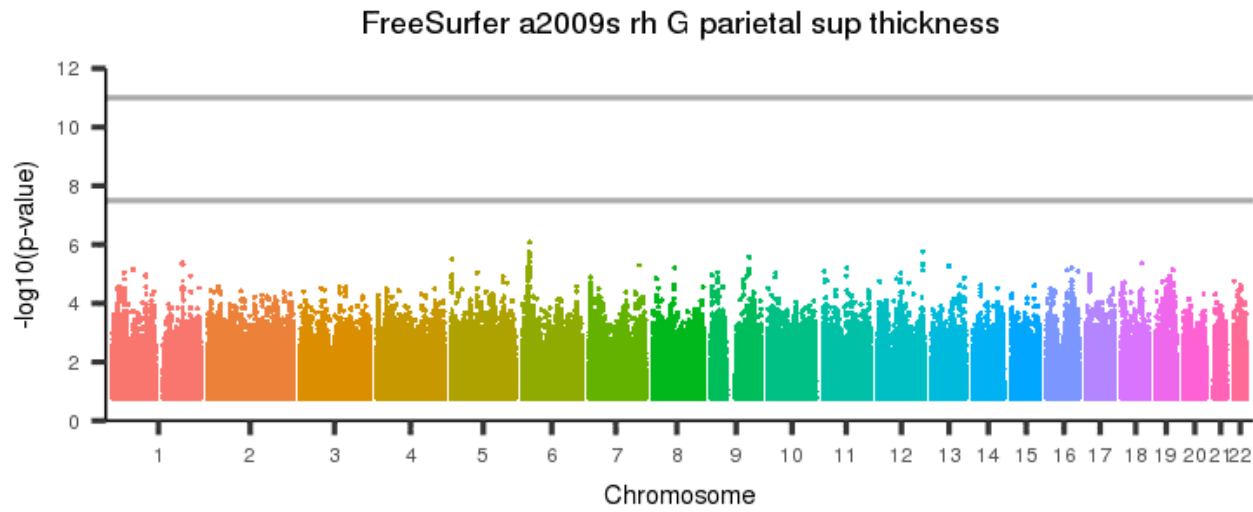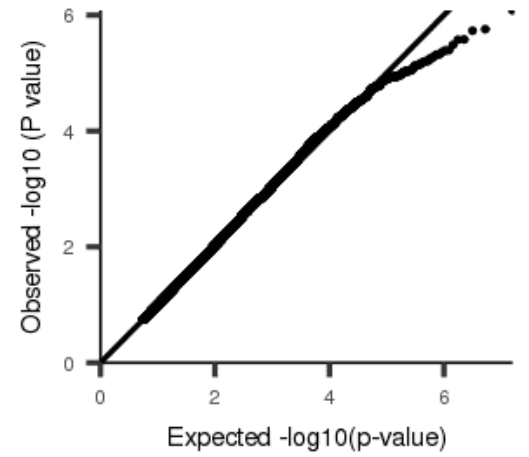

[back to list of plots](#)

Figure 3092: FreeSurfer a2009s rh G postcentral thickness

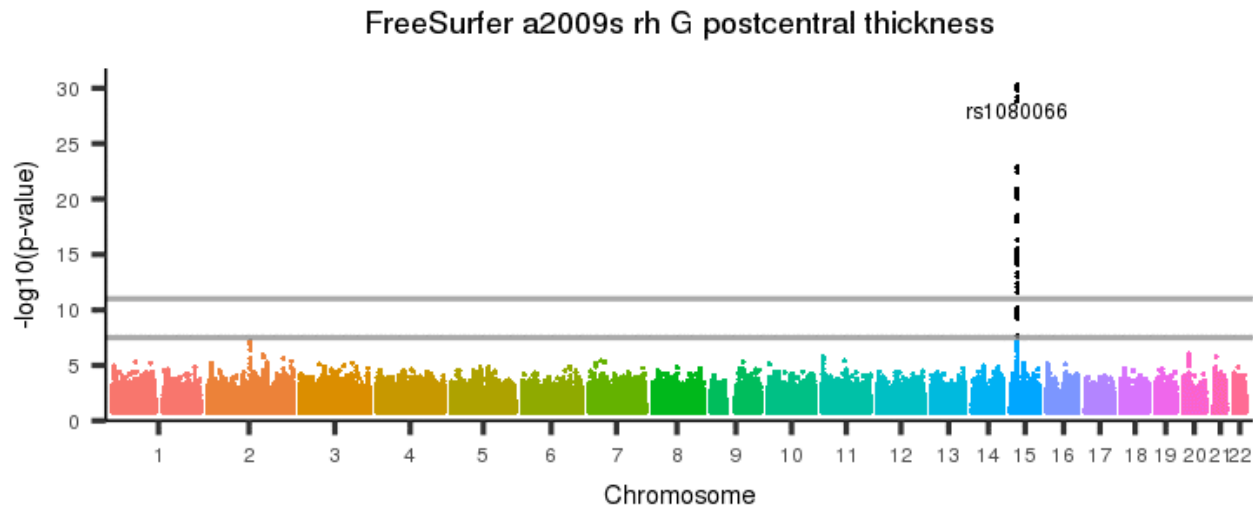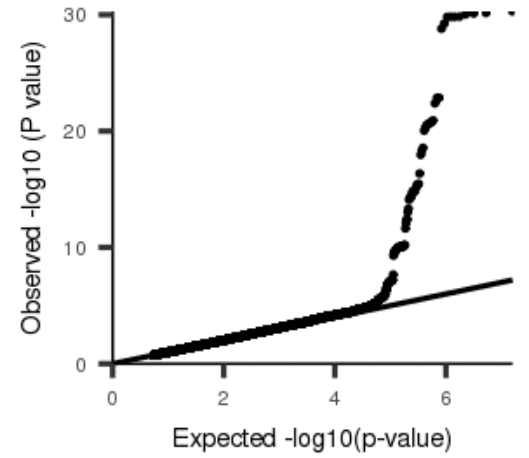

[back to list of plots](#)

Figure 3093: FreeSurfer a2009s rh G precentral thickness

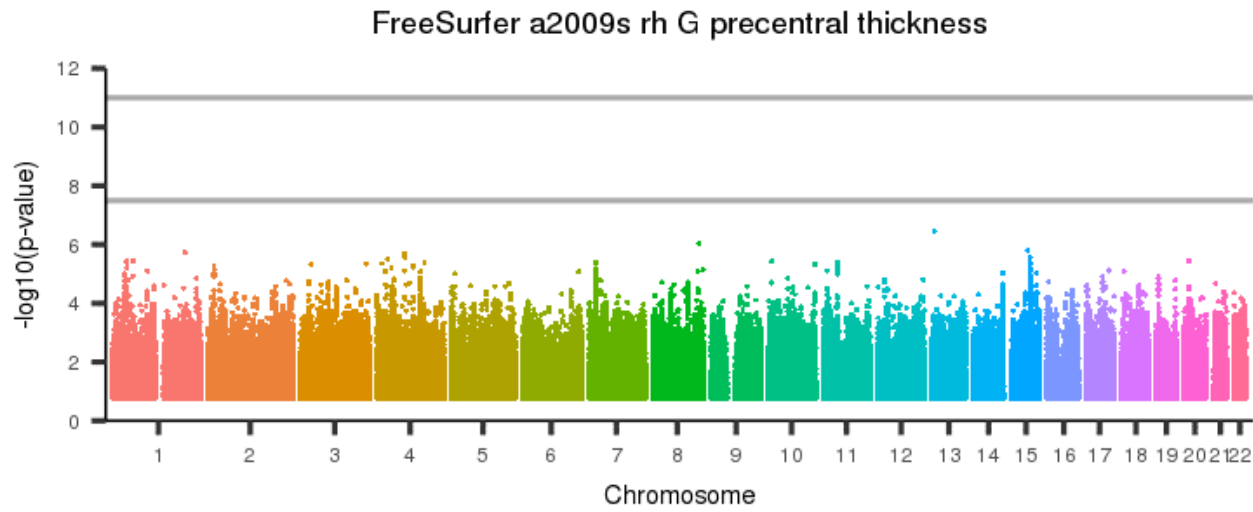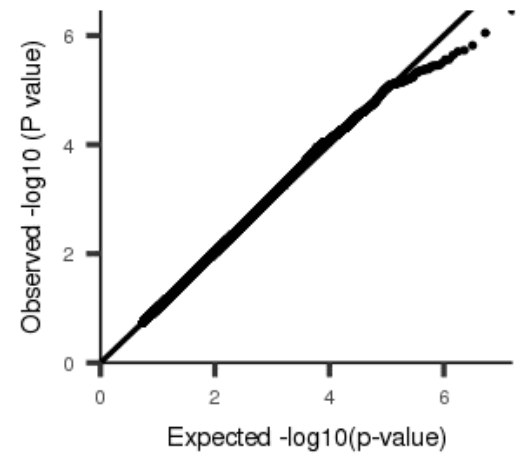

[back to list of plots](#)



Figure 3094: FreeSurfer a2009s rh G precuneus thickness

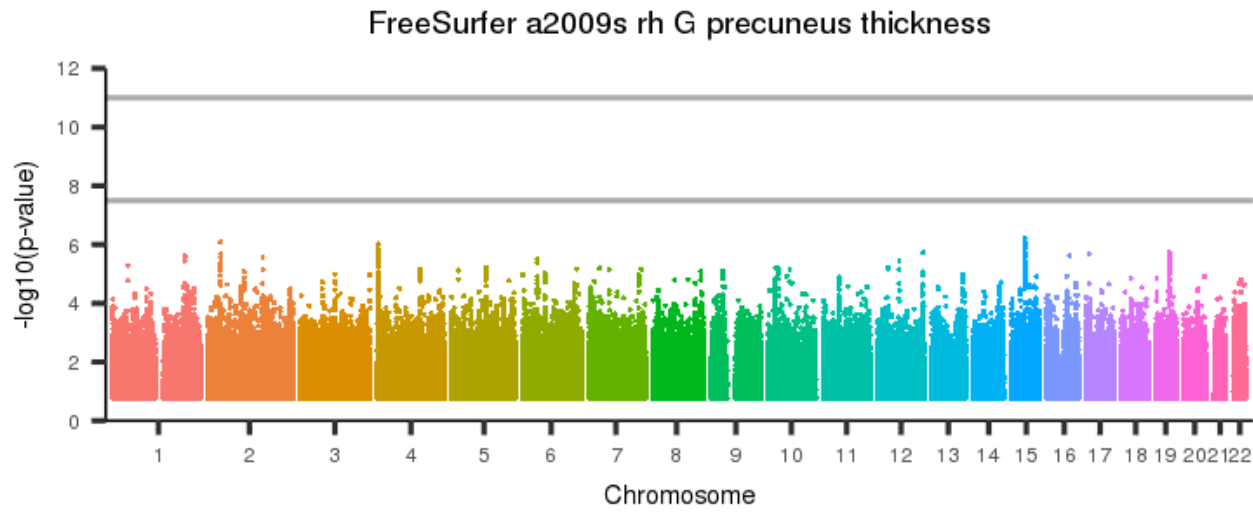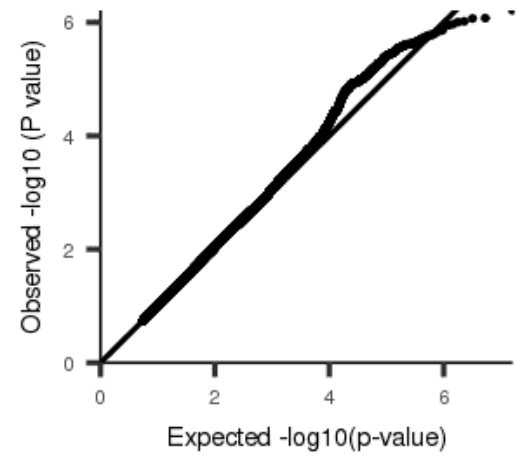

[back to list of plots](#)

Figure 3095: FreeSurfer a2009s rh G rectus thickness

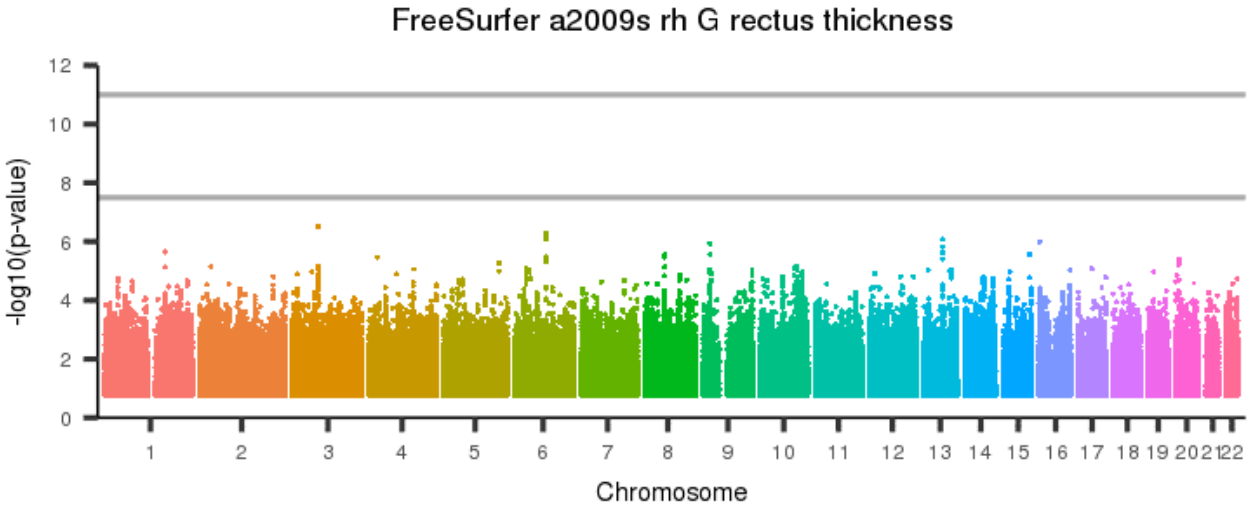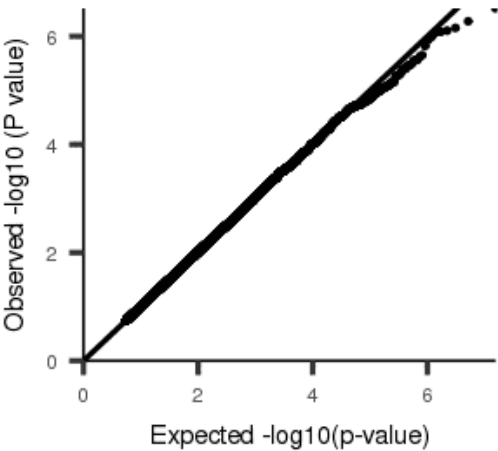

[back to list of plots](#)

Figure 3096: FreeSurfer a2009s rh G subcallosal thickness

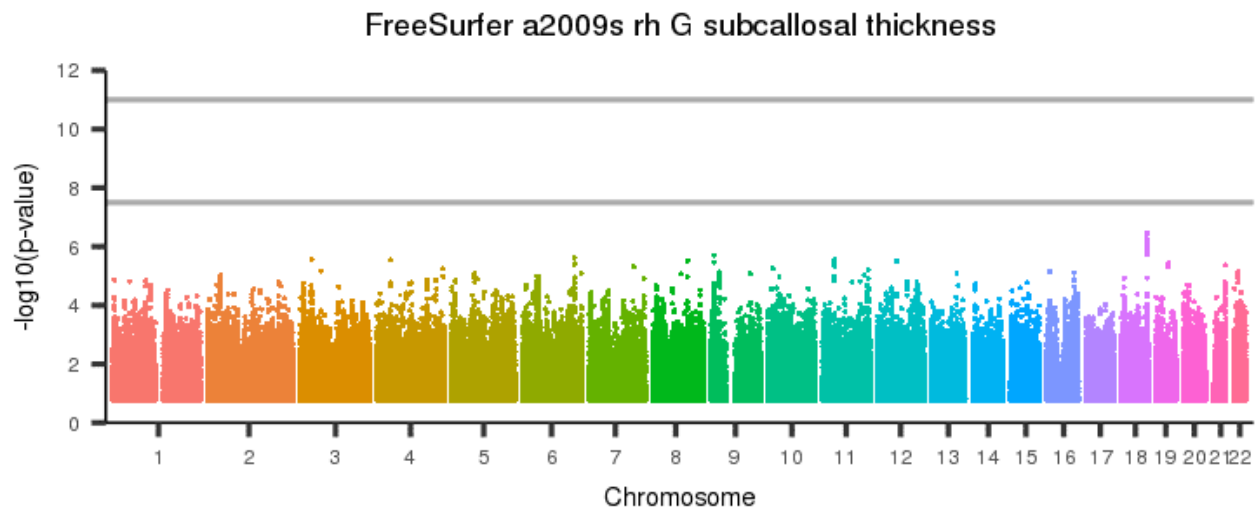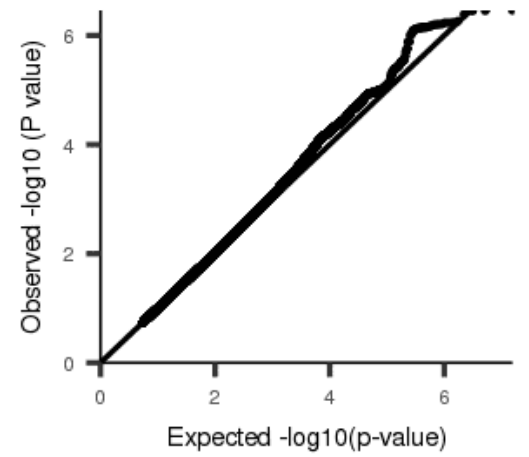

[back to list of plots](#)

Figure 3097: FreeSurfer a2009s rh G temp sup-G T transv thickness

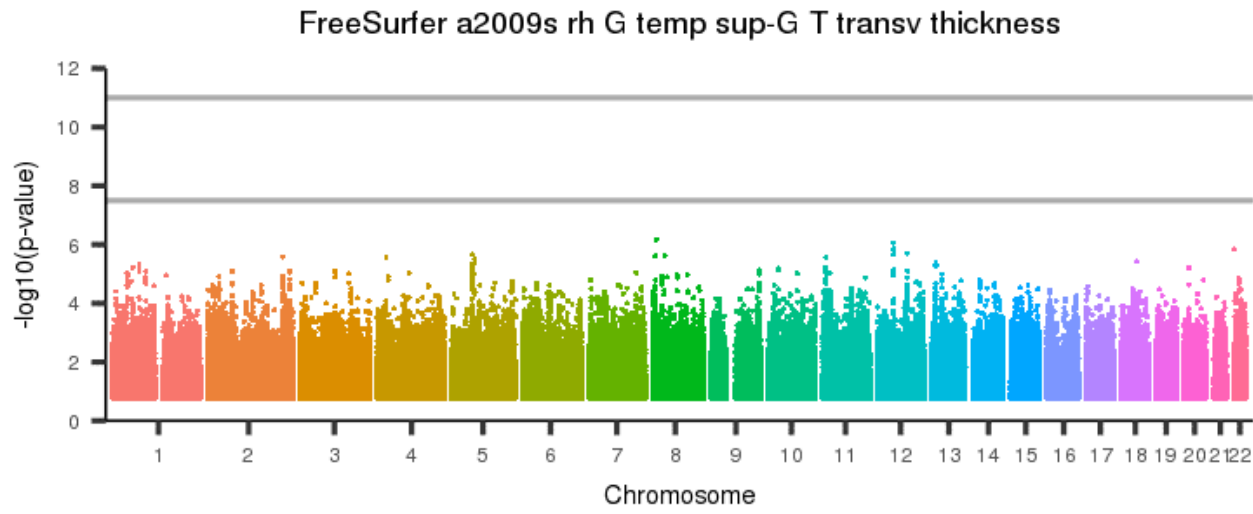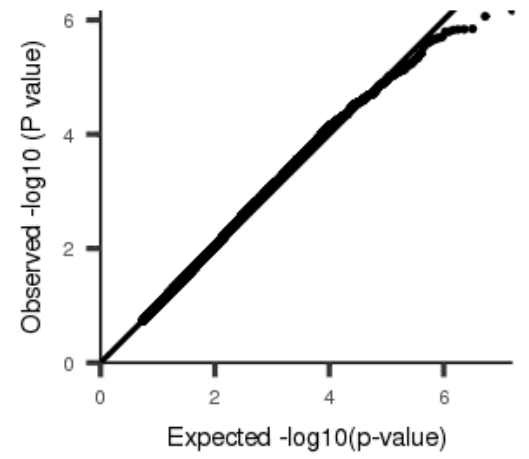

[back to list of plots](#)

Figure 3098: FreeSurfer a2009s rh G temp sup-Lateral thickness

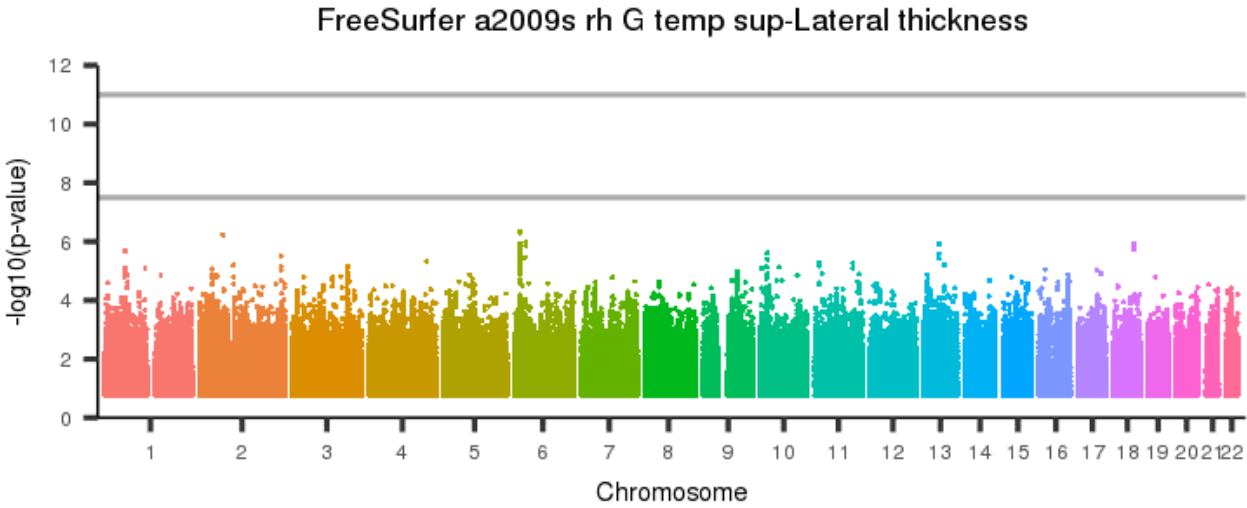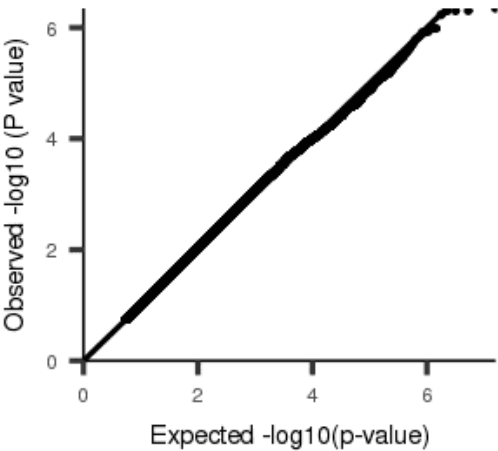

[back to list of plots](#)

Figure 3099: FreeSurfer a2009s rh G temp sup-Plan polar thickness

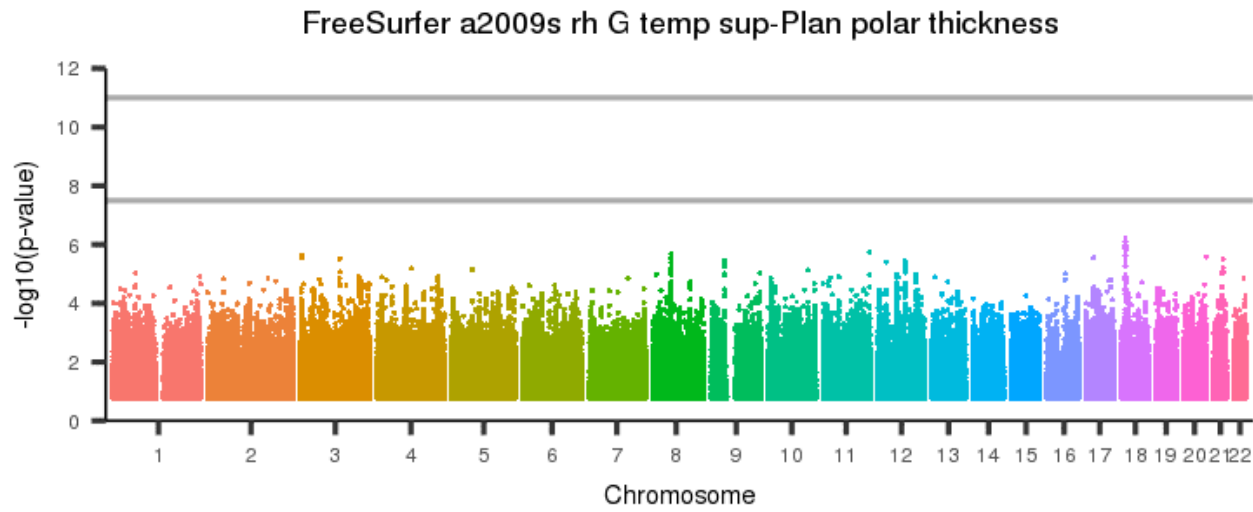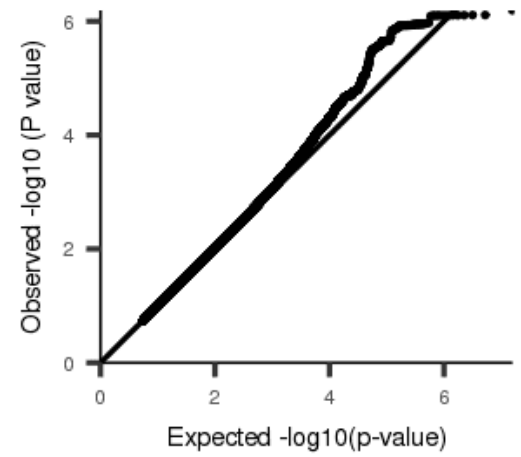

[back to list of plots](#)

Figure 3100: FreeSurfer a2009s rh G temp sup-Plan tempo thickness

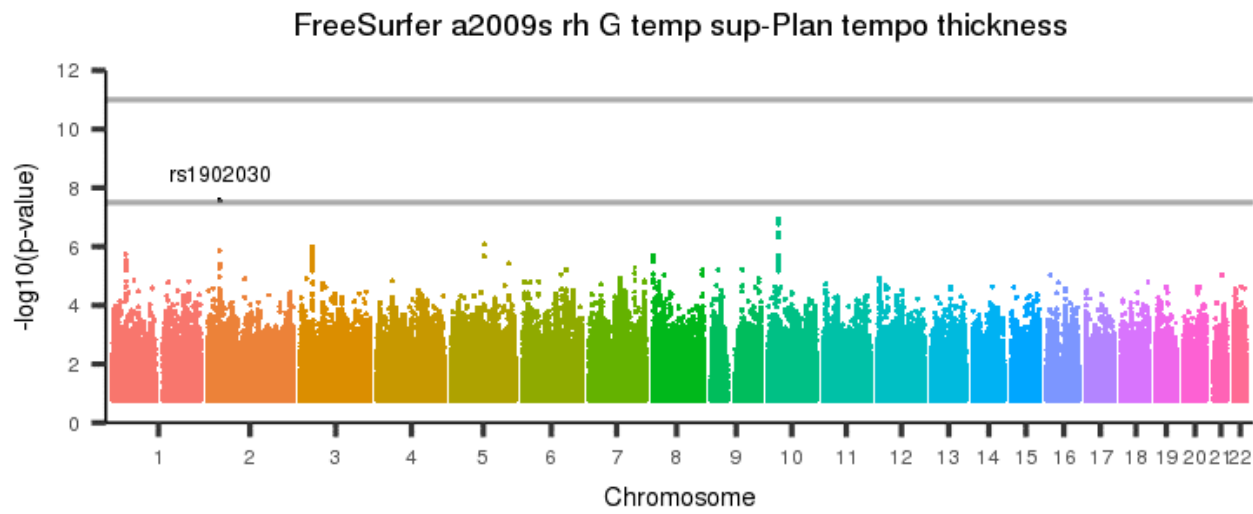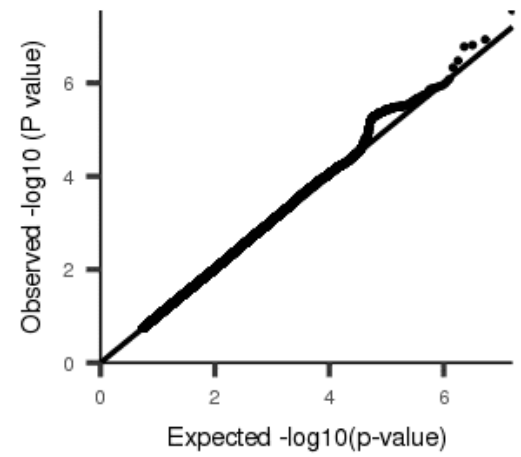

[back to list of plots](#)

Figure 3101: FreeSurfer a2009s rh G temporal inf thickness

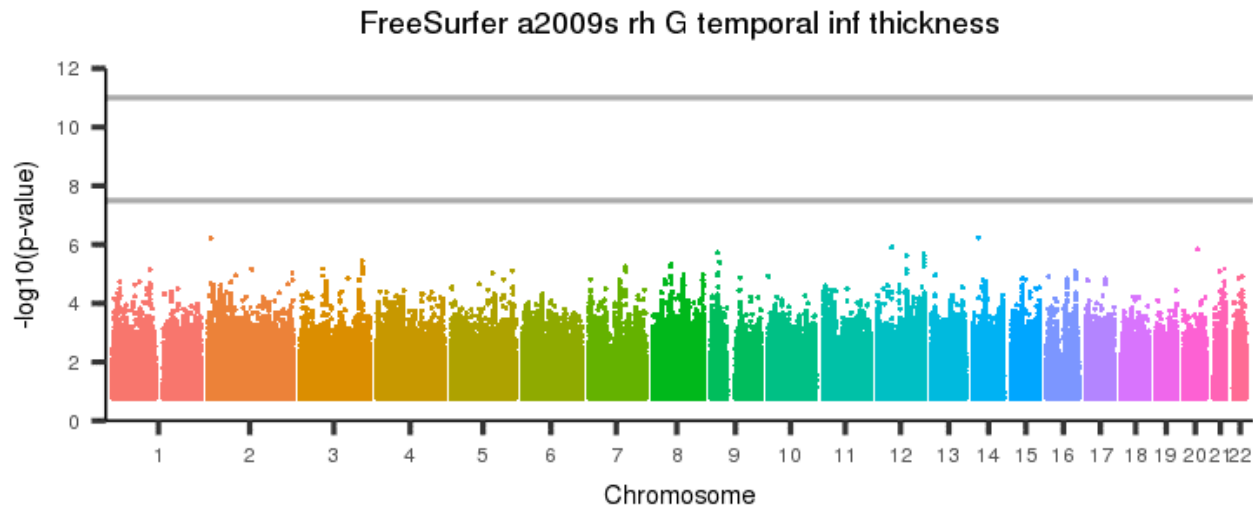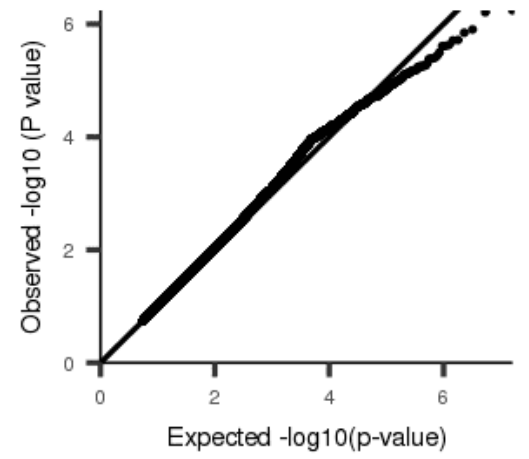

[back to list of plots](#)



Figure 3102: FreeSurfer a2009s rh G temporal middle thickness

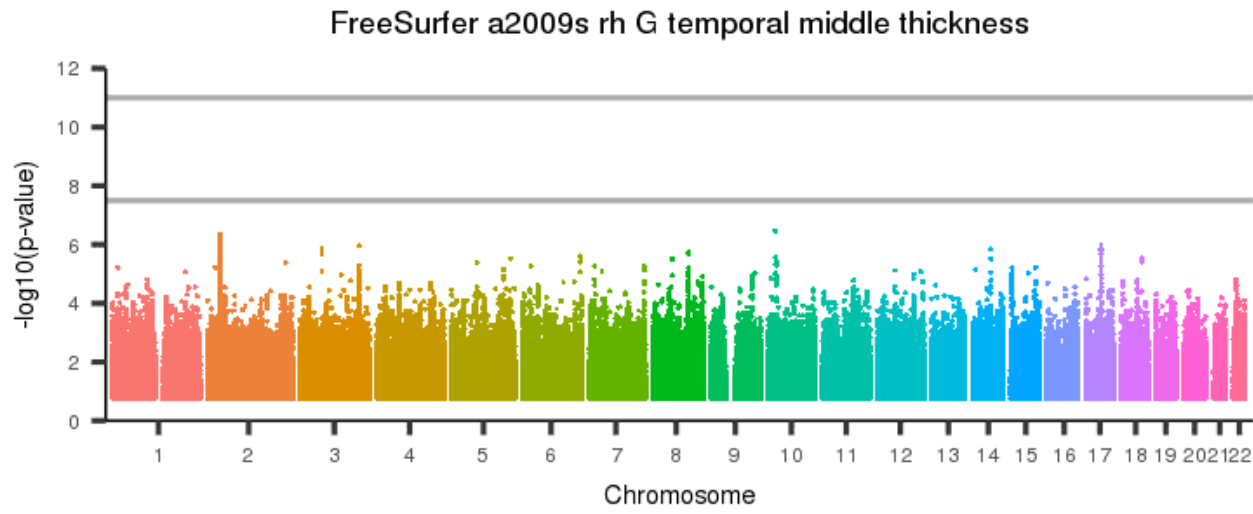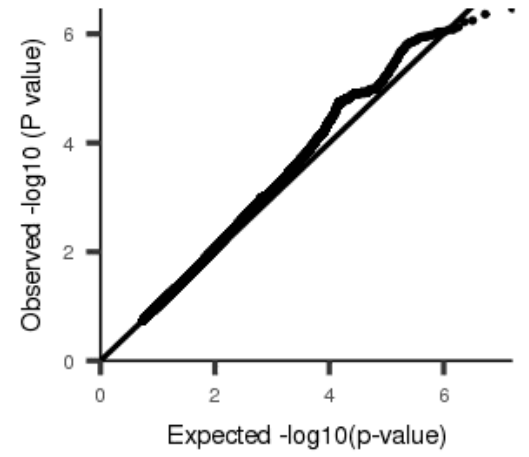

[back to list of plots](#)

Figure 3103: FreeSurfer a2009s rh Lat Fis-ant-Horizont thickness

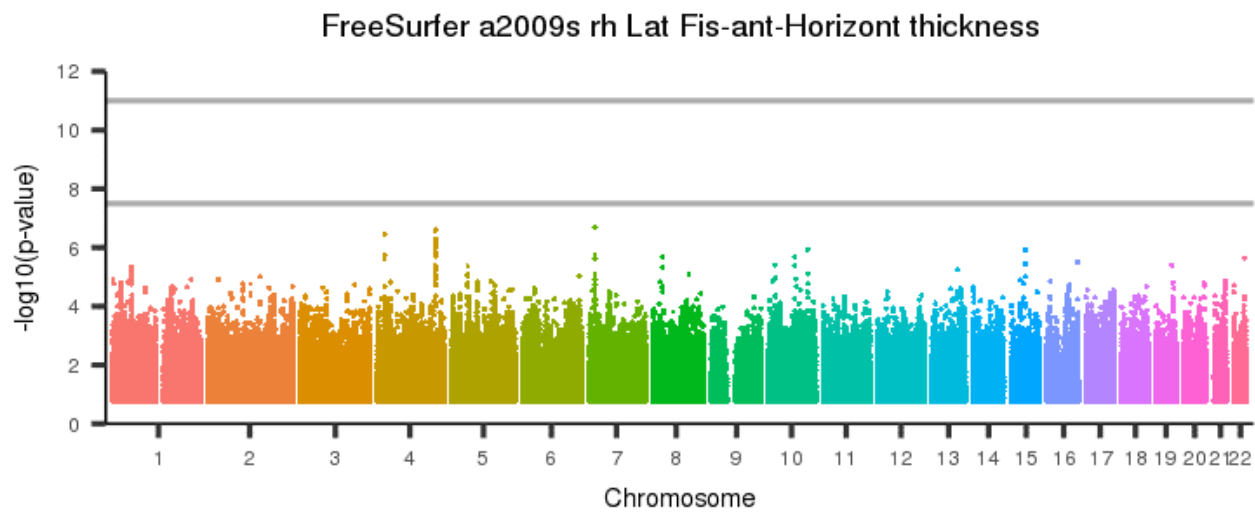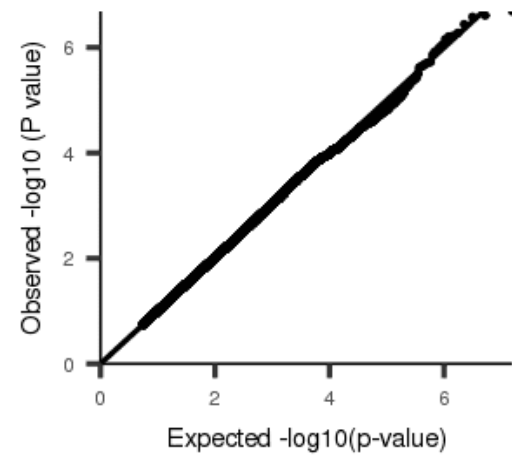

[back to list of plots](#)

Figure 3104: FreeSurfer a2009s rh Lat Fis-ant-Vertical thickness

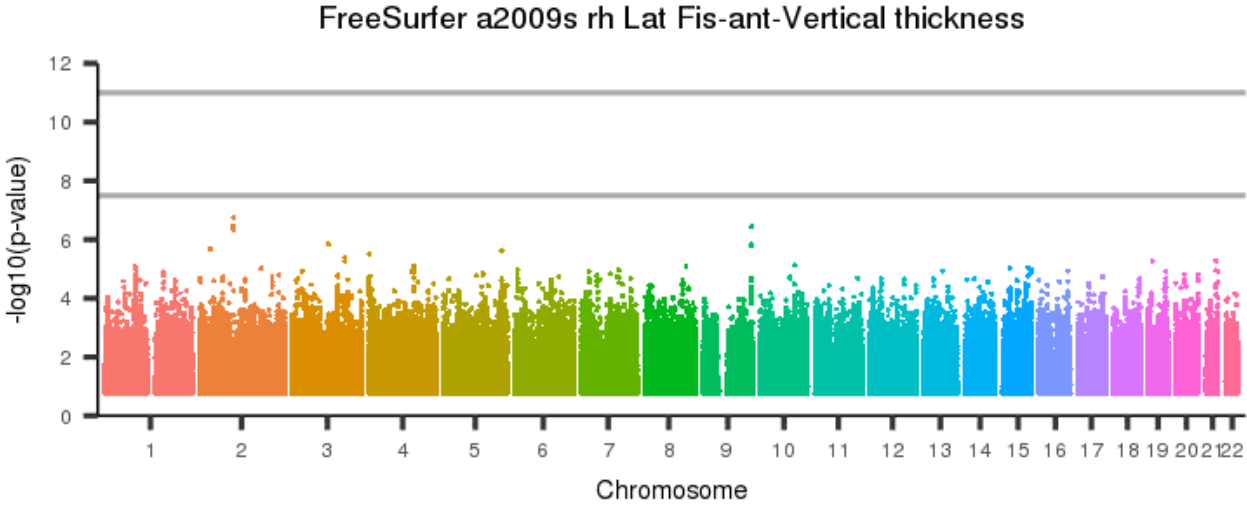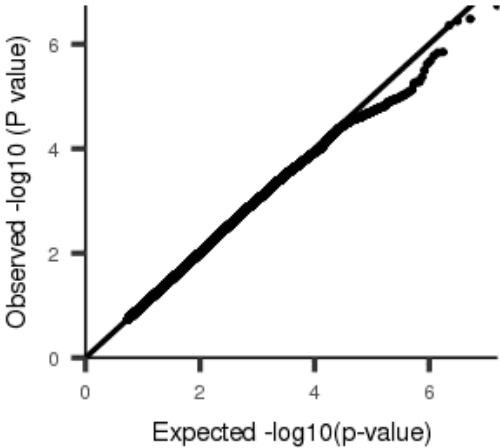

[back to list of plots](#)

Figure 3105: FreeSurfer a2009s rh Lat Fis-post thickness

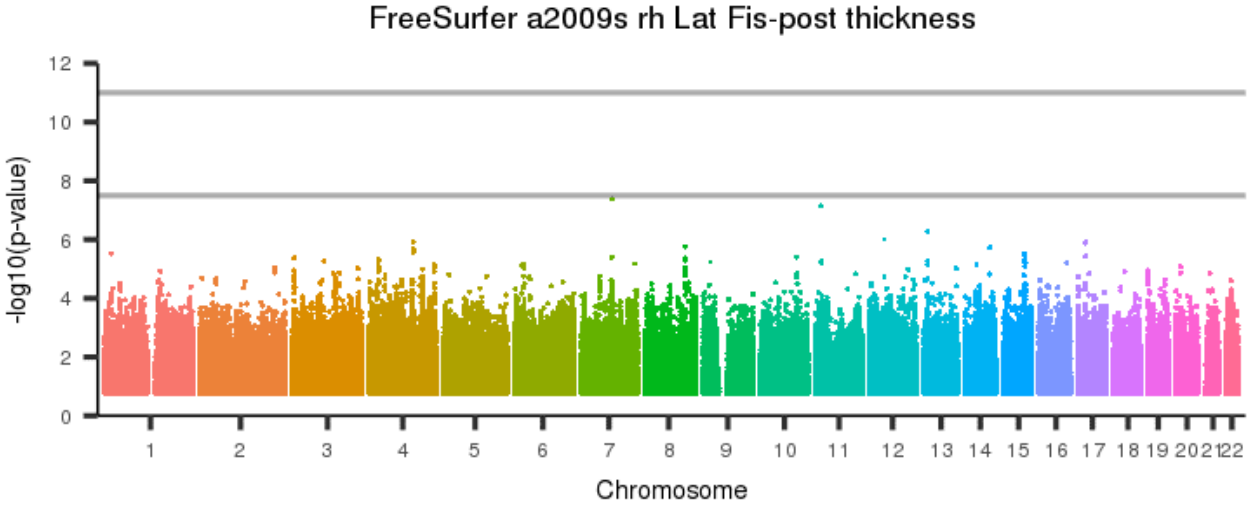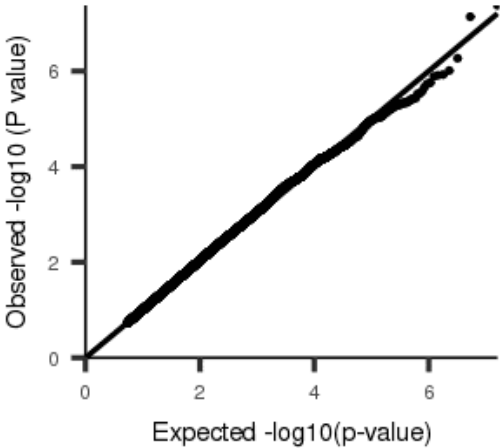

[back to list of plots](#)

Figure 3106: FreeSurfer a2009s rh Pole occipital thickness

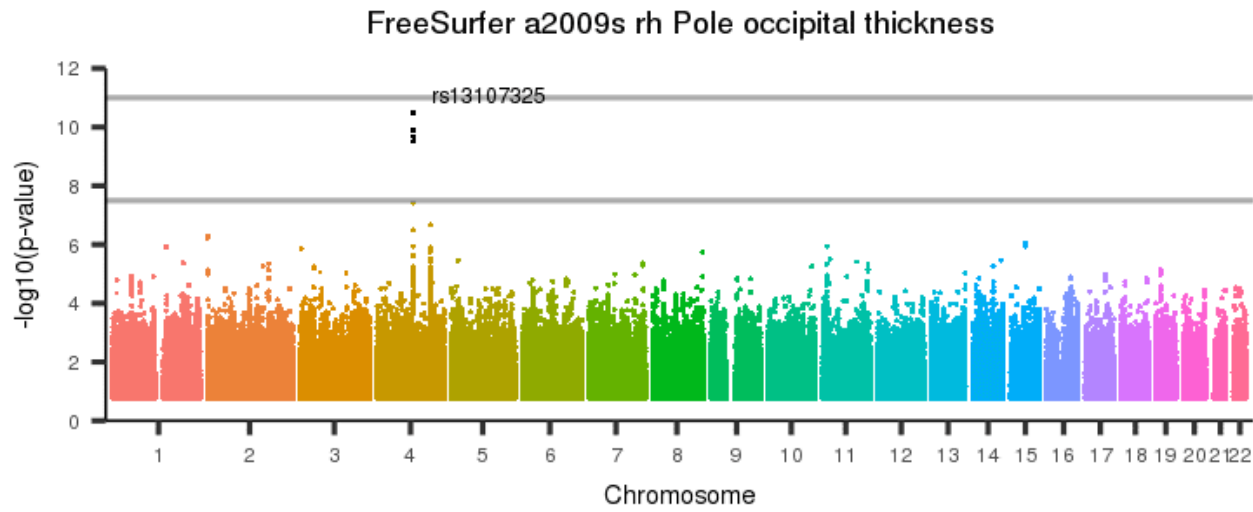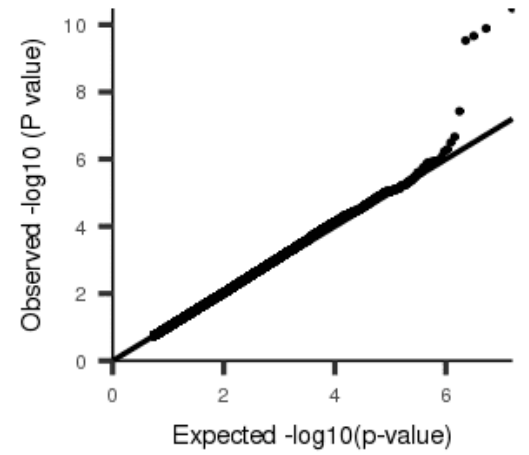

[back to list of plots](#)

Figure 3107: FreeSurfer a2009s rh Pole temporal thickness

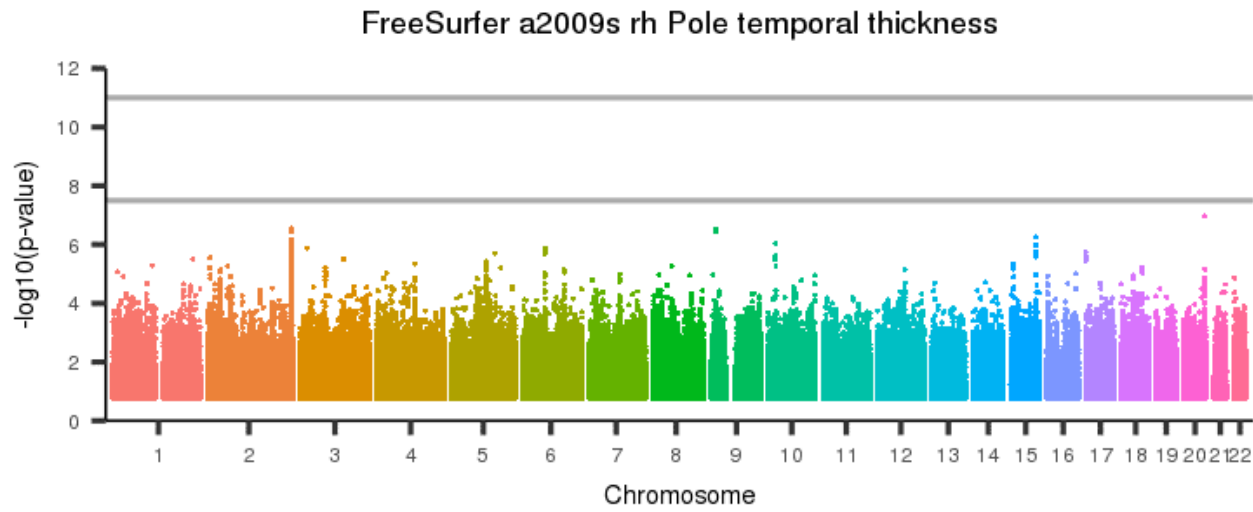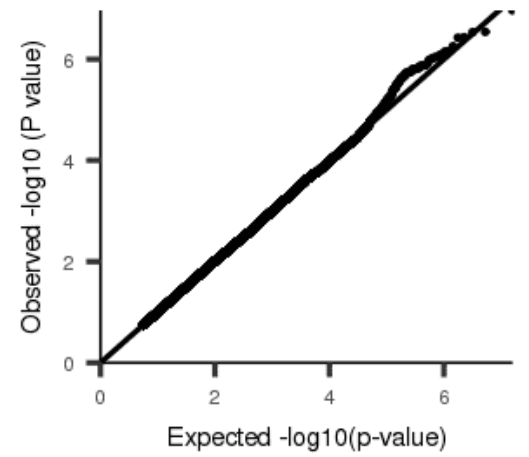

[back to list of plots](#)

Figure 3108: FreeSurfer a2009s rh S calcarine thickness

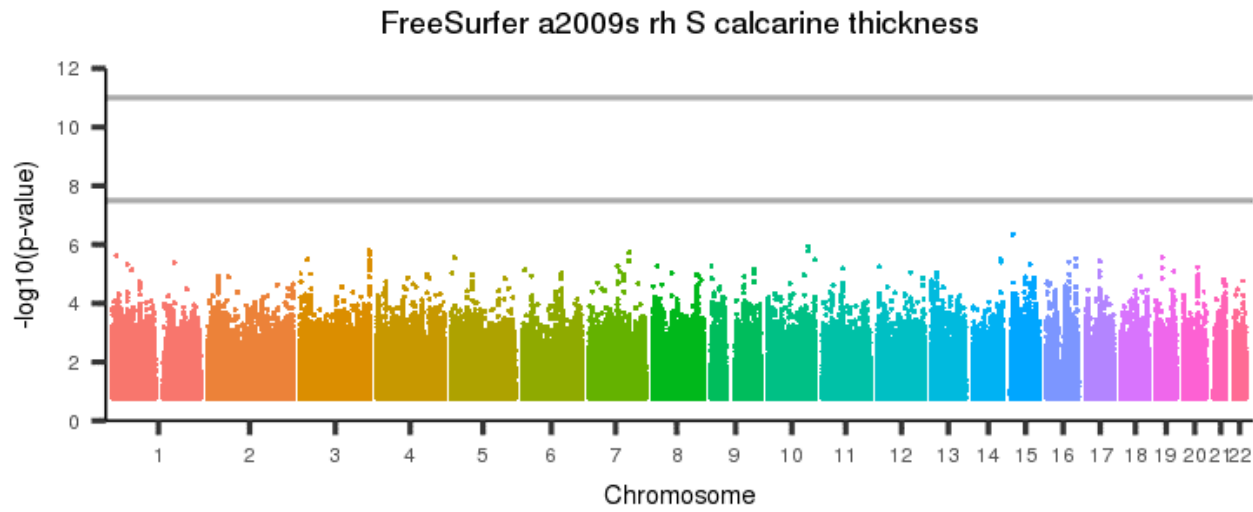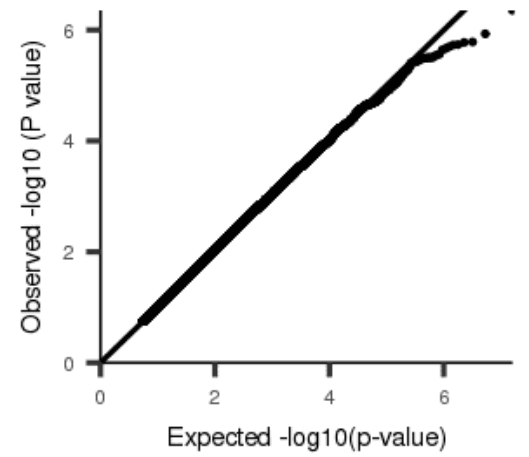

[back to list of plots](#)

Figure 3109: FreeSurfer a2009s rh S central thickness

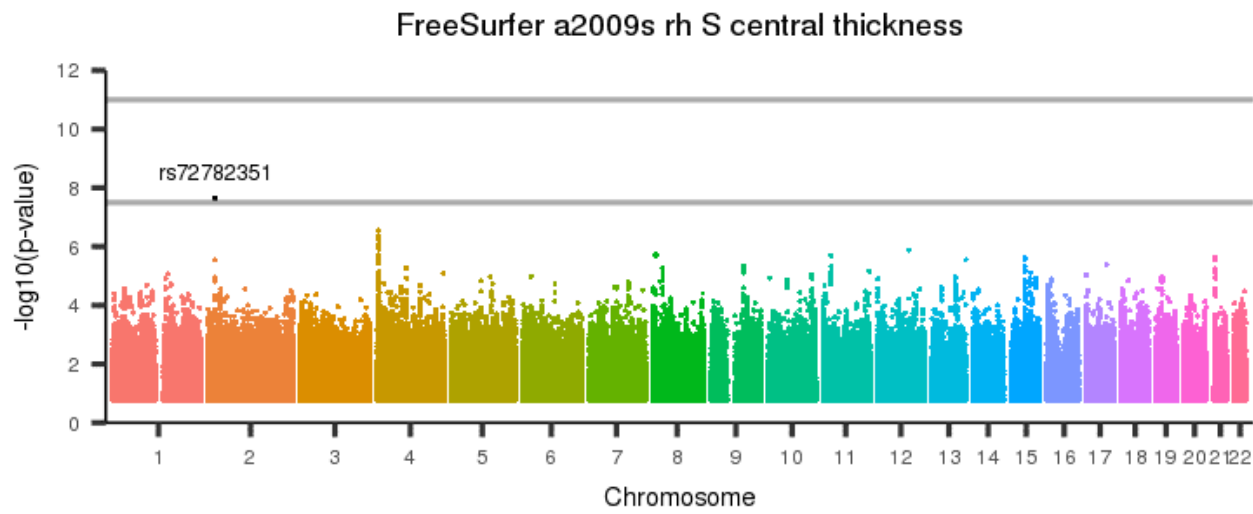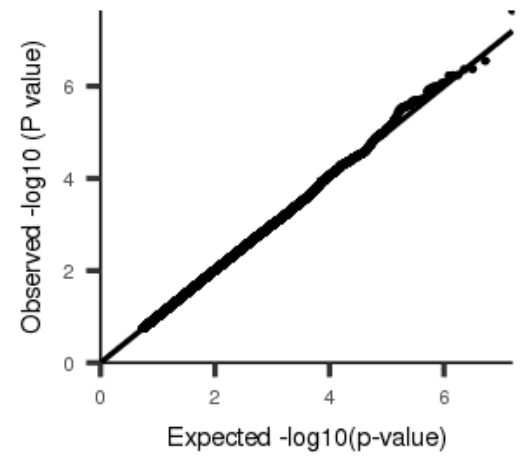

[back to list of plots](#)



Figure 3110: FreeSurfer a2009s rh S cingul-Marginalis thickness

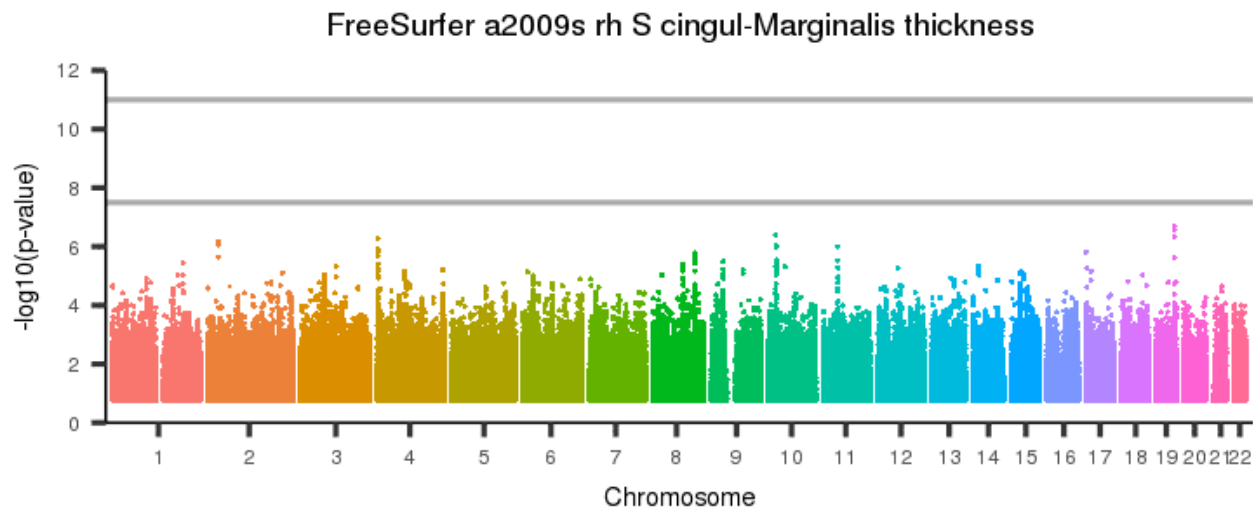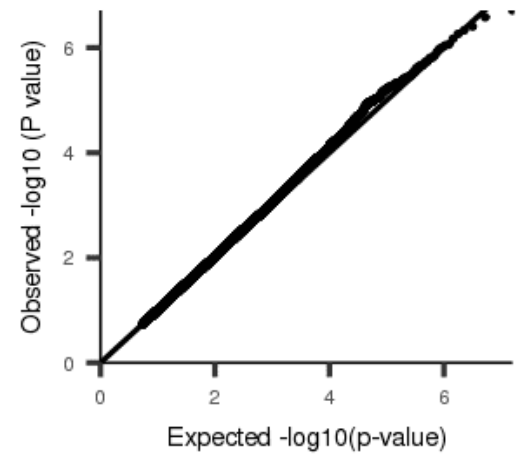

[back to list of plots](#)

Figure 3111: FreeSurfer a2009s rh S circular insula ant thickness

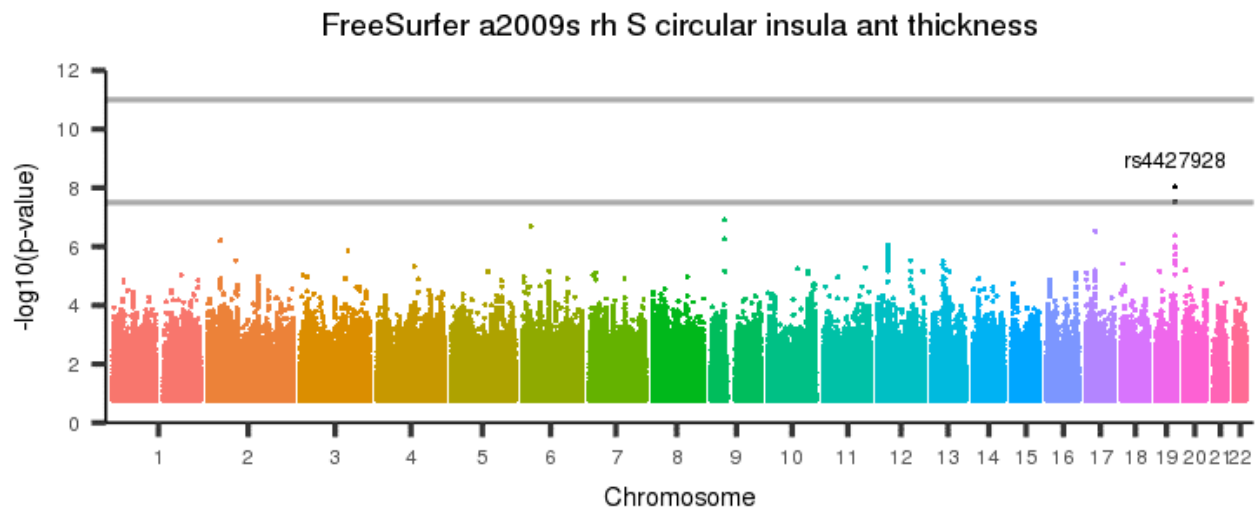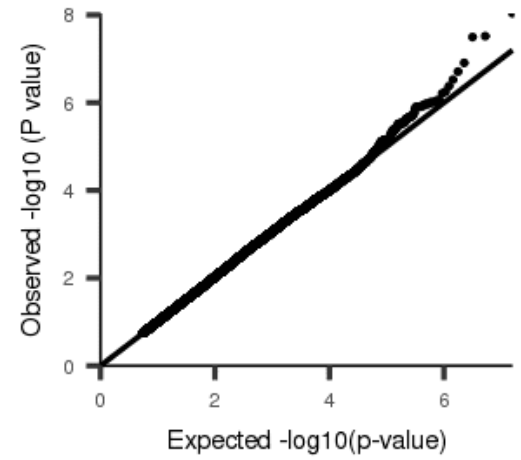

[back to list of plots](#)

Figure 3112: FreeSurfer a2009s rh S circular insula inf thickness

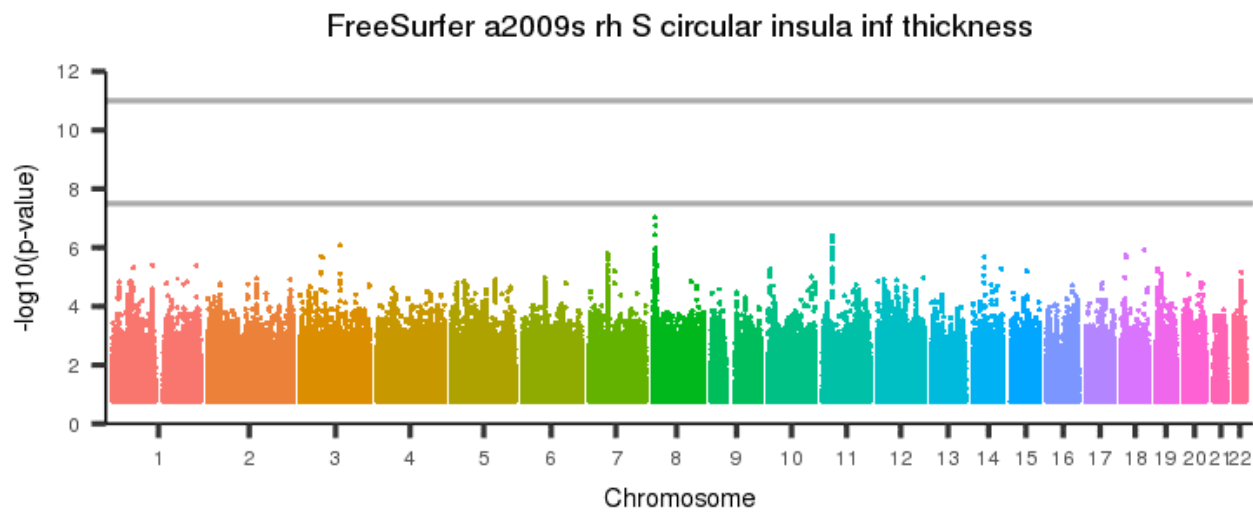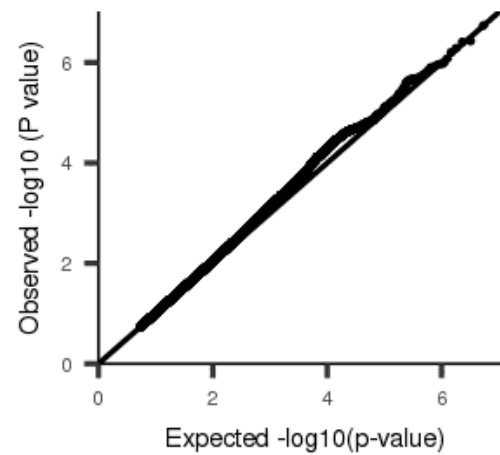

[back to list of plots](#)

Figure 3113: FreeSurfer a2009s rh S circular insula sup thickness

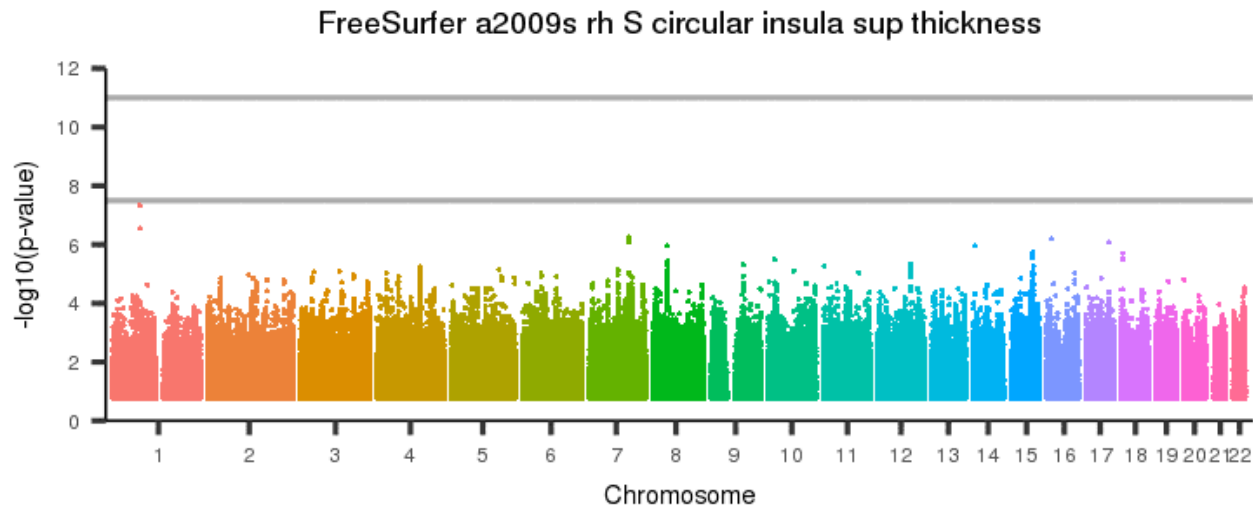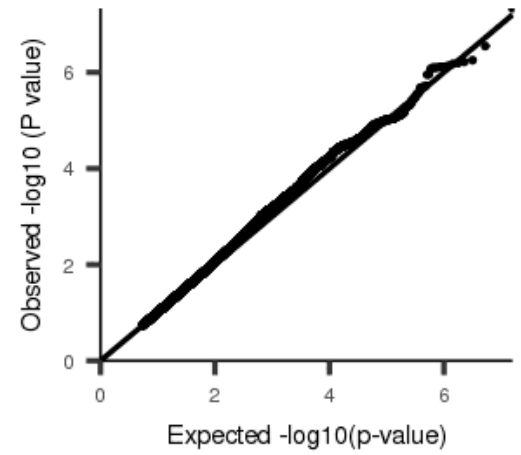

[back to list of plots](#)

Figure 3114: FreeSurfer a2009s rh S collat transv ant thickness

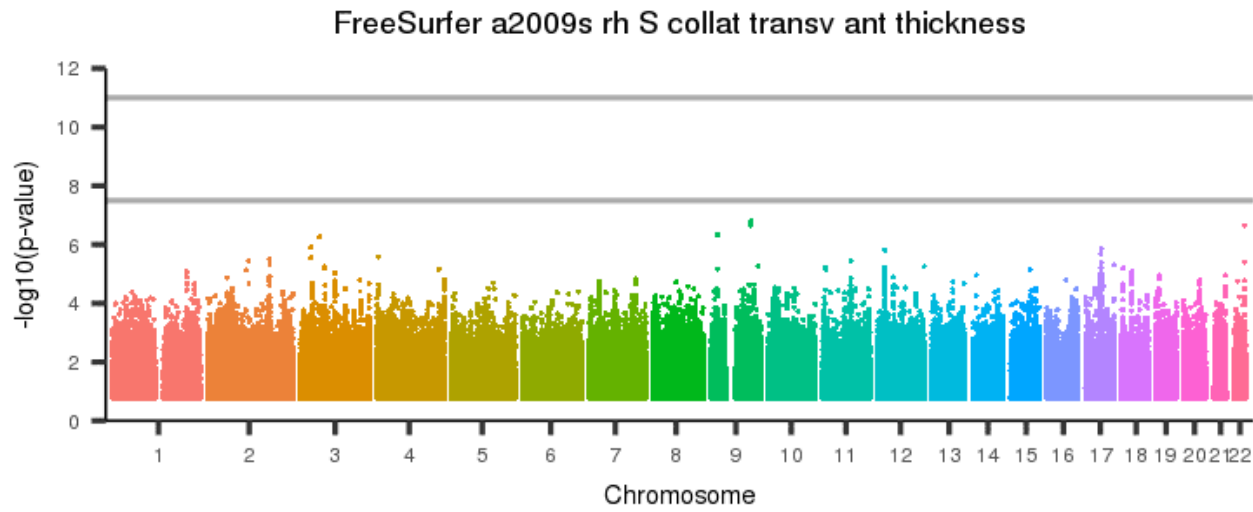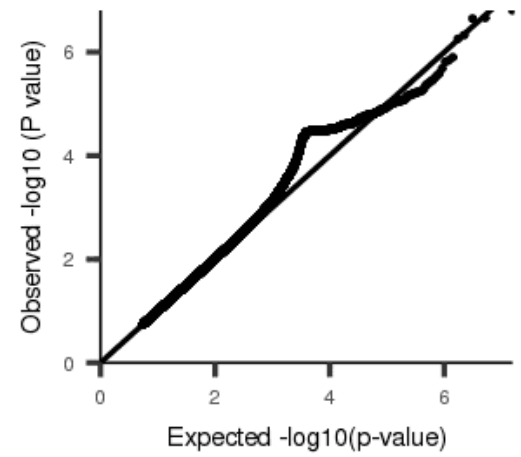

[back to list of plots](#)

Figure 3115: FreeSurfer a2009s rh S collat transv post thickness

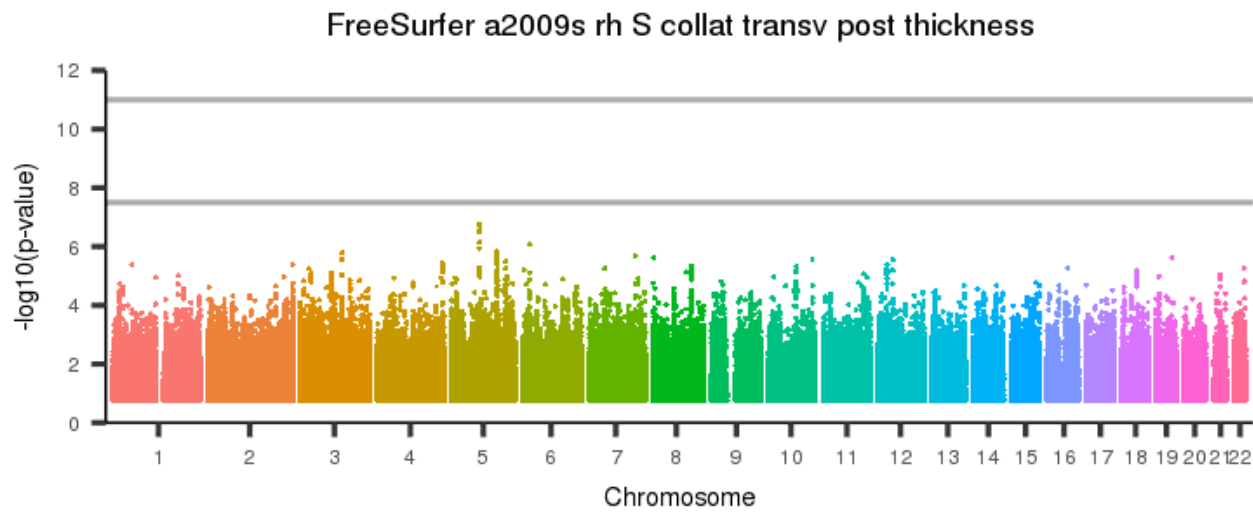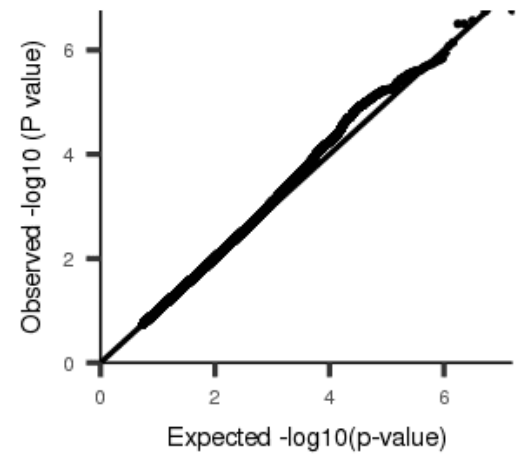

[back to list of plots](#)

Figure 3116: FreeSurfer a2009s rh S front inf thickness

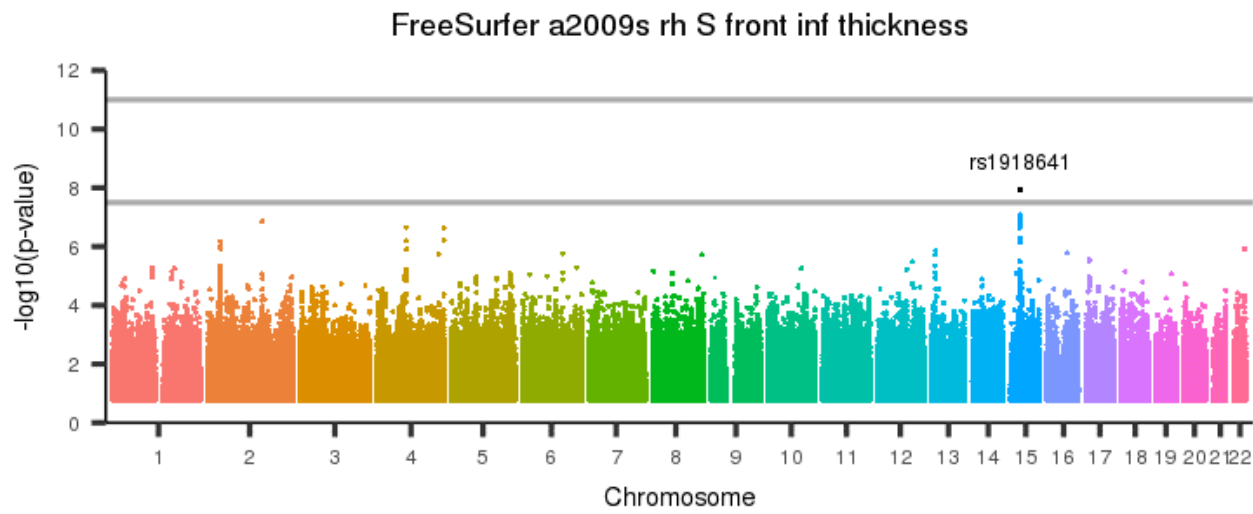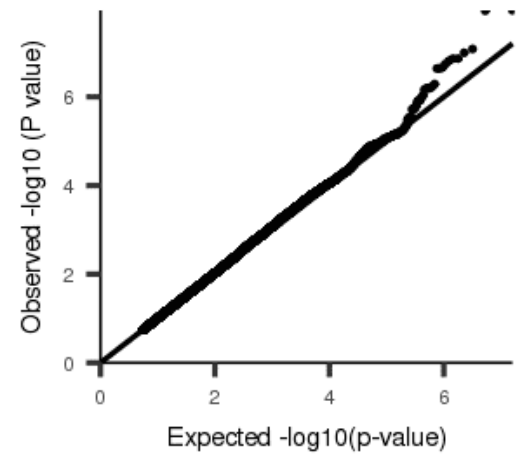

[back to list of plots](#)

Figure 3117: FreeSurfer a2009s rh S front middle thickness

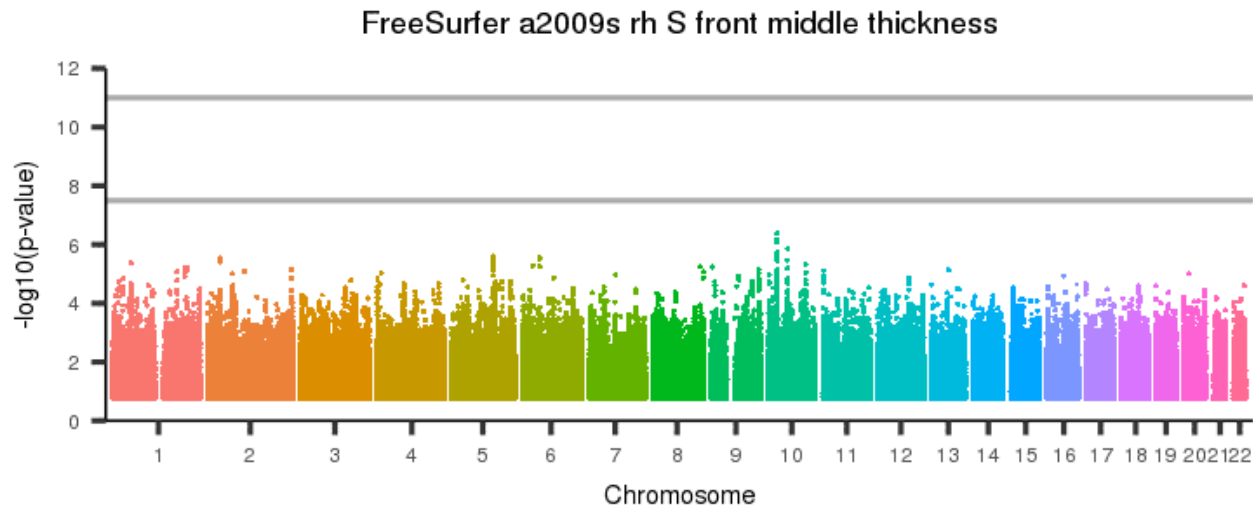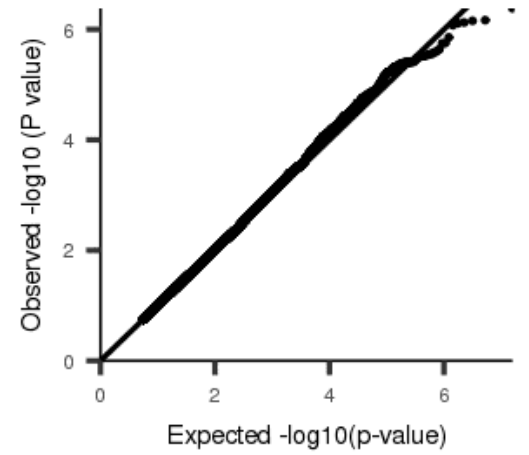

[back to list of plots](#)



Figure 3118: FreeSurfer a2009s rh S front sup thickness

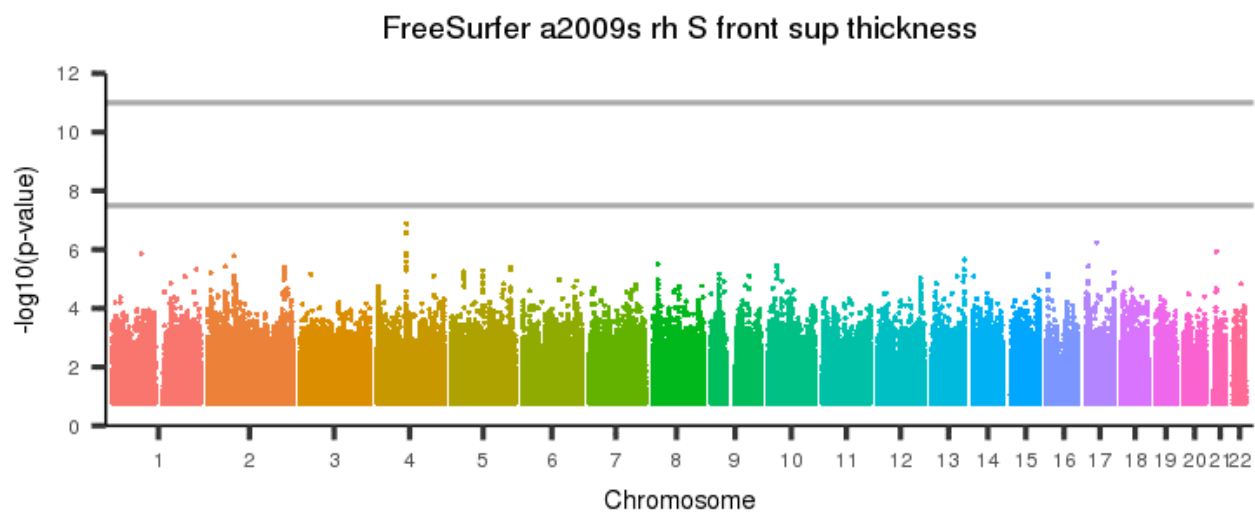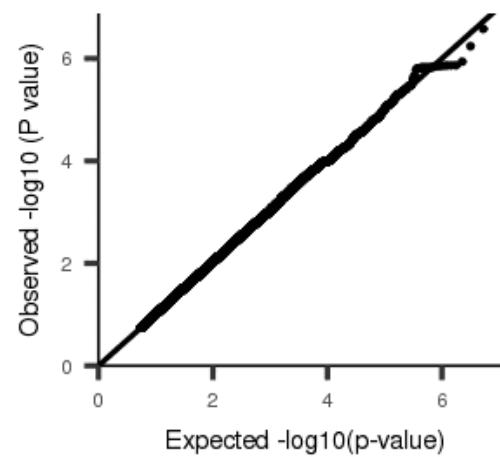

[back to list of plots](#)

Figure 3119: FreeSurfer a2009s rh S interm prim-Jensen thickness

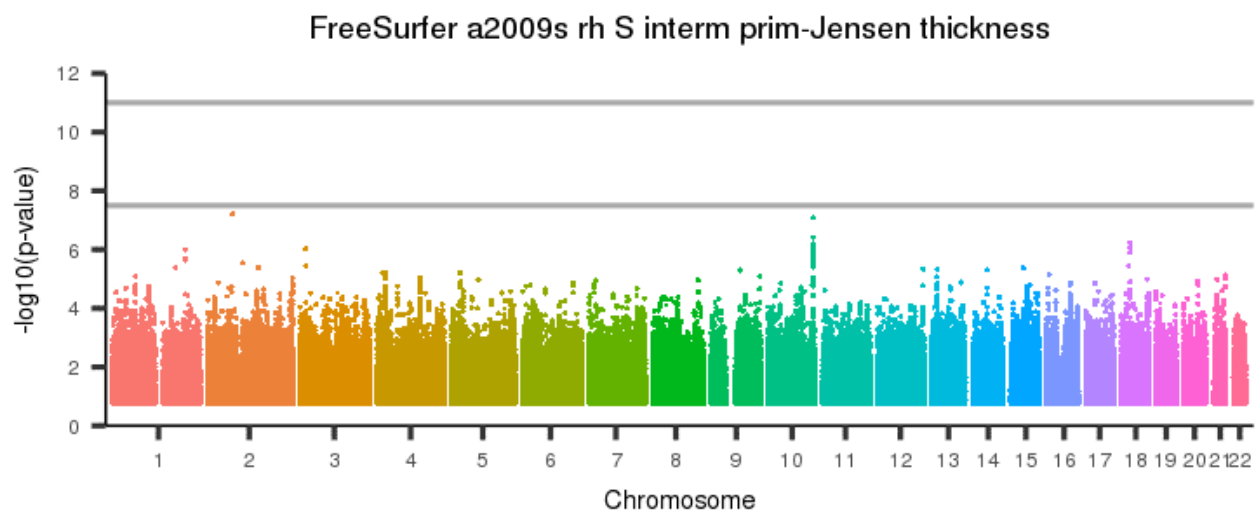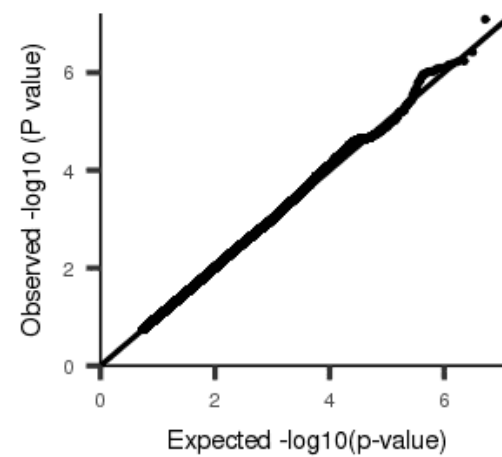

[back to list of plots](#)

Figure 3120: FreeSurfer a2009s rh S intrapariet and P trans thickness

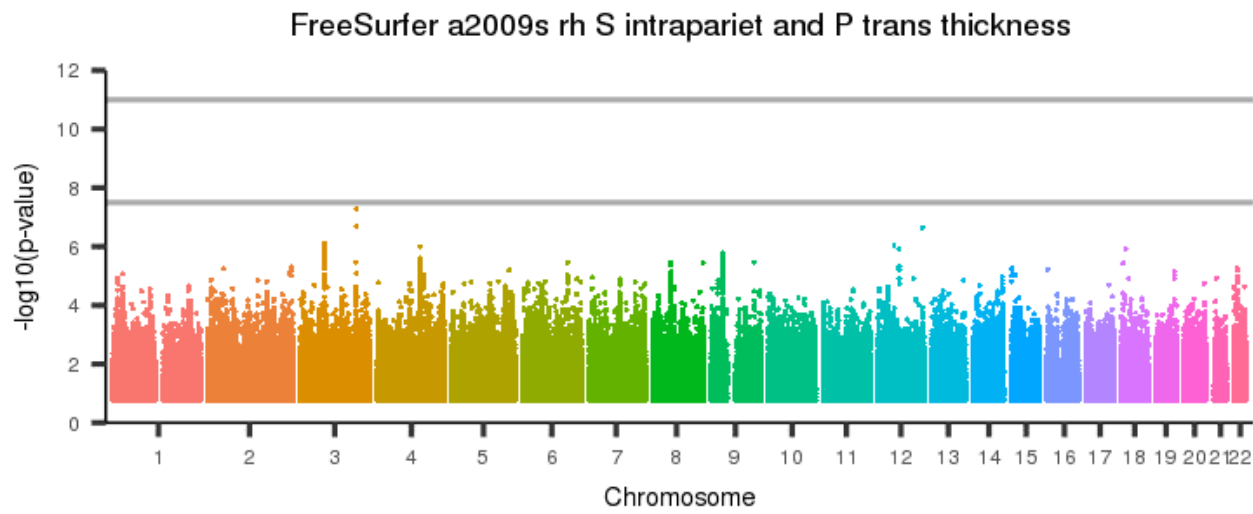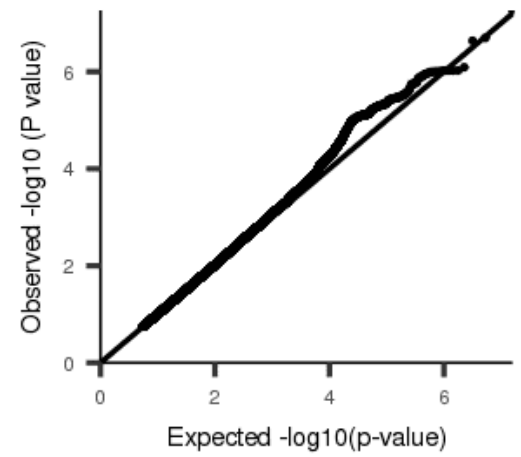

[back to list of plots](#)

Figure 3121: FreeSurfer a2009s rh S oc middle and Lunatus thickness

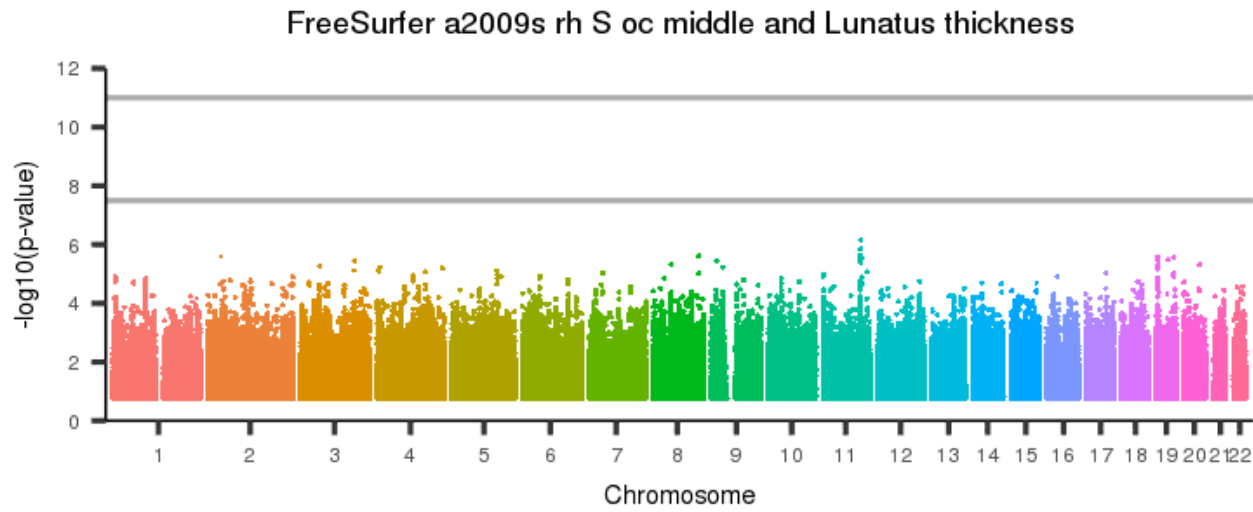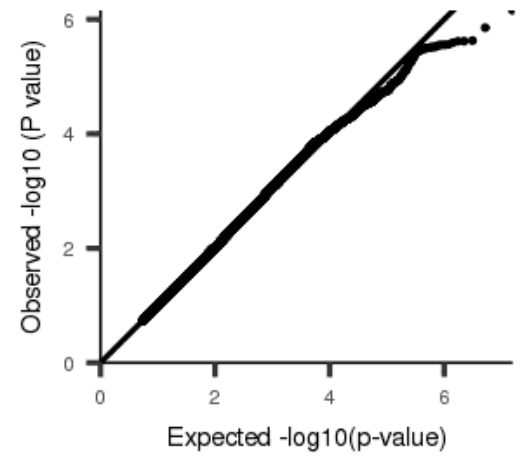

[back to list of plots](#)

Figure 3122: FreeSurfer a2009s rh S oc sup and transversal thickness

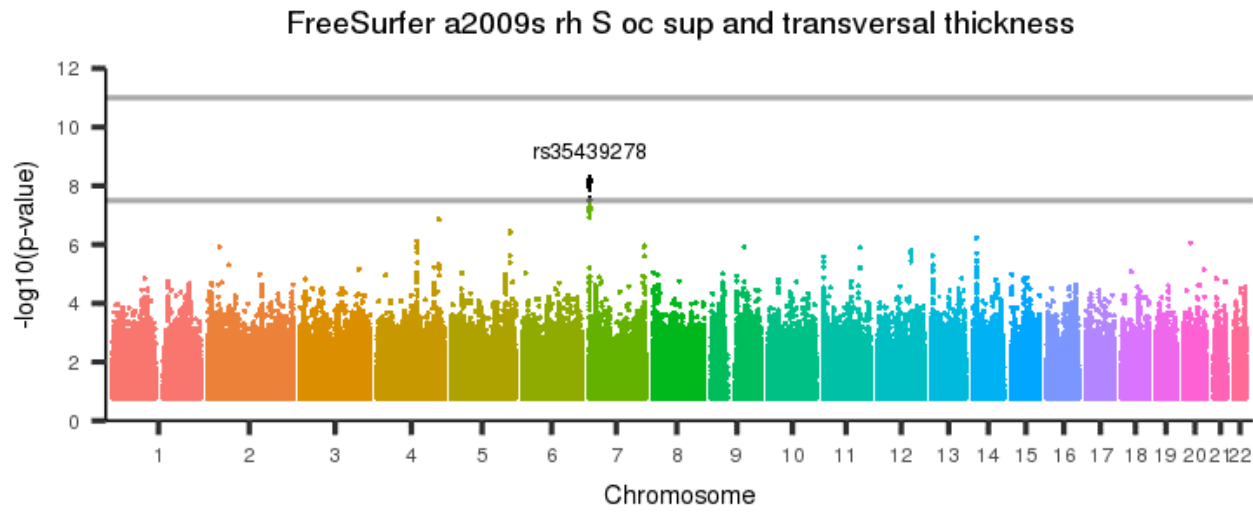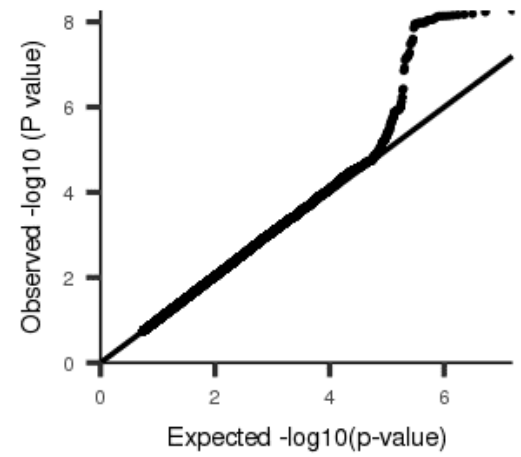

[back to list of plots](#)

Figure 3123: FreeSurfer a2009s rh S occipital ant thickness

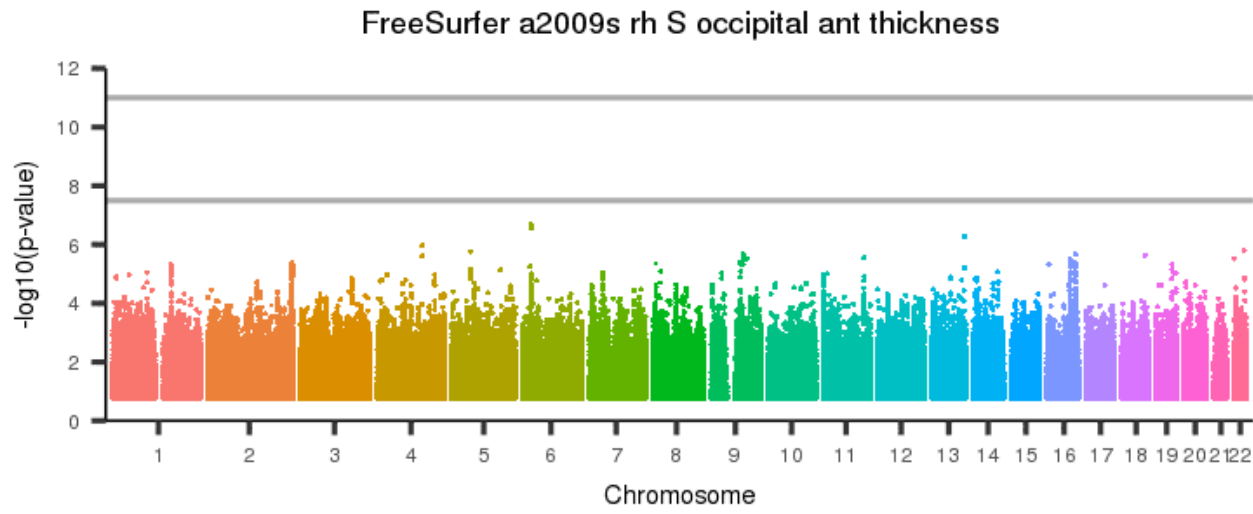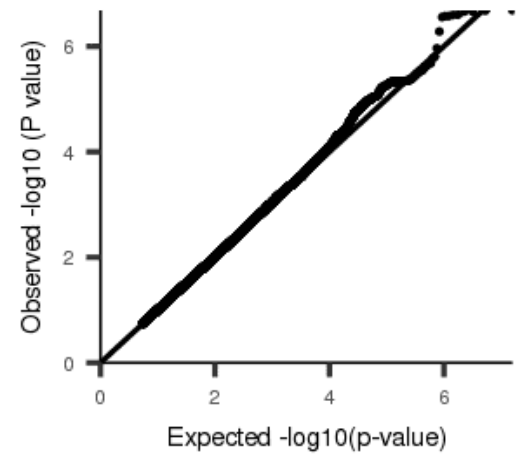

[back to list of plots](#)

Figure 3124: FreeSurfer a2009s rh S oc-temp lat thickness

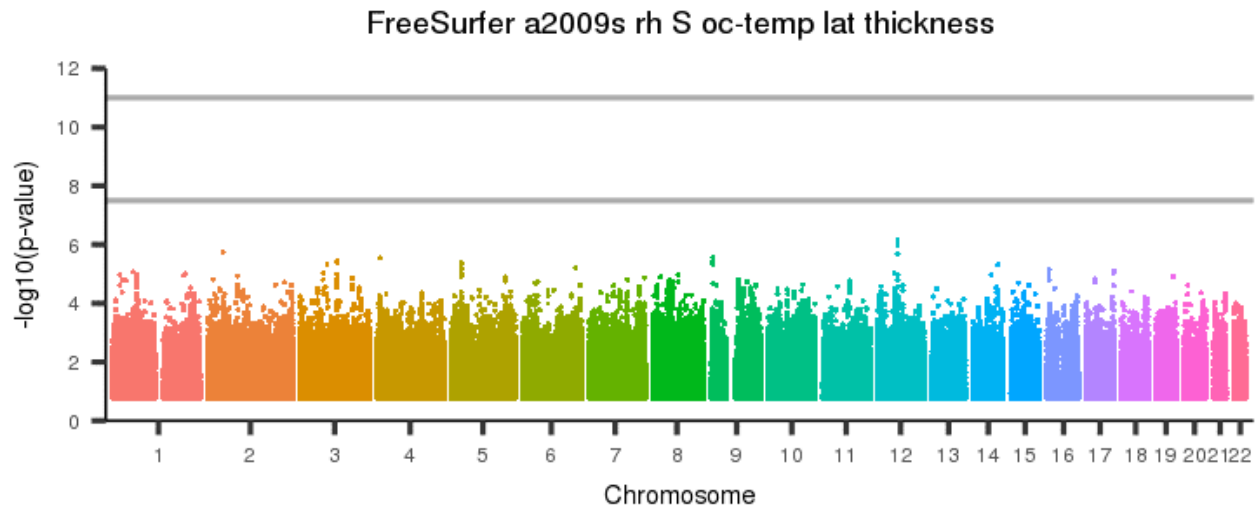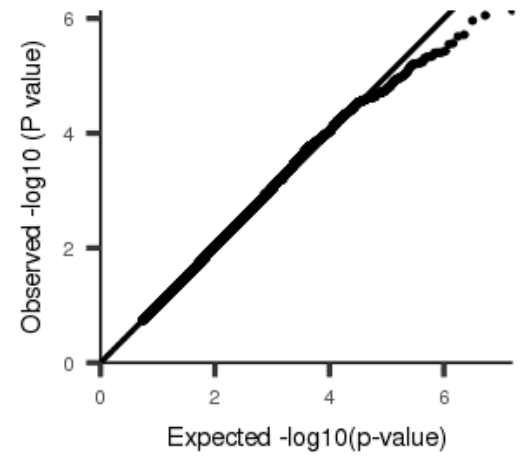

[back to list of plots](#)

Figure 3125: FreeSurfer a2009s rh S oc-temp med and Lingual thickness

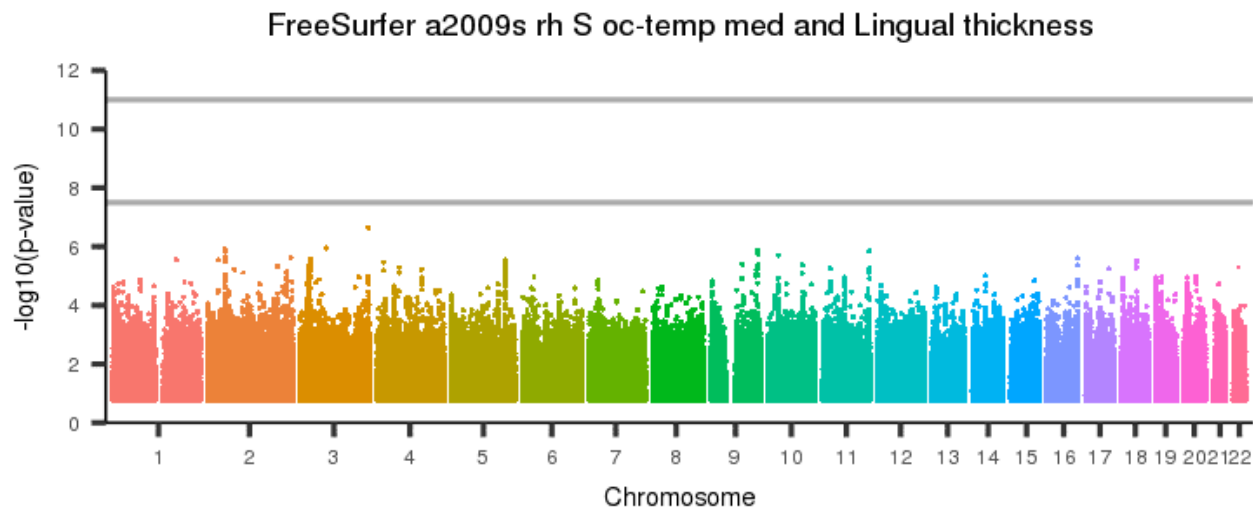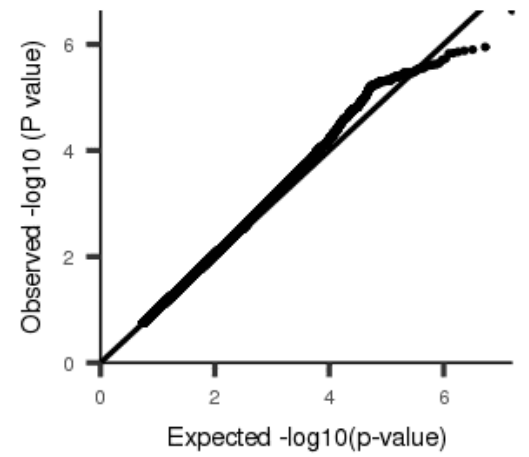

[back to list of plots](#)



Figure 3126: FreeSurfer a2009s rh S orbital lateral thickness

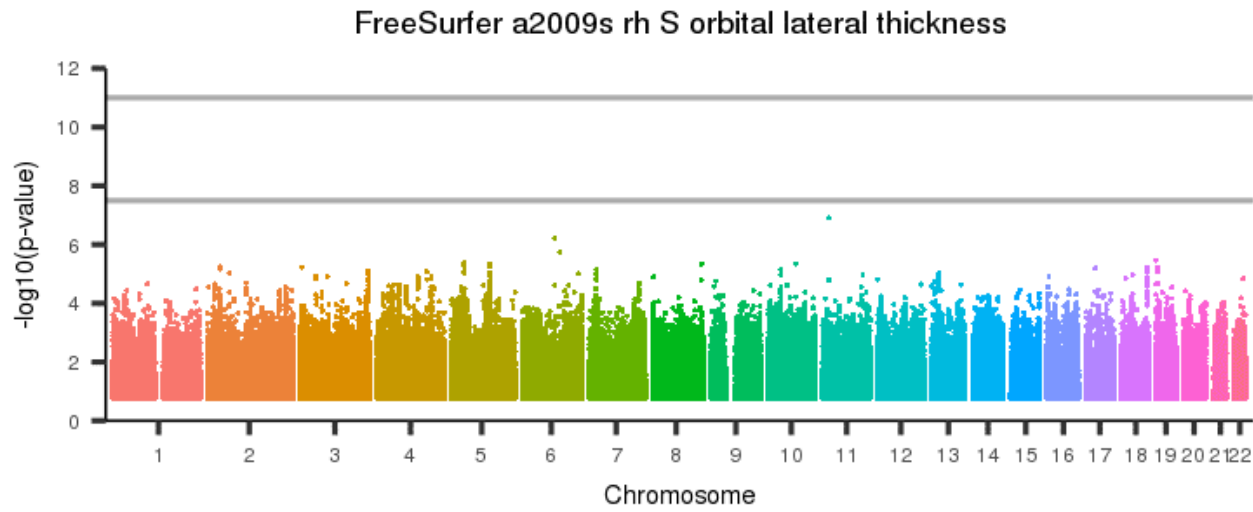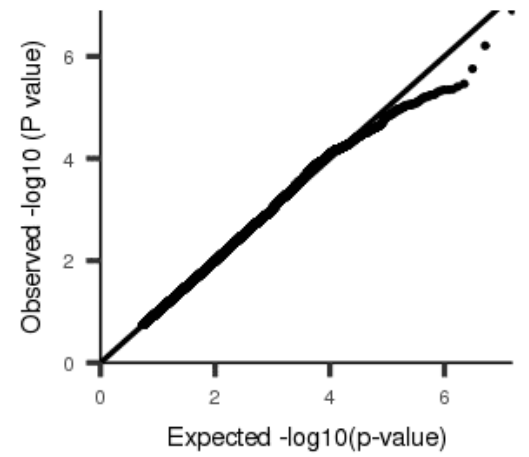

[back to list of plots](#)

Figure 3127: FreeSurfer a2009s rh S orbital med-olfact thickness

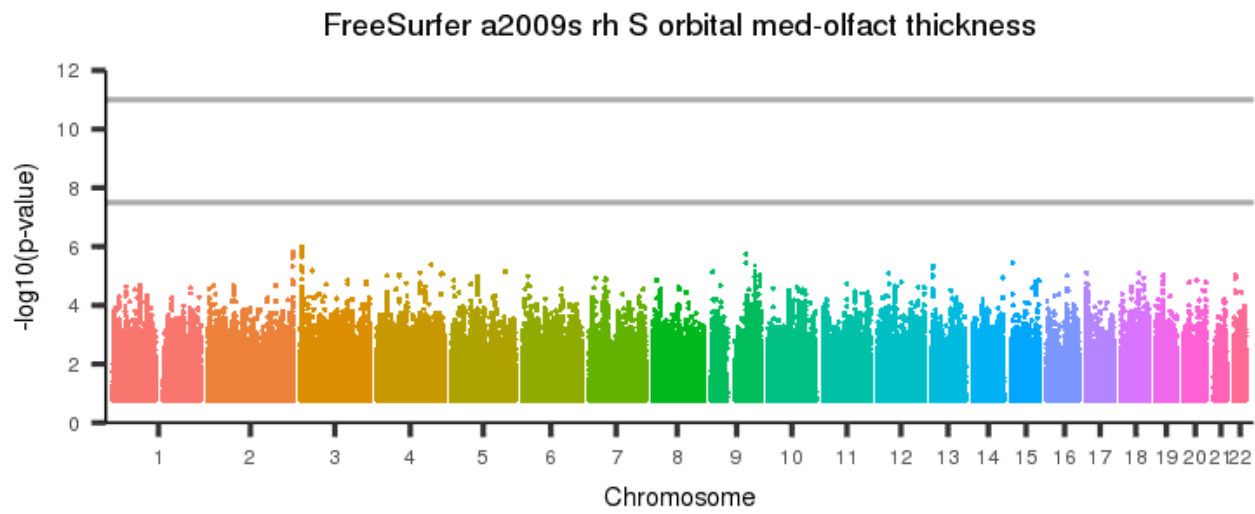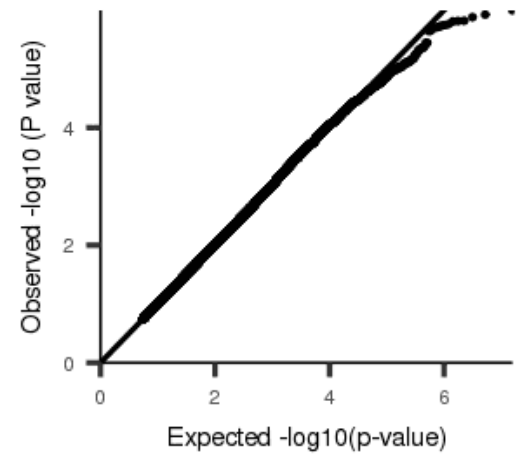

[back to list of plots](#)

Figure 3128: FreeSurfer a2009s rh S orbital-H Shaped thickness

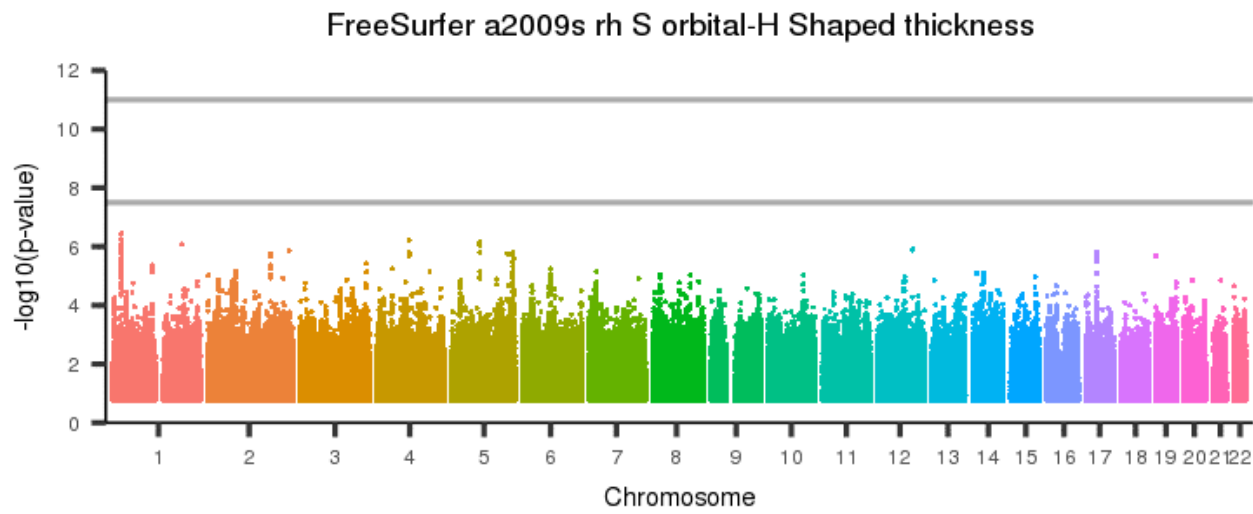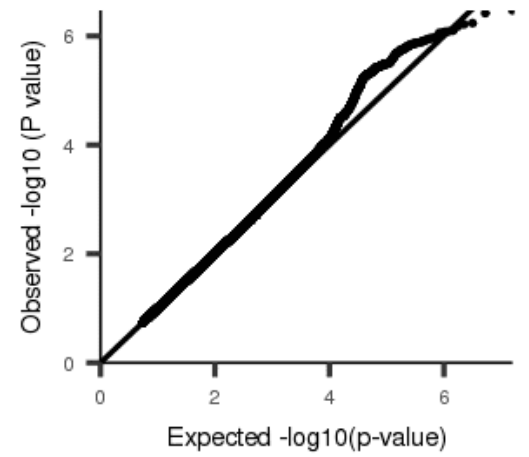

[back to list of plots](#)

Figure 3129: FreeSurfer a2009s rh S parieto occipital thickness

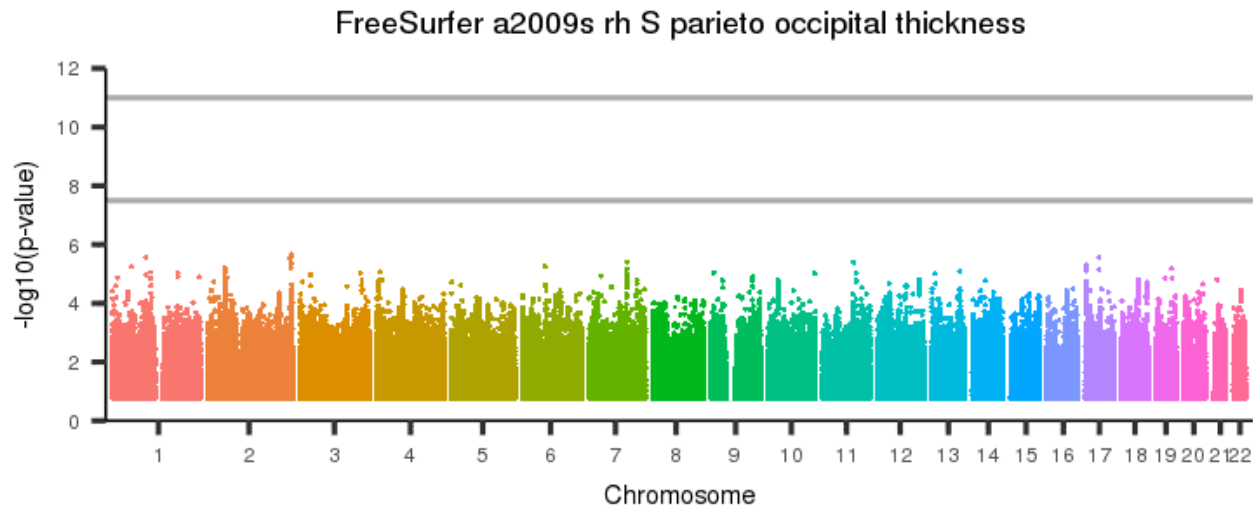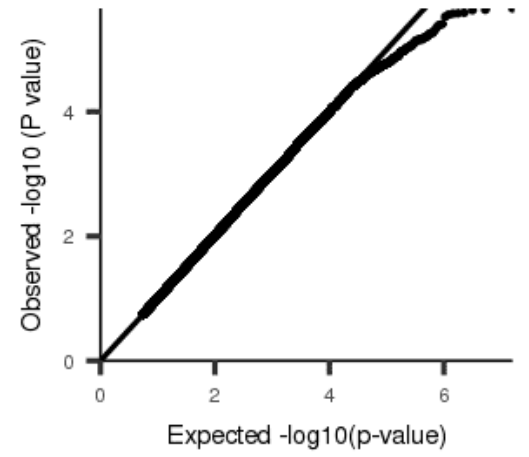

[back to list of plots](#)

Figure 3130: FreeSurfer a2009s rh S pericallosal thickness

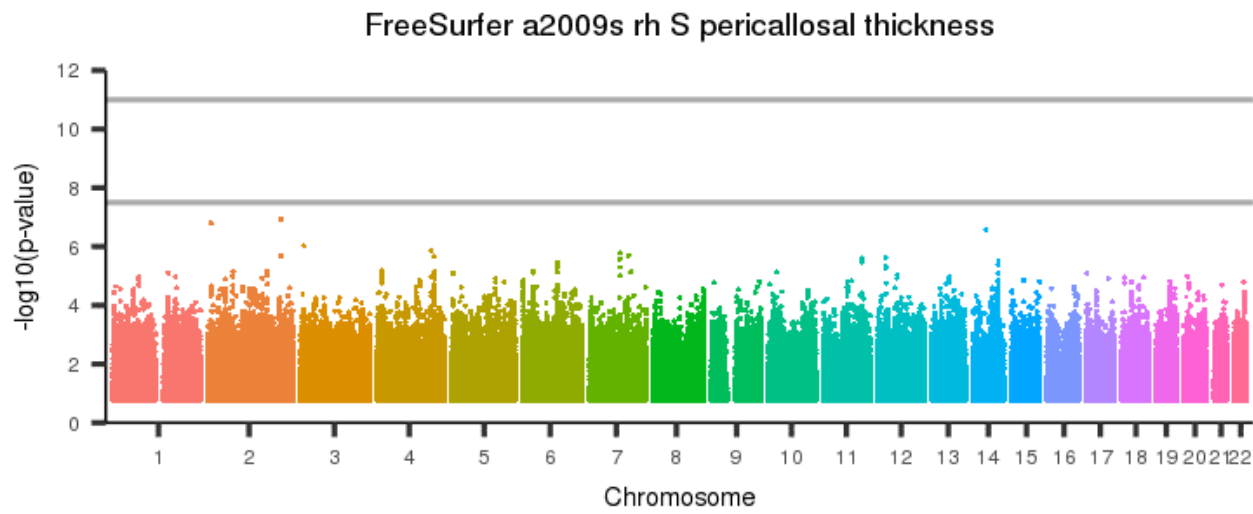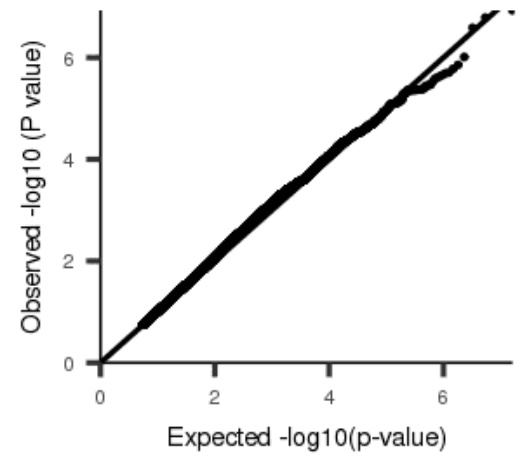

[back to list of plots](#)

Figure 3131: FreeSurfer a2009s rh S postcentral thickness

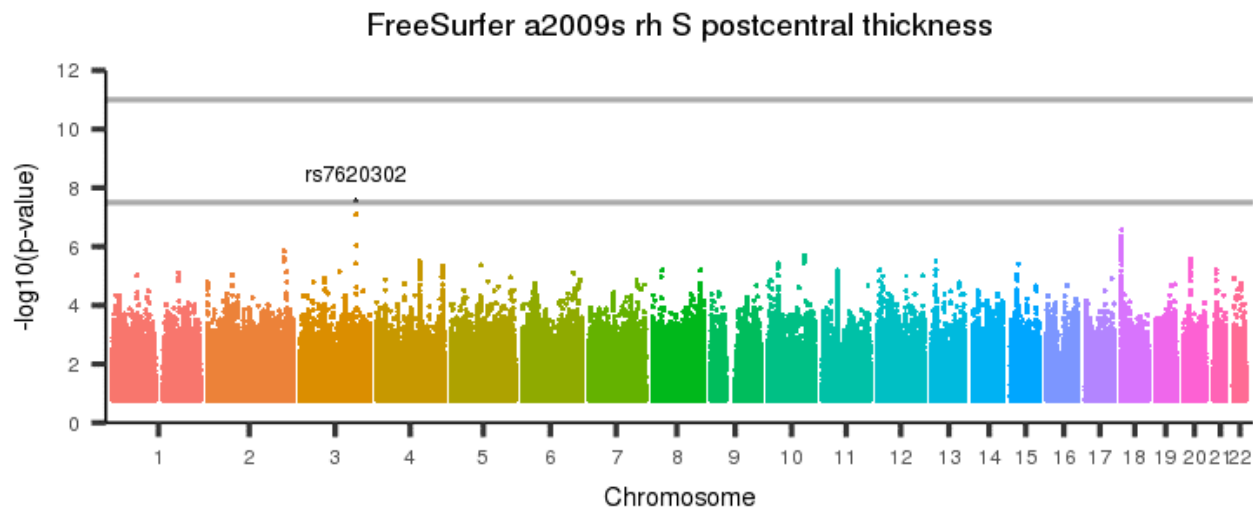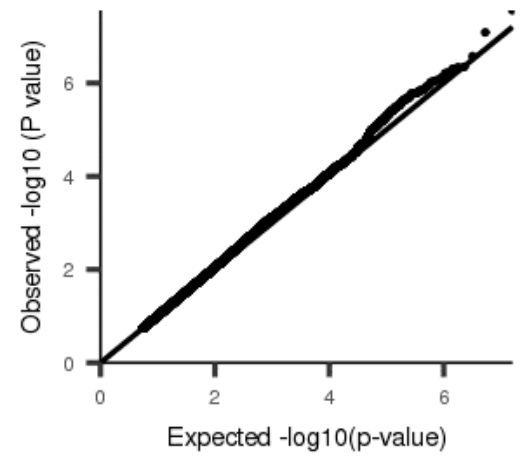

[back to list of plots](#)

Figure 3132: FreeSurfer a2009s rh S precentral-inf-part thickness

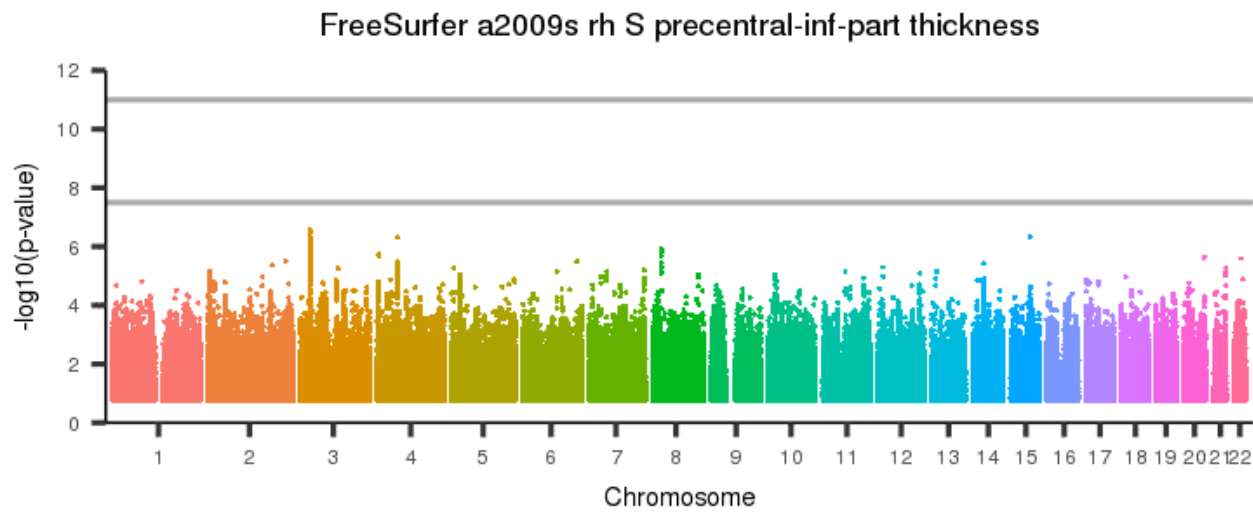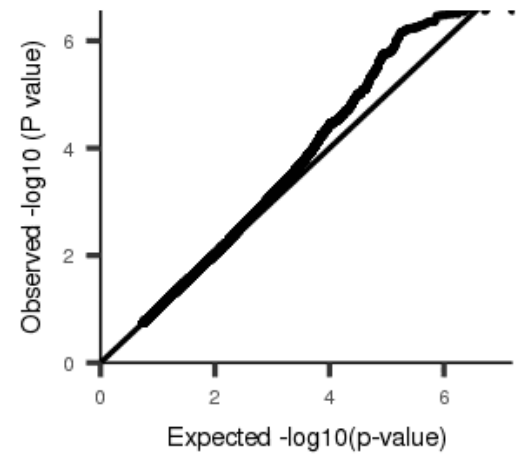

[back to list of plots](#)

Figure 3133: FreeSurfer a2009s rh S precentral-sup-part thickness

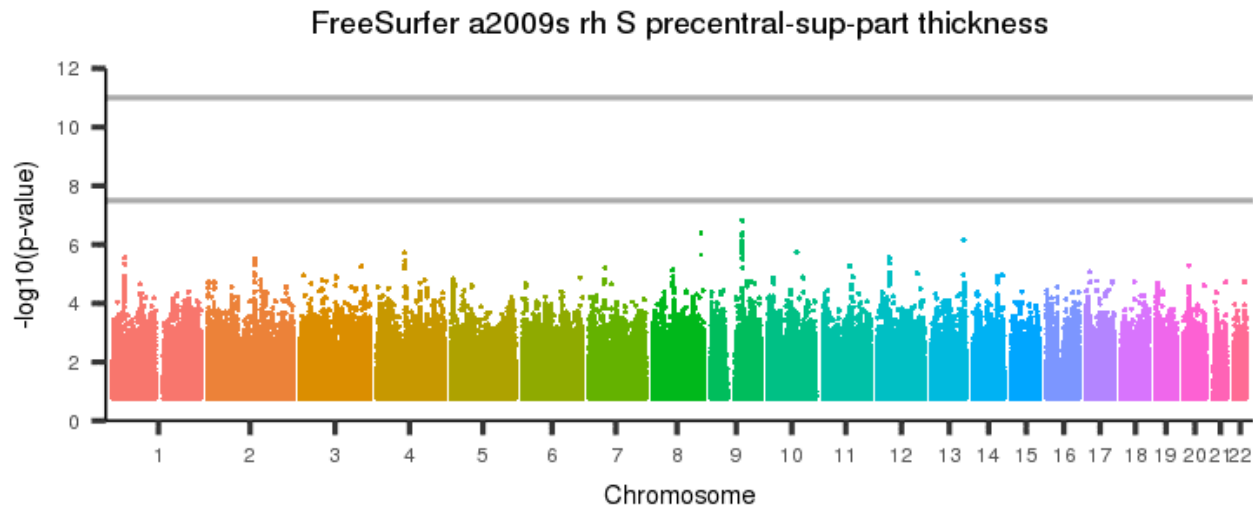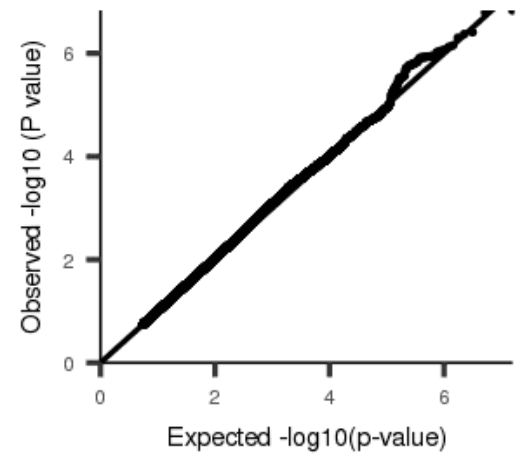

[back to list of plots](#)



Figure 3134: FreeSurfer a2009s rh S suborbital thickness

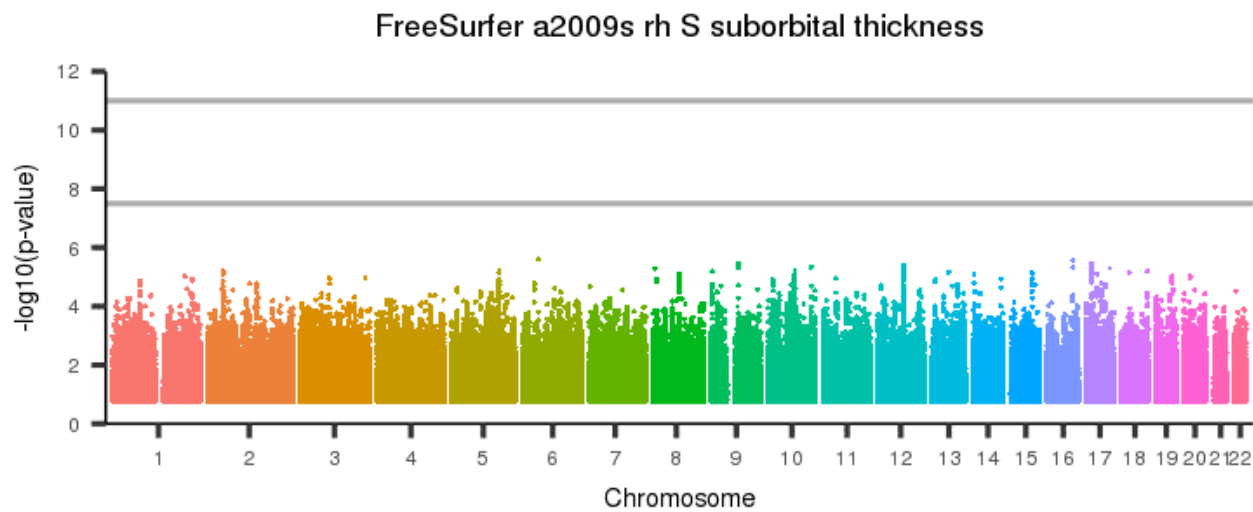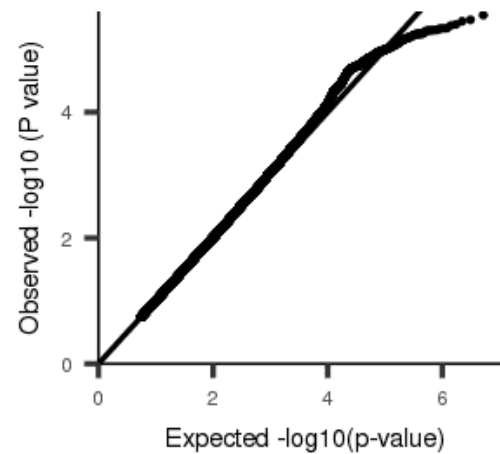

[back to list of plots](#)

Figure 3135: FreeSurfer a2009s rh S subparietal thickness

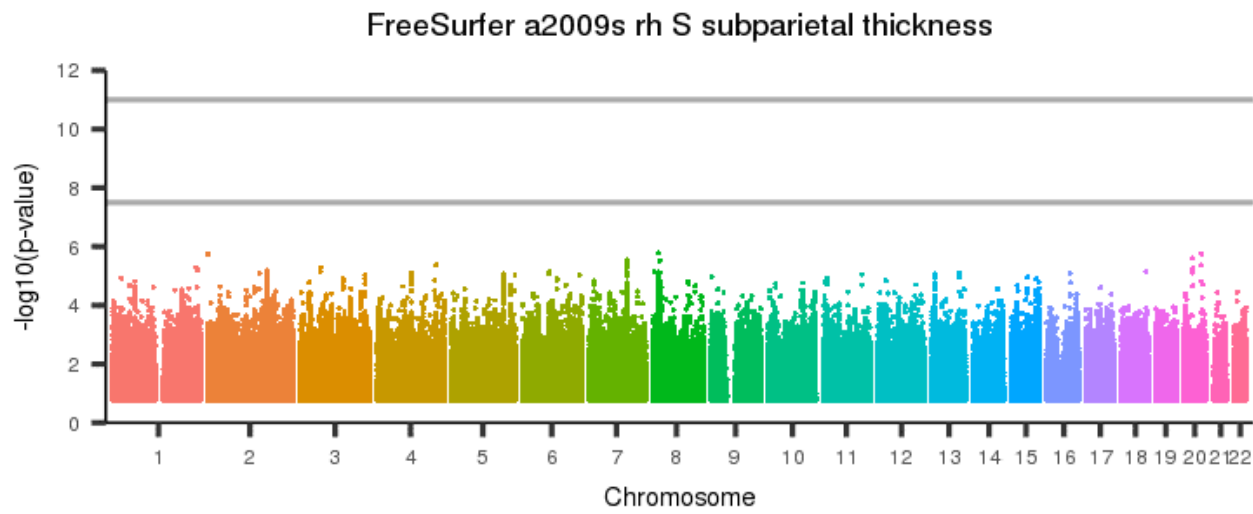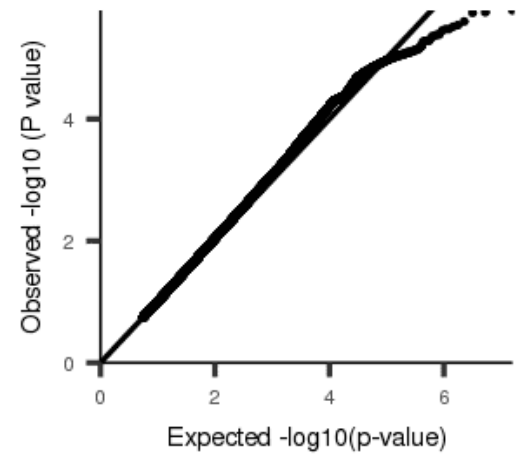

[back to list of plots](#)

Figure 3136: FreeSurfer a2009s rh S temporal inf thickness

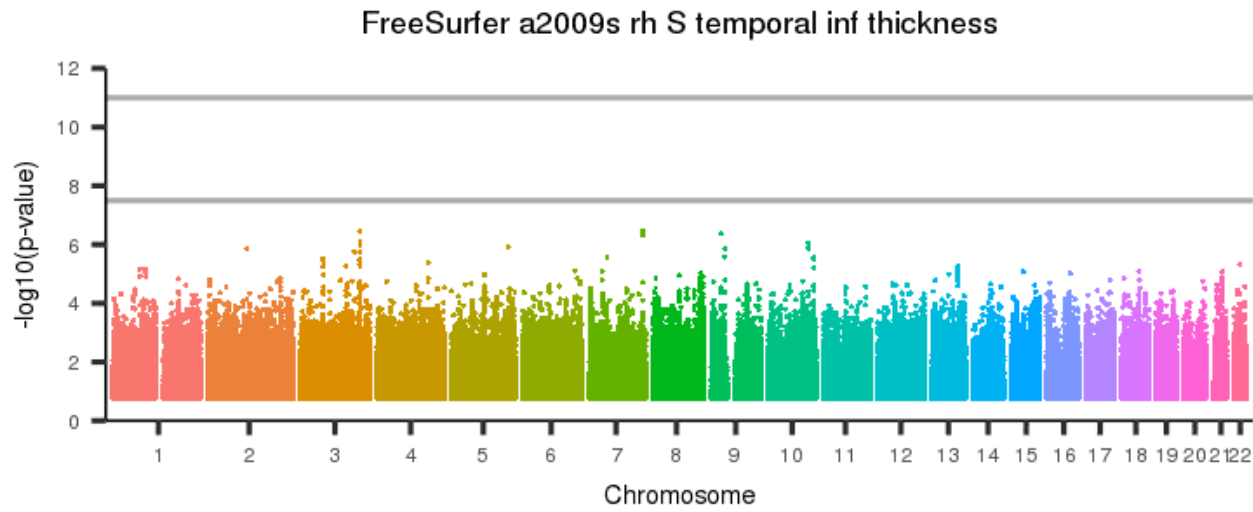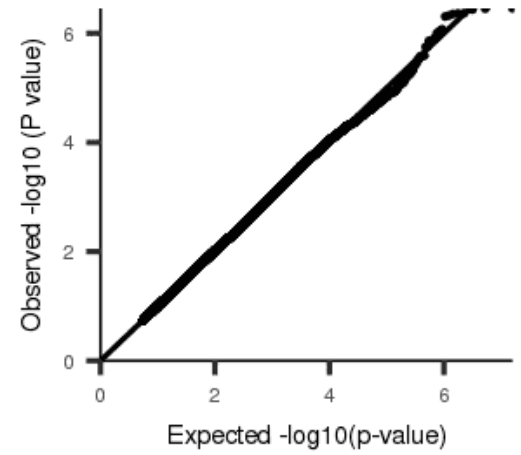

[back to list of plots](#)

Figure 3137: FreeSurfer a2009s rh S temporal sup thickness

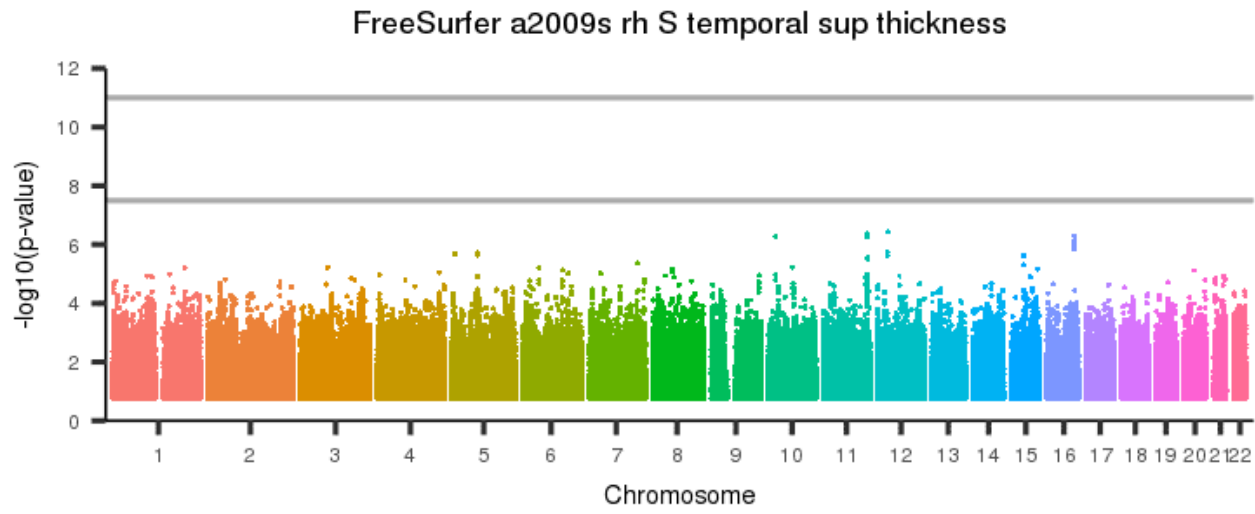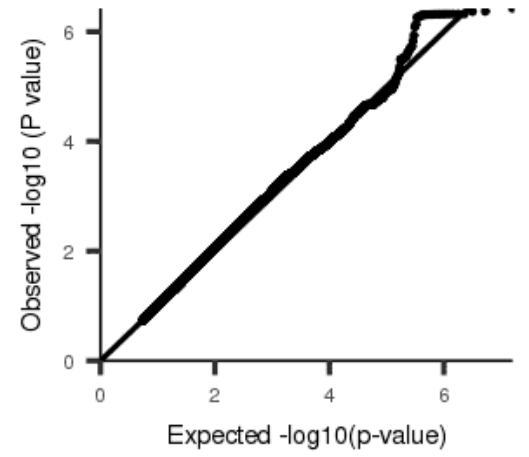

[back to list of plots](#)

Figure 3138: FreeSurfer a2009s rh S temporal transverse thickness

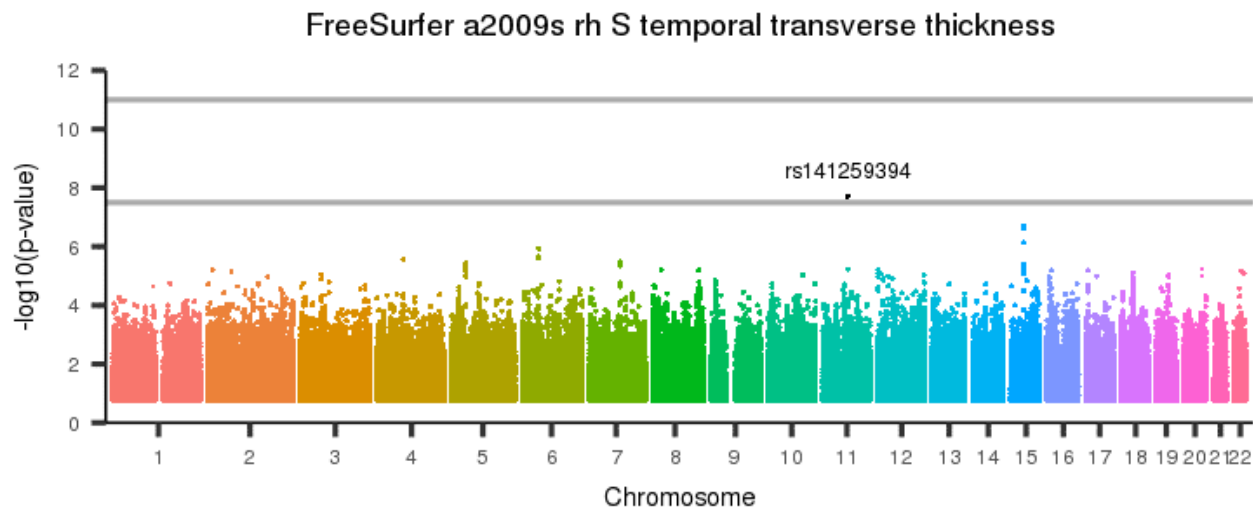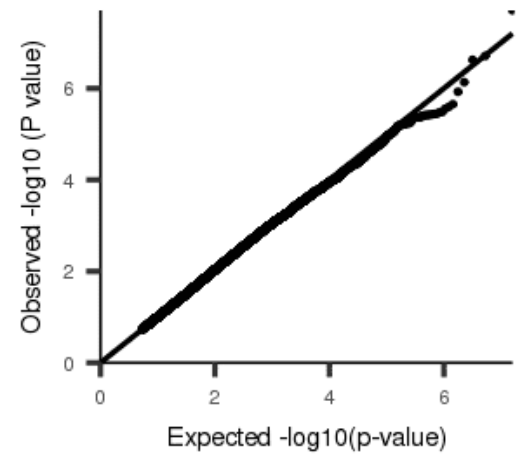

[back to list of plots](#)

Figure 3139: NETMAT edge ICA 1

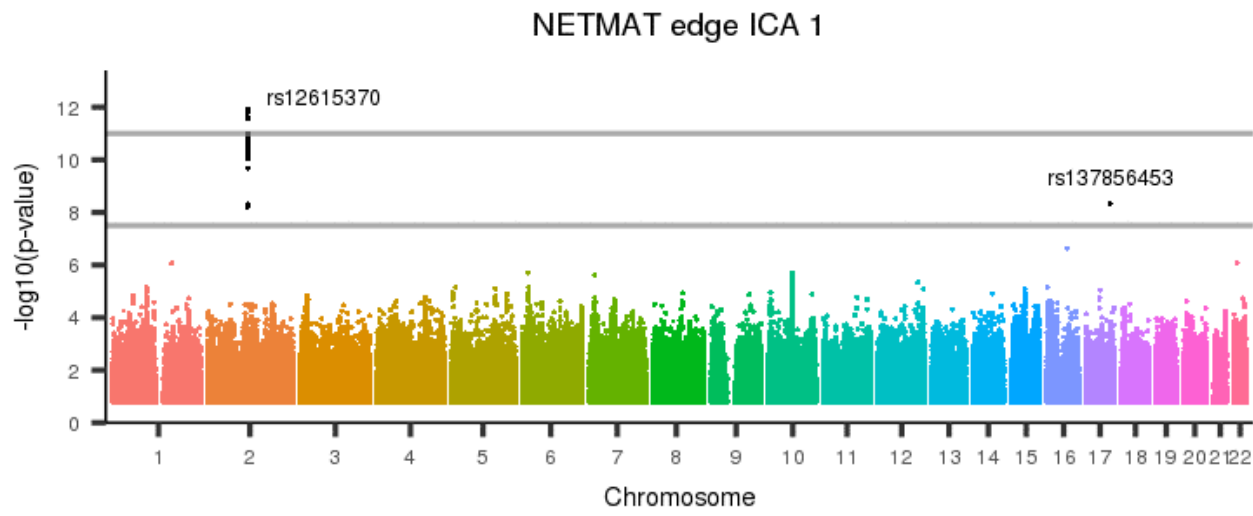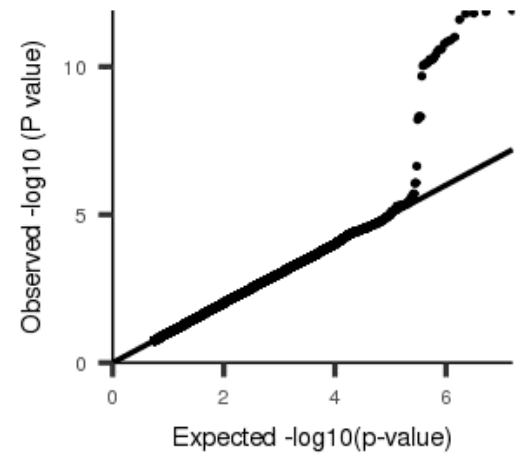

[back to list of plots](#)

Figure 3140: NETMAT edge ICA 2

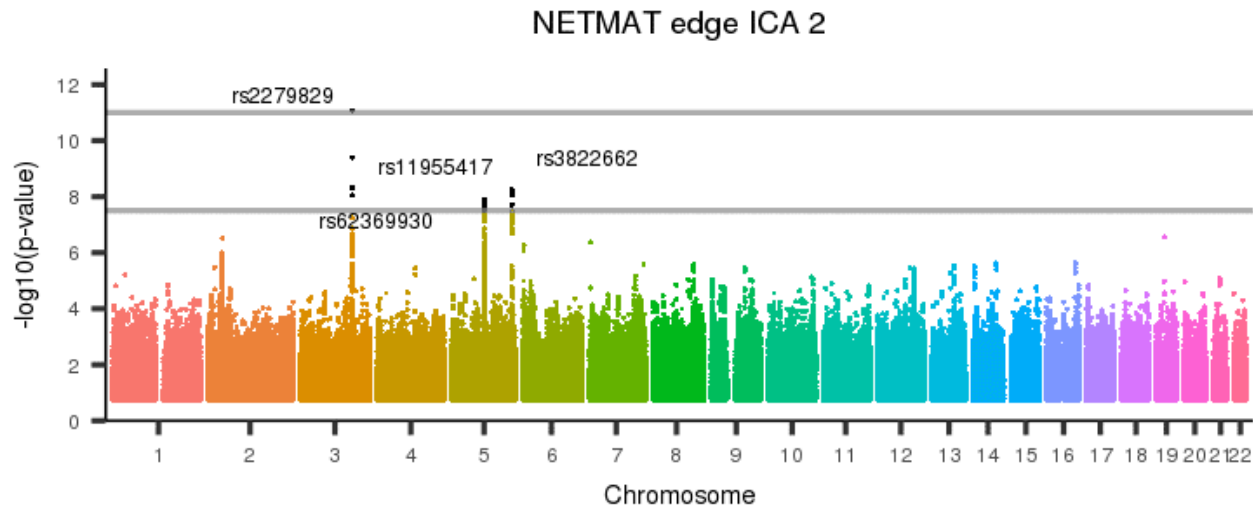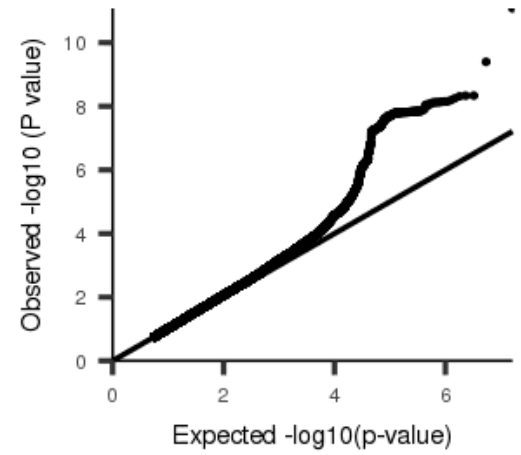

[back to list of plots](#)

Figure 3141: NETMAT edge ICA 3

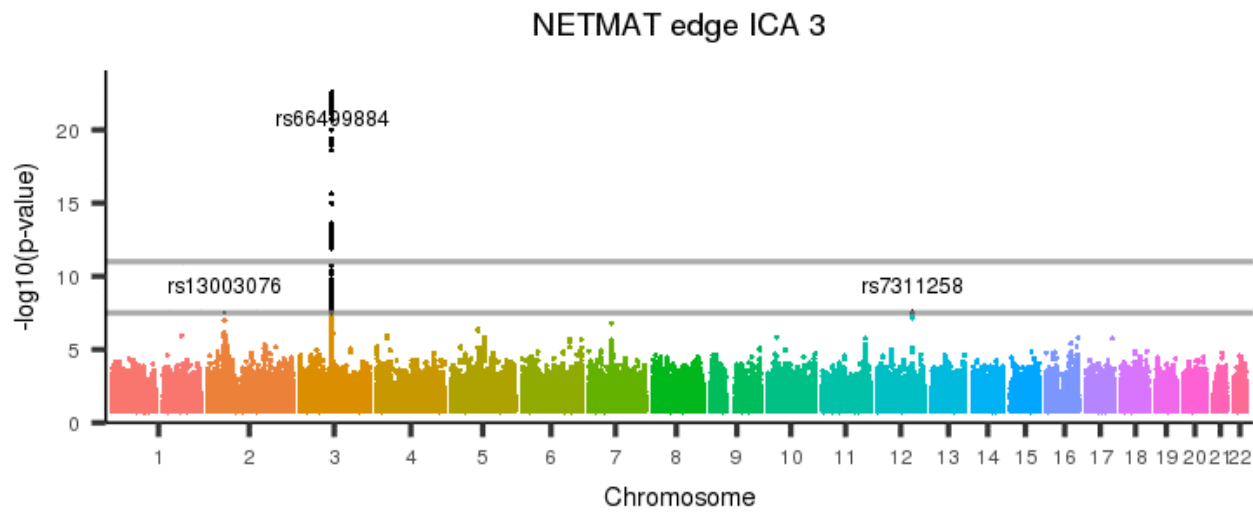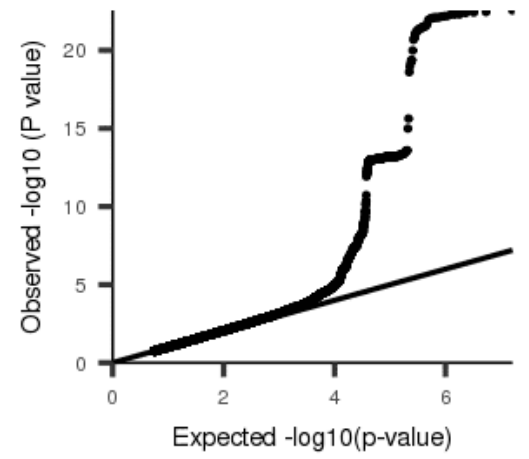

[back to list of plots](#)



Figure 3142: NETMAT edge ICA 4

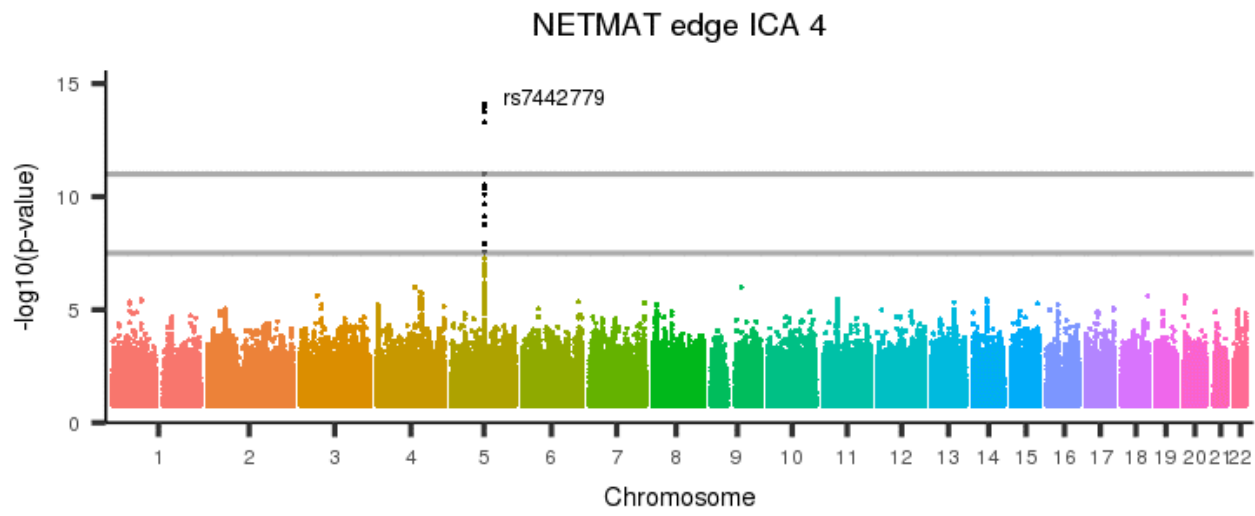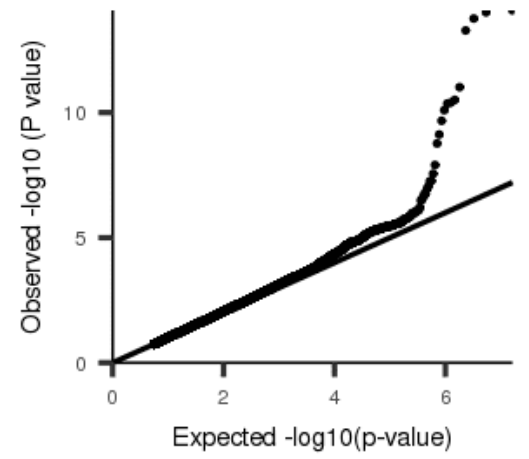

[back to list of plots](#)

Figure 3143: NETMAT edge ICA 5

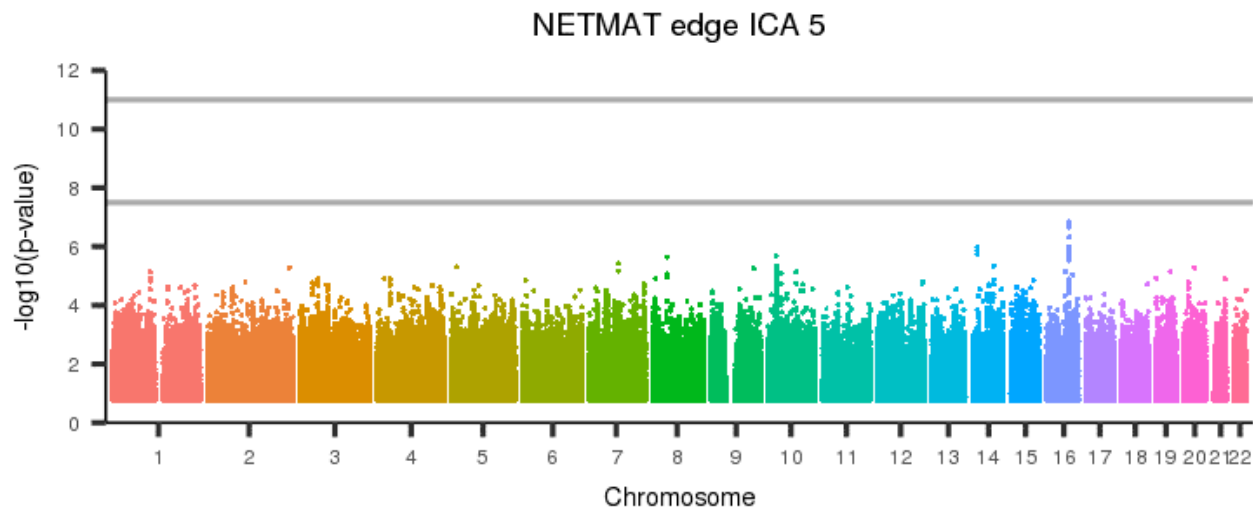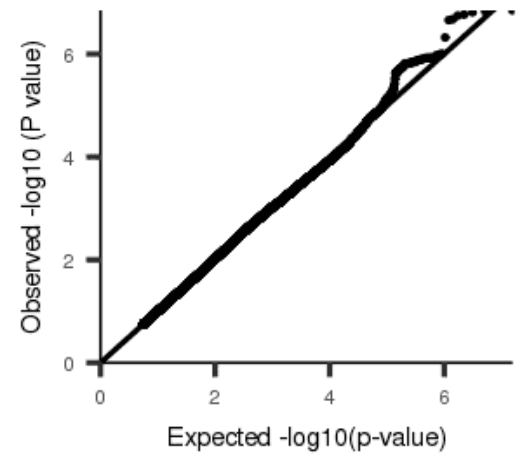

[back to list of plots](#)

Figure 3144: NETMAT edge ICA 6

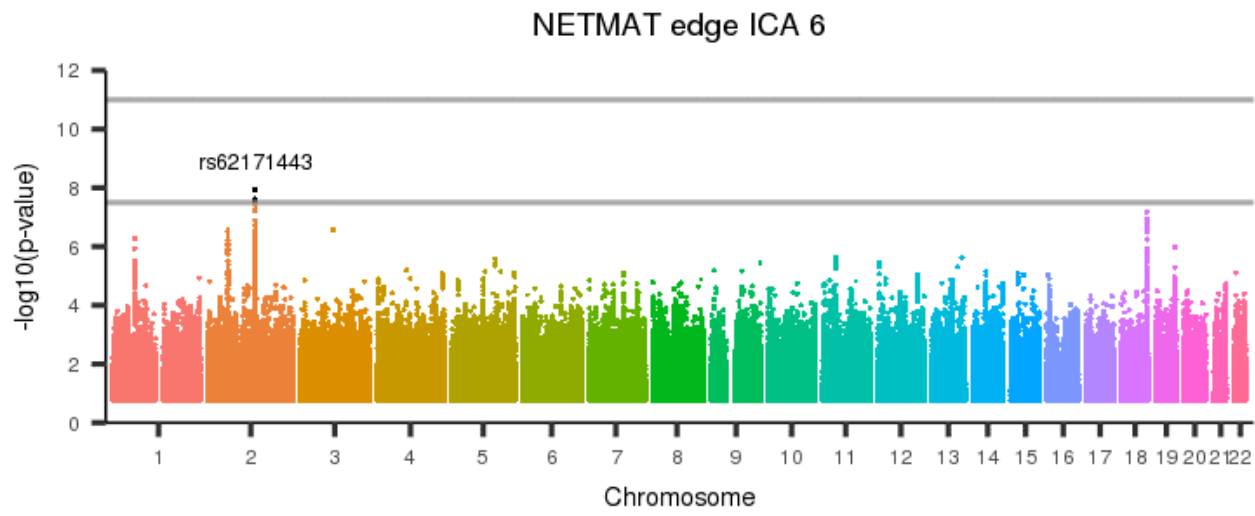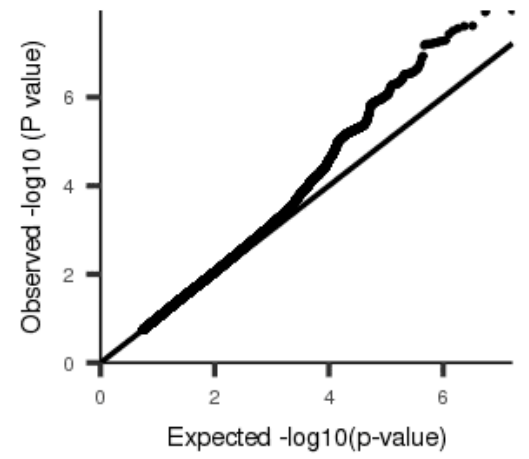

[back to list of plots](#)
